# Supplementary material for: Prevalence of Lower Urinary Tract Symptoms in China, Taiwan, and South Korea: Results from a Cross-Sectional, Population-Based Study
Source: Springer Nature journal article supplement (doi:10.1007/s12325-017-0577-9), 2017-07-07
Supplement: MOESM1 [file 13288430]

---

## Instrument

---

## Symptom Group

---

## Type of Response

## Description

| respid | SubsID    | dCountry | Country | QDisclaimer | Q1 | Q2 | Gender | Q3_1 | age Nr | dAge | age Group  | Weight in Ctry | Q4 |
|--------|-----------|----------|---------|-------------|----|----|--------|------|--------|------|------------|----------------|----|
| 241    | 350130264 | 3        | Korea   | 1           | 2  | 1  | Male   | 1966 | 49     | 2    | 45-49      | 0.8            |    |
| 242    | 350112771 | 3        | Korea   | 1           | 2  | 1  | Male   | 1970 | 45     | 2    | 45-49      | 0.8            |    |
| 243    | 350236220 | 3        | Korea   | 1           | 2  | 1  | Male   | 1975 | 40     | 1    | 40-44 year | 0.9            |    |
| 244    | 350216424 | 3        | Korea   | 1           | 2  | 1  | Male   | 1969 | 46     | 2    | 45-49      | 0.8            |    |
| 245    | 350108785 | 3        | Korea   | 1           | 2  | 2  | Female | 1959 | 56     | 4    | 55-59      | 0.7            |    |
| 246    | 350281672 | 3        | Korea   | 1           | 2  | 1  | Male   | 1960 | 55     | 4    | 55-59      | 0.8            |    |
| 247    | 350091158 | 3        | Korea   | 1           | 2  | 1  | Male   | 1962 | 53     | 3    | 50-54      | 0.9            |    |
| 253    | 350272964 | 3        | Korea   | 1           | 2  | 2  | Female | 1970 | 45     | 2    | 45-49      | 0.9            | 2  |
| 256    | 350227438 | 3        | Korea   | 1           | 2  | 1  | Male   | 1964 | 51     | 3    | 50-54      | 0.9            |    |
| 257    | 350203360 | 3        | Korea   | 1           | 2  | 2  | Female | 1967 | 48     | 2    | 45-49      | 0.9            | 2  |
| 258    | 350284677 | 3        | Korea   | 1           | 2  | 1  | Male   | 1966 | 49     | 2    | 45-49      | 0.8            |    |
| 259    | 350287798 | 3        | Korea   | 1           | 2  | 2  | Female | 1963 | 52     | 3    | 50-54      | 0.8            |    |
| 263    | 350202745 | 3        | Korea   | 1           | 2  | 1  | Male   | 1964 | 51     | 3    | 50-54      | 0.9            |    |
| 264    | 350288346 | 3        | Korea   | 1           | 2  | 2  | Female | 1967 | 48     | 2    | 45-49      | 0.9            | 2  |
| 265    | 350256920 | 3        | Korea   | 1           | 2  | 1  | Male   | 1968 | 47     | 2    | 45-49      | 0.8            |    |
| 266    | 350175797 | 3        | Korea   | 1           | 2  | 2  | Female | 1968 | 47     | 2    | 45-49      | 0.9            | 2  |
| 268    | 350331050 | 3        | Korea   | 1           | 2  | 1  | Male   | 1964 | 51     | 3    | 50-54      | 0.9            |    |
| 270    | 350314410 | 3        | Korea   | 1           | 2  | 2  | Female | 1962 | 53     | 3    | 50-54      | 0.8            |    |
| 272    | 350241184 | 3        | Korea   | 1           | 2  | 1  | Male   | 1960 | 55     | 4    | 55-59      | 0.8            |    |
| 274    | 350269996 | 3        | Korea   | 1           | 2  | 1  | Male   | 1963 | 52     | 3    | 50-54      | 0.9            |    |

| respid | SubsID    | dCountry | Country | QDisclaim<br>er | Q1 | Q2 | Gender | Q3_1 | age Nr | dAge | age Group  | Weight in<br>Ctry | Q4 |
|--------|-----------|----------|---------|-----------------|----|----|--------|------|--------|------|------------|-------------------|----|
| 275    | 350255478 | 3        | Korea   | 1               | 2  | 2  | Female | 1971 | 44     | 1    | 40-44 year | 0.9               | 2  |
| 276    | 350069249 | 3        | Korea   | 1               | 2  | 2  | Female | 1961 | 54     | 3    | 50-54      | 0.8               |    |
| 277    | 350323210 | 3        | Korea   | 1               | 2  | 1  | Male   | 1972 | 43     | 1    | 40-44 year | 0.9               |    |
| 279    | 350284367 | 3        | Korea   | 1               | 2  | 1  | Male   | 1972 | 43     | 1    | 40-44 year | 0.9               |    |
| 286    | 350247413 | 3        | Korea   | 1               | 2  | 2  | Female | 1966 | 49     | 2    | 45-49      | 0.9               | 2  |
| 290    | 280446031 | 1        | China   | 1               | 2  | 1  | Male   | 1973 | 42     | 1    | 40-44 year | 1.0               |    |
| 291    | 350242051 | 3        | Korea   | 1               | 2  | 2  | Female | 1969 | 46     | 2    | 45-49      | 0.9               | 2  |
| 295    | 380208585 | 2        | Taiwan  | 1               | 2  | 2  | Female | 1970 | 45     | 2    | 45-49      | 0.9               | 2  |
| 297    | 350297431 | 3        | Korea   | 1               | 2  | 1  | Male   | 1964 | 51     | 3    | 50-54      | 0.9               |    |
| 299    | 350231876 | 3        | Korea   | 1               | 2  | 1  | Male   | 1972 | 43     | 1    | 40-44 year | 0.9               |    |
| 300    | 350300360 | 3        | Korea   | 1               | 2  | 1  | Male   | 1974 | 41     | 1    | 40-44 year | 0.9               |    |
| 303    | 350247337 | 3        | Korea   | 1               | 2  | 1  | Male   | 1969 | 46     | 2    | 45-49      | 0.8               |    |
| 304    | 350053596 | 3        | Korea   | 1               | 2  | 2  | Female | 1974 | 41     | 1    | 40-44 year | 0.9               | 2  |
| 306    | 280796892 | 1        | China   | 1               | 2  | 1  | Male   | 1968 | 47     | 2    | 45-49      | 1.0               |    |
| 307    | 350145288 | 3        | Korea   | 1               | 2  | 2  | Female | 1958 | 57     | 4    | 55-59      | 0.7               |    |
| 312    | 350228848 | 3        | Korea   | 1               | 2  | 2  | Female | 1960 | 55     | 4    | 55-59      | 0.7               |    |
| 315    | 350176937 | 3        | Korea   | 1               | 2  | 1  | Male   | 1957 | 58     | 4    | 55-59      | 0.8               |    |
| 317    | 350342945 | 3        | Korea   | 1               | 2  | 1  | Male   | 1963 | 52     | 3    | 50-54      | 0.9               |    |
| 322    | 350124865 | 3        | Korea   | 1               | 2  | 2  | Female | 1965 | 50     | 3    | 50-54      | 0.8               |    |
| 335    | 350242202 | 3        | Korea   | 1               | 2  | 2  | Female | 1963 | 52     | 3    | 50-54      | 0.8               |    |
| 374    | 350322429 | 3        | Korea   | 1               | 2  | 2  | Female | 1963 | 52     | 3    | 50-54      | 0.8               |    |
| 378    | 350007979 | 3        | Korea   | 1               | 2  | 1  | Male   | 1962 | 53     | 3    | 50-54      | 0.9               |    |
| 380    | 350299206 | 3        | Korea   | 1               | 2  | 1  | Male   | 1969 | 46     | 2    | 45-49      | 0.8               |    |
| 382    | 350317876 | 3        | Korea   | 1               | 2  | 1  | Male   | 1955 | 60     | 5    | >=60       | 1.6               |    |
| 384    | 350251101 | 3        | Korea   | 1               | 2  | 1  | Male   | 1969 | 46     | 2    | 45-49      | 0.8               |    |
| 385    | 350224840 | 3        | Korea   | 1               | 2  | 1  | Male   | 1971 | 44     | 1    | 40-44 year | 0.9               |    |
| 395    | 350182657 | 3        | Korea   | 1               | 2  | 1  | Male   | 1959 | 56     | 4    | 55-59      | 0.8               |    |
| 396    | 280725468 | 1        | China   | 1               | 2  | 1  | Male   | 1972 | 43     | 1    | 40-44 year | 1.0               |    |
| 398    | 350328690 | 3        | Korea   | 1               | 2  | 1  | Male   | 1974 | 41     | 1    | 40-44 year | 0.9               |    |
| 402    | 350291168 | 3        | Korea   | 1               | 2  | 2  | Female | 1962 | 53     | 3    | 50-54      | 0.8               |    |
| 414    | 350343017 | 3        | Korea   | 1               | 2  | 1  | Male   | 1960 | 55     | 4    | 55-59      | 0.8               |    |
| 415    | 350254087 | 3        | Korea   | 1               | 2  | 1  | Male   | 1972 | 43     | 1    | 40-44 year | 0.9               |    |



| respid | SubsID    | dCountry | Country | QDisclaimer | Q1 | Q2 | Gender   | Q3_1 | age Nr | dAge | age Group    | Weight in Ctry | Q4 |
|--------|-----------|----------|---------|-------------|----|----|----------|------|--------|------|--------------|----------------|----|
| 416    | 281205023 |          | 1 China |             | 1  | 2  | 1 Male   | 1974 | 41     |      | 1 40-44 year | 1.0            |    |
| 420    | 350246450 |          | 3 Korea |             | 1  | 2  | 1 Male   | 1972 | 43     |      | 1 40-44 year | 0.9            |    |
| 421    | 350205919 |          | 3 Korea |             | 1  | 2  | 1 Male   | 1959 | 56     |      | 4 55-59      | 0.8            |    |
| 422    | 350309067 |          | 3 Korea |             | 1  | 2  | 2 Female | 1975 | 40     |      | 1 40-44 year | 0.9            | 2  |
| 423    | 350211753 |          | 3 Korea |             | 1  | 2  | 2 Female | 1969 | 46     |      | 2 45-49      | 0.9            | 2  |
| 424    | 280869007 |          | 1 China |             | 1  | 2  | 2 Female | 1972 | 43     |      | 1 40-44 year | 1.0            | 2  |
| 425    | 280254941 |          | 1 China |             | 1  | 2  | 1 Male   | 1956 | 59     |      | 4 55-59      | 0.9            |    |
| 428    | 280313429 |          | 1 China |             | 1  | 2  | 1 Male   | 1973 | 42     |      | 1 40-44 year | 1.0            |    |
| 429    | 350313060 |          | 3 Korea |             | 1  | 2  | 2 Female | 1974 | 41     |      | 1 40-44 year | 0.9            | 2  |
| 431    | 350223486 |          | 3 Korea |             | 1  | 2  | 1 Male   | 1965 | 50     |      | 3 50-54      | 0.9            |    |
| 437    | 350260204 |          | 3 Korea |             | 1  | 2  | 1 Male   | 1952 | 63     |      | 5 >=60       | 1.6            |    |
| 438    | 350200341 |          | 3 Korea |             | 1  | 2  | 1 Male   | 1971 | 44     |      | 1 40-44 year | 0.9            |    |
| 441    | 350246885 |          | 3 Korea |             | 1  | 2  | 2 Female | 1963 | 52     |      | 3 50-54      | 0.8            |    |
| 444    | 280943379 |          | 1 China |             | 1  | 2  | 1 Male   | 1975 | 40     |      | 1 40-44 year | 1.0            |    |
| 448    | 350304254 |          | 3 Korea |             | 1  | 2  | 1 Male   | 1972 | 43     |      | 1 40-44 year | 0.9            |    |
| 449    | 350286354 |          | 3 Korea |             | 1  | 2  | 2 Female | 1951 | 64     |      | 5 >=60       | 1.6            |    |
| 457    | 350237666 |          | 3 Korea |             | 1  | 2  | 2 Female | 1961 | 54     |      | 3 50-54      | 0.8            |    |
| 460    | 350248933 |          | 3 Korea |             | 1  | 2  | 1 Male   | 1964 | 51     |      | 3 50-54      | 0.9            |    |
| 469    | 350273539 |          | 3 Korea |             | 1  | 2  | 1 Male   | 1959 | 56     |      | 4 55-59      | 0.8            |    |
| 471    | 350272198 |          | 3 Korea |             | 1  | 2  | 2 Female | 1967 | 48     |      | 2 45-49      | 0.9            | 2  |
| 473    | 280533132 |          | 1 China |             | 1  | 2  | 1 Male   | 1966 | 49     |      | 2 45-49      | 1.0            |    |
| 476    | 350346282 |          | 3 Korea |             | 1  | 2  | 1 Male   | 1954 | 61     |      | 5 >=60       | 1.6            |    |
| 479    | 280679524 |          | 1 China |             | 1  | 2  | 1 Male   | 1970 | 45     |      | 2 45-49      | 1.0            |    |
| 485    | 350135557 |          | 3 Korea |             | 1  | 2  | 1 Male   | 1971 | 44     |      | 1 40-44 year | 0.9            |    |
| 488    | 350203101 |          | 3 Korea |             | 1  | 2  | 2 Female | 1961 | 54     |      | 3 50-54      | 0.8            |    |
| 494    | 350298643 |          | 3 Korea |             | 1  | 2  | 2 Female | 1965 | 50     |      | 3 50-54      | 0.8            |    |
| 496    | 350007754 |          | 3 Korea |             | 1  | 2  | 1 Male   | 1964 | 51     |      | 3 50-54      | 0.9            |    |
| 501    | 350151901 |          | 3 Korea |             | 1  | 2  | 1 Male   | 1951 | 64     |      | 5 >=60       | 1.6            |    |
| 502    | 350247940 |          | 3 Korea |             | 1  | 2  | 1 Male   | 1941 | 74     |      | 5 >=60       | 1.6            |    |
| 503    | 350206497 |          | 3 Korea |             | 1  | 2  | 1 Male   | 1960 | 55     |      | 4 55-59      | 0.8            |    |
| 506    | 350106829 |          | 3 Korea |             | 1  | 2  | 1 Male   | 1958 | 57     |      | 4 55-59      | 0.8            |    |
| 514    | 350266395 |          | 3 Korea |             | 1  | 2  | 2 Female | 1963 | 52     |      | 3 50-54      | 0.8            |    |

| respid | SubsID    | dCountry | Country | QDisclaim<br>er | Q1 | Q2 | Gender | Q3_1 | age Nr | dAge | age Group  | Weight in<br>Ctry | Q4 |
|--------|-----------|----------|---------|-----------------|----|----|--------|------|--------|------|------------|-------------------|----|
| 515    | 350340494 | 3        | Korea   | 1               | 2  | 1  | Male   | 1952 | 63     | 5    | >=60       | 1.6               |    |
| 516    | 350231260 | 3        | Korea   | 1               | 2  | 2  | Female | 1971 | 44     | 1    | 40-44 year | 0.9               | 2  |
| 519    | 350343000 | 3        | Korea   | 1               | 2  | 2  | Female | 1962 | 53     | 3    | 50-54      | 0.8               |    |
| 522    | 350068819 | 3        | Korea   | 1               | 2  | 1  | Male   | 1964 | 51     | 3    | 50-54      | 0.9               |    |
| 525    | 350265717 | 3        | Korea   | 1               | 2  | 1  | Male   | 1956 | 59     | 4    | 55-59      | 0.8               |    |
| 528    | 350071431 | 3        | Korea   | 1               | 2  | 1  | Male   | 1972 | 43     | 1    | 40-44 year | 0.9               |    |
| 532    | 350344676 | 3        | Korea   | 1               | 2  | 1  | Male   | 1961 | 54     | 3    | 50-54      | 0.9               |    |
| 536    | 350234589 | 3        | Korea   | 1               | 2  | 2  | Female | 1964 | 51     | 3    | 50-54      | 0.8               |    |
| 539    | 350303923 | 3        | Korea   | 1               | 2  | 2  | Female | 1969 | 46     | 2    | 45-49      | 0.9               | 2  |
| 540    | 350330991 | 3        | Korea   | 1               | 2  | 2  | Female | 1961 | 54     | 3    | 50-54      | 0.8               |    |
| 547    | 280803981 | 1        | China   | 1               | 2  | 1  | Male   | 1955 | 60     | 5    | >=60       | 1.0               |    |
| 551    | 350238842 | 3        | Korea   | 1               | 2  | 1  | Male   | 1974 | 41     | 1    | 40-44 year | 0.9               |    |
| 554    | 350199492 | 3        | Korea   | 1               | 2  | 1  | Male   | 1972 | 43     | 1    | 40-44 year | 0.9               |    |
| 558    | 350342972 | 3        | Korea   | 1               | 2  | 1  | Male   | 1964 | 51     | 3    | 50-54      | 0.9               |    |
| 563    | 350297657 | 3        | Korea   | 1               | 2  | 2  | Female | 1966 | 49     | 2    | 45-49      | 0.9               | 2  |
| 564    | 350290391 | 3        | Korea   | 1               | 2  | 1  | Male   | 1961 | 54     | 3    | 50-54      | 0.9               |    |
| 565    | 350299724 | 3        | Korea   | 1               | 2  | 1  | Male   | 1959 | 56     | 4    | 55-59      | 0.8               |    |
| 567    | 280573231 | 1        | China   | 1               | 2  | 2  | Female | 1973 | 42     | 1    | 40-44 year | 1.0               | 2  |
| 569    | 350139678 | 3        | Korea   | 1               | 2  | 2  | Female | 1974 | 41     | 1    | 40-44 year | 0.9               | 2  |
| 572    | 350210186 | 3        | Korea   | 1               | 2  | 1  | Male   | 1974 | 41     | 1    | 40-44 year | 0.9               |    |
| 574    | 350290202 | 3        | Korea   | 1               | 2  | 2  | Female | 1955 | 60     | 5    | >=60       | 1.6               |    |
| 583    | 280164317 | 1        | China   | 1               | 2  | 1  | Male   | 1966 | 49     | 2    | 45-49      | 1.0               |    |
| 589    | 280791590 | 1        | China   | 1               | 2  | 1  | Male   | 1972 | 43     | 1    | 40-44 year | 1.0               |    |
| 592    | 350323087 | 3        | Korea   | 1               | 2  | 1  | Male   | 1970 | 45     | 2    | 45-49      | 0.8               |    |
| 593    | 350305496 | 3        | Korea   | 1               | 2  | 2  | Female | 1975 | 40     | 1    | 40-44 year | 0.9               | 2  |
| 594    | 350310616 | 3        | Korea   | 1               | 2  | 1  | Male   | 1966 | 49     | 2    | 45-49      | 0.8               |    |
| 597    | 350290093 | 3        | Korea   | 1               | 2  | 1  | Male   | 1970 | 45     | 2    | 45-49      | 0.8               |    |
| 601    | 350224870 | 3        | Korea   | 1               | 2  | 2  | Female | 1960 | 55     | 4    | 55-59      | 0.7               |    |
| 607    | 350211664 | 3        | Korea   | 1               | 2  | 1  | Male   | 1967 | 48     | 2    | 45-49      | 0.8               |    |
| 610    | 350345572 | 3        | Korea   | 1               | 2  | 1  | Male   | 1974 | 41     | 1    | 40-44 year | 0.9               |    |
| 612    | 350259307 | 3        | Korea   | 1               | 2  | 1  | Male   | 1948 | 67     | 5    | >=60       | 1.6               |    |
| 627    | 350042904 | 3        | Korea   | 1               | 2  | 1  | Male   | 1967 | 48     | 2    | 45-49      | 0.8               |    |

| respid | SubsID    | dCountry | Country | QDisclaim<br>er | Q1 | Q2 | Gender   | Q3_1 | age Nr | dAge | age Group  | Weight in<br>Ctry | Q4 |
|--------|-----------|----------|---------|-----------------|----|----|----------|------|--------|------|------------|-------------------|----|
| 631    | 350336214 | 3        | Korea   | 1               | 1  | 2  | 1 Male   | 1974 | 41     | 1    | 40-44 year | 0.9               |    |
| 633    | 350282189 | 3        | Korea   | 1               | 1  | 2  | 2 Female | 1971 | 44     | 1    | 40-44 year | 0.9               | 2  |
| 636    | 350343984 | 3        | Korea   | 1               | 1  | 2  | 2 Female | 1961 | 54     | 3    | 50-54      | 0.8               |    |
| 656    | 281104063 | 1        | China   | 1               | 1  | 2  | 1 Male   | 1970 | 45     | 2    | 45-49      | 1.0               |    |
| 659    | 280762317 | 1        | China   | 1               | 1  | 2  | 1 Male   | 1961 | 54     | 3    | 50-54      | 1.0               |    |
| 670    | 350155261 | 3        | Korea   | 1               | 1  | 2  | 1 Male   | 1960 | 55     | 4    | 55-59      | 0.8               |    |
| 672    | 350327580 | 3        | Korea   | 1               | 1  | 2  | 2 Female | 1974 | 41     | 1    | 40-44 year | 0.9               | 2  |
| 673    | 350151592 | 3        | Korea   | 1               | 1  | 2  | 2 Female | 1962 | 53     | 3    | 50-54      | 0.8               |    |
| 675    | 350148820 | 3        | Korea   | 1               | 1  | 2  | 2 Female | 1957 | 58     | 4    | 55-59      | 0.7               |    |
| 676    | 350256534 | 3        | Korea   | 1               | 1  | 2  | 1 Male   | 1961 | 54     | 3    | 50-54      | 0.9               |    |
| 679    | 350197391 | 3        | Korea   | 1               | 1  | 2  | 1 Male   | 1955 | 60     | 5    | >=60       | 1.6               |    |
| 683    | 350311423 | 3        | Korea   | 1               | 1  | 2  | 1 Male   | 1971 | 44     | 1    | 40-44 year | 0.9               |    |
| 684    | 350187065 | 3        | Korea   | 1               | 1  | 2  | 1 Male   | 1955 | 60     | 5    | >=60       | 1.6               |    |
| 690    | 350343830 | 3        | Korea   | 1               | 1  | 2  | 2 Female | 1962 | 53     | 3    | 50-54      | 0.8               |    |
| 701    | 350199819 | 3        | Korea   | 1               | 1  | 2  | 1 Male   | 1958 | 57     | 4    | 55-59      | 0.8               |    |
| 709    | 350229531 | 3        | Korea   | 1               | 1  | 2  | 1 Male   | 1968 | 47     | 2    | 45-49      | 0.8               |    |
| 719    | 380000384 | 2        | Taiwan  | 1               | 1  | 2  | 1 Male   | 1973 | 42     | 1    | 40-44 year | 0.8               |    |
| 726    | 280992663 | 1        | China   | 1               | 1  | 2  | 2 Female | 1963 | 52     | 3    | 50-54      | 1.2               |    |
| 730    | 350149461 | 3        | Korea   | 1               | 1  | 2  | 1 Male   | 1971 | 44     | 1    | 40-44 year | 0.9               |    |
| 731    | 380159313 | 2        | Taiwan  | 1               | 1  | 2  | 1 Male   | 1963 | 52     | 3    | 50-54      | 0.8               |    |
| 732    | 380145077 | 2        | Taiwan  | 1               | 1  | 2  | 1 Male   | 1969 | 46     | 2    | 45-49      | 0.8               |    |
| 733    | 380001771 | 2        | Taiwan  | 1               | 1  | 2  | 2 Female | 1970 | 45     | 2    | 45-49      | 0.9               | 2  |
| 735    | 281065377 | 1        | China   | 1               | 1  | 2  | 1 Male   | 1970 | 45     | 2    | 45-49      | 1.0               |    |
| 738    | 380127501 | 2        | Taiwan  | 1               | 1  | 2  | 1 Male   | 1966 | 49     | 2    | 45-49      | 0.8               |    |
| 740    | 380018072 | 2        | Taiwan  | 1               | 1  | 2  | 2 Female | 1961 | 54     | 3    | 50-54      | 0.9               |    |
| 742    | 380072497 | 2        | Taiwan  | 1               | 1  | 2  | 1 Male   | 1968 | 47     | 2    | 45-49      | 0.8               |    |
| 744    | 280572772 | 1        | China   | 1               | 1  | 2  | 2 Female | 1970 | 45     | 2    | 45-49      | 1.0               | 2  |
| 749    | 380132297 | 2        | Taiwan  | 1               | 1  | 2  | 2 Female | 1974 | 41     | 1    | 40-44 year | 0.8               | 2  |
| 751    | 380016905 | 2        | Taiwan  | 1               | 1  | 2  | 2 Female | 1969 | 46     | 2    | 45-49      | 0.9               | 2  |
| 752    | 380135491 | 2        | Taiwan  | 1               | 1  | 2  | 1 Male   | 1961 | 54     | 3    | 50-54      | 0.8               |    |
| 753    | 380038973 | 2        | Taiwan  | 1               | 1  | 2  | 1 Male   | 1962 | 53     | 3    | 50-54      | 0.8               |    |
| 755    | 280797778 | 1        | China   | 1               | 1  | 2  | 1 Male   | 1961 | 54     | 3    | 50-54      | 1.0               |    |

| respid | SubsID    | dCountry | Country | QDisclaim<br>er | Q1 | Q2 | Gender | Q3_1 | age Nr | dAge | age Group  | Weight in<br>Ctry | Q4 |
|--------|-----------|----------|---------|-----------------|----|----|--------|------|--------|------|------------|-------------------|----|
| 756    | 380200262 | 2        | Taiwan  | 1               | 2  | 2  | Female | 1974 | 41     | 1    | 40-44 year | 0.8               | 2  |
| 759    | 380123952 | 2        | Taiwan  | 1               | 2  | 2  | Female | 1968 | 47     | 2    | 45-49      | 0.9               | 2  |
| 760    | 380036866 | 2        | Taiwan  | 1               | 2  | 2  | Female | 1958 | 57     | 4    | 55-59      | 0.9               |    |
| 763    | 380147691 | 2        | Taiwan  | 1               | 1  | 1  | Male   | 1959 | 56     | 4    | 55-59      | 0.7               |    |
| 764    | 380187846 | 2        | Taiwan  | 1               | 2  | 2  | Female | 1974 | 41     | 1    | 40-44 year | 0.8               | 2  |
| 765    | 380110954 | 2        | Taiwan  | 1               | 1  | 2  | Female | 1963 | 52     | 3    | 50-54      | 0.9               |    |
| 766    | 380108631 | 2        | Taiwan  | 1               | 2  | 1  | Male   | 1966 | 49     | 2    | 45-49      | 0.8               |    |
| 767    | 280963235 | 1        | China   | 1               | 2  | 1  | Male   | 1969 | 46     | 2    | 45-49      | 1.0               |    |
| 771    | 280467496 | 1        | China   | 1               | 2  | 1  | Male   | 1954 | 61     | 5    | >=60       | 1.0               |    |
| 773    | 380123365 | 2        | Taiwan  | 1               | 2  | 1  | Male   | 1958 | 57     | 4    | 55-59      | 0.7               |    |
| 774    | 280573734 | 1        | China   | 1               | 2  | 1  | Male   | 1970 | 45     | 2    | 45-49      | 1.0               |    |
| 775    | 380019563 | 2        | Taiwan  | 1               | 2  | 2  | Female | 1959 | 56     | 4    | 55-59      | 0.9               |    |
| 776    | 380081886 | 2        | Taiwan  | 1               | 2  | 1  | Male   | 1974 | 41     | 1    | 40-44 year | 0.8               |    |
| 778    | 380063817 | 2        | Taiwan  | 1               | 1  | 1  | Male   | 1963 | 52     | 3    | 50-54      | 0.8               |    |
| 780    | 380024624 | 2        | Taiwan  | 1               | 2  | 1  | Male   | 1959 | 56     | 4    | 55-59      | 0.7               |    |
| 781    | 280281983 | 1        | China   | 1               | 2  | 1  | Male   | 1972 | 43     | 1    | 40-44 year | 1.0               |    |
| 782    | 380210875 | 2        | Taiwan  | 1               | 2  | 2  | Female | 1974 | 41     | 1    | 40-44 year | 0.8               | 2  |
| 783    | 380207509 | 2        | Taiwan  | 1               | 2  | 2  | Female | 1968 | 47     | 2    | 45-49      | 0.9               | 2  |
| 786    | 280875300 | 1        | China   | 1               | 2  | 1  | Male   | 1975 | 40     | 1    | 40-44 year | 1.0               |    |
| 788    | 380152706 | 2        | Taiwan  | 1               | 2  | 1  | Male   | 1966 | 49     | 2    | 45-49      | 0.8               |    |
| 792    | 380051098 | 2        | Taiwan  | 1               | 2  | 1  | Male   | 1964 | 51     | 3    | 50-54      | 0.8               |    |
| 794    | 380001140 | 2        | Taiwan  | 1               | 2  | 1  | Male   | 1963 | 52     | 3    | 50-54      | 0.8               |    |
| 795    | 380166496 | 2        | Taiwan  | 1               | 2  | 1  | Male   | 1958 | 57     | 4    | 55-59      | 0.7               |    |
| 799    | 380141871 | 2        | Taiwan  | 1               | 2  | 1  | Male   | 1964 | 51     | 3    | 50-54      | 0.8               |    |
| 800    | 380123016 | 2        | Taiwan  | 1               | 2  | 1  | Male   | 1973 | 42     | 1    | 40-44 year | 0.8               |    |
| 801    | 380201869 | 2        | Taiwan  | 1               | 2  | 1  | Male   | 1959 | 56     | 4    | 55-59      | 0.7               |    |
| 804    | 380084422 | 2        | Taiwan  | 1               | 2  | 2  | Female | 1967 | 48     | 2    | 45-49      | 0.9               | 2  |
| 806    | 380023872 | 2        | Taiwan  | 1               | 2  | 1  | Male   | 1965 | 50     | 3    | 50-54      | 0.8               |    |
| 807    | 380066453 | 2        | Taiwan  | 1               | 2  | 1  | Male   | 1961 | 54     | 3    | 50-54      | 0.8               |    |
| 808    | 380062534 | 2        | Taiwan  | 1               | 2  | 1  | Male   | 1956 | 59     | 4    | 55-59      | 0.7               |    |
| 809    | 380153310 | 2        | Taiwan  | 1               | 2  | 1  | Male   | 1960 | 55     | 4    | 55-59      | 0.7               |    |
| 811    | 380162492 | 2        | Taiwan  | 1               | 2  | 2  | Female | 1966 | 49     | 2    | 45-49      | 0.9               | 2  |

| respid | SubsID    | dCountry | Country | QDisclaimer | Q1 | Q2 | Gender   | Q3_1 | age Nr | dAge | age Group  | Weight in Ctry | Q4 |
|--------|-----------|----------|---------|-------------|----|----|----------|------|--------|------|------------|----------------|----|
| 812    | 380112010 | 2        | Taiwan  |             | 1  | 2  | 1 Male   | 1964 | 51     | 3    | 50-54      | 0.8            |    |
| 815    | 380206169 | 2        | Taiwan  |             | 1  | 2  | 1 Male   | 1963 | 52     | 3    | 50-54      | 0.8            |    |
| 817    | 380059316 | 2        | Taiwan  |             | 1  | 2  | 1 Male   | 1975 | 40     | 1    | 40-44 year | 0.8            |    |
| 818    | 380122100 | 2        | Taiwan  |             | 1  | 2  | 2 Female | 1961 | 54     | 3    | 50-54      | 0.9            |    |
| 819    | 380097987 | 2        | Taiwan  |             | 1  | 2  | 1 Male   | 1971 | 44     | 1    | 40-44 year | 0.8            |    |
| 821    | 380004550 | 2        | Taiwan  |             | 1  | 2  | 2 Female | 1972 | 43     | 1    | 40-44 year | 0.8            | 2  |
| 824    | 380102469 | 2        | Taiwan  |             | 1  | 2  | 1 Male   | 1969 | 46     | 2    | 45-49      | 0.8            |    |
| 825    | 380000481 | 2        | Taiwan  |             | 1  | 2  | 1 Male   | 1971 | 44     | 1    | 40-44 year | 0.8            |    |
| 828    | 280894632 | 1        | China   |             | 1  | 2  | 2 Female | 1972 | 43     | 1    | 40-44 year | 1.0            | 2  |
| 832    | 380052940 | 2        | Taiwan  |             | 1  | 1  | 1 Male   | 1965 | 50     | 3    | 50-54      | 0.8            |    |
| 834    | 380068951 | 2        | Taiwan  |             | 1  | 2  | 1 Male   | 1965 | 50     | 3    | 50-54      | 0.8            |    |
| 835    | 380031162 | 2        | Taiwan  |             | 1  | 2  | 1 Male   | 1962 | 53     | 3    | 50-54      | 0.8            |    |
| 836    | 380097403 | 2        | Taiwan  |             | 1  | 2  | 1 Male   | 1975 | 40     | 1    | 40-44 year | 0.8            |    |
| 837    | 380019549 | 2        | Taiwan  |             | 1  | 2  | 2 Female | 1973 | 42     | 1    | 40-44 year | 0.8            | 2  |
| 840    | 380153542 | 2        | Taiwan  |             | 1  | 2  | 1 Male   | 1972 | 43     | 1    | 40-44 year | 0.8            |    |
| 841    | 380107113 | 2        | Taiwan  |             | 1  | 2  | 2 Female | 1974 | 41     | 1    | 40-44 year | 0.8            | 2  |
| 845    | 380056103 | 2        | Taiwan  |             | 1  | 1  | 2 Female | 1966 | 49     | 2    | 45-49      | 0.9            | 2  |
| 846    | 380001086 | 2        | Taiwan  |             | 1  | 2  | 2 Female | 1967 | 48     | 2    | 45-49      | 0.9            | 2  |
| 849    | 380211509 | 2        | Taiwan  |             | 1  | 2  | 1 Male   | 1965 | 50     | 3    | 50-54      | 0.8            |    |
| 852    | 380146779 | 2        | Taiwan  |             | 1  | 2  | 2 Female | 1956 | 59     | 4    | 55-59      | 0.9            |    |
| 854    | 380190175 | 2        | Taiwan  |             | 1  | 2  | 1 Male   | 1962 | 53     | 3    | 50-54      | 0.8            |    |
| 856    | 380207485 | 2        | Taiwan  |             | 1  | 2  | 1 Male   | 1961 | 54     | 3    | 50-54      | 0.8            |    |
| 858    | 380142229 | 2        | Taiwan  |             | 1  | 2  | 1 Male   | 1973 | 42     | 1    | 40-44 year | 0.8            |    |
| 859    | 380064330 | 2        | Taiwan  |             | 1  | 1  | 2 Female | 1966 | 49     | 2    | 45-49      | 0.9            | 2  |
| 861    | 380170848 | 2        | Taiwan  |             | 1  | 2  | 2 Female | 1966 | 49     | 2    | 45-49      | 0.9            | 2  |
| 863    | 280094333 | 1        | China   |             | 1  | 2  | 2 Female | 1962 | 53     | 3    | 50-54      | 1.2            |    |
| 864    | 380189095 | 2        | Taiwan  |             | 1  | 2  | 1 Male   | 1971 | 44     | 1    | 40-44 year | 0.8            |    |
| 866    | 280006153 | 1        | China   |             | 1  | 2  | 1 Male   | 1967 | 48     | 2    | 45-49      | 1.0            |    |
| 869    | 380038697 | 2        | Taiwan  |             | 1  | 2  | 1 Male   | 1965 | 50     | 3    | 50-54      | 0.8            |    |
| 870    | 380154868 | 2        | Taiwan  |             | 1  | 2  | 1 Male   | 1957 | 58     | 4    | 55-59      | 0.7            |    |
| 871    | 280828088 | 1        | China   |             | 1  | 2  | 2 Female | 1960 | 55     | 4    | 55-59      | 1.0            |    |
| 873    | 380098682 | 2        | Taiwan  |             | 1  | 2  | 1 Male   | 1958 | 57     | 4    | 55-59      | 0.7            |    |

| respid | SubsID    | dCountry | Country | QDisclaimer | Q1 | Q2 | Gender   | Q3_1 | age Nr | dAge | age Group  | Weight in Ctry | Q4 |
|--------|-----------|----------|---------|-------------|----|----|----------|------|--------|------|------------|----------------|----|
| 879    | 280717885 | 1        | China   |             | 1  | 2  | 1 Male   | 1954 | 61     | 5    | >=60       | 1.0            |    |
| 880    | 380114293 | 2        | Taiwan  |             | 1  | 2  | 2 Female | 1963 | 52     | 3    | 50-54      | 0.9            |    |
| 881    | 280937029 | 1        | China   |             | 1  | 1  | 1 Male   | 1962 | 53     | 3    | 50-54      | 1.0            |    |
| 882    | 380052005 | 2        | Taiwan  |             | 1  | 2  | 1 Male   | 1950 | 65     | 5    | >=60       | 1.6            |    |
| 885    | 380099239 | 2        | Taiwan  |             | 1  | 2  | 1 Male   | 1963 | 52     | 3    | 50-54      | 0.8            |    |
| 886    | 380000102 | 2        | Taiwan  |             | 1  | 2  | 1 Male   | 1969 | 46     | 2    | 45-49      | 0.8            |    |
| 887    | 280890185 | 1        | China   |             | 1  | 2  | 2 Female | 1960 | 55     | 4    | 55-59      | 1.0            |    |
| 888    | 380051889 | 2        | Taiwan  |             | 1  | 2  | 1 Male   | 1959 | 56     | 4    | 55-59      | 0.7            |    |
| 889    | 380113070 | 2        | Taiwan  |             | 1  | 2  | 1 Male   | 1962 | 53     | 3    | 50-54      | 0.8            |    |
| 890    | 380166303 | 2        | Taiwan  |             | 1  | 2  | 1 Male   | 1959 | 56     | 4    | 55-59      | 0.7            |    |
| 900    | 280089931 | 1        | China   |             | 1  | 2  | 2 Female | 1972 | 43     | 1    | 40-44 year | 1.0            | 2  |
| 901    | 380014756 | 2        | Taiwan  |             | 1  | 2  | 1 Male   | 1959 | 56     | 4    | 55-59      | 0.7            |    |
| 902    | 380120374 | 2        | Taiwan  |             | 1  | 2  | 1 Male   | 1968 | 47     | 2    | 45-49      | 0.8            |    |
| 903    | 380101397 | 2        | Taiwan  |             | 1  | 2  | 1 Male   | 1970 | 45     | 2    | 45-49      | 0.8            |    |
| 906    | 380007837 | 2        | Taiwan  |             | 1  | 2  | 2 Female | 1958 | 57     | 4    | 55-59      | 0.9            |    |
| 907    | 380076353 | 2        | Taiwan  |             | 1  | 2  | 2 Female | 1963 | 52     | 3    | 50-54      | 0.9            |    |
| 908    | 380029457 | 2        | Taiwan  |             | 1  | 1  | 2 Female | 1969 | 46     | 2    | 45-49      | 0.9            | 2  |
| 910    | 380000549 | 2        | Taiwan  |             | 1  | 2  | 2 Female | 1965 | 50     | 3    | 50-54      | 0.9            |    |
| 911    | 380085820 | 2        | Taiwan  |             | 1  | 2  | 1 Male   | 1966 | 49     | 2    | 45-49      | 0.8            |    |
| 912    | 380001261 | 2        | Taiwan  |             | 1  | 2  | 1 Male   | 1974 | 41     | 1    | 40-44 year | 0.8            |    |
| 915    | 281318533 | 1        | China   |             | 1  | 2  | 1 Male   | 1964 | 51     | 3    | 50-54      | 1.0            |    |
| 923    | 280572826 | 1        | China   |             | 1  | 2  | 1 Male   | 1970 | 45     | 2    | 45-49      | 1.0            |    |
| 925    | 380181264 | 2        | Taiwan  |             | 1  | 2  | 2 Female | 1970 | 45     | 2    | 45-49      | 0.9            | 2  |
| 926    | 380144075 | 2        | Taiwan  |             | 1  | 2  | 1 Male   | 1970 | 45     | 2    | 45-49      | 0.8            |    |
| 929    | 280159746 | 1        | China   |             | 1  | 2  | 2 Female | 1967 | 48     | 2    | 45-49      | 1.0            | 2  |
| 932    | 380123478 | 2        | Taiwan  |             | 1  | 1  | 2 Female | 1967 | 48     | 2    | 45-49      | 0.9            | 2  |
| 933    | 380183212 | 2        | Taiwan  |             | 1  | 2  | 1 Male   | 1952 | 63     | 5    | >=60       | 1.6            |    |
| 934    | 380060972 | 2        | Taiwan  |             | 1  | 2  | 2 Female | 1961 | 54     | 3    | 50-54      | 0.9            |    |
| 938    | 380081268 | 2        | Taiwan  |             | 1  | 2  | 1 Male   | 1959 | 56     | 4    | 55-59      | 0.7            |    |
| 941    | 380006664 | 2        | Taiwan  |             | 1  | 2  | 1 Male   | 1965 | 50     | 3    | 50-54      | 0.8            |    |
| 942    | 280738399 | 1        | China   |             | 1  | 2  | 1 Male   | 1971 | 44     | 1    | 40-44 year | 1.0            |    |
| 943    | 280094604 | 1        | China   |             | 1  | 2  | 1 Male   | 1966 | 49     | 2    | 45-49      | 1.0            |    |

| respid | SubsID    | dCountry | Country | QDisclaimer | Q1 | Q2 | Gender   | Q3_1 | age Nr | dAge | age Group  | Weight in Ctry | Q4 |
|--------|-----------|----------|---------|-------------|----|----|----------|------|--------|------|------------|----------------|----|
| 945    | 380048577 | 2        | Taiwan  | 1           | 1  | 2  | 2 Female | 1968 | 47     | 2    | 45-49      | 0.9            | 2  |
| 946    | 380085999 | 2        | Taiwan  | 1           | 1  | 2  | 1 Male   | 1950 | 65     | 5    | >=60       | 1.6            |    |
| 947    | 380103879 | 2        | Taiwan  | 1           | 1  | 2  | 1 Male   | 1952 | 63     | 5    | >=60       | 1.6            |    |
| 948    | 380132426 | 2        | Taiwan  | 1           | 1  | 2  | 1 Male   | 1967 | 48     | 2    | 45-49      | 0.8            |    |
| 949    | 281004491 | 1        | China   | 1           | 1  | 1  | 1 Male   | 1970 | 45     | 2    | 45-49      | 1.0            |    |
| 952    | 380039474 | 2        | Taiwan  | 1           | 1  | 2  | 1 Male   | 1971 | 44     | 1    | 40-44 year | 0.8            |    |
| 956    | 280273977 | 1        | China   | 1           | 1  | 2  | 2 Female | 1964 | 51     | 3    | 50-54      | 1.2            |    |
| 957    | 380207106 | 2        | Taiwan  | 1           | 1  | 2  | 2 Female | 1973 | 42     | 1    | 40-44 year | 0.8            | 2  |
| 959    | 380049082 | 2        | Taiwan  | 1           | 1  | 2  | 1 Male   | 1970 | 45     | 2    | 45-49      | 0.8            |    |
| 961    | 380000410 | 2        | Taiwan  | 1           | 1  | 2  | 1 Male   | 1965 | 50     | 3    | 50-54      | 0.8            |    |
| 962    | 281310738 | 1        | China   | 1           | 1  | 2  | 2 Female | 1960 | 55     | 4    | 55-59      | 1.0            |    |
| 965    | 380000181 | 2        | Taiwan  | 1           | 1  | 2  | 1 Male   | 1963 | 52     | 3    | 50-54      | 0.8            |    |
| 967    | 380098484 | 2        | Taiwan  | 1           | 1  | 2  | 2 Female | 1974 | 41     | 1    | 40-44 year | 0.8            | 2  |
| 969    | 280465061 | 1        | China   | 1           | 1  | 2  | 2 Female | 1971 | 44     | 1    | 40-44 year | 1.0            | 2  |
| 970    | 280365169 | 1        | China   | 1           | 1  | 2  | 2 Female | 1974 | 41     | 1    | 40-44 year | 1.0            | 2  |
| 973    | 280670375 | 1        | China   | 1           | 1  | 2  | 1 Male   | 1972 | 43     | 1    | 40-44 year | 1.0            |    |
| 974    | 380211642 | 2        | Taiwan  | 1           | 1  | 2  | 1 Male   | 1964 | 51     | 3    | 50-54      | 0.8            |    |
| 975    | 280694387 | 1        | China   | 1           | 1  | 2  | 1 Male   | 1969 | 46     | 2    | 45-49      | 1.0            |    |
| 976    | 281323130 | 1        | China   | 1           | 1  | 2  | 1 Male   | 1974 | 41     | 1    | 40-44 year | 1.0            |    |
| 977    | 280275184 | 1        | China   | 1           | 1  | 2  | 1 Male   | 1970 | 45     | 2    | 45-49      | 1.0            |    |
| 979    | 280667216 | 1        | China   | 1           | 1  | 2  | 1 Male   | 1970 | 45     | 2    | 45-49      | 1.0            |    |
| 981    | 280800211 | 1        | China   | 1           | 1  | 2  | 2 Female | 1953 | 62     | 5    | >=60       | 1.1            |    |
| 983    | 380112014 | 2        | Taiwan  | 1           | 1  | 2  | 2 Female | 1971 | 44     | 1    | 40-44 year | 0.8            | 2  |
| 987    | 280312522 | 1        | China   | 1           | 1  | 2  | 1 Male   | 1974 | 41     | 1    | 40-44 year | 1.0            |    |
| 991    | 280007986 | 1        | China   | 1           | 1  | 2  | 1 Male   | 1973 | 42     | 1    | 40-44 year | 1.0            |    |
| 992    | 380072796 | 2        | Taiwan  | 1           | 1  | 2  | 1 Male   | 1973 | 42     | 1    | 40-44 year | 0.8            |    |
| 993    | 280615786 | 1        | China   | 1           | 1  | 2  | 2 Female | 1973 | 42     | 1    | 40-44 year | 1.0            | 2  |
| 994    | 380149923 | 2        | Taiwan  | 1           | 1  | 2  | 2 Female | 1968 | 47     | 2    | 45-49      | 0.9            | 2  |
| 995    | 380131579 | 2        | Taiwan  | 1           | 1  | 2  | 1 Male   | 1958 | 57     | 4    | 55-59      | 0.7            |    |
| 998    | 280893366 | 1        | China   | 1           | 1  | 2  | 2 Female | 1968 | 47     | 2    | 45-49      | 1.0            | 2  |
| 1000   | 380060190 | 2        | Taiwan  | 1           | 1  | 2  | 1 Male   | 1973 | 42     | 1    | 40-44 year | 0.8            |    |
| 1001   | 380001180 | 2        | Taiwan  | 1           | 1  | 2  | 1 Male   | 1964 | 51     | 3    | 50-54      | 0.8            |    |

| respid | SubsID    | dCountry | Country  | QDisclaimer | Q1 | Q2 | Gender   | Q3_1 | age Nr | dAge | age Group    | Weight in Ctry | Q4 |
|--------|-----------|----------|----------|-------------|----|----|----------|------|--------|------|--------------|----------------|----|
| 1002   | 281327559 |          | 1 China  |             | 1  | 2  | 1 Male   | 1955 | 60     |      | 5 >=60       | 1.0            |    |
| 1004   | 280979950 |          | 1 China  |             | 1  | 2  | 1 Male   | 1973 | 42     |      | 1 40-44 year | 1.0            |    |
| 1005   | 380075384 |          | 2 Taiwan |             | 1  | 1  | 2 Female | 1958 | 57     |      | 4 55-59      | 0.9            |    |
| 1006   | 380057277 |          | 2 Taiwan |             | 1  | 2  | 1 Male   | 1967 | 48     |      | 2 45-49      | 0.8            |    |
| 1007   | 380160610 |          | 2 Taiwan |             | 1  | 2  | 2 Female | 1964 | 51     |      | 3 50-54      | 0.9            |    |
| 1009   | 281265163 |          | 1 China  |             | 1  | 1  | 1 Male   | 1969 | 46     |      | 2 45-49      | 1.0            |    |
| 1013   | 280326329 |          | 1 China  |             | 1  | 2  | 2 Female | 1962 | 53     |      | 3 50-54      | 1.2            |    |
| 1015   | 281159413 |          | 1 China  |             | 1  | 2  | 1 Male   | 1963 | 52     |      | 3 50-54      | 1.0            |    |
| 1020   | 280937295 |          | 1 China  |             | 1  | 2  | 1 Male   | 1974 | 41     |      | 1 40-44 year | 1.0            |    |
| 1022   | 280578230 |          | 1 China  |             | 1  | 2  | 1 Male   | 1963 | 52     |      | 3 50-54      | 1.0            |    |
| 1024   | 281316447 |          | 1 China  |             | 1  | 2  | 2 Female | 1974 | 41     |      | 1 40-44 year | 1.0            | 2  |
| 1025   | 280324874 |          | 1 China  |             | 1  | 2  | 2 Female | 1963 | 52     |      | 3 50-54      | 1.2            |    |
| 1027   | 280049178 |          | 1 China  |             | 1  | 1  | 1 Male   | 1972 | 43     |      | 1 40-44 year | 1.0            |    |
| 1031   | 280609347 |          | 1 China  |             | 1  | 2  | 1 Male   | 1959 | 56     |      | 4 55-59      | 0.9            |    |
| 1037   | 280680871 |          | 1 China  |             | 1  | 2  | 1 Male   | 1958 | 57     |      | 4 55-59      | 0.9            |    |
| 1039   | 280606732 |          | 1 China  |             | 1  | 2  | 1 Male   | 1966 | 49     |      | 2 45-49      | 1.0            |    |
| 1040   | 280935387 |          | 1 China  |             | 1  | 2  | 1 Male   | 1975 | 40     |      | 1 40-44 year | 1.0            |    |
| 1056   | 280485657 |          | 1 China  |             | 1  | 2  | 1 Male   | 1962 | 53     |      | 3 50-54      | 1.0            |    |
| 1057   | 280312280 |          | 1 China  |             | 1  | 2  | 1 Male   | 1967 | 48     |      | 2 45-49      | 1.0            |    |
| 1062   | 281214705 |          | 1 China  |             | 1  | 2  | 1 Male   | 1967 | 48     |      | 2 45-49      | 1.0            |    |
| 1069   | 280744744 |          | 1 China  |             | 1  | 2  | 2 Female | 1975 | 40     |      | 1 40-44 year | 1.0            | 2  |
| 1070   | 280095017 |          | 1 China  |             | 1  | 2  | 2 Female | 1956 | 59     |      | 4 55-59      | 1.0            |    |
| 1072   | 281015615 |          | 1 China  |             | 1  | 2  | 1 Male   | 1970 | 45     |      | 2 45-49      | 1.0            |    |
| 1076   | 281282921 |          | 1 China  |             | 1  | 2  | 1 Male   | 1965 | 50     |      | 3 50-54      | 1.0            |    |
| 1077   | 281312349 |          | 1 China  |             | 1  | 2  | 1 Male   | 1969 | 46     |      | 2 45-49      | 1.0            |    |
| 1078   | 280631986 |          | 1 China  |             | 1  | 2  | 2 Female | 1971 | 44     |      | 1 40-44 year | 1.0            | 2  |
| 1080   | 281132932 |          | 1 China  |             | 1  | 1  | 1 Male   | 1971 | 44     |      | 1 40-44 year | 1.0            |    |
| 1094   | 280788711 |          | 1 China  |             | 1  | 2  | 2 Female | 1973 | 42     |      | 1 40-44 year | 1.0            | 2  |
| 1098   | 280744289 |          | 1 China  |             | 1  | 2  | 1 Male   | 1955 | 60     |      | 5 >=60       | 1.0            |    |
| 1099   | 280805016 |          | 1 China  |             | 1  | 2  | 2 Female | 1967 | 48     |      | 2 45-49      | 1.0            | 2  |
| 1102   | 281318600 |          | 1 China  |             | 1  | 2  | 1 Male   | 1963 | 52     |      | 3 50-54      | 1.0            |    |
| 1110   | 281323314 |          | 1 China  |             | 1  | 2  | 1 Male   | 1973 | 42     |      | 1 40-44 year | 1.0            |    |



| respid | SubsID    | dCountry | Country | QDisclaimer | Q1 | Q2 | Gender   | Q3_1 | age Nr | dAge | age Group  | Weight in Ctry | Q4 |
|--------|-----------|----------|---------|-------------|----|----|----------|------|--------|------|------------|----------------|----|
| 1117   | 280527125 | 1        | China   |             | 1  | 2  | 2 Female | 1969 | 46     | 2    | 45-49      | 1.0            | 2  |
| 1119   | 280373351 | 1        | China   |             | 1  | 2  | 2 Female | 1974 | 41     | 1    | 40-44 year | 1.0            | 2  |
| 1126   | 280744046 | 1        | China   |             | 1  | 2  | 1 Male   | 1974 | 41     | 1    | 40-44 year | 1.0            |    |
| 1127   | 281321163 | 1        | China   |             | 1  | 1  | 2 Female | 1971 | 44     | 1    | 40-44 year | 1.0            | 2  |
| 1130   | 280672523 | 1        | China   |             | 1  | 2  | 2 Female | 1962 | 53     | 3    | 50-54      | 1.2            |    |
| 1131   | 280701838 | 1        | China   |             | 1  | 2  | 2 Female | 1975 | 40     | 1    | 40-44 year | 1.0            | 2  |
| 1135   | 281269836 | 1        | China   |             | 1  | 2  | 1 Male   | 1970 | 45     | 2    | 45-49      | 1.0            |    |
| 1138   | 280011033 | 1        | China   |             | 1  | 2  | 2 Female | 1971 | 44     | 1    | 40-44 year | 1.0            | 2  |
| 1139   | 280415714 | 1        | China   |             | 1  | 2  | 2 Female | 1960 | 55     | 4    | 55-59      | 1.0            |    |
| 1140   | 280548398 | 1        | China   |             | 1  | 2  | 2 Female | 1961 | 54     | 3    | 50-54      | 1.2            |    |
| 1142   | 280662962 | 1        | China   |             | 1  | 2  | 2 Female | 1963 | 52     | 3    | 50-54      | 1.2            |    |
| 1143   | 280673513 | 1        | China   |             | 1  | 2  | 2 Female | 1961 | 54     | 3    | 50-54      | 1.2            |    |
| 1145   | 281319986 | 1        | China   |             | 1  | 2  | 1 Male   | 1973 | 42     | 1    | 40-44 year | 1.0            |    |
| 1149   | 280287309 | 1        | China   |             | 1  | 2  | 2 Female | 1974 | 41     | 1    | 40-44 year | 1.0            | 2  |
| 1152   | 280558846 | 1        | China   |             | 1  | 2  | 1 Male   | 1973 | 42     | 1    | 40-44 year | 1.0            |    |
| 1160   | 281268575 | 1        | China   |             | 1  | 2  | 1 Male   | 1968 | 47     | 2    | 45-49      | 1.0            |    |
| 1164   | 280250867 | 1        | China   |             | 1  | 2  | 2 Female | 1970 | 45     | 2    | 45-49      | 1.0            | 2  |
| 1165   | 280419174 | 1        | China   |             | 1  | 2  | 2 Female | 1971 | 44     | 1    | 40-44 year | 1.0            | 2  |
| 1169   | 280937076 | 1        | China   |             | 1  | 2  | 2 Female | 1969 | 46     | 2    | 45-49      | 1.0            | 2  |
| 1170   | 280738635 | 1        | China   |             | 1  | 2  | 1 Male   | 1973 | 42     | 1    | 40-44 year | 1.0            |    |
| 1179   | 280412490 | 1        | China   |             | 1  | 2  | 2 Female | 1975 | 40     | 1    | 40-44 year | 1.0            | 2  |
| 1180   | 280759987 | 1        | China   |             | 1  | 2  | 1 Male   | 1965 | 50     | 3    | 50-54      | 1.0            |    |
| 1183   | 280583789 | 1        | China   |             | 1  | 2  | 1 Male   | 1965 | 50     | 3    | 50-54      | 1.0            |    |
| 1187   | 280220372 | 1        | China   |             | 1  | 2  | 1 Male   | 1974 | 41     | 1    | 40-44 year | 1.0            |    |
| 1188   | 280912181 | 1        | China   |             | 1  | 2  | 1 Male   | 1967 | 48     | 2    | 45-49      | 1.0            |    |
| 1193   | 281309980 | 1        | China   |             | 1  | 1  | 1 Male   | 1967 | 48     | 2    | 45-49      | 1.0            |    |
| 1194   | 280611237 | 1        | China   |             | 1  | 1  | 1 Male   | 1969 | 46     | 2    | 45-49      | 1.0            |    |
| 1197   | 280753907 | 1        | China   |             | 1  | 1  | 2 Female | 1971 | 44     | 1    | 40-44 year | 1.0            | 2  |
| 1202   | 280957874 | 1        | China   |             | 1  | 2  | 2 Female | 1955 | 60     | 5    | >=60       | 1.1            |    |
| 1204   | 281235041 | 1        | China   |             | 1  | 2  | 2 Female | 1972 | 43     | 1    | 40-44 year | 1.0            | 2  |
| 1211   | 280298890 | 1        | China   |             | 1  | 2  | 1 Male   | 1972 | 43     | 1    | 40-44 year | 1.0            |    |
| 1224   | 300013    | 2        | Taiwan  |             | 1  | 2  | 1 Male   | 1950 | 65     | 5    | >=60       | 1.6            |    |

| respid | SubsID    | dCountry | Country | QDisclaim<br>er | Q1 | Q2 | Gender | Q3_1 | age Nr | dAge | age Group  | Weight in<br>Ctry | Q4 |
|--------|-----------|----------|---------|-----------------|----|----|--------|------|--------|------|------------|-------------------|----|
| 1225   | 200015    | 3        | Korea   | 1               | 2  | 2  | Female | 1962 | 53     | 3    | 50-54      | 0.8               |    |
| 1230   | 300015    | 2        | Taiwan  | 1               | 2  | 2  | Female | 1950 | 65     | 5    | >=60       | 1.7               |    |
| 1232   | 200016    | 3        | Korea   | 1               | 2  | 2  | Female | 1957 | 58     | 4    | 55-59      | 0.7               |    |
| 1233   | 200017    | 3        | Korea   | 1               | 2  | 1  | Male   | 1969 | 46     | 2    | 45-49      | 0.8               |    |
| 1234   | 300017    | 2        | Taiwan  | 1               | 2  | 2  | Female | 1961 | 54     | 3    | 50-54      | 0.9               |    |
| 1235   | 200018    | 3        | Korea   | 1               | 2  | 1  | Male   | 1944 | 71     | 5    | >=60       | 1.6               |    |
| 1236   | 200019    | 3        | Korea   | 1               | 2  | 2  | Female | 1975 | 40     | 1    | 40-44 year | 0.9               | 2  |
| 1237   | 200020    | 3        | Korea   | 1               | 2  | 2  | Female | 1962 | 53     | 3    | 50-54      | 0.8               |    |
| 1238   | 300018    | 2        | Taiwan  | 1               | 2  | 1  | Male   | 1956 | 59     | 4    | 55-59      | 0.7               |    |
| 1239   | 200021    | 3        | Korea   | 1               | 2  | 2  | Female | 1958 | 57     | 4    | 55-59      | 0.7               |    |
| 1241   | 300019    | 2        | Taiwan  | 1               | 2  | 1  | Male   | 1951 | 64     | 5    | >=60       | 1.6               |    |
| 1242   | 300020    | 2        | Taiwan  | 1               | 1  | 1  | Male   | 1957 | 58     | 4    | 55-59      | 0.7               |    |
| 1244   | 300021    | 2        | Taiwan  | 1               | 2  | 1  | Male   | 1944 | 71     | 5    | >=60       | 1.6               |    |
| 1245   | 200023    | 3        | Korea   | 1               | 2  | 1  | Male   | 1964 | 51     | 3    | 50-54      | 0.9               |    |
| 1247   | 300022    | 2        | Taiwan  | 1               | 2  | 1  | Male   | 1958 | 57     | 4    | 55-59      | 0.7               |    |
| 1248   | 200025    | 3        | Korea   | 1               | 2  | 2  | Female | 1958 | 57     | 4    | 55-59      | 0.7               |    |
| 1249   | 200024    | 3        | Korea   | 1               | 2  | 1  | Male   | 1964 | 51     | 3    | 50-54      | 0.9               |    |
| 1250   | 281189868 | 1        | China   | 1               | 2  | 1  | Male   | 1972 | 43     | 1    | 40-44 year | 1.0               |    |
| 1251   | 200026    | 3        | Korea   | 1               | 2  | 1  | Male   | 1968 | 47     | 2    | 45-49      | 0.8               |    |
| 1252   | 100004    | 1        | China   | 1               | 2  | 2  | Female | 1955 | 60     | 5    | >=60       | 1.1               |    |
| 1253   | 300023    | 2        | Taiwan  | 1               | 2  | 2  | Female | 1960 | 55     | 4    | 55-59      | 0.9               |    |
| 1254   | 300024    | 2        | Taiwan  | 1               | 2  | 1  | Male   | 1963 | 52     | 3    | 50-54      | 0.8               |    |
| 1258   | 100005    | 1        | China   | 1               | 2  | 1  | Male   | 1933 | 82     | 5    | >=60       | 1.0               |    |
| 1260   | 100006    | 1        | China   | 1               | 2  | 1  | Male   | 1949 | 66     | 5    | >=60       | 1.0               |    |
| 1261   | 200028    | 3        | Korea   | 1               | 2  | 1  | Male   | 1949 | 66     | 5    | >=60       | 1.6               |    |
| 1262   | 100007    | 1        | China   | 1               | 2  | 1  | Male   | 1952 | 63     | 5    | >=60       | 1.0               |    |
| 1263   | 300025    | 2        | Taiwan  | 1               | 1  | 1  | Male   | 1948 | 67     | 5    | >=60       | 1.6               |    |
| 1264   | 300026    | 2        | Taiwan  | 1               | 2  | 2  | Female | 1970 | 45     | 2    | 45-49      | 0.9               | 2  |
| 1265   | 300027    | 2        | Taiwan  | 1               | 2  | 1  | Male   | 1938 | 77     | 5    | >=60       | 1.6               |    |
| 1266   | 300028    | 2        | Taiwan  | 1               | 2  | 1  | Male   | 1955 | 60     | 5    | >=60       | 1.6               |    |
| 1270   | 300029    | 2        | Taiwan  | 1               | 2  | 1  | Male   | 1958 | 57     | 4    | 55-59      | 0.7               |    |
| 1272   | 300031    | 2        | Taiwan  | 1               | 2  | 2  | Female | 1939 | 76     | 5    | >=60       | 1.7               |    |

| respid | SubsID | dCountry | Country | QDisclaim<br>er | Q1 | Q2 | Gender | Q3_1 | age Nr | dAge | age Group  | Weight in<br>Ctry | Q4 |
|--------|--------|----------|---------|-----------------|----|----|--------|------|--------|------|------------|-------------------|----|
| 1273   | 200031 | 3        | Korea   | 1               | 2  | 2  | Female | 1963 | 52     | 3    | 50-54      | 0.8               |    |
| 1276   | 200033 | 3        | Korea   | 1               | 2  | 1  | Male   | 1969 | 46     | 2    | 45-49      | 0.8               |    |
| 1277   | 300033 | 2        | Taiwan  | 1               | 2  | 1  | Male   | 1949 | 66     | 5    | >=60       | 1.6               |    |
| 1278   | 200034 | 3        | Korea   | 1               | 2  | 1  | Male   | 1970 | 45     | 2    | 45-49      | 0.8               |    |
| 1280   | 300034 | 2        | Taiwan  | 1               | 2  | 2  | Female | 1952 | 63     | 5    | >=60       | 1.7               |    |
| 1281   | 200036 | 3        | Korea   | 1               | 2  | 1  | Male   | 1962 | 53     | 3    | 50-54      | 0.9               |    |
| 1282   | 200037 | 3        | Korea   | 1               | 2  | 1  | Male   | 1961 | 54     | 3    | 50-54      | 0.9               |    |
| 1283   | 200038 | 3        | Korea   | 1               | 2  | 1  | Male   | 1964 | 51     | 3    | 50-54      | 0.9               |    |
| 1288   | 300038 | 2        | Taiwan  | 1               | 2  | 2  | Female | 1949 | 66     | 5    | >=60       | 1.7               |    |
| 1289   | 200039 | 3        | Korea   | 1               | 2  | 2  | Female | 1972 | 43     | 1    | 40-44 year | 0.9               | 2  |
| 1290   | 300039 | 2        | Taiwan  | 1               | 2  | 1  | Male   | 1963 | 52     | 3    | 50-54      | 0.8               |    |
| 1291   | 300040 | 2        | Taiwan  | 1               | 2  | 1  | Male   | 1971 | 44     | 1    | 40-44 year | 0.8               |    |
| 1293   | 200040 | 3        | Korea   | 1               | 2  | 2  | Female | 1968 | 47     | 2    | 45-49      | 0.9               | 2  |
| 1294   | 200041 | 3        | Korea   | 1               | 2  | 1  | Male   | 1967 | 48     | 2    | 45-49      | 0.8               |    |
| 1295   | 200042 | 3        | Korea   | 1               | 2  | 1  | Male   | 1950 | 65     | 5    | >=60       | 1.6               |    |
| 1296   | 200043 | 3        | Korea   | 1               | 2  | 2  | Female | 1972 | 43     | 1    | 40-44 year | 0.9               | 2  |
| 1297   | 200044 | 3        | Korea   | 1               | 2  | 2  | Female | 1968 | 47     | 2    | 45-49      | 0.9               | 2  |
| 1298   | 200045 | 3        | Korea   | 1               | 2  | 1  | Male   | 1965 | 50     | 3    | 50-54      | 0.9               |    |
| 1300   | 200046 | 3        | Korea   | 1               | 2  | 1  | Male   | 1971 | 44     | 1    | 40-44 year | 0.9               |    |
| 1302   | 200047 | 3        | Korea   | 1               | 2  | 2  | Female | 1967 | 48     | 2    | 45-49      | 0.9               | 2  |
| 1303   | 100009 | 1        | China   | 1               | 2  | 1  | Male   | 1971 | 44     | 1    | 40-44 year | 1.0               |    |
| 1304   | 200048 | 3        | Korea   | 1               | 2  | 1  | Male   | 1968 | 47     | 2    | 45-49      | 0.8               |    |
| 1305   | 200049 | 3        | Korea   | 1               | 2  | 1  | Male   | 1960 | 55     | 4    | 55-59      | 0.8               |    |
| 1307   | 300044 | 2        | Taiwan  | 1               | 2  | 1  | Male   | 1972 | 43     | 1    | 40-44 year | 0.8               |    |
| 1312   | 200050 | 3        | Korea   | 1               | 1  | 2  | Female | 1961 | 54     | 3    | 50-54      | 0.8               |    |
| 1313   | 300046 | 2        | Taiwan  | 1               | 2  | 2  | Female | 1968 | 47     | 2    | 45-49      | 0.9               | 2  |
| 1314   | 100010 | 1        | China   | 1               | 2  | 2  | Female | 1971 | 44     | 1    | 40-44 year | 1.0               | 2  |
| 1317   | 300047 | 2        | Taiwan  | 1               | 2  | 2  | Female | 1966 | 49     | 2    | 45-49      | 0.9               | 2  |
| 1318   | 200051 | 3        | Korea   | 1               | 2  | 1  | Male   | 1947 | 68     | 5    | >=60       | 1.6               |    |
| 1319   | 200052 | 3        | Korea   | 1               | 2  | 1  | Male   | 1958 | 57     | 4    | 55-59      | 0.8               |    |
| 1321   | 100011 | 1        | China   | 1               | 2  | 1  | Male   | 1973 | 42     | 1    | 40-44 year | 1.0               |    |
| 1324   | 200054 | 3        | Korea   | 1               | 2  | 1  | Male   | 1963 | 52     | 3    | 50-54      | 0.9               |    |

| respid | SubsID | dCountry | Country | QDisclaimer | Q1 | Q2 | Gender | Q3_1 | age Nr | dAge | age Group  | Weight in Ctry | Q4 |
|--------|--------|----------|---------|-------------|----|----|--------|------|--------|------|------------|----------------|----|
| 1325   | 300050 | 2        | Taiwan  | 1           | 2  | 1  | Male   | 1967 | 48     | 2    | 45-49      | 0.8            |    |
| 1326   | 300051 | 2        | Taiwan  | 1           | 1  | 1  | Male   | 1964 | 51     | 3    | 50-54      | 0.8            |    |
| 1327   | 300052 | 2        | Taiwan  | 1           | 2  | 1  | Male   | 1975 | 40     | 1    | 40-44 year | 0.8            |    |
| 1329   | 300053 | 2        | Taiwan  | 1           | 2  | 1  | Male   | 1969 | 46     | 2    | 45-49      | 0.8            |    |
| 1330   | 200055 | 3        | Korea   | 1           | 2  | 2  | Female | 1952 | 63     | 5    | >=60       | 1.6            |    |
| 1331   | 200056 | 3        | Korea   | 1           | 2  | 2  | Female | 1968 | 47     | 2    | 45-49      | 0.9            | 2  |
| 1335   | 300056 | 2        | Taiwan  | 1           | 2  | 1  | Male   | 1968 | 47     | 2    | 45-49      | 0.8            |    |
| 1337   | 100012 | 1        | China   | 1           | 2  | 2  | Female | 1970 | 45     | 2    | 45-49      | 1.0            | 2  |
| 1341   | 200059 | 3        | Korea   | 1           | 2  | 2  | Female | 1973 | 42     | 1    | 40-44 year | 0.9            | 2  |
| 1342   | 200060 | 3        | Korea   | 1           | 2  | 2  | Female | 1959 | 56     | 4    | 55-59      | 0.7            |    |
| 1344   | 200061 | 3        | Korea   | 1           | 2  | 1  | Male   | 1964 | 51     | 3    | 50-54      | 0.9            |    |
| 1345   | 300059 | 2        | Taiwan  | 1           | 2  | 2  | Female | 1974 | 41     | 1    | 40-44 year | 0.8            | 2  |
| 1346   | 200062 | 3        | Korea   | 1           | 2  | 1  | Male   | 1974 | 41     | 1    | 40-44 year | 0.9            |    |
| 1350   | 200063 | 3        | Korea   | 1           | 2  | 2  | Female | 1972 | 43     | 1    | 40-44 year | 0.9            | 2  |
| 1352   | 100013 | 1        | China   | 1           | 2  | 2  | Female | 1970 | 45     | 2    | 45-49      | 1.0            | 2  |
| 1353   | 200065 | 3        | Korea   | 1           | 2  | 1  | Male   | 1958 | 57     | 4    | 55-59      | 0.8            |    |
| 1354   | 300060 | 2        | Taiwan  | 1           | 2  | 1  | Male   | 1955 | 60     | 5    | >=60       | 1.6            |    |
| 1355   | 200066 | 3        | Korea   | 1           | 2  | 1  | Male   | 1970 | 45     | 2    | 45-49      | 0.8            |    |
| 1357   | 300061 | 2        | Taiwan  | 1           | 2  | 1  | Male   | 1955 | 60     | 5    | >=60       | 1.6            |    |
| 1360   | 200068 | 3        | Korea   | 1           | 2  | 2  | Female | 1961 | 54     | 3    | 50-54      | 0.8            |    |
| 1362   | 300062 | 2        | Taiwan  | 1           | 2  | 2  | Female | 1960 | 55     | 4    | 55-59      | 0.9            |    |
| 1363   | 300063 | 2        | Taiwan  | 1           | 2  | 2  | Female | 1972 | 43     | 1    | 40-44 year | 0.8            | 2  |
| 1367   | 300064 | 2        | Taiwan  | 1           | 2  | 2  | Female | 1974 | 41     | 1    | 40-44 year | 0.8            | 2  |
| 1369   | 200070 | 3        | Korea   | 1           | 2  | 1  | Male   | 1949 | 66     | 5    | >=60       | 1.6            |    |
| 1371   | 100016 | 1        | China   | 1           | 2  | 2  | Female | 1974 | 41     | 1    | 40-44 year | 1.0            | 2  |
| 1372   | 300066 | 2        | Taiwan  | 1           | 2  | 1  | Male   | 1967 | 48     | 2    | 45-49      | 0.8            |    |
| 1375   | 200058 | 3        | Korea   | 1           | 2  | 1  | Male   | 1974 | 41     | 1    | 40-44 year | 0.9            |    |
| 1377   | 200072 | 3        | Korea   | 1           | 2  | 1  | Male   | 1964 | 51     | 3    | 50-54      | 0.9            |    |
| 1379   | 300068 | 2        | Taiwan  | 1           | 2  | 1  | Male   | 1935 | 80     | 5    | >=60       | 1.6            |    |
| 1380   | 200074 | 3        | Korea   | 1           | 2  | 1  | Male   | 1964 | 51     | 3    | 50-54      | 0.9            |    |
| 1382   | 200075 | 3        | Korea   | 1           | 2  | 2  | Female | 1955 | 60     | 5    | >=60       | 1.6            |    |
| 1383   | 300069 | 2        | Taiwan  | 1           | 2  | 2  | Female | 1971 | 44     | 1    | 40-44 year | 0.8            | 2  |

| respid | SubsID | dCountry | Country | QDisclaim<br>er | Q1 | Q2 | Gender | Q3_1 | age Nr | dAge | age Group  | Weight in<br>Ctry | Q4 |
|--------|--------|----------|---------|-----------------|----|----|--------|------|--------|------|------------|-------------------|----|
| 1384   | 300070 | 2        | Taiwan  | 1               | 2  | 2  | Female | 1960 | 55     | 4    | 55-59      | 0.9               |    |
| 1385   | 200076 | 3        | Korea   | 1               | 2  | 1  | Male   | 1958 | 57     | 4    | 55-59      | 0.8               |    |
| 1387   | 200077 | 3        | Korea   | 1               | 2  | 1  | Male   | 1966 | 49     | 2    | 45-49      | 0.8               |    |
| 1388   | 200078 | 3        | Korea   | 1               | 2  | 1  | Male   | 1973 | 42     | 1    | 40-44 year | 0.9               |    |
| 1389   | 200079 | 3        | Korea   | 1               | 2  | 2  | Female | 1973 | 42     | 1    | 40-44 year | 0.9               | 2  |
| 1390   | 200080 | 3        | Korea   | 1               | 2  | 2  | Female | 1966 | 49     | 2    | 45-49      | 0.9               | 2  |
| 1395   | 300073 | 2        | Taiwan  | 1               | 1  | 1  | Male   | 1972 | 43     | 1    | 40-44 year | 0.8               |    |
| 1396   | 300074 | 2        | Taiwan  | 1               | 2  | 2  | Female | 1968 | 47     | 2    | 45-49      | 0.9               | 2  |
| 1397   | 200081 | 3        | Korea   | 1               | 2  | 1  | Male   | 1952 | 63     | 5    | >=60       | 1.6               |    |
| 1398   | 300075 | 2        | Taiwan  | 1               | 2  | 1  | Male   | 1972 | 43     | 1    | 40-44 year | 0.8               |    |
| 1399   | 200082 | 3        | Korea   | 1               | 2  | 1  | Male   | 1971 | 44     | 1    | 40-44 year | 0.9               |    |
| 1403   | 200085 | 3        | Korea   | 1               | 2  | 2  | Female | 1968 | 47     | 2    | 45-49      | 0.9               | 2  |
| 1405   | 200086 | 3        | Korea   | 1               | 2  | 1  | Male   | 1950 | 65     | 5    | >=60       | 1.6               |    |
| 1406   | 200087 | 3        | Korea   | 1               | 1  | 2  | Female | 1968 | 47     | 2    | 45-49      | 0.9               | 2  |
| 1407   | 200088 | 3        | Korea   | 1               | 2  | 2  | Female | 1961 | 54     | 3    | 50-54      | 0.8               |    |
| 1408   | 200089 | 3        | Korea   | 1               | 2  | 1  | Male   | 1970 | 45     | 2    | 45-49      | 0.8               |    |
| 1409   | 200090 | 3        | Korea   | 1               | 2  | 1  | Male   | 1958 | 57     | 4    | 55-59      | 0.8               |    |
| 1410   | 200091 | 3        | Korea   | 1               | 2  | 1  | Male   | 1971 | 44     | 1    | 40-44 year | 0.9               |    |
| 1411   | 200092 | 3        | Korea   | 1               | 2  | 2  | Female | 1972 | 43     | 1    | 40-44 year | 0.9               | 2  |
| 1412   | 200093 | 3        | Korea   | 1               | 2  | 1  | Male   | 1965 | 50     | 3    | 50-54      | 0.9               |    |
| 1413   | 200094 | 3        | Korea   | 1               | 2  | 2  | Female | 1961 | 54     | 3    | 50-54      | 0.8               |    |
| 1414   | 300077 | 2        | Taiwan  | 1               | 2  | 1  | Male   | 1953 | 62     | 5    | >=60       | 1.6               |    |
| 1415   | 200095 | 3        | Korea   | 1               | 2  | 1  | Male   | 1950 | 65     | 5    | >=60       | 1.6               |    |
| 1416   | 100017 | 1        | China   | 1               | 2  | 1  | Male   | 1971 | 44     | 1    | 40-44 year | 1.0               |    |
| 1417   | 200096 | 3        | Korea   | 1               | 2  | 2  | Female | 1968 | 47     | 2    | 45-49      | 0.9               | 2  |
| 1418   | 200097 | 3        | Korea   | 1               | 2  | 1  | Male   | 1960 | 55     | 4    | 55-59      | 0.8               |    |
| 1419   | 200098 | 3        | Korea   | 1               | 1  | 1  | Male   | 1970 | 45     | 2    | 45-49      | 0.8               |    |
| 1420   | 200099 | 3        | Korea   | 1               | 2  | 1  | Male   | 1938 | 77     | 5    | >=60       | 1.6               |    |
| 1421   | 200100 | 3        | Korea   | 1               | 2  | 1  | Male   | 1961 | 54     | 3    | 50-54      | 0.9               |    |
| 1422   | 200101 | 3        | Korea   | 1               | 2  | 2  | Female | 1971 | 44     | 1    | 40-44 year | 0.9               | 2  |
| 1423   | 200102 | 3        | Korea   | 1               | 2  | 1  | Male   | 1969 | 46     | 2    | 45-49      | 0.8               |    |
| 1424   | 200103 | 3        | Korea   | 1               | 2  | 1  | Male   | 1970 | 45     | 2    | 45-49      | 0.8               |    |

| respid | SubsID | dCountry | Country | QDisclaim<br>er | Q1 | Q2 | Gender | Q3_1 | age Nr | dAge | age Group  | Weight in<br>Ctry | Q4 |
|--------|--------|----------|---------|-----------------|----|----|--------|------|--------|------|------------|-------------------|----|
| 1429   | 200107 | 3        | Korea   | 1               | 2  | 1  | Male   | 1968 | 47     | 2    | 45-49      | 0.8               |    |
| 1430   | 200108 | 3        | Korea   | 1               | 2  | 1  | Male   | 1948 | 67     | 5    | >=60       | 1.6               |    |
| 1431   | 200109 | 3        | Korea   | 1               | 2  | 1  | Male   | 1948 | 67     | 5    | >=60       | 1.6               |    |
| 1433   | 200111 | 3        | Korea   | 1               | 2  | 1  | Male   | 1968 | 47     | 2    | 45-49      | 0.8               |    |
| 1435   | 200105 | 3        | Korea   | 1               | 2  | 1  | Male   | 1960 | 55     | 4    | 55-59      | 0.8               |    |
| 1436   | 200112 | 3        | Korea   | 1               | 2  | 1  | Male   | 1974 | 41     | 1    | 40-44 year | 0.9               |    |
| 1438   | 100019 | 1        | China   | 1               | 1  | 1  | Male   | 1947 | 68     | 5    | >=60       | 1.0               |    |
| 1439   | 200113 | 3        | Korea   | 1               | 2  | 1  | Male   | 1953 | 62     | 5    | >=60       | 1.6               |    |
| 1441   | 200115 | 3        | Korea   | 1               | 2  | 1  | Male   | 1956 | 59     | 4    | 55-59      | 0.8               |    |
| 1442   | 200116 | 3        | Korea   | 1               | 2  | 1  | Male   | 1946 | 69     | 5    | >=60       | 1.6               |    |
| 1443   | 100020 | 1        | China   | 1               | 2  | 1  | Male   | 1963 | 52     | 3    | 50-54      | 1.0               |    |
| 1444   | 200117 | 3        | Korea   | 1               | 2  | 2  | Female | 1969 | 46     | 2    | 45-49      | 0.9               | 2  |
| 1445   | 200118 | 3        | Korea   | 1               | 2  | 1  | Male   | 1963 | 52     | 3    | 50-54      | 0.9               |    |
| 1446   | 200119 | 3        | Korea   | 1               | 2  | 2  | Female | 1967 | 48     | 2    | 45-49      | 0.9               | 2  |
| 1447   | 200120 | 3        | Korea   | 1               | 2  | 1  | Male   | 1949 | 66     | 5    | >=60       | 1.6               |    |
| 1449   | 200121 | 3        | Korea   | 1               | 2  | 2  | Female | 1953 | 62     | 5    | >=60       | 1.6               |    |
| 1450   | 300078 | 2        | Taiwan  | 1               | 2  | 1  | Male   | 1972 | 43     | 1    | 40-44 year | 0.8               |    |
| 1451   | 200122 | 3        | Korea   | 1               | 2  | 2  | Female | 1968 | 47     | 2    | 45-49      | 0.9               | 2  |
| 1452   | 200123 | 3        | Korea   | 1               | 2  | 2  | Female | 1966 | 49     | 2    | 45-49      | 0.9               | 2  |
| 1453   | 200124 | 3        | Korea   | 1               | 2  | 2  | Female | 1968 | 47     | 2    | 45-49      | 0.9               | 2  |
| 1454   | 200125 | 3        | Korea   | 1               | 2  | 2  | Female | 1974 | 41     | 1    | 40-44 year | 0.9               | 2  |
| 1456   | 200126 | 3        | Korea   | 1               | 2  | 1  | Male   | 1963 | 52     | 3    | 50-54      | 0.9               |    |
| 1457   | 200106 | 3        | Korea   | 1               | 2  | 1  | Male   | 1952 | 63     | 5    | >=60       | 1.6               |    |
| 1459   | 100023 | 1        | China   | 1               | 2  | 1  | Male   | 1968 | 47     | 2    | 45-49      | 1.0               |    |
| 1460   | 300079 | 2        | Taiwan  | 1               | 2  | 1  | Male   | 1971 | 44     | 1    | 40-44 year | 0.8               |    |
| 1463   | 300080 | 2        | Taiwan  | 1               | 2  | 1  | Male   | 1966 | 49     | 2    | 45-49      | 0.8               |    |
| 1465   | 300081 | 2        | Taiwan  | 1               | 1  | 2  | Female | 1962 | 53     | 3    | 50-54      | 0.9               |    |
| 1467   | 100024 | 1        | China   | 1               | 2  | 1  | Male   | 1955 | 60     | 5    | >=60       | 1.0               |    |
| 1470   | 200130 | 3        | Korea   | 1               | 2  | 1  | Male   | 1972 | 43     | 1    | 40-44 year | 0.9               |    |
| 1471   | 200131 | 3        | Korea   | 1               | 2  | 1  | Male   | 1956 | 59     | 4    | 55-59      | 0.8               |    |
| 1472   | 100025 | 1        | China   | 1               | 2  | 1  | Male   | 1946 | 69     | 5    | >=60       | 1.0               |    |
| 1474   | 200133 | 3        | Korea   | 1               | 2  | 2  | Female | 1970 | 45     | 2    | 45-49      | 0.9               | 2  |

| respid | SubsID | dCountry | Country | QDisclaim<br>er | Q1 | Q2 | Gender | Q3_1 | age Nr | dAge | age Group  | Weight in<br>Ctry | Q4 |
|--------|--------|----------|---------|-----------------|----|----|--------|------|--------|------|------------|-------------------|----|
| 1475   | 300082 | 2        | Taiwan  | 1               | 2  | 1  | Male   | 1969 | 46     | 2    | 45-49      | 0.8               |    |
| 1477   | 300083 | 2        | Taiwan  | 1               | 2  | 1  | Male   | 1972 | 43     | 1    | 40-44 year | 0.8               |    |
| 1478   | 300084 | 2        | Taiwan  | 1               | 1  | 1  | Male   | 1961 | 54     | 3    | 50-54      | 0.8               |    |
| 1480   | 100027 | 1        | China   | 1               | 2  | 1  | Male   | 1973 | 42     | 1    | 40-44 year | 1.0               |    |
| 1481   | 200135 | 3        | Korea   | 1               | 2  | 2  | Female | 1966 | 49     | 2    | 45-49      | 0.9               | 2  |
| 1483   | 300086 | 2        | Taiwan  | 1               | 2  | 1  | Male   | 1957 | 58     | 4    | 55-59      | 0.7               |    |
| 1484   | 200136 | 3        | Korea   | 1               | 2  | 1  | Male   | 1962 | 53     | 3    | 50-54      | 0.9               |    |
| 1485   | 100028 | 1        | China   | 1               | 2  | 1  | Male   | 1970 | 45     | 2    | 45-49      | 1.0               |    |
| 1486   | 300087 | 2        | Taiwan  | 1               | 2  | 1  | Male   | 1958 | 57     | 4    | 55-59      | 0.7               |    |
| 1487   | 100029 | 1        | China   | 1               | 2  | 1  | Male   | 1957 | 58     | 4    | 55-59      | 0.9               |    |
| 1488   | 200137 | 3        | Korea   | 1               | 2  | 1  | Male   | 1956 | 59     | 4    | 55-59      | 0.8               |    |
| 1489   | 200138 | 3        | Korea   | 1               | 2  | 1  | Male   | 1951 | 64     | 5    | >=60       | 1.6               |    |
| 1490   | 100030 | 1        | China   | 1               | 2  | 1  | Male   | 1974 | 41     | 1    | 40-44 year | 1.0               |    |
| 1491   | 200139 | 3        | Korea   | 1               | 1  | 2  | Female | 1970 | 45     | 2    | 45-49      | 0.9               | 2  |
| 1492   | 200140 | 3        | Korea   | 1               | 2  | 2  | Female | 1962 | 53     | 3    | 50-54      | 0.8               |    |
| 1494   | 100032 | 1        | China   | 1               | 2  | 1  | Male   | 1971 | 44     | 1    | 40-44 year | 1.0               |    |
| 1495   | 200141 | 3        | Korea   | 1               | 2  | 1  | Male   | 1938 | 77     | 5    | >=60       | 1.6               |    |
| 1496   | 200142 | 3        | Korea   | 1               | 2  | 1  | Male   | 1962 | 53     | 3    | 50-54      | 0.9               |    |
| 1498   | 100034 | 1        | China   | 1               | 2  | 1  | Male   | 1953 | 62     | 5    | >=60       | 1.0               |    |
| 1499   | 100035 | 1        | China   | 1               | 2  | 2  | Female | 1949 | 66     | 5    | >=60       | 1.1               |    |
| 1500   | 200143 | 3        | Korea   | 1               | 2  | 2  | Female | 1948 | 67     | 5    | >=60       | 1.6               |    |
| 1501   | 200144 | 3        | Korea   | 1               | 2  | 2  | Female | 1974 | 41     | 1    | 40-44 year | 0.9               | 2  |
| 1503   | 200146 | 3        | Korea   | 1               | 2  | 2  | Female | 1956 | 59     | 4    | 55-59      | 0.7               |    |
| 1504   | 100036 | 1        | China   | 1               | 2  | 2  | Female | 1965 | 50     | 3    | 50-54      | 1.2               |    |
| 1508   | 100038 | 1        | China   | 1               | 2  | 1  | Male   | 1963 | 52     | 3    | 50-54      | 1.0               |    |
| 1509   | 100039 | 1        | China   | 1               | 2  | 1  | Male   | 1964 | 51     | 3    | 50-54      | 1.0               |    |
| 1511   | 300089 | 2        | Taiwan  | 1               | 2  | 1  | Male   | 1954 | 61     | 5    | >=60       | 1.6               |    |
| 1512   | 200148 | 3        | Korea   | 1               | 2  | 1  | Male   | 1967 | 48     | 2    | 45-49      | 0.8               |    |
| 1513   | 200149 | 3        | Korea   | 1               | 2  | 1  | Male   | 1968 | 47     | 2    | 45-49      | 0.8               |    |
| 1515   | 200150 | 3        | Korea   | 1               | 2  | 1  | Male   | 1973 | 42     | 1    | 40-44 year | 0.9               |    |
| 1517   | 200151 | 3        | Korea   | 1               | 2  | 1  | Male   | 1946 | 69     | 5    | >=60       | 1.6               |    |
| 1518   | 200152 | 3        | Korea   | 1               | 2  | 2  | Female | 1967 | 48     | 2    | 45-49      | 0.9               | 2  |

| respid | SubsID | dCountry | Country | QDisclaimer | Q1 | Q2 | Gender | Q3_1 | age Nr | dAge | age Group  | Weight in Ctry | Q4 |
|--------|--------|----------|---------|-------------|----|----|--------|------|--------|------|------------|----------------|----|
| 1519   | 200153 | 3        | Korea   | 1           | 2  | 2  | Female | 1952 | 63     | 5    | >=60       | 1.6            |    |
| 1520   | 300091 | 2        | Taiwan  | 1           | 2  | 1  | Male   | 1961 | 54     | 3    | 50-54      | 0.8            |    |
| 1521   | 200154 | 3        | Korea   | 1           | 2  | 2  | Female | 1974 | 41     | 1    | 40-44 year | 0.9            | 2  |
| 1522   | 200155 | 3        | Korea   | 1           | 2  | 2  | Female | 1963 | 52     | 3    | 50-54      | 0.8            |    |
| 1523   | 200156 | 3        | Korea   | 1           | 2  | 1  | Male   | 1973 | 42     | 1    | 40-44 year | 0.9            |    |
| 1524   | 100040 | 1        | China   | 1           | 2  | 2  | Female | 1970 | 45     | 2    | 45-49      | 1.0            | 2  |
| 1525   | 300092 | 2        | Taiwan  | 1           | 2  | 2  | Female | 1963 | 52     | 3    | 50-54      | 0.9            |    |
| 1526   | 200157 | 3        | Korea   | 1           | 2  | 1  | Male   | 1970 | 45     | 2    | 45-49      | 0.8            |    |
| 1527   | 100041 | 1        | China   | 1           | 2  | 1  | Male   | 1950 | 65     | 5    | >=60       | 1.0            |    |
| 1534   | 100044 | 1        | China   | 1           | 2  | 1  | Male   | 1958 | 57     | 4    | 55-59      | 0.9            |    |
| 1535   | 200158 | 3        | Korea   | 1           | 2  | 1  | Male   | 1974 | 41     | 1    | 40-44 year | 0.9            |    |
| 1536   | 200159 | 3        | Korea   | 1           | 2  | 1  | Male   | 1973 | 42     | 1    | 40-44 year | 0.9            |    |
| 1538   | 100046 | 1        | China   | 1           | 2  | 1  | Male   | 1970 | 45     | 2    | 45-49      | 1.0            |    |
| 1539   | 200160 | 3        | Korea   | 1           | 2  | 1  | Male   | 1967 | 48     | 2    | 45-49      | 0.8            |    |
| 1540   | 200161 | 3        | Korea   | 1           | 1  | 2  | Female | 1969 | 46     | 2    | 45-49      | 0.9            | 2  |
| 1541   | 200162 | 3        | Korea   | 1           | 2  | 1  | Male   | 1967 | 48     | 2    | 45-49      | 0.8            |    |
| 1542   | 200163 | 3        | Korea   | 1           | 2  | 1  | Male   | 1968 | 47     | 2    | 45-49      | 0.8            |    |
| 1543   | 100047 | 1        | China   | 1           | 2  | 2  | Female | 1972 | 43     | 1    | 40-44 year | 1.0            | 2  |
| 1545   | 200164 | 3        | Korea   | 1           | 2  | 2  | Female | 1973 | 42     | 1    | 40-44 year | 0.9            | 2  |
| 1546   | 100049 | 1        | China   | 1           | 2  | 1  | Male   | 1972 | 43     | 1    | 40-44 year | 1.0            |    |
| 1548   | 200166 | 3        | Korea   | 1           | 2  | 2  | Female | 1952 | 63     | 5    | >=60       | 1.6            |    |
| 1549   | 100048 | 1        | China   | 1           | 2  | 1  | Male   | 1964 | 51     | 3    | 50-54      | 1.0            |    |
| 1551   | 200114 | 3        | Korea   | 1           | 2  | 1  | Male   | 1962 | 53     | 3    | 50-54      | 0.9            |    |
| 1552   | 200167 | 3        | Korea   | 1           | 2  | 1  | Male   | 1973 | 42     | 1    | 40-44 year | 0.9            |    |
| 1556   | 200170 | 3        | Korea   | 1           | 2  | 1  | Male   | 1966 | 49     | 2    | 45-49      | 0.8            |    |
| 1557   | 100052 | 1        | China   | 1           | 2  | 2  | Female | 1973 | 42     | 1    | 40-44 year | 1.0            | 2  |
| 1558   | 200171 | 3        | Korea   | 1           | 2  | 1  | Male   | 1963 | 52     | 3    | 50-54      | 0.9            |    |
| 1561   | 100053 | 1        | China   | 1           | 2  | 1  | Male   | 1969 | 46     | 2    | 45-49      | 1.0            |    |
| 1562   | 100054 | 1        | China   | 1           | 2  | 1  | Male   | 1966 | 49     | 2    | 45-49      | 1.0            |    |
| 1563   | 100055 | 1        | China   | 1           | 1  | 1  | Male   | 1971 | 44     | 1    | 40-44 year | 1.0            |    |
| 1564   | 100056 | 1        | China   | 1           | 2  | 1  | Male   | 1970 | 45     | 2    | 45-49      | 1.0            |    |
| 1565   | 200174 | 3        | Korea   | 1           | 2  | 2  | Female | 1975 | 40     | 1    | 40-44 year | 0.9            | 2  |



| respid | SubsID | dCountry | Country | QDisclaimer | Q1 | Q2 | Gender   | Q3_1 | age Nr | dAge | age Group  | Weight in Ctry | Q4 |
|--------|--------|----------|---------|-------------|----|----|----------|------|--------|------|------------|----------------|----|
| 1566   | 100057 | 1        | China   |             | 1  | 2  | 1 Male   | 1967 | 48     | 2    | 45-49      | 1.0            |    |
| 1567   | 300094 | 2        | Taiwan  |             | 1  | 2  | 1 Male   | 1951 | 64     | 5    | >=60       | 1.6            |    |
| 1569   | 100058 | 1        | China   |             | 1  | 2  | 1 Male   | 1951 | 64     | 5    | >=60       | 1.0            |    |
| 1570   | 100059 | 1        | China   |             | 1  | 2  | 2 Female | 1974 | 41     | 1    | 40-44 year | 1.0            | 2  |
| 1574   | 300096 | 2        | Taiwan  |             | 1  | 2  | 1 Male   | 1972 | 43     | 1    | 40-44 year | 0.8            |    |
| 1575   | 200175 | 3        | Korea   |             | 1  | 2  | 2 Female | 1961 | 54     | 3    | 50-54      | 0.8            |    |
| 1576   | 300097 | 2        | Taiwan  |             | 1  | 1  | 1 Male   | 1966 | 49     | 2    | 45-49      | 0.8            |    |
| 1577   | 100060 | 1        | China   |             | 1  | 2  | 1 Male   | 1962 | 53     | 3    | 50-54      | 1.0            |    |
| 1581   | 300099 | 2        | Taiwan  |             | 1  | 2  | 2 Female | 1974 | 41     | 1    | 40-44 year | 0.8            | 2  |
| 1583   | 100061 | 1        | China   |             | 1  | 2  | 1 Male   | 1950 | 65     | 5    | >=60       | 1.0            |    |
| 1585   | 200177 | 3        | Korea   |             | 1  | 2  | 1 Male   | 1966 | 49     | 2    | 45-49      | 0.8            |    |
| 1586   | 200178 | 3        | Korea   |             | 1  | 2  | 1 Male   | 1975 | 40     | 1    | 40-44 year | 0.9            |    |
| 1588   | 200179 | 3        | Korea   |             | 1  | 2  | 1 Male   | 1964 | 51     | 3    | 50-54      | 0.9            |    |
| 1590   | 300100 | 2        | Taiwan  |             | 1  | 2  | 1 Male   | 1974 | 41     | 1    | 40-44 year | 0.8            |    |
| 1592   | 100063 | 1        | China   |             | 1  | 2  | 2 Female | 1972 | 43     | 1    | 40-44 year | 1.0            | 2  |
| 1594   | 200180 | 3        | Korea   |             | 1  | 2  | 1 Male   | 1962 | 53     | 3    | 50-54      | 0.9            |    |
| 1598   | 300101 | 2        | Taiwan  |             | 1  | 2  | 1 Male   | 1930 | 85     | 5    | >=60       | 1.6            |    |
| 1599   | 300102 | 2        | Taiwan  |             | 1  | 2  | 1 Male   | 1966 | 49     | 2    | 45-49      | 0.8            |    |
| 1600   | 100065 | 1        | China   |             | 1  | 2  | 1 Male   | 1955 | 60     | 5    | >=60       | 1.0            |    |
| 1602   | 200183 | 3        | Korea   |             | 1  | 2  | 2 Female | 1974 | 41     | 1    | 40-44 year | 0.9            | 2  |
| 1603   | 300103 | 2        | Taiwan  |             | 1  | 2  | 2 Female | 1963 | 52     | 3    | 50-54      | 0.9            |    |
| 1604   | 100067 | 1        | China   |             | 1  | 2  | 2 Female | 1968 | 47     | 2    | 45-49      | 1.0            | 2  |
| 1605   | 200184 | 3        | Korea   |             | 1  | 2  | 1 Male   | 1938 | 77     | 5    | >=60       | 1.6            |    |
| 1606   | 100068 | 1        | China   |             | 1  | 2  | 1 Male   | 1970 | 45     | 2    | 45-49      | 1.0            |    |
| 1610   | 200185 | 3        | Korea   |             | 1  | 2  | 1 Male   | 1948 | 67     | 5    | >=60       | 1.6            |    |
| 1611   | 300104 | 2        | Taiwan  |             | 1  | 2  | 1 Male   | 1965 | 50     | 3    | 50-54      | 0.8            |    |
| 1612   | 200186 | 3        | Korea   |             | 1  | 2  | 1 Male   | 1966 | 49     | 2    | 45-49      | 0.8            |    |
| 1613   | 300105 | 2        | Taiwan  |             | 1  | 2  | 1 Male   | 1951 | 64     | 5    | >=60       | 1.6            |    |
| 1615   | 200187 | 3        | Korea   |             | 1  | 2  | 1 Male   | 1971 | 44     | 1    | 40-44 year | 0.9            |    |
| 1616   | 300106 | 2        | Taiwan  |             | 1  | 2  | 1 Male   | 1964 | 51     | 3    | 50-54      | 0.8            |    |
| 1617   | 200188 | 3        | Korea   |             | 1  | 2  | 1 Male   | 1964 | 51     | 3    | 50-54      | 0.9            |    |
| 1618   | 100070 | 1        | China   |             | 1  | 2  | 1 Male   | 1956 | 59     | 4    | 55-59      | 0.9            |    |

| respid | SubsID | dCountry | Country | QDisclaimer | Q1 | Q2 | Gender | Q3_1 | age Nr | dAge | age Group  | Weight in Ctry | Q4 |
|--------|--------|----------|---------|-------------|----|----|--------|------|--------|------|------------|----------------|----|
| 1620   | 200190 | 3        | Korea   | 1           | 2  | 2  | Female | 1975 | 40     | 1    | 40-44 year | 0.9            | 2  |
| 1621   | 200191 | 3        | Korea   | 1           | 2  | 1  | Male   | 1945 | 70     | 5    | >=60       | 1.6            |    |
| 1622   | 100066 | 1        | China   | 1           | 2  | 1  | Male   | 1971 | 44     | 1    | 40-44 year | 1.0            |    |
| 1623   | 300107 | 2        | Taiwan  | 1           | 2  | 1  | Male   | 1975 | 40     | 1    | 40-44 year | 0.8            |    |
| 1624   | 100071 | 1        | China   | 1           | 2  | 2  | Female | 1969 | 46     | 2    | 45-49      | 1.0            | 2  |
| 1625   | 100072 | 1        | China   | 1           | 2  | 1  | Male   | 1974 | 41     | 1    | 40-44 year | 1.0            |    |
| 1626   | 200192 | 3        | Korea   | 1           | 1  | 2  | Female | 1947 | 68     | 5    | >=60       | 1.6            |    |
| 1627   | 200193 | 3        | Korea   | 1           | 2  | 2  | Female | 1966 | 49     | 2    | 45-49      | 0.9            | 2  |
| 1629   | 200195 | 3        | Korea   | 1           | 2  | 1  | Male   | 1974 | 41     | 1    | 40-44 year | 0.9            |    |
| 1630   | 100073 | 1        | China   | 1           | 2  | 1  | Male   | 1974 | 41     | 1    | 40-44 year | 1.0            |    |
| 1631   | 200196 | 3        | Korea   | 1           | 2  | 1  | Male   | 1969 | 46     | 2    | 45-49      | 0.8            |    |
| 1634   | 300109 | 2        | Taiwan  | 1           | 1  | 2  | Female | 1970 | 45     | 2    | 45-49      | 0.9            | 2  |
| 1635   | 300065 | 2        | Taiwan  | 1           | 2  | 1  | Male   | 1974 | 41     | 1    | 40-44 year | 0.8            |    |
| 1636   | 200197 | 3        | Korea   | 1           | 2  | 1  | Male   | 1965 | 50     | 3    | 50-54      | 0.9            |    |
| 1637   | 300110 | 2        | Taiwan  | 1           | 2  | 1  | Male   | 1974 | 41     | 1    | 40-44 year | 0.8            |    |
| 1640   | 200199 | 3        | Korea   | 1           | 1  | 2  | Female | 1962 | 53     | 3    | 50-54      | 0.8            |    |
| 1642   | 100075 | 1        | China   | 1           | 2  | 2  | Female | 1961 | 54     | 3    | 50-54      | 1.2            |    |
| 1643   | 200201 | 3        | Korea   | 1           | 2  | 2  | Female | 1960 | 55     | 4    | 55-59      | 0.7            |    |
| 1644   | 300112 | 2        | Taiwan  | 1           | 2  | 1  | Male   | 1959 | 56     | 4    | 55-59      | 0.7            |    |
| 1645   | 200202 | 3        | Korea   | 1           | 2  | 2  | Female | 1963 | 52     | 3    | 50-54      | 0.8            |    |
| 1646   | 200203 | 3        | Korea   | 1           | 2  | 2  | Female | 1960 | 55     | 4    | 55-59      | 0.7            |    |
| 1647   | 200200 | 3        | Korea   | 1           | 2  | 1  | Male   | 1972 | 43     | 1    | 40-44 year | 0.9            |    |
| 1650   | 300113 | 2        | Taiwan  | 1           | 2  | 1  | Male   | 1961 | 54     | 3    | 50-54      | 0.8            |    |
| 1654   | 100077 | 1        | China   | 1           | 2  | 1  | Male   | 1973 | 42     | 1    | 40-44 year | 1.0            |    |
| 1656   | 200207 | 3        | Korea   | 1           | 2  | 1  | Male   | 1960 | 55     | 4    | 55-59      | 0.8            |    |
| 1657   | 300115 | 2        | Taiwan  | 1           | 2  | 1  | Male   | 1963 | 52     | 3    | 50-54      | 0.8            |    |
| 1659   | 100078 | 1        | China   | 1           | 2  | 1  | Male   | 1955 | 60     | 5    | >=60       | 1.0            |    |
| 1662   | 200208 | 3        | Korea   | 1           | 2  | 2  | Female | 1970 | 45     | 2    | 45-49      | 0.9            | 2  |
| 1663   | 200209 | 3        | Korea   | 1           | 2  | 2  | Female | 1973 | 42     | 1    | 40-44 year | 0.9            | 2  |
| 1664   | 100079 | 1        | China   | 1           | 2  | 2  | Female | 1974 | 41     | 1    | 40-44 year | 1.0            | 2  |
| 1665   | 300117 | 2        | Taiwan  | 1           | 2  | 1  | Male   | 1963 | 52     | 3    | 50-54      | 0.8            |    |
| 1667   | 300118 | 2        | Taiwan  | 1           | 2  | 1  | Male   | 1970 | 45     | 2    | 45-49      | 0.8            |    |

| respid | SubsID | dCountry | Country | QDisclaimer | Q1 | Q2 | Gender   | Q3_1 | age Nr | dAge | age Group  | Weight in Ctry | Q4 |
|--------|--------|----------|---------|-------------|----|----|----------|------|--------|------|------------|----------------|----|
| 1668   | 300119 | 2        | Taiwan  | 1           | 1  | 2  | 1 Male   | 1965 | 50     | 3    | 50-54      | 0.8            |    |
| 1670   | 200211 | 3        | Korea   | 1           | 1  | 2  | 1 Male   | 1963 | 52     | 3    | 50-54      | 0.9            |    |
| 1671   | 200212 | 3        | Korea   | 1           | 1  | 2  | 1 Male   | 1952 | 63     | 5    | >=60       | 1.6            |    |
| 1673   | 100081 | 1        | China   | 1           | 1  | 2  | 2 Female | 1974 | 41     | 1    | 40-44 year | 1.0            | 2  |
| 1674   | 100082 | 1        | China   | 1           | 1  | 2  | 1 Male   | 1974 | 41     | 1    | 40-44 year | 1.0            |    |
| 1676   | 200213 | 3        | Korea   | 1           | 1  | 2  | 1 Male   | 1950 | 65     | 5    | >=60       | 1.6            |    |
| 1677   | 200214 | 3        | Korea   | 1           | 1  | 2  | 1 Male   | 1954 | 61     | 5    | >=60       | 1.6            |    |
| 1678   | 100083 | 1        | China   | 1           | 1  | 2  | 1 Male   | 1971 | 44     | 1    | 40-44 year | 1.0            |    |
| 1680   | 200215 | 3        | Korea   | 1           | 1  | 2  | 2 Female | 1973 | 42     | 1    | 40-44 year | 0.9            | 2  |
| 1681   | 200216 | 3        | Korea   | 1           | 1  | 2  | 1 Male   | 1971 | 44     | 1    | 40-44 year | 0.9            |    |
| 1683   | 100085 | 1        | China   | 1           | 1  | 2  | 1 Male   | 1957 | 58     | 4    | 55-59      | 0.9            |    |
| 1685   | 200218 | 3        | Korea   | 1           | 1  | 2  | 2 Female | 1973 | 42     | 1    | 40-44 year | 0.9            | 2  |
| 1686   | 100086 | 1        | China   | 1           | 1  | 2  | 2 Female | 1967 | 48     | 2    | 45-49      | 1.0            | 2  |
| 1690   | 300122 | 2        | Taiwan  | 1           | 1  | 2  | 1 Male   | 1974 | 41     | 1    | 40-44 year | 0.8            |    |
| 1691   | 200220 | 3        | Korea   | 1           | 1  | 2  | 2 Female | 1971 | 44     | 1    | 40-44 year | 0.9            | 2  |
| 1692   | 200221 | 3        | Korea   | 1           | 1  | 2  | 1 Male   | 1951 | 64     | 5    | >=60       | 1.6            |    |
| 1693   | 100087 | 1        | China   | 1           | 1  | 2  | 1 Male   | 1971 | 44     | 1    | 40-44 year | 1.0            |    |
| 1695   | 100089 | 1        | China   | 1           | 1  | 2  | 2 Female | 1971 | 44     | 1    | 40-44 year | 1.0            | 2  |
| 1696   | 300123 | 2        | Taiwan  | 1           | 1  | 2  | 1 Male   | 1961 | 54     | 3    | 50-54      | 0.8            |    |
| 1698   | 300125 | 2        | Taiwan  | 1           | 1  | 2  | 1 Male   | 1969 | 46     | 2    | 45-49      | 0.8            |    |
| 1699   | 200222 | 3        | Korea   | 1           | 1  | 2  | 2 Female | 1971 | 44     | 1    | 40-44 year | 0.9            | 2  |
| 1701   | 200223 | 3        | Korea   | 1           | 1  | 2  | 1 Male   | 1974 | 41     | 1    | 40-44 year | 0.9            |    |
| 1702   | 200224 | 3        | Korea   | 1           | 1  | 2  | 2 Female | 1969 | 46     | 2    | 45-49      | 0.9            | 2  |
| 1703   | 100090 | 1        | China   | 1           | 1  | 2  | 1 Male   | 1955 | 60     | 5    | >=60       | 1.0            |    |
| 1705   | 300126 | 2        | Taiwan  | 1           | 1  | 2  | 2 Female | 1970 | 45     | 2    | 45-49      | 0.9            | 2  |
| 1706   | 200225 | 3        | Korea   | 1           | 1  | 2  | 1 Male   | 1974 | 41     | 1    | 40-44 year | 0.9            |    |
| 1708   | 300128 | 2        | Taiwan  | 1           | 1  | 2  | 1 Male   | 1964 | 51     | 3    | 50-54      | 0.8            |    |
| 1711   | 100091 | 1        | China   | 1           | 1  | 1  | 2 Female | 1967 | 48     | 2    | 45-49      | 1.0            | 2  |
| 1712   | 300129 | 2        | Taiwan  | 1           | 1  | 1  | 1 Male   | 1958 | 57     | 4    | 55-59      | 0.7            |    |
| 1713   | 200035 | 3        | Korea   | 1           | 1  | 2  | 2 Female | 1969 | 46     | 2    | 45-49      | 0.9            | 2  |
| 1715   | 100092 | 1        | China   | 1           | 1  | 2  | 2 Female | 1962 | 53     | 3    | 50-54      | 1.2            |    |
| 1717   | 200226 | 3        | Korea   | 1           | 1  | 2  | 1 Male   | 1972 | 43     | 1    | 40-44 year | 0.9            |    |

| respid | SubsID | dCountry | Country | QDisclaimer | Q1 | Q2 | Gender   | Q3_1 | age Nr | dAge | age Group  | Weight in Ctry | Q4 |
|--------|--------|----------|---------|-------------|----|----|----------|------|--------|------|------------|----------------|----|
| 1718   | 300130 | 2        | Taiwan  | 1           | 1  | 2  | 1 Male   | 1957 | 58     | 4    | 55-59      | 0.7            |    |
| 1719   | 200227 | 3        | Korea   | 1           | 1  | 2  | 2 Female | 1973 | 42     | 1    | 40-44 year | 0.9            | 2  |
| 1721   | 100095 | 1        | China   | 1           | 1  | 2  | 1 Male   | 1955 | 60     | 5    | >=60       | 1.0            |    |
| 1722   | 200228 | 3        | Korea   | 1           | 1  | 2  | 2 Female | 1962 | 53     | 3    | 50-54      | 0.8            |    |
| 1724   | 100096 | 1        | China   | 1           | 1  | 2  | 2 Female | 1966 | 49     | 2    | 45-49      | 1.0            | 2  |
| 1725   | 100097 | 1        | China   | 1           | 1  | 1  | 2 Female | 1966 | 49     | 2    | 45-49      | 1.0            | 2  |
| 1726   | 300131 | 2        | Taiwan  | 1           | 1  | 2  | 1 Male   | 1972 | 43     | 1    | 40-44 year | 0.8            |    |
| 1727   | 300132 | 2        | Taiwan  | 1           | 1  | 2  | 1 Male   | 1972 | 43     | 1    | 40-44 year | 0.8            |    |
| 1728   | 200229 | 3        | Korea   | 1           | 1  | 2  | 1 Male   | 1964 | 51     | 3    | 50-54      | 0.9            |    |
| 1731   | 300133 | 2        | Taiwan  | 1           | 1  | 2  | 1 Male   | 1965 | 50     | 3    | 50-54      | 0.8            |    |
| 1733   | 300135 | 2        | Taiwan  | 1           | 1  | 2  | 1 Male   | 1971 | 44     | 1    | 40-44 year | 0.8            |    |
| 1734   | 100099 | 1        | China   | 1           | 1  | 2  | 1 Male   | 1963 | 52     | 3    | 50-54      | 1.0            |    |
| 1735   | 100100 | 1        | China   | 1           | 1  | 2  | 1 Male   | 1970 | 45     | 2    | 45-49      | 1.0            |    |
| 1736   | 100101 | 1        | China   | 1           | 1  | 2  | 2 Female | 1960 | 55     | 4    | 55-59      | 1.0            |    |
| 1737   | 300136 | 2        | Taiwan  | 1           | 1  | 2  | 1 Male   | 1972 | 43     | 1    | 40-44 year | 0.8            |    |
| 1738   | 300137 | 2        | Taiwan  | 1           | 1  | 2  | 2 Female | 1956 | 59     | 4    | 55-59      | 0.9            |    |
| 1743   | 300139 | 2        | Taiwan  | 1           | 1  | 2  | 2 Female | 1973 | 42     | 1    | 40-44 year | 0.8            | 2  |
| 1755   | 200232 | 3        | Korea   | 1           | 1  | 2  | 2 Female | 1968 | 47     | 2    | 45-49      | 0.9            | 2  |
| 1756   | 300142 | 2        | Taiwan  | 1           | 1  | 2  | 2 Female | 1975 | 40     | 1    | 40-44 year | 0.8            | 2  |
| 1757   | 300143 | 2        | Taiwan  | 1           | 1  | 1  | 2 Female | 1958 | 57     | 4    | 55-59      | 0.9            |    |
| 1758   | 300144 | 2        | Taiwan  | 1           | 1  | 1  | 2 Female | 1971 | 44     | 1    | 40-44 year | 0.8            | 2  |
| 1759   | 200233 | 3        | Korea   | 1           | 1  | 2  | 1 Male   | 1974 | 41     | 1    | 40-44 year | 0.9            |    |
| 1761   | 100093 | 1        | China   | 1           | 1  | 2  | 2 Female | 1961 | 54     | 3    | 50-54      | 1.2            |    |
| 1762   | 100104 | 1        | China   | 1           | 1  | 2  | 2 Female | 1961 | 54     | 3    | 50-54      | 1.2            |    |
| 1764   | 300145 | 2        | Taiwan  | 1           | 1  | 1  | 2 Female | 1960 | 55     | 4    | 55-59      | 0.9            |    |
| 1767   | 200234 | 3        | Korea   | 1           | 1  | 2  | 2 Female | 1973 | 42     | 1    | 40-44 year | 0.9            | 2  |
| 1768   | 200235 | 3        | Korea   | 1           | 1  | 2  | 1 Male   | 1972 | 43     | 1    | 40-44 year | 0.9            |    |
| 1769   | 300146 | 2        | Taiwan  | 1           | 1  | 2  | 1 Male   | 1961 | 54     | 3    | 50-54      | 0.8            |    |
| 1770   | 200236 | 3        | Korea   | 1           | 1  | 2  | 1 Male   | 1961 | 54     | 3    | 50-54      | 0.9            |    |
| 1771   | 300147 | 2        | Taiwan  | 1           | 1  | 2  | 1 Male   | 1973 | 42     | 1    | 40-44 year | 0.8            |    |
| 1776   | 200210 | 3        | Korea   | 1           | 1  | 2  | 1 Male   | 1946 | 69     | 5    | >=60       | 1.6            |    |
| 1777   | 100105 | 1        | China   | 1           | 1  | 2  | 2 Female | 1973 | 42     | 1    | 40-44 year | 1.0            | 2  |

| respid | SubsID | dCountry | Country | QDisclaim<br>er | Q1 | Q2 | Gender | Q3_1 | age Nr | dAge | age Group  | Weight in<br>Ctry | Q4 |
|--------|--------|----------|---------|-----------------|----|----|--------|------|--------|------|------------|-------------------|----|
| 1778   | 300148 | 2        | Taiwan  | 1               | 2  | 1  | Male   | 1956 | 59     | 4    | 55-59      | 0.7               |    |
| 1779   | 100106 | 1        | China   | 1               | 2  | 1  | Male   | 1964 | 51     | 3    | 50-54      | 1.0               |    |
| 1780   | 200237 | 3        | Korea   | 1               | 2  | 1  | Male   | 1950 | 65     | 5    | >=60       | 1.6               |    |
| 1781   | 100107 | 1        | China   | 1               | 2  | 1  | Male   | 1967 | 48     | 2    | 45-49      | 1.0               |    |
| 1783   | 300149 | 2        | Taiwan  | 1               | 2  | 2  | Female | 1965 | 50     | 3    | 50-54      | 0.9               |    |
| 1784   | 100108 | 1        | China   | 1               | 2  | 1  | Male   | 1969 | 46     | 2    | 45-49      | 1.0               |    |
| 1785   | 200238 | 3        | Korea   | 1               | 2  | 1  | Male   | 1970 | 45     | 2    | 45-49      | 0.8               |    |
| 1788   | 300151 | 2        | Taiwan  | 1               | 2  | 1  | Male   | 1964 | 51     | 3    | 50-54      | 0.8               |    |
| 1792   | 300152 | 2        | Taiwan  | 1               | 2  | 2  | Female | 1960 | 55     | 4    | 55-59      | 0.9               |    |
| 1794   | 200239 | 3        | Korea   | 1               | 2  | 2  | Female | 1971 | 44     | 1    | 40-44 year | 0.9               | 2  |
| 1798   | 200241 | 3        | Korea   | 1               | 2  | 2  | Female | 1939 | 76     | 5    | >=60       | 1.6               |    |
| 1799   | 100111 | 1        | China   | 1               | 2  | 2  | Female | 1966 | 49     | 2    | 45-49      | 1.0               | 2  |
| 1800   | 300154 | 2        | Taiwan  | 1               | 2  | 1  | Male   | 1971 | 44     | 1    | 40-44 year | 0.8               |    |
| 1804   | 300155 | 2        | Taiwan  | 1               | 2  | 1  | Male   | 1949 | 66     | 5    | >=60       | 1.6               |    |
| 1806   | 200244 | 3        | Korea   | 1               | 2  | 2  | Female | 1969 | 46     | 2    | 45-49      | 0.9               | 2  |
| 1807   | 200245 | 3        | Korea   | 1               | 2  | 2  | Female | 1969 | 46     | 2    | 45-49      | 0.9               | 2  |
| 1808   | 300156 | 2        | Taiwan  | 1               | 2  | 1  | Male   | 1958 | 57     | 4    | 55-59      | 0.7               |    |
| 1809   | 300157 | 2        | Taiwan  | 1               | 2  | 2  | Female | 1962 | 53     | 3    | 50-54      | 0.9               |    |
| 1811   | 300159 | 2        | Taiwan  | 1               | 1  | 1  | Male   | 1970 | 45     | 2    | 45-49      | 0.8               |    |
| 1812   | 200246 | 3        | Korea   | 1               | 2  | 1  | Male   | 1948 | 67     | 5    | >=60       | 1.6               |    |
| 1813   | 300160 | 2        | Taiwan  | 1               | 2  | 1  | Male   | 1961 | 54     | 3    | 50-54      | 0.8               |    |
| 1814   | 300161 | 2        | Taiwan  | 1               | 2  | 2  | Female | 1964 | 51     | 3    | 50-54      | 0.9               |    |
| 1815   | 300162 | 2        | Taiwan  | 1               | 2  | 2  | Female | 1964 | 51     | 3    | 50-54      | 0.9               |    |
| 1817   | 300163 | 2        | Taiwan  | 1               | 2  | 2  | Female | 1965 | 50     | 3    | 50-54      | 0.9               |    |
| 1820   | 100114 | 1        | China   | 1               | 2  | 1  | Male   | 1963 | 52     | 3    | 50-54      | 1.0               |    |
| 1821   | 300164 | 2        | Taiwan  | 1               | 2  | 1  | Male   | 1958 | 57     | 4    | 55-59      | 0.7               |    |
| 1822   | 100115 | 1        | China   | 1               | 2  | 1  | Male   | 1964 | 51     | 3    | 50-54      | 1.0               |    |
| 1823   | 300165 | 2        | Taiwan  | 1               | 2  | 1  | Male   | 1968 | 47     | 2    | 45-49      | 0.8               |    |
| 1824   | 100116 | 1        | China   | 1               | 2  | 1  | Male   | 1973 | 42     | 1    | 40-44 year | 1.0               |    |
| 1826   | 300166 | 2        | Taiwan  | 1               | 2  | 1  | Male   | 1960 | 55     | 4    | 55-59      | 0.7               |    |
| 1828   | 300167 | 2        | Taiwan  | 1               | 2  | 1  | Male   | 1962 | 53     | 3    | 50-54      | 0.8               |    |
| 1829   | 100117 | 1        | China   | 1               | 2  | 2  | Female | 1968 | 47     | 2    | 45-49      | 1.0               | 2  |

| respid | SubsID | dCountry | Country | QDisclaimer | Q1 | Q2 | Gender | Q3_1 | age Nr | dAge | age Group  | Weight in Ctry | Q4 |
|--------|--------|----------|---------|-------------|----|----|--------|------|--------|------|------------|----------------|----|
| 1830   | 300168 | 2        | Taiwan  | 1           | 2  | 1  | Male   | 1956 | 59     | 4    | 55-59      | 0.7            |    |
| 1831   | 200247 | 3        | Korea   | 1           | 2  | 1  | Male   | 1972 | 43     | 1    | 40-44 year | 0.9            |    |
| 1832   | 200248 | 3        | Korea   | 1           | 2  | 2  | Female | 1948 | 67     | 5    | >=60       | 1.6            |    |
| 1836   | 300170 | 2        | Taiwan  | 1           | 2  | 1  | Male   | 1948 | 67     | 5    | >=60       | 1.6            |    |
| 1838   | 100118 | 1        | China   | 1           | 2  | 1  | Male   | 1960 | 55     | 4    | 55-59      | 0.9            |    |
| 1839   | 100119 | 1        | China   | 1           | 2  | 1  | Male   | 1963 | 52     | 3    | 50-54      | 1.0            |    |
| 1840   | 200251 | 3        | Korea   | 1           | 2  | 1  | Male   | 1966 | 49     | 2    | 45-49      | 0.8            |    |
| 1841   | 200250 | 3        | Korea   | 1           | 2  | 1  | Male   | 1956 | 59     | 4    | 55-59      | 0.8            |    |
| 1842   | 300171 | 2        | Taiwan  | 1           | 1  | 1  | Male   | 1962 | 53     | 3    | 50-54      | 0.8            |    |
| 1843   | 300172 | 2        | Taiwan  | 1           | 2  | 1  | Male   | 1967 | 48     | 2    | 45-49      | 0.8            |    |
| 1844   | 100120 | 1        | China   | 1           | 2  | 1  | Male   | 1964 | 51     | 3    | 50-54      | 1.0            |    |
| 1845   | 300173 | 2        | Taiwan  | 1           | 2  | 1  | Male   | 1962 | 53     | 3    | 50-54      | 0.8            |    |
| 1849   | 300174 | 2        | Taiwan  | 1           | 2  | 2  | Female | 1955 | 60     | 5    | >=60       | 1.7            |    |
| 1850   | 100122 | 1        | China   | 1           | 2  | 2  | Female | 1974 | 41     | 1    | 40-44 year | 1.0            | 2  |
| 1851   | 100123 | 1        | China   | 1           | 2  | 1  | Male   | 1963 | 52     | 3    | 50-54      | 1.0            |    |
| 1852   | 300169 | 2        | Taiwan  | 1           | 2  | 2  | Female | 1956 | 59     | 4    | 55-59      | 0.9            |    |
| 1857   | 200253 | 3        | Korea   | 1           | 2  | 1  | Male   | 1970 | 45     | 2    | 45-49      | 0.8            |    |
| 1858   | 200254 | 3        | Korea   | 1           | 2  | 2  | Female | 1955 | 60     | 5    | >=60       | 1.6            |    |
| 1861   | 100124 | 1        | China   | 1           | 2  | 2  | Female | 1961 | 54     | 3    | 50-54      | 1.2            |    |
| 1862   | 100125 | 1        | China   | 1           | 1  | 2  | Female | 1968 | 47     | 2    | 45-49      | 1.0            | 2  |
| 1863   | 300177 | 2        | Taiwan  | 1           | 2  | 1  | Male   | 1957 | 58     | 4    | 55-59      | 0.7            |    |
| 1864   | 100126 | 1        | China   | 1           | 2  | 1  | Male   | 1973 | 42     | 1    | 40-44 year | 1.0            |    |
| 1865   | 100127 | 1        | China   | 1           | 2  | 1  | Male   | 1973 | 42     | 1    | 40-44 year | 1.0            |    |
| 1867   | 300178 | 2        | Taiwan  | 1           | 2  | 1  | Male   | 1954 | 61     | 5    | >=60       | 1.6            |    |
| 1868   | 300179 | 2        | Taiwan  | 1           | 2  | 1  | Male   | 1958 | 57     | 4    | 55-59      | 0.7            |    |
| 1869   | 100128 | 1        | China   | 1           | 2  | 1  | Male   | 1968 | 47     | 2    | 45-49      | 1.0            |    |
| 1870   | 300180 | 2        | Taiwan  | 1           | 2  | 1  | Male   | 1964 | 51     | 3    | 50-54      | 0.8            |    |
| 1871   | 100129 | 1        | China   | 1           | 2  | 1  | Male   | 1951 | 64     | 5    | >=60       | 1.0            |    |
| 1872   | 100130 | 1        | China   | 1           | 2  | 1  | Male   | 1968 | 47     | 2    | 45-49      | 1.0            |    |
| 1873   | 200256 | 3        | Korea   | 1           | 2  | 2  | Female | 1958 | 57     | 4    | 55-59      | 0.7            |    |
| 1876   | 100132 | 1        | China   | 1           | 2  | 1  | Male   | 1965 | 50     | 3    | 50-54      | 1.0            |    |
| 1877   | 100133 | 1        | China   | 1           | 2  | 1  | Male   | 1959 | 56     | 4    | 55-59      | 0.9            |    |

| respid | SubsID | dCountry | Country | QDisclaimer | Q1 | Q2 | Gender | Q3_1 | age Nr | dAge | age Group  | Weight in Ctry | Q4 |
|--------|--------|----------|---------|-------------|----|----|--------|------|--------|------|------------|----------------|----|
| 1878   | 200257 | 3        | Korea   | 1           | 2  | 1  | Male   | 1974 | 41     | 1    | 40-44 year | 0.9            |    |
| 1879   | 200258 | 3        | Korea   | 1           | 2  | 1  | Male   | 1954 | 61     | 5    | >=60       | 1.6            |    |
| 1880   | 200259 | 3        | Korea   | 1           | 2  | 1  | Male   | 1962 | 53     | 3    | 50-54      | 0.9            |    |
| 1881   | 300181 | 2        | Taiwan  | 1           | 1  | 2  | Female | 1967 | 48     | 2    | 45-49      | 0.9            | 2  |
| 1883   | 100135 | 1        | China   | 1           | 2  | 1  | Male   | 1955 | 60     | 5    | >=60       | 1.0            |    |
| 1886   | 100137 | 1        | China   | 1           | 2  | 1  | Male   | 1973 | 42     | 1    | 40-44 year | 1.0            |    |
| 1888   | 200261 | 3        | Korea   | 1           | 1  | 1  | Male   | 1962 | 53     | 3    | 50-54      | 0.9            |    |
| 1889   | 300182 | 2        | Taiwan  | 1           | 2  | 1  | Male   | 1959 | 56     | 4    | 55-59      | 0.7            |    |
| 1890   | 100139 | 1        | China   | 1           | 2  | 1  | Male   | 1957 | 58     | 4    | 55-59      | 0.9            |    |
| 1891   | 100140 | 1        | China   | 1           | 2  | 1  | Male   | 1974 | 41     | 1    | 40-44 year | 1.0            |    |
| 1893   | 200262 | 3        | Korea   | 1           | 2  | 2  | Female | 1970 | 45     | 2    | 45-49      | 0.9            | 2  |
| 1894   | 200263 | 3        | Korea   | 1           | 2  | 2  | Female | 1967 | 48     | 2    | 45-49      | 0.9            | 2  |
| 1895   | 300183 | 2        | Taiwan  | 1           | 2  | 1  | Male   | 1961 | 54     | 3    | 50-54      | 0.8            |    |
| 1896   | 200264 | 3        | Korea   | 1           | 2  | 1  | Male   | 1974 | 41     | 1    | 40-44 year | 0.9            |    |
| 1897   | 200265 | 3        | Korea   | 1           | 2  | 1  | Male   | 1951 | 64     | 5    | >=60       | 1.6            |    |
| 1898   | 200266 | 3        | Korea   | 1           | 2  | 2  | Female | 1965 | 50     | 3    | 50-54      | 0.8            |    |
| 1899   | 200267 | 3        | Korea   | 1           | 2  | 1  | Male   | 1968 | 47     | 2    | 45-49      | 0.8            |    |
| 1900   | 300108 | 2        | Taiwan  | 1           | 2  | 1  | Male   | 1969 | 46     | 2    | 45-49      | 0.8            |    |
| 1903   | 300185 | 2        | Taiwan  | 1           | 2  | 1  | Male   | 1958 | 57     | 4    | 55-59      | 0.7            |    |
| 1906   | 100142 | 1        | China   | 1           | 2  | 1  | Male   | 1973 | 42     | 1    | 40-44 year | 1.0            |    |
| 1907   | 300186 | 2        | Taiwan  | 1           | 2  | 1  | Male   | 1950 | 65     | 5    | >=60       | 1.6            |    |
| 1908   | 100143 | 1        | China   | 1           | 2  | 2  | Female | 1967 | 48     | 2    | 45-49      | 1.0            | 2  |
| 1909   | 300187 | 2        | Taiwan  | 1           | 2  | 2  | Female | 1967 | 48     | 2    | 45-49      | 0.9            | 2  |
| 1910   | 100144 | 1        | China   | 1           | 2  | 1  | Male   | 1965 | 50     | 3    | 50-54      | 1.0            |    |
| 1911   | 100145 | 1        | China   | 1           | 2  | 1  | Male   | 1971 | 44     | 1    | 40-44 year | 1.0            |    |
| 1912   | 300188 | 2        | Taiwan  | 1           | 1  | 2  | Female | 1966 | 49     | 2    | 45-49      | 0.9            | 2  |
| 1917   | 300189 | 2        | Taiwan  | 1           | 2  | 2  | Female | 1963 | 52     | 3    | 50-54      | 0.9            |    |
| 1918   | 300190 | 2        | Taiwan  | 1           | 2  | 2  | Female | 1959 | 56     | 4    | 55-59      | 0.9            |    |
| 1919   | 200271 | 3        | Korea   | 1           | 2  | 1  | Male   | 1969 | 46     | 2    | 45-49      | 0.8            |    |
| 1922   | 300191 | 2        | Taiwan  | 1           | 2  | 2  | Female | 1967 | 48     | 2    | 45-49      | 0.9            | 2  |
| 1925   | 300111 | 2        | Taiwan  | 1           | 1  | 2  | Female | 1960 | 55     | 4    | 55-59      | 0.9            |    |
| 1926   | 100151 | 1        | China   | 1           | 2  | 1  | Male   | 1966 | 49     | 2    | 45-49      | 1.0            |    |

| respid | SubsID | dCountry | Country | QDisclaimer | Q1 | Q2 | Gender   | Q3_1 | age Nr | dAge | age Group  | Weight in Ctry | Q4 |
|--------|--------|----------|---------|-------------|----|----|----------|------|--------|------|------------|----------------|----|
| 1927   | 100152 | 1        | China   |             | 1  | 2  | 2 Female | 1961 | 54     | 3    | 50-54      | 1.2            |    |
| 1928   | 200273 | 3        | Korea   |             | 1  | 2  | 2 Female | 1974 | 41     | 1    | 40-44 year | 0.9            | 2  |
| 1929   | 300192 | 2        | Taiwan  |             | 1  | 2  | 1 Male   | 1960 | 55     | 4    | 55-59      | 0.7            |    |
| 1934   | 100153 | 1        | China   |             | 1  | 2  | 1 Male   | 1949 | 66     | 5    | >=60       | 1.0            |    |
| 1935   | 200276 | 3        | Korea   |             | 1  | 2  | 1 Male   | 1970 | 45     | 2    | 45-49      | 0.8            |    |
| 1936   | 200277 | 3        | Korea   |             | 1  | 2  | 1 Male   | 1961 | 54     | 3    | 50-54      | 0.9            |    |
| 1937   | 200278 | 3        | Korea   |             | 1  | 2  | 2 Female | 1973 | 42     | 1    | 40-44 year | 0.9            | 2  |
| 1938   | 200279 | 3        | Korea   |             | 1  | 2  | 2 Female | 1964 | 51     | 3    | 50-54      | 0.8            |    |
| 1939   | 200280 | 3        | Korea   |             | 1  | 2  | 2 Female | 1972 | 43     | 1    | 40-44 year | 0.9            | 2  |
| 1940   | 200147 | 3        | Korea   |             | 1  | 2  | 1 Male   | 1953 | 62     | 5    | >=60       | 1.6            |    |
| 1941   | 100154 | 1        | China   |             | 1  | 2  | 2 Female | 1971 | 44     | 1    | 40-44 year | 1.0            | 2  |
| 1948   | 300194 | 2        | Taiwan  |             | 1  | 2  | 2 Female | 1969 | 46     | 2    | 45-49      | 0.9            | 2  |
| 1950   | 300195 | 2        | Taiwan  |             | 1  | 2  | 1 Male   | 1970 | 45     | 2    | 45-49      | 0.8            |    |
| 1955   | 300197 | 2        | Taiwan  |             | 1  | 2  | 1 Male   | 1971 | 44     | 1    | 40-44 year | 0.8            |    |
| 1958   | 100159 | 1        | China   |             | 1  | 2  | 2 Female | 1957 | 58     | 4    | 55-59      | 1.0            |    |
| 1960   | 300198 | 2        | Taiwan  |             | 1  | 1  | 1 Male   | 1966 | 49     | 2    | 45-49      | 0.8            |    |
| 1961   | 300199 | 2        | Taiwan  |             | 1  | 2  | 1 Male   | 1975 | 40     | 1    | 40-44 year | 0.8            |    |
| 1962   | 100162 | 1        | China   |             | 1  | 2  | 2 Female | 1953 | 62     | 5    | >=60       | 1.1            |    |
| 1965   | 100165 | 1        | China   |             | 1  | 2  | 2 Female | 1973 | 42     | 1    | 40-44 year | 1.0            | 2  |
| 1966   | 100166 | 1        | China   |             | 1  | 2  | 1 Male   | 1973 | 42     | 1    | 40-44 year | 1.0            |    |
| 1967   | 100167 | 1        | China   |             | 1  | 2  | 1 Male   | 1950 | 65     | 5    | >=60       | 1.0            |    |
| 1968   | 300200 | 2        | Taiwan  |             | 1  | 2  | 2 Female | 1962 | 53     | 3    | 50-54      | 0.9            |    |
| 1973   | 100171 | 1        | China   |             | 1  | 2  | 2 Female | 1966 | 49     | 2    | 45-49      | 1.0            | 2  |
| 1974   | 300201 | 2        | Taiwan  |             | 1  | 2  | 2 Female | 1959 | 56     | 4    | 55-59      | 0.9            |    |
| 1975   | 100160 | 1        | China   |             | 1  | 1  | 2 Female | 1975 | 40     | 1    | 40-44 year | 1.0            | 2  |
| 1977   | 200282 | 3        | Korea   |             | 1  | 2  | 2 Female | 1959 | 56     | 4    | 55-59      | 0.7            |    |
| 1978   | 200283 | 3        | Korea   |             | 1  | 2  | 2 Female | 1974 | 41     | 1    | 40-44 year | 0.9            | 2  |
| 1979   | 200255 | 3        | Korea   |             | 1  | 2  | 2 Female | 1962 | 53     | 3    | 50-54      | 0.8            |    |
| 1982   | 100173 | 1        | China   |             | 1  | 2  | 1 Male   | 1971 | 44     | 1    | 40-44 year | 1.0            |    |
| 1983   | 100174 | 1        | China   |             | 1  | 2  | 1 Male   | 1955 | 60     | 5    | >=60       | 1.0            |    |
| 1987   | 200284 | 3        | Korea   |             | 1  | 2  | 1 Male   | 1948 | 67     | 5    | >=60       | 1.6            |    |
| 1988   | 100176 | 1        | China   |             | 1  | 2  | 1 Male   | 1963 | 52     | 3    | 50-54      | 1.0            |    |



| respid | SubsID | dCountry | Country | QDisclaimer | Q1 | Q2 | Gender   | Q3_1 | age Nr | dAge | age Group    | Weight in Ctry | Q4 |
|--------|--------|----------|---------|-------------|----|----|----------|------|--------|------|--------------|----------------|----|
| 1991   | 200285 | 3        | Korea   |             | 1  | 2  | 2 Female | 1975 | 40     |      | 1 40-44 year | 0.9            | 2  |
| 1992   | 300204 | 2        | Taiwan  |             | 1  | 2  | 1 Male   | 1967 | 48     |      | 2 45-49      | 0.8            |    |
| 1993   | 200286 | 3        | Korea   |             | 1  | 2  | 2 Female | 1965 | 50     |      | 3 50-54      | 0.8            |    |
| 1994   | 200287 | 3        | Korea   |             | 1  | 2  | 2 Female | 1947 | 68     |      | 5 >=60       | 1.6            |    |
| 1995   | 200288 | 3        | Korea   |             | 1  | 2  | 2 Female | 1972 | 43     |      | 1 40-44 year | 0.9            | 2  |
| 1996   | 100177 | 1        | China   |             | 1  | 2  | 2 Female | 1960 | 55     |      | 4 55-59      | 1.0            |    |
| 1997   | 200289 | 3        | Korea   |             | 1  | 2  | 2 Female | 1955 | 60     |      | 5 >=60       | 1.6            |    |
| 1998   | 100178 | 1        | China   |             | 1  | 1  | 1 Male   | 1973 | 42     |      | 1 40-44 year | 1.0            |    |
| 1999   | 200290 | 3        | Korea   |             | 1  | 2  | 1 Male   | 1937 | 78     |      | 5 >=60       | 1.6            |    |
| 2000   | 200291 | 3        | Korea   |             | 1  | 2  | 1 Male   | 1974 | 41     |      | 1 40-44 year | 0.9            |    |
| 2001   | 300205 | 2        | Taiwan  |             | 1  | 2  | 2 Female | 1971 | 44     |      | 1 40-44 year | 0.8            | 2  |
| 2002   | 200292 | 3        | Korea   |             | 1  | 2  | 2 Female | 1942 | 73     |      | 5 >=60       | 1.6            |    |
| 2003   | 100179 | 1        | China   |             | 1  | 2  | 1 Male   | 1972 | 43     |      | 1 40-44 year | 1.0            |    |
| 2004   | 100180 | 1        | China   |             | 1  | 2  | 2 Female | 1960 | 55     |      | 4 55-59      | 1.0            |    |
| 2005   | 200293 | 3        | Korea   |             | 1  | 2  | 2 Female | 1963 | 52     |      | 3 50-54      | 0.8            |    |
| 2007   | 100181 | 1        | China   |             | 1  | 1  | 1 Male   | 1958 | 57     |      | 4 55-59      | 0.9            |    |
| 2009   | 200294 | 3        | Korea   |             | 1  | 2  | 1 Male   | 1975 | 40     |      | 1 40-44 year | 0.9            |    |
| 2010   | 200295 | 3        | Korea   |             | 1  | 2  | 1 Male   | 1969 | 46     |      | 2 45-49      | 0.8            |    |
| 2011   | 100182 | 1        | China   |             | 1  | 2  | 2 Female | 1965 | 50     |      | 3 50-54      | 1.2            |    |
| 2013   | 200296 | 3        | Korea   |             | 1  | 2  | 1 Male   | 1954 | 61     |      | 5 >=60       | 1.6            |    |
| 2014   | 200297 | 3        | Korea   |             | 1  | 2  | 1 Male   | 1957 | 58     |      | 4 55-59      | 0.8            |    |
| 2017   | 300209 | 2        | Taiwan  |             | 1  | 2  | 1 Male   | 1967 | 48     |      | 2 45-49      | 0.8            |    |
| 2020   | 300212 | 2        | Taiwan  |             | 1  | 1  | 2 Female | 1975 | 40     |      | 1 40-44 year | 0.8            | 2  |
| 2023   | 100184 | 1        | China   |             | 1  | 2  | 1 Male   | 1971 | 44     |      | 1 40-44 year | 1.0            |    |
| 2024   | 300214 | 2        | Taiwan  |             | 1  | 2  | 1 Male   | 1959 | 56     |      | 4 55-59      | 0.7            |    |
| 2029   | 200298 | 3        | Korea   |             | 1  | 2  | 1 Male   | 1955 | 60     |      | 5 >=60       | 1.6            |    |
| 2030   | 100186 | 1        | China   |             | 1  | 2  | 2 Female | 1974 | 41     |      | 1 40-44 year | 1.0            | 2  |
| 2031   | 200299 | 3        | Korea   |             | 1  | 2  | 1 Male   | 1965 | 50     |      | 3 50-54      | 0.9            |    |
| 2032   | 200300 | 3        | Korea   |             | 1  | 2  | 1 Male   | 1959 | 56     |      | 4 55-59      | 0.8            |    |
| 2033   | 100187 | 1        | China   |             | 1  | 2  | 2 Female | 1972 | 43     |      | 1 40-44 year | 1.0            | 2  |
| 2034   | 200301 | 3        | Korea   |             | 1  | 2  | 1 Male   | 1970 | 45     |      | 2 45-49      | 0.8            |    |
| 2036   | 200302 | 3        | Korea   |             | 1  | 2  | 2 Female | 1956 | 59     |      | 4 55-59      | 0.7            |    |

| respid | SubsID    | dCountry | Country | QDisclaim<br>er | Q1 | Q2 | Gender | Q3_1 | age Nr | dAge | age Group  | Weight in<br>Ctry | Q4 |
|--------|-----------|----------|---------|-----------------|----|----|--------|------|--------|------|------------|-------------------|----|
| 2037   | 200303    | 3        | Korea   | 1               | 2  | 2  | Female | 1974 | 41     | 1    | 40-44 year | 0.9               | 2  |
| 2038   | 200304    | 3        | Korea   | 1               | 2  | 1  | Male   | 1962 | 53     | 3    | 50-54      | 0.9               |    |
| 2039   | 200305    | 3        | Korea   | 1               | 2  | 1  | Male   | 1950 | 65     | 5    | >=60       | 1.6               |    |
| 2040   | 300216    | 2        | Taiwan  | 1               | 2  | 2  | Female | 1974 | 41     | 1    | 40-44 year | 0.8               | 2  |
| 2041   | 200306    | 3        | Korea   | 1               | 2  | 2  | Female | 1954 | 61     | 5    | >=60       | 1.6               |    |
| 2042   | 200307    | 3        | Korea   | 1               | 2  | 2  | Female | 1970 | 45     | 2    | 45-49      | 0.9               | 2  |
| 2043   | 100189    | 1        | China   | 1               | 2  | 2  | Female | 1955 | 60     | 5    | >=60       | 1.1               |    |
| 2051   | 300219    | 2        | Taiwan  | 1               | 2  | 1  | Male   | 1965 | 50     | 3    | 50-54      | 0.8               |    |
| 2052   | 100190    | 1        | China   | 1               | 2  | 1  | Male   | 1963 | 52     | 3    | 50-54      | 1.0               |    |
| 2053   | 300220    | 2        | Taiwan  | 1               | 2  | 2  | Female | 1963 | 52     | 3    | 50-54      | 0.9               |    |
| 2054   | 100191    | 1        | China   | 1               | 2  | 2  | Female | 1965 | 50     | 3    | 50-54      | 1.2               |    |
| 2055   | 100192    | 1        | China   | 1               | 2  | 2  | Female | 1972 | 43     | 1    | 40-44 year | 1.0               | 2  |
| 2056   | 200309    | 3        | Korea   | 1               | 2  | 2  | Female | 1952 | 63     | 5    | >=60       | 1.6               |    |
| 2057   | 300221    | 2        | Taiwan  | 1               | 2  | 1  | Male   | 1962 | 53     | 3    | 50-54      | 0.8               |    |
| 2059   | 100193    | 1        | China   | 1               | 2  | 2  | Female | 1966 | 49     | 2    | 45-49      | 1.0               | 2  |
| 2063   | 200310    | 3        | Korea   | 1               | 2  | 2  | Female | 1968 | 47     | 2    | 45-49      | 0.9               | 2  |
| 2066   | 300223    | 2        | Taiwan  | 1               | 2  | 2  | Female | 1964 | 51     | 3    | 50-54      | 0.9               |    |
| 2068   | 200312    | 3        | Korea   | 1               | 2  | 2  | Female | 1963 | 52     | 3    | 50-54      | 0.8               |    |
| 2069   | 100084    | 1        | China   | 1               | 2  | 1  | Male   | 1925 | 90     | 5    | >=60       | 1.0               |    |
| 2070   | 100194    | 1        | China   | 1               | 2  | 1  | Male   | 1969 | 46     | 2    | 45-49      | 1.0               |    |
| 2071   | 300224    | 2        | Taiwan  | 1               | 2  | 1  | Male   | 1965 | 50     | 3    | 50-54      | 0.8               |    |
| 2073   | 100196    | 1        | China   | 1               | 2  | 2  | Female | 1973 | 42     | 1    | 40-44 year | 1.0               | 2  |
| 2077   | 100197    | 1        | China   | 1               | 2  | 2  | Female | 1970 | 45     | 2    | 45-49      | 1.0               | 2  |
| 2079   | 200313    | 3        | Korea   | 1               | 2  | 1  | Male   | 1966 | 49     | 2    | 45-49      | 0.8               |    |
| 2080   | 300227    | 2        | Taiwan  | 1               | 2  | 2  | Female | 1967 | 48     | 2    | 45-49      | 0.9               | 2  |
| 2081   | 100198    | 1        | China   | 1               | 2  | 1  | Male   | 1962 | 53     | 3    | 50-54      | 1.0               |    |
| 2084   | 300228    | 2        | Taiwan  | 1               | 2  | 2  | Female | 1975 | 40     | 1    | 40-44 year | 0.8               | 2  |
| 2085   | 100201    | 1        | China   | 1               | 2  | 2  | Female | 1959 | 56     | 4    | 55-59      | 1.0               |    |
| 2087   | 350207610 | 3        | Korea   | 1               | 2  | 2  | Female | 1962 | 53     | 3    | 50-54      | 0.8               |    |
| 2089   | 200315    | 3        | Korea   | 1               | 2  | 1  | Male   | 1937 | 78     | 5    | >=60       | 1.6               |    |
| 2093   | 100203    | 1        | China   | 1               | 2  | 1  | Male   | 1963 | 52     | 3    | 50-54      | 1.0               |    |
| 2094   | 100205    | 1        | China   | 1               | 2  | 1  | Male   | 1959 | 56     | 4    | 55-59      | 0.9               |    |

| respid | SubsID | dCountry | Country | QDisclaimer | Q1 | Q2 | Gender   | Q3_1 | age Nr | dAge | age Group  | Weight in Ctry | Q4 |
|--------|--------|----------|---------|-------------|----|----|----------|------|--------|------|------------|----------------|----|
| 2095   | 300229 | 2        | Taiwan  | 1           | 1  | 2  | 1 Male   | 1971 | 44     | 1    | 40-44 year | 0.8            |    |
| 2097   | 100207 | 1        | China   | 1           | 1  | 2  | 1 Male   | 1961 | 54     | 3    | 50-54      | 1.0            |    |
| 2099   | 200316 | 3        | Korea   | 1           | 1  | 2  | 2 Female | 1959 | 56     | 4    | 55-59      | 0.7            |    |
| 2100   | 100208 | 1        | China   | 1           | 1  | 2  | 2 Female | 1960 | 55     | 4    | 55-59      | 1.0            |    |
| 2101   | 300230 | 2        | Taiwan  | 1           | 1  | 2  | 1 Male   | 1966 | 49     | 2    | 45-49      | 0.8            |    |
| 2103   | 100209 | 1        | China   | 1           | 1  | 2  | 1 Male   | 1973 | 42     | 1    | 40-44 year | 1.0            |    |
| 2104   | 300232 | 2        | Taiwan  | 1           | 1  | 2  | 2 Female | 1965 | 50     | 3    | 50-54      | 0.9            |    |
| 2106   | 100212 | 1        | China   | 1           | 1  | 2  | 1 Male   | 1969 | 46     | 2    | 45-49      | 1.0            |    |
| 2111   | 200317 | 3        | Korea   | 1           | 1  | 2  | 1 Male   | 1963 | 52     | 3    | 50-54      | 0.9            |    |
| 2113   | 100215 | 1        | China   | 1           | 1  | 2  | 1 Male   | 1963 | 52     | 3    | 50-54      | 1.0            |    |
| 2115   | 100216 | 1        | China   | 1           | 1  | 2  | 1 Male   | 1956 | 59     | 4    | 55-59      | 0.9            |    |
| 2119   | 300234 | 2        | Taiwan  | 1           | 1  | 2  | 1 Male   | 1965 | 50     | 3    | 50-54      | 0.8            |    |
| 2120   | 100217 | 1        | China   | 1           | 1  | 2  | 1 Male   | 1968 | 47     | 2    | 45-49      | 1.0            |    |
| 2123   | 100220 | 1        | China   | 1           | 1  | 2  | 1 Male   | 1969 | 46     | 2    | 45-49      | 1.0            |    |
| 2124   | 100221 | 1        | China   | 1           | 1  | 2  | 1 Male   | 1968 | 47     | 2    | 45-49      | 1.0            |    |
| 2130   | 100224 | 1        | China   | 1           | 1  | 2  | 1 Male   | 1966 | 49     | 2    | 45-49      | 1.0            |    |
| 2131   | 300235 | 2        | Taiwan  | 1           | 1  | 2  | 2 Female | 1973 | 42     | 1    | 40-44 year | 0.8            | 2  |
| 2133   | 100226 | 1        | China   | 1           | 1  | 2  | 1 Male   | 1965 | 50     | 3    | 50-54      | 1.0            |    |
| 2139   | 200318 | 3        | Korea   | 1           | 1  | 2  | 2 Female | 1952 | 63     | 5    | >=60       | 1.6            |    |
| 2141   | 300236 | 2        | Taiwan  | 1           | 1  | 2  | 1 Male   | 1970 | 45     | 2    | 45-49      | 0.8            |    |
| 2143   | 100230 | 1        | China   | 1           | 1  | 1  | 1 Male   | 1963 | 52     | 3    | 50-54      | 1.0            |    |
| 2144   | 300237 | 2        | Taiwan  | 1           | 1  | 2  | 1 Male   | 1973 | 42     | 1    | 40-44 year | 0.8            |    |
| 2147   | 100232 | 1        | China   | 1           | 1  | 2  | 1 Male   | 1955 | 60     | 5    | >=60       | 1.0            |    |
| 2151   | 100234 | 1        | China   | 1           | 1  | 2  | 1 Male   | 1973 | 42     | 1    | 40-44 year | 1.0            |    |
| 2153   | 100236 | 1        | China   | 1           | 1  | 2  | 1 Male   | 1972 | 43     | 1    | 40-44 year | 1.0            |    |
| 2154   | 100237 | 1        | China   | 1           | 1  | 2  | 2 Female | 1956 | 59     | 4    | 55-59      | 1.0            |    |
| 2155   | 300239 | 2        | Taiwan  | 1           | 1  | 2  | 1 Male   | 1965 | 50     | 3    | 50-54      | 0.8            |    |
| 2159   | 300240 | 2        | Taiwan  | 1           | 1  | 2  | 2 Female | 1962 | 53     | 3    | 50-54      | 0.9            |    |
| 2160   | 200320 | 3        | Korea   | 1           | 1  | 2  | 2 Female | 1962 | 53     | 3    | 50-54      | 0.8            |    |
| 2161   | 300241 | 2        | Taiwan  | 1           | 1  | 2  | 1 Male   | 1959 | 56     | 4    | 55-59      | 0.7            |    |
| 2163   | 200321 | 3        | Korea   | 1           | 1  | 1  | 1 Male   | 1956 | 59     | 4    | 55-59      | 0.8            |    |
| 2164   | 300242 | 2        | Taiwan  | 1           | 1  | 2  | 1 Male   | 1972 | 43     | 1    | 40-44 year | 0.8            |    |

| respid | SubsID | dCountry | Country | QDisclaimer | Q1 | Q2 | Gender | Q3_1 | age Nr | dAge | age Group  | Weight in Ctry | Q4 |
|--------|--------|----------|---------|-------------|----|----|--------|------|--------|------|------------|----------------|----|
| 2168   | 200322 | 3        | Korea   | 1           | 2  | 1  | Male   | 1962 | 53     | 3    | 50-54      | 0.9            |    |
| 2169   | 200323 | 3        | Korea   | 1           | 2  | 1  | Male   | 1963 | 52     | 3    | 50-54      | 0.9            |    |
| 2170   | 100161 | 1        | China   | 1           | 2  | 1  | Male   | 1963 | 52     | 3    | 50-54      | 1.0            |    |
| 2171   | 200324 | 3        | Korea   | 1           | 2  | 1  | Male   | 1972 | 43     | 1    | 40-44 year | 0.9            |    |
| 2172   | 100240 | 1        | China   | 1           | 2  | 1  | Male   | 1963 | 52     | 3    | 50-54      | 1.0            |    |
| 2173   | 300245 | 2        | Taiwan  | 1           | 2  | 1  | Male   | 1954 | 61     | 5    | >=60       | 1.6            |    |
| 2174   | 200325 | 3        | Korea   | 1           | 2  | 2  | Female | 1972 | 43     | 1    | 40-44 year | 0.9            | 2  |
| 2175   | 200326 | 3        | Korea   | 1           | 2  | 1  | Male   | 1974 | 41     | 1    | 40-44 year | 0.9            |    |
| 2176   | 300246 | 2        | Taiwan  | 1           | 2  | 1  | Male   | 1961 | 54     | 3    | 50-54      | 0.8            |    |
| 2177   | 100241 | 1        | China   | 1           | 2  | 1  | Male   | 1965 | 50     | 3    | 50-54      | 1.0            |    |
| 2179   | 200328 | 3        | Korea   | 1           | 2  | 2  | Female | 1962 | 53     | 3    | 50-54      | 0.8            |    |
| 2181   | 100242 | 1        | China   | 1           | 2  | 1  | Male   | 1972 | 43     | 1    | 40-44 year | 1.0            |    |
| 2182   | 200329 | 3        | Korea   | 1           | 2  | 2  | Female | 1963 | 52     | 3    | 50-54      | 0.8            |    |
| 2183   | 200330 | 3        | Korea   | 1           | 2  | 1  | Male   | 1953 | 62     | 5    | >=60       | 1.6            |    |
| 2184   | 100243 | 1        | China   | 1           | 2  | 2  | Female | 1954 | 61     | 5    | >=60       | 1.1            |    |
| 2185   | 100244 | 1        | China   | 1           | 2  | 2  | Female | 1962 | 53     | 3    | 50-54      | 1.2            |    |
| 2186   | 200331 | 3        | Korea   | 1           | 2  | 2  | Female | 1968 | 47     | 2    | 45-49      | 0.9            | 2  |
| 2187   | 200332 | 3        | Korea   | 1           | 2  | 1  | Male   | 1973 | 42     | 1    | 40-44 year | 0.9            |    |
| 2188   | 200333 | 3        | Korea   | 1           | 2  | 1  | Male   | 1949 | 66     | 5    | >=60       | 1.6            |    |
| 2189   | 100245 | 1        | China   | 1           | 2  | 1  | Male   | 1974 | 41     | 1    | 40-44 year | 1.0            |    |
| 2190   | 300248 | 2        | Taiwan  | 1           | 2  | 2  | Female | 1966 | 49     | 2    | 45-49      | 0.9            | 2  |
| 2193   | 200334 | 3        | Korea   | 1           | 2  | 2  | Female | 1957 | 58     | 4    | 55-59      | 0.7            |    |
| 2195   | 300247 | 2        | Taiwan  | 1           | 2  | 2  | Female | 1960 | 55     | 4    | 55-59      | 0.9            |    |
| 2198   | 300250 | 2        | Taiwan  | 1           | 2  | 1  | Male   | 1965 | 50     | 3    | 50-54      | 0.8            |    |
| 2200   | 100250 | 1        | China   | 1           | 2  | 2  | Female | 1965 | 50     | 3    | 50-54      | 1.2            |    |
| 2205   | 200336 | 3        | Korea   | 1           | 1  | 1  | Male   | 1971 | 44     | 1    | 40-44 year | 0.9            |    |
| 2208   | 200337 | 3        | Korea   | 1           | 2  | 2  | Female | 1964 | 51     | 3    | 50-54      | 0.8            |    |
| 2209   | 300251 | 2        | Taiwan  | 1           | 2  | 1  | Male   | 1961 | 54     | 3    | 50-54      | 0.8            |    |
| 2210   | 200338 | 3        | Korea   | 1           | 2  | 2  | Female | 1947 | 68     | 5    | >=60       | 1.6            |    |
| 2211   | 300252 | 2        | Taiwan  | 1           | 2  | 1  | Male   | 1965 | 50     | 3    | 50-54      | 0.8            |    |
| 2213   | 100254 | 1        | China   | 1           | 1  | 2  | Female | 1971 | 44     | 1    | 40-44 year | 1.0            | 2  |
| 2214   | 200339 | 3        | Korea   | 1           | 2  | 2  | Female | 1953 | 62     | 5    | >=60       | 1.6            |    |

| respid | SubsID | dCountry | Country | QDisclaim<br>er | Q1 | Q2 | Gender | Q3_1 | age Nr | dAge | age Group  | Weight in<br>Ctry | Q4 |
|--------|--------|----------|---------|-----------------|----|----|--------|------|--------|------|------------|-------------------|----|
| 2216   | 200340 | 3        | Korea   | 1               | 2  | 1  | Male   | 1963 | 52     | 3    | 50-54      | 0.9               |    |
| 2220   | 100255 | 1        | China   | 1               | 2  | 2  | Female | 1960 | 55     | 4    | 55-59      | 1.0               |    |
| 2225   | 300255 | 2        | Taiwan  | 1               | 2  | 1  | Male   | 1958 | 57     | 4    | 55-59      | 0.7               |    |
| 2227   | 300256 | 2        | Taiwan  | 1               | 2  | 1  | Male   | 1964 | 51     | 3    | 50-54      | 0.8               |    |
| 2228   | 100259 | 1        | China   | 1               | 2  | 2  | Female | 1958 | 57     | 4    | 55-59      | 1.0               |    |
| 2229   | 100253 | 1        | China   | 1               | 2  | 1  | Male   | 1955 | 60     | 5    | >=60       | 1.0               |    |
| 2230   | 100260 | 1        | China   | 1               | 2  | 1  | Male   | 1973 | 42     | 1    | 40-44 year | 1.0               |    |
| 2236   | 100263 | 1        | China   | 1               | 2  | 2  | Female | 1958 | 57     | 4    | 55-59      | 1.0               |    |
| 2238   | 100264 | 1        | China   | 1               | 2  | 1  | Male   | 1972 | 43     | 1    | 40-44 year | 1.0               |    |
| 2239   | 100015 | 1        | China   | 1               | 1  | 1  | Male   | 1966 | 49     | 2    | 45-49      | 1.0               |    |
| 2240   | 200342 | 3        | Korea   | 1               | 2  | 1  | Male   | 1967 | 48     | 2    | 45-49      | 0.8               |    |
| 2241   | 300257 | 2        | Taiwan  | 1               | 2  | 2  | Female | 1956 | 59     | 4    | 55-59      | 0.9               |    |
| 2243   | 100265 | 1        | China   | 1               | 2  | 2  | Female | 1974 | 41     | 1    | 40-44 year | 1.0               | 2  |
| 2245   | 300258 | 2        | Taiwan  | 1               | 2  | 2  | Female | 1971 | 44     | 1    | 40-44 year | 0.8               | 2  |
| 2247   | 200343 | 3        | Korea   | 1               | 2  | 2  | Female | 1959 | 56     | 4    | 55-59      | 0.7               |    |
| 2248   | 300259 | 2        | Taiwan  | 1               | 2  | 2  | Female | 1962 | 53     | 3    | 50-54      | 0.9               |    |
| 2249   | 100267 | 1        | China   | 1               | 2  | 2  | Female | 1955 | 60     | 5    | >=60       | 1.1               |    |
| 2254   | 200344 | 3        | Korea   | 1               | 2  | 2  | Female | 1960 | 55     | 4    | 55-59      | 0.7               |    |
| 2256   | 300260 | 2        | Taiwan  | 1               | 2  | 1  | Male   | 1971 | 44     | 1    | 40-44 year | 0.8               |    |
| 2259   | 300261 | 2        | Taiwan  | 1               | 2  | 1  | Male   | 1946 | 69     | 5    | >=60       | 1.6               |    |
| 2261   | 100249 | 1        | China   | 1               | 2  | 2  | Female | 1946 | 69     | 5    | >=60       | 1.1               |    |
| 2262   | 100251 | 1        | China   | 1               | 2  | 1  | Male   | 1973 | 42     | 1    | 40-44 year | 1.0               |    |
| 2263   | 200345 | 3        | Korea   | 1               | 2  | 2  | Female | 1973 | 42     | 1    | 40-44 year | 0.9               | 2  |
| 2264   | 100270 | 1        | China   | 1               | 2  | 2  | Female | 1966 | 49     | 2    | 45-49      | 1.0               | 2  |
| 2265   | 300262 | 2        | Taiwan  | 1               | 1  | 1  | Male   | 1965 | 50     | 3    | 50-54      | 0.8               |    |
| 2270   | 100272 | 1        | China   | 1               | 2  | 1  | Male   | 1965 | 50     | 3    | 50-54      | 1.0               |    |
| 2271   | 200346 | 3        | Korea   | 1               | 2  | 1  | Male   | 1970 | 45     | 2    | 45-49      | 0.8               |    |
| 2272   | 100273 | 1        | China   | 1               | 2  | 1  | Male   | 1974 | 41     | 1    | 40-44 year | 1.0               |    |
| 2273   | 300263 | 2        | Taiwan  | 1               | 2  | 2  | Female | 1965 | 50     | 3    | 50-54      | 0.9               |    |
| 2274   | 200347 | 3        | Korea   | 1               | 2  | 2  | Female | 1951 | 64     | 5    | >=60       | 1.6               |    |
| 2276   | 200348 | 3        | Korea   | 1               | 2  | 2  | Female | 1960 | 55     | 4    | 55-59      | 0.7               |    |
| 2277   | 300265 | 2        | Taiwan  | 1               | 2  | 2  | Female | 1953 | 62     | 5    | >=60       | 1.7               |    |

| respid | SubsID    | dCountry | Country | QDisclaimer | Q1 | Q2 | Gender   | Q3_1 | age Nr | dAge | age Group  | Weight in Ctry | Q4 |
|--------|-----------|----------|---------|-------------|----|----|----------|------|--------|------|------------|----------------|----|
| 2281   | 100276    | 1        | China   |             | 1  | 2  | 2 Female | 1971 | 44     | 1    | 40-44 year | 1.0            | 2  |
| 2288   | 100185    | 1        | China   |             | 1  | 1  | 1 Male   | 1966 | 49     | 2    | 45-49      | 1.0            |    |
| 2290   | 100278    | 1        | China   |             | 1  | 2  | 2 Female | 1946 | 69     | 5    | >=60       | 1.1            |    |
| 2294   | 100280    | 1        | China   |             | 1  | 1  | 2 Female | 1971 | 44     | 1    | 40-44 year | 1.0            | 2  |
| 2295   | 200349    | 3        | Korea   |             | 1  | 2  | 2 Female | 1968 | 47     | 2    | 45-49      | 0.9            | 2  |
| 2296   | 200350    | 3        | Korea   |             | 1  | 2  | 2 Female | 1972 | 43     | 1    | 40-44 year | 0.9            | 2  |
| 2297   | 200351    | 3        | Korea   |             | 1  | 2  | 1 Male   | 1965 | 50     | 3    | 50-54      | 0.9            |    |
| 2298   | 200352    | 3        | Korea   |             | 1  | 2  | 1 Male   | 1974 | 41     | 1    | 40-44 year | 0.9            |    |
| 2301   | 200353    | 3        | Korea   |             | 1  | 2  | 1 Male   | 1961 | 54     | 3    | 50-54      | 0.9            |    |
| 2302   | 300268    | 2        | Taiwan  |             | 1  | 2  | 2 Female | 1969 | 46     | 2    | 45-49      | 0.9            | 2  |
| 2303   | 200354    | 3        | Korea   |             | 1  | 2  | 2 Female | 1967 | 48     | 2    | 45-49      | 0.9            | 2  |
| 2305   | 100281    | 1        | China   |             | 1  | 2  | 1 Male   | 1961 | 54     | 3    | 50-54      | 1.0            |    |
| 2309   | 100282    | 1        | China   |             | 1  | 2  | 2 Female | 1974 | 41     | 1    | 40-44 year | 1.0            | 2  |
| 2310   | 100283    | 1        | China   |             | 1  | 2  | 1 Male   | 1969 | 46     | 2    | 45-49      | 1.0            |    |
| 2311   | 200357    | 3        | Korea   |             | 1  | 2  | 2 Female | 1973 | 42     | 1    | 40-44 year | 0.9            | 2  |
| 2313   | 200358    | 3        | Korea   |             | 1  | 2  | 1 Male   | 1948 | 67     | 5    | >=60       | 1.6            |    |
| 2316   | 200359    | 3        | Korea   |             | 1  | 2  | 1 Male   | 1960 | 55     | 4    | 55-59      | 0.8            |    |
| 2317   | 300271    | 2        | Taiwan  |             | 1  | 2  | 2 Female | 1974 | 41     | 1    | 40-44 year | 0.8            | 2  |
| 2318   | 200360    | 3        | Korea   |             | 1  | 2  | 2 Female | 1952 | 63     | 5    | >=60       | 1.6            |    |
| 2319   | 300272    | 2        | Taiwan  |             | 1  | 2  | 2 Female | 1974 | 41     | 1    | 40-44 year | 0.8            | 2  |
| 2321   | 280566712 | 1        | China   |             | 1  | 2  | 1 Male   | 1972 | 43     | 1    | 40-44 year | 1.0            |    |
| 2324   | 300273    | 2        | Taiwan  |             | 1  | 2  | 2 Female | 1969 | 46     | 2    | 45-49      | 0.9            | 2  |
| 2328   | 100289    | 1        | China   |             | 1  | 2  | 2 Female | 1971 | 44     | 1    | 40-44 year | 1.0            | 2  |
| 2329   | 200363    | 3        | Korea   |             | 1  | 2  | 1 Male   | 1952 | 63     | 5    | >=60       | 1.6            |    |
| 2330   | 200364    | 3        | Korea   |             | 1  | 2  | 2 Female | 1970 | 45     | 2    | 45-49      | 0.9            | 2  |
| 2333   | 200366    | 3        | Korea   |             | 1  | 2  | 2 Female | 1961 | 54     | 3    | 50-54      | 0.8            |    |
| 2334   | 300274    | 2        | Taiwan  |             | 1  | 2  | 2 Female | 1971 | 44     | 1    | 40-44 year | 0.8            | 2  |
| 2338   | 300275    | 2        | Taiwan  |             | 1  | 2  | 2 Female | 1968 | 47     | 2    | 45-49      | 0.9            | 2  |
| 2341   | 300276    | 2        | Taiwan  |             | 1  | 2  | 1 Male   | 1961 | 54     | 3    | 50-54      | 0.8            |    |
| 2342   | 200369    | 3        | Korea   |             | 1  | 2  | 2 Female | 1973 | 42     | 1    | 40-44 year | 0.9            | 2  |
| 2343   | 100292    | 1        | China   |             | 1  | 2  | 1 Male   | 1970 | 45     | 2    | 45-49      | 1.0            |    |
| 2346   | 200370    | 3        | Korea   |             | 1  | 2  | 2 Female | 1958 | 57     | 4    | 55-59      | 0.7            |    |

| respid | SubsID    | dCountry | Country  | QDisclaimer | Q1 | Q2 | Gender   | Q3_1 | age Nr | dAge | age Group    | Weight in Ctry | Q4 |
|--------|-----------|----------|----------|-------------|----|----|----------|------|--------|------|--------------|----------------|----|
| 2347   | 100294    |          | 1 China  |             | 1  | 2  | 1 Male   | 1956 | 59     |      | 4 55-59      | 0.9            |    |
| 2348   | 200371    |          | 3 Korea  |             | 1  | 2  | 1 Male   | 1970 | 45     |      | 2 45-49      | 0.8            |    |
| 2349   | 200372    |          | 3 Korea  |             | 1  | 2  | 2 Female | 1970 | 45     |      | 2 45-49      | 0.9            | 2  |
| 2350   | 200373    |          | 3 Korea  |             | 1  | 2  | 2 Female | 1954 | 61     |      | 5 >=60       | 1.6            |    |
| 2351   | 300277    |          | 2 Taiwan |             | 1  | 2  | 1 Male   | 1970 | 45     |      | 2 45-49      | 0.8            |    |
| 2352   | 300278    |          | 2 Taiwan |             | 1  | 2  | 1 Male   | 1950 | 65     |      | 5 >=60       | 1.6            |    |
| 2359   | 100298    |          | 1 China  |             | 1  | 2  | 1 Male   | 1973 | 42     |      | 1 40-44 year | 1.0            |    |
| 2362   | 200377    |          | 3 Korea  |             | 1  | 2  | 1 Male   | 1972 | 43     |      | 1 40-44 year | 0.9            |    |
| 2363   | 300279    |          | 2 Taiwan |             | 1  | 2  | 1 Male   | 1956 | 59     |      | 4 55-59      | 0.7            |    |
| 2365   | 300280    |          | 2 Taiwan |             | 1  | 1  | 1 Male   | 1954 | 61     |      | 5 >=60       | 1.6            |    |
| 2367   | 300282    |          | 2 Taiwan |             | 1  | 2  | 1 Male   | 1966 | 49     |      | 2 45-49      | 0.8            |    |
| 2368   | 300283    |          | 2 Taiwan |             | 1  | 2  | 2 Female | 1968 | 47     |      | 2 45-49      | 0.9            | 2  |
| 2369   | 200378    |          | 3 Korea  |             | 1  | 2  | 1 Male   | 1968 | 47     |      | 2 45-49      | 0.8            |    |
| 2372   | 380152524 |          | 2 Taiwan |             | 1  | 2  | 2 Female | 1974 | 41     |      | 1 40-44 year | 0.8            | 2  |
| 2374   | 200379    |          | 3 Korea  |             | 1  | 2  | 1 Male   | 1950 | 65     |      | 5 >=60       | 1.6            |    |
| 2376   | 100302    |          | 1 China  |             | 1  | 2  | 1 Male   | 1945 | 70     |      | 5 >=60       | 1.0            |    |
| 2379   | 200380    |          | 3 Korea  |             | 1  | 2  | 1 Male   | 1966 | 49     |      | 2 45-49      | 0.8            |    |
| 2380   | 100303    |          | 1 China  |             | 1  | 2  | 2 Female | 1954 | 61     |      | 5 >=60       | 1.1            |    |
| 2381   | 200381    |          | 3 Korea  |             | 1  | 2  | 2 Female | 1954 | 61     |      | 5 >=60       | 1.6            |    |
| 2382   | 300285    |          | 2 Taiwan |             | 1  | 2  | 1 Male   | 1966 | 49     |      | 2 45-49      | 0.8            |    |
| 2385   | 100305    |          | 1 China  |             | 1  | 2  | 2 Female | 1973 | 42     |      | 1 40-44 year | 1.0            | 2  |
| 2387   | 300287    |          | 2 Taiwan |             | 1  | 1  | 1 Male   | 1959 | 56     |      | 4 55-59      | 0.7            |    |
| 2388   | 100306    |          | 1 China  |             | 1  | 2  | 1 Male   | 1973 | 42     |      | 1 40-44 year | 1.0            |    |
| 2389   | 300288    |          | 2 Taiwan |             | 1  | 2  | 2 Female | 1960 | 55     |      | 4 55-59      | 0.9            |    |
| 2391   | 200383    |          | 3 Korea  |             | 1  | 2  | 2 Female | 1953 | 62     |      | 5 >=60       | 1.6            |    |
| 2392   | 200384    |          | 3 Korea  |             | 1  | 2  | 1 Male   | 1954 | 61     |      | 5 >=60       | 1.6            |    |
| 2393   | 100299    |          | 1 China  |             | 1  | 2  | 1 Male   | 1974 | 41     |      | 1 40-44 year | 1.0            |    |
| 2394   | 200385    |          | 3 Korea  |             | 1  | 2  | 2 Female | 1966 | 49     |      | 2 45-49      | 0.9            | 2  |
| 2397   | 300290    |          | 2 Taiwan |             | 1  | 2  | 1 Male   | 1965 | 50     |      | 3 50-54      | 0.8            |    |
| 2398   | 300215    |          | 2 Taiwan |             | 1  | 2  | 2 Female | 1970 | 45     |      | 2 45-49      | 0.9            | 2  |
| 2400   | 200387    |          | 3 Korea  |             | 1  | 2  | 1 Male   | 1962 | 53     |      | 3 50-54      | 0.9            |    |
| 2402   | 300292    |          | 2 Taiwan |             | 1  | 2  | 2 Female | 1974 | 41     |      | 1 40-44 year | 0.8            | 2  |

| respid | SubsID    | dCountry | Country  | QDisclaimer | Q1 | Q2 | Gender   | Q3_1 | age Nr | dAge | age Group    | Weight in Ctry | Q4 |
|--------|-----------|----------|----------|-------------|----|----|----------|------|--------|------|--------------|----------------|----|
| 2406   | 100309    |          | 1 China  |             | 1  | 2  | 2 Female | 1973 | 42     |      | 1 40-44 year | 1.0            | 2  |
| 2408   | 350313061 |          | 3 Korea  |             | 1  | 2  | 2 Female | 1974 | 41     |      | 1 40-44 year | 0.9            | 2  |
| 2410   | 350060381 |          | 3 Korea  |             | 1  | 2  | 1 Male   | 1959 | 56     |      | 4 55-59      | 0.8            |    |
| 2411   | 350209431 |          | 3 Korea  |             | 1  | 2  | 1 Male   | 1971 | 44     |      | 1 40-44 year | 0.9            |    |
| 2412   | 350090262 |          | 3 Korea  |             | 1  | 2  | 1 Male   | 1961 | 54     |      | 3 50-54      | 0.9            |    |
| 2414   | 350301046 |          | 3 Korea  |             | 1  | 2  | 2 Female | 1957 | 58     |      | 4 55-59      | 0.7            |    |
| 2421   | 380149938 |          | 2 Taiwan |             | 1  | 2  | 2 Female | 1968 | 47     |      | 2 45-49      | 0.9            | 2  |
| 2423   | 350163572 |          | 3 Korea  |             | 1  | 2  | 1 Male   | 1957 | 58     |      | 4 55-59      | 0.8            |    |
| 2424   | 350149194 |          | 3 Korea  |             | 1  | 2  | 1 Male   | 1970 | 45     |      | 2 45-49      | 0.8            |    |
| 2425   | 380020517 |          | 2 Taiwan |             | 1  | 2  | 2 Female | 1967 | 48     |      | 2 45-49      | 0.9            | 2  |
| 2426   | 350126514 |          | 3 Korea  |             | 1  | 2  | 1 Male   | 1965 | 50     |      | 3 50-54      | 0.9            |    |
| 2429   | 380092846 |          | 2 Taiwan |             | 1  | 1  | 1 Male   | 1967 | 48     |      | 2 45-49      | 0.8            |    |
| 2430   | 380058270 |          | 2 Taiwan |             | 1  | 2  | 1 Male   | 1971 | 44     |      | 1 40-44 year | 0.8            |    |
| 2432   | 350079275 |          | 3 Korea  |             | 1  | 2  | 1 Male   | 1959 | 56     |      | 4 55-59      | 0.8            |    |
| 2433   | 350221645 |          | 3 Korea  |             | 1  | 2  | 2 Female | 1962 | 53     |      | 3 50-54      | 0.8            |    |
| 2434   | 380025684 |          | 2 Taiwan |             | 1  | 2  | 1 Male   | 1962 | 53     |      | 3 50-54      | 0.8            |    |
| 2435   | 380071997 |          | 2 Taiwan |             | 1  | 2  | 2 Female | 1962 | 53     |      | 3 50-54      | 0.9            |    |
| 2436   | 350186179 |          | 3 Korea  |             | 1  | 2  | 2 Female | 1969 | 46     |      | 2 45-49      | 0.9            | 2  |
| 2439   | 350202886 |          | 3 Korea  |             | 1  | 2  | 2 Female | 1961 | 54     |      | 3 50-54      | 0.8            |    |
| 2440   | 350149453 |          | 3 Korea  |             | 1  | 2  | 1 Male   | 1953 | 62     |      | 5 >=60       | 1.6            |    |
| 2441   | 380025194 |          | 2 Taiwan |             | 1  | 2  | 1 Male   | 1964 | 51     |      | 3 50-54      | 0.8            |    |
| 2446   | 350209485 |          | 3 Korea  |             | 1  | 2  | 1 Male   | 1960 | 55     |      | 4 55-59      | 0.8            |    |
| 2448   | 280413922 |          | 1 China  |             | 1  | 2  | 1 Male   | 1970 | 45     |      | 2 45-49      | 1.0            |    |
| 2449   | 350128537 |          | 3 Korea  |             | 1  | 2  | 1 Male   | 1960 | 55     |      | 4 55-59      | 0.8            |    |
| 2451   | 380095977 |          | 2 Taiwan |             | 1  | 2  | 1 Male   | 1956 | 59     |      | 4 55-59      | 0.7            |    |
| 2452   | 350062155 |          | 3 Korea  |             | 1  | 2  | 1 Male   | 1960 | 55     |      | 4 55-59      | 0.8            |    |
| 2455   | 350170269 |          | 3 Korea  |             | 1  | 2  | 1 Male   | 1956 | 59     |      | 4 55-59      | 0.8            |    |
| 2457   | 350209649 |          | 3 Korea  |             | 1  | 2  | 2 Female | 1972 | 43     |      | 1 40-44 year | 0.9            | 2  |
| 2458   | 380073564 |          | 2 Taiwan |             | 1  | 2  | 2 Female | 1973 | 42     |      | 1 40-44 year | 0.8            | 2  |
| 2459   | 350174248 |          | 3 Korea  |             | 1  | 2  | 2 Female | 1970 | 45     |      | 2 45-49      | 0.9            | 2  |
| 2460   | 280224622 |          | 1 China  |             | 1  | 2  | 1 Male   | 1970 | 45     |      | 2 45-49      | 1.0            |    |
| 2462   | 280909635 |          | 1 China  |             | 1  | 2  | 1 Male   | 1973 | 42     |      | 1 40-44 year | 1.0            |    |



| respid | SubsID    | dCountry | Country | QDisclaimer | Q1 | Q2 | Gender   | Q3_1 | age Nr | dAge | age Group  | Weight in Ctry | Q4 |
|--------|-----------|----------|---------|-------------|----|----|----------|------|--------|------|------------|----------------|----|
| 2464   | 350080537 | 3        | Korea   | 1           | 1  | 2  | 1 Male   | 1955 | 60     | 5    | >=60       | 1.6            |    |
| 2465   | 350214787 | 3        | Korea   | 1           | 1  | 2  | 2 Female | 1960 | 55     | 4    | 55-59      | 0.7            |    |
| 2468   | 350151432 | 3        | Korea   | 1           | 1  | 2  | 2 Female | 1968 | 47     | 2    | 45-49      | 0.9            | 2  |
| 2469   | 350221892 | 3        | Korea   | 1           | 1  | 2  | 1 Male   | 1959 | 56     | 4    | 55-59      | 0.8            |    |
| 2470   | 380015129 | 2        | Taiwan  | 1           | 1  | 2  | 2 Female | 1975 | 40     | 1    | 40-44 year | 0.8            | 2  |
| 2471   | 350187475 | 3        | Korea   | 1           | 1  | 1  | 1 Male   | 1961 | 54     | 3    | 50-54      | 0.9            |    |
| 2472   | 350226167 | 3        | Korea   | 1           | 1  | 2  | 1 Male   | 1966 | 49     | 2    | 45-49      | 0.8            |    |
| 2474   | 280221349 | 1        | China   | 1           | 1  | 2  | 1 Male   | 1974 | 41     | 1    | 40-44 year | 1.0            |    |
| 2476   | 280135925 | 1        | China   | 1           | 1  | 2  | 1 Male   | 1971 | 44     | 1    | 40-44 year | 1.0            |    |
| 2478   | 380017968 | 2        | Taiwan  | 1           | 1  | 2  | 1 Male   | 1972 | 43     | 1    | 40-44 year | 0.8            |    |
| 2479   | 380049773 | 2        | Taiwan  | 1           | 1  | 2  | 1 Male   | 1960 | 55     | 4    | 55-59      | 0.7            |    |
| 2480   | 350167162 | 3        | Korea   | 1           | 1  | 2  | 1 Male   | 1972 | 43     | 1    | 40-44 year | 0.9            |    |
| 2482   | 350152418 | 3        | Korea   | 1           | 1  | 2  | 1 Male   | 1971 | 44     | 1    | 40-44 year | 0.9            |    |
| 2486   | 280576092 | 1        | China   | 1           | 1  | 2  | 2 Female | 1975 | 40     | 1    | 40-44 year | 1.0            | 2  |
| 2488   | 350231687 | 3        | Korea   | 1           | 1  | 2  | 2 Female | 1965 | 50     | 3    | 50-54      | 0.8            |    |
| 2489   | 380060792 | 2        | Taiwan  | 1           | 1  | 2  | 2 Female | 1963 | 52     | 3    | 50-54      | 0.9            |    |
| 2491   | 280941899 | 1        | China   | 1           | 1  | 2  | 1 Male   | 1973 | 42     | 1    | 40-44 year | 1.0            |    |
| 2495   | 280403131 | 1        | China   | 1           | 1  | 2  | 1 Male   | 1975 | 40     | 1    | 40-44 year | 1.0            |    |
| 2496   | 350086273 | 3        | Korea   | 1           | 1  | 2  | 1 Male   | 1969 | 46     | 2    | 45-49      | 0.8            |    |
| 2498   | 350200729 | 3        | Korea   | 1           | 1  | 2  | 2 Female | 1970 | 45     | 2    | 45-49      | 0.9            | 2  |
| 2501   | 380025481 | 2        | Taiwan  | 1           | 1  | 2  | 1 Male   | 1973 | 42     | 1    | 40-44 year | 0.8            |    |
| 2502   | 350011870 | 3        | Korea   | 1           | 1  | 1  | 1 Male   | 1975 | 40     | 1    | 40-44 year | 0.9            |    |
| 2503   | 380059213 | 2        | Taiwan  | 1           | 1  | 2  | 1 Male   | 1958 | 57     | 4    | 55-59      | 0.7            |    |
| 2504   | 380027923 | 2        | Taiwan  | 1           | 1  | 2  | 1 Male   | 1964 | 51     | 3    | 50-54      | 0.8            |    |
| 2507   | 350239382 | 3        | Korea   | 1           | 1  | 2  | 2 Female | 1965 | 50     | 3    | 50-54      | 0.8            |    |
| 2509   | 380078028 | 2        | Taiwan  | 1           | 1  | 2  | 2 Female | 1965 | 50     | 3    | 50-54      | 0.9            |    |
| 2512   | 350108261 | 3        | Korea   | 1           | 1  | 2  | 2 Female | 1964 | 51     | 3    | 50-54      | 0.8            |    |
| 2514   | 350154255 | 3        | Korea   | 1           | 1  | 2  | 1 Male   | 1961 | 54     | 3    | 50-54      | 0.9            |    |
| 2516   | 380068033 | 2        | Taiwan  | 1           | 1  | 2  | 1 Male   | 1943 | 72     | 5    | >=60       | 1.6            |    |
| 2517   | 350179161 | 3        | Korea   | 1           | 1  | 2  | 1 Male   | 1969 | 46     | 2    | 45-49      | 0.8            |    |
| 2521   | 380107840 | 2        | Taiwan  | 1           | 1  | 2  | 1 Male   | 1962 | 53     | 3    | 50-54      | 0.8            |    |
| 2522   | 380108297 | 2        | Taiwan  | 1           | 1  | 2  | 1 Male   | 1958 | 57     | 4    | 55-59      | 0.7            |    |

| respid | SubsID    | dCountry | Country | QDisclaimer | Q1 | Q2 | Gender   | Q3_1 | age Nr | dAge | age Group  | Weight in Ctry | Q4 |
|--------|-----------|----------|---------|-------------|----|----|----------|------|--------|------|------------|----------------|----|
| 2524   | 380103168 | 2        | Taiwan  | 1           | 1  | 2  | 1 Male   | 1950 | 65     | 5    | >=60       | 1.6            |    |
| 2525   | 380101616 | 2        | Taiwan  | 1           | 1  | 2  | 2 Female | 1967 | 48     | 2    | 45-49      | 0.9            | 2  |
| 2526   | 380126548 | 2        | Taiwan  | 1           | 1  | 2  | 1 Male   | 1970 | 45     | 2    | 45-49      | 0.8            |    |
| 2527   | 380112723 | 2        | Taiwan  | 1           | 1  | 2  | 2 Female | 1952 | 63     | 5    | >=60       | 1.7            |    |
| 2528   | 380077714 | 2        | Taiwan  | 1           | 1  | 2  | 2 Female | 1968 | 47     | 2    | 45-49      | 0.9            | 2  |
| 2531   | 350104565 | 3        | Korea   | 1           | 1  | 2  | 2 Female | 1962 | 53     | 3    | 50-54      | 0.8            |    |
| 2533   | 380124844 | 2        | Taiwan  | 1           | 1  | 1  | 1 Male   | 1962 | 53     | 3    | 50-54      | 0.8            |    |
| 2535   | 281067450 | 1        | China   | 1           | 1  | 2  | 1 Male   | 1959 | 56     | 4    | 55-59      | 0.9            |    |
| 2536   | 280232227 | 1        | China   | 1           | 1  | 2  | 1 Male   | 1973 | 42     | 1    | 40-44 year | 1.0            |    |
| 2539   | 280254520 | 1        | China   | 1           | 1  | 2  | 2 Female | 1971 | 44     | 1    | 40-44 year | 1.0            | 2  |
| 2540   | 350203190 | 3        | Korea   | 1           | 1  | 1  | 1 Male   | 1964 | 51     | 3    | 50-54      | 0.9            |    |
| 2543   | 380048789 | 2        | Taiwan  | 1           | 1  | 2  | 1 Male   | 1974 | 41     | 1    | 40-44 year | 0.8            |    |
| 2546   | 380018278 | 2        | Taiwan  | 1           | 1  | 2  | 2 Female | 1967 | 48     | 2    | 45-49      | 0.9            | 2  |
| 2547   | 380098787 | 2        | Taiwan  | 1           | 1  | 2  | 2 Female | 1965 | 50     | 3    | 50-54      | 0.9            |    |
| 2549   | 380135044 | 2        | Taiwan  | 1           | 1  | 2  | 1 Male   | 1957 | 58     | 4    | 55-59      | 0.7            |    |
| 2553   | 280788852 | 1        | China   | 1           | 1  | 2  | 1 Male   | 1972 | 43     | 1    | 40-44 year | 1.0            |    |
| 2554   | 380121602 | 2        | Taiwan  | 1           | 1  | 2  | 2 Female | 1972 | 43     | 1    | 40-44 year | 0.8            | 2  |
| 2555   | 280244481 | 1        | China   | 1           | 1  | 2  | 1 Male   | 1974 | 41     | 1    | 40-44 year | 1.0            |    |
| 2556   | 380129537 | 2        | Taiwan  | 1           | 1  | 2  | 1 Male   | 1960 | 55     | 4    | 55-59      | 0.7            |    |
| 2557   | 380123842 | 2        | Taiwan  | 1           | 1  | 1  | 1 Male   | 1954 | 61     | 5    | >=60       | 1.6            |    |
| 2559   | 280354427 | 1        | China   | 1           | 1  | 2  | 1 Male   | 1966 | 49     | 2    | 45-49      | 1.0            |    |
| 2560   | 350129039 | 3        | Korea   | 1           | 1  | 1  | 2 Female | 1955 | 60     | 5    | >=60       | 1.6            |    |
| 2561   | 380086202 | 2        | Taiwan  | 1           | 1  | 2  | 1 Male   | 1970 | 45     | 2    | 45-49      | 0.8            |    |
| 2566   | 350149514 | 3        | Korea   | 1           | 1  | 2  | 1 Male   | 1963 | 52     | 3    | 50-54      | 0.9            |    |
| 2567   | 380113330 | 2        | Taiwan  | 1           | 1  | 2  | 2 Female | 1956 | 59     | 4    | 55-59      | 0.9            |    |
| 2570   | 380036783 | 2        | Taiwan  | 1           | 1  | 2  | 1 Male   | 1969 | 46     | 2    | 45-49      | 0.8            |    |
| 2574   | 380102388 | 2        | Taiwan  | 1           | 1  | 2  | 1 Male   | 1963 | 52     | 3    | 50-54      | 0.8            |    |
| 2578   | 280454672 | 1        | China   | 1           | 1  | 2  | 1 Male   | 1972 | 43     | 1    | 40-44 year | 1.0            |    |
| 2580   | 280192574 | 1        | China   | 1           | 1  | 2  | 1 Male   | 1973 | 42     | 1    | 40-44 year | 1.0            |    |
| 2590   | 350050150 | 3        | Korea   | 1           | 1  | 2  | 1 Male   | 1974 | 41     | 1    | 40-44 year | 0.9            |    |
| 2593   | 380208842 | 2        | Taiwan  | 1           | 1  | 2  | 1 Male   | 1971 | 44     | 1    | 40-44 year | 0.8            |    |
| 2594   | 350131412 | 3        | Korea   | 1           | 1  | 1  | 1 Male   | 1967 | 48     | 2    | 45-49      | 0.8            |    |

| respid | SubsID    | dCountry | Country  | QDisclaimer | Q1 | Q2 | Gender   | Q3_1 | age Nr | dAge | age Group    | Weight in Ctry | Q4 |
|--------|-----------|----------|----------|-------------|----|----|----------|------|--------|------|--------------|----------------|----|
| 2595   | 350069629 |          | 3 Korea  |             | 1  | 2  | 1 Male   | 1970 | 45     |      | 2 45-49      | 0.8            |    |
| 2596   | 350033986 |          | 3 Korea  |             | 1  | 2  | 1 Male   | 1973 | 42     |      | 1 40-44 year | 0.9            |    |
| 2597   | 350151895 |          | 3 Korea  |             | 1  | 2  | 1 Male   | 1966 | 49     |      | 2 45-49      | 0.8            |    |
| 2598   | 280681640 |          | 1 China  |             | 1  | 2  | 1 Male   | 1965 | 50     |      | 3 50-54      | 1.0            |    |
| 2602   | 280970331 |          | 1 China  |             | 1  | 2  | 2 Female | 1972 | 43     |      | 1 40-44 year | 1.0            | 2  |
| 2605   | 280816351 |          | 1 China  |             | 1  | 2  | 1 Male   | 1970 | 45     |      | 2 45-49      | 1.0            |    |
| 2606   | 280815787 |          | 1 China  |             | 1  | 2  | 1 Male   | 1964 | 51     |      | 3 50-54      | 1.0            |    |
| 2607   | 280555846 |          | 1 China  |             | 1  | 2  | 2 Female | 1974 | 41     |      | 1 40-44 year | 1.0            | 2  |
| 2608   | 380043211 |          | 2 Taiwan |             | 1  | 2  | 1 Male   | 1963 | 52     |      | 3 50-54      | 0.8            |    |
| 2609   | 280274295 |          | 1 China  |             | 1  | 2  | 1 Male   | 1969 | 46     |      | 2 45-49      | 1.0            |    |
| 2610   | 350158588 |          | 3 Korea  |             | 1  | 2  | 2 Female | 1968 | 47     |      | 2 45-49      | 0.9            | 2  |
| 2614   | 281070344 |          | 1 China  |             | 1  | 2  | 1 Male   | 1970 | 45     |      | 2 45-49      | 1.0            |    |
| 2615   | 280754741 |          | 1 China  |             | 1  | 2  | 1 Male   | 1970 | 45     |      | 2 45-49      | 1.0            |    |
| 2616   | 380045650 |          | 2 Taiwan |             | 1  | 2  | 1 Male   | 1962 | 53     |      | 3 50-54      | 0.8            |    |
| 2618   | 380108079 |          | 2 Taiwan |             | 1  | 2  | 1 Male   | 1960 | 55     |      | 4 55-59      | 0.7            |    |
| 2630   | 281323126 |          | 1 China  |             | 1  | 2  | 1 Male   | 1952 | 63     |      | 5 >=60       | 1.0            |    |
| 2633   | 380189235 |          | 2 Taiwan |             | 1  | 2  | 1 Male   | 1962 | 53     |      | 3 50-54      | 0.8            |    |
| 2637   | 380188872 |          | 2 Taiwan |             | 1  | 2  | 1 Male   | 1955 | 60     |      | 5 >=60       | 1.6            |    |
| 2638   | 280989079 |          | 1 China  |             | 1  | 2  | 1 Male   | 1949 | 66     |      | 5 >=60       | 1.0            |    |
| 2641   | 380196053 |          | 2 Taiwan |             | 1  | 2  | 2 Female | 1974 | 41     |      | 1 40-44 year | 0.8            | 2  |
| 2644   | 281316722 |          | 1 China  |             | 1  | 2  | 2 Female | 1971 | 44     |      | 1 40-44 year | 1.0            | 2  |
| 2645   | 380144476 |          | 2 Taiwan |             | 1  | 2  | 1 Male   | 1952 | 63     |      | 5 >=60       | 1.6            |    |
| 2646   | 281284954 |          | 1 China  |             | 1  | 2  | 1 Male   | 1973 | 42     |      | 1 40-44 year | 1.0            |    |
| 2648   | 281221742 |          | 1 China  |             | 1  | 2  | 1 Male   | 1975 | 40     |      | 1 40-44 year | 1.0            |    |
| 2651   | 380153907 |          | 2 Taiwan |             | 1  | 2  | 1 Male   | 1960 | 55     |      | 4 55-59      | 0.7            |    |
| 2652   | 281128375 |          | 1 China  |             | 1  | 2  | 2 Female | 1975 | 40     |      | 1 40-44 year | 1.0            | 2  |
| 2653   | 380159315 |          | 2 Taiwan |             | 1  | 2  | 1 Male   | 1965 | 50     |      | 3 50-54      | 0.8            |    |
| 2656   | 380170693 |          | 2 Taiwan |             | 1  | 2  | 1 Male   | 1967 | 48     |      | 2 45-49      | 0.8            |    |
| 2657   | 380186028 |          | 2 Taiwan |             | 1  | 2  | 1 Male   | 1953 | 62     |      | 5 >=60       | 1.6            |    |
| 2658   | 380133087 |          | 2 Taiwan |             | 1  | 2  | 1 Male   | 1964 | 51     |      | 3 50-54      | 0.8            |    |
| 2661   | 281328965 |          | 1 China  |             | 1  | 2  | 2 Female | 1972 | 43     |      | 1 40-44 year | 1.0            | 2  |
| 2663   | 380195666 |          | 2 Taiwan |             | 1  | 2  | 1 Male   | 1972 | 43     |      | 1 40-44 year | 0.8            |    |

| respid | SubsID    | dCountry | Country | QDisclaimer | Q1 | Q2 | Gender   | Q3_1 | age Nr | dAge | age Group  | Weight in Ctry | Q4 |
|--------|-----------|----------|---------|-------------|----|----|----------|------|--------|------|------------|----------------|----|
| 2665   | 281148683 | 1        | China   | 1           | 1  | 2  | 1 Male   | 1965 | 50     | 3    | 50-54      | 1.0            |    |
| 2670   | 380185254 | 2        | Taiwan  | 1           | 1  | 2  | 1 Male   | 1959 | 56     | 4    | 55-59      | 0.7            |    |
| 2672   | 380158114 | 2        | Taiwan  | 1           | 1  | 2  | 1 Male   | 1972 | 43     | 1    | 40-44 year | 0.8            |    |
| 2673   | 380060997 | 2        | Taiwan  | 1           | 1  | 2  | 1 Male   | 1970 | 45     | 2    | 45-49      | 0.8            |    |
| 2677   | 280740369 | 1        | China   | 1           | 1  | 2  | 1 Male   | 1973 | 42     | 1    | 40-44 year | 1.0            |    |
| 2686   | 281235096 | 1        | China   | 1           | 1  | 2  | 1 Male   | 1958 | 57     | 4    | 55-59      | 0.9            |    |
| 2688   | 280211801 | 1        | China   | 1           | 1  | 2  | 1 Male   | 1965 | 50     | 3    | 50-54      | 1.0            |    |
| 2689   | 380047953 | 2        | Taiwan  | 1           | 1  | 2  | 1 Male   | 1974 | 41     | 1    | 40-44 year | 0.8            |    |
| 2691   | 280591632 | 1        | China   | 1           | 1  | 2  | 1 Male   | 1972 | 43     | 1    | 40-44 year | 1.0            |    |
| 2695   | 350202645 | 3        | Korea   | 1           | 1  | 2  | 1 Male   | 1964 | 51     | 3    | 50-54      | 0.9            |    |
| 2696   | 380177759 | 2        | Taiwan  | 1           | 1  | 2  | 2 Female | 1969 | 46     | 2    | 45-49      | 0.9            | 2  |
| 2697   | 350111466 | 3        | Korea   | 1           | 1  | 2  | 1 Male   | 1969 | 46     | 2    | 45-49      | 0.8            |    |
| 2698   | 280110734 | 1        | China   | 1           | 1  | 2  | 1 Male   | 1973 | 42     | 1    | 40-44 year | 1.0            |    |
| 2703   | 380205463 | 2        | Taiwan  | 1           | 1  | 2  | 2 Female | 1968 | 47     | 2    | 45-49      | 0.9            | 2  |
| 2704   | 380148139 | 2        | Taiwan  | 1           | 1  | 2  | 2 Female | 1975 | 40     | 1    | 40-44 year | 0.8            | 2  |
| 2706   | 280983677 | 1        | China   | 1           | 1  | 2  | 1 Male   | 1964 | 51     | 3    | 50-54      | 1.0            |    |
| 2707   | 380195737 | 2        | Taiwan  | 1           | 1  | 2  | 1 Male   | 1968 | 47     | 2    | 45-49      | 0.8            |    |
| 2710   | 380145806 | 2        | Taiwan  | 1           | 1  | 2  | 1 Male   | 1962 | 53     | 3    | 50-54      | 0.8            |    |
| 2711   | 380197086 | 2        | Taiwan  | 1           | 1  | 2  | 2 Female | 1969 | 46     | 2    | 45-49      | 0.9            | 2  |
| 2712   | 380012436 | 2        | Taiwan  | 1           | 1  | 2  | 1 Male   | 1974 | 41     | 1    | 40-44 year | 0.8            |    |
| 2713   | 280932153 | 1        | China   | 1           | 1  | 2  | 1 Male   | 1974 | 41     | 1    | 40-44 year | 1.0            |    |
| 2721   | 280334533 | 1        | China   | 1           | 1  | 2  | 1 Male   | 1970 | 45     | 2    | 45-49      | 1.0            |    |
| 2730   | 380099841 | 2        | Taiwan  | 1           | 1  | 2  | 2 Female | 1974 | 41     | 1    | 40-44 year | 0.8            | 2  |
| 2731   | 350334464 | 3        | Korea   | 1           | 1  | 2  | 1 Male   | 1965 | 50     | 3    | 50-54      | 0.9            |    |
| 2732   | 350258425 | 3        | Korea   | 1           | 1  | 2  | 2 Female | 1972 | 43     | 1    | 40-44 year | 0.9            | 2  |
| 2733   | 350250086 | 3        | Korea   | 1           | 1  | 2  | 1 Male   | 1964 | 51     | 3    | 50-54      | 0.9            |    |
| 2735   | 350322882 | 3        | Korea   | 1           | 1  | 2  | 2 Female | 1975 | 40     | 1    | 40-44 year | 0.9            | 2  |
| 2736   | 350304396 | 3        | Korea   | 1           | 1  | 2  | 2 Female | 1973 | 42     | 1    | 40-44 year | 0.9            | 2  |
| 2740   | 350033972 | 3        | Korea   | 1           | 1  | 2  | 1 Male   | 1962 | 53     | 3    | 50-54      | 0.9            |    |
| 2741   | 380118134 | 2        | Taiwan  | 1           | 1  | 2  | 1 Male   | 1972 | 43     | 1    | 40-44 year | 0.8            |    |
| 2742   | 380213151 | 2        | Taiwan  | 1           | 1  | 2  | 1 Male   | 1974 | 41     | 1    | 40-44 year | 0.8            |    |
| 2743   | 380020014 | 2        | Taiwan  | 1           | 1  | 2  | 1 Male   | 1975 | 40     | 1    | 40-44 year | 0.8            |    |

| respid | SubsID    | dCountry | Country | QDisclaimer | Q1 | Q2 | Gender   | Q3_1 | age Nr | dAge | age Group  | Weight in Ctry | Q4 |
|--------|-----------|----------|---------|-------------|----|----|----------|------|--------|------|------------|----------------|----|
| 2744   | 350291962 | 3        | Korea   | 1           | 1  | 2  | 1 Male   | 1970 | 45     | 2    | 45-49      | 0.8            |    |
| 2745   | 350140010 | 3        | Korea   | 1           | 1  | 2  | 2 Female | 1972 | 43     | 1    | 40-44 year | 0.9            | 2  |
| 2749   | 350346719 | 3        | Korea   | 1           | 1  | 1  | 2 Female | 1968 | 47     | 2    | 45-49      | 0.9            | 2  |
| 2751   | 350149528 | 3        | Korea   | 1           | 1  | 2  | 1 Male   | 1967 | 48     | 2    | 45-49      | 0.8            |    |
| 2754   | 350151782 | 3        | Korea   | 1           | 1  | 2  | 1 Male   | 1960 | 55     | 4    | 55-59      | 0.8            |    |
| 2755   | 350310227 | 3        | Korea   | 1           | 1  | 2  | 1 Male   | 1965 | 50     | 3    | 50-54      | 0.9            |    |
| 2757   | 350248134 | 3        | Korea   | 1           | 1  | 2  | 1 Male   | 1971 | 44     | 1    | 40-44 year | 0.9            |    |
| 2758   | 350344302 | 3        | Korea   | 1           | 1  | 2  | 1 Male   | 1963 | 52     | 3    | 50-54      | 0.9            |    |
| 2759   | 350303535 | 3        | Korea   | 1           | 1  | 2  | 1 Male   | 1971 | 44     | 1    | 40-44 year | 0.9            |    |
| 2761   | 350294755 | 3        | Korea   | 1           | 1  | 2  | 2 Female | 1970 | 45     | 2    | 45-49      | 0.9            | 2  |
| 2762   | 380214496 | 2        | Taiwan  | 1           | 1  | 2  | 1 Male   | 1968 | 47     | 2    | 45-49      | 0.8            |    |
| 2763   | 350347024 | 3        | Korea   | 1           | 1  | 2  | 2 Female | 1961 | 54     | 3    | 50-54      | 0.8            |    |
| 2764   | 350329726 | 3        | Korea   | 1           | 1  | 2  | 1 Male   | 1967 | 48     | 2    | 45-49      | 0.8            |    |
| 2765   | 350347600 | 3        | Korea   | 1           | 1  | 2  | 2 Female | 1971 | 44     | 1    | 40-44 year | 0.9            | 2  |
| 2766   | 350228665 | 3        | Korea   | 1           | 1  | 2  | 1 Male   | 1970 | 45     | 2    | 45-49      | 0.8            |    |
| 2767   | 350348118 | 3        | Korea   | 1           | 1  | 2  | 1 Male   | 1971 | 44     | 1    | 40-44 year | 0.9            |    |
| 2769   | 350084880 | 3        | Korea   | 1           | 1  | 2  | 2 Female | 1974 | 41     | 1    | 40-44 year | 0.9            | 2  |
| 2770   | 350271041 | 3        | Korea   | 1           | 1  | 2  | 1 Male   | 1961 | 54     | 3    | 50-54      | 0.9            |    |
| 2771   | 350214866 | 3        | Korea   | 1           | 1  | 2  | 2 Female | 1975 | 40     | 1    | 40-44 year | 0.9            | 2  |
| 2774   | 380010946 | 2        | Taiwan  | 1           | 1  | 2  | 1 Male   | 1972 | 43     | 1    | 40-44 year | 0.8            |    |
| 2777   | 350297980 | 3        | Korea   | 1           | 1  | 2  | 2 Female | 1973 | 42     | 1    | 40-44 year | 0.9            | 2  |
| 2778   | 350226930 | 3        | Korea   | 1           | 1  | 2  | 1 Male   | 1966 | 49     | 2    | 45-49      | 0.8            |    |
| 2781   | 380153001 | 2        | Taiwan  | 1           | 1  | 1  | 1 Male   | 1970 | 45     | 2    | 45-49      | 0.8            |    |
| 2782   | 350051114 | 3        | Korea   | 1           | 1  | 2  | 1 Male   | 1969 | 46     | 2    | 45-49      | 0.8            |    |
| 2784   | 350151498 | 3        | Korea   | 1           | 1  | 2  | 2 Female | 1965 | 50     | 3    | 50-54      | 0.8            |    |
| 2785   | 350350303 | 3        | Korea   | 1           | 1  | 2  | 2 Female | 1973 | 42     | 1    | 40-44 year | 0.9            | 2  |
| 2786   | 380215634 | 2        | Taiwan  | 1           | 1  | 2  | 2 Female | 1970 | 45     | 2    | 45-49      | 0.9            | 2  |
| 2787   | 350228095 | 3        | Korea   | 1           | 1  | 2  | 2 Female | 1969 | 46     | 2    | 45-49      | 0.9            | 2  |
| 2789   | 350247207 | 3        | Korea   | 1           | 1  | 2  | 2 Female | 1974 | 41     | 1    | 40-44 year | 0.9            | 2  |
| 2790   | 380153943 | 2        | Taiwan  | 1           | 1  | 2  | 2 Female | 1969 | 46     | 2    | 45-49      | 0.9            | 2  |
| 2791   | 350331736 | 3        | Korea   | 1           | 1  | 2  | 2 Female | 1971 | 44     | 1    | 40-44 year | 0.9            | 2  |
| 2793   | 350245869 | 3        | Korea   | 1           | 1  | 2  | 1 Male   | 1970 | 45     | 2    | 45-49      | 0.8            |    |

| respid | SubsID    | dCountry | Country | QDisclaimer | Q1 | Q2 | Gender   | Q3_1 | age Nr | dAge | age Group  | Weight in Ctry | Q4 |
|--------|-----------|----------|---------|-------------|----|----|----------|------|--------|------|------------|----------------|----|
| 2797   | 350242483 | 3        | Korea   | 1           | 1  | 2  | 2 Female | 1972 | 43     | 1    | 40-44 year | 0.9            | 2  |
| 2798   | 350225081 | 3        | Korea   | 1           | 1  | 2  | 1 Male   | 1974 | 41     | 1    | 40-44 year | 0.9            |    |
| 2799   | 350314231 | 3        | Korea   | 1           | 1  | 2  | 1 Male   | 1973 | 42     | 1    | 40-44 year | 0.9            |    |
| 2801   | 350304412 | 3        | Korea   | 1           | 1  | 2  | 1 Male   | 1969 | 46     | 2    | 45-49      | 0.8            |    |
| 2802   | 350297426 | 3        | Korea   | 1           | 1  | 2  | 2 Female | 1959 | 56     | 4    | 55-59      | 0.7            |    |
| 2803   | 350333698 | 3        | Korea   | 1           | 1  | 2  | 2 Female | 1969 | 46     | 2    | 45-49      | 0.9            | 2  |
| 2804   | 350259342 | 3        | Korea   | 1           | 1  | 2  | 2 Female | 1971 | 44     | 1    | 40-44 year | 0.9            | 2  |
| 2807   | 380200633 | 2        | Taiwan  | 1           | 1  | 2  | 1 Male   | 1972 | 43     | 1    | 40-44 year | 0.8            |    |
| 2809   | 350336336 | 3        | Korea   | 1           | 1  | 2  | 2 Female | 1970 | 45     | 2    | 45-49      | 0.9            | 2  |
| 2810   | 350350270 | 3        | Korea   | 1           | 1  | 2  | 2 Female | 1969 | 46     | 2    | 45-49      | 0.9            | 2  |
| 2812   | 350336339 | 3        | Korea   | 1           | 1  | 2  | 1 Male   | 1974 | 41     | 1    | 40-44 year | 0.9            |    |
| 2814   | 380044021 | 2        | Taiwan  | 1           | 1  | 2  | 1 Male   | 1973 | 42     | 1    | 40-44 year | 0.8            |    |
| 2815   | 350266913 | 3        | Korea   | 1           | 1  | 2  | 1 Male   | 1968 | 47     | 2    | 45-49      | 0.8            |    |
| 2816   | 350350325 | 3        | Korea   | 1           | 1  | 2  | 1 Male   | 1973 | 42     | 1    | 40-44 year | 0.9            |    |
| 2817   | 350295112 | 3        | Korea   | 1           | 1  | 2  | 1 Male   | 1968 | 47     | 2    | 45-49      | 0.8            |    |
| 2819   | 350309741 | 3        | Korea   | 1           | 1  | 2  | 1 Male   | 1974 | 41     | 1    | 40-44 year | 0.9            |    |
| 2820   | 350151532 | 3        | Korea   | 1           | 1  | 2  | 1 Male   | 1971 | 44     | 1    | 40-44 year | 0.9            |    |
| 2821   | 350313420 | 3        | Korea   | 1           | 1  | 2  | 2 Female | 1974 | 41     | 1    | 40-44 year | 0.9            | 2  |
| 2822   | 350069053 | 3        | Korea   | 1           | 1  | 2  | 2 Female | 1969 | 46     | 2    | 45-49      | 0.9            | 2  |
| 2823   | 350211900 | 3        | Korea   | 1           | 1  | 2  | 1 Male   | 1970 | 45     | 2    | 45-49      | 0.8            |    |
| 2824   | 350339127 | 3        | Korea   | 1           | 1  | 2  | 2 Female | 1969 | 46     | 2    | 45-49      | 0.9            | 2  |
| 2825   | 350147461 | 3        | Korea   | 1           | 1  | 2  | 1 Male   | 1970 | 45     | 2    | 45-49      | 0.8            |    |
| 2826   | 350239465 | 3        | Korea   | 1           | 1  | 2  | 2 Female | 1966 | 49     | 2    | 45-49      | 0.9            | 2  |
| 2827   | 380212010 | 2        | Taiwan  | 1           | 1  | 1  | 2 Female | 1970 | 45     | 2    | 45-49      | 0.9            | 2  |
| 2828   | 280248077 | 1        | China   | 1           | 1  | 2  | 1 Male   | 1970 | 45     | 2    | 45-49      | 1.0            |    |
| 2829   | 350004899 | 3        | Korea   | 1           | 1  | 2  | 1 Male   | 1969 | 46     | 2    | 45-49      | 0.8            |    |
| 2830   | 350183349 | 3        | Korea   | 1           | 1  | 2  | 1 Male   | 1974 | 41     | 1    | 40-44 year | 0.9            |    |
| 2831   | 350348190 | 3        | Korea   | 1           | 1  | 2  | 1 Male   | 1971 | 44     | 1    | 40-44 year | 0.9            |    |
| 2832   | 350282566 | 3        | Korea   | 1           | 1  | 2  | 2 Female | 1970 | 45     | 2    | 45-49      | 0.9            | 2  |
| 2833   | 350321636 | 3        | Korea   | 1           | 1  | 2  | 2 Female | 1966 | 49     | 2    | 45-49      | 0.9            | 2  |
| 2834   | 350265544 | 3        | Korea   | 1           | 1  | 2  | 1 Male   | 1974 | 41     | 1    | 40-44 year | 0.9            |    |
| 2835   | 350335761 | 3        | Korea   | 1           | 1  | 2  | 1 Male   | 1973 | 42     | 1    | 40-44 year | 0.9            |    |

| respid | SubsID    | dCountry | Country | QDisclaimer | Q1 | Q2 | Gender   | Q3_1 | age Nr | dAge | age Group  | Weight in Ctry | Q4 |
|--------|-----------|----------|---------|-------------|----|----|----------|------|--------|------|------------|----------------|----|
| 2836   | 350350196 | 3        | Korea   | 1           | 1  | 2  | 1 Male   | 1963 | 52     | 3    | 50-54      | 0.9            |    |
| 2837   | 380166513 | 2        | Taiwan  | 1           | 1  | 2  | 1 Male   | 1971 | 44     | 1    | 40-44 year | 0.8            |    |
| 2838   | 350350310 | 3        | Korea   | 1           | 1  | 2  | 2 Female | 1970 | 45     | 2    | 45-49      | 0.9            | 2  |
| 2844   | 350227643 | 3        | Korea   | 1           | 1  | 2  | 2 Female | 1966 | 49     | 2    | 45-49      | 0.9            | 2  |
| 2845   | 350180413 | 3        | Korea   | 1           | 1  | 2  | 1 Male   | 1975 | 40     | 1    | 40-44 year | 0.9            |    |
| 2847   | 350166465 | 3        | Korea   | 1           | 1  | 2  | 1 Male   | 1971 | 44     | 1    | 40-44 year | 0.9            |    |
| 2848   | 380167505 | 2        | Taiwan  | 1           | 1  | 2  | 1 Male   | 1961 | 54     | 3    | 50-54      | 0.8            |    |
| 2849   | 350221569 | 3        | Korea   | 1           | 1  | 2  | 1 Male   | 1969 | 46     | 2    | 45-49      | 0.8            |    |
| 2851   | 380212483 | 2        | Taiwan  | 1           | 1  | 2  | 2 Female | 1960 | 55     | 4    | 55-59      | 0.9            |    |
| 2852   | 350349897 | 3        | Korea   | 1           | 1  | 2  | 2 Female | 1975 | 40     | 1    | 40-44 year | 0.9            | 2  |
| 2853   | 380004720 | 2        | Taiwan  | 1           | 1  | 2  | 2 Female | 1975 | 40     | 1    | 40-44 year | 0.8            | 2  |
| 2854   | 350309947 | 3        | Korea   | 1           | 1  | 2  | 2 Female | 1973 | 42     | 1    | 40-44 year | 0.9            | 2  |
| 2856   | 350250515 | 3        | Korea   | 1           | 1  | 2  | 1 Male   | 1968 | 47     | 2    | 45-49      | 0.8            |    |
| 2857   | 350340755 | 3        | Korea   | 1           | 1  | 2  | 1 Male   | 1971 | 44     | 1    | 40-44 year | 0.9            |    |
| 2858   | 350225661 | 3        | Korea   | 1           | 1  | 2  | 1 Male   | 1973 | 42     | 1    | 40-44 year | 0.9            |    |
| 2859   | 350219099 | 3        | Korea   | 1           | 1  | 2  | 1 Male   | 1970 | 45     | 2    | 45-49      | 0.8            |    |
| 2860   | 350303338 | 3        | Korea   | 1           | 1  | 2  | 2 Female | 1968 | 47     | 2    | 45-49      | 0.9            | 2  |
| 2861   | 350250247 | 3        | Korea   | 1           | 1  | 2  | 1 Male   | 1968 | 47     | 2    | 45-49      | 0.8            |    |
| 2863   | 350148700 | 3        | Korea   | 1           | 1  | 2  | 1 Male   | 1972 | 43     | 1    | 40-44 year | 0.9            |    |
| 2864   | 350254047 | 3        | Korea   | 1           | 1  | 2  | 2 Female | 1971 | 44     | 1    | 40-44 year | 0.9            | 2  |
| 2866   | 380211833 | 2        | Taiwan  | 1           | 1  | 2  | 2 Female | 1975 | 40     | 1    | 40-44 year | 0.8            | 2  |
| 2872   | 350222773 | 3        | Korea   | 1           | 1  | 2  | 1 Male   | 1974 | 41     | 1    | 40-44 year | 0.9            |    |
| 2875   | 380049786 | 2        | Taiwan  | 1           | 1  | 2  | 2 Female | 1974 | 41     | 1    | 40-44 year | 0.8            | 2  |
| 2879   | 350273422 | 3        | Korea   | 1           | 1  | 2  | 1 Male   | 1968 | 47     | 2    | 45-49      | 0.8            |    |
| 2881   | 350349368 | 3        | Korea   | 1           | 1  | 2  | 2 Female | 1971 | 44     | 1    | 40-44 year | 0.9            | 2  |
| 2882   | 380099097 | 2        | Taiwan  | 1           | 1  | 2  | 1 Male   | 1971 | 44     | 1    | 40-44 year | 0.8            |    |
| 2883   | 350255315 | 3        | Korea   | 1           | 1  | 2  | 1 Male   | 1972 | 43     | 1    | 40-44 year | 0.9            |    |
| 2884   | 350271610 | 3        | Korea   | 1           | 1  | 2  | 1 Male   | 1971 | 44     | 1    | 40-44 year | 0.9            |    |
| 2885   | 350298679 | 3        | Korea   | 1           | 1  | 2  | 2 Female | 1968 | 47     | 2    | 45-49      | 0.9            | 2  |
| 2887   | 350218129 | 3        | Korea   | 1           | 1  | 2  | 1 Male   | 1971 | 44     | 1    | 40-44 year | 0.9            |    |
| 2888   | 380025085 | 2        | Taiwan  | 1           | 1  | 2  | 1 Male   | 1963 | 52     | 3    | 50-54      | 0.8            |    |
| 2890   | 350335396 | 3        | Korea   | 1           | 1  | 2  | 1 Male   | 1974 | 41     | 1    | 40-44 year | 0.9            |    |

| respid | SubsID    | dCountry | Country | QDisclaimer | Q1 | Q2 | Gender   | Q3_1 | age Nr | dAge | age Group  | Weight in Ctry | Q4 |
|--------|-----------|----------|---------|-------------|----|----|----------|------|--------|------|------------|----------------|----|
| 2891   | 350313200 | 3        | Korea   | 1           | 1  | 2  | 2 Female | 1969 | 46     | 2    | 45-49      | 0.9            | 2  |
| 2892   | 380048158 | 2        | Taiwan  | 1           | 1  | 2  | 2 Female | 1973 | 42     | 1    | 40-44 year | 0.8            | 2  |
| 2895   | 380120309 | 2        | Taiwan  | 1           | 1  | 2  | 1 Male   | 1969 | 46     | 2    | 45-49      | 0.8            |    |
| 2899   | 350309163 | 3        | Korea   | 1           | 1  | 2  | 1 Male   | 1970 | 45     | 2    | 45-49      | 0.8            |    |
| 2900   | 350350988 | 3        | Korea   | 1           | 1  | 2  | 1 Male   | 1972 | 43     | 1    | 40-44 year | 0.9            |    |
| 2902   | 350343559 | 3        | Korea   | 1           | 1  | 2  | 2 Female | 1971 | 44     | 1    | 40-44 year | 0.9            | 2  |
| 2903   | 350350187 | 3        | Korea   | 1           | 1  | 2  | 1 Male   | 1974 | 41     | 1    | 40-44 year | 0.9            |    |
| 2904   | 380133094 | 2        | Taiwan  | 1           | 1  | 2  | 1 Male   | 1971 | 44     | 1    | 40-44 year | 0.8            |    |
| 2906   | 350341208 | 3        | Korea   | 1           | 1  | 2  | 2 Female | 1973 | 42     | 1    | 40-44 year | 0.9            | 2  |
| 2908   | 350223092 | 3        | Korea   | 1           | 1  | 2  | 2 Female | 1972 | 43     | 1    | 40-44 year | 0.9            | 2  |
| 2910   | 300294    | 2        | Taiwan  | 1           | 1  | 2  | 2 Female | 1968 | 47     | 2    | 45-49      | 0.9            | 2  |
| 2917   | 350330851 | 3        | Korea   | 1           | 1  | 2  | 1 Male   | 1962 | 53     | 3    | 50-54      | 0.9            |    |
| 2918   | 300297    | 2        | Taiwan  | 1           | 1  | 2  | 1 Male   | 1971 | 44     | 1    | 40-44 year | 0.8            |    |
| 2919   | 100310    | 1        | China   | 1           | 1  | 2  | 1 Male   | 1956 | 59     | 4    | 55-59      | 0.9            |    |
| 2920   | 300298    | 2        | Taiwan  | 1           | 1  | 2  | 1 Male   | 1967 | 48     | 2    | 45-49      | 0.8            |    |
| 2921   | 350231062 | 3        | Korea   | 1           | 1  | 2  | 1 Male   | 1970 | 45     | 2    | 45-49      | 0.8            |    |
| 2922   | 350273300 | 3        | Korea   | 1           | 1  | 2  | 1 Male   | 1972 | 43     | 1    | 40-44 year | 0.9            |    |
| 2923   | 350348221 | 3        | Korea   | 1           | 1  | 2  | 1 Male   | 1972 | 43     | 1    | 40-44 year | 0.9            |    |
| 2924   | 350254754 | 3        | Korea   | 1           | 1  | 2  | 2 Female | 1974 | 41     | 1    | 40-44 year | 0.9            | 2  |
| 2926   | 380162968 | 2        | Taiwan  | 1           | 1  | 2  | 2 Female | 1969 | 46     | 2    | 45-49      | 0.9            | 2  |
| 2928   | 350260359 | 3        | Korea   | 1           | 1  | 2  | 1 Male   | 1975 | 40     | 1    | 40-44 year | 0.9            |    |
| 2930   | 300301    | 2        | Taiwan  | 1           | 1  | 2  | 2 Female | 1972 | 43     | 1    | 40-44 year | 0.8            | 2  |
| 2931   | 300302    | 2        | Taiwan  | 1           | 1  | 2  | 1 Male   | 1971 | 44     | 1    | 40-44 year | 0.8            |    |
| 2933   | 350304015 | 3        | Korea   | 1           | 1  | 2  | 1 Male   | 1960 | 55     | 4    | 55-59      | 0.8            |    |
| 2935   | 100311    | 1        | China   | 1           | 1  | 2  | 1 Male   | 1974 | 41     | 1    | 40-44 year | 1.0            |    |
| 2936   | 380200740 | 2        | Taiwan  | 1           | 1  | 2  | 1 Male   | 1970 | 45     | 2    | 45-49      | 0.8            |    |
| 2937   | 100312    | 1        | China   | 1           | 1  | 2  | 1 Male   | 1961 | 54     | 3    | 50-54      | 1.0            |    |
| 2938   | 380048464 | 2        | Taiwan  | 1           | 1  | 2  | 1 Male   | 1970 | 45     | 2    | 45-49      | 0.8            |    |
| 2944   | 300305    | 2        | Taiwan  | 1           | 1  | 2  | 1 Male   | 1965 | 50     | 3    | 50-54      | 0.8            |    |
| 2945   | 350152777 | 3        | Korea   | 1           | 1  | 2  | 2 Female | 1975 | 40     | 1    | 40-44 year | 0.9            | 2  |
| 2947   | 300306    | 2        | Taiwan  | 1           | 1  | 1  | 1 Male   | 1964 | 51     | 3    | 50-54      | 0.8            |    |
| 2949   | 100319    | 1        | China   | 1           | 1  | 2  | 2 Female | 1953 | 62     | 5    | >=60       | 1.1            |    |



| respid | SubsID    | dCountry | Country | QDisclaimer | Q1 | Q2 | Gender   | Q3_1 | age Nr | dAge | age Group  | Weight in Ctry | Q4 |
|--------|-----------|----------|---------|-------------|----|----|----------|------|--------|------|------------|----------------|----|
| 2951   | 350177000 | 3        | Korea   | 1           | 1  | 2  | 2 Female | 1972 | 43     | 1    | 40-44 year | 0.9            | 2  |
| 2952   | 350254775 | 3        | Korea   | 1           | 1  | 2  | 1 Male   | 1971 | 44     | 1    | 40-44 year | 0.9            |    |
| 2953   | 350240018 | 3        | Korea   | 1           | 1  | 2  | 2 Female | 1971 | 44     | 1    | 40-44 year | 0.9            | 2  |
| 2955   | 350080345 | 3        | Korea   | 1           | 1  | 2  | 1 Male   | 1966 | 49     | 2    | 45-49      | 0.8            |    |
| 2957   | 350283345 | 3        | Korea   | 1           | 1  | 2  | 1 Male   | 1965 | 50     | 3    | 50-54      | 0.9            |    |
| 2958   | 350307380 | 3        | Korea   | 1           | 1  | 2  | 2 Female | 1975 | 40     | 1    | 40-44 year | 0.9            | 2  |
| 2960   | 300307    | 2        | Taiwan  | 1           | 1  | 2  | 2 Female | 1967 | 48     | 2    | 45-49      | 0.9            | 2  |
| 2963   | 300308    | 2        | Taiwan  | 1           | 1  | 2  | 1 Male   | 1961 | 54     | 3    | 50-54      | 0.8            |    |
| 2964   | 350217705 | 3        | Korea   | 1           | 1  | 2  | 2 Female | 1967 | 48     | 2    | 45-49      | 0.9            | 2  |
| 2967   | 350223012 | 3        | Korea   | 1           | 1  | 2  | 2 Female | 1974 | 41     | 1    | 40-44 year | 0.9            | 2  |
| 2968   | 100326    | 1        | China   | 1           | 1  | 2  | 2 Female | 1975 | 40     | 1    | 40-44 year | 1.0            | 2  |
| 2971   | 300309    | 2        | Taiwan  | 1           | 1  | 2  | 2 Female | 1971 | 44     | 1    | 40-44 year | 0.8            | 2  |
| 2974   | 100329    | 1        | China   | 1           | 1  | 2  | 2 Female | 1966 | 49     | 2    | 45-49      | 1.0            | 2  |
| 2975   | 300310    | 2        | Taiwan  | 1           | 1  | 2  | 2 Female | 1972 | 43     | 1    | 40-44 year | 0.8            | 2  |
| 2982   | 200389    | 3        | Korea   | 1           | 1  | 2  | 2 Female | 1974 | 41     | 1    | 40-44 year | 0.9            | 2  |
| 2983   | 300312    | 2        | Taiwan  | 1           | 1  | 2  | 1 Male   | 1973 | 42     | 1    | 40-44 year | 0.8            |    |
| 2985   | 350244974 | 3        | Korea   | 1           | 1  | 2  | 2 Female | 1971 | 44     | 1    | 40-44 year | 0.9            | 2  |
| 2986   | 350069302 | 3        | Korea   | 1           | 1  | 2  | 1 Male   | 1974 | 41     | 1    | 40-44 year | 0.9            |    |
| 2987   | 300313    | 2        | Taiwan  | 1           | 1  | 2  | 2 Female | 1968 | 47     | 2    | 45-49      | 0.9            | 2  |
| 2988   | 100330    | 1        | China   | 1           | 1  | 2  | 2 Female | 1965 | 50     | 3    | 50-54      | 1.2            |    |
| 2993   | 350151838 | 3        | Korea   | 1           | 1  | 2  | 1 Male   | 1972 | 43     | 1    | 40-44 year | 0.9            |    |
| 2996   | 300314    | 2        | Taiwan  | 1           | 1  | 2  | 1 Male   | 1973 | 42     | 1    | 40-44 year | 0.8            |    |
| 2997   | 300315    | 2        | Taiwan  | 1           | 1  | 2  | 1 Male   | 1960 | 55     | 4    | 55-59      | 0.7            |    |
| 2998   | 300316    | 2        | Taiwan  | 1           | 1  | 2  | 2 Female | 1972 | 43     | 1    | 40-44 year | 0.8            | 2  |
| 3004   | 100337    | 1        | China   | 1           | 1  | 2  | 1 Male   | 1962 | 53     | 3    | 50-54      | 1.0            |    |
| 3007   | 200390    | 3        | Korea   | 1           | 1  | 1  | 2 Female | 1958 | 57     | 4    | 55-59      | 0.7            |    |
| 3011   | 100340    | 1        | China   | 1           | 1  | 2  | 1 Male   | 1965 | 50     | 3    | 50-54      | 1.0            |    |
| 3012   | 300317    | 2        | Taiwan  | 1           | 1  | 2  | 1 Male   | 1960 | 55     | 4    | 55-59      | 0.7            |    |
| 3013   | 300318    | 2        | Taiwan  | 1           | 1  | 2  | 1 Male   | 1969 | 46     | 2    | 45-49      | 0.8            |    |
| 3014   | 100341    | 1        | China   | 1           | 1  | 1  | 2 Female | 1966 | 49     | 2    | 45-49      | 1.0            | 2  |
| 3015   | 300319    | 2        | Taiwan  | 1           | 1  | 2  | 1 Male   | 1969 | 46     | 2    | 45-49      | 0.8            |    |
| 3016   | 100342    | 1        | China   | 1           | 1  | 2  | 2 Female | 1969 | 46     | 2    | 45-49      | 1.0            | 2  |

| respid | SubsID    | dCountry | Country  | QDisclaimer | Q1 | Q2 | Gender   | Q3_1 | age Nr | dAge | age Group    | Weight in Ctry | Q4 |
|--------|-----------|----------|----------|-------------|----|----|----------|------|--------|------|--------------|----------------|----|
| 3017   | 350350664 |          | 3 Korea  |             | 1  | 2  | 1 Male   | 1974 | 41     |      | 1 40-44 year | 0.9            |    |
| 3020   | 100344    |          | 1 China  |             | 1  | 2  | 1 Male   | 1975 | 40     |      | 1 40-44 year | 1.0            |    |
| 3022   | 300320    |          | 2 Taiwan |             | 1  | 2  | 1 Male   | 1972 | 43     |      | 1 40-44 year | 0.8            |    |
| 3023   | 280301728 |          | 1 China  |             | 1  | 2  | 1 Male   | 1963 | 52     |      | 3 50-54      | 1.0            |    |
| 3026   | 300321    |          | 2 Taiwan |             | 1  | 2  | 2 Female | 1973 | 42     |      | 1 40-44 year | 0.8            | 2  |
| 3038   | 100351    |          | 1 China  |             | 1  | 2  | 1 Male   | 1954 | 61     |      | 5 >=60       | 1.0            |    |
| 3039   | 100352    |          | 1 China  |             | 1  | 1  | 2 Female | 1955 | 60     |      | 5 >=60       | 1.1            |    |
| 3040   | 100353    |          | 1 China  |             | 1  | 2  | 1 Male   | 1964 | 51     |      | 3 50-54      | 1.0            |    |
| 3041   | 100354    |          | 1 China  |             | 1  | 2  | 2 Female | 1969 | 46     |      | 2 45-49      | 1.0            | 2  |
| 3042   | 300324    |          | 2 Taiwan |             | 1  | 2  | 2 Female | 1975 | 40     |      | 1 40-44 year | 0.8            | 2  |
| 3044   | 100355    |          | 1 China  |             | 1  | 1  | 1 Male   | 1975 | 40     |      | 1 40-44 year | 1.0            |    |
| 3050   | 100357    |          | 1 China  |             | 1  | 1  | 1 Male   | 1970 | 45     |      | 2 45-49      | 1.0            |    |
| 3052   | 300325    |          | 2 Taiwan |             | 1  | 2  | 1 Male   | 1960 | 55     |      | 4 55-59      | 0.7            |    |
| 3056   | 100360    |          | 1 China  |             | 1  | 2  | 2 Female | 1973 | 42     |      | 1 40-44 year | 1.0            | 2  |
| 3059   | 100363    |          | 1 China  |             | 1  | 2  | 2 Female | 1974 | 41     |      | 1 40-44 year | 1.0            | 2  |
| 3060   | 300326    |          | 2 Taiwan |             | 1  | 2  | 1 Male   | 1974 | 41     |      | 1 40-44 year | 0.8            |    |
| 3063   | 350243434 |          | 3 Korea  |             | 1  | 1  | 2 Female | 1970 | 45     |      | 2 45-49      | 0.9            | 2  |
| 3065   | 300327    |          | 2 Taiwan |             | 1  | 2  | 1 Male   | 1971 | 44     |      | 1 40-44 year | 0.8            |    |
| 3067   | 350210938 |          | 3 Korea  |             | 1  | 2  | 1 Male   | 1971 | 44     |      | 1 40-44 year | 0.9            |    |
| 3068   | 350268928 |          | 3 Korea  |             | 1  | 1  | 1 Male   | 1974 | 41     |      | 1 40-44 year | 0.9            |    |
| 3072   | 100368    |          | 1 China  |             | 1  | 2  | 1 Male   | 1971 | 44     |      | 1 40-44 year | 1.0            |    |
| 3074   | 300328    |          | 2 Taiwan |             | 1  | 2  | 1 Male   | 1974 | 41     |      | 1 40-44 year | 0.8            |    |
| 3075   | 350242655 |          | 3 Korea  |             | 1  | 2  | 1 Male   | 1965 | 50     |      | 3 50-54      | 0.9            |    |
| 3076   | 350212543 |          | 3 Korea  |             | 1  | 2  | 2 Female | 1972 | 43     |      | 1 40-44 year | 0.9            | 2  |
| 3079   | 300329    |          | 2 Taiwan |             | 1  | 2  | 1 Male   | 1973 | 42     |      | 1 40-44 year | 0.8            |    |
| 3082   | 100372    |          | 1 China  |             | 1  | 1  | 1 Male   | 1959 | 56     |      | 4 55-59      | 0.9            |    |
| 3083   | 200391    |          | 3 Korea  |             | 1  | 2  | 1 Male   | 1959 | 56     |      | 4 55-59      | 0.8            |    |
| 3084   | 350253583 |          | 3 Korea  |             | 1  | 2  | 1 Male   | 1968 | 47     |      | 2 45-49      | 0.8            |    |
| 3085   | 300330    |          | 2 Taiwan |             | 1  | 2  | 2 Female | 1971 | 44     |      | 1 40-44 year | 0.8            | 2  |
| 3090   | 300331    |          | 2 Taiwan |             | 1  | 2  | 2 Female | 1972 | 43     |      | 1 40-44 year | 0.8            | 2  |
| 3091   | 300332    |          | 2 Taiwan |             | 1  | 2  | 2 Female | 1972 | 43     |      | 1 40-44 year | 0.8            | 2  |
| 3092   | 100375    |          | 1 China  |             | 1  | 2  | 1 Male   | 1955 | 60     |      | 5 >=60       | 1.0            |    |

| respid | SubsID    | dCountry | Country | QDisclaim<br>er | Q1 | Q2 | Gender | Q3_1 | age Nr | dAge | age Group  | Weight in<br>Ctry | Q4 |
|--------|-----------|----------|---------|-----------------|----|----|--------|------|--------|------|------------|-------------------|----|
| 3095   | 350150259 | 3        | Korea   | 1               | 2  | 1  | Male   | 1974 | 41     | 1    | 40-44 year | 0.9               |    |
| 3096   | 350234413 | 3        | Korea   | 1               | 2  | 1  | Male   | 1967 | 48     | 2    | 45-49      | 0.8               |    |
| 3097   | 350187060 | 3        | Korea   | 1               | 2  | 2  | Female | 1973 | 42     | 1    | 40-44 year | 0.9               | 2  |
| 3099   | 100378    | 1        | China   | 1               | 2  | 1  | Male   | 1972 | 43     | 1    | 40-44 year | 1.0               |    |
| 3101   | 350332088 | 3        | Korea   | 1               | 2  | 2  | Female | 1967 | 48     | 2    | 45-49      | 0.9               | 2  |
| 3103   | 100381    | 1        | China   | 1               | 2  | 1  | Male   | 1966 | 49     | 2    | 45-49      | 1.0               |    |
| 3104   | 200392    | 3        | Korea   | 1               | 2  | 1  | Male   | 1968 | 47     | 2    | 45-49      | 0.8               |    |
| 3105   | 100382    | 1        | China   | 1               | 2  | 1  | Male   | 1955 | 60     | 5    | >=60       | 1.0               |    |
| 3107   | 350326909 | 3        | Korea   | 1               | 2  | 1  | Male   | 1970 | 45     | 2    | 45-49      | 0.8               |    |
| 3108   | 300333    | 2        | Taiwan  | 1               | 2  | 1  | Male   | 1969 | 46     | 2    | 45-49      | 0.8               |    |
| 3109   | 380182953 | 2        | Taiwan  | 1               | 2  | 2  | Female | 1974 | 41     | 1    | 40-44 year | 0.8               | 2  |
| 3116   | 100388    | 1        | China   | 1               | 2  | 2  | Female | 1962 | 53     | 3    | 50-54      | 1.2               |    |
| 3117   | 350230218 | 3        | Korea   | 1               | 2  | 2  | Female | 1975 | 40     | 1    | 40-44 year | 0.9               | 2  |
| 3119   | 100390    | 1        | China   | 1               | 1  | 1  | Male   | 1974 | 41     | 1    | 40-44 year | 1.0               |    |
| 3120   | 350347324 | 3        | Korea   | 1               | 2  | 1  | Male   | 1949 | 66     | 5    | >=60       | 1.6               |    |
| 3130   | 300335    | 2        | Taiwan  | 1               | 2  | 2  | Female | 1968 | 47     | 2    | 45-49      | 0.9               | 2  |
| 3131   | 350310041 | 3        | Korea   | 1               | 2  | 2  | Female | 1967 | 48     | 2    | 45-49      | 0.9               | 2  |
| 3133   | 350127826 | 3        | Korea   | 1               | 2  | 1  | Male   | 1967 | 48     | 2    | 45-49      | 0.8               |    |
| 3134   | 380215462 | 2        | Taiwan  | 1               | 2  | 1  | Male   | 1972 | 43     | 1    | 40-44 year | 0.8               |    |
| 3135   | 300336    | 2        | Taiwan  | 1               | 2  | 1  | Male   | 1967 | 48     | 2    | 45-49      | 0.8               |    |
| 3145   | 350241212 | 3        | Korea   | 1               | 2  | 1  | Male   | 1968 | 47     | 2    | 45-49      | 0.8               |    |
| 3147   | 350328653 | 3        | Korea   | 1               | 2  | 2  | Female | 1970 | 45     | 2    | 45-49      | 0.9               | 2  |
| 3152   | 350313301 | 3        | Korea   | 1               | 2  | 1  | Male   | 1969 | 46     | 2    | 45-49      | 0.8               |    |
| 3155   | 350262134 | 3        | Korea   | 1               | 2  | 2  | Female | 1966 | 49     | 2    | 45-49      | 0.9               | 2  |
| 3156   | 300337    | 2        | Taiwan  | 1               | 2  | 2  | Female | 1975 | 40     | 1    | 40-44 year | 0.8               | 2  |
| 3157   | 350350503 | 3        | Korea   | 1               | 2  | 1  | Male   | 1974 | 41     | 1    | 40-44 year | 0.9               |    |
| 3166   | 380049225 | 2        | Taiwan  | 1               | 2  | 1  | Male   | 1967 | 48     | 2    | 45-49      | 0.8               |    |
| 3169   | 350259740 | 3        | Korea   | 1               | 1  | 2  | Female | 1974 | 41     | 1    | 40-44 year | 0.9               | 2  |
| 3179   | 100408    | 1        | China   | 1               | 2  | 2  | Female | 1974 | 41     | 1    | 40-44 year | 1.0               | 2  |
| 3181   | 300340    | 2        | Taiwan  | 1               | 2  | 2  | Female | 1965 | 50     | 3    | 50-54      | 0.9               |    |
| 3185   | 100411    | 1        | China   | 1               | 1  | 2  | Female | 1970 | 45     | 2    | 45-49      | 1.0               | 2  |
| 3190   | 350018267 | 3        | Korea   | 1               | 2  | 1  | Male   | 1969 | 46     | 2    | 45-49      | 0.8               |    |

| respid | SubsID    | dCountry | Country | QDisclaim<br>er | Q1 | Q2 | Gender | Q3_1 | age Nr | dAge | age Group  | Weight in<br>Ctry | Q4 |
|--------|-----------|----------|---------|-----------------|----|----|--------|------|--------|------|------------|-------------------|----|
| 3191   | 300341    | 2        | Taiwan  | 1               | 2  | 1  | Male   | 1973 | 42     | 1    | 40-44 year | 0.8               |    |
| 3192   | 300342    | 2        | Taiwan  | 1               | 2  | 1  | Male   | 1964 | 51     | 3    | 50-54      | 0.8               |    |
| 3193   | 300343    | 2        | Taiwan  | 1               | 2  | 2  | Female | 1972 | 43     | 1    | 40-44 year | 0.8               | 2  |
| 3195   | 350148678 | 3        | Korea   | 1               | 2  | 1  | Male   | 1972 | 43     | 1    | 40-44 year | 0.9               |    |
| 3202   | 300345    | 2        | Taiwan  | 1               | 2  | 1  | Male   | 1967 | 48     | 2    | 45-49      | 0.8               |    |
| 3204   | 100418    | 1        | China   | 1               | 2  | 1  | Male   | 1970 | 45     | 2    | 45-49      | 1.0               |    |
| 3208   | 100420    | 1        | China   | 1               | 2  | 1  | Male   | 1960 | 55     | 4    | 55-59      | 0.9               |    |
| 3212   | 300346    | 2        | Taiwan  | 1               | 2  | 1  | Male   | 1964 | 51     | 3    | 50-54      | 0.8               |    |
| 3218   | 300347    | 2        | Taiwan  | 1               | 2  | 1  | Male   | 1974 | 41     | 1    | 40-44 year | 0.8               |    |
| 3219   | 300348    | 2        | Taiwan  | 1               | 2  | 2  | Female | 1967 | 48     | 2    | 45-49      | 0.9               | 2  |
| 3220   | 350328390 | 3        | Korea   | 1               | 1  | 2  | Female | 1966 | 49     | 2    | 45-49      | 0.9               | 2  |
| 3221   | 350176457 | 3        | Korea   | 1               | 2  | 1  | Male   | 1974 | 41     | 1    | 40-44 year | 0.9               |    |
| 3223   | 350233776 | 3        | Korea   | 1               | 2  | 2  | Female | 1959 | 56     | 4    | 55-59      | 0.7               |    |
| 3231   | 350241170 | 3        | Korea   | 1               | 2  | 2  | Female | 1970 | 45     | 2    | 45-49      | 0.9               | 2  |
| 3232   | 350257913 | 3        | Korea   | 1               | 2  | 2  | Female | 1972 | 43     | 1    | 40-44 year | 0.9               | 2  |
| 3234   | 100430    | 1        | China   | 1               | 2  | 1  | Male   | 1974 | 41     | 1    | 40-44 year | 1.0               |    |
| 3235   | 350257729 | 3        | Korea   | 1               | 2  | 1  | Male   | 1971 | 44     | 1    | 40-44 year | 0.9               |    |
| 3237   | 350001443 | 3        | Korea   | 1               | 2  | 2  | Female | 1970 | 45     | 2    | 45-49      | 0.9               | 2  |
| 3238   | 300349    | 2        | Taiwan  | 1               | 2  | 1  | Male   | 1972 | 43     | 1    | 40-44 year | 0.8               |    |
| 3240   | 300351    | 2        | Taiwan  | 1               | 2  | 1  | Male   | 1966 | 49     | 2    | 45-49      | 0.8               |    |
| 3241   | 300352    | 2        | Taiwan  | 1               | 2  | 2  | Female | 1970 | 45     | 2    | 45-49      | 0.9               | 2  |
| 3243   | 350313939 | 3        | Korea   | 1               | 2  | 2  | Female | 1969 | 46     | 2    | 45-49      | 0.9               | 2  |
| 3244   | 350178685 | 3        | Korea   | 1               | 2  | 2  | Female | 1970 | 45     | 2    | 45-49      | 0.9               | 2  |
| 3247   | 350228377 | 3        | Korea   | 1               | 2  | 1  | Male   | 1963 | 52     | 3    | 50-54      | 0.9               |    |
| 3250   | 350350927 | 3        | Korea   | 1               | 2  | 1  | Male   | 1968 | 47     | 2    | 45-49      | 0.8               |    |
| 3251   | 350219827 | 3        | Korea   | 1               | 2  | 2  | Female | 1972 | 43     | 1    | 40-44 year | 0.9               | 2  |
| 3255   | 100427    | 1        | China   | 1               | 2  | 2  | Female | 1970 | 45     | 2    | 45-49      | 1.0               | 2  |
| 3256   | 350310664 | 3        | Korea   | 1               | 2  | 1  | Male   | 1971 | 44     | 1    | 40-44 year | 0.9               |    |
| 3257   | 100433    | 1        | China   | 1               | 2  | 2  | Female | 1970 | 45     | 2    | 45-49      | 1.0               | 2  |
| 3258   | 200393    | 3        | Korea   | 1               | 2  | 2  | Female | 1971 | 44     | 1    | 40-44 year | 0.9               | 2  |
| 3259   | 350292308 | 3        | Korea   | 1               | 2  | 2  | Female | 1970 | 45     | 2    | 45-49      | 0.9               | 2  |
| 3260   | 300355    | 2        | Taiwan  | 1               | 2  | 1  | Male   | 1967 | 48     | 2    | 45-49      | 0.8               |    |

| respid | SubsID    | dCountry | Country | QDisclaimer | Q1 | Q2 | Gender   | Q3_1 | age Nr | dAge | age Group  | Weight in Ctry | Q4 |
|--------|-----------|----------|---------|-------------|----|----|----------|------|--------|------|------------|----------------|----|
| 3261   | 350342122 | 3        | Korea   | 1           | 1  | 2  | 1 Male   | 1970 | 45     | 2    | 45-49      | 0.8            |    |
| 3262   | 380025143 | 2        | Taiwan  | 1           | 1  | 2  | 1 Male   | 1967 | 48     | 2    | 45-49      | 0.8            |    |
| 3264   | 300356    | 2        | Taiwan  | 1           | 1  | 2  | 2 Female | 1962 | 53     | 3    | 50-54      | 0.9            |    |
| 3265   | 100434    | 1        | China   | 1           | 1  | 1  | 1 Male   | 1975 | 40     | 1    | 40-44 year | 1.0            |    |
| 3267   | 350297620 | 3        | Korea   | 1           | 1  | 2  | 1 Male   | 1972 | 43     | 1    | 40-44 year | 0.9            |    |
| 3268   | 350298590 | 3        | Korea   | 1           | 1  | 2  | 2 Female | 1969 | 46     | 2    | 45-49      | 0.9            | 2  |
| 3270   | 350243014 | 3        | Korea   | 1           | 1  | 2  | 1 Male   | 1962 | 53     | 3    | 50-54      | 0.9            |    |
| 3271   | 200394    | 3        | Korea   | 1           | 1  | 2  | 1 Male   | 1972 | 43     | 1    | 40-44 year | 0.9            |    |
| 3274   | 100436    | 1        | China   | 1           | 1  | 2  | 2 Female | 1968 | 47     | 2    | 45-49      | 1.0            | 2  |
| 3276   | 100438    | 1        | China   | 1           | 1  | 2  | 2 Female | 1974 | 41     | 1    | 40-44 year | 1.0            | 2  |
| 3277   | 380212009 | 2        | Taiwan  | 1           | 1  | 2  | 2 Female | 1972 | 43     | 1    | 40-44 year | 0.8            | 2  |
| 3279   | 300358    | 2        | Taiwan  | 1           | 1  | 2  | 1 Male   | 1967 | 48     | 2    | 45-49      | 0.8            |    |
| 3281   | 350064978 | 3        | Korea   | 1           | 1  | 2  | 1 Male   | 1972 | 43     | 1    | 40-44 year | 0.9            |    |
| 3283   | 100442    | 1        | China   | 1           | 1  | 2  | 1 Male   | 1968 | 47     | 2    | 45-49      | 1.0            |    |
| 3285   | 280669521 | 1        | China   | 1           | 1  | 2  | 1 Male   | 1974 | 41     | 1    | 40-44 year | 1.0            |    |
| 3286   | 100443    | 1        | China   | 1           | 1  | 2  | 1 Male   | 1964 | 51     | 3    | 50-54      | 1.0            |    |
| 3287   | 350341433 | 3        | Korea   | 1           | 1  | 2  | 1 Male   | 1967 | 48     | 2    | 45-49      | 0.8            |    |
| 3289   | 300359    | 2        | Taiwan  | 1           | 1  | 2  | 1 Male   | 1970 | 45     | 2    | 45-49      | 0.8            |    |
| 3290   | 100444    | 1        | China   | 1           | 1  | 1  | 1 Male   | 1973 | 42     | 1    | 40-44 year | 1.0            |    |
| 3291   | 350225637 | 3        | Korea   | 1           | 1  | 2  | 1 Male   | 1962 | 53     | 3    | 50-54      | 0.9            |    |
| 3292   | 100445    | 1        | China   | 1           | 1  | 2  | 2 Female | 1973 | 42     | 1    | 40-44 year | 1.0            | 2  |
| 3293   | 350234590 | 3        | Korea   | 1           | 1  | 2  | 1 Male   | 1969 | 46     | 2    | 45-49      | 0.8            |    |
| 3294   | 380157088 | 2        | Taiwan  | 1           | 1  | 2  | 1 Male   | 1969 | 46     | 2    | 45-49      | 0.8            |    |
| 3296   | 350335921 | 3        | Korea   | 1           | 1  | 2  | 2 Female | 1974 | 41     | 1    | 40-44 year | 0.9            | 2  |
| 3306   | 300360    | 2        | Taiwan  | 1           | 1  | 2  | 2 Female | 1970 | 45     | 2    | 45-49      | 0.9            | 2  |
| 3307   | 100449    | 1        | China   | 1           | 1  | 2  | 2 Female | 1973 | 42     | 1    | 40-44 year | 1.0            | 2  |
| 3308   | 300361    | 2        | Taiwan  | 1           | 1  | 2  | 2 Female | 1960 | 55     | 4    | 55-59      | 0.9            |    |
| 3312   | 100451    | 1        | China   | 1           | 1  | 2  | 1 Male   | 1968 | 47     | 2    | 45-49      | 1.0            |    |
| 3313   | 100452    | 1        | China   | 1           | 1  | 1  | 1 Male   | 1975 | 40     | 1    | 40-44 year | 1.0            |    |
| 3316   | 280865138 | 1        | China   | 1           | 1  | 2  | 1 Male   | 1975 | 40     | 1    | 40-44 year | 1.0            |    |
| 3317   | 350307113 | 3        | Korea   | 1           | 1  | 2  | 1 Male   | 1959 | 56     | 4    | 55-59      | 0.8            |    |
| 3320   | 380118137 | 2        | Taiwan  | 1           | 1  | 2  | 1 Male   | 1972 | 43     | 1    | 40-44 year | 0.8            |    |

| respid | SubsID    | dCountry | Country | QDisclaimer | Q1 | Q2 | Gender | Q3_1 | age Nr | dAge | age Group  | Weight in Ctry | Q4 |
|--------|-----------|----------|---------|-------------|----|----|--------|------|--------|------|------------|----------------|----|
| 3321   | 350307307 | 3        | Korea   | 1           | 2  | 1  | Male   | 1967 | 48     | 2    | 45-49      | 0.8            |    |
| 3322   | 350322987 | 3        | Korea   | 1           | 2  | 1  | Male   | 1959 | 56     | 4    | 55-59      | 0.8            |    |
| 3323   | 380000262 | 2        | Taiwan  | 1           | 2  | 2  | Female | 1969 | 46     | 2    | 45-49      | 0.9            | 2  |
| 3325   | 100456    | 1        | China   | 1           | 2  | 2  | Female | 1974 | 41     | 1    | 40-44 year | 1.0            | 2  |
| 3332   | 300363    | 2        | Taiwan  | 1           | 2  | 1  | Male   | 1969 | 46     | 2    | 45-49      | 0.8            |    |
| 3334   | 300364    | 2        | Taiwan  | 1           | 2  | 1  | Male   | 1969 | 46     | 2    | 45-49      | 0.8            |    |
| 3335   | 100461    | 1        | China   | 1           | 2  | 1  | Male   | 1955 | 60     | 5    | >=60       | 1.0            |    |
| 3341   | 281335942 | 1        | China   | 1           | 2  | 2  | Female | 1970 | 45     | 2    | 45-49      | 1.0            | 2  |
| 3345   | 100464    | 1        | China   | 1           | 2  | 1  | Male   | 1970 | 45     | 2    | 45-49      | 1.0            |    |
| 3346   | 300365    | 2        | Taiwan  | 1           | 2  | 1  | Male   | 1972 | 43     | 1    | 40-44 year | 0.8            |    |
| 3349   | 350341540 | 3        | Korea   | 1           | 2  | 1  | Male   | 1973 | 42     | 1    | 40-44 year | 0.9            |    |
| 3351   | 350233260 | 3        | Korea   | 1           | 2  | 2  | Female | 1967 | 48     | 2    | 45-49      | 0.9            | 2  |
| 3353   | 300366    | 2        | Taiwan  | 1           | 2  | 1  | Male   | 1965 | 50     | 3    | 50-54      | 0.8            |    |
| 3354   | 350275778 | 3        | Korea   | 1           | 2  | 2  | Female | 1974 | 41     | 1    | 40-44 year | 0.9            | 2  |
| 3356   | 200395    | 3        | Korea   | 1           | 2  | 2  | Female | 1960 | 55     | 4    | 55-59      | 0.7            |    |
| 3357   | 300367    | 2        | Taiwan  | 1           | 2  | 2  | Female | 1967 | 48     | 2    | 45-49      | 0.9            | 2  |
| 3360   | 300368    | 2        | Taiwan  | 1           | 2  | 2  | Female | 1968 | 47     | 2    | 45-49      | 0.9            | 2  |
| 3361   | 300369    | 2        | Taiwan  | 1           | 2  | 1  | Male   | 1972 | 43     | 1    | 40-44 year | 0.8            |    |
| 3362   | 350332631 | 3        | Korea   | 1           | 2  | 1  | Male   | 1961 | 54     | 3    | 50-54      | 0.9            |    |
| 3363   | 300370    | 2        | Taiwan  | 1           | 2  | 2  | Female | 1970 | 45     | 2    | 45-49      | 0.9            | 2  |
| 3364   | 100347    | 1        | China   | 1           | 2  | 1  | Male   | 1969 | 46     | 2    | 45-49      | 1.0            |    |
| 3368   | 380119321 | 2        | Taiwan  | 1           | 2  | 1  | Male   | 1967 | 48     | 2    | 45-49      | 0.8            |    |
| 3370   | 100467    | 1        | China   | 1           | 1  | 2  | Female | 1967 | 48     | 2    | 45-49      | 1.0            | 2  |
| 3371   | 300371    | 2        | Taiwan  | 1           | 2  | 1  | Male   | 1970 | 45     | 2    | 45-49      | 0.8            |    |
| 3379   | 380021052 | 2        | Taiwan  | 1           | 2  | 2  | Female | 1968 | 47     | 2    | 45-49      | 0.9            | 2  |
| 3380   | 100472    | 1        | China   | 1           | 2  | 1  | Male   | 1974 | 41     | 1    | 40-44 year | 1.0            |    |
| 3382   | 100474    | 1        | China   | 1           | 1  | 1  | Male   | 1966 | 49     | 2    | 45-49      | 1.0            |    |
| 3384   | 100475    | 1        | China   | 1           | 2  | 1  | Male   | 1971 | 44     | 1    | 40-44 year | 1.0            |    |
| 3385   | 300374    | 2        | Taiwan  | 1           | 2  | 2  | Female | 1969 | 46     | 2    | 45-49      | 0.9            | 2  |
| 3388   | 380213248 | 2        | Taiwan  | 1           | 2  | 1  | Male   | 1973 | 42     | 1    | 40-44 year | 0.8            |    |
| 3392   | 350254124 | 3        | Korea   | 1           | 2  | 2  | Female | 1972 | 43     | 1    | 40-44 year | 0.9            | 2  |
| 3393   | 300376    | 2        | Taiwan  | 1           | 2  | 2  | Female | 1971 | 44     | 1    | 40-44 year | 0.8            | 2  |

| respid | SubsID    | dCountry | Country | QDisclaimer | Q1 | Q2 | Gender | Q3_1 | age Nr | dAge | age Group  | Weight in Ctry | Q4 |
|--------|-----------|----------|---------|-------------|----|----|--------|------|--------|------|------------|----------------|----|
| 3394   | 300377    | 2        | Taiwan  | 1           | 2  | 1  | Male   | 1965 | 50     | 3    | 50-54      | 0.8            |    |
| 3395   | 350296735 | 3        | Korea   | 1           | 2  | 1  | Male   | 1974 | 41     | 1    | 40-44 year | 0.9            |    |
| 3396   | 100478    | 1        | China   | 1           | 2  | 1  | Male   | 1974 | 41     | 1    | 40-44 year | 1.0            |    |
| 3397   | 300378    | 2        | Taiwan  | 1           | 2  | 1  | Male   | 1962 | 53     | 3    | 50-54      | 0.8            |    |
| 3398   | 100480    | 1        | China   | 1           | 1  | 2  | Female | 1963 | 52     | 3    | 50-54      | 1.2            |    |
| 3399   | 300048    | 2        | Taiwan  | 1           | 2  | 1  | Male   | 1961 | 54     | 3    | 50-54      | 0.8            |    |
| 3400   | 380211165 | 2        | Taiwan  | 1           | 2  | 1  | Male   | 1966 | 49     | 2    | 45-49      | 0.8            |    |
| 3401   | 100479    | 1        | China   | 1           | 2  | 1  | Male   | 1969 | 46     | 2    | 45-49      | 1.0            |    |
| 3402   | 100481    | 1        | China   | 1           | 2  | 1  | Male   | 1969 | 46     | 2    | 45-49      | 1.0            |    |
| 3403   | 300379    | 2        | Taiwan  | 1           | 2  | 1  | Male   | 1969 | 46     | 2    | 45-49      | 0.8            |    |
| 3405   | 350243330 | 3        | Korea   | 1           | 2  | 2  | Female | 1972 | 43     | 1    | 40-44 year | 0.9            | 2  |
| 3407   | 350245023 | 3        | Korea   | 1           | 2  | 1  | Male   | 1972 | 43     | 1    | 40-44 year | 0.9            |    |
| 3410   | 300381    | 2        | Taiwan  | 1           | 2  | 1  | Male   | 1960 | 55     | 4    | 55-59      | 0.7            |    |
| 3411   | 380213265 | 2        | Taiwan  | 1           | 2  | 2  | Female | 1970 | 45     | 2    | 45-49      | 0.9            | 2  |
| 3413   | 380121797 | 2        | Taiwan  | 1           | 2  | 1  | Male   | 1969 | 46     | 2    | 45-49      | 0.8            |    |
| 3414   | 300382    | 2        | Taiwan  | 1           | 2  | 2  | Female | 1968 | 47     | 2    | 45-49      | 0.9            | 2  |
| 3420   | 300383    | 2        | Taiwan  | 1           | 2  | 2  | Female | 1970 | 45     | 2    | 45-49      | 0.9            | 2  |
| 3421   | 100487    | 1        | China   | 1           | 2  | 2  | Female | 1963 | 52     | 3    | 50-54      | 1.2            |    |
| 3425   | 350148845 | 3        | Korea   | 1           | 2  | 1  | Male   | 1970 | 45     | 2    | 45-49      | 0.8            |    |
| 3426   | 350232211 | 3        | Korea   | 1           | 2  | 1  | Male   | 1967 | 48     | 2    | 45-49      | 0.8            |    |
| 3429   | 100450    | 1        | China   | 1           | 2  | 2  | Female | 1954 | 61     | 5    | >=60       | 1.1            |    |
| 3430   | 100489    | 1        | China   | 1           | 2  | 1  | Male   | 1972 | 43     | 1    | 40-44 year | 1.0            |    |
| 3433   | 350241387 | 3        | Korea   | 1           | 2  | 2  | Female | 1975 | 40     | 1    | 40-44 year | 0.9            | 2  |
| 3434   | 100493    | 1        | China   | 1           | 2  | 1  | Male   | 1968 | 47     | 2    | 45-49      | 1.0            |    |
| 3437   | 300386    | 2        | Taiwan  | 1           | 2  | 1  | Male   | 1970 | 45     | 2    | 45-49      | 0.8            |    |
| 3439   | 350241587 | 3        | Korea   | 1           | 2  | 1  | Male   | 1947 | 68     | 5    | >=60       | 1.6            |    |
| 3441   | 350345715 | 3        | Korea   | 1           | 2  | 1  | Male   | 1964 | 51     | 3    | 50-54      | 0.9            |    |
| 3442   | 350240656 | 3        | Korea   | 1           | 2  | 2  | Female | 1968 | 47     | 2    | 45-49      | 0.9            | 2  |
| 3444   | 350350791 | 3        | Korea   | 1           | 2  | 2  | Female | 1974 | 41     | 1    | 40-44 year | 0.9            | 2  |
| 3445   | 100495    | 1        | China   | 1           | 2  | 2  | Female | 1972 | 43     | 1    | 40-44 year | 1.0            | 2  |
| 3450   | 350307178 | 3        | Korea   | 1           | 2  | 1  | Male   | 1973 | 42     | 1    | 40-44 year | 0.9            |    |
| 3452   | 380105031 | 2        | Taiwan  | 1           | 2  | 2  | Female | 1968 | 47     | 2    | 45-49      | 0.9            | 2  |

| respid | SubsID    | dCountry | Country | QDisclaimer | Q1 | Q2 | Gender   | Q3_1 | age Nr | dAge | age Group  | Weight in Ctry | Q4 |
|--------|-----------|----------|---------|-------------|----|----|----------|------|--------|------|------------|----------------|----|
| 3456   | 300388    | 2        | Taiwan  | 1           | 1  | 2  | 1 Male   | 1972 | 43     | 1    | 40-44 year | 0.8            |    |
| 3459   | 100499    | 1        | China   | 1           | 1  | 2  | 1 Male   | 1969 | 46     | 2    | 45-49      | 1.0            |    |
| 3460   | 200396    | 3        | Korea   | 1           | 1  | 2  | 1 Male   | 1960 | 55     | 4    | 55-59      | 0.8            |    |
| 3461   | 100500    | 1        | China   | 1           | 1  | 2  | 2 Female | 1975 | 40     | 1    | 40-44 year | 1.0            | 2  |
| 3466   | 350222848 | 3        | Korea   | 1           | 1  | 2  | 1 Male   | 1968 | 47     | 2    | 45-49      | 0.8            |    |
| 3471   | 280215314 | 1        | China   | 1           | 1  | 2  | 1 Male   | 1973 | 42     | 1    | 40-44 year | 1.0            |    |
| 3473   | 300389    | 2        | Taiwan  | 1           | 1  | 2  | 1 Male   | 1957 | 58     | 4    | 55-59      | 0.7            |    |
| 3475   | 350103103 | 3        | Korea   | 1           | 1  | 2  | 2 Female | 1971 | 44     | 1    | 40-44 year | 0.9            | 2  |
| 3476   | 350220325 | 3        | Korea   | 1           | 1  | 1  | 1 Male   | 1959 | 56     | 4    | 55-59      | 0.8            |    |
| 3477   | 300390    | 2        | Taiwan  | 1           | 1  | 2  | 1 Male   | 1970 | 45     | 2    | 45-49      | 0.8            |    |
| 3478   | 380124895 | 2        | Taiwan  | 1           | 1  | 2  | 1 Male   | 1972 | 43     | 1    | 40-44 year | 0.8            |    |
| 3479   | 380078685 | 2        | Taiwan  | 1           | 1  | 2  | 2 Female | 1968 | 47     | 2    | 45-49      | 0.9            | 2  |
| 3482   | 300391    | 2        | Taiwan  | 1           | 1  | 2  | 1 Male   | 1963 | 52     | 3    | 50-54      | 0.8            |    |
| 3483   | 281335612 | 1        | China   | 1           | 1  | 2  | 2 Female | 1963 | 52     | 3    | 50-54      | 1.2            |    |
| 3485   | 350209205 | 3        | Korea   | 1           | 1  | 2  | 2 Female | 1970 | 45     | 2    | 45-49      | 0.9            | 2  |
| 3489   | 100508    | 1        | China   | 1           | 1  | 2  | 1 Male   | 1969 | 46     | 2    | 45-49      | 1.0            |    |
| 3490   | 380213279 | 2        | Taiwan  | 1           | 1  | 2  | 2 Female | 1968 | 47     | 2    | 45-49      | 0.9            | 2  |
| 3491   | 100509    | 1        | China   | 1           | 1  | 2  | 2 Female | 1972 | 43     | 1    | 40-44 year | 1.0            | 2  |
| 3494   | 350226143 | 3        | Korea   | 1           | 1  | 2  | 2 Female | 1975 | 40     | 1    | 40-44 year | 0.9            | 2  |
| 3495   | 300058    | 2        | Taiwan  | 1           | 1  | 2  | 2 Female | 1961 | 54     | 3    | 50-54      | 0.9            |    |
| 3501   | 100514    | 1        | China   | 1           | 1  | 2  | 1 Male   | 1970 | 45     | 2    | 45-49      | 1.0            |    |
| 3506   | 300394    | 2        | Taiwan  | 1           | 1  | 2  | 1 Male   | 1974 | 41     | 1    | 40-44 year | 0.8            |    |
| 3507   | 350231361 | 3        | Korea   | 1           | 1  | 2  | 1 Male   | 1965 | 50     | 3    | 50-54      | 0.9            |    |
| 3517   | 350278177 | 3        | Korea   | 1           | 1  | 2  | 1 Male   | 1974 | 41     | 1    | 40-44 year | 0.9            |    |
| 3520   | 380092470 | 2        | Taiwan  | 1           | 1  | 2  | 2 Female | 1970 | 45     | 2    | 45-49      | 0.9            | 2  |
| 3521   | 350251529 | 3        | Korea   | 1           | 1  | 2  | 1 Male   | 1947 | 68     | 5    | >=60       | 1.6            |    |
| 3522   | 350061861 | 3        | Korea   | 1           | 1  | 2  | 2 Female | 1971 | 44     | 1    | 40-44 year | 0.9            | 2  |
| 3524   | 350220105 | 3        | Korea   | 1           | 1  | 2  | 1 Male   | 1973 | 42     | 1    | 40-44 year | 0.9            |    |
| 3527   | 300395    | 2        | Taiwan  | 1           | 1  | 2  | 1 Male   | 1968 | 47     | 2    | 45-49      | 0.8            |    |
| 3528   | 380018363 | 2        | Taiwan  | 1           | 1  | 2  | 1 Male   | 1968 | 47     | 2    | 45-49      | 0.8            |    |
| 3529   | 350251064 | 3        | Korea   | 1           | 1  | 2  | 1 Male   | 1975 | 40     | 1    | 40-44 year | 0.9            |    |
| 3536   | 200398    | 3        | Korea   | 1           | 1  | 2  | 2 Female | 1972 | 43     | 1    | 40-44 year | 0.9            | 2  |



| respid | SubsID    | dCountry | Country | QDisclaimer | Q1 | Q2 | Gender   | Q3_1 | age Nr | dAge | age Group  | Weight in Ctry | Q4 |
|--------|-----------|----------|---------|-------------|----|----|----------|------|--------|------|------------|----------------|----|
| 3537   | 300284    | 2        | Taiwan  | 1           | 1  | 2  | 1 Male   | 1970 | 45     | 2    | 45-49      | 0.8            |    |
| 3538   | 300396    | 2        | Taiwan  | 1           | 1  | 2  | 1 Male   | 1959 | 56     | 4    | 55-59      | 0.7            |    |
| 3540   | 350217824 | 3        | Korea   | 1           | 1  | 2  | 2 Female | 1967 | 48     | 2    | 45-49      | 0.9            | 2  |
| 3545   | 350146114 | 3        | Korea   | 1           | 1  | 2  | 1 Male   | 1970 | 45     | 2    | 45-49      | 0.8            |    |
| 3547   | 350189474 | 3        | Korea   | 1           | 1  | 2  | 1 Male   | 1962 | 53     | 3    | 50-54      | 0.9            |    |
| 3554   | 300397    | 2        | Taiwan  | 1           | 1  | 2  | 2 Female | 1971 | 44     | 1    | 40-44 year | 0.8            | 2  |
| 3556   | 350293860 | 3        | Korea   | 1           | 1  | 2  | 1 Male   | 1972 | 43     | 1    | 40-44 year | 0.9            |    |
| 3557   | 350344845 | 3        | Korea   | 1           | 1  | 2  | 1 Male   | 1971 | 44     | 1    | 40-44 year | 0.9            |    |
| 3559   | 100529    | 1        | China   | 1           | 1  | 2  | 2 Female | 1956 | 59     | 4    | 55-59      | 1.0            |    |
| 3560   | 200399    | 3        | Korea   | 1           | 1  | 2  | 1 Male   | 1953 | 62     | 5    | >=60       | 1.6            |    |
| 3562   | 100531    | 1        | China   | 1           | 1  | 2  | 1 Male   | 1971 | 44     | 1    | 40-44 year | 1.0            |    |
| 3564   | 350251455 | 3        | Korea   | 1           | 1  | 2  | 2 Female | 1971 | 44     | 1    | 40-44 year | 0.9            | 2  |
| 3565   | 100523    | 1        | China   | 1           | 1  | 2  | 2 Female | 1970 | 45     | 2    | 45-49      | 1.0            | 2  |
| 3568   | 100533    | 1        | China   | 1           | 1  | 2  | 1 Male   | 1971 | 44     | 1    | 40-44 year | 1.0            |    |
| 3572   | 300399    | 2        | Taiwan  | 1           | 1  | 2  | 1 Male   | 1969 | 46     | 2    | 45-49      | 0.8            |    |
| 3578   | 300141    | 2        | Taiwan  | 1           | 1  | 2  | 2 Female | 1961 | 54     | 3    | 50-54      | 0.9            |    |
| 3581   | 350270476 | 3        | Korea   | 1           | 1  | 2  | 2 Female | 1967 | 48     | 2    | 45-49      | 0.9            | 2  |
| 3583   | 380213977 | 2        | Taiwan  | 1           | 1  | 2  | 2 Female | 1971 | 44     | 1    | 40-44 year | 0.8            | 2  |
| 3588   | 350149451 | 3        | Korea   | 1           | 1  | 2  | 1 Male   | 1974 | 41     | 1    | 40-44 year | 0.9            |    |
| 3591   | 300401    | 2        | Taiwan  | 1           | 1  | 2  | 1 Male   | 1971 | 44     | 1    | 40-44 year | 0.8            |    |
| 3594   | 350201620 | 3        | Korea   | 1           | 1  | 2  | 1 Male   | 1967 | 48     | 2    | 45-49      | 0.8            |    |
| 3595   | 200402    | 3        | Korea   | 1           | 1  | 2  | 1 Male   | 1974 | 41     | 1    | 40-44 year | 0.9            |    |
| 3596   | 350311802 | 3        | Korea   | 1           | 1  | 2  | 2 Female | 1972 | 43     | 1    | 40-44 year | 0.9            | 2  |
| 3597   | 350148748 | 3        | Korea   | 1           | 1  | 2  | 1 Male   | 1972 | 43     | 1    | 40-44 year | 0.9            |    |
| 3598   | 200403    | 3        | Korea   | 1           | 1  | 2  | 2 Female | 1973 | 42     | 1    | 40-44 year | 0.9            | 2  |
| 3600   | 350315713 | 3        | Korea   | 1           | 1  | 2  | 2 Female | 1974 | 41     | 1    | 40-44 year | 0.9            | 2  |
| 3602   | 200404    | 3        | Korea   | 1           | 1  | 2  | 2 Female | 1966 | 49     | 2    | 45-49      | 0.9            | 2  |
| 3604   | 300402    | 2        | Taiwan  | 1           | 1  | 2  | 1 Male   | 1967 | 48     | 2    | 45-49      | 0.8            |    |
| 3605   | 350284859 | 3        | Korea   | 1           | 1  | 2  | 1 Male   | 1959 | 56     | 4    | 55-59      | 0.8            |    |
| 3606   | 100541    | 1        | China   | 1           | 1  | 2  | 1 Male   | 1970 | 45     | 2    | 45-49      | 1.0            |    |
| 3607   | 350292441 | 3        | Korea   | 1           | 1  | 2  | 2 Female | 1967 | 48     | 2    | 45-49      | 0.9            | 2  |
| 3610   | 380214769 | 2        | Taiwan  | 1           | 1  | 2  | 1 Male   | 1963 | 52     | 3    | 50-54      | 0.8            |    |

| respid | SubsID    | dCountry | Country | QDisclaim<br>er | Q1 | Q2 | Gender | Q3_1 | age Nr | dAge | age Group  | Weight in<br>Ctry | Q4 |
|--------|-----------|----------|---------|-----------------|----|----|--------|------|--------|------|------------|-------------------|----|
| 3611   | 100544    | 1        | China   | 1               | 2  | 1  | Male   | 1967 | 48     | 2    | 45-49      | 1.0               |    |
| 3612   | 300403    | 2        | Taiwan  | 1               | 2  | 1  | Male   | 1974 | 41     | 1    | 40-44 year | 0.8               |    |
| 3614   | 300404    | 2        | Taiwan  | 1               | 2  | 2  | Female | 1964 | 51     | 3    | 50-54      | 0.9               |    |
| 3616   | 100547    | 1        | China   | 1               | 2  | 1  | Male   | 1969 | 46     | 2    | 45-49      | 1.0               |    |
| 3617   | 350124851 | 3        | Korea   | 1               | 2  | 2  | Female | 1974 | 41     | 1    | 40-44 year | 0.9               | 2  |
| 3618   | 300405    | 2        | Taiwan  | 1               | 2  | 2  | Female | 1973 | 42     | 1    | 40-44 year | 0.8               | 2  |
| 3619   | 380019512 | 2        | Taiwan  | 1               | 2  | 2  | Female | 1970 | 45     | 2    | 45-49      | 0.9               | 2  |
| 3621   | 350279693 | 3        | Korea   | 1               | 2  | 1  | Male   | 1974 | 41     | 1    | 40-44 year | 0.9               |    |
| 3622   | 100549    | 1        | China   | 1               | 2  | 2  | Female | 1958 | 57     | 4    | 55-59      | 1.0               |    |
| 3624   | 300406    | 2        | Taiwan  | 1               | 1  | 1  | Male   | 1972 | 43     | 1    | 40-44 year | 0.8               |    |
| 3626   | 100551    | 1        | China   | 1               | 2  | 1  | Male   | 1971 | 44     | 1    | 40-44 year | 1.0               |    |
| 3629   | 100552    | 1        | China   | 1               | 2  | 2  | Female | 1975 | 40     | 1    | 40-44 year | 1.0               | 2  |
| 3631   | 300407    | 2        | Taiwan  | 1               | 2  | 1  | Male   | 1959 | 56     | 4    | 55-59      | 0.7               |    |
| 3632   | 100554    | 1        | China   | 1               | 2  | 1  | Male   | 1970 | 45     | 2    | 45-49      | 1.0               |    |
| 3638   | 350221505 | 3        | Korea   | 1               | 1  | 1  | Male   | 1965 | 50     | 3    | 50-54      | 0.9               |    |
| 3640   | 350174202 | 3        | Korea   | 1               | 2  | 2  | Female | 1975 | 40     | 1    | 40-44 year | 0.9               | 2  |
| 3641   | 100558    | 1        | China   | 1               | 2  | 2  | Female | 1965 | 50     | 3    | 50-54      | 1.2               |    |
| 3645   | 350135670 | 3        | Korea   | 1               | 2  | 1  | Male   | 1973 | 42     | 1    | 40-44 year | 0.9               |    |
| 3650   | 380061278 | 2        | Taiwan  | 1               | 2  | 1  | Male   | 1969 | 46     | 2    | 45-49      | 0.8               |    |
| 3653   | 350124109 | 3        | Korea   | 1               | 2  | 1  | Male   | 1970 | 45     | 2    | 45-49      | 0.8               |    |
| 3655   | 350350322 | 3        | Korea   | 1               | 2  | 1  | Male   | 1973 | 42     | 1    | 40-44 year | 0.9               |    |
| 3657   | 350252345 | 3        | Korea   | 1               | 2  | 2  | Female | 1970 | 45     | 2    | 45-49      | 0.9               | 2  |
| 3658   | 200405    | 3        | Korea   | 1               | 2  | 2  | Female | 1953 | 62     | 5    | >=60       | 1.6               |    |
| 3659   | 350152622 | 3        | Korea   | 1               | 2  | 2  | Female | 1971 | 44     | 1    | 40-44 year | 0.9               | 2  |
| 3664   | 100566    | 1        | China   | 1               | 2  | 1  | Male   | 1965 | 50     | 3    | 50-54      | 1.0               |    |
| 3665   | 350347302 | 3        | Korea   | 1               | 2  | 1  | Male   | 1972 | 43     | 1    | 40-44 year | 0.9               |    |
| 3667   | 350294879 | 3        | Korea   | 1               | 2  | 1  | Male   | 1970 | 45     | 2    | 45-49      | 0.8               |    |
| 3668   | 100564    | 1        | China   | 1               | 1  | 1  | Male   | 1969 | 46     | 2    | 45-49      | 1.0               |    |
| 3675   | 380208489 | 2        | Taiwan  | 1               | 2  | 2  | Female | 1974 | 41     | 1    | 40-44 year | 0.8               | 2  |
| 3678   | 300410    | 2        | Taiwan  | 1               | 2  | 2  | Female | 1968 | 47     | 2    | 45-49      | 0.9               | 2  |
| 3680   | 350068834 | 3        | Korea   | 1               | 2  | 2  | Female | 1967 | 48     | 2    | 45-49      | 0.9               | 2  |
| 3684   | 281234941 | 1        | China   | 1               | 2  | 1  | Male   | 1971 | 44     | 1    | 40-44 year | 1.0               |    |

| respid | SubsID    | dCountry | Country  | QDisclaimer | Q1 | Q2 | Gender   | Q3_1 | age Nr | dAge | age Group    | Weight in Ctry | Q4 |
|--------|-----------|----------|----------|-------------|----|----|----------|------|--------|------|--------------|----------------|----|
| 3685   | 350262160 |          | 3 Korea  |             | 1  | 2  | 2 Female | 1964 | 51     |      | 3 50-54      | 0.8            |    |
| 3687   | 300412    |          | 2 Taiwan |             | 1  | 2  | 1 Male   | 1965 | 50     |      | 3 50-54      | 0.8            |    |
| 3689   | 100573    |          | 1 China  |             | 1  | 2  | 1 Male   | 1970 | 45     |      | 2 45-49      | 1.0            |    |
| 3690   | 280519692 |          | 1 China  |             | 1  | 2  | 1 Male   | 1972 | 43     |      | 1 40-44 year | 1.0            |    |
| 3693   | 380105211 |          | 2 Taiwan |             | 1  | 2  | 1 Male   | 1968 | 47     |      | 2 45-49      | 0.8            |    |
| 3694   | 300413    |          | 2 Taiwan |             | 1  | 2  | 2 Female | 1972 | 43     |      | 1 40-44 year | 0.8            | 2  |
| 3695   | 350252692 |          | 3 Korea  |             | 1  | 2  | 2 Female | 1970 | 45     |      | 2 45-49      | 0.9            | 2  |
| 3700   | 300415    |          | 2 Taiwan |             | 1  | 2  | 2 Female | 1968 | 47     |      | 2 45-49      | 0.9            | 2  |
| 3701   | 300416    |          | 2 Taiwan |             | 1  | 2  | 1 Male   | 1962 | 53     |      | 3 50-54      | 0.8            |    |
| 3703   | 100576    |          | 1 China  |             | 1  | 2  | 2 Female | 1975 | 40     |      | 1 40-44 year | 1.0            | 2  |
| 3704   | 350202961 |          | 3 Korea  |             | 1  | 2  | 2 Female | 1966 | 49     |      | 2 45-49      | 0.9            | 2  |
| 3705   | 300417    |          | 2 Taiwan |             | 1  | 2  | 1 Male   | 1963 | 52     |      | 3 50-54      | 0.8            |    |
| 3709   | 300418    |          | 2 Taiwan |             | 1  | 2  | 1 Male   | 1955 | 60     |      | 5 >=60       | 1.6            |    |
| 3710   | 100577    |          | 1 China  |             | 1  | 2  | 1 Male   | 1968 | 47     |      | 2 45-49      | 1.0            |    |
| 3722   | 380024590 |          | 2 Taiwan |             | 1  | 2  | 1 Male   | 1974 | 41     |      | 1 40-44 year | 0.8            |    |
| 3725   | 380212425 |          | 2 Taiwan |             | 1  | 2  | 1 Male   | 1970 | 45     |      | 2 45-49      | 0.8            |    |
| 3726   | 300420    |          | 2 Taiwan |             | 1  | 2  | 2 Female | 1968 | 47     |      | 2 45-49      | 0.9            | 2  |
| 3727   | 100583    |          | 1 China  |             | 1  | 2  | 2 Female | 1971 | 44     |      | 1 40-44 year | 1.0            | 2  |
| 3728   | 350298691 |          | 3 Korea  |             | 1  | 2  | 2 Female | 1971 | 44     |      | 1 40-44 year | 0.9            | 2  |
| 3729   | 350151476 |          | 3 Korea  |             | 1  | 2  | 1 Male   | 1968 | 47     |      | 2 45-49      | 0.8            |    |
| 3731   | 100585    |          | 1 China  |             | 1  | 2  | 1 Male   | 1969 | 46     |      | 2 45-49      | 1.0            |    |
| 3738   | 100588    |          | 1 China  |             | 1  | 2  | 2 Female | 1965 | 50     |      | 3 50-54      | 1.2            |    |
| 3739   | 380061653 |          | 2 Taiwan |             | 1  | 2  | 2 Female | 1970 | 45     |      | 2 45-49      | 0.9            | 2  |
| 3740   | 280049365 |          | 1 China  |             | 1  | 2  | 1 Male   | 1971 | 44     |      | 1 40-44 year | 1.0            |    |
| 3749   | 350300474 |          | 3 Korea  |             | 1  | 2  | 1 Male   | 1961 | 54     |      | 3 50-54      | 0.9            |    |
| 3758   | 350033121 |          | 3 Korea  |             | 1  | 2  | 1 Male   | 1969 | 46     |      | 2 45-49      | 0.8            |    |
| 3762   | 300419    |          | 2 Taiwan |             | 1  | 2  | 2 Female | 1970 | 45     |      | 2 45-49      | 0.9            | 2  |
| 3765   | 300421    |          | 2 Taiwan |             | 1  | 2  | 2 Female | 1973 | 42     |      | 1 40-44 year | 0.8            | 2  |
| 3770   | 100603    |          | 1 China  |             | 1  | 2  | 2 Female | 1973 | 42     |      | 1 40-44 year | 1.0            | 2  |
| 3771   | 100604    |          | 1 China  |             | 1  | 2  | 2 Female | 1965 | 50     |      | 3 50-54      | 1.2            |    |
| 3778   | 100607    |          | 1 China  |             | 1  | 2  | 2 Female | 1974 | 41     |      | 1 40-44 year | 1.0            | 2  |
| 3779   | 350291963 |          | 3 Korea  |             | 1  | 2  | 1 Male   | 1968 | 47     |      | 2 45-49      | 0.8            |    |

| respid | SubsID    | dCountry | Country  | QDisclaimer | Q1 | Q2 | Gender   | Q3_1 | age Nr | dAge | age Group    | Weight in Ctry | Q4 |
|--------|-----------|----------|----------|-------------|----|----|----------|------|--------|------|--------------|----------------|----|
| 3780   | 350229607 |          | 3 Korea  |             | 1  | 2  | 1 Male   | 1973 | 42     |      | 1 40-44 year | 0.9            |    |
| 3782   | 300422    |          | 2 Taiwan |             | 1  | 2  | 2 Female | 1969 | 46     |      | 2 45-49      | 0.9            | 2  |
| 3784   | 100610    |          | 1 China  |             | 1  | 2  | 1 Male   | 1974 | 41     |      | 1 40-44 year | 1.0            |    |
| 3787   | 300424    |          | 2 Taiwan |             | 1  | 2  | 2 Female | 1975 | 40     |      | 1 40-44 year | 0.8            | 2  |
| 3790   | 100613    |          | 1 China  |             | 1  | 2  | 1 Male   | 1961 | 54     |      | 3 50-54      | 1.0            |    |
| 3791   | 350003986 |          | 3 Korea  |             | 1  | 1  | 1 Male   | 1969 | 46     |      | 2 45-49      | 0.8            |    |
| 3793   | 350347369 |          | 3 Korea  |             | 1  | 2  | 1 Male   | 1974 | 41     |      | 1 40-44 year | 0.9            |    |
| 3795   | 281326893 |          | 1 China  |             | 1  | 2  | 2 Female | 1964 | 51     |      | 3 50-54      | 1.2            |    |
| 3799   | 350252968 |          | 3 Korea  |             | 1  | 2  | 1 Male   | 1974 | 41     |      | 1 40-44 year | 0.9            |    |
| 3801   | 350038432 |          | 3 Korea  |             | 1  | 2  | 1 Male   | 1968 | 47     |      | 2 45-49      | 0.8            |    |
| 3804   | 100618    |          | 1 China  |             | 1  | 2  | 1 Male   | 1958 | 57     |      | 4 55-59      | 0.9            |    |
| 3809   | 100620    |          | 1 China  |             | 1  | 2  | 2 Female | 1971 | 44     |      | 1 40-44 year | 1.0            | 2  |
| 3810   | 350348306 |          | 3 Korea  |             | 1  | 2  | 2 Female | 1970 | 45     |      | 2 45-49      | 0.9            | 2  |
| 3813   | 100623    |          | 1 China  |             | 1  | 2  | 1 Male   | 1974 | 41     |      | 1 40-44 year | 1.0            |    |
| 3816   | 380011220 |          | 2 Taiwan |             | 1  | 2  | 2 Female | 1972 | 43     |      | 1 40-44 year | 0.8            | 2  |
| 3820   | 300426    |          | 2 Taiwan |             | 1  | 2  | 2 Female | 1966 | 49     |      | 2 45-49      | 0.9            | 2  |
| 3821   | 100625    |          | 1 China  |             | 1  | 2  | 1 Male   | 1963 | 52     |      | 3 50-54      | 1.0            |    |
| 3823   | 100626    |          | 1 China  |             | 1  | 2  | 2 Female | 1968 | 47     |      | 2 45-49      | 1.0            | 2  |
| 3828   | 380213303 |          | 2 Taiwan |             | 1  | 2  | 2 Female | 1961 | 54     |      | 3 50-54      | 0.9            |    |
| 3829   | 350147064 |          | 3 Korea  |             | 1  | 2  | 1 Male   | 1961 | 54     |      | 3 50-54      | 0.9            |    |
| 3832   | 100631    |          | 1 China  |             | 1  | 2  | 2 Female | 1970 | 45     |      | 2 45-49      | 1.0            | 2  |
| 3835   | 350344436 |          | 3 Korea  |             | 1  | 2  | 2 Female | 1971 | 44     |      | 1 40-44 year | 0.9            | 2  |
| 3837   | 200406    |          | 3 Korea  |             | 1  | 2  | 2 Female | 1950 | 65     |      | 5 >=60       | 1.6            |    |
| 3838   | 380072795 |          | 2 Taiwan |             | 1  | 2  | 2 Female | 1973 | 42     |      | 1 40-44 year | 0.8            | 2  |
| 3839   | 100633    |          | 1 China  |             | 1  | 2  | 1 Male   | 1970 | 45     |      | 2 45-49      | 1.0            |    |
| 3840   | 350299419 |          | 3 Korea  |             | 1  | 2  | 2 Female | 1973 | 42     |      | 1 40-44 year | 0.9            | 2  |
| 3842   | 350245409 |          | 3 Korea  |             | 1  | 2  | 2 Female | 1973 | 42     |      | 1 40-44 year | 0.9            | 2  |
| 3843   | 100634    |          | 1 China  |             | 1  | 2  | 2 Female | 1970 | 45     |      | 2 45-49      | 1.0            | 2  |
| 3844   | 300387    |          | 2 Taiwan |             | 1  | 1  | 2 Female | 1974 | 41     |      | 1 40-44 year | 0.8            | 2  |
| 3850   | 100640    |          | 1 China  |             | 1  | 1  | 1 Male   | 1956 | 59     |      | 4 55-59      | 0.9            |    |
| 3851   | 100639    |          | 1 China  |             | 1  | 2  | 2 Female | 1966 | 49     |      | 2 45-49      | 1.0            | 2  |
| 3856   | 380052484 |          | 2 Taiwan |             | 1  | 2  | 1 Male   | 1969 | 46     |      | 2 45-49      | 0.8            |    |

| respid | SubsID    | dCountry | Country  | QDisclaimer | Q1 | Q2 | Gender   | Q3_1 | age Nr | dAge | age Group    | Weight in Ctry | Q4 |
|--------|-----------|----------|----------|-------------|----|----|----------|------|--------|------|--------------|----------------|----|
| 3859   | 100645    |          | 1 China  |             | 1  | 2  | 1 Male   | 1965 | 50     |      | 3 50-54      | 1.0            |    |
| 3860   | 300428    |          | 2 Taiwan |             | 1  | 2  | 1 Male   | 1974 | 41     |      | 1 40-44 year | 0.8            |    |
| 3863   | 380157973 |          | 2 Taiwan |             | 1  | 2  | 1 Male   | 1971 | 44     |      | 1 40-44 year | 0.8            |    |
| 3866   | 300429    |          | 2 Taiwan |             | 1  | 2  | 1 Male   | 1970 | 45     |      | 2 45-49      | 0.8            |    |
| 3867   | 350243628 |          | 3 Korea  |             | 1  | 2  | 1 Male   | 1968 | 47     |      | 2 45-49      | 0.8            |    |
| 3870   | 100648    |          | 1 China  |             | 1  | 2  | 1 Male   | 1963 | 52     |      | 3 50-54      | 1.0            |    |
| 3873   | 350128621 |          | 3 Korea  |             | 1  | 2  | 2 Female | 1972 | 43     |      | 1 40-44 year | 0.9            | 2  |
| 3875   | 380022227 |          | 2 Taiwan |             | 1  | 2  | 1 Male   | 1965 | 50     |      | 3 50-54      | 0.8            |    |
| 3878   | 300430    |          | 2 Taiwan |             | 1  | 2  | 2 Female | 1973 | 42     |      | 1 40-44 year | 0.8            | 2  |
| 3881   | 380019501 |          | 2 Taiwan |             | 1  | 2  | 2 Female | 1970 | 45     |      | 2 45-49      | 0.9            | 2  |
| 3883   | 350311851 |          | 3 Korea  |             | 1  | 2  | 1 Male   | 1973 | 42     |      | 1 40-44 year | 0.9            |    |
| 3884   | 350320901 |          | 3 Korea  |             | 1  | 2  | 1 Male   | 1973 | 42     |      | 1 40-44 year | 0.9            |    |
| 3885   | 100650    |          | 1 China  |             | 1  | 2  | 1 Male   | 1965 | 50     |      | 3 50-54      | 1.0            |    |
| 3886   | 350309765 |          | 3 Korea  |             | 1  | 2  | 2 Female | 1966 | 49     |      | 2 45-49      | 0.9            | 2  |
| 3887   | 100651    |          | 1 China  |             | 1  | 2  | 1 Male   | 1967 | 48     |      | 2 45-49      | 1.0            |    |
| 3888   | 300431    |          | 2 Taiwan |             | 1  | 2  | 2 Female | 1973 | 42     |      | 1 40-44 year | 0.8            | 2  |
| 3889   | 100652    |          | 1 China  |             | 1  | 2  | 2 Female | 1970 | 45     |      | 2 45-49      | 1.0            | 2  |
| 3890   | 100653    |          | 1 China  |             | 1  | 2  | 1 Male   | 1963 | 52     |      | 3 50-54      | 1.0            |    |
| 3896   | 350282663 |          | 3 Korea  |             | 1  | 2  | 2 Female | 1974 | 41     |      | 1 40-44 year | 0.9            | 2  |
| 3902   | 100658    |          | 1 China  |             | 1  | 2  | 2 Female | 1963 | 52     |      | 3 50-54      | 1.2            |    |
| 3909   | 300432    |          | 2 Taiwan |             | 1  | 2  | 2 Female | 1963 | 52     |      | 3 50-54      | 0.9            |    |
| 3912   | 100660    |          | 1 China  |             | 1  | 2  | 1 Male   | 1958 | 57     |      | 4 55-59      | 0.9            |    |
| 3922   | 100663    |          | 1 China  |             | 1  | 2  | 1 Male   | 1955 | 60     |      | 5 >=60       | 1.0            |    |
| 3928   | 350329994 |          | 3 Korea  |             | 1  | 2  | 2 Female | 1972 | 43     |      | 1 40-44 year | 0.9            | 2  |
| 3930   | 100667    |          | 1 China  |             | 1  | 2  | 1 Male   | 1963 | 52     |      | 3 50-54      | 1.0            |    |
| 3931   | 350346718 |          | 3 Korea  |             | 1  | 2  | 2 Female | 1967 | 48     |      | 2 45-49      | 0.9            | 2  |
| 3933   | 200407    |          | 3 Korea  |             | 1  | 2  | 1 Male   | 1964 | 51     |      | 3 50-54      | 0.9            |    |
| 3935   | 380042760 |          | 2 Taiwan |             | 1  | 2  | 2 Female | 1968 | 47     |      | 2 45-49      | 0.9            | 2  |
| 3937   | 100670    |          | 1 China  |             | 1  | 2  | 2 Female | 1970 | 45     |      | 2 45-49      | 1.0            | 2  |
| 3939   | 100672    |          | 1 China  |             | 1  | 2  | 1 Male   | 1964 | 51     |      | 3 50-54      | 1.0            |    |
| 3942   | 350180778 |          | 3 Korea  |             | 1  | 2  | 1 Male   | 1964 | 51     |      | 3 50-54      | 0.9            |    |
| 3943   | 100675    |          | 1 China  |             | 1  | 2  | 2 Female | 1973 | 42     |      | 1 40-44 year | 1.0            | 2  |

| respid | SubsID    | dCountry | Country | QDisclaimer | Q1 | Q2 | Gender | Q3_1 | age Nr | dAge | age Group  | Weight in Ctry | Q4 |
|--------|-----------|----------|---------|-------------|----|----|--------|------|--------|------|------------|----------------|----|
| 3944   | 100676    | 1        | China   | 1           | 2  | 1  | Male   | 1974 | 41     | 1    | 40-44 year | 1.0            |    |
| 3945   | 350332340 | 3        | Korea   | 1           | 2  | 1  | Male   | 1959 | 56     | 4    | 55-59      | 0.8            |    |
| 3947   | 350064116 | 3        | Korea   | 1           | 2  | 1  | Male   | 1965 | 50     | 3    | 50-54      | 0.9            |    |
| 3948   | 300433    | 2        | Taiwan  | 1           | 2  | 1  | Male   | 1956 | 59     | 4    | 55-59      | 0.7            |    |
| 3951   | 350213273 | 3        | Korea   | 1           | 2  | 1  | Male   | 1970 | 45     | 2    | 45-49      | 0.8            |    |
| 3959   | 380194136 | 2        | Taiwan  | 1           | 2  | 1  | Male   | 1974 | 41     | 1    | 40-44 year | 0.8            |    |
| 3969   | 100680    | 1        | China   | 1           | 2  | 1  | Male   | 1959 | 56     | 4    | 55-59      | 0.9            |    |
| 3973   | 300436    | 2        | Taiwan  | 1           | 2  | 1  | Male   | 1966 | 49     | 2    | 45-49      | 0.8            |    |
| 3975   | 300437    | 2        | Taiwan  | 1           | 2  | 1  | Male   | 1973 | 42     | 1    | 40-44 year | 0.8            |    |
| 3976   | 280046629 | 1        | China   | 1           | 2  | 1  | Male   | 1974 | 41     | 1    | 40-44 year | 1.0            |    |
| 3977   | 300438    | 2        | Taiwan  | 1           | 2  | 1  | Male   | 1967 | 48     | 2    | 45-49      | 0.8            |    |
| 3978   | 300439    | 2        | Taiwan  | 1           | 2  | 2  | Female | 1973 | 42     | 1    | 40-44 year | 0.8            | 2  |
| 3994   | 380212485 | 2        | Taiwan  | 1           | 2  | 1  | Male   | 1961 | 54     | 3    | 50-54      | 0.8            |    |
| 3995   | 380209732 | 2        | Taiwan  | 1           | 2  | 2  | Female | 1970 | 45     | 2    | 45-49      | 0.9            | 2  |
| 3997   | 350344220 | 3        | Korea   | 1           | 2  | 1  | Male   | 1969 | 46     | 2    | 45-49      | 0.8            |    |
| 3998   | 350280395 | 3        | Korea   | 1           | 2  | 1  | Male   | 1968 | 47     | 2    | 45-49      | 0.8            |    |
| 3999   | 350266901 | 3        | Korea   | 1           | 2  | 2  | Female | 1970 | 45     | 2    | 45-49      | 0.9            | 2  |
| 4002   | 350276217 | 3        | Korea   | 1           | 2  | 2  | Female | 1972 | 43     | 1    | 40-44 year | 0.9            | 2  |
| 4004   | 350164833 | 3        | Korea   | 1           | 2  | 1  | Male   | 1971 | 44     | 1    | 40-44 year | 0.9            |    |
| 4005   | 350252738 | 3        | Korea   | 1           | 2  | 2  | Female | 1957 | 58     | 4    | 55-59      | 0.7            |    |
| 4006   | 350224358 | 3        | Korea   | 1           | 2  | 1  | Male   | 1968 | 47     | 2    | 45-49      | 0.8            |    |
| 4008   | 350348865 | 3        | Korea   | 1           | 2  | 1  | Male   | 1973 | 42     | 1    | 40-44 year | 0.9            |    |
| 4010   | 350148109 | 3        | Korea   | 1           | 2  | 1  | Male   | 1974 | 41     | 1    | 40-44 year | 0.9            |    |
| 4011   | 350088463 | 3        | Korea   | 1           | 2  | 1  | Male   | 1965 | 50     | 3    | 50-54      | 0.9            |    |
| 4013   | 380183572 | 2        | Taiwan  | 1           | 2  | 1  | Male   | 1963 | 52     | 3    | 50-54      | 0.8            |    |
| 4014   | 380213431 | 2        | Taiwan  | 1           | 2  | 1  | Male   | 1959 | 56     | 4    | 55-59      | 0.7            |    |
| 4016   | 350145343 | 3        | Korea   | 1           | 2  | 1  | Male   | 1975 | 40     | 1    | 40-44 year | 0.9            |    |
| 4017   | 380056213 | 2        | Taiwan  | 1           | 2  | 1  | Male   | 1968 | 47     | 2    | 45-49      | 0.8            |    |
| 4019   | 350315963 | 3        | Korea   | 1           | 2  | 1  | Male   | 1967 | 48     | 2    | 45-49      | 0.8            |    |
| 4021   | 380000562 | 2        | Taiwan  | 1           | 2  | 2  | Female | 1968 | 47     | 2    | 45-49      | 0.9            | 2  |
| 4023   | 380026971 | 2        | Taiwan  | 1           | 2  | 2  | Female | 1974 | 41     | 1    | 40-44 year | 0.8            | 2  |
| 4024   | 350349963 | 3        | Korea   | 1           | 2  | 2  | Female | 1965 | 50     | 3    | 50-54      | 0.8            |    |

| respid | SubsID    | dCountry | Country | QDisclaimer | Q1 | Q2 | Gender   | Q3_1 | age Nr | dAge | age Group  | Weight in Ctry | Q4 |
|--------|-----------|----------|---------|-------------|----|----|----------|------|--------|------|------------|----------------|----|
| 4025   | 350338559 | 3        | Korea   | 1           | 1  | 2  | 2 Female | 1969 | 46     | 2    | 45-49      | 0.9            | 2  |
| 4027   | 350349015 | 3        | Korea   | 1           | 1  | 2  | 1 Male   | 1974 | 41     | 1    | 40-44 year | 0.9            |    |
| 4032   | 380029796 | 2        | Taiwan  | 1           | 1  | 2  | 2 Female | 1973 | 42     | 1    | 40-44 year | 0.8            | 2  |
| 4034   | 350284931 | 3        | Korea   | 1           | 1  | 1  | 1 Male   | 1969 | 46     | 2    | 45-49      | 0.8            |    |
| 4035   | 350204598 | 3        | Korea   | 1           | 1  | 2  | 1 Male   | 1963 | 52     | 3    | 50-54      | 0.9            |    |
| 4037   | 350073643 | 3        | Korea   | 1           | 1  | 2  | 1 Male   | 1969 | 46     | 2    | 45-49      | 0.8            |    |
| 4040   | 350149612 | 3        | Korea   | 1           | 1  | 2  | 2 Female | 1970 | 45     | 2    | 45-49      | 0.9            | 2  |
| 4041   | 380056180 | 2        | Taiwan  | 1           | 1  | 2  | 1 Male   | 1966 | 49     | 2    | 45-49      | 0.8            |    |
| 4042   | 380106363 | 2        | Taiwan  | 1           | 1  | 2  | 2 Female | 1968 | 47     | 2    | 45-49      | 0.9            | 2  |
| 4043   | 350267590 | 3        | Korea   | 1           | 1  | 2  | 2 Female | 1968 | 47     | 2    | 45-49      | 0.9            | 2  |
| 4045   | 350280435 | 3        | Korea   | 1           | 1  | 2  | 2 Female | 1970 | 45     | 2    | 45-49      | 0.9            | 2  |
| 4046   | 380049746 | 2        | Taiwan  | 1           | 1  | 2  | 1 Male   | 1971 | 44     | 1    | 40-44 year | 0.8            |    |
| 4048   | 350293678 | 3        | Korea   | 1           | 1  | 2  | 2 Female | 1973 | 42     | 1    | 40-44 year | 0.9            | 2  |
| 4049   | 350168384 | 3        | Korea   | 1           | 1  | 2  | 1 Male   | 1957 | 58     | 4    | 55-59      | 0.8            |    |
| 4050   | 350255140 | 3        | Korea   | 1           | 1  | 2  | 2 Female | 1957 | 58     | 4    | 55-59      | 0.7            |    |
| 4052   | 350015661 | 3        | Korea   | 1           | 1  | 2  | 1 Male   | 1974 | 41     | 1    | 40-44 year | 0.9            |    |
| 4053   | 350200670 | 3        | Korea   | 1           | 1  | 1  | 1 Male   | 1966 | 49     | 2    | 45-49      | 0.8            |    |
| 4060   | 280218999 | 1        | China   | 1           | 1  | 2  | 1 Male   | 1971 | 44     | 1    | 40-44 year | 1.0            |    |
| 4065   | 350180974 | 3        | Korea   | 1           | 1  | 2  | 1 Male   | 1973 | 42     | 1    | 40-44 year | 0.9            |    |
| 4066   | 380179318 | 2        | Taiwan  | 1           | 1  | 2  | 2 Female | 1974 | 41     | 1    | 40-44 year | 0.8            | 2  |
| 4067   | 350231977 | 3        | Korea   | 1           | 1  | 2  | 1 Male   | 1970 | 45     | 2    | 45-49      | 0.8            |    |
| 4068   | 350285590 | 3        | Korea   | 1           | 1  | 2  | 1 Male   | 1968 | 47     | 2    | 45-49      | 0.8            |    |
| 4069   | 380188944 | 2        | Taiwan  | 1           | 1  | 2  | 1 Male   | 1975 | 40     | 1    | 40-44 year | 0.8            |    |
| 4070   | 380159260 | 2        | Taiwan  | 1           | 1  | 2  | 1 Male   | 1973 | 42     | 1    | 40-44 year | 0.8            |    |
| 4071   | 350140797 | 3        | Korea   | 1           | 1  | 2  | 1 Male   | 1975 | 40     | 1    | 40-44 year | 0.9            |    |
| 4072   | 350341429 | 3        | Korea   | 1           | 1  | 2  | 1 Male   | 1966 | 49     | 2    | 45-49      | 0.8            |    |
| 4073   | 350327473 | 3        | Korea   | 1           | 1  | 2  | 1 Male   | 1962 | 53     | 3    | 50-54      | 0.9            |    |
| 4074   | 350348246 | 3        | Korea   | 1           | 1  | 2  | 1 Male   | 1970 | 45     | 2    | 45-49      | 0.8            |    |
| 4075   | 280689613 | 1        | China   | 1           | 1  | 2  | 1 Male   | 1974 | 41     | 1    | 40-44 year | 1.0            |    |
| 4078   | 350256877 | 3        | Korea   | 1           | 1  | 2  | 1 Male   | 1974 | 41     | 1    | 40-44 year | 0.9            |    |
| 4080   | 350202419 | 3        | Korea   | 1           | 1  | 2  | 1 Male   | 1972 | 43     | 1    | 40-44 year | 0.9            |    |
| 4081   | 350221751 | 3        | Korea   | 1           | 1  | 2  | 1 Male   | 1971 | 44     | 1    | 40-44 year | 0.9            |    |

| respid | SubsID    | dCountry | Country | QDisclaimer | Q1 | Q2 | Gender | Q3_1 | age Nr | dAge | age Group  | Weight in Ctry | Q4 |
|--------|-----------|----------|---------|-------------|----|----|--------|------|--------|------|------------|----------------|----|
| 4082   | 350296157 | 3        | Korea   | 1           | 2  | 2  | Female | 1974 | 41     | 1    | 40-44 year | 0.9            | 2  |
| 4083   | 350327979 | 3        | Korea   | 1           | 1  | 1  | Male   | 1969 | 46     | 2    | 45-49      | 0.8            |    |
| 4084   | 380126245 | 2        | Taiwan  | 1           | 2  | 1  | Male   | 1970 | 45     | 2    | 45-49      | 0.8            |    |
| 4086   | 350274480 | 3        | Korea   | 1           | 2  | 2  | Female | 1968 | 47     | 2    | 45-49      | 0.9            | 2  |
| 4087   | 350048432 | 3        | Korea   | 1           | 2  | 1  | Male   | 1964 | 51     | 3    | 50-54      | 0.9            |    |
| 4088   | 350348477 | 3        | Korea   | 1           | 2  | 1  | Male   | 1969 | 46     | 2    | 45-49      | 0.8            |    |
| 4089   | 380188220 | 2        | Taiwan  | 1           | 2  | 2  | Female | 1969 | 46     | 2    | 45-49      | 0.9            | 2  |
| 4090   | 281092945 | 1        | China   | 1           | 2  | 1  | Male   | 1971 | 44     | 1    | 40-44 year | 1.0            |    |
| 4093   | 350291502 | 3        | Korea   | 1           | 2  | 1  | Male   | 1971 | 44     | 1    | 40-44 year | 0.9            |    |
| 4094   | 350158312 | 3        | Korea   | 1           | 2  | 2  | Female | 1970 | 45     | 2    | 45-49      | 0.9            | 2  |
| 4095   | 380156755 | 2        | Taiwan  | 1           | 2  | 1  | Male   | 1965 | 50     | 3    | 50-54      | 0.8            |    |
| 4096   | 350225213 | 3        | Korea   | 1           | 2  | 1  | Male   | 1971 | 44     | 1    | 40-44 year | 0.9            |    |
| 4098   | 350336034 | 3        | Korea   | 1           | 2  | 1  | Male   | 1975 | 40     | 1    | 40-44 year | 0.9            |    |
| 4103   | 350290132 | 3        | Korea   | 1           | 2  | 1  | Male   | 1962 | 53     | 3    | 50-54      | 0.9            |    |
| 4104   | 350245025 | 3        | Korea   | 1           | 2  | 2  | Female | 1959 | 56     | 4    | 55-59      | 0.7            |    |
| 4107   | 380082390 | 2        | Taiwan  | 1           | 2  | 1  | Male   | 1969 | 46     | 2    | 45-49      | 0.8            |    |
| 4109   | 380076013 | 2        | Taiwan  | 1           | 2  | 2  | Female | 1974 | 41     | 1    | 40-44 year | 0.8            | 2  |
| 4110   | 380139641 | 2        | Taiwan  | 1           | 2  | 2  | Female | 1973 | 42     | 1    | 40-44 year | 0.8            | 2  |
| 4113   | 350286747 | 3        | Korea   | 1           | 2  | 2  | Female | 1970 | 45     | 2    | 45-49      | 0.9            | 2  |
| 4114   | 380050460 | 2        | Taiwan  | 1           | 2  | 1  | Male   | 1967 | 48     | 2    | 45-49      | 0.8            |    |
| 4116   | 380120255 | 2        | Taiwan  | 1           | 2  | 1  | Male   | 1951 | 64     | 5    | >=60       | 1.6            |    |
| 4119   | 350261096 | 3        | Korea   | 1           | 2  | 1  | Male   | 1966 | 49     | 2    | 45-49      | 0.8            |    |
| 4120   | 380211734 | 2        | Taiwan  | 1           | 2  | 2  | Female | 1971 | 44     | 1    | 40-44 year | 0.8            | 2  |
| 4121   | 380018377 | 2        | Taiwan  | 1           | 2  | 2  | Female | 1971 | 44     | 1    | 40-44 year | 0.8            | 2  |
| 4122   | 350251873 | 3        | Korea   | 1           | 2  | 1  | Male   | 1953 | 62     | 5    | >=60       | 1.6            |    |
| 4124   | 350287749 | 3        | Korea   | 1           | 2  | 2  | Female | 1970 | 45     | 2    | 45-49      | 0.9            | 2  |
| 4126   | 380215350 | 2        | Taiwan  | 1           | 2  | 2  | Female | 1969 | 46     | 2    | 45-49      | 0.9            | 2  |
| 4127   | 380108593 | 2        | Taiwan  | 1           | 2  | 1  | Male   | 1964 | 51     | 3    | 50-54      | 0.8            |    |
| 4131   | 350193927 | 3        | Korea   | 1           | 2  | 2  | Female | 1963 | 52     | 3    | 50-54      | 0.8            |    |
| 4134   | 350239591 | 3        | Korea   | 1           | 2  | 2  | Female | 1972 | 43     | 1    | 40-44 year | 0.9            | 2  |
| 4144   | 380172782 | 2        | Taiwan  | 1           | 2  | 1  | Male   | 1950 | 65     | 5    | >=60       | 1.6            |    |
| 4145   | 350295101 | 3        | Korea   | 1           | 2  | 1  | Male   | 1967 | 48     | 2    | 45-49      | 0.8            |    |



| respid | SubsID    | dCountry | Country | QDisclaimer | Q1 | Q2 | Gender   | Q3_1 | age Nr | dAge | age Group  | Weight in Ctry | Q4 |
|--------|-----------|----------|---------|-------------|----|----|----------|------|--------|------|------------|----------------|----|
| 4146   | 350298858 | 3        | Korea   | 1           | 1  | 2  | 1 Male   | 1967 | 48     | 2    | 45-49      | 0.8            |    |
| 4147   | 350285959 | 3        | Korea   | 1           | 1  | 2  | 1 Male   | 1969 | 46     | 2    | 45-49      | 0.8            |    |
| 4149   | 350267024 | 3        | Korea   | 1           | 1  | 2  | 2 Female | 1966 | 49     | 2    | 45-49      | 0.9            | 2  |
| 4150   | 350108965 | 3        | Korea   | 1           | 1  | 2  | 1 Male   | 1962 | 53     | 3    | 50-54      | 0.9            |    |
| 4151   | 350226037 | 3        | Korea   | 1           | 1  | 2  | 2 Female | 1969 | 46     | 2    | 45-49      | 0.9            | 2  |
| 4153   | 350181467 | 3        | Korea   | 1           | 1  | 2  | 2 Female | 1975 | 40     | 1    | 40-44 year | 0.9            | 2  |
| 4155   | 380004195 | 2        | Taiwan  | 1           | 1  | 2  | 2 Female | 1965 | 50     | 3    | 50-54      | 0.9            |    |
| 4157   | 380064116 | 2        | Taiwan  | 1           | 1  | 2  | 1 Male   | 1954 | 61     | 5    | >=60       | 1.6            |    |
| 4159   | 350252194 | 3        | Korea   | 1           | 1  | 2  | 2 Female | 1972 | 43     | 1    | 40-44 year | 0.9            | 2  |
| 4160   | 350336689 | 3        | Korea   | 1           | 1  | 2  | 1 Male   | 1971 | 44     | 1    | 40-44 year | 0.9            |    |
| 4161   | 350339921 | 3        | Korea   | 1           | 1  | 2  | 1 Male   | 1966 | 49     | 2    | 45-49      | 0.8            |    |
| 4163   | 350210520 | 3        | Korea   | 1           | 1  | 2  | 2 Female | 1963 | 52     | 3    | 50-54      | 0.8            |    |
| 4164   | 350292070 | 3        | Korea   | 1           | 1  | 2  | 1 Male   | 1969 | 46     | 2    | 45-49      | 0.8            |    |
| 4165   | 380098706 | 2        | Taiwan  | 1           | 1  | 2  | 2 Female | 1960 | 55     | 4    | 55-59      | 0.9            |    |
| 4166   | 350294289 | 3        | Korea   | 1           | 1  | 2  | 1 Male   | 1973 | 42     | 1    | 40-44 year | 0.9            |    |
| 4167   | 380152892 | 2        | Taiwan  | 1           | 1  | 2  | 2 Female | 1971 | 44     | 1    | 40-44 year | 0.8            | 2  |
| 4170   | 350252771 | 3        | Korea   | 1           | 1  | 2  | 2 Female | 1975 | 40     | 1    | 40-44 year | 0.9            | 2  |
| 4172   | 350347025 | 3        | Korea   | 1           | 1  | 2  | 1 Male   | 1959 | 56     | 4    | 55-59      | 0.8            |    |
| 4173   | 350305106 | 3        | Korea   | 1           | 1  | 1  | 1 Male   | 1971 | 44     | 1    | 40-44 year | 0.9            |    |
| 4180   | 380120644 | 2        | Taiwan  | 1           | 1  | 2  | 2 Female | 1960 | 55     | 4    | 55-59      | 0.9            |    |
| 4185   | 350076385 | 3        | Korea   | 1           | 1  | 2  | 1 Male   | 1970 | 45     | 2    | 45-49      | 0.8            |    |
| 4187   | 380039307 | 2        | Taiwan  | 1           | 1  | 2  | 1 Male   | 1973 | 42     | 1    | 40-44 year | 0.8            |    |
| 4190   | 350196050 | 3        | Korea   | 1           | 1  | 2  | 1 Male   | 1974 | 41     | 1    | 40-44 year | 0.9            |    |
| 4191   | 350189857 | 3        | Korea   | 1           | 1  | 2  | 1 Male   | 1975 | 40     | 1    | 40-44 year | 0.9            |    |
| 4193   | 350204938 | 3        | Korea   | 1           | 1  | 2  | 1 Male   | 1959 | 56     | 4    | 55-59      | 0.8            |    |
| 4194   | 350246897 | 3        | Korea   | 1           | 1  | 2  | 1 Male   | 1974 | 41     | 1    | 40-44 year | 0.9            |    |
| 4195   | 350348550 | 3        | Korea   | 1           | 1  | 2  | 1 Male   | 1966 | 49     | 2    | 45-49      | 0.8            |    |
| 4196   | 281176669 | 1        | China   | 1           | 1  | 2  | 2 Female | 1972 | 43     | 1    | 40-44 year | 1.0            | 2  |
| 4197   | 380091180 | 2        | Taiwan  | 1           | 1  | 2  | 2 Female | 1964 | 51     | 3    | 50-54      | 0.9            |    |
| 4198   | 380015418 | 2        | Taiwan  | 1           | 1  | 2  | 1 Male   | 1968 | 47     | 2    | 45-49      | 0.8            |    |
| 4199   | 281128756 | 1        | China   | 1           | 1  | 2  | 2 Female | 1963 | 52     | 3    | 50-54      | 1.2            |    |
| 4205   | 350246825 | 3        | Korea   | 1           | 1  | 2  | 2 Female | 1966 | 49     | 2    | 45-49      | 0.9            | 2  |

| respid | SubsID    | dCountry | Country | QDisclaimer | Q1 | Q2 | Gender   | Q3_1 | age Nr | dAge | age Group  | Weight in Ctry | Q4 |
|--------|-----------|----------|---------|-------------|----|----|----------|------|--------|------|------------|----------------|----|
| 4206   | 380092552 | 2        | Taiwan  | 1           | 1  | 2  | 2 Female | 1968 | 47     | 2    | 45-49      | 0.9            | 2  |
| 4207   | 350256795 | 3        | Korea   | 1           | 1  | 2  | 1 Male   | 1971 | 44     | 1    | 40-44 year | 0.9            |    |
| 4214   | 380071638 | 2        | Taiwan  | 1           | 1  | 2  | 1 Male   | 1948 | 67     | 5    | >=60       | 1.6            |    |
| 4215   | 350346934 | 3        | Korea   | 1           | 1  | 2  | 1 Male   | 1969 | 46     | 2    | 45-49      | 0.8            |    |
| 4217   | 350034448 | 3        | Korea   | 1           | 1  | 2  | 1 Male   | 1966 | 49     | 2    | 45-49      | 0.8            |    |
| 4219   | 350253046 | 3        | Korea   | 1           | 1  | 2  | 2 Female | 1970 | 45     | 2    | 45-49      | 0.9            | 2  |
| 4223   | 350083712 | 3        | Korea   | 1           | 1  | 2  | 2 Female | 1974 | 41     | 1    | 40-44 year | 0.9            | 2  |
| 4226   | 380154108 | 2        | Taiwan  | 1           | 1  | 2  | 1 Male   | 1962 | 53     | 3    | 50-54      | 0.8            |    |
| 4229   | 350310682 | 3        | Korea   | 1           | 1  | 2  | 2 Female | 1973 | 42     | 1    | 40-44 year | 0.9            | 2  |
| 4230   | 380144642 | 2        | Taiwan  | 1           | 1  | 2  | 1 Male   | 1951 | 64     | 5    | >=60       | 1.6            |    |
| 4232   | 350295515 | 3        | Korea   | 1           | 1  | 2  | 2 Female | 1969 | 46     | 2    | 45-49      | 0.9            | 2  |
| 4233   | 350330749 | 3        | Korea   | 1           | 1  | 2  | 1 Male   | 1961 | 54     | 3    | 50-54      | 0.9            |    |
| 4234   | 281175302 | 1        | China   | 1           | 1  | 2  | 2 Female | 1974 | 41     | 1    | 40-44 year | 1.0            | 2  |
| 4235   | 280833034 | 1        | China   | 1           | 1  | 2  | 1 Male   | 1950 | 65     | 5    | >=60       | 1.0            |    |
| 4236   | 380145366 | 2        | Taiwan  | 1           | 1  | 2  | 2 Female | 1972 | 43     | 1    | 40-44 year | 0.8            | 2  |
| 4237   | 350334415 | 3        | Korea   | 1           | 1  | 2  | 2 Female | 1964 | 51     | 3    | 50-54      | 0.8            |    |
| 4238   | 350287309 | 3        | Korea   | 1           | 1  | 2  | 1 Male   | 1972 | 43     | 1    | 40-44 year | 0.9            |    |
| 4240   | 380067736 | 2        | Taiwan  | 1           | 1  | 2  | 1 Male   | 1956 | 59     | 4    | 55-59      | 0.7            |    |
| 4241   | 380122418 | 2        | Taiwan  | 1           | 1  | 2  | 1 Male   | 1973 | 42     | 1    | 40-44 year | 0.8            |    |
| 4247   | 350110415 | 3        | Korea   | 1           | 1  | 2  | 1 Male   | 1964 | 51     | 3    | 50-54      | 0.9            |    |
| 4250   | 380152196 | 2        | Taiwan  | 1           | 1  | 2  | 2 Female | 1953 | 62     | 5    | >=60       | 1.7            |    |
| 4251   | 380137738 | 2        | Taiwan  | 1           | 1  | 2  | 2 Female | 1969 | 46     | 2    | 45-49      | 0.9            | 2  |
| 4253   | 380001917 | 2        | Taiwan  | 1           | 1  | 2  | 1 Male   | 1968 | 47     | 2    | 45-49      | 0.8            |    |
| 4254   | 350205920 | 3        | Korea   | 1           | 1  | 2  | 2 Female | 1975 | 40     | 1    | 40-44 year | 0.9            | 2  |
| 4258   | 380102921 | 2        | Taiwan  | 1           | 1  | 2  | 1 Male   | 1951 | 64     | 5    | >=60       | 1.6            |    |
| 4260   | 380121536 | 2        | Taiwan  | 1           | 1  | 2  | 2 Female | 1967 | 48     | 2    | 45-49      | 0.9            | 2  |
| 4263   | 350303882 | 3        | Korea   | 1           | 1  | 2  | 2 Female | 1973 | 42     | 1    | 40-44 year | 0.9            | 2  |
| 4265   | 350346566 | 3        | Korea   | 1           | 1  | 2  | 1 Male   | 1969 | 46     | 2    | 45-49      | 0.8            |    |
| 4266   | 380151921 | 2        | Taiwan  | 1           | 1  | 2  | 1 Male   | 1973 | 42     | 1    | 40-44 year | 0.8            |    |
| 4267   | 380147562 | 2        | Taiwan  | 1           | 1  | 2  | 1 Male   | 1964 | 51     | 3    | 50-54      | 0.8            |    |
| 4270   | 281297162 | 1        | China   | 1           | 1  | 2  | 1 Male   | 1970 | 45     | 2    | 45-49      | 1.0            |    |
| 4273   | 350232962 | 3        | Korea   | 1           | 1  | 2  | 2 Female | 1961 | 54     | 3    | 50-54      | 0.8            |    |

| respid | SubsID    | dCountry | Country | QDisclaimer | Q1 | Q2 | Gender   | Q3_1 | age Nr | dAge | age Group  | Weight in Ctry | Q4 |
|--------|-----------|----------|---------|-------------|----|----|----------|------|--------|------|------------|----------------|----|
| 4280   | 380039029 | 2        | Taiwan  | 1           | 1  | 2  | 1 Male   | 1962 | 53     | 3    | 50-54      | 0.8            |    |
| 4281   | 350149600 | 3        | Korea   | 1           | 1  | 2  | 1 Male   | 1967 | 48     | 2    | 45-49      | 0.8            |    |
| 4282   | 350127461 | 3        | Korea   | 1           | 1  | 2  | 1 Male   | 1972 | 43     | 1    | 40-44 year | 0.9            |    |
| 4283   | 350348095 | 3        | Korea   | 1           | 1  | 2  | 2 Female | 1974 | 41     | 1    | 40-44 year | 0.9            | 2  |
| 4286   | 380210158 | 2        | Taiwan  | 1           | 1  | 2  | 1 Male   | 1964 | 51     | 3    | 50-54      | 0.8            |    |
| 4287   | 380170901 | 2        | Taiwan  | 1           | 1  | 2  | 2 Female | 1974 | 41     | 1    | 40-44 year | 0.8            | 2  |
| 4289   | 350350940 | 3        | Korea   | 1           | 1  | 2  | 2 Female | 1971 | 44     | 1    | 40-44 year | 0.9            | 2  |
| 4290   | 350240353 | 3        | Korea   | 1           | 1  | 2  | 1 Male   | 1970 | 45     | 2    | 45-49      | 0.8            |    |
| 4291   | 350310981 | 3        | Korea   | 1           | 1  | 2  | 2 Female | 1972 | 43     | 1    | 40-44 year | 0.9            | 2  |
| 4292   | 350347947 | 3        | Korea   | 1           | 1  | 2  | 1 Male   | 1973 | 42     | 1    | 40-44 year | 0.9            |    |
| 4293   | 380001158 | 2        | Taiwan  | 1           | 1  | 2  | 1 Male   | 1966 | 49     | 2    | 45-49      | 0.8            |    |
| 4294   | 350240639 | 3        | Korea   | 1           | 1  | 2  | 2 Female | 1973 | 42     | 1    | 40-44 year | 0.9            | 2  |
| 4295   | 350331498 | 3        | Korea   | 1           | 1  | 2  | 2 Female | 1973 | 42     | 1    | 40-44 year | 0.9            | 2  |
| 4296   | 350092828 | 3        | Korea   | 1           | 1  | 2  | 1 Male   | 1968 | 47     | 2    | 45-49      | 0.8            |    |
| 4297   | 350130241 | 3        | Korea   | 1           | 1  | 2  | 1 Male   | 1970 | 45     | 2    | 45-49      | 0.8            |    |
| 4298   | 380005234 | 2        | Taiwan  | 1           | 1  | 2  | 2 Female | 1965 | 50     | 3    | 50-54      | 0.9            |    |
| 4299   | 350247997 | 3        | Korea   | 1           | 1  | 2  | 2 Female | 1961 | 54     | 3    | 50-54      | 0.8            |    |
| 4300   | 380185333 | 2        | Taiwan  | 1           | 1  | 2  | 2 Female | 1975 | 40     | 1    | 40-44 year | 0.8            | 2  |
| 4301   | 350230599 | 3        | Korea   | 1           | 1  | 2  | 2 Female | 1973 | 42     | 1    | 40-44 year | 0.9            | 2  |
| 4302   | 350283647 | 3        | Korea   | 1           | 1  | 2  | 2 Female | 1964 | 51     | 3    | 50-54      | 0.8            |    |
| 4304   | 350294331 | 3        | Korea   | 1           | 1  | 2  | 1 Male   | 1958 | 57     | 4    | 55-59      | 0.8            |    |
| 4305   | 350226527 | 3        | Korea   | 1           | 1  | 2  | 1 Male   | 1972 | 43     | 1    | 40-44 year | 0.9            |    |
| 4307   | 350241215 | 3        | Korea   | 1           | 1  | 2  | 1 Male   | 1970 | 45     | 2    | 45-49      | 0.8            |    |
| 4308   | 350140110 | 3        | Korea   | 1           | 1  | 2  | 1 Male   | 1973 | 42     | 1    | 40-44 year | 0.9            |    |
| 4312   | 350234472 | 3        | Korea   | 1           | 1  | 2  | 1 Male   | 1962 | 53     | 3    | 50-54      | 0.9            |    |
| 4314   | 350260729 | 3        | Korea   | 1           | 1  | 2  | 2 Female | 1965 | 50     | 3    | 50-54      | 0.8            |    |
| 4316   | 380211245 | 2        | Taiwan  | 1           | 1  | 2  | 1 Male   | 1967 | 48     | 2    | 45-49      | 0.8            |    |
| 4317   | 350223470 | 3        | Korea   | 1           | 1  | 2  | 2 Female | 1971 | 44     | 1    | 40-44 year | 0.9            | 2  |
| 4319   | 350151388 | 3        | Korea   | 1           | 1  | 2  | 2 Female | 1974 | 41     | 1    | 40-44 year | 0.9            | 2  |
| 4323   | 380172808 | 2        | Taiwan  | 1           | 1  | 2  | 2 Female | 1972 | 43     | 1    | 40-44 year | 0.8            | 2  |
| 4337   | 380211859 | 2        | Taiwan  | 1           | 1  | 2  | 2 Female | 1971 | 44     | 1    | 40-44 year | 0.8            | 2  |
| 4341   | 350254090 | 3        | Korea   | 1           | 1  | 2  | 2 Female | 1970 | 45     | 2    | 45-49      | 0.9            | 2  |

| respid | SubsID    | dCountry | Country  | QDisclaimer | Q1 | Q2 | Gender   | Q3_1 | age Nr | dAge | age Group    | Weight in Ctry | Q4 |
|--------|-----------|----------|----------|-------------|----|----|----------|------|--------|------|--------------|----------------|----|
| 4342   | 350233466 |          | 3 Korea  |             | 1  | 2  | 2 Female | 1973 | 42     |      | 1 40-44 year | 0.9            | 2  |
| 4344   | 350241246 |          | 3 Korea  |             | 1  | 2  | 1 Male   | 1966 | 49     |      | 2 45-49      | 0.8            |    |
| 4345   | 350152021 |          | 3 Korea  |             | 1  | 2  | 2 Female | 1972 | 43     |      | 1 40-44 year | 0.9            | 2  |
| 4346   | 350241255 |          | 3 Korea  |             | 1  | 2  | 2 Female | 1974 | 41     |      | 1 40-44 year | 0.9            | 2  |
| 4347   | 380166948 |          | 2 Taiwan |             | 1  | 2  | 1 Male   | 1974 | 41     |      | 1 40-44 year | 0.8            |    |
| 4350   | 281290645 |          | 1 China  |             | 1  | 2  | 2 Female | 1973 | 42     |      | 1 40-44 year | 1.0            | 2  |
| 4352   | 380056618 |          | 2 Taiwan |             | 1  | 2  | 1 Male   | 1962 | 53     |      | 3 50-54      | 0.8            |    |
| 4353   | 281319099 |          | 1 China  |             | 1  | 2  | 2 Female | 1966 | 49     |      | 2 45-49      | 1.0            | 2  |
| 4355   | 350253052 |          | 3 Korea  |             | 1  | 2  | 1 Male   | 1969 | 46     |      | 2 45-49      | 0.8            |    |
| 4356   | 350292988 |          | 3 Korea  |             | 1  | 2  | 1 Male   | 1970 | 45     |      | 2 45-49      | 0.8            |    |
| 4358   | 280410518 |          | 1 China  |             | 1  | 2  | 1 Male   | 1963 | 52     |      | 3 50-54      | 1.0            |    |
| 4359   | 350303647 |          | 3 Korea  |             | 1  | 2  | 1 Male   | 1970 | 45     |      | 2 45-49      | 0.8            |    |
| 4360   | 350258223 |          | 3 Korea  |             | 1  | 2  | 1 Male   | 1972 | 43     |      | 1 40-44 year | 0.9            |    |
| 4361   | 350327702 |          | 3 Korea  |             | 1  | 2  | 1 Male   | 1970 | 45     |      | 2 45-49      | 0.8            |    |
| 4363   | 350343183 |          | 3 Korea  |             | 1  | 2  | 1 Male   | 1972 | 43     |      | 1 40-44 year | 0.9            |    |
| 4364   | 350310496 |          | 3 Korea  |             | 1  | 2  | 2 Female | 1969 | 46     |      | 2 45-49      | 0.9            | 2  |
| 4365   | 350307069 |          | 3 Korea  |             | 1  | 2  | 1 Male   | 1938 | 77     |      | 5 >=60       | 1.6            |    |
| 4367   | 281279947 |          | 1 China  |             | 1  | 2  | 1 Male   | 1975 | 40     |      | 1 40-44 year | 1.0            |    |
| 4369   | 380203884 |          | 2 Taiwan |             | 1  | 2  | 2 Female | 1974 | 41     |      | 1 40-44 year | 0.8            | 2  |
| 4373   | 350321152 |          | 3 Korea  |             | 1  | 2  | 2 Female | 1975 | 40     |      | 1 40-44 year | 0.9            | 2  |
| 4374   | 350203065 |          | 3 Korea  |             | 1  | 1  | 2 Female | 1972 | 43     |      | 1 40-44 year | 0.9            | 2  |
| 4375   | 380033401 |          | 2 Taiwan |             | 1  | 2  | 2 Female | 1969 | 46     |      | 2 45-49      | 0.9            | 2  |
| 4378   | 380106137 |          | 2 Taiwan |             | 1  | 2  | 2 Female | 1971 | 44     |      | 1 40-44 year | 0.8            | 2  |
| 4379   | 350210655 |          | 3 Korea  |             | 1  | 2  | 1 Male   | 1965 | 50     |      | 3 50-54      | 0.9            |    |
| 4382   | 350148713 |          | 3 Korea  |             | 1  | 2  | 1 Male   | 1967 | 48     |      | 2 45-49      | 0.8            |    |
| 4383   | 380156229 |          | 2 Taiwan |             | 1  | 1  | 1 Male   | 1965 | 50     |      | 3 50-54      | 0.8            |    |
| 4384   | 350310979 |          | 3 Korea  |             | 1  | 2  | 1 Male   | 1961 | 54     |      | 3 50-54      | 0.9            |    |
| 4385   | 350343952 |          | 3 Korea  |             | 1  | 2  | 1 Male   | 1963 | 52     |      | 3 50-54      | 0.9            |    |
| 4388   | 350348283 |          | 3 Korea  |             | 1  | 2  | 1 Male   | 1965 | 50     |      | 3 50-54      | 0.9            |    |
| 4389   | 350342115 |          | 3 Korea  |             | 1  | 2  | 2 Female | 1967 | 48     |      | 2 45-49      | 0.9            | 2  |
| 4391   | 380180880 |          | 2 Taiwan |             | 1  | 2  | 2 Female | 1971 | 44     |      | 1 40-44 year | 0.8            | 2  |
| 4392   | 350127787 |          | 3 Korea  |             | 1  | 2  | 1 Male   | 1964 | 51     |      | 3 50-54      | 0.9            |    |

| respid | SubsID    | dCountry | Country | QDisclaimer | Q1 | Q2 | Gender   | Q3_1 | age Nr | dAge | age Group  | Weight in Ctry | Q4 |
|--------|-----------|----------|---------|-------------|----|----|----------|------|--------|------|------------|----------------|----|
| 4393   | 350233912 | 3        | Korea   | 1           | 1  | 2  | 2 Female | 1972 | 43     | 1    | 40-44 year | 0.9            | 2  |
| 4395   | 350243580 | 3        | Korea   | 1           | 1  | 2  | 1 Male   | 1971 | 44     | 1    | 40-44 year | 0.9            |    |
| 4397   | 350162630 | 3        | Korea   | 1           | 1  | 2  | 2 Female | 1974 | 41     | 1    | 40-44 year | 0.9            | 2  |
| 4398   | 380211728 | 2        | Taiwan  | 1           | 1  | 2  | 2 Female | 1972 | 43     | 1    | 40-44 year | 0.8            | 2  |
| 4399   | 350340368 | 3        | Korea   | 1           | 1  | 2  | 1 Male   | 1969 | 46     | 2    | 45-49      | 0.8            |    |
| 4400   | 380151042 | 2        | Taiwan  | 1           | 1  | 2  | 1 Male   | 1974 | 41     | 1    | 40-44 year | 0.8            |    |
| 4401   | 281182975 | 1        | China   | 1           | 1  | 2  | 1 Male   | 1970 | 45     | 2    | 45-49      | 1.0            |    |
| 4402   | 350224226 | 3        | Korea   | 1           | 1  | 2  | 2 Female | 1967 | 48     | 2    | 45-49      | 0.9            | 2  |
| 4404   | 350291899 | 3        | Korea   | 1           | 1  | 2  | 2 Female | 1974 | 41     | 1    | 40-44 year | 0.9            | 2  |
| 4405   | 380120501 | 2        | Taiwan  | 1           | 1  | 2  | 1 Male   | 1973 | 42     | 1    | 40-44 year | 0.8            |    |
| 4407   | 380143568 | 2        | Taiwan  | 1           | 1  | 2  | 1 Male   | 1965 | 50     | 3    | 50-54      | 0.8            |    |
| 4408   | 350229479 | 3        | Korea   | 1           | 1  | 2  | 2 Female | 1962 | 53     | 3    | 50-54      | 0.8            |    |
| 4411   | 280260060 | 1        | China   | 1           | 1  | 2  | 1 Male   | 1972 | 43     | 1    | 40-44 year | 1.0            |    |
| 4420   | 280143151 | 1        | China   | 1           | 1  | 2  | 2 Female | 1975 | 40     | 1    | 40-44 year | 1.0            | 2  |
| 4421   | 280603213 | 1        | China   | 1           | 1  | 2  | 2 Female | 1973 | 42     | 1    | 40-44 year | 1.0            | 2  |
| 4424   | 350243825 | 3        | Korea   | 1           | 1  | 1  | 2 Female | 1959 | 56     | 4    | 55-59      | 0.7            |    |
| 4425   | 350350041 | 3        | Korea   | 1           | 1  | 2  | 2 Female | 1971 | 44     | 1    | 40-44 year | 0.9            | 2  |
| 4427   | 280032956 | 1        | China   | 1           | 1  | 2  | 2 Female | 1955 | 60     | 5    | >=60       | 1.1            |    |
| 4430   | 350310298 | 3        | Korea   | 1           | 1  | 2  | 2 Female | 1969 | 46     | 2    | 45-49      | 0.9            | 2  |
| 4431   | 350227869 | 3        | Korea   | 1           | 1  | 2  | 2 Female | 1974 | 41     | 1    | 40-44 year | 0.9            | 2  |
| 4432   | 350097719 | 3        | Korea   | 1           | 1  | 1  | 1 Male   | 1964 | 51     | 3    | 50-54      | 0.9            |    |
| 4436   | 380212039 | 2        | Taiwan  | 1           | 1  | 2  | 1 Male   | 1972 | 43     | 1    | 40-44 year | 0.8            |    |
| 4439   | 380039375 | 2        | Taiwan  | 1           | 1  | 2  | 1 Male   | 1971 | 44     | 1    | 40-44 year | 0.8            |    |
| 4451   | 350085491 | 3        | Korea   | 1           | 1  | 2  | 1 Male   | 1970 | 45     | 2    | 45-49      | 0.8            |    |
| 4452   | 281235081 | 1        | China   | 1           | 1  | 2  | 1 Male   | 1958 | 57     | 4    | 55-59      | 0.9            |    |
| 4458   | 350310752 | 3        | Korea   | 1           | 1  | 2  | 1 Male   | 1969 | 46     | 2    | 45-49      | 0.8            |    |
| 4464   | 350300512 | 3        | Korea   | 1           | 1  | 2  | 2 Female | 1972 | 43     | 1    | 40-44 year | 0.9            | 2  |
| 4465   | 350283824 | 3        | Korea   | 1           | 1  | 2  | 1 Male   | 1952 | 63     | 5    | >=60       | 1.6            |    |
| 4467   | 350314291 | 3        | Korea   | 1           | 1  | 2  | 1 Male   | 1966 | 49     | 2    | 45-49      | 0.8            |    |
| 4470   | 350108713 | 3        | Korea   | 1           | 1  | 2  | 1 Male   | 1964 | 51     | 3    | 50-54      | 0.9            |    |
| 4471   | 380131400 | 2        | Taiwan  | 1           | 1  | 2  | 1 Male   | 1970 | 45     | 2    | 45-49      | 0.8            |    |
| 4472   | 350244980 | 3        | Korea   | 1           | 1  | 2  | 1 Male   | 1966 | 49     | 2    | 45-49      | 0.8            |    |

| respid | SubsID    | dCountry | Country  | QDisclaim<br>er | Q1 | Q2       | Gender | Q3_1 | age Nr | dAge       | age Group | Weight in<br>Ctry | Q4 |
|--------|-----------|----------|----------|-----------------|----|----------|--------|------|--------|------------|-----------|-------------------|----|
| 4473   | 350113188 |          | 3 Korea  | 1               | 2  | 1 Male   | 1972   | 43   | 1      | 40-44 year | 0.9       |                   |    |
| 4475   | 350147657 |          | 3 Korea  | 1               | 2  | 2 Female | 1966   | 49   | 2      | 45-49      | 0.9       | 2                 |    |
| 4476   | 350153309 |          | 3 Korea  | 1               | 2  | 2 Female | 1972   | 43   | 1      | 40-44 year | 0.9       | 2                 |    |
| 4478   | 350233181 |          | 3 Korea  | 1               | 2  | 1 Male   | 1974   | 41   | 1      | 40-44 year | 0.9       |                   |    |
| 4485   | 281333967 |          | 1 China  | 1               | 2  | 2 Female | 1963   | 52   | 3      | 50-54      | 1.2       |                   |    |
| 4486   | 350336576 |          | 3 Korea  | 1               | 2  | 2 Female | 1971   | 44   | 1      | 40-44 year | 0.9       | 2                 |    |
| 4490   | 350176699 |          | 3 Korea  | 1               | 2  | 2 Female | 1970   | 45   | 2      | 45-49      | 0.9       | 2                 |    |
| 4502   | 281127570 |          | 1 China  | 1               | 2  | 1 Male   | 1973   | 42   | 1      | 40-44 year | 1.0       |                   |    |
| 4503   | 200408    |          | 3 Korea  | 1               | 2  | 2 Female | 1968   | 47   | 2      | 45-49      | 0.9       | 2                 |    |
| 4504   | 100683    |          | 1 China  | 1               | 1  | 2 Female | 1969   | 46   | 2      | 45-49      | 1.0       | 2                 |    |
| 4506   | 100684    |          | 1 China  | 1               | 2  | 2 Female | 1963   | 52   | 3      | 50-54      | 1.2       |                   |    |
| 4508   | 380060201 |          | 2 Taiwan | 1               | 2  | 2 Female | 1955   | 60   | 5      | >=60       | 1.7       |                   |    |
| 4515   | 100686    |          | 1 China  | 1               | 2  | 1 Male   | 1953   | 62   | 5      | >=60       | 1.0       |                   |    |
| 4516   | 300442    |          | 2 Taiwan | 1               | 2  | 1 Male   | 1957   | 58   | 4      | 55-59      | 0.7       |                   |    |
| 4519   | 300443    |          | 2 Taiwan | 1               | 2  | 1 Male   | 1975   | 40   | 1      | 40-44 year | 0.8       |                   |    |
| 4523   | 200409    |          | 3 Korea  | 1               | 1  | 2 Female | 1958   | 57   | 4      | 55-59      | 0.7       |                   |    |
| 4525   | 350152127 |          | 3 Korea  | 1               | 2  | 1 Male   | 1952   | 63   | 5      | >=60       | 1.6       |                   |    |
| 4526   | 350234868 |          | 3 Korea  | 1               | 2  | 1 Male   | 1975   | 40   | 1      | 40-44 year | 0.9       |                   |    |
| 4528   | 200410    |          | 3 Korea  | 1               | 2  | 2 Female | 1969   | 46   | 2      | 45-49      | 0.9       | 2                 |    |
| 4530   | 300445    |          | 2 Taiwan | 1               | 2  | 1 Male   | 1968   | 47   | 2      | 45-49      | 0.8       |                   |    |
| 4531   | 100690    |          | 1 China  | 1               | 2  | 2 Female | 1973   | 42   | 1      | 40-44 year | 1.0       | 2                 |    |
| 4532   | 300446    |          | 2 Taiwan | 1               | 2  | 1 Male   | 1956   | 59   | 4      | 55-59      | 0.7       |                   |    |
| 4537   | 100692    |          | 1 China  | 1               | 2  | 2 Female | 1971   | 44   | 1      | 40-44 year | 1.0       | 2                 |    |
| 4538   | 300449    |          | 2 Taiwan | 1               | 2  | 2 Female | 1970   | 45   | 2      | 45-49      | 0.9       | 2                 |    |
| 4539   | 300450    |          | 2 Taiwan | 1               | 1  | 2 Female | 1973   | 42   | 1      | 40-44 year | 0.8       | 2                 |    |
| 4541   | 300451    |          | 2 Taiwan | 1               | 2  | 1 Male   | 1973   | 42   | 1      | 40-44 year | 0.8       |                   |    |
| 4543   | 300452    |          | 2 Taiwan | 1               | 2  | 1 Male   | 1971   | 44   | 1      | 40-44 year | 0.8       |                   |    |
| 4544   | 100693    |          | 1 China  | 1               | 2  | 2 Female | 1966   | 49   | 2      | 45-49      | 1.0       | 2                 |    |
| 4546   | 100694    |          | 1 China  | 1               | 2  | 1 Male   | 1968   | 47   | 2      | 45-49      | 1.0       |                   |    |
| 4547   | 300454    |          | 2 Taiwan | 1               | 2  | 2 Female | 1949   | 66   | 5      | >=60       | 1.7       |                   |    |
| 4549   | 300456    |          | 2 Taiwan | 1               | 2  | 2 Female | 1974   | 41   | 1      | 40-44 year | 0.8       | 2                 |    |
| 4550   | 300457    |          | 2 Taiwan | 1               | 2  | 1 Male   | 1960   | 55   | 4      | 55-59      | 0.7       |                   |    |

| respid | SubsID    | dCountry | Country | QDisclaimer | Q1 | Q2 | Gender   | Q3_1 | age Nr | dAge | age Group  | Weight in Ctry | Q4 |
|--------|-----------|----------|---------|-------------|----|----|----------|------|--------|------|------------|----------------|----|
| 4551   | 100695    | 1        | China   |             | 1  | 2  | 1 Male   | 1959 | 56     | 4    | 55-59      | 0.9            |    |
| 4554   | 100697    | 1        | China   |             | 1  | 2  | 1 Male   | 1970 | 45     | 2    | 45-49      | 1.0            |    |
| 4557   | 300459    | 2        | Taiwan  |             | 1  | 2  | 1 Male   | 1973 | 42     | 1    | 40-44 year | 0.8            |    |
| 4565   | 300462    | 2        | Taiwan  |             | 1  | 2  | 2 Female | 1967 | 48     | 2    | 45-49      | 0.9            | 2  |
| 4568   | 300463    | 2        | Taiwan  |             | 1  | 2  | 1 Male   | 1967 | 48     | 2    | 45-49      | 0.8            |    |
| 4569   | 100699    | 1        | China   |             | 1  | 2  | 2 Female | 1952 | 63     | 5    | >=60       | 1.1            |    |
| 4570   | 380216329 | 2        | Taiwan  |             | 1  | 2  | 1 Male   | 1972 | 43     | 1    | 40-44 year | 0.8            |    |
| 4572   | 300464    | 2        | Taiwan  |             | 1  | 2  | 1 Male   | 1965 | 50     | 3    | 50-54      | 0.8            |    |
| 4574   | 200411    | 3        | Korea   |             | 1  | 2  | 1 Male   | 1966 | 49     | 2    | 45-49      | 0.8            |    |
| 4576   | 200412    | 3        | Korea   |             | 1  | 2  | 2 Female | 1955 | 60     | 5    | >=60       | 1.6            |    |
| 4578   | 100701    | 1        | China   |             | 1  | 2  | 1 Male   | 1974 | 41     | 1    | 40-44 year | 1.0            |    |
| 4579   | 100252    | 1        | China   |             | 1  | 2  | 1 Male   | 1961 | 54     | 3    | 50-54      | 1.0            |    |
| 4580   | 300465    | 2        | Taiwan  |             | 1  | 2  | 2 Female | 1968 | 47     | 2    | 45-49      | 0.9            | 2  |
| 4581   | 300466    | 2        | Taiwan  |             | 1  | 2  | 1 Male   | 1970 | 45     | 2    | 45-49      | 0.8            |    |
| 4584   | 300467    | 2        | Taiwan  |             | 1  | 2  | 1 Male   | 1965 | 50     | 3    | 50-54      | 0.8            |    |
| 4586   | 300468    | 2        | Taiwan  |             | 1  | 2  | 1 Male   | 1965 | 50     | 3    | 50-54      | 0.8            |    |
| 4587   | 300469    | 2        | Taiwan  |             | 1  | 2  | 1 Male   | 1959 | 56     | 4    | 55-59      | 0.7            |    |
| 4590   | 200413    | 3        | Korea   |             | 1  | 2  | 1 Male   | 1957 | 58     | 4    | 55-59      | 0.8            |    |
| 4592   | 300471    | 2        | Taiwan  |             | 1  | 2  | 1 Male   | 1971 | 44     | 1    | 40-44 year | 0.8            |    |
| 4593   | 200314    | 3        | Korea   |             | 1  | 2  | 2 Female | 1963 | 52     | 3    | 50-54      | 0.8            |    |
| 4595   | 200414    | 3        | Korea   |             | 1  | 2  | 1 Male   | 1972 | 43     | 1    | 40-44 year | 0.9            |    |
| 4597   | 300472    | 2        | Taiwan  |             | 1  | 2  | 1 Male   | 1963 | 52     | 3    | 50-54      | 0.8            |    |
| 4598   | 200416    | 3        | Korea   |             | 1  | 2  | 1 Male   | 1954 | 61     | 5    | >=60       | 1.6            |    |
| 4599   | 300473    | 2        | Taiwan  |             | 1  | 2  | 1 Male   | 1972 | 43     | 1    | 40-44 year | 0.8            |    |
| 4600   | 300474    | 2        | Taiwan  |             | 1  | 2  | 2 Female | 1975 | 40     | 1    | 40-44 year | 0.8            | 2  |
| 4601   | 300475    | 2        | Taiwan  |             | 1  | 2  | 2 Female | 1974 | 41     | 1    | 40-44 year | 0.8            | 2  |
| 4608   | 350047973 | 3        | Korea   |             | 1  | 2  | 2 Female | 1956 | 59     | 4    | 55-59      | 0.7            |    |
| 4609   | 300480    | 2        | Taiwan  |             | 1  | 2  | 1 Male   | 1952 | 63     | 5    | >=60       | 1.6            |    |
| 4611   | 380146879 | 2        | Taiwan  |             | 1  | 2  | 2 Female | 1972 | 43     | 1    | 40-44 year | 0.8            | 2  |
| 4612   | 200417    | 3        | Korea   |             | 1  | 2  | 1 Male   | 1953 | 62     | 5    | >=60       | 1.6            |    |
| 4613   | 380103311 | 2        | Taiwan  |             | 1  | 2  | 1 Male   | 1974 | 41     | 1    | 40-44 year | 0.8            |    |
| 4616   | 300483    | 2        | Taiwan  |             | 1  | 2  | 1 Male   | 1962 | 53     | 3    | 50-54      | 0.8            |    |

| respid | SubsID    | dCountry | Country | QDisclaim<br>er | Q1 | Q2 | Gender | Q3_1 | age Nr | dAge | age Group  | Weight in<br>Ctry | Q4 |
|--------|-----------|----------|---------|-----------------|----|----|--------|------|--------|------|------------|-------------------|----|
| 4617   | 300484    | 2        | Taiwan  | 1               | 2  | 2  | Female | 1969 | 46     | 2    | 45-49      | 0.9               | 2  |
| 4620   | 300486    | 2        | Taiwan  | 1               | 2  | 2  | Female | 1972 | 43     | 1    | 40-44 year | 0.8               | 2  |
| 4621   | 100702    | 1        | China   | 1               | 2  | 1  | Male   | 1963 | 52     | 3    | 50-54      | 1.0               |    |
| 4622   | 200418    | 3        | Korea   | 1               | 1  | 1  | Male   | 1970 | 45     | 2    | 45-49      | 0.8               |    |
| 4624   | 200419    | 3        | Korea   | 1               | 2  | 2  | Female | 1962 | 53     | 3    | 50-54      | 0.8               |    |
| 4625   | 300414    | 2        | Taiwan  | 1               | 2  | 1  | Male   | 1970 | 45     | 2    | 45-49      | 0.8               |    |
| 4627   | 300488    | 2        | Taiwan  | 1               | 2  | 1  | Male   | 1960 | 55     | 4    | 55-59      | 0.7               |    |
| 4628   | 350212197 | 3        | Korea   | 1               | 2  | 1  | Male   | 1953 | 62     | 5    | >=60       | 1.6               |    |
| 4629   | 100703    | 1        | China   | 1               | 2  | 1  | Male   | 1961 | 54     | 3    | 50-54      | 1.0               |    |
| 4630   | 300489    | 2        | Taiwan  | 1               | 1  | 2  | Female | 1971 | 44     | 1    | 40-44 year | 0.8               | 2  |
| 4632   | 300490    | 2        | Taiwan  | 1               | 2  | 1  | Male   | 1970 | 45     | 2    | 45-49      | 0.8               |    |
| 4634   | 100705    | 1        | China   | 1               | 2  | 2  | Female | 1973 | 42     | 1    | 40-44 year | 1.0               | 2  |
| 4635   | 300491    | 2        | Taiwan  | 1               | 2  | 1  | Male   | 1971 | 44     | 1    | 40-44 year | 0.8               |    |
| 4636   | 200420    | 3        | Korea   | 1               | 2  | 1  | Male   | 1969 | 46     | 2    | 45-49      | 0.8               |    |
| 4637   | 300492    | 2        | Taiwan  | 1               | 2  | 1  | Male   | 1973 | 42     | 1    | 40-44 year | 0.8               |    |
| 4638   | 300493    | 2        | Taiwan  | 1               | 2  | 1  | Male   | 1972 | 43     | 1    | 40-44 year | 0.8               |    |
| 4639   | 300494    | 2        | Taiwan  | 1               | 2  | 2  | Female | 1971 | 44     | 1    | 40-44 year | 0.8               | 2  |
| 4641   | 300496    | 2        | Taiwan  | 1               | 2  | 2  | Female | 1968 | 47     | 2    | 45-49      | 0.9               | 2  |
| 4643   | 200421    | 3        | Korea   | 1               | 2  | 1  | Male   | 1971 | 44     | 1    | 40-44 year | 0.9               |    |
| 4645   | 100707    | 1        | China   | 1               | 2  | 1  | Male   | 1963 | 52     | 3    | 50-54      | 1.0               |    |
| 4646   | 350285059 | 3        | Korea   | 1               | 2  | 2  | Female | 1974 | 41     | 1    | 40-44 year | 0.9               | 2  |
| 4647   | 300495    | 2        | Taiwan  | 1               | 2  | 2  | Female | 1962 | 53     | 3    | 50-54      | 0.9               |    |
| 4648   | 100708    | 1        | China   | 1               | 2  | 2  | Female | 1953 | 62     | 5    | >=60       | 1.1               |    |
| 4649   | 300498    | 2        | Taiwan  | 1               | 2  | 2  | Female | 1970 | 45     | 2    | 45-49      | 0.9               | 2  |
| 4650   | 350151648 | 3        | Korea   | 1               | 1  | 1  | Male   | 1971 | 44     | 1    | 40-44 year | 0.9               |    |
| 4651   | 300499    | 2        | Taiwan  | 1               | 2  | 1  | Male   | 1964 | 51     | 3    | 50-54      | 0.8               |    |
| 4652   | 200422    | 3        | Korea   | 1               | 2  | 2  | Female | 1963 | 52     | 3    | 50-54      | 0.8               |    |
| 4653   | 100709    | 1        | China   | 1               | 2  | 2  | Female | 1955 | 60     | 5    | >=60       | 1.1               |    |
| 4657   | 100710    | 1        | China   | 1               | 2  | 1  | Male   | 1973 | 42     | 1    | 40-44 year | 1.0               |    |
| 4660   | 100485    | 1        | China   | 1               | 2  | 2  | Female | 1969 | 46     | 2    | 45-49      | 1.0               | 2  |
| 4661   | 300501    | 2        | Taiwan  | 1               | 2  | 2  | Female | 1970 | 45     | 2    | 45-49      | 0.9               | 2  |
| 4662   | 380216254 | 2        | Taiwan  | 1               | 2  | 2  | Female | 1960 | 55     | 4    | 55-59      | 0.9               |    |



| respid | SubsID    | dCountry | Country | QDisclaimer | Q1 | Q2 | Gender   | Q3_1 | age Nr | dAge | age Group  | Weight in Ctry | Q4 |
|--------|-----------|----------|---------|-------------|----|----|----------|------|--------|------|------------|----------------|----|
| 4667   | 350235947 | 3        | Korea   | 1           | 1  | 2  | 1 Male   | 1972 | 43     | 1    | 40-44 year | 0.9            |    |
| 4669   | 300502    | 2        | Taiwan  | 1           | 1  | 2  | 2 Female | 1969 | 46     | 2    | 45-49      | 0.9            | 2  |
| 4671   | 300503    | 2        | Taiwan  | 1           | 1  | 2  | 1 Male   | 1964 | 51     | 3    | 50-54      | 0.8            |    |
| 4672   | 200374    | 3        | Korea   | 1           | 1  | 2  | 1 Male   | 1958 | 57     | 4    | 55-59      | 0.8            |    |
| 4673   | 100712    | 1        | China   | 1           | 1  | 2  | 2 Female | 1955 | 60     | 5    | >=60       | 1.1            |    |
| 4677   | 200424    | 3        | Korea   | 1           | 1  | 2  | 2 Female | 1960 | 55     | 4    | 55-59      | 0.7            |    |
| 4679   | 300504    | 2        | Taiwan  | 1           | 1  | 2  | 1 Male   | 1959 | 56     | 4    | 55-59      | 0.7            |    |
| 4683   | 100714    | 1        | China   | 1           | 1  | 2  | 1 Male   | 1970 | 45     | 2    | 45-49      | 1.0            |    |
| 4684   | 300507    | 2        | Taiwan  | 1           | 1  | 2  | 2 Female | 1970 | 45     | 2    | 45-49      | 0.9            | 2  |
| 4685   | 300508    | 2        | Taiwan  | 1           | 1  | 2  | 1 Male   | 1966 | 49     | 2    | 45-49      | 0.8            |    |
| 4686   | 300509    | 2        | Taiwan  | 1           | 1  | 2  | 1 Male   | 1968 | 47     | 2    | 45-49      | 0.8            |    |
| 4687   | 100715    | 1        | China   | 1           | 1  | 2  | 1 Male   | 1972 | 43     | 1    | 40-44 year | 1.0            |    |
| 4688   | 100716    | 1        | China   | 1           | 1  | 2  | 1 Male   | 1962 | 53     | 3    | 50-54      | 1.0            |    |
| 4691   | 300510    | 2        | Taiwan  | 1           | 1  | 2  | 1 Male   | 1973 | 42     | 1    | 40-44 year | 0.8            |    |
| 4692   | 300511    | 2        | Taiwan  | 1           | 1  | 2  | 2 Female | 1966 | 49     | 2    | 45-49      | 0.9            | 2  |
| 4694   | 100718    | 1        | China   | 1           | 1  | 2  | 1 Male   | 1963 | 52     | 3    | 50-54      | 1.0            |    |
| 4695   | 200425    | 3        | Korea   | 1           | 1  | 2  | 1 Male   | 1963 | 52     | 3    | 50-54      | 0.9            |    |
| 4696   | 300513    | 2        | Taiwan  | 1           | 1  | 2  | 1 Male   | 1962 | 53     | 3    | 50-54      | 0.8            |    |
| 4697   | 100719    | 1        | China   | 1           | 1  | 2  | 2 Female | 1967 | 48     | 2    | 45-49      | 1.0            | 2  |
| 4698   | 200426    | 3        | Korea   | 1           | 1  | 2  | 1 Male   | 1949 | 66     | 5    | >=60       | 1.6            |    |
| 4699   | 300514    | 2        | Taiwan  | 1           | 1  | 2  | 1 Male   | 1957 | 58     | 4    | 55-59      | 0.7            |    |
| 4701   | 100720    | 1        | China   | 1           | 1  | 2  | 2 Female | 1972 | 43     | 1    | 40-44 year | 1.0            | 2  |
| 4703   | 300516    | 2        | Taiwan  | 1           | 1  | 2  | 1 Male   | 1971 | 44     | 1    | 40-44 year | 0.8            |    |
| 4704   | 300517    | 2        | Taiwan  | 1           | 1  | 1  | 2 Female | 1974 | 41     | 1    | 40-44 year | 0.8            | 2  |
| 4705   | 300518    | 2        | Taiwan  | 1           | 1  | 2  | 2 Female | 1970 | 45     | 2    | 45-49      | 0.9            | 2  |
| 4706   | 100722    | 1        | China   | 1           | 1  | 2  | 1 Male   | 1969 | 46     | 2    | 45-49      | 1.0            |    |
| 4707   | 300519    | 2        | Taiwan  | 1           | 1  | 2  | 2 Female | 1974 | 41     | 1    | 40-44 year | 0.8            | 2  |
| 4708   | 300520    | 2        | Taiwan  | 1           | 1  | 2  | 1 Male   | 1956 | 59     | 4    | 55-59      | 0.7            |    |
| 4710   | 300522    | 2        | Taiwan  | 1           | 1  | 2  | 1 Male   | 1960 | 55     | 4    | 55-59      | 0.7            |    |
| 4711   | 300523    | 2        | Taiwan  | 1           | 1  | 2  | 1 Male   | 1966 | 49     | 2    | 45-49      | 0.8            |    |
| 4715   | 100202    | 1        | China   | 1           | 1  | 2  | 2 Female | 1973 | 42     | 1    | 40-44 year | 1.0            | 2  |
| 4716   | 200427    | 3        | Korea   | 1           | 1  | 2  | 2 Female | 1973 | 42     | 1    | 40-44 year | 0.9            | 2  |

| respid | SubsID    | dCountry | Country | QDisclaimer | Q1 | Q2 | Gender | Q3_1 | age Nr | dAge | age Group  | Weight in Ctry | Q4 |
|--------|-----------|----------|---------|-------------|----|----|--------|------|--------|------|------------|----------------|----|
| 4717   | 200428    | 3        | Korea   | 1           | 2  | 1  | Male   | 1938 | 77     | 5    | >=60       | 1.6            |    |
| 4718   | 100723    | 1        | China   | 1           | 2  | 1  | Male   | 1975 | 40     | 1    | 40-44 year | 1.0            |    |
| 4722   | 100726    | 1        | China   | 1           | 2  | 1  | Male   | 1950 | 65     | 5    | >=60       | 1.0            |    |
| 4727   | 100725    | 1        | China   | 1           | 2  | 1  | Male   | 1968 | 47     | 2    | 45-49      | 1.0            |    |
| 4728   | 200429    | 3        | Korea   | 1           | 2  | 1  | Male   | 1962 | 53     | 3    | 50-54      | 0.9            |    |
| 4729   | 100268    | 1        | China   | 1           | 2  | 1  | Male   | 1962 | 53     | 3    | 50-54      | 1.0            |    |
| 4732   | 200430    | 3        | Korea   | 1           | 2  | 1  | Male   | 1966 | 49     | 2    | 45-49      | 0.8            |    |
| 4733   | 350222554 | 3        | Korea   | 1           | 1  | 2  | Female | 1973 | 42     | 1    | 40-44 year | 0.9            | 2  |
| 4734   | 350149485 | 3        | Korea   | 1           | 2  | 1  | Male   | 1965 | 50     | 3    | 50-54      | 0.9            |    |
| 4735   | 200431    | 3        | Korea   | 1           | 2  | 1  | Male   | 1963 | 52     | 3    | 50-54      | 0.9            |    |
| 4737   | 200432    | 3        | Korea   | 1           | 2  | 1  | Male   | 1965 | 50     | 3    | 50-54      | 0.9            |    |
| 4738   | 200433    | 3        | Korea   | 1           | 2  | 1  | Male   | 1958 | 57     | 4    | 55-59      | 0.8            |    |
| 4740   | 200434    | 3        | Korea   | 1           | 1  | 2  | Female | 1973 | 42     | 1    | 40-44 year | 0.9            | 2  |
| 4741   | 100261    | 1        | China   | 1           | 2  | 1  | Male   | 1956 | 59     | 4    | 55-59      | 0.9            |    |
| 4743   | 100728    | 1        | China   | 1           | 2  | 2  | Female | 1965 | 50     | 3    | 50-54      | 1.2            |    |
| 4746   | 200437    | 3        | Korea   | 1           | 2  | 1  | Male   | 1965 | 50     | 3    | 50-54      | 0.9            |    |
| 4750   | 200438    | 3        | Korea   | 1           | 2  | 1  | Male   | 1970 | 45     | 2    | 45-49      | 0.8            |    |
| 4752   | 200439    | 3        | Korea   | 1           | 2  | 1  | Male   | 1954 | 61     | 5    | >=60       | 1.6            |    |
| 4753   | 200440    | 3        | Korea   | 1           | 2  | 2  | Female | 1971 | 44     | 1    | 40-44 year | 0.9            | 2  |
| 4754   | 100732    | 1        | China   | 1           | 2  | 1  | Male   | 1972 | 43     | 1    | 40-44 year | 1.0            |    |
| 4755   | 200436    | 3        | Korea   | 1           | 2  | 2  | Female | 1972 | 43     | 1    | 40-44 year | 0.9            | 2  |
| 4758   | 100733    | 1        | China   | 1           | 2  | 2  | Female | 1972 | 43     | 1    | 40-44 year | 1.0            | 2  |
| 4766   | 100734    | 1        | China   | 1           | 2  | 1  | Male   | 1971 | 44     | 1    | 40-44 year | 1.0            |    |
| 4767   | 200441    | 3        | Korea   | 1           | 2  | 2  | Female | 1965 | 50     | 3    | 50-54      | 0.8            |    |
| 4768   | 380107089 | 2        | Taiwan  | 1           | 2  | 1  | Male   | 1954 | 61     | 5    | >=60       | 1.6            |    |
| 4769   | 200442    | 3        | Korea   | 1           | 2  | 1  | Male   | 1970 | 45     | 2    | 45-49      | 0.8            |    |
| 4771   | 200443    | 3        | Korea   | 1           | 2  | 1  | Male   | 1963 | 52     | 3    | 50-54      | 0.9            |    |
| 4772   | 100735    | 1        | China   | 1           | 2  | 2  | Female | 1955 | 60     | 5    | >=60       | 1.1            |    |
| 4773   | 100736    | 1        | China   | 1           | 1  | 1  | Male   | 1956 | 59     | 4    | 55-59      | 0.9            |    |
| 4774   | 350236492 | 3        | Korea   | 1           | 2  | 2  | Female | 1974 | 41     | 1    | 40-44 year | 0.9            | 2  |
| 4776   | 200444    | 3        | Korea   | 1           | 2  | 1  | Male   | 1960 | 55     | 4    | 55-59      | 0.8            |    |
| 4777   | 100738    | 1        | China   | 1           | 2  | 2  | Female | 1968 | 47     | 2    | 45-49      | 1.0            | 2  |

| respid | SubsID    | dCountry | Country | QDisclaimer | Q1 | Q2 | Gender | Q3_1 | age Nr | dAge | age Group  | Weight in Ctry | Q4 |
|--------|-----------|----------|---------|-------------|----|----|--------|------|--------|------|------------|----------------|----|
| 4779   | 200445    | 3        | Korea   | 1           | 2  | 2  | Female | 1967 | 48     | 2    | 45-49      | 0.9            | 2  |
| 4780   | 200446    | 3        | Korea   | 1           | 2  | 2  | Female | 1950 | 65     | 5    | >=60       | 1.6            |    |
| 4781   | 200447    | 3        | Korea   | 1           | 2  | 1  | Male   | 1960 | 55     | 4    | 55-59      | 0.8            |    |
| 4783   | 200448    | 3        | Korea   | 1           | 2  | 2  | Female | 1946 | 69     | 5    | >=60       | 1.6            |    |
| 4784   | 100739    | 1        | China   | 1           | 1  | 1  | Male   | 1973 | 42     | 1    | 40-44 year | 1.0            |    |
| 4785   | 200449    | 3        | Korea   | 1           | 2  | 1  | Male   | 1964 | 51     | 3    | 50-54      | 0.9            |    |
| 4788   | 100740    | 1        | China   | 1           | 2  | 1  | Male   | 1959 | 56     | 4    | 55-59      | 0.9            |    |
| 4789   | 200450    | 3        | Korea   | 1           | 2  | 1  | Male   | 1960 | 55     | 4    | 55-59      | 0.8            |    |
| 4790   | 200451    | 3        | Korea   | 1           | 2  | 1  | Male   | 1960 | 55     | 4    | 55-59      | 0.8            |    |
| 4791   | 200452    | 3        | Korea   | 1           | 2  | 1  | Male   | 1970 | 45     | 2    | 45-49      | 0.8            |    |
| 4794   | 200453    | 3        | Korea   | 1           | 2  | 1  | Male   | 1975 | 40     | 1    | 40-44 year | 0.9            |    |
| 4795   | 100742    | 1        | China   | 1           | 2  | 1  | Male   | 1959 | 56     | 4    | 55-59      | 0.9            |    |
| 4797   | 200454    | 3        | Korea   | 1           | 2  | 1  | Male   | 1967 | 48     | 2    | 45-49      | 0.8            |    |
| 4802   | 200458    | 3        | Korea   | 1           | 2  | 1  | Male   | 1956 | 59     | 4    | 55-59      | 0.8            |    |
| 4803   | 200459    | 3        | Korea   | 1           | 2  | 1  | Male   | 1965 | 50     | 3    | 50-54      | 0.9            |    |
| 4804   | 100744    | 1        | China   | 1           | 2  | 1  | Male   | 1967 | 48     | 2    | 45-49      | 1.0            |    |
| 4805   | 200460    | 3        | Korea   | 1           | 1  | 1  | Male   | 1964 | 51     | 3    | 50-54      | 0.9            |    |
| 4807   | 100746    | 1        | China   | 1           | 2  | 2  | Female | 1974 | 41     | 1    | 40-44 year | 1.0            | 2  |
| 4808   | 100747    | 1        | China   | 1           | 2  | 1  | Male   | 1974 | 41     | 1    | 40-44 year | 1.0            |    |
| 4809   | 200461    | 3        | Korea   | 1           | 2  | 1  | Male   | 1958 | 57     | 4    | 55-59      | 0.8            |    |
| 4811   | 100749    | 1        | China   | 1           | 2  | 2  | Female | 1964 | 51     | 3    | 50-54      | 1.2            |    |
| 4817   | 200462    | 3        | Korea   | 1           | 2  | 2  | Female | 1963 | 52     | 3    | 50-54      | 0.8            |    |
| 4819   | 200463    | 3        | Korea   | 1           | 2  | 1  | Male   | 1969 | 46     | 2    | 45-49      | 0.8            |    |
| 4820   | 380101692 | 2        | Taiwan  | 1           | 2  | 2  | Female | 1973 | 42     | 1    | 40-44 year | 0.8            | 2  |
| 4821   | 100751    | 1        | China   | 1           | 2  | 1  | Male   | 1973 | 42     | 1    | 40-44 year | 1.0            |    |
| 4822   | 100752    | 1        | China   | 1           | 2  | 1  | Male   | 1972 | 43     | 1    | 40-44 year | 1.0            |    |
| 4823   | 100753    | 1        | China   | 1           | 2  | 2  | Female | 1968 | 47     | 2    | 45-49      | 1.0            | 2  |
| 4825   | 100754    | 1        | China   | 1           | 2  | 1  | Male   | 1974 | 41     | 1    | 40-44 year | 1.0            |    |
| 4826   | 100755    | 1        | China   | 1           | 2  | 1  | Male   | 1973 | 42     | 1    | 40-44 year | 1.0            |    |
| 4830   | 100756    | 1        | China   | 1           | 2  | 1  | Male   | 1954 | 61     | 5    | >=60       | 1.0            |    |
| 4832   | 100757    | 1        | China   | 1           | 2  | 1  | Male   | 1972 | 43     | 1    | 40-44 year | 1.0            |    |
| 4838   | 380146047 | 2        | Taiwan  | 1           | 2  | 2  | Female | 1964 | 51     | 3    | 50-54      | 0.9            |    |

| respid | SubsID    | dCountry | Country | QDisclaimer | Q1 | Q2 | Gender | Q3_1 | age Nr | dAge | age Group  | Weight in Ctry | Q4 |
|--------|-----------|----------|---------|-------------|----|----|--------|------|--------|------|------------|----------------|----|
| 4840   | 200465    | 3        | Korea   | 1           | 2  | 2  | Female | 1975 | 40     | 1    | 40-44 year | 0.9            | 2  |
| 4841   | 200466    | 3        | Korea   | 1           | 2  | 1  | Male   | 1964 | 51     | 3    | 50-54      | 0.9            |    |
| 4843   | 100759    | 1        | China   | 1           | 2  | 1  | Male   | 1959 | 56     | 4    | 55-59      | 0.9            |    |
| 4845   | 100761    | 1        | China   | 1           | 1  | 1  | Male   | 1963 | 52     | 3    | 50-54      | 1.0            |    |
| 4846   | 100762    | 1        | China   | 1           | 2  | 1  | Male   | 1974 | 41     | 1    | 40-44 year | 1.0            |    |
| 4848   | 100763    | 1        | China   | 1           | 2  | 1  | Male   | 1962 | 53     | 3    | 50-54      | 1.0            |    |
| 4853   | 100760    | 1        | China   | 1           | 2  | 1  | Male   | 1956 | 59     | 4    | 55-59      | 0.9            |    |
| 4854   | 100764    | 1        | China   | 1           | 2  | 1  | Male   | 1970 | 45     | 2    | 45-49      | 1.0            |    |
| 4859   | 380024478 | 2        | Taiwan  | 1           | 2  | 1  | Male   | 1971 | 44     | 1    | 40-44 year | 0.8            |    |
| 4861   | 100767    | 1        | China   | 1           | 2  | 2  | Female | 1969 | 46     | 2    | 45-49      | 1.0            | 2  |
| 4864   | 100768    | 1        | China   | 1           | 2  | 1  | Male   | 1965 | 50     | 3    | 50-54      | 1.0            |    |
| 4867   | 100771    | 1        | China   | 1           | 2  | 1  | Male   | 1954 | 61     | 5    | >=60       | 1.0            |    |
| 4870   | 200467    | 3        | Korea   | 1           | 2  | 2  | Female | 1975 | 40     | 1    | 40-44 year | 0.9            | 2  |
| 4872   | 200468    | 3        | Korea   | 1           | 2  | 1  | Male   | 1970 | 45     | 2    | 45-49      | 0.8            |    |
| 4873   | 100772    | 1        | China   | 1           | 2  | 1  | Male   | 1963 | 52     | 3    | 50-54      | 1.0            |    |
| 4874   | 100773    | 1        | China   | 1           | 2  | 2  | Female | 1963 | 52     | 3    | 50-54      | 1.2            |    |
| 4878   | 200469    | 3        | Korea   | 1           | 2  | 1  | Male   | 1964 | 51     | 3    | 50-54      | 0.9            |    |
| 4880   | 200470    | 3        | Korea   | 1           | 2  | 2  | Female | 1969 | 46     | 2    | 45-49      | 0.9            | 2  |
| 4881   | 200341    | 3        | Korea   | 1           | 2  | 1  | Male   | 1945 | 70     | 5    | >=60       | 1.6            |    |
| 4882   | 200471    | 3        | Korea   | 1           | 2  | 2  | Female | 1963 | 52     | 3    | 50-54      | 0.8            |    |
| 4883   | 350343920 | 3        | Korea   | 1           | 2  | 1  | Male   | 1975 | 40     | 1    | 40-44 year | 0.9            |    |
| 4885   | 100774    | 1        | China   | 1           | 1  | 1  | Male   | 1971 | 44     | 1    | 40-44 year | 1.0            |    |
| 4889   | 100775    | 1        | China   | 1           | 2  | 1  | Male   | 1951 | 64     | 5    | >=60       | 1.0            |    |
| 4890   | 350147327 | 3        | Korea   | 1           | 2  | 1  | Male   | 1960 | 55     | 4    | 55-59      | 0.8            |    |
| 4891   | 200472    | 3        | Korea   | 1           | 2  | 1  | Male   | 1956 | 59     | 4    | 55-59      | 0.8            |    |
| 4894   | 200473    | 3        | Korea   | 1           | 2  | 2  | Female | 1967 | 48     | 2    | 45-49      | 0.9            | 2  |
| 4895   | 350093828 | 3        | Korea   | 1           | 1  | 1  | Male   | 1955 | 60     | 5    | >=60       | 1.6            |    |
| 4896   | 200474    | 3        | Korea   | 1           | 2  | 2  | Female | 1973 | 42     | 1    | 40-44 year | 0.9            | 2  |
| 4897   | 200475    | 3        | Korea   | 1           | 2  | 2  | Female | 1950 | 65     | 5    | >=60       | 1.6            |    |
| 4898   | 350071639 | 3        | Korea   | 1           | 2  | 1  | Male   | 1966 | 49     | 2    | 45-49      | 0.8            |    |
| 4899   | 380025366 | 2        | Taiwan  | 1           | 2  | 1  | Male   | 1972 | 43     | 1    | 40-44 year | 0.8            |    |
| 4900   | 380052762 | 2        | Taiwan  | 1           | 2  | 1  | Male   | 1974 | 41     | 1    | 40-44 year | 0.8            |    |

| respid | SubsID    | dCountry | Country | QDisclaimer | Q1 | Q2 | Gender   | Q3_1 | age Nr | dAge | age Group  | Weight in Ctry | Q4 |
|--------|-----------|----------|---------|-------------|----|----|----------|------|--------|------|------------|----------------|----|
| 4901   | 350148951 | 3        | Korea   | 1           | 1  | 2  | 1 Male   | 1970 | 45     | 2    | 45-49      | 0.8            |    |
| 4903   | 380042905 | 2        | Taiwan  | 1           | 1  | 2  | 1 Male   | 1970 | 45     | 2    | 45-49      | 0.8            |    |
| 4904   | 350208098 | 3        | Korea   | 1           | 1  | 1  | 1 Male   | 1973 | 42     | 1    | 40-44 year | 0.9            |    |
| 4908   | 380208934 | 2        | Taiwan  | 1           | 1  | 2  | 1 Male   | 1967 | 48     | 2    | 45-49      | 0.8            |    |
| 4909   | 350343912 | 3        | Korea   | 1           | 1  | 2  | 1 Male   | 1967 | 48     | 2    | 45-49      | 0.8            |    |
| 4913   | 380045648 | 2        | Taiwan  | 1           | 1  | 2  | 1 Male   | 1969 | 46     | 2    | 45-49      | 0.8            |    |
| 4917   | 350307978 | 3        | Korea   | 1           | 1  | 2  | 2 Female | 1971 | 44     | 1    | 40-44 year | 0.9            | 2  |
| 4918   | 350220503 | 3        | Korea   | 1           | 1  | 2  | 2 Female | 1969 | 46     | 2    | 45-49      | 0.9            | 2  |
| 4920   | 380064455 | 2        | Taiwan  | 1           | 1  | 2  | 1 Male   | 1971 | 44     | 1    | 40-44 year | 0.8            |    |
| 4921   | 350157747 | 3        | Korea   | 1           | 1  | 2  | 1 Male   | 1971 | 44     | 1    | 40-44 year | 0.9            |    |
| 4925   | 350241498 | 3        | Korea   | 1           | 1  | 2  | 2 Female | 1964 | 51     | 3    | 50-54      | 0.8            |    |
| 4926   | 350144840 | 3        | Korea   | 1           | 1  | 2  | 1 Male   | 1965 | 50     | 3    | 50-54      | 0.9            |    |
| 4927   | 350286623 | 3        | Korea   | 1           | 1  | 2  | 1 Male   | 1962 | 53     | 3    | 50-54      | 0.9            |    |
| 4928   | 350325348 | 3        | Korea   | 1           | 1  | 2  | 1 Male   | 1960 | 55     | 4    | 55-59      | 0.8            |    |
| 4929   | 380212140 | 2        | Taiwan  | 1           | 1  | 2  | 1 Male   | 1969 | 46     | 2    | 45-49      | 0.8            |    |
| 4930   | 350318357 | 3        | Korea   | 1           | 1  | 2  | 2 Female | 1966 | 49     | 2    | 45-49      | 0.9            | 2  |
| 4931   | 380097805 | 2        | Taiwan  | 1           | 1  | 2  | 1 Male   | 1954 | 61     | 5    | >=60       | 1.6            |    |
| 4932   | 350151588 | 3        | Korea   | 1           | 1  | 2  | 2 Female | 1973 | 42     | 1    | 40-44 year | 0.9            | 2  |
| 4933   | 350028273 | 3        | Korea   | 1           | 1  | 2  | 1 Male   | 1968 | 47     | 2    | 45-49      | 0.8            |    |
| 4934   | 350214457 | 3        | Korea   | 1           | 1  | 2  | 2 Female | 1970 | 45     | 2    | 45-49      | 0.9            | 2  |
| 5934   | 100776    | 1        | China   | 1           | 1  | 2  | 1 Male   | 1972 | 43     | 1    | 40-44 year | 1.0            |    |
| 5935   | 100777    | 1        | China   | 1           | 1  | 2  | 2 Female | 1973 | 42     | 1    | 40-44 year | 1.0            | 2  |
| 5936   | 300525    | 2        | Taiwan  | 1           | 1  | 2  | 2 Female | 1975 | 40     | 1    | 40-44 year | 0.8            | 2  |
| 5938   | 100778    | 1        | China   | 1           | 1  | 2  | 1 Male   | 1971 | 44     | 1    | 40-44 year | 1.0            |    |
| 5939   | 300527    | 2        | Taiwan  | 1           | 1  | 2  | 2 Female | 1965 | 50     | 3    | 50-54      | 0.9            |    |
| 5940   | 100779    | 1        | China   | 1           | 1  | 2  | 2 Female | 1968 | 47     | 2    | 45-49      | 1.0            | 2  |
| 5942   | 100780    | 1        | China   | 1           | 1  | 2  | 1 Male   | 1965 | 50     | 3    | 50-54      | 1.0            |    |
| 5944   | 300528    | 2        | Taiwan  | 1           | 1  | 2  | 1 Male   | 1974 | 41     | 1    | 40-44 year | 0.8            |    |
| 5951   | 100785    | 1        | China   | 1           | 1  | 1  | 1 Male   | 1971 | 44     | 1    | 40-44 year | 1.0            |    |
| 5952   | 100786    | 1        | China   | 1           | 1  | 2  | 2 Female | 1973 | 42     | 1    | 40-44 year | 1.0            | 2  |
| 5954   | 100787    | 1        | China   | 1           | 1  | 2  | 1 Male   | 1971 | 44     | 1    | 40-44 year | 1.0            |    |
| 5956   | 100788    | 1        | China   | 1           | 1  | 2  | 1 Male   | 1962 | 53     | 3    | 50-54      | 1.0            |    |

| respid | SubsID    | dCountry | Country | QDisclaimer | Q1 | Q2 | Gender | Q3_1 | age Nr | dAge | age Group  | Weight in Ctry | Q4 |
|--------|-----------|----------|---------|-------------|----|----|--------|------|--------|------|------------|----------------|----|
| 5957   | 300530    | 2        | Taiwan  | 1           | 2  | 1  | Male   | 1967 | 48     | 2    | 45-49      | 0.8            |    |
| 5958   | 100789    | 1        | China   | 1           | 2  | 1  | Male   | 1965 | 50     | 3    | 50-54      | 1.0            |    |
| 5959   | 350308164 | 3        | Korea   | 1           | 2  | 2  | Female | 1972 | 43     | 1    | 40-44 year | 0.9            | 2  |
| 5960   | 300531    | 2        | Taiwan  | 1           | 2  | 1  | Male   | 1961 | 54     | 3    | 50-54      | 0.8            |    |
| 5963   | 300532    | 2        | Taiwan  | 1           | 2  | 2  | Female | 1966 | 49     | 2    | 45-49      | 0.9            | 2  |
| 5966   | 100791    | 1        | China   | 1           | 1  | 1  | Male   | 1963 | 52     | 3    | 50-54      | 1.0            |    |
| 5968   | 100792    | 1        | China   | 1           | 2  | 1  | Male   | 1964 | 51     | 3    | 50-54      | 1.0            |    |
| 5974   | 100793    | 1        | China   | 1           | 2  | 2  | Female | 1971 | 44     | 1    | 40-44 year | 1.0            | 2  |
| 5975   | 100794    | 1        | China   | 1           | 2  | 2  | Female | 1964 | 51     | 3    | 50-54      | 1.2            |    |
| 5976   | 300534    | 2        | Taiwan  | 1           | 2  | 1  | Male   | 1960 | 55     | 4    | 55-59      | 0.7            |    |
| 5977   | 300535    | 2        | Taiwan  | 1           | 2  | 2  | Female | 1958 | 57     | 4    | 55-59      | 0.9            |    |
| 5978   | 280426772 | 1        | China   | 1           | 1  | 1  | Male   | 1962 | 53     | 3    | 50-54      | 1.0            |    |
| 5979   | 100795    | 1        | China   | 1           | 2  | 2  | Female | 1970 | 45     | 2    | 45-49      | 1.0            | 2  |
| 5983   | 380053344 | 2        | Taiwan  | 1           | 2  | 2  | Female | 1971 | 44     | 1    | 40-44 year | 0.8            | 2  |
| 5984   | 300537    | 2        | Taiwan  | 1           | 2  | 1  | Male   | 1974 | 41     | 1    | 40-44 year | 0.8            |    |
| 5990   | 300540    | 2        | Taiwan  | 1           | 2  | 2  | Female | 1969 | 46     | 2    | 45-49      | 0.9            | 2  |
| 5991   | 300138    | 2        | Taiwan  | 1           | 1  | 2  | Female | 1971 | 44     | 1    | 40-44 year | 0.8            | 2  |
| 5992   | 300541    | 2        | Taiwan  | 1           | 2  | 1  | Male   | 1966 | 49     | 2    | 45-49      | 0.8            |    |
| 5993   | 300542    | 2        | Taiwan  | 1           | 2  | 2  | Female | 1965 | 50     | 3    | 50-54      | 0.9            |    |
| 5994   | 300543    | 2        | Taiwan  | 1           | 2  | 2  | Female | 1971 | 44     | 1    | 40-44 year | 0.8            | 2  |
| 5996   | 300544    | 2        | Taiwan  | 1           | 2  | 2  | Female | 1961 | 54     | 3    | 50-54      | 0.9            |    |
| 6001   | 300546    | 2        | Taiwan  | 1           | 1  | 1  | Male   | 1962 | 53     | 3    | 50-54      | 0.8            |    |
| 6003   | 300547    | 2        | Taiwan  | 1           | 2  | 2  | Female | 1974 | 41     | 1    | 40-44 year | 0.8            | 2  |
| 6004   | 300548    | 2        | Taiwan  | 1           | 2  | 1  | Male   | 1974 | 41     | 1    | 40-44 year | 0.8            |    |
| 6005   | 350235928 | 3        | Korea   | 1           | 2  | 1  | Male   | 1972 | 43     | 1    | 40-44 year | 0.9            |    |
| 6006   | 300549    | 2        | Taiwan  | 1           | 2  | 2  | Female | 1974 | 41     | 1    | 40-44 year | 0.8            | 2  |
| 6008   | 300550    | 2        | Taiwan  | 1           | 2  | 1  | Male   | 1960 | 55     | 4    | 55-59      | 0.7            |    |
| 6009   | 300551    | 2        | Taiwan  | 1           | 2  | 2  | Female | 1971 | 44     | 1    | 40-44 year | 0.8            | 2  |
| 6014   | 300554    | 2        | Taiwan  | 1           | 2  | 2  | Female | 1971 | 44     | 1    | 40-44 year | 0.8            | 2  |
| 6016   | 300555    | 2        | Taiwan  | 1           | 2  | 1  | Male   | 1951 | 64     | 5    | >=60       | 1.6            |    |
| 6017   | 300556    | 2        | Taiwan  | 1           | 2  | 2  | Female | 1964 | 51     | 3    | 50-54      | 0.9            |    |
| 6018   | 300557    | 2        | Taiwan  | 1           | 2  | 2  | Female | 1971 | 44     | 1    | 40-44 year | 0.8            | 2  |

| respid | SubsID    | dCountry | Country | QDisclaimer | Q1 | Q2 | Gender | Q3_1 | age Nr | dAge | age Group  | Weight in Ctry | Q4 |
|--------|-----------|----------|---------|-------------|----|----|--------|------|--------|------|------------|----------------|----|
| 6020   | 300558    | 2        | Taiwan  | 1           | 2  | 2  | Female | 1973 | 42     | 1    | 40-44 year | 0.8            | 2  |
| 6021   | 300559    | 2        | Taiwan  | 1           | 2  | 2  | Female | 1975 | 40     | 1    | 40-44 year | 0.8            | 2  |
| 6024   | 300562    | 2        | Taiwan  | 1           | 2  | 1  | Male   | 1971 | 44     | 1    | 40-44 year | 0.8            |    |
| 6025   | 300563    | 2        | Taiwan  | 1           | 2  | 1  | Male   | 1964 | 51     | 3    | 50-54      | 0.8            |    |
| 6026   | 300564    | 2        | Taiwan  | 1           | 2  | 2  | Female | 1965 | 50     | 3    | 50-54      | 0.9            |    |
| 6032   | 300567    | 2        | Taiwan  | 1           | 2  | 1  | Male   | 1956 | 59     | 4    | 55-59      | 0.7            |    |
| 6035   | 100797    | 1        | China   | 1           | 2  | 2  | Female | 1969 | 46     | 2    | 45-49      | 1.0            | 2  |
| 6038   | 300569    | 2        | Taiwan  | 1           | 2  | 1  | Male   | 1968 | 47     | 2    | 45-49      | 0.8            |    |
| 6043   | 300571    | 2        | Taiwan  | 1           | 2  | 2  | Female | 1962 | 53     | 3    | 50-54      | 0.9            |    |
| 6044   | 300572    | 2        | Taiwan  | 1           | 2  | 2  | Female | 1965 | 50     | 3    | 50-54      | 0.9            |    |
| 6046   | 350350096 | 3        | Korea   | 1           | 2  | 1  | Male   | 1969 | 46     | 2    | 45-49      | 0.8            |    |
| 6047   | 300574    | 2        | Taiwan  | 1           | 2  | 2  | Female | 1961 | 54     | 3    | 50-54      | 0.9            |    |
| 6048   | 300575    | 2        | Taiwan  | 1           | 2  | 2  | Female | 1970 | 45     | 2    | 45-49      | 0.9            | 2  |
| 6050   | 300577    | 2        | Taiwan  | 1           | 2  | 1  | Male   | 1956 | 59     | 4    | 55-59      | 0.7            |    |
| 6051   | 300578    | 2        | Taiwan  | 1           | 2  | 2  | Female | 1965 | 50     | 3    | 50-54      | 0.9            |    |
| 6053   | 300580    | 2        | Taiwan  | 1           | 2  | 2  | Female | 1971 | 44     | 1    | 40-44 year | 0.8            | 2  |
| 6054   | 300581    | 2        | Taiwan  | 1           | 2  | 1  | Male   | 1965 | 50     | 3    | 50-54      | 0.8            |    |
| 6056   | 100798    | 1        | China   | 1           | 2  | 1  | Male   | 1973 | 42     | 1    | 40-44 year | 1.0            |    |
| 6058   | 300583    | 2        | Taiwan  | 1           | 2  | 2  | Female | 1967 | 48     | 2    | 45-49      | 0.9            | 2  |
| 6060   | 300585    | 2        | Taiwan  | 1           | 2  | 1  | Male   | 1963 | 52     | 3    | 50-54      | 0.8            |    |
| 6061   | 300055    | 2        | Taiwan  | 1           | 1  | 2  | Female | 1972 | 43     | 1    | 40-44 year | 0.8            | 2  |
| 6062   | 300586    | 2        | Taiwan  | 1           | 1  | 2  | Female | 1958 | 57     | 4    | 55-59      | 0.9            |    |
| 6067   | 300589    | 2        | Taiwan  | 1           | 2  | 2  | Female | 1969 | 46     | 2    | 45-49      | 0.9            | 2  |
| 6070   | 300592    | 2        | Taiwan  | 1           | 2  | 2  | Female | 1963 | 52     | 3    | 50-54      | 0.9            |    |
| 6074   | 300595    | 2        | Taiwan  | 1           | 2  | 2  | Female | 1966 | 49     | 2    | 45-49      | 0.9            | 2  |
| 6076   | 300596    | 2        | Taiwan  | 1           | 2  | 2  | Female | 1975 | 40     | 1    | 40-44 year | 0.8            | 2  |
| 6078   | 300598    | 2        | Taiwan  | 1           | 1  | 2  | Female | 1960 | 55     | 4    | 55-59      | 0.9            |    |
| 6081   | 300594    | 2        | Taiwan  | 1           | 2  | 1  | Male   | 1971 | 44     | 1    | 40-44 year | 0.8            |    |
| 6085   | 100803    | 1        | China   | 1           | 2  | 2  | Female | 1974 | 41     | 1    | 40-44 year | 1.0            | 2  |
| 6088   | 300599    | 2        | Taiwan  | 1           | 2  | 1  | Male   | 1973 | 42     | 1    | 40-44 year | 0.8            |    |
| 6092   | 300591    | 2        | Taiwan  | 1           | 2  | 1  | Male   | 1974 | 41     | 1    | 40-44 year | 0.8            |    |
| 6095   | 300601    | 2        | Taiwan  | 1           | 2  | 1  | Male   | 1961 | 54     | 3    | 50-54      | 0.8            |    |

| respid | SubsID | dCountry | Country | QDisclaimer | Q1 | Q2 | Gender   | Q3_1 | age Nr | dAge | age Group  | Weight in Ctry | Q4 |
|--------|--------|----------|---------|-------------|----|----|----------|------|--------|------|------------|----------------|----|
| 6098   | 100807 | 1        | China   |             | 1  | 2  | 2 Female | 1950 | 65     | 5    | >=60       | 1.1            |    |
| 6101   | 100809 | 1        | China   |             | 1  | 2  | 2 Female | 1974 | 41     | 1    | 40-44 year | 1.0            | 2  |
| 6102   | 300603 | 2        | Taiwan  |             | 1  | 2  | 2 Female | 1962 | 53     | 3    | 50-54      | 0.9            |    |
| 6105   | 300392 | 2        | Taiwan  |             | 1  | 2  | 2 Female | 1974 | 41     | 1    | 40-44 year | 0.8            | 2  |
| 6106   | 300604 | 2        | Taiwan  |             | 1  | 2  | 1 Male   | 1959 | 56     | 4    | 55-59      | 0.7            |    |
| 6107   | 300605 | 2        | Taiwan  |             | 1  | 1  | 2 Female | 1973 | 42     | 1    | 40-44 year | 0.8            | 2  |
| 6111   | 300607 | 2        | Taiwan  |             | 1  | 1  | 1 Male   | 1957 | 58     | 4    | 55-59      | 0.7            |    |
| 6112   | 100813 | 1        | China   |             | 1  | 2  | 2 Female | 1964 | 51     | 3    | 50-54      | 1.2            |    |
| 6113   | 300608 | 2        | Taiwan  |             | 1  | 2  | 1 Male   | 1966 | 49     | 2    | 45-49      | 0.8            |    |
| 6115   | 300609 | 2        | Taiwan  |             | 1  | 2  | 1 Male   | 1958 | 57     | 4    | 55-59      | 0.7            |    |
| 6116   | 300610 | 2        | Taiwan  |             | 1  | 2  | 2 Female | 1968 | 47     | 2    | 45-49      | 0.9            | 2  |
| 6117   | 100814 | 1        | China   |             | 1  | 2  | 2 Female | 1968 | 47     | 2    | 45-49      | 1.0            | 2  |
| 6124   | 300612 | 2        | Taiwan  |             | 1  | 2  | 1 Male   | 1965 | 50     | 3    | 50-54      | 0.8            |    |
| 6125   | 300613 | 2        | Taiwan  |             | 1  | 2  | 1 Male   | 1964 | 51     | 3    | 50-54      | 0.8            |    |
| 6128   | 300615 | 2        | Taiwan  |             | 1  | 2  | 2 Female | 1971 | 44     | 1    | 40-44 year | 0.8            | 2  |
| 6133   | 100821 | 1        | China   |             | 1  | 2  | 2 Female | 1955 | 60     | 5    | >=60       | 1.1            |    |
| 6134   | 300617 | 2        | Taiwan  |             | 1  | 2  | 2 Female | 1974 | 41     | 1    | 40-44 year | 0.8            | 2  |
| 6135   | 300618 | 2        | Taiwan  |             | 1  | 2  | 1 Male   | 1964 | 51     | 3    | 50-54      | 0.8            |    |
| 6138   | 300619 | 2        | Taiwan  |             | 1  | 2  | 2 Female | 1962 | 53     | 3    | 50-54      | 0.9            |    |
| 6140   | 300620 | 2        | Taiwan  |             | 1  | 2  | 1 Male   | 1975 | 40     | 1    | 40-44 year | 0.8            |    |
| 6143   | 100824 | 1        | China   |             | 1  | 2  | 1 Male   | 1970 | 45     | 2    | 45-49      | 1.0            |    |
| 6147   | 300621 | 2        | Taiwan  |             | 1  | 2  | 2 Female | 1974 | 41     | 1    | 40-44 year | 0.8            | 2  |
| 6154   | 100833 | 1        | China   |             | 1  | 2  | 2 Female | 1967 | 48     | 2    | 45-49      | 1.0            | 2  |
| 6162   | 300623 | 2        | Taiwan  |             | 1  | 2  | 1 Male   | 1964 | 51     | 3    | 50-54      | 0.8            |    |
| 6165   | 300624 | 2        | Taiwan  |             | 1  | 2  | 2 Female | 1961 | 54     | 3    | 50-54      | 0.9            |    |
| 6166   | 300625 | 2        | Taiwan  |             | 1  | 1  | 1 Male   | 1971 | 44     | 1    | 40-44 year | 0.8            |    |
| 6173   | 300627 | 2        | Taiwan  |             | 1  | 2  | 1 Male   | 1966 | 49     | 2    | 45-49      | 0.8            |    |
| 6180   | 300628 | 2        | Taiwan  |             | 1  | 2  | 1 Male   | 1961 | 54     | 3    | 50-54      | 0.8            |    |
| 6184   | 100839 | 1        | China   |             | 1  | 2  | 2 Female | 1961 | 54     | 3    | 50-54      | 1.2            |    |
| 6185   | 300629 | 2        | Taiwan  |             | 1  | 2  | 1 Male   | 1963 | 52     | 3    | 50-54      | 0.8            |    |
| 6186   | 300630 | 2        | Taiwan  |             | 1  | 2  | 2 Female | 1972 | 43     | 1    | 40-44 year | 0.8            | 2  |
| 6188   | 300631 | 2        | Taiwan  |             | 1  | 2  | 1 Male   | 1961 | 54     | 3    | 50-54      | 0.8            |    |



| respid | SubsID | dCountry | Country | QDisclaim<br>er | Q1 | Q2 | Gender | Q3_1 | age Nr | dAge | age Group  | Weight in<br>Ctry | Q4 |
|--------|--------|----------|---------|-----------------|----|----|--------|------|--------|------|------------|-------------------|----|
| 6192   | 300632 | 2        | Taiwan  | 1               | 2  | 2  | Female | 1962 | 53     | 3    | 50-54      | 0.9               |    |
| 6194   | 100843 | 1        | China   | 1               | 1  | 1  | Male   | 1973 | 42     | 1    | 40-44 year | 1.0               |    |
| 6195   | 300633 | 2        | Taiwan  | 1               | 2  | 2  | Female | 1972 | 43     | 1    | 40-44 year | 0.8               | 2  |
| 6196   | 100844 | 1        | China   | 1               | 2  | 2  | Female | 1957 | 58     | 4    | 55-59      | 1.0               |    |
| 6199   | 100845 | 1        | China   | 1               | 1  | 1  | Male   | 1975 | 40     | 1    | 40-44 year | 1.0               |    |
| 6200   | 300635 | 2        | Taiwan  | 1               | 2  | 1  | Male   | 1973 | 42     | 1    | 40-44 year | 0.8               |    |
| 6201   | 300636 | 2        | Taiwan  | 1               | 2  | 1  | Male   | 1972 | 43     | 1    | 40-44 year | 0.8               |    |
| 6202   | 100835 | 1        | China   | 1               | 2  | 2  | Female | 1956 | 59     | 4    | 55-59      | 1.0               |    |
| 6203   | 300637 | 2        | Taiwan  | 1               | 1  | 1  | Male   | 1970 | 45     | 2    | 45-49      | 0.8               |    |
| 6205   | 300638 | 2        | Taiwan  | 1               | 2  | 2  | Female | 1963 | 52     | 3    | 50-54      | 0.9               |    |
| 6210   | 300640 | 2        | Taiwan  | 1               | 2  | 1  | Male   | 1973 | 42     | 1    | 40-44 year | 0.8               |    |
| 6212   | 300641 | 2        | Taiwan  | 1               | 2  | 1  | Male   | 1972 | 43     | 1    | 40-44 year | 0.8               |    |
| 6216   | 100850 | 1        | China   | 1               | 2  | 2  | Female | 1968 | 47     | 2    | 45-49      | 1.0               | 2  |
| 6218   | 300643 | 2        | Taiwan  | 1               | 2  | 1  | Male   | 1971 | 44     | 1    | 40-44 year | 0.8               |    |
| 6221   | 300645 | 2        | Taiwan  | 1               | 2  | 1  | Male   | 1959 | 56     | 4    | 55-59      | 0.7               |    |
| 6224   | 300647 | 2        | Taiwan  | 1               | 2  | 1  | Male   | 1973 | 42     | 1    | 40-44 year | 0.8               |    |
| 6225   | 300648 | 2        | Taiwan  | 1               | 2  | 1  | Male   | 1972 | 43     | 1    | 40-44 year | 0.8               |    |
| 6227   | 300649 | 2        | Taiwan  | 1               | 2  | 1  | Male   | 1970 | 45     | 2    | 45-49      | 0.8               |    |
| 6230   | 300651 | 2        | Taiwan  | 1               | 2  | 1  | Male   | 1975 | 40     | 1    | 40-44 year | 0.8               |    |
| 6231   | 300652 | 2        | Taiwan  | 1               | 2  | 1  | Male   | 1963 | 52     | 3    | 50-54      | 0.8               |    |
| 6233   | 300653 | 2        | Taiwan  | 1               | 1  | 2  | Female | 1973 | 42     | 1    | 40-44 year | 0.8               | 2  |
| 6234   | 300654 | 2        | Taiwan  | 1               | 1  | 2  | Female | 1963 | 52     | 3    | 50-54      | 0.9               |    |
| 6235   | 300655 | 2        | Taiwan  | 1               | 2  | 1  | Male   | 1967 | 48     | 2    | 45-49      | 0.8               |    |
| 6237   | 300656 | 2        | Taiwan  | 1               | 2  | 1  | Male   | 1970 | 45     | 2    | 45-49      | 0.8               |    |
| 6240   | 300657 | 2        | Taiwan  | 1               | 2  | 2  | Female | 1969 | 46     | 2    | 45-49      | 0.9               | 2  |
| 6248   | 300552 | 2        | Taiwan  | 1               | 2  | 1  | Male   | 1975 | 40     | 1    | 40-44 year | 0.8               |    |
| 6249   | 300661 | 2        | Taiwan  | 1               | 2  | 1  | Male   | 1974 | 41     | 1    | 40-44 year | 0.8               |    |
| 6252   | 300663 | 2        | Taiwan  | 1               | 2  | 1  | Male   | 1962 | 53     | 3    | 50-54      | 0.8               |    |
| 6254   | 300662 | 2        | Taiwan  | 1               | 2  | 1  | Male   | 1973 | 42     | 1    | 40-44 year | 0.8               |    |
| 6269   | 100856 | 1        | China   | 1               | 2  | 2  | Female | 1970 | 45     | 2    | 45-49      | 1.0               | 2  |
| 6304   | 100859 | 1        | China   | 1               | 1  | 2  | Female | 1967 | 48     | 2    | 45-49      | 1.0               | 2  |
| 6334   | 100861 | 1        | China   | 1               | 2  | 1  | Male   | 1962 | 53     | 3    | 50-54      | 1.0               |    |

| respid | SubsID | dCountry | Country | QDisclaim<br>er | Q1 | Q2 | Gender | Q3_1 | age Nr | dAge | age Group  | Weight in<br>Ctry | Q4 |
|--------|--------|----------|---------|-----------------|----|----|--------|------|--------|------|------------|-------------------|----|
| 6341   | 300664 | 2        | Taiwan  | 1               | 2  | 2  | Female | 1968 | 47     | 2    | 45-49      | 0.9               | 2  |
| 6350   | 100864 | 1        | China   | 1               | 2  | 2  | Female | 1970 | 45     | 2    | 45-49      | 1.0               | 2  |
| 6370   | 300665 | 2        | Taiwan  | 1               | 2  | 2  | Female | 1972 | 43     | 1    | 40-44 year | 0.8               | 2  |
| 6384   | 300667 | 2        | Taiwan  | 1               | 2  | 2  | Female | 1963 | 52     | 3    | 50-54      | 0.9               |    |
| 6400   | 300668 | 2        | Taiwan  | 1               | 2  | 1  | Male   | 1951 | 64     | 5    | >=60       | 1.6               |    |
| 6418   | 300669 | 2        | Taiwan  | 1               | 2  | 1  | Male   | 1974 | 41     | 1    | 40-44 year | 0.8               |    |
| 6467   | 100870 | 1        | China   | 1               | 2  | 1  | Male   | 1975 | 40     | 1    | 40-44 year | 1.0               |    |
| 6469   | 300673 | 2        | Taiwan  | 1               | 2  | 1  | Male   | 1963 | 52     | 3    | 50-54      | 0.8               |    |
| 6474   | 100871 | 1        | China   | 1               | 2  | 2  | Female | 1974 | 41     | 1    | 40-44 year | 1.0               | 2  |
| 6475   | 300674 | 2        | Taiwan  | 1               | 2  | 1  | Male   | 1966 | 49     | 2    | 45-49      | 0.8               |    |
| 6476   | 300675 | 2        | Taiwan  | 1               | 1  | 2  | Female | 1964 | 51     | 3    | 50-54      | 0.9               |    |
| 6477   | 300676 | 2        | Taiwan  | 1               | 2  | 1  | Male   | 1969 | 46     | 2    | 45-49      | 0.8               |    |
| 6480   | 300678 | 2        | Taiwan  | 1               | 2  | 1  | Male   | 1958 | 57     | 4    | 55-59      | 0.7               |    |
| 6481   | 300679 | 2        | Taiwan  | 1               | 2  | 1  | Male   | 1956 | 59     | 4    | 55-59      | 0.7               |    |
| 6485   | 300680 | 2        | Taiwan  | 1               | 2  | 2  | Female | 1969 | 46     | 2    | 45-49      | 0.9               | 2  |
| 6488   | 300681 | 2        | Taiwan  | 1               | 1  | 1  | Male   | 1975 | 40     | 1    | 40-44 year | 0.8               |    |
| 6495   | 100878 | 1        | China   | 1               | 2  | 1  | Male   | 1965 | 50     | 3    | 50-54      | 1.0               |    |
| 6499   | 100880 | 1        | China   | 1               | 2  | 2  | Female | 1963 | 52     | 3    | 50-54      | 1.2               |    |
| 6500   | 100881 | 1        | China   | 1               | 2  | 2  | Female | 1966 | 49     | 2    | 45-49      | 1.0               | 2  |
| 6504   | 100877 | 1        | China   | 1               | 1  | 1  | Male   | 1966 | 49     | 2    | 45-49      | 1.0               |    |
| 6507   | 100884 | 1        | China   | 1               | 2  | 1  | Male   | 1937 | 78     | 5    | >=60       | 1.0               |    |
| 6512   | 100888 | 1        | China   | 1               | 2  | 2  | Female | 1967 | 48     | 2    | 45-49      | 1.0               | 2  |
| 6525   | 300683 | 2        | Taiwan  | 1               | 2  | 2  | Female | 1969 | 46     | 2    | 45-49      | 0.9               | 2  |
| 6532   | 300684 | 2        | Taiwan  | 1               | 2  | 2  | Female | 1972 | 43     | 1    | 40-44 year | 0.8               | 2  |
| 6535   | 100900 | 1        | China   | 1               | 2  | 1  | Male   | 1967 | 48     | 2    | 45-49      | 1.0               |    |
| 6546   | 100304 | 1        | China   | 1               | 2  | 2  | Female | 1969 | 46     | 2    | 45-49      | 1.0               | 2  |
| 6551   | 100906 | 1        | China   | 1               | 2  | 2  | Female | 1970 | 45     | 2    | 45-49      | 1.0               | 2  |
| 6556   | 300686 | 2        | Taiwan  | 1               | 2  | 2  | Female | 1965 | 50     | 3    | 50-54      | 0.9               |    |
| 6566   | 300687 | 2        | Taiwan  | 1               | 2  | 1  | Male   | 1971 | 44     | 1    | 40-44 year | 0.8               |    |
| 6569   | 100908 | 1        | China   | 1               | 1  | 2  | Female | 1975 | 40     | 1    | 40-44 year | 1.0               | 2  |
| 6574   | 300506 | 2        | Taiwan  | 1               | 2  | 2  | Female | 1972 | 43     | 1    | 40-44 year | 0.8               | 2  |
| 6576   | 300689 | 2        | Taiwan  | 1               | 2  | 2  | Female | 1961 | 54     | 3    | 50-54      | 0.9               |    |

| respid | SubsID    | dCountry | Country | QDisclaimer | Q1 | Q2 | Gender | Q3_1 | age Nr | dAge | age Group  | Weight in Ctry | Q4 |
|--------|-----------|----------|---------|-------------|----|----|--------|------|--------|------|------------|----------------|----|
| 6580   | 300691    | 2        | Taiwan  | 1           | 2  | 1  | Male   | 1966 | 49     | 2    | 45-49      | 0.8            |    |
| 6584   | 300688    | 2        | Taiwan  | 1           | 2  | 1  | Male   | 1970 | 45     | 2    | 45-49      | 0.8            |    |
| 6585   | 350347349 | 3        | Korea   | 1           | 2  | 1  | Male   | 1964 | 51     | 3    | 50-54      | 0.9            |    |
| 6589   | 300693    | 2        | Taiwan  | 1           | 2  | 2  | Female | 1968 | 47     | 2    | 45-49      | 0.9            | 2  |
| 6590   | 300344    | 2        | Taiwan  | 1           | 2  | 2  | Female | 1972 | 43     | 1    | 40-44 year | 0.8            | 2  |
| 6598   | 300694    | 2        | Taiwan  | 1           | 2  | 1  | Male   | 1966 | 49     | 2    | 45-49      | 0.8            |    |
| 6603   | 100930    | 1        | China   | 1           | 2  | 1  | Male   | 1970 | 45     | 2    | 45-49      | 1.0            |    |
| 6618   | 100937    | 1        | China   | 1           | 1  | 2  | Female | 1960 | 55     | 4    | 55-59      | 1.0            |    |
| 6630   | 100942    | 1        | China   | 1           | 2  | 1  | Male   | 1968 | 47     | 2    | 45-49      | 1.0            |    |
| 6636   | 380004989 | 2        | Taiwan  | 1           | 2  | 1  | Male   | 1972 | 43     | 1    | 40-44 year | 0.8            |    |
| 6649   | 100948    | 1        | China   | 1           | 1  | 1  | Male   | 1963 | 52     | 3    | 50-54      | 1.0            |    |
| 6675   | 100955    | 1        | China   | 1           | 2  | 1  | Male   | 1948 | 67     | 5    | >=60       | 1.0            |    |
| 6678   | 100957    | 1        | China   | 1           | 2  | 1  | Male   | 1971 | 44     | 1    | 40-44 year | 1.0            |    |
| 6681   | 100960    | 1        | China   | 1           | 2  | 1  | Male   | 1952 | 63     | 5    | >=60       | 1.0            |    |
| 6684   | 100962    | 1        | China   | 1           | 2  | 1  | Male   | 1966 | 49     | 2    | 45-49      | 1.0            |    |
| 6688   | 100966    | 1        | China   | 1           | 2  | 2  | Female | 1970 | 45     | 2    | 45-49      | 1.0            | 2  |
| 6691   | 100969    | 1        | China   | 1           | 2  | 1  | Male   | 1969 | 46     | 2    | 45-49      | 1.0            |    |
| 6694   | 100972    | 1        | China   | 1           | 2  | 2  | Female | 1973 | 42     | 1    | 40-44 year | 1.0            | 2  |
| 6696   | 100974    | 1        | China   | 1           | 2  | 1  | Male   | 1973 | 42     | 1    | 40-44 year | 1.0            |    |
| 6720   | 100978    | 1        | China   | 1           | 2  | 2  | Female | 1965 | 50     | 3    | 50-54      | 1.2            |    |
| 6722   | 100983    | 1        | China   | 1           | 2  | 1  | Male   | 1964 | 51     | 3    | 50-54      | 1.0            |    |
| 6724   | 100985    | 1        | China   | 1           | 2  | 1  | Male   | 1968 | 47     | 2    | 45-49      | 1.0            |    |
| 6725   | 100986    | 1        | China   | 1           | 2  | 1  | Male   | 1975 | 40     | 1    | 40-44 year | 1.0            |    |
| 6727   | 100988    | 1        | China   | 1           | 2  | 1  | Male   | 1972 | 43     | 1    | 40-44 year | 1.0            |    |
| 6734   | 100993    | 1        | China   | 1           | 2  | 2  | Female | 1973 | 42     | 1    | 40-44 year | 1.0            | 2  |
| 6739   | 100995    | 1        | China   | 1           | 2  | 1  | Male   | 1968 | 47     | 2    | 45-49      | 1.0            |    |
| 6743   | 100997    | 1        | China   | 1           | 1  | 1  | Male   | 1957 | 58     | 4    | 55-59      | 0.9            |    |
| 6749   | 101001    | 1        | China   | 1           | 2  | 1  | Male   | 1966 | 49     | 2    | 45-49      | 1.0            |    |
| 6756   | 101005    | 1        | China   | 1           | 2  | 1  | Male   | 1973 | 42     | 1    | 40-44 year | 1.0            |    |
| 6764   | 101007    | 1        | China   | 1           | 2  | 1  | Male   | 1968 | 47     | 2    | 45-49      | 1.0            |    |
| 6765   | 101008    | 1        | China   | 1           | 2  | 2  | Female | 1974 | 41     | 1    | 40-44 year | 1.0            | 2  |
| 6768   | 101011    | 1        | China   | 1           | 2  | 1  | Male   | 1972 | 43     | 1    | 40-44 year | 1.0            |    |

| respid | SubsID | dCountry | Country | QDisclaimer | Q1 | Q2 | Gender   | Q3_1 | age Nr | dAge | age Group    | Weight in Ctry | Q4 |
|--------|--------|----------|---------|-------------|----|----|----------|------|--------|------|--------------|----------------|----|
| 6773   | 101016 | 1        | China   |             | 1  | 2  | 2 Female | 1974 | 41     |      | 1 40-44 year | 1.0            | 2  |
| 6775   | 101018 | 1        | China   |             | 1  | 1  | 2 Female | 1971 | 44     |      | 1 40-44 year | 1.0            | 2  |
| 6777   | 101020 | 1        | China   |             | 1  | 2  | 2 Female | 1965 | 50     |      | 3 50-54      | 1.2            |    |
| 6779   | 101022 | 1        | China   |             | 1  | 2  | 2 Female | 1961 | 54     |      | 3 50-54      | 1.2            |    |
| 6790   | 101026 | 1        | China   |             | 1  | 2  | 2 Female | 1968 | 47     |      | 2 45-49      | 1.0            | 2  |
| 6797   | 101031 | 1        | China   |             | 1  | 2  | 2 Female | 1972 | 43     |      | 1 40-44 year | 1.0            | 2  |
| 6798   | 101032 | 1        | China   |             | 1  | 2  | 2 Female | 1957 | 58     |      | 4 55-59      | 1.0            |    |
| 6808   | 101039 | 1        | China   |             | 1  | 2  | 2 Female | 1960 | 55     |      | 4 55-59      | 1.0            |    |
| 6810   | 100384 | 1        | China   |             | 1  | 1  | 2 Female | 1975 | 40     |      | 1 40-44 year | 1.0            | 2  |
| 6811   | 101041 | 1        | China   |             | 1  | 2  | 1 Male   | 1970 | 45     |      | 2 45-49      | 1.0            |    |
| 6812   | 101042 | 1        | China   |             | 1  | 2  | 2 Female | 1971 | 44     |      | 1 40-44 year | 1.0            | 2  |
| 6814   | 101044 | 1        | China   |             | 1  | 1  | 1 Male   | 1952 | 63     |      | 5 >=60       | 1.0            |    |
| 6819   | 101047 | 1        | China   |             | 1  | 2  | 1 Male   | 1968 | 47     |      | 2 45-49      | 1.0            |    |
| 6820   | 101048 | 1        | China   |             | 1  | 1  | 1 Male   | 1974 | 41     |      | 1 40-44 year | 1.0            |    |
| 6832   | 101058 | 1        | China   |             | 1  | 2  | 1 Male   | 1970 | 45     |      | 2 45-49      | 1.0            |    |
| 6854   | 101073 | 1        | China   |             | 1  | 2  | 1 Male   | 1967 | 48     |      | 2 45-49      | 1.0            |    |
| 6855   | 101072 | 1        | China   |             | 1  | 2  | 1 Male   | 1966 | 49     |      | 2 45-49      | 1.0            |    |
| 6857   | 101074 | 1        | China   |             | 1  | 2  | 1 Male   | 1975 | 40     |      | 1 40-44 year | 1.0            |    |
| 6858   | 101075 | 1        | China   |             | 1  | 2  | 2 Female | 1973 | 42     |      | 1 40-44 year | 1.0            | 2  |
| 6859   | 101076 | 1        | China   |             | 1  | 1  | 2 Female | 1960 | 55     |      | 4 55-59      | 1.0            |    |
| 6860   | 101077 | 1        | China   |             | 1  | 1  | 1 Male   | 1956 | 59     |      | 4 55-59      | 0.9            |    |
| 6862   | 101064 | 1        | China   |             | 1  | 1  | 2 Female | 1965 | 50     |      | 3 50-54      | 1.2            |    |
| 6879   | 101088 | 1        | China   |             | 1  | 2  | 2 Female | 1971 | 44     |      | 1 40-44 year | 1.0            | 2  |
| 6893   | 101096 | 1        | China   |             | 1  | 2  | 1 Male   | 1956 | 59     |      | 4 55-59      | 0.9            |    |
| 6898   | 101098 | 1        | China   |             | 1  | 1  | 2 Female | 1970 | 45     |      | 2 45-49      | 1.0            | 2  |
| 6902   | 101101 | 1        | China   |             | 1  | 2  | 1 Male   | 1970 | 45     |      | 2 45-49      | 1.0            |    |
| 6903   | 101102 | 1        | China   |             | 1  | 2  | 2 Female | 1957 | 58     |      | 4 55-59      | 1.0            |    |
| 6907   | 101105 | 1        | China   |             | 1  | 2  | 2 Female | 1960 | 55     |      | 4 55-59      | 1.0            |    |
| 6908   | 101106 | 1        | China   |             | 1  | 2  | 2 Female | 1969 | 46     |      | 2 45-49      | 1.0            | 2  |
| 6912   | 101109 | 1        | China   |             | 1  | 2  | 2 Female | 1973 | 42     |      | 1 40-44 year | 1.0            | 2  |
| 6915   | 101112 | 1        | China   |             | 1  | 2  | 2 Female | 1970 | 45     |      | 2 45-49      | 1.0            | 2  |
| 6916   | 101113 | 1        | China   |             | 1  | 1  | 2 Female | 1974 | 41     |      | 1 40-44 year | 1.0            | 2  |

| respid | SubsID    | dCountry | Country  | QDisclaim<br>er | Q1 | Q2 | Gender   | Q3_1 | age Nr | dAge | age Group    | Weight in<br>Ctry | Q4 |
|--------|-----------|----------|----------|-----------------|----|----|----------|------|--------|------|--------------|-------------------|----|
| 6917   | 350230312 |          | 3 Korea  |                 | 1  | 2  | 2 Female | 1969 | 46     |      | 2 45-49      | 0.9               | 2  |
| 6923   | 101117    |          | 1 China  |                 | 1  | 1  | 1 Male   | 1965 | 50     |      | 3 50-54      | 1.0               |    |
| 6934   | 350311916 |          | 3 Korea  |                 | 1  | 2  | 1 Male   | 1975 | 40     |      | 1 40-44 year | 0.9               |    |
| 6937   | 101127    |          | 1 China  |                 | 1  | 2  | 2 Female | 1969 | 46     |      | 2 45-49      | 1.0               | 2  |
| 6945   | 101134    |          | 1 China  |                 | 1  | 2  | 1 Male   | 1969 | 46     |      | 2 45-49      | 1.0               |    |
| 6954   | 350162761 |          | 3 Korea  |                 | 1  | 2  | 1 Male   | 1974 | 41     |      | 1 40-44 year | 0.9               |    |
| 6956   | 101144    |          | 1 China  |                 | 1  | 1  | 2 Female | 1956 | 59     |      | 4 55-59      | 1.0               |    |
| 6958   | 101146    |          | 1 China  |                 | 1  | 2  | 1 Male   | 1970 | 45     |      | 2 45-49      | 1.0               |    |
| 6961   | 101148    |          | 1 China  |                 | 1  | 2  | 2 Female | 1960 | 55     |      | 4 55-59      | 1.0               |    |
| 6963   | 100994    |          | 1 China  |                 | 1  | 2  | 2 Female | 1974 | 41     |      | 1 40-44 year | 1.0               | 2  |
| 6964   | 101149    |          | 1 China  |                 | 1  | 2  | 2 Female | 1973 | 42     |      | 1 40-44 year | 1.0               | 2  |
| 6976   | 101154    |          | 1 China  |                 | 1  | 2  | 2 Female | 1969 | 46     |      | 2 45-49      | 1.0               | 2  |
| 6977   | 101155    |          | 1 China  |                 | 1  | 1  | 2 Female | 1963 | 52     |      | 3 50-54      | 1.2               |    |
| 7000   | 101170    |          | 1 China  |                 | 1  | 2  | 1 Male   | 1971 | 44     |      | 1 40-44 year | 1.0               |    |
| 7001   | 380049143 |          | 2 Taiwan |                 | 1  | 2  | 1 Male   | 1969 | 46     |      | 2 45-49      | 0.8               |    |
| 7005   | 101171    |          | 1 China  |                 | 1  | 2  | 1 Male   | 1973 | 42     |      | 1 40-44 year | 1.0               |    |
| 7006   | 101172    |          | 1 China  |                 | 1  | 2  | 2 Female | 1965 | 50     |      | 3 50-54      | 1.2               |    |
| 7008   | 101174    |          | 1 China  |                 | 1  | 2  | 2 Female | 1965 | 50     |      | 3 50-54      | 1.2               |    |
| 7009   | 101175    |          | 1 China  |                 | 1  | 1  | 2 Female | 1975 | 40     |      | 1 40-44 year | 1.0               | 2  |
| 7019   | 101180    |          | 1 China  |                 | 1  | 2  | 1 Male   | 1968 | 47     |      | 2 45-49      | 1.0               |    |
| 7021   | 101182    |          | 1 China  |                 | 1  | 1  | 2 Female | 1973 | 42     |      | 1 40-44 year | 1.0               | 2  |
| 7026   | 101184    |          | 1 China  |                 | 1  | 2  | 1 Male   | 1963 | 52     |      | 3 50-54      | 1.0               |    |
| 7030   | 101187    |          | 1 China  |                 | 1  | 2  | 2 Female | 1970 | 45     |      | 2 45-49      | 1.0               | 2  |
| 7034   | 101191    |          | 1 China  |                 | 1  | 2  | 1 Male   | 1972 | 43     |      | 1 40-44 year | 1.0               |    |
| 7039   | 101192    |          | 1 China  |                 | 1  | 1  | 2 Female | 1954 | 61     |      | 5 >=60       | 1.1               |    |
| 7041   | 100275    |          | 1 China  |                 | 1  | 2  | 1 Male   | 1949 | 66     |      | 5 >=60       | 1.0               |    |
| 7047   | 101198    |          | 1 China  |                 | 1  | 1  | 2 Female | 1963 | 52     |      | 3 50-54      | 1.2               |    |
| 7051   | 101201    |          | 1 China  |                 | 1  | 2  | 1 Male   | 1975 | 40     |      | 1 40-44 year | 1.0               |    |
| 7052   | 101202    |          | 1 China  |                 | 1  | 2  | 1 Male   | 1960 | 55     |      | 4 55-59      | 0.9               |    |
| 7059   | 101206    |          | 1 China  |                 | 1  | 2  | 2 Female | 1972 | 43     |      | 1 40-44 year | 1.0               | 2  |
| 7062   | 101209    |          | 1 China  |                 | 1  | 2  | 2 Female | 1974 | 41     |      | 1 40-44 year | 1.0               | 2  |
| 7065   | 101210    |          | 1 China  |                 | 1  | 2  | 2 Female | 1966 | 49     |      | 2 45-49      | 1.0               | 2  |

| respid | SubsID | dCountry | Country | QDisclaimer | Q1 | Q2 | Gender   | Q3_1 | age Nr | dAge | age Group  | Weight in Ctry | Q4 |
|--------|--------|----------|---------|-------------|----|----|----------|------|--------|------|------------|----------------|----|
| 7066   | 101211 | 1        | China   |             | 1  | 2  | 2 Female | 1969 | 46     | 2    | 45-49      | 1.0            | 2  |
| 7069   | 100586 | 1        | China   |             | 1  | 2  | 2 Female | 1965 | 50     | 3    | 50-54      | 1.2            |    |
| 7070   | 101153 | 1        | China   |             | 1  | 2  | 1 Male   | 1975 | 40     | 1    | 40-44 year | 1.0            |    |
| 7073   | 101214 | 1        | China   |             | 1  | 1  | 1 Male   | 1968 | 47     | 2    | 45-49      | 1.0            |    |
| 7078   | 101217 | 1        | China   |             | 1  | 2  | 1 Male   | 1974 | 41     | 1    | 40-44 year | 1.0            |    |
| 7083   | 101219 | 1        | China   |             | 1  | 2  | 1 Male   | 1969 | 46     | 2    | 45-49      | 1.0            |    |
| 7084   | 101220 | 1        | China   |             | 1  | 2  | 1 Male   | 1973 | 42     | 1    | 40-44 year | 1.0            |    |
| 7085   | 101221 | 1        | China   |             | 1  | 2  | 1 Male   | 1974 | 41     | 1    | 40-44 year | 1.0            |    |
| 7088   | 101222 | 1        | China   |             | 1  | 1  | 1 Male   | 1970 | 45     | 2    | 45-49      | 1.0            |    |
| 7090   | 101223 | 1        | China   |             | 1  | 1  | 1 Male   | 1970 | 45     | 2    | 45-49      | 1.0            |    |
| 7095   | 101226 | 1        | China   |             | 1  | 2  | 2 Female | 1974 | 41     | 1    | 40-44 year | 1.0            | 2  |
| 7100   | 101230 | 1        | China   |             | 1  | 1  | 1 Male   | 1956 | 59     | 4    | 55-59      | 0.9            |    |
| 7102   | 300696 | 2        | Taiwan  |             | 1  | 2  | 1 Male   | 1964 | 51     | 3    | 50-54      | 0.8            |    |
| 7103   | 300697 | 2        | Taiwan  |             | 1  | 2  | 2 Female | 1971 | 44     | 1    | 40-44 year | 0.8            | 2  |
| 7108   | 300699 | 2        | Taiwan  |             | 1  | 2  | 2 Female | 1958 | 57     | 4    | 55-59      | 0.9            |    |
| 7109   | 300672 | 2        | Taiwan  |             | 1  | 2  | 2 Female | 1968 | 47     | 2    | 45-49      | 0.9            | 2  |
| 7110   | 101233 | 1        | China   |             | 1  | 2  | 1 Male   | 1975 | 40     | 1    | 40-44 year | 1.0            |    |
| 7112   | 300700 | 2        | Taiwan  |             | 1  | 2  | 2 Female | 1960 | 55     | 4    | 55-59      | 0.9            |    |
| 7114   | 101236 | 1        | China   |             | 1  | 2  | 2 Female | 1973 | 42     | 1    | 40-44 year | 1.0            | 2  |
| 7116   | 300701 | 2        | Taiwan  |             | 1  | 2  | 1 Male   | 1973 | 42     | 1    | 40-44 year | 0.8            |    |
| 7117   | 101238 | 1        | China   |             | 1  | 2  | 2 Female | 1967 | 48     | 2    | 45-49      | 1.0            | 2  |
| 7118   | 101239 | 1        | China   |             | 1  | 1  | 2 Female | 1970 | 45     | 2    | 45-49      | 1.0            | 2  |
| 7120   | 101241 | 1        | China   |             | 1  | 1  | 2 Female | 1966 | 49     | 2    | 45-49      | 1.0            | 2  |
| 7124   | 300703 | 2        | Taiwan  |             | 1  | 2  | 2 Female | 1971 | 44     | 1    | 40-44 year | 0.8            | 2  |
| 7130   | 101245 | 1        | China   |             | 1  | 2  | 1 Male   | 1955 | 60     | 5    | >=60       | 1.0            |    |
| 7135   | 101247 | 1        | China   |             | 1  | 2  | 1 Male   | 1973 | 42     | 1    | 40-44 year | 1.0            |    |
| 7137   | 101248 | 1        | China   |             | 1  | 1  | 1 Male   | 1975 | 40     | 1    | 40-44 year | 1.0            |    |
| 7140   | 101250 | 1        | China   |             | 1  | 1  | 1 Male   | 1959 | 56     | 4    | 55-59      | 0.9            |    |
| 7141   | 300706 | 2        | Taiwan  |             | 1  | 2  | 2 Female | 1969 | 46     | 2    | 45-49      | 0.9            | 2  |
| 7148   | 300708 | 2        | Taiwan  |             | 1  | 2  | 2 Female | 1973 | 42     | 1    | 40-44 year | 0.8            | 2  |
| 7152   | 101256 | 1        | China   |             | 1  | 1  | 2 Female | 1956 | 59     | 4    | 55-59      | 1.0            |    |
| 7154   | 300710 | 2        | Taiwan  |             | 1  | 2  | 1 Male   | 1968 | 47     | 2    | 45-49      | 0.8            |    |

| respid | SubsID | dCountry | Country | QDisclaimer | Q1 | Q2 | Gender | Q3_1 | age Nr | dAge | age Group  | Weight in Ctry | Q4 |
|--------|--------|----------|---------|-------------|----|----|--------|------|--------|------|------------|----------------|----|
| 7156   | 300711 | 2        | Taiwan  | 1           | 2  | 2  | Female | 1970 | 45     | 2    | 45-49      | 0.9            | 2  |
| 7158   | 101259 | 1        | China   | 1           | 2  | 2  | Female | 1970 | 45     | 2    | 45-49      | 1.0            | 2  |
| 7159   | 101260 | 1        | China   | 1           | 2  | 2  | Female | 1971 | 44     | 1    | 40-44 year | 1.0            | 2  |
| 7161   | 300713 | 2        | Taiwan  | 1           | 2  | 1  | Male   | 1959 | 56     | 4    | 55-59      | 0.7            |    |
| 7164   | 300715 | 2        | Taiwan  | 1           | 2  | 1  | Male   | 1974 | 41     | 1    | 40-44 year | 0.8            |    |
| 7166   | 101263 | 1        | China   | 1           | 2  | 1  | Male   | 1968 | 47     | 2    | 45-49      | 1.0            |    |
| 7167   | 300716 | 2        | Taiwan  | 1           | 2  | 2  | Female | 1971 | 44     | 1    | 40-44 year | 0.8            | 2  |
| 7168   | 300717 | 2        | Taiwan  | 1           | 2  | 2  | Female | 1972 | 43     | 1    | 40-44 year | 0.8            | 2  |
| 7170   | 101265 | 1        | China   | 1           | 2  | 2  | Female | 1973 | 42     | 1    | 40-44 year | 1.0            | 2  |
| 7171   | 300718 | 2        | Taiwan  | 1           | 2  | 2  | Female | 1973 | 42     | 1    | 40-44 year | 0.8            | 2  |
| 7172   | 300719 | 2        | Taiwan  | 1           | 2  | 2  | Female | 1969 | 46     | 2    | 45-49      | 0.9            | 2  |
| 7173   | 300720 | 2        | Taiwan  | 1           | 2  | 2  | Female | 1964 | 51     | 3    | 50-54      | 0.9            |    |
| 7175   | 300722 | 2        | Taiwan  | 1           | 2  | 2  | Female | 1971 | 44     | 1    | 40-44 year | 0.8            | 2  |
| 7176   | 101266 | 1        | China   | 1           | 2  | 1  | Male   | 1950 | 65     | 5    | >=60       | 1.0            |    |
| 7180   | 300723 | 2        | Taiwan  | 1           | 2  | 1  | Male   | 1963 | 52     | 3    | 50-54      | 0.8            |    |
| 7183   | 300724 | 2        | Taiwan  | 1           | 2  | 1  | Male   | 1959 | 56     | 4    | 55-59      | 0.7            |    |
| 7189   | 101271 | 1        | China   | 1           | 2  | 1  | Male   | 1975 | 40     | 1    | 40-44 year | 1.0            |    |
| 7193   | 300726 | 2        | Taiwan  | 1           | 2  | 1  | Male   | 1960 | 55     | 4    | 55-59      | 0.7            |    |
| 7194   | 300727 | 2        | Taiwan  | 1           | 2  | 2  | Female | 1974 | 41     | 1    | 40-44 year | 0.8            | 2  |
| 7195   | 300728 | 2        | Taiwan  | 1           | 2  | 2  | Female | 1971 | 44     | 1    | 40-44 year | 0.8            | 2  |
| 7200   | 300730 | 2        | Taiwan  | 1           | 1  | 2  | Female | 1968 | 47     | 2    | 45-49      | 0.9            | 2  |
| 7201   | 300731 | 2        | Taiwan  | 1           | 2  | 2  | Female | 1956 | 59     | 4    | 55-59      | 0.9            |    |
| 7205   | 300733 | 2        | Taiwan  | 1           | 2  | 1  | Male   | 1967 | 48     | 2    | 45-49      | 0.8            |    |
| 7207   | 300614 | 2        | Taiwan  | 1           | 2  | 1  | Male   | 1975 | 40     | 1    | 40-44 year | 0.8            |    |
| 7208   | 101275 | 1        | China   | 1           | 2  | 2  | Female | 1972 | 43     | 1    | 40-44 year | 1.0            | 2  |
| 7210   | 300734 | 2        | Taiwan  | 1           | 2  | 2  | Female | 1975 | 40     | 1    | 40-44 year | 0.8            | 2  |
| 7211   | 300735 | 2        | Taiwan  | 1           | 2  | 1  | Male   | 1972 | 43     | 1    | 40-44 year | 0.8            |    |
| 7217   | 300736 | 2        | Taiwan  | 1           | 2  | 2  | Female | 1956 | 59     | 4    | 55-59      | 0.9            |    |
| 7218   | 300737 | 2        | Taiwan  | 1           | 2  | 2  | Female | 1973 | 42     | 1    | 40-44 year | 0.8            | 2  |
| 7220   | 101282 | 1        | China   | 1           | 2  | 1  | Male   | 1970 | 45     | 2    | 45-49      | 1.0            |    |
| 7225   | 300739 | 2        | Taiwan  | 1           | 2  | 1  | Male   | 1972 | 43     | 1    | 40-44 year | 0.8            |    |
| 7228   | 300740 | 2        | Taiwan  | 1           | 2  | 1  | Male   | 1972 | 43     | 1    | 40-44 year | 0.8            |    |

| respid | SubsID    | dCountry | Country | QDisclaim<br>er | Q1 | Q2 | Gender | Q3_1 | age Nr | dAge | age Group  | Weight in<br>Ctry | Q4 |
|--------|-----------|----------|---------|-----------------|----|----|--------|------|--------|------|------------|-------------------|----|
| 7230   | 300670    | 2        | Taiwan  | 1               | 2  | 1  | Male   | 1965 | 50     | 3    | 50-54      | 0.8               |    |
| 7233   | 101286    | 1        | China   | 1               | 2  | 1  | Male   | 1967 | 48     | 2    | 45-49      | 1.0               |    |
| 7234   | 300741    | 2        | Taiwan  | 1               | 2  | 1  | Male   | 1972 | 43     | 1    | 40-44 year | 0.8               |    |
| 7235   | 380191649 | 2        | Taiwan  | 1               | 2  | 1  | Male   | 1974 | 41     | 1    | 40-44 year | 0.8               |    |
| 7236   | 300742    | 2        | Taiwan  | 1               | 2  | 1  | Male   | 1963 | 52     | 3    | 50-54      | 0.8               |    |
| 7241   | 300743    | 2        | Taiwan  | 1               | 2  | 1  | Male   | 1970 | 45     | 2    | 45-49      | 0.8               |    |
| 7251   | 300747    | 2        | Taiwan  | 1               | 2  | 1  | Male   | 1970 | 45     | 2    | 45-49      | 0.8               |    |
| 7253   | 101291    | 1        | China   | 1               | 1  | 1  | Male   | 1974 | 41     | 1    | 40-44 year | 1.0               |    |
| 7259   | 300749    | 2        | Taiwan  | 1               | 2  | 1  | Male   | 1956 | 59     | 4    | 55-59      | 0.7               |    |
| 7260   | 300750    | 2        | Taiwan  | 1               | 2  | 2  | Female | 1957 | 58     | 4    | 55-59      | 0.9               |    |
| 7261   | 101294    | 1        | China   | 1               | 2  | 1  | Male   | 1950 | 65     | 5    | >=60       | 1.0               |    |
| 7263   | 300751    | 2        | Taiwan  | 1               | 2  | 2  | Female | 1975 | 40     | 1    | 40-44 year | 0.8               | 2  |
| 7265   | 300752    | 2        | Taiwan  | 1               | 2  | 2  | Female | 1975 | 40     | 1    | 40-44 year | 0.8               | 2  |
| 7268   | 300754    | 2        | Taiwan  | 1               | 2  | 2  | Female | 1973 | 42     | 1    | 40-44 year | 0.8               | 2  |
| 7269   | 300755    | 2        | Taiwan  | 1               | 2  | 1  | Male   | 1962 | 53     | 3    | 50-54      | 0.8               |    |
| 7271   | 101297    | 1        | China   | 1               | 2  | 1  | Male   | 1965 | 50     | 3    | 50-54      | 1.0               |    |
| 7276   | 101299    | 1        | China   | 1               | 1  | 2  | Female | 1960 | 55     | 4    | 55-59      | 1.0               |    |
| 7280   | 300756    | 2        | Taiwan  | 1               | 2  | 1  | Male   | 1970 | 45     | 2    | 45-49      | 0.8               |    |
| 7283   | 300757    | 2        | Taiwan  | 1               | 2  | 2  | Female | 1968 | 47     | 2    | 45-49      | 0.9               | 2  |
| 7284   | 300758    | 2        | Taiwan  | 1               | 1  | 2  | Female | 1971 | 44     | 1    | 40-44 year | 0.8               | 2  |
| 7286   | 300725    | 2        | Taiwan  | 1               | 1  | 1  | Male   | 1956 | 59     | 4    | 55-59      | 0.7               |    |
| 7287   | 101304    | 1        | China   | 1               | 2  | 1  | Male   | 1964 | 51     | 3    | 50-54      | 1.0               |    |
| 7288   | 101305    | 1        | China   | 1               | 1  | 2  | Female | 1955 | 60     | 5    | >=60       | 1.1               |    |
| 7294   | 300759    | 2        | Taiwan  | 1               | 2  | 2  | Female | 1970 | 45     | 2    | 45-49      | 0.9               | 2  |
| 7295   | 101307    | 1        | China   | 1               | 2  | 1  | Male   | 1973 | 42     | 1    | 40-44 year | 1.0               |    |
| 7296   | 101308    | 1        | China   | 1               | 2  | 1  | Male   | 1973 | 42     | 1    | 40-44 year | 1.0               |    |
| 7297   | 101309    | 1        | China   | 1               | 2  | 1  | Male   | 1970 | 45     | 2    | 45-49      | 1.0               |    |
| 7299   | 101310    | 1        | China   | 1               | 2  | 2  | Female | 1970 | 45     | 2    | 45-49      | 1.0               | 2  |
| 7300   | 101311    | 1        | China   | 1               | 1  | 1  | Male   | 1975 | 40     | 1    | 40-44 year | 1.0               |    |
| 7301   | 101228    | 1        | China   | 1               | 2  | 1  | Male   | 1964 | 51     | 3    | 50-54      | 1.0               |    |
| 7302   | 101312    | 1        | China   | 1               | 2  | 1  | Male   | 1975 | 40     | 1    | 40-44 year | 1.0               |    |
| 7306   | 101314    | 1        | China   | 1               | 1  | 2  | Female | 1973 | 42     | 1    | 40-44 year | 1.0               | 2  |



| respid | SubsID | dCountry | Country | QDisclaimer | Q1 | Q2 | Gender   | Q3_1 | age Nr | dAge | age Group    | Weight in Ctry | Q4 |
|--------|--------|----------|---------|-------------|----|----|----------|------|--------|------|--------------|----------------|----|
| 7313   | 101317 | 1        | China   |             | 1  | 2  | 1 Male   | 1971 | 44     |      | 1 40-44 year | 1.0            |    |
| 7315   | 300761 | 2        | Taiwan  |             | 1  | 2  | 2 Female | 1966 | 49     |      | 2 45-49      | 0.9            | 2  |
| 7317   | 101319 | 1        | China   |             | 1  | 2  | 2 Female | 1969 | 46     |      | 2 45-49      | 1.0            | 2  |
| 7321   | 300762 | 2        | Taiwan  |             | 1  | 2  | 1 Male   | 1974 | 41     |      | 1 40-44 year | 0.8            |    |
| 7322   | 300763 | 2        | Taiwan  |             | 1  | 2  | 1 Male   | 1958 | 57     |      | 4 55-59      | 0.7            |    |
| 7323   | 101321 | 1        | China   |             | 1  | 2  | 1 Male   | 1970 | 45     |      | 2 45-49      | 1.0            |    |
| 7333   | 300765 | 2        | Taiwan  |             | 1  | 2  | 1 Male   | 1968 | 47     |      | 2 45-49      | 0.8            |    |
| 7335   | 300766 | 2        | Taiwan  |             | 1  | 2  | 2 Female | 1971 | 44     |      | 1 40-44 year | 0.8            | 2  |
| 7336   | 300767 | 2        | Taiwan  |             | 1  | 2  | 1 Male   | 1972 | 43     |      | 1 40-44 year | 0.8            |    |
| 7337   | 101323 | 1        | China   |             | 1  | 2  | 1 Male   | 1972 | 43     |      | 1 40-44 year | 1.0            |    |
| 7338   | 101324 | 1        | China   |             | 1  | 2  | 1 Male   | 1960 | 55     |      | 4 55-59      | 0.9            |    |
| 7340   | 300768 | 2        | Taiwan  |             | 1  | 2  | 1 Male   | 1975 | 40     |      | 1 40-44 year | 0.8            |    |
| 7341   | 300769 | 2        | Taiwan  |             | 1  | 2  | 2 Female | 1956 | 59     |      | 4 55-59      | 0.9            |    |
| 7342   | 300770 | 2        | Taiwan  |             | 1  | 1  | 1 Male   | 1966 | 49     |      | 2 45-49      | 0.8            |    |
| 7344   | 101326 | 1        | China   |             | 1  | 1  | 2 Female | 1975 | 40     |      | 1 40-44 year | 1.0            | 2  |
| 7346   | 101328 | 1        | China   |             | 1  | 2  | 2 Female | 1967 | 48     |      | 2 45-49      | 1.0            | 2  |
| 7347   | 300771 | 2        | Taiwan  |             | 1  | 2  | 2 Female | 1967 | 48     |      | 2 45-49      | 0.9            | 2  |
| 7349   | 101329 | 1        | China   |             | 1  | 2  | 2 Female | 1972 | 43     |      | 1 40-44 year | 1.0            | 2  |
| 7352   | 300773 | 2        | Taiwan  |             | 1  | 2  | 1 Male   | 1966 | 49     |      | 2 45-49      | 0.8            |    |
| 7353   | 300774 | 2        | Taiwan  |             | 1  | 1  | 1 Male   | 1975 | 40     |      | 1 40-44 year | 0.8            |    |
| 7355   | 300210 | 2        | Taiwan  |             | 1  | 2  | 1 Male   | 1962 | 53     |      | 3 50-54      | 0.8            |    |
| 7356   | 101332 | 1        | China   |             | 1  | 2  | 2 Female | 1970 | 45     |      | 2 45-49      | 1.0            | 2  |
| 7360   | 101334 | 1        | China   |             | 1  | 1  | 2 Female | 1973 | 42     |      | 1 40-44 year | 1.0            | 2  |
| 7371   | 101339 | 1        | China   |             | 1  | 2  | 2 Female | 1963 | 52     |      | 3 50-54      | 1.2            |    |
| 7376   | 101343 | 1        | China   |             | 1  | 1  | 1 Male   | 1972 | 43     |      | 1 40-44 year | 1.0            |    |
| 7379   | 101346 | 1        | China   |             | 1  | 1  | 2 Female | 1966 | 49     |      | 2 45-49      | 1.0            | 2  |
| 7381   | 101348 | 1        | China   |             | 1  | 2  | 1 Male   | 1971 | 44     |      | 1 40-44 year | 1.0            |    |
| 7386   | 101352 | 1        | China   |             | 1  | 2  | 1 Male   | 1969 | 46     |      | 2 45-49      | 1.0            |    |
| 7389   | 101353 | 1        | China   |             | 1  | 2  | 1 Male   | 1963 | 52     |      | 3 50-54      | 1.0            |    |
| 7390   | 101354 | 1        | China   |             | 1  | 2  | 1 Male   | 1959 | 56     |      | 4 55-59      | 0.9            |    |
| 7393   | 101356 | 1        | China   |             | 1  | 2  | 1 Male   | 1973 | 42     |      | 1 40-44 year | 1.0            |    |
| 7394   | 101357 | 1        | China   |             | 1  | 1  | 1 Male   | 1967 | 48     |      | 2 45-49      | 1.0            |    |

| respid | SubsID    | dCountry | Country  | QDisclaimer | Q1 | Q2 | Gender   | Q3_1 | age Nr | dAge | age Group    | Weight in Ctry | Q4 |
|--------|-----------|----------|----------|-------------|----|----|----------|------|--------|------|--------------|----------------|----|
| 7396   | 300776    |          | 2 Taiwan |             | 1  | 2  | 2 Female | 1963 | 52     |      | 3 50-54      | 0.9            |    |
| 7400   | 101362    |          | 1 China  |             | 1  | 1  | 2 Female | 1964 | 51     |      | 3 50-54      | 1.2            |    |
| 7401   | 101363    |          | 1 China  |             | 1  | 2  | 1 Male   | 1974 | 41     |      | 1 40-44 year | 1.0            |    |
| 7403   | 300778    |          | 2 Taiwan |             | 1  | 2  | 1 Male   | 1966 | 49     |      | 2 45-49      | 0.8            |    |
| 7406   | 101366    |          | 1 China  |             | 1  | 2  | 1 Male   | 1971 | 44     |      | 1 40-44 year | 1.0            |    |
| 7409   | 101368    |          | 1 China  |             | 1  | 2  | 1 Male   | 1975 | 40     |      | 1 40-44 year | 1.0            |    |
| 7410   | 101372    |          | 1 China  |             | 1  | 2  | 1 Male   | 1972 | 43     |      | 1 40-44 year | 1.0            |    |
| 7412   | 101370    |          | 1 China  |             | 1  | 1  | 2 Female | 1968 | 47     |      | 2 45-49      | 1.0            | 2  |
| 7414   | 101374    |          | 1 China  |             | 1  | 2  | 2 Female | 1969 | 46     |      | 2 45-49      | 1.0            | 2  |
| 7415   | 101375    |          | 1 China  |             | 1  | 2  | 1 Male   | 1960 | 55     |      | 4 55-59      | 0.9            |    |
| 7417   | 101371    |          | 1 China  |             | 1  | 2  | 1 Male   | 1975 | 40     |      | 1 40-44 year | 1.0            |    |
| 7421   | 101378    |          | 1 China  |             | 1  | 2  | 1 Male   | 1975 | 40     |      | 1 40-44 year | 1.0            |    |
| 7425   | 101379    |          | 1 China  |             | 1  | 2  | 1 Male   | 1963 | 52     |      | 3 50-54      | 1.0            |    |
| 7430   | 101383    |          | 1 China  |             | 1  | 2  | 1 Male   | 1957 | 58     |      | 4 55-59      | 0.9            |    |
| 7432   | 101384    |          | 1 China  |             | 1  | 2  | 1 Male   | 1963 | 52     |      | 3 50-54      | 1.0            |    |
| 7433   | 101385    |          | 1 China  |             | 1  | 2  | 2 Female | 1967 | 48     |      | 2 45-49      | 1.0            | 2  |
| 7442   | 101388    |          | 1 China  |             | 1  | 2  | 2 Female | 1974 | 41     |      | 1 40-44 year | 1.0            | 2  |
| 7445   | 300782    |          | 2 Taiwan |             | 1  | 2  | 2 Female | 1965 | 50     |      | 3 50-54      | 0.9            |    |
| 7446   | 300783    |          | 2 Taiwan |             | 1  | 2  | 2 Female | 1970 | 45     |      | 2 45-49      | 0.9            | 2  |
| 7449   | 300784    |          | 2 Taiwan |             | 1  | 2  | 1 Male   | 1965 | 50     |      | 3 50-54      | 0.8            |    |
| 7450   | 101369    |          | 1 China  |             | 1  | 2  | 2 Female | 1974 | 41     |      | 1 40-44 year | 1.0            | 2  |
| 7451   | 101391    |          | 1 China  |             | 1  | 2  | 1 Male   | 1966 | 49     |      | 2 45-49      | 1.0            |    |
| 7459   | 300786    |          | 2 Taiwan |             | 1  | 2  | 1 Male   | 1958 | 57     |      | 4 55-59      | 0.7            |    |
| 7462   | 101361    |          | 1 China  |             | 1  | 2  | 2 Female | 1970 | 45     |      | 2 45-49      | 1.0            | 2  |
| 7463   | 101397    |          | 1 China  |             | 1  | 2  | 2 Female | 1964 | 51     |      | 3 50-54      | 1.2            |    |
| 7469   | 300787    |          | 2 Taiwan |             | 1  | 2  | 1 Male   | 1974 | 41     |      | 1 40-44 year | 0.8            |    |
| 7482   | 350270009 |          | 3 Korea  |             | 1  | 2  | 1 Male   | 1973 | 42     |      | 1 40-44 year | 0.9            |    |
| 7484   | 300788    |          | 2 Taiwan |             | 1  | 2  | 2 Female | 1960 | 55     |      | 4 55-59      | 0.9            |    |
| 7486   | 101404    |          | 1 China  |             | 1  | 2  | 1 Male   | 1971 | 44     |      | 1 40-44 year | 1.0            |    |
| 7496   | 101409    |          | 1 China  |             | 1  | 1  | 1 Male   | 1964 | 51     |      | 3 50-54      | 1.0            |    |
| 7502   | 300789    |          | 2 Taiwan |             | 1  | 2  | 1 Male   | 1974 | 41     |      | 1 40-44 year | 0.8            |    |
| 7504   | 300790    |          | 2 Taiwan |             | 1  | 2  | 1 Male   | 1973 | 42     |      | 1 40-44 year | 0.8            |    |

| respid | SubsID | dCountry | Country | QDisclaimer | Q1 | Q2 | Gender   | Q3_1 | age Nr | dAge | age Group  | Weight in Ctry | Q4 |
|--------|--------|----------|---------|-------------|----|----|----------|------|--------|------|------------|----------------|----|
| 7509   | 101415 | 1        | China   |             | 1  | 2  | 1 Male   | 1959 | 56     | 4    | 55-59      | 0.9            |    |
| 7513   | 300792 | 2        | Taiwan  |             | 1  | 2  | 2 Female | 1971 | 44     | 1    | 40-44 year | 0.8            | 2  |
| 7514   | 101417 | 1        | China   |             | 1  | 2  | 1 Male   | 1972 | 43     | 1    | 40-44 year | 1.0            |    |
| 7520   | 300794 | 2        | Taiwan  |             | 1  | 2  | 2 Female | 1975 | 40     | 1    | 40-44 year | 0.8            | 2  |
| 7523   | 101419 | 1        | China   |             | 1  | 2  | 2 Female | 1965 | 50     | 3    | 50-54      | 1.2            |    |
| 7526   | 101423 | 1        | China   |             | 1  | 2  | 2 Female | 1961 | 54     | 3    | 50-54      | 1.2            |    |
| 7529   | 101425 | 1        | China   |             | 1  | 2  | 1 Male   | 1966 | 49     | 2    | 45-49      | 1.0            |    |
| 7534   | 101427 | 1        | China   |             | 1  | 2  | 2 Female | 1971 | 44     | 1    | 40-44 year | 1.0            | 2  |
| 7536   | 300795 | 2        | Taiwan  |             | 1  | 2  | 1 Male   | 1974 | 41     | 1    | 40-44 year | 0.8            |    |
| 7540   | 101431 | 1        | China   |             | 1  | 2  | 1 Male   | 1974 | 41     | 1    | 40-44 year | 1.0            |    |
| 7541   | 300796 | 2        | Taiwan  |             | 1  | 2  | 1 Male   | 1972 | 43     | 1    | 40-44 year | 0.8            |    |
| 7542   | 101420 | 1        | China   |             | 1  | 2  | 2 Female | 1966 | 49     | 2    | 45-49      | 1.0            | 2  |
| 7555   | 101438 | 1        | China   |             | 1  | 2  | 1 Male   | 1967 | 48     | 2    | 45-49      | 1.0            |    |
| 7566   | 300798 | 2        | Taiwan  |             | 1  | 2  | 2 Female | 1965 | 50     | 3    | 50-54      | 0.9            |    |
| 7568   | 300799 | 2        | Taiwan  |             | 1  | 2  | 1 Male   | 1961 | 54     | 3    | 50-54      | 0.8            |    |
| 7570   | 101416 | 1        | China   |             | 1  | 2  | 1 Male   | 1966 | 49     | 2    | 45-49      | 1.0            |    |
| 7572   | 101442 | 1        | China   |             | 1  | 1  | 2 Female | 1969 | 46     | 2    | 45-49      | 1.0            | 2  |
| 7573   | 300116 | 2        | Taiwan  |             | 1  | 2  | 2 Female | 1956 | 59     | 4    | 55-59      | 0.9            |    |
| 7576   | 101444 | 1        | China   |             | 1  | 2  | 2 Female | 1975 | 40     | 1    | 40-44 year | 1.0            | 2  |
| 7577   | 300801 | 2        | Taiwan  |             | 1  | 2  | 2 Female | 1974 | 41     | 1    | 40-44 year | 0.8            | 2  |
| 7583   | 101447 | 1        | China   |             | 1  | 1  | 1 Male   | 1974 | 41     | 1    | 40-44 year | 1.0            |    |
| 7584   | 101448 | 1        | China   |             | 1  | 2  | 1 Male   | 1967 | 48     | 2    | 45-49      | 1.0            |    |
| 7585   | 101449 | 1        | China   |             | 1  | 2  | 2 Female | 1967 | 48     | 2    | 45-49      | 1.0            | 2  |
| 7586   | 300802 | 2        | Taiwan  |             | 1  | 1  | 1 Male   | 1974 | 41     | 1    | 40-44 year | 0.8            |    |
| 7587   | 101450 | 1        | China   |             | 1  | 2  | 1 Male   | 1970 | 45     | 2    | 45-49      | 1.0            |    |
| 7588   | 300803 | 2        | Taiwan  |             | 1  | 2  | 1 Male   | 1969 | 46     | 2    | 45-49      | 0.8            |    |
| 7596   | 101453 | 1        | China   |             | 1  | 2  | 1 Male   | 1959 | 56     | 4    | 55-59      | 0.9            |    |
| 7599   | 101455 | 1        | China   |             | 1  | 2  | 2 Female | 1969 | 46     | 2    | 45-49      | 1.0            | 2  |
| 7600   | 101456 | 1        | China   |             | 1  | 2  | 1 Male   | 1973 | 42     | 1    | 40-44 year | 1.0            |    |
| 7602   | 101458 | 1        | China   |             | 1  | 2  | 2 Female | 1957 | 58     | 4    | 55-59      | 1.0            |    |
| 7613   | 101461 | 1        | China   |             | 1  | 2  | 1 Male   | 1962 | 53     | 3    | 50-54      | 1.0            |    |
| 7620   | 300804 | 2        | Taiwan  |             | 1  | 2  | 2 Female | 1969 | 46     | 2    | 45-49      | 0.9            | 2  |

| respid | SubsID | dCountry | Country | QDisclaimer | Q1 | Q2 | Gender   | Q3_1 | age Nr | dAge | age Group  | Weight in Ctry | Q4 |
|--------|--------|----------|---------|-------------|----|----|----------|------|--------|------|------------|----------------|----|
| 7623   | 300805 | 2        | Taiwan  | 1           | 1  | 2  | 1 Male   | 1965 | 50     | 3    | 50-54      | 0.8            |    |
| 7635   | 300806 | 2        | Taiwan  | 1           | 1  | 2  | 1 Male   | 1975 | 40     | 1    | 40-44 year | 0.8            |    |
| 7636   | 101472 | 1        | China   | 1           | 1  | 2  | 2 Female | 1965 | 50     | 3    | 50-54      | 1.2            |    |
| 7643   | 101477 | 1        | China   | 1           | 1  | 2  | 2 Female | 1969 | 46     | 2    | 45-49      | 1.0            | 2  |
| 7645   | 300807 | 2        | Taiwan  | 1           | 1  | 2  | 2 Female | 1956 | 59     | 4    | 55-59      | 0.9            |    |
| 7649   | 101479 | 1        | China   | 1           | 1  | 2  | 2 Female | 1965 | 50     | 3    | 50-54      | 1.2            |    |
| 7651   | 101481 | 1        | China   | 1           | 1  | 2  | 2 Female | 1970 | 45     | 2    | 45-49      | 1.0            | 2  |
| 7652   | 300808 | 2        | Taiwan  | 1           | 1  | 2  | 1 Male   | 1960 | 55     | 4    | 55-59      | 0.7            |    |
| 7655   | 101482 | 1        | China   | 1           | 1  | 1  | 1 Male   | 1966 | 49     | 2    | 45-49      | 1.0            |    |
| 7657   | 101484 | 1        | China   | 1           | 1  | 1  | 1 Male   | 1973 | 42     | 1    | 40-44 year | 1.0            |    |
| 7675   | 300810 | 2        | Taiwan  | 1           | 1  | 2  | 2 Female | 1957 | 58     | 4    | 55-59      | 0.9            |    |
| 7676   | 101493 | 1        | China   | 1           | 1  | 2  | 1 Male   | 1970 | 45     | 2    | 45-49      | 1.0            |    |
| 7684   | 101496 | 1        | China   | 1           | 1  | 2  | 2 Female | 1973 | 42     | 1    | 40-44 year | 1.0            | 2  |
| 7693   | 101498 | 1        | China   | 1           | 1  | 2  | 1 Male   | 1965 | 50     | 3    | 50-54      | 1.0            |    |
| 7694   | 101499 | 1        | China   | 1           | 1  | 2  | 2 Female | 1964 | 51     | 3    | 50-54      | 1.2            |    |
| 7695   | 101500 | 1        | China   | 1           | 1  | 1  | 1 Male   | 1966 | 49     | 2    | 45-49      | 1.0            |    |
| 7696   | 101501 | 1        | China   | 1           | 1  | 2  | 2 Female | 1964 | 51     | 3    | 50-54      | 1.2            |    |
| 7698   | 101502 | 1        | China   | 1           | 1  | 2  | 2 Female | 1974 | 41     | 1    | 40-44 year | 1.0            | 2  |
| 7700   | 101503 | 1        | China   | 1           | 1  | 2  | 2 Female | 1966 | 49     | 2    | 45-49      | 1.0            | 2  |
| 7701   | 101504 | 1        | China   | 1           | 1  | 2  | 1 Male   | 1970 | 45     | 2    | 45-49      | 1.0            |    |
| 7704   | 101495 | 1        | China   | 1           | 1  | 2  | 2 Female | 1957 | 58     | 4    | 55-59      | 1.0            |    |
| 7709   | 101506 | 1        | China   | 1           | 1  | 2  | 1 Male   | 1969 | 46     | 2    | 45-49      | 1.0            |    |
| 7713   | 101509 | 1        | China   | 1           | 1  | 2  | 1 Male   | 1956 | 59     | 4    | 55-59      | 0.9            |    |
| 7714   | 300812 | 2        | Taiwan  | 1           | 1  | 2  | 1 Male   | 1957 | 58     | 4    | 55-59      | 0.7            |    |
| 7718   | 101513 | 1        | China   | 1           | 1  | 2  | 1 Male   | 1970 | 45     | 2    | 45-49      | 1.0            |    |
| 7720   | 300813 | 2        | Taiwan  | 1           | 1  | 2  | 1 Male   | 1972 | 43     | 1    | 40-44 year | 0.8            |    |
| 7721   | 101441 | 1        | China   | 1           | 1  | 2  | 1 Male   | 1958 | 57     | 4    | 55-59      | 0.9            |    |
| 7722   | 101514 | 1        | China   | 1           | 1  | 2  | 1 Male   | 1960 | 55     | 4    | 55-59      | 0.9            |    |
| 7724   | 300814 | 2        | Taiwan  | 1           | 1  | 2  | 1 Male   | 1969 | 46     | 2    | 45-49      | 0.8            |    |
| 7728   | 300815 | 2        | Taiwan  | 1           | 1  | 2  | 1 Male   | 1960 | 55     | 4    | 55-59      | 0.7            |    |
| 7731   | 101518 | 1        | China   | 1           | 1  | 2  | 1 Male   | 1958 | 57     | 4    | 55-59      | 0.9            |    |
| 7735   | 300816 | 2        | Taiwan  | 1           | 1  | 2  | 1 Male   | 1971 | 44     | 1    | 40-44 year | 0.8            |    |

| respid | SubsID | dCountry | Country  | QDisclaimer | Q1 | Q2 | Gender   | Q3_1 | age Nr | dAge | age Group    | Weight in Ctry | Q4 |
|--------|--------|----------|----------|-------------|----|----|----------|------|--------|------|--------------|----------------|----|
| 7737   | 101520 |          | 1 China  |             | 1  | 2  | 1 Male   | 1969 | 46     |      | 2 45-49      | 1.0            |    |
| 7741   | 101522 |          | 1 China  |             | 1  | 2  | 1 Male   | 1965 | 50     |      | 3 50-54      | 1.0            |    |
| 7746   | 300817 |          | 2 Taiwan |             | 1  | 2  | 1 Male   | 1968 | 47     |      | 2 45-49      | 0.8            |    |
| 7747   | 101526 |          | 1 China  |             | 1  | 2  | 2 Female | 1968 | 47     |      | 2 45-49      | 1.0            | 2  |
| 7748   | 101527 |          | 1 China  |             | 1  | 2  | 1 Male   | 1970 | 45     |      | 2 45-49      | 1.0            |    |
| 7750   | 101529 |          | 1 China  |             | 1  | 2  | 2 Female | 1969 | 46     |      | 2 45-49      | 1.0            | 2  |
| 7754   | 101530 |          | 1 China  |             | 1  | 2  | 2 Female | 1971 | 44     |      | 1 40-44 year | 1.0            | 2  |
| 7755   | 101531 |          | 1 China  |             | 1  | 2  | 2 Female | 1972 | 43     |      | 1 40-44 year | 1.0            | 2  |
| 7762   | 101534 |          | 1 China  |             | 1  | 2  | 2 Female | 1970 | 45     |      | 2 45-49      | 1.0            | 2  |
| 7764   | 101535 |          | 1 China  |             | 1  | 2  | 1 Male   | 1974 | 41     |      | 1 40-44 year | 1.0            |    |
| 7766   | 101537 |          | 1 China  |             | 1  | 2  | 2 Female | 1974 | 41     |      | 1 40-44 year | 1.0            | 2  |
| 7768   | 101538 |          | 1 China  |             | 1  | 2  | 2 Female | 1970 | 45     |      | 2 45-49      | 1.0            | 2  |
| 7770   | 101539 |          | 1 China  |             | 1  | 2  | 1 Male   | 1966 | 49     |      | 2 45-49      | 1.0            |    |
| 7771   | 101540 |          | 1 China  |             | 1  | 2  | 1 Male   | 1964 | 51     |      | 3 50-54      | 1.0            |    |
| 7777   | 101544 |          | 1 China  |             | 1  | 2  | 1 Male   | 1972 | 43     |      | 1 40-44 year | 1.0            |    |
| 7778   | 101545 |          | 1 China  |             | 1  | 2  | 1 Male   | 1961 | 54     |      | 3 50-54      | 1.0            |    |
| 7783   | 101549 |          | 1 China  |             | 1  | 2  | 1 Male   | 1965 | 50     |      | 3 50-54      | 1.0            |    |
| 7789   | 101554 |          | 1 China  |             | 1  | 2  | 2 Female | 1975 | 40     |      | 1 40-44 year | 1.0            | 2  |
| 7790   | 101555 |          | 1 China  |             | 1  | 1  | 1 Male   | 1951 | 64     |      | 5 >=60       | 1.0            |    |
| 7795   | 101558 |          | 1 China  |             | 1  | 1  | 1 Male   | 1973 | 42     |      | 1 40-44 year | 1.0            |    |
| 7807   | 101563 |          | 1 China  |             | 1  | 2  | 1 Male   | 1956 | 59     |      | 4 55-59      | 0.9            |    |
| 7808   | 101564 |          | 1 China  |             | 1  | 2  | 1 Male   | 1968 | 47     |      | 2 45-49      | 1.0            |    |
| 7818   | 101571 |          | 1 China  |             | 1  | 2  | 2 Female | 1962 | 53     |      | 3 50-54      | 1.2            |    |
| 7820   | 101573 |          | 1 China  |             | 1  | 2  | 1 Male   | 1959 | 56     |      | 4 55-59      | 0.9            |    |
| 7831   | 101579 |          | 1 China  |             | 1  | 2  | 2 Female | 1965 | 50     |      | 3 50-54      | 1.2            |    |
| 7832   | 101580 |          | 1 China  |             | 1  | 1  | 1 Male   | 1971 | 44     |      | 1 40-44 year | 1.0            |    |
| 7837   | 300818 |          | 2 Taiwan |             | 1  | 2  | 1 Male   | 1966 | 49     |      | 2 45-49      | 0.8            |    |
| 7841   | 101585 |          | 1 China  |             | 1  | 2  | 1 Male   | 1972 | 43     |      | 1 40-44 year | 1.0            |    |
| 7845   | 300819 |          | 2 Taiwan |             | 1  | 2  | 1 Male   | 1956 | 59     |      | 4 55-59      | 0.7            |    |
| 7853   | 300820 |          | 2 Taiwan |             | 1  | 1  | 1 Male   | 1957 | 58     |      | 4 55-59      | 0.7            |    |
| 7854   | 300821 |          | 2 Taiwan |             | 1  | 2  | 2 Female | 1974 | 41     |      | 1 40-44 year | 0.8            | 2  |
| 7862   | 101590 |          | 1 China  |             | 1  | 2  | 1 Male   | 1960 | 55     |      | 4 55-59      | 0.9            |    |

| respid | SubsID | dCountry | Country | QDisclaimer | Q1 | Q2 | Gender   | Q3_1 | age Nr | dAge | age Group  | Weight in Ctry | Q4 |
|--------|--------|----------|---------|-------------|----|----|----------|------|--------|------|------------|----------------|----|
| 7871   | 101595 | 1        | China   |             | 1  | 2  | 2 Female | 1973 | 42     | 1    | 40-44 year | 1.0            | 2  |
| 7875   | 101598 | 1        | China   |             | 1  | 2  | 2 Female | 1961 | 54     | 3    | 50-54      | 1.2            |    |
| 7880   | 101596 | 1        | China   |             | 1  | 2  | 2 Female | 1970 | 45     | 2    | 45-49      | 1.0            | 2  |
| 7881   | 101602 | 1        | China   |             | 1  | 2  | 2 Female | 1974 | 41     | 1    | 40-44 year | 1.0            | 2  |
| 7883   | 101603 | 1        | China   |             | 1  | 2  | 1 Male   | 1969 | 46     | 2    | 45-49      | 1.0            |    |
| 7896   | 101599 | 1        | China   |             | 1  | 2  | 1 Male   | 1961 | 54     | 3    | 50-54      | 1.0            |    |
| 7905   | 300825 | 2        | Taiwan  |             | 1  | 2  | 1 Male   | 1964 | 51     | 3    | 50-54      | 0.8            |    |
| 7919   | 101621 | 1        | China   |             | 1  | 1  | 1 Male   | 1963 | 52     | 3    | 50-54      | 1.0            |    |
| 7928   | 101624 | 1        | China   |             | 1  | 2  | 1 Male   | 1967 | 48     | 2    | 45-49      | 1.0            |    |
| 7929   | 300826 | 2        | Taiwan  |             | 1  | 2  | 2 Female | 1965 | 50     | 3    | 50-54      | 0.9            |    |
| 7938   | 101628 | 1        | China   |             | 1  | 2  | 1 Male   | 1975 | 40     | 1    | 40-44 year | 1.0            |    |
| 7940   | 101557 | 1        | China   |             | 1  | 2  | 1 Male   | 1975 | 40     | 1    | 40-44 year | 1.0            |    |
| 7941   | 101630 | 1        | China   |             | 1  | 2  | 1 Male   | 1975 | 40     | 1    | 40-44 year | 1.0            |    |
| 7952   | 101611 | 1        | China   |             | 1  | 2  | 1 Male   | 1972 | 43     | 1    | 40-44 year | 1.0            |    |
| 7962   | 101638 | 1        | China   |             | 1  | 2  | 1 Male   | 1962 | 53     | 3    | 50-54      | 1.0            |    |
| 7968   | 101642 | 1        | China   |             | 1  | 2  | 1 Male   | 1966 | 49     | 2    | 45-49      | 1.0            |    |
| 7972   | 101646 | 1        | China   |             | 1  | 2  | 1 Male   | 1971 | 44     | 1    | 40-44 year | 1.0            |    |
| 7983   | 101653 | 1        | China   |             | 1  | 2  | 1 Male   | 1968 | 47     | 2    | 45-49      | 1.0            |    |
| 7990   | 101658 | 1        | China   |             | 1  | 2  | 1 Male   | 1975 | 40     | 1    | 40-44 year | 1.0            |    |
| 7993   | 101660 | 1        | China   |             | 1  | 2  | 2 Female | 1971 | 44     | 1    | 40-44 year | 1.0            | 2  |
| 8005   | 101664 | 1        | China   |             | 1  | 2  | 2 Female | 1967 | 48     | 2    | 45-49      | 1.0            | 2  |
| 8008   | 100503 | 1        | China   |             | 1  | 2  | 2 Female | 1965 | 50     | 3    | 50-54      | 1.2            |    |
| 8012   | 101667 | 1        | China   |             | 1  | 2  | 2 Female | 1966 | 49     | 2    | 45-49      | 1.0            | 2  |
| 8021   | 101671 | 1        | China   |             | 1  | 2  | 2 Female | 1974 | 41     | 1    | 40-44 year | 1.0            | 2  |
| 8024   | 300827 | 2        | Taiwan  |             | 1  | 2  | 2 Female | 1962 | 53     | 3    | 50-54      | 0.9            |    |
| 8043   | 101678 | 1        | China   |             | 1  | 2  | 2 Female | 1968 | 47     | 2    | 45-49      | 1.0            | 2  |
| 8051   | 101682 | 1        | China   |             | 1  | 2  | 2 Female | 1974 | 41     | 1    | 40-44 year | 1.0            | 2  |
| 8056   | 101685 | 1        | China   |             | 1  | 1  | 1 Male   | 1965 | 50     | 3    | 50-54      | 1.0            |    |
| 8061   | 101620 | 1        | China   |             | 1  | 2  | 1 Male   | 1972 | 43     | 1    | 40-44 year | 1.0            |    |
| 8066   | 300828 | 2        | Taiwan  |             | 1  | 2  | 1 Male   | 1964 | 51     | 3    | 50-54      | 0.8            |    |
| 8069   | 101689 | 1        | China   |             | 1  | 2  | 2 Female | 1966 | 49     | 2    | 45-49      | 1.0            | 2  |
| 8071   | 101690 | 1        | China   |             | 1  | 2  | 2 Female | 1970 | 45     | 2    | 45-49      | 1.0            | 2  |

| respid | SubsID | dCountry | Country | QDisclaim<br>er | Q1 | Q2 | Gender | Q3_1 | age Nr | dAge | age Group  | Weight in<br>Ctry | Q4 |
|--------|--------|----------|---------|-----------------|----|----|--------|------|--------|------|------------|-------------------|----|
| 8072   | 101494 | 1        | China   | 1               | 2  | 2  | Female | 1975 | 40     | 1    | 40-44 year | 1.0               | 2  |
| 8076   | 300829 | 2        | Taiwan  | 1               | 2  | 1  | Male   | 1965 | 50     | 3    | 50-54      | 0.8               |    |
| 8080   | 300830 | 2        | Taiwan  | 1               | 2  | 1  | Male   | 1968 | 47     | 2    | 45-49      | 0.8               |    |
| 8083   | 101695 | 1        | China   | 1               | 2  | 1  | Male   | 1971 | 44     | 1    | 40-44 year | 1.0               |    |
| 8093   | 101699 | 1        | China   | 1               | 2  | 1  | Male   | 1975 | 40     | 1    | 40-44 year | 1.0               |    |
| 8095   | 300832 | 2        | Taiwan  | 1               | 2  | 1  | Male   | 1960 | 55     | 4    | 55-59      | 0.7               |    |
| 8099   | 101701 | 1        | China   | 1               | 1  | 1  | Male   | 1967 | 48     | 2    | 45-49      | 1.0               |    |
| 8100   | 101702 | 1        | China   | 1               | 2  | 1  | Male   | 1973 | 42     | 1    | 40-44 year | 1.0               |    |
| 8103   | 300833 | 2        | Taiwan  | 1               | 2  | 1  | Male   | 1964 | 51     | 3    | 50-54      | 0.8               |    |
| 8104   | 101704 | 1        | China   | 1               | 2  | 1  | Male   | 1964 | 51     | 3    | 50-54      | 1.0               |    |
| 8115   | 300834 | 2        | Taiwan  | 1               | 2  | 1  | Male   | 1960 | 55     | 4    | 55-59      | 0.7               |    |
| 8121   | 101712 | 1        | China   | 1               | 1  | 1  | Male   | 1960 | 55     | 4    | 55-59      | 0.9               |    |
| 8128   | 101715 | 1        | China   | 1               | 2  | 2  | Female | 1972 | 43     | 1    | 40-44 year | 1.0               | 2  |
| 8130   | 101717 | 1        | China   | 1               | 2  | 2  | Female | 1973 | 42     | 1    | 40-44 year | 1.0               | 2  |
| 8131   | 101718 | 1        | China   | 1               | 1  | 2  | Female | 1962 | 53     | 3    | 50-54      | 1.2               |    |
| 8133   | 101721 | 1        | China   | 1               | 2  | 2  | Female | 1973 | 42     | 1    | 40-44 year | 1.0               | 2  |
| 8143   | 100892 | 1        | China   | 1               | 1  | 1  | Male   | 1966 | 49     | 2    | 45-49      | 1.0               |    |
| 8144   | 101725 | 1        | China   | 1               | 2  | 2  | Female | 1970 | 45     | 2    | 45-49      | 1.0               | 2  |
| 8146   | 101727 | 1        | China   | 1               | 2  | 1  | Male   | 1959 | 56     | 4    | 55-59      | 0.9               |    |
| 8148   | 101728 | 1        | China   | 1               | 2  | 1  | Male   | 1962 | 53     | 3    | 50-54      | 1.0               |    |
| 8157   | 101732 | 1        | China   | 1               | 2  | 1  | Male   | 1969 | 46     | 2    | 45-49      | 1.0               |    |
| 8164   | 101736 | 1        | China   | 1               | 2  | 2  | Female | 1973 | 42     | 1    | 40-44 year | 1.0               | 2  |
| 8173   | 101742 | 1        | China   | 1               | 2  | 1  | Male   | 1971 | 44     | 1    | 40-44 year | 1.0               |    |
| 8176   | 101744 | 1        | China   | 1               | 2  | 2  | Female | 1971 | 44     | 1    | 40-44 year | 1.0               | 2  |
| 8179   | 101746 | 1        | China   | 1               | 2  | 1  | Male   | 1974 | 41     | 1    | 40-44 year | 1.0               |    |
| 8181   | 300835 | 2        | Taiwan  | 1               | 2  | 2  | Female | 1963 | 52     | 3    | 50-54      | 0.9               |    |
| 8182   | 101747 | 1        | China   | 1               | 2  | 2  | Female | 1975 | 40     | 1    | 40-44 year | 1.0               | 2  |
| 8196   | 101743 | 1        | China   | 1               | 2  | 1  | Male   | 1972 | 43     | 1    | 40-44 year | 1.0               |    |
| 8200   | 300836 | 2        | Taiwan  | 1               | 2  | 2  | Female | 1963 | 52     | 3    | 50-54      | 0.9               |    |
| 8203   | 101756 | 1        | China   | 1               | 2  | 1  | Male   | 1968 | 47     | 2    | 45-49      | 1.0               |    |
| 8204   | 300837 | 2        | Taiwan  | 1               | 2  | 2  | Female | 1965 | 50     | 3    | 50-54      | 0.9               |    |
| 8206   | 101758 | 1        | China   | 1               | 2  | 2  | Female | 1957 | 58     | 4    | 55-59      | 1.0               |    |

| respid | SubsID | dCountry | Country | QDisclaimer | Q1 | Q2 | Gender   | Q3_1 | age Nr | dAge | age Group    | Weight in Ctry | Q4 |
|--------|--------|----------|---------|-------------|----|----|----------|------|--------|------|--------------|----------------|----|
| 8208   | 101759 | 1        | China   |             | 1  | 2  | 2 Female | 1970 | 45     |      | 2 45-49      | 1.0            | 2  |
| 8212   | 101762 | 1        | China   |             | 1  | 1  | 1 Male   | 1963 | 52     |      | 3 50-54      | 1.0            |    |
| 8222   | 101766 | 1        | China   |             | 1  | 1  | 2 Female | 1964 | 51     |      | 3 50-54      | 1.2            |    |
| 8223   | 101767 | 1        | China   |             | 1  | 2  | 1 Male   | 1968 | 47     |      | 2 45-49      | 1.0            |    |
| 8225   | 101769 | 1        | China   |             | 1  | 2  | 1 Male   | 1972 | 43     |      | 1 40-44 year | 1.0            |    |
| 8226   | 101770 | 1        | China   |             | 1  | 2  | 1 Male   | 1970 | 45     |      | 2 45-49      | 1.0            |    |
| 8228   | 101772 | 1        | China   |             | 1  | 2  | 1 Male   | 1975 | 40     |      | 1 40-44 year | 1.0            |    |
| 8229   | 101773 | 1        | China   |             | 1  | 2  | 1 Male   | 1951 | 64     |      | 5 >=60       | 1.0            |    |
| 8239   | 101777 | 1        | China   |             | 1  | 2  | 1 Male   | 1974 | 41     |      | 1 40-44 year | 1.0            |    |
| 8246   | 101774 | 1        | China   |             | 1  | 2  | 1 Male   | 1946 | 69     |      | 5 >=60       | 1.0            |    |
| 8258   | 300839 | 2        | Taiwan  |             | 1  | 1  | 1 Male   | 1959 | 56     |      | 4 55-59      | 0.7            |    |
| 8260   | 101785 | 1        | China   |             | 1  | 2  | 1 Male   | 1972 | 43     |      | 1 40-44 year | 1.0            |    |
| 8262   | 101788 | 1        | China   |             | 1  | 1  | 1 Male   | 1973 | 42     |      | 1 40-44 year | 1.0            |    |
| 8263   | 101787 | 1        | China   |             | 1  | 2  | 1 Male   | 1967 | 48     |      | 2 45-49      | 1.0            |    |
| 8267   | 300840 | 2        | Taiwan  |             | 1  | 2  | 1 Male   | 1958 | 57     |      | 4 55-59      | 0.7            |    |
| 8271   | 101792 | 1        | China   |             | 1  | 2  | 2 Female | 1972 | 43     |      | 1 40-44 year | 1.0            | 2  |
| 8274   | 101794 | 1        | China   |             | 1  | 2  | 1 Male   | 1968 | 47     |      | 2 45-49      | 1.0            |    |
| 8275   | 101795 | 1        | China   |             | 1  | 2  | 1 Male   | 1969 | 46     |      | 2 45-49      | 1.0            |    |
| 8279   | 101798 | 1        | China   |             | 1  | 2  | 2 Female | 1968 | 47     |      | 2 45-49      | 1.0            | 2  |
| 8285   | 101799 | 1        | China   |             | 1  | 2  | 1 Male   | 1972 | 43     |      | 1 40-44 year | 1.0            |    |
| 8287   | 101574 | 1        | China   |             | 1  | 2  | 1 Male   | 1960 | 55     |      | 4 55-59      | 0.9            |    |
| 8289   | 101801 | 1        | China   |             | 1  | 2  | 1 Male   | 1967 | 48     |      | 2 45-49      | 1.0            |    |
| 8291   | 101802 | 1        | China   |             | 1  | 2  | 2 Female | 1967 | 48     |      | 2 45-49      | 1.0            | 2  |
| 8299   | 101806 | 1        | China   |             | 1  | 2  | 1 Male   | 1972 | 43     |      | 1 40-44 year | 1.0            |    |
| 8301   | 300841 | 2        | Taiwan  |             | 1  | 1  | 1 Male   | 1959 | 56     |      | 4 55-59      | 0.7            |    |
| 8302   | 101808 | 1        | China   |             | 1  | 2  | 2 Female | 1974 | 41     |      | 1 40-44 year | 1.0            | 2  |
| 8308   | 101810 | 1        | China   |             | 1  | 2  | 2 Female | 1974 | 41     |      | 1 40-44 year | 1.0            | 2  |
| 8313   | 101440 | 1        | China   |             | 1  | 1  | 1 Male   | 1971 | 44     |      | 1 40-44 year | 1.0            |    |
| 8316   | 101816 | 1        | China   |             | 1  | 2  | 1 Male   | 1964 | 51     |      | 3 50-54      | 1.0            |    |
| 8317   | 101817 | 1        | China   |             | 1  | 2  | 2 Female | 1971 | 44     |      | 1 40-44 year | 1.0            | 2  |
| 8319   | 300842 | 2        | Taiwan  |             | 1  | 2  | 1 Male   | 1965 | 50     |      | 3 50-54      | 0.8            |    |
| 8323   | 101821 | 1        | China   |             | 1  | 2  | 1 Male   | 1974 | 41     |      | 1 40-44 year | 1.0            |    |



| respid | SubsID | dCountry | Country | QDisclaimer | Q1 | Q2 | Gender   | Q3_1 | age Nr | dAge | age Group  | Weight in Ctry | Q4 |
|--------|--------|----------|---------|-------------|----|----|----------|------|--------|------|------------|----------------|----|
| 8324   | 300843 | 2        | Taiwan  | 1           | 1  | 2  | 2 Female | 1966 | 49     | 2    | 45-49      | 0.9            | 2  |
| 8327   | 101824 | 1        | China   | 1           | 1  | 2  | 1 Male   | 1970 | 45     | 2    | 45-49      | 1.0            |    |
| 8328   | 300844 | 2        | Taiwan  | 1           | 1  | 2  | 2 Female | 1965 | 50     | 3    | 50-54      | 0.9            |    |
| 8342   | 101836 | 1        | China   | 1           | 1  | 2  | 1 Male   | 1975 | 40     | 1    | 40-44 year | 1.0            |    |
| 8350   | 101842 | 1        | China   | 1           | 1  | 2  | 2 Female | 1972 | 43     | 1    | 40-44 year | 1.0            | 2  |
| 8352   | 101844 | 1        | China   | 1           | 1  | 2  | 2 Female | 1974 | 41     | 1    | 40-44 year | 1.0            | 2  |
| 8353   | 300845 | 2        | Taiwan  | 1           | 1  | 2  | 1 Male   | 1964 | 51     | 3    | 50-54      | 0.8            |    |
| 8356   | 101846 | 1        | China   | 1           | 1  | 2  | 2 Female | 1959 | 56     | 4    | 55-59      | 1.0            |    |
| 8367   | 101848 | 1        | China   | 1           | 1  | 2  | 2 Female | 1955 | 60     | 5    | >=60       | 1.1            |    |
| 8373   | 101852 | 1        | China   | 1           | 1  | 2  | 1 Male   | 1972 | 43     | 1    | 40-44 year | 1.0            |    |
| 8379   | 101857 | 1        | China   | 1           | 1  | 2  | 1 Male   | 1970 | 45     | 2    | 45-49      | 1.0            |    |
| 8382   | 101858 | 1        | China   | 1           | 1  | 2  | 1 Male   | 1975 | 40     | 1    | 40-44 year | 1.0            |    |
| 8387   | 101861 | 1        | China   | 1           | 1  | 1  | 2 Female | 1955 | 60     | 5    | >=60       | 1.1            |    |
| 8409   | 101868 | 1        | China   | 1           | 1  | 2  | 2 Female | 1975 | 40     | 1    | 40-44 year | 1.0            | 2  |
| 8410   | 101869 | 1        | China   | 1           | 1  | 2  | 2 Female | 1970 | 45     | 2    | 45-49      | 1.0            | 2  |
| 8412   | 101851 | 1        | China   | 1           | 1  | 2  | 2 Female | 1971 | 44     | 1    | 40-44 year | 1.0            | 2  |
| 8415   | 101853 | 1        | China   | 1           | 1  | 2  | 2 Female | 1975 | 40     | 1    | 40-44 year | 1.0            | 2  |
| 8417   | 101872 | 1        | China   | 1           | 1  | 2  | 1 Male   | 1974 | 41     | 1    | 40-44 year | 1.0            |    |
| 8422   | 101437 | 1        | China   | 1           | 1  | 2  | 1 Male   | 1964 | 51     | 3    | 50-54      | 1.0            |    |
| 8430   | 300848 | 2        | Taiwan  | 1           | 1  | 2  | 2 Female | 1963 | 52     | 3    | 50-54      | 0.9            |    |
| 8434   | 101879 | 1        | China   | 1           | 1  | 2  | 2 Female | 1960 | 55     | 4    | 55-59      | 1.0            |    |
| 8436   | 101880 | 1        | China   | 1           | 1  | 2  | 2 Female | 1965 | 50     | 3    | 50-54      | 1.2            |    |
| 8446   | 101884 | 1        | China   | 1           | 1  | 2  | 1 Male   | 1975 | 40     | 1    | 40-44 year | 1.0            |    |
| 8447   | 101885 | 1        | China   | 1           | 1  | 2  | 1 Male   | 1963 | 52     | 3    | 50-54      | 1.0            |    |
| 8448   | 101886 | 1        | China   | 1           | 1  | 2  | 2 Female | 1975 | 40     | 1    | 40-44 year | 1.0            | 2  |
| 8455   | 101888 | 1        | China   | 1           | 1  | 2  | 1 Male   | 1970 | 45     | 2    | 45-49      | 1.0            |    |
| 8456   | 300849 | 2        | Taiwan  | 1           | 1  | 2  | 1 Male   | 1957 | 58     | 4    | 55-59      | 0.7            |    |
| 8459   | 300850 | 2        | Taiwan  | 1           | 1  | 2  | 2 Female | 1961 | 54     | 3    | 50-54      | 0.9            |    |
| 8460   | 101895 | 1        | China   | 1           | 1  | 2  | 2 Female | 1974 | 41     | 1    | 40-44 year | 1.0            | 2  |
| 8464   | 101897 | 1        | China   | 1           | 1  | 2  | 1 Male   | 1971 | 44     | 1    | 40-44 year | 1.0            |    |
| 8470   | 101899 | 1        | China   | 1           | 1  | 1  | 2 Female | 1965 | 50     | 3    | 50-54      | 1.2            |    |
| 8473   | 300851 | 2        | Taiwan  | 1           | 1  | 2  | 2 Female | 1963 | 52     | 3    | 50-54      | 0.9            |    |

| respid | SubsID    | dCountry | Country | QDisclaimer | Q1 | Q2 | Gender   | Q3_1 | age Nr | dAge | age Group  | Weight in Ctry | Q4 |
|--------|-----------|----------|---------|-------------|----|----|----------|------|--------|------|------------|----------------|----|
| 8486   | 101904    | 1        | China   |             | 1  | 1  | 2 Female | 1964 | 51     | 3    | 50-54      | 1.2            |    |
| 8487   | 101905    | 1        | China   |             | 1  | 2  | 2 Female | 1962 | 53     | 3    | 50-54      | 1.2            |    |
| 8489   | 300852    | 2        | Taiwan  |             | 1  | 2  | 2 Female | 1965 | 50     | 3    | 50-54      | 0.9            |    |
| 8494   | 101908    | 1        | China   |             | 1  | 2  | 1 Male   | 1966 | 49     | 2    | 45-49      | 1.0            |    |
| 8495   | 300853    | 2        | Taiwan  |             | 1  | 1  | 2 Female | 1966 | 49     | 2    | 45-49      | 0.9            | 2  |
| 8497   | 101909    | 1        | China   |             | 1  | 2  | 2 Female | 1973 | 42     | 1    | 40-44 year | 1.0            | 2  |
| 8510   | 101901    | 1        | China   |             | 1  | 2  | 2 Female | 1970 | 45     | 2    | 45-49      | 1.0            | 2  |
| 8515   | 300855    | 2        | Taiwan  |             | 1  | 2  | 2 Female | 1946 | 69     | 5    | >=60       | 1.7            |    |
| 8526   | 300856    | 2        | Taiwan  |             | 1  | 2  | 2 Female | 1965 | 50     | 3    | 50-54      | 0.9            |    |
| 8530   | 300857    | 2        | Taiwan  |             | 1  | 2  | 2 Female | 1971 | 44     | 1    | 40-44 year | 0.8            | 2  |
| 8532   | 300858    | 2        | Taiwan  |             | 1  | 2  | 1 Male   | 1968 | 47     | 2    | 45-49      | 0.8            |    |
| 8533   | 300859    | 2        | Taiwan  |             | 1  | 2  | 2 Female | 1974 | 41     | 1    | 40-44 year | 0.8            | 2  |
| 8534   | 101559    | 1        | China   |             | 1  | 2  | 2 Female | 1972 | 43     | 1    | 40-44 year | 1.0            | 2  |
| 8572   | 101940    | 1        | China   |             | 1  | 2  | 1 Male   | 1970 | 45     | 2    | 45-49      | 1.0            |    |
| 8582   | 100698    | 1        | China   |             | 1  | 2  | 1 Male   | 1975 | 40     | 1    | 40-44 year | 1.0            |    |
| 8584   | 101947    | 1        | China   |             | 1  | 2  | 1 Male   | 1963 | 52     | 3    | 50-54      | 1.0            |    |
| 8585   | 101948    | 1        | China   |             | 1  | 2  | 2 Female | 1961 | 54     | 3    | 50-54      | 1.2            |    |
| 8586   | 300863    | 2        | Taiwan  |             | 1  | 2  | 1 Male   | 1969 | 46     | 2    | 45-49      | 0.8            |    |
| 8589   | 101949    | 1        | China   |             | 1  | 1  | 1 Male   | 1970 | 45     | 2    | 45-49      | 1.0            |    |
| 8593   | 300864    | 2        | Taiwan  |             | 1  | 2  | 2 Female | 1960 | 55     | 4    | 55-59      | 0.9            |    |
| 8594   | 300865    | 2        | Taiwan  |             | 1  | 2  | 2 Female | 1972 | 43     | 1    | 40-44 year | 0.8            | 2  |
| 8601   | 300866    | 2        | Taiwan  |             | 1  | 2  | 2 Female | 1966 | 49     | 2    | 45-49      | 0.9            | 2  |
| 8603   | 300868    | 2        | Taiwan  |             | 1  | 1  | 1 Male   | 1963 | 52     | 3    | 50-54      | 0.8            |    |
| 8604   | 101945    | 1        | China   |             | 1  | 1  | 2 Female | 1962 | 53     | 3    | 50-54      | 1.2            |    |
| 8605   | 300869    | 2        | Taiwan  |             | 1  | 2  | 2 Female | 1968 | 47     | 2    | 45-49      | 0.9            | 2  |
| 8607   | 300870    | 2        | Taiwan  |             | 1  | 2  | 1 Male   | 1969 | 46     | 2    | 45-49      | 0.8            |    |
| 8623   | 300874    | 2        | Taiwan  |             | 1  | 2  | 1 Male   | 1946 | 69     | 5    | >=60       | 1.6            |    |
| 8626   | 101959    | 1        | China   |             | 1  | 2  | 1 Male   | 1974 | 41     | 1    | 40-44 year | 1.0            |    |
| 8638   | 300875    | 2        | Taiwan  |             | 1  | 2  | 2 Female | 1966 | 49     | 2    | 45-49      | 0.9            | 2  |
| 8640   | 101902    | 1        | China   |             | 1  | 1  | 2 Female | 1973 | 42     | 1    | 40-44 year | 1.0            | 2  |
| 8641   | 350038648 | 3        | Korea   |             | 1  | 2  | 1 Male   | 1975 | 40     | 1    | 40-44 year | 0.9            |    |
| 8643   | 300876    | 2        | Taiwan  |             | 1  | 2  | 2 Female | 1972 | 43     | 1    | 40-44 year | 0.8            | 2  |

| respid | SubsID    | dCountry | Country  | QDisclaim<br>er | Q1 | Q2 | Gender   | Q3_1 | age Nr | dAge | age Group    | Weight in<br>Ctry | Q4 |
|--------|-----------|----------|----------|-----------------|----|----|----------|------|--------|------|--------------|-------------------|----|
| 8644   | 101963    |          | 1 China  |                 | 1  | 2  | 2 Female | 1969 | 46     |      | 2 45-49      | 1.0               | 2  |
| 8646   | 300877    |          | 2 Taiwan |                 | 1  | 1  | 2 Female | 1963 | 52     |      | 3 50-54      | 0.9               |    |
| 8647   | 300878    |          | 2 Taiwan |                 | 1  | 2  | 1 Male   | 1967 | 48     |      | 2 45-49      | 0.8               |    |
| 8649   | 350241550 |          | 3 Korea  |                 | 1  | 2  | 1 Male   | 1971 | 44     |      | 1 40-44 year | 0.9               |    |
| 8650   | 101966    |          | 1 China  |                 | 1  | 1  | 2 Female | 1968 | 47     |      | 2 45-49      | 1.0               | 2  |
| 8658   | 380080775 |          | 2 Taiwan |                 | 1  | 2  | 2 Female | 1970 | 45     |      | 2 45-49      | 0.9               | 2  |
| 8659   | 101911    |          | 1 China  |                 | 1  | 2  | 1 Male   | 1969 | 46     |      | 2 45-49      | 1.0               |    |
| 8669   | 300880    |          | 2 Taiwan |                 | 1  | 2  | 1 Male   | 1961 | 54     |      | 3 50-54      | 0.8               |    |
| 8672   | 101973    |          | 1 China  |                 | 1  | 2  | 1 Male   | 1968 | 47     |      | 2 45-49      | 1.0               |    |
| 8673   | 101974    |          | 1 China  |                 | 1  | 2  | 2 Female | 1968 | 47     |      | 2 45-49      | 1.0               | 2  |
| 8676   | 101977    |          | 1 China  |                 | 1  | 2  | 1 Male   | 1961 | 54     |      | 3 50-54      | 1.0               |    |
| 8677   | 300881    |          | 2 Taiwan |                 | 1  | 2  | 1 Male   | 1968 | 47     |      | 2 45-49      | 0.8               |    |
| 8681   | 101978    |          | 1 China  |                 | 1  | 2  | 2 Female | 1970 | 45     |      | 2 45-49      | 1.0               | 2  |
| 8688   | 101983    |          | 1 China  |                 | 1  | 2  | 1 Male   | 1965 | 50     |      | 3 50-54      | 1.0               |    |
| 8689   | 101023    |          | 1 China  |                 | 1  | 1  | 2 Female | 1974 | 41     |      | 1 40-44 year | 1.0               | 2  |
| 8690   | 101984    |          | 1 China  |                 | 1  | 2  | 1 Male   | 1971 | 44     |      | 1 40-44 year | 1.0               |    |
| 8693   | 350186270 |          | 3 Korea  |                 | 1  | 2  | 1 Male   | 1968 | 47     |      | 2 45-49      | 0.8               |    |
| 8694   | 300882    |          | 2 Taiwan |                 | 1  | 2  | 1 Male   | 1974 | 41     |      | 1 40-44 year | 0.8               |    |
| 8699   | 101988    |          | 1 China  |                 | 1  | 2  | 1 Male   | 1970 | 45     |      | 2 45-49      | 1.0               |    |
| 8700   | 101989    |          | 1 China  |                 | 1  | 2  | 1 Male   | 1968 | 47     |      | 2 45-49      | 1.0               |    |
| 8703   | 300883    |          | 2 Taiwan |                 | 1  | 2  | 2 Female | 1966 | 49     |      | 2 45-49      | 0.9               | 2  |
| 8704   | 380033989 |          | 2 Taiwan |                 | 1  | 2  | 1 Male   | 1974 | 41     |      | 1 40-44 year | 0.8               |    |
| 8706   | 300884    |          | 2 Taiwan |                 | 1  | 2  | 1 Male   | 1949 | 66     |      | 5 >=60       | 1.6               |    |
| 8709   | 101993    |          | 1 China  |                 | 1  | 2  | 1 Male   | 1962 | 53     |      | 3 50-54      | 1.0               |    |
| 8715   | 300885    |          | 2 Taiwan |                 | 1  | 2  | 1 Male   | 1970 | 45     |      | 2 45-49      | 0.8               |    |
| 8728   | 102002    |          | 1 China  |                 | 1  | 2  | 1 Male   | 1958 | 57     |      | 4 55-59      | 0.9               |    |
| 8729   | 300888    |          | 2 Taiwan |                 | 1  | 2  | 1 Male   | 1974 | 41     |      | 1 40-44 year | 0.8               |    |
| 8730   | 102003    |          | 1 China  |                 | 1  | 2  | 2 Female | 1960 | 55     |      | 4 55-59      | 1.0               |    |
| 8742   | 300889    |          | 2 Taiwan |                 | 1  | 2  | 1 Male   | 1950 | 65     |      | 5 >=60       | 1.6               |    |
| 8748   | 380062472 |          | 2 Taiwan |                 | 1  | 2  | 2 Female | 1975 | 40     |      | 1 40-44 year | 0.8               | 2  |
| 8749   | 102012    |          | 1 China  |                 | 1  | 2  | 1 Male   | 1964 | 51     |      | 3 50-54      | 1.0               |    |
| 8750   | 300891    |          | 2 Taiwan |                 | 1  | 2  | 1 Male   | 1968 | 47     |      | 2 45-49      | 0.8               |    |

| respid | SubsID    | dCountry | Country  | QDisclaimer | Q1 | Q2 | Gender   | Q3_1 | age Nr | dAge | age Group    | Weight in Ctry | Q4 |
|--------|-----------|----------|----------|-------------|----|----|----------|------|--------|------|--------------|----------------|----|
| 8751   | 380117105 |          | 2 Taiwan |             | 1  | 2  | 1 Male   | 1964 | 51     |      | 3 50-54      | 0.8            |    |
| 8752   | 102013    |          | 1 China  |             | 1  | 2  | 1 Male   | 1970 | 45     |      | 2 45-49      | 1.0            |    |
| 8754   | 100447    |          | 1 China  |             | 1  | 2  | 1 Male   | 1975 | 40     |      | 1 40-44 year | 1.0            |    |
| 8757   | 300892    |          | 2 Taiwan |             | 1  | 2  | 1 Male   | 1965 | 50     |      | 3 50-54      | 0.8            |    |
| 8760   | 350352185 |          | 3 Korea  |             | 1  | 2  | 1 Male   | 1968 | 47     |      | 2 45-49      | 0.8            |    |
| 8761   | 102019    |          | 1 China  |             | 1  | 2  | 1 Male   | 1973 | 42     |      | 1 40-44 year | 1.0            |    |
| 8762   | 102020    |          | 1 China  |             | 1  | 2  | 1 Male   | 1957 | 58     |      | 4 55-59      | 0.9            |    |
| 8763   | 380056544 |          | 2 Taiwan |             | 1  | 2  | 1 Male   | 1966 | 49     |      | 2 45-49      | 0.8            |    |
| 8764   | 102021    |          | 1 China  |             | 1  | 2  | 2 Female | 1959 | 56     |      | 4 55-59      | 1.0            |    |
| 8765   | 300893    |          | 2 Taiwan |             | 1  | 2  | 1 Male   | 1965 | 50     |      | 3 50-54      | 0.8            |    |
| 8766   | 380050650 |          | 2 Taiwan |             | 1  | 2  | 2 Female | 1968 | 47     |      | 2 45-49      | 0.9            | 2  |
| 8767   | 300894    |          | 2 Taiwan |             | 1  | 2  | 2 Female | 1943 | 72     |      | 5 >=60       | 1.7            |    |
| 8768   | 102022    |          | 1 China  |             | 1  | 2  | 2 Female | 1967 | 48     |      | 2 45-49      | 1.0            | 2  |
| 8770   | 102024    |          | 1 China  |             | 1  | 2  | 1 Male   | 1969 | 46     |      | 2 45-49      | 1.0            |    |
| 8771   | 300895    |          | 2 Taiwan |             | 1  | 2  | 1 Male   | 1970 | 45     |      | 2 45-49      | 0.8            |    |
| 8773   | 350225603 |          | 3 Korea  |             | 1  | 2  | 2 Female | 1961 | 54     |      | 3 50-54      | 0.8            |    |
| 8774   | 102026    |          | 1 China  |             | 1  | 2  | 1 Male   | 1957 | 58     |      | 4 55-59      | 0.9            |    |
| 8776   | 102027    |          | 1 China  |             | 1  | 2  | 2 Female | 1966 | 49     |      | 2 45-49      | 1.0            | 2  |
| 8777   | 350298726 |          | 3 Korea  |             | 1  | 2  | 2 Female | 1971 | 44     |      | 1 40-44 year | 0.9            | 2  |
| 8778   | 300896    |          | 2 Taiwan |             | 1  | 2  | 2 Female | 1973 | 42     |      | 1 40-44 year | 0.8            | 2  |
| 8779   | 102028    |          | 1 China  |             | 1  | 2  | 1 Male   | 1967 | 48     |      | 2 45-49      | 1.0            |    |
| 8784   | 102031    |          | 1 China  |             | 1  | 2  | 1 Male   | 1964 | 51     |      | 3 50-54      | 1.0            |    |
| 8786   | 380041131 |          | 2 Taiwan |             | 1  | 2  | 1 Male   | 1956 | 59     |      | 4 55-59      | 0.7            |    |
| 8787   | 300897    |          | 2 Taiwan |             | 1  | 2  | 1 Male   | 1964 | 51     |      | 3 50-54      | 0.8            |    |
| 8790   | 350149765 |          | 3 Korea  |             | 1  | 2  | 1 Male   | 1953 | 62     |      | 5 >=60       | 1.6            |    |
| 8791   | 101467    |          | 1 China  |             | 1  | 1  | 1 Male   | 1962 | 53     |      | 3 50-54      | 1.0            |    |
| 8793   | 380103045 |          | 2 Taiwan |             | 1  | 2  | 2 Female | 1971 | 44     |      | 1 40-44 year | 0.8            | 2  |
| 8795   | 300898    |          | 2 Taiwan |             | 1  | 2  | 2 Female | 1975 | 40     |      | 1 40-44 year | 0.8            | 2  |
| 8797   | 102037    |          | 1 China  |             | 1  | 2  | 2 Female | 1962 | 53     |      | 3 50-54      | 1.2            |    |
| 8801   | 102040    |          | 1 China  |             | 1  | 2  | 1 Male   | 1964 | 51     |      | 3 50-54      | 1.0            |    |
| 8802   | 300899    |          | 2 Taiwan |             | 1  | 2  | 1 Male   | 1972 | 43     |      | 1 40-44 year | 0.8            |    |
| 8807   | 102044    |          | 1 China  |             | 1  | 1  | 1 Male   | 1955 | 60     |      | 5 >=60       | 1.0            |    |

| respid | SubsID    | dCountry | Country  | QDisclaim<br>er | Q1 | Q2 | Gender   | Q3_1 | age Nr | dAge | age Group    | Weight in<br>Ctry | Q4 |
|--------|-----------|----------|----------|-----------------|----|----|----------|------|--------|------|--------------|-------------------|----|
| 8813   | 102047    |          | 1 China  |                 | 1  | 2  | 1 Male   | 1970 | 45     |      | 2 45-49      | 1.0               |    |
| 8817   | 380216918 |          | 2 Taiwan |                 | 1  | 2  | 2 Female | 1968 | 47     |      | 2 45-49      | 0.9               | 2  |
| 8818   | 300900    |          | 2 Taiwan |                 | 1  | 2  | 1 Male   | 1974 | 41     |      | 1 40-44 year | 0.8               |    |
| 8821   | 102052    |          | 1 China  |                 | 1  | 2  | 2 Female | 1968 | 47     |      | 2 45-49      | 1.0               | 2  |
| 8822   | 102053    |          | 1 China  |                 | 1  | 2  | 2 Female | 1965 | 50     |      | 3 50-54      | 1.2               |    |
| 8823   | 300901    |          | 2 Taiwan |                 | 1  | 2  | 2 Female | 1974 | 41     |      | 1 40-44 year | 0.8               | 2  |
| 8824   | 350176846 |          | 3 Korea  |                 | 1  | 2  | 1 Male   | 1964 | 51     |      | 3 50-54      | 0.9               |    |
| 8825   | 300902    |          | 2 Taiwan |                 | 1  | 2  | 2 Female | 1967 | 48     |      | 2 45-49      | 0.9               | 2  |
| 8834   | 102058    |          | 1 China  |                 | 1  | 1  | 1 Male   | 1962 | 53     |      | 3 50-54      | 1.0               |    |
| 8840   | 102062    |          | 1 China  |                 | 1  | 2  | 2 Female | 1963 | 52     |      | 3 50-54      | 1.2               |    |
| 8843   | 102064    |          | 1 China  |                 | 1  | 1  | 1 Male   | 1974 | 41     |      | 1 40-44 year | 1.0               |    |
| 8846   | 102066    |          | 1 China  |                 | 1  | 1  | 1 Male   | 1960 | 55     |      | 4 55-59      | 0.9               |    |
| 8862   | 102074    |          | 1 China  |                 | 1  | 2  | 1 Male   | 1970 | 45     |      | 2 45-49      | 1.0               |    |
| 8866   | 102077    |          | 1 China  |                 | 1  | 2  | 1 Male   | 1973 | 42     |      | 1 40-44 year | 1.0               |    |
| 8869   | 102081    |          | 1 China  |                 | 1  | 2  | 1 Male   | 1959 | 56     |      | 4 55-59      | 0.9               |    |
| 8872   | 102080    |          | 1 China  |                 | 1  | 1  | 2 Female | 1970 | 45     |      | 2 45-49      | 1.0               | 2  |
| 8903   | 102095    |          | 1 China  |                 | 1  | 2  | 1 Male   | 1974 | 41     |      | 1 40-44 year | 1.0               |    |
| 8909   | 102097    |          | 1 China  |                 | 1  | 2  | 1 Male   | 1964 | 51     |      | 3 50-54      | 1.0               |    |
| 8926   | 102100    |          | 1 China  |                 | 1  | 2  | 2 Female | 1974 | 41     |      | 1 40-44 year | 1.0               | 2  |
| 8936   | 102103    |          | 1 China  |                 | 1  | 2  | 2 Female | 1954 | 61     |      | 5 >=60       | 1.1               |    |
| 8945   | 300904    |          | 2 Taiwan |                 | 1  | 2  | 2 Female | 1969 | 46     |      | 2 45-49      | 0.9               | 2  |
| 8954   | 102111    |          | 1 China  |                 | 1  | 2  | 1 Male   | 1956 | 59     |      | 4 55-59      | 0.9               |    |
| 8955   | 300905    |          | 2 Taiwan |                 | 1  | 2  | 2 Female | 1969 | 46     |      | 2 45-49      | 0.9               | 2  |
| 8958   | 102112    |          | 1 China  |                 | 1  | 2  | 1 Male   | 1960 | 55     |      | 4 55-59      | 0.9               |    |
| 8959   | 102113    |          | 1 China  |                 | 1  | 2  | 2 Female | 1975 | 40     |      | 1 40-44 year | 1.0               | 2  |
| 8960   | 102114    |          | 1 China  |                 | 1  | 2  | 1 Male   | 1970 | 45     |      | 2 45-49      | 1.0               |    |
| 8976   | 300393    |          | 2 Taiwan |                 | 1  | 2  | 2 Female | 1970 | 45     |      | 2 45-49      | 0.9               | 2  |
| 8977   | 300906    |          | 2 Taiwan |                 | 1  | 1  | 2 Female | 1969 | 46     |      | 2 45-49      | 0.9               | 2  |
| 8979   | 102123    |          | 1 China  |                 | 1  | 2  | 1 Male   | 1957 | 58     |      | 4 55-59      | 0.9               |    |
| 8985   | 300908    |          | 2 Taiwan |                 | 1  | 1  | 1 Male   | 1972 | 43     |      | 1 40-44 year | 0.8               |    |
| 8994   | 102127    |          | 1 China  |                 | 1  | 1  | 1 Male   | 1970 | 45     |      | 2 45-49      | 1.0               |    |
| 8997   | 102130    |          | 1 China  |                 | 1  | 2  | 1 Male   | 1963 | 52     |      | 3 50-54      | 1.0               |    |

| respid | SubsID    | dCountry | Country  | QDisclaim<br>er | Q1 | Q2 | Gender   | Q3_1 | age Nr | dAge | age Group    | Weight in<br>Ctry | Q4 |
|--------|-----------|----------|----------|-----------------|----|----|----------|------|--------|------|--------------|-------------------|----|
| 9002   | 102133    |          | 1 China  |                 | 1  | 2  | 1 Male   | 1965 | 50     |      | 3 50-54      | 1.0               |    |
| 9005   | 380068844 |          | 2 Taiwan |                 | 1  | 2  | 2 Female | 1970 | 45     |      | 2 45-49      | 0.9               | 2  |
| 9017   | 300487    |          | 2 Taiwan |                 | 1  | 2  | 2 Female | 1973 | 42     |      | 1 40-44 year | 0.8               | 2  |
| 9018   | 102140    |          | 1 China  |                 | 1  | 1  | 1 Male   | 1956 | 59     |      | 4 55-59      | 0.9               |    |
| 9021   | 102141    |          | 1 China  |                 | 1  | 2  | 2 Female | 1957 | 58     |      | 4 55-59      | 1.0               |    |
| 9029   | 102146    |          | 1 China  |                 | 1  | 2  | 1 Male   | 1960 | 55     |      | 4 55-59      | 0.9               |    |
| 9035   | 102149    |          | 1 China  |                 | 1  | 2  | 1 Male   | 1970 | 45     |      | 2 45-49      | 1.0               |    |
| 9038   | 102151    |          | 1 China  |                 | 1  | 2  | 1 Male   | 1960 | 55     |      | 4 55-59      | 0.9               |    |
| 9039   | 102152    |          | 1 China  |                 | 1  | 2  | 1 Male   | 1974 | 41     |      | 1 40-44 year | 1.0               |    |
| 9040   | 102153    |          | 1 China  |                 | 1  | 2  | 2 Female | 1953 | 62     |      | 5 >=60       | 1.1               |    |
| 9042   | 102155    |          | 1 China  |                 | 1  | 2  | 1 Male   | 1970 | 45     |      | 2 45-49      | 1.0               |    |
| 9043   | 102156    |          | 1 China  |                 | 1  | 2  | 1 Male   | 1954 | 61     |      | 5 >=60       | 1.0               |    |
| 9045   | 102158    |          | 1 China  |                 | 1  | 2  | 1 Male   | 1974 | 41     |      | 1 40-44 year | 1.0               |    |
| 9051   | 300910    |          | 2 Taiwan |                 | 1  | 2  | 1 Male   | 1975 | 40     |      | 1 40-44 year | 0.8               |    |
| 9067   | 102148    |          | 1 China  |                 | 1  | 2  | 1 Male   | 1971 | 44     |      | 1 40-44 year | 1.0               |    |
| 9069   | 300911    |          | 2 Taiwan |                 | 1  | 2  | 1 Male   | 1967 | 48     |      | 2 45-49      | 0.8               |    |
| 9073   | 350270470 |          | 3 Korea  |                 | 1  | 2  | 1 Male   | 1972 | 43     |      | 1 40-44 year | 0.9               |    |
| 9084   | 102175    |          | 1 China  |                 | 1  | 1  | 2 Female | 1956 | 59     |      | 4 55-59      | 1.0               |    |
| 9096   | 102178    |          | 1 China  |                 | 1  | 1  | 2 Female | 1960 | 55     |      | 4 55-59      | 1.0               |    |
| 9100   | 102183    |          | 1 China  |                 | 1  | 2  | 2 Female | 1966 | 49     |      | 2 45-49      | 1.0               | 2  |
| 9107   | 380103502 |          | 2 Taiwan |                 | 1  | 2  | 1 Male   | 1961 | 54     |      | 3 50-54      | 0.8               |    |
| 9110   | 102188    |          | 1 China  |                 | 1  | 2  | 1 Male   | 1959 | 56     |      | 4 55-59      | 0.9               |    |
| 9120   | 102193    |          | 1 China  |                 | 1  | 2  | 2 Female | 1963 | 52     |      | 3 50-54      | 1.2               |    |
| 9122   | 102195    |          | 1 China  |                 | 1  | 2  | 2 Female | 1955 | 60     |      | 5 >=60       | 1.1               |    |
| 9130   | 300912    |          | 2 Taiwan |                 | 1  | 2  | 2 Female | 1964 | 51     |      | 3 50-54      | 0.9               |    |
| 9134   | 102204    |          | 1 China  |                 | 1  | 2  | 2 Female | 1960 | 55     |      | 4 55-59      | 1.0               |    |
| 9137   | 102206    |          | 1 China  |                 | 1  | 2  | 1 Male   | 1963 | 52     |      | 3 50-54      | 1.0               |    |
| 9139   | 380059901 |          | 2 Taiwan |                 | 1  | 2  | 2 Female | 1971 | 44     |      | 1 40-44 year | 0.8               | 2  |
| 9144   | 102209    |          | 1 China  |                 | 1  | 2  | 2 Female | 1955 | 60     |      | 5 >=60       | 1.1               |    |
| 9157   | 102216    |          | 1 China  |                 | 1  | 2  | 1 Male   | 1973 | 42     |      | 1 40-44 year | 1.0               |    |
| 9166   | 102219    |          | 1 China  |                 | 1  | 2  | 1 Male   | 1975 | 40     |      | 1 40-44 year | 1.0               |    |
| 9177   | 300913    |          | 2 Taiwan |                 | 1  | 2  | 1 Male   | 1959 | 56     |      | 4 55-59      | 0.7               |    |

| respid | SubsID    | dCountry | Country | QDisclaimer | Q1 | Q2 | Gender | Q3_1 | age Nr | dAge | age Group  | Weight in Ctry | Q4 |
|--------|-----------|----------|---------|-------------|----|----|--------|------|--------|------|------------|----------------|----|
| 9181   | 102223    | 1        | China   | 1           | 1  | 1  | Female | 1975 | 40     | 1    | 40-44 year | 1.0            | 2  |
| 9183   | 102224    | 1        | China   | 1           | 1  | 1  | Male   | 1966 | 49     | 2    | 45-49      | 1.0            |    |
| 9184   | 102225    | 1        | China   | 1           | 2  | 1  | Male   | 1959 | 56     | 4    | 55-59      | 0.9            |    |
| 9188   | 102229    | 1        | China   | 1           | 2  | 1  | Male   | 1962 | 53     | 3    | 50-54      | 1.0            |    |
| 9197   | 102228    | 1        | China   | 1           | 2  | 1  | Male   | 1969 | 46     | 2    | 45-49      | 1.0            |    |
| 9200   | 300916    | 2        | Taiwan  | 1           | 2  | 2  | Female | 1973 | 42     | 1    | 40-44 year | 0.8            | 2  |
| 9205   | 102237    | 1        | China   | 1           | 2  | 2  | Female | 1974 | 41     | 1    | 40-44 year | 1.0            | 2  |
| 9207   | 300917    | 2        | Taiwan  | 1           | 2  | 2  | Female | 1964 | 51     | 3    | 50-54      | 0.9            |    |
| 9213   | 300918    | 2        | Taiwan  | 1           | 2  | 1  | Male   | 1970 | 45     | 2    | 45-49      | 0.8            |    |
| 9216   | 300919    | 2        | Taiwan  | 1           | 2  | 1  | Male   | 1971 | 44     | 1    | 40-44 year | 0.8            |    |
| 9217   | 300920    | 2        | Taiwan  | 1           | 2  | 1  | Male   | 1970 | 45     | 2    | 45-49      | 0.8            |    |
| 9218   | 380071846 | 2        | Taiwan  | 1           | 2  | 2  | Female | 1970 | 45     | 2    | 45-49      | 0.9            | 2  |
| 9219   | 102242    | 1        | China   | 1           | 2  | 2  | Female | 1969 | 46     | 2    | 45-49      | 1.0            | 2  |
| 9220   | 102243    | 1        | China   | 1           | 2  | 2  | Female | 1970 | 45     | 2    | 45-49      | 1.0            | 2  |
| 9221   | 102244    | 1        | China   | 1           | 1  | 1  | Male   | 1956 | 59     | 4    | 55-59      | 0.9            |    |
| 9223   | 102241    | 1        | China   | 1           | 1  | 1  | Male   | 1964 | 51     | 3    | 50-54      | 1.0            |    |
| 9228   | 102247    | 1        | China   | 1           | 2  | 2  | Female | 1965 | 50     | 3    | 50-54      | 1.2            |    |
| 9230   | 102249    | 1        | China   | 1           | 2  | 1  | Male   | 1967 | 48     | 2    | 45-49      | 1.0            |    |
| 9231   | 350189191 | 3        | Korea   | 1           | 1  | 2  | Female | 1966 | 49     | 2    | 45-49      | 0.9            | 2  |
| 9233   | 102251    | 1        | China   | 1           | 1  | 1  | Male   | 1959 | 56     | 4    | 55-59      | 0.9            |    |
| 9235   | 350204228 | 3        | Korea   | 1           | 2  | 2  | Female | 1968 | 47     | 2    | 45-49      | 0.9            | 2  |
| 9237   | 300922    | 2        | Taiwan  | 1           | 2  | 2  | Female | 1966 | 49     | 2    | 45-49      | 0.9            | 2  |
| 9242   | 102256    | 1        | China   | 1           | 2  | 2  | Female | 1956 | 59     | 4    | 55-59      | 1.0            |    |
| 9250   | 102259    | 1        | China   | 1           | 2  | 1  | Male   | 1972 | 43     | 1    | 40-44 year | 1.0            |    |
| 9253   | 102261    | 1        | China   | 1           | 2  | 2  | Female | 1963 | 52     | 3    | 50-54      | 1.2            |    |
| 9257   | 102265    | 1        | China   | 1           | 2  | 1  | Male   | 1971 | 44     | 1    | 40-44 year | 1.0            |    |
| 9263   | 102266    | 1        | China   | 1           | 1  | 1  | Male   | 1957 | 58     | 4    | 55-59      | 0.9            |    |
| 9267   | 102269    | 1        | China   | 1           | 2  | 1  | Male   | 1972 | 43     | 1    | 40-44 year | 1.0            |    |
| 9272   | 102270    | 1        | China   | 1           | 2  | 1  | Male   | 1963 | 52     | 3    | 50-54      | 1.0            |    |
| 9279   | 300923    | 2        | Taiwan  | 1           | 2  | 1  | Male   | 1973 | 42     | 1    | 40-44 year | 0.8            |    |
| 9281   | 102274    | 1        | China   | 1           | 1  | 2  | Female | 1973 | 42     | 1    | 40-44 year | 1.0            | 2  |
| 9285   | 102277    | 1        | China   | 1           | 2  | 1  | Male   | 1957 | 58     | 4    | 55-59      | 0.9            |    |

| respid | SubsID    | dCountry | Country | QDisclaimer | Q1 | Q2 | Gender   | Q3_1 | age Nr | dAge | age Group  | Weight in Ctry | Q4 |
|--------|-----------|----------|---------|-------------|----|----|----------|------|--------|------|------------|----------------|----|
| 9286   | 102278    | 1        | China   |             | 1  | 2  | 2 Female | 1973 | 42     | 1    | 40-44 year | 1.0            | 2  |
| 9294   | 102281    | 1        | China   |             | 1  | 2  | 1 Male   | 1962 | 53     | 3    | 50-54      | 1.0            |    |
| 9295   | 300924    | 2        | Taiwan  |             | 1  | 2  | 2 Female | 1968 | 47     | 2    | 45-49      | 0.9            | 2  |
| 9297   | 102282    | 1        | China   |             | 1  | 2  | 1 Male   | 1960 | 55     | 4    | 55-59      | 0.9            |    |
| 9299   | 102283    | 1        | China   |             | 1  | 2  | 1 Male   | 1966 | 49     | 2    | 45-49      | 1.0            |    |
| 9309   | 102289    | 1        | China   |             | 1  | 2  | 2 Female | 1973 | 42     | 1    | 40-44 year | 1.0            | 2  |
| 9315   | 101021    | 1        | China   |             | 1  | 2  | 2 Female | 1971 | 44     | 1    | 40-44 year | 1.0            | 2  |
| 9320   | 350183482 | 3        | Korea   |             | 1  | 2  | 1 Male   | 1956 | 59     | 4    | 55-59      | 0.8            |    |
| 9324   | 300927    | 2        | Taiwan  |             | 1  | 2  | 1 Male   | 1965 | 50     | 3    | 50-54      | 0.8            |    |
| 9326   | 102296    | 1        | China   |             | 1  | 2  | 2 Female | 1968 | 47     | 2    | 45-49      | 1.0            | 2  |
| 9333   | 102301    | 1        | China   |             | 1  | 2  | 2 Female | 1959 | 56     | 4    | 55-59      | 1.0            |    |
| 9334   | 102302    | 1        | China   |             | 1  | 2  | 2 Female | 1973 | 42     | 1    | 40-44 year | 1.0            | 2  |
| 9336   | 102304    | 1        | China   |             | 1  | 1  | 2 Female | 1970 | 45     | 2    | 45-49      | 1.0            | 2  |
| 9337   | 300928    | 2        | Taiwan  |             | 1  | 2  | 1 Male   | 1963 | 52     | 3    | 50-54      | 0.8            |    |
| 9342   | 300929    | 2        | Taiwan  |             | 1  | 2  | 1 Male   | 1962 | 53     | 3    | 50-54      | 0.8            |    |
| 9347   | 102310    | 1        | China   |             | 1  | 2  | 2 Female | 1966 | 49     | 2    | 45-49      | 1.0            | 2  |
| 9352   | 380039019 | 2        | Taiwan  |             | 1  | 2  | 1 Male   | 1963 | 52     | 3    | 50-54      | 0.8            |    |
| 9355   | 102313    | 1        | China   |             | 1  | 2  | 1 Male   | 1966 | 49     | 2    | 45-49      | 1.0            |    |
| 9356   | 300930    | 2        | Taiwan  |             | 1  | 2  | 1 Male   | 1969 | 46     | 2    | 45-49      | 0.8            |    |
| 9359   | 300931    | 2        | Taiwan  |             | 1  | 2  | 1 Male   | 1954 | 61     | 5    | >=60       | 1.6            |    |
| 9368   | 300932    | 2        | Taiwan  |             | 1  | 2  | 2 Female | 1974 | 41     | 1    | 40-44 year | 0.8            | 2  |
| 9375   | 350299658 | 3        | Korea   |             | 1  | 2  | 1 Male   | 1962 | 53     | 3    | 50-54      | 0.9            |    |
| 9384   | 102332    | 1        | China   |             | 1  | 2  | 2 Female | 1970 | 45     | 2    | 45-49      | 1.0            | 2  |
| 9388   | 300933    | 2        | Taiwan  |             | 1  | 2  | 1 Male   | 1969 | 46     | 2    | 45-49      | 0.8            |    |
| 9397   | 102339    | 1        | China   |             | 1  | 2  | 1 Male   | 1964 | 51     | 3    | 50-54      | 1.0            |    |
| 9400   | 102342    | 1        | China   |             | 1  | 2  | 1 Male   | 1964 | 51     | 3    | 50-54      | 1.0            |    |
| 9401   | 102343    | 1        | China   |             | 1  | 2  | 1 Male   | 1965 | 50     | 3    | 50-54      | 1.0            |    |
| 9402   | 300934    | 2        | Taiwan  |             | 1  | 2  | 2 Female | 1972 | 43     | 1    | 40-44 year | 0.8            | 2  |
| 9417   | 280924811 | 1        | China   |             | 1  | 2  | 1 Male   | 1975 | 40     | 1    | 40-44 year | 1.0            |    |
| 9424   | 300935    | 2        | Taiwan  |             | 1  | 2  | 1 Male   | 1966 | 49     | 2    | 45-49      | 0.8            |    |
| 9427   | 102354    | 1        | China   |             | 1  | 1  | 2 Female | 1960 | 55     | 4    | 55-59      | 1.0            |    |
| 9429   | 380118703 | 2        | Taiwan  |             | 1  | 2  | 1 Male   | 1962 | 53     | 3    | 50-54      | 0.8            |    |



| respid | SubsID | dCountry | Country | QDisclaimer | Q1 | Q2 | Gender   | Q3_1 | age Nr | dAge | age Group  | Weight in Ctry | Q4 |
|--------|--------|----------|---------|-------------|----|----|----------|------|--------|------|------------|----------------|----|
| 9437   | 102359 | 1        | China   |             | 1  | 2  | 1 Male   | 1958 | 57     | 4    | 55-59      | 0.9            |    |
| 9442   | 102361 | 1        | China   |             | 1  | 2  | 1 Male   | 1960 | 55     | 4    | 55-59      | 0.9            |    |
| 9446   | 102364 | 1        | China   |             | 1  | 1  | 1 Male   | 1953 | 62     | 5    | >=60       | 1.0            |    |
| 9447   | 102365 | 1        | China   |             | 1  | 2  | 1 Male   | 1963 | 52     | 3    | 50-54      | 1.0            |    |
| 9448   | 300936 | 2        | Taiwan  |             | 1  | 2  | 2 Female | 1965 | 50     | 3    | 50-54      | 0.9            |    |
| 9449   | 100412 | 1        | China   |             | 1  | 1  | 1 Male   | 1972 | 43     | 1    | 40-44 year | 1.0            |    |
| 9455   | 300938 | 2        | Taiwan  |             | 1  | 1  | 2 Female | 1946 | 69     | 5    | >=60       | 1.7            |    |
| 9459   | 102371 | 1        | China   |             | 1  | 1  | 2 Female | 1956 | 59     | 4    | 55-59      | 1.0            |    |
| 9460   | 102370 | 1        | China   |             | 1  | 2  | 1 Male   | 1970 | 45     | 2    | 45-49      | 1.0            |    |
| 9461   | 300940 | 2        | Taiwan  |             | 1  | 2  | 1 Male   | 1973 | 42     | 1    | 40-44 year | 0.8            |    |
| 9463   | 300941 | 2        | Taiwan  |             | 1  | 2  | 2 Female | 1967 | 48     | 2    | 45-49      | 0.9            | 2  |
| 9464   | 102374 | 1        | China   |             | 1  | 1  | 1 Male   | 1970 | 45     | 2    | 45-49      | 1.0            |    |
| 9466   | 102376 | 1        | China   |             | 1  | 2  | 1 Male   | 1970 | 45     | 2    | 45-49      | 1.0            |    |
| 9477   | 300939 | 2        | Taiwan  |             | 1  | 1  | 2 Female | 1961 | 54     | 3    | 50-54      | 0.9            |    |
| 9482   | 102379 | 1        | China   |             | 1  | 1  | 1 Male   | 1970 | 45     | 2    | 45-49      | 1.0            |    |
| 9486   | 102383 | 1        | China   |             | 1  | 2  | 2 Female | 1965 | 50     | 3    | 50-54      | 1.2            |    |
| 9488   | 102385 | 1        | China   |             | 1  | 1  | 1 Male   | 1970 | 45     | 2    | 45-49      | 1.0            |    |
| 9489   | 102386 | 1        | China   |             | 1  | 1  | 2 Female | 1969 | 46     | 2    | 45-49      | 1.0            | 2  |
| 9496   | 102390 | 1        | China   |             | 1  | 1  | 1 Male   | 1956 | 59     | 4    | 55-59      | 0.9            |    |
| 9499   | 102391 | 1        | China   |             | 1  | 2  | 1 Male   | 1968 | 47     | 2    | 45-49      | 1.0            |    |
| 9512   | 102397 | 1        | China   |             | 1  | 2  | 2 Female | 1973 | 42     | 1    | 40-44 year | 1.0            | 2  |
| 9514   | 102399 | 1        | China   |             | 1  | 1  | 1 Male   | 1964 | 51     | 3    | 50-54      | 1.0            |    |
| 9516   | 102400 | 1        | China   |             | 1  | 1  | 1 Male   | 1968 | 47     | 2    | 45-49      | 1.0            |    |
| 9517   | 102401 | 1        | China   |             | 1  | 1  | 1 Male   | 1970 | 45     | 2    | 45-49      | 1.0            |    |
| 9520   | 102402 | 1        | China   |             | 1  | 2  | 1 Male   | 1956 | 59     | 4    | 55-59      | 0.9            |    |
| 9527   | 300943 | 2        | Taiwan  |             | 1  | 2  | 1 Male   | 1969 | 46     | 2    | 45-49      | 0.8            |    |
| 9532   | 102405 | 1        | China   |             | 1  | 2  | 1 Male   | 1952 | 63     | 5    | >=60       | 1.0            |    |
| 9533   | 300944 | 2        | Taiwan  |             | 1  | 2  | 1 Male   | 1974 | 41     | 1    | 40-44 year | 0.8            |    |
| 9543   | 102409 | 1        | China   |             | 1  | 2  | 1 Male   | 1969 | 46     | 2    | 45-49      | 1.0            |    |
| 9550   | 102413 | 1        | China   |             | 1  | 1  | 1 Male   | 1968 | 47     | 2    | 45-49      | 1.0            |    |
| 9553   | 102416 | 1        | China   |             | 1  | 1  | 2 Female | 1966 | 49     | 2    | 45-49      | 1.0            | 2  |
| 9555   | 300945 | 2        | Taiwan  |             | 1  | 2  | 2 Female | 1971 | 44     | 1    | 40-44 year | 0.8            | 2  |

| respid | SubsID    | dCountry | Country  | QDisclaimer | Q1 | Q2 | Gender   | Q3_1 | age Nr | dAge | age Group    | Weight in Ctry | Q4 |
|--------|-----------|----------|----------|-------------|----|----|----------|------|--------|------|--------------|----------------|----|
| 9565   | 380121152 |          | 2 Taiwan |             | 1  | 2  | 2 Female | 1973 | 42     |      | 1 40-44 year | 0.8            | 2  |
| 9583   | 102424    |          | 1 China  |             | 1  | 2  | 1 Male   | 1970 | 45     |      | 2 45-49      | 1.0            |    |
| 9594   | 300947    |          | 2 Taiwan |             | 1  | 1  | 1 Male   | 1968 | 47     |      | 2 45-49      | 0.8            |    |
| 9596   | 102430    |          | 1 China  |             | 1  | 2  | 1 Male   | 1962 | 53     |      | 3 50-54      | 1.0            |    |
| 9600   | 102431    |          | 1 China  |             | 1  | 2  | 2 Female | 1927 | 88     |      | 5 >=60       | 1.1            |    |
| 9602   | 380215993 |          | 2 Taiwan |             | 1  | 2  | 1 Male   | 1953 | 62     |      | 5 >=60       | 1.6            |    |
| 9606   | 380200561 |          | 2 Taiwan |             | 1  | 2  | 1 Male   | 1969 | 46     |      | 2 45-49      | 0.8            |    |
| 9608   | 102435    |          | 1 China  |             | 1  | 2  | 1 Male   | 1955 | 60     |      | 5 >=60       | 1.0            |    |
| 9610   | 102437    |          | 1 China  |             | 1  | 1  | 2 Female | 1950 | 65     |      | 5 >=60       | 1.1            |    |
| 9612   | 100269    |          | 1 China  |             | 1  | 1  | 2 Female | 1967 | 48     |      | 2 45-49      | 1.0            | 2  |
| 9613   | 102438    |          | 1 China  |             | 1  | 2  | 1 Male   | 1968 | 47     |      | 2 45-49      | 1.0            |    |
| 9614   | 102439    |          | 1 China  |             | 1  | 2  | 1 Male   | 1969 | 46     |      | 2 45-49      | 1.0            |    |
| 9620   | 300948    |          | 2 Taiwan |             | 1  | 2  | 1 Male   | 1968 | 47     |      | 2 45-49      | 0.8            |    |
| 9628   | 380023320 |          | 2 Taiwan |             | 1  | 2  | 2 Female | 1970 | 45     |      | 2 45-49      | 0.9            | 2  |
| 9631   | 102443    |          | 1 China  |             | 1  | 2  | 1 Male   | 1955 | 60     |      | 5 >=60       | 1.0            |    |
| 9632   | 102444    |          | 1 China  |             | 1  | 2  | 1 Male   | 1973 | 42     |      | 1 40-44 year | 1.0            |    |
| 9633   | 300950    |          | 2 Taiwan |             | 1  | 2  | 2 Female | 1974 | 41     |      | 1 40-44 year | 0.8            | 2  |
| 9639   | 102449    |          | 1 China  |             | 1  | 2  | 1 Male   | 1963 | 52     |      | 3 50-54      | 1.0            |    |
| 9640   | 300951    |          | 2 Taiwan |             | 1  | 2  | 2 Female | 1959 | 56     |      | 4 55-59      | 0.9            |    |
| 9642   | 102451    |          | 1 China  |             | 1  | 2  | 1 Male   | 1960 | 55     |      | 4 55-59      | 0.9            |    |
| 9653   | 102453    |          | 1 China  |             | 1  | 2  | 1 Male   | 1957 | 58     |      | 4 55-59      | 0.9            |    |
| 9658   | 300952    |          | 2 Taiwan |             | 1  | 2  | 2 Female | 1967 | 48     |      | 2 45-49      | 0.9            | 2  |
| 9659   | 350149483 |          | 3 Korea  |             | 1  | 2  | 2 Female | 1963 | 52     |      | 3 50-54      | 0.8            |    |
| 9661   | 102457    |          | 1 China  |             | 1  | 1  | 2 Female | 1962 | 53     |      | 3 50-54      | 1.2            |    |
| 9664   | 102459    |          | 1 China  |             | 1  | 2  | 1 Male   | 1963 | 52     |      | 3 50-54      | 1.0            |    |
| 9665   | 300953    |          | 2 Taiwan |             | 1  | 2  | 2 Female | 1967 | 48     |      | 2 45-49      | 0.9            | 2  |
| 9666   | 102460    |          | 1 China  |             | 1  | 2  | 1 Male   | 1960 | 55     |      | 4 55-59      | 0.9            |    |
| 9667   | 102461    |          | 1 China  |             | 1  | 1  | 2 Female | 1963 | 52     |      | 3 50-54      | 1.2            |    |
| 9668   | 102462    |          | 1 China  |             | 1  | 2  | 1 Male   | 1960 | 55     |      | 4 55-59      | 0.9            |    |
| 9670   | 102463    |          | 1 China  |             | 1  | 1  | 1 Male   | 1970 | 45     |      | 2 45-49      | 1.0            |    |
| 9671   | 300954    |          | 2 Taiwan |             | 1  | 2  | 2 Female | 1971 | 44     |      | 1 40-44 year | 0.8            | 2  |
| 9681   | 102469    |          | 1 China  |             | 1  | 2  | 1 Male   | 1969 | 46     |      | 2 45-49      | 1.0            |    |

| respid | SubsID    | dCountry | Country | QDisclaimer | Q1 | Q2 | Gender   | Q3_1 | age Nr | dAge | age Group  | Weight in Ctry | Q4 |
|--------|-----------|----------|---------|-------------|----|----|----------|------|--------|------|------------|----------------|----|
| 9684   | 300956    | 2        | Taiwan  | 1           | 1  | 2  | 1 Male   | 1974 | 41     | 1    | 40-44 year | 0.8            |    |
| 9685   | 102472    | 1        | China   | 1           | 1  | 2  | 1 Male   | 1965 | 50     | 3    | 50-54      | 1.0            |    |
| 9686   | 300957    | 2        | Taiwan  | 1           | 1  | 1  | 1 Male   | 1967 | 48     | 2    | 45-49      | 0.8            |    |
| 9688   | 300811    | 2        | Taiwan  | 1           | 1  | 2  | 1 Male   | 1971 | 44     | 1    | 40-44 year | 0.8            |    |
| 9692   | 300958    | 2        | Taiwan  | 1           | 1  | 2  | 1 Male   | 1972 | 43     | 1    | 40-44 year | 0.8            |    |
| 9693   | 102476    | 1        | China   | 1           | 1  | 2  | 2 Female | 1962 | 53     | 3    | 50-54      | 1.2            |    |
| 9698   | 102478    | 1        | China   | 1           | 1  | 2  | 2 Female | 1970 | 45     | 2    | 45-49      | 1.0            | 2  |
| 9699   | 300959    | 2        | Taiwan  | 1           | 1  | 2  | 2 Female | 1966 | 49     | 2    | 45-49      | 0.9            | 2  |
| 9701   | 102479    | 1        | China   | 1           | 1  | 2  | 1 Male   | 1958 | 57     | 4    | 55-59      | 0.9            |    |
| 9702   | 102480    | 1        | China   | 1           | 1  | 2  | 2 Female | 1960 | 55     | 4    | 55-59      | 1.0            |    |
| 9709   | 102484    | 1        | China   | 1           | 1  | 2  | 1 Male   | 1968 | 47     | 2    | 45-49      | 1.0            |    |
| 9713   | 102488    | 1        | China   | 1           | 1  | 2  | 2 Female | 1970 | 45     | 2    | 45-49      | 1.0            | 2  |
| 9715   | 102489    | 1        | China   | 1           | 1  | 2  | 1 Male   | 1965 | 50     | 3    | 50-54      | 1.0            |    |
| 9721   | 300961    | 2        | Taiwan  | 1           | 1  | 2  | 2 Female | 1974 | 41     | 1    | 40-44 year | 0.8            | 2  |
| 9725   | 300962    | 2        | Taiwan  | 1           | 1  | 2  | 2 Female | 1973 | 42     | 1    | 40-44 year | 0.8            | 2  |
| 9729   | 300964    | 2        | Taiwan  | 1           | 1  | 2  | 1 Male   | 1972 | 43     | 1    | 40-44 year | 0.8            |    |
| 9731   | 300965    | 2        | Taiwan  | 1           | 1  | 2  | 2 Female | 1966 | 49     | 2    | 45-49      | 0.9            | 2  |
| 9736   | 102497    | 1        | China   | 1           | 1  | 2  | 1 Male   | 1971 | 44     | 1    | 40-44 year | 1.0            |    |
| 9740   | 101095    | 1        | China   | 1           | 1  | 2  | 2 Female | 1969 | 46     | 2    | 45-49      | 1.0            | 2  |
| 9741   | 102500    | 1        | China   | 1           | 1  | 2  | 1 Male   | 1959 | 56     | 4    | 55-59      | 0.9            |    |
| 9749   | 102503    | 1        | China   | 1           | 1  | 2  | 1 Male   | 1965 | 50     | 3    | 50-54      | 1.0            |    |
| 9750   | 300966    | 2        | Taiwan  | 1           | 1  | 2  | 1 Male   | 1962 | 53     | 3    | 50-54      | 0.8            |    |
| 9751   | 102504    | 1        | China   | 1           | 1  | 2  | 2 Female | 1970 | 45     | 2    | 45-49      | 1.0            | 2  |
| 9753   | 300967    | 2        | Taiwan  | 1           | 1  | 2  | 2 Female | 1975 | 40     | 1    | 40-44 year | 0.8            | 2  |
| 9754   | 300968    | 2        | Taiwan  | 1           | 1  | 2  | 1 Male   | 1974 | 41     | 1    | 40-44 year | 0.8            |    |
| 9756   | 350177890 | 3        | Korea   | 1           | 1  | 2  | 1 Male   | 1968 | 47     | 2    | 45-49      | 0.8            |    |
| 9758   | 102506    | 1        | China   | 1           | 1  | 1  | 2 Female | 1963 | 52     | 3    | 50-54      | 1.2            |    |
| 9759   | 300969    | 2        | Taiwan  | 1           | 1  | 2  | 2 Female | 1966 | 49     | 2    | 45-49      | 0.9            | 2  |
| 9760   | 300970    | 2        | Taiwan  | 1           | 1  | 2  | 2 Female | 1967 | 48     | 2    | 45-49      | 0.9            | 2  |
| 9761   | 102507    | 1        | China   | 1           | 1  | 2  | 2 Female | 1966 | 49     | 2    | 45-49      | 1.0            | 2  |
| 9762   | 102508    | 1        | China   | 1           | 1  | 2  | 1 Male   | 1963 | 52     | 3    | 50-54      | 1.0            |    |
| 9764   | 100301    | 1        | China   | 1           | 1  | 2  | 2 Female | 1970 | 45     | 2    | 45-49      | 1.0            | 2  |

| respid | SubsID    | dCountry | Country | QDisclaimer | Q1 | Q2 | Gender   | Q3_1 | age Nr | dAge | age Group  | Weight in Ctry | Q4 |
|--------|-----------|----------|---------|-------------|----|----|----------|------|--------|------|------------|----------------|----|
| 9768   | 380124662 | 2        | Taiwan  | 1           | 1  | 2  | 1 Male   | 1973 | 42     | 1    | 40-44 year | 0.8            |    |
| 9769   | 380147952 | 2        | Taiwan  | 1           | 1  | 2  | 2 Female | 1968 | 47     | 2    | 45-49      | 0.9            | 2  |
| 9770   | 300971    | 2        | Taiwan  | 1           | 1  | 1  | 2 Female | 1968 | 47     | 2    | 45-49      | 0.9            | 2  |
| 9771   | 300972    | 2        | Taiwan  | 1           | 1  | 2  | 1 Male   | 1943 | 72     | 5    | >=60       | 1.6            |    |
| 9772   | 300973    | 2        | Taiwan  | 1           | 1  | 2  | 1 Male   | 1974 | 41     | 1    | 40-44 year | 0.8            |    |
| 9773   | 300974    | 2        | Taiwan  | 1           | 1  | 2  | 1 Male   | 1964 | 51     | 3    | 50-54      | 0.8            |    |
| 9776   | 102509    | 1        | China   | 1           | 1  | 2  | 2 Female | 1966 | 49     | 2    | 45-49      | 1.0            | 2  |
| 9786   | 300500    | 2        | Taiwan  | 1           | 1  | 2  | 1 Male   | 1956 | 59     | 4    | 55-59      | 0.7            |    |
| 9790   | 300976    | 2        | Taiwan  | 1           | 1  | 2  | 2 Female | 1970 | 45     | 2    | 45-49      | 0.9            | 2  |
| 9791   | 102512    | 1        | China   | 1           | 1  | 2  | 1 Male   | 1975 | 40     | 1    | 40-44 year | 1.0            |    |
| 9794   | 300978    | 2        | Taiwan  | 1           | 1  | 2  | 1 Male   | 1967 | 48     | 2    | 45-49      | 0.8            |    |
| 9797   | 102513    | 1        | China   | 1           | 1  | 2  | 2 Female | 1954 | 61     | 5    | >=60       | 1.1            |    |
| 9799   | 350179315 | 3        | Korea   | 1           | 1  | 2  | 2 Female | 1973 | 42     | 1    | 40-44 year | 0.9            | 2  |
| 9804   | 102515    | 1        | China   | 1           | 1  | 2  | 1 Male   | 1945 | 70     | 5    | >=60       | 1.0            |    |
| 9805   | 350151729 | 3        | Korea   | 1           | 1  | 2  | 1 Male   | 1966 | 49     | 2    | 45-49      | 0.8            |    |
| 9806   | 300979    | 2        | Taiwan  | 1           | 1  | 2  | 1 Male   | 1970 | 45     | 2    | 45-49      | 0.8            |    |
| 9807   | 300980    | 2        | Taiwan  | 1           | 1  | 2  | 2 Female | 1959 | 56     | 4    | 55-59      | 0.9            |    |
| 9813   | 300982    | 2        | Taiwan  | 1           | 1  | 2  | 2 Female | 1951 | 64     | 5    | >=60       | 1.7            |    |
| 9817   | 102517    | 1        | China   | 1           | 1  | 2  | 2 Female | 1971 | 44     | 1    | 40-44 year | 1.0            | 2  |
| 9823   | 102518    | 1        | China   | 1           | 1  | 2  | 2 Female | 1966 | 49     | 2    | 45-49      | 1.0            | 2  |
| 9826   | 102519    | 1        | China   | 1           | 1  | 2  | 2 Female | 1966 | 49     | 2    | 45-49      | 1.0            | 2  |
| 9830   | 300986    | 2        | Taiwan  | 1           | 1  | 2  | 2 Female | 1965 | 50     | 3    | 50-54      | 0.9            |    |
| 9835   | 300987    | 2        | Taiwan  | 1           | 1  | 2  | 2 Female | 1973 | 42     | 1    | 40-44 year | 0.8            | 2  |
| 9836   | 300988    | 2        | Taiwan  | 1           | 1  | 2  | 1 Male   | 1949 | 66     | 5    | >=60       | 1.6            |    |
| 9841   | 300989    | 2        | Taiwan  | 1           | 1  | 1  | 1 Male   | 1973 | 42     | 1    | 40-44 year | 0.8            |    |
| 9842   | 300990    | 2        | Taiwan  | 1           | 1  | 2  | 1 Male   | 1967 | 48     | 2    | 45-49      | 0.8            |    |
| 9844   | 300991    | 2        | Taiwan  | 1           | 1  | 1  | 2 Female | 1975 | 40     | 1    | 40-44 year | 0.8            | 2  |
| 9847   | 300992    | 2        | Taiwan  | 1           | 1  | 2  | 2 Female | 1972 | 43     | 1    | 40-44 year | 0.8            | 2  |
| 9851   | 300994    | 2        | Taiwan  | 1           | 1  | 2  | 2 Female | 1969 | 46     | 2    | 45-49      | 0.9            | 2  |
| 9852   | 102522    | 1        | China   | 1           | 1  | 2  | 1 Male   | 1949 | 66     | 5    | >=60       | 1.0            |    |
| 9854   | 300996    | 2        | Taiwan  | 1           | 1  | 2  | 2 Female | 1962 | 53     | 3    | 50-54      | 0.9            |    |
| 9855   | 300997    | 2        | Taiwan  | 1           | 1  | 2  | 2 Female | 1974 | 41     | 1    | 40-44 year | 0.8            | 2  |

| respid | SubsID    | dCountry | Country | QDisclaim<br>er | Q1 | Q2 | Gender | Q3_1 | age Nr | dAge | age Group  | Weight in<br>Ctry | Q4 |
|--------|-----------|----------|---------|-----------------|----|----|--------|------|--------|------|------------|-------------------|----|
| 9856   | 300998    | 2        | Taiwan  | 1               | 2  | 2  | Female | 1964 | 51     | 3    | 50-54      | 0.9               |    |
| 9862   | 300999    | 2        | Taiwan  | 1               | 2  | 1  | Male   | 1975 | 40     | 1    | 40-44 year | 0.8               |    |
| 9863   | 102523    | 1        | China   | 1               | 2  | 1  | Male   | 1950 | 65     | 5    | >=60       | 1.0               |    |
| 9866   | 380048148 | 2        | Taiwan  | 1               | 2  | 2  | Female | 1972 | 43     | 1    | 40-44 year | 0.8               | 2  |
| 9867   | 200476    | 3        | Korea   | 1               | 2  | 1  | Male   | 1939 | 76     | 5    | >=60       | 1.6               |    |
| 9868   | 200477    | 3        | Korea   | 1               | 2  | 1  | Male   | 1938 | 77     | 5    | >=60       | 1.6               |    |
| 9869   | 350154477 | 3        | Korea   | 1               | 2  | 1  | Male   | 1964 | 51     | 3    | 50-54      | 0.9               |    |
| 9878   | 200480    | 3        | Korea   | 1               | 2  | 1  | Male   | 1949 | 66     | 5    | >=60       | 1.6               |    |
| 9879   | 200481    | 3        | Korea   | 1               | 2  | 1  | Male   | 1947 | 68     | 5    | >=60       | 1.6               |    |
| 9881   | 200482    | 3        | Korea   | 1               | 2  | 1  | Male   | 1950 | 65     | 5    | >=60       | 1.6               |    |
| 9882   | 200483    | 3        | Korea   | 1               | 2  | 1  | Male   | 1947 | 68     | 5    | >=60       | 1.6               |    |
| 9884   | 301000    | 2        | Taiwan  | 1               | 2  | 1  | Male   | 1970 | 45     | 2    | 45-49      | 0.8               |    |
| 9885   | 301001    | 2        | Taiwan  | 1               | 2  | 1  | Male   | 1971 | 44     | 1    | 40-44 year | 0.8               |    |
| 9888   | 102528    | 1        | China   | 1               | 2  | 2  | Female | 1975 | 40     | 1    | 40-44 year | 1.0               | 2  |
| 9889   | 301003    | 2        | Taiwan  | 1               | 2  | 1  | Male   | 1974 | 41     | 1    | 40-44 year | 0.8               |    |
| 9894   | 200484    | 3        | Korea   | 1               | 2  | 1  | Male   | 1946 | 69     | 5    | >=60       | 1.6               |    |
| 9895   | 102531    | 1        | China   | 1               | 2  | 1  | Male   | 1974 | 41     | 1    | 40-44 year | 1.0               |    |
| 9896   | 102532    | 1        | China   | 1               | 2  | 2  | Female | 1955 | 60     | 5    | >=60       | 1.1               |    |
| 9897   | 301005    | 2        | Taiwan  | 1               | 2  | 1  | Male   | 1968 | 47     | 2    | 45-49      | 0.8               |    |
| 9905   | 200485    | 3        | Korea   | 1               | 2  | 1  | Male   | 1940 | 75     | 5    | >=60       | 1.6               |    |
| 9907   | 301006    | 2        | Taiwan  | 1               | 2  | 2  | Female | 1972 | 43     | 1    | 40-44 year | 0.8               | 2  |
| 9908   | 102534    | 1        | China   | 1               | 2  | 1  | Male   | 1965 | 50     | 3    | 50-54      | 1.0               |    |
| 9909   | 301007    | 2        | Taiwan  | 1               | 2  | 1  | Male   | 1975 | 40     | 1    | 40-44 year | 0.8               |    |
| 9910   | 200486    | 3        | Korea   | 1               | 2  | 1  | Male   | 1955 | 60     | 5    | >=60       | 1.6               |    |
| 9913   | 200487    | 3        | Korea   | 1               | 2  | 1  | Male   | 1939 | 76     | 5    | >=60       | 1.6               |    |
| 9914   | 200488    | 3        | Korea   | 1               | 2  | 1  | Male   | 1942 | 73     | 5    | >=60       | 1.6               |    |
| 9915   | 301008    | 2        | Taiwan  | 1               | 2  | 2  | Female | 1971 | 44     | 1    | 40-44 year | 0.8               | 2  |
| 9916   | 200489    | 3        | Korea   | 1               | 2  | 1  | Male   | 1952 | 63     | 5    | >=60       | 1.6               |    |
| 9918   | 301009    | 2        | Taiwan  | 1               | 2  | 1  | Male   | 1969 | 46     | 2    | 45-49      | 0.8               |    |
| 9919   | 200490    | 3        | Korea   | 1               | 2  | 1  | Male   | 1945 | 70     | 5    | >=60       | 1.6               |    |
| 9922   | 102540    | 1        | China   | 1               | 2  | 1  | Male   | 1961 | 54     | 3    | 50-54      | 1.0               |    |
| 9930   | 100246    | 1        | China   | 1               | 2  | 2  | Female | 1972 | 43     | 1    | 40-44 year | 1.0               | 2  |

| respid | SubsID    | dCountry | Country | QDisclaimer | Q1 | Q2 | Gender | Q3_1 | age Nr | dAge | age Group  | Weight in Ctry | Q4 |
|--------|-----------|----------|---------|-------------|----|----|--------|------|--------|------|------------|----------------|----|
| 9934   | 200491    | 3        | Korea   | 1           | 2  | 1  | Male   | 1949 | 66     | 5    | >=60       | 1.6            |    |
| 9936   | 102544    | 1        | China   | 1           | 1  | 1  | Male   | 1966 | 49     | 2    | 45-49      | 1.0            |    |
| 9938   | 102546    | 1        | China   | 1           | 2  | 2  | Female | 1975 | 40     | 1    | 40-44 year | 1.0            | 2  |
| 9940   | 102547    | 1        | China   | 1           | 1  | 1  | Male   | 1955 | 60     | 5    | >=60       | 1.0            |    |
| 9944   | 102548    | 1        | China   | 1           | 2  | 2  | Female | 1951 | 64     | 5    | >=60       | 1.1            |    |
| 9945   | 102549    | 1        | China   | 1           | 2  | 1  | Male   | 1954 | 61     | 5    | >=60       | 1.0            |    |
| 9948   | 301011    | 2        | Taiwan  | 1           | 1  | 2  | Female | 1968 | 47     | 2    | 45-49      | 0.9            | 2  |
| 9949   | 102550    | 1        | China   | 1           | 2  | 2  | Female | 1953 | 62     | 5    | >=60       | 1.1            |    |
| 9951   | 102552    | 1        | China   | 1           | 1  | 1  | Male   | 1953 | 62     | 5    | >=60       | 1.0            |    |
| 9952   | 102553    | 1        | China   | 1           | 2  | 2  | Female | 1966 | 49     | 2    | 45-49      | 1.0            | 2  |
| 9954   | 380125662 | 2        | Taiwan  | 1           | 2  | 2  | Female | 1975 | 40     | 1    | 40-44 year | 0.8            | 2  |
| 9955   | 301012    | 2        | Taiwan  | 1           | 2  | 2  | Female | 1958 | 57     | 4    | 55-59      | 0.9            |    |
| 9956   | 102554    | 1        | China   | 1           | 1  | 1  | Male   | 1943 | 72     | 5    | >=60       | 1.0            |    |
| 9957   | 102555    | 1        | China   | 1           | 1  | 2  | Female | 1940 | 75     | 5    | >=60       | 1.1            |    |
| 9958   | 101907    | 1        | China   | 1           | 2  | 1  | Male   | 1969 | 46     | 2    | 45-49      | 1.0            |    |
| 9959   | 102556    | 1        | China   | 1           | 1  | 2  | Female | 1955 | 60     | 5    | >=60       | 1.1            |    |
| 9960   | 200492    | 3        | Korea   | 1           | 2  | 1  | Male   | 1949 | 66     | 5    | >=60       | 1.6            |    |
| 9961   | 102557    | 1        | China   | 1           | 2  | 1  | Male   | 1954 | 61     | 5    | >=60       | 1.0            |    |
| 9962   | 102558    | 1        | China   | 1           | 1  | 1  | Male   | 1966 | 49     | 2    | 45-49      | 1.0            |    |
| 9969   | 102560    | 1        | China   | 1           | 2  | 1  | Male   | 1973 | 42     | 1    | 40-44 year | 1.0            |    |
| 9982   | 301014    | 2        | Taiwan  | 1           | 2  | 1  | Male   | 1957 | 58     | 4    | 55-59      | 0.7            |    |
| 9984   | 301013    | 2        | Taiwan  | 1           | 2  | 1  | Male   | 1975 | 40     | 1    | 40-44 year | 0.8            |    |
| 9990   | 102565    | 1        | China   | 1           | 2  | 1  | Male   | 1971 | 44     | 1    | 40-44 year | 1.0            |    |
| 9992   | 301017    | 2        | Taiwan  | 1           | 2  | 2  | Female | 1951 | 64     | 5    | >=60       | 1.7            |    |
| 9993   | 301018    | 2        | Taiwan  | 1           | 1  | 1  | Male   | 1974 | 41     | 1    | 40-44 year | 0.8            |    |
| 9997   | 102567    | 1        | China   | 1           | 2  | 2  | Female | 1954 | 61     | 5    | >=60       | 1.1            |    |
| 9999   | 102568    | 1        | China   | 1           | 2  | 1  | Male   | 1947 | 68     | 5    | >=60       | 1.0            |    |
| 10000  | 200494    | 3        | Korea   | 1           | 2  | 1  | Male   | 1946 | 69     | 5    | >=60       | 1.6            |    |
| 10005  | 380050947 | 2        | Taiwan  | 1           | 2  | 1  | Male   | 1968 | 47     | 2    | 45-49      | 0.8            |    |
| 10014  | 301021    | 2        | Taiwan  | 1           | 2  | 1  | Male   | 1974 | 41     | 1    | 40-44 year | 0.8            |    |
| 10016  | 300942    | 2        | Taiwan  | 1           | 1  | 2  | Female | 1972 | 43     | 1    | 40-44 year | 0.8            | 2  |
| 10017  | 102571    | 1        | China   | 1           | 1  | 1  | Male   | 1934 | 81     | 5    | >=60       | 1.0            |    |

| respid | SubsID    | dCountry | Country | QDisclaimer | Q1 | Q2 | Gender   | Q3_1 | age Nr | dAge | age Group  | Weight in Ctry | Q4 |
|--------|-----------|----------|---------|-------------|----|----|----------|------|--------|------|------------|----------------|----|
| 10018  | 301022    | 2        | Taiwan  | 1           | 1  | 2  | 1 Male   | 1954 | 61     | 5    | >=60       | 1.6            |    |
| 10021  | 102573    | 1        | China   | 1           | 1  | 2  | 1 Male   | 1966 | 49     | 2    | 45-49      | 1.0            |    |
| 10025  | 102575    | 1        | China   | 1           | 1  | 1  | 2 Female | 1950 | 65     | 5    | >=60       | 1.1            |    |
| 10027  | 102576    | 1        | China   | 1           | 1  | 2  | 1 Male   | 1975 | 40     | 1    | 40-44 year | 1.0            |    |
| 10028  | 200495    | 3        | Korea   | 1           | 1  | 2  | 1 Male   | 1948 | 67     | 5    | >=60       | 1.6            |    |
| 10031  | 301023    | 2        | Taiwan  | 1           | 1  | 2  | 1 Male   | 1952 | 63     | 5    | >=60       | 1.6            |    |
| 10036  | 102578    | 1        | China   | 1           | 1  | 1  | 2 Female | 1952 | 63     | 5    | >=60       | 1.1            |    |
| 10037  | 301024    | 2        | Taiwan  | 1           | 1  | 2  | 2 Female | 1972 | 43     | 1    | 40-44 year | 0.8            | 2  |
| 10038  | 102579    | 1        | China   | 1           | 1  | 2  | 1 Male   | 1971 | 44     | 1    | 40-44 year | 1.0            |    |
| 10039  | 301025    | 2        | Taiwan  | 1           | 1  | 2  | 2 Female | 1940 | 75     | 5    | >=60       | 1.7            |    |
| 10041  | 102580    | 1        | China   | 1           | 1  | 1  | 1 Male   | 1964 | 51     | 3    | 50-54      | 1.0            |    |
| 10045  | 301027    | 2        | Taiwan  | 1           | 1  | 2  | 1 Male   | 1954 | 61     | 5    | >=60       | 1.6            |    |
| 10046  | 200496    | 3        | Korea   | 1           | 1  | 2  | 1 Male   | 1954 | 61     | 5    | >=60       | 1.6            |    |
| 10047  | 301028    | 2        | Taiwan  | 1           | 1  | 1  | 1 Male   | 1953 | 62     | 5    | >=60       | 1.6            |    |
| 10048  | 301029    | 2        | Taiwan  | 1           | 1  | 2  | 2 Female | 1975 | 40     | 1    | 40-44 year | 0.8            | 2  |
| 10049  | 301030    | 2        | Taiwan  | 1           | 1  | 2  | 1 Male   | 1967 | 48     | 2    | 45-49      | 0.8            |    |
| 10051  | 102584    | 1        | China   | 1           | 1  | 2  | 1 Male   | 1952 | 63     | 5    | >=60       | 1.0            |    |
| 10052  | 301031    | 2        | Taiwan  | 1           | 1  | 2  | 1 Male   | 1968 | 47     | 2    | 45-49      | 0.8            |    |
| 10056  | 301032    | 2        | Taiwan  | 1           | 1  | 1  | 1 Male   | 1954 | 61     | 5    | >=60       | 1.6            |    |
| 10061  | 301035    | 2        | Taiwan  | 1           | 1  | 2  | 1 Male   | 1953 | 62     | 5    | >=60       | 1.6            |    |
| 10064  | 301037    | 2        | Taiwan  | 1           | 1  | 2  | 1 Male   | 1955 | 60     | 5    | >=60       | 1.6            |    |
| 10066  | 301038    | 2        | Taiwan  | 1           | 1  | 2  | 2 Female | 1972 | 43     | 1    | 40-44 year | 0.8            | 2  |
| 10069  | 102589    | 1        | China   | 1           | 1  | 2  | 1 Male   | 1953 | 62     | 5    | >=60       | 1.0            |    |
| 10071  | 301039    | 2        | Taiwan  | 1           | 1  | 2  | 1 Male   | 1963 | 52     | 3    | 50-54      | 0.8            |    |
| 10074  | 301040    | 2        | Taiwan  | 1           | 1  | 1  | 1 Male   | 1949 | 66     | 5    | >=60       | 1.6            |    |
| 10079  | 200497    | 3        | Korea   | 1           | 1  | 2  | 1 Male   | 1951 | 64     | 5    | >=60       | 1.6            |    |
| 10087  | 102597    | 1        | China   | 1           | 1  | 2  | 1 Male   | 1966 | 49     | 2    | 45-49      | 1.0            |    |
| 10095  | 380201677 | 2        | Taiwan  | 1           | 1  | 2  | 1 Male   | 1963 | 52     | 3    | 50-54      | 0.8            |    |
| 10097  | 301043    | 2        | Taiwan  | 1           | 1  | 2  | 2 Female | 1949 | 66     | 5    | >=60       | 1.7            |    |
| 10100  | 301045    | 2        | Taiwan  | 1           | 1  | 2  | 1 Male   | 1954 | 61     | 5    | >=60       | 1.6            |    |
| 10105  | 102601    | 1        | China   | 1           | 1  | 2  | 1 Male   | 1951 | 64     | 5    | >=60       | 1.0            |    |
| 10107  | 200498    | 3        | Korea   | 1           | 1  | 2  | 1 Male   | 1940 | 75     | 5    | >=60       | 1.6            |    |

| respid | SubsID    | dCountry | Country  | QDisclaimer | Q1 | Q2 | Gender   | Q3_1 | age Nr | dAge | age Group    | Weight in Ctry | Q4 |
|--------|-----------|----------|----------|-------------|----|----|----------|------|--------|------|--------------|----------------|----|
| 10111  | 102604    |          | 1 China  |             | 1  | 1  | 1 Male   | 1946 | 69     |      | 5 >=60       | 1.0            |    |
| 10116  | 301046    |          | 2 Taiwan |             | 1  | 2  | 2 Female | 1971 | 44     |      | 1 40-44 year | 0.8            | 2  |
| 10118  | 102608    |          | 1 China  |             | 1  | 2  | 2 Female | 1972 | 43     |      | 1 40-44 year | 1.0            | 2  |
| 10123  | 301047    |          | 2 Taiwan |             | 1  | 1  | 1 Male   | 1974 | 41     |      | 1 40-44 year | 0.8            |    |
| 10124  | 102602    |          | 1 China  |             | 1  | 2  | 2 Female | 1952 | 63     |      | 5 >=60       | 1.1            |    |
| 10130  | 200499    |          | 3 Korea  |             | 1  | 2  | 1 Male   | 1952 | 63     |      | 5 >=60       | 1.6            |    |
| 10134  | 301048    |          | 2 Taiwan |             | 1  | 2  | 2 Female | 1949 | 66     |      | 5 >=60       | 1.7            |    |
| 10135  | 380084950 |          | 2 Taiwan |             | 1  | 2  | 1 Male   | 1971 | 44     |      | 1 40-44 year | 0.8            |    |
| 10136  | 102613    |          | 1 China  |             | 1  | 2  | 2 Female | 1956 | 59     |      | 4 55-59      | 1.0            |    |
| 10141  | 301049    |          | 2 Taiwan |             | 1  | 2  | 1 Male   | 1973 | 42     |      | 1 40-44 year | 0.8            |    |
| 10142  | 380121435 |          | 2 Taiwan |             | 1  | 2  | 2 Female | 1971 | 44     |      | 1 40-44 year | 0.8            | 2  |
| 10143  | 200500    |          | 3 Korea  |             | 1  | 2  | 1 Male   | 1955 | 60     |      | 5 >=60       | 1.6            |    |
| 10145  | 200502    |          | 3 Korea  |             | 1  | 2  | 1 Male   | 1954 | 61     |      | 5 >=60       | 1.6            |    |
| 10149  | 200503    |          | 3 Korea  |             | 1  | 2  | 2 Female | 1949 | 66     |      | 5 >=60       | 1.6            |    |
| 10150  | 200504    |          | 3 Korea  |             | 1  | 2  | 1 Male   | 1949 | 66     |      | 5 >=60       | 1.6            |    |
| 10151  | 200505    |          | 3 Korea  |             | 1  | 2  | 1 Male   | 1953 | 62     |      | 5 >=60       | 1.6            |    |
| 10152  | 200506    |          | 3 Korea  |             | 1  | 2  | 1 Male   | 1954 | 61     |      | 5 >=60       | 1.6            |    |
| 10153  | 200507    |          | 3 Korea  |             | 1  | 2  | 1 Male   | 1955 | 60     |      | 5 >=60       | 1.6            |    |
| 10156  | 301050    |          | 2 Taiwan |             | 1  | 2  | 2 Female | 1968 | 47     |      | 2 45-49      | 0.9            | 2  |
| 10160  | 102623    |          | 1 China  |             | 1  | 2  | 2 Female | 1949 | 66     |      | 5 >=60       | 1.1            |    |
| 10161  | 102624    |          | 1 China  |             | 1  | 2  | 1 Male   | 1954 | 61     |      | 5 >=60       | 1.0            |    |
| 10167  | 102626    |          | 1 China  |             | 1  | 1  | 2 Female | 1972 | 43     |      | 1 40-44 year | 1.0            | 2  |
| 10171  | 301051    |          | 2 Taiwan |             | 1  | 2  | 1 Male   | 1956 | 59     |      | 4 55-59      | 0.7            |    |
| 10172  | 102628    |          | 1 China  |             | 1  | 2  | 1 Male   | 1954 | 61     |      | 5 >=60       | 1.0            |    |
| 10176  | 102631    |          | 1 China  |             | 1  | 1  | 1 Male   | 1953 | 62     |      | 5 >=60       | 1.0            |    |
| 10177  | 301052    |          | 2 Taiwan |             | 1  | 1  | 2 Female | 1963 | 52     |      | 3 50-54      | 0.9            |    |
| 10182  | 102634    |          | 1 China  |             | 1  | 2  | 1 Male   | 1952 | 63     |      | 5 >=60       | 1.0            |    |
| 10184  | 380066977 |          | 2 Taiwan |             | 1  | 2  | 1 Male   | 1957 | 58     |      | 4 55-59      | 0.7            |    |
| 10186  | 301053    |          | 2 Taiwan |             | 1  | 2  | 2 Female | 1962 | 53     |      | 3 50-54      | 0.9            |    |
| 10189  | 102638    |          | 1 China  |             | 1  | 2  | 1 Male   | 1953 | 62     |      | 5 >=60       | 1.0            |    |
| 10191  | 102640    |          | 1 China  |             | 1  | 1  | 1 Male   | 1950 | 65     |      | 5 >=60       | 1.0            |    |
| 10192  | 200508    |          | 3 Korea  |             | 1  | 2  | 1 Male   | 1952 | 63     |      | 5 >=60       | 1.6            |    |



| respid | SubsID | dCountry | Country | QDisclaimer | Q1 | Q2 | Gender | Q3_1 | age Nr | dAge | age Group  | Weight in Ctry | Q4 |
|--------|--------|----------|---------|-------------|----|----|--------|------|--------|------|------------|----------------|----|
| 10195  | 102641 | 1        | China   | 1           | 2  | 1  | Male   | 1968 | 47     | 2    | 45-49      | 1.0            |    |
| 10199  | 102645 | 1        | China   | 1           | 2  | 2  | Female | 1950 | 65     | 5    | >=60       | 1.1            |    |
| 10201  | 200509 | 3        | Korea   | 1           | 2  | 1  | Male   | 1946 | 69     | 5    | >=60       | 1.6            |    |
| 10213  | 301054 | 2        | Taiwan  | 1           | 2  | 2  | Female | 1974 | 41     | 1    | 40-44 year | 0.8            | 2  |
| 10222  | 102651 | 1        | China   | 1           | 2  | 2  | Female | 1950 | 65     | 5    | >=60       | 1.1            |    |
| 10224  | 102653 | 1        | China   | 1           | 2  | 2  | Female | 1953 | 62     | 5    | >=60       | 1.1            |    |
| 10245  | 102659 | 1        | China   | 1           | 2  | 2  | Female | 1955 | 60     | 5    | >=60       | 1.1            |    |
| 10254  | 102660 | 1        | China   | 1           | 1  | 1  | Male   | 1950 | 65     | 5    | >=60       | 1.0            |    |
| 10255  | 102661 | 1        | China   | 1           | 1  | 1  | Male   | 1939 | 76     | 5    | >=60       | 1.0            |    |
| 10257  | 102662 | 1        | China   | 1           | 2  | 1  | Male   | 1962 | 53     | 3    | 50-54      | 1.0            |    |
| 10260  | 200510 | 3        | Korea   | 1           | 2  | 1  | Male   | 1949 | 66     | 5    | >=60       | 1.6            |    |
| 10261  | 102664 | 1        | China   | 1           | 2  | 1  | Male   | 1953 | 62     | 5    | >=60       | 1.0            |    |
| 10263  | 102665 | 1        | China   | 1           | 1  | 2  | Female | 1945 | 70     | 5    | >=60       | 1.1            |    |
| 10264  | 102666 | 1        | China   | 1           | 1  | 1  | Male   | 1965 | 50     | 3    | 50-54      | 1.0            |    |
| 10268  | 102668 | 1        | China   | 1           | 2  | 1  | Male   | 1945 | 70     | 5    | >=60       | 1.0            |    |
| 10269  | 102669 | 1        | China   | 1           | 2  | 1  | Male   | 1954 | 61     | 5    | >=60       | 1.0            |    |
| 10270  | 102670 | 1        | China   | 1           | 1  | 1  | Male   | 1954 | 61     | 5    | >=60       | 1.0            |    |
| 10282  | 301057 | 2        | Taiwan  | 1           | 1  | 1  | Male   | 1974 | 41     | 1    | 40-44 year | 0.8            |    |
| 10285  | 102675 | 1        | China   | 1           | 1  | 1  | Male   | 1961 | 54     | 3    | 50-54      | 1.0            |    |
| 10288  | 102676 | 1        | China   | 1           | 2  | 1  | Male   | 1975 | 40     | 1    | 40-44 year | 1.0            |    |
| 10291  | 102677 | 1        | China   | 1           | 2  | 1  | Male   | 1965 | 50     | 3    | 50-54      | 1.0            |    |
| 10292  | 301059 | 2        | Taiwan  | 1           | 2  | 2  | Female | 1953 | 62     | 5    | >=60       | 1.7            |    |
| 10304  | 102620 | 1        | China   | 1           | 2  | 1  | Male   | 1955 | 60     | 5    | >=60       | 1.0            |    |
| 10305  | 102682 | 1        | China   | 1           | 2  | 2  | Female | 1953 | 62     | 5    | >=60       | 1.1            |    |
| 10310  | 301061 | 2        | Taiwan  | 1           | 1  | 1  | Male   | 1974 | 41     | 1    | 40-44 year | 0.8            |    |
| 10324  | 102688 | 1        | China   | 1           | 2  | 2  | Female | 1973 | 42     | 1    | 40-44 year | 1.0            | 2  |
| 10325  | 300854 | 2        | Taiwan  | 1           | 2  | 2  | Female | 1967 | 48     | 2    | 45-49      | 0.9            | 2  |
| 10326  | 200511 | 3        | Korea   | 1           | 2  | 1  | Male   | 1949 | 66     | 5    | >=60       | 1.6            |    |
| 10329  | 102690 | 1        | China   | 1           | 2  | 2  | Female | 1955 | 60     | 5    | >=60       | 1.1            |    |
| 10332  | 301063 | 2        | Taiwan  | 1           | 2  | 1  | Male   | 1967 | 48     | 2    | 45-49      | 0.8            |    |
| 10337  | 200512 | 3        | Korea   | 1           | 2  | 1  | Male   | 1955 | 60     | 5    | >=60       | 1.6            |    |
| 10341  | 200513 | 3        | Korea   | 1           | 2  | 2  | Female | 1947 | 68     | 5    | >=60       | 1.6            |    |

| respid | SubsID    | dCountry | Country  | QDisclaimer | Q1 | Q2 | Gender   | Q3_1 | age Nr | dAge | age Group    | Weight in Ctry | Q4 |
|--------|-----------|----------|----------|-------------|----|----|----------|------|--------|------|--------------|----------------|----|
| 10353  | 200514    |          | 3 Korea  |             | 1  | 2  | 1 Male   | 1949 | 66     |      | 5 >=60       | 1.6            |    |
| 10354  | 301064    |          | 2 Taiwan |             | 1  | 2  | 1 Male   | 1957 | 58     |      | 4 55-59      | 0.7            |    |
| 10359  | 301042    |          | 2 Taiwan |             | 1  | 2  | 2 Female | 1966 | 49     |      | 2 45-49      | 0.9            | 2  |
| 10360  | 102702    |          | 1 China  |             | 1  | 2  | 1 Male   | 1946 | 69     |      | 5 >=60       | 1.0            |    |
| 10362  | 102703    |          | 1 China  |             | 1  | 1  | 1 Male   | 1950 | 65     |      | 5 >=60       | 1.0            |    |
| 10364  | 200515    |          | 3 Korea  |             | 1  | 2  | 1 Male   | 1953 | 62     |      | 5 >=60       | 1.6            |    |
| 10366  | 102705    |          | 1 China  |             | 1  | 1  | 1 Male   | 1954 | 61     |      | 5 >=60       | 1.0            |    |
| 10367  | 102706    |          | 1 China  |             | 1  | 1  | 2 Female | 1965 | 50     |      | 3 50-54      | 1.2            |    |
| 10371  | 102707    |          | 1 China  |             | 1  | 2  | 1 Male   | 1949 | 66     |      | 5 >=60       | 1.0            |    |
| 10374  | 301065    |          | 2 Taiwan |             | 1  | 2  | 2 Female | 1974 | 41     |      | 1 40-44 year | 0.8            | 2  |
| 10375  | 350256104 |          | 3 Korea  |             | 1  | 2  | 2 Female | 1971 | 44     |      | 1 40-44 year | 0.9            | 2  |
| 10376  | 101677    |          | 1 China  |             | 1  | 2  | 1 Male   | 1953 | 62     |      | 5 >=60       | 1.0            |    |
| 10377  | 301066    |          | 2 Taiwan |             | 1  | 2  | 1 Male   | 1973 | 42     |      | 1 40-44 year | 0.8            |    |
| 10378  | 102524    |          | 1 China  |             | 1  | 1  | 1 Male   | 1973 | 42     |      | 1 40-44 year | 1.0            |    |
| 10387  | 102711    |          | 1 China  |             | 1  | 2  | 1 Male   | 1954 | 61     |      | 5 >=60       | 1.0            |    |
| 10396  | 102715    |          | 1 China  |             | 1  | 1  | 1 Male   | 1955 | 60     |      | 5 >=60       | 1.0            |    |
| 10397  | 100043    |          | 1 China  |             | 1  | 1  | 1 Male   | 1959 | 56     |      | 4 55-59      | 0.9            |    |
| 10399  | 102716    |          | 1 China  |             | 1  | 1  | 1 Male   | 1953 | 62     |      | 5 >=60       | 1.0            |    |
| 10405  | 102719    |          | 1 China  |             | 1  | 2  | 1 Male   | 1969 | 46     |      | 2 45-49      | 1.0            |    |
| 10406  | 102720    |          | 1 China  |             | 1  | 2  | 1 Male   | 1949 | 66     |      | 5 >=60       | 1.0            |    |
| 10408  | 301067    |          | 2 Taiwan |             | 1  | 2  | 1 Male   | 1973 | 42     |      | 1 40-44 year | 0.8            |    |
| 10409  | 102721    |          | 1 China  |             | 1  | 2  | 2 Female | 1973 | 42     |      | 1 40-44 year | 1.0            | 2  |
| 10412  | 102722    |          | 1 China  |             | 1  | 2  | 1 Male   | 1970 | 45     |      | 2 45-49      | 1.0            |    |
| 10413  | 102723    |          | 1 China  |             | 1  | 2  | 1 Male   | 1955 | 60     |      | 5 >=60       | 1.0            |    |
| 10419  | 102727    |          | 1 China  |             | 1  | 2  | 1 Male   | 1954 | 61     |      | 5 >=60       | 1.0            |    |
| 10423  | 102730    |          | 1 China  |             | 1  | 2  | 1 Male   | 1954 | 61     |      | 5 >=60       | 1.0            |    |
| 10426  | 102729    |          | 1 China  |             | 1  | 1  | 2 Female | 1950 | 65     |      | 5 >=60       | 1.1            |    |
| 10446  | 102735    |          | 1 China  |             | 1  | 2  | 1 Male   | 1952 | 63     |      | 5 >=60       | 1.0            |    |
| 10448  | 301068    |          | 2 Taiwan |             | 1  | 2  | 1 Male   | 1970 | 45     |      | 2 45-49      | 0.8            |    |
| 10450  | 102728    |          | 1 China  |             | 1  | 2  | 2 Female | 1973 | 42     |      | 1 40-44 year | 1.0            | 2  |
| 10455  | 301069    |          | 2 Taiwan |             | 1  | 2  | 1 Male   | 1969 | 46     |      | 2 45-49      | 0.8            |    |
| 10460  | 301072    |          | 2 Taiwan |             | 1  | 2  | 2 Female | 1969 | 46     |      | 2 45-49      | 0.9            | 2  |

| respid | SubsID    | dCountry | Country | QDisclaimer | Q1 | Q2 | Gender | Q3_1 | age Nr | dAge | age Group  | Weight in Ctry | Q4 |
|--------|-----------|----------|---------|-------------|----|----|--------|------|--------|------|------------|----------------|----|
| 10461  | 102742    | 1        | China   | 1           | 2  | 1  | Male   | 1950 | 65     | 5    | >=60       | 1.0            |    |
| 10471  | 102749    | 1        | China   | 1           | 2  | 1  | Male   | 1950 | 65     | 5    | >=60       | 1.0            |    |
| 10472  | 102750    | 1        | China   | 1           | 2  | 1  | Male   | 1950 | 65     | 5    | >=60       | 1.0            |    |
| 10491  | 102757    | 1        | China   | 1           | 2  | 1  | Male   | 1950 | 65     | 5    | >=60       | 1.0            |    |
| 10493  | 102759    | 1        | China   | 1           | 2  | 2  | Female | 1946 | 69     | 5    | >=60       | 1.1            |    |
| 10498  | 301074    | 2        | Taiwan  | 1           | 2  | 2  | Female | 1971 | 44     | 1    | 40-44 year | 0.8            | 2  |
| 10533  | 350134394 | 3        | Korea   | 1           | 2  | 2  | Female | 1969 | 46     | 2    | 45-49      | 0.9            | 2  |
| 10539  | 102768    | 1        | China   | 1           | 2  | 1  | Male   | 1973 | 42     | 1    | 40-44 year | 1.0            |    |
| 10540  | 102769    | 1        | China   | 1           | 1  | 1  | Male   | 1952 | 63     | 5    | >=60       | 1.0            |    |
| 10557  | 102777    | 1        | China   | 1           | 2  | 1  | Male   | 1974 | 41     | 1    | 40-44 year | 1.0            |    |
| 10558  | 102778    | 1        | China   | 1           | 2  | 1  | Male   | 1955 | 60     | 5    | >=60       | 1.0            |    |
| 10559  | 102779    | 1        | China   | 1           | 1  | 2  | Female | 1950 | 65     | 5    | >=60       | 1.1            |    |
| 10564  | 200520    | 3        | Korea   | 1           | 2  | 2  | Female | 1953 | 62     | 5    | >=60       | 1.6            |    |
| 10570  | 102784    | 1        | China   | 1           | 2  | 2  | Female | 1950 | 65     | 5    | >=60       | 1.1            |    |
| 10572  | 102786    | 1        | China   | 1           | 2  | 2  | Female | 1975 | 40     | 1    | 40-44 year | 1.0            | 2  |
| 10576  | 200521    | 3        | Korea   | 1           | 2  | 1  | Male   | 1954 | 61     | 5    | >=60       | 1.6            |    |
| 10582  | 102793    | 1        | China   | 1           | 2  | 1  | Male   | 1956 | 59     | 4    | 55-59      | 0.9            |    |
| 10593  | 102799    | 1        | China   | 1           | 2  | 2  | Female | 1970 | 45     | 2    | 45-49      | 1.0            | 2  |
| 10596  | 102801    | 1        | China   | 1           | 2  | 1  | Male   | 1945 | 70     | 5    | >=60       | 1.0            |    |
| 10615  | 350080157 | 3        | Korea   | 1           | 2  | 2  | Female | 1974 | 41     | 1    | 40-44 year | 0.9            | 2  |
| 10616  | 102806    | 1        | China   | 1           | 2  | 1  | Male   | 1963 | 52     | 3    | 50-54      | 1.0            |    |
| 10623  | 102810    | 1        | China   | 1           | 2  | 1  | Male   | 1974 | 41     | 1    | 40-44 year | 1.0            |    |
| 10626  | 300299    | 2        | Taiwan  | 1           | 2  | 2  | Female | 1974 | 41     | 1    | 40-44 year | 0.8            | 2  |
| 10627  | 102811    | 1        | China   | 1           | 2  | 2  | Female | 1954 | 61     | 5    | >=60       | 1.1            |    |
| 10629  | 102813    | 1        | China   | 1           | 1  | 1  | Male   | 1956 | 59     | 4    | 55-59      | 0.9            |    |
| 10632  | 102814    | 1        | China   | 1           | 2  | 2  | Female | 1954 | 61     | 5    | >=60       | 1.1            |    |
| 10641  | 102821    | 1        | China   | 1           | 2  | 2  | Female | 1953 | 62     | 5    | >=60       | 1.1            |    |
| 10648  | 102827    | 1        | China   | 1           | 1  | 1  | Male   | 1965 | 50     | 3    | 50-54      | 1.0            |    |
| 10651  | 102829    | 1        | China   | 1           | 1  | 2  | Female | 1950 | 65     | 5    | >=60       | 1.1            |    |
| 10654  | 102826    | 1        | China   | 1           | 2  | 2  | Female | 1953 | 62     | 5    | >=60       | 1.1            |    |
| 10673  | 100568    | 1        | China   | 1           | 2  | 2  | Female | 1970 | 45     | 2    | 45-49      | 1.0            | 2  |
| 10675  | 102832    | 1        | China   | 1           | 2  | 1  | Male   | 1953 | 62     | 5    | >=60       | 1.0            |    |

| respid | SubsID    | dCountry | Country  | QDisclaimer | Q1 | Q2 | Gender   | Q3_1 | age Nr | dAge | age Group    | Weight in Ctry | Q4 |
|--------|-----------|----------|----------|-------------|----|----|----------|------|--------|------|--------------|----------------|----|
| 10689  | 102835    |          | 1 China  |             | 1  | 2  | 1 Male   | 1954 | 61     |      | 5 >=60       | 1.0            |    |
| 10692  | 102836    |          | 1 China  |             | 1  | 2  | 2 Female | 1945 | 70     |      | 5 >=60       | 1.1            |    |
| 10694  | 102837    |          | 1 China  |             | 1  | 2  | 1 Male   | 1972 | 43     |      | 1 40-44 year | 1.0            |    |
| 10695  | 200522    |          | 3 Korea  |             | 1  | 2  | 1 Male   | 1955 | 60     |      | 5 >=60       | 1.6            |    |
| 10702  | 200523    |          | 3 Korea  |             | 1  | 2  | 2 Female | 1951 | 64     |      | 5 >=60       | 1.6            |    |
| 10703  | 200524    |          | 3 Korea  |             | 1  | 2  | 1 Male   | 1950 | 65     |      | 5 >=60       | 1.6            |    |
| 10708  | 301078    |          | 2 Taiwan |             | 1  | 2  | 1 Male   | 1963 | 52     |      | 3 50-54      | 0.8            |    |
| 10719  | 102849    |          | 1 China  |             | 1  | 2  | 1 Male   | 1955 | 60     |      | 5 >=60       | 1.0            |    |
| 10722  | 102851    |          | 1 China  |             | 1  | 2  | 2 Female | 1974 | 41     |      | 1 40-44 year | 1.0            | 2  |
| 10723  | 200525    |          | 3 Korea  |             | 1  | 2  | 1 Male   | 1946 | 69     |      | 5 >=60       | 1.6            |    |
| 10726  | 281331369 |          | 1 China  |             | 1  | 1  | 1 Male   | 1951 | 64     |      | 5 >=60       | 1.0            |    |
| 10727  | 102853    |          | 1 China  |             | 1  | 2  | 1 Male   | 1954 | 61     |      | 5 >=60       | 1.0            |    |
| 10730  | 301079    |          | 2 Taiwan |             | 1  | 2  | 1 Male   | 1966 | 49     |      | 2 45-49      | 0.8            |    |
| 10731  | 301080    |          | 2 Taiwan |             | 1  | 2  | 1 Male   | 1970 | 45     |      | 2 45-49      | 0.8            |    |
| 10737  | 301081    |          | 2 Taiwan |             | 1  | 2  | 1 Male   | 1973 | 42     |      | 1 40-44 year | 0.8            |    |
| 10743  | 102862    |          | 1 China  |             | 1  | 2  | 2 Female | 1946 | 69     |      | 5 >=60       | 1.1            |    |
| 10763  | 102870    |          | 1 China  |             | 1  | 2  | 1 Male   | 1973 | 42     |      | 1 40-44 year | 1.0            |    |
| 10777  | 301082    |          | 2 Taiwan |             | 1  | 2  | 1 Male   | 1971 | 44     |      | 1 40-44 year | 0.8            |    |
| 10787  | 350250991 |          | 3 Korea  |             | 1  | 2  | 1 Male   | 1963 | 52     |      | 3 50-54      | 0.9            |    |
| 10798  | 102881    |          | 1 China  |             | 1  | 2  | 2 Female | 1953 | 62     |      | 5 >=60       | 1.1            |    |
| 10800  | 301083    |          | 2 Taiwan |             | 1  | 2  | 1 Male   | 1966 | 49     |      | 2 45-49      | 0.8            |    |
| 10802  | 102883    |          | 1 China  |             | 1  | 2  | 2 Female | 1963 | 52     |      | 3 50-54      | 1.2            |    |
| 10803  | 100465    |          | 1 China  |             | 1  | 1  | 2 Female | 1965 | 50     |      | 3 50-54      | 1.2            |    |
| 10808  | 102885    |          | 1 China  |             | 1  | 2  | 2 Female | 1955 | 60     |      | 5 >=60       | 1.1            |    |
| 10810  | 102887    |          | 1 China  |             | 1  | 2  | 1 Male   | 1969 | 46     |      | 2 45-49      | 1.0            |    |
| 10819  | 301084    |          | 2 Taiwan |             | 1  | 2  | 1 Male   | 1946 | 69     |      | 5 >=60       | 1.6            |    |
| 10825  | 102893    |          | 1 China  |             | 1  | 1  | 1 Male   | 1949 | 66     |      | 5 >=60       | 1.0            |    |
| 10827  | 102895    |          | 1 China  |             | 1  | 2  | 1 Male   | 1967 | 48     |      | 2 45-49      | 1.0            |    |
| 10830  | 200527    |          | 3 Korea  |             | 1  | 2  | 1 Male   | 1946 | 69     |      | 5 >=60       | 1.6            |    |
| 10847  | 100980    |          | 1 China  |             | 1  | 2  | 1 Male   | 1961 | 54     |      | 3 50-54      | 1.0            |    |
| 10849  | 301085    |          | 2 Taiwan |             | 1  | 2  | 1 Male   | 1969 | 46     |      | 2 45-49      | 0.8            |    |
| 10852  | 102899    |          | 1 China  |             | 1  | 1  | 1 Male   | 1973 | 42     |      | 1 40-44 year | 1.0            |    |

| respid | SubsID    | dCountry | Country  | QDisclaimer | Q1 | Q2 | Gender   | Q3_1 | age Nr | dAge | age Group    | Weight in Ctry | Q4 |
|--------|-----------|----------|----------|-------------|----|----|----------|------|--------|------|--------------|----------------|----|
| 10854  | 350168168 |          | 3 Korea  |             | 1  | 2  | 1 Male   | 1938 | 77     |      | 5 >=60       | 1.6            |    |
| 10857  | 100031    |          | 1 China  |             | 1  | 2  | 2 Female | 1959 | 56     |      | 4 55-59      | 1.0            |    |
| 10861  | 301086    |          | 2 Taiwan |             | 1  | 2  | 2 Female | 1959 | 56     |      | 4 55-59      | 0.9            |    |
| 10862  | 102903    |          | 1 China  |             | 1  | 2  | 1 Male   | 1970 | 45     |      | 2 45-49      | 1.0            |    |
| 10870  | 102906    |          | 1 China  |             | 1  | 2  | 1 Male   | 1955 | 60     |      | 5 >=60       | 1.0            |    |
| 10873  | 102907    |          | 1 China  |             | 1  | 2  | 1 Male   | 1950 | 65     |      | 5 >=60       | 1.0            |    |
| 10881  | 280738249 |          | 1 China  |             | 1  | 2  | 2 Female | 1966 | 49     |      | 2 45-49      | 1.0            | 2  |
| 10893  | 102922    |          | 1 China  |             | 1  | 2  | 2 Female | 1970 | 45     |      | 2 45-49      | 1.0            | 2  |
| 10898  | 301088    |          | 2 Taiwan |             | 1  | 2  | 2 Female | 1969 | 46     |      | 2 45-49      | 0.9            | 2  |
| 10899  | 102924    |          | 1 China  |             | 1  | 1  | 1 Male   | 1954 | 61     |      | 5 >=60       | 1.0            |    |
| 10905  | 102929    |          | 1 China  |             | 1  | 1  | 1 Male   | 1938 | 77     |      | 5 >=60       | 1.0            |    |
| 10910  | 102930    |          | 1 China  |             | 1  | 1  | 1 Male   | 1955 | 60     |      | 5 >=60       | 1.0            |    |
| 10911  | 301089    |          | 2 Taiwan |             | 1  | 2  | 2 Female | 1973 | 42     |      | 1 40-44 year | 0.8            | 2  |
| 10912  | 301090    |          | 2 Taiwan |             | 1  | 2  | 2 Female | 1972 | 43     |      | 1 40-44 year | 0.8            | 2  |
| 10913  | 102932    |          | 1 China  |             | 1  | 2  | 2 Female | 1942 | 73     |      | 5 >=60       | 1.1            |    |
| 10918  | 102933    |          | 1 China  |             | 1  | 1  | 2 Female | 1945 | 70     |      | 5 >=60       | 1.1            |    |
| 10995  | 102914    |          | 1 China  |             | 1  | 2  | 2 Female | 1969 | 46     |      | 2 45-49      | 1.0            | 2  |
| 11002  | 301091    |          | 2 Taiwan |             | 1  | 2  | 1 Male   | 1963 | 52     |      | 3 50-54      | 0.8            |    |
| 11003  | 301092    |          | 2 Taiwan |             | 1  | 2  | 1 Male   | 1958 | 57     |      | 4 55-59      | 0.7            |    |
| 11005  | 200528    |          | 3 Korea  |             | 1  | 2  | 1 Male   | 1951 | 64     |      | 5 >=60       | 1.6            |    |
| 11015  | 102947    |          | 1 China  |             | 1  | 2  | 2 Female | 1950 | 65     |      | 5 >=60       | 1.1            |    |
| 11016  | 102948    |          | 1 China  |             | 1  | 1  | 1 Male   | 1956 | 59     |      | 4 55-59      | 0.9            |    |
| 11017  | 102949    |          | 1 China  |             | 1  | 2  | 1 Male   | 1968 | 47     |      | 2 45-49      | 1.0            |    |
| 11020  | 102950    |          | 1 China  |             | 1  | 2  | 2 Female | 1953 | 62     |      | 5 >=60       | 1.1            |    |
| 11024  | 102952    |          | 1 China  |             | 1  | 2  | 1 Male   | 1966 | 49     |      | 2 45-49      | 1.0            |    |
| 11026  | 380020891 |          | 2 Taiwan |             | 1  | 2  | 2 Female | 1973 | 42     |      | 1 40-44 year | 0.8            | 2  |
| 11028  | 350069521 |          | 3 Korea  |             | 1  | 2  | 1 Male   | 1966 | 49     |      | 2 45-49      | 0.8            |    |
| 11029  | 102954    |          | 1 China  |             | 1  | 2  | 2 Female | 1953 | 62     |      | 5 >=60       | 1.1            |    |
| 11030  | 301094    |          | 2 Taiwan |             | 1  | 2  | 1 Male   | 1954 | 61     |      | 5 >=60       | 1.6            |    |
| 11031  | 102955    |          | 1 China  |             | 1  | 2  | 2 Female | 1955 | 60     |      | 5 >=60       | 1.1            |    |
| 11038  | 301095    |          | 2 Taiwan |             | 1  | 2  | 2 Female | 1956 | 59     |      | 4 55-59      | 0.9            |    |
| 11051  | 300295    |          | 2 Taiwan |             | 1  | 2  | 2 Female | 1975 | 40     |      | 1 40-44 year | 0.8            | 2  |

| respid | SubsID | dCountry | Country | QDisclaimer | Q1 | Q2 | Gender   | Q3_1 | age Nr | dAge | age Group  | Weight in Ctry | Q4 |
|--------|--------|----------|---------|-------------|----|----|----------|------|--------|------|------------|----------------|----|
| 11052  | 102963 | 1        | China   |             | 1  | 2  | 2 Female | 1953 | 62     | 5    | >=60       | 1.1            |    |
| 11053  | 301097 | 2        | Taiwan  |             | 1  | 2  | 2 Female | 1974 | 41     | 1    | 40-44 year | 0.8            | 2  |
| 11054  | 102964 | 1        | China   |             | 1  | 2  | 2 Female | 1953 | 62     | 5    | >=60       | 1.1            |    |
| 11063  | 101604 | 1        | China   |             | 1  | 2  | 2 Female | 1953 | 62     | 5    | >=60       | 1.1            |    |
| 11075  | 102972 | 1        | China   |             | 1  | 1  | 1 Male   | 1955 | 60     | 5    | >=60       | 1.0            |    |
| 11083  | 102976 | 1        | China   |             | 1  | 2  | 1 Male   | 1953 | 62     | 5    | >=60       | 1.0            |    |
| 11092  | 102978 | 1        | China   |             | 1  | 1  | 2 Female | 1954 | 61     | 5    | >=60       | 1.1            |    |
| 11118  | 102986 | 1        | China   |             | 1  | 1  | 1 Male   | 1950 | 65     | 5    | >=60       | 1.0            |    |
| 11119  | 102987 | 1        | China   |             | 1  | 1  | 1 Male   | 1951 | 64     | 5    | >=60       | 1.0            |    |
| 11134  | 102991 | 1        | China   |             | 1  | 2  | 1 Male   | 1973 | 42     | 1    | 40-44 year | 1.0            |    |
| 11139  | 102994 | 1        | China   |             | 1  | 2  | 1 Male   | 1950 | 65     | 5    | >=60       | 1.0            |    |
| 11154  | 102999 | 1        | China   |             | 1  | 2  | 1 Male   | 1966 | 49     | 2    | 45-49      | 1.0            |    |
| 11166  | 103008 | 1        | China   |             | 1  | 1  | 1 Male   | 1966 | 49     | 2    | 45-49      | 1.0            |    |
| 11168  | 200529 | 3        | Korea   |             | 1  | 2  | 1 Male   | 1951 | 64     | 5    | >=60       | 1.6            |    |
| 11176  | 103015 | 1        | China   |             | 1  | 1  | 1 Male   | 1970 | 45     | 2    | 45-49      | 1.0            |    |
| 11183  | 103010 | 1        | China   |             | 1  | 2  | 2 Female | 1955 | 60     | 5    | >=60       | 1.1            |    |
| 11189  | 301101 | 2        | Taiwan  |             | 1  | 2  | 1 Male   | 1966 | 49     | 2    | 45-49      | 0.8            |    |
| 11196  | 103024 | 1        | China   |             | 1  | 2  | 2 Female | 1953 | 62     | 5    | >=60       | 1.1            |    |
| 11200  | 301102 | 2        | Taiwan  |             | 1  | 2  | 1 Male   | 1971 | 44     | 1    | 40-44 year | 0.8            |    |
| 11201  | 301103 | 2        | Taiwan  |             | 1  | 2  | 1 Male   | 1970 | 45     | 2    | 45-49      | 0.8            |    |
| 11211  | 103028 | 1        | China   |             | 1  | 2  | 2 Female | 1953 | 62     | 5    | >=60       | 1.1            |    |
| 11218  | 103032 | 1        | China   |             | 1  | 2  | 2 Female | 1952 | 63     | 5    | >=60       | 1.1            |    |
| 11219  | 301105 | 2        | Taiwan  |             | 1  | 2  | 2 Female | 1972 | 43     | 1    | 40-44 year | 0.8            | 2  |
| 11221  | 301106 | 2        | Taiwan  |             | 1  | 1  | 2 Female | 1973 | 42     | 1    | 40-44 year | 0.8            | 2  |
| 11222  | 103034 | 1        | China   |             | 1  | 2  | 2 Female | 1959 | 56     | 4    | 55-59      | 1.0            |    |
| 11230  | 103037 | 1        | China   |             | 1  | 2  | 2 Female | 1953 | 62     | 5    | >=60       | 1.1            |    |
| 11236  | 103040 | 1        | China   |             | 1  | 2  | 2 Female | 1953 | 62     | 5    | >=60       | 1.1            |    |
| 11237  | 200530 | 3        | Korea   |             | 1  | 2  | 1 Male   | 1951 | 64     | 5    | >=60       | 1.6            |    |
| 11240  | 200531 | 3        | Korea   |             | 1  | 2  | 2 Female | 1954 | 61     | 5    | >=60       | 1.6            |    |
| 11244  | 103042 | 1        | China   |             | 1  | 2  | 2 Female | 1953 | 62     | 5    | >=60       | 1.1            |    |
| 11249  | 301109 | 2        | Taiwan  |             | 1  | 2  | 2 Female | 1974 | 41     | 1    | 40-44 year | 0.8            | 2  |
| 11252  | 103045 | 1        | China   |             | 1  | 2  | 2 Female | 1953 | 62     | 5    | >=60       | 1.1            |    |

| respid | SubsID | dCountry | Country | QDisclaimer | Q1 | Q2 | Gender   | Q3_1 | age Nr | dAge | age Group  | Weight in Ctry | Q4 |
|--------|--------|----------|---------|-------------|----|----|----------|------|--------|------|------------|----------------|----|
| 11254  | 103047 | 1        | China   |             | 1  | 1  | 1 Male   | 1966 | 49     | 2    | 45-49      | 1.0            |    |
| 11255  | 301110 | 2        | Taiwan  |             | 1  | 2  | 2 Female | 1962 | 53     | 3    | 50-54      | 0.9            |    |
| 11258  | 103049 | 1        | China   |             | 1  | 2  | 2 Female | 1953 | 62     | 5    | >=60       | 1.1            |    |
| 11260  | 103051 | 1        | China   |             | 1  | 2  | 1 Male   | 1951 | 64     | 5    | >=60       | 1.0            |    |
| 11264  | 103050 | 1        | China   |             | 1  | 2  | 1 Male   | 1949 | 66     | 5    | >=60       | 1.0            |    |
| 11266  | 103054 | 1        | China   |             | 1  | 1  | 1 Male   | 1949 | 66     | 5    | >=60       | 1.0            |    |
| 11268  | 103055 | 1        | China   |             | 1  | 2  | 1 Male   | 1964 | 51     | 3    | 50-54      | 1.0            |    |
| 11269  | 100691 | 1        | China   |             | 1  | 2  | 1 Male   | 1972 | 43     | 1    | 40-44 year | 1.0            |    |
| 11272  | 103057 | 1        | China   |             | 1  | 2  | 1 Male   | 1952 | 63     | 5    | >=60       | 1.0            |    |
| 11273  | 103058 | 1        | China   |             | 1  | 1  | 1 Male   | 1954 | 61     | 5    | >=60       | 1.0            |    |
| 11275  | 103059 | 1        | China   |             | 1  | 2  | 2 Female | 1972 | 43     | 1    | 40-44 year | 1.0            | 2  |
| 11276  | 103060 | 1        | China   |             | 1  | 2  | 2 Female | 1968 | 47     | 2    | 45-49      | 1.0            | 2  |
| 11278  | 103062 | 1        | China   |             | 1  | 1  | 2 Female | 1953 | 62     | 5    | >=60       | 1.1            |    |
| 11288  | 301111 | 2        | Taiwan  |             | 1  | 2  | 1 Male   | 1959 | 56     | 4    | 55-59      | 0.7            |    |
| 11289  | 103064 | 1        | China   |             | 1  | 2  | 2 Female | 1955 | 60     | 5    | >=60       | 1.1            |    |
| 11291  | 103065 | 1        | China   |             | 1  | 2  | 1 Male   | 1967 | 48     | 2    | 45-49      | 1.0            |    |
| 11295  | 103069 | 1        | China   |             | 1  | 2  | 1 Male   | 1970 | 45     | 2    | 45-49      | 1.0            |    |
| 11297  | 301112 | 2        | Taiwan  |             | 1  | 1  | 2 Female | 1973 | 42     | 1    | 40-44 year | 0.8            | 2  |
| 11304  | 103074 | 1        | China   |             | 1  | 2  | 1 Male   | 1951 | 64     | 5    | >=60       | 1.0            |    |
| 11305  | 103075 | 1        | China   |             | 1  | 2  | 1 Male   | 1956 | 59     | 4    | 55-59      | 0.9            |    |
| 11311  | 301113 | 2        | Taiwan  |             | 1  | 2  | 2 Female | 1975 | 40     | 1    | 40-44 year | 0.8            | 2  |
| 11313  | 103080 | 1        | China   |             | 1  | 2  | 2 Female | 1961 | 54     | 3    | 50-54      | 1.2            |    |
| 11315  | 103082 | 1        | China   |             | 1  | 2  | 2 Female | 1970 | 45     | 2    | 45-49      | 1.0            | 2  |
| 11316  | 103083 | 1        | China   |             | 1  | 2  | 2 Female | 1970 | 45     | 2    | 45-49      | 1.0            | 2  |
| 11318  | 103085 | 1        | China   |             | 1  | 2  | 2 Female | 1975 | 40     | 1    | 40-44 year | 1.0            | 2  |
| 11323  | 103087 | 1        | China   |             | 1  | 2  | 2 Female | 1972 | 43     | 1    | 40-44 year | 1.0            | 2  |
| 11331  | 103094 | 1        | China   |             | 1  | 1  | 2 Female | 1965 | 50     | 3    | 50-54      | 1.2            |    |
| 11333  | 301114 | 2        | Taiwan  |             | 1  | 1  | 2 Female | 1968 | 47     | 2    | 45-49      | 0.9            | 2  |
| 11334  | 103097 | 1        | China   |             | 1  | 2  | 1 Male   | 1974 | 41     | 1    | 40-44 year | 1.0            |    |
| 11340  | 103101 | 1        | China   |             | 1  | 2  | 1 Male   | 1970 | 45     | 2    | 45-49      | 1.0            |    |
| 11345  | 103103 | 1        | China   |             | 1  | 2  | 1 Male   | 1959 | 56     | 4    | 55-59      | 0.9            |    |
| 11354  | 103110 | 1        | China   |             | 1  | 2  | 1 Male   | 1973 | 42     | 1    | 40-44 year | 1.0            |    |

| respid | SubsID | dCountry | Country | QDisclaimer | Q1 | Q2 | Gender | Q3_1 | age Nr | dAge | age Group  | Weight in Ctry | Q4 |
|--------|--------|----------|---------|-------------|----|----|--------|------|--------|------|------------|----------------|----|
| 11360  | 103115 | 1        | China   | 1           | 2  | 1  | Male   | 1967 | 48     | 2    | 45-49      | 1.0            |    |
| 11361  | 103116 | 1        | China   | 1           | 1  | 1  | Male   | 1960 | 55     | 4    | 55-59      | 0.9            |    |
| 11367  | 103119 | 1        | China   | 1           | 2  | 2  | Female | 1971 | 44     | 1    | 40-44 year | 1.0            | 2  |
| 11370  | 103120 | 1        | China   | 1           | 2  | 1  | Male   | 1960 | 55     | 4    | 55-59      | 0.9            |    |
| 11371  | 103121 | 1        | China   | 1           | 2  | 2  | Female | 1956 | 59     | 4    | 55-59      | 1.0            |    |
| 11372  | 103122 | 1        | China   | 1           | 2  | 2  | Female | 1961 | 54     | 3    | 50-54      | 1.2            |    |
| 11373  | 103123 | 1        | China   | 1           | 2  | 2  | Female | 1956 | 59     | 4    | 55-59      | 1.0            |    |
| 11382  | 103132 | 1        | China   | 1           | 2  | 1  | Male   | 1973 | 42     | 1    | 40-44 year | 1.0            |    |
| 11394  | 103138 | 1        | China   | 1           | 1  | 1  | Male   | 1944 | 71     | 5    | >=60       | 1.0            |    |
| 11395  | 103139 | 1        | China   | 1           | 2  | 1  | Male   | 1966 | 49     | 2    | 45-49      | 1.0            |    |
| 11397  | 103140 | 1        | China   | 1           | 2  | 1  | Male   | 1963 | 52     | 3    | 50-54      | 1.0            |    |
| 11402  | 103145 | 1        | China   | 1           | 2  | 1  | Male   | 1951 | 64     | 5    | >=60       | 1.0            |    |
| 11409  | 103149 | 1        | China   | 1           | 2  | 1  | Male   | 1965 | 50     | 3    | 50-54      | 1.0            |    |
| 11410  | 103150 | 1        | China   | 1           | 2  | 2  | Female | 1973 | 42     | 1    | 40-44 year | 1.0            | 2  |
| 11411  | 103151 | 1        | China   | 1           | 2  | 1  | Male   | 1973 | 42     | 1    | 40-44 year | 1.0            |    |
| 11418  | 103155 | 1        | China   | 1           | 2  | 1  | Male   | 1970 | 45     | 2    | 45-49      | 1.0            |    |
| 11425  | 103156 | 1        | China   | 1           | 2  | 2  | Female | 1961 | 54     | 3    | 50-54      | 1.2            |    |
| 11429  | 103159 | 1        | China   | 1           | 2  | 2  | Female | 1952 | 63     | 5    | >=60       | 1.1            |    |
| 11430  | 103160 | 1        | China   | 1           | 2  | 1  | Male   | 1975 | 40     | 1    | 40-44 year | 1.0            |    |
| 11431  | 103161 | 1        | China   | 1           | 2  | 2  | Female | 1959 | 56     | 4    | 55-59      | 1.0            |    |
| 11432  | 103162 | 1        | China   | 1           | 2  | 1  | Male   | 1966 | 49     | 2    | 45-49      | 1.0            |    |
| 11433  | 103163 | 1        | China   | 1           | 2  | 1  | Male   | 1973 | 42     | 1    | 40-44 year | 1.0            |    |
| 11435  | 103165 | 1        | China   | 1           | 2  | 1  | Male   | 1954 | 61     | 5    | >=60       | 1.0            |    |
| 11436  | 103167 | 1        | China   | 1           | 2  | 2  | Female | 1974 | 41     | 1    | 40-44 year | 1.0            | 2  |
| 11437  | 103166 | 1        | China   | 1           | 1  | 2  | Female | 1960 | 55     | 4    | 55-59      | 1.0            |    |
| 11439  | 103169 | 1        | China   | 1           | 2  | 1  | Male   | 1971 | 44     | 1    | 40-44 year | 1.0            |    |
| 11440  | 101252 | 1        | China   | 1           | 2  | 2  | Female | 1969 | 46     | 2    | 45-49      | 1.0            | 2  |
| 11447  | 103175 | 1        | China   | 1           | 1  | 1  | Male   | 1953 | 62     | 5    | >=60       | 1.0            |    |
| 11455  | 103179 | 1        | China   | 1           | 2  | 2  | Female | 1966 | 49     | 2    | 45-49      | 1.0            | 2  |
| 11456  | 103180 | 1        | China   | 1           | 2  | 2  | Female | 1961 | 54     | 3    | 50-54      | 1.2            |    |
| 11461  | 103182 | 1        | China   | 1           | 2  | 1  | Male   | 1962 | 53     | 3    | 50-54      | 1.0            |    |
| 11463  | 103183 | 1        | China   | 1           | 1  | 1  | Male   | 1954 | 61     | 5    | >=60       | 1.0            |    |



| respid | SubsID | dCountry | Country | QDisclaimer | Q1 | Q2 | Gender | Q3_1 | age Nr | dAge | age Group  | Weight in Ctry | Q4 |
|--------|--------|----------|---------|-------------|----|----|--------|------|--------|------|------------|----------------|----|
| 11470  | 103187 | 1        | China   | 1           | 1  | 1  | Male   | 1968 | 47     | 2    | 45-49      | 1.0            |    |
| 11472  | 103189 | 1        | China   | 1           | 2  | 1  | Male   | 1957 | 58     | 4    | 55-59      | 0.9            |    |
| 11475  | 103190 | 1        | China   | 1           | 2  | 1  | Male   | 1942 | 73     | 5    | >=60       | 1.0            |    |
| 11476  | 103191 | 1        | China   | 1           | 2  | 2  | Female | 1969 | 46     | 2    | 45-49      | 1.0            | 2  |
| 11482  | 103197 | 1        | China   | 1           | 2  | 2  | Female | 1960 | 55     | 4    | 55-59      | 1.0            |    |
| 11501  | 103208 | 1        | China   | 1           | 2  | 1  | Male   | 1956 | 59     | 4    | 55-59      | 0.9            |    |
| 11503  | 103210 | 1        | China   | 1           | 2  | 2  | Female | 1952 | 63     | 5    | >=60       | 1.1            |    |
| 11505  | 103212 | 1        | China   | 1           | 2  | 1  | Male   | 1949 | 66     | 5    | >=60       | 1.0            |    |
| 11510  | 103215 | 1        | China   | 1           | 2  | 2  | Female | 1975 | 40     | 1    | 40-44 year | 1.0            | 2  |
| 11519  | 103220 | 1        | China   | 1           | 2  | 1  | Male   | 1968 | 47     | 2    | 45-49      | 1.0            |    |
| 11527  | 103225 | 1        | China   | 1           | 2  | 1  | Male   | 1960 | 55     | 4    | 55-59      | 0.9            |    |
| 11529  | 103227 | 1        | China   | 1           | 2  | 2  | Female | 1957 | 58     | 4    | 55-59      | 1.0            |    |
| 11530  | 100511 | 1        | China   | 1           | 1  | 1  | Male   | 1930 | 85     | 5    | >=60       | 1.0            |    |
| 11536  | 103228 | 1        | China   | 1           | 2  | 1  | Male   | 1940 | 75     | 5    | >=60       | 1.0            |    |
| 11543  | 103234 | 1        | China   | 1           | 2  | 1  | Male   | 1956 | 59     | 4    | 55-59      | 0.9            |    |
| 11548  | 103096 | 1        | China   | 1           | 2  | 1  | Male   | 1965 | 50     | 3    | 50-54      | 1.0            |    |
| 11566  | 103253 | 1        | China   | 1           | 2  | 1  | Male   | 1955 | 60     | 5    | >=60       | 1.0            |    |
| 11570  | 103257 | 1        | China   | 1           | 2  | 2  | Female | 1965 | 50     | 3    | 50-54      | 1.2            |    |
| 11571  | 103258 | 1        | China   | 1           | 2  | 1  | Male   | 1964 | 51     | 3    | 50-54      | 1.0            |    |
| 11578  | 103262 | 1        | China   | 1           | 2  | 1  | Male   | 1965 | 50     | 3    | 50-54      | 1.0            |    |
| 11579  | 103263 | 1        | China   | 1           | 2  | 2  | Female | 1971 | 44     | 1    | 40-44 year | 1.0            | 2  |
| 11581  | 103265 | 1        | China   | 1           | 2  | 1  | Male   | 1957 | 58     | 4    | 55-59      | 0.9            |    |
| 11582  | 103266 | 1        | China   | 1           | 2  | 2  | Female | 1964 | 51     | 3    | 50-54      | 1.2            |    |
| 11583  | 103267 | 1        | China   | 1           | 2  | 1  | Male   | 1974 | 41     | 1    | 40-44 year | 1.0            |    |
| 11589  | 103271 | 1        | China   | 1           | 2  | 1  | Male   | 1965 | 50     | 3    | 50-54      | 1.0            |    |
| 11590  | 103272 | 1        | China   | 1           | 2  | 1  | Male   | 1969 | 46     | 2    | 45-49      | 1.0            |    |
| 11592  | 103273 | 1        | China   | 1           | 2  | 1  | Male   | 1949 | 66     | 5    | >=60       | 1.0            |    |
| 11596  | 103274 | 1        | China   | 1           | 2  | 1  | Male   | 1965 | 50     | 3    | 50-54      | 1.0            |    |
| 11598  | 103276 | 1        | China   | 1           | 2  | 1  | Male   | 1957 | 58     | 4    | 55-59      | 0.9            |    |
| 11602  | 103278 | 1        | China   | 1           | 2  | 2  | Female | 1974 | 41     | 1    | 40-44 year | 1.0            | 2  |
| 11605  | 103281 | 1        | China   | 1           | 2  | 1  | Male   | 1961 | 54     | 3    | 50-54      | 1.0            |    |
| 11618  | 103291 | 1        | China   | 1           | 2  | 2  | Female | 1973 | 42     | 1    | 40-44 year | 1.0            | 2  |

| respid | SubsID | dCountry | Country | QDisclaimer | Q1 | Q2 | Gender   | Q3_1 | age Nr | dAge | age Group  | Weight in Ctry | Q4 |
|--------|--------|----------|---------|-------------|----|----|----------|------|--------|------|------------|----------------|----|
| 11621  | 103293 | 1        | China   |             | 1  | 2  | 1 Male   | 1970 | 45     | 2    | 45-49      | 1.0            |    |
| 11630  | 103297 | 1        | China   |             | 1  | 1  | 2 Female | 1973 | 42     | 1    | 40-44 year | 1.0            | 2  |
| 11636  | 103301 | 1        | China   |             | 1  | 2  | 2 Female | 1975 | 40     | 1    | 40-44 year | 1.0            | 2  |
| 11640  | 103305 | 1        | China   |             | 1  | 2  | 2 Female | 1968 | 47     | 2    | 45-49      | 1.0            | 2  |
| 11658  | 103317 | 1        | China   |             | 1  | 2  | 1 Male   | 1974 | 41     | 1    | 40-44 year | 1.0            |    |
| 11665  | 103319 | 1        | China   |             | 1  | 2  | 2 Female | 1971 | 44     | 1    | 40-44 year | 1.0            | 2  |
| 11666  | 103320 | 1        | China   |             | 1  | 1  | 2 Female | 1969 | 46     | 2    | 45-49      | 1.0            | 2  |
| 11667  | 103321 | 1        | China   |             | 1  | 2  | 1 Male   | 1971 | 44     | 1    | 40-44 year | 1.0            |    |
| 11674  | 103327 | 1        | China   |             | 1  | 1  | 2 Female | 1973 | 42     | 1    | 40-44 year | 1.0            | 2  |
| 11680  | 103328 | 1        | China   |             | 1  | 2  | 1 Male   | 1948 | 67     | 5    | >=60       | 1.0            |    |
| 11683  | 103331 | 1        | China   |             | 1  | 2  | 1 Male   | 1958 | 57     | 4    | 55-59      | 0.9            |    |
| 11688  | 103336 | 1        | China   |             | 1  | 2  | 1 Male   | 1971 | 44     | 1    | 40-44 year | 1.0            |    |
| 11690  | 103338 | 1        | China   |             | 1  | 2  | 2 Female | 1974 | 41     | 1    | 40-44 year | 1.0            | 2  |
| 11694  | 103332 | 1        | China   |             | 1  | 2  | 1 Male   | 1974 | 41     | 1    | 40-44 year | 1.0            |    |
| 11705  | 103346 | 1        | China   |             | 1  | 2  | 2 Female | 1963 | 52     | 3    | 50-54      | 1.2            |    |
| 11720  | 103354 | 1        | China   |             | 1  | 2  | 1 Male   | 1969 | 46     | 2    | 45-49      | 1.0            |    |
| 11724  | 103355 | 1        | China   |             | 1  | 2  | 2 Female | 1973 | 42     | 1    | 40-44 year | 1.0            | 2  |
| 11738  | 200532 | 3        | Korea   |             | 1  | 2  | 2 Female | 1954 | 61     | 5    | >=60       | 1.6            |    |
| 11744  | 103370 | 1        | China   |             | 1  | 2  | 2 Female | 1974 | 41     | 1    | 40-44 year | 1.0            | 2  |
| 11745  | 103371 | 1        | China   |             | 1  | 2  | 2 Female | 1968 | 47     | 2    | 45-49      | 1.0            | 2  |
| 11747  | 103373 | 1        | China   |             | 1  | 2  | 2 Female | 1972 | 43     | 1    | 40-44 year | 1.0            | 2  |
| 11755  | 103376 | 1        | China   |             | 1  | 2  | 2 Female | 1969 | 46     | 2    | 45-49      | 1.0            | 2  |
| 11756  | 103378 | 1        | China   |             | 1  | 2  | 1 Male   | 1970 | 45     | 2    | 45-49      | 1.0            |    |
| 11772  | 103384 | 1        | China   |             | 1  | 2  | 2 Female | 1973 | 42     | 1    | 40-44 year | 1.0            | 2  |
| 11773  | 103383 | 1        | China   |             | 1  | 2  | 2 Female | 1971 | 44     | 1    | 40-44 year | 1.0            | 2  |
| 11778  | 103387 | 1        | China   |             | 1  | 2  | 1 Male   | 1958 | 57     | 4    | 55-59      | 0.9            |    |
| 11790  | 103390 | 1        | China   |             | 1  | 2  | 1 Male   | 1973 | 42     | 1    | 40-44 year | 1.0            |    |
| 11794  | 103391 | 1        | China   |             | 1  | 2  | 2 Female | 1975 | 40     | 1    | 40-44 year | 1.0            | 2  |
| 11795  | 103392 | 1        | China   |             | 1  | 2  | 1 Male   | 1950 | 65     | 5    | >=60       | 1.0            |    |
| 11799  | 103394 | 1        | China   |             | 1  | 2  | 1 Male   | 1970 | 45     | 2    | 45-49      | 1.0            |    |
| 11803  | 103396 | 1        | China   |             | 1  | 2  | 1 Male   | 1960 | 55     | 4    | 55-59      | 0.9            |    |
| 11806  | 103397 | 1        | China   |             | 1  | 2  | 2 Female | 1970 | 45     | 2    | 45-49      | 1.0            | 2  |

| respid | SubsID | dCountry | Country | QDisclaimer | Q1 | Q2 | Gender   | Q3_1 | age Nr | dAge | age Group  | Weight in Ctry | Q4 |
|--------|--------|----------|---------|-------------|----|----|----------|------|--------|------|------------|----------------|----|
| 11808  | 103399 | 1        | China   |             | 1  | 2  | 2 Female | 1965 | 50     | 3    | 50-54      | 1.2            |    |
| 11810  | 103401 | 1        | China   |             | 1  | 2  | 2 Female | 1974 | 41     | 1    | 40-44 year | 1.0            | 2  |
| 11811  | 103400 | 1        | China   |             | 1  | 2  | 2 Female | 1974 | 41     | 1    | 40-44 year | 1.0            | 2  |
| 11812  | 103402 | 1        | China   |             | 1  | 2  | 1 Male   | 1971 | 44     | 1    | 40-44 year | 1.0            |    |
| 11813  | 103403 | 1        | China   |             | 1  | 2  | 1 Male   | 1962 | 53     | 3    | 50-54      | 1.0            |    |
| 11821  | 103406 | 1        | China   |             | 1  | 1  | 2 Female | 1965 | 50     | 3    | 50-54      | 1.2            |    |
| 11827  | 103407 | 1        | China   |             | 1  | 2  | 2 Female | 1972 | 43     | 1    | 40-44 year | 1.0            | 2  |
| 11831  | 103412 | 1        | China   |             | 1  | 2  | 2 Female | 1958 | 57     | 4    | 55-59      | 1.0            |    |
| 11841  | 103418 | 1        | China   |             | 1  | 2  | 2 Female | 1973 | 42     | 1    | 40-44 year | 1.0            | 2  |
| 11872  | 103426 | 1        | China   |             | 1  | 2  | 2 Female | 1954 | 61     | 5    | >=60       | 1.1            |    |
| 11898  | 103435 | 1        | China   |             | 1  | 2  | 1 Male   | 1966 | 49     | 2    | 45-49      | 1.0            |    |
| 11902  | 103438 | 1        | China   |             | 1  | 1  | 1 Male   | 1950 | 65     | 5    | >=60       | 1.0            |    |
| 11912  | 100946 | 1        | China   |             | 1  | 2  | 2 Female | 1948 | 67     | 5    | >=60       | 1.1            |    |
| 11926  | 103445 | 1        | China   |             | 1  | 2  | 1 Male   | 1963 | 52     | 3    | 50-54      | 1.0            |    |
| 11928  | 103446 | 1        | China   |             | 1  | 2  | 2 Female | 1953 | 62     | 5    | >=60       | 1.1            |    |
| 11932  | 103450 | 1        | China   |             | 1  | 2  | 1 Male   | 1951 | 64     | 5    | >=60       | 1.0            |    |
| 11934  | 103452 | 1        | China   |             | 1  | 2  | 1 Male   | 1965 | 50     | 3    | 50-54      | 1.0            |    |
| 11941  | 102564 | 1        | China   |             | 1  | 2  | 1 Male   | 1952 | 63     | 5    | >=60       | 1.0            |    |
| 11942  | 103456 | 1        | China   |             | 1  | 2  | 1 Male   | 1964 | 51     | 3    | 50-54      | 1.0            |    |
| 11943  | 103457 | 1        | China   |             | 1  | 2  | 1 Male   | 1948 | 67     | 5    | >=60       | 1.0            |    |
| 11944  | 103458 | 1        | China   |             | 1  | 1  | 2 Female | 1950 | 65     | 5    | >=60       | 1.1            |    |
| 11955  | 103464 | 1        | China   |             | 1  | 1  | 2 Female | 1954 | 61     | 5    | >=60       | 1.1            |    |
| 11958  | 103466 | 1        | China   |             | 1  | 2  | 1 Male   | 1955 | 60     | 5    | >=60       | 1.0            |    |
| 11968  | 103470 | 1        | China   |             | 1  | 2  | 1 Male   | 1954 | 61     | 5    | >=60       | 1.0            |    |
| 11979  | 200534 | 3        | Korea   |             | 1  | 2  | 2 Female | 1944 | 71     | 5    | >=60       | 1.6            |    |
| 11988  | 103481 | 1        | China   |             | 1  | 1  | 1 Male   | 1975 | 40     | 1    | 40-44 year | 1.0            |    |
| 11999  | 103488 | 1        | China   |             | 1  | 2  | 1 Male   | 1943 | 72     | 5    | >=60       | 1.0            |    |
| 12002  | 103491 | 1        | China   |             | 1  | 2  | 2 Female | 1953 | 62     | 5    | >=60       | 1.1            |    |
| 12004  | 103493 | 1        | China   |             | 1  | 2  | 1 Male   | 1947 | 68     | 5    | >=60       | 1.0            |    |
| 12008  | 103495 | 1        | China   |             | 1  | 2  | 1 Male   | 1965 | 50     | 3    | 50-54      | 1.0            |    |
| 12013  | 103497 | 1        | China   |             | 1  | 1  | 2 Female | 1945 | 70     | 5    | >=60       | 1.1            |    |
| 12018  | 103498 | 1        | China   |             | 1  | 2  | 1 Male   | 1950 | 65     | 5    | >=60       | 1.0            |    |

| respid | SubsID | dCountry | Country | QDisclaim<br>er | Q1 | Q2 | Gender   | Q3_1 | age Nr | dAge | age Group | Weight in<br>Ctry | Q4 |
|--------|--------|----------|---------|-----------------|----|----|----------|------|--------|------|-----------|-------------------|----|
| 12023  | 103501 | 1        | China   | 1               | 1  | 1  | 2 Female | 1947 | 68     | 5    | >=60      | 1.1               |    |
| 12027  | 103505 | 1        | China   | 1               | 2  | 1  | 2 Female | 1951 | 64     | 5    | >=60      | 1.1               |    |
| 12030  | 103508 | 1        | China   | 1               | 1  | 1  | 2 Female | 1965 | 50     | 3    | 50-54     | 1.2               |    |
| 12031  | 103509 | 1        | China   | 1               | 2  | 1  | 2 Female | 1957 | 58     | 4    | 55-59     | 1.0               |    |
| 12036  | 103514 | 1        | China   | 1               | 2  | 1  | 1 Male   | 1964 | 51     | 3    | 50-54     | 1.0               |    |
| 12037  | 103515 | 1        | China   | 1               | 1  | 1  | 1 Male   | 1951 | 64     | 5    | >=60      | 1.0               |    |
| 12038  | 103516 | 1        | China   | 1               | 2  | 1  | 1 Male   | 1950 | 65     | 5    | >=60      | 1.0               |    |
| 12039  | 103517 | 1        | China   | 1               | 2  | 1  | 1 Male   | 1962 | 53     | 3    | 50-54     | 1.0               |    |
| 12045  | 103522 | 1        | China   | 1               | 2  | 1  | 2 Female | 1952 | 63     | 5    | >=60      | 1.1               |    |
| 12046  | 103523 | 1        | China   | 1               | 2  | 1  | 1 Male   | 1953 | 62     | 5    | >=60      | 1.0               |    |
| 12054  | 103530 | 1        | China   | 1               | 1  | 1  | 1 Male   | 1964 | 51     | 3    | 50-54     | 1.0               |    |
| 12055  | 103531 | 1        | China   | 1               | 2  | 1  | 2 Female | 1964 | 51     | 3    | 50-54     | 1.2               |    |
| 12069  | 103540 | 1        | China   | 1               | 1  | 1  | 1 Male   | 1946 | 69     | 5    | >=60      | 1.0               |    |
| 12070  | 103541 | 1        | China   | 1               | 2  | 1  | 1 Male   | 1960 | 55     | 4    | 55-59     | 0.9               |    |
| 12074  | 103543 | 1        | China   | 1               | 1  | 1  | 2 Female | 1940 | 75     | 5    | >=60      | 1.1               |    |
| 12075  | 103546 | 1        | China   | 1               | 2  | 1  | 1 Male   | 1960 | 55     | 4    | 55-59     | 0.9               |    |
| 12078  | 103548 | 1        | China   | 1               | 2  | 1  | 1 Male   | 1965 | 50     | 3    | 50-54     | 1.0               |    |
| 12089  | 103553 | 1        | China   | 1               | 2  | 1  | 2 Female | 1963 | 52     | 3    | 50-54     | 1.2               |    |
| 12091  | 103555 | 1        | China   | 1               | 2  | 1  | 1 Male   | 1965 | 50     | 3    | 50-54     | 1.0               |    |
| 12092  | 103556 | 1        | China   | 1               | 2  | 1  | 2 Female | 1964 | 51     | 3    | 50-54     | 1.2               |    |
| 12108  | 103560 | 1        | China   | 1               | 2  | 1  | 1 Male   | 1964 | 51     | 3    | 50-54     | 1.0               |    |
| 12111  | 103562 | 1        | China   | 1               | 2  | 1  | 1 Male   | 1957 | 58     | 4    | 55-59     | 0.9               |    |
| 12112  | 103563 | 1        | China   | 1               | 2  | 1  | 1 Male   | 1962 | 53     | 3    | 50-54     | 1.0               |    |
| 12126  | 103573 | 1        | China   | 1               | 2  | 1  | 1 Male   | 1960 | 55     | 4    | 55-59     | 0.9               |    |
| 12132  | 103577 | 1        | China   | 1               | 2  | 1  | 1 Male   | 1963 | 52     | 3    | 50-54     | 1.0               |    |
| 12150  | 103586 | 1        | China   | 1               | 2  | 1  | 1 Male   | 1963 | 52     | 3    | 50-54     | 1.0               |    |
| 12152  | 103588 | 1        | China   | 1               | 2  | 1  | 1 Male   | 1960 | 55     | 4    | 55-59     | 0.9               |    |
| 12154  | 103589 | 1        | China   | 1               | 2  | 1  | 1 Male   | 1957 | 58     | 4    | 55-59     | 0.9               |    |
| 12157  | 103591 | 1        | China   | 1               | 2  | 1  | 1 Male   | 1965 | 50     | 3    | 50-54     | 1.0               |    |
| 12165  | 103599 | 1        | China   | 1               | 2  | 1  | 2 Female | 1964 | 51     | 3    | 50-54     | 1.2               |    |
| 12169  | 103603 | 1        | China   | 1               | 2  | 1  | 1 Male   | 1955 | 60     | 5    | >=60      | 1.0               |    |
| 12182  | 103611 | 1        | China   | 1               | 2  | 1  | 1 Male   | 1953 | 62     | 5    | >=60      | 1.0               |    |

| respid | SubsID    | dCountry | Country | QDisclaimer | Q1 | Q2 | Gender   | Q3_1 | age Nr | dAge | age Group  | Weight in Ctry | Q4 |
|--------|-----------|----------|---------|-------------|----|----|----------|------|--------|------|------------|----------------|----|
| 12198  | 101698    | 1        | China   |             | 1  | 2  | 2 Female | 1962 | 53     | 3    | 50-54      | 1.2            |    |
| 12199  | 103621    | 1        | China   |             | 1  | 2  | 1 Male   | 1957 | 58     | 4    | 55-59      | 0.9            |    |
| 12202  | 103623    | 1        | China   |             | 1  | 2  | 2 Female | 1963 | 52     | 3    | 50-54      | 1.2            |    |
| 12207  | 103627    | 1        | China   |             | 1  | 2  | 1 Male   | 1962 | 53     | 3    | 50-54      | 1.0            |    |
| 12208  | 103628    | 1        | China   |             | 1  | 1  | 1 Male   | 1967 | 48     | 2    | 45-49      | 1.0            |    |
| 12210  | 103630    | 1        | China   |             | 1  | 1  | 2 Female | 1962 | 53     | 3    | 50-54      | 1.2            |    |
| 12219  | 103636    | 1        | China   |             | 1  | 2  | 2 Female | 1953 | 62     | 5    | >=60       | 1.1            |    |
| 12224  | 103641    | 1        | China   |             | 1  | 2  | 1 Male   | 1963 | 52     | 3    | 50-54      | 1.0            |    |
| 12230  | 103644    | 1        | China   |             | 1  | 2  | 1 Male   | 1950 | 65     | 5    | >=60       | 1.0            |    |
| 12238  | 103650    | 1        | China   |             | 1  | 1  | 2 Female | 1955 | 60     | 5    | >=60       | 1.1            |    |
| 12239  | 101835    | 1        | China   |             | 1  | 2  | 2 Female | 1959 | 56     | 4    | 55-59      | 1.0            |    |
| 12243  | 103653    | 1        | China   |             | 1  | 2  | 1 Male   | 1960 | 55     | 4    | 55-59      | 0.9            |    |
| 12245  | 103655    | 1        | China   |             | 1  | 2  | 1 Male   | 1958 | 57     | 4    | 55-59      | 0.9            |    |
| 12246  | 103656    | 1        | China   |             | 1  | 2  | 2 Female | 1951 | 64     | 5    | >=60       | 1.1            |    |
| 12247  | 103657    | 1        | China   |             | 1  | 2  | 1 Male   | 1946 | 69     | 5    | >=60       | 1.0            |    |
| 12248  | 103658    | 1        | China   |             | 1  | 2  | 1 Male   | 1963 | 52     | 3    | 50-54      | 1.0            |    |
| 12249  | 103659    | 1        | China   |             | 1  | 2  | 2 Female | 1951 | 64     | 5    | >=60       | 1.1            |    |
| 12258  | 103662    | 1        | China   |             | 1  | 2  | 1 Male   | 1950 | 65     | 5    | >=60       | 1.0            |    |
| 12265  | 103666    | 1        | China   |             | 1  | 2  | 2 Female | 1952 | 63     | 5    | >=60       | 1.1            |    |
| 12269  | 103668    | 1        | China   |             | 1  | 2  | 2 Female | 1957 | 58     | 4    | 55-59      | 1.0            |    |
| 12270  | 103669    | 1        | China   |             | 1  | 2  | 1 Male   | 1952 | 63     | 5    | >=60       | 1.0            |    |
| 12279  | 103675    | 1        | China   |             | 1  | 2  | 1 Male   | 1954 | 61     | 5    | >=60       | 1.0            |    |
| 12280  | 103676    | 1        | China   |             | 1  | 2  | 1 Male   | 1959 | 56     | 4    | 55-59      | 0.9            |    |
| 12282  | 103678    | 1        | China   |             | 1  | 2  | 2 Female | 1961 | 54     | 3    | 50-54      | 1.2            |    |
| 12283  | 103679    | 1        | China   |             | 1  | 2  | 2 Female | 1965 | 50     | 3    | 50-54      | 1.2            |    |
| 12287  | 103682    | 1        | China   |             | 1  | 2  | 2 Female | 1975 | 40     | 1    | 40-44 year | 1.0            | 2  |
| 12288  | 103683    | 1        | China   |             | 1  | 2  | 2 Female | 1964 | 51     | 3    | 50-54      | 1.2            |    |
| 12290  | 103684    | 1        | China   |             | 1  | 2  | 2 Female | 1961 | 54     | 3    | 50-54      | 1.2            |    |
| 12292  | 350349286 | 3        | Korea   |             | 1  | 2  | 2 Female | 1964 | 51     | 3    | 50-54      | 0.8            |    |
| 12294  | 350179995 | 3        | Korea   |             | 1  | 2  | 1 Male   | 1972 | 43     | 1    | 40-44 year | 0.9            |    |
| 12296  | 103686    | 1        | China   |             | 1  | 2  | 1 Male   | 1952 | 63     | 5    | >=60       | 1.0            |    |
| 12307  | 103691    | 1        | China   |             | 1  | 2  | 2 Female | 1964 | 51     | 3    | 50-54      | 1.2            |    |

| respID | SubsID    | dCountry | Country  | QDisclaimer | Q1 | Q2 | Gender   | Q3_1 | age Nr | dAge | age Group    | Weight in Ctry | Q4 |
|--------|-----------|----------|----------|-------------|----|----|----------|------|--------|------|--------------|----------------|----|
| 12309  | 103693    |          | 1 China  |             | 1  | 2  | 1 Male   | 1964 | 51     |      | 3 50-54      | 1.0            |    |
| 12312  | 350149156 |          | 3 Korea  |             | 1  | 2  | 1 Male   | 1960 | 55     |      | 4 55-59      | 0.8            |    |
| 12317  | 103697    |          | 1 China  |             | 1  | 2  | 2 Female | 1952 | 63     |      | 5 >=60       | 1.1            |    |
| 12319  | 103698    |          | 1 China  |             | 1  | 1  | 1 Male   | 1960 | 55     |      | 4 55-59      | 0.9            |    |
| 12320  | 350341835 |          | 3 Korea  |             | 1  | 2  | 1 Male   | 1967 | 48     |      | 2 45-49      | 0.8            |    |
| 12322  | 350220861 |          | 3 Korea  |             | 1  | 2  | 1 Male   | 1970 | 45     |      | 2 45-49      | 0.8            |    |
| 12328  | 103704    |          | 1 China  |             | 1  | 2  | 2 Female | 1957 | 58     |      | 4 55-59      | 1.0            |    |
| 12331  | 350228699 |          | 3 Korea  |             | 1  | 2  | 1 Male   | 1972 | 43     |      | 1 40-44 year | 0.9            |    |
| 12332  | 350345706 |          | 3 Korea  |             | 1  | 2  | 1 Male   | 1955 | 60     |      | 5 >=60       | 1.6            |    |
| 12334  | 350177250 |          | 3 Korea  |             | 1  | 2  | 2 Female | 1972 | 43     |      | 1 40-44 year | 0.9            | 2  |
| 12337  | 350123417 |          | 3 Korea  |             | 1  | 2  | 1 Male   | 1961 | 54     |      | 3 50-54      | 0.9            |    |
| 12338  | 350301191 |          | 3 Korea  |             | 1  | 2  | 1 Male   | 1968 | 47     |      | 2 45-49      | 0.8            |    |
| 12342  | 350153259 |          | 3 Korea  |             | 1  | 2  | 1 Male   | 1964 | 51     |      | 3 50-54      | 0.9            |    |
| 12349  | 380001514 |          | 2 Taiwan |             | 1  | 2  | 2 Female | 1974 | 41     |      | 1 40-44 year | 0.8            | 2  |
| 12352  | 103715    |          | 1 China  |             | 1  | 2  | 1 Male   | 1965 | 50     |      | 3 50-54      | 1.0            |    |
| 12355  | 103475    |          | 1 China  |             | 1  | 1  | 1 Male   | 1946 | 69     |      | 5 >=60       | 1.0            |    |
| 12357  | 103717    |          | 1 China  |             | 1  | 2  | 1 Male   | 1959 | 56     |      | 4 55-59      | 0.9            |    |
| 12358  | 380189404 |          | 2 Taiwan |             | 1  | 2  | 1 Male   | 1963 | 52     |      | 3 50-54      | 0.8            |    |
| 12371  | 103725    |          | 1 China  |             | 1  | 2  | 2 Female | 1958 | 57     |      | 4 55-59      | 1.0            |    |
| 12372  | 200535    |          | 3 Korea  |             | 1  | 2  | 2 Female | 1961 | 54     |      | 3 50-54      | 0.8            |    |
| 12373  | 101894    |          | 1 China  |             | 1  | 2  | 1 Male   | 1964 | 51     |      | 3 50-54      | 1.0            |    |
| 12379  | 103727    |          | 1 China  |             | 1  | 2  | 1 Male   | 1961 | 54     |      | 3 50-54      | 1.0            |    |
| 12381  | 200536    |          | 3 Korea  |             | 1  | 2  | 2 Female | 1964 | 51     |      | 3 50-54      | 0.8            |    |
| 12383  | 350308447 |          | 3 Korea  |             | 1  | 2  | 1 Male   | 1971 | 44     |      | 1 40-44 year | 0.9            |    |
| 12384  | 200537    |          | 3 Korea  |             | 1  | 2  | 2 Female | 1962 | 53     |      | 3 50-54      | 0.8            |    |
| 12386  | 103730    |          | 1 China  |             | 1  | 2  | 1 Male   | 1962 | 53     |      | 3 50-54      | 1.0            |    |
| 12389  | 200538    |          | 3 Korea  |             | 1  | 2  | 2 Female | 1964 | 51     |      | 3 50-54      | 0.8            |    |
| 12392  | 200539    |          | 3 Korea  |             | 1  | 2  | 2 Female | 1964 | 51     |      | 3 50-54      | 0.8            |    |
| 12396  | 103734    |          | 1 China  |             | 1  | 2  | 2 Female | 1958 | 57     |      | 4 55-59      | 1.0            |    |
| 12397  | 200541    |          | 3 Korea  |             | 1  | 2  | 2 Female | 1957 | 58     |      | 4 55-59      | 0.7            |    |
| 12399  | 200542    |          | 3 Korea  |             | 1  | 2  | 2 Female | 1966 | 49     |      | 2 45-49      | 0.9            | 2  |
| 12400  | 350294202 |          | 3 Korea  |             | 1  | 2  | 1 Male   | 1974 | 41     |      | 1 40-44 year | 0.9            |    |

| respid | SubsID    | dCountry | Country  | QDisclaimer | Q1 | Q2 | Gender   | Q3_1 | age Nr | dAge | age Group    | Weight in Ctry | Q4 |
|--------|-----------|----------|----------|-------------|----|----|----------|------|--------|------|--------------|----------------|----|
| 12406  | 350234559 |          | 3 Korea  |             | 1  | 2  | 2 Female | 1954 | 61     |      | 5 >=60       | 1.6            |    |
| 12407  | 200544    |          | 3 Korea  |             | 1  | 2  | 2 Female | 1956 | 59     |      | 4 55-59      | 0.7            |    |
| 12410  | 350251942 |          | 3 Korea  |             | 1  | 2  | 1 Male   | 1952 | 63     |      | 5 >=60       | 1.6            |    |
| 12413  | 103722    |          | 1 China  |             | 1  | 1  | 2 Female | 1947 | 68     |      | 5 >=60       | 1.1            |    |
| 12416  | 103738    |          | 1 China  |             | 1  | 2  | 1 Male   | 1952 | 63     |      | 5 >=60       | 1.0            |    |
| 12419  | 103740    |          | 1 China  |             | 1  | 1  | 1 Male   | 1957 | 58     |      | 4 55-59      | 0.9            |    |
| 12422  | 103742    |          | 1 China  |             | 1  | 1  | 1 Male   | 1972 | 43     |      | 1 40-44 year | 1.0            |    |
| 12423  | 350352186 |          | 3 Korea  |             | 1  | 2  | 2 Female | 1967 | 48     |      | 2 45-49      | 0.9            | 2  |
| 12429  | 103744    |          | 1 China  |             | 1  | 2  | 2 Female | 1953 | 62     |      | 5 >=60       | 1.1            |    |
| 12434  | 350148928 |          | 3 Korea  |             | 1  | 2  | 2 Female | 1969 | 46     |      | 2 45-49      | 0.9            | 2  |
| 12435  | 103747    |          | 1 China  |             | 1  | 2  | 1 Male   | 1963 | 52     |      | 3 50-54      | 1.0            |    |
| 12436  | 103748    |          | 1 China  |             | 1  | 2  | 1 Male   | 1959 | 56     |      | 4 55-59      | 0.9            |    |
| 12442  | 103754    |          | 1 China  |             | 1  | 2  | 2 Female | 1960 | 55     |      | 4 55-59      | 1.0            |    |
| 12449  | 103761    |          | 1 China  |             | 1  | 2  | 2 Female | 1953 | 62     |      | 5 >=60       | 1.1            |    |
| 12451  | 103763    |          | 1 China  |             | 1  | 2  | 1 Male   | 1964 | 51     |      | 3 50-54      | 1.0            |    |
| 12456  | 103765    |          | 1 China  |             | 1  | 2  | 2 Female | 1955 | 60     |      | 5 >=60       | 1.1            |    |
| 12457  | 103688    |          | 1 China  |             | 1  | 2  | 1 Male   | 1964 | 51     |      | 3 50-54      | 1.0            |    |
| 12458  | 103766    |          | 1 China  |             | 1  | 2  | 2 Female | 1963 | 52     |      | 3 50-54      | 1.2            |    |
| 12461  | 103768    |          | 1 China  |             | 1  | 2  | 2 Female | 1965 | 50     |      | 3 50-54      | 1.2            |    |
| 12462  | 103769    |          | 1 China  |             | 1  | 2  | 1 Male   | 1952 | 63     |      | 5 >=60       | 1.0            |    |
| 12463  | 103770    |          | 1 China  |             | 1  | 1  | 1 Male   | 1950 | 65     |      | 5 >=60       | 1.0            |    |
| 12466  | 350281621 |          | 3 Korea  |             | 1  | 2  | 1 Male   | 1970 | 45     |      | 2 45-49      | 0.8            |    |
| 12470  | 103773    |          | 1 China  |             | 1  | 2  | 1 Male   | 1954 | 61     |      | 5 >=60       | 1.0            |    |
| 12471  | 103774    |          | 1 China  |             | 1  | 1  | 1 Male   | 1965 | 50     |      | 3 50-54      | 1.0            |    |
| 12472  | 380194190 |          | 2 Taiwan |             | 1  | 2  | 1 Male   | 1968 | 47     |      | 2 45-49      | 0.8            |    |
| 12478  | 103776    |          | 1 China  |             | 1  | 2  | 1 Male   | 1955 | 60     |      | 5 >=60       | 1.0            |    |
| 12479  | 103777    |          | 1 China  |             | 1  | 1  | 1 Male   | 1950 | 65     |      | 5 >=60       | 1.0            |    |
| 12481  | 301115    |          | 2 Taiwan |             | 1  | 2  | 2 Female | 1962 | 53     |      | 3 50-54      | 0.9            |    |
| 12482  | 103779    |          | 1 China  |             | 1  | 2  | 2 Female | 1960 | 55     |      | 4 55-59      | 1.0            |    |
| 12483  | 103780    |          | 1 China  |             | 1  | 2  | 2 Female | 1966 | 49     |      | 2 45-49      | 1.0            | 2  |
| 12496  | 200545    |          | 3 Korea  |             | 1  | 2  | 2 Female | 1960 | 55     |      | 4 55-59      | 0.7            |    |
| 12497  | 200546    |          | 3 Korea  |             | 1  | 2  | 2 Female | 1961 | 54     |      | 3 50-54      | 0.8            |    |

| respid | SubsID    | dCountry | Country | QDisclaimer | Q1 | Q2 | Gender   | Q3_1 | age Nr | dAge | age Group | Weight in Ctry | Q4 |
|--------|-----------|----------|---------|-------------|----|----|----------|------|--------|------|-----------|----------------|----|
| 12498  | 200547    | 3        | Korea   | 1           | 1  | 2  | 2 Female | 1965 | 50     | 3    | 50-54     | 0.8            |    |
| 12500  | 103785    | 1        | China   | 1           | 1  | 2  | 1 Male   | 1955 | 60     | 5    | >=60      | 1.0            |    |
| 12501  | 200549    | 3        | Korea   | 1           | 1  | 2  | 2 Female | 1959 | 56     | 4    | 55-59     | 0.7            |    |
| 12502  | 200550    | 3        | Korea   | 1           | 1  | 1  | 2 Female | 1963 | 52     | 3    | 50-54     | 0.8            |    |
| 12503  | 200551    | 3        | Korea   | 1           | 1  | 2  | 2 Female | 1961 | 54     | 3    | 50-54     | 0.8            |    |
| 12505  | 200552    | 3        | Korea   | 1           | 1  | 2  | 2 Female | 1956 | 59     | 4    | 55-59     | 0.7            |    |
| 12508  | 200553    | 3        | Korea   | 1           | 1  | 2  | 2 Female | 1956 | 59     | 4    | 55-59     | 0.7            |    |
| 12509  | 380081287 | 2        | Taiwan  | 1           | 1  | 2  | 1 Male   | 1967 | 48     | 2    | 45-49     | 0.8            |    |
| 12510  | 350156269 | 3        | Korea   | 1           | 1  | 2  | 1 Male   | 1965 | 50     | 3    | 50-54     | 0.9            |    |
| 12512  | 200554    | 3        | Korea   | 1           | 1  | 2  | 2 Female | 1960 | 55     | 4    | 55-59     | 0.7            |    |
| 12514  | 200555    | 3        | Korea   | 1           | 1  | 2  | 2 Female | 1964 | 51     | 3    | 50-54     | 0.8            |    |
| 12515  | 103790    | 1        | China   | 1           | 1  | 2  | 2 Female | 1952 | 63     | 5    | >=60      | 1.1            |    |
| 12520  | 103791    | 1        | China   | 1           | 1  | 2  | 1 Male   | 1965 | 50     | 3    | 50-54     | 1.0            |    |
| 12522  | 200558    | 3        | Korea   | 1           | 1  | 2  | 2 Female | 1957 | 58     | 4    | 55-59     | 0.7            |    |
| 12526  | 103794    | 1        | China   | 1           | 1  | 2  | 1 Male   | 1952 | 63     | 5    | >=60      | 1.0            |    |
| 12527  | 200559    | 3        | Korea   | 1           | 1  | 2  | 2 Female | 1965 | 50     | 3    | 50-54     | 0.8            |    |
| 12528  | 103795    | 1        | China   | 1           | 1  | 2  | 2 Female | 1964 | 51     | 3    | 50-54     | 1.2            |    |
| 12530  | 200561    | 3        | Korea   | 1           | 1  | 2  | 2 Female | 1959 | 56     | 4    | 55-59     | 0.7            |    |
| 12535  | 200564    | 3        | Korea   | 1           | 1  | 2  | 2 Female | 1965 | 50     | 3    | 50-54     | 0.8            |    |
| 12539  | 200567    | 3        | Korea   | 1           | 1  | 2  | 2 Female | 1959 | 56     | 4    | 55-59     | 0.7            |    |
| 12541  | 103798    | 1        | China   | 1           | 1  | 2  | 1 Male   | 1963 | 52     | 3    | 50-54     | 1.0            |    |
| 12542  | 103799    | 1        | China   | 1           | 1  | 2  | 2 Female | 1965 | 50     | 3    | 50-54     | 1.2            |    |
| 12545  | 200568    | 3        | Korea   | 1           | 1  | 2  | 2 Female | 1958 | 57     | 4    | 55-59     | 0.7            |    |
| 12547  | 103803    | 1        | China   | 1           | 1  | 2  | 2 Female | 1951 | 64     | 5    | >=60      | 1.1            |    |
| 12549  | 103804    | 1        | China   | 1           | 1  | 1  | 1 Male   | 1950 | 65     | 5    | >=60      | 1.0            |    |
| 12550  | 103805    | 1        | China   | 1           | 1  | 2  | 2 Female | 1957 | 58     | 4    | 55-59     | 1.0            |    |
| 12555  | 200571    | 3        | Korea   | 1           | 1  | 2  | 2 Female | 1965 | 50     | 3    | 50-54     | 0.8            |    |
| 12557  | 200572    | 3        | Korea   | 1           | 1  | 1  | 2 Female | 1936 | 79     | 5    | >=60      | 1.6            |    |
| 12559  | 200574    | 3        | Korea   | 1           | 1  | 2  | 2 Female | 1961 | 54     | 3    | 50-54     | 0.8            |    |
| 12561  | 103807    | 1        | China   | 1           | 1  | 2  | 2 Female | 1954 | 61     | 5    | >=60      | 1.1            |    |
| 12562  | 103808    | 1        | China   | 1           | 1  | 2  | 2 Female | 1959 | 56     | 4    | 55-59     | 1.0            |    |
| 12563  | 301116    | 2        | Taiwan  | 1           | 1  | 2  | 2 Female | 1956 | 59     | 4    | 55-59     | 0.9            |    |



| respid | SubsID    | dCountry | Country | QDisclaimer | Q1 | Q2 | Gender | Q3_1 | age Nr | dAge | age Group  | Weight in Ctry | Q4 |
|--------|-----------|----------|---------|-------------|----|----|--------|------|--------|------|------------|----------------|----|
| 12565  | 200576    | 3        | Korea   | 1           | 2  | 2  | Female | 1957 | 58     | 4    | 55-59      | 0.7            |    |
| 12566  | 103809    | 1        | China   | 1           | 2  | 1  | Male   | 1959 | 56     | 4    | 55-59      | 0.9            |    |
| 12570  | 103810    | 1        | China   | 1           | 2  | 2  | Female | 1952 | 63     | 5    | >=60       | 1.1            |    |
| 12571  | 200577    | 3        | Korea   | 1           | 2  | 2  | Female | 1965 | 50     | 3    | 50-54      | 0.8            |    |
| 12572  | 103811    | 1        | China   | 1           | 2  | 1  | Male   | 1958 | 57     | 4    | 55-59      | 0.9            |    |
| 12578  | 103815    | 1        | China   | 1           | 2  | 2  | Female | 1955 | 60     | 5    | >=60       | 1.1            |    |
| 12579  | 350316317 | 3        | Korea   | 1           | 2  | 1  | Male   | 1972 | 43     | 1    | 40-44 year | 0.9            |    |
| 12581  | 200578    | 3        | Korea   | 1           | 2  | 2  | Female | 1960 | 55     | 4    | 55-59      | 0.7            |    |
| 12582  | 200579    | 3        | Korea   | 1           | 2  | 2  | Female | 1955 | 60     | 5    | >=60       | 1.6            |    |
| 12585  | 103817    | 1        | China   | 1           | 1  | 2  | Female | 1962 | 53     | 3    | 50-54      | 1.2            |    |
| 12586  | 301117    | 2        | Taiwan  | 1           | 2  | 2  | Female | 1964 | 51     | 3    | 50-54      | 0.9            |    |
| 12588  | 200580    | 3        | Korea   | 1           | 2  | 2  | Female | 1960 | 55     | 4    | 55-59      | 0.7            |    |
| 12589  | 200581    | 3        | Korea   | 1           | 2  | 2  | Female | 1963 | 52     | 3    | 50-54      | 0.8            |    |
| 12590  | 200582    | 3        | Korea   | 1           | 2  | 2  | Female | 1964 | 51     | 3    | 50-54      | 0.8            |    |
| 12591  | 103818    | 1        | China   | 1           | 2  | 1  | Male   | 1959 | 56     | 4    | 55-59      | 0.9            |    |
| 12593  | 103820    | 1        | China   | 1           | 1  | 1  | Male   | 1960 | 55     | 4    | 55-59      | 0.9            |    |
| 12594  | 200583    | 3        | Korea   | 1           | 2  | 2  | Female | 1957 | 58     | 4    | 55-59      | 0.7            |    |
| 12599  | 103825    | 1        | China   | 1           | 2  | 2  | Female | 1955 | 60     | 5    | >=60       | 1.1            |    |
| 12600  | 200584    | 3        | Korea   | 1           | 2  | 2  | Female | 1964 | 51     | 3    | 50-54      | 0.8            |    |
| 12602  | 200585    | 3        | Korea   | 1           | 2  | 2  | Female | 1960 | 55     | 4    | 55-59      | 0.7            |    |
| 12606  | 350127160 | 3        | Korea   | 1           | 2  | 2  | Female | 1973 | 42     | 1    | 40-44 year | 0.9            | 2  |
| 12607  | 301118    | 2        | Taiwan  | 1           | 2  | 1  | Male   | 1952 | 63     | 5    | >=60       | 1.6            |    |
| 12608  | 103829    | 1        | China   | 1           | 2  | 1  | Male   | 1959 | 56     | 4    | 55-59      | 0.9            |    |
| 12610  | 103831    | 1        | China   | 1           | 2  | 2  | Female | 1960 | 55     | 4    | 55-59      | 1.0            |    |
| 12611  | 103832    | 1        | China   | 1           | 2  | 1  | Male   | 1959 | 56     | 4    | 55-59      | 0.9            |    |
| 12613  | 200586    | 3        | Korea   | 1           | 2  | 2  | Female | 1964 | 51     | 3    | 50-54      | 0.8            |    |
| 12616  | 103835    | 1        | China   | 1           | 2  | 2  | Female | 1955 | 60     | 5    | >=60       | 1.1            |    |
| 12617  | 301119    | 2        | Taiwan  | 1           | 2  | 1  | Male   | 1935 | 80     | 5    | >=60       | 1.6            |    |
| 12619  | 200587    | 3        | Korea   | 1           | 2  | 2  | Female | 1959 | 56     | 4    | 55-59      | 0.7            |    |
| 12622  | 103837    | 1        | China   | 1           | 2  | 2  | Female | 1961 | 54     | 3    | 50-54      | 1.2            |    |
| 12628  | 103839    | 1        | China   | 1           | 2  | 2  | Female | 1965 | 50     | 3    | 50-54      | 1.2            |    |
| 12631  | 200588    | 3        | Korea   | 1           | 2  | 2  | Female | 1962 | 53     | 3    | 50-54      | 0.8            |    |

| respid | SubsID    | dCountry | Country | QDisclaim<br>er | Q1 | Q2 | Gender | Q3_1 | age Nr | dAge | age Group  | Weight in<br>Ctry | Q4 |
|--------|-----------|----------|---------|-----------------|----|----|--------|------|--------|------|------------|-------------------|----|
| 12635  | 103842    | 1        | China   | 1               | 2  | 2  | Female | 1952 | 63     | 5    | >=60       | 1.1               |    |
| 12638  | 200589    | 3        | Korea   | 1               | 2  | 2  | Female | 1952 | 63     | 5    | >=60       | 1.6               |    |
| 12639  | 103843    | 1        | China   | 1               | 2  | 2  | Female | 1958 | 57     | 4    | 55-59      | 1.0               |    |
| 12640  | 103845    | 1        | China   | 1               | 2  | 2  | Female | 1958 | 57     | 4    | 55-59      | 1.0               |    |
| 12643  | 103848    | 1        | China   | 1               | 2  | 2  | Female | 1962 | 53     | 3    | 50-54      | 1.2               |    |
| 12646  | 103849    | 1        | China   | 1               | 2  | 1  | Male   | 1964 | 51     | 3    | 50-54      | 1.0               |    |
| 12648  | 103851    | 1        | China   | 1               | 2  | 2  | Female | 1962 | 53     | 3    | 50-54      | 1.2               |    |
| 12650  | 103852    | 1        | China   | 1               | 2  | 1  | Male   | 1959 | 56     | 4    | 55-59      | 0.9               |    |
| 12651  | 200590    | 3        | Korea   | 1               | 2  | 2  | Female | 1955 | 60     | 5    | >=60       | 1.6               |    |
| 12658  | 103857    | 1        | China   | 1               | 2  | 2  | Female | 1964 | 51     | 3    | 50-54      | 1.2               |    |
| 12662  | 200591    | 3        | Korea   | 1               | 2  | 2  | Female | 1963 | 52     | 3    | 50-54      | 0.8               |    |
| 12663  | 103858    | 1        | China   | 1               | 2  | 1  | Male   | 1957 | 58     | 4    | 55-59      | 0.9               |    |
| 12664  | 103859    | 1        | China   | 1               | 2  | 1  | Male   | 1955 | 60     | 5    | >=60       | 1.0               |    |
| 12669  | 103861    | 1        | China   | 1               | 2  | 2  | Female | 1973 | 42     | 1    | 40-44 year | 1.0               | 2  |
| 12670  | 103862    | 1        | China   | 1               | 2  | 2  | Female | 1955 | 60     | 5    | >=60       | 1.1               |    |
| 12673  | 200592    | 3        | Korea   | 1               | 2  | 2  | Female | 1961 | 54     | 3    | 50-54      | 0.8               |    |
| 12675  | 301121    | 2        | Taiwan  | 1               | 2  | 2  | Female | 1958 | 57     | 4    | 55-59      | 0.9               |    |
| 12677  | 103866    | 1        | China   | 1               | 2  | 2  | Female | 1955 | 60     | 5    | >=60       | 1.1               |    |
| 12679  | 200593    | 3        | Korea   | 1               | 2  | 2  | Female | 1964 | 51     | 3    | 50-54      | 0.8               |    |
| 12682  | 103867    | 1        | China   | 1               | 2  | 1  | Male   | 1955 | 60     | 5    | >=60       | 1.0               |    |
| 12696  | 350151795 | 3        | Korea   | 1               | 2  | 2  | Female | 1968 | 47     | 2    | 45-49      | 0.9               | 2  |
| 12697  | 103870    | 1        | China   | 1               | 2  | 2  | Female | 1955 | 60     | 5    | >=60       | 1.1               |    |
| 12699  | 200594    | 3        | Korea   | 1               | 2  | 2  | Female | 1959 | 56     | 4    | 55-59      | 0.7               |    |
| 12700  | 103872    | 1        | China   | 1               | 2  | 2  | Female | 1956 | 59     | 4    | 55-59      | 1.0               |    |
| 12701  | 103873    | 1        | China   | 1               | 2  | 2  | Female | 1950 | 65     | 5    | >=60       | 1.1               |    |
| 12702  | 103874    | 1        | China   | 1               | 2  | 2  | Female | 1955 | 60     | 5    | >=60       | 1.1               |    |
| 12704  | 103875    | 1        | China   | 1               | 2  | 1  | Male   | 1958 | 57     | 4    | 55-59      | 0.9               |    |
| 12705  | 200595    | 3        | Korea   | 1               | 2  | 2  | Female | 1960 | 55     | 4    | 55-59      | 0.7               |    |
| 12709  | 103877    | 1        | China   | 1               | 2  | 1  | Male   | 1960 | 55     | 4    | 55-59      | 0.9               |    |
| 12710  | 103878    | 1        | China   | 1               | 2  | 2  | Female | 1955 | 60     | 5    | >=60       | 1.1               |    |
| 12713  | 200596    | 3        | Korea   | 1               | 2  | 2  | Female | 1964 | 51     | 3    | 50-54      | 0.8               |    |
| 12716  | 103881    | 1        | China   | 1               | 2  | 2  | Female | 1958 | 57     | 4    | 55-59      | 1.0               |    |

| respID | SubsID    | dCountry | Country  | QDisclaimer | Q1 | Q2 | Gender   | Q3_1 | age Nr | dAge | age Group | Weight in Ctry | Q4 |
|--------|-----------|----------|----------|-------------|----|----|----------|------|--------|------|-----------|----------------|----|
| 12719  | 103869    |          | 1 China  |             | 1  | 2  | 1 Male   | 1964 | 51     |      | 3 50-54   | 1.0            |    |
| 12720  | 103883    |          | 1 China  |             | 1  | 2  | 2 Female | 1955 | 60     |      | 5 >=60    | 1.1            |    |
| 12723  | 200597    |          | 3 Korea  |             | 1  | 2  | 2 Female | 1962 | 53     |      | 3 50-54   | 0.8            |    |
| 12726  | 103885    |          | 1 China  |             | 1  | 2  | 2 Female | 1955 | 60     |      | 5 >=60    | 1.1            |    |
| 12728  | 103886    |          | 1 China  |             | 1  | 2  | 2 Female | 1957 | 58     |      | 4 55-59   | 1.0            |    |
| 12729  | 200598    |          | 3 Korea  |             | 1  | 2  | 2 Female | 1962 | 53     |      | 3 50-54   | 0.8            |    |
| 12731  | 103888    |          | 1 China  |             | 1  | 2  | 2 Female | 1955 | 60     |      | 5 >=60    | 1.1            |    |
| 12732  | 103889    |          | 1 China  |             | 1  | 2  | 2 Female | 1959 | 56     |      | 4 55-59   | 1.0            |    |
| 12733  | 301125    |          | 2 Taiwan |             | 1  | 2  | 2 Female | 1965 | 50     |      | 3 50-54   | 0.9            |    |
| 12736  | 350223018 |          | 3 Korea  |             | 1  | 1  | 1 Male   | 1968 | 47     |      | 2 45-49   | 0.8            |    |
| 12737  | 103892    |          | 1 China  |             | 1  | 2  | 2 Female | 1955 | 60     |      | 5 >=60    | 1.1            |    |
| 12739  | 103894    |          | 1 China  |             | 1  | 1  | 1 Male   | 1954 | 61     |      | 5 >=60    | 1.0            |    |
| 12742  | 103897    |          | 1 China  |             | 1  | 2  | 2 Female | 1955 | 60     |      | 5 >=60    | 1.1            |    |
| 12743  | 103898    |          | 1 China  |             | 1  | 2  | 1 Male   | 1959 | 56     |      | 4 55-59   | 0.9            |    |
| 12744  | 200599    |          | 3 Korea  |             | 1  | 2  | 2 Female | 1963 | 52     |      | 3 50-54   | 0.8            |    |
| 12747  | 103900    |          | 1 China  |             | 1  | 2  | 1 Male   | 1951 | 64     |      | 5 >=60    | 1.0            |    |
| 12751  | 103904    |          | 1 China  |             | 1  | 2  | 1 Male   | 1965 | 50     |      | 3 50-54   | 1.0            |    |
| 12754  | 103906    |          | 1 China  |             | 1  | 2  | 2 Female | 1955 | 60     |      | 5 >=60    | 1.1            |    |
| 12756  | 103907    |          | 1 China  |             | 1  | 2  | 2 Female | 1959 | 56     |      | 4 55-59   | 1.0            |    |
| 12757  | 103908    |          | 1 China  |             | 1  | 2  | 2 Female | 1955 | 60     |      | 5 >=60    | 1.1            |    |
| 12760  | 103910    |          | 1 China  |             | 1  | 2  | 2 Female | 1953 | 62     |      | 5 >=60    | 1.1            |    |
| 12761  | 103911    |          | 1 China  |             | 1  | 2  | 2 Female | 1955 | 60     |      | 5 >=60    | 1.1            |    |
| 12762  | 200600    |          | 3 Korea  |             | 1  | 2  | 2 Female | 1963 | 52     |      | 3 50-54   | 0.8            |    |
| 12766  | 103915    |          | 1 China  |             | 1  | 1  | 1 Male   | 1951 | 64     |      | 5 >=60    | 1.0            |    |
| 12769  | 380146431 |          | 2 Taiwan |             | 1  | 2  | 1 Male   | 1959 | 56     |      | 4 55-59   | 0.7            |    |
| 12770  | 103917    |          | 1 China  |             | 1  | 2  | 1 Male   | 1965 | 50     |      | 3 50-54   | 1.0            |    |
| 12773  | 103920    |          | 1 China  |             | 1  | 1  | 2 Female | 1958 | 57     |      | 4 55-59   | 1.0            |    |
| 12780  | 103922    |          | 1 China  |             | 1  | 1  | 1 Male   | 1963 | 52     |      | 3 50-54   | 1.0            |    |
| 12789  | 200601    |          | 3 Korea  |             | 1  | 2  | 2 Female | 1959 | 56     |      | 4 55-59   | 0.7            |    |
| 12792  | 103925    |          | 1 China  |             | 1  | 2  | 1 Male   | 1965 | 50     |      | 3 50-54   | 1.0            |    |
| 12795  | 103926    |          | 1 China  |             | 1  | 2  | 1 Male   | 1957 | 58     |      | 4 55-59   | 0.9            |    |
| 12804  | 103930    |          | 1 China  |             | 1  | 2  | 1 Male   | 1949 | 66     |      | 5 >=60    | 1.0            |    |

| respid | SubsID    | dCountry | Country | QDisclaimer | Q1 | Q2 | Gender   | Q3_1 | age Nr | dAge | age Group    | Weight in Ctry | Q4 |
|--------|-----------|----------|---------|-------------|----|----|----------|------|--------|------|--------------|----------------|----|
| 12811  | 103933    |          | 1 China |             | 1  | 1  | 2 Female | 1955 | 60     |      | 5 >=60       | 1.1            |    |
| 12813  | 200602    |          | 3 Korea |             | 1  | 2  | 2 Female | 1965 | 50     |      | 3 50-54      | 0.8            |    |
| 12814  | 103935    |          | 1 China |             | 1  | 2  | 1 Male   | 1957 | 58     |      | 4 55-59      | 0.9            |    |
| 12815  | 200603    |          | 3 Korea |             | 1  | 2  | 2 Female | 1955 | 60     |      | 5 >=60       | 1.6            |    |
| 12816  | 350313346 |          | 3 Korea |             | 1  | 2  | 1 Male   | 1963 | 52     |      | 3 50-54      | 0.9            |    |
| 12817  | 200604    |          | 3 Korea |             | 1  | 2  | 2 Female | 1964 | 51     |      | 3 50-54      | 0.8            |    |
| 12818  | 200605    |          | 3 Korea |             | 1  | 2  | 2 Female | 1958 | 57     |      | 4 55-59      | 0.7            |    |
| 12819  | 103821    |          | 1 China |             | 1  | 2  | 1 Male   | 1973 | 42     |      | 1 40-44 year | 1.0            |    |
| 12820  | 200606    |          | 3 Korea |             | 1  | 2  | 2 Female | 1963 | 52     |      | 3 50-54      | 0.8            |    |
| 12821  | 103937    |          | 1 China |             | 1  | 2  | 1 Male   | 1964 | 51     |      | 3 50-54      | 1.0            |    |
| 12824  | 200607    |          | 3 Korea |             | 1  | 2  | 2 Female | 1963 | 52     |      | 3 50-54      | 0.8            |    |
| 12827  | 103939    |          | 1 China |             | 1  | 1  | 1 Male   | 1954 | 61     |      | 5 >=60       | 1.0            |    |
| 12836  | 350101402 |          | 3 Korea |             | 1  | 1  | 1 Male   | 1971 | 44     |      | 1 40-44 year | 0.9            |    |
| 12837  | 103940    |          | 1 China |             | 1  | 2  | 1 Male   | 1963 | 52     |      | 3 50-54      | 1.0            |    |
| 12838  | 200608    |          | 3 Korea |             | 1  | 2  | 2 Female | 1965 | 50     |      | 3 50-54      | 0.8            |    |
| 12845  | 200609    |          | 3 Korea |             | 1  | 2  | 2 Female | 1962 | 53     |      | 3 50-54      | 0.8            |    |
| 12847  | 103944    |          | 1 China |             | 1  | 2  | 1 Male   | 1965 | 50     |      | 3 50-54      | 1.0            |    |
| 12849  | 103946    |          | 1 China |             | 1  | 2  | 2 Female | 1953 | 62     |      | 5 >=60       | 1.1            |    |
| 12850  | 200610    |          | 3 Korea |             | 1  | 2  | 2 Female | 1959 | 56     |      | 4 55-59      | 0.7            |    |
| 12852  | 103948    |          | 1 China |             | 1  | 2  | 1 Male   | 1963 | 52     |      | 3 50-54      | 1.0            |    |
| 12853  | 103949    |          | 1 China |             | 1  | 2  | 2 Female | 1953 | 62     |      | 5 >=60       | 1.1            |    |
| 12854  | 103950    |          | 1 China |             | 1  | 2  | 1 Male   | 1957 | 58     |      | 4 55-59      | 0.9            |    |
| 12860  | 103952    |          | 1 China |             | 1  | 1  | 1 Male   | 1959 | 56     |      | 4 55-59      | 0.9            |    |
| 12861  | 103953    |          | 1 China |             | 1  | 2  | 1 Male   | 1973 | 42     |      | 1 40-44 year | 1.0            |    |
| 12863  | 103955    |          | 1 China |             | 1  | 2  | 2 Female | 1962 | 53     |      | 3 50-54      | 1.2            |    |
| 12865  | 103956    |          | 1 China |             | 1  | 1  | 2 Female | 1962 | 53     |      | 3 50-54      | 1.2            |    |
| 12870  | 200611    |          | 3 Korea |             | 1  | 2  | 2 Female | 1958 | 57     |      | 4 55-59      | 0.7            |    |
| 12871  | 103959    |          | 1 China |             | 1  | 2  | 1 Male   | 1963 | 52     |      | 3 50-54      | 1.0            |    |
| 12873  | 103960    |          | 1 China |             | 1  | 2  | 1 Male   | 1956 | 59     |      | 4 55-59      | 0.9            |    |
| 12877  | 103485    |          | 1 China |             | 1  | 2  | 1 Male   | 1960 | 55     |      | 4 55-59      | 0.9            |    |
| 12880  | 200613    |          | 3 Korea |             | 1  | 2  | 2 Female | 1960 | 55     |      | 4 55-59      | 0.7            |    |
| 12881  | 200614    |          | 3 Korea |             | 1  | 2  | 2 Female | 1961 | 54     |      | 3 50-54      | 0.8            |    |

| respid | SubsID    | dCountry | Country | QDisclaimer | Q1 | Q2 | Gender | Q3_1 | age Nr | dAge | age Group  | Weight in Ctry | Q4 |
|--------|-----------|----------|---------|-------------|----|----|--------|------|--------|------|------------|----------------|----|
| 12882  | 200615    | 3        | Korea   | 1           | 2  | 2  | Female | 1960 | 55     | 4    | 55-59      | 0.7            |    |
| 12883  | 200616    | 3        | Korea   | 1           | 2  | 2  | Female | 1963 | 52     | 3    | 50-54      | 0.8            |    |
| 12885  | 350223947 | 3        | Korea   | 1           | 1  | 1  | Male   | 1966 | 49     | 2    | 45-49      | 0.8            |    |
| 12887  | 200617    | 3        | Korea   | 1           | 2  | 2  | Female | 1963 | 52     | 3    | 50-54      | 0.8            |    |
| 12889  | 200618    | 3        | Korea   | 1           | 2  | 2  | Female | 1964 | 51     | 3    | 50-54      | 0.8            |    |
| 12890  | 103967    | 1        | China   | 1           | 2  | 1  | Male   | 1966 | 49     | 2    | 45-49      | 1.0            |    |
| 12891  | 200619    | 3        | Korea   | 1           | 2  | 2  | Female | 1957 | 58     | 4    | 55-59      | 0.7            |    |
| 12892  | 100550    | 1        | China   | 1           | 1  | 2  | Female | 1970 | 45     | 2    | 45-49      | 1.0            | 2  |
| 12893  | 350206677 | 3        | Korea   | 1           | 2  | 1  | Male   | 1974 | 41     | 1    | 40-44 year | 0.9            |    |
| 12895  | 200620    | 3        | Korea   | 1           | 2  | 2  | Female | 1958 | 57     | 4    | 55-59      | 0.7            |    |
| 12898  | 103970    | 1        | China   | 1           | 2  | 1  | Male   | 1961 | 54     | 3    | 50-54      | 1.0            |    |
| 12907  | 103972    | 1        | China   | 1           | 2  | 1  | Male   | 1957 | 58     | 4    | 55-59      | 0.9            |    |
| 12908  | 200622    | 3        | Korea   | 1           | 2  | 2  | Female | 1962 | 53     | 3    | 50-54      | 0.8            |    |
| 12909  | 200623    | 3        | Korea   | 1           | 2  | 2  | Female | 1964 | 51     | 3    | 50-54      | 0.8            |    |
| 12914  | 380022805 | 2        | Taiwan  | 1           | 2  | 1  | Male   | 1967 | 48     | 2    | 45-49      | 0.8            |    |
| 12915  | 200624    | 3        | Korea   | 1           | 2  | 2  | Female | 1965 | 50     | 3    | 50-54      | 0.8            |    |
| 12916  | 103974    | 1        | China   | 1           | 2  | 1  | Male   | 1971 | 44     | 1    | 40-44 year | 1.0            |    |
| 12921  | 200625    | 3        | Korea   | 1           | 2  | 2  | Female | 1964 | 51     | 3    | 50-54      | 0.8            |    |
| 12922  | 103975    | 1        | China   | 1           | 2  | 2  | Female | 1958 | 57     | 4    | 55-59      | 1.0            |    |
| 12923  | 103976    | 1        | China   | 1           | 1  | 1  | Male   | 1947 | 68     | 5    | >=60       | 1.0            |    |
| 12926  | 103979    | 1        | China   | 1           | 2  | 1  | Male   | 1964 | 51     | 3    | 50-54      | 1.0            |    |
| 12927  | 300677    | 2        | Taiwan  | 1           | 2  | 2  | Female | 1964 | 51     | 3    | 50-54      | 0.9            |    |
| 12932  | 103980    | 1        | China   | 1           | 2  | 1  | Male   | 1962 | 53     | 3    | 50-54      | 1.0            |    |
| 12936  | 103985    | 1        | China   | 1           | 2  | 1  | Male   | 1958 | 57     | 4    | 55-59      | 0.9            |    |
| 12937  | 200626    | 3        | Korea   | 1           | 2  | 2  | Female | 1959 | 56     | 4    | 55-59      | 0.7            |    |
| 12938  | 103986    | 1        | China   | 1           | 2  | 2  | Female | 1960 | 55     | 4    | 55-59      | 1.0            |    |
| 12939  | 103705    | 1        | China   | 1           | 2  | 2  | Female | 1964 | 51     | 3    | 50-54      | 1.2            |    |
| 12940  | 103987    | 1        | China   | 1           | 2  | 2  | Female | 1959 | 56     | 4    | 55-59      | 1.0            |    |
| 12945  | 301129    | 2        | Taiwan  | 1           | 2  | 2  | Female | 1960 | 55     | 4    | 55-59      | 0.9            |    |
| 12946  | 350076484 | 3        | Korea   | 1           | 2  | 2  | Female | 1955 | 60     | 5    | >=60       | 1.6            |    |
| 12947  | 103990    | 1        | China   | 1           | 2  | 1  | Male   | 1965 | 50     | 3    | 50-54      | 1.0            |    |
| 12948  | 200629    | 3        | Korea   | 1           | 2  | 1  | Male   | 1964 | 51     | 3    | 50-54      | 0.9            |    |

| respid | SubsID    | dCountry | Country | QDisclaimer | Q1 | Q2 | Gender   | Q3_1 | age Nr | dAge | age Group  | Weight in Ctry | Q4 |
|--------|-----------|----------|---------|-------------|----|----|----------|------|--------|------|------------|----------------|----|
| 12951  | 200630    | 3        | Korea   | 1           | 1  | 2  | 2 Female | 1956 | 59     | 4    | 55-59      | 0.7            |    |
| 12952  | 200631    | 3        | Korea   | 1           | 1  | 2  | 2 Female | 1958 | 57     | 4    | 55-59      | 0.7            |    |
| 12954  | 200633    | 3        | Korea   | 1           | 1  | 2  | 2 Female | 1963 | 52     | 3    | 50-54      | 0.8            |    |
| 12960  | 103995    | 1        | China   | 1           | 1  | 2  | 2 Female | 1958 | 57     | 4    | 55-59      | 1.0            |    |
| 12961  | 350258131 | 3        | Korea   | 1           | 1  | 2  | 2 Female | 1962 | 53     | 3    | 50-54      | 0.8            |    |
| 12962  | 301130    | 2        | Taiwan  | 1           | 1  | 2  | 2 Female | 1963 | 52     | 3    | 50-54      | 0.9            |    |
| 12963  | 103996    | 1        | China   | 1           | 1  | 2  | 1 Male   | 1958 | 57     | 4    | 55-59      | 0.9            |    |
| 12964  | 350286331 | 3        | Korea   | 1           | 1  | 2  | 2 Female | 1970 | 45     | 2    | 45-49      | 0.9            | 2  |
| 12966  | 103997    | 1        | China   | 1           | 1  | 1  | 1 Male   | 1942 | 73     | 5    | >=60       | 1.0            |    |
| 12967  | 103998    | 1        | China   | 1           | 1  | 2  | 1 Male   | 1963 | 52     | 3    | 50-54      | 1.0            |    |
| 12969  | 350225784 | 3        | Korea   | 1           | 1  | 2  | 1 Male   | 1967 | 48     | 2    | 45-49      | 0.8            |    |
| 12970  | 103999    | 1        | China   | 1           | 1  | 2  | 1 Male   | 1964 | 51     | 3    | 50-54      | 1.0            |    |
| 12974  | 200634    | 3        | Korea   | 1           | 1  | 2  | 1 Male   | 1964 | 51     | 3    | 50-54      | 0.9            |    |
| 12979  | 301131    | 2        | Taiwan  | 1           | 1  | 2  | 2 Female | 1965 | 50     | 3    | 50-54      | 0.9            |    |
| 12980  | 104002    | 1        | China   | 1           | 1  | 2  | 1 Male   | 1964 | 51     | 3    | 50-54      | 1.0            |    |
| 12983  | 200612    | 3        | Korea   | 1           | 1  | 2  | 2 Female | 1956 | 59     | 4    | 55-59      | 0.7            |    |
| 12988  | 200636    | 3        | Korea   | 1           | 1  | 2  | 2 Female | 1963 | 52     | 3    | 50-54      | 0.8            |    |
| 12994  | 200637    | 3        | Korea   | 1           | 1  | 2  | 2 Female | 1964 | 51     | 3    | 50-54      | 0.8            |    |
| 12995  | 200638    | 3        | Korea   | 1           | 1  | 2  | 2 Female | 1950 | 65     | 5    | >=60       | 1.6            |    |
| 12996  | 200639    | 3        | Korea   | 1           | 1  | 2  | 2 Female | 1961 | 54     | 3    | 50-54      | 0.8            |    |
| 12998  | 200640    | 3        | Korea   | 1           | 1  | 2  | 2 Female | 1961 | 54     | 3    | 50-54      | 0.8            |    |
| 12999  | 104007    | 1        | China   | 1           | 1  | 2  | 2 Female | 1963 | 52     | 3    | 50-54      | 1.2            |    |
| 13001  | 104009    | 1        | China   | 1           | 1  | 1  | 1 Male   | 1959 | 56     | 4    | 55-59      | 0.9            |    |
| 13005  | 104011    | 1        | China   | 1           | 1  | 2  | 2 Female | 1963 | 52     | 3    | 50-54      | 1.2            |    |
| 13006  | 301132    | 2        | Taiwan  | 1           | 1  | 2  | 2 Female | 1956 | 59     | 4    | 55-59      | 0.9            |    |
| 13007  | 200641    | 3        | Korea   | 1           | 1  | 2  | 2 Female | 1962 | 53     | 3    | 50-54      | 0.8            |    |
| 13011  | 200642    | 3        | Korea   | 1           | 1  | 2  | 2 Female | 1962 | 53     | 3    | 50-54      | 0.8            |    |
| 13012  | 101649    | 1        | China   | 1           | 1  | 1  | 2 Female | 1953 | 62     | 5    | >=60       | 1.1            |    |
| 13013  | 104015    | 1        | China   | 1           | 1  | 1  | 2 Female | 1953 | 62     | 5    | >=60       | 1.1            |    |
| 13016  | 104017    | 1        | China   | 1           | 1  | 1  | 1 Male   | 1966 | 49     | 2    | 45-49      | 1.0            |    |
| 13018  | 350348647 | 3        | Korea   | 1           | 1  | 2  | 1 Male   | 1969 | 46     | 2    | 45-49      | 0.8            |    |
| 13020  | 350305887 | 3        | Korea   | 1           | 1  | 2  | 1 Male   | 1975 | 40     | 1    | 40-44 year | 0.9            |    |

| respid | SubsID    | dCountry | Country | QDisclaimer | Q1 | Q2 | Gender | Q3_1 | age Nr | dAge | age Group  | Weight in Ctry | Q4 |
|--------|-----------|----------|---------|-------------|----|----|--------|------|--------|------|------------|----------------|----|
| 13024  | 104022    | 1        | China   | 1           | 2  | 1  | Male   | 1960 | 55     | 4    | 55-59      | 0.9            |    |
| 13025  | 200644    | 3        | Korea   | 1           | 2  | 2  | Female | 1958 | 57     | 4    | 55-59      | 0.7            |    |
| 13027  | 301133    | 2        | Taiwan  | 1           | 2  | 2  | Female | 1963 | 52     | 3    | 50-54      | 0.9            |    |
| 13031  | 350141150 | 3        | Korea   | 1           | 2  | 1  | Male   | 1970 | 45     | 2    | 45-49      | 0.8            |    |
| 13032  | 102888    | 1        | China   | 1           | 2  | 1  | Male   | 1952 | 63     | 5    | >=60       | 1.0            |    |
| 13034  | 200645    | 3        | Korea   | 1           | 2  | 2  | Female | 1952 | 63     | 5    | >=60       | 1.6            |    |
| 13036  | 104024    | 1        | China   | 1           | 2  | 2  | Female | 1968 | 47     | 2    | 45-49      | 1.0            | 2  |
| 13037  | 200646    | 3        | Korea   | 1           | 2  | 2  | Female | 1951 | 64     | 5    | >=60       | 1.6            |    |
| 13038  | 200647    | 3        | Korea   | 1           | 2  | 2  | Female | 1960 | 55     | 4    | 55-59      | 0.7            |    |
| 13039  | 200648    | 3        | Korea   | 1           | 2  | 2  | Female | 1954 | 61     | 5    | >=60       | 1.6            |    |
| 13040  | 200649    | 3        | Korea   | 1           | 2  | 2  | Female | 1950 | 65     | 5    | >=60       | 1.6            |    |
| 13041  | 200650    | 3        | Korea   | 1           | 2  | 2  | Female | 1957 | 58     | 4    | 55-59      | 0.7            |    |
| 13045  | 350204413 | 3        | Korea   | 1           | 2  | 2  | Female | 1959 | 56     | 4    | 55-59      | 0.7            |    |
| 13046  | 200653    | 3        | Korea   | 1           | 2  | 2  | Female | 1952 | 63     | 5    | >=60       | 1.6            |    |
| 13048  | 200654    | 3        | Korea   | 1           | 2  | 2  | Female | 1961 | 54     | 3    | 50-54      | 0.8            |    |
| 13051  | 281265362 | 1        | China   | 1           | 2  | 2  | Female | 1954 | 61     | 5    | >=60       | 1.1            |    |
| 13053  | 104025    | 1        | China   | 1           | 2  | 2  | Female | 1960 | 55     | 4    | 55-59      | 1.0            |    |
| 13055  | 200657    | 3        | Korea   | 1           | 2  | 2  | Female | 1961 | 54     | 3    | 50-54      | 0.8            |    |
| 13059  | 200660    | 3        | Korea   | 1           | 2  | 2  | Female | 1953 | 62     | 5    | >=60       | 1.6            |    |
| 13068  | 200661    | 3        | Korea   | 1           | 2  | 2  | Female | 1952 | 63     | 5    | >=60       | 1.6            |    |
| 13069  | 200662    | 3        | Korea   | 1           | 2  | 2  | Female | 1957 | 58     | 4    | 55-59      | 0.7            |    |
| 13076  | 200665    | 3        | Korea   | 1           | 2  | 2  | Female | 1965 | 50     | 3    | 50-54      | 0.8            |    |
| 13081  | 200666    | 3        | Korea   | 1           | 2  | 2  | Female | 1965 | 50     | 3    | 50-54      | 0.8            |    |
| 13082  | 200663    | 3        | Korea   | 1           | 2  | 2  | Female | 1973 | 42     | 1    | 40-44 year | 0.9            | 2  |
| 13084  | 200667    | 3        | Korea   | 1           | 2  | 2  | Female | 1962 | 53     | 3    | 50-54      | 0.8            |    |
| 13085  | 200668    | 3        | Korea   | 1           | 2  | 1  | Male   | 1954 | 61     | 5    | >=60       | 1.6            |    |
| 13086  | 200669    | 3        | Korea   | 1           | 2  | 2  | Female | 1958 | 57     | 4    | 55-59      | 0.7            |    |
| 13093  | 104033    | 1        | China   | 1           | 2  | 2  | Female | 1969 | 46     | 2    | 45-49      | 1.0            | 2  |
| 13094  | 200671    | 3        | Korea   | 1           | 2  | 2  | Female | 1960 | 55     | 4    | 55-59      | 0.7            |    |
| 13097  | 380128511 | 2        | Taiwan  | 1           | 2  | 2  | Female | 1968 | 47     | 2    | 45-49      | 0.9            | 2  |
| 13098  | 200672    | 3        | Korea   | 1           | 2  | 2  | Female | 1962 | 53     | 3    | 50-54      | 0.8            |    |
| 13099  | 200673    | 3        | Korea   | 1           | 2  | 2  | Female | 1954 | 61     | 5    | >=60       | 1.6            |    |

| respid | SubsID    | dCountry | Country | QDisclaimer | Q1 | Q2 | Gender   | Q3_1 | age Nr | dAge | age Group    | Weight in Ctry | Q4 |
|--------|-----------|----------|---------|-------------|----|----|----------|------|--------|------|--------------|----------------|----|
| 13100  | 200674    | 3        | Korea   |             | 1  | 1  | 2 Female | 1950 | 65     |      | 5 >=60       | 1.6            |    |
| 13101  | 200675    | 3        | Korea   |             | 1  | 2  | 2 Female | 1959 | 56     |      | 4 55-59      | 0.7            |    |
| 13103  | 104036    | 1        | China   |             | 1  | 2  | 1 Male   | 1954 | 61     |      | 5 >=60       | 1.0            |    |
| 13105  | 200677    | 3        | Korea   |             | 1  | 2  | 2 Female | 1968 | 47     |      | 2 45-49      | 0.9            | 2  |
| 13106  | 200678    | 3        | Korea   |             | 1  | 2  | 2 Female | 1958 | 57     |      | 4 55-59      | 0.7            |    |
| 13107  | 200679    | 3        | Korea   |             | 1  | 2  | 2 Female | 1957 | 58     |      | 4 55-59      | 0.7            |    |
| 13110  | 200681    | 3        | Korea   |             | 1  | 2  | 2 Female | 1965 | 50     |      | 3 50-54      | 0.8            |    |
| 13118  | 104039    | 1        | China   |             | 1  | 2  | 2 Female | 1962 | 53     |      | 3 50-54      | 1.2            |    |
| 13120  | 104041    | 1        | China   |             | 1  | 2  | 2 Female | 1956 | 59     |      | 4 55-59      | 1.0            |    |
| 13130  | 350195252 | 3        | Korea   |             | 1  | 2  | 1 Male   | 1967 | 48     |      | 2 45-49      | 0.8            |    |
| 13133  | 200686    | 3        | Korea   |             | 1  | 2  | 2 Female | 1952 | 63     |      | 5 >=60       | 1.6            |    |
| 13134  | 350347187 | 3        | Korea   |             | 1  | 2  | 1 Male   | 1965 | 50     |      | 3 50-54      | 0.9            |    |
| 13139  | 200688    | 3        | Korea   |             | 1  | 2  | 2 Female | 1959 | 56     |      | 4 55-59      | 0.7            |    |
| 13142  | 200689    | 3        | Korea   |             | 1  | 2  | 2 Female | 1962 | 53     |      | 3 50-54      | 0.8            |    |
| 13143  | 104045    | 1        | China   |             | 1  | 2  | 2 Female | 1955 | 60     |      | 5 >=60       | 1.1            |    |
| 13145  | 200690    | 3        | Korea   |             | 1  | 2  | 2 Female | 1954 | 61     |      | 5 >=60       | 1.6            |    |
| 13148  | 200692    | 3        | Korea   |             | 1  | 2  | 1 Male   | 1974 | 41     |      | 1 40-44 year | 0.9            |    |
| 13149  | 104047    | 1        | China   |             | 1  | 2  | 1 Male   | 1959 | 56     |      | 4 55-59      | 0.9            |    |
| 13151  | 200694    | 3        | Korea   |             | 1  | 2  | 2 Female | 1958 | 57     |      | 4 55-59      | 0.7            |    |
| 13153  | 200695    | 3        | Korea   |             | 1  | 2  | 2 Female | 1962 | 53     |      | 3 50-54      | 0.8            |    |
| 13158  | 200696    | 3        | Korea   |             | 1  | 2  | 2 Female | 1947 | 68     |      | 5 >=60       | 1.6            |    |
| 13160  | 301136    | 2        | Taiwan  |             | 1  | 1  | 2 Female | 1965 | 50     |      | 3 50-54      | 0.9            |    |
| 13162  | 104049    | 1        | China   |             | 1  | 1  | 2 Female | 1964 | 51     |      | 3 50-54      | 1.2            |    |
| 13169  | 104052    | 1        | China   |             | 1  | 2  | 1 Male   | 1962 | 53     |      | 3 50-54      | 1.0            |    |
| 13172  | 200699    | 3        | Korea   |             | 1  | 2  | 2 Female | 1962 | 53     |      | 3 50-54      | 0.8            |    |
| 13173  | 301138    | 2        | Taiwan  |             | 1  | 2  | 2 Female | 1958 | 57     |      | 4 55-59      | 0.9            |    |
| 13176  | 200701    | 3        | Korea   |             | 1  | 2  | 2 Female | 1956 | 59     |      | 4 55-59      | 0.7            |    |
| 13179  | 380045528 | 2        | Taiwan  |             | 1  | 2  | 2 Female | 1974 | 41     |      | 1 40-44 year | 0.8            | 2  |
| 13184  | 104057    | 1        | China   |             | 1  | 1  | 2 Female | 1964 | 51     |      | 3 50-54      | 1.2            |    |
| 13185  | 104058    | 1        | China   |             | 1  | 2  | 2 Female | 1955 | 60     |      | 5 >=60       | 1.1            |    |
| 13186  | 200703    | 3        | Korea   |             | 1  | 2  | 2 Female | 1954 | 61     |      | 5 >=60       | 1.6            |    |
| 13188  | 200704    | 3        | Korea   |             | 1  | 2  | 2 Female | 1963 | 52     |      | 3 50-54      | 0.8            |    |



| respid | SubsID    | dCountry | Country | QDisclaimer | Q1 | Q2 | Gender | Q3_1 | age Nr | dAge | age Group  | Weight in Ctry | Q4 |
|--------|-----------|----------|---------|-------------|----|----|--------|------|--------|------|------------|----------------|----|
| 13190  | 200706    | 3        | Korea   | 1           | 2  | 2  | Female | 1960 | 55     | 4    | 55-59      | 0.7            |    |
| 13192  | 200708    | 3        | Korea   | 1           | 2  | 2  | Female | 1966 | 49     | 2    | 45-49      | 0.9            | 2  |
| 13193  | 104060    | 1        | China   | 1           | 2  | 2  | Female | 1955 | 60     | 5    | >=60       | 1.1            |    |
| 13201  | 104062    | 1        | China   | 1           | 2  | 2  | Female | 1954 | 61     | 5    | >=60       | 1.1            |    |
| 13207  | 200709    | 3        | Korea   | 1           | 2  | 2  | Female | 1965 | 50     | 3    | 50-54      | 0.8            |    |
| 13208  | 200710    | 3        | Korea   | 1           | 2  | 2  | Female | 1962 | 53     | 3    | 50-54      | 0.8            |    |
| 13209  | 104064    | 1        | China   | 1           | 2  | 1  | Male   | 1967 | 48     | 2    | 45-49      | 1.0            |    |
| 13212  | 200711    | 3        | Korea   | 1           | 2  | 2  | Female | 1960 | 55     | 4    | 55-59      | 0.7            |    |
| 13215  | 200713    | 3        | Korea   | 1           | 2  | 2  | Female | 1965 | 50     | 3    | 50-54      | 0.8            |    |
| 13218  | 200714    | 3        | Korea   | 1           | 2  | 2  | Female | 1957 | 58     | 4    | 55-59      | 0.7            |    |
| 13219  | 104067    | 1        | China   | 1           | 2  | 1  | Male   | 1963 | 52     | 3    | 50-54      | 1.0            |    |
| 13224  | 104071    | 1        | China   | 1           | 2  | 2  | Female | 1954 | 61     | 5    | >=60       | 1.1            |    |
| 13225  | 200715    | 3        | Korea   | 1           | 2  | 2  | Female | 1965 | 50     | 3    | 50-54      | 0.8            |    |
| 13226  | 200716    | 3        | Korea   | 1           | 2  | 2  | Female | 1964 | 51     | 3    | 50-54      | 0.8            |    |
| 13232  | 301140    | 2        | Taiwan  | 1           | 2  | 2  | Female | 1964 | 51     | 3    | 50-54      | 0.9            |    |
| 13237  | 200717    | 3        | Korea   | 1           | 2  | 2  | Female | 1963 | 52     | 3    | 50-54      | 0.8            |    |
| 13239  | 301139    | 2        | Taiwan  | 1           | 2  | 2  | Female | 1959 | 56     | 4    | 55-59      | 0.9            |    |
| 13241  | 200718    | 3        | Korea   | 1           | 2  | 2  | Female | 1953 | 62     | 5    | >=60       | 1.6            |    |
| 13243  | 200719    | 3        | Korea   | 1           | 2  | 2  | Female | 1951 | 64     | 5    | >=60       | 1.6            |    |
| 13247  | 104075    | 1        | China   | 1           | 2  | 2  | Female | 1972 | 43     | 1    | 40-44 year | 1.0            | 2  |
| 13248  | 200721    | 3        | Korea   | 1           | 2  | 2  | Female | 1973 | 42     | 1    | 40-44 year | 0.9            | 2  |
| 13251  | 200722    | 3        | Korea   | 1           | 2  | 2  | Female | 1955 | 60     | 5    | >=60       | 1.6            |    |
| 13256  | 200723    | 3        | Korea   | 1           | 2  | 2  | Female | 1961 | 54     | 3    | 50-54      | 0.8            |    |
| 13260  | 380145056 | 2        | Taiwan  | 1           | 2  | 1  | Male   | 1967 | 48     | 2    | 45-49      | 0.8            |    |
| 13261  | 200725    | 3        | Korea   | 1           | 2  | 2  | Female | 1956 | 59     | 4    | 55-59      | 0.7            |    |
| 13264  | 350297396 | 3        | Korea   | 1           | 1  | 2  | Female | 1972 | 43     | 1    | 40-44 year | 0.9            | 2  |
| 13273  | 200731    | 3        | Korea   | 1           | 2  | 2  | Female | 1961 | 54     | 3    | 50-54      | 0.8            |    |
| 13274  | 380129584 | 2        | Taiwan  | 1           | 2  | 2  | Female | 1958 | 57     | 4    | 55-59      | 0.9            |    |
| 13276  | 200732    | 3        | Korea   | 1           | 2  | 2  | Female | 1962 | 53     | 3    | 50-54      | 0.8            |    |
| 13278  | 200734    | 3        | Korea   | 1           | 2  | 2  | Female | 1954 | 61     | 5    | >=60       | 1.6            |    |
| 13279  | 200735    | 3        | Korea   | 1           | 2  | 2  | Female | 1959 | 56     | 4    | 55-59      | 0.7            |    |
| 13282  | 200736    | 3        | Korea   | 1           | 2  | 2  | Female | 1964 | 51     | 3    | 50-54      | 0.8            |    |

| respID | SubsID    | dCountry | Country | QDisclaimer | Q1 | Q2 | Gender   | Q3_1 | age Nr | dAge | age Group  | Weight in Ctry | Q4 |
|--------|-----------|----------|---------|-------------|----|----|----------|------|--------|------|------------|----------------|----|
| 13283  | 350268102 | 3        | Korea   | 1           | 1  | 2  | 1 Male   | 1968 | 47     | 2    | 45-49      | 0.8            |    |
| 13285  | 200738    | 3        | Korea   | 1           | 1  | 2  | 2 Female | 1955 | 60     | 5    | >=60       | 1.6            |    |
| 13286  | 200739    | 3        | Korea   | 1           | 1  | 2  | 2 Female | 1959 | 56     | 4    | 55-59      | 0.7            |    |
| 13299  | 301142    | 2        | Taiwan  | 1           | 1  | 1  | 2 Female | 1964 | 51     | 3    | 50-54      | 0.9            |    |
| 13300  | 200742    | 3        | Korea   | 1           | 1  | 2  | 2 Female | 1960 | 55     | 4    | 55-59      | 0.7            |    |
| 13301  | 200740    | 3        | Korea   | 1           | 1  | 2  | 2 Female | 1964 | 51     | 3    | 50-54      | 0.8            |    |
| 13303  | 200743    | 3        | Korea   | 1           | 1  | 2  | 2 Female | 1948 | 67     | 5    | >=60       | 1.6            |    |
| 13304  | 200744    | 3        | Korea   | 1           | 1  | 2  | 2 Female | 1962 | 53     | 3    | 50-54      | 0.8            |    |
| 13307  | 200745    | 3        | Korea   | 1           | 1  | 2  | 2 Female | 1960 | 55     | 4    | 55-59      | 0.7            |    |
| 13308  | 200737    | 3        | Korea   | 1           | 1  | 2  | 2 Female | 1953 | 62     | 5    | >=60       | 1.6            |    |
| 13312  | 200746    | 3        | Korea   | 1           | 1  | 2  | 2 Female | 1963 | 52     | 3    | 50-54      | 0.8            |    |
| 13313  | 200747    | 3        | Korea   | 1           | 1  | 2  | 2 Female | 1962 | 53     | 3    | 50-54      | 0.8            |    |
| 13314  | 200748    | 3        | Korea   | 1           | 1  | 2  | 2 Female | 1957 | 58     | 4    | 55-59      | 0.7            |    |
| 13318  | 200750    | 3        | Korea   | 1           | 1  | 2  | 2 Female | 1955 | 60     | 5    | >=60       | 1.6            |    |
| 13320  | 200751    | 3        | Korea   | 1           | 1  | 2  | 2 Female | 1964 | 51     | 3    | 50-54      | 0.8            |    |
| 13322  | 200753    | 3        | Korea   | 1           | 1  | 2  | 2 Female | 1957 | 58     | 4    | 55-59      | 0.7            |    |
| 13324  | 200755    | 3        | Korea   | 1           | 1  | 2  | 2 Female | 1964 | 51     | 3    | 50-54      | 0.8            |    |
| 13325  | 200756    | 3        | Korea   | 1           | 1  | 2  | 2 Female | 1954 | 61     | 5    | >=60       | 1.6            |    |
| 13327  | 350309612 | 3        | Korea   | 1           | 1  | 2  | 1 Male   | 1971 | 44     | 1    | 40-44 year | 0.9            |    |
| 13330  | 200758    | 3        | Korea   | 1           | 1  | 2  | 2 Female | 1964 | 51     | 3    | 50-54      | 0.8            |    |
| 13332  | 350198136 | 3        | Korea   | 1           | 1  | 2  | 1 Male   | 1969 | 46     | 2    | 45-49      | 0.8            |    |
| 13333  | 200760    | 3        | Korea   | 1           | 1  | 2  | 2 Female | 1959 | 56     | 4    | 55-59      | 0.7            |    |
| 13334  | 301145    | 2        | Taiwan  | 1           | 1  | 2  | 2 Female | 1965 | 50     | 3    | 50-54      | 0.9            |    |
| 13351  | 102920    | 1        | China   | 1           | 1  | 1  | 2 Female | 1967 | 48     | 2    | 45-49      | 1.0            | 2  |
| 13353  | 200765    | 3        | Korea   | 1           | 1  | 2  | 2 Female | 1961 | 54     | 3    | 50-54      | 0.8            |    |
| 13354  | 200762    | 3        | Korea   | 1           | 1  | 2  | 2 Female | 1949 | 66     | 5    | >=60       | 1.6            |    |
| 13355  | 200766    | 3        | Korea   | 1           | 1  | 2  | 2 Female | 1964 | 51     | 3    | 50-54      | 0.8            |    |
| 13358  | 200768    | 3        | Korea   | 1           | 1  | 2  | 2 Female | 1965 | 50     | 3    | 50-54      | 0.8            |    |
| 13359  | 200769    | 3        | Korea   | 1           | 1  | 2  | 2 Female | 1963 | 52     | 3    | 50-54      | 0.8            |    |
| 13360  | 200770    | 3        | Korea   | 1           | 1  | 2  | 2 Female | 1961 | 54     | 3    | 50-54      | 0.8            |    |
| 13364  | 200772    | 3        | Korea   | 1           | 1  | 2  | 2 Female | 1955 | 60     | 5    | >=60       | 1.6            |    |
| 13365  | 350319896 | 3        | Korea   | 1           | 1  | 2  | 1 Male   | 1965 | 50     | 3    | 50-54      | 0.9            |    |

| respid | SubsID | dCountry | Country | QDisclaimer | Q1 | Q2 | Gender | Q3_1 | age Nr | dAge | age Group  | Weight in Ctry | Q4 |
|--------|--------|----------|---------|-------------|----|----|--------|------|--------|------|------------|----------------|----|
| 13368  | 200774 | 3        | Korea   | 1           | 2  | 2  | Female | 1960 | 55     | 4    | 55-59      | 0.7            |    |
| 13370  | 200775 | 3        | Korea   | 1           | 2  | 2  | Female | 1959 | 56     | 4    | 55-59      | 0.7            |    |
| 13375  | 200777 | 3        | Korea   | 1           | 2  | 2  | Female | 1960 | 55     | 4    | 55-59      | 0.7            |    |
| 13384  | 200781 | 3        | Korea   | 1           | 2  | 2  | Female | 1958 | 57     | 4    | 55-59      | 0.7            |    |
| 13387  | 200783 | 3        | Korea   | 1           | 2  | 2  | Female | 1958 | 57     | 4    | 55-59      | 0.7            |    |
| 13395  | 200787 | 3        | Korea   | 1           | 2  | 2  | Female | 1966 | 49     | 2    | 45-49      | 0.9            | 2  |
| 13398  | 200789 | 3        | Korea   | 1           | 2  | 2  | Female | 1956 | 59     | 4    | 55-59      | 0.7            |    |
| 13404  | 200793 | 3        | Korea   | 1           | 2  | 2  | Female | 1954 | 61     | 5    | >=60       | 1.6            |    |
| 13405  | 200794 | 3        | Korea   | 1           | 2  | 2  | Female | 1961 | 54     | 3    | 50-54      | 0.8            |    |
| 13408  | 200791 | 3        | Korea   | 1           | 2  | 2  | Female | 1961 | 54     | 3    | 50-54      | 0.8            |    |
| 13411  | 200785 | 3        | Korea   | 1           | 2  | 2  | Female | 1966 | 49     | 2    | 45-49      | 0.9            | 2  |
| 13413  | 200797 | 3        | Korea   | 1           | 2  | 2  | Female | 1960 | 55     | 4    | 55-59      | 0.7            |    |
| 13419  | 200801 | 3        | Korea   | 1           | 2  | 2  | Female | 1963 | 52     | 3    | 50-54      | 0.8            |    |
| 13420  | 200802 | 3        | Korea   | 1           | 2  | 2  | Female | 1965 | 50     | 3    | 50-54      | 0.8            |    |
| 13427  | 200806 | 3        | Korea   | 1           | 2  | 2  | Female | 1951 | 64     | 5    | >=60       | 1.6            |    |
| 13441  | 200814 | 3        | Korea   | 1           | 2  | 2  | Female | 1961 | 54     | 3    | 50-54      | 0.8            |    |
| 13444  | 200816 | 3        | Korea   | 1           | 2  | 2  | Female | 1960 | 55     | 4    | 55-59      | 0.7            |    |
| 13456  | 104095 | 1        | China   | 1           | 2  | 1  | Male   | 1950 | 65     | 5    | >=60       | 1.0            |    |
| 13466  | 200817 | 3        | Korea   | 1           | 2  | 2  | Female | 1961 | 54     | 3    | 50-54      | 0.8            |    |
| 13468  | 200819 | 3        | Korea   | 1           | 2  | 2  | Female | 1964 | 51     | 3    | 50-54      | 0.8            |    |
| 13475  | 200822 | 3        | Korea   | 1           | 2  | 2  | Female | 1966 | 49     | 2    | 45-49      | 0.9            | 2  |
| 13484  | 200825 | 3        | Korea   | 1           | 2  | 2  | Female | 1952 | 63     | 5    | >=60       | 1.6            |    |
| 13486  | 200827 | 3        | Korea   | 1           | 2  | 2  | Female | 1971 | 44     | 1    | 40-44 year | 0.9            | 2  |
| 13487  | 200828 | 3        | Korea   | 1           | 2  | 2  | Female | 1954 | 61     | 5    | >=60       | 1.6            |    |
| 13491  | 200830 | 3        | Korea   | 1           | 2  | 2  | Female | 1964 | 51     | 3    | 50-54      | 0.8            |    |
| 13496  | 200833 | 3        | Korea   | 1           | 2  | 2  | Female | 1963 | 52     | 3    | 50-54      | 0.8            |    |
| 13497  | 200834 | 3        | Korea   | 1           | 2  | 2  | Female | 1956 | 59     | 4    | 55-59      | 0.7            |    |
| 13498  | 200835 | 3        | Korea   | 1           | 2  | 2  | Female | 1961 | 54     | 3    | 50-54      | 0.8            |    |
| 13502  | 200837 | 3        | Korea   | 1           | 2  | 2  | Female | 1958 | 57     | 4    | 55-59      | 0.7            |    |
| 13503  | 104103 | 1        | China   | 1           | 2  | 1  | Male   | 1944 | 71     | 5    | >=60       | 1.0            |    |
| 13505  | 200839 | 3        | Korea   | 1           | 2  | 2  | Female | 1947 | 68     | 5    | >=60       | 1.6            |    |
| 13509  | 200841 | 3        | Korea   | 1           | 2  | 2  | Female | 1952 | 63     | 5    | >=60       | 1.6            |    |

| respid | SubsID    | dCountry | Country | QDisclaimer | Q1 | Q2 | Gender | Q3_1 | age Nr | dAge | age Group  | Weight in Ctry | Q4 |
|--------|-----------|----------|---------|-------------|----|----|--------|------|--------|------|------------|----------------|----|
| 13510  | 200842    | 3        | Korea   | 1           | 2  | 2  | Female | 1957 | 58     | 4    | 55-59      | 0.7            |    |
| 13518  | 350334883 | 3        | Korea   | 1           | 2  | 1  | Male   | 1962 | 53     | 3    | 50-54      | 0.9            |    |
| 13521  | 200844    | 3        | Korea   | 1           | 2  | 2  | Female | 1962 | 53     | 3    | 50-54      | 0.8            |    |
| 13523  | 200838    | 3        | Korea   | 1           | 2  | 2  | Female | 1955 | 60     | 5    | >=60       | 1.6            |    |
| 13528  | 200845    | 3        | Korea   | 1           | 2  | 2  | Female | 1952 | 63     | 5    | >=60       | 1.6            |    |
| 13531  | 200832    | 3        | Korea   | 1           | 2  | 2  | Female | 1955 | 60     | 5    | >=60       | 1.6            |    |
| 13532  | 380064968 | 2        | Taiwan  | 1           | 2  | 2  | Female | 1971 | 44     | 1    | 40-44 year | 0.8            | 2  |
| 13533  | 200848    | 3        | Korea   | 1           | 2  | 2  | Female | 1959 | 56     | 4    | 55-59      | 0.7            |    |
| 13534  | 200849    | 3        | Korea   | 1           | 2  | 2  | Female | 1947 | 68     | 5    | >=60       | 1.6            |    |
| 13535  | 200850    | 3        | Korea   | 1           | 2  | 2  | Female | 1953 | 62     | 5    | >=60       | 1.6            |    |
| 13538  | 200852    | 3        | Korea   | 1           | 2  | 2  | Female | 1962 | 53     | 3    | 50-54      | 0.8            |    |
| 13540  | 200853    | 3        | Korea   | 1           | 2  | 2  | Female | 1952 | 63     | 5    | >=60       | 1.6            |    |
| 13541  | 200854    | 3        | Korea   | 1           | 2  | 2  | Female | 1957 | 58     | 4    | 55-59      | 0.7            |    |
| 13542  | 200855    | 3        | Korea   | 1           | 2  | 2  | Female | 1960 | 55     | 4    | 55-59      | 0.7            |    |
| 13550  | 200858    | 3        | Korea   | 1           | 2  | 2  | Female | 1965 | 50     | 3    | 50-54      | 0.8            |    |
| 13553  | 200823    | 3        | Korea   | 1           | 2  | 2  | Female | 1958 | 57     | 4    | 55-59      | 0.7            |    |
| 13554  | 200808    | 3        | Korea   | 1           | 2  | 2  | Female | 1956 | 59     | 4    | 55-59      | 0.7            |    |
| 13555  | 200860    | 3        | Korea   | 1           | 1  | 2  | Female | 1950 | 65     | 5    | >=60       | 1.6            |    |
| 13556  | 104109    | 1        | China   | 1           | 1  | 1  | Male   | 1954 | 61     | 5    | >=60       | 1.0            |    |
| 13563  | 200861    | 3        | Korea   | 1           | 2  | 2  | Female | 1963 | 52     | 3    | 50-54      | 0.8            |    |
| 13564  | 200863    | 3        | Korea   | 1           | 2  | 2  | Female | 1955 | 60     | 5    | >=60       | 1.6            |    |
| 13567  | 200864    | 3        | Korea   | 1           | 2  | 2  | Female | 1957 | 58     | 4    | 55-59      | 0.7            |    |
| 13568  | 104112    | 1        | China   | 1           | 2  | 1  | Male   | 1952 | 63     | 5    | >=60       | 1.0            |    |
| 13570  | 200865    | 3        | Korea   | 1           | 2  | 2  | Female | 1960 | 55     | 4    | 55-59      | 0.7            |    |
| 13573  | 200867    | 3        | Korea   | 1           | 2  | 2  | Female | 1975 | 40     | 1    | 40-44 year | 0.9            | 2  |
| 13575  | 200868    | 3        | Korea   | 1           | 2  | 2  | Female | 1960 | 55     | 4    | 55-59      | 0.7            |    |
| 13577  | 104115    | 1        | China   | 1           | 2  | 1  | Male   | 1950 | 65     | 5    | >=60       | 1.0            |    |
| 13580  | 104117    | 1        | China   | 1           | 2  | 1  | Male   | 1950 | 65     | 5    | >=60       | 1.0            |    |
| 13582  | 200869    | 3        | Korea   | 1           | 2  | 2  | Female | 1964 | 51     | 3    | 50-54      | 0.8            |    |
| 13584  | 104119    | 1        | China   | 1           | 2  | 1  | Male   | 1950 | 65     | 5    | >=60       | 1.0            |    |
| 13585  | 200870    | 3        | Korea   | 1           | 2  | 2  | Female | 1963 | 52     | 3    | 50-54      | 0.8            |    |
| 13586  | 102828    | 1        | China   | 1           | 2  | 2  | Female | 1963 | 52     | 3    | 50-54      | 1.2            |    |

| respid | SubsID    | dCountry | Country | QDisclaimer | Q1 | Q2 | Gender | Q3_1 | age Nr | dAge | age Group  | Weight in Ctry | Q4 |
|--------|-----------|----------|---------|-------------|----|----|--------|------|--------|------|------------|----------------|----|
| 13587  | 200871    | 3        | Korea   | 1           | 2  | 2  | Female | 1963 | 52     | 3    | 50-54      | 0.8            |    |
| 13592  | 104123    | 1        | China   | 1           | 2  | 1  | Male   | 1950 | 65     | 5    | >=60       | 1.0            |    |
| 13596  | 200872    | 3        | Korea   | 1           | 2  | 2  | Female | 1957 | 58     | 4    | 55-59      | 0.7            |    |
| 13597  | 200873    | 3        | Korea   | 1           | 2  | 2  | Female | 1960 | 55     | 4    | 55-59      | 0.7            |    |
| 13599  | 200874    | 3        | Korea   | 1           | 2  | 2  | Female | 1960 | 55     | 4    | 55-59      | 0.7            |    |
| 13601  | 200875    | 3        | Korea   | 1           | 2  | 2  | Female | 1962 | 53     | 3    | 50-54      | 0.8            |    |
| 13604  | 350323040 | 3        | Korea   | 1           | 2  | 1  | Male   | 1972 | 43     | 1    | 40-44 year | 0.9            |    |
| 13608  | 104127    | 1        | China   | 1           | 2  | 1  | Male   | 1963 | 52     | 3    | 50-54      | 1.0            |    |
| 13616  | 380083385 | 2        | Taiwan  | 1           | 2  | 2  | Female | 1966 | 49     | 2    | 45-49      | 0.9            | 2  |
| 13618  | 104134    | 1        | China   | 1           | 2  | 2  | Female | 1963 | 52     | 3    | 50-54      | 1.2            |    |
| 13619  | 380011381 | 2        | Taiwan  | 1           | 1  | 2  | Female | 1973 | 42     | 1    | 40-44 year | 0.8            | 2  |
| 13626  | 200876    | 3        | Korea   | 1           | 2  | 2  | Female | 1964 | 51     | 3    | 50-54      | 0.8            |    |
| 13628  | 104141    | 1        | China   | 1           | 2  | 1  | Male   | 1963 | 52     | 3    | 50-54      | 1.0            |    |
| 13640  | 104144    | 1        | China   | 1           | 2  | 1  | Male   | 1963 | 52     | 3    | 50-54      | 1.0            |    |
| 13645  | 301147    | 2        | Taiwan  | 1           | 2  | 1  | Male   | 1954 | 61     | 5    | >=60       | 1.6            |    |
| 13648  | 104148    | 1        | China   | 1           | 2  | 1  | Male   | 1963 | 52     | 3    | 50-54      | 1.0            |    |
| 13653  | 104151    | 1        | China   | 1           | 2  | 2  | Female | 1957 | 58     | 4    | 55-59      | 1.0            |    |
| 13655  | 104153    | 1        | China   | 1           | 2  | 1  | Male   | 1963 | 52     | 3    | 50-54      | 1.0            |    |
| 13662  | 104159    | 1        | China   | 1           | 2  | 1  | Male   | 1962 | 53     | 3    | 50-54      | 1.0            |    |
| 13670  | 104161    | 1        | China   | 1           | 2  | 1  | Male   | 1960 | 55     | 4    | 55-59      | 0.9            |    |
| 13673  | 200877    | 3        | Korea   | 1           | 2  | 2  | Female | 1964 | 51     | 3    | 50-54      | 0.8            |    |
| 13674  | 350349156 | 3        | Korea   | 1           | 2  | 2  | Female | 1974 | 41     | 1    | 40-44 year | 0.9            | 2  |
| 13675  | 104164    | 1        | China   | 1           | 1  | 1  | Male   | 1944 | 71     | 5    | >=60       | 1.0            |    |
| 13678  | 104167    | 1        | China   | 1           | 1  | 1  | Male   | 1954 | 61     | 5    | >=60       | 1.0            |    |
| 13680  | 350271035 | 3        | Korea   | 1           | 2  | 2  | Female | 1974 | 41     | 1    | 40-44 year | 0.9            | 2  |
| 13681  | 104169    | 1        | China   | 1           | 2  | 1  | Male   | 1965 | 50     | 3    | 50-54      | 1.0            |    |
| 13683  | 200878    | 3        | Korea   | 1           | 2  | 2  | Female | 1959 | 56     | 4    | 55-59      | 0.7            |    |
| 13684  | 200879    | 3        | Korea   | 1           | 2  | 2  | Female | 1962 | 53     | 3    | 50-54      | 0.8            |    |
| 13685  | 104171    | 1        | China   | 1           | 2  | 2  | Female | 1963 | 52     | 3    | 50-54      | 1.2            |    |
| 13687  | 104172    | 1        | China   | 1           | 2  | 1  | Male   | 1965 | 50     | 3    | 50-54      | 1.0            |    |
| 13690  | 104174    | 1        | China   | 1           | 2  | 1  | Male   | 1957 | 58     | 4    | 55-59      | 0.9            |    |
| 13700  | 104177    | 1        | China   | 1           | 1  | 1  | Male   | 1962 | 53     | 3    | 50-54      | 1.0            |    |

| respID | SubsID    | dCountry | Country | QDisclaimer | Q1 | Q2 | Gender   | Q3_1 | age Nr | dAge | age Group  | Weight in Ctry | Q4 |
|--------|-----------|----------|---------|-------------|----|----|----------|------|--------|------|------------|----------------|----|
| 13705  | 104178    | 1        | China   |             | 1  | 2  | 1 Male   | 1963 | 52     | 3    | 50-54      | 1.0            |    |
| 13710  | 104181    | 1        | China   |             | 1  | 2  | 1 Male   | 1964 | 51     | 3    | 50-54      | 1.0            |    |
| 13711  | 104182    | 1        | China   |             | 1  | 2  | 1 Male   | 1954 | 61     | 5    | >=60       | 1.0            |    |
| 13713  | 301148    | 2        | Taiwan  |             | 1  | 2  | 1 Male   | 1953 | 62     | 5    | >=60       | 1.6            |    |
| 13716  | 104185    | 1        | China   |             | 1  | 2  | 1 Male   | 1957 | 58     | 4    | 55-59      | 0.9            |    |
| 13721  | 350297408 | 3        | Korea   |             | 1  | 2  | 2 Female | 1972 | 43     | 1    | 40-44 year | 0.9            | 2  |
| 13722  | 104187    | 1        | China   |             | 1  | 2  | 1 Male   | 1964 | 51     | 3    | 50-54      | 1.0            |    |
| 13723  | 104188    | 1        | China   |             | 1  | 1  | 1 Male   | 1953 | 62     | 5    | >=60       | 1.0            |    |
| 13726  | 104191    | 1        | China   |             | 1  | 2  | 1 Male   | 1953 | 62     | 5    | >=60       | 1.0            |    |
| 13728  | 104192    | 1        | China   |             | 1  | 2  | 1 Male   | 1963 | 52     | 3    | 50-54      | 1.0            |    |
| 13730  | 104193    | 1        | China   |             | 1  | 1  | 1 Male   | 1950 | 65     | 5    | >=60       | 1.0            |    |
| 13734  | 101874    | 1        | China   |             | 1  | 2  | 1 Male   | 1964 | 51     | 3    | 50-54      | 1.0            |    |
| 13736  | 104194    | 1        | China   |             | 1  | 2  | 2 Female | 1958 | 57     | 4    | 55-59      | 1.0            |    |
| 13737  | 104048    | 1        | China   |             | 1  | 2  | 1 Male   | 1963 | 52     | 3    | 50-54      | 1.0            |    |
| 13739  | 104196    | 1        | China   |             | 1  | 2  | 2 Female | 1953 | 62     | 5    | >=60       | 1.1            |    |
| 13742  | 104198    | 1        | China   |             | 1  | 2  | 1 Male   | 1958 | 57     | 4    | 55-59      | 0.9            |    |
| 13746  | 200880    | 3        | Korea   |             | 1  | 2  | 2 Female | 1960 | 55     | 4    | 55-59      | 0.7            |    |
| 13747  | 103938    | 1        | China   |             | 1  | 2  | 1 Male   | 1965 | 50     | 3    | 50-54      | 1.0            |    |
| 13749  | 104200    | 1        | China   |             | 1  | 2  | 2 Female | 1965 | 50     | 3    | 50-54      | 1.2            |    |
| 13751  | 301149    | 2        | Taiwan  |             | 1  | 2  | 1 Male   | 1950 | 65     | 5    | >=60       | 1.6            |    |
| 13752  | 200881    | 3        | Korea   |             | 1  | 2  | 2 Female | 1959 | 56     | 4    | 55-59      | 0.7            |    |
| 13756  | 200882    | 3        | Korea   |             | 1  | 2  | 2 Female | 1957 | 58     | 4    | 55-59      | 0.7            |    |
| 13757  | 301150    | 2        | Taiwan  |             | 1  | 2  | 1 Male   | 1955 | 60     | 5    | >=60       | 1.6            |    |
| 13767  | 104210    | 1        | China   |             | 1  | 2  | 2 Female | 1951 | 64     | 5    | >=60       | 1.1            |    |
| 13771  | 104213    | 1        | China   |             | 1  | 2  | 1 Male   | 1958 | 57     | 4    | 55-59      | 0.9            |    |
| 13772  | 104214    | 1        | China   |             | 1  | 2  | 1 Male   | 1959 | 56     | 4    | 55-59      | 0.9            |    |
| 13779  | 350013206 | 3        | Korea   |             | 1  | 2  | 1 Male   | 1970 | 45     | 2    | 45-49      | 0.8            |    |
| 13782  | 301152    | 2        | Taiwan  |             | 1  | 2  | 1 Male   | 1950 | 65     | 5    | >=60       | 1.6            |    |
| 13783  | 104219    | 1        | China   |             | 1  | 1  | 2 Female | 1965 | 50     | 3    | 50-54      | 1.2            |    |
| 13785  | 350029021 | 3        | Korea   |             | 1  | 2  | 1 Male   | 1961 | 54     | 3    | 50-54      | 0.9            |    |
| 13786  | 301141    | 2        | Taiwan  |             | 1  | 2  | 2 Female | 1959 | 56     | 4    | 55-59      | 0.9            |    |
| 13792  | 104225    | 1        | China   |             | 1  | 2  | 1 Male   | 1949 | 66     | 5    | >=60       | 1.0            |    |

| respid | SubsID | dCountry | Country | QDisclaimer | Q1 | Q2 | Gender   | Q3_1 | age Nr | dAge | age Group  | Weight in Ctry | Q4 |
|--------|--------|----------|---------|-------------|----|----|----------|------|--------|------|------------|----------------|----|
| 13796  | 104227 | 1        | China   |             | 1  | 1  | 1 Male   | 1953 | 62     | 5    | >=60       | 1.0            |    |
| 13798  | 104229 | 1        | China   |             | 1  | 2  | 1 Male   | 1960 | 55     | 4    | 55-59      | 0.9            |    |
| 13799  | 104230 | 1        | China   |             | 1  | 2  | 1 Male   | 1956 | 59     | 4    | 55-59      | 0.9            |    |
| 13804  | 104232 | 1        | China   |             | 1  | 2  | 1 Male   | 1975 | 40     | 1    | 40-44 year | 1.0            |    |
| 13805  | 104233 | 1        | China   |             | 1  | 1  | 2 Female | 1963 | 52     | 3    | 50-54      | 1.2            |    |
| 13810  | 104238 | 1        | China   |             | 1  | 2  | 2 Female | 1964 | 51     | 3    | 50-54      | 1.2            |    |
| 13811  | 104239 | 1        | China   |             | 1  | 2  | 2 Female | 1965 | 50     | 3    | 50-54      | 1.2            |    |
| 13819  | 104245 | 1        | China   |             | 1  | 2  | 1 Male   | 1959 | 56     | 4    | 55-59      | 0.9            |    |
| 13821  | 104246 | 1        | China   |             | 1  | 2  | 2 Female | 1960 | 55     | 4    | 55-59      | 1.0            |    |
| 13824  | 104248 | 1        | China   |             | 1  | 2  | 1 Male   | 1960 | 55     | 4    | 55-59      | 0.9            |    |
| 13828  | 200884 | 3        | Korea   |             | 1  | 2  | 2 Female | 1955 | 60     | 5    | >=60       | 1.6            |    |
| 13829  | 104251 | 1        | China   |             | 1  | 2  | 2 Female | 1960 | 55     | 4    | 55-59      | 1.0            |    |
| 13831  | 104253 | 1        | China   |             | 1  | 2  | 1 Male   | 1958 | 57     | 4    | 55-59      | 0.9            |    |
| 13833  | 104254 | 1        | China   |             | 1  | 2  | 1 Male   | 1963 | 52     | 3    | 50-54      | 1.0            |    |
| 13835  | 104255 | 1        | China   |             | 1  | 2  | 1 Male   | 1957 | 58     | 4    | 55-59      | 0.9            |    |
| 13838  | 104258 | 1        | China   |             | 1  | 2  | 1 Male   | 1962 | 53     | 3    | 50-54      | 1.0            |    |
| 13839  | 104259 | 1        | China   |             | 1  | 2  | 2 Female | 1960 | 55     | 4    | 55-59      | 1.0            |    |
| 13845  | 104264 | 1        | China   |             | 1  | 2  | 1 Male   | 1963 | 52     | 3    | 50-54      | 1.0            |    |
| 13846  | 103186 | 1        | China   |             | 1  | 2  | 1 Male   | 1942 | 73     | 5    | >=60       | 1.0            |    |
| 13853  | 104098 | 1        | China   |             | 1  | 1  | 1 Male   | 1950 | 65     | 5    | >=60       | 1.0            |    |
| 13855  | 104266 | 1        | China   |             | 1  | 2  | 2 Female | 1960 | 55     | 4    | 55-59      | 1.0            |    |
| 13858  | 104270 | 1        | China   |             | 1  | 1  | 2 Female | 1965 | 50     | 3    | 50-54      | 1.2            |    |
| 13860  | 104271 | 1        | China   |             | 1  | 2  | 1 Male   | 1964 | 51     | 3    | 50-54      | 1.0            |    |
| 13865  | 104272 | 1        | China   |             | 1  | 2  | 2 Female | 1959 | 56     | 4    | 55-59      | 1.0            |    |
| 13870  | 104278 | 1        | China   |             | 1  | 2  | 1 Male   | 1958 | 57     | 4    | 55-59      | 0.9            |    |
| 13872  | 104279 | 1        | China   |             | 1  | 2  | 2 Female | 1963 | 52     | 3    | 50-54      | 1.2            |    |
| 13873  | 200885 | 3        | Korea   |             | 1  | 2  | 2 Female | 1954 | 61     | 5    | >=60       | 1.6            |    |
| 13874  | 104280 | 1        | China   |             | 1  | 2  | 1 Male   | 1961 | 54     | 3    | 50-54      | 1.0            |    |
| 13875  | 104281 | 1        | China   |             | 1  | 2  | 2 Female | 1960 | 55     | 4    | 55-59      | 1.0            |    |
| 13881  | 104282 | 1        | China   |             | 1  | 2  | 1 Male   | 1961 | 54     | 3    | 50-54      | 1.0            |    |
| 13887  | 104285 | 1        | China   |             | 1  | 2  | 1 Male   | 1963 | 52     | 3    | 50-54      | 1.0            |    |
| 13888  | 104286 | 1        | China   |             | 1  | 2  | 2 Female | 1960 | 55     | 4    | 55-59      | 1.0            |    |

| respid | SubsID | dCountry | Country | QDisclaimer | Q1 | Q2 | Gender   | Q3_1 | age Nr | dAge | age Group | Weight in Ctry | Q4 |
|--------|--------|----------|---------|-------------|----|----|----------|------|--------|------|-----------|----------------|----|
| 13889  | 104287 | 1        | China   |             | 1  | 2  | 2 Female | 1960 | 55     | 4    | 55-59     | 1.0            |    |
| 13895  | 104291 | 1        | China   |             | 1  | 2  | 1 Male   | 1960 | 55     | 4    | 55-59     | 0.9            |    |
| 13897  | 104293 | 1        | China   |             | 1  | 2  | 1 Male   | 1965 | 50     | 3    | 50-54     | 1.0            |    |
| 13898  | 104294 | 1        | China   |             | 1  | 2  | 1 Male   | 1965 | 50     | 3    | 50-54     | 1.0            |    |
| 13901  | 104297 | 1        | China   |             | 1  | 1  | 1 Male   | 1960 | 55     | 4    | 55-59     | 0.9            |    |
| 13902  | 104298 | 1        | China   |             | 1  | 1  | 2 Female | 1959 | 56     | 4    | 55-59     | 1.0            |    |
| 13903  | 104299 | 1        | China   |             | 1  | 2  | 2 Female | 1964 | 51     | 3    | 50-54     | 1.2            |    |
| 13905  | 104301 | 1        | China   |             | 1  | 2  | 2 Female | 1960 | 55     | 4    | 55-59     | 1.0            |    |
| 13908  | 104304 | 1        | China   |             | 1  | 2  | 2 Female | 1959 | 56     | 4    | 55-59     | 1.0            |    |
| 13909  | 104305 | 1        | China   |             | 1  | 1  | 1 Male   | 1954 | 61     | 5    | >=60      | 1.0            |    |
| 13910  | 104306 | 1        | China   |             | 1  | 2  | 2 Female | 1958 | 57     | 4    | 55-59     | 1.0            |    |
| 13911  | 104307 | 1        | China   |             | 1  | 1  | 2 Female | 1961 | 54     | 3    | 50-54     | 1.2            |    |
| 13914  | 104308 | 1        | China   |             | 1  | 2  | 2 Female | 1951 | 64     | 5    | >=60      | 1.1            |    |
| 13920  | 104312 | 1        | China   |             | 1  | 2  | 2 Female | 1957 | 58     | 4    | 55-59     | 1.0            |    |
| 13926  | 301153 | 2        | Taiwan  |             | 1  | 2  | 2 Female | 1963 | 52     | 3    | 50-54     | 0.9            |    |
| 13929  | 104316 | 1        | China   |             | 1  | 2  | 2 Female | 1960 | 55     | 4    | 55-59     | 1.0            |    |
| 13930  | 104314 | 1        | China   |             | 1  | 2  | 1 Male   | 1956 | 59     | 4    | 55-59     | 0.9            |    |
| 13931  | 104317 | 1        | China   |             | 1  | 2  | 2 Female | 1962 | 53     | 3    | 50-54     | 1.2            |    |
| 13932  | 104318 | 1        | China   |             | 1  | 2  | 1 Male   | 1963 | 52     | 3    | 50-54     | 1.0            |    |
| 13934  | 104319 | 1        | China   |             | 1  | 2  | 2 Female | 1957 | 58     | 4    | 55-59     | 1.0            |    |
| 13938  | 200888 | 3        | Korea   |             | 1  | 2  | 1 Male   | 1952 | 63     | 5    | >=60      | 1.6            |    |
| 13942  | 200889 | 3        | Korea   |             | 1  | 2  | 2 Female | 1957 | 58     | 4    | 55-59     | 0.7            |    |
| 13945  | 104321 | 1        | China   |             | 1  | 2  | 2 Female | 1960 | 55     | 4    | 55-59     | 1.0            |    |
| 13947  | 200892 | 3        | Korea   |             | 1  | 2  | 1 Male   | 1958 | 57     | 4    | 55-59     | 0.8            |    |
| 13948  | 200893 | 3        | Korea   |             | 1  | 2  | 2 Female | 1953 | 62     | 5    | >=60      | 1.6            |    |
| 13959  | 200899 | 3        | Korea   |             | 1  | 2  | 1 Male   | 1962 | 53     | 3    | 50-54     | 0.9            |    |
| 13962  | 200902 | 3        | Korea   |             | 1  | 2  | 1 Male   | 1959 | 56     | 4    | 55-59     | 0.8            |    |
| 13963  | 200903 | 3        | Korea   |             | 1  | 2  | 1 Male   | 1962 | 53     | 3    | 50-54     | 0.9            |    |
| 13964  | 200904 | 3        | Korea   |             | 1  | 2  | 1 Male   | 1964 | 51     | 3    | 50-54     | 0.9            |    |
| 13966  | 104323 | 1        | China   |             | 1  | 2  | 2 Female | 1960 | 55     | 4    | 55-59     | 1.0            |    |
| 13968  | 200907 | 3        | Korea   |             | 1  | 2  | 1 Male   | 1960 | 55     | 4    | 55-59     | 0.8            |    |
| 13971  | 200908 | 3        | Korea   |             | 1  | 2  | 1 Male   | 1959 | 56     | 4    | 55-59     | 0.8            |    |



| respid | SubsID | dCountry | Country | QDisclaim<br>er | Q1 | Q2 | Gender | Q3_1 | age Nr | dAge | age Group | Weight in<br>Ctry | Q4 |
|--------|--------|----------|---------|-----------------|----|----|--------|------|--------|------|-----------|-------------------|----|
| 13979  | 200911 | 3        | Korea   | 1               | 2  | 2  | Female | 1961 | 54     | 3    | 50-54     | 0.8               |    |
| 13980  | 200912 | 3        | Korea   | 1               | 2  | 2  | Female | 1954 | 61     | 5    | >=60      | 1.6               |    |
| 13981  | 200913 | 3        | Korea   | 1               | 2  | 2  | Female | 1966 | 49     | 2    | 45-49     | 0.9               | 2  |
| 13982  | 200914 | 3        | Korea   | 1               | 2  | 1  | Male   | 1960 | 55     | 4    | 55-59     | 0.8               |    |
| 13984  | 200915 | 3        | Korea   | 1               | 2  | 1  | Male   | 1957 | 58     | 4    | 55-59     | 0.8               |    |
| 13989  | 200916 | 3        | Korea   | 1               | 2  | 1  | Male   | 1957 | 58     | 4    | 55-59     | 0.8               |    |
| 13990  | 200917 | 3        | Korea   | 1               | 2  | 2  | Female | 1955 | 60     | 5    | >=60      | 1.6               |    |
| 13992  | 200919 | 3        | Korea   | 1               | 2  | 2  | Female | 1956 | 59     | 4    | 55-59     | 0.7               |    |
| 13998  | 200922 | 3        | Korea   | 1               | 2  | 2  | Female | 1960 | 55     | 4    | 55-59     | 0.7               |    |
| 13999  | 104325 | 1        | China   | 1               | 2  | 2  | Female | 1953 | 62     | 5    | >=60      | 1.1               |    |
| 14000  | 200923 | 3        | Korea   | 1               | 2  | 1  | Male   | 1958 | 57     | 4    | 55-59     | 0.8               |    |
| 14003  | 200925 | 3        | Korea   | 1               | 2  | 1  | Male   | 1962 | 53     | 3    | 50-54     | 0.9               |    |
| 14004  | 200926 | 3        | Korea   | 1               | 1  | 2  | Female | 1959 | 56     | 4    | 55-59     | 0.7               |    |
| 14006  | 200928 | 3        | Korea   | 1               | 2  | 1  | Male   | 1958 | 57     | 4    | 55-59     | 0.8               |    |
| 14007  | 200929 | 3        | Korea   | 1               | 2  | 2  | Female | 1964 | 51     | 3    | 50-54     | 0.8               |    |
| 14008  | 104326 | 1        | China   | 1               | 1  | 2  | Female | 1959 | 56     | 4    | 55-59     | 1.0               |    |
| 14013  | 200931 | 3        | Korea   | 1               | 2  | 2  | Female | 1958 | 57     | 4    | 55-59     | 0.7               |    |
| 14015  | 200933 | 3        | Korea   | 1               | 2  | 2  | Female | 1960 | 55     | 4    | 55-59     | 0.7               |    |
| 14018  | 200934 | 3        | Korea   | 1               | 2  | 2  | Female | 1957 | 58     | 4    | 55-59     | 0.7               |    |
| 14021  | 104327 | 1        | China   | 1               | 1  | 2  | Female | 1964 | 51     | 3    | 50-54     | 1.2               |    |
| 14023  | 200937 | 3        | Korea   | 1               | 2  | 1  | Male   | 1953 | 62     | 5    | >=60      | 1.6               |    |
| 14024  | 200938 | 3        | Korea   | 1               | 2  | 1  | Male   | 1957 | 58     | 4    | 55-59     | 0.8               |    |
| 14026  | 200939 | 3        | Korea   | 1               | 2  | 1  | Male   | 1957 | 58     | 4    | 55-59     | 0.8               |    |
| 14030  | 200940 | 3        | Korea   | 1               | 2  | 1  | Male   | 1956 | 59     | 4    | 55-59     | 0.8               |    |
| 14032  | 104329 | 1        | China   | 1               | 2  | 1  | Male   | 1952 | 63     | 5    | >=60      | 1.0               |    |
| 14040  | 200946 | 3        | Korea   | 1               | 2  | 1  | Male   | 1958 | 57     | 4    | 55-59     | 0.8               |    |
| 14045  | 104331 | 1        | China   | 1               | 2  | 2  | Female | 1954 | 61     | 5    | >=60      | 1.1               |    |
| 14048  | 104333 | 1        | China   | 1               | 2  | 2  | Female | 1958 | 57     | 4    | 55-59     | 1.0               |    |
| 14049  | 200948 | 3        | Korea   | 1               | 2  | 1  | Male   | 1954 | 61     | 5    | >=60      | 1.6               |    |
| 14050  | 200949 | 3        | Korea   | 1               | 2  | 2  | Female | 1958 | 57     | 4    | 55-59     | 0.7               |    |
| 14051  | 104330 | 1        | China   | 1               | 2  | 2  | Female | 1958 | 57     | 4    | 55-59     | 1.0               |    |
| 14052  | 200950 | 3        | Korea   | 1               | 2  | 1  | Male   | 1961 | 54     | 3    | 50-54     | 0.9               |    |

| respid | SubsID    | dCountry | Country | QDisclaimer | Q1 | Q2 | Gender | Q3_1 | age Nr | dAge | age Group  | Weight in Ctry | Q4 |
|--------|-----------|----------|---------|-------------|----|----|--------|------|--------|------|------------|----------------|----|
| 14054  | 200952    | 3        | Korea   | 1           | 2  | 2  | Female | 1960 | 55     | 4    | 55-59      | 0.7            |    |
| 14055  | 104334    | 1        | China   | 1           | 1  | 2  | Female | 1957 | 58     | 4    | 55-59      | 1.0            |    |
| 14057  | 200951    | 3        | Korea   | 1           | 2  | 2  | Female | 1968 | 47     | 2    | 45-49      | 0.9            | 2  |
| 14058  | 200953    | 3        | Korea   | 1           | 2  | 2  | Female | 1950 | 65     | 5    | >=60       | 1.6            |    |
| 14059  | 200954    | 3        | Korea   | 1           | 2  | 1  | Male   | 1957 | 58     | 4    | 55-59      | 0.8            |    |
| 14060  | 200955    | 3        | Korea   | 1           | 2  | 2  | Female | 1962 | 53     | 3    | 50-54      | 0.8            |    |
| 14061  | 200956    | 3        | Korea   | 1           | 2  | 1  | Male   | 1957 | 58     | 4    | 55-59      | 0.8            |    |
| 14071  | 200958    | 3        | Korea   | 1           | 2  | 2  | Female | 1958 | 57     | 4    | 55-59      | 0.7            |    |
| 14073  | 200960    | 3        | Korea   | 1           | 2  | 1  | Male   | 1965 | 50     | 3    | 50-54      | 0.9            |    |
| 14074  | 200961    | 3        | Korea   | 1           | 2  | 2  | Female | 1957 | 58     | 4    | 55-59      | 0.7            |    |
| 14076  | 200963    | 3        | Korea   | 1           | 2  | 2  | Female | 1957 | 58     | 4    | 55-59      | 0.7            |    |
| 14080  | 200966    | 3        | Korea   | 1           | 2  | 1  | Male   | 1956 | 59     | 4    | 55-59      | 0.8            |    |
| 14082  | 200967    | 3        | Korea   | 1           | 2  | 1  | Male   | 1957 | 58     | 4    | 55-59      | 0.8            |    |
| 14083  | 200968    | 3        | Korea   | 1           | 2  | 2  | Female | 1954 | 61     | 5    | >=60       | 1.6            |    |
| 14084  | 200969    | 3        | Korea   | 1           | 1  | 2  | Female | 1958 | 57     | 4    | 55-59      | 0.7            |    |
| 14085  | 104339    | 1        | China   | 1           | 2  | 1  | Male   | 1958 | 57     | 4    | 55-59      | 0.9            |    |
| 14086  | 104340    | 1        | China   | 1           | 2  | 1  | Male   | 1957 | 58     | 4    | 55-59      | 0.9            |    |
| 14088  | 301155    | 2        | Taiwan  | 1           | 1  | 2  | Female | 1964 | 51     | 3    | 50-54      | 0.9            |    |
| 14090  | 200970    | 3        | Korea   | 1           | 2  | 1  | Male   | 1960 | 55     | 4    | 55-59      | 0.8            |    |
| 14092  | 200971    | 3        | Korea   | 1           | 2  | 1  | Male   | 1961 | 54     | 3    | 50-54      | 0.9            |    |
| 14093  | 104341    | 1        | China   | 1           | 2  | 1  | Male   | 1965 | 50     | 3    | 50-54      | 1.0            |    |
| 14096  | 200973    | 3        | Korea   | 1           | 2  | 2  | Female | 1959 | 56     | 4    | 55-59      | 0.7            |    |
| 14103  | 104343    | 1        | China   | 1           | 2  | 2  | Female | 1964 | 51     | 3    | 50-54      | 1.2            |    |
| 14105  | 350226550 | 3        | Korea   | 1           | 2  | 2  | Female | 1973 | 42     | 1    | 40-44 year | 0.9            | 2  |
| 14106  | 200974    | 3        | Korea   | 1           | 2  | 1  | Male   | 1959 | 56     | 4    | 55-59      | 0.8            |    |
| 14107  | 104345    | 1        | China   | 1           | 2  | 2  | Female | 1960 | 55     | 4    | 55-59      | 1.0            |    |
| 14108  | 104346    | 1        | China   | 1           | 2  | 2  | Female | 1960 | 55     | 4    | 55-59      | 1.0            |    |
| 14112  | 200976    | 3        | Korea   | 1           | 2  | 2  | Female | 1958 | 57     | 4    | 55-59      | 0.7            |    |
| 14114  | 200977    | 3        | Korea   | 1           | 2  | 2  | Female | 1958 | 57     | 4    | 55-59      | 0.7            |    |
| 14115  | 200978    | 3        | Korea   | 1           | 2  | 2  | Female | 1958 | 57     | 4    | 55-59      | 0.7            |    |
| 14116  | 104348    | 1        | China   | 1           | 2  | 1  | Male   | 1960 | 55     | 4    | 55-59      | 0.9            |    |
| 14117  | 200979    | 3        | Korea   | 1           | 2  | 1  | Male   | 1960 | 55     | 4    | 55-59      | 0.8            |    |

| respid | SubsID    | dCountry | Country | QDisclaim<br>er | Q1 | Q2 | Gender | Q3_1 | age Nr | dAge | age Group | Weight in<br>Ctry | Q4 |
|--------|-----------|----------|---------|-----------------|----|----|--------|------|--------|------|-----------|-------------------|----|
| 14118  | 104349    | 1        | China   | 1               | 2  | 2  | Female | 1959 | 56     | 4    | 55-59     | 1.0               |    |
| 14119  | 200980    | 3        | Korea   | 1               | 2  | 2  | Female | 1958 | 57     | 4    | 55-59     | 0.7               |    |
| 14127  | 104352    | 1        | China   | 1               | 1  | 1  | Male   | 1958 | 57     | 4    | 55-59     | 0.9               |    |
| 14129  | 200982    | 3        | Korea   | 1               | 2  | 2  | Female | 1951 | 64     | 5    | >=60      | 1.6               |    |
| 14131  | 200984    | 3        | Korea   | 1               | 2  | 2  | Female | 1956 | 59     | 4    | 55-59     | 0.7               |    |
| 14132  | 200985    | 3        | Korea   | 1               | 2  | 1  | Male   | 1960 | 55     | 4    | 55-59     | 0.8               |    |
| 14133  | 104354    | 1        | China   | 1               | 2  | 2  | Female | 1960 | 55     | 4    | 55-59     | 1.0               |    |
| 14134  | 200986    | 3        | Korea   | 1               | 2  | 1  | Male   | 1956 | 59     | 4    | 55-59     | 0.8               |    |
| 14135  | 104355    | 1        | China   | 1               | 2  | 2  | Female | 1953 | 62     | 5    | >=60      | 1.1               |    |
| 14136  | 200987    | 3        | Korea   | 1               | 2  | 2  | Female | 1963 | 52     | 3    | 50-54     | 0.8               |    |
| 14138  | 104356    | 1        | China   | 1               | 2  | 1  | Male   | 1962 | 53     | 3    | 50-54     | 1.0               |    |
| 14139  | 200989    | 3        | Korea   | 1               | 2  | 2  | Female | 1957 | 58     | 4    | 55-59     | 0.7               |    |
| 14140  | 200990    | 3        | Korea   | 1               | 2  | 2  | Female | 1946 | 69     | 5    | >=60      | 1.6               |    |
| 14141  | 200959    | 3        | Korea   | 1               | 2  | 1  | Male   | 1956 | 59     | 4    | 55-59     | 0.8               |    |
| 14143  | 200992    | 3        | Korea   | 1               | 2  | 1  | Male   | 1965 | 50     | 3    | 50-54     | 0.9               |    |
| 14146  | 200993    | 3        | Korea   | 1               | 2  | 2  | Female | 1954 | 61     | 5    | >=60      | 1.6               |    |
| 14147  | 104358    | 1        | China   | 1               | 2  | 1  | Male   | 1958 | 57     | 4    | 55-59     | 0.9               |    |
| 14148  | 200994    | 3        | Korea   | 1               | 2  | 2  | Female | 1958 | 57     | 4    | 55-59     | 0.7               |    |
| 14151  | 200997    | 3        | Korea   | 1               | 2  | 2  | Female | 1956 | 59     | 4    | 55-59     | 0.7               |    |
| 14152  | 104359    | 1        | China   | 1               | 2  | 1  | Male   | 1957 | 58     | 4    | 55-59     | 0.9               |    |
| 14153  | 200998    | 3        | Korea   | 1               | 2  | 2  | Female | 1958 | 57     | 4    | 55-59     | 0.7               |    |
| 14154  | 200999    | 3        | Korea   | 1               | 2  | 1  | Male   | 1958 | 57     | 4    | 55-59     | 0.8               |    |
| 14158  | 201002    | 3        | Korea   | 1               | 2  | 2  | Female | 1958 | 57     | 4    | 55-59     | 0.7               |    |
| 14159  | 104360    | 1        | China   | 1               | 2  | 2  | Female | 1960 | 55     | 4    | 55-59     | 1.0               |    |
| 14160  | 201003    | 3        | Korea   | 1               | 2  | 1  | Male   | 1962 | 53     | 3    | 50-54     | 0.9               |    |
| 14161  | 104361    | 1        | China   | 1               | 2  | 1  | Male   | 1960 | 55     | 4    | 55-59     | 0.9               |    |
| 14162  | 201004    | 3        | Korea   | 1               | 2  | 1  | Male   | 1966 | 49     | 2    | 45-49     | 0.8               |    |
| 14165  | 200972    | 3        | Korea   | 1               | 2  | 1  | Male   | 1959 | 56     | 4    | 55-59     | 0.8               |    |
| 14166  | 104362    | 1        | China   | 1               | 2  | 1  | Male   | 1956 | 59     | 4    | 55-59     | 0.9               |    |
| 14167  | 201007    | 3        | Korea   | 1               | 2  | 2  | Female | 1957 | 58     | 4    | 55-59     | 0.7               |    |
| 14169  | 201009    | 3        | Korea   | 1               | 2  | 2  | Female | 1951 | 64     | 5    | >=60      | 1.6               |    |
| 14170  | 350215850 | 3        | Korea   | 1               | 2  | 2  | Female | 1965 | 50     | 3    | 50-54     | 0.8               |    |

| respid | SubsID    | dCountry | Country | QDisclaim<br>er | Q1 | Q2 | Gender | Q3_1 | age Nr | dAge | age Group  | Weight in<br>Ctry | Q4 |
|--------|-----------|----------|---------|-----------------|----|----|--------|------|--------|------|------------|-------------------|----|
| 14172  | 201012    | 3        | Korea   | 1               | 2  | 1  | Male   | 1958 | 57     | 4    | 55-59      | 0.8               |    |
| 14173  | 201011    | 3        | Korea   | 1               | 2  | 2  | Female | 1955 | 60     | 5    | >=60       | 1.6               |    |
| 14174  | 201013    | 3        | Korea   | 1               | 2  | 2  | Female | 1957 | 58     | 4    | 55-59      | 0.7               |    |
| 14175  | 201014    | 3        | Korea   | 1               | 2  | 2  | Female | 1956 | 59     | 4    | 55-59      | 0.7               |    |
| 14176  | 201015    | 3        | Korea   | 1               | 2  | 1  | Male   | 1961 | 54     | 3    | 50-54      | 0.9               |    |
| 14178  | 201017    | 3        | Korea   | 1               | 2  | 1  | Male   | 1963 | 52     | 3    | 50-54      | 0.9               |    |
| 14179  | 201018    | 3        | Korea   | 1               | 2  | 1  | Male   | 1959 | 56     | 4    | 55-59      | 0.8               |    |
| 14180  | 104363    | 1        | China   | 1               | 1  | 1  | Male   | 1953 | 62     | 5    | >=60       | 1.0               |    |
| 14183  | 104364    | 1        | China   | 1               | 2  | 2  | Female | 1960 | 55     | 4    | 55-59      | 1.0               |    |
| 14185  | 104365    | 1        | China   | 1               | 1  | 2  | Female | 1966 | 49     | 2    | 45-49      | 1.0               | 2  |
| 14187  | 200932    | 3        | Korea   | 1               | 2  | 2  | Female | 1957 | 58     | 4    | 55-59      | 0.7               |    |
| 14189  | 201022    | 3        | Korea   | 1               | 2  | 2  | Female | 1953 | 62     | 5    | >=60       | 1.6               |    |
| 14191  | 104366    | 1        | China   | 1               | 2  | 1  | Male   | 1965 | 50     | 3    | 50-54      | 1.0               |    |
| 14192  | 201023    | 3        | Korea   | 1               | 2  | 2  | Female | 1947 | 68     | 5    | >=60       | 1.6               |    |
| 14195  | 201024    | 3        | Korea   | 1               | 2  | 2  | Female | 1958 | 57     | 4    | 55-59      | 0.7               |    |
| 14197  | 201025    | 3        | Korea   | 1               | 2  | 2  | Female | 1953 | 62     | 5    | >=60       | 1.6               |    |
| 14203  | 104368    | 1        | China   | 1               | 2  | 1  | Male   | 1956 | 59     | 4    | 55-59      | 0.9               |    |
| 14204  | 201027    | 3        | Korea   | 1               | 2  | 2  | Female | 1956 | 59     | 4    | 55-59      | 0.7               |    |
| 14205  | 201028    | 3        | Korea   | 1               | 2  | 2  | Female | 1952 | 63     | 5    | >=60       | 1.6               |    |
| 14208  | 104370    | 1        | China   | 1               | 2  | 1  | Male   | 1964 | 51     | 3    | 50-54      | 1.0               |    |
| 14211  | 104372    | 1        | China   | 1               | 2  | 2  | Female | 1958 | 57     | 4    | 55-59      | 1.0               |    |
| 14214  | 201030    | 3        | Korea   | 1               | 2  | 2  | Female | 1958 | 57     | 4    | 55-59      | 0.7               |    |
| 14215  | 201031    | 3        | Korea   | 1               | 2  | 1  | Male   | 1961 | 54     | 3    | 50-54      | 0.9               |    |
| 14216  | 104374    | 1        | China   | 1               | 2  | 1  | Male   | 1963 | 52     | 3    | 50-54      | 1.0               |    |
| 14218  | 201033    | 3        | Korea   | 1               | 2  | 1  | Male   | 1959 | 56     | 4    | 55-59      | 0.8               |    |
| 14220  | 201034    | 3        | Korea   | 1               | 2  | 1  | Male   | 1962 | 53     | 3    | 50-54      | 0.9               |    |
| 14223  | 104376    | 1        | China   | 1               | 1  | 2  | Female | 1961 | 54     | 3    | 50-54      | 1.2               |    |
| 14225  | 104377    | 1        | China   | 1               | 2  | 1  | Male   | 1952 | 63     | 5    | >=60       | 1.0               |    |
| 14226  | 380202087 | 2        | Taiwan  | 1               | 2  | 1  | Male   | 1966 | 49     | 2    | 45-49      | 0.8               |    |
| 14228  | 104378    | 1        | China   | 1               | 2  | 2  | Female | 1960 | 55     | 4    | 55-59      | 1.0               |    |
| 14231  | 201036    | 3        | Korea   | 1               | 2  | 2  | Female | 1973 | 42     | 1    | 40-44 year | 0.9               | 2  |
| 14233  | 201038    | 3        | Korea   | 1               | 2  | 2  | Female | 1965 | 50     | 3    | 50-54      | 0.8               |    |

| respid | SubsID | dCountry | Country | QDisclaimer | Q1 | Q2 | Gender | Q3_1 | age Nr | dAge | age Group  | Weight in Ctry | Q4 |
|--------|--------|----------|---------|-------------|----|----|--------|------|--------|------|------------|----------------|----|
| 14237  | 201040 | 3        | Korea   | 1           | 2  | 2  | Female | 1959 | 56     | 4    | 55-59      | 0.7            |    |
| 14238  | 104380 | 1        | China   | 1           | 2  | 1  | Male   | 1962 | 53     | 3    | 50-54      | 1.0            |    |
| 14243  | 301157 | 2        | Taiwan  | 1           | 2  | 1  | Male   | 1951 | 64     | 5    | >=60       | 1.6            |    |
| 14245  | 104382 | 1        | China   | 1           | 2  | 1  | Male   | 1965 | 50     | 3    | 50-54      | 1.0            |    |
| 14246  | 104383 | 1        | China   | 1           | 2  | 2  | Female | 1960 | 55     | 4    | 55-59      | 1.0            |    |
| 14248  | 104384 | 1        | China   | 1           | 1  | 2  | Female | 1961 | 54     | 3    | 50-54      | 1.2            |    |
| 14250  | 104385 | 1        | China   | 1           | 2  | 2  | Female | 1963 | 52     | 3    | 50-54      | 1.2            |    |
| 14253  | 201043 | 3        | Korea   | 1           | 2  | 2  | Female | 1957 | 58     | 4    | 55-59      | 0.7            |    |
| 14254  | 201044 | 3        | Korea   | 1           | 2  | 1  | Male   | 1960 | 55     | 4    | 55-59      | 0.8            |    |
| 14255  | 201045 | 3        | Korea   | 1           | 2  | 2  | Female | 1960 | 55     | 4    | 55-59      | 0.7            |    |
| 14257  | 201046 | 3        | Korea   | 1           | 2  | 2  | Female | 1971 | 44     | 1    | 40-44 year | 0.9            | 2  |
| 14258  | 301158 | 2        | Taiwan  | 1           | 2  | 2  | Female | 1957 | 58     | 4    | 55-59      | 0.9            |    |
| 14259  | 201047 | 3        | Korea   | 1           | 2  | 1  | Male   | 1961 | 54     | 3    | 50-54      | 0.9            |    |
| 14260  | 201048 | 3        | Korea   | 1           | 2  | 2  | Female | 1961 | 54     | 3    | 50-54      | 0.8            |    |
| 14261  | 104387 | 1        | China   | 1           | 2  | 2  | Female | 1960 | 55     | 4    | 55-59      | 1.0            |    |
| 14263  | 201049 | 3        | Korea   | 1           | 2  | 2  | Female | 1959 | 56     | 4    | 55-59      | 0.7            |    |
| 14264  | 201050 | 3        | Korea   | 1           | 2  | 2  | Female | 1963 | 52     | 3    | 50-54      | 0.8            |    |
| 14266  | 201051 | 3        | Korea   | 1           | 2  | 2  | Female | 1958 | 57     | 4    | 55-59      | 0.7            |    |
| 14267  | 104389 | 1        | China   | 1           | 2  | 2  | Female | 1960 | 55     | 4    | 55-59      | 1.0            |    |
| 14268  | 201052 | 3        | Korea   | 1           | 2  | 1  | Male   | 1960 | 55     | 4    | 55-59      | 0.8            |    |
| 14275  | 201056 | 3        | Korea   | 1           | 2  | 2  | Female | 1959 | 56     | 4    | 55-59      | 0.7            |    |
| 14278  | 201057 | 3        | Korea   | 1           | 2  | 2  | Female | 1957 | 58     | 4    | 55-59      | 0.7            |    |
| 14279  | 201058 | 3        | Korea   | 1           | 1  | 1  | Male   | 1959 | 56     | 4    | 55-59      | 0.8            |    |
| 14280  | 104394 | 1        | China   | 1           | 1  | 2  | Female | 1951 | 64     | 5    | >=60       | 1.1            |    |
| 14281  | 201059 | 3        | Korea   | 1           | 2  | 2  | Female | 1952 | 63     | 5    | >=60       | 1.6            |    |
| 14282  | 104395 | 1        | China   | 1           | 2  | 2  | Female | 1960 | 55     | 4    | 55-59      | 1.0            |    |
| 14283  | 201060 | 3        | Korea   | 1           | 2  | 1  | Male   | 1964 | 51     | 3    | 50-54      | 0.9            |    |
| 14286  | 201061 | 3        | Korea   | 1           | 2  | 2  | Female | 1961 | 54     | 3    | 50-54      | 0.8            |    |
| 14287  | 104396 | 1        | China   | 1           | 1  | 1  | Male   | 1957 | 58     | 4    | 55-59      | 0.9            |    |
| 14288  | 201062 | 3        | Korea   | 1           | 2  | 2  | Female | 1955 | 60     | 5    | >=60       | 1.6            |    |
| 14291  | 104398 | 1        | China   | 1           | 2  | 1  | Male   | 1961 | 54     | 3    | 50-54      | 1.0            |    |
| 14292  | 104399 | 1        | China   | 1           | 2  | 1  | Male   | 1962 | 53     | 3    | 50-54      | 1.0            |    |

| respid | SubsID | dCountry | Country | QDisclaimer | Q1 | Q2 | Gender | Q3_1 | age Nr | dAge | age Group  | Weight in Ctry | Q4 |
|--------|--------|----------|---------|-------------|----|----|--------|------|--------|------|------------|----------------|----|
| 14293  | 200962 | 3        | Korea   | 1           | 2  | 2  | Female | 1960 | 55     | 4    | 55-59      | 0.7            |    |
| 14304  | 104401 | 1        | China   | 1           | 2  | 2  | Female | 1960 | 55     | 4    | 55-59      | 1.0            |    |
| 14308  | 201065 | 3        | Korea   | 1           | 2  | 1  | Male   | 1956 | 59     | 4    | 55-59      | 0.8            |    |
| 14313  | 201067 | 3        | Korea   | 1           | 2  | 2  | Female | 1957 | 58     | 4    | 55-59      | 0.7            |    |
| 14314  | 201068 | 3        | Korea   | 1           | 2  | 1  | Male   | 1960 | 55     | 4    | 55-59      | 0.8            |    |
| 14316  | 201070 | 3        | Korea   | 1           | 2  | 2  | Female | 1950 | 65     | 5    | >=60       | 1.6            |    |
| 14317  | 104402 | 1        | China   | 1           | 2  | 1  | Male   | 1961 | 54     | 3    | 50-54      | 1.0            |    |
| 14318  | 201071 | 3        | Korea   | 1           | 2  | 2  | Female | 1949 | 66     | 5    | >=60       | 1.6            |    |
| 14319  | 201072 | 3        | Korea   | 1           | 2  | 1  | Male   | 1966 | 49     | 2    | 45-49      | 0.8            |    |
| 14320  | 104403 | 1        | China   | 1           | 2  | 2  | Female | 1960 | 55     | 4    | 55-59      | 1.0            |    |
| 14321  | 201073 | 3        | Korea   | 1           | 2  | 2  | Female | 1963 | 52     | 3    | 50-54      | 0.8            |    |
| 14322  | 104404 | 1        | China   | 1           | 2  | 2  | Female | 1960 | 55     | 4    | 55-59      | 1.0            |    |
| 14326  | 201074 | 3        | Korea   | 1           | 2  | 2  | Female | 1949 | 66     | 5    | >=60       | 1.6            |    |
| 14327  | 104405 | 1        | China   | 1           | 2  | 2  | Female | 1960 | 55     | 4    | 55-59      | 1.0            |    |
| 14328  | 201075 | 3        | Korea   | 1           | 2  | 1  | Male   | 1952 | 63     | 5    | >=60       | 1.6            |    |
| 14330  | 201077 | 3        | Korea   | 1           | 2  | 2  | Female | 1964 | 51     | 3    | 50-54      | 0.8            |    |
| 14332  | 201078 | 3        | Korea   | 1           | 2  | 2  | Female | 1961 | 54     | 3    | 50-54      | 0.8            |    |
| 14334  | 104406 | 1        | China   | 1           | 2  | 2  | Female | 1962 | 53     | 3    | 50-54      | 1.2            |    |
| 14336  | 201080 | 3        | Korea   | 1           | 2  | 2  | Female | 1959 | 56     | 4    | 55-59      | 0.7            |    |
| 14337  | 201081 | 3        | Korea   | 1           | 2  | 2  | Female | 1957 | 58     | 4    | 55-59      | 0.7            |    |
| 14339  | 104407 | 1        | China   | 1           | 1  | 2  | Female | 1961 | 54     | 3    | 50-54      | 1.2            |    |
| 14340  | 104408 | 1        | China   | 1           | 2  | 2  | Female | 1964 | 51     | 3    | 50-54      | 1.2            |    |
| 14341  | 104409 | 1        | China   | 1           | 2  | 2  | Female | 1953 | 62     | 5    | >=60       | 1.1            |    |
| 14344  | 104410 | 1        | China   | 1           | 2  | 1  | Male   | 1963 | 52     | 3    | 50-54      | 1.0            |    |
| 14345  | 201083 | 3        | Korea   | 1           | 2  | 1  | Male   | 1958 | 57     | 4    | 55-59      | 0.8            |    |
| 14346  | 104411 | 1        | China   | 1           | 2  | 1  | Male   | 1964 | 51     | 3    | 50-54      | 1.0            |    |
| 14348  | 201085 | 3        | Korea   | 1           | 2  | 1  | Male   | 1960 | 55     | 4    | 55-59      | 0.8            |    |
| 14349  | 201086 | 3        | Korea   | 1           | 2  | 1  | Male   | 1954 | 61     | 5    | >=60       | 1.6            |    |
| 14358  | 104413 | 1        | China   | 1           | 2  | 2  | Female | 1960 | 55     | 4    | 55-59      | 1.0            |    |
| 14360  | 201089 | 3        | Korea   | 1           | 2  | 2  | Female | 1959 | 56     | 4    | 55-59      | 0.7            |    |
| 14362  | 201090 | 3        | Korea   | 1           | 2  | 1  | Male   | 1974 | 41     | 1    | 40-44 year | 0.9            |    |
| 14366  | 104414 | 1        | China   | 1           | 2  | 1  | Male   | 1964 | 51     | 3    | 50-54      | 1.0            |    |

| respid | SubsID    | dCountry | Country  | QDisclaimer | Q1 | Q2 | Gender   | Q3_1 | age Nr | dAge | age Group    | Weight in Ctry | Q4 |
|--------|-----------|----------|----------|-------------|----|----|----------|------|--------|------|--------------|----------------|----|
| 14367  | 301159    |          | 2 Taiwan |             | 1  | 2  | 1 Male   | 1955 | 60     |      | 5 >=60       | 1.6            |    |
| 14369  | 201092    |          | 3 Korea  |             | 1  | 2  | 1 Male   | 1955 | 60     |      | 5 >=60       | 1.6            |    |
| 14371  | 201093    |          | 3 Korea  |             | 1  | 2  | 2 Female | 1964 | 51     |      | 3 50-54      | 0.8            |    |
| 14372  | 201094    |          | 3 Korea  |             | 1  | 2  | 2 Female | 1958 | 57     |      | 4 55-59      | 0.7            |    |
| 14374  | 201095    |          | 3 Korea  |             | 1  | 2  | 2 Female | 1960 | 55     |      | 4 55-59      | 0.7            |    |
| 14376  | 201096    |          | 3 Korea  |             | 1  | 2  | 2 Female | 1957 | 58     |      | 4 55-59      | 0.7            |    |
| 14377  | 201097    |          | 3 Korea  |             | 1  | 2  | 2 Female | 1953 | 62     |      | 5 >=60       | 1.6            |    |
| 14378  | 201098    |          | 3 Korea  |             | 1  | 2  | 2 Female | 1952 | 63     |      | 5 >=60       | 1.6            |    |
| 14379  | 350186454 |          | 3 Korea  |             | 1  | 1  | 1 Male   | 1968 | 47     |      | 2 45-49      | 0.8            |    |
| 14381  | 104418    |          | 1 China  |             | 1  | 2  | 1 Male   | 1963 | 52     |      | 3 50-54      | 1.0            |    |
| 14383  | 201100    |          | 3 Korea  |             | 1  | 2  | 2 Female | 1957 | 58     |      | 4 55-59      | 0.7            |    |
| 14384  | 104417    |          | 1 China  |             | 1  | 2  | 2 Female | 1961 | 54     |      | 3 50-54      | 1.2            |    |
| 14385  | 104419    |          | 1 China  |             | 1  | 2  | 2 Female | 1960 | 55     |      | 4 55-59      | 1.0            |    |
| 14386  | 201101    |          | 3 Korea  |             | 1  | 2  | 2 Female | 1959 | 56     |      | 4 55-59      | 0.7            |    |
| 14390  | 201103    |          | 3 Korea  |             | 1  | 2  | 1 Male   | 1955 | 60     |      | 5 >=60       | 1.6            |    |
| 14391  | 301160    |          | 2 Taiwan |             | 1  | 2  | 2 Female | 1964 | 51     |      | 3 50-54      | 0.9            |    |
| 14392  | 104420    |          | 1 China  |             | 1  | 1  | 1 Male   | 1951 | 64     |      | 5 >=60       | 1.0            |    |
| 14393  | 201104    |          | 3 Korea  |             | 1  | 2  | 2 Female | 1972 | 43     |      | 1 40-44 year | 0.9            | 2  |
| 14394  | 201105    |          | 3 Korea  |             | 1  | 2  | 2 Female | 1956 | 59     |      | 4 55-59      | 0.7            |    |
| 14395  | 104421    |          | 1 China  |             | 1  | 2  | 1 Male   | 1962 | 53     |      | 3 50-54      | 1.0            |    |
| 14396  | 104422    |          | 1 China  |             | 1  | 2  | 1 Male   | 1963 | 52     |      | 3 50-54      | 1.0            |    |
| 14397  | 201019    |          | 3 Korea  |             | 1  | 2  | 1 Male   | 1949 | 66     |      | 5 >=60       | 1.6            |    |
| 14398  | 201106    |          | 3 Korea  |             | 1  | 2  | 2 Female | 1950 | 65     |      | 5 >=60       | 1.6            |    |
| 14399  | 201107    |          | 3 Korea  |             | 1  | 1  | 2 Female | 1960 | 55     |      | 4 55-59      | 0.7            |    |
| 14400  | 200856    |          | 3 Korea  |             | 1  | 2  | 2 Female | 1960 | 55     |      | 4 55-59      | 0.7            |    |
| 14403  | 201109    |          | 3 Korea  |             | 1  | 2  | 2 Female | 1955 | 60     |      | 5 >=60       | 1.6            |    |
| 14404  | 201110    |          | 3 Korea  |             | 1  | 2  | 2 Female | 1958 | 57     |      | 4 55-59      | 0.7            |    |
| 14405  | 200829    |          | 3 Korea  |             | 1  | 2  | 1 Male   | 1970 | 45     |      | 2 45-49      | 0.8            |    |
| 14407  | 104425    |          | 1 China  |             | 1  | 2  | 1 Male   | 1963 | 52     |      | 3 50-54      | 1.0            |    |
| 14408  | 104426    |          | 1 China  |             | 1  | 2  | 1 Male   | 1960 | 55     |      | 4 55-59      | 0.9            |    |
| 14410  | 104424    |          | 1 China  |             | 1  | 2  | 2 Female | 1959 | 56     |      | 4 55-59      | 1.0            |    |
| 14415  | 201112    |          | 3 Korea  |             | 1  | 2  | 1 Male   | 1959 | 56     |      | 4 55-59      | 0.8            |    |

| respid | SubsID    | dCountry | Country | QDisclaimer | Q1 | Q2 | Gender | Q3_1 | age Nr | dAge | age Group | Weight in Ctry | Q4 |
|--------|-----------|----------|---------|-------------|----|----|--------|------|--------|------|-----------|----------------|----|
| 14419  | 201114    | 3        | Korea   | 1           | 2  | 2  | Female | 1959 | 56     | 4    | 55-59     | 0.7            |    |
| 14420  | 201115    | 3        | Korea   | 1           | 2  | 2  | Female | 1961 | 54     | 3    | 50-54     | 0.8            |    |
| 14421  | 104429    | 1        | China   | 1           | 2  | 1  | Male   | 1960 | 55     | 4    | 55-59     | 0.9            |    |
| 14423  | 201116    | 3        | Korea   | 1           | 2  | 1  | Male   | 1965 | 50     | 3    | 50-54     | 0.9            |    |
| 14424  | 104431    | 1        | China   | 1           | 2  | 1  | Male   | 1963 | 52     | 3    | 50-54     | 1.0            |    |
| 14425  | 201117    | 3        | Korea   | 1           | 2  | 2  | Female | 1964 | 51     | 3    | 50-54     | 0.8            |    |
| 14426  | 104432    | 1        | China   | 1           | 2  | 1  | Male   | 1961 | 54     | 3    | 50-54     | 1.0            |    |
| 14427  | 201118    | 3        | Korea   | 1           | 2  | 2  | Female | 1959 | 56     | 4    | 55-59     | 0.7            |    |
| 14428  | 104433    | 1        | China   | 1           | 2  | 2  | Female | 1960 | 55     | 4    | 55-59     | 1.0            |    |
| 14431  | 104435    | 1        | China   | 1           | 1  | 2  | Female | 1959 | 56     | 4    | 55-59     | 1.0            |    |
| 14433  | 201120    | 3        | Korea   | 1           | 2  | 1  | Male   | 1963 | 52     | 3    | 50-54     | 0.9            |    |
| 14434  | 200776    | 3        | Korea   | 1           | 2  | 2  | Female | 1961 | 54     | 3    | 50-54     | 0.8            |    |
| 14435  | 201121    | 3        | Korea   | 1           | 2  | 2  | Female | 1961 | 54     | 3    | 50-54     | 0.8            |    |
| 14436  | 201122    | 3        | Korea   | 1           | 2  | 2  | Female | 1960 | 55     | 4    | 55-59     | 0.7            |    |
| 14438  | 104437    | 1        | China   | 1           | 2  | 1  | Male   | 1964 | 51     | 3    | 50-54     | 1.0            |    |
| 14442  | 201124    | 3        | Korea   | 1           | 2  | 2  | Female | 1952 | 63     | 5    | >=60      | 1.6            |    |
| 14447  | 201125    | 3        | Korea   | 1           | 2  | 1  | Male   | 1954 | 61     | 5    | >=60      | 1.6            |    |
| 14448  | 104440    | 1        | China   | 1           | 2  | 1  | Male   | 1961 | 54     | 3    | 50-54     | 1.0            |    |
| 14450  | 201126    | 3        | Korea   | 1           | 2  | 1  | Male   | 1958 | 57     | 4    | 55-59     | 0.8            |    |
| 14451  | 201127    | 3        | Korea   | 1           | 2  | 2  | Female | 1955 | 60     | 5    | >=60      | 1.6            |    |
| 14454  | 104441    | 1        | China   | 1           | 2  | 1  | Male   | 1955 | 60     | 5    | >=60      | 1.0            |    |
| 14455  | 201128    | 3        | Korea   | 1           | 2  | 2  | Female | 1957 | 58     | 4    | 55-59     | 0.7            |    |
| 14456  | 350326885 | 3        | Korea   | 1           | 2  | 1  | Male   | 1969 | 46     | 2    | 45-49     | 0.8            |    |
| 14457  | 104442    | 1        | China   | 1           | 2  | 2  | Female | 1958 | 57     | 4    | 55-59     | 1.0            |    |
| 14458  | 104443    | 1        | China   | 1           | 2  | 2  | Female | 1959 | 56     | 4    | 55-59     | 1.0            |    |
| 14459  | 201129    | 3        | Korea   | 1           | 2  | 2  | Female | 1958 | 57     | 4    | 55-59     | 0.7            |    |
| 14460  | 104444    | 1        | China   | 1           | 2  | 1  | Male   | 1963 | 52     | 3    | 50-54     | 1.0            |    |
| 14464  | 201130    | 3        | Korea   | 1           | 2  | 2  | Female | 1957 | 58     | 4    | 55-59     | 0.7            |    |
| 14465  | 201131    | 3        | Korea   | 1           | 2  | 1  | Male   | 1962 | 53     | 3    | 50-54     | 0.9            |    |
| 14466  | 100851    | 1        | China   | 1           | 2  | 1  | Male   | 1952 | 63     | 5    | >=60      | 1.0            |    |
| 14467  | 201132    | 3        | Korea   | 1           | 2  | 2  | Female | 1957 | 58     | 4    | 55-59     | 0.7            |    |
| 14470  | 200030    | 3        | Korea   | 1           | 2  | 2  | Female | 1950 | 65     | 5    | >=60      | 1.6            |    |



| respid | SubsID | dCountry | Country | QDisclaim<br>er | Q1 | Q2 | Gender | Q3_1 | age Nr | dAge | age Group  | Weight in<br>Ctry | Q4 |
|--------|--------|----------|---------|-----------------|----|----|--------|------|--------|------|------------|-------------------|----|
| 14472  | 201134 | 3        | Korea   | 1               | 2  | 1  | Male   | 1961 | 54     | 3    | 50-54      | 0.9               |    |
| 14473  | 201135 | 3        | Korea   | 1               | 2  | 2  | Female | 1954 | 61     | 5    | >=60       | 1.6               |    |
| 14474  | 201136 | 3        | Korea   | 1               | 2  | 2  | Female | 1961 | 54     | 3    | 50-54      | 0.8               |    |
| 14477  | 104446 | 1        | China   | 1               | 2  | 2  | Female | 1949 | 66     | 5    | >=60       | 1.1               |    |
| 14478  | 200800 | 3        | Korea   | 1               | 2  | 2  | Female | 1959 | 56     | 4    | 55-59      | 0.7               |    |
| 14479  | 104447 | 1        | China   | 1               | 2  | 1  | Male   | 1961 | 54     | 3    | 50-54      | 1.0               |    |
| 14484  | 201137 | 3        | Korea   | 1               | 2  | 1  | Male   | 1960 | 55     | 4    | 55-59      | 0.8               |    |
| 14485  | 201138 | 3        | Korea   | 1               | 2  | 1  | Male   | 1965 | 50     | 3    | 50-54      | 0.9               |    |
| 14486  | 104448 | 1        | China   | 1               | 1  | 2  | Female | 1956 | 59     | 4    | 55-59      | 1.0               |    |
| 14487  | 104449 | 1        | China   | 1               | 2  | 1  | Male   | 1963 | 52     | 3    | 50-54      | 1.0               |    |
| 14488  | 104450 | 1        | China   | 1               | 2  | 2  | Female | 1960 | 55     | 4    | 55-59      | 1.0               |    |
| 14491  | 201139 | 3        | Korea   | 1               | 2  | 1  | Male   | 1956 | 59     | 4    | 55-59      | 0.8               |    |
| 14495  | 201141 | 3        | Korea   | 1               | 2  | 2  | Female | 1973 | 42     | 1    | 40-44 year | 0.9               | 2  |
| 14500  | 104452 | 1        | China   | 1               | 1  | 2  | Female | 1964 | 51     | 3    | 50-54      | 1.2               |    |
| 14502  | 104453 | 1        | China   | 1               | 2  | 1  | Male   | 1964 | 51     | 3    | 50-54      | 1.0               |    |
| 14504  | 104454 | 1        | China   | 1               | 2  | 1  | Male   | 1955 | 60     | 5    | >=60       | 1.0               |    |
| 14505  | 104455 | 1        | China   | 1               | 2  | 2  | Female | 1958 | 57     | 4    | 55-59      | 1.0               |    |
| 14507  | 104457 | 1        | China   | 1               | 2  | 1  | Male   | 1964 | 51     | 3    | 50-54      | 1.0               |    |
| 14517  | 201146 | 3        | Korea   | 1               | 2  | 2  | Female | 1953 | 62     | 5    | >=60       | 1.6               |    |
| 14518  | 201147 | 3        | Korea   | 1               | 2  | 2  | Female | 1959 | 56     | 4    | 55-59      | 0.7               |    |
| 14519  | 201148 | 3        | Korea   | 1               | 2  | 2  | Female | 1958 | 57     | 4    | 55-59      | 0.7               |    |
| 14521  | 104458 | 1        | China   | 1               | 1  | 1  | Male   | 1953 | 62     | 5    | >=60       | 1.0               |    |
| 14522  | 201150 | 3        | Korea   | 1               | 2  | 2  | Female | 1960 | 55     | 4    | 55-59      | 0.7               |    |
| 14526  | 201152 | 3        | Korea   | 1               | 2  | 2  | Female | 1960 | 55     | 4    | 55-59      | 0.7               |    |
| 14528  | 104459 | 1        | China   | 1               | 1  | 1  | Male   | 1960 | 55     | 4    | 55-59      | 0.9               |    |
| 14529  | 201154 | 3        | Korea   | 1               | 2  | 1  | Male   | 1965 | 50     | 3    | 50-54      | 0.9               |    |
| 14530  | 301162 | 2        | Taiwan  | 1               | 2  | 1  | Male   | 1955 | 60     | 5    | >=60       | 1.6               |    |
| 14531  | 104460 | 1        | China   | 1               | 2  | 1  | Male   | 1960 | 55     | 4    | 55-59      | 0.9               |    |
| 14534  | 104461 | 1        | China   | 1               | 2  | 2  | Female | 1955 | 60     | 5    | >=60       | 1.1               |    |
| 14538  | 104462 | 1        | China   | 1               | 2  | 1  | Male   | 1963 | 52     | 3    | 50-54      | 1.0               |    |
| 14539  | 201156 | 3        | Korea   | 1               | 2  | 1  | Male   | 1958 | 57     | 4    | 55-59      | 0.8               |    |
| 14545  | 201158 | 3        | Korea   | 1               | 2  | 2  | Female | 1960 | 55     | 4    | 55-59      | 0.7               |    |

| respid | SubsID | dCountry | Country | QDisclaim<br>er | Q1 | Q2 | Gender | Q3_1 | age Nr | dAge | age Group | Weight in<br>Ctry | Q4 |
|--------|--------|----------|---------|-----------------|----|----|--------|------|--------|------|-----------|-------------------|----|
| 14546  | 201159 | 3        | Korea   | 1               | 2  | 2  | Female | 1955 | 60     | 5    | >=60      | 1.6               |    |
| 14551  | 201161 | 3        | Korea   | 1               | 2  | 1  | Male   | 1957 | 58     | 4    | 55-59     | 0.8               |    |
| 14553  | 104465 | 1        | China   | 1               | 2  | 2  | Female | 1960 | 55     | 4    | 55-59     | 1.0               |    |
| 14557  | 201163 | 3        | Korea   | 1               | 2  | 2  | Female | 1957 | 58     | 4    | 55-59     | 0.7               |    |
| 14558  | 104466 | 1        | China   | 1               | 2  | 1  | Male   | 1965 | 50     | 3    | 50-54     | 1.0               |    |
| 14559  | 104467 | 1        | China   | 1               | 1  | 1  | Male   | 1953 | 62     | 5    | >=60      | 1.0               |    |
| 14560  | 201164 | 3        | Korea   | 1               | 2  | 2  | Female | 1965 | 50     | 3    | 50-54     | 0.8               |    |
| 14563  | 201165 | 3        | Korea   | 1               | 2  | 2  | Female | 1961 | 54     | 3    | 50-54     | 0.8               |    |
| 14565  | 201167 | 3        | Korea   | 1               | 2  | 2  | Female | 1960 | 55     | 4    | 55-59     | 0.7               |    |
| 14571  | 104470 | 1        | China   | 1               | 2  | 2  | Female | 1956 | 59     | 4    | 55-59     | 1.0               |    |
| 14572  | 104471 | 1        | China   | 1               | 2  | 1  | Male   | 1965 | 50     | 3    | 50-54     | 1.0               |    |
| 14573  | 200712 | 3        | Korea   | 1               | 2  | 2  | Female | 1955 | 60     | 5    | >=60      | 1.6               |    |
| 14575  | 201169 | 3        | Korea   | 1               | 1  | 2  | Female | 1970 | 45     | 2    | 45-49     | 0.9               | 2  |
| 14576  | 104472 | 1        | China   | 1               | 1  | 1  | Male   | 1953 | 62     | 5    | >=60      | 1.0               |    |
| 14578  | 201170 | 3        | Korea   | 1               | 2  | 2  | Female | 1956 | 59     | 4    | 55-59     | 0.7               |    |
| 14579  | 201171 | 3        | Korea   | 1               | 2  | 1  | Male   | 1960 | 55     | 4    | 55-59     | 0.8               |    |
| 14580  | 104474 | 1        | China   | 1               | 2  | 1  | Male   | 1962 | 53     | 3    | 50-54     | 1.0               |    |
| 14582  | 201172 | 3        | Korea   | 1               | 1  | 2  | Female | 1957 | 58     | 4    | 55-59     | 0.7               |    |
| 14585  | 201174 | 3        | Korea   | 1               | 2  | 2  | Female | 1958 | 57     | 4    | 55-59     | 0.7               |    |
| 14588  | 201176 | 3        | Korea   | 1               | 2  | 2  | Female | 1960 | 55     | 4    | 55-59     | 0.7               |    |
| 14590  | 104475 | 1        | China   | 1               | 2  | 1  | Male   | 1955 | 60     | 5    | >=60      | 1.0               |    |
| 14592  | 201178 | 3        | Korea   | 1               | 2  | 2  | Female | 1961 | 54     | 3    | 50-54     | 0.8               |    |
| 14593  | 104476 | 1        | China   | 1               | 2  | 1  | Male   | 1961 | 54     | 3    | 50-54     | 1.0               |    |
| 14595  | 104477 | 1        | China   | 1               | 2  | 1  | Male   | 1955 | 60     | 5    | >=60      | 1.0               |    |
| 14597  | 200927 | 3        | Korea   | 1               | 2  | 2  | Female | 1957 | 58     | 4    | 55-59     | 0.7               |    |
| 14600  | 201181 | 3        | Korea   | 1               | 2  | 1  | Male   | 1959 | 56     | 4    | 55-59     | 0.8               |    |
| 14602  | 104479 | 1        | China   | 1               | 2  | 2  | Female | 1960 | 55     | 4    | 55-59     | 1.0               |    |
| 14604  | 104480 | 1        | China   | 1               | 1  | 1  | Male   | 1957 | 58     | 4    | 55-59     | 0.9               |    |
| 14605  | 201183 | 3        | Korea   | 1               | 1  | 1  | Male   | 1958 | 57     | 4    | 55-59     | 0.8               |    |
| 14609  | 201185 | 3        | Korea   | 1               | 2  | 2  | Female | 1957 | 58     | 4    | 55-59     | 0.7               |    |
| 14610  | 201186 | 3        | Korea   | 1               | 2  | 1  | Male   | 1959 | 56     | 4    | 55-59     | 0.8               |    |
| 14611  | 201187 | 3        | Korea   | 1               | 2  | 1  | Male   | 1959 | 56     | 4    | 55-59     | 0.8               |    |

| respid | SubsID | dCountry | Country | QDisclaimer | Q1 | Q2 | Gender | Q3_1 | age Nr | dAge | age Group | Weight in Ctry | Q4 |
|--------|--------|----------|---------|-------------|----|----|--------|------|--------|------|-----------|----------------|----|
| 14612  | 104482 | 1        | China   | 1           | 2  | 1  | Male   | 1962 | 53     | 3    | 50-54     | 1.0            |    |
| 14614  | 104484 | 1        | China   | 1           | 1  | 1  | Male   | 1953 | 62     | 5    | >=60      | 1.0            |    |
| 14615  | 201188 | 3        | Korea   | 1           | 2  | 2  | Female | 1967 | 48     | 2    | 45-49     | 0.9            | 2  |
| 14618  | 104485 | 1        | China   | 1           | 1  | 2  | Female | 1965 | 50     | 3    | 50-54     | 1.2            |    |
| 14621  | 104486 | 1        | China   | 1           | 1  | 2  | Female | 1956 | 59     | 4    | 55-59     | 1.0            |    |
| 14624  | 201191 | 3        | Korea   | 1           | 2  | 2  | Female | 1951 | 64     | 5    | >=60      | 1.6            |    |
| 14626  | 201192 | 3        | Korea   | 1           | 2  | 2  | Female | 1959 | 56     | 4    | 55-59     | 0.7            |    |
| 14627  | 201193 | 3        | Korea   | 1           | 2  | 2  | Female | 1959 | 56     | 4    | 55-59     | 0.7            |    |
| 14628  | 104487 | 1        | China   | 1           | 2  | 2  | Female | 1957 | 58     | 4    | 55-59     | 1.0            |    |
| 14631  | 104488 | 1        | China   | 1           | 2  | 1  | Male   | 1962 | 53     | 3    | 50-54     | 1.0            |    |
| 14633  | 104489 | 1        | China   | 1           | 1  | 1  | Male   | 1953 | 62     | 5    | >=60      | 1.0            |    |
| 14642  | 104491 | 1        | China   | 1           | 2  | 1  | Male   | 1959 | 56     | 4    | 55-59     | 0.9            |    |
| 14647  | 104493 | 1        | China   | 1           | 2  | 1  | Male   | 1959 | 56     | 4    | 55-59     | 0.9            |    |
| 14658  | 104496 | 1        | China   | 1           | 2  | 1  | Male   | 1960 | 55     | 4    | 55-59     | 0.9            |    |
| 14659  | 104497 | 1        | China   | 1           | 1  | 1  | Male   | 1952 | 63     | 5    | >=60      | 1.0            |    |
| 14660  | 104498 | 1        | China   | 1           | 2  | 1  | Male   | 1957 | 58     | 4    | 55-59     | 0.9            |    |
| 14661  | 104499 | 1        | China   | 1           | 2  | 1  | Male   | 1964 | 51     | 3    | 50-54     | 1.0            |    |
| 14662  | 104500 | 1        | China   | 1           | 2  | 1  | Male   | 1956 | 59     | 4    | 55-59     | 0.9            |    |
| 14663  | 104501 | 1        | China   | 1           | 2  | 1  | Male   | 1963 | 52     | 3    | 50-54     | 1.0            |    |
| 14670  | 104502 | 1        | China   | 1           | 2  | 1  | Male   | 1961 | 54     | 3    | 50-54     | 1.0            |    |
| 14671  | 104503 | 1        | China   | 1           | 1  | 1  | Male   | 1956 | 59     | 4    | 55-59     | 0.9            |    |
| 14672  | 104504 | 1        | China   | 1           | 2  | 1  | Male   | 1955 | 60     | 5    | >=60      | 1.0            |    |
| 14675  | 104505 | 1        | China   | 1           | 2  | 1  | Male   | 1958 | 57     | 4    | 55-59     | 0.9            |    |
| 14676  | 104506 | 1        | China   | 1           | 2  | 1  | Male   | 1963 | 52     | 3    | 50-54     | 1.0            |    |
| 14677  | 104507 | 1        | China   | 1           | 2  | 2  | Female | 1954 | 61     | 5    | >=60      | 1.1            |    |
| 14678  | 104508 | 1        | China   | 1           | 2  | 1  | Male   | 1964 | 51     | 3    | 50-54     | 1.0            |    |
| 14681  | 104509 | 1        | China   | 1           | 1  | 1  | Male   | 1953 | 62     | 5    | >=60      | 1.0            |    |
| 14684  | 104511 | 1        | China   | 1           | 1  | 1  | Male   | 1958 | 57     | 4    | 55-59     | 0.9            |    |
| 14688  | 104512 | 1        | China   | 1           | 2  | 1  | Male   | 1965 | 50     | 3    | 50-54     | 1.0            |    |
| 14690  | 104513 | 1        | China   | 1           | 2  | 1  | Male   | 1963 | 52     | 3    | 50-54     | 1.0            |    |
| 14694  | 104514 | 1        | China   | 1           | 2  | 1  | Male   | 1954 | 61     | 5    | >=60      | 1.0            |    |
| 14696  | 104515 | 1        | China   | 1           | 2  | 1  | Male   | 1959 | 56     | 4    | 55-59     | 0.9            |    |

| respid | SubsID | dCountry | Country | QDisclaim<br>er | Q1 | Q2 | Gender | Q3_1 | age Nr | dAge | age Group  | Weight in<br>Ctry | Q4 |
|--------|--------|----------|---------|-----------------|----|----|--------|------|--------|------|------------|-------------------|----|
| 14700  | 104517 | 1        | China   | 1               | 1  | 2  | Female | 1965 | 50     | 3    | 50-54      | 1.2               |    |
| 14701  | 104516 | 1        | China   | 1               | 2  | 1  | Male   | 1953 | 62     | 5    | >=60       | 1.0               |    |
| 14703  | 104518 | 1        | China   | 1               | 2  | 2  | Female | 1954 | 61     | 5    | >=60       | 1.1               |    |
| 14707  | 104521 | 1        | China   | 1               | 2  | 1  | Male   | 1964 | 51     | 3    | 50-54      | 1.0               |    |
| 14711  | 104525 | 1        | China   | 1               | 2  | 1  | Male   | 1953 | 62     | 5    | >=60       | 1.0               |    |
| 14714  | 104528 | 1        | China   | 1               | 2  | 1  | Male   | 1964 | 51     | 3    | 50-54      | 1.0               |    |
| 14715  | 104529 | 1        | China   | 1               | 2  | 2  | Female | 1957 | 58     | 4    | 55-59      | 1.0               |    |
| 14716  | 101918 | 1        | China   | 1               | 2  | 2  | Female | 1957 | 58     | 4    | 55-59      | 1.0               |    |
| 14720  | 104530 | 1        | China   | 1               | 2  | 1  | Male   | 1975 | 40     | 1    | 40-44 year | 1.0               |    |
| 14725  | 300975 | 2        | Taiwan  | 1               | 2  | 2  | Female | 1964 | 51     | 3    | 50-54      | 0.9               |    |
| 14726  | 301128 | 2        | Taiwan  | 1               | 2  | 2  | Female | 1958 | 57     | 4    | 55-59      | 0.9               |    |
| 14734  | 104535 | 1        | China   | 1               | 2  | 1  | Male   | 1963 | 52     | 3    | 50-54      | 1.0               |    |
| 14735  | 104536 | 1        | China   | 1               | 2  | 1  | Male   | 1963 | 52     | 3    | 50-54      | 1.0               |    |
| 14736  | 104537 | 1        | China   | 1               | 1  | 1  | Male   | 1952 | 63     | 5    | >=60       | 1.0               |    |
| 14740  | 104538 | 1        | China   | 1               | 2  | 1  | Male   | 1964 | 51     | 3    | 50-54      | 1.0               |    |
| 14745  | 104541 | 1        | China   | 1               | 2  | 1  | Male   | 1962 | 53     | 3    | 50-54      | 1.0               |    |
| 14747  | 104543 | 1        | China   | 1               | 2  | 1  | Male   | 1961 | 54     | 3    | 50-54      | 1.0               |    |
| 14750  | 104546 | 1        | China   | 1               | 2  | 1  | Male   | 1955 | 60     | 5    | >=60       | 1.0               |    |
| 14751  | 104547 | 1        | China   | 1               | 2  | 1  | Male   | 1962 | 53     | 3    | 50-54      | 1.0               |    |
| 14753  | 104549 | 1        | China   | 1               | 2  | 1  | Male   | 1964 | 51     | 3    | 50-54      | 1.0               |    |
| 14756  | 104551 | 1        | China   | 1               | 2  | 2  | Female | 1964 | 51     | 3    | 50-54      | 1.2               |    |
| 14780  | 104558 | 1        | China   | 1               | 2  | 2  | Female | 1964 | 51     | 3    | 50-54      | 1.2               |    |
| 14782  | 301168 | 2        | Taiwan  | 1               | 2  | 1  | Male   | 1940 | 75     | 5    | >=60       | 1.6               |    |
| 14800  | 104564 | 1        | China   | 1               | 2  | 2  | Female | 1960 | 55     | 4    | 55-59      | 1.0               |    |
| 14801  | 104565 | 1        | China   | 1               | 2  | 1  | Male   | 1956 | 59     | 4    | 55-59      | 0.9               |    |
| 14802  | 104566 | 1        | China   | 1               | 2  | 2  | Female | 1958 | 57     | 4    | 55-59      | 1.0               |    |
| 14805  | 104568 | 1        | China   | 1               | 2  | 2  | Female | 1962 | 53     | 3    | 50-54      | 1.2               |    |
| 14811  | 104571 | 1        | China   | 1               | 2  | 1  | Male   | 1960 | 55     | 4    | 55-59      | 0.9               |    |
| 14814  | 104573 | 1        | China   | 1               | 2  | 2  | Female | 1957 | 58     | 4    | 55-59      | 1.0               |    |
| 14822  | 104575 | 1        | China   | 1               | 2  | 2  | Female | 1960 | 55     | 4    | 55-59      | 1.0               |    |
| 14827  | 104578 | 1        | China   | 1               | 2  | 2  | Female | 1960 | 55     | 4    | 55-59      | 1.0               |    |
| 14828  | 104579 | 1        | China   | 1               | 2  | 1  | Male   | 1959 | 56     | 4    | 55-59      | 0.9               |    |

| respid | SubsID    | dCountry | Country | QDisclaim<br>er | Q1 | Q2 | Gender | Q3_1 | age Nr | dAge | age Group  | Weight in<br>Ctry | Q4 |
|--------|-----------|----------|---------|-----------------|----|----|--------|------|--------|------|------------|-------------------|----|
| 14830  | 104581    | 1        | China   | 1               | 2  | 1  | Male   | 1956 | 59     | 4    | 55-59      | 0.9               |    |
| 14832  | 104583    | 1        | China   | 1               | 2  | 2  | Female | 1960 | 55     | 4    | 55-59      | 1.0               |    |
| 14835  | 104585    | 1        | China   | 1               | 2  | 2  | Female | 1963 | 52     | 3    | 50-54      | 1.2               |    |
| 14841  | 104591    | 1        | China   | 1               | 2  | 2  | Female | 1949 | 66     | 5    | >=60       | 1.1               |    |
| 14849  | 104592    | 1        | China   | 1               | 2  | 2  | Female | 1965 | 50     | 3    | 50-54      | 1.2               |    |
| 14850  | 104594    | 1        | China   | 1               | 2  | 1  | Male   | 1960 | 55     | 4    | 55-59      | 0.9               |    |
| 14851  | 104595    | 1        | China   | 1               | 1  | 1  | Male   | 1960 | 55     | 4    | 55-59      | 0.9               |    |
| 14856  | 104598    | 1        | China   | 1               | 2  | 2  | Female | 1959 | 56     | 4    | 55-59      | 1.0               |    |
| 14862  | 104602    | 1        | China   | 1               | 2  | 2  | Female | 1960 | 55     | 4    | 55-59      | 1.0               |    |
| 14863  | 301169    | 2        | Taiwan  | 1               | 2  | 2  | Female | 1965 | 50     | 3    | 50-54      | 0.9               |    |
| 14864  | 104603    | 1        | China   | 1               | 2  | 2  | Female | 1958 | 57     | 4    | 55-59      | 1.0               |    |
| 14866  | 104605    | 1        | China   | 1               | 2  | 2  | Female | 1963 | 52     | 3    | 50-54      | 1.2               |    |
| 14867  | 104606    | 1        | China   | 1               | 2  | 2  | Female | 1958 | 57     | 4    | 55-59      | 1.0               |    |
| 14868  | 281169925 | 1        | China   | 1               | 2  | 1  | Male   | 1974 | 41     | 1    | 40-44 year | 1.0               |    |
| 14870  | 104608    | 1        | China   | 1               | 1  | 2  | Female | 1969 | 46     | 2    | 45-49      | 1.0               | 2  |
| 14873  | 104610    | 1        | China   | 1               | 2  | 1  | Male   | 1972 | 43     | 1    | 40-44 year | 1.0               |    |
| 14878  | 380090434 | 2        | Taiwan  | 1               | 2  | 2  | Female | 1969 | 46     | 2    | 45-49      | 0.9               | 2  |
| 14879  | 301170    | 2        | Taiwan  | 1               | 2  | 1  | Male   | 1954 | 61     | 5    | >=60       | 1.6               |    |
| 14881  | 104614    | 1        | China   | 1               | 2  | 2  | Female | 1953 | 62     | 5    | >=60       | 1.1               |    |
| 14888  | 104617    | 1        | China   | 1               | 2  | 2  | Female | 1965 | 50     | 3    | 50-54      | 1.2               |    |
| 14895  | 104620    | 1        | China   | 1               | 2  | 2  | Female | 1961 | 54     | 3    | 50-54      | 1.2               |    |
| 14900  | 104623    | 1        | China   | 1               | 2  | 2  | Female | 1964 | 51     | 3    | 50-54      | 1.2               |    |
| 14912  | 104626    | 1        | China   | 1               | 2  | 1  | Male   | 1959 | 56     | 4    | 55-59      | 0.9               |    |
| 14922  | 104627    | 1        | China   | 1               | 2  | 2  | Female | 1960 | 55     | 4    | 55-59      | 1.0               |    |
| 14923  | 104628    | 1        | China   | 1               | 2  | 2  | Female | 1963 | 52     | 3    | 50-54      | 1.2               |    |
| 14924  | 301172    | 2        | Taiwan  | 1               | 2  | 1  | Male   | 1954 | 61     | 5    | >=60       | 1.6               |    |
| 14925  | 104629    | 1        | China   | 1               | 2  | 2  | Female | 1959 | 56     | 4    | 55-59      | 1.0               |    |
| 14926  | 104630    | 1        | China   | 1               | 2  | 2  | Female | 1961 | 54     | 3    | 50-54      | 1.2               |    |
| 14927  | 104631    | 1        | China   | 1               | 2  | 2  | Female | 1958 | 57     | 4    | 55-59      | 1.0               |    |
| 14930  | 104632    | 1        | China   | 1               | 2  | 2  | Female | 1958 | 57     | 4    | 55-59      | 1.0               |    |
| 14937  | 104635    | 1        | China   | 1               | 2  | 2  | Female | 1960 | 55     | 4    | 55-59      | 1.0               |    |
| 14938  | 104636    | 1        | China   | 1               | 2  | 2  | Female | 1962 | 53     | 3    | 50-54      | 1.2               |    |

| respid | SubsID | dCountry | Country | QDisclaim<br>er | Q1 | Q2 | Gender | Q3_1 | age Nr | dAge | age Group | Weight in<br>Ctry | Q4 |
|--------|--------|----------|---------|-----------------|----|----|--------|------|--------|------|-----------|-------------------|----|
| 14939  | 104637 | 1        | China   | 1               | 2  | 2  | Female | 1960 | 55     | 4    | 55-59     | 1.0               |    |
| 14942  | 104639 | 1        | China   | 1               | 2  | 2  | Female | 1958 | 57     | 4    | 55-59     | 1.0               |    |
| 14943  | 104640 | 1        | China   | 1               | 1  | 1  | Male   | 1956 | 59     | 4    | 55-59     | 0.9               |    |
| 14953  | 104641 | 1        | China   | 1               | 2  | 2  | Female | 1964 | 51     | 3    | 50-54     | 1.2               |    |
| 14954  | 104643 | 1        | China   | 1               | 2  | 2  | Female | 1961 | 54     | 3    | 50-54     | 1.2               |    |
| 14955  | 104645 | 1        | China   | 1               | 1  | 1  | Male   | 1953 | 62     | 5    | >=60      | 1.0               |    |
| 14957  | 104646 | 1        | China   | 1               | 2  | 2  | Female | 1959 | 56     | 4    | 55-59     | 1.0               |    |
| 14958  | 104647 | 1        | China   | 1               | 2  | 2  | Female | 1961 | 54     | 3    | 50-54     | 1.2               |    |
| 14959  | 104648 | 1        | China   | 1               | 2  | 2  | Female | 1957 | 58     | 4    | 55-59     | 1.0               |    |
| 14961  | 104650 | 1        | China   | 1               | 1  | 1  | Male   | 1960 | 55     | 4    | 55-59     | 0.9               |    |
| 14963  | 104651 | 1        | China   | 1               | 2  | 2  | Female | 1958 | 57     | 4    | 55-59     | 1.0               |    |
| 14964  | 104653 | 1        | China   | 1               | 2  | 1  | Male   | 1959 | 56     | 4    | 55-59     | 0.9               |    |
| 14965  | 104652 | 1        | China   | 1               | 2  | 2  | Female | 1962 | 53     | 3    | 50-54     | 1.2               |    |
| 14967  | 104654 | 1        | China   | 1               | 1  | 2  | Female | 1957 | 58     | 4    | 55-59     | 1.0               |    |
| 14970  | 104656 | 1        | China   | 1               | 2  | 2  | Female | 1959 | 56     | 4    | 55-59     | 1.0               |    |
| 14972  | 104657 | 1        | China   | 1               | 2  | 2  | Female | 1963 | 52     | 3    | 50-54     | 1.2               |    |
| 14975  | 104658 | 1        | China   | 1               | 1  | 2  | Female | 1958 | 57     | 4    | 55-59     | 1.0               |    |
| 14977  | 104660 | 1        | China   | 1               | 2  | 2  | Female | 1962 | 53     | 3    | 50-54     | 1.2               |    |
| 14982  | 301173 | 2        | Taiwan  | 1               | 2  | 1  | Male   | 1955 | 60     | 5    | >=60      | 1.6               |    |
| 14985  | 104663 | 1        | China   | 1               | 2  | 2  | Female | 1962 | 53     | 3    | 50-54     | 1.2               |    |
| 14986  | 104664 | 1        | China   | 1               | 1  | 1  | Male   | 1956 | 59     | 4    | 55-59     | 0.9               |    |
| 14987  | 201200 | 3        | Korea   | 1               | 2  | 2  | Female | 1959 | 56     | 4    | 55-59     | 0.7               |    |
| 14988  | 104665 | 1        | China   | 1               | 1  | 2  | Female | 1963 | 52     | 3    | 50-54     | 1.2               |    |
| 14989  | 104059 | 1        | China   | 1               | 2  | 2  | Female | 1963 | 52     | 3    | 50-54     | 1.2               |    |
| 14993  | 104666 | 1        | China   | 1               | 2  | 1  | Male   | 1959 | 56     | 4    | 55-59     | 0.9               |    |
| 15001  | 104671 | 1        | China   | 1               | 1  | 1  | Male   | 1959 | 56     | 4    | 55-59     | 0.9               |    |
| 15002  | 104672 | 1        | China   | 1               | 2  | 2  | Female | 1964 | 51     | 3    | 50-54     | 1.2               |    |
| 15006  | 104673 | 1        | China   | 1               | 2  | 1  | Male   | 1959 | 56     | 4    | 55-59     | 0.9               |    |
| 15007  | 104674 | 1        | China   | 1               | 2  | 2  | Female | 1963 | 52     | 3    | 50-54     | 1.2               |    |
| 15014  | 104678 | 1        | China   | 1               | 2  | 2  | Female | 1960 | 55     | 4    | 55-59     | 1.0               |    |
| 15020  | 104681 | 1        | China   | 1               | 2  | 1  | Male   | 1959 | 56     | 4    | 55-59     | 0.9               |    |
| 15021  | 104682 | 1        | China   | 1               | 2  | 2  | Female | 1955 | 60     | 5    | >=60      | 1.1               |    |

| respid | SubsID    | dCountry | Country | QDisclaimer | Q1 | Q2 | Gender   | Q3_1 | age Nr | dAge | age Group | Weight in Ctry | Q4 |
|--------|-----------|----------|---------|-------------|----|----|----------|------|--------|------|-----------|----------------|----|
| 15023  | 104684    | 1        | China   | 1           | 1  | 1  | 2 Female | 1964 | 51     | 3    | 50-54     | 1.2            |    |
| 15030  | 104686    | 1        | China   | 1           | 2  | 2  | 2 Female | 1961 | 54     | 3    | 50-54     | 1.2            |    |
| 15032  | 104687    | 1        | China   | 1           | 2  | 2  | 2 Female | 1965 | 50     | 3    | 50-54     | 1.2            |    |
| 15033  | 104688    | 1        | China   | 1           | 1  | 2  | 2 Female | 1951 | 64     | 5    | >=60      | 1.1            |    |
| 15034  | 104689    | 1        | China   | 1           | 2  | 1  | 1 Male   | 1959 | 56     | 4    | 55-59     | 0.9            |    |
| 15035  | 104690    | 1        | China   | 1           | 2  | 2  | 2 Female | 1963 | 52     | 3    | 50-54     | 1.2            |    |
| 15037  | 104692    | 1        | China   | 1           | 2  | 1  | 1 Male   | 1957 | 58     | 4    | 55-59     | 0.9            |    |
| 15039  | 104694    | 1        | China   | 1           | 2  | 2  | 2 Female | 1958 | 57     | 4    | 55-59     | 1.0            |    |
| 15040  | 104695    | 1        | China   | 1           | 1  | 2  | 2 Female | 1958 | 57     | 4    | 55-59     | 1.0            |    |
| 15042  | 104697    | 1        | China   | 1           | 2  | 2  | 2 Female | 1962 | 53     | 3    | 50-54     | 1.2            |    |
| 15044  | 104699    | 1        | China   | 1           | 1  | 2  | 2 Female | 1959 | 56     | 4    | 55-59     | 1.0            |    |
| 15045  | 201202    | 3        | Korea   | 1           | 2  | 2  | 2 Female | 1957 | 58     | 4    | 55-59     | 0.7            |    |
| 15046  | 104700    | 1        | China   | 1           | 2  | 1  | 1 Male   | 1955 | 60     | 5    | >=60      | 1.0            |    |
| 15052  | 104704    | 1        | China   | 1           | 2  | 2  | 2 Female | 1956 | 59     | 4    | 55-59     | 1.0            |    |
| 15058  | 104709    | 1        | China   | 1           | 2  | 2  | 2 Female | 1965 | 50     | 3    | 50-54     | 1.2            |    |
| 15063  | 104711    | 1        | China   | 1           | 2  | 2  | 2 Female | 1958 | 57     | 4    | 55-59     | 1.0            |    |
| 15066  | 104713    | 1        | China   | 1           | 2  | 2  | 2 Female | 1957 | 58     | 4    | 55-59     | 1.0            |    |
| 15069  | 104715    | 1        | China   | 1           | 1  | 1  | 1 Male   | 1950 | 65     | 5    | >=60      | 1.0            |    |
| 15071  | 104717    | 1        | China   | 1           | 1  | 2  | 2 Female | 1945 | 70     | 5    | >=60      | 1.1            |    |
| 15076  | 104719    | 1        | China   | 1           | 2  | 1  | 1 Male   | 1950 | 65     | 5    | >=60      | 1.0            |    |
| 15078  | 350178597 | 3        | Korea   | 1           | 2  | 2  | 2 Female | 1967 | 48     | 2    | 45-49     | 0.9            | 2  |
| 15087  | 104723    | 1        | China   | 1           | 2  | 2  | 2 Female | 1961 | 54     | 3    | 50-54     | 1.2            |    |
| 15090  | 104726    | 1        | China   | 1           | 2  | 2  | 2 Female | 1952 | 63     | 5    | >=60      | 1.1            |    |
| 15091  | 104727    | 1        | China   | 1           | 2  | 2  | 2 Female | 1965 | 50     | 3    | 50-54     | 1.2            |    |
| 15092  | 104728    | 1        | China   | 1           | 2  | 2  | 2 Female | 1960 | 55     | 4    | 55-59     | 1.0            |    |
| 15096  | 104718    | 1        | China   | 1           | 2  | 2  | 2 Female | 1955 | 60     | 5    | >=60      | 1.1            |    |
| 15106  | 104736    | 1        | China   | 1           | 2  | 2  | 2 Female | 1957 | 58     | 4    | 55-59     | 1.0            |    |
| 15108  | 104738    | 1        | China   | 1           | 1  | 1  | 1 Male   | 1956 | 59     | 4    | 55-59     | 0.9            |    |
| 15113  | 104741    | 1        | China   | 1           | 1  | 2  | 2 Female | 1960 | 55     | 4    | 55-59     | 1.0            |    |
| 15116  | 104744    | 1        | China   | 1           | 2  | 2  | 2 Female | 1969 | 46     | 2    | 45-49     | 1.0            | 2  |
| 15119  | 104747    | 1        | China   | 1           | 2  | 1  | 1 Male   | 1955 | 60     | 5    | >=60      | 1.0            |    |
| 15120  | 104748    | 1        | China   | 1           | 2  | 1  | 1 Male   | 1959 | 56     | 4    | 55-59     | 0.9            |    |

| respid | SubsID | dCountry | Country | QDisclaimer | Q1 | Q2 | Gender   | Q3_1 | age Nr | dAge | age Group | Weight in Ctry | Q4 |
|--------|--------|----------|---------|-------------|----|----|----------|------|--------|------|-----------|----------------|----|
| 15121  | 104750 | 1        | China   |             | 1  | 2  | 1 Male   | 1959 | 56     | 4    | 55-59     | 0.9            |    |
| 15123  | 104751 | 1        | China   |             | 1  | 2  | 1 Male   | 1960 | 55     | 4    | 55-59     | 0.9            |    |
| 15124  | 104752 | 1        | China   |             | 1  | 1  | 2 Female | 1963 | 52     | 3    | 50-54     | 1.2            |    |
| 15128  | 104754 | 1        | China   |             | 1  | 2  | 2 Female | 1965 | 50     | 3    | 50-54     | 1.2            |    |
| 15131  | 104755 | 1        | China   |             | 1  | 1  | 1 Male   | 1955 | 60     | 5    | >=60      | 1.0            |    |
| 15136  | 104756 | 1        | China   |             | 1  | 2  | 2 Female | 1956 | 59     | 4    | 55-59     | 1.0            |    |
| 15137  | 104757 | 1        | China   |             | 1  | 2  | 2 Female | 1956 | 59     | 4    | 55-59     | 1.0            |    |
| 15141  | 104760 | 1        | China   |             | 1  | 2  | 1 Male   | 1957 | 58     | 4    | 55-59     | 0.9            |    |
| 15144  | 104762 | 1        | China   |             | 1  | 1  | 2 Female | 1960 | 55     | 4    | 55-59     | 1.0            |    |
| 15147  | 104764 | 1        | China   |             | 1  | 2  | 1 Male   | 1955 | 60     | 5    | >=60      | 1.0            |    |
| 15151  | 104765 | 1        | China   |             | 1  | 2  | 1 Male   | 1959 | 56     | 4    | 55-59     | 0.9            |    |
| 15154  | 104766 | 1        | China   |             | 1  | 2  | 2 Female | 1963 | 52     | 3    | 50-54     | 1.2            |    |
| 15157  | 104768 | 1        | China   |             | 1  | 1  | 1 Male   | 1959 | 56     | 4    | 55-59     | 0.9            |    |
| 15164  | 104773 | 1        | China   |             | 1  | 2  | 2 Female | 1957 | 58     | 4    | 55-59     | 1.0            |    |
| 15168  | 104774 | 1        | China   |             | 1  | 1  | 1 Male   | 1956 | 59     | 4    | 55-59     | 0.9            |    |
| 15169  | 104775 | 1        | China   |             | 1  | 2  | 1 Male   | 1954 | 61     | 5    | >=60      | 1.0            |    |
| 15172  | 104777 | 1        | China   |             | 1  | 2  | 2 Female | 1958 | 57     | 4    | 55-59     | 1.0            |    |
| 15177  | 104778 | 1        | China   |             | 1  | 2  | 2 Female | 1958 | 57     | 4    | 55-59     | 1.0            |    |
| 15178  | 104780 | 1        | China   |             | 1  | 1  | 2 Female | 1960 | 55     | 4    | 55-59     | 1.0            |    |
| 15180  | 104782 | 1        | China   |             | 1  | 2  | 2 Female | 1960 | 55     | 4    | 55-59     | 1.0            |    |
| 15181  | 104783 | 1        | China   |             | 1  | 2  | 1 Male   | 1960 | 55     | 4    | 55-59     | 0.9            |    |
| 15182  | 104784 | 1        | China   |             | 1  | 2  | 1 Male   | 1958 | 57     | 4    | 55-59     | 0.9            |    |
| 15183  | 104785 | 1        | China   |             | 1  | 2  | 1 Male   | 1960 | 55     | 4    | 55-59     | 0.9            |    |
| 15188  | 104788 | 1        | China   |             | 1  | 1  | 2 Female | 1960 | 55     | 4    | 55-59     | 1.0            |    |
| 15190  | 104789 | 1        | China   |             | 1  | 2  | 2 Female | 1964 | 51     | 3    | 50-54     | 1.2            |    |
| 15195  | 104792 | 1        | China   |             | 1  | 1  | 2 Female | 1965 | 50     | 3    | 50-54     | 1.2            |    |
| 15201  | 104794 | 1        | China   |             | 1  | 2  | 2 Female | 1965 | 50     | 3    | 50-54     | 1.2            |    |
| 15203  | 104795 | 1        | China   |             | 1  | 1  | 1 Male   | 1960 | 55     | 4    | 55-59     | 0.9            |    |
| 15204  | 104796 | 1        | China   |             | 1  | 2  | 1 Male   | 1959 | 56     | 4    | 55-59     | 0.9            |    |
| 15207  | 104798 | 1        | China   |             | 1  | 1  | 1 Male   | 1954 | 61     | 5    | >=60      | 1.0            |    |
| 15208  | 104799 | 1        | China   |             | 1  | 2  | 2 Female | 1964 | 51     | 3    | 50-54     | 1.2            |    |
| 15209  | 104800 | 1        | China   |             | 1  | 2  | 1 Male   | 1960 | 55     | 4    | 55-59     | 0.9            |    |



| respid | SubsID | dCountry | Country | QDisclaimer | Q1 | Q2 | Gender   | Q3_1 | age Nr | dAge | age Group  | Weight in Ctry | Q4 |
|--------|--------|----------|---------|-------------|----|----|----------|------|--------|------|------------|----------------|----|
| 15212  | 104801 | 1        | China   |             | 1  | 2  | 2 Female | 1962 | 53     | 3    | 50-54      | 1.2            |    |
| 15213  | 104802 | 1        | China   |             | 1  | 2  | 1 Male   | 1960 | 55     | 4    | 55-59      | 0.9            |    |
| 15219  | 104805 | 1        | China   |             | 1  | 2  | 1 Male   | 1958 | 57     | 4    | 55-59      | 0.9            |    |
| 15220  | 104806 | 1        | China   |             | 1  | 2  | 1 Male   | 1959 | 56     | 4    | 55-59      | 0.9            |    |
| 15221  | 104807 | 1        | China   |             | 1  | 2  | 2 Female | 1964 | 51     | 3    | 50-54      | 1.2            |    |
| 15223  | 104808 | 1        | China   |             | 1  | 2  | 2 Female | 1958 | 57     | 4    | 55-59      | 1.0            |    |
| 15224  | 104809 | 1        | China   |             | 1  | 2  | 1 Male   | 1957 | 58     | 4    | 55-59      | 0.9            |    |
| 15225  | 104810 | 1        | China   |             | 1  | 2  | 2 Female | 1960 | 55     | 4    | 55-59      | 1.0            |    |
| 15226  | 104811 | 1        | China   |             | 1  | 2  | 2 Female | 1954 | 61     | 5    | >=60       | 1.1            |    |
| 15230  | 104813 | 1        | China   |             | 1  | 2  | 2 Female | 1963 | 52     | 3    | 50-54      | 1.2            |    |
| 15231  | 104814 | 1        | China   |             | 1  | 2  | 2 Female | 1961 | 54     | 3    | 50-54      | 1.2            |    |
| 15232  | 104815 | 1        | China   |             | 1  | 2  | 1 Male   | 1960 | 55     | 4    | 55-59      | 0.9            |    |
| 15237  | 104816 | 1        | China   |             | 1  | 2  | 1 Male   | 1956 | 59     | 4    | 55-59      | 0.9            |    |
| 15239  | 104817 | 1        | China   |             | 1  | 2  | 2 Female | 1962 | 53     | 3    | 50-54      | 1.2            |    |
| 15241  | 104818 | 1        | China   |             | 1  | 2  | 2 Female | 1963 | 52     | 3    | 50-54      | 1.2            |    |
| 15242  | 104819 | 1        | China   |             | 1  | 1  | 1 Male   | 1959 | 56     | 4    | 55-59      | 0.9            |    |
| 15247  | 104823 | 1        | China   |             | 1  | 2  | 2 Female | 1964 | 51     | 3    | 50-54      | 1.2            |    |
| 15248  | 104820 | 1        | China   |             | 1  | 1  | 2 Female | 1955 | 60     | 5    | >=60       | 1.1            |    |
| 15251  | 104824 | 1        | China   |             | 1  | 2  | 1 Male   | 1958 | 57     | 4    | 55-59      | 0.9            |    |
| 15257  | 104825 | 1        | China   |             | 1  | 2  | 2 Female | 1962 | 53     | 3    | 50-54      | 1.2            |    |
| 15260  | 104828 | 1        | China   |             | 1  | 2  | 2 Female | 1961 | 54     | 3    | 50-54      | 1.2            |    |
| 15261  | 104829 | 1        | China   |             | 1  | 2  | 1 Male   | 1960 | 55     | 4    | 55-59      | 0.9            |    |
| 15262  | 104830 | 1        | China   |             | 1  | 2  | 1 Male   | 1956 | 59     | 4    | 55-59      | 0.9            |    |
| 15263  | 104831 | 1        | China   |             | 1  | 1  | 1 Male   | 1961 | 54     | 3    | 50-54      | 1.0            |    |
| 15265  | 104833 | 1        | China   |             | 1  | 2  | 2 Female | 1961 | 54     | 3    | 50-54      | 1.2            |    |
| 15266  | 201204 | 3        | Korea   |             | 1  | 2  | 1 Male   | 1948 | 67     | 5    | >=60       | 1.6            |    |
| 15268  | 104835 | 1        | China   |             | 1  | 2  | 1 Male   | 1958 | 57     | 4    | 55-59      | 0.9            |    |
| 15269  | 201205 | 3        | Korea   |             | 1  | 2  | 1 Male   | 1971 | 44     | 1    | 40-44 year | 0.9            |    |
| 15270  | 201206 | 3        | Korea   |             | 1  | 2  | 1 Male   | 1973 | 42     | 1    | 40-44 year | 0.9            |    |
| 15273  | 104837 | 1        | China   |             | 1  | 2  | 2 Female | 1958 | 57     | 4    | 55-59      | 1.0            |    |
| 15276  | 104838 | 1        | China   |             | 1  | 2  | 1 Male   | 1959 | 56     | 4    | 55-59      | 0.9            |    |
| 15277  | 104839 | 1        | China   |             | 1  | 2  | 2 Female | 1961 | 54     | 3    | 50-54      | 1.2            |    |

| respid | SubsID | dCountry | Country | QDisclaim<br>er | Q1 | Q2 | Gender | Q3_1 | age Nr | dAge | age Group  | Weight in<br>Ctry | Q4 |
|--------|--------|----------|---------|-----------------|----|----|--------|------|--------|------|------------|-------------------|----|
| 15282  | 201209 | 3        | Korea   | 1               | 2  | 2  | Female | 1968 | 47     | 2    | 45-49      | 0.9               | 2  |
| 15284  | 104840 | 1        | China   | 1               | 2  | 1  | Male   | 1954 | 61     | 5    | >=60       | 1.0               |    |
| 15285  | 201210 | 3        | Korea   | 1               | 2  | 1  | Male   | 1974 | 41     | 1    | 40-44 year | 0.9               |    |
| 15286  | 104841 | 1        | China   | 1               | 2  | 2  | Female | 1963 | 52     | 3    | 50-54      | 1.2               |    |
| 15288  | 104842 | 1        | China   | 1               | 2  | 1  | Male   | 1961 | 54     | 3    | 50-54      | 1.0               |    |
| 15292  | 104845 | 1        | China   | 1               | 2  | 1  | Male   | 1960 | 55     | 4    | 55-59      | 0.9               |    |
| 15296  | 104847 | 1        | China   | 1               | 2  | 2  | Female | 1971 | 44     | 1    | 40-44 year | 1.0               | 2  |
| 15297  | 101793 | 1        | China   | 1               | 2  | 2  | Female | 1975 | 40     | 1    | 40-44 year | 1.0               | 2  |
| 15298  | 200355 | 3        | Korea   | 1               | 2  | 2  | Female | 1969 | 46     | 2    | 45-49      | 0.9               | 2  |
| 15301  | 104849 | 1        | China   | 1               | 2  | 2  | Female | 1973 | 42     | 1    | 40-44 year | 1.0               | 2  |
| 15302  | 104848 | 1        | China   | 1               | 2  | 1  | Male   | 1960 | 55     | 4    | 55-59      | 0.9               |    |
| 15305  | 104850 | 1        | China   | 1               | 2  | 1  | Male   | 1953 | 62     | 5    | >=60       | 1.0               |    |
| 15307  | 201211 | 3        | Korea   | 1               | 2  | 1  | Male   | 1968 | 47     | 2    | 45-49      | 0.8               |    |
| 15308  | 201212 | 3        | Korea   | 1               | 2  | 2  | Female | 1974 | 41     | 1    | 40-44 year | 0.9               | 2  |
| 15309  | 201213 | 3        | Korea   | 1               | 2  | 1  | Male   | 1967 | 48     | 2    | 45-49      | 0.8               |    |
| 15311  | 201214 | 3        | Korea   | 1               | 2  | 1  | Male   | 1972 | 43     | 1    | 40-44 year | 0.9               |    |
| 15315  | 104855 | 1        | China   | 1               | 2  | 1  | Male   | 1959 | 56     | 4    | 55-59      | 0.9               |    |
| 15316  | 104856 | 1        | China   | 1               | 2  | 2  | Female | 1973 | 42     | 1    | 40-44 year | 1.0               | 2  |
| 15318  | 104857 | 1        | China   | 1               | 1  | 2  | Female | 1960 | 55     | 4    | 55-59      | 1.0               |    |
| 15321  | 104859 | 1        | China   | 1               | 2  | 1  | Male   | 1960 | 55     | 4    | 55-59      | 0.9               |    |
| 15322  | 201215 | 3        | Korea   | 1               | 2  | 1  | Male   | 1945 | 70     | 5    | >=60       | 1.6               |    |
| 15324  | 201216 | 3        | Korea   | 1               | 2  | 2  | Female | 1969 | 46     | 2    | 45-49      | 0.9               | 2  |
| 15326  | 104860 | 1        | China   | 1               | 2  | 1  | Male   | 1960 | 55     | 4    | 55-59      | 0.9               |    |
| 15327  | 201217 | 3        | Korea   | 1               | 2  | 1  | Male   | 1955 | 60     | 5    | >=60       | 1.6               |    |
| 15328  | 104861 | 1        | China   | 1               | 1  | 2  | Female | 1961 | 54     | 3    | 50-54      | 1.2               |    |
| 15330  | 104863 | 1        | China   | 1               | 2  | 2  | Female | 1966 | 49     | 2    | 45-49      | 1.0               | 2  |
| 15332  | 104864 | 1        | China   | 1               | 1  | 1  | Male   | 1963 | 52     | 3    | 50-54      | 1.0               |    |
| 15333  | 104865 | 1        | China   | 1               | 2  | 2  | Female | 1969 | 46     | 2    | 45-49      | 1.0               | 2  |
| 15334  | 104866 | 1        | China   | 1               | 2  | 1  | Male   | 1959 | 56     | 4    | 55-59      | 0.9               |    |
| 15336  | 104867 | 1        | China   | 1               | 2  | 1  | Male   | 1960 | 55     | 4    | 55-59      | 0.9               |    |
| 15337  | 104868 | 1        | China   | 1               | 2  | 2  | Female | 1966 | 49     | 2    | 45-49      | 1.0               | 2  |
| 15338  | 104869 | 1        | China   | 1               | 2  | 2  | Female | 1962 | 53     | 3    | 50-54      | 1.2               |    |

| respid | SubsID | dCountry | Country | QDisclaimer | Q1 | Q2 | Gender   | Q3_1 | age Nr | dAge | age Group  | Weight in Ctry | Q4 |
|--------|--------|----------|---------|-------------|----|----|----------|------|--------|------|------------|----------------|----|
| 15339  | 104870 | 1        | China   |             | 1  | 2  | 2 Female | 1969 | 46     | 2    | 45-49      | 1.0            | 2  |
| 15341  | 104872 | 1        | China   |             | 1  | 2  | 1 Male   | 1965 | 50     | 3    | 50-54      | 1.0            |    |
| 15344  | 101464 | 1        | China   |             | 1  | 2  | 2 Female | 1967 | 48     | 2    | 45-49      | 1.0            | 2  |
| 15345  | 104873 | 1        | China   |             | 1  | 2  | 2 Female | 1967 | 48     | 2    | 45-49      | 1.0            | 2  |
| 15350  | 104875 | 1        | China   |             | 1  | 1  | 2 Female | 1965 | 50     | 3    | 50-54      | 1.2            |    |
| 15351  | 104876 | 1        | China   |             | 1  | 2  | 1 Male   | 1959 | 56     | 4    | 55-59      | 0.9            |    |
| 15352  | 201219 | 3        | Korea   |             | 1  | 1  | 2 Female | 1969 | 46     | 2    | 45-49      | 0.9            | 2  |
| 15372  | 104883 | 1        | China   |             | 1  | 2  | 1 Male   | 1958 | 57     | 4    | 55-59      | 0.9            |    |
| 15373  | 104884 | 1        | China   |             | 1  | 2  | 2 Female | 1957 | 58     | 4    | 55-59      | 1.0            |    |
| 15376  | 201220 | 3        | Korea   |             | 1  | 2  | 1 Male   | 1965 | 50     | 3    | 50-54      | 0.9            |    |
| 15377  | 104886 | 1        | China   |             | 1  | 2  | 2 Female | 1961 | 54     | 3    | 50-54      | 1.2            |    |
| 15382  | 104887 | 1        | China   |             | 1  | 2  | 1 Male   | 1959 | 56     | 4    | 55-59      | 0.9            |    |
| 15383  | 201221 | 3        | Korea   |             | 1  | 2  | 1 Male   | 1969 | 46     | 2    | 45-49      | 0.8            |    |
| 15385  | 104889 | 1        | China   |             | 1  | 2  | 2 Female | 1958 | 57     | 4    | 55-59      | 1.0            |    |
| 15390  | 104890 | 1        | China   |             | 1  | 2  | 2 Female | 1963 | 52     | 3    | 50-54      | 1.2            |    |
| 15399  | 104892 | 1        | China   |             | 1  | 1  | 2 Female | 1965 | 50     | 3    | 50-54      | 1.2            |    |
| 15404  | 201223 | 3        | Korea   |             | 1  | 2  | 1 Male   | 1966 | 49     | 2    | 45-49      | 0.8            |    |
| 15410  | 104895 | 1        | China   |             | 1  | 2  | 2 Female | 1972 | 43     | 1    | 40-44 year | 1.0            | 2  |
| 15411  | 104896 | 1        | China   |             | 1  | 1  | 1 Male   | 1953 | 62     | 5    | >=60       | 1.0            |    |
| 15412  | 104897 | 1        | China   |             | 1  | 2  | 2 Female | 1961 | 54     | 3    | 50-54      | 1.2            |    |
| 15413  | 301177 | 2        | Taiwan  |             | 1  | 2  | 1 Male   | 1966 | 49     | 2    | 45-49      | 0.8            |    |
| 15414  | 104898 | 1        | China   |             | 1  | 2  | 2 Female | 1965 | 50     | 3    | 50-54      | 1.2            |    |
| 15417  | 104899 | 1        | China   |             | 1  | 2  | 2 Female | 1960 | 55     | 4    | 55-59      | 1.0            |    |
| 15418  | 201224 | 3        | Korea   |             | 1  | 2  | 1 Male   | 1970 | 45     | 2    | 45-49      | 0.8            |    |
| 15421  | 104901 | 1        | China   |             | 1  | 2  | 2 Female | 1965 | 50     | 3    | 50-54      | 1.2            |    |
| 15423  | 104902 | 1        | China   |             | 1  | 2  | 1 Male   | 1960 | 55     | 4    | 55-59      | 0.9            |    |
| 15425  | 201225 | 3        | Korea   |             | 1  | 2  | 2 Female | 1967 | 48     | 2    | 45-49      | 0.9            | 2  |
| 15426  | 104903 | 1        | China   |             | 1  | 2  | 1 Male   | 1960 | 55     | 4    | 55-59      | 0.9            |    |
| 15430  | 104905 | 1        | China   |             | 1  | 2  | 1 Male   | 1958 | 57     | 4    | 55-59      | 0.9            |    |
| 15431  | 104906 | 1        | China   |             | 1  | 2  | 2 Female | 1958 | 57     | 4    | 55-59      | 1.0            |    |
| 15435  | 104910 | 1        | China   |             | 1  | 2  | 2 Female | 1975 | 40     | 1    | 40-44 year | 1.0            | 2  |
| 15436  | 201226 | 3        | Korea   |             | 1  | 2  | 1 Male   | 1971 | 44     | 1    | 40-44 year | 0.9            |    |

| respid | SubsID | dCountry | Country  | QDisclaimer | Q1 | Q2 | Gender   | Q3_1 | age Nr | dAge | age Group    | Weight in Ctry | Q4 |
|--------|--------|----------|----------|-------------|----|----|----------|------|--------|------|--------------|----------------|----|
| 15437  | 301178 |          | 2 Taiwan |             | 1  | 2  | 2 Female | 1952 | 63     |      | 5 >=60       | 1.7            |    |
| 15438  | 104911 |          | 1 China  |             | 1  | 1  | 2 Female | 1974 | 41     |      | 1 40-44 year | 1.0            | 2  |
| 15439  | 104912 |          | 1 China  |             | 1  | 2  | 1 Male   | 1960 | 55     |      | 4 55-59      | 0.9            |    |
| 15441  | 104914 |          | 1 China  |             | 1  | 2  | 2 Female | 1960 | 55     |      | 4 55-59      | 1.0            |    |
| 15443  | 201227 |          | 3 Korea  |             | 1  | 2  | 1 Male   | 1946 | 69     |      | 5 >=60       | 1.6            |    |
| 15446  | 104915 |          | 1 China  |             | 1  | 2  | 1 Male   | 1959 | 56     |      | 4 55-59      | 0.9            |    |
| 15449  | 104916 |          | 1 China  |             | 1  | 1  | 1 Male   | 1953 | 62     |      | 5 >=60       | 1.0            |    |
| 15451  | 201229 |          | 3 Korea  |             | 1  | 2  | 2 Female | 1971 | 44     |      | 1 40-44 year | 0.9            | 2  |
| 15452  | 104917 |          | 1 China  |             | 1  | 1  | 2 Female | 1957 | 58     |      | 4 55-59      | 1.0            |    |
| 15454  | 301180 |          | 2 Taiwan |             | 1  | 2  | 1 Male   | 1955 | 60     |      | 5 >=60       | 1.6            |    |
| 15456  | 201230 |          | 3 Korea  |             | 1  | 2  | 1 Male   | 1963 | 52     |      | 3 50-54      | 0.9            |    |
| 15457  | 104919 |          | 1 China  |             | 1  | 2  | 2 Female | 1974 | 41     |      | 1 40-44 year | 1.0            | 2  |
| 15458  | 201231 |          | 3 Korea  |             | 1  | 1  | 2 Female | 1971 | 44     |      | 1 40-44 year | 0.9            | 2  |
| 15462  | 201232 |          | 3 Korea  |             | 1  | 2  | 1 Male   | 1953 | 62     |      | 5 >=60       | 1.6            |    |
| 15467  | 104922 |          | 1 China  |             | 1  | 2  | 2 Female | 1959 | 56     |      | 4 55-59      | 1.0            |    |
| 15470  | 104925 |          | 1 China  |             | 1  | 2  | 2 Female | 1959 | 56     |      | 4 55-59      | 1.0            |    |
| 15472  | 201233 |          | 3 Korea  |             | 1  | 2  | 1 Male   | 1952 | 63     |      | 5 >=60       | 1.6            |    |
| 15476  | 201234 |          | 3 Korea  |             | 1  | 2  | 2 Female | 1973 | 42     |      | 1 40-44 year | 0.9            | 2  |
| 15477  | 104927 |          | 1 China  |             | 1  | 2  | 2 Female | 1965 | 50     |      | 3 50-54      | 1.2            |    |
| 15488  | 104928 |          | 1 China  |             | 1  | 2  | 2 Female | 1973 | 42     |      | 1 40-44 year | 1.0            | 2  |
| 15489  | 104929 |          | 1 China  |             | 1  | 2  | 2 Female | 1968 | 47     |      | 2 45-49      | 1.0            | 2  |
| 15490  | 104930 |          | 1 China  |             | 1  | 2  | 2 Female | 1964 | 51     |      | 3 50-54      | 1.2            |    |
| 15496  | 201235 |          | 3 Korea  |             | 1  | 2  | 1 Male   | 1953 | 62     |      | 5 >=60       | 1.6            |    |
| 15497  | 104933 |          | 1 China  |             | 1  | 2  | 2 Female | 1957 | 58     |      | 4 55-59      | 1.0            |    |
| 15498  | 301181 |          | 2 Taiwan |             | 1  | 2  | 1 Male   | 1953 | 62     |      | 5 >=60       | 1.6            |    |
| 15509  | 104935 |          | 1 China  |             | 1  | 2  | 1 Male   | 1957 | 58     |      | 4 55-59      | 0.9            |    |
| 15510  | 104936 |          | 1 China  |             | 1  | 2  | 2 Female | 1964 | 51     |      | 3 50-54      | 1.2            |    |
| 15516  | 201236 |          | 3 Korea  |             | 1  | 2  | 2 Female | 1971 | 44     |      | 1 40-44 year | 0.9            | 2  |
| 15519  | 104937 |          | 1 China  |             | 1  | 1  | 2 Female | 1967 | 48     |      | 2 45-49      | 1.0            | 2  |
| 15520  | 104940 |          | 1 China  |             | 1  | 2  | 2 Female | 1963 | 52     |      | 3 50-54      | 1.2            |    |
| 15524  | 201237 |          | 3 Korea  |             | 1  | 2  | 2 Female | 1971 | 44     |      | 1 40-44 year | 0.9            | 2  |
| 15525  | 201238 |          | 3 Korea  |             | 1  | 1  | 1 Male   | 1973 | 42     |      | 1 40-44 year | 0.9            |    |

| respid | SubsID    | dCountry | Country | QDisclaim<br>er | Q1 | Q2 | Gender | Q3_1 | age Nr | dAge | age Group  | Weight in<br>Ctry | Q4 |
|--------|-----------|----------|---------|-----------------|----|----|--------|------|--------|------|------------|-------------------|----|
| 15526  | 104942    | 1        | China   | 1               | 2  | 2  | Female | 1960 | 55     | 4    | 55-59      | 1.0               |    |
| 15531  | 104943    | 1        | China   | 1               | 2  | 2  | Female | 1962 | 53     | 3    | 50-54      | 1.2               |    |
| 15532  | 104944    | 1        | China   | 1               | 2  | 2  | Female | 1973 | 42     | 1    | 40-44 year | 1.0               | 2  |
| 15534  | 104946    | 1        | China   | 1               | 2  | 2  | Female | 1960 | 55     | 4    | 55-59      | 1.0               |    |
| 15535  | 104947    | 1        | China   | 1               | 2  | 2  | Female | 1960 | 55     | 4    | 55-59      | 1.0               |    |
| 15539  | 104949    | 1        | China   | 1               | 1  | 1  | Male   | 1956 | 59     | 4    | 55-59      | 0.9               |    |
| 15550  | 350335560 | 3        | Korea   | 1               | 2  | 1  | Male   | 1960 | 55     | 4    | 55-59      | 0.8               |    |
| 15556  | 104953    | 1        | China   | 1               | 2  | 2  | Female | 1965 | 50     | 3    | 50-54      | 1.2               |    |
| 15558  | 104954    | 1        | China   | 1               | 2  | 2  | Female | 1960 | 55     | 4    | 55-59      | 1.0               |    |
| 15565  | 201239    | 3        | Korea   | 1               | 2  | 2  | Female | 1970 | 45     | 2    | 45-49      | 0.9               | 2  |
| 15567  | 104957    | 1        | China   | 1               | 2  | 2  | Female | 1955 | 60     | 5    | >=60       | 1.1               |    |
| 15568  | 104958    | 1        | China   | 1               | 2  | 2  | Female | 1960 | 55     | 4    | 55-59      | 1.0               |    |
| 15571  | 201240    | 3        | Korea   | 1               | 1  | 1  | Male   | 1966 | 49     | 2    | 45-49      | 0.8               |    |
| 15573  | 301183    | 2        | Taiwan  | 1               | 2  | 1  | Male   | 1949 | 66     | 5    | >=60       | 1.6               |    |
| 15574  | 104960    | 1        | China   | 1               | 2  | 2  | Female | 1960 | 55     | 4    | 55-59      | 1.0               |    |
| 15576  | 104961    | 1        | China   | 1               | 1  | 1  | Male   | 1973 | 42     | 1    | 40-44 year | 1.0               |    |
| 15587  | 201241    | 3        | Korea   | 1               | 2  | 2  | Female | 1964 | 51     | 3    | 50-54      | 0.8               |    |
| 15588  | 104966    | 1        | China   | 1               | 2  | 2  | Female | 1972 | 43     | 1    | 40-44 year | 1.0               | 2  |
| 15593  | 104967    | 1        | China   | 1               | 2  | 1  | Male   | 1968 | 47     | 2    | 45-49      | 1.0               |    |
| 15597  | 104969    | 1        | China   | 1               | 2  | 2  | Female | 1968 | 47     | 2    | 45-49      | 1.0               | 2  |
| 15598  | 200219    | 3        | Korea   | 1               | 2  | 1  | Male   | 1963 | 52     | 3    | 50-54      | 0.9               |    |
| 15599  | 201242    | 3        | Korea   | 1               | 2  | 1  | Male   | 1949 | 66     | 5    | >=60       | 1.6               |    |
| 15601  | 201244    | 3        | Korea   | 1               | 2  | 1  | Male   | 1947 | 68     | 5    | >=60       | 1.6               |    |
| 15604  | 104970    | 1        | China   | 1               | 2  | 2  | Female | 1973 | 42     | 1    | 40-44 year | 1.0               | 2  |
| 15611  | 201245    | 3        | Korea   | 1               | 2  | 1  | Male   | 1964 | 51     | 3    | 50-54      | 0.9               |    |
| 15613  | 201246    | 3        | Korea   | 1               | 2  | 1  | Male   | 1975 | 40     | 1    | 40-44 year | 0.9               |    |
| 15614  | 201247    | 3        | Korea   | 1               | 2  | 1  | Male   | 1954 | 61     | 5    | >=60       | 1.6               |    |
| 15617  | 201248    | 3        | Korea   | 1               | 2  | 2  | Female | 1955 | 60     | 5    | >=60       | 1.6               |    |
| 15622  | 301184    | 2        | Taiwan  | 1               | 1  | 2  | Female | 1969 | 46     | 2    | 45-49      | 0.9               | 2  |
| 15623  | 104974    | 1        | China   | 1               | 2  | 2  | Female | 1968 | 47     | 2    | 45-49      | 1.0               | 2  |
| 15625  | 201250    | 3        | Korea   | 1               | 2  | 1  | Male   | 1967 | 48     | 2    | 45-49      | 0.8               |    |
| 15627  | 201251    | 3        | Korea   | 1               | 1  | 1  | Male   | 1972 | 43     | 1    | 40-44 year | 0.9               |    |

| respid | SubsID | dCountry | Country | QDisclaim<br>er | Q1 | Q2 | Gender | Q3_1 | age Nr | dAge | age Group  | Weight in<br>Ctry | Q4 |
|--------|--------|----------|---------|-----------------|----|----|--------|------|--------|------|------------|-------------------|----|
| 15628  | 104976 | 1        | China   | 1               | 2  | 1  | Male   | 1959 | 56     | 4    | 55-59      | 0.9               |    |
| 15633  | 200526 | 3        | Korea   | 1               | 2  | 1  | Male   | 1953 | 62     | 5    | >=60       | 1.6               |    |
| 15634  | 104980 | 1        | China   | 1               | 2  | 1  | Male   | 1960 | 55     | 4    | 55-59      | 0.9               |    |
| 15637  | 104982 | 1        | China   | 1               | 2  | 1  | Male   | 1960 | 55     | 4    | 55-59      | 0.9               |    |
| 15644  | 104986 | 1        | China   | 1               | 2  | 1  | Male   | 1960 | 55     | 4    | 55-59      | 0.9               |    |
| 15645  | 201252 | 3        | Korea   | 1               | 2  | 1  | Male   | 1962 | 53     | 3    | 50-54      | 0.9               |    |
| 15649  | 104989 | 1        | China   | 1               | 2  | 2  | Female | 1973 | 42     | 1    | 40-44 year | 1.0               | 2  |
| 15650  | 201253 | 3        | Korea   | 1               | 2  | 1  | Male   | 1954 | 61     | 5    | >=60       | 1.6               |    |
| 15651  | 201254 | 3        | Korea   | 1               | 2  | 2  | Female | 1972 | 43     | 1    | 40-44 year | 0.9               | 2  |
| 15657  | 104993 | 1        | China   | 1               | 2  | 1  | Male   | 1951 | 64     | 5    | >=60       | 1.0               |    |
| 15658  | 104994 | 1        | China   | 1               | 2  | 2  | Female | 1968 | 47     | 2    | 45-49      | 1.0               | 2  |
| 15660  | 104995 | 1        | China   | 1               | 2  | 1  | Male   | 1959 | 56     | 4    | 55-59      | 0.9               |    |
| 15667  | 104997 | 1        | China   | 1               | 2  | 2  | Female | 1969 | 46     | 2    | 45-49      | 1.0               | 2  |
| 15671  | 201255 | 3        | Korea   | 1               | 2  | 2  | Female | 1969 | 46     | 2    | 45-49      | 0.9               | 2  |
| 15679  | 201256 | 3        | Korea   | 1               | 2  | 1  | Male   | 1956 | 59     | 4    | 55-59      | 0.8               |    |
| 15712  | 104998 | 1        | China   | 1               | 1  | 2  | Female | 1975 | 40     | 1    | 40-44 year | 1.0               | 2  |
| 15715  | 201257 | 3        | Korea   | 1               | 2  | 1  | Male   | 1975 | 40     | 1    | 40-44 year | 0.9               |    |
| 15749  | 105000 | 1        | China   | 1               | 2  | 2  | Female | 1969 | 46     | 2    | 45-49      | 1.0               | 2  |
| 15754  | 105001 | 1        | China   | 1               | 2  | 1  | Male   | 1957 | 58     | 4    | 55-59      | 0.9               |    |
| 15756  | 105002 | 1        | China   | 1               | 2  | 1  | Male   | 1952 | 63     | 5    | >=60       | 1.0               |    |
| 15773  | 201258 | 3        | Korea   | 1               | 2  | 1  | Male   | 1943 | 72     | 5    | >=60       | 1.6               |    |
| 15774  | 201259 | 3        | Korea   | 1               | 2  | 1  | Male   | 1953 | 62     | 5    | >=60       | 1.6               |    |
| 15776  | 201260 | 3        | Korea   | 1               | 2  | 1  | Male   | 1953 | 62     | 5    | >=60       | 1.6               |    |
| 15777  | 105004 | 1        | China   | 1               | 2  | 1  | Male   | 1956 | 59     | 4    | 55-59      | 0.9               |    |
| 15779  | 105007 | 1        | China   | 1               | 2  | 2  | Female | 1974 | 41     | 1    | 40-44 year | 1.0               | 2  |
| 15780  | 105005 | 1        | China   | 1               | 2  | 1  | Male   | 1958 | 57     | 4    | 55-59      | 0.9               |    |
| 15792  | 201261 | 3        | Korea   | 1               | 2  | 1  | Male   | 1969 | 46     | 2    | 45-49      | 0.8               |    |
| 15793  | 105016 | 1        | China   | 1               | 2  | 1  | Male   | 1957 | 58     | 4    | 55-59      | 0.9               |    |
| 15796  | 105019 | 1        | China   | 1               | 2  | 1  | Male   | 1959 | 56     | 4    | 55-59      | 0.9               |    |
| 15798  | 105020 | 1        | China   | 1               | 2  | 2  | Female | 1969 | 46     | 2    | 45-49      | 1.0               | 2  |
| 15809  | 201262 | 3        | Korea   | 1               | 2  | 1  | Male   | 1949 | 66     | 5    | >=60       | 1.6               |    |
| 15810  | 105026 | 1        | China   | 1               | 1  | 2  | Female | 1954 | 61     | 5    | >=60       | 1.1               |    |

| respid | SubsID | dCountry | Country | QDisclaimer | Q1 | Q2 | Gender   | Q3_1 | age Nr | dAge | age Group  | Weight in Ctry | Q4 |
|--------|--------|----------|---------|-------------|----|----|----------|------|--------|------|------------|----------------|----|
| 15815  | 105028 | 1        | China   |             | 1  | 2  | 2 Female | 1967 | 48     | 2    | 45-49      | 1.0            | 2  |
| 15816  | 105029 | 1        | China   |             | 1  | 2  | 1 Male   | 1959 | 56     | 4    | 55-59      | 0.9            |    |
| 15817  | 105030 | 1        | China   |             | 1  | 2  | 2 Female | 1971 | 44     | 1    | 40-44 year | 1.0            | 2  |
| 15821  | 105033 | 1        | China   |             | 1  | 2  | 2 Female | 1958 | 57     | 4    | 55-59      | 1.0            |    |
| 15823  | 301186 | 2        | Taiwan  |             | 1  | 2  | 2 Female | 1958 | 57     | 4    | 55-59      | 0.9            |    |
| 15834  | 105038 | 1        | China   |             | 1  | 2  | 1 Male   | 1956 | 59     | 4    | 55-59      | 0.9            |    |
| 15835  | 105039 | 1        | China   |             | 1  | 1  | 2 Female | 1969 | 46     | 2    | 45-49      | 1.0            | 2  |
| 15836  | 201263 | 3        | Korea   |             | 1  | 1  | 2 Female | 1973 | 42     | 1    | 40-44 year | 0.9            | 2  |
| 15837  | 105040 | 1        | China   |             | 1  | 2  | 2 Female | 1972 | 43     | 1    | 40-44 year | 1.0            | 2  |
| 15839  | 105041 | 1        | China   |             | 1  | 2  | 1 Male   | 1958 | 57     | 4    | 55-59      | 0.9            |    |
| 15840  | 105042 | 1        | China   |             | 1  | 2  | 2 Female | 1961 | 54     | 3    | 50-54      | 1.2            |    |
| 15844  | 105043 | 1        | China   |             | 1  | 2  | 1 Male   | 1969 | 46     | 2    | 45-49      | 1.0            |    |
| 15845  | 201264 | 3        | Korea   |             | 1  | 2  | 1 Male   | 1941 | 74     | 5    | >=60       | 1.6            |    |
| 15847  | 105044 | 1        | China   |             | 1  | 1  | 1 Male   | 1958 | 57     | 4    | 55-59      | 0.9            |    |
| 15848  | 201265 | 3        | Korea   |             | 1  | 2  | 2 Female | 1963 | 52     | 3    | 50-54      | 0.8            |    |
| 15849  | 105045 | 1        | China   |             | 1  | 2  | 1 Male   | 1957 | 58     | 4    | 55-59      | 0.9            |    |
| 15857  | 301188 | 2        | Taiwan  |             | 1  | 2  | 2 Female | 1964 | 51     | 3    | 50-54      | 0.9            |    |
| 15858  | 105047 | 1        | China   |             | 1  | 2  | 1 Male   | 1955 | 60     | 5    | >=60       | 1.0            |    |
| 15862  | 105049 | 1        | China   |             | 1  | 2  | 1 Male   | 1959 | 56     | 4    | 55-59      | 0.9            |    |
| 15866  | 105050 | 1        | China   |             | 1  | 2  | 2 Female | 1964 | 51     | 3    | 50-54      | 1.2            |    |
| 15870  | 105052 | 1        | China   |             | 1  | 2  | 2 Female | 1964 | 51     | 3    | 50-54      | 1.2            |    |
| 15871  | 201266 | 3        | Korea   |             | 1  | 2  | 1 Male   | 1971 | 44     | 1    | 40-44 year | 0.9            |    |
| 15872  | 105053 | 1        | China   |             | 1  | 2  | 1 Male   | 1958 | 57     | 4    | 55-59      | 0.9            |    |
| 15873  | 201267 | 3        | Korea   |             | 1  | 2  | 1 Male   | 1971 | 44     | 1    | 40-44 year | 0.9            |    |
| 15874  | 105054 | 1        | China   |             | 1  | 1  | 1 Male   | 1953 | 62     | 5    | >=60       | 1.0            |    |
| 15875  | 201268 | 3        | Korea   |             | 1  | 2  | 2 Female | 1971 | 44     | 1    | 40-44 year | 0.9            | 2  |
| 15876  | 105055 | 1        | China   |             | 1  | 1  | 2 Female | 1952 | 63     | 5    | >=60       | 1.1            |    |
| 15882  | 105057 | 1        | China   |             | 1  | 2  | 2 Female | 1957 | 58     | 4    | 55-59      | 1.0            |    |
| 15884  | 105059 | 1        | China   |             | 1  | 2  | 2 Female | 1962 | 53     | 3    | 50-54      | 1.2            |    |
| 15890  | 105060 | 1        | China   |             | 1  | 2  | 1 Male   | 1959 | 56     | 4    | 55-59      | 0.9            |    |
| 15892  | 105061 | 1        | China   |             | 1  | 2  | 2 Female | 1967 | 48     | 2    | 45-49      | 1.0            | 2  |
| 15908  | 105065 | 1        | China   |             | 1  | 2  | 1 Male   | 1958 | 57     | 4    | 55-59      | 0.9            |    |

| respid | SubsID | dCountry | Country | QDisclaimer | Q1 | Q2 | Gender   | Q3_1 | age Nr | dAge | age Group  | Weight in Ctry | Q4 |
|--------|--------|----------|---------|-------------|----|----|----------|------|--------|------|------------|----------------|----|
| 15914  | 105066 | 1        | China   |             | 1  | 2  | 2 Female | 1963 | 52     | 3    | 50-54      | 1.2            |    |
| 15932  | 201269 | 3        | Korea   |             | 1  | 2  | 1 Male   | 1953 | 62     | 5    | >=60       | 1.6            |    |
| 15933  | 105070 | 1        | China   |             | 1  | 2  | 1 Male   | 1954 | 61     | 5    | >=60       | 1.0            |    |
| 15938  | 201270 | 3        | Korea   |             | 1  | 2  | 1 Male   | 1971 | 44     | 1    | 40-44 year | 0.9            |    |
| 15940  | 105071 | 1        | China   |             | 1  | 2  | 2 Female | 1962 | 53     | 3    | 50-54      | 1.2            |    |
| 15945  | 105072 | 1        | China   |             | 1  | 2  | 2 Female | 1963 | 52     | 3    | 50-54      | 1.2            |    |
| 15947  | 105073 | 1        | China   |             | 1  | 2  | 1 Male   | 1957 | 58     | 4    | 55-59      | 0.9            |    |
| 15950  | 105074 | 1        | China   |             | 1  | 2  | 2 Female | 1963 | 52     | 3    | 50-54      | 1.2            |    |
| 15951  | 105063 | 1        | China   |             | 1  | 2  | 2 Female | 1972 | 43     | 1    | 40-44 year | 1.0            | 2  |
| 15952  | 105075 | 1        | China   |             | 1  | 2  | 1 Male   | 1957 | 58     | 4    | 55-59      | 0.9            |    |
| 15953  | 105076 | 1        | China   |             | 1  | 2  | 2 Female | 1972 | 43     | 1    | 40-44 year | 1.0            | 2  |
| 15954  | 105077 | 1        | China   |             | 1  | 2  | 2 Female | 1975 | 40     | 1    | 40-44 year | 1.0            | 2  |
| 15957  | 105079 | 1        | China   |             | 1  | 2  | 2 Female | 1956 | 59     | 4    | 55-59      | 1.0            |    |
| 15965  | 105082 | 1        | China   |             | 1  | 2  | 2 Female | 1960 | 55     | 4    | 55-59      | 1.0            |    |
| 15966  | 105084 | 1        | China   |             | 1  | 1  | 1 Male   | 1954 | 61     | 5    | >=60       | 1.0            |    |
| 15967  | 105083 | 1        | China   |             | 1  | 2  | 1 Male   | 1959 | 56     | 4    | 55-59      | 0.9            |    |
| 15968  | 105085 | 1        | China   |             | 1  | 2  | 1 Male   | 1953 | 62     | 5    | >=60       | 1.0            |    |
| 15970  | 201271 | 3        | Korea   |             | 1  | 2  | 2 Female | 1968 | 47     | 2    | 45-49      | 0.9            | 2  |
| 15973  | 105086 | 1        | China   |             | 1  | 2  | 2 Female | 1964 | 51     | 3    | 50-54      | 1.2            |    |
| 15974  | 105087 | 1        | China   |             | 1  | 2  | 2 Female | 1964 | 51     | 3    | 50-54      | 1.2            |    |
| 15975  | 105088 | 1        | China   |             | 1  | 2  | 2 Female | 1968 | 47     | 2    | 45-49      | 1.0            | 2  |
| 15980  | 105090 | 1        | China   |             | 1  | 2  | 2 Female | 1960 | 55     | 4    | 55-59      | 1.0            |    |
| 15984  | 105092 | 1        | China   |             | 1  | 2  | 1 Male   | 1958 | 57     | 4    | 55-59      | 0.9            |    |
| 15985  | 105093 | 1        | China   |             | 1  | 1  | 2 Female | 1952 | 63     | 5    | >=60       | 1.1            |    |
| 15994  | 105096 | 1        | China   |             | 1  | 1  | 1 Male   | 1954 | 61     | 5    | >=60       | 1.0            |    |
| 15995  | 101866 | 1        | China   |             | 1  | 2  | 2 Female | 1966 | 49     | 2    | 45-49      | 1.0            | 2  |
| 16000  | 105097 | 1        | China   |             | 1  | 2  | 1 Male   | 1957 | 58     | 4    | 55-59      | 0.9            |    |
| 16004  | 105099 | 1        | China   |             | 1  | 2  | 2 Female | 1961 | 54     | 3    | 50-54      | 1.2            |    |
| 16005  | 105100 | 1        | China   |             | 1  | 2  | 2 Female | 1963 | 52     | 3    | 50-54      | 1.2            |    |
| 16006  | 105101 | 1        | China   |             | 1  | 1  | 2 Female | 1965 | 50     | 3    | 50-54      | 1.2            |    |
| 16009  | 201272 | 3        | Korea   |             | 1  | 2  | 1 Male   | 1966 | 49     | 2    | 45-49      | 0.8            |    |
| 16017  | 201273 | 3        | Korea   |             | 1  | 2  | 2 Female | 1969 | 46     | 2    | 45-49      | 0.9            | 2  |



| respid | SubsID | dCountry | Country | QDisclaimer | Q1 | Q2 | Gender   | Q3_1 | age Nr | dAge | age Group  | Weight in Ctry | Q4 |
|--------|--------|----------|---------|-------------|----|----|----------|------|--------|------|------------|----------------|----|
| 16019  | 105104 | 1        | China   |             | 1  | 2  | 2 Female | 1964 | 51     | 3    | 50-54      | 1.2            |    |
| 16021  | 301191 | 2        | Taiwan  |             | 1  | 2  | 2 Female | 1965 | 50     | 3    | 50-54      | 0.9            |    |
| 16024  | 201275 | 3        | Korea   |             | 1  | 2  | 1 Male   | 1968 | 47     | 2    | 45-49      | 0.8            |    |
| 16026  | 201276 | 3        | Korea   |             | 1  | 2  | 1 Male   | 1953 | 62     | 5    | >=60       | 1.6            |    |
| 16029  | 201278 | 3        | Korea   |             | 1  | 1  | 1 Male   | 1966 | 49     | 2    | 45-49      | 0.8            |    |
| 16031  | 201279 | 3        | Korea   |             | 1  | 2  | 1 Male   | 1950 | 65     | 5    | >=60       | 1.6            |    |
| 16037  | 105107 | 1        | China   |             | 1  | 1  | 2 Female | 1963 | 52     | 3    | 50-54      | 1.2            |    |
| 16043  | 201280 | 3        | Korea   |             | 1  | 2  | 1 Male   | 1951 | 64     | 5    | >=60       | 1.6            |    |
| 16044  | 301192 | 2        | Taiwan  |             | 1  | 2  | 2 Female | 1974 | 41     | 1    | 40-44 year | 0.8            | 2  |
| 16047  | 201282 | 3        | Korea   |             | 1  | 2  | 1 Male   | 1959 | 56     | 4    | 55-59      | 0.8            |    |
| 16048  | 201283 | 3        | Korea   |             | 1  | 2  | 1 Male   | 1952 | 63     | 5    | >=60       | 1.6            |    |
| 16049  | 201284 | 3        | Korea   |             | 1  | 2  | 2 Female | 1971 | 44     | 1    | 40-44 year | 0.9            | 2  |
| 16051  | 201285 | 3        | Korea   |             | 1  | 2  | 2 Female | 1971 | 44     | 1    | 40-44 year | 0.9            | 2  |
| 16053  | 201287 | 3        | Korea   |             | 1  | 2  | 1 Male   | 1961 | 54     | 3    | 50-54      | 0.9            |    |
| 16054  | 301193 | 2        | Taiwan  |             | 1  | 2  | 2 Female | 1962 | 53     | 3    | 50-54      | 0.9            |    |
| 16069  | 201289 | 3        | Korea   |             | 1  | 2  | 2 Female | 1972 | 43     | 1    | 40-44 year | 0.9            | 2  |
| 16070  | 201290 | 3        | Korea   |             | 1  | 2  | 1 Male   | 1961 | 54     | 3    | 50-54      | 0.9            |    |
| 16074  | 201291 | 3        | Korea   |             | 1  | 2  | 1 Male   | 1969 | 46     | 2    | 45-49      | 0.8            |    |
| 16076  | 201292 | 3        | Korea   |             | 1  | 2  | 2 Female | 1973 | 42     | 1    | 40-44 year | 0.9            | 2  |
| 16078  | 301194 | 2        | Taiwan  |             | 1  | 2  | 1 Male   | 1963 | 52     | 3    | 50-54      | 0.8            |    |
| 16081  | 201293 | 3        | Korea   |             | 1  | 2  | 2 Female | 1972 | 43     | 1    | 40-44 year | 0.9            | 2  |
| 16085  | 201294 | 3        | Korea   |             | 1  | 2  | 2 Female | 1961 | 54     | 3    | 50-54      | 0.8            |    |
| 16088  | 105122 | 1        | China   |             | 1  | 2  | 1 Male   | 1964 | 51     | 3    | 50-54      | 1.0            |    |
| 16091  | 201295 | 3        | Korea   |             | 1  | 2  | 2 Female | 1961 | 54     | 3    | 50-54      | 0.8            |    |
| 16092  | 201296 | 3        | Korea   |             | 1  | 2  | 1 Male   | 1969 | 46     | 2    | 45-49      | 0.8            |    |
| 16093  | 301195 | 2        | Taiwan  |             | 1  | 2  | 1 Male   | 1965 | 50     | 3    | 50-54      | 0.8            |    |
| 16097  | 201297 | 3        | Korea   |             | 1  | 2  | 1 Male   | 1958 | 57     | 4    | 55-59      | 0.8            |    |
| 16100  | 201298 | 3        | Korea   |             | 1  | 2  | 2 Female | 1966 | 49     | 2    | 45-49      | 0.9            | 2  |
| 16101  | 102973 | 1        | China   |             | 1  | 2  | 2 Female | 1970 | 45     | 2    | 45-49      | 1.0            | 2  |
| 16105  | 105128 | 1        | China   |             | 1  | 2  | 2 Female | 1965 | 50     | 3    | 50-54      | 1.2            |    |
| 16118  | 105133 | 1        | China   |             | 1  | 1  | 2 Female | 1960 | 55     | 4    | 55-59      | 1.0            |    |
| 16129  | 201218 | 3        | Korea   |             | 1  | 2  | 1 Male   | 1969 | 46     | 2    | 45-49      | 0.8            |    |

| respid | SubsID | dCountry | Country | QDisclaimer | Q1 | Q2 | Gender | Q3_1 | age Nr | dAge | age Group  | Weight in Ctry | Q4 |
|--------|--------|----------|---------|-------------|----|----|--------|------|--------|------|------------|----------------|----|
| 16130  | 301182 | 2        | Taiwan  | 1           | 2  | 1  | Male   | 1948 | 67     | 5    | >=60       | 1.6            |    |
| 16131  | 105134 | 1        | China   | 1           | 1  | 1  | Male   | 1954 | 61     | 5    | >=60       | 1.0            |    |
| 16136  | 201301 | 3        | Korea   | 1           | 1  | 2  | Female | 1975 | 40     | 1    | 40-44 year | 0.9            | 2  |
| 16137  | 201302 | 3        | Korea   | 1           | 2  | 2  | Female | 1958 | 57     | 4    | 55-59      | 0.7            |    |
| 16138  | 201303 | 3        | Korea   | 1           | 2  | 2  | Female | 1969 | 46     | 2    | 45-49      | 0.9            | 2  |
| 16139  | 201304 | 3        | Korea   | 1           | 2  | 2  | Female | 1961 | 54     | 3    | 50-54      | 0.8            |    |
| 16140  | 103209 | 1        | China   | 1           | 2  | 2  | Female | 1974 | 41     | 1    | 40-44 year | 1.0            | 2  |
| 16145  | 105137 | 1        | China   | 1           | 1  | 2  | Female | 1956 | 59     | 4    | 55-59      | 1.0            |    |
| 16150  | 201306 | 3        | Korea   | 1           | 2  | 2  | Female | 1966 | 49     | 2    | 45-49      | 0.9            | 2  |
| 16151  | 301196 | 2        | Taiwan  | 1           | 2  | 2  | Female | 1966 | 49     | 2    | 45-49      | 0.9            | 2  |
| 16153  | 201307 | 3        | Korea   | 1           | 2  | 1  | Male   | 1970 | 45     | 2    | 45-49      | 0.8            |    |
| 16164  | 301187 | 2        | Taiwan  | 1           | 2  | 1  | Male   | 1966 | 49     | 2    | 45-49      | 0.8            |    |
| 16168  | 301198 | 2        | Taiwan  | 1           | 2  | 1  | Male   | 1967 | 48     | 2    | 45-49      | 0.8            |    |
| 16173  | 201309 | 3        | Korea   | 1           | 2  | 2  | Female | 1962 | 53     | 3    | 50-54      | 0.8            |    |
| 16174  | 301199 | 2        | Taiwan  | 1           | 2  | 1  | Male   | 1966 | 49     | 2    | 45-49      | 0.8            |    |
| 16177  | 201310 | 3        | Korea   | 1           | 2  | 1  | Male   | 1970 | 45     | 2    | 45-49      | 0.8            |    |
| 16185  | 201311 | 3        | Korea   | 1           | 2  | 1  | Male   | 1955 | 60     | 5    | >=60       | 1.6            |    |
| 16189  | 301202 | 2        | Taiwan  | 1           | 1  | 2  | Female | 1971 | 44     | 1    | 40-44 year | 0.8            | 2  |
| 16192  | 105148 | 1        | China   | 1           | 1  | 1  | Male   | 1948 | 67     | 5    | >=60       | 1.0            |    |
| 16193  | 201312 | 3        | Korea   | 1           | 2  | 2  | Female | 1957 | 58     | 4    | 55-59      | 0.7            |    |
| 16194  | 201313 | 3        | Korea   | 1           | 2  | 1  | Male   | 1951 | 64     | 5    | >=60       | 1.6            |    |
| 16196  | 105149 | 1        | China   | 1           | 2  | 2  | Female | 1965 | 50     | 3    | 50-54      | 1.2            |    |
| 16202  | 105151 | 1        | China   | 1           | 1  | 2  | Female | 1954 | 61     | 5    | >=60       | 1.1            |    |
| 16205  | 201315 | 3        | Korea   | 1           | 2  | 2  | Female | 1967 | 48     | 2    | 45-49      | 0.9            | 2  |
| 16206  | 201316 | 3        | Korea   | 1           | 2  | 2  | Female | 1963 | 52     | 3    | 50-54      | 0.8            |    |
| 16208  | 201317 | 3        | Korea   | 1           | 2  | 1  | Male   | 1963 | 52     | 3    | 50-54      | 0.9            |    |
| 16211  | 105155 | 1        | China   | 1           | 2  | 2  | Female | 1955 | 60     | 5    | >=60       | 1.1            |    |
| 16212  | 201318 | 3        | Korea   | 1           | 2  | 2  | Female | 1973 | 42     | 1    | 40-44 year | 0.9            | 2  |
| 16215  | 301058 | 2        | Taiwan  | 1           | 2  | 2  | Female | 1959 | 56     | 4    | 55-59      | 0.9            |    |
| 16217  | 201320 | 3        | Korea   | 1           | 2  | 1  | Male   | 1951 | 64     | 5    | >=60       | 1.6            |    |
| 16221  | 201321 | 3        | Korea   | 1           | 2  | 1  | Male   | 1970 | 45     | 2    | 45-49      | 0.8            |    |
| 16226  | 201322 | 3        | Korea   | 1           | 2  | 2  | Female | 1967 | 48     | 2    | 45-49      | 0.9            | 2  |

| respid | SubsID    | dCountry | Country  | QDisclaim<br>er | Q1 | Q2 | Gender   | Q3_1 | age Nr | dAge | age Group    | Weight in<br>Ctry | Q4 |
|--------|-----------|----------|----------|-----------------|----|----|----------|------|--------|------|--------------|-------------------|----|
| 16228  | 105159    |          | 1 China  |                 | 1  | 1  | 2 Female | 1962 | 53     |      | 3 50-54      | 1.2               |    |
| 16229  | 201323    |          | 3 Korea  |                 | 1  | 2  | 1 Male   | 1973 | 42     |      | 1 40-44 year | 0.9               |    |
| 16230  | 105160    |          | 1 China  |                 | 1  | 2  | 2 Female | 1956 | 59     |      | 4 55-59      | 1.0               |    |
| 16231  | 201324    |          | 3 Korea  |                 | 1  | 2  | 1 Male   | 1971 | 44     |      | 1 40-44 year | 0.9               |    |
| 16232  | 350328718 |          | 3 Korea  |                 | 1  | 2  | 1 Male   | 1969 | 46     |      | 2 45-49      | 0.8               |    |
| 16234  | 105162    |          | 1 China  |                 | 1  | 2  | 1 Male   | 1958 | 57     |      | 4 55-59      | 0.9               |    |
| 16235  | 104734    |          | 1 China  |                 | 1  | 1  | 1 Male   | 1950 | 65     |      | 5 >=60       | 1.0               |    |
| 16236  | 201325    |          | 3 Korea  |                 | 1  | 2  | 1 Male   | 1947 | 68     |      | 5 >=60       | 1.6               |    |
| 16237  | 105163    |          | 1 China  |                 | 1  | 1  | 1 Male   | 1964 | 51     |      | 3 50-54      | 1.0               |    |
| 16238  | 105164    |          | 1 China  |                 | 1  | 2  | 1 Male   | 1962 | 53     |      | 3 50-54      | 1.0               |    |
| 16239  | 301207    |          | 2 Taiwan |                 | 1  | 2  | 2 Female | 1965 | 50     |      | 3 50-54      | 0.9               |    |
| 16243  | 105167    |          | 1 China  |                 | 1  | 1  | 2 Female | 1955 | 60     |      | 5 >=60       | 1.1               |    |
| 16248  | 201326    |          | 3 Korea  |                 | 1  | 2  | 1 Male   | 1970 | 45     |      | 2 45-49      | 0.8               |    |
| 16249  | 301208    |          | 2 Taiwan |                 | 1  | 2  | 2 Female | 1965 | 50     |      | 3 50-54      | 0.9               |    |
| 16251  | 105171    |          | 1 China  |                 | 1  | 2  | 2 Female | 1971 | 44     |      | 1 40-44 year | 1.0               | 2  |
| 16263  | 201328    |          | 3 Korea  |                 | 1  | 2  | 2 Female | 1971 | 44     |      | 1 40-44 year | 0.9               | 2  |
| 16265  | 201329    |          | 3 Korea  |                 | 1  | 2  | 2 Female | 1975 | 40     |      | 1 40-44 year | 0.9               | 2  |
| 16269  | 201330    |          | 3 Korea  |                 | 1  | 2  | 2 Female | 1964 | 51     |      | 3 50-54      | 0.8               |    |
| 16272  | 201331    |          | 3 Korea  |                 | 1  | 2  | 2 Female | 1962 | 53     |      | 3 50-54      | 0.8               |    |
| 16273  | 104309    |          | 1 China  |                 | 1  | 1  | 2 Female | 1965 | 50     |      | 3 50-54      | 1.2               |    |
| 16281  | 100748    |          | 1 China  |                 | 1  | 2  | 2 Female | 1972 | 43     |      | 1 40-44 year | 1.0               | 2  |
| 16282  | 300067    |          | 2 Taiwan |                 | 1  | 2  | 2 Female | 1962 | 53     |      | 3 50-54      | 0.9               |    |
| 16287  | 201335    |          | 3 Korea  |                 | 1  | 2  | 1 Male   | 1961 | 54     |      | 3 50-54      | 0.9               |    |
| 16290  | 105185    |          | 1 China  |                 | 1  | 1  | 1 Male   | 1949 | 66     |      | 5 >=60       | 1.0               |    |
| 16294  | 380013968 |          | 2 Taiwan |                 | 1  | 2  | 1 Male   | 1970 | 45     |      | 2 45-49      | 0.8               |    |
| 16295  | 201336    |          | 3 Korea  |                 | 1  | 2  | 1 Male   | 1968 | 47     |      | 2 45-49      | 0.8               |    |
| 16296  | 201337    |          | 3 Korea  |                 | 1  | 2  | 2 Female | 1971 | 44     |      | 1 40-44 year | 0.9               | 2  |
| 16299  | 201338    |          | 3 Korea  |                 | 1  | 2  | 1 Male   | 1965 | 50     |      | 3 50-54      | 0.9               |    |
| 16302  | 201339    |          | 3 Korea  |                 | 1  | 2  | 1 Male   | 1970 | 45     |      | 2 45-49      | 0.8               |    |
| 16303  | 301211    |          | 2 Taiwan |                 | 1  | 2  | 1 Male   | 1967 | 48     |      | 2 45-49      | 0.8               |    |
| 16304  | 105188    |          | 1 China  |                 | 1  | 2  | 2 Female | 1945 | 70     |      | 5 >=60       | 1.1               |    |
| 16306  | 201340    |          | 3 Korea  |                 | 1  | 2  | 2 Female | 1969 | 46     |      | 2 45-49      | 0.9               | 2  |

| respid | SubsID    | dCountry | Country | QDisclaimer | Q1 | Q2 | Gender   | Q3_1 | age Nr | dAge | age Group  | Weight in Ctry | Q4 |
|--------|-----------|----------|---------|-------------|----|----|----------|------|--------|------|------------|----------------|----|
| 16318  | 301213    | 2        | Taiwan  | 1           | 1  | 2  | 1 Male   | 1969 | 46     | 2    | 45-49      | 0.8            |    |
| 16320  | 201341    | 3        | Korea   | 1           | 1  | 2  | 1 Male   | 1966 | 49     | 2    | 45-49      | 0.8            |    |
| 16321  | 201342    | 3        | Korea   | 1           | 1  | 2  | 1 Male   | 1958 | 57     | 4    | 55-59      | 0.8            |    |
| 16322  | 201343    | 3        | Korea   | 1           | 1  | 2  | 1 Male   | 1973 | 42     | 1    | 40-44 year | 0.9            |    |
| 16324  | 201344    | 3        | Korea   | 1           | 1  | 2  | 2 Female | 1964 | 51     | 3    | 50-54      | 0.8            |    |
| 16326  | 201345    | 3        | Korea   | 1           | 1  | 2  | 1 Male   | 1972 | 43     | 1    | 40-44 year | 0.9            |    |
| 16328  | 105194    | 1        | China   | 1           | 1  | 2  | 2 Female | 1955 | 60     | 5    | >=60       | 1.1            |    |
| 16336  | 105196    | 1        | China   | 1           | 1  | 1  | 1 Male   | 1954 | 61     | 5    | >=60       | 1.0            |    |
| 16341  | 201347    | 3        | Korea   | 1           | 1  | 2  | 1 Male   | 1962 | 53     | 3    | 50-54      | 0.9            |    |
| 16342  | 105197    | 1        | China   | 1           | 1  | 2  | 2 Female | 1958 | 57     | 4    | 55-59      | 1.0            |    |
| 16343  | 105198    | 1        | China   | 1           | 1  | 1  | 2 Female | 1959 | 56     | 4    | 55-59      | 1.0            |    |
| 16345  | 105199    | 1        | China   | 1           | 1  | 2  | 1 Male   | 1955 | 60     | 5    | >=60       | 1.0            |    |
| 16349  | 350235616 | 3        | Korea   | 1           | 1  | 2  | 2 Female | 1971 | 44     | 1    | 40-44 year | 0.9            | 2  |
| 16355  | 201349    | 3        | Korea   | 1           | 1  | 2  | 1 Male   | 1970 | 45     | 2    | 45-49      | 0.8            |    |
| 16364  | 105206    | 1        | China   | 1           | 1  | 1  | 1 Male   | 1950 | 65     | 5    | >=60       | 1.0            |    |
| 16374  | 201351    | 3        | Korea   | 1           | 1  | 2  | 2 Female | 1964 | 51     | 3    | 50-54      | 0.8            |    |
| 16375  | 105208    | 1        | China   | 1           | 1  | 1  | 2 Female | 1975 | 40     | 1    | 40-44 year | 1.0            | 2  |
| 16376  | 105209    | 1        | China   | 1           | 1  | 1  | 1 Male   | 1970 | 45     | 2    | 45-49      | 1.0            |    |
| 16393  | 301219    | 2        | Taiwan  | 1           | 1  | 2  | 2 Female | 1959 | 56     | 4    | 55-59      | 0.9            |    |
| 16394  | 301220    | 2        | Taiwan  | 1           | 1  | 2  | 2 Female | 1959 | 56     | 4    | 55-59      | 0.9            |    |
| 16395  | 301221    | 2        | Taiwan  | 1           | 1  | 1  | 1 Male   | 1970 | 45     | 2    | 45-49      | 0.8            |    |
| 16397  | 350294130 | 3        | Korea   | 1           | 1  | 1  | 1 Male   | 1972 | 43     | 1    | 40-44 year | 0.9            |    |
| 16398  | 105213    | 1        | China   | 1           | 1  | 2  | 1 Male   | 1965 | 50     | 3    | 50-54      | 1.0            |    |
| 16402  | 201355    | 3        | Korea   | 1           | 1  | 2  | 1 Male   | 1964 | 51     | 3    | 50-54      | 0.9            |    |
| 16405  | 201362    | 3        | Korea   | 1           | 1  | 2  | 1 Male   | 1958 | 57     | 4    | 55-59      | 0.8            |    |
| 16416  | 201368    | 3        | Korea   | 1           | 1  | 2  | 1 Male   | 1969 | 46     | 2    | 45-49      | 0.8            |    |
| 16422  | 201372    | 3        | Korea   | 1           | 1  | 2  | 1 Male   | 1952 | 63     | 5    | >=60       | 1.6            |    |
| 16429  | 105216    | 1        | China   | 1           | 1  | 2  | 2 Female | 1960 | 55     | 4    | 55-59      | 1.0            |    |
| 16430  | 201374    | 3        | Korea   | 1           | 1  | 2  | 2 Female | 1970 | 45     | 2    | 45-49      | 0.9            | 2  |
| 16432  | 201375    | 3        | Korea   | 1           | 1  | 2  | 1 Male   | 1968 | 47     | 2    | 45-49      | 0.8            |    |
| 16433  | 201376    | 3        | Korea   | 1           | 1  | 2  | 1 Male   | 1970 | 45     | 2    | 45-49      | 0.8            |    |
| 16434  | 301223    | 2        | Taiwan  | 1           | 1  | 2  | 1 Male   | 1961 | 54     | 3    | 50-54      | 0.8            |    |

| respid | SubsID    | dCountry | Country | QDisclaimer | Q1 | Q2 | Gender | Q3_1 | age Nr | dAge | age Group  | Weight in Ctry | Q4 |
|--------|-----------|----------|---------|-------------|----|----|--------|------|--------|------|------------|----------------|----|
| 16437  | 201377    | 3        | Korea   | 1           | 2  | 2  | Female | 1969 | 46     | 2    | 45-49      | 0.9            | 2  |
| 16439  | 105221    | 1        | China   | 1           | 2  | 1  | Male   | 1963 | 52     | 3    | 50-54      | 1.0            |    |
| 16440  | 201286    | 3        | Korea   | 1           | 2  | 2  | Female | 1967 | 48     | 2    | 45-49      | 0.9            | 2  |
| 16441  | 105222    | 1        | China   | 1           | 2  | 1  | Male   | 1974 | 41     | 1    | 40-44 year | 1.0            |    |
| 16442  | 105223    | 1        | China   | 1           | 2  | 1  | Male   | 1969 | 46     | 2    | 45-49      | 1.0            |    |
| 16450  | 201379    | 3        | Korea   | 1           | 2  | 2  | Female | 1956 | 59     | 4    | 55-59      | 0.7            |    |
| 16451  | 301224    | 2        | Taiwan  | 1           | 1  | 1  | Male   | 1969 | 46     | 2    | 45-49      | 0.8            |    |
| 16452  | 301225    | 2        | Taiwan  | 1           | 2  | 2  | Female | 1970 | 45     | 2    | 45-49      | 0.9            | 2  |
| 16467  | 201382    | 3        | Korea   | 1           | 2  | 2  | Female | 1961 | 54     | 3    | 50-54      | 0.8            |    |
| 16468  | 100080    | 1        | China   | 1           | 2  | 2  | Female | 1968 | 47     | 2    | 45-49      | 1.0            | 2  |
| 16469  | 201383    | 3        | Korea   | 1           | 2  | 1  | Male   | 1959 | 56     | 4    | 55-59      | 0.8            |    |
| 16470  | 201384    | 3        | Korea   | 1           | 2  | 1  | Male   | 1970 | 45     | 2    | 45-49      | 0.8            |    |
| 16471  | 300211    | 2        | Taiwan  | 1           | 2  | 2  | Female | 1961 | 54     | 3    | 50-54      | 0.9            |    |
| 16473  | 201385    | 3        | Korea   | 1           | 2  | 2  | Female | 1969 | 46     | 2    | 45-49      | 0.9            | 2  |
| 16476  | 201386    | 3        | Korea   | 1           | 2  | 1  | Male   | 1961 | 54     | 3    | 50-54      | 0.9            |    |
| 16478  | 201387    | 3        | Korea   | 1           | 2  | 2  | Female | 1965 | 50     | 3    | 50-54      | 0.8            |    |
| 16484  | 105232    | 1        | China   | 1           | 2  | 2  | Female | 1972 | 43     | 1    | 40-44 year | 1.0            | 2  |
| 16499  | 201389    | 3        | Korea   | 1           | 2  | 2  | Female | 1969 | 46     | 2    | 45-49      | 0.9            | 2  |
| 16502  | 201390    | 3        | Korea   | 1           | 2  | 2  | Female | 1962 | 53     | 3    | 50-54      | 0.8            |    |
| 16505  | 301228    | 2        | Taiwan  | 1           | 2  | 2  | Female | 1960 | 55     | 4    | 55-59      | 0.9            |    |
| 16514  | 350237929 | 3        | Korea   | 1           | 2  | 1  | Male   | 1970 | 45     | 2    | 45-49      | 0.8            |    |
| 16515  | 301230    | 2        | Taiwan  | 1           | 1  | 1  | Male   | 1962 | 53     | 3    | 50-54      | 0.8            |    |
| 16517  | 105242    | 1        | China   | 1           | 1  | 2  | Female | 1960 | 55     | 4    | 55-59      | 1.0            |    |
| 16518  | 301231    | 2        | Taiwan  | 1           | 2  | 1  | Male   | 1963 | 52     | 3    | 50-54      | 0.8            |    |
| 16519  | 105243    | 1        | China   | 1           | 2  | 1  | Male   | 1963 | 52     | 3    | 50-54      | 1.0            |    |
| 16525  | 201394    | 3        | Korea   | 1           | 2  | 1  | Male   | 1953 | 62     | 5    | >=60       | 1.6            |    |
| 16526  | 105244    | 1        | China   | 1           | 1  | 2  | Female | 1971 | 44     | 1    | 40-44 year | 1.0            | 2  |
| 16530  | 105247    | 1        | China   | 1           | 2  | 2  | Female | 1975 | 40     | 1    | 40-44 year | 1.0            | 2  |
| 16532  | 201396    | 3        | Korea   | 1           | 2  | 1  | Male   | 1952 | 63     | 5    | >=60       | 1.6            |    |
| 16536  | 201397    | 3        | Korea   | 1           | 2  | 1  | Male   | 1953 | 62     | 5    | >=60       | 1.6            |    |
| 16537  | 201133    | 3        | Korea   | 1           | 1  | 2  | Female | 1956 | 59     | 4    | 55-59      | 0.7            |    |
| 16541  | 105252    | 1        | China   | 1           | 1  | 1  | Male   | 1954 | 61     | 5    | >=60       | 1.0            |    |

| respid | SubsID | dCountry | Country | QDisclaimer | Q1 | Q2 | Gender   | Q3_1 | age Nr | dAge | age Group  | Weight in Ctry | Q4 |
|--------|--------|----------|---------|-------------|----|----|----------|------|--------|------|------------|----------------|----|
| 16543  | 201249 | 3        | Korea   | 1           | 1  | 2  | 1 Male   | 1953 | 62     | 5    | >=60       | 1.6            |    |
| 16544  | 105253 | 1        | China   | 1           | 1  | 1  | 2 Female | 1964 | 51     | 3    | 50-54      | 1.2            |    |
| 16545  | 201398 | 3        | Korea   | 1           | 1  | 2  | 1 Male   | 1945 | 70     | 5    | >=60       | 1.6            |    |
| 16546  | 201399 | 3        | Korea   | 1           | 1  | 2  | 2 Female | 1970 | 45     | 2    | 45-49      | 0.9            | 2  |
| 16548  | 201400 | 3        | Korea   | 1           | 1  | 2  | 1 Male   | 1959 | 56     | 4    | 55-59      | 0.8            |    |
| 16552  | 105254 | 1        | China   | 1           | 1  | 1  | 1 Male   | 1973 | 42     | 1    | 40-44 year | 1.0            |    |
| 16559  | 105258 | 1        | China   | 1           | 1  | 1  | 2 Female | 1964 | 51     | 3    | 50-54      | 1.2            |    |
| 16564  | 201403 | 3        | Korea   | 1           | 1  | 2  | 2 Female | 1962 | 53     | 3    | 50-54      | 0.8            |    |
| 16565  | 105260 | 1        | China   | 1           | 1  | 2  | 1 Male   | 1951 | 64     | 5    | >=60       | 1.0            |    |
| 16567  | 105261 | 1        | China   | 1           | 1  | 2  | 2 Female | 1974 | 41     | 1    | 40-44 year | 1.0            | 2  |
| 16571  | 201404 | 3        | Korea   | 1           | 1  | 2  | 2 Female | 1970 | 45     | 2    | 45-49      | 0.9            | 2  |
| 16572  | 105264 | 1        | China   | 1           | 1  | 1  | 2 Female | 1974 | 41     | 1    | 40-44 year | 1.0            | 2  |
| 16579  | 105267 | 1        | China   | 1           | 1  | 2  | 2 Female | 1974 | 41     | 1    | 40-44 year | 1.0            | 2  |
| 16588  | 105269 | 1        | China   | 1           | 1  | 2  | 2 Female | 1971 | 44     | 1    | 40-44 year | 1.0            | 2  |
| 16599  | 201408 | 3        | Korea   | 1           | 1  | 2  | 2 Female | 1967 | 48     | 2    | 45-49      | 0.9            | 2  |
| 16605  | 301236 | 2        | Taiwan  | 1           | 1  | 1  | 1 Male   | 1949 | 66     | 5    | >=60       | 1.6            |    |
| 16622  | 301245 | 2        | Taiwan  | 1           | 1  | 2  | 2 Female | 1949 | 66     | 5    | >=60       | 1.7            |    |
| 16635  | 105276 | 1        | China   | 1           | 1  | 1  | 1 Male   | 1954 | 61     | 5    | >=60       | 1.0            |    |
| 16638  | 301252 | 2        | Taiwan  | 1           | 1  | 2  | 2 Female | 1953 | 62     | 5    | >=60       | 1.7            |    |
| 16652  | 201423 | 3        | Korea   | 1           | 1  | 1  | 2 Female | 1966 | 49     | 2    | 45-49      | 0.9            | 2  |
| 16656  | 301260 | 2        | Taiwan  | 1           | 1  | 2  | 1 Male   | 1942 | 73     | 5    | >=60       | 1.6            |    |
| 16671  | 301267 | 2        | Taiwan  | 1           | 1  | 2  | 1 Male   | 1955 | 60     | 5    | >=60       | 1.6            |    |
| 16676  | 301269 | 2        | Taiwan  | 1           | 1  | 2  | 1 Male   | 1950 | 65     | 5    | >=60       | 1.6            |    |
| 16678  | 301271 | 2        | Taiwan  | 1           | 1  | 1  | 1 Male   | 1941 | 74     | 5    | >=60       | 1.6            |    |
| 16702  | 201439 | 3        | Korea   | 1           | 1  | 2  | 1 Male   | 1965 | 50     | 3    | 50-54      | 0.9            |    |
| 16705  | 201440 | 3        | Korea   | 1           | 1  | 2  | 2 Female | 1966 | 49     | 2    | 45-49      | 0.9            | 2  |
| 16707  | 105278 | 1        | China   | 1           | 1  | 1  | 1 Male   | 1955 | 60     | 5    | >=60       | 1.0            |    |
| 16711  | 201442 | 3        | Korea   | 1           | 1  | 2  | 2 Female | 1952 | 63     | 5    | >=60       | 1.6            |    |
| 16712  | 201441 | 3        | Korea   | 1           | 1  | 2  | 1 Male   | 1961 | 54     | 3    | 50-54      | 0.9            |    |
| 16716  | 301284 | 2        | Taiwan  | 1           | 1  | 2  | 1 Male   | 1962 | 53     | 3    | 50-54      | 0.8            |    |
| 16724  | 201447 | 3        | Korea   | 1           | 1  | 2  | 2 Female | 1959 | 56     | 4    | 55-59      | 0.7            |    |
| 16727  | 301289 | 2        | Taiwan  | 1           | 1  | 1  | 1 Male   | 1945 | 70     | 5    | >=60       | 1.6            |    |

| respid | SubsID | dCountry | Country | QDisclaimer | Q1 | Q2 | Gender | Q3_1 | age Nr | dAge | age Group | Weight in Ctry | Q4 |
|--------|--------|----------|---------|-------------|----|----|--------|------|--------|------|-----------|----------------|----|
| 16734  | 301292 | 2        | Taiwan  | 1           | 1  | 1  | Male   | 1959 | 56     | 4    | 55-59     | 0.7            |    |
| 16740  | 301295 | 2        | Taiwan  | 1           | 2  | 2  | Female | 1968 | 47     | 2    | 45-49     | 0.9            | 2  |
| 16748  | 201455 | 3        | Korea   | 1           | 2  | 1  | Male   | 1962 | 53     | 3    | 50-54     | 0.9            |    |
| 16759  | 201459 | 3        | Korea   | 1           | 2  | 1  | Male   | 1964 | 51     | 3    | 50-54     | 0.9            |    |
| 16761  | 301299 | 2        | Taiwan  | 1           | 2  | 1  | Male   | 1965 | 50     | 3    | 50-54     | 0.8            |    |
| 16763  | 201460 | 3        | Korea   | 1           | 2  | 1  | Male   | 1960 | 55     | 4    | 55-59     | 0.8            |    |
| 16764  | 201458 | 3        | Korea   | 1           | 2  | 1  | Male   | 1944 | 71     | 5    | >=60      | 1.6            |    |
| 16766  | 105279 | 1        | China   | 1           | 1  | 2  | Female | 1965 | 50     | 3    | 50-54     | 1.2            |    |
| 16767  | 301300 | 2        | Taiwan  | 1           | 1  | 1  | Male   | 1951 | 64     | 5    | >=60      | 1.6            |    |
| 16776  | 201467 | 3        | Korea   | 1           | 2  | 2  | Female | 1970 | 45     | 2    | 45-49     | 0.9            | 2  |
| 16781  | 201469 | 3        | Korea   | 1           | 2  | 1  | Male   | 1958 | 57     | 4    | 55-59     | 0.8            |    |
| 16793  | 301309 | 2        | Taiwan  | 1           | 1  | 1  | Male   | 1956 | 59     | 4    | 55-59     | 0.7            |    |
| 16796  | 201475 | 3        | Korea   | 1           | 2  | 2  | Female | 1961 | 54     | 3    | 50-54     | 0.8            |    |
| 16810  | 105281 | 1        | China   | 1           | 2  | 2  | Female | 1955 | 60     | 5    | >=60      | 1.1            |    |
| 16811  | 201479 | 3        | Korea   | 1           | 2  | 2  | Female | 1969 | 46     | 2    | 45-49     | 0.9            | 2  |
| 16813  | 201481 | 3        | Korea   | 1           | 2  | 2  | Female | 1962 | 53     | 3    | 50-54     | 0.8            |    |
| 16814  | 201482 | 3        | Korea   | 1           | 2  | 1  | Male   | 1963 | 52     | 3    | 50-54     | 0.9            |    |
| 16831  | 201490 | 3        | Korea   | 1           | 2  | 2  | Female | 1965 | 50     | 3    | 50-54     | 0.8            |    |
| 16833  | 201491 | 3        | Korea   | 1           | 2  | 2  | Female | 1970 | 45     | 2    | 45-49     | 0.9            | 2  |
| 16839  | 201496 | 3        | Korea   | 1           | 2  | 1  | Male   | 1958 | 57     | 4    | 55-59     | 0.8            |    |
| 16843  | 201499 | 3        | Korea   | 1           | 2  | 2  | Female | 1965 | 50     | 3    | 50-54     | 0.8            |    |
| 16860  | 301326 | 2        | Taiwan  | 1           | 2  | 2  | Female | 1942 | 73     | 5    | >=60      | 1.7            |    |
| 16871  | 201510 | 3        | Korea   | 1           | 2  | 1  | Male   | 1960 | 55     | 4    | 55-59     | 0.8            |    |
| 16881  | 201514 | 3        | Korea   | 1           | 2  | 1  | Male   | 1946 | 69     | 5    | >=60      | 1.6            |    |
| 16884  | 201515 | 3        | Korea   | 1           | 1  | 2  | Female | 1963 | 52     | 3    | 50-54     | 0.8            |    |
| 16891  | 201518 | 3        | Korea   | 1           | 2  | 1  | Male   | 1962 | 53     | 3    | 50-54     | 0.9            |    |
| 16909  | 201526 | 3        | Korea   | 1           | 2  | 2  | Female | 1959 | 56     | 4    | 55-59     | 0.7            |    |
| 16911  | 201527 | 3        | Korea   | 1           | 1  | 2  | Female | 1960 | 55     | 4    | 55-59     | 0.7            |    |
| 16922  | 201530 | 3        | Korea   | 1           | 2  | 1  | Male   | 1953 | 62     | 5    | >=60      | 1.6            |    |
| 16935  | 201535 | 3        | Korea   | 1           | 1  | 1  | Male   | 1953 | 62     | 5    | >=60      | 1.6            |    |
| 16942  | 301355 | 2        | Taiwan  | 1           | 1  | 2  | Female | 1963 | 52     | 3    | 50-54     | 0.9            |    |
| 16950  | 301360 | 2        | Taiwan  | 1           | 2  | 2  | Female | 1952 | 63     | 5    | >=60      | 1.7            |    |

| respid | SubsID | dCountry | Country | QDisclaimer | Q1 | Q2 | Gender   | Q3_1 | age Nr | dAge | age Group  | Weight in Ctry | Q4 |
|--------|--------|----------|---------|-------------|----|----|----------|------|--------|------|------------|----------------|----|
| 16952  | 201538 | 3        | Korea   |             | 1  | 2  | 2 Female | 1970 | 45     | 2    | 45-49      | 0.9            | 2  |
| 16963  | 301365 | 2        | Taiwan  |             | 1  | 1  | 1 Male   | 1949 | 66     | 5    | >=60       | 1.6            |    |
| 16967  | 301367 | 2        | Taiwan  |             | 1  | 1  | 1 Male   | 1967 | 48     | 2    | 45-49      | 0.8            |    |
| 16970  | 201547 | 3        | Korea   |             | 1  | 2  | 2 Female | 1970 | 45     | 2    | 45-49      | 0.9            | 2  |
| 16976  | 201549 | 3        | Korea   |             | 1  | 1  | 1 Male   | 1964 | 51     | 3    | 50-54      | 0.9            |    |
| 16982  | 201553 | 3        | Korea   |             | 1  | 2  | 1 Male   | 1957 | 58     | 4    | 55-59      | 0.8            |    |
| 16995  | 201556 | 3        | Korea   |             | 1  | 2  | 1 Male   | 1957 | 58     | 4    | 55-59      | 0.8            |    |
| 17004  | 201563 | 3        | Korea   |             | 1  | 2  | 1 Male   | 1952 | 63     | 5    | >=60       | 1.6            |    |
| 17006  | 201565 | 3        | Korea   |             | 1  | 2  | 1 Male   | 1963 | 52     | 3    | 50-54      | 0.9            |    |
| 17009  | 201566 | 3        | Korea   |             | 1  | 2  | 1 Male   | 1956 | 59     | 4    | 55-59      | 0.8            |    |
| 17021  | 301385 | 2        | Taiwan  |             | 1  | 2  | 1 Male   | 1954 | 61     | 5    | >=60       | 1.6            |    |
| 17040  | 201575 | 3        | Korea   |             | 1  | 2  | 2 Female | 1956 | 59     | 4    | 55-59      | 0.7            |    |
| 17041  | 201576 | 3        | Korea   |             | 1  | 2  | 1 Male   | 1956 | 59     | 4    | 55-59      | 0.8            |    |
| 17044  | 201578 | 3        | Korea   |             | 1  | 2  | 2 Female | 1950 | 65     | 5    | >=60       | 1.6            |    |
| 17046  | 201581 | 3        | Korea   |             | 1  | 1  | 2 Female | 1956 | 59     | 4    | 55-59      | 0.7            |    |
| 17052  | 201584 | 3        | Korea   |             | 1  | 2  | 1 Male   | 1954 | 61     | 5    | >=60       | 1.6            |    |
| 17055  | 105287 | 1        | China   |             | 1  | 2  | 2 Female | 1971 | 44     | 1    | 40-44 year | 1.0            | 2  |
| 17108  | 301398 | 2        | Taiwan  |             | 1  | 2  | 1 Male   | 1945 | 70     | 5    | >=60       | 1.6            |    |
| 17109  | 201590 | 3        | Korea   |             | 1  | 2  | 2 Female | 1968 | 47     | 2    | 45-49      | 0.9            | 2  |
| 17113  | 301399 | 2        | Taiwan  |             | 1  | 2  | 1 Male   | 1961 | 54     | 3    | 50-54      | 0.8            |    |
| 17115  | 301400 | 2        | Taiwan  |             | 1  | 2  | 1 Male   | 1967 | 48     | 2    | 45-49      | 0.8            |    |
| 17132  | 301406 | 2        | Taiwan  |             | 1  | 2  | 1 Male   | 1951 | 64     | 5    | >=60       | 1.6            |    |
| 17135  | 201601 | 3        | Korea   |             | 1  | 2  | 2 Female | 1960 | 55     | 4    | 55-59      | 0.7            |    |
| 17138  | 201603 | 3        | Korea   |             | 1  | 2  | 2 Female | 1956 | 59     | 4    | 55-59      | 0.7            |    |
| 17141  | 201606 | 3        | Korea   |             | 1  | 2  | 1 Male   | 1957 | 58     | 4    | 55-59      | 0.8            |    |
| 17143  | 201607 | 3        | Korea   |             | 1  | 2  | 1 Male   | 1958 | 57     | 4    | 55-59      | 0.8            |    |
| 17148  | 201611 | 3        | Korea   |             | 1  | 2  | 1 Male   | 1957 | 58     | 4    | 55-59      | 0.8            |    |
| 17151  | 201613 | 3        | Korea   |             | 1  | 2  | 1 Male   | 1956 | 59     | 4    | 55-59      | 0.8            |    |
| 17153  | 201615 | 3        | Korea   |             | 1  | 2  | 1 Male   | 1963 | 52     | 3    | 50-54      | 0.9            |    |
| 17154  | 201616 | 3        | Korea   |             | 1  | 2  | 1 Male   | 1964 | 51     | 3    | 50-54      | 0.9            |    |
| 17157  | 201619 | 3        | Korea   |             | 1  | 2  | 1 Male   | 1959 | 56     | 4    | 55-59      | 0.8            |    |
| 17160  | 201621 | 3        | Korea   |             | 1  | 2  | 1 Male   | 1959 | 56     | 4    | 55-59      | 0.8            |    |



| respid | SubsID | dCountry | Country | QDisclaimer | Q1 | Q2 | Gender | Q3_1 | age Nr | dAge | age Group  | Weight in Ctry | Q4 |
|--------|--------|----------|---------|-------------|----|----|--------|------|--------|------|------------|----------------|----|
| 17167  | 201624 | 3        | Korea   | 1           | 2  | 1  | Male   | 1958 | 57     | 4    | 55-59      | 0.8            |    |
| 17169  | 201626 | 3        | Korea   | 1           | 1  | 1  | Male   | 1959 | 56     | 4    | 55-59      | 0.8            |    |
| 17174  | 105292 | 1        | China   | 1           | 2  | 1  | Male   | 1965 | 50     | 3    | 50-54      | 1.0            |    |
| 17179  | 201631 | 3        | Korea   | 1           | 2  | 1  | Male   | 1964 | 51     | 3    | 50-54      | 0.9            |    |
| 17180  | 201632 | 3        | Korea   | 1           | 2  | 1  | Male   | 1963 | 52     | 3    | 50-54      | 0.9            |    |
| 17182  | 301412 | 2        | Taiwan  | 1           | 2  | 1  | Male   | 1968 | 47     | 2    | 45-49      | 0.8            |    |
| 17184  | 201635 | 3        | Korea   | 1           | 2  | 1  | Male   | 1961 | 54     | 3    | 50-54      | 0.9            |    |
| 17186  | 201636 | 3        | Korea   | 1           | 2  | 1  | Male   | 1961 | 54     | 3    | 50-54      | 0.9            |    |
| 17187  | 201637 | 3        | Korea   | 1           | 2  | 1  | Male   | 1963 | 52     | 3    | 50-54      | 0.9            |    |
| 17192  | 201639 | 3        | Korea   | 1           | 2  | 1  | Male   | 1961 | 54     | 3    | 50-54      | 0.9            |    |
| 17197  | 201642 | 3        | Korea   | 1           | 2  | 1  | Male   | 1967 | 48     | 2    | 45-49      | 0.8            |    |
| 17217  | 301421 | 2        | Taiwan  | 1           | 2  | 2  | Female | 1969 | 46     | 2    | 45-49      | 0.9            | 2  |
| 17226  | 201661 | 3        | Korea   | 1           | 2  | 1  | Male   | 1957 | 58     | 4    | 55-59      | 0.8            |    |
| 17228  | 105295 | 1        | China   | 1           | 1  | 1  | Male   | 1955 | 60     | 5    | >=60       | 1.0            |    |
| 17245  | 201672 | 3        | Korea   | 1           | 2  | 1  | Male   | 1959 | 56     | 4    | 55-59      | 0.8            |    |
| 17247  | 201673 | 3        | Korea   | 1           | 2  | 2  | Female | 1970 | 45     | 2    | 45-49      | 0.9            | 2  |
| 17258  | 201679 | 3        | Korea   | 1           | 2  | 2  | Female | 1956 | 59     | 4    | 55-59      | 0.7            |    |
| 17259  | 301427 | 2        | Taiwan  | 1           | 1  | 1  | Male   | 1950 | 65     | 5    | >=60       | 1.6            |    |
| 17262  | 201682 | 3        | Korea   | 1           | 2  | 1  | Male   | 1956 | 59     | 4    | 55-59      | 0.8            |    |
| 17265  | 201684 | 3        | Korea   | 1           | 1  | 2  | Female | 1957 | 58     | 4    | 55-59      | 0.7            |    |
| 17281  | 105299 | 1        | China   | 1           | 2  | 1  | Male   | 1974 | 41     | 1    | 40-44 year | 1.0            |    |
| 17282  | 201697 | 3        | Korea   | 1           | 1  | 2  | Female | 1953 | 62     | 5    | >=60       | 1.6            |    |
| 17293  | 201708 | 3        | Korea   | 1           | 2  | 1  | Male   | 1956 | 59     | 4    | 55-59      | 0.8            |    |
| 17306  | 201719 | 3        | Korea   | 1           | 2  | 2  | Female | 1966 | 49     | 2    | 45-49      | 0.9            | 2  |
| 17312  | 201725 | 3        | Korea   | 1           | 1  | 1  | Male   | 1959 | 56     | 4    | 55-59      | 0.8            |    |
| 17318  | 301430 | 2        | Taiwan  | 1           | 2  | 1  | Male   | 1947 | 68     | 5    | >=60       | 1.6            |    |
| 17328  | 201734 | 3        | Korea   | 1           | 2  | 2  | Female | 1954 | 61     | 5    | >=60       | 1.6            |    |
| 17343  | 201746 | 3        | Korea   | 1           | 1  | 1  | Male   | 1956 | 59     | 4    | 55-59      | 0.8            |    |
| 17344  | 105305 | 1        | China   | 1           | 2  | 2  | Female | 1975 | 40     | 1    | 40-44 year | 1.0            | 2  |
| 17348  | 105306 | 1        | China   | 1           | 2  | 1  | Male   | 1970 | 45     | 2    | 45-49      | 1.0            |    |
| 17352  | 301433 | 2        | Taiwan  | 1           | 2  | 2  | Female | 1968 | 47     | 2    | 45-49      | 0.9            | 2  |
| 17355  | 301435 | 2        | Taiwan  | 1           | 1  | 1  | Male   | 1960 | 55     | 4    | 55-59      | 0.7            |    |

| respid | SubsID | dCountry | Country | QDisclaimer | Q1 | Q2 | Gender | Q3_1 | age Nr | dAge | age Group  | Weight in Ctry | Q4 |
|--------|--------|----------|---------|-------------|----|----|--------|------|--------|------|------------|----------------|----|
| 17356  | 201753 | 3        | Korea   | 1           | 2  | 2  | Female | 1969 | 46     | 2    | 45-49      | 0.9            | 2  |
| 17359  | 301436 | 2        | Taiwan  | 1           | 2  | 2  | Female | 1963 | 52     | 3    | 50-54      | 0.9            |    |
| 17373  | 201768 | 3        | Korea   | 1           | 2  | 2  | Female | 1969 | 46     | 2    | 45-49      | 0.9            | 2  |
| 17381  | 105307 | 1        | China   | 1           | 2  | 2  | Female | 1968 | 47     | 2    | 45-49      | 1.0            | 2  |
| 17388  | 201777 | 3        | Korea   | 1           | 1  | 2  | Female | 1956 | 59     | 4    | 55-59      | 0.7            |    |
| 17394  | 301439 | 2        | Taiwan  | 1           | 2  | 2  | Female | 1961 | 54     | 3    | 50-54      | 0.9            |    |
| 17401  | 201789 | 3        | Korea   | 1           | 2  | 1  | Male   | 1955 | 60     | 5    | >=60       | 1.6            |    |
| 17403  | 201791 | 3        | Korea   | 1           | 2  | 2  | Female | 1970 | 45     | 2    | 45-49      | 0.9            | 2  |
| 17411  | 105308 | 1        | China   | 1           | 1  | 2  | Female | 1973 | 42     | 1    | 40-44 year | 1.0            | 2  |
| 17423  | 201803 | 3        | Korea   | 1           | 1  | 2  | Female | 1959 | 56     | 4    | 55-59      | 0.7            |    |
| 17427  | 105311 | 1        | China   | 1           | 2  | 1  | Male   | 1971 | 44     | 1    | 40-44 year | 1.0            |    |
| 17433  | 105313 | 1        | China   | 1           | 2  | 2  | Female | 1969 | 46     | 2    | 45-49      | 1.0            | 2  |
| 17441  | 105314 | 1        | China   | 1           | 2  | 1  | Male   | 1967 | 48     | 2    | 45-49      | 1.0            |    |
| 17442  | 201814 | 3        | Korea   | 1           | 2  | 1  | Male   | 1959 | 56     | 4    | 55-59      | 0.8            |    |
| 17447  | 201819 | 3        | Korea   | 1           | 2  | 1  | Male   | 1958 | 57     | 4    | 55-59      | 0.8            |    |
| 17458  | 105317 | 1        | China   | 1           | 2  | 2  | Female | 1975 | 40     | 1    | 40-44 year | 1.0            | 2  |
| 17474  | 105319 | 1        | China   | 1           | 2  | 2  | Female | 1973 | 42     | 1    | 40-44 year | 1.0            | 2  |
| 17475  | 201438 | 3        | Korea   | 1           | 2  | 1  | Male   | 1958 | 57     | 4    | 55-59      | 0.8            |    |
| 17476  | 201507 | 3        | Korea   | 1           | 2  | 1  | Male   | 1943 | 72     | 5    | >=60       | 1.6            |    |
| 17480  | 105320 | 1        | China   | 1           | 2  | 2  | Female | 1975 | 40     | 1    | 40-44 year | 1.0            | 2  |
| 17484  | 201839 | 3        | Korea   | 1           | 2  | 1  | Male   | 1959 | 56     | 4    | 55-59      | 0.8            |    |
| 17490  | 301452 | 2        | Taiwan  | 1           | 2  | 2  | Female | 1951 | 64     | 5    | >=60       | 1.7            |    |
| 17491  | 201845 | 3        | Korea   | 1           | 2  | 2  | Female | 1934 | 81     | 5    | >=60       | 1.6            |    |
| 17500  | 201851 | 3        | Korea   | 1           | 2  | 2  | Female | 1960 | 55     | 4    | 55-59      | 0.7            |    |
| 17507  | 201856 | 3        | Korea   | 1           | 2  | 1  | Male   | 1958 | 57     | 4    | 55-59      | 0.8            |    |
| 17517  | 201863 | 3        | Korea   | 1           | 2  | 1  | Male   | 1954 | 61     | 5    | >=60       | 1.6            |    |
| 17520  | 201866 | 3        | Korea   | 1           | 1  | 1  | Male   | 1959 | 56     | 4    | 55-59      | 0.8            |    |
| 17521  | 105322 | 1        | China   | 1           | 2  | 1  | Male   | 1957 | 58     | 4    | 55-59      | 0.9            |    |
| 17531  | 301460 | 2        | Taiwan  | 1           | 2  | 1  | Male   | 1950 | 65     | 5    | >=60       | 1.6            |    |
| 17540  | 105325 | 1        | China   | 1           | 2  | 2  | Female | 1964 | 51     | 3    | 50-54      | 1.2            |    |
| 17550  | 301463 | 2        | Taiwan  | 1           | 2  | 1  | Male   | 1970 | 45     | 2    | 45-49      | 0.8            |    |
| 17551  | 201880 | 3        | Korea   | 1           | 2  | 2  | Female | 1958 | 57     | 4    | 55-59      | 0.7            |    |

| respid | SubsID | dCountry | Country | QDisclaimer | Q1 | Q2 | Gender   | Q3_1 | age Nr | dAge | age Group    | Weight in Ctry | Q4 |
|--------|--------|----------|---------|-------------|----|----|----------|------|--------|------|--------------|----------------|----|
| 17555  | 105327 | 1        | China   |             | 1  | 2  | 1 Male   | 1971 | 44     |      | 1 40-44 year | 1.0            |    |
| 17556  | 301465 | 2        | Taiwan  |             | 1  | 1  | 2 Female | 1950 | 65     |      | 5 >=60       | 1.7            |    |
| 17574  | 201896 | 3        | Korea   |             | 1  | 2  | 1 Male   | 1956 | 59     |      | 4 55-59      | 0.8            |    |
| 17575  | 105330 | 1        | China   |             | 1  | 2  | 2 Female | 1971 | 44     |      | 1 40-44 year | 1.0            | 2  |
| 17582  | 201901 | 3        | Korea   |             | 1  | 1  | 2 Female | 1952 | 63     |      | 5 >=60       | 1.6            |    |
| 17587  | 301469 | 2        | Taiwan  |             | 1  | 2  | 2 Female | 1956 | 59     |      | 4 55-59      | 0.9            |    |
| 17601  | 201912 | 3        | Korea   |             | 1  | 2  | 1 Male   | 1950 | 65     |      | 5 >=60       | 1.6            |    |
| 17607  | 201915 | 3        | Korea   |             | 1  | 2  | 1 Male   | 1954 | 61     |      | 5 >=60       | 1.6            |    |
| 17609  | 201917 | 3        | Korea   |             | 1  | 2  | 2 Female | 1959 | 56     |      | 4 55-59      | 0.7            |    |
| 17611  | 105333 | 1        | China   |             | 1  | 2  | 2 Female | 1956 | 59     |      | 4 55-59      | 1.0            |    |
| 17613  | 301473 | 2        | Taiwan  |             | 1  | 2  | 2 Female | 1945 | 70     |      | 5 >=60       | 1.7            |    |
| 17615  | 201919 | 3        | Korea   |             | 1  | 2  | 2 Female | 1957 | 58     |      | 4 55-59      | 0.7            |    |
| 17620  | 105335 | 1        | China   |             | 1  | 2  | 1 Male   | 1967 | 48     |      | 2 45-49      | 1.0            |    |
| 17624  | 201924 | 3        | Korea   |             | 1  | 1  | 2 Female | 1951 | 64     |      | 5 >=60       | 1.6            |    |
| 17635  | 201928 | 3        | Korea   |             | 1  | 2  | 1 Male   | 1959 | 56     |      | 4 55-59      | 0.8            |    |
| 17643  | 201932 | 3        | Korea   |             | 1  | 2  | 2 Female | 1956 | 59     |      | 4 55-59      | 0.7            |    |
| 17645  | 201934 | 3        | Korea   |             | 1  | 2  | 2 Female | 1951 | 64     |      | 5 >=60       | 1.6            |    |
| 17646  | 105339 | 1        | China   |             | 1  | 1  | 2 Female | 1967 | 48     |      | 2 45-49      | 1.0            | 2  |
| 17649  | 201937 | 3        | Korea   |             | 1  | 1  | 1 Male   | 1960 | 55     |      | 4 55-59      | 0.8            |    |
| 17658  | 301485 | 2        | Taiwan  |             | 1  | 2  | 1 Male   | 1965 | 50     |      | 3 50-54      | 0.8            |    |
| 17666  | 105340 | 1        | China   |             | 1  | 2  | 1 Male   | 1972 | 43     |      | 1 40-44 year | 1.0            |    |
| 17670  | 201946 | 3        | Korea   |             | 1  | 2  | 2 Female | 1959 | 56     |      | 4 55-59      | 0.7            |    |
| 17678  | 105345 | 1        | China   |             | 1  | 2  | 2 Female | 1975 | 40     |      | 1 40-44 year | 1.0            | 2  |
| 17679  | 105342 | 1        | China   |             | 1  | 2  | 2 Female | 1975 | 40     |      | 1 40-44 year | 1.0            | 2  |
| 17695  | 201963 | 3        | Korea   |             | 1  | 2  | 2 Female | 1958 | 57     |      | 4 55-59      | 0.7            |    |
| 17697  | 201964 | 3        | Korea   |             | 1  | 2  | 1 Male   | 1954 | 61     |      | 5 >=60       | 1.6            |    |
| 17698  | 201965 | 3        | Korea   |             | 1  | 2  | 1 Male   | 1955 | 60     |      | 5 >=60       | 1.6            |    |
| 17723  | 201975 | 3        | Korea   |             | 1  | 2  | 2 Female | 1957 | 58     |      | 4 55-59      | 0.7            |    |
| 17727  | 201143 | 3        | Korea   |             | 1  | 2  | 1 Male   | 1954 | 61     |      | 5 >=60       | 1.6            |    |
| 17734  | 105351 | 1        | China   |             | 1  | 1  | 2 Female | 1959 | 56     |      | 4 55-59      | 1.0            |    |
| 17737  | 105353 | 1        | China   |             | 1  | 2  | 2 Female | 1964 | 51     |      | 3 50-54      | 1.2            |    |
| 17748  | 201979 | 3        | Korea   |             | 1  | 2  | 1 Male   | 1957 | 58     |      | 4 55-59      | 0.8            |    |

| respid | SubsID | dCountry | Country | QDisclaimer | Q1 | Q2 | Gender   | Q3_1 | age Nr | dAge | age Group  | Weight in Ctry | Q4 |
|--------|--------|----------|---------|-------------|----|----|----------|------|--------|------|------------|----------------|----|
| 17749  | 201980 | 3        | Korea   |             | 1  | 2  | 2 Female | 1960 | 55     | 4    | 55-59      | 0.7            |    |
| 17754  | 201982 | 3        | Korea   |             | 1  | 1  | 1 Male   | 1960 | 55     | 4    | 55-59      | 0.8            |    |
| 17766  | 201987 | 3        | Korea   |             | 1  | 2  | 2 Female | 1959 | 56     | 4    | 55-59      | 0.7            |    |
| 17777  | 301496 | 2        | Taiwan  |             | 1  | 1  | 2 Female | 1958 | 57     | 4    | 55-59      | 0.9            |    |
| 17780  | 201993 | 3        | Korea   |             | 1  | 2  | 1 Male   | 1960 | 55     | 4    | 55-59      | 0.8            |    |
| 17788  | 201997 | 3        | Korea   |             | 1  | 2  | 1 Male   | 1960 | 55     | 4    | 55-59      | 0.8            |    |
| 17801  | 202002 | 3        | Korea   |             | 1  | 2  | 1 Male   | 1959 | 56     | 4    | 55-59      | 0.8            |    |
| 17803  | 104040 | 1        | China   |             | 1  | 2  | 2 Female | 1958 | 57     | 4    | 55-59      | 1.0            |    |
| 17807  | 202005 | 3        | Korea   |             | 1  | 1  | 1 Male   | 1953 | 62     | 5    | >=60       | 1.6            |    |
| 17808  | 202006 | 3        | Korea   |             | 1  | 2  | 1 Male   | 1958 | 57     | 4    | 55-59      | 0.8            |    |
| 17809  | 301503 | 2        | Taiwan  |             | 1  | 1  | 1 Male   | 1951 | 64     | 5    | >=60       | 1.6            |    |
| 17821  | 100784 | 1        | China   |             | 1  | 2  | 1 Male   | 1974 | 41     | 1    | 40-44 year | 1.0            |    |
| 17827  | 202018 | 3        | Korea   |             | 1  | 2  | 1 Male   | 1960 | 55     | 4    | 55-59      | 0.8            |    |
| 17834  | 202023 | 3        | Korea   |             | 1  | 1  | 1 Male   | 1947 | 68     | 5    | >=60       | 1.6            |    |
| 17838  | 202026 | 3        | Korea   |             | 1  | 2  | 1 Male   | 1960 | 55     | 4    | 55-59      | 0.8            |    |
| 17842  | 105008 | 1        | China   |             | 1  | 2  | 2 Female | 1968 | 47     | 2    | 45-49      | 1.0            | 2  |
| 17862  | 202038 | 3        | Korea   |             | 1  | 2  | 1 Male   | 1954 | 61     | 5    | >=60       | 1.6            |    |
| 17863  | 105358 | 1        | China   |             | 1  | 2  | 2 Female | 1975 | 40     | 1    | 40-44 year | 1.0            | 2  |
| 17871  | 201358 | 3        | Korea   |             | 1  | 2  | 1 Male   | 1957 | 58     | 4    | 55-59      | 0.8            |    |
| 17872  | 201088 | 3        | Korea   |             | 1  | 2  | 1 Male   | 1956 | 59     | 4    | 55-59      | 0.8            |    |
| 17903  | 301519 | 2        | Taiwan  |             | 1  | 2  | 2 Female | 1950 | 65     | 5    | >=60       | 1.7            |    |
| 17906  | 202056 | 3        | Korea   |             | 1  | 2  | 1 Male   | 1960 | 55     | 4    | 55-59      | 0.8            |    |
| 17910  | 200767 | 3        | Korea   |             | 1  | 1  | 2 Female | 1950 | 65     | 5    | >=60       | 1.6            |    |
| 17922  | 202065 | 3        | Korea   |             | 1  | 2  | 1 Male   | 1955 | 60     | 5    | >=60       | 1.6            |    |
| 17923  | 105362 | 1        | China   |             | 1  | 2  | 1 Male   | 1957 | 58     | 4    | 55-59      | 0.9            |    |
| 17925  | 202067 | 3        | Korea   |             | 1  | 2  | 1 Male   | 1960 | 55     | 4    | 55-59      | 0.8            |    |
| 17926  | 105363 | 1        | China   |             | 1  | 2  | 1 Male   | 1954 | 61     | 5    | >=60       | 1.0            |    |
| 17937  | 105348 | 1        | China   |             | 1  | 1  | 1 Male   | 1955 | 60     | 5    | >=60       | 1.0            |    |
| 17956  | 105368 | 1        | China   |             | 1  | 2  | 1 Male   | 1967 | 48     | 2    | 45-49      | 1.0            |    |
| 17958  | 202083 | 3        | Korea   |             | 1  | 2  | 1 Male   | 1959 | 56     | 4    | 55-59      | 0.8            |    |
| 17985  | 202095 | 3        | Korea   |             | 1  | 2  | 1 Male   | 1959 | 56     | 4    | 55-59      | 0.8            |    |
| 17989  | 202099 | 3        | Korea   |             | 1  | 2  | 2 Female | 1940 | 75     | 5    | >=60       | 1.6            |    |

| respid | SubsID | dCountry | Country | QDisclaimer | Q1 | Q2 | Gender | Q3_1 | age Nr | dAge | age Group  | Weight in Ctry | Q4 |
|--------|--------|----------|---------|-------------|----|----|--------|------|--------|------|------------|----------------|----|
| 17995  | 200812 | 3        | Korea   | 1           | 2  | 2  | Female | 1954 | 61     | 5    | >=60       | 1.6            |    |
| 18000  | 301544 | 2        | Taiwan  | 1           | 2  | 2  | Female | 1965 | 50     | 3    | 50-54      | 0.9            |    |
| 18010  | 202108 | 3        | Korea   | 1           | 2  | 1  | Male   | 1957 | 58     | 4    | 55-59      | 0.8            |    |
| 18015  | 301547 | 2        | Taiwan  | 1           | 2  | 1  | Male   | 1966 | 49     | 2    | 45-49      | 0.8            |    |
| 18018  | 105373 | 1        | China   | 1           | 2  | 2  | Female | 1966 | 49     | 2    | 45-49      | 1.0            | 2  |
| 18031  | 301550 | 2        | Taiwan  | 1           | 2  | 2  | Female | 1949 | 66     | 5    | >=60       | 1.7            |    |
| 18033  | 202119 | 3        | Korea   | 1           | 1  | 2  | Female | 1953 | 62     | 5    | >=60       | 1.6            |    |
| 18036  | 301551 | 2        | Taiwan  | 1           | 2  | 2  | Female | 1961 | 54     | 3    | 50-54      | 0.9            |    |
| 18041  | 202126 | 3        | Korea   | 1           | 2  | 1  | Male   | 1957 | 58     | 4    | 55-59      | 0.8            |    |
| 18068  | 200022 | 3        | Korea   | 1           | 2  | 2  | Female | 1951 | 64     | 5    | >=60       | 1.6            |    |
| 18080  | 202146 | 3        | Korea   | 1           | 2  | 1  | Male   | 1960 | 55     | 4    | 55-59      | 0.8            |    |
| 18081  | 202147 | 3        | Korea   | 1           | 1  | 1  | Male   | 1959 | 56     | 4    | 55-59      | 0.8            |    |
| 18083  | 202148 | 3        | Korea   | 1           | 2  | 1  | Male   | 1948 | 67     | 5    | >=60       | 1.6            |    |
| 18113  | 202167 | 3        | Korea   | 1           | 2  | 1  | Male   | 1959 | 56     | 4    | 55-59      | 0.8            |    |
| 18115  | 202169 | 3        | Korea   | 1           | 2  | 1  | Male   | 1942 | 73     | 5    | >=60       | 1.6            |    |
| 18117  | 202171 | 3        | Korea   | 1           | 2  | 2  | Female | 1954 | 61     | 5    | >=60       | 1.6            |    |
| 18129  | 301567 | 2        | Taiwan  | 1           | 2  | 2  | Female | 1961 | 54     | 3    | 50-54      | 0.9            |    |
| 18132  | 202175 | 3        | Korea   | 1           | 2  | 1  | Male   | 1954 | 61     | 5    | >=60       | 1.6            |    |
| 18146  | 202188 | 3        | Korea   | 1           | 2  | 1  | Male   | 1960 | 55     | 4    | 55-59      | 0.8            |    |
| 18147  | 202189 | 3        | Korea   | 1           | 2  | 1  | Male   | 1957 | 58     | 4    | 55-59      | 0.8            |    |
| 18153  | 301577 | 2        | Taiwan  | 1           | 2  | 2  | Female | 1967 | 48     | 2    | 45-49      | 0.9            | 2  |
| 18154  | 301578 | 2        | Taiwan  | 1           | 2  | 1  | Male   | 1952 | 63     | 5    | >=60       | 1.6            |    |
| 18157  | 105380 | 1        | China   | 1           | 2  | 1  | Male   | 1975 | 40     | 1    | 40-44 year | 1.0            |    |
| 18166  | 301581 | 2        | Taiwan  | 1           | 2  | 1  | Male   | 1942 | 73     | 5    | >=60       | 1.6            |    |
| 18169  | 202201 | 3        | Korea   | 1           | 2  | 1  | Male   | 1959 | 56     | 4    | 55-59      | 0.8            |    |
| 18171  | 202203 | 3        | Korea   | 1           | 2  | 2  | Female | 1955 | 60     | 5    | >=60       | 1.6            |    |
| 18173  | 105382 | 1        | China   | 1           | 2  | 2  | Female | 1973 | 42     | 1    | 40-44 year | 1.0            | 2  |
| 18204  | 202218 | 3        | Korea   | 1           | 2  | 1  | Male   | 1958 | 57     | 4    | 55-59      | 0.8            |    |
| 18210  | 202223 | 3        | Korea   | 1           | 2  | 1  | Male   | 1957 | 58     | 4    | 55-59      | 0.8            |    |
| 18212  | 105384 | 1        | China   | 1           | 2  | 2  | Female | 1974 | 41     | 1    | 40-44 year | 1.0            | 2  |
| 18220  | 202228 | 3        | Korea   | 1           | 2  | 1  | Male   | 1954 | 61     | 5    | >=60       | 1.6            |    |
| 18221  | 202229 | 3        | Korea   | 1           | 2  | 2  | Female | 1948 | 67     | 5    | >=60       | 1.6            |    |

| respid | SubsID | dCountry | Country | QDisclaimer | Q1 | Q2 | Gender   | Q3_1 | age Nr | dAge | age Group  | Weight in Ctry | Q4 |
|--------|--------|----------|---------|-------------|----|----|----------|------|--------|------|------------|----------------|----|
| 18228  | 202234 | 3        | Korea   | 1           | 1  | 2  | 1 Male   | 1957 | 58     | 4    | 55-59      | 0.8            |    |
| 18231  | 105381 | 1        | China   | 1           | 1  | 2  | 1 Male   | 1970 | 45     | 2    | 45-49      | 1.0            |    |
| 18233  | 202235 | 3        | Korea   | 1           | 1  | 2  | 1 Male   | 1956 | 59     | 4    | 55-59      | 0.8            |    |
| 18235  | 105385 | 1        | China   | 1           | 1  | 1  | 2 Female | 1961 | 54     | 3    | 50-54      | 1.2            |    |
| 18237  | 105388 | 1        | China   | 1           | 1  | 2  | 1 Male   | 1968 | 47     | 2    | 45-49      | 1.0            |    |
| 18250  | 301603 | 2        | Taiwan  | 1           | 1  | 2  | 2 Female | 1967 | 48     | 2    | 45-49      | 0.9            | 2  |
| 18253  | 301605 | 2        | Taiwan  | 1           | 1  | 2  | 2 Female | 1969 | 46     | 2    | 45-49      | 0.9            | 2  |
| 18264  | 202252 | 3        | Korea   | 1           | 1  | 2  | 2 Female | 1954 | 61     | 5    | >=60       | 1.6            |    |
| 18285  | 202266 | 3        | Korea   | 1           | 1  | 2  | 1 Male   | 1946 | 69     | 5    | >=60       | 1.6            |    |
| 18287  | 202267 | 3        | Korea   | 1           | 1  | 2  | 1 Male   | 1948 | 67     | 5    | >=60       | 1.6            |    |
| 18296  | 202270 | 3        | Korea   | 1           | 1  | 2  | 2 Female | 1955 | 60     | 5    | >=60       | 1.6            |    |
| 18299  | 300785 | 2        | Taiwan  | 1           | 1  | 1  | 1 Male   | 1960 | 55     | 4    | 55-59      | 0.7            |    |
| 18313  | 301612 | 2        | Taiwan  | 1           | 1  | 2  | 2 Female | 1959 | 56     | 4    | 55-59      | 0.9            |    |
| 18321  | 300779 | 2        | Taiwan  | 1           | 1  | 1  | 2 Female | 1970 | 45     | 2    | 45-49      | 0.9            | 2  |
| 18324  | 301617 | 2        | Taiwan  | 1           | 1  | 1  | 1 Male   | 1963 | 52     | 3    | 50-54      | 0.8            |    |
| 18329  | 202284 | 3        | Korea   | 1           | 1  | 2  | 1 Male   | 1957 | 58     | 4    | 55-59      | 0.8            |    |
| 18332  | 301618 | 2        | Taiwan  | 1           | 1  | 2  | 2 Female | 1946 | 69     | 5    | >=60       | 1.7            |    |
| 18339  | 301619 | 2        | Taiwan  | 1           | 1  | 2  | 1 Male   | 1963 | 52     | 3    | 50-54      | 0.8            |    |
| 18340  | 301610 | 2        | Taiwan  | 1           | 1  | 1  | 1 Male   | 1966 | 49     | 2    | 45-49      | 0.8            |    |
| 18348  | 105400 | 1        | China   | 1           | 1  | 2  | 2 Female | 1973 | 42     | 1    | 40-44 year | 1.0            | 2  |
| 18355  | 202295 | 3        | Korea   | 1           | 1  | 2  | 1 Male   | 1949 | 66     | 5    | >=60       | 1.6            |    |
| 18360  | 200945 | 3        | Korea   | 1           | 1  | 2  | 1 Male   | 1957 | 58     | 4    | 55-59      | 0.8            |    |
| 18380  | 202306 | 3        | Korea   | 1           | 1  | 2  | 2 Female | 1952 | 63     | 5    | >=60       | 1.6            |    |
| 18403  | 202317 | 3        | Korea   | 1           | 1  | 2  | 2 Female | 1955 | 60     | 5    | >=60       | 1.6            |    |
| 18405  | 301635 | 2        | Taiwan  | 1           | 1  | 2  | 1 Male   | 1957 | 58     | 4    | 55-59      | 0.7            |    |
| 18409  | 105405 | 1        | China   | 1           | 1  | 1  | 1 Male   | 1956 | 59     | 4    | 55-59      | 0.9            |    |
| 18445  | 301642 | 2        | Taiwan  | 1           | 1  | 1  | 1 Male   | 1957 | 58     | 4    | 55-59      | 0.7            |    |
| 18458  | 301647 | 2        | Taiwan  | 1           | 1  | 1  | 1 Male   | 1957 | 58     | 4    | 55-59      | 0.7            |    |
| 18477  | 301651 | 2        | Taiwan  | 1           | 1  | 2  | 2 Female | 1970 | 45     | 2    | 45-49      | 0.9            | 2  |
| 18481  | 105411 | 1        | China   | 1           | 1  | 1  | 1 Male   | 1955 | 60     | 5    | >=60       | 1.0            |    |
| 18491  | 105412 | 1        | China   | 1           | 1  | 2  | 1 Male   | 1970 | 45     | 2    | 45-49      | 1.0            |    |
| 18492  | 301654 | 2        | Taiwan  | 1           | 1  | 2  | 1 Male   | 1960 | 55     | 4    | 55-59      | 0.7            |    |

| respid | SubsID | dCountry | Country | QDisclaimer | Q1 | Q2 | Gender | Q3_1 | age Nr | dAge | age Group  | Weight in Ctry | Q4 |
|--------|--------|----------|---------|-------------|----|----|--------|------|--------|------|------------|----------------|----|
| 18494  | 301655 | 2        | Taiwan  | 1           | 2  | 2  | Female | 1970 | 45     | 2    | 45-49      | 0.9            | 2  |
| 18495  | 202353 | 3        | Korea   | 1           | 1  | 2  | Female | 1955 | 60     | 5    | >=60       | 1.6            |    |
| 18496  | 202348 | 3        | Korea   | 1           | 1  | 2  | Female | 1939 | 76     | 5    | >=60       | 1.6            |    |
| 18507  | 105414 | 1        | China   | 1           | 1  | 2  | Female | 1974 | 41     | 1    | 40-44 year | 1.0            | 2  |
| 18509  | 105415 | 1        | China   | 1           | 2  | 1  | Male   | 1969 | 46     | 2    | 45-49      | 1.0            |    |
| 18510  | 202358 | 3        | Korea   | 1           | 2  | 2  | Female | 1952 | 63     | 5    | >=60       | 1.6            |    |
| 18513  | 105416 | 1        | China   | 1           | 2  | 2  | Female | 1972 | 43     | 1    | 40-44 year | 1.0            | 2  |
| 18525  | 105418 | 1        | China   | 1           | 2  | 1  | Male   | 1975 | 40     | 1    | 40-44 year | 1.0            |    |
| 18526  | 301662 | 2        | Taiwan  | 1           | 1  | 2  | Female | 1953 | 62     | 5    | >=60       | 1.7            |    |
| 18527  | 202367 | 3        | Korea   | 1           | 2  | 1  | Male   | 1947 | 68     | 5    | >=60       | 1.6            |    |
| 18536  | 105420 | 1        | China   | 1           | 2  | 2  | Female | 1970 | 45     | 2    | 45-49      | 1.0            | 2  |
| 18540  | 202374 | 3        | Korea   | 1           | 2  | 2  | Female | 1954 | 61     | 5    | >=60       | 1.6            |    |
| 18548  | 301667 | 2        | Taiwan  | 1           | 2  | 2  | Female | 1956 | 59     | 4    | 55-59      | 0.9            |    |
| 18550  | 301668 | 2        | Taiwan  | 1           | 2  | 2  | Female | 1969 | 46     | 2    | 45-49      | 0.9            | 2  |
| 18556  | 202382 | 3        | Korea   | 1           | 1  | 1  | Male   | 1942 | 73     | 5    | >=60       | 1.6            |    |
| 18561  | 301671 | 2        | Taiwan  | 1           | 2  | 1  | Male   | 1963 | 52     | 3    | 50-54      | 0.8            |    |
| 18577  | 202393 | 3        | Korea   | 1           | 2  | 1  | Male   | 1949 | 66     | 5    | >=60       | 1.6            |    |
| 18580  | 202394 | 3        | Korea   | 1           | 2  | 2  | Female | 1946 | 69     | 5    | >=60       | 1.6            |    |
| 18633  | 301687 | 2        | Taiwan  | 1           | 1  | 1  | Male   | 1961 | 54     | 3    | 50-54      | 0.8            |    |
| 18635  | 301689 | 2        | Taiwan  | 1           | 1  | 1  | Male   | 1951 | 64     | 5    | >=60       | 1.6            |    |
| 18636  | 105426 | 1        | China   | 1           | 2  | 2  | Female | 1975 | 40     | 1    | 40-44 year | 1.0            | 2  |
| 18645  | 105429 | 1        | China   | 1           | 2  | 2  | Female | 1970 | 45     | 2    | 45-49      | 1.0            | 2  |
| 18649  | 105430 | 1        | China   | 1           | 2  | 2  | Female | 1974 | 41     | 1    | 40-44 year | 1.0            | 2  |
| 18664  | 301695 | 2        | Taiwan  | 1           | 2  | 1  | Male   | 1970 | 45     | 2    | 45-49      | 0.8            |    |
| 18668  | 105433 | 1        | China   | 1           | 2  | 1  | Male   | 1975 | 40     | 1    | 40-44 year | 1.0            |    |
| 18682  | 301700 | 2        | Taiwan  | 1           | 2  | 1  | Male   | 1956 | 59     | 4    | 55-59      | 0.7            |    |
| 18685  | 301701 | 2        | Taiwan  | 1           | 2  | 2  | Female | 1964 | 51     | 3    | 50-54      | 0.9            |    |
| 18688  | 301702 | 2        | Taiwan  | 1           | 2  | 2  | Female | 1950 | 65     | 5    | >=60       | 1.7            |    |
| 18689  | 105436 | 1        | China   | 1           | 2  | 1  | Male   | 1970 | 45     | 2    | 45-49      | 1.0            |    |
| 18693  | 202440 | 3        | Korea   | 1           | 1  | 2  | Female | 1953 | 62     | 5    | >=60       | 1.6            |    |
| 18694  | 301705 | 2        | Taiwan  | 1           | 2  | 2  | Female | 1948 | 67     | 5    | >=60       | 1.7            |    |
| 18705  | 105435 | 1        | China   | 1           | 2  | 1  | Male   | 1973 | 42     | 1    | 40-44 year | 1.0            |    |

| respid | SubsID    | dCountry | Country | QDisclaimer | Q1 | Q2 | Gender   | Q3_1 | age Nr | dAge | age Group  | Weight in Ctry | Q4 |
|--------|-----------|----------|---------|-------------|----|----|----------|------|--------|------|------------|----------------|----|
| 18710  | 202446    | 3        | Korea   | 1           | 1  | 2  | 1 Male   | 1947 | 68     | 5    | >=60       | 1.6            |    |
| 18715  | 105438    | 1        | China   | 1           | 1  | 2  | 2 Female | 1970 | 45     | 2    | 45-49      | 1.0            | 2  |
| 18718  | 202450    | 3        | Korea   | 1           | 1  | 2  | 1 Male   | 1946 | 69     | 5    | >=60       | 1.6            |    |
| 18727  | 301620    | 2        | Taiwan  | 1           | 1  | 2  | 2 Female | 1969 | 46     | 2    | 45-49      | 0.9            | 2  |
| 18732  | 105440    | 1        | China   | 1           | 1  | 1  | 2 Female | 1974 | 41     | 1    | 40-44 year | 1.0            | 2  |
| 18735  | 105441    | 1        | China   | 1           | 1  | 1  | 2 Female | 1968 | 47     | 2    | 45-49      | 1.0            | 2  |
| 18742  | 105442    | 1        | China   | 1           | 1  | 2  | 1 Male   | 1967 | 48     | 2    | 45-49      | 1.0            |    |
| 18745  | 301721    | 2        | Taiwan  | 1           | 1  | 1  | 1 Male   | 1956 | 59     | 4    | 55-59      | 0.7            |    |
| 18747  | 300777    | 2        | Taiwan  | 1           | 1  | 2  | 1 Male   | 1956 | 59     | 4    | 55-59      | 0.7            |    |
| 18750  | 201144    | 3        | Korea   | 1           | 1  | 2  | 2 Female | 1953 | 62     | 5    | >=60       | 1.6            |    |
| 18751  | 202464    | 3        | Korea   | 1           | 1  | 2  | 1 Male   | 1941 | 74     | 5    | >=60       | 1.6            |    |
| 18753  | 301722    | 2        | Taiwan  | 1           | 1  | 2  | 2 Female | 1952 | 63     | 5    | >=60       | 1.7            |    |
| 18754  | 301723    | 2        | Taiwan  | 1           | 1  | 2  | 2 Female | 1954 | 61     | 5    | >=60       | 1.7            |    |
| 18759  | 202469    | 3        | Korea   | 1           | 1  | 2  | 2 Female | 1953 | 62     | 5    | >=60       | 1.6            |    |
| 18780  | 105446    | 1        | China   | 1           | 1  | 2  | 2 Female | 1972 | 43     | 1    | 40-44 year | 1.0            | 2  |
| 18782  | 300588    | 2        | Taiwan  | 1           | 1  | 1  | 2 Female | 1961 | 54     | 3    | 50-54      | 0.9            |    |
| 18807  | 105451    | 1        | China   | 1           | 1  | 2  | 2 Female | 1975 | 40     | 1    | 40-44 year | 1.0            | 2  |
| 18815  | 301304    | 2        | Taiwan  | 1           | 1  | 2  | 1 Male   | 1952 | 63     | 5    | >=60       | 1.6            |    |
| 18818  | 300600    | 2        | Taiwan  | 1           | 1  | 2  | 2 Female | 1967 | 48     | 2    | 45-49      | 0.9            | 2  |
| 18820  | 202501    | 3        | Korea   | 1           | 1  | 2  | 2 Female | 1947 | 68     | 5    | >=60       | 1.6            |    |
| 18823  | 105453    | 1        | China   | 1           | 1  | 2  | 2 Female | 1971 | 44     | 1    | 40-44 year | 1.0            | 2  |
| 18825  | 202504    | 3        | Korea   | 1           | 1  | 2  | 2 Female | 1949 | 66     | 5    | >=60       | 1.6            |    |
| 18828  | 105454    | 1        | China   | 1           | 1  | 2  | 1 Male   | 1969 | 46     | 2    | 45-49      | 1.0            |    |
| 18832  | 301737    | 2        | Taiwan  | 1           | 1  | 1  | 2 Female | 1962 | 53     | 3    | 50-54      | 0.9            |    |
| 18834  | 202508    | 3        | Korea   | 1           | 1  | 2  | 1 Male   | 1952 | 63     | 5    | >=60       | 1.6            |    |
| 18835  | 105456    | 1        | China   | 1           | 1  | 1  | 1 Male   | 1974 | 41     | 1    | 40-44 year | 1.0            |    |
| 18837  | 301739    | 2        | Taiwan  | 1           | 1  | 1  | 2 Female | 1963 | 52     | 3    | 50-54      | 0.9            |    |
| 18842  | 301743    | 2        | Taiwan  | 1           | 1  | 1  | 2 Female | 1966 | 49     | 2    | 45-49      | 0.9            | 2  |
| 18846  | 201064    | 3        | Korea   | 1           | 1  | 2  | 2 Female | 1955 | 60     | 5    | >=60       | 1.6            |    |
| 18855  | 105460    | 1        | China   | 1           | 1  | 2  | 1 Male   | 1954 | 61     | 5    | >=60       | 1.0            |    |
| 18856  | 350188927 | 3        | Korea   | 1           | 1  | 2  | 1 Male   | 1955 | 60     | 5    | >=60       | 1.6            |    |
| 18887  | 202529    | 3        | Korea   | 1           | 1  | 2  | 1 Male   | 1948 | 67     | 5    | >=60       | 1.6            |    |



| respid | SubsID | dCountry | Country | QDisclaim<br>er | Q1 | Q2 | Gender | Q3_1 | age Nr | dAge | age Group  | Weight in<br>Ctry | Q4 |
|--------|--------|----------|---------|-----------------|----|----|--------|------|--------|------|------------|-------------------|----|
| 18903  | 105461 | 1        | China   | 1               | 2  | 1  | Male   | 1975 | 40     | 1    | 40-44 year | 1.0               |    |
| 18906  | 105462 | 1        | China   | 1               | 2  | 1  | Male   | 1971 | 44     | 1    | 40-44 year | 1.0               |    |
| 18910  | 105463 | 1        | China   | 1               | 1  | 2  | Female | 1974 | 41     | 1    | 40-44 year | 1.0               | 2  |
| 18919  | 202547 | 3        | Korea   | 1               | 2  | 2  | Female | 1947 | 68     | 5    | >=60       | 1.6               |    |
| 18928  | 105465 | 1        | China   | 1               | 1  | 2  | Female | 1949 | 66     | 5    | >=60       | 1.1               |    |
| 18931  | 105466 | 1        | China   | 1               | 2  | 1  | Male   | 1966 | 49     | 2    | 45-49      | 1.0               |    |
| 18939  | 105467 | 1        | China   | 1               | 2  | 1  | Male   | 1967 | 48     | 2    | 45-49      | 1.0               |    |
| 18946  | 301759 | 2        | Taiwan  | 1               | 2  | 2  | Female | 1970 | 45     | 2    | 45-49      | 0.9               | 2  |
| 18952  | 301760 | 2        | Taiwan  | 1               | 2  | 2  | Female | 1952 | 63     | 5    | >=60       | 1.7               |    |
| 18954  | 105472 | 1        | China   | 1               | 1  | 1  | Male   | 1967 | 48     | 2    | 45-49      | 1.0               |    |
| 18982  | 105476 | 1        | China   | 1               | 2  | 2  | Female | 1975 | 40     | 1    | 40-44 year | 1.0               | 2  |
| 18986  | 105477 | 1        | China   | 1               | 2  | 1  | Male   | 1967 | 48     | 2    | 45-49      | 1.0               |    |
| 18989  | 105479 | 1        | China   | 1               | 1  | 1  | Male   | 1954 | 61     | 5    | >=60       | 1.0               |    |
| 18990  | 105480 | 1        | China   | 1               | 2  | 1  | Male   | 1964 | 51     | 3    | 50-54      | 1.0               |    |
| 18996  | 105482 | 1        | China   | 1               | 2  | 1  | Male   | 1972 | 43     | 1    | 40-44 year | 1.0               |    |
| 18998  | 105483 | 1        | China   | 1               | 2  | 2  | Female | 1970 | 45     | 2    | 45-49      | 1.0               | 2  |
| 19009  | 202585 | 3        | Korea   | 1               | 2  | 2  | Female | 1954 | 61     | 5    | >=60       | 1.6               |    |
| 19010  | 105485 | 1        | China   | 1               | 2  | 2  | Female | 1965 | 50     | 3    | 50-54      | 1.2               |    |
| 19017  | 105488 | 1        | China   | 1               | 2  | 2  | Female | 1972 | 43     | 1    | 40-44 year | 1.0               | 2  |
| 19018  | 105487 | 1        | China   | 1               | 2  | 1  | Male   | 1970 | 45     | 2    | 45-49      | 1.0               |    |
| 19020  | 105489 | 1        | China   | 1               | 2  | 1  | Male   | 1974 | 41     | 1    | 40-44 year | 1.0               |    |
| 19027  | 202591 | 3        | Korea   | 1               | 2  | 2  | Female | 1933 | 82     | 5    | >=60       | 1.6               |    |
| 19035  | 105494 | 1        | China   | 1               | 2  | 2  | Female | 1970 | 45     | 2    | 45-49      | 1.0               | 2  |
| 19037  | 105496 | 1        | China   | 1               | 2  | 1  | Male   | 1954 | 61     | 5    | >=60       | 1.0               |    |
| 19048  | 105499 | 1        | China   | 1               | 2  | 1  | Male   | 1968 | 47     | 2    | 45-49      | 1.0               |    |
| 19051  | 301771 | 2        | Taiwan  | 1               | 2  | 2  | Female | 1964 | 51     | 3    | 50-54      | 0.9               |    |
| 19054  | 105500 | 1        | China   | 1               | 2  | 1  | Male   | 1969 | 46     | 2    | 45-49      | 1.0               |    |
| 19057  | 105501 | 1        | China   | 1               | 2  | 2  | Female | 1969 | 46     | 2    | 45-49      | 1.0               | 2  |
| 19073  | 105505 | 1        | China   | 1               | 1  | 2  | Female | 1967 | 48     | 2    | 45-49      | 1.0               | 2  |
| 19075  | 301776 | 2        | Taiwan  | 1               | 2  | 1  | Male   | 1940 | 75     | 5    | >=60       | 1.6               |    |
| 19079  | 105507 | 1        | China   | 1               | 2  | 1  | Male   | 1964 | 51     | 3    | 50-54      | 1.0               |    |
| 19087  | 105510 | 1        | China   | 1               | 1  | 2  | Female | 1975 | 40     | 1    | 40-44 year | 1.0               | 2  |

| respid | SubsID | dCountry | Country | QDisclaimer | Q1 | Q2 | Gender   | Q3_1 | age Nr | dAge | age Group  | Weight in Ctry | Q4 |
|--------|--------|----------|---------|-------------|----|----|----------|------|--------|------|------------|----------------|----|
| 19090  | 301778 | 2        | Taiwan  | 1           | 1  | 2  | 2 Female | 1967 | 48     | 2    | 45-49      | 0.9            | 2  |
| 19093  | 105512 | 1        | China   | 1           | 1  | 2  | 1 Male   | 1973 | 42     | 1    | 40-44 year | 1.0            |    |
| 19099  | 301781 | 2        | Taiwan  | 1           | 1  | 2  | 2 Female | 1960 | 55     | 4    | 55-59      | 0.9            |    |
| 19100  | 105514 | 1        | China   | 1           | 1  | 2  | 2 Female | 1968 | 47     | 2    | 45-49      | 1.0            | 2  |
| 19101  | 105491 | 1        | China   | 1           | 1  | 2  | 2 Female | 1970 | 45     | 2    | 45-49      | 1.0            | 2  |
| 19105  | 105515 | 1        | China   | 1           | 1  | 2  | 2 Female | 1973 | 42     | 1    | 40-44 year | 1.0            | 2  |
| 19111  | 105516 | 1        | China   | 1           | 1  | 2  | 1 Male   | 1974 | 41     | 1    | 40-44 year | 1.0            |    |
| 19112  | 105517 | 1        | China   | 1           | 1  | 2  | 2 Female | 1950 | 65     | 5    | >=60       | 1.1            |    |
| 19117  | 105519 | 1        | China   | 1           | 1  | 2  | 2 Female | 1968 | 47     | 2    | 45-49      | 1.0            | 2  |
| 19122  | 105522 | 1        | China   | 1           | 1  | 2  | 2 Female | 1955 | 60     | 5    | >=60       | 1.1            |    |
| 19126  | 301784 | 2        | Taiwan  | 1           | 1  | 1  | 1 Male   | 1968 | 47     | 2    | 45-49      | 0.8            |    |
| 19127  | 301785 | 2        | Taiwan  | 1           | 1  | 2  | 1 Male   | 1956 | 59     | 4    | 55-59      | 0.7            |    |
| 19131  | 105525 | 1        | China   | 1           | 1  | 2  | 1 Male   | 1965 | 50     | 3    | 50-54      | 1.0            |    |
| 19134  | 105526 | 1        | China   | 1           | 1  | 2  | 2 Female | 1975 | 40     | 1    | 40-44 year | 1.0            | 2  |
| 19149  | 105528 | 1        | China   | 1           | 1  | 2  | 2 Female | 1959 | 56     | 4    | 55-59      | 1.0            |    |
| 19151  | 105529 | 1        | China   | 1           | 1  | 2  | 1 Male   | 1970 | 45     | 2    | 45-49      | 1.0            |    |
| 19164  | 301791 | 2        | Taiwan  | 1           | 1  | 2  | 1 Male   | 1969 | 46     | 2    | 45-49      | 0.8            |    |
| 19166  | 105535 | 1        | China   | 1           | 1  | 1  | 1 Male   | 1966 | 49     | 2    | 45-49      | 1.0            |    |
| 19172  | 105537 | 1        | China   | 1           | 1  | 2  | 2 Female | 1972 | 43     | 1    | 40-44 year | 1.0            | 2  |
| 19173  | 105538 | 1        | China   | 1           | 1  | 1  | 1 Male   | 1957 | 58     | 4    | 55-59      | 0.9            |    |
| 19180  | 300800 | 2        | Taiwan  | 1           | 1  | 2  | 1 Male   | 1965 | 50     | 3    | 50-54      | 0.8            |    |
| 19185  | 105540 | 1        | China   | 1           | 1  | 2  | 1 Male   | 1970 | 45     | 2    | 45-49      | 1.0            |    |
| 19189  | 105542 | 1        | China   | 1           | 1  | 2  | 2 Female | 1969 | 46     | 2    | 45-49      | 1.0            | 2  |
| 19191  | 105543 | 1        | China   | 1           | 1  | 2  | 1 Male   | 1975 | 40     | 1    | 40-44 year | 1.0            |    |
| 19198  | 202641 | 3        | Korea   | 1           | 1  | 2  | 2 Female | 1955 | 60     | 5    | >=60       | 1.6            |    |
| 19203  | 105548 | 1        | China   | 1           | 1  | 2  | 1 Male   | 1962 | 53     | 3    | 50-54      | 1.0            |    |
| 19209  | 105551 | 1        | China   | 1           | 1  | 2  | 2 Female | 1969 | 46     | 2    | 45-49      | 1.0            | 2  |
| 19210  | 105552 | 1        | China   | 1           | 1  | 2  | 2 Female | 1966 | 49     | 2    | 45-49      | 1.0            | 2  |
| 19218  | 105549 | 1        | China   | 1           | 1  | 2  | 2 Female | 1975 | 40     | 1    | 40-44 year | 1.0            | 2  |
| 19220  | 105556 | 1        | China   | 1           | 1  | 2  | 1 Male   | 1973 | 42     | 1    | 40-44 year | 1.0            |    |
| 19225  | 105558 | 1        | China   | 1           | 1  | 2  | 1 Male   | 1975 | 40     | 1    | 40-44 year | 1.0            |    |
| 19227  | 105559 | 1        | China   | 1           | 1  | 2  | 1 Male   | 1966 | 49     | 2    | 45-49      | 1.0            |    |

| respid | SubsID | dCountry | Country | QDisclaimer | Q1 | Q2 | Gender   | Q3_1 | age Nr | dAge | age Group  | Weight in Ctry | Q4 |
|--------|--------|----------|---------|-------------|----|----|----------|------|--------|------|------------|----------------|----|
| 19228  | 105560 | 1        | China   |             | 1  | 2  | 1 Male   | 1957 | 58     | 4    | 55-59      | 0.9            |    |
| 19243  | 105564 | 1        | China   |             | 1  | 2  | 2 Female | 1954 | 61     | 5    | >=60       | 1.1            |    |
| 19244  | 301800 | 2        | Taiwan  |             | 1  | 2  | 1 Male   | 1963 | 52     | 3    | 50-54      | 0.8            |    |
| 19246  | 105565 | 1        | China   |             | 1  | 2  | 2 Female | 1975 | 40     | 1    | 40-44 year | 1.0            | 2  |
| 19248  | 105566 | 1        | China   |             | 1  | 2  | 1 Male   | 1967 | 48     | 2    | 45-49      | 1.0            |    |
| 19249  | 300824 | 2        | Taiwan  |             | 1  | 1  | 1 Male   | 1964 | 51     | 3    | 50-54      | 0.8            |    |
| 19252  | 105568 | 1        | China   |             | 1  | 2  | 2 Female | 1967 | 48     | 2    | 45-49      | 1.0            | 2  |
| 19255  | 105555 | 1        | China   |             | 1  | 1  | 1 Male   | 1950 | 65     | 5    | >=60       | 1.0            |    |
| 19257  | 105569 | 1        | China   |             | 1  | 1  | 2 Female | 1973 | 42     | 1    | 40-44 year | 1.0            | 2  |
| 19274  | 105574 | 1        | China   |             | 1  | 2  | 2 Female | 1966 | 49     | 2    | 45-49      | 1.0            | 2  |
| 19279  | 301804 | 2        | Taiwan  |             | 1  | 2  | 2 Female | 1954 | 61     | 5    | >=60       | 1.7            |    |
| 19291  | 301808 | 2        | Taiwan  |             | 1  | 2  | 1 Male   | 1952 | 63     | 5    | >=60       | 1.6            |    |
| 19292  | 105576 | 1        | China   |             | 1  | 2  | 2 Female | 1971 | 44     | 1    | 40-44 year | 1.0            | 2  |
| 19308  | 301811 | 2        | Taiwan  |             | 1  | 2  | 1 Male   | 1949 | 66     | 5    | >=60       | 1.6            |    |
| 19310  | 105578 | 1        | China   |             | 1  | 2  | 1 Male   | 1968 | 47     | 2    | 45-49      | 1.0            |    |
| 19311  | 105579 | 1        | China   |             | 1  | 2  | 1 Male   | 1963 | 52     | 3    | 50-54      | 1.0            |    |
| 19326  | 301813 | 2        | Taiwan  |             | 1  | 2  | 2 Female | 1959 | 56     | 4    | 55-59      | 0.9            |    |
| 19327  | 105586 | 1        | China   |             | 1  | 2  | 1 Male   | 1971 | 44     | 1    | 40-44 year | 1.0            |    |
| 19329  | 301814 | 2        | Taiwan  |             | 1  | 2  | 2 Female | 1954 | 61     | 5    | >=60       | 1.7            |    |
| 19330  | 105589 | 1        | China   |             | 1  | 2  | 1 Male   | 1968 | 47     | 2    | 45-49      | 1.0            |    |
| 19333  | 105590 | 1        | China   |             | 1  | 2  | 2 Female | 1975 | 40     | 1    | 40-44 year | 1.0            | 2  |
| 19336  | 202674 | 3        | Korea   |             | 1  | 2  | 2 Female | 1949 | 66     | 5    | >=60       | 1.6            |    |
| 19343  | 105594 | 1        | China   |             | 1  | 2  | 2 Female | 1970 | 45     | 2    | 45-49      | 1.0            | 2  |
| 19348  | 105597 | 1        | China   |             | 1  | 2  | 2 Female | 1970 | 45     | 2    | 45-49      | 1.0            | 2  |
| 19349  | 301819 | 2        | Taiwan  |             | 1  | 2  | 2 Female | 1921 | 94     | 5    | >=60       | 1.7            |    |
| 19352  | 105598 | 1        | China   |             | 1  | 2  | 1 Male   | 1973 | 42     | 1    | 40-44 year | 1.0            |    |
| 19356  | 105600 | 1        | China   |             | 1  | 2  | 2 Female | 1972 | 43     | 1    | 40-44 year | 1.0            | 2  |
| 19357  | 105601 | 1        | China   |             | 1  | 2  | 1 Male   | 1972 | 43     | 1    | 40-44 year | 1.0            |    |
| 19358  | 105602 | 1        | China   |             | 1  | 2  | 2 Female | 1975 | 40     | 1    | 40-44 year | 1.0            | 2  |
| 19367  | 105608 | 1        | China   |             | 1  | 2  | 1 Male   | 1975 | 40     | 1    | 40-44 year | 1.0            |    |
| 19376  | 105611 | 1        | China   |             | 1  | 1  | 2 Female | 1957 | 58     | 4    | 55-59      | 1.0            |    |
| 19377  | 105612 | 1        | China   |             | 1  | 2  | 2 Female | 1975 | 40     | 1    | 40-44 year | 1.0            | 2  |

| respid | SubsID | dCountry | Country | QDisclaimer | Q1 | Q2 | Gender   | Q3_1 | age Nr | dAge | age Group  | Weight in Ctry | Q4 |
|--------|--------|----------|---------|-------------|----|----|----------|------|--------|------|------------|----------------|----|
| 19380  | 301825 | 2        | Taiwan  | 1           | 1  | 2  | 1 Male   | 1964 | 51     | 3    | 50-54      | 0.8            |    |
| 19384  | 105615 | 1        | China   | 1           | 1  | 2  | 1 Male   | 1969 | 46     | 2    | 45-49      | 1.0            |    |
| 19391  | 301828 | 2        | Taiwan  | 1           | 1  | 2  | 1 Male   | 1961 | 54     | 3    | 50-54      | 0.8            |    |
| 19397  | 105619 | 1        | China   | 1           | 1  | 2  | 2 Female | 1973 | 42     | 1    | 40-44 year | 1.0            | 2  |
| 19398  | 202685 | 3        | Korea   | 1           | 1  | 2  | 2 Female | 1952 | 63     | 5    | >=60       | 1.6            |    |
| 19401  | 301830 | 2        | Taiwan  | 1           | 1  | 1  | 2 Female | 1955 | 60     | 5    | >=60       | 1.7            |    |
| 19402  | 105621 | 1        | China   | 1           | 1  | 2  | 2 Female | 1969 | 46     | 2    | 45-49      | 1.0            | 2  |
| 19403  | 105622 | 1        | China   | 1           | 1  | 2  | 2 Female | 1973 | 42     | 1    | 40-44 year | 1.0            | 2  |
| 19405  | 105624 | 1        | China   | 1           | 1  | 2  | 1 Male   | 1969 | 46     | 2    | 45-49      | 1.0            |    |
| 19407  | 105625 | 1        | China   | 1           | 1  | 2  | 2 Female | 1968 | 47     | 2    | 45-49      | 1.0            | 2  |
| 19415  | 202691 | 3        | Korea   | 1           | 1  | 2  | 2 Female | 1955 | 60     | 5    | >=60       | 1.6            |    |
| 19420  | 105629 | 1        | China   | 1           | 1  | 2  | 1 Male   | 1970 | 45     | 2    | 45-49      | 1.0            |    |
| 19423  | 105630 | 1        | China   | 1           | 1  | 2  | 1 Male   | 1975 | 40     | 1    | 40-44 year | 1.0            |    |
| 19424  | 301835 | 2        | Taiwan  | 1           | 1  | 2  | 2 Female | 1947 | 68     | 5    | >=60       | 1.7            |    |
| 19426  | 105631 | 1        | China   | 1           | 1  | 2  | 2 Female | 1971 | 44     | 1    | 40-44 year | 1.0            | 2  |
| 19429  | 105632 | 1        | China   | 1           | 1  | 2  | 2 Female | 1971 | 44     | 1    | 40-44 year | 1.0            | 2  |
| 19435  | 105633 | 1        | China   | 1           | 1  | 1  | 2 Female | 1975 | 40     | 1    | 40-44 year | 1.0            | 2  |
| 19441  | 105636 | 1        | China   | 1           | 1  | 1  | 2 Female | 1967 | 48     | 2    | 45-49      | 1.0            | 2  |
| 19450  | 105639 | 1        | China   | 1           | 1  | 2  | 1 Male   | 1957 | 58     | 4    | 55-59      | 0.9            |    |
| 19456  | 202700 | 3        | Korea   | 1           | 1  | 2  | 2 Female | 1947 | 68     | 5    | >=60       | 1.6            |    |
| 19457  | 105643 | 1        | China   | 1           | 1  | 2  | 2 Female | 1974 | 41     | 1    | 40-44 year | 1.0            | 2  |
| 19463  | 105645 | 1        | China   | 1           | 1  | 2  | 2 Female | 1970 | 45     | 2    | 45-49      | 1.0            | 2  |
| 19467  | 105647 | 1        | China   | 1           | 1  | 1  | 1 Male   | 1972 | 43     | 1    | 40-44 year | 1.0            |    |
| 19468  | 105648 | 1        | China   | 1           | 1  | 1  | 1 Male   | 1972 | 43     | 1    | 40-44 year | 1.0            |    |
| 19471  | 105649 | 1        | China   | 1           | 1  | 2  | 2 Female | 1974 | 41     | 1    | 40-44 year | 1.0            | 2  |
| 19473  | 105650 | 1        | China   | 1           | 1  | 2  | 1 Male   | 1974 | 41     | 1    | 40-44 year | 1.0            |    |
| 19478  | 105653 | 1        | China   | 1           | 1  | 2  | 1 Male   | 1975 | 40     | 1    | 40-44 year | 1.0            |    |
| 19480  | 105654 | 1        | China   | 1           | 1  | 2  | 2 Female | 1963 | 52     | 3    | 50-54      | 1.2            |    |
| 19481  | 105655 | 1        | China   | 1           | 1  | 2  | 2 Female | 1975 | 40     | 1    | 40-44 year | 1.0            | 2  |
| 19484  | 105658 | 1        | China   | 1           | 1  | 2  | 1 Male   | 1966 | 49     | 2    | 45-49      | 1.0            |    |
| 19487  | 105659 | 1        | China   | 1           | 1  | 1  | 1 Male   | 1920 | 95     | 5    | >=60       | 1.0            |    |
| 19491  | 105661 | 1        | China   | 1           | 1  | 2  | 2 Female | 1970 | 45     | 2    | 45-49      | 1.0            | 2  |

| respid | SubsID | dCountry | Country | QDisclaimer | Q1 | Q2 | Gender   | Q3_1 | age Nr | dAge | age Group  | Weight in Ctry | Q4 |
|--------|--------|----------|---------|-------------|----|----|----------|------|--------|------|------------|----------------|----|
| 19495  | 105662 | 1        | China   |             | 1  | 1  | 1 Male   | 1954 | 61     | 5    | >=60       | 1.0            |    |
| 19498  | 301842 | 2        | Taiwan  |             | 1  | 2  | 2 Female | 1952 | 63     | 5    | >=60       | 1.7            |    |
| 19500  | 105663 | 1        | China   |             | 1  | 2  | 1 Male   | 1968 | 47     | 2    | 45-49      | 1.0            |    |
| 19501  | 105664 | 1        | China   |             | 1  | 2  | 2 Female | 1954 | 61     | 5    | >=60       | 1.1            |    |
| 19503  | 105666 | 1        | China   |             | 1  | 2  | 2 Female | 1960 | 55     | 4    | 55-59      | 1.0            |    |
| 19506  | 105668 | 1        | China   |             | 1  | 2  | 1 Male   | 1975 | 40     | 1    | 40-44 year | 1.0            |    |
| 19508  | 105670 | 1        | China   |             | 1  | 2  | 2 Female | 1972 | 43     | 1    | 40-44 year | 1.0            | 2  |
| 19509  | 301843 | 2        | Taiwan  |             | 1  | 2  | 1 Male   | 1959 | 56     | 4    | 55-59      | 0.7            |    |
| 19518  | 105671 | 1        | China   |             | 1  | 1  | 2 Female | 1967 | 48     | 2    | 45-49      | 1.0            | 2  |
| 19520  | 105673 | 1        | China   |             | 1  | 2  | 1 Male   | 1974 | 41     | 1    | 40-44 year | 1.0            |    |
| 19536  | 105679 | 1        | China   |             | 1  | 2  | 2 Female | 1973 | 42     | 1    | 40-44 year | 1.0            | 2  |
| 19538  | 105680 | 1        | China   |             | 1  | 2  | 2 Female | 1974 | 41     | 1    | 40-44 year | 1.0            | 2  |
| 19541  | 301848 | 2        | Taiwan  |             | 1  | 2  | 2 Female | 1966 | 49     | 2    | 45-49      | 0.9            | 2  |
| 19548  | 105682 | 1        | China   |             | 1  | 1  | 1 Male   | 1957 | 58     | 4    | 55-59      | 0.9            |    |
| 19553  | 105683 | 1        | China   |             | 1  | 1  | 1 Male   | 1973 | 42     | 1    | 40-44 year | 1.0            |    |
| 19556  | 105684 | 1        | China   |             | 1  | 2  | 2 Female | 1972 | 43     | 1    | 40-44 year | 1.0            | 2  |
| 19559  | 104991 | 1        | China   |             | 1  | 2  | 2 Female | 1972 | 43     | 1    | 40-44 year | 1.0            | 2  |
| 19561  | 105685 | 1        | China   |             | 1  | 2  | 2 Female | 1967 | 48     | 2    | 45-49      | 1.0            | 2  |
| 19562  | 301849 | 2        | Taiwan  |             | 1  | 1  | 2 Female | 1955 | 60     | 5    | >=60       | 1.7            |    |
| 19564  | 301851 | 2        | Taiwan  |             | 1  | 2  | 1 Male   | 1965 | 50     | 3    | 50-54      | 0.8            |    |
| 19567  | 105686 | 1        | China   |             | 1  | 2  | 1 Male   | 1969 | 46     | 2    | 45-49      | 1.0            |    |
| 19571  | 105687 | 1        | China   |             | 1  | 2  | 1 Male   | 1971 | 44     | 1    | 40-44 year | 1.0            |    |
| 19576  | 105688 | 1        | China   |             | 1  | 1  | 1 Male   | 1969 | 46     | 2    | 45-49      | 1.0            |    |
| 19578  | 105689 | 1        | China   |             | 1  | 2  | 2 Female | 1971 | 44     | 1    | 40-44 year | 1.0            | 2  |
| 19606  | 105693 | 1        | China   |             | 1  | 2  | 2 Female | 1974 | 41     | 1    | 40-44 year | 1.0            | 2  |
| 19607  | 105694 | 1        | China   |             | 1  | 2  | 2 Female | 1973 | 42     | 1    | 40-44 year | 1.0            | 2  |
| 19608  | 105695 | 1        | China   |             | 1  | 2  | 2 Female | 1974 | 41     | 1    | 40-44 year | 1.0            | 2  |
| 19612  | 105697 | 1        | China   |             | 1  | 1  | 2 Female | 1970 | 45     | 2    | 45-49      | 1.0            | 2  |
| 19618  | 105698 | 1        | China   |             | 1  | 2  | 2 Female | 1967 | 48     | 2    | 45-49      | 1.0            | 2  |
| 19621  | 105699 | 1        | China   |             | 1  | 2  | 2 Female | 1972 | 43     | 1    | 40-44 year | 1.0            | 2  |
| 19624  | 105700 | 1        | China   |             | 1  | 2  | 1 Male   | 1973 | 42     | 1    | 40-44 year | 1.0            |    |
| 19630  | 105703 | 1        | China   |             | 1  | 2  | 2 Female | 1966 | 49     | 2    | 45-49      | 1.0            | 2  |

| respid | SubsID | dCountry | Country | QDisclaimer | Q1 | Q2 | Gender   | Q3_1 | age Nr | dAge | age Group  | Weight in Ctry | Q4 |
|--------|--------|----------|---------|-------------|----|----|----------|------|--------|------|------------|----------------|----|
| 19637  | 105705 | 1        | China   |             | 1  | 2  | 1 Male   | 1970 | 45     | 2    | 45-49      | 1.0            |    |
| 19639  | 105706 | 1        | China   |             | 1  | 2  | 1 Male   | 1964 | 51     | 3    | 50-54      | 1.0            |    |
| 19647  | 301864 | 2        | Taiwan  |             | 1  | 1  | 2 Female | 1966 | 49     | 2    | 45-49      | 0.9            | 2  |
| 19648  | 105708 | 1        | China   |             | 1  | 2  | 1 Male   | 1975 | 40     | 1    | 40-44 year | 1.0            |    |
| 19660  | 105710 | 1        | China   |             | 1  | 2  | 1 Male   | 1962 | 53     | 3    | 50-54      | 1.0            |    |
| 19662  | 105711 | 1        | China   |             | 1  | 2  | 2 Female | 1972 | 43     | 1    | 40-44 year | 1.0            | 2  |
| 19669  | 105714 | 1        | China   |             | 1  | 2  | 2 Female | 1963 | 52     | 3    | 50-54      | 1.2            |    |
| 19680  | 301870 | 2        | Taiwan  |             | 1  | 2  | 1 Male   | 1959 | 56     | 4    | 55-59      | 0.7            |    |
| 19682  | 105716 | 1        | China   |             | 1  | 1  | 2 Female | 1975 | 40     | 1    | 40-44 year | 1.0            | 2  |
| 19686  | 105718 | 1        | China   |             | 1  | 2  | 2 Female | 1966 | 49     | 2    | 45-49      | 1.0            | 2  |
| 19700  | 105702 | 1        | China   |             | 1  | 2  | 2 Female | 1974 | 41     | 1    | 40-44 year | 1.0            | 2  |
| 19701  | 100274 | 1        | China   |             | 1  | 2  | 2 Female | 1971 | 44     | 1    | 40-44 year | 1.0            | 2  |
| 19704  | 105722 | 1        | China   |             | 1  | 2  | 2 Female | 1966 | 49     | 2    | 45-49      | 1.0            | 2  |
| 19706  | 300791 | 2        | Taiwan  |             | 1  | 1  | 2 Female | 1966 | 49     | 2    | 45-49      | 0.9            | 2  |
| 19707  | 301874 | 2        | Taiwan  |             | 1  | 2  | 1 Male   | 1958 | 57     | 4    | 55-59      | 0.7            |    |
| 19717  | 105727 | 1        | China   |             | 1  | 2  | 2 Female | 1954 | 61     | 5    | >=60       | 1.1            |    |
| 19718  | 105728 | 1        | China   |             | 1  | 2  | 2 Female | 1975 | 40     | 1    | 40-44 year | 1.0            | 2  |
| 19721  | 301875 | 2        | Taiwan  |             | 1  | 2  | 2 Female | 1966 | 49     | 2    | 45-49      | 0.9            | 2  |
| 19722  | 105729 | 1        | China   |             | 1  | 2  | 1 Male   | 1954 | 61     | 5    | >=60       | 1.0            |    |
| 19729  | 105731 | 1        | China   |             | 1  | 2  | 1 Male   | 1962 | 53     | 3    | 50-54      | 1.0            |    |
| 19738  | 105737 | 1        | China   |             | 1  | 2  | 2 Female | 1971 | 44     | 1    | 40-44 year | 1.0            | 2  |
| 19741  | 301876 | 2        | Taiwan  |             | 1  | 2  | 2 Female | 1965 | 50     | 3    | 50-54      | 0.9            |    |
| 19742  | 105739 | 1        | China   |             | 1  | 2  | 1 Male   | 1963 | 52     | 3    | 50-54      | 1.0            |    |
| 19747  | 301877 | 2        | Taiwan  |             | 1  | 2  | 1 Male   | 1953 | 62     | 5    | >=60       | 1.6            |    |
| 19748  | 105741 | 1        | China   |             | 1  | 2  | 2 Female | 1970 | 45     | 2    | 45-49      | 1.0            | 2  |
| 19749  | 301878 | 2        | Taiwan  |             | 1  | 2  | 2 Female | 1966 | 49     | 2    | 45-49      | 0.9            | 2  |
| 19756  | 105743 | 1        | China   |             | 1  | 2  | 1 Male   | 1972 | 43     | 1    | 40-44 year | 1.0            |    |
| 19771  | 105748 | 1        | China   |             | 1  | 2  | 2 Female | 1965 | 50     | 3    | 50-54      | 1.2            |    |
| 19772  | 105749 | 1        | China   |             | 1  | 2  | 2 Female | 1969 | 46     | 2    | 45-49      | 1.0            | 2  |
| 19775  | 105751 | 1        | China   |             | 1  | 2  | 1 Male   | 1971 | 44     | 1    | 40-44 year | 1.0            |    |
| 19783  | 105753 | 1        | China   |             | 1  | 2  | 2 Female | 1964 | 51     | 3    | 50-54      | 1.2            |    |
| 19787  | 105754 | 1        | China   |             | 1  | 2  | 1 Male   | 1956 | 59     | 4    | 55-59      | 0.9            |    |

| respid | SubsID | dCountry | Country | QDisclaimer | Q1 | Q2 | Gender   | Q3_1 | age Nr | dAge | age Group  | Weight in Ctry | Q4 |
|--------|--------|----------|---------|-------------|----|----|----------|------|--------|------|------------|----------------|----|
| 19790  | 105756 | 1        | China   |             | 1  | 2  | 2 Female | 1963 | 52     | 3    | 50-54      | 1.2            |    |
| 19797  | 301888 | 2        | Taiwan  |             | 1  | 2  | 2 Female | 1968 | 47     | 2    | 45-49      | 0.9            | 2  |
| 19802  | 105761 | 1        | China   |             | 1  | 2  | 2 Female | 1969 | 46     | 2    | 45-49      | 1.0            | 2  |
| 19808  | 105765 | 1        | China   |             | 1  | 2  | 1 Male   | 1956 | 59     | 4    | 55-59      | 0.9            |    |
| 19810  | 105766 | 1        | China   |             | 1  | 2  | 2 Female | 1970 | 45     | 2    | 45-49      | 1.0            | 2  |
| 19811  | 105767 | 1        | China   |             | 1  | 2  | 1 Male   | 1970 | 45     | 2    | 45-49      | 1.0            |    |
| 19812  | 105768 | 1        | China   |             | 1  | 2  | 2 Female | 1967 | 48     | 2    | 45-49      | 1.0            | 2  |
| 19821  | 105769 | 1        | China   |             | 1  | 2  | 1 Male   | 1960 | 55     | 4    | 55-59      | 0.9            |    |
| 19826  | 105770 | 1        | China   |             | 1  | 2  | 2 Female | 1970 | 45     | 2    | 45-49      | 1.0            | 2  |
| 19827  | 301894 | 2        | Taiwan  |             | 1  | 2  | 2 Female | 1965 | 50     | 3    | 50-54      | 0.9            |    |
| 19830  | 105772 | 1        | China   |             | 1  | 2  | 2 Female | 1975 | 40     | 1    | 40-44 year | 1.0            | 2  |
| 19834  | 301895 | 2        | Taiwan  |             | 1  | 1  | 2 Female | 1970 | 45     | 2    | 45-49      | 0.9            | 2  |
| 19838  | 301896 | 2        | Taiwan  |             | 1  | 1  | 1 Male   | 1950 | 65     | 5    | >=60       | 1.6            |    |
| 19843  | 105780 | 1        | China   |             | 1  | 2  | 1 Male   | 1975 | 40     | 1    | 40-44 year | 1.0            |    |
| 19845  | 105779 | 1        | China   |             | 1  | 2  | 1 Male   | 1975 | 40     | 1    | 40-44 year | 1.0            |    |
| 19846  | 105781 | 1        | China   |             | 1  | 2  | 1 Male   | 1972 | 43     | 1    | 40-44 year | 1.0            |    |
| 19852  | 105783 | 1        | China   |             | 1  | 2  | 1 Male   | 1973 | 42     | 1    | 40-44 year | 1.0            |    |
| 19855  | 105784 | 1        | China   |             | 1  | 2  | 2 Female | 1956 | 59     | 4    | 55-59      | 1.0            |    |
| 19858  | 105786 | 1        | China   |             | 1  | 2  | 1 Male   | 1969 | 46     | 2    | 45-49      | 1.0            |    |
| 19861  | 202814 | 3        | Korea   |             | 1  | 2  | 2 Female | 1954 | 61     | 5    | >=60       | 1.6            |    |
| 19863  | 105787 | 1        | China   |             | 1  | 2  | 2 Female | 1973 | 42     | 1    | 40-44 year | 1.0            | 2  |
| 19868  | 301900 | 2        | Taiwan  |             | 1  | 2  | 1 Male   | 1965 | 50     | 3    | 50-54      | 0.8            |    |
| 19874  | 105789 | 1        | China   |             | 1  | 2  | 2 Female | 1972 | 43     | 1    | 40-44 year | 1.0            | 2  |
| 19876  | 105791 | 1        | China   |             | 1  | 2  | 1 Male   | 1973 | 42     | 1    | 40-44 year | 1.0            |    |
| 19880  | 105792 | 1        | China   |             | 1  | 2  | 2 Female | 1963 | 52     | 3    | 50-54      | 1.2            |    |
| 19885  | 105793 | 1        | China   |             | 1  | 2  | 1 Male   | 1966 | 49     | 2    | 45-49      | 1.0            |    |
| 19890  | 105795 | 1        | China   |             | 1  | 2  | 1 Male   | 1974 | 41     | 1    | 40-44 year | 1.0            |    |
| 19894  | 301903 | 2        | Taiwan  |             | 1  | 2  | 1 Male   | 1960 | 55     | 4    | 55-59      | 0.7            |    |
| 19895  | 105796 | 1        | China   |             | 1  | 2  | 1 Male   | 1972 | 43     | 1    | 40-44 year | 1.0            |    |
| 19897  | 301904 | 2        | Taiwan  |             | 1  | 1  | 2 Female | 1948 | 67     | 5    | >=60       | 1.7            |    |
| 19906  | 105800 | 1        | China   |             | 1  | 2  | 2 Female | 1965 | 50     | 3    | 50-54      | 1.2            |    |
| 19908  | 105801 | 1        | China   |             | 1  | 2  | 2 Female | 1971 | 44     | 1    | 40-44 year | 1.0            | 2  |

| respid | SubsID | dCountry | Country | QDisclaim<br>er | Q1 | Q2 | Gender | Q3_1 | age Nr | dAge | age Group  | Weight in<br>Ctry | Q4 |
|--------|--------|----------|---------|-----------------|----|----|--------|------|--------|------|------------|-------------------|----|
| 19912  | 301906 | 2        | Taiwan  | 1               | 1  | 2  | Female | 1966 | 49     | 2    | 45-49      | 0.9               | 2  |
| 19913  | 301907 | 2        | Taiwan  | 1               | 2  | 2  | Female | 1930 | 85     | 5    | >=60       | 1.7               |    |
| 19914  | 105802 | 1        | China   | 1               | 2  | 2  | Female | 1951 | 64     | 5    | >=60       | 1.1               |    |
| 19918  | 105573 | 1        | China   | 1               | 2  | 2  | Female | 1972 | 43     | 1    | 40-44 year | 1.0               | 2  |
| 19924  | 105804 | 1        | China   | 1               | 2  | 2  | Female | 1971 | 44     | 1    | 40-44 year | 1.0               | 2  |
| 19936  | 105809 | 1        | China   | 1               | 2  | 1  | Male   | 1969 | 46     | 2    | 45-49      | 1.0               |    |
| 19940  | 105810 | 1        | China   | 1               | 2  | 2  | Female | 1973 | 42     | 1    | 40-44 year | 1.0               | 2  |
| 19945  | 202844 | 3        | Korea   | 1               | 2  | 2  | Female | 1950 | 65     | 5    | >=60       | 1.6               |    |
| 19948  | 105814 | 1        | China   | 1               | 2  | 2  | Female | 1972 | 43     | 1    | 40-44 year | 1.0               | 2  |
| 19959  | 105819 | 1        | China   | 1               | 2  | 2  | Female | 1973 | 42     | 1    | 40-44 year | 1.0               | 2  |
| 19961  | 301912 | 2        | Taiwan  | 1               | 2  | 2  | Female | 1957 | 58     | 4    | 55-59      | 0.9               |    |
| 19962  | 301913 | 2        | Taiwan  | 1               | 2  | 1  | Male   | 1964 | 51     | 3    | 50-54      | 0.8               |    |
| 19965  | 105822 | 1        | China   | 1               | 2  | 2  | Female | 1958 | 57     | 4    | 55-59      | 1.0               |    |
| 19966  | 105823 | 1        | China   | 1               | 2  | 2  | Female | 1975 | 40     | 1    | 40-44 year | 1.0               | 2  |
| 19973  | 105825 | 1        | China   | 1               | 1  | 2  | Female | 1975 | 40     | 1    | 40-44 year | 1.0               | 2  |
| 19981  | 301916 | 2        | Taiwan  | 1               | 2  | 1  | Male   | 1964 | 51     | 3    | 50-54      | 0.8               |    |
| 19986  | 105829 | 1        | China   | 1               | 2  | 1  | Male   | 1969 | 46     | 2    | 45-49      | 1.0               |    |
| 19989  | 105831 | 1        | China   | 1               | 1  | 1  | Male   | 1970 | 45     | 2    | 45-49      | 1.0               |    |
| 19998  | 105835 | 1        | China   | 1               | 2  | 2  | Female | 1962 | 53     | 3    | 50-54      | 1.2               |    |
| 20001  | 105824 | 1        | China   | 1               | 2  | 1  | Male   | 1974 | 41     | 1    | 40-44 year | 1.0               |    |
| 20005  | 105837 | 1        | China   | 1               | 2  | 2  | Female | 1969 | 46     | 2    | 45-49      | 1.0               | 2  |
| 20013  | 105839 | 1        | China   | 1               | 2  | 2  | Female | 1973 | 42     | 1    | 40-44 year | 1.0               | 2  |
| 20015  | 105841 | 1        | China   | 1               | 2  | 1  | Male   | 1970 | 45     | 2    | 45-49      | 1.0               |    |
| 20017  | 105842 | 1        | China   | 1               | 2  | 2  | Female | 1969 | 46     | 2    | 45-49      | 1.0               | 2  |
| 20020  | 105778 | 1        | China   | 1               | 2  | 2  | Female | 1967 | 48     | 2    | 45-49      | 1.0               | 2  |
| 20021  | 105844 | 1        | China   | 1               | 2  | 2  | Female | 1971 | 44     | 1    | 40-44 year | 1.0               | 2  |
| 20026  | 105846 | 1        | China   | 1               | 2  | 2  | Female | 1962 | 53     | 3    | 50-54      | 1.2               |    |
| 20028  | 105848 | 1        | China   | 1               | 2  | 1  | Male   | 1967 | 48     | 2    | 45-49      | 1.0               |    |
| 20030  | 105850 | 1        | China   | 1               | 2  | 2  | Female | 1963 | 52     | 3    | 50-54      | 1.2               |    |
| 20031  | 105851 | 1        | China   | 1               | 1  | 2  | Female | 1969 | 46     | 2    | 45-49      | 1.0               | 2  |
| 20034  | 202856 | 3        | Korea   | 1               | 2  | 2  | Female | 1950 | 65     | 5    | >=60       | 1.6               |    |
| 20035  | 105853 | 1        | China   | 1               | 2  | 2  | Female | 1975 | 40     | 1    | 40-44 year | 1.0               | 2  |



| respid | SubsID | dCountry | Country | QDisclaimer | Q1 | Q2 | Gender   | Q3_1 | age Nr | dAge | age Group  | Weight in Ctry | Q4 |
|--------|--------|----------|---------|-------------|----|----|----------|------|--------|------|------------|----------------|----|
| 20040  | 105855 | 1        | China   | 1           | 1  | 2  | 2 Female | 1973 | 42     | 1    | 40-44 year | 1.0            | 2  |
| 20045  | 105856 | 1        | China   | 1           | 1  | 1  | 1 Male   | 1966 | 49     | 2    | 45-49      | 1.0            |    |
| 20048  | 301926 | 2        | Taiwan  | 1           | 1  | 1  | 2 Female | 1939 | 76     | 5    | >=60       | 1.7            |    |
| 20053  | 301927 | 2        | Taiwan  | 1           | 1  | 1  | 2 Female | 1948 | 67     | 5    | >=60       | 1.7            |    |
| 20064  | 105860 | 1        | China   | 1           | 1  | 2  | 1 Male   | 1968 | 47     | 2    | 45-49      | 1.0            |    |
| 20071  | 105862 | 1        | China   | 1           | 1  | 2  | 1 Male   | 1973 | 42     | 1    | 40-44 year | 1.0            |    |
| 20072  | 105863 | 1        | China   | 1           | 1  | 2  | 1 Male   | 1970 | 45     | 2    | 45-49      | 1.0            |    |
| 20076  | 105843 | 1        | China   | 1           | 1  | 1  | 2 Female | 1974 | 41     | 1    | 40-44 year | 1.0            | 2  |
| 20081  | 105867 | 1        | China   | 1           | 1  | 2  | 1 Male   | 1970 | 45     | 2    | 45-49      | 1.0            |    |
| 20082  | 105868 | 1        | China   | 1           | 1  | 2  | 1 Male   | 1974 | 41     | 1    | 40-44 year | 1.0            |    |
| 20083  | 301930 | 2        | Taiwan  | 1           | 1  | 2  | 2 Female | 1955 | 60     | 5    | >=60       | 1.7            |    |
| 20088  | 105869 | 1        | China   | 1           | 1  | 2  | 1 Male   | 1971 | 44     | 1    | 40-44 year | 1.0            |    |
| 20089  | 105870 | 1        | China   | 1           | 1  | 2  | 1 Male   | 1959 | 56     | 4    | 55-59      | 0.9            |    |
| 20099  | 105875 | 1        | China   | 1           | 1  | 2  | 1 Male   | 1975 | 40     | 1    | 40-44 year | 1.0            |    |
| 20101  | 105876 | 1        | China   | 1           | 1  | 1  | 2 Female | 1973 | 42     | 1    | 40-44 year | 1.0            | 2  |
| 20102  | 105877 | 1        | China   | 1           | 1  | 2  | 1 Male   | 1967 | 48     | 2    | 45-49      | 1.0            |    |
| 20109  | 301935 | 2        | Taiwan  | 1           | 1  | 1  | 1 Male   | 1958 | 57     | 4    | 55-59      | 0.7            |    |
| 20118  | 202878 | 3        | Korea   | 1           | 1  | 2  | 2 Female | 1953 | 62     | 5    | >=60       | 1.6            |    |
| 20119  | 105865 | 1        | China   | 1           | 1  | 2  | 1 Male   | 1957 | 58     | 4    | 55-59      | 0.9            |    |
| 20124  | 301938 | 2        | Taiwan  | 1           | 1  | 2  | 2 Female | 1963 | 52     | 3    | 50-54      | 0.9            |    |
| 20126  | 105881 | 1        | China   | 1           | 1  | 2  | 2 Female | 1972 | 43     | 1    | 40-44 year | 1.0            | 2  |
| 20130  | 105883 | 1        | China   | 1           | 1  | 2  | 2 Female | 1972 | 43     | 1    | 40-44 year | 1.0            | 2  |
| 20131  | 105884 | 1        | China   | 1           | 1  | 2  | 2 Female | 1975 | 40     | 1    | 40-44 year | 1.0            | 2  |
| 20134  | 105887 | 1        | China   | 1           | 1  | 2  | 2 Female | 1972 | 43     | 1    | 40-44 year | 1.0            | 2  |
| 20146  | 105890 | 1        | China   | 1           | 1  | 2  | 2 Female | 1973 | 42     | 1    | 40-44 year | 1.0            | 2  |
| 20152  | 105892 | 1        | China   | 1           | 1  | 2  | 2 Female | 1966 | 49     | 2    | 45-49      | 1.0            | 2  |
| 20155  | 105894 | 1        | China   | 1           | 1  | 2  | 2 Female | 1975 | 40     | 1    | 40-44 year | 1.0            | 2  |
| 20156  | 105885 | 1        | China   | 1           | 1  | 2  | 2 Female | 1971 | 44     | 1    | 40-44 year | 1.0            | 2  |
| 20157  | 105895 | 1        | China   | 1           | 1  | 2  | 1 Male   | 1973 | 42     | 1    | 40-44 year | 1.0            |    |
| 20164  | 105896 | 1        | China   | 1           | 1  | 2  | 2 Female | 1975 | 40     | 1    | 40-44 year | 1.0            | 2  |
| 20168  | 202884 | 3        | Korea   | 1           | 1  | 2  | 2 Female | 1955 | 60     | 5    | >=60       | 1.6            |    |
| 20173  | 105900 | 1        | China   | 1           | 1  | 2  | 1 Male   | 1970 | 45     | 2    | 45-49      | 1.0            |    |

| respid | SubsID | dCountry | Country | QDisclaimer | Q1 | Q2 | Gender | Q3_1 | age Nr | dAge | age Group  | Weight in Ctry | Q4 |
|--------|--------|----------|---------|-------------|----|----|--------|------|--------|------|------------|----------------|----|
| 20174  | 105901 | 1        | China   | 1           | 1  | 2  | Female | 1975 | 40     | 1    | 40-44 year | 1.0            | 2  |
| 20175  | 105902 | 1        | China   | 1           | 2  | 1  | Male   | 1968 | 47     | 2    | 45-49      | 1.0            |    |
| 20189  | 105907 | 1        | China   | 1           | 2  | 1  | Male   | 1975 | 40     | 1    | 40-44 year | 1.0            |    |
| 20190  | 301946 | 2        | Taiwan  | 1           | 2  | 2  | Female | 1966 | 49     | 2    | 45-49      | 0.9            | 2  |
| 20201  | 105909 | 1        | China   | 1           | 2  | 1  | Male   | 1968 | 47     | 2    | 45-49      | 1.0            |    |
| 20202  | 105910 | 1        | China   | 1           | 2  | 1  | Male   | 1972 | 43     | 1    | 40-44 year | 1.0            |    |
| 20204  | 105878 | 1        | China   | 1           | 2  | 1  | Male   | 1966 | 49     | 2    | 45-49      | 1.0            |    |
| 20206  | 105911 | 1        | China   | 1           | 2  | 2  | Female | 1973 | 42     | 1    | 40-44 year | 1.0            | 2  |
| 20207  | 105912 | 1        | China   | 1           | 2  | 2  | Female | 1972 | 43     | 1    | 40-44 year | 1.0            | 2  |
| 20212  | 301952 | 2        | Taiwan  | 1           | 1  | 1  | Male   | 1953 | 62     | 5    | >=60       | 1.6            |    |
| 20213  | 202895 | 3        | Korea   | 1           | 2  | 2  | Female | 1952 | 63     | 5    | >=60       | 1.6            |    |
| 20217  | 301954 | 2        | Taiwan  | 1           | 2  | 2  | Female | 1955 | 60     | 5    | >=60       | 1.7            |    |
| 20222  | 105917 | 1        | China   | 1           | 2  | 1  | Male   | 1943 | 72     | 5    | >=60       | 1.0            |    |
| 20227  | 301955 | 2        | Taiwan  | 1           | 2  | 2  | Female | 1942 | 73     | 5    | >=60       | 1.7            |    |
| 20228  | 105919 | 1        | China   | 1           | 2  | 2  | Female | 1969 | 46     | 2    | 45-49      | 1.0            | 2  |
| 20238  | 202903 | 3        | Korea   | 1           | 1  | 2  | Female | 1951 | 64     | 5    | >=60       | 1.6            |    |
| 20242  | 105922 | 1        | China   | 1           | 2  | 1  | Male   | 1969 | 46     | 2    | 45-49      | 1.0            |    |
| 20246  | 105920 | 1        | China   | 1           | 2  | 2  | Female | 1975 | 40     | 1    | 40-44 year | 1.0            | 2  |
| 20255  | 301961 | 2        | Taiwan  | 1           | 1  | 1  | Male   | 1950 | 65     | 5    | >=60       | 1.6            |    |
| 20256  | 301962 | 2        | Taiwan  | 1           | 2  | 1  | Male   | 1967 | 48     | 2    | 45-49      | 0.8            |    |
| 20259  | 301956 | 2        | Taiwan  | 1           | 2  | 1  | Male   | 1955 | 60     | 5    | >=60       | 1.6            |    |
| 20262  | 105931 | 1        | China   | 1           | 2  | 1  | Male   | 1973 | 42     | 1    | 40-44 year | 1.0            |    |
| 20274  | 301964 | 2        | Taiwan  | 1           | 2  | 1  | Male   | 1965 | 50     | 3    | 50-54      | 0.8            |    |
| 20283  | 105938 | 1        | China   | 1           | 2  | 2  | Female | 1973 | 42     | 1    | 40-44 year | 1.0            | 2  |
| 20284  | 105939 | 1        | China   | 1           | 1  | 2  | Female | 1972 | 43     | 1    | 40-44 year | 1.0            | 2  |
| 20291  | 105941 | 1        | China   | 1           | 2  | 2  | Female | 1970 | 45     | 2    | 45-49      | 1.0            | 2  |
| 20292  | 105942 | 1        | China   | 1           | 2  | 2  | Female | 1974 | 41     | 1    | 40-44 year | 1.0            | 2  |
| 20293  | 105943 | 1        | China   | 1           | 2  | 2  | Female | 1956 | 59     | 4    | 55-59      | 1.0            |    |
| 20298  | 105946 | 1        | China   | 1           | 1  | 2  | Female | 1967 | 48     | 2    | 45-49      | 1.0            | 2  |
| 20301  | 301968 | 2        | Taiwan  | 1           | 2  | 1  | Male   | 1967 | 48     | 2    | 45-49      | 0.8            |    |
| 20303  | 105947 | 1        | China   | 1           | 1  | 1  | Male   | 1968 | 47     | 2    | 45-49      | 1.0            |    |
| 20309  | 105948 | 1        | China   | 1           | 2  | 2  | Female | 1971 | 44     | 1    | 40-44 year | 1.0            | 2  |

| respid | SubsID | dCountry | Country | QDisclaimer | Q1 | Q2 | Gender   | Q3_1 | age Nr | dAge | age Group  | Weight in Ctry | Q4 |
|--------|--------|----------|---------|-------------|----|----|----------|------|--------|------|------------|----------------|----|
| 20318  | 105950 | 1        | China   |             | 1  | 2  | 1 Male   | 1970 | 45     | 2    | 45-49      | 1.0            |    |
| 20324  | 105951 | 1        | China   |             | 1  | 1  | 1 Male   | 1970 | 45     | 2    | 45-49      | 1.0            |    |
| 20335  | 105952 | 1        | China   |             | 1  | 1  | 1 Male   | 1972 | 43     | 1    | 40-44 year | 1.0            |    |
| 20336  | 301972 | 2        | Taiwan  |             | 1  | 2  | 2 Female | 1969 | 46     | 2    | 45-49      | 0.9            | 2  |
| 20339  | 105953 | 1        | China   |             | 1  | 2  | 1 Male   | 1968 | 47     | 2    | 45-49      | 1.0            |    |
| 20348  | 301975 | 2        | Taiwan  |             | 1  | 2  | 2 Female | 1960 | 55     | 4    | 55-59      | 0.9            |    |
| 20351  | 105956 | 1        | China   |             | 1  | 2  | 1 Male   | 1966 | 49     | 2    | 45-49      | 1.0            |    |
| 20353  | 301977 | 2        | Taiwan  |             | 1  | 2  | 2 Female | 1969 | 46     | 2    | 45-49      | 0.9            | 2  |
| 20356  | 105957 | 1        | China   |             | 1  | 2  | 2 Female | 1951 | 64     | 5    | >=60       | 1.1            |    |
| 20357  | 202931 | 3        | Korea   |             | 1  | 2  | 2 Female | 1953 | 62     | 5    | >=60       | 1.6            |    |
| 20366  | 105960 | 1        | China   |             | 1  | 2  | 1 Male   | 1969 | 46     | 2    | 45-49      | 1.0            |    |
| 20369  | 105962 | 1        | China   |             | 1  | 2  | 1 Male   | 1967 | 48     | 2    | 45-49      | 1.0            |    |
| 20372  | 105959 | 1        | China   |             | 1  | 2  | 1 Male   | 1972 | 43     | 1    | 40-44 year | 1.0            |    |
| 20375  | 301980 | 2        | Taiwan  |             | 1  | 1  | 2 Female | 1958 | 57     | 4    | 55-59      | 0.9            |    |
| 20379  | 105963 | 1        | China   |             | 1  | 1  | 2 Female | 1968 | 47     | 2    | 45-49      | 1.0            | 2  |
| 20380  | 105964 | 1        | China   |             | 1  | 2  | 2 Female | 1967 | 48     | 2    | 45-49      | 1.0            | 2  |
| 20396  | 301985 | 2        | Taiwan  |             | 1  | 2  | 2 Female | 1966 | 49     | 2    | 45-49      | 0.9            | 2  |
| 20398  | 105968 | 1        | China   |             | 1  | 2  | 2 Female | 1958 | 57     | 4    | 55-59      | 1.0            |    |
| 20412  | 105971 | 1        | China   |             | 1  | 2  | 2 Female | 1971 | 44     | 1    | 40-44 year | 1.0            | 2  |
| 20415  | 105973 | 1        | China   |             | 1  | 1  | 2 Female | 1954 | 61     | 5    | >=60       | 1.1            |    |
| 20424  | 301989 | 2        | Taiwan  |             | 1  | 2  | 2 Female | 1970 | 45     | 2    | 45-49      | 0.9            | 2  |
| 20434  | 202958 | 3        | Korea   |             | 1  | 2  | 2 Female | 1953 | 62     | 5    | >=60       | 1.6            |    |
| 20435  | 105977 | 1        | China   |             | 1  | 2  | 1 Male   | 1970 | 45     | 2    | 45-49      | 1.0            |    |
| 20440  | 105978 | 1        | China   |             | 1  | 2  | 1 Male   | 1967 | 48     | 2    | 45-49      | 1.0            |    |
| 20441  | 105979 | 1        | China   |             | 1  | 2  | 1 Male   | 1974 | 41     | 1    | 40-44 year | 1.0            |    |
| 20445  | 301991 | 2        | Taiwan  |             | 1  | 1  | 2 Female | 1968 | 47     | 2    | 45-49      | 0.9            | 2  |
| 20446  | 301992 | 2        | Taiwan  |             | 1  | 2  | 2 Female | 1954 | 61     | 5    | >=60       | 1.7            |    |
| 20450  | 105981 | 1        | China   |             | 1  | 2  | 2 Female | 1974 | 41     | 1    | 40-44 year | 1.0            | 2  |
| 20453  | 105983 | 1        | China   |             | 1  | 2  | 2 Female | 1969 | 46     | 2    | 45-49      | 1.0            | 2  |
| 20458  | 105984 | 1        | China   |             | 1  | 2  | 2 Female | 1972 | 43     | 1    | 40-44 year | 1.0            | 2  |
| 20464  | 301997 | 2        | Taiwan  |             | 1  | 2  | 1 Male   | 1961 | 54     | 3    | 50-54      | 0.8            |    |
| 20471  | 105985 | 1        | China   |             | 1  | 2  | 2 Female | 1952 | 63     | 5    | >=60       | 1.1            |    |

| respid | SubsID | dCountry | Country | QDisclaimer | Q1 | Q2 | Gender | Q3_1 | age Nr | dAge | age Group  | Weight in Ctry | Q4 |
|--------|--------|----------|---------|-------------|----|----|--------|------|--------|------|------------|----------------|----|
| 20473  | 302001 | 2        | Taiwan  | 1           | 2  | 1  | Male   | 1961 | 54     | 3    | 50-54      | 0.8            |    |
| 20474  | 302002 | 2        | Taiwan  | 1           | 2  | 2  | Female | 1959 | 56     | 4    | 55-59      | 0.9            |    |
| 20477  | 302003 | 2        | Taiwan  | 1           | 1  | 1  | Male   | 1963 | 52     | 3    | 50-54      | 0.8            |    |
| 20479  | 105987 | 1        | China   | 1           | 2  | 2  | Female | 1975 | 40     | 1    | 40-44 year | 1.0            | 2  |
| 20485  | 105989 | 1        | China   | 1           | 2  | 2  | Female | 1974 | 41     | 1    | 40-44 year | 1.0            | 2  |
| 20487  | 302007 | 2        | Taiwan  | 1           | 1  | 2  | Female | 1958 | 57     | 4    | 55-59      | 0.9            |    |
| 20488  | 105990 | 1        | China   | 1           | 2  | 1  | Male   | 1974 | 41     | 1    | 40-44 year | 1.0            |    |
| 20494  | 202976 | 3        | Korea   | 1           | 2  | 2  | Female | 1953 | 62     | 5    | >=60       | 1.6            |    |
| 20502  | 105993 | 1        | China   | 1           | 2  | 1  | Male   | 1975 | 40     | 1    | 40-44 year | 1.0            |    |
| 20503  | 302015 | 2        | Taiwan  | 1           | 2  | 2  | Female | 1955 | 60     | 5    | >=60       | 1.7            |    |
| 20510  | 105994 | 1        | China   | 1           | 2  | 1  | Male   | 1970 | 45     | 2    | 45-49      | 1.0            |    |
| 20512  | 302020 | 2        | Taiwan  | 1           | 1  | 1  | Male   | 1953 | 62     | 5    | >=60       | 1.6            |    |
| 20516  | 302022 | 2        | Taiwan  | 1           | 2  | 1  | Male   | 1963 | 52     | 3    | 50-54      | 0.8            |    |
| 20522  | 302025 | 2        | Taiwan  | 1           | 1  | 2  | Female | 1954 | 61     | 5    | >=60       | 1.7            |    |
| 20527  | 302026 | 2        | Taiwan  | 1           | 1  | 2  | Female | 1954 | 61     | 5    | >=60       | 1.7            |    |
| 20529  | 105996 | 1        | China   | 1           | 2  | 1  | Male   | 1959 | 56     | 4    | 55-59      | 0.9            |    |
| 20535  | 105997 | 1        | China   | 1           | 2  | 1  | Male   | 1956 | 59     | 4    | 55-59      | 0.9            |    |
| 20543  | 102000 | 1        | China   | 1           | 1  | 1  | Male   | 1955 | 60     | 5    | >=60       | 1.0            |    |
| 20546  | 106000 | 1        | China   | 1           | 2  | 2  | Female | 1954 | 61     | 5    | >=60       | 1.1            |    |
| 20548  | 106001 | 1        | China   | 1           | 2  | 1  | Male   | 1973 | 42     | 1    | 40-44 year | 1.0            |    |
| 20552  | 106002 | 1        | China   | 1           | 2  | 1  | Male   | 1972 | 43     | 1    | 40-44 year | 1.0            |    |
| 20556  | 106004 | 1        | China   | 1           | 1  | 1  | Male   | 1960 | 55     | 4    | 55-59      | 0.9            |    |
| 20566  | 106006 | 1        | China   | 1           | 2  | 1  | Male   | 1970 | 45     | 2    | 45-49      | 1.0            |    |
| 20576  | 106008 | 1        | China   | 1           | 2  | 1  | Male   | 1975 | 40     | 1    | 40-44 year | 1.0            |    |
| 20587  | 106010 | 1        | China   | 1           | 2  | 1  | Male   | 1971 | 44     | 1    | 40-44 year | 1.0            |    |
| 20589  | 302047 | 2        | Taiwan  | 1           | 2  | 1  | Male   | 1969 | 46     | 2    | 45-49      | 0.8            |    |
| 20593  | 202996 | 3        | Korea   | 1           | 2  | 2  | Female | 1950 | 65     | 5    | >=60       | 1.6            |    |
| 20594  | 106012 | 1        | China   | 1           | 2  | 2  | Female | 1970 | 45     | 2    | 45-49      | 1.0            | 2  |
| 20602  | 302053 | 2        | Taiwan  | 1           | 1  | 2  | Female | 1959 | 56     | 4    | 55-59      | 0.9            |    |
| 20607  | 302055 | 2        | Taiwan  | 1           | 2  | 2  | Female | 1953 | 62     | 5    | >=60       | 1.7            |    |
| 20608  | 106013 | 1        | China   | 1           | 1  | 1  | Male   | 1974 | 41     | 1    | 40-44 year | 1.0            |    |
| 20611  | 302057 | 2        | Taiwan  | 1           | 2  | 1  | Male   | 1951 | 64     | 5    | >=60       | 1.6            |    |

| respid | SubsID | dCountry | Country | QDisclaim<br>er | Q1 | Q2 | Gender   | Q3_1 | age Nr | dAge | age Group  | Weight in<br>Ctry | Q4 |
|--------|--------|----------|---------|-----------------|----|----|----------|------|--------|------|------------|-------------------|----|
| 20612  | 302058 | 2        | Taiwan  | 1               | 1  | 1  | 2 Female | 1959 | 56     | 4    | 55-59      | 0.9               |    |
| 20615  | 302060 | 2        | Taiwan  | 1               | 1  | 1  | 1 Male   | 1953 | 62     | 5    | >=60       | 1.6               |    |
| 20625  | 106016 | 1        | China   | 1               | 2  | 1  | 1 Male   | 1971 | 44     | 1    | 40-44 year | 1.0               |    |
| 20630  | 302063 | 2        | Taiwan  | 1               | 1  | 2  | 2 Female | 1956 | 59     | 4    | 55-59      | 0.9               |    |
| 20639  | 106018 | 1        | China   | 1               | 2  | 2  | 2 Female | 1968 | 47     | 2    | 45-49      | 1.0               | 2  |
| 20643  | 302069 | 2        | Taiwan  | 1               | 2  | 1  | 1 Male   | 1950 | 65     | 5    | >=60       | 1.6               |    |
| 20645  | 106020 | 1        | China   | 1               | 2  | 1  | 1 Male   | 1975 | 40     | 1    | 40-44 year | 1.0               |    |
| 20647  | 106021 | 1        | China   | 1               | 2  | 1  | 1 Male   | 1975 | 40     | 1    | 40-44 year | 1.0               |    |
| 20652  | 106022 | 1        | China   | 1               | 2  | 2  | 2 Female | 1967 | 48     | 2    | 45-49      | 1.0               | 2  |
| 20661  | 106024 | 1        | China   | 1               | 2  | 2  | 2 Female | 1971 | 44     | 1    | 40-44 year | 1.0               | 2  |
| 20665  | 106027 | 1        | China   | 1               | 2  | 2  | 2 Female | 1970 | 45     | 2    | 45-49      | 1.0               | 2  |
| 20679  | 106031 | 1        | China   | 1               | 2  | 1  | 1 Male   | 1974 | 41     | 1    | 40-44 year | 1.0               |    |
| 20682  | 105315 | 1        | China   | 1               | 2  | 1  | 1 Male   | 1960 | 55     | 4    | 55-59      | 0.9               |    |
| 20683  | 302083 | 2        | Taiwan  | 1               | 2  | 1  | 1 Male   | 1955 | 60     | 5    | >=60       | 1.6               |    |
| 20700  | 302089 | 2        | Taiwan  | 1               | 1  | 1  | 1 Male   | 1952 | 63     | 5    | >=60       | 1.6               |    |
| 20702  | 203015 | 3        | Korea   | 1               | 2  | 2  | 2 Female | 1950 | 65     | 5    | >=60       | 1.6               |    |
| 20709  | 302092 | 2        | Taiwan  | 1               | 1  | 2  | 2 Female | 1959 | 56     | 4    | 55-59      | 0.9               |    |
| 20715  | 106040 | 1        | China   | 1               | 1  | 1  | 1 Male   | 1974 | 41     | 1    | 40-44 year | 1.0               |    |
| 20718  | 106041 | 1        | China   | 1               | 2  | 2  | 2 Female | 1957 | 58     | 4    | 55-59      | 1.0               |    |
| 20722  | 106043 | 1        | China   | 1               | 1  | 1  | 1 Male   | 1972 | 43     | 1    | 40-44 year | 1.0               |    |
| 20729  | 106046 | 1        | China   | 1               | 2  | 1  | 1 Male   | 1967 | 48     | 2    | 45-49      | 1.0               |    |
| 20732  | 106048 | 1        | China   | 1               | 2  | 2  | 2 Female | 1972 | 43     | 1    | 40-44 year | 1.0               | 2  |
| 20746  | 302097 | 2        | Taiwan  | 1               | 1  | 1  | 1 Male   | 1967 | 48     | 2    | 45-49      | 0.8               |    |
| 20747  | 106051 | 1        | China   | 1               | 1  | 2  | 2 Female | 1960 | 55     | 4    | 55-59      | 1.0               |    |
| 20758  | 106053 | 1        | China   | 1               | 2  | 1  | 1 Male   | 1975 | 40     | 1    | 40-44 year | 1.0               |    |
| 20767  | 106054 | 1        | China   | 1               | 2  | 2  | 2 Female | 1973 | 42     | 1    | 40-44 year | 1.0               | 2  |
| 20777  | 106057 | 1        | China   | 1               | 1  | 1  | 1 Male   | 1970 | 45     | 2    | 45-49      | 1.0               |    |
| 20778  | 106055 | 1        | China   | 1               | 2  | 2  | 2 Female | 1972 | 43     | 1    | 40-44 year | 1.0               | 2  |
| 20780  | 302104 | 2        | Taiwan  | 1               | 2  | 2  | 2 Female | 1963 | 52     | 3    | 50-54      | 0.9               |    |
| 20800  | 203056 | 3        | Korea   | 1               | 2  | 2  | 2 Female | 1955 | 60     | 5    | >=60       | 1.6               |    |
| 20810  | 106065 | 1        | China   | 1               | 2  | 1  | 1 Male   | 1975 | 40     | 1    | 40-44 year | 1.0               |    |
| 20814  | 302109 | 2        | Taiwan  | 1               | 2  | 2  | 2 Female | 1958 | 57     | 4    | 55-59      | 0.9               |    |

| respid | SubsID | dCountry | Country  | QDisclaimer | Q1 | Q2 | Gender   | Q3_1 | age Nr | dAge | age Group    | Weight in Ctry | Q4 |
|--------|--------|----------|----------|-------------|----|----|----------|------|--------|------|--------------|----------------|----|
| 20816  | 302110 |          | 2 Taiwan |             | 1  | 2  | 2 Female | 1962 | 53     |      | 3 50-54      | 0.9            |    |
| 20832  | 106068 |          | 1 China  |             | 1  | 2  | 2 Female | 1975 | 40     |      | 1 40-44 year | 1.0            | 2  |
| 20838  | 106069 |          | 1 China  |             | 1  | 2  | 1 Male   | 1952 | 63     |      | 5 >=60       | 1.0            |    |
| 20841  | 302115 |          | 2 Taiwan |             | 1  | 1  | 2 Female | 1940 | 75     |      | 5 >=60       | 1.7            |    |
| 20848  | 106072 |          | 1 China  |             | 1  | 2  | 1 Male   | 1955 | 60     |      | 5 >=60       | 1.0            |    |
| 20850  | 106073 |          | 1 China  |             | 1  | 2  | 2 Female | 1958 | 57     |      | 4 55-59      | 1.0            |    |
| 20851  | 302080 |          | 2 Taiwan |             | 1  | 1  | 2 Female | 1955 | 60     |      | 5 >=60       | 1.7            |    |
| 20861  | 106075 |          | 1 China  |             | 1  | 2  | 1 Male   | 1972 | 43     |      | 1 40-44 year | 1.0            |    |
| 20870  | 106078 |          | 1 China  |             | 1  | 2  | 1 Male   | 1971 | 44     |      | 1 40-44 year | 1.0            |    |
| 20880  | 106076 |          | 1 China  |             | 1  | 2  | 1 Male   | 1971 | 44     |      | 1 40-44 year | 1.0            |    |
| 20883  | 106081 |          | 1 China  |             | 1  | 2  | 1 Male   | 1970 | 45     |      | 2 45-49      | 1.0            |    |
| 20894  | 302126 |          | 2 Taiwan |             | 1  | 1  | 2 Female | 1957 | 58     |      | 4 55-59      | 0.9            |    |
| 20896  | 302127 |          | 2 Taiwan |             | 1  | 1  | 1 Male   | 1960 | 55     |      | 4 55-59      | 0.7            |    |
| 20901  | 302130 |          | 2 Taiwan |             | 1  | 1  | 1 Male   | 1966 | 49     |      | 2 45-49      | 0.8            |    |
| 20903  | 106084 |          | 1 China  |             | 1  | 1  | 2 Female | 1974 | 41     |      | 1 40-44 year | 1.0            | 2  |
| 20909  | 106086 |          | 1 China  |             | 1  | 2  | 2 Female | 1970 | 45     |      | 2 45-49      | 1.0            | 2  |
| 20919  | 106089 |          | 1 China  |             | 1  | 2  | 1 Male   | 1969 | 46     |      | 2 45-49      | 1.0            |    |
| 20925  | 302134 |          | 2 Taiwan |             | 1  | 1  | 1 Male   | 1949 | 66     |      | 5 >=60       | 1.6            |    |
| 20935  | 106091 |          | 1 China  |             | 1  | 2  | 1 Male   | 1958 | 57     |      | 4 55-59      | 0.9            |    |
| 20939  | 106093 |          | 1 China  |             | 1  | 2  | 2 Female | 1972 | 43     |      | 1 40-44 year | 1.0            | 2  |
| 20956  | 106097 |          | 1 China  |             | 1  | 2  | 1 Male   | 1970 | 45     |      | 2 45-49      | 1.0            |    |
| 20970  | 106100 |          | 1 China  |             | 1  | 2  | 2 Female | 1975 | 40     |      | 1 40-44 year | 1.0            | 2  |
| 20974  | 302146 |          | 2 Taiwan |             | 1  | 1  | 1 Male   | 1959 | 56     |      | 4 55-59      | 0.7            |    |
| 20975  | 105561 |          | 1 China  |             | 1  | 2  | 1 Male   | 1973 | 42     |      | 1 40-44 year | 1.0            |    |
| 20984  | 302150 |          | 2 Taiwan |             | 1  | 1  | 1 Male   | 1952 | 63     |      | 5 >=60       | 1.6            |    |
| 20988  | 106102 |          | 1 China  |             | 1  | 2  | 1 Male   | 1975 | 40     |      | 1 40-44 year | 1.0            |    |
| 20996  | 106103 |          | 1 China  |             | 1  | 1  | 2 Female | 1966 | 49     |      | 2 45-49      | 1.0            | 2  |
| 20998  | 302153 |          | 2 Taiwan |             | 1  | 2  | 2 Female | 1950 | 65     |      | 5 >=60       | 1.7            |    |
| 21007  | 106104 |          | 1 China  |             | 1  | 2  | 1 Male   | 1953 | 62     |      | 5 >=60       | 1.0            |    |
| 21008  | 106105 |          | 1 China  |             | 1  | 2  | 1 Male   | 1974 | 41     |      | 1 40-44 year | 1.0            |    |
| 21014  | 106106 |          | 1 China  |             | 1  | 2  | 2 Female | 1974 | 41     |      | 1 40-44 year | 1.0            | 2  |
| 21020  | 302160 |          | 2 Taiwan |             | 1  | 2  | 2 Female | 1964 | 51     |      | 3 50-54      | 0.9            |    |

| respid | SubsID | dCountry | Country | QDisclaimer | Q1 | Q2 | Gender   | Q3_1 | age Nr | dAge | age Group  | Weight in Ctry | Q4 |
|--------|--------|----------|---------|-------------|----|----|----------|------|--------|------|------------|----------------|----|
| 21022  | 106107 | 1        | China   |             | 1  | 2  | 1 Male   | 1970 | 45     | 2    | 45-49      | 1.0            |    |
| 21024  | 302162 | 2        | Taiwan  |             | 1  | 2  | 1 Male   | 1955 | 60     | 5    | >=60       | 1.6            |    |
| 21026  | 106108 | 1        | China   |             | 1  | 2  | 1 Male   | 1970 | 45     | 2    | 45-49      | 1.0            |    |
| 21027  | 106109 | 1        | China   |             | 1  | 2  | 1 Male   | 1974 | 41     | 1    | 40-44 year | 1.0            |    |
| 21030  | 106110 | 1        | China   |             | 1  | 1  | 2 Female | 1975 | 40     | 1    | 40-44 year | 1.0            | 2  |
| 21032  | 106112 | 1        | China   |             | 1  | 2  | 2 Female | 1953 | 62     | 5    | >=60       | 1.1            |    |
| 21040  | 106113 | 1        | China   |             | 1  | 2  | 2 Female | 1975 | 40     | 1    | 40-44 year | 1.0            | 2  |
| 21045  | 302167 | 2        | Taiwan  |             | 1  | 2  | 1 Male   | 1964 | 51     | 3    | 50-54      | 0.8            |    |
| 21058  | 106114 | 1        | China   |             | 1  | 2  | 1 Male   | 1971 | 44     | 1    | 40-44 year | 1.0            |    |
| 21064  | 302121 | 2        | Taiwan  |             | 1  | 1  | 2 Female | 1959 | 56     | 4    | 55-59      | 0.9            |    |
| 21073  | 106118 | 1        | China   |             | 1  | 2  | 2 Female | 1957 | 58     | 4    | 55-59      | 1.0            |    |
| 21086  | 106121 | 1        | China   |             | 1  | 2  | 1 Male   | 1952 | 63     | 5    | >=60       | 1.0            |    |
| 21092  | 106123 | 1        | China   |             | 1  | 2  | 1 Male   | 1975 | 40     | 1    | 40-44 year | 1.0            |    |
| 21096  | 106124 | 1        | China   |             | 1  | 2  | 2 Female | 1950 | 65     | 5    | >=60       | 1.1            |    |
| 21103  | 106126 | 1        | China   |             | 1  | 2  | 2 Female | 1956 | 59     | 4    | 55-59      | 1.0            |    |
| 21120  | 106132 | 1        | China   |             | 1  | 2  | 2 Female | 1951 | 64     | 5    | >=60       | 1.1            |    |
| 21125  | 106133 | 1        | China   |             | 1  | 2  | 1 Male   | 1956 | 59     | 4    | 55-59      | 0.9            |    |
| 21126  | 106134 | 1        | China   |             | 1  | 2  | 1 Male   | 1973 | 42     | 1    | 40-44 year | 1.0            |    |
| 21132  | 302192 | 2        | Taiwan  |             | 1  | 1  | 2 Female | 1951 | 64     | 5    | >=60       | 1.7            |    |
| 21139  | 302194 | 2        | Taiwan  |             | 1  | 1  | 2 Female | 1960 | 55     | 4    | 55-59      | 0.9            |    |
| 21147  | 302199 | 2        | Taiwan  |             | 1  | 2  | 2 Female | 1950 | 65     | 5    | >=60       | 1.7            |    |
| 21148  | 106137 | 1        | China   |             | 1  | 1  | 1 Male   | 1975 | 40     | 1    | 40-44 year | 1.0            |    |
| 21149  | 302198 | 2        | Taiwan  |             | 1  | 1  | 2 Female | 1958 | 57     | 4    | 55-59      | 0.9            |    |
| 21164  | 106140 | 1        | China   |             | 1  | 1  | 1 Male   | 1949 | 66     | 5    | >=60       | 1.0            |    |
| 21165  | 106142 | 1        | China   |             | 1  | 2  | 1 Male   | 1958 | 57     | 4    | 55-59      | 0.9            |    |
| 21171  | 106141 | 1        | China   |             | 1  | 1  | 2 Female | 1955 | 60     | 5    | >=60       | 1.1            |    |
| 21176  | 106145 | 1        | China   |             | 1  | 2  | 2 Female | 1967 | 48     | 2    | 45-49      | 1.0            | 2  |
| 21187  | 302217 | 2        | Taiwan  |             | 1  | 1  | 2 Female | 1959 | 56     | 4    | 55-59      | 0.9            |    |
| 21192  | 106146 | 1        | China   |             | 1  | 2  | 2 Female | 1970 | 45     | 2    | 45-49      | 1.0            | 2  |
| 21198  | 106147 | 1        | China   |             | 1  | 2  | 2 Female | 1973 | 42     | 1    | 40-44 year | 1.0            | 2  |
| 21199  | 203170 | 3        | Korea   |             | 1  | 2  | 2 Female | 1955 | 60     | 5    | >=60       | 1.6            |    |
| 21206  | 106149 | 1        | China   |             | 1  | 2  | 2 Female | 1953 | 62     | 5    | >=60       | 1.1            |    |

| respid | SubsID | dCountry | Country | QDisclaimer | Q1 | Q2 | Gender | Q3_1 | age Nr | dAge | age Group  | Weight in Ctry | Q4 |
|--------|--------|----------|---------|-------------|----|----|--------|------|--------|------|------------|----------------|----|
| 21212  | 302226 | 2        | Taiwan  | 1           | 1  | 1  | Male   | 1948 | 67     | 5    | >=60       | 1.6            |    |
| 21216  | 106117 | 1        | China   | 1           | 2  | 2  | Female | 1975 | 40     | 1    | 40-44 year | 1.0            | 2  |
| 21217  | 106151 | 1        | China   | 1           | 2  | 1  | Male   | 1948 | 67     | 5    | >=60       | 1.0            |    |
| 21228  | 106152 | 1        | China   | 1           | 2  | 1  | Male   | 1971 | 44     | 1    | 40-44 year | 1.0            |    |
| 21229  | 302230 | 2        | Taiwan  | 1           | 1  | 2  | Female | 1961 | 54     | 3    | 50-54      | 0.9            |    |
| 21230  | 106155 | 1        | China   | 1           | 2  | 2  | Female | 1969 | 46     | 2    | 45-49      | 1.0            | 2  |
| 21243  | 302235 | 2        | Taiwan  | 1           | 1  | 2  | Female | 1955 | 60     | 5    | >=60       | 1.7            |    |
| 21247  | 106159 | 1        | China   | 1           | 2  | 2  | Female | 1959 | 56     | 4    | 55-59      | 1.0            |    |
| 21253  | 106160 | 1        | China   | 1           | 2  | 1  | Male   | 1968 | 47     | 2    | 45-49      | 1.0            |    |
| 21264  | 302239 | 2        | Taiwan  | 1           | 1  | 1  | Male   | 1954 | 61     | 5    | >=60       | 1.6            |    |
| 21265  | 302240 | 2        | Taiwan  | 1           | 2  | 2  | Female | 1960 | 55     | 4    | 55-59      | 0.9            |    |
| 21273  | 106163 | 1        | China   | 1           | 2  | 1  | Male   | 1953 | 62     | 5    | >=60       | 1.0            |    |
| 21275  | 106164 | 1        | China   | 1           | 2  | 2  | Female | 1974 | 41     | 1    | 40-44 year | 1.0            | 2  |
| 21278  | 302245 | 2        | Taiwan  | 1           | 1  | 2  | Female | 1961 | 54     | 3    | 50-54      | 0.9            |    |
| 21291  | 302249 | 2        | Taiwan  | 1           | 1  | 1  | Male   | 1948 | 67     | 5    | >=60       | 1.6            |    |
| 21298  | 106169 | 1        | China   | 1           | 2  | 1  | Male   | 1973 | 42     | 1    | 40-44 year | 1.0            |    |
| 21301  | 106170 | 1        | China   | 1           | 1  | 1  | Male   | 1972 | 43     | 1    | 40-44 year | 1.0            |    |
| 21312  | 106172 | 1        | China   | 1           | 2  | 1  | Male   | 1959 | 56     | 4    | 55-59      | 0.9            |    |
| 21323  | 203196 | 3        | Korea   | 1           | 2  | 2  | Female | 1943 | 72     | 5    | >=60       | 1.6            |    |
| 21325  | 302255 | 2        | Taiwan  | 1           | 1  | 1  | Male   | 1955 | 60     | 5    | >=60       | 1.6            |    |
| 21341  | 106178 | 1        | China   | 1           | 2  | 2  | Female | 1975 | 40     | 1    | 40-44 year | 1.0            | 2  |
| 21349  | 106180 | 1        | China   | 1           | 2  | 2  | Female | 1952 | 63     | 5    | >=60       | 1.1            |    |
| 21350  | 302264 | 2        | Taiwan  | 1           | 1  | 2  | Female | 1958 | 57     | 4    | 55-59      | 0.9            |    |
| 21354  | 106181 | 1        | China   | 1           | 1  | 1  | Male   | 1950 | 65     | 5    | >=60       | 1.0            |    |
| 21372  | 302269 | 2        | Taiwan  | 1           | 1  | 2  | Female | 1954 | 61     | 5    | >=60       | 1.7            |    |
| 21373  | 302270 | 2        | Taiwan  | 1           | 2  | 2  | Female | 1958 | 57     | 4    | 55-59      | 0.9            |    |
| 21378  | 203210 | 3        | Korea   | 1           | 2  | 2  | Female | 1953 | 62     | 5    | >=60       | 1.6            |    |
| 21393  | 106186 | 1        | China   | 1           | 2  | 2  | Female | 1969 | 46     | 2    | 45-49      | 1.0            | 2  |
| 21401  | 302278 | 2        | Taiwan  | 1           | 2  | 1  | Male   | 1965 | 50     | 3    | 50-54      | 0.8            |    |
| 21405  | 302280 | 2        | Taiwan  | 1           | 1  | 1  | Male   | 1955 | 60     | 5    | >=60       | 1.6            |    |
| 21406  | 302281 | 2        | Taiwan  | 1           | 1  | 2  | Female | 1953 | 62     | 5    | >=60       | 1.7            |    |
| 21407  | 106189 | 1        | China   | 1           | 2  | 1  | Male   | 1955 | 60     | 5    | >=60       | 1.0            |    |



| respid | SubsID | dCountry | Country | QDisclaimer | Q1 | Q2 | Gender   | Q3_1 | age Nr | dAge | age Group    | Weight in Ctry | Q4 |
|--------|--------|----------|---------|-------------|----|----|----------|------|--------|------|--------------|----------------|----|
| 21418  | 106192 | 1        | China   |             | 1  | 1  | 1 Male   | 1972 | 43     |      | 1 40-44 year | 1.0            |    |
| 21420  | 302282 | 2        | Taiwan  |             | 1  | 1  | 1 Male   | 1958 | 57     |      | 4 55-59      | 0.7            |    |
| 21421  | 106193 | 1        | China   |             | 1  | 2  | 2 Female | 1967 | 48     |      | 2 45-49      | 1.0            | 2  |
| 21446  | 302293 | 2        | Taiwan  |             | 1  | 1  | 2 Female | 1959 | 56     |      | 4 55-59      | 0.9            |    |
| 21449  | 302294 | 2        | Taiwan  |             | 1  | 1  | 1 Male   | 1960 | 55     |      | 4 55-59      | 0.7            |    |
| 21452  | 302295 | 2        | Taiwan  |             | 1  | 2  | 2 Female | 1965 | 50     |      | 3 50-54      | 0.9            |    |
| 21455  | 106200 | 1        | China   |             | 1  | 2  | 1 Male   | 1949 | 66     |      | 5 >=60       | 1.0            |    |
| 21469  | 106201 | 1        | China   |             | 1  | 2  | 2 Female | 1958 | 57     |      | 4 55-59      | 1.0            |    |
| 21471  | 302306 | 2        | Taiwan  |             | 1  | 2  | 2 Female | 1949 | 66     |      | 5 >=60       | 1.7            |    |
| 21472  | 106202 | 1        | China   |             | 1  | 2  | 2 Female | 1955 | 60     |      | 5 >=60       | 1.1            |    |
| 21474  | 203228 | 3        | Korea   |             | 1  | 2  | 2 Female | 1951 | 64     |      | 5 >=60       | 1.6            |    |
| 21479  | 106204 | 1        | China   |             | 1  | 2  | 2 Female | 1966 | 49     |      | 2 45-49      | 1.0            | 2  |
| 21485  | 106206 | 1        | China   |             | 1  | 2  | 1 Male   | 1970 | 45     |      | 2 45-49      | 1.0            |    |
| 21512  | 302319 | 2        | Taiwan  |             | 1  | 1  | 1 Male   | 1954 | 61     |      | 5 >=60       | 1.6            |    |
| 21513  | 302320 | 2        | Taiwan  |             | 1  | 2  | 1 Male   | 1960 | 55     |      | 4 55-59      | 0.7            |    |
| 21514  | 106211 | 1        | China   |             | 1  | 2  | 1 Male   | 1951 | 64     |      | 5 >=60       | 1.0            |    |
| 21520  | 106214 | 1        | China   |             | 1  | 2  | 2 Female | 1971 | 44     |      | 1 40-44 year | 1.0            | 2  |
| 21539  | 302330 | 2        | Taiwan  |             | 1  | 2  | 2 Female | 1960 | 55     |      | 4 55-59      | 0.9            |    |
| 21553  | 302335 | 2        | Taiwan  |             | 1  | 2  | 1 Male   | 1964 | 51     |      | 3 50-54      | 0.8            |    |
| 21560  | 106221 | 1        | China   |             | 1  | 2  | 2 Female | 1968 | 47     |      | 2 45-49      | 1.0            | 2  |
| 21561  | 106217 | 1        | China   |             | 1  | 2  | 2 Female | 1966 | 49     |      | 2 45-49      | 1.0            | 2  |
| 21563  | 302337 | 2        | Taiwan  |             | 1  | 1  | 2 Female | 1962 | 53     |      | 3 50-54      | 0.9            |    |
| 21565  | 302338 | 2        | Taiwan  |             | 1  | 1  | 1 Male   | 1955 | 60     |      | 5 >=60       | 1.6            |    |
| 21582  | 302348 | 2        | Taiwan  |             | 1  | 1  | 2 Female | 1945 | 70     |      | 5 >=60       | 1.7            |    |
| 21584  | 106222 | 1        | China   |             | 1  | 2  | 1 Male   | 1975 | 40     |      | 1 40-44 year | 1.0            |    |
| 21585  | 106223 | 1        | China   |             | 1  | 2  | 1 Male   | 1951 | 64     |      | 5 >=60       | 1.0            |    |
| 21586  | 302349 | 2        | Taiwan  |             | 1  | 1  | 1 Male   | 1942 | 73     |      | 5 >=60       | 1.6            |    |
| 21587  | 302350 | 2        | Taiwan  |             | 1  | 1  | 1 Male   | 1964 | 51     |      | 3 50-54      | 0.8            |    |
| 21590  | 106225 | 1        | China   |             | 1  | 1  | 1 Male   | 1952 | 63     |      | 5 >=60       | 1.0            |    |
| 21601  | 302354 | 2        | Taiwan  |             | 1  | 1  | 2 Female | 1957 | 58     |      | 4 55-59      | 0.9            |    |
| 21611  | 106228 | 1        | China   |             | 1  | 2  | 2 Female | 1954 | 61     |      | 5 >=60       | 1.1            |    |
| 21612  | 302356 | 2        | Taiwan  |             | 1  | 1  | 1 Male   | 1945 | 70     |      | 5 >=60       | 1.6            |    |

| respid | SubsID | dCountry | Country | QDisclaimer | Q1 | Q2 | Gender   | Q3_1 | age Nr | dAge | age Group  | Weight in Ctry | Q4 |
|--------|--------|----------|---------|-------------|----|----|----------|------|--------|------|------------|----------------|----|
| 21625  | 302361 | 2        | Taiwan  | 1           | 1  | 2  | 1 Male   | 1957 | 58     | 4    | 55-59      | 0.7            |    |
| 21633  | 106234 | 1        | China   | 1           | 1  | 2  | 1 Male   | 1970 | 45     | 2    | 45-49      | 1.0            |    |
| 21640  | 106235 | 1        | China   | 1           | 1  | 2  | 1 Male   | 1955 | 60     | 5    | >=60       | 1.0            |    |
| 21647  | 106237 | 1        | China   | 1           | 1  | 2  | 2 Female | 1950 | 65     | 5    | >=60       | 1.1            |    |
| 21648  | 106238 | 1        | China   | 1           | 1  | 2  | 1 Male   | 1955 | 60     | 5    | >=60       | 1.0            |    |
| 21656  | 203268 | 3        | Korea   | 1           | 1  | 1  | 2 Female | 1955 | 60     | 5    | >=60       | 1.6            |    |
| 21657  | 302369 | 2        | Taiwan  | 1           | 1  | 2  | 2 Female | 1957 | 58     | 4    | 55-59      | 0.9            |    |
| 21658  | 106241 | 1        | China   | 1           | 1  | 2  | 1 Male   | 1949 | 66     | 5    | >=60       | 1.0            |    |
| 21665  | 106244 | 1        | China   | 1           | 1  | 2  | 2 Female | 1951 | 64     | 5    | >=60       | 1.1            |    |
| 21666  | 302372 | 2        | Taiwan  | 1           | 1  | 2  | 1 Male   | 1961 | 54     | 3    | 50-54      | 0.8            |    |
| 21668  | 106245 | 1        | China   | 1           | 1  | 2  | 1 Male   | 1952 | 63     | 5    | >=60       | 1.0            |    |
| 21673  | 302377 | 2        | Taiwan  | 1           | 1  | 2  | 2 Female | 1951 | 64     | 5    | >=60       | 1.7            |    |
| 21681  | 106247 | 1        | China   | 1           | 1  | 2  | 1 Male   | 1951 | 64     | 5    | >=60       | 1.0            |    |
| 21682  | 106248 | 1        | China   | 1           | 1  | 2  | 1 Male   | 1966 | 49     | 2    | 45-49      | 1.0            |    |
| 21685  | 106249 | 1        | China   | 1           | 1  | 2  | 1 Male   | 1970 | 45     | 2    | 45-49      | 1.0            |    |
| 21692  | 302381 | 2        | Taiwan  | 1           | 1  | 2  | 2 Female | 1962 | 53     | 3    | 50-54      | 0.9            |    |
| 21697  | 106253 | 1        | China   | 1           | 1  | 2  | 2 Female | 1974 | 41     | 1    | 40-44 year | 1.0            | 2  |
| 21711  | 302384 | 2        | Taiwan  | 1           | 1  | 1  | 2 Female | 1960 | 55     | 4    | 55-59      | 0.9            |    |
| 21715  | 302385 | 2        | Taiwan  | 1           | 1  | 1  | 2 Female | 1951 | 64     | 5    | >=60       | 1.7            |    |
| 21726  | 302388 | 2        | Taiwan  | 1           | 1  | 2  | 1 Male   | 1941 | 74     | 5    | >=60       | 1.6            |    |
| 21748  | 203293 | 3        | Korea   | 1           | 1  | 2  | 2 Female | 1950 | 65     | 5    | >=60       | 1.6            |    |
| 21761  | 106260 | 1        | China   | 1           | 1  | 2  | 2 Female | 1970 | 45     | 2    | 45-49      | 1.0            | 2  |
| 21769  | 106261 | 1        | China   | 1           | 1  | 2  | 2 Female | 1953 | 62     | 5    | >=60       | 1.1            |    |
| 21774  | 106264 | 1        | China   | 1           | 1  | 1  | 1 Male   | 1953 | 62     | 5    | >=60       | 1.0            |    |
| 21778  | 106265 | 1        | China   | 1           | 1  | 1  | 2 Female | 1966 | 49     | 2    | 45-49      | 1.0            | 2  |
| 21785  | 106266 | 1        | China   | 1           | 1  | 2  | 1 Male   | 1951 | 64     | 5    | >=60       | 1.0            |    |
| 21799  | 301487 | 2        | Taiwan  | 1           | 1  | 1  | 1 Male   | 1948 | 67     | 5    | >=60       | 1.6            |    |
| 21820  | 106272 | 1        | China   | 1           | 1  | 1  | 2 Female | 1949 | 66     | 5    | >=60       | 1.1            |    |
| 21837  | 106275 | 1        | China   | 1           | 1  | 2  | 2 Female | 1969 | 46     | 2    | 45-49      | 1.0            | 2  |
| 21845  | 106276 | 1        | China   | 1           | 1  | 2  | 1 Male   | 1950 | 65     | 5    | >=60       | 1.0            |    |
| 21846  | 302427 | 2        | Taiwan  | 1           | 1  | 1  | 2 Female | 1961 | 54     | 3    | 50-54      | 0.9            |    |
| 21849  | 106278 | 1        | China   | 1           | 1  | 2  | 1 Male   | 1974 | 41     | 1    | 40-44 year | 1.0            |    |

| respid | SubsID | dCountry | Country  | QDisclaimer | Q1 | Q2 | Gender   | Q3_1 | age Nr | dAge | age Group    | Weight in Ctry | Q4 |
|--------|--------|----------|----------|-------------|----|----|----------|------|--------|------|--------------|----------------|----|
| 21850  | 302428 |          | 2 Taiwan |             | 1  | 1  | 2 Female | 1956 | 59     |      | 4 55-59      | 0.9            |    |
| 21855  | 106273 |          | 1 China  |             | 1  | 2  | 1 Male   | 1970 | 45     |      | 2 45-49      | 1.0            |    |
| 21859  | 106283 |          | 1 China  |             | 1  | 2  | 1 Male   | 1975 | 40     |      | 1 40-44 year | 1.0            |    |
| 21861  | 106284 |          | 1 China  |             | 1  | 2  | 1 Male   | 1972 | 43     |      | 1 40-44 year | 1.0            |    |
| 21866  | 106285 |          | 1 China  |             | 1  | 2  | 2 Female | 1955 | 60     |      | 5 >=60       | 1.1            |    |
| 21873  | 106287 |          | 1 China  |             | 1  | 2  | 1 Male   | 1975 | 40     |      | 1 40-44 year | 1.0            |    |
| 21876  | 106015 |          | 1 China  |             | 1  | 2  | 1 Male   | 1956 | 59     |      | 4 55-59      | 0.9            |    |
| 21882  | 106289 |          | 1 China  |             | 1  | 2  | 2 Female | 1972 | 43     |      | 1 40-44 year | 1.0            | 2  |
| 21884  | 203327 |          | 3 Korea  |             | 1  | 1  | 2 Female | 1947 | 68     |      | 5 >=60       | 1.6            |    |
| 21887  | 106291 |          | 1 China  |             | 1  | 1  | 1 Male   | 1955 | 60     |      | 5 >=60       | 1.0            |    |
| 21892  | 106293 |          | 1 China  |             | 1  | 2  | 1 Male   | 1968 | 47     |      | 2 45-49      | 1.0            |    |
| 21907  | 302445 |          | 2 Taiwan |             | 1  | 2  | 2 Female | 1963 | 52     |      | 3 50-54      | 0.9            |    |
| 21910  | 106299 |          | 1 China  |             | 1  | 1  | 1 Male   | 1954 | 61     |      | 5 >=60       | 1.0            |    |
| 21912  | 302446 |          | 2 Taiwan |             | 1  | 2  | 2 Female | 1958 | 57     |      | 4 55-59      | 0.9            |    |
| 21914  | 106300 |          | 1 China  |             | 1  | 2  | 1 Male   | 1973 | 42     |      | 1 40-44 year | 1.0            |    |
| 21925  | 302452 |          | 2 Taiwan |             | 1  | 1  | 1 Male   | 1960 | 55     |      | 4 55-59      | 0.7            |    |
| 21937  | 105954 |          | 1 China  |             | 1  | 2  | 2 Female | 1975 | 40     |      | 1 40-44 year | 1.0            | 2  |
| 21938  | 203337 |          | 3 Korea  |             | 1  | 2  | 2 Female | 1955 | 60     |      | 5 >=60       | 1.6            |    |
| 21940  | 302458 |          | 2 Taiwan |             | 1  | 2  | 1 Male   | 1965 | 50     |      | 3 50-54      | 0.8            |    |
| 21942  | 106304 |          | 1 China  |             | 1  | 2  | 2 Female | 1973 | 42     |      | 1 40-44 year | 1.0            | 2  |
| 21947  | 106305 |          | 1 China  |             | 1  | 2  | 1 Male   | 1967 | 48     |      | 2 45-49      | 1.0            |    |
| 21948  | 203341 |          | 3 Korea  |             | 1  | 1  | 2 Female | 1954 | 61     |      | 5 >=60       | 1.6            |    |
| 21961  | 203348 |          | 3 Korea  |             | 1  | 2  | 2 Female | 1955 | 60     |      | 5 >=60       | 1.6            |    |
| 21977  | 302468 |          | 2 Taiwan |             | 1  | 1  | 1 Male   | 1952 | 63     |      | 5 >=60       | 1.6            |    |
| 21983  | 302471 |          | 2 Taiwan |             | 1  | 2  | 1 Male   | 1950 | 65     |      | 5 >=60       | 1.6            |    |
| 21986  | 106295 |          | 1 China  |             | 1  | 2  | 2 Female | 1968 | 47     |      | 2 45-49      | 1.0            | 2  |
| 21988  | 106311 |          | 1 China  |             | 1  | 2  | 1 Male   | 1975 | 40     |      | 1 40-44 year | 1.0            |    |
| 21996  | 302475 |          | 2 Taiwan |             | 1  | 1  | 2 Female | 1951 | 64     |      | 5 >=60       | 1.7            |    |
| 21997  | 302476 |          | 2 Taiwan |             | 1  | 2  | 2 Female | 1953 | 62     |      | 5 >=60       | 1.7            |    |
| 22005  | 106313 |          | 1 China  |             | 1  | 2  | 1 Male   | 1973 | 42     |      | 1 40-44 year | 1.0            |    |
| 22013  | 302481 |          | 2 Taiwan |             | 1  | 1  | 2 Female | 1956 | 59     |      | 4 55-59      | 0.9            |    |
| 22018  | 302483 |          | 2 Taiwan |             | 1  | 2  | 2 Female | 1956 | 59     |      | 4 55-59      | 0.9            |    |

| respid | SubsID | dCountry | Country | QDisclaimer | Q1 | Q2 | Gender | Q3_1 | age Nr | dAge | age Group  | Weight in Ctry | Q4 |
|--------|--------|----------|---------|-------------|----|----|--------|------|--------|------|------------|----------------|----|
| 22019  | 203362 | 3        | Korea   | 1           | 2  | 2  | Female | 1952 | 63     | 5    | >=60       | 1.6            |    |
| 22071  | 302500 | 2        | Taiwan  | 1           | 1  | 2  | Female | 1956 | 59     | 4    | 55-59      | 0.9            |    |
| 22082  | 302504 | 2        | Taiwan  | 1           | 1  | 2  | Female | 1958 | 57     | 4    | 55-59      | 0.9            |    |
| 22085  | 302506 | 2        | Taiwan  | 1           | 1  | 1  | Male   | 1950 | 65     | 5    | >=60       | 1.6            |    |
| 22092  | 106327 | 1        | China   | 1           | 2  | 2  | Female | 1954 | 61     | 5    | >=60       | 1.1            |    |
| 22097  | 106328 | 1        | China   | 1           | 2  | 2  | Female | 1969 | 46     | 2    | 45-49      | 1.0            | 2  |
| 22111  | 302509 | 2        | Taiwan  | 1           | 2  | 2  | Female | 1953 | 62     | 5    | >=60       | 1.7            |    |
| 22118  | 106332 | 1        | China   | 1           | 2  | 1  | Male   | 1974 | 41     | 1    | 40-44 year | 1.0            |    |
| 22132  | 106335 | 1        | China   | 1           | 2  | 2  | Female | 1970 | 45     | 2    | 45-49      | 1.0            | 2  |
| 22133  | 302514 | 2        | Taiwan  | 1           | 2  | 1  | Male   | 1964 | 51     | 3    | 50-54      | 0.8            |    |
| 22139  | 106337 | 1        | China   | 1           | 2  | 2  | Female | 1972 | 43     | 1    | 40-44 year | 1.0            | 2  |
| 22142  | 106338 | 1        | China   | 1           | 2  | 1  | Male   | 1960 | 55     | 4    | 55-59      | 0.9            |    |
| 22146  | 106339 | 1        | China   | 1           | 2  | 2  | Female | 1969 | 46     | 2    | 45-49      | 1.0            | 2  |
| 22181  | 106342 | 1        | China   | 1           | 2  | 1  | Male   | 1972 | 43     | 1    | 40-44 year | 1.0            |    |
| 22202  | 302526 | 2        | Taiwan  | 1           | 2  | 1  | Male   | 1949 | 66     | 5    | >=60       | 1.6            |    |
| 22214  | 302530 | 2        | Taiwan  | 1           | 2  | 2  | Female | 1959 | 56     | 4    | 55-59      | 0.9            |    |
| 22223  | 302532 | 2        | Taiwan  | 1           | 1  | 2  | Female | 1953 | 62     | 5    | >=60       | 1.7            |    |
| 22227  | 106348 | 1        | China   | 1           | 2  | 2  | Female | 1954 | 61     | 5    | >=60       | 1.1            |    |
| 22229  | 106349 | 1        | China   | 1           | 2  | 2  | Female | 1973 | 42     | 1    | 40-44 year | 1.0            | 2  |
| 22239  | 106350 | 1        | China   | 1           | 2  | 2  | Female | 1956 | 59     | 4    | 55-59      | 1.0            |    |
| 22245  | 106346 | 1        | China   | 1           | 1  | 1  | Male   | 1954 | 61     | 5    | >=60       | 1.0            |    |
| 22256  | 302184 | 2        | Taiwan  | 1           | 1  | 2  | Female | 1953 | 62     | 5    | >=60       | 1.7            |    |
| 22260  | 302538 | 2        | Taiwan  | 1           | 1  | 2  | Female | 1956 | 59     | 4    | 55-59      | 0.9            |    |
| 22298  | 302547 | 2        | Taiwan  | 1           | 1  | 1  | Male   | 1951 | 64     | 5    | >=60       | 1.6            |    |
| 22321  | 106358 | 1        | China   | 1           | 2  | 2  | Female | 1970 | 45     | 2    | 45-49      | 1.0            | 2  |
| 22340  | 302555 | 2        | Taiwan  | 1           | 1  | 2  | Female | 1953 | 62     | 5    | >=60       | 1.7            |    |
| 22346  | 106362 | 1        | China   | 1           | 2  | 2  | Female | 1951 | 64     | 5    | >=60       | 1.1            |    |
| 22356  | 302561 | 2        | Taiwan  | 1           | 2  | 1  | Male   | 1962 | 53     | 3    | 50-54      | 0.8            |    |
| 22361  | 302563 | 2        | Taiwan  | 1           | 1  | 1  | Male   | 1949 | 66     | 5    | >=60       | 1.6            |    |
| 22364  | 302565 | 2        | Taiwan  | 1           | 2  | 1  | Male   | 1950 | 65     | 5    | >=60       | 1.6            |    |
| 22368  | 302567 | 2        | Taiwan  | 1           | 2  | 1  | Male   | 1963 | 52     | 3    | 50-54      | 0.8            |    |
| 22374  | 106364 | 1        | China   | 1           | 2  | 2  | Female | 1973 | 42     | 1    | 40-44 year | 1.0            | 2  |

| respid | SubsID | dCountry | Country | QDisclaimer | Q1 | Q2 | Gender   | Q3_1 | age Nr | dAge | age Group    | Weight in Ctry | Q4 |
|--------|--------|----------|---------|-------------|----|----|----------|------|--------|------|--------------|----------------|----|
| 22375  | 106365 | 1        | China   |             | 1  | 2  | 2 Female | 1972 | 43     |      | 1 40-44 year | 1.0            | 2  |
| 22377  | 302569 | 2        | Taiwan  |             | 1  | 2  | 2 Female | 1962 | 53     |      | 3 50-54      | 0.9            |    |
| 22383  | 302573 | 2        | Taiwan  |             | 1  | 2  | 1 Male   | 1963 | 52     |      | 3 50-54      | 0.8            |    |
| 22387  | 106367 | 1        | China   |             | 1  | 1  | 2 Female | 1969 | 46     |      | 2 45-49      | 1.0            | 2  |
| 22392  | 106369 | 1        | China   |             | 1  | 2  | 2 Female | 1971 | 44     |      | 1 40-44 year | 1.0            | 2  |
| 22393  | 106370 | 1        | China   |             | 1  | 2  | 2 Female | 1952 | 63     |      | 5 >=60       | 1.1            |    |
| 22394  | 106371 | 1        | China   |             | 1  | 2  | 2 Female | 1973 | 42     |      | 1 40-44 year | 1.0            | 2  |
| 22395  | 302575 | 2        | Taiwan  |             | 1  | 1  | 2 Female | 1953 | 62     |      | 5 >=60       | 1.7            |    |
| 22401  | 106373 | 1        | China   |             | 1  | 2  | 1 Male   | 1955 | 60     |      | 5 >=60       | 1.0            |    |
| 22407  | 302576 | 2        | Taiwan  |             | 1  | 2  | 1 Male   | 1964 | 51     |      | 3 50-54      | 0.8            |    |
| 22410  | 106376 | 1        | China   |             | 1  | 2  | 1 Male   | 1950 | 65     |      | 5 >=60       | 1.0            |    |
| 22418  | 302581 | 2        | Taiwan  |             | 1  | 1  | 2 Female | 1944 | 71     |      | 5 >=60       | 1.7            |    |
| 22421  | 302583 | 2        | Taiwan  |             | 1  | 2  | 1 Male   | 1963 | 52     |      | 3 50-54      | 0.8            |    |
| 22423  | 302584 | 2        | Taiwan  |             | 1  | 2  | 1 Male   | 1956 | 59     |      | 4 55-59      | 0.7            |    |
| 22425  | 106379 | 1        | China   |             | 1  | 2  | 2 Female | 1975 | 40     |      | 1 40-44 year | 1.0            | 2  |
| 22427  | 302585 | 2        | Taiwan  |             | 1  | 1  | 1 Male   | 1965 | 50     |      | 3 50-54      | 0.8            |    |
| 22431  | 106381 | 1        | China   |             | 1  | 2  | 2 Female | 1949 | 66     |      | 5 >=60       | 1.1            |    |
| 22435  | 302591 | 2        | Taiwan  |             | 1  | 2  | 1 Male   | 1953 | 62     |      | 5 >=60       | 1.6            |    |
| 22436  | 302592 | 2        | Taiwan  |             | 1  | 2  | 2 Female | 1965 | 50     |      | 3 50-54      | 0.9            |    |
| 22442  | 302594 | 2        | Taiwan  |             | 1  | 2  | 1 Male   | 1956 | 59     |      | 4 55-59      | 0.7            |    |
| 22444  | 302596 | 2        | Taiwan  |             | 1  | 2  | 1 Male   | 1960 | 55     |      | 4 55-59      | 0.7            |    |
| 22445  | 302597 | 2        | Taiwan  |             | 1  | 1  | 2 Female | 1957 | 58     |      | 4 55-59      | 0.9            |    |
| 22446  | 302598 | 2        | Taiwan  |             | 1  | 1  | 2 Female | 1950 | 65     |      | 5 >=60       | 1.7            |    |
| 22448  | 203421 | 3        | Korea   |             | 1  | 2  | 2 Female | 1952 | 63     |      | 5 >=60       | 1.6            |    |
| 22449  | 106384 | 1        | China   |             | 1  | 2  | 2 Female | 1953 | 62     |      | 5 >=60       | 1.1            |    |
| 22450  | 106383 | 1        | China   |             | 1  | 2  | 1 Male   | 1953 | 62     |      | 5 >=60       | 1.0            |    |
| 22453  | 106385 | 1        | China   |             | 1  | 2  | 1 Male   | 1951 | 64     |      | 5 >=60       | 1.0            |    |
| 22465  | 302607 | 2        | Taiwan  |             | 1  | 1  | 2 Female | 1962 | 53     |      | 3 50-54      | 0.9            |    |
| 22472  | 302611 | 2        | Taiwan  |             | 1  | 1  | 1 Male   | 1949 | 66     |      | 5 >=60       | 1.6            |    |
| 22475  | 106387 | 1        | China   |             | 1  | 2  | 2 Female | 1952 | 63     |      | 5 >=60       | 1.1            |    |
| 22478  | 302613 | 2        | Taiwan  |             | 1  | 1  | 1 Male   | 1956 | 59     |      | 4 55-59      | 0.7            |    |
| 22491  | 106389 | 1        | China   |             | 1  | 1  | 1 Male   | 1975 | 40     |      | 1 40-44 year | 1.0            |    |

| respid | SubsID | dCountry | Country | QDisclaimer | Q1 | Q2 | Gender | Q3_1 | age Nr | dAge | age Group  | Weight in Ctry | Q4 |
|--------|--------|----------|---------|-------------|----|----|--------|------|--------|------|------------|----------------|----|
| 22497  | 302618 | 2        | Taiwan  | 1           | 2  | 2  | Female | 1946 | 69     | 5    | >=60       | 1.7            |    |
| 22498  | 302619 | 2        | Taiwan  | 1           | 1  | 2  | Female | 1960 | 55     | 4    | 55-59      | 0.9            |    |
| 22499  | 302620 | 2        | Taiwan  | 1           | 2  | 1  | Male   | 1950 | 65     | 5    | >=60       | 1.6            |    |
| 22503  | 302622 | 2        | Taiwan  | 1           | 1  | 1  | Male   | 1952 | 63     | 5    | >=60       | 1.6            |    |
| 22507  | 302624 | 2        | Taiwan  | 1           | 2  | 2  | Female | 1959 | 56     | 4    | 55-59      | 0.9            |    |
| 22513  | 302627 | 2        | Taiwan  | 1           | 1  | 2  | Female | 1952 | 63     | 5    | >=60       | 1.7            |    |
| 22517  | 302630 | 2        | Taiwan  | 1           | 1  | 2  | Female | 1948 | 67     | 5    | >=60       | 1.7            |    |
| 22524  | 302632 | 2        | Taiwan  | 1           | 1  | 1  | Male   | 1956 | 59     | 4    | 55-59      | 0.7            |    |
| 22528  | 106397 | 1        | China   | 1           | 2  | 2  | Female | 1955 | 60     | 5    | >=60       | 1.1            |    |
| 22544  | 106398 | 1        | China   | 1           | 2  | 1  | Male   | 1946 | 69     | 5    | >=60       | 1.0            |    |
| 22571  | 106400 | 1        | China   | 1           | 2  | 2  | Female | 1969 | 46     | 2    | 45-49      | 1.0            | 2  |
| 22576  | 302652 | 2        | Taiwan  | 1           | 2  | 2  | Female | 1955 | 60     | 5    | >=60       | 1.7            |    |
| 22579  | 302655 | 2        | Taiwan  | 1           | 1  | 2  | Female | 1953 | 62     | 5    | >=60       | 1.7            |    |
| 22583  | 200680 | 3        | Korea   | 1           | 2  | 2  | Female | 1953 | 62     | 5    | >=60       | 1.6            |    |
| 22591  | 106403 | 1        | China   | 1           | 2  | 1  | Male   | 1948 | 67     | 5    | >=60       | 1.0            |    |
| 22592  | 302661 | 2        | Taiwan  | 1           | 2  | 2  | Female | 1941 | 74     | 5    | >=60       | 1.7            |    |
| 22612  | 302673 | 2        | Taiwan  | 1           | 2  | 2  | Female | 1955 | 60     | 5    | >=60       | 1.7            |    |
| 22613  | 106407 | 1        | China   | 1           | 2  | 1  | Male   | 1974 | 41     | 1    | 40-44 year | 1.0            |    |
| 22615  | 106409 | 1        | China   | 1           | 2  | 1  | Male   | 1968 | 47     | 2    | 45-49      | 1.0            |    |
| 22621  | 106410 | 1        | China   | 1           | 2  | 1  | Male   | 1973 | 42     | 1    | 40-44 year | 1.0            |    |
| 22625  | 302056 | 2        | Taiwan  | 1           | 1  | 2  | Female | 1956 | 59     | 4    | 55-59      | 0.9            |    |
| 22628  | 203452 | 3        | Korea   | 1           | 1  | 2  | Female | 1946 | 69     | 5    | >=60       | 1.6            |    |
| 22632  | 106412 | 1        | China   | 1           | 2  | 2  | Female | 1946 | 69     | 5    | >=60       | 1.1            |    |
| 22639  | 106413 | 1        | China   | 1           | 2  | 1  | Male   | 1975 | 40     | 1    | 40-44 year | 1.0            |    |
| 22648  | 203456 | 3        | Korea   | 1           | 2  | 2  | Female | 1952 | 63     | 5    | >=60       | 1.6            |    |
| 22649  | 302684 | 2        | Taiwan  | 1           | 1  | 1  | Male   | 1960 | 55     | 4    | 55-59      | 0.7            |    |
| 22655  | 106414 | 1        | China   | 1           | 2  | 1  | Male   | 1967 | 48     | 2    | 45-49      | 1.0            |    |
| 22659  | 302688 | 2        | Taiwan  | 1           | 1  | 2  | Female | 1954 | 61     | 5    | >=60       | 1.7            |    |
| 22660  | 105271 | 1        | China   | 1           | 2  | 1  | Male   | 1970 | 45     | 2    | 45-49      | 1.0            |    |
| 22666  | 106416 | 1        | China   | 1           | 2  | 2  | Female | 1954 | 61     | 5    | >=60       | 1.1            |    |
| 22667  | 106417 | 1        | China   | 1           | 2  | 1  | Male   | 1975 | 40     | 1    | 40-44 year | 1.0            |    |
| 22670  | 106411 | 1        | China   | 1           | 2  | 1  | Male   | 1974 | 41     | 1    | 40-44 year | 1.0            |    |

| respid | SubsID | dCountry | Country | QDisclaimer | Q1 | Q2 | Gender   | Q3_1 | age Nr | dAge | age Group  | Weight in Ctry | Q4 |
|--------|--------|----------|---------|-------------|----|----|----------|------|--------|------|------------|----------------|----|
| 22681  | 106418 | 1        | China   |             | 1  | 2  | 1 Male   | 1968 | 47     | 2    | 45-49      | 1.0            |    |
| 22683  | 302701 | 2        | Taiwan  |             | 1  | 2  | 2 Female | 1958 | 57     | 4    | 55-59      | 0.9            |    |
| 22688  | 302703 | 2        | Taiwan  |             | 1  | 1  | 2 Female | 1948 | 67     | 5    | >=60       | 1.7            |    |
| 22695  | 106422 | 1        | China   |             | 1  | 2  | 1 Male   | 1950 | 65     | 5    | >=60       | 1.0            |    |
| 22696  | 106423 | 1        | China   |             | 1  | 2  | 1 Male   | 1971 | 44     | 1    | 40-44 year | 1.0            |    |
| 22705  | 203468 | 3        | Korea   |             | 1  | 2  | 2 Female | 1954 | 61     | 5    | >=60       | 1.6            |    |
| 22718  | 106426 | 1        | China   |             | 1  | 2  | 1 Male   | 1951 | 64     | 5    | >=60       | 1.0            |    |
| 22720  | 302713 | 2        | Taiwan  |             | 1  | 2  | 1 Male   | 1945 | 70     | 5    | >=60       | 1.6            |    |
| 22724  | 203472 | 3        | Korea   |             | 1  | 2  | 2 Female | 1955 | 60     | 5    | >=60       | 1.6            |    |
| 22728  | 106427 | 1        | China   |             | 1  | 2  | 2 Female | 1970 | 45     | 2    | 45-49      | 1.0            | 2  |
| 22751  | 302730 | 2        | Taiwan  |             | 1  | 2  | 1 Male   | 1955 | 60     | 5    | >=60       | 1.6            |    |
| 22782  | 302741 | 2        | Taiwan  |             | 1  | 2  | 1 Male   | 1941 | 74     | 5    | >=60       | 1.6            |    |
| 22786  | 302744 | 2        | Taiwan  |             | 1  | 1  | 1 Male   | 1948 | 67     | 5    | >=60       | 1.6            |    |
| 22788  | 106434 | 1        | China   |             | 1  | 2  | 2 Female | 1953 | 62     | 5    | >=60       | 1.1            |    |
| 22810  | 106439 | 1        | China   |             | 1  | 2  | 2 Female | 1954 | 61     | 5    | >=60       | 1.1            |    |
| 22816  | 302087 | 2        | Taiwan  |             | 1  | 1  | 2 Female | 1953 | 62     | 5    | >=60       | 1.7            |    |
| 22818  | 106440 | 1        | China   |             | 1  | 2  | 2 Female | 1946 | 69     | 5    | >=60       | 1.1            |    |
| 22854  | 302768 | 2        | Taiwan  |             | 1  | 1  | 2 Female | 1963 | 52     | 3    | 50-54      | 0.9            |    |
| 22858  | 302772 | 2        | Taiwan  |             | 1  | 1  | 2 Female | 1953 | 62     | 5    | >=60       | 1.7            |    |
| 22862  | 302775 | 2        | Taiwan  |             | 1  | 2  | 2 Female | 1952 | 63     | 5    | >=60       | 1.7            |    |
| 22865  | 302777 | 2        | Taiwan  |             | 1  | 2  | 1 Male   | 1964 | 51     | 3    | 50-54      | 0.8            |    |
| 22868  | 302779 | 2        | Taiwan  |             | 1  | 1  | 2 Female | 1962 | 53     | 3    | 50-54      | 0.9            |    |
| 22869  | 302770 | 2        | Taiwan  |             | 1  | 2  | 1 Male   | 1960 | 55     | 4    | 55-59      | 0.7            |    |
| 22873  | 302782 | 2        | Taiwan  |             | 1  | 1  | 2 Female | 1965 | 50     | 3    | 50-54      | 0.9            |    |
| 22875  | 106443 | 1        | China   |             | 1  | 2  | 1 Male   | 1975 | 40     | 1    | 40-44 year | 1.0            |    |
| 22876  | 106444 | 1        | China   |             | 1  | 2  | 2 Female | 1971 | 44     | 1    | 40-44 year | 1.0            | 2  |
| 22882  | 106446 | 1        | China   |             | 1  | 2  | 2 Female | 1953 | 62     | 5    | >=60       | 1.1            |    |
| 22884  | 106447 | 1        | China   |             | 1  | 1  | 1 Male   | 1950 | 65     | 5    | >=60       | 1.0            |    |
| 22887  | 302787 | 2        | Taiwan  |             | 1  | 1  | 2 Female | 1955 | 60     | 5    | >=60       | 1.7            |    |
| 22888  | 302788 | 2        | Taiwan  |             | 1  | 1  | 2 Female | 1957 | 58     | 4    | 55-59      | 0.9            |    |
| 22900  | 106448 | 1        | China   |             | 1  | 2  | 1 Male   | 1975 | 40     | 1    | 40-44 year | 1.0            |    |
| 22901  | 302796 | 2        | Taiwan  |             | 1  | 1  | 2 Female | 1958 | 57     | 4    | 55-59      | 0.9            |    |

| respid | SubsID | dCountry | Country | QDisclaim<br>er | Q1 | Q2 | Gender | Q3_1 | age Nr | dAge | age Group  | Weight in<br>Ctry | Q4 |
|--------|--------|----------|---------|-----------------|----|----|--------|------|--------|------|------------|-------------------|----|
| 22912  | 106449 | 1        | China   | 1               | 2  | 1  | Male   | 1973 | 42     | 1    | 40-44 year | 1.0               |    |
| 22913  | 302798 | 2        | Taiwan  | 1               | 2  | 1  | Male   | 1960 | 55     | 4    | 55-59      | 0.7               |    |
| 22921  | 106452 | 1        | China   | 1               | 2  | 1  | Male   | 1975 | 40     | 1    | 40-44 year | 1.0               |    |
| 22925  | 106372 | 1        | China   | 1               | 2  | 1  | Male   | 1973 | 42     | 1    | 40-44 year | 1.0               |    |
| 22940  | 302808 | 2        | Taiwan  | 1               | 1  | 2  | Female | 1959 | 56     | 4    | 55-59      | 0.9               |    |
| 22941  | 302809 | 2        | Taiwan  | 1               | 1  | 1  | Male   | 1955 | 60     | 5    | >=60       | 1.6               |    |
| 22947  | 106456 | 1        | China   | 1               | 2  | 1  | Male   | 1951 | 64     | 5    | >=60       | 1.0               |    |
| 22948  | 106457 | 1        | China   | 1               | 2  | 1  | Male   | 1968 | 47     | 2    | 45-49      | 1.0               |    |
| 22964  | 203507 | 3        | Korea   | 1               | 2  | 2  | Female | 1951 | 64     | 5    | >=60       | 1.6               |    |
| 22966  | 106459 | 1        | China   | 1               | 2  | 1  | Male   | 1973 | 42     | 1    | 40-44 year | 1.0               |    |
| 22969  | 302819 | 2        | Taiwan  | 1               | 1  | 2  | Female | 1957 | 58     | 4    | 55-59      | 0.9               |    |
| 22971  | 106460 | 1        | China   | 1               | 2  | 2  | Female | 1973 | 42     | 1    | 40-44 year | 1.0               | 2  |
| 22988  | 106463 | 1        | China   | 1               | 2  | 2  | Female | 1956 | 59     | 4    | 55-59      | 1.0               |    |
| 22990  | 302830 | 2        | Taiwan  | 1               | 1  | 2  | Female | 1962 | 53     | 3    | 50-54      | 0.9               |    |
| 23000  | 302834 | 2        | Taiwan  | 1               | 1  | 2  | Female | 1955 | 60     | 5    | >=60       | 1.7               |    |
| 23016  | 302840 | 2        | Taiwan  | 1               | 2  | 1  | Male   | 1945 | 70     | 5    | >=60       | 1.6               |    |
| 23026  | 302841 | 2        | Taiwan  | 1               | 2  | 1  | Male   | 1950 | 65     | 5    | >=60       | 1.6               |    |
| 23035  | 106468 | 1        | China   | 1               | 2  | 1  | Male   | 1969 | 46     | 2    | 45-49      | 1.0               |    |
| 23037  | 106469 | 1        | China   | 1               | 2  | 1  | Male   | 1953 | 62     | 5    | >=60       | 1.0               |    |
| 23044  | 106470 | 1        | China   | 1               | 2  | 2  | Female | 1972 | 43     | 1    | 40-44 year | 1.0               | 2  |
| 23046  | 106471 | 1        | China   | 1               | 2  | 1  | Male   | 1946 | 69     | 5    | >=60       | 1.0               |    |
| 23047  | 106472 | 1        | China   | 1               | 2  | 2  | Female | 1957 | 58     | 4    | 55-59      | 1.0               |    |
| 23049  | 106473 | 1        | China   | 1               | 2  | 2  | Female | 1969 | 46     | 2    | 45-49      | 1.0               | 2  |
| 23055  | 302847 | 2        | Taiwan  | 1               | 2  | 1  | Male   | 1960 | 55     | 4    | 55-59      | 0.7               |    |
| 23066  | 302852 | 2        | Taiwan  | 1               | 1  | 1  | Male   | 1940 | 75     | 5    | >=60       | 1.6               |    |
| 23075  | 106480 | 1        | China   | 1               | 2  | 2  | Female | 1945 | 70     | 5    | >=60       | 1.1               |    |
| 23081  | 302855 | 2        | Taiwan  | 1               | 1  | 1  | Male   | 1950 | 65     | 5    | >=60       | 1.6               |    |
| 23087  | 106482 | 1        | China   | 1               | 2  | 1  | Male   | 1974 | 41     | 1    | 40-44 year | 1.0               |    |
| 23094  | 106096 | 1        | China   | 1               | 1  | 2  | Female | 1953 | 62     | 5    | >=60       | 1.1               |    |
| 23099  | 106484 | 1        | China   | 1               | 2  | 1  | Male   | 1970 | 45     | 2    | 45-49      | 1.0               |    |
| 23101  | 302858 | 2        | Taiwan  | 1               | 1  | 2  | Female | 1963 | 52     | 3    | 50-54      | 0.9               |    |
| 23105  | 106485 | 1        | China   | 1               | 1  | 1  | Male   | 1970 | 45     | 2    | 45-49      | 1.0               |    |



| respid | SubsID | dCountry | Country | QDisclaimer | Q1 | Q2 | Gender   | Q3_1 | age Nr | dAge | age Group  | Weight in Ctry | Q4 |
|--------|--------|----------|---------|-------------|----|----|----------|------|--------|------|------------|----------------|----|
| 23115  | 302861 | 2        | Taiwan  | 1           | 1  | 1  | 2 Female | 1952 | 63     | 5    | >=60       | 1.7            |    |
| 23121  | 106489 | 1        | China   | 1           | 2  | 2  | 2 Female | 1970 | 45     | 2    | 45-49      | 1.0            | 2  |
| 23127  | 106491 | 1        | China   | 1           | 2  | 2  | 2 Female | 1971 | 44     | 1    | 40-44 year | 1.0            | 2  |
| 23131  | 106495 | 1        | China   | 1           | 2  | 2  | 2 Female | 1973 | 42     | 1    | 40-44 year | 1.0            | 2  |
| 23134  | 106497 | 1        | China   | 1           | 2  | 2  | 2 Female | 1969 | 46     | 2    | 45-49      | 1.0            | 2  |
| 23145  | 106501 | 1        | China   | 1           | 2  | 1  | 1 Male   | 1970 | 45     | 2    | 45-49      | 1.0            |    |
| 23151  | 106503 | 1        | China   | 1           | 2  | 1  | 1 Male   | 1974 | 41     | 1    | 40-44 year | 1.0            |    |
| 23161  | 106505 | 1        | China   | 1           | 2  | 2  | 2 Female | 1970 | 45     | 2    | 45-49      | 1.0            | 2  |
| 23169  | 203531 | 3        | Korea   | 1           | 2  | 2  | 2 Female | 1954 | 61     | 5    | >=60       | 1.6            |    |
| 23173  | 106510 | 1        | China   | 1           | 2  | 2  | 2 Female | 1970 | 45     | 2    | 45-49      | 1.0            | 2  |
| 23174  | 106511 | 1        | China   | 1           | 2  | 1  | 1 Male   | 1974 | 41     | 1    | 40-44 year | 1.0            |    |
| 23186  | 106515 | 1        | China   | 1           | 2  | 2  | 2 Female | 1946 | 69     | 5    | >=60       | 1.1            |    |
| 23195  | 302867 | 2        | Taiwan  | 1           | 1  | 2  | 2 Female | 1951 | 64     | 5    | >=60       | 1.7            |    |
| 23197  | 106518 | 1        | China   | 1           | 1  | 1  | 1 Male   | 1974 | 41     | 1    | 40-44 year | 1.0            |    |
| 23198  | 106519 | 1        | China   | 1           | 2  | 1  | 1 Male   | 1970 | 45     | 2    | 45-49      | 1.0            |    |
| 23203  | 302868 | 2        | Taiwan  | 1           | 2  | 1  | 1 Male   | 1963 | 52     | 3    | 50-54      | 0.8            |    |
| 23204  | 301134 | 2        | Taiwan  | 1           | 2  | 1  | 1 Male   | 1949 | 66     | 5    | >=60       | 1.6            |    |
| 23212  | 106521 | 1        | China   | 1           | 1  | 2  | 2 Female | 1975 | 40     | 1    | 40-44 year | 1.0            | 2  |
| 23214  | 203563 | 3        | Korea   | 1           | 2  | 2  | 2 Female | 1947 | 68     | 5    | >=60       | 1.6            |    |
| 23221  | 106524 | 1        | China   | 1           | 2  | 1  | 1 Male   | 1973 | 42     | 1    | 40-44 year | 1.0            |    |
| 23237  | 302873 | 2        | Taiwan  | 1           | 1  | 1  | 1 Male   | 1963 | 52     | 3    | 50-54      | 0.8            |    |
| 23251  | 203577 | 3        | Korea   | 1           | 1  | 2  | 2 Female | 1950 | 65     | 5    | >=60       | 1.6            |    |
| 23254  | 302876 | 2        | Taiwan  | 1           | 2  | 1  | 1 Male   | 1964 | 51     | 3    | 50-54      | 0.8            |    |
| 23262  | 302878 | 2        | Taiwan  | 1           | 1  | 2  | 2 Female | 1945 | 70     | 5    | >=60       | 1.7            |    |
| 23267  | 106533 | 1        | China   | 1           | 2  | 1  | 1 Male   | 1972 | 43     | 1    | 40-44 year | 1.0            |    |
| 23268  | 302880 | 2        | Taiwan  | 1           | 2  | 1  | 1 Male   | 1965 | 50     | 3    | 50-54      | 0.8            |    |
| 23273  | 106534 | 1        | China   | 1           | 2  | 2  | 2 Female | 1972 | 43     | 1    | 40-44 year | 1.0            | 2  |
| 23278  | 106535 | 1        | China   | 1           | 2  | 1  | 1 Male   | 1974 | 41     | 1    | 40-44 year | 1.0            |    |
| 23279  | 106537 | 1        | China   | 1           | 2  | 1  | 1 Male   | 1970 | 45     | 2    | 45-49      | 1.0            |    |
| 23281  | 106538 | 1        | China   | 1           | 2  | 1  | 1 Male   | 1975 | 40     | 1    | 40-44 year | 1.0            |    |
| 23282  | 106539 | 1        | China   | 1           | 2  | 1  | 1 Male   | 1972 | 43     | 1    | 40-44 year | 1.0            |    |
| 23283  | 106540 | 1        | China   | 1           | 2  | 2  | 2 Female | 1969 | 46     | 2    | 45-49      | 1.0            | 2  |

| respid | SubsID | dCountry | Country | QDisclaimer | Q1 | Q2 | Gender   | Q3_1 | age Nr | dAge | age Group    | Weight in Ctry | Q4 |
|--------|--------|----------|---------|-------------|----|----|----------|------|--------|------|--------------|----------------|----|
| 23285  | 106541 | 1        | China   |             | 1  | 2  | 2 Female | 1974 | 41     |      | 1 40-44 year | 1.0            | 2  |
| 23305  | 302884 | 2        | Taiwan  |             | 1  | 2  | 2 Female | 1949 | 66     |      | 5 >=60       | 1.7            |    |
| 23309  | 203588 | 3        | Korea   |             | 1  | 2  | 2 Female | 1955 | 60     |      | 5 >=60       | 1.6            |    |
| 23310  | 302886 | 2        | Taiwan  |             | 1  | 1  | 1 Male   | 1953 | 62     |      | 5 >=60       | 1.6            |    |
| 23311  | 106545 | 1        | China   |             | 1  | 1  | 2 Female | 1975 | 40     |      | 1 40-44 year | 1.0            | 2  |
| 23312  | 106546 | 1        | China   |             | 1  | 2  | 1 Male   | 1970 | 45     |      | 2 45-49      | 1.0            |    |
| 23319  | 302887 | 2        | Taiwan  |             | 1  | 2  | 1 Male   | 1960 | 55     |      | 4 55-59      | 0.7            |    |
| 23320  | 106550 | 1        | China   |             | 1  | 2  | 1 Male   | 1973 | 42     |      | 1 40-44 year | 1.0            |    |
| 23322  | 302888 | 2        | Taiwan  |             | 1  | 1  | 2 Female | 1951 | 64     |      | 5 >=60       | 1.7            |    |
| 23334  | 106552 | 1        | China   |             | 1  | 2  | 2 Female | 1973 | 42     |      | 1 40-44 year | 1.0            | 2  |
| 23340  | 302411 | 2        | Taiwan  |             | 1  | 1  | 2 Female | 1959 | 56     |      | 4 55-59      | 0.9            |    |
| 23346  | 106554 | 1        | China   |             | 1  | 2  | 2 Female | 1958 | 57     |      | 4 55-59      | 1.0            |    |
| 23353  | 106556 | 1        | China   |             | 1  | 2  | 1 Male   | 1972 | 43     |      | 1 40-44 year | 1.0            |    |
| 23363  | 203604 | 3        | Korea   |             | 1  | 2  | 2 Female | 1950 | 65     |      | 5 >=60       | 1.6            |    |
| 23364  | 302896 | 2        | Taiwan  |             | 1  | 2  | 2 Female | 1954 | 61     |      | 5 >=60       | 1.7            |    |
| 23376  | 302900 | 2        | Taiwan  |             | 1  | 2  | 1 Male   | 1960 | 55     |      | 4 55-59      | 0.7            |    |
| 23378  | 106560 | 1        | China   |             | 1  | 2  | 1 Male   | 1971 | 44     |      | 1 40-44 year | 1.0            |    |
| 23382  | 106562 | 1        | China   |             | 1  | 1  | 1 Male   | 1970 | 45     |      | 2 45-49      | 1.0            |    |
| 23383  | 106563 | 1        | China   |             | 1  | 2  | 1 Male   | 1971 | 44     |      | 1 40-44 year | 1.0            |    |
| 23390  | 106565 | 1        | China   |             | 1  | 2  | 1 Male   | 1970 | 45     |      | 2 45-49      | 1.0            |    |
| 23395  | 106567 | 1        | China   |             | 1  | 2  | 1 Male   | 1970 | 45     |      | 2 45-49      | 1.0            |    |
| 23398  | 106568 | 1        | China   |             | 1  | 1  | 2 Female | 1960 | 55     |      | 4 55-59      | 1.0            |    |
| 23399  | 302903 | 2        | Taiwan  |             | 1  | 2  | 1 Male   | 1965 | 50     |      | 3 50-54      | 0.8            |    |
| 23406  | 302904 | 2        | Taiwan  |             | 1  | 1  | 1 Male   | 1956 | 59     |      | 4 55-59      | 0.7            |    |
| 23418  | 106576 | 1        | China   |             | 1  | 2  | 1 Male   | 1975 | 40     |      | 1 40-44 year | 1.0            |    |
| 23427  | 302907 | 2        | Taiwan  |             | 1  | 1  | 2 Female | 1959 | 56     |      | 4 55-59      | 0.9            |    |
| 23428  | 106580 | 1        | China   |             | 1  | 2  | 2 Female | 1969 | 46     |      | 2 45-49      | 1.0            | 2  |
| 23435  | 106583 | 1        | China   |             | 1  | 2  | 1 Male   | 1953 | 62     |      | 5 >=60       | 1.0            |    |
| 23439  | 106585 | 1        | China   |             | 1  | 2  | 2 Female | 1975 | 40     |      | 1 40-44 year | 1.0            | 2  |
| 23440  | 106586 | 1        | China   |             | 1  | 2  | 1 Male   | 1953 | 62     |      | 5 >=60       | 1.0            |    |
| 23444  | 106588 | 1        | China   |             | 1  | 2  | 2 Female | 1970 | 45     |      | 2 45-49      | 1.0            | 2  |
| 23445  | 106589 | 1        | China   |             | 1  | 1  | 1 Male   | 1954 | 61     |      | 5 >=60       | 1.0            |    |

| respid | SubsID | dCountry | Country | QDisclaimer | Q1 | Q2 | Gender | Q3_1 | age Nr | dAge | age Group  | Weight in Ctry | Q4 |
|--------|--------|----------|---------|-------------|----|----|--------|------|--------|------|------------|----------------|----|
| 23455  | 106593 | 1        | China   | 1           | 2  | 1  | Male   | 1971 | 44     | 1    | 40-44 year | 1.0            |    |
| 23467  | 106595 | 1        | China   | 1           | 2  | 1  | Male   | 1952 | 63     | 5    | >=60       | 1.0            |    |
| 23478  | 106598 | 1        | China   | 1           | 2  | 1  | Male   | 1968 | 47     | 2    | 45-49      | 1.0            |    |
| 23492  | 106605 | 1        | China   | 1           | 2  | 1  | Male   | 1974 | 41     | 1    | 40-44 year | 1.0            |    |
| 23498  | 302917 | 2        | Taiwan  | 1           | 2  | 2  | Female | 1964 | 51     | 3    | 50-54      | 0.9            |    |
| 23511  | 106612 | 1        | China   | 1           | 2  | 2  | Female | 1969 | 46     | 2    | 45-49      | 1.0            | 2  |
| 23514  | 106613 | 1        | China   | 1           | 2  | 2  | Female | 1970 | 45     | 2    | 45-49      | 1.0            | 2  |
| 23515  | 302920 | 2        | Taiwan  | 1           | 2  | 1  | Male   | 1950 | 65     | 5    | >=60       | 1.6            |    |
| 23522  | 106615 | 1        | China   | 1           | 2  | 1  | Male   | 1970 | 45     | 2    | 45-49      | 1.0            |    |
| 23524  | 106616 | 1        | China   | 1           | 2  | 2  | Female | 1970 | 45     | 2    | 45-49      | 1.0            | 2  |
| 23531  | 106619 | 1        | China   | 1           | 2  | 1  | Male   | 1968 | 47     | 2    | 45-49      | 1.0            |    |
| 23532  | 106620 | 1        | China   | 1           | 2  | 2  | Female | 1968 | 47     | 2    | 45-49      | 1.0            | 2  |
| 23533  | 106621 | 1        | China   | 1           | 2  | 2  | Female | 1970 | 45     | 2    | 45-49      | 1.0            | 2  |
| 23534  | 106622 | 1        | China   | 1           | 2  | 1  | Male   | 1960 | 55     | 4    | 55-59      | 0.9            |    |
| 23538  | 106623 | 1        | China   | 1           | 2  | 2  | Female | 1973 | 42     | 1    | 40-44 year | 1.0            | 2  |
| 23539  | 106624 | 1        | China   | 1           | 2  | 1  | Male   | 1971 | 44     | 1    | 40-44 year | 1.0            |    |
| 23548  | 302927 | 2        | Taiwan  | 1           | 2  | 2  | Female | 1954 | 61     | 5    | >=60       | 1.7            |    |
| 23553  | 106630 | 1        | China   | 1           | 2  | 1  | Male   | 1968 | 47     | 2    | 45-49      | 1.0            |    |
| 23556  | 106631 | 1        | China   | 1           | 2  | 2  | Female | 1958 | 57     | 4    | 55-59      | 1.0            |    |
| 23563  | 302930 | 2        | Taiwan  | 1           | 1  | 1  | Male   | 1934 | 81     | 5    | >=60       | 1.6            |    |
| 23572  | 302934 | 2        | Taiwan  | 1           | 2  | 1  | Male   | 1963 | 52     | 3    | 50-54      | 0.8            |    |
| 23575  | 106634 | 1        | China   | 1           | 2  | 2  | Female | 1972 | 43     | 1    | 40-44 year | 1.0            | 2  |
| 23576  | 106635 | 1        | China   | 1           | 2  | 1  | Male   | 1949 | 66     | 5    | >=60       | 1.0            |    |
| 23577  | 106636 | 1        | China   | 1           | 2  | 1  | Male   | 1973 | 42     | 1    | 40-44 year | 1.0            |    |
| 23578  | 106637 | 1        | China   | 1           | 2  | 2  | Female | 1969 | 46     | 2    | 45-49      | 1.0            | 2  |
| 23587  | 106641 | 1        | China   | 1           | 2  | 1  | Male   | 1968 | 47     | 2    | 45-49      | 1.0            |    |
| 23597  | 106644 | 1        | China   | 1           | 2  | 2  | Female | 1971 | 44     | 1    | 40-44 year | 1.0            | 2  |
| 23598  | 106645 | 1        | China   | 1           | 2  | 1  | Male   | 1972 | 43     | 1    | 40-44 year | 1.0            |    |
| 23604  | 106647 | 1        | China   | 1           | 2  | 1  | Male   | 1966 | 49     | 2    | 45-49      | 1.0            |    |
| 23617  | 106650 | 1        | China   | 1           | 2  | 2  | Female | 1967 | 48     | 2    | 45-49      | 1.0            | 2  |
| 23620  | 106652 | 1        | China   | 1           | 2  | 1  | Male   | 1954 | 61     | 5    | >=60       | 1.0            |    |
| 23621  | 302943 | 2        | Taiwan  | 1           | 1  | 2  | Female | 1954 | 61     | 5    | >=60       | 1.7            |    |

| respid | SubsID | dCountry | Country | QDisclaimer | Q1 | Q2 | Gender   | Q3_1 | age Nr | dAge | age Group  | Weight in Ctry | Q4 |
|--------|--------|----------|---------|-------------|----|----|----------|------|--------|------|------------|----------------|----|
| 23625  | 302946 | 2        | Taiwan  | 1           | 1  | 2  | 1 Male   | 1958 | 57     | 4    | 55-59      | 0.7            |    |
| 23629  | 106654 | 1        | China   | 1           | 1  | 2  | 2 Female | 1960 | 55     | 4    | 55-59      | 1.0            |    |
| 23635  | 106602 | 1        | China   | 1           | 1  | 2  | 2 Female | 1966 | 49     | 2    | 45-49      | 1.0            | 2  |
| 23636  | 106642 | 1        | China   | 1           | 1  | 2  | 2 Female | 1974 | 41     | 1    | 40-44 year | 1.0            | 2  |
| 23637  | 302948 | 2        | Taiwan  | 1           | 1  | 1  | 1 Male   | 1955 | 60     | 5    | >=60       | 1.6            |    |
| 23638  | 302949 | 2        | Taiwan  | 1           | 1  | 1  | 1 Male   | 1956 | 59     | 4    | 55-59      | 0.7            |    |
| 23644  | 302952 | 2        | Taiwan  | 1           | 1  | 1  | 2 Female | 1950 | 65     | 5    | >=60       | 1.7            |    |
| 23645  | 302953 | 2        | Taiwan  | 1           | 1  | 2  | 2 Female | 1960 | 55     | 4    | 55-59      | 0.9            |    |
| 23649  | 106658 | 1        | China   | 1           | 1  | 1  | 1 Male   | 1969 | 46     | 2    | 45-49      | 1.0            |    |
| 23654  | 302802 | 2        | Taiwan  | 1           | 1  | 1  | 1 Male   | 1960 | 55     | 4    | 55-59      | 0.7            |    |
| 23662  | 106661 | 1        | China   | 1           | 1  | 2  | 2 Female | 1974 | 41     | 1    | 40-44 year | 1.0            | 2  |
| 23664  | 106663 | 1        | China   | 1           | 1  | 2  | 2 Female | 1969 | 46     | 2    | 45-49      | 1.0            | 2  |
| 23665  | 106664 | 1        | China   | 1           | 1  | 2  | 1 Male   | 1975 | 40     | 1    | 40-44 year | 1.0            |    |
| 23666  | 106665 | 1        | China   | 1           | 1  | 1  | 2 Female | 1975 | 40     | 1    | 40-44 year | 1.0            | 2  |
| 23671  | 106667 | 1        | China   | 1           | 1  | 2  | 2 Female | 1968 | 47     | 2    | 45-49      | 1.0            | 2  |
| 23672  | 302957 | 2        | Taiwan  | 1           | 1  | 2  | 1 Male   | 1959 | 56     | 4    | 55-59      | 0.7            |    |
| 23685  | 302961 | 2        | Taiwan  | 1           | 1  | 2  | 1 Male   | 1965 | 50     | 3    | 50-54      | 0.8            |    |
| 23686  | 302962 | 2        | Taiwan  | 1           | 1  | 1  | 1 Male   | 1949 | 66     | 5    | >=60       | 1.6            |    |
| 23689  | 302963 | 2        | Taiwan  | 1           | 1  | 1  | 1 Male   | 1944 | 71     | 5    | >=60       | 1.6            |    |
| 23690  | 302964 | 2        | Taiwan  | 1           | 1  | 1  | 1 Male   | 1946 | 69     | 5    | >=60       | 1.6            |    |
| 23695  | 106675 | 1        | China   | 1           | 1  | 2  | 2 Female | 1950 | 65     | 5    | >=60       | 1.1            |    |
| 23700  | 106677 | 1        | China   | 1           | 1  | 2  | 1 Male   | 1975 | 40     | 1    | 40-44 year | 1.0            |    |
| 23714  | 302968 | 2        | Taiwan  | 1           | 1  | 1  | 2 Female | 1954 | 61     | 5    | >=60       | 1.7            |    |
| 23719  | 106683 | 1        | China   | 1           | 1  | 1  | 1 Male   | 1969 | 46     | 2    | 45-49      | 1.0            |    |
| 23720  | 106684 | 1        | China   | 1           | 1  | 2  | 2 Female | 1969 | 46     | 2    | 45-49      | 1.0            | 2  |
| 23721  | 106685 | 1        | China   | 1           | 1  | 2  | 1 Male   | 1973 | 42     | 1    | 40-44 year | 1.0            |    |
| 23729  | 106688 | 1        | China   | 1           | 1  | 2  | 2 Female | 1960 | 55     | 4    | 55-59      | 1.0            |    |
| 23730  | 106689 | 1        | China   | 1           | 1  | 1  | 1 Male   | 1959 | 56     | 4    | 55-59      | 0.9            |    |
| 23732  | 106690 | 1        | China   | 1           | 1  | 2  | 2 Female | 1959 | 56     | 4    | 55-59      | 1.0            |    |
| 23736  | 106691 | 1        | China   | 1           | 1  | 2  | 1 Male   | 1972 | 43     | 1    | 40-44 year | 1.0            |    |
| 23754  | 105674 | 1        | China   | 1           | 1  | 2  | 2 Female | 1973 | 42     | 1    | 40-44 year | 1.0            | 2  |
| 23756  | 302975 | 2        | Taiwan  | 1           | 1  | 2  | 1 Male   | 1956 | 59     | 4    | 55-59      | 0.7            |    |

| respid | SubsID | dCountry | Country | QDisclaimer | Q1 | Q2 | Gender   | Q3_1 | age Nr | dAge | age Group  | Weight in Ctry | Q4 |
|--------|--------|----------|---------|-------------|----|----|----------|------|--------|------|------------|----------------|----|
| 23759  | 106696 | 1        | China   |             | 1  | 2  | 2 Female | 1956 | 59     | 4    | 55-59      | 1.0            |    |
| 23761  | 203685 | 3        | Korea   |             | 1  | 2  | 2 Female | 1955 | 60     | 5    | >=60       | 1.6            |    |
| 23766  | 106698 | 1        | China   |             | 1  | 2  | 1 Male   | 1960 | 55     | 4    | 55-59      | 0.9            |    |
| 23768  | 106699 | 1        | China   |             | 1  | 2  | 2 Female | 1949 | 66     | 5    | >=60       | 1.1            |    |
| 23773  | 106701 | 1        | China   |             | 1  | 2  | 1 Male   | 1968 | 47     | 2    | 45-49      | 1.0            |    |
| 23781  | 106705 | 1        | China   |             | 1  | 2  | 2 Female | 1973 | 42     | 1    | 40-44 year | 1.0            | 2  |
| 23782  | 302979 | 2        | Taiwan  |             | 1  | 2  | 2 Female | 1952 | 63     | 5    | >=60       | 1.7            |    |
| 23787  | 106708 | 1        | China   |             | 1  | 2  | 2 Female | 1975 | 40     | 1    | 40-44 year | 1.0            | 2  |
| 23788  | 106709 | 1        | China   |             | 1  | 1  | 2 Female | 1939 | 76     | 5    | >=60       | 1.1            |    |
| 23790  | 106710 | 1        | China   |             | 1  | 2  | 2 Female | 1975 | 40     | 1    | 40-44 year | 1.0            | 2  |
| 23794  | 106713 | 1        | China   |             | 1  | 2  | 1 Male   | 1949 | 66     | 5    | >=60       | 1.0            |    |
| 23795  | 106714 | 1        | China   |             | 1  | 2  | 1 Male   | 1970 | 45     | 2    | 45-49      | 1.0            |    |
| 23801  | 106717 | 1        | China   |             | 1  | 2  | 2 Female | 1968 | 47     | 2    | 45-49      | 1.0            | 2  |
| 23806  | 106719 | 1        | China   |             | 1  | 1  | 2 Female | 1975 | 40     | 1    | 40-44 year | 1.0            | 2  |
| 23809  | 106721 | 1        | China   |             | 1  | 1  | 1 Male   | 1970 | 45     | 2    | 45-49      | 1.0            |    |
| 23813  | 106724 | 1        | China   |             | 1  | 1  | 2 Female | 1970 | 45     | 2    | 45-49      | 1.0            | 2  |
| 23815  | 106135 | 1        | China   |             | 1  | 1  | 2 Female | 1970 | 45     | 2    | 45-49      | 1.0            | 2  |
| 23821  | 106609 | 1        | China   |             | 1  | 2  | 1 Male   | 1954 | 61     | 5    | >=60       | 1.0            |    |
| 23825  | 106728 | 1        | China   |             | 1  | 2  | 2 Female | 1971 | 44     | 1    | 40-44 year | 1.0            | 2  |
| 23826  | 106727 | 1        | China   |             | 1  | 2  | 1 Male   | 1973 | 42     | 1    | 40-44 year | 1.0            |    |
| 23830  | 106731 | 1        | China   |             | 1  | 2  | 2 Female | 1970 | 45     | 2    | 45-49      | 1.0            | 2  |
| 23833  | 106732 | 1        | China   |             | 1  | 2  | 2 Female | 1946 | 69     | 5    | >=60       | 1.1            |    |
| 23837  | 106734 | 1        | China   |             | 1  | 2  | 1 Male   | 1973 | 42     | 1    | 40-44 year | 1.0            |    |
| 23848  | 106736 | 1        | China   |             | 1  | 2  | 2 Female | 1974 | 41     | 1    | 40-44 year | 1.0            | 2  |
| 23850  | 302987 | 2        | Taiwan  |             | 1  | 2  | 2 Female | 1952 | 63     | 5    | >=60       | 1.7            |    |
| 23870  | 302992 | 2        | Taiwan  |             | 1  | 1  | 1 Male   | 1958 | 57     | 4    | 55-59      | 0.7            |    |
| 23877  | 106746 | 1        | China   |             | 1  | 2  | 2 Female | 1975 | 40     | 1    | 40-44 year | 1.0            | 2  |
| 23880  | 106748 | 1        | China   |             | 1  | 2  | 1 Male   | 1950 | 65     | 5    | >=60       | 1.0            |    |
| 23882  | 106742 | 1        | China   |             | 1  | 2  | 2 Female | 1973 | 42     | 1    | 40-44 year | 1.0            | 2  |
| 23888  | 105419 | 1        | China   |             | 1  | 2  | 2 Female | 1966 | 49     | 2    | 45-49      | 1.0            | 2  |
| 23908  | 302999 | 2        | Taiwan  |             | 1  | 1  | 1 Male   | 1965 | 50     | 3    | 50-54      | 0.8            |    |
| 23914  | 106405 | 1        | China   |             | 1  | 2  | 2 Female | 1968 | 47     | 2    | 45-49      | 1.0            | 2  |

| respid | SubsID | dCountry | Country | QDisclaimer | Q1 | Q2 | Gender | Q3_1 | age Nr | dAge | age Group  | Weight in Ctry | Q4 |
|--------|--------|----------|---------|-------------|----|----|--------|------|--------|------|------------|----------------|----|
| 23916  | 303000 | 2        | Taiwan  | 1           | 2  | 2  | Female | 1965 | 50     | 3    | 50-54      | 0.9            |    |
| 23922  | 106756 | 1        | China   | 1           | 1  | 1  | Male   | 1955 | 60     | 5    | >=60       | 1.0            |    |
| 23932  | 303005 | 2        | Taiwan  | 1           | 1  | 1  | Male   | 1947 | 68     | 5    | >=60       | 1.6            |    |
| 23934  | 106760 | 1        | China   | 1           | 2  | 1  | Male   | 1975 | 40     | 1    | 40-44 year | 1.0            |    |
| 23942  | 106763 | 1        | China   | 1           | 2  | 2  | Female | 1970 | 45     | 2    | 45-49      | 1.0            | 2  |
| 23945  | 106764 | 1        | China   | 1           | 1  | 1  | Male   | 1951 | 64     | 5    | >=60       | 1.0            |    |
| 23948  | 106766 | 1        | China   | 1           | 2  | 1  | Male   | 1973 | 42     | 1    | 40-44 year | 1.0            |    |
| 23955  | 105715 | 1        | China   | 1           | 2  | 1  | Male   | 1960 | 55     | 4    | 55-59      | 0.9            |    |
| 23956  | 106769 | 1        | China   | 1           | 2  | 2  | Female | 1970 | 45     | 2    | 45-49      | 1.0            | 2  |
| 23978  | 106772 | 1        | China   | 1           | 2  | 1  | Male   | 1954 | 61     | 5    | >=60       | 1.0            |    |
| 23981  | 106773 | 1        | China   | 1           | 2  | 2  | Female | 1969 | 46     | 2    | 45-49      | 1.0            | 2  |
| 23982  | 106774 | 1        | China   | 1           | 2  | 2  | Female | 1957 | 58     | 4    | 55-59      | 1.0            |    |
| 23991  | 106776 | 1        | China   | 1           | 2  | 2  | Female | 1958 | 57     | 4    | 55-59      | 1.0            |    |
| 23994  | 303019 | 2        | Taiwan  | 1           | 2  | 1  | Male   | 1952 | 63     | 5    | >=60       | 1.6            |    |
| 23995  | 106779 | 1        | China   | 1           | 2  | 1  | Male   | 1968 | 47     | 2    | 45-49      | 1.0            |    |
| 23999  | 303021 | 2        | Taiwan  | 1           | 2  | 2  | Female | 1965 | 50     | 3    | 50-54      | 0.9            |    |
| 24005  | 106784 | 1        | China   | 1           | 2  | 2  | Female | 1968 | 47     | 2    | 45-49      | 1.0            | 2  |
| 24018  | 106787 | 1        | China   | 1           | 2  | 2  | Female | 1969 | 46     | 2    | 45-49      | 1.0            | 2  |
| 24021  | 106789 | 1        | China   | 1           | 2  | 2  | Female | 1970 | 45     | 2    | 45-49      | 1.0            | 2  |
| 24035  | 106798 | 1        | China   | 1           | 2  | 1  | Male   | 1970 | 45     | 2    | 45-49      | 1.0            |    |
| 24040  | 106799 | 1        | China   | 1           | 2  | 1  | Male   | 1952 | 63     | 5    | >=60       | 1.0            |    |
| 24043  | 106800 | 1        | China   | 1           | 2  | 1  | Male   | 1954 | 61     | 5    | >=60       | 1.0            |    |
| 24046  | 106802 | 1        | China   | 1           | 2  | 1  | Male   | 1975 | 40     | 1    | 40-44 year | 1.0            |    |
| 24047  | 106803 | 1        | China   | 1           | 2  | 2  | Female | 1957 | 58     | 4    | 55-59      | 1.0            |    |
| 24048  | 106804 | 1        | China   | 1           | 2  | 1  | Male   | 1973 | 42     | 1    | 40-44 year | 1.0            |    |
| 24062  | 106810 | 1        | China   | 1           | 2  | 1  | Male   | 1972 | 43     | 1    | 40-44 year | 1.0            |    |
| 24063  | 106811 | 1        | China   | 1           | 2  | 1  | Male   | 1955 | 60     | 5    | >=60       | 1.0            |    |
| 24066  | 106813 | 1        | China   | 1           | 2  | 2  | Female | 1953 | 62     | 5    | >=60       | 1.1            |    |
| 24069  | 106815 | 1        | China   | 1           | 2  | 2  | Female | 1966 | 49     | 2    | 45-49      | 1.0            | 2  |
| 24070  | 106816 | 1        | China   | 1           | 1  | 2  | Female | 1975 | 40     | 1    | 40-44 year | 1.0            | 2  |
| 24074  | 106818 | 1        | China   | 1           | 2  | 2  | Female | 1973 | 42     | 1    | 40-44 year | 1.0            | 2  |
| 24080  | 106821 | 1        | China   | 1           | 2  | 2  | Female | 1952 | 63     | 5    | >=60       | 1.1            |    |

| respId | SubsID | dCountry | Country | QDisclaimer | Q1 | Q2 | Gender   | Q3_1 | age Nr | dAge | age Group    | Weight in Ctry | Q4 |
|--------|--------|----------|---------|-------------|----|----|----------|------|--------|------|--------------|----------------|----|
| 24082  | 106822 | 1        | China   |             | 1  | 2  | 2 Female | 1975 | 40     |      | 1 40-44 year | 1.0            | 2  |
| 24088  | 303038 | 2        | Taiwan  |             | 1  | 2  | 2 Female | 1961 | 54     |      | 3 50-54      | 0.9            |    |
| 24089  | 106795 | 1        | China   |             | 1  | 2  | 1 Male   | 1968 | 47     |      | 2 45-49      | 1.0            |    |
| 24091  | 203730 | 3        | Korea   |             | 1  | 1  | 2 Female | 1953 | 62     |      | 5 >=60       | 1.6            |    |
| 24095  | 106825 | 1        | China   |             | 1  | 2  | 2 Female | 1970 | 45     |      | 2 45-49      | 1.0            | 2  |
| 24100  | 106827 | 1        | China   |             | 1  | 2  | 2 Female | 1949 | 66     |      | 5 >=60       | 1.1            |    |
| 24105  | 303043 | 2        | Taiwan  |             | 1  | 1  | 1 Male   | 1962 | 53     |      | 3 50-54      | 0.8            |    |
| 24107  | 106829 | 1        | China   |             | 1  | 1  | 2 Female | 1974 | 41     |      | 1 40-44 year | 1.0            | 2  |
| 24108  | 106830 | 1        | China   |             | 1  | 2  | 2 Female | 1974 | 41     |      | 1 40-44 year | 1.0            | 2  |
| 24113  | 203733 | 3        | Korea   |             | 1  | 2  | 2 Female | 1955 | 60     |      | 5 >=60       | 1.6            |    |
| 24120  | 106832 | 1        | China   |             | 1  | 2  | 2 Female | 1968 | 47     |      | 2 45-49      | 1.0            | 2  |
| 24122  | 106833 | 1        | China   |             | 1  | 1  | 2 Female | 1959 | 56     |      | 4 55-59      | 1.0            |    |
| 24123  | 303046 | 2        | Taiwan  |             | 1  | 2  | 2 Female | 1925 | 90     |      | 5 >=60       | 1.7            |    |
| 24125  | 106834 | 1        | China   |             | 1  | 1  | 2 Female | 1954 | 61     |      | 5 >=60       | 1.1            |    |
| 24132  | 303048 | 2        | Taiwan  |             | 1  | 1  | 1 Male   | 1965 | 50     |      | 3 50-54      | 0.8            |    |
| 24139  | 106836 | 1        | China   |             | 1  | 2  | 1 Male   | 1974 | 41     |      | 1 40-44 year | 1.0            |    |
| 24140  | 106837 | 1        | China   |             | 1  | 2  | 1 Male   | 1970 | 45     |      | 2 45-49      | 1.0            |    |
| 24143  | 106838 | 1        | China   |             | 1  | 2  | 2 Female | 1975 | 40     |      | 1 40-44 year | 1.0            | 2  |
| 24150  | 303052 | 2        | Taiwan  |             | 1  | 1  | 1 Male   | 1954 | 61     |      | 5 >=60       | 1.6            |    |
| 24153  | 106841 | 1        | China   |             | 1  | 2  | 1 Male   | 1969 | 46     |      | 2 45-49      | 1.0            |    |
| 24161  | 106843 | 1        | China   |             | 1  | 2  | 1 Male   | 1948 | 67     |      | 5 >=60       | 1.0            |    |
| 24168  | 106847 | 1        | China   |             | 1  | 2  | 1 Male   | 1974 | 41     |      | 1 40-44 year | 1.0            |    |
| 24179  | 106849 | 1        | China   |             | 1  | 2  | 1 Male   | 1969 | 46     |      | 2 45-49      | 1.0            |    |
| 24182  | 106850 | 1        | China   |             | 1  | 2  | 1 Male   | 1967 | 48     |      | 2 45-49      | 1.0            |    |
| 24194  | 106855 | 1        | China   |             | 1  | 2  | 1 Male   | 1967 | 48     |      | 2 45-49      | 1.0            |    |
| 24206  | 303061 | 2        | Taiwan  |             | 1  | 1  | 1 Male   | 1964 | 51     |      | 3 50-54      | 0.8            |    |
| 24214  | 303062 | 2        | Taiwan  |             | 1  | 1  | 2 Female | 1958 | 57     |      | 4 55-59      | 0.9            |    |
| 24215  | 106857 | 1        | China   |             | 1  | 2  | 1 Male   | 1975 | 40     |      | 1 40-44 year | 1.0            |    |
| 24224  | 106861 | 1        | China   |             | 1  | 2  | 2 Female | 1975 | 40     |      | 1 40-44 year | 1.0            | 2  |
| 24225  | 106862 | 1        | China   |             | 1  | 2  | 2 Female | 1968 | 47     |      | 2 45-49      | 1.0            | 2  |
| 24227  | 106864 | 1        | China   |             | 1  | 2  | 2 Female | 1968 | 47     |      | 2 45-49      | 1.0            | 2  |
| 24229  | 106865 | 1        | China   |             | 1  | 2  | 2 Female | 1966 | 49     |      | 2 45-49      | 1.0            | 2  |

| respid | SubsID | dCountry | Country | QDisclaimer | Q1 | Q2 | Gender | Q3_1 | age Nr | dAge | age Group  | Weight in Ctry | Q4 |
|--------|--------|----------|---------|-------------|----|----|--------|------|--------|------|------------|----------------|----|
| 24230  | 106866 | 1        | China   | 1           | 2  | 1  | Male   | 1973 | 42     | 1    | 40-44 year | 1.0            |    |
| 24232  | 106867 | 1        | China   | 1           | 2  | 2  | Female | 1951 | 64     | 5    | >=60       | 1.1            |    |
| 24253  | 303073 | 2        | Taiwan  | 1           | 1  | 2  | Female | 1958 | 57     | 4    | 55-59      | 0.9            |    |
| 24267  | 106875 | 1        | China   | 1           | 1  | 2  | Female | 1975 | 40     | 1    | 40-44 year | 1.0            | 2  |
| 24274  | 106879 | 1        | China   | 1           | 2  | 1  | Male   | 1950 | 65     | 5    | >=60       | 1.0            |    |
| 24275  | 106880 | 1        | China   | 1           | 1  | 2  | Female | 1974 | 41     | 1    | 40-44 year | 1.0            | 2  |
| 24277  | 106881 | 1        | China   | 1           | 2  | 1  | Male   | 1971 | 44     | 1    | 40-44 year | 1.0            |    |
| 24280  | 303079 | 2        | Taiwan  | 1           | 2  | 1  | Male   | 1946 | 69     | 5    | >=60       | 1.6            |    |
| 24285  | 106883 | 1        | China   | 1           | 2  | 1  | Male   | 1971 | 44     | 1    | 40-44 year | 1.0            |    |
| 24293  | 303085 | 2        | Taiwan  | 1           | 1  | 2  | Female | 1956 | 59     | 4    | 55-59      | 0.9            |    |
| 24295  | 106886 | 1        | China   | 1           | 2  | 2  | Female | 1956 | 59     | 4    | 55-59      | 1.0            |    |
| 24299  | 106888 | 1        | China   | 1           | 2  | 2  | Female | 1974 | 41     | 1    | 40-44 year | 1.0            | 2  |
| 24303  | 106890 | 1        | China   | 1           | 2  | 1  | Male   | 1970 | 45     | 2    | 45-49      | 1.0            |    |
| 24308  | 106893 | 1        | China   | 1           | 2  | 1  | Male   | 1971 | 44     | 1    | 40-44 year | 1.0            |    |
| 24322  | 106899 | 1        | China   | 1           | 2  | 2  | Female | 1973 | 42     | 1    | 40-44 year | 1.0            | 2  |
| 24325  | 106901 | 1        | China   | 1           | 2  | 2  | Female | 1971 | 44     | 1    | 40-44 year | 1.0            | 2  |
| 24328  | 106902 | 1        | China   | 1           | 2  | 2  | Female | 1970 | 45     | 2    | 45-49      | 1.0            | 2  |
| 24334  | 303094 | 2        | Taiwan  | 1           | 2  | 1  | Male   | 1958 | 57     | 4    | 55-59      | 0.7            |    |
| 24342  | 303096 | 2        | Taiwan  | 1           | 1  | 2  | Female | 1962 | 53     | 3    | 50-54      | 0.9            |    |
| 24343  | 106909 | 1        | China   | 1           | 2  | 1  | Male   | 1969 | 46     | 2    | 45-49      | 1.0            |    |
| 24348  | 106913 | 1        | China   | 1           | 1  | 1  | Male   | 1936 | 79     | 5    | >=60       | 1.0            |    |
| 24352  | 105439 | 1        | China   | 1           | 2  | 2  | Female | 1973 | 42     | 1    | 40-44 year | 1.0            | 2  |
| 24354  | 106915 | 1        | China   | 1           | 2  | 2  | Female | 1972 | 43     | 1    | 40-44 year | 1.0            | 2  |
| 24357  | 106918 | 1        | China   | 1           | 2  | 2  | Female | 1970 | 45     | 2    | 45-49      | 1.0            | 2  |
| 24360  | 106919 | 1        | China   | 1           | 2  | 1  | Male   | 1949 | 66     | 5    | >=60       | 1.0            |    |
| 24369  | 106924 | 1        | China   | 1           | 2  | 2  | Female | 1953 | 62     | 5    | >=60       | 1.1            |    |
| 24373  | 303103 | 2        | Taiwan  | 1           | 2  | 2  | Female | 1949 | 66     | 5    | >=60       | 1.7            |    |
| 24398  | 106934 | 1        | China   | 1           | 2  | 1  | Male   | 1952 | 63     | 5    | >=60       | 1.0            |    |
| 24402  | 106935 | 1        | China   | 1           | 2  | 2  | Female | 1973 | 42     | 1    | 40-44 year | 1.0            | 2  |
| 24405  | 106936 | 1        | China   | 1           | 2  | 2  | Female | 1970 | 45     | 2    | 45-49      | 1.0            | 2  |
| 24407  | 106937 | 1        | China   | 1           | 1  | 1  | Male   | 1949 | 66     | 5    | >=60       | 1.0            |    |
| 24413  | 106670 | 1        | China   | 1           | 1  | 2  | Female | 1952 | 63     | 5    | >=60       | 1.1            |    |



| respid | SubsID | dCountry | Country | QDisclaimer | Q1 | Q2 | Gender   | Q3_1 | age Nr | dAge | age Group | Weight in Ctry | Q4 |
|--------|--------|----------|---------|-------------|----|----|----------|------|--------|------|-----------|----------------|----|
| 24443  | 303115 | 2        | Taiwan  | 1           | 1  | 1  | 2 Female | 1948 | 67     | 5    | >=60      | 1.7            |    |
| 24451  | 106945 | 1        | China   | 1           | 2  | 2  | 2 Female | 1970 | 45     | 2    | 45-49     | 1.0            | 2  |
| 24459  | 106949 | 1        | China   | 1           | 2  | 1  | 1 Male   | 1970 | 45     | 2    | 45-49     | 1.0            |    |
| 24465  | 106859 | 1        | China   | 1           | 1  | 2  | 2 Female | 1957 | 58     | 4    | 55-59     | 1.0            |    |
| 24481  | 303121 | 2        | Taiwan  | 1           | 1  | 2  | 2 Female | 1947 | 68     | 5    | >=60      | 1.7            |    |
| 24482  | 303122 | 2        | Taiwan  | 1           | 2  | 2  | 2 Female | 1949 | 66     | 5    | >=60      | 1.7            |    |
| 24491  | 303125 | 2        | Taiwan  | 1           | 2  | 2  | 2 Female | 1955 | 60     | 5    | >=60      | 1.7            |    |
| 24495  | 106961 | 1        | China   | 1           | 2  | 1  | 1 Male   | 1969 | 46     | 2    | 45-49     | 1.0            |    |
| 24497  | 106963 | 1        | China   | 1           | 2  | 1  | 1 Male   | 1955 | 60     | 5    | >=60      | 1.0            |    |
| 24511  | 106968 | 1        | China   | 1           | 2  | 2  | 2 Female | 1970 | 45     | 2    | 45-49     | 1.0            | 2  |
| 24513  | 106969 | 1        | China   | 1           | 1  | 1  | 1 Male   | 1968 | 47     | 2    | 45-49     | 1.0            |    |
| 24516  | 106971 | 1        | China   | 1           | 2  | 1  | 1 Male   | 1969 | 46     | 2    | 45-49     | 1.0            |    |
| 24518  | 303134 | 2        | Taiwan  | 1           | 2  | 2  | 2 Female | 1948 | 67     | 5    | >=60      | 1.7            |    |
| 24524  | 106973 | 1        | China   | 1           | 2  | 2  | 2 Female | 1970 | 45     | 2    | 45-49     | 1.0            | 2  |
| 24528  | 303137 | 2        | Taiwan  | 1           | 1  | 1  | 1 Male   | 1963 | 52     | 3    | 50-54     | 0.8            |    |
| 24531  | 106977 | 1        | China   | 1           | 2  | 1  | 1 Male   | 1969 | 46     | 2    | 45-49     | 1.0            |    |
| 24533  | 106979 | 1        | China   | 1           | 2  | 1  | 1 Male   | 1950 | 65     | 5    | >=60      | 1.0            |    |
| 24547  | 303139 | 2        | Taiwan  | 1           | 2  | 2  | 2 Female | 1963 | 52     | 3    | 50-54     | 0.9            |    |
| 24557  | 106992 | 1        | China   | 1           | 2  | 2  | 2 Female | 1969 | 46     | 2    | 45-49     | 1.0            | 2  |
| 24559  | 303142 | 2        | Taiwan  | 1           | 1  | 1  | 1 Male   | 1956 | 59     | 4    | 55-59     | 0.7            |    |
| 24567  | 106997 | 1        | China   | 1           | 1  | 2  | 2 Female | 1949 | 66     | 5    | >=60      | 1.1            |    |
| 24568  | 303143 | 2        | Taiwan  | 1           | 2  | 1  | 1 Male   | 1951 | 64     | 5    | >=60      | 1.6            |    |
| 24577  | 107003 | 1        | China   | 1           | 2  | 1  | 1 Male   | 1956 | 59     | 4    | 55-59     | 0.9            |    |
| 24581  | 107006 | 1        | China   | 1           | 2  | 2  | 2 Female | 1968 | 47     | 2    | 45-49     | 1.0            | 2  |
| 24588  | 203800 | 3        | Korea   | 1           | 2  | 2  | 2 Female | 1953 | 62     | 5    | >=60      | 1.6            |    |
| 24604  | 303147 | 2        | Taiwan  | 1           | 2  | 1  | 1 Male   | 1949 | 66     | 5    | >=60      | 1.6            |    |
| 24612  | 303149 | 2        | Taiwan  | 1           | 1  | 1  | 1 Male   | 1955 | 60     | 5    | >=60      | 1.6            |    |
| 24621  | 107016 | 1        | China   | 1           | 2  | 2  | 2 Female | 1967 | 48     | 2    | 45-49     | 1.0            | 2  |
| 24625  | 303153 | 2        | Taiwan  | 1           | 1  | 2  | 2 Female | 1947 | 68     | 5    | >=60      | 1.7            |    |
| 24627  | 107018 | 1        | China   | 1           | 2  | 2  | 2 Female | 1958 | 57     | 4    | 55-59     | 1.0            |    |
| 24640  | 303160 | 2        | Taiwan  | 1           | 1  | 2  | 2 Female | 1941 | 74     | 5    | >=60      | 1.7            |    |
| 24644  | 106158 | 1        | China   | 1           | 2  | 2  | 2 Female | 1959 | 56     | 4    | 55-59     | 1.0            |    |

| respid | SubsID | dCountry | Country | QDisclaimer | Q1 | Q2 | Gender | Q3_1 | age Nr | dAge | age Group | Weight in Ctry | Q4 |
|--------|--------|----------|---------|-------------|----|----|--------|------|--------|------|-----------|----------------|----|
| 24664  | 107026 | 1        | China   | 1           | 2  | 1  | Male   | 1955 | 60     | 5    | >=60      | 1.0            |    |
| 24669  | 107028 | 1        | China   | 1           | 1  | 1  | Male   | 1968 | 47     | 2    | 45-49     | 1.0            |    |
| 24685  | 203819 | 3        | Korea   | 1           | 1  | 2  | Female | 1953 | 62     | 5    | >=60      | 1.6            |    |
| 24687  | 303171 | 2        | Taiwan  | 1           | 1  | 2  | Female | 1961 | 54     | 3    | 50-54     | 0.9            |    |
| 24688  | 107036 | 1        | China   | 1           | 2  | 1  | Male   | 1967 | 48     | 2    | 45-49     | 1.0            |    |
| 24691  | 107038 | 1        | China   | 1           | 2  | 2  | Female | 1969 | 46     | 2    | 45-49     | 1.0            | 2  |
| 24693  | 107040 | 1        | China   | 1           | 2  | 1  | Male   | 1970 | 45     | 2    | 45-49     | 1.0            |    |
| 24706  | 107045 | 1        | China   | 1           | 2  | 2  | Female | 1966 | 49     | 2    | 45-49     | 1.0            | 2  |
| 24710  | 107047 | 1        | China   | 1           | 2  | 2  | Female | 1970 | 45     | 2    | 45-49     | 1.0            | 2  |
| 24717  | 107049 | 1        | China   | 1           | 2  | 1  | Male   | 1966 | 49     | 2    | 45-49     | 1.0            |    |
| 24720  | 303173 | 2        | Taiwan  | 1           | 2  | 2  | Female | 1965 | 50     | 3    | 50-54     | 0.9            |    |
| 24731  | 107054 | 1        | China   | 1           | 2  | 1  | Male   | 1946 | 69     | 5    | >=60      | 1.0            |    |
| 24732  | 107055 | 1        | China   | 1           | 1  | 1  | Male   | 1970 | 45     | 2    | 45-49     | 1.0            |    |
| 24733  | 303176 | 2        | Taiwan  | 1           | 2  | 2  | Female | 1947 | 68     | 5    | >=60      | 1.7            |    |
| 24747  | 303177 | 2        | Taiwan  | 1           | 1  | 2  | Female | 1948 | 67     | 5    | >=60      | 1.7            |    |
| 24750  | 107064 | 1        | China   | 1           | 2  | 1  | Male   | 1953 | 62     | 5    | >=60      | 1.0            |    |
| 24758  | 107068 | 1        | China   | 1           | 2  | 2  | Female | 1955 | 60     | 5    | >=60      | 1.1            |    |
| 24760  | 107021 | 1        | China   | 1           | 1  | 2  | Female | 1951 | 64     | 5    | >=60      | 1.1            |    |
| 24765  | 107072 | 1        | China   | 1           | 2  | 2  | Female | 1970 | 45     | 2    | 45-49     | 1.0            | 2  |
| 24772  | 107077 | 1        | China   | 1           | 2  | 2  | Female | 1970 | 45     | 2    | 45-49     | 1.0            | 2  |
| 24779  | 107080 | 1        | China   | 1           | 1  | 1  | Male   | 1953 | 62     | 5    | >=60      | 1.0            |    |
| 24794  | 303182 | 2        | Taiwan  | 1           | 2  | 1  | Male   | 1961 | 54     | 3    | 50-54     | 0.8            |    |
| 24796  | 107087 | 1        | China   | 1           | 2  | 2  | Female | 1954 | 61     | 5    | >=60      | 1.1            |    |
| 24797  | 107088 | 1        | China   | 1           | 1  | 1  | Male   | 1968 | 47     | 2    | 45-49     | 1.0            |    |
| 24800  | 107090 | 1        | China   | 1           | 2  | 1  | Male   | 1968 | 47     | 2    | 45-49     | 1.0            |    |
| 24813  | 303184 | 2        | Taiwan  | 1           | 1  | 2  | Female | 1950 | 65     | 5    | >=60      | 1.7            |    |
| 24815  | 203841 | 3        | Korea   | 1           | 1  | 2  | Female | 1952 | 63     | 5    | >=60      | 1.6            |    |
| 24821  | 303186 | 2        | Taiwan  | 1           | 2  | 2  | Female | 1949 | 66     | 5    | >=60      | 1.7            |    |
| 24822  | 107098 | 1        | China   | 1           | 2  | 2  | Female | 1969 | 46     | 2    | 45-49     | 1.0            | 2  |
| 24831  | 303187 | 2        | Taiwan  | 1           | 1  | 2  | Female | 1937 | 78     | 5    | >=60      | 1.7            |    |
| 24835  | 303185 | 2        | Taiwan  | 1           | 1  | 2  | Female | 1949 | 66     | 5    | >=60      | 1.7            |    |
| 24843  | 303191 | 2        | Taiwan  | 1           | 1  | 2  | Female | 1953 | 62     | 5    | >=60      | 1.7            |    |

| respid | SubsID | dCountry | Country | QDisclaimer | Q1 | Q2 | Gender   | Q3_1 | age Nr | dAge | age Group | Weight in Ctry | Q4 |
|--------|--------|----------|---------|-------------|----|----|----------|------|--------|------|-----------|----------------|----|
| 24844  | 107109 | 1        | China   |             | 1  | 2  | 1 Male   | 1968 | 47     | 2    | 45-49     | 1.0            |    |
| 24860  | 107115 | 1        | China   |             | 1  | 2  | 1 Male   | 1970 | 45     | 2    | 45-49     | 1.0            |    |
| 24861  | 303195 | 2        | Taiwan  |             | 1  | 2  | 1 Male   | 1948 | 67     | 5    | >=60      | 1.6            |    |
| 24865  | 107117 | 1        | China   |             | 1  | 2  | 2 Female | 1969 | 46     | 2    | 45-49     | 1.0            | 2  |
| 24870  | 107119 | 1        | China   |             | 1  | 2  | 1 Male   | 1968 | 47     | 2    | 45-49     | 1.0            |    |
| 24887  | 107128 | 1        | China   |             | 1  | 2  | 2 Female | 1969 | 46     | 2    | 45-49     | 1.0            | 2  |
| 24897  | 107133 | 1        | China   |             | 1  | 2  | 1 Male   | 1949 | 66     | 5    | >=60      | 1.0            |    |
| 24902  | 303202 | 2        | Taiwan  |             | 1  | 1  | 1 Male   | 1950 | 65     | 5    | >=60      | 1.6            |    |
| 24914  | 107140 | 1        | China   |             | 1  | 2  | 2 Female | 1950 | 65     | 5    | >=60      | 1.1            |    |
| 24921  | 303207 | 2        | Taiwan  |             | 1  | 1  | 2 Female | 1965 | 50     | 3    | 50-54     | 0.9            |    |
| 24922  | 107144 | 1        | China   |             | 1  | 2  | 1 Male   | 1966 | 49     | 2    | 45-49     | 1.0            |    |
| 24924  | 303209 | 2        | Taiwan  |             | 1  | 1  | 1 Male   | 1965 | 50     | 3    | 50-54     | 0.8            |    |
| 24927  | 107145 | 1        | China   |             | 1  | 2  | 2 Female | 1952 | 63     | 5    | >=60      | 1.1            |    |
| 24936  | 107151 | 1        | China   |             | 1  | 2  | 2 Female | 1951 | 64     | 5    | >=60      | 1.1            |    |
| 24937  | 107152 | 1        | China   |             | 1  | 2  | 2 Female | 1970 | 45     | 2    | 45-49     | 1.0            | 2  |
| 24942  | 302244 | 2        | Taiwan  |             | 1  | 1  | 1 Male   | 1954 | 61     | 5    | >=60      | 1.6            |    |
| 24947  | 107157 | 1        | China   |             | 1  | 2  | 2 Female | 1969 | 46     | 2    | 45-49     | 1.0            | 2  |
| 24953  | 303210 | 2        | Taiwan  |             | 1  | 2  | 1 Male   | 1959 | 56     | 4    | 55-59     | 0.7            |    |
| 24954  | 107160 | 1        | China   |             | 1  | 1  | 1 Male   | 1953 | 62     | 5    | >=60      | 1.0            |    |
| 24960  | 107162 | 1        | China   |             | 1  | 1  | 1 Male   | 1948 | 67     | 5    | >=60      | 1.0            |    |
| 24965  | 107167 | 1        | China   |             | 1  | 2  | 2 Female | 1948 | 67     | 5    | >=60      | 1.1            |    |
| 24975  | 303211 | 2        | Taiwan  |             | 1  | 2  | 2 Female | 1948 | 67     | 5    | >=60      | 1.7            |    |
| 24983  | 107176 | 1        | China   |             | 1  | 2  | 2 Female | 1969 | 46     | 2    | 45-49     | 1.0            | 2  |
| 24985  | 303212 | 2        | Taiwan  |             | 1  | 1  | 1 Male   | 1951 | 64     | 5    | >=60      | 1.6            |    |
| 24990  | 303213 | 2        | Taiwan  |             | 1  | 2  | 1 Male   | 1961 | 54     | 3    | 50-54     | 0.8            |    |
| 25000  | 303214 | 2        | Taiwan  |             | 1  | 2  | 2 Female | 1962 | 53     | 3    | 50-54     | 0.9            |    |
| 25007  | 107179 | 1        | China   |             | 1  | 2  | 2 Female | 1953 | 62     | 5    | >=60      | 1.1            |    |
| 25008  | 106138 | 1        | China   |             | 1  | 2  | 2 Female | 1969 | 46     | 2    | 45-49     | 1.0            | 2  |
| 25010  | 303217 | 2        | Taiwan  |             | 1  | 2  | 1 Male   | 1958 | 57     | 4    | 55-59     | 0.7            |    |
| 25016  | 107181 | 1        | China   |             | 1  | 1  | 1 Male   | 1966 | 49     | 2    | 45-49     | 1.0            |    |
| 25021  | 303222 | 2        | Taiwan  |             | 1  | 1  | 2 Female | 1958 | 57     | 4    | 55-59     | 0.9            |    |
| 25040  | 107192 | 1        | China   |             | 1  | 2  | 2 Female | 1954 | 61     | 5    | >=60      | 1.1            |    |

| respid | SubsID | dCountry | Country | QDisclaimer | Q1 | Q2 | Gender | Q3_1 | age Nr | dAge | age Group | Weight in Ctry | Q4 |
|--------|--------|----------|---------|-------------|----|----|--------|------|--------|------|-----------|----------------|----|
| 25043  | 107194 | 1        | China   | 1           | 2  | 1  | Male   | 1968 | 47     | 2    | 45-49     | 1.0            |    |
| 25055  | 107197 | 1        | China   | 1           | 2  | 1  | Male   | 1967 | 48     | 2    | 45-49     | 1.0            |    |
| 25057  | 107198 | 1        | China   | 1           | 2  | 1  | Male   | 1968 | 47     | 2    | 45-49     | 1.0            |    |
| 25060  | 107199 | 1        | China   | 1           | 2  | 1  | Male   | 1968 | 47     | 2    | 45-49     | 1.0            |    |
| 25062  | 107200 | 1        | China   | 1           | 2  | 1  | Male   | 1969 | 46     | 2    | 45-49     | 1.0            |    |
| 25064  | 203883 | 3        | Korea   | 1           | 2  | 2  | Female | 1953 | 62     | 5    | >=60      | 1.6            |    |
| 25069  | 107204 | 1        | China   | 1           | 2  | 2  | Female | 1968 | 47     | 2    | 45-49     | 1.0            | 2  |
| 25077  | 303229 | 2        | Taiwan  | 1           | 2  | 2  | Female | 1960 | 55     | 4    | 55-59     | 0.9            |    |
| 25088  | 107212 | 1        | China   | 1           | 2  | 2  | Female | 1957 | 58     | 4    | 55-59     | 1.0            |    |
| 25093  | 107215 | 1        | China   | 1           | 2  | 1  | Male   | 1946 | 69     | 5    | >=60      | 1.0            |    |
| 25121  | 107230 | 1        | China   | 1           | 2  | 2  | Female | 1950 | 65     | 5    | >=60      | 1.1            |    |
| 25140  | 107237 | 1        | China   | 1           | 2  | 2  | Female | 1969 | 46     | 2    | 45-49     | 1.0            | 2  |
| 25144  | 303236 | 2        | Taiwan  | 1           | 2  | 2  | Female | 1950 | 65     | 5    | >=60      | 1.7            |    |
| 25149  | 203903 | 3        | Korea   | 1           | 2  | 2  | Female | 1946 | 69     | 5    | >=60      | 1.6            |    |
| 25159  | 107243 | 1        | China   | 1           | 2  | 1  | Male   | 1944 | 71     | 5    | >=60      | 1.0            |    |
| 25191  | 107253 | 1        | China   | 1           | 2  | 1  | Male   | 1954 | 61     | 5    | >=60      | 1.0            |    |
| 25193  | 107255 | 1        | China   | 1           | 2  | 2  | Female | 1953 | 62     | 5    | >=60      | 1.1            |    |
| 25202  | 107257 | 1        | China   | 1           | 2  | 2  | Female | 1969 | 46     | 2    | 45-49     | 1.0            | 2  |
| 25215  | 107261 | 1        | China   | 1           | 1  | 1  | Male   | 1969 | 46     | 2    | 45-49     | 1.0            |    |
| 25229  | 303247 | 2        | Taiwan  | 1           | 2  | 1  | Male   | 1940 | 75     | 5    | >=60      | 1.6            |    |
| 25231  | 303248 | 2        | Taiwan  | 1           | 2  | 2  | Female | 1964 | 51     | 3    | 50-54     | 0.9            |    |
| 25236  | 107273 | 1        | China   | 1           | 1  | 2  | Female | 1954 | 61     | 5    | >=60      | 1.1            |    |
| 25242  | 107275 | 1        | China   | 1           | 2  | 1  | Male   | 1957 | 58     | 4    | 55-59     | 0.9            |    |
| 25252  | 107161 | 1        | China   | 1           | 2  | 1  | Male   | 1951 | 64     | 5    | >=60      | 1.0            |    |
| 25253  | 107281 | 1        | China   | 1           | 2  | 2  | Female | 1953 | 62     | 5    | >=60      | 1.1            |    |
| 25256  | 107283 | 1        | China   | 1           | 2  | 2  | Female | 1969 | 46     | 2    | 45-49     | 1.0            | 2  |
| 25260  | 107284 | 1        | China   | 1           | 2  | 1  | Male   | 1950 | 65     | 5    | >=60      | 1.0            |    |
| 25261  | 107285 | 1        | China   | 1           | 2  | 1  | Male   | 1950 | 65     | 5    | >=60      | 1.0            |    |
| 25280  | 107291 | 1        | China   | 1           | 2  | 2  | Female | 1955 | 60     | 5    | >=60      | 1.1            |    |
| 25282  | 203938 | 3        | Korea   | 1           | 2  | 2  | Female | 1952 | 63     | 5    | >=60      | 1.6            |    |
| 25289  | 107294 | 1        | China   | 1           | 1  | 1  | Male   | 1959 | 56     | 4    | 55-59     | 0.9            |    |
| 25303  | 107300 | 1        | China   | 1           | 2  | 2  | Female | 1967 | 48     | 2    | 45-49     | 1.0            | 2  |

| respid | SubsID | dCountry | Country | QDisclaimer | Q1 | Q2 | Gender   | Q3_1 | age Nr | dAge | age Group | Weight in Ctry | Q4 |
|--------|--------|----------|---------|-------------|----|----|----------|------|--------|------|-----------|----------------|----|
| 25304  | 303258 | 2        | Taiwan  | 1           | 1  | 2  | 2 Female | 1947 | 68     | 5    | >=60      | 1.7            |    |
| 25309  | 107302 | 1        | China   | 1           | 1  | 1  | 2 Female | 1970 | 45     | 2    | 45-49     | 1.0            | 2  |
| 25317  | 303259 | 2        | Taiwan  | 1           | 1  | 2  | 2 Female | 1960 | 55     | 4    | 55-59     | 0.9            |    |
| 25318  | 107308 | 1        | China   | 1           | 1  | 2  | 2 Female | 1954 | 61     | 5    | >=60      | 1.1            |    |
| 25320  | 107310 | 1        | China   | 1           | 1  | 2  | 2 Female | 1950 | 65     | 5    | >=60      | 1.1            |    |
| 25324  | 107312 | 1        | China   | 1           | 1  | 2  | 2 Female | 1969 | 46     | 2    | 45-49     | 1.0            | 2  |
| 25331  | 107315 | 1        | China   | 1           | 1  | 2  | 2 Female | 1970 | 45     | 2    | 45-49     | 1.0            | 2  |
| 25340  | 106649 | 1        | China   | 1           | 1  | 2  | 1 Male   | 1968 | 47     | 2    | 45-49     | 1.0            |    |
| 25342  | 107319 | 1        | China   | 1           | 1  | 2  | 2 Female | 1956 | 59     | 4    | 55-59     | 1.0            |    |
| 25350  | 303265 | 2        | Taiwan  | 1           | 1  | 2  | 2 Female | 1965 | 50     | 3    | 50-54     | 0.9            |    |
| 25352  | 203954 | 3        | Korea   | 1           | 1  | 2  | 2 Female | 1950 | 65     | 5    | >=60      | 1.6            |    |
| 25358  | 203956 | 3        | Korea   | 1           | 1  | 2  | 2 Female | 1955 | 60     | 5    | >=60      | 1.6            |    |
| 25375  | 107331 | 1        | China   | 1           | 1  | 2  | 2 Female | 1969 | 46     | 2    | 45-49     | 1.0            | 2  |
| 25386  | 107338 | 1        | China   | 1           | 1  | 2  | 1 Male   | 1966 | 49     | 2    | 45-49     | 1.0            |    |
| 25388  | 107339 | 1        | China   | 1           | 1  | 2  | 1 Male   | 1950 | 65     | 5    | >=60      | 1.0            |    |
| 25390  | 303268 | 2        | Taiwan  | 1           | 1  | 1  | 2 Female | 1955 | 60     | 5    | >=60      | 1.7            |    |
| 25391  | 107341 | 1        | China   | 1           | 1  | 2  | 1 Male   | 1969 | 46     | 2    | 45-49     | 1.0            |    |
| 25400  | 107343 | 1        | China   | 1           | 1  | 1  | 2 Female | 1970 | 45     | 2    | 45-49     | 1.0            | 2  |
| 25413  | 107347 | 1        | China   | 1           | 1  | 2  | 2 Female | 1969 | 46     | 2    | 45-49     | 1.0            | 2  |
| 25424  | 107344 | 1        | China   | 1           | 1  | 2  | 1 Male   | 1953 | 62     | 5    | >=60      | 1.0            |    |
| 25426  | 303274 | 2        | Taiwan  | 1           | 1  | 2  | 1 Male   | 1945 | 70     | 5    | >=60      | 1.6            |    |
| 25430  | 107350 | 1        | China   | 1           | 1  | 2  | 2 Female | 1970 | 45     | 2    | 45-49     | 1.0            | 2  |
| 25434  | 203966 | 3        | Korea   | 1           | 1  | 2  | 2 Female | 1951 | 64     | 5    | >=60      | 1.6            |    |
| 25439  | 107356 | 1        | China   | 1           | 1  | 1  | 1 Male   | 1955 | 60     | 5    | >=60      | 1.0            |    |
| 25441  | 107335 | 1        | China   | 1           | 1  | 2  | 1 Male   | 1968 | 47     | 2    | 45-49     | 1.0            |    |
| 25445  | 107360 | 1        | China   | 1           | 1  | 2  | 1 Male   | 1952 | 63     | 5    | >=60      | 1.0            |    |
| 25451  | 107361 | 1        | China   | 1           | 1  | 1  | 1 Male   | 1967 | 48     | 2    | 45-49     | 1.0            |    |
| 25469  | 107372 | 1        | China   | 1           | 1  | 2  | 2 Female | 1969 | 46     | 2    | 45-49     | 1.0            | 2  |
| 25471  | 107374 | 1        | China   | 1           | 1  | 2  | 1 Male   | 1953 | 62     | 5    | >=60      | 1.0            |    |
| 25476  | 107376 | 1        | China   | 1           | 1  | 2  | 2 Female | 1950 | 65     | 5    | >=60      | 1.1            |    |
| 25480  | 107377 | 1        | China   | 1           | 1  | 1  | 1 Male   | 1955 | 60     | 5    | >=60      | 1.0            |    |
| 25482  | 107378 | 1        | China   | 1           | 1  | 2  | 2 Female | 1953 | 62     | 5    | >=60      | 1.1            |    |

| respid | SubsID | dCountry | Country | QDisclaimer | Q1 | Q2 | Gender   | Q3_1 | age Nr | dAge | age Group | Weight in Ctry | Q4 |
|--------|--------|----------|---------|-------------|----|----|----------|------|--------|------|-----------|----------------|----|
| 25500  | 107384 | 1        | China   |             | 1  | 2  | 1 Male   | 1967 | 48     | 2    | 45-49     | 1.0            |    |
| 25516  | 107394 | 1        | China   |             | 1  | 2  | 1 Male   | 1950 | 65     | 5    | >=60      | 1.0            |    |
| 25521  | 107399 | 1        | China   |             | 1  | 2  | 1 Male   | 1970 | 45     | 2    | 45-49     | 1.0            |    |
| 25525  | 107403 | 1        | China   |             | 1  | 2  | 1 Male   | 1952 | 63     | 5    | >=60      | 1.0            |    |
| 25530  | 107405 | 1        | China   |             | 1  | 1  | 1 Male   | 1970 | 45     | 2    | 45-49     | 1.0            |    |
| 25555  | 107413 | 1        | China   |             | 1  | 2  | 1 Male   | 1949 | 66     | 5    | >=60      | 1.0            |    |
| 25558  | 107416 | 1        | China   |             | 1  | 2  | 2 Female | 1957 | 58     | 4    | 55-59     | 1.0            |    |
| 25561  | 107417 | 1        | China   |             | 1  | 2  | 2 Female | 1954 | 61     | 5    | >=60      | 1.1            |    |
| 25566  | 107419 | 1        | China   |             | 1  | 2  | 1 Male   | 1967 | 48     | 2    | 45-49     | 1.0            |    |
| 25571  | 303286 | 2        | Taiwan  |             | 1  | 2  | 2 Female | 1955 | 60     | 5    | >=60      | 1.7            |    |
| 25572  | 303287 | 2        | Taiwan  |             | 1  | 1  | 1 Male   | 1944 | 71     | 5    | >=60      | 1.6            |    |
| 25574  | 107421 | 1        | China   |             | 1  | 2  | 1 Male   | 1966 | 49     | 2    | 45-49     | 1.0            |    |
| 25588  | 303293 | 2        | Taiwan  |             | 1  | 2  | 2 Female | 1958 | 57     | 4    | 55-59     | 0.9            |    |
| 25591  | 107424 | 1        | China   |             | 1  | 2  | 2 Female | 1969 | 46     | 2    | 45-49     | 1.0            | 2  |
| 25599  | 107428 | 1        | China   |             | 1  | 2  | 2 Female | 1954 | 61     | 5    | >=60      | 1.1            |    |
| 25604  | 303298 | 2        | Taiwan  |             | 1  | 1  | 1 Male   | 1950 | 65     | 5    | >=60      | 1.6            |    |
| 25614  | 302972 | 2        | Taiwan  |             | 1  | 1  | 2 Female | 1961 | 54     | 3    | 50-54     | 0.9            |    |
| 25634  | 107443 | 1        | China   |             | 1  | 2  | 1 Male   | 1954 | 61     | 5    | >=60      | 1.0            |    |
| 25642  | 303308 | 2        | Taiwan  |             | 1  | 2  | 1 Male   | 1946 | 69     | 5    | >=60      | 1.6            |    |
| 25647  | 107449 | 1        | China   |             | 1  | 2  | 1 Male   | 1953 | 62     | 5    | >=60      | 1.0            |    |
| 25653  | 107452 | 1        | China   |             | 1  | 2  | 1 Male   | 1953 | 62     | 5    | >=60      | 1.0            |    |
| 25654  | 303312 | 2        | Taiwan  |             | 1  | 2  | 2 Female | 1953 | 62     | 5    | >=60      | 1.7            |    |
| 25660  | 303314 | 2        | Taiwan  |             | 1  | 2  | 1 Male   | 1964 | 51     | 3    | 50-54     | 0.8            |    |
| 25664  | 303315 | 2        | Taiwan  |             | 1  | 1  | 1 Male   | 1952 | 63     | 5    | >=60      | 1.6            |    |
| 25665  | 107456 | 1        | China   |             | 1  | 2  | 1 Male   | 1968 | 47     | 2    | 45-49     | 1.0            |    |
| 25672  | 303317 | 2        | Taiwan  |             | 1  | 1  | 1 Male   | 1951 | 64     | 5    | >=60      | 1.6            |    |
| 25677  | 107458 | 1        | China   |             | 1  | 2  | 1 Male   | 1970 | 45     | 2    | 45-49     | 1.0            |    |
| 25685  | 106218 | 1        | China   |             | 1  | 2  | 1 Male   | 1951 | 64     | 5    | >=60      | 1.0            |    |
| 25699  | 303325 | 2        | Taiwan  |             | 1  | 1  | 1 Male   | 1950 | 65     | 5    | >=60      | 1.6            |    |
| 25703  | 107467 | 1        | China   |             | 1  | 2  | 1 Male   | 1958 | 57     | 4    | 55-59     | 0.9            |    |
| 25704  | 107468 | 1        | China   |             | 1  | 2  | 1 Male   | 1970 | 45     | 2    | 45-49     | 1.0            |    |
| 25705  | 107469 | 1        | China   |             | 1  | 2  | 1 Male   | 1969 | 46     | 2    | 45-49     | 1.0            |    |

| respid | SubsID | dCountry | Country | QDisclaimer | Q1 | Q2 | Gender | Q3_1 | age Nr | dAge | age Group | Weight in Ctry | Q4 |
|--------|--------|----------|---------|-------------|----|----|--------|------|--------|------|-----------|----------------|----|
| 25711  | 303328 | 2        | Taiwan  | 1           | 1  | 1  | Female | 1959 | 56     | 4    | 55-59     | 0.9            |    |
| 25727  | 107477 | 1        | China   | 1           | 2  | 1  | Male   | 1956 | 59     | 4    | 55-59     | 0.9            |    |
| 25728  | 107478 | 1        | China   | 1           | 2  | 1  | Male   | 1967 | 48     | 2    | 45-49     | 1.0            |    |
| 25733  | 107481 | 1        | China   | 1           | 2  | 1  | Male   | 1970 | 45     | 2    | 45-49     | 1.0            |    |
| 25735  | 303329 | 2        | Taiwan  | 1           | 1  | 2  | Female | 1959 | 56     | 4    | 55-59     | 0.9            |    |
| 25736  | 107482 | 1        | China   | 1           | 2  | 2  | Female | 1951 | 64     | 5    | >=60      | 1.1            |    |
| 25742  | 107485 | 1        | China   | 1           | 1  | 2  | Female | 1955 | 60     | 5    | >=60      | 1.1            |    |
| 25750  | 107491 | 1        | China   | 1           | 2  | 1  | Male   | 1967 | 48     | 2    | 45-49     | 1.0            |    |
| 25754  | 303334 | 2        | Taiwan  | 1           | 1  | 1  | Male   | 1959 | 56     | 4    | 55-59     | 0.7            |    |
| 25776  | 107496 | 1        | China   | 1           | 2  | 2  | Female | 1958 | 57     | 4    | 55-59     | 1.0            |    |
| 25778  | 303340 | 2        | Taiwan  | 1           | 1  | 1  | Male   | 1952 | 63     | 5    | >=60      | 1.6            |    |
| 25796  | 107503 | 1        | China   | 1           | 2  | 2  | Female | 1957 | 58     | 4    | 55-59     | 1.0            |    |
| 25852  | 107520 | 1        | China   | 1           | 2  | 2  | Female | 1954 | 61     | 5    | >=60      | 1.1            |    |
| 25858  | 107523 | 1        | China   | 1           | 1  | 2  | Female | 1954 | 61     | 5    | >=60      | 1.1            |    |
| 25859  | 107524 | 1        | China   | 1           | 1  | 1  | Male   | 1968 | 47     | 2    | 45-49     | 1.0            |    |
| 25886  | 303358 | 2        | Taiwan  | 1           | 1  | 1  | Male   | 1951 | 64     | 5    | >=60      | 1.6            |    |
| 25890  | 107535 | 1        | China   | 1           | 2  | 1  | Male   | 1949 | 66     | 5    | >=60      | 1.0            |    |
| 25897  | 303359 | 2        | Taiwan  | 1           | 2  | 1  | Male   | 1946 | 69     | 5    | >=60      | 1.6            |    |
| 25903  | 107540 | 1        | China   | 1           | 2  | 2  | Female | 1970 | 45     | 2    | 45-49     | 1.0            | 2  |
| 25905  | 107541 | 1        | China   | 1           | 2  | 2  | Female | 1951 | 64     | 5    | >=60      | 1.1            |    |
| 25917  | 106003 | 1        | China   | 1           | 2  | 2  | Female | 1969 | 46     | 2    | 45-49     | 1.0            | 2  |
| 25918  | 303363 | 2        | Taiwan  | 1           | 2  | 2  | Female | 1953 | 62     | 5    | >=60      | 1.7            |    |
| 25928  | 107553 | 1        | China   | 1           | 2  | 1  | Male   | 1968 | 47     | 2    | 45-49     | 1.0            |    |
| 25930  | 107555 | 1        | China   | 1           | 2  | 2  | Female | 1968 | 47     | 2    | 45-49     | 1.0            | 2  |
| 25949  | 303338 | 2        | Taiwan  | 1           | 1  | 2  | Female | 1963 | 52     | 3    | 50-54     | 0.9            |    |
| 25955  | 107560 | 1        | China   | 1           | 2  | 2  | Female | 1957 | 58     | 4    | 55-59     | 1.0            |    |
| 25959  | 303372 | 2        | Taiwan  | 1           | 2  | 2  | Female | 1954 | 61     | 5    | >=60      | 1.7            |    |
| 25964  | 303373 | 2        | Taiwan  | 1           | 1  | 1  | Male   | 1956 | 59     | 4    | 55-59     | 0.7            |    |
| 25972  | 107566 | 1        | China   | 1           | 2  | 1  | Male   | 1958 | 57     | 4    | 55-59     | 0.9            |    |
| 25999  | 107562 | 1        | China   | 1           | 2  | 2  | Female | 1953 | 62     | 5    | >=60      | 1.1            |    |
| 26019  | 107577 | 1        | China   | 1           | 1  | 2  | Female | 1970 | 45     | 2    | 45-49     | 1.0            | 2  |
| 26025  | 303378 | 2        | Taiwan  | 1           | 1  | 2  | Female | 1963 | 52     | 3    | 50-54     | 0.9            |    |

| respid | SubsID | dCountry | Country | QDisclaimer | Q1 | Q2 | Gender | Q3_1 | age Nr | dAge | age Group | Weight in Ctry | Q4 |
|--------|--------|----------|---------|-------------|----|----|--------|------|--------|------|-----------|----------------|----|
| 26039  | 107582 | 1        | China   | 1           | 2  | 1  | Male   | 1968 | 47     | 2    | 45-49     | 1.0            |    |
| 26055  | 107586 | 1        | China   | 1           | 2  | 2  | Female | 1966 | 49     | 2    | 45-49     | 1.0            | 2  |
| 26061  | 303386 | 2        | Taiwan  | 1           | 1  | 2  | Female | 1955 | 60     | 5    | >=60      | 1.7            |    |
| 26076  | 107591 | 1        | China   | 1           | 2  | 1  | Male   | 1960 | 55     | 4    | 55-59     | 0.9            |    |
| 26088  | 107594 | 1        | China   | 1           | 1  | 1  | Male   | 1966 | 49     | 2    | 45-49     | 1.0            |    |
| 26094  | 107596 | 1        | China   | 1           | 1  | 1  | Male   | 1952 | 63     | 5    | >=60      | 1.0            |    |
| 26104  | 303395 | 2        | Taiwan  | 1           | 1  | 2  | Female | 1958 | 57     | 4    | 55-59     | 0.9            |    |
| 26131  | 107607 | 1        | China   | 1           | 2  | 1  | Male   | 1968 | 47     | 2    | 45-49     | 1.0            |    |
| 26134  | 107609 | 1        | China   | 1           | 2  | 1  | Male   | 1968 | 47     | 2    | 45-49     | 1.0            |    |
| 26160  | 107615 | 1        | China   | 1           | 2  | 1  | Male   | 1950 | 65     | 5    | >=60      | 1.0            |    |
| 26168  | 303403 | 2        | Taiwan  | 1           | 2  | 1  | Male   | 1959 | 56     | 4    | 55-59     | 0.7            |    |
| 26170  | 303404 | 2        | Taiwan  | 1           | 1  | 2  | Female | 1964 | 51     | 3    | 50-54     | 0.9            |    |
| 26191  | 204067 | 3        | Korea   | 1           | 2  | 2  | Female | 1933 | 82     | 5    | >=60      | 1.6            |    |
| 26192  | 107625 | 1        | China   | 1           | 2  | 2  | Female | 1970 | 45     | 2    | 45-49     | 1.0            | 2  |
| 26195  | 107627 | 1        | China   | 1           | 2  | 1  | Male   | 1952 | 63     | 5    | >=60      | 1.0            |    |
| 26198  | 107628 | 1        | China   | 1           | 2  | 2  | Female | 1956 | 59     | 4    | 55-59     | 1.0            |    |
| 26199  | 303409 | 2        | Taiwan  | 1           | 1  | 2  | Female | 1946 | 69     | 5    | >=60      | 1.7            |    |
| 26201  | 303410 | 2        | Taiwan  | 1           | 2  | 2  | Female | 1954 | 61     | 5    | >=60      | 1.7            |    |
| 26202  | 303411 | 2        | Taiwan  | 1           | 1  | 1  | Male   | 1956 | 59     | 4    | 55-59     | 0.7            |    |
| 26226  | 106296 | 1        | China   | 1           | 2  | 2  | Female | 1969 | 46     | 2    | 45-49     | 1.0            | 2  |
| 26233  | 107639 | 1        | China   | 1           | 1  | 2  | Female | 1947 | 68     | 5    | >=60      | 1.1            |    |
| 26236  | 302438 | 2        | Taiwan  | 1           | 1  | 2  | Female | 1948 | 67     | 5    | >=60      | 1.7            |    |
| 26242  | 303416 | 2        | Taiwan  | 1           | 1  | 2  | Female | 1963 | 52     | 3    | 50-54     | 0.9            |    |
| 26244  | 107640 | 1        | China   | 1           | 2  | 1  | Male   | 1956 | 59     | 4    | 55-59     | 0.9            |    |
| 26250  | 107642 | 1        | China   | 1           | 2  | 2  | Female | 1950 | 65     | 5    | >=60      | 1.1            |    |
| 26266  | 204074 | 3        | Korea   | 1           | 1  | 2  | Female | 1942 | 73     | 5    | >=60      | 1.6            |    |
| 26274  | 107650 | 1        | China   | 1           | 2  | 1  | Male   | 1950 | 65     | 5    | >=60      | 1.0            |    |
| 26286  | 303425 | 2        | Taiwan  | 1           | 1  | 2  | Female | 1960 | 55     | 4    | 55-59     | 0.9            |    |
| 26288  | 107652 | 1        | China   | 1           | 2  | 2  | Female | 1970 | 45     | 2    | 45-49     | 1.0            | 2  |
| 26295  | 303427 | 2        | Taiwan  | 1           | 1  | 2  | Female | 1964 | 51     | 3    | 50-54     | 0.9            |    |
| 26296  | 303428 | 2        | Taiwan  | 1           | 2  | 1  | Male   | 1959 | 56     | 4    | 55-59     | 0.7            |    |
| 26297  | 107654 | 1        | China   | 1           | 1  | 2  | Female | 1956 | 59     | 4    | 55-59     | 1.0            |    |



| respid | SubsID | dCountry | Country | QDisclaim<br>er | Q1 | Q2 | Gender   | Q3_1 | age Nr | dAge | age Group | Weight in<br>Ctry | Q4 |
|--------|--------|----------|---------|-----------------|----|----|----------|------|--------|------|-----------|-------------------|----|
| 26300  | 303430 | 2        | Taiwan  | 1               | 1  | 1  | 2 Female | 1956 | 59     | 4    | 55-59     | 0.9               |    |
| 26317  | 303435 | 2        | Taiwan  | 1               | 1  | 1  | 2 Female | 1949 | 66     | 5    | >=60      | 1.7               |    |
| 26343  | 107667 | 1        | China   | 1               | 2  | 1  | 1 Male   | 1959 | 56     | 4    | 55-59     | 0.9               |    |
| 26367  | 303443 | 2        | Taiwan  | 1               | 1  | 1  | 2 Female | 1953 | 62     | 5    | >=60      | 1.7               |    |
| 26372  | 303445 | 2        | Taiwan  | 1               | 1  | 1  | 1 Male   | 1960 | 55     | 4    | 55-59     | 0.7               |    |
| 26403  | 303454 | 2        | Taiwan  | 1               | 1  | 1  | 2 Female | 1956 | 59     | 4    | 55-59     | 0.9               |    |
| 26423  | 303457 | 2        | Taiwan  | 1               | 2  | 1  | 1 Male   | 1958 | 57     | 4    | 55-59     | 0.7               |    |
| 26430  | 303460 | 2        | Taiwan  | 1               | 2  | 1  | 1 Male   | 1950 | 65     | 5    | >=60      | 1.6               |    |
| 26437  | 107689 | 1        | China   | 1               | 2  | 1  | 1 Male   | 1951 | 64     | 5    | >=60      | 1.0               |    |
| 26457  | 107697 | 1        | China   | 1               | 2  | 2  | 2 Female | 1970 | 45     | 2    | 45-49     | 1.0               | 2  |
| 26466  | 107699 | 1        | China   | 1               | 1  | 1  | 1 Male   | 1956 | 59     | 4    | 55-59     | 0.9               |    |
| 26467  | 107700 | 1        | China   | 1               | 2  | 2  | 2 Female | 1967 | 48     | 2    | 45-49     | 1.0               | 2  |
| 26469  | 107701 | 1        | China   | 1               | 2  | 2  | 2 Female | 1966 | 49     | 2    | 45-49     | 1.0               | 2  |
| 26494  | 303470 | 2        | Taiwan  | 1               | 2  | 2  | 2 Female | 1953 | 62     | 5    | >=60      | 1.7               |    |
| 26510  | 303474 | 2        | Taiwan  | 1               | 1  | 2  | 2 Female | 1952 | 63     | 5    | >=60      | 1.7               |    |
| 26519  | 303476 | 2        | Taiwan  | 1               | 2  | 2  | 2 Female | 1956 | 59     | 4    | 55-59     | 0.9               |    |
| 26525  | 303478 | 2        | Taiwan  | 1               | 1  | 2  | 2 Female | 1951 | 64     | 5    | >=60      | 1.7               |    |
| 26529  | 106614 | 1        | China   | 1               | 2  | 1  | 1 Male   | 1955 | 60     | 5    | >=60      | 1.0               |    |
| 26533  | 303480 | 2        | Taiwan  | 1               | 1  | 1  | 1 Male   | 1957 | 58     | 4    | 55-59     | 0.7               |    |
| 26556  | 303485 | 2        | Taiwan  | 1               | 2  | 2  | 2 Female | 1963 | 52     | 3    | 50-54     | 0.9               |    |
| 26559  | 107720 | 1        | China   | 1               | 2  | 2  | 2 Female | 1952 | 63     | 5    | >=60      | 1.1               |    |
| 26565  | 107727 | 1        | China   | 1               | 2  | 1  | 1 Male   | 1949 | 66     | 5    | >=60      | 1.0               |    |
| 26576  | 107730 | 1        | China   | 1               | 2  | 1  | 1 Male   | 1960 | 55     | 4    | 55-59     | 0.9               |    |
| 26601  | 107739 | 1        | China   | 1               | 2  | 1  | 1 Male   | 1958 | 57     | 4    | 55-59     | 0.9               |    |
| 26607  | 303494 | 2        | Taiwan  | 1               | 1  | 2  | 2 Female | 1955 | 60     | 5    | >=60      | 1.7               |    |
| 26611  | 107744 | 1        | China   | 1               | 1  | 2  | 2 Female | 1955 | 60     | 5    | >=60      | 1.1               |    |
| 26619  | 204124 | 3        | Korea   | 1               | 2  | 2  | 2 Female | 1953 | 62     | 5    | >=60      | 1.6               |    |
| 26631  | 303499 | 2        | Taiwan  | 1               | 2  | 1  | 1 Male   | 1942 | 73     | 5    | >=60      | 1.6               |    |
| 26654  | 107757 | 1        | China   | 1               | 2  | 1  | 1 Male   | 1952 | 63     | 5    | >=60      | 1.0               |    |
| 26656  | 303505 | 2        | Taiwan  | 1               | 2  | 2  | 2 Female | 1962 | 53     | 3    | 50-54     | 0.9               |    |
| 26664  | 302650 | 2        | Taiwan  | 1               | 1  | 2  | 2 Female | 1956 | 59     | 4    | 55-59     | 0.9               |    |
| 26667  | 303510 | 2        | Taiwan  | 1               | 2  | 1  | 1 Male   | 1959 | 56     | 4    | 55-59     | 0.7               |    |

| respid | SubsID | dCountry | Country | QDisclaimer | Q1 | Q2 | Gender   | Q3_1 | age Nr | dAge | age Group | Weight in Ctry | Q4 |
|--------|--------|----------|---------|-------------|----|----|----------|------|--------|------|-----------|----------------|----|
| 26674  | 107760 | 1        | China   |             | 1  | 2  | 2 Female | 1970 | 45     | 2    | 45-49     | 1.0            | 2  |
| 26678  | 303515 | 2        | Taiwan  |             | 1  | 1  | 1 Male   | 1945 | 70     | 5    | >=60      | 1.6            |    |
| 26693  | 303518 | 2        | Taiwan  |             | 1  | 1  | 1 Male   | 1959 | 56     | 4    | 55-59     | 0.7            |    |
| 26696  | 303519 | 2        | Taiwan  |             | 1  | 2  | 2 Female | 1954 | 61     | 5    | >=60      | 1.7            |    |
| 26703  | 105177 | 1        | China   |             | 1  | 1  | 2 Female | 1960 | 55     | 4    | 55-59     | 1.0            |    |
| 26705  | 107769 | 1        | China   |             | 1  | 2  | 2 Female | 1966 | 49     | 2    | 45-49     | 1.0            | 2  |
| 26706  | 303522 | 2        | Taiwan  |             | 1  | 1  | 1 Male   | 1955 | 60     | 5    | >=60      | 1.6            |    |
| 26716  | 106246 | 1        | China   |             | 1  | 2  | 2 Female | 1969 | 46     | 2    | 45-49     | 1.0            | 2  |
| 26721  | 303526 | 2        | Taiwan  |             | 1  | 1  | 2 Female | 1965 | 50     | 3    | 50-54     | 0.9            |    |
| 26730  | 303528 | 2        | Taiwan  |             | 1  | 2  | 2 Female | 1959 | 56     | 4    | 55-59     | 0.9            |    |
| 26752  | 107781 | 1        | China   |             | 1  | 2  | 2 Female | 1967 | 48     | 2    | 45-49     | 1.0            | 2  |
| 26755  | 204139 | 3        | Korea   |             | 1  | 2  | 2 Female | 1954 | 61     | 5    | >=60      | 1.6            |    |
| 26791  | 303545 | 2        | Taiwan  |             | 1  | 1  | 1 Male   | 1957 | 58     | 4    | 55-59     | 0.7            |    |
| 26804  | 303552 | 2        | Taiwan  |             | 1  | 1  | 1 Male   | 1945 | 70     | 5    | >=60      | 1.6            |    |
| 26810  | 204148 | 3        | Korea   |             | 1  | 2  | 2 Female | 1955 | 60     | 5    | >=60      | 1.6            |    |
| 26813  | 107796 | 1        | China   |             | 1  | 2  | 1 Male   | 1949 | 66     | 5    | >=60      | 1.0            |    |
| 26833  | 303560 | 2        | Taiwan  |             | 1  | 1  | 2 Female | 1963 | 52     | 3    | 50-54     | 0.9            |    |
| 26880  | 107809 | 1        | China   |             | 1  | 2  | 2 Female | 1955 | 60     | 5    | >=60      | 1.1            |    |
| 26884  | 107812 | 1        | China   |             | 1  | 2  | 2 Female | 1970 | 45     | 2    | 45-49     | 1.0            | 2  |
| 26885  | 107813 | 1        | China   |             | 1  | 2  | 1 Male   | 1953 | 62     | 5    | >=60      | 1.0            |    |
| 26890  | 107815 | 1        | China   |             | 1  | 2  | 1 Male   | 1948 | 67     | 5    | >=60      | 1.0            |    |
| 26937  | 204164 | 3        | Korea   |             | 1  | 2  | 2 Female | 1953 | 62     | 5    | >=60      | 1.6            |    |
| 26939  | 303590 | 2        | Taiwan  |             | 1  | 2  | 2 Female | 1931 | 84     | 5    | >=60      | 1.7            |    |
| 26941  | 107142 | 1        | China   |             | 1  | 2  | 2 Female | 1969 | 46     | 2    | 45-49     | 1.0            | 2  |
| 26992  | 303601 | 2        | Taiwan  |             | 1  | 1  | 2 Female | 1941 | 74     | 5    | >=60      | 1.7            |    |
| 27037  | 107833 | 1        | China   |             | 1  | 2  | 2 Female | 1960 | 55     | 4    | 55-59     | 1.0            |    |
| 27045  | 107835 | 1        | China   |             | 1  | 2  | 2 Female | 1952 | 63     | 5    | >=60      | 1.1            |    |
| 27053  | 204178 | 3        | Korea   |             | 1  | 1  | 2 Female | 1950 | 65     | 5    | >=60      | 1.6            |    |
| 27060  | 107840 | 1        | China   |             | 1  | 2  | 2 Female | 1951 | 64     | 5    | >=60      | 1.1            |    |
| 27076  | 107846 | 1        | China   |             | 1  | 2  | 2 Female | 1967 | 48     | 2    | 45-49     | 1.0            | 2  |
| 27124  | 107855 | 1        | China   |             | 1  | 2  | 2 Female | 1968 | 47     | 2    | 45-49     | 1.0            | 2  |
| 27125  | 303618 | 2        | Taiwan  |             | 1  | 2  | 1 Male   | 1954 | 61     | 5    | >=60      | 1.6            |    |

| respid | SubsID | dCountry | Country | QDisclaimer | Q1 | Q2 | Gender   | Q3_1 | age Nr | dAge | age Group | Weight in Ctry | Q4 |
|--------|--------|----------|---------|-------------|----|----|----------|------|--------|------|-----------|----------------|----|
| 27132  | 107858 | 1        | China   |             | 1  | 1  | 1 Male   | 1955 | 60     | 5    | >=60      | 1.0            |    |
| 27166  | 107866 | 1        | China   |             | 1  | 2  | 2 Female | 1968 | 47     | 2    | 45-49     | 1.0            | 2  |
| 27190  | 107879 | 1        | China   |             | 1  | 1  | 1 Male   | 1960 | 55     | 4    | 55-59     | 0.9            |    |
| 27199  | 107882 | 1        | China   |             | 1  | 2  | 1 Male   | 1955 | 60     | 5    | >=60      | 1.0            |    |
| 27221  | 107889 | 1        | China   |             | 1  | 2  | 2 Female | 1952 | 63     | 5    | >=60      | 1.1            |    |
| 27233  | 303624 | 2        | Taiwan  |             | 1  | 2  | 2 Female | 1950 | 65     | 5    | >=60      | 1.7            |    |
| 27241  | 303625 | 2        | Taiwan  |             | 1  | 2  | 2 Female | 1962 | 53     | 3    | 50-54     | 0.9            |    |
| 27244  | 106852 | 1        | China   |             | 1  | 2  | 1 Male   | 1952 | 63     | 5    | >=60      | 1.0            |    |
| 27245  | 107898 | 1        | China   |             | 1  | 2  | 2 Female | 1948 | 67     | 5    | >=60      | 1.1            |    |
| 27246  | 204209 | 3        | Korea   |             | 1  | 2  | 2 Female | 1950 | 65     | 5    | >=60      | 1.6            |    |
| 27253  | 107900 | 1        | China   |             | 1  | 2  | 1 Male   | 1950 | 65     | 5    | >=60      | 1.0            |    |
| 27255  | 107902 | 1        | China   |             | 1  | 2  | 2 Female | 1948 | 67     | 5    | >=60      | 1.1            |    |
| 27267  | 303630 | 2        | Taiwan  |             | 1  | 2  | 1 Male   | 1956 | 59     | 4    | 55-59     | 0.7            |    |
| 27283  | 303633 | 2        | Taiwan  |             | 1  | 1  | 2 Female | 1965 | 50     | 3    | 50-54     | 0.9            |    |
| 27289  | 204210 | 3        | Korea   |             | 1  | 1  | 2 Female | 1955 | 60     | 5    | >=60      | 1.6            |    |
| 27302  | 107919 | 1        | China   |             | 1  | 2  | 2 Female | 1970 | 45     | 2    | 45-49     | 1.0            | 2  |
| 27317  | 303638 | 2        | Taiwan  |             | 1  | 2  | 2 Female | 1965 | 50     | 3    | 50-54     | 0.9            |    |
| 27319  | 107926 | 1        | China   |             | 1  | 2  | 2 Female | 1966 | 49     | 2    | 45-49     | 1.0            | 2  |
| 27331  | 107931 | 1        | China   |             | 1  | 2  | 1 Male   | 1955 | 60     | 5    | >=60      | 1.0            |    |
| 27333  | 107932 | 1        | China   |             | 1  | 2  | 1 Male   | 1952 | 63     | 5    | >=60      | 1.0            |    |
| 27340  | 107916 | 1        | China   |             | 1  | 2  | 2 Female | 1970 | 45     | 2    | 45-49     | 1.0            | 2  |
| 27362  | 107942 | 1        | China   |             | 1  | 1  | 1 Male   | 1954 | 61     | 5    | >=60      | 1.0            |    |
| 27370  | 303651 | 2        | Taiwan  |             | 1  | 1  | 1 Male   | 1953 | 62     | 5    | >=60      | 1.6            |    |
| 27379  | 303652 | 2        | Taiwan  |             | 1  | 2  | 2 Female | 1952 | 63     | 5    | >=60      | 1.7            |    |
| 27386  | 107954 | 1        | China   |             | 1  | 2  | 2 Female | 1954 | 61     | 5    | >=60      | 1.1            |    |
| 27398  | 107962 | 1        | China   |             | 1  | 2  | 2 Female | 1969 | 46     | 2    | 45-49     | 1.0            | 2  |
| 27404  | 107965 | 1        | China   |             | 1  | 2  | 2 Female | 1951 | 64     | 5    | >=60      | 1.1            |    |
| 27408  | 204226 | 3        | Korea   |             | 1  | 2  | 2 Female | 1951 | 64     | 5    | >=60      | 1.6            |    |
| 27412  | 107967 | 1        | China   |             | 1  | 2  | 2 Female | 1953 | 62     | 5    | >=60      | 1.1            |    |
| 27426  | 107976 | 1        | China   |             | 1  | 2  | 2 Female | 1950 | 65     | 5    | >=60      | 1.1            |    |
| 27455  | 303664 | 2        | Taiwan  |             | 1  | 1  | 2 Female | 1932 | 83     | 5    | >=60      | 1.7            |    |
| 27464  | 303667 | 2        | Taiwan  |             | 1  | 2  | 1 Male   | 1940 | 75     | 5    | >=60      | 1.6            |    |

| respid | SubsID | dCountry | Country | QDisclaimer | Q1 | Q2 | Gender | Q3_1 | age Nr | dAge | age Group | Weight in Ctry | Q4 |
|--------|--------|----------|---------|-------------|----|----|--------|------|--------|------|-----------|----------------|----|
| 27484  | 107999 | 1        | China   | 1           | 2  | 1  | Male   | 1950 | 65     | 5    | >=60      | 1.0            |    |
| 27493  | 108001 | 1        | China   | 1           | 2  | 2  | Female | 1954 | 61     | 5    | >=60      | 1.1            |    |
| 27512  | 108007 | 1        | China   | 1           | 2  | 1  | Male   | 1954 | 61     | 5    | >=60      | 1.0            |    |
| 27525  | 108012 | 1        | China   | 1           | 2  | 1  | Male   | 1952 | 63     | 5    | >=60      | 1.0            |    |
| 27532  | 108015 | 1        | China   | 1           | 2  | 2  | Female | 1947 | 68     | 5    | >=60      | 1.1            |    |
| 27539  | 108017 | 1        | China   | 1           | 2  | 2  | Female | 1966 | 49     | 2    | 45-49     | 1.0            | 2  |
| 27540  | 108018 | 1        | China   | 1           | 2  | 1  | Male   | 1953 | 62     | 5    | >=60      | 1.0            |    |
| 27552  | 108022 | 1        | China   | 1           | 2  | 1  | Male   | 1950 | 65     | 5    | >=60      | 1.0            |    |
| 27562  | 108019 | 1        | China   | 1           | 2  | 2  | Female | 1970 | 45     | 2    | 45-49     | 1.0            | 2  |
| 27568  | 303685 | 2        | Taiwan  | 1           | 1  | 2  | Female | 1949 | 66     | 5    | >=60      | 1.7            |    |
| 27574  | 108026 | 1        | China   | 1           | 2  | 1  | Male   | 1953 | 62     | 5    | >=60      | 1.0            |    |
| 27575  | 302967 | 2        | Taiwan  | 1           | 2  | 2  | Female | 1956 | 59     | 4    | 55-59     | 0.9            |    |
| 27577  | 108027 | 1        | China   | 1           | 2  | 1  | Male   | 1953 | 62     | 5    | >=60      | 1.0            |    |
| 27589  | 108030 | 1        | China   | 1           | 2  | 2  | Female | 1967 | 48     | 2    | 45-49     | 1.0            | 2  |
| 27593  | 108032 | 1        | China   | 1           | 2  | 2  | Female | 1954 | 61     | 5    | >=60      | 1.1            |    |
| 27594  | 303693 | 2        | Taiwan  | 1           | 1  | 1  | Male   | 1949 | 66     | 5    | >=60      | 1.6            |    |
| 27595  | 108033 | 1        | China   | 1           | 2  | 2  | Female | 1954 | 61     | 5    | >=60      | 1.1            |    |
| 27598  | 108034 | 1        | China   | 1           | 2  | 2  | Female | 1953 | 62     | 5    | >=60      | 1.1            |    |
| 27620  | 108045 | 1        | China   | 1           | 1  | 1  | Male   | 1952 | 63     | 5    | >=60      | 1.0            |    |
| 27621  | 108046 | 1        | China   | 1           | 2  | 1  | Male   | 1949 | 66     | 5    | >=60      | 1.0            |    |
| 27628  | 303698 | 2        | Taiwan  | 1           | 1  | 1  | Male   | 1960 | 55     | 4    | 55-59     | 0.7            |    |
| 27633  | 108049 | 1        | China   | 1           | 2  | 2  | Female | 1954 | 61     | 5    | >=60      | 1.1            |    |
| 27643  | 108054 | 1        | China   | 1           | 2  | 2  | Female | 1951 | 64     | 5    | >=60      | 1.1            |    |
| 27644  | 108055 | 1        | China   | 1           | 2  | 1  | Male   | 1958 | 57     | 4    | 55-59     | 0.9            |    |
| 27668  | 107276 | 1        | China   | 1           | 2  | 2  | Female | 1970 | 45     | 2    | 45-49     | 1.0            | 2  |
| 27681  | 108065 | 1        | China   | 1           | 1  | 1  | Male   | 1920 | 95     | 5    | >=60      | 1.0            |    |
| 27691  | 108069 | 1        | China   | 1           | 2  | 2  | Female | 1969 | 46     | 2    | 45-49     | 1.0            | 2  |
| 27693  | 303711 | 2        | Taiwan  | 1           | 2  | 1  | Male   | 1960 | 55     | 4    | 55-59     | 0.7            |    |
| 27703  | 303715 | 2        | Taiwan  | 1           | 1  | 2  | Female | 1939 | 76     | 5    | >=60      | 1.7            |    |
| 27708  | 204265 | 3        | Korea   | 1           | 2  | 2  | Female | 1946 | 69     | 5    | >=60      | 1.6            |    |
| 27719  | 303719 | 2        | Taiwan  | 1           | 1  | 2  | Female | 1964 | 51     | 3    | 50-54     | 0.9            |    |
| 27720  | 303720 | 2        | Taiwan  | 1           | 2  | 2  | Female | 1942 | 73     | 5    | >=60      | 1.7            |    |

| respid | SubsID | dCountry | Country | QDisclaimer | Q1 | Q2 | Gender | Q3_1 | age Nr | dAge | age Group | Weight in Ctry | Q4 |
|--------|--------|----------|---------|-------------|----|----|--------|------|--------|------|-----------|----------------|----|
| 27723  | 303722 | 2        | Taiwan  | 1           | 2  | 2  | Female | 1948 | 67     | 5    | >=60      | 1.7            |    |
| 27725  | 303723 | 2        | Taiwan  | 1           | 1  | 2  | Female | 1962 | 53     | 3    | 50-54     | 0.9            |    |
| 27734  | 108083 | 1        | China   | 1           | 2  | 2  | Female | 1955 | 60     | 5    | >=60      | 1.1            |    |
| 27744  | 108088 | 1        | China   | 1           | 2  | 1  | Male   | 1952 | 63     | 5    | >=60      | 1.0            |    |
| 27749  | 108091 | 1        | China   | 1           | 1  | 1  | Male   | 1952 | 63     | 5    | >=60      | 1.0            |    |
| 27762  | 108098 | 1        | China   | 1           | 2  | 2  | Female | 1953 | 62     | 5    | >=60      | 1.1            |    |
| 27808  | 108111 | 1        | China   | 1           | 1  | 2  | Female | 1969 | 46     | 2    | 45-49     | 1.0            | 2  |
| 27810  | 108112 | 1        | China   | 1           | 1  | 2  | Female | 1950 | 65     | 5    | >=60      | 1.1            |    |
| 27812  | 107426 | 1        | China   | 1           | 1  | 1  | Male   | 1953 | 62     | 5    | >=60      | 1.0            |    |
| 27815  | 303741 | 2        | Taiwan  | 1           | 2  | 1  | Male   | 1950 | 65     | 5    | >=60      | 1.6            |    |
| 27818  | 303743 | 2        | Taiwan  | 1           | 2  | 2  | Female | 1950 | 65     | 5    | >=60      | 1.7            |    |
| 27823  | 303746 | 2        | Taiwan  | 1           | 1  | 2  | Female | 1953 | 62     | 5    | >=60      | 1.7            |    |
| 27841  | 303751 | 2        | Taiwan  | 1           | 1  | 2  | Female | 1957 | 58     | 4    | 55-59     | 0.9            |    |
| 27843  | 108119 | 1        | China   | 1           | 2  | 2  | Female | 1968 | 47     | 2    | 45-49     | 1.0            | 2  |
| 27851  | 108120 | 1        | China   | 1           | 2  | 2  | Female | 1955 | 60     | 5    | >=60      | 1.1            |    |
| 27858  | 303755 | 2        | Taiwan  | 1           | 1  | 2  | Female | 1955 | 60     | 5    | >=60      | 1.7            |    |
| 27859  | 303756 | 2        | Taiwan  | 1           | 1  | 1  | Male   | 1955 | 60     | 5    | >=60      | 1.6            |    |
| 27869  | 108124 | 1        | China   | 1           | 2  | 2  | Female | 1951 | 64     | 5    | >=60      | 1.1            |    |
| 27872  | 108126 | 1        | China   | 1           | 2  | 1  | Male   | 1955 | 60     | 5    | >=60      | 1.0            |    |
| 27873  | 108127 | 1        | China   | 1           | 2  | 2  | Female | 1950 | 65     | 5    | >=60      | 1.1            |    |
| 27884  | 303761 | 2        | Taiwan  | 1           | 1  | 2  | Female | 1954 | 61     | 5    | >=60      | 1.7            |    |
| 27904  | 303767 | 2        | Taiwan  | 1           | 1  | 2  | Female | 1951 | 64     | 5    | >=60      | 1.7            |    |
| 27915  | 108137 | 1        | China   | 1           | 2  | 1  | Male   | 1953 | 62     | 5    | >=60      | 1.0            |    |
| 27918  | 303773 | 2        | Taiwan  | 1           | 1  | 2  | Female | 1951 | 64     | 5    | >=60      | 1.7            |    |
| 27937  | 303778 | 2        | Taiwan  | 1           | 2  | 2  | Female | 1958 | 57     | 4    | 55-59     | 0.9            |    |
| 27943  | 204304 | 3        | Korea   | 1           | 2  | 2  | Female | 1947 | 68     | 5    | >=60      | 1.6            |    |
| 27948  | 303782 | 2        | Taiwan  | 1           | 2  | 2  | Female | 1962 | 53     | 3    | 50-54     | 0.9            |    |
| 27971  | 108152 | 1        | China   | 1           | 2  | 2  | Female | 1970 | 45     | 2    | 45-49     | 1.0            | 2  |
| 27991  | 303789 | 2        | Taiwan  | 1           | 1  | 2  | Female | 1960 | 55     | 4    | 55-59     | 0.9            |    |
| 28000  | 303792 | 2        | Taiwan  | 1           | 2  | 1  | Male   | 1956 | 59     | 4    | 55-59     | 0.7            |    |
| 28011  | 303794 | 2        | Taiwan  | 1           | 2  | 2  | Female | 1957 | 58     | 4    | 55-59     | 0.9            |    |
| 28022  | 108167 | 1        | China   | 1           | 2  | 2  | Female | 1966 | 49     | 2    | 45-49     | 1.0            | 2  |

| respid | SubsID | dCountry | Country | QDisclaimer | Q1 | Q2 | Gender   | Q3_1 | age Nr | dAge | age Group | Weight in Ctry | Q4 |
|--------|--------|----------|---------|-------------|----|----|----------|------|--------|------|-----------|----------------|----|
| 28025  | 108168 | 1        | China   |             | 1  | 2  | 2 Female | 1970 | 45     | 2    | 45-49     | 1.0            | 2  |
| 28041  | 303798 | 2        | Taiwan  |             | 1  | 2  | 1 Male   | 1956 | 59     | 4    | 55-59     | 0.7            |    |
| 28057  | 108178 | 1        | China   |             | 1  | 2  | 1 Male   | 1950 | 65     | 5    | >=60      | 1.0            |    |
| 28080  | 108187 | 1        | China   |             | 1  | 2  | 2 Female | 1969 | 46     | 2    | 45-49     | 1.0            | 2  |
| 28098  | 303812 | 2        | Taiwan  |             | 1  | 2  | 2 Female | 1953 | 62     | 5    | >=60      | 1.7            |    |
| 28104  | 108199 | 1        | China   |             | 1  | 2  | 2 Female | 1950 | 65     | 5    | >=60      | 1.1            |    |
| 28109  | 303814 | 2        | Taiwan  |             | 1  | 1  | 1 Male   | 1960 | 55     | 4    | 55-59     | 0.7            |    |
| 28129  | 108207 | 1        | China   |             | 1  | 2  | 2 Female | 1966 | 49     | 2    | 45-49     | 1.0            | 2  |
| 28141  | 303819 | 2        | Taiwan  |             | 1  | 1  | 2 Female | 1956 | 59     | 4    | 55-59     | 0.9            |    |
| 28143  | 108214 | 1        | China   |             | 1  | 2  | 1 Male   | 1948 | 67     | 5    | >=60      | 1.0            |    |
| 28149  | 303820 | 2        | Taiwan  |             | 1  | 1  | 2 Female | 1952 | 63     | 5    | >=60      | 1.7            |    |
| 28151  | 303821 | 2        | Taiwan  |             | 1  | 1  | 2 Female | 1950 | 65     | 5    | >=60      | 1.7            |    |
| 28161  | 108217 | 1        | China   |             | 1  | 2  | 1 Male   | 1966 | 49     | 2    | 45-49     | 1.0            |    |
| 28169  | 303825 | 2        | Taiwan  |             | 1  | 2  | 1 Male   | 1940 | 75     | 5    | >=60      | 1.6            |    |
| 28194  | 303830 | 2        | Taiwan  |             | 1  | 1  | 2 Female | 1953 | 62     | 5    | >=60      | 1.7            |    |
| 28197  | 108227 | 1        | China   |             | 1  | 1  | 1 Male   | 1970 | 45     | 2    | 45-49     | 1.0            |    |
| 28206  | 303832 | 2        | Taiwan  |             | 1  | 1  | 2 Female | 1946 | 69     | 5    | >=60      | 1.7            |    |
| 28218  | 108234 | 1        | China   |             | 1  | 2  | 1 Male   | 1969 | 46     | 2    | 45-49     | 1.0            |    |
| 28227  | 303835 | 2        | Taiwan  |             | 1  | 2  | 1 Male   | 1956 | 59     | 4    | 55-59     | 0.7            |    |
| 28235  | 108238 | 1        | China   |             | 1  | 2  | 2 Female | 1952 | 63     | 5    | >=60      | 1.1            |    |
| 28246  | 108176 | 1        | China   |             | 1  | 2  | 2 Female | 1967 | 48     | 2    | 45-49     | 1.0            | 2  |
| 28259  | 108247 | 1        | China   |             | 1  | 2  | 2 Female | 1952 | 63     | 5    | >=60      | 1.1            |    |
| 28263  | 108249 | 1        | China   |             | 1  | 2  | 2 Female | 1967 | 48     | 2    | 45-49     | 1.0            | 2  |
| 28267  | 108252 | 1        | China   |             | 1  | 2  | 1 Male   | 1950 | 65     | 5    | >=60      | 1.0            |    |
| 28274  | 108254 | 1        | China   |             | 1  | 2  | 1 Male   | 1967 | 48     | 2    | 45-49     | 1.0            |    |
| 28278  | 108257 | 1        | China   |             | 1  | 2  | 2 Female | 1969 | 46     | 2    | 45-49     | 1.0            | 2  |
| 28288  | 108260 | 1        | China   |             | 1  | 2  | 2 Female | 1969 | 46     | 2    | 45-49     | 1.0            | 2  |
| 28308  | 108266 | 1        | China   |             | 1  | 1  | 2 Female | 1968 | 47     | 2    | 45-49     | 1.0            | 2  |
| 28309  | 303849 | 2        | Taiwan  |             | 1  | 1  | 2 Female | 1945 | 70     | 5    | >=60      | 1.7            |    |
| 28323  | 204357 | 3        | Korea   |             | 1  | 2  | 2 Female | 1955 | 60     | 5    | >=60      | 1.6            |    |
| 28335  | 100629 | 1        | China   |             | 1  | 2  | 1 Male   | 1950 | 65     | 5    | >=60      | 1.0            |    |
| 28354  | 108279 | 1        | China   |             | 1  | 2  | 1 Male   | 1950 | 65     | 5    | >=60      | 1.0            |    |

| respid | SubsID | dCountry | Country | QDisclaimer | Q1 | Q2 | Gender   | Q3_1 | age Nr | dAge | age Group | Weight in Ctry | Q4 |
|--------|--------|----------|---------|-------------|----|----|----------|------|--------|------|-----------|----------------|----|
| 28355  | 108280 | 1        | China   |             | 1  | 2  | 1 Male   | 1940 | 75     | 5    | >=60      | 1.0            |    |
| 28356  | 108281 | 1        | China   |             | 1  | 2  | 1 Male   | 1948 | 67     | 5    | >=60      | 1.0            |    |
| 28357  | 108282 | 1        | China   |             | 1  | 1  | 1 Male   | 1960 | 55     | 4    | 55-59     | 0.9            |    |
| 28363  | 108284 | 1        | China   |             | 1  | 2  | 1 Male   | 1954 | 61     | 5    | >=60      | 1.0            |    |
| 28366  | 108285 | 1        | China   |             | 1  | 2  | 1 Male   | 1953 | 62     | 5    | >=60      | 1.0            |    |
| 28372  | 108287 | 1        | China   |             | 1  | 1  | 2 Female | 1945 | 70     | 5    | >=60      | 1.1            |    |
| 28381  | 108292 | 1        | China   |             | 1  | 2  | 2 Female | 1946 | 69     | 5    | >=60      | 1.1            |    |
| 28388  | 303861 | 2        | Taiwan  |             | 1  | 1  | 1 Male   | 1957 | 58     | 4    | 55-59     | 0.7            |    |
| 28413  | 108303 | 1        | China   |             | 1  | 2  | 1 Male   | 1950 | 65     | 5    | >=60      | 1.0            |    |
| 28421  | 106741 | 1        | China   |             | 1  | 2  | 1 Male   | 1970 | 45     | 2    | 45-49     | 1.0            |    |
| 28430  | 108307 | 1        | China   |             | 1  | 2  | 1 Male   | 1950 | 65     | 5    | >=60      | 1.0            |    |
| 28439  | 108312 | 1        | China   |             | 1  | 2  | 1 Male   | 1950 | 65     | 5    | >=60      | 1.0            |    |
| 28458  | 108315 | 1        | China   |             | 1  | 1  | 2 Female | 1950 | 65     | 5    | >=60      | 1.1            |    |
| 28461  | 108316 | 1        | China   |             | 1  | 2  | 1 Male   | 1954 | 61     | 5    | >=60      | 1.0            |    |
| 28466  | 108318 | 1        | China   |             | 1  | 2  | 2 Female | 1952 | 63     | 5    | >=60      | 1.1            |    |
| 28492  | 108328 | 1        | China   |             | 1  | 2  | 1 Male   | 1969 | 46     | 2    | 45-49     | 1.0            |    |
| 28534  | 108344 | 1        | China   |             | 1  | 2  | 2 Female | 1953 | 62     | 5    | >=60      | 1.1            |    |
| 28537  | 108345 | 1        | China   |             | 1  | 2  | 1 Male   | 1949 | 66     | 5    | >=60      | 1.0            |    |
| 28560  | 108350 | 1        | China   |             | 1  | 2  | 1 Male   | 1954 | 61     | 5    | >=60      | 1.0            |    |
| 28566  | 204397 | 3        | Korea   |             | 1  | 1  | 2 Female | 1943 | 72     | 5    | >=60      | 1.6            |    |
| 28569  | 108353 | 1        | China   |             | 1  | 2  | 1 Male   | 1952 | 63     | 5    | >=60      | 1.0            |    |
| 28584  | 108354 | 1        | China   |             | 1  | 2  | 1 Male   | 1947 | 68     | 5    | >=60      | 1.0            |    |
| 28590  | 108355 | 1        | China   |             | 1  | 2  | 1 Male   | 1948 | 67     | 5    | >=60      | 1.0            |    |
| 28596  | 303879 | 2        | Taiwan  |             | 1  | 2  | 1 Male   | 1950 | 65     | 5    | >=60      | 1.6            |    |
| 28608  | 108360 | 1        | China   |             | 1  | 2  | 1 Male   | 1953 | 62     | 5    | >=60      | 1.0            |    |
| 28631  | 303883 | 2        | Taiwan  |             | 1  | 1  | 2 Female | 1960 | 55     | 4    | 55-59     | 0.9            |    |
| 28644  | 303887 | 2        | Taiwan  |             | 1  | 1  | 2 Female | 1958 | 57     | 4    | 55-59     | 0.9            |    |
| 28646  | 108373 | 1        | China   |             | 1  | 2  | 2 Female | 1955 | 60     | 5    | >=60      | 1.1            |    |
| 28665  | 303891 | 2        | Taiwan  |             | 1  | 1  | 1 Male   | 1957 | 58     | 4    | 55-59     | 0.7            |    |
| 28686  | 108389 | 1        | China   |             | 1  | 2  | 1 Male   | 1952 | 63     | 5    | >=60      | 1.0            |    |
| 28704  | 204376 | 3        | Korea   |             | 1  | 2  | 2 Female | 1952 | 63     | 5    | >=60      | 1.6            |    |
| 28719  | 108399 | 1        | China   |             | 1  | 2  | 1 Male   | 1970 | 45     | 2    | 45-49     | 1.0            |    |

| respid | SubsID | dCountry | Country | QDisclaimer | Q1 | Q2 | Gender   | Q3_1 | age Nr | dAge | age Group | Weight in Ctry | Q4 |
|--------|--------|----------|---------|-------------|----|----|----------|------|--------|------|-----------|----------------|----|
| 28736  | 303901 | 2        | Taiwan  | 1           | 1  | 2  | 1 Male   | 1948 | 67     | 5    | >=60      | 1.6            |    |
| 28739  | 108407 | 1        | China   | 1           | 1  | 2  | 1 Male   | 1955 | 60     | 5    | >=60      | 1.0            |    |
| 28758  | 303904 | 2        | Taiwan  | 1           | 1  | 1  | 2 Female | 1949 | 66     | 5    | >=60      | 1.7            |    |
| 28761  | 108412 | 1        | China   | 1           | 1  | 2  | 2 Female | 1954 | 61     | 5    | >=60      | 1.1            |    |
| 28770  | 108415 | 1        | China   | 1           | 1  | 1  | 2 Female | 1951 | 64     | 5    | >=60      | 1.1            |    |
| 28774  | 108388 | 1        | China   | 1           | 1  | 2  | 2 Female | 1950 | 65     | 5    | >=60      | 1.1            |    |
| 28778  | 108416 | 1        | China   | 1           | 1  | 2  | 1 Male   | 1969 | 46     | 2    | 45-49     | 1.0            |    |
| 28783  | 108417 | 1        | China   | 1           | 1  | 1  | 1 Male   | 1966 | 49     | 2    | 45-49     | 1.0            |    |
| 28785  | 303913 | 2        | Taiwan  | 1           | 1  | 2  | 1 Male   | 1959 | 56     | 4    | 55-59     | 0.7            |    |
| 28797  | 108425 | 1        | China   | 1           | 1  | 1  | 1 Male   | 1950 | 65     | 5    | >=60      | 1.0            |    |
| 28801  | 108428 | 1        | China   | 1           | 1  | 2  | 1 Male   | 1955 | 60     | 5    | >=60      | 1.0            |    |
| 28821  | 105176 | 1        | China   | 1           | 1  | 2  | 2 Female | 1951 | 64     | 5    | >=60      | 1.1            |    |
| 28827  | 301966 | 2        | Taiwan  | 1           | 1  | 1  | 1 Male   | 1948 | 67     | 5    | >=60      | 1.6            |    |
| 28828  | 303919 | 2        | Taiwan  | 1           | 1  | 1  | 2 Female | 1951 | 64     | 5    | >=60      | 1.7            |    |
| 28871  | 303921 | 2        | Taiwan  | 1           | 1  | 1  | 2 Female | 1956 | 59     | 4    | 55-59     | 0.9            |    |
| 28876  | 108442 | 1        | China   | 1           | 1  | 2  | 1 Male   | 1950 | 65     | 5    | >=60      | 1.0            |    |
| 28891  | 108444 | 1        | China   | 1           | 1  | 2  | 1 Male   | 1950 | 65     | 5    | >=60      | 1.0            |    |
| 28898  | 108445 | 1        | China   | 1           | 1  | 2  | 1 Male   | 1970 | 45     | 2    | 45-49     | 1.0            |    |
| 28909  | 108450 | 1        | China   | 1           | 1  | 1  | 1 Male   | 1968 | 47     | 2    | 45-49     | 1.0            |    |
| 28930  | 303944 | 2        | Taiwan  | 1           | 1  | 1  | 2 Female | 1952 | 63     | 5    | >=60      | 1.7            |    |
| 28935  | 303945 | 2        | Taiwan  | 1           | 1  | 1  | 2 Female | 1965 | 50     | 3    | 50-54     | 0.9            |    |
| 28964  | 107827 | 1        | China   | 1           | 1  | 2  | 1 Male   | 1949 | 66     | 5    | >=60      | 1.0            |    |
| 28965  | 303954 | 2        | Taiwan  | 1           | 1  | 1  | 1 Male   | 1959 | 56     | 4    | 55-59     | 0.7            |    |
| 28967  | 108457 | 1        | China   | 1           | 1  | 2  | 1 Male   | 1952 | 63     | 5    | >=60      | 1.0            |    |
| 28975  | 204442 | 3        | Korea   | 1           | 1  | 2  | 2 Female | 1952 | 63     | 5    | >=60      | 1.6            |    |
| 28982  | 108460 | 1        | China   | 1           | 1  | 2  | 1 Male   | 1953 | 62     | 5    | >=60      | 1.0            |    |
| 28989  | 108461 | 1        | China   | 1           | 1  | 2  | 1 Male   | 1953 | 62     | 5    | >=60      | 1.0            |    |
| 29003  | 108464 | 1        | China   | 1           | 1  | 2  | 1 Male   | 1950 | 65     | 5    | >=60      | 1.0            |    |
| 29004  | 303966 | 2        | Taiwan  | 1           | 1  | 2  | 2 Female | 1951 | 64     | 5    | >=60      | 1.7            |    |
| 29007  | 303969 | 2        | Taiwan  | 1           | 1  | 1  | 2 Female | 1951 | 64     | 5    | >=60      | 1.7            |    |
| 29008  | 303970 | 2        | Taiwan  | 1           | 1  | 2  | 1 Male   | 1933 | 82     | 5    | >=60      | 1.6            |    |
| 29011  | 108465 | 1        | China   | 1           | 1  | 2  | 2 Female | 1950 | 65     | 5    | >=60      | 1.1            |    |



| respid | SubsID | dCountry | Country | QDisclaim<br>er | Q1 | Q2 | Gender | Q3_1 | age Nr | dAge | age Group | Weight in<br>Ctry | Q4 |
|--------|--------|----------|---------|-----------------|----|----|--------|------|--------|------|-----------|-------------------|----|
| 29012  | 303971 | 2        | Taiwan  | 1               | 1  | 1  | Male   | 1951 | 64     | 5    | >=60      | 1.6               |    |
| 29014  | 303972 | 2        | Taiwan  | 1               | 1  | 2  | Female | 1951 | 64     | 5    | >=60      | 1.7               |    |
| 29016  | 303973 | 2        | Taiwan  | 1               | 1  | 2  | Female | 1955 | 60     | 5    | >=60      | 1.7               |    |
| 29018  | 303975 | 2        | Taiwan  | 1               | 1  | 2  | Female | 1963 | 52     | 3    | 50-54     | 0.9               |    |
| 29048  | 303986 | 2        | Taiwan  | 1               | 2  | 2  | Female | 1963 | 52     | 3    | 50-54     | 0.9               |    |
| 29184  | 303991 | 2        | Taiwan  | 1               | 2  | 2  | Female | 1965 | 50     | 3    | 50-54     | 0.9               |    |
| 29237  | 108489 | 1        | China   | 1               | 2  | 2  | Female | 1959 | 56     | 4    | 55-59     | 1.0               |    |
| 29252  | 108496 | 1        | China   | 1               | 2  | 1  | Male   | 1952 | 63     | 5    | >=60      | 1.0               |    |
| 29267  | 106770 | 1        | China   | 1               | 2  | 1  | Male   | 1951 | 64     | 5    | >=60      | 1.0               |    |
| 29276  | 108503 | 1        | China   | 1               | 2  | 1  | Male   | 1948 | 67     | 5    | >=60      | 1.0               |    |
| 29281  | 304005 | 2        | Taiwan  | 1               | 1  | 2  | Female | 1955 | 60     | 5    | >=60      | 1.7               |    |
| 29285  | 204477 | 3        | Korea   | 1               | 2  | 2  | Female | 1952 | 63     | 5    | >=60      | 1.6               |    |
| 29291  | 108507 | 1        | China   | 1               | 2  | 1  | Male   | 1955 | 60     | 5    | >=60      | 1.0               |    |
| 29304  | 304009 | 2        | Taiwan  | 1               | 1  | 1  | Male   | 1956 | 59     | 4    | 55-59     | 0.7               |    |
| 29323  | 304011 | 2        | Taiwan  | 1               | 1  | 2  | Female | 1955 | 60     | 5    | >=60      | 1.7               |    |
| 29330  | 108524 | 1        | China   | 1               | 1  | 1  | Male   | 1946 | 69     | 5    | >=60      | 1.0               |    |
| 29357  | 108534 | 1        | China   | 1               | 1  | 1  | Male   | 1953 | 62     | 5    | >=60      | 1.0               |    |
| 29416  | 204490 | 3        | Korea   | 1               | 1  | 2  | Female | 1937 | 78     | 5    | >=60      | 1.6               |    |
| 29432  | 108557 | 1        | China   | 1               | 2  | 1  | Male   | 1953 | 62     | 5    | >=60      | 1.0               |    |
| 29482  | 304029 | 2        | Taiwan  | 1               | 1  | 2  | Female | 1954 | 61     | 5    | >=60      | 1.7               |    |
| 29506  | 304034 | 2        | Taiwan  | 1               | 2  | 1  | Male   | 1955 | 60     | 5    | >=60      | 1.6               |    |
| 29509  | 304035 | 2        | Taiwan  | 1               | 2  | 1  | Male   | 1939 | 76     | 5    | >=60      | 1.6               |    |
| 29512  | 304033 | 2        | Taiwan  | 1               | 1  | 2  | Female | 1954 | 61     | 5    | >=60      | 1.7               |    |
| 29519  | 304037 | 2        | Taiwan  | 1               | 2  | 2  | Female | 1949 | 66     | 5    | >=60      | 1.7               |    |
| 29520  | 302940 | 2        | Taiwan  | 1               | 1  | 2  | Female | 1961 | 54     | 3    | 50-54     | 0.9               |    |
| 29521  | 302032 | 2        | Taiwan  | 1               | 1  | 2  | Female | 1954 | 61     | 5    | >=60      | 1.7               |    |
| 29529  | 108593 | 1        | China   | 1               | 2  | 2  | Female | 1947 | 68     | 5    | >=60      | 1.1               |    |
| 29532  | 108594 | 1        | China   | 1               | 1  | 1  | Male   | 1953 | 62     | 5    | >=60      | 1.0               |    |
| 29547  | 304044 | 2        | Taiwan  | 1               | 1  | 2  | Female | 1946 | 69     | 5    | >=60      | 1.7               |    |
| 29551  | 304045 | 2        | Taiwan  | 1               | 1  | 1  | Male   | 1956 | 59     | 4    | 55-59     | 0.7               |    |
| 29584  | 304051 | 2        | Taiwan  | 1               | 1  | 1  | Male   | 1960 | 55     | 4    | 55-59     | 0.7               |    |
| 29591  | 108615 | 1        | China   | 1               | 1  | 2  | Female | 1950 | 65     | 5    | >=60      | 1.1               |    |

| respid | SubsID | dCountry | Country | QDisclaimer | Q1 | Q2 | Gender   | Q3_1 | age Nr | dAge | age Group | Weight in Ctry | Q4 |
|--------|--------|----------|---------|-------------|----|----|----------|------|--------|------|-----------|----------------|----|
| 29613  | 204513 | 3        | Korea   | 1           | 1  | 1  | 2 Female | 1955 | 60     | 5    | >=60      | 1.6            |    |
| 29615  | 108622 | 1        | China   | 1           | 1  | 1  | 2 Female | 1954 | 61     | 5    | >=60      | 1.1            |    |
| 29625  | 108625 | 1        | China   | 1           | 1  | 1  | 1 Male   | 1954 | 61     | 5    | >=60      | 1.0            |    |
| 29660  | 108642 | 1        | China   | 1           | 2  | 2  | 2 Female | 1951 | 64     | 5    | >=60      | 1.1            |    |
| 29677  | 304064 | 2        | Taiwan  | 1           | 2  | 2  | 2 Female | 1952 | 63     | 5    | >=60      | 1.7            |    |
| 29700  | 108651 | 1        | China   | 1           | 1  | 1  | 1 Male   | 1950 | 65     | 5    | >=60      | 1.0            |    |
| 29715  | 108658 | 1        | China   | 1           | 2  | 1  | 1 Male   | 1952 | 63     | 5    | >=60      | 1.0            |    |
| 29720  | 108661 | 1        | China   | 1           | 1  | 2  | 2 Female | 1953 | 62     | 5    | >=60      | 1.1            |    |
| 29730  | 304075 | 2        | Taiwan  | 1           | 2  | 1  | 1 Male   | 1955 | 60     | 5    | >=60      | 1.6            |    |
| 29734  | 108667 | 1        | China   | 1           | 1  | 2  | 2 Female | 1950 | 65     | 5    | >=60      | 1.1            |    |
| 29754  | 304078 | 2        | Taiwan  | 1           | 2  | 2  | 2 Female | 1960 | 55     | 4    | 55-59     | 0.9            |    |
| 29771  | 303704 | 2        | Taiwan  | 1           | 1  | 1  | 1 Male   | 1958 | 57     | 4    | 55-59     | 0.7            |    |
| 29774  | 304081 | 2        | Taiwan  | 1           | 2  | 1  | 1 Male   | 1958 | 57     | 4    | 55-59     | 0.7            |    |
| 29783  | 304083 | 2        | Taiwan  | 1           | 2  | 2  | 2 Female | 1960 | 55     | 4    | 55-59     | 0.9            |    |
| 29812  | 303850 | 2        | Taiwan  | 1           | 1  | 2  | 2 Female | 1958 | 57     | 4    | 55-59     | 0.9            |    |
| 29813  | 108697 | 1        | China   | 1           | 2  | 1  | 1 Male   | 1947 | 68     | 5    | >=60      | 1.0            |    |
| 29814  | 108698 | 1        | China   | 1           | 1  | 2  | 2 Female | 1955 | 60     | 5    | >=60      | 1.1            |    |
| 29820  | 304088 | 2        | Taiwan  | 1           | 2  | 1  | 1 Male   | 1959 | 56     | 4    | 55-59     | 0.7            |    |
| 29906  | 108739 | 1        | China   | 1           | 2  | 1  | 1 Male   | 1949 | 66     | 5    | >=60      | 1.0            |    |
| 29907  | 304097 | 2        | Taiwan  | 1           | 1  | 2  | 2 Female | 1953 | 62     | 5    | >=60      | 1.7            |    |
| 29928  | 304102 | 2        | Taiwan  | 1           | 1  | 2  | 2 Female | 1958 | 57     | 4    | 55-59     | 0.9            |    |
| 29932  | 304104 | 2        | Taiwan  | 1           | 2  | 1  | 1 Male   | 1950 | 65     | 5    | >=60      | 1.6            |    |
| 29958  | 204550 | 3        | Korea   | 1           | 2  | 2  | 2 Female | 1954 | 61     | 5    | >=60      | 1.6            |    |
| 29982  | 304111 | 2        | Taiwan  | 1           | 1  | 1  | 1 Male   | 1956 | 59     | 4    | 55-59     | 0.7            |    |
| 29989  | 304113 | 2        | Taiwan  | 1           | 2  | 1  | 1 Male   | 1958 | 57     | 4    | 55-59     | 0.7            |    |
| 29994  | 108772 | 1        | China   | 1           | 1  | 1  | 1 Male   | 1950 | 65     | 5    | >=60      | 1.0            |    |
| 30005  | 303437 | 2        | Taiwan  | 1           | 1  | 2  | 2 Female | 1952 | 63     | 5    | >=60      | 1.7            |    |
| 30077  | 304131 | 2        | Taiwan  | 1           | 1  | 1  | 1 Male   | 1939 | 76     | 5    | >=60      | 1.6            |    |
| 30098  | 303382 | 2        | Taiwan  | 1           | 2  | 1  | 1 Male   | 1950 | 65     | 5    | >=60      | 1.6            |    |
| 30107  | 304136 | 2        | Taiwan  | 1           | 2  | 2  | 2 Female | 1956 | 59     | 4    | 55-59     | 0.9            |    |
| 30154  | 106239 | 1        | China   | 1           | 2  | 1  | 1 Male   | 1936 | 79     | 5    | >=60      | 1.0            |    |
| 30159  | 304145 | 2        | Taiwan  | 1           | 2  | 1  | 1 Male   | 1959 | 56     | 4    | 55-59     | 0.7            |    |

| respid | SubsID | dCountry | Country | QDisclaimer | Q1 | Q2 | Gender | Q3_1 | age Nr | dAge | age Group | Weight in Ctry | Q4 |
|--------|--------|----------|---------|-------------|----|----|--------|------|--------|------|-----------|----------------|----|
| 30162  | 303646 | 2        | Taiwan  | 1           | 1  | 1  | Male   | 1958 | 57     | 4    | 55-59     | 0.7            |    |
| 30163  | 304146 | 2        | Taiwan  | 1           | 2  | 1  | Male   | 1950 | 65     | 5    | >=60      | 1.6            |    |
| 30189  | 304154 | 2        | Taiwan  | 1           | 2  | 2  | Female | 1951 | 64     | 5    | >=60      | 1.7            |    |
| 30230  | 304161 | 2        | Taiwan  | 1           | 1  | 2  | Female | 1959 | 56     | 4    | 55-59     | 0.9            |    |
| 30259  | 304168 | 2        | Taiwan  | 1           | 1  | 1  | Male   | 1953 | 62     | 5    | >=60      | 1.6            |    |
| 30284  | 301725 | 2        | Taiwan  | 1           | 1  | 1  | Male   | 1933 | 82     | 5    | >=60      | 1.6            |    |
| 30296  | 304175 | 2        | Taiwan  | 1           | 1  | 2  | Female | 1938 | 77     | 5    | >=60      | 1.7            |    |
| 30330  | 108855 | 1        | China   | 1           | 2  | 1  | Male   | 1953 | 62     | 5    | >=60      | 1.0            |    |
| 30341  | 304187 | 2        | Taiwan  | 1           | 1  | 2  | Female | 1956 | 59     | 4    | 55-59     | 0.9            |    |
| 30352  | 304190 | 2        | Taiwan  | 1           | 1  | 2  | Female | 1954 | 61     | 5    | >=60      | 1.7            |    |
| 30379  | 304202 | 2        | Taiwan  | 1           | 1  | 1  | Male   | 1955 | 60     | 5    | >=60      | 1.6            |    |
| 30424  | 304216 | 2        | Taiwan  | 1           | 1  | 2  | Female | 1959 | 56     | 4    | 55-59     | 0.9            |    |
| 30447  | 105651 | 1        | China   | 1           | 2  | 1  | Male   | 1954 | 61     | 5    | >=60      | 1.0            |    |
| 30477  | 108895 | 1        | China   | 1           | 2  | 1  | Male   | 1943 | 72     | 5    | >=60      | 1.0            |    |
| 30503  | 304240 | 2        | Taiwan  | 1           | 1  | 1  | Male   | 1953 | 62     | 5    | >=60      | 1.6            |    |
| 30515  | 108901 | 1        | China   | 1           | 1  | 1  | Male   | 1955 | 60     | 5    | >=60      | 1.0            |    |
| 30516  | 304242 | 2        | Taiwan  | 1           | 1  | 2  | Female | 1953 | 62     | 5    | >=60      | 1.7            |    |
| 30623  | 108921 | 1        | China   | 1           | 1  | 1  | Male   | 1953 | 62     | 5    | >=60      | 1.0            |    |
| 30639  | 108924 | 1        | China   | 1           | 2  | 1  | Male   | 1953 | 62     | 5    | >=60      | 1.0            |    |
| 30670  | 304276 | 2        | Taiwan  | 1           | 2  | 1  | Male   | 1945 | 70     | 5    | >=60      | 1.6            |    |
| 30697  | 304279 | 2        | Taiwan  | 1           | 2  | 1  | Male   | 1955 | 60     | 5    | >=60      | 1.6            |    |
| 30735  | 301675 | 2        | Taiwan  | 1           | 1  | 2  | Female | 1956 | 59     | 4    | 55-59     | 0.9            |    |
| 30742  | 304285 | 2        | Taiwan  | 1           | 1  | 1  | Male   | 1951 | 64     | 5    | >=60      | 1.6            |    |
| 30751  | 108960 | 1        | China   | 1           | 2  | 1  | Male   | 1953 | 62     | 5    | >=60      | 1.0            |    |
| 30789  | 304291 | 2        | Taiwan  | 1           | 1  | 1  | Male   | 1956 | 59     | 4    | 55-59     | 0.7            |    |
| 30867  | 108993 | 1        | China   | 1           | 2  | 1  | Male   | 1950 | 65     | 5    | >=60      | 1.0            |    |
| 30876  | 108994 | 1        | China   | 1           | 1  | 2  | Female | 1951 | 64     | 5    | >=60      | 1.1            |    |
| 30877  | 304300 | 2        | Taiwan  | 1           | 2  | 1  | Male   | 1949 | 66     | 5    | >=60      | 1.6            |    |
| 30887  | 108999 | 1        | China   | 1           | 2  | 1  | Male   | 1949 | 66     | 5    | >=60      | 1.0            |    |
| 30891  | 109000 | 1        | China   | 1           | 1  | 1  | Male   | 1953 | 62     | 5    | >=60      | 1.0            |    |
| 31030  | 109037 | 1        | China   | 1           | 2  | 2  | Female | 1953 | 62     | 5    | >=60      | 1.1            |    |
| 31059  | 304330 | 2        | Taiwan  | 1           | 2  | 1  | Male   | 1960 | 55     | 4    | 55-59     | 0.7            |    |

| respid | SubsID | dCountry | Country | QDisclaimer | Q1 | Q2 | Gender | Q3_1 | age Nr | dAge | age Group | Weight in Ctry | Q4 |
|--------|--------|----------|---------|-------------|----|----|--------|------|--------|------|-----------|----------------|----|
| 31082  | 304332 | 2        | Taiwan  | 1           | 1  | 1  | Male   | 1959 | 56     | 4    | 55-59     | 0.7            |    |
| 31106  | 304335 | 2        | Taiwan  | 1           | 1  | 1  | Male   | 1960 | 55     | 4    | 55-59     | 0.7            |    |
| 31110  | 109056 | 1        | China   | 1           | 2  | 1  | Male   | 1950 | 65     | 5    | >=60      | 1.0            |    |
| 31265  | 109114 | 1        | China   | 1           | 2  | 2  | Female | 1950 | 65     | 5    | >=60      | 1.1            |    |
| 31266  | 109115 | 1        | China   | 1           | 2  | 2  | Female | 1950 | 65     | 5    | >=60      | 1.1            |    |
| 31267  | 109116 | 1        | China   | 1           | 2  | 2  | Female | 1950 | 65     | 5    | >=60      | 1.1            |    |
| 31310  | 304354 | 2        | Taiwan  | 1           | 1  | 1  | Male   | 1960 | 55     | 4    | 55-59     | 0.7            |    |
| 31325  | 109132 | 1        | China   | 1           | 1  | 1  | Male   | 1950 | 65     | 5    | >=60      | 1.0            |    |
| 31367  | 109146 | 1        | China   | 1           | 2  | 1  | Male   | 1950 | 65     | 5    | >=60      | 1.0            |    |
| 31389  | 109151 | 1        | China   | 1           | 2  | 2  | Female | 1918 | 97     | 5    | >=60      | 1.1            |    |
| 31440  | 304369 | 2        | Taiwan  | 1           | 1  | 2  | Female | 1954 | 61     | 5    | >=60      | 1.7            |    |
| 31465  | 204707 | 3        | Korea   | 1           | 2  | 2  | Female | 1945 | 70     | 5    | >=60      | 1.6            |    |
| 31477  | 204709 | 3        | Korea   | 1           | 2  | 2  | Female | 1953 | 62     | 5    | >=60      | 1.6            |    |
| 31491  | 302317 | 2        | Taiwan  | 1           | 1  | 1  | Male   | 1951 | 64     | 5    | >=60      | 1.6            |    |
| 31494  | 109187 | 1        | China   | 1           | 1  | 1  | Male   | 1950 | 65     | 5    | >=60      | 1.0            |    |
| 31509  | 109190 | 1        | China   | 1           | 2  | 1  | Male   | 1950 | 65     | 5    | >=60      | 1.0            |    |
| 31533  | 109197 | 1        | China   | 1           | 2  | 1  | Male   | 1950 | 65     | 5    | >=60      | 1.0            |    |
| 31547  | 301789 | 2        | Taiwan  | 1           | 2  | 2  | Female | 1955 | 60     | 5    | >=60      | 1.7            |    |
| 31558  | 304396 | 2        | Taiwan  | 1           | 2  | 2  | Female | 1959 | 56     | 4    | 55-59     | 0.9            |    |
| 31579  | 304400 | 2        | Taiwan  | 1           | 1  | 2  | Female | 1958 | 57     | 4    | 55-59     | 0.9            |    |
| 31591  | 109218 | 1        | China   | 1           | 1  | 2  | Female | 1949 | 66     | 5    | >=60      | 1.1            |    |
| 31596  | 109219 | 1        | China   | 1           | 1  | 2  | Female | 1950 | 65     | 5    | >=60      | 1.1            |    |
| 31601  | 109222 | 1        | China   | 1           | 2  | 1  | Male   | 1954 | 61     | 5    | >=60      | 1.0            |    |
| 31605  | 109224 | 1        | China   | 1           | 2  | 2  | Female | 1948 | 67     | 5    | >=60      | 1.1            |    |
| 31637  | 109226 | 1        | China   | 1           | 2  | 2  | Female | 1953 | 62     | 5    | >=60      | 1.1            |    |
| 31646  | 109228 | 1        | China   | 1           | 1  | 2  | Female | 1947 | 68     | 5    | >=60      | 1.1            |    |
| 31647  | 304413 | 2        | Taiwan  | 1           | 1  | 2  | Female | 1958 | 57     | 4    | 55-59     | 0.9            |    |
| 31650  | 304415 | 2        | Taiwan  | 1           | 2  | 1  | Male   | 1953 | 62     | 5    | >=60      | 1.6            |    |
| 31651  | 109230 | 1        | China   | 1           | 2  | 1  | Male   | 1950 | 65     | 5    | >=60      | 1.0            |    |
| 31657  | 109234 | 1        | China   | 1           | 2  | 1  | Male   | 1950 | 65     | 5    | >=60      | 1.0            |    |
| 31660  | 304418 | 2        | Taiwan  | 1           | 1  | 2  | Female | 1949 | 66     | 5    | >=60      | 1.7            |    |
| 31661  | 109235 | 1        | China   | 1           | 2  | 1  | Male   | 1950 | 65     | 5    | >=60      | 1.0            |    |

| respid | SubsID | dCountry | Country | QDisclaimer | Q1 | Q2 | Gender   | Q3_1 | age Nr | dAge | age Group | Weight in Ctry | Q4 |
|--------|--------|----------|---------|-------------|----|----|----------|------|--------|------|-----------|----------------|----|
| 31667  | 109236 | 1        | China   | 1           | 1  | 2  | 1 Male   | 1950 | 65     | 5    | >=60      | 1.0            |    |
| 31674  | 109239 | 1        | China   | 1           | 1  | 2  | 1 Male   | 1950 | 65     | 5    | >=60      | 1.0            |    |
| 31686  | 109240 | 1        | China   | 1           | 1  | 2  | 1 Male   | 1948 | 67     | 5    | >=60      | 1.0            |    |
| 31693  | 109241 | 1        | China   | 1           | 1  | 2  | 1 Male   | 1954 | 61     | 5    | >=60      | 1.0            |    |
| 31716  | 102510 | 1        | China   | 1           | 1  | 2  | 1 Male   | 1955 | 60     | 5    | >=60      | 1.0            |    |
| 31818  | 109296 | 1        | China   | 1           | 1  | 2  | 1 Male   | 1947 | 68     | 5    | >=60      | 1.0            |    |
| 31886  | 109333 | 1        | China   | 1           | 1  | 2  | 1 Male   | 1950 | 65     | 5    | >=60      | 1.0            |    |
| 31945  | 109359 | 1        | China   | 1           | 1  | 2  | 1 Male   | 1949 | 66     | 5    | >=60      | 1.0            |    |
| 31957  | 302806 | 2        | Taiwan  | 1           | 1  | 1  | 2 Female | 1956 | 59     | 4    | 55-59     | 0.9            |    |
| 31966  | 204735 | 3        | Korea   | 1           | 1  | 2  | 2 Female | 1946 | 69     | 5    | >=60      | 1.6            |    |
| 31978  | 304463 | 2        | Taiwan  | 1           | 1  | 1  | 1 Male   | 1949 | 66     | 5    | >=60      | 1.6            |    |
| 31999  | 304467 | 2        | Taiwan  | 1           | 1  | 2  | 2 Female | 1958 | 57     | 4    | 55-59     | 0.9            |    |
| 32026  | 204741 | 3        | Korea   | 1           | 1  | 2  | 2 Female | 1952 | 63     | 5    | >=60      | 1.6            |    |
| 32033  | 304472 | 2        | Taiwan  | 1           | 1  | 2  | 2 Female | 1954 | 61     | 5    | >=60      | 1.7            |    |
| 32037  | 109396 | 1        | China   | 1           | 1  | 2  | 2 Female | 1950 | 65     | 5    | >=60      | 1.1            |    |
| 32038  | 109397 | 1        | China   | 1           | 1  | 2  | 2 Female | 1950 | 65     | 5    | >=60      | 1.1            |    |
| 32047  | 109429 | 1        | China   | 1           | 1  | 2  | 2 Female | 1954 | 61     | 5    | >=60      | 1.1            |    |
| 32053  | 109431 | 1        | China   | 1           | 1  | 2  | 1 Male   | 1950 | 65     | 5    | >=60      | 1.0            |    |
| 32069  | 304483 | 2        | Taiwan  | 1           | 1  | 1  | 2 Female | 1956 | 59     | 4    | 55-59     | 0.9            |    |
| 32081  | 109440 | 1        | China   | 1           | 1  | 2  | 1 Male   | 1950 | 65     | 5    | >=60      | 1.0            |    |
| 32123  | 304488 | 2        | Taiwan  | 1           | 1  | 1  | 2 Female | 1954 | 61     | 5    | >=60      | 1.7            |    |
| 32130  | 109455 | 1        | China   | 1           | 1  | 2  | 2 Female | 1949 | 66     | 5    | >=60      | 1.1            |    |
| 32141  | 109461 | 1        | China   | 1           | 1  | 2  | 1 Male   | 1952 | 63     | 5    | >=60      | 1.0            |    |
| 32158  | 109468 | 1        | China   | 1           | 1  | 2  | 1 Male   | 1950 | 65     | 5    | >=60      | 1.0            |    |
| 32165  | 304492 | 2        | Taiwan  | 1           | 1  | 2  | 2 Female | 1960 | 55     | 4    | 55-59     | 0.9            |    |
| 32180  | 301988 | 2        | Taiwan  | 1           | 1  | 1  | 2 Female | 1954 | 61     | 5    | >=60      | 1.7            |    |
| 32221  | 109490 | 1        | China   | 1           | 1  | 2  | 2 Female | 1955 | 60     | 5    | >=60      | 1.1            |    |
| 32292  | 304515 | 2        | Taiwan  | 1           | 1  | 1  | 1 Male   | 1959 | 56     | 4    | 55-59     | 0.7            |    |
| 32318  | 304519 | 2        | Taiwan  | 1           | 1  | 2  | 2 Female | 1958 | 57     | 4    | 55-59     | 0.9            |    |
| 32346  | 202677 | 3        | Korea   | 1           | 1  | 2  | 2 Female | 1954 | 61     | 5    | >=60      | 1.6            |    |
| 32402  | 304530 | 2        | Taiwan  | 1           | 1  | 2  | 1 Male   | 1930 | 85     | 5    | >=60      | 1.6            |    |
| 32422  | 109546 | 1        | China   | 1           | 1  | 2  | 2 Female | 1950 | 65     | 5    | >=60      | 1.1            |    |

| respid | SubsID | dCountry | Country | QDisclaim<br>er | Q1 | Q2 | Gender | Q3_1 | age Nr | dAge | age Group | Weight in<br>Ctry | Q4 |
|--------|--------|----------|---------|-----------------|----|----|--------|------|--------|------|-----------|-------------------|----|
| 32439  | 106750 | 1        | China   | 1               | 2  | 1  | Male   | 1955 | 60     | 5    | >=60      | 1.0               |    |
| 32507  | 304551 | 2        | Taiwan  | 1               | 2  | 1  | Male   | 1960 | 55     | 4    | 55-59     | 0.7               |    |
| 32522  | 109573 | 1        | China   | 1               | 2  | 1  | Male   | 1949 | 66     | 5    | >=60      | 1.0               |    |
| 32535  | 109577 | 1        | China   | 1               | 2  | 1  | Male   | 1950 | 65     | 5    | >=60      | 1.0               |    |
| 32546  | 109580 | 1        | China   | 1               | 1  | 2  | Female | 1953 | 62     | 5    | >=60      | 1.1               |    |
| 32553  | 109583 | 1        | China   | 1               | 2  | 1  | Male   | 1948 | 67     | 5    | >=60      | 1.0               |    |
| 32570  | 304563 | 2        | Taiwan  | 1               | 1  | 1  | Male   | 1960 | 55     | 4    | 55-59     | 0.7               |    |
| 32592  | 106786 | 1        | China   | 1               | 2  | 1  | Male   | 1947 | 68     | 5    | >=60      | 1.0               |    |
| 32605  | 304572 | 2        | Taiwan  | 1               | 1  | 2  | Female | 1941 | 74     | 5    | >=60      | 1.7               |    |
| 32630  | 109600 | 1        | China   | 1               | 1  | 1  | Male   | 1955 | 60     | 5    | >=60      | 1.0               |    |
| 32642  | 109601 | 1        | China   | 1               | 2  | 1  | Male   | 1954 | 61     | 5    | >=60      | 1.0               |    |
| 32646  | 304582 | 2        | Taiwan  | 1               | 1  | 2  | Female | 1958 | 57     | 4    | 55-59     | 0.9               |    |
| 32665  | 300781 | 2        | Taiwan  | 1               | 2  | 1  | Male   | 1959 | 56     | 4    | 55-59     | 0.7               |    |
| 32677  | 304586 | 2        | Taiwan  | 1               | 1  | 2  | Female | 1954 | 61     | 5    | >=60      | 1.7               |    |
| 32694  | 304589 | 2        | Taiwan  | 1               | 2  | 2  | Female | 1953 | 62     | 5    | >=60      | 1.7               |    |
| 32698  | 304590 | 2        | Taiwan  | 1               | 1  | 2  | Female | 1951 | 64     | 5    | >=60      | 1.7               |    |
| 32754  | 204844 | 3        | Korea   | 1               | 1  | 2  | Female | 1954 | 61     | 5    | >=60      | 1.6               |    |
| 32799  | 109634 | 1        | China   | 1               | 2  | 2  | Female | 1952 | 63     | 5    | >=60      | 1.1               |    |
| 32816  | 304612 | 2        | Taiwan  | 1               | 1  | 1  | Male   | 1957 | 58     | 4    | 55-59     | 0.7               |    |
| 32819  | 109643 | 1        | China   | 1               | 1  | 2  | Female | 1953 | 62     | 5    | >=60      | 1.1               |    |
| 32840  | 109651 | 1        | China   | 1               | 2  | 2  | Female | 1954 | 61     | 5    | >=60      | 1.1               |    |
| 32861  | 303517 | 2        | Taiwan  | 1               | 1  | 1  | Male   | 1956 | 59     | 4    | 55-59     | 0.7               |    |
| 32866  | 304622 | 2        | Taiwan  | 1               | 1  | 2  | Female | 1957 | 58     | 4    | 55-59     | 0.9               |    |
| 32889  | 304627 | 2        | Taiwan  | 1               | 2  | 2  | Female | 1960 | 55     | 4    | 55-59     | 0.9               |    |
| 32960  | 302379 | 2        | Taiwan  | 1               | 2  | 1  | Male   | 1957 | 58     | 4    | 55-59     | 0.7               |    |
| 32965  | 304640 | 2        | Taiwan  | 1               | 1  | 2  | Female | 1952 | 63     | 5    | >=60      | 1.7               |    |
| 32986  | 109682 | 1        | China   | 1               | 1  | 2  | Female | 1953 | 62     | 5    | >=60      | 1.1               |    |
| 33005  | 304651 | 2        | Taiwan  | 1               | 2  | 2  | Female | 1956 | 59     | 4    | 55-59     | 0.9               |    |
| 33054  | 109697 | 1        | China   | 1               | 2  | 1  | Male   | 1953 | 62     | 5    | >=60      | 1.0               |    |
| 33072  | 304665 | 2        | Taiwan  | 1               | 1  | 2  | Female | 1954 | 61     | 5    | >=60      | 1.7               |    |
| 33095  | 304670 | 2        | Taiwan  | 1               | 2  | 1  | Male   | 1948 | 67     | 5    | >=60      | 1.6               |    |
| 33099  | 109695 | 1        | China   | 1               | 2  | 2  | Female | 1954 | 61     | 5    | >=60      | 1.1               |    |

| respid | SubsID    | dCountry | Country | QDisclaimer | Q1 | Q2 | Gender   | Q3_1 | age Nr | dAge | age Group | Weight in Ctry | Q4 |
|--------|-----------|----------|---------|-------------|----|----|----------|------|--------|------|-----------|----------------|----|
| 33121  | 109714    | 1        | China   |             | 1  | 1  | 1 Male   | 1951 | 64     | 5    | >=60      | 1.0            |    |
| 33152  | 304679    | 2        | Taiwan  |             | 1  | 2  | 2 Female | 1951 | 64     | 5    | >=60      | 1.7            |    |
| 33159  | 109721    | 1        | China   |             | 1  | 2  | 1 Male   | 1950 | 65     | 5    | >=60      | 1.0            |    |
| 33189  | 304687    | 2        | Taiwan  |             | 1  | 1  | 1 Male   | 1944 | 71     | 5    | >=60      | 1.6            |    |
| 33198  | 109731    | 1        | China   |             | 1  | 2  | 2 Female | 1949 | 66     | 5    | >=60      | 1.1            |    |
| 33202  | 202416    | 3        | Korea   |             | 1  | 2  | 2 Female | 1954 | 61     | 5    | >=60      | 1.6            |    |
| 33204  | 304688    | 2        | Taiwan  |             | 1  | 1  | 2 Female | 1938 | 77     | 5    | >=60      | 1.7            |    |
| 33224  | 304691    | 2        | Taiwan  |             | 1  | 1  | 1 Male   | 1960 | 55     | 4    | 55-59     | 0.7            |    |
| 33272  | 109748    | 1        | China   |             | 1  | 1  | 2 Female | 1950 | 65     | 5    | >=60      | 1.1            |    |
| 33294  | 304704    | 2        | Taiwan  |             | 1  | 1  | 2 Female | 1951 | 64     | 5    | >=60      | 1.7            |    |
| 33300  | 109751    | 1        | China   |             | 1  | 2  | 1 Male   | 1953 | 62     | 5    | >=60      | 1.0            |    |
| 33314  | 109756    | 1        | China   |             | 1  | 1  | 2 Female | 1950 | 65     | 5    | >=60      | 1.1            |    |
| 33338  | 109761    | 1        | China   |             | 1  | 1  | 1 Male   | 1949 | 66     | 5    | >=60      | 1.0            |    |
| 33350  | 109766    | 1        | China   |             | 1  | 2  | 1 Male   | 1950 | 65     | 5    | >=60      | 1.0            |    |
| 33362  | 109768    | 1        | China   |             | 1  | 2  | 1 Male   | 1951 | 64     | 5    | >=60      | 1.0            |    |
| 33368  | 109770    | 1        | China   |             | 1  | 2  | 1 Male   | 1952 | 63     | 5    | >=60      | 1.0            |    |
| 33374  | 109772    | 1        | China   |             | 1  | 2  | 1 Male   | 1952 | 63     | 5    | >=60      | 1.0            |    |
| 33380  | 109774    | 1        | China   |             | 1  | 2  | 1 Male   | 1952 | 63     | 5    | >=60      | 1.0            |    |
| 33385  | 109776    | 1        | China   |             | 1  | 2  | 1 Male   | 1951 | 64     | 5    | >=60      | 1.0            |    |
| 33402  | 109782    | 1        | China   |             | 1  | 1  | 1 Male   | 1949 | 66     | 5    | >=60      | 1.0            |    |
| 33414  | 109783    | 1        | China   |             | 1  | 2  | 1 Male   | 1950 | 65     | 5    | >=60      | 1.0            |    |
| 33439  | 109789    | 1        | China   |             | 1  | 1  | 1 Male   | 1950 | 65     | 5    | >=60      | 1.0            |    |
| 33449  | 109791    | 1        | China   |             | 1  | 2  | 1 Male   | 1950 | 65     | 5    | >=60      | 1.0            |    |
| 33533  | 204967    | 3        | Korea   |             | 1  | 1  | 2 Female | 1948 | 67     | 5    | >=60      | 1.6            |    |
| 33540  | 304767    | 2        | Taiwan  |             | 1  | 1  | 2 Female | 1958 | 57     | 4    | 55-59     | 0.9            |    |
| 33556  | 204981    | 3        | Korea   |             | 1  | 2  | 2 Female | 1949 | 66     | 5    | >=60      | 1.6            |    |
| 33615  | 205021    | 3        | Korea   |             | 1  | 2  | 2 Female | 1948 | 67     | 5    | >=60      | 1.6            |    |
| 33694  | 304779    | 2        | Taiwan  |             | 1  | 2  | 1 Male   | 1960 | 55     | 4    | 55-59     | 0.7            |    |
| 33717  | 280007347 | 1        | China   |             | 1  | 1  | 1 Male   | 1951 | 64     | 5    | >=60      | 1.0            |    |
| 33729  | 205074    | 3        | Korea   |             | 1  | 2  | 2 Female | 1955 | 60     | 5    | >=60      | 1.6            |    |
| 33746  | 205078    | 3        | Korea   |             | 1  | 1  | 2 Female | 1942 | 73     | 5    | >=60      | 1.6            |    |
| 33764  | 280428172 | 1        | China   |             | 1  | 2  | 2 Female | 1954 | 61     | 5    | >=60      | 1.1            |    |

| respid | SubsID    | dCountry | Country  | QDisclaimer | Q1 | Q2 | Gender   | Q3_1 | age Nr | dAge | age Group | Weight in Ctry | Q4 |
|--------|-----------|----------|----------|-------------|----|----|----------|------|--------|------|-----------|----------------|----|
| 33790  | 301171    |          | 2 Taiwan |             | 1  | 1  | 2 Female | 1942 | 73     |      | 5 >=60    | 1.7            |    |
| 33868  | 109836    |          | 1 China  |             | 1  | 1  | 1 Male   | 1954 | 61     |      | 5 >=60    | 1.0            |    |
| 33872  | 109837    |          | 1 China  |             | 1  | 1  | 1 Male   | 1948 | 67     |      | 5 >=60    | 1.0            |    |
| 33883  | 280242044 |          | 1 China  |             | 1  | 2  | 2 Female | 1951 | 64     |      | 5 >=60    | 1.1            |    |
| 33884  | 304803    |          | 2 Taiwan |             | 1  | 2  | 2 Female | 1956 | 59     |      | 4 55-59   | 0.9            |    |
| 33900  | 304806    |          | 2 Taiwan |             | 1  | 1  | 2 Female | 1956 | 59     |      | 4 55-59   | 0.9            |    |
| 33933  | 109843    |          | 1 China  |             | 1  | 2  | 2 Female | 1954 | 61     |      | 5 >=60    | 1.1            |    |
| 33949  | 205160    |          | 3 Korea  |             | 1  | 2  | 2 Female | 1954 | 61     |      | 5 >=60    | 1.6            |    |
| 34005  | 280285791 |          | 1 China  |             | 1  | 2  | 1 Male   | 1953 | 62     |      | 5 >=60    | 1.0            |    |
| 34016  | 205186    |          | 3 Korea  |             | 1  | 2  | 2 Female | 1947 | 68     |      | 5 >=60    | 1.6            |    |
| 34041  | 109855    |          | 1 China  |             | 1  | 2  | 1 Male   | 1955 | 60     |      | 5 >=60    | 1.0            |    |
| 34053  | 304824    |          | 2 Taiwan |             | 1  | 1  | 2 Female | 1959 | 56     |      | 4 55-59   | 0.9            |    |
| 34056  | 304825    |          | 2 Taiwan |             | 1  | 1  | 2 Female | 1953 | 62     |      | 5 >=60    | 1.7            |    |
| 34093  | 109857    |          | 1 China  |             | 1  | 1  | 1 Male   | 1953 | 62     |      | 5 >=60    | 1.0            |    |
| 34112  | 109865    |          | 1 China  |             | 1  | 2  | 2 Female | 1946 | 69     |      | 5 >=60    | 1.1            |    |
| 34136  | 109870    |          | 1 China  |             | 1  | 2  | 1 Male   | 1950 | 65     |      | 5 >=60    | 1.0            |    |
| 34138  | 304094    |          | 2 Taiwan |             | 1  | 2  | 2 Female | 1952 | 63     |      | 5 >=60    | 1.7            |    |
| 34139  | 109871    |          | 1 China  |             | 1  | 2  | 1 Male   | 1952 | 63     |      | 5 >=60    | 1.0            |    |
| 34189  | 109881    |          | 1 China  |             | 1  | 1  | 1 Male   | 1942 | 73     |      | 5 >=60    | 1.0            |    |
| 34239  | 304851    |          | 2 Taiwan |             | 1  | 2  | 2 Female | 1949 | 66     |      | 5 >=60    | 1.7            |    |
| 34240  | 205270    |          | 3 Korea  |             | 1  | 2  | 2 Female | 1950 | 65     |      | 5 >=60    | 1.6            |    |
| 34241  | 205271    |          | 3 Korea  |             | 1  | 2  | 2 Female | 1954 | 61     |      | 5 >=60    | 1.6            |    |
| 34259  | 109891    |          | 1 China  |             | 1  | 2  | 1 Male   | 1953 | 62     |      | 5 >=60    | 1.0            |    |
| 34303  | 101128    |          | 1 China  |             | 1  | 1  | 1 Male   | 1949 | 66     |      | 5 >=60    | 1.0            |    |
| 34306  | 109898    |          | 1 China  |             | 1  | 2  | 1 Male   | 1951 | 64     |      | 5 >=60    | 1.0            |    |
| 34395  | 304866    |          | 2 Taiwan |             | 1  | 1  | 1 Male   | 1958 | 57     |      | 4 55-59   | 0.7            |    |
| 34463  | 304878    |          | 2 Taiwan |             | 1  | 2  | 2 Female | 1945 | 70     |      | 5 >=60    | 1.7            |    |
| 34466  | 101124    |          | 1 China  |             | 1  | 1  | 1 Male   | 1950 | 65     |      | 5 >=60    | 1.0            |    |
| 34471  | 109920    |          | 1 China  |             | 1  | 1  | 2 Female | 1930 | 85     |      | 5 >=60    | 1.1            |    |
| 34489  | 109922    |          | 1 China  |             | 1  | 2  | 1 Male   | 1954 | 61     |      | 5 >=60    | 1.0            |    |
| 34518  | 205382    |          | 3 Korea  |             | 1  | 2  | 2 Female | 1955 | 60     |      | 5 >=60    | 1.6            |    |
| 34542  | 205395    |          | 3 Korea  |             | 1  | 2  | 2 Female | 1955 | 60     |      | 5 >=60    | 1.6            |    |



| respid | SubsID | dCountry | Country | QDisclaim<br>er | Q1 | Q2 | Gender | Q3_1 | age Nr | dAge | age Group | Weight in<br>Ctry | Q4 |
|--------|--------|----------|---------|-----------------|----|----|--------|------|--------|------|-----------|-------------------|----|
| 34595  | 205416 | 3        | Korea   | 1               | 2  | 2  | Female | 1950 | 65     | 5    | >=60      | 1.6               |    |
| 34604  | 205422 | 3        | Korea   | 1               | 1  | 2  | Female | 1947 | 68     | 5    | >=60      | 1.6               |    |
| 34631  | 304894 | 2        | Taiwan  | 1               | 2  | 2  | Female | 1958 | 57     | 4    | 55-59     | 0.9               |    |
| 34665  | 304895 | 2        | Taiwan  | 1               | 2  | 2  | Female | 1950 | 65     | 5    | >=60      | 1.7               |    |
| 34716  | 304898 | 2        | Taiwan  | 1               | 2  | 2  | Female | 1958 | 57     | 4    | 55-59     | 0.9               |    |
| 34729  | 205497 | 3        | Korea   | 1               | 2  | 2  | Female | 1953 | 62     | 5    | >=60      | 1.6               |    |
| 34772  | 109936 | 1        | China   | 1               | 2  | 2  | Female | 1950 | 65     | 5    | >=60      | 1.1               |    |
| 34800  | 304909 | 2        | Taiwan  | 1               | 1  | 2  | Female | 1955 | 60     | 5    | >=60      | 1.7               |    |
| 34819  | 109943 | 1        | China   | 1               | 2  | 2  | Female | 1948 | 67     | 5    | >=60      | 1.1               |    |
| 34829  | 109945 | 1        | China   | 1               | 2  | 2  | Female | 1955 | 60     | 5    | >=60      | 1.1               |    |
| 34831  | 109947 | 1        | China   | 1               | 1  | 2  | Female | 1954 | 61     | 5    | >=60      | 1.1               |    |
| 34839  | 304913 | 2        | Taiwan  | 1               | 1  | 2  | Female | 1955 | 60     | 5    | >=60      | 1.7               |    |
| 34868  | 109969 | 1        | China   | 1               | 1  | 2  | Female | 1953 | 62     | 5    | >=60      | 1.1               |    |
| 34869  | 109971 | 1        | China   | 1               | 2  | 2  | Female | 1922 | 93     | 5    | >=60      | 1.1               |    |
| 34882  | 109981 | 1        | China   | 1               | 2  | 2  | Female | 1935 | 80     | 5    | >=60      | 1.1               |    |
| 34895  | 109986 | 1        | China   | 1               | 2  | 1  | Male   | 1953 | 62     | 5    | >=60      | 1.0               |    |
| 34901  | 109991 | 1        | China   | 1               | 1  | 2  | Female | 1934 | 81     | 5    | >=60      | 1.1               |    |
| 34904  | 109996 | 1        | China   | 1               | 1  | 2  | Female | 1955 | 60     | 5    | >=60      | 1.1               |    |
| 34907  | 109997 | 1        | China   | 1               | 1  | 2  | Female | 1932 | 83     | 5    | >=60      | 1.1               |    |
| 34914  | 110003 | 1        | China   | 1               | 1  | 1  | Male   | 1932 | 83     | 5    | >=60      | 1.0               |    |
| 34918  | 110006 | 1        | China   | 1               | 2  | 1  | Male   | 1953 | 62     | 5    | >=60      | 1.0               |    |
| 34924  | 110011 | 1        | China   | 1               | 2  | 2  | Female | 1949 | 66     | 5    | >=60      | 1.1               |    |
| 34933  | 110020 | 1        | China   | 1               | 2  | 2  | Female | 1950 | 65     | 5    | >=60      | 1.1               |    |
| 34938  | 110025 | 1        | China   | 1               | 1  | 1  | Male   | 1953 | 62     | 5    | >=60      | 1.0               |    |
| 34952  | 110034 | 1        | China   | 1               | 1  | 1  | Male   | 1953 | 62     | 5    | >=60      | 1.0               |    |
| 34959  | 110041 | 1        | China   | 1               | 1  | 1  | Male   | 1954 | 61     | 5    | >=60      | 1.0               |    |
| 34972  | 110052 | 1        | China   | 1               | 1  | 2  | Female | 1955 | 60     | 5    | >=60      | 1.1               |    |
| 34973  | 110053 | 1        | China   | 1               | 2  | 2  | Female | 1950 | 65     | 5    | >=60      | 1.1               |    |
| 34975  | 110056 | 1        | China   | 1               | 2  | 1  | Male   | 1954 | 61     | 5    | >=60      | 1.0               |    |
| 34977  | 110039 | 1        | China   | 1               | 2  | 1  | Male   | 1946 | 69     | 5    | >=60      | 1.0               |    |
| 34978  | 110057 | 1        | China   | 1               | 1  | 2  | Female | 1935 | 80     | 5    | >=60      | 1.1               |    |
| 34980  | 110059 | 1        | China   | 1               | 1  | 1  | Male   | 1951 | 64     | 5    | >=60      | 1.0               |    |

| respid | SubsID | dCountry | Country | QDisclaimer | Q1 | Q2 | Gender   | Q3_1 | age Nr | dAge | age Group | Weight in Ctry | Q4 |
|--------|--------|----------|---------|-------------|----|----|----------|------|--------|------|-----------|----------------|----|
| 34984  | 110062 | 1        | China   |             | 1  | 1  | 2 Female | 1950 | 65     |      | 5 >=60    | 1.1            |    |
| 34986  | 110063 | 1        | China   |             | 1  | 1  | 1 Male   | 1951 | 64     |      | 5 >=60    | 1.0            |    |
| 34994  | 110071 | 1        | China   |             | 1  | 2  | 2 Female | 1952 | 63     |      | 5 >=60    | 1.1            |    |
| 34996  | 110074 | 1        | China   |             | 1  | 2  | 1 Male   | 1943 | 72     |      | 5 >=60    | 1.0            |    |
| 35003  | 110077 | 1        | China   |             | 1  | 2  | 1 Male   | 1952 | 63     |      | 5 >=60    | 1.0            |    |
| 35014  | 110081 | 1        | China   |             | 1  | 2  | 2 Female | 1952 | 63     |      | 5 >=60    | 1.1            |    |
| 35029  | 110088 | 1        | China   |             | 1  | 1  | 1 Male   | 1952 | 63     |      | 5 >=60    | 1.0            |    |
| 35030  | 110089 | 1        | China   |             | 1  | 2  | 2 Female | 1946 | 69     |      | 5 >=60    | 1.1            |    |
| 35037  | 110094 | 1        | China   |             | 1  | 2  | 2 Female | 1936 | 79     |      | 5 >=60    | 1.1            |    |
| 35043  | 304919 | 2        | Taiwan  |             | 1  | 2  | 1 Male   | 1960 | 55     |      | 4 55-59   | 0.7            |    |
| 35048  | 110101 | 1        | China   |             | 1  | 2  | 1 Male   | 1950 | 65     |      | 5 >=60    | 1.0            |    |
| 35055  | 110104 | 1        | China   |             | 1  | 1  | 2 Female | 1945 | 70     |      | 5 >=60    | 1.1            |    |
| 35067  | 110113 | 1        | China   |             | 1  | 2  | 2 Female | 1954 | 61     |      | 5 >=60    | 1.1            |    |
| 35072  | 110116 | 1        | China   |             | 1  | 1  | 2 Female | 1954 | 61     |      | 5 >=60    | 1.1            |    |
| 35078  | 110119 | 1        | China   |             | 1  | 1  | 1 Male   | 1940 | 75     |      | 5 >=60    | 1.0            |    |
| 35084  | 110124 | 1        | China   |             | 1  | 1  | 1 Male   | 1952 | 63     |      | 5 >=60    | 1.0            |    |
| 35095  | 110130 | 1        | China   |             | 1  | 1  | 1 Male   | 1955 | 60     |      | 5 >=60    | 1.0            |    |
| 35096  | 110132 | 1        | China   |             | 1  | 2  | 2 Female | 1950 | 65     |      | 5 >=60    | 1.1            |    |
| 35097  | 110133 | 1        | China   |             | 1  | 2  | 1 Male   | 1954 | 61     |      | 5 >=60    | 1.0            |    |
| 35098  | 110134 | 1        | China   |             | 1  | 2  | 2 Female | 1950 | 65     |      | 5 >=60    | 1.1            |    |
| 35109  | 110141 | 1        | China   |             | 1  | 1  | 1 Male   | 1943 | 72     |      | 5 >=60    | 1.0            |    |
| 35114  | 110143 | 1        | China   |             | 1  | 1  | 2 Female | 1933 | 82     |      | 5 >=60    | 1.1            |    |
| 35115  | 110144 | 1        | China   |             | 1  | 1  | 2 Female | 1949 | 66     |      | 5 >=60    | 1.1            |    |
| 35124  | 110152 | 1        | China   |             | 1  | 2  | 2 Female | 1953 | 62     |      | 5 >=60    | 1.1            |    |
| 35125  | 110153 | 1        | China   |             | 1  | 2  | 1 Male   | 1952 | 63     |      | 5 >=60    | 1.0            |    |
| 35141  | 110161 | 1        | China   |             | 1  | 1  | 2 Female | 1954 | 61     |      | 5 >=60    | 1.1            |    |
| 35142  | 110162 | 1        | China   |             | 1  | 2  | 2 Female | 1954 | 61     |      | 5 >=60    | 1.1            |    |
| 35145  | 110163 | 1        | China   |             | 1  | 1  | 2 Female | 1945 | 70     |      | 5 >=60    | 1.1            |    |
| 35149  | 110165 | 1        | China   |             | 1  | 1  | 2 Female | 1952 | 63     |      | 5 >=60    | 1.1            |    |
| 35159  | 110170 | 1        | China   |             | 1  | 2  | 2 Female | 1952 | 63     |      | 5 >=60    | 1.1            |    |
| 35163  | 110173 | 1        | China   |             | 1  | 1  | 2 Female | 1937 | 78     |      | 5 >=60    | 1.1            |    |
| 35174  | 110177 | 1        | China   |             | 1  | 1  | 2 Female | 1954 | 61     |      | 5 >=60    | 1.1            |    |

| respid | SubsID    | dCountry | Country | QDisclaimer | Q1 | Q2 | Gender   | Q3_1 | age Nr | dAge | age Group | Weight in Ctry | Q4 |
|--------|-----------|----------|---------|-------------|----|----|----------|------|--------|------|-----------|----------------|----|
| 35188  | 110184    | 1        | China   |             | 1  | 2  | 1 Male   | 1950 | 65     | 5    | >=60      | 1.0            |    |
| 35189  | 110186    | 1        | China   |             | 1  | 1  | 2 Female | 1954 | 61     | 5    | >=60      | 1.1            |    |
| 35201  | 110191    | 1        | China   |             | 1  | 1  | 2 Female | 1954 | 61     | 5    | >=60      | 1.1            |    |
| 35215  | 110180    | 1        | China   |             | 1  | 2  | 2 Female | 1949 | 66     | 5    | >=60      | 1.1            |    |
| 35228  | 110210    | 1        | China   |             | 1  | 1  | 2 Female | 1950 | 65     | 5    | >=60      | 1.1            |    |
| 35235  | 110214    | 1        | China   |             | 1  | 1  | 2 Female | 1951 | 64     | 5    | >=60      | 1.1            |    |
| 35239  | 110213    | 1        | China   |             | 1  | 2  | 1 Male   | 1950 | 65     | 5    | >=60      | 1.0            |    |
| 35243  | 110216    | 1        | China   |             | 1  | 1  | 1 Male   | 1951 | 64     | 5    | >=60      | 1.0            |    |
| 35245  | 110217    | 1        | China   |             | 1  | 1  | 1 Male   | 1949 | 66     | 5    | >=60      | 1.0            |    |
| 35259  | 304923    | 2        | Taiwan  |             | 1  | 2  | 1 Male   | 1959 | 56     | 4    | 55-59     | 0.7            |    |
| 35265  | 110225    | 1        | China   |             | 1  | 2  | 1 Male   | 1950 | 65     | 5    | >=60      | 1.0            |    |
| 35272  | 110227    | 1        | China   |             | 1  | 1  | 2 Female | 1942 | 73     | 5    | >=60      | 1.1            |    |
| 35280  | 304924    | 2        | Taiwan  |             | 1  | 1  | 2 Female | 1950 | 65     | 5    | >=60      | 1.7            |    |
| 35298  | 110243    | 1        | China   |             | 1  | 2  | 1 Male   | 1953 | 62     | 5    | >=60      | 1.0            |    |
| 35305  | 110247    | 1        | China   |             | 1  | 1  | 2 Female | 1950 | 65     | 5    | >=60      | 1.1            |    |
| 35306  | 110248    | 1        | China   |             | 1  | 2  | 1 Male   | 1954 | 61     | 5    | >=60      | 1.0            |    |
| 35307  | 110249    | 1        | China   |             | 1  | 1  | 1 Male   | 1952 | 63     | 5    | >=60      | 1.0            |    |
| 35311  | 110252    | 1        | China   |             | 1  | 1  | 2 Female | 1941 | 74     | 5    | >=60      | 1.1            |    |
| 35322  | 110258    | 1        | China   |             | 1  | 2  | 2 Female | 1937 | 78     | 5    | >=60      | 1.1            |    |
| 35323  | 110259    | 1        | China   |             | 1  | 1  | 1 Male   | 1949 | 66     | 5    | >=60      | 1.0            |    |
| 35327  | 110260    | 1        | China   |             | 1  | 2  | 2 Female | 1950 | 65     | 5    | >=60      | 1.1            |    |
| 35366  | 110272    | 1        | China   |             | 1  | 1  | 1 Male   | 1954 | 61     | 5    | >=60      | 1.0            |    |
| 35378  | 280486845 | 1        | China   |             | 1  | 1  | 2 Female | 1953 | 62     | 5    | >=60      | 1.1            |    |
| 35389  | 304927    | 2        | Taiwan  |             | 1  | 1  | 2 Female | 1953 | 62     | 5    | >=60      | 1.7            |    |
| 35390  | 110280    | 1        | China   |             | 1  | 1  | 1 Male   | 1947 | 68     | 5    | >=60      | 1.0            |    |
| 35395  | 110283    | 1        | China   |             | 1  | 2  | 1 Male   | 1950 | 65     | 5    | >=60      | 1.0            |    |
| 35411  | 110288    | 1        | China   |             | 1  | 1  | 1 Male   | 1951 | 64     | 5    | >=60      | 1.0            |    |
| 35423  | 110293    | 1        | China   |             | 1  | 2  | 1 Male   | 1954 | 61     | 5    | >=60      | 1.0            |    |
| 35425  | 110295    | 1        | China   |             | 1  | 2  | 2 Female | 1950 | 65     | 5    | >=60      | 1.1            |    |
| 35434  | 110300    | 1        | China   |             | 1  | 2  | 2 Female | 1950 | 65     | 5    | >=60      | 1.1            |    |
| 35462  | 110308    | 1        | China   |             | 1  | 1  | 2 Female | 1954 | 61     | 5    | >=60      | 1.1            |    |
| 35478  | 110314    | 1        | China   |             | 1  | 2  | 1 Male   | 1950 | 65     | 5    | >=60      | 1.0            |    |

| respid | SubsID    | dCountry | Country  | QDisclaimer | Q1 | Q2 | Gender   | Q3_1 | age Nr | dAge | age Group | Weight in Ctry | Q4 |
|--------|-----------|----------|----------|-------------|----|----|----------|------|--------|------|-----------|----------------|----|
| 35481  | 110315    |          | 1 China  |             | 1  | 2  | 1 Male   | 1954 | 61     |      | 5 >=60    | 1.0            |    |
| 35498  | 110319    |          | 1 China  |             | 1  | 1  | 1 Male   | 1949 | 66     |      | 5 >=60    | 1.0            |    |
| 35499  | 110320    |          | 1 China  |             | 1  | 1  | 1 Male   | 1948 | 67     |      | 5 >=60    | 1.0            |    |
| 35502  | 110322    |          | 1 China  |             | 1  | 2  | 2 Female | 1949 | 66     |      | 5 >=60    | 1.1            |    |
| 35503  | 110323    |          | 1 China  |             | 1  | 1  | 2 Female | 1954 | 61     |      | 5 >=60    | 1.1            |    |
| 35504  | 110325    |          | 1 China  |             | 1  | 1  | 1 Male   | 1955 | 60     |      | 5 >=60    | 1.0            |    |
| 35508  | 110327    |          | 1 China  |             | 1  | 1  | 2 Female | 1946 | 69     |      | 5 >=60    | 1.1            |    |
| 35513  | 110329    |          | 1 China  |             | 1  | 2  | 1 Male   | 1949 | 66     |      | 5 >=60    | 1.0            |    |
| 35516  | 110331    |          | 1 China  |             | 1  | 1  | 1 Male   | 1935 | 80     |      | 5 >=60    | 1.0            |    |
| 35519  | 110333    |          | 1 China  |             | 1  | 1  | 2 Female | 1945 | 70     |      | 5 >=60    | 1.1            |    |
| 35530  | 205564    |          | 3 Korea  |             | 1  | 1  | 2 Female | 1954 | 61     |      | 5 >=60    | 1.6            |    |
| 35533  | 110338    |          | 1 China  |             | 1  | 1  | 2 Female | 1954 | 61     |      | 5 >=60    | 1.1            |    |
| 35561  | 110349    |          | 1 China  |             | 1  | 1  | 2 Female | 1951 | 64     |      | 5 >=60    | 1.1            |    |
| 35565  | 110351    |          | 1 China  |             | 1  | 1  | 1 Male   | 1952 | 63     |      | 5 >=60    | 1.0            |    |
| 35588  | 110359    |          | 1 China  |             | 1  | 1  | 2 Female | 1928 | 87     |      | 5 >=60    | 1.1            |    |
| 35598  | 110365    |          | 1 China  |             | 1  | 1  | 1 Male   | 1951 | 64     |      | 5 >=60    | 1.0            |    |
| 35607  | 110367    |          | 1 China  |             | 1  | 1  | 1 Male   | 1954 | 61     |      | 5 >=60    | 1.0            |    |
| 35638  | 110375    |          | 1 China  |             | 1  | 1  | 2 Female | 1952 | 63     |      | 5 >=60    | 1.1            |    |
| 35642  | 304933    |          | 2 Taiwan |             | 1  | 2  | 1 Male   | 1958 | 57     |      | 4 55-59   | 0.7            |    |
| 35643  | 110378    |          | 1 China  |             | 1  | 1  | 1 Male   | 1949 | 66     |      | 5 >=60    | 1.0            |    |
| 35680  | 110387    |          | 1 China  |             | 1  | 1  | 2 Female | 1952 | 63     |      | 5 >=60    | 1.1            |    |
| 35697  | 304936    |          | 2 Taiwan |             | 1  | 1  | 2 Female | 1959 | 56     |      | 4 55-59   | 0.9            |    |
| 35703  | 110395    |          | 1 China  |             | 1  | 2  | 2 Female | 1955 | 60     |      | 5 >=60    | 1.1            |    |
| 35709  | 281362720 |          | 1 China  |             | 1  | 1  | 2 Female | 1920 | 95     |      | 5 >=60    | 1.1            |    |
| 35710  | 304930    |          | 2 Taiwan |             | 1  | 1  | 1 Male   | 1957 | 58     |      | 4 55-59   | 0.7            |    |
| 35721  | 110406    |          | 1 China  |             | 1  | 1  | 2 Female | 1938 | 77     |      | 5 >=60    | 1.1            |    |
| 35723  | 110407    |          | 1 China  |             | 1  | 2  | 2 Female | 1953 | 62     |      | 5 >=60    | 1.1            |    |
| 35736  | 110411    |          | 1 China  |             | 1  | 1  | 2 Female | 1932 | 83     |      | 5 >=60    | 1.1            |    |
| 35739  | 110108    |          | 1 China  |             | 1  | 1  | 2 Female | 1945 | 70     |      | 5 >=60    | 1.1            |    |
| 35745  | 205577    |          | 3 Korea  |             | 1  | 1  | 2 Female | 1947 | 68     |      | 5 >=60    | 1.6            |    |
| 35748  | 110416    |          | 1 China  |             | 1  | 2  | 1 Male   | 1950 | 65     |      | 5 >=60    | 1.0            |    |
| 35750  | 304938    |          | 2 Taiwan |             | 1  | 1  | 2 Female | 1949 | 66     |      | 5 >=60    | 1.7            |    |

| respid | SubsID | dCountry | Country | QDisclaimer | Q1 | Q2 | Gender | Q3_1 | age Nr | dAge | age Group | Weight in Ctry | Q4 |
|--------|--------|----------|---------|-------------|----|----|--------|------|--------|------|-----------|----------------|----|
| 35752  | 110027 | 1        | China   | 1           | 2  | 2  | Female | 1948 | 67     | 5    | >=60      | 1.1            |    |
| 35773  | 110430 | 1        | China   | 1           | 1  | 2  | Female | 1954 | 61     | 5    | >=60      | 1.1            |    |
| 35779  | 110433 | 1        | China   | 1           | 2  | 1  | Male   | 1947 | 68     | 5    | >=60      | 1.0            |    |
| 35791  | 110439 | 1        | China   | 1           | 2  | 1  | Male   | 1954 | 61     | 5    | >=60      | 1.0            |    |
| 35801  | 110444 | 1        | China   | 1           | 2  | 2  | Female | 1948 | 67     | 5    | >=60      | 1.1            |    |
| 35802  | 110445 | 1        | China   | 1           | 1  | 2  | Female | 1952 | 63     | 5    | >=60      | 1.1            |    |
| 35837  | 110443 | 1        | China   | 1           | 2  | 2  | Female | 1954 | 61     | 5    | >=60      | 1.1            |    |
| 35853  | 110463 | 1        | China   | 1           | 1  | 2  | Female | 1949 | 66     | 5    | >=60      | 1.1            |    |
| 35858  | 110465 | 1        | China   | 1           | 2  | 1  | Male   | 1951 | 64     | 5    | >=60      | 1.0            |    |
| 35860  | 110466 | 1        | China   | 1           | 2  | 2  | Female | 1949 | 66     | 5    | >=60      | 1.1            |    |
| 35875  | 110470 | 1        | China   | 1           | 2  | 2  | Female | 1952 | 63     | 5    | >=60      | 1.1            |    |
| 35883  | 110473 | 1        | China   | 1           | 2  | 1  | Male   | 1953 | 62     | 5    | >=60      | 1.0            |    |
| 35890  | 110479 | 1        | China   | 1           | 1  | 2  | Female | 1944 | 71     | 5    | >=60      | 1.1            |    |
| 35898  | 110481 | 1        | China   | 1           | 1  | 2  | Female | 1942 | 73     | 5    | >=60      | 1.1            |    |
| 35901  | 110482 | 1        | China   | 1           | 1  | 2  | Female | 1943 | 72     | 5    | >=60      | 1.1            |    |
| 35914  | 110486 | 1        | China   | 1           | 1  | 2  | Female | 1936 | 79     | 5    | >=60      | 1.1            |    |
| 35924  | 205589 | 3        | Korea   | 1           | 2  | 2  | Female | 1949 | 66     | 5    | >=60      | 1.6            |    |
| 35950  | 110503 | 1        | China   | 1           | 1  | 1  | Male   | 1947 | 68     | 5    | >=60      | 1.0            |    |
| 35961  | 110506 | 1        | China   | 1           | 1  | 1  | Male   | 1952 | 63     | 5    | >=60      | 1.0            |    |
| 35966  | 110508 | 1        | China   | 1           | 2  | 2  | Female | 1947 | 68     | 5    | >=60      | 1.1            |    |
| 35967  | 110509 | 1        | China   | 1           | 2  | 1  | Male   | 1955 | 60     | 5    | >=60      | 1.0            |    |
| 35971  | 110510 | 1        | China   | 1           | 1  | 1  | Male   | 1940 | 75     | 5    | >=60      | 1.0            |    |
| 35974  | 110511 | 1        | China   | 1           | 1  | 2  | Female | 1953 | 62     | 5    | >=60      | 1.1            |    |
| 35983  | 110514 | 1        | China   | 1           | 1  | 2  | Female | 1952 | 63     | 5    | >=60      | 1.1            |    |
| 35992  | 110517 | 1        | China   | 1           | 2  | 2  | Female | 1952 | 63     | 5    | >=60      | 1.1            |    |
| 36010  | 110522 | 1        | China   | 1           | 2  | 2  | Female | 1947 | 68     | 5    | >=60      | 1.1            |    |
| 36019  | 110524 | 1        | China   | 1           | 2  | 1  | Male   | 1950 | 65     | 5    | >=60      | 1.0            |    |
| 36029  | 110531 | 1        | China   | 1           | 2  | 2  | Female | 1952 | 63     | 5    | >=60      | 1.1            |    |
| 36033  | 110532 | 1        | China   | 1           | 1  | 1  | Male   | 1954 | 61     | 5    | >=60      | 1.0            |    |
| 36042  | 110310 | 1        | China   | 1           | 1  | 2  | Female | 1955 | 60     | 5    | >=60      | 1.1            |    |
| 36043  | 110537 | 1        | China   | 1           | 1  | 2  | Female | 1940 | 75     | 5    | >=60      | 1.1            |    |
| 36048  | 110538 | 1        | China   | 1           | 1  | 2  | Female | 1949 | 66     | 5    | >=60      | 1.1            |    |

| respid | SubsID | dCountry | Country | QDisclaimer | Q1 | Q2 | Gender   | Q3_1 | age Nr | dAge | age Group | Weight in Ctry | Q4 |
|--------|--------|----------|---------|-------------|----|----|----------|------|--------|------|-----------|----------------|----|
| 36050  | 110540 | 1        | China   |             | 1  | 2  | 1 Male   | 1950 | 65     | 5    | >=60      | 1.0            |    |
| 36062  | 110155 | 1        | China   |             | 1  | 1  | 2 Female | 1951 | 64     | 5    | >=60      | 1.1            |    |
| 36063  | 110544 | 1        | China   |             | 1  | 2  | 1 Male   | 1954 | 61     | 5    | >=60      | 1.0            |    |
| 36092  | 110552 | 1        | China   |             | 1  | 1  | 2 Female | 1947 | 68     | 5    | >=60      | 1.1            |    |
| 36097  | 110557 | 1        | China   |             | 1  | 2  | 2 Female | 1949 | 66     | 5    | >=60      | 1.1            |    |
| 36108  | 110562 | 1        | China   |             | 1  | 2  | 1 Male   | 1953 | 62     | 5    | >=60      | 1.0            |    |
| 36113  | 110565 | 1        | China   |             | 1  | 1  | 1 Male   | 1950 | 65     | 5    | >=60      | 1.0            |    |
| 36117  | 304951 | 2        | Taiwan  |             | 1  | 2  | 2 Female | 1955 | 60     | 5    | >=60      | 1.7            |    |
| 36129  | 110570 | 1        | China   |             | 1  | 2  | 1 Male   | 1943 | 72     | 5    | >=60      | 1.0            |    |
| 36144  | 110575 | 1        | China   |             | 1  | 1  | 1 Male   | 1953 | 62     | 5    | >=60      | 1.0            |    |
| 36152  | 110577 | 1        | China   |             | 1  | 2  | 1 Male   | 1947 | 68     | 5    | >=60      | 1.0            |    |
| 36154  | 110578 | 1        | China   |             | 1  | 2  | 2 Female | 1945 | 70     | 5    | >=60      | 1.1            |    |
| 36155  | 110579 | 1        | China   |             | 1  | 1  | 1 Male   | 1952 | 63     | 5    | >=60      | 1.0            |    |
| 36167  | 110588 | 1        | China   |             | 1  | 2  | 2 Female | 1952 | 63     | 5    | >=60      | 1.1            |    |
| 36172  | 110590 | 1        | China   |             | 1  | 2  | 1 Male   | 1953 | 62     | 5    | >=60      | 1.0            |    |
| 36173  | 304955 | 2        | Taiwan  |             | 1  | 1  | 2 Female | 1955 | 60     | 5    | >=60      | 1.7            |    |
| 36174  | 110591 | 1        | China   |             | 1  | 2  | 2 Female | 1952 | 63     | 5    | >=60      | 1.1            |    |
| 36182  | 110595 | 1        | China   |             | 1  | 1  | 2 Female | 1953 | 62     | 5    | >=60      | 1.1            |    |
| 36192  | 110599 | 1        | China   |             | 1  | 1  | 2 Female | 1955 | 60     | 5    | >=60      | 1.1            |    |
| 36195  | 110600 | 1        | China   |             | 1  | 2  | 1 Male   | 1951 | 64     | 5    | >=60      | 1.0            |    |
| 36204  | 110607 | 1        | China   |             | 1  | 2  | 1 Male   | 1946 | 69     | 5    | >=60      | 1.0            |    |
| 36205  | 110606 | 1        | China   |             | 1  | 1  | 2 Female | 1938 | 77     | 5    | >=60      | 1.1            |    |
| 36208  | 110610 | 1        | China   |             | 1  | 1  | 1 Male   | 1954 | 61     | 5    | >=60      | 1.0            |    |
| 36216  | 110614 | 1        | China   |             | 1  | 2  | 2 Female | 1947 | 68     | 5    | >=60      | 1.1            |    |
| 36221  | 110617 | 1        | China   |             | 1  | 1  | 2 Female | 1943 | 72     | 5    | >=60      | 1.1            |    |
| 36244  | 110626 | 1        | China   |             | 1  | 2  | 1 Male   | 1955 | 60     | 5    | >=60      | 1.0            |    |
| 36255  | 110631 | 1        | China   |             | 1  | 2  | 1 Male   | 1950 | 65     | 5    | >=60      | 1.0            |    |
| 36259  | 110634 | 1        | China   |             | 1  | 1  | 1 Male   | 1945 | 70     | 5    | >=60      | 1.0            |    |
| 36262  | 110636 | 1        | China   |             | 1  | 2  | 1 Male   | 1948 | 67     | 5    | >=60      | 1.0            |    |
| 36268  | 110477 | 1        | China   |             | 1  | 2  | 2 Female | 1950 | 65     | 5    | >=60      | 1.1            |    |
| 36308  | 110650 | 1        | China   |             | 1  | 2  | 1 Male   | 1943 | 72     | 5    | >=60      | 1.0            |    |
| 36324  | 110663 | 1        | China   |             | 1  | 1  | 2 Female | 1955 | 60     | 5    | >=60      | 1.1            |    |

| respid | SubsID | dCountry | Country | QDisclaimer | Q1 | Q2 | Gender   | Q3_1 | age Nr | dAge | age Group | Weight in Ctry | Q4 |
|--------|--------|----------|---------|-------------|----|----|----------|------|--------|------|-----------|----------------|----|
| 36330  | 110480 | 1        | China   |             | 1  | 1  | 2 Female | 1946 | 69     |      | 5 >=60    | 1.1            |    |
| 36331  | 110666 | 1        | China   |             | 1  | 1  | 2 Female | 1943 | 72     |      | 5 >=60    | 1.1            |    |
| 36336  | 110668 | 1        | China   |             | 1  | 2  | 1 Male   | 1946 | 69     |      | 5 >=60    | 1.0            |    |
| 36337  | 110669 | 1        | China   |             | 1  | 2  | 1 Male   | 1953 | 62     |      | 5 >=60    | 1.0            |    |
| 36364  | 110678 | 1        | China   |             | 1  | 1  | 1 Male   | 1938 | 77     |      | 5 >=60    | 1.0            |    |
| 36365  | 110679 | 1        | China   |             | 1  | 1  | 1 Male   | 1944 | 71     |      | 5 >=60    | 1.0            |    |
| 36396  | 110692 | 1        | China   |             | 1  | 1  | 2 Female | 1950 | 65     |      | 5 >=60    | 1.1            |    |
| 36403  | 110696 | 1        | China   |             | 1  | 1  | 1 Male   | 1950 | 65     |      | 5 >=60    | 1.0            |    |
| 36410  | 110701 | 1        | China   |             | 1  | 2  | 1 Male   | 1937 | 78     |      | 5 >=60    | 1.0            |    |
| 36413  | 110702 | 1        | China   |             | 1  | 1  | 2 Female | 1944 | 71     |      | 5 >=60    | 1.1            |    |
| 36422  | 110707 | 1        | China   |             | 1  | 2  | 1 Male   | 1952 | 63     |      | 5 >=60    | 1.0            |    |
| 36424  | 110708 | 1        | China   |             | 1  | 2  | 1 Male   | 1945 | 70     |      | 5 >=60    | 1.0            |    |
| 36425  | 110709 | 1        | China   |             | 1  | 2  | 1 Male   | 1953 | 62     |      | 5 >=60    | 1.0            |    |
| 36432  | 110711 | 1        | China   |             | 1  | 2  | 1 Male   | 1952 | 63     |      | 5 >=60    | 1.0            |    |
| 36435  | 110712 | 1        | China   |             | 1  | 2  | 1 Male   | 1954 | 61     |      | 5 >=60    | 1.0            |    |
| 36446  | 205644 | 3        | Korea   |             | 1  | 1  | 2 Female | 1942 | 73     |      | 5 >=60    | 1.6            |    |
| 36451  | 110719 | 1        | China   |             | 1  | 1  | 2 Female | 1950 | 65     |      | 5 >=60    | 1.1            |    |
| 36453  | 110721 | 1        | China   |             | 1  | 1  | 1 Male   | 1953 | 62     |      | 5 >=60    | 1.0            |    |
| 36459  | 110723 | 1        | China   |             | 1  | 1  | 2 Female | 1953 | 62     |      | 5 >=60    | 1.1            |    |
| 36464  | 110726 | 1        | China   |             | 1  | 2  | 2 Female | 1952 | 63     |      | 5 >=60    | 1.1            |    |
| 36465  | 110727 | 1        | China   |             | 1  | 1  | 2 Female | 1930 | 85     |      | 5 >=60    | 1.1            |    |
| 36466  | 110728 | 1        | China   |             | 1  | 1  | 2 Female | 1954 | 61     |      | 5 >=60    | 1.1            |    |
| 36476  | 110730 | 1        | China   |             | 1  | 1  | 1 Male   | 1955 | 60     |      | 5 >=60    | 1.0            |    |
| 36487  | 110735 | 1        | China   |             | 1  | 1  | 1 Male   | 1924 | 91     |      | 5 >=60    | 1.0            |    |
| 36488  | 110736 | 1        | China   |             | 1  | 1  | 1 Male   | 1941 | 74     |      | 5 >=60    | 1.0            |    |
| 36500  | 110739 | 1        | China   |             | 1  | 1  | 2 Female | 1940 | 75     |      | 5 >=60    | 1.1            |    |
| 36504  | 110741 | 1        | China   |             | 1  | 1  | 2 Female | 1954 | 61     |      | 5 >=60    | 1.1            |    |
| 36513  | 110746 | 1        | China   |             | 1  | 1  | 2 Female | 1955 | 60     |      | 5 >=60    | 1.1            |    |
| 36515  | 110748 | 1        | China   |             | 1  | 1  | 1 Male   | 1952 | 63     |      | 5 >=60    | 1.0            |    |
| 36521  | 110751 | 1        | China   |             | 1  | 2  | 2 Female | 1942 | 73     |      | 5 >=60    | 1.1            |    |
| 36530  | 110753 | 1        | China   |             | 1  | 2  | 1 Male   | 1948 | 67     |      | 5 >=60    | 1.0            |    |
| 36556  | 110762 | 1        | China   |             | 1  | 2  | 2 Female | 1944 | 71     |      | 5 >=60    | 1.1            |    |

| respid | SubsID | dCountry | Country | QDisclaimer | Q1 | Q2 | Gender | Q3_1 | age Nr | dAge | age Group | Weight in Ctry | Q4 |
|--------|--------|----------|---------|-------------|----|----|--------|------|--------|------|-----------|----------------|----|
| 36564  | 110366 | 1        | China   | 1           | 1  | 1  | Male   | 1946 | 69     | 5    | >=60      | 1.0            |    |
| 36584  | 110774 | 1        | China   | 1           | 1  | 1  | Male   | 1954 | 61     | 5    | >=60      | 1.0            |    |
| 36585  | 110775 | 1        | China   | 1           | 1  | 1  | Male   | 1954 | 61     | 5    | >=60      | 1.0            |    |
| 36586  | 304972 | 2        | Taiwan  | 1           | 1  | 2  | Female | 1944 | 71     | 5    | >=60      | 1.7            |    |
| 36606  | 304973 | 2        | Taiwan  | 1           | 1  | 2  | Female | 1957 | 58     | 4    | 55-59     | 0.9            |    |
| 36615  | 110788 | 1        | China   | 1           | 2  | 2  | Female | 1951 | 64     | 5    | >=60      | 1.1            |    |
| 36628  | 304975 | 2        | Taiwan  | 1           | 1  | 2  | Female | 1948 | 67     | 5    | >=60      | 1.7            |    |
| 36630  | 110794 | 1        | China   | 1           | 1  | 1  | Male   | 1933 | 82     | 5    | >=60      | 1.0            |    |
| 36631  | 110795 | 1        | China   | 1           | 2  | 1  | Male   | 1950 | 65     | 5    | >=60      | 1.0            |    |
| 36636  | 110796 | 1        | China   | 1           | 1  | 2  | Female | 1953 | 62     | 5    | >=60      | 1.1            |    |
| 36637  | 110797 | 1        | China   | 1           | 2  | 2  | Female | 1949 | 66     | 5    | >=60      | 1.1            |    |
| 36651  | 110803 | 1        | China   | 1           | 2  | 1  | Male   | 1955 | 60     | 5    | >=60      | 1.0            |    |
| 36661  | 110808 | 1        | China   | 1           | 2  | 1  | Male   | 1953 | 62     | 5    | >=60      | 1.0            |    |
| 36670  | 110813 | 1        | China   | 1           | 1  | 2  | Female | 1947 | 68     | 5    | >=60      | 1.1            |    |
| 36671  | 110814 | 1        | China   | 1           | 2  | 1  | Male   | 1951 | 64     | 5    | >=60      | 1.0            |    |
| 36688  | 110824 | 1        | China   | 1           | 1  | 1  | Male   | 1954 | 61     | 5    | >=60      | 1.0            |    |
| 36694  | 110828 | 1        | China   | 1           | 2  | 1  | Male   | 1925 | 90     | 5    | >=60      | 1.0            |    |
| 36696  | 110829 | 1        | China   | 1           | 1  | 1  | Male   | 1954 | 61     | 5    | >=60      | 1.0            |    |
| 36703  | 110833 | 1        | China   | 1           | 1  | 1  | Male   | 1951 | 64     | 5    | >=60      | 1.0            |    |
| 36719  | 110842 | 1        | China   | 1           | 2  | 2  | Female | 1950 | 65     | 5    | >=60      | 1.1            |    |
| 36721  | 110844 | 1        | China   | 1           | 2  | 2  | Female | 1950 | 65     | 5    | >=60      | 1.1            |    |
| 36740  | 110851 | 1        | China   | 1           | 1  | 1  | Male   | 1953 | 62     | 5    | >=60      | 1.0            |    |
| 36755  | 110854 | 1        | China   | 1           | 2  | 1  | Male   | 1943 | 72     | 5    | >=60      | 1.0            |    |
| 36765  | 110855 | 1        | China   | 1           | 1  | 2  | Female | 1949 | 66     | 5    | >=60      | 1.1            |    |
| 36770  | 110861 | 1        | China   | 1           | 1  | 1  | Male   | 1947 | 68     | 5    | >=60      | 1.0            |    |
| 36773  | 110811 | 1        | China   | 1           | 2  | 1  | Male   | 1950 | 65     | 5    | >=60      | 1.0            |    |
| 36813  | 110878 | 1        | China   | 1           | 1  | 2  | Female | 1954 | 61     | 5    | >=60      | 1.1            |    |
| 36819  | 110883 | 1        | China   | 1           | 1  | 1  | Male   | 1945 | 70     | 5    | >=60      | 1.0            |    |
| 36820  | 110246 | 1        | China   | 1           | 1  | 2  | Female | 1945 | 70     | 5    | >=60      | 1.1            |    |
| 36821  | 110884 | 1        | China   | 1           | 1  | 1  | Male   | 1954 | 61     | 5    | >=60      | 1.0            |    |
| 36827  | 110888 | 1        | China   | 1           | 1  | 2  | Female | 1952 | 63     | 5    | >=60      | 1.1            |    |
| 36835  | 110890 | 1        | China   | 1           | 2  | 2  | Female | 1951 | 64     | 5    | >=60      | 1.1            |    |



| respid | SubsID | dCountry | Country | QDisclaim<br>er | Q1 | Q2 | Gender   | Q3_1 | age Nr | dAge | age Group | Weight in<br>Ctry | Q4 |
|--------|--------|----------|---------|-----------------|----|----|----------|------|--------|------|-----------|-------------------|----|
| 36837  | 110893 | 1        | China   | 1               | 1  | 1  | 2 Female | 1948 | 67     | 5    | >=60      | 1.1               |    |
| 36849  | 110898 | 1        | China   | 1               | 1  | 1  | 1 Male   | 1935 | 80     | 5    | >=60      | 1.0               |    |
| 36851  | 110900 | 1        | China   | 1               | 1  | 1  | 2 Female | 1953 | 62     | 5    | >=60      | 1.1               |    |
| 36868  | 110911 | 1        | China   | 1               | 2  | 1  | 1 Male   | 1953 | 62     | 5    | >=60      | 1.0               |    |
| 36870  | 110912 | 1        | China   | 1               | 1  | 1  | 1 Male   | 1944 | 71     | 5    | >=60      | 1.0               |    |
| 36871  | 110913 | 1        | China   | 1               | 2  | 2  | 2 Female | 1954 | 61     | 5    | >=60      | 1.1               |    |
| 36874  | 110915 | 1        | China   | 1               | 1  | 1  | 1 Male   | 1950 | 65     | 5    | >=60      | 1.0               |    |
| 36878  | 110918 | 1        | China   | 1               | 1  | 1  | 1 Male   | 1950 | 65     | 5    | >=60      | 1.0               |    |
| 36887  | 110922 | 1        | China   | 1               | 2  | 2  | 2 Female | 1954 | 61     | 5    | >=60      | 1.1               |    |
| 36889  | 110923 | 1        | China   | 1               | 1  | 2  | 2 Female | 1949 | 66     | 5    | >=60      | 1.1               |    |
| 36891  | 110925 | 1        | China   | 1               | 1  | 1  | 1 Male   | 1939 | 76     | 5    | >=60      | 1.0               |    |
| 36903  | 110930 | 1        | China   | 1               | 1  | 1  | 1 Male   | 1932 | 83     | 5    | >=60      | 1.0               |    |
| 36905  | 110932 | 1        | China   | 1               | 1  | 2  | 2 Female | 1955 | 60     | 5    | >=60      | 1.1               |    |
| 36913  | 110938 | 1        | China   | 1               | 2  | 1  | 1 Male   | 1953 | 62     | 5    | >=60      | 1.0               |    |
| 36949  | 110954 | 1        | China   | 1               | 1  | 2  | 2 Female | 1940 | 75     | 5    | >=60      | 1.1               |    |
| 36954  | 110956 | 1        | China   | 1               | 1  | 1  | 1 Male   | 1950 | 65     | 5    | >=60      | 1.0               |    |
| 36962  | 110962 | 1        | China   | 1               | 1  | 2  | 2 Female | 1952 | 63     | 5    | >=60      | 1.1               |    |
| 36965  | 110964 | 1        | China   | 1               | 1  | 1  | 1 Male   | 1955 | 60     | 5    | >=60      | 1.0               |    |
| 36970  | 110968 | 1        | China   | 1               | 2  | 1  | 1 Male   | 1955 | 60     | 5    | >=60      | 1.0               |    |
| 36979  | 110975 | 1        | China   | 1               | 1  | 2  | 2 Female | 1946 | 69     | 5    | >=60      | 1.1               |    |
| 36990  | 110977 | 1        | China   | 1               | 1  | 2  | 2 Female | 1945 | 70     | 5    | >=60      | 1.1               |    |
| 36991  | 110979 | 1        | China   | 1               | 2  | 1  | 1 Male   | 1942 | 73     | 5    | >=60      | 1.0               |    |
| 36992  | 110980 | 1        | China   | 1               | 2  | 1  | 1 Male   | 1953 | 62     | 5    | >=60      | 1.0               |    |
| 37015  | 110994 | 1        | China   | 1               | 1  | 1  | 1 Male   | 1949 | 66     | 5    | >=60      | 1.0               |    |
| 37017  | 110995 | 1        | China   | 1               | 2  | 1  | 1 Male   | 1950 | 65     | 5    | >=60      | 1.0               |    |
| 37020  | 110996 | 1        | China   | 1               | 1  | 2  | 2 Female | 1943 | 72     | 5    | >=60      | 1.1               |    |
| 37033  | 111003 | 1        | China   | 1               | 2  | 1  | 1 Male   | 1952 | 63     | 5    | >=60      | 1.0               |    |
| 37041  | 110876 | 1        | China   | 1               | 1  | 1  | 1 Male   | 1946 | 69     | 5    | >=60      | 1.0               |    |
| 37048  | 111012 | 1        | China   | 1               | 1  | 2  | 2 Female | 1950 | 65     | 5    | >=60      | 1.1               |    |
| 37050  | 111013 | 1        | China   | 1               | 1  | 1  | 1 Male   | 1954 | 61     | 5    | >=60      | 1.0               |    |
| 37054  | 111016 | 1        | China   | 1               | 1  | 2  | 2 Female | 1952 | 63     | 5    | >=60      | 1.1               |    |
| 37057  | 111017 | 1        | China   | 1               | 1  | 2  | 2 Female | 1927 | 88     | 5    | >=60      | 1.1               |    |

| respid | SubsID | dCountry | Country | QDisclaim<br>er | Q1 | Q2 | Gender | Q3_1 | age Nr | dAge | age Group | Weight in<br>Ctry | Q4 |
|--------|--------|----------|---------|-----------------|----|----|--------|------|--------|------|-----------|-------------------|----|
| 37067  | 111022 | 1        | China   | 1               | 1  | 1  | Male   | 1950 | 65     | 5    | >=60      | 1.0               |    |
| 37074  | 111027 | 1        | China   | 1               | 1  | 1  | Male   | 1935 | 80     | 5    | >=60      | 1.0               |    |
| 37088  | 111030 | 1        | China   | 1               | 1  | 2  | Female | 1948 | 67     | 5    | >=60      | 1.1               |    |
| 37090  | 111031 | 1        | China   | 1               | 2  | 1  | Male   | 1950 | 65     | 5    | >=60      | 1.0               |    |
| 37110  | 111046 | 1        | China   | 1               | 2  | 1  | Male   | 1950 | 65     | 5    | >=60      | 1.0               |    |
| 37122  | 111053 | 1        | China   | 1               | 2  | 1  | Male   | 1936 | 79     | 5    | >=60      | 1.0               |    |
| 37124  | 111055 | 1        | China   | 1               | 2  | 1  | Male   | 1940 | 75     | 5    | >=60      | 1.0               |    |
| 37126  | 111056 | 1        | China   | 1               | 2  | 1  | Male   | 1955 | 60     | 5    | >=60      | 1.0               |    |
| 37129  | 111059 | 1        | China   | 1               | 1  | 1  | Male   | 1950 | 65     | 5    | >=60      | 1.0               |    |
| 37130  | 111060 | 1        | China   | 1               | 1  | 2  | Female | 1950 | 65     | 5    | >=60      | 1.1               |    |
| 37142  | 111067 | 1        | China   | 1               | 1  | 1  | Male   | 1949 | 66     | 5    | >=60      | 1.0               |    |
| 37160  | 111075 | 1        | China   | 1               | 2  | 1  | Male   | 1953 | 62     | 5    | >=60      | 1.0               |    |
| 37168  | 111079 | 1        | China   | 1               | 1  | 2  | Female | 1955 | 60     | 5    | >=60      | 1.1               |    |
| 37169  | 111080 | 1        | China   | 1               | 2  | 1  | Male   | 1954 | 61     | 5    | >=60      | 1.0               |    |
| 37191  | 111092 | 1        | China   | 1               | 1  | 1  | Male   | 1945 | 70     | 5    | >=60      | 1.0               |    |
| 37197  | 111094 | 1        | China   | 1               | 2  | 1  | Male   | 1950 | 65     | 5    | >=60      | 1.0               |    |
| 37204  | 111099 | 1        | China   | 1               | 1  | 2  | Female | 1950 | 65     | 5    | >=60      | 1.1               |    |
| 37213  | 111107 | 1        | China   | 1               | 2  | 2  | Female | 1954 | 61     | 5    | >=60      | 1.1               |    |
| 37238  | 111117 | 1        | China   | 1               | 1  | 2  | Female | 1954 | 61     | 5    | >=60      | 1.1               |    |
| 37242  | 111120 | 1        | China   | 1               | 1  | 2  | Female | 1953 | 62     | 5    | >=60      | 1.1               |    |
| 37243  | 111121 | 1        | China   | 1               | 2  | 1  | Male   | 1952 | 63     | 5    | >=60      | 1.0               |    |
| 37275  | 111112 | 1        | China   | 1               | 1  | 2  | Female | 1950 | 65     | 5    | >=60      | 1.1               |    |
| 37305  | 111142 | 1        | China   | 1               | 2  | 2  | Female | 1946 | 69     | 5    | >=60      | 1.1               |    |
| 37357  | 111188 | 1        | China   | 1               | 2  | 2  | Female | 1950 | 65     | 5    | >=60      | 1.1               |    |
| 37365  | 111190 | 1        | China   | 1               | 2  | 2  | Female | 1945 | 70     | 5    | >=60      | 1.1               |    |
| 37370  | 305003 | 2        | Taiwan  | 1               | 1  | 1  | Male   | 1957 | 58     | 4    | 55-59     | 0.7               |    |
| 37406  | 111213 | 1        | China   | 1               | 2  | 2  | Female | 1953 | 62     | 5    | >=60      | 1.1               |    |
| 37410  | 111216 | 1        | China   | 1               | 1  | 2  | Female | 1946 | 69     | 5    | >=60      | 1.1               |    |
| 37411  | 111217 | 1        | China   | 1               | 2  | 2  | Female | 1955 | 60     | 5    | >=60      | 1.1               |    |
| 37427  | 111230 | 1        | China   | 1               | 2  | 2  | Female | 1945 | 70     | 5    | >=60      | 1.1               |    |
| 37437  | 111236 | 1        | China   | 1               | 2  | 2  | Female | 1952 | 63     | 5    | >=60      | 1.1               |    |
| 37440  | 305004 | 2        | Taiwan  | 1               | 1  | 1  | Male   | 1960 | 55     | 4    | 55-59     | 0.7               |    |

| respid | SubsID | dCountry | Country | QDisclaimer | Q1 | Q2 | Gender   | Q3_1 | age Nr | dAge | age Group | Weight in Ctry | Q4 |
|--------|--------|----------|---------|-------------|----|----|----------|------|--------|------|-----------|----------------|----|
| 37452  | 111242 | 1        | China   |             | 1  | 1  | 2 Female | 1953 | 62     |      | 5 >=60    | 1.1            |    |
| 37465  | 111252 | 1        | China   |             | 1  | 2  | 2 Female | 1953 | 62     |      | 5 >=60    | 1.1            |    |
| 37468  | 111255 | 1        | China   |             | 1  | 2  | 2 Female | 1949 | 66     |      | 5 >=60    | 1.1            |    |
| 37469  | 111256 | 1        | China   |             | 1  | 2  | 2 Female | 1946 | 69     |      | 5 >=60    | 1.1            |    |
| 37477  | 111260 | 1        | China   |             | 1  | 2  | 2 Female | 1947 | 68     |      | 5 >=60    | 1.1            |    |
| 37509  | 111282 | 1        | China   |             | 1  | 1  | 2 Female | 1945 | 70     |      | 5 >=60    | 1.1            |    |
| 37513  | 111284 | 1        | China   |             | 1  | 2  | 2 Female | 1954 | 61     |      | 5 >=60    | 1.1            |    |
| 37534  | 111293 | 1        | China   |             | 1  | 2  | 2 Female | 1950 | 65     |      | 5 >=60    | 1.1            |    |
| 37537  | 111297 | 1        | China   |             | 1  | 1  | 2 Female | 1950 | 65     |      | 5 >=60    | 1.1            |    |
| 37560  | 111301 | 1        | China   |             | 1  | 2  | 2 Female | 1948 | 67     |      | 5 >=60    | 1.1            |    |
| 37566  | 111312 | 1        | China   |             | 1  | 1  | 2 Female | 1954 | 61     |      | 5 >=60    | 1.1            |    |
| 37572  | 111315 | 1        | China   |             | 1  | 1  | 2 Female | 1953 | 62     |      | 5 >=60    | 1.1            |    |
| 37574  | 111317 | 1        | China   |             | 1  | 1  | 2 Female | 1942 | 73     |      | 5 >=60    | 1.1            |    |
| 37575  | 111318 | 1        | China   |             | 1  | 2  | 2 Female | 1950 | 65     |      | 5 >=60    | 1.1            |    |
| 37590  | 111329 | 1        | China   |             | 1  | 2  | 2 Female | 1946 | 69     |      | 5 >=60    | 1.1            |    |
| 37593  | 305008 | 2        | Taiwan  |             | 1  | 1  | 2 Female | 1959 | 56     |      | 4 55-59   | 0.9            |    |
| 37599  | 111337 | 1        | China   |             | 1  | 1  | 2 Female | 1950 | 65     |      | 5 >=60    | 1.1            |    |
| 37641  | 305009 | 2        | Taiwan  |             | 1  | 1  | 2 Female | 1953 | 62     |      | 5 >=60    | 1.7            |    |
| 37651  | 111355 | 1        | China   |             | 1  | 2  | 2 Female | 1955 | 60     |      | 5 >=60    | 1.1            |    |
| 37670  | 111363 | 1        | China   |             | 1  | 2  | 2 Female | 1949 | 66     |      | 5 >=60    | 1.1            |    |
| 37680  | 111372 | 1        | China   |             | 1  | 2  | 2 Female | 1951 | 64     |      | 5 >=60    | 1.1            |    |
| 37690  | 111378 | 1        | China   |             | 1  | 2  | 2 Female | 1951 | 64     |      | 5 >=60    | 1.1            |    |
| 37694  | 111381 | 1        | China   |             | 1  | 1  | 2 Female | 1949 | 66     |      | 5 >=60    | 1.1            |    |
| 37705  | 111388 | 1        | China   |             | 1  | 2  | 2 Female | 1951 | 64     |      | 5 >=60    | 1.1            |    |
| 37710  | 111392 | 1        | China   |             | 1  | 1  | 2 Female | 1952 | 63     |      | 5 >=60    | 1.1            |    |
| 37719  | 111397 | 1        | China   |             | 1  | 1  | 2 Female | 1935 | 80     |      | 5 >=60    | 1.1            |    |
| 37741  | 111408 | 1        | China   |             | 1  | 2  | 2 Female | 1955 | 60     |      | 5 >=60    | 1.1            |    |
| 37752  | 111415 | 1        | China   |             | 1  | 2  | 2 Female | 1946 | 69     |      | 5 >=60    | 1.1            |    |
| 37755  | 111419 | 1        | China   |             | 1  | 1  | 2 Female | 1941 | 74     |      | 5 >=60    | 1.1            |    |
| 37757  | 111418 | 1        | China   |             | 1  | 2  | 2 Female | 1953 | 62     |      | 5 >=60    | 1.1            |    |
| 37783  | 111435 | 1        | China   |             | 1  | 1  | 2 Female | 1949 | 66     |      | 5 >=60    | 1.1            |    |
| 37793  | 111441 | 1        | China   |             | 1  | 2  | 2 Female | 1953 | 62     |      | 5 >=60    | 1.1            |    |

| respid | SubsID | dCountry | Country | QDisclaimer | Q1 | Q2 | Gender   | Q3_1 | age Nr | dAge | age Group | Weight in Ctry | Q4 |
|--------|--------|----------|---------|-------------|----|----|----------|------|--------|------|-----------|----------------|----|
| 37800  | 111445 | 1        | China   |             | 1  | 2  | 2 Female | 1951 | 64     | 5    | >=60      | 1.1            |    |
| 37801  | 111446 | 1        | China   |             | 1  | 2  | 2 Female | 1954 | 61     | 5    | >=60      | 1.1            |    |
| 37820  | 111456 | 1        | China   |             | 1  | 2  | 2 Female | 1954 | 61     | 5    | >=60      | 1.1            |    |
| 37826  | 111430 | 1        | China   |             | 1  | 1  | 2 Female | 1950 | 65     | 5    | >=60      | 1.1            |    |
| 37835  | 111465 | 1        | China   |             | 1  | 2  | 2 Female | 1951 | 64     | 5    | >=60      | 1.1            |    |
| 37839  | 111467 | 1        | China   |             | 1  | 2  | 2 Female | 1951 | 64     | 5    | >=60      | 1.1            |    |
| 37871  | 111481 | 1        | China   |             | 1  | 2  | 2 Female | 1953 | 62     | 5    | >=60      | 1.1            |    |
| 37876  | 111483 | 1        | China   |             | 1  | 2  | 2 Female | 1947 | 68     | 5    | >=60      | 1.1            |    |
| 37879  | 111486 | 1        | China   |             | 1  | 1  | 2 Female | 1940 | 75     | 5    | >=60      | 1.1            |    |
| 37894  | 111495 | 1        | China   |             | 1  | 2  | 2 Female | 1949 | 66     | 5    | >=60      | 1.1            |    |
| 37895  | 111496 | 1        | China   |             | 1  | 2  | 2 Female | 1952 | 63     | 5    | >=60      | 1.1            |    |
| 37901  | 111500 | 1        | China   |             | 1  | 2  | 2 Female | 1950 | 65     | 5    | >=60      | 1.1            |    |
| 37926  | 111515 | 1        | China   |             | 1  | 2  | 2 Female | 1953 | 62     | 5    | >=60      | 1.1            |    |
| 37937  | 111523 | 1        | China   |             | 1  | 1  | 2 Female | 1953 | 62     | 5    | >=60      | 1.1            |    |
| 37938  | 111524 | 1        | China   |             | 1  | 1  | 2 Female | 1950 | 65     | 5    | >=60      | 1.1            |    |
| 37959  | 111534 | 1        | China   |             | 1  | 1  | 2 Female | 1940 | 75     | 5    | >=60      | 1.1            |    |
| 37970  | 111541 | 1        | China   |             | 1  | 1  | 2 Female | 1943 | 72     | 5    | >=60      | 1.1            |    |
| 37972  | 111543 | 1        | China   |             | 1  | 2  | 2 Female | 1952 | 63     | 5    | >=60      | 1.1            |    |
| 37988  | 111549 | 1        | China   |             | 1  | 1  | 2 Female | 1950 | 65     | 5    | >=60      | 1.1            |    |
| 37989  | 111550 | 1        | China   |             | 1  | 2  | 2 Female | 1947 | 68     | 5    | >=60      | 1.1            |    |
| 38000  | 111560 | 1        | China   |             | 1  | 1  | 2 Female | 1942 | 73     | 5    | >=60      | 1.1            |    |
| 38028  | 111578 | 1        | China   |             | 1  | 2  | 2 Female | 1953 | 62     | 5    | >=60      | 1.1            |    |
| 38042  | 111587 | 1        | China   |             | 1  | 1  | 2 Female | 1952 | 63     | 5    | >=60      | 1.1            |    |
| 38052  | 111593 | 1        | China   |             | 1  | 1  | 2 Female | 1935 | 80     | 5    | >=60      | 1.1            |    |
| 38056  | 111594 | 1        | China   |             | 1  | 1  | 2 Female | 1953 | 62     | 5    | >=60      | 1.1            |    |
| 38106  | 111617 | 1        | China   |             | 1  | 2  | 2 Female | 1949 | 66     | 5    | >=60      | 1.1            |    |
| 38114  | 111606 | 1        | China   |             | 1  | 2  | 1 Male   | 1954 | 61     | 5    | >=60      | 1.0            |    |
| 38134  | 111629 | 1        | China   |             | 1  | 1  | 2 Female | 1955 | 60     | 5    | >=60      | 1.1            |    |
| 38135  | 111630 | 1        | China   |             | 1  | 1  | 2 Female | 1933 | 82     | 5    | >=60      | 1.1            |    |
| 38139  | 111627 | 1        | China   |             | 1  | 2  | 2 Female | 1952 | 63     | 5    | >=60      | 1.1            |    |
| 38160  | 111644 | 1        | China   |             | 1  | 2  | 1 Male   | 1953 | 62     | 5    | >=60      | 1.0            |    |
| 38164  | 111647 | 1        | China   |             | 1  | 1  | 2 Female | 1953 | 62     | 5    | >=60      | 1.1            |    |

| respid | SubsID | dCountry | Country | QDisclaim<br>er | Q1 | Q2 | Gender | Q3_1 | age Nr | dAge | age Group | Weight in<br>Ctry | Q4 |
|--------|--------|----------|---------|-----------------|----|----|--------|------|--------|------|-----------|-------------------|----|
| 38168  | 111649 | 1        | China   | 1               | 2  | 1  | Male   | 1948 | 67     | 5    | >=60      | 1.0               |    |
| 38173  | 111652 | 1        | China   | 1               | 1  | 1  | Male   | 1948 | 67     | 5    | >=60      | 1.0               |    |
| 38193  | 111662 | 1        | China   | 1               | 2  | 2  | Female | 1946 | 69     | 5    | >=60      | 1.1               |    |
| 38204  | 111668 | 1        | China   | 1               | 2  | 2  | Female | 1947 | 68     | 5    | >=60      | 1.1               |    |
| 38206  | 111669 | 1        | China   | 1               | 2  | 2  | Female | 1952 | 63     | 5    | >=60      | 1.1               |    |
| 38233  | 111679 | 1        | China   | 1               | 2  | 1  | Male   | 1947 | 68     | 5    | >=60      | 1.0               |    |
| 38242  | 111684 | 1        | China   | 1               | 2  | 2  | Female | 1948 | 67     | 5    | >=60      | 1.1               |    |
| 38245  | 111687 | 1        | China   | 1               | 2  | 1  | Male   | 1952 | 63     | 5    | >=60      | 1.0               |    |
| 38261  | 111698 | 1        | China   | 1               | 1  | 2  | Female | 1954 | 61     | 5    | >=60      | 1.1               |    |
| 38288  | 111714 | 1        | China   | 1               | 2  | 2  | Female | 1943 | 72     | 5    | >=60      | 1.1               |    |
| 38296  | 111720 | 1        | China   | 1               | 2  | 2  | Female | 1953 | 62     | 5    | >=60      | 1.1               |    |
| 38299  | 111716 | 1        | China   | 1               | 2  | 1  | Male   | 1950 | 65     | 5    | >=60      | 1.0               |    |
| 38300  | 111723 | 1        | China   | 1               | 1  | 1  | Male   | 1949 | 66     | 5    | >=60      | 1.0               |    |
| 38303  | 111725 | 1        | China   | 1               | 2  | 1  | Male   | 1944 | 71     | 5    | >=60      | 1.0               |    |
| 38317  | 111708 | 1        | China   | 1               | 1  | 2  | Female | 1943 | 72     | 5    | >=60      | 1.1               |    |
| 38328  | 111737 | 1        | China   | 1               | 1  | 1  | Male   | 1950 | 65     | 5    | >=60      | 1.0               |    |
| 38333  | 111740 | 1        | China   | 1               | 2  | 2  | Female | 1951 | 64     | 5    | >=60      | 1.1               |    |
| 38336  | 111742 | 1        | China   | 1               | 1  | 1  | Male   | 1948 | 67     | 5    | >=60      | 1.0               |    |
| 38338  | 111743 | 1        | China   | 1               | 1  | 2  | Female | 1948 | 67     | 5    | >=60      | 1.1               |    |
| 38342  | 111745 | 1        | China   | 1               | 1  | 1  | Male   | 1942 | 73     | 5    | >=60      | 1.0               |    |
| 38360  | 111754 | 1        | China   | 1               | 1  | 1  | Male   | 1949 | 66     | 5    | >=60      | 1.0               |    |
| 38362  | 111756 | 1        | China   | 1               | 1  | 1  | Male   | 1949 | 66     | 5    | >=60      | 1.0               |    |
| 38364  | 111759 | 1        | China   | 1               | 1  | 1  | Male   | 1948 | 67     | 5    | >=60      | 1.0               |    |
| 38402  | 110656 | 1        | China   | 1               | 1  | 1  | Male   | 1950 | 65     | 5    | >=60      | 1.0               |    |
| 38423  | 111787 | 1        | China   | 1               | 2  | 2  | Female | 1950 | 65     | 5    | >=60      | 1.1               |    |
| 38424  | 111788 | 1        | China   | 1               | 1  | 1  | Male   | 1944 | 71     | 5    | >=60      | 1.0               |    |
| 38435  | 111793 | 1        | China   | 1               | 2  | 2  | Female | 1953 | 62     | 5    | >=60      | 1.1               |    |
| 38450  | 111804 | 1        | China   | 1               | 2  | 2  | Female | 1947 | 68     | 5    | >=60      | 1.1               |    |
| 38455  | 111809 | 1        | China   | 1               | 1  | 1  | Male   | 1938 | 77     | 5    | >=60      | 1.0               |    |
| 38467  | 111814 | 1        | China   | 1               | 1  | 2  | Female | 1935 | 80     | 5    | >=60      | 1.1               |    |
| 38468  | 111815 | 1        | China   | 1               | 2  | 1  | Male   | 1942 | 73     | 5    | >=60      | 1.0               |    |
| 38472  | 111819 | 1        | China   | 1               | 2  | 2  | Female | 1950 | 65     | 5    | >=60      | 1.1               |    |

| respid | SubsID | dCountry | Country | QDisclaim<br>er | Q1 | Q2 | Gender | Q3_1 | age Nr | dAge | age Group | Weight in<br>Ctry | Q4 |
|--------|--------|----------|---------|-----------------|----|----|--------|------|--------|------|-----------|-------------------|----|
| 38484  | 111827 | 1        | China   | 1               | 1  | 1  | Male   | 1951 | 64     | 5    | >=60      | 1.0               |    |
| 38498  | 111838 | 1        | China   | 1               | 1  | 1  | Male   | 1954 | 61     | 5    | >=60      | 1.0               |    |
| 38507  | 111842 | 1        | China   | 1               | 2  | 1  | Male   | 1955 | 60     | 5    | >=60      | 1.0               |    |
| 38511  | 305033 | 2        | Taiwan  | 1               | 1  | 2  | Female | 1959 | 56     | 4    | 55-59     | 0.9               |    |
| 38524  | 111845 | 1        | China   | 1               | 2  | 1  | Male   | 1950 | 65     | 5    | >=60      | 1.0               |    |
| 38526  | 111851 | 1        | China   | 1               | 2  | 2  | Female | 1954 | 61     | 5    | >=60      | 1.1               |    |
| 38534  | 111856 | 1        | China   | 1               | 1  | 2  | Female | 1950 | 65     | 5    | >=60      | 1.1               |    |
| 38536  | 111858 | 1        | China   | 1               | 1  | 1  | Male   | 1945 | 70     | 5    | >=60      | 1.0               |    |
| 38539  | 111861 | 1        | China   | 1               | 1  | 1  | Male   | 1954 | 61     | 5    | >=60      | 1.0               |    |
| 38547  | 111867 | 1        | China   | 1               | 1  | 2  | Female | 1953 | 62     | 5    | >=60      | 1.1               |    |
| 38549  | 111868 | 1        | China   | 1               | 2  | 1  | Male   | 1950 | 65     | 5    | >=60      | 1.0               |    |
| 38575  | 111881 | 1        | China   | 1               | 1  | 2  | Female | 1952 | 63     | 5    | >=60      | 1.1               |    |
| 38579  | 111889 | 1        | China   | 1               | 2  | 2  | Female | 1943 | 72     | 5    | >=60      | 1.1               |    |
| 38585  | 111894 | 1        | China   | 1               | 1  | 1  | Male   | 1950 | 65     | 5    | >=60      | 1.0               |    |
| 38589  | 111897 | 1        | China   | 1               | 1  | 1  | Male   | 1952 | 63     | 5    | >=60      | 1.0               |    |
| 38595  | 111902 | 1        | China   | 1               | 2  | 2  | Female | 1953 | 62     | 5    | >=60      | 1.1               |    |
| 38602  | 111907 | 1        | China   | 1               | 2  | 2  | Female | 1954 | 61     | 5    | >=60      | 1.1               |    |
| 38603  | 111908 | 1        | China   | 1               | 2  | 2  | Female | 1954 | 61     | 5    | >=60      | 1.1               |    |
| 38612  | 111912 | 1        | China   | 1               | 2  | 2  | Female | 1954 | 61     | 5    | >=60      | 1.1               |    |
| 38621  | 111921 | 1        | China   | 1               | 2  | 2  | Female | 1953 | 62     | 5    | >=60      | 1.1               |    |
| 38624  | 111924 | 1        | China   | 1               | 1  | 2  | Female | 1955 | 60     | 5    | >=60      | 1.1               |    |
| 38636  | 305037 | 2        | Taiwan  | 1               | 1  | 2  | Female | 1960 | 55     | 4    | 55-59     | 0.9               |    |
| 38656  | 111939 | 1        | China   | 1               | 1  | 1  | Male   | 1953 | 62     | 5    | >=60      | 1.0               |    |
| 38668  | 111947 | 1        | China   | 1               | 2  | 1  | Male   | 1953 | 62     | 5    | >=60      | 1.0               |    |
| 38675  | 111950 | 1        | China   | 1               | 2  | 2  | Female | 1951 | 64     | 5    | >=60      | 1.1               |    |
| 38676  | 111951 | 1        | China   | 1               | 1  | 1  | Male   | 1954 | 61     | 5    | >=60      | 1.0               |    |
| 38682  | 111952 | 1        | China   | 1               | 1  | 1  | Male   | 1953 | 62     | 5    | >=60      | 1.0               |    |
| 38689  | 111956 | 1        | China   | 1               | 2  | 1  | Male   | 1953 | 62     | 5    | >=60      | 1.0               |    |
| 38702  | 111960 | 1        | China   | 1               | 1  | 2  | Female | 1935 | 80     | 5    | >=60      | 1.1               |    |
| 38704  | 111962 | 1        | China   | 1               | 2  | 2  | Female | 1952 | 63     | 5    | >=60      | 1.1               |    |
| 38713  | 111963 | 1        | China   | 1               | 1  | 1  | Male   | 1943 | 72     | 5    | >=60      | 1.0               |    |
| 38718  | 111967 | 1        | China   | 1               | 2  | 1  | Male   | 1949 | 66     | 5    | >=60      | 1.0               |    |

| respid | SubsID | dCountry | Country | QDisclaim<br>er | Q1 | Q2 | Gender   | Q3_1 | age Nr | dAge | age Group | Weight in<br>Ctry | Q4 |
|--------|--------|----------|---------|-----------------|----|----|----------|------|--------|------|-----------|-------------------|----|
| 38725  | 111970 | 1        | China   | 1               | 1  | 1  | 2 Female | 1940 | 75     | 5    | >=60      | 1.1               |    |
| 38730  | 111974 | 1        | China   | 1               | 1  | 1  | 2 Female | 1953 | 62     | 5    | >=60      | 1.1               |    |
| 38737  | 111979 | 1        | China   | 1               | 1  | 1  | 2 Female | 1948 | 67     | 5    | >=60      | 1.1               |    |
| 38738  | 111980 | 1        | China   | 1               | 2  | 2  | 2 Female | 1953 | 62     | 5    | >=60      | 1.1               |    |
| 38744  | 111984 | 1        | China   | 1               | 1  | 1  | 2 Female | 1947 | 68     | 5    | >=60      | 1.1               |    |
| 38746  | 111987 | 1        | China   | 1               | 1  | 1  | 2 Female | 1954 | 61     | 5    | >=60      | 1.1               |    |
| 38753  | 111991 | 1        | China   | 1               | 1  | 1  | 2 Female | 1932 | 83     | 5    | >=60      | 1.1               |    |
| 38756  | 111993 | 1        | China   | 1               | 2  | 2  | 2 Female | 1952 | 63     | 5    | >=60      | 1.1               |    |
| 38760  | 305040 | 2        | Taiwan  | 1               | 1  | 1  | 2 Female | 1957 | 58     | 4    | 55-59     | 0.9               |    |
| 38762  | 111998 | 1        | China   | 1               | 2  | 2  | 2 Female | 1953 | 62     | 5    | >=60      | 1.1               |    |
| 38765  | 112001 | 1        | China   | 1               | 1  | 1  | 2 Female | 1952 | 63     | 5    | >=60      | 1.1               |    |
| 38769  | 112003 | 1        | China   | 1               | 1  | 1  | 2 Female | 1950 | 65     | 5    | >=60      | 1.1               |    |
| 38781  | 112006 | 1        | China   | 1               | 2  | 2  | 2 Female | 1953 | 62     | 5    | >=60      | 1.1               |    |
| 38786  | 112011 | 1        | China   | 1               | 1  | 1  | 2 Female | 1945 | 70     | 5    | >=60      | 1.1               |    |
| 38790  | 112015 | 1        | China   | 1               | 1  | 1  | 1 Male   | 1945 | 70     | 5    | >=60      | 1.0               |    |
| 38793  | 112017 | 1        | China   | 1               | 1  | 1  | 2 Female | 1939 | 76     | 5    | >=60      | 1.1               |    |
| 38797  | 110000 | 1        | China   | 1               | 2  | 2  | 2 Female | 1953 | 62     | 5    | >=60      | 1.1               |    |
| 38802  | 112021 | 1        | China   | 1               | 1  | 1  | 2 Female | 1953 | 62     | 5    | >=60      | 1.1               |    |
| 38815  | 112028 | 1        | China   | 1               | 2  | 2  | 1 Male   | 1940 | 75     | 5    | >=60      | 1.0               |    |
| 38826  | 112034 | 1        | China   | 1               | 2  | 2  | 2 Female | 1952 | 63     | 5    | >=60      | 1.1               |    |
| 38828  | 112035 | 1        | China   | 1               | 1  | 1  | 1 Male   | 1950 | 65     | 5    | >=60      | 1.0               |    |
| 38829  | 112036 | 1        | China   | 1               | 1  | 1  | 2 Female | 1949 | 66     | 5    | >=60      | 1.1               |    |
| 38835  | 112041 | 1        | China   | 1               | 1  | 1  | 1 Male   | 1950 | 65     | 5    | >=60      | 1.0               |    |
| 38842  | 112042 | 1        | China   | 1               | 2  | 2  | 2 Female | 1955 | 60     | 5    | >=60      | 1.1               |    |
| 38853  | 112047 | 1        | China   | 1               | 2  | 2  | 1 Male   | 1944 | 71     | 5    | >=60      | 1.0               |    |
| 38855  | 112048 | 1        | China   | 1               | 2  | 2  | 2 Female | 1952 | 63     | 5    | >=60      | 1.1               |    |
| 38860  | 112052 | 1        | China   | 1               | 2  | 2  | 2 Female | 1954 | 61     | 5    | >=60      | 1.1               |    |
| 38869  | 112058 | 1        | China   | 1               | 2  | 2  | 2 Female | 1953 | 62     | 5    | >=60      | 1.1               |    |
| 38882  | 112063 | 1        | China   | 1               | 2  | 2  | 2 Female | 1950 | 65     | 5    | >=60      | 1.1               |    |
| 38897  | 112074 | 1        | China   | 1               | 1  | 1  | 2 Female | 1928 | 87     | 5    | >=60      | 1.1               |    |
| 38903  | 112076 | 1        | China   | 1               | 2  | 2  | 2 Female | 1952 | 63     | 5    | >=60      | 1.1               |    |
| 38910  | 112078 | 1        | China   | 1               | 2  | 2  | 2 Female | 1953 | 62     | 5    | >=60      | 1.1               |    |

| respid | SubsID | dCountry | Country | QDisclaim<br>er | Q1 | Q2 | Gender | Q3_1 | age Nr | dAge | age Group | Weight in<br>Ctry | Q4 |
|--------|--------|----------|---------|-----------------|----|----|--------|------|--------|------|-----------|-------------------|----|
| 38948  | 112089 | 1        | China   | 1               | 2  | 2  | Female | 1955 | 60     | 5    | >=60      | 1.1               |    |
| 38949  | 112090 | 1        | China   | 1               | 1  | 1  | Male   | 1936 | 79     | 5    | >=60      | 1.0               |    |
| 38953  | 112092 | 1        | China   | 1               | 2  | 2  | Female | 1954 | 61     | 5    | >=60      | 1.1               |    |
| 38989  | 112108 | 1        | China   | 1               | 1  | 2  | Female | 1939 | 76     | 5    | >=60      | 1.1               |    |
| 38997  | 112094 | 1        | China   | 1               | 2  | 2  | Female | 1950 | 65     | 5    | >=60      | 1.1               |    |
| 38999  | 112114 | 1        | China   | 1               | 2  | 1  | Male   | 1950 | 65     | 5    | >=60      | 1.0               |    |
| 39002  | 112117 | 1        | China   | 1               | 2  | 2  | Female | 1950 | 65     | 5    | >=60      | 1.1               |    |
| 39003  | 112118 | 1        | China   | 1               | 2  | 2  | Female | 1953 | 62     | 5    | >=60      | 1.1               |    |
| 39006  | 112119 | 1        | China   | 1               | 1  | 1  | Male   | 1945 | 70     | 5    | >=60      | 1.0               |    |
| 39014  | 112126 | 1        | China   | 1               | 1  | 2  | Female | 1955 | 60     | 5    | >=60      | 1.1               |    |
| 39017  | 112127 | 1        | China   | 1               | 2  | 2  | Female | 1954 | 61     | 5    | >=60      | 1.1               |    |
| 39018  | 112129 | 1        | China   | 1               | 2  | 2  | Female | 1953 | 62     | 5    | >=60      | 1.1               |    |
| 39025  | 112135 | 1        | China   | 1               | 2  | 2  | Female | 1950 | 65     | 5    | >=60      | 1.1               |    |
| 39031  | 112141 | 1        | China   | 1               | 2  | 2  | Female | 1948 | 67     | 5    | >=60      | 1.1               |    |
| 39061  | 112156 | 1        | China   | 1               | 2  | 2  | Female | 1953 | 62     | 5    | >=60      | 1.1               |    |
| 39131  | 110955 | 1        | China   | 1               | 1  | 2  | Female | 1952 | 63     | 5    | >=60      | 1.1               |    |
| 39153  | 112191 | 1        | China   | 1               | 2  | 2  | Female | 1952 | 63     | 5    | >=60      | 1.1               |    |
| 39194  | 112216 | 1        | China   | 1               | 1  | 2  | Female | 1950 | 65     | 5    | >=60      | 1.1               |    |
| 39204  | 112221 | 1        | China   | 1               | 2  | 2  | Female | 1949 | 66     | 5    | >=60      | 1.1               |    |
| 39208  | 112224 | 1        | China   | 1               | 1  | 2  | Female | 1947 | 68     | 5    | >=60      | 1.1               |    |
| 39213  | 112228 | 1        | China   | 1               | 2  | 2  | Female | 1948 | 67     | 5    | >=60      | 1.1               |    |
| 39231  | 112234 | 1        | China   | 1               | 2  | 2  | Female | 1952 | 63     | 5    | >=60      | 1.1               |    |
| 39251  | 112240 | 1        | China   | 1               | 2  | 2  | Female | 1945 | 70     | 5    | >=60      | 1.1               |    |
| 39257  | 112244 | 1        | China   | 1               | 2  | 2  | Female | 1954 | 61     | 5    | >=60      | 1.1               |    |
| 39262  | 112249 | 1        | China   | 1               | 2  | 2  | Female | 1950 | 65     | 5    | >=60      | 1.1               |    |
| 39269  | 112255 | 1        | China   | 1               | 2  | 2  | Female | 1947 | 68     | 5    | >=60      | 1.1               |    |
| 39272  | 112257 | 1        | China   | 1               | 1  | 2  | Female | 1953 | 62     | 5    | >=60      | 1.1               |    |
| 39280  | 112262 | 1        | China   | 1               | 2  | 2  | Female | 1950 | 65     | 5    | >=60      | 1.1               |    |
| 39294  | 112271 | 1        | China   | 1               | 2  | 2  | Female | 1953 | 62     | 5    | >=60      | 1.1               |    |
| 39297  | 112274 | 1        | China   | 1               | 2  | 2  | Female | 1952 | 63     | 5    | >=60      | 1.1               |    |
| 39300  | 112277 | 1        | China   | 1               | 1  | 2  | Female | 1954 | 61     | 5    | >=60      | 1.1               |    |
| 39307  | 112284 | 1        | China   | 1               | 2  | 2  | Female | 1953 | 62     | 5    | >=60      | 1.1               |    |



| respid | SubsID    | dCountry | Country | QDisclaimer | Q1 | Q2 | Gender   | Q3_1 | age Nr | dAge | age Group  | Weight in Ctry | Q4 |
|--------|-----------|----------|---------|-------------|----|----|----------|------|--------|------|------------|----------------|----|
| 39320  | 112289    | 1        | China   |             | 1  | 2  | 2 Female | 1948 | 67     | 5    | >=60       | 1.1            |    |
| 39333  | 112294    | 1        | China   |             | 1  | 1  | 2 Female | 1954 | 61     | 5    | >=60       | 1.1            |    |
| 39335  | 112296    | 1        | China   |             | 1  | 1  | 2 Female | 1947 | 68     | 5    | >=60       | 1.1            |    |
| 39339  | 112299    | 1        | China   |             | 1  | 2  | 2 Female | 1945 | 70     | 5    | >=60       | 1.1            |    |
| 39375  | 112310    | 1        | China   |             | 1  | 1  | 2 Female | 1945 | 70     | 5    | >=60       | 1.1            |    |
| 39377  | 112312    | 1        | China   |             | 1  | 1  | 2 Female | 1947 | 68     | 5    | >=60       | 1.1            |    |
| 39380  | 112314    | 1        | China   |             | 1  | 2  | 2 Female | 1949 | 66     | 5    | >=60       | 1.1            |    |
| 39425  | 305062    | 2        | Taiwan  |             | 1  | 1  | 2 Female | 1945 | 70     | 5    | >=60       | 1.7            |    |
| 39590  | 305065    | 2        | Taiwan  |             | 1  | 2  | 2 Female | 1954 | 61     | 5    | >=60       | 1.7            |    |
| 40529  | 305096    | 2        | Taiwan  |             | 1  | 1  | 2 Female | 1960 | 55     | 4    | 55-59      | 0.9            |    |
| 40702  | 304345    | 2        | Taiwan  |             | 1  | 1  | 2 Female | 1947 | 68     | 5    | >=60       | 1.7            |    |
| 40788  | 305104    | 2        | Taiwan  |             | 1  | 1  | 2 Female | 1955 | 60     | 5    | >=60       | 1.7            |    |
| 40841  | 305105    | 2        | Taiwan  |             | 1  | 2  | 2 Female | 1959 | 56     | 4    | 55-59      | 0.9            |    |
| 40965  | 304014    | 2        | Taiwan  |             | 1  | 1  | 2 Female | 1959 | 56     | 4    | 55-59      | 0.9            |    |
| 41092  | 305112    | 2        | Taiwan  |             | 1  | 1  | 1 Male   | 1957 | 58     | 4    | 55-59      | 0.7            |    |
| 41534  | 305131    | 2        | Taiwan  |             | 1  | 1  | 2 Female | 1954 | 61     | 5    | >=60       | 1.7            |    |
| 41919  | 305153    | 2        | Taiwan  |             | 1  | 2  | 2 Female | 1954 | 61     | 5    | >=60       | 1.7            |    |
| 42110  | 305162    | 2        | Taiwan  |             | 1  | 2  | 1 Male   | 1961 | 54     | 3    | 50-54      | 0.8            |    |
| 42135  | 113923    | 1        | China   |             | 1  | 1  | 1 Male   | 1971 | 44     | 1    | 40-44 year | 1.0            |    |
| 42142  | 305163    | 2        | Taiwan  |             | 1  | 2  | 1 Male   | 1975 | 40     | 1    | 40-44 year | 0.8            |    |
| 42163  | 305164    | 2        | Taiwan  |             | 1  | 1  | 2 Female | 1953 | 62     | 5    | >=60       | 1.7            |    |
| 42164  | 113936    | 1        | China   |             | 1  | 1  | 1 Male   | 1953 | 62     | 5    | >=60       | 1.0            |    |
| 42172  | 113938    | 1        | China   |             | 1  | 1  | 2 Female | 1942 | 73     | 5    | >=60       | 1.1            |    |
| 42177  | 113942    | 1        | China   |             | 1  | 2  | 1 Male   | 1961 | 54     | 3    | 50-54      | 1.0            |    |
| 42181  | 113945    | 1        | China   |             | 1  | 2  | 1 Male   | 1953 | 62     | 5    | >=60       | 1.0            |    |
| 42193  | 113950    | 1        | China   |             | 1  | 1  | 1 Male   | 1941 | 74     | 5    | >=60       | 1.0            |    |
| 42196  | 113951    | 1        | China   |             | 1  | 1  | 1 Male   | 1953 | 62     | 5    | >=60       | 1.0            |    |
| 42202  | 113955    | 1        | China   |             | 1  | 1  | 2 Female | 1948 | 67     | 5    | >=60       | 1.1            |    |
| 42248  | 113968    | 1        | China   |             | 1  | 1  | 1 Male   | 1959 | 56     | 4    | 55-59      | 0.9            |    |
| 42283  | 380017349 | 2        | Taiwan  |             | 1  | 2  | 1 Male   | 1959 | 56     | 4    | 55-59      | 0.7            |    |
| 42284  | 380123035 | 2        | Taiwan  |             | 1  | 2  | 1 Male   | 1961 | 54     | 3    | 50-54      | 0.8            |    |
| 42323  | 380152809 | 2        | Taiwan  |             | 1  | 2  | 1 Male   | 1975 | 40     | 1    | 40-44 year | 0.8            |    |

| respid | SubsID    | dCountry | Country | QDisclaim<br>er | Q1 | Q2 | Gender | Q3_1 | age Nr | dAge | age Group  | Weight in<br>Ctry | Q4 |
|--------|-----------|----------|---------|-----------------|----|----|--------|------|--------|------|------------|-------------------|----|
| 42349  | 380095376 | 2        | Taiwan  | 1               | 2  | 2  | Female | 1957 | 58     | 4    | 55-59      | 0.9               |    |
| 42351  | 380215846 | 2        | Taiwan  | 1               | 1  | 1  | Male   | 1966 | 49     | 2    | 45-49      | 0.8               |    |
| 42357  | 380220978 | 2        | Taiwan  | 1               | 1  | 2  | Female | 1946 | 69     | 5    | >=60       | 1.7               |    |
| 42366  | 380138678 | 2        | Taiwan  | 1               | 2  | 1  | Male   | 1959 | 56     | 4    | 55-59      | 0.7               |    |
| 42380  | 380200544 | 2        | Taiwan  | 1               | 2  | 2  | Female | 1954 | 61     | 5    | >=60       | 1.7               |    |
| 42414  | 380038934 | 2        | Taiwan  | 1               | 1  | 1  | Male   | 1956 | 59     | 4    | 55-59      | 0.7               |    |
| 42420  | 380153275 | 2        | Taiwan  | 1               | 1  | 1  | Male   | 1963 | 52     | 3    | 50-54      | 0.8               |    |
| 42454  | 350289642 | 3        | Korea   | 1               | 1  | 2  | Female | 1961 | 54     | 3    | 50-54      | 0.8               |    |
| 42458  | 380149978 | 2        | Taiwan  | 1               | 1  | 2  | Female | 1971 | 44     | 1    | 40-44 year | 0.8               | 2  |
| 42461  | 350290110 | 3        | Korea   | 1               | 2  | 1  | Male   | 1975 | 40     | 1    | 40-44 year | 0.9               |    |
| 42488  | 380169482 | 2        | Taiwan  | 1               | 1  | 2  | Female | 1955 | 60     | 5    | >=60       | 1.7               |    |
| 42511  | 114010    | 1        | China   | 1               | 2  | 2  | Female | 1949 | 66     | 5    | >=60       | 1.1               |    |
| 42512  | 301394    | 2        | Taiwan  | 1               | 1  | 2  | Female | 1954 | 61     | 5    | >=60       | 1.7               |    |
| 42530  | 350164467 | 3        | Korea   | 1               | 1  | 2  | Female | 1955 | 60     | 5    | >=60       | 1.6               |    |
| 42531  | 114011    | 1        | China   | 1               | 1  | 1  | Male   | 1955 | 60     | 5    | >=60       | 1.0               |    |
| 42533  | 380001440 | 2        | Taiwan  | 1               | 2  | 1  | Male   | 1952 | 63     | 5    | >=60       | 1.6               |    |
| 42549  | 305178    | 2        | Taiwan  | 1               | 2  | 1  | Male   | 1959 | 56     | 4    | 55-59      | 0.7               |    |
| 42550  | 305179    | 2        | Taiwan  | 1               | 1  | 2  | Female | 1942 | 73     | 5    | >=60       | 1.7               |    |
| 42553  | 350339639 | 3        | Korea   | 1               | 2  | 2  | Female | 1957 | 58     | 4    | 55-59      | 0.7               |    |
| 42562  | 380064584 | 2        | Taiwan  | 1               | 2  | 2  | Female | 1954 | 61     | 5    | >=60       | 1.7               |    |
| 42567  | 305181    | 2        | Taiwan  | 1               | 2  | 1  | Male   | 1959 | 56     | 4    | 55-59      | 0.7               |    |
| 42589  | 350195429 | 3        | Korea   | 1               | 2  | 2  | Female | 1961 | 54     | 3    | 50-54      | 0.8               |    |
| 42604  | 350311547 | 3        | Korea   | 1               | 2  | 2  | Female | 1966 | 49     | 2    | 45-49      | 0.9               | 2  |
| 42618  | 114017    | 1        | China   | 1               | 2  | 2  | Female | 1969 | 46     | 2    | 45-49      | 1.0               | 2  |
| 42621  | 380166600 | 2        | Taiwan  | 1               | 2  | 1  | Male   | 1960 | 55     | 4    | 55-59      | 0.7               |    |
| 42627  | 350297838 | 3        | Korea   | 1               | 2  | 2  | Female | 1963 | 52     | 3    | 50-54      | 0.8               |    |
| 42641  | 350326537 | 3        | Korea   | 1               | 2  | 1  | Male   | 1966 | 49     | 2    | 45-49      | 0.8               |    |
| 42655  | 114019    | 1        | China   | 1               | 1  | 1  | Male   | 1950 | 65     | 5    | >=60       | 1.0               |    |
| 42666  | 350227054 | 3        | Korea   | 1               | 2  | 2  | Female | 1942 | 73     | 5    | >=60       | 1.6               |    |
| 42667  | 380140367 | 2        | Taiwan  | 1               | 2  | 1  | Male   | 1967 | 48     | 2    | 45-49      | 0.8               |    |
| 42697  | 350227202 | 3        | Korea   | 1               | 2  | 2  | Female | 1955 | 60     | 5    | >=60       | 1.6               |    |
| 42703  | 350285241 | 3        | Korea   | 1               | 2  | 2  | Female | 1953 | 62     | 5    | >=60       | 1.6               |    |

| respid | SubsID    | dCountry | Country | QDisclaim<br>er | Q1 | Q2 | Gender   | Q3_1 | age Nr | dAge | age Group  | Weight in<br>Ctry | Q4 |
|--------|-----------|----------|---------|-----------------|----|----|----------|------|--------|------|------------|-------------------|----|
| 42712  | 350138975 | 3        | Korea   | 1               | 1  | 2  | 1 Male   | 1952 | 63     | 5    | >=60       | 1.6               |    |
| 42731  | 350311401 | 3        | Korea   | 1               | 1  | 2  | 1 Male   | 1950 | 65     | 5    | >=60       | 1.6               |    |
| 42780  | 380023960 | 2        | Taiwan  | 1               | 1  | 2  | 1 Male   | 1950 | 65     | 5    | >=60       | 1.6               |    |
| 42785  | 380185181 | 2        | Taiwan  | 1               | 1  | 2  | 2 Female | 1954 | 61     | 5    | >=60       | 1.7               |    |
| 42788  | 350313944 | 3        | Korea   | 1               | 1  | 2  | 1 Male   | 1965 | 50     | 3    | 50-54      | 0.9               |    |
| 42802  | 114033    | 1        | China   | 1               | 1  | 1  | 1 Male   | 1955 | 60     | 5    | >=60       | 1.0               |    |
| 42818  | 380149122 | 2        | Taiwan  | 1               | 1  | 1  | 2 Female | 1960 | 55     | 4    | 55-59      | 0.9               |    |
| 42821  | 350236650 | 3        | Korea   | 1               | 1  | 2  | 2 Female | 1955 | 60     | 5    | >=60       | 1.6               |    |
| 42824  | 281264652 | 1        | China   | 1               | 1  | 2  | 2 Female | 1951 | 64     | 5    | >=60       | 1.1               |    |
| 42831  | 281357755 | 1        | China   | 1               | 1  | 1  | 2 Female | 1955 | 60     | 5    | >=60       | 1.1               |    |
| 42836  | 380051108 | 2        | Taiwan  | 1               | 1  | 2  | 1 Male   | 1953 | 62     | 5    | >=60       | 1.6               |    |
| 42864  | 350304305 | 3        | Korea   | 1               | 1  | 2  | 1 Male   | 1951 | 64     | 5    | >=60       | 1.6               |    |
| 42875  | 350286055 | 3        | Korea   | 1               | 1  | 2  | 1 Male   | 1975 | 40     | 1    | 40-44 year | 0.9               |    |
| 42891  | 350252192 | 3        | Korea   | 1               | 1  | 2  | 2 Female | 1951 | 64     | 5    | >=60       | 1.6               |    |
| 42897  | 380107165 | 2        | Taiwan  | 1               | 1  | 1  | 2 Female | 1956 | 59     | 4    | 55-59      | 0.9               |    |
| 42900  | 114050    | 1        | China   | 1               | 1  | 1  | 2 Female | 1943 | 72     | 5    | >=60       | 1.1               |    |
| 42902  | 114051    | 1        | China   | 1               | 1  | 1  | 1 Male   | 1950 | 65     | 5    | >=60       | 1.0               |    |
| 42921  | 380148603 | 2        | Taiwan  | 1               | 1  | 1  | 2 Female | 1955 | 60     | 5    | >=60       | 1.7               |    |
| 42925  | 350349876 | 3        | Korea   | 1               | 1  | 2  | 2 Female | 1954 | 61     | 5    | >=60       | 1.6               |    |
| 42944  | 350299299 | 3        | Korea   | 1               | 1  | 2  | 2 Female | 1960 | 55     | 4    | 55-59      | 0.7               |    |
| 42950  | 380106127 | 2        | Taiwan  | 1               | 1  | 1  | 2 Female | 1964 | 51     | 3    | 50-54      | 0.9               |    |
| 42963  | 280576708 | 1        | China   | 1               | 1  | 2  | 2 Female | 1956 | 59     | 4    | 55-59      | 1.0               |    |
| 42967  | 350301166 | 3        | Korea   | 1               | 1  | 2  | 1 Male   | 1952 | 63     | 5    | >=60       | 1.6               |    |
| 42985  | 380212780 | 2        | Taiwan  | 1               | 1  | 1  | 2 Female | 1954 | 61     | 5    | >=60       | 1.7               |    |
| 42990  | 350361764 | 3        | Korea   | 1               | 1  | 1  | 1 Male   | 1963 | 52     | 3    | 50-54      | 0.9               |    |
| 42996  | 380214919 | 2        | Taiwan  | 1               | 1  | 1  | 1 Male   | 1946 | 69     | 5    | >=60       | 1.6               |    |
| 43002  | 380073451 | 2        | Taiwan  | 1               | 1  | 2  | 2 Female | 1955 | 60     | 5    | >=60       | 1.7               |    |
| 43004  | 114069    | 1        | China   | 1               | 1  | 2  | 1 Male   | 1963 | 52     | 3    | 50-54      | 1.0               |    |
| 43012  | 350315943 | 3        | Korea   | 1               | 1  | 2  | 2 Female | 1960 | 55     | 4    | 55-59      | 0.7               |    |
| 43027  | 114075    | 1        | China   | 1               | 1  | 1  | 1 Male   | 1954 | 61     | 5    | >=60       | 1.0               |    |
| 43028  | 305191    | 2        | Taiwan  | 1               | 1  | 2  | 1 Male   | 1964 | 51     | 3    | 50-54      | 0.8               |    |
| 43029  | 280486387 | 1        | China   | 1               | 1  | 1  | 2 Female | 1927 | 88     | 5    | >=60       | 1.1               |    |

| respid | SubsID    | dCountry | Country  | QDisclaimer | Q1 | Q2 | Gender   | Q3_1 | age Nr | dAge | age Group    | Weight in Ctry | Q4 |
|--------|-----------|----------|----------|-------------|----|----|----------|------|--------|------|--------------|----------------|----|
| 43031  | 380175408 |          | 2 Taiwan |             | 1  | 2  | 2 Female | 1970 | 45     |      | 2 45-49      | 0.9            | 2  |
| 43042  | 380141932 |          | 2 Taiwan |             | 1  | 1  | 1 Male   | 1966 | 49     |      | 2 45-49      | 0.8            |    |
| 43054  | 280824459 |          | 1 China  |             | 1  | 1  | 2 Female | 1955 | 60     |      | 5 >=60       | 1.1            |    |
| 43058  | 380024888 |          | 2 Taiwan |             | 1  | 2  | 1 Male   | 1957 | 58     |      | 4 55-59      | 0.7            |    |
| 43064  | 110307    |          | 1 China  |             | 1  | 1  | 2 Female | 1945 | 70     |      | 5 >=60       | 1.1            |    |
| 43069  | 114086    |          | 1 China  |             | 1  | 2  | 2 Female | 1973 | 42     |      | 1 40-44 year | 1.0            | 2  |
| 43071  | 380161698 |          | 2 Taiwan |             | 1  | 1  | 1 Male   | 1952 | 63     |      | 5 >=60       | 1.6            |    |
| 43072  | 114087    |          | 1 China  |             | 1  | 2  | 1 Male   | 1964 | 51     |      | 3 50-54      | 1.0            |    |
| 43077  | 114089    |          | 1 China  |             | 1  | 1  | 1 Male   | 1950 | 65     |      | 5 >=60       | 1.0            |    |
| 43078  | 114090    |          | 1 China  |             | 1  | 1  | 1 Male   | 1954 | 61     |      | 5 >=60       | 1.0            |    |
| 43082  | 350253860 |          | 3 Korea  |             | 1  | 2  | 2 Female | 1948 | 67     |      | 5 >=60       | 1.6            |    |
| 43092  | 350312275 |          | 3 Korea  |             | 1  | 1  | 1 Male   | 1965 | 50     |      | 3 50-54      | 0.9            |    |
| 43096  | 380122973 |          | 2 Taiwan |             | 1  | 2  | 1 Male   | 1975 | 40     |      | 1 40-44 year | 0.8            |    |
| 43109  | 305194    |          | 2 Taiwan |             | 1  | 1  | 2 Female | 1955 | 60     |      | 5 >=60       | 1.7            |    |
| 43113  | 114098    |          | 1 China  |             | 1  | 2  | 2 Female | 1930 | 85     |      | 5 >=60       | 1.1            |    |
| 43123  | 305195    |          | 2 Taiwan |             | 1  | 2  | 2 Female | 1972 | 43     |      | 1 40-44 year | 0.8            | 2  |
| 43127  | 350203903 |          | 3 Korea  |             | 1  | 1  | 2 Female | 1959 | 56     |      | 4 55-59      | 0.7            |    |
| 43128  | 380177861 |          | 2 Taiwan |             | 1  | 2  | 2 Female | 1975 | 40     |      | 1 40-44 year | 0.8            | 2  |
| 43129  | 305196    |          | 2 Taiwan |             | 1  | 1  | 2 Female | 1961 | 54     |      | 3 50-54      | 0.9            |    |
| 43133  | 114102    |          | 1 China  |             | 1  | 2  | 2 Female | 1951 | 64     |      | 5 >=60       | 1.1            |    |
| 43140  | 301622    |          | 2 Taiwan |             | 1  | 1  | 2 Female | 1951 | 64     |      | 5 >=60       | 1.7            |    |
| 43143  | 114106    |          | 1 China  |             | 1  | 1  | 2 Female | 1954 | 61     |      | 5 >=60       | 1.1            |    |
| 43149  | 114107    |          | 1 China  |             | 1  | 1  | 2 Female | 1953 | 62     |      | 5 >=60       | 1.1            |    |
| 43150  | 114108    |          | 1 China  |             | 1  | 1  | 2 Female | 1954 | 61     |      | 5 >=60       | 1.1            |    |
| 43153  | 114110    |          | 1 China  |             | 1  | 2  | 2 Female | 1945 | 70     |      | 5 >=60       | 1.1            |    |
| 43170  | 380161026 |          | 2 Taiwan |             | 1  | 2  | 1 Male   | 1954 | 61     |      | 5 >=60       | 1.6            |    |
| 43187  | 350232138 |          | 3 Korea  |             | 1  | 2  | 2 Female | 1955 | 60     |      | 5 >=60       | 1.6            |    |
| 43188  | 350345521 |          | 3 Korea  |             | 1  | 2  | 2 Female | 1956 | 59     |      | 4 55-59      | 0.7            |    |
| 43198  | 114130    |          | 1 China  |             | 1  | 2  | 2 Female | 1970 | 45     |      | 2 45-49      | 1.0            | 2  |
| 43208  | 350356950 |          | 3 Korea  |             | 1  | 2  | 2 Female | 1968 | 47     |      | 2 45-49      | 0.9            | 2  |
| 43216  | 114136    |          | 1 China  |             | 1  | 2  | 1 Male   | 1972 | 43     |      | 1 40-44 year | 1.0            |    |
| 43222  | 114139    |          | 1 China  |             | 1  | 1  | 2 Female | 1960 | 55     |      | 4 55-59      | 1.0            |    |

| respid | SubsID    | dCountry | Country | QDisclaimer | Q1 | Q2 | Gender | Q3_1 | age Nr | dAge | age Group  | Weight in Ctry | Q4 |
|--------|-----------|----------|---------|-------------|----|----|--------|------|--------|------|------------|----------------|----|
| 43224  | 114140    | 1        | China   | 1           | 2  | 2  | Female | 1964 | 51     | 3    | 50-54      | 1.2            |    |
| 43230  | 114142    | 1        | China   | 1           | 1  | 1  | Male   | 1962 | 53     | 3    | 50-54      | 1.0            |    |
| 43231  | 114143    | 1        | China   | 1           | 1  | 1  | Male   | 1961 | 54     | 3    | 50-54      | 1.0            |    |
| 43265  | 114157    | 1        | China   | 1           | 1  | 1  | Male   | 1965 | 50     | 3    | 50-54      | 1.0            |    |
| 43270  | 114159    | 1        | China   | 1           | 1  | 1  | Male   | 1965 | 50     | 3    | 50-54      | 1.0            |    |
| 43283  | 114166    | 1        | China   | 1           | 1  | 1  | Male   | 1965 | 50     | 3    | 50-54      | 1.0            |    |
| 43295  | 114170    | 1        | China   | 1           | 1  | 1  | Male   | 1965 | 50     | 3    | 50-54      | 1.0            |    |
| 43297  | 114171    | 1        | China   | 1           | 2  | 1  | Male   | 1972 | 43     | 1    | 40-44 year | 1.0            |    |
| 43299  | 114172    | 1        | China   | 1           | 1  | 2  | Female | 1965 | 50     | 3    | 50-54      | 1.2            |    |
| 43307  | 305205    | 2        | Taiwan  | 1           | 2  | 2  | Female | 1951 | 64     | 5    | >=60       | 1.7            |    |
| 43316  | 114176    | 1        | China   | 1           | 1  | 1  | Male   | 1963 | 52     | 3    | 50-54      | 1.0            |    |
| 43318  | 114178    | 1        | China   | 1           | 1  | 1  | Male   | 1964 | 51     | 3    | 50-54      | 1.0            |    |
| 43319  | 380072749 | 2        | Taiwan  | 1           | 2  | 1  | Male   | 1975 | 40     | 1    | 40-44 year | 0.8            |    |
| 43324  | 114179    | 1        | China   | 1           | 1  | 1  | Male   | 1965 | 50     | 3    | 50-54      | 1.0            |    |
| 43325  | 305207    | 2        | Taiwan  | 1           | 1  | 2  | Female | 1960 | 55     | 4    | 55-59      | 0.9            |    |
| 43327  | 305208    | 2        | Taiwan  | 1           | 1  | 2  | Female | 1955 | 60     | 5    | >=60       | 1.7            |    |
| 43338  | 114183    | 1        | China   | 1           | 2  | 2  | Female | 1968 | 47     | 2    | 45-49      | 1.0            | 2  |
| 43342  | 380159056 | 2        | Taiwan  | 1           | 1  | 2  | Female | 1959 | 56     | 4    | 55-59      | 0.9            |    |
| 43348  | 350359433 | 3        | Korea   | 1           | 2  | 2  | Female | 1966 | 49     | 2    | 45-49      | 0.9            | 2  |
| 43395  | 114195    | 1        | China   | 1           | 1  | 1  | Male   | 1965 | 50     | 3    | 50-54      | 1.0            |    |
| 43404  | 114198    | 1        | China   | 1           | 1  | 1  | Male   | 1965 | 50     | 3    | 50-54      | 1.0            |    |
| 43406  | 350177140 | 3        | Korea   | 1           | 2  | 1  | Male   | 1952 | 63     | 5    | >=60       | 1.6            |    |
| 43407  | 114199    | 1        | China   | 1           | 1  | 2  | Female | 1971 | 44     | 1    | 40-44 year | 1.0            | 2  |
| 43411  | 350218873 | 3        | Korea   | 1           | 2  | 2  | Female | 1975 | 40     | 1    | 40-44 year | 0.9            | 2  |
| 43416  | 114204    | 1        | China   | 1           | 1  | 1  | Male   | 1965 | 50     | 3    | 50-54      | 1.0            |    |
| 43428  | 114206    | 1        | China   | 1           | 2  | 1  | Male   | 1970 | 45     | 2    | 45-49      | 1.0            |    |
| 43429  | 305214    | 2        | Taiwan  | 1           | 1  | 1  | Male   | 1961 | 54     | 3    | 50-54      | 0.8            |    |
| 43432  | 380202141 | 2        | Taiwan  | 1           | 2  | 1  | Male   | 1947 | 68     | 5    | >=60       | 1.6            |    |
| 43443  | 380223266 | 2        | Taiwan  | 1           | 1  | 1  | Male   | 1968 | 47     | 2    | 45-49      | 0.8            |    |
| 43455  | 380021524 | 2        | Taiwan  | 1           | 2  | 1  | Male   | 1951 | 64     | 5    | >=60       | 1.6            |    |
| 43457  | 350353778 | 3        | Korea   | 1           | 2  | 1  | Male   | 1950 | 65     | 5    | >=60       | 1.6            |    |
| 43458  | 380207640 | 2        | Taiwan  | 1           | 2  | 2  | Female | 1975 | 40     | 1    | 40-44 year | 0.8            | 2  |

| respid | SubsID    | dCountry | Country | QDisclaimer | Q1 | Q2 | Gender | Q3_1 | age Nr | dAge | age Group  | Weight in Ctry | Q4 |
|--------|-----------|----------|---------|-------------|----|----|--------|------|--------|------|------------|----------------|----|
| 43477  | 114214    | 1        | China   | 1           | 2  | 2  | Female | 1960 | 55     | 4    | 55-59      | 1.0            |    |
| 43520  | 350332914 | 3        | Korea   | 1           | 2  | 2  | Female | 1957 | 58     | 4    | 55-59      | 0.7            |    |
| 43521  | 380224613 | 2        | Taiwan  | 1           | 2  | 1  | Male   | 1950 | 65     | 5    | >=60       | 1.6            |    |
| 43550  | 350094509 | 3        | Korea   | 1           | 2  | 2  | Female | 1966 | 49     | 2    | 45-49      | 0.9            | 2  |
| 43551  | 380039027 | 2        | Taiwan  | 1           | 2  | 1  | Male   | 1947 | 68     | 5    | >=60       | 1.6            |    |
| 43554  | 114229    | 1        | China   | 1           | 2  | 2  | Female | 1959 | 56     | 4    | 55-59      | 1.0            |    |
| 43560  | 350297507 | 3        | Korea   | 1           | 2  | 2  | Female | 1947 | 68     | 5    | >=60       | 1.6            |    |
| 43569  | 350299327 | 3        | Korea   | 1           | 2  | 2  | Female | 1961 | 54     | 3    | 50-54      | 0.8            |    |
| 43583  | 350353231 | 3        | Korea   | 1           | 2  | 2  | Female | 1963 | 52     | 3    | 50-54      | 0.8            |    |
| 43590  | 305230    | 2        | Taiwan  | 1           | 1  | 2  | Female | 1958 | 57     | 4    | 55-59      | 0.9            |    |
| 43591  | 114238    | 1        | China   | 1           | 2  | 2  | Female | 1964 | 51     | 3    | 50-54      | 1.2            |    |
| 43595  | 305231    | 2        | Taiwan  | 1           | 2  | 2  | Female | 1961 | 54     | 3    | 50-54      | 0.9            |    |
| 43599  | 380025875 | 2        | Taiwan  | 1           | 1  | 2  | Female | 1945 | 70     | 5    | >=60       | 1.7            |    |
| 43606  | 305233    | 2        | Taiwan  | 1           | 1  | 2  | Female | 1954 | 61     | 5    | >=60       | 1.7            |    |
| 43609  | 350360372 | 3        | Korea   | 1           | 2  | 2  | Female | 1961 | 54     | 3    | 50-54      | 0.8            |    |
| 43629  | 305237    | 2        | Taiwan  | 1           | 2  | 1  | Male   | 1955 | 60     | 5    | >=60       | 1.6            |    |
| 43636  | 380122622 | 2        | Taiwan  | 1           | 2  | 2  | Female | 1965 | 50     | 3    | 50-54      | 0.9            |    |
| 43661  | 350295455 | 3        | Korea   | 1           | 1  | 1  | Male   | 1953 | 62     | 5    | >=60       | 1.6            |    |
| 43668  | 350222007 | 3        | Korea   | 1           | 2  | 1  | Male   | 1975 | 40     | 1    | 40-44 year | 0.9            |    |
| 43672  | 380110275 | 2        | Taiwan  | 1           | 2  | 2  | Female | 1949 | 66     | 5    | >=60       | 1.7            |    |
| 43677  | 114253    | 1        | China   | 1           | 2  | 2  | Female | 1958 | 57     | 4    | 55-59      | 1.0            |    |
| 43683  | 380113154 | 2        | Taiwan  | 1           | 2  | 2  | Female | 1961 | 54     | 3    | 50-54      | 0.9            |    |
| 43708  | 281223851 | 1        | China   | 1           | 2  | 1  | Male   | 1960 | 55     | 4    | 55-59      | 0.9            |    |
| 43713  | 301543    | 2        | Taiwan  | 1           | 1  | 2  | Female | 1956 | 59     | 4    | 55-59      | 0.9            |    |
| 43718  | 305246    | 2        | Taiwan  | 1           | 2  | 2  | Female | 1955 | 60     | 5    | >=60       | 1.7            |    |
| 43725  | 350357258 | 3        | Korea   | 1           | 1  | 2  | Female | 1966 | 49     | 2    | 45-49      | 0.9            | 2  |
| 43747  | 305252    | 2        | Taiwan  | 1           | 1  | 2  | Female | 1959 | 56     | 4    | 55-59      | 0.9            |    |
| 43755  | 380213450 | 2        | Taiwan  | 1           | 2  | 2  | Female | 1971 | 44     | 1    | 40-44 year | 0.8            | 2  |
| 43770  | 380092243 | 2        | Taiwan  | 1           | 2  | 1  | Male   | 1949 | 66     | 5    | >=60       | 1.6            |    |
| 43775  | 114273    | 1        | China   | 1           | 2  | 2  | Female | 1970 | 45     | 2    | 45-49      | 1.0            | 2  |
| 43788  | 380222033 | 2        | Taiwan  | 1           | 1  | 2  | Female | 1974 | 41     | 1    | 40-44 year | 0.8            | 2  |
| 43790  | 114277    | 1        | China   | 1           | 1  | 2  | Female | 1965 | 50     | 3    | 50-54      | 1.2            |    |

| respid | SubsID    | dCountry | Country | QDisclaimer | Q1 | Q2 | Gender   | Q3_1 | age Nr | dAge | age Group  | Weight in Ctry | Q4 |
|--------|-----------|----------|---------|-------------|----|----|----------|------|--------|------|------------|----------------|----|
| 43797  | 114281    | 1        | China   | 1           | 1  | 1  | 2 Female | 1964 | 51     | 3    | 50-54      | 1.2            |    |
| 43798  | 114282    | 1        | China   | 1           | 1  | 1  | 2 Female | 1964 | 51     | 3    | 50-54      | 1.2            |    |
| 43811  | 114285    | 1        | China   | 1           | 1  | 1  | 2 Female | 1963 | 52     | 3    | 50-54      | 1.2            |    |
| 43819  | 114288    | 1        | China   | 1           | 1  | 1  | 2 Female | 1965 | 50     | 3    | 50-54      | 1.2            |    |
| 43821  | 114289    | 1        | China   | 1           | 1  | 1  | 2 Female | 1963 | 52     | 3    | 50-54      | 1.2            |    |
| 43822  | 380159331 | 2        | Taiwan  | 1           | 2  | 2  | 2 Female | 1970 | 45     | 2    | 45-49      | 0.9            | 2  |
| 43825  | 380148289 | 2        | Taiwan  | 1           | 2  | 2  | 2 Female | 1958 | 57     | 4    | 55-59      | 0.9            |    |
| 43826  | 380161804 | 2        | Taiwan  | 1           | 1  | 1  | 2 Female | 1950 | 65     | 5    | >=60       | 1.7            |    |
| 43831  | 305265    | 2        | Taiwan  | 1           | 1  | 1  | 2 Female | 1952 | 63     | 5    | >=60       | 1.7            |    |
| 43836  | 114297    | 1        | China   | 1           | 1  | 1  | 2 Female | 1965 | 50     | 3    | 50-54      | 1.2            |    |
| 43852  | 114300    | 1        | China   | 1           | 1  | 1  | 2 Female | 1965 | 50     | 3    | 50-54      | 1.2            |    |
| 43857  | 114301    | 1        | China   | 1           | 2  | 2  | 2 Female | 1956 | 59     | 4    | 55-59      | 1.0            |    |
| 43858  | 350345606 | 3        | Korea   | 1           | 1  | 1  | 1 Male   | 1955 | 60     | 5    | >=60       | 1.6            |    |
| 43859  | 114302    | 1        | China   | 1           | 1  | 1  | 2 Female | 1965 | 50     | 3    | 50-54      | 1.2            |    |
| 43863  | 114304    | 1        | China   | 1           | 1  | 1  | 1 Male   | 1966 | 49     | 2    | 45-49      | 1.0            |    |
| 43868  | 114305    | 1        | China   | 1           | 1  | 1  | 2 Female | 1968 | 47     | 2    | 45-49      | 1.0            | 2  |
| 43872  | 114309    | 1        | China   | 1           | 1  | 1  | 2 Female | 1969 | 46     | 2    | 45-49      | 1.0            | 2  |
| 43874  | 114311    | 1        | China   | 1           | 1  | 1  | 2 Female | 1968 | 47     | 2    | 45-49      | 1.0            | 2  |
| 43882  | 350263135 | 3        | Korea   | 1           | 2  | 2  | 2 Female | 1963 | 52     | 3    | 50-54      | 0.8            |    |
| 43886  | 305273    | 2        | Taiwan  | 1           | 2  | 2  | 2 Female | 1955 | 60     | 5    | >=60       | 1.7            |    |
| 43903  | 114321    | 1        | China   | 1           | 2  | 2  | 2 Female | 1958 | 57     | 4    | 55-59      | 1.0            |    |
| 43929  | 380033638 | 2        | Taiwan  | 1           | 2  | 2  | 2 Female | 1965 | 50     | 3    | 50-54      | 0.9            |    |
| 43932  | 350350360 | 3        | Korea   | 1           | 2  | 2  | 2 Female | 1968 | 47     | 2    | 45-49      | 0.9            | 2  |
| 43936  | 350237077 | 3        | Korea   | 1           | 2  | 2  | 2 Female | 1975 | 40     | 1    | 40-44 year | 0.9            | 2  |
| 43962  | 305284    | 2        | Taiwan  | 1           | 2  | 2  | 2 Female | 1953 | 62     | 5    | >=60       | 1.7            |    |
| 43964  | 114337    | 1        | China   | 1           | 2  | 2  | 2 Female | 1967 | 48     | 2    | 45-49      | 1.0            | 2  |
| 43968  | 114338    | 1        | China   | 1           | 2  | 2  | 2 Female | 1971 | 44     | 1    | 40-44 year | 1.0            | 2  |
| 43979  | 114342    | 1        | China   | 1           | 2  | 2  | 2 Female | 1967 | 48     | 2    | 45-49      | 1.0            | 2  |
| 44006  | 305289    | 2        | Taiwan  | 1           | 1  | 1  | 1 Male   | 1960 | 55     | 4    | 55-59      | 0.7            |    |
| 44009  | 114356    | 1        | China   | 1           | 2  | 2  | 2 Female | 1973 | 42     | 1    | 40-44 year | 1.0            | 2  |
| 44023  | 350358329 | 3        | Korea   | 1           | 2  | 2  | 2 Female | 1970 | 45     | 2    | 45-49      | 0.9            | 2  |
| 44035  | 114362    | 1        | China   | 1           | 1  | 1  | 2 Female | 1968 | 47     | 2    | 45-49      | 1.0            | 2  |

| respid | SubsID    | dCountry | Country  | QDisclaim<br>er | Q1 | Q2 | Gender   | Q3_1 | age Nr | dAge | age Group    | Weight in<br>Ctry | Q4 |
|--------|-----------|----------|----------|-----------------|----|----|----------|------|--------|------|--------------|-------------------|----|
| 44038  | 303848    |          | 2 Taiwan |                 | 1  | 1  | 1 Male   | 1960 | 55     |      | 4 55-59      | 0.7               |    |
| 44039  | 114363    |          | 1 China  |                 | 1  | 1  | 2 Female | 1969 | 46     |      | 2 45-49      | 1.0               | 2  |
| 44043  | 305293    |          | 2 Taiwan |                 | 1  | 1  | 2 Female | 1948 | 67     |      | 5 >=60       | 1.7               |    |
| 44048  | 114366    |          | 1 China  |                 | 1  | 1  | 2 Female | 1969 | 46     |      | 2 45-49      | 1.0               | 2  |
| 44050  | 305296    |          | 2 Taiwan |                 | 1  | 1  | 2 Female | 1958 | 57     |      | 4 55-59      | 0.9               |    |
| 44051  | 114367    |          | 1 China  |                 | 1  | 1  | 2 Female | 1967 | 48     |      | 2 45-49      | 1.0               | 2  |
| 44061  | 114371    |          | 1 China  |                 | 1  | 1  | 2 Female | 1975 | 40     |      | 1 40-44 year | 1.0               | 2  |
| 44063  | 114372    |          | 1 China  |                 | 1  | 1  | 2 Female | 1975 | 40     |      | 1 40-44 year | 1.0               | 2  |
| 44072  | 114374    |          | 1 China  |                 | 1  | 1  | 2 Female | 1975 | 40     |      | 1 40-44 year | 1.0               | 2  |
| 44075  | 114375    |          | 1 China  |                 | 1  | 1  | 2 Female | 1975 | 40     |      | 1 40-44 year | 1.0               | 2  |
| 44089  | 114378    |          | 1 China  |                 | 1  | 1  | 2 Female | 1973 | 42     |      | 1 40-44 year | 1.0               | 2  |
| 44090  | 114379    |          | 1 China  |                 | 1  | 2  | 1 Male   | 1975 | 40     |      | 1 40-44 year | 1.0               |    |
| 44091  | 114380    |          | 1 China  |                 | 1  | 1  | 2 Female | 1974 | 41     |      | 1 40-44 year | 1.0               | 2  |
| 44092  | 305302    |          | 2 Taiwan |                 | 1  | 2  | 2 Female | 1956 | 59     |      | 4 55-59      | 0.9               |    |
| 44110  | 114386    |          | 1 China  |                 | 1  | 1  | 2 Female | 1975 | 40     |      | 1 40-44 year | 1.0               | 2  |
| 44112  | 114388    |          | 1 China  |                 | 1  | 1  | 2 Female | 1975 | 40     |      | 1 40-44 year | 1.0               | 2  |
| 44114  | 114389    |          | 1 China  |                 | 1  | 2  | 2 Female | 1975 | 40     |      | 1 40-44 year | 1.0               | 2  |
| 44143  | 350354046 |          | 3 Korea  |                 | 1  | 2  | 1 Male   | 1968 | 47     |      | 2 45-49      | 0.8               |    |
| 44179  | 350334960 |          | 3 Korea  |                 | 1  | 1  | 2 Female | 1966 | 49     |      | 2 45-49      | 0.9               | 2  |
| 44234  | 350310124 |          | 3 Korea  |                 | 1  | 2  | 1 Male   | 1975 | 40     |      | 1 40-44 year | 0.9               |    |
| 44236  | 114417    |          | 1 China  |                 | 1  | 2  | 1 Male   | 1973 | 42     |      | 1 40-44 year | 1.0               |    |
| 44239  | 114420    |          | 1 China  |                 | 1  | 1  | 1 Male   | 1975 | 40     |      | 1 40-44 year | 1.0               |    |
| 44241  | 114421    |          | 1 China  |                 | 1  | 2  | 1 Male   | 1975 | 40     |      | 1 40-44 year | 1.0               |    |
| 44253  | 114425    |          | 1 China  |                 | 1  | 2  | 1 Male   | 1970 | 45     |      | 2 45-49      | 1.0               |    |
| 44260  | 114429    |          | 1 China  |                 | 1  | 1  | 1 Male   | 1975 | 40     |      | 1 40-44 year | 1.0               |    |
| 44261  | 114430    |          | 1 China  |                 | 1  | 1  | 1 Male   | 1975 | 40     |      | 1 40-44 year | 1.0               |    |
| 44263  | 114431    |          | 1 China  |                 | 1  | 1  | 1 Male   | 1975 | 40     |      | 1 40-44 year | 1.0               |    |
| 44264  | 380202122 |          | 2 Taiwan |                 | 1  | 1  | 2 Female | 1966 | 49     |      | 2 45-49      | 0.9               | 2  |
| 44265  | 380011575 |          | 2 Taiwan |                 | 1  | 2  | 1 Male   | 1970 | 45     |      | 2 45-49      | 0.8               |    |
| 44267  | 114433    |          | 1 China  |                 | 1  | 1  | 1 Male   | 1975 | 40     |      | 1 40-44 year | 1.0               |    |
| 44306  | 114450    |          | 1 China  |                 | 1  | 2  | 2 Female | 1959 | 56     |      | 4 55-59      | 1.0               |    |
| 44309  | 114452    |          | 1 China  |                 | 1  | 2  | 2 Female | 1956 | 59     |      | 4 55-59      | 1.0               |    |



| respid | SubsID    | dCountry | Country  | QDisclaimer | Q1 | Q2 | Gender   | Q3_1 | age Nr | dAge | age Group    | Weight in Ctry | Q4 |
|--------|-----------|----------|----------|-------------|----|----|----------|------|--------|------|--------------|----------------|----|
| 44310  | 350309629 |          | 3 Korea  |             | 1  | 2  | 2 Female | 1975 | 40     |      | 1 40-44 year | 0.9            | 2  |
| 44361  | 114464    |          | 1 China  |             | 1  | 2  | 2 Female | 1956 | 59     |      | 4 55-59      | 1.0            |    |
| 44380  | 350353604 |          | 3 Korea  |             | 1  | 2  | 2 Female | 1970 | 45     |      | 2 45-49      | 0.9            | 2  |
| 44386  | 350322303 |          | 3 Korea  |             | 1  | 2  | 2 Female | 1963 | 52     |      | 3 50-54      | 0.8            |    |
| 44419  | 380138548 |          | 2 Taiwan |             | 1  | 1  | 2 Female | 1970 | 45     |      | 2 45-49      | 0.9            | 2  |
| 44426  | 380161677 |          | 2 Taiwan |             | 1  | 1  | 2 Female | 1960 | 55     |      | 4 55-59      | 0.9            |    |
| 44479  | 281369150 |          | 1 China  |             | 1  | 2  | 1 Male   | 1956 | 59     |      | 4 55-59      | 0.9            |    |
| 44484  | 350149513 |          | 3 Korea  |             | 1  | 2  | 1 Male   | 1972 | 43     |      | 1 40-44 year | 0.9            |    |
| 44487  | 114499    |          | 1 China  |             | 1  | 2  | 1 Male   | 1968 | 47     |      | 2 45-49      | 1.0            |    |
| 44509  | 350346065 |          | 3 Korea  |             | 1  | 1  | 2 Female | 1959 | 56     |      | 4 55-59      | 0.7            |    |
| 44540  | 114525    |          | 1 China  |             | 1  | 2  | 2 Female | 1959 | 56     |      | 4 55-59      | 1.0            |    |
| 44551  | 380129115 |          | 2 Taiwan |             | 1  | 2  | 1 Male   | 1962 | 53     |      | 3 50-54      | 0.8            |    |
| 44553  | 114533    |          | 1 China  |             | 1  | 1  | 1 Male   | 1970 | 45     |      | 2 45-49      | 1.0            |    |
| 44650  | 350213176 |          | 3 Korea  |             | 1  | 2  | 2 Female | 1959 | 56     |      | 4 55-59      | 0.7            |    |
| 44665  | 114586    |          | 1 China  |             | 1  | 2  | 2 Female | 1956 | 59     |      | 4 55-59      | 1.0            |    |
| 44779  | 380207669 |          | 2 Taiwan |             | 1  | 2  | 1 Male   | 1975 | 40     |      | 1 40-44 year | 0.8            |    |
| 44797  | 350335145 |          | 3 Korea  |             | 1  | 1  | 2 Female | 1958 | 57     |      | 4 55-59      | 0.7            |    |
| 44807  | 350356346 |          | 3 Korea  |             | 1  | 2  | 1 Male   | 1962 | 53     |      | 3 50-54      | 0.9            |    |
| 44815  | 114667    |          | 1 China  |             | 1  | 2  | 2 Female | 1959 | 56     |      | 4 55-59      | 1.0            |    |
| 44836  | 350181790 |          | 3 Korea  |             | 1  | 2  | 2 Female | 1958 | 57     |      | 4 55-59      | 0.7            |    |
| 44868  | 114699    |          | 1 China  |             | 1  | 2  | 1 Male   | 1960 | 55     |      | 4 55-59      | 0.9            |    |
| 44927  | 114728    |          | 1 China  |             | 1  | 2  | 1 Male   | 1958 | 57     |      | 4 55-59      | 0.9            |    |
| 44983  | 380138114 |          | 2 Taiwan |             | 1  | 2  | 2 Female | 1963 | 52     |      | 3 50-54      | 0.9            |    |
| 45040  | 350334682 |          | 3 Korea  |             | 1  | 2  | 2 Female | 1958 | 57     |      | 4 55-59      | 0.7            |    |
| 45051  | 350361141 |          | 3 Korea  |             | 1  | 2  | 2 Female | 1966 | 49     |      | 2 45-49      | 0.9            | 2  |
| 45067  | 350273143 |          | 3 Korea  |             | 1  | 2  | 2 Female | 1959 | 56     |      | 4 55-59      | 0.7            |    |
| 45074  | 114811    |          | 1 China  |             | 1  | 2  | 1 Male   | 1956 | 59     |      | 4 55-59      | 0.9            |    |
| 45115  | 350316875 |          | 3 Korea  |             | 1  | 2  | 2 Female | 1963 | 52     |      | 3 50-54      | 0.8            |    |
| 45187  | 114862    |          | 1 China  |             | 1  | 1  | 1 Male   | 1957 | 58     |      | 4 55-59      | 0.9            |    |
| 45221  | 114875    |          | 1 China  |             | 1  | 2  | 1 Male   | 1967 | 48     |      | 2 45-49      | 1.0            |    |
| 45279  | 350330204 |          | 3 Korea  |             | 1  | 2  | 2 Female | 1948 | 67     |      | 5 >=60       | 1.6            |    |
| 45308  | 350249898 |          | 3 Korea  |             | 1  | 2  | 2 Female | 1960 | 55     |      | 4 55-59      | 0.7            |    |

| respid | SubsID    | dCountry | Country | QDisclaim<br>er | Q1 | Q2 | Gender | Q3_1 | age Nr | dAge | age Group | Weight in<br>Ctry | Q4 |
|--------|-----------|----------|---------|-----------------|----|----|--------|------|--------|------|-----------|-------------------|----|
| 45317  | 380099141 | 2        | Taiwan  | 1               | 2  | 1  | Male   | 1965 | 50     | 3    | 50-54     | 0.8               |    |
| 45379  | 114982    | 1        | China   | 1               | 1  | 1  | Male   | 1960 | 55     | 4    | 55-59     | 0.9               |    |
| 45451  | 380103147 | 2        | Taiwan  | 1               | 2  | 2  | Female | 1962 | 53     | 3    | 50-54     | 0.9               |    |
| 45472  | 115024    | 1        | China   | 1               | 2  | 1  | Male   | 1958 | 57     | 4    | 55-59     | 0.9               |    |
| 45474  | 115027    | 1        | China   | 1               | 2  | 1  | Male   | 1969 | 46     | 2    | 45-49     | 1.0               |    |
| 45544  | 281011903 | 1        | China   | 1               | 2  | 1  | Male   | 1956 | 59     | 4    | 55-59     | 0.9               |    |
| 45561  | 350297949 | 3        | Korea   | 1               | 2  | 2  | Female | 1964 | 51     | 3    | 50-54     | 0.8               |    |
| 45596  | 350309565 | 3        | Korea   | 1               | 1  | 2  | Female | 1955 | 60     | 5    | >=60      | 1.6               |    |

---

**Instrum**

---

**Symptom**

---

**Type of R****Descripti**

Diabetes Tx

| respid | Q5 | Q6 | Marital Status | Q7 | Education        | Q8 | Work        | Q9 | Q10 | Diabetes | Q10a | Q11 | High BP |
|--------|----|----|----------------|----|------------------|----|-------------|----|-----|----------|------|-----|---------|
| 241    | 2  | 2  | Married/li     | 1  | High school or l | 1  | Working, fi | 20 | 2   | No       |      | 1   | Yes     |
| 242    | 2  | 2  | Married/li     | 3  | College degree   | 1  | Working, fi | 19 | 2   | No       |      | 1   | Yes     |
| 243    | 2  | 2  | Married/li     | 3  | College degree   | 1  | Working, fi | 17 | 2   | No       |      | 1   | Yes     |
| 244    | 2  | 2  | Married/li     | 3  | College degree   | 1  | Working, fi | 17 | 2   | No       |      | 1   | Yes     |
| 245    | 2  | 2  | Married/li     | 3  | College degree   | 1  | Working, fi | 23 | 2   | No       |      | 2   | No      |
| 246    | 2  | 2  | Married/li     | 4  | Postgraduate     | 1  | Working, fi | 20 | 2   | No       |      | 2   | No      |
| 247    | 2  | 2  | Married/li     | 4  | Postgraduate     | 1  | Working, fi | 19 | 2   | No       |      | 2   | No      |
| 253    | 2  | 2  | Married/li     | 3  | College degree   | 6  | Homemake    | 19 | 2   | No       |      | 2   | No      |
| 256    | 2  | 2  | Married/li     | 4  | Postgraduate     | 1  | Working, fi | 18 | 2   | No       |      | 2   | No      |
| 257    | 2  | 2  | Married/li     | 3  | College degree   | 6  | Homemake    | 21 | 2   | No       |      | 2   | No      |
| 258    | 2  | 2  | Married/li     | 3  | College degree   | 1  | Working, fi | 18 | 2   | No       |      | 1   | Yes     |
| 259    | 2  | 2  | Married/li     | 3  | College degree   | 1  | Working, fi | 21 | 2   | No       |      | 2   | No      |
| 263    | 2  | 2  | Married/li     | 3  | College degree   | 1  | Working, fi | 16 | 2   | No       |      | 1   | Yes     |
| 264    | 2  | 1  | Single         | 1  | High school or l | 1  | Working, fi | 20 | 2   | No       |      | 2   | No      |
| 265    | 2  | 2  | Married/li     | 3  | College degree   | 1  | Working, fi | 20 | 2   | No       |      | 2   | No      |
| 266    | 2  | 2  | Married/li     | 1  | High school or l | 6  | Homemake    | 17 | 2   | No       |      | 2   | No      |
| 268    | 2  | 2  | Married/li     | 4  | Postgraduate     | 1  | Working, fi | 21 | 2   | No       |      | 1   | Yes     |
| 270    | 2  | 1  | Single         | 4  | Postgraduate     | 9  | Other       | 18 | 2   | No       |      | 2   | No      |
| 272    | 2  | 2  | Married/li     | 3  | College degree   | 1  | Working, fi | 20 | 1   | Yes      | 1    | 1   | Yes     |
| 274    | 2  | 1  | Single         | 3  | College degree   | 1  | Working, fi | 17 | 2   | No       |      | 2   | No      |

| respid | Q5 | Q6 | Marital Status | Q7 | Education        | Q8 | Work        | Q9 | Q10 | Diabetes | Q10a | Q11 | High BP |
|--------|----|----|----------------|----|------------------|----|-------------|----|-----|----------|------|-----|---------|
| 275    | 2  | 2  | Married/li     | 3  | College degree   | 1  | Working, fi | 23 | 2   | No       |      | 2   | No      |
| 276    | 2  | 2  | Married/li     | 3  | College degree   | 1  | Working, fi | 23 | 2   | No       |      | 2   | No      |
| 277    | 2  | 1  | Single         | 3  | College degree   | 1  | Working, fi | 18 | 2   | No       |      | 1   | Yes     |
| 279    | 2  | 2  | Married/li     | 3  | College degree   | 1  | Working, fi | 18 | 2   | No       |      | 1   | Yes     |
| 286    | 2  | 2  | Married/li     | 1  | High school or l | 1  | Working, fi | 17 | 2   | No       |      | 2   | No      |
| 290    | 2  | 2  | Married/li     | 3  | College degree   | 1  | Working, fi | 11 | 2   | No       |      | 2   | No      |
| 291    | 2  | 1  | Single         | 1  | High school or l | 1  | Working, fi | 15 | 2   | No       |      | 2   | No      |
| 295    | 2  | 2  | Married/li     | 3  | College degree   | 1  | Working, fi | 99 | 2   | No       |      | 2   | No      |
| 297    | 2  | 2  | Married/li     | 3  | College degree   | 1  | Working, fi | 21 | 2   | No       |      | 2   | No      |
| 299    | 2  | 2  | Married/li     | 1  | High school or l | 2  | Working, p  | 17 | 2   | No       |      | 2   | No      |
| 300    | 2  | 2  | Married/li     | 3  | College degree   | 1  | Working, fi | 18 | 2   | No       |      | 1   | Yes     |
| 303    | 2  | 2  | Married/li     | 3  | College degree   | 1  | Working, fi | 23 | 2   | No       |      | 2   | No      |
| 304    | 2  | 2  | Married/li     | 3  | College degree   | 1  | Working, fi | 21 | 2   | No       |      | 2   | No      |
| 306    | 2  | 2  | Married/li     | 1  | High school or l | 1  | Working, fi | 8  | 2   | No       |      | 2   | No      |
| 307    | 2  | 2  | Married/li     | 1  | High school or l | 1  | Working, fi | 21 | 2   | No       |      | 2   | No      |
| 312    | 2  | 2  | Married/li     | 3  | College degree   | 1  | Working, fi | 20 | 1   | Yes      | 2    | 1   | Yes     |
| 315    | 2  | 2  | Married/li     | 4  | Postgraduate     | 1  | Working, fi | 20 | 2   | No       |      | 2   | No      |
| 317    | 2  | 2  | Married/li     | 3  | College degree   | 1  | Working, fi | 20 | 2   | No       |      | 2   | No      |
| 322    | 2  | 2  | Married/li     | 3  | College degree   | 1  | Working, fi | 19 | 2   | No       |      | 2   | No      |
| 335    | 2  | 2  | Married/li     | 3  | College degree   | 1  | Working, fi | 18 | 2   | No       |      | 2   | No      |
| 374    | 2  | 2  | Married/li     | 3  | College degree   | 1  | Working, fi | 22 | 2   | No       |      | 2   | No      |
| 378    | 2  | 2  | Married/li     | 3  | College degree   | 1  | Working, fi | 18 | 2   | No       |      | 1   | Yes     |
| 380    | 2  | 2  | Married/li     | 3  | College degree   | 1  | Working, fi | 19 | 2   | No       |      | 2   | No      |
| 382    | 2  | 2  | Married/li     | 3  | College degree   | 1  | Working, fi | 20 | 2   | No       |      | 2   | No      |
| 384    | 2  | 2  | Married/li     | 3  | College degree   | 1  | Working, fi | 19 | 2   | No       |      | 2   | No      |
| 385    | 2  | 2  | Married/li     | 3  | College degree   | 1  | Working, fi | 19 | 2   | No       |      | 2   | No      |
| 395    | 2  | 2  | Married/li     | 4  | Postgraduate     | 1  | Working, fi | 20 | 2   | No       |      | 2   | No      |
| 396    | 2  | 2  | Married/li     | 3  | College degree   | 1  | Working, fi | 14 | 2   | No       |      | 2   | No      |
| 398    | 2  | 2  | Married/li     | 3  | College degree   | 1  | Working, fi | 16 | 2   | No       |      | 2   | No      |
| 402    | 2  | 2  | Married/li     | 3  | College degree   | 1  | Working, fi | 20 | 1   | Yes      | 2    | 2   | No      |
| 414    | 2  | 2  | Married/li     | 1  | High school or l | 1  | Working, fi | 21 | 2   | No       |      | 1   | Yes     |
| 415    | 2  | 2  | Married/li     | 1  | High school or l | 1  | Working, fi | 18 | 1   | Yes      | 1    | 2   | No      |

| respid | Q5 | Q6 | Marital Status | Q7 | Education        | Q8 | Work        | Q9 | Q10 | Diabetes | Q10a | Q11 | High BP |
|--------|----|----|----------------|----|------------------|----|-------------|----|-----|----------|------|-----|---------|
| 416    | 2  | 3  | Divorced       | 3  | College degree   | 1  | Working, fi | 7  | 2   | No       |      | 2   | No      |
| 420    | 2  | 2  | Married/li     | 3  | College degree   | 1  | Working, fi | 18 | 1   | Yes      | 1    | 1   | Yes     |
| 421    | 2  | 2  | Married/li     | 3  | College degree   | 1  | Working, fi | 21 | 2   | No       |      | 2   | No      |
| 422    | 2  | 2  | Married/li     | 3  | College degree   | 1  | Working, fi | 20 | 2   | No       |      | 1   | Yes     |
| 423    | 2  | 1  | Single         | 3  | College degree   | 1  | Working, fi | 17 | 2   | No       |      | 2   | No      |
| 424    | 2  | 2  | Married/li     | 2  | Some college     | 1  | Working, fi | 13 | 2   | No       |      | 2   | No      |
| 425    | 2  | 2  | Married/li     | 2  | Some college     | 1  | Working, fi | 13 | 1   | Yes      | 1    | 2   | No      |
| 428    | 2  | 2  | Married/li     | 2  | Some college     | 1  | Working, fi | 4  | 2   | No       |      | 2   | No      |
| 429    | 2  | 2  | Married/li     | 3  | College degree   | 1  | Working, fi | 18 | 2   | No       |      | 2   | No      |
| 431    | 2  | 1  | Single         | 3  | College degree   | 1  | Working, fi | 16 | 2   | No       |      | 2   | No      |
| 437    | 2  | 2  | Married/li     | 1  | High school or l | 2  | Working, p  | 22 | 2   | No       |      | 1   | Yes     |
| 438    | 2  | 1  | Single         | 1  | High school or l | 3  | Unemploy    | 15 | 2   | No       |      | 2   | No      |
| 441    | 2  | 2  | Married/li     | 3  | College degree   | 1  | Working, fi | 18 | 2   | No       |      | 1   | Yes     |
| 444    | 2  | 2  | Married/li     | 3  | College degree   | 1  | Working, fi | 14 | 2   | No       |      | 1   | Yes     |
| 448    | 2  | 2  | Married/li     | 3  | College degree   | 1  | Working, fi | 20 | 2   | No       |      | 1   | Yes     |
| 449    | 2  | 2  | Married/li     | 3  | College degree   | 6  | Homemake    | 19 | 2   | No       |      | 2   | No      |
| 457    | 2  | 2  | Married/li     | 3  | College degree   | 1  | Working, fi | 17 | 2   | No       |      | 2   | No      |
| 460    | 2  | 2  | Married/li     | 3  | College degree   | 1  | Working, fi | 19 | 2   | No       |      | 1   | Yes     |
| 469    | 2  | 2  | Married/li     | 3  | College degree   | 1  | Working, fi | 19 | 2   | No       |      | 1   | Yes     |
| 471    | 2  | 2  | Married/li     | 3  | College degree   | 2  | Working, p  | 20 | 2   | No       |      | 2   | No      |
| 473    | 2  | 2  | Married/li     | 3  | College degree   | 1  | Working, fi | 11 | 1   | Yes      | 2    | 1   | Yes     |
| 476    | 2  | 2  | Married/li     | 2  | Some college     | 4  | Retired     | 17 | 2   | No       |      | 1   | Yes     |
| 479    | 2  | 2  | Married/li     | 3  | College degree   | 1  | Working, fi | 13 | 2   | No       |      | 1   | Yes     |
| 485    | 2  | 1  | Single         | 1  | High school or l | 1  | Working, fi | 16 | 2   | No       |      | 1   | Yes     |
| 488    | 2  | 2  | Married/li     | 3  | College degree   | 2  | Working, p  | 17 | 2   | No       |      | 1   | Yes     |
| 494    | 2  | 1  | Single         | 3  | College degree   | 2  | Working, p  | 16 | 2   | No       |      | 2   | No      |
| 496    | 2  | 2  | Married/li     | 3  | College degree   | 1  | Working, fi | 19 | 2   | No       |      | 2   | No      |
| 501    | 2  | 2  | Married/li     | 3  | College degree   | 9  | Other       | 21 | 2   | No       |      | 2   | No      |
| 502    | 2  | 2  | Married/li     | 3  | College degree   | 4  | Retired     | 20 | 2   | No       |      | 1   | Yes     |
| 503    | 2  | 1  | Single         | 3  | College degree   | 1  | Working, fi | 16 | 2   | No       |      | 2   | No      |
| 506    | 2  | 2  | Married/li     | 1  | High school or l | 1  | Working, fi | 21 | 2   | No       |      | 2   | No      |
| 514    | 2  | 2  | Married/li     | 1  | High school or l | 6  | Homemake    | 18 | 2   | No       |      | 1   | Yes     |

| respid | Q5 | Q6 | Marital Status | Q7 | Education        | Q8 | Work        | Q9 | Q10 | Diabetes | Q10a | Q11 | High BP |
|--------|----|----|----------------|----|------------------|----|-------------|----|-----|----------|------|-----|---------|
| 515    | 2  | 2  | Married/li     | 3  | College degree   | 1  | Working, fi | 23 | 2   | No       |      | 2   | No      |
| 516    | 2  | 1  | Single         | 2  | Some college     | 2  | Working, p  | 16 | 2   | No       |      | 2   | No      |
| 519    | 2  | 2  | Married/li     | 1  | High school or l | 9  | Other       | 17 | 2   | No       |      | 2   | No      |
| 522    | 2  | 3  | Divorced       | 3  | College degree   | 1  | Working, fi | 21 | 2   | No       |      | 2   | No      |
| 525    | 2  | 2  | Married/li     | 4  | Postgraduate     | 1  | Working, fi | 18 | 2   | No       |      | 1   | Yes     |
| 528    | 2  | 1  | Single         | 3  | College degree   | 2  | Working, p  | 15 | 2   | No       |      | 2   | No      |
| 532    | 2  | 2  | Married/li     | 1  | High school or l | 1  | Working, fi | 16 | 2   | No       |      | 2   | No      |
| 536    | 2  | 2  | Married/li     | 3  | College degree   | 9  | Other       | 18 | 2   | No       |      | 2   | No      |
| 539    | 2  | 2  | Married/li     | 4  | Postgraduate     | 1  | Working, fi | 19 | 2   | No       |      | 2   | No      |
| 540    | 2  | 2  | Married/li     | 3  | College degree   | 6  | Homemake    | 18 | 2   | No       |      | 2   | No      |
| 547    | 2  | 2  | Married/li     | 3  | College degree   | 1  | Working, fi | 14 | 1   | Yes      | 2    | 1   | Yes     |
| 551    | 2  | 2  | Married/li     | 3  | College degree   | 1  | Working, fi | 20 | 2   | No       |      | 2   | No      |
| 554    | 2  | 2  | Married/li     | 1  | High school or l | 3  | Unemploye   | 15 | 2   | No       |      | 2   | No      |
| 558    | 2  | 2  | Married/li     | 3  | College degree   | 1  | Working, fi | 24 | 2   | No       |      | 1   | Yes     |
| 563    | 2  | 2  | Married/li     | 1  | High school or l | 1  | Working, fi | 19 | 2   | No       |      | 2   | No      |
| 564    | 2  | 2  | Married/li     | 1  | High school or l | 1  | Working, fi | 19 | 2   | No       |      | 2   | No      |
| 565    | 2  | 1  | Single         | 3  | College degree   | 2  | Working, p  | 15 | 2   | No       |      | 2   | No      |
| 567    | 2  | 1  | Single         | 2  | Some college     | 1  | Working, fi | 13 | 2   | No       |      | 2   | No      |
| 569    | 2  | 2  | Married/li     | 1  | High school or l | 6  | Homemake    | 16 | 2   | No       |      | 2   | No      |
| 572    | 2  | 1  | Single         | 3  | College degree   | 1  | Working, fi | 15 | 2   | No       |      | 2   | No      |
| 574    | 2  | 2  | Married/li     | 3  | College degree   | 6  | Homemake    | 18 | 2   | No       |      | 2   | No      |
| 583    | 2  | 2  | Married/li     | 2  | Some college     | 1  | Working, fi | 10 | 2   | No       |      | 2   | No      |
| 589    | 2  | 2  | Married/li     | 3  | College degree   | 1  | Working, fi | 11 | 2   | No       |      | 2   | No      |
| 592    | 2  | 2  | Married/li     | 3  | College degree   | 1  | Working, fi | 22 | 1   | Yes      | 1    | 2   | No      |
| 593    | 2  | 1  | Single         | 1  | High school or l | 3  | Unemploye   | 15 | 2   | No       |      | 2   | No      |
| 594    | 2  | 3  | Divorced       | 3  | College degree   | 5  | Permanent   | 16 | 2   | No       |      | 1   | Yes     |
| 597    | 2  | 1  | Single         | 3  | College degree   | 1  | Working, fi | 19 | 2   | No       |      | 1   | Yes     |
| 601    | 2  | 1  | Single         | 1  | High school or l | 9  | Other       | 15 | 2   | No       |      | 2   | No      |
| 607    | 2  | 2  | Married/li     | 4  | Postgraduate     | 1  | Working, fi | 22 | 2   | No       |      | 2   | No      |
| 610    | 2  | 2  | Married/li     | 3  | College degree   | 1  | Working, fi | 16 | 2   | No       |      | 2   | No      |
| 612    | 2  | 2  | Married/li     | 3  | College degree   | 4  | Retired     | 18 | 2   | No       |      | 1   | Yes     |
| 627    | 2  | 1  | Single         | 3  | College degree   | 1  | Working, fi | 20 | 2   | No       |      | 2   | No      |

| respid | Q5 | Q6 | Marital Status | Q7 | Education        | Q8 | Work        | Q9 | Q10 | Diabetes | Q10a | Q11 | High BP |
|--------|----|----|----------------|----|------------------|----|-------------|----|-----|----------|------|-----|---------|
| 631    | 2  | 2  | Married/li     | 3  | College degree   | 1  | Working, fi | 16 | 2   | No       |      | 2   | No      |
| 633    | 2  | 2  | Married/li     | 1  | High school or l | 1  | Working, fi | 24 | 2   | No       |      | 1   | Yes     |
| 636    | 2  | 3  | Divorced       | 3  | College degree   | 8  | Other worl  | 15 | 2   | No       |      | 2   | No      |
| 656    | 2  | 2  | Married/li     | 3  | College degree   | 1  | Working, fi | 12 | 2   | No       |      | 2   | No      |
| 659    | 2  | 2  | Married/li     | 4  | Postgraduate     | 1  | Working, fi | 14 | 2   | No       |      | 2   | No      |
| 670    | 2  | 2  | Married/li     | 3  | College degree   | 4  | Retired     | 21 | 1   | Yes      | 1    | 1   | Yes     |
| 672    | 2  | 2  | Married/li     | 1  | High school or l | 1  | Working, fi | 16 | 2   | No       |      | 2   | No      |
| 673    | 2  | 2  | Married/li     | 3  | College degree   | 2  | Working, p  | 17 | 2   | No       |      | 2   | No      |
| 675    | 2  | 2  | Married/li     | 3  | College degree   | 6  | Homemake    | 22 | 2   | No       |      | 2   | No      |
| 676    | 2  | 1  | Single         | 3  | College degree   | 8  | Other worl  | 18 | 2   | No       |      | 2   | No      |
| 679    | 2  | 2  | Married/li     | 1  | High school or l | 1  | Working, fi | 18 | 2   | No       |      | 2   | No      |
| 683    | 2  | 1  | Single         | 1  | High school or l | 1  | Working, fi | 19 | 2   | No       |      | 2   | No      |
| 684    | 2  | 2  | Married/li     | 3  | College degree   | 1  | Working, fi | 18 | 2   | No       |      | 1   | Yes     |
| 690    | 2  | 2  | Married/li     | 3  | College degree   | 6  | Homemake    | 17 | 2   | No       |      | 2   | No      |
| 701    | 2  | 2  | Married/li     | 3  | College degree   | 1  | Working, fi | 19 | 2   | No       |      | 2   | No      |
| 709    | 2  | 2  | Married/li     | 3  | College degree   | 1  | Working, fi | 20 | 2   | No       |      | 2   | No      |
| 719    | 2  | 1  | Single         | 1  | High school or l | 1  | Working, fi | 31 | 2   | No       |      | 2   | No      |
| 726    | 2  | 2  | Married/li     | 1  | High school or l | 1  | Working, fi | 8  | 2   | No       |      | 2   | No      |
| 730    | 2  | 2  | Married/li     | 3  | College degree   | 1  | Working, fi | 18 | 2   | No       |      | 2   | No      |
| 731    | 2  | 2  | Married/li     | 3  | College degree   | 2  | Working, p  | 29 | 2   | No       |      | 1   | Yes     |
| 732    | 2  | 2  | Married/li     | 3  | College degree   | 1  | Working, fi | 31 | 2   | No       |      | 2   | No      |
| 733    | 2  | 2  | Married/li     | 3  | College degree   | 1  | Working, fi | 30 | 2   | No       |      | 2   | No      |
| 735    | 2  | 2  | Married/li     | 1  | High school or l | 1  | Working, fi | 11 | 2   | No       |      | 2   | No      |
| 738    | 2  | 2  | Married/li     | 1  | High school or l | 1  | Working, fi | 29 | 2   | No       |      | 2   | No      |
| 740    | 2  | 3  | Divorced       | 3  | College degree   | 2  | Working, p  | 27 | 2   | No       |      | 2   | No      |
| 742    | 2  | 2  | Married/li     | 2  | Some college     | 1  | Working, fi | 36 | 2   | No       |      | 2   | No      |
| 744    | 2  | 2  | Married/li     | 2  | Some college     | 1  | Working, fi | 13 | 2   | No       |      | 2   | No      |
| 749    | 2  | 1  | Single         | 2  | Some college     | 1  | Working, fi | 28 | 2   | No       |      | 2   | No      |
| 751    | 2  | 3  | Divorced       | 2  | Some college     | 1  | Working, fi | 26 | 2   | No       |      | 2   | No      |
| 752    | 2  | 2  | Married/li     | 4  | Postgraduate     | 1  | Working, fi | 34 | 2   | No       |      | 2   | No      |
| 753    | 2  | 2  | Married/li     | 3  | College degree   | 1  | Working, fi | 32 | 2   | No       |      | 1   | Yes     |
| 755    | 2  | 2  | Married/li     | 3  | College degree   | 1  | Working, fi | 11 | 2   | No       |      | 1   | Yes     |

| respid | Q5 | Q6 | Marital Status | Q7 | Education        | Q8 | Work        | Q9 | Q10 | Diabetes | Q10a | Q11 | High BP |
|--------|----|----|----------------|----|------------------|----|-------------|----|-----|----------|------|-----|---------|
| 756    | 2  | 1  | Single         | 2  | Some college     | 2  | Working, p  | 30 | 2   | No       |      | 2   | No      |
| 759    | 2  | 1  | Single         | 4  | Postgraduate     | 2  | Working, p  | 33 | 2   | No       |      | 2   | No      |
| 760    | 2  | 2  | Married/li     | 3  | College degree   | 1  | Working, fi | 32 | 2   | No       |      | 2   | No      |
| 763    | 2  | 2  | Married/li     | 2  | Some college     | 1  | Working, fi | 33 | 1   | Yes      | 1    | 2   | No      |
| 764    | 2  | 2  | Married/li     | 3  | College degree   | 6  | Homemake    | 29 | 2   | No       |      | 2   | No      |
| 765    | 2  | 1  | Single         | 3  | College degree   | 1  | Working, fi | 25 | 2   | No       |      | 2   | No      |
| 766    | 2  | 2  | Married/li     | 4  | Postgraduate     | 1  | Working, fi | 37 | 2   | No       |      | 2   | No      |
| 767    | 2  | 2  | Married/li     | 3  | College degree   | 1  | Working, fi | 9  | 2   | No       |      | 2   | No      |
| 771    | 2  | 2  | Married/li     | 3  | College degree   | 4  | Retired     | 13 | 1   | Yes      | 2    | 1   | Yes     |
| 773    | 2  | 2  | Married/li     | 2  | Some college     | 1  | Working, fi | 36 | 2   | No       |      | 2   | No      |
| 774    | 2  | 2  | Married/li     | 1  | High school or l | 1  | Working, fi | 5  | 2   | No       |      | 1   | Yes     |
| 775    | 2  | 3  | Divorced       | 1  | High school or l | 2  | Working, p  | 28 | 2   | No       |      | 2   | No      |
| 776    | 2  | 2  | Married/li     | 4  | Postgraduate     | 1  | Working, fi | 33 | 1   | Yes      | 1    | 1   | Yes     |
| 778    | 2  | 2  | Married/li     | 2  | Some college     | 1  | Working, fi | 35 | 2   | No       |      | 2   | No      |
| 780    | 2  | 2  | Married/li     | 3  | College degree   | 1  | Working, fi | 35 | 2   | No       |      | 2   | No      |
| 781    | 2  | 2  | Married/li     | 2  | Some college     | 1  | Working, fi | 11 | 2   | No       |      | 2   | No      |
| 782    | 2  | 1  | Single         | 3  | College degree   | 1  | Working, fi | 30 | 1   | Yes      | 1    | 2   | No      |
| 783    | 2  | 3  | Divorced       | 2  | Some college     | 3  | Unemploy    | 26 | 1   | Yes      | 1    | 1   | Yes     |
| 786    | 2  | 2  | Married/li     | 3  | College degree   | 1  | Working, fi | 11 | 2   | No       |      | 1   | Yes     |
| 788    | 2  | 2  | Married/li     | 4  | Postgraduate     | 1  | Working, fi | 32 | 2   | No       |      | 2   | No      |
| 792    | 2  | 1  | Single         | 1  | High school or l | 3  | Unemploy    | 25 | 2   | No       |      | 2   | No      |
| 794    | 2  | 2  | Married/li     | 3  | College degree   | 1  | Working, fi | 38 | 2   | No       |      | 2   | No      |
| 795    | 2  | 2  | Married/li     | 3  | College degree   | 1  | Working, fi | 35 | 2   | No       |      | 2   | No      |
| 799    | 2  | 2  | Married/li     | 4  | Postgraduate     | 1  | Working, fi | 30 | 2   | No       |      | 1   | Yes     |
| 800    | 2  | 2  | Married/li     | 3  | College degree   | 1  | Working, fi | 25 | 2   | No       |      | 2   | No      |
| 801    | 2  | 2  | Married/li     | 3  | College degree   | 1  | Working, fi | 33 | 2   | No       |      | 2   | No      |
| 804    | 2  | 2  | Married/li     | 3  | College degree   | 6  | Homemake    | 33 | 2   | No       |      | 2   | No      |
| 806    | 2  | 3  | Divorced       | 2  | Some college     | 1  | Working, fi | 29 | 2   | No       |      | 2   | No      |
| 807    | 2  | 2  | Married/li     | 4  | Postgraduate     | 1  | Working, fi | 36 | 2   | No       |      | 2   | No      |
| 808    | 2  | 2  | Married/li     | 4  | Postgraduate     | 1  | Working, fi | 34 | 1   | Yes      | 1    | 1   | Yes     |
| 809    | 2  | 1  | Single         | 1  | High school or l | 3  | Unemploy    | 99 | 2   | No       |      | 2   | No      |
| 811    | 2  | 2  | Married/li     | 4  | Postgraduate     | 1  | Working, fi | 36 | 2   | No       |      | 2   | No      |



| respid | Q5 | Q6 | Marital Status | Q7 | Education        | Q8 | Work        | Q9 | Q10 | Diabetes | Q10a | Q11 | High BP |
|--------|----|----|----------------|----|------------------|----|-------------|----|-----|----------|------|-----|---------|
| 812    | 2  | 1  | Single         | 3  | College degree   | 1  | Working, fi | 32 | 2   | No       |      | 1   | Yes     |
| 815    | 2  | 2  | Married/li     | 2  | Some college     | 1  | Working, fi | 31 | 2   | No       |      | 2   | No      |
| 817    | 2  | 1  | Single         | 3  | College degree   | 2  | Working, p  | 25 | 2   | No       |      | 2   | No      |
| 818    | 2  | 2  | Married/li     | 3  | College degree   | 1  | Working, fi | 34 | 2   | No       |      | 2   | No      |
| 819    | 2  | 2  | Married/li     | 4  | Postgraduate     | 1  | Working, fi | 31 | 2   | No       |      | 2   | No      |
| 821    | 2  | 2  | Married/li     | 1  | High school or l | 1  | Working, fi | 37 | 2   | No       |      | 2   | No      |
| 824    | 2  | 2  | Married/li     | 1  | High school or l | 1  | Working, fi | 31 | 2   | No       |      | 2   | No      |
| 825    | 2  | 2  | Married/li     | 1  | High school or l | 1  | Working, fi | 25 | 2   | No       |      | 2   | No      |
| 828    | 2  | 2  | Married/li     | 3  | College degree   | 1  | Working, fi | 13 | 2   | No       |      | 2   | No      |
| 832    | 2  | 2  | Married/li     | 3  | College degree   | 1  | Working, fi | 37 | 2   | No       |      | 2   | No      |
| 834    | 2  | 2  | Married/li     | 4  | Postgraduate     | 9  | Other       | 32 | 2   | No       |      | 2   | No      |
| 835    | 2  | 2  | Married/li     | 3  | College degree   | 1  | Working, fi | 34 | 2   | No       |      | 1   | Yes     |
| 836    | 2  | 2  | Married/li     | 3  | College degree   | 1  | Working, fi | 32 | 2   | No       |      | 2   | No      |
| 837    | 2  | 2  | Married/li     | 2  | Some college     | 1  | Working, fi | 34 | 2   | No       |      | 2   | No      |
| 840    | 2  | 2  | Married/li     | 3  | College degree   | 1  | Working, fi | 33 | 1   | Yes      | 1    | 2   | No      |
| 841    | 2  | 2  | Married/li     | 1  | High school or l | 1  | Working, fi | 29 | 2   | No       |      | 2   | No      |
| 845    | 2  | 2  | Married/li     | 3  | College degree   | 6  | Homemake    | 30 | 2   | No       |      | 2   | No      |
| 846    | 2  | 2  | Married/li     | 1  | High school or l | 1  | Working, fi | 32 | 2   | No       |      | 2   | No      |
| 849    | 2  | 2  | Married/li     | 2  | Some college     | 1  | Working, fi | 31 | 2   | No       |      | 2   | No      |
| 852    | 2  | 2  | Married/li     | 3  | College degree   | 4  | Retired     | 35 | 2   | No       |      | 2   | No      |
| 854    | 2  | 2  | Married/li     | 3  | College degree   | 1  | Working, fi | 27 | 1   | Yes      | 2    | 2   | No      |
| 856    | 2  | 2  | Married/li     | 4  | Postgraduate     | 1  | Working, fi | 38 | 2   | No       |      | 2   | No      |
| 858    | 2  | 2  | Married/li     | 1  | High school or l | 1  | Working, fi | 33 | 2   | No       |      | 2   | No      |
| 859    | 2  | 4  | Widow/wi       | 3  | College degree   | 1  | Working, fi | 35 | 2   | No       |      | 2   | No      |
| 861    | 2  | 2  | Married/li     | 2  | Some college     | 1  | Working, fi | 29 | 2   | No       |      | 2   | No      |
| 863    | 2  | 2  | Married/li     | 3  | College degree   | 1  | Working, fi | 14 | 2   | No       |      | 2   | No      |
| 864    | 2  | 2  | Married/li     | 3  | College degree   | 1  | Working, fi | 33 | 2   | No       |      | 1   | Yes     |
| 866    | 2  | 2  | Married/li     | 2  | Some college     | 1  | Working, fi | 9  | 2   | No       |      | 2   | No      |
| 869    | 2  | 2  | Married/li     | 3  | College degree   | 1  | Working, fi | 32 | 2   | No       |      | 1   | Yes     |
| 870    | 2  | 2  | Married/li     | 2  | Some college     | 4  | Retired     | 33 | 2   | No       |      | 2   | No      |
| 871    | 2  | 2  | Married/li     | 2  | Some college     | 1  | Working, fi | 13 | 2   | No       |      | 1   | Yes     |
| 873    | 2  | 2  | Married/li     | 3  | College degree   | 1  | Working, fi | 33 | 2   | No       |      | 1   | Yes     |

| respid | Q5 | Q6 | Marital Status | Q7 | Education        | Q8 | Work        | Q9 | Q10 | Diabetes | Q10a | Q11 | High BP |
|--------|----|----|----------------|----|------------------|----|-------------|----|-----|----------|------|-----|---------|
| 879    | 2  | 2  | Married/li     | 3  | College degree   | 1  | Working, fi | 13 | 2   | No       |      | 2   | No      |
| 880    | 2  | 1  | Single         | 2  | Some college     | 9  | Other       | 25 | 2   | No       |      | 2   | No      |
| 881    | 2  | 2  | Married/li     | 3  | College degree   | 1  | Working, fi | 13 | 2   | No       |      | 2   | No      |
| 882    | 2  | 2  | Married/li     | 4  | Postgraduate     | 4  | Retired     | 35 | 2   | No       |      | 2   | No      |
| 885    | 2  | 1  | Single         | 3  | College degree   | 4  | Retired     | 29 | 2   | No       |      | 2   | No      |
| 886    | 2  | 3  | Divorced       | 2  | Some college     | 1  | Working, fi | 33 | 2   | No       |      | 1   | Yes     |
| 887    | 2  | 2  | Married/li     | 1  | High school or l | 1  | Working, fi | 14 | 2   | No       |      | 2   | No      |
| 888    | 2  | 2  | Married/li     | 2  | Some college     | 1  | Working, fi | 33 | 2   | No       |      | 1   | Yes     |
| 889    | 2  | 2  | Married/li     | 1  | High school or l | 1  | Working, fi | 32 | 2   | No       |      | 2   | No      |
| 890    | 2  | 2  | Married/li     | 3  | College degree   | 1  | Working, fi | 33 | 2   | No       |      | 1   | Yes     |
| 900    | 2  | 2  | Married/li     | 3  | College degree   | 1  | Working, fi | 13 | 2   | No       |      | 2   | No      |
| 901    | 2  | 1  | Single         | 2  | Some college     | 1  | Working, fi | 35 | 2   | No       |      | 2   | No      |
| 902    | 2  | 5  | Prefer not     | 1  | High school or l | 1  | Working, fi | 33 | 2   | No       |      | 1   | Yes     |
| 903    | 2  | 1  | Single         | 3  | College degree   | 1  | Working, fi | 30 | 2   | No       |      | 2   | No      |
| 906    | 2  | 1  | Single         | 2  | Some college     | 1  | Working, fi | 30 | 2   | No       |      | 2   | No      |
| 907    | 2  | 2  | Married/li     | 3  | College degree   | 4  | Retired     | 36 | 2   | No       |      | 2   | No      |
| 908    | 2  | 2  | Married/li     | 1  | High school or l | 1  | Working, fi | 34 | 2   | No       |      | 2   | No      |
| 910    | 2  | 2  | Married/li     | 2  | Some college     | 1  | Working, fi | 36 | 2   | No       |      | 1   | Yes     |
| 911    | 2  | 2  | Married/li     | 3  | College degree   | 1  | Working, fi | 32 | 1   | Yes      | 1    | 1   | Yes     |
| 912    | 2  | 2  | Married/li     | 3  | College degree   | 1  | Working, fi | 35 | 2   | No       |      | 2   | No      |
| 915    | 2  | 2  | Married/li     | 2  | Some college     | 1  | Working, fi | 10 | 2   | No       |      | 2   | No      |
| 923    | 2  | 2  | Married/li     | 3  | College degree   | 1  | Working, fi | 13 | 1   | Yes      | 1    | 1   | Yes     |
| 925    | 2  | 2  | Married/li     | 2  | Some college     | 1  | Working, fi | 33 | 2   | No       |      | 2   | No      |
| 926    | 2  | 2  | Married/li     | 2  | Some college     | 1  | Working, fi | 31 | 2   | No       |      | 1   | Yes     |
| 929    | 2  | 2  | Married/li     | 3  | College degree   | 1  | Working, fi | 13 | 2   | No       |      | 2   | No      |
| 932    | 2  | 1  | Single         | 1  | High school or l | 9  | Other       | 99 | 2   | No       |      | 2   | No      |
| 933    | 2  | 2  | Married/li     | 3  | College degree   | 1  | Working, fi | 34 | 2   | No       |      | 1   | Yes     |
| 934    | 2  | 5  | Prefer not     | 2  | Some college     | 1  | Working, fi | 99 | 2   | No       |      | 2   | No      |
| 938    | 2  | 2  | Married/li     | 2  | Some college     | 4  | Retired     | 33 | 1   | Yes      | 2    | 1   | Yes     |
| 941    | 2  | 2  | Married/li     | 4  | Postgraduate     | 1  | Working, fi | 29 | 2   | No       |      | 2   | No      |
| 942    | 2  | 2  | Married/li     | 2  | Some college     | 1  | Working, fi | 12 | 2   | No       |      | 2   | No      |
| 943    | 2  | 2  | Married/li     | 3  | College degree   | 1  | Working, fi | 13 | 2   | No       |      | 2   | No      |

| respid | Q5 | Q6 | Marital Status | Q7 | Education        | Q8 | Work        | Q9 | Q10 | Diabetes | Q10a | Q11 | High BP |
|--------|----|----|----------------|----|------------------|----|-------------|----|-----|----------|------|-----|---------|
| 945    | 2  | 1  | Single         | 1  | High school or l | 1  | Working, fi | 30 | 2   | No       |      | 1   | Yes     |
| 946    | 2  | 2  | Married/li     | 4  | Postgraduate     | 1  | Working, fi | 27 | 2   | No       |      | 1   | Yes     |
| 947    | 2  | 2  | Married/li     | 3  | College degree   | 1  | Working, fi | 33 | 2   | No       |      | 2   | No      |
| 948    | 2  | 2  | Married/li     | 3  | College degree   | 1  | Working, fi | 33 | 2   | No       |      | 1   | Yes     |
| 949    | 2  | 2  | Married/li     | 3  | College degree   | 1  | Working, fi | 11 | 1   | Yes      | 1    | 2   | No      |
| 952    | 2  | 2  | Married/li     | 2  | Some college     | 3  | Unemploy    | 25 | 2   | No       |      | 2   | No      |
| 956    | 2  | 2  | Married/li     | 3  | College degree   | 1  | Working, fi | 11 | 1   | Yes      | 1    | 2   | No      |
| 957    | 2  | 1  | Single         | 3  | College degree   | 1  | Working, fi | 29 | 2   | No       |      | 2   | No      |
| 959    | 2  | 2  | Married/li     | 1  | High school or l | 1  | Working, fi | 28 | 2   | No       |      | 1   | Yes     |
| 961    | 2  | 2  | Married/li     | 3  | College degree   | 1  | Working, fi | 34 | 2   | No       |      | 2   | No      |
| 962    | 2  | 2  | Married/li     | 2  | Some college     | 1  | Working, fi | 12 | 2   | No       |      | 1   | Yes     |
| 965    | 2  | 2  | Married/li     | 3  | College degree   | 1  | Working, fi | 33 | 2   | No       |      | 2   | No      |
| 967    | 2  | 2  | Married/li     | 3  | College degree   | 1  | Working, fi | 30 | 2   | No       |      | 1   | Yes     |
| 969    | 2  | 2  | Married/li     | 3  | College degree   | 1  | Working, fi | 11 | 2   | No       |      | 2   | No      |
| 970    | 2  | 2  | Married/li     | 3  | College degree   | 1  | Working, fi | 12 | 2   | No       |      | 2   | No      |
| 973    | 2  | 2  | Married/li     | 3  | College degree   | 1  | Working, fi | 13 | 2   | No       |      | 2   | No      |
| 974    | 2  | 2  | Married/li     | 1  | High school or l | 2  | Working, p  | 27 | 2   | No       |      | 1   | Yes     |
| 975    | 2  | 2  | Married/li     | 3  | College degree   | 1  | Working, fi | 9  | 2   | No       |      | 1   | Yes     |
| 976    | 2  | 2  | Married/li     | 2  | Some college     | 1  | Working, fi | 7  | 2   | No       |      | 2   | No      |
| 977    | 2  | 2  | Married/li     | 3  | College degree   | 1  | Working, fi | 10 | 1   | Yes      | 2    | 2   | No      |
| 979    | 2  | 2  | Married/li     | 3  | College degree   | 1  | Working, fi | 12 | 2   | No       |      | 2   | No      |
| 981    | 2  | 2  | Married/li     | 1  | High school or l | 4  | Retired     | 8  | 2   | No       |      | 2   | No      |
| 983    | 2  | 1  | Single         | 2  | Some college     | 1  | Working, fi | 30 | 2   | No       |      | 2   | No      |
| 987    | 2  | 2  | Married/li     | 3  | College degree   | 1  | Working, fi | 12 | 2   | No       |      | 2   | No      |
| 991    | 2  | 2  | Married/li     | 3  | College degree   | 1  | Working, fi | 11 | 2   | No       |      | 2   | No      |
| 992    | 2  | 1  | Single         | 1  | High school or l | 1  | Working, fi | 37 | 2   | No       |      | 2   | No      |
| 993    | 2  | 2  | Married/li     | 3  | College degree   | 1  | Working, fi | 99 | 2   | No       |      | 2   | No      |
| 994    | 2  | 2  | Married/li     | 3  | College degree   | 6  | Homemake    | 33 | 2   | No       |      | 2   | No      |
| 995    | 2  | 2  | Married/li     | 3  | College degree   | 4  | Retired     | 35 | 2   | No       |      | 2   | No      |
| 998    | 2  | 2  | Married/li     | 2  | Some college     | 1  | Working, fi | 12 | 2   | No       |      | 1   | Yes     |
| 1000   | 2  | 1  | Single         | 3  | College degree   | 5  | Permanent   | 25 | 2   | No       |      | 2   | No      |
| 1001   | 2  | 2  | Married/li     | 1  | High school or l | 1  | Working, fi | 26 | 1   | Yes      | 2    | 1   | Yes     |

| respid | Q5 | Q6 | Marital Status | Q7 | Education        | Q8 | Work        | Q9 | Q10 | Diabetes | Q10a | Q11 | High BP |
|--------|----|----|----------------|----|------------------|----|-------------|----|-----|----------|------|-----|---------|
| 1002   | 2  | 2  | Married/li     | 2  | Some college     | 4  | Retired     | 14 | 2   | No       |      | 2   | No      |
| 1004   | 2  | 2  | Married/li     | 2  | Some college     | 1  | Working, fi | 5  | 2   | No       |      | 2   | No      |
| 1005   | 2  | 2  | Married/li     | 1  | High school or l | 6  | Homemake    | 36 | 2   | No       |      | 2   | No      |
| 1006   | 2  | 1  | Single         | 2  | Some college     | 1  | Working, fi | 30 | 1   | Yes      | 1    | 1   | Yes     |
| 1007   | 2  | 2  | Married/li     | 1  | High school or l | 2  | Working, p  | 26 | 2   | No       |      | 2   | No      |
| 1009   | 2  | 1  | Single         | 1  | High school or l | 1  | Working, fi | 4  | 2   | No       |      | 2   | No      |
| 1013   | 2  | 2  | Married/li     | 2  | Some college     | 1  | Working, fi | 14 | 2   | No       |      | 2   | No      |
| 1015   | 2  | 2  | Married/li     | 3  | College degree   | 1  | Working, fi | 8  | 2   | No       |      | 1   | Yes     |
| 1020   | 2  | 2  | Married/li     | 3  | College degree   | 1  | Working, fi | 12 | 2   | No       |      | 2   | No      |
| 1022   | 2  | 2  | Married/li     | 2  | Some college     | 1  | Working, fi | 13 | 2   | No       |      | 2   | No      |
| 1024   | 2  | 2  | Married/li     | 3  | College degree   | 1  | Working, fi | 6  | 2   | No       |      | 2   | No      |
| 1025   | 2  | 2  | Married/li     | 3  | College degree   | 1  | Working, fi | 14 | 2   | No       |      | 2   | No      |
| 1027   | 2  | 2  | Married/li     | 2  | Some college     | 1  | Working, fi | 5  | 2   | No       |      | 2   | No      |
| 1031   | 2  | 2  | Married/li     | 3  | College degree   | 1  | Working, fi | 14 | 2   | No       |      | 2   | No      |
| 1037   | 2  | 2  | Married/li     | 1  | High school or l | 1  | Working, fi | 5  | 2   | No       |      | 1   | Yes     |
| 1039   | 2  | 2  | Married/li     | 1  | High school or l | 1  | Working, fi | 4  | 2   | No       |      | 2   | No      |
| 1040   | 2  | 2  | Married/li     | 3  | College degree   | 1  | Working, fi | 5  | 2   | No       |      | 2   | No      |
| 1056   | 2  | 2  | Married/li     | 3  | College degree   | 1  | Working, fi | 13 | 1   | Yes      | 1    | 1   | Yes     |
| 1057   | 2  | 2  | Married/li     | 3  | College degree   | 1  | Working, fi | 11 | 2   | No       |      | 1   | Yes     |
| 1062   | 2  | 2  | Married/li     | 3  | College degree   | 1  | Working, fi | 11 | 2   | No       |      | 2   | No      |
| 1069   | 2  | 2  | Married/li     | 2  | Some college     | 1  | Working, fi | 11 | 2   | No       |      | 2   | No      |
| 1070   | 2  | 2  | Married/li     | 2  | Some college     | 1  | Working, fi | 12 | 2   | No       |      | 2   | No      |
| 1072   | 2  | 2  | Married/li     | 2  | Some college     | 1  | Working, fi | 11 | 2   | No       |      | 2   | No      |
| 1076   | 2  | 2  | Married/li     | 3  | College degree   | 1  | Working, fi | 11 | 2   | No       |      | 2   | No      |
| 1077   | 2  | 2  | Married/li     | 3  | College degree   | 1  | Working, fi | 8  | 2   | No       |      | 2   | No      |
| 1078   | 2  | 2  | Married/li     | 2  | Some college     | 1  | Working, fi | 4  | 2   | No       |      | 2   | No      |
| 1080   | 2  | 2  | Married/li     | 3  | College degree   | 1  | Working, fi | 2  | 2   | No       |      | 2   | No      |
| 1094   | 2  | 2  | Married/li     | 3  | College degree   | 1  | Working, fi | 13 | 2   | No       |      | 2   | No      |
| 1098   | 2  | 2  | Married/li     | 1  | High school or l | 2  | Working, p  | 4  | 2   | No       |      | 1   | Yes     |
| 1099   | 2  | 2  | Married/li     | 3  | College degree   | 1  | Working, fi | 11 | 2   | No       |      | 2   | No      |
| 1102   | 2  | 2  | Married/li     | 3  | College degree   | 1  | Working, fi | 7  | 2   | No       |      | 2   | No      |
| 1110   | 2  | 1  | Single         | 2  | Some college     | 2  | Working, p  | 10 | 2   | No       |      | 2   | No      |

| respid | Q5 | Q6 | Marital Status | Q7 | Education        | Q8 | Work        | Q9 | Q10 | Diabetes | Q10a | Q11 | High BP |
|--------|----|----|----------------|----|------------------|----|-------------|----|-----|----------|------|-----|---------|
| 1117   | 2  | 2  | Married/li     | 3  | College degree   | 1  | Working, fi | 11 | 2   | No       |      | 1   | Yes     |
| 1119   | 2  | 2  | Married/li     | 1  | High school or l | 1  | Working, fi | 9  | 2   | No       |      | 2   | No      |
| 1126   | 2  | 2  | Married/li     | 3  | College degree   | 1  | Working, fi | 11 | 2   | No       |      | 2   | No      |
| 1127   | 2  | 2  | Married/li     | 2  | Some college     | 1  | Working, fi | 2  | 2   | No       |      | 2   | No      |
| 1130   | 2  | 2  | Married/li     | 3  | College degree   | 1  | Working, fi | 14 | 2   | No       |      | 2   | No      |
| 1131   | 2  | 2  | Married/li     | 3  | College degree   | 1  | Working, fi | 12 | 2   | No       |      | 2   | No      |
| 1135   | 2  | 2  | Married/li     | 3  | College degree   | 1  | Working, fi | 3  | 1   | Yes      | 1    | 2   | No      |
| 1138   | 2  | 2  | Married/li     | 3  | College degree   | 1  | Working, fi | 11 | 1   | Yes      | 1    | 1   | Yes     |
| 1139   | 2  | 2  | Married/li     | 2  | Some college     | 1  | Working, fi | 14 | 2   | No       |      | 2   | No      |
| 1140   | 2  | 2  | Married/li     | 2  | Some college     | 1  | Working, fi | 14 | 2   | No       |      | 2   | No      |
| 1142   | 2  | 2  | Married/li     | 2  | Some college     | 1  | Working, fi | 14 | 2   | No       |      | 2   | No      |
| 1143   | 2  | 2  | Married/li     | 2  | Some college     | 1  | Working, fi | 14 | 2   | No       |      | 2   | No      |
| 1145   | 2  | 2  | Married/li     | 2  | Some college     | 1  | Working, fi | 1  | 2   | No       |      | 2   | No      |
| 1149   | 2  | 2  | Married/li     | 2  | Some college     | 1  | Working, fi | 6  | 2   | No       |      | 2   | No      |
| 1152   | 2  | 2  | Married/li     | 3  | College degree   | 1  | Working, fi | 10 | 2   | No       |      | 1   | Yes     |
| 1160   | 2  | 2  | Married/li     | 2  | Some college     | 1  | Working, fi | 11 | 2   | No       |      | 1   | Yes     |
| 1164   | 2  | 2  | Married/li     | 2  | Some college     | 1  | Working, fi | 11 | 2   | No       |      | 2   | No      |
| 1165   | 2  | 3  | Divorced       | 2  | Some college     | 1  | Working, fi | 3  | 2   | No       |      | 2   | No      |
| 1169   | 2  | 2  | Married/li     | 3  | College degree   | 1  | Working, fi | 14 | 2   | No       |      | 1   | Yes     |
| 1170   | 2  | 2  | Married/li     | 2  | Some college     | 1  | Working, fi | 6  | 2   | No       |      | 2   | No      |
| 1179   | 2  | 2  | Married/li     | 3  | College degree   | 1  | Working, fi | 14 | 1   | Yes      | 1    | 2   | No      |
| 1180   | 2  | 2  | Married/li     | 1  | High school or l | 1  | Working, fi | 14 | 2   | No       |      | 2   | No      |
| 1183   | 2  | 2  | Married/li     | 3  | College degree   | 1  | Working, fi | 11 | 1   | Yes      | 2    | 2   | No      |
| 1187   | 2  | 2  | Married/li     | 4  | Postgraduate     | 1  | Working, fi | 14 | 2   | No       |      | 2   | No      |
| 1188   | 2  | 2  | Married/li     | 2  | Some college     | 1  | Working, fi | 9  | 2   | No       |      | 1   | Yes     |
| 1193   | 2  | 2  | Married/li     | 2  | Some college     | 9  | Other       | 3  | 2   | No       |      | 2   | No      |
| 1194   | 2  | 2  | Married/li     | 2  | Some college     | 2  | Working, p  | 3  | 2   | No       |      | 2   | No      |
| 1197   | 2  | 1  | Single         | 3  | College degree   | 1  | Working, fi | 13 | 2   | No       |      | 2   | No      |
| 1202   | 2  | 2  | Married/li     | 1  | High school or l | 4  | Retired     | 10 | 2   | No       |      | 2   | No      |
| 1204   | 2  | 2  | Married/li     | 2  | Some college     | 1  | Working, fi | 10 | 2   | No       |      | 2   | No      |
| 1211   | 2  | 2  | Married/li     | 2  | Some college     | 2  | Working, p  | 14 | 2   | No       |      | 2   | No      |
| 1224   | 2  | 2  | Married/li     | 4  | Postgraduate     | 4  | Retired     | 36 | 2   | No       |      | 2   | No      |

| respid | Q5 | Q6 | Marital Status | Q7 | Education        | Q8 | Work        | Q9 | Q10 | Diabetes | Q10a | Q11 | High BP |
|--------|----|----|----------------|----|------------------|----|-------------|----|-----|----------|------|-----|---------|
| 1225   | 2  | 2  | Married/li     | 3  | College degree   | 6  | Homemake    | 17 | 2   | No       |      | 2   | No      |
| 1230   | 2  | 2  | Married/li     | 1  | High school or l | 4  | Retired     | 34 | 2   | No       |      | 2   | No      |
| 1232   | 2  | 3  | Divorced       | 2  | Some college     | 6  | Homemake    | 16 | 2   | No       |      | 2   | No      |
| 1233   | 2  | 2  | Married/li     | 3  | College degree   | 1  | Working, fi | 17 | 1   | Yes      | 1    | 2   | No      |
| 1234   | 2  | 3  | Divorced       | 3  | College degree   | 2  | Working, p  | 27 | 2   | No       |      | 2   | No      |
| 1235   | 2  | 4  | Widow/wi       | 3  | College degree   | 4  | Retired     | 15 | 2   | No       |      | 1   | Yes     |
| 1236   | 2  | 1  | Single         | 3  | College degree   | 1  | Working, fi | 17 | 2   | No       |      | 2   | No      |
| 1237   | 2  | 1  | Single         | 4  | Postgraduate     | 1  | Working, fi | 18 | 2   | No       |      | 2   | No      |
| 1238   | 2  | 2  | Married/li     | 4  | Postgraduate     | 1  | Working, fi | 38 | 2   | No       |      | 1   | Yes     |
| 1239   | 2  | 2  | Married/li     | 1  | High school or l | 1  | Working, fi | 21 | 2   | No       |      | 2   | No      |
| 1241   | 2  | 2  | Married/li     | 1  | High school or l | 2  | Working, p  | 26 | 2   | No       |      | 1   | Yes     |
| 1242   | 2  | 2  | Married/li     | 2  | Some college     | 1  | Working, fi | 27 | 2   | No       |      | 2   | No      |
| 1244   | 2  | 2  | Married/li     | 3  | College degree   | 4  | Retired     | 29 | 2   | No       |      | 1   | Yes     |
| 1245   | 2  | 2  | Married/li     | 3  | College degree   | 1  | Working, fi | 20 | 2   | No       |      | 1   | Yes     |
| 1247   | 2  | 2  | Married/li     | 3  | College degree   | 4  | Retired     | 35 | 2   | No       |      | 2   | No      |
| 1248   | 2  | 2  | Married/li     | 1  | High school or l | 6  | Homemake    | 16 | 2   | No       |      | 2   | No      |
| 1249   | 2  | 2  | Married/li     | 4  | Postgraduate     | 1  | Working, fi | 18 | 2   | No       |      | 2   | No      |
| 1250   | 2  | 1  | Single         | 3  | College degree   | 1  | Working, fi | 12 | 2   | No       |      | 2   | No      |
| 1251   | 2  | 2  | Married/li     | 3  | College degree   | 1  | Working, fi | 23 | 2   | No       |      | 2   | No      |
| 1252   | 2  | 2  | Married/li     | 2  | Some college     | 4  | Retired     | 7  | 2   | No       |      | 2   | No      |
| 1253   | 2  | 2  | Married/li     | 2  | Some college     | 1  | Working, fi | 33 | 1   | Yes      | 1    | 2   | No      |
| 1254   | 2  | 3  | Divorced       | 2  | Some college     | 2  | Working, p  | 26 | 1   | Yes      | 2    | 2   | No      |
| 1258   | 2  | 2  | Married/li     | 3  | College degree   | 4  | Retired     | 9  | 2   | No       |      | 1   | Yes     |
| 1260   | 2  | 2  | Married/li     | 2  | Some college     | 4  | Retired     | 6  | 1   | Yes      | 1    | 2   | No      |
| 1261   | 2  | 2  | Married/li     | 3  | College degree   | 4  | Retired     | 16 | 2   | No       |      | 2   | No      |
| 1262   | 2  | 2  | Married/li     | 3  | College degree   | 4  | Retired     | 11 | 2   | No       |      | 1   | Yes     |
| 1263   | 2  | 2  | Married/li     | 3  | College degree   | 4  | Retired     | 27 | 1   | Yes      | 1    | 2   | No      |
| 1264   | 2  | 2  | Married/li     | 3  | College degree   | 2  | Working, p  | 27 | 2   | No       |      | 2   | No      |
| 1265   | 2  | 2  | Married/li     | 3  | College degree   | 4  | Retired     | 25 | 1   | Yes      | 1    | 2   | No      |
| 1266   | 2  | 2  | Married/li     | 4  | Postgraduate     | 1  | Working, fi | 32 | 2   | No       |      | 2   | No      |
| 1270   | 2  | 2  | Married/li     | 3  | College degree   | 4  | Retired     | 30 | 2   | No       |      | 1   | Yes     |
| 1272   | 2  | 4  | Widow/wi       | 1  | High school or l | 5  | Permanent   | 35 | 2   | No       |      | 1   | Yes     |

| respid | Q5 | Q6 | Marital Status | Q7 | Education        | Q8 | Work        | Q9 | Q10 | Diabetes | Q10a | Q11 | High BP |
|--------|----|----|----------------|----|------------------|----|-------------|----|-----|----------|------|-----|---------|
| 1273   | 2  | 2  | Married/li     | 1  | High school or l | 1  | Working, fi | 16 | 2   | No       |      | 2   | No      |
| 1276   | 2  | 2  | Married/li     | 3  | College degree   | 1  | Working, fi | 24 | 2   | No       |      | 2   | No      |
| 1277   | 2  | 2  | Married/li     | 2  | Some college     | 1  | Working, fi | 33 | 2   | No       |      | 2   | No      |
| 1278   | 2  | 1  | Single         | 3  | College degree   | 1  | Working, fi | 21 | 2   | No       |      | 2   | No      |
| 1280   | 2  | 2  | Married/li     | 2  | Some college     | 1  | Working, fi | 33 | 2   | No       |      | 2   | No      |
| 1281   | 2  | 2  | Married/li     | 1  | High school or l | 3  | Unemploye   | 19 | 2   | No       |      | 2   | No      |
| 1282   | 2  | 2  | Married/li     | 1  | High school or l | 1  | Working, fi | 19 | 2   | No       |      | 2   | No      |
| 1283   | 2  | 2  | Married/li     | 1  | High school or l | 1  | Working, fi | 18 | 2   | No       |      | 2   | No      |
| 1288   | 2  | 2  | Married/li     | 1  | High school or l | 6  | Homemake    | 25 | 2   | No       |      | 2   | No      |
| 1289   | 2  | 2  | Married/li     | 3  | College degree   | 6  | Homemake    | 19 | 2   | No       |      | 2   | No      |
| 1290   | 2  | 1  | Single         | 2  | Some college     | 1  | Working, fi | 29 | 2   | No       |      | 2   | No      |
| 1291   | 2  | 2  | Married/li     | 3  | College degree   | 1  | Working, fi | 26 | 2   | No       |      | 2   | No      |
| 1293   | 2  | 2  | Married/li     | 3  | College degree   | 1  | Working, fi | 18 | 2   | No       |      | 2   | No      |
| 1294   | 2  | 2  | Married/li     | 3  | College degree   | 1  | Working, fi | 19 | 2   | No       |      | 2   | No      |
| 1295   | 2  | 2  | Married/li     | 4  | Postgraduate     | 1  | Working, fi | 23 | 2   | No       |      | 1   | Yes     |
| 1296   | 2  | 2  | Married/li     | 2  | Some college     | 1  | Working, fi | 17 | 2   | No       |      | 2   | No      |
| 1297   | 2  | 2  | Married/li     | 3  | College degree   | 6  | Homemake    | 18 | 2   | No       |      | 2   | No      |
| 1298   | 2  | 2  | Married/li     | 3  | College degree   | 1  | Working, fi | 20 | 2   | No       |      | 1   | Yes     |
| 1300   | 2  | 1  | Single         | 1  | High school or l | 1  | Working, fi | 17 | 2   | No       |      | 1   | Yes     |
| 1302   | 2  | 1  | Single         | 1  | High school or l | 1  | Working, fi | 16 | 2   | No       |      | 2   | No      |
| 1303   | 2  | 2  | Married/li     | 2  | Some college     | 1  | Working, fi | 5  | 2   | No       |      | 1   | Yes     |
| 1304   | 2  | 2  | Married/li     | 4  | Postgraduate     | 1  | Working, fi | 19 | 2   | No       |      | 2   | No      |
| 1305   | 2  | 2  | Married/li     | 3  | College degree   | 1  | Working, fi | 21 | 2   | No       |      | 1   | Yes     |
| 1307   | 2  | 2  | Married/li     | 4  | Postgraduate     | 1  | Working, fi | 37 | 2   | No       |      | 2   | No      |
| 1312   | 2  | 2  | Married/li     | 3  | College degree   | 9  | Other       | 20 | 2   | No       |      | 2   | No      |
| 1313   | 2  | 1  | Single         | 4  | Postgraduate     | 2  | Working, p  | 33 | 2   | No       |      | 2   | No      |
| 1314   | 2  | 2  | Married/li     | 3  | College degree   | 1  | Working, fi | 13 | 2   | No       |      | 2   | No      |
| 1317   | 2  | 3  | Divorced       | 1  | High school or l | 4  | Retired     | 28 | 2   | No       |      | 2   | No      |
| 1318   | 2  | 2  | Married/li     | 1  | High school or l | 1  | Working, fi | 16 | 2   | No       |      | 2   | No      |
| 1319   | 2  | 2  | Married/li     | 1  | High school or l | 8  | Other worl  | 15 | 2   | No       |      | 2   | No      |
| 1321   | 2  | 2  | Married/li     | 3  | College degree   | 1  | Working, fi | 11 | 2   | No       |      | 2   | No      |
| 1324   | 2  | 2  | Married/li     | 3  | College degree   | 1  | Working, fi | 19 | 2   | No       |      | 1   | Yes     |

| respid | Q5 | Q6 | Marital Status | Q7 | Education        | Q8 | Work        | Q9 | Q10 | Diabetes | Q10a | Q11 | High BP |
|--------|----|----|----------------|----|------------------|----|-------------|----|-----|----------|------|-----|---------|
| 1325   | 2  | 3  | Divorced       | 4  | Postgraduate     | 1  | Working, fi | 33 | 2   | No       |      | 2   | No      |
| 1326   | 2  | 2  | Married/li     | 3  | College degree   | 1  | Working, fi | 30 | 2   | No       |      | 2   | No      |
| 1327   | 2  | 1  | Single         | 2  | Some college     | 1  | Working, fi | 38 | 2   | No       |      | 2   | No      |
| 1329   | 2  | 4  | Widow/wi       | 1  | High school or l | 1  | Working, fi | 33 | 2   | No       |      | 2   | No      |
| 1330   | 2  | 2  | Married/li     | 1  | High school or l | 2  | Working, p  | 16 | 2   | No       |      | 2   | No      |
| 1331   | 2  | 2  | Married/li     | 1  | High school or l | 1  | Working, fi | 18 | 2   | No       |      | 2   | No      |
| 1335   | 2  | 2  | Married/li     | 4  | Postgraduate     | 1  | Working, fi | 33 | 1   | Yes      | 1    | 1   | Yes     |
| 1337   | 2  | 2  | Married/li     | 2  | Some college     | 1  | Working, fi | 13 | 2   | No       |      | 2   | No      |
| 1341   | 2  | 1  | Single         | 1  | High school or l | 1  | Working, fi | 15 | 2   | No       |      | 2   | No      |
| 1342   | 2  | 2  | Married/li     | 3  | College degree   | 6  | Homemake    | 21 | 2   | No       |      | 2   | No      |
| 1344   | 2  | 1  | Single         | 3  | College degree   | 8  | Other worl  | 18 | 2   | No       |      | 1   | Yes     |
| 1345   | 2  | 1  | Single         | 3  | College degree   | 1  | Working, fi | 31 | 2   | No       |      | 1   | Yes     |
| 1346   | 2  | 2  | Married/li     | 3  | College degree   | 1  | Working, fi | 18 | 2   | No       |      | 2   | No      |
| 1350   | 2  | 2  | Married/li     | 3  | College degree   | 1  | Working, fi | 22 | 2   | No       |      | 1   | Yes     |
| 1352   | 2  | 2  | Married/li     | 1  | High school or l | 1  | Working, fi | 5  | 2   | No       |      | 2   | No      |
| 1353   | 2  | 2  | Married/li     | 3  | College degree   | 1  | Working, fi | 20 | 2   | No       |      | 2   | No      |
| 1354   | 2  | 4  | Widow/wi       | 3  | College degree   | 4  | Retired     | 29 | 2   | No       |      | 2   | No      |
| 1355   | 2  | 2  | Married/li     | 3  | College degree   | 1  | Working, fi | 20 | 2   | No       |      | 2   | No      |
| 1357   | 2  | 2  | Married/li     | 3  | College degree   | 3  | Unemploy    | 25 | 1   | Yes      | 1    | 2   | No      |
| 1360   | 2  | 2  | Married/li     | 3  | College degree   | 6  | Homemake    | 21 | 2   | No       |      | 2   | No      |
| 1362   | 2  | 2  | Married/li     | 1  | High school or l | 2  | Working, p  | 33 | 2   | No       |      | 1   | Yes     |
| 1363   | 2  | 2  | Married/li     | 2  | Some college     | 1  | Working, fi | 35 | 2   | No       |      | 2   | No      |
| 1367   | 2  | 2  | Married/li     | 3  | College degree   | 1  | Working, fi | 33 | 2   | No       |      | 2   | No      |
| 1369   | 2  | 2  | Married/li     | 3  | College degree   | 1  | Working, fi | 18 | 2   | No       |      | 2   | No      |
| 1371   | 2  | 2  | Married/li     | 2  | Some college     | 1  | Working, fi | 5  | 2   | No       |      | 2   | No      |
| 1372   | 2  | 1  | Single         | 3  | College degree   | 1  | Working, fi | 31 | 2   | No       |      | 1   | Yes     |
| 1375   | 2  | 2  | Married/li     | 3  | College degree   | 1  | Working, fi | 23 | 1   | Yes      | 2    | 1   | Yes     |
| 1377   | 2  | 2  | Married/li     | 4  | Postgraduate     | 1  | Working, fi | 24 | 2   | No       |      | 2   | No      |
| 1379   | 2  | 2  | Married/li     | 1  | High school or l | 1  | Working, fi | 32 | 1   | Yes      | 1    | 1   | Yes     |
| 1380   | 2  | 2  | Married/li     | 1  | High school or l | 1  | Working, fi | 18 | 1   | Yes      | 1    | 1   | Yes     |
| 1382   | 2  | 2  | Married/li     | 4  | Postgraduate     | 1  | Working, fi | 16 | 2   | No       |      | 2   | No      |
| 1383   | 2  | 2  | Married/li     | 1  | High school or l | 1  | Working, fi | 31 | 2   | No       |      | 2   | No      |



| respid | Q5 | Q6 | Marital Status | Q7 | Education        | Q8 | Work        | Q9 | Q10 | Diabetes | Q10a | Q11 | High BP |
|--------|----|----|----------------|----|------------------|----|-------------|----|-----|----------|------|-----|---------|
| 1384   | 2  | 2  | Married/li     | 3  | College degree   | 1  | Working, fi | 26 | 2   | No       |      | 2   | No      |
| 1385   | 2  | 2  | Married/li     | 3  | College degree   | 1  | Working, fi | 24 | 2   | No       |      | 2   | No      |
| 1387   | 2  | 2  | Married/li     | 3  | College degree   | 1  | Working, fi | 17 | 2   | No       |      | 2   | No      |
| 1388   | 2  | 1  | Single         | 1  | High school or l | 1  | Working, fi | 21 | 2   | No       |      | 2   | No      |
| 1389   | 2  | 1  | Single         | 3  | College degree   | 1  | Working, fi | 16 | 2   | No       |      | 2   | No      |
| 1390   | 2  | 1  | Single         | 3  | College degree   | 1  | Working, fi | 20 | 2   | No       |      | 2   | No      |
| 1395   | 2  | 1  | Single         | 3  | College degree   | 1  | Working, fi | 36 | 2   | No       |      | 2   | No      |
| 1396   | 2  | 2  | Married/li     | 1  | High school or l | 2  | Working, p  | 25 | 2   | No       |      | 2   | No      |
| 1397   | 2  | 2  | Married/li     | 3  | College degree   | 1  | Working, fi | 21 | 1   | Yes      | 1    | 1   | Yes     |
| 1398   | 2  | 1  | Single         | 1  | High school or l | 1  | Working, fi | 33 | 2   | No       |      | 2   | No      |
| 1399   | 2  | 1  | Single         | 1  | High school or l | 1  | Working, fi | 19 | 2   | No       |      | 2   | No      |
| 1403   | 2  | 2  | Married/li     | 3  | College degree   | 6  | Homemake    | 18 | 2   | No       |      | 2   | No      |
| 1405   | 2  | 2  | Married/li     | 3  | College degree   | 1  | Working, fi | 15 | 1   | Yes      | 1    | 1   | Yes     |
| 1406   | 2  | 2  | Married/li     | 4  | Postgraduate     | 1  | Working, fi | 24 | 2   | No       |      | 2   | No      |
| 1407   | 2  | 2  | Married/li     | 3  | College degree   | 6  | Homemake    | 18 | 2   | No       |      | 1   | Yes     |
| 1408   | 2  | 2  | Married/li     | 3  | College degree   | 2  | Working, p  | 16 | 2   | No       |      | 2   | No      |
| 1409   | 2  | 2  | Married/li     | 3  | College degree   | 1  | Working, fi | 21 | 2   | No       |      | 2   | No      |
| 1410   | 2  | 2  | Married/li     | 1  | High school or l | 7  | Student     | 15 | 2   | No       |      | 2   | No      |
| 1411   | 2  | 1  | Single         | 3  | College degree   | 1  | Working, fi | 16 | 2   | No       |      | 2   | No      |
| 1412   | 2  | 2  | Married/li     | 3  | College degree   | 1  | Working, fi | 18 | 2   | No       |      | 2   | No      |
| 1413   | 2  | 2  | Married/li     | 1  | High school or l | 6  | Homemake    | 20 | 2   | No       |      | 2   | No      |
| 1414   | 2  | 2  | Married/li     | 3  | College degree   | 4  | Retired     | 30 | 2   | No       |      | 2   | No      |
| 1415   | 2  | 2  | Married/li     | 1  | High school or l | 4  | Retired     | 16 | 2   | No       |      | 1   | Yes     |
| 1416   | 2  | 2  | Married/li     | 3  | College degree   | 1  | Working, fi | 12 | 2   | No       |      | 2   | No      |
| 1417   | 2  | 2  | Married/li     | 3  | College degree   | 3  | Unemploy    | 18 | 2   | No       |      | 2   | No      |
| 1418   | 2  | 2  | Married/li     | 1  | High school or l | 1  | Working, fi | 19 | 2   | No       |      | 1   | Yes     |
| 1419   | 2  | 2  | Married/li     | 3  | College degree   | 1  | Working, fi | 21 | 2   | No       |      | 1   | Yes     |
| 1420   | 2  | 2  | Married/li     | 3  | College degree   | 8  | Other worl  | 17 | 2   | No       |      | 2   | No      |
| 1421   | 2  | 2  | Married/li     | 2  | Some college     | 1  | Working, fi | 17 | 2   | No       |      | 1   | Yes     |
| 1422   | 2  | 2  | Married/li     | 3  | College degree   | 6  | Homemake    | 22 | 2   | No       |      | 1   | Yes     |
| 1423   | 2  | 2  | Married/li     | 1  | High school or l | 1  | Working, fi | 18 | 2   | No       |      | 2   | No      |
| 1424   | 2  | 2  | Married/li     | 3  | College degree   | 1  | Working, fi | 19 | 2   | No       |      | 2   | No      |

| respid | Q5 | Q6 | Marital Status | Q7 | Education        | Q8 | Work        | Q9 | Q10 | Diabetes | Q10a | Q11 | High BP |
|--------|----|----|----------------|----|------------------|----|-------------|----|-----|----------|------|-----|---------|
| 1429   | 2  | 2  | Married/li     | 3  | College degree   | 1  | Working, fi | 22 | 2   | No       |      | 2   | No      |
| 1430   | 2  | 2  | Married/li     | 1  | High school or l | 4  | Retired     | 15 | 1   | Yes      | 1    | 1   | Yes     |
| 1431   | 2  | 2  | Married/li     | 1  | High school or l | 2  | Working, p  | 16 | 2   | No       |      | 2   | No      |
| 1433   | 2  | 1  | Single         | 1  | High school or l | 2  | Working, p  | 15 | 2   | No       |      | 2   | No      |
| 1435   | 2  | 2  | Married/li     | 4  | Postgraduate     | 1  | Working, fi | 22 | 2   | No       |      | 2   | No      |
| 1436   | 2  | 2  | Married/li     | 1  | High school or l | 1  | Working, fi | 17 | 2   | No       |      | 2   | No      |
| 1438   | 2  | 2  | Married/li     | 3  | College degree   | 4  | Retired     | 14 | 2   | No       |      | 1   | Yes     |
| 1439   | 2  | 2  | Married/li     | 1  | High school or l | 2  | Working, p  | 17 | 2   | No       |      | 1   | Yes     |
| 1441   | 2  | 2  | Married/li     | 3  | College degree   | 1  | Working, fi | 19 | 1   | Yes      | 1    | 2   | No      |
| 1442   | 2  | 2  | Married/li     | 4  | Postgraduate     | 1  | Working, fi | 24 | 2   | No       |      | 1   | Yes     |
| 1443   | 2  | 2  | Married/li     | 1  | High school or l | 1  | Working, fi | 3  | 2   | No       |      | 2   | No      |
| 1444   | 2  | 2  | Married/li     | 3  | College degree   | 1  | Working, fi | 20 | 2   | No       |      | 2   | No      |
| 1445   | 2  | 2  | Married/li     | 3  | College degree   | 1  | Working, fi | 20 | 1   | Yes      | 1    | 1   | Yes     |
| 1446   | 2  | 1  | Single         | 3  | College degree   | 1  | Working, fi | 18 | 2   | No       |      | 2   | No      |
| 1447   | 2  | 2  | Married/li     | 4  | Postgraduate     | 4  | Retired     | 18 | 2   | No       |      | 2   | No      |
| 1449   | 2  | 2  | Married/li     | 1  | High school or l | 6  | Homemake    | 17 | 1   | Yes      | 1    | 2   | No      |
| 1450   | 2  | 1  | Single         | 3  | College degree   | 2  | Working, p  | 25 | 2   | No       |      | 2   | No      |
| 1451   | 2  | 3  | Divorced       | 1  | High school or l | 6  | Homemake    | 19 | 2   | No       |      | 2   | No      |
| 1452   | 2  | 2  | Married/li     | 1  | High school or l | 1  | Working, fi | 22 | 2   | No       |      | 2   | No      |
| 1453   | 2  | 2  | Married/li     | 1  | High school or l | 1  | Working, fi | 17 | 2   | No       |      | 1   | Yes     |
| 1454   | 2  | 2  | Married/li     | 3  | College degree   | 1  | Working, fi | 18 | 2   | No       |      | 2   | No      |
| 1456   | 2  | 2  | Married/li     | 3  | College degree   | 1  | Working, fi | 21 | 1   | Yes      | 1    | 1   | Yes     |
| 1457   | 2  | 2  | Married/li     | 3  | College degree   | 4  | Retired     | 18 | 2   | No       |      | 1   | Yes     |
| 1459   | 2  | 2  | Married/li     | 1  | High school or l | 1  | Working, fi | 1  | 2   | No       |      | 2   | No      |
| 1460   | 2  | 2  | Married/li     | 3  | College degree   | 1  | Working, fi | 33 | 2   | No       |      | 2   | No      |
| 1463   | 2  | 2  | Married/li     | 4  | Postgraduate     | 1  | Working, fi | 36 | 2   | No       |      | 1   | Yes     |
| 1465   | 2  | 2  | Married/li     | 1  | High school or l | 6  | Homemake    | 25 | 2   | No       |      | 2   | No      |
| 1467   | 2  | 2  | Married/li     | 2  | Some college     | 2  | Working, p  | 4  | 2   | No       |      | 1   | Yes     |
| 1470   | 2  | 2  | Married/li     | 3  | College degree   | 1  | Working, fi | 19 | 2   | No       |      | 2   | No      |
| 1471   | 2  | 2  | Married/li     | 3  | College degree   | 1  | Working, fi | 20 | 1   | Yes      | 1    | 1   | Yes     |
| 1472   | 2  | 1  | Single         | 3  | College degree   | 4  | Retired     | 7  | 2   | No       |      | 2   | No      |
| 1474   | 2  | 2  | Married/li     | 4  | Postgraduate     | 1  | Working, fi | 24 | 2   | No       |      | 2   | No      |

| respid | Q5 | Q6 | Marital Status | Q7 | Education        | Q8 | Work        | Q9 | Q10 | Diabetes | Q10a | Q11 | High BP |
|--------|----|----|----------------|----|------------------|----|-------------|----|-----|----------|------|-----|---------|
| 1475   | 2  | 3  | Divorced       | 1  | High school or l | 1  | Working, fi | 27 | 2   | No       |      | 1   | Yes     |
| 1477   | 2  | 3  | Divorced       | 2  | Some college     | 1  | Working, fi | 29 | 1   | Yes      | 1    | 1   | Yes     |
| 1478   | 2  | 2  | Married/li     | 1  | High school or l | 1  | Working, fi | 27 | 2   | No       |      | 2   | No      |
| 1480   | 2  | 2  | Married/li     | 3  | College degree   | 1  | Working, fi | 13 | 2   | No       |      | 2   | No      |
| 1481   | 2  | 2  | Married/li     | 1  | High school or l | 6  | Homemake    | 16 | 2   | No       |      | 2   | No      |
| 1483   | 2  | 2  | Married/li     | 3  | College degree   | 1  | Working, fi | 37 | 2   | No       |      | 2   | No      |
| 1484   | 2  | 2  | Married/li     | 3  | College degree   | 1  | Working, fi | 19 | 2   | No       |      | 1   | Yes     |
| 1485   | 2  | 2  | Married/li     | 3  | College degree   | 1  | Working, fi | 14 | 2   | No       |      | 2   | No      |
| 1486   | 2  | 2  | Married/li     | 4  | Postgraduate     | 1  | Working, fi | 35 | 2   | No       |      | 1   | Yes     |
| 1487   | 2  | 2  | Married/li     | 4  | Postgraduate     | 1  | Working, fi | 11 | 2   | No       |      | 1   | Yes     |
| 1488   | 2  | 2  | Married/li     | 3  | College degree   | 1  | Working, fi | 20 | 2   | No       |      | 2   | No      |
| 1489   | 2  | 2  | Married/li     | 3  | College degree   | 8  | Other worl  | 18 | 2   | No       |      | 1   | Yes     |
| 1490   | 2  | 2  | Married/li     | 3  | College degree   | 1  | Working, fi | 11 | 2   | No       |      | 1   | Yes     |
| 1491   | 2  | 2  | Married/li     | 3  | College degree   | 9  | Other       | 19 | 2   | No       |      | 1   | Yes     |
| 1492   | 2  | 2  | Married/li     | 3  | College degree   | 6  | Homemake    | 17 | 2   | No       |      | 2   | No      |
| 1494   | 2  | 2  | Married/li     | 2  | Some college     | 1  | Working, fi | 11 | 2   | No       |      | 2   | No      |
| 1495   | 2  | 2  | Married/li     | 4  | Postgraduate     | 4  | Retired     | 17 | 2   | No       |      | 2   | No      |
| 1496   | 2  | 2  | Married/li     | 4  | Postgraduate     | 1  | Working, fi | 24 | 2   | No       |      | 2   | No      |
| 1498   | 2  | 2  | Married/li     | 1  | High school or l | 4  | Retired     | 8  | 2   | No       |      | 1   | Yes     |
| 1499   | 2  | 2  | Married/li     | 1  | High school or l | 4  | Retired     | 7  | 2   | No       |      | 2   | No      |
| 1500   | 2  | 2  | Married/li     | 1  | High school or l | 6  | Homemake    | 19 | 1   | Yes      | 1    | 1   | Yes     |
| 1501   | 2  | 2  | Married/li     | 4  | Postgraduate     | 1  | Working, fi | 24 | 2   | No       |      | 2   | No      |
| 1503   | 2  | 2  | Married/li     | 3  | College degree   | 1  | Working, fi | 18 | 2   | No       |      | 2   | No      |
| 1504   | 2  | 2  | Married/li     | 1  | High school or l | 4  | Retired     | 6  | 2   | No       |      | 2   | No      |
| 1508   | 2  | 2  | Married/li     | 1  | High school or l | 1  | Working, fi | 5  | 2   | No       |      | 1   | Yes     |
| 1509   | 2  | 2  | Married/li     | 3  | College degree   | 1  | Working, fi | 13 | 2   | No       |      | 1   | Yes     |
| 1511   | 2  | 2  | Married/li     | 3  | College degree   | 1  | Working, fi | 36 | 2   | No       |      | 2   | No      |
| 1512   | 2  | 2  | Married/li     | 3  | College degree   | 1  | Working, fi | 19 | 2   | No       |      | 1   | Yes     |
| 1513   | 2  | 2  | Married/li     | 3  | College degree   | 1  | Working, fi | 20 | 2   | No       |      | 2   | No      |
| 1515   | 2  | 2  | Married/li     | 3  | College degree   | 1  | Working, fi | 18 | 2   | No       |      | 1   | Yes     |
| 1517   | 2  | 2  | Married/li     | 3  | College degree   | 1  | Working, fi | 24 | 2   | No       |      | 2   | No      |
| 1518   | 2  | 2  | Married/li     | 1  | High school or l | 6  | Homemake    | 16 | 2   | No       |      | 2   | No      |

| respid | Q5 | Q6 | Marital Status | Q7 | Education        | Q8 | Work        | Q9 | Q10 | Diabetes | Q10a | Q11 | High BP |
|--------|----|----|----------------|----|------------------|----|-------------|----|-----|----------|------|-----|---------|
| 1519   | 2  | 3  | Divorced       | 1  | High school or l | 1  | Working, fi | 21 | 1   | Yes      | 1    | 2   | No      |
| 1520   | 2  | 2  | Married/li     | 3  | College degree   | 1  | Working, fi | 33 | 2   | No       |      | 1   | Yes     |
| 1521   | 2  | 2  | Married/li     | 3  | College degree   | 1  | Working, fi | 18 | 2   | No       |      | 2   | No      |
| 1522   | 2  | 2  | Married/li     | 3  | College degree   | 1  | Working, fi | 23 | 2   | No       |      | 2   | No      |
| 1523   | 2  | 2  | Married/li     | 1  | High school or l | 8  | Other worl  | 15 | 2   | No       |      | 1   | Yes     |
| 1524   | 2  | 2  | Married/li     | 3  | College degree   | 1  | Working, fi | 3  | 2   | No       |      | 2   | No      |
| 1525   | 2  | 2  | Married/li     | 3  | College degree   | 1  | Working, fi | 30 | 2   | No       |      | 2   | No      |
| 1526   | 2  | 2  | Married/li     | 3  | College degree   | 1  | Working, fi | 19 | 2   | No       |      | 2   | No      |
| 1527   | 2  | 2  | Married/li     | 1  | High school or l | 4  | Retired     | 11 | 2   | No       |      | 1   | Yes     |
| 1534   | 2  | 2  | Married/li     | 3  | College degree   | 1  | Working, fi | 13 | 2   | No       |      | 2   | No      |
| 1535   | 2  | 3  | Divorced       | 4  | Postgraduate     | 1  | Working, fi | 20 | 2   | No       |      | 2   | No      |
| 1536   | 2  | 2  | Married/li     | 3  | College degree   | 1  | Working, fi | 21 | 2   | No       |      | 2   | No      |
| 1538   | 2  | 2  | Married/li     | 2  | Some college     | 1  | Working, fi | 11 | 2   | No       |      | 2   | No      |
| 1539   | 2  | 2  | Married/li     | 4  | Postgraduate     | 9  | Other       | 16 | 2   | No       |      | 2   | No      |
| 1540   | 2  | 1  | Single         | 3  | College degree   | 1  | Working, fi | 18 | 2   | No       |      | 2   | No      |
| 1541   | 2  | 2  | Married/li     | 3  | College degree   | 1  | Working, fi | 19 | 2   | No       |      | 1   | Yes     |
| 1542   | 2  | 2  | Married/li     | 3  | College degree   | 1  | Working, fi | 18 | 2   | No       |      | 1   | Yes     |
| 1543   | 2  | 2  | Married/li     | 2  | Some college     | 1  | Working, fi | 8  | 2   | No       |      | 2   | No      |
| 1545   | 2  | 2  | Married/li     | 3  | College degree   | 1  | Working, fi | 18 | 2   | No       |      | 2   | No      |
| 1546   | 2  | 2  | Married/li     | 3  | College degree   | 1  | Working, fi | 14 | 2   | No       |      | 1   | Yes     |
| 1548   | 2  | 2  | Married/li     | 3  | College degree   | 6  | Homemake    | 16 | 2   | No       |      | 1   | Yes     |
| 1549   | 2  | 2  | Married/li     | 3  | College degree   | 1  | Working, fi | 9  | 2   | No       |      | 2   | No      |
| 1551   | 2  | 2  | Married/li     | 3  | College degree   | 1  | Working, fi | 19 | 2   | No       |      | 2   | No      |
| 1552   | 2  | 2  | Married/li     | 3  | College degree   | 1  | Working, fi | 20 | 2   | No       |      | 2   | No      |
| 1556   | 2  | 2  | Married/li     | 3  | College degree   | 1  | Working, fi | 21 | 2   | No       |      | 2   | No      |
| 1557   | 2  | 2  | Married/li     | 3  | College degree   | 1  | Working, fi | 12 | 2   | No       |      | 2   | No      |
| 1558   | 2  | 2  | Married/li     | 4  | Postgraduate     | 1  | Working, fi | 21 | 2   | No       |      | 1   | Yes     |
| 1561   | 2  | 2  | Married/li     | 3  | College degree   | 1  | Working, fi | 12 | 2   | No       |      | 2   | No      |
| 1562   | 2  | 2  | Married/li     | 3  | College degree   | 1  | Working, fi | 14 | 2   | No       |      | 2   | No      |
| 1563   | 2  | 2  | Married/li     | 4  | Postgraduate     | 1  | Working, fi | 10 | 2   | No       |      | 2   | No      |
| 1564   | 2  | 2  | Married/li     | 3  | College degree   | 1  | Working, fi | 12 | 2   | No       |      | 1   | Yes     |
| 1565   | 2  | 2  | Married/li     | 3  | College degree   | 6  | Homemake    | 17 | 2   | No       |      | 2   | No      |

| respid | Q5 | Q6 | Marital Status | Q7 | Education        | Q8 | Work        | Q9 | Q10 | Diabetes | Q10a | Q11 | High BP |
|--------|----|----|----------------|----|------------------|----|-------------|----|-----|----------|------|-----|---------|
| 1566   | 2  | 2  | Married/li     | 3  | College degree   | 1  | Working, fi | 4  | 2   | No       |      | 2   | No      |
| 1567   | 2  | 1  | Single         | 3  | College degree   | 1  | Working, fi | 27 | 2   | No       |      | 2   | No      |
| 1569   | 2  | 2  | Married/li     | 2  | Some college     | 1  | Working, fi | 10 | 2   | No       |      | 2   | No      |
| 1570   | 2  | 2  | Married/li     | 2  | Some college     | 1  | Working, fi | 5  | 2   | No       |      | 2   | No      |
| 1574   | 2  | 1  | Single         | 3  | College degree   | 1  | Working, fi | 27 | 2   | No       |      | 2   | No      |
| 1575   | 2  | 2  | Married/li     | 4  | Postgraduate     | 1  | Working, fi | 21 | 2   | No       |      | 2   | No      |
| 1576   | 2  | 2  | Married/li     | 2  | Some college     | 1  | Working, fi | 33 | 2   | No       |      | 2   | No      |
| 1577   | 2  | 2  | Married/li     | 4  | Postgraduate     | 1  | Working, fi | 11 | 2   | No       |      | 1   | Yes     |
| 1581   | 2  | 2  | Married/li     | 2  | Some college     | 1  | Working, fi | 34 | 2   | No       |      | 2   | No      |
| 1583   | 2  | 2  | Married/li     | 3  | College degree   | 4  | Retired     | 12 | 2   | No       |      | 2   | No      |
| 1585   | 2  | 2  | Married/li     | 3  | College degree   | 1  | Working, fi | 21 | 2   | No       |      | 2   | No      |
| 1586   | 2  | 2  | Married/li     | 1  | High school or l | 1  | Working, fi | 18 | 2   | No       |      | 2   | No      |
| 1588   | 2  | 2  | Married/li     | 3  | College degree   | 1  | Working, fi | 20 | 2   | No       |      | 2   | No      |
| 1590   | 2  | 2  | Married/li     | 2  | Some college     | 1  | Working, fi | 33 | 2   | No       |      | 2   | No      |
| 1592   | 2  | 2  | Married/li     | 3  | College degree   | 1  | Working, fi | 13 | 2   | No       |      | 2   | No      |
| 1594   | 2  | 2  | Married/li     | 3  | College degree   | 1  | Working, fi | 20 | 2   | No       |      | 1   | Yes     |
| 1598   | 2  | 2  | Married/li     | 1  | High school or l | 4  | Retired     | 33 | 2   | No       |      | 1   | Yes     |
| 1599   | 2  | 1  | Single         | 3  | College degree   | 1  | Working, fi | 28 | 1   | Yes      | 1    | 1   | Yes     |
| 1600   | 2  | 2  | Married/li     | 3  | College degree   | 1  | Working, fi | 11 | 2   | No       |      | 2   | No      |
| 1602   | 2  | 2  | Married/li     | 3  | College degree   | 1  | Working, fi | 20 | 2   | No       |      | 2   | No      |
| 1603   | 2  | 2  | Married/li     | 4  | Postgraduate     | 1  | Working, fi | 35 | 2   | No       |      | 2   | No      |
| 1604   | 2  | 2  | Married/li     | 2  | Some college     | 1  | Working, fi | 12 | 2   | No       |      | 2   | No      |
| 1605   | 2  | 2  | Married/li     | 3  | College degree   | 4  | Retired     | 15 | 1   | Yes      | 1    | 2   | No      |
| 1606   | 2  | 2  | Married/li     | 4  | Postgraduate     | 1  | Working, fi | 14 | 2   | No       |      | 1   | Yes     |
| 1610   | 2  | 4  | Widow/wi       | 3  | College degree   | 4  | Retired     | 15 | 2   | No       |      | 1   | Yes     |
| 1611   | 2  | 2  | Married/li     | 3  | College degree   | 1  | Working, fi | 36 | 2   | No       |      | 2   | No      |
| 1612   | 2  | 2  | Married/li     | 3  | College degree   | 1  | Working, fi | 20 | 2   | No       |      | 2   | No      |
| 1613   | 2  | 2  | Married/li     | 3  | College degree   | 4  | Retired     | 32 | 2   | No       |      | 2   | No      |
| 1615   | 2  | 2  | Married/li     | 3  | College degree   | 1  | Working, fi | 19 | 2   | No       |      | 2   | No      |
| 1616   | 2  | 2  | Married/li     | 3  | College degree   | 1  | Working, fi | 34 | 2   | No       |      | 2   | No      |
| 1617   | 2  | 2  | Married/li     | 3  | College degree   | 1  | Working, fi | 18 | 2   | No       |      | 2   | No      |
| 1618   | 2  | 2  | Married/li     | 1  | High school or l | 1  | Working, fi | 11 | 2   | No       |      | 1   | Yes     |

| respid | Q5 | Q6 | Marital Status | Q7 | Education        | Q8 | Work        | Q9 | Q10 | Diabetes | Q10a | Q11 | High BP |
|--------|----|----|----------------|----|------------------|----|-------------|----|-----|----------|------|-----|---------|
| 1620   | 2  | 1  | Single         | 3  | College degree   | 1  | Working, fi | 17 | 2   | No       |      | 2   | No      |
| 1621   | 2  | 2  | Married/li     | 3  | College degree   | 2  | Working, p  | 17 | 2   | No       |      | 1   | Yes     |
| 1622   | 2  | 2  | Married/li     | 3  | College degree   | 1  | Working, fi | 10 | 1   | Yes      | 2    | 2   | No      |
| 1623   | 2  | 2  | Married/li     | 4  | Postgraduate     | 1  | Working, fi | 34 | 2   | No       |      | 1   | Yes     |
| 1624   | 2  | 2  | Married/li     | 3  | College degree   | 1  | Working, fi | 11 | 2   | No       |      | 2   | No      |
| 1625   | 2  | 2  | Married/li     | 3  | College degree   | 1  | Working, fi | 11 | 2   | No       |      | 2   | No      |
| 1626   | 2  | 2  | Married/li     | 1  | High school or l | 6  | Homemake    | 17 | 2   | No       |      | 2   | No      |
| 1627   | 2  | 2  | Married/li     | 3  | College degree   | 6  | Homemake    | 17 | 2   | No       |      | 2   | No      |
| 1629   | 2  | 2  | Married/li     | 3  | College degree   | 1  | Working, fi | 22 | 2   | No       |      | 2   | No      |
| 1630   | 2  | 3  | Divorced       | 3  | College degree   | 1  | Working, fi | 8  | 2   | No       |      | 2   | No      |
| 1631   | 2  | 3  | Divorced       | 1  | High school or l | 8  | Other worl  | 15 | 2   | No       |      | 2   | No      |
| 1634   | 2  | 2  | Married/li     | 4  | Postgraduate     | 1  | Working, fi | 35 | 2   | No       |      | 2   | No      |
| 1635   | 2  | 2  | Married/li     | 3  | College degree   | 1  | Working, fi | 32 | 2   | No       |      | 2   | No      |
| 1636   | 2  | 2  | Married/li     | 4  | Postgraduate     | 1  | Working, fi | 24 | 2   | No       |      | 1   | Yes     |
| 1637   | 2  | 2  | Married/li     | 3  | College degree   | 1  | Working, fi | 35 | 2   | No       |      | 2   | No      |
| 1640   | 2  | 2  | Married/li     | 1  | High school or l | 6  | Homemake    | 22 | 2   | No       |      | 2   | No      |
| 1642   | 2  | 2  | Married/li     | 3  | College degree   | 1  | Working, fi | 12 | 2   | No       |      | 2   | No      |
| 1643   | 2  | 2  | Married/li     | 1  | High school or l | 1  | Working, fi | 18 | 2   | No       |      | 2   | No      |
| 1644   | 2  | 2  | Married/li     | 2  | Some college     | 1  | Working, fi | 28 | 1   | Yes      | 1    | 1   | Yes     |
| 1645   | 2  | 1  | Single         | 1  | High school or l | 9  | Other       | 16 | 2   | No       |      | 2   | No      |
| 1646   | 2  | 2  | Married/li     | 3  | College degree   | 1  | Working, fi | 18 | 2   | No       |      | 2   | No      |
| 1647   | 2  | 2  | Married/li     | 4  | Postgraduate     | 9  | Other       | 16 | 2   | No       |      | 2   | No      |
| 1650   | 2  | 2  | Married/li     | 3  | College degree   | 1  | Working, fi | 28 | 2   | No       |      | 1   | Yes     |
| 1654   | 2  | 2  | Married/li     | 3  | College degree   | 1  | Working, fi | 7  | 2   | No       |      | 2   | No      |
| 1656   | 2  | 2  | Married/li     | 3  | College degree   | 1  | Working, fi | 17 | 2   | No       |      | 2   | No      |
| 1657   | 2  | 2  | Married/li     | 3  | College degree   | 1  | Working, fi | 38 | 2   | No       |      | 2   | No      |
| 1659   | 2  | 2  | Married/li     | 3  | College degree   | 1  | Working, fi | 11 | 1   | Yes      | 1    | 1   | Yes     |
| 1662   | 2  | 2  | Married/li     | 3  | College degree   | 1  | Working, fi | 20 | 2   | No       |      | 2   | No      |
| 1663   | 2  | 1  | Single         | 3  | College degree   | 1  | Working, fi | 17 | 2   | No       |      | 2   | No      |
| 1664   | 2  | 1  | Single         | 3  | College degree   | 1  | Working, fi | 11 | 2   | No       |      | 2   | No      |
| 1665   | 2  | 1  | Single         | 3  | College degree   | 4  | Retired     | 28 | 2   | No       |      | 2   | No      |
| 1667   | 2  | 2  | Married/li     | 4  | Postgraduate     | 1  | Working, fi | 38 | 2   | No       |      | 2   | No      |

| respid | Q5 | Q6 | Marital Status | Q7 | Education        | Q8 | Work        | Q9 | Q10 | Diabetes | Q10a | Q11 | High BP |
|--------|----|----|----------------|----|------------------|----|-------------|----|-----|----------|------|-----|---------|
| 1668   | 2  | 2  | Married/li     | 3  | College degree   | 1  | Working, fi | 35 | 2   | No       |      | 2   | No      |
| 1670   | 2  | 2  | Married/li     | 3  | College degree   | 1  | Working, fi | 16 | 2   | No       |      | 2   | No      |
| 1671   | 2  | 2  | Married/li     | 3  | College degree   | 4  | Retired     | 23 | 2   | No       |      | 1   | Yes     |
| 1673   | 2  | 2  | Married/li     | 2  | Some college     | 1  | Working, fi | 8  | 2   | No       |      | 2   | No      |
| 1674   | 2  | 2  | Married/li     | 2  | Some college     | 1  | Working, fi | 3  | 2   | No       |      | 2   | No      |
| 1676   | 2  | 2  | Married/li     | 1  | High school or l | 1  | Working, fi | 20 | 2   | No       |      | 1   | Yes     |
| 1677   | 2  | 2  | Married/li     | 4  | Postgraduate     | 1  | Working, fi | 24 | 2   | No       |      | 2   | No      |
| 1678   | 2  | 2  | Married/li     | 3  | College degree   | 1  | Working, fi | 13 | 2   | No       |      | 1   | Yes     |
| 1680   | 2  | 2  | Married/li     | 3  | College degree   | 1  | Working, fi | 17 | 2   | No       |      | 2   | No      |
| 1681   | 2  | 1  | Single         | 3  | College degree   | 1  | Working, fi | 17 | 2   | No       |      | 2   | No      |
| 1683   | 2  | 2  | Married/li     | 3  | College degree   | 1  | Working, fi | 7  | 2   | No       |      | 2   | No      |
| 1685   | 2  | 1  | Single         | 3  | College degree   | 1  | Working, fi | 16 | 2   | No       |      | 2   | No      |
| 1686   | 2  | 2  | Married/li     | 2  | Some college     | 1  | Working, fi | 13 | 2   | No       |      | 1   | Yes     |
| 1690   | 2  | 2  | Married/li     | 3  | College degree   | 1  | Working, fi | 32 | 2   | No       |      | 2   | No      |
| 1691   | 2  | 2  | Married/li     | 3  | College degree   | 6  | Homemake    | 19 | 2   | No       |      | 1   | Yes     |
| 1692   | 2  | 2  | Married/li     | 3  | College degree   | 1  | Working, fi | 19 | 2   | No       |      | 2   | No      |
| 1693   | 2  | 2  | Married/li     | 3  | College degree   | 1  | Working, fi | 13 | 2   | No       |      | 2   | No      |
| 1695   | 2  | 2  | Married/li     | 2  | Some college     | 1  | Working, fi | 10 | 2   | No       |      | 2   | No      |
| 1696   | 2  | 2  | Married/li     | 4  | Postgraduate     | 1  | Working, fi | 35 | 2   | No       |      | 2   | No      |
| 1698   | 2  | 2  | Married/li     | 3  | College degree   | 1  | Working, fi | 33 | 2   | No       |      | 2   | No      |
| 1699   | 2  | 2  | Married/li     | 3  | College degree   | 1  | Working, fi | 23 | 2   | No       |      | 2   | No      |
| 1701   | 2  | 2  | Married/li     | 3  | College degree   | 1  | Working, fi | 18 | 2   | No       |      | 2   | No      |
| 1702   | 2  | 2  | Married/li     | 3  | College degree   | 6  | Homemake    | 23 | 2   | No       |      | 2   | No      |
| 1703   | 2  | 2  | Married/li     | 3  | College degree   | 1  | Working, fi | 11 | 2   | No       |      | 2   | No      |
| 1705   | 2  | 3  | Divorced       | 2  | Some college     | 1  | Working, fi | 26 | 2   | No       |      | 2   | No      |
| 1706   | 2  | 2  | Married/li     | 3  | College degree   | 1  | Working, fi | 17 | 2   | No       |      | 1   | Yes     |
| 1708   | 2  | 1  | Single         | 1  | High school or l | 3  | Unemploye   | 25 | 2   | No       |      | 2   | No      |
| 1711   | 2  | 2  | Married/li     | 3  | College degree   | 1  | Working, fi | 8  | 2   | No       |      | 2   | No      |
| 1712   | 2  | 2  | Married/li     | 2  | Some college     | 1  | Working, fi | 35 | 2   | No       |      | 1   | Yes     |
| 1713   | 2  | 2  | Married/li     | 3  | College degree   | 6  | Homemake    | 20 | 2   | No       |      | 2   | No      |
| 1715   | 2  | 2  | Married/li     | 3  | College degree   | 1  | Working, fi | 2  | 2   | No       |      | 2   | No      |
| 1717   | 2  | 2  | Married/li     | 3  | College degree   | 1  | Working, fi | 22 | 2   | No       |      | 2   | No      |

| respid | Q5 | Q6 | Marital Status | Q7 | Education        | Q8 | Work        | Q9 | Q10 | Diabetes | Q10a | Q11 | High BP |
|--------|----|----|----------------|----|------------------|----|-------------|----|-----|----------|------|-----|---------|
| 1718   | 2  | 2  | Married/li     | 1  | High school or l | 4  | Retired     | 25 | 1   | Yes      | 1    | 1   | Yes     |
| 1719   | 2  | 2  | Married/li     | 3  | College degree   | 6  | Homemake    | 19 | 2   | No       |      | 2   | No      |
| 1721   | 2  | 2  | Married/li     | 3  | College degree   | 4  | Retired     | 8  | 2   | No       |      | 1   | Yes     |
| 1722   | 2  | 2  | Married/li     | 3  | College degree   | 1  | Working, fi | 23 | 2   | No       |      | 1   | Yes     |
| 1724   | 2  | 2  | Married/li     | 3  | College degree   | 1  | Working, fi | 14 | 2   | No       |      | 2   | No      |
| 1725   | 2  | 2  | Married/li     | 1  | High school or l | 1  | Working, fi | 7  | 2   | No       |      | 2   | No      |
| 1726   | 2  | 2  | Married/li     | 2  | Some college     | 1  | Working, fi | 34 | 2   | No       |      | 2   | No      |
| 1727   | 2  | 2  | Married/li     | 3  | College degree   | 1  | Working, fi | 36 | 2   | No       |      | 1   | Yes     |
| 1728   | 2  | 2  | Married/li     | 3  | College degree   | 1  | Working, fi | 18 | 2   | No       |      | 2   | No      |
| 1731   | 2  | 3  | Divorced       | 3  | College degree   | 1  | Working, fi | 29 | 1   | Yes      | 1    | 1   | Yes     |
| 1733   | 2  | 2  | Married/li     | 1  | High school or l | 1  | Working, fi | 25 | 2   | No       |      | 2   | No      |
| 1734   | 2  | 2  | Married/li     | 4  | Postgraduate     | 1  | Working, fi | 12 | 2   | No       |      | 1   | Yes     |
| 1735   | 2  | 2  | Married/li     | 3  | College degree   | 1  | Working, fi | 13 | 2   | No       |      | 1   | Yes     |
| 1736   | 2  | 2  | Married/li     | 3  | College degree   | 1  | Working, fi | 10 | 2   | No       |      | 2   | No      |
| 1737   | 2  | 1  | Single         | 2  | Some college     | 3  | Unemploy    | 99 | 2   | No       |      | 2   | No      |
| 1738   | 2  | 2  | Married/li     | 3  | College degree   | 6  | Homemake    | 29 | 2   | No       |      | 1   | Yes     |
| 1743   | 2  | 1  | Single         | 3  | College degree   | 1  | Working, fi | 33 | 2   | No       |      | 2   | No      |
| 1755   | 2  | 2  | Married/li     | 4  | Postgraduate     | 6  | Homemake    | 19 | 1   | Yes      | 1    | 2   | No      |
| 1756   | 2  | 2  | Married/li     | 1  | High school or l | 1  | Working, fi | 28 | 2   | No       |      | 2   | No      |
| 1757   | 2  | 2  | Married/li     | 1  | High school or l | 6  | Homemake    | 34 | 2   | No       |      | 2   | No      |
| 1758   | 2  | 2  | Married/li     | 2  | Some college     | 1  | Working, fi | 28 | 2   | No       |      | 1   | Yes     |
| 1759   | 2  | 2  | Married/li     | 3  | College degree   | 1  | Working, fi | 21 | 2   | No       |      | 1   | Yes     |
| 1761   | 2  | 2  | Married/li     | 2  | Some college     | 1  | Working, fi | 9  | 2   | No       |      | 1   | Yes     |
| 1762   | 2  | 2  | Married/li     | 1  | High school or l | 4  | Retired     | 12 | 2   | No       |      | 2   | No      |
| 1764   | 2  | 2  | Married/li     | 2  | Some college     | 1  | Working, fi | 27 | 2   | No       |      | 2   | No      |
| 1767   | 2  | 2  | Married/li     | 3  | College degree   | 1  | Working, fi | 20 | 2   | No       |      | 2   | No      |
| 1768   | 2  | 2  | Married/li     | 3  | College degree   | 1  | Working, fi | 19 | 2   | No       |      | 2   | No      |
| 1769   | 2  | 2  | Married/li     | 2  | Some college     | 1  | Working, fi | 33 | 2   | No       |      | 2   | No      |
| 1770   | 2  | 2  | Married/li     | 3  | College degree   | 1  | Working, fi | 17 | 2   | No       |      | 1   | Yes     |
| 1771   | 2  | 2  | Married/li     | 3  | College degree   | 1  | Working, fi | 33 | 2   | No       |      | 1   | Yes     |
| 1776   | 2  | 4  | Widow/wi       | 1  | High school or l | 1  | Working, fi | 19 | 2   | No       |      | 1   | Yes     |
| 1777   | 2  | 2  | Married/li     | 3  | College degree   | 1  | Working, fi | 13 | 2   | No       |      | 2   | No      |



| respid | Q5 | Q6 | Marital Status | Q7 | Education        | Q8 | Work        | Q9 | Q10 | Diabetes | Q10a | Q11 | High BP |
|--------|----|----|----------------|----|------------------|----|-------------|----|-----|----------|------|-----|---------|
| 1778   | 2  | 2  | Married/li     | 2  | Some college     | 1  | Working, fi | 31 | 2   | No       |      | 1   | Yes     |
| 1779   | 2  | 2  | Married/li     | 3  | College degree   | 1  | Working, fi | 11 | 2   | No       |      | 2   | No      |
| 1780   | 2  | 2  | Married/li     | 3  | College degree   | 1  | Working, fi | 18 | 1   | Yes      | 1    | 1   | Yes     |
| 1781   | 2  | 2  | Married/li     | 3  | College degree   | 1  | Working, fi | 11 | 2   | No       |      | 2   | No      |
| 1783   | 2  | 4  | Widow/wi       | 2  | Some college     | 1  | Working, fi | 28 | 2   | No       |      | 2   | No      |
| 1784   | 2  | 2  | Married/li     | 3  | College degree   | 1  | Working, fi | 11 | 1   | Yes      | 1    | 1   | Yes     |
| 1785   | 2  | 2  | Married/li     | 3  | College degree   | 1  | Working, fi | 24 | 2   | No       |      | 2   | No      |
| 1788   | 2  | 2  | Married/li     | 4  | Postgraduate     | 1  | Working, fi | 35 | 2   | No       |      | 2   | No      |
| 1792   | 2  | 4  | Widow/wi       | 3  | College degree   | 1  | Working, fi | 37 | 2   | No       |      | 2   | No      |
| 1794   | 2  | 1  | Single         | 2  | Some college     | 1  | Working, fi | 16 | 2   | No       |      | 2   | No      |
| 1798   | 2  | 2  | Married/li     | 2  | Some college     | 1  | Working, fi | 20 | 2   | No       |      | 2   | No      |
| 1799   | 2  | 2  | Married/li     | 2  | Some college     | 1  | Working, fi | 11 | 2   | No       |      | 2   | No      |
| 1800   | 2  | 2  | Married/li     | 1  | High school or l | 1  | Working, fi | 99 | 2   | No       |      | 2   | No      |
| 1804   | 2  | 2  | Married/li     | 1  | High school or l | 8  | Other worl  | 99 | 2   | No       |      | 2   | No      |
| 1806   | 2  | 2  | Married/li     | 1  | High school or l | 6  | Homemake    | 18 | 2   | No       |      | 1   | Yes     |
| 1807   | 2  | 2  | Married/li     | 1  | High school or l | 1  | Working, fi | 18 | 2   | No       |      | 2   | No      |
| 1808   | 2  | 2  | Married/li     | 2  | Some college     | 1  | Working, fi | 33 | 2   | No       |      | 2   | No      |
| 1809   | 2  | 2  | Married/li     | 3  | College degree   | 1  | Working, fi | 34 | 2   | No       |      | 2   | No      |
| 1811   | 2  | 2  | Married/li     | 3  | College degree   | 1  | Working, fi | 33 | 1   | Yes      | 1    | 2   | No      |
| 1812   | 2  | 2  | Married/li     | 1  | High school or l | 4  | Retired     | 15 | 1   | Yes      | 1    | 1   | Yes     |
| 1813   | 2  | 2  | Married/li     | 1  | High school or l | 2  | Working, p  | 35 | 2   | No       |      | 2   | No      |
| 1814   | 2  | 2  | Married/li     | 1  | High school or l | 1  | Working, fi | 35 | 2   | No       |      | 2   | No      |
| 1815   | 2  | 2  | Married/li     | 1  | High school or l | 6  | Homemake    | 99 | 2   | No       |      | 2   | No      |
| 1817   | 2  | 1  | Single         | 2  | Some college     | 9  | Other       | 31 | 2   | No       |      | 2   | No      |
| 1820   | 2  | 2  | Married/li     | 1  | High school or l | 1  | Working, fi | 11 | 2   | No       |      | 2   | No      |
| 1821   | 2  | 3  | Divorced       | 4  | Postgraduate     | 1  | Working, fi | 33 | 1   | Yes      | 1    | 2   | No      |
| 1822   | 2  | 2  | Married/li     | 3  | College degree   | 1  | Working, fi | 5  | 2   | No       |      | 1   | Yes     |
| 1823   | 2  | 1  | Single         | 1  | High school or l | 1  | Working, fi | 25 | 1   | Yes      | 1    | 1   | Yes     |
| 1824   | 2  | 2  | Married/li     | 3  | College degree   | 1  | Working, fi | 12 | 1   | Yes      | 1    | 2   | No      |
| 1826   | 2  | 1  | Single         | 2  | Some college     | 1  | Working, fi | 26 | 2   | No       |      | 2   | No      |
| 1828   | 2  | 3  | Divorced       | 2  | Some college     | 1  | Working, fi | 27 | 2   | No       |      | 2   | No      |
| 1829   | 2  | 2  | Married/li     | 3  | College degree   | 6  | Homemake    | 14 | 2   | No       |      | 2   | No      |

| respid | Q5 | Q6 | Marital Status | Q7 | Education        | Q8 | Work        | Q9 | Q10 | Diabetes | Q10a | Q11 | High BP |
|--------|----|----|----------------|----|------------------|----|-------------|----|-----|----------|------|-----|---------|
| 1830   | 2  | 3  | Divorced       | 3  | College degree   | 1  | Working, fi | 28 | 2   | No       |      | 1   | Yes     |
| 1831   | 2  | 2  | Married/li     | 3  | College degree   | 1  | Working, fi | 21 | 2   | No       |      | 2   | No      |
| 1832   | 2  | 4  | Widow/wi       | 3  | College degree   | 1  | Working, fi | 21 | 2   | No       |      | 2   | No      |
| 1836   | 2  | 2  | Married/li     | 3  | College degree   | 1  | Working, fi | 36 | 2   | No       |      | 1   | Yes     |
| 1838   | 2  | 2  | Married/li     | 3  | College degree   | 1  | Working, fi | 12 | 2   | No       |      | 2   | No      |
| 1839   | 2  | 2  | Married/li     | 2  | Some college     | 1  | Working, fi | 10 | 1   | Yes      | 1    | 2   | No      |
| 1840   | 2  | 2  | Married/li     | 3  | College degree   | 1  | Working, fi | 20 | 2   | No       |      | 1   | Yes     |
| 1841   | 2  | 2  | Married/li     | 3  | College degree   | 1  | Working, fi | 19 | 2   | No       |      | 1   | Yes     |
| 1842   | 2  | 2  | Married/li     | 3  | College degree   | 1  | Working, fi | 33 | 1   | Yes      | 1    | 1   | Yes     |
| 1843   | 2  | 2  | Married/li     | 4  | Postgraduate     | 1  | Working, fi | 33 | 2   | No       |      | 1   | Yes     |
| 1844   | 2  | 2  | Married/li     | 2  | Some college     | 1  | Working, fi | 8  | 2   | No       |      | 2   | No      |
| 1845   | 2  | 2  | Married/li     | 4  | Postgraduate     | 1  | Working, fi | 35 | 1   | Yes      | 1    | 2   | No      |
| 1849   | 2  | 2  | Married/li     | 3  | College degree   | 1  | Working, fi | 36 | 2   | No       |      | 1   | Yes     |
| 1850   | 2  | 2  | Married/li     | 3  | College degree   | 1  | Working, fi | 13 | 2   | No       |      | 2   | No      |
| 1851   | 2  | 2  | Married/li     | 3  | College degree   | 1  | Working, fi | 14 | 2   | No       |      | 1   | Yes     |
| 1852   | 2  | 1  | Single         | 3  | College degree   | 1  | Working, fi | 30 | 2   | No       |      | 2   | No      |
| 1857   | 2  | 2  | Married/li     | 3  | College degree   | 1  | Working, fi | 24 | 2   | No       |      | 2   | No      |
| 1858   | 2  | 4  | Widow/wi       | 1  | High school or l | 2  | Working, p  | 15 | 1   | Yes      | 1    | 1   | Yes     |
| 1861   | 2  | 2  | Married/li     | 1  | High school or l | 4  | Retired     | 12 | 2   | No       |      | 2   | No      |
| 1862   | 2  | 2  | Married/li     | 2  | Some college     | 1  | Working, fi | 10 | 2   | No       |      | 2   | No      |
| 1863   | 2  | 1  | Single         | 1  | High school or l | 8  | Other worl  | 99 | 2   | No       |      | 2   | No      |
| 1864   | 2  | 2  | Married/li     | 3  | College degree   | 1  | Working, fi | 11 | 1   | Yes      | 1    | 2   | No      |
| 1865   | 2  | 2  | Married/li     | 3  | College degree   | 1  | Working, fi | 14 | 2   | No       |      | 2   | No      |
| 1867   | 2  | 2  | Married/li     | 3  | College degree   | 4  | Retired     | 33 | 2   | No       |      | 2   | No      |
| 1868   | 2  | 3  | Divorced       | 1  | High school or l | 1  | Working, fi | 35 | 1   | Yes      | 1    | 2   | No      |
| 1869   | 2  | 2  | Married/li     | 3  | College degree   | 1  | Working, fi | 14 | 2   | No       |      | 2   | No      |
| 1870   | 2  | 2  | Married/li     | 3  | College degree   | 1  | Working, fi | 35 | 2   | No       |      | 2   | No      |
| 1871   | 2  | 2  | Married/li     | 1  | High school or l | 4  | Retired     | 11 | 2   | No       |      | 2   | No      |
| 1872   | 2  | 2  | Married/li     | 4  | Postgraduate     | 1  | Working, fi | 14 | 2   | No       |      | 2   | No      |
| 1873   | 2  | 2  | Married/li     | 3  | College degree   | 6  | Homemake    | 18 | 2   | No       |      | 2   | No      |
| 1876   | 2  | 1  | Single         | 1  | High school or l | 1  | Working, fi | 6  | 2   | No       |      | 2   | No      |
| 1877   | 2  | 2  | Married/li     | 3  | College degree   | 1  | Working, fi | 8  | 2   | No       |      | 2   | No      |

| respid | Q5 | Q6 | Marital Status | Q7 | Education        | Q8 | Work        | Q9 | Q10 | Diabetes | Q10a | Q11 | High BP |
|--------|----|----|----------------|----|------------------|----|-------------|----|-----|----------|------|-----|---------|
| 1878   | 2  | 1  | Single         | 3  | College degree   | 2  | Working, p  | 16 | 2   | No       |      | 2   | No      |
| 1879   | 2  | 2  | Married/li     | 1  | High school or l | 4  | Retired     | 18 | 1   | Yes      | 1    | 1   | Yes     |
| 1880   | 2  | 2  | Married/li     | 3  | College degree   | 1  | Working, fi | 19 | 2   | No       |      | 2   | No      |
| 1881   | 2  | 2  | Married/li     | 2  | Some college     | 2  | Working, p  | 34 | 2   | No       |      | 2   | No      |
| 1883   | 2  | 2  | Married/li     | 1  | High school or l | 2  | Working, p  | 5  | 2   | No       |      | 1   | Yes     |
| 1886   | 2  | 2  | Married/li     | 3  | College degree   | 1  | Working, fi | 8  | 2   | No       |      | 2   | No      |
| 1888   | 2  | 2  | Married/li     | 3  | College degree   | 1  | Working, fi | 22 | 1   | Yes      | 1    | 1   | Yes     |
| 1889   | 2  | 2  | Married/li     | 3  | College degree   | 1  | Working, fi | 33 | 2   | No       |      | 1   | Yes     |
| 1890   | 2  | 2  | Married/li     | 3  | College degree   | 1  | Working, fi | 7  | 2   | No       |      | 1   | Yes     |
| 1891   | 2  | 1  | Single         | 3  | College degree   | 1  | Working, fi | 13 | 2   | No       |      | 2   | No      |
| 1893   | 2  | 2  | Married/li     | 3  | College degree   | 6  | Homemake    | 19 | 2   | No       |      | 2   | No      |
| 1894   | 2  | 2  | Married/li     | 3  | College degree   | 6  | Homemake    | 19 | 2   | No       |      | 2   | No      |
| 1895   | 2  | 2  | Married/li     | 3  | College degree   | 2  | Working, p  | 29 | 2   | No       |      | 1   | Yes     |
| 1896   | 2  | 1  | Single         | 3  | College degree   | 1  | Working, fi | 18 | 2   | No       |      | 2   | No      |
| 1897   | 2  | 2  | Married/li     | 3  | College degree   | 4  | Retired     | 18 | 2   | No       |      | 2   | No      |
| 1898   | 2  | 2  | Married/li     | 2  | Some college     | 6  | Homemake    | 19 | 2   | No       |      | 1   | Yes     |
| 1899   | 2  | 2  | Married/li     | 3  | College degree   | 1  | Working, fi | 19 | 2   | No       |      | 1   | Yes     |
| 1900   | 2  | 3  | Divorced       | 2  | Some college     | 1  | Working, fi | 33 | 2   | No       |      | 1   | Yes     |
| 1903   | 2  | 2  | Married/li     | 3  | College degree   | 1  | Working, fi | 33 | 2   | No       |      | 2   | No      |
| 1906   | 2  | 2  | Married/li     | 2  | Some college     | 1  | Working, fi | 12 | 2   | No       |      | 2   | No      |
| 1907   | 2  | 2  | Married/li     | 1  | High school or l | 4  | Retired     | 26 | 1   | Yes      | 1    | 1   | Yes     |
| 1908   | 2  | 2  | Married/li     | 3  | College degree   | 1  | Working, fi | 12 | 2   | No       |      | 2   | No      |
| 1909   | 2  | 2  | Married/li     | 3  | College degree   | 2  | Working, p  | 33 | 2   | No       |      | 1   | Yes     |
| 1910   | 2  | 2  | Married/li     | 3  | College degree   | 1  | Working, fi | 9  | 2   | No       |      | 2   | No      |
| 1911   | 2  | 2  | Married/li     | 1  | High school or l | 1  | Working, fi | 9  | 2   | No       |      | 2   | No      |
| 1912   | 2  | 2  | Married/li     | 3  | College degree   | 6  | Homemake    | 33 | 2   | No       |      | 2   | No      |
| 1917   | 2  | 1  | Single         | 2  | Some college     | 9  | Other       | 25 | 2   | No       |      | 2   | No      |
| 1918   | 2  | 3  | Divorced       | 1  | High school or l | 2  | Working, p  | 28 | 2   | No       |      | 2   | No      |
| 1919   | 2  | 3  | Divorced       | 1  | High school or l | 8  | Other worl  | 15 | 2   | No       |      | 2   | No      |
| 1922   | 2  | 2  | Married/li     | 1  | High school or l | 1  | Working, fi | 32 | 2   | No       |      | 2   | No      |
| 1925   | 2  | 2  | Married/li     | 3  | College degree   | 6  | Homemake    | 33 | 2   | No       |      | 2   | No      |
| 1926   | 2  | 2  | Married/li     | 3  | College degree   | 1  | Working, fi | 5  | 2   | No       |      | 2   | No      |

| respid | Q5 | Q6 | Marital Status | Q7 | Education        | Q8 | Work        | Q9 | Q10 | Diabetes | Q10a | Q11 | High BP |
|--------|----|----|----------------|----|------------------|----|-------------|----|-----|----------|------|-----|---------|
| 1927   | 2  | 2  | Married/li     | 1  | High school or l | 4  | Retired     | 10 | 2   | No       |      | 2   | No      |
| 1928   | 2  | 2  | Married/li     | 3  | College degree   | 6  | Homemake    | 22 | 2   | No       |      | 2   | No      |
| 1929   | 2  | 2  | Married/li     | 2  | Some college     | 4  | Retired     | 34 | 2   | No       |      | 2   | No      |
| 1934   | 2  | 2  | Married/li     | 2  | Some college     | 4  | Retired     | 11 | 2   | No       |      | 2   | No      |
| 1935   | 2  | 1  | Single         | 3  | College degree   | 9  | Other       | 16 | 1   | Yes      | 1    | 2   | No      |
| 1936   | 2  | 2  | Married/li     | 3  | College degree   | 1  | Working, fi | 18 | 2   | No       |      | 2   | No      |
| 1937   | 2  | 1  | Single         | 1  | High school or l | 1  | Working, fi | 18 | 2   | No       |      | 2   | No      |
| 1938   | 2  | 2  | Married/li     | 2  | Some college     | 6  | Homemake    | 17 | 2   | No       |      | 2   | No      |
| 1939   | 2  | 2  | Married/li     | 1  | High school or l | 6  | Homemake    | 17 | 2   | No       |      | 2   | No      |
| 1940   | 2  | 2  | Married/li     | 3  | College degree   | 2  | Working, p  | 17 | 2   | No       |      | 2   | No      |
| 1941   | 2  | 1  | Single         | 3  | College degree   | 3  | Unemploy    | 8  | 2   | No       |      | 2   | No      |
| 1948   | 2  | 2  | Married/li     | 1  | High school or l | 6  | Homemake    | 34 | 2   | No       |      | 2   | No      |
| 1950   | 2  | 2  | Married/li     | 4  | Postgraduate     | 1  | Working, fi | 35 | 2   | No       |      | 2   | No      |
| 1955   | 2  | 2  | Married/li     | 3  | College degree   | 1  | Working, fi | 30 | 2   | No       |      | 2   | No      |
| 1958   | 2  | 2  | Married/li     | 3  | College degree   | 4  | Retired     | 11 | 2   | No       |      | 1   | Yes     |
| 1960   | 2  | 2  | Married/li     | 3  | College degree   | 1  | Working, fi | 33 | 2   | No       |      | 2   | No      |
| 1961   | 2  | 2  | Married/li     | 3  | College degree   | 1  | Working, fi | 32 | 2   | No       |      | 2   | No      |
| 1962   | 2  | 2  | Married/li     | 3  | College degree   | 2  | Working, p  | 11 | 2   | No       |      | 2   | No      |
| 1965   | 2  | 2  | Married/li     | 2  | Some college     | 1  | Working, fi | 13 | 2   | No       |      | 2   | No      |
| 1966   | 2  | 1  | Single         | 1  | High school or l | 2  | Working, p  | 99 | 2   | No       |      | 2   | No      |
| 1967   | 2  | 2  | Married/li     | 2  | Some college     | 4  | Retired     | 10 | 2   | No       |      | 2   | No      |
| 1968   | 2  | 2  | Married/li     | 2  | Some college     | 2  | Working, p  | 33 | 2   | No       |      | 2   | No      |
| 1973   | 2  | 2  | Married/li     | 3  | College degree   | 1  | Working, fi | 7  | 2   | No       |      | 2   | No      |
| 1974   | 2  | 2  | Married/li     | 2  | Some college     | 1  | Working, fi | 36 | 2   | No       |      | 1   | Yes     |
| 1975   | 2  | 1  | Single         | 4  | Postgraduate     | 1  | Working, fi | 2  | 2   | No       |      | 2   | No      |
| 1977   | 2  | 1  | Single         | 3  | College degree   | 1  | Working, fi | 20 | 2   | No       |      | 2   | No      |
| 1978   | 2  | 3  | Divorced       | 1  | High school or l | 1  | Working, fi | 15 | 2   | No       |      | 2   | No      |
| 1979   | 2  | 2  | Married/li     | 3  | College degree   | 1  | Working, fi | 20 | 2   | No       |      | 2   | No      |
| 1982   | 2  | 2  | Married/li     | 3  | College degree   | 1  | Working, fi | 10 | 2   | No       |      | 2   | No      |
| 1983   | 2  | 4  | Widow/wi       | 1  | High school or l | 1  | Working, fi | 5  | 2   | No       |      | 2   | No      |
| 1987   | 2  | 2  | Married/li     | 1  | High school or l | 2  | Working, p  | 15 | 2   | No       |      | 2   | No      |
| 1988   | 2  | 2  | Married/li     | 3  | College degree   | 1  | Working, fi | 12 | 2   | No       |      | 2   | No      |

| respid | Q5 | Q6 | Marital Status | Q7 | Education        | Q8 | Work        | Q9 | Q10 | Diabetes | Q10a | Q11 | High BP |
|--------|----|----|----------------|----|------------------|----|-------------|----|-----|----------|------|-----|---------|
| 1991   | 2  | 2  | Married/li     | 3  | College degree   | 6  | Homemake    | 17 | 2   | No       |      | 2   | No      |
| 1992   | 2  | 1  | Single         | 3  | College degree   | 1  | Working, fi | 31 | 2   | No       |      | 2   | No      |
| 1993   | 2  | 2  | Married/li     | 3  | College degree   | 1  | Working, fi | 24 | 2   | No       |      | 2   | No      |
| 1994   | 2  | 3  | Divorced       | 1  | High school or l | 6  | Homemake    | 16 | 2   | No       |      | 2   | No      |
| 1995   | 2  | 2  | Married/li     | 1  | High school or l | 6  | Homemake    | 17 | 2   | No       |      | 2   | No      |
| 1996   | 2  | 2  | Married/li     | 1  | High school or l | 3  | Unemploye   | 11 | 1   | Yes      | 1    | 1   | Yes     |
| 1997   | 2  | 2  | Married/li     | 1  | High school or l | 6  | Homemake    | 18 | 2   | No       |      | 2   | No      |
| 1998   | 2  | 2  | Married/li     | 3  | College degree   | 1  | Working, fi | 13 | 2   | No       |      | 2   | No      |
| 1999   | 2  | 2  | Married/li     | 3  | College degree   | 2  | Working, p  | 19 | 2   | No       |      | 2   | No      |
| 2000   | 2  | 2  | Married/li     | 3  | College degree   | 1  | Working, fi | 18 | 2   | No       |      | 1   | Yes     |
| 2001   | 2  | 2  | Married/li     | 3  | College degree   | 2  | Working, p  | 33 | 2   | No       |      | 2   | No      |
| 2002   | 2  | 2  | Married/li     | 3  | College degree   | 6  | Homemake    | 16 | 2   | No       |      | 2   | No      |
| 2003   | 2  | 2  | Married/li     | 3  | College degree   | 1  | Working, fi | 11 | 2   | No       |      | 2   | No      |
| 2004   | 2  | 2  | Married/li     | 2  | Some college     | 4  | Retired     | 7  | 2   | No       |      | 2   | No      |
| 2005   | 2  | 2  | Married/li     | 3  | College degree   | 1  | Working, fi | 18 | 2   | No       |      | 1   | Yes     |
| 2007   | 2  | 2  | Married/li     | 2  | Some college     | 1  | Working, fi | 11 | 1   | Yes      | 1    | 1   | Yes     |
| 2009   | 2  | 2  | Married/li     | 3  | College degree   | 8  | Other worl  | 16 | 2   | No       |      | 2   | No      |
| 2010   | 2  | 2  | Married/li     | 3  | College degree   | 1  | Working, fi | 17 | 2   | No       |      | 2   | No      |
| 2011   | 2  | 2  | Married/li     | 3  | College degree   | 1  | Working, fi | 13 | 2   | No       |      | 2   | No      |
| 2013   | 2  | 2  | Married/li     | 3  | College degree   | 1  | Working, fi | 21 | 2   | No       |      | 2   | No      |
| 2014   | 2  | 2  | Married/li     | 4  | Postgraduate     | 1  | Working, fi | 21 | 2   | No       |      | 1   | Yes     |
| 2017   | 2  | 2  | Married/li     | 2  | Some college     | 1  | Working, fi | 29 | 2   | No       |      | 1   | Yes     |
| 2020   | 2  | 1  | Single         | 4  | Postgraduate     | 2  | Working, p  | 99 | 2   | No       |      | 2   | No      |
| 2023   | 2  | 2  | Married/li     | 3  | College degree   | 1  | Working, fi | 12 | 1   | Yes      | 1    | 1   | Yes     |
| 2024   | 2  | 2  | Married/li     | 2  | Some college     | 1  | Working, fi | 33 | 1   | Yes      | 1    | 2   | No      |
| 2029   | 2  | 2  | Married/li     | 4  | Postgraduate     | 1  | Working, fi | 20 | 2   | No       |      | 2   | No      |
| 2030   | 2  | 2  | Married/li     | 2  | Some college     | 1  | Working, fi | 12 | 2   | No       |      | 1   | Yes     |
| 2031   | 2  | 2  | Married/li     | 3  | College degree   | 1  | Working, fi | 19 | 2   | No       |      | 2   | No      |
| 2032   | 2  | 2  | Married/li     | 3  | College degree   | 9  | Other       | 17 | 2   | No       |      | 1   | Yes     |
| 2033   | 2  | 2  | Married/li     | 3  | College degree   | 1  | Working, fi | 12 | 2   | No       |      | 2   | No      |
| 2034   | 2  | 2  | Married/li     | 3  | College degree   | 1  | Working, fi | 19 | 2   | No       |      | 2   | No      |
| 2036   | 2  | 2  | Married/li     | 1  | High school or l | 6  | Homemake    | 18 | 2   | No       |      | 1   | Yes     |

| respid | Q5 | Q6 | Marital Status | Q7 | Education        | Q8 | Work        | Q9 | Q10 | Diabetes | Q10a | Q11 | High BP |
|--------|----|----|----------------|----|------------------|----|-------------|----|-----|----------|------|-----|---------|
| 2037   | 2  | 2  | Married/li     | 1  | High school or l | 6  | Homemake    | 15 | 2   | No       |      | 2   | No      |
| 2038   | 2  | 2  | Married/li     | 3  | College degree   | 1  | Working, fi | 19 | 2   | No       |      | 2   | No      |
| 2039   | 2  | 2  | Married/li     | 3  | College degree   | 8  | Other worl  | 19 | 2   | No       |      | 1   | Yes     |
| 2040   | 2  | 1  | Single         | 3  | College degree   | 1  | Working, fi | 33 | 2   | No       |      | 2   | No      |
| 2041   | 2  | 2  | Married/li     | 3  | College degree   | 6  | Homemake    | 20 | 2   | No       |      | 2   | No      |
| 2042   | 2  | 2  | Married/li     | 1  | High school or l | 1  | Working, fi | 18 | 2   | No       |      | 2   | No      |
| 2043   | 2  | 2  | Married/li     | 3  | College degree   | 1  | Working, fi | 12 | 2   | No       |      | 2   | No      |
| 2051   | 2  | 2  | Married/li     | 3  | College degree   | 1  | Working, fi | 99 | 2   | No       |      | 2   | No      |
| 2052   | 2  | 2  | Married/li     | 1  | High school or l | 1  | Working, fi | 7  | 2   | No       |      | 2   | No      |
| 2053   | 2  | 2  | Married/li     | 4  | Postgraduate     | 1  | Working, fi | 34 | 2   | No       |      | 2   | No      |
| 2054   | 2  | 2  | Married/li     | 2  | Some college     | 1  | Working, fi | 8  | 2   | No       |      | 2   | No      |
| 2055   | 2  | 2  | Married/li     | 3  | College degree   | 1  | Working, fi | 12 | 2   | No       |      | 2   | No      |
| 2056   | 2  | 2  | Married/li     | 3  | College degree   | 6  | Homemake    | 19 | 2   | No       |      | 2   | No      |
| 2057   | 2  | 2  | Married/li     | 3  | College degree   | 1  | Working, fi | 31 | 2   | No       |      | 2   | No      |
| 2059   | 2  | 1  | Single         | 3  | College degree   | 1  | Working, fi | 7  | 2   | No       |      | 2   | No      |
| 2063   | 2  | 2  | Married/li     | 1  | High school or l | 6  | Homemake    | 16 | 2   | No       |      | 2   | No      |
| 2066   | 2  | 2  | Married/li     | 1  | High school or l | 6  | Homemake    | 26 | 2   | No       |      | 2   | No      |
| 2068   | 2  | 2  | Married/li     | 1  | High school or l | 1  | Working, fi | 17 | 2   | No       |      | 2   | No      |
| 2069   | 2  | 2  | Married/li     | 3  | College degree   | 4  | Retired     | 10 | 2   | No       |      | 2   | No      |
| 2070   | 2  | 2  | Married/li     | 2  | Some college     | 1  | Working, fi | 13 | 2   | No       |      | 2   | No      |
| 2071   | 2  | 3  | Divorced       | 4  | Postgraduate     | 1  | Working, fi | 33 | 2   | No       |      | 2   | No      |
| 2073   | 2  | 2  | Married/li     | 2  | Some college     | 1  | Working, fi | 14 | 2   | No       |      | 2   | No      |
| 2077   | 2  | 2  | Married/li     | 3  | College degree   | 1  | Working, fi | 14 | 2   | No       |      | 2   | No      |
| 2079   | 2  | 2  | Married/li     | 1  | High school or l | 1  | Working, fi | 17 | 2   | No       |      | 2   | No      |
| 2080   | 2  | 1  | Single         | 1  | High school or l | 3  | Unemploye   | 99 | 2   | No       |      | 2   | No      |
| 2081   | 2  | 2  | Married/li     | 3  | College degree   | 1  | Working, fi | 10 | 2   | No       |      | 1   | Yes     |
| 2084   | 2  | 2  | Married/li     | 2  | Some college     | 1  | Working, fi | 33 | 2   | No       |      | 2   | No      |
| 2085   | 2  | 2  | Married/li     | 2  | Some college     | 4  | Retired     | 11 | 2   | No       |      | 1   | Yes     |
| 2087   | 2  | 2  | Married/li     | 1  | High school or l | 6  | Homemake    | 17 | 2   | No       |      | 2   | No      |
| 2089   | 2  | 2  | Married/li     | 3  | College degree   | 4  | Retired     | 18 | 2   | No       |      | 1   | Yes     |
| 2093   | 2  | 2  | Married/li     | 2  | Some college     | 1  | Working, fi | 9  | 2   | No       |      | 1   | Yes     |
| 2094   | 2  | 2  | Married/li     | 2  | Some college     | 1  | Working, fi | 14 | 2   | No       |      | 2   | No      |

| respid | Q5 | Q6 | Marital Status | Q7 | Education        | Q8 | Work        | Q9 | Q10 | Diabetes | Q10a | Q11 | High BP |
|--------|----|----|----------------|----|------------------|----|-------------|----|-----|----------|------|-----|---------|
| 2095   | 2  | 2  | Married/li     | 3  | College degree   | 1  | Working, fi | 32 | 2   | No       |      | 2   | No      |
| 2097   | 2  | 2  | Married/li     | 2  | Some college     | 1  | Working, fi | 6  | 2   | No       |      | 1   | Yes     |
| 2099   | 2  | 2  | Married/li     | 3  | College degree   | 6  | Homemake    | 24 | 2   | No       |      | 1   | Yes     |
| 2100   | 2  | 2  | Married/li     | 3  | College degree   | 1  | Working, fi | 12 | 2   | No       |      | 2   | No      |
| 2101   | 2  | 1  | Single         | 1  | High school or l | 1  | Working, fi | 29 | 2   | No       |      | 2   | No      |
| 2103   | 2  | 1  | Single         | 2  | Some college     | 1  | Working, fi | 12 | 2   | No       |      | 2   | No      |
| 2104   | 2  | 2  | Married/li     | 2  | Some college     | 1  | Working, fi | 36 | 2   | No       |      | 1   | Yes     |
| 2106   | 2  | 2  | Married/li     | 3  | College degree   | 1  | Working, fi | 12 | 2   | No       |      | 2   | No      |
| 2111   | 2  | 2  | Married/li     | 3  | College degree   | 1  | Working, fi | 21 | 1   | Yes      | 2    | 2   | No      |
| 2113   | 2  | 2  | Married/li     | 1  | High school or l | 2  | Working, p  | 4  | 2   | No       |      | 1   | Yes     |
| 2115   | 2  | 2  | Married/li     | 2  | Some college     | 1  | Working, fi | 11 | 2   | No       |      | 2   | No      |
| 2119   | 2  | 2  | Married/li     | 4  | Postgraduate     | 1  | Working, fi | 35 | 2   | No       |      | 1   | Yes     |
| 2120   | 2  | 2  | Married/li     | 3  | College degree   | 1  | Working, fi | 13 | 2   | No       |      | 2   | No      |
| 2123   | 2  | 2  | Married/li     | 3  | College degree   | 1  | Working, fi | 12 | 2   | No       |      | 2   | No      |
| 2124   | 2  | 2  | Married/li     | 3  | College degree   | 1  | Working, fi | 12 | 2   | No       |      | 2   | No      |
| 2130   | 2  | 2  | Married/li     | 3  | College degree   | 1  | Working, fi | 11 | 2   | No       |      | 2   | No      |
| 2131   | 2  | 1  | Single         | 3  | College degree   | 1  | Working, fi | 31 | 2   | No       |      | 2   | No      |
| 2133   | 2  | 2  | Married/li     | 3  | College degree   | 1  | Working, fi | 12 | 2   | No       |      | 1   | Yes     |
| 2139   | 2  | 2  | Married/li     | 1  | High school or l | 6  | Homemake    | 19 | 1   | Yes      | 1    | 1   | Yes     |
| 2141   | 2  | 2  | Married/li     | 3  | College degree   | 1  | Working, fi | 30 | 2   | No       |      | 2   | No      |
| 2143   | 2  | 2  | Married/li     | 3  | College degree   | 1  | Working, fi | 9  | 2   | No       |      | 2   | No      |
| 2144   | 2  | 1  | Single         | 1  | High school or l | 1  | Working, fi | 31 | 2   | No       |      | 2   | No      |
| 2147   | 2  | 2  | Married/li     | 3  | College degree   | 1  | Working, fi | 11 | 2   | No       |      | 2   | No      |
| 2151   | 2  | 2  | Married/li     | 3  | College degree   | 1  | Working, fi | 13 | 2   | No       |      | 2   | No      |
| 2153   | 2  | 2  | Married/li     | 3  | College degree   | 1  | Working, fi | 8  | 2   | No       |      | 2   | No      |
| 2154   | 2  | 2  | Married/li     | 3  | College degree   | 1  | Working, fi | 10 | 2   | No       |      | 2   | No      |
| 2155   | 2  | 2  | Married/li     | 4  | Postgraduate     | 1  | Working, fi | 37 | 2   | No       |      | 1   | Yes     |
| 2159   | 2  | 1  | Single         | 4  | Postgraduate     | 4  | Retired     | 25 | 2   | No       |      | 2   | No      |
| 2160   | 2  | 2  | Married/li     | 3  | College degree   | 1  | Working, fi | 20 | 2   | No       |      | 2   | No      |
| 2161   | 2  | 2  | Married/li     | 2  | Some college     | 1  | Working, fi | 33 | 2   | No       |      | 1   | Yes     |
| 2163   | 2  | 2  | Married/li     | 3  | College degree   | 1  | Working, fi | 20 | 2   | No       |      | 2   | No      |
| 2164   | 2  | 2  | Married/li     | 3  | College degree   | 1  | Working, fi | 36 | 2   | No       |      | 2   | No      |

| respid | Q5 | Q6 | Marital Status | Q7 | Education        | Q8 | Work        | Q9 | Q10 | Diabetes | Q10a | Q11 | High BP |
|--------|----|----|----------------|----|------------------|----|-------------|----|-----|----------|------|-----|---------|
| 2168   | 2  | 2  | Married/li     | 4  | Postgraduate     | 1  | Working, fi | 21 | 1   | Yes      | 2    | 2   | No      |
| 2169   | 2  | 1  | Single         | 3  | College degree   | 3  | Unemploy    | 15 | 2   | No       |      | 2   | No      |
| 2170   | 2  | 2  | Married/li     | 3  | College degree   | 1  | Working, fi | 11 | 2   | No       |      | 1   | Yes     |
| 2171   | 2  | 2  | Married/li     | 1  | High school or l | 1  | Working, fi | 19 | 2   | No       |      | 2   | No      |
| 2172   | 2  | 2  | Married/li     | 2  | Some college     | 1  | Working, fi | 10 | 2   | No       |      | 2   | No      |
| 2173   | 2  | 3  | Divorced       | 1  | High school or l | 8  | Other worl  | 26 | 2   | No       |      | 2   | No      |
| 2174   | 2  | 2  | Married/li     | 3  | College degree   | 6  | Homemake    | 19 | 2   | No       |      | 2   | No      |
| 2175   | 2  | 1  | Single         | 3  | College degree   | 2  | Working, p  | 16 | 2   | No       |      | 1   | Yes     |
| 2176   | 2  | 2  | Married/li     | 3  | College degree   | 1  | Working, fi | 34 | 2   | No       |      | 2   | No      |
| 2177   | 2  | 2  | Married/li     | 3  | College degree   | 1  | Working, fi | 10 | 1   | Yes      | 1    | 1   | Yes     |
| 2179   | 2  | 4  | Widow/wi       | 3  | College degree   | 1  | Working, fi | 20 | 2   | No       |      | 2   | No      |
| 2181   | 2  | 2  | Married/li     | 3  | College degree   | 1  | Working, fi | 13 | 2   | No       |      | 2   | No      |
| 2182   | 2  | 1  | Single         | 3  | College degree   | 1  | Working, fi | 17 | 2   | No       |      | 1   | Yes     |
| 2183   | 2  | 2  | Married/li     | 3  | College degree   | 1  | Working, fi | 22 | 2   | No       |      | 2   | No      |
| 2184   | 2  | 2  | Married/li     | 2  | Some college     | 1  | Working, fi | 13 | 1   | Yes      | 1    | 2   | No      |
| 2185   | 2  | 2  | Married/li     | 3  | College degree   | 1  | Working, fi | 13 | 2   | No       |      | 2   | No      |
| 2186   | 2  | 2  | Married/li     | 1  | High school or l | 1  | Working, fi | 18 | 2   | No       |      | 2   | No      |
| 2187   | 2  | 3  | Divorced       | 3  | College degree   | 1  | Working, fi | 17 | 2   | No       |      | 2   | No      |
| 2188   | 2  | 2  | Married/li     | 3  | College degree   | 1  | Working, fi | 19 | 2   | No       |      | 2   | No      |
| 2189   | 2  | 2  | Married/li     | 2  | Some college     | 1  | Working, fi | 11 | 2   | No       |      | 2   | No      |
| 2190   | 2  | 2  | Married/li     | 4  | Postgraduate     | 1  | Working, fi | 35 | 2   | No       |      | 2   | No      |
| 2193   | 2  | 1  | Single         | 1  | High school or l | 1  | Working, fi | 15 | 2   | No       |      | 1   | Yes     |
| 2195   | 2  | 2  | Married/li     | 2  | Some college     | 1  | Working, fi | 99 | 2   | No       |      | 2   | No      |
| 2198   | 2  | 2  | Married/li     | 4  | Postgraduate     | 1  | Working, fi | 32 | 2   | No       |      | 2   | No      |
| 2200   | 2  | 2  | Married/li     | 3  | College degree   | 1  | Working, fi | 11 | 2   | No       |      | 2   | No      |
| 2205   | 2  | 2  | Married/li     | 3  | College degree   | 1  | Working, fi | 16 | 2   | No       |      | 2   | No      |
| 2208   | 2  | 2  | Married/li     | 3  | College degree   | 2  | Working, p  | 19 | 2   | No       |      | 2   | No      |
| 2209   | 2  | 2  | Married/li     | 1  | High school or l | 1  | Working, fi | 33 | 2   | No       |      | 1   | Yes     |
| 2210   | 2  | 2  | Married/li     | 1  | High school or l | 6  | Homemake    | 17 | 2   | No       |      | 1   | Yes     |
| 2211   | 2  | 2  | Married/li     | 2  | Some college     | 1  | Working, fi | 31 | 2   | No       |      | 2   | No      |
| 2213   | 2  | 2  | Married/li     | 3  | College degree   | 1  | Working, fi | 13 | 2   | No       |      | 2   | No      |
| 2214   | 2  | 2  | Married/li     | 3  | College degree   | 9  | Other       | 16 | 2   | No       |      | 2   | No      |



| respid | Q5 | Q6 | Marital Status | Q7 | Education        | Q8 | Work        | Q9 | Q10 | Diabetes | Q10a | Q11 | High BP |
|--------|----|----|----------------|----|------------------|----|-------------|----|-----|----------|------|-----|---------|
| 2216   | 2  | 1  | Single         | 3  | College degree   | 1  | Working, fi | 16 | 1   | Yes      | 1    | 1   | Yes     |
| 2220   | 2  | 2  | Married/li     | 2  | Some college     | 1  | Working, fi | 13 | 2   | No       |      | 1   | Yes     |
| 2225   | 2  | 2  | Married/li     | 3  | College degree   | 1  | Working, fi | 33 | 2   | No       |      | 2   | No      |
| 2227   | 2  | 2  | Married/li     | 1  | High school or l | 1  | Working, fi | 25 | 2   | No       |      | 1   | Yes     |
| 2228   | 2  | 2  | Married/li     | 2  | Some college     | 1  | Working, fi | 11 | 2   | No       |      | 1   | Yes     |
| 2229   | 2  | 2  | Married/li     | 1  | High school or l | 1  | Working, fi | 7  | 2   | No       |      | 1   | Yes     |
| 2230   | 2  | 2  | Married/li     | 3  | College degree   | 1  | Working, fi | 11 | 2   | No       |      | 2   | No      |
| 2236   | 2  | 2  | Married/li     | 1  | High school or l | 1  | Working, fi | 8  | 2   | No       |      | 2   | No      |
| 2238   | 2  | 2  | Married/li     | 3  | College degree   | 1  | Working, fi | 14 | 2   | No       |      | 2   | No      |
| 2239   | 2  | 2  | Married/li     | 4  | Postgraduate     | 1  | Working, fi | 14 | 2   | No       |      | 2   | No      |
| 2240   | 2  | 3  | Divorced       | 3  | College degree   | 1  | Working, fi | 23 | 2   | No       |      | 2   | No      |
| 2241   | 2  | 2  | Married/li     | 3  | College degree   | 6  | Homemake    | 31 | 2   | No       |      | 1   | Yes     |
| 2243   | 2  | 2  | Married/li     | 2  | Some college     | 1  | Working, fi | 5  | 2   | No       |      | 2   | No      |
| 2245   | 2  | 2  | Married/li     | 4  | Postgraduate     | 6  | Homemake    | 32 | 2   | No       |      | 2   | No      |
| 2247   | 2  | 2  | Married/li     | 3  | College degree   | 1  | Working, fi | 18 | 2   | No       |      | 1   | Yes     |
| 2248   | 2  | 2  | Married/li     | 3  | College degree   | 1  | Working, fi | 36 | 2   | No       |      | 2   | No      |
| 2249   | 2  | 2  | Married/li     | 2  | Some college     | 4  | Retired     | 8  | 2   | No       |      | 1   | Yes     |
| 2254   | 2  | 1  | Single         | 3  | College degree   | 8  | Other worl  | 16 | 2   | No       |      | 2   | No      |
| 2256   | 2  | 2  | Married/li     | 2  | Some college     | 1  | Working, fi | 33 | 2   | No       |      | 2   | No      |
| 2259   | 2  | 2  | Married/li     | 1  | High school or l | 4  | Retired     | 26 | 2   | No       |      | 1   | Yes     |
| 2261   | 2  | 2  | Married/li     | 1  | High school or l | 4  | Retired     | 12 | 2   | No       |      | 1   | Yes     |
| 2262   | 2  | 2  | Married/li     | 1  | High school or l | 1  | Working, fi | 11 | 2   | No       |      | 2   | No      |
| 2263   | 2  | 2  | Married/li     | 1  | High school or l | 6  | Homemake    | 18 | 2   | No       |      | 2   | No      |
| 2264   | 2  | 2  | Married/li     | 3  | College degree   | 1  | Working, fi | 11 | 2   | No       |      | 2   | No      |
| 2265   | 2  | 2  | Married/li     | 1  | High school or l | 1  | Working, fi | 26 | 2   | No       |      | 2   | No      |
| 2270   | 2  | 2  | Married/li     | 3  | College degree   | 1  | Working, fi | 11 | 2   | No       |      | 2   | No      |
| 2271   | 2  | 2  | Married/li     | 4  | Postgraduate     | 1  | Working, fi | 21 | 2   | No       |      | 1   | Yes     |
| 2272   | 2  | 2  | Married/li     | 2  | Some college     | 1  | Working, fi | 10 | 2   | No       |      | 2   | No      |
| 2273   | 2  | 1  | Single         | 2  | Some college     | 1  | Working, fi | 25 | 2   | No       |      | 2   | No      |
| 2274   | 2  | 2  | Married/li     | 3  | College degree   | 6  | Homemake    | 19 | 2   | No       |      | 2   | No      |
| 2276   | 2  | 2  | Married/li     | 1  | High school or l | 6  | Homemake    | 18 | 2   | No       |      | 2   | No      |
| 2277   | 2  | 2  | Married/li     | 3  | College degree   | 4  | Retired     | 33 | 2   | No       |      | 2   | No      |

| respid | Q5 | Q6 | Marital Status | Q7 | Education        | Q8 | Work        | Q9 | Q10 | Diabetes | Q10a | Q11 | High BP |
|--------|----|----|----------------|----|------------------|----|-------------|----|-----|----------|------|-----|---------|
| 2281   | 2  | 2  | Married/li     | 3  | College degree   | 1  | Working, fi | 13 | 2   | No       |      | 2   | No      |
| 2288   | 2  | 2  | Married/li     | 3  | College degree   | 1  | Working, fi | 10 | 1   | Yes      | 1    | 2   | No      |
| 2290   | 2  | 2  | Married/li     | 2  | Some college     | 4  | Retired     | 3  | 2   | No       |      | 2   | No      |
| 2294   | 2  | 2  | Married/li     | 3  | College degree   | 1  | Working, fi | 9  | 2   | No       |      | 1   | Yes     |
| 2295   | 2  | 2  | Married/li     | 1  | High school or l | 6  | Homemake    | 22 | 2   | No       |      | 2   | No      |
| 2296   | 2  | 2  | Married/li     | 3  | College degree   | 1  | Working, fi | 22 | 2   | No       |      | 1   | Yes     |
| 2297   | 2  | 2  | Married/li     | 3  | College degree   | 1  | Working, fi | 18 | 2   | No       |      | 2   | No      |
| 2298   | 2  | 1  | Single         | 1  | High school or l | 1  | Working, fi | 16 | 2   | No       |      | 2   | No      |
| 2301   | 2  | 2  | Married/li     | 3  | College degree   | 9  | Other       | 16 | 2   | No       |      | 2   | No      |
| 2302   | 2  | 2  | Married/li     | 3  | College degree   | 1  | Working, fi | 32 | 2   | No       |      | 2   | No      |
| 2303   | 2  | 2  | Married/li     | 3  | College degree   | 1  | Working, fi | 18 | 2   | No       |      | 2   | No      |
| 2305   | 2  | 2  | Married/li     | 3  | College degree   | 1  | Working, fi | 14 | 2   | No       |      | 1   | Yes     |
| 2309   | 2  | 2  | Married/li     | 3  | College degree   | 1  | Working, fi | 13 | 2   | No       |      | 2   | No      |
| 2310   | 2  | 2  | Married/li     | 3  | College degree   | 1  | Working, fi | 14 | 2   | No       |      | 2   | No      |
| 2311   | 2  | 2  | Married/li     | 3  | College degree   | 6  | Homemake    | 21 | 2   | No       |      | 2   | No      |
| 2313   | 2  | 2  | Married/li     | 2  | Some college     | 1  | Working, fi | 19 | 2   | No       |      | 2   | No      |
| 2316   | 2  | 2  | Married/li     | 3  | College degree   | 8  | Other worl  | 19 | 2   | No       |      | 2   | No      |
| 2317   | 2  | 2  | Married/li     | 1  | High school or l | 1  | Working, fi | 28 | 2   | No       |      | 2   | No      |
| 2318   | 2  | 2  | Married/li     | 1  | High school or l | 6  | Homemake    | 24 | 2   | No       |      | 1   | Yes     |
| 2319   | 2  | 2  | Married/li     | 2  | Some college     | 1  | Working, fi | 32 | 2   | No       |      | 2   | No      |
| 2321   | 2  | 2  | Married/li     | 4  | Postgraduate     | 1  | Working, fi | 13 | 2   | No       |      | 2   | No      |
| 2324   | 2  | 2  | Married/li     | 2  | Some college     | 1  | Working, fi | 30 | 2   | No       |      | 2   | No      |
| 2328   | 2  | 2  | Married/li     | 2  | Some college     | 1  | Working, fi | 11 | 2   | No       |      | 2   | No      |
| 2329   | 2  | 2  | Married/li     | 1  | High school or l | 1  | Working, fi | 19 | 2   | No       |      | 2   | No      |
| 2330   | 2  | 2  | Married/li     | 3  | College degree   | 1  | Working, fi | 18 | 2   | No       |      | 1   | Yes     |
| 2333   | 2  | 2  | Married/li     | 3  | College degree   | 6  | Homemake    | 17 | 1   | Yes      | 2    | 2   | No      |
| 2334   | 2  | 2  | Married/li     | 1  | High school or l | 6  | Homemake    | 26 | 2   | No       |      | 2   | No      |
| 2338   | 2  | 2  | Married/li     | 3  | College degree   | 9  | Other       | 99 | 2   | No       |      | 2   | No      |
| 2341   | 2  | 2  | Married/li     | 3  | College degree   | 1  | Working, fi | 37 | 2   | No       |      | 2   | No      |
| 2342   | 2  | 3  | Divorced       | 1  | High school or l | 2  | Working, p  | 15 | 2   | No       |      | 2   | No      |
| 2343   | 2  | 2  | Married/li     | 4  | Postgraduate     | 1  | Working, fi | 14 | 2   | No       |      | 2   | No      |
| 2346   | 2  | 2  | Married/li     | 3  | College degree   | 6  | Homemake    | 19 | 2   | No       |      | 2   | No      |

| respid | Q5 | Q6 | Marital Status | Q7 | Education        | Q8 | Work        | Q9 | Q10 | Diabetes | Q10a | Q11 | High BP |
|--------|----|----|----------------|----|------------------|----|-------------|----|-----|----------|------|-----|---------|
| 2347   | 2  | 2  | Married/li     | 2  | Some college     | 1  | Working, fi | 10 | 2   | No       |      | 1   | Yes     |
| 2348   | 2  | 2  | Married/li     | 1  | High school or l | 1  | Working, fi | 16 | 2   | No       |      | 2   | No      |
| 2349   | 2  | 2  | Married/li     | 1  | High school or l | 6  | Homemake    | 18 | 2   | No       |      | 2   | No      |
| 2350   | 2  | 4  | Widow/wi       | 3  | College degree   | 1  | Working, fi | 21 | 2   | No       |      | 2   | No      |
| 2351   | 2  | 2  | Married/li     | 2  | Some college     | 1  | Working, fi | 26 | 2   | No       |      | 2   | No      |
| 2352   | 2  | 2  | Married/li     | 3  | College degree   | 1  | Working, fi | 33 | 2   | No       |      | 1   | Yes     |
| 2359   | 2  | 2  | Married/li     | 3  | College degree   | 1  | Working, fi | 11 | 2   | No       |      | 2   | No      |
| 2362   | 2  | 2  | Married/li     | 3  | College degree   | 1  | Working, fi | 20 | 2   | No       |      | 2   | No      |
| 2363   | 2  | 1  | Single         | 1  | High school or l | 1  | Working, fi | 25 | 2   | No       |      | 2   | No      |
| 2365   | 2  | 2  | Married/li     | 1  | High school or l | 2  | Working, p  | 27 | 2   | No       |      | 2   | No      |
| 2367   | 2  | 2  | Married/li     | 3  | College degree   | 1  | Working, fi | 33 | 2   | No       |      | 1   | Yes     |
| 2368   | 2  | 1  | Single         | 1  | High school or l | 1  | Working, fi | 30 | 2   | No       |      | 1   | Yes     |
| 2369   | 2  | 2  | Married/li     | 4  | Postgraduate     | 2  | Working, p  | 24 | 2   | No       |      | 1   | Yes     |
| 2372   | 2  | 2  | Married/li     | 3  | College degree   | 1  | Working, fi | 35 | 2   | No       |      | 2   | No      |
| 2374   | 2  | 2  | Married/li     | 3  | College degree   | 1  | Working, fi | 22 | 1   | Yes      | 1    | 1   | Yes     |
| 2376   | 2  | 2  | Married/li     | 3  | College degree   | 4  | Retired     | 7  | 2   | No       |      | 2   | No      |
| 2379   | 2  | 2  | Married/li     | 3  | College degree   | 1  | Working, fi | 20 | 2   | No       |      | 1   | Yes     |
| 2380   | 2  | 2  | Married/li     | 1  | High school or l | 4  | Retired     | 10 | 1   | Yes      | 1    | 1   | Yes     |
| 2381   | 2  | 4  | Widow/wi       | 1  | High school or l | 3  | Unemploy    | 15 | 2   | No       |      | 2   | No      |
| 2382   | 2  | 2  | Married/li     | 4  | Postgraduate     | 4  | Retired     | 33 | 2   | No       |      | 2   | No      |
| 2385   | 2  | 2  | Married/li     | 3  | College degree   | 1  | Working, fi | 14 | 2   | No       |      | 2   | No      |
| 2387   | 2  | 3  | Divorced       | 3  | College degree   | 1  | Working, fi | 34 | 1   | Yes      | 1    | 2   | No      |
| 2388   | 2  | 2  | Married/li     | 4  | Postgraduate     | 1  | Working, fi | 14 | 2   | No       |      | 1   | Yes     |
| 2389   | 2  | 2  | Married/li     | 2  | Some college     | 1  | Working, fi | 31 | 1   | Yes      | 1    | 1   | Yes     |
| 2391   | 2  | 2  | Married/li     | 3  | College degree   | 3  | Unemploy    | 15 | 2   | No       |      | 2   | No      |
| 2392   | 2  | 2  | Married/li     | 4  | Postgraduate     | 1  | Working, fi | 22 | 2   | No       |      | 2   | No      |
| 2393   | 2  | 2  | Married/li     | 1  | High school or l | 1  | Working, fi | 8  | 2   | No       |      | 2   | No      |
| 2394   | 2  | 2  | Married/li     | 1  | High school or l | 1  | Working, fi | 17 | 2   | No       |      | 2   | No      |
| 2397   | 2  | 3  | Divorced       | 2  | Some college     | 9  | Other       | 27 | 2   | No       |      | 2   | No      |
| 2398   | 2  | 1  | Single         | 3  | College degree   | 1  | Working, fi | 31 | 2   | No       |      | 2   | No      |
| 2400   | 2  | 2  | Married/li     | 3  | College degree   | 1  | Working, fi | 17 | 2   | No       |      | 2   | No      |
| 2402   | 2  | 2  | Married/li     | 3  | College degree   | 1  | Working, fi | 34 | 2   | No       |      | 2   | No      |

| respid | Q5 | Q6 | Marital Status | Q7 | Education        | Q8 | Work        | Q9 | Q10 | Diabetes | Q10a | Q11 | High BP |
|--------|----|----|----------------|----|------------------|----|-------------|----|-----|----------|------|-----|---------|
| 2406   | 2  | 2  | Married/li     | 3  | College degree   | 1  | Working, fi | 13 | 2   | No       |      | 2   | No      |
| 2408   | 2  | 1  | Single         | 1  | High school or l | 1  | Working, fi | 15 | 2   | No       |      | 2   | No      |
| 2410   | 2  | 2  | Married/li     | 3  | College degree   | 1  | Working, fi | 20 | 2   | No       |      | 1   | Yes     |
| 2411   | 2  | 2  | Married/li     | 3  | College degree   | 1  | Working, fi | 23 | 2   | No       |      | 1   | Yes     |
| 2412   | 2  | 2  | Married/li     | 3  | College degree   | 2  | Working, p  | 19 | 2   | No       |      | 2   | No      |
| 2414   | 2  | 2  | Married/li     | 3  | College degree   | 1  | Working, fi | 21 | 2   | No       |      | 1   | Yes     |
| 2421   | 2  | 2  | Married/li     | 1  | High school or l | 1  | Working, fi | 99 | 2   | No       |      | 2   | No      |
| 2423   | 2  | 2  | Married/li     | 4  | Postgraduate     | 1  | Working, fi | 24 | 2   | No       |      | 2   | No      |
| 2424   | 2  | 2  | Married/li     | 3  | College degree   | 1  | Working, fi | 21 | 2   | No       |      | 1   | Yes     |
| 2425   | 2  | 3  | Divorced       | 1  | High school or l | 1  | Working, fi | 33 | 2   | No       |      | 1   | Yes     |
| 2426   | 2  | 2  | Married/li     | 4  | Postgraduate     | 1  | Working, fi | 21 | 2   | No       |      | 1   | Yes     |
| 2429   | 2  | 2  | Married/li     | 4  | Postgraduate     | 1  | Working, fi | 35 | 2   | No       |      | 1   | Yes     |
| 2430   | 2  | 2  | Married/li     | 4  | Postgraduate     | 1  | Working, fi | 32 | 2   | No       |      | 1   | Yes     |
| 2432   | 2  | 2  | Married/li     | 3  | College degree   | 1  | Working, fi | 22 | 2   | No       |      | 2   | No      |
| 2433   | 2  | 3  | Divorced       | 3  | College degree   | 1  | Working, fi | 18 | 2   | No       |      | 2   | No      |
| 2434   | 2  | 2  | Married/li     | 3  | College degree   | 1  | Working, fi | 34 | 2   | No       |      | 2   | No      |
| 2435   | 2  | 2  | Married/li     | 3  | College degree   | 1  | Working, fi | 28 | 2   | No       |      | 2   | No      |
| 2436   | 2  | 2  | Married/li     | 2  | Some college     | 1  | Working, fi | 16 | 2   | No       |      | 2   | No      |
| 2439   | 2  | 2  | Married/li     | 1  | High school or l | 2  | Working, p  | 16 | 2   | No       |      | 2   | No      |
| 2440   | 2  | 2  | Married/li     | 4  | Postgraduate     | 1  | Working, fi | 17 | 2   | No       |      | 1   | Yes     |
| 2441   | 2  | 2  | Married/li     | 2  | Some college     | 1  | Working, fi | 33 | 1   | Yes      | 2    | 2   | No      |
| 2446   | 2  | 2  | Married/li     | 3  | College degree   | 1  | Working, fi | 19 | 2   | No       |      | 2   | No      |
| 2448   | 2  | 2  | Married/li     | 4  | Postgraduate     | 1  | Working, fi | 13 | 2   | No       |      | 2   | No      |
| 2449   | 2  | 2  | Married/li     | 3  | College degree   | 1  | Working, fi | 20 | 2   | No       |      | 2   | No      |
| 2451   | 2  | 2  | Married/li     | 2  | Some college     | 4  | Retired     | 34 | 2   | No       |      | 1   | Yes     |
| 2452   | 2  | 2  | Married/li     | 3  | College degree   | 1  | Working, fi | 20 | 2   | No       |      | 1   | Yes     |
| 2455   | 2  | 2  | Married/li     | 4  | Postgraduate     | 2  | Working, p  | 17 | 2   | No       |      | 1   | Yes     |
| 2457   | 2  | 2  | Married/li     | 3  | College degree   | 6  | Homemake    | 17 | 2   | No       |      | 2   | No      |
| 2458   | 2  | 1  | Single         | 3  | College degree   | 1  | Working, fi | 29 | 2   | No       |      | 2   | No      |
| 2459   | 2  | 1  | Single         | 4  | Postgraduate     | 1  | Working, fi | 17 | 2   | No       |      | 2   | No      |
| 2460   | 2  | 2  | Married/li     | 3  | College degree   | 1  | Working, fi | 11 | 2   | No       |      | 2   | No      |
| 2462   | 2  | 1  | Single         | 2  | Some college     | 4  | Retired     | 11 | 1   | Yes      | 1    | 1   | Yes     |

| respid | Q5 | Q6 | Marital Status | Q7 | Education        | Q8 | Work        | Q9 | Q10 | Diabetes | Q10a | Q11 | High BP |
|--------|----|----|----------------|----|------------------|----|-------------|----|-----|----------|------|-----|---------|
| 2464   | 2  | 2  | Married/li     | 3  | College degree   | 9  | Other       | 16 | 2   | No       |      | 1   | Yes     |
| 2465   | 2  | 2  | Married/li     | 4  | Postgraduate     | 1  | Working, fi | 20 | 2   | No       |      | 2   | No      |
| 2468   | 2  | 2  | Married/li     | 3  | College degree   | 1  | Working, fi | 20 | 1   | Yes      | 2    | 1   | Yes     |
| 2469   | 2  | 2  | Married/li     | 3  | College degree   | 1  | Working, fi | 16 | 2   | No       |      | 1   | Yes     |
| 2470   | 2  | 1  | Single         | 3  | College degree   | 2  | Working, p  | 26 | 2   | No       |      | 2   | No      |
| 2471   | 2  | 2  | Married/li     | 1  | High school or l | 8  | Other worl  | 16 | 1   | Yes      | 1    | 1   | Yes     |
| 2472   | 2  | 2  | Married/li     | 4  | Postgraduate     | 1  | Working, fi | 24 | 1   | Yes      | 2    | 1   | Yes     |
| 2474   | 2  | 2  | Married/li     | 2  | Some college     | 1  | Working, fi | 6  | 2   | No       |      | 2   | No      |
| 2476   | 2  | 2  | Married/li     | 3  | College degree   | 1  | Working, fi | 9  | 2   | No       |      | 2   | No      |
| 2478   | 2  | 2  | Married/li     | 3  | College degree   | 1  | Working, fi | 31 | 2   | No       |      | 2   | No      |
| 2479   | 2  | 2  | Married/li     | 2  | Some college     | 1  | Working, fi | 32 | 2   | No       |      | 1   | Yes     |
| 2480   | 2  | 2  | Married/li     | 3  | College degree   | 1  | Working, fi | 20 | 2   | No       |      | 2   | No      |
| 2482   | 2  | 1  | Single         | 3  | College degree   | 1  | Working, fi | 16 | 2   | No       |      | 1   | Yes     |
| 2486   | 2  | 2  | Married/li     | 3  | College degree   | 1  | Working, fi | 13 | 2   | No       |      | 2   | No      |
| 2488   | 2  | 2  | Married/li     | 3  | College degree   | 6  | Homemake    | 18 | 2   | No       |      | 2   | No      |
| 2489   | 2  | 1  | Single         | 4  | Postgraduate     | 1  | Working, fi | 26 | 2   | No       |      | 2   | No      |
| 2491   | 2  | 2  | Married/li     | 3  | College degree   | 1  | Working, fi | 11 | 2   | No       |      | 2   | No      |
| 2495   | 2  | 2  | Married/li     | 4  | Postgraduate     | 1  | Working, fi | 14 | 2   | No       |      | 1   | Yes     |
| 2496   | 2  | 2  | Married/li     | 4  | Postgraduate     | 1  | Working, fi | 20 | 2   | No       |      | 2   | No      |
| 2498   | 2  | 2  | Married/li     | 3  | College degree   | 1  | Working, fi | 20 | 2   | No       |      | 2   | No      |
| 2501   | 2  | 3  | Divorced       | 2  | Some college     | 1  | Working, fi | 31 | 2   | No       |      | 2   | No      |
| 2502   | 2  | 2  | Married/li     | 3  | College degree   | 1  | Working, fi | 18 | 2   | No       |      | 2   | No      |
| 2503   | 2  | 2  | Married/li     | 3  | College degree   | 1  | Working, fi | 35 | 2   | No       |      | 1   | Yes     |
| 2504   | 2  | 2  | Married/li     | 3  | College degree   | 1  | Working, fi | 35 | 2   | No       |      | 2   | No      |
| 2507   | 2  | 2  | Married/li     | 3  | College degree   | 6  | Homemake    | 23 | 2   | No       |      | 2   | No      |
| 2509   | 2  | 2  | Married/li     | 2  | Some college     | 1  | Working, fi | 34 | 2   | No       |      | 2   | No      |
| 2512   | 2  | 2  | Married/li     | 3  | College degree   | 6  | Homemake    | 19 | 2   | No       |      | 2   | No      |
| 2514   | 2  | 2  | Married/li     | 3  | College degree   | 1  | Working, fi | 18 | 2   | No       |      | 2   | No      |
| 2516   | 2  | 2  | Married/li     | 3  | College degree   | 4  | Retired     | 26 | 2   | No       |      | 1   | Yes     |
| 2517   | 2  | 2  | Married/li     | 3  | College degree   | 1  | Working, fi | 20 | 2   | No       |      | 2   | No      |
| 2521   | 2  | 2  | Married/li     | 4  | Postgraduate     | 1  | Working, fi | 33 | 2   | No       |      | 2   | No      |
| 2522   | 2  | 2  | Married/li     | 2  | Some college     | 1  | Working, fi | 25 | 2   | No       |      | 2   | No      |

| respid | Q5 | Q6 | Marital Status | Q7 | Education        | Q8 | Work        | Q9 | Q10 | Diabetes | Q10a | Q11 | High BP |
|--------|----|----|----------------|----|------------------|----|-------------|----|-----|----------|------|-----|---------|
| 2524   | 2  | 2  | Married/li     | 3  | College degree   | 4  | Retired     | 30 | 2   | No       |      | 2   | No      |
| 2525   | 2  | 4  | Widow/wi       | 3  | College degree   | 1  | Working, fi | 34 | 2   | No       |      | 2   | No      |
| 2526   | 2  | 2  | Married/li     | 4  | Postgraduate     | 1  | Working, fi | 35 | 2   | No       |      | 2   | No      |
| 2527   | 2  | 4  | Widow/wi       | 2  | Some college     | 1  | Working, fi | 34 | 2   | No       |      | 2   | No      |
| 2528   | 2  | 2  | Married/li     | 2  | Some college     | 1  | Working, fi | 38 | 2   | No       |      | 2   | No      |
| 2531   | 2  | 2  | Married/li     | 3  | College degree   | 6  | Homemake    | 19 | 2   | No       |      | 2   | No      |
| 2533   | 2  | 3  | Divorced       | 3  | College degree   | 1  | Working, fi | 29 | 1   | Yes      | 1    | 1   | Yes     |
| 2535   | 2  | 2  | Married/li     | 3  | College degree   | 1  | Working, fi | 12 | 2   | No       |      | 2   | No      |
| 2536   | 2  | 2  | Married/li     | 4  | Postgraduate     | 1  | Working, fi | 11 | 2   | No       |      | 2   | No      |
| 2539   | 2  | 2  | Married/li     | 4  | Postgraduate     | 1  | Working, fi | 14 | 2   | No       |      | 2   | No      |
| 2540   | 2  | 2  | Married/li     | 3  | College degree   | 1  | Working, fi | 19 | 2   | No       |      | 1   | Yes     |
| 2543   | 2  | 2  | Married/li     | 4  | Postgraduate     | 1  | Working, fi | 32 | 2   | No       |      | 2   | No      |
| 2546   | 2  | 1  | Single         | 2  | Some college     | 1  | Working, fi | 30 | 2   | No       |      | 2   | No      |
| 2547   | 2  | 2  | Married/li     | 3  | College degree   | 1  | Working, fi | 27 | 1   | Yes      | 1    | 1   | Yes     |
| 2549   | 2  | 2  | Married/li     | 2  | Some college     | 1  | Working, fi | 30 | 2   | No       |      | 2   | No      |
| 2553   | 2  | 2  | Married/li     | 3  | College degree   | 1  | Working, fi | 14 | 2   | No       |      | 2   | No      |
| 2554   | 2  | 2  | Married/li     | 3  | College degree   | 1  | Working, fi | 33 | 2   | No       |      | 2   | No      |
| 2555   | 2  | 2  | Married/li     | 3  | College degree   | 1  | Working, fi | 6  | 1   | Yes      | 1    | 2   | No      |
| 2556   | 2  | 2  | Married/li     | 3  | College degree   | 1  | Working, fi | 36 | 2   | No       |      | 1   | Yes     |
| 2557   | 2  | 2  | Married/li     | 1  | High school or l | 2  | Working, p  | 26 | 2   | No       |      | 2   | No      |
| 2559   | 2  | 2  | Married/li     | 3  | College degree   | 1  | Working, fi | 13 | 2   | No       |      | 2   | No      |
| 2560   | 2  | 2  | Married/li     | 1  | High school or l | 1  | Working, fi | 20 | 1   | Yes      | 1    | 1   | Yes     |
| 2561   | 2  | 1  | Single         | 3  | College degree   | 1  | Working, fi | 30 | 2   | No       |      | 2   | No      |
| 2566   | 2  | 2  | Married/li     | 3  | College degree   | 1  | Working, fi | 18 | 2   | No       |      | 1   | Yes     |
| 2567   | 2  | 2  | Married/li     | 2  | Some college     | 6  | Homemake    | 25 | 2   | No       |      | 1   | Yes     |
| 2570   | 2  | 1  | Single         | 2  | Some college     | 1  | Working, fi | 26 | 2   | No       |      | 2   | No      |
| 2574   | 2  | 3  | Divorced       | 2  | Some college     | 2  | Working, p  | 25 | 1   | Yes      | 2    | 2   | No      |
| 2578   | 2  | 2  | Married/li     | 3  | College degree   | 1  | Working, fi | 12 | 2   | No       |      | 2   | No      |
| 2580   | 2  | 2  | Married/li     | 3  | College degree   | 1  | Working, fi | 12 | 2   | No       |      | 2   | No      |
| 2590   | 2  | 1  | Single         | 3  | College degree   | 8  | Other worl  | 16 | 2   | No       |      | 1   | Yes     |
| 2593   | 2  | 2  | Married/li     | 4  | Postgraduate     | 1  | Working, fi | 33 | 2   | No       |      | 2   | No      |
| 2594   | 2  | 2  | Married/li     | 3  | College degree   | 1  | Working, fi | 23 | 1   | Yes      | 1    | 2   | No      |

| respid | Q5 | Q6 | Marital Status | Q7 | Education        | Q8 | Work        | Q9 | Q10 | Diabetes | Q10a | Q11 | High BP |
|--------|----|----|----------------|----|------------------|----|-------------|----|-----|----------|------|-----|---------|
| 2595   | 2  | 1  | Single         | 3  | College degree   | 1  | Working, fi | 21 | 2   | No       |      | 2   | No      |
| 2596   | 2  | 1  | Single         | 3  | College degree   | 2  | Working, p  | 17 | 2   | No       |      | 2   | No      |
| 2597   | 2  | 2  | Married/li     | 3  | College degree   | 1  | Working, fi | 18 | 2   | No       |      | 2   | No      |
| 2598   | 2  | 2  | Married/li     | 2  | Some college     | 1  | Working, fi | 14 | 2   | No       |      | 2   | No      |
| 2602   | 2  | 2  | Married/li     | 3  | College degree   | 1  | Working, fi | 12 | 2   | No       |      | 2   | No      |
| 2605   | 2  | 2  | Married/li     | 2  | Some college     | 1  | Working, fi | 12 | 1   | Yes      | 1    | 1   | Yes     |
| 2606   | 2  | 2  | Married/li     | 2  | Some college     | 1  | Working, fi | 7  | 2   | No       |      | 2   | No      |
| 2607   | 2  | 2  | Married/li     | 2  | Some college     | 1  | Working, fi | 11 | 2   | No       |      | 2   | No      |
| 2608   | 2  | 2  | Married/li     | 4  | Postgraduate     | 1  | Working, fi | 38 | 2   | No       |      | 2   | No      |
| 2609   | 2  | 2  | Married/li     | 2  | Some college     | 1  | Working, fi | 8  | 2   | No       |      | 2   | No      |
| 2610   | 2  | 2  | Married/li     | 3  | College degree   | 6  | Homemake    | 16 | 2   | No       |      | 2   | No      |
| 2614   | 2  | 1  | Single         | 3  | College degree   | 2  | Working, p  | 4  | 2   | No       |      | 2   | No      |
| 2615   | 2  | 2  | Married/li     | 3  | College degree   | 1  | Working, fi | 10 | 2   | No       |      | 1   | Yes     |
| 2616   | 2  | 2  | Married/li     | 2  | Some college     | 1  | Working, fi | 28 | 2   | No       |      | 2   | No      |
| 2618   | 2  | 1  | Single         | 2  | Some college     | 4  | Retired     | 25 | 2   | No       |      | 2   | No      |
| 2630   | 2  | 3  | Divorced       | 1  | High school or l | 4  | Retired     | 7  | 2   | No       |      | 1   | Yes     |
| 2633   | 2  | 2  | Married/li     | 4  | Postgraduate     | 1  | Working, fi | 33 | 2   | No       |      | 2   | No      |
| 2637   | 2  | 2  | Married/li     | 3  | College degree   | 3  | Unemploy    | 25 | 1   | Yes      | 1    | 2   | No      |
| 2638   | 2  | 2  | Married/li     | 2  | Some college     | 4  | Retired     | 13 | 2   | No       |      | 2   | No      |
| 2641   | 2  | 2  | Married/li     | 3  | College degree   | 2  | Working, p  | 99 | 2   | No       |      | 2   | No      |
| 2644   | 2  | 2  | Married/li     | 2  | Some college     | 1  | Working, fi | 9  | 2   | No       |      | 2   | No      |
| 2645   | 2  | 2  | Married/li     | 2  | Some college     | 4  | Retired     | 32 | 2   | No       |      | 2   | No      |
| 2646   | 2  | 2  | Married/li     | 2  | Some college     | 2  | Working, p  | 4  | 2   | No       |      | 2   | No      |
| 2648   | 2  | 2  | Married/li     | 4  | Postgraduate     | 1  | Working, fi | 99 | 2   | No       |      | 2   | No      |
| 2651   | 2  | 2  | Married/li     | 4  | Postgraduate     | 1  | Working, fi | 35 | 2   | No       |      | 2   | No      |
| 2652   | 2  | 2  | Married/li     | 3  | College degree   | 1  | Working, fi | 9  | 2   | No       |      | 2   | No      |
| 2653   | 2  | 2  | Married/li     | 4  | Postgraduate     | 1  | Working, fi | 33 | 2   | No       |      | 1   | Yes     |
| 2656   | 2  | 1  | Single         | 3  | College degree   | 1  | Working, fi | 31 | 2   | No       |      | 1   | Yes     |
| 2657   | 2  | 2  | Married/li     | 4  | Postgraduate     | 2  | Working, p  | 32 | 2   | No       |      | 2   | No      |
| 2658   | 2  | 1  | Single         | 4  | Postgraduate     | 2  | Working, p  | 25 | 2   | No       |      | 2   | No      |
| 2661   | 2  | 2  | Married/li     | 1  | High school or l | 6  | Homemake    | 1  | 2   | No       |      | 2   | No      |
| 2663   | 2  | 2  | Married/li     | 2  | Some college     | 1  | Working, fi | 28 | 2   | No       |      | 2   | No      |

| respid | Q5 | Q6 | Marital Status | Q7 | Education        | Q8 | Work        | Q9 | Q10 | Diabetes | Q10a | Q11 | High BP |
|--------|----|----|----------------|----|------------------|----|-------------|----|-----|----------|------|-----|---------|
| 2665   | 2  | 2  | Married/li     | 2  | Some college     | 1  | Working, fi | 7  | 2   | No       |      | 1   | Yes     |
| 2670   | 2  | 2  | Married/li     | 2  | Some college     | 1  | Working, fi | 35 | 2   | No       |      | 1   | Yes     |
| 2672   | 2  | 2  | Married/li     | 4  | Postgraduate     | 1  | Working, fi | 37 | 2   | No       |      | 2   | No      |
| 2673   | 2  | 2  | Married/li     | 4  | Postgraduate     | 1  | Working, fi | 28 | 2   | No       |      | 2   | No      |
| 2677   | 2  | 2  | Married/li     | 2  | Some college     | 1  | Working, fi | 12 | 2   | No       |      | 2   | No      |
| 2686   | 2  | 2  | Married/li     | 2  | Some college     | 4  | Retired     | 12 | 2   | No       |      | 1   | Yes     |
| 2688   | 2  | 2  | Married/li     | 4  | Postgraduate     | 1  | Working, fi | 11 | 2   | No       |      | 1   | Yes     |
| 2689   | 2  | 2  | Married/li     | 3  | College degree   | 1  | Working, fi | 33 | 2   | No       |      | 2   | No      |
| 2691   | 2  | 2  | Married/li     | 2  | Some college     | 2  | Working, p  | 8  | 2   | No       |      | 1   | Yes     |
| 2695   | 2  | 2  | Married/li     | 3  | College degree   | 1  | Working, fi | 21 | 2   | No       |      | 2   | No      |
| 2696   | 2  | 2  | Married/li     | 2  | Some college     | 1  | Working, fi | 33 | 2   | No       |      | 2   | No      |
| 2697   | 2  | 2  | Married/li     | 4  | Postgraduate     | 1  | Working, fi | 24 | 2   | No       |      | 2   | No      |
| 2698   | 2  | 2  | Married/li     | 2  | Some college     | 1  | Working, fi | 12 | 2   | No       |      | 2   | No      |
| 2703   | 2  | 1  | Single         | 2  | Some college     | 1  | Working, fi | 34 | 2   | No       |      | 2   | No      |
| 2704   | 2  | 2  | Married/li     | 4  | Postgraduate     | 1  | Working, fi | 30 | 1   | Yes      | 2    | 2   | No      |
| 2706   | 2  | 2  | Married/li     | 3  | College degree   | 1  | Working, fi | 11 | 2   | No       |      | 2   | No      |
| 2707   | 2  | 2  | Married/li     | 2  | Some college     | 1  | Working, fi | 30 | 2   | No       |      | 2   | No      |
| 2710   | 2  | 2  | Married/li     | 2  | Some college     | 1  | Working, fi | 34 | 2   | No       |      | 2   | No      |
| 2711   | 2  | 2  | Married/li     | 2  | Some college     | 1  | Working, fi | 31 | 2   | No       |      | 2   | No      |
| 2712   | 2  | 2  | Married/li     | 3  | College degree   | 1  | Working, fi | 31 | 2   | No       |      | 2   | No      |
| 2713   | 2  | 2  | Married/li     | 3  | College degree   | 1  | Working, fi | 2  | 2   | No       |      | 2   | No      |
| 2721   | 2  | 2  | Married/li     | 3  | College degree   | 1  | Working, fi | 11 | 2   | No       |      | 1   | Yes     |
| 2730   | 2  | 2  | Married/li     | 1  | High school or l | 1  | Working, fi | 28 | 2   | No       |      | 2   | No      |
| 2731   | 2  | 2  | Married/li     | 1  | High school or l | 1  | Working, fi | 20 | 2   | No       |      | 1   | Yes     |
| 2732   | 2  | 2  | Married/li     | 3  | College degree   | 1  | Working, fi | 17 | 2   | No       |      | 2   | No      |
| 2733   | 2  | 2  | Married/li     | 1  | High school or l | 1  | Working, fi | 20 | 2   | No       |      | 2   | No      |
| 2735   | 2  | 2  | Married/li     | 1  | High school or l | 1  | Working, fi | 16 | 2   | No       |      | 2   | No      |
| 2736   | 2  | 2  | Married/li     | 2  | Some college     | 6  | Homemake    | 99 | 2   | No       |      | 2   | No      |
| 2740   | 2  | 2  | Married/li     | 3  | College degree   | 1  | Working, fi | 18 | 2   | No       |      | 1   | Yes     |
| 2741   | 2  | 2  | Married/li     | 2  | Some college     | 1  | Working, fi | 32 | 2   | No       |      | 2   | No      |
| 2742   | 2  | 2  | Married/li     | 3  | College degree   | 2  | Working, p  | 25 | 2   | No       |      | 2   | No      |
| 2743   | 2  | 2  | Married/li     | 4  | Postgraduate     | 1  | Working, fi | 34 | 2   | No       |      | 2   | No      |



| respid | Q5 | Q6 | Marital Status | Q7 | Education        | Q8 | Work        | Q9 | Q10 | Diabetes | Q10a | Q11 | High BP |
|--------|----|----|----------------|----|------------------|----|-------------|----|-----|----------|------|-----|---------|
| 2744   | 2  | 2  | Married/li     | 3  | College degree   | 1  | Working, fi | 18 | 2   | No       |      | 1   | Yes     |
| 2745   | 2  | 3  | Divorced       | 3  | College degree   | 1  | Working, fi | 20 | 2   | No       |      | 2   | No      |
| 2749   | 2  | 2  | Married/li     | 3  | College degree   | 6  | Homemake    | 17 | 2   | No       |      | 2   | No      |
| 2751   | 2  | 1  | Single         | 3  | College degree   | 9  | Other       | 15 | 1   | Yes      | 1    | 2   | No      |
| 2754   | 2  | 4  | Widow/wi       | 3  | College degree   | 1  | Working, fi | 18 | 2   | No       |      | 2   | No      |
| 2755   | 2  | 2  | Married/li     | 3  | College degree   | 1  | Working, fi | 22 | 2   | No       |      | 2   | No      |
| 2757   | 2  | 3  | Divorced       | 1  | High school or l | 3  | Unemploy    | 15 | 1   | Yes      | 1    | 2   | No      |
| 2758   | 2  | 2  | Married/li     | 3  | College degree   | 1  | Working, fi | 19 | 2   | No       |      | 2   | No      |
| 2759   | 2  | 2  | Married/li     | 3  | College degree   | 8  | Other worl  | 17 | 2   | No       |      | 2   | No      |
| 2761   | 2  | 2  | Married/li     | 3  | College degree   | 6  | Homemake    | 19 | 2   | No       |      | 2   | No      |
| 2762   | 2  | 4  | Widow/wi       | 4  | Postgraduate     | 1  | Working, fi | 30 | 2   | No       |      | 2   | No      |
| 2763   | 2  | 2  | Married/li     | 3  | College degree   | 6  | Homemake    | 21 | 2   | No       |      | 2   | No      |
| 2764   | 2  | 2  | Married/li     | 4  | Postgraduate     | 1  | Working, fi | 20 | 2   | No       |      | 1   | Yes     |
| 2765   | 2  | 2  | Married/li     | 1  | High school or l | 1  | Working, fi | 18 | 2   | No       |      | 2   | No      |
| 2766   | 2  | 2  | Married/li     | 3  | College degree   | 1  | Working, fi | 19 | 2   | No       |      | 1   | Yes     |
| 2767   | 2  | 3  | Divorced       | 2  | Some college     | 8  | Other worl  | 18 | 2   | No       |      | 1   | Yes     |
| 2769   | 2  | 2  | Married/li     | 3  | College degree   | 1  | Working, fi | 22 | 2   | No       |      | 2   | No      |
| 2770   | 2  | 2  | Married/li     | 3  | College degree   | 1  | Working, fi | 23 | 2   | No       |      | 1   | Yes     |
| 2771   | 2  | 1  | Single         | 2  | Some college     | 9  | Other       | 17 | 2   | No       |      | 2   | No      |
| 2774   | 2  | 2  | Married/li     | 3  | College degree   | 1  | Working, fi | 32 | 2   | No       |      | 2   | No      |
| 2777   | 2  | 2  | Married/li     | 3  | College degree   | 1  | Working, fi | 21 | 2   | No       |      | 2   | No      |
| 2778   | 2  | 2  | Married/li     | 3  | College degree   | 1  | Working, fi | 20 | 2   | No       |      | 2   | No      |
| 2781   | 2  | 2  | Married/li     | 2  | Some college     | 1  | Working, fi | 33 | 2   | No       |      | 1   | Yes     |
| 2782   | 2  | 1  | Single         | 3  | College degree   | 1  | Working, fi | 19 | 2   | No       |      | 2   | No      |
| 2784   | 2  | 2  | Married/li     | 3  | College degree   | 6  | Homemake    | 20 | 2   | No       |      | 2   | No      |
| 2785   | 2  | 2  | Married/li     | 3  | College degree   | 1  | Working, fi | 19 | 2   | No       |      | 2   | No      |
| 2786   | 2  | 1  | Single         | 3  | College degree   | 8  | Other worl  | 99 | 2   | No       |      | 2   | No      |
| 2787   | 2  | 1  | Single         | 3  | College degree   | 1  | Working, fi | 15 | 2   | No       |      | 2   | No      |
| 2789   | 2  | 2  | Married/li     | 1  | High school or l | 1  | Working, fi | 21 | 2   | No       |      | 2   | No      |
| 2790   | 2  | 2  | Married/li     | 2  | Some college     | 1  | Working, fi | 34 | 2   | No       |      | 2   | No      |
| 2791   | 2  | 2  | Married/li     | 3  | College degree   | 6  | Homemake    | 24 | 2   | No       |      | 2   | No      |
| 2793   | 2  | 3  | Divorced       | 1  | High school or l | 1  | Working, fi | 17 | 2   | No       |      | 2   | No      |

| respid | Q5 | Q6 | Marital Status | Q7 | Education        | Q8 | Work        | Q9 | Q10 | Diabetes | Q10a | Q11 | High BP |
|--------|----|----|----------------|----|------------------|----|-------------|----|-----|----------|------|-----|---------|
| 2797   | 2  | 2  | Married/li     | 1  | High school or l | 1  | Working, fi | 20 | 2   | No       |      | 2   | No      |
| 2798   | 2  | 2  | Married/li     | 3  | College degree   | 1  | Working, fi | 19 | 2   | No       |      | 2   | No      |
| 2799   | 2  | 2  | Married/li     | 3  | College degree   | 1  | Working, fi | 21 | 2   | No       |      | 2   | No      |
| 2801   | 2  | 2  | Married/li     | 3  | College degree   | 1  | Working, fi | 21 | 2   | No       |      | 1   | Yes     |
| 2802   | 2  | 2  | Married/li     | 3  | College degree   | 6  | Homemake    | 21 | 1   | Yes      | 1    | 1   | Yes     |
| 2803   | 2  | 2  | Married/li     | 3  | College degree   | 2  | Working, p  | 20 | 2   | No       |      | 2   | No      |
| 2804   | 2  | 1  | Single         | 1  | High school or l | 1  | Working, fi | 16 | 2   | No       |      | 2   | No      |
| 2807   | 2  | 1  | Single         | 2  | Some college     | 1  | Working, fi | 27 | 2   | No       |      | 2   | No      |
| 2809   | 2  | 2  | Married/li     | 3  | College degree   | 6  | Homemake    | 19 | 2   | No       |      | 2   | No      |
| 2810   | 2  | 2  | Married/li     | 3  | College degree   | 1  | Working, fi | 18 | 2   | No       |      | 1   | Yes     |
| 2812   | 2  | 2  | Married/li     | 3  | College degree   | 1  | Working, fi | 16 | 2   | No       |      | 2   | No      |
| 2814   | 2  | 2  | Married/li     | 2  | Some college     | 1  | Working, fi | 29 | 2   | No       |      | 2   | No      |
| 2815   | 2  | 2  | Married/li     | 3  | College degree   | 1  | Working, fi | 19 | 2   | No       |      | 1   | Yes     |
| 2816   | 2  | 2  | Married/li     | 3  | College degree   | 1  | Working, fi | 18 | 2   | No       |      | 2   | No      |
| 2817   | 2  | 2  | Married/li     | 3  | College degree   | 1  | Working, fi | 23 | 2   | No       |      | 2   | No      |
| 2819   | 2  | 2  | Married/li     | 3  | College degree   | 1  | Working, fi | 19 | 2   | No       |      | 1   | Yes     |
| 2820   | 2  | 2  | Married/li     | 4  | Postgraduate     | 1  | Working, fi | 23 | 2   | No       |      | 2   | No      |
| 2821   | 2  | 2  | Married/li     | 3  | College degree   | 1  | Working, fi | 18 | 2   | No       |      | 2   | No      |
| 2822   | 2  | 2  | Married/li     | 4  | Postgraduate     | 1  | Working, fi | 23 | 2   | No       |      | 2   | No      |
| 2823   | 2  | 2  | Married/li     | 3  | College degree   | 1  | Working, fi | 24 | 2   | No       |      | 2   | No      |
| 2824   | 2  | 2  | Married/li     | 3  | College degree   | 1  | Working, fi | 19 | 2   | No       |      | 2   | No      |
| 2825   | 2  | 2  | Married/li     | 3  | College degree   | 1  | Working, fi | 21 | 2   | No       |      | 2   | No      |
| 2826   | 2  | 1  | Single         | 3  | College degree   | 1  | Working, fi | 20 | 2   | No       |      | 2   | No      |
| 2827   | 2  | 2  | Married/li     | 2  | Some college     | 1  | Working, fi | 27 | 2   | No       |      | 2   | No      |
| 2828   | 2  | 2  | Married/li     | 4  | Postgraduate     | 1  | Working, fi | 14 | 2   | No       |      | 1   | Yes     |
| 2829   | 2  | 5  | Prefer not     | 1  | High school or l | 1  | Working, fi | 15 | 2   | No       |      | 2   | No      |
| 2830   | 2  | 2  | Married/li     | 3  | College degree   | 1  | Working, fi | 19 | 2   | No       |      | 2   | No      |
| 2831   | 2  | 1  | Single         | 1  | High school or l | 1  | Working, fi | 17 | 2   | No       |      | 2   | No      |
| 2832   | 2  | 2  | Married/li     | 3  | College degree   | 6  | Homemake    | 23 | 2   | No       |      | 2   | No      |
| 2833   | 2  | 2  | Married/li     | 3  | College degree   | 6  | Homemake    | 18 | 2   | No       |      | 2   | No      |
| 2834   | 2  | 2  | Married/li     | 3  | College degree   | 1  | Working, fi | 24 | 2   | No       |      | 2   | No      |
| 2835   | 2  | 2  | Married/li     | 3  | College degree   | 1  | Working, fi | 23 | 1   | Yes      | 1    | 1   | Yes     |

| respid | Q5 | Q6 | Marital Status | Q7 | Education        | Q8 | Work        | Q9 | Q10 | Diabetes | Q10a | Q11 | High BP |
|--------|----|----|----------------|----|------------------|----|-------------|----|-----|----------|------|-----|---------|
| 2836   | 2  | 2  | Married/li     | 3  | College degree   | 1  | Working, fi | 17 | 2   | No       |      | 2   | No      |
| 2837   | 2  | 1  | Single         | 3  | College degree   | 1  | Working, fi | 31 | 2   | No       |      | 1   | Yes     |
| 2838   | 2  | 2  | Married/li     | 1  | High school or l | 1  | Working, fi | 18 | 2   | No       |      | 2   | No      |
| 2844   | 2  | 2  | Married/li     | 2  | Some college     | 6  | Homemake    | 18 | 1   | Yes      | 1    | 1   | Yes     |
| 2845   | 2  | 1  | Single         | 4  | Postgraduate     | 1  | Working, fi | 24 | 2   | No       |      | 2   | No      |
| 2847   | 2  | 2  | Married/li     | 1  | High school or l | 7  | Student     | 15 | 2   | No       |      | 2   | No      |
| 2848   | 2  | 2  | Married/li     | 3  | College degree   | 1  | Working, fi | 33 | 2   | No       |      | 2   | No      |
| 2849   | 2  | 2  | Married/li     | 3  | College degree   | 1  | Working, fi | 20 | 1   | Yes      | 2    | 2   | No      |
| 2851   | 2  | 2  | Married/li     | 1  | High school or l | 9  | Other       | 28 | 2   | No       |      | 2   | No      |
| 2852   | 2  | 3  | Divorced       | 4  | Postgraduate     | 1  | Working, fi | 21 | 2   | No       |      | 1   | Yes     |
| 2853   | 2  | 2  | Married/li     | 2  | Some college     | 1  | Working, fi | 27 | 2   | No       |      | 2   | No      |
| 2854   | 2  | 1  | Single         | 1  | High school or l | 1  | Working, fi | 21 | 2   | No       |      | 2   | No      |
| 2856   | 2  | 2  | Married/li     | 3  | College degree   | 1  | Working, fi | 20 | 2   | No       |      | 2   | No      |
| 2857   | 2  | 2  | Married/li     | 3  | College degree   | 1  | Working, fi | 17 | 1   | Yes      | 1    | 1   | Yes     |
| 2858   | 2  | 2  | Married/li     | 3  | College degree   | 1  | Working, fi | 20 | 2   | No       |      | 2   | No      |
| 2859   | 2  | 2  | Married/li     | 3  | College degree   | 1  | Working, fi | 19 | 2   | No       |      | 2   | No      |
| 2860   | 2  | 2  | Married/li     | 3  | College degree   | 6  | Homemake    | 17 | 2   | No       |      | 2   | No      |
| 2861   | 2  | 2  | Married/li     | 4  | Postgraduate     | 1  | Working, fi | 22 | 1   | Yes      | 1    | 2   | No      |
| 2863   | 2  | 2  | Married/li     | 3  | College degree   | 1  | Working, fi | 21 | 2   | No       |      | 1   | Yes     |
| 2864   | 2  | 2  | Married/li     | 3  | College degree   | 6  | Homemake    | 15 | 2   | No       |      | 2   | No      |
| 2866   | 2  | 2  | Married/li     | 2  | Some college     | 1  | Working, fi | 29 | 2   | No       |      | 2   | No      |
| 2872   | 2  | 1  | Single         | 3  | College degree   | 1  | Working, fi | 19 | 2   | No       |      | 2   | No      |
| 2875   | 2  | 5  | Prefer not     | 4  | Postgraduate     | 1  | Working, fi | 31 | 2   | No       |      | 2   | No      |
| 2879   | 2  | 1  | Single         | 1  | High school or l | 1  | Working, fi | 18 | 2   | No       |      | 2   | No      |
| 2881   | 2  | 2  | Married/li     | 3  | College degree   | 1  | Working, fi | 18 | 2   | No       |      | 2   | No      |
| 2882   | 2  | 2  | Married/li     | 2  | Some college     | 1  | Working, fi | 33 | 1   | Yes      | 1    | 1   | Yes     |
| 2883   | 2  | 2  | Married/li     | 4  | Postgraduate     | 1  | Working, fi | 24 | 2   | No       |      | 2   | No      |
| 2884   | 2  | 2  | Married/li     | 3  | College degree   | 1  | Working, fi | 18 | 2   | No       |      | 2   | No      |
| 2885   | 2  | 2  | Married/li     | 3  | College degree   | 1  | Working, fi | 19 | 2   | No       |      | 2   | No      |
| 2887   | 2  | 2  | Married/li     | 3  | College degree   | 1  | Working, fi | 17 | 2   | No       |      | 2   | No      |
| 2888   | 2  | 2  | Married/li     | 1  | High school or l | 1  | Working, fi | 26 | 2   | No       |      | 2   | No      |
| 2890   | 2  | 2  | Married/li     | 4  | Postgraduate     | 1  | Working, fi | 24 | 2   | No       |      | 2   | No      |

| respid | Q5 | Q6 | Marital Status | Q7 | Education        | Q8 | Work        | Q9 | Q10 | Diabetes | Q10a | Q11 | High BP |
|--------|----|----|----------------|----|------------------|----|-------------|----|-----|----------|------|-----|---------|
| 2891   | 2  | 2  | Married/li     | 3  | College degree   | 1  | Working, fi | 19 | 2   | No       |      | 2   | No      |
| 2892   | 2  | 1  | Single         | 2  | Some college     | 3  | Unemploy    | 25 | 2   | No       |      | 2   | No      |
| 2895   | 2  | 2  | Married/li     | 3  | College degree   | 1  | Working, fi | 33 | 2   | No       |      | 2   | No      |
| 2899   | 2  | 2  | Married/li     | 3  | College degree   | 1  | Working, fi | 17 | 2   | No       |      | 2   | No      |
| 2900   | 2  | 1  | Single         | 3  | College degree   | 3  | Unemploy    | 15 | 2   | No       |      | 2   | No      |
| 2902   | 2  | 2  | Married/li     | 1  | High school or l | 9  | Other       | 21 | 2   | No       |      | 2   | No      |
| 2903   | 2  | 2  | Married/li     | 1  | High school or l | 1  | Working, fi | 16 | 2   | No       |      | 2   | No      |
| 2904   | 2  | 2  | Married/li     | 3  | College degree   | 1  | Working, fi | 33 | 2   | No       |      | 2   | No      |
| 2906   | 2  | 2  | Married/li     | 3  | College degree   | 1  | Working, fi | 18 | 2   | No       |      | 2   | No      |
| 2908   | 2  | 2  | Married/li     | 3  | College degree   | 6  | Homemake    | 20 | 2   | No       |      | 2   | No      |
| 2910   | 2  | 2  | Married/li     | 2  | Some college     | 6  | Homemake    | 26 | 2   | No       |      | 2   | No      |
| 2917   | 2  | 2  | Married/li     | 3  | College degree   | 9  | Other       | 19 | 2   | No       |      | 2   | No      |
| 2918   | 2  | 2  | Married/li     | 4  | Postgraduate     | 1  | Working, fi | 34 | 2   | No       |      | 1   | Yes     |
| 2919   | 2  | 2  | Married/li     | 3  | College degree   | 1  | Working, fi | 9  | 2   | No       |      | 1   | Yes     |
| 2920   | 2  | 2  | Married/li     | 3  | College degree   | 1  | Working, fi | 33 | 2   | No       |      | 2   | No      |
| 2921   | 2  | 2  | Married/li     | 3  | College degree   | 1  | Working, fi | 17 | 2   | No       |      | 2   | No      |
| 2922   | 2  | 2  | Married/li     | 3  | College degree   | 1  | Working, fi | 20 | 2   | No       |      | 2   | No      |
| 2923   | 2  | 1  | Single         | 4  | Postgraduate     | 9  | Other       | 15 | 2   | No       |      | 2   | No      |
| 2924   | 2  | 2  | Married/li     | 3  | College degree   | 6  | Homemake    | 19 | 2   | No       |      | 2   | No      |
| 2926   | 2  | 2  | Married/li     | 2  | Some college     | 1  | Working, fi | 36 | 1   | Yes      | 1    | 2   | No      |
| 2928   | 2  | 1  | Single         | 3  | College degree   | 1  | Working, fi | 17 | 2   | No       |      | 2   | No      |
| 2930   | 2  | 2  | Married/li     | 3  | College degree   | 6  | Homemake    | 34 | 2   | No       |      | 2   | No      |
| 2931   | 2  | 1  | Single         | 3  | College degree   | 1  | Working, fi | 27 | 2   | No       |      | 2   | No      |
| 2933   | 2  | 2  | Married/li     | 3  | College degree   | 1  | Working, fi | 20 | 2   | No       |      | 2   | No      |
| 2935   | 2  | 2  | Married/li     | 2  | Some college     | 1  | Working, fi | 11 | 2   | No       |      | 2   | No      |
| 2936   | 2  | 2  | Married/li     | 2  | Some college     | 1  | Working, fi | 32 | 2   | No       |      | 2   | No      |
| 2937   | 2  | 2  | Married/li     | 2  | Some college     | 1  | Working, fi | 13 | 2   | No       |      | 1   | Yes     |
| 2938   | 2  | 3  | Divorced       | 3  | College degree   | 1  | Working, fi | 27 | 2   | No       |      | 2   | No      |
| 2944   | 2  | 2  | Married/li     | 3  | College degree   | 1  | Working, fi | 33 | 2   | No       |      | 1   | Yes     |
| 2945   | 2  | 1  | Single         | 3  | College degree   | 8  | Other worl  | 19 | 2   | No       |      | 2   | No      |
| 2947   | 2  | 2  | Married/li     | 3  | College degree   | 1  | Working, fi | 37 | 2   | No       |      | 1   | Yes     |
| 2949   | 2  | 2  | Married/li     | 2  | Some college     | 4  | Retired     | 11 | 2   | No       |      | 2   | No      |

| respid | Q5 | Q6 | Marital Status | Q7 | Education        | Q8 | Work        | Q9 | Q10 | Diabetes | Q10a | Q11 | High BP |
|--------|----|----|----------------|----|------------------|----|-------------|----|-----|----------|------|-----|---------|
| 2951   | 2  | 2  | Married/li     | 3  | College degree   | 1  | Working, fi | 18 | 2   | No       |      | 2   | No      |
| 2952   | 2  | 2  | Married/li     | 4  | Postgraduate     | 1  | Working, fi | 22 | 2   | No       |      | 1   | Yes     |
| 2953   | 2  | 2  | Married/li     | 3  | College degree   | 6  | Homemake    | 99 | 2   | No       |      | 2   | No      |
| 2955   | 2  | 2  | Married/li     | 3  | College degree   | 1  | Working, fi | 17 | 2   | No       |      | 2   | No      |
| 2957   | 2  | 2  | Married/li     | 3  | College degree   | 1  | Working, fi | 20 | 2   | No       |      | 1   | Yes     |
| 2958   | 2  | 2  | Married/li     | 3  | College degree   | 1  | Working, fi | 21 | 2   | No       |      | 2   | No      |
| 2960   | 2  | 1  | Single         | 1  | High school or l | 1  | Working, fi | 33 | 2   | No       |      | 2   | No      |
| 2963   | 2  | 1  | Single         | 4  | Postgraduate     | 1  | Working, fi | 28 | 2   | No       |      | 2   | No      |
| 2964   | 2  | 2  | Married/li     | 3  | College degree   | 6  | Homemake    | 19 | 2   | No       |      | 2   | No      |
| 2967   | 2  | 3  | Divorced       | 1  | High school or l | 1  | Working, fi | 15 | 2   | No       |      | 2   | No      |
| 2968   | 2  | 2  | Married/li     | 3  | College degree   | 1  | Working, fi | 13 | 2   | No       |      | 2   | No      |
| 2971   | 2  | 2  | Married/li     | 3  | College degree   | 1  | Working, fi | 33 | 2   | No       |      | 1   | Yes     |
| 2974   | 2  | 1  | Single         | 3  | College degree   | 1  | Working, fi | 6  | 2   | No       |      | 2   | No      |
| 2975   | 2  | 2  | Married/li     | 3  | College degree   | 2  | Working, p  | 25 | 2   | No       |      | 2   | No      |
| 2982   | 2  | 1  | Single         | 3  | College degree   | 1  | Working, fi | 19 | 1   | Yes      | 1    | 2   | No      |
| 2983   | 2  | 2  | Married/li     | 3  | College degree   | 1  | Working, fi | 34 | 2   | No       |      | 2   | No      |
| 2985   | 2  | 2  | Married/li     | 3  | College degree   | 1  | Working, fi | 16 | 2   | No       |      | 2   | No      |
| 2986   | 2  | 2  | Married/li     | 4  | Postgraduate     | 1  | Working, fi | 19 | 1   | Yes      | 1    | 1   | Yes     |
| 2987   | 2  | 1  | Single         | 3  | College degree   | 2  | Working, p  | 25 | 2   | No       |      | 2   | No      |
| 2988   | 2  | 2  | Married/li     | 3  | College degree   | 1  | Working, fi | 11 | 1   | Yes      | 1    | 1   | Yes     |
| 2993   | 2  | 2  | Married/li     | 3  | College degree   | 1  | Working, fi | 24 | 2   | No       |      | 2   | No      |
| 2996   | 2  | 1  | Single         | 4  | Postgraduate     | 1  | Working, fi | 29 | 2   | No       |      | 2   | No      |
| 2997   | 2  | 2  | Married/li     | 4  | Postgraduate     | 1  | Working, fi | 32 | 2   | No       |      | 1   | Yes     |
| 2998   | 2  | 2  | Married/li     | 2  | Some college     | 1  | Working, fi | 31 | 2   | No       |      | 2   | No      |
| 3004   | 2  | 2  | Married/li     | 1  | High school or l | 1  | Working, fi | 10 | 2   | No       |      | 2   | No      |
| 3007   | 2  | 2  | Married/li     | 1  | High school or l | 6  | Homemake    | 18 | 1   | Yes      | 1    | 1   | Yes     |
| 3011   | 2  | 2  | Married/li     | 3  | College degree   | 1  | Working, fi | 9  | 2   | No       |      | 2   | No      |
| 3012   | 2  | 2  | Married/li     | 2  | Some college     | 1  | Working, fi | 33 | 2   | No       |      | 1   | Yes     |
| 3013   | 2  | 2  | Married/li     | 2  | Some college     | 1  | Working, fi | 30 | 2   | No       |      | 2   | No      |
| 3014   | 2  | 2  | Married/li     | 1  | High school or l | 1  | Working, fi | 9  | 2   | No       |      | 2   | No      |
| 3015   | 2  | 2  | Married/li     | 4  | Postgraduate     | 1  | Working, fi | 35 | 2   | No       |      | 2   | No      |
| 3016   | 2  | 2  | Married/li     | 3  | College degree   | 1  | Working, fi | 11 | 2   | No       |      | 2   | No      |

| respid | Q5 | Q6 | Marital Status | Q7 | Education        | Q8 | Work        | Q9 | Q10 | Diabetes | Q10a | Q11 | High BP |
|--------|----|----|----------------|----|------------------|----|-------------|----|-----|----------|------|-----|---------|
| 3017   | 2  | 1  | Single         | 1  | High school or l | 2  | Working, p  | 15 | 2   | No       |      | 2   | No      |
| 3020   | 2  | 2  | Married/li     | 4  | Postgraduate     | 1  | Working, fi | 11 | 2   | No       |      | 2   | No      |
| 3022   | 2  | 2  | Married/li     | 3  | College degree   | 1  | Working, fi | 32 | 2   | No       |      | 2   | No      |
| 3023   | 2  | 2  | Married/li     | 3  | College degree   | 1  | Working, fi | 13 | 2   | No       |      | 2   | No      |
| 3026   | 2  | 1  | Single         | 2  | Some college     | 1  | Working, fi | 36 | 2   | No       |      | 2   | No      |
| 3038   | 2  | 2  | Married/li     | 2  | Some college     | 1  | Working, fi | 13 | 2   | No       |      | 1   | Yes     |
| 3039   | 2  | 2  | Married/li     | 1  | High school or l | 4  | Retired     | 6  | 1   | Yes      | 1    | 1   | Yes     |
| 3040   | 2  | 2  | Married/li     | 3  | College degree   | 1  | Working, fi | 13 | 2   | No       |      | 2   | No      |
| 3041   | 2  | 2  | Married/li     | 3  | College degree   | 1  | Working, fi | 11 | 2   | No       |      | 2   | No      |
| 3042   | 2  | 2  | Married/li     | 2  | Some college     | 1  | Working, fi | 27 | 2   | No       |      | 2   | No      |
| 3044   | 2  | 2  | Married/li     | 3  | College degree   | 1  | Working, fi | 99 | 2   | No       |      | 2   | No      |
| 3050   | 2  | 2  | Married/li     | 3  | College degree   | 1  | Working, fi | 2  | 2   | No       |      | 2   | No      |
| 3052   | 2  | 2  | Married/li     | 3  | College degree   | 1  | Working, fi | 33 | 2   | No       |      | 2   | No      |
| 3056   | 2  | 2  | Married/li     | 4  | Postgraduate     | 1  | Working, fi | 13 | 2   | No       |      | 2   | No      |
| 3059   | 2  | 2  | Married/li     | 3  | College degree   | 2  | Working, p  | 10 | 2   | No       |      | 2   | No      |
| 3060   | 2  | 2  | Married/li     | 2  | Some college     | 1  | Working, fi | 26 | 2   | No       |      | 2   | No      |
| 3063   | 2  | 2  | Married/li     | 3  | College degree   | 1  | Working, fi | 19 | 2   | No       |      | 2   | No      |
| 3065   | 2  | 1  | Single         | 3  | College degree   | 1  | Working, fi | 31 | 2   | No       |      | 1   | Yes     |
| 3067   | 2  | 2  | Married/li     | 3  | College degree   | 1  | Working, fi | 19 | 2   | No       |      | 1   | Yes     |
| 3068   | 2  | 3  | Divorced       | 4  | Postgraduate     | 8  | Other worl  | 23 | 2   | No       |      | 2   | No      |
| 3072   | 2  | 2  | Married/li     | 3  | College degree   | 1  | Working, fi | 9  | 2   | No       |      | 2   | No      |
| 3074   | 2  | 2  | Married/li     | 2  | Some college     | 3  | Unemploye   | 31 | 2   | No       |      | 2   | No      |
| 3075   | 2  | 2  | Married/li     | 3  | College degree   | 1  | Working, fi | 20 | 2   | No       |      | 1   | Yes     |
| 3076   | 2  | 2  | Married/li     | 3  | College degree   | 1  | Working, fi | 20 | 2   | No       |      | 1   | Yes     |
| 3079   | 2  | 2  | Married/li     | 2  | Some college     | 1  | Working, fi | 26 | 1   | Yes      | 1    | 1   | Yes     |
| 3082   | 2  | 2  | Married/li     | 1  | High school or l | 4  | Retired     | 10 | 1   | Yes      | 1    | 1   | Yes     |
| 3083   | 2  | 2  | Married/li     | 4  | Postgraduate     | 1  | Working, fi | 17 | 2   | No       |      | 2   | No      |
| 3084   | 2  | 1  | Single         | 2  | Some college     | 8  | Other worl  | 15 | 1   | Yes      | 1    | 1   | Yes     |
| 3085   | 2  | 2  | Married/li     | 2  | Some college     | 1  | Working, fi | 32 | 2   | No       |      | 2   | No      |
| 3090   | 2  | 2  | Married/li     | 3  | College degree   | 1  | Working, fi | 33 | 2   | No       |      | 2   | No      |
| 3091   | 2  | 2  | Married/li     | 2  | Some college     | 1  | Working, fi | 33 | 2   | No       |      | 2   | No      |
| 3092   | 2  | 2  | Married/li     | 1  | High school or l | 4  | Retired     | 5  | 2   | No       |      | 1   | Yes     |

| respid | Q5 | Q6 | Marital Status | Q7 | Education        | Q8 | Work        | Q9 | Q10 | Diabetes | Q10a | Q11 | High BP |
|--------|----|----|----------------|----|------------------|----|-------------|----|-----|----------|------|-----|---------|
| 3095   | 2  | 2  | Married/li     | 3  | College degree   | 1  | Working, fi | 19 | 2   | No       |      | 2   | No      |
| 3096   | 2  | 2  | Married/li     | 3  | College degree   | 1  | Working, fi | 21 | 1   | Yes      | 1    | 1   | Yes     |
| 3097   | 2  | 2  | Married/li     | 3  | College degree   | 2  | Working, p  | 17 | 2   | No       |      | 1   | Yes     |
| 3099   | 2  | 2  | Married/li     | 3  | College degree   | 1  | Working, fi | 8  | 1   | Yes      | 1    | 1   | Yes     |
| 3101   | 2  | 2  | Married/li     | 1  | High school or l | 6  | Homemake    | 16 | 2   | No       |      | 2   | No      |
| 3103   | 2  | 2  | Married/li     | 3  | College degree   | 1  | Working, fi | 14 | 2   | No       |      | 2   | No      |
| 3104   | 2  | 1  | Single         | 3  | College degree   | 8  | Other worl  | 18 | 1   | Yes      | 1    | 2   | No      |
| 3105   | 2  | 2  | Married/li     | 2  | Some college     | 4  | Retired     | 1  | 2   | No       |      | 2   | No      |
| 3107   | 2  | 1  | Single         | 3  | College degree   | 1  | Working, fi | 17 | 1   | Yes      | 1    | 2   | No      |
| 3108   | 2  | 2  | Married/li     | 1  | High school or l | 1  | Working, fi | 32 | 2   | No       |      | 2   | No      |
| 3109   | 2  | 1  | Single         | 2  | Some college     | 1  | Working, fi | 28 | 2   | No       |      | 2   | No      |
| 3116   | 2  | 2  | Married/li     | 2  | Some college     | 1  | Working, fi | 13 | 2   | No       |      | 2   | No      |
| 3117   | 2  | 2  | Married/li     | 3  | College degree   | 1  | Working, fi | 18 | 2   | No       |      | 2   | No      |
| 3119   | 2  | 2  | Married/li     | 1  | High school or l | 1  | Working, fi | 12 | 2   | No       |      | 1   | Yes     |
| 3120   | 2  | 2  | Married/li     | 1  | High school or l | 4  | Retired     | 17 | 2   | No       |      | 1   | Yes     |
| 3130   | 2  | 2  | Married/li     | 3  | College degree   | 1  | Working, fi | 28 | 2   | No       |      | 2   | No      |
| 3131   | 2  | 2  | Married/li     | 3  | College degree   | 6  | Homemake    | 19 | 2   | No       |      | 2   | No      |
| 3133   | 2  | 2  | Married/li     | 3  | College degree   | 1  | Working, fi | 18 | 2   | No       |      | 1   | Yes     |
| 3134   | 2  | 2  | Married/li     | 3  | College degree   | 1  | Working, fi | 34 | 2   | No       |      | 2   | No      |
| 3135   | 2  | 1  | Single         | 3  | College degree   | 1  | Working, fi | 30 | 1   | Yes      | 1    | 1   | Yes     |
| 3145   | 2  | 2  | Married/li     | 3  | College degree   | 1  | Working, fi | 20 | 2   | No       |      | 1   | Yes     |
| 3147   | 2  | 2  | Married/li     | 3  | College degree   | 9  | Other       | 16 | 2   | No       |      | 2   | No      |
| 3152   | 2  | 2  | Married/li     | 4  | Postgraduate     | 1  | Working, fi | 20 | 2   | No       |      | 2   | No      |
| 3155   | 2  | 2  | Married/li     | 3  | College degree   | 1  | Working, fi | 18 | 2   | No       |      | 1   | Yes     |
| 3156   | 2  | 3  | Divorced       | 3  | College degree   | 1  | Working, fi | 26 | 2   | No       |      | 2   | No      |
| 3157   | 2  | 2  | Married/li     | 3  | College degree   | 1  | Working, fi | 22 | 2   | No       |      | 2   | No      |
| 3166   | 2  | 2  | Married/li     | 4  | Postgraduate     | 1  | Working, fi | 33 | 2   | No       |      | 2   | No      |
| 3169   | 2  | 1  | Single         | 1  | High school or l | 1  | Working, fi | 16 | 2   | No       |      | 2   | No      |
| 3179   | 2  | 1  | Single         | 3  | College degree   | 1  | Working, fi | 10 | 2   | No       |      | 2   | No      |
| 3181   | 2  | 3  | Divorced       | 2  | Some college     | 3  | Unemploy    | 25 | 2   | No       |      | 2   | No      |
| 3185   | 2  | 2  | Married/li     | 3  | College degree   | 1  | Working, fi | 13 | 2   | No       |      | 2   | No      |
| 3190   | 2  | 1  | Single         | 1  | High school or l | 5  | Permanent   | 16 | 2   | No       |      | 2   | No      |

| respid | Q5 | Q6 | Marital Status | Q7 | Education        | Q8 | Work        | Q9 | Q10 | Diabetes | Q10a | Q11 | High BP |
|--------|----|----|----------------|----|------------------|----|-------------|----|-----|----------|------|-----|---------|
| 3191   | 2  | 2  | Married/li     | 3  | College degree   | 1  | Working, fi | 33 | 2   | No       |      | 1   | Yes     |
| 3192   | 2  | 1  | Single         | 3  | College degree   | 1  | Working, fi | 30 | 1   | Yes      | 2    | 1   | Yes     |
| 3193   | 2  | 2  | Married/li     | 1  | High school or l | 1  | Working, fi | 32 | 2   | No       |      | 2   | No      |
| 3195   | 2  | 1  | Single         | 3  | College degree   | 1  | Working, fi | 19 | 2   | No       |      | 2   | No      |
| 3202   | 2  | 2  | Married/li     | 2  | Some college     | 1  | Working, fi | 32 | 2   | No       |      | 2   | No      |
| 3204   | 2  | 2  | Married/li     | 1  | High school or l | 1  | Working, fi | 8  | 2   | No       |      | 2   | No      |
| 3208   | 2  | 2  | Married/li     | 3  | College degree   | 1  | Working, fi | 12 | 2   | No       |      | 2   | No      |
| 3212   | 2  | 2  | Married/li     | 2  | Some college     | 4  | Retired     | 34 | 2   | No       |      | 2   | No      |
| 3218   | 2  | 3  | Divorced       | 1  | High school or l | 1  | Working, fi | 26 | 2   | No       |      | 1   | Yes     |
| 3219   | 2  | 1  | Single         | 3  | College degree   | 1  | Working, fi | 36 | 2   | No       |      | 2   | No      |
| 3220   | 2  | 2  | Married/li     | 3  | College degree   | 1  | Working, fi | 24 | 2   | No       |      | 1   | Yes     |
| 3221   | 2  | 1  | Single         | 3  | College degree   | 2  | Working, p  | 17 | 2   | No       |      | 1   | Yes     |
| 3223   | 2  | 2  | Married/li     | 3  | College degree   | 6  | Homemake    | 24 | 2   | No       |      | 2   | No      |
| 3231   | 2  | 2  | Married/li     | 3  | College degree   | 1  | Working, fi | 19 | 2   | No       |      | 2   | No      |
| 3232   | 2  | 2  | Married/li     | 3  | College degree   | 6  | Homemake    | 19 | 2   | No       |      | 2   | No      |
| 3234   | 2  | 2  | Married/li     | 3  | College degree   | 1  | Working, fi | 12 | 2   | No       |      | 2   | No      |
| 3235   | 2  | 2  | Married/li     | 3  | College degree   | 1  | Working, fi | 22 | 2   | No       |      | 2   | No      |
| 3237   | 2  | 1  | Single         | 3  | College degree   | 1  | Working, fi | 19 | 2   | No       |      | 1   | Yes     |
| 3238   | 2  | 2  | Married/li     | 4  | Postgraduate     | 1  | Working, fi | 34 | 2   | No       |      | 2   | No      |
| 3240   | 2  | 2  | Married/li     | 2  | Some college     | 1  | Working, fi | 33 | 2   | No       |      | 2   | No      |
| 3241   | 2  | 2  | Married/li     | 1  | High school or l | 1  | Working, fi | 33 | 2   | No       |      | 2   | No      |
| 3243   | 2  | 2  | Married/li     | 3  | College degree   | 6  | Homemake    | 19 | 2   | No       |      | 2   | No      |
| 3244   | 2  | 3  | Divorced       | 1  | High school or l | 9  | Other       | 17 | 2   | No       |      | 2   | No      |
| 3247   | 2  | 2  | Married/li     | 3  | College degree   | 1  | Working, fi | 21 | 2   | No       |      | 2   | No      |
| 3250   | 2  | 2  | Married/li     | 3  | College degree   | 1  | Working, fi | 18 | 2   | No       |      | 2   | No      |
| 3251   | 2  | 2  | Married/li     | 3  | College degree   | 1  | Working, fi | 23 | 2   | No       |      | 1   | Yes     |
| 3255   | 2  | 2  | Married/li     | 2  | Some college     | 4  | Retired     | 12 | 2   | No       |      | 2   | No      |
| 3256   | 2  | 2  | Married/li     | 3  | College degree   | 1  | Working, fi | 18 | 2   | No       |      | 2   | No      |
| 3257   | 2  | 2  | Married/li     | 2  | Some college     | 1  | Working, fi | 7  | 2   | No       |      | 1   | Yes     |
| 3258   | 2  | 2  | Married/li     | 1  | High school or l | 1  | Working, fi | 19 | 2   | No       |      | 2   | No      |
| 3259   | 2  | 2  | Married/li     | 3  | College degree   | 6  | Homemake    | 19 | 2   | No       |      | 2   | No      |
| 3260   | 2  | 3  | Divorced       | 3  | College degree   | 1  | Working, fi | 29 | 2   | No       |      | 1   | Yes     |



| respid | Q5 | Q6 | Marital Status | Q7 | Education        | Q8 | Work        | Q9 | Q10 | Diabetes | Q10a | Q11 | High BP |
|--------|----|----|----------------|----|------------------|----|-------------|----|-----|----------|------|-----|---------|
| 3261   | 2  | 3  | Divorced       | 1  | High school or l | 1  | Working, fi | 16 | 2   | No       |      | 2   | No      |
| 3262   | 2  | 2  | Married/li     | 4  | Postgraduate     | 4  | Retired     | 30 | 1   | Yes      | 2    | 1   | Yes     |
| 3264   | 2  | 2  | Married/li     | 2  | Some college     | 1  | Working, fi | 33 | 2   | No       |      | 2   | No      |
| 3265   | 2  | 2  | Married/li     | 2  | Some college     | 1  | Working, fi | 13 | 2   | No       |      | 1   | Yes     |
| 3267   | 2  | 2  | Married/li     | 4  | Postgraduate     | 1  | Working, fi | 16 | 2   | No       |      | 2   | No      |
| 3268   | 2  | 2  | Married/li     | 3  | College degree   | 6  | Homemake    | 20 | 2   | No       |      | 2   | No      |
| 3270   | 2  | 2  | Married/li     | 3  | College degree   | 1  | Working, fi | 19 | 2   | No       |      | 2   | No      |
| 3271   | 2  | 2  | Married/li     | 3  | College degree   | 1  | Working, fi | 18 | 2   | No       |      | 1   | Yes     |
| 3274   | 2  | 2  | Married/li     | 1  | High school or l | 1  | Working, fi | 11 | 2   | No       |      | 2   | No      |
| 3276   | 2  | 2  | Married/li     | 2  | Some college     | 1  | Working, fi | 7  | 2   | No       |      | 2   | No      |
| 3277   | 2  | 2  | Married/li     | 1  | High school or l | 1  | Working, fi | 31 | 2   | No       |      | 2   | No      |
| 3279   | 2  | 2  | Married/li     | 1  | High school or l | 1  | Working, fi | 32 | 2   | No       |      | 2   | No      |
| 3281   | 2  | 2  | Married/li     | 3  | College degree   | 1  | Working, fi | 18 | 2   | No       |      | 2   | No      |
| 3283   | 2  | 2  | Married/li     | 2  | Some college     | 1  | Working, fi | 5  | 2   | No       |      | 2   | No      |
| 3285   | 2  | 2  | Married/li     | 3  | College degree   | 1  | Working, fi | 12 | 2   | No       |      | 1   | Yes     |
| 3286   | 2  | 2  | Married/li     | 3  | College degree   | 1  | Working, fi | 11 | 2   | No       |      | 2   | No      |
| 3287   | 2  | 2  | Married/li     | 3  | College degree   | 1  | Working, fi | 17 | 2   | No       |      | 2   | No      |
| 3289   | 2  | 2  | Married/li     | 2  | Some college     | 1  | Working, fi | 31 | 2   | No       |      | 1   | Yes     |
| 3290   | 2  | 2  | Married/li     | 3  | College degree   | 1  | Working, fi | 8  | 2   | No       |      | 2   | No      |
| 3291   | 2  | 2  | Married/li     | 3  | College degree   | 1  | Working, fi | 18 | 2   | No       |      | 2   | No      |
| 3292   | 2  | 2  | Married/li     | 3  | College degree   | 1  | Working, fi | 11 | 2   | No       |      | 1   | Yes     |
| 3293   | 2  | 2  | Married/li     | 3  | College degree   | 1  | Working, fi | 18 | 2   | No       |      | 2   | No      |
| 3294   | 2  | 2  | Married/li     | 3  | College degree   | 1  | Working, fi | 33 | 1   | Yes      | 1    | 1   | Yes     |
| 3296   | 2  | 2  | Married/li     | 4  | Postgraduate     | 1  | Working, fi | 22 | 2   | No       |      | 2   | No      |
| 3306   | 2  | 2  | Married/li     | 1  | High school or l | 1  | Working, fi | 34 | 2   | No       |      | 2   | No      |
| 3307   | 2  | 2  | Married/li     | 2  | Some college     | 1  | Working, fi | 10 | 2   | No       |      | 2   | No      |
| 3308   | 2  | 2  | Married/li     | 3  | College degree   | 1  | Working, fi | 38 | 2   | No       |      | 2   | No      |
| 3312   | 2  | 2  | Married/li     | 3  | College degree   | 1  | Working, fi | 11 | 2   | No       |      | 1   | Yes     |
| 3313   | 2  | 2  | Married/li     | 2  | Some college     | 6  | Homemake    | 11 | 2   | No       |      | 2   | No      |
| 3316   | 2  | 2  | Married/li     | 4  | Postgraduate     | 1  | Working, fi | 14 | 2   | No       |      | 2   | No      |
| 3317   | 2  | 3  | Divorced       | 1  | High school or l | 1  | Working, fi | 16 | 2   | No       |      | 1   | Yes     |
| 3320   | 2  | 1  | Single         | 3  | College degree   | 1  | Working, fi | 27 | 2   | No       |      | 2   | No      |

| respid | Q5 | Q6 | Marital Status | Q7 | Education        | Q8 | Work        | Q9 | Q10 | Diabetes | Q10a | Q11 | High BP |
|--------|----|----|----------------|----|------------------|----|-------------|----|-----|----------|------|-----|---------|
| 3321   | 2  | 2  | Married/li     | 3  | College degree   | 1  | Working, fi | 18 | 2   | No       |      | 1   | Yes     |
| 3322   | 2  | 2  | Married/li     | 3  | College degree   | 1  | Working, fi | 20 | 2   | No       |      | 2   | No      |
| 3323   | 2  | 1  | Single         | 3  | College degree   | 9  | Other       | 26 | 2   | No       |      | 2   | No      |
| 3325   | 2  | 2  | Married/li     | 1  | High school or l | 1  | Working, fi | 11 | 2   | No       |      | 2   | No      |
| 3332   | 2  | 1  | Single         | 3  | College degree   | 1  | Working, fi | 29 | 2   | No       |      | 2   | No      |
| 3334   | 2  | 1  | Single         | 1  | High school or l | 9  | Other       | 99 | 2   | No       |      | 2   | No      |
| 3335   | 2  | 2  | Married/li     | 1  | High school or l | 4  | Retired     | 11 | 2   | No       |      | 1   | Yes     |
| 3341   | 2  | 2  | Married/li     | 1  | High school or l | 1  | Working, fi | 2  | 2   | No       |      | 2   | No      |
| 3345   | 2  | 1  | Single         | 1  | High school or l | 3  | Unemploy    | 99 | 2   | No       |      | 1   | Yes     |
| 3346   | 2  | 2  | Married/li     | 3  | College degree   | 1  | Working, fi | 26 | 2   | No       |      | 2   | No      |
| 3349   | 2  | 2  | Married/li     | 3  | College degree   | 1  | Working, fi | 20 | 2   | No       |      | 1   | Yes     |
| 3351   | 2  | 3  | Divorced       | 1  | High school or l | 1  | Working, fi | 19 | 2   | No       |      | 2   | No      |
| 3353   | 2  | 2  | Married/li     | 3  | College degree   | 1  | Working, fi | 33 | 2   | No       |      | 2   | No      |
| 3354   | 2  | 3  | Divorced       | 1  | High school or l | 3  | Unemploy    | 99 | 2   | No       |      | 2   | No      |
| 3356   | 2  | 2  | Married/li     | 3  | College degree   | 1  | Working, fi | 16 | 2   | No       |      | 2   | No      |
| 3357   | 2  | 1  | Single         | 3  | College degree   | 9  | Other       | 30 | 2   | No       |      | 2   | No      |
| 3360   | 2  | 2  | Married/li     | 1  | High school or l | 6  | Homemake    | 25 | 2   | No       |      | 2   | No      |
| 3361   | 2  | 2  | Married/li     | 4  | Postgraduate     | 1  | Working, fi | 33 | 2   | No       |      | 2   | No      |
| 3362   | 2  | 2  | Married/li     | 3  | College degree   | 1  | Working, fi | 21 | 2   | No       |      | 2   | No      |
| 3363   | 2  | 1  | Single         | 1  | High school or l | 1  | Working, fi | 29 | 2   | No       |      | 2   | No      |
| 3364   | 2  | 2  | Married/li     | 3  | College degree   | 1  | Working, fi | 12 | 1   | Yes      | 1    | 1   | Yes     |
| 3368   | 2  | 3  | Divorced       | 1  | High school or l | 1  | Working, fi | 26 | 2   | No       |      | 2   | No      |
| 3370   | 2  | 2  | Married/li     | 1  | High school or l | 1  | Working, fi | 11 | 2   | No       |      | 2   | No      |
| 3371   | 2  | 1  | Single         | 1  | High school or l | 1  | Working, fi | 25 | 2   | No       |      | 2   | No      |
| 3379   | 2  | 2  | Married/li     | 3  | College degree   | 1  | Working, fi | 33 | 2   | No       |      | 2   | No      |
| 3380   | 2  | 2  | Married/li     | 3  | College degree   | 1  | Working, fi | 12 | 2   | No       |      | 2   | No      |
| 3382   | 2  | 2  | Married/li     | 1  | High school or l | 4  | Retired     | 5  | 2   | No       |      | 1   | Yes     |
| 3384   | 2  | 2  | Married/li     | 1  | High school or l | 2  | Working, p  | 2  | 2   | No       |      | 2   | No      |
| 3385   | 2  | 2  | Married/li     | 2  | Some college     | 1  | Working, fi | 33 | 2   | No       |      | 2   | No      |
| 3388   | 2  | 2  | Married/li     | 2  | Some college     | 1  | Working, fi | 29 | 2   | No       |      | 2   | No      |
| 3392   | 2  | 2  | Married/li     | 3  | College degree   | 6  | Homemake    | 21 | 2   | No       |      | 2   | No      |
| 3393   | 2  | 2  | Married/li     | 2  | Some college     | 6  | Homemake    | 30 | 2   | No       |      | 2   | No      |

| respid | Q5 | Q6 | Marital Status | Q7 | Education        | Q8 | Work        | Q9 | Q10 | Diabetes | Q10a | Q11 | High BP |
|--------|----|----|----------------|----|------------------|----|-------------|----|-----|----------|------|-----|---------|
| 3394   | 2  | 2  | Married/li     | 4  | Postgraduate     | 1  | Working, fi | 35 | 2   | No       |      | 2   | No      |
| 3395   | 2  | 2  | Married/li     | 3  | College degree   | 1  | Working, fi | 24 | 2   | No       |      | 1   | Yes     |
| 3396   | 2  | 2  | Married/li     | 2  | Some college     | 2  | Working, p  | 3  | 2   | No       |      | 2   | No      |
| 3397   | 2  | 3  | Divorced       | 1  | High school or l | 1  | Working, fi | 30 | 2   | No       |      | 1   | Yes     |
| 3398   | 2  | 2  | Married/li     | 2  | Some college     | 1  | Working, fi | 12 | 2   | No       |      | 2   | No      |
| 3399   | 2  | 2  | Married/li     | 1  | High school or l | 3  | Unemploye   | 30 | 1   | Yes      | 1    | 1   | Yes     |
| 3400   | 2  | 2  | Married/li     | 2  | Some college     | 1  | Working, fi | 29 | 2   | No       |      | 2   | No      |
| 3401   | 2  | 2  | Married/li     | 3  | College degree   | 1  | Working, fi | 12 | 1   | Yes      | 1    | 1   | Yes     |
| 3402   | 2  | 2  | Married/li     | 2  | Some college     | 1  | Working, fi | 8  | 2   | No       |      | 2   | No      |
| 3403   | 2  | 2  | Married/li     | 3  | College degree   | 1  | Working, fi | 32 | 2   | No       |      | 1   | Yes     |
| 3405   | 2  | 2  | Married/li     | 1  | High school or l | 6  | Homemake    | 15 | 2   | No       |      | 1   | Yes     |
| 3407   | 2  | 2  | Married/li     | 3  | College degree   | 1  | Working, fi | 21 | 2   | No       |      | 1   | Yes     |
| 3410   | 2  | 2  | Married/li     | 3  | College degree   | 1  | Working, fi | 29 | 2   | No       |      | 2   | No      |
| 3411   | 2  | 3  | Divorced       | 2  | Some college     | 9  | Other       | 26 | 2   | No       |      | 2   | No      |
| 3413   | 2  | 1  | Single         | 1  | High school or l | 9  | Other       | 99 | 2   | No       |      | 2   | No      |
| 3414   | 2  | 1  | Single         | 1  | High school or l | 1  | Working, fi | 32 | 2   | No       |      | 2   | No      |
| 3420   | 2  | 2  | Married/li     | 2  | Some college     | 1  | Working, fi | 33 | 2   | No       |      | 2   | No      |
| 3421   | 2  | 2  | Married/li     | 4  | Postgraduate     | 1  | Working, fi | 13 | 2   | No       |      | 1   | Yes     |
| 3425   | 2  | 2  | Married/li     | 3  | College degree   | 1  | Working, fi | 19 | 2   | No       |      | 2   | No      |
| 3426   | 2  | 2  | Married/li     | 1  | High school or l | 1  | Working, fi | 18 | 1   | Yes      | 1    | 1   | Yes     |
| 3429   | 2  | 2  | Married/li     | 2  | Some college     | 4  | Retired     | 10 | 1   | Yes      | 1    | 1   | Yes     |
| 3430   | 2  | 2  | Married/li     | 2  | Some college     | 1  | Working, fi | 10 | 2   | No       |      | 1   | Yes     |
| 3433   | 2  | 1  | Single         | 3  | College degree   | 2  | Working, p  | 16 | 2   | No       |      | 2   | No      |
| 3434   | 2  | 1  | Single         | 1  | High school or l | 5  | Permanent   | 11 | 2   | No       |      | 1   | Yes     |
| 3437   | 2  | 2  | Married/li     | 2  | Some college     | 1  | Working, fi | 25 | 2   | No       |      | 1   | Yes     |
| 3439   | 2  | 2  | Married/li     | 3  | College degree   | 4  | Retired     | 16 | 2   | No       |      | 2   | No      |
| 3441   | 2  | 1  | Single         | 3  | College degree   | 1  | Working, fi | 15 | 2   | No       |      | 2   | No      |
| 3442   | 2  | 2  | Married/li     | 3  | College degree   | 2  | Working, p  | 19 | 2   | No       |      | 2   | No      |
| 3444   | 2  | 2  | Married/li     | 3  | College degree   | 9  | Other       | 24 | 2   | No       |      | 2   | No      |
| 3445   | 2  | 2  | Married/li     | 3  | College degree   | 1  | Working, fi | 14 | 2   | No       |      | 2   | No      |
| 3450   | 2  | 1  | Single         | 3  | College degree   | 1  | Working, fi | 18 | 2   | No       |      | 1   | Yes     |
| 3452   | 2  | 3  | Divorced       | 2  | Some college     | 1  | Working, fi | 25 | 2   | No       |      | 2   | No      |

| respid | Q5 | Q6 | Marital Status | Q7 | Education        | Q8 | Work        | Q9 | Q10 | Diabetes | Q10a | Q11 | High BP |
|--------|----|----|----------------|----|------------------|----|-------------|----|-----|----------|------|-----|---------|
| 3456   | 2  | 2  | Married/li     | 3  | College degree   | 1  | Working, fi | 36 | 2   | No       |      | 2   | No      |
| 3459   | 2  | 2  | Married/li     | 2  | Some college     | 1  | Working, fi | 10 | 2   | No       |      | 2   | No      |
| 3460   | 2  | 2  | Married/li     | 1  | High school or l | 1  | Working, fi | 16 | 2   | No       |      | 2   | No      |
| 3461   | 2  | 2  | Married/li     | 2  | Some college     | 1  | Working, fi | 14 | 2   | No       |      | 2   | No      |
| 3466   | 2  | 2  | Married/li     | 4  | Postgraduate     | 1  | Working, fi | 21 | 2   | No       |      | 1   | Yes     |
| 3471   | 2  | 2  | Married/li     | 3  | College degree   | 1  | Working, fi | 8  | 2   | No       |      | 2   | No      |
| 3473   | 2  | 2  | Married/li     | 4  | Postgraduate     | 1  | Working, fi | 38 | 2   | No       |      | 1   | Yes     |
| 3475   | 2  | 2  | Married/li     | 1  | High school or l | 1  | Working, fi | 19 | 2   | No       |      | 1   | Yes     |
| 3476   | 2  | 2  | Married/li     | 1  | High school or l | 1  | Working, fi | 24 | 2   | No       |      | 1   | Yes     |
| 3477   | 2  | 1  | Single         | 1  | High school or l | 1  | Working, fi | 26 | 2   | No       |      | 1   | Yes     |
| 3478   | 2  | 1  | Single         | 4  | Postgraduate     | 1  | Working, fi | 33 | 2   | No       |      | 2   | No      |
| 3479   | 2  | 2  | Married/li     | 1  | High school or l | 6  | Homemake    | 31 | 2   | No       |      | 2   | No      |
| 3482   | 2  | 2  | Married/li     | 2  | Some college     | 1  | Working, fi | 29 | 2   | No       |      | 1   | Yes     |
| 3483   | 2  | 2  | Married/li     | 2  | Some college     | 4  | Retired     | 7  | 2   | No       |      | 2   | No      |
| 3485   | 2  | 2  | Married/li     | 3  | College degree   | 1  | Working, fi | 16 | 2   | No       |      | 2   | No      |
| 3489   | 2  | 2  | Married/li     | 2  | Some college     | 1  | Working, fi | 10 | 2   | No       |      | 2   | No      |
| 3490   | 2  | 1  | Single         | 2  | Some college     | 1  | Working, fi | 25 | 2   | No       |      | 2   | No      |
| 3491   | 2  | 2  | Married/li     | 3  | College degree   | 1  | Working, fi | 13 | 2   | No       |      | 2   | No      |
| 3494   | 2  | 2  | Married/li     | 1  | High school or l | 1  | Working, fi | 99 | 2   | No       |      | 2   | No      |
| 3495   | 2  | 2  | Married/li     | 1  | High school or l | 2  | Working, p  | 29 | 2   | No       |      | 2   | No      |
| 3501   | 2  | 2  | Married/li     | 3  | College degree   | 1  | Working, fi | 7  | 2   | No       |      | 2   | No      |
| 3506   | 2  | 1  | Single         | 2  | Some college     | 1  | Working, fi | 34 | 2   | No       |      | 2   | No      |
| 3507   | 2  | 2  | Married/li     | 3  | College degree   | 1  | Working, fi | 23 | 2   | No       |      | 2   | No      |
| 3517   | 2  | 2  | Married/li     | 3  | College degree   | 1  | Working, fi | 17 | 2   | No       |      | 1   | Yes     |
| 3520   | 2  | 2  | Married/li     | 3  | College degree   | 1  | Working, fi | 34 | 2   | No       |      | 2   | No      |
| 3521   | 2  | 4  | Widow/wi       | 3  | College degree   | 1  | Working, fi | 22 | 2   | No       |      | 2   | No      |
| 3522   | 2  | 2  | Married/li     | 3  | College degree   | 6  | Homemake    | 17 | 2   | No       |      | 2   | No      |
| 3524   | 2  | 2  | Married/li     | 3  | College degree   | 1  | Working, fi | 18 | 2   | No       |      | 2   | No      |
| 3527   | 2  | 2  | Married/li     | 1  | High school or l | 1  | Working, fi | 34 | 2   | No       |      | 2   | No      |
| 3528   | 2  | 3  | Divorced       | 3  | College degree   | 1  | Working, fi | 33 | 2   | No       |      | 2   | No      |
| 3529   | 2  | 1  | Single         | 3  | College degree   | 1  | Working, fi | 16 | 2   | No       |      | 2   | No      |
| 3536   | 2  | 2  | Married/li     | 3  | College degree   | 6  | Homemake    | 20 | 2   | No       |      | 2   | No      |

| respid | Q5 | Q6 | Marital Status | Q7 | Education        | Q8 | Work        | Q9 | Q10 | Diabetes | Q10a | Q11 | High BP |
|--------|----|----|----------------|----|------------------|----|-------------|----|-----|----------|------|-----|---------|
| 3537   | 2  | 2  | Married/li     | 1  | High school or l | 1  | Working, fi | 28 | 2   | No       |      | 1   | Yes     |
| 3538   | 2  | 2  | Married/li     | 2  | Some college     | 1  | Working, fi | 30 | 1   | Yes      | 1    | 1   | Yes     |
| 3540   | 2  | 2  | Married/li     | 1  | High school or l | 6  | Homemake    | 19 | 2   | No       |      | 2   | No      |
| 3545   | 2  | 2  | Married/li     | 3  | College degree   | 1  | Working, fi | 18 | 1   | Yes      | 1    | 1   | Yes     |
| 3547   | 2  | 2  | Married/li     | 3  | College degree   | 1  | Working, fi | 20 | 1   | Yes      | 2    | 1   | Yes     |
| 3554   | 2  | 4  | Widow/wi       | 2  | Some college     | 1  | Working, fi | 33 | 2   | No       |      | 2   | No      |
| 3556   | 2  | 3  | Divorced       | 1  | High school or l | 9  | Other       | 18 | 2   | No       |      | 1   | Yes     |
| 3557   | 2  | 2  | Married/li     | 3  | College degree   | 1  | Working, fi | 18 | 2   | No       |      | 2   | No      |
| 3559   | 2  | 2  | Married/li     | 4  | Postgraduate     | 1  | Working, fi | 10 | 1   | Yes      | 1    | 1   | Yes     |
| 3560   | 2  | 2  | Married/li     | 4  | Postgraduate     | 4  | Retired     | 24 | 2   | No       |      | 2   | No      |
| 3562   | 2  | 2  | Married/li     | 3  | College degree   | 1  | Working, fi | 7  | 2   | No       |      | 1   | Yes     |
| 3564   | 2  | 2  | Married/li     | 3  | College degree   | 1  | Working, fi | 17 | 2   | No       |      | 1   | Yes     |
| 3565   | 2  | 2  | Married/li     | 4  | Postgraduate     | 1  | Working, fi | 12 | 2   | No       |      | 1   | Yes     |
| 3568   | 2  | 2  | Married/li     | 4  | Postgraduate     | 1  | Working, fi | 14 | 1   | Yes      | 1    | 2   | No      |
| 3572   | 2  | 2  | Married/li     | 4  | Postgraduate     | 1  | Working, fi | 38 | 2   | No       |      | 1   | Yes     |
| 3578   | 2  | 2  | Married/li     | 1  | High school or l | 6  | Homemake    | 32 | 2   | No       |      | 2   | No      |
| 3581   | 2  | 2  | Married/li     | 3  | College degree   | 1  | Working, fi | 19 | 2   | No       |      | 2   | No      |
| 3583   | 2  | 2  | Married/li     | 3  | College degree   | 1  | Working, fi | 32 | 2   | No       |      | 2   | No      |
| 3588   | 2  | 2  | Married/li     | 3  | College degree   | 1  | Working, fi | 23 | 2   | No       |      | 1   | Yes     |
| 3591   | 2  | 2  | Married/li     | 2  | Some college     | 1  | Working, fi | 29 | 2   | No       |      | 2   | No      |
| 3594   | 2  | 2  | Married/li     | 3  | College degree   | 1  | Working, fi | 18 | 2   | No       |      | 2   | No      |
| 3595   | 2  | 2  | Married/li     | 3  | College degree   | 1  | Working, fi | 19 | 2   | No       |      | 2   | No      |
| 3596   | 2  | 2  | Married/li     | 3  | College degree   | 6  | Homemake    | 20 | 2   | No       |      | 2   | No      |
| 3597   | 2  | 2  | Married/li     | 1  | High school or l | 2  | Working, p  | 16 | 2   | No       |      | 2   | No      |
| 3598   | 2  | 2  | Married/li     | 1  | High school or l | 6  | Homemake    | 16 | 2   | No       |      | 2   | No      |
| 3600   | 2  | 1  | Single         | 3  | College degree   | 1  | Working, fi | 24 | 2   | No       |      | 2   | No      |
| 3602   | 2  | 2  | Married/li     | 3  | College degree   | 2  | Working, p  | 19 | 2   | No       |      | 2   | No      |
| 3604   | 2  | 3  | Divorced       | 3  | College degree   | 1  | Working, fi | 27 | 2   | No       |      | 2   | No      |
| 3605   | 2  | 1  | Single         | 3  | College degree   | 3  | Unemploy    | 15 | 2   | No       |      | 2   | No      |
| 3606   | 2  | 2  | Married/li     | 3  | College degree   | 1  | Working, fi | 13 | 2   | No       |      | 2   | No      |
| 3607   | 2  | 2  | Married/li     | 2  | Some college     | 6  | Homemake    | 17 | 2   | No       |      | 1   | Yes     |
| 3610   | 2  | 3  | Divorced       | 2  | Some college     | 9  | Other       | 30 | 2   | No       |      | 2   | No      |

| respid | Q5 | Q6 | Marital Status | Q7 | Education        | Q8 | Work        | Q9 | Q10 | Diabetes | Q10a | Q11 | High BP |
|--------|----|----|----------------|----|------------------|----|-------------|----|-----|----------|------|-----|---------|
| 3611   | 2  | 2  | Married/li     | 3  | College degree   | 1  | Working, fi | 7  | 2   | No       |      | 2   | No      |
| 3612   | 2  | 2  | Married/li     | 3  | College degree   | 1  | Working, fi | 33 | 2   | No       |      | 2   | No      |
| 3614   | 2  | 2  | Married/li     | 1  | High school or l | 6  | Homemake    | 26 | 2   | No       |      | 2   | No      |
| 3616   | 2  | 2  | Married/li     | 2  | Some college     | 1  | Working, fi | 11 | 2   | No       |      | 2   | No      |
| 3617   | 2  | 1  | Single         | 1  | High school or l | 2  | Working, p  | 18 | 2   | No       |      | 2   | No      |
| 3618   | 2  | 1  | Single         | 3  | College degree   | 1  | Working, fi | 29 | 2   | No       |      | 2   | No      |
| 3619   | 2  | 2  | Married/li     | 2  | Some college     | 1  | Working, fi | 33 | 2   | No       |      | 2   | No      |
| 3621   | 2  | 2  | Married/li     | 4  | Postgraduate     | 1  | Working, fi | 24 | 2   | No       |      | 2   | No      |
| 3622   | 2  | 2  | Married/li     | 3  | College degree   | 2  | Working, p  | 11 | 1   | Yes      | 1    | 2   | No      |
| 3624   | 2  | 2  | Married/li     | 4  | Postgraduate     | 1  | Working, fi | 34 | 1   | Yes      | 2    | 1   | Yes     |
| 3626   | 2  | 2  | Married/li     | 3  | College degree   | 1  | Working, fi | 8  | 2   | No       |      | 2   | No      |
| 3629   | 2  | 2  | Married/li     | 3  | College degree   | 1  | Working, fi | 12 | 2   | No       |      | 2   | No      |
| 3631   | 2  | 2  | Married/li     | 2  | Some college     | 2  | Working, p  | 33 | 2   | No       |      | 2   | No      |
| 3632   | 2  | 2  | Married/li     | 2  | Some college     | 1  | Working, fi | 11 | 2   | No       |      | 2   | No      |
| 3638   | 2  | 2  | Married/li     | 3  | College degree   | 1  | Working, fi | 18 | 2   | No       |      | 2   | No      |
| 3640   | 2  | 2  | Married/li     | 3  | College degree   | 6  | Homemake    | 18 | 2   | No       |      | 2   | No      |
| 3641   | 2  | 2  | Married/li     | 2  | Some college     | 1  | Working, fi | 11 | 2   | No       |      | 2   | No      |
| 3645   | 2  | 2  | Married/li     | 4  | Postgraduate     | 1  | Working, fi | 19 | 2   | No       |      | 2   | No      |
| 3650   | 2  | 2  | Married/li     | 4  | Postgraduate     | 1  | Working, fi | 38 | 2   | No       |      | 1   | Yes     |
| 3653   | 2  | 2  | Married/li     | 3  | College degree   | 1  | Working, fi | 21 | 2   | No       |      | 1   | Yes     |
| 3655   | 2  | 2  | Married/li     | 2  | Some college     | 1  | Working, fi | 16 | 2   | No       |      | 2   | No      |
| 3657   | 2  | 2  | Married/li     | 3  | College degree   | 1  | Working, fi | 24 | 2   | No       |      | 2   | No      |
| 3658   | 2  | 2  | Married/li     | 1  | High school or l | 2  | Working, p  | 20 | 2   | No       |      | 1   | Yes     |
| 3659   | 2  | 2  | Married/li     | 3  | College degree   | 6  | Homemake    | 24 | 2   | No       |      | 2   | No      |
| 3664   | 2  | 2  | Married/li     | 3  | College degree   | 1  | Working, fi | 14 | 1   | Yes      | 1    | 1   | Yes     |
| 3665   | 2  | 2  | Married/li     | 2  | Some college     | 1  | Working, fi | 17 | 2   | No       |      | 2   | No      |
| 3667   | 2  | 2  | Married/li     | 4  | Postgraduate     | 8  | Other worl  | 17 | 2   | No       |      | 2   | No      |
| 3668   | 2  | 2  | Married/li     | 3  | College degree   | 1  | Working, fi | 11 | 1   | Yes      | 1    | 2   | No      |
| 3675   | 2  | 1  | Single         | 1  | High school or l | 1  | Working, fi | 26 | 2   | No       |      | 2   | No      |
| 3678   | 2  | 1  | Single         | 3  | College degree   | 1  | Working, fi | 33 | 2   | No       |      | 2   | No      |
| 3680   | 2  | 2  | Married/li     | 3  | College degree   | 1  | Working, fi | 20 | 2   | No       |      | 2   | No      |
| 3684   | 2  | 2  | Married/li     | 3  | College degree   | 1  | Working, fi | 14 | 2   | No       |      | 1   | Yes     |

| respid | Q5 | Q6 | Marital Status | Q7 | Education        | Q8 | Work        | Q9 | Q10 | Diabetes | Q10a | Q11 | High BP |
|--------|----|----|----------------|----|------------------|----|-------------|----|-----|----------|------|-----|---------|
| 3685   | 2  | 2  | Married/li     | 1  | High school or l | 6  | Homemake    | 15 | 2   | No       |      | 2   | No      |
| 3687   | 2  | 3  | Divorced       | 4  | Postgraduate     | 1  | Working, fi | 35 | 2   | No       |      | 2   | No      |
| 3689   | 2  | 2  | Married/li     | 2  | Some college     | 1  | Working, fi | 12 | 1   | Yes      | 1    | 1   | Yes     |
| 3690   | 2  | 2  | Married/li     | 2  | Some college     | 1  | Working, fi | 11 | 2   | No       |      | 2   | No      |
| 3693   | 2  | 2  | Married/li     | 1  | High school or l | 1  | Working, fi | 34 | 2   | No       |      | 2   | No      |
| 3694   | 2  | 1  | Single         | 2  | Some college     | 1  | Working, fi | 27 | 2   | No       |      | 2   | No      |
| 3695   | 2  | 2  | Married/li     | 3  | College degree   | 1  | Working, fi | 24 | 2   | No       |      | 2   | No      |
| 3700   | 2  | 2  | Married/li     | 2  | Some college     | 6  | Homemake    | 26 | 2   | No       |      | 2   | No      |
| 3701   | 2  | 2  | Married/li     | 1  | High school or l | 1  | Working, fi | 33 | 2   | No       |      | 1   | Yes     |
| 3703   | 2  | 2  | Married/li     | 4  | Postgraduate     | 1  | Working, fi | 3  | 2   | No       |      | 2   | No      |
| 3704   | 2  | 2  | Married/li     | 3  | College degree   | 1  | Working, fi | 23 | 1   | Yes      | 1    | 1   | Yes     |
| 3705   | 2  | 2  | Married/li     | 4  | Postgraduate     | 1  | Working, fi | 38 | 2   | No       |      | 2   | No      |
| 3709   | 2  | 2  | Married/li     | 2  | Some college     | 2  | Working, p  | 31 | 2   | No       |      | 2   | No      |
| 3710   | 2  | 2  | Married/li     | 3  | College degree   | 1  | Working, fi | 12 | 2   | No       |      | 2   | No      |
| 3722   | 2  | 1  | Single         | 4  | Postgraduate     | 1  | Working, fi | 29 | 2   | No       |      | 1   | Yes     |
| 3725   | 2  | 2  | Married/li     | 1  | High school or l | 1  | Working, fi | 26 | 2   | No       |      | 1   | Yes     |
| 3726   | 2  | 2  | Married/li     | 3  | College degree   | 1  | Working, fi | 33 | 2   | No       |      | 2   | No      |
| 3727   | 2  | 2  | Married/li     | 3  | College degree   | 1  | Working, fi | 13 | 2   | No       |      | 2   | No      |
| 3728   | 2  | 2  | Married/li     | 3  | College degree   | 6  | Homemake    | 21 | 2   | No       |      | 2   | No      |
| 3729   | 2  | 2  | Married/li     | 3  | College degree   | 1  | Working, fi | 24 | 2   | No       |      | 2   | No      |
| 3731   | 2  | 2  | Married/li     | 2  | Some college     | 1  | Working, fi | 10 | 2   | No       |      | 2   | No      |
| 3738   | 2  | 2  | Married/li     | 3  | College degree   | 1  | Working, fi | 11 | 2   | No       |      | 2   | No      |
| 3739   | 2  | 1  | Single         | 2  | Some college     | 1  | Working, fi | 33 | 2   | No       |      | 2   | No      |
| 3740   | 2  | 2  | Married/li     | 3  | College degree   | 1  | Working, fi | 7  | 2   | No       |      | 1   | Yes     |
| 3749   | 2  | 2  | Married/li     | 3  | College degree   | 2  | Working, p  | 16 | 2   | No       |      | 1   | Yes     |
| 3758   | 2  | 2  | Married/li     | 3  | College degree   | 1  | Working, fi | 18 | 2   | No       |      | 2   | No      |
| 3762   | 2  | 2  | Married/li     | 1  | High school or l | 2  | Working, p  | 26 | 2   | No       |      | 2   | No      |
| 3765   | 2  | 2  | Married/li     | 3  | College degree   | 6  | Homemake    | 33 | 2   | No       |      | 2   | No      |
| 3770   | 2  | 2  | Married/li     | 3  | College degree   | 1  | Working, fi | 12 | 2   | No       |      | 2   | No      |
| 3771   | 2  | 2  | Married/li     | 2  | Some college     | 1  | Working, fi | 10 | 2   | No       |      | 2   | No      |
| 3778   | 2  | 2  | Married/li     | 2  | Some college     | 1  | Working, fi | 11 | 2   | No       |      | 2   | No      |
| 3779   | 2  | 2  | Married/li     | 3  | College degree   | 1  | Working, fi | 21 | 2   | No       |      | 2   | No      |

| respid | Q5 | Q6 | Marital Status | Q7 | Education        | Q8 | Work        | Q9 | Q10 | Diabetes | Q10a | Q11 | High BP |
|--------|----|----|----------------|----|------------------|----|-------------|----|-----|----------|------|-----|---------|
| 3780   | 2  | 1  | Single         | 3  | College degree   | 1  | Working, fi | 17 | 2   | No       |      | 2   | No      |
| 3782   | 2  | 1  | Single         | 2  | Some college     | 1  | Working, fi | 29 | 2   | No       |      | 2   | No      |
| 3784   | 2  | 2  | Married/li     | 3  | College degree   | 1  | Working, fi | 12 | 2   | No       |      | 2   | No      |
| 3787   | 2  | 2  | Married/li     | 4  | Postgraduate     | 1  | Working, fi | 35 | 2   | No       |      | 2   | No      |
| 3790   | 2  | 2  | Married/li     | 3  | College degree   | 9  | Other       | 4  | 1   | Yes      | 2    | 1   | Yes     |
| 3791   | 2  | 2  | Married/li     | 3  | College degree   | 1  | Working, fi | 22 | 2   | No       |      | 2   | No      |
| 3793   | 2  | 2  | Married/li     | 3  | College degree   | 1  | Working, fi | 19 | 2   | No       |      | 2   | No      |
| 3795   | 2  | 2  | Married/li     | 3  | College degree   | 4  | Retired     | 11 | 2   | No       |      | 2   | No      |
| 3799   | 2  | 1  | Single         | 3  | College degree   | 1  | Working, fi | 16 | 2   | No       |      | 2   | No      |
| 3801   | 2  | 2  | Married/li     | 3  | College degree   | 1  | Working, fi | 16 | 2   | No       |      | 2   | No      |
| 3804   | 2  | 2  | Married/li     | 1  | High school or l | 1  | Working, fi | 7  | 2   | No       |      | 2   | No      |
| 3809   | 2  | 1  | Single         | 3  | College degree   | 1  | Working, fi | 4  | 2   | No       |      | 2   | No      |
| 3810   | 2  | 2  | Married/li     | 1  | High school or l | 6  | Homemake    | 17 | 2   | No       |      | 2   | No      |
| 3813   | 2  | 2  | Married/li     | 3  | College degree   | 1  | Working, fi | 13 | 2   | No       |      | 2   | No      |
| 3816   | 2  | 1  | Single         | 3  | College degree   | 1  | Working, fi | 26 | 2   | No       |      | 2   | No      |
| 3820   | 2  | 1  | Single         | 2  | Some college     | 1  | Working, fi | 25 | 2   | No       |      | 2   | No      |
| 3821   | 2  | 2  | Married/li     | 3  | College degree   | 1  | Working, fi | 12 | 2   | No       |      | 2   | No      |
| 3823   | 2  | 2  | Married/li     | 3  | College degree   | 1  | Working, fi | 11 | 2   | No       |      | 2   | No      |
| 3828   | 2  | 1  | Single         | 2  | Some college     | 1  | Working, fi | 27 | 2   | No       |      | 2   | No      |
| 3829   | 2  | 2  | Married/li     | 3  | College degree   | 8  | Other worl  | 18 | 2   | No       |      | 2   | No      |
| 3832   | 2  | 2  | Married/li     | 3  | College degree   | 1  | Working, fi | 7  | 2   | No       |      | 2   | No      |
| 3835   | 2  | 3  | Divorced       | 3  | College degree   | 1  | Working, fi | 17 | 2   | No       |      | 2   | No      |
| 3837   | 2  | 2  | Married/li     | 3  | College degree   | 6  | Homemake    | 23 | 1   | Yes      | 1    | 1   | Yes     |
| 3838   | 2  | 1  | Single         | 4  | Postgraduate     | 1  | Working, fi | 36 | 2   | No       |      | 2   | No      |
| 3839   | 2  | 2  | Married/li     | 3  | College degree   | 1  | Working, fi | 13 | 1   | Yes      | 1    | 1   | Yes     |
| 3840   | 2  | 2  | Married/li     | 3  | College degree   | 1  | Working, fi | 17 | 2   | No       |      | 2   | No      |
| 3842   | 2  | 2  | Married/li     | 3  | College degree   | 1  | Working, fi | 17 | 2   | No       |      | 2   | No      |
| 3843   | 2  | 2  | Married/li     | 2  | Some college     | 1  | Working, fi | 13 | 2   | No       |      | 2   | No      |
| 3844   | 2  | 2  | Married/li     | 3  | College degree   | 1  | Working, fi | 32 | 2   | No       |      | 1   | Yes     |
| 3850   | 2  | 2  | Married/li     | 1  | High school or l | 1  | Working, fi | 10 | 2   | No       |      | 2   | No      |
| 3851   | 2  | 1  | Single         | 3  | College degree   | 1  | Working, fi | 6  | 2   | No       |      | 2   | No      |
| 3856   | 2  | 2  | Married/li     | 1  | High school or l | 1  | Working, fi | 30 | 2   | No       |      | 2   | No      |



| respid | Q5 | Q6 | Marital Status | Q7 | Education        | Q8 | Work        | Q9 | Q10 | Diabetes | Q10a | Q11 | High BP |
|--------|----|----|----------------|----|------------------|----|-------------|----|-----|----------|------|-----|---------|
| 3859   | 2  | 2  | Married/li     | 3  | College degree   | 1  | Working, fi | 11 | 2   | No       |      | 1   | Yes     |
| 3860   | 2  | 1  | Single         | 4  | Postgraduate     | 1  | Working, fi | 29 | 2   | No       |      | 1   | Yes     |
| 3863   | 2  | 2  | Married/li     | 4  | Postgraduate     | 1  | Working, fi | 36 | 2   | No       |      | 2   | No      |
| 3866   | 2  | 1  | Single         | 2  | Some college     | 1  | Working, fi | 99 | 2   | No       |      | 2   | No      |
| 3867   | 2  | 1  | Single         | 3  | College degree   | 3  | Unemploy    | 16 | 2   | No       |      | 2   | No      |
| 3870   | 2  | 2  | Married/li     | 1  | High school or l | 1  | Working, fi | 11 | 2   | No       |      | 2   | No      |
| 3873   | 2  | 2  | Married/li     | 1  | High school or l | 1  | Working, fi | 17 | 2   | No       |      | 2   | No      |
| 3875   | 2  | 3  | Divorced       | 2  | Some college     | 2  | Working, p  | 26 | 2   | No       |      | 2   | No      |
| 3878   | 2  | 2  | Married/li     | 1  | High school or l | 1  | Working, fi | 32 | 2   | No       |      | 2   | No      |
| 3881   | 2  | 2  | Married/li     | 3  | College degree   | 2  | Working, p  | 27 | 2   | No       |      | 2   | No      |
| 3883   | 2  | 2  | Married/li     | 4  | Postgraduate     | 1  | Working, fi | 19 | 2   | No       |      | 1   | Yes     |
| 3884   | 2  | 1  | Single         | 3  | College degree   | 1  | Working, fi | 15 | 2   | No       |      | 2   | No      |
| 3885   | 2  | 2  | Married/li     | 3  | College degree   | 1  | Working, fi | 14 | 1   | Yes      | 1    | 1   | Yes     |
| 3886   | 2  | 2  | Married/li     | 1  | High school or l | 6  | Homemake    | 17 | 2   | No       |      | 1   | Yes     |
| 3887   | 2  | 2  | Married/li     | 2  | Some college     | 1  | Working, fi | 6  | 2   | No       |      | 2   | No      |
| 3888   | 2  | 1  | Single         | 2  | Some college     | 3  | Unemploy    | 26 | 2   | No       |      | 2   | No      |
| 3889   | 2  | 2  | Married/li     | 3  | College degree   | 1  | Working, fi | 14 | 1   | Yes      | 1    | 1   | Yes     |
| 3890   | 2  | 2  | Married/li     | 3  | College degree   | 1  | Working, fi | 13 | 2   | No       |      | 2   | No      |
| 3896   | 2  | 2  | Married/li     | 3  | College degree   | 2  | Working, p  | 24 | 2   | No       |      | 2   | No      |
| 3902   | 2  | 2  | Married/li     | 4  | Postgraduate     | 1  | Working, fi | 13 | 2   | No       |      | 1   | Yes     |
| 3909   | 2  | 2  | Married/li     | 1  | High school or l | 1  | Working, fi | 33 | 2   | No       |      | 2   | No      |
| 3912   | 2  | 2  | Married/li     | 1  | High school or l | 1  | Working, fi | 7  | 2   | No       |      | 2   | No      |
| 3922   | 2  | 2  | Married/li     | 3  | College degree   | 1  | Working, fi | 11 | 2   | No       |      | 2   | No      |
| 3928   | 2  | 2  | Married/li     | 1  | High school or l | 6  | Homemake    | 17 | 2   | No       |      | 2   | No      |
| 3930   | 2  | 2  | Married/li     | 1  | High school or l | 1  | Working, fi | 11 | 2   | No       |      | 2   | No      |
| 3931   | 2  | 2  | Married/li     | 1  | High school or l | 6  | Homemake    | 15 | 2   | No       |      | 2   | No      |
| 3933   | 2  | 2  | Married/li     | 3  | College degree   | 1  | Working, fi | 20 | 1   | Yes      | 1    | 1   | Yes     |
| 3935   | 2  | 1  | Single         | 2  | Some college     | 1  | Working, fi | 29 | 2   | No       |      | 2   | No      |
| 3937   | 2  | 2  | Married/li     | 3  | College degree   | 1  | Working, fi | 11 | 2   | No       |      | 2   | No      |
| 3939   | 2  | 2  | Married/li     | 1  | High school or l | 1  | Working, fi | 6  | 2   | No       |      | 2   | No      |
| 3942   | 2  | 2  | Married/li     | 4  | Postgraduate     | 1  | Working, fi | 22 | 2   | No       |      | 1   | Yes     |
| 3943   | 2  | 2  | Married/li     | 3  | College degree   | 1  | Working, fi | 13 | 2   | No       |      | 2   | No      |

| respid | Q5 | Q6 | Marital Status | Q7 | Education        | Q8 | Work        | Q9 | Q10 | Diabetes | Q10a | Q11 | High BP |
|--------|----|----|----------------|----|------------------|----|-------------|----|-----|----------|------|-----|---------|
| 3944   | 2  | 2  | Married/li     | 3  | College degree   | 1  | Working, fi | 8  | 2   | No       |      | 2   | No      |
| 3945   | 2  | 2  | Married/li     | 3  | College degree   | 1  | Working, fi | 19 | 2   | No       |      | 1   | Yes     |
| 3947   | 2  | 2  | Married/li     | 3  | College degree   | 1  | Working, fi | 22 | 2   | No       |      | 2   | No      |
| 3948   | 2  | 2  | Married/li     | 3  | College degree   | 1  | Working, fi | 34 | 2   | No       |      | 2   | No      |
| 3951   | 2  | 2  | Married/li     | 3  | College degree   | 1  | Working, fi | 19 | 2   | No       |      | 1   | Yes     |
| 3959   | 2  | 2  | Married/li     | 4  | Postgraduate     | 1  | Working, fi | 32 | 2   | No       |      | 2   | No      |
| 3969   | 2  | 2  | Married/li     | 2  | Some college     | 1  | Working, fi | 11 | 2   | No       |      | 1   | Yes     |
| 3973   | 2  | 2  | Married/li     | 3  | College degree   | 1  | Working, fi | 33 | 2   | No       |      | 2   | No      |
| 3975   | 2  | 1  | Single         | 2  | Some college     | 1  | Working, fi | 33 | 2   | No       |      | 2   | No      |
| 3976   | 2  | 2  | Married/li     | 3  | College degree   | 1  | Working, fi | 12 | 2   | No       |      | 2   | No      |
| 3977   | 2  | 1  | Single         | 3  | College degree   | 1  | Working, fi | 33 | 2   | No       |      | 2   | No      |
| 3978   | 2  | 2  | Married/li     | 2  | Some college     | 6  | Homemake    | 33 | 2   | No       |      | 2   | No      |
| 3994   | 2  | 2  | Married/li     | 2  | Some college     | 1  | Working, fi | 35 | 2   | No       |      | 1   | Yes     |
| 3995   | 2  | 2  | Married/li     | 2  | Some college     | 1  | Working, fi | 30 | 2   | No       |      | 2   | No      |
| 3997   | 2  | 2  | Married/li     | 3  | College degree   | 1  | Working, fi | 20 | 2   | No       |      | 1   | Yes     |
| 3998   | 2  | 2  | Married/li     | 3  | College degree   | 1  | Working, fi | 17 | 2   | No       |      | 2   | No      |
| 3999   | 2  | 2  | Married/li     | 4  | Postgraduate     | 2  | Working, p  | 23 | 2   | No       |      | 2   | No      |
| 4002   | 2  | 2  | Married/li     | 3  | College degree   | 6  | Homemake    | 21 | 2   | No       |      | 2   | No      |
| 4004   | 2  | 2  | Married/li     | 3  | College degree   | 1  | Working, fi | 18 | 2   | No       |      | 2   | No      |
| 4005   | 2  | 2  | Married/li     | 3  | College degree   | 1  | Working, fi | 21 | 2   | No       |      | 2   | No      |
| 4006   | 2  | 2  | Married/li     | 3  | College degree   | 1  | Working, fi | 19 | 2   | No       |      | 2   | No      |
| 4008   | 2  | 2  | Married/li     | 3  | College degree   | 1  | Working, fi | 20 | 2   | No       |      | 2   | No      |
| 4010   | 2  | 2  | Married/li     | 3  | College degree   | 1  | Working, fi | 17 | 2   | No       |      | 2   | No      |
| 4011   | 2  | 2  | Married/li     | 3  | College degree   | 1  | Working, fi | 19 | 2   | No       |      | 1   | Yes     |
| 4013   | 2  | 2  | Married/li     | 4  | Postgraduate     | 1  | Working, fi | 34 | 1   | Yes      | 1    | 1   | Yes     |
| 4014   | 2  | 2  | Married/li     | 1  | High school or l | 1  | Working, fi | 25 | 2   | No       |      | 2   | No      |
| 4016   | 2  | 2  | Married/li     | 3  | College degree   | 1  | Working, fi | 18 | 1   | Yes      | 1    | 1   | Yes     |
| 4017   | 2  | 1  | Single         | 1  | High school or l | 1  | Working, fi | 25 | 1   | Yes      | 1    | 2   | No      |
| 4019   | 2  | 2  | Married/li     | 3  | College degree   | 2  | Working, p  | 17 | 2   | No       |      | 2   | No      |
| 4021   | 2  | 1  | Single         | 3  | College degree   | 1  | Working, fi | 30 | 2   | No       |      | 2   | No      |
| 4023   | 2  | 2  | Married/li     | 1  | High school or l | 6  | Homemake    | 99 | 2   | No       |      | 2   | No      |
| 4024   | 2  | 2  | Married/li     | 4  | Postgraduate     | 1  | Working, fi | 24 | 2   | No       |      | 2   | No      |

| respid | Q5 | Q6 | Marital Status | Q7 | Education        | Q8 | Work        | Q9 | Q10 | Diabetes | Q10a | Q11 | High BP |
|--------|----|----|----------------|----|------------------|----|-------------|----|-----|----------|------|-----|---------|
| 4025   | 2  | 2  | Married/li     | 3  | College degree   | 6  | Homemake    | 23 | 2   | No       |      | 2   | No      |
| 4027   | 2  | 1  | Single         | 3  | College degree   | 1  | Working, fi | 16 | 2   | No       |      | 2   | No      |
| 4032   | 2  | 2  | Married/li     | 1  | High school or l | 1  | Working, fi | 31 | 2   | No       |      | 2   | No      |
| 4034   | 2  | 2  | Married/li     | 3  | College degree   | 1  | Working, fi | 18 | 2   | No       |      | 2   | No      |
| 4035   | 2  | 2  | Married/li     | 3  | College degree   | 1  | Working, fi | 18 | 2   | No       |      | 2   | No      |
| 4037   | 2  | 2  | Married/li     | 1  | High school or l | 1  | Working, fi | 18 | 2   | No       |      | 1   | Yes     |
| 4040   | 2  | 2  | Married/li     | 4  | Postgraduate     | 2  | Working, p  | 19 | 2   | No       |      | 2   | No      |
| 4041   | 2  | 2  | Married/li     | 2  | Some college     | 1  | Working, fi | 32 | 2   | No       |      | 2   | No      |
| 4042   | 2  | 2  | Married/li     | 1  | High school or l | 9  | Other       | 25 | 2   | No       |      | 2   | No      |
| 4043   | 2  | 2  | Married/li     | 1  | High school or l | 6  | Homemake    | 16 | 2   | No       |      | 2   | No      |
| 4045   | 2  | 2  | Married/li     | 4  | Postgraduate     | 6  | Homemake    | 20 | 2   | No       |      | 2   | No      |
| 4046   | 2  | 3  | Divorced       | 1  | High school or l | 1  | Working, fi | 28 | 2   | No       |      | 2   | No      |
| 4048   | 2  | 2  | Married/li     | 2  | Some college     | 2  | Working, p  | 21 | 2   | No       |      | 2   | No      |
| 4049   | 2  | 2  | Married/li     | 4  | Postgraduate     | 1  | Working, fi | 24 | 2   | No       |      | 2   | No      |
| 4050   | 2  | 2  | Married/li     | 4  | Postgraduate     | 2  | Working, p  | 19 | 2   | No       |      | 2   | No      |
| 4052   | 2  | 2  | Married/li     | 4  | Postgraduate     | 1  | Working, fi | 24 | 2   | No       |      | 2   | No      |
| 4053   | 2  | 2  | Married/li     | 1  | High school or l | 1  | Working, fi | 17 | 2   | No       |      | 2   | No      |
| 4060   | 2  | 2  | Married/li     | 3  | College degree   | 1  | Working, fi | 11 | 2   | No       |      | 2   | No      |
| 4065   | 2  | 2  | Married/li     | 3  | College degree   | 1  | Working, fi | 19 | 2   | No       |      | 2   | No      |
| 4066   | 2  | 1  | Single         | 3  | College degree   | 1  | Working, fi | 31 | 2   | No       |      | 1   | Yes     |
| 4067   | 2  | 2  | Married/li     | 1  | High school or l | 1  | Working, fi | 18 | 2   | No       |      | 2   | No      |
| 4068   | 2  | 2  | Married/li     | 3  | College degree   | 1  | Working, fi | 17 | 1   | Yes      | 2    | 1   | Yes     |
| 4069   | 2  | 1  | Single         | 2  | Some college     | 1  | Working, fi | 26 | 2   | No       |      | 2   | No      |
| 4070   | 2  | 2  | Married/li     | 1  | High school or l | 1  | Working, fi | 31 | 2   | No       |      | 2   | No      |
| 4071   | 2  | 1  | Single         | 3  | College degree   | 1  | Working, fi | 17 | 2   | No       |      | 1   | Yes     |
| 4072   | 2  | 1  | Single         | 3  | College degree   | 2  | Working, p  | 15 | 2   | No       |      | 2   | No      |
| 4073   | 2  | 2  | Married/li     | 4  | Postgraduate     | 1  | Working, fi | 23 | 2   | No       |      | 1   | Yes     |
| 4074   | 2  | 2  | Married/li     | 3  | College degree   | 1  | Working, fi | 17 | 2   | No       |      | 2   | No      |
| 4075   | 2  | 2  | Married/li     | 3  | College degree   | 1  | Working, fi | 11 | 2   | No       |      | 1   | Yes     |
| 4078   | 2  | 2  | Married/li     | 1  | High school or l | 1  | Working, fi | 17 | 1   | Yes      | 1    | 2   | No      |
| 4080   | 2  | 1  | Single         | 2  | Some college     | 1  | Working, fi | 17 | 2   | No       |      | 1   | Yes     |
| 4081   | 2  | 2  | Married/li     | 4  | Postgraduate     | 1  | Working, fi | 17 | 2   | No       |      | 2   | No      |

| respid | Q5 | Q6 | Marital Status | Q7 | Education        | Q8 | Work        | Q9 | Q10 | Diabetes | Q10a | Q11 | High BP |
|--------|----|----|----------------|----|------------------|----|-------------|----|-----|----------|------|-----|---------|
| 4082   | 2  | 2  | Married/li     | 3  | College degree   | 6  | Homemake    | 20 | 2   | No       |      | 2   | No      |
| 4083   | 2  | 2  | Married/li     | 3  | College degree   | 1  | Working, fi | 21 | 2   | No       |      | 2   | No      |
| 4084   | 2  | 3  | Divorced       | 2  | Some college     | 1  | Working, fi | 25 | 2   | No       |      | 2   | No      |
| 4086   | 2  | 2  | Married/li     | 3  | College degree   | 6  | Homemake    | 17 | 2   | No       |      | 2   | No      |
| 4087   | 2  | 2  | Married/li     | 3  | College degree   | 1  | Working, fi | 18 | 2   | No       |      | 1   | Yes     |
| 4088   | 2  | 2  | Married/li     | 4  | Postgraduate     | 1  | Working, fi | 19 | 2   | No       |      | 2   | No      |
| 4089   | 2  | 5  | Prefer not     | 1  | High school or l | 1  | Working, fi | 25 | 2   | No       |      | 2   | No      |
| 4090   | 2  | 2  | Married/li     | 2  | Some college     | 1  | Working, fi | 3  | 2   | No       |      | 2   | No      |
| 4093   | 2  | 2  | Married/li     | 4  | Postgraduate     | 1  | Working, fi | 16 | 2   | No       |      | 1   | Yes     |
| 4094   | 2  | 1  | Single         | 3  | College degree   | 8  | Other worl  | 17 | 2   | No       |      | 2   | No      |
| 4095   | 2  | 2  | Married/li     | 4  | Postgraduate     | 1  | Working, fi | 33 | 2   | No       |      | 1   | Yes     |
| 4096   | 2  | 1  | Single         | 1  | High school or l | 2  | Working, p  | 15 | 2   | No       |      | 2   | No      |
| 4098   | 2  | 1  | Single         | 1  | High school or l | 1  | Working, fi | 17 | 2   | No       |      | 2   | No      |
| 4103   | 2  | 2  | Married/li     | 3  | College degree   | 1  | Working, fi | 22 | 2   | No       |      | 2   | No      |
| 4104   | 2  | 2  | Married/li     | 3  | College degree   | 1  | Working, fi | 22 | 2   | No       |      | 2   | No      |
| 4107   | 2  | 2  | Married/li     | 2  | Some college     | 1  | Working, fi | 36 | 2   | No       |      | 2   | No      |
| 4109   | 2  | 2  | Married/li     | 2  | Some college     | 1  | Working, fi | 33 | 2   | No       |      | 2   | No      |
| 4110   | 2  | 2  | Married/li     | 3  | College degree   | 2  | Working, p  | 34 | 2   | No       |      | 2   | No      |
| 4113   | 2  | 2  | Married/li     | 3  | College degree   | 6  | Homemake    | 22 | 2   | No       |      | 2   | No      |
| 4114   | 2  | 2  | Married/li     | 1  | High school or l | 1  | Working, fi | 32 | 1   | Yes      | 1    | 1   | Yes     |
| 4116   | 2  | 2  | Married/li     | 2  | Some college     | 1  | Working, fi | 33 | 1   | Yes      | 1    | 2   | No      |
| 4119   | 2  | 2  | Married/li     | 3  | College degree   | 2  | Working, p  | 24 | 2   | No       |      | 1   | Yes     |
| 4120   | 2  | 1  | Single         | 3  | College degree   | 1  | Working, fi | 31 | 2   | No       |      | 2   | No      |
| 4121   | 2  | 1  | Single         | 3  | College degree   | 1  | Working, fi | 33 | 1   | Yes      | 1    | 2   | No      |
| 4122   | 2  | 2  | Married/li     | 3  | College degree   | 1  | Working, fi | 21 | 1   | Yes      | 1    | 1   | Yes     |
| 4124   | 2  | 2  | Married/li     | 3  | College degree   | 6  | Homemake    | 20 | 2   | No       |      | 2   | No      |
| 4126   | 2  | 2  | Married/li     | 3  | College degree   | 1  | Working, fi | 33 | 2   | No       |      | 2   | No      |
| 4127   | 2  | 2  | Married/li     | 3  | College degree   | 1  | Working, fi | 33 | 2   | No       |      | 2   | No      |
| 4131   | 2  | 2  | Married/li     | 3  | College degree   | 8  | Other worl  | 22 | 2   | No       |      | 2   | No      |
| 4134   | 2  | 3  | Divorced       | 1  | High school or l | 1  | Working, fi | 15 | 2   | No       |      | 2   | No      |
| 4144   | 2  | 2  | Married/li     | 2  | Some college     | 1  | Working, fi | 32 | 2   | No       |      | 1   | Yes     |
| 4145   | 2  | 2  | Married/li     | 4  | Postgraduate     | 1  | Working, fi | 22 | 1   | Yes      | 1    | 2   | No      |

| respid | Q5 | Q6 | Marital Status | Q7 | Education        | Q8 | Work        | Q9 | Q10 | Diabetes | Q10a | Q11 | High BP |
|--------|----|----|----------------|----|------------------|----|-------------|----|-----|----------|------|-----|---------|
| 4146   | 2  | 2  | Married/li     | 3  | College degree   | 1  | Working, fi | 99 | 2   | No       |      | 1   | Yes     |
| 4147   | 2  | 2  | Married/li     | 3  | College degree   | 1  | Working, fi | 19 | 2   | No       |      | 2   | No      |
| 4149   | 2  | 2  | Married/li     | 3  | College degree   | 6  | Homemake    | 20 | 2   | No       |      | 2   | No      |
| 4150   | 2  | 2  | Married/li     | 3  | College degree   | 1  | Working, fi | 22 | 2   | No       |      | 2   | No      |
| 4151   | 2  | 2  | Married/li     | 3  | College degree   | 6  | Homemake    | 22 | 2   | No       |      | 2   | No      |
| 4153   | 2  | 2  | Married/li     | 3  | College degree   | 1  | Working, fi | 21 | 2   | No       |      | 2   | No      |
| 4155   | 2  | 2  | Married/li     | 1  | High school or l | 1  | Working, fi | 28 | 2   | No       |      | 2   | No      |
| 4157   | 2  | 2  | Married/li     | 4  | Postgraduate     | 1  | Working, fi | 33 | 2   | No       |      | 1   | Yes     |
| 4159   | 2  | 2  | Married/li     | 3  | College degree   | 1  | Working, fi | 24 | 2   | No       |      | 2   | No      |
| 4160   | 2  | 2  | Married/li     | 3  | College degree   | 1  | Working, fi | 18 | 2   | No       |      | 2   | No      |
| 4161   | 2  | 2  | Married/li     | 4  | Postgraduate     | 1  | Working, fi | 99 | 2   | No       |      | 2   | No      |
| 4163   | 2  | 2  | Married/li     | 1  | High school or l | 2  | Working, p  | 17 | 2   | No       |      | 2   | No      |
| 4164   | 2  | 2  | Married/li     | 4  | Postgraduate     | 1  | Working, fi | 24 | 2   | No       |      | 1   | Yes     |
| 4165   | 2  | 2  | Married/li     | 3  | College degree   | 1  | Working, fi | 38 | 2   | No       |      | 2   | No      |
| 4166   | 2  | 2  | Married/li     | 3  | College degree   | 1  | Working, fi | 22 | 2   | No       |      | 2   | No      |
| 4167   | 2  | 2  | Married/li     | 2  | Some college     | 1  | Working, fi | 31 | 2   | No       |      | 2   | No      |
| 4170   | 2  | 2  | Married/li     | 3  | College degree   | 1  | Working, fi | 15 | 2   | No       |      | 2   | No      |
| 4172   | 2  | 2  | Married/li     | 1  | High school or l | 9  | Other       | 99 | 2   | No       |      | 2   | No      |
| 4173   | 2  | 2  | Married/li     | 3  | College degree   | 1  | Working, fi | 17 | 2   | No       |      | 2   | No      |
| 4180   | 2  | 2  | Married/li     | 4  | Postgraduate     | 1  | Working, fi | 37 | 2   | No       |      | 2   | No      |
| 4185   | 2  | 2  | Married/li     | 3  | College degree   | 1  | Working, fi | 19 | 2   | No       |      | 2   | No      |
| 4187   | 2  | 2  | Married/li     | 3  | College degree   | 1  | Working, fi | 35 | 2   | No       |      | 2   | No      |
| 4190   | 2  | 2  | Married/li     | 3  | College degree   | 1  | Working, fi | 18 | 2   | No       |      | 2   | No      |
| 4191   | 2  | 2  | Married/li     | 3  | College degree   | 1  | Working, fi | 16 | 2   | No       |      | 1   | Yes     |
| 4193   | 2  | 2  | Married/li     | 3  | College degree   | 1  | Working, fi | 21 | 2   | No       |      | 1   | Yes     |
| 4194   | 2  | 2  | Married/li     | 3  | College degree   | 1  | Working, fi | 20 | 2   | No       |      | 1   | Yes     |
| 4195   | 2  | 2  | Married/li     | 3  | College degree   | 1  | Working, fi | 24 | 2   | No       |      | 1   | Yes     |
| 4196   | 2  | 2  | Married/li     | 1  | High school or l | 1  | Working, fi | 6  | 2   | No       |      | 2   | No      |
| 4197   | 2  | 2  | Married/li     | 4  | Postgraduate     | 1  | Working, fi | 36 | 2   | No       |      | 2   | No      |
| 4198   | 2  | 1  | Single         | 4  | Postgraduate     | 1  | Working, fi | 33 | 2   | No       |      | 2   | No      |
| 4199   | 2  | 2  | Married/li     | 1  | High school or l | 4  | Retired     | 7  | 2   | No       |      | 2   | No      |
| 4205   | 2  | 2  | Married/li     | 3  | College degree   | 1  | Working, fi | 19 | 2   | No       |      | 2   | No      |

| respid | Q5 | Q6 | Marital Status | Q7 | Education        | Q8 | Work        | Q9 | Q10 | Diabetes | Q10a | Q11 | High BP |
|--------|----|----|----------------|----|------------------|----|-------------|----|-----|----------|------|-----|---------|
| 4206   | 2  | 1  | Single         | 3  | College degree   | 1  | Working, fi | 27 | 2   | No       |      | 2   | No      |
| 4207   | 2  | 2  | Married/li     | 3  | College degree   | 1  | Working, fi | 19 | 2   | No       |      | 2   | No      |
| 4214   | 2  | 2  | Married/li     | 3  | College degree   | 2  | Working, p  | 32 | 2   | No       |      | 2   | No      |
| 4215   | 2  | 2  | Married/li     | 3  | College degree   | 1  | Working, fi | 17 | 2   | No       |      | 2   | No      |
| 4217   | 2  | 2  | Married/li     | 3  | College degree   | 1  | Working, fi | 20 | 2   | No       |      | 2   | No      |
| 4219   | 2  | 2  | Married/li     | 3  | College degree   | 6  | Homemake    | 18 | 2   | No       |      | 2   | No      |
| 4223   | 2  | 2  | Married/li     | 3  | College degree   | 1  | Working, fi | 24 | 2   | No       |      | 2   | No      |
| 4226   | 2  | 2  | Married/li     | 3  | College degree   | 1  | Working, fi | 35 | 1   | Yes      | 1    | 2   | No      |
| 4229   | 2  | 2  | Married/li     | 3  | College degree   | 6  | Homemake    | 18 | 2   | No       |      | 2   | No      |
| 4230   | 2  | 2  | Married/li     | 2  | Some college     | 1  | Working, fi | 34 | 2   | No       |      | 2   | No      |
| 4232   | 2  | 2  | Married/li     | 3  | College degree   | 1  | Working, fi | 18 | 2   | No       |      | 2   | No      |
| 4233   | 2  | 2  | Married/li     | 1  | High school or l | 1  | Working, fi | 16 | 2   | No       |      | 1   | Yes     |
| 4234   | 2  | 2  | Married/li     | 3  | College degree   | 1  | Working, fi | 2  | 2   | No       |      | 2   | No      |
| 4235   | 2  | 2  | Married/li     | 3  | College degree   | 1  | Working, fi | 14 | 2   | No       |      | 2   | No      |
| 4236   | 2  | 2  | Married/li     | 1  | High school or l | 1  | Working, fi | 26 | 2   | No       |      | 2   | No      |
| 4237   | 2  | 2  | Married/li     | 3  | College degree   | 6  | Homemake    | 24 | 2   | No       |      | 2   | No      |
| 4238   | 2  | 2  | Married/li     | 3  | College degree   | 1  | Working, fi | 22 | 2   | No       |      | 1   | Yes     |
| 4240   | 2  | 2  | Married/li     | 3  | College degree   | 1  | Working, fi | 28 | 2   | No       |      | 2   | No      |
| 4241   | 2  | 2  | Married/li     | 2  | Some college     | 2  | Working, p  | 30 | 2   | No       |      | 2   | No      |
| 4247   | 2  | 2  | Married/li     | 3  | College degree   | 1  | Working, fi | 20 | 2   | No       |      | 2   | No      |
| 4250   | 2  | 2  | Married/li     | 1  | High school or l | 8  | Other worl  | 30 | 2   | No       |      | 2   | No      |
| 4251   | 2  | 2  | Married/li     | 1  | High school or l | 6  | Homemake    | 26 | 2   | No       |      | 1   | Yes     |
| 4253   | 2  | 2  | Married/li     | 4  | Postgraduate     | 1  | Working, fi | 37 | 2   | No       |      | 2   | No      |
| 4254   | 2  | 2  | Married/li     | 3  | College degree   | 1  | Working, fi | 17 | 2   | No       |      | 2   | No      |
| 4258   | 2  | 2  | Married/li     | 1  | High school or l | 4  | Retired     | 35 | 2   | No       |      | 1   | Yes     |
| 4260   | 2  | 2  | Married/li     | 3  | College degree   | 1  | Working, fi | 34 | 2   | No       |      | 2   | No      |
| 4263   | 2  | 2  | Married/li     | 1  | High school or l | 6  | Homemake    | 17 | 2   | No       |      | 2   | No      |
| 4265   | 2  | 1  | Single         | 3  | College degree   | 1  | Working, fi | 16 | 2   | No       |      | 2   | No      |
| 4266   | 2  | 2  | Married/li     | 2  | Some college     | 1  | Working, fi | 32 | 2   | No       |      | 1   | Yes     |
| 4267   | 2  | 2  | Married/li     | 2  | Some college     | 1  | Working, fi | 37 | 2   | No       |      | 1   | Yes     |
| 4270   | 2  | 2  | Married/li     | 2  | Some college     | 1  | Working, fi | 11 | 2   | No       |      | 2   | No      |
| 4273   | 2  | 2  | Married/li     | 3  | College degree   | 6  | Homemake    | 18 | 2   | No       |      | 2   | No      |

| respid | Q5 | Q6 | Marital Status | Q7 | Education        | Q8 | Work        | Q9 | Q10 | Diabetes | Q10a | Q11 | High BP |
|--------|----|----|----------------|----|------------------|----|-------------|----|-----|----------|------|-----|---------|
| 4280   | 2  | 2  | Married/li     | 2  | Some college     | 4  | Retired     | 33 | 2   | No       |      | 2   | No      |
| 4281   | 2  | 1  | Single         | 4  | Postgraduate     | 1  | Working, fi | 15 | 2   | No       |      | 1   | Yes     |
| 4282   | 2  | 2  | Married/li     | 3  | College degree   | 8  | Other worl  | 19 | 2   | No       |      | 2   | No      |
| 4283   | 2  | 1  | Single         | 3  | College degree   | 1  | Working, fi | 16 | 2   | No       |      | 2   | No      |
| 4286   | 2  | 1  | Single         | 1  | High school or l | 1  | Working, fi | 30 | 2   | No       |      | 1   | Yes     |
| 4287   | 2  | 2  | Married/li     | 3  | College degree   | 1  | Working, fi | 33 | 2   | No       |      | 2   | No      |
| 4289   | 2  | 2  | Married/li     | 3  | College degree   | 9  | Other       | 22 | 2   | No       |      | 2   | No      |
| 4290   | 2  | 3  | Divorced       | 3  | College degree   | 2  | Working, p  | 15 | 2   | No       |      | 2   | No      |
| 4291   | 2  | 2  | Married/li     | 3  | College degree   | 8  | Other worl  | 20 | 2   | No       |      | 2   | No      |
| 4292   | 2  | 1  | Single         | 4  | Postgraduate     | 7  | Student     | 15 | 2   | No       |      | 1   | Yes     |
| 4293   | 2  | 2  | Married/li     | 3  | College degree   | 1  | Working, fi | 30 | 2   | No       |      | 2   | No      |
| 4294   | 2  | 1  | Single         | 4  | Postgraduate     | 1  | Working, fi | 18 | 2   | No       |      | 2   | No      |
| 4295   | 2  | 1  | Single         | 1  | High school or l | 7  | Student     | 19 | 2   | No       |      | 2   | No      |
| 4296   | 2  | 1  | Single         | 1  | High school or l | 2  | Working, p  | 15 | 2   | No       |      | 2   | No      |
| 4297   | 2  | 2  | Married/li     | 3  | College degree   | 1  | Working, fi | 21 | 2   | No       |      | 1   | Yes     |
| 4298   | 2  | 2  | Married/li     | 1  | High school or l | 2  | Working, p  | 30 | 2   | No       |      | 2   | No      |
| 4299   | 2  | 2  | Married/li     | 1  | High school or l | 6  | Homemake    | 15 | 2   | No       |      | 1   | Yes     |
| 4300   | 2  | 1  | Single         | 3  | College degree   | 2  | Working, p  | 26 | 2   | No       |      | 2   | No      |
| 4301   | 2  | 2  | Married/li     | 3  | College degree   | 2  | Working, p  | 18 | 2   | No       |      | 2   | No      |
| 4302   | 2  | 2  | Married/li     | 1  | High school or l | 6  | Homemake    | 15 | 2   | No       |      | 2   | No      |
| 4304   | 2  | 2  | Married/li     | 4  | Postgraduate     | 4  | Retired     | 20 | 2   | No       |      | 2   | No      |
| 4305   | 2  | 2  | Married/li     | 3  | College degree   | 1  | Working, fi | 20 | 2   | No       |      | 2   | No      |
| 4307   | 2  | 1  | Single         | 3  | College degree   | 1  | Working, fi | 16 | 2   | No       |      | 2   | No      |
| 4308   | 2  | 1  | Single         | 4  | Postgraduate     | 1  | Working, fi | 22 | 2   | No       |      | 2   | No      |
| 4312   | 2  | 3  | Divorced       | 3  | College degree   | 1  | Working, fi | 20 | 2   | No       |      | 2   | No      |
| 4314   | 2  | 2  | Married/li     | 2  | Some college     | 2  | Working, p  | 18 | 2   | No       |      | 1   | Yes     |
| 4316   | 2  | 2  | Married/li     | 4  | Postgraduate     | 1  | Working, fi | 28 | 2   | No       |      | 1   | Yes     |
| 4317   | 2  | 2  | Married/li     | 3  | College degree   | 6  | Homemake    | 20 | 2   | No       |      | 1   | Yes     |
| 4319   | 2  | 2  | Married/li     | 3  | College degree   | 1  | Working, fi | 21 | 2   | No       |      | 2   | No      |
| 4323   | 2  | 1  | Single         | 3  | College degree   | 1  | Working, fi | 32 | 2   | No       |      | 2   | No      |
| 4337   | 2  | 1  | Single         | 1  | High school or l | 1  | Working, fi | 32 | 2   | No       |      | 2   | No      |
| 4341   | 2  | 5  | Prefer not     | 3  | College degree   | 9  | Other       | 20 | 2   | No       |      | 2   | No      |

| respid | Q5 | Q6 | Marital Status | Q7 | Education        | Q8 | Work        | Q9 | Q10 | Diabetes | Q10a | Q11 | High BP |
|--------|----|----|----------------|----|------------------|----|-------------|----|-----|----------|------|-----|---------|
| 4342   | 2  | 2  | Married/li     | 3  | College degree   | 2  | Working, p  | 17 | 2   | No       |      | 1   | Yes     |
| 4344   | 2  | 2  | Married/li     | 3  | College degree   | 8  | Other worl  | 16 | 1   | Yes      | 1    | 2   | No      |
| 4345   | 2  | 1  | Single         | 1  | High school or l | 2  | Working, p  | 18 | 2   | No       |      | 2   | No      |
| 4346   | 2  | 1  | Single         | 3  | College degree   | 3  | Unemploye   | 16 | 2   | No       |      | 2   | No      |
| 4347   | 2  | 5  | Prefer not     | 1  | High school or l | 9  | Other       | 25 | 2   | No       |      | 2   | No      |
| 4350   | 2  | 2  | Married/li     | 1  | High school or l | 9  | Other       | 1  | 2   | No       |      | 2   | No      |
| 4352   | 2  | 2  | Married/li     | 1  | High school or l | 1  | Working, fi | 32 | 2   | No       |      | 2   | No      |
| 4353   | 2  | 2  | Married/li     | 1  | High school or l | 4  | Retired     | 12 | 2   | No       |      | 2   | No      |
| 4355   | 2  | 2  | Married/li     | 3  | College degree   | 1  | Working, fi | 19 | 2   | No       |      | 2   | No      |
| 4356   | 2  | 1  | Single         | 3  | College degree   | 1  | Working, fi | 19 | 2   | No       |      | 2   | No      |
| 4358   | 2  | 2  | Married/li     | 3  | College degree   | 1  | Working, fi | 13 | 2   | No       |      | 2   | No      |
| 4359   | 2  | 2  | Married/li     | 3  | College degree   | 1  | Working, fi | 17 | 2   | No       |      | 1   | Yes     |
| 4360   | 2  | 2  | Married/li     | 3  | College degree   | 1  | Working, fi | 20 | 2   | No       |      | 2   | No      |
| 4361   | 2  | 3  | Divorced       | 2  | Some college     | 1  | Working, fi | 16 | 1   | Yes      | 1    | 1   | Yes     |
| 4363   | 2  | 3  | Divorced       | 3  | College degree   | 1  | Working, fi | 17 | 2   | No       |      | 2   | No      |
| 4364   | 2  | 4  | Widow/wi       | 3  | College degree   | 1  | Working, fi | 15 | 2   | No       |      | 2   | No      |
| 4365   | 2  | 2  | Married/li     | 2  | Some college     | 1  | Working, fi | 16 | 2   | No       |      | 1   | Yes     |
| 4367   | 2  | 2  | Married/li     | 1  | High school or l | 3  | Unemploye   | 1  | 2   | No       |      | 2   | No      |
| 4369   | 2  | 2  | Married/li     | 4  | Postgraduate     | 1  | Working, fi | 34 | 2   | No       |      | 2   | No      |
| 4373   | 2  | 1  | Single         | 3  | College degree   | 2  | Working, p  | 17 | 2   | No       |      | 1   | Yes     |
| 4374   | 2  | 2  | Married/li     | 3  | College degree   | 6  | Homemake    | 19 | 2   | No       |      | 2   | No      |
| 4375   | 2  | 1  | Single         | 3  | College degree   | 1  | Working, fi | 33 | 2   | No       |      | 2   | No      |
| 4378   | 2  | 2  | Married/li     | 4  | Postgraduate     | 1  | Working, fi | 33 | 2   | No       |      | 2   | No      |
| 4379   | 2  | 2  | Married/li     | 2  | Some college     | 1  | Working, fi | 16 | 2   | No       |      | 2   | No      |
| 4382   | 2  | 2  | Married/li     | 3  | College degree   | 1  | Working, fi | 20 | 1   | Yes      | 1    | 2   | No      |
| 4383   | 2  | 2  | Married/li     | 1  | High school or l | 1  | Working, fi | 25 | 2   | No       |      | 2   | No      |
| 4384   | 2  | 2  | Married/li     | 3  | College degree   | 1  | Working, fi | 23 | 2   | No       |      | 2   | No      |
| 4385   | 2  | 2  | Married/li     | 3  | College degree   | 1  | Working, fi | 24 | 2   | No       |      | 2   | No      |
| 4388   | 2  | 2  | Married/li     | 3  | College degree   | 1  | Working, fi | 19 | 2   | No       |      | 2   | No      |
| 4389   | 2  | 2  | Married/li     | 1  | High school or l | 2  | Working, p  | 22 | 2   | No       |      | 2   | No      |
| 4391   | 2  | 3  | Divorced       | 1  | High school or l | 1  | Working, fi | 26 | 2   | No       |      | 2   | No      |
| 4392   | 2  | 2  | Married/li     | 4  | Postgraduate     | 1  | Working, fi | 22 | 2   | No       |      | 2   | No      |



| respid | Q5 | Q6 | Marital Status | Q7 | Education        | Q8 | Work        | Q9 | Q10 | Diabetes | Q10a | Q11 | High BP |
|--------|----|----|----------------|----|------------------|----|-------------|----|-----|----------|------|-----|---------|
| 4393   | 2  | 2  | Married/li     | 1  | High school or l | 1  | Working, fi | 17 | 2   | No       |      | 2   | No      |
| 4395   | 2  | 2  | Married/li     | 3  | College degree   | 1  | Working, fi | 18 | 2   | No       |      | 2   | No      |
| 4397   | 2  | 3  | Divorced       | 3  | College degree   | 2  | Working, p  | 18 | 2   | No       |      | 2   | No      |
| 4398   | 2  | 1  | Single         | 4  | Postgraduate     | 1  | Working, fi | 27 | 2   | No       |      | 2   | No      |
| 4399   | 2  | 2  | Married/li     | 3  | College degree   | 1  | Working, fi | 20 | 1   | Yes      | 1    | 2   | No      |
| 4400   | 2  | 2  | Married/li     | 2  | Some college     | 1  | Working, fi | 99 | 2   | No       |      | 2   | No      |
| 4401   | 2  | 1  | Single         | 2  | Some college     | 1  | Working, fi | 11 | 2   | No       |      | 2   | No      |
| 4402   | 2  | 2  | Married/li     | 1  | High school or l | 6  | Homemake    | 17 | 2   | No       |      | 2   | No      |
| 4404   | 2  | 2  | Married/li     | 3  | College degree   | 6  | Homemake    | 19 | 2   | No       |      | 2   | No      |
| 4405   | 2  | 1  | Single         | 1  | High school or l | 1  | Working, fi | 37 | 2   | No       |      | 1   | Yes     |
| 4407   | 2  | 2  | Married/li     | 3  | College degree   | 1  | Working, fi | 34 | 2   | No       |      | 1   | Yes     |
| 4408   | 2  | 2  | Married/li     | 1  | High school or l | 1  | Working, fi | 19 | 2   | No       |      | 2   | No      |
| 4411   | 2  | 2  | Married/li     | 2  | Some college     | 1  | Working, fi | 11 | 2   | No       |      | 2   | No      |
| 4420   | 2  | 2  | Married/li     | 3  | College degree   | 1  | Working, fi | 12 | 2   | No       |      | 2   | No      |
| 4421   | 2  | 2  | Married/li     | 1  | High school or l | 1  | Working, fi | 11 | 2   | No       |      | 2   | No      |
| 4424   | 2  | 2  | Married/li     | 3  | College degree   | 1  | Working, fi | 19 | 1   | Yes      | 1    | 2   | No      |
| 4425   | 2  | 2  | Married/li     | 1  | High school or l | 6  | Homemake    | 17 | 2   | No       |      | 2   | No      |
| 4427   | 2  | 3  | Divorced       | 2  | Some college     | 1  | Working, fi | 11 | 2   | No       |      | 2   | No      |
| 4430   | 2  | 2  | Married/li     | 3  | College degree   | 1  | Working, fi | 18 | 2   | No       |      | 2   | No      |
| 4431   | 2  | 2  | Married/li     | 3  | College degree   | 6  | Homemake    | 22 | 2   | No       |      | 2   | No      |
| 4432   | 2  | 3  | Divorced       | 3  | College degree   | 9  | Other       | 16 | 2   | No       |      | 2   | No      |
| 4436   | 2  | 1  | Single         | 3  | College degree   | 1  | Working, fi | 27 | 2   | No       |      | 2   | No      |
| 4439   | 2  | 2  | Married/li     | 2  | Some college     | 1  | Working, fi | 33 | 2   | No       |      | 2   | No      |
| 4451   | 2  | 1  | Single         | 1  | High school or l | 1  | Working, fi | 15 | 2   | No       |      | 2   | No      |
| 4452   | 2  | 2  | Married/li     | 2  | Some college     | 4  | Retired     | 11 | 2   | No       |      | 1   | Yes     |
| 4458   | 2  | 2  | Married/li     | 3  | College degree   | 1  | Working, fi | 17 | 2   | No       |      | 1   | Yes     |
| 4464   | 2  | 2  | Married/li     | 3  | College degree   | 1  | Working, fi | 15 | 2   | No       |      | 2   | No      |
| 4465   | 2  | 2  | Married/li     | 3  | College degree   | 4  | Retired     | 20 | 2   | No       |      | 1   | Yes     |
| 4467   | 2  | 2  | Married/li     | 1  | High school or l | 1  | Working, fi | 16 | 2   | No       |      | 1   | Yes     |
| 4470   | 2  | 2  | Married/li     | 3  | College degree   | 1  | Working, fi | 17 | 2   | No       |      | 2   | No      |
| 4471   | 2  | 2  | Married/li     | 3  | College degree   | 1  | Working, fi | 33 | 2   | No       |      | 2   | No      |
| 4472   | 2  | 2  | Married/li     | 4  | Postgraduate     | 1  | Working, fi | 21 | 1   | Yes      | 1    | 2   | No      |

| respid | Q5 | Q6 | Marital Status | Q7 | Education        | Q8 | Work        | Q9 | Q10 | Diabetes | Q10a | Q11 | High BP |
|--------|----|----|----------------|----|------------------|----|-------------|----|-----|----------|------|-----|---------|
| 4473   | 2  | 2  | Married/li     | 3  | College degree   | 1  | Working, fi | 16 | 2   | No       |      | 2   | No      |
| 4475   | 2  | 2  | Married/li     | 3  | College degree   | 6  | Homemake    | 21 | 2   | No       |      | 2   | No      |
| 4476   | 2  | 2  | Married/li     | 3  | College degree   | 6  | Homemake    | 19 | 2   | No       |      | 2   | No      |
| 4478   | 2  | 2  | Married/li     | 3  | College degree   | 1  | Working, fi | 17 | 2   | No       |      | 2   | No      |
| 4485   | 2  | 2  | Married/li     | 1  | High school or l | 4  | Retired     | 99 | 2   | No       |      | 2   | No      |
| 4486   | 2  | 3  | Divorced       | 1  | High school or l | 1  | Working, fi | 15 | 2   | No       |      | 2   | No      |
| 4490   | 2  | 2  | Married/li     | 3  | College degree   | 1  | Working, fi | 23 | 2   | No       |      | 2   | No      |
| 4502   | 2  | 2  | Married/li     | 3  | College degree   | 1  | Working, fi | 14 | 2   | No       |      | 2   | No      |
| 4503   | 2  | 2  | Married/li     | 1  | High school or l | 8  | Other worl  | 15 | 2   | No       |      | 2   | No      |
| 4504   | 2  | 2  | Married/li     | 3  | College degree   | 1  | Working, fi | 12 | 2   | No       |      | 2   | No      |
| 4506   | 2  | 2  | Married/li     | 2  | Some college     | 1  | Working, fi | 9  | 2   | No       |      | 2   | No      |
| 4508   | 2  | 1  | Single         | 3  | College degree   | 3  | Unemploy    | 25 | 2   | No       |      | 2   | No      |
| 4515   | 2  | 2  | Married/li     | 2  | Some college     | 1  | Working, fi | 10 | 2   | No       |      | 1   | Yes     |
| 4516   | 2  | 2  | Married/li     | 3  | College degree   | 1  | Working, fi | 37 | 2   | No       |      | 2   | No      |
| 4519   | 2  | 1  | Single         | 4  | Postgraduate     | 5  | Permanent   | 31 | 2   | No       |      | 1   | Yes     |
| 4523   | 2  | 2  | Married/li     | 3  | College degree   | 1  | Working, fi | 18 | 2   | No       |      | 2   | No      |
| 4525   | 2  | 2  | Married/li     | 4  | Postgraduate     | 1  | Working, fi | 24 | 2   | No       |      | 1   | Yes     |
| 4526   | 2  | 1  | Single         | 2  | Some college     | 1  | Working, fi | 16 | 2   | No       |      | 2   | No      |
| 4528   | 2  | 2  | Married/li     | 3  | College degree   | 1  | Working, fi | 23 | 2   | No       |      | 2   | No      |
| 4530   | 2  | 3  | Divorced       | 2  | Some college     | 1  | Working, fi | 25 | 2   | No       |      | 2   | No      |
| 4531   | 2  | 2  | Married/li     | 4  | Postgraduate     | 1  | Working, fi | 14 | 2   | No       |      | 2   | No      |
| 4532   | 2  | 2  | Married/li     | 4  | Postgraduate     | 1  | Working, fi | 38 | 2   | No       |      | 2   | No      |
| 4537   | 2  | 2  | Married/li     | 3  | College degree   | 1  | Working, fi | 10 | 2   | No       |      | 1   | Yes     |
| 4538   | 2  | 2  | Married/li     | 3  | College degree   | 1  | Working, fi | 33 | 2   | No       |      | 2   | No      |
| 4539   | 2  | 1  | Single         | 2  | Some college     | 1  | Working, fi | 33 | 2   | No       |      | 2   | No      |
| 4541   | 2  | 1  | Single         | 3  | College degree   | 1  | Working, fi | 27 | 2   | No       |      | 2   | No      |
| 4543   | 2  | 1  | Single         | 3  | College degree   | 1  | Working, fi | 26 | 2   | No       |      | 2   | No      |
| 4544   | 2  | 2  | Married/li     | 2  | Some college     | 2  | Working, p  | 99 | 2   | No       |      | 2   | No      |
| 4546   | 2  | 2  | Married/li     | 3  | College degree   | 1  | Working, fi | 11 | 2   | No       |      | 2   | No      |
| 4547   | 2  | 2  | Married/li     | 3  | College degree   | 6  | Homemake    | 33 | 1   | Yes      | 1    | 1   | Yes     |
| 4549   | 2  | 1  | Single         | 3  | College degree   | 1  | Working, fi | 29 | 2   | No       |      | 1   | Yes     |
| 4550   | 2  | 1  | Single         | 1  | High school or l | 1  | Working, fi | 25 | 2   | No       |      | 2   | No      |

| respid | Q5 | Q6 | Marital Status | Q7 | Education        | Q8 | Work        | Q9 | Q10 | Diabetes | Q10a | Q11 | High BP |
|--------|----|----|----------------|----|------------------|----|-------------|----|-----|----------|------|-----|---------|
| 4551   | 2  | 2  | Married/li     | 3  | College degree   | 1  | Working, fi | 13 | 2   | No       |      | 2   | No      |
| 4554   | 2  | 2  | Married/li     | 3  | College degree   | 1  | Working, fi | 2  | 2   | No       |      | 2   | No      |
| 4557   | 2  | 1  | Single         | 3  | College degree   | 1  | Working, fi | 29 | 2   | No       |      | 2   | No      |
| 4565   | 2  | 1  | Single         | 3  | College degree   | 2  | Working, p  | 31 | 2   | No       |      | 2   | No      |
| 4568   | 2  | 2  | Married/li     | 3  | College degree   | 1  | Working, fi | 37 | 2   | No       |      | 2   | No      |
| 4569   | 2  | 2  | Married/li     | 3  | College degree   | 1  | Working, fi | 14 | 2   | No       |      | 2   | No      |
| 4570   | 2  | 2  | Married/li     | 1  | High school or l | 1  | Working, fi | 37 | 2   | No       |      | 2   | No      |
| 4572   | 2  | 1  | Single         | 3  | College degree   | 1  | Working, fi | 30 | 1   | Yes      | 1    | 2   | No      |
| 4574   | 2  | 2  | Married/li     | 4  | Postgraduate     | 1  | Working, fi | 21 | 1   | Yes      | 1    | 1   | Yes     |
| 4576   | 2  | 1  | Single         | 1  | High school or l | 1  | Working, fi | 15 | 2   | No       |      | 2   | No      |
| 4578   | 2  | 2  | Married/li     | 2  | Some college     | 1  | Working, fi | 11 | 2   | No       |      | 1   | Yes     |
| 4579   | 2  | 2  | Married/li     | 3  | College degree   | 1  | Working, fi | 14 | 2   | No       |      | 2   | No      |
| 4580   | 2  | 3  | Divorced       | 4  | Postgraduate     | 1  | Working, fi | 33 | 2   | No       |      | 2   | No      |
| 4581   | 2  | 2  | Married/li     | 3  | College degree   | 1  | Working, fi | 28 | 2   | No       |      | 2   | No      |
| 4584   | 2  | 3  | Divorced       | 1  | High school or l | 1  | Working, fi | 29 | 2   | No       |      | 2   | No      |
| 4586   | 2  | 2  | Married/li     | 3  | College degree   | 1  | Working, fi | 29 | 2   | No       |      | 2   | No      |
| 4587   | 2  | 2  | Married/li     | 1  | High school or l | 1  | Working, fi | 27 | 2   | No       |      | 2   | No      |
| 4590   | 2  | 2  | Married/li     | 3  | College degree   | 1  | Working, fi | 17 | 2   | No       |      | 1   | Yes     |
| 4592   | 2  | 2  | Married/li     | 2  | Some college     | 3  | Unemploy    | 25 | 2   | No       |      | 2   | No      |
| 4593   | 2  | 2  | Married/li     | 3  | College degree   | 6  | Homemake    | 19 | 2   | No       |      | 1   | Yes     |
| 4595   | 2  | 2  | Married/li     | 3  | College degree   | 1  | Working, fi | 18 | 2   | No       |      | 2   | No      |
| 4597   | 2  | 1  | Single         | 3  | College degree   | 4  | Retired     | 28 | 2   | No       |      | 2   | No      |
| 4598   | 2  | 2  | Married/li     | 3  | College degree   | 1  | Working, fi | 21 | 2   | No       |      | 2   | No      |
| 4599   | 2  | 1  | Single         | 1  | High school or l | 1  | Working, fi | 26 | 2   | No       |      | 2   | No      |
| 4600   | 2  | 1  | Single         | 1  | High school or l | 6  | Homemake    | 26 | 2   | No       |      | 2   | No      |
| 4601   | 2  | 1  | Single         | 3  | College degree   | 1  | Working, fi | 31 | 2   | No       |      | 2   | No      |
| 4608   | 2  | 2  | Married/li     | 3  | College degree   | 1  | Working, fi | 22 | 2   | No       |      | 2   | No      |
| 4609   | 2  | 2  | Married/li     | 2  | Some college     | 4  | Retired     | 33 | 2   | No       |      | 2   | No      |
| 4611   | 2  | 2  | Married/li     | 4  | Postgraduate     | 2  | Working, p  | 30 | 2   | No       |      | 2   | No      |
| 4612   | 2  | 2  | Married/li     | 1  | High school or l | 1  | Working, fi | 24 | 2   | No       |      | 2   | No      |
| 4613   | 2  | 1  | Single         | 3  | College degree   | 1  | Working, fi | 26 | 2   | No       |      | 2   | No      |
| 4616   | 2  | 3  | Divorced       | 3  | College degree   | 1  | Working, fi | 30 | 1   | Yes      | 1    | 1   | Yes     |

| respid | Q5 | Q6 | Marital Status | Q7 | Education        | Q8 | Work        | Q9 | Q10 | Diabetes | Q10a | Q11 | High BP |
|--------|----|----|----------------|----|------------------|----|-------------|----|-----|----------|------|-----|---------|
| 4617   | 2  | 2  | Married/li     | 1  | High school or l | 1  | Working, fi | 34 | 2   | No       |      | 2   | No      |
| 4620   | 2  | 1  | Single         | 2  | Some college     | 1  | Working, fi | 38 | 2   | No       |      | 2   | No      |
| 4621   | 2  | 2  | Married/li     | 2  | Some college     | 1  | Working, fi | 11 | 2   | No       |      | 1   | Yes     |
| 4622   | 2  | 2  | Married/li     | 1  | High school or l | 1  | Working, fi | 18 | 1   | Yes      | 2    | 1   | Yes     |
| 4624   | 2  | 2  | Married/li     | 3  | College degree   | 6  | Homemake    | 21 | 2   | No       |      | 2   | No      |
| 4625   | 2  | 2  | Married/li     | 4  | Postgraduate     | 1  | Working, fi | 27 | 2   | No       |      | 2   | No      |
| 4627   | 2  | 2  | Married/li     | 2  | Some college     | 1  | Working, fi | 32 | 2   | No       |      | 1   | Yes     |
| 4628   | 2  | 2  | Married/li     | 3  | College degree   | 3  | Unemploye   | 17 | 2   | No       |      | 2   | No      |
| 4629   | 2  | 2  | Married/li     | 2  | Some college     | 1  | Working, fi | 3  | 2   | No       |      | 1   | Yes     |
| 4630   | 2  | 2  | Married/li     | 1  | High school or l | 6  | Homemake    | 99 | 2   | No       |      | 2   | No      |
| 4632   | 2  | 2  | Married/li     | 1  | High school or l | 1  | Working, fi | 34 | 2   | No       |      | 2   | No      |
| 4634   | 2  | 2  | Married/li     | 3  | College degree   | 1  | Working, fi | 11 | 2   | No       |      | 2   | No      |
| 4635   | 2  | 2  | Married/li     | 4  | Postgraduate     | 1  | Working, fi | 34 | 1   | Yes      | 1    | 1   | Yes     |
| 4636   | 2  | 2  | Married/li     | 3  | College degree   | 1  | Working, fi | 19 | 2   | No       |      | 2   | No      |
| 4637   | 2  | 1  | Single         | 3  | College degree   | 1  | Working, fi | 32 | 2   | No       |      | 2   | No      |
| 4638   | 2  | 1  | Single         | 3  | College degree   | 1  | Working, fi | 31 | 2   | No       |      | 1   | Yes     |
| 4639   | 2  | 1  | Single         | 3  | College degree   | 1  | Working, fi | 33 | 2   | No       |      | 2   | No      |
| 4641   | 2  | 1  | Single         | 2  | Some college     | 2  | Working, p  | 30 | 2   | No       |      | 2   | No      |
| 4643   | 2  | 2  | Married/li     | 4  | Postgraduate     | 1  | Working, fi | 19 | 2   | No       |      | 2   | No      |
| 4645   | 2  | 2  | Married/li     | 3  | College degree   | 1  | Working, fi | 8  | 2   | No       |      | 2   | No      |
| 4646   | 2  | 2  | Married/li     | 3  | College degree   | 1  | Working, fi | 24 | 2   | No       |      | 2   | No      |
| 4647   | 2  | 2  | Married/li     | 1  | High school or l | 9  | Other       | 25 | 2   | No       |      | 2   | No      |
| 4648   | 2  | 3  | Divorced       | 1  | High school or l | 4  | Retired     | 8  | 2   | No       |      | 2   | No      |
| 4649   | 2  | 1  | Single         | 2  | Some college     | 1  | Working, fi | 28 | 2   | No       |      | 2   | No      |
| 4650   | 2  | 1  | Single         | 3  | College degree   | 1  | Working, fi | 18 | 2   | No       |      | 1   | Yes     |
| 4651   | 2  | 1  | Single         | 1  | High school or l | 1  | Working, fi | 30 | 2   | No       |      | 1   | Yes     |
| 4652   | 2  | 2  | Married/li     | 1  | High school or l | 6  | Homemake    | 16 | 2   | No       |      | 2   | No      |
| 4653   | 2  | 2  | Married/li     | 1  | High school or l | 4  | Retired     | 7  | 2   | No       |      | 2   | No      |
| 4657   | 2  | 1  | Single         | 3  | College degree   | 1  | Working, fi | 14 | 2   | No       |      | 2   | No      |
| 4660   | 2  | 2  | Married/li     | 2  | Some college     | 1  | Working, fi | 11 | 2   | No       |      | 2   | No      |
| 4661   | 2  | 1  | Single         | 1  | High school or l | 1  | Working, fi | 27 | 2   | No       |      | 2   | No      |
| 4662   | 2  | 3  | Divorced       | 3  | College degree   | 1  | Working, fi | 27 | 1   | Yes      | 1    | 1   | Yes     |

| respid | Q5 | Q6 | Marital Status | Q7 | Education        | Q8 | Work        | Q9 | Q10 | Diabetes | Q10a | Q11 | High BP |
|--------|----|----|----------------|----|------------------|----|-------------|----|-----|----------|------|-----|---------|
| 4667   | 2  | 2  | Married/li     | 3  | College degree   | 1  | Working, fi | 17 | 2   | No       |      | 2   | No      |
| 4669   | 2  | 1  | Single         | 2  | Some college     | 1  | Working, fi | 33 | 2   | No       |      | 2   | No      |
| 4671   | 2  | 2  | Married/li     | 2  | Some college     | 1  | Working, fi | 34 | 2   | No       |      | 2   | No      |
| 4672   | 2  | 2  | Married/li     | 3  | College degree   | 1  | Working, fi | 22 | 2   | No       |      | 1   | Yes     |
| 4673   | 2  | 2  | Married/li     | 2  | Some college     | 2  | Working, p  | 4  | 2   | No       |      | 1   | Yes     |
| 4677   | 2  | 4  | Widow/wi       | 3  | College degree   | 2  | Working, p  | 15 | 2   | No       |      | 2   | No      |
| 4679   | 2  | 1  | Single         | 2  | Some college     | 1  | Working, fi | 34 | 2   | No       |      | 2   | No      |
| 4683   | 2  | 2  | Married/li     | 2  | Some college     | 1  | Working, fi | 11 | 2   | No       |      | 2   | No      |
| 4684   | 2  | 2  | Married/li     | 3  | College degree   | 1  | Working, fi | 25 | 2   | No       |      | 2   | No      |
| 4685   | 2  | 1  | Single         | 2  | Some college     | 1  | Working, fi | 29 | 2   | No       |      | 2   | No      |
| 4686   | 2  | 2  | Married/li     | 3  | College degree   | 1  | Working, fi | 32 | 2   | No       |      | 2   | No      |
| 4687   | 2  | 2  | Married/li     | 3  | College degree   | 1  | Working, fi | 6  | 2   | No       |      | 1   | Yes     |
| 4688   | 2  | 2  | Married/li     | 3  | College degree   | 1  | Working, fi | 11 | 2   | No       |      | 2   | No      |
| 4691   | 2  | 1  | Single         | 4  | Postgraduate     | 1  | Working, fi | 36 | 2   | No       |      | 2   | No      |
| 4692   | 2  | 1  | Single         | 1  | High school or l | 1  | Working, fi | 28 | 2   | No       |      | 2   | No      |
| 4694   | 2  | 2  | Married/li     | 3  | College degree   | 1  | Working, fi | 8  | 2   | No       |      | 1   | Yes     |
| 4695   | 2  | 2  | Married/li     | 1  | High school or l | 1  | Working, fi | 18 | 1   | Yes      | 1    | 2   | No      |
| 4696   | 2  | 2  | Married/li     | 1  | High school or l | 1  | Working, fi | 32 | 2   | No       |      | 1   | Yes     |
| 4697   | 2  | 2  | Married/li     | 3  | College degree   | 1  | Working, fi | 12 | 2   | No       |      | 2   | No      |
| 4698   | 2  | 2  | Married/li     | 2  | Some college     | 2  | Working, p  | 18 | 2   | No       |      | 1   | Yes     |
| 4699   | 2  | 2  | Married/li     | 1  | High school or l | 1  | Working, fi | 25 | 2   | No       |      | 1   | Yes     |
| 4701   | 2  | 2  | Married/li     | 2  | Some college     | 1  | Working, fi | 12 | 2   | No       |      | 2   | No      |
| 4703   | 2  | 3  | Divorced       | 2  | Some college     | 1  | Working, fi | 26 | 2   | No       |      | 2   | No      |
| 4704   | 2  | 2  | Married/li     | 3  | College degree   | 2  | Working, p  | 37 | 2   | No       |      | 1   | Yes     |
| 4705   | 2  | 2  | Married/li     | 3  | College degree   | 1  | Working, fi | 31 | 2   | No       |      | 2   | No      |
| 4706   | 2  | 1  | Single         | 1  | High school or l | 2  | Working, p  | 11 | 2   | No       |      | 2   | No      |
| 4707   | 2  | 2  | Married/li     | 3  | College degree   | 1  | Working, fi | 29 | 2   | No       |      | 2   | No      |
| 4708   | 2  | 3  | Divorced       | 3  | College degree   | 1  | Working, fi | 28 | 1   | Yes      | 1    | 1   | Yes     |
| 4710   | 2  | 2  | Married/li     | 4  | Postgraduate     | 1  | Working, fi | 33 | 1   | Yes      | 1    | 2   | No      |
| 4711   | 2  | 2  | Married/li     | 3  | College degree   | 1  | Working, fi | 33 | 1   | Yes      | 1    | 2   | No      |
| 4715   | 2  | 2  | Married/li     | 3  | College degree   | 1  | Working, fi | 12 | 2   | No       |      | 2   | No      |
| 4716   | 2  | 2  | Married/li     | 3  | College degree   | 1  | Working, fi | 19 | 2   | No       |      | 2   | No      |

| respid | Q5 | Q6 | Marital Status | Q7 | Education        | Q8 | Work        | Q9 | Q10 | Diabetes | Q10a | Q11 | High BP |
|--------|----|----|----------------|----|------------------|----|-------------|----|-----|----------|------|-----|---------|
| 4717   | 2  | 2  | Married/li     | 2  | Some college     | 1  | Working, fi | 16 | 2   | No       |      | 1   | Yes     |
| 4718   | 2  | 2  | Married/li     | 2  | Some college     | 1  | Working, fi | 1  | 2   | No       |      | 1   | Yes     |
| 4722   | 2  | 2  | Married/li     | 1  | High school or l | 4  | Retired     | 6  | 2   | No       |      | 1   | Yes     |
| 4727   | 2  | 2  | Married/li     | 3  | College degree   | 1  | Working, fi | 11 | 1   | Yes      | 1    | 1   | Yes     |
| 4728   | 2  | 2  | Married/li     | 4  | Postgraduate     | 1  | Working, fi | 24 | 2   | No       |      | 1   | Yes     |
| 4729   | 2  | 2  | Married/li     | 3  | College degree   | 1  | Working, fi | 12 | 2   | No       |      | 1   | Yes     |
| 4732   | 2  | 2  | Married/li     | 3  | College degree   | 1  | Working, fi | 17 | 2   | No       |      | 2   | No      |
| 4733   | 2  | 2  | Married/li     | 3  | College degree   | 1  | Working, fi | 17 | 2   | No       |      | 2   | No      |
| 4734   | 2  | 2  | Married/li     | 3  | College degree   | 1  | Working, fi | 21 | 1   | Yes      | 2    | 2   | No      |
| 4735   | 2  | 2  | Married/li     | 1  | High school or l | 4  | Retired     | 16 | 2   | No       |      | 1   | Yes     |
| 4737   | 2  | 4  | Widow/wi       | 1  | High school or l | 9  | Other       | 15 | 2   | No       |      | 2   | No      |
| 4738   | 2  | 2  | Married/li     | 3  | College degree   | 1  | Working, fi | 21 | 1   | Yes      | 1    | 2   | No      |
| 4740   | 2  | 2  | Married/li     | 3  | College degree   | 1  | Working, fi | 17 | 2   | No       |      | 2   | No      |
| 4741   | 2  | 2  | Married/li     | 2  | Some college     | 1  | Working, fi | 11 | 2   | No       |      | 1   | Yes     |
| 4743   | 2  | 2  | Married/li     | 3  | College degree   | 1  | Working, fi | 9  | 2   | No       |      | 2   | No      |
| 4746   | 2  | 2  | Married/li     | 4  | Postgraduate     | 1  | Working, fi | 21 | 2   | No       |      | 1   | Yes     |
| 4750   | 2  | 2  | Married/li     | 3  | College degree   | 1  | Working, fi | 18 | 2   | No       |      | 1   | Yes     |
| 4752   | 2  | 2  | Married/li     | 3  | College degree   | 1  | Working, fi | 24 | 2   | No       |      | 2   | No      |
| 4753   | 2  | 2  | Married/li     | 3  | College degree   | 2  | Working, p  | 20 | 2   | No       |      | 2   | No      |
| 4754   | 2  | 2  | Married/li     | 2  | Some college     | 1  | Working, fi | 14 | 2   | No       |      | 1   | Yes     |
| 4755   | 2  | 1  | Single         | 3  | College degree   | 2  | Working, p  | 21 | 2   | No       |      | 2   | No      |
| 4758   | 2  | 2  | Married/li     | 3  | College degree   | 1  | Working, fi | 13 | 2   | No       |      | 2   | No      |
| 4766   | 2  | 2  | Married/li     | 2  | Some college     | 1  | Working, fi | 12 | 2   | No       |      | 2   | No      |
| 4767   | 2  | 2  | Married/li     | 3  | College degree   | 6  | Homemake    | 18 | 2   | No       |      | 2   | No      |
| 4768   | 2  | 2  | Married/li     | 2  | Some college     | 4  | Retired     | 26 | 2   | No       |      | 1   | Yes     |
| 4769   | 2  | 2  | Married/li     | 3  | College degree   | 1  | Working, fi | 21 | 2   | No       |      | 1   | Yes     |
| 4771   | 2  | 2  | Married/li     | 3  | College degree   | 1  | Working, fi | 18 | 1   | Yes      | 1    | 1   | Yes     |
| 4772   | 2  | 3  | Divorced       | 2  | Some college     | 4  | Retired     | 4  | 2   | No       |      | 1   | Yes     |
| 4773   | 2  | 2  | Married/li     | 2  | Some college     | 1  | Working, fi | 5  | 2   | No       |      | 2   | No      |
| 4774   | 2  | 2  | Married/li     | 3  | College degree   | 6  | Homemake    | 17 | 2   | No       |      | 2   | No      |
| 4776   | 2  | 2  | Married/li     | 3  | College degree   | 1  | Working, fi | 17 | 2   | No       |      | 2   | No      |
| 4777   | 2  | 2  | Married/li     | 2  | Some college     | 1  | Working, fi | 7  | 2   | No       |      | 2   | No      |

| respid | Q5 | Q6 | Marital Status | Q7 | Education        | Q8 | Work        | Q9 | Q10 | Diabetes | Q10a | Q11 | High BP |
|--------|----|----|----------------|----|------------------|----|-------------|----|-----|----------|------|-----|---------|
| 4779   | 2  | 2  | Married/li     | 3  | College degree   | 1  | Working, fi | 20 | 2   | No       |      | 1   | Yes     |
| 4780   | 2  | 2  | Married/li     | 4  | Postgraduate     | 4  | Retired     | 20 | 1   | Yes      | 1    | 2   | No      |
| 4781   | 2  | 1  | Single         | 3  | College degree   | 9  | Other       | 20 | 2   | No       |      | 2   | No      |
| 4783   | 2  | 3  | Divorced       | 1  | High school or l | 6  | Homemake    | 16 | 2   | No       |      | 2   | No      |
| 4784   | 2  | 2  | Married/li     | 2  | Some college     | 1  | Working, fi | 3  | 2   | No       |      | 2   | No      |
| 4785   | 2  | 1  | Single         | 3  | College degree   | 1  | Working, fi | 17 | 2   | No       |      | 2   | No      |
| 4788   | 2  | 2  | Married/li     | 3  | College degree   | 1  | Working, fi | 6  | 2   | No       |      | 2   | No      |
| 4789   | 2  | 2  | Married/li     | 3  | College degree   | 1  | Working, fi | 18 | 1   | Yes      | 1    | 1   | Yes     |
| 4790   | 2  | 2  | Married/li     | 3  | College degree   | 1  | Working, fi | 21 | 2   | No       |      | 2   | No      |
| 4791   | 2  | 3  | Divorced       | 1  | High school or l | 1  | Working, fi | 16 | 2   | No       |      | 2   | No      |
| 4794   | 2  | 1  | Single         | 3  | College degree   | 8  | Other worl  | 15 | 2   | No       |      | 2   | No      |
| 4795   | 2  | 2  | Married/li     | 1  | High school or l | 1  | Working, fi | 14 | 2   | No       |      | 1   | Yes     |
| 4797   | 2  | 2  | Married/li     | 3  | College degree   | 1  | Working, fi | 20 | 2   | No       |      | 2   | No      |
| 4802   | 2  | 2  | Married/li     | 1  | High school or l | 1  | Working, fi | 20 | 2   | No       |      | 2   | No      |
| 4803   | 2  | 2  | Married/li     | 3  | College degree   | 1  | Working, fi | 18 | 2   | No       |      | 1   | Yes     |
| 4804   | 2  | 2  | Married/li     | 1  | High school or l | 1  | Working, fi | 1  | 2   | No       |      | 2   | No      |
| 4805   | 2  | 2  | Married/li     | 1  | High school or l | 2  | Working, p  | 15 | 2   | No       |      | 2   | No      |
| 4807   | 2  | 2  | Married/li     | 2  | Some college     | 1  | Working, fi | 11 | 2   | No       |      | 2   | No      |
| 4808   | 2  | 2  | Married/li     | 3  | College degree   | 1  | Working, fi | 13 | 2   | No       |      | 2   | No      |
| 4809   | 2  | 2  | Married/li     | 3  | College degree   | 1  | Working, fi | 21 | 2   | No       |      | 2   | No      |
| 4811   | 2  | 2  | Married/li     | 3  | College degree   | 1  | Working, fi | 13 | 2   | No       |      | 2   | No      |
| 4817   | 2  | 2  | Married/li     | 1  | High school or l | 1  | Working, fi | 15 | 2   | No       |      | 2   | No      |
| 4819   | 2  | 2  | Married/li     | 3  | College degree   | 1  | Working, fi | 19 | 2   | No       |      | 1   | Yes     |
| 4820   | 2  | 3  | Divorced       | 1  | High school or l | 1  | Working, fi | 28 | 2   | No       |      | 2   | No      |
| 4821   | 2  | 2  | Married/li     | 3  | College degree   | 1  | Working, fi | 11 | 2   | No       |      | 2   | No      |
| 4822   | 2  | 2  | Married/li     | 3  | College degree   | 1  | Working, fi | 12 | 2   | No       |      | 2   | No      |
| 4823   | 2  | 2  | Married/li     | 3  | College degree   | 1  | Working, fi | 11 | 2   | No       |      | 2   | No      |
| 4825   | 2  | 2  | Married/li     | 3  | College degree   | 1  | Working, fi | 11 | 2   | No       |      | 2   | No      |
| 4826   | 2  | 1  | Single         | 2  | Some college     | 1  | Working, fi | 12 | 2   | No       |      | 2   | No      |
| 4830   | 2  | 2  | Married/li     | 1  | High school or l | 4  | Retired     | 5  | 2   | No       |      | 2   | No      |
| 4832   | 2  | 2  | Married/li     | 3  | College degree   | 1  | Working, fi | 1  | 2   | No       |      | 2   | No      |
| 4838   | 2  | 2  | Married/li     | 3  | College degree   | 3  | Unemploye   | 27 | 2   | No       |      | 2   | No      |

| respid | Q5 | Q6 | Marital Status | Q7 | Education        | Q8 | Work        | Q9 | Q10 | Diabetes | Q10a | Q11 | High BP |
|--------|----|----|----------------|----|------------------|----|-------------|----|-----|----------|------|-----|---------|
| 4840   | 2  | 1  | Single         | 3  | College degree   | 1  | Working, fi | 20 | 2   | No       |      | 2   | No      |
| 4841   | 2  | 2  | Married/li     | 3  | College degree   | 1  | Working, fi | 23 | 2   | No       |      | 2   | No      |
| 4843   | 2  | 2  | Married/li     | 3  | College degree   | 1  | Working, fi | 12 | 1   | Yes      | 2    | 2   | No      |
| 4845   | 2  | 2  | Married/li     | 3  | College degree   | 1  | Working, fi | 10 | 2   | No       |      | 2   | No      |
| 4846   | 2  | 2  | Married/li     | 3  | College degree   | 1  | Working, fi | 12 | 1   | Yes      | 1    | 2   | No      |
| 4848   | 2  | 2  | Married/li     | 2  | Some college     | 1  | Working, fi | 10 | 2   | No       |      | 2   | No      |
| 4853   | 2  | 2  | Married/li     | 2  | Some college     | 1  | Working, fi | 8  | 2   | No       |      | 1   | Yes     |
| 4854   | 2  | 2  | Married/li     | 1  | High school or l | 1  | Working, fi | 4  | 2   | No       |      | 2   | No      |
| 4859   | 2  | 1  | Single         | 4  | Postgraduate     | 1  | Working, fi | 33 | 2   | No       |      | 2   | No      |
| 4861   | 2  | 1  | Single         | 3  | College degree   | 1  | Working, fi | 8  | 2   | No       |      | 2   | No      |
| 4864   | 2  | 2  | Married/li     | 1  | High school or l | 9  | Other       | 6  | 2   | No       |      | 2   | No      |
| 4867   | 2  | 2  | Married/li     | 1  | High school or l | 1  | Working, fi | 1  | 2   | No       |      | 2   | No      |
| 4870   | 2  | 2  | Married/li     | 3  | College degree   | 6  | Homemake    | 16 | 2   | No       |      | 2   | No      |
| 4872   | 2  | 1  | Single         | 3  | College degree   | 1  | Working, fi | 18 | 2   | No       |      | 2   | No      |
| 4873   | 2  | 3  | Divorced       | 2  | Some college     | 1  | Working, fi | 10 | 1   | Yes      | 1    | 1   | Yes     |
| 4874   | 2  | 2  | Married/li     | 1  | High school or l | 1  | Working, fi | 9  | 2   | No       |      | 2   | No      |
| 4878   | 2  | 2  | Married/li     | 3  | College degree   | 1  | Working, fi | 16 | 2   | No       |      | 2   | No      |
| 4880   | 2  | 2  | Married/li     | 3  | College degree   | 6  | Homemake    | 19 | 2   | No       |      | 1   | Yes     |
| 4881   | 2  | 2  | Married/li     | 1  | High school or l | 4  | Retired     | 17 | 2   | No       |      | 1   | Yes     |
| 4882   | 2  | 2  | Married/li     | 3  | College degree   | 1  | Working, fi | 21 | 2   | No       |      | 2   | No      |
| 4883   | 2  | 2  | Married/li     | 3  | College degree   | 1  | Working, fi | 19 | 2   | No       |      | 2   | No      |
| 4885   | 2  | 2  | Married/li     | 3  | College degree   | 1  | Working, fi | 7  | 2   | No       |      | 2   | No      |
| 4889   | 2  | 2  | Married/li     | 3  | College degree   | 4  | Retired     | 5  | 2   | No       |      | 1   | Yes     |
| 4890   | 2  | 2  | Married/li     | 1  | High school or l | 1  | Working, fi | 24 | 2   | No       |      | 1   | Yes     |
| 4891   | 2  | 2  | Married/li     | 1  | High school or l | 1  | Working, fi | 19 | 2   | No       |      | 1   | Yes     |
| 4894   | 2  | 2  | Married/li     | 1  | High school or l | 1  | Working, fi | 17 | 2   | No       |      | 2   | No      |
| 4895   | 2  | 2  | Married/li     | 3  | College degree   | 1  | Working, fi | 20 | 1   | Yes      | 1    | 1   | Yes     |
| 4896   | 2  | 2  | Married/li     | 3  | College degree   | 6  | Homemake    | 20 | 2   | No       |      | 2   | No      |
| 4897   | 2  | 4  | Widow/wi       | 1  | High school or l | 6  | Homemake    | 19 | 2   | No       |      | 2   | No      |
| 4898   | 2  | 1  | Single         | 2  | Some college     | 1  | Working, fi | 15 | 2   | No       |      | 2   | No      |
| 4899   | 2  | 2  | Married/li     | 2  | Some college     | 1  | Working, fi | 33 | 2   | No       |      | 2   | No      |
| 4900   | 2  | 1  | Single         | 3  | College degree   | 1  | Working, fi | 35 | 2   | No       |      | 2   | No      |



| respid | Q5 | Q6 | Marital Status | Q7 | Education        | Q8 | Work        | Q9 | Q10 | Diabetes | Q10a | Q11 | High BP |
|--------|----|----|----------------|----|------------------|----|-------------|----|-----|----------|------|-----|---------|
| 4901   | 2  | 2  | Married/li     | 3  | College degree   | 1  | Working, fi | 19 | 2   | No       |      | 2   | No      |
| 4903   | 2  | 1  | Single         | 3  | College degree   | 1  | Working, fi | 31 | 2   | No       |      | 2   | No      |
| 4904   | 2  | 2  | Married/li     | 3  | College degree   | 1  | Working, fi | 16 | 2   | No       |      | 2   | No      |
| 4908   | 2  | 5  | Prefer not     | 1  | High school or l | 1  | Working, fi | 99 | 2   | No       |      | 2   | No      |
| 4909   | 2  | 1  | Single         | 1  | High school or l | 9  | Other       | 15 | 2   | No       |      | 2   | No      |
| 4913   | 2  | 2  | Married/li     | 3  | College degree   | 1  | Working, fi | 31 | 2   | No       |      | 2   | No      |
| 4917   | 2  | 2  | Married/li     | 3  | College degree   | 1  | Working, fi | 23 | 2   | No       |      | 2   | No      |
| 4918   | 2  | 2  | Married/li     | 3  | College degree   | 1  | Working, fi | 18 | 2   | No       |      | 2   | No      |
| 4920   | 2  | 1  | Single         | 1  | High school or l | 1  | Working, fi | 26 | 2   | No       |      | 2   | No      |
| 4921   | 2  | 1  | Single         | 3  | College degree   | 2  | Working, p  | 17 | 2   | No       |      | 1   | Yes     |
| 4925   | 2  | 2  | Married/li     | 3  | College degree   | 6  | Homemake    | 19 | 2   | No       |      | 1   | Yes     |
| 4926   | 2  | 2  | Married/li     | 3  | College degree   | 1  | Working, fi | 19 | 2   | No       |      | 2   | No      |
| 4927   | 2  | 2  | Married/li     | 3  | College degree   | 1  | Working, fi | 24 | 2   | No       |      | 2   | No      |
| 4928   | 2  | 2  | Married/li     | 3  | College degree   | 1  | Working, fi | 22 | 2   | No       |      | 2   | No      |
| 4929   | 2  | 2  | Married/li     | 4  | Postgraduate     | 1  | Working, fi | 33 | 2   | No       |      | 1   | Yes     |
| 4930   | 2  | 2  | Married/li     | 3  | College degree   | 1  | Working, fi | 15 | 2   | No       |      | 2   | No      |
| 4931   | 2  | 2  | Married/li     | 3  | College degree   | 1  | Working, fi | 31 | 2   | No       |      | 2   | No      |
| 4932   | 2  | 2  | Married/li     | 3  | College degree   | 6  | Homemake    | 23 | 2   | No       |      | 1   | Yes     |
| 4933   | 2  | 2  | Married/li     | 4  | Postgraduate     | 1  | Working, fi | 23 | 2   | No       |      | 1   | Yes     |
| 4934   | 2  | 2  | Married/li     | 1  | High school or l | 1  | Working, fi | 15 | 2   | No       |      | 2   | No      |
| 5934   | 2  | 2  | Married/li     | 2  | Some college     | 1  | Working, fi | 5  | 2   | No       |      | 2   | No      |
| 5935   | 2  | 2  | Married/li     | 3  | College degree   | 1  | Working, fi | 11 | 2   | No       |      | 2   | No      |
| 5936   | 2  | 2  | Married/li     | 1  | High school or l | 1  | Working, fi | 28 | 2   | No       |      | 2   | No      |
| 5938   | 2  | 2  | Married/li     | 1  | High school or l | 1  | Working, fi | 9  | 2   | No       |      | 2   | No      |
| 5939   | 2  | 3  | Divorced       | 4  | Postgraduate     | 1  | Working, fi | 28 | 2   | No       |      | 2   | No      |
| 5940   | 2  | 2  | Married/li     | 2  | Some college     | 1  | Working, fi | 12 | 2   | No       |      | 2   | No      |
| 5942   | 2  | 2  | Married/li     | 2  | Some college     | 1  | Working, fi | 8  | 2   | No       |      | 2   | No      |
| 5944   | 2  | 2  | Married/li     | 4  | Postgraduate     | 1  | Working, fi | 33 | 2   | No       |      | 2   | No      |
| 5951   | 2  | 2  | Married/li     | 3  | College degree   | 1  | Working, fi | 7  | 2   | No       |      | 1   | Yes     |
| 5952   | 2  | 2  | Married/li     | 2  | Some college     | 1  | Working, fi | 14 | 2   | No       |      | 2   | No      |
| 5954   | 2  | 2  | Married/li     | 2  | Some college     | 1  | Working, fi | 3  | 2   | No       |      | 2   | No      |
| 5956   | 2  | 2  | Married/li     | 2  | Some college     | 1  | Working, fi | 11 | 2   | No       |      | 2   | No      |

| respid | Q5 | Q6 | Marital Status | Q7 | Education        | Q8 | Work        | Q9 | Q10 | Diabetes | Q10a | Q11 | High BP |
|--------|----|----|----------------|----|------------------|----|-------------|----|-----|----------|------|-----|---------|
| 5957   | 2  | 1  | Single         | 2  | Some college     | 1  | Working, fi | 31 | 1   | Yes      | 1    | 1   | Yes     |
| 5958   | 2  | 2  | Married/li     | 3  | College degree   | 1  | Working, fi | 5  | 1   | Yes      | 2    | 1   | Yes     |
| 5959   | 2  | 2  | Married/li     | 3  | College degree   | 6  | Homemake    | 19 | 2   | No       |      | 2   | No      |
| 5960   | 2  | 2  | Married/li     | 2  | Some college     | 1  | Working, fi | 33 | 2   | No       |      | 1   | Yes     |
| 5963   | 2  | 2  | Married/li     | 2  | Some college     | 6  | Homemake    | 29 | 2   | No       |      | 2   | No      |
| 5966   | 2  | 2  | Married/li     | 3  | College degree   | 1  | Working, fi | 8  | 2   | No       |      | 2   | No      |
| 5968   | 2  | 2  | Married/li     | 2  | Some college     | 1  | Working, fi | 8  | 2   | No       |      | 1   | Yes     |
| 5974   | 2  | 2  | Married/li     | 2  | Some college     | 1  | Working, fi | 14 | 2   | No       |      | 2   | No      |
| 5975   | 2  | 2  | Married/li     | 1  | High school or l | 4  | Retired     | 5  | 2   | No       |      | 2   | No      |
| 5976   | 2  | 2  | Married/li     | 3  | College degree   | 1  | Working, fi | 32 | 2   | No       |      | 2   | No      |
| 5977   | 2  | 1  | Single         | 2  | Some college     | 1  | Working, fi | 32 | 2   | No       |      | 2   | No      |
| 5978   | 2  | 2  | Married/li     | 3  | College degree   | 1  | Working, fi | 10 | 2   | No       |      | 1   | Yes     |
| 5979   | 2  | 2  | Married/li     | 2  | Some college     | 1  | Working, fi | 11 | 2   | No       |      | 2   | No      |
| 5983   | 2  | 1  | Single         | 2  | Some college     | 1  | Working, fi | 29 | 2   | No       |      | 2   | No      |
| 5984   | 2  | 1  | Single         | 4  | Postgraduate     | 1  | Working, fi | 32 | 1   | Yes      | 1    | 2   | No      |
| 5990   | 2  | 2  | Married/li     | 2  | Some college     | 1  | Working, fi | 31 | 2   | No       |      | 2   | No      |
| 5991   | 2  | 1  | Single         | 2  | Some college     | 1  | Working, fi | 30 | 2   | No       |      | 2   | No      |
| 5992   | 2  | 2  | Married/li     | 3  | College degree   | 1  | Working, fi | 31 | 2   | No       |      | 2   | No      |
| 5993   | 2  | 2  | Married/li     | 1  | High school or l | 1  | Working, fi | 31 | 2   | No       |      | 2   | No      |
| 5994   | 2  | 1  | Single         | 3  | College degree   | 1  | Working, fi | 30 | 2   | No       |      | 2   | No      |
| 5996   | 2  | 1  | Single         | 2  | Some college     | 9  | Other       | 30 | 2   | No       |      | 2   | No      |
| 6001   | 2  | 2  | Married/li     | 3  | College degree   | 1  | Working, fi | 35 | 1   | Yes      | 1    | 1   | Yes     |
| 6003   | 2  | 5  | Prefer not     | 2  | Some college     | 1  | Working, fi | 99 | 2   | No       |      | 2   | No      |
| 6004   | 2  | 1  | Single         | 3  | College degree   | 3  | Unemploy    | 25 | 2   | No       |      | 1   | Yes     |
| 6005   | 2  | 2  | Married/li     | 2  | Some college     | 8  | Other worl  | 17 | 2   | No       |      | 2   | No      |
| 6006   | 2  | 1  | Single         | 3  | College degree   | 1  | Working, fi | 26 | 2   | No       |      | 2   | No      |
| 6008   | 2  | 2  | Married/li     | 3  | College degree   | 1  | Working, fi | 32 | 2   | No       |      | 2   | No      |
| 6009   | 2  | 2  | Married/li     | 3  | College degree   | 1  | Working, fi | 34 | 2   | No       |      | 2   | No      |
| 6014   | 2  | 1  | Single         | 4  | Postgraduate     | 1  | Working, fi | 33 | 2   | No       |      | 2   | No      |
| 6016   | 2  | 2  | Married/li     | 3  | College degree   | 1  | Working, fi | 35 | 2   | No       |      | 2   | No      |
| 6017   | 2  | 3  | Divorced       | 1  | High school or l | 1  | Working, fi | 25 | 2   | No       |      | 2   | No      |
| 6018   | 2  | 1  | Single         | 3  | College degree   | 2  | Working, p  | 26 | 2   | No       |      | 2   | No      |

| respid | Q5 | Q6 | Marital Status | Q7 | Education        | Q8 | Work        | Q9 | Q10 | Diabetes | Q10a | Q11 | High BP |
|--------|----|----|----------------|----|------------------|----|-------------|----|-----|----------|------|-----|---------|
| 6020   | 2  | 2  | Married/li     | 3  | College degree   | 1  | Working, fi | 28 | 1   | Yes      | 1    | 2   | No      |
| 6021   | 2  | 1  | Single         | 1  | High school or l | 3  | Unemploy    | 25 | 2   | No       |      | 2   | No      |
| 6024   | 2  | 2  | Married/li     | 1  | High school or l | 1  | Working, fi | 25 | 2   | No       |      | 1   | Yes     |
| 6025   | 2  | 1  | Single         | 3  | College degree   | 1  | Working, fi | 30 | 1   | Yes      | 2    | 1   | Yes     |
| 6026   | 2  | 2  | Married/li     | 1  | High school or l | 1  | Working, fi | 32 | 2   | No       |      | 2   | No      |
| 6032   | 2  | 2  | Married/li     | 4  | Postgraduate     | 4  | Retired     | 33 | 2   | No       |      | 2   | No      |
| 6035   | 2  | 2  | Married/li     | 3  | College degree   | 1  | Working, fi | 13 | 2   | No       |      | 2   | No      |
| 6038   | 2  | 2  | Married/li     | 3  | College degree   | 1  | Working, fi | 29 | 1   | Yes      | 2    | 2   | No      |
| 6043   | 2  | 2  | Married/li     | 1  | High school or l | 6  | Homemake    | 28 | 2   | No       |      | 2   | No      |
| 6044   | 2  | 2  | Married/li     | 2  | Some college     | 1  | Working, fi | 34 | 2   | No       |      | 2   | No      |
| 6046   | 2  | 2  | Married/li     | 4  | Postgraduate     | 1  | Working, fi | 20 | 2   | No       |      | 1   | Yes     |
| 6047   | 2  | 3  | Divorced       | 3  | College degree   | 2  | Working, p  | 27 | 2   | No       |      | 2   | No      |
| 6048   | 2  | 1  | Single         | 2  | Some college     | 3  | Unemploy    | 29 | 2   | No       |      | 2   | No      |
| 6050   | 2  | 2  | Married/li     | 2  | Some college     | 1  | Working, fi | 31 | 2   | No       |      | 1   | Yes     |
| 6051   | 2  | 2  | Married/li     | 2  | Some college     | 6  | Homemake    | 28 | 2   | No       |      | 2   | No      |
| 6053   | 2  | 1  | Single         | 3  | College degree   | 1  | Working, fi | 33 | 2   | No       |      | 2   | No      |
| 6054   | 2  | 3  | Divorced       | 4  | Postgraduate     | 1  | Working, fi | 35 | 2   | No       |      | 2   | No      |
| 6056   | 2  | 2  | Married/li     | 4  | Postgraduate     | 1  | Working, fi | 2  | 2   | No       |      | 2   | No      |
| 6058   | 2  | 2  | Married/li     | 3  | College degree   | 6  | Homemake    | 33 | 2   | No       |      | 2   | No      |
| 6060   | 2  | 2  | Married/li     | 3  | College degree   | 1  | Working, fi | 99 | 2   | No       |      | 2   | No      |
| 6061   | 2  | 2  | Married/li     | 4  | Postgraduate     | 2  | Working, p  | 27 | 2   | No       |      | 2   | No      |
| 6062   | 2  | 2  | Married/li     | 3  | College degree   | 4  | Retired     | 34 | 2   | No       |      | 2   | No      |
| 6067   | 2  | 2  | Married/li     | 3  | College degree   | 6  | Homemake    | 29 | 2   | No       |      | 2   | No      |
| 6070   | 2  | 1  | Single         | 2  | Some college     | 1  | Working, fi | 33 | 2   | No       |      | 2   | No      |
| 6074   | 2  | 2  | Married/li     | 1  | High school or l | 1  | Working, fi | 33 | 2   | No       |      | 1   | Yes     |
| 6076   | 2  | 1  | Single         | 3  | College degree   | 1  | Working, fi | 34 | 2   | No       |      | 2   | No      |
| 6078   | 2  | 2  | Married/li     | 1  | High school or l | 1  | Working, fi | 31 | 2   | No       |      | 2   | No      |
| 6081   | 2  | 2  | Married/li     | 4  | Postgraduate     | 1  | Working, fi | 36 | 2   | No       |      | 2   | No      |
| 6085   | 2  | 2  | Married/li     | 3  | College degree   | 1  | Working, fi | 14 | 2   | No       |      | 2   | No      |
| 6088   | 2  | 1  | Single         | 4  | Postgraduate     | 1  | Working, fi | 29 | 2   | No       |      | 2   | No      |
| 6092   | 2  | 2  | Married/li     | 3  | College degree   | 1  | Working, fi | 33 | 2   | No       |      | 2   | No      |
| 6095   | 2  | 2  | Married/li     | 1  | High school or l | 1  | Working, fi | 34 | 2   | No       |      | 1   | Yes     |

| respid | Q5 | Q6 | Marital Status | Q7 | Education        | Q8 | Work        | Q9 | Q10 | Diabetes | Q10a | Q11 | High BP |
|--------|----|----|----------------|----|------------------|----|-------------|----|-----|----------|------|-----|---------|
| 6098   | 2  | 2  | Married/li     | 3  | College degree   | 1  | Working, fi | 11 | 2   | No       |      | 1   | Yes     |
| 6101   | 2  | 2  | Married/li     | 2  | Some college     | 1  | Working, fi | 7  | 2   | No       |      | 2   | No      |
| 6102   | 2  | 2  | Married/li     | 2  | Some college     | 6  | Homemake    | 30 | 2   | No       |      | 2   | No      |
| 6105   | 2  | 2  | Married/li     | 2  | Some college     | 1  | Working, fi | 35 | 2   | No       |      | 2   | No      |
| 6106   | 2  | 2  | Married/li     | 3  | College degree   | 1  | Working, fi | 35 | 2   | No       |      | 2   | No      |
| 6107   | 2  | 3  | Divorced       | 1  | High school or l | 1  | Working, fi | 25 | 2   | No       |      | 2   | No      |
| 6111   | 2  | 2  | Married/li     | 2  | Some college     | 1  | Working, fi | 28 | 2   | No       |      | 1   | Yes     |
| 6112   | 2  | 2  | Married/li     | 2  | Some college     | 1  | Working, fi | 12 | 1   | Yes      | 1    | 2   | No      |
| 6113   | 2  | 2  | Married/li     | 3  | College degree   | 1  | Working, fi | 32 | 2   | No       |      | 1   | Yes     |
| 6115   | 2  | 2  | Married/li     | 2  | Some college     | 1  | Working, fi | 33 | 2   | No       |      | 2   | No      |
| 6116   | 2  | 1  | Single         | 1  | High school or l | 1  | Working, fi | 31 | 2   | No       |      | 2   | No      |
| 6117   | 2  | 2  | Married/li     | 3  | College degree   | 1  | Working, fi | 11 | 2   | No       |      | 2   | No      |
| 6124   | 2  | 4  | Widow/wi       | 2  | Some college     | 1  | Working, fi | 31 | 1   | Yes      | 1    | 2   | No      |
| 6125   | 2  | 1  | Single         | 3  | College degree   | 2  | Working, p  | 27 | 2   | No       |      | 2   | No      |
| 6128   | 2  | 2  | Married/li     | 2  | Some college     | 6  | Homemake    | 30 | 2   | No       |      | 2   | No      |
| 6133   | 2  | 2  | Married/li     | 2  | Some college     | 1  | Working, fi | 14 | 2   | No       |      | 2   | No      |
| 6134   | 2  | 1  | Single         | 3  | College degree   | 1  | Working, fi | 31 | 2   | No       |      | 2   | No      |
| 6135   | 2  | 3  | Divorced       | 4  | Postgraduate     | 1  | Working, fi | 33 | 1   | Yes      | 1    | 1   | Yes     |
| 6138   | 2  | 2  | Married/li     | 3  | College degree   | 1  | Working, fi | 33 | 2   | No       |      | 2   | No      |
| 6140   | 2  | 2  | Married/li     | 3  | College degree   | 1  | Working, fi | 26 | 2   | No       |      | 1   | Yes     |
| 6143   | 2  | 2  | Married/li     | 4  | Postgraduate     | 1  | Working, fi | 14 | 2   | No       |      | 1   | Yes     |
| 6147   | 2  | 2  | Married/li     | 2  | Some college     | 1  | Working, fi | 31 | 2   | No       |      | 2   | No      |
| 6154   | 2  | 2  | Married/li     | 3  | College degree   | 1  | Working, fi | 1  | 2   | No       |      | 2   | No      |
| 6162   | 2  | 2  | Married/li     | 3  | College degree   | 1  | Working, fi | 36 | 2   | No       |      | 2   | No      |
| 6165   | 2  | 3  | Divorced       | 2  | Some college     | 1  | Working, fi | 34 | 2   | No       |      | 2   | No      |
| 6166   | 2  | 2  | Married/li     | 3  | College degree   | 1  | Working, fi | 33 | 2   | No       |      | 1   | Yes     |
| 6173   | 2  | 2  | Married/li     | 3  | College degree   | 1  | Working, fi | 30 | 2   | No       |      | 2   | No      |
| 6180   | 2  | 1  | Single         | 3  | College degree   | 1  | Working, fi | 30 | 1   | Yes      | 2    | 2   | No      |
| 6184   | 2  | 2  | Married/li     | 2  | Some college     | 1  | Working, fi | 12 | 2   | No       |      | 2   | No      |
| 6185   | 2  | 2  | Married/li     | 1  | High school or l | 9  | Other       | 99 | 2   | No       |      | 1   | Yes     |
| 6186   | 2  | 2  | Married/li     | 4  | Postgraduate     | 1  | Working, fi | 34 | 2   | No       |      | 2   | No      |
| 6188   | 2  | 2  | Married/li     | 2  | Some college     | 1  | Working, fi | 32 | 2   | No       |      | 2   | No      |

| respid | Q5 | Q6 | Marital Status | Q7 | Education        | Q8 | Work        | Q9 | Q10 | Diabetes | Q10a | Q11 | High BP |
|--------|----|----|----------------|----|------------------|----|-------------|----|-----|----------|------|-----|---------|
| 6192   | 2  | 2  | Married/li     | 1  | High school or l | 2  | Working, p  | 27 | 2   | No       |      | 2   | No      |
| 6194   | 2  | 2  | Married/li     | 2  | Some college     | 1  | Working, fi | 3  | 2   | No       |      | 2   | No      |
| 6195   | 2  | 1  | Single         | 3  | College degree   | 1  | Working, fi | 29 | 2   | No       |      | 2   | No      |
| 6196   | 2  | 2  | Married/li     | 1  | High school or l | 2  | Working, p  | 12 | 2   | No       |      | 2   | No      |
| 6199   | 2  | 2  | Married/li     | 1  | High school or l | 2  | Working, p  | 2  | 1   | Yes      | 1    | 1   | Yes     |
| 6200   | 2  | 2  | Married/li     | 1  | High school or l | 1  | Working, fi | 31 | 2   | No       |      | 2   | No      |
| 6201   | 2  | 2  | Married/li     | 4  | Postgraduate     | 1  | Working, fi | 37 | 2   | No       |      | 2   | No      |
| 6202   | 2  | 2  | Married/li     | 2  | Some college     | 4  | Retired     | 11 | 2   | No       |      | 2   | No      |
| 6203   | 2  | 2  | Married/li     | 1  | High school or l | 1  | Working, fi | 30 | 2   | No       |      | 2   | No      |
| 6205   | 2  | 1  | Single         | 2  | Some college     | 1  | Working, fi | 25 | 2   | No       |      | 1   | Yes     |
| 6210   | 2  | 2  | Married/li     | 3  | College degree   | 1  | Working, fi | 37 | 1   | Yes      | 1    | 1   | Yes     |
| 6212   | 2  | 2  | Married/li     | 4  | Postgraduate     | 1  | Working, fi | 32 | 2   | No       |      | 2   | No      |
| 6216   | 2  | 2  | Married/li     | 3  | College degree   | 1  | Working, fi | 11 | 2   | No       |      | 2   | No      |
| 6218   | 2  | 2  | Married/li     | 1  | High school or l | 1  | Working, fi | 29 | 1   | Yes      | 1    | 2   | No      |
| 6221   | 2  | 2  | Married/li     | 3  | College degree   | 1  | Working, fi | 35 | 2   | No       |      | 2   | No      |
| 6224   | 2  | 1  | Single         | 1  | High school or l | 1  | Working, fi | 37 | 2   | No       |      | 2   | No      |
| 6225   | 2  | 1  | Single         | 3  | College degree   | 1  | Working, fi | 27 | 2   | No       |      | 2   | No      |
| 6227   | 2  | 1  | Single         | 3  | College degree   | 3  | Unemploy    | 32 | 2   | No       |      | 2   | No      |
| 6230   | 2  | 2  | Married/li     | 3  | College degree   | 1  | Working, fi | 27 | 2   | No       |      | 1   | Yes     |
| 6231   | 2  | 1  | Single         | 2  | Some college     | 1  | Working, fi | 30 | 2   | No       |      | 2   | No      |
| 6233   | 2  | 1  | Single         | 4  | Postgraduate     | 1  | Working, fi | 33 | 2   | No       |      | 2   | No      |
| 6234   | 2  | 2  | Married/li     | 3  | College degree   | 2  | Working, p  | 99 | 2   | No       |      | 2   | No      |
| 6235   | 2  | 1  | Single         | 3  | College degree   | 1  | Working, fi | 29 | 2   | No       |      | 1   | Yes     |
| 6237   | 2  | 2  | Married/li     | 4  | Postgraduate     | 1  | Working, fi | 35 | 2   | No       |      | 2   | No      |
| 6240   | 2  | 2  | Married/li     | 2  | Some college     | 1  | Working, fi | 29 | 2   | No       |      | 2   | No      |
| 6248   | 2  | 1  | Single         | 1  | High school or l | 1  | Working, fi | 26 | 2   | No       |      | 1   | Yes     |
| 6249   | 2  | 2  | Married/li     | 3  | College degree   | 1  | Working, fi | 30 | 2   | No       |      | 2   | No      |
| 6252   | 2  | 1  | Single         | 3  | College degree   | 1  | Working, fi | 32 | 2   | No       |      | 2   | No      |
| 6254   | 2  | 1  | Single         | 3  | College degree   | 1  | Working, fi | 26 | 2   | No       |      | 2   | No      |
| 6269   | 2  | 2  | Married/li     | 2  | Some college     | 1  | Working, fi | 7  | 2   | No       |      | 2   | No      |
| 6304   | 2  | 1  | Single         | 2  | Some college     | 3  | Unemploy    | 4  | 2   | No       |      | 1   | Yes     |
| 6334   | 2  | 2  | Married/li     | 2  | Some college     | 1  | Working, fi | 10 | 2   | No       |      | 1   | Yes     |

| respid | Q5 | Q6 | Marital Status | Q7 | Education        | Q8 | Work        | Q9 | Q10 | Diabetes | Q10a | Q11 | High BP |
|--------|----|----|----------------|----|------------------|----|-------------|----|-----|----------|------|-----|---------|
| 6341   | 2  | 2  | Married/li     | 2  | Some college     | 6  | Homemake    | 30 | 2   | No       |      | 2   | No      |
| 6350   | 2  | 2  | Married/li     | 3  | College degree   | 1  | Working, fi | 12 | 1   | Yes      | 1    | 1   | Yes     |
| 6370   | 2  | 2  | Married/li     | 2  | Some college     | 1  | Working, fi | 34 | 2   | No       |      | 2   | No      |
| 6384   | 2  | 1  | Single         | 3  | College degree   | 1  | Working, fi | 25 | 2   | No       |      | 2   | No      |
| 6400   | 2  | 2  | Married/li     | 3  | College degree   | 8  | Other worl  | 33 | 2   | No       |      | 2   | No      |
| 6418   | 2  | 1  | Single         | 2  | Some college     | 1  | Working, fi | 26 | 2   | No       |      | 2   | No      |
| 6467   | 2  | 2  | Married/li     | 3  | College degree   | 1  | Working, fi | 14 | 2   | No       |      | 2   | No      |
| 6469   | 2  | 1  | Single         | 2  | Some college     | 1  | Working, fi | 34 | 2   | No       |      | 2   | No      |
| 6474   | 2  | 2  | Married/li     | 3  | College degree   | 1  | Working, fi | 12 | 2   | No       |      | 2   | No      |
| 6475   | 2  | 2  | Married/li     | 3  | College degree   | 1  | Working, fi | 31 | 2   | No       |      | 2   | No      |
| 6476   | 2  | 2  | Married/li     | 2  | Some college     | 1  | Working, fi | 32 | 2   | No       |      | 2   | No      |
| 6477   | 2  | 1  | Single         | 1  | High school or l | 1  | Working, fi | 32 | 2   | No       |      | 1   | Yes     |
| 6480   | 2  | 2  | Married/li     | 2  | Some college     | 1  | Working, fi | 35 | 2   | No       |      | 2   | No      |
| 6481   | 2  | 2  | Married/li     | 3  | College degree   | 1  | Working, fi | 36 | 2   | No       |      | 2   | No      |
| 6485   | 2  | 1  | Single         | 1  | High school or l | 1  | Working, fi | 26 | 2   | No       |      | 2   | No      |
| 6488   | 2  | 2  | Married/li     | 2  | Some college     | 1  | Working, fi | 32 | 2   | No       |      | 1   | Yes     |
| 6495   | 2  | 2  | Married/li     | 2  | Some college     | 1  | Working, fi | 11 | 1   | Yes      | 1    | 2   | No      |
| 6499   | 2  | 2  | Married/li     | 1  | High school or l | 6  | Homemake    | 1  | 2   | No       |      | 1   | Yes     |
| 6500   | 2  | 2  | Married/li     | 3  | College degree   | 1  | Working, fi | 12 | 2   | No       |      | 2   | No      |
| 6504   | 2  | 2  | Married/li     | 3  | College degree   | 1  | Working, fi | 4  | 2   | No       |      | 2   | No      |
| 6507   | 2  | 2  | Married/li     | 1  | High school or l | 4  | Retired     | 6  | 2   | No       |      | 1   | Yes     |
| 6512   | 2  | 2  | Married/li     | 3  | College degree   | 1  | Working, fi | 11 | 2   | No       |      | 1   | Yes     |
| 6525   | 2  | 1  | Single         | 1  | High school or l | 9  | Other       | 25 | 2   | No       |      | 2   | No      |
| 6532   | 2  | 2  | Married/li     | 3  | College degree   | 1  | Working, fi | 28 | 2   | No       |      | 2   | No      |
| 6535   | 2  | 2  | Married/li     | 2  | Some college     | 1  | Working, fi | 6  | 2   | No       |      | 2   | No      |
| 6546   | 2  | 2  | Married/li     | 3  | College degree   | 1  | Working, fi | 12 | 2   | No       |      | 2   | No      |
| 6551   | 2  | 2  | Married/li     | 3  | College degree   | 1  | Working, fi | 14 | 2   | No       |      | 2   | No      |
| 6556   | 2  | 2  | Married/li     | 2  | Some college     | 1  | Working, fi | 32 | 2   | No       |      | 2   | No      |
| 6566   | 2  | 2  | Married/li     | 3  | College degree   | 1  | Working, fi | 29 | 2   | No       |      | 1   | Yes     |
| 6569   | 2  | 2  | Married/li     | 1  | High school or l | 1  | Working, fi | 11 | 2   | No       |      | 2   | No      |
| 6574   | 2  | 1  | Single         | 3  | College degree   | 1  | Working, fi | 27 | 2   | No       |      | 2   | No      |
| 6576   | 2  | 2  | Married/li     | 3  | College degree   | 1  | Working, fi | 28 | 2   | No       |      | 2   | No      |

| respid | Q5 | Q6 | Marital Status | Q7 | Education        | Q8 | Work        | Q9 | Q10 | Diabetes | Q10a | Q11 | High BP |
|--------|----|----|----------------|----|------------------|----|-------------|----|-----|----------|------|-----|---------|
| 6580   | 2  | 2  | Married/li     | 4  | Postgraduate     | 1  | Working, fi | 28 | 2   | No       |      | 2   | No      |
| 6584   | 2  | 2  | Married/li     | 3  | College degree   | 1  | Working, fi | 27 | 2   | No       |      | 2   | No      |
| 6585   | 2  | 2  | Married/li     | 4  | Postgraduate     | 8  | Other worl  | 18 | 2   | No       |      | 2   | No      |
| 6589   | 2  | 2  | Married/li     | 2  | Some college     | 2  | Working, p  | 30 | 2   | No       |      | 2   | No      |
| 6590   | 2  | 1  | Single         | 3  | College degree   | 2  | Working, p  | 25 | 2   | No       |      | 2   | No      |
| 6598   | 2  | 2  | Married/li     | 4  | Postgraduate     | 1  | Working, fi | 29 | 2   | No       |      | 2   | No      |
| 6603   | 2  | 2  | Married/li     | 1  | High school or l | 4  | Retired     | 4  | 2   | No       |      | 2   | No      |
| 6618   | 2  | 2  | Married/li     | 4  | Postgraduate     | 1  | Working, fi | 14 | 2   | No       |      | 2   | No      |
| 6630   | 2  | 2  | Married/li     | 1  | High school or l | 9  | Other       | 11 | 2   | No       |      | 1   | Yes     |
| 6636   | 2  | 1  | Single         | 3  | College degree   | 1  | Working, fi | 26 | 2   | No       |      | 2   | No      |
| 6649   | 2  | 2  | Married/li     | 3  | College degree   | 1  | Working, fi | 8  | 2   | No       |      | 2   | No      |
| 6675   | 2  | 2  | Married/li     | 2  | Some college     | 4  | Retired     | 12 | 1   | Yes      | 1    | 2   | No      |
| 6678   | 2  | 2  | Married/li     | 3  | College degree   | 1  | Working, fi | 13 | 2   | No       |      | 2   | No      |
| 6681   | 2  | 2  | Married/li     | 3  | College degree   | 1  | Working, fi | 11 | 2   | No       |      | 2   | No      |
| 6684   | 2  | 1  | Single         | 4  | Postgraduate     | 1  | Working, fi | 14 | 2   | No       |      | 2   | No      |
| 6688   | 2  | 2  | Married/li     | 3  | College degree   | 1  | Working, fi | 11 | 2   | No       |      | 2   | No      |
| 6691   | 2  | 2  | Married/li     | 2  | Some college     | 1  | Working, fi | 11 | 2   | No       |      | 2   | No      |
| 6694   | 2  | 2  | Married/li     | 3  | College degree   | 1  | Working, fi | 9  | 2   | No       |      | 2   | No      |
| 6696   | 2  | 2  | Married/li     | 3  | College degree   | 3  | Unemploy    | 4  | 2   | No       |      | 2   | No      |
| 6720   | 2  | 2  | Married/li     | 2  | Some college     | 1  | Working, fi | 12 | 2   | No       |      | 2   | No      |
| 6722   | 2  | 2  | Married/li     | 1  | High school or l | 1  | Working, fi | 10 | 2   | No       |      | 2   | No      |
| 6724   | 2  | 2  | Married/li     | 3  | College degree   | 1  | Working, fi | 11 | 2   | No       |      | 2   | No      |
| 6725   | 2  | 2  | Married/li     | 2  | Some college     | 1  | Working, fi | 9  | 2   | No       |      | 1   | Yes     |
| 6727   | 2  | 2  | Married/li     | 3  | College degree   | 1  | Working, fi | 11 | 2   | No       |      | 2   | No      |
| 6734   | 2  | 2  | Married/li     | 3  | College degree   | 1  | Working, fi | 10 | 2   | No       |      | 2   | No      |
| 6739   | 2  | 2  | Married/li     | 2  | Some college     | 1  | Working, fi | 11 | 2   | No       |      | 1   | Yes     |
| 6743   | 2  | 2  | Married/li     | 2  | Some college     | 4  | Retired     | 14 | 1   | Yes      | 1    | 1   | Yes     |
| 6749   | 2  | 2  | Married/li     | 2  | Some college     | 1  | Working, fi | 12 | 2   | No       |      | 2   | No      |
| 6756   | 2  | 2  | Married/li     | 3  | College degree   | 1  | Working, fi | 11 | 1   | Yes      | 1    | 2   | No      |
| 6764   | 2  | 2  | Married/li     | 3  | College degree   | 1  | Working, fi | 13 | 2   | No       |      | 2   | No      |
| 6765   | 2  | 2  | Married/li     | 3  | College degree   | 1  | Working, fi | 14 | 2   | No       |      | 2   | No      |
| 6768   | 2  | 2  | Married/li     | 2  | Some college     | 1  | Working, fi | 12 | 2   | No       |      | 2   | No      |

| respid | Q5 | Q6 | Marital Status | Q7 | Education        | Q8 | Work        | Q9 | Q10 | Diabetes | Q10a | Q11 | High BP |
|--------|----|----|----------------|----|------------------|----|-------------|----|-----|----------|------|-----|---------|
| 6773   | 2  | 2  | Married/li     | 2  | Some college     | 6  | Homemake    | 10 | 2   | No       |      | 2   | No      |
| 6775   | 2  | 2  | Married/li     | 3  | College degree   | 1  | Working, fi | 11 | 2   | No       |      | 1   | Yes     |
| 6777   | 2  | 2  | Married/li     | 3  | College degree   | 1  | Working, fi | 7  | 2   | No       |      | 2   | No      |
| 6779   | 2  | 2  | Married/li     | 3  | College degree   | 4  | Retired     | 11 | 2   | No       |      | 2   | No      |
| 6790   | 2  | 2  | Married/li     | 1  | High school or l | 1  | Working, fi | 4  | 1   | Yes      | 1    | 2   | No      |
| 6797   | 2  | 2  | Married/li     | 3  | College degree   | 1  | Working, fi | 12 | 2   | No       |      | 2   | No      |
| 6798   | 2  | 2  | Married/li     | 1  | High school or l | 4  | Retired     | 8  | 2   | No       |      | 1   | Yes     |
| 6808   | 2  | 2  | Married/li     | 3  | College degree   | 1  | Working, fi | 12 | 2   | No       |      | 2   | No      |
| 6810   | 2  | 2  | Married/li     | 3  | College degree   | 1  | Working, fi | 2  | 2   | No       |      | 2   | No      |
| 6811   | 2  | 2  | Married/li     | 2  | Some college     | 1  | Working, fi | 11 | 2   | No       |      | 2   | No      |
| 6812   | 2  | 2  | Married/li     | 1  | High school or l | 1  | Working, fi | 6  | 2   | No       |      | 2   | No      |
| 6814   | 2  | 2  | Married/li     | 1  | High school or l | 1  | Working, fi | 8  | 2   | No       |      | 1   | Yes     |
| 6819   | 2  | 2  | Married/li     | 3  | College degree   | 1  | Working, fi | 7  | 2   | No       |      | 2   | No      |
| 6820   | 2  | 2  | Married/li     | 3  | College degree   | 1  | Working, fi | 11 | 2   | No       |      | 2   | No      |
| 6832   | 2  | 2  | Married/li     | 2  | Some college     | 1  | Working, fi | 7  | 2   | No       |      | 2   | No      |
| 6854   | 2  | 1  | Single         | 4  | Postgraduate     | 1  | Working, fi | 12 | 2   | No       |      | 2   | No      |
| 6855   | 2  | 2  | Married/li     | 3  | College degree   | 1  | Working, fi | 13 | 2   | No       |      | 2   | No      |
| 6857   | 2  | 1  | Single         | 1  | High school or l | 3  | Unemploye   | 4  | 2   | No       |      | 2   | No      |
| 6858   | 2  | 2  | Married/li     | 3  | College degree   | 1  | Working, fi | 13 | 2   | No       |      | 2   | No      |
| 6859   | 2  | 2  | Married/li     | 2  | Some college     | 1  | Working, fi | 3  | 2   | No       |      | 2   | No      |
| 6860   | 2  | 2  | Married/li     | 2  | Some college     | 1  | Working, fi | 11 | 2   | No       |      | 2   | No      |
| 6862   | 2  | 2  | Married/li     | 1  | High school or l | 3  | Unemploye   | 1  | 2   | No       |      | 1   | Yes     |
| 6879   | 2  | 2  | Married/li     | 2  | Some college     | 1  | Working, fi | 10 | 2   | No       |      | 2   | No      |
| 6893   | 2  | 2  | Married/li     | 2  | Some college     | 1  | Working, fi | 11 | 2   | No       |      | 2   | No      |
| 6898   | 2  | 2  | Married/li     | 1  | High school or l | 1  | Working, fi | 8  | 2   | No       |      | 2   | No      |
| 6902   | 2  | 2  | Married/li     | 4  | Postgraduate     | 1  | Working, fi | 13 | 2   | No       |      | 2   | No      |
| 6903   | 2  | 2  | Married/li     | 3  | College degree   | 4  | Retired     | 2  | 2   | No       |      | 2   | No      |
| 6907   | 2  | 2  | Married/li     | 3  | College degree   | 1  | Working, fi | 11 | 2   | No       |      | 1   | Yes     |
| 6908   | 2  | 2  | Married/li     | 2  | Some college     | 1  | Working, fi | 9  | 2   | No       |      | 2   | No      |
| 6912   | 2  | 2  | Married/li     | 2  | Some college     | 1  | Working, fi | 12 | 2   | No       |      | 2   | No      |
| 6915   | 2  | 2  | Married/li     | 3  | College degree   | 1  | Working, fi | 9  | 2   | No       |      | 2   | No      |
| 6916   | 2  | 2  | Married/li     | 1  | High school or l | 1  | Working, fi | 99 | 2   | No       |      | 2   | No      |



| respid | Q5 | Q6 | Marital Status | Q7 | Education        | Q8 | Work        | Q9 | Q10 | Diabetes | Q10a | Q11 | High BP |
|--------|----|----|----------------|----|------------------|----|-------------|----|-----|----------|------|-----|---------|
| 6917   | 2  | 2  | Married/li     | 3  | College degree   | 6  | Homemake    | 21 | 2   | No       |      | 2   | No      |
| 6923   | 2  | 2  | Married/li     | 1  | High school or l | 1  | Working, fi | 1  | 2   | No       |      | 2   | No      |
| 6934   | 2  | 2  | Married/li     | 3  | College degree   | 1  | Working, fi | 19 | 2   | No       |      | 2   | No      |
| 6937   | 2  | 5  | Prefer not     | 3  | College degree   | 1  | Working, fi | 5  | 2   | No       |      | 2   | No      |
| 6945   | 2  | 2  | Married/li     | 3  | College degree   | 1  | Working, fi | 9  | 2   | No       |      | 2   | No      |
| 6954   | 2  | 2  | Married/li     | 3  | College degree   | 1  | Working, fi | 18 | 2   | No       |      | 1   | Yes     |
| 6956   | 2  | 2  | Married/li     | 1  | High school or l | 4  | Retired     | 2  | 2   | No       |      | 1   | Yes     |
| 6958   | 2  | 2  | Married/li     | 2  | Some college     | 1  | Working, fi | 11 | 2   | No       |      | 2   | No      |
| 6961   | 2  | 2  | Married/li     | 3  | College degree   | 1  | Working, fi | 10 | 2   | No       |      | 2   | No      |
| 6963   | 2  | 2  | Married/li     | 2  | Some college     | 1  | Working, fi | 12 | 2   | No       |      | 2   | No      |
| 6964   | 2  | 2  | Married/li     | 2  | Some college     | 1  | Working, fi | 13 | 2   | No       |      | 2   | No      |
| 6976   | 2  | 1  | Single         | 3  | College degree   | 1  | Working, fi | 12 | 2   | No       |      | 2   | No      |
| 6977   | 2  | 2  | Married/li     | 2  | Some college     | 1  | Working, fi | 7  | 2   | No       |      | 2   | No      |
| 7000   | 2  | 2  | Married/li     | 2  | Some college     | 1  | Working, fi | 7  | 2   | No       |      | 1   | Yes     |
| 7001   | 2  | 1  | Single         | 2  | Some college     | 1  | Working, fi | 29 | 2   | No       |      | 2   | No      |
| 7005   | 2  | 2  | Married/li     | 3  | College degree   | 1  | Working, fi | 13 | 2   | No       |      | 2   | No      |
| 7006   | 2  | 2  | Married/li     | 3  | College degree   | 1  | Working, fi | 10 | 2   | No       |      | 1   | Yes     |
| 7008   | 2  | 2  | Married/li     | 3  | College degree   | 1  | Working, fi | 12 | 2   | No       |      | 2   | No      |
| 7009   | 2  | 2  | Married/li     | 1  | High school or l | 1  | Working, fi | 11 | 2   | No       |      | 1   | Yes     |
| 7019   | 2  | 2  | Married/li     | 4  | Postgraduate     | 1  | Working, fi | 10 | 2   | No       |      | 1   | Yes     |
| 7021   | 2  | 2  | Married/li     | 3  | College degree   | 1  | Working, fi | 12 | 2   | No       |      | 2   | No      |
| 7026   | 2  | 2  | Married/li     | 3  | College degree   | 1  | Working, fi | 13 | 2   | No       |      | 2   | No      |
| 7030   | 2  | 2  | Married/li     | 4  | Postgraduate     | 1  | Working, fi | 13 | 1   | Yes      | 1    | 1   | Yes     |
| 7034   | 2  | 2  | Married/li     | 3  | College degree   | 1  | Working, fi | 11 | 2   | No       |      | 1   | Yes     |
| 7039   | 2  | 2  | Married/li     | 1  | High school or l | 4  | Retired     | 9  | 2   | No       |      | 2   | No      |
| 7041   | 2  | 2  | Married/li     | 1  | High school or l | 1  | Working, fi | 3  | 1   | Yes      | 1    | 2   | No      |
| 7047   | 2  | 3  | Divorced       | 2  | Some college     | 1  | Working, fi | 11 | 2   | No       |      | 2   | No      |
| 7051   | 2  | 2  | Married/li     | 3  | College degree   | 1  | Working, fi | 7  | 2   | No       |      | 2   | No      |
| 7052   | 2  | 2  | Married/li     | 3  | College degree   | 1  | Working, fi | 12 | 2   | No       |      | 2   | No      |
| 7059   | 2  | 2  | Married/li     | 3  | College degree   | 1  | Working, fi | 14 | 2   | No       |      | 2   | No      |
| 7062   | 2  | 2  | Married/li     | 3  | College degree   | 1  | Working, fi | 7  | 2   | No       |      | 2   | No      |
| 7065   | 2  | 2  | Married/li     | 3  | College degree   | 1  | Working, fi | 13 | 2   | No       |      | 2   | No      |

| respid | Q5 | Q6 | Marital Status | Q7 | Education        | Q8 | Work        | Q9 | Q10 | Diabetes | Q10a | Q11 | High BP |
|--------|----|----|----------------|----|------------------|----|-------------|----|-----|----------|------|-----|---------|
| 7066   | 2  | 2  | Married/li     | 3  | College degree   | 1  | Working, fi | 10 | 2   | No       |      | 2   | No      |
| 7069   | 2  | 2  | Married/li     | 3  | College degree   | 1  | Working, fi | 13 | 2   | No       |      | 2   | No      |
| 7070   | 2  | 2  | Married/li     | 1  | High school or l | 1  | Working, fi | 11 | 2   | No       |      | 2   | No      |
| 7073   | 2  | 2  | Married/li     | 3  | College degree   | 1  | Working, fi | 11 | 2   | No       |      | 2   | No      |
| 7078   | 2  | 2  | Married/li     | 3  | College degree   | 1  | Working, fi | 11 | 2   | No       |      | 2   | No      |
| 7083   | 2  | 2  | Married/li     | 2  | Some college     | 1  | Working, fi | 12 | 2   | No       |      | 2   | No      |
| 7084   | 2  | 2  | Married/li     | 4  | Postgraduate     | 1  | Working, fi | 11 | 2   | No       |      | 2   | No      |
| 7085   | 2  | 2  | Married/li     | 3  | College degree   | 1  | Working, fi | 9  | 2   | No       |      | 2   | No      |
| 7088   | 2  | 2  | Married/li     | 1  | High school or l | 1  | Working, fi | 6  | 2   | No       |      | 2   | No      |
| 7090   | 2  | 2  | Married/li     | 1  | High school or l | 1  | Working, fi | 11 | 1   | Yes      | 1    | 2   | No      |
| 7095   | 2  | 2  | Married/li     | 3  | College degree   | 1  | Working, fi | 14 | 2   | No       |      | 2   | No      |
| 7100   | 2  | 2  | Married/li     | 3  | College degree   | 1  | Working, fi | 13 | 2   | No       |      | 2   | No      |
| 7102   | 2  | 2  | Married/li     | 3  | College degree   | 1  | Working, fi | 34 | 2   | No       |      | 1   | Yes     |
| 7103   | 2  | 2  | Married/li     | 1  | High school or l | 1  | Working, fi | 31 | 2   | No       |      | 2   | No      |
| 7108   | 2  | 2  | Married/li     | 3  | College degree   | 1  | Working, fi | 32 | 2   | No       |      | 2   | No      |
| 7109   | 2  | 1  | Single         | 4  | Postgraduate     | 2  | Working, p  | 26 | 2   | No       |      | 2   | No      |
| 7110   | 2  | 2  | Married/li     | 1  | High school or l | 1  | Working, fi | 99 | 2   | No       |      | 2   | No      |
| 7112   | 2  | 2  | Married/li     | 2  | Some college     | 1  | Working, fi | 36 | 2   | No       |      | 2   | No      |
| 7114   | 2  | 2  | Married/li     | 3  | College degree   | 1  | Working, fi | 13 | 2   | No       |      | 2   | No      |
| 7116   | 2  | 3  | Divorced       | 2  | Some college     | 2  | Working, p  | 30 | 2   | No       |      | 2   | No      |
| 7117   | 2  | 2  | Married/li     | 1  | High school or l | 1  | Working, fi | 11 | 2   | No       |      | 2   | No      |
| 7118   | 2  | 2  | Married/li     | 3  | College degree   | 1  | Working, fi | 3  | 2   | No       |      | 1   | Yes     |
| 7120   | 2  | 2  | Married/li     | 3  | College degree   | 1  | Working, fi | 12 | 1   | Yes      | 2    | 1   | Yes     |
| 7124   | 2  | 2  | Married/li     | 3  | College degree   | 1  | Working, fi | 33 | 2   | No       |      | 2   | No      |
| 7130   | 2  | 2  | Married/li     | 1  | High school or l | 4  | Retired     | 5  | 2   | No       |      | 2   | No      |
| 7135   | 2  | 3  | Divorced       | 2  | Some college     | 1  | Working, fi | 8  | 2   | No       |      | 2   | No      |
| 7137   | 2  | 2  | Married/li     | 3  | College degree   | 1  | Working, fi | 9  | 2   | No       |      | 1   | Yes     |
| 7140   | 2  | 2  | Married/li     | 1  | High school or l | 4  | Retired     | 5  | 2   | No       |      | 2   | No      |
| 7141   | 2  | 1  | Single         | 2  | Some college     | 1  | Working, fi | 36 | 2   | No       |      | 2   | No      |
| 7148   | 2  | 2  | Married/li     | 2  | Some college     | 1  | Working, fi | 27 | 2   | No       |      | 2   | No      |
| 7152   | 2  | 2  | Married/li     | 1  | High school or l | 4  | Retired     | 99 | 2   | No       |      | 2   | No      |
| 7154   | 2  | 1  | Single         | 3  | College degree   | 4  | Retired     | 25 | 1   | Yes      | 1    | 2   | No      |

| respid | Q5 | Q6 | Marital Status | Q7 | Education        | Q8 | Work        | Q9 | Q10 | Diabetes | Q10a | Q11 | High BP |
|--------|----|----|----------------|----|------------------|----|-------------|----|-----|----------|------|-----|---------|
| 7156   | 2  | 2  | Married/li     | 2  | Some college     | 1  | Working, fi | 32 | 2   | No       |      | 2   | No      |
| 7158   | 2  | 2  | Married/li     | 3  | College degree   | 1  | Working, fi | 8  | 1   | Yes      | 1    | 2   | No      |
| 7159   | 2  | 2  | Married/li     | 3  | College degree   | 1  | Working, fi | 9  | 2   | No       |      | 2   | No      |
| 7161   | 2  | 2  | Married/li     | 2  | Some college     | 1  | Working, fi | 32 | 2   | No       |      | 1   | Yes     |
| 7164   | 2  | 2  | Married/li     | 3  | College degree   | 1  | Working, fi | 33 | 2   | No       |      | 2   | No      |
| 7166   | 2  | 2  | Married/li     | 2  | Some college     | 1  | Working, fi | 6  | 2   | No       |      | 2   | No      |
| 7167   | 2  | 1  | Single         | 2  | Some college     | 1  | Working, fi | 36 | 2   | No       |      | 2   | No      |
| 7168   | 2  | 2  | Married/li     | 3  | College degree   | 1  | Working, fi | 33 | 2   | No       |      | 2   | No      |
| 7170   | 2  | 4  | Widow/wi       | 2  | Some college     | 1  | Working, fi | 3  | 2   | No       |      | 2   | No      |
| 7171   | 2  | 2  | Married/li     | 2  | Some college     | 1  | Working, fi | 33 | 2   | No       |      | 2   | No      |
| 7172   | 2  | 2  | Married/li     | 2  | Some college     | 1  | Working, fi | 32 | 2   | No       |      | 2   | No      |
| 7173   | 2  | 1  | Single         | 2  | Some college     | 1  | Working, fi | 32 | 2   | No       |      | 2   | No      |
| 7175   | 2  | 2  | Married/li     | 1  | High school or l | 1  | Working, fi | 33 | 2   | No       |      | 2   | No      |
| 7176   | 2  | 2  | Married/li     | 3  | College degree   | 1  | Working, fi | 14 | 2   | No       |      | 2   | No      |
| 7180   | 2  | 2  | Married/li     | 2  | Some college     | 1  | Working, fi | 31 | 2   | No       |      | 2   | No      |
| 7183   | 2  | 2  | Married/li     | 3  | College degree   | 1  | Working, fi | 36 | 2   | No       |      | 2   | No      |
| 7189   | 2  | 2  | Married/li     | 3  | College degree   | 1  | Working, fi | 11 | 2   | No       |      | 1   | Yes     |
| 7193   | 2  | 2  | Married/li     | 3  | College degree   | 1  | Working, fi | 28 | 2   | No       |      | 2   | No      |
| 7194   | 2  | 1  | Single         | 3  | College degree   | 1  | Working, fi | 29 | 2   | No       |      | 2   | No      |
| 7195   | 2  | 2  | Married/li     | 3  | College degree   | 1  | Working, fi | 31 | 2   | No       |      | 2   | No      |
| 7200   | 2  | 1  | Single         | 2  | Some college     | 1  | Working, fi | 25 | 2   | No       |      | 2   | No      |
| 7201   | 2  | 2  | Married/li     | 3  | College degree   | 6  | Homemake    | 27 | 2   | No       |      | 1   | Yes     |
| 7205   | 2  | 2  | Married/li     | 3  | College degree   | 2  | Working, p  | 31 | 2   | No       |      | 1   | Yes     |
| 7207   | 2  | 2  | Married/li     | 3  | College degree   | 1  | Working, fi | 33 | 2   | No       |      | 2   | No      |
| 7208   | 2  | 2  | Married/li     | 3  | College degree   | 1  | Working, fi | 13 | 2   | No       |      | 2   | No      |
| 7210   | 2  | 2  | Married/li     | 3  | College degree   | 3  | Unemploy    | 33 | 2   | No       |      | 2   | No      |
| 7211   | 2  | 2  | Married/li     | 3  | College degree   | 1  | Working, fi | 29 | 2   | No       |      | 2   | No      |
| 7217   | 2  | 2  | Married/li     | 2  | Some college     | 4  | Retired     | 35 | 1   | Yes      | 1    | 1   | Yes     |
| 7218   | 2  | 2  | Married/li     | 1  | High school or l | 1  | Working, fi | 28 | 2   | No       |      | 2   | No      |
| 7220   | 2  | 2  | Married/li     | 2  | Some college     | 1  | Working, fi | 7  | 2   | No       |      | 2   | No      |
| 7225   | 2  | 2  | Married/li     | 1  | High school or l | 1  | Working, fi | 27 | 2   | No       |      | 2   | No      |
| 7228   | 2  | 2  | Married/li     | 2  | Some college     | 1  | Working, fi | 33 | 2   | No       |      | 1   | Yes     |

| respid | Q5 | Q6 | Marital Status | Q7 | Education        | Q8 | Work        | Q9 | Q10 | Diabetes | Q10a | Q11 | High BP |
|--------|----|----|----------------|----|------------------|----|-------------|----|-----|----------|------|-----|---------|
| 7230   | 2  | 2  | Married/li     | 3  | College degree   | 1  | Working, fi | 33 | 2   | No       |      | 2   | No      |
| 7233   | 2  | 2  | Married/li     | 3  | College degree   | 1  | Working, fi | 13 | 2   | No       |      | 1   | Yes     |
| 7234   | 2  | 2  | Married/li     | 3  | College degree   | 1  | Working, fi | 32 | 2   | No       |      | 2   | No      |
| 7235   | 2  | 3  | Divorced       | 2  | Some college     | 1  | Working, fi | 31 | 2   | No       |      | 2   | No      |
| 7236   | 2  | 2  | Married/li     | 3  | College degree   | 1  | Working, fi | 33 | 2   | No       |      | 2   | No      |
| 7241   | 2  | 2  | Married/li     | 4  | Postgraduate     | 1  | Working, fi | 36 | 2   | No       |      | 2   | No      |
| 7251   | 2  | 2  | Married/li     | 1  | High school or l | 1  | Working, fi | 34 | 2   | No       |      | 2   | No      |
| 7253   | 2  | 2  | Married/li     | 2  | Some college     | 1  | Working, fi | 12 | 2   | No       |      | 2   | No      |
| 7259   | 2  | 2  | Married/li     | 3  | College degree   | 1  | Working, fi | 34 | 2   | No       |      | 2   | No      |
| 7260   | 2  | 2  | Married/li     | 3  | College degree   | 6  | Homemake    | 33 | 2   | No       |      | 2   | No      |
| 7261   | 2  | 2  | Married/li     | 3  | College degree   | 1  | Working, fi | 14 | 2   | No       |      | 2   | No      |
| 7263   | 2  | 2  | Married/li     | 2  | Some college     | 1  | Working, fi | 28 | 2   | No       |      | 2   | No      |
| 7265   | 2  | 1  | Single         | 3  | College degree   | 1  | Working, fi | 25 | 2   | No       |      | 2   | No      |
| 7268   | 2  | 3  | Divorced       | 1  | High school or l | 1  | Working, fi | 27 | 2   | No       |      | 2   | No      |
| 7269   | 2  | 2  | Married/li     | 4  | Postgraduate     | 1  | Working, fi | 35 | 1   | Yes      | 1    | 2   | No      |
| 7271   | 2  | 2  | Married/li     | 3  | College degree   | 1  | Working, fi | 6  | 1   | Yes      | 1    | 1   | Yes     |
| 7276   | 2  | 3  | Divorced       | 1  | High school or l | 1  | Working, fi | 4  | 2   | No       |      | 1   | Yes     |
| 7280   | 2  | 2  | Married/li     | 3  | College degree   | 1  | Working, fi | 29 | 2   | No       |      | 2   | No      |
| 7283   | 2  | 1  | Single         | 3  | College degree   | 2  | Working, p  | 26 | 2   | No       |      | 2   | No      |
| 7284   | 2  | 2  | Married/li     | 2  | Some college     | 1  | Working, fi | 34 | 2   | No       |      | 1   | Yes     |
| 7286   | 2  | 2  | Married/li     | 3  | College degree   | 1  | Working, fi | 33 | 2   | No       |      | 1   | Yes     |
| 7287   | 2  | 2  | Married/li     | 1  | High school or l | 1  | Working, fi | 3  | 2   | No       |      | 2   | No      |
| 7288   | 2  | 2  | Married/li     | 1  | High school or l | 4  | Retired     | 6  | 2   | No       |      | 2   | No      |
| 7294   | 2  | 1  | Single         | 3  | College degree   | 1  | Working, fi | 27 | 2   | No       |      | 2   | No      |
| 7295   | 2  | 3  | Divorced       | 2  | Some college     | 1  | Working, fi | 8  | 2   | No       |      | 2   | No      |
| 7296   | 2  | 2  | Married/li     | 3  | College degree   | 1  | Working, fi | 13 | 2   | No       |      | 2   | No      |
| 7297   | 2  | 5  | Prefer not     | 1  | High school or l | 1  | Working, fi | 7  | 2   | No       |      | 2   | No      |
| 7299   | 2  | 2  | Married/li     | 1  | High school or l | 6  | Homemake    | 2  | 2   | No       |      | 2   | No      |
| 7300   | 2  | 2  | Married/li     | 3  | College degree   | 1  | Working, fi | 3  | 2   | No       |      | 2   | No      |
| 7301   | 2  | 2  | Married/li     | 2  | Some college     | 1  | Working, fi | 11 | 2   | No       |      | 2   | No      |
| 7302   | 2  | 2  | Married/li     | 2  | Some college     | 1  | Working, fi | 9  | 2   | No       |      | 2   | No      |
| 7306   | 2  | 2  | Married/li     | 2  | Some college     | 1  | Working, fi | 11 | 2   | No       |      | 1   | Yes     |

| respid | Q5 | Q6 | Marital Status | Q7 | Education        | Q8 | Work        | Q9 | Q10 | Diabetes | Q10a | Q11 | High BP |
|--------|----|----|----------------|----|------------------|----|-------------|----|-----|----------|------|-----|---------|
| 7313   | 2  | 2  | Married/li     | 3  | College degree   | 1  | Working, fi | 11 | 1   | Yes      | 1    | 2   | No      |
| 7315   | 2  | 1  | Single         | 2  | Some college     | 1  | Working, fi | 35 | 2   | No       |      | 2   | No      |
| 7317   | 2  | 5  | Prefer not     | 3  | College degree   | 1  | Working, fi | 1  | 2   | No       |      | 2   | No      |
| 7321   | 2  | 2  | Married/li     | 3  | College degree   | 1  | Working, fi | 35 | 2   | No       |      | 2   | No      |
| 7322   | 2  | 2  | Married/li     | 1  | High school or l | 1  | Working, fi | 26 | 1   | Yes      | 1    | 1   | Yes     |
| 7323   | 2  | 2  | Married/li     | 3  | College degree   | 1  | Working, fi | 3  | 2   | No       |      | 2   | No      |
| 7333   | 2  | 2  | Married/li     | 2  | Some college     | 9  | Other       | 33 | 2   | No       |      | 2   | No      |
| 7335   | 2  | 2  | Married/li     | 4  | Postgraduate     | 1  | Working, fi | 33 | 2   | No       |      | 2   | No      |
| 7336   | 2  | 1  | Single         | 2  | Some college     | 2  | Working, p  | 36 | 2   | No       |      | 2   | No      |
| 7337   | 2  | 2  | Married/li     | 3  | College degree   | 1  | Working, fi | 2  | 2   | No       |      | 2   | No      |
| 7338   | 2  | 2  | Married/li     | 3  | College degree   | 1  | Working, fi | 14 | 2   | No       |      | 2   | No      |
| 7340   | 2  | 1  | Single         | 2  | Some college     | 1  | Working, fi | 33 | 2   | No       |      | 2   | No      |
| 7341   | 2  | 2  | Married/li     | 3  | College degree   | 6  | Homemake    | 31 | 2   | No       |      | 1   | Yes     |
| 7342   | 2  | 2  | Married/li     | 2  | Some college     | 1  | Working, fi | 33 | 2   | No       |      | 2   | No      |
| 7344   | 2  | 2  | Married/li     | 3  | College degree   | 1  | Working, fi | 2  | 2   | No       |      | 2   | No      |
| 7346   | 2  | 2  | Married/li     | 3  | College degree   | 1  | Working, fi | 13 | 2   | No       |      | 1   | Yes     |
| 7347   | 2  | 2  | Married/li     | 2  | Some college     | 1  | Working, fi | 33 | 2   | No       |      | 2   | No      |
| 7349   | 2  | 2  | Married/li     | 3  | College degree   | 6  | Homemake    | 5  | 2   | No       |      | 2   | No      |
| 7352   | 2  | 2  | Married/li     | 3  | College degree   | 1  | Working, fi | 32 | 2   | No       |      | 1   | Yes     |
| 7353   | 2  | 2  | Married/li     | 1  | High school or l | 1  | Working, fi | 33 | 2   | No       |      | 2   | No      |
| 7355   | 2  | 1  | Single         | 3  | College degree   | 2  | Working, p  | 31 | 2   | No       |      | 1   | Yes     |
| 7356   | 2  | 2  | Married/li     | 2  | Some college     | 1  | Working, fi | 4  | 2   | No       |      | 2   | No      |
| 7360   | 2  | 2  | Married/li     | 2  | Some college     | 1  | Working, fi | 11 | 2   | No       |      | 2   | No      |
| 7371   | 2  | 2  | Married/li     | 2  | Some college     | 1  | Working, fi | 11 | 2   | No       |      | 1   | Yes     |
| 7376   | 2  | 1  | Single         | 1  | High school or l | 1  | Working, fi | 1  | 2   | No       |      | 1   | Yes     |
| 7379   | 2  | 2  | Married/li     | 3  | College degree   | 1  | Working, fi | 8  | 2   | No       |      | 2   | No      |
| 7381   | 2  | 2  | Married/li     | 3  | College degree   | 1  | Working, fi | 13 | 2   | No       |      | 2   | No      |
| 7386   | 2  | 2  | Married/li     | 3  | College degree   | 1  | Working, fi | 6  | 2   | No       |      | 2   | No      |
| 7389   | 2  | 2  | Married/li     | 3  | College degree   | 1  | Working, fi | 11 | 2   | No       |      | 1   | Yes     |
| 7390   | 2  | 2  | Married/li     | 3  | College degree   | 1  | Working, fi | 11 | 2   | No       |      | 2   | No      |
| 7393   | 2  | 2  | Married/li     | 3  | College degree   | 1  | Working, fi | 12 | 2   | No       |      | 2   | No      |
| 7394   | 2  | 2  | Married/li     | 2  | Some college     | 1  | Working, fi | 9  | 2   | No       |      | 2   | No      |

| respid | Q5 | Q6 | Marital Status | Q7 | Education        | Q8 | Work        | Q9 | Q10 | Diabetes | Q10a | Q11 | High BP |
|--------|----|----|----------------|----|------------------|----|-------------|----|-----|----------|------|-----|---------|
| 7396   | 2  | 2  | Married/li     | 3  | College degree   | 2  | Working, p  | 34 | 2   | No       |      | 2   | No      |
| 7400   | 2  | 2  | Married/li     | 3  | College degree   | 2  | Working, p  | 8  | 2   | No       |      | 2   | No      |
| 7401   | 2  | 2  | Married/li     | 3  | College degree   | 1  | Working, fi | 12 | 2   | No       |      | 2   | No      |
| 7403   | 2  | 1  | Single         | 2  | Some college     | 1  | Working, fi | 30 | 2   | No       |      | 1   | Yes     |
| 7406   | 2  | 2  | Married/li     | 3  | College degree   | 1  | Working, fi | 13 | 2   | No       |      | 2   | No      |
| 7409   | 2  | 2  | Married/li     | 3  | College degree   | 1  | Working, fi | 11 | 2   | No       |      | 1   | Yes     |
| 7410   | 2  | 2  | Married/li     | 3  | College degree   | 1  | Working, fi | 12 | 1   | Yes      | 1    | 2   | No      |
| 7412   | 2  | 2  | Married/li     | 2  | Some college     | 1  | Working, fi | 3  | 2   | No       |      | 2   | No      |
| 7414   | 2  | 2  | Married/li     | 3  | College degree   | 6  | Homemake    | 11 | 2   | No       |      | 2   | No      |
| 7415   | 2  | 2  | Married/li     | 3  | College degree   | 1  | Working, fi | 11 | 2   | No       |      | 2   | No      |
| 7417   | 2  | 2  | Married/li     | 2  | Some college     | 1  | Working, fi | 11 | 2   | No       |      | 2   | No      |
| 7421   | 2  | 2  | Married/li     | 3  | College degree   | 1  | Working, fi | 14 | 2   | No       |      | 2   | No      |
| 7425   | 2  | 2  | Married/li     | 3  | College degree   | 1  | Working, fi | 13 | 2   | No       |      | 2   | No      |
| 7430   | 2  | 2  | Married/li     | 3  | College degree   | 4  | Retired     | 11 | 2   | No       |      | 2   | No      |
| 7432   | 2  | 2  | Married/li     | 3  | College degree   | 1  | Working, fi | 9  | 2   | No       |      | 2   | No      |
| 7433   | 2  | 2  | Married/li     | 3  | College degree   | 1  | Working, fi | 11 | 2   | No       |      | 1   | Yes     |
| 7442   | 2  | 2  | Married/li     | 1  | High school or l | 1  | Working, fi | 6  | 2   | No       |      | 1   | Yes     |
| 7445   | 2  | 1  | Single         | 2  | Some college     | 1  | Working, fi | 25 | 2   | No       |      | 2   | No      |
| 7446   | 2  | 3  | Divorced       | 3  | College degree   | 1  | Working, fi | 27 | 2   | No       |      | 2   | No      |
| 7449   | 2  | 2  | Married/li     | 4  | Postgraduate     | 1  | Working, fi | 29 | 2   | No       |      | 2   | No      |
| 7450   | 2  | 2  | Married/li     | 3  | College degree   | 1  | Working, fi | 9  | 2   | No       |      | 2   | No      |
| 7451   | 2  | 2  | Married/li     | 4  | Postgraduate     | 1  | Working, fi | 12 | 2   | No       |      | 2   | No      |
| 7459   | 2  | 2  | Married/li     | 1  | High school or l | 1  | Working, fi | 37 | 1   | Yes      | 1    | 2   | No      |
| 7462   | 2  | 2  | Married/li     | 1  | High school or l | 6  | Homemake    | 99 | 2   | No       |      | 2   | No      |
| 7463   | 2  | 2  | Married/li     | 3  | College degree   | 1  | Working, fi | 11 | 2   | No       |      | 1   | Yes     |
| 7469   | 2  | 2  | Married/li     | 3  | College degree   | 1  | Working, fi | 33 | 2   | No       |      | 2   | No      |
| 7482   | 2  | 2  | Married/li     | 3  | College degree   | 2  | Working, p  | 16 | 2   | No       |      | 2   | No      |
| 7484   | 2  | 2  | Married/li     | 4  | Postgraduate     | 1  | Working, fi | 37 | 2   | No       |      | 1   | Yes     |
| 7486   | 2  | 2  | Married/li     | 2  | Some college     | 1  | Working, fi | 4  | 2   | No       |      | 2   | No      |
| 7496   | 2  | 2  | Married/li     | 2  | Some college     | 1  | Working, fi | 4  | 2   | No       |      | 2   | No      |
| 7502   | 2  | 2  | Married/li     | 3  | College degree   | 1  | Working, fi | 34 | 2   | No       |      | 2   | No      |
| 7504   | 2  | 2  | Married/li     | 3  | College degree   | 1  | Working, fi | 99 | 2   | No       |      | 1   | Yes     |

| respid | Q5 | Q6 | Marital Status | Q7 | Education        | Q8 | Work        | Q9 | Q10 | Diabetes | Q10a | Q11 | High BP |
|--------|----|----|----------------|----|------------------|----|-------------|----|-----|----------|------|-----|---------|
| 7509   | 2  | 2  | Married/li     | 2  | Some college     | 1  | Working, fi | 11 | 2   | No       |      | 1   | Yes     |
| 7513   | 2  | 2  | Married/li     | 3  | College degree   | 1  | Working, fi | 33 | 2   | No       |      | 2   | No      |
| 7514   | 2  | 2  | Married/li     | 3  | College degree   | 1  | Working, fi | 11 | 2   | No       |      | 1   | Yes     |
| 7520   | 2  | 1  | Single         | 4  | Postgraduate     | 1  | Working, fi | 26 | 2   | No       |      | 2   | No      |
| 7523   | 2  | 2  | Married/li     | 2  | Some college     | 4  | Retired     | 8  | 2   | No       |      | 2   | No      |
| 7526   | 2  | 2  | Married/li     | 3  | College degree   | 1  | Working, fi | 12 | 2   | No       |      | 2   | No      |
| 7529   | 2  | 2  | Married/li     | 2  | Some college     | 1  | Working, fi | 8  | 2   | No       |      | 2   | No      |
| 7534   | 2  | 2  | Married/li     | 2  | Some college     | 1  | Working, fi | 14 | 2   | No       |      | 2   | No      |
| 7536   | 2  | 1  | Single         | 3  | College degree   | 1  | Working, fi | 33 | 2   | No       |      | 1   | Yes     |
| 7540   | 2  | 2  | Married/li     | 1  | High school or l | 1  | Working, fi | 7  | 2   | No       |      | 2   | No      |
| 7541   | 2  | 2  | Married/li     | 3  | College degree   | 1  | Working, fi | 33 | 2   | No       |      | 2   | No      |
| 7542   | 2  | 2  | Married/li     | 3  | College degree   | 1  | Working, fi | 13 | 2   | No       |      | 2   | No      |
| 7555   | 2  | 2  | Married/li     | 2  | Some college     | 1  | Working, fi | 11 | 2   | No       |      | 1   | Yes     |
| 7566   | 2  | 2  | Married/li     | 1  | High school or l | 1  | Working, fi | 33 | 2   | No       |      | 2   | No      |
| 7568   | 2  | 2  | Married/li     | 3  | College degree   | 1  | Working, fi | 33 | 2   | No       |      | 1   | Yes     |
| 7570   | 2  | 2  | Married/li     | 3  | College degree   | 1  | Working, fi | 11 | 2   | No       |      | 2   | No      |
| 7572   | 2  | 2  | Married/li     | 3  | College degree   | 6  | Homemake    | 8  | 2   | No       |      | 2   | No      |
| 7573   | 2  | 2  | Married/li     | 1  | High school or l | 2  | Working, p  | 99 | 2   | No       |      | 1   | Yes     |
| 7576   | 2  | 2  | Married/li     | 3  | College degree   | 1  | Working, fi | 14 | 2   | No       |      | 2   | No      |
| 7577   | 2  | 2  | Married/li     | 2  | Some college     | 1  | Working, fi | 35 | 2   | No       |      | 2   | No      |
| 7583   | 2  | 2  | Married/li     | 3  | College degree   | 1  | Working, fi | 9  | 2   | No       |      | 2   | No      |
| 7584   | 2  | 2  | Married/li     | 1  | High school or l | 1  | Working, fi | 6  | 2   | No       |      | 1   | Yes     |
| 7585   | 2  | 2  | Married/li     | 4  | Postgraduate     | 1  | Working, fi | 13 | 2   | No       |      | 1   | Yes     |
| 7586   | 2  | 1  | Single         | 2  | Some college     | 1  | Working, fi | 26 | 2   | No       |      | 2   | No      |
| 7587   | 2  | 2  | Married/li     | 3  | College degree   | 1  | Working, fi | 11 | 2   | No       |      | 2   | No      |
| 7588   | 2  | 2  | Married/li     | 2  | Some college     | 4  | Retired     | 31 | 2   | No       |      | 2   | No      |
| 7596   | 2  | 2  | Married/li     | 3  | College degree   | 1  | Working, fi | 14 | 2   | No       |      | 2   | No      |
| 7599   | 2  | 2  | Married/li     | 3  | College degree   | 1  | Working, fi | 6  | 2   | No       |      | 2   | No      |
| 7600   | 2  | 2  | Married/li     | 2  | Some college     | 1  | Working, fi | 12 | 2   | No       |      | 2   | No      |
| 7602   | 2  | 2  | Married/li     | 3  | College degree   | 1  | Working, fi | 9  | 2   | No       |      | 1   | Yes     |
| 7613   | 2  | 2  | Married/li     | 2  | Some college     | 4  | Retired     | 9  | 2   | No       |      | 2   | No      |
| 7620   | 2  | 2  | Married/li     | 2  | Some college     | 1  | Working, fi | 33 | 2   | No       |      | 2   | No      |

| respid | Q5 | Q6 | Marital Status | Q7 | Education        | Q8 | Work        | Q9 | Q10 | Diabetes | Q10a | Q11 | High BP |
|--------|----|----|----------------|----|------------------|----|-------------|----|-----|----------|------|-----|---------|
| 7623   | 2  | 2  | Married/li     | 2  | Some college     | 2  | Working, p  | 26 | 2   | No       |      | 2   | No      |
| 7635   | 2  | 2  | Married/li     | 2  | Some college     | 1  | Working, fi | 28 | 2   | No       |      | 2   | No      |
| 7636   | 2  | 2  | Married/li     | 2  | Some college     | 6  | Homemake    | 1  | 2   | No       |      | 2   | No      |
| 7643   | 2  | 2  | Married/li     | 3  | College degree   | 1  | Working, fi | 9  | 2   | No       |      | 2   | No      |
| 7645   | 2  | 2  | Married/li     | 3  | College degree   | 1  | Working, fi | 38 | 2   | No       |      | 2   | No      |
| 7649   | 2  | 2  | Married/li     | 2  | Some college     | 1  | Working, fi | 12 | 1   | Yes      | 1    | 1   | Yes     |
| 7651   | 2  | 2  | Married/li     | 3  | College degree   | 1  | Working, fi | 1  | 2   | No       |      | 2   | No      |
| 7652   | 2  | 2  | Married/li     | 4  | Postgraduate     | 1  | Working, fi | 32 | 2   | No       |      | 2   | No      |
| 7655   | 2  | 2  | Married/li     | 1  | High school or l | 1  | Working, fi | 4  | 2   | No       |      | 2   | No      |
| 7657   | 2  | 2  | Married/li     | 2  | Some college     | 1  | Working, fi | 1  | 2   | No       |      | 2   | No      |
| 7675   | 2  | 1  | Single         | 3  | College degree   | 1  | Working, fi | 26 | 2   | No       |      | 2   | No      |
| 7676   | 2  | 2  | Married/li     | 2  | Some college     | 1  | Working, fi | 6  | 2   | No       |      | 1   | Yes     |
| 7684   | 2  | 2  | Married/li     | 1  | High school or l | 1  | Working, fi | 4  | 2   | No       |      | 2   | No      |
| 7693   | 2  | 2  | Married/li     | 3  | College degree   | 1  | Working, fi | 11 | 2   | No       |      | 2   | No      |
| 7694   | 2  | 2  | Married/li     | 3  | College degree   | 1  | Working, fi | 13 | 1   | Yes      | 1    | 1   | Yes     |
| 7695   | 2  | 2  | Married/li     | 1  | High school or l | 1  | Working, fi | 1  | 2   | No       |      | 1   | Yes     |
| 7696   | 2  | 2  | Married/li     | 3  | College degree   | 1  | Working, fi | 13 | 1   | Yes      | 1    | 1   | Yes     |
| 7698   | 2  | 2  | Married/li     | 3  | College degree   | 1  | Working, fi | 10 | 2   | No       |      | 2   | No      |
| 7700   | 2  | 2  | Married/li     | 3  | College degree   | 2  | Working, p  | 1  | 2   | No       |      | 2   | No      |
| 7701   | 2  | 2  | Married/li     | 1  | High school or l | 2  | Working, p  | 10 | 2   | No       |      | 1   | Yes     |
| 7704   | 2  | 2  | Married/li     | 3  | College degree   | 1  | Working, fi | 11 | 2   | No       |      | 1   | Yes     |
| 7709   | 2  | 1  | Single         | 3  | College degree   | 1  | Working, fi | 10 | 2   | No       |      | 2   | No      |
| 7713   | 2  | 2  | Married/li     | 2  | Some college     | 1  | Working, fi | 12 | 2   | No       |      | 2   | No      |
| 7714   | 2  | 2  | Married/li     | 1  | High school or l | 4  | Retired     | 26 | 2   | No       |      | 2   | No      |
| 7718   | 2  | 2  | Married/li     | 3  | College degree   | 1  | Working, fi | 13 | 1   | Yes      | 1    | 1   | Yes     |
| 7720   | 2  | 2  | Married/li     | 4  | Postgraduate     | 1  | Working, fi | 33 | 2   | No       |      | 2   | No      |
| 7721   | 2  | 2  | Married/li     | 2  | Some college     | 1  | Working, fi | 4  | 2   | No       |      | 2   | No      |
| 7722   | 2  | 2  | Married/li     | 2  | Some college     | 4  | Retired     | 13 | 2   | No       |      | 1   | Yes     |
| 7724   | 2  | 2  | Married/li     | 1  | High school or l | 1  | Working, fi | 32 | 2   | No       |      | 2   | No      |
| 7728   | 2  | 2  | Married/li     | 1  | High school or l | 1  | Working, fi | 33 | 2   | No       |      | 2   | No      |
| 7731   | 2  | 2  | Married/li     | 1  | High school or l | 2  | Working, p  | 5  | 2   | No       |      | 2   | No      |
| 7735   | 2  | 2  | Married/li     | 1  | High school or l | 1  | Working, fi | 30 | 2   | No       |      | 2   | No      |



| respid | Q5 | Q6 | Marital Status | Q7 | Education        | Q8 | Work        | Q9 | Q10 | Diabetes | Q10a | Q11 | High BP |
|--------|----|----|----------------|----|------------------|----|-------------|----|-----|----------|------|-----|---------|
| 7737   | 2  | 2  | Married/li     | 3  | College degree   | 1  | Working, fi | 10 | 2   | No       |      | 1   | Yes     |
| 7741   | 2  | 2  | Married/li     | 2  | Some college     | 1  | Working, fi | 14 | 2   | No       |      | 2   | No      |
| 7746   | 2  | 2  | Married/li     | 2  | Some college     | 1  | Working, fi | 33 | 2   | No       |      | 2   | No      |
| 7747   | 2  | 2  | Married/li     | 3  | College degree   | 1  | Working, fi | 9  | 2   | No       |      | 2   | No      |
| 7748   | 2  | 2  | Married/li     | 3  | College degree   | 1  | Working, fi | 11 | 1   | Yes      | 1    | 2   | No      |
| 7750   | 2  | 2  | Married/li     | 3  | College degree   | 1  | Working, fi | 10 | 2   | No       |      | 2   | No      |
| 7754   | 2  | 2  | Married/li     | 3  | College degree   | 1  | Working, fi | 11 | 2   | No       |      | 2   | No      |
| 7755   | 2  | 2  | Married/li     | 3  | College degree   | 1  | Working, fi | 8  | 2   | No       |      | 1   | Yes     |
| 7762   | 2  | 2  | Married/li     | 2  | Some college     | 1  | Working, fi | 2  | 2   | No       |      | 2   | No      |
| 7764   | 2  | 2  | Married/li     | 2  | Some college     | 1  | Working, fi | 2  | 1   | Yes      | 1    | 2   | No      |
| 7766   | 2  | 2  | Married/li     | 3  | College degree   | 1  | Working, fi | 14 | 2   | No       |      | 2   | No      |
| 7768   | 2  | 2  | Married/li     | 3  | College degree   | 1  | Working, fi | 11 | 2   | No       |      | 2   | No      |
| 7770   | 2  | 2  | Married/li     | 3  | College degree   | 1  | Working, fi | 8  | 2   | No       |      | 1   | Yes     |
| 7771   | 2  | 2  | Married/li     | 2  | Some college     | 1  | Working, fi | 9  | 2   | No       |      | 2   | No      |
| 7777   | 2  | 2  | Married/li     | 1  | High school or l | 1  | Working, fi | 7  | 2   | No       |      | 2   | No      |
| 7778   | 2  | 2  | Married/li     | 2  | Some college     | 1  | Working, fi | 6  | 2   | No       |      | 2   | No      |
| 7783   | 2  | 2  | Married/li     | 3  | College degree   | 1  | Working, fi | 14 | 1   | Yes      | 1    | 1   | Yes     |
| 7789   | 2  | 2  | Married/li     | 3  | College degree   | 1  | Working, fi | 13 | 2   | No       |      | 2   | No      |
| 7790   | 2  | 4  | Widow/wi       | 1  | High school or l | 5  | Permanent   | 7  | 2   | No       |      | 1   | Yes     |
| 7795   | 2  | 2  | Married/li     | 3  | College degree   | 1  | Working, fi | 7  | 2   | No       |      | 1   | Yes     |
| 7807   | 2  | 2  | Married/li     | 1  | High school or l | 1  | Working, fi | 9  | 2   | No       |      | 2   | No      |
| 7808   | 2  | 2  | Married/li     | 3  | College degree   | 1  | Working, fi | 12 | 2   | No       |      | 1   | Yes     |
| 7818   | 2  | 4  | Widow/wi       | 1  | High school or l | 6  | Homemake    | 2  | 2   | No       |      | 2   | No      |
| 7820   | 2  | 2  | Married/li     | 1  | High school or l | 1  | Working, fi | 8  | 2   | No       |      | 2   | No      |
| 7831   | 2  | 2  | Married/li     | 3  | College degree   | 4  | Retired     | 9  | 2   | No       |      | 1   | Yes     |
| 7832   | 2  | 2  | Married/li     | 2  | Some college     | 1  | Working, fi | 2  | 2   | No       |      | 1   | Yes     |
| 7837   | 2  | 2  | Married/li     | 4  | Postgraduate     | 1  | Working, fi | 33 | 2   | No       |      | 2   | No      |
| 7841   | 2  | 2  | Married/li     | 2  | Some college     | 1  | Working, fi | 11 | 2   | No       |      | 1   | Yes     |
| 7845   | 2  | 2  | Married/li     | 3  | College degree   | 1  | Working, fi | 36 | 2   | No       |      | 2   | No      |
| 7853   | 2  | 2  | Married/li     | 4  | Postgraduate     | 4  | Retired     | 35 | 2   | No       |      | 2   | No      |
| 7854   | 2  | 1  | Single         | 3  | College degree   | 1  | Working, fi | 26 | 2   | No       |      | 2   | No      |
| 7862   | 2  | 2  | Married/li     | 3  | College degree   | 2  | Working, p  | 11 | 2   | No       |      | 2   | No      |

| respid | Q5 | Q6 | Marital Status | Q7 | Education        | Q8 | Work        | Q9 | Q10 | Diabetes | Q10a | Q11 | High BP |
|--------|----|----|----------------|----|------------------|----|-------------|----|-----|----------|------|-----|---------|
| 7871   | 2  | 2  | Married/li     | 3  | College degree   | 1  | Working, fi | 6  | 2   | No       |      | 2   | No      |
| 7875   | 2  | 2  | Married/li     | 1  | High school or l | 6  | Homemake    | 4  | 2   | No       |      | 2   | No      |
| 7880   | 2  | 2  | Married/li     | 2  | Some college     | 1  | Working, fi | 12 | 2   | No       |      | 2   | No      |
| 7881   | 2  | 2  | Married/li     | 3  | College degree   | 1  | Working, fi | 14 | 2   | No       |      | 2   | No      |
| 7883   | 2  | 2  | Married/li     | 3  | College degree   | 1  | Working, fi | 11 | 2   | No       |      | 2   | No      |
| 7896   | 2  | 2  | Married/li     | 1  | High school or l | 1  | Working, fi | 13 | 2   | No       |      | 2   | No      |
| 7905   | 2  | 1  | Single         | 1  | High school or l | 1  | Working, fi | 28 | 2   | No       |      | 2   | No      |
| 7919   | 2  | 2  | Married/li     | 3  | College degree   | 1  | Working, fi | 8  | 2   | No       |      | 2   | No      |
| 7928   | 2  | 2  | Married/li     | 3  | College degree   | 1  | Working, fi | 9  | 1   | Yes      | 1    | 2   | No      |
| 7929   | 2  | 2  | Married/li     | 4  | Postgraduate     | 1  | Working, fi | 35 | 2   | No       |      | 2   | No      |
| 7938   | 2  | 2  | Married/li     | 2  | Some college     | 1  | Working, fi | 7  | 2   | No       |      | 2   | No      |
| 7940   | 2  | 2  | Married/li     | 2  | Some college     | 1  | Working, fi | 9  | 2   | No       |      | 2   | No      |
| 7941   | 2  | 2  | Married/li     | 4  | Postgraduate     | 1  | Working, fi | 11 | 2   | No       |      | 2   | No      |
| 7952   | 2  | 2  | Married/li     | 3  | College degree   | 1  | Working, fi | 14 | 2   | No       |      | 2   | No      |
| 7962   | 2  | 2  | Married/li     | 2  | Some college     | 1  | Working, fi | 10 | 2   | No       |      | 2   | No      |
| 7968   | 2  | 2  | Married/li     | 3  | College degree   | 1  | Working, fi | 7  | 2   | No       |      | 1   | Yes     |
| 7972   | 2  | 2  | Married/li     | 3  | College degree   | 1  | Working, fi | 13 | 2   | No       |      | 1   | Yes     |
| 7983   | 2  | 2  | Married/li     | 3  | College degree   | 1  | Working, fi | 13 | 1   | Yes      | 2    | 1   | Yes     |
| 7990   | 2  | 2  | Married/li     | 3  | College degree   | 1  | Working, fi | 11 | 2   | No       |      | 1   | Yes     |
| 7993   | 2  | 2  | Married/li     | 3  | College degree   | 1  | Working, fi | 14 | 1   | Yes      | 1    | 1   | Yes     |
| 8005   | 2  | 2  | Married/li     | 3  | College degree   | 1  | Working, fi | 13 | 2   | No       |      | 2   | No      |
| 8008   | 2  | 2  | Married/li     | 3  | College degree   | 1  | Working, fi | 12 | 2   | No       |      | 1   | Yes     |
| 8012   | 2  | 2  | Married/li     | 2  | Some college     | 1  | Working, fi | 10 | 2   | No       |      | 1   | Yes     |
| 8021   | 2  | 2  | Married/li     | 3  | College degree   | 1  | Working, fi | 9  | 2   | No       |      | 2   | No      |
| 8024   | 2  | 2  | Married/li     | 1  | High school or l | 1  | Working, fi | 31 | 2   | No       |      | 1   | Yes     |
| 8043   | 2  | 2  | Married/li     | 3  | College degree   | 1  | Working, fi | 11 | 2   | No       |      | 2   | No      |
| 8051   | 2  | 1  | Single         | 3  | College degree   | 1  | Working, fi | 11 | 2   | No       |      | 2   | No      |
| 8056   | 2  | 2  | Married/li     | 2  | Some college     | 1  | Working, fi | 12 | 2   | No       |      | 2   | No      |
| 8061   | 2  | 2  | Married/li     | 3  | College degree   | 1  | Working, fi | 1  | 2   | No       |      | 2   | No      |
| 8066   | 2  | 3  | Divorced       | 2  | Some college     | 1  | Working, fi | 30 | 2   | No       |      | 1   | Yes     |
| 8069   | 2  | 2  | Married/li     | 3  | College degree   | 1  | Working, fi | 8  | 2   | No       |      | 1   | Yes     |
| 8071   | 2  | 2  | Married/li     | 3  | College degree   | 1  | Working, fi | 12 | 2   | No       |      | 1   | Yes     |

| respid | Q5 | Q6 | Marital Status | Q7 | Education        | Q8 | Work        | Q9 | Q10 | Diabetes | Q10a | Q11 | High BP |
|--------|----|----|----------------|----|------------------|----|-------------|----|-----|----------|------|-----|---------|
| 8072   | 2  | 2  | Married/li     | 2  | Some college     | 2  | Working, p  | 1  | 2   | No       |      | 2   | No      |
| 8076   | 2  | 2  | Married/li     | 1  | High school or l | 1  | Working, fi | 31 | 2   | No       |      | 2   | No      |
| 8080   | 2  | 3  | Divorced       | 3  | College degree   | 1  | Working, fi | 31 | 2   | No       |      | 2   | No      |
| 8083   | 2  | 2  | Married/li     | 3  | College degree   | 1  | Working, fi | 13 | 2   | No       |      | 2   | No      |
| 8093   | 2  | 2  | Married/li     | 3  | College degree   | 1  | Working, fi | 13 | 2   | No       |      | 1   | Yes     |
| 8095   | 2  | 2  | Married/li     | 2  | Some college     | 1  | Working, fi | 32 | 1   | Yes      | 1    | 1   | Yes     |
| 8099   | 2  | 2  | Married/li     | 3  | College degree   | 2  | Working, p  | 11 | 2   | No       |      | 2   | No      |
| 8100   | 2  | 2  | Married/li     | 3  | College degree   | 1  | Working, fi | 14 | 2   | No       |      | 2   | No      |
| 8103   | 2  | 1  | Single         | 1  | High school or l | 3  | Unemploy    | 25 | 2   | No       |      | 2   | No      |
| 8104   | 2  | 2  | Married/li     | 4  | Postgraduate     | 1  | Working, fi | 11 | 1   | Yes      | 1    | 2   | No      |
| 8115   | 2  | 2  | Married/li     | 4  | Postgraduate     | 1  | Working, fi | 37 | 1   | Yes      | 2    | 1   | Yes     |
| 8121   | 2  | 2  | Married/li     | 2  | Some college     | 1  | Working, fi | 12 | 2   | No       |      | 1   | Yes     |
| 8128   | 2  | 2  | Married/li     | 1  | High school or l | 2  | Working, p  | 11 | 2   | No       |      | 2   | No      |
| 8130   | 2  | 2  | Married/li     | 2  | Some college     | 2  | Working, p  | 8  | 2   | No       |      | 2   | No      |
| 8131   | 2  | 2  | Married/li     | 3  | College degree   | 1  | Working, fi | 11 | 1   | Yes      | 1    | 2   | No      |
| 8133   | 2  | 2  | Married/li     | 3  | College degree   | 1  | Working, fi | 13 | 2   | No       |      | 2   | No      |
| 8143   | 2  | 2  | Married/li     | 3  | College degree   | 1  | Working, fi | 5  | 2   | No       |      | 1   | Yes     |
| 8144   | 2  | 2  | Married/li     | 3  | College degree   | 1  | Working, fi | 11 | 2   | No       |      | 2   | No      |
| 8146   | 2  | 2  | Married/li     | 3  | College degree   | 1  | Working, fi | 12 | 2   | No       |      | 2   | No      |
| 8148   | 2  | 2  | Married/li     | 2  | Some college     | 1  | Working, fi | 12 | 2   | No       |      | 2   | No      |
| 8157   | 2  | 2  | Married/li     | 3  | College degree   | 1  | Working, fi | 13 | 2   | No       |      | 2   | No      |
| 8164   | 2  | 2  | Married/li     | 1  | High school or l | 6  | Homemake    | 11 | 2   | No       |      | 2   | No      |
| 8173   | 2  | 2  | Married/li     | 3  | College degree   | 1  | Working, fi | 9  | 2   | No       |      | 2   | No      |
| 8176   | 2  | 2  | Married/li     | 3  | College degree   | 1  | Working, fi | 1  | 2   | No       |      | 2   | No      |
| 8179   | 2  | 2  | Married/li     | 3  | College degree   | 1  | Working, fi | 11 | 2   | No       |      | 1   | Yes     |
| 8181   | 2  | 2  | Married/li     | 1  | High school or l | 6  | Homemake    | 29 | 2   | No       |      | 2   | No      |
| 8182   | 2  | 2  | Married/li     | 2  | Some college     | 2  | Working, p  | 7  | 2   | No       |      | 2   | No      |
| 8196   | 2  | 2  | Married/li     | 3  | College degree   | 1  | Working, fi | 4  | 2   | No       |      | 2   | No      |
| 8200   | 2  | 2  | Married/li     | 3  | College degree   | 4  | Retired     | 35 | 2   | No       |      | 2   | No      |
| 8203   | 2  | 2  | Married/li     | 2  | Some college     | 1  | Working, fi | 9  | 2   | No       |      | 2   | No      |
| 8204   | 2  | 2  | Married/li     | 1  | High school or l | 6  | Homemake    | 25 | 2   | No       |      | 2   | No      |
| 8206   | 2  | 2  | Married/li     | 1  | High school or l | 4  | Retired     | 8  | 2   | No       |      | 2   | No      |

| respid | Q5 | Q6 | Marital Status | Q7 | Education        | Q8 | Work        | Q9 | Q10 | Diabetes | Q10a | Q11 | High BP |
|--------|----|----|----------------|----|------------------|----|-------------|----|-----|----------|------|-----|---------|
| 8208   | 2  | 2  | Married/li     | 3  | College degree   | 1  | Working, fi | 8  | 2   | No       |      | 2   | No      |
| 8212   | 2  | 2  | Married/li     | 1  | High school or l | 1  | Working, fi | 6  | 2   | No       |      | 1   | Yes     |
| 8222   | 2  | 3  | Divorced       | 2  | Some college     | 2  | Working, p  | 10 | 2   | No       |      | 2   | No      |
| 8223   | 2  | 2  | Married/li     | 3  | College degree   | 1  | Working, fi | 14 | 2   | No       |      | 2   | No      |
| 8225   | 2  | 2  | Married/li     | 3  | College degree   | 1  | Working, fi | 10 | 2   | No       |      | 1   | Yes     |
| 8226   | 2  | 2  | Married/li     | 4  | Postgraduate     | 1  | Working, fi | 14 | 2   | No       |      | 2   | No      |
| 8228   | 2  | 2  | Married/li     | 2  | Some college     | 1  | Working, fi | 3  | 2   | No       |      | 1   | Yes     |
| 8229   | 2  | 2  | Married/li     | 2  | Some college     | 9  | Other       | 3  | 2   | No       |      | 2   | No      |
| 8239   | 2  | 2  | Married/li     | 2  | Some college     | 1  | Working, fi | 6  | 2   | No       |      | 1   | Yes     |
| 8246   | 2  | 2  | Married/li     | 2  | Some college     | 4  | Retired     | 11 | 2   | No       |      | 2   | No      |
| 8258   | 2  | 2  | Married/li     | 2  | Some college     | 1  | Working, fi | 30 | 2   | No       |      | 1   | Yes     |
| 8260   | 2  | 2  | Married/li     | 3  | College degree   | 1  | Working, fi | 12 | 1   | Yes      | 1    | 2   | No      |
| 8262   | 2  | 2  | Married/li     | 3  | College degree   | 1  | Working, fi | 12 | 2   | No       |      | 1   | Yes     |
| 8263   | 2  | 2  | Married/li     | 3  | College degree   | 1  | Working, fi | 11 | 2   | No       |      | 2   | No      |
| 8267   | 2  | 2  | Married/li     | 2  | Some college     | 1  | Working, fi | 32 | 2   | No       |      | 1   | Yes     |
| 8271   | 2  | 2  | Married/li     | 3  | College degree   | 1  | Working, fi | 14 | 2   | No       |      | 2   | No      |
| 8274   | 2  | 2  | Married/li     | 3  | College degree   | 1  | Working, fi | 8  | 2   | No       |      | 2   | No      |
| 8275   | 2  | 2  | Married/li     | 2  | Some college     | 1  | Working, fi | 11 | 2   | No       |      | 1   | Yes     |
| 8279   | 2  | 2  | Married/li     | 2  | Some college     | 1  | Working, fi | 12 | 2   | No       |      | 1   | Yes     |
| 8285   | 2  | 2  | Married/li     | 3  | College degree   | 1  | Working, fi | 12 | 1   | Yes      | 1    | 1   | Yes     |
| 8287   | 2  | 2  | Married/li     | 3  | College degree   | 1  | Working, fi | 12 | 1   | Yes      | 1    | 1   | Yes     |
| 8289   | 2  | 2  | Married/li     | 2  | Some college     | 1  | Working, fi | 11 | 2   | No       |      | 1   | Yes     |
| 8291   | 2  | 2  | Married/li     | 2  | Some college     | 1  | Working, fi | 8  | 2   | No       |      | 2   | No      |
| 8299   | 2  | 2  | Married/li     | 2  | Some college     | 1  | Working, fi | 10 | 2   | No       |      | 2   | No      |
| 8301   | 2  | 1  | Single         | 3  | College degree   | 8  | Other worl  | 25 | 2   | No       |      | 1   | Yes     |
| 8302   | 2  | 2  | Married/li     | 3  | College degree   | 1  | Working, fi | 13 | 2   | No       |      | 2   | No      |
| 8308   | 2  | 2  | Married/li     | 2  | Some college     | 1  | Working, fi | 12 | 2   | No       |      | 1   | Yes     |
| 8313   | 2  | 2  | Married/li     | 3  | College degree   | 1  | Working, fi | 8  | 2   | No       |      | 1   | Yes     |
| 8316   | 2  | 2  | Married/li     | 2  | Some college     | 1  | Working, fi | 12 | 2   | No       |      | 2   | No      |
| 8317   | 2  | 2  | Married/li     | 3  | College degree   | 1  | Working, fi | 1  | 2   | No       |      | 2   | No      |
| 8319   | 2  | 2  | Married/li     | 4  | Postgraduate     | 1  | Working, fi | 28 | 2   | No       |      | 2   | No      |
| 8323   | 2  | 2  | Married/li     | 2  | Some college     | 1  | Working, fi | 12 | 2   | No       |      | 1   | Yes     |

| respid | Q5 | Q6 | Marital Status | Q7 | Education        | Q8 | Work        | Q9 | Q10 | Diabetes | Q10a | Q11 | High BP |
|--------|----|----|----------------|----|------------------|----|-------------|----|-----|----------|------|-----|---------|
| 8324   | 2  | 1  | Single         | 3  | College degree   | 1  | Working, fi | 30 | 2   | No       |      | 2   | No      |
| 8327   | 2  | 2  | Married/li     | 3  | College degree   | 1  | Working, fi | 13 | 2   | No       |      | 1   | Yes     |
| 8328   | 2  | 2  | Married/li     | 3  | College degree   | 1  | Working, fi | 34 | 2   | No       |      | 1   | Yes     |
| 8342   | 2  | 2  | Married/li     | 2  | Some college     | 1  | Working, fi | 7  | 2   | No       |      | 2   | No      |
| 8350   | 2  | 2  | Married/li     | 2  | Some college     | 1  | Working, fi | 12 | 2   | No       |      | 2   | No      |
| 8352   | 2  | 2  | Married/li     | 2  | Some college     | 1  | Working, fi | 11 | 2   | No       |      | 2   | No      |
| 8353   | 2  | 2  | Married/li     | 4  | Postgraduate     | 1  | Working, fi | 36 | 2   | No       |      | 2   | No      |
| 8356   | 2  | 2  | Married/li     | 2  | Some college     | 4  | Retired     | 2  | 2   | No       |      | 1   | Yes     |
| 8367   | 2  | 2  | Married/li     | 3  | College degree   | 1  | Working, fi | 10 | 2   | No       |      | 2   | No      |
| 8373   | 2  | 2  | Married/li     | 3  | College degree   | 1  | Working, fi | 13 | 2   | No       |      | 1   | Yes     |
| 8379   | 2  | 1  | Single         | 2  | Some college     | 3  | Unemploy    | 3  | 2   | No       |      | 2   | No      |
| 8382   | 2  | 2  | Married/li     | 2  | Some college     | 1  | Working, fi | 7  | 2   | No       |      | 2   | No      |
| 8387   | 2  | 2  | Married/li     | 1  | High school or l | 4  | Retired     | 12 | 2   | No       |      | 1   | Yes     |
| 8409   | 2  | 2  | Married/li     | 1  | High school or l | 1  | Working, fi | 11 | 1   | Yes      | 1    | 1   | Yes     |
| 8410   | 2  | 2  | Married/li     | 2  | Some college     | 1  | Working, fi | 13 | 2   | No       |      | 2   | No      |
| 8412   | 2  | 2  | Married/li     | 3  | College degree   | 1  | Working, fi | 4  | 2   | No       |      | 2   | No      |
| 8415   | 2  | 2  | Married/li     | 2  | Some college     | 1  | Working, fi | 6  | 2   | No       |      | 2   | No      |
| 8417   | 2  | 2  | Married/li     | 3  | College degree   | 1  | Working, fi | 9  | 2   | No       |      | 2   | No      |
| 8422   | 2  | 2  | Married/li     | 1  | High school or l | 1  | Working, fi | 12 | 2   | No       |      | 1   | Yes     |
| 8430   | 2  | 2  | Married/li     | 2  | Some college     | 6  | Homemake    | 36 | 2   | No       |      | 2   | No      |
| 8434   | 2  | 2  | Married/li     | 4  | Postgraduate     | 1  | Working, fi | 12 | 2   | No       |      | 2   | No      |
| 8436   | 2  | 2  | Married/li     | 3  | College degree   | 1  | Working, fi | 12 | 2   | No       |      | 2   | No      |
| 8446   | 2  | 2  | Married/li     | 3  | College degree   | 1  | Working, fi | 13 | 2   | No       |      | 2   | No      |
| 8447   | 2  | 2  | Married/li     | 3  | College degree   | 1  | Working, fi | 13 | 2   | No       |      | 1   | Yes     |
| 8448   | 2  | 2  | Married/li     | 3  | College degree   | 6  | Homemake    | 2  | 2   | No       |      | 2   | No      |
| 8455   | 2  | 2  | Married/li     | 3  | College degree   | 1  | Working, fi | 10 | 2   | No       |      | 1   | Yes     |
| 8456   | 2  | 2  | Married/li     | 2  | Some college     | 4  | Retired     | 33 | 2   | No       |      | 2   | No      |
| 8459   | 2  | 2  | Married/li     | 2  | Some college     | 4  | Retired     | 38 | 2   | No       |      | 2   | No      |
| 8460   | 2  | 2  | Married/li     | 3  | College degree   | 1  | Working, fi | 6  | 2   | No       |      | 2   | No      |
| 8464   | 2  | 2  | Married/li     | 3  | College degree   | 1  | Working, fi | 11 | 2   | No       |      | 1   | Yes     |
| 8470   | 2  | 2  | Married/li     | 3  | College degree   | 1  | Working, fi | 8  | 1   | Yes      | 2    | 2   | No      |
| 8473   | 2  | 2  | Married/li     | 3  | College degree   | 1  | Working, fi | 31 | 2   | No       |      | 2   | No      |

| respid | Q5 | Q6 | Marital Status | Q7 | Education        | Q8 | Work        | Q9 | Q10 | Diabetes | Q10a | Q11 | High BP |
|--------|----|----|----------------|----|------------------|----|-------------|----|-----|----------|------|-----|---------|
| 8486   | 2  | 2  | Married/li     | 2  | Some college     | 1  | Working, fi | 13 | 2   | No       |      | 2   | No      |
| 8487   | 2  | 2  | Married/li     | 1  | High school or l | 4  | Retired     | 4  | 2   | No       |      | 2   | No      |
| 8489   | 2  | 2  | Married/li     | 4  | Postgraduate     | 1  | Working, fi | 36 | 2   | No       |      | 1   | Yes     |
| 8494   | 2  | 2  | Married/li     | 4  | Postgraduate     | 1  | Working, fi | 11 | 2   | No       |      | 2   | No      |
| 8495   | 2  | 2  | Married/li     | 3  | College degree   | 1  | Working, fi | 35 | 1   | Yes      | 1    | 1   | Yes     |
| 8497   | 2  | 1  | Single         | 3  | College degree   | 1  | Working, fi | 1  | 2   | No       |      | 2   | No      |
| 8510   | 2  | 2  | Married/li     | 2  | Some college     | 1  | Working, fi | 11 | 2   | No       |      | 2   | No      |
| 8515   | 2  | 4  | Widow/wi       | 1  | High school or l | 6  | Homemake    | 33 | 2   | No       |      | 1   | Yes     |
| 8526   | 2  | 2  | Married/li     | 4  | Postgraduate     | 1  | Working, fi | 36 | 2   | No       |      | 2   | No      |
| 8530   | 2  | 2  | Married/li     | 1  | High school or l | 6  | Homemake    | 25 | 2   | No       |      | 2   | No      |
| 8532   | 2  | 2  | Married/li     | 3  | College degree   | 1  | Working, fi | 35 | 2   | No       |      | 1   | Yes     |
| 8533   | 2  | 1  | Single         | 2  | Some college     | 6  | Homemake    | 25 | 2   | No       |      | 2   | No      |
| 8534   | 2  | 2  | Married/li     | 2  | Some college     | 1  | Working, fi | 9  | 2   | No       |      | 2   | No      |
| 8572   | 2  | 2  | Married/li     | 3  | College degree   | 1  | Working, fi | 13 | 2   | No       |      | 1   | Yes     |
| 8582   | 2  | 2  | Married/li     | 3  | College degree   | 1  | Working, fi | 6  | 2   | No       |      | 2   | No      |
| 8584   | 2  | 2  | Married/li     | 1  | High school or l | 1  | Working, fi | 11 | 2   | No       |      | 1   | Yes     |
| 8585   | 2  | 2  | Married/li     | 3  | College degree   | 1  | Working, fi | 13 | 2   | No       |      | 2   | No      |
| 8586   | 2  | 2  | Married/li     | 3  | College degree   | 1  | Working, fi | 32 | 2   | No       |      | 2   | No      |
| 8589   | 2  | 2  | Married/li     | 1  | High school or l | 1  | Working, fi | 5  | 1   | Yes      | 1    | 2   | No      |
| 8593   | 2  | 2  | Married/li     | 1  | High school or l | 2  | Working, p  | 33 | 2   | No       |      | 1   | Yes     |
| 8594   | 2  | 2  | Married/li     | 3  | College degree   | 1  | Working, fi | 37 | 2   | No       |      | 1   | Yes     |
| 8601   | 2  | 2  | Married/li     | 2  | Some college     | 1  | Working, fi | 29 | 2   | No       |      | 2   | No      |
| 8603   | 2  | 1  | Single         | 2  | Some college     | 1  | Working, fi | 27 | 2   | No       |      | 2   | No      |
| 8604   | 2  | 2  | Married/li     | 1  | High school or l | 9  | Other       | 99 | 2   | No       |      | 2   | No      |
| 8605   | 2  | 1  | Single         | 3  | College degree   | 1  | Working, fi | 30 | 2   | No       |      | 2   | No      |
| 8607   | 2  | 1  | Single         | 2  | Some college     | 1  | Working, fi | 29 | 2   | No       |      | 2   | No      |
| 8623   | 2  | 2  | Married/li     | 3  | College degree   | 4  | Retired     | 32 | 2   | No       |      | 2   | No      |
| 8626   | 2  | 2  | Married/li     | 3  | College degree   | 1  | Working, fi | 7  | 2   | No       |      | 2   | No      |
| 8638   | 2  | 2  | Married/li     | 1  | High school or l | 6  | Homemake    | 31 | 2   | No       |      | 1   | Yes     |
| 8640   | 2  | 2  | Married/li     | 2  | Some college     | 6  | Homemake    | 6  | 2   | No       |      | 2   | No      |
| 8641   | 2  | 2  | Married/li     | 1  | High school or l | 1  | Working, fi | 20 | 1   | Yes      | 1    | 2   | No      |
| 8643   | 2  | 2  | Married/li     | 1  | High school or l | 2  | Working, p  | 33 | 1   | Yes      | 1    | 2   | No      |

| respid | Q5 | Q6 | Marital Status | Q7 | Education        | Q8 | Work        | Q9 | Q10 | Diabetes | Q10a | Q11 | High BP |
|--------|----|----|----------------|----|------------------|----|-------------|----|-----|----------|------|-----|---------|
| 8644   | 2  | 2  | Married/li     | 3  | College degree   | 1  | Working, fi | 10 | 2   | No       |      | 2   | No      |
| 8646   | 2  | 2  | Married/li     | 1  | High school or l | 6  | Homemake    | 99 | 2   | No       |      | 1   | Yes     |
| 8647   | 2  | 2  | Married/li     | 2  | Some college     | 1  | Working, fi | 31 | 2   | No       |      | 2   | No      |
| 8649   | 2  | 1  | Single         | 3  | College degree   | 1  | Working, fi | 18 | 2   | No       |      | 2   | No      |
| 8650   | 2  | 2  | Married/li     | 3  | College degree   | 1  | Working, fi | 3  | 2   | No       |      | 2   | No      |
| 8658   | 2  | 1  | Single         | 1  | High school or l | 2  | Working, p  | 29 | 2   | No       |      | 2   | No      |
| 8659   | 2  | 2  | Married/li     | 3  | College degree   | 1  | Working, fi | 10 | 2   | No       |      | 2   | No      |
| 8669   | 2  | 2  | Married/li     | 3  | College degree   | 1  | Working, fi | 35 | 2   | No       |      | 1   | Yes     |
| 8672   | 2  | 2  | Married/li     | 3  | College degree   | 1  | Working, fi | 11 | 2   | No       |      | 2   | No      |
| 8673   | 2  | 2  | Married/li     | 2  | Some college     | 1  | Working, fi | 11 | 2   | No       |      | 1   | Yes     |
| 8676   | 2  | 2  | Married/li     | 4  | Postgraduate     | 1  | Working, fi | 13 | 1   | Yes      | 1    | 2   | No      |
| 8677   | 2  | 2  | Married/li     | 3  | College degree   | 1  | Working, fi | 36 | 2   | No       |      | 2   | No      |
| 8681   | 2  | 2  | Married/li     | 3  | College degree   | 1  | Working, fi | 6  | 2   | No       |      | 2   | No      |
| 8688   | 2  | 2  | Married/li     | 2  | Some college     | 1  | Working, fi | 12 | 2   | No       |      | 1   | Yes     |
| 8689   | 2  | 2  | Married/li     | 2  | Some college     | 1  | Working, fi | 2  | 2   | No       |      | 2   | No      |
| 8690   | 2  | 2  | Married/li     | 3  | College degree   | 1  | Working, fi | 5  | 2   | No       |      | 2   | No      |
| 8693   | 2  | 2  | Married/li     | 3  | College degree   | 1  | Working, fi | 17 | 2   | No       |      | 1   | Yes     |
| 8694   | 2  | 2  | Married/li     | 3  | College degree   | 1  | Working, fi | 31 | 2   | No       |      | 2   | No      |
| 8699   | 2  | 2  | Married/li     | 2  | Some college     | 1  | Working, fi | 11 | 2   | No       |      | 2   | No      |
| 8700   | 2  | 2  | Married/li     | 3  | College degree   | 1  | Working, fi | 13 | 2   | No       |      | 2   | No      |
| 8703   | 2  | 1  | Single         | 4  | Postgraduate     | 1  | Working, fi | 28 | 2   | No       |      | 2   | No      |
| 8704   | 2  | 1  | Single         | 4  | Postgraduate     | 1  | Working, fi | 29 | 2   | No       |      | 2   | No      |
| 8706   | 2  | 2  | Married/li     | 4  | Postgraduate     | 2  | Working, p  | 29 | 2   | No       |      | 2   | No      |
| 8709   | 2  | 2  | Married/li     | 2  | Some college     | 1  | Working, fi | 12 | 2   | No       |      | 1   | Yes     |
| 8715   | 2  | 2  | Married/li     | 2  | Some college     | 1  | Working, fi | 33 | 2   | No       |      | 2   | No      |
| 8728   | 2  | 2  | Married/li     | 1  | High school or l | 4  | Retired     | 13 | 2   | No       |      | 1   | Yes     |
| 8729   | 2  | 1  | Single         | 3  | College degree   | 1  | Working, fi | 35 | 2   | No       |      | 2   | No      |
| 8730   | 2  | 2  | Married/li     | 2  | Some college     | 1  | Working, fi | 11 | 2   | No       |      | 2   | No      |
| 8742   | 2  | 2  | Married/li     | 2  | Some college     | 1  | Working, fi | 27 | 2   | No       |      | 2   | No      |
| 8748   | 2  | 2  | Married/li     | 4  | Postgraduate     | 1  | Working, fi | 35 | 2   | No       |      | 2   | No      |
| 8749   | 2  | 2  | Married/li     | 3  | College degree   | 1  | Working, fi | 14 | 2   | No       |      | 2   | No      |
| 8750   | 2  | 2  | Married/li     | 3  | College degree   | 1  | Working, fi | 37 | 2   | No       |      | 2   | No      |

| respid | Q5 | Q6 | Marital Status | Q7 | Education        | Q8 | Work        | Q9 | Q10 | Diabetes | Q10a | Q11 | High BP |
|--------|----|----|----------------|----|------------------|----|-------------|----|-----|----------|------|-----|---------|
| 8751   | 2  | 2  | Married/li     | 3  | College degree   | 1  | Working, fi | 35 | 2   | No       |      | 2   | No      |
| 8752   | 2  | 2  | Married/li     | 3  | College degree   | 1  | Working, fi | 10 | 2   | No       |      | 1   | Yes     |
| 8754   | 2  | 2  | Married/li     | 3  | College degree   | 1  | Working, fi | 13 | 2   | No       |      | 2   | No      |
| 8757   | 2  | 2  | Married/li     | 4  | Postgraduate     | 1  | Working, fi | 32 | 2   | No       |      | 2   | No      |
| 8760   | 2  | 1  | Single         | 3  | College degree   | 8  | Other worl  | 15 | 2   | No       |      | 2   | No      |
| 8761   | 2  | 2  | Married/li     | 3  | College degree   | 1  | Working, fi | 11 | 2   | No       |      | 2   | No      |
| 8762   | 2  | 2  | Married/li     | 3  | College degree   | 1  | Working, fi | 11 | 2   | No       |      | 2   | No      |
| 8763   | 2  | 2  | Married/li     | 3  | College degree   | 1  | Working, fi | 28 | 2   | No       |      | 2   | No      |
| 8764   | 2  | 2  | Married/li     | 2  | Some college     | 1  | Working, fi | 13 | 2   | No       |      | 2   | No      |
| 8765   | 2  | 2  | Married/li     | 3  | College degree   | 1  | Working, fi | 34 | 2   | No       |      | 2   | No      |
| 8766   | 2  | 2  | Married/li     | 2  | Some college     | 1  | Working, fi | 99 | 2   | No       |      | 2   | No      |
| 8767   | 2  | 2  | Married/li     | 1  | High school or l | 1  | Working, fi | 35 | 2   | No       |      | 1   | Yes     |
| 8768   | 2  | 5  | Prefer not     | 1  | High school or l | 1  | Working, fi | 99 | 2   | No       |      | 2   | No      |
| 8770   | 2  | 2  | Married/li     | 1  | High school or l | 1  | Working, fi | 10 | 2   | No       |      | 2   | No      |
| 8771   | 2  | 3  | Divorced       | 2  | Some college     | 1  | Working, fi | 25 | 2   | No       |      | 1   | Yes     |
| 8773   | 2  | 2  | Married/li     | 4  | Postgraduate     | 1  | Working, fi | 24 | 2   | No       |      | 2   | No      |
| 8774   | 2  | 2  | Married/li     | 3  | College degree   | 1  | Working, fi | 13 | 1   | Yes      | 1    | 1   | Yes     |
| 8776   | 2  | 2  | Married/li     | 2  | Some college     | 1  | Working, fi | 13 | 2   | No       |      | 2   | No      |
| 8777   | 2  | 2  | Married/li     | 3  | College degree   | 1  | Working, fi | 18 | 2   | No       |      | 2   | No      |
| 8778   | 2  | 1  | Single         | 2  | Some college     | 1  | Working, fi | 26 | 1   | Yes      | 1    | 1   | Yes     |
| 8779   | 2  | 2  | Married/li     | 2  | Some college     | 1  | Working, fi | 12 | 2   | No       |      | 2   | No      |
| 8784   | 2  | 2  | Married/li     | 2  | Some college     | 1  | Working, fi | 11 | 2   | No       |      | 2   | No      |
| 8786   | 2  | 2  | Married/li     | 2  | Some college     | 8  | Other worl  | 34 | 2   | No       |      | 1   | Yes     |
| 8787   | 2  | 1  | Single         | 2  | Some college     | 1  | Working, fi | 25 | 2   | No       |      | 2   | No      |
| 8790   | 2  | 2  | Married/li     | 3  | College degree   | 1  | Working, fi | 16 | 2   | No       |      | 2   | No      |
| 8791   | 2  | 2  | Married/li     | 4  | Postgraduate     | 1  | Working, fi | 13 | 2   | No       |      | 2   | No      |
| 8793   | 2  | 2  | Married/li     | 1  | High school or l | 1  | Working, fi | 26 | 2   | No       |      | 2   | No      |
| 8795   | 2  | 2  | Married/li     | 2  | Some college     | 1  | Working, fi | 34 | 2   | No       |      | 2   | No      |
| 8797   | 2  | 2  | Married/li     | 2  | Some college     | 4  | Retired     | 14 | 2   | No       |      | 2   | No      |
| 8801   | 2  | 2  | Married/li     | 2  | Some college     | 1  | Working, fi | 9  | 2   | No       |      | 1   | Yes     |
| 8802   | 2  | 1  | Single         | 2  | Some college     | 1  | Working, fi | 29 | 2   | No       |      | 2   | No      |
| 8807   | 2  | 2  | Married/li     | 3  | College degree   | 2  | Working, p  | 12 | 2   | No       |      | 2   | No      |



| respid | Q5 | Q6 | Marital Status | Q7 | Education        | Q8 | Work        | Q9 | Q10 | Diabetes | Q10a | Q11 | High BP |
|--------|----|----|----------------|----|------------------|----|-------------|----|-----|----------|------|-----|---------|
| 8813   | 2  | 2  | Married/li     | 2  | Some college     | 1  | Working, fi | 6  | 2   | No       |      | 2   | No      |
| 8817   | 2  | 1  | Single         | 3  | College degree   | 1  | Working, fi | 34 | 2   | No       |      | 2   | No      |
| 8818   | 2  | 2  | Married/li     | 4  | Postgraduate     | 1  | Working, fi | 35 | 2   | No       |      | 2   | No      |
| 8821   | 2  | 2  | Married/li     | 2  | Some college     | 1  | Working, fi | 14 | 2   | No       |      | 2   | No      |
| 8822   | 2  | 2  | Married/li     | 3  | College degree   | 1  | Working, fi | 11 | 2   | No       |      | 2   | No      |
| 8823   | 2  | 2  | Married/li     | 1  | High school or l | 6  | Homemake    | 29 | 2   | No       |      | 2   | No      |
| 8824   | 2  | 2  | Married/li     | 3  | College degree   | 1  | Working, fi | 19 | 2   | No       |      | 1   | Yes     |
| 8825   | 2  | 2  | Married/li     | 3  | College degree   | 6  | Homemake    | 31 | 2   | No       |      | 2   | No      |
| 8834   | 2  | 2  | Married/li     | 4  | Postgraduate     | 2  | Working, p  | 6  | 1   | Yes      | 2    | 1   | Yes     |
| 8840   | 2  | 1  | Single         | 1  | High school or l | 6  | Homemake    | 10 | 2   | No       |      | 2   | No      |
| 8843   | 2  | 2  | Married/li     | 3  | College degree   | 1  | Working, fi | 1  | 2   | No       |      | 2   | No      |
| 8846   | 2  | 2  | Married/li     | 1  | High school or l | 4  | Retired     | 5  | 1   | Yes      | 1    | 1   | Yes     |
| 8862   | 2  | 2  | Married/li     | 2  | Some college     | 1  | Working, fi | 10 | 2   | No       |      | 2   | No      |
| 8866   | 2  | 1  | Single         | 2  | Some college     | 1  | Working, fi | 10 | 2   | No       |      | 1   | Yes     |
| 8869   | 2  | 2  | Married/li     | 2  | Some college     | 1  | Working, fi | 11 | 2   | No       |      | 2   | No      |
| 8872   | 2  | 2  | Married/li     | 3  | College degree   | 6  | Homemake    | 12 | 2   | No       |      | 2   | No      |
| 8903   | 2  | 2  | Married/li     | 3  | College degree   | 1  | Working, fi | 12 | 2   | No       |      | 2   | No      |
| 8909   | 2  | 2  | Married/li     | 4  | Postgraduate     | 1  | Working, fi | 13 | 2   | No       |      | 2   | No      |
| 8926   | 2  | 2  | Married/li     | 2  | Some college     | 1  | Working, fi | 4  | 2   | No       |      | 2   | No      |
| 8936   | 2  | 2  | Married/li     | 1  | High school or l | 4  | Retired     | 12 | 2   | No       |      | 2   | No      |
| 8945   | 2  | 2  | Married/li     | 2  | Some college     | 1  | Working, fi | 32 | 2   | No       |      | 2   | No      |
| 8954   | 2  | 2  | Married/li     | 2  | Some college     | 1  | Working, fi | 9  | 2   | No       |      | 2   | No      |
| 8955   | 2  | 2  | Married/li     | 3  | College degree   | 1  | Working, fi | 33 | 2   | No       |      | 2   | No      |
| 8958   | 2  | 2  | Married/li     | 2  | Some college     | 1  | Working, fi | 13 | 2   | No       |      | 1   | Yes     |
| 8959   | 2  | 2  | Married/li     | 3  | College degree   | 1  | Working, fi | 11 | 2   | No       |      | 2   | No      |
| 8960   | 2  | 2  | Married/li     | 4  | Postgraduate     | 1  | Working, fi | 12 | 2   | No       |      | 2   | No      |
| 8976   | 2  | 1  | Single         | 2  | Some college     | 1  | Working, fi | 28 | 2   | No       |      | 2   | No      |
| 8977   | 2  | 2  | Married/li     | 2  | Some college     | 1  | Working, fi | 33 | 2   | No       |      | 2   | No      |
| 8979   | 2  | 2  | Married/li     | 3  | College degree   | 1  | Working, fi | 6  | 2   | No       |      | 2   | No      |
| 8985   | 2  | 1  | Single         | 3  | College degree   | 1  | Working, fi | 28 | 2   | No       |      | 2   | No      |
| 8994   | 2  | 2  | Married/li     | 1  | High school or l | 2  | Working, p  | 11 | 2   | No       |      | 2   | No      |
| 8997   | 2  | 2  | Married/li     | 1  | High school or l | 1  | Working, fi | 5  | 2   | No       |      | 1   | Yes     |

| respid | Q5 | Q6 | Marital Status | Q7 | Education        | Q8 | Work        | Q9 | Q10 | Diabetes | Q10a | Q11 | High BP |
|--------|----|----|----------------|----|------------------|----|-------------|----|-----|----------|------|-----|---------|
| 9002   | 2  | 2  | Married/li     | 2  | Some college     | 1  | Working, fi | 7  | 2   | No       |      | 2   | No      |
| 9005   | 2  | 2  | Married/li     | 3  | College degree   | 1  | Working, fi | 28 | 2   | No       |      | 2   | No      |
| 9017   | 2  | 2  | Married/li     | 3  | College degree   | 1  | Working, fi | 33 | 2   | No       |      | 2   | No      |
| 9018   | 2  | 2  | Married/li     | 3  | College degree   | 1  | Working, fi | 13 | 2   | No       |      | 2   | No      |
| 9021   | 2  | 2  | Married/li     | 2  | Some college     | 4  | Retired     | 11 | 2   | No       |      | 1   | Yes     |
| 9029   | 2  | 2  | Married/li     | 3  | College degree   | 1  | Working, fi | 12 | 2   | No       |      | 1   | Yes     |
| 9035   | 2  | 2  | Married/li     | 3  | College degree   | 1  | Working, fi | 11 | 2   | No       |      | 2   | No      |
| 9038   | 2  | 2  | Married/li     | 2  | Some college     | 1  | Working, fi | 12 | 2   | No       |      | 1   | Yes     |
| 9039   | 2  | 1  | Single         | 3  | College degree   | 1  | Working, fi | 14 | 2   | No       |      | 2   | No      |
| 9040   | 2  | 2  | Married/li     | 1  | High school or l | 4  | Retired     | 4  | 2   | No       |      | 1   | Yes     |
| 9042   | 2  | 3  | Divorced       | 2  | Some college     | 1  | Working, fi | 8  | 2   | No       |      | 2   | No      |
| 9043   | 2  | 2  | Married/li     | 4  | Postgraduate     | 1  | Working, fi | 14 | 2   | No       |      | 2   | No      |
| 9045   | 2  | 2  | Married/li     | 2  | Some college     | 1  | Working, fi | 9  | 2   | No       |      | 2   | No      |
| 9051   | 2  | 2  | Married/li     | 4  | Postgraduate     | 1  | Working, fi | 34 | 2   | No       |      | 2   | No      |
| 9067   | 2  | 2  | Married/li     | 1  | High school or l | 1  | Working, fi | 9  | 2   | No       |      | 2   | No      |
| 9069   | 2  | 3  | Divorced       | 2  | Some college     | 1  | Working, fi | 26 | 2   | No       |      | 2   | No      |
| 9073   | 2  | 2  | Married/li     | 4  | Postgraduate     | 1  | Working, fi | 19 | 2   | No       |      | 1   | Yes     |
| 9084   | 2  | 2  | Married/li     | 1  | High school or l | 3  | Unemploye   | 3  | 2   | No       |      | 2   | No      |
| 9096   | 2  | 2  | Married/li     | 1  | High school or l | 4  | Retired     | 6  | 2   | No       |      | 2   | No      |
| 9100   | 2  | 1  | Single         | 2  | Some college     | 1  | Working, fi | 3  | 2   | No       |      | 2   | No      |
| 9107   | 2  | 2  | Married/li     | 2  | Some college     | 1  | Working, fi | 33 | 2   | No       |      | 1   | Yes     |
| 9110   | 2  | 2  | Married/li     | 2  | Some college     | 1  | Working, fi | 12 | 2   | No       |      | 1   | Yes     |
| 9120   | 2  | 2  | Married/li     | 1  | High school or l | 4  | Retired     | 5  | 2   | No       |      | 2   | No      |
| 9122   | 2  | 2  | Married/li     | 1  | High school or l | 4  | Retired     | 12 | 2   | No       |      | 1   | Yes     |
| 9130   | 2  | 1  | Single         | 3  | College degree   | 1  | Working, fi | 35 | 2   | No       |      | 2   | No      |
| 9134   | 2  | 2  | Married/li     | 3  | College degree   | 4  | Retired     | 14 | 2   | No       |      | 2   | No      |
| 9137   | 2  | 2  | Married/li     | 1  | High school or l | 1  | Working, fi | 6  | 2   | No       |      | 2   | No      |
| 9139   | 2  | 1  | Single         | 2  | Some college     | 1  | Working, fi | 27 | 2   | No       |      | 2   | No      |
| 9144   | 2  | 2  | Married/li     | 3  | College degree   | 1  | Working, fi | 13 | 2   | No       |      | 2   | No      |
| 9157   | 2  | 2  | Married/li     | 3  | College degree   | 1  | Working, fi | 11 | 2   | No       |      | 2   | No      |
| 9166   | 2  | 2  | Married/li     | 2  | Some college     | 1  | Working, fi | 8  | 1   | Yes      | 1    | 2   | No      |
| 9177   | 2  | 2  | Married/li     | 4  | Postgraduate     | 1  | Working, fi | 34 | 2   | No       |      | 2   | No      |

| respid | Q5 | Q6 | Marital Status | Q7 | Education        | Q8 | Work        | Q9 | Q10 | Diabetes | Q10a | Q11 | High BP |
|--------|----|----|----------------|----|------------------|----|-------------|----|-----|----------|------|-----|---------|
| 9181   | 2  | 2  | Married/li     | 4  | Postgraduate     | 1  | Working, fi | 8  | 2   | No       |      | 2   | No      |
| 9183   | 2  | 3  | Divorced       | 3  | College degree   | 1  | Working, fi | 7  | 2   | No       |      | 2   | No      |
| 9184   | 2  | 2  | Married/li     | 4  | Postgraduate     | 1  | Working, fi | 12 | 2   | No       |      | 1   | Yes     |
| 9188   | 2  | 2  | Married/li     | 1  | High school or l | 4  | Retired     | 11 | 2   | No       |      | 2   | No      |
| 9197   | 2  | 2  | Married/li     | 4  | Postgraduate     | 1  | Working, fi | 6  | 2   | No       |      | 2   | No      |
| 9200   | 2  | 2  | Married/li     | 3  | College degree   | 1  | Working, fi | 36 | 2   | No       |      | 2   | No      |
| 9205   | 2  | 2  | Married/li     | 2  | Some college     | 1  | Working, fi | 13 | 1   | Yes      | 1    | 2   | No      |
| 9207   | 2  | 2  | Married/li     | 4  | Postgraduate     | 4  | Retired     | 38 | 2   | No       |      | 2   | No      |
| 9213   | 2  | 1  | Single         | 3  | College degree   | 1  | Working, fi | 25 | 2   | No       |      | 2   | No      |
| 9216   | 2  | 2  | Married/li     | 3  | College degree   | 1  | Working, fi | 32 | 2   | No       |      | 1   | Yes     |
| 9217   | 2  | 2  | Married/li     | 2  | Some college     | 1  | Working, fi | 29 | 2   | No       |      | 2   | No      |
| 9218   | 2  | 2  | Married/li     | 2  | Some college     | 1  | Working, fi | 30 | 2   | No       |      | 2   | No      |
| 9219   | 2  | 2  | Married/li     | 3  | College degree   | 1  | Working, fi | 12 | 2   | No       |      | 2   | No      |
| 9220   | 2  | 2  | Married/li     | 2  | Some college     | 2  | Working, p  | 11 | 2   | No       |      | 2   | No      |
| 9221   | 2  | 2  | Married/li     | 1  | High school or l | 4  | Retired     | 9  | 2   | No       |      | 1   | Yes     |
| 9223   | 2  | 2  | Married/li     | 1  | High school or l | 1  | Working, fi | 9  | 2   | No       |      | 1   | Yes     |
| 9228   | 2  | 2  | Married/li     | 3  | College degree   | 1  | Working, fi | 2  | 2   | No       |      | 2   | No      |
| 9230   | 2  | 2  | Married/li     | 2  | Some college     | 1  | Working, fi | 3  | 2   | No       |      | 2   | No      |
| 9231   | 2  | 2  | Married/li     | 3  | College degree   | 6  | Homemake    | 20 | 2   | No       |      | 2   | No      |
| 9233   | 2  | 2  | Married/li     | 1  | High school or l | 8  | Other worl  | 2  | 2   | No       |      | 2   | No      |
| 9235   | 2  | 2  | Married/li     | 1  | High school or l | 6  | Homemake    | 20 | 2   | No       |      | 2   | No      |
| 9237   | 2  | 2  | Married/li     | 3  | College degree   | 1  | Working, fi | 33 | 2   | No       |      | 2   | No      |
| 9242   | 2  | 2  | Married/li     | 3  | College degree   | 1  | Working, fi | 11 | 2   | No       |      | 2   | No      |
| 9250   | 2  | 1  | Single         | 3  | College degree   | 1  | Working, fi | 12 | 2   | No       |      | 2   | No      |
| 9253   | 2  | 2  | Married/li     | 1  | High school or l | 4  | Retired     | 11 | 2   | No       |      | 2   | No      |
| 9257   | 2  | 2  | Married/li     | 1  | High school or l | 1  | Working, fi | 2  | 2   | No       |      | 2   | No      |
| 9263   | 2  | 2  | Married/li     | 1  | High school or l | 1  | Working, fi | 6  | 2   | No       |      | 2   | No      |
| 9267   | 2  | 2  | Married/li     | 4  | Postgraduate     | 1  | Working, fi | 14 | 1   | Yes      | 1    | 2   | No      |
| 9272   | 2  | 2  | Married/li     | 2  | Some college     | 1  | Working, fi | 11 | 2   | No       |      | 2   | No      |
| 9279   | 2  | 2  | Married/li     | 1  | High school or l | 1  | Working, fi | 26 | 2   | No       |      | 2   | No      |
| 9281   | 2  | 2  | Married/li     | 1  | High school or l | 1  | Working, fi | 3  | 2   | No       |      | 2   | No      |
| 9285   | 2  | 2  | Married/li     | 3  | College degree   | 1  | Working, fi | 12 | 2   | No       |      | 2   | No      |

| respid | Q5 | Q6 | Marital Status | Q7 | Education        | Q8 | Work        | Q9 | Q10 | Diabetes | Q10a | Q11 | High BP |
|--------|----|----|----------------|----|------------------|----|-------------|----|-----|----------|------|-----|---------|
| 9286   | 2  | 2  | Married/li     | 3  | College degree   | 1  | Working, fi | 11 | 2   | No       |      | 2   | No      |
| 9294   | 2  | 2  | Married/li     | 2  | Some college     | 1  | Working, fi | 11 | 2   | No       |      | 2   | No      |
| 9295   | 2  | 3  | Divorced       | 2  | Some college     | 1  | Working, fi | 28 | 2   | No       |      | 1   | Yes     |
| 9297   | 2  | 2  | Married/li     | 2  | Some college     | 4  | Retired     | 4  | 2   | No       |      | 2   | No      |
| 9299   | 2  | 2  | Married/li     | 3  | College degree   | 1  | Working, fi | 12 | 2   | No       |      | 2   | No      |
| 9309   | 2  | 2  | Married/li     | 1  | High school or l | 6  | Homemake    | 2  | 2   | No       |      | 2   | No      |
| 9315   | 2  | 2  | Married/li     | 2  | Some college     | 1  | Working, fi | 8  | 2   | No       |      | 2   | No      |
| 9320   | 2  | 2  | Married/li     | 3  | College degree   | 8  | Other worl  | 17 | 2   | No       |      | 2   | No      |
| 9324   | 2  | 2  | Married/li     | 1  | High school or l | 1  | Working, fi | 31 | 2   | No       |      | 2   | No      |
| 9326   | 2  | 2  | Married/li     | 3  | College degree   | 1  | Working, fi | 10 | 2   | No       |      | 2   | No      |
| 9333   | 2  | 2  | Married/li     | 2  | Some college     | 2  | Working, p  | 12 | 2   | No       |      | 2   | No      |
| 9334   | 2  | 2  | Married/li     | 3  | College degree   | 1  | Working, fi | 11 | 1   | Yes      | 1    | 1   | Yes     |
| 9336   | 2  | 2  | Married/li     | 2  | Some college     | 6  | Homemake    | 6  | 1   | Yes      | 1    | 1   | Yes     |
| 9337   | 2  | 2  | Married/li     | 2  | Some college     | 1  | Working, fi | 28 | 2   | No       |      | 2   | No      |
| 9342   | 2  | 1  | Single         | 3  | College degree   | 1  | Working, fi | 32 | 2   | No       |      | 2   | No      |
| 9347   | 2  | 2  | Married/li     | 2  | Some college     | 1  | Working, fi | 2  | 2   | No       |      | 1   | Yes     |
| 9352   | 2  | 2  | Married/li     | 4  | Postgraduate     | 1  | Working, fi | 32 | 2   | No       |      | 2   | No      |
| 9355   | 2  | 2  | Married/li     | 1  | High school or l | 1  | Working, fi | 7  | 2   | No       |      | 2   | No      |
| 9356   | 2  | 2  | Married/li     | 1  | High school or l | 1  | Working, fi | 30 | 2   | No       |      | 2   | No      |
| 9359   | 2  | 2  | Married/li     | 2  | Some college     | 1  | Working, fi | 33 | 2   | No       |      | 1   | Yes     |
| 9368   | 2  | 2  | Married/li     | 3  | College degree   | 6  | Homemake    | 34 | 2   | No       |      | 2   | No      |
| 9375   | 2  | 2  | Married/li     | 3  | College degree   | 1  | Working, fi | 19 | 2   | No       |      | 2   | No      |
| 9384   | 2  | 1  | Single         | 2  | Some college     | 1  | Working, fi | 7  | 2   | No       |      | 2   | No      |
| 9388   | 2  | 1  | Single         | 2  | Some college     | 1  | Working, fi | 29 | 2   | No       |      | 2   | No      |
| 9397   | 2  | 2  | Married/li     | 3  | College degree   | 1  | Working, fi | 6  | 2   | No       |      | 1   | Yes     |
| 9400   | 2  | 2  | Married/li     | 3  | College degree   | 1  | Working, fi | 11 | 2   | No       |      | 2   | No      |
| 9401   | 2  | 2  | Married/li     | 3  | College degree   | 1  | Working, fi | 12 | 2   | No       |      | 2   | No      |
| 9402   | 2  | 1  | Single         | 2  | Some college     | 1  | Working, fi | 27 | 2   | No       |      | 2   | No      |
| 9417   | 2  | 2  | Married/li     | 3  | College degree   | 1  | Working, fi | 10 | 2   | No       |      | 1   | Yes     |
| 9424   | 2  | 3  | Divorced       | 3  | College degree   | 1  | Working, fi | 29 | 2   | No       |      | 1   | Yes     |
| 9427   | 2  | 2  | Married/li     | 2  | Some college     | 4  | Retired     | 7  | 2   | No       |      | 2   | No      |
| 9429   | 2  | 2  | Married/li     | 3  | College degree   | 1  | Working, fi | 31 | 2   | No       |      | 2   | No      |

| respid | Q5 | Q6 | Marital Status | Q7 | Education        | Q8 | Work        | Q9 | Q10 | Diabetes | Q10a | Q11 | High BP |
|--------|----|----|----------------|----|------------------|----|-------------|----|-----|----------|------|-----|---------|
| 9437   | 2  | 2  | Married/li     | 3  | College degree   | 1  | Working, fi | 11 | 2   | No       |      | 1   | Yes     |
| 9442   | 2  | 2  | Married/li     | 3  | College degree   | 1  | Working, fi | 11 | 1   | Yes      | 1    | 2   | No      |
| 9446   | 2  | 2  | Married/li     | 1  | High school or l | 4  | Retired     | 10 | 2   | No       |      | 2   | No      |
| 9447   | 2  | 2  | Married/li     | 3  | College degree   | 1  | Working, fi | 11 | 2   | No       |      | 2   | No      |
| 9448   | 2  | 1  | Single         | 3  | College degree   | 1  | Working, fi | 28 | 1   | Yes      | 1    | 1   | Yes     |
| 9449   | 2  | 2  | Married/li     | 2  | Some college     | 1  | Working, fi | 10 | 2   | No       |      | 2   | No      |
| 9455   | 2  | 4  | Widow/wi       | 1  | High school or l | 4  | Retired     | 28 | 2   | No       |      | 1   | Yes     |
| 9459   | 2  | 2  | Married/li     | 1  | High school or l | 4  | Retired     | 13 | 2   | No       |      | 2   | No      |
| 9460   | 2  | 1  | Single         | 2  | Some college     | 1  | Working, fi | 11 | 2   | No       |      | 2   | No      |
| 9461   | 2  | 2  | Married/li     | 2  | Some college     | 1  | Working, fi | 31 | 2   | No       |      | 2   | No      |
| 9463   | 2  | 2  | Married/li     | 1  | High school or l | 6  | Homemake    | 27 | 2   | No       |      | 2   | No      |
| 9464   | 2  | 2  | Married/li     | 1  | High school or l | 1  | Working, fi | 2  | 2   | No       |      | 2   | No      |
| 9466   | 2  | 2  | Married/li     | 1  | High school or l | 1  | Working, fi | 12 | 2   | No       |      | 1   | Yes     |
| 9477   | 2  | 2  | Married/li     | 3  | College degree   | 1  | Working, fi | 27 | 2   | No       |      | 1   | Yes     |
| 9482   | 2  | 2  | Married/li     | 1  | High school or l | 1  | Working, fi | 11 | 1   | Yes      | 1    | 2   | No      |
| 9486   | 2  | 2  | Married/li     | 3  | College degree   | 1  | Working, fi | 14 | 2   | No       |      | 2   | No      |
| 9488   | 2  | 2  | Married/li     | 1  | High school or l | 2  | Working, p  | 3  | 2   | No       |      | 1   | Yes     |
| 9489   | 2  | 2  | Married/li     | 3  | College degree   | 1  | Working, fi | 1  | 2   | No       |      | 2   | No      |
| 9496   | 2  | 5  | Prefer not     | 2  | Some college     | 4  | Retired     | 1  | 2   | No       |      | 2   | No      |
| 9499   | 2  | 2  | Married/li     | 3  | College degree   | 1  | Working, fi | 14 | 2   | No       |      | 2   | No      |
| 9512   | 2  | 2  | Married/li     | 3  | College degree   | 1  | Working, fi | 14 | 2   | No       |      | 2   | No      |
| 9514   | 2  | 2  | Married/li     | 1  | High school or l | 1  | Working, fi | 11 | 2   | No       |      | 2   | No      |
| 9516   | 2  | 2  | Married/li     | 1  | High school or l | 1  | Working, fi | 13 | 2   | No       |      | 1   | Yes     |
| 9517   | 2  | 2  | Married/li     | 2  | Some college     | 1  | Working, fi | 1  | 2   | No       |      | 1   | Yes     |
| 9520   | 2  | 2  | Married/li     | 1  | High school or l | 4  | Retired     | 2  | 2   | No       |      | 2   | No      |
| 9527   | 2  | 2  | Married/li     | 3  | College degree   | 1  | Working, fi | 29 | 2   | No       |      | 2   | No      |
| 9532   | 2  | 2  | Married/li     | 1  | High school or l | 1  | Working, fi | 4  | 2   | No       |      | 2   | No      |
| 9533   | 2  | 2  | Married/li     | 3  | College degree   | 1  | Working, fi | 33 | 2   | No       |      | 2   | No      |
| 9543   | 2  | 2  | Married/li     | 2  | Some college     | 1  | Working, fi | 2  | 2   | No       |      | 1   | Yes     |
| 9550   | 2  | 2  | Married/li     | 2  | Some college     | 1  | Working, fi | 4  | 2   | No       |      | 2   | No      |
| 9553   | 2  | 2  | Married/li     | 2  | Some college     | 1  | Working, fi | 12 | 2   | No       |      | 2   | No      |
| 9555   | 2  | 2  | Married/li     | 2  | Some college     | 1  | Working, fi | 31 | 2   | No       |      | 2   | No      |

| respid | Q5 | Q6 | Marital Status | Q7 | Education        | Q8 | Work        | Q9 | Q10 | Diabetes | Q10a | Q11 | High BP |
|--------|----|----|----------------|----|------------------|----|-------------|----|-----|----------|------|-----|---------|
| 9565   | 2  | 1  | Single         | 2  | Some college     | 2  | Working, p  | 27 | 1   | Yes      | 1    | 1   | Yes     |
| 9583   | 2  | 2  | Married/li     | 2  | Some college     | 1  | Working, fi | 7  | 2   | No       |      | 2   | No      |
| 9594   | 2  | 2  | Married/li     | 4  | Postgraduate     | 1  | Working, fi | 30 | 2   | No       |      | 2   | No      |
| 9596   | 2  | 2  | Married/li     | 2  | Some college     | 1  | Working, fi | 8  | 2   | No       |      | 1   | Yes     |
| 9600   | 2  | 2  | Married/li     | 2  | Some college     | 4  | Retired     | 11 | 2   | No       |      | 1   | Yes     |
| 9602   | 2  | 2  | Married/li     | 4  | Postgraduate     | 1  | Working, fi | 25 | 2   | No       |      | 1   | Yes     |
| 9606   | 2  | 2  | Married/li     | 3  | College degree   | 1  | Working, fi | 32 | 2   | No       |      | 2   | No      |
| 9608   | 2  | 2  | Married/li     | 2  | Some college     | 4  | Retired     | 7  | 2   | No       |      | 1   | Yes     |
| 9610   | 2  | 2  | Married/li     | 1  | High school or l | 6  | Homemake    | 2  | 1   | Yes      | 1    | 1   | Yes     |
| 9612   | 2  | 2  | Married/li     | 3  | College degree   | 1  | Working, fi | 7  | 2   | No       |      | 2   | No      |
| 9613   | 2  | 2  | Married/li     | 2  | Some college     | 1  | Working, fi | 11 | 2   | No       |      | 2   | No      |
| 9614   | 2  | 2  | Married/li     | 2  | Some college     | 1  | Working, fi | 11 | 2   | No       |      | 2   | No      |
| 9620   | 2  | 1  | Single         | 1  | High school or l | 1  | Working, fi | 29 | 2   | No       |      | 2   | No      |
| 9628   | 2  | 1  | Single         | 3  | College degree   | 1  | Working, fi | 29 | 2   | No       |      | 2   | No      |
| 9631   | 2  | 2  | Married/li     | 1  | High school or l | 6  | Homemake    | 9  | 1   | Yes      | 1    | 1   | Yes     |
| 9632   | 2  | 2  | Married/li     | 2  | Some college     | 1  | Working, fi | 12 | 2   | No       |      | 2   | No      |
| 9633   | 2  | 1  | Single         | 3  | College degree   | 1  | Working, fi | 29 | 1   | Yes      | 1    | 2   | No      |
| 9639   | 2  | 2  | Married/li     | 1  | High school or l | 1  | Working, fi | 14 | 2   | No       |      | 2   | No      |
| 9640   | 2  | 2  | Married/li     | 3  | College degree   | 4  | Retired     | 25 | 2   | No       |      | 2   | No      |
| 9642   | 2  | 2  | Married/li     | 1  | High school or l | 4  | Retired     | 1  | 2   | No       |      | 2   | No      |
| 9653   | 2  | 2  | Married/li     | 3  | College degree   | 4  | Retired     | 11 | 2   | No       |      | 2   | No      |
| 9658   | 2  | 2  | Married/li     | 2  | Some college     | 1  | Working, fi | 33 | 2   | No       |      | 2   | No      |
| 9659   | 2  | 2  | Married/li     | 3  | College degree   | 1  | Working, fi | 24 | 2   | No       |      | 2   | No      |
| 9661   | 2  | 4  | Widow/wi       | 1  | High school or l | 6  | Homemake    | 6  | 2   | No       |      | 2   | No      |
| 9664   | 2  | 2  | Married/li     | 3  | College degree   | 1  | Working, fi | 8  | 2   | No       |      | 2   | No      |
| 9665   | 2  | 2  | Married/li     | 3  | College degree   | 1  | Working, fi | 37 | 2   | No       |      | 2   | No      |
| 9666   | 2  | 2  | Married/li     | 1  | High school or l | 4  | Retired     | 7  | 1   | Yes      | 1    | 2   | No      |
| 9667   | 2  | 2  | Married/li     | 1  | High school or l | 4  | Retired     | 8  | 2   | No       |      | 1   | Yes     |
| 9668   | 2  | 2  | Married/li     | 1  | High school or l | 1  | Working, fi | 14 | 2   | No       |      | 2   | No      |
| 9670   | 2  | 2  | Married/li     | 3  | College degree   | 1  | Working, fi | 6  | 2   | No       |      | 1   | Yes     |
| 9671   | 2  | 2  | Married/li     | 2  | Some college     | 6  | Homemake    | 33 | 2   | No       |      | 2   | No      |
| 9681   | 2  | 2  | Married/li     | 3  | College degree   | 1  | Working, fi | 14 | 2   | No       |      | 2   | No      |

| respid | Q5 | Q6 | Marital Status | Q7 | Education        | Q8 | Work        | Q9 | Q10 | Diabetes | Q10a | Q11 | High BP |
|--------|----|----|----------------|----|------------------|----|-------------|----|-----|----------|------|-----|---------|
| 9684   | 2  | 2  | Married/li     | 3  | College degree   | 1  | Working, fi | 34 | 2   | No       |      | 2   | No      |
| 9685   | 2  | 2  | Married/li     | 3  | College degree   | 1  | Working, fi | 13 | 2   | No       |      | 2   | No      |
| 9686   | 2  | 2  | Married/li     | 2  | Some college     | 1  | Working, fi | 30 | 2   | No       |      | 2   | No      |
| 9688   | 2  | 2  | Married/li     | 3  | College degree   | 1  | Working, fi | 34 | 1   | Yes      | 1    | 2   | No      |
| 9692   | 2  | 1  | Single         | 2  | Some college     | 1  | Working, fi | 28 | 2   | No       |      | 2   | No      |
| 9693   | 2  | 2  | Married/li     | 3  | College degree   | 1  | Working, fi | 14 | 2   | No       |      | 2   | No      |
| 9698   | 2  | 2  | Married/li     | 3  | College degree   | 1  | Working, fi | 12 | 2   | No       |      | 2   | No      |
| 9699   | 2  | 2  | Married/li     | 4  | Postgraduate     | 1  | Working, fi | 36 | 2   | No       |      | 2   | No      |
| 9701   | 2  | 2  | Married/li     | 2  | Some college     | 1  | Working, fi | 11 | 2   | No       |      | 2   | No      |
| 9702   | 2  | 2  | Married/li     | 3  | College degree   | 2  | Working, p  | 10 | 1   | Yes      | 1    | 2   | No      |
| 9709   | 2  | 2  | Married/li     | 3  | College degree   | 1  | Working, fi | 13 | 2   | No       |      | 1   | Yes     |
| 9713   | 2  | 2  | Married/li     | 3  | College degree   | 1  | Working, fi | 12 | 2   | No       |      | 1   | Yes     |
| 9715   | 2  | 2  | Married/li     | 3  | College degree   | 1  | Working, fi | 13 | 2   | No       |      | 2   | No      |
| 9721   | 2  | 1  | Single         | 1  | High school or l | 1  | Working, fi | 26 | 2   | No       |      | 2   | No      |
| 9725   | 2  | 1  | Single         | 3  | College degree   | 1  | Working, fi | 32 | 2   | No       |      | 2   | No      |
| 9729   | 2  | 2  | Married/li     | 2  | Some college     | 1  | Working, fi | 31 | 2   | No       |      | 2   | No      |
| 9731   | 2  | 2  | Married/li     | 2  | Some college     | 2  | Working, p  | 29 | 2   | No       |      | 2   | No      |
| 9736   | 2  | 2  | Married/li     | 3  | College degree   | 1  | Working, fi | 11 | 2   | No       |      | 2   | No      |
| 9740   | 2  | 2  | Married/li     | 1  | High school or l | 1  | Working, fi | 12 | 2   | No       |      | 2   | No      |
| 9741   | 2  | 2  | Married/li     | 4  | Postgraduate     | 1  | Working, fi | 14 | 2   | No       |      | 2   | No      |
| 9749   | 2  | 2  | Married/li     | 2  | Some college     | 1  | Working, fi | 9  | 1   | Yes      | 1    | 1   | Yes     |
| 9750   | 2  | 2  | Married/li     | 3  | College degree   | 2  | Working, p  | 25 | 2   | No       |      | 2   | No      |
| 9751   | 2  | 2  | Married/li     | 3  | College degree   | 1  | Working, fi | 12 | 1   | Yes      | 1    | 2   | No      |
| 9753   | 2  | 1  | Single         | 2  | Some college     | 1  | Working, fi | 27 | 2   | No       |      | 2   | No      |
| 9754   | 2  | 1  | Single         | 2  | Some college     | 1  | Working, fi | 29 | 2   | No       |      | 2   | No      |
| 9756   | 2  | 1  | Single         | 1  | High school or l | 1  | Working, fi | 17 | 2   | No       |      | 2   | No      |
| 9758   | 2  | 2  | Married/li     | 2  | Some college     | 4  | Retired     | 2  | 1   | Yes      | 1    | 1   | Yes     |
| 9759   | 2  | 3  | Divorced       | 2  | Some college     | 1  | Working, fi | 27 | 2   | No       |      | 2   | No      |
| 9760   | 2  | 1  | Single         | 2  | Some college     | 1  | Working, fi | 30 | 2   | No       |      | 2   | No      |
| 9761   | 2  | 2  | Married/li     | 3  | College degree   | 1  | Working, fi | 14 | 2   | No       |      | 2   | No      |
| 9762   | 2  | 2  | Married/li     | 2  | Some college     | 1  | Working, fi | 11 | 2   | No       |      | 1   | Yes     |
| 9764   | 2  | 3  | Divorced       | 2  | Some college     | 9  | Other       | 7  | 2   | No       |      | 2   | No      |

| respid | Q5 | Q6 | Marital Status | Q7 | Education        | Q8 | Work        | Q9 | Q10 | Diabetes | Q10a | Q11 | High BP |
|--------|----|----|----------------|----|------------------|----|-------------|----|-----|----------|------|-----|---------|
| 9768   | 2  | 3  | Divorced       | 3  | College degree   | 1  | Working, fi | 26 | 2   | No       |      | 1   | Yes     |
| 9769   | 2  | 1  | Single         | 3  | College degree   | 9  | Other       | 99 | 2   | No       |      | 2   | No      |
| 9770   | 2  | 2  | Married/li     | 2  | Some college     | 1  | Working, fi | 31 | 1   | Yes      | 1    | 2   | No      |
| 9771   | 2  | 2  | Married/li     | 1  | High school or l | 4  | Retired     | 25 | 2   | No       |      | 2   | No      |
| 9772   | 2  | 1  | Single         | 3  | College degree   | 1  | Working, fi | 34 | 2   | No       |      | 1   | Yes     |
| 9773   | 2  | 2  | Married/li     | 4  | Postgraduate     | 1  | Working, fi | 30 | 2   | No       |      | 1   | Yes     |
| 9776   | 2  | 2  | Married/li     | 3  | College degree   | 1  | Working, fi | 11 | 2   | No       |      | 2   | No      |
| 9786   | 2  | 2  | Married/li     | 1  | High school or l | 1  | Working, fi | 33 | 2   | No       |      | 2   | No      |
| 9790   | 2  | 1  | Single         | 3  | College degree   | 1  | Working, fi | 34 | 2   | No       |      | 2   | No      |
| 9791   | 2  | 2  | Married/li     | 2  | Some college     | 1  | Working, fi | 9  | 2   | No       |      | 2   | No      |
| 9794   | 2  | 2  | Married/li     | 4  | Postgraduate     | 1  | Working, fi | 33 | 2   | No       |      | 2   | No      |
| 9797   | 2  | 2  | Married/li     | 3  | College degree   | 2  | Working, p  | 12 | 2   | No       |      | 2   | No      |
| 9799   | 2  | 2  | Married/li     | 3  | College degree   | 1  | Working, fi | 21 | 2   | No       |      | 2   | No      |
| 9804   | 2  | 2  | Married/li     | 3  | College degree   | 2  | Working, p  | 14 | 2   | No       |      | 1   | Yes     |
| 9805   | 2  | 4  | Widow/wi       | 3  | College degree   | 1  | Working, fi | 19 | 2   | No       |      | 2   | No      |
| 9806   | 2  | 2  | Married/li     | 2  | Some college     | 1  | Working, fi | 35 | 2   | No       |      | 2   | No      |
| 9807   | 2  | 5  | Prefer not     | 4  | Postgraduate     | 2  | Working, p  | 28 | 2   | No       |      | 2   | No      |
| 9813   | 2  | 2  | Married/li     | 1  | High school or l | 1  | Working, fi | 31 | 2   | No       |      | 2   | No      |
| 9817   | 2  | 2  | Married/li     | 3  | College degree   | 6  | Homemake    | 11 | 2   | No       |      | 2   | No      |
| 9823   | 2  | 2  | Married/li     | 2  | Some college     | 1  | Working, fi | 9  | 2   | No       |      | 2   | No      |
| 9826   | 2  | 2  | Married/li     | 2  | Some college     | 1  | Working, fi | 9  | 2   | No       |      | 2   | No      |
| 9830   | 2  | 2  | Married/li     | 2  | Some college     | 2  | Working, p  | 32 | 2   | No       |      | 2   | No      |
| 9835   | 2  | 2  | Married/li     | 3  | College degree   | 1  | Working, fi | 35 | 2   | No       |      | 2   | No      |
| 9836   | 2  | 2  | Married/li     | 1  | High school or l | 1  | Working, fi | 33 | 2   | No       |      | 2   | No      |
| 9841   | 2  | 2  | Married/li     | 3  | College degree   | 1  | Working, fi | 33 | 2   | No       |      | 2   | No      |
| 9842   | 2  | 1  | Single         | 1  | High school or l | 1  | Working, fi | 26 | 2   | No       |      | 2   | No      |
| 9844   | 2  | 1  | Single         | 1  | High school or l | 2  | Working, p  | 25 | 2   | No       |      | 2   | No      |
| 9847   | 2  | 2  | Married/li     | 1  | High school or l | 1  | Working, fi | 25 | 2   | No       |      | 2   | No      |
| 9851   | 2  | 1  | Single         | 2  | Some college     | 1  | Working, fi | 25 | 2   | No       |      | 2   | No      |
| 9852   | 2  | 2  | Married/li     | 2  | Some college     | 4  | Retired     | 11 | 1   | Yes      | 1    | 2   | No      |
| 9854   | 2  | 2  | Married/li     | 3  | College degree   | 2  | Working, p  | 34 | 2   | No       |      | 1   | Yes     |
| 9855   | 2  | 2  | Married/li     | 3  | College degree   | 6  | Homemake    | 26 | 2   | No       |      | 2   | No      |



| respid | Q5 | Q6 | Marital Status | Q7 | Education        | Q8 | Work        | Q9 | Q10 | Diabetes | Q10a | Q11 | High BP |
|--------|----|----|----------------|----|------------------|----|-------------|----|-----|----------|------|-----|---------|
| 9856   | 2  | 1  | Single         | 3  | College degree   | 4  | Retired     | 27 | 2   | No       |      | 1   | Yes     |
| 9862   | 2  | 2  | Married/li     | 3  | College degree   | 1  | Working, fi | 30 | 2   | No       |      | 1   | Yes     |
| 9863   | 2  | 3  | Divorced       | 1  | High school or l | 4  | Retired     | 4  | 2   | No       |      | 2   | No      |
| 9866   | 2  | 1  | Single         | 3  | College degree   | 3  | Unemploye   | 25 | 2   | No       |      | 2   | No      |
| 9867   | 2  | 3  | Divorced       | 1  | High school or l | 4  | Retired     | 16 | 2   | No       |      | 2   | No      |
| 9868   | 2  | 2  | Married/li     | 4  | Postgraduate     | 4  | Retired     | 19 | 2   | No       |      | 1   | Yes     |
| 9869   | 2  | 2  | Married/li     | 4  | Postgraduate     | 1  | Working, fi | 24 | 2   | No       |      | 2   | No      |
| 9878   | 2  | 4  | Widow/wi       | 3  | College degree   | 2  | Working, p  | 15 | 2   | No       |      | 1   | Yes     |
| 9879   | 2  | 2  | Married/li     | 3  | College degree   | 1  | Working, fi | 19 | 2   | No       |      | 2   | No      |
| 9881   | 2  | 2  | Married/li     | 3  | College degree   | 4  | Retired     | 18 | 2   | No       |      | 2   | No      |
| 9882   | 2  | 2  | Married/li     | 3  | College degree   | 1  | Working, fi | 19 | 2   | No       |      | 2   | No      |
| 9884   | 2  | 2  | Married/li     | 4  | Postgraduate     | 1  | Working, fi | 32 | 2   | No       |      | 1   | Yes     |
| 9885   | 2  | 2  | Married/li     | 1  | High school or l | 1  | Working, fi | 27 | 2   | No       |      | 2   | No      |
| 9888   | 2  | 2  | Married/li     | 2  | Some college     | 1  | Working, fi | 13 | 2   | No       |      | 2   | No      |
| 9889   | 2  | 1  | Single         | 4  | Postgraduate     | 1  | Working, fi | 29 | 2   | No       |      | 2   | No      |
| 9894   | 2  | 4  | Widow/wi       | 3  | College degree   | 1  | Working, fi | 15 | 1   | Yes      | 1    | 1   | Yes     |
| 9895   | 2  | 2  | Married/li     | 3  | College degree   | 1  | Working, fi | 8  | 2   | No       |      | 2   | No      |
| 9896   | 2  | 2  | Married/li     | 3  | College degree   | 4  | Retired     | 11 | 2   | No       |      | 1   | Yes     |
| 9897   | 2  | 2  | Married/li     | 4  | Postgraduate     | 1  | Working, fi | 37 | 2   | No       |      | 2   | No      |
| 9905   | 2  | 2  | Married/li     | 3  | College degree   | 4  | Retired     | 17 | 2   | No       |      | 2   | No      |
| 9907   | 2  | 1  | Single         | 4  | Postgraduate     | 1  | Working, fi | 28 | 2   | No       |      | 2   | No      |
| 9908   | 2  | 2  | Married/li     | 1  | High school or l | 1  | Working, fi | 10 | 2   | No       |      | 1   | Yes     |
| 9909   | 2  | 2  | Married/li     | 4  | Postgraduate     | 1  | Working, fi | 33 | 2   | No       |      | 2   | No      |
| 9910   | 2  | 2  | Married/li     | 3  | College degree   | 1  | Working, fi | 21 | 2   | No       |      | 2   | No      |
| 9913   | 2  | 2  | Married/li     | 4  | Postgraduate     | 4  | Retired     | 16 | 2   | No       |      | 1   | Yes     |
| 9914   | 2  | 2  | Married/li     | 4  | Postgraduate     | 9  | Other       | 18 | 2   | No       |      | 2   | No      |
| 9915   | 2  | 1  | Single         | 2  | Some college     | 1  | Working, fi | 31 | 2   | No       |      | 2   | No      |
| 9916   | 2  | 2  | Married/li     | 1  | High school or l | 1  | Working, fi | 16 | 2   | No       |      | 2   | No      |
| 9918   | 2  | 1  | Single         | 3  | College degree   | 1  | Working, fi | 35 | 2   | No       |      | 2   | No      |
| 9919   | 2  | 2  | Married/li     | 3  | College degree   | 4  | Retired     | 17 | 2   | No       |      | 2   | No      |
| 9922   | 2  | 2  | Married/li     | 2  | Some college     | 1  | Working, fi | 5  | 2   | No       |      | 2   | No      |
| 9930   | 2  | 2  | Married/li     | 3  | College degree   | 1  | Working, fi | 9  | 2   | No       |      | 2   | No      |

| respid | Q5 | Q6 | Marital Status | Q7 | Education        | Q8 | Work        | Q9 | Q10 | Diabetes | Q10a | Q11 | High BP |
|--------|----|----|----------------|----|------------------|----|-------------|----|-----|----------|------|-----|---------|
| 9934   | 2  | 2  | Married/li     | 1  | High school or l | 1  | Working, fi | 16 | 2   | No       |      | 1   | Yes     |
| 9936   | 2  | 2  | Married/li     | 3  | College degree   | 1  | Working, fi | 2  | 1   | Yes      | 1    | 2   | No      |
| 9938   | 2  | 5  | Prefer not     | 2  | Some college     | 1  | Working, fi | 99 | 2   | No       |      | 2   | No      |
| 9940   | 2  | 2  | Married/li     | 3  | College degree   | 1  | Working, fi | 11 | 2   | No       |      | 2   | No      |
| 9944   | 2  | 2  | Married/li     | 2  | Some college     | 4  | Retired     | 4  | 2   | No       |      | 2   | No      |
| 9945   | 2  | 2  | Married/li     | 3  | College degree   | 1  | Working, fi | 10 | 2   | No       |      | 2   | No      |
| 9948   | 2  | 3  | Divorced       | 3  | College degree   | 1  | Working, fi | 27 | 2   | No       |      | 2   | No      |
| 9949   | 2  | 2  | Married/li     | 1  | High school or l | 4  | Retired     | 10 | 2   | No       |      | 1   | Yes     |
| 9951   | 2  | 2  | Married/li     | 1  | High school or l | 4  | Retired     | 5  | 2   | No       |      | 1   | Yes     |
| 9952   | 2  | 2  | Married/li     | 3  | College degree   | 4  | Retired     | 2  | 2   | No       |      | 2   | No      |
| 9954   | 2  | 2  | Married/li     | 2  | Some college     | 1  | Working, fi | 33 | 2   | No       |      | 2   | No      |
| 9955   | 2  | 3  | Divorced       | 3  | College degree   | 1  | Working, fi | 29 | 2   | No       |      | 2   | No      |
| 9956   | 2  | 4  | Widow/wi       | 1  | High school or l | 4  | Retired     | 3  | 2   | No       |      | 2   | No      |
| 9957   | 2  | 4  | Widow/wi       | 1  | High school or l | 6  | Homemake    | 1  | 1   | Yes      | 1    | 1   | Yes     |
| 9958   | 2  | 2  | Married/li     | 4  | Postgraduate     | 1  | Working, fi | 6  | 2   | No       |      | 2   | No      |
| 9959   | 2  | 2  | Married/li     | 3  | College degree   | 1  | Working, fi | 14 | 1   | Yes      | 1    | 1   | Yes     |
| 9960   | 2  | 2  | Married/li     | 3  | College degree   | 1  | Working, fi | 18 | 2   | No       |      | 1   | Yes     |
| 9961   | 2  | 2  | Married/li     | 1  | High school or l | 1  | Working, fi | 11 | 2   | No       |      | 1   | Yes     |
| 9962   | 2  | 2  | Married/li     | 1  | High school or l | 4  | Retired     | 99 | 2   | No       |      | 1   | Yes     |
| 9969   | 2  | 2  | Married/li     | 3  | College degree   | 1  | Working, fi | 8  | 2   | No       |      | 2   | No      |
| 9982   | 2  | 2  | Married/li     | 3  | College degree   | 2  | Working, p  | 32 | 2   | No       |      | 2   | No      |
| 9984   | 2  | 2  | Married/li     | 3  | College degree   | 1  | Working, fi | 33 | 2   | No       |      | 1   | Yes     |
| 9990   | 2  | 2  | Married/li     | 3  | College degree   | 1  | Working, fi | 8  | 2   | No       |      | 2   | No      |
| 9992   | 2  | 2  | Married/li     | 2  | Some college     | 6  | Homemake    | 31 | 1   | Yes      | 1    | 1   | Yes     |
| 9993   | 2  | 2  | Married/li     | 4  | Postgraduate     | 1  | Working, fi | 30 | 2   | No       |      | 1   | Yes     |
| 9997   | 2  | 3  | Divorced       | 3  | College degree   | 4  | Retired     | 12 | 2   | No       |      | 1   | Yes     |
| 9999   | 2  | 2  | Married/li     | 3  | College degree   | 4  | Retired     | 4  | 2   | No       |      | 2   | No      |
| 10000  | 2  | 2  | Married/li     | 1  | High school or l | 4  | Retired     | 23 | 2   | No       |      | 1   | Yes     |
| 10005  | 2  | 2  | Married/li     | 2  | Some college     | 1  | Working, fi | 27 | 2   | No       |      | 2   | No      |
| 10014  | 2  | 2  | Married/li     | 1  | High school or l | 1  | Working, fi | 25 | 2   | No       |      | 2   | No      |
| 10016  | 2  | 1  | Single         | 4  | Postgraduate     | 1  | Working, fi | 30 | 2   | No       |      | 2   | No      |
| 10017  | 2  | 2  | Married/li     | 1  | High school or l | 4  | Retired     | 2  | 1   | Yes      | 1    | 1   | Yes     |

| respid | Q5 | Q6 | Marital Status | Q7 | Education        | Q8 | Work        | Q9 | Q10 | Diabetes | Q10a | Q11 | High BP |
|--------|----|----|----------------|----|------------------|----|-------------|----|-----|----------|------|-----|---------|
| 10018  | 2  | 2  | Married/li     | 3  | College degree   | 4  | Retired     | 30 | 2   | No       |      | 2   | No      |
| 10021  | 2  | 2  | Married/li     | 3  | College degree   | 4  | Retired     | 2  | 2   | No       |      | 2   | No      |
| 10025  | 2  | 2  | Married/li     | 3  | College degree   | 2  | Working, p  | 6  | 2   | No       |      | 1   | Yes     |
| 10027  | 2  | 2  | Married/li     | 3  | College degree   | 1  | Working, fi | 11 | 2   | No       |      | 2   | No      |
| 10028  | 2  | 2  | Married/li     | 4  | Postgraduate     | 1  | Working, fi | 23 | 2   | No       |      | 1   | Yes     |
| 10031  | 2  | 2  | Married/li     | 3  | College degree   | 4  | Retired     | 34 | 2   | No       |      | 1   | Yes     |
| 10036  | 2  | 4  | Widow/wi       | 1  | High school or l | 4  | Retired     | 11 | 2   | No       |      | 2   | No      |
| 10037  | 2  | 2  | Married/li     | 4  | Postgraduate     | 2  | Working, p  | 30 | 2   | No       |      | 2   | No      |
| 10038  | 2  | 2  | Married/li     | 3  | College degree   | 1  | Working, fi | 11 | 1   | Yes      | 1    | 1   | Yes     |
| 10039  | 2  | 2  | Married/li     | 1  | High school or l | 4  | Retired     | 33 | 2   | No       |      | 2   | No      |
| 10041  | 2  | 2  | Married/li     | 2  | Some college     | 1  | Working, fi | 7  | 2   | No       |      | 2   | No      |
| 10045  | 2  | 2  | Married/li     | 3  | College degree   | 1  | Working, fi | 36 | 2   | No       |      | 2   | No      |
| 10046  | 2  | 2  | Married/li     | 2  | Some college     | 1  | Working, fi | 19 | 2   | No       |      | 1   | Yes     |
| 10047  | 2  | 2  | Married/li     | 2  | Some college     | 1  | Working, fi | 36 | 2   | No       |      | 1   | Yes     |
| 10048  | 2  | 3  | Divorced       | 3  | College degree   | 1  | Working, fi | 29 | 2   | No       |      | 2   | No      |
| 10049  | 2  | 2  | Married/li     | 3  | College degree   | 1  | Working, fi | 29 | 2   | No       |      | 2   | No      |
| 10051  | 2  | 2  | Married/li     | 2  | Some college     | 4  | Retired     | 6  | 2   | No       |      | 2   | No      |
| 10052  | 2  | 3  | Divorced       | 3  | College degree   | 1  | Working, fi | 29 | 2   | No       |      | 2   | No      |
| 10056  | 2  | 2  | Married/li     | 1  | High school or l | 1  | Working, fi | 33 | 2   | No       |      | 2   | No      |
| 10061  | 2  | 2  | Married/li     | 3  | College degree   | 4  | Retired     | 30 | 2   | No       |      | 2   | No      |
| 10064  | 2  | 2  | Married/li     | 4  | Postgraduate     | 1  | Working, fi | 32 | 2   | No       |      | 2   | No      |
| 10066  | 2  | 4  | Widow/wi       | 3  | College degree   | 1  | Working, fi | 27 | 2   | No       |      | 2   | No      |
| 10069  | 2  | 2  | Married/li     | 3  | College degree   | 4  | Retired     | 11 | 2   | No       |      | 2   | No      |
| 10071  | 2  | 1  | Single         | 2  | Some college     | 1  | Working, fi | 34 | 2   | No       |      | 2   | No      |
| 10074  | 2  | 2  | Married/li     | 3  | College degree   | 4  | Retired     | 28 | 2   | No       |      | 2   | No      |
| 10079  | 2  | 3  | Divorced       | 1  | High school or l | 3  | Unemploy    | 15 | 2   | No       |      | 1   | Yes     |
| 10087  | 2  | 2  | Married/li     | 3  | College degree   | 1  | Working, fi | 9  | 2   | No       |      | 2   | No      |
| 10095  | 2  | 2  | Married/li     | 1  | High school or l | 4  | Retired     | 26 | 2   | No       |      | 2   | No      |
| 10097  | 2  | 2  | Married/li     | 1  | High school or l | 6  | Homemake    | 25 | 2   | No       |      | 2   | No      |
| 10100  | 2  | 2  | Married/li     | 3  | College degree   | 1  | Working, fi | 37 | 2   | No       |      | 2   | No      |
| 10105  | 2  | 2  | Married/li     | 3  | College degree   | 2  | Working, p  | 11 | 2   | No       |      | 2   | No      |
| 10107  | 2  | 2  | Married/li     | 2  | Some college     | 4  | Retired     | 21 | 1   | Yes      | 1    | 2   | No      |

| respid | Q5 | Q6 | Marital Status | Q7 | Education        | Q8 | Work        | Q9 | Q10 | Diabetes | Q10a | Q11 | High BP |
|--------|----|----|----------------|----|------------------|----|-------------|----|-----|----------|------|-----|---------|
| 10111  | 2  | 2  | Married/li     | 2  | Some college     | 4  | Retired     | 13 | 2   | No       |      | 2   | No      |
| 10116  | 2  | 2  | Married/li     | 1  | High school or l | 1  | Working, fi | 26 | 2   | No       |      | 2   | No      |
| 10118  | 2  | 2  | Married/li     | 1  | High school or l | 1  | Working, fi | 11 | 2   | No       |      | 2   | No      |
| 10123  | 2  | 1  | Single         | 2  | Some college     | 1  | Working, fi | 26 | 2   | No       |      | 2   | No      |
| 10124  | 2  | 2  | Married/li     | 3  | College degree   | 1  | Working, fi | 11 | 2   | No       |      | 2   | No      |
| 10130  | 2  | 2  | Married/li     | 3  | College degree   | 1  | Working, fi | 18 | 2   | No       |      | 2   | No      |
| 10134  | 2  | 2  | Married/li     | 1  | High school or l | 2  | Working, p  | 26 | 2   | No       |      | 2   | No      |
| 10135  | 2  | 2  | Married/li     | 3  | College degree   | 1  | Working, fi | 27 | 2   | No       |      | 2   | No      |
| 10136  | 2  | 2  | Married/li     | 3  | College degree   | 1  | Working, fi | 3  | 2   | No       |      | 2   | No      |
| 10141  | 2  | 1  | Single         | 2  | Some college     | 1  | Working, fi | 25 | 2   | No       |      | 2   | No      |
| 10142  | 2  | 2  | Married/li     | 2  | Some college     | 1  | Working, fi | 32 | 2   | No       |      | 2   | No      |
| 10143  | 2  | 2  | Married/li     | 4  | Postgraduate     | 2  | Working, p  | 21 | 1   | Yes      | 2    | 2   | No      |
| 10145  | 2  | 4  | Widow/wi       | 1  | High school or l | 9  | Other       | 15 | 2   | No       |      | 2   | No      |
| 10149  | 2  | 3  | Divorced       | 1  | High school or l | 6  | Homemake    | 18 | 2   | No       |      | 1   | Yes     |
| 10150  | 2  | 2  | Married/li     | 3  | College degree   | 1  | Working, fi | 15 | 2   | No       |      | 1   | Yes     |
| 10151  | 2  | 2  | Married/li     | 4  | Postgraduate     | 1  | Working, fi | 17 | 2   | No       |      | 1   | Yes     |
| 10152  | 2  | 2  | Married/li     | 1  | High school or l | 1  | Working, fi | 16 | 2   | No       |      | 1   | Yes     |
| 10153  | 2  | 2  | Married/li     | 3  | College degree   | 2  | Working, p  | 16 | 2   | No       |      | 2   | No      |
| 10156  | 2  | 2  | Married/li     | 3  | College degree   | 1  | Working, fi | 30 | 2   | No       |      | 1   | Yes     |
| 10160  | 2  | 2  | Married/li     | 2  | Some college     | 4  | Retired     | 12 | 2   | No       |      | 2   | No      |
| 10161  | 2  | 2  | Married/li     | 1  | High school or l | 4  | Retired     | 4  | 2   | No       |      | 1   | Yes     |
| 10167  | 2  | 2  | Married/li     | 3  | College degree   | 4  | Retired     | 2  | 1   | Yes      | 1    | 1   | Yes     |
| 10171  | 2  | 3  | Divorced       | 1  | High school or l | 5  | Permanent   | 25 | 2   | No       |      | 2   | No      |
| 10172  | 2  | 2  | Married/li     | 1  | High school or l | 4  | Retired     | 3  | 2   | No       |      | 2   | No      |
| 10176  | 2  | 2  | Married/li     | 3  | College degree   | 4  | Retired     | 9  | 2   | No       |      | 2   | No      |
| 10177  | 2  | 2  | Married/li     | 3  | College degree   | 1  | Working, fi | 27 | 2   | No       |      | 2   | No      |
| 10182  | 2  | 2  | Married/li     | 1  | High school or l | 1  | Working, fi | 12 | 2   | No       |      | 1   | Yes     |
| 10184  | 2  | 2  | Married/li     | 3  | College degree   | 1  | Working, fi | 33 | 2   | No       |      | 1   | Yes     |
| 10186  | 2  | 1  | Single         | 2  | Some college     | 1  | Working, fi | 27 | 2   | No       |      | 1   | Yes     |
| 10189  | 2  | 2  | Married/li     | 2  | Some college     | 4  | Retired     | 7  | 2   | No       |      | 1   | Yes     |
| 10191  | 2  | 2  | Married/li     | 1  | High school or l | 4  | Retired     | 7  | 2   | No       |      | 2   | No      |
| 10192  | 2  | 2  | Married/li     | 1  | High school or l | 8  | Other worl  | 16 | 2   | No       |      | 1   | Yes     |

| respid | Q5 | Q6 | Marital Status | Q7 | Education        | Q8 | Work        | Q9 | Q10 | Diabetes | Q10a | Q11 | High BP |
|--------|----|----|----------------|----|------------------|----|-------------|----|-----|----------|------|-----|---------|
| 10195  | 2  | 2  | Married/li     | 3  | College degree   | 1  | Working, fi | 11 | 1   | Yes      | 1    | 1   | Yes     |
| 10199  | 2  | 2  | Married/li     | 1  | High school or l | 4  | Retired     | 5  | 2   | No       |      | 2   | No      |
| 10201  | 2  | 2  | Married/li     | 1  | High school or l | 1  | Working, fi | 17 | 2   | No       |      | 2   | No      |
| 10213  | 2  | 1  | Single         | 2  | Some college     | 1  | Working, fi | 99 | 2   | No       |      | 2   | No      |
| 10222  | 2  | 2  | Married/li     | 3  | College degree   | 4  | Retired     | 14 | 2   | No       |      | 2   | No      |
| 10224  | 2  | 2  | Married/li     | 1  | High school or l | 4  | Retired     | 2  | 2   | No       |      | 1   | Yes     |
| 10245  | 2  | 2  | Married/li     | 2  | Some college     | 4  | Retired     | 10 | 2   | No       |      | 2   | No      |
| 10254  | 2  | 2  | Married/li     | 1  | High school or l | 4  | Retired     | 6  | 2   | No       |      | 1   | Yes     |
| 10255  | 2  | 2  | Married/li     | 1  | High school or l | 4  | Retired     | 11 | 2   | No       |      | 1   | Yes     |
| 10257  | 2  | 1  | Single         | 1  | High school or l | 3  | Unemploy    | 2  | 2   | No       |      | 1   | Yes     |
| 10260  | 2  | 2  | Married/li     | 1  | High school or l | 2  | Working, p  | 16 | 1   | Yes      | 1    | 1   | Yes     |
| 10261  | 2  | 2  | Married/li     | 1  | High school or l | 4  | Retired     | 2  | 2   | No       |      | 1   | Yes     |
| 10263  | 2  | 4  | Widow/wi       | 1  | High school or l | 5  | Permanent   | 4  | 1   | Yes      | 1    | 1   | Yes     |
| 10264  | 2  | 2  | Married/li     | 1  | High school or l | 4  | Retired     | 3  | 2   | No       |      | 1   | Yes     |
| 10268  | 2  | 2  | Married/li     | 1  | High school or l | 1  | Working, fi | 5  | 2   | No       |      | 2   | No      |
| 10269  | 2  | 2  | Married/li     | 3  | College degree   | 4  | Retired     | 13 | 2   | No       |      | 1   | Yes     |
| 10270  | 2  | 2  | Married/li     | 1  | High school or l | 4  | Retired     | 1  | 2   | No       |      | 2   | No      |
| 10282  | 2  | 2  | Married/li     | 1  | High school or l | 1  | Working, fi | 28 | 2   | No       |      | 2   | No      |
| 10285  | 2  | 2  | Married/li     | 4  | Postgraduate     | 4  | Retired     | 8  | 1   | Yes      | 1    | 2   | No      |
| 10288  | 2  | 2  | Married/li     | 2  | Some college     | 1  | Working, fi | 10 | 2   | No       |      | 2   | No      |
| 10291  | 2  | 2  | Married/li     | 3  | College degree   | 1  | Working, fi | 11 | 2   | No       |      | 2   | No      |
| 10292  | 2  | 1  | Single         | 1  | High school or l | 1  | Working, fi | 26 | 2   | No       |      | 2   | No      |
| 10304  | 2  | 2  | Married/li     | 2  | Some college     | 1  | Working, fi | 8  | 2   | No       |      | 1   | Yes     |
| 10305  | 2  | 2  | Married/li     | 2  | Some college     | 4  | Retired     | 4  | 2   | No       |      | 2   | No      |
| 10310  | 2  | 2  | Married/li     | 3  | College degree   | 1  | Working, fi | 28 | 2   | No       |      | 2   | No      |
| 10324  | 2  | 3  | Divorced       | 1  | High school or l | 1  | Working, fi | 4  | 2   | No       |      | 2   | No      |
| 10325  | 2  | 2  | Married/li     | 2  | Some college     | 2  | Working, p  | 31 | 2   | No       |      | 2   | No      |
| 10326  | 2  | 2  | Married/li     | 3  | College degree   | 8  | Other worl  | 17 | 2   | No       |      | 2   | No      |
| 10329  | 2  | 2  | Married/li     | 3  | College degree   | 4  | Retired     | 12 | 2   | No       |      | 2   | No      |
| 10332  | 2  | 2  | Married/li     | 4  | Postgraduate     | 1  | Working, fi | 38 | 1   | Yes      | 1    | 1   | Yes     |
| 10337  | 2  | 2  | Married/li     | 3  | College degree   | 1  | Working, fi | 19 | 2   | No       |      | 2   | No      |
| 10341  | 2  | 2  | Married/li     | 1  | High school or l | 6  | Homemake    | 15 | 2   | No       |      | 1   | Yes     |

| respid | Q5 | Q6 | Marital Status | Q7 | Education        | Q8 | Work        | Q9 | Q10 | Diabetes | Q10a | Q11 | High BP |
|--------|----|----|----------------|----|------------------|----|-------------|----|-----|----------|------|-----|---------|
| 10353  | 2  | 2  | Married/li     | 3  | College degree   | 4  | Retired     | 21 | 1   | Yes      | 1    | 1   | Yes     |
| 10354  | 2  | 2  | Married/li     | 1  | High school or l | 4  | Retired     | 26 | 2   | No       |      | 2   | No      |
| 10359  | 2  | 1  | Single         | 3  | College degree   | 9  | Other       | 25 | 2   | No       |      | 2   | No      |
| 10360  | 2  | 2  | Married/li     | 3  | College degree   | 4  | Retired     | 14 | 2   | No       |      | 2   | No      |
| 10362  | 2  | 4  | Widow/wi       | 1  | High school or l | 4  | Retired     | 9  | 1   | Yes      | 2    | 2   | No      |
| 10364  | 2  | 2  | Married/li     | 1  | High school or l | 4  | Retired     | 19 | 1   | Yes      | 1    | 1   | Yes     |
| 10366  | 2  | 2  | Married/li     | 1  | High school or l | 4  | Retired     | 4  | 2   | No       |      | 1   | Yes     |
| 10367  | 2  | 2  | Married/li     | 1  | High school or l | 4  | Retired     | 4  | 2   | No       |      | 2   | No      |
| 10371  | 2  | 2  | Married/li     | 1  | High school or l | 4  | Retired     | 13 | 2   | No       |      | 2   | No      |
| 10374  | 2  | 2  | Married/li     | 3  | College degree   | 1  | Working, fi | 29 | 2   | No       |      | 2   | No      |
| 10375  | 2  | 2  | Married/li     | 3  | College degree   | 1  | Working, fi | 18 | 2   | No       |      | 2   | No      |
| 10376  | 2  | 2  | Married/li     | 3  | College degree   | 4  | Retired     | 11 | 2   | No       |      | 2   | No      |
| 10377  | 2  | 2  | Married/li     | 3  | College degree   | 1  | Working, fi | 31 | 2   | No       |      | 2   | No      |
| 10378  | 2  | 2  | Married/li     | 3  | College degree   | 1  | Working, fi | 6  | 2   | No       |      | 2   | No      |
| 10387  | 2  | 2  | Married/li     | 1  | High school or l | 4  | Retired     | 5  | 2   | No       |      | 2   | No      |
| 10396  | 2  | 2  | Married/li     | 3  | College degree   | 4  | Retired     | 10 | 2   | No       |      | 2   | No      |
| 10397  | 2  | 2  | Married/li     | 4  | Postgraduate     | 1  | Working, fi | 14 | 2   | No       |      | 1   | Yes     |
| 10399  | 2  | 2  | Married/li     | 3  | College degree   | 1  | Working, fi | 4  | 2   | No       |      | 1   | Yes     |
| 10405  | 2  | 2  | Married/li     | 3  | College degree   | 1  | Working, fi | 1  | 2   | No       |      | 2   | No      |
| 10406  | 2  | 2  | Married/li     | 2  | Some college     | 4  | Retired     | 6  | 1   | Yes      | 1    | 2   | No      |
| 10408  | 2  | 2  | Married/li     | 3  | College degree   | 1  | Working, fi | 33 | 2   | No       |      | 2   | No      |
| 10409  | 2  | 2  | Married/li     | 1  | High school or l | 1  | Working, fi | 11 | 2   | No       |      | 2   | No      |
| 10412  | 2  | 2  | Married/li     | 1  | High school or l | 1  | Working, fi | 7  | 2   | No       |      | 2   | No      |
| 10413  | 2  | 2  | Married/li     | 2  | Some college     | 4  | Retired     | 1  | 2   | No       |      | 2   | No      |
| 10419  | 2  | 2  | Married/li     | 2  | Some college     | 4  | Retired     | 10 | 2   | No       |      | 2   | No      |
| 10423  | 2  | 2  | Married/li     | 3  | College degree   | 4  | Retired     | 13 | 2   | No       |      | 1   | Yes     |
| 10426  | 2  | 4  | Widow/wi       | 1  | High school or l | 4  | Retired     | 2  | 2   | No       |      | 2   | No      |
| 10446  | 2  | 2  | Married/li     | 3  | College degree   | 4  | Retired     | 11 | 1   | Yes      | 1    | 2   | No      |
| 10448  | 2  | 2  | Married/li     | 2  | Some college     | 1  | Working, fi | 28 | 2   | No       |      | 2   | No      |
| 10450  | 2  | 2  | Married/li     | 3  | College degree   | 1  | Working, fi | 10 | 2   | No       |      | 2   | No      |
| 10455  | 2  | 1  | Single         | 2  | Some college     | 1  | Working, fi | 34 | 2   | No       |      | 2   | No      |
| 10460  | 2  | 2  | Married/li     | 1  | High school or l | 1  | Working, fi | 32 | 2   | No       |      | 1   | Yes     |

| respid | Q5 | Q6 | Marital Status | Q7 | Education        | Q8 | Work        | Q9 | Q10 | Diabetes | Q10a | Q11 | High BP |
|--------|----|----|----------------|----|------------------|----|-------------|----|-----|----------|------|-----|---------|
| 10461  | 2  | 2  | Married/li     | 3  | College degree   | 4  | Retired     | 14 | 2   | No       |      | 1   | Yes     |
| 10471  | 2  | 2  | Married/li     | 1  | High school or l | 4  | Retired     | 11 | 1   | Yes      | 1    | 2   | No      |
| 10472  | 2  | 2  | Married/li     | 1  | High school or l | 4  | Retired     | 11 | 2   | No       |      | 1   | Yes     |
| 10491  | 2  | 2  | Married/li     | 3  | College degree   | 4  | Retired     | 8  | 1   | Yes      | 1    | 1   | Yes     |
| 10493  | 2  | 2  | Married/li     | 2  | Some college     | 4  | Retired     | 5  | 2   | No       |      | 2   | No      |
| 10498  | 2  | 2  | Married/li     | 1  | High school or l | 2  | Working, p  | 33 | 2   | No       |      | 2   | No      |
| 10533  | 2  | 2  | Married/li     | 3  | College degree   | 1  | Working, fi | 20 | 2   | No       |      | 2   | No      |
| 10539  | 2  | 2  | Married/li     | 3  | College degree   | 1  | Working, fi | 14 | 2   | No       |      | 1   | Yes     |
| 10540  | 2  | 4  | Widow/wi       | 1  | High school or l | 3  | Unemploy    | 2  | 2   | No       |      | 2   | No      |
| 10557  | 2  | 2  | Married/li     | 3  | College degree   | 1  | Working, fi | 12 | 2   | No       |      | 2   | No      |
| 10558  | 2  | 2  | Married/li     | 2  | Some college     | 4  | Retired     | 1  | 1   | Yes      | 1    | 2   | No      |
| 10559  | 2  | 4  | Widow/wi       | 1  | High school or l | 4  | Retired     | 1  | 2   | No       |      | 1   | Yes     |
| 10564  | 2  | 2  | Married/li     | 3  | College degree   | 1  | Working, fi | 17 | 2   | No       |      | 2   | No      |
| 10570  | 2  | 2  | Married/li     | 1  | High school or l | 4  | Retired     | 1  | 2   | No       |      | 1   | Yes     |
| 10572  | 2  | 2  | Married/li     | 1  | High school or l | 1  | Working, fi | 4  | 2   | No       |      | 2   | No      |
| 10576  | 2  | 2  | Married/li     | 1  | High school or l | 1  | Working, fi | 20 | 2   | No       |      | 2   | No      |
| 10582  | 2  | 3  | Divorced       | 1  | High school or l | 4  | Retired     | 1  | 1   | Yes      | 1    | 2   | No      |
| 10593  | 2  | 2  | Married/li     | 2  | Some college     | 1  | Working, fi | 8  | 2   | No       |      | 1   | Yes     |
| 10596  | 2  | 2  | Married/li     | 2  | Some college     | 4  | Retired     | 2  | 2   | No       |      | 1   | Yes     |
| 10615  | 2  | 2  | Married/li     | 3  | College degree   | 1  | Working, fi | 24 | 2   | No       |      | 2   | No      |
| 10616  | 2  | 2  | Married/li     | 2  | Some college     | 1  | Working, fi | 11 | 2   | No       |      | 2   | No      |
| 10623  | 2  | 2  | Married/li     | 3  | College degree   | 1  | Working, fi | 1  | 2   | No       |      | 2   | No      |
| 10626  | 2  | 1  | Single         | 2  | Some college     | 1  | Working, fi | 27 | 2   | No       |      | 2   | No      |
| 10627  | 2  | 2  | Married/li     | 3  | College degree   | 1  | Working, fi | 11 | 2   | No       |      | 2   | No      |
| 10629  | 2  | 2  | Married/li     | 1  | High school or l | 4  | Retired     | 12 | 2   | No       |      | 2   | No      |
| 10632  | 2  | 2  | Married/li     | 3  | College degree   | 1  | Working, fi | 11 | 2   | No       |      | 2   | No      |
| 10641  | 2  | 2  | Married/li     | 3  | College degree   | 4  | Retired     | 1  | 1   | Yes      | 1    | 2   | No      |
| 10648  | 2  | 2  | Married/li     | 1  | High school or l | 4  | Retired     | 12 | 1   | Yes      | 1    | 2   | No      |
| 10651  | 2  | 2  | Married/li     | 1  | High school or l | 4  | Retired     | 6  | 1   | Yes      | 1    | 1   | Yes     |
| 10654  | 2  | 2  | Married/li     | 2  | Some college     | 4  | Retired     | 3  | 2   | No       |      | 2   | No      |
| 10673  | 2  | 2  | Married/li     | 2  | Some college     | 1  | Working, fi | 8  | 2   | No       |      | 2   | No      |
| 10675  | 2  | 2  | Married/li     | 1  | High school or l | 4  | Retired     | 8  | 1   | Yes      | 1    | 1   | Yes     |

| respid | Q5 | Q6 | Marital Status | Q7 | Education        | Q8 | Work        | Q9 | Q10 | Diabetes | Q10a | Q11 | High BP |
|--------|----|----|----------------|----|------------------|----|-------------|----|-----|----------|------|-----|---------|
| 10689  | 2  | 2  | Married/li     | 1  | High school or l | 4  | Retired     | 6  | 2   | No       |      | 2   | No      |
| 10692  | 2  | 2  | Married/li     | 3  | College degree   | 1  | Working, fi | 9  | 2   | No       |      | 2   | No      |
| 10694  | 2  | 2  | Married/li     | 3  | College degree   | 1  | Working, fi | 13 | 2   | No       |      | 2   | No      |
| 10695  | 2  | 2  | Married/li     | 3  | College degree   | 8  | Other worl  | 16 | 2   | No       |      | 2   | No      |
| 10702  | 2  | 2  | Married/li     | 1  | High school or l | 6  | Homemake    | 19 | 2   | No       |      | 1   | Yes     |
| 10703  | 2  | 2  | Married/li     | 4  | Postgraduate     | 1  | Working, fi | 18 | 1   | Yes      | 1    | 2   | No      |
| 10708  | 2  | 2  | Married/li     | 4  | Postgraduate     | 1  | Working, fi | 34 | 2   | No       |      | 2   | No      |
| 10719  | 2  | 2  | Married/li     | 2  | Some college     | 1  | Working, fi | 9  | 2   | No       |      | 2   | No      |
| 10722  | 2  | 2  | Married/li     | 3  | College degree   | 1  | Working, fi | 10 | 2   | No       |      | 2   | No      |
| 10723  | 2  | 2  | Married/li     | 3  | College degree   | 4  | Retired     | 18 | 1   | Yes      | 2    | 1   | Yes     |
| 10726  | 2  | 2  | Married/li     | 3  | College degree   | 4  | Retired     | 11 | 2   | No       |      | 2   | No      |
| 10727  | 2  | 2  | Married/li     | 1  | High school or l | 4  | Retired     | 11 | 2   | No       |      | 2   | No      |
| 10730  | 2  | 2  | Married/li     | 1  | High school or l | 1  | Working, fi | 29 | 1   | Yes      | 2    | 2   | No      |
| 10731  | 2  | 2  | Married/li     | 2  | Some college     | 1  | Working, fi | 33 | 2   | No       |      | 2   | No      |
| 10737  | 2  | 2  | Married/li     | 3  | College degree   | 1  | Working, fi | 33 | 2   | No       |      | 2   | No      |
| 10743  | 2  | 4  | Widow/wi       | 1  | High school or l | 6  | Homemake    | 11 | 2   | No       |      | 2   | No      |
| 10763  | 2  | 2  | Married/li     | 3  | College degree   | 1  | Working, fi | 12 | 2   | No       |      | 2   | No      |
| 10777  | 2  | 1  | Single         | 1  | High school or l | 1  | Working, fi | 25 | 2   | No       |      | 2   | No      |
| 10787  | 2  | 2  | Married/li     | 1  | High school or l | 1  | Working, fi | 18 | 2   | No       |      | 1   | Yes     |
| 10798  | 2  | 2  | Married/li     | 3  | College degree   | 1  | Working, fi | 11 | 2   | No       |      | 2   | No      |
| 10800  | 2  | 2  | Married/li     | 2  | Some college     | 1  | Working, fi | 33 | 2   | No       |      | 1   | Yes     |
| 10802  | 2  | 2  | Married/li     | 3  | College degree   | 1  | Working, fi | 11 | 2   | No       |      | 2   | No      |
| 10803  | 2  | 2  | Married/li     | 3  | College degree   | 1  | Working, fi | 2  | 1   | Yes      | 1    | 2   | No      |
| 10808  | 2  | 2  | Married/li     | 2  | Some college     | 4  | Retired     | 13 | 2   | No       |      | 2   | No      |
| 10810  | 2  | 2  | Married/li     | 3  | College degree   | 1  | Working, fi | 8  | 2   | No       |      | 2   | No      |
| 10819  | 2  | 2  | Married/li     | 2  | Some college     | 4  | Retired     | 25 | 1   | Yes      | 1    | 1   | Yes     |
| 10825  | 2  | 2  | Married/li     | 1  | High school or l | 4  | Retired     | 1  | 2   | No       |      | 1   | Yes     |
| 10827  | 2  | 2  | Married/li     | 3  | College degree   | 1  | Working, fi | 11 | 2   | No       |      | 2   | No      |
| 10830  | 2  | 2  | Married/li     | 3  | College degree   | 1  | Working, fi | 21 | 2   | No       |      | 1   | Yes     |
| 10847  | 2  | 1  | Single         | 4  | Postgraduate     | 1  | Working, fi | 7  | 2   | No       |      | 2   | No      |
| 10849  | 2  | 1  | Single         | 2  | Some college     | 8  | Other worl  | 26 | 2   | No       |      | 2   | No      |
| 10852  | 2  | 2  | Married/li     | 2  | Some college     | 1  | Working, fi | 11 | 2   | No       |      | 2   | No      |



| respid | Q5 | Q6 | Marital Status | Q7 | Education        | Q8 | Work        | Q9 | Q10 | Diabetes | Q10a | Q11 | High BP |
|--------|----|----|----------------|----|------------------|----|-------------|----|-----|----------|------|-----|---------|
| 10854  | 2  | 2  | Married/li     | 1  | High school or l | 2  | Working, p  | 16 | 1   | Yes      | 1    | 2   | No      |
| 10857  | 2  | 2  | Married/li     | 1  | High school or l | 4  | Retired     | 10 | 2   | No       |      | 2   | No      |
| 10861  | 2  | 1  | Single         | 3  | College degree   | 4  | Retired     | 25 | 2   | No       |      | 1   | Yes     |
| 10862  | 2  | 2  | Married/li     | 3  | College degree   | 1  | Working, fi | 12 | 2   | No       |      | 2   | No      |
| 10870  | 2  | 2  | Married/li     | 1  | High school or l | 4  | Retired     | 6  | 2   | No       |      | 1   | Yes     |
| 10873  | 2  | 5  | Prefer not     | 1  | High school or l | 3  | Unemploye   | 1  | 1   | Yes      | 2    | 2   | No      |
| 10881  | 2  | 2  | Married/li     | 3  | College degree   | 1  | Working, fi | 12 | 2   | No       |      | 1   | Yes     |
| 10893  | 2  | 2  | Married/li     | 3  | College degree   | 1  | Working, fi | 9  | 2   | No       |      | 2   | No      |
| 10898  | 2  | 2  | Married/li     | 1  | High school or l | 1  | Working, fi | 32 | 2   | No       |      | 2   | No      |
| 10899  | 2  | 2  | Married/li     | 1  | High school or l | 4  | Retired     | 10 | 2   | No       |      | 1   | Yes     |
| 10905  | 2  | 2  | Married/li     | 1  | High school or l | 4  | Retired     | 1  | 2   | No       |      | 2   | No      |
| 10910  | 2  | 2  | Married/li     | 1  | High school or l | 4  | Retired     | 1  | 2   | No       |      | 2   | No      |
| 10911  | 2  | 2  | Married/li     | 3  | College degree   | 1  | Working, fi | 33 | 2   | No       |      | 2   | No      |
| 10912  | 2  | 2  | Married/li     | 3  | College degree   | 6  | Homemake    | 32 | 2   | No       |      | 2   | No      |
| 10913  | 2  | 4  | Widow/wi       | 2  | Some college     | 4  | Retired     | 12 | 2   | No       |      | 2   | No      |
| 10918  | 2  | 4  | Widow/wi       | 1  | High school or l | 4  | Retired     | 3  | 2   | No       |      | 1   | Yes     |
| 10995  | 2  | 4  | Widow/wi       | 1  | High school or l | 1  | Working, fi | 9  | 2   | No       |      | 2   | No      |
| 11002  | 2  | 2  | Married/li     | 3  | College degree   | 1  | Working, fi | 33 | 2   | No       |      | 2   | No      |
| 11003  | 2  | 2  | Married/li     | 1  | High school or l | 1  | Working, fi | 36 | 1   | Yes      | 1    | 2   | No      |
| 11005  | 2  | 2  | Married/li     | 4  | Postgraduate     | 1  | Working, fi | 20 | 2   | No       |      | 1   | Yes     |
| 11015  | 2  | 2  | Married/li     | 2  | Some college     | 4  | Retired     | 11 | 2   | No       |      | 2   | No      |
| 11016  | 2  | 2  | Married/li     | 3  | College degree   | 9  | Other       | 1  | 2   | No       |      | 2   | No      |
| 11017  | 2  | 2  | Married/li     | 3  | College degree   | 1  | Working, fi | 6  | 2   | No       |      | 1   | Yes     |
| 11020  | 2  | 2  | Married/li     | 3  | College degree   | 1  | Working, fi | 11 | 2   | No       |      | 2   | No      |
| 11024  | 2  | 2  | Married/li     | 2  | Some college     | 1  | Working, fi | 6  | 2   | No       |      | 2   | No      |
| 11026  | 2  | 2  | Married/li     | 2  | Some college     | 6  | Homemake    | 30 | 1   | Yes      | 1    | 2   | No      |
| 11028  | 2  | 2  | Married/li     | 3  | College degree   | 1  | Working, fi | 19 | 1   | Yes      | 1    | 1   | Yes     |
| 11029  | 2  | 2  | Married/li     | 3  | College degree   | 1  | Working, fi | 11 | 2   | No       |      | 2   | No      |
| 11030  | 2  | 2  | Married/li     | 4  | Postgraduate     | 1  | Working, fi | 33 | 2   | No       |      | 1   | Yes     |
| 11031  | 2  | 2  | Married/li     | 2  | Some college     | 4  | Retired     | 7  | 2   | No       |      | 2   | No      |
| 11038  | 2  | 2  | Married/li     | 2  | Some college     | 6  | Homemake    | 25 | 2   | No       |      | 1   | Yes     |
| 11051  | 2  | 2  | Married/li     | 3  | College degree   | 1  | Working, fi | 33 | 2   | No       |      | 2   | No      |

| respid | Q5 | Q6 | Marital Status | Q7 | Education        | Q8 | Work        | Q9 | Q10 | Diabetes | Q10a | Q11 | High BP |
|--------|----|----|----------------|----|------------------|----|-------------|----|-----|----------|------|-----|---------|
| 11052  | 2  | 2  | Married/li     | 3  | College degree   | 1  | Working, fi | 11 | 2   | No       |      | 2   | No      |
| 11053  | 2  | 2  | Married/li     | 3  | College degree   | 1  | Working, fi | 33 | 2   | No       |      | 2   | No      |
| 11054  | 2  | 2  | Married/li     | 3  | College degree   | 1  | Working, fi | 12 | 2   | No       |      | 2   | No      |
| 11063  | 2  | 5  | Prefer not     | 1  | High school or l | 4  | Retired     | 4  | 2   | No       |      | 1   | Yes     |
| 11075  | 2  | 2  | Married/li     | 3  | College degree   | 1  | Working, fi | 14 | 1   | Yes      | 2    | 1   | Yes     |
| 11083  | 2  | 2  | Married/li     | 2  | Some college     | 4  | Retired     | 11 | 2   | No       |      | 2   | No      |
| 11092  | 2  | 2  | Married/li     | 3  | College degree   | 4  | Retired     | 5  | 2   | No       |      | 2   | No      |
| 11118  | 2  | 2  | Married/li     | 1  | High school or l | 4  | Retired     | 2  | 2   | No       |      | 2   | No      |
| 11119  | 2  | 4  | Widow/wi       | 1  | High school or l | 4  | Retired     | 1  | 1   | Yes      | 1    | 1   | Yes     |
| 11134  | 2  | 2  | Married/li     | 3  | College degree   | 1  | Working, fi | 8  | 2   | No       |      | 2   | No      |
| 11139  | 2  | 5  | Prefer not     | 1  | High school or l | 4  | Retired     | 1  | 1   | Yes      | 2    | 2   | No      |
| 11154  | 2  | 2  | Married/li     | 3  | College degree   | 1  | Working, fi | 4  | 2   | No       |      | 2   | No      |
| 11166  | 2  | 2  | Married/li     | 1  | High school or l | 4  | Retired     | 2  | 2   | No       |      | 2   | No      |
| 11168  | 2  | 2  | Married/li     | 3  | College degree   | 9  | Other       | 21 | 2   | No       |      | 2   | No      |
| 11176  | 2  | 4  | Widow/wi       | 4  | Postgraduate     | 4  | Retired     | 7  | 1   | Yes      | 1    | 1   | Yes     |
| 11183  | 2  | 2  | Married/li     | 4  | Postgraduate     | 1  | Working, fi | 14 | 1   | Yes      | 1    | 1   | Yes     |
| 11189  | 2  | 2  | Married/li     | 1  | High school or l | 1  | Working, fi | 27 | 2   | No       |      | 2   | No      |
| 11196  | 2  | 2  | Married/li     | 1  | High school or l | 4  | Retired     | 5  | 1   | Yes      | 1    | 1   | Yes     |
| 11200  | 2  | 2  | Married/li     | 3  | College degree   | 1  | Working, fi | 37 | 2   | No       |      | 2   | No      |
| 11201  | 2  | 2  | Married/li     | 3  | College degree   | 1  | Working, fi | 30 | 2   | No       |      | 2   | No      |
| 11211  | 2  | 2  | Married/li     | 1  | High school or l | 4  | Retired     | 5  | 1   | Yes      | 1    | 1   | Yes     |
| 11218  | 2  | 2  | Married/li     | 1  | High school or l | 4  | Retired     | 11 | 2   | No       |      | 2   | No      |
| 11219  | 2  | 2  | Married/li     | 3  | College degree   | 1  | Working, fi | 33 | 2   | No       |      | 2   | No      |
| 11221  | 2  | 2  | Married/li     | 2  | Some college     | 1  | Working, fi | 28 | 2   | No       |      | 2   | No      |
| 11222  | 2  | 2  | Married/li     | 1  | High school or l | 4  | Retired     | 10 | 2   | No       |      | 1   | Yes     |
| 11230  | 2  | 2  | Married/li     | 1  | High school or l | 4  | Retired     | 5  | 1   | Yes      | 1    | 1   | Yes     |
| 11236  | 2  | 2  | Married/li     | 1  | High school or l | 4  | Retired     | 5  | 2   | No       |      | 1   | Yes     |
| 11237  | 2  | 2  | Married/li     | 4  | Postgraduate     | 2  | Working, p  | 24 | 2   | No       |      | 1   | Yes     |
| 11240  | 2  | 2  | Married/li     | 3  | College degree   | 2  | Working, p  | 21 | 2   | No       |      | 1   | Yes     |
| 11244  | 2  | 2  | Married/li     | 1  | High school or l | 4  | Retired     | 5  | 2   | No       |      | 1   | Yes     |
| 11249  | 2  | 2  | Married/li     | 4  | Postgraduate     | 1  | Working, fi | 35 | 2   | No       |      | 2   | No      |
| 11252  | 2  | 2  | Married/li     | 1  | High school or l | 4  | Retired     | 5  | 2   | No       |      | 1   | Yes     |

| respid | Q5 | Q6 | Marital Status | Q7 | Education        | Q8 | Work        | Q9 | Q10 | Diabetes | Q10a | Q11 | High BP |
|--------|----|----|----------------|----|------------------|----|-------------|----|-----|----------|------|-----|---------|
| 11254  | 2  | 2  | Married/li     | 3  | College degree   | 4  | Retired     | 2  | 1   | Yes      | 1    | 2   | No      |
| 11255  | 2  | 3  | Divorced       | 3  | College degree   | 1  | Working, fi | 34 | 2   | No       |      | 1   | Yes     |
| 11258  | 2  | 2  | Married/li     | 1  | High school or l | 4  | Retired     | 5  | 2   | No       |      | 1   | Yes     |
| 11260  | 2  | 2  | Married/li     | 3  | College degree   | 4  | Retired     | 12 | 2   | No       |      | 1   | Yes     |
| 11264  | 2  | 2  | Married/li     | 3  | College degree   | 4  | Retired     | 11 | 2   | No       |      | 1   | Yes     |
| 11266  | 2  | 2  | Married/li     | 3  | College degree   | 4  | Retired     | 7  | 2   | No       |      | 2   | No      |
| 11268  | 2  | 2  | Married/li     | 1  | High school or l | 9  | Other       | 3  | 2   | No       |      | 1   | Yes     |
| 11269  | 2  | 2  | Married/li     | 3  | College degree   | 1  | Working, fi | 13 | 2   | No       |      | 2   | No      |
| 11272  | 2  | 2  | Married/li     | 2  | Some college     | 4  | Retired     | 10 | 1   | Yes      | 1    | 1   | Yes     |
| 11273  | 2  | 2  | Married/li     | 1  | High school or l | 4  | Retired     | 3  | 2   | No       |      | 2   | No      |
| 11275  | 2  | 2  | Married/li     | 3  | College degree   | 1  | Working, fi | 11 | 2   | No       |      | 2   | No      |
| 11276  | 2  | 2  | Married/li     | 3  | College degree   | 1  | Working, fi | 10 | 2   | No       |      | 2   | No      |
| 11278  | 2  | 4  | Widow/wi       | 1  | High school or l | 4  | Retired     | 13 | 2   | No       |      | 2   | No      |
| 11288  | 2  | 2  | Married/li     | 3  | College degree   | 2  | Working, p  | 35 | 2   | No       |      | 2   | No      |
| 11289  | 2  | 2  | Married/li     | 1  | High school or l | 4  | Retired     | 7  | 2   | No       |      | 1   | Yes     |
| 11291  | 2  | 2  | Married/li     | 2  | Some college     | 1  | Working, fi | 11 | 2   | No       |      | 2   | No      |
| 11295  | 2  | 2  | Married/li     | 3  | College degree   | 1  | Working, fi | 7  | 2   | No       |      | 2   | No      |
| 11297  | 2  | 2  | Married/li     | 1  | High school or l | 2  | Working, p  | 25 | 2   | No       |      | 2   | No      |
| 11304  | 2  | 2  | Married/li     | 2  | Some college     | 4  | Retired     | 9  | 2   | No       |      | 1   | Yes     |
| 11305  | 2  | 2  | Married/li     | 2  | Some college     | 4  | Retired     | 8  | 2   | No       |      | 2   | No      |
| 11311  | 2  | 2  | Married/li     | 2  | Some college     | 1  | Working, fi | 27 | 2   | No       |      | 2   | No      |
| 11313  | 2  | 2  | Married/li     | 3  | College degree   | 1  | Working, fi | 12 | 2   | No       |      | 2   | No      |
| 11315  | 2  | 2  | Married/li     | 3  | College degree   | 1  | Working, fi | 12 | 2   | No       |      | 2   | No      |
| 11316  | 2  | 2  | Married/li     | 3  | College degree   | 1  | Working, fi | 12 | 2   | No       |      | 2   | No      |
| 11318  | 2  | 2  | Married/li     | 2  | Some college     | 1  | Working, fi | 11 | 2   | No       |      | 2   | No      |
| 11323  | 2  | 2  | Married/li     | 3  | College degree   | 1  | Working, fi | 11 | 2   | No       |      | 2   | No      |
| 11331  | 2  | 2  | Married/li     | 2  | Some college     | 1  | Working, fi | 9  | 2   | No       |      | 2   | No      |
| 11333  | 2  | 2  | Married/li     | 2  | Some college     | 1  | Working, fi | 34 | 2   | No       |      | 2   | No      |
| 11334  | 2  | 2  | Married/li     | 3  | College degree   | 1  | Working, fi | 11 | 2   | No       |      | 1   | Yes     |
| 11340  | 2  | 2  | Married/li     | 2  | Some college     | 1  | Working, fi | 12 | 1   | Yes      | 1    | 2   | No      |
| 11345  | 2  | 2  | Married/li     | 2  | Some college     | 1  | Working, fi | 11 | 2   | No       |      | 1   | Yes     |
| 11354  | 2  | 2  | Married/li     | 3  | College degree   | 1  | Working, fi | 10 | 2   | No       |      | 2   | No      |

| respid | Q5 | Q6 | Marital Status | Q7 | Education        | Q8 | Work        | Q9 | Q10 | Diabetes | Q10a | Q11 | High BP |
|--------|----|----|----------------|----|------------------|----|-------------|----|-----|----------|------|-----|---------|
| 11360  | 2  | 2  | Married/li     | 3  | College degree   | 2  | Working, p  | 11 | 2   | No       |      | 2   | No      |
| 11361  | 2  | 2  | Married/li     | 4  | Postgraduate     | 1  | Working, fi | 9  | 2   | No       |      | 2   | No      |
| 11367  | 2  | 2  | Married/li     | 3  | College degree   | 1  | Working, fi | 11 | 2   | No       |      | 2   | No      |
| 11370  | 2  | 2  | Married/li     | 1  | High school or l | 1  | Working, fi | 11 | 2   | No       |      | 2   | No      |
| 11371  | 2  | 2  | Married/li     | 1  | High school or l | 6  | Homemake    | 8  | 1   | Yes      | 1    | 1   | Yes     |
| 11372  | 2  | 2  | Married/li     | 2  | Some college     | 1  | Working, fi | 7  | 2   | No       |      | 1   | Yes     |
| 11373  | 2  | 2  | Married/li     | 3  | College degree   | 1  | Working, fi | 13 | 2   | No       |      | 2   | No      |
| 11382  | 2  | 2  | Married/li     | 1  | High school or l | 8  | Other worl  | 1  | 2   | No       |      | 2   | No      |
| 11394  | 2  | 4  | Widow/wi       | 1  | High school or l | 4  | Retired     | 1  | 2   | No       |      | 1   | Yes     |
| 11395  | 2  | 2  | Married/li     | 3  | College degree   | 1  | Working, fi | 10 | 1   | Yes      | 1    | 1   | Yes     |
| 11397  | 2  | 2  | Married/li     | 1  | High school or l | 1  | Working, fi | 11 | 2   | No       |      | 2   | No      |
| 11402  | 2  | 1  | Single         | 3  | College degree   | 2  | Working, p  | 12 | 2   | No       |      | 2   | No      |
| 11409  | 2  | 2  | Married/li     | 3  | College degree   | 1  | Working, fi | 11 | 2   | No       |      | 1   | Yes     |
| 11410  | 2  | 1  | Single         | 3  | College degree   | 1  | Working, fi | 13 | 2   | No       |      | 2   | No      |
| 11411  | 2  | 2  | Married/li     | 2  | Some college     | 1  | Working, fi | 11 | 2   | No       |      | 2   | No      |
| 11418  | 2  | 2  | Married/li     | 3  | College degree   | 1  | Working, fi | 11 | 2   | No       |      | 2   | No      |
| 11425  | 2  | 2  | Married/li     | 2  | Some college     | 1  | Working, fi | 7  | 2   | No       |      | 1   | Yes     |
| 11429  | 2  | 2  | Married/li     | 3  | College degree   | 1  | Working, fi | 11 | 2   | No       |      | 1   | Yes     |
| 11430  | 2  | 2  | Married/li     | 3  | College degree   | 1  | Working, fi | 12 | 2   | No       |      | 1   | Yes     |
| 11431  | 2  | 2  | Married/li     | 2  | Some college     | 1  | Working, fi | 11 | 2   | No       |      | 1   | Yes     |
| 11432  | 2  | 2  | Married/li     | 1  | High school or l | 1  | Working, fi | 11 | 2   | No       |      | 2   | No      |
| 11433  | 2  | 1  | Single         | 3  | College degree   | 1  | Working, fi | 7  | 2   | No       |      | 1   | Yes     |
| 11435  | 2  | 2  | Married/li     | 1  | High school or l | 4  | Retired     | 10 | 2   | No       |      | 2   | No      |
| 11436  | 2  | 2  | Married/li     | 4  | Postgraduate     | 1  | Working, fi | 11 | 2   | No       |      | 2   | No      |
| 11437  | 2  | 2  | Married/li     | 3  | College degree   | 1  | Working, fi | 14 | 1   | Yes      | 1    | 2   | No      |
| 11439  | 2  | 2  | Married/li     | 3  | College degree   | 1  | Working, fi | 5  | 2   | No       |      | 2   | No      |
| 11440  | 2  | 2  | Married/li     | 3  | College degree   | 1  | Working, fi | 12 | 2   | No       |      | 2   | No      |
| 11447  | 2  | 1  | Single         | 3  | College degree   | 1  | Working, fi | 11 | 2   | No       |      | 2   | No      |
| 11455  | 2  | 2  | Married/li     | 3  | College degree   | 1  | Working, fi | 11 | 2   | No       |      | 1   | Yes     |
| 11456  | 2  | 2  | Married/li     | 2  | Some college     | 1  | Working, fi | 8  | 2   | No       |      | 2   | No      |
| 11461  | 2  | 2  | Married/li     | 3  | College degree   | 1  | Working, fi | 11 | 2   | No       |      | 1   | Yes     |
| 11463  | 2  | 2  | Married/li     | 3  | College degree   | 4  | Retired     | 12 | 1   | Yes      | 1    | 1   | Yes     |

| respid | Q5 | Q6 | Marital Status | Q7 | Education        | Q8 | Work        | Q9 | Q10 | Diabetes | Q10a | Q11 | High BP |
|--------|----|----|----------------|----|------------------|----|-------------|----|-----|----------|------|-----|---------|
| 11470  | 2  | 2  | Married/li     | 3  | College degree   | 1  | Working, fi | 12 | 1   | Yes      | 1    | 2   | No      |
| 11472  | 2  | 2  | Married/li     | 1  | High school or l | 1  | Working, fi | 13 | 2   | No       |      | 2   | No      |
| 11475  | 2  | 2  | Married/li     | 1  | High school or l | 4  | Retired     | 2  | 2   | No       |      | 2   | No      |
| 11476  | 2  | 2  | Married/li     | 3  | College degree   | 1  | Working, fi | 10 | 1   | Yes      | 1    | 2   | No      |
| 11482  | 2  | 2  | Married/li     | 2  | Some college     | 1  | Working, fi | 8  | 2   | No       |      | 2   | No      |
| 11501  | 2  | 2  | Married/li     | 3  | College degree   | 1  | Working, fi | 10 | 2   | No       |      | 1   | Yes     |
| 11503  | 2  | 2  | Married/li     | 3  | College degree   | 1  | Working, fi | 12 | 1   | Yes      | 1    | 1   | Yes     |
| 11505  | 2  | 2  | Married/li     | 2  | Some college     | 4  | Retired     | 6  | 1   | Yes      | 1    | 2   | No      |
| 11510  | 2  | 2  | Married/li     | 3  | College degree   | 1  | Working, fi | 11 | 2   | No       |      | 2   | No      |
| 11519  | 2  | 2  | Married/li     | 1  | High school or l | 1  | Working, fi | 11 | 2   | No       |      | 2   | No      |
| 11527  | 2  | 2  | Married/li     | 3  | College degree   | 1  | Working, fi | 11 | 2   | No       |      | 2   | No      |
| 11529  | 2  | 2  | Married/li     | 3  | College degree   | 1  | Working, fi | 12 | 2   | No       |      | 2   | No      |
| 11530  | 2  | 2  | Married/li     | 1  | High school or l | 4  | Retired     | 1  | 2   | No       |      | 1   | Yes     |
| 11536  | 2  | 2  | Married/li     | 1  | High school or l | 4  | Retired     | 7  | 2   | No       |      | 1   | Yes     |
| 11543  | 2  | 2  | Married/li     | 2  | Some college     | 1  | Working, fi | 13 | 2   | No       |      | 2   | No      |
| 11548  | 2  | 2  | Married/li     | 2  | Some college     | 1  | Working, fi | 12 | 2   | No       |      | 2   | No      |
| 11566  | 2  | 2  | Married/li     | 2  | Some college     | 4  | Retired     | 7  | 2   | No       |      | 2   | No      |
| 11570  | 2  | 2  | Married/li     | 3  | College degree   | 1  | Working, fi | 14 | 2   | No       |      | 2   | No      |
| 11571  | 2  | 2  | Married/li     | 1  | High school or l | 1  | Working, fi | 9  | 2   | No       |      | 1   | Yes     |
| 11578  | 2  | 2  | Married/li     | 3  | College degree   | 1  | Working, fi | 12 | 2   | No       |      | 2   | No      |
| 11579  | 2  | 2  | Married/li     | 3  | College degree   | 1  | Working, fi | 11 | 2   | No       |      | 2   | No      |
| 11581  | 2  | 2  | Married/li     | 3  | College degree   | 1  | Working, fi | 12 | 2   | No       |      | 2   | No      |
| 11582  | 2  | 2  | Married/li     | 1  | High school or l | 4  | Retired     | 11 | 1   | Yes      | 1    | 2   | No      |
| 11583  | 2  | 2  | Married/li     | 2  | Some college     | 1  | Working, fi | 14 | 2   | No       |      | 2   | No      |
| 11589  | 2  | 2  | Married/li     | 3  | College degree   | 1  | Working, fi | 10 | 2   | No       |      | 2   | No      |
| 11590  | 2  | 2  | Married/li     | 3  | College degree   | 1  | Working, fi | 10 | 2   | No       |      | 2   | No      |
| 11592  | 2  | 2  | Married/li     | 1  | High school or l | 1  | Working, fi | 2  | 1   | Yes      | 1    | 2   | No      |
| 11596  | 2  | 2  | Married/li     | 2  | Some college     | 1  | Working, fi | 12 | 2   | No       |      | 2   | No      |
| 11598  | 2  | 2  | Married/li     | 3  | College degree   | 1  | Working, fi | 10 | 2   | No       |      | 2   | No      |
| 11602  | 2  | 2  | Married/li     | 2  | Some college     | 1  | Working, fi | 11 | 2   | No       |      | 2   | No      |
| 11605  | 2  | 2  | Married/li     | 2  | Some college     | 1  | Working, fi | 12 | 2   | No       |      | 2   | No      |
| 11618  | 2  | 2  | Married/li     | 2  | Some college     | 1  | Working, fi | 11 | 1   | Yes      | 1    | 2   | No      |

| respid | Q5 | Q6 | Marital Status | Q7 | Education        | Q8 | Work        | Q9 | Q10 | Diabetes | Q10a | Q11 | High BP |
|--------|----|----|----------------|----|------------------|----|-------------|----|-----|----------|------|-----|---------|
| 11621  | 2  | 2  | Married/li     | 3  | College degree   | 1  | Working, fi | 7  | 2   | No       |      | 1   | Yes     |
| 11630  | 2  | 2  | Married/li     | 4  | Postgraduate     | 1  | Working, fi | 14 | 2   | No       |      | 2   | No      |
| 11636  | 2  | 2  | Married/li     | 3  | College degree   | 1  | Working, fi | 13 | 2   | No       |      | 1   | Yes     |
| 11640  | 2  | 2  | Married/li     | 3  | College degree   | 1  | Working, fi | 13 | 1   | Yes      | 1    | 1   | Yes     |
| 11658  | 2  | 2  | Married/li     | 3  | College degree   | 1  | Working, fi | 14 | 2   | No       |      | 2   | No      |
| 11665  | 2  | 2  | Married/li     | 3  | College degree   | 1  | Working, fi | 10 | 2   | No       |      | 2   | No      |
| 11666  | 2  | 2  | Married/li     | 3  | College degree   | 1  | Working, fi | 2  | 1   | Yes      | 1    | 1   | Yes     |
| 11667  | 2  | 2  | Married/li     | 4  | Postgraduate     | 1  | Working, fi | 7  | 2   | No       |      | 1   | Yes     |
| 11674  | 2  | 2  | Married/li     | 3  | College degree   | 1  | Working, fi | 13 | 2   | No       |      | 2   | No      |
| 11680  | 2  | 2  | Married/li     | 2  | Some college     | 4  | Retired     | 5  | 2   | No       |      | 2   | No      |
| 11683  | 2  | 2  | Married/li     | 1  | High school or l | 4  | Retired     | 14 | 1   | Yes      | 1    | 2   | No      |
| 11688  | 2  | 2  | Married/li     | 3  | College degree   | 1  | Working, fi | 12 | 2   | No       |      | 1   | Yes     |
| 11690  | 2  | 2  | Married/li     | 3  | College degree   | 1  | Working, fi | 11 | 2   | No       |      | 2   | No      |
| 11694  | 2  | 1  | Single         | 3  | College degree   | 1  | Working, fi | 14 | 2   | No       |      | 2   | No      |
| 11705  | 2  | 2  | Married/li     | 3  | College degree   | 2  | Working, p  | 6  | 1   | Yes      | 1    | 2   | No      |
| 11720  | 2  | 2  | Married/li     | 3  | College degree   | 1  | Working, fi | 6  | 2   | No       |      | 1   | Yes     |
| 11724  | 2  | 2  | Married/li     | 3  | College degree   | 1  | Working, fi | 2  | 2   | No       |      | 2   | No      |
| 11738  | 2  | 2  | Married/li     | 3  | College degree   | 1  | Working, fi | 24 | 2   | No       |      | 2   | No      |
| 11744  | 2  | 2  | Married/li     | 3  | College degree   | 1  | Working, fi | 10 | 2   | No       |      | 2   | No      |
| 11745  | 2  | 2  | Married/li     | 2  | Some college     | 1  | Working, fi | 11 | 2   | No       |      | 2   | No      |
| 11747  | 2  | 2  | Married/li     | 3  | College degree   | 1  | Working, fi | 2  | 2   | No       |      | 2   | No      |
| 11755  | 2  | 2  | Married/li     | 3  | College degree   | 1  | Working, fi | 12 | 1   | Yes      | 1    | 1   | Yes     |
| 11756  | 2  | 2  | Married/li     | 2  | Some college     | 1  | Working, fi | 11 | 2   | No       |      | 2   | No      |
| 11772  | 2  | 2  | Married/li     | 2  | Some college     | 1  | Working, fi | 9  | 2   | No       |      | 1   | Yes     |
| 11773  | 2  | 2  | Married/li     | 3  | College degree   | 1  | Working, fi | 2  | 2   | No       |      | 2   | No      |
| 11778  | 2  | 2  | Married/li     | 3  | College degree   | 1  | Working, fi | 11 | 2   | No       |      | 2   | No      |
| 11790  | 2  | 2  | Married/li     | 2  | Some college     | 1  | Working, fi | 11 | 2   | No       |      | 2   | No      |
| 11794  | 2  | 2  | Married/li     | 3  | College degree   | 1  | Working, fi | 2  | 2   | No       |      | 2   | No      |
| 11795  | 2  | 2  | Married/li     | 1  | High school or l | 4  | Retired     | 8  | 2   | No       |      | 1   | Yes     |
| 11799  | 2  | 2  | Married/li     | 3  | College degree   | 1  | Working, fi | 6  | 2   | No       |      | 1   | Yes     |
| 11803  | 2  | 2  | Married/li     | 3  | College degree   | 1  | Working, fi | 11 | 2   | No       |      | 2   | No      |
| 11806  | 2  | 2  | Married/li     | 4  | Postgraduate     | 1  | Working, fi | 14 | 2   | No       |      | 1   | Yes     |

| respid | Q5 | Q6 | Marital Status | Q7 | Education        | Q8 | Work        | Q9 | Q10 | Diabetes | Q10a | Q11 | High BP |
|--------|----|----|----------------|----|------------------|----|-------------|----|-----|----------|------|-----|---------|
| 11808  | 2  | 2  | Married/li     | 3  | College degree   | 1  | Working, fi | 11 | 2   | No       |      | 2   | No      |
| 11810  | 2  | 2  | Married/li     | 3  | College degree   | 6  | Homemake    | 5  | 2   | No       |      | 2   | No      |
| 11811  | 2  | 2  | Married/li     | 3  | College degree   | 1  | Working, fi | 2  | 2   | No       |      | 2   | No      |
| 11812  | 2  | 2  | Married/li     | 1  | High school or l | 1  | Working, fi | 6  | 2   | No       |      | 2   | No      |
| 11813  | 2  | 2  | Married/li     | 2  | Some college     | 1  | Working, fi | 12 | 2   | No       |      | 2   | No      |
| 11821  | 2  | 2  | Married/li     | 2  | Some college     | 4  | Retired     | 10 | 2   | No       |      | 1   | Yes     |
| 11827  | 2  | 2  | Married/li     | 3  | College degree   | 1  | Working, fi | 2  | 2   | No       |      | 2   | No      |
| 11831  | 2  | 2  | Married/li     | 3  | College degree   | 4  | Retired     | 12 | 1   | Yes      | 1    | 1   | Yes     |
| 11841  | 2  | 2  | Married/li     | 3  | College degree   | 1  | Working, fi | 2  | 2   | No       |      | 2   | No      |
| 11872  | 2  | 2  | Married/li     | 1  | High school or l | 1  | Working, fi | 8  | 2   | No       |      | 2   | No      |
| 11898  | 2  | 2  | Married/li     | 3  | College degree   | 1  | Working, fi | 11 | 2   | No       |      | 2   | No      |
| 11902  | 2  | 4  | Widow/wi       | 1  | High school or l | 4  | Retired     | 5  | 1   | Yes      | 1    | 1   | Yes     |
| 11912  | 2  | 2  | Married/li     | 2  | Some college     | 4  | Retired     | 13 | 2   | No       |      | 2   | No      |
| 11926  | 2  | 2  | Married/li     | 3  | College degree   | 1  | Working, fi | 6  | 2   | No       |      | 2   | No      |
| 11928  | 2  | 2  | Married/li     | 3  | College degree   | 1  | Working, fi | 11 | 2   | No       |      | 2   | No      |
| 11932  | 2  | 2  | Married/li     | 3  | College degree   | 1  | Working, fi | 11 | 1   | Yes      | 1    | 1   | Yes     |
| 11934  | 2  | 2  | Married/li     | 4  | Postgraduate     | 1  | Working, fi | 14 | 2   | No       |      | 2   | No      |
| 11941  | 2  | 2  | Married/li     | 1  | High school or l | 4  | Retired     | 8  | 2   | No       |      | 1   | Yes     |
| 11942  | 2  | 2  | Married/li     | 2  | Some college     | 1  | Working, fi | 8  | 2   | No       |      | 2   | No      |
| 11943  | 2  | 2  | Married/li     | 3  | College degree   | 4  | Retired     | 11 | 2   | No       |      | 1   | Yes     |
| 11944  | 2  | 2  | Married/li     | 1  | High school or l | 4  | Retired     | 11 | 1   | Yes      | 1    | 1   | Yes     |
| 11955  | 2  | 2  | Married/li     | 3  | College degree   | 6  | Homemake    | 11 | 2   | No       |      | 1   | Yes     |
| 11958  | 2  | 2  | Married/li     | 3  | College degree   | 1  | Working, fi | 14 | 1   | Yes      | 1    | 1   | Yes     |
| 11968  | 2  | 2  | Married/li     | 1  | High school or l | 1  | Working, fi | 2  | 1   | Yes      | 1    | 1   | Yes     |
| 11979  | 2  | 2  | Married/li     | 1  | High school or l | 6  | Homemake    | 17 | 2   | No       |      | 1   | Yes     |
| 11988  | 2  | 2  | Married/li     | 3  | College degree   | 1  | Working, fi | 10 | 2   | No       |      | 2   | No      |
| 11999  | 2  | 2  | Married/li     | 1  | High school or l | 4  | Retired     | 9  | 2   | No       |      | 1   | Yes     |
| 12002  | 2  | 2  | Married/li     | 2  | Some college     | 4  | Retired     | 99 | 2   | No       |      | 2   | No      |
| 12004  | 2  | 1  | Single         | 1  | High school or l | 4  | Retired     | 2  | 2   | No       |      | 1   | Yes     |
| 12008  | 2  | 2  | Married/li     | 3  | College degree   | 1  | Working, fi | 10 | 2   | No       |      | 2   | No      |
| 12013  | 2  | 2  | Married/li     | 3  | College degree   | 4  | Retired     | 11 | 2   | No       |      | 1   | Yes     |
| 12018  | 2  | 2  | Married/li     | 3  | College degree   | 4  | Retired     | 12 | 2   | No       |      | 2   | No      |

| respid | Q5 | Q6 | Marital Status | Q7 | Education        | Q8 | Work        | Q9 | Q10 | Diabetes | Q10a | Q11 | High BP |
|--------|----|----|----------------|----|------------------|----|-------------|----|-----|----------|------|-----|---------|
| 12023  | 2  | 2  | Married/li     | 1  | High school or l | 6  | Homemake    | 7  | 2   | No       |      | 1   | Yes     |
| 12027  | 2  | 2  | Married/li     | 3  | College degree   | 4  | Retired     | 11 | 2   | No       |      | 2   | No      |
| 12030  | 2  | 2  | Married/li     | 3  | College degree   | 1  | Working, fi | 14 | 2   | No       |      | 2   | No      |
| 12031  | 2  | 2  | Married/li     | 1  | High school or l | 4  | Retired     | 5  | 2   | No       |      | 1   | Yes     |
| 12036  | 2  | 2  | Married/li     | 2  | Some college     | 2  | Working, p  | 14 | 2   | No       |      | 2   | No      |
| 12037  | 2  | 2  | Married/li     | 3  | College degree   | 4  | Retired     | 11 | 2   | No       |      | 1   | Yes     |
| 12038  | 2  | 2  | Married/li     | 1  | High school or l | 4  | Retired     | 10 | 2   | No       |      | 2   | No      |
| 12039  | 2  | 2  | Married/li     | 3  | College degree   | 1  | Working, fi | 12 | 2   | No       |      | 2   | No      |
| 12045  | 2  | 4  | Widow/wi       | 1  | High school or l | 4  | Retired     | 6  | 2   | No       |      | 2   | No      |
| 12046  | 2  | 2  | Married/li     | 2  | Some college     | 4  | Retired     | 8  | 2   | No       |      | 2   | No      |
| 12054  | 2  | 2  | Married/li     | 3  | College degree   | 1  | Working, fi | 13 | 2   | No       |      | 2   | No      |
| 12055  | 2  | 2  | Married/li     | 3  | College degree   | 1  | Working, fi | 11 | 2   | No       |      | 2   | No      |
| 12069  | 2  | 2  | Married/li     | 1  | High school or l | 4  | Retired     | 10 | 2   | No       |      | 1   | Yes     |
| 12070  | 2  | 2  | Married/li     | 2  | Some college     | 1  | Working, fi | 12 | 2   | No       |      | 1   | Yes     |
| 12074  | 2  | 4  | Widow/wi       | 1  | High school or l | 4  | Retired     | 3  | 2   | No       |      | 2   | No      |
| 12075  | 2  | 2  | Married/li     | 3  | College degree   | 1  | Working, fi | 11 | 2   | No       |      | 2   | No      |
| 12078  | 2  | 2  | Married/li     | 3  | College degree   | 1  | Working, fi | 2  | 1   | Yes      | 1    | 2   | No      |
| 12089  | 2  | 2  | Married/li     | 2  | Some college     | 1  | Working, fi | 13 | 2   | No       |      | 1   | Yes     |
| 12091  | 2  | 2  | Married/li     | 1  | High school or l | 2  | Working, p  | 6  | 2   | No       |      | 2   | No      |
| 12092  | 2  | 2  | Married/li     | 3  | College degree   | 1  | Working, fi | 11 | 2   | No       |      | 1   | Yes     |
| 12108  | 2  | 1  | Single         | 1  | High school or l | 2  | Working, p  | 6  | 2   | No       |      | 2   | No      |
| 12111  | 2  | 2  | Married/li     | 2  | Some college     | 1  | Working, fi | 8  | 2   | No       |      | 2   | No      |
| 12112  | 2  | 2  | Married/li     | 1  | High school or l | 2  | Working, p  | 7  | 2   | No       |      | 2   | No      |
| 12126  | 2  | 2  | Married/li     | 3  | College degree   | 1  | Working, fi | 13 | 2   | No       |      | 2   | No      |
| 12132  | 2  | 2  | Married/li     | 1  | High school or l | 1  | Working, fi | 6  | 2   | No       |      | 2   | No      |
| 12150  | 2  | 2  | Married/li     | 3  | College degree   | 1  | Working, fi | 14 | 1   | Yes      | 1    | 1   | Yes     |
| 12152  | 2  | 2  | Married/li     | 3  | College degree   | 1  | Working, fi | 11 | 2   | No       |      | 2   | No      |
| 12154  | 2  | 2  | Married/li     | 2  | Some college     | 4  | Retired     | 11 | 2   | No       |      | 2   | No      |
| 12157  | 2  | 2  | Married/li     | 1  | High school or l | 1  | Working, fi | 6  | 2   | No       |      | 2   | No      |
| 12165  | 2  | 2  | Married/li     | 3  | College degree   | 1  | Working, fi | 12 | 2   | No       |      | 2   | No      |
| 12169  | 2  | 2  | Married/li     | 2  | Some college     | 1  | Working, fi | 11 | 2   | No       |      | 1   | Yes     |
| 12182  | 2  | 2  | Married/li     | 3  | College degree   | 4  | Retired     | 11 | 2   | No       |      | 2   | No      |



| respid | Q5 | Q6 | Marital Status | Q7 | Education        | Q8 | Work        | Q9 | Q10 | Diabetes | Q10a | Q11 | High BP |
|--------|----|----|----------------|----|------------------|----|-------------|----|-----|----------|------|-----|---------|
| 12198  | 2  | 2  | Married/li     | 3  | College degree   | 1  | Working, fi | 11 | 2   | No       |      | 2   | No      |
| 12199  | 2  | 2  | Married/li     | 3  | College degree   | 1  | Working, fi | 10 | 2   | No       |      | 2   | No      |
| 12202  | 2  | 2  | Married/li     | 1  | High school or l | 1  | Working, fi | 11 | 2   | No       |      | 2   | No      |
| 12207  | 2  | 2  | Married/li     | 1  | High school or l | 1  | Working, fi | 11 | 2   | No       |      | 2   | No      |
| 12208  | 2  | 2  | Married/li     | 1  | High school or l | 1  | Working, fi | 5  | 1   | Yes      | 1    | 1   | Yes     |
| 12210  | 2  | 2  | Married/li     | 3  | College degree   | 4  | Retired     | 11 | 2   | No       |      | 2   | No      |
| 12219  | 2  | 2  | Married/li     | 4  | Postgraduate     | 4  | Retired     | 11 | 2   | No       |      | 2   | No      |
| 12224  | 2  | 2  | Married/li     | 2  | Some college     | 1  | Working, fi | 5  | 1   | Yes      | 2    | 1   | Yes     |
| 12230  | 2  | 2  | Married/li     | 2  | Some college     | 4  | Retired     | 9  | 2   | No       |      | 1   | Yes     |
| 12238  | 2  | 2  | Married/li     | 1  | High school or l | 1  | Working, fi | 11 | 1   | Yes      | 1    | 1   | Yes     |
| 12239  | 2  | 2  | Married/li     | 3  | College degree   | 4  | Retired     | 12 | 2   | No       |      | 2   | No      |
| 12243  | 2  | 2  | Married/li     | 3  | College degree   | 1  | Working, fi | 12 | 2   | No       |      | 1   | Yes     |
| 12245  | 2  | 2  | Married/li     | 3  | College degree   | 1  | Working, fi | 4  | 2   | No       |      | 1   | Yes     |
| 12246  | 2  | 4  | Widow/wi       | 2  | Some college     | 4  | Retired     | 11 | 2   | No       |      | 2   | No      |
| 12247  | 2  | 2  | Married/li     | 1  | High school or l | 4  | Retired     | 11 | 2   | No       |      | 1   | Yes     |
| 12248  | 2  | 2  | Married/li     | 4  | Postgraduate     | 1  | Working, fi | 11 | 2   | No       |      | 1   | Yes     |
| 12249  | 2  | 2  | Married/li     | 1  | High school or l | 4  | Retired     | 7  | 2   | No       |      | 2   | No      |
| 12258  | 2  | 2  | Married/li     | 1  | High school or l | 4  | Retired     | 11 | 1   | Yes      | 1    | 2   | No      |
| 12265  | 2  | 4  | Widow/wi       | 2  | Some college     | 4  | Retired     | 10 | 2   | No       |      | 2   | No      |
| 12269  | 2  | 2  | Married/li     | 2  | Some college     | 4  | Retired     | 9  | 2   | No       |      | 2   | No      |
| 12270  | 2  | 2  | Married/li     | 3  | College degree   | 4  | Retired     | 1  | 2   | No       |      | 1   | Yes     |
| 12279  | 2  | 2  | Married/li     | 2  | Some college     | 4  | Retired     | 9  | 2   | No       |      | 2   | No      |
| 12280  | 2  | 2  | Married/li     | 2  | Some college     | 1  | Working, fi | 5  | 2   | No       |      | 2   | No      |
| 12282  | 2  | 2  | Married/li     | 3  | College degree   | 4  | Retired     | 12 | 2   | No       |      | 2   | No      |
| 12283  | 2  | 2  | Married/li     | 1  | High school or l | 1  | Working, fi | 8  | 2   | No       |      | 2   | No      |
| 12287  | 2  | 2  | Married/li     | 3  | College degree   | 1  | Working, fi | 9  | 2   | No       |      | 2   | No      |
| 12288  | 2  | 2  | Married/li     | 3  | College degree   | 1  | Working, fi | 13 | 2   | No       |      | 2   | No      |
| 12290  | 2  | 2  | Married/li     | 3  | College degree   | 4  | Retired     | 8  | 2   | No       |      | 2   | No      |
| 12292  | 2  | 2  | Married/li     | 4  | Postgraduate     | 1  | Working, fi | 17 | 2   | No       |      | 2   | No      |
| 12294  | 2  | 2  | Married/li     | 3  | College degree   | 1  | Working, fi | 17 | 2   | No       |      | 2   | No      |
| 12296  | 2  | 1  | Single         | 2  | Some college     | 4  | Retired     | 8  | 2   | No       |      | 2   | No      |
| 12307  | 2  | 2  | Married/li     | 1  | High school or l | 4  | Retired     | 11 | 1   | Yes      | 1    | 2   | No      |

| respid | Q5 | Q6 | Marital Status | Q7 | Education        | Q8 | Work        | Q9 | Q10 | Diabetes | Q10a | Q11 | High BP |
|--------|----|----|----------------|----|------------------|----|-------------|----|-----|----------|------|-----|---------|
| 12309  | 2  | 2  | Married/li     | 3  | College degree   | 1  | Working, fi | 13 | 2   | No       |      | 1   | Yes     |
| 12312  | 2  | 2  | Married/li     | 3  | College degree   | 1  | Working, fi | 22 | 2   | No       |      | 1   | Yes     |
| 12317  | 2  | 2  | Married/li     | 3  | College degree   | 4  | Retired     | 10 | 2   | No       |      | 2   | No      |
| 12319  | 2  | 2  | Married/li     | 3  | College degree   | 1  | Working, fi | 1  | 2   | No       |      | 2   | No      |
| 12320  | 2  | 2  | Married/li     | 4  | Postgraduate     | 1  | Working, fi | 18 | 2   | No       |      | 2   | No      |
| 12322  | 2  | 2  | Married/li     | 1  | High school or l | 1  | Working, fi | 18 | 2   | No       |      | 1   | Yes     |
| 12328  | 2  | 2  | Married/li     | 2  | Some college     | 4  | Retired     | 9  | 2   | No       |      | 2   | No      |
| 12331  | 2  | 2  | Married/li     | 3  | College degree   | 1  | Working, fi | 20 | 2   | No       |      | 1   | Yes     |
| 12332  | 2  | 2  | Married/li     | 3  | College degree   | 4  | Retired     | 16 | 2   | No       |      | 2   | No      |
| 12334  | 2  | 1  | Single         | 3  | College degree   | 3  | Unemploy    | 15 | 2   | No       |      | 2   | No      |
| 12337  | 2  | 2  | Married/li     | 3  | College degree   | 1  | Working, fi | 24 | 2   | No       |      | 2   | No      |
| 12338  | 2  | 2  | Married/li     | 4  | Postgraduate     | 1  | Working, fi | 24 | 2   | No       |      | 2   | No      |
| 12342  | 2  | 2  | Married/li     | 4  | Postgraduate     | 1  | Working, fi | 24 | 2   | No       |      | 2   | No      |
| 12349  | 2  | 2  | Married/li     | 2  | Some college     | 1  | Working, fi | 32 | 2   | No       |      | 2   | No      |
| 12352  | 2  | 2  | Married/li     | 3  | College degree   | 1  | Working, fi | 11 | 2   | No       |      | 1   | Yes     |
| 12355  | 2  | 2  | Married/li     | 3  | College degree   | 4  | Retired     | 6  | 2   | No       |      | 2   | No      |
| 12357  | 2  | 2  | Married/li     | 2  | Some college     | 1  | Working, fi | 9  | 2   | No       |      | 1   | Yes     |
| 12358  | 2  | 2  | Married/li     | 3  | College degree   | 1  | Working, fi | 25 | 2   | No       |      | 1   | Yes     |
| 12371  | 2  | 2  | Married/li     | 2  | Some college     | 4  | Retired     | 9  | 2   | No       |      | 2   | No      |
| 12372  | 2  | 2  | Married/li     | 3  | College degree   | 6  | Homemake    | 24 | 2   | No       |      | 2   | No      |
| 12373  | 2  | 2  | Married/li     | 2  | Some college     | 1  | Working, fi | 10 | 2   | No       |      | 1   | Yes     |
| 12379  | 2  | 2  | Married/li     | 3  | College degree   | 1  | Working, fi | 99 | 2   | No       |      | 2   | No      |
| 12381  | 2  | 2  | Married/li     | 3  | College degree   | 6  | Homemake    | 19 | 2   | No       |      | 1   | Yes     |
| 12383  | 2  | 1  | Single         | 3  | College degree   | 9  | Other       | 19 | 2   | No       |      | 2   | No      |
| 12384  | 2  | 2  | Married/li     | 3  | College degree   | 6  | Homemake    | 18 | 2   | No       |      | 2   | No      |
| 12386  | 2  | 2  | Married/li     | 2  | Some college     | 1  | Working, fi | 3  | 2   | No       |      | 1   | Yes     |
| 12389  | 2  | 2  | Married/li     | 3  | College degree   | 6  | Homemake    | 18 | 2   | No       |      | 2   | No      |
| 12392  | 2  | 2  | Married/li     | 1  | High school or l | 2  | Working, p  | 15 | 2   | No       |      | 2   | No      |
| 12396  | 2  | 1  | Single         | 3  | College degree   | 4  | Retired     | 7  | 2   | No       |      | 2   | No      |
| 12397  | 2  | 1  | Single         | 1  | High school or l | 3  | Unemploy    | 15 | 2   | No       |      | 2   | No      |
| 12399  | 2  | 1  | Single         | 4  | Postgraduate     | 1  | Working, fi | 17 | 2   | No       |      | 1   | Yes     |
| 12400  | 2  | 2  | Married/li     | 1  | High school or l | 1  | Working, fi | 19 | 2   | No       |      | 1   | Yes     |

| respid | Q5 | Q6 | Marital Status | Q7 | Education        | Q8 | Work        | Q9 | Q10 | Diabetes | Q10a | Q11 | High BP |
|--------|----|----|----------------|----|------------------|----|-------------|----|-----|----------|------|-----|---------|
| 12406  | 2  | 2  | Married/li     | 3  | College degree   | 2  | Working, p  | 21 | 2   | No       |      | 1   | Yes     |
| 12407  | 2  | 2  | Married/li     | 1  | High school or l | 2  | Working, p  | 18 | 2   | No       |      | 2   | No      |
| 12410  | 2  | 2  | Married/li     | 3  | College degree   | 4  | Retired     | 23 | 2   | No       |      | 2   | No      |
| 12413  | 2  | 4  | Widow/wi       | 1  | High school or l | 6  | Homemake    | 2  | 2   | No       |      | 1   | Yes     |
| 12416  | 2  | 2  | Married/li     | 1  | High school or l | 4  | Retired     | 6  | 2   | No       |      | 1   | Yes     |
| 12419  | 2  | 2  | Married/li     | 1  | High school or l | 9  | Other       | 3  | 2   | No       |      | 1   | Yes     |
| 12422  | 2  | 2  | Married/li     | 3  | College degree   | 1  | Working, fi | 12 | 1   | Yes      | 1    | 1   | Yes     |
| 12423  | 2  | 2  | Married/li     | 3  | College degree   | 1  | Working, fi | 20 | 1   | Yes      | 1    | 1   | Yes     |
| 12429  | 2  | 2  | Married/li     | 1  | High school or l | 4  | Retired     | 7  | 2   | No       |      | 2   | No      |
| 12434  | 2  | 2  | Married/li     | 3  | College degree   | 1  | Working, fi | 20 | 2   | No       |      | 1   | Yes     |
| 12435  | 2  | 2  | Married/li     | 1  | High school or l | 1  | Working, fi | 11 | 2   | No       |      | 1   | Yes     |
| 12436  | 2  | 2  | Married/li     | 2  | Some college     | 1  | Working, fi | 11 | 2   | No       |      | 1   | Yes     |
| 12442  | 2  | 3  | Divorced       | 3  | College degree   | 4  | Retired     | 11 | 2   | No       |      | 2   | No      |
| 12449  | 2  | 2  | Married/li     | 2  | Some college     | 2  | Working, p  | 13 | 2   | No       |      | 2   | No      |
| 12451  | 2  | 2  | Married/li     | 3  | College degree   | 2  | Working, p  | 10 | 2   | No       |      | 2   | No      |
| 12456  | 2  | 2  | Married/li     | 3  | College degree   | 4  | Retired     | 11 | 2   | No       |      | 2   | No      |
| 12457  | 2  | 2  | Married/li     | 3  | College degree   | 1  | Working, fi | 6  | 2   | No       |      | 2   | No      |
| 12458  | 2  | 2  | Married/li     | 4  | Postgraduate     | 1  | Working, fi | 14 | 2   | No       |      | 2   | No      |
| 12461  | 2  | 2  | Married/li     | 2  | Some college     | 1  | Working, fi | 9  | 2   | No       |      | 2   | No      |
| 12462  | 2  | 2  | Married/li     | 2  | Some college     | 4  | Retired     | 12 | 1   | Yes      | 1    | 2   | No      |
| 12463  | 2  | 2  | Married/li     | 3  | College degree   | 1  | Working, fi | 10 | 2   | No       |      | 1   | Yes     |
| 12466  | 2  | 1  | Single         | 3  | College degree   | 1  | Working, fi | 15 | 2   | No       |      | 2   | No      |
| 12470  | 2  | 2  | Married/li     | 3  | College degree   | 1  | Working, fi | 11 | 2   | No       |      | 2   | No      |
| 12471  | 2  | 2  | Married/li     | 2  | Some college     | 1  | Working, fi | 12 | 2   | No       |      | 2   | No      |
| 12472  | 2  | 3  | Divorced       | 1  | High school or l | 1  | Working, fi | 29 | 2   | No       |      | 2   | No      |
| 12478  | 2  | 2  | Married/li     | 3  | College degree   | 1  | Working, fi | 13 | 2   | No       |      | 1   | Yes     |
| 12479  | 2  | 2  | Married/li     | 2  | Some college     | 4  | Retired     | 1  | 1   | Yes      | 1    | 1   | Yes     |
| 12481  | 2  | 2  | Married/li     | 3  | College degree   | 1  | Working, fi | 36 | 2   | No       |      | 2   | No      |
| 12482  | 2  | 2  | Married/li     | 3  | College degree   | 4  | Retired     | 11 | 2   | No       |      | 1   | Yes     |
| 12483  | 2  | 2  | Married/li     | 4  | Postgraduate     | 1  | Working, fi | 9  | 2   | No       |      | 1   | Yes     |
| 12496  | 2  | 2  | Married/li     | 3  | College degree   | 6  | Homemake    | 22 | 2   | No       |      | 1   | Yes     |
| 12497  | 2  | 2  | Married/li     | 1  | High school or l | 6  | Homemake    | 17 | 2   | No       |      | 2   | No      |

| respid | Q5 | Q6 | Marital Status | Q7 | Education        | Q8 | Work        | Q9 | Q10 | Diabetes | Q10a | Q11 | High BP |
|--------|----|----|----------------|----|------------------|----|-------------|----|-----|----------|------|-----|---------|
| 12498  | 2  | 2  | Married/li     | 3  | College degree   | 6  | Homemake    | 22 | 1   | Yes      | 1    | 2   | No      |
| 12500  | 2  | 2  | Married/li     | 3  | College degree   | 4  | Retired     | 11 | 2   | No       |      | 2   | No      |
| 12501  | 2  | 2  | Married/li     | 3  | College degree   | 1  | Working, fi | 19 | 2   | No       |      | 2   | No      |
| 12502  | 2  | 2  | Married/li     | 3  | College degree   | 8  | Other worl  | 21 | 2   | No       |      | 2   | No      |
| 12503  | 2  | 2  | Married/li     | 1  | High school or l | 1  | Working, fi | 18 | 2   | No       |      | 2   | No      |
| 12505  | 2  | 2  | Married/li     | 3  | College degree   | 6  | Homemake    | 18 | 2   | No       |      | 2   | No      |
| 12508  | 2  | 2  | Married/li     | 1  | High school or l | 1  | Working, fi | 20 | 2   | No       |      | 2   | No      |
| 12509  | 2  | 2  | Married/li     | 4  | Postgraduate     | 1  | Working, fi | 34 | 2   | No       |      | 2   | No      |
| 12510  | 2  | 2  | Married/li     | 3  | College degree   | 1  | Working, fi | 18 | 2   | No       |      | 2   | No      |
| 12512  | 2  | 2  | Married/li     | 3  | College degree   | 1  | Working, fi | 19 | 2   | No       |      | 2   | No      |
| 12514  | 2  | 2  | Married/li     | 3  | College degree   | 1  | Working, fi | 21 | 2   | No       |      | 2   | No      |
| 12515  | 2  | 2  | Married/li     | 3  | College degree   | 4  | Retired     | 11 | 2   | No       |      | 2   | No      |
| 12520  | 2  | 2  | Married/li     | 2  | Some college     | 1  | Working, fi | 11 | 2   | No       |      | 2   | No      |
| 12522  | 2  | 2  | Married/li     | 3  | College degree   | 6  | Homemake    | 22 | 2   | No       |      | 2   | No      |
| 12526  | 2  | 2  | Married/li     | 2  | Some college     | 4  | Retired     | 12 | 2   | No       |      | 2   | No      |
| 12527  | 2  | 2  | Married/li     | 2  | Some college     | 6  | Homemake    | 22 | 2   | No       |      | 2   | No      |
| 12528  | 2  | 2  | Married/li     | 3  | College degree   | 2  | Working, p  | 11 | 2   | No       |      | 2   | No      |
| 12530  | 2  | 2  | Married/li     | 3  | College degree   | 1  | Working, fi | 18 | 2   | No       |      | 2   | No      |
| 12535  | 2  | 1  | Single         | 3  | College degree   | 2  | Working, p  | 16 | 2   | No       |      | 2   | No      |
| 12539  | 2  | 2  | Married/li     | 3  | College degree   | 6  | Homemake    | 21 | 1   | Yes      | 1    | 1   | Yes     |
| 12541  | 2  | 1  | Single         | 2  | Some college     | 1  | Working, fi | 11 | 1   | Yes      | 1    | 1   | Yes     |
| 12542  | 2  | 2  | Married/li     | 1  | High school or l | 4  | Retired     | 7  | 2   | No       |      | 1   | Yes     |
| 12545  | 2  | 3  | Divorced       | 4  | Postgraduate     | 6  | Homemake    | 21 | 2   | No       |      | 2   | No      |
| 12547  | 2  | 2  | Married/li     | 2  | Some college     | 4  | Retired     | 10 | 2   | No       |      | 1   | Yes     |
| 12549  | 2  | 2  | Married/li     | 3  | College degree   | 1  | Working, fi | 10 | 2   | No       |      | 1   | Yes     |
| 12550  | 2  | 2  | Married/li     | 1  | High school or l | 4  | Retired     | 11 | 2   | No       |      | 1   | Yes     |
| 12555  | 2  | 1  | Single         | 3  | College degree   | 3  | Unemploye   | 15 | 2   | No       |      | 2   | No      |
| 12557  | 2  | 4  | Widow/wi       | 1  | High school or l | 6  | Homemake    | 21 | 2   | No       |      | 1   | Yes     |
| 12559  | 2  | 2  | Married/li     | 3  | College degree   | 1  | Working, fi | 18 | 2   | No       |      | 2   | No      |
| 12561  | 2  | 2  | Married/li     | 1  | High school or l | 1  | Working, fi | 13 | 2   | No       |      | 2   | No      |
| 12562  | 2  | 2  | Married/li     | 1  | High school or l | 4  | Retired     | 9  | 2   | No       |      | 2   | No      |
| 12563  | 2  | 2  | Married/li     | 3  | College degree   | 6  | Homemake    | 29 | 2   | No       |      | 2   | No      |

| respid | Q5 | Q6 | Marital Status | Q7 | Education        | Q8 | Work        | Q9 | Q10 | Diabetes | Q10a | Q11 | High BP |
|--------|----|----|----------------|----|------------------|----|-------------|----|-----|----------|------|-----|---------|
| 12565  | 2  | 4  | Widow/wi       | 4  | Postgraduate     | 1  | Working, fi | 17 | 2   | No       |      | 2   | No      |
| 12566  | 2  | 2  | Married/li     | 3  | College degree   | 4  | Retired     | 7  | 2   | No       |      | 2   | No      |
| 12570  | 2  | 2  | Married/li     | 1  | High school or l | 1  | Working, fi | 12 | 2   | No       |      | 1   | Yes     |
| 12571  | 2  | 2  | Married/li     | 3  | College degree   | 1  | Working, fi | 20 | 2   | No       |      | 2   | No      |
| 12572  | 2  | 2  | Married/li     | 1  | High school or l | 1  | Working, fi | 10 | 2   | No       |      | 2   | No      |
| 12578  | 2  | 2  | Married/li     | 1  | High school or l | 2  | Working, p  | 13 | 2   | No       |      | 2   | No      |
| 12579  | 2  | 1  | Single         | 3  | College degree   | 1  | Working, fi | 17 | 2   | No       |      | 2   | No      |
| 12581  | 2  | 2  | Married/li     | 1  | High school or l | 6  | Homemake    | 17 | 2   | No       |      | 2   | No      |
| 12582  | 2  | 4  | Widow/wi       | 1  | High school or l | 6  | Homemake    | 16 | 2   | No       |      | 2   | No      |
| 12585  | 2  | 2  | Married/li     | 2  | Some college     | 1  | Working, fi | 1  | 2   | No       |      | 2   | No      |
| 12586  | 2  | 2  | Married/li     | 2  | Some college     | 6  | Homemake    | 30 | 2   | No       |      | 2   | No      |
| 12588  | 2  | 2  | Married/li     | 1  | High school or l | 6  | Homemake    | 21 | 2   | No       |      | 1   | Yes     |
| 12589  | 2  | 2  | Married/li     | 3  | College degree   | 1  | Working, fi | 22 | 2   | No       |      | 1   | Yes     |
| 12590  | 2  | 2  | Married/li     | 1  | High school or l | 6  | Homemake    | 17 | 2   | No       |      | 2   | No      |
| 12591  | 2  | 2  | Married/li     | 2  | Some college     | 1  | Working, fi | 11 | 2   | No       |      | 2   | No      |
| 12593  | 2  | 2  | Married/li     | 3  | College degree   | 1  | Working, fi | 9  | 2   | No       |      | 2   | No      |
| 12594  | 2  | 2  | Married/li     | 3  | College degree   | 6  | Homemake    | 19 | 2   | No       |      | 2   | No      |
| 12599  | 2  | 2  | Married/li     | 1  | High school or l | 2  | Working, p  | 12 | 2   | No       |      | 2   | No      |
| 12600  | 2  | 2  | Married/li     | 3  | College degree   | 6  | Homemake    | 24 | 2   | No       |      | 2   | No      |
| 12602  | 2  | 2  | Married/li     | 3  | College degree   | 1  | Working, fi | 20 | 2   | No       |      | 2   | No      |
| 12606  | 2  | 2  | Married/li     | 1  | High school or l | 8  | Other worl  | 16 | 2   | No       |      | 2   | No      |
| 12607  | 2  | 1  | Single         | 3  | College degree   | 1  | Working, fi | 32 | 2   | No       |      | 2   | No      |
| 12608  | 2  | 2  | Married/li     | 2  | Some college     | 1  | Working, fi | 10 | 2   | No       |      | 2   | No      |
| 12610  | 2  | 2  | Married/li     | 1  | High school or l | 4  | Retired     | 9  | 2   | No       |      | 2   | No      |
| 12611  | 2  | 2  | Married/li     | 3  | College degree   | 1  | Working, fi | 10 | 2   | No       |      | 2   | No      |
| 12613  | 2  | 2  | Married/li     | 3  | College degree   | 6  | Homemake    | 19 | 2   | No       |      | 1   | Yes     |
| 12616  | 2  | 2  | Married/li     | 2  | Some college     | 1  | Working, fi | 12 | 2   | No       |      | 2   | No      |
| 12617  | 2  | 2  | Married/li     | 1  | High school or l | 1  | Working, fi | 33 | 2   | No       |      | 1   | Yes     |
| 12619  | 2  | 2  | Married/li     | 1  | High school or l | 6  | Homemake    | 18 | 2   | No       |      | 2   | No      |
| 12622  | 2  | 2  | Married/li     | 3  | College degree   | 1  | Working, fi | 13 | 2   | No       |      | 2   | No      |
| 12628  | 2  | 2  | Married/li     | 1  | High school or l | 6  | Homemake    | 1  | 2   | No       |      | 2   | No      |
| 12631  | 2  | 2  | Married/li     | 1  | High school or l | 6  | Homemake    | 23 | 2   | No       |      | 2   | No      |

| respid | Q5 | Q6 | Marital Status | Q7 | Education        | Q8 | Work        | Q9 | Q10 | Diabetes | Q10a | Q11 | High BP |
|--------|----|----|----------------|----|------------------|----|-------------|----|-----|----------|------|-----|---------|
| 12635  | 2  | 2  | Married/li     | 2  | Some college     | 4  | Retired     | 11 | 1   | Yes      | 1    | 2   | No      |
| 12638  | 2  | 2  | Married/li     | 3  | College degree   | 6  | Homemake    | 17 | 2   | No       |      | 2   | No      |
| 12639  | 2  | 2  | Married/li     | 1  | High school or l | 1  | Working, fi | 11 | 2   | No       |      | 2   | No      |
| 12640  | 2  | 2  | Married/li     | 1  | High school or l | 1  | Working, fi | 11 | 2   | No       |      | 2   | No      |
| 12643  | 2  | 2  | Married/li     | 1  | High school or l | 4  | Retired     | 1  | 2   | No       |      | 2   | No      |
| 12646  | 2  | 2  | Married/li     | 2  | Some college     | 1  | Working, fi | 11 | 2   | No       |      | 1   | Yes     |
| 12648  | 2  | 2  | Married/li     | 2  | Some college     | 1  | Working, fi | 13 | 1   | Yes      | 1    | 1   | Yes     |
| 12650  | 2  | 2  | Married/li     | 2  | Some college     | 1  | Working, fi | 10 | 2   | No       |      | 2   | No      |
| 12651  | 2  | 2  | Married/li     | 3  | College degree   | 6  | Homemake    | 18 | 2   | No       |      | 2   | No      |
| 12658  | 2  | 2  | Married/li     | 3  | College degree   | 1  | Working, fi | 12 | 2   | No       |      | 2   | No      |
| 12662  | 2  | 2  | Married/li     | 2  | Some college     | 6  | Homemake    | 15 | 2   | No       |      | 2   | No      |
| 12663  | 2  | 2  | Married/li     | 2  | Some college     | 1  | Working, fi | 10 | 2   | No       |      | 2   | No      |
| 12664  | 2  | 2  | Married/li     | 1  | High school or l | 1  | Working, fi | 11 | 1   | Yes      | 1    | 1   | Yes     |
| 12669  | 2  | 2  | Married/li     | 4  | Postgraduate     | 1  | Working, fi | 13 | 2   | No       |      | 1   | Yes     |
| 12670  | 2  | 2  | Married/li     | 1  | High school or l | 1  | Working, fi | 12 | 2   | No       |      | 2   | No      |
| 12673  | 2  | 2  | Married/li     | 1  | High school or l | 1  | Working, fi | 16 | 2   | No       |      | 2   | No      |
| 12675  | 2  | 2  | Married/li     | 1  | High school or l | 6  | Homemake    | 25 | 2   | No       |      | 2   | No      |
| 12677  | 2  | 2  | Married/li     | 1  | High school or l | 1  | Working, fi | 11 | 2   | No       |      | 2   | No      |
| 12679  | 2  | 2  | Married/li     | 1  | High school or l | 8  | Other worl  | 16 | 2   | No       |      | 2   | No      |
| 12682  | 2  | 2  | Married/li     | 2  | Some college     | 4  | Retired     | 8  | 2   | No       |      | 2   | No      |
| 12696  | 2  | 2  | Married/li     | 3  | College degree   | 6  | Homemake    | 19 | 2   | No       |      | 2   | No      |
| 12697  | 2  | 2  | Married/li     | 1  | High school or l | 2  | Working, p  | 11 | 2   | No       |      | 2   | No      |
| 12699  | 2  | 2  | Married/li     | 3  | College degree   | 1  | Working, fi | 23 | 2   | No       |      | 2   | No      |
| 12700  | 2  | 2  | Married/li     | 3  | College degree   | 4  | Retired     | 11 | 2   | No       |      | 2   | No      |
| 12701  | 2  | 2  | Married/li     | 3  | College degree   | 4  | Retired     | 9  | 2   | No       |      | 1   | Yes     |
| 12702  | 2  | 2  | Married/li     | 2  | Some college     | 1  | Working, fi | 12 | 2   | No       |      | 2   | No      |
| 12704  | 2  | 2  | Married/li     | 2  | Some college     | 1  | Working, fi | 12 | 1   | Yes      | 1    | 1   | Yes     |
| 12705  | 2  | 2  | Married/li     | 1  | High school or l | 6  | Homemake    | 21 | 2   | No       |      | 1   | Yes     |
| 12709  | 2  | 2  | Married/li     | 2  | Some college     | 3  | Unemploy    | 10 | 2   | No       |      | 2   | No      |
| 12710  | 2  | 2  | Married/li     | 1  | High school or l | 2  | Working, p  | 11 | 2   | No       |      | 2   | No      |
| 12713  | 2  | 3  | Divorced       | 3  | College degree   | 3  | Unemploy    | 15 | 2   | No       |      | 2   | No      |
| 12716  | 2  | 2  | Married/li     | 2  | Some college     | 4  | Retired     | 9  | 2   | No       |      | 2   | No      |

| respid | Q5 | Q6 | Marital Status | Q7 | Education        | Q8 | Work        | Q9 | Q10 | Diabetes | Q10a | Q11 | High BP |
|--------|----|----|----------------|----|------------------|----|-------------|----|-----|----------|------|-----|---------|
| 12719  | 2  | 2  | Married/li     | 3  | College degree   | 1  | Working, fi | 10 | 2   | No       |      | 2   | No      |
| 12720  | 2  | 2  | Married/li     | 2  | Some college     | 1  | Working, fi | 13 | 2   | No       |      | 2   | No      |
| 12723  | 2  | 3  | Divorced       | 3  | College degree   | 2  | Working, p  | 16 | 2   | No       |      | 2   | No      |
| 12726  | 2  | 2  | Married/li     | 2  | Some college     | 1  | Working, fi | 12 | 2   | No       |      | 2   | No      |
| 12728  | 2  | 2  | Married/li     | 2  | Some college     | 4  | Retired     | 8  | 2   | No       |      | 2   | No      |
| 12729  | 2  | 2  | Married/li     | 3  | College degree   | 2  | Working, p  | 17 | 2   | No       |      | 2   | No      |
| 12731  | 2  | 2  | Married/li     | 1  | High school or l | 1  | Working, fi | 12 | 2   | No       |      | 2   | No      |
| 12732  | 2  | 2  | Married/li     | 3  | College degree   | 4  | Retired     | 7  | 2   | No       |      | 2   | No      |
| 12733  | 2  | 2  | Married/li     | 2  | Some college     | 1  | Working, fi | 32 | 2   | No       |      | 2   | No      |
| 12736  | 2  | 2  | Married/li     | 3  | College degree   | 1  | Working, fi | 19 | 2   | No       |      | 2   | No      |
| 12737  | 2  | 2  | Married/li     | 1  | High school or l | 2  | Working, p  | 12 | 2   | No       |      | 2   | No      |
| 12739  | 2  | 2  | Married/li     | 2  | Some college     | 4  | Retired     | 7  | 2   | No       |      | 2   | No      |
| 12742  | 2  | 2  | Married/li     | 1  | High school or l | 2  | Working, p  | 12 | 2   | No       |      | 2   | No      |
| 12743  | 2  | 2  | Married/li     | 2  | Some college     | 4  | Retired     | 2  | 1   | Yes      | 1    | 1   | Yes     |
| 12744  | 2  | 2  | Married/li     | 4  | Postgraduate     | 1  | Working, fi | 24 | 2   | No       |      | 2   | No      |
| 12747  | 2  | 2  | Married/li     | 2  | Some college     | 4  | Retired     | 10 | 2   | No       |      | 2   | No      |
| 12751  | 2  | 2  | Married/li     | 2  | Some college     | 1  | Working, fi | 6  | 2   | No       |      | 2   | No      |
| 12754  | 2  | 2  | Married/li     | 2  | Some college     | 2  | Working, p  | 12 | 2   | No       |      | 2   | No      |
| 12756  | 2  | 4  | Widow/wi       | 2  | Some college     | 4  | Retired     | 7  | 2   | No       |      | 2   | No      |
| 12757  | 2  | 2  | Married/li     | 1  | High school or l | 1  | Working, fi | 13 | 2   | No       |      | 2   | No      |
| 12760  | 2  | 2  | Married/li     | 1  | High school or l | 4  | Retired     | 11 | 2   | No       |      | 2   | No      |
| 12761  | 2  | 2  | Married/li     | 1  | High school or l | 1  | Working, fi | 13 | 2   | No       |      | 2   | No      |
| 12762  | 2  | 2  | Married/li     | 3  | College degree   | 2  | Working, p  | 19 | 2   | No       |      | 2   | No      |
| 12766  | 2  | 2  | Married/li     | 2  | Some college     | 4  | Retired     | 11 | 2   | No       |      | 2   | No      |
| 12769  | 2  | 3  | Divorced       | 2  | Some college     | 1  | Working, fi | 25 | 2   | No       |      | 2   | No      |
| 12770  | 2  | 2  | Married/li     | 1  | High school or l | 2  | Working, p  | 6  | 2   | No       |      | 2   | No      |
| 12773  | 2  | 2  | Married/li     | 3  | College degree   | 1  | Working, fi | 13 | 2   | No       |      | 2   | No      |
| 12780  | 2  | 2  | Married/li     | 2  | Some college     | 1  | Working, fi | 11 | 2   | No       |      | 1   | Yes     |
| 12789  | 2  | 2  | Married/li     | 1  | High school or l | 1  | Working, fi | 24 | 1   | Yes      | 1    | 1   | Yes     |
| 12792  | 2  | 2  | Married/li     | 1  | High school or l | 2  | Working, p  | 9  | 2   | No       |      | 1   | Yes     |
| 12795  | 2  | 2  | Married/li     | 2  | Some college     | 1  | Working, fi | 11 | 2   | No       |      | 2   | No      |
| 12804  | 2  | 2  | Married/li     | 1  | High school or l | 4  | Retired     | 2  | 1   | Yes      | 1    | 2   | No      |

| respid | Q5 | Q6 | Marital Status | Q7 | Education        | Q8 | Work        | Q9 | Q10 | Diabetes | Q10a | Q11 | High BP |
|--------|----|----|----------------|----|------------------|----|-------------|----|-----|----------|------|-----|---------|
| 12811  | 2  | 2  | Married/li     | 1  | High school or l | 4  | Retired     | 1  | 2   | No       |      | 2   | No      |
| 12813  | 2  | 2  | Married/li     | 3  | College degree   | 6  | Homemake    | 19 | 2   | No       |      | 1   | Yes     |
| 12814  | 2  | 4  | Widow/wi       | 1  | High school or l | 1  | Working, fi | 10 | 2   | No       |      | 2   | No      |
| 12815  | 2  | 2  | Married/li     | 3  | College degree   | 6  | Homemake    | 18 | 2   | No       |      | 2   | No      |
| 12816  | 2  | 2  | Married/li     | 3  | College degree   | 1  | Working, fi | 20 | 2   | No       |      | 2   | No      |
| 12817  | 2  | 2  | Married/li     | 1  | High school or l | 6  | Homemake    | 17 | 2   | No       |      | 2   | No      |
| 12818  | 2  | 2  | Married/li     | 3  | College degree   | 4  | Retired     | 22 | 2   | No       |      | 2   | No      |
| 12819  | 2  | 2  | Married/li     | 3  | College degree   | 1  | Working, fi | 5  | 2   | No       |      | 2   | No      |
| 12820  | 2  | 1  | Single         | 3  | College degree   | 8  | Other worl  | 15 | 2   | No       |      | 2   | No      |
| 12821  | 2  | 2  | Married/li     | 3  | College degree   | 1  | Working, fi | 10 | 2   | No       |      | 2   | No      |
| 12824  | 2  | 2  | Married/li     | 3  | College degree   | 1  | Working, fi | 21 | 2   | No       |      | 1   | Yes     |
| 12827  | 2  | 2  | Married/li     | 1  | High school or l | 4  | Retired     | 11 | 1   | Yes      | 1    | 2   | No      |
| 12836  | 2  | 2  | Married/li     | 3  | College degree   | 1  | Working, fi | 19 | 2   | No       |      | 2   | No      |
| 12837  | 2  | 2  | Married/li     | 2  | Some college     | 1  | Working, fi | 8  | 2   | No       |      | 2   | No      |
| 12838  | 2  | 2  | Married/li     | 3  | College degree   | 1  | Working, fi | 18 | 2   | No       |      | 1   | Yes     |
| 12845  | 2  | 2  | Married/li     | 4  | Postgraduate     | 2  | Working, p  | 20 | 2   | No       |      | 2   | No      |
| 12847  | 2  | 2  | Married/li     | 3  | College degree   | 1  | Working, fi | 12 | 2   | No       |      | 1   | Yes     |
| 12849  | 2  | 2  | Married/li     | 3  | College degree   | 1  | Working, fi | 12 | 2   | No       |      | 2   | No      |
| 12850  | 2  | 2  | Married/li     | 1  | High school or l | 1  | Working, fi | 22 | 2   | No       |      | 2   | No      |
| 12852  | 2  | 2  | Married/li     | 2  | Some college     | 1  | Working, fi | 2  | 2   | No       |      | 1   | Yes     |
| 12853  | 2  | 2  | Married/li     | 3  | College degree   | 1  | Working, fi | 12 | 2   | No       |      | 2   | No      |
| 12854  | 2  | 2  | Married/li     | 3  | College degree   | 1  | Working, fi | 6  | 2   | No       |      | 2   | No      |
| 12860  | 2  | 2  | Married/li     | 2  | Some college     | 1  | Working, fi | 8  | 2   | No       |      | 2   | No      |
| 12861  | 2  | 2  | Married/li     | 4  | Postgraduate     | 1  | Working, fi | 11 | 2   | No       |      | 2   | No      |
| 12863  | 2  | 2  | Married/li     | 2  | Some college     | 4  | Retired     | 12 | 2   | No       |      | 2   | No      |
| 12865  | 2  | 2  | Married/li     | 3  | College degree   | 1  | Working, fi | 8  | 2   | No       |      | 2   | No      |
| 12870  | 2  | 2  | Married/li     | 1  | High school or l | 1  | Working, fi | 18 | 2   | No       |      | 2   | No      |
| 12871  | 2  | 1  | Single         | 2  | Some college     | 1  | Working, fi | 1  | 2   | No       |      | 1   | Yes     |
| 12873  | 2  | 2  | Married/li     | 2  | Some college     | 1  | Working, fi | 11 | 1   | Yes      | 1    | 1   | Yes     |
| 12877  | 2  | 2  | Married/li     | 2  | Some college     | 1  | Working, fi | 6  | 1   | Yes      | 1    | 2   | No      |
| 12880  | 2  | 3  | Divorced       | 3  | College degree   | 1  | Working, fi | 23 | 2   | No       |      | 2   | No      |
| 12881  | 2  | 2  | Married/li     | 1  | High school or l | 2  | Working, p  | 15 | 2   | No       |      | 2   | No      |



| respid | Q5 | Q6 | Marital Status | Q7 | Education        | Q8 | Work        | Q9 | Q10 | Diabetes | Q10a | Q11 | High BP |
|--------|----|----|----------------|----|------------------|----|-------------|----|-----|----------|------|-----|---------|
| 12882  | 2  | 2  | Married/li     | 3  | College degree   | 1  | Working, fi | 20 | 2   | No       |      | 2   | No      |
| 12883  | 2  | 4  | Widow/wi       | 1  | High school or l | 1  | Working, fi | 18 | 2   | No       |      | 2   | No      |
| 12885  | 2  | 2  | Married/li     | 3  | College degree   | 1  | Working, fi | 19 | 2   | No       |      | 2   | No      |
| 12887  | 2  | 2  | Married/li     | 3  | College degree   | 6  | Homemake    | 18 | 2   | No       |      | 2   | No      |
| 12889  | 2  | 2  | Married/li     | 3  | College degree   | 1  | Working, fi | 17 | 2   | No       |      | 2   | No      |
| 12890  | 2  | 2  | Married/li     | 3  | College degree   | 1  | Working, fi | 12 | 2   | No       |      | 2   | No      |
| 12891  | 2  | 2  | Married/li     | 3  | College degree   | 1  | Working, fi | 22 | 2   | No       |      | 1   | Yes     |
| 12892  | 2  | 4  | Widow/wi       | 1  | High school or l | 4  | Retired     | 2  | 1   | Yes      | 1    | 1   | Yes     |
| 12893  | 2  | 2  | Married/li     | 3  | College degree   | 8  | Other worl  | 15 | 2   | No       |      | 2   | No      |
| 12895  | 2  | 2  | Married/li     | 1  | High school or l | 6  | Homemake    | 17 | 2   | No       |      | 1   | Yes     |
| 12898  | 2  | 2  | Married/li     | 3  | College degree   | 1  | Working, fi | 10 | 2   | No       |      | 1   | Yes     |
| 12907  | 2  | 2  | Married/li     | 1  | High school or l | 2  | Working, p  | 8  | 2   | No       |      | 1   | Yes     |
| 12908  | 2  | 4  | Widow/wi       | 1  | High school or l | 9  | Other       | 17 | 1   | Yes      | 1    | 2   | No      |
| 12909  | 2  | 2  | Married/li     | 3  | College degree   | 6  | Homemake    | 18 | 2   | No       |      | 2   | No      |
| 12914  | 2  | 1  | Single         | 2  | Some college     | 1  | Working, fi | 32 | 1   | Yes      | 1    | 2   | No      |
| 12915  | 2  | 2  | Married/li     | 3  | College degree   | 6  | Homemake    | 18 | 2   | No       |      | 2   | No      |
| 12916  | 2  | 2  | Married/li     | 3  | College degree   | 1  | Working, fi | 9  | 2   | No       |      | 2   | No      |
| 12921  | 2  | 2  | Married/li     | 3  | College degree   | 6  | Homemake    | 22 | 2   | No       |      | 2   | No      |
| 12922  | 2  | 2  | Married/li     | 2  | Some college     | 4  | Retired     | 9  | 2   | No       |      | 1   | Yes     |
| 12923  | 2  | 2  | Married/li     | 3  | College degree   | 4  | Retired     | 7  | 2   | No       |      | 2   | No      |
| 12926  | 2  | 2  | Married/li     | 3  | College degree   | 1  | Working, fi | 5  | 1   | Yes      | 1    | 2   | No      |
| 12927  | 2  | 2  | Married/li     | 1  | High school or l | 1  | Working, fi | 35 | 2   | No       |      | 2   | No      |
| 12932  | 2  | 2  | Married/li     | 3  | College degree   | 1  | Working, fi | 11 | 2   | No       |      | 1   | Yes     |
| 12936  | 2  | 2  | Married/li     | 2  | Some college     | 1  | Working, fi | 4  | 2   | No       |      | 2   | No      |
| 12937  | 2  | 2  | Married/li     | 3  | College degree   | 1  | Working, fi | 20 | 2   | No       |      | 2   | No      |
| 12938  | 2  | 2  | Married/li     | 2  | Some college     | 1  | Working, fi | 13 | 1   | Yes      | 1    | 1   | Yes     |
| 12939  | 2  | 2  | Married/li     | 2  | Some college     | 4  | Retired     | 1  | 2   | No       |      | 2   | No      |
| 12940  | 2  | 2  | Married/li     | 3  | College degree   | 1  | Working, fi | 2  | 2   | No       |      | 1   | Yes     |
| 12945  | 2  | 2  | Married/li     | 1  | High school or l | 1  | Working, fi | 25 | 2   | No       |      | 2   | No      |
| 12946  | 2  | 2  | Married/li     | 3  | College degree   | 1  | Working, fi | 19 | 2   | No       |      | 2   | No      |
| 12947  | 2  | 2  | Married/li     | 3  | College degree   | 1  | Working, fi | 13 | 2   | No       |      | 2   | No      |
| 12948  | 2  | 2  | Married/li     | 3  | College degree   | 1  | Working, fi | 18 | 2   | No       |      | 1   | Yes     |

| respid | Q5 | Q6 | Marital Status | Q7 | Education        | Q8 | Work        | Q9 | Q10 | Diabetes | Q10a | Q11 | High BP |
|--------|----|----|----------------|----|------------------|----|-------------|----|-----|----------|------|-----|---------|
| 12951  | 2  | 2  | Married/li     | 1  | High school or l | 4  | Retired     | 18 | 2   | No       |      | 1   | Yes     |
| 12952  | 2  | 2  | Married/li     | 1  | High school or l | 6  | Homemake    | 18 | 2   | No       |      | 2   | No      |
| 12954  | 2  | 2  | Married/li     | 3  | College degree   | 6  | Homemake    | 23 | 2   | No       |      | 2   | No      |
| 12960  | 2  | 2  | Married/li     | 3  | College degree   | 1  | Working, fi | 14 | 2   | No       |      | 2   | No      |
| 12961  | 2  | 2  | Married/li     | 1  | High school or l | 1  | Working, fi | 23 | 2   | No       |      | 2   | No      |
| 12962  | 2  | 2  | Married/li     | 1  | High school or l | 1  | Working, fi | 25 | 2   | No       |      | 2   | No      |
| 12963  | 2  | 2  | Married/li     | 2  | Some college     | 1  | Working, fi | 11 | 2   | No       |      | 2   | No      |
| 12964  | 2  | 2  | Married/li     | 3  | College degree   | 1  | Working, fi | 21 | 2   | No       |      | 1   | Yes     |
| 12966  | 2  | 2  | Married/li     | 1  | High school or l | 6  | Homemake    | 1  | 2   | No       |      | 2   | No      |
| 12967  | 2  | 2  | Married/li     | 3  | College degree   | 1  | Working, fi | 11 | 2   | No       |      | 1   | Yes     |
| 12969  | 2  | 1  | Single         | 3  | College degree   | 1  | Working, fi | 16 | 2   | No       |      | 1   | Yes     |
| 12970  | 2  | 2  | Married/li     | 3  | College degree   | 1  | Working, fi | 14 | 2   | No       |      | 2   | No      |
| 12974  | 2  | 2  | Married/li     | 3  | College degree   | 1  | Working, fi | 20 | 2   | No       |      | 2   | No      |
| 12979  | 2  | 2  | Married/li     | 2  | Some college     | 1  | Working, fi | 29 | 2   | No       |      | 2   | No      |
| 12980  | 2  | 2  | Married/li     | 3  | College degree   | 1  | Working, fi | 1  | 2   | No       |      | 2   | No      |
| 12983  | 2  | 2  | Married/li     | 1  | High school or l | 9  | Other       | 16 | 2   | No       |      | 2   | No      |
| 12988  | 2  | 1  | Single         | 4  | Postgraduate     | 2  | Working, p  | 16 | 2   | No       |      | 2   | No      |
| 12994  | 2  | 3  | Divorced       | 1  | High school or l | 1  | Working, fi | 17 | 2   | No       |      | 2   | No      |
| 12995  | 2  | 2  | Married/li     | 1  | High school or l | 6  | Homemake    | 15 | 2   | No       |      | 2   | No      |
| 12996  | 2  | 2  | Married/li     | 3  | College degree   | 1  | Working, fi | 23 | 2   | No       |      | 2   | No      |
| 12998  | 2  | 2  | Married/li     | 3  | College degree   | 1  | Working, fi | 17 | 2   | No       |      | 2   | No      |
| 12999  | 2  | 1  | Single         | 3  | College degree   | 4  | Retired     | 2  | 2   | No       |      | 1   | Yes     |
| 13001  | 2  | 2  | Married/li     | 3  | College degree   | 1  | Working, fi | 8  | 2   | No       |      | 2   | No      |
| 13005  | 2  | 2  | Married/li     | 1  | High school or l | 4  | Retired     | 6  | 2   | No       |      | 2   | No      |
| 13006  | 2  | 3  | Divorced       | 1  | High school or l | 6  | Homemake    | 30 | 2   | No       |      | 2   | No      |
| 13007  | 2  | 2  | Married/li     | 3  | College degree   | 9  | Other       | 18 | 2   | No       |      | 1   | Yes     |
| 13011  | 2  | 2  | Married/li     | 3  | College degree   | 2  | Working, p  | 18 | 2   | No       |      | 2   | No      |
| 13012  | 2  | 2  | Married/li     | 1  | High school or l | 4  | Retired     | 1  | 2   | No       |      | 2   | No      |
| 13013  | 2  | 2  | Married/li     | 1  | High school or l | 4  | Retired     | 5  | 2   | No       |      | 1   | Yes     |
| 13016  | 2  | 2  | Married/li     | 2  | Some college     | 1  | Working, fi | 12 | 2   | No       |      | 2   | No      |
| 13018  | 2  | 2  | Married/li     | 4  | Postgraduate     | 1  | Working, fi | 19 | 1   | Yes      | 1    | 1   | Yes     |
| 13020  | 2  | 2  | Married/li     | 4  | Postgraduate     | 1  | Working, fi | 22 | 2   | No       |      | 2   | No      |

| respid | Q5 | Q6 | Marital Status | Q7 | Education        | Q8 | Work        | Q9 | Q10 | Diabetes | Q10a | Q11 | High BP |
|--------|----|----|----------------|----|------------------|----|-------------|----|-----|----------|------|-----|---------|
| 13024  | 2  | 2  | Married/li     | 3  | College degree   | 1  | Working, fi | 12 | 2   | No       |      | 2   | No      |
| 13025  | 2  | 2  | Married/li     | 3  | College degree   | 1  | Working, fi | 20 | 2   | No       |      | 2   | No      |
| 13027  | 2  | 2  | Married/li     | 2  | Some college     | 1  | Working, fi | 33 | 2   | No       |      | 2   | No      |
| 13031  | 2  | 2  | Married/li     | 3  | College degree   | 1  | Working, fi | 20 | 2   | No       |      | 1   | Yes     |
| 13032  | 2  | 2  | Married/li     | 1  | High school or l | 4  | Retired     | 11 | 2   | No       |      | 2   | No      |
| 13034  | 2  | 2  | Married/li     | 1  | High school or l | 6  | Homemake    | 19 | 2   | No       |      | 2   | No      |
| 13036  | 2  | 2  | Married/li     | 2  | Some college     | 8  | Other worl  | 2  | 2   | No       |      | 2   | No      |
| 13037  | 2  | 4  | Widow/wi       | 1  | High school or l | 1  | Working, fi | 17 | 2   | No       |      | 2   | No      |
| 13038  | 2  | 2  | Married/li     | 3  | College degree   | 6  | Homemake    | 17 | 2   | No       |      | 1   | Yes     |
| 13039  | 2  | 4  | Widow/wi       | 1  | High school or l | 1  | Working, fi | 18 | 2   | No       |      | 2   | No      |
| 13040  | 2  | 2  | Married/li     | 3  | College degree   | 1  | Working, fi | 24 | 2   | No       |      | 1   | Yes     |
| 13041  | 2  | 2  | Married/li     | 3  | College degree   | 6  | Homemake    | 19 | 2   | No       |      | 1   | Yes     |
| 13045  | 2  | 2  | Married/li     | 2  | Some college     | 1  | Working, fi | 20 | 1   | Yes      | 2    | 1   | Yes     |
| 13046  | 2  | 2  | Married/li     | 3  | College degree   | 4  | Retired     | 19 | 2   | No       |      | 1   | Yes     |
| 13048  | 2  | 2  | Married/li     | 3  | College degree   | 6  | Homemake    | 24 | 2   | No       |      | 2   | No      |
| 13051  | 2  | 2  | Married/li     | 3  | College degree   | 1  | Working, fi | 12 | 1   | Yes      | 1    | 2   | No      |
| 13053  | 2  | 2  | Married/li     | 1  | High school or l | 4  | Retired     | 14 | 2   | No       |      | 2   | No      |
| 13055  | 2  | 2  | Married/li     | 3  | College degree   | 6  | Homemake    | 18 | 2   | No       |      | 2   | No      |
| 13059  | 2  | 2  | Married/li     | 1  | High school or l | 6  | Homemake    | 18 | 2   | No       |      | 1   | Yes     |
| 13068  | 2  | 2  | Married/li     | 1  | High school or l | 6  | Homemake    | 16 | 2   | No       |      | 1   | Yes     |
| 13069  | 2  | 2  | Married/li     | 3  | College degree   | 6  | Homemake    | 19 | 2   | No       |      | 2   | No      |
| 13076  | 2  | 2  | Married/li     | 1  | High school or l | 1  | Working, fi | 21 | 2   | No       |      | 2   | No      |
| 13081  | 2  | 2  | Married/li     | 1  | High school or l | 2  | Working, p  | 15 | 2   | No       |      | 2   | No      |
| 13082  | 2  | 2  | Married/li     | 3  | College degree   | 6  | Homemake    | 20 | 2   | No       |      | 2   | No      |
| 13084  | 2  | 2  | Married/li     | 1  | High school or l | 2  | Working, p  | 18 | 2   | No       |      | 2   | No      |
| 13085  | 2  | 2  | Married/li     | 1  | High school or l | 4  | Retired     | 15 | 2   | No       |      | 1   | Yes     |
| 13086  | 2  | 2  | Married/li     | 3  | College degree   | 2  | Working, p  | 21 | 1   | Yes      | 1    | 2   | No      |
| 13093  | 2  | 2  | Married/li     | 1  | High school or l | 6  | Homemake    | 2  | 1   | Yes      | 1    | 1   | Yes     |
| 13094  | 2  | 2  | Married/li     | 3  | College degree   | 1  | Working, fi | 20 | 2   | No       |      | 2   | No      |
| 13097  | 2  | 1  | Single         | 2  | Some college     | 1  | Working, fi | 31 | 2   | No       |      | 2   | No      |
| 13098  | 2  | 2  | Married/li     | 3  | College degree   | 6  | Homemake    | 20 | 2   | No       |      | 1   | Yes     |
| 13099  | 2  | 2  | Married/li     | 3  | College degree   | 6  | Homemake    | 18 | 2   | No       |      | 2   | No      |

| respid | Q5 | Q6 | Marital Status | Q7 | Education        | Q8 | Work        | Q9 | Q10 | Diabetes | Q10a | Q11 | High BP |
|--------|----|----|----------------|----|------------------|----|-------------|----|-----|----------|------|-----|---------|
| 13100  | 2  | 4  | Widow/wi       | 3  | College degree   | 6  | Homemake    | 16 | 2   | No       |      | 1   | Yes     |
| 13101  | 2  | 2  | Married/li     | 3  | College degree   | 1  | Working, fi | 17 | 2   | No       |      | 2   | No      |
| 13103  | 2  | 2  | Married/li     | 2  | Some college     | 4  | Retired     | 10 | 2   | No       |      | 2   | No      |
| 13105  | 2  | 2  | Married/li     | 3  | College degree   | 6  | Homemake    | 18 | 2   | No       |      | 2   | No      |
| 13106  | 2  | 2  | Married/li     | 1  | High school or l | 6  | Homemake    | 24 | 2   | No       |      | 2   | No      |
| 13107  | 2  | 2  | Married/li     | 4  | Postgraduate     | 6  | Homemake    | 18 | 2   | No       |      | 2   | No      |
| 13110  | 2  | 2  | Married/li     | 3  | College degree   | 1  | Working, fi | 18 | 1   | Yes      | 1    | 2   | No      |
| 13118  | 2  | 2  | Married/li     | 1  | High school or l | 6  | Homemake    | 11 | 2   | No       |      | 2   | No      |
| 13120  | 2  | 2  | Married/li     | 1  | High school or l | 6  | Homemake    | 4  | 1   | Yes      | 1    | 1   | Yes     |
| 13130  | 2  | 2  | Married/li     | 3  | College degree   | 1  | Working, fi | 21 | 2   | No       |      | 1   | Yes     |
| 13133  | 2  | 2  | Married/li     | 1  | High school or l | 6  | Homemake    | 19 | 2   | No       |      | 2   | No      |
| 13134  | 2  | 2  | Married/li     | 3  | College degree   | 1  | Working, fi | 16 | 2   | No       |      | 2   | No      |
| 13139  | 2  | 2  | Married/li     | 1  | High school or l | 2  | Working, p  | 99 | 2   | No       |      | 2   | No      |
| 13142  | 2  | 2  | Married/li     | 3  | College degree   | 6  | Homemake    | 17 | 2   | No       |      | 2   | No      |
| 13143  | 2  | 2  | Married/li     | 3  | College degree   | 4  | Retired     | 1  | 2   | No       |      | 2   | No      |
| 13145  | 2  | 4  | Widow/wi       | 1  | High school or l | 6  | Homemake    | 15 | 2   | No       |      | 2   | No      |
| 13148  | 2  | 2  | Married/li     | 4  | Postgraduate     | 1  | Working, fi | 17 | 2   | No       |      | 2   | No      |
| 13149  | 2  | 2  | Married/li     | 2  | Some college     | 1  | Working, fi | 11 | 2   | No       |      | 2   | No      |
| 13151  | 2  | 2  | Married/li     | 3  | College degree   | 1  | Working, fi | 21 | 1   | Yes      | 1    | 2   | No      |
| 13153  | 2  | 2  | Married/li     | 3  | College degree   | 1  | Working, fi | 21 | 2   | No       |      | 2   | No      |
| 13158  | 2  | 2  | Married/li     | 1  | High school or l | 6  | Homemake    | 15 | 2   | No       |      | 2   | No      |
| 13160  | 2  | 2  | Married/li     | 3  | College degree   | 1  | Working, fi | 36 | 1   | Yes      | 1    | 1   | Yes     |
| 13162  | 2  | 2  | Married/li     | 3  | College degree   | 1  | Working, fi | 12 | 2   | No       |      | 2   | No      |
| 13169  | 2  | 2  | Married/li     | 3  | College degree   | 1  | Working, fi | 3  | 1   | Yes      | 1    | 2   | No      |
| 13172  | 2  | 2  | Married/li     | 1  | High school or l | 9  | Other       | 17 | 2   | No       |      | 2   | No      |
| 13173  | 2  | 1  | Single         | 2  | Some college     | 1  | Working, fi | 31 | 2   | No       |      | 2   | No      |
| 13176  | 2  | 2  | Married/li     | 3  | College degree   | 1  | Working, fi | 17 | 2   | No       |      | 2   | No      |
| 13179  | 2  | 3  | Divorced       | 2  | Some college     | 1  | Working, fi | 29 | 2   | No       |      | 2   | No      |
| 13184  | 2  | 2  | Married/li     | 1  | High school or l | 1  | Working, fi | 2  | 2   | No       |      | 1   | Yes     |
| 13185  | 2  | 2  | Married/li     | 1  | High school or l | 2  | Working, p  | 12 | 2   | No       |      | 2   | No      |
| 13186  | 2  | 2  | Married/li     | 3  | College degree   | 6  | Homemake    | 23 | 2   | No       |      | 2   | No      |
| 13188  | 2  | 2  | Married/li     | 3  | College degree   | 1  | Working, fi | 18 | 1   | Yes      | 1    | 1   | Yes     |

| respid | Q5 | Q6 | Marital Status | Q7 | Education        | Q8 | Work        | Q9 | Q10 | Diabetes | Q10a | Q11 | High BP |
|--------|----|----|----------------|----|------------------|----|-------------|----|-----|----------|------|-----|---------|
| 13190  | 2  | 2  | Married/li     | 4  | Postgraduate     | 1  | Working, fi | 21 | 2   | No       |      | 1   | Yes     |
| 13192  | 2  | 2  | Married/li     | 3  | College degree   | 1  | Working, fi | 21 | 2   | No       |      | 2   | No      |
| 13193  | 2  | 2  | Married/li     | 1  | High school or l | 4  | Retired     | 10 | 2   | No       |      | 2   | No      |
| 13201  | 2  | 2  | Married/li     | 1  | High school or l | 4  | Retired     | 13 | 2   | No       |      | 2   | No      |
| 13207  | 2  | 1  | Single         | 3  | College degree   | 1  | Working, fi | 20 | 2   | No       |      | 2   | No      |
| 13208  | 2  | 3  | Divorced       | 3  | College degree   | 2  | Working, p  | 16 | 2   | No       |      | 2   | No      |
| 13209  | 2  | 2  | Married/li     | 1  | High school or l | 4  | Retired     | 6  | 2   | No       |      | 1   | Yes     |
| 13212  | 2  | 2  | Married/li     | 1  | High school or l | 6  | Homemake    | 20 | 2   | No       |      | 2   | No      |
| 13215  | 2  | 2  | Married/li     | 3  | College degree   | 6  | Homemake    | 22 | 2   | No       |      | 2   | No      |
| 13218  | 2  | 2  | Married/li     | 3  | College degree   | 6  | Homemake    | 22 | 1   | Yes      | 1    | 1   | Yes     |
| 13219  | 2  | 2  | Married/li     | 3  | College degree   | 1  | Working, fi | 99 | 2   | No       |      | 2   | No      |
| 13224  | 2  | 2  | Married/li     | 1  | High school or l | 4  | Retired     | 12 | 2   | No       |      | 2   | No      |
| 13225  | 2  | 2  | Married/li     | 3  | College degree   | 6  | Homemake    | 19 | 2   | No       |      | 2   | No      |
| 13226  | 2  | 2  | Married/li     | 1  | High school or l | 6  | Homemake    | 19 | 2   | No       |      | 2   | No      |
| 13232  | 2  | 1  | Single         | 3  | College degree   | 1  | Working, fi | 34 | 2   | No       |      | 2   | No      |
| 13237  | 2  | 2  | Married/li     | 1  | High school or l | 6  | Homemake    | 16 | 2   | No       |      | 2   | No      |
| 13239  | 2  | 2  | Married/li     | 2  | Some college     | 1  | Working, fi | 35 | 2   | No       |      | 2   | No      |
| 13241  | 2  | 2  | Married/li     | 3  | College degree   | 6  | Homemake    | 21 | 2   | No       |      | 2   | No      |
| 13243  | 2  | 2  | Married/li     | 1  | High school or l | 6  | Homemake    | 15 | 2   | No       |      | 2   | No      |
| 13247  | 2  | 2  | Married/li     | 1  | High school or l | 1  | Working, fi | 3  | 2   | No       |      | 1   | Yes     |
| 13248  | 2  | 2  | Married/li     | 3  | College degree   | 1  | Working, fi | 19 | 2   | No       |      | 1   | Yes     |
| 13251  | 2  | 4  | Widow/wi       | 4  | Postgraduate     | 1  | Working, fi | 17 | 2   | No       |      | 1   | Yes     |
| 13256  | 2  | 2  | Married/li     | 1  | High school or l | 6  | Homemake    | 17 | 2   | No       |      | 2   | No      |
| 13260  | 2  | 2  | Married/li     | 2  | Some college     | 1  | Working, fi | 33 | 2   | No       |      | 1   | Yes     |
| 13261  | 2  | 2  | Married/li     | 1  | High school or l | 2  | Working, p  | 17 | 1   | Yes      | 2    | 1   | Yes     |
| 13264  | 2  | 2  | Married/li     | 3  | College degree   | 1  | Working, fi | 21 | 2   | No       |      | 2   | No      |
| 13273  | 2  | 2  | Married/li     | 1  | High school or l | 6  | Homemake    | 18 | 2   | No       |      | 2   | No      |
| 13274  | 2  | 1  | Single         | 2  | Some college     | 1  | Working, fi | 31 | 2   | No       |      | 2   | No      |
| 13276  | 2  | 2  | Married/li     | 3  | College degree   | 6  | Homemake    | 18 | 2   | No       |      | 2   | No      |
| 13278  | 2  | 2  | Married/li     | 3  | College degree   | 6  | Homemake    | 17 | 2   | No       |      | 2   | No      |
| 13279  | 2  | 2  | Married/li     | 3  | College degree   | 1  | Working, fi | 20 | 2   | No       |      | 1   | Yes     |
| 13282  | 2  | 2  | Married/li     | 2  | Some college     | 1  | Working, fi | 17 | 2   | No       |      | 2   | No      |

| respid | Q5 | Q6 | Marital Status | Q7 | Education        | Q8 | Work        | Q9 | Q10 | Diabetes | Q10a | Q11 | High BP |
|--------|----|----|----------------|----|------------------|----|-------------|----|-----|----------|------|-----|---------|
| 13283  | 2  | 2  | Married/li     | 3  | College degree   | 8  | Other worl  | 21 | 2   | No       |      | 2   | No      |
| 13285  | 2  | 2  | Married/li     | 1  | High school or l | 6  | Homemake    | 16 | 2   | No       |      | 2   | No      |
| 13286  | 2  | 2  | Married/li     | 1  | High school or l | 6  | Homemake    | 16 | 2   | No       |      | 2   | No      |
| 13299  | 2  | 2  | Married/li     | 2  | Some college     | 6  | Homemake    | 33 | 2   | No       |      | 2   | No      |
| 13300  | 2  | 2  | Married/li     | 1  | High school or l | 1  | Working, fi | 18 | 1   | Yes      | 1    | 1   | Yes     |
| 13301  | 2  | 2  | Married/li     | 1  | High school or l | 6  | Homemake    | 19 | 2   | No       |      | 2   | No      |
| 13303  | 2  | 4  | Widow/wi       | 1  | High school or l | 6  | Homemake    | 19 | 2   | No       |      | 1   | Yes     |
| 13304  | 2  | 2  | Married/li     | 1  | High school or l | 6  | Homemake    | 17 | 2   | No       |      | 2   | No      |
| 13307  | 2  | 4  | Widow/wi       | 1  | High school or l | 6  | Homemake    | 15 | 2   | No       |      | 2   | No      |
| 13308  | 2  | 4  | Widow/wi       | 1  | High school or l | 1  | Working, fi | 15 | 2   | No       |      | 2   | No      |
| 13312  | 2  | 1  | Single         | 3  | College degree   | 2  | Working, p  | 15 | 2   | No       |      | 1   | Yes     |
| 13313  | 2  | 3  | Divorced       | 3  | College degree   | 1  | Working, fi | 18 | 2   | No       |      | 2   | No      |
| 13314  | 2  | 2  | Married/li     | 3  | College degree   | 1  | Working, fi | 20 | 2   | No       |      | 1   | Yes     |
| 13318  | 2  | 2  | Married/li     | 1  | High school or l | 6  | Homemake    | 20 | 2   | No       |      | 2   | No      |
| 13320  | 2  | 2  | Married/li     | 1  | High school or l | 1  | Working, fi | 23 | 2   | No       |      | 2   | No      |
| 13322  | 2  | 2  | Married/li     | 3  | College degree   | 1  | Working, fi | 20 | 2   | No       |      | 1   | Yes     |
| 13324  | 2  | 2  | Married/li     | 3  | College degree   | 6  | Homemake    | 20 | 2   | No       |      | 2   | No      |
| 13325  | 2  | 2  | Married/li     | 3  | College degree   | 6  | Homemake    | 16 | 2   | No       |      | 1   | Yes     |
| 13327  | 2  | 2  | Married/li     | 4  | Postgraduate     | 1  | Working, fi | 18 | 2   | No       |      | 1   | Yes     |
| 13330  | 2  | 2  | Married/li     | 1  | High school or l | 6  | Homemake    | 17 | 2   | No       |      | 1   | Yes     |
| 13332  | 2  | 2  | Married/li     | 4  | Postgraduate     | 2  | Working, p  | 18 | 2   | No       |      | 1   | Yes     |
| 13333  | 2  | 2  | Married/li     | 3  | College degree   | 6  | Homemake    | 21 | 1   | Yes      | 1    | 1   | Yes     |
| 13334  | 2  | 2  | Married/li     | 2  | Some college     | 1  | Working, fi | 33 | 2   | No       |      | 1   | Yes     |
| 13351  | 2  | 1  | Single         | 4  | Postgraduate     | 1  | Working, fi | 14 | 2   | No       |      | 1   | Yes     |
| 13353  | 2  | 2  | Married/li     | 4  | Postgraduate     | 6  | Homemake    | 20 | 2   | No       |      | 2   | No      |
| 13354  | 2  | 2  | Married/li     | 1  | High school or l | 9  | Other       | 15 | 2   | No       |      | 2   | No      |
| 13355  | 2  | 2  | Married/li     | 3  | College degree   | 1  | Working, fi | 23 | 2   | No       |      | 2   | No      |
| 13358  | 2  | 1  | Single         | 3  | College degree   | 1  | Working, fi | 15 | 2   | No       |      | 2   | No      |
| 13359  | 2  | 3  | Divorced       | 3  | College degree   | 9  | Other       | 16 | 2   | No       |      | 2   | No      |
| 13360  | 2  | 2  | Married/li     | 1  | High school or l | 2  | Working, p  | 19 | 2   | No       |      | 2   | No      |
| 13364  | 2  | 2  | Married/li     | 4  | Postgraduate     | 6  | Homemake    | 17 | 2   | No       |      | 2   | No      |
| 13365  | 2  | 1  | Single         | 1  | High school or l | 5  | Permanent   | 15 | 2   | No       |      | 1   | Yes     |

| respid | Q5 | Q6 | Marital Status | Q7 | Education        | Q8 | Work        | Q9 | Q10 | Diabetes | Q10a | Q11 | High BP |
|--------|----|----|----------------|----|------------------|----|-------------|----|-----|----------|------|-----|---------|
| 13368  | 2  | 2  | Married/li     | 3  | College degree   | 6  | Homemake    | 15 | 2   | No       |      | 2   | No      |
| 13370  | 2  | 2  | Married/li     | 1  | High school or l | 6  | Homemake    | 15 | 2   | No       |      | 2   | No      |
| 13375  | 2  | 2  | Married/li     | 1  | High school or l | 1  | Working, fi | 21 | 2   | No       |      | 1   | Yes     |
| 13384  | 2  | 2  | Married/li     | 1  | High school or l | 1  | Working, fi | 21 | 2   | No       |      | 2   | No      |
| 13387  | 2  | 2  | Married/li     | 3  | College degree   | 1  | Working, fi | 17 | 1   | Yes      | 1    | 2   | No      |
| 13395  | 2  | 2  | Married/li     | 1  | High school or l | 1  | Working, fi | 17 | 2   | No       |      | 2   | No      |
| 13398  | 2  | 3  | Divorced       | 3  | College degree   | 4  | Retired     | 19 | 2   | No       |      | 1   | Yes     |
| 13404  | 2  | 2  | Married/li     | 1  | High school or l | 8  | Other worl  | 16 | 2   | No       |      | 2   | No      |
| 13405  | 2  | 2  | Married/li     | 3  | College degree   | 6  | Homemake    | 23 | 1   | Yes      | 2    | 2   | No      |
| 13408  | 2  | 4  | Widow/wi       | 1  | High school or l | 1  | Working, fi | 15 | 2   | No       |      | 1   | Yes     |
| 13411  | 2  | 2  | Married/li     | 3  | College degree   | 6  | Homemake    | 20 | 2   | No       |      | 1   | Yes     |
| 13413  | 2  | 2  | Married/li     | 3  | College degree   | 6  | Homemake    | 23 | 2   | No       |      | 2   | No      |
| 13419  | 2  | 2  | Married/li     | 3  | College degree   | 6  | Homemake    | 19 | 2   | No       |      | 2   | No      |
| 13420  | 2  | 2  | Married/li     | 3  | College degree   | 1  | Working, fi | 20 | 2   | No       |      | 2   | No      |
| 13427  | 2  | 2  | Married/li     | 1  | High school or l | 6  | Homemake    | 15 | 1   | Yes      | 1    | 1   | Yes     |
| 13441  | 2  | 2  | Married/li     | 4  | Postgraduate     | 6  | Homemake    | 19 | 2   | No       |      | 1   | Yes     |
| 13444  | 2  | 2  | Married/li     | 3  | College degree   | 6  | Homemake    | 22 | 1   | Yes      | 1    | 2   | No      |
| 13456  | 2  | 2  | Married/li     | 3  | College degree   | 4  | Retired     | 2  | 2   | No       |      | 2   | No      |
| 13466  | 2  | 2  | Married/li     | 3  | College degree   | 1  | Working, fi | 18 | 2   | No       |      | 2   | No      |
| 13468  | 2  | 2  | Married/li     | 3  | College degree   | 6  | Homemake    | 21 | 2   | No       |      | 2   | No      |
| 13475  | 2  | 2  | Married/li     | 3  | College degree   | 6  | Homemake    | 21 | 2   | No       |      | 2   | No      |
| 13484  | 2  | 1  | Single         | 3  | College degree   | 4  | Retired     | 15 | 2   | No       |      | 2   | No      |
| 13486  | 2  | 2  | Married/li     | 1  | High school or l | 6  | Homemake    | 16 | 2   | No       |      | 2   | No      |
| 13487  | 2  | 2  | Married/li     | 1  | High school or l | 8  | Other worl  | 18 | 1   | Yes      | 1    | 1   | Yes     |
| 13491  | 2  | 2  | Married/li     | 3  | College degree   | 6  | Homemake    | 18 | 2   | No       |      | 2   | No      |
| 13496  | 2  | 2  | Married/li     | 4  | Postgraduate     | 1  | Working, fi | 24 | 2   | No       |      | 1   | Yes     |
| 13497  | 2  | 2  | Married/li     | 1  | High school or l | 1  | Working, fi | 16 | 2   | No       |      | 1   | Yes     |
| 13498  | 2  | 2  | Married/li     | 3  | College degree   | 1  | Working, fi | 15 | 2   | No       |      | 2   | No      |
| 13502  | 2  | 2  | Married/li     | 1  | High school or l | 1  | Working, fi | 18 | 2   | No       |      | 2   | No      |
| 13503  | 2  | 1  | Single         | 1  | High school or l | 4  | Retired     | 1  | 2   | No       |      | 2   | No      |
| 13505  | 2  | 4  | Widow/wi       | 1  | High school or l | 6  | Homemake    | 99 | 2   | No       |      | 1   | Yes     |
| 13509  | 2  | 2  | Married/li     | 1  | High school or l | 6  | Homemake    | 17 | 2   | No       |      | 1   | Yes     |

| respid | Q5 | Q6 | Marital Status | Q7 | Education        | Q8 | Work        | Q9 | Q10 | Diabetes | Q10a | Q11 | High BP |
|--------|----|----|----------------|----|------------------|----|-------------|----|-----|----------|------|-----|---------|
| 13510  | 2  | 2  | Married/li     | 3  | College degree   | 1  | Working, fi | 22 | 2   | No       |      | 2   | No      |
| 13518  | 2  | 2  | Married/li     | 1  | High school or l | 2  | Working, p  | 16 | 2   | No       |      | 2   | No      |
| 13521  | 2  | 2  | Married/li     | 3  | College degree   | 2  | Working, p  | 17 | 2   | No       |      | 2   | No      |
| 13523  | 2  | 2  | Married/li     | 3  | College degree   | 4  | Retired     | 18 | 1   | Yes      | 1    | 1   | Yes     |
| 13528  | 2  | 2  | Married/li     | 1  | High school or l | 6  | Homemake    | 16 | 2   | No       |      | 2   | No      |
| 13531  | 2  | 2  | Married/li     | 3  | College degree   | 6  | Homemake    | 23 | 2   | No       |      | 2   | No      |
| 13532  | 2  | 2  | Married/li     | 1  | High school or l | 2  | Working, p  | 25 | 2   | No       |      | 2   | No      |
| 13533  | 2  | 4  | Widow/wi       | 3  | College degree   | 6  | Homemake    | 19 | 2   | No       |      | 2   | No      |
| 13534  | 2  | 4  | Widow/wi       | 1  | High school or l | 2  | Working, p  | 17 | 2   | No       |      | 2   | No      |
| 13535  | 2  | 2  | Married/li     | 3  | College degree   | 6  | Homemake    | 21 | 2   | No       |      | 1   | Yes     |
| 13538  | 2  | 2  | Married/li     | 3  | College degree   | 1  | Working, fi | 18 | 2   | No       |      | 1   | Yes     |
| 13540  | 2  | 4  | Widow/wi       | 1  | High school or l | 6  | Homemake    | 16 | 2   | No       |      | 2   | No      |
| 13541  | 2  | 2  | Married/li     | 1  | High school or l | 6  | Homemake    | 17 | 2   | No       |      | 2   | No      |
| 13542  | 2  | 4  | Widow/wi       | 3  | College degree   | 9  | Other       | 16 | 2   | No       |      | 2   | No      |
| 13550  | 2  | 2  | Married/li     | 3  | College degree   | 6  | Homemake    | 19 | 2   | No       |      | 2   | No      |
| 13553  | 2  | 2  | Married/li     | 1  | High school or l | 6  | Homemake    | 18 | 2   | No       |      | 1   | Yes     |
| 13554  | 2  | 2  | Married/li     | 2  | Some college     | 2  | Working, p  | 16 | 2   | No       |      | 2   | No      |
| 13555  | 2  | 2  | Married/li     | 1  | High school or l | 6  | Homemake    | 15 | 2   | No       |      | 1   | Yes     |
| 13556  | 2  | 2  | Married/li     | 1  | High school or l | 9  | Other       | 5  | 2   | No       |      | 2   | No      |
| 13563  | 2  | 2  | Married/li     | 3  | College degree   | 1  | Working, fi | 18 | 2   | No       |      | 2   | No      |
| 13564  | 2  | 2  | Married/li     | 3  | College degree   | 6  | Homemake    | 19 | 2   | No       |      | 1   | Yes     |
| 13567  | 2  | 2  | Married/li     | 1  | High school or l | 6  | Homemake    | 21 | 2   | No       |      | 2   | No      |
| 13568  | 2  | 2  | Married/li     | 3  | College degree   | 1  | Working, fi | 13 | 1   | Yes      | 1    | 1   | Yes     |
| 13570  | 2  | 2  | Married/li     | 3  | College degree   | 6  | Homemake    | 17 | 2   | No       |      | 2   | No      |
| 13573  | 2  | 2  | Married/li     | 3  | College degree   | 1  | Working, fi | 24 | 2   | No       |      | 2   | No      |
| 13575  | 2  | 2  | Married/li     | 3  | College degree   | 6  | Homemake    | 21 | 2   | No       |      | 2   | No      |
| 13577  | 2  | 2  | Married/li     | 3  | College degree   | 1  | Working, fi | 12 | 1   | Yes      | 1    | 1   | Yes     |
| 13580  | 2  | 2  | Married/li     | 3  | College degree   | 1  | Working, fi | 12 | 1   | Yes      | 1    | 1   | Yes     |
| 13582  | 2  | 2  | Married/li     | 3  | College degree   | 9  | Other       | 20 | 2   | No       |      | 2   | No      |
| 13584  | 2  | 2  | Married/li     | 3  | College degree   | 1  | Working, fi | 12 | 1   | Yes      | 1    | 1   | Yes     |
| 13585  | 2  | 1  | Single         | 3  | College degree   | 1  | Working, fi | 15 | 2   | No       |      | 2   | No      |
| 13586  | 2  | 2  | Married/li     | 1  | High school or l | 4  | Retired     | 11 | 2   | No       |      | 2   | No      |



| respid | Q5 | Q6 | Marital Status | Q7 | Education        | Q8 | Work        | Q9 | Q10 | Diabetes | Q10a | Q11 | High BP |
|--------|----|----|----------------|----|------------------|----|-------------|----|-----|----------|------|-----|---------|
| 13587  | 2  | 2  | Married/li     | 3  | College degree   | 1  | Working, fi | 22 | 2   | No       |      | 1   | Yes     |
| 13592  | 2  | 2  | Married/li     | 3  | College degree   | 1  | Working, fi | 12 | 1   | Yes      | 1    | 1   | Yes     |
| 13596  | 2  | 3  | Divorced       | 1  | High school or l | 6  | Homemake    | 17 | 2   | No       |      | 2   | No      |
| 13597  | 2  | 2  | Married/li     | 4  | Postgraduate     | 6  | Homemake    | 18 | 2   | No       |      | 2   | No      |
| 13599  | 2  | 2  | Married/li     | 3  | College degree   | 6  | Homemake    | 24 | 1   | Yes      | 1    | 2   | No      |
| 13601  | 2  | 2  | Married/li     | 3  | College degree   | 1  | Working, fi | 19 | 2   | No       |      | 2   | No      |
| 13604  | 2  | 2  | Married/li     | 1  | High school or l | 1  | Working, fi | 17 | 2   | No       |      | 2   | No      |
| 13608  | 2  | 2  | Married/li     | 2  | Some college     | 1  | Working, fi | 8  | 2   | No       |      | 1   | Yes     |
| 13616  | 2  | 2  | Married/li     | 4  | Postgraduate     | 1  | Working, fi | 34 | 1   | Yes      | 2    | 2   | No      |
| 13618  | 2  | 4  | Widow/wi       | 2  | Some college     | 1  | Working, fi | 1  | 2   | No       |      | 2   | No      |
| 13619  | 2  | 2  | Married/li     | 2  | Some college     | 1  | Working, fi | 25 | 2   | No       |      | 2   | No      |
| 13626  | 2  | 2  | Married/li     | 3  | College degree   | 6  | Homemake    | 21 | 2   | No       |      | 2   | No      |
| 13628  | 2  | 2  | Married/li     | 3  | College degree   | 1  | Working, fi | 12 | 2   | No       |      | 2   | No      |
| 13640  | 2  | 2  | Married/li     | 1  | High school or l | 1  | Working, fi | 8  | 2   | No       |      | 1   | Yes     |
| 13645  | 2  | 2  | Married/li     | 2  | Some college     | 8  | Other worl  | 32 | 2   | No       |      | 2   | No      |
| 13648  | 2  | 2  | Married/li     | 3  | College degree   | 1  | Working, fi | 11 | 2   | No       |      | 2   | No      |
| 13653  | 2  | 2  | Married/li     | 3  | College degree   | 1  | Working, fi | 12 | 2   | No       |      | 2   | No      |
| 13655  | 2  | 2  | Married/li     | 1  | High school or l | 1  | Working, fi | 5  | 2   | No       |      | 2   | No      |
| 13662  | 2  | 3  | Divorced       | 3  | College degree   | 1  | Working, fi | 8  | 1   | Yes      | 1    | 2   | No      |
| 13670  | 2  | 2  | Married/li     | 3  | College degree   | 4  | Retired     | 7  | 2   | No       |      | 2   | No      |
| 13673  | 2  | 3  | Divorced       | 1  | High school or l | 9  | Other       | 16 | 2   | No       |      | 2   | No      |
| 13674  | 2  | 2  | Married/li     | 3  | College degree   | 8  | Other worl  | 18 | 2   | No       |      | 2   | No      |
| 13675  | 2  | 2  | Married/li     | 1  | High school or l | 4  | Retired     | 99 | 2   | No       |      | 1   | Yes     |
| 13678  | 2  | 2  | Married/li     | 1  | High school or l | 4  | Retired     | 8  | 2   | No       |      | 2   | No      |
| 13680  | 2  | 1  | Single         | 3  | College degree   | 2  | Working, p  | 17 | 2   | No       |      | 2   | No      |
| 13681  | 2  | 2  | Married/li     | 2  | Some college     | 1  | Working, fi | 7  | 2   | No       |      | 2   | No      |
| 13683  | 2  | 2  | Married/li     | 3  | College degree   | 6  | Homemake    | 19 | 2   | No       |      | 1   | Yes     |
| 13684  | 2  | 2  | Married/li     | 3  | College degree   | 2  | Working, p  | 18 | 2   | No       |      | 2   | No      |
| 13685  | 2  | 2  | Married/li     | 3  | College degree   | 1  | Working, fi | 7  | 2   | No       |      | 2   | No      |
| 13687  | 2  | 2  | Married/li     | 3  | College degree   | 1  | Working, fi | 1  | 2   | No       |      | 2   | No      |
| 13690  | 2  | 2  | Married/li     | 2  | Some college     | 1  | Working, fi | 12 | 2   | No       |      | 2   | No      |
| 13700  | 2  | 2  | Married/li     | 2  | Some college     | 1  | Working, fi | 8  | 2   | No       |      | 2   | No      |

| respid | Q5 | Q6 | Marital Status | Q7 | Education        | Q8 | Work        | Q9 | Q10 | Diabetes | Q10a | Q11 | High BP |
|--------|----|----|----------------|----|------------------|----|-------------|----|-----|----------|------|-----|---------|
| 13705  | 2  | 2  | Married/li     | 2  | Some college     | 1  | Working, fi | 9  | 2   | No       |      | 2   | No      |
| 13710  | 2  | 2  | Married/li     | 3  | College degree   | 1  | Working, fi | 6  | 2   | No       |      | 2   | No      |
| 13711  | 2  | 3  | Divorced       | 1  | High school or l | 4  | Retired     | 5  | 2   | No       |      | 1   | Yes     |
| 13713  | 2  | 4  | Widow/wi       | 1  | High school or l | 9  | Other       | 31 | 2   | No       |      | 2   | No      |
| 13716  | 2  | 2  | Married/li     | 1  | High school or l | 1  | Working, fi | 14 | 2   | No       |      | 2   | No      |
| 13721  | 2  | 2  | Married/li     | 3  | College degree   | 1  | Working, fi | 18 | 2   | No       |      | 2   | No      |
| 13722  | 2  | 2  | Married/li     | 2  | Some college     | 1  | Working, fi | 13 | 2   | No       |      | 1   | Yes     |
| 13723  | 2  | 2  | Married/li     | 2  | Some college     | 4  | Retired     | 13 | 2   | No       |      | 1   | Yes     |
| 13726  | 2  | 2  | Married/li     | 1  | High school or l | 4  | Retired     | 11 | 2   | No       |      | 1   | Yes     |
| 13728  | 2  | 2  | Married/li     | 4  | Postgraduate     | 1  | Working, fi | 14 | 2   | No       |      | 2   | No      |
| 13730  | 2  | 2  | Married/li     | 1  | High school or l | 4  | Retired     | 3  | 2   | No       |      | 2   | No      |
| 13734  | 2  | 2  | Married/li     | 3  | College degree   | 1  | Working, fi | 5  | 2   | No       |      | 1   | Yes     |
| 13736  | 2  | 2  | Married/li     | 3  | College degree   | 1  | Working, fi | 14 | 2   | No       |      | 2   | No      |
| 13737  | 2  | 2  | Married/li     | 2  | Some college     | 1  | Working, fi | 13 | 2   | No       |      | 2   | No      |
| 13739  | 2  | 2  | Married/li     | 1  | High school or l | 4  | Retired     | 1  | 2   | No       |      | 2   | No      |
| 13742  | 2  | 2  | Married/li     | 1  | High school or l | 1  | Working, fi | 6  | 2   | No       |      | 2   | No      |
| 13746  | 2  | 2  | Married/li     | 3  | College degree   | 6  | Homemake    | 18 | 2   | No       |      | 2   | No      |
| 13747  | 2  | 2  | Married/li     | 3  | College degree   | 1  | Working, fi | 10 | 2   | No       |      | 2   | No      |
| 13749  | 2  | 2  | Married/li     | 2  | Some college     | 4  | Retired     | 1  | 2   | No       |      | 2   | No      |
| 13751  | 2  | 2  | Married/li     | 2  | Some college     | 1  | Working, fi | 27 | 1   | Yes      | 1    | 2   | No      |
| 13752  | 2  | 2  | Married/li     | 3  | College degree   | 6  | Homemake    | 23 | 2   | No       |      | 1   | Yes     |
| 13756  | 2  | 2  | Married/li     | 1  | High school or l | 6  | Homemake    | 17 | 2   | No       |      | 1   | Yes     |
| 13757  | 2  | 2  | Married/li     | 3  | College degree   | 4  | Retired     | 34 | 2   | No       |      | 1   | Yes     |
| 13767  | 2  | 2  | Married/li     | 2  | Some college     | 4  | Retired     | 11 | 2   | No       |      | 2   | No      |
| 13771  | 2  | 2  | Married/li     | 2  | Some college     | 1  | Working, fi | 11 | 2   | No       |      | 2   | No      |
| 13772  | 2  | 2  | Married/li     | 3  | College degree   | 1  | Working, fi | 14 | 2   | No       |      | 2   | No      |
| 13779  | 2  | 2  | Married/li     | 4  | Postgraduate     | 1  | Working, fi | 19 | 2   | No       |      | 2   | No      |
| 13782  | 2  | 2  | Married/li     | 2  | Some college     | 1  | Working, fi | 27 | 2   | No       |      | 2   | No      |
| 13783  | 2  | 2  | Married/li     | 3  | College degree   | 1  | Working, fi | 13 | 2   | No       |      | 2   | No      |
| 13785  | 2  | 2  | Married/li     | 4  | Postgraduate     | 1  | Working, fi | 18 | 2   | No       |      | 1   | Yes     |
| 13786  | 2  | 2  | Married/li     | 2  | Some college     | 1  | Working, fi | 31 | 2   | No       |      | 2   | No      |
| 13792  | 2  | 4  | Widow/wi       | 1  | High school or l | 4  | Retired     | 3  | 1   | Yes      | 1    | 1   | Yes     |

| respid | Q5 | Q6 | Marital Status | Q7 | Education        | Q8 | Work        | Q9 | Q10 | Diabetes | Q10a | Q11 | High BP |
|--------|----|----|----------------|----|------------------|----|-------------|----|-----|----------|------|-----|---------|
| 13796  | 2  | 1  | Single         | 1  | High school or l | 4  | Retired     | 2  | 2   | No       |      | 1   | Yes     |
| 13798  | 2  | 3  | Divorced       | 1  | High school or l | 1  | Working, fi | 8  | 2   | No       |      | 2   | No      |
| 13799  | 2  | 2  | Married/li     | 2  | Some college     | 2  | Working, p  | 8  | 2   | No       |      | 2   | No      |
| 13804  | 2  | 2  | Married/li     | 3  | College degree   | 1  | Working, fi | 4  | 2   | No       |      | 1   | Yes     |
| 13805  | 2  | 2  | Married/li     | 1  | High school or l | 1  | Working, fi | 8  | 2   | No       |      | 2   | No      |
| 13810  | 2  | 2  | Married/li     | 3  | College degree   | 1  | Working, fi | 13 | 2   | No       |      | 1   | Yes     |
| 13811  | 2  | 2  | Married/li     | 1  | High school or l | 6  | Homemake    | 13 | 2   | No       |      | 2   | No      |
| 13819  | 2  | 2  | Married/li     | 1  | High school or l | 2  | Working, p  | 4  | 1   | Yes      | 1    | 1   | Yes     |
| 13821  | 2  | 2  | Married/li     | 2  | Some college     | 1  | Working, fi | 10 | 1   | Yes      | 1    | 1   | Yes     |
| 13824  | 2  | 2  | Married/li     | 3  | College degree   | 1  | Working, fi | 12 | 2   | No       |      | 1   | Yes     |
| 13828  | 2  | 2  | Married/li     | 1  | High school or l | 2  | Working, p  | 16 | 2   | No       |      | 2   | No      |
| 13829  | 2  | 2  | Married/li     | 2  | Some college     | 1  | Working, fi | 10 | 1   | Yes      | 1    | 1   | Yes     |
| 13831  | 2  | 2  | Married/li     | 1  | High school or l | 4  | Retired     | 3  | 2   | No       |      | 1   | Yes     |
| 13833  | 2  | 3  | Divorced       | 1  | High school or l | 1  | Working, fi | 9  | 2   | No       |      | 2   | No      |
| 13835  | 2  | 2  | Married/li     | 3  | College degree   | 1  | Working, fi | 14 | 2   | No       |      | 2   | No      |
| 13838  | 2  | 2  | Married/li     | 1  | High school or l | 1  | Working, fi | 6  | 2   | No       |      | 2   | No      |
| 13839  | 2  | 2  | Married/li     | 1  | High school or l | 1  | Working, fi | 10 | 1   | Yes      | 1    | 1   | Yes     |
| 13845  | 2  | 2  | Married/li     | 1  | High school or l | 1  | Working, fi | 6  | 2   | No       |      | 2   | No      |
| 13846  | 2  | 2  | Married/li     | 1  | High school or l | 4  | Retired     | 7  | 2   | No       |      | 1   | Yes     |
| 13853  | 2  | 5  | Prefer not     | 1  | High school or l | 4  | Retired     | 1  | 2   | No       |      | 1   | Yes     |
| 13855  | 2  | 2  | Married/li     | 2  | Some college     | 1  | Working, fi | 10 | 1   | Yes      | 1    | 1   | Yes     |
| 13858  | 2  | 2  | Married/li     | 3  | College degree   | 1  | Working, fi | 11 | 2   | No       |      | 1   | Yes     |
| 13860  | 2  | 2  | Married/li     | 1  | High school or l | 1  | Working, fi | 8  | 2   | No       |      | 2   | No      |
| 13865  | 2  | 2  | Married/li     | 2  | Some college     | 1  | Working, fi | 11 | 1   | Yes      | 1    | 1   | Yes     |
| 13870  | 2  | 2  | Married/li     | 1  | High school or l | 1  | Working, fi | 10 | 2   | No       |      | 2   | No      |
| 13872  | 2  | 2  | Married/li     | 3  | College degree   | 1  | Working, fi | 14 | 2   | No       |      | 2   | No      |
| 13873  | 2  | 2  | Married/li     | 3  | College degree   | 2  | Working, p  | 18 | 2   | No       |      | 2   | No      |
| 13874  | 2  | 2  | Married/li     | 1  | High school or l | 1  | Working, fi | 5  | 2   | No       |      | 2   | No      |
| 13875  | 2  | 2  | Married/li     | 2  | Some college     | 1  | Working, fi | 10 | 1   | Yes      | 1    | 1   | Yes     |
| 13881  | 2  | 2  | Married/li     | 1  | High school or l | 2  | Working, p  | 4  | 2   | No       |      | 1   | Yes     |
| 13887  | 2  | 2  | Married/li     | 1  | High school or l | 1  | Working, fi | 11 | 2   | No       |      | 2   | No      |
| 13888  | 2  | 2  | Married/li     | 2  | Some college     | 1  | Working, fi | 10 | 1   | Yes      | 1    | 1   | Yes     |

| respid | Q5 | Q6 | Marital Status | Q7 | Education        | Q8 | Work        | Q9 | Q10 | Diabetes | Q10a | Q11 | High BP |
|--------|----|----|----------------|----|------------------|----|-------------|----|-----|----------|------|-----|---------|
| 13889  | 2  | 2  | Married/li     | 2  | Some college     | 1  | Working, fi | 10 | 1   | Yes      | 1    | 1   | Yes     |
| 13895  | 2  | 2  | Married/li     | 3  | College degree   | 1  | Working, fi | 14 | 2   | No       |      | 2   | No      |
| 13897  | 2  | 2  | Married/li     | 1  | High school or l | 1  | Working, fi | 5  | 2   | No       |      | 2   | No      |
| 13898  | 2  | 2  | Married/li     | 2  | Some college     | 1  | Working, fi | 12 | 2   | No       |      | 1   | Yes     |
| 13901  | 2  | 4  | Widow/wi       | 1  | High school or l | 1  | Working, fi | 6  | 2   | No       |      | 2   | No      |
| 13902  | 2  | 2  | Married/li     | 3  | College degree   | 1  | Working, fi | 11 | 1   | Yes      | 1    | 2   | No      |
| 13903  | 2  | 2  | Married/li     | 1  | High school or l | 1  | Working, fi | 5  | 2   | No       |      | 2   | No      |
| 13905  | 2  | 2  | Married/li     | 2  | Some college     | 1  | Working, fi | 10 | 1   | Yes      | 1    | 1   | Yes     |
| 13908  | 2  | 2  | Married/li     | 2  | Some college     | 1  | Working, fi | 7  | 2   | No       |      | 2   | No      |
| 13909  | 2  | 2  | Married/li     | 1  | High school or l | 4  | Retired     | 2  | 2   | No       |      | 1   | Yes     |
| 13910  | 2  | 2  | Married/li     | 3  | College degree   | 1  | Working, fi | 11 | 1   | Yes      | 1    | 1   | Yes     |
| 13911  | 2  | 2  | Married/li     | 1  | High school or l | 1  | Working, fi | 5  | 2   | No       |      | 2   | No      |
| 13914  | 2  | 2  | Married/li     | 2  | Some college     | 1  | Working, fi | 8  | 2   | No       |      | 2   | No      |
| 13920  | 2  | 2  | Married/li     | 2  | Some college     | 4  | Retired     | 8  | 2   | No       |      | 2   | No      |
| 13926  | 2  | 2  | Married/li     | 3  | College degree   | 1  | Working, fi | 33 | 2   | No       |      | 2   | No      |
| 13929  | 2  | 2  | Married/li     | 2  | Some college     | 1  | Working, fi | 10 | 1   | Yes      | 1    | 1   | Yes     |
| 13930  | 2  | 2  | Married/li     | 3  | College degree   | 1  | Working, fi | 14 | 2   | No       |      | 2   | No      |
| 13931  | 2  | 2  | Married/li     | 1  | High school or l | 1  | Working, fi | 6  | 2   | No       |      | 2   | No      |
| 13932  | 2  | 2  | Married/li     | 3  | College degree   | 1  | Working, fi | 11 | 2   | No       |      | 1   | Yes     |
| 13934  | 2  | 2  | Married/li     | 2  | Some college     | 4  | Retired     | 7  | 2   | No       |      | 2   | No      |
| 13938  | 2  | 2  | Married/li     | 3  | College degree   | 1  | Working, fi | 19 | 2   | No       |      | 2   | No      |
| 13942  | 2  | 2  | Married/li     | 3  | College degree   | 6  | Homemake    | 18 | 2   | No       |      | 2   | No      |
| 13945  | 2  | 2  | Married/li     | 2  | Some college     | 4  | Retired     | 6  | 2   | No       |      | 2   | No      |
| 13947  | 2  | 2  | Married/li     | 3  | College degree   | 1  | Working, fi | 19 | 2   | No       |      | 2   | No      |
| 13948  | 2  | 2  | Married/li     | 3  | College degree   | 6  | Homemake    | 19 | 2   | No       |      | 2   | No      |
| 13959  | 2  | 2  | Married/li     | 3  | College degree   | 1  | Working, fi | 18 | 2   | No       |      | 1   | Yes     |
| 13962  | 2  | 2  | Married/li     | 4  | Postgraduate     | 1  | Working, fi | 17 | 2   | No       |      | 2   | No      |
| 13963  | 2  | 2  | Married/li     | 3  | College degree   | 9  | Other       | 16 | 2   | No       |      | 2   | No      |
| 13964  | 2  | 2  | Married/li     | 3  | College degree   | 4  | Retired     | 99 | 2   | No       |      | 2   | No      |
| 13966  | 2  | 2  | Married/li     | 2  | Some college     | 1  | Working, fi | 10 | 1   | Yes      | 1    | 1   | Yes     |
| 13968  | 2  | 1  | Single         | 1  | High school or l | 2  | Working, p  | 15 | 2   | No       |      | 2   | No      |
| 13971  | 2  | 2  | Married/li     | 3  | College degree   | 8  | Other worl  | 22 | 2   | No       |      | 1   | Yes     |

| respid | Q5 | Q6 | Marital Status | Q7 | Education        | Q8 | Work        | Q9 | Q10 | Diabetes | Q10a | Q11 | High BP |
|--------|----|----|----------------|----|------------------|----|-------------|----|-----|----------|------|-----|---------|
| 13979  | 2  | 2  | Married/li     | 2  | Some college     | 2  | Working, p  | 16 | 2   | No       |      | 1   | Yes     |
| 13980  | 2  | 2  | Married/li     | 3  | College degree   | 6  | Homemake    | 22 | 2   | No       |      | 2   | No      |
| 13981  | 2  | 2  | Married/li     | 3  | College degree   | 2  | Working, p  | 17 | 1   | Yes      | 1    | 2   | No      |
| 13982  | 2  | 2  | Married/li     | 3  | College degree   | 1  | Working, fi | 18 | 1   | Yes      | 1    | 1   | Yes     |
| 13984  | 2  | 2  | Married/li     | 3  | College degree   | 1  | Working, fi | 19 | 2   | No       |      | 2   | No      |
| 13989  | 2  | 2  | Married/li     | 4  | Postgraduate     | 1  | Working, fi | 23 | 2   | No       |      | 2   | No      |
| 13990  | 2  | 2  | Married/li     | 2  | Some college     | 6  | Homemake    | 16 | 2   | No       |      | 1   | Yes     |
| 13992  | 2  | 3  | Divorced       | 3  | College degree   | 2  | Working, p  | 15 | 1   | Yes      | 1    | 2   | No      |
| 13998  | 2  | 2  | Married/li     | 3  | College degree   | 6  | Homemake    | 20 | 2   | No       |      | 2   | No      |
| 13999  | 2  | 2  | Married/li     | 1  | High school or l | 4  | Retired     | 7  | 2   | No       |      | 2   | No      |
| 14000  | 2  | 3  | Divorced       | 2  | Some college     | 9  | Other       | 18 | 2   | No       |      | 1   | Yes     |
| 14003  | 2  | 2  | Married/li     | 3  | College degree   | 1  | Working, fi | 18 | 2   | No       |      | 1   | Yes     |
| 14004  | 2  | 2  | Married/li     | 2  | Some college     | 6  | Homemake    | 23 | 2   | No       |      | 1   | Yes     |
| 14006  | 2  | 2  | Married/li     | 3  | College degree   | 1  | Working, fi | 21 | 2   | No       |      | 2   | No      |
| 14007  | 2  | 2  | Married/li     | 3  | College degree   | 6  | Homemake    | 18 | 2   | No       |      | 2   | No      |
| 14008  | 2  | 2  | Married/li     | 1  | High school or l | 1  | Working, fi | 6  | 2   | No       |      | 2   | No      |
| 14013  | 2  | 2  | Married/li     | 1  | High school or l | 6  | Homemake    | 18 | 2   | No       |      | 2   | No      |
| 14015  | 2  | 2  | Married/li     | 3  | College degree   | 6  | Homemake    | 24 | 2   | No       |      | 1   | Yes     |
| 14018  | 2  | 2  | Married/li     | 3  | College degree   | 6  | Homemake    | 18 | 2   | No       |      | 1   | Yes     |
| 14021  | 2  | 2  | Married/li     | 3  | College degree   | 1  | Working, fi | 11 | 2   | No       |      | 2   | No      |
| 14023  | 2  | 2  | Married/li     | 1  | High school or l | 9  | Other       | 15 | 2   | No       |      | 1   | Yes     |
| 14024  | 2  | 2  | Married/li     | 1  | High school or l | 4  | Retired     | 17 | 1   | Yes      | 1    | 2   | No      |
| 14026  | 2  | 1  | Single         | 3  | College degree   | 1  | Working, fi | 15 | 2   | No       |      | 2   | No      |
| 14030  | 2  | 2  | Married/li     | 1  | High school or l | 9  | Other       | 15 | 2   | No       |      | 1   | Yes     |
| 14032  | 2  | 2  | Married/li     | 3  | College degree   | 4  | Retired     | 12 | 2   | No       |      | 2   | No      |
| 14040  | 2  | 2  | Married/li     | 3  | College degree   | 1  | Working, fi | 21 | 2   | No       |      | 2   | No      |
| 14045  | 2  | 2  | Married/li     | 1  | High school or l | 4  | Retired     | 6  | 2   | No       |      | 2   | No      |
| 14048  | 2  | 2  | Married/li     | 2  | Some college     | 4  | Retired     | 9  | 2   | No       |      | 2   | No      |
| 14049  | 2  | 2  | Married/li     | 3  | College degree   | 8  | Other worl  | 18 | 2   | No       |      | 1   | Yes     |
| 14050  | 2  | 2  | Married/li     | 1  | High school or l | 6  | Homemake    | 17 | 2   | No       |      | 2   | No      |
| 14051  | 2  | 2  | Married/li     | 3  | College degree   | 1  | Working, fi | 11 | 1   | Yes      | 1    | 1   | Yes     |
| 14052  | 2  | 2  | Married/li     | 1  | High school or l | 1  | Working, fi | 16 | 1   | Yes      | 2    | 1   | Yes     |

| respid | Q5 | Q6 | Marital Status | Q7 | Education        | Q8 | Work        | Q9 | Q10 | Diabetes | Q10a | Q11 | High BP |
|--------|----|----|----------------|----|------------------|----|-------------|----|-----|----------|------|-----|---------|
| 14054  | 2  | 2  | Married/li     | 3  | College degree   | 1  | Working, fi | 20 | 2   | No       |      | 2   | No      |
| 14055  | 2  | 2  | Married/li     | 1  | High school or l | 1  | Working, fi | 5  | 2   | No       |      | 2   | No      |
| 14057  | 2  | 2  | Married/li     | 4  | Postgraduate     | 1  | Working, fi | 19 | 2   | No       |      | 2   | No      |
| 14058  | 2  | 5  | Prefer not     | 1  | High school or l | 6  | Homemake    | 16 | 2   | No       |      | 1   | Yes     |
| 14059  | 2  | 2  | Married/li     | 1  | High school or l | 1  | Working, fi | 17 | 1   | Yes      | 1    | 2   | No      |
| 14060  | 2  | 2  | Married/li     | 1  | High school or l | 1  | Working, fi | 19 | 2   | No       |      | 2   | No      |
| 14061  | 2  | 2  | Married/li     | 3  | College degree   | 4  | Retired     | 18 | 2   | No       |      | 2   | No      |
| 14071  | 2  | 1  | Single         | 4  | Postgraduate     | 4  | Retired     | 16 | 2   | No       |      | 2   | No      |
| 14073  | 2  | 2  | Married/li     | 3  | College degree   | 1  | Working, fi | 16 | 2   | No       |      | 1   | Yes     |
| 14074  | 2  | 5  | Prefer not     | 1  | High school or l | 8  | Other worl  | 20 | 2   | No       |      | 2   | No      |
| 14076  | 2  | 2  | Married/li     | 1  | High school or l | 6  | Homemake    | 15 | 2   | No       |      | 2   | No      |
| 14080  | 2  | 2  | Married/li     | 1  | High school or l | 1  | Working, fi | 16 | 1   | Yes      | 1    | 1   | Yes     |
| 14082  | 2  | 2  | Married/li     | 1  | High school or l | 1  | Working, fi | 17 | 2   | No       |      | 2   | No      |
| 14083  | 2  | 3  | Divorced       | 1  | High school or l | 1  | Working, fi | 15 | 1   | Yes      | 1    | 1   | Yes     |
| 14084  | 2  | 2  | Married/li     | 3  | College degree   | 6  | Homemake    | 23 | 2   | No       |      | 1   | Yes     |
| 14085  | 2  | 2  | Married/li     | 1  | High school or l | 1  | Working, fi | 10 | 2   | No       |      | 2   | No      |
| 14086  | 2  | 2  | Married/li     | 3  | College degree   | 1  | Working, fi | 14 | 2   | No       |      | 2   | No      |
| 14088  | 2  | 2  | Married/li     | 3  | College degree   | 1  | Working, fi | 29 | 2   | No       |      | 2   | No      |
| 14090  | 2  | 2  | Married/li     | 3  | College degree   | 1  | Working, fi | 18 | 2   | No       |      | 2   | No      |
| 14092  | 2  | 2  | Married/li     | 3  | College degree   | 1  | Working, fi | 17 | 2   | No       |      | 1   | Yes     |
| 14093  | 2  | 2  | Married/li     | 3  | College degree   | 1  | Working, fi | 13 | 2   | No       |      | 2   | No      |
| 14096  | 2  | 2  | Married/li     | 3  | College degree   | 6  | Homemake    | 21 | 2   | No       |      | 2   | No      |
| 14103  | 2  | 2  | Married/li     | 1  | High school or l | 4  | Retired     | 6  | 2   | No       |      | 2   | No      |
| 14105  | 2  | 2  | Married/li     | 3  | College degree   | 1  | Working, fi | 18 | 2   | No       |      | 2   | No      |
| 14106  | 2  | 1  | Single         | 3  | College degree   | 3  | Unemploy    | 15 | 2   | No       |      | 2   | No      |
| 14107  | 2  | 2  | Married/li     | 2  | Some college     | 1  | Working, fi | 10 | 1   | Yes      | 1    | 1   | Yes     |
| 14108  | 2  | 2  | Married/li     | 2  | Some college     | 1  | Working, fi | 10 | 1   | Yes      | 1    | 1   | Yes     |
| 14112  | 2  | 2  | Married/li     | 1  | High school or l | 1  | Working, fi | 18 | 2   | No       |      | 2   | No      |
| 14114  | 2  | 3  | Divorced       | 4  | Postgraduate     | 6  | Homemake    | 21 | 2   | No       |      | 2   | No      |
| 14115  | 2  | 2  | Married/li     | 1  | High school or l | 1  | Working, fi | 22 | 2   | No       |      | 1   | Yes     |
| 14116  | 2  | 2  | Married/li     | 3  | College degree   | 1  | Working, fi | 11 | 2   | No       |      | 2   | No      |
| 14117  | 2  | 2  | Married/li     | 1  | High school or l | 9  | Other       | 17 | 1   | Yes      | 1    | 2   | No      |

| respid | Q5 | Q6 | Marital Status | Q7 | Education        | Q8 | Work        | Q9 | Q10 | Diabetes | Q10a | Q11 | High BP |
|--------|----|----|----------------|----|------------------|----|-------------|----|-----|----------|------|-----|---------|
| 14118  | 2  | 2  | Married/li     | 1  | High school or l | 4  | Retired     | 7  | 2   | No       |      | 2   | No      |
| 14119  | 2  | 2  | Married/li     | 3  | College degree   | 1  | Working, fi | 21 | 2   | No       |      | 2   | No      |
| 14127  | 2  | 2  | Married/li     | 1  | High school or l | 1  | Working, fi | 5  | 2   | No       |      | 2   | No      |
| 14129  | 2  | 2  | Married/li     | 1  | High school or l | 6  | Homemake    | 20 | 2   | No       |      | 1   | Yes     |
| 14131  | 2  | 2  | Married/li     | 3  | College degree   | 6  | Homemake    | 18 | 2   | No       |      | 2   | No      |
| 14132  | 2  | 2  | Married/li     | 3  | College degree   | 1  | Working, fi | 17 | 2   | No       |      | 2   | No      |
| 14133  | 2  | 2  | Married/li     | 2  | Some college     | 1  | Working, fi | 10 | 1   | Yes      | 1    | 1   | Yes     |
| 14134  | 2  | 2  | Married/li     | 1  | High school or l | 1  | Working, fi | 20 | 2   | No       |      | 1   | Yes     |
| 14135  | 2  | 2  | Married/li     | 2  | Some college     | 1  | Working, fi | 9  | 2   | No       |      | 2   | No      |
| 14136  | 2  | 2  | Married/li     | 3  | College degree   | 1  | Working, fi | 24 | 2   | No       |      | 2   | No      |
| 14138  | 2  | 3  | Divorced       | 3  | College degree   | 1  | Working, fi | 9  | 2   | No       |      | 2   | No      |
| 14139  | 2  | 1  | Single         | 3  | College degree   | 9  | Other       | 19 | 2   | No       |      | 2   | No      |
| 14140  | 2  | 4  | Widow/wi       | 1  | High school or l | 6  | Homemake    | 15 | 2   | No       |      | 2   | No      |
| 14141  | 2  | 2  | Married/li     | 3  | College degree   | 4  | Retired     | 17 | 2   | No       |      | 2   | No      |
| 14143  | 2  | 2  | Married/li     | 3  | College degree   | 1  | Working, fi | 23 | 2   | No       |      | 2   | No      |
| 14146  | 2  | 2  | Married/li     | 1  | High school or l | 6  | Homemake    | 15 | 1   | Yes      | 1    | 1   | Yes     |
| 14147  | 2  | 2  | Married/li     | 3  | College degree   | 1  | Working, fi | 14 | 2   | No       |      | 2   | No      |
| 14148  | 2  | 2  | Married/li     | 1  | High school or l | 6  | Homemake    | 20 | 2   | No       |      | 1   | Yes     |
| 14151  | 2  | 3  | Divorced       | 4  | Postgraduate     | 2  | Working, p  | 20 | 1   | Yes      | 1    | 1   | Yes     |
| 14152  | 2  | 2  | Married/li     | 1  | High school or l | 4  | Retired     | 7  | 2   | No       |      | 2   | No      |
| 14153  | 2  | 2  | Married/li     | 1  | High school or l | 6  | Homemake    | 19 | 1   | Yes      | 2    | 2   | No      |
| 14154  | 2  | 2  | Married/li     | 2  | Some college     | 2  | Working, p  | 17 | 2   | No       |      | 2   | No      |
| 14158  | 2  | 2  | Married/li     | 3  | College degree   | 1  | Working, fi | 19 | 2   | No       |      | 2   | No      |
| 14159  | 2  | 2  | Married/li     | 2  | Some college     | 1  | Working, fi | 10 | 1   | Yes      | 1    | 1   | Yes     |
| 14160  | 2  | 3  | Divorced       | 4  | Postgraduate     | 1  | Working, fi | 21 | 2   | No       |      | 2   | No      |
| 14161  | 2  | 2  | Married/li     | 1  | High school or l | 4  | Retired     | 8  | 2   | No       |      | 2   | No      |
| 14162  | 2  | 2  | Married/li     | 3  | College degree   | 1  | Working, fi | 21 | 2   | No       |      | 1   | Yes     |
| 14165  | 2  | 2  | Married/li     | 3  | College degree   | 4  | Retired     | 20 | 2   | No       |      | 2   | No      |
| 14166  | 2  | 2  | Married/li     | 2  | Some college     | 4  | Retired     | 7  | 2   | No       |      | 2   | No      |
| 14167  | 2  | 2  | Married/li     | 1  | High school or l | 6  | Homemake    | 17 | 1   | Yes      | 1    | 2   | No      |
| 14169  | 2  | 3  | Divorced       | 3  | College degree   | 6  | Homemake    | 18 | 2   | No       |      | 2   | No      |
| 14170  | 2  | 2  | Married/li     | 1  | High school or l | 1  | Working, fi | 19 | 2   | No       |      | 2   | No      |

| respid | Q5 | Q6 | Marital Status | Q7 | Education        | Q8 | Work        | Q9 | Q10 | Diabetes | Q10a | Q11 | High BP |
|--------|----|----|----------------|----|------------------|----|-------------|----|-----|----------|------|-----|---------|
| 14172  | 2  | 2  | Married/li     | 3  | College degree   | 1  | Working, fi | 18 | 2   | No       |      | 2   | No      |
| 14173  | 2  | 2  | Married/li     | 3  | College degree   | 6  | Homemake    | 99 | 2   | No       |      | 2   | No      |
| 14174  | 2  | 2  | Married/li     | 3  | College degree   | 1  | Working, fi | 22 | 2   | No       |      | 1   | Yes     |
| 14175  | 2  | 2  | Married/li     | 1  | High school or l | 2  | Working, p  | 18 | 2   | No       |      | 2   | No      |
| 14176  | 2  | 2  | Married/li     | 3  | College degree   | 1  | Working, fi | 18 | 2   | No       |      | 2   | No      |
| 14178  | 2  | 2  | Married/li     | 3  | College degree   | 1  | Working, fi | 20 | 2   | No       |      | 2   | No      |
| 14179  | 2  | 3  | Divorced       | 3  | College degree   | 1  | Working, fi | 16 | 2   | No       |      | 2   | No      |
| 14180  | 2  | 2  | Married/li     | 1  | High school or l | 4  | Retired     | 7  | 2   | No       |      | 2   | No      |
| 14183  | 2  | 2  | Married/li     | 2  | Some college     | 1  | Working, fi | 10 | 1   | Yes      | 1    | 1   | Yes     |
| 14185  | 2  | 2  | Married/li     | 3  | College degree   | 1  | Working, fi | 9  | 1   | Yes      | 1    | 2   | No      |
| 14187  | 2  | 4  | Widow/wi       | 3  | College degree   | 6  | Homemake    | 17 | 2   | No       |      | 2   | No      |
| 14189  | 2  | 2  | Married/li     | 1  | High school or l | 2  | Working, p  | 18 | 2   | No       |      | 1   | Yes     |
| 14191  | 2  | 2  | Married/li     | 1  | High school or l | 2  | Working, p  | 10 | 2   | No       |      | 2   | No      |
| 14192  | 2  | 4  | Widow/wi       | 3  | College degree   | 4  | Retired     | 19 | 2   | No       |      | 2   | No      |
| 14195  | 2  | 2  | Married/li     | 3  | College degree   | 1  | Working, fi | 17 | 2   | No       |      | 1   | Yes     |
| 14197  | 2  | 2  | Married/li     | 3  | College degree   | 6  | Homemake    | 15 | 2   | No       |      | 2   | No      |
| 14203  | 2  | 2  | Married/li     | 2  | Some college     | 4  | Retired     | 8  | 2   | No       |      | 1   | Yes     |
| 14204  | 2  | 2  | Married/li     | 3  | College degree   | 2  | Working, p  | 21 | 2   | No       |      | 2   | No      |
| 14205  | 2  | 3  | Divorced       | 2  | Some college     | 2  | Working, p  | 15 | 2   | No       |      | 1   | Yes     |
| 14208  | 2  | 2  | Married/li     | 3  | College degree   | 1  | Working, fi | 11 | 2   | No       |      | 2   | No      |
| 14211  | 2  | 2  | Married/li     | 3  | College degree   | 1  | Working, fi | 14 | 2   | No       |      | 2   | No      |
| 14214  | 2  | 2  | Married/li     | 1  | High school or l | 6  | Homemake    | 18 | 2   | No       |      | 2   | No      |
| 14215  | 2  | 2  | Married/li     | 4  | Postgraduate     | 1  | Working, fi | 20 | 2   | No       |      | 2   | No      |
| 14216  | 2  | 2  | Married/li     | 1  | High school or l | 1  | Working, fi | 6  | 2   | No       |      | 2   | No      |
| 14218  | 2  | 2  | Married/li     | 3  | College degree   | 1  | Working, fi | 16 | 2   | No       |      | 1   | Yes     |
| 14220  | 2  | 2  | Married/li     | 3  | College degree   | 3  | Unemploy    | 20 | 2   | No       |      | 1   | Yes     |
| 14223  | 2  | 2  | Married/li     | 1  | High school or l | 2  | Working, p  | 6  | 2   | No       |      | 2   | No      |
| 14225  | 2  | 2  | Married/li     | 1  | High school or l | 4  | Retired     | 8  | 2   | No       |      | 1   | Yes     |
| 14226  | 2  | 2  | Married/li     | 3  | College degree   | 1  | Working, fi | 31 | 2   | No       |      | 2   | No      |
| 14228  | 2  | 2  | Married/li     | 2  | Some college     | 1  | Working, fi | 10 | 1   | Yes      | 1    | 1   | Yes     |
| 14231  | 2  | 2  | Married/li     | 3  | College degree   | 1  | Working, fi | 23 | 2   | No       |      | 2   | No      |
| 14233  | 2  | 2  | Married/li     | 1  | High school or l | 6  | Homemake    | 18 | 2   | No       |      | 2   | No      |



| respid | Q5 | Q6 | Marital Status | Q7 | Education        | Q8 | Work        | Q9 | Q10 | Diabetes | Q10a | Q11 | High BP |
|--------|----|----|----------------|----|------------------|----|-------------|----|-----|----------|------|-----|---------|
| 14237  | 2  | 2  | Married/li     | 1  | High school or l | 1  | Working, fi | 19 | 2   | No       |      | 2   | No      |
| 14238  | 2  | 2  | Married/li     | 1  | High school or l | 4  | Retired     | 9  | 2   | No       |      | 1   | Yes     |
| 14243  | 2  | 2  | Married/li     | 3  | College degree   | 1  | Working, fi | 35 | 2   | No       |      | 2   | No      |
| 14245  | 2  | 2  | Married/li     | 3  | College degree   | 2  | Working, p  | 14 | 2   | No       |      | 2   | No      |
| 14246  | 2  | 2  | Married/li     | 2  | Some college     | 1  | Working, fi | 10 | 1   | Yes      | 1    | 1   | Yes     |
| 14248  | 2  | 2  | Married/li     | 1  | High school or l | 1  | Working, fi | 5  | 2   | No       |      | 1   | Yes     |
| 14250  | 2  | 2  | Married/li     | 3  | College degree   | 4  | Retired     | 9  | 2   | No       |      | 2   | No      |
| 14253  | 2  | 2  | Married/li     | 4  | Postgraduate     | 4  | Retired     | 18 | 2   | No       |      | 2   | No      |
| 14254  | 2  | 2  | Married/li     | 3  | College degree   | 1  | Working, fi | 18 | 2   | No       |      | 2   | No      |
| 14255  | 2  | 4  | Widow/wi       | 1  | High school or l | 6  | Homemake    | 15 | 2   | No       |      | 2   | No      |
| 14257  | 2  | 2  | Married/li     | 3  | College degree   | 6  | Homemake    | 20 | 2   | No       |      | 2   | No      |
| 14258  | 2  | 3  | Divorced       | 1  | High school or l | 6  | Homemake    | 26 | 2   | No       |      | 2   | No      |
| 14259  | 2  | 2  | Married/li     | 4  | Postgraduate     | 1  | Working, fi | 22 | 1   | Yes      | 1    | 1   | Yes     |
| 14260  | 2  | 2  | Married/li     | 3  | College degree   | 6  | Homemake    | 20 | 2   | No       |      | 1   | Yes     |
| 14261  | 2  | 2  | Married/li     | 2  | Some college     | 1  | Working, fi | 10 | 1   | Yes      | 1    | 1   | Yes     |
| 14263  | 2  | 2  | Married/li     | 3  | College degree   | 1  | Working, fi | 21 | 2   | No       |      | 1   | Yes     |
| 14264  | 2  | 2  | Married/li     | 3  | College degree   | 2  | Working, p  | 16 | 2   | No       |      | 1   | Yes     |
| 14266  | 2  | 2  | Married/li     | 3  | College degree   | 1  | Working, fi | 19 | 1   | Yes      | 1    | 1   | Yes     |
| 14267  | 2  | 2  | Married/li     | 2  | Some college     | 1  | Working, fi | 10 | 1   | Yes      | 1    | 1   | Yes     |
| 14268  | 2  | 2  | Married/li     | 4  | Postgraduate     | 1  | Working, fi | 22 | 2   | No       |      | 2   | No      |
| 14275  | 2  | 2  | Married/li     | 2  | Some college     | 1  | Working, fi | 17 | 2   | No       |      | 1   | Yes     |
| 14278  | 2  | 4  | Widow/wi       | 4  | Postgraduate     | 1  | Working, fi | 17 | 2   | No       |      | 2   | No      |
| 14279  | 2  | 2  | Married/li     | 3  | College degree   | 1  | Working, fi | 19 | 2   | No       |      | 2   | No      |
| 14280  | 2  | 2  | Married/li     | 1  | High school or l | 4  | Retired     | 1  | 1   | Yes      | 2    | 2   | No      |
| 14281  | 2  | 2  | Married/li     | 1  | High school or l | 2  | Working, p  | 16 | 2   | No       |      | 2   | No      |
| 14282  | 2  | 2  | Married/li     | 2  | Some college     | 1  | Working, fi | 10 | 1   | Yes      | 1    | 1   | Yes     |
| 14283  | 2  | 3  | Divorced       | 3  | College degree   | 3  | Unemploy    | 99 | 2   | No       |      | 2   | No      |
| 14286  | 2  | 2  | Married/li     | 4  | Postgraduate     | 1  | Working, fi | 22 | 2   | No       |      | 2   | No      |
| 14287  | 2  | 2  | Married/li     | 1  | High school or l | 4  | Retired     | 5  | 2   | No       |      | 2   | No      |
| 14288  | 2  | 2  | Married/li     | 3  | College degree   | 6  | Homemake    | 24 | 2   | No       |      | 1   | Yes     |
| 14291  | 2  | 2  | Married/li     | 1  | High school or l | 1  | Working, fi | 10 | 2   | No       |      | 2   | No      |
| 14292  | 2  | 2  | Married/li     | 3  | College degree   | 1  | Working, fi | 9  | 2   | No       |      | 2   | No      |

| respid | Q5 | Q6 | Marital Status | Q7 | Education        | Q8 | Work        | Q9 | Q10 | Diabetes | Q10a | Q11 | High BP |
|--------|----|----|----------------|----|------------------|----|-------------|----|-----|----------|------|-----|---------|
| 14293  | 2  | 2  | Married/li     | 3  | College degree   | 6  | Homemake    | 16 | 2   | No       |      | 2   | No      |
| 14304  | 2  | 2  | Married/li     | 2  | Some college     | 1  | Working, fi | 10 | 1   | Yes      | 1    | 1   | Yes     |
| 14308  | 2  | 2  | Married/li     | 3  | College degree   | 4  | Retired     | 18 | 2   | No       |      | 2   | No      |
| 14313  | 2  | 2  | Married/li     | 1  | High school or l | 6  | Homemake    | 17 | 2   | No       |      | 2   | No      |
| 14314  | 2  | 3  | Divorced       | 3  | College degree   | 3  | Unemploy    | 15 | 1   | Yes      | 1    | 1   | Yes     |
| 14316  | 2  | 4  | Widow/wi       | 1  | High school or l | 1  | Working, fi | 17 | 2   | No       |      | 2   | No      |
| 14317  | 2  | 2  | Married/li     | 2  | Some college     | 1  | Working, fi | 10 | 2   | No       |      | 2   | No      |
| 14318  | 2  | 2  | Married/li     | 3  | College degree   | 6  | Homemake    | 20 | 2   | No       |      | 2   | No      |
| 14319  | 2  | 1  | Single         | 4  | Postgraduate     | 8  | Other worl  | 16 | 2   | No       |      | 2   | No      |
| 14320  | 2  | 2  | Married/li     | 3  | College degree   | 1  | Working, fi | 10 | 1   | Yes      | 1    | 1   | Yes     |
| 14321  | 2  | 2  | Married/li     | 3  | College degree   | 1  | Working, fi | 22 | 2   | No       |      | 2   | No      |
| 14322  | 2  | 2  | Married/li     | 2  | Some college     | 1  | Working, fi | 10 | 1   | Yes      | 1    | 1   | Yes     |
| 14326  | 2  | 2  | Married/li     | 1  | High school or l | 6  | Homemake    | 18 | 2   | No       |      | 1   | Yes     |
| 14327  | 2  | 2  | Married/li     | 2  | Some college     | 1  | Working, fi | 10 | 1   | Yes      | 1    | 1   | Yes     |
| 14328  | 2  | 2  | Married/li     | 1  | High school or l | 1  | Working, fi | 17 | 2   | No       |      | 2   | No      |
| 14330  | 2  | 2  | Married/li     | 1  | High school or l | 6  | Homemake    | 19 | 2   | No       |      | 2   | No      |
| 14332  | 2  | 2  | Married/li     | 3  | College degree   | 6  | Homemake    | 22 | 2   | No       |      | 2   | No      |
| 14334  | 2  | 2  | Married/li     | 2  | Some college     | 1  | Working, fi | 5  | 2   | No       |      | 2   | No      |
| 14336  | 2  | 2  | Married/li     | 3  | College degree   | 6  | Homemake    | 18 | 2   | No       |      | 1   | Yes     |
| 14337  | 2  | 2  | Married/li     | 3  | College degree   | 6  | Homemake    | 18 | 2   | No       |      | 2   | No      |
| 14339  | 2  | 2  | Married/li     | 1  | High school or l | 4  | Retired     | 5  | 2   | No       |      | 2   | No      |
| 14340  | 2  | 2  | Married/li     | 3  | College degree   | 1  | Working, fi | 14 | 2   | No       |      | 2   | No      |
| 14341  | 2  | 2  | Married/li     | 3  | College degree   | 1  | Working, fi | 12 | 2   | No       |      | 2   | No      |
| 14344  | 2  | 2  | Married/li     | 3  | College degree   | 1  | Working, fi | 12 | 2   | No       |      | 2   | No      |
| 14345  | 2  | 2  | Married/li     | 3  | College degree   | 1  | Working, fi | 20 | 2   | No       |      | 2   | No      |
| 14346  | 2  | 2  | Married/li     | 2  | Some college     | 2  | Working, p  | 14 | 2   | No       |      | 2   | No      |
| 14348  | 2  | 2  | Married/li     | 3  | College degree   | 1  | Working, fi | 20 | 2   | No       |      | 2   | No      |
| 14349  | 2  | 2  | Married/li     | 1  | High school or l | 1  | Working, fi | 18 | 2   | No       |      | 1   | Yes     |
| 14358  | 2  | 2  | Married/li     | 2  | Some college     | 1  | Working, fi | 10 | 1   | Yes      | 1    | 1   | Yes     |
| 14360  | 2  | 2  | Married/li     | 1  | High school or l | 6  | Homemake    | 18 | 2   | No       |      | 2   | No      |
| 14362  | 2  | 1  | Single         | 1  | High school or l | 1  | Working, fi | 17 | 2   | No       |      | 1   | Yes     |
| 14366  | 2  | 2  | Married/li     | 3  | College degree   | 1  | Working, fi | 10 | 2   | No       |      | 2   | No      |

| respid | Q5 | Q6 | Marital Status | Q7 | Education        | Q8 | Work        | Q9 | Q10 | Diabetes | Q10a | Q11 | High BP |
|--------|----|----|----------------|----|------------------|----|-------------|----|-----|----------|------|-----|---------|
| 14367  | 2  | 2  | Married/li     | 4  | Postgraduate     | 1  | Working, fi | 37 | 2   | No       |      | 2   | No      |
| 14369  | 2  | 2  | Married/li     | 3  | College degree   | 1  | Working, fi | 16 | 2   | No       |      | 2   | No      |
| 14371  | 2  | 2  | Married/li     | 3  | College degree   | 1  | Working, fi | 19 | 2   | No       |      | 2   | No      |
| 14372  | 2  | 2  | Married/li     | 1  | High school or l | 6  | Homemake    | 20 | 2   | No       |      | 2   | No      |
| 14374  | 2  | 5  | Prefer not     | 1  | High school or l | 3  | Unemploye   | 99 | 2   | No       |      | 2   | No      |
| 14376  | 2  | 2  | Married/li     | 1  | High school or l | 6  | Homemake    | 15 | 2   | No       |      | 2   | No      |
| 14377  | 2  | 2  | Married/li     | 3  | College degree   | 6  | Homemake    | 20 | 2   | No       |      | 1   | Yes     |
| 14378  | 2  | 2  | Married/li     | 3  | College degree   | 2  | Working, p  | 21 | 2   | No       |      | 2   | No      |
| 14379  | 2  | 2  | Married/li     | 3  | College degree   | 1  | Working, fi | 18 | 2   | No       |      | 2   | No      |
| 14381  | 2  | 2  | Married/li     | 3  | College degree   | 1  | Working, fi | 10 | 2   | No       |      | 2   | No      |
| 14383  | 2  | 2  | Married/li     | 1  | High school or l | 1  | Working, fi | 16 | 2   | No       |      | 2   | No      |
| 14384  | 2  | 2  | Married/li     | 3  | College degree   | 1  | Working, fi | 14 | 2   | No       |      | 2   | No      |
| 14385  | 2  | 2  | Married/li     | 2  | Some college     | 1  | Working, fi | 10 | 1   | Yes      | 1    | 1   | Yes     |
| 14386  | 2  | 2  | Married/li     | 4  | Postgraduate     | 1  | Working, fi | 21 | 2   | No       |      | 2   | No      |
| 14390  | 2  | 2  | Married/li     | 1  | High school or l | 1  | Working, fi | 19 | 1   | Yes      | 1    | 1   | Yes     |
| 14391  | 2  | 2  | Married/li     | 3  | College degree   | 1  | Working, fi | 33 | 2   | No       |      | 2   | No      |
| 14392  | 2  | 2  | Married/li     | 2  | Some college     | 1  | Working, fi | 1  | 2   | No       |      | 1   | Yes     |
| 14393  | 2  | 2  | Married/li     | 3  | College degree   | 1  | Working, fi | 21 | 2   | No       |      | 2   | No      |
| 14394  | 2  | 3  | Divorced       | 1  | High school or l | 9  | Other       | 19 | 2   | No       |      | 2   | No      |
| 14395  | 2  | 2  | Married/li     | 3  | College degree   | 1  | Working, fi | 8  | 2   | No       |      | 2   | No      |
| 14396  | 2  | 2  | Married/li     | 3  | College degree   | 1  | Working, fi | 13 | 2   | No       |      | 2   | No      |
| 14397  | 2  | 2  | Married/li     | 3  | College degree   | 3  | Unemploye   | 16 | 2   | No       |      | 2   | No      |
| 14398  | 2  | 2  | Married/li     | 3  | College degree   | 6  | Homemake    | 21 | 2   | No       |      | 2   | No      |
| 14399  | 2  | 2  | Married/li     | 3  | College degree   | 1  | Working, fi | 17 | 2   | No       |      | 2   | No      |
| 14400  | 2  | 2  | Married/li     | 3  | College degree   | 1  | Working, fi | 18 | 2   | No       |      | 2   | No      |
| 14403  | 2  | 2  | Married/li     | 3  | College degree   | 6  | Homemake    | 18 | 2   | No       |      | 2   | No      |
| 14404  | 2  | 2  | Married/li     | 1  | High school or l | 6  | Homemake    | 17 | 1   | Yes      | 1    | 2   | No      |
| 14405  | 2  | 2  | Married/li     | 3  | College degree   | 1  | Working, fi | 18 | 2   | No       |      | 2   | No      |
| 14407  | 2  | 2  | Married/li     | 2  | Some college     | 1  | Working, fi | 9  | 2   | No       |      | 1   | Yes     |
| 14408  | 2  | 2  | Married/li     | 3  | College degree   | 1  | Working, fi | 14 | 1   | Yes      | 1    | 2   | No      |
| 14410  | 2  | 2  | Married/li     | 2  | Some college     | 1  | Working, fi | 11 | 1   | Yes      | 1    | 1   | Yes     |
| 14415  | 2  | 2  | Married/li     | 3  | College degree   | 1  | Working, fi | 16 | 2   | No       |      | 1   | Yes     |

| respid | Q5 | Q6 | Marital Status | Q7 | Education        | Q8 | Work        | Q9 | Q10 | Diabetes | Q10a | Q11 | High BP |
|--------|----|----|----------------|----|------------------|----|-------------|----|-----|----------|------|-----|---------|
| 14419  | 2  | 2  | Married/li     | 3  | College degree   | 6  | Homemake    | 24 | 2   | No       |      | 2   | No      |
| 14420  | 2  | 2  | Married/li     | 3  | College degree   | 6  | Homemake    | 24 | 2   | No       |      | 2   | No      |
| 14421  | 2  | 2  | Married/li     | 1  | High school or l | 9  | Other       | 99 | 2   | No       |      | 2   | No      |
| 14423  | 2  | 2  | Married/li     | 3  | College degree   | 1  | Working, fi | 22 | 2   | No       |      | 2   | No      |
| 14424  | 2  | 2  | Married/li     | 3  | College degree   | 1  | Working, fi | 12 | 2   | No       |      | 1   | Yes     |
| 14425  | 2  | 2  | Married/li     | 1  | High school or l | 1  | Working, fi | 18 | 2   | No       |      | 1   | Yes     |
| 14426  | 2  | 2  | Married/li     | 1  | High school or l | 1  | Working, fi | 10 | 2   | No       |      | 2   | No      |
| 14427  | 2  | 3  | Divorced       | 3  | College degree   | 2  | Working, p  | 15 | 2   | No       |      | 2   | No      |
| 14428  | 2  | 2  | Married/li     | 2  | Some college     | 1  | Working, fi | 10 | 1   | Yes      | 1    | 1   | Yes     |
| 14431  | 2  | 2  | Married/li     | 3  | College degree   | 1  | Working, fi | 11 | 2   | No       |      | 2   | No      |
| 14433  | 2  | 2  | Married/li     | 1  | High school or l | 1  | Working, fi | 16 | 2   | No       |      | 2   | No      |
| 14434  | 2  | 2  | Married/li     | 4  | Postgraduate     | 1  | Working, fi | 22 | 2   | No       |      | 2   | No      |
| 14435  | 2  | 2  | Married/li     | 1  | High school or l | 6  | Homemake    | 17 | 2   | No       |      | 2   | No      |
| 14436  | 2  | 2  | Married/li     | 1  | High school or l | 1  | Working, fi | 21 | 2   | No       |      | 2   | No      |
| 14438  | 2  | 2  | Married/li     | 3  | College degree   | 1  | Working, fi | 11 | 2   | No       |      | 1   | Yes     |
| 14442  | 2  | 2  | Married/li     | 1  | High school or l | 6  | Homemake    | 17 | 2   | No       |      | 1   | Yes     |
| 14447  | 2  | 2  | Married/li     | 1  | High school or l | 4  | Retired     | 18 | 2   | No       |      | 2   | No      |
| 14448  | 2  | 2  | Married/li     | 3  | College degree   | 1  | Working, fi | 11 | 2   | No       |      | 1   | Yes     |
| 14450  | 2  | 2  | Married/li     | 1  | High school or l | 1  | Working, fi | 17 | 2   | No       |      | 1   | Yes     |
| 14451  | 2  | 2  | Married/li     | 3  | College degree   | 6  | Homemake    | 18 | 1   | Yes      | 1    | 2   | No      |
| 14454  | 2  | 2  | Married/li     | 3  | College degree   | 2  | Working, p  | 11 | 2   | No       |      | 1   | Yes     |
| 14455  | 2  | 4  | Widow/wi       | 1  | High school or l | 6  | Homemake    | 15 | 2   | No       |      | 2   | No      |
| 14456  | 2  | 3  | Divorced       | 4  | Postgraduate     | 2  | Working, p  | 16 | 2   | No       |      | 2   | No      |
| 14457  | 2  | 2  | Married/li     | 2  | Some college     | 1  | Working, fi | 9  | 1   | Yes      | 1    | 1   | Yes     |
| 14458  | 2  | 2  | Married/li     | 2  | Some college     | 1  | Working, fi | 10 | 1   | Yes      | 1    | 1   | Yes     |
| 14459  | 2  | 2  | Married/li     | 1  | High school or l | 6  | Homemake    | 16 | 2   | No       |      | 2   | No      |
| 14460  | 2  | 2  | Married/li     | 3  | College degree   | 1  | Working, fi | 11 | 2   | No       |      | 2   | No      |
| 14464  | 2  | 2  | Married/li     | 3  | College degree   | 1  | Working, fi | 24 | 2   | No       |      | 2   | No      |
| 14465  | 2  | 2  | Married/li     | 3  | College degree   | 1  | Working, fi | 23 | 2   | No       |      | 1   | Yes     |
| 14466  | 2  | 2  | Married/li     | 1  | High school or l | 4  | Retired     | 11 | 2   | No       |      | 2   | No      |
| 14467  | 2  | 4  | Widow/wi       | 1  | High school or l | 6  | Homemake    | 99 | 2   | No       |      | 1   | Yes     |
| 14470  | 2  | 2  | Married/li     | 1  | High school or l | 6  | Homemake    | 17 | 2   | No       |      | 1   | Yes     |

| respid | Q5 | Q6 | Marital Status | Q7 | Education        | Q8 | Work        | Q9 | Q10 | Diabetes | Q10a | Q11 | High BP |
|--------|----|----|----------------|----|------------------|----|-------------|----|-----|----------|------|-----|---------|
| 14472  | 2  | 2  | Married/li     | 1  | High school or l | 1  | Working, fi | 18 | 2   | No       |      | 2   | No      |
| 14473  | 2  | 2  | Married/li     | 3  | College degree   | 6  | Homemake    | 21 | 2   | No       |      | 2   | No      |
| 14474  | 2  | 5  | Prefer not     | 1  | High school or l | 6  | Homemake    | 15 | 2   | No       |      | 2   | No      |
| 14477  | 2  | 2  | Married/li     | 1  | High school or l | 4  | Retired     | 1  | 2   | No       |      | 2   | No      |
| 14478  | 2  | 2  | Married/li     | 1  | High school or l | 6  | Homemake    | 21 | 2   | No       |      | 2   | No      |
| 14479  | 2  | 2  | Married/li     | 2  | Some college     | 1  | Working, fi | 11 | 2   | No       |      | 2   | No      |
| 14484  | 2  | 2  | Married/li     | 3  | College degree   | 1  | Working, fi | 18 | 2   | No       |      | 1   | Yes     |
| 14485  | 2  | 2  | Married/li     | 3  | College degree   | 1  | Working, fi | 99 | 2   | No       |      | 2   | No      |
| 14486  | 2  | 2  | Married/li     | 3  | College degree   | 4  | Retired     | 3  | 2   | No       |      | 1   | Yes     |
| 14487  | 2  | 2  | Married/li     | 3  | College degree   | 1  | Working, fi | 11 | 2   | No       |      | 1   | Yes     |
| 14488  | 2  | 2  | Married/li     | 4  | Postgraduate     | 1  | Working, fi | 13 | 2   | No       |      | 2   | No      |
| 14491  | 2  | 2  | Married/li     | 1  | High school or l | 1  | Working, fi | 20 | 2   | No       |      | 2   | No      |
| 14495  | 2  | 2  | Married/li     | 4  | Postgraduate     | 1  | Working, fi | 24 | 2   | No       |      | 2   | No      |
| 14500  | 2  | 2  | Married/li     | 4  | Postgraduate     | 1  | Working, fi | 13 | 2   | No       |      | 2   | No      |
| 14502  | 2  | 2  | Married/li     | 3  | College degree   | 1  | Working, fi | 9  | 2   | No       |      | 2   | No      |
| 14504  | 2  | 2  | Married/li     | 3  | College degree   | 2  | Working, p  | 12 | 2   | No       |      | 1   | Yes     |
| 14505  | 2  | 2  | Married/li     | 2  | Some college     | 1  | Working, fi | 10 | 1   | Yes      | 1    | 1   | Yes     |
| 14507  | 2  | 2  | Married/li     | 1  | High school or l | 1  | Working, fi | 10 | 2   | No       |      | 2   | No      |
| 14517  | 2  | 2  | Married/li     | 1  | High school or l | 4  | Retired     | 17 | 2   | No       |      | 2   | No      |
| 14518  | 2  | 2  | Married/li     | 3  | College degree   | 8  | Other worl  | 23 | 2   | No       |      | 2   | No      |
| 14519  | 2  | 2  | Married/li     | 3  | College degree   | 6  | Homemake    | 19 | 2   | No       |      | 2   | No      |
| 14521  | 2  | 2  | Married/li     | 1  | High school or l | 4  | Retired     | 9  | 2   | No       |      | 1   | Yes     |
| 14522  | 2  | 2  | Married/li     | 1  | High school or l | 1  | Working, fi | 24 | 2   | No       |      | 1   | Yes     |
| 14526  | 2  | 2  | Married/li     | 3  | College degree   | 6  | Homemake    | 22 | 2   | No       |      | 2   | No      |
| 14528  | 2  | 2  | Married/li     | 3  | College degree   | 1  | Working, fi | 13 | 1   | Yes      | 1    | 1   | Yes     |
| 14529  | 2  | 1  | Single         | 3  | College degree   | 1  | Working, fi | 16 | 2   | No       |      | 2   | No      |
| 14530  | 2  | 2  | Married/li     | 2  | Some college     | 1  | Working, fi | 34 | 2   | No       |      | 1   | Yes     |
| 14531  | 2  | 2  | Married/li     | 2  | Some college     | 2  | Working, p  | 11 | 1   | Yes      | 1    | 2   | No      |
| 14534  | 2  | 2  | Married/li     | 3  | College degree   | 2  | Working, p  | 13 | 2   | No       |      | 1   | Yes     |
| 14538  | 2  | 2  | Married/li     | 3  | College degree   | 1  | Working, fi | 13 | 2   | No       |      | 1   | Yes     |
| 14539  | 2  | 2  | Married/li     | 3  | College degree   | 1  | Working, fi | 17 | 2   | No       |      | 2   | No      |
| 14545  | 2  | 2  | Married/li     | 1  | High school or l | 1  | Working, fi | 21 | 2   | No       |      | 2   | No      |

| respid | Q5 | Q6 | Marital Status | Q7 | Education        | Q8 | Work        | Q9 | Q10 | Diabetes | Q10a | Q11 | High BP |
|--------|----|----|----------------|----|------------------|----|-------------|----|-----|----------|------|-----|---------|
| 14546  | 2  | 1  | Single         | 1  | High school or l | 1  | Working, fi | 15 | 2   | No       |      | 2   | No      |
| 14551  | 2  | 2  | Married/li     | 4  | Postgraduate     | 1  | Working, fi | 18 | 1   | Yes      | 1    | 2   | No      |
| 14553  | 2  | 2  | Married/li     | 2  | Some college     | 1  | Working, fi | 10 | 1   | Yes      | 1    | 1   | Yes     |
| 14557  | 2  | 2  | Married/li     | 1  | High school or l | 1  | Working, fi | 17 | 2   | No       |      | 2   | No      |
| 14558  | 2  | 2  | Married/li     | 3  | College degree   | 1  | Working, fi | 10 | 2   | No       |      | 1   | Yes     |
| 14559  | 2  | 2  | Married/li     | 3  | College degree   | 4  | Retired     | 8  | 1   | Yes      | 2    | 1   | Yes     |
| 14560  | 2  | 2  | Married/li     | 3  | College degree   | 1  | Working, fi | 24 | 2   | No       |      | 2   | No      |
| 14563  | 2  | 2  | Married/li     | 3  | College degree   | 1  | Working, fi | 21 | 2   | No       |      | 2   | No      |
| 14565  | 2  | 2  | Married/li     | 3  | College degree   | 1  | Working, fi | 16 | 2   | No       |      | 2   | No      |
| 14571  | 2  | 2  | Married/li     | 3  | College degree   | 1  | Working, fi | 10 | 1   | Yes      | 1    | 2   | No      |
| 14572  | 2  | 2  | Married/li     | 2  | Some college     | 1  | Working, fi | 11 | 2   | No       |      | 1   | Yes     |
| 14573  | 2  | 2  | Married/li     | 3  | College degree   | 6  | Homemake    | 20 | 2   | No       |      | 2   | No      |
| 14575  | 2  | 5  | Prefer not     | 3  | College degree   | 1  | Working, fi | 15 | 2   | No       |      | 2   | No      |
| 14576  | 2  | 2  | Married/li     | 3  | College degree   | 4  | Retired     | 9  | 1   | Yes      | 1    | 1   | Yes     |
| 14578  | 2  | 2  | Married/li     | 3  | College degree   | 6  | Homemake    | 16 | 2   | No       |      | 1   | Yes     |
| 14579  | 2  | 1  | Single         | 3  | College degree   | 2  | Working, p  | 16 | 2   | No       |      | 2   | No      |
| 14580  | 2  | 2  | Married/li     | 2  | Some college     | 1  | Working, fi | 8  | 2   | No       |      | 2   | No      |
| 14582  | 2  | 2  | Married/li     | 3  | College degree   | 6  | Homemake    | 23 | 2   | No       |      | 1   | Yes     |
| 14585  | 2  | 2  | Married/li     | 3  | College degree   | 2  | Working, p  | 18 | 2   | No       |      | 2   | No      |
| 14588  | 2  | 2  | Married/li     | 3  | College degree   | 1  | Working, fi | 24 | 2   | No       |      | 2   | No      |
| 14590  | 2  | 2  | Married/li     | 3  | College degree   | 2  | Working, p  | 12 | 2   | No       |      | 1   | Yes     |
| 14592  | 2  | 2  | Married/li     | 1  | High school or l | 6  | Homemake    | 18 | 1   | Yes      | 1    | 2   | No      |
| 14593  | 2  | 2  | Married/li     | 2  | Some college     | 1  | Working, fi | 10 | 2   | No       |      | 1   | Yes     |
| 14595  | 2  | 2  | Married/li     | 3  | College degree   | 1  | Working, fi | 11 | 2   | No       |      | 1   | Yes     |
| 14597  | 2  | 2  | Married/li     | 3  | College degree   | 4  | Retired     | 22 | 2   | No       |      | 2   | No      |
| 14600  | 2  | 1  | Single         | 3  | College degree   | 1  | Working, fi | 16 | 1   | Yes      | 1    | 1   | Yes     |
| 14602  | 2  | 2  | Married/li     | 2  | Some college     | 1  | Working, fi | 10 | 1   | Yes      | 1    | 2   | No      |
| 14604  | 2  | 2  | Married/li     | 1  | High school or l | 1  | Working, fi | 4  | 2   | No       |      | 1   | Yes     |
| 14605  | 2  | 2  | Married/li     | 1  | High school or l | 9  | Other       | 15 | 2   | No       |      | 2   | No      |
| 14609  | 2  | 2  | Married/li     | 1  | High school or l | 1  | Working, fi | 22 | 2   | No       |      | 2   | No      |
| 14610  | 2  | 2  | Married/li     | 3  | College degree   | 9  | Other       | 18 | 2   | No       |      | 2   | No      |
| 14611  | 2  | 2  | Married/li     | 1  | High school or l | 2  | Working, p  | 19 | 2   | No       |      | 1   | Yes     |

| respid | Q5 | Q6 | Marital Status | Q7 | Education        | Q8 | Work        | Q9 | Q10 | Diabetes | Q10a | Q11 | High BP |
|--------|----|----|----------------|----|------------------|----|-------------|----|-----|----------|------|-----|---------|
| 14612  | 2  | 2  | Married/li     | 3  | College degree   | 1  | Working, fi | 9  | 2   | No       |      | 2   | No      |
| 14614  | 2  | 2  | Married/li     | 3  | College degree   | 4  | Retired     | 10 | 1   | Yes      | 1    | 2   | No      |
| 14615  | 2  | 2  | Married/li     | 3  | College degree   | 1  | Working, fi | 23 | 2   | No       |      | 2   | No      |
| 14618  | 2  | 2  | Married/li     | 1  | High school or l | 1  | Working, fi | 11 | 1   | Yes      | 1    | 1   | Yes     |
| 14621  | 2  | 2  | Married/li     | 1  | High school or l | 1  | Working, fi | 4  | 2   | No       |      | 2   | No      |
| 14624  | 2  | 3  | Divorced       | 4  | Postgraduate     | 1  | Working, fi | 24 | 2   | No       |      | 2   | No      |
| 14626  | 2  | 2  | Married/li     | 1  | High school or l | 6  | Homemake    | 18 | 2   | No       |      | 2   | No      |
| 14627  | 2  | 2  | Married/li     | 1  | High school or l | 1  | Working, fi | 20 | 2   | No       |      | 2   | No      |
| 14628  | 2  | 2  | Married/li     | 3  | College degree   | 1  | Working, fi | 9  | 1   | Yes      | 1    | 1   | Yes     |
| 14631  | 2  | 2  | Married/li     | 4  | Postgraduate     | 1  | Working, fi | 11 | 2   | No       |      | 2   | No      |
| 14633  | 2  | 2  | Married/li     | 2  | Some college     | 4  | Retired     | 10 | 1   | Yes      | 1    | 1   | Yes     |
| 14642  | 2  | 2  | Married/li     | 2  | Some college     | 1  | Working, fi | 10 | 2   | No       |      | 2   | No      |
| 14647  | 2  | 2  | Married/li     | 1  | High school or l | 1  | Working, fi | 6  | 2   | No       |      | 2   | No      |
| 14658  | 2  | 2  | Married/li     | 2  | Some college     | 1  | Working, fi | 10 | 2   | No       |      | 2   | No      |
| 14659  | 2  | 2  | Married/li     | 2  | Some college     | 4  | Retired     | 10 | 2   | No       |      | 1   | Yes     |
| 14660  | 2  | 2  | Married/li     | 3  | College degree   | 1  | Working, fi | 12 | 2   | No       |      | 2   | No      |
| 14661  | 2  | 2  | Married/li     | 3  | College degree   | 1  | Working, fi | 11 | 2   | No       |      | 2   | No      |
| 14662  | 2  | 2  | Married/li     | 3  | College degree   | 1  | Working, fi | 10 | 1   | Yes      | 1    | 1   | Yes     |
| 14663  | 2  | 2  | Married/li     | 4  | Postgraduate     | 1  | Working, fi | 13 | 2   | No       |      | 1   | Yes     |
| 14670  | 2  | 2  | Married/li     | 2  | Some college     | 1  | Working, fi | 8  | 2   | No       |      | 1   | Yes     |
| 14671  | 2  | 2  | Married/li     | 1  | High school or l | 1  | Working, fi | 5  | 1   | Yes      | 2    | 2   | No      |
| 14672  | 2  | 2  | Married/li     | 3  | College degree   | 2  | Working, p  | 12 | 2   | No       |      | 1   | Yes     |
| 14675  | 2  | 2  | Married/li     | 3  | College degree   | 1  | Working, fi | 11 | 2   | No       |      | 2   | No      |
| 14676  | 2  | 2  | Married/li     | 2  | Some college     | 1  | Working, fi | 14 | 1   | Yes      | 2    | 1   | Yes     |
| 14677  | 2  | 2  | Married/li     | 2  | Some college     | 1  | Working, fi | 8  | 2   | No       |      | 1   | Yes     |
| 14678  | 2  | 2  | Married/li     | 2  | Some college     | 1  | Working, fi | 9  | 1   | Yes      | 2    | 2   | No      |
| 14681  | 2  | 2  | Married/li     | 1  | High school or l | 4  | Retired     | 8  | 2   | No       |      | 2   | No      |
| 14684  | 2  | 2  | Married/li     | 1  | High school or l | 4  | Retired     | 6  | 2   | No       |      | 1   | Yes     |
| 14688  | 2  | 2  | Married/li     | 2  | Some college     | 1  | Working, fi | 14 | 2   | No       |      | 2   | No      |
| 14690  | 2  | 2  | Married/li     | 3  | College degree   | 1  | Working, fi | 10 | 2   | No       |      | 2   | No      |
| 14694  | 2  | 2  | Married/li     | 3  | College degree   | 2  | Working, p  | 12 | 2   | No       |      | 1   | Yes     |
| 14696  | 2  | 2  | Married/li     | 3  | College degree   | 1  | Working, fi | 12 | 2   | No       |      | 2   | No      |

| respid | Q5 | Q6 | Marital Status | Q7 | Education        | Q8 | Work        | Q9 | Q10 | Diabetes | Q10a | Q11 | High BP |
|--------|----|----|----------------|----|------------------|----|-------------|----|-----|----------|------|-----|---------|
| 14700  | 2  | 2  | Married/li     | 1  | High school or l | 2  | Working, p  | 5  | 2   | No       |      | 2   | No      |
| 14701  | 2  | 2  | Married/li     | 1  | High school or l | 4  | Retired     | 11 | 2   | No       |      | 1   | Yes     |
| 14703  | 2  | 2  | Married/li     | 3  | College degree   | 1  | Working, fi | 8  | 1   | Yes      | 1    | 1   | Yes     |
| 14707  | 2  | 2  | Married/li     | 3  | College degree   | 1  | Working, fi | 8  | 2   | No       |      | 2   | No      |
| 14711  | 2  | 2  | Married/li     | 3  | College degree   | 2  | Working, p  | 12 | 2   | No       |      | 1   | Yes     |
| 14714  | 2  | 2  | Married/li     | 3  | College degree   | 1  | Working, fi | 12 | 2   | No       |      | 2   | No      |
| 14715  | 2  | 2  | Married/li     | 2  | Some college     | 1  | Working, fi | 9  | 1   | Yes      | 1    | 1   | Yes     |
| 14716  | 2  | 2  | Married/li     | 3  | College degree   | 4  | Retired     | 99 | 2   | No       |      | 2   | No      |
| 14720  | 2  | 2  | Married/li     | 3  | College degree   | 1  | Working, fi | 14 | 2   | No       |      | 2   | No      |
| 14725  | 2  | 2  | Married/li     | 1  | High school or l | 8  | Other worl  | 99 | 2   | No       |      | 1   | Yes     |
| 14726  | 2  | 2  | Married/li     | 3  | College degree   | 4  | Retired     | 33 | 2   | No       |      | 2   | No      |
| 14734  | 2  | 2  | Married/li     | 3  | College degree   | 1  | Working, fi | 10 | 2   | No       |      | 2   | No      |
| 14735  | 2  | 2  | Married/li     | 2  | Some college     | 1  | Working, fi | 9  | 1   | Yes      | 1    | 2   | No      |
| 14736  | 2  | 2  | Married/li     | 3  | College degree   | 4  | Retired     | 9  | 2   | No       |      | 1   | Yes     |
| 14740  | 2  | 2  | Married/li     | 2  | Some college     | 1  | Working, fi | 11 | 1   | Yes      | 2    | 2   | No      |
| 14745  | 2  | 2  | Married/li     | 4  | Postgraduate     | 1  | Working, fi | 13 | 1   | Yes      | 1    | 2   | No      |
| 14747  | 2  | 2  | Married/li     | 3  | College degree   | 1  | Working, fi | 12 | 2   | No       |      | 1   | Yes     |
| 14750  | 2  | 2  | Married/li     | 3  | College degree   | 2  | Working, p  | 12 | 2   | No       |      | 1   | Yes     |
| 14751  | 2  | 2  | Married/li     | 2  | Some college     | 1  | Working, fi | 13 | 2   | No       |      | 2   | No      |
| 14753  | 2  | 2  | Married/li     | 3  | College degree   | 1  | Working, fi | 10 | 2   | No       |      | 2   | No      |
| 14756  | 2  | 2  | Married/li     | 3  | College degree   | 1  | Working, fi | 14 | 2   | No       |      | 2   | No      |
| 14780  | 2  | 2  | Married/li     | 3  | College degree   | 1  | Working, fi | 14 | 2   | No       |      | 2   | No      |
| 14782  | 2  | 2  | Married/li     | 4  | Postgraduate     | 4  | Retired     | 35 | 2   | No       |      | 2   | No      |
| 14800  | 2  | 2  | Married/li     | 2  | Some college     | 1  | Working, fi | 10 | 1   | Yes      | 1    | 1   | Yes     |
| 14801  | 2  | 3  | Divorced       | 3  | College degree   | 1  | Working, fi | 10 | 2   | No       |      | 2   | No      |
| 14802  | 2  | 2  | Married/li     | 2  | Some college     | 4  | Retired     | 11 | 1   | Yes      | 1    | 1   | Yes     |
| 14805  | 2  | 2  | Married/li     | 3  | College degree   | 1  | Working, fi | 14 | 2   | No       |      | 2   | No      |
| 14811  | 2  | 2  | Married/li     | 3  | College degree   | 1  | Working, fi | 11 | 2   | No       |      | 2   | No      |
| 14814  | 2  | 2  | Married/li     | 2  | Some college     | 7  | Student     | 11 | 1   | Yes      | 1    | 1   | Yes     |
| 14822  | 2  | 2  | Married/li     | 3  | College degree   | 1  | Working, fi | 14 | 1   | Yes      | 1    | 1   | Yes     |
| 14827  | 2  | 2  | Married/li     | 2  | Some college     | 1  | Working, fi | 10 | 1   | Yes      | 1    | 1   | Yes     |
| 14828  | 2  | 2  | Married/li     | 2  | Some college     | 1  | Working, fi | 11 | 2   | No       |      | 2   | No      |



| respid | Q5 | Q6 | Marital Status | Q7 | Education        | Q8 | Work        | Q9 | Q10 | Diabetes | Q10a | Q11 | High BP |
|--------|----|----|----------------|----|------------------|----|-------------|----|-----|----------|------|-----|---------|
| 14830  | 2  | 2  | Married/li     | 1  | High school or l | 4  | Retired     | 5  | 1   | Yes      | 1    | 1   | Yes     |
| 14832  | 2  | 2  | Married/li     | 2  | Some college     | 1  | Working, fi | 10 | 1   | Yes      | 1    | 1   | Yes     |
| 14835  | 2  | 2  | Married/li     | 3  | College degree   | 1  | Working, fi | 14 | 2   | No       |      | 2   | No      |
| 14841  | 2  | 2  | Married/li     | 1  | High school or l | 4  | Retired     | 1  | 2   | No       |      | 2   | No      |
| 14849  | 2  | 2  | Married/li     | 3  | College degree   | 1  | Working, fi | 14 | 2   | No       |      | 2   | No      |
| 14850  | 2  | 2  | Married/li     | 1  | High school or l | 1  | Working, fi | 9  | 2   | No       |      | 2   | No      |
| 14851  | 2  | 2  | Married/li     | 1  | High school or l | 2  | Working, p  | 4  | 2   | No       |      | 1   | Yes     |
| 14856  | 2  | 2  | Married/li     | 3  | College degree   | 4  | Retired     | 11 | 1   | Yes      | 1    | 2   | No      |
| 14862  | 2  | 2  | Married/li     | 3  | College degree   | 1  | Working, fi | 12 | 1   | Yes      | 1    | 1   | Yes     |
| 14863  | 2  | 2  | Married/li     | 1  | High school or l | 6  | Homemake    | 30 | 2   | No       |      | 2   | No      |
| 14864  | 2  | 2  | Married/li     | 1  | High school or l | 4  | Retired     | 8  | 2   | No       |      | 2   | No      |
| 14866  | 2  | 2  | Married/li     | 1  | High school or l | 6  | Homemake    | 10 | 2   | No       |      | 2   | No      |
| 14867  | 2  | 2  | Married/li     | 2  | Some college     | 4  | Retired     | 11 | 1   | Yes      | 1    | 2   | No      |
| 14868  | 2  | 2  | Married/li     | 3  | College degree   | 1  | Working, fi | 6  | 2   | No       |      | 2   | No      |
| 14870  | 2  | 2  | Married/li     | 1  | High school or l | 1  | Working, fi | 5  | 2   | No       |      | 2   | No      |
| 14873  | 2  | 2  | Married/li     | 2  | Some college     | 1  | Working, fi | 1  | 2   | No       |      | 2   | No      |
| 14878  | 2  | 1  | Single         | 3  | College degree   | 1  | Working, fi | 25 | 2   | No       |      | 2   | No      |
| 14879  | 2  | 2  | Married/li     | 4  | Postgraduate     | 1  | Working, fi | 33 | 2   | No       |      | 1   | Yes     |
| 14881  | 2  | 4  | Widow/wi       | 3  | College degree   | 4  | Retired     | 11 | 2   | No       |      | 1   | Yes     |
| 14888  | 2  | 2  | Married/li     | 4  | Postgraduate     | 1  | Working, fi | 14 | 1   | Yes      | 1    | 1   | Yes     |
| 14895  | 2  | 2  | Married/li     | 3  | College degree   | 1  | Working, fi | 14 | 2   | No       |      | 2   | No      |
| 14900  | 2  | 2  | Married/li     | 3  | College degree   | 2  | Working, p  | 8  | 1   | Yes      | 1    | 1   | Yes     |
| 14912  | 2  | 2  | Married/li     | 2  | Some college     | 1  | Working, fi | 10 | 2   | No       |      | 2   | No      |
| 14922  | 2  | 2  | Married/li     | 2  | Some college     | 1  | Working, fi | 12 | 1   | Yes      | 1    | 1   | Yes     |
| 14923  | 2  | 2  | Married/li     | 3  | College degree   | 2  | Working, p  | 7  | 1   | Yes      | 1    | 1   | Yes     |
| 14924  | 2  | 3  | Divorced       | 3  | College degree   | 2  | Working, p  | 37 | 1   | Yes      | 1    | 1   | Yes     |
| 14925  | 2  | 2  | Married/li     | 2  | Some college     | 1  | Working, fi | 8  | 1   | Yes      | 2    | 2   | No      |
| 14926  | 2  | 2  | Married/li     | 1  | High school or l | 1  | Working, fi | 12 | 2   | No       |      | 2   | No      |
| 14927  | 2  | 2  | Married/li     | 3  | College degree   | 4  | Retired     | 11 | 1   | Yes      | 1    | 2   | No      |
| 14930  | 2  | 2  | Married/li     | 3  | College degree   | 6  | Homemake    | 5  | 2   | No       |      | 2   | No      |
| 14937  | 2  | 2  | Married/li     | 3  | College degree   | 1  | Working, fi | 10 | 2   | No       |      | 2   | No      |
| 14938  | 2  | 2  | Married/li     | 3  | College degree   | 1  | Working, fi | 11 | 1   | Yes      | 1    | 1   | Yes     |

| respid | Q5 | Q6 | Marital Status | Q7 | Education        | Q8 | Work        | Q9 | Q10 | Diabetes | Q10a | Q11 | High BP |
|--------|----|----|----------------|----|------------------|----|-------------|----|-----|----------|------|-----|---------|
| 14939  | 2  | 2  | Married/li     | 3  | College degree   | 1  | Working, fi | 10 | 2   | No       |      | 2   | No      |
| 14942  | 2  | 2  | Married/li     | 1  | High school or l | 1  | Working, fi | 10 | 2   | No       |      | 2   | No      |
| 14943  | 2  | 2  | Married/li     | 1  | High school or l | 9  | Other       | 4  | 2   | No       |      | 2   | No      |
| 14953  | 2  | 2  | Married/li     | 3  | College degree   | 1  | Working, fi | 14 | 2   | No       |      | 2   | No      |
| 14954  | 2  | 2  | Married/li     | 1  | High school or l | 2  | Working, p  | 12 | 2   | No       |      | 2   | No      |
| 14955  | 2  | 2  | Married/li     | 2  | Some college     | 4  | Retired     | 2  | 2   | No       |      | 1   | Yes     |
| 14957  | 2  | 2  | Married/li     | 1  | High school or l | 4  | Retired     | 9  | 2   | No       |      | 2   | No      |
| 14958  | 2  | 2  | Married/li     | 4  | Postgraduate     | 1  | Working, fi | 7  | 1   | Yes      | 1    | 1   | Yes     |
| 14959  | 2  | 2  | Married/li     | 3  | College degree   | 4  | Retired     | 11 | 2   | No       |      | 2   | No      |
| 14961  | 2  | 2  | Married/li     | 1  | High school or l | 9  | Other       | 4  | 2   | No       |      | 2   | No      |
| 14963  | 2  | 2  | Married/li     | 2  | Some college     | 1  | Working, fi | 11 | 2   | No       |      | 2   | No      |
| 14964  | 2  | 5  | Prefer not     | 3  | College degree   | 4  | Retired     | 7  | 2   | No       |      | 2   | No      |
| 14965  | 2  | 2  | Married/li     | 2  | Some college     | 1  | Working, fi | 12 | 2   | No       |      | 2   | No      |
| 14967  | 2  | 2  | Married/li     | 1  | High school or l | 1  | Working, fi | 8  | 1   | Yes      | 2    | 2   | No      |
| 14970  | 2  | 2  | Married/li     | 3  | College degree   | 2  | Working, p  | 6  | 1   | Yes      | 1    | 1   | Yes     |
| 14972  | 2  | 2  | Married/li     | 2  | Some college     | 4  | Retired     | 7  | 2   | No       |      | 2   | No      |
| 14975  | 2  | 2  | Married/li     | 3  | College degree   | 6  | Homemake    | 2  | 1   | Yes      | 1    | 1   | Yes     |
| 14977  | 2  | 2  | Married/li     | 1  | High school or l | 1  | Working, fi | 11 | 2   | No       |      | 2   | No      |
| 14982  | 2  | 2  | Married/li     | 3  | College degree   | 4  | Retired     | 99 | 1   | Yes      | 1    | 1   | Yes     |
| 14985  | 2  | 2  | Married/li     | 2  | Some college     | 4  | Retired     | 7  | 2   | No       |      | 2   | No      |
| 14986  | 2  | 2  | Married/li     | 1  | High school or l | 9  | Other       | 4  | 2   | No       |      | 1   | Yes     |
| 14987  | 2  | 2  | Married/li     | 3  | College degree   | 1  | Working, fi | 99 | 2   | No       |      | 2   | No      |
| 14988  | 2  | 3  | Divorced       | 4  | Postgraduate     | 1  | Working, fi | 11 | 1   | Yes      | 1    | 1   | Yes     |
| 14989  | 2  | 2  | Married/li     | 1  | High school or l | 4  | Retired     | 7  | 1   | Yes      | 2    | 1   | Yes     |
| 14993  | 2  | 2  | Married/li     | 2  | Some college     | 4  | Retired     | 6  | 2   | No       |      | 2   | No      |
| 15001  | 2  | 5  | Prefer not     | 3  | College degree   | 4  | Retired     | 7  | 2   | No       |      | 2   | No      |
| 15002  | 2  | 2  | Married/li     | 3  | College degree   | 1  | Working, fi | 11 | 1   | Yes      | 1    | 1   | Yes     |
| 15006  | 2  | 2  | Married/li     | 1  | High school or l | 4  | Retired     | 8  | 2   | No       |      | 2   | No      |
| 15007  | 2  | 2  | Married/li     | 1  | High school or l | 1  | Working, fi | 12 | 2   | No       |      | 2   | No      |
| 15014  | 2  | 2  | Married/li     | 3  | College degree   | 1  | Working, fi | 10 | 2   | No       |      | 2   | No      |
| 15020  | 2  | 2  | Married/li     | 2  | Some college     | 2  | Working, p  | 10 | 2   | No       |      | 2   | No      |
| 15021  | 2  | 2  | Married/li     | 3  | College degree   | 4  | Retired     | 11 | 2   | No       |      | 2   | No      |

| respid | Q5 | Q6 | Marital Status | Q7 | Education        | Q8 | Work        | Q9 | Q10 | Diabetes | Q10a | Q11 | High BP |
|--------|----|----|----------------|----|------------------|----|-------------|----|-----|----------|------|-----|---------|
| 15023  | 2  | 3  | Divorced       | 4  | Postgraduate     | 4  | Retired     | 7  | 1   | Yes      | 1    | 1   | Yes     |
| 15030  | 2  | 2  | Married/li     | 1  | High school or l | 1  | Working, fi | 12 | 2   | No       |      | 2   | No      |
| 15032  | 2  | 2  | Married/li     | 3  | College degree   | 1  | Working, fi | 10 | 2   | No       |      | 2   | No      |
| 15033  | 2  | 2  | Married/li     | 1  | High school or l | 4  | Retired     | 11 | 2   | No       |      | 2   | No      |
| 15034  | 2  | 2  | Married/li     | 2  | Some college     | 1  | Working, fi | 9  | 2   | No       |      | 2   | No      |
| 15035  | 2  | 2  | Married/li     | 3  | College degree   | 1  | Working, fi | 13 | 2   | No       |      | 2   | No      |
| 15037  | 2  | 2  | Married/li     | 3  | College degree   | 1  | Working, fi | 10 | 2   | No       |      | 2   | No      |
| 15039  | 2  | 2  | Married/li     | 2  | Some college     | 1  | Working, fi | 11 | 2   | No       |      | 2   | No      |
| 15040  | 2  | 2  | Married/li     | 1  | High school or l | 9  | Other       | 6  | 2   | No       |      | 2   | No      |
| 15042  | 2  | 2  | Married/li     | 3  | College degree   | 1  | Working, fi | 13 | 2   | No       |      | 2   | No      |
| 15044  | 2  | 2  | Married/li     | 1  | High school or l | 9  | Other       | 5  | 2   | No       |      | 2   | No      |
| 15045  | 2  | 2  | Married/li     | 3  | College degree   | 6  | Homemake    | 16 | 2   | No       |      | 2   | No      |
| 15046  | 2  | 2  | Married/li     | 2  | Some college     | 1  | Working, fi | 9  | 2   | No       |      | 2   | No      |
| 15052  | 2  | 2  | Married/li     | 4  | Postgraduate     | 1  | Working, fi | 9  | 2   | No       |      | 2   | No      |
| 15058  | 2  | 2  | Married/li     | 2  | Some college     | 4  | Retired     | 11 | 2   | No       |      | 1   | Yes     |
| 15063  | 2  | 2  | Married/li     | 2  | Some college     | 1  | Working, fi | 10 | 2   | No       |      | 2   | No      |
| 15066  | 2  | 2  | Married/li     | 2  | Some college     | 4  | Retired     | 9  | 2   | No       |      | 2   | No      |
| 15069  | 2  | 2  | Married/li     | 1  | High school or l | 4  | Retired     | 8  | 2   | No       |      | 1   | Yes     |
| 15071  | 2  | 2  | Married/li     | 1  | High school or l | 4  | Retired     | 4  | 1   | Yes      | 1    | 1   | Yes     |
| 15076  | 2  | 2  | Married/li     | 3  | College degree   | 1  | Working, fi | 13 | 1   | Yes      | 1    | 2   | No      |
| 15078  | 2  | 2  | Married/li     | 3  | College degree   | 6  | Homemake    | 19 | 2   | No       |      | 2   | No      |
| 15087  | 2  | 2  | Married/li     | 3  | College degree   | 1  | Working, fi | 13 | 2   | No       |      | 2   | No      |
| 15090  | 2  | 2  | Married/li     | 2  | Some college     | 4  | Retired     | 11 | 2   | No       |      | 1   | Yes     |
| 15091  | 2  | 2  | Married/li     | 2  | Some college     | 4  | Retired     | 11 | 1   | Yes      | 1    | 1   | Yes     |
| 15092  | 2  | 2  | Married/li     | 3  | College degree   | 1  | Working, fi | 12 | 2   | No       |      | 2   | No      |
| 15096  | 2  | 2  | Married/li     | 2  | Some college     | 4  | Retired     | 9  | 2   | No       |      | 1   | Yes     |
| 15106  | 2  | 2  | Married/li     | 2  | Some college     | 1  | Working, fi | 10 | 2   | No       |      | 2   | No      |
| 15108  | 2  | 2  | Married/li     | 1  | High school or l | 9  | Other       | 5  | 2   | No       |      | 2   | No      |
| 15113  | 2  | 2  | Married/li     | 2  | Some college     | 4  | Retired     | 11 | 2   | No       |      | 2   | No      |
| 15116  | 2  | 2  | Married/li     | 3  | College degree   | 1  | Working, fi | 12 | 2   | No       |      | 2   | No      |
| 15119  | 2  | 2  | Married/li     | 2  | Some college     | 4  | Retired     | 11 | 2   | No       |      | 1   | Yes     |
| 15120  | 2  | 2  | Married/li     | 3  | College degree   | 1  | Working, fi | 12 | 2   | No       |      | 2   | No      |

| respid | Q5 | Q6 | Marital Status | Q7 | Education        | Q8 | Work        | Q9 | Q10 | Diabetes | Q10a | Q11 | High BP |
|--------|----|----|----------------|----|------------------|----|-------------|----|-----|----------|------|-----|---------|
| 15121  | 2  | 2  | Married/li     | 3  | College degree   | 1  | Working, fi | 14 | 2   | No       |      | 2   | No      |
| 15123  | 2  | 2  | Married/li     | 3  | College degree   | 1  | Working, fi | 13 | 2   | No       |      | 2   | No      |
| 15124  | 2  | 2  | Married/li     | 1  | High school or l | 6  | Homemake    | 1  | 2   | No       |      | 2   | No      |
| 15128  | 2  | 2  | Married/li     | 2  | Some college     | 1  | Working, fi | 11 | 2   | No       |      | 2   | No      |
| 15131  | 2  | 2  | Married/li     | 1  | High school or l | 8  | Other worl  | 5  | 2   | No       |      | 2   | No      |
| 15136  | 2  | 2  | Married/li     | 2  | Some college     | 4  | Retired     | 11 | 2   | No       |      | 2   | No      |
| 15137  | 2  | 2  | Married/li     | 3  | College degree   | 4  | Retired     | 9  | 2   | No       |      | 1   | Yes     |
| 15141  | 2  | 2  | Married/li     | 3  | College degree   | 1  | Working, fi | 13 | 2   | No       |      | 2   | No      |
| 15144  | 2  | 2  | Married/li     | 2  | Some college     | 4  | Retired     | 11 | 2   | No       |      | 2   | No      |
| 15147  | 2  | 2  | Married/li     | 3  | College degree   | 2  | Working, p  | 10 | 2   | No       |      | 2   | No      |
| 15151  | 2  | 5  | Prefer not     | 1  | High school or l | 4  | Retired     | 7  | 2   | No       |      | 1   | Yes     |
| 15154  | 2  | 2  | Married/li     | 1  | High school or l | 1  | Working, fi | 11 | 1   | Yes      | 1    | 2   | No      |
| 15157  | 2  | 2  | Married/li     | 2  | Some college     | 4  | Retired     | 12 | 2   | No       |      | 1   | Yes     |
| 15164  | 2  | 2  | Married/li     | 3  | College degree   | 1  | Working, fi | 11 | 1   | Yes      | 1    | 1   | Yes     |
| 15168  | 2  | 2  | Married/li     | 2  | Some college     | 1  | Working, fi | 13 | 2   | No       |      | 1   | Yes     |
| 15169  | 2  | 2  | Married/li     | 3  | College degree   | 4  | Retired     | 10 | 1   | Yes      | 1    | 2   | No      |
| 15172  | 2  | 2  | Married/li     | 3  | College degree   | 1  | Working, fi | 10 | 2   | No       |      | 2   | No      |
| 15177  | 2  | 2  | Married/li     | 3  | College degree   | 4  | Retired     | 11 | 2   | No       |      | 2   | No      |
| 15178  | 2  | 2  | Married/li     | 2  | Some college     | 1  | Working, fi | 10 | 2   | No       |      | 2   | No      |
| 15180  | 2  | 2  | Married/li     | 3  | College degree   | 1  | Working, fi | 12 | 1   | Yes      | 1    | 1   | Yes     |
| 15181  | 2  | 2  | Married/li     | 3  | College degree   | 1  | Working, fi | 13 | 2   | No       |      | 2   | No      |
| 15182  | 2  | 2  | Married/li     | 3  | College degree   | 1  | Working, fi | 13 | 2   | No       |      | 2   | No      |
| 15183  | 2  | 2  | Married/li     | 3  | College degree   | 2  | Working, p  | 14 | 2   | No       |      | 2   | No      |
| 15188  | 2  | 2  | Married/li     | 2  | Some college     | 4  | Retired     | 10 | 1   | Yes      | 1    | 2   | No      |
| 15190  | 2  | 2  | Married/li     | 3  | College degree   | 1  | Working, fi | 12 | 1   | Yes      | 1    | 1   | Yes     |
| 15195  | 2  | 2  | Married/li     | 2  | Some college     | 4  | Retired     | 11 | 2   | No       |      | 2   | No      |
| 15201  | 2  | 2  | Married/li     | 3  | College degree   | 1  | Working, fi | 9  | 1   | Yes      | 1    | 1   | Yes     |
| 15203  | 2  | 2  | Married/li     | 3  | College degree   | 1  | Working, fi | 12 | 1   | Yes      | 1    | 2   | No      |
| 15204  | 2  | 2  | Married/li     | 4  | Postgraduate     | 1  | Working, fi | 11 | 2   | No       |      | 2   | No      |
| 15207  | 2  | 2  | Married/li     | 1  | High school or l | 9  | Other       | 4  | 2   | No       |      | 1   | Yes     |
| 15208  | 2  | 2  | Married/li     | 2  | Some college     | 2  | Working, p  | 6  | 1   | Yes      | 1    | 2   | No      |
| 15209  | 2  | 2  | Married/li     | 3  | College degree   | 1  | Working, fi | 13 | 2   | No       |      | 2   | No      |

| respid | Q5 | Q6 | Marital Status | Q7 | Education        | Q8 | Work        | Q9 | Q10 | Diabetes | Q10a | Q11 | High BP |
|--------|----|----|----------------|----|------------------|----|-------------|----|-----|----------|------|-----|---------|
| 15212  | 2  | 2  | Married/li     | 1  | High school or l | 1  | Working, fi | 10 | 2   | No       |      | 2   | No      |
| 15213  | 2  | 2  | Married/li     | 1  | High school or l | 1  | Working, fi | 11 | 2   | No       |      | 2   | No      |
| 15219  | 2  | 2  | Married/li     | 2  | Some college     | 1  | Working, fi | 9  | 2   | No       |      | 2   | No      |
| 15220  | 2  | 2  | Married/li     | 3  | College degree   | 1  | Working, fi | 13 | 2   | No       |      | 2   | No      |
| 15221  | 2  | 2  | Married/li     | 1  | High school or l | 1  | Working, fi | 12 | 2   | No       |      | 2   | No      |
| 15223  | 2  | 2  | Married/li     | 2  | Some college     | 1  | Working, fi | 10 | 1   | Yes      | 1    | 1   | Yes     |
| 15224  | 2  | 2  | Married/li     | 2  | Some college     | 1  | Working, fi | 10 | 2   | No       |      | 2   | No      |
| 15225  | 2  | 2  | Married/li     | 2  | Some college     | 1  | Working, fi | 12 | 2   | No       |      | 2   | No      |
| 15226  | 2  | 2  | Married/li     | 1  | High school or l | 1  | Working, fi | 13 | 2   | No       |      | 2   | No      |
| 15230  | 2  | 2  | Married/li     | 2  | Some college     | 1  | Working, fi | 12 | 2   | No       |      | 2   | No      |
| 15231  | 2  | 2  | Married/li     | 3  | College degree   | 2  | Working, p  | 9  | 1   | Yes      | 1    | 1   | Yes     |
| 15232  | 2  | 2  | Married/li     | 4  | Postgraduate     | 1  | Working, fi | 14 | 2   | No       |      | 2   | No      |
| 15237  | 2  | 2  | Married/li     | 3  | College degree   | 1  | Working, fi | 10 | 1   | Yes      | 2    | 2   | No      |
| 15239  | 2  | 2  | Married/li     | 2  | Some college     | 1  | Working, fi | 13 | 2   | No       |      | 2   | No      |
| 15241  | 2  | 2  | Married/li     | 2  | Some college     | 1  | Working, fi | 13 | 2   | No       |      | 2   | No      |
| 15242  | 2  | 2  | Married/li     | 1  | High school or l | 4  | Retired     | 2  | 2   | No       |      | 1   | Yes     |
| 15247  | 2  | 2  | Married/li     | 2  | Some college     | 1  | Working, fi | 13 | 2   | No       |      | 2   | No      |
| 15248  | 2  | 2  | Married/li     | 1  | High school or l | 8  | Other worl  | 5  | 2   | No       |      | 2   | No      |
| 15251  | 2  | 2  | Married/li     | 3  | College degree   | 1  | Working, fi | 12 | 2   | No       |      | 2   | No      |
| 15257  | 2  | 2  | Married/li     | 2  | Some college     | 1  | Working, fi | 11 | 2   | No       |      | 2   | No      |
| 15260  | 2  | 2  | Married/li     | 2  | Some college     | 1  | Working, fi | 13 | 2   | No       |      | 2   | No      |
| 15261  | 2  | 2  | Married/li     | 2  | Some college     | 1  | Working, fi | 10 | 1   | Yes      | 1    | 1   | Yes     |
| 15262  | 2  | 2  | Married/li     | 3  | College degree   | 1  | Working, fi | 14 | 2   | No       |      | 2   | No      |
| 15263  | 2  | 2  | Married/li     | 2  | Some college     | 1  | Working, fi | 2  | 1   | Yes      | 1    | 2   | No      |
| 15265  | 2  | 2  | Married/li     | 3  | College degree   | 1  | Working, fi | 14 | 2   | No       |      | 2   | No      |
| 15266  | 2  | 2  | Married/li     | 1  | High school or l | 3  | Unemploy    | 15 | 1   | Yes      | 1    | 2   | No      |
| 15268  | 2  | 2  | Married/li     | 2  | Some college     | 1  | Working, fi | 10 | 1   | Yes      | 1    | 2   | No      |
| 15269  | 2  | 1  | Single         | 1  | High school or l | 3  | Unemploy    | 15 | 2   | No       |      | 2   | No      |
| 15270  | 2  | 2  | Married/li     | 3  | College degree   | 1  | Working, fi | 19 | 2   | No       |      | 1   | Yes     |
| 15273  | 2  | 2  | Married/li     | 2  | Some college     | 1  | Working, fi | 10 | 1   | Yes      | 1    | 1   | Yes     |
| 15276  | 2  | 2  | Married/li     | 2  | Some college     | 1  | Working, fi | 10 | 1   | Yes      | 1    | 1   | Yes     |
| 15277  | 2  | 2  | Married/li     | 2  | Some college     | 1  | Working, fi | 13 | 2   | No       |      | 2   | No      |

| respid | Q5 | Q6 | Marital Status | Q7 | Education        | Q8 | Work        | Q9 | Q10 | Diabetes | Q10a | Q11 | High BP |
|--------|----|----|----------------|----|------------------|----|-------------|----|-----|----------|------|-----|---------|
| 15282  | 2  | 1  | Single         | 1  | High school or l | 3  | Unemploye   | 99 | 2   | No       |      | 2   | No      |
| 15284  | 2  | 2  | Married/li     | 3  | College degree   | 1  | Working, fi | 14 | 2   | No       |      | 2   | No      |
| 15285  | 2  | 1  | Single         | 1  | High school or l | 2  | Working, p  | 15 | 2   | No       |      | 2   | No      |
| 15286  | 2  | 2  | Married/li     | 3  | College degree   | 1  | Working, fi | 10 | 1   | Yes      | 1    | 1   | Yes     |
| 15288  | 2  | 2  | Married/li     | 3  | College degree   | 1  | Working, fi | 12 | 2   | No       |      | 1   | Yes     |
| 15292  | 2  | 2  | Married/li     | 2  | Some college     | 1  | Working, fi | 10 | 1   | Yes      | 1    | 1   | Yes     |
| 15296  | 2  | 2  | Married/li     | 3  | College degree   | 1  | Working, fi | 12 | 2   | No       |      | 2   | No      |
| 15297  | 2  | 2  | Married/li     | 1  | High school or l | 1  | Working, fi | 3  | 2   | No       |      | 2   | No      |
| 15298  | 2  | 2  | Married/li     | 3  | College degree   | 6  | Homemake    | 20 | 2   | No       |      | 2   | No      |
| 15301  | 2  | 2  | Married/li     | 3  | College degree   | 1  | Working, fi | 11 | 2   | No       |      | 2   | No      |
| 15302  | 2  | 2  | Married/li     | 1  | High school or l | 1  | Working, fi | 12 | 2   | No       |      | 2   | No      |
| 15305  | 2  | 2  | Married/li     | 3  | College degree   | 1  | Working, fi | 14 | 2   | No       |      | 2   | No      |
| 15307  | 2  | 2  | Married/li     | 1  | High school or l | 1  | Working, fi | 20 | 2   | No       |      | 2   | No      |
| 15308  | 2  | 2  | Married/li     | 3  | College degree   | 1  | Working, fi | 17 | 2   | No       |      | 2   | No      |
| 15309  | 2  | 2  | Married/li     | 1  | High school or l | 1  | Working, fi | 18 | 2   | No       |      | 1   | Yes     |
| 15311  | 2  | 1  | Single         | 1  | High school or l | 1  | Working, fi | 16 | 2   | No       |      | 2   | No      |
| 15315  | 2  | 2  | Married/li     | 1  | High school or l | 1  | Working, fi | 10 | 1   | Yes      | 1    | 2   | No      |
| 15316  | 2  | 2  | Married/li     | 3  | College degree   | 1  | Working, fi | 11 | 2   | No       |      | 2   | No      |
| 15318  | 2  | 2  | Married/li     | 2  | Some college     | 4  | Retired     | 10 | 1   | Yes      | 1    | 2   | No      |
| 15321  | 2  | 2  | Married/li     | 2  | Some college     | 1  | Working, fi | 10 | 1   | Yes      | 1    | 1   | Yes     |
| 15322  | 2  | 1  | Single         | 1  | High school or l | 9  | Other       | 16 | 1   | Yes      | 2    | 1   | Yes     |
| 15324  | 2  | 1  | Single         | 1  | High school or l | 1  | Working, fi | 17 | 2   | No       |      | 2   | No      |
| 15326  | 2  | 2  | Married/li     | 2  | Some college     | 1  | Working, fi | 12 | 1   | Yes      | 1    | 1   | Yes     |
| 15327  | 2  | 2  | Married/li     | 3  | College degree   | 1  | Working, fi | 18 | 2   | No       |      | 1   | Yes     |
| 15328  | 2  | 2  | Married/li     | 1  | High school or l | 4  | Retired     | 10 | 2   | No       |      | 2   | No      |
| 15330  | 2  | 2  | Married/li     | 3  | College degree   | 1  | Working, fi | 11 | 2   | No       |      | 2   | No      |
| 15332  | 2  | 2  | Married/li     | 1  | High school or l | 4  | Retired     | 12 | 2   | No       |      | 2   | No      |
| 15333  | 2  | 5  | Prefer not     | 1  | High school or l | 6  | Homemake    | 99 | 2   | No       |      | 2   | No      |
| 15334  | 2  | 2  | Married/li     | 1  | High school or l | 1  | Working, fi | 12 | 2   | No       |      | 2   | No      |
| 15336  | 2  | 2  | Married/li     | 2  | Some college     | 1  | Working, fi | 10 | 1   | Yes      | 1    | 1   | Yes     |
| 15337  | 2  | 2  | Married/li     | 2  | Some college     | 1  | Working, fi | 12 | 2   | No       |      | 2   | No      |
| 15338  | 2  | 2  | Married/li     | 1  | High school or l | 1  | Working, fi | 12 | 2   | No       |      | 2   | No      |

| respid | Q5 | Q6 | Marital Status | Q7 | Education        | Q8 | Work        | Q9 | Q10 | Diabetes | Q10a | Q11 | High BP |
|--------|----|----|----------------|----|------------------|----|-------------|----|-----|----------|------|-----|---------|
| 15339  | 2  | 2  | Married/li     | 3  | College degree   | 1  | Working, fi | 10 | 2   | No       |      | 2   | No      |
| 15341  | 2  | 2  | Married/li     | 3  | College degree   | 1  | Working, fi | 1  | 2   | No       |      | 2   | No      |
| 15344  | 2  | 2  | Married/li     | 3  | College degree   | 1  | Working, fi | 13 | 2   | No       |      | 2   | No      |
| 15345  | 2  | 2  | Married/li     | 2  | Some college     | 1  | Working, fi | 10 | 2   | No       |      | 2   | No      |
| 15350  | 2  | 2  | Married/li     | 1  | High school or l | 4  | Retired     | 10 | 2   | No       |      | 2   | No      |
| 15351  | 2  | 2  | Married/li     | 1  | High school or l | 1  | Working, fi | 12 | 2   | No       |      | 2   | No      |
| 15352  | 2  | 2  | Married/li     | 3  | College degree   | 1  | Working, fi | 18 | 2   | No       |      | 2   | No      |
| 15372  | 2  | 2  | Married/li     | 3  | College degree   | 1  | Working, fi | 13 | 1   | Yes      | 2    | 2   | No      |
| 15373  | 2  | 2  | Married/li     | 3  | College degree   | 1  | Working, fi | 8  | 1   | Yes      | 1    | 1   | Yes     |
| 15376  | 2  | 2  | Married/li     | 3  | College degree   | 1  | Working, fi | 16 | 2   | No       |      | 1   | Yes     |
| 15377  | 2  | 2  | Married/li     | 2  | Some college     | 1  | Working, fi | 13 | 2   | No       |      | 2   | No      |
| 15382  | 2  | 2  | Married/li     | 1  | High school or l | 1  | Working, fi | 10 | 2   | No       |      | 1   | Yes     |
| 15383  | 2  | 2  | Married/li     | 3  | College degree   | 1  | Working, fi | 20 | 2   | No       |      | 1   | Yes     |
| 15385  | 2  | 2  | Married/li     | 3  | College degree   | 4  | Retired     | 11 | 2   | No       |      | 2   | No      |
| 15390  | 2  | 2  | Married/li     | 1  | High school or l | 1  | Working, fi | 11 | 2   | No       |      | 2   | No      |
| 15399  | 2  | 2  | Married/li     | 2  | Some college     | 4  | Retired     | 10 | 2   | No       |      | 2   | No      |
| 15404  | 2  | 2  | Married/li     | 3  | College degree   | 1  | Working, fi | 19 | 1   | Yes      | 1    | 1   | Yes     |
| 15410  | 2  | 2  | Married/li     | 2  | Some college     | 1  | Working, fi | 9  | 2   | No       |      | 2   | No      |
| 15411  | 2  | 2  | Married/li     | 3  | College degree   | 4  | Retired     | 10 | 2   | No       |      | 1   | Yes     |
| 15412  | 2  | 2  | Married/li     | 1  | High school or l | 4  | Retired     | 11 | 2   | No       |      | 1   | Yes     |
| 15413  | 2  | 2  | Married/li     | 3  | College degree   | 1  | Working, fi | 34 | 1   | Yes      | 1    | 2   | No      |
| 15414  | 2  | 2  | Married/li     | 1  | High school or l | 1  | Working, fi | 13 | 2   | No       |      | 2   | No      |
| 15417  | 2  | 2  | Married/li     | 2  | Some college     | 2  | Working, p  | 12 | 2   | No       |      | 2   | No      |
| 15418  | 2  | 2  | Married/li     | 3  | College degree   | 1  | Working, fi | 18 | 2   | No       |      | 1   | Yes     |
| 15421  | 2  | 2  | Married/li     | 1  | High school or l | 1  | Working, fi | 13 | 2   | No       |      | 2   | No      |
| 15423  | 2  | 2  | Married/li     | 1  | High school or l | 1  | Working, fi | 13 | 1   | Yes      | 1    | 2   | No      |
| 15425  | 2  | 2  | Married/li     | 3  | College degree   | 6  | Homemake    | 24 | 2   | No       |      | 1   | Yes     |
| 15426  | 2  | 2  | Married/li     | 2  | Some college     | 1  | Working, fi | 10 | 1   | Yes      | 1    | 1   | Yes     |
| 15430  | 2  | 2  | Married/li     | 2  | Some college     | 1  | Working, fi | 9  | 2   | No       |      | 2   | No      |
| 15431  | 2  | 2  | Married/li     | 3  | College degree   | 4  | Retired     | 11 | 2   | No       |      | 2   | No      |
| 15435  | 2  | 2  | Married/li     | 2  | Some college     | 1  | Working, fi | 12 | 2   | No       |      | 2   | No      |
| 15436  | 2  | 2  | Married/li     | 1  | High school or l | 1  | Working, fi | 18 | 2   | No       |      | 2   | No      |

| respid | Q5 | Q6 | Marital Status | Q7 | Education        | Q8 | Work        | Q9 | Q10 | Diabetes | Q10a | Q11 | High BP |
|--------|----|----|----------------|----|------------------|----|-------------|----|-----|----------|------|-----|---------|
| 15437  | 2  | 5  | Prefer not     | 2  | Some college     | 4  | Retired     | 25 | 1   | Yes      | 1    | 2   | No      |
| 15438  | 2  | 2  | Married/li     | 1  | High school or l | 2  | Working, p  | 1  | 2   | No       |      | 2   | No      |
| 15439  | 2  | 2  | Married/li     | 1  | High school or l | 1  | Working, fi | 10 | 2   | No       |      | 1   | Yes     |
| 15441  | 2  | 2  | Married/li     | 2  | Some college     | 1  | Working, fi | 10 | 1   | Yes      | 1    | 1   | Yes     |
| 15443  | 2  | 2  | Married/li     | 1  | High school or l | 4  | Retired     | 19 | 2   | No       |      | 2   | No      |
| 15446  | 2  | 2  | Married/li     | 3  | College degree   | 1  | Working, fi | 13 | 2   | No       |      | 2   | No      |
| 15449  | 2  | 2  | Married/li     | 1  | High school or l | 4  | Retired     | 8  | 2   | No       |      | 1   | Yes     |
| 15451  | 2  | 1  | Single         | 3  | College degree   | 2  | Working, p  | 17 | 2   | No       |      | 2   | No      |
| 15452  | 2  | 2  | Married/li     | 3  | College degree   | 4  | Retired     | 11 | 2   | No       |      | 2   | No      |
| 15454  | 2  | 4  | Widow/wi       | 3  | College degree   | 4  | Retired     | 29 | 2   | No       |      | 2   | No      |
| 15456  | 2  | 2  | Married/li     | 1  | High school or l | 1  | Working, fi | 19 | 2   | No       |      | 2   | No      |
| 15457  | 2  | 2  | Married/li     | 3  | College degree   | 1  | Working, fi | 99 | 2   | No       |      | 2   | No      |
| 15458  | 2  | 2  | Married/li     | 3  | College degree   | 6  | Homemake    | 21 | 2   | No       |      | 2   | No      |
| 15462  | 2  | 2  | Married/li     | 3  | College degree   | 1  | Working, fi | 24 | 1   | Yes      | 1    | 1   | Yes     |
| 15467  | 2  | 2  | Married/li     | 2  | Some college     | 1  | Working, fi | 11 | 1   | Yes      | 1    | 2   | No      |
| 15470  | 2  | 2  | Married/li     | 3  | College degree   | 1  | Working, fi | 12 | 2   | No       |      | 1   | Yes     |
| 15472  | 2  | 2  | Married/li     | 3  | College degree   | 9  | Other       | 22 | 2   | No       |      | 2   | No      |
| 15476  | 2  | 1  | Single         | 3  | College degree   | 1  | Working, fi | 15 | 2   | No       |      | 1   | Yes     |
| 15477  | 2  | 2  | Married/li     | 1  | High school or l | 1  | Working, fi | 12 | 2   | No       |      | 2   | No      |
| 15488  | 2  | 2  | Married/li     | 1  | High school or l | 1  | Working, fi | 7  | 2   | No       |      | 2   | No      |
| 15489  | 2  | 2  | Married/li     | 2  | Some college     | 1  | Working, fi | 11 | 2   | No       |      | 2   | No      |
| 15490  | 2  | 2  | Married/li     | 1  | High school or l | 1  | Working, fi | 13 | 2   | No       |      | 2   | No      |
| 15496  | 2  | 2  | Married/li     | 3  | College degree   | 4  | Retired     | 17 | 2   | No       |      | 1   | Yes     |
| 15497  | 2  | 2  | Married/li     | 1  | High school or l | 6  | Homemake    | 7  | 1   | Yes      | 2    | 2   | No      |
| 15498  | 2  | 2  | Married/li     | 3  | College degree   | 1  | Working, fi | 36 | 2   | No       |      | 1   | Yes     |
| 15509  | 2  | 2  | Married/li     | 2  | Some college     | 1  | Working, fi | 9  | 2   | No       |      | 2   | No      |
| 15510  | 2  | 2  | Married/li     | 1  | High school or l | 1  | Working, fi | 13 | 2   | No       |      | 2   | No      |
| 15516  | 2  | 2  | Married/li     | 3  | College degree   | 6  | Homemake    | 22 | 2   | No       |      | 2   | No      |
| 15519  | 2  | 2  | Married/li     | 2  | Some college     | 1  | Working, fi | 11 | 2   | No       |      | 2   | No      |
| 15520  | 2  | 2  | Married/li     | 1  | High school or l | 1  | Working, fi | 13 | 2   | No       |      | 2   | No      |
| 15524  | 2  | 2  | Married/li     | 4  | Postgraduate     | 1  | Working, fi | 20 | 2   | No       |      | 2   | No      |
| 15525  | 2  | 2  | Married/li     | 3  | College degree   | 1  | Working, fi | 19 | 2   | No       |      | 2   | No      |



| respid | Q5 | Q6 | Marital Status | Q7 | Education        | Q8 | Work        | Q9 | Q10 | Diabetes | Q10a | Q11 | High BP |
|--------|----|----|----------------|----|------------------|----|-------------|----|-----|----------|------|-----|---------|
| 15526  | 2  | 3  | Divorced       | 1  | High school or l | 1  | Working, fi | 9  | 2   | No       |      | 2   | No      |
| 15531  | 2  | 2  | Married/li     | 2  | Some college     | 1  | Working, fi | 12 | 2   | No       |      | 2   | No      |
| 15532  | 2  | 2  | Married/li     | 2  | Some college     | 1  | Working, fi | 14 | 2   | No       |      | 2   | No      |
| 15534  | 2  | 2  | Married/li     | 2  | Some college     | 1  | Working, fi | 13 | 2   | No       |      | 1   | Yes     |
| 15535  | 2  | 2  | Married/li     | 3  | College degree   | 1  | Working, fi | 10 | 1   | Yes      | 1    | 2   | No      |
| 15539  | 2  | 2  | Married/li     | 1  | High school or l | 4  | Retired     | 11 | 1   | Yes      | 1    | 2   | No      |
| 15550  | 2  | 2  | Married/li     | 3  | College degree   | 1  | Working, fi | 20 | 2   | No       |      | 2   | No      |
| 15556  | 2  | 2  | Married/li     | 2  | Some college     | 1  | Working, fi | 13 | 2   | No       |      | 2   | No      |
| 15558  | 2  | 2  | Married/li     | 3  | College degree   | 1  | Working, fi | 10 | 2   | No       |      | 2   | No      |
| 15565  | 2  | 1  | Single         | 3  | College degree   | 2  | Working, p  | 15 | 2   | No       |      | 1   | Yes     |
| 15567  | 2  | 2  | Married/li     | 3  | College degree   | 1  | Working, fi | 11 | 2   | No       |      | 2   | No      |
| 15568  | 2  | 2  | Married/li     | 3  | College degree   | 1  | Working, fi | 10 | 2   | No       |      | 2   | No      |
| 15571  | 2  | 2  | Married/li     | 3  | College degree   | 1  | Working, fi | 19 | 2   | No       |      | 2   | No      |
| 15573  | 2  | 2  | Married/li     | 3  | College degree   | 2  | Working, p  | 33 | 2   | No       |      | 2   | No      |
| 15574  | 2  | 2  | Married/li     | 3  | College degree   | 1  | Working, fi | 10 | 2   | No       |      | 2   | No      |
| 15576  | 2  | 3  | Divorced       | 3  | College degree   | 4  | Retired     | 4  | 2   | No       |      | 1   | Yes     |
| 15587  | 2  | 2  | Married/li     | 1  | High school or l | 2  | Working, p  | 18 | 2   | No       |      | 2   | No      |
| 15588  | 2  | 2  | Married/li     | 3  | College degree   | 1  | Working, fi | 12 | 2   | No       |      | 2   | No      |
| 15593  | 2  | 1  | Single         | 2  | Some college     | 1  | Working, fi | 8  | 2   | No       |      | 1   | Yes     |
| 15597  | 2  | 2  | Married/li     | 3  | College degree   | 1  | Working, fi | 9  | 2   | No       |      | 2   | No      |
| 15598  | 2  | 5  | Prefer not     | 4  | Postgraduate     | 1  | Working, fi | 22 | 2   | No       |      | 1   | Yes     |
| 15599  | 2  | 2  | Married/li     | 3  | College degree   | 4  | Retired     | 18 | 2   | No       |      | 2   | No      |
| 15601  | 2  | 2  | Married/li     | 2  | Some college     | 4  | Retired     | 15 | 2   | No       |      | 2   | No      |
| 15604  | 2  | 2  | Married/li     | 2  | Some college     | 6  | Homemake    | 3  | 2   | No       |      | 2   | No      |
| 15611  | 2  | 2  | Married/li     | 3  | College degree   | 1  | Working, fi | 23 | 2   | No       |      | 1   | Yes     |
| 15613  | 2  | 1  | Single         | 1  | High school or l | 1  | Working, fi | 17 | 2   | No       |      | 2   | No      |
| 15614  | 2  | 2  | Married/li     | 3  | College degree   | 4  | Retired     | 15 | 2   | No       |      | 1   | Yes     |
| 15617  | 2  | 2  | Married/li     | 2  | Some college     | 6  | Homemake    | 19 | 2   | No       |      | 1   | Yes     |
| 15622  | 2  | 2  | Married/li     | 4  | Postgraduate     | 1  | Working, fi | 30 | 2   | No       |      | 2   | No      |
| 15623  | 2  | 2  | Married/li     | 2  | Some college     | 1  | Working, fi | 10 | 2   | No       |      | 2   | No      |
| 15625  | 2  | 2  | Married/li     | 1  | High school or l | 9  | Other       | 17 | 1   | Yes      | 1    | 1   | Yes     |
| 15627  | 2  | 2  | Married/li     | 3  | College degree   | 2  | Working, p  | 16 | 2   | No       |      | 2   | No      |

| respid | Q5 | Q6 | Marital Status | Q7 | Education        | Q8 | Work        | Q9 | Q10 | Diabetes | Q10a | Q11 | High BP |
|--------|----|----|----------------|----|------------------|----|-------------|----|-----|----------|------|-----|---------|
| 15628  | 2  | 2  | Married/li     | 3  | College degree   | 1  | Working, fi | 11 | 2   | No       |      | 1   | Yes     |
| 15633  | 2  | 2  | Married/li     | 1  | High school or l | 1  | Working, fi | 17 | 2   | No       |      | 2   | No      |
| 15634  | 2  | 2  | Married/li     | 3  | College degree   | 1  | Working, fi | 11 | 2   | No       |      | 2   | No      |
| 15637  | 2  | 2  | Married/li     | 1  | High school or l | 1  | Working, fi | 12 | 2   | No       |      | 1   | Yes     |
| 15644  | 2  | 2  | Married/li     | 2  | Some college     | 1  | Working, fi | 9  | 2   | No       |      | 2   | No      |
| 15645  | 2  | 2  | Married/li     | 1  | High school or l | 1  | Working, fi | 19 | 2   | No       |      | 2   | No      |
| 15649  | 2  | 1  | Single         | 1  | High school or l | 3  | Unemploy    | 2  | 2   | No       |      | 2   | No      |
| 15650  | 2  | 2  | Married/li     | 2  | Some college     | 1  | Working, fi | 18 | 2   | No       |      | 1   | Yes     |
| 15651  | 2  | 2  | Married/li     | 3  | College degree   | 6  | Homemake    | 21 | 2   | No       |      | 2   | No      |
| 15657  | 2  | 2  | Married/li     | 3  | College degree   | 1  | Working, fi | 13 | 2   | No       |      | 2   | No      |
| 15658  | 2  | 1  | Single         | 1  | High school or l | 1  | Working, fi | 10 | 2   | No       |      | 2   | No      |
| 15660  | 2  | 2  | Married/li     | 2  | Some college     | 1  | Working, fi | 10 | 2   | No       |      | 2   | No      |
| 15667  | 2  | 2  | Married/li     | 3  | College degree   | 1  | Working, fi | 11 | 2   | No       |      | 2   | No      |
| 15671  | 2  | 1  | Single         | 1  | High school or l | 1  | Working, fi | 16 | 2   | No       |      | 2   | No      |
| 15679  | 2  | 2  | Married/li     | 3  | College degree   | 9  | Other       | 99 | 1   | Yes      | 1    | 1   | Yes     |
| 15712  | 2  | 2  | Married/li     | 1  | High school or l | 1  | Working, fi | 11 | 2   | No       |      | 2   | No      |
| 15715  | 2  | 2  | Married/li     | 3  | College degree   | 1  | Working, fi | 24 | 2   | No       |      | 2   | No      |
| 15749  | 2  | 2  | Married/li     | 3  | College degree   | 1  | Working, fi | 11 | 2   | No       |      | 2   | No      |
| 15754  | 2  | 2  | Married/li     | 1  | High school or l | 1  | Working, fi | 8  | 2   | No       |      | 2   | No      |
| 15756  | 2  | 2  | Married/li     | 3  | College degree   | 1  | Working, fi | 14 | 2   | No       |      | 2   | No      |
| 15773  | 2  | 2  | Married/li     | 1  | High school or l | 3  | Unemploy    | 99 | 2   | No       |      | 2   | No      |
| 15774  | 2  | 2  | Married/li     | 3  | College degree   | 9  | Other       | 15 | 2   | No       |      | 2   | No      |
| 15776  | 2  | 2  | Married/li     | 3  | College degree   | 4  | Retired     | 17 | 2   | No       |      | 2   | No      |
| 15777  | 2  | 2  | Married/li     | 2  | Some college     | 1  | Working, fi | 11 | 2   | No       |      | 2   | No      |
| 15779  | 2  | 2  | Married/li     | 3  | College degree   | 1  | Working, fi | 13 | 2   | No       |      | 2   | No      |
| 15780  | 2  | 2  | Married/li     | 1  | High school or l | 1  | Working, fi | 9  | 2   | No       |      | 2   | No      |
| 15792  | 2  | 2  | Married/li     | 3  | College degree   | 1  | Working, fi | 18 | 2   | No       |      | 1   | Yes     |
| 15793  | 2  | 2  | Married/li     | 3  | College degree   | 1  | Working, fi | 11 | 2   | No       |      | 2   | No      |
| 15796  | 2  | 2  | Married/li     | 1  | High school or l | 1  | Working, fi | 9  | 2   | No       |      | 2   | No      |
| 15798  | 2  | 2  | Married/li     | 2  | Some college     | 1  | Working, fi | 7  | 2   | No       |      | 2   | No      |
| 15809  | 2  | 2  | Married/li     | 3  | College degree   | 1  | Working, fi | 17 | 2   | No       |      | 2   | No      |
| 15810  | 2  | 2  | Married/li     | 1  | High school or l | 4  | Retired     | 4  | 1   | Yes      | 1    | 2   | No      |

| respid | Q5 | Q6 | Marital Status | Q7 | Education        | Q8 | Work        | Q9 | Q10 | Diabetes | Q10a | Q11 | High BP |
|--------|----|----|----------------|----|------------------|----|-------------|----|-----|----------|------|-----|---------|
| 15815  | 2  | 2  | Married/li     | 2  | Some college     | 1  | Working, fi | 10 | 2   | No       |      | 2   | No      |
| 15816  | 2  | 2  | Married/li     | 2  | Some college     | 1  | Working, fi | 12 | 2   | No       |      | 1   | Yes     |
| 15817  | 2  | 2  | Married/li     | 3  | College degree   | 1  | Working, fi | 11 | 2   | No       |      | 2   | No      |
| 15821  | 2  | 2  | Married/li     | 2  | Some college     | 1  | Working, fi | 11 | 2   | No       |      | 2   | No      |
| 15823  | 2  | 2  | Married/li     | 2  | Some college     | 1  | Working, fi | 33 | 2   | No       |      | 2   | No      |
| 15834  | 2  | 2  | Married/li     | 1  | High school or l | 1  | Working, fi | 11 | 2   | No       |      | 1   | Yes     |
| 15835  | 2  | 2  | Married/li     | 3  | College degree   | 1  | Working, fi | 2  | 2   | No       |      | 2   | No      |
| 15836  | 2  | 2  | Married/li     | 3  | College degree   | 1  | Working, fi | 19 | 2   | No       |      | 2   | No      |
| 15837  | 2  | 2  | Married/li     | 3  | College degree   | 1  | Working, fi | 12 | 1   | Yes      | 1    | 2   | No      |
| 15839  | 2  | 2  | Married/li     | 3  | College degree   | 1  | Working, fi | 11 | 2   | No       |      | 2   | No      |
| 15840  | 2  | 2  | Married/li     | 2  | Some college     | 1  | Working, fi | 13 | 2   | No       |      | 2   | No      |
| 15844  | 2  | 2  | Married/li     | 2  | Some college     | 1  | Working, fi | 1  | 2   | No       |      | 1   | Yes     |
| 15845  | 2  | 2  | Married/li     | 1  | High school or l | 4  | Retired     | 16 | 2   | No       |      | 1   | Yes     |
| 15847  | 2  | 2  | Married/li     | 2  | Some college     | 1  | Working, fi | 11 | 2   | No       |      | 2   | No      |
| 15848  | 2  | 2  | Married/li     | 1  | High school or l | 1  | Working, fi | 16 | 1   | Yes      | 1    | 2   | No      |
| 15849  | 2  | 2  | Married/li     | 1  | High school or l | 1  | Working, fi | 11 | 1   | Yes      | 1    | 2   | No      |
| 15857  | 2  | 2  | Married/li     | 2  | Some college     | 1  | Working, fi | 33 | 2   | No       |      | 2   | No      |
| 15858  | 2  | 2  | Married/li     | 3  | College degree   | 1  | Working, fi | 14 | 2   | No       |      | 2   | No      |
| 15862  | 2  | 2  | Married/li     | 2  | Some college     | 1  | Working, fi | 10 | 1   | Yes      | 1    | 1   | Yes     |
| 15866  | 2  | 2  | Married/li     | 1  | High school or l | 1  | Working, fi | 13 | 2   | No       |      | 2   | No      |
| 15870  | 2  | 2  | Married/li     | 2  | Some college     | 1  | Working, fi | 12 | 2   | No       |      | 2   | No      |
| 15871  | 2  | 2  | Married/li     | 3  | College degree   | 1  | Working, fi | 19 | 2   | No       |      | 2   | No      |
| 15872  | 2  | 2  | Married/li     | 1  | High school or l | 1  | Working, fi | 13 | 1   | Yes      | 2    | 1   | Yes     |
| 15873  | 2  | 2  | Married/li     | 3  | College degree   | 1  | Working, fi | 24 | 2   | No       |      | 2   | No      |
| 15874  | 2  | 2  | Married/li     | 1  | High school or l | 8  | Other worl  | 4  | 2   | No       |      | 1   | Yes     |
| 15875  | 2  | 2  | Married/li     | 4  | Postgraduate     | 1  | Working, fi | 23 | 2   | No       |      | 2   | No      |
| 15876  | 2  | 2  | Married/li     | 2  | Some college     | 4  | Retired     | 9  | 2   | No       |      | 1   | Yes     |
| 15882  | 2  | 2  | Married/li     | 2  | Some college     | 1  | Working, fi | 10 | 1   | Yes      | 1    | 2   | No      |
| 15884  | 2  | 2  | Married/li     | 1  | High school or l | 6  | Homemake    | 12 | 1   | Yes      | 1    | 2   | No      |
| 15890  | 2  | 2  | Married/li     | 3  | College degree   | 1  | Working, fi | 11 | 2   | No       |      | 1   | Yes     |
| 15892  | 2  | 2  | Married/li     | 1  | High school or l | 1  | Working, fi | 11 | 2   | No       |      | 1   | Yes     |
| 15908  | 2  | 2  | Married/li     | 1  | High school or l | 1  | Working, fi | 12 | 2   | No       |      | 2   | No      |

| respid | Q5 | Q6 | Marital Status | Q7 | Education        | Q8 | Work        | Q9 | Q10 | Diabetes | Q10a | Q11 | High BP |
|--------|----|----|----------------|----|------------------|----|-------------|----|-----|----------|------|-----|---------|
| 15914  | 2  | 2  | Married/li     | 2  | Some college     | 1  | Working, fi | 12 | 2   | No       |      | 2   | No      |
| 15932  | 2  | 2  | Married/li     | 1  | High school or l | 2  | Working, p  | 15 | 2   | No       |      | 2   | No      |
| 15933  | 2  | 2  | Married/li     | 3  | College degree   | 1  | Working, fi | 13 | 2   | No       |      | 2   | No      |
| 15938  | 2  | 1  | Single         | 3  | College degree   | 1  | Working, fi | 19 | 2   | No       |      | 2   | No      |
| 15940  | 2  | 3  | Divorced       | 4  | Postgraduate     | 2  | Working, p  | 9  | 1   | Yes      | 1    | 1   | Yes     |
| 15945  | 2  | 2  | Married/li     | 2  | Some college     | 1  | Working, fi | 12 | 2   | No       |      | 2   | No      |
| 15947  | 2  | 2  | Married/li     | 1  | High school or l | 1  | Working, fi | 9  | 1   | Yes      | 2    | 2   | No      |
| 15950  | 2  | 2  | Married/li     | 2  | Some college     | 1  | Working, fi | 12 | 2   | No       |      | 2   | No      |
| 15951  | 2  | 2  | Married/li     | 2  | Some college     | 1  | Working, fi | 10 | 1   | Yes      | 1    | 2   | No      |
| 15952  | 2  | 2  | Married/li     | 2  | Some college     | 1  | Working, fi | 10 | 2   | No       |      | 2   | No      |
| 15953  | 2  | 2  | Married/li     | 3  | College degree   | 1  | Working, fi | 14 | 2   | No       |      | 1   | Yes     |
| 15954  | 2  | 2  | Married/li     | 3  | College degree   | 1  | Working, fi | 14 | 2   | No       |      | 2   | No      |
| 15957  | 2  | 2  | Married/li     | 3  | College degree   | 1  | Working, fi | 11 | 2   | No       |      | 1   | Yes     |
| 15965  | 2  | 2  | Married/li     | 3  | College degree   | 1  | Working, fi | 10 | 2   | No       |      | 2   | No      |
| 15966  | 2  | 2  | Married/li     | 1  | High school or l | 4  | Retired     | 4  | 2   | No       |      | 2   | No      |
| 15967  | 2  | 2  | Married/li     | 1  | High school or l | 1  | Working, fi | 8  | 1   | Yes      | 1    | 2   | No      |
| 15968  | 2  | 2  | Married/li     | 3  | College degree   | 1  | Working, fi | 13 | 2   | No       |      | 2   | No      |
| 15970  | 2  | 2  | Married/li     | 3  | College degree   | 6  | Homemake    | 19 | 2   | No       |      | 2   | No      |
| 15973  | 2  | 2  | Married/li     | 2  | Some college     | 1  | Working, fi | 12 | 2   | No       |      | 2   | No      |
| 15974  | 2  | 2  | Married/li     | 2  | Some college     | 1  | Working, fi | 13 | 2   | No       |      | 2   | No      |
| 15975  | 2  | 2  | Married/li     | 2  | Some college     | 1  | Working, fi | 11 | 2   | No       |      | 2   | No      |
| 15980  | 2  | 2  | Married/li     | 3  | College degree   | 1  | Working, fi | 12 | 1   | Yes      | 1    | 1   | Yes     |
| 15984  | 2  | 2  | Married/li     | 3  | College degree   | 1  | Working, fi | 9  | 2   | No       |      | 2   | No      |
| 15985  | 2  | 2  | Married/li     | 2  | Some college     | 4  | Retired     | 9  | 1   | Yes      | 1    | 1   | Yes     |
| 15994  | 2  | 2  | Married/li     | 1  | High school or l | 8  | Other worl  | 7  | 2   | No       |      | 2   | No      |
| 15995  | 2  | 2  | Married/li     | 3  | College degree   | 1  | Working, fi | 12 | 2   | No       |      | 1   | Yes     |
| 16000  | 2  | 2  | Married/li     | 2  | Some college     | 1  | Working, fi | 11 | 2   | No       |      | 2   | No      |
| 16004  | 2  | 2  | Married/li     | 2  | Some college     | 1  | Working, fi | 12 | 2   | No       |      | 2   | No      |
| 16005  | 2  | 2  | Married/li     | 1  | High school or l | 1  | Working, fi | 13 | 2   | No       |      | 2   | No      |
| 16006  | 2  | 3  | Divorced       | 2  | Some college     | 4  | Retired     | 9  | 2   | No       |      | 2   | No      |
| 16009  | 2  | 2  | Married/li     | 3  | College degree   | 1  | Working, fi | 19 | 2   | No       |      | 2   | No      |
| 16017  | 2  | 2  | Married/li     | 1  | High school or l | 6  | Homemake    | 23 | 2   | No       |      | 2   | No      |

| respid | Q5 | Q6 | Marital Status | Q7 | Education        | Q8 | Work        | Q9 | Q10 | Diabetes | Q10a | Q11 | High BP |
|--------|----|----|----------------|----|------------------|----|-------------|----|-----|----------|------|-----|---------|
| 16019  | 2  | 2  | Married/li     | 3  | College degree   | 4  | Retired     | 14 | 2   | No       |      | 1   | Yes     |
| 16021  | 2  | 1  | Single         | 3  | College degree   | 1  | Working, fi | 28 | 2   | No       |      | 2   | No      |
| 16024  | 2  | 1  | Single         | 1  | High school or l | 1  | Working, fi | 15 | 2   | No       |      | 2   | No      |
| 16026  | 2  | 2  | Married/li     | 3  | College degree   | 1  | Working, fi | 21 | 1   | Yes      | 1    | 1   | Yes     |
| 16029  | 2  | 2  | Married/li     | 3  | College degree   | 9  | Other       | 22 | 2   | No       |      | 2   | No      |
| 16031  | 2  | 2  | Married/li     | 3  | College degree   | 1  | Working, fi | 16 | 1   | Yes      | 1    | 1   | Yes     |
| 16037  | 2  | 2  | Married/li     | 3  | College degree   | 6  | Homemake    | 14 | 2   | No       |      | 2   | No      |
| 16043  | 2  | 2  | Married/li     | 1  | High school or l | 2  | Working, p  | 16 | 2   | No       |      | 2   | No      |
| 16044  | 2  | 2  | Married/li     | 1  | High school or l | 6  | Homemake    | 26 | 2   | No       |      | 2   | No      |
| 16047  | 2  | 2  | Married/li     | 3  | College degree   | 1  | Working, fi | 17 | 2   | No       |      | 1   | Yes     |
| 16048  | 2  | 2  | Married/li     | 3  | College degree   | 4  | Retired     | 16 | 2   | No       |      | 1   | Yes     |
| 16049  | 2  | 2  | Married/li     | 4  | Postgraduate     | 6  | Homemake    | 23 | 2   | No       |      | 2   | No      |
| 16051  | 2  | 2  | Married/li     | 1  | High school or l | 6  | Homemake    | 17 | 2   | No       |      | 2   | No      |
| 16053  | 2  | 2  | Married/li     | 3  | College degree   | 2  | Working, p  | 16 | 1   | Yes      | 1    | 2   | No      |
| 16054  | 2  | 2  | Married/li     | 3  | College degree   | 1  | Working, fi | 32 | 2   | No       |      | 2   | No      |
| 16069  | 2  | 2  | Married/li     | 3  | College degree   | 2  | Working, p  | 21 | 2   | No       |      | 2   | No      |
| 16070  | 2  | 2  | Married/li     | 3  | College degree   | 2  | Working, p  | 16 | 2   | No       |      | 2   | No      |
| 16074  | 2  | 3  | Divorced       | 4  | Postgraduate     | 1  | Working, fi | 18 | 2   | No       |      | 2   | No      |
| 16076  | 2  | 2  | Married/li     | 3  | College degree   | 1  | Working, fi | 21 | 2   | No       |      | 2   | No      |
| 16078  | 2  | 2  | Married/li     | 2  | Some college     | 1  | Working, fi | 31 | 2   | No       |      | 2   | No      |
| 16081  | 2  | 3  | Divorced       | 1  | High school or l | 1  | Working, fi | 16 | 2   | No       |      | 2   | No      |
| 16085  | 2  | 2  | Married/li     | 3  | College degree   | 9  | Other       | 19 | 2   | No       |      | 2   | No      |
| 16088  | 2  | 4  | Widow/wi       | 3  | College degree   | 4  | Retired     | 2  | 2   | No       |      | 1   | Yes     |
| 16091  | 2  | 2  | Married/li     | 3  | College degree   | 2  | Working, p  | 18 | 2   | No       |      | 2   | No      |
| 16092  | 2  | 1  | Single         | 3  | College degree   | 8  | Other worl  | 16 | 2   | No       |      | 2   | No      |
| 16093  | 2  | 2  | Married/li     | 1  | High school or l | 1  | Working, fi | 25 | 2   | No       |      | 2   | No      |
| 16097  | 2  | 2  | Married/li     | 3  | College degree   | 1  | Working, fi | 18 | 2   | No       |      | 2   | No      |
| 16100  | 2  | 2  | Married/li     | 1  | High school or l | 6  | Homemake    | 18 | 2   | No       |      | 2   | No      |
| 16101  | 2  | 2  | Married/li     | 3  | College degree   | 1  | Working, fi | 14 | 2   | No       |      | 2   | No      |
| 16105  | 2  | 2  | Married/li     | 2  | Some college     | 1  | Working, fi | 3  | 2   | No       |      | 2   | No      |
| 16118  | 2  | 2  | Married/li     | 3  | College degree   | 4  | Retired     | 7  | 1   | Yes      | 1    | 1   | Yes     |
| 16129  | 2  | 2  | Married/li     | 3  | College degree   | 1  | Working, fi | 21 | 2   | No       |      | 2   | No      |

| respid | Q5 | Q6 | Marital Status | Q7 | Education        | Q8 | Work        | Q9 | Q10 | Diabetes | Q10a | Q11 | High BP |
|--------|----|----|----------------|----|------------------|----|-------------|----|-----|----------|------|-----|---------|
| 16130  | 2  | 2  | Married/li     | 3  | College degree   | 4  | Retired     | 27 | 1   | Yes      | 1    | 2   | No      |
| 16131  | 2  | 2  | Married/li     | 1  | High school or l | 4  | Retired     | 1  | 2   | No       |      | 1   | Yes     |
| 16136  | 2  | 2  | Married/li     | 3  | College degree   | 2  | Working, p  | 18 | 2   | No       |      | 2   | No      |
| 16137  | 2  | 2  | Married/li     | 1  | High school or l | 6  | Homemake    | 16 | 2   | No       |      | 2   | No      |
| 16138  | 2  | 2  | Married/li     | 3  | College degree   | 6  | Homemake    | 23 | 2   | No       |      | 2   | No      |
| 16139  | 2  | 2  | Married/li     | 2  | Some college     | 6  | Homemake    | 19 | 2   | No       |      | 2   | No      |
| 16140  | 2  | 2  | Married/li     | 3  | College degree   | 1  | Working, fi | 1  | 2   | No       |      | 2   | No      |
| 16145  | 2  | 2  | Married/li     | 1  | High school or l | 4  | Retired     | 10 | 2   | No       |      | 1   | Yes     |
| 16150  | 2  | 1  | Single         | 1  | High school or l | 3  | Unemploy    | 16 | 2   | No       |      | 2   | No      |
| 16151  | 2  | 1  | Single         | 4  | Postgraduate     | 2  | Working, p  | 26 | 2   | No       |      | 2   | No      |
| 16153  | 2  | 1  | Single         | 3  | College degree   | 1  | Working, fi | 17 | 2   | No       |      | 2   | No      |
| 16164  | 2  | 1  | Single         | 1  | High school or l | 1  | Working, fi | 34 | 2   | No       |      | 2   | No      |
| 16168  | 2  | 2  | Married/li     | 3  | College degree   | 1  | Working, fi | 32 | 1   | Yes      | 2    | 1   | Yes     |
| 16173  | 2  | 2  | Married/li     | 1  | High school or l | 1  | Working, fi | 18 | 2   | No       |      | 2   | No      |
| 16174  | 2  | 2  | Married/li     | 2  | Some college     | 1  | Working, fi | 32 | 2   | No       |      | 2   | No      |
| 16177  | 2  | 2  | Married/li     | 3  | College degree   | 1  | Working, fi | 17 | 2   | No       |      | 2   | No      |
| 16185  | 2  | 2  | Married/li     | 3  | College degree   | 1  | Working, fi | 21 | 2   | No       |      | 1   | Yes     |
| 16189  | 2  | 2  | Married/li     | 2  | Some college     | 1  | Working, fi | 28 | 2   | No       |      | 2   | No      |
| 16192  | 2  | 2  | Married/li     | 1  | High school or l | 4  | Retired     | 3  | 2   | No       |      | 2   | No      |
| 16193  | 2  | 2  | Married/li     | 4  | Postgraduate     | 1  | Working, fi | 23 | 2   | No       |      | 2   | No      |
| 16194  | 2  | 2  | Married/li     | 1  | High school or l | 1  | Working, fi | 16 | 2   | No       |      | 2   | No      |
| 16196  | 2  | 2  | Married/li     | 2  | Some college     | 1  | Working, fi | 14 | 2   | No       |      | 2   | No      |
| 16202  | 2  | 2  | Married/li     | 1  | High school or l | 4  | Retired     | 1  | 1   | Yes      | 1    | 1   | Yes     |
| 16205  | 2  | 2  | Married/li     | 3  | College degree   | 1  | Working, fi | 20 | 2   | No       |      | 2   | No      |
| 16206  | 2  | 1  | Single         | 3  | College degree   | 1  | Working, fi | 16 | 2   | No       |      | 2   | No      |
| 16208  | 2  | 2  | Married/li     | 4  | Postgraduate     | 1  | Working, fi | 24 | 2   | No       |      | 2   | No      |
| 16211  | 2  | 2  | Married/li     | 3  | College degree   | 4  | Retired     | 2  | 2   | No       |      | 2   | No      |
| 16212  | 2  | 2  | Married/li     | 4  | Postgraduate     | 6  | Homemake    | 20 | 2   | No       |      | 2   | No      |
| 16215  | 2  | 2  | Married/li     | 4  | Postgraduate     | 1  | Working, fi | 31 | 2   | No       |      | 2   | No      |
| 16217  | 2  | 2  | Married/li     | 1  | High school or l | 9  | Other       | 15 | 2   | No       |      | 2   | No      |
| 16221  | 2  | 2  | Married/li     | 2  | Some college     | 1  | Working, fi | 16 | 2   | No       |      | 2   | No      |
| 16226  | 2  | 2  | Married/li     | 3  | College degree   | 6  | Homemake    | 19 | 2   | No       |      | 2   | No      |

| respid | Q5 | Q6 | Marital Status | Q7 | Education        | Q8 | Work        | Q9 | Q10 | Diabetes | Q10a | Q11 | High BP |
|--------|----|----|----------------|----|------------------|----|-------------|----|-----|----------|------|-----|---------|
| 16228  | 2  | 2  | Married/li     | 1  | High school or l | 1  | Working, fi | 6  | 2   | No       |      | 2   | No      |
| 16229  | 2  | 3  | Divorced       | 3  | College degree   | 2  | Working, p  | 21 | 2   | No       |      | 1   | Yes     |
| 16230  | 2  | 2  | Married/li     | 2  | Some college     | 4  | Retired     | 99 | 2   | No       |      | 2   | No      |
| 16231  | 2  | 2  | Married/li     | 3  | College degree   | 1  | Working, fi | 17 | 2   | No       |      | 2   | No      |
| 16232  | 2  | 3  | Divorced       | 3  | College degree   | 1  | Working, fi | 24 | 1   | Yes      | 1    | 2   | No      |
| 16234  | 2  | 2  | Married/li     | 3  | College degree   | 1  | Working, fi | 14 | 2   | No       |      | 2   | No      |
| 16235  | 2  | 1  | Single         | 3  | College degree   | 1  | Working, fi | 3  | 1   | Yes      | 1    | 2   | No      |
| 16236  | 2  | 2  | Married/li     | 3  | College degree   | 4  | Retired     | 18 | 2   | No       |      | 1   | Yes     |
| 16237  | 2  | 2  | Married/li     | 3  | College degree   | 1  | Working, fi | 11 | 2   | No       |      | 2   | No      |
| 16238  | 2  | 2  | Married/li     | 1  | High school or l | 4  | Retired     | 3  | 2   | No       |      | 1   | Yes     |
| 16239  | 2  | 2  | Married/li     | 1  | High school or l | 1  | Working, fi | 26 | 2   | No       |      | 2   | No      |
| 16243  | 2  | 2  | Married/li     | 3  | College degree   | 1  | Working, fi | 11 | 2   | No       |      | 2   | No      |
| 16248  | 2  | 1  | Single         | 3  | College degree   | 1  | Working, fi | 19 | 2   | No       |      | 2   | No      |
| 16249  | 2  | 2  | Married/li     | 1  | High school or l | 1  | Working, fi | 26 | 2   | No       |      | 2   | No      |
| 16251  | 2  | 2  | Married/li     | 3  | College degree   | 1  | Working, fi | 12 | 2   | No       |      | 2   | No      |
| 16263  | 2  | 1  | Single         | 1  | High school or l | 1  | Working, fi | 17 | 2   | No       |      | 2   | No      |
| 16265  | 2  | 2  | Married/li     | 4  | Postgraduate     | 1  | Working, fi | 20 | 2   | No       |      | 2   | No      |
| 16269  | 2  | 3  | Divorced       | 3  | College degree   | 1  | Working, fi | 18 | 2   | No       |      | 2   | No      |
| 16272  | 2  | 2  | Married/li     | 3  | College degree   | 1  | Working, fi | 17 | 2   | No       |      | 1   | Yes     |
| 16273  | 2  | 2  | Married/li     | 3  | College degree   | 1  | Working, fi | 9  | 2   | No       |      | 2   | No      |
| 16281  | 2  | 2  | Married/li     | 2  | Some college     | 1  | Working, fi | 8  | 2   | No       |      | 2   | No      |
| 16282  | 2  | 1  | Single         | 2  | Some college     | 1  | Working, fi | 29 | 2   | No       |      | 2   | No      |
| 16287  | 2  | 2  | Married/li     | 3  | College degree   | 2  | Working, p  | 17 | 2   | No       |      | 2   | No      |
| 16290  | 2  | 2  | Married/li     | 1  | High school or l | 4  | Retired     | 6  | 1   | Yes      | 1    | 2   | No      |
| 16294  | 2  | 2  | Married/li     | 3  | College degree   | 1  | Working, fi | 33 | 2   | No       |      | 2   | No      |
| 16295  | 2  | 2  | Married/li     | 3  | College degree   | 1  | Working, fi | 18 | 2   | No       |      | 2   | No      |
| 16296  | 2  | 2  | Married/li     | 1  | High school or l | 1  | Working, fi | 16 | 2   | No       |      | 1   | Yes     |
| 16299  | 2  | 2  | Married/li     | 1  | High school or l | 2  | Working, p  | 16 | 2   | No       |      | 1   | Yes     |
| 16302  | 2  | 2  | Married/li     | 3  | College degree   | 1  | Working, fi | 19 | 2   | No       |      | 2   | No      |
| 16303  | 2  | 2  | Married/li     | 2  | Some college     | 1  | Working, fi | 28 | 1   | Yes      | 1    | 2   | No      |
| 16304  | 2  | 4  | Widow/wi       | 1  | High school or l | 4  | Retired     | 1  | 2   | No       |      | 1   | Yes     |
| 16306  | 2  | 2  | Married/li     | 3  | College degree   | 9  | Other       | 18 | 2   | No       |      | 2   | No      |

| respid | Q5 | Q6 | Marital Status | Q7 | Education        | Q8 | Work        | Q9 | Q10 | Diabetes | Q10a | Q11 | High BP |
|--------|----|----|----------------|----|------------------|----|-------------|----|-----|----------|------|-----|---------|
| 16318  | 2  | 1  | Single         | 1  | High school or l | 1  | Working, fi | 27 | 2   | No       |      | 2   | No      |
| 16320  | 2  | 2  | Married/li     | 3  | College degree   | 1  | Working, fi | 20 | 2   | No       |      | 2   | No      |
| 16321  | 2  | 2  | Married/li     | 3  | College degree   | 4  | Retired     | 18 | 2   | No       |      | 2   | No      |
| 16322  | 2  | 2  | Married/li     | 1  | High school or l | 1  | Working, fi | 18 | 2   | No       |      | 2   | No      |
| 16324  | 2  | 2  | Married/li     | 4  | Postgraduate     | 1  | Working, fi | 20 | 2   | No       |      | 2   | No      |
| 16326  | 2  | 2  | Married/li     | 3  | College degree   | 1  | Working, fi | 19 | 2   | No       |      | 1   | Yes     |
| 16328  | 2  | 2  | Married/li     | 3  | College degree   | 4  | Retired     | 2  | 2   | No       |      | 1   | Yes     |
| 16336  | 2  | 2  | Married/li     | 1  | High school or l | 4  | Retired     | 6  | 1   | Yes      | 1    | 1   | Yes     |
| 16341  | 2  | 2  | Married/li     | 3  | College degree   | 1  | Working, fi | 21 | 2   | No       |      | 1   | Yes     |
| 16342  | 2  | 2  | Married/li     | 3  | College degree   | 4  | Retired     | 12 | 2   | No       |      | 2   | No      |
| 16343  | 2  | 2  | Married/li     | 1  | High school or l | 6  | Homemake    | 4  | 2   | No       |      | 1   | Yes     |
| 16345  | 2  | 2  | Married/li     | 2  | Some college     | 1  | Working, fi | 6  | 2   | No       |      | 2   | No      |
| 16349  | 2  | 2  | Married/li     | 3  | College degree   | 1  | Working, fi | 23 | 2   | No       |      | 2   | No      |
| 16355  | 2  | 5  | Prefer not     | 2  | Some college     | 1  | Working, fi | 99 | 2   | No       |      | 2   | No      |
| 16364  | 2  | 2  | Married/li     | 3  | College degree   | 1  | Working, fi | 13 | 2   | No       |      | 1   | Yes     |
| 16374  | 2  | 2  | Married/li     | 3  | College degree   | 2  | Working, p  | 18 | 2   | No       |      | 2   | No      |
| 16375  | 2  | 2  | Married/li     | 3  | College degree   | 1  | Working, fi | 11 | 2   | No       |      | 2   | No      |
| 16376  | 2  | 2  | Married/li     | 1  | High school or l | 1  | Working, fi | 4  | 2   | No       |      | 2   | No      |
| 16393  | 2  | 2  | Married/li     | 1  | High school or l | 1  | Working, fi | 99 | 2   | No       |      | 2   | No      |
| 16394  | 2  | 2  | Married/li     | 1  | High school or l | 1  | Working, fi | 99 | 2   | No       |      | 2   | No      |
| 16395  | 2  | 2  | Married/li     | 2  | Some college     | 1  | Working, fi | 33 | 2   | No       |      | 2   | No      |
| 16397  | 2  | 2  | Married/li     | 4  | Postgraduate     | 1  | Working, fi | 17 | 2   | No       |      | 1   | Yes     |
| 16398  | 2  | 2  | Married/li     | 3  | College degree   | 1  | Working, fi | 4  | 2   | No       |      | 1   | Yes     |
| 16402  | 2  | 2  | Married/li     | 3  | College degree   | 1  | Working, fi | 24 | 2   | No       |      | 2   | No      |
| 16405  | 2  | 2  | Married/li     | 4  | Postgraduate     | 1  | Working, fi | 22 | 2   | No       |      | 2   | No      |
| 16416  | 2  | 1  | Single         | 3  | College degree   | 1  | Working, fi | 18 | 2   | No       |      | 1   | Yes     |
| 16422  | 2  | 2  | Married/li     | 3  | College degree   | 2  | Working, p  | 17 | 1   | Yes      | 1    | 2   | No      |
| 16429  | 2  | 2  | Married/li     | 3  | College degree   | 1  | Working, fi | 14 | 2   | No       |      | 2   | No      |
| 16430  | 2  | 2  | Married/li     | 1  | High school or l | 1  | Working, fi | 19 | 2   | No       |      | 2   | No      |
| 16432  | 2  | 2  | Married/li     | 3  | College degree   | 1  | Working, fi | 19 | 2   | No       |      | 1   | Yes     |
| 16433  | 2  | 2  | Married/li     | 3  | College degree   | 1  | Working, fi | 19 | 2   | No       |      | 1   | Yes     |
| 16434  | 2  | 2  | Married/li     | 3  | College degree   | 1  | Working, fi | 33 | 1   | Yes      | 1    | 2   | No      |



| respid | Q5 | Q6 | Marital Status | Q7 | Education        | Q8 | Work        | Q9 | Q10 | Diabetes | Q10a | Q11 | High BP |
|--------|----|----|----------------|----|------------------|----|-------------|----|-----|----------|------|-----|---------|
| 16437  | 2  | 2  | Married/li     | 3  | College degree   | 6  | Homemake    | 20 | 2   | No       |      | 2   | No      |
| 16439  | 2  | 2  | Married/li     | 3  | College degree   | 1  | Working, fi | 11 | 2   | No       |      | 2   | No      |
| 16440  | 2  | 2  | Married/li     | 2  | Some college     | 1  | Working, fi | 20 | 2   | No       |      | 2   | No      |
| 16441  | 2  | 2  | Married/li     | 1  | High school or l | 4  | Retired     | 5  | 2   | No       |      | 1   | Yes     |
| 16442  | 2  | 2  | Married/li     | 3  | College degree   | 8  | Other worl  | 14 | 2   | No       |      | 2   | No      |
| 16450  | 2  | 2  | Married/li     | 1  | High school or l | 2  | Working, p  | 19 | 2   | No       |      | 2   | No      |
| 16451  | 2  | 2  | Married/li     | 2  | Some college     | 1  | Working, fi | 26 | 2   | No       |      | 1   | Yes     |
| 16452  | 2  | 2  | Married/li     | 1  | High school or l | 1  | Working, fi | 26 | 2   | No       |      | 2   | No      |
| 16467  | 2  | 2  | Married/li     | 3  | College degree   | 1  | Working, fi | 18 | 2   | No       |      | 2   | No      |
| 16468  | 2  | 2  | Married/li     | 2  | Some college     | 2  | Working, p  | 14 | 2   | No       |      | 2   | No      |
| 16469  | 2  | 3  | Divorced       | 3  | College degree   | 1  | Working, fi | 17 | 2   | No       |      | 1   | Yes     |
| 16470  | 2  | 2  | Married/li     | 4  | Postgraduate     | 1  | Working, fi | 24 | 2   | No       |      | 2   | No      |
| 16471  | 2  | 2  | Married/li     | 2  | Some college     | 1  | Working, fi | 29 | 2   | No       |      | 1   | Yes     |
| 16473  | 2  | 2  | Married/li     | 1  | High school or l | 1  | Working, fi | 16 | 2   | No       |      | 2   | No      |
| 16476  | 2  | 1  | Single         | 3  | College degree   | 1  | Working, fi | 17 | 2   | No       |      | 2   | No      |
| 16478  | 2  | 1  | Single         | 3  | College degree   | 1  | Working, fi | 19 | 1   | Yes      | 1    | 2   | No      |
| 16484  | 2  | 2  | Married/li     | 3  | College degree   | 1  | Working, fi | 11 | 2   | No       |      | 2   | No      |
| 16499  | 2  | 2  | Married/li     | 3  | College degree   | 1  | Working, fi | 18 | 2   | No       |      | 1   | Yes     |
| 16502  | 2  | 2  | Married/li     | 3  | College degree   | 2  | Working, p  | 18 | 2   | No       |      | 2   | No      |
| 16505  | 2  | 2  | Married/li     | 1  | High school or l | 6  | Homemake    | 32 | 2   | No       |      | 2   | No      |
| 16514  | 2  | 2  | Married/li     | 4  | Postgraduate     | 9  | Other       | 16 | 2   | No       |      | 1   | Yes     |
| 16515  | 2  | 2  | Married/li     | 3  | College degree   | 1  | Working, fi | 32 | 2   | No       |      | 2   | No      |
| 16517  | 2  | 2  | Married/li     | 2  | Some college     | 4  | Retired     | 1  | 2   | No       |      | 1   | Yes     |
| 16518  | 2  | 1  | Single         | 1  | High school or l | 1  | Working, fi | 29 | 2   | No       |      | 1   | Yes     |
| 16519  | 2  | 2  | Married/li     | 1  | High school or l | 8  | Other worl  | 2  | 2   | No       |      | 2   | No      |
| 16525  | 2  | 2  | Married/li     | 4  | Postgraduate     | 4  | Retired     | 18 | 2   | No       |      | 2   | No      |
| 16526  | 2  | 2  | Married/li     | 3  | College degree   | 6  | Homemake    | 3  | 2   | No       |      | 2   | No      |
| 16530  | 2  | 2  | Married/li     | 3  | College degree   | 1  | Working, fi | 12 | 2   | No       |      | 1   | Yes     |
| 16532  | 2  | 2  | Married/li     | 3  | College degree   | 1  | Working, fi | 18 | 2   | No       |      | 1   | Yes     |
| 16536  | 2  | 2  | Married/li     | 3  | College degree   | 1  | Working, fi | 19 | 2   | No       |      | 1   | Yes     |
| 16537  | 2  | 2  | Married/li     | 3  | College degree   | 1  | Working, fi | 19 | 2   | No       |      | 2   | No      |
| 16541  | 2  | 4  | Widow/wi       | 1  | High school or l | 4  | Retired     | 11 | 1   | Yes      | 2    | 2   | No      |

| respid | Q5 | Q6 | Marital Status | Q7 | Education        | Q8 | Work        | Q9 | Q10 | Diabetes | Q10a | Q11 | High BP |
|--------|----|----|----------------|----|------------------|----|-------------|----|-----|----------|------|-----|---------|
| 16543  | 2  | 2  | Married/li     | 4  | Postgraduate     | 1  | Working, fi | 17 | 1   | Yes      | 1    | 2   | No      |
| 16544  | 2  | 2  | Married/li     | 3  | College degree   | 4  | Retired     | 11 | 2   | No       |      | 1   | Yes     |
| 16545  | 2  | 2  | Married/li     | 1  | High school or l | 1  | Working, fi | 16 | 2   | No       |      | 2   | No      |
| 16546  | 2  | 2  | Married/li     | 3  | College degree   | 1  | Working, fi | 18 | 2   | No       |      | 2   | No      |
| 16548  | 2  | 2  | Married/li     | 3  | College degree   | 4  | Retired     | 16 | 2   | No       |      | 2   | No      |
| 16552  | 2  | 2  | Married/li     | 1  | High school or l | 8  | Other worl  | 1  | 2   | No       |      | 1   | Yes     |
| 16559  | 2  | 2  | Married/li     | 1  | High school or l | 4  | Retired     | 13 | 2   | No       |      | 1   | Yes     |
| 16564  | 2  | 2  | Married/li     | 1  | High school or l | 6  | Homemake    | 20 | 1   | Yes      | 1    | 1   | Yes     |
| 16565  | 2  | 2  | Married/li     | 3  | College degree   | 1  | Working, fi | 14 | 2   | No       |      | 1   | Yes     |
| 16567  | 2  | 2  | Married/li     | 1  | High school or l | 1  | Working, fi | 2  | 2   | No       |      | 2   | No      |
| 16571  | 2  | 2  | Married/li     | 3  | College degree   | 6  | Homemake    | 22 | 2   | No       |      | 2   | No      |
| 16572  | 2  | 2  | Married/li     | 2  | Some college     | 6  | Homemake    | 3  | 2   | No       |      | 1   | Yes     |
| 16579  | 2  | 2  | Married/li     | 1  | High school or l | 1  | Working, fi | 9  | 2   | No       |      | 2   | No      |
| 16588  | 2  | 2  | Married/li     | 3  | College degree   | 1  | Working, fi | 12 | 1   | Yes      | 1    | 1   | Yes     |
| 16599  | 2  | 2  | Married/li     | 1  | High school or l | 1  | Working, fi | 16 | 2   | No       |      | 2   | No      |
| 16605  | 2  | 2  | Married/li     | 4  | Postgraduate     | 4  | Retired     | 34 | 2   | No       |      | 1   | Yes     |
| 16622  | 2  | 4  | Widow/wi       | 2  | Some college     | 4  | Retired     | 30 | 2   | No       |      | 2   | No      |
| 16635  | 2  | 2  | Married/li     | 1  | High school or l | 4  | Retired     | 14 | 2   | No       |      | 2   | No      |
| 16638  | 2  | 2  | Married/li     | 1  | High school or l | 1  | Working, fi | 33 | 2   | No       |      | 2   | No      |
| 16652  | 2  | 4  | Widow/wi       | 1  | High school or l | 1  | Working, fi | 15 | 2   | No       |      | 2   | No      |
| 16656  | 2  | 2  | Married/li     | 3  | College degree   | 4  | Retired     | 33 | 2   | No       |      | 1   | Yes     |
| 16671  | 2  | 1  | Single         | 2  | Some college     | 2  | Working, p  | 29 | 2   | No       |      | 1   | Yes     |
| 16676  | 2  | 5  | Prefer not     | 1  | High school or l | 9  | Other       | 25 | 2   | No       |      | 2   | No      |
| 16678  | 2  | 2  | Married/li     | 3  | College degree   | 4  | Retired     | 34 | 2   | No       |      | 1   | Yes     |
| 16702  | 2  | 2  | Married/li     | 3  | College degree   | 1  | Working, fi | 21 | 2   | No       |      | 2   | No      |
| 16705  | 2  | 2  | Married/li     | 1  | High school or l | 1  | Working, fi | 19 | 2   | No       |      | 2   | No      |
| 16707  | 2  | 2  | Married/li     | 3  | College degree   | 4  | Retired     | 9  | 1   | Yes      | 1    | 1   | Yes     |
| 16711  | 2  | 4  | Widow/wi       | 1  | High school or l | 6  | Homemake    | 17 | 2   | No       |      | 2   | No      |
| 16712  | 2  | 2  | Married/li     | 1  | High school or l | 3  | Unemploy    | 15 | 2   | No       |      | 1   | Yes     |
| 16716  | 2  | 2  | Married/li     | 1  | High school or l | 1  | Working, fi | 30 | 2   | No       |      | 2   | No      |
| 16724  | 2  | 2  | Married/li     | 3  | College degree   | 2  | Working, p  | 20 | 2   | No       |      | 2   | No      |
| 16727  | 2  | 2  | Married/li     | 2  | Some college     | 4  | Retired     | 25 | 2   | No       |      | 1   | Yes     |

| respid | Q5 | Q6 | Marital Status | Q7 | Education        | Q8 | Work        | Q9 | Q10 | Diabetes | Q10a | Q11 | High BP |
|--------|----|----|----------------|----|------------------|----|-------------|----|-----|----------|------|-----|---------|
| 16734  | 2  | 1  | Single         | 3  | College degree   | 2  | Working, p  | 25 | 2   | No       |      | 1   | Yes     |
| 16740  | 2  | 3  | Divorced       | 2  | Some college     | 1  | Working, fi | 36 | 2   | No       |      | 2   | No      |
| 16748  | 2  | 2  | Married/li     | 3  | College degree   | 1  | Working, fi | 19 | 2   | No       |      | 2   | No      |
| 16759  | 2  | 2  | Married/li     | 4  | Postgraduate     | 1  | Working, fi | 19 | 2   | No       |      | 2   | No      |
| 16761  | 2  | 1  | Single         | 2  | Some college     | 2  | Working, p  | 25 | 2   | No       |      | 2   | No      |
| 16763  | 2  | 2  | Married/li     | 3  | College degree   | 1  | Working, fi | 20 | 2   | No       |      | 2   | No      |
| 16764  | 2  | 2  | Married/li     | 3  | College degree   | 1  | Working, fi | 22 | 2   | No       |      | 2   | No      |
| 16766  | 2  | 2  | Married/li     | 1  | High school or l | 4  | Retired     | 1  | 2   | No       |      | 1   | Yes     |
| 16767  | 2  | 3  | Divorced       | 1  | High school or l | 1  | Working, fi | 26 | 2   | No       |      | 1   | Yes     |
| 16776  | 2  | 2  | Married/li     | 3  | College degree   | 6  | Homemake    | 23 | 2   | No       |      | 2   | No      |
| 16781  | 2  | 2  | Married/li     | 4  | Postgraduate     | 1  | Working, fi | 21 | 2   | No       |      | 2   | No      |
| 16793  | 2  | 2  | Married/li     | 3  | College degree   | 4  | Retired     | 35 | 2   | No       |      | 1   | Yes     |
| 16796  | 2  | 2  | Married/li     | 1  | High school or l | 1  | Working, fi | 20 | 2   | No       |      | 2   | No      |
| 16810  | 2  | 2  | Married/li     | 3  | College degree   | 1  | Working, fi | 1  | 2   | No       |      | 2   | No      |
| 16811  | 2  | 2  | Married/li     | 3  | College degree   | 1  | Working, fi | 23 | 2   | No       |      | 2   | No      |
| 16813  | 2  | 1  | Single         | 1  | High school or l | 7  | Student     | 15 | 2   | No       |      | 2   | No      |
| 16814  | 2  | 2  | Married/li     | 4  | Postgraduate     | 1  | Working, fi | 17 | 2   | No       |      | 2   | No      |
| 16831  | 2  | 2  | Married/li     | 3  | College degree   | 6  | Homemake    | 19 | 2   | No       |      | 2   | No      |
| 16833  | 2  | 2  | Married/li     | 3  | College degree   | 6  | Homemake    | 24 | 2   | No       |      | 2   | No      |
| 16839  | 2  | 2  | Married/li     | 3  | College degree   | 1  | Working, fi | 19 | 2   | No       |      | 2   | No      |
| 16843  | 2  | 2  | Married/li     | 3  | College degree   | 1  | Working, fi | 19 | 2   | No       |      | 2   | No      |
| 16860  | 2  | 2  | Married/li     | 1  | High school or l | 1  | Working, fi | 35 | 2   | No       |      | 1   | Yes     |
| 16871  | 2  | 2  | Married/li     | 3  | College degree   | 1  | Working, fi | 20 | 2   | No       |      | 2   | No      |
| 16881  | 2  | 4  | Widow/wi       | 1  | High school or l | 6  | Homemake    | 18 | 2   | No       |      | 1   | Yes     |
| 16884  | 2  | 2  | Married/li     | 3  | College degree   | 1  | Working, fi | 19 | 2   | No       |      | 1   | Yes     |
| 16891  | 2  | 1  | Single         | 3  | College degree   | 1  | Working, fi | 23 | 2   | No       |      | 2   | No      |
| 16909  | 2  | 3  | Divorced       | 3  | College degree   | 2  | Working, p  | 15 | 2   | No       |      | 2   | No      |
| 16911  | 2  | 2  | Married/li     | 1  | High school or l | 6  | Homemake    | 19 | 2   | No       |      | 2   | No      |
| 16922  | 2  | 2  | Married/li     | 1  | High school or l | 1  | Working, fi | 22 | 1   | Yes      | 1    | 1   | Yes     |
| 16935  | 2  | 2  | Married/li     | 3  | College degree   | 1  | Working, fi | 18 | 2   | No       |      | 1   | Yes     |
| 16942  | 2  | 1  | Single         | 3  | College degree   | 7  | Student     | 28 | 2   | No       |      | 2   | No      |
| 16950  | 2  | 4  | Widow/wi       | 2  | Some college     | 1  | Working, fi | 31 | 2   | No       |      | 1   | Yes     |

| respid | Q5 | Q6 | Marital Status | Q7 | Education        | Q8 | Work        | Q9 | Q10 | Diabetes | Q10a | Q11 | High BP |
|--------|----|----|----------------|----|------------------|----|-------------|----|-----|----------|------|-----|---------|
| 16952  | 2  | 2  | Married/li     | 3  | College degree   | 2  | Working, p  | 16 | 2   | No       |      | 2   | No      |
| 16963  | 2  | 2  | Married/li     | 1  | High school or l | 1  | Working, fi | 34 | 2   | No       |      | 2   | No      |
| 16967  | 2  | 5  | Prefer not     | 3  | College degree   | 7  | Student     | 34 | 2   | No       |      | 2   | No      |
| 16970  | 2  | 2  | Married/li     | 3  | College degree   | 1  | Working, fi | 24 | 2   | No       |      | 2   | No      |
| 16976  | 2  | 2  | Married/li     | 3  | College degree   | 1  | Working, fi | 23 | 2   | No       |      | 1   | Yes     |
| 16982  | 2  | 1  | Single         | 3  | College degree   | 1  | Working, fi | 23 | 1   | Yes      | 1    | 2   | No      |
| 16995  | 2  | 2  | Married/li     | 1  | High school or l | 4  | Retired     | 17 | 2   | No       |      | 2   | No      |
| 17004  | 2  | 2  | Married/li     | 1  | High school or l | 9  | Other       | 18 | 2   | No       |      | 1   | Yes     |
| 17006  | 2  | 2  | Married/li     | 3  | College degree   | 1  | Working, fi | 21 | 2   | No       |      | 2   | No      |
| 17009  | 2  | 2  | Married/li     | 1  | High school or l | 1  | Working, fi | 24 | 1   | Yes      | 1    | 2   | No      |
| 17021  | 2  | 2  | Married/li     | 1  | High school or l | 6  | Homemake    | 99 | 2   | No       |      | 1   | Yes     |
| 17040  | 2  | 5  | Prefer not     | 1  | High school or l | 8  | Other worl  | 20 | 2   | No       |      | 2   | No      |
| 17041  | 2  | 2  | Married/li     | 4  | Postgraduate     | 2  | Working, p  | 17 | 2   | No       |      | 1   | Yes     |
| 17044  | 2  | 2  | Married/li     | 1  | High school or l | 8  | Other worl  | 16 | 1   | Yes      | 1    | 2   | No      |
| 17046  | 2  | 2  | Married/li     | 3  | College degree   | 1  | Working, fi | 22 | 2   | No       |      | 2   | No      |
| 17052  | 2  | 2  | Married/li     | 2  | Some college     | 1  | Working, fi | 17 | 2   | No       |      | 1   | Yes     |
| 17055  | 2  | 2  | Married/li     | 1  | High school or l | 1  | Working, fi | 5  | 2   | No       |      | 2   | No      |
| 17108  | 2  | 2  | Married/li     | 1  | High school or l | 5  | Permanent   | 99 | 1   | Yes      | 1    | 1   | Yes     |
| 17109  | 2  | 2  | Married/li     | 1  | High school or l | 6  | Homemake    | 16 | 2   | No       |      | 2   | No      |
| 17113  | 2  | 2  | Married/li     | 1  | High school or l | 4  | Retired     | 25 | 2   | No       |      | 2   | No      |
| 17115  | 2  | 1  | Single         | 3  | College degree   | 1  | Working, fi | 33 | 2   | No       |      | 2   | No      |
| 17132  | 2  | 4  | Widow/wi       | 1  | High school or l | 6  | Homemake    | 25 | 1   | Yes      | 1    | 2   | No      |
| 17135  | 2  | 2  | Married/li     | 3  | College degree   | 1  | Working, fi | 21 | 1   | Yes      | 1    | 1   | Yes     |
| 17138  | 2  | 2  | Married/li     | 1  | High school or l | 6  | Homemake    | 18 | 2   | No       |      | 1   | Yes     |
| 17141  | 2  | 2  | Married/li     | 3  | College degree   | 1  | Working, fi | 19 | 2   | No       |      | 1   | Yes     |
| 17143  | 2  | 2  | Married/li     | 3  | College degree   | 1  | Working, fi | 17 | 2   | No       |      | 2   | No      |
| 17148  | 2  | 2  | Married/li     | 3  | College degree   | 1  | Working, fi | 21 | 2   | No       |      | 1   | Yes     |
| 17151  | 2  | 2  | Married/li     | 3  | College degree   | 1  | Working, fi | 20 | 2   | No       |      | 1   | Yes     |
| 17153  | 2  | 2  | Married/li     | 1  | High school or l | 1  | Working, fi | 20 | 2   | No       |      | 1   | Yes     |
| 17154  | 2  | 1  | Single         | 3  | College degree   | 1  | Working, fi | 17 | 1   | Yes      | 1    | 1   | Yes     |
| 17157  | 2  | 2  | Married/li     | 4  | Postgraduate     | 1  | Working, fi | 17 | 2   | No       |      | 1   | Yes     |
| 17160  | 2  | 2  | Married/li     | 4  | Postgraduate     | 1  | Working, fi | 17 | 2   | No       |      | 2   | No      |

| respid | Q5 | Q6 | Marital Status | Q7 | Education        | Q8 | Work        | Q9 | Q10 | Diabetes | Q10a | Q11 | High BP |
|--------|----|----|----------------|----|------------------|----|-------------|----|-----|----------|------|-----|---------|
| 17167  | 2  | 2  | Married/li     | 3  | College degree   | 1  | Working, fi | 18 | 2   | No       |      | 2   | No      |
| 17169  | 2  | 2  | Married/li     | 1  | High school or l | 1  | Working, fi | 24 | 2   | No       |      | 1   | Yes     |
| 17174  | 2  | 2  | Married/li     | 3  | College degree   | 1  | Working, fi | 11 | 2   | No       |      | 2   | No      |
| 17179  | 2  | 2  | Married/li     | 3  | College degree   | 1  | Working, fi | 17 | 2   | No       |      | 2   | No      |
| 17180  | 2  | 2  | Married/li     | 4  | Postgraduate     | 1  | Working, fi | 22 | 2   | No       |      | 2   | No      |
| 17182  | 2  | 1  | Single         | 3  | College degree   | 1  | Working, fi | 28 | 2   | No       |      | 2   | No      |
| 17184  | 2  | 2  | Married/li     | 2  | Some college     | 3  | Unemploy    | 17 | 2   | No       |      | 1   | Yes     |
| 17186  | 2  | 2  | Married/li     | 4  | Postgraduate     | 1  | Working, fi | 24 | 2   | No       |      | 1   | Yes     |
| 17187  | 2  | 2  | Married/li     | 3  | College degree   | 1  | Working, fi | 19 | 2   | No       |      | 1   | Yes     |
| 17192  | 2  | 2  | Married/li     | 3  | College degree   | 1  | Working, fi | 23 | 2   | No       |      | 1   | Yes     |
| 17197  | 2  | 2  | Married/li     | 4  | Postgraduate     | 1  | Working, fi | 24 | 2   | No       |      | 1   | Yes     |
| 17217  | 2  | 2  | Married/li     | 1  | High school or l | 1  | Working, fi | 34 | 2   | No       |      | 2   | No      |
| 17226  | 2  | 2  | Married/li     | 4  | Postgraduate     | 1  | Working, fi | 20 | 2   | No       |      | 1   | Yes     |
| 17228  | 2  | 2  | Married/li     | 3  | College degree   | 4  | Retired     | 10 | 2   | No       |      | 1   | Yes     |
| 17245  | 2  | 2  | Married/li     | 4  | Postgraduate     | 1  | Working, fi | 24 | 2   | No       |      | 1   | Yes     |
| 17247  | 2  | 3  | Divorced       | 1  | High school or l | 2  | Working, p  | 15 | 2   | No       |      | 2   | No      |
| 17258  | 2  | 2  | Married/li     | 1  | High school or l | 1  | Working, fi | 16 | 2   | No       |      | 2   | No      |
| 17259  | 2  | 2  | Married/li     | 2  | Some college     | 4  | Retired     | 32 | 2   | No       |      | 1   | Yes     |
| 17262  | 2  | 2  | Married/li     | 1  | High school or l | 1  | Working, fi | 16 | 2   | No       |      | 2   | No      |
| 17265  | 2  | 4  | Widow/wi       | 1  | High school or l | 6  | Homemake    | 18 | 2   | No       |      | 2   | No      |
| 17281  | 2  | 2  | Married/li     | 1  | High school or l | 1  | Working, fi | 13 | 2   | No       |      | 1   | Yes     |
| 17282  | 2  | 2  | Married/li     | 1  | High school or l | 1  | Working, fi | 15 | 2   | No       |      | 1   | Yes     |
| 17293  | 2  | 2  | Married/li     | 2  | Some college     | 9  | Other       | 16 | 2   | No       |      | 2   | No      |
| 17306  | 2  | 2  | Married/li     | 3  | College degree   | 6  | Homemake    | 16 | 1   | Yes      | 1    | 2   | No      |
| 17312  | 2  | 2  | Married/li     | 3  | College degree   | 1  | Working, fi | 19 | 2   | No       |      | 1   | Yes     |
| 17318  | 2  | 2  | Married/li     | 2  | Some college     | 4  | Retired     | 26 | 2   | No       |      | 1   | Yes     |
| 17328  | 2  | 2  | Married/li     | 3  | College degree   | 1  | Working, fi | 20 | 2   | No       |      | 1   | Yes     |
| 17343  | 2  | 2  | Married/li     | 3  | College degree   | 1  | Working, fi | 17 | 2   | No       |      | 2   | No      |
| 17344  | 2  | 2  | Married/li     | 3  | College degree   | 1  | Working, fi | 12 | 2   | No       |      | 2   | No      |
| 17348  | 2  | 3  | Divorced       | 1  | High school or l | 1  | Working, fi | 6  | 2   | No       |      | 2   | No      |
| 17352  | 2  | 1  | Single         | 2  | Some college     | 1  | Working, fi | 25 | 2   | No       |      | 2   | No      |
| 17355  | 2  | 2  | Married/li     | 1  | High school or l | 4  | Retired     | 36 | 1   | Yes      | 2    | 2   | No      |

| respid | Q5 | Q6 | Marital Status | Q7 | Education        | Q8 | Work        | Q9 | Q10 | Diabetes | Q10a | Q11 | High BP |
|--------|----|----|----------------|----|------------------|----|-------------|----|-----|----------|------|-----|---------|
| 17356  | 2  | 2  | Married/li     | 1  | High school or l | 6  | Homemake    | 17 | 2   | No       |      | 1   | Yes     |
| 17359  | 2  | 2  | Married/li     | 1  | High school or l | 1  | Working, fi | 27 | 1   | Yes      | 1    | 2   | No      |
| 17373  | 2  | 2  | Married/li     | 3  | College degree   | 1  | Working, fi | 21 | 1   | Yes      | 1    | 2   | No      |
| 17381  | 2  | 2  | Married/li     | 3  | College degree   | 1  | Working, fi | 5  | 2   | No       |      | 2   | No      |
| 17388  | 2  | 1  | Single         | 3  | College degree   | 9  | Other       | 17 | 2   | No       |      | 2   | No      |
| 17394  | 2  | 2  | Married/li     | 1  | High school or l | 6  | Homemake    | 27 | 2   | No       |      | 1   | Yes     |
| 17401  | 2  | 2  | Married/li     | 1  | High school or l | 1  | Working, fi | 17 | 2   | No       |      | 1   | Yes     |
| 17403  | 2  | 2  | Married/li     | 3  | College degree   | 1  | Working, fi | 18 | 2   | No       |      | 2   | No      |
| 17411  | 2  | 2  | Married/li     | 1  | High school or l | 1  | Working, fi | 2  | 2   | No       |      | 2   | No      |
| 17423  | 2  | 2  | Married/li     | 1  | High school or l | 1  | Working, fi | 17 | 2   | No       |      | 2   | No      |
| 17427  | 2  | 2  | Married/li     | 3  | College degree   | 1  | Working, fi | 14 | 2   | No       |      | 2   | No      |
| 17433  | 2  | 2  | Married/li     | 3  | College degree   | 1  | Working, fi | 12 | 2   | No       |      | 2   | No      |
| 17441  | 2  | 2  | Married/li     | 4  | Postgraduate     | 1  | Working, fi | 12 | 2   | No       |      | 2   | No      |
| 17442  | 2  | 2  | Married/li     | 3  | College degree   | 1  | Working, fi | 21 | 2   | No       |      | 1   | Yes     |
| 17447  | 2  | 2  | Married/li     | 3  | College degree   | 1  | Working, fi | 19 | 1   | Yes      | 1    | 1   | Yes     |
| 17458  | 2  | 2  | Married/li     | 1  | High school or l | 1  | Working, fi | 11 | 2   | No       |      | 2   | No      |
| 17474  | 2  | 2  | Married/li     | 3  | College degree   | 1  | Working, fi | 1  | 2   | No       |      | 2   | No      |
| 17475  | 2  | 2  | Married/li     | 3  | College degree   | 1  | Working, fi | 17 | 1   | Yes      | 1    | 1   | Yes     |
| 17476  | 2  | 2  | Married/li     | 1  | High school or l | 1  | Working, fi | 18 | 1   | Yes      | 1    | 1   | Yes     |
| 17480  | 2  | 2  | Married/li     | 3  | College degree   | 1  | Working, fi | 12 | 2   | No       |      | 2   | No      |
| 17484  | 2  | 2  | Married/li     | 3  | College degree   | 1  | Working, fi | 21 | 2   | No       |      | 1   | Yes     |
| 17490  | 2  | 2  | Married/li     | 2  | Some college     | 1  | Working, fi | 30 | 2   | No       |      | 2   | No      |
| 17491  | 2  | 2  | Married/li     | 3  | College degree   | 6  | Homemake    | 16 | 2   | No       |      | 2   | No      |
| 17500  | 2  | 2  | Married/li     | 3  | College degree   | 1  | Working, fi | 22 | 2   | No       |      | 1   | Yes     |
| 17507  | 2  | 2  | Married/li     | 1  | High school or l | 1  | Working, fi | 17 | 2   | No       |      | 1   | Yes     |
| 17517  | 2  | 2  | Married/li     | 1  | High school or l | 4  | Retired     | 16 | 2   | No       |      | 1   | Yes     |
| 17520  | 2  | 2  | Married/li     | 3  | College degree   | 1  | Working, fi | 18 | 2   | No       |      | 1   | Yes     |
| 17521  | 2  | 2  | Married/li     | 1  | High school or l | 6  | Homemake    | 1  | 2   | No       |      | 1   | Yes     |
| 17531  | 2  | 2  | Married/li     | 3  | College degree   | 1  | Working, fi | 32 | 2   | No       |      | 2   | No      |
| 17540  | 2  | 1  | Single         | 3  | College degree   | 1  | Working, fi | 11 | 2   | No       |      | 2   | No      |
| 17550  | 2  | 2  | Married/li     | 1  | High school or l | 1  | Working, fi | 27 | 2   | No       |      | 2   | No      |
| 17551  | 2  | 2  | Married/li     | 3  | College degree   | 1  | Working, fi | 23 | 2   | No       |      | 2   | No      |

| respid | Q5 | Q6 | Marital Status | Q7 | Education        | Q8 | Work        | Q9 | Q10 | Diabetes | Q10a | Q11 | High BP |
|--------|----|----|----------------|----|------------------|----|-------------|----|-----|----------|------|-----|---------|
| 17555  | 2  | 2  | Married/li     | 3  | College degree   | 1  | Working, fi | 12 | 2   | No       |      | 1   | Yes     |
| 17556  | 2  | 1  | Single         | 4  | Postgraduate     | 1  | Working, fi | 34 | 2   | No       |      | 2   | No      |
| 17574  | 2  | 2  | Married/li     | 4  | Postgraduate     | 1  | Working, fi | 24 | 1   | Yes      | 1    | 2   | No      |
| 17575  | 2  | 2  | Married/li     | 3  | College degree   | 1  | Working, fi | 12 | 2   | No       |      | 2   | No      |
| 17582  | 2  | 2  | Married/li     | 1  | High school or l | 1  | Working, fi | 17 | 2   | No       |      | 1   | Yes     |
| 17587  | 2  | 2  | Married/li     | 4  | Postgraduate     | 1  | Working, fi | 34 | 2   | No       |      | 1   | Yes     |
| 17601  | 2  | 2  | Married/li     | 4  | Postgraduate     | 4  | Retired     | 19 | 2   | No       |      | 1   | Yes     |
| 17607  | 2  | 2  | Married/li     | 3  | College degree   | 1  | Working, fi | 20 | 1   | Yes      | 1    | 1   | Yes     |
| 17609  | 2  | 1  | Single         | 3  | College degree   | 1  | Working, fi | 20 | 2   | No       |      | 1   | Yes     |
| 17611  | 2  | 1  | Single         | 1  | High school or l | 4  | Retired     | 9  | 2   | No       |      | 2   | No      |
| 17613  | 2  | 2  | Married/li     | 1  | High school or l | 4  | Retired     | 99 | 2   | No       |      | 2   | No      |
| 17615  | 2  | 1  | Single         | 4  | Postgraduate     | 9  | Other       | 99 | 2   | No       |      | 2   | No      |
| 17620  | 2  | 2  | Married/li     | 3  | College degree   | 1  | Working, fi | 11 | 2   | No       |      | 1   | Yes     |
| 17624  | 2  | 2  | Married/li     | 1  | High school or l | 1  | Working, fi | 15 | 1   | Yes      | 2    | 1   | Yes     |
| 17635  | 2  | 2  | Married/li     | 2  | Some college     | 1  | Working, fi | 22 | 2   | No       |      | 1   | Yes     |
| 17643  | 2  | 4  | Widow/wi       | 1  | High school or l | 6  | Homemake    | 15 | 2   | No       |      | 2   | No      |
| 17645  | 2  | 2  | Married/li     | 3  | College degree   | 4  | Retired     | 18 | 2   | No       |      | 2   | No      |
| 17646  | 2  | 2  | Married/li     | 3  | College degree   | 1  | Working, fi | 8  | 2   | No       |      | 2   | No      |
| 17649  | 2  | 2  | Married/li     | 3  | College degree   | 1  | Working, fi | 22 | 1   | Yes      | 1    | 1   | Yes     |
| 17658  | 2  | 2  | Married/li     | 2  | Some college     | 1  | Working, fi | 31 | 2   | No       |      | 2   | No      |
| 17666  | 2  | 2  | Married/li     | 3  | College degree   | 1  | Working, fi | 14 | 2   | No       |      | 2   | No      |
| 17670  | 2  | 2  | Married/li     | 3  | College degree   | 1  | Working, fi | 18 | 2   | No       |      | 2   | No      |
| 17678  | 2  | 2  | Married/li     | 4  | Postgraduate     | 1  | Working, fi | 2  | 2   | No       |      | 2   | No      |
| 17679  | 2  | 2  | Married/li     | 2  | Some college     | 1  | Working, fi | 9  | 2   | No       |      | 2   | No      |
| 17695  | 2  | 2  | Married/li     | 3  | College degree   | 4  | Retired     | 17 | 2   | No       |      | 2   | No      |
| 17697  | 2  | 2  | Married/li     | 1  | High school or l | 8  | Other worl  | 15 | 2   | No       |      | 1   | Yes     |
| 17698  | 2  | 2  | Married/li     | 3  | College degree   | 1  | Working, fi | 21 | 1   | Yes      | 1    | 1   | Yes     |
| 17723  | 2  | 2  | Married/li     | 4  | Postgraduate     | 1  | Working, fi | 22 | 1   | Yes      | 1    | 1   | Yes     |
| 17727  | 2  | 2  | Married/li     | 1  | High school or l | 4  | Retired     | 18 | 2   | No       |      | 2   | No      |
| 17734  | 2  | 2  | Married/li     | 1  | High school or l | 4  | Retired     | 14 | 1   | Yes      | 1    | 2   | No      |
| 17737  | 2  | 2  | Married/li     | 1  | High school or l | 2  | Working, p  | 5  | 1   | Yes      | 1    | 1   | Yes     |
| 17748  | 2  | 2  | Married/li     | 1  | High school or l | 1  | Working, fi | 17 | 1   | Yes      | 1    | 2   | No      |

| respid | Q5 | Q6 | Marital Status | Q7 | Education        | Q8 | Work        | Q9 | Q10 | Diabetes | Q10a | Q11 | High BP |
|--------|----|----|----------------|----|------------------|----|-------------|----|-----|----------|------|-----|---------|
| 17749  | 2  | 2  | Married/li     | 1  | High school or l | 1  | Working, fi | 19 | 2   | No       |      | 2   | No      |
| 17754  | 2  | 2  | Married/li     | 3  | College degree   | 1  | Working, fi | 17 | 2   | No       |      | 1   | Yes     |
| 17766  | 2  | 3  | Divorced       | 1  | High school or l | 5  | Permanent   | 15 | 2   | No       |      | 2   | No      |
| 17777  | 2  | 2  | Married/li     | 1  | High school or l | 1  | Working, fi | 34 | 2   | No       |      | 2   | No      |
| 17780  | 2  | 2  | Married/li     | 3  | College degree   | 1  | Working, fi | 19 | 1   | Yes      | 1    | 2   | No      |
| 17788  | 2  | 2  | Married/li     | 3  | College degree   | 1  | Working, fi | 20 | 2   | No       |      | 1   | Yes     |
| 17801  | 2  | 2  | Married/li     | 3  | College degree   | 1  | Working, fi | 21 | 2   | No       |      | 1   | Yes     |
| 17803  | 2  | 2  | Married/li     | 3  | College degree   | 4  | Retired     | 8  | 2   | No       |      | 2   | No      |
| 17807  | 2  | 2  | Married/li     | 3  | College degree   | 1  | Working, fi | 19 | 2   | No       |      | 2   | No      |
| 17808  | 2  | 2  | Married/li     | 3  | College degree   | 1  | Working, fi | 18 | 2   | No       |      | 2   | No      |
| 17809  | 2  | 1  | Single         | 3  | College degree   | 1  | Working, fi | 33 | 2   | No       |      | 2   | No      |
| 17821  | 2  | 2  | Married/li     | 3  | College degree   | 1  | Working, fi | 10 | 2   | No       |      | 2   | No      |
| 17827  | 2  | 2  | Married/li     | 3  | College degree   | 5  | Permanent   | 17 | 2   | No       |      | 1   | Yes     |
| 17834  | 2  | 2  | Married/li     | 3  | College degree   | 4  | Retired     | 18 | 2   | No       |      | 1   | Yes     |
| 17838  | 2  | 2  | Married/li     | 3  | College degree   | 1  | Working, fi | 17 | 2   | No       |      | 2   | No      |
| 17842  | 2  | 2  | Married/li     | 3  | College degree   | 1  | Working, fi | 1  | 2   | No       |      | 2   | No      |
| 17862  | 2  | 2  | Married/li     | 3  | College degree   | 4  | Retired     | 24 | 2   | No       |      | 1   | Yes     |
| 17863  | 2  | 1  | Single         | 2  | Some college     | 2  | Working, p  | 99 | 2   | No       |      | 2   | No      |
| 17871  | 2  | 2  | Married/li     | 3  | College degree   | 1  | Working, fi | 17 | 2   | No       |      | 1   | Yes     |
| 17872  | 2  | 2  | Married/li     | 3  | College degree   | 9  | Other       | 16 | 2   | No       |      | 2   | No      |
| 17903  | 2  | 4  | Widow/wi       | 1  | High school or l | 4  | Retired     | 99 | 1   | Yes      | 1    | 2   | No      |
| 17906  | 2  | 2  | Married/li     | 3  | College degree   | 8  | Other worl  | 18 | 1   | Yes      | 1    | 2   | No      |
| 17910  | 2  | 2  | Married/li     | 3  | College degree   | 1  | Working, fi | 21 | 2   | No       |      | 1   | Yes     |
| 17922  | 2  | 2  | Married/li     | 3  | College degree   | 8  | Other worl  | 15 | 2   | No       |      | 1   | Yes     |
| 17923  | 2  | 2  | Married/li     | 1  | High school or l | 1  | Working, fi | 6  | 2   | No       |      | 2   | No      |
| 17925  | 2  | 2  | Married/li     | 3  | College degree   | 1  | Working, fi | 17 | 2   | No       |      | 2   | No      |
| 17926  | 2  | 2  | Married/li     | 3  | College degree   | 1  | Working, fi | 11 | 2   | No       |      | 2   | No      |
| 17937  | 2  | 2  | Married/li     | 1  | High school or l | 8  | Other worl  | 2  | 2   | No       |      | 2   | No      |
| 17956  | 2  | 2  | Married/li     | 3  | College degree   | 1  | Working, fi | 12 | 2   | No       |      | 2   | No      |
| 17958  | 2  | 2  | Married/li     | 3  | College degree   | 1  | Working, fi | 17 | 2   | No       |      | 2   | No      |
| 17985  | 2  | 2  | Married/li     | 3  | College degree   | 4  | Retired     | 16 | 2   | No       |      | 2   | No      |
| 17989  | 2  | 4  | Widow/wi       | 1  | High school or l | 6  | Homemake    | 19 | 2   | No       |      | 1   | Yes     |



| respid | Q5 | Q6 | Marital Status | Q7 | Education        | Q8 | Work        | Q9 | Q10 | Diabetes | Q10a | Q11 | High BP |
|--------|----|----|----------------|----|------------------|----|-------------|----|-----|----------|------|-----|---------|
| 17995  | 2  | 4  | Widow/wid      | 1  | High school or l | 6  | Homemaker   | 15 | 2   | No       |      | 2   | No      |
| 18000  | 2  | 2  | Married/liv    | 1  | High school or l | 4  | Retired     | 26 | 2   | No       |      | 2   | No      |
| 18010  | 2  | 2  | Married/liv    | 3  | College degree   | 1  | Working, fi | 19 | 2   | No       |      | 1   | Yes     |
| 18015  | 2  | 2  | Married/liv    | 3  | College degree   | 1  | Working, fi | 32 | 2   | No       |      | 2   | No      |
| 18018  | 2  | 2  | Married/liv    | 1  | High school or l | 2  | Working, p  | 5  | 2   | No       |      | 2   | No      |
| 18031  | 2  | 2  | Married/liv    | 3  | College degree   | 4  | Retired     | 34 | 2   | No       |      | 2   | No      |
| 18033  | 2  | 4  | Widow/wid      | 1  | High school or l | 1  | Working, fi | 15 | 2   | No       |      | 2   | No      |
| 18036  | 2  | 2  | Married/liv    | 3  | College degree   | 2  | Working, p  | 31 | 2   | No       |      | 2   | No      |
| 18041  | 2  | 2  | Married/liv    | 4  | Postgraduate     | 2  | Working, p  | 19 | 2   | No       |      | 1   | Yes     |
| 18068  | 2  | 2  | Married/liv    | 1  | High school or l | 6  | Homemaker   | 17 | 2   | No       |      | 2   | No      |
| 18080  | 2  | 2  | Married/liv    | 1  | High school or l | 1  | Working, fi | 15 | 2   | No       |      | 1   | Yes     |
| 18081  | 2  | 2  | Married/liv    | 3  | College degree   | 1  | Working, fi | 19 | 2   | No       |      | 1   | Yes     |
| 18083  | 2  | 1  | Single         | 3  | College degree   | 1  | Working, fi | 17 | 2   | No       |      | 1   | Yes     |
| 18113  | 2  | 2  | Married/liv    | 3  | College degree   | 1  | Working, fi | 23 | 2   | No       |      | 1   | Yes     |
| 18115  | 2  | 2  | Married/liv    | 2  | Some college     | 1  | Working, fi | 17 | 2   | No       |      | 2   | No      |
| 18117  | 2  | 2  | Married/liv    | 3  | College degree   | 1  | Working, fi | 22 | 2   | No       |      | 2   | No      |
| 18129  | 2  | 3  | Divorced       | 1  | High school or l | 6  | Homemaker   | 25 | 2   | No       |      | 2   | No      |
| 18132  | 2  | 2  | Married/liv    | 3  | College degree   | 2  | Working, p  | 19 | 2   | No       |      | 2   | No      |
| 18146  | 2  | 2  | Married/liv    | 1  | High school or l | 8  | Other worl  | 17 | 2   | No       |      | 1   | Yes     |
| 18147  | 2  | 2  | Married/liv    | 4  | Postgraduate     | 4  | Retired     | 18 | 1   | Yes      | 1    | 1   | Yes     |
| 18153  | 2  | 2  | Married/liv    | 1  | High school or l | 1  | Working, fi | 31 | 2   | No       |      | 2   | No      |
| 18154  | 2  | 2  | Married/liv    | 1  | High school or l | 1  | Working, fi | 31 | 2   | No       |      | 2   | No      |
| 18157  | 2  | 1  | Single         | 1  | High school or l | 2  | Working, p  | 3  | 2   | No       |      | 2   | No      |
| 18166  | 2  | 2  | Married/liv    | 1  | High school or l | 4  | Retired     | 25 | 2   | No       |      | 1   | Yes     |
| 18169  | 2  | 2  | Married/liv    | 3  | College degree   | 1  | Working, fi | 20 | 2   | No       |      | 2   | No      |
| 18171  | 2  | 2  | Married/liv    | 3  | College degree   | 6  | Homemaker   | 21 | 2   | No       |      | 1   | Yes     |
| 18173  | 2  | 2  | Married/liv    | 3  | College degree   | 1  | Working, fi | 12 | 2   | No       |      | 2   | No      |
| 18204  | 2  | 2  | Married/liv    | 2  | Some college     | 1  | Working, fi | 17 | 2   | No       |      | 1   | Yes     |
| 18210  | 2  | 5  | Prefer not     | 3  | College degree   | 1  | Working, fi | 17 | 2   | No       |      | 1   | Yes     |
| 18212  | 2  | 2  | Married/liv    | 3  | College degree   | 1  | Working, fi | 13 | 2   | No       |      | 2   | No      |
| 18220  | 2  | 3  | Divorced       | 3  | College degree   | 9  | Other       | 20 | 1   | Yes      | 2    | 1   | Yes     |
| 18221  | 2  | 1  | Single         | 3  | College degree   | 1  | Working, fi | 21 | 2   | No       |      | 2   | No      |

| respid | Q5 | Q6 | Marital Status | Q7 | Education        | Q8 | Work        | Q9 | Q10 | Diabetes | Q10a | Q11 | High BP |
|--------|----|----|----------------|----|------------------|----|-------------|----|-----|----------|------|-----|---------|
| 18228  | 2  | 2  | Married/li     | 4  | Postgraduate     | 1  | Working, fi | 22 | 2   | No       |      | 2   | No      |
| 18231  | 2  | 2  | Married/li     | 3  | College degree   | 1  | Working, fi | 11 | 2   | No       |      | 2   | No      |
| 18233  | 2  | 2  | Married/li     | 3  | College degree   | 4  | Retired     | 16 | 2   | No       |      | 2   | No      |
| 18235  | 2  | 2  | Married/li     | 1  | High school or l | 4  | Retired     | 5  | 2   | No       |      | 1   | Yes     |
| 18237  | 2  | 2  | Married/li     | 2  | Some college     | 1  | Working, fi | 11 | 2   | No       |      | 1   | Yes     |
| 18250  | 2  | 2  | Married/li     | 1  | High school or l | 1  | Working, fi | 31 | 1   | Yes      | 1    | 1   | Yes     |
| 18253  | 2  | 2  | Married/li     | 4  | Postgraduate     | 8  | Other worl  | 33 | 2   | No       |      | 2   | No      |
| 18264  | 2  | 2  | Married/li     | 1  | High school or l | 2  | Working, p  | 16 | 2   | No       |      | 2   | No      |
| 18285  | 2  | 2  | Married/li     | 1  | High school or l | 3  | Unemploy    | 19 | 2   | No       |      | 2   | No      |
| 18287  | 2  | 2  | Married/li     | 3  | College degree   | 3  | Unemploy    | 15 | 2   | No       |      | 1   | Yes     |
| 18296  | 2  | 2  | Married/li     | 1  | High school or l | 1  | Working, fi | 18 | 2   | No       |      | 2   | No      |
| 18299  | 2  | 2  | Married/li     | 1  | High school or l | 1  | Working, fi | 27 | 2   | No       |      | 2   | No      |
| 18313  | 2  | 2  | Married/li     | 1  | High school or l | 1  | Working, fi | 28 | 2   | No       |      | 2   | No      |
| 18321  | 2  | 2  | Married/li     | 3  | College degree   | 1  | Working, fi | 34 | 2   | No       |      | 2   | No      |
| 18324  | 2  | 2  | Married/li     | 3  | College degree   | 1  | Working, fi | 33 | 2   | No       |      | 1   | Yes     |
| 18329  | 2  | 2  | Married/li     | 1  | High school or l | 1  | Working, fi | 24 | 2   | No       |      | 1   | Yes     |
| 18332  | 2  | 4  | Widow/wi       | 1  | High school or l | 6  | Homemake    | 26 | 2   | No       |      | 2   | No      |
| 18339  | 2  | 2  | Married/li     | 3  | College degree   | 1  | Working, fi | 38 | 2   | No       |      | 2   | No      |
| 18340  | 2  | 2  | Married/li     | 1  | High school or l | 8  | Other worl  | 27 | 2   | No       |      | 2   | No      |
| 18348  | 2  | 2  | Married/li     | 4  | Postgraduate     | 1  | Working, fi | 11 | 2   | No       |      | 2   | No      |
| 18355  | 2  | 2  | Married/li     | 3  | College degree   | 1  | Working, fi | 18 | 2   | No       |      | 1   | Yes     |
| 18360  | 2  | 2  | Married/li     | 1  | High school or l | 1  | Working, fi | 17 | 1   | Yes      | 1    | 1   | Yes     |
| 18380  | 2  | 2  | Married/li     | 3  | College degree   | 6  | Homemake    | 20 | 2   | No       |      | 2   | No      |
| 18403  | 2  | 2  | Married/li     | 3  | College degree   | 6  | Homemake    | 19 | 2   | No       |      | 2   | No      |
| 18405  | 2  | 1  | Single         | 1  | High school or l | 3  | Unemploy    | 25 | 2   | No       |      | 2   | No      |
| 18409  | 2  | 2  | Married/li     | 2  | Some college     | 1  | Working, fi | 11 | 2   | No       |      | 2   | No      |
| 18445  | 2  | 2  | Married/li     | 1  | High school or l | 4  | Retired     | 33 | 2   | No       |      | 2   | No      |
| 18458  | 2  | 2  | Married/li     | 1  | High school or l | 1  | Working, fi | 25 | 2   | No       |      | 1   | Yes     |
| 18477  | 2  | 2  | Married/li     | 2  | Some college     | 1  | Working, fi | 32 | 1   | Yes      | 1    | 2   | No      |
| 18481  | 2  | 2  | Married/li     | 2  | Some college     | 4  | Retired     | 10 | 1   | Yes      | 1    | 1   | Yes     |
| 18491  | 2  | 2  | Married/li     | 3  | College degree   | 1  | Working, fi | 11 | 2   | No       |      | 2   | No      |
| 18492  | 2  | 2  | Married/li     | 1  | High school or l | 1  | Working, fi | 35 | 2   | No       |      | 1   | Yes     |

| respid | Q5 | Q6 | Marital Status | Q7 | Education        | Q8 | Work        | Q9 | Q10 | Diabetes | Q10a | Q11 | High BP |
|--------|----|----|----------------|----|------------------|----|-------------|----|-----|----------|------|-----|---------|
| 18494  | 2  | 1  | Single         | 3  | College degree   | 1  | Working, fi | 31 | 2   | No       |      | 2   | No      |
| 18495  | 2  | 4  | Widow/wi       | 1  | High school or l | 2  | Working, p  | 15 | 1   | Yes      | 1    | 1   | Yes     |
| 18496  | 2  | 2  | Married/li     | 1  | High school or l | 5  | Permanent   | 16 | 1   | Yes      | 1    | 2   | No      |
| 18507  | 2  | 2  | Married/li     | 3  | College degree   | 1  | Working, fi | 7  | 2   | No       |      | 1   | Yes     |
| 18509  | 2  | 2  | Married/li     | 3  | College degree   | 2  | Working, p  | 1  | 2   | No       |      | 1   | Yes     |
| 18510  | 2  | 2  | Married/li     | 1  | High school or l | 1  | Working, fi | 15 | 2   | No       |      | 2   | No      |
| 18513  | 2  | 2  | Married/li     | 3  | College degree   | 1  | Working, fi | 13 | 2   | No       |      | 1   | Yes     |
| 18525  | 2  | 2  | Married/li     | 1  | High school or l | 1  | Working, fi | 11 | 2   | No       |      | 2   | No      |
| 18526  | 2  | 2  | Married/li     | 1  | High school or l | 1  | Working, fi | 32 | 2   | No       |      | 2   | No      |
| 18527  | 2  | 2  | Married/li     | 3  | College degree   | 4  | Retired     | 18 | 2   | No       |      | 1   | Yes     |
| 18536  | 2  | 3  | Divorced       | 3  | College degree   | 1  | Working, fi | 5  | 2   | No       |      | 2   | No      |
| 18540  | 2  | 2  | Married/li     | 1  | High school or l | 1  | Working, fi | 15 | 2   | No       |      | 2   | No      |
| 18548  | 2  | 2  | Married/li     | 2  | Some college     | 1  | Working, fi | 32 | 2   | No       |      | 2   | No      |
| 18550  | 2  | 1  | Single         | 2  | Some college     | 1  | Working, fi | 99 | 2   | No       |      | 2   | No      |
| 18556  | 2  | 5  | Prefer not     | 2  | Some college     | 4  | Retired     | 16 | 2   | No       |      | 1   | Yes     |
| 18561  | 2  | 2  | Married/li     | 2  | Some college     | 1  | Working, fi | 28 | 2   | No       |      | 1   | Yes     |
| 18577  | 2  | 2  | Married/li     | 4  | Postgraduate     | 9  | Other       | 15 | 2   | No       |      | 2   | No      |
| 18580  | 2  | 1  | Single         | 4  | Postgraduate     | 1  | Working, fi | 16 | 2   | No       |      | 2   | No      |
| 18633  | 2  | 2  | Married/li     | 1  | High school or l | 4  | Retired     | 30 | 2   | No       |      | 2   | No      |
| 18635  | 2  | 2  | Married/li     | 1  | High school or l | 4  | Retired     | 34 | 2   | No       |      | 2   | No      |
| 18636  | 2  | 2  | Married/li     | 3  | College degree   | 1  | Working, fi | 11 | 2   | No       |      | 2   | No      |
| 18645  | 2  | 2  | Married/li     | 3  | College degree   | 1  | Working, fi | 14 | 2   | No       |      | 2   | No      |
| 18649  | 2  | 2  | Married/li     | 1  | High school or l | 1  | Working, fi | 7  | 2   | No       |      | 2   | No      |
| 18664  | 2  | 2  | Married/li     | 4  | Postgraduate     | 1  | Working, fi | 35 | 2   | No       |      | 2   | No      |
| 18668  | 2  | 2  | Married/li     | 3  | College degree   | 1  | Working, fi | 11 | 2   | No       |      | 1   | Yes     |
| 18682  | 2  | 2  | Married/li     | 1  | High school or l | 1  | Working, fi | 27 | 2   | No       |      | 1   | Yes     |
| 18685  | 2  | 2  | Married/li     | 3  | College degree   | 6  | Homemake    | 25 | 2   | No       |      | 2   | No      |
| 18688  | 2  | 2  | Married/li     | 1  | High school or l | 1  | Working, fi | 33 | 2   | No       |      | 1   | Yes     |
| 18689  | 2  | 2  | Married/li     | 3  | College degree   | 3  | Unemploy    | 7  | 2   | No       |      | 2   | No      |
| 18693  | 2  | 5  | Prefer not     | 4  | Postgraduate     | 2  | Working, p  | 16 | 2   | No       |      | 2   | No      |
| 18694  | 2  | 2  | Married/li     | 1  | High school or l | 4  | Retired     | 25 | 2   | No       |      | 1   | Yes     |
| 18705  | 2  | 2  | Married/li     | 3  | College degree   | 1  | Working, fi | 9  | 2   | No       |      | 2   | No      |

| respid | Q5 | Q6 | Marital Status | Q7 | Education        | Q8 | Work        | Q9 | Q10 | Diabetes | Q10a | Q11 | High BP |
|--------|----|----|----------------|----|------------------|----|-------------|----|-----|----------|------|-----|---------|
| 18710  | 2  | 2  | Married/li     | 1  | High school or l | 1  | Working, fi | 16 | 2   | No       |      | 1   | Yes     |
| 18715  | 2  | 2  | Married/li     | 3  | College degree   | 1  | Working, fi | 13 | 2   | No       |      | 2   | No      |
| 18718  | 2  | 2  | Married/li     | 3  | College degree   | 1  | Working, fi | 21 | 2   | No       |      | 2   | No      |
| 18727  | 2  | 2  | Married/li     | 1  | High school or l | 1  | Working, fi | 36 | 2   | No       |      | 2   | No      |
| 18732  | 2  | 2  | Married/li     | 4  | Postgraduate     | 1  | Working, fi | 11 | 2   | No       |      | 2   | No      |
| 18735  | 2  | 2  | Married/li     | 1  | High school or l | 6  | Homemake    | 11 | 2   | No       |      | 2   | No      |
| 18742  | 2  | 2  | Married/li     | 2  | Some college     | 1  | Working, fi | 6  | 2   | No       |      | 2   | No      |
| 18745  | 2  | 3  | Divorced       | 2  | Some college     | 1  | Working, fi | 27 | 2   | No       |      | 1   | Yes     |
| 18747  | 2  | 2  | Married/li     | 2  | Some college     | 4  | Retired     | 26 | 2   | No       |      | 2   | No      |
| 18750  | 2  | 4  | Widow/wi       | 1  | High school or l | 1  | Working, fi | 18 | 2   | No       |      | 2   | No      |
| 18751  | 2  | 4  | Widow/wi       | 1  | High school or l | 4  | Retired     | 22 | 1   | Yes      | 1    | 1   | Yes     |
| 18753  | 2  | 2  | Married/li     | 1  | High school or l | 1  | Working, fi | 30 | 2   | No       |      | 2   | No      |
| 18754  | 2  | 2  | Married/li     | 1  | High school or l | 1  | Working, fi | 35 | 2   | No       |      | 1   | Yes     |
| 18759  | 2  | 2  | Married/li     | 3  | College degree   | 6  | Homemake    | 20 | 2   | No       |      | 1   | Yes     |
| 18780  | 2  | 2  | Married/li     | 3  | College degree   | 1  | Working, fi | 12 | 2   | No       |      | 2   | No      |
| 18782  | 2  | 2  | Married/li     | 2  | Some college     | 6  | Homemake    | 38 | 2   | No       |      | 1   | Yes     |
| 18807  | 2  | 2  | Married/li     | 3  | College degree   | 1  | Working, fi | 14 | 1   | Yes      | 1    | 1   | Yes     |
| 18815  | 2  | 2  | Married/li     | 1  | High school or l | 2  | Working, p  | 27 | 2   | No       |      | 1   | Yes     |
| 18818  | 2  | 2  | Married/li     | 2  | Some college     | 1  | Working, fi | 33 | 1   | Yes      | 1    | 2   | No      |
| 18820  | 2  | 2  | Married/li     | 1  | High school or l | 6  | Homemake    | 15 | 2   | No       |      | 1   | Yes     |
| 18823  | 2  | 2  | Married/li     | 2  | Some college     | 1  | Working, fi | 12 | 1   | Yes      | 1    | 1   | Yes     |
| 18825  | 2  | 2  | Married/li     | 3  | College degree   | 6  | Homemake    | 18 | 2   | No       |      | 2   | No      |
| 18828  | 2  | 1  | Single         | 2  | Some college     | 1  | Working, fi | 5  | 2   | No       |      | 1   | Yes     |
| 18832  | 2  | 2  | Married/li     | 2  | Some college     | 6  | Homemake    | 34 | 2   | No       |      | 2   | No      |
| 18834  | 2  | 2  | Married/li     | 3  | College degree   | 1  | Working, fi | 23 | 2   | No       |      | 1   | Yes     |
| 18835  | 2  | 2  | Married/li     | 3  | College degree   | 1  | Working, fi | 14 | 2   | No       |      | 1   | Yes     |
| 18837  | 2  | 2  | Married/li     | 1  | High school or l | 9  | Other       | 25 | 2   | No       |      | 2   | No      |
| 18842  | 2  | 2  | Married/li     | 1  | High school or l | 6  | Homemake    | 25 | 2   | No       |      | 1   | Yes     |
| 18846  | 2  | 2  | Married/li     | 1  | High school or l | 6  | Homemake    | 18 | 2   | No       |      | 2   | No      |
| 18855  | 2  | 2  | Married/li     | 2  | Some college     | 1  | Working, fi | 9  | 2   | No       |      | 2   | No      |
| 18856  | 2  | 5  | Prefer not     | 3  | College degree   | 9  | Other       | 17 | 2   | No       |      | 1   | Yes     |
| 18887  | 2  | 2  | Married/li     | 1  | High school or l | 2  | Working, p  | 15 | 2   | No       |      | 2   | No      |

| respid | Q5 | Q6 | Marital Status | Q7 | Education        | Q8 | Work        | Q9 | Q10 | Diabetes | Q10a | Q11 | High BP |
|--------|----|----|----------------|----|------------------|----|-------------|----|-----|----------|------|-----|---------|
| 18903  | 2  | 2  | Married/li     | 3  | College degree   | 1  | Working, fi | 2  | 2   | No       |      | 1   | Yes     |
| 18906  | 2  | 2  | Married/li     | 3  | College degree   | 1  | Working, fi | 11 | 1   | Yes      | 1    | 2   | No      |
| 18910  | 2  | 2  | Married/li     | 3  | College degree   | 1  | Working, fi | 2  | 2   | No       |      | 2   | No      |
| 18919  | 2  | 2  | Married/li     | 1  | High school or l | 4  | Retired     | 17 | 2   | No       |      | 1   | Yes     |
| 18928  | 2  | 2  | Married/li     | 2  | Some college     | 4  | Retired     | 8  | 2   | No       |      | 2   | No      |
| 18931  | 2  | 2  | Married/li     | 2  | Some college     | 1  | Working, fi | 11 | 2   | No       |      | 2   | No      |
| 18939  | 2  | 2  | Married/li     | 3  | College degree   | 1  | Working, fi | 12 | 2   | No       |      | 2   | No      |
| 18946  | 2  | 2  | Married/li     | 4  | Postgraduate     | 1  | Working, fi | 33 | 2   | No       |      | 2   | No      |
| 18952  | 2  | 2  | Married/li     | 1  | High school or l | 4  | Retired     | 35 | 2   | No       |      | 2   | No      |
| 18954  | 2  | 2  | Married/li     | 3  | College degree   | 1  | Working, fi | 12 | 2   | No       |      | 1   | Yes     |
| 18982  | 2  | 2  | Married/li     | 3  | College degree   | 1  | Working, fi | 11 | 2   | No       |      | 2   | No      |
| 18986  | 2  | 2  | Married/li     | 3  | College degree   | 1  | Working, fi | 2  | 2   | No       |      | 2   | No      |
| 18989  | 2  | 2  | Married/li     | 1  | High school or l | 4  | Retired     | 11 | 2   | No       |      | 2   | No      |
| 18990  | 2  | 2  | Married/li     | 3  | College degree   | 1  | Working, fi | 11 | 2   | No       |      | 2   | No      |
| 18996  | 2  | 2  | Married/li     | 2  | Some college     | 1  | Working, fi | 6  | 2   | No       |      | 2   | No      |
| 18998  | 2  | 2  | Married/li     | 2  | Some college     | 1  | Working, fi | 13 | 2   | No       |      | 2   | No      |
| 19009  | 2  | 1  | Single         | 4  | Postgraduate     | 3  | Unemploye   | 15 | 2   | No       |      | 2   | No      |
| 19010  | 2  | 2  | Married/li     | 2  | Some college     | 1  | Working, fi | 12 | 2   | No       |      | 2   | No      |
| 19017  | 2  | 2  | Married/li     | 2  | Some college     | 1  | Working, fi | 9  | 2   | No       |      | 2   | No      |
| 19018  | 2  | 2  | Married/li     | 3  | College degree   | 1  | Working, fi | 11 | 2   | No       |      | 2   | No      |
| 19020  | 2  | 2  | Married/li     | 3  | College degree   | 1  | Working, fi | 11 | 2   | No       |      | 2   | No      |
| 19027  | 2  | 1  | Single         | 3  | College degree   | 1  | Working, fi | 16 | 1   | Yes      | 1    | 1   | Yes     |
| 19035  | 2  | 2  | Married/li     | 3  | College degree   | 1  | Working, fi | 14 | 2   | No       |      | 2   | No      |
| 19037  | 2  | 4  | Widow/wi       | 1  | High school or l | 4  | Retired     | 10 | 2   | No       |      | 1   | Yes     |
| 19048  | 2  | 2  | Married/li     | 3  | College degree   | 1  | Working, fi | 13 | 2   | No       |      | 2   | No      |
| 19051  | 2  | 2  | Married/li     | 1  | High school or l | 6  | Homemake    | 33 | 2   | No       |      | 2   | No      |
| 19054  | 2  | 2  | Married/li     | 3  | College degree   | 1  | Working, fi | 11 | 2   | No       |      | 1   | Yes     |
| 19057  | 2  | 2  | Married/li     | 2  | Some college     | 1  | Working, fi | 2  | 2   | No       |      | 2   | No      |
| 19073  | 2  | 2  | Married/li     | 1  | High school or l | 1  | Working, fi | 14 | 2   | No       |      | 2   | No      |
| 19075  | 2  | 2  | Married/li     | 1  | High school or l | 1  | Working, fi | 32 | 2   | No       |      | 2   | No      |
| 19079  | 2  | 2  | Married/li     | 3  | College degree   | 1  | Working, fi | 11 | 2   | No       |      | 1   | Yes     |
| 19087  | 2  | 2  | Married/li     | 3  | College degree   | 1  | Working, fi | 14 | 2   | No       |      | 2   | No      |

| respid | Q5 | Q6 | Marital Status | Q7 | Education        | Q8 | Work        | Q9 | Q10 | Diabetes | Q10a | Q11 | High BP |
|--------|----|----|----------------|----|------------------|----|-------------|----|-----|----------|------|-----|---------|
| 19090  | 2  | 1  | Single         | 3  | College degree   | 9  | Other       | 30 | 2   | No       |      | 2   | No      |
| 19093  | 2  | 2  | Married/li     | 3  | College degree   | 1  | Working, fi | 8  | 2   | No       |      | 2   | No      |
| 19099  | 2  | 1  | Single         | 3  | College degree   | 1  | Working, fi | 30 | 2   | No       |      | 1   | Yes     |
| 19100  | 2  | 2  | Married/li     | 4  | Postgraduate     | 1  | Working, fi | 14 | 2   | No       |      | 2   | No      |
| 19101  | 2  | 2  | Married/li     | 2  | Some college     | 1  | Working, fi | 12 | 2   | No       |      | 2   | No      |
| 19105  | 2  | 2  | Married/li     | 3  | College degree   | 2  | Working, p  | 13 | 2   | No       |      | 2   | No      |
| 19111  | 2  | 2  | Married/li     | 3  | College degree   | 1  | Working, fi | 9  | 2   | No       |      | 2   | No      |
| 19112  | 2  | 2  | Married/li     | 3  | College degree   | 4  | Retired     | 99 | 1   | Yes      | 2    | 1   | Yes     |
| 19117  | 2  | 2  | Married/li     | 3  | College degree   | 1  | Working, fi | 14 | 2   | No       |      | 1   | Yes     |
| 19122  | 2  | 2  | Married/li     | 2  | Some college     | 4  | Retired     | 14 | 2   | No       |      | 2   | No      |
| 19126  | 2  | 2  | Married/li     | 2  | Some college     | 1  | Working, fi | 33 | 2   | No       |      | 2   | No      |
| 19127  | 2  | 3  | Divorced       | 3  | College degree   | 1  | Working, fi | 28 | 1   | Yes      | 1    | 1   | Yes     |
| 19131  | 2  | 2  | Married/li     | 3  | College degree   | 1  | Working, fi | 12 | 2   | No       |      | 1   | Yes     |
| 19134  | 2  | 2  | Married/li     | 2  | Some college     | 1  | Working, fi | 11 | 2   | No       |      | 2   | No      |
| 19149  | 2  | 2  | Married/li     | 3  | College degree   | 4  | Retired     | 12 | 2   | No       |      | 2   | No      |
| 19151  | 2  | 2  | Married/li     | 3  | College degree   | 1  | Working, fi | 6  | 2   | No       |      | 1   | Yes     |
| 19164  | 2  | 2  | Married/li     | 4  | Postgraduate     | 1  | Working, fi | 35 | 2   | No       |      | 2   | No      |
| 19166  | 2  | 2  | Married/li     | 1  | High school or l | 1  | Working, fi | 4  | 1   | Yes      | 1    | 1   | Yes     |
| 19172  | 2  | 2  | Married/li     | 3  | College degree   | 1  | Working, fi | 10 | 2   | No       |      | 2   | No      |
| 19173  | 2  | 2  | Married/li     | 1  | High school or l | 3  | Unemploye   | 12 | 2   | No       |      | 2   | No      |
| 19180  | 2  | 2  | Married/li     | 1  | High school or l | 1  | Working, fi | 25 | 2   | No       |      | 2   | No      |
| 19185  | 2  | 2  | Married/li     | 4  | Postgraduate     | 1  | Working, fi | 9  | 2   | No       |      | 1   | Yes     |
| 19189  | 2  | 4  | Widow/wi       | 3  | College degree   | 1  | Working, fi | 8  | 2   | No       |      | 2   | No      |
| 19191  | 2  | 1  | Single         | 2  | Some college     | 9  | Other       | 8  | 2   | No       |      | 2   | No      |
| 19198  | 2  | 3  | Divorced       | 2  | Some college     | 6  | Homemake    | 15 | 2   | No       |      | 1   | Yes     |
| 19203  | 2  | 2  | Married/li     | 3  | College degree   | 1  | Working, fi | 14 | 2   | No       |      | 1   | Yes     |
| 19209  | 2  | 2  | Married/li     | 2  | Some college     | 1  | Working, fi | 11 | 2   | No       |      | 2   | No      |
| 19210  | 2  | 2  | Married/li     | 2  | Some college     | 1  | Working, fi | 11 | 2   | No       |      | 2   | No      |
| 19218  | 2  | 2  | Married/li     | 3  | College degree   | 1  | Working, fi | 13 | 2   | No       |      | 2   | No      |
| 19220  | 2  | 2  | Married/li     | 3  | College degree   | 1  | Working, fi | 11 | 2   | No       |      | 2   | No      |
| 19225  | 2  | 2  | Married/li     | 3  | College degree   | 1  | Working, fi | 1  | 2   | No       |      | 2   | No      |
| 19227  | 2  | 2  | Married/li     | 2  | Some college     | 1  | Working, fi | 1  | 2   | No       |      | 2   | No      |

| respid | Q5 | Q6 | Marital Status | Q7 | Education        | Q8 | Work        | Q9 | Q10 | Diabetes | Q10a | Q11 | High BP |
|--------|----|----|----------------|----|------------------|----|-------------|----|-----|----------|------|-----|---------|
| 19228  | 2  | 4  | Widow/wi       | 2  | Some college     | 1  | Working, fi | 7  | 2   | No       |      | 2   | No      |
| 19243  | 2  | 2  | Married/li     | 2  | Some college     | 1  | Working, fi | 11 | 2   | No       |      | 1   | Yes     |
| 19244  | 2  | 2  | Married/li     | 1  | High school or l | 6  | Homemake    | 29 | 2   | No       |      | 2   | No      |
| 19246  | 2  | 2  | Married/li     | 3  | College degree   | 1  | Working, fi | 3  | 2   | No       |      | 2   | No      |
| 19248  | 2  | 2  | Married/li     | 2  | Some college     | 1  | Working, fi | 13 | 2   | No       |      | 2   | No      |
| 19249  | 2  | 2  | Married/li     | 3  | College degree   | 1  | Working, fi | 32 | 2   | No       |      | 1   | Yes     |
| 19252  | 2  | 2  | Married/li     | 3  | College degree   | 1  | Working, fi | 12 | 2   | No       |      | 2   | No      |
| 19255  | 2  | 2  | Married/li     | 3  | College degree   | 4  | Retired     | 11 | 2   | No       |      | 2   | No      |
| 19257  | 2  | 2  | Married/li     | 2  | Some college     | 1  | Working, fi | 12 | 2   | No       |      | 2   | No      |
| 19274  | 2  | 2  | Married/li     | 2  | Some college     | 4  | Retired     | 13 | 2   | No       |      | 2   | No      |
| 19279  | 2  | 2  | Married/li     | 1  | High school or l | 6  | Homemake    | 25 | 2   | No       |      | 2   | No      |
| 19291  | 2  | 1  | Single         | 3  | College degree   | 1  | Working, fi | 30 | 2   | No       |      | 2   | No      |
| 19292  | 2  | 2  | Married/li     | 2  | Some college     | 1  | Working, fi | 12 | 2   | No       |      | 2   | No      |
| 19308  | 2  | 2  | Married/li     | 1  | High school or l | 9  | Other       | 99 | 2   | No       |      | 2   | No      |
| 19310  | 2  | 2  | Married/li     | 3  | College degree   | 1  | Working, fi | 10 | 2   | No       |      | 1   | Yes     |
| 19311  | 2  | 1  | Single         | 2  | Some college     | 1  | Working, fi | 7  | 2   | No       |      | 1   | Yes     |
| 19326  | 2  | 1  | Single         | 1  | High school or l | 1  | Working, fi | 33 | 2   | No       |      | 2   | No      |
| 19327  | 2  | 2  | Married/li     | 2  | Some college     | 1  | Working, fi | 10 | 2   | No       |      | 2   | No      |
| 19329  | 2  | 2  | Married/li     | 1  | High school or l | 1  | Working, fi | 25 | 2   | No       |      | 1   | Yes     |
| 19330  | 2  | 2  | Married/li     | 2  | Some college     | 1  | Working, fi | 12 | 1   | Yes      | 1    | 1   | Yes     |
| 19333  | 2  | 2  | Married/li     | 3  | College degree   | 1  | Working, fi | 11 | 2   | No       |      | 1   | Yes     |
| 19336  | 2  | 2  | Married/li     | 3  | College degree   | 6  | Homemake    | 20 | 2   | No       |      | 2   | No      |
| 19343  | 2  | 2  | Married/li     | 3  | College degree   | 1  | Working, fi | 11 | 2   | No       |      | 2   | No      |
| 19348  | 2  | 2  | Married/li     | 3  | College degree   | 1  | Working, fi | 14 | 2   | No       |      | 2   | No      |
| 19349  | 2  | 2  | Married/li     | 2  | Some college     | 4  | Retired     | 27 | 2   | No       |      | 2   | No      |
| 19352  | 2  | 2  | Married/li     | 2  | Some college     | 1  | Working, fi | 9  | 2   | No       |      | 1   | Yes     |
| 19356  | 2  | 2  | Married/li     | 4  | Postgraduate     | 1  | Working, fi | 11 | 2   | No       |      | 2   | No      |
| 19357  | 2  | 2  | Married/li     | 1  | High school or l | 1  | Working, fi | 6  | 2   | No       |      | 2   | No      |
| 19358  | 2  | 2  | Married/li     | 3  | College degree   | 1  | Working, fi | 13 | 2   | No       |      | 2   | No      |
| 19367  | 2  | 2  | Married/li     | 3  | College degree   | 1  | Working, fi | 7  | 2   | No       |      | 2   | No      |
| 19376  | 2  | 2  | Married/li     | 1  | High school or l | 4  | Retired     | 1  | 2   | No       |      | 2   | No      |
| 19377  | 2  | 1  | Single         | 3  | College degree   | 1  | Working, fi | 8  | 2   | No       |      | 1   | Yes     |

| respid | Q5 | Q6 | Marital Status | Q7 | Education        | Q8 | Work        | Q9 | Q10 | Diabetes | Q10a | Q11 | High BP |
|--------|----|----|----------------|----|------------------|----|-------------|----|-----|----------|------|-----|---------|
| 19380  | 2  | 2  | Married/li     | 3  | College degree   | 1  | Working, fi | 33 | 2   | No       |      | 2   | No      |
| 19384  | 2  | 2  | Married/li     | 1  | High school or l | 1  | Working, fi | 11 | 2   | No       |      | 2   | No      |
| 19391  | 2  | 2  | Married/li     | 2  | Some college     | 1  | Working, fi | 34 | 2   | No       |      | 2   | No      |
| 19397  | 2  | 1  | Single         | 2  | Some college     | 1  | Working, fi | 11 | 2   | No       |      | 2   | No      |
| 19398  | 2  | 2  | Married/li     | 3  | College degree   | 6  | Homemake    | 17 | 2   | No       |      | 2   | No      |
| 19401  | 2  | 2  | Married/li     | 3  | College degree   | 2  | Working, p  | 25 | 2   | No       |      | 2   | No      |
| 19402  | 2  | 2  | Married/li     | 4  | Postgraduate     | 1  | Working, fi | 12 | 2   | No       |      | 2   | No      |
| 19403  | 2  | 2  | Married/li     | 3  | College degree   | 1  | Working, fi | 14 | 2   | No       |      | 2   | No      |
| 19405  | 2  | 2  | Married/li     | 3  | College degree   | 1  | Working, fi | 11 | 2   | No       |      | 2   | No      |
| 19407  | 2  | 1  | Single         | 1  | High school or l | 9  | Other       | 5  | 2   | No       |      | 2   | No      |
| 19415  | 2  | 2  | Married/li     | 1  | High school or l | 6  | Homemake    | 15 | 2   | No       |      | 2   | No      |
| 19420  | 2  | 4  | Widow/wi       | 1  | High school or l | 4  | Retired     | 1  | 2   | No       |      | 2   | No      |
| 19423  | 2  | 2  | Married/li     | 4  | Postgraduate     | 1  | Working, fi | 11 | 1   | Yes      | 1    | 1   | Yes     |
| 19424  | 2  | 2  | Married/li     | 1  | High school or l | 4  | Retired     | 26 | 2   | No       |      | 1   | Yes     |
| 19426  | 2  | 2  | Married/li     | 3  | College degree   | 1  | Working, fi | 13 | 2   | No       |      | 2   | No      |
| 19429  | 2  | 2  | Married/li     | 1  | High school or l | 1  | Working, fi | 13 | 2   | No       |      | 2   | No      |
| 19435  | 2  | 2  | Married/li     | 3  | College degree   | 1  | Working, fi | 11 | 2   | No       |      | 2   | No      |
| 19441  | 2  | 2  | Married/li     | 2  | Some college     | 1  | Working, fi | 14 | 2   | No       |      | 2   | No      |
| 19450  | 2  | 2  | Married/li     | 2  | Some college     | 1  | Working, fi | 13 | 2   | No       |      | 2   | No      |
| 19456  | 2  | 2  | Married/li     | 3  | College degree   | 4  | Retired     | 16 | 2   | No       |      | 1   | Yes     |
| 19457  | 2  | 2  | Married/li     | 2  | Some college     | 6  | Homemake    | 14 | 2   | No       |      | 2   | No      |
| 19463  | 2  | 2  | Married/li     | 2  | Some college     | 1  | Working, fi | 6  | 2   | No       |      | 2   | No      |
| 19467  | 2  | 2  | Married/li     | 3  | College degree   | 1  | Working, fi | 14 | 2   | No       |      | 1   | Yes     |
| 19468  | 2  | 2  | Married/li     | 2  | Some college     | 1  | Working, fi | 11 | 1   | Yes      | 2    | 1   | Yes     |
| 19471  | 2  | 2  | Married/li     | 3  | College degree   | 3  | Unemploy    | 11 | 2   | No       |      | 2   | No      |
| 19473  | 2  | 2  | Married/li     | 1  | High school or l | 1  | Working, fi | 4  | 2   | No       |      | 2   | No      |
| 19478  | 2  | 2  | Married/li     | 2  | Some college     | 1  | Working, fi | 11 | 1   | Yes      | 1    | 1   | Yes     |
| 19480  | 2  | 2  | Married/li     | 2  | Some college     | 1  | Working, fi | 11 | 2   | No       |      | 2   | No      |
| 19481  | 2  | 2  | Married/li     | 2  | Some college     | 2  | Working, p  | 11 | 2   | No       |      | 2   | No      |
| 19484  | 2  | 2  | Married/li     | 3  | College degree   | 1  | Working, fi | 7  | 2   | No       |      | 2   | No      |
| 19487  | 2  | 5  | Prefer not     | 1  | High school or l | 9  | Other       | 99 | 2   | No       |      | 2   | No      |
| 19491  | 2  | 2  | Married/li     | 3  | College degree   | 1  | Working, fi | 13 | 2   | No       |      | 1   | Yes     |



| respid | Q5 | Q6 | Marital Status | Q7 | Education        | Q8 | Work        | Q9 | Q10 | Diabetes | Q10a | Q11 | High BP |
|--------|----|----|----------------|----|------------------|----|-------------|----|-----|----------|------|-----|---------|
| 19495  | 2  | 2  | Married/li     | 1  | High school or l | 4  | Retired     | 11 | 2   | No       |      | 2   | No      |
| 19498  | 2  | 2  | Married/li     | 3  | College degree   | 1  | Working, fi | 35 | 1   | Yes      | 1    | 2   | No      |
| 19500  | 2  | 2  | Married/li     | 2  | Some college     | 1  | Working, fi | 10 | 2   | No       |      | 2   | No      |
| 19501  | 2  | 2  | Married/li     | 3  | College degree   | 4  | Retired     | 14 | 2   | No       |      | 1   | Yes     |
| 19503  | 2  | 2  | Married/li     | 2  | Some college     | 4  | Retired     | 6  | 2   | No       |      | 2   | No      |
| 19506  | 2  | 2  | Married/li     | 3  | College degree   | 1  | Working, fi | 9  | 2   | No       |      | 2   | No      |
| 19508  | 2  | 2  | Married/li     | 3  | College degree   | 1  | Working, fi | 11 | 2   | No       |      | 2   | No      |
| 19509  | 2  | 3  | Divorced       | 3  | College degree   | 1  | Working, fi | 34 | 1   | Yes      | 1    | 2   | No      |
| 19518  | 2  | 2  | Married/li     | 2  | Some college     | 1  | Working, fi | 1  | 2   | No       |      | 2   | No      |
| 19520  | 2  | 2  | Married/li     | 3  | College degree   | 1  | Working, fi | 12 | 2   | No       |      | 2   | No      |
| 19536  | 2  | 2  | Married/li     | 3  | College degree   | 1  | Working, fi | 9  | 2   | No       |      | 2   | No      |
| 19538  | 2  | 2  | Married/li     | 1  | High school or l | 1  | Working, fi | 11 | 2   | No       |      | 1   | Yes     |
| 19541  | 2  | 3  | Divorced       | 4  | Postgraduate     | 1  | Working, fi | 34 | 2   | No       |      | 1   | Yes     |
| 19548  | 2  | 2  | Married/li     | 1  | High school or l | 4  | Retired     | 7  | 2   | No       |      | 2   | No      |
| 19553  | 2  | 2  | Married/li     | 3  | College degree   | 1  | Working, fi | 6  | 2   | No       |      | 2   | No      |
| 19556  | 2  | 2  | Married/li     | 2  | Some college     | 1  | Working, fi | 12 | 2   | No       |      | 2   | No      |
| 19559  | 2  | 2  | Married/li     | 3  | College degree   | 1  | Working, fi | 14 | 2   | No       |      | 2   | No      |
| 19561  | 2  | 2  | Married/li     | 3  | College degree   | 1  | Working, fi | 13 | 1   | Yes      | 2    | 2   | No      |
| 19562  | 2  | 2  | Married/li     | 3  | College degree   | 1  | Working, fi | 37 | 2   | No       |      | 1   | Yes     |
| 19564  | 2  | 2  | Married/li     | 2  | Some college     | 1  | Working, fi | 32 | 2   | No       |      | 2   | No      |
| 19567  | 2  | 2  | Married/li     | 3  | College degree   | 1  | Working, fi | 13 | 1   | Yes      | 1    | 1   | Yes     |
| 19571  | 2  | 2  | Married/li     | 2  | Some college     | 1  | Working, fi | 12 | 2   | No       |      | 2   | No      |
| 19576  | 2  | 2  | Married/li     | 3  | College degree   | 1  | Working, fi | 12 | 2   | No       |      | 2   | No      |
| 19578  | 2  | 2  | Married/li     | 3  | College degree   | 1  | Working, fi | 6  | 2   | No       |      | 2   | No      |
| 19606  | 2  | 2  | Married/li     | 1  | High school or l | 1  | Working, fi | 1  | 2   | No       |      | 2   | No      |
| 19607  | 2  | 2  | Married/li     | 3  | College degree   | 1  | Working, fi | 10 | 2   | No       |      | 2   | No      |
| 19608  | 2  | 2  | Married/li     | 1  | High school or l | 1  | Working, fi | 8  | 2   | No       |      | 2   | No      |
| 19612  | 2  | 2  | Married/li     | 2  | Some college     | 1  | Working, fi | 11 | 2   | No       |      | 2   | No      |
| 19618  | 2  | 2  | Married/li     | 3  | College degree   | 1  | Working, fi | 11 | 2   | No       |      | 2   | No      |
| 19621  | 2  | 2  | Married/li     | 2  | Some college     | 1  | Working, fi | 2  | 2   | No       |      | 2   | No      |
| 19624  | 2  | 2  | Married/li     | 3  | College degree   | 1  | Working, fi | 14 | 2   | No       |      | 2   | No      |
| 19630  | 2  | 2  | Married/li     | 2  | Some college     | 1  | Working, fi | 10 | 2   | No       |      | 2   | No      |

| respid | Q5 | Q6 | Marital Status | Q7 | Education        | Q8 | Work        | Q9 | Q10 | Diabetes | Q10a | Q11 | High BP |
|--------|----|----|----------------|----|------------------|----|-------------|----|-----|----------|------|-----|---------|
| 19637  | 2  | 2  | Married/li     | 2  | Some college     | 1  | Working, fi | 10 | 2   | No       |      | 2   | No      |
| 19639  | 2  | 2  | Married/li     | 2  | Some college     | 1  | Working, fi | 11 | 2   | No       |      | 2   | No      |
| 19647  | 2  | 4  | Widow/wi       | 3  | College degree   | 1  | Working, fi | 34 | 2   | No       |      | 2   | No      |
| 19648  | 2  | 2  | Married/li     | 3  | College degree   | 1  | Working, fi | 11 | 1   | Yes      | 1    | 2   | No      |
| 19660  | 2  | 2  | Married/li     | 2  | Some college     | 1  | Working, fi | 8  | 2   | No       |      | 2   | No      |
| 19662  | 2  | 2  | Married/li     | 2  | Some college     | 1  | Working, fi | 11 | 2   | No       |      | 1   | Yes     |
| 19669  | 2  | 1  | Single         | 3  | College degree   | 4  | Retired     | 2  | 2   | No       |      | 2   | No      |
| 19680  | 2  | 2  | Married/li     | 2  | Some college     | 1  | Working, fi | 32 | 2   | No       |      | 2   | No      |
| 19682  | 2  | 2  | Married/li     | 2  | Some college     | 1  | Working, fi | 11 | 2   | No       |      | 2   | No      |
| 19686  | 2  | 2  | Married/li     | 3  | College degree   | 1  | Working, fi | 14 | 2   | No       |      | 2   | No      |
| 19700  | 2  | 2  | Married/li     | 2  | Some college     | 1  | Working, fi | 11 | 2   | No       |      | 2   | No      |
| 19701  | 2  | 2  | Married/li     | 4  | Postgraduate     | 1  | Working, fi | 13 | 2   | No       |      | 2   | No      |
| 19704  | 2  | 1  | Single         | 3  | College degree   | 1  | Working, fi | 7  | 2   | No       |      | 2   | No      |
| 19706  | 2  | 2  | Married/li     | 3  | College degree   | 1  | Working, fi | 35 | 2   | No       |      | 2   | No      |
| 19707  | 2  | 2  | Married/li     | 1  | High school or l | 8  | Other worl  | 29 | 2   | No       |      | 2   | No      |
| 19717  | 2  | 2  | Married/li     | 3  | College degree   | 4  | Retired     | 13 | 2   | No       |      | 1   | Yes     |
| 19718  | 2  | 3  | Divorced       | 2  | Some college     | 1  | Working, fi | 11 | 2   | No       |      | 2   | No      |
| 19721  | 2  | 2  | Married/li     | 1  | High school or l | 1  | Working, fi | 29 | 2   | No       |      | 2   | No      |
| 19722  | 2  | 2  | Married/li     | 3  | College degree   | 4  | Retired     | 11 | 2   | No       |      | 2   | No      |
| 19729  | 2  | 2  | Married/li     | 3  | College degree   | 1  | Working, fi | 11 | 2   | No       |      | 2   | No      |
| 19738  | 2  | 2  | Married/li     | 2  | Some college     | 1  | Working, fi | 12 | 2   | No       |      | 2   | No      |
| 19741  | 2  | 2  | Married/li     | 4  | Postgraduate     | 2  | Working, p  | 33 | 2   | No       |      | 2   | No      |
| 19742  | 2  | 2  | Married/li     | 4  | Postgraduate     | 1  | Working, fi | 13 | 2   | No       |      | 2   | No      |
| 19747  | 2  | 2  | Married/li     | 1  | High school or l | 6  | Homemake    | 33 | 2   | No       |      | 1   | Yes     |
| 19748  | 2  | 2  | Married/li     | 3  | College degree   | 1  | Working, fi | 14 | 2   | No       |      | 2   | No      |
| 19749  | 2  | 2  | Married/li     | 1  | High school or l | 1  | Working, fi | 32 | 1   | Yes      | 1    | 2   | No      |
| 19756  | 2  | 2  | Married/li     | 3  | College degree   | 1  | Working, fi | 8  | 2   | No       |      | 2   | No      |
| 19771  | 2  | 2  | Married/li     | 1  | High school or l | 4  | Retired     | 3  | 2   | No       |      | 2   | No      |
| 19772  | 2  | 2  | Married/li     | 2  | Some college     | 1  | Working, fi | 11 | 2   | No       |      | 2   | No      |
| 19775  | 2  | 2  | Married/li     | 3  | College degree   | 1  | Working, fi | 11 | 2   | No       |      | 1   | Yes     |
| 19783  | 2  | 2  | Married/li     | 2  | Some college     | 1  | Working, fi | 8  | 2   | No       |      | 2   | No      |
| 19787  | 2  | 2  | Married/li     | 1  | High school or l | 1  | Working, fi | 11 | 2   | No       |      | 2   | No      |

| respid | Q5 | Q6 | Marital Status | Q7 | Education        | Q8 | Work        | Q9 | Q10 | Diabetes | Q10a | Q11 | High BP |
|--------|----|----|----------------|----|------------------|----|-------------|----|-----|----------|------|-----|---------|
| 19790  | 2  | 2  | Married/li     | 2  | Some college     | 1  | Working, fi | 11 | 2   | No       |      | 2   | No      |
| 19797  | 2  | 1  | Single         | 1  | High school or l | 3  | Unemploye   | 99 | 2   | No       |      | 2   | No      |
| 19802  | 2  | 2  | Married/li     | 2  | Some college     | 1  | Working, fi | 10 | 2   | No       |      | 2   | No      |
| 19808  | 2  | 2  | Married/li     | 3  | College degree   | 3  | Unemploye   | 9  | 2   | No       |      | 1   | Yes     |
| 19810  | 2  | 2  | Married/li     | 1  | High school or l | 1  | Working, fi | 4  | 2   | No       |      | 2   | No      |
| 19811  | 2  | 2  | Married/li     | 1  | High school or l | 2  | Working, p  | 5  | 2   | No       |      | 2   | No      |
| 19812  | 2  | 2  | Married/li     | 2  | Some college     | 1  | Working, fi | 11 | 2   | No       |      | 2   | No      |
| 19821  | 2  | 2  | Married/li     | 2  | Some college     | 1  | Working, fi | 11 | 2   | No       |      | 1   | Yes     |
| 19826  | 2  | 2  | Married/li     | 3  | College degree   | 1  | Working, fi | 7  | 2   | No       |      | 2   | No      |
| 19827  | 2  | 2  | Married/li     | 1  | High school or l | 1  | Working, fi | 33 | 2   | No       |      | 2   | No      |
| 19830  | 2  | 2  | Married/li     | 3  | College degree   | 1  | Working, fi | 3  | 2   | No       |      | 2   | No      |
| 19834  | 2  | 2  | Married/li     | 1  | High school or l | 1  | Working, fi | 33 | 2   | No       |      | 2   | No      |
| 19838  | 2  | 2  | Married/li     | 1  | High school or l | 1  | Working, fi | 33 | 1   | Yes      | 1    | 2   | No      |
| 19843  | 2  | 2  | Married/li     | 3  | College degree   | 1  | Working, fi | 2  | 2   | No       |      | 2   | No      |
| 19845  | 2  | 2  | Married/li     | 3  | College degree   | 1  | Working, fi | 12 | 2   | No       |      | 2   | No      |
| 19846  | 2  | 2  | Married/li     | 3  | College degree   | 1  | Working, fi | 11 | 2   | No       |      | 1   | Yes     |
| 19852  | 2  | 2  | Married/li     | 2  | Some college     | 1  | Working, fi | 1  | 2   | No       |      | 1   | Yes     |
| 19855  | 2  | 2  | Married/li     | 3  | College degree   | 1  | Working, fi | 13 | 2   | No       |      | 2   | No      |
| 19858  | 2  | 2  | Married/li     | 1  | High school or l | 1  | Working, fi | 8  | 2   | No       |      | 2   | No      |
| 19861  | 2  | 3  | Divorced       | 3  | College degree   | 6  | Homemake    | 24 | 2   | No       |      | 1   | Yes     |
| 19863  | 2  | 2  | Married/li     | 3  | College degree   | 1  | Working, fi | 11 | 2   | No       |      | 2   | No      |
| 19868  | 2  | 2  | Married/li     | 2  | Some college     | 1  | Working, fi | 30 | 2   | No       |      | 2   | No      |
| 19874  | 2  | 2  | Married/li     | 3  | College degree   | 1  | Working, fi | 11 | 2   | No       |      | 2   | No      |
| 19876  | 2  | 2  | Married/li     | 2  | Some college     | 1  | Working, fi | 2  | 2   | No       |      | 2   | No      |
| 19880  | 2  | 2  | Married/li     | 3  | College degree   | 1  | Working, fi | 12 | 2   | No       |      | 2   | No      |
| 19885  | 2  | 1  | Single         | 3  | College degree   | 1  | Working, fi | 6  | 2   | No       |      | 2   | No      |
| 19890  | 2  | 2  | Married/li     | 3  | College degree   | 1  | Working, fi | 14 | 2   | No       |      | 2   | No      |
| 19894  | 2  | 2  | Married/li     | 1  | High school or l | 1  | Working, fi | 33 | 2   | No       |      | 2   | No      |
| 19895  | 2  | 2  | Married/li     | 3  | College degree   | 1  | Working, fi | 14 | 2   | No       |      | 2   | No      |
| 19897  | 2  | 4  | Widow/wi       | 1  | High school or l | 4  | Retired     | 37 | 2   | No       |      | 2   | No      |
| 19906  | 2  | 2  | Married/li     | 3  | College degree   | 1  | Working, fi | 14 | 2   | No       |      | 2   | No      |
| 19908  | 2  | 2  | Married/li     | 3  | College degree   | 1  | Working, fi | 13 | 2   | No       |      | 1   | Yes     |

| respid | Q5 | Q6 | Marital Status | Q7 | Education        | Q8 | Work        | Q9 | Q10 | Diabetes | Q10a | Q11 | High BP |
|--------|----|----|----------------|----|------------------|----|-------------|----|-----|----------|------|-----|---------|
| 19912  | 2  | 2  | Married/li     | 1  | High school or l | 1  | Working, fi | 32 | 2   | No       |      | 2   | No      |
| 19913  | 2  | 2  | Married/li     | 1  | High school or l | 4  | Retired     | 31 | 2   | No       |      | 1   | Yes     |
| 19914  | 2  | 2  | Married/li     | 3  | College degree   | 4  | Retired     | 10 | 2   | No       |      | 2   | No      |
| 19918  | 2  | 2  | Married/li     | 2  | Some college     | 1  | Working, fi | 5  | 1   | Yes      | 1    | 1   | Yes     |
| 19924  | 2  | 2  | Married/li     | 2  | Some college     | 1  | Working, fi | 12 | 2   | No       |      | 2   | No      |
| 19936  | 2  | 1  | Single         | 3  | College degree   | 1  | Working, fi | 2  | 1   | Yes      | 2    | 2   | No      |
| 19940  | 2  | 2  | Married/li     | 2  | Some college     | 1  | Working, fi | 2  | 2   | No       |      | 2   | No      |
| 19945  | 2  | 2  | Married/li     | 3  | College degree   | 4  | Retired     | 23 | 2   | No       |      | 1   | Yes     |
| 19948  | 2  | 2  | Married/li     | 2  | Some college     | 1  | Working, fi | 9  | 2   | No       |      | 2   | No      |
| 19959  | 2  | 2  | Married/li     | 3  | College degree   | 1  | Working, fi | 12 | 2   | No       |      | 1   | Yes     |
| 19961  | 2  | 2  | Married/li     | 3  | College degree   | 1  | Working, fi | 32 | 2   | No       |      | 1   | Yes     |
| 19962  | 2  | 2  | Married/li     | 2  | Some college     | 1  | Working, fi | 99 | 2   | No       |      | 2   | No      |
| 19965  | 2  | 2  | Married/li     | 1  | High school or l | 4  | Retired     | 13 | 2   | No       |      | 2   | No      |
| 19966  | 2  | 2  | Married/li     | 3  | College degree   | 1  | Working, fi | 11 | 2   | No       |      | 2   | No      |
| 19973  | 2  | 2  | Married/li     | 3  | College degree   | 1  | Working, fi | 5  | 2   | No       |      | 2   | No      |
| 19981  | 2  | 2  | Married/li     | 4  | Postgraduate     | 1  | Working, fi | 36 | 1   | Yes      | 1    | 2   | No      |
| 19986  | 2  | 2  | Married/li     | 3  | College degree   | 1  | Working, fi | 7  | 2   | No       |      | 2   | No      |
| 19989  | 2  | 2  | Married/li     | 3  | College degree   | 1  | Working, fi | 3  | 2   | No       |      | 2   | No      |
| 19998  | 2  | 2  | Married/li     | 3  | College degree   | 1  | Working, fi | 14 | 2   | No       |      | 2   | No      |
| 20001  | 2  | 2  | Married/li     | 2  | Some college     | 1  | Working, fi | 10 | 2   | No       |      | 2   | No      |
| 20005  | 2  | 2  | Married/li     | 3  | College degree   | 1  | Working, fi | 14 | 2   | No       |      | 2   | No      |
| 20013  | 2  | 2  | Married/li     | 4  | Postgraduate     | 1  | Working, fi | 14 | 2   | No       |      | 2   | No      |
| 20015  | 2  | 2  | Married/li     | 3  | College degree   | 1  | Working, fi | 11 | 2   | No       |      | 2   | No      |
| 20017  | 2  | 2  | Married/li     | 3  | College degree   | 1  | Working, fi | 14 | 2   | No       |      | 1   | Yes     |
| 20020  | 2  | 2  | Married/li     | 1  | High school or l | 6  | Homemake    | 5  | 2   | No       |      | 2   | No      |
| 20021  | 2  | 3  | Divorced       | 2  | Some college     | 1  | Working, fi | 1  | 2   | No       |      | 2   | No      |
| 20026  | 2  | 2  | Married/li     | 1  | High school or l | 4  | Retired     | 11 | 2   | No       |      | 1   | Yes     |
| 20028  | 2  | 2  | Married/li     | 1  | High school or l | 1  | Working, fi | 9  | 2   | No       |      | 2   | No      |
| 20030  | 2  | 2  | Married/li     | 3  | College degree   | 1  | Working, fi | 13 | 2   | No       |      | 2   | No      |
| 20031  | 2  | 2  | Married/li     | 2  | Some college     | 1  | Working, fi | 2  | 2   | No       |      | 2   | No      |
| 20034  | 2  | 4  | Widow/wi       | 3  | College degree   | 6  | Homemake    | 16 | 2   | No       |      | 2   | No      |
| 20035  | 2  | 2  | Married/li     | 3  | College degree   | 1  | Working, fi | 12 | 2   | No       |      | 2   | No      |

| respid | Q5 | Q6 | Marital Status | Q7 | Education        | Q8 | Work        | Q9 | Q10 | Diabetes | Q10a | Q11 | High BP |
|--------|----|----|----------------|----|------------------|----|-------------|----|-----|----------|------|-----|---------|
| 20040  | 2  | 2  | Married/li     | 3  | College degree   | 1  | Working, fi | 13 | 2   | No       |      | 2   | No      |
| 20045  | 2  | 2  | Married/li     | 1  | High school or l | 9  | Other       | 14 | 2   | No       |      | 1   | Yes     |
| 20048  | 2  | 4  | Widow/wi       | 1  | High school or l | 5  | Permanent   | 99 | 2   | No       |      | 1   | Yes     |
| 20053  | 2  | 4  | Widow/wi       | 1  | High school or l | 6  | Homemake    | 99 | 2   | No       |      | 1   | Yes     |
| 20064  | 2  | 2  | Married/li     | 3  | College degree   | 1  | Working, fi | 12 | 1   | Yes      | 1    | 1   | Yes     |
| 20071  | 2  | 2  | Married/li     | 2  | Some college     | 1  | Working, fi | 12 | 2   | No       |      | 2   | No      |
| 20072  | 2  | 2  | Married/li     | 4  | Postgraduate     | 1  | Working, fi | 12 | 2   | No       |      | 2   | No      |
| 20076  | 2  | 2  | Married/li     | 1  | High school or l | 1  | Working, fi | 1  | 2   | No       |      | 2   | No      |
| 20081  | 2  | 2  | Married/li     | 3  | College degree   | 1  | Working, fi | 12 | 2   | No       |      | 1   | Yes     |
| 20082  | 2  | 2  | Married/li     | 3  | College degree   | 1  | Working, fi | 8  | 1   | Yes      | 1    | 1   | Yes     |
| 20083  | 2  | 2  | Married/li     | 3  | College degree   | 1  | Working, fi | 29 | 2   | No       |      | 1   | Yes     |
| 20088  | 2  | 2  | Married/li     | 3  | College degree   | 1  | Working, fi | 13 | 2   | No       |      | 1   | Yes     |
| 20089  | 2  | 2  | Married/li     | 3  | College degree   | 1  | Working, fi | 11 | 2   | No       |      | 2   | No      |
| 20099  | 2  | 2  | Married/li     | 3  | College degree   | 1  | Working, fi | 14 | 2   | No       |      | 1   | Yes     |
| 20101  | 2  | 2  | Married/li     | 2  | Some college     | 1  | Working, fi | 2  | 2   | No       |      | 2   | No      |
| 20102  | 2  | 2  | Married/li     | 2  | Some college     | 2  | Working, p  | 11 | 2   | No       |      | 2   | No      |
| 20109  | 2  | 2  | Married/li     | 3  | College degree   | 1  | Working, fi | 32 | 2   | No       |      | 1   | Yes     |
| 20118  | 2  | 2  | Married/li     | 4  | Postgraduate     | 1  | Working, fi | 24 | 2   | No       |      | 2   | No      |
| 20119  | 2  | 2  | Married/li     | 2  | Some college     | 1  | Working, fi | 2  | 2   | No       |      | 2   | No      |
| 20124  | 2  | 2  | Married/li     | 2  | Some college     | 1  | Working, fi | 36 | 2   | No       |      | 2   | No      |
| 20126  | 2  | 2  | Married/li     | 3  | College degree   | 1  | Working, fi | 14 | 2   | No       |      | 2   | No      |
| 20130  | 2  | 2  | Married/li     | 2  | Some college     | 1  | Working, fi | 8  | 2   | No       |      | 2   | No      |
| 20131  | 2  | 1  | Single         | 4  | Postgraduate     | 1  | Working, fi | 12 | 2   | No       |      | 2   | No      |
| 20134  | 2  | 2  | Married/li     | 1  | High school or l | 1  | Working, fi | 10 | 2   | No       |      | 2   | No      |
| 20146  | 2  | 2  | Married/li     | 3  | College degree   | 1  | Working, fi | 12 | 2   | No       |      | 2   | No      |
| 20152  | 2  | 3  | Divorced       | 2  | Some college     | 1  | Working, fi | 1  | 2   | No       |      | 2   | No      |
| 20155  | 2  | 2  | Married/li     | 3  | College degree   | 1  | Working, fi | 12 | 2   | No       |      | 2   | No      |
| 20156  | 2  | 1  | Single         | 3  | College degree   | 1  | Working, fi | 14 | 2   | No       |      | 2   | No      |
| 20157  | 2  | 2  | Married/li     | 3  | College degree   | 1  | Working, fi | 12 | 2   | No       |      | 2   | No      |
| 20164  | 2  | 2  | Married/li     | 3  | College degree   | 1  | Working, fi | 12 | 2   | No       |      | 2   | No      |
| 20168  | 2  | 2  | Married/li     | 1  | High school or l | 6  | Homemake    | 24 | 2   | No       |      | 2   | No      |
| 20173  | 2  | 2  | Married/li     | 2  | Some college     | 1  | Working, fi | 8  | 2   | No       |      | 1   | Yes     |

| respid | Q5 | Q6 | Marital Status | Q7 | Education        | Q8 | Work        | Q9 | Q10 | Diabetes | Q10a | Q11 | High BP |
|--------|----|----|----------------|----|------------------|----|-------------|----|-----|----------|------|-----|---------|
| 20174  | 2  | 2  | Married/li     | 3  | College degree   | 1  | Working, fi | 12 | 2   | No       |      | 2   | No      |
| 20175  | 2  | 2  | Married/li     | 3  | College degree   | 1  | Working, fi | 11 | 2   | No       |      | 2   | No      |
| 20189  | 2  | 2  | Married/li     | 2  | Some college     | 1  | Working, fi | 2  | 2   | No       |      | 2   | No      |
| 20190  | 2  | 3  | Divorced       | 1  | High school or l | 1  | Working, fi | 29 | 2   | No       |      | 2   | No      |
| 20201  | 2  | 2  | Married/li     | 2  | Some college     | 1  | Working, fi | 11 | 2   | No       |      | 2   | No      |
| 20202  | 2  | 2  | Married/li     | 3  | College degree   | 1  | Working, fi | 5  | 2   | No       |      | 2   | No      |
| 20204  | 2  | 2  | Married/li     | 3  | College degree   | 2  | Working, p  | 2  | 2   | No       |      | 2   | No      |
| 20206  | 2  | 2  | Married/li     | 2  | Some college     | 1  | Working, fi | 10 | 2   | No       |      | 2   | No      |
| 20207  | 2  | 2  | Married/li     | 3  | College degree   | 1  | Working, fi | 12 | 2   | No       |      | 2   | No      |
| 20212  | 2  | 4  | Widow/wi       | 2  | Some college     | 9  | Other       | 26 | 1   | Yes      | 1    | 1   | Yes     |
| 20213  | 2  | 2  | Married/li     | 1  | High school or l | 8  | Other worl  | 15 | 2   | No       |      | 2   | No      |
| 20217  | 2  | 2  | Married/li     | 1  | High school or l | 1  | Working, fi | 25 | 2   | No       |      | 2   | No      |
| 20222  | 2  | 2  | Married/li     | 2  | Some college     | 1  | Working, fi | 11 | 2   | No       |      | 1   | Yes     |
| 20227  | 2  | 2  | Married/li     | 1  | High school or l | 1  | Working, fi | 35 | 2   | No       |      | 2   | No      |
| 20228  | 2  | 2  | Married/li     | 1  | High school or l | 1  | Working, fi | 8  | 2   | No       |      | 2   | No      |
| 20238  | 2  | 2  | Married/li     | 1  | High school or l | 1  | Working, fi | 18 | 2   | No       |      | 1   | Yes     |
| 20242  | 2  | 2  | Married/li     | 3  | College degree   | 1  | Working, fi | 10 | 2   | No       |      | 2   | No      |
| 20246  | 2  | 2  | Married/li     | 1  | High school or l | 2  | Working, p  | 6  | 2   | No       |      | 2   | No      |
| 20255  | 2  | 2  | Married/li     | 1  | High school or l | 2  | Working, p  | 27 | 2   | No       |      | 1   | Yes     |
| 20256  | 2  | 2  | Married/li     | 3  | College degree   | 1  | Working, fi | 31 | 2   | No       |      | 2   | No      |
| 20259  | 2  | 2  | Married/li     | 1  | High school or l | 2  | Working, p  | 32 | 2   | No       |      | 1   | Yes     |
| 20262  | 2  | 2  | Married/li     | 2  | Some college     | 1  | Working, fi | 12 | 2   | No       |      | 2   | No      |
| 20274  | 2  | 2  | Married/li     | 1  | High school or l | 1  | Working, fi | 35 | 1   | Yes      | 1    | 1   | Yes     |
| 20283  | 2  | 1  | Single         | 4  | Postgraduate     | 1  | Working, fi | 13 | 2   | No       |      | 2   | No      |
| 20284  | 2  | 2  | Married/li     | 1  | High school or l | 1  | Working, fi | 13 | 2   | No       |      | 2   | No      |
| 20291  | 2  | 2  | Married/li     | 2  | Some college     | 1  | Working, fi | 11 | 2   | No       |      | 2   | No      |
| 20292  | 2  | 2  | Married/li     | 3  | College degree   | 1  | Working, fi | 11 | 2   | No       |      | 2   | No      |
| 20293  | 2  | 2  | Married/li     | 2  | Some college     | 4  | Retired     | 11 | 2   | No       |      | 2   | No      |
| 20298  | 2  | 2  | Married/li     | 3  | College degree   | 1  | Working, fi | 13 | 2   | No       |      | 2   | No      |
| 20301  | 2  | 2  | Married/li     | 4  | Postgraduate     | 1  | Working, fi | 35 | 2   | No       |      | 2   | No      |
| 20303  | 2  | 2  | Married/li     | 3  | College degree   | 1  | Working, fi | 12 | 2   | No       |      | 1   | Yes     |
| 20309  | 2  | 3  | Divorced       | 4  | Postgraduate     | 1  | Working, fi | 10 | 2   | No       |      | 2   | No      |

| respid | Q5 | Q6 | Marital Status | Q7 | Education        | Q8 | Work        | Q9 | Q10 | Diabetes | Q10a | Q11 | High BP |
|--------|----|----|----------------|----|------------------|----|-------------|----|-----|----------|------|-----|---------|
| 20318  | 2  | 2  | Married/li     | 3  | College degree   | 1  | Working, fi | 12 | 2   | No       |      | 1   | Yes     |
| 20324  | 2  | 2  | Married/li     | 4  | Postgraduate     | 1  | Working, fi | 14 | 2   | No       |      | 2   | No      |
| 20335  | 2  | 2  | Married/li     | 3  | College degree   | 1  | Working, fi | 9  | 2   | No       |      | 2   | No      |
| 20336  | 2  | 2  | Married/li     | 3  | College degree   | 1  | Working, fi | 33 | 2   | No       |      | 2   | No      |
| 20339  | 2  | 2  | Married/li     | 3  | College degree   | 1  | Working, fi | 10 | 2   | No       |      | 2   | No      |
| 20348  | 2  | 2  | Married/li     | 3  | College degree   | 1  | Working, fi | 38 | 2   | No       |      | 2   | No      |
| 20351  | 2  | 2  | Married/li     | 3  | College degree   | 1  | Working, fi | 12 | 2   | No       |      | 2   | No      |
| 20353  | 2  | 2  | Married/li     | 2  | Some college     | 1  | Working, fi | 30 | 2   | No       |      | 2   | No      |
| 20356  | 2  | 2  | Married/li     | 2  | Some college     | 4  | Retired     | 14 | 2   | No       |      | 1   | Yes     |
| 20357  | 2  | 2  | Married/li     | 3  | College degree   | 1  | Working, fi | 18 | 2   | No       |      | 2   | No      |
| 20366  | 2  | 2  | Married/li     | 3  | College degree   | 1  | Working, fi | 13 | 2   | No       |      | 2   | No      |
| 20369  | 2  | 2  | Married/li     | 2  | Some college     | 1  | Working, fi | 8  | 1   | Yes      | 1    | 2   | No      |
| 20372  | 2  | 2  | Married/li     | 2  | Some college     | 1  | Working, fi | 11 | 2   | No       |      | 2   | No      |
| 20375  | 2  | 2  | Married/li     | 1  | High school or l | 1  | Working, fi | 38 | 2   | No       |      | 2   | No      |
| 20379  | 2  | 2  | Married/li     | 3  | College degree   | 1  | Working, fi | 8  | 2   | No       |      | 2   | No      |
| 20380  | 2  | 2  | Married/li     | 3  | College degree   | 1  | Working, fi | 13 | 2   | No       |      | 2   | No      |
| 20396  | 2  | 2  | Married/li     | 3  | College degree   | 1  | Working, fi | 32 | 2   | No       |      | 2   | No      |
| 20398  | 2  | 2  | Married/li     | 1  | High school or l | 4  | Retired     | 9  | 1   | Yes      | 1    | 1   | Yes     |
| 20412  | 2  | 2  | Married/li     | 4  | Postgraduate     | 1  | Working, fi | 14 | 2   | No       |      | 2   | No      |
| 20415  | 2  | 2  | Married/li     | 1  | High school or l | 4  | Retired     | 11 | 2   | No       |      | 2   | No      |
| 20424  | 2  | 2  | Married/li     | 1  | High school or l | 1  | Working, fi | 28 | 2   | No       |      | 2   | No      |
| 20434  | 2  | 2  | Married/li     | 1  | High school or l | 1  | Working, fi | 19 | 2   | No       |      | 2   | No      |
| 20435  | 2  | 2  | Married/li     | 3  | College degree   | 1  | Working, fi | 1  | 2   | No       |      | 1   | Yes     |
| 20440  | 2  | 2  | Married/li     | 4  | Postgraduate     | 1  | Working, fi | 11 | 1   | Yes      | 1    | 2   | No      |
| 20441  | 2  | 2  | Married/li     | 3  | College degree   | 1  | Working, fi | 8  | 2   | No       |      | 2   | No      |
| 20445  | 2  | 2  | Married/li     | 1  | High school or l | 1  | Working, fi | 33 | 2   | No       |      | 2   | No      |
| 20446  | 2  | 2  | Married/li     | 1  | High school or l | 6  | Homemake    | 30 | 1   | Yes      | 1    | 1   | Yes     |
| 20450  | 2  | 2  | Married/li     | 1  | High school or l | 1  | Working, fi | 5  | 2   | No       |      | 2   | No      |
| 20453  | 2  | 2  | Married/li     | 3  | College degree   | 1  | Working, fi | 12 | 2   | No       |      | 2   | No      |
| 20458  | 2  | 2  | Married/li     | 1  | High school or l | 1  | Working, fi | 8  | 2   | No       |      | 2   | No      |
| 20464  | 2  | 2  | Married/li     | 2  | Some college     | 1  | Working, fi | 33 | 2   | No       |      | 1   | Yes     |
| 20471  | 2  | 2  | Married/li     | 1  | High school or l | 4  | Retired     | 7  | 2   | No       |      | 2   | No      |

| respid | Q5 | Q6 | Marital Status | Q7 | Education        | Q8 | Work        | Q9 | Q10 | Diabetes | Q10a | Q11 | High BP |
|--------|----|----|----------------|----|------------------|----|-------------|----|-----|----------|------|-----|---------|
| 20473  | 2  | 2  | Married/li     | 1  | High school or l | 1  | Working, fi | 30 | 2   | No       |      | 1   | Yes     |
| 20474  | 2  | 2  | Married/li     | 1  | High school or l | 6  | Homemake    | 33 | 1   | Yes      | 1    | 2   | No      |
| 20477  | 2  | 2  | Married/li     | 2  | Some college     | 1  | Working, fi | 99 | 2   | No       |      | 2   | No      |
| 20479  | 2  | 2  | Married/li     | 3  | College degree   | 1  | Working, fi | 10 | 2   | No       |      | 2   | No      |
| 20485  | 2  | 2  | Married/li     | 3  | College degree   | 1  | Working, fi | 12 | 2   | No       |      | 2   | No      |
| 20487  | 2  | 2  | Married/li     | 1  | High school or l | 1  | Working, fi | 38 | 2   | No       |      | 2   | No      |
| 20488  | 2  | 2  | Married/li     | 3  | College degree   | 1  | Working, fi | 14 | 2   | No       |      | 2   | No      |
| 20494  | 2  | 2  | Married/li     | 3  | College degree   | 9  | Other       | 16 | 2   | No       |      | 2   | No      |
| 20502  | 2  | 2  | Married/li     | 3  | College degree   | 1  | Working, fi | 14 | 1   | Yes      | 1    | 1   | Yes     |
| 20503  | 2  | 2  | Married/li     | 1  | High school or l | 1  | Working, fi | 35 | 2   | No       |      | 2   | No      |
| 20510  | 2  | 2  | Married/li     | 3  | College degree   | 1  | Working, fi | 11 | 2   | No       |      | 2   | No      |
| 20512  | 2  | 4  | Widow/wi       | 1  | High school or l | 9  | Other       | 31 | 2   | No       |      | 2   | No      |
| 20516  | 2  | 1  | Single         | 3  | College degree   | 1  | Working, fi | 30 | 2   | No       |      | 2   | No      |
| 20522  | 2  | 2  | Married/li     | 1  | High school or l | 4  | Retired     | 28 | 2   | No       |      | 2   | No      |
| 20527  | 2  | 2  | Married/li     | 1  | High school or l | 6  | Homemake    | 27 | 1   | Yes      | 1    | 2   | No      |
| 20529  | 2  | 2  | Married/li     | 4  | Postgraduate     | 1  | Working, fi | 11 | 2   | No       |      | 1   | Yes     |
| 20535  | 2  | 2  | Married/li     | 3  | College degree   | 1  | Working, fi | 11 | 2   | No       |      | 1   | Yes     |
| 20543  | 2  | 2  | Married/li     | 2  | Some college     | 1  | Working, fi | 9  | 2   | No       |      | 1   | Yes     |
| 20546  | 2  | 2  | Married/li     | 1  | High school or l | 4  | Retired     | 5  | 2   | No       |      | 2   | No      |
| 20548  | 2  | 2  | Married/li     | 3  | College degree   | 1  | Working, fi | 1  | 2   | No       |      | 2   | No      |
| 20552  | 2  | 2  | Married/li     | 1  | High school or l | 1  | Working, fi | 6  | 2   | No       |      | 1   | Yes     |
| 20556  | 2  | 2  | Married/li     | 1  | High school or l | 1  | Working, fi | 10 | 2   | No       |      | 1   | Yes     |
| 20566  | 2  | 2  | Married/li     | 2  | Some college     | 1  | Working, fi | 11 | 2   | No       |      | 1   | Yes     |
| 20576  | 2  | 2  | Married/li     | 4  | Postgraduate     | 1  | Working, fi | 12 | 2   | No       |      | 1   | Yes     |
| 20587  | 2  | 2  | Married/li     | 3  | College degree   | 1  | Working, fi | 13 | 2   | No       |      | 2   | No      |
| 20589  | 2  | 1  | Single         | 3  | College degree   | 1  | Working, fi | 35 | 2   | No       |      | 2   | No      |
| 20593  | 2  | 2  | Married/li     | 4  | Postgraduate     | 1  | Working, fi | 24 | 2   | No       |      | 2   | No      |
| 20594  | 2  | 3  | Divorced       | 1  | High school or l | 1  | Working, fi | 4  | 2   | No       |      | 2   | No      |
| 20602  | 2  | 2  | Married/li     | 1  | High school or l | 1  | Working, fi | 36 | 2   | No       |      | 2   | No      |
| 20607  | 2  | 2  | Married/li     | 2  | Some college     | 6  | Homemake    | 29 | 2   | No       |      | 2   | No      |
| 20608  | 2  | 2  | Married/li     | 3  | College degree   | 1  | Working, fi | 13 | 2   | No       |      | 1   | Yes     |
| 20611  | 2  | 2  | Married/li     | 1  | High school or l | 1  | Working, fi | 38 | 2   | No       |      | 1   | Yes     |



| respid | Q5 | Q6 | Marital Status | Q7 | Education        | Q8 | Work        | Q9 | Q10 | Diabetes | Q10a | Q11 | High BP |
|--------|----|----|----------------|----|------------------|----|-------------|----|-----|----------|------|-----|---------|
| 20612  | 2  | 2  | Married/li     | 1  | High school or l | 1  | Working, fi | 31 | 2   | No       |      | 2   | No      |
| 20615  | 2  | 2  | Married/li     | 1  | High school or l | 4  | Retired     | 27 | 2   | No       |      | 2   | No      |
| 20625  | 2  | 2  | Married/li     | 3  | College degree   | 1  | Working, fi | 10 | 2   | No       |      | 2   | No      |
| 20630  | 2  | 2  | Married/li     | 1  | High school or l | 6  | Homemake    | 26 | 2   | No       |      | 2   | No      |
| 20639  | 2  | 2  | Married/li     | 2  | Some college     | 6  | Homemake    | 11 | 2   | No       |      | 2   | No      |
| 20643  | 2  | 2  | Married/li     | 2  | Some college     | 1  | Working, fi | 31 | 2   | No       |      | 2   | No      |
| 20645  | 2  | 2  | Married/li     | 3  | College degree   | 1  | Working, fi | 1  | 2   | No       |      | 2   | No      |
| 20647  | 2  | 2  | Married/li     | 3  | College degree   | 1  | Working, fi | 11 | 2   | No       |      | 1   | Yes     |
| 20652  | 2  | 2  | Married/li     | 2  | Some college     | 1  | Working, fi | 11 | 2   | No       |      | 2   | No      |
| 20661  | 2  | 2  | Married/li     | 2  | Some college     | 2  | Working, p  | 6  | 2   | No       |      | 2   | No      |
| 20665  | 2  | 2  | Married/li     | 2  | Some college     | 1  | Working, fi | 1  | 2   | No       |      | 2   | No      |
| 20679  | 2  | 2  | Married/li     | 1  | High school or l | 1  | Working, fi | 8  | 2   | No       |      | 2   | No      |
| 20682  | 2  | 2  | Married/li     | 3  | College degree   | 1  | Working, fi | 11 | 2   | No       |      | 2   | No      |
| 20683  | 2  | 2  | Married/li     | 1  | High school or l | 1  | Working, fi | 30 | 2   | No       |      | 2   | No      |
| 20700  | 2  | 2  | Married/li     | 1  | High school or l | 6  | Homemake    | 31 | 2   | No       |      | 1   | Yes     |
| 20702  | 2  | 2  | Married/li     | 3  | College degree   | 6  | Homemake    | 20 | 2   | No       |      | 1   | Yes     |
| 20709  | 2  | 2  | Married/li     | 1  | High school or l | 6  | Homemake    | 33 | 1   | Yes      | 1    | 2   | No      |
| 20715  | 2  | 2  | Married/li     | 2  | Some college     | 1  | Working, fi | 12 | 1   | Yes      | 1    | 1   | Yes     |
| 20718  | 2  | 2  | Married/li     | 3  | College degree   | 4  | Retired     | 7  | 2   | No       |      | 2   | No      |
| 20722  | 2  | 2  | Married/li     | 2  | Some college     | 1  | Working, fi | 12 | 2   | No       |      | 2   | No      |
| 20729  | 2  | 1  | Single         | 1  | High school or l | 1  | Working, fi | 3  | 2   | No       |      | 2   | No      |
| 20732  | 2  | 2  | Married/li     | 1  | High school or l | 1  | Working, fi | 10 | 2   | No       |      | 2   | No      |
| 20746  | 2  | 2  | Married/li     | 3  | College degree   | 1  | Working, fi | 35 | 2   | No       |      | 1   | Yes     |
| 20747  | 2  | 2  | Married/li     | 2  | Some college     | 1  | Working, fi | 11 | 2   | No       |      | 2   | No      |
| 20758  | 2  | 2  | Married/li     | 1  | High school or l | 1  | Working, fi | 11 | 2   | No       |      | 2   | No      |
| 20767  | 2  | 2  | Married/li     | 2  | Some college     | 1  | Working, fi | 11 | 2   | No       |      | 2   | No      |
| 20777  | 2  | 2  | Married/li     | 4  | Postgraduate     | 1  | Working, fi | 13 | 2   | No       |      | 2   | No      |
| 20778  | 2  | 2  | Married/li     | 3  | College degree   | 1  | Working, fi | 9  | 2   | No       |      | 2   | No      |
| 20780  | 2  | 2  | Married/li     | 2  | Some college     | 1  | Working, fi | 25 | 2   | No       |      | 2   | No      |
| 20800  | 2  | 1  | Single         | 3  | College degree   | 1  | Working, fi | 19 | 2   | No       |      | 2   | No      |
| 20810  | 2  | 2  | Married/li     | 3  | College degree   | 1  | Working, fi | 14 | 2   | No       |      | 2   | No      |
| 20814  | 2  | 2  | Married/li     | 3  | College degree   | 4  | Retired     | 33 | 2   | No       |      | 2   | No      |

| respid | Q5 | Q6 | Marital Status | Q7 | Education        | Q8 | Work        | Q9 | Q10 | Diabetes | Q10a | Q11 | High BP |
|--------|----|----|----------------|----|------------------|----|-------------|----|-----|----------|------|-----|---------|
| 20816  | 2  | 3  | Divorced       | 1  | High school or l | 1  | Working, fi | 30 | 2   | No       |      | 2   | No      |
| 20832  | 2  | 2  | Married/li     | 3  | College degree   | 1  | Working, fi | 2  | 2   | No       |      | 2   | No      |
| 20838  | 2  | 2  | Married/li     | 3  | College degree   | 4  | Retired     | 12 | 2   | No       |      | 2   | No      |
| 20841  | 2  | 4  | Widow/wi       | 1  | High school or l | 4  | Retired     | 33 | 2   | No       |      | 1   | Yes     |
| 20848  | 2  | 2  | Married/li     | 2  | Some college     | 4  | Retired     | 11 | 2   | No       |      | 1   | Yes     |
| 20850  | 2  | 2  | Married/li     | 1  | High school or l | 6  | Homemake    | 3  | 2   | No       |      | 2   | No      |
| 20851  | 2  | 2  | Married/li     | 2  | Some college     | 1  | Working, fi | 30 | 2   | No       |      | 1   | Yes     |
| 20861  | 2  | 2  | Married/li     | 2  | Some college     | 1  | Working, fi | 11 | 2   | No       |      | 2   | No      |
| 20870  | 2  | 2  | Married/li     | 3  | College degree   | 1  | Working, fi | 10 | 2   | No       |      | 2   | No      |
| 20880  | 2  | 2  | Married/li     | 3  | College degree   | 1  | Working, fi | 10 | 2   | No       |      | 1   | Yes     |
| 20883  | 2  | 2  | Married/li     | 3  | College degree   | 1  | Working, fi | 12 | 2   | No       |      | 2   | No      |
| 20894  | 2  | 2  | Married/li     | 3  | College degree   | 6  | Homemake    | 34 | 2   | No       |      | 1   | Yes     |
| 20896  | 2  | 2  | Married/li     | 3  | College degree   | 1  | Working, fi | 30 | 2   | No       |      | 1   | Yes     |
| 20901  | 2  | 1  | Single         | 1  | High school or l | 1  | Working, fi | 33 | 1   | Yes      | 1    | 1   | Yes     |
| 20903  | 2  | 2  | Married/li     | 2  | Some college     | 1  | Working, fi | 6  | 2   | No       |      | 2   | No      |
| 20909  | 2  | 2  | Married/li     | 2  | Some college     | 1  | Working, fi | 10 | 2   | No       |      | 2   | No      |
| 20919  | 2  | 2  | Married/li     | 3  | College degree   | 1  | Working, fi | 14 | 2   | No       |      | 2   | No      |
| 20925  | 2  | 4  | Widow/wi       | 3  | College degree   | 4  | Retired     | 34 | 2   | No       |      | 1   | Yes     |
| 20935  | 2  | 2  | Married/li     | 3  | College degree   | 1  | Working, fi | 11 | 2   | No       |      | 1   | Yes     |
| 20939  | 2  | 2  | Married/li     | 3  | College degree   | 1  | Working, fi | 11 | 1   | Yes      | 1    | 2   | No      |
| 20956  | 2  | 2  | Married/li     | 3  | College degree   | 1  | Working, fi | 13 | 1   | Yes      | 1    | 1   | Yes     |
| 20970  | 2  | 2  | Married/li     | 3  | College degree   | 1  | Working, fi | 14 | 2   | No       |      | 2   | No      |
| 20974  | 2  | 2  | Married/li     | 1  | High school or l | 1  | Working, fi | 30 | 2   | No       |      | 2   | No      |
| 20975  | 2  | 2  | Married/li     | 2  | Some college     | 1  | Working, fi | 11 | 2   | No       |      | 2   | No      |
| 20984  | 2  | 2  | Married/li     | 1  | High school or l | 5  | Permanent   | 99 | 2   | No       |      | 1   | Yes     |
| 20988  | 2  | 2  | Married/li     | 4  | Postgraduate     | 1  | Working, fi | 14 | 2   | No       |      | 2   | No      |
| 20996  | 2  | 3  | Divorced       | 3  | College degree   | 1  | Working, fi | 1  | 2   | No       |      | 1   | Yes     |
| 20998  | 2  | 4  | Widow/wi       | 1  | High school or l | 6  | Homemake    | 33 | 2   | No       |      | 2   | No      |
| 21007  | 2  | 2  | Married/li     | 2  | Some college     | 4  | Retired     | 12 | 2   | No       |      | 2   | No      |
| 21008  | 2  | 1  | Single         | 3  | College degree   | 1  | Working, fi | 14 | 2   | No       |      | 2   | No      |
| 21014  | 2  | 2  | Married/li     | 3  | College degree   | 1  | Working, fi | 14 | 2   | No       |      | 2   | No      |
| 21020  | 2  | 2  | Married/li     | 1  | High school or l | 1  | Working, fi | 26 | 2   | No       |      | 2   | No      |

| respid | Q5 | Q6 | Marital Status | Q7 | Education        | Q8 | Work        | Q9 | Q10 | Diabetes | Q10a | Q11 | High BP |
|--------|----|----|----------------|----|------------------|----|-------------|----|-----|----------|------|-----|---------|
| 21022  | 2  | 2  | Married/li     | 4  | Postgraduate     | 1  | Working, fi | 13 | 2   | No       |      | 1   | Yes     |
| 21024  | 2  | 3  | Divorced       | 1  | High school or l | 1  | Working, fi | 32 | 2   | No       |      | 2   | No      |
| 21026  | 2  | 2  | Married/li     | 3  | College degree   | 1  | Working, fi | 11 | 2   | No       |      | 2   | No      |
| 21027  | 2  | 2  | Married/li     | 3  | College degree   | 1  | Working, fi | 11 | 2   | No       |      | 2   | No      |
| 21030  | 2  | 2  | Married/li     | 3  | College degree   | 1  | Working, fi | 11 | 2   | No       |      | 2   | No      |
| 21032  | 2  | 2  | Married/li     | 3  | College degree   | 1  | Working, fi | 9  | 2   | No       |      | 2   | No      |
| 21040  | 2  | 2  | Married/li     | 2  | Some college     | 1  | Working, fi | 8  | 2   | No       |      | 1   | Yes     |
| 21045  | 2  | 2  | Married/li     | 4  | Postgraduate     | 1  | Working, fi | 34 | 2   | No       |      | 2   | No      |
| 21058  | 2  | 2  | Married/li     | 2  | Some college     | 1  | Working, fi | 9  | 2   | No       |      | 2   | No      |
| 21064  | 2  | 2  | Married/li     | 1  | High school or l | 1  | Working, fi | 26 | 1   | Yes      | 1    | 1   | Yes     |
| 21073  | 2  | 2  | Married/li     | 2  | Some college     | 4  | Retired     | 6  | 2   | No       |      | 2   | No      |
| 21086  | 2  | 2  | Married/li     | 1  | High school or l | 4  | Retired     | 10 | 2   | No       |      | 2   | No      |
| 21092  | 2  | 2  | Married/li     | 2  | Some college     | 1  | Working, fi | 7  | 1   | Yes      | 1    | 1   | Yes     |
| 21096  | 2  | 2  | Married/li     | 3  | College degree   | 4  | Retired     | 5  | 1   | Yes      | 1    | 1   | Yes     |
| 21103  | 2  | 2  | Married/li     | 1  | High school or l | 1  | Working, fi | 11 | 2   | No       |      | 1   | Yes     |
| 21120  | 2  | 2  | Married/li     | 3  | College degree   | 4  | Retired     | 11 | 2   | No       |      | 2   | No      |
| 21125  | 2  | 2  | Married/li     | 2  | Some college     | 1  | Working, fi | 12 | 2   | No       |      | 1   | Yes     |
| 21126  | 2  | 1  | Single         | 2  | Some college     | 1  | Working, fi | 2  | 2   | No       |      | 2   | No      |
| 21132  | 2  | 2  | Married/li     | 1  | High school or l | 4  | Retired     | 33 | 2   | No       |      | 2   | No      |
| 21139  | 2  | 1  | Single         | 2  | Some college     | 1  | Working, fi | 27 | 2   | No       |      | 1   | Yes     |
| 21147  | 2  | 2  | Married/li     | 1  | High school or l | 4  | Retired     | 30 | 2   | No       |      | 1   | Yes     |
| 21148  | 2  | 2  | Married/li     | 1  | High school or l | 1  | Working, fi | 9  | 2   | No       |      | 1   | Yes     |
| 21149  | 2  | 2  | Married/li     | 1  | High school or l | 6  | Homemake    | 32 | 1   | Yes      | 1    | 1   | Yes     |
| 21164  | 2  | 2  | Married/li     | 3  | College degree   | 4  | Retired     | 13 | 2   | No       |      | 2   | No      |
| 21165  | 2  | 2  | Married/li     | 2  | Some college     | 1  | Working, fi | 12 | 2   | No       |      | 1   | Yes     |
| 21171  | 2  | 2  | Married/li     | 2  | Some college     | 4  | Retired     | 11 | 2   | No       |      | 2   | No      |
| 21176  | 2  | 2  | Married/li     | 1  | High school or l | 2  | Working, p  | 6  | 2   | No       |      | 2   | No      |
| 21187  | 2  | 2  | Married/li     | 1  | High school or l | 1  | Working, fi | 27 | 2   | No       |      | 2   | No      |
| 21192  | 2  | 2  | Married/li     | 2  | Some college     | 1  | Working, fi | 11 | 2   | No       |      | 1   | Yes     |
| 21198  | 2  | 3  | Divorced       | 1  | High school or l | 1  | Working, fi | 7  | 2   | No       |      | 2   | No      |
| 21199  | 2  | 2  | Married/li     | 1  | High school or l | 2  | Working, p  | 16 | 2   | No       |      | 2   | No      |
| 21206  | 2  | 2  | Married/li     | 2  | Some college     | 4  | Retired     | 10 | 2   | No       |      | 2   | No      |

| respid | Q5 | Q6 | Marital Status | Q7 | Education        | Q8 | Work        | Q9 | Q10 | Diabetes | Q10a | Q11 | High BP |
|--------|----|----|----------------|----|------------------|----|-------------|----|-----|----------|------|-----|---------|
| 21212  | 2  | 2  | Married/li     | 1  | High school or l | 4  | Retired     | 99 | 2   | No       |      | 1   | Yes     |
| 21216  | 2  | 2  | Married/li     | 3  | College degree   | 1  | Working, fi | 11 | 2   | No       |      | 2   | No      |
| 21217  | 2  | 2  | Married/li     | 3  | College degree   | 4  | Retired     | 12 | 1   | Yes      | 1    | 2   | No      |
| 21228  | 2  | 2  | Married/li     | 2  | Some college     | 1  | Working, fi | 11 | 2   | No       |      | 2   | No      |
| 21229  | 2  | 2  | Married/li     | 2  | Some college     | 1  | Working, fi | 31 | 2   | No       |      | 2   | No      |
| 21230  | 2  | 2  | Married/li     | 3  | College degree   | 1  | Working, fi | 9  | 1   | Yes      | 1    | 1   | Yes     |
| 21243  | 2  | 2  | Married/li     | 1  | High school or l | 1  | Working, fi | 31 | 2   | No       |      | 2   | No      |
| 21247  | 2  | 2  | Married/li     | 1  | High school or l | 6  | Homemake    | 11 | 2   | No       |      | 2   | No      |
| 21253  | 2  | 2  | Married/li     | 2  | Some college     | 1  | Working, fi | 10 | 2   | No       |      | 2   | No      |
| 21264  | 2  | 3  | Divorced       | 1  | High school or l | 1  | Working, fi | 30 | 2   | No       |      | 2   | No      |
| 21265  | 2  | 2  | Married/li     | 1  | High school or l | 1  | Working, fi | 27 | 2   | No       |      | 1   | Yes     |
| 21273  | 2  | 2  | Married/li     | 2  | Some college     | 4  | Retired     | 8  | 1   | Yes      | 1    | 2   | No      |
| 21275  | 2  | 2  | Married/li     | 3  | College degree   | 1  | Working, fi | 10 | 2   | No       |      | 2   | No      |
| 21278  | 2  | 2  | Married/li     | 2  | Some college     | 1  | Working, fi | 32 | 2   | No       |      | 2   | No      |
| 21291  | 2  | 2  | Married/li     | 1  | High school or l | 4  | Retired     | 33 | 2   | No       |      | 2   | No      |
| 21298  | 2  | 2  | Married/li     | 2  | Some college     | 1  | Working, fi | 1  | 2   | No       |      | 2   | No      |
| 21301  | 2  | 2  | Married/li     | 3  | College degree   | 1  | Working, fi | 11 | 2   | No       |      | 1   | Yes     |
| 21312  | 2  | 2  | Married/li     | 2  | Some college     | 1  | Working, fi | 10 | 2   | No       |      | 2   | No      |
| 21323  | 2  | 2  | Married/li     | 1  | High school or l | 9  | Other       | 16 | 2   | No       |      | 2   | No      |
| 21325  | 2  | 2  | Married/li     | 2  | Some college     | 4  | Retired     | 26 | 2   | No       |      | 1   | Yes     |
| 21341  | 2  | 2  | Married/li     | 2  | Some college     | 1  | Working, fi | 12 | 2   | No       |      | 2   | No      |
| 21349  | 2  | 2  | Married/li     | 4  | Postgraduate     | 4  | Retired     | 13 | 2   | No       |      | 2   | No      |
| 21350  | 2  | 2  | Married/li     | 1  | High school or l | 6  | Homemake    | 32 | 1   | Yes      | 1    | 1   | Yes     |
| 21354  | 2  | 2  | Married/li     | 2  | Some college     | 4  | Retired     | 11 | 1   | Yes      | 2    | 1   | Yes     |
| 21372  | 2  | 2  | Married/li     | 1  | High school or l | 4  | Retired     | 35 | 2   | No       |      | 2   | No      |
| 21373  | 2  | 1  | Single         | 2  | Some college     | 1  | Working, fi | 28 | 2   | No       |      | 2   | No      |
| 21378  | 2  | 2  | Married/li     | 3  | College degree   | 6  | Homemake    | 17 | 2   | No       |      | 2   | No      |
| 21393  | 2  | 2  | Married/li     | 3  | College degree   | 1  | Working, fi | 11 | 2   | No       |      | 2   | No      |
| 21401  | 2  | 2  | Married/li     | 3  | College degree   | 1  | Working, fi | 26 | 2   | No       |      | 2   | No      |
| 21405  | 2  | 2  | Married/li     | 2  | Some college     | 4  | Retired     | 27 | 2   | No       |      | 2   | No      |
| 21406  | 2  | 2  | Married/li     | 1  | High school or l | 1  | Working, fi | 31 | 2   | No       |      | 2   | No      |
| 21407  | 2  | 2  | Married/li     | 1  | High school or l | 4  | Retired     | 8  | 2   | No       |      | 2   | No      |

| respid | Q5 | Q6 | Marital Status | Q7 | Education        | Q8 | Work        | Q9 | Q10 | Diabetes | Q10a | Q11 | High BP |
|--------|----|----|----------------|----|------------------|----|-------------|----|-----|----------|------|-----|---------|
| 21418  | 2  | 2  | Married/li     | 3  | College degree   | 1  | Working, fi | 10 | 2   | No       |      | 2   | No      |
| 21420  | 2  | 2  | Married/li     | 1  | High school or l | 4  | Retired     | 26 | 1   | Yes      | 1    | 2   | No      |
| 21421  | 2  | 2  | Married/li     | 3  | College degree   | 1  | Working, fi | 7  | 2   | No       |      | 2   | No      |
| 21446  | 2  | 2  | Married/li     | 2  | Some college     | 4  | Retired     | 99 | 2   | No       |      | 2   | No      |
| 21449  | 2  | 2  | Married/li     | 2  | Some college     | 1  | Working, fi | 27 | 2   | No       |      | 2   | No      |
| 21452  | 2  | 2  | Married/li     | 2  | Some college     | 1  | Working, fi | 34 | 2   | No       |      | 2   | No      |
| 21455  | 2  | 2  | Married/li     | 3  | College degree   | 1  | Working, fi | 11 | 2   | No       |      | 2   | No      |
| 21469  | 2  | 2  | Married/li     | 2  | Some college     | 1  | Working, fi | 12 | 2   | No       |      | 2   | No      |
| 21471  | 2  | 4  | Widow/wi       | 1  | High school or l | 4  | Retired     | 34 | 1   | Yes      | 1    | 2   | No      |
| 21472  | 2  | 2  | Married/li     | 2  | Some college     | 4  | Retired     | 13 | 2   | No       |      | 2   | No      |
| 21474  | 2  | 1  | Single         | 3  | College degree   | 1  | Working, fi | 24 | 2   | No       |      | 2   | No      |
| 21479  | 2  | 2  | Married/li     | 3  | College degree   | 1  | Working, fi | 1  | 2   | No       |      | 2   | No      |
| 21485  | 2  | 2  | Married/li     | 1  | High school or l | 9  | Other       | 1  | 2   | No       |      | 2   | No      |
| 21512  | 2  | 2  | Married/li     | 4  | Postgraduate     | 1  | Working, fi | 32 | 2   | No       |      | 2   | No      |
| 21513  | 2  | 2  | Married/li     | 1  | High school or l | 1  | Working, fi | 99 | 2   | No       |      | 2   | No      |
| 21514  | 2  | 2  | Married/li     | 2  | Some college     | 4  | Retired     | 7  | 2   | No       |      | 2   | No      |
| 21520  | 2  | 2  | Married/li     | 3  | College degree   | 1  | Working, fi | 9  | 2   | No       |      | 2   | No      |
| 21539  | 2  | 2  | Married/li     | 3  | College degree   | 1  | Working, fi | 30 | 2   | No       |      | 1   | Yes     |
| 21553  | 2  | 1  | Single         | 4  | Postgraduate     | 2  | Working, p  | 25 | 2   | No       |      | 1   | Yes     |
| 21560  | 2  | 2  | Married/li     | 2  | Some college     | 1  | Working, fi | 11 | 2   | No       |      | 2   | No      |
| 21561  | 2  | 2  | Married/li     | 4  | Postgraduate     | 1  | Working, fi | 14 | 2   | No       |      | 2   | No      |
| 21563  | 2  | 2  | Married/li     | 2  | Some college     | 6  | Homemake    | 27 | 1   | Yes      | 1    | 1   | Yes     |
| 21565  | 2  | 2  | Married/li     | 1  | High school or l | 4  | Retired     | 27 | 2   | No       |      | 2   | No      |
| 21582  | 2  | 4  | Widow/wi       | 2  | Some college     | 4  | Retired     | 37 | 2   | No       |      | 1   | Yes     |
| 21584  | 2  | 2  | Married/li     | 2  | Some college     | 1  | Working, fi | 11 | 1   | Yes      | 2    | 2   | No      |
| 21585  | 2  | 2  | Married/li     | 2  | Some college     | 4  | Retired     | 8  | 2   | No       |      | 2   | No      |
| 21586  | 2  | 2  | Married/li     | 2  | Some college     | 1  | Working, fi | 99 | 2   | No       |      | 2   | No      |
| 21587  | 2  | 2  | Married/li     | 2  | Some college     | 1  | Working, fi | 33 | 2   | No       |      | 2   | No      |
| 21590  | 2  | 2  | Married/li     | 1  | High school or l | 4  | Retired     | 5  | 1   | Yes      | 1    | 2   | No      |
| 21601  | 2  | 2  | Married/li     | 1  | High school or l | 2  | Working, p  | 29 | 1   | Yes      | 1    | 2   | No      |
| 21611  | 2  | 2  | Married/li     | 2  | Some college     | 4  | Retired     | 11 | 1   | Yes      | 1    | 1   | Yes     |
| 21612  | 2  | 2  | Married/li     | 1  | High school or l | 4  | Retired     | 30 | 2   | No       |      | 1   | Yes     |

| respid | Q5 | Q6 | Marital Status | Q7 | Education        | Q8 | Work        | Q9 | Q10 | Diabetes | Q10a | Q11 | High BP |
|--------|----|----|----------------|----|------------------|----|-------------|----|-----|----------|------|-----|---------|
| 21625  | 2  | 2  | Married/li     | 3  | College degree   | 1  | Working, fi | 32 | 2   | No       |      | 1   | Yes     |
| 21633  | 2  | 2  | Married/li     | 2  | Some college     | 1  | Working, fi | 8  | 2   | No       |      | 2   | No      |
| 21640  | 2  | 2  | Married/li     | 3  | College degree   | 2  | Working, p  | 7  | 2   | No       |      | 2   | No      |
| 21647  | 2  | 2  | Married/li     | 3  | College degree   | 1  | Working, fi | 12 | 2   | No       |      | 2   | No      |
| 21648  | 2  | 2  | Married/li     | 1  | High school or l | 2  | Working, p  | 10 | 1   | Yes      | 1    | 2   | No      |
| 21656  | 2  | 2  | Married/li     | 1  | High school or l | 1  | Working, fi | 19 | 2   | No       |      | 2   | No      |
| 21657  | 2  | 2  | Married/li     | 1  | High school or l | 4  | Retired     | 34 | 2   | No       |      | 2   | No      |
| 21658  | 2  | 2  | Married/li     | 3  | College degree   | 4  | Retired     | 12 | 1   | Yes      | 1    | 2   | No      |
| 21665  | 2  | 2  | Married/li     | 3  | College degree   | 4  | Retired     | 11 | 2   | No       |      | 2   | No      |
| 21666  | 2  | 3  | Divorced       | 1  | High school or l | 1  | Working, fi | 26 | 1   | Yes      | 2    | 2   | No      |
| 21668  | 2  | 2  | Married/li     | 3  | College degree   | 4  | Retired     | 7  | 1   | Yes      | 1    | 1   | Yes     |
| 21673  | 2  | 2  | Married/li     | 1  | High school or l | 6  | Homemake    | 33 | 2   | No       |      | 2   | No      |
| 21681  | 2  | 2  | Married/li     | 2  | Some college     | 4  | Retired     | 8  | 2   | No       |      | 2   | No      |
| 21682  | 2  | 2  | Married/li     | 3  | College degree   | 1  | Working, fi | 11 | 1   | Yes      | 1    | 2   | No      |
| 21685  | 2  | 2  | Married/li     | 2  | Some college     | 1  | Working, fi | 11 | 2   | No       |      | 1   | Yes     |
| 21692  | 2  | 2  | Married/li     | 1  | High school or l | 1  | Working, fi | 26 | 2   | No       |      | 2   | No      |
| 21697  | 2  | 2  | Married/li     | 3  | College degree   | 1  | Working, fi | 12 | 2   | No       |      | 2   | No      |
| 21711  | 2  | 1  | Single         | 3  | College degree   | 3  | Unemploy    | 25 | 2   | No       |      | 2   | No      |
| 21715  | 2  | 4  | Widow/wi       | 1  | High school or l | 1  | Working, fi | 35 | 1   | Yes      | 1    | 1   | Yes     |
| 21726  | 2  | 2  | Married/li     | 1  | High school or l | 4  | Retired     | 31 | 2   | No       |      | 2   | No      |
| 21748  | 2  | 4  | Widow/wi       | 1  | High school or l | 6  | Homemake    | 19 | 2   | No       |      | 2   | No      |
| 21761  | 2  | 2  | Married/li     | 3  | College degree   | 1  | Working, fi | 9  | 2   | No       |      | 2   | No      |
| 21769  | 2  | 2  | Married/li     | 1  | High school or l | 4  | Retired     | 9  | 1   | Yes      | 1    | 1   | Yes     |
| 21774  | 2  | 2  | Married/li     | 2  | Some college     | 4  | Retired     | 9  | 1   | Yes      | 2    | 1   | Yes     |
| 21778  | 2  | 2  | Married/li     | 3  | College degree   | 1  | Working, fi | 11 | 2   | No       |      | 2   | No      |
| 21785  | 2  | 2  | Married/li     | 2  | Some college     | 4  | Retired     | 7  | 2   | No       |      | 2   | No      |
| 21799  | 2  | 2  | Married/li     | 2  | Some college     | 4  | Retired     | 33 | 2   | No       |      | 1   | Yes     |
| 21820  | 2  | 2  | Married/li     | 2  | Some college     | 1  | Working, fi | 14 | 1   | Yes      | 1    | 1   | Yes     |
| 21837  | 2  | 2  | Married/li     | 3  | College degree   | 1  | Working, fi | 8  | 2   | No       |      | 2   | No      |
| 21845  | 2  | 2  | Married/li     | 2  | Some college     | 4  | Retired     | 8  | 1   | Yes      | 1    | 1   | Yes     |
| 21846  | 2  | 2  | Married/li     | 4  | Postgraduate     | 1  | Working, fi | 34 | 2   | No       |      | 2   | No      |
| 21849  | 2  | 2  | Married/li     | 3  | College degree   | 1  | Working, fi | 2  | 2   | No       |      | 2   | No      |

| respid | Q5 | Q6 | Marital Status | Q7 | Education        | Q8 | Work        | Q9 | Q10 | Diabetes | Q10a | Q11 | High BP |
|--------|----|----|----------------|----|------------------|----|-------------|----|-----|----------|------|-----|---------|
| 21850  | 2  | 2  | Married/li     | 1  | High school or l | 4  | Retired     | 28 | 2   | No       |      | 2   | No      |
| 21855  | 2  | 2  | Married/li     | 3  | College degree   | 1  | Working, fi | 13 | 2   | No       |      | 2   | No      |
| 21859  | 2  | 2  | Married/li     | 3  | College degree   | 1  | Working, fi | 14 | 2   | No       |      | 2   | No      |
| 21861  | 2  | 2  | Married/li     | 2  | Some college     | 1  | Working, fi | 12 | 2   | No       |      | 2   | No      |
| 21866  | 2  | 2  | Married/li     | 1  | High school or l | 4  | Retired     | 7  | 2   | No       |      | 2   | No      |
| 21873  | 2  | 2  | Married/li     | 2  | Some college     | 1  | Working, fi | 14 | 2   | No       |      | 2   | No      |
| 21876  | 2  | 2  | Married/li     | 1  | High school or l | 4  | Retired     | 12 | 1   | Yes      | 1    | 1   | Yes     |
| 21882  | 2  | 2  | Married/li     | 2  | Some college     | 1  | Working, fi | 1  | 2   | No       |      | 2   | No      |
| 21884  | 2  | 2  | Married/li     | 1  | High school or l | 9  | Other       | 15 | 1   | Yes      | 1    | 2   | No      |
| 21887  | 2  | 2  | Married/li     | 2  | Some college     | 1  | Working, fi | 5  | 2   | No       |      | 1   | Yes     |
| 21892  | 2  | 2  | Married/li     | 2  | Some college     | 1  | Working, fi | 10 | 2   | No       |      | 2   | No      |
| 21907  | 2  | 2  | Married/li     | 3  | College degree   | 4  | Retired     | 33 | 2   | No       |      | 2   | No      |
| 21910  | 2  | 2  | Married/li     | 1  | High school or l | 1  | Working, fi | 12 | 1   | Yes      | 1    | 1   | Yes     |
| 21912  | 2  | 4  | Widow/wi       | 1  | High school or l | 2  | Working, p  | 31 | 2   | No       |      | 2   | No      |
| 21914  | 2  | 2  | Married/li     | 3  | College degree   | 1  | Working, fi | 8  | 2   | No       |      | 2   | No      |
| 21925  | 2  | 2  | Married/li     | 1  | High school or l | 1  | Working, fi | 29 | 1   | Yes      | 1    | 2   | No      |
| 21937  | 2  | 2  | Married/li     | 2  | Some college     | 1  | Working, fi | 11 | 2   | No       |      | 2   | No      |
| 21938  | 2  | 2  | Married/li     | 4  | Postgraduate     | 1  | Working, fi | 18 | 2   | No       |      | 2   | No      |
| 21940  | 2  | 2  | Married/li     | 4  | Postgraduate     | 1  | Working, fi | 33 | 2   | No       |      | 2   | No      |
| 21942  | 2  | 2  | Married/li     | 2  | Some college     | 1  | Working, fi | 9  | 2   | No       |      | 2   | No      |
| 21947  | 2  | 2  | Married/li     | 3  | College degree   | 1  | Working, fi | 12 | 2   | No       |      | 2   | No      |
| 21948  | 2  | 2  | Married/li     | 3  | College degree   | 1  | Working, fi | 16 | 2   | No       |      | 1   | Yes     |
| 21961  | 2  | 2  | Married/li     | 1  | High school or l | 6  | Homemake    | 20 | 2   | No       |      | 2   | No      |
| 21977  | 2  | 2  | Married/li     | 1  | High school or l | 4  | Retired     | 32 | 2   | No       |      | 2   | No      |
| 21983  | 2  | 2  | Married/li     | 3  | College degree   | 4  | Retired     | 29 | 2   | No       |      | 2   | No      |
| 21986  | 2  | 2  | Married/li     | 3  | College degree   | 1  | Working, fi | 12 | 2   | No       |      | 1   | Yes     |
| 21988  | 2  | 2  | Married/li     | 2  | Some college     | 1  | Working, fi | 11 | 2   | No       |      | 1   | Yes     |
| 21996  | 2  | 2  | Married/li     | 2  | Some college     | 4  | Retired     | 26 | 2   | No       |      | 2   | No      |
| 21997  | 2  | 2  | Married/li     | 1  | High school or l | 6  | Homemake    | 29 | 2   | No       |      | 2   | No      |
| 22005  | 2  | 2  | Married/li     | 1  | High school or l | 1  | Working, fi | 11 | 2   | No       |      | 2   | No      |
| 22013  | 2  | 2  | Married/li     | 1  | High school or l | 6  | Homemake    | 30 | 2   | No       |      | 2   | No      |
| 22018  | 2  | 2  | Married/li     | 3  | College degree   | 6  | Homemake    | 28 | 2   | No       |      | 2   | No      |

| respid | Q5 | Q6 | Marital Status | Q7 | Education        | Q8 | Work        | Q9 | Q10 | Diabetes | Q10a | Q11 | High BP |
|--------|----|----|----------------|----|------------------|----|-------------|----|-----|----------|------|-----|---------|
| 22019  | 2  | 2  | Married/li     | 3  | College degree   | 6  | Homemake    | 19 | 2   | No       |      | 1   | Yes     |
| 22071  | 2  | 2  | Married/li     | 2  | Some college     | 1  | Working, fi | 31 | 2   | No       |      | 2   | No      |
| 22082  | 2  | 2  | Married/li     | 1  | High school or l | 1  | Working, fi | 31 | 2   | No       |      | 1   | Yes     |
| 22085  | 2  | 5  | Prefer not     | 1  | High school or l | 1  | Working, fi | 27 | 2   | No       |      | 2   | No      |
| 22092  | 2  | 2  | Married/li     | 1  | High school or l | 4  | Retired     | 11 | 2   | No       |      | 2   | No      |
| 22097  | 2  | 2  | Married/li     | 4  | Postgraduate     | 6  | Homemake    | 13 | 2   | No       |      | 2   | No      |
| 22111  | 2  | 2  | Married/li     | 1  | High school or l | 1  | Working, fi | 29 | 2   | No       |      | 2   | No      |
| 22118  | 2  | 2  | Married/li     | 3  | College degree   | 1  | Working, fi | 11 | 2   | No       |      | 2   | No      |
| 22132  | 2  | 2  | Married/li     | 1  | High school or l | 1  | Working, fi | 2  | 2   | No       |      | 2   | No      |
| 22133  | 2  | 2  | Married/li     | 2  | Some college     | 1  | Working, fi | 32 | 2   | No       |      | 2   | No      |
| 22139  | 2  | 2  | Married/li     | 2  | Some college     | 8  | Other worl  | 2  | 2   | No       |      | 2   | No      |
| 22142  | 2  | 2  | Married/li     | 3  | College degree   | 1  | Working, fi | 11 | 2   | No       |      | 1   | Yes     |
| 22146  | 2  | 2  | Married/li     | 1  | High school or l | 1  | Working, fi | 10 | 2   | No       |      | 2   | No      |
| 22181  | 2  | 2  | Married/li     | 3  | College degree   | 1  | Working, fi | 12 | 2   | No       |      | 2   | No      |
| 22202  | 2  | 2  | Married/li     | 1  | High school or l | 4  | Retired     | 99 | 2   | No       |      | 2   | No      |
| 22214  | 2  | 2  | Married/li     | 1  | High school or l | 1  | Working, fi | 36 | 2   | No       |      | 2   | No      |
| 22223  | 2  | 2  | Married/li     | 1  | High school or l | 1  | Working, fi | 33 | 2   | No       |      | 2   | No      |
| 22227  | 2  | 2  | Married/li     | 3  | College degree   | 4  | Retired     | 12 | 2   | No       |      | 2   | No      |
| 22229  | 2  | 2  | Married/li     | 3  | College degree   | 1  | Working, fi | 11 | 2   | No       |      | 2   | No      |
| 22239  | 2  | 2  | Married/li     | 1  | High school or l | 4  | Retired     | 9  | 2   | No       |      | 2   | No      |
| 22245  | 2  | 2  | Married/li     | 1  | High school or l | 1  | Working, fi | 12 | 1   | Yes      | 1    | 1   | Yes     |
| 22256  | 2  | 2  | Married/li     | 1  | High school or l | 1  | Working, fi | 29 | 2   | No       |      | 2   | No      |
| 22260  | 2  | 2  | Married/li     | 1  | High school or l | 1  | Working, fi | 29 | 1   | Yes      | 1    | 2   | No      |
| 22298  | 2  | 2  | Married/li     | 2  | Some college     | 4  | Retired     | 32 | 2   | No       |      | 1   | Yes     |
| 22321  | 2  | 2  | Married/li     | 3  | College degree   | 1  | Working, fi | 10 | 2   | No       |      | 2   | No      |
| 22340  | 2  | 2  | Married/li     | 1  | High school or l | 1  | Working, fi | 33 | 2   | No       |      | 2   | No      |
| 22346  | 2  | 2  | Married/li     | 3  | College degree   | 4  | Retired     | 12 | 2   | No       |      | 2   | No      |
| 22356  | 2  | 2  | Married/li     | 1  | High school or l | 1  | Working, fi | 33 | 2   | No       |      | 1   | Yes     |
| 22361  | 2  | 2  | Married/li     | 1  | High school or l | 4  | Retired     | 27 | 2   | No       |      | 1   | Yes     |
| 22364  | 2  | 1  | Single         | 4  | Postgraduate     | 1  | Working, fi | 33 | 2   | No       |      | 2   | No      |
| 22368  | 2  | 2  | Married/li     | 1  | High school or l | 1  | Working, fi | 35 | 2   | No       |      | 2   | No      |
| 22374  | 2  | 2  | Married/li     | 2  | Some college     | 1  | Working, fi | 4  | 2   | No       |      | 2   | No      |



| respid | Q5 | Q6 | Marital Status | Q7 | Education        | Q8 | Work        | Q9 | Q10 | Diabetes | Q10a | Q11 | High BP |
|--------|----|----|----------------|----|------------------|----|-------------|----|-----|----------|------|-----|---------|
| 22375  | 2  | 2  | Married/li     | 2  | Some college     | 1  | Working, fi | 11 | 2   | No       |      | 2   | No      |
| 22377  | 2  | 2  | Married/li     | 2  | Some college     | 6  | Homemake    | 25 | 2   | No       |      | 1   | Yes     |
| 22383  | 2  | 2  | Married/li     | 2  | Some college     | 1  | Working, fi | 35 | 2   | No       |      | 2   | No      |
| 22387  | 2  | 2  | Married/li     | 2  | Some college     | 1  | Working, fi | 12 | 2   | No       |      | 2   | No      |
| 22392  | 2  | 2  | Married/li     | 2  | Some college     | 1  | Working, fi | 12 | 2   | No       |      | 2   | No      |
| 22393  | 2  | 2  | Married/li     | 2  | Some college     | 4  | Retired     | 11 | 2   | No       |      | 2   | No      |
| 22394  | 2  | 2  | Married/li     | 2  | Some college     | 1  | Working, fi | 11 | 2   | No       |      | 2   | No      |
| 22395  | 2  | 2  | Married/li     | 1  | High school or l | 1  | Working, fi | 35 | 2   | No       |      | 2   | No      |
| 22401  | 2  | 2  | Married/li     | 1  | High school or l | 4  | Retired     | 11 | 2   | No       |      | 1   | Yes     |
| 22407  | 2  | 2  | Married/li     | 2  | Some college     | 1  | Working, fi | 35 | 2   | No       |      | 2   | No      |
| 22410  | 2  | 2  | Married/li     | 2  | Some college     | 4  | Retired     | 11 | 1   | Yes      | 1    | 2   | No      |
| 22418  | 2  | 2  | Married/li     | 1  | High school or l | 1  | Working, fi | 99 | 2   | No       |      | 2   | No      |
| 22421  | 2  | 2  | Married/li     | 2  | Some college     | 1  | Working, fi | 34 | 2   | No       |      | 2   | No      |
| 22423  | 2  | 2  | Married/li     | 2  | Some college     | 1  | Working, fi | 30 | 2   | No       |      | 2   | No      |
| 22425  | 2  | 2  | Married/li     | 3  | College degree   | 1  | Working, fi | 12 | 2   | No       |      | 2   | No      |
| 22427  | 2  | 2  | Married/li     | 2  | Some college     | 1  | Working, fi | 27 | 2   | No       |      | 2   | No      |
| 22431  | 2  | 2  | Married/li     | 3  | College degree   | 4  | Retired     | 13 | 1   | Yes      | 1    | 1   | Yes     |
| 22435  | 2  | 2  | Married/li     | 1  | High school or l | 4  | Retired     | 29 | 2   | No       |      | 2   | No      |
| 22436  | 2  | 1  | Single         | 3  | College degree   | 1  | Working, fi | 25 | 2   | No       |      | 2   | No      |
| 22442  | 2  | 2  | Married/li     | 2  | Some college     | 1  | Working, fi | 31 | 2   | No       |      | 2   | No      |
| 22444  | 2  | 2  | Married/li     | 1  | High school or l | 1  | Working, fi | 30 | 2   | No       |      | 2   | No      |
| 22445  | 2  | 2  | Married/li     | 3  | College degree   | 4  | Retired     | 35 | 2   | No       |      | 2   | No      |
| 22446  | 2  | 2  | Married/li     | 1  | High school or l | 6  | Homemake    | 25 | 2   | No       |      | 2   | No      |
| 22448  | 2  | 2  | Married/li     | 1  | High school or l | 6  | Homemake    | 21 | 2   | No       |      | 2   | No      |
| 22449  | 2  | 2  | Married/li     | 1  | High school or l | 6  | Homemake    | 11 | 2   | No       |      | 2   | No      |
| 22450  | 2  | 2  | Married/li     | 1  | High school or l | 4  | Retired     | 10 | 2   | No       |      | 2   | No      |
| 22453  | 2  | 2  | Married/li     | 2  | Some college     | 4  | Retired     | 9  | 1   | Yes      | 1    | 1   | Yes     |
| 22465  | 2  | 2  | Married/li     | 2  | Some college     | 6  | Homemake    | 34 | 2   | No       |      | 2   | No      |
| 22472  | 2  | 2  | Married/li     | 1  | High school or l | 1  | Working, fi | 26 | 2   | No       |      | 1   | Yes     |
| 22475  | 2  | 2  | Married/li     | 2  | Some college     | 4  | Retired     | 8  | 2   | No       |      | 1   | Yes     |
| 22478  | 2  | 2  | Married/li     | 1  | High school or l | 1  | Working, fi | 33 | 2   | No       |      | 1   | Yes     |
| 22491  | 2  | 2  | Married/li     | 4  | Postgraduate     | 1  | Working, fi | 13 | 2   | No       |      | 2   | No      |

| respid | Q5 | Q6 | Marital Status | Q7 | Education        | Q8 | Work        | Q9 | Q10 | Diabetes | Q10a | Q11 | High BP |
|--------|----|----|----------------|----|------------------|----|-------------|----|-----|----------|------|-----|---------|
| 22497  | 2  | 4  | Widow/wid      | 1  | High school or l | 6  | Homemaker   | 33 | 2   | No       |      | 1   | Yes     |
| 22498  | 2  | 2  | Married/liv    | 3  | College degree   | 1  | Working, fi | 29 | 2   | No       |      | 2   | No      |
| 22499  | 2  | 3  | Divorced       | 1  | High school or l | 5  | Permanent   | 29 | 2   | No       |      | 2   | No      |
| 22503  | 2  | 2  | Married/liv    | 1  | High school or l | 1  | Working, fi | 33 | 2   | No       |      | 1   | Yes     |
| 22507  | 2  | 4  | Widow/wid      | 1  | High school or l | 2  | Working, p  | 33 | 2   | No       |      | 2   | No      |
| 22513  | 2  | 2  | Married/liv    | 1  | High school or l | 2  | Working, p  | 27 | 1   | Yes      | 2    | 1   | Yes     |
| 22517  | 2  | 2  | Married/liv    | 2  | Some college     | 1  | Working, fi | 30 | 2   | No       |      | 1   | Yes     |
| 22524  | 2  | 2  | Married/liv    | 3  | College degree   | 4  | Retired     | 31 | 2   | No       |      | 1   | Yes     |
| 22528  | 2  | 2  | Married/liv    | 3  | College degree   | 4  | Retired     | 12 | 1   | Yes      | 1    | 2   | No      |
| 22544  | 2  | 2  | Married/liv    | 2  | Some college     | 4  | Retired     | 13 | 2   | No       |      | 1   | Yes     |
| 22571  | 2  | 1  | Single         | 2  | Some college     | 1  | Working, fi | 4  | 2   | No       |      | 2   | No      |
| 22576  | 2  | 2  | Married/liv    | 2  | Some college     | 1  | Working, fi | 34 | 1   | Yes      | 1    | 2   | No      |
| 22579  | 2  | 4  | Widow/wid      | 1  | High school or l | 2  | Working, p  | 33 | 2   | No       |      | 2   | No      |
| 22583  | 2  | 2  | Married/liv    | 1  | High school or l | 6  | Homemaker   | 17 | 1   | Yes      | 2    | 2   | No      |
| 22591  | 2  | 2  | Married/liv    | 1  | High school or l | 4  | Retired     | 9  | 2   | No       |      | 2   | No      |
| 22592  | 2  | 2  | Married/liv    | 1  | High school or l | 6  | Homemaker   | 25 | 2   | No       |      | 2   | No      |
| 22612  | 2  | 2  | Married/liv    | 1  | High school or l | 6  | Homemaker   | 34 | 2   | No       |      | 2   | No      |
| 22613  | 2  | 2  | Married/liv    | 3  | College degree   | 1  | Working, fi | 3  | 2   | No       |      | 2   | No      |
| 22615  | 2  | 2  | Married/liv    | 3  | College degree   | 1  | Working, fi | 11 | 2   | No       |      | 1   | Yes     |
| 22621  | 2  | 2  | Married/liv    | 2  | Some college     | 1  | Working, fi | 10 | 1   | Yes      | 1    | 1   | Yes     |
| 22625  | 2  | 4  | Widow/wid      | 1  | High school or l | 6  | Homemaker   | 31 | 2   | No       |      | 2   | No      |
| 22628  | 2  | 4  | Widow/wid      | 1  | High school or l | 6  | Homemaker   | 18 | 2   | No       |      | 1   | Yes     |
| 22632  | 2  | 2  | Married/liv    | 3  | College degree   | 4  | Retired     | 14 | 2   | No       |      | 1   | Yes     |
| 22639  | 2  | 2  | Married/liv    | 3  | College degree   | 1  | Working, fi | 7  | 2   | No       |      | 2   | No      |
| 22648  | 2  | 2  | Married/liv    | 3  | College degree   | 6  | Homemaker   | 16 | 2   | No       |      | 2   | No      |
| 22649  | 2  | 1  | Single         | 4  | Postgraduate     | 1  | Working, fi | 27 | 1   | Yes      | 1    | 2   | No      |
| 22655  | 2  | 2  | Married/liv    | 3  | College degree   | 1  | Working, fi | 11 | 2   | No       |      | 2   | No      |
| 22659  | 2  | 1  | Single         | 3  | College degree   | 1  | Working, fi | 32 | 2   | No       |      | 2   | No      |
| 22660  | 2  | 2  | Married/liv    | 3  | College degree   | 1  | Working, fi | 11 | 1   | Yes      | 1    | 2   | No      |
| 22666  | 2  | 2  | Married/liv    | 1  | High school or l | 4  | Retired     | 9  | 2   | No       |      | 2   | No      |
| 22667  | 2  | 2  | Married/liv    | 3  | College degree   | 1  | Working, fi | 6  | 2   | No       |      | 2   | No      |
| 22670  | 2  | 2  | Married/liv    | 4  | Postgraduate     | 1  | Working, fi | 14 | 2   | No       |      | 2   | No      |

| respid | Q5 | Q6 | Marital Status | Q7 | Education        | Q8 | Work        | Q9 | Q10 | Diabetes | Q10a | Q11 | High BP |
|--------|----|----|----------------|----|------------------|----|-------------|----|-----|----------|------|-----|---------|
| 22681  | 2  | 2  | Married/li     | 3  | College degree   | 1  | Working, fi | 9  | 2   | No       |      | 2   | No      |
| 22683  | 2  | 2  | Married/li     | 1  | High school or l | 1  | Working, fi | 31 | 2   | No       |      | 2   | No      |
| 22688  | 2  | 4  | Widow/wi       | 1  | High school or l | 4  | Retired     | 28 | 2   | No       |      | 1   | Yes     |
| 22695  | 2  | 2  | Married/li     | 2  | Some college     | 4  | Retired     | 11 | 2   | No       |      | 2   | No      |
| 22696  | 2  | 2  | Married/li     | 3  | College degree   | 1  | Working, fi | 11 | 2   | No       |      | 2   | No      |
| 22705  | 2  | 2  | Married/li     | 1  | High school or l | 1  | Working, fi | 18 | 1   | Yes      | 1    | 1   | Yes     |
| 22718  | 2  | 2  | Married/li     | 2  | Some college     | 1  | Working, fi | 8  | 2   | No       |      | 1   | Yes     |
| 22720  | 2  | 2  | Married/li     | 1  | High school or l | 4  | Retired     | 28 | 2   | No       |      | 1   | Yes     |
| 22724  | 2  | 2  | Married/li     | 3  | College degree   | 2  | Working, p  | 18 | 2   | No       |      | 2   | No      |
| 22728  | 2  | 2  | Married/li     | 1  | High school or l | 1  | Working, fi | 9  | 2   | No       |      | 1   | Yes     |
| 22751  | 2  | 2  | Married/li     | 1  | High school or l | 4  | Retired     | 32 | 2   | No       |      | 1   | Yes     |
| 22782  | 2  | 4  | Widow/wi       | 1  | High school or l | 4  | Retired     | 26 | 2   | No       |      | 2   | No      |
| 22786  | 2  | 2  | Married/li     | 1  | High school or l | 4  | Retired     | 36 | 1   | Yes      | 1    | 2   | No      |
| 22788  | 2  | 2  | Married/li     | 3  | College degree   | 4  | Retired     | 12 | 2   | No       |      | 2   | No      |
| 22810  | 2  | 2  | Married/li     | 3  | College degree   | 4  | Retired     | 12 | 2   | No       |      | 2   | No      |
| 22816  | 2  | 4  | Widow/wi       | 1  | High school or l | 6  | Homemake    | 30 | 2   | No       |      | 2   | No      |
| 22818  | 2  | 2  | Married/li     | 2  | Some college     | 4  | Retired     | 14 | 2   | No       |      | 1   | Yes     |
| 22854  | 2  | 1  | Single         | 3  | College degree   | 7  | Student     | 26 | 2   | No       |      | 2   | No      |
| 22858  | 2  | 2  | Married/li     | 1  | High school or l | 1  | Working, fi | 34 | 2   | No       |      | 2   | No      |
| 22862  | 2  | 4  | Widow/wi       | 2  | Some college     | 1  | Working, fi | 31 | 2   | No       |      | 2   | No      |
| 22865  | 2  | 2  | Married/li     | 3  | College degree   | 1  | Working, fi | 30 | 2   | No       |      | 1   | Yes     |
| 22868  | 2  | 2  | Married/li     | 1  | High school or l | 6  | Homemake    | 28 | 2   | No       |      | 2   | No      |
| 22869  | 2  | 2  | Married/li     | 3  | College degree   | 1  | Working, fi | 36 | 2   | No       |      | 1   | Yes     |
| 22873  | 2  | 2  | Married/li     | 2  | Some college     | 6  | Homemake    | 99 | 2   | No       |      | 2   | No      |
| 22875  | 2  | 2  | Married/li     | 3  | College degree   | 1  | Working, fi | 14 | 2   | No       |      | 2   | No      |
| 22876  | 2  | 2  | Married/li     | 2  | Some college     | 1  | Working, fi | 14 | 2   | No       |      | 2   | No      |
| 22882  | 2  | 2  | Married/li     | 3  | College degree   | 1  | Working, fi | 11 | 2   | No       |      | 2   | No      |
| 22884  | 2  | 4  | Widow/wi       | 1  | High school or l | 4  | Retired     | 11 | 1   | Yes      | 1    | 2   | No      |
| 22887  | 2  | 2  | Married/li     | 1  | High school or l | 1  | Working, fi | 26 | 2   | No       |      | 2   | No      |
| 22888  | 2  | 2  | Married/li     | 1  | High school or l | 6  | Homemake    | 25 | 2   | No       |      | 1   | Yes     |
| 22900  | 2  | 2  | Married/li     | 3  | College degree   | 1  | Working, fi | 11 | 2   | No       |      | 2   | No      |
| 22901  | 2  | 2  | Married/li     | 1  | High school or l | 6  | Homemake    | 26 | 2   | No       |      | 2   | No      |

| respid | Q5 | Q6 | Marital Status | Q7 | Education        | Q8 | Work        | Q9 | Q10 | Diabetes | Q10a | Q11 | High BP |
|--------|----|----|----------------|----|------------------|----|-------------|----|-----|----------|------|-----|---------|
| 22912  | 2  | 3  | Divorced       | 2  | Some college     | 1  | Working, fi | 8  | 2   | No       |      | 2   | No      |
| 22913  | 2  | 2  | Married/li     | 3  | College degree   | 1  | Working, fi | 26 | 2   | No       |      | 2   | No      |
| 22921  | 2  | 2  | Married/li     | 2  | Some college     | 1  | Working, fi | 11 | 2   | No       |      | 1   | Yes     |
| 22925  | 2  | 2  | Married/li     | 3  | College degree   | 1  | Working, fi | 14 | 1   | Yes      | 2    | 2   | No      |
| 22940  | 2  | 2  | Married/li     | 2  | Some college     | 1  | Working, fi | 31 | 2   | No       |      | 2   | No      |
| 22941  | 2  | 3  | Divorced       | 1  | High school or l | 4  | Retired     | 32 | 2   | No       |      | 1   | Yes     |
| 22947  | 2  | 2  | Married/li     | 3  | College degree   | 4  | Retired     | 11 | 1   | Yes      | 1    | 1   | Yes     |
| 22948  | 2  | 2  | Married/li     | 3  | College degree   | 1  | Working, fi | 14 | 2   | No       |      | 2   | No      |
| 22964  | 2  | 2  | Married/li     | 1  | High school or l | 2  | Working, p  | 17 | 2   | No       |      | 1   | Yes     |
| 22966  | 2  | 1  | Single         | 2  | Some college     | 1  | Working, fi | 7  | 2   | No       |      | 2   | No      |
| 22969  | 2  | 3  | Divorced       | 1  | High school or l | 1  | Working, fi | 25 | 2   | No       |      | 1   | Yes     |
| 22971  | 2  | 2  | Married/li     | 3  | College degree   | 1  | Working, fi | 11 | 2   | No       |      | 2   | No      |
| 22988  | 2  | 2  | Married/li     | 3  | College degree   | 4  | Retired     | 7  | 2   | No       |      | 1   | Yes     |
| 22990  | 2  | 2  | Married/li     | 1  | High school or l | 2  | Working, p  | 33 | 2   | No       |      | 2   | No      |
| 23000  | 2  | 2  | Married/li     | 1  | High school or l | 6  | Homemake    | 34 | 2   | No       |      | 1   | Yes     |
| 23016  | 2  | 2  | Married/li     | 1  | High school or l | 4  | Retired     | 28 | 2   | No       |      | 2   | No      |
| 23026  | 2  | 2  | Married/li     | 1  | High school or l | 4  | Retired     | 25 | 2   | No       |      | 2   | No      |
| 23035  | 2  | 1  | Single         | 1  | High school or l | 2  | Working, p  | 12 | 2   | No       |      | 2   | No      |
| 23037  | 2  | 2  | Married/li     | 2  | Some college     | 4  | Retired     | 7  | 2   | No       |      | 1   | Yes     |
| 23044  | 2  | 2  | Married/li     | 3  | College degree   | 1  | Working, fi | 1  | 2   | No       |      | 2   | No      |
| 23046  | 2  | 2  | Married/li     | 3  | College degree   | 4  | Retired     | 4  | 1   | Yes      | 1    | 2   | No      |
| 23047  | 2  | 2  | Married/li     | 1  | High school or l | 4  | Retired     | 1  | 2   | No       |      | 2   | No      |
| 23049  | 2  | 2  | Married/li     | 4  | Postgraduate     | 1  | Working, fi | 13 | 2   | No       |      | 2   | No      |
| 23055  | 2  | 2  | Married/li     | 4  | Postgraduate     | 4  | Retired     | 32 | 2   | No       |      | 1   | Yes     |
| 23066  | 2  | 2  | Married/li     | 1  | High school or l | 4  | Retired     | 33 | 2   | No       |      | 2   | No      |
| 23075  | 2  | 2  | Married/li     | 3  | College degree   | 4  | Retired     | 11 | 2   | No       |      | 1   | Yes     |
| 23081  | 2  | 2  | Married/li     | 1  | High school or l | 4  | Retired     | 26 | 2   | No       |      | 2   | No      |
| 23087  | 2  | 2  | Married/li     | 1  | High school or l | 1  | Working, fi | 9  | 2   | No       |      | 2   | No      |
| 23094  | 2  | 2  | Married/li     | 3  | College degree   | 1  | Working, fi | 7  | 2   | No       |      | 2   | No      |
| 23099  | 2  | 2  | Married/li     | 3  | College degree   | 1  | Working, fi | 11 | 2   | No       |      | 2   | No      |
| 23101  | 2  | 2  | Married/li     | 1  | High school or l | 6  | Homemake    | 25 | 2   | No       |      | 2   | No      |
| 23105  | 2  | 2  | Married/li     | 3  | College degree   | 1  | Working, fi | 13 | 2   | No       |      | 2   | No      |

| respid | Q5 | Q6 | Marital Status | Q7 | Education        | Q8 | Work        | Q9 | Q10 | Diabetes | Q10a | Q11 | High BP |
|--------|----|----|----------------|----|------------------|----|-------------|----|-----|----------|------|-----|---------|
| 23115  | 2  | 2  | Married/li     | 1  | High school or l | 6  | Homemake    | 30 | 2   | No       |      | 2   | No      |
| 23121  | 2  | 2  | Married/li     | 2  | Some college     | 1  | Working, fi | 7  | 2   | No       |      | 2   | No      |
| 23127  | 2  | 2  | Married/li     | 2  | Some college     | 1  | Working, fi | 1  | 2   | No       |      | 2   | No      |
| 23131  | 2  | 1  | Single         | 3  | College degree   | 1  | Working, fi | 3  | 2   | No       |      | 2   | No      |
| 23134  | 2  | 2  | Married/li     | 3  | College degree   | 1  | Working, fi | 12 | 2   | No       |      | 2   | No      |
| 23145  | 2  | 2  | Married/li     | 2  | Some college     | 1  | Working, fi | 3  | 2   | No       |      | 2   | No      |
| 23151  | 2  | 2  | Married/li     | 1  | High school or l | 1  | Working, fi | 4  | 2   | No       |      | 2   | No      |
| 23161  | 2  | 2  | Married/li     | 3  | College degree   | 1  | Working, fi | 11 | 2   | No       |      | 2   | No      |
| 23169  | 2  | 2  | Married/li     | 1  | High school or l | 6  | Homemake    | 16 | 2   | No       |      | 1   | Yes     |
| 23173  | 2  | 3  | Divorced       | 1  | High school or l | 1  | Working, fi | 3  | 2   | No       |      | 2   | No      |
| 23174  | 2  | 2  | Married/li     | 1  | High school or l | 1  | Working, fi | 2  | 2   | No       |      | 1   | Yes     |
| 23186  | 2  | 2  | Married/li     | 2  | Some college     | 4  | Retired     | 10 | 2   | No       |      | 1   | Yes     |
| 23195  | 2  | 4  | Widow/wi       | 1  | High school or l | 6  | Homemake    | 25 | 1   | Yes      | 1    | 2   | No      |
| 23197  | 2  | 2  | Married/li     | 2  | Some college     | 1  | Working, fi | 11 | 2   | No       |      | 1   | Yes     |
| 23198  | 2  | 2  | Married/li     | 1  | High school or l | 1  | Working, fi | 1  | 2   | No       |      | 2   | No      |
| 23203  | 2  | 2  | Married/li     | 1  | High school or l | 1  | Working, fi | 32 | 2   | No       |      | 2   | No      |
| 23204  | 2  | 2  | Married/li     | 2  | Some college     | 1  | Working, fi | 37 | 1   | Yes      | 1    | 1   | Yes     |
| 23212  | 2  | 2  | Married/li     | 1  | High school or l | 1  | Working, fi | 11 | 2   | No       |      | 1   | Yes     |
| 23214  | 2  | 2  | Married/li     | 1  | High school or l | 6  | Homemake    | 15 | 2   | No       |      | 1   | Yes     |
| 23221  | 2  | 2  | Married/li     | 3  | College degree   | 1  | Working, fi | 11 | 2   | No       |      | 1   | Yes     |
| 23237  | 2  | 2  | Married/li     | 2  | Some college     | 1  | Working, fi | 26 | 2   | No       |      | 1   | Yes     |
| 23251  | 2  | 2  | Married/li     | 3  | College degree   | 1  | Working, fi | 17 | 2   | No       |      | 2   | No      |
| 23254  | 2  | 2  | Married/li     | 1  | High school or l | 1  | Working, fi | 34 | 2   | No       |      | 2   | No      |
| 23262  | 2  | 2  | Married/li     | 3  | College degree   | 2  | Working, p  | 33 | 2   | No       |      | 1   | Yes     |
| 23267  | 2  | 2  | Married/li     | 1  | High school or l | 1  | Working, fi | 1  | 2   | No       |      | 2   | No      |
| 23268  | 2  | 2  | Married/li     | 3  | College degree   | 1  | Working, fi | 33 | 2   | No       |      | 1   | Yes     |
| 23273  | 2  | 2  | Married/li     | 3  | College degree   | 1  | Working, fi | 13 | 2   | No       |      | 2   | No      |
| 23278  | 2  | 2  | Married/li     | 3  | College degree   | 1  | Working, fi | 7  | 2   | No       |      | 2   | No      |
| 23279  | 2  | 2  | Married/li     | 1  | High school or l | 1  | Working, fi | 4  | 1   | Yes      | 1    | 1   | Yes     |
| 23281  | 2  | 2  | Married/li     | 3  | College degree   | 1  | Working, fi | 12 | 2   | No       |      | 2   | No      |
| 23282  | 2  | 2  | Married/li     | 3  | College degree   | 1  | Working, fi | 11 | 2   | No       |      | 2   | No      |
| 23283  | 2  | 2  | Married/li     | 2  | Some college     | 1  | Working, fi | 12 | 2   | No       |      | 2   | No      |

| respid | Q5 | Q6 | Marital Status | Q7 | Education        | Q8 | Work        | Q9 | Q10 | Diabetes | Q10a | Q11 | High BP |
|--------|----|----|----------------|----|------------------|----|-------------|----|-----|----------|------|-----|---------|
| 23285  | 2  | 2  | Married/li     | 3  | College degree   | 1  | Working, fi | 12 | 2   | No       |      | 2   | No      |
| 23305  | 2  | 4  | Widow/wi       | 1  | High school or l | 2  | Working, p  | 27 | 2   | No       |      | 1   | Yes     |
| 23309  | 2  | 2  | Married/li     | 3  | College degree   | 6  | Homemake    | 19 | 2   | No       |      | 2   | No      |
| 23310  | 2  | 2  | Married/li     | 1  | High school or l | 4  | Retired     | 31 | 2   | No       |      | 2   | No      |
| 23311  | 2  | 2  | Married/li     | 3  | College degree   | 1  | Working, fi | 11 | 2   | No       |      | 1   | Yes     |
| 23312  | 2  | 2  | Married/li     | 3  | College degree   | 1  | Working, fi | 11 | 2   | No       |      | 2   | No      |
| 23319  | 2  | 2  | Married/li     | 2  | Some college     | 1  | Working, fi | 32 | 2   | No       |      | 1   | Yes     |
| 23320  | 2  | 2  | Married/li     | 3  | College degree   | 1  | Working, fi | 11 | 2   | No       |      | 2   | No      |
| 23322  | 2  | 1  | Single         | 3  | College degree   | 1  | Working, fi | 33 | 1   | Yes      | 1    | 1   | Yes     |
| 23334  | 2  | 2  | Married/li     | 2  | Some college     | 1  | Working, fi | 9  | 2   | No       |      | 2   | No      |
| 23340  | 2  | 2  | Married/li     | 1  | High school or l | 6  | Homemake    | 33 | 1   | Yes      | 1    | 2   | No      |
| 23346  | 2  | 2  | Married/li     | 2  | Some college     | 4  | Retired     | 14 | 2   | No       |      | 2   | No      |
| 23353  | 2  | 2  | Married/li     | 2  | Some college     | 1  | Working, fi | 10 | 2   | No       |      | 1   | Yes     |
| 23363  | 2  | 2  | Married/li     | 3  | College degree   | 1  | Working, fi | 22 | 1   | Yes      | 1    | 1   | Yes     |
| 23364  | 2  | 2  | Married/li     | 3  | College degree   | 1  | Working, fi | 38 | 1   | Yes      | 1    | 1   | Yes     |
| 23376  | 2  | 2  | Married/li     | 1  | High school or l | 1  | Working, fi | 33 | 2   | No       |      | 2   | No      |
| 23378  | 2  | 2  | Married/li     | 2  | Some college     | 1  | Working, fi | 7  | 2   | No       |      | 2   | No      |
| 23382  | 2  | 2  | Married/li     | 3  | College degree   | 1  | Working, fi | 11 | 2   | No       |      | 2   | No      |
| 23383  | 2  | 2  | Married/li     | 3  | College degree   | 1  | Working, fi | 5  | 2   | No       |      | 2   | No      |
| 23390  | 2  | 2  | Married/li     | 3  | College degree   | 1  | Working, fi | 11 | 2   | No       |      | 2   | No      |
| 23395  | 2  | 3  | Divorced       | 3  | College degree   | 1  | Working, fi | 11 | 2   | No       |      | 2   | No      |
| 23398  | 2  | 2  | Married/li     | 1  | High school or l | 4  | Retired     | 3  | 2   | No       |      | 1   | Yes     |
| 23399  | 2  | 1  | Single         | 2  | Some college     | 1  | Working, fi | 31 | 1   | Yes      | 2    | 2   | No      |
| 23406  | 2  | 2  | Married/li     | 1  | High school or l | 1  | Working, fi | 33 | 2   | No       |      | 2   | No      |
| 23418  | 2  | 2  | Married/li     | 3  | College degree   | 1  | Working, fi | 12 | 2   | No       |      | 2   | No      |
| 23427  | 2  | 2  | Married/li     | 1  | High school or l | 6  | Homemake    | 33 | 2   | No       |      | 2   | No      |
| 23428  | 2  | 2  | Married/li     | 2  | Some college     | 1  | Working, fi | 13 | 2   | No       |      | 2   | No      |
| 23435  | 2  | 2  | Married/li     | 2  | Some college     | 4  | Retired     | 11 | 2   | No       |      | 2   | No      |
| 23439  | 2  | 2  | Married/li     | 3  | College degree   | 1  | Working, fi | 1  | 2   | No       |      | 2   | No      |
| 23440  | 2  | 2  | Married/li     | 1  | High school or l | 4  | Retired     | 11 | 2   | No       |      | 2   | No      |
| 23444  | 2  | 2  | Married/li     | 3  | College degree   | 1  | Working, fi | 14 | 2   | No       |      | 1   | Yes     |
| 23445  | 2  | 2  | Married/li     | 3  | College degree   | 4  | Retired     | 12 | 1   | Yes      | 1    | 1   | Yes     |

| respid | Q5 | Q6 | Marital Status | Q7 | Education        | Q8 | Work        | Q9 | Q10 | Diabetes | Q10a | Q11 | High BP |
|--------|----|----|----------------|----|------------------|----|-------------|----|-----|----------|------|-----|---------|
| 23455  | 2  | 1  | Single         | 2  | Some college     | 1  | Working, fi | 4  | 2   | No       |      | 2   | No      |
| 23467  | 2  | 2  | Married/li     | 1  | High school or l | 4  | Retired     | 7  | 2   | No       |      | 2   | No      |
| 23478  | 2  | 2  | Married/li     | 4  | Postgraduate     | 1  | Working, fi | 99 | 2   | No       |      | 2   | No      |
| 23492  | 2  | 2  | Married/li     | 3  | College degree   | 1  | Working, fi | 4  | 2   | No       |      | 1   | Yes     |
| 23498  | 2  | 2  | Married/li     | 1  | High school or l | 1  | Working, fi | 25 | 2   | No       |      | 2   | No      |
| 23511  | 2  | 2  | Married/li     | 3  | College degree   | 1  | Working, fi | 7  | 2   | No       |      | 2   | No      |
| 23514  | 2  | 2  | Married/li     | 3  | College degree   | 1  | Working, fi | 2  | 2   | No       |      | 2   | No      |
| 23515  | 2  | 2  | Married/li     | 3  | College degree   | 1  | Working, fi | 31 | 2   | No       |      | 2   | No      |
| 23522  | 2  | 2  | Married/li     | 3  | College degree   | 1  | Working, fi | 13 | 2   | No       |      | 2   | No      |
| 23524  | 2  | 2  | Married/li     | 3  | College degree   | 1  | Working, fi | 13 | 2   | No       |      | 2   | No      |
| 23531  | 2  | 2  | Married/li     | 2  | Some college     | 1  | Working, fi | 12 | 2   | No       |      | 1   | Yes     |
| 23532  | 2  | 2  | Married/li     | 2  | Some college     | 1  | Working, fi | 12 | 2   | No       |      | 2   | No      |
| 23533  | 2  | 2  | Married/li     | 2  | Some college     | 1  | Working, fi | 14 | 2   | No       |      | 2   | No      |
| 23534  | 2  | 2  | Married/li     | 3  | College degree   | 1  | Working, fi | 11 | 2   | No       |      | 2   | No      |
| 23538  | 2  | 2  | Married/li     | 3  | College degree   | 1  | Working, fi | 12 | 2   | No       |      | 1   | Yes     |
| 23539  | 2  | 2  | Married/li     | 2  | Some college     | 1  | Working, fi | 11 | 2   | No       |      | 2   | No      |
| 23548  | 2  | 2  | Married/li     | 1  | High school or l | 1  | Working, fi | 31 | 2   | No       |      | 1   | Yes     |
| 23553  | 2  | 2  | Married/li     | 3  | College degree   | 1  | Working, fi | 6  | 1   | Yes      | 1    | 1   | Yes     |
| 23556  | 2  | 2  | Married/li     | 1  | High school or l | 6  | Homemake    | 99 | 2   | No       |      | 1   | Yes     |
| 23563  | 2  | 2  | Married/li     | 1  | High school or l | 1  | Working, fi | 33 | 2   | No       |      | 2   | No      |
| 23572  | 2  | 2  | Married/li     | 1  | High school or l | 1  | Working, fi | 29 | 2   | No       |      | 2   | No      |
| 23575  | 2  | 2  | Married/li     | 1  | High school or l | 1  | Working, fi | 2  | 2   | No       |      | 2   | No      |
| 23576  | 2  | 2  | Married/li     | 3  | College degree   | 1  | Working, fi | 8  | 2   | No       |      | 2   | No      |
| 23577  | 2  | 2  | Married/li     | 3  | College degree   | 1  | Working, fi | 1  | 2   | No       |      | 2   | No      |
| 23578  | 2  | 2  | Married/li     | 3  | College degree   | 1  | Working, fi | 10 | 2   | No       |      | 1   | Yes     |
| 23587  | 2  | 2  | Married/li     | 3  | College degree   | 1  | Working, fi | 10 | 2   | No       |      | 1   | Yes     |
| 23597  | 2  | 2  | Married/li     | 2  | Some college     | 1  | Working, fi | 11 | 2   | No       |      | 2   | No      |
| 23598  | 2  | 2  | Married/li     | 1  | High school or l | 1  | Working, fi | 8  | 2   | No       |      | 2   | No      |
| 23604  | 2  | 2  | Married/li     | 3  | College degree   | 1  | Working, fi | 11 | 2   | No       |      | 2   | No      |
| 23617  | 2  | 2  | Married/li     | 3  | College degree   | 1  | Working, fi | 11 | 2   | No       |      | 2   | No      |
| 23620  | 2  | 2  | Married/li     | 2  | Some college     | 4  | Retired     | 12 | 1   | Yes      | 2    | 2   | No      |
| 23621  | 2  | 2  | Married/li     | 1  | High school or l | 6  | Homemake    | 25 | 2   | No       |      | 2   | No      |

| respid | Q5 | Q6 | Marital Status | Q7 | Education        | Q8 | Work        | Q9 | Q10 | Diabetes | Q10a | Q11 | High BP |
|--------|----|----|----------------|----|------------------|----|-------------|----|-----|----------|------|-----|---------|
| 23625  | 2  | 3  | Divorced       | 4  | Postgraduate     | 1  | Working, fi | 33 | 1   | Yes      | 1    | 2   | No      |
| 23629  | 2  | 3  | Divorced       | 2  | Some college     | 1  | Working, fi | 5  | 2   | No       |      | 2   | No      |
| 23635  | 2  | 2  | Married/li     | 1  | High school or l | 1  | Working, fi | 1  | 2   | No       |      | 2   | No      |
| 23636  | 2  | 2  | Married/li     | 1  | High school or l | 1  | Working, fi | 11 | 2   | No       |      | 2   | No      |
| 23637  | 2  | 2  | Married/li     | 2  | Some college     | 1  | Working, fi | 33 | 2   | No       |      | 2   | No      |
| 23638  | 2  | 2  | Married/li     | 2  | Some college     | 1  | Working, fi | 35 | 2   | No       |      | 2   | No      |
| 23644  | 2  | 2  | Married/li     | 1  | High school or l | 4  | Retired     | 30 | 2   | No       |      | 1   | Yes     |
| 23645  | 2  | 2  | Married/li     | 3  | College degree   | 6  | Homemake    | 37 | 2   | No       |      | 1   | Yes     |
| 23649  | 2  | 3  | Divorced       | 2  | Some college     | 1  | Working, fi | 6  | 2   | No       |      | 1   | Yes     |
| 23654  | 2  | 2  | Married/li     | 2  | Some college     | 1  | Working, fi | 32 | 1   | Yes      | 1    | 1   | Yes     |
| 23662  | 2  | 1  | Single         | 2  | Some college     | 1  | Working, fi | 1  | 2   | No       |      | 2   | No      |
| 23664  | 2  | 2  | Married/li     | 1  | High school or l | 2  | Working, p  | 7  | 2   | No       |      | 2   | No      |
| 23665  | 2  | 2  | Married/li     | 3  | College degree   | 1  | Working, fi | 10 | 2   | No       |      | 2   | No      |
| 23666  | 2  | 2  | Married/li     | 3  | College degree   | 1  | Working, fi | 11 | 2   | No       |      | 2   | No      |
| 23671  | 2  | 2  | Married/li     | 3  | College degree   | 1  | Working, fi | 11 | 2   | No       |      | 2   | No      |
| 23672  | 2  | 1  | Single         | 1  | High school or l | 1  | Working, fi | 26 | 2   | No       |      | 1   | Yes     |
| 23685  | 2  | 1  | Single         | 1  | High school or l | 2  | Working, p  | 27 | 2   | No       |      | 1   | Yes     |
| 23686  | 2  | 2  | Married/li     | 2  | Some college     | 4  | Retired     | 31 | 2   | No       |      | 2   | No      |
| 23689  | 2  | 2  | Married/li     | 2  | Some college     | 4  | Retired     | 35 | 2   | No       |      | 1   | Yes     |
| 23690  | 2  | 1  | Single         | 3  | College degree   | 1  | Working, fi | 33 | 1   | Yes      | 1    | 2   | No      |
| 23695  | 2  | 2  | Married/li     | 1  | High school or l | 4  | Retired     | 3  | 2   | No       |      | 1   | Yes     |
| 23700  | 2  | 2  | Married/li     | 4  | Postgraduate     | 1  | Working, fi | 13 | 2   | No       |      | 2   | No      |
| 23714  | 2  | 2  | Married/li     | 1  | High school or l | 4  | Retired     | 36 | 2   | No       |      | 2   | No      |
| 23719  | 2  | 2  | Married/li     | 2  | Some college     | 1  | Working, fi | 11 | 2   | No       |      | 1   | Yes     |
| 23720  | 2  | 2  | Married/li     | 2  | Some college     | 1  | Working, fi | 10 | 2   | No       |      | 2   | No      |
| 23721  | 2  | 2  | Married/li     | 3  | College degree   | 1  | Working, fi | 11 | 2   | No       |      | 2   | No      |
| 23729  | 2  | 2  | Married/li     | 2  | Some college     | 6  | Homemake    | 1  | 2   | No       |      | 2   | No      |
| 23730  | 2  | 2  | Married/li     | 2  | Some college     | 1  | Working, fi | 8  | 2   | No       |      | 2   | No      |
| 23732  | 2  | 2  | Married/li     | 2  | Some college     | 4  | Retired     | 7  | 2   | No       |      | 2   | No      |
| 23736  | 2  | 2  | Married/li     | 3  | College degree   | 1  | Working, fi | 9  | 2   | No       |      | 2   | No      |
| 23754  | 2  | 2  | Married/li     | 2  | Some college     | 1  | Working, fi | 11 | 2   | No       |      | 2   | No      |
| 23756  | 2  | 2  | Married/li     | 2  | Some college     | 1  | Working, fi | 30 | 2   | No       |      | 2   | No      |



| respid | Q5 | Q6 | Marital Status | Q7 | Education        | Q8 | Work        | Q9 | Q10 | Diabetes | Q10a | Q11 | High BP |
|--------|----|----|----------------|----|------------------|----|-------------|----|-----|----------|------|-----|---------|
| 23759  | 2  | 2  | Married/li     | 2  | Some college     | 6  | Homemake    | 10 | 2   | No       |      | 2   | No      |
| 23761  | 2  | 2  | Married/li     | 1  | High school or l | 6  | Homemake    | 23 | 2   | No       |      | 2   | No      |
| 23766  | 2  | 2  | Married/li     | 3  | College degree   | 1  | Working, fi | 13 | 2   | No       |      | 2   | No      |
| 23768  | 2  | 2  | Married/li     | 3  | College degree   | 4  | Retired     | 12 | 1   | Yes      | 1    | 2   | No      |
| 23773  | 2  | 2  | Married/li     | 2  | Some college     | 1  | Working, fi | 10 | 2   | No       |      | 2   | No      |
| 23781  | 2  | 2  | Married/li     | 3  | College degree   | 1  | Working, fi | 2  | 2   | No       |      | 2   | No      |
| 23782  | 2  | 2  | Married/li     | 2  | Some college     | 4  | Retired     | 32 | 2   | No       |      | 1   | Yes     |
| 23787  | 2  | 2  | Married/li     | 3  | College degree   | 1  | Working, fi | 10 | 2   | No       |      | 2   | No      |
| 23788  | 2  | 2  | Married/li     | 1  | High school or l | 4  | Retired     | 7  | 2   | No       |      | 1   | Yes     |
| 23790  | 2  | 2  | Married/li     | 1  | High school or l | 1  | Working, fi | 11 | 2   | No       |      | 2   | No      |
| 23794  | 2  | 2  | Married/li     | 2  | Some college     | 4  | Retired     | 12 | 2   | No       |      | 2   | No      |
| 23795  | 2  | 2  | Married/li     | 3  | College degree   | 1  | Working, fi | 6  | 2   | No       |      | 2   | No      |
| 23801  | 2  | 2  | Married/li     | 2  | Some college     | 1  | Working, fi | 8  | 2   | No       |      | 2   | No      |
| 23806  | 2  | 2  | Married/li     | 2  | Some college     | 2  | Working, p  | 4  | 2   | No       |      | 2   | No      |
| 23809  | 2  | 2  | Married/li     | 1  | High school or l | 8  | Other worl  | 2  | 2   | No       |      | 2   | No      |
| 23813  | 2  | 2  | Married/li     | 3  | College degree   | 1  | Working, fi | 5  | 2   | No       |      | 2   | No      |
| 23815  | 2  | 2  | Married/li     | 2  | Some college     | 1  | Working, fi | 11 | 2   | No       |      | 2   | No      |
| 23821  | 2  | 2  | Married/li     | 3  | College degree   | 4  | Retired     | 8  | 2   | No       |      | 2   | No      |
| 23825  | 2  | 2  | Married/li     | 2  | Some college     | 1  | Working, fi | 9  | 2   | No       |      | 2   | No      |
| 23826  | 2  | 2  | Married/li     | 1  | High school or l | 1  | Working, fi | 4  | 2   | No       |      | 2   | No      |
| 23830  | 2  | 2  | Married/li     | 3  | College degree   | 1  | Working, fi | 12 | 2   | No       |      | 2   | No      |
| 23833  | 2  | 2  | Married/li     | 3  | College degree   | 4  | Retired     | 14 | 2   | No       |      | 1   | Yes     |
| 23837  | 2  | 2  | Married/li     | 3  | College degree   | 1  | Working, fi | 6  | 2   | No       |      | 2   | No      |
| 23848  | 2  | 2  | Married/li     | 1  | High school or l | 1  | Working, fi | 1  | 2   | No       |      | 2   | No      |
| 23850  | 2  | 2  | Married/li     | 1  | High school or l | 6  | Homemake    | 32 | 1   | Yes      | 1    | 2   | No      |
| 23870  | 2  | 2  | Married/li     | 1  | High school or l | 1  | Working, fi | 99 | 2   | No       |      | 1   | Yes     |
| 23877  | 2  | 2  | Married/li     | 2  | Some college     | 1  | Working, fi | 9  | 2   | No       |      | 2   | No      |
| 23880  | 2  | 2  | Married/li     | 3  | College degree   | 4  | Retired     | 10 | 1   | Yes      | 1    | 1   | Yes     |
| 23882  | 2  | 2  | Married/li     | 1  | High school or l | 1  | Working, fi | 11 | 2   | No       |      | 2   | No      |
| 23888  | 2  | 2  | Married/li     | 3  | College degree   | 1  | Working, fi | 10 | 2   | No       |      | 2   | No      |
| 23908  | 2  | 2  | Married/li     | 3  | College degree   | 1  | Working, fi | 33 | 2   | No       |      | 2   | No      |
| 23914  | 2  | 2  | Married/li     | 2  | Some college     | 1  | Working, fi | 12 | 2   | No       |      | 2   | No      |

| respid | Q5 | Q6 | Marital Status | Q7 | Education        | Q8 | Work        | Q9 | Q10 | Diabetes | Q10a | Q11 | High BP |
|--------|----|----|----------------|----|------------------|----|-------------|----|-----|----------|------|-----|---------|
| 23916  | 2  | 2  | Married/li     | 2  | Some college     | 1  | Working, fi | 26 | 2   | No       |      | 2   | No      |
| 23922  | 2  | 2  | Married/li     | 3  | College degree   | 1  | Working, fi | 11 | 2   | No       |      | 2   | No      |
| 23932  | 2  | 3  | Divorced       | 1  | High school or l | 1  | Working, fi | 33 | 1   | Yes      | 1    | 2   | No      |
| 23934  | 2  | 2  | Married/li     | 4  | Postgraduate     | 1  | Working, fi | 10 | 2   | No       |      | 2   | No      |
| 23942  | 2  | 3  | Divorced       | 2  | Some college     | 1  | Working, fi | 9  | 2   | No       |      | 2   | No      |
| 23945  | 2  | 2  | Married/li     | 1  | High school or l | 4  | Retired     | 5  | 2   | No       |      | 1   | Yes     |
| 23948  | 2  | 2  | Married/li     | 1  | High school or l | 1  | Working, fi | 8  | 2   | No       |      | 2   | No      |
| 23955  | 2  | 2  | Married/li     | 1  | High school or l | 4  | Retired     | 11 | 2   | No       |      | 2   | No      |
| 23956  | 2  | 2  | Married/li     | 2  | Some college     | 1  | Working, fi | 14 | 2   | No       |      | 1   | Yes     |
| 23978  | 2  | 2  | Married/li     | 3  | College degree   | 4  | Retired     | 1  | 2   | No       |      | 1   | Yes     |
| 23981  | 2  | 2  | Married/li     | 2  | Some college     | 1  | Working, fi | 3  | 2   | No       |      | 2   | No      |
| 23982  | 2  | 2  | Married/li     | 1  | High school or l | 4  | Retired     | 6  | 2   | No       |      | 1   | Yes     |
| 23991  | 2  | 3  | Divorced       | 2  | Some college     | 4  | Retired     | 1  | 2   | No       |      | 2   | No      |
| 23994  | 2  | 2  | Married/li     | 1  | High school or l | 5  | Permanent   | 99 | 2   | No       |      | 1   | Yes     |
| 23995  | 2  | 2  | Married/li     | 2  | Some college     | 1  | Working, fi | 13 | 2   | No       |      | 1   | Yes     |
| 23999  | 2  | 2  | Married/li     | 1  | High school or l | 4  | Retired     | 29 | 2   | No       |      | 1   | Yes     |
| 24005  | 2  | 2  | Married/li     | 3  | College degree   | 1  | Working, fi | 14 | 1   | Yes      | 1    | 2   | No      |
| 24018  | 2  | 2  | Married/li     | 3  | College degree   | 1  | Working, fi | 11 | 2   | No       |      | 2   | No      |
| 24021  | 2  | 2  | Married/li     | 1  | High school or l | 1  | Working, fi | 1  | 2   | No       |      | 2   | No      |
| 24035  | 2  | 2  | Married/li     | 3  | College degree   | 1  | Working, fi | 2  | 2   | No       |      | 2   | No      |
| 24040  | 2  | 2  | Married/li     | 1  | High school or l | 4  | Retired     | 11 | 2   | No       |      | 2   | No      |
| 24043  | 2  | 2  | Married/li     | 3  | College degree   | 1  | Working, fi | 3  | 2   | No       |      | 2   | No      |
| 24046  | 2  | 2  | Married/li     | 3  | College degree   | 1  | Working, fi | 11 | 2   | No       |      | 2   | No      |
| 24047  | 2  | 2  | Married/li     | 3  | College degree   | 4  | Retired     | 6  | 2   | No       |      | 1   | Yes     |
| 24048  | 2  | 2  | Married/li     | 3  | College degree   | 1  | Working, fi | 11 | 2   | No       |      | 2   | No      |
| 24062  | 2  | 2  | Married/li     | 3  | College degree   | 1  | Working, fi | 12 | 2   | No       |      | 2   | No      |
| 24063  | 2  | 2  | Married/li     | 3  | College degree   | 1  | Working, fi | 9  | 1   | Yes      | 1    | 2   | No      |
| 24066  | 2  | 2  | Married/li     | 1  | High school or l | 4  | Retired     | 2  | 2   | No       |      | 1   | Yes     |
| 24069  | 2  | 2  | Married/li     | 1  | High school or l | 1  | Working, fi | 8  | 2   | No       |      | 2   | No      |
| 24070  | 2  | 2  | Married/li     | 3  | College degree   | 1  | Working, fi | 1  | 2   | No       |      | 2   | No      |
| 24074  | 2  | 2  | Married/li     | 2  | Some college     | 1  | Working, fi | 1  | 2   | No       |      | 2   | No      |
| 24080  | 2  | 2  | Married/li     | 2  | Some college     | 4  | Retired     | 10 | 2   | No       |      | 2   | No      |

| respid | Q5 | Q6 | Marital Status | Q7 | Education        | Q8 | Work        | Q9 | Q10 | Diabetes | Q10a | Q11 | High BP |
|--------|----|----|----------------|----|------------------|----|-------------|----|-----|----------|------|-----|---------|
| 24082  | 2  | 2  | Married/li     | 3  | College degree   | 1  | Working, fi | 2  | 2   | No       |      | 2   | No      |
| 24088  | 2  | 1  | Single         | 3  | College degree   | 4  | Retired     | 25 | 2   | No       |      | 2   | No      |
| 24089  | 2  | 2  | Married/li     | 3  | College degree   | 1  | Working, fi | 14 | 2   | No       |      | 1   | Yes     |
| 24091  | 2  | 2  | Married/li     | 1  | High school or l | 2  | Working, p  | 15 | 2   | No       |      | 2   | No      |
| 24095  | 2  | 2  | Married/li     | 4  | Postgraduate     | 1  | Working, fi | 11 | 2   | No       |      | 2   | No      |
| 24100  | 2  | 4  | Widow/wi       | 1  | High school or l | 6  | Homemake    | 11 | 1   | Yes      | 1    | 1   | Yes     |
| 24105  | 2  | 2  | Married/li     | 3  | College degree   | 1  | Working, fi | 34 | 2   | No       |      | 1   | Yes     |
| 24107  | 2  | 2  | Married/li     | 2  | Some college     | 1  | Working, fi | 11 | 2   | No       |      | 1   | Yes     |
| 24108  | 2  | 2  | Married/li     | 3  | College degree   | 1  | Working, fi | 11 | 2   | No       |      | 2   | No      |
| 24113  | 2  | 1  | Single         | 3  | College degree   | 3  | Unemploy    | 15 | 2   | No       |      | 2   | No      |
| 24120  | 2  | 2  | Married/li     | 3  | College degree   | 1  | Working, fi | 12 | 2   | No       |      | 2   | No      |
| 24122  | 2  | 2  | Married/li     | 2  | Some college     | 4  | Retired     | 2  | 2   | No       |      | 1   | Yes     |
| 24123  | 2  | 4  | Widow/wi       | 1  | High school or l | 4  | Retired     | 26 | 2   | No       |      | 1   | Yes     |
| 24125  | 2  | 2  | Married/li     | 1  | High school or l | 4  | Retired     | 2  | 2   | No       |      | 1   | Yes     |
| 24132  | 2  | 2  | Married/li     | 1  | High school or l | 1  | Working, fi | 34 | 2   | No       |      | 2   | No      |
| 24139  | 2  | 2  | Married/li     | 3  | College degree   | 1  | Working, fi | 12 | 2   | No       |      | 2   | No      |
| 24140  | 2  | 2  | Married/li     | 3  | College degree   | 1  | Working, fi | 11 | 2   | No       |      | 2   | No      |
| 24143  | 2  | 2  | Married/li     | 3  | College degree   | 1  | Working, fi | 6  | 2   | No       |      | 2   | No      |
| 24150  | 2  | 2  | Married/li     | 1  | High school or l | 2  | Working, p  | 30 | 2   | No       |      | 1   | Yes     |
| 24153  | 2  | 2  | Married/li     | 2  | Some college     | 1  | Working, fi | 10 | 2   | No       |      | 2   | No      |
| 24161  | 2  | 2  | Married/li     | 1  | High school or l | 4  | Retired     | 1  | 2   | No       |      | 2   | No      |
| 24168  | 2  | 1  | Single         | 1  | High school or l | 2  | Working, p  | 4  | 2   | No       |      | 2   | No      |
| 24179  | 2  | 2  | Married/li     | 3  | College degree   | 1  | Working, fi | 8  | 2   | No       |      | 2   | No      |
| 24182  | 2  | 2  | Married/li     | 3  | College degree   | 1  | Working, fi | 11 | 2   | No       |      | 1   | Yes     |
| 24194  | 2  | 2  | Married/li     | 1  | High school or l | 1  | Working, fi | 10 | 2   | No       |      | 2   | No      |
| 24206  | 2  | 2  | Married/li     | 2  | Some college     | 1  | Working, fi | 34 | 2   | No       |      | 2   | No      |
| 24214  | 2  | 2  | Married/li     | 1  | High school or l | 6  | Homemake    | 29 | 2   | No       |      | 2   | No      |
| 24215  | 2  | 2  | Married/li     | 3  | College degree   | 1  | Working, fi | 11 | 2   | No       |      | 2   | No      |
| 24224  | 2  | 2  | Married/li     | 3  | College degree   | 1  | Working, fi | 1  | 2   | No       |      | 2   | No      |
| 24225  | 2  | 3  | Divorced       | 2  | Some college     | 1  | Working, fi | 11 | 2   | No       |      | 2   | No      |
| 24227  | 2  | 2  | Married/li     | 3  | College degree   | 2  | Working, p  | 14 | 2   | No       |      | 2   | No      |
| 24229  | 2  | 2  | Married/li     | 3  | College degree   | 1  | Working, fi | 13 | 2   | No       |      | 2   | No      |

| respid | Q5 | Q6 | Marital Status | Q7 | Education        | Q8 | Work        | Q9 | Q10 | Diabetes | Q10a | Q11 | High BP |
|--------|----|----|----------------|----|------------------|----|-------------|----|-----|----------|------|-----|---------|
| 24230  | 2  | 2  | Married/li     | 3  | College degree   | 1  | Working, fi | 11 | 2   | No       |      | 2   | No      |
| 24232  | 2  | 2  | Married/li     | 3  | College degree   | 4  | Retired     | 11 | 2   | No       |      | 2   | No      |
| 24253  | 2  | 4  | Widow/wi       | 1  | High school or l | 4  | Retired     | 99 | 2   | No       |      | 1   | Yes     |
| 24267  | 2  | 3  | Divorced       | 2  | Some college     | 1  | Working, fi | 6  | 2   | No       |      | 1   | Yes     |
| 24274  | 2  | 2  | Married/li     | 2  | Some college     | 4  | Retired     | 12 | 2   | No       |      | 2   | No      |
| 24275  | 2  | 2  | Married/li     | 3  | College degree   | 1  | Working, fi | 11 | 2   | No       |      | 1   | Yes     |
| 24277  | 2  | 2  | Married/li     | 3  | College degree   | 1  | Working, fi | 14 | 2   | No       |      | 2   | No      |
| 24280  | 2  | 2  | Married/li     | 1  | High school or l | 4  | Retired     | 25 | 2   | No       |      | 2   | No      |
| 24285  | 2  | 2  | Married/li     | 2  | Some college     | 1  | Working, fi | 11 | 2   | No       |      | 2   | No      |
| 24293  | 2  | 1  | Single         | 3  | College degree   | 1  | Working, fi | 32 | 2   | No       |      | 2   | No      |
| 24295  | 2  | 3  | Divorced       | 2  | Some college     | 4  | Retired     | 9  | 2   | No       |      | 1   | Yes     |
| 24299  | 2  | 2  | Married/li     | 3  | College degree   | 1  | Working, fi | 8  | 2   | No       |      | 2   | No      |
| 24303  | 2  | 2  | Married/li     | 3  | College degree   | 1  | Working, fi | 3  | 2   | No       |      | 2   | No      |
| 24308  | 2  | 2  | Married/li     | 2  | Some college     | 1  | Working, fi | 13 | 2   | No       |      | 2   | No      |
| 24322  | 2  | 2  | Married/li     | 3  | College degree   | 1  | Working, fi | 9  | 2   | No       |      | 2   | No      |
| 24325  | 2  | 2  | Married/li     | 3  | College degree   | 1  | Working, fi | 1  | 2   | No       |      | 2   | No      |
| 24328  | 2  | 2  | Married/li     | 3  | College degree   | 1  | Working, fi | 11 | 2   | No       |      | 2   | No      |
| 24334  | 2  | 4  | Widow/wi       | 1  | High school or l | 1  | Working, fi | 34 | 1   | Yes      | 1    | 1   | Yes     |
| 24342  | 2  | 2  | Married/li     | 3  | College degree   | 1  | Working, fi | 33 | 2   | No       |      | 2   | No      |
| 24343  | 2  | 2  | Married/li     | 3  | College degree   | 1  | Working, fi | 13 | 2   | No       |      | 2   | No      |
| 24348  | 2  | 2  | Married/li     | 1  | High school or l | 4  | Retired     | 14 | 2   | No       |      | 2   | No      |
| 24352  | 2  | 2  | Married/li     | 3  | College degree   | 1  | Working, fi | 10 | 2   | No       |      | 2   | No      |
| 24354  | 2  | 2  | Married/li     | 3  | College degree   | 1  | Working, fi | 13 | 1   | Yes      | 1    | 2   | No      |
| 24357  | 2  | 2  | Married/li     | 3  | College degree   | 1  | Working, fi | 8  | 2   | No       |      | 2   | No      |
| 24360  | 2  | 2  | Married/li     | 2  | Some college     | 2  | Working, p  | 7  | 1   | Yes      | 1    | 1   | Yes     |
| 24369  | 2  | 2  | Married/li     | 1  | High school or l | 4  | Retired     | 8  | 1   | Yes      | 1    | 2   | No      |
| 24373  | 2  | 1  | Single         | 1  | High school or l | 4  | Retired     | 26 | 2   | No       |      | 2   | No      |
| 24398  | 2  | 2  | Married/li     | 3  | College degree   | 4  | Retired     | 12 | 1   | Yes      | 1    | 1   | Yes     |
| 24402  | 2  | 2  | Married/li     | 2  | Some college     | 1  | Working, fi | 11 | 2   | No       |      | 2   | No      |
| 24405  | 2  | 2  | Married/li     | 3  | College degree   | 1  | Working, fi | 13 | 2   | No       |      | 2   | No      |
| 24407  | 2  | 2  | Married/li     | 1  | High school or l | 4  | Retired     | 6  | 2   | No       |      | 2   | No      |
| 24413  | 2  | 2  | Married/li     | 1  | High school or l | 4  | Retired     | 11 | 2   | No       |      | 2   | No      |

| respid | Q5 | Q6 | Marital Status | Q7 | Education        | Q8 | Work        | Q9 | Q10 | Diabetes | Q10a | Q11 | High BP |
|--------|----|----|----------------|----|------------------|----|-------------|----|-----|----------|------|-----|---------|
| 24443  | 2  | 2  | Married/li     | 3  | College degree   | 4  | Retired     | 33 | 1   | Yes      | 1    | 1   | Yes     |
| 24451  | 2  | 2  | Married/li     | 3  | College degree   | 1  | Working, fi | 4  | 2   | No       |      | 2   | No      |
| 24459  | 2  | 2  | Married/li     | 2  | Some college     | 1  | Working, fi | 12 | 2   | No       |      | 2   | No      |
| 24465  | 2  | 2  | Married/li     | 1  | High school or l | 6  | Homemake    | 10 | 2   | No       |      | 2   | No      |
| 24481  | 2  | 2  | Married/li     | 2  | Some college     | 4  | Retired     | 34 | 1   | Yes      | 1    | 1   | Yes     |
| 24482  | 2  | 2  | Married/li     | 2  | Some college     | 1  | Working, fi | 34 | 2   | No       |      | 2   | No      |
| 24491  | 2  | 3  | Divorced       | 1  | High school or l | 4  | Retired     | 28 | 2   | No       |      | 2   | No      |
| 24495  | 2  | 2  | Married/li     | 2  | Some college     | 1  | Working, fi | 1  | 2   | No       |      | 2   | No      |
| 24497  | 2  | 2  | Married/li     | 1  | High school or l | 4  | Retired     | 6  | 2   | No       |      | 1   | Yes     |
| 24511  | 2  | 2  | Married/li     | 2  | Some college     | 1  | Working, fi | 4  | 1   | Yes      | 1    | 1   | Yes     |
| 24513  | 2  | 2  | Married/li     | 2  | Some college     | 1  | Working, fi | 9  | 2   | No       |      | 2   | No      |
| 24516  | 2  | 2  | Married/li     | 3  | College degree   | 1  | Working, fi | 11 | 2   | No       |      | 1   | Yes     |
| 24518  | 2  | 2  | Married/li     | 1  | High school or l | 9  | Other       | 27 | 2   | No       |      | 2   | No      |
| 24524  | 2  | 2  | Married/li     | 1  | High school or l | 1  | Working, fi | 2  | 2   | No       |      | 2   | No      |
| 24528  | 2  | 2  | Married/li     | 2  | Some college     | 1  | Working, fi | 32 | 2   | No       |      | 2   | No      |
| 24531  | 2  | 2  | Married/li     | 3  | College degree   | 1  | Working, fi | 11 | 2   | No       |      | 2   | No      |
| 24533  | 2  | 2  | Married/li     | 2  | Some college     | 4  | Retired     | 11 | 1   | Yes      | 2    | 1   | Yes     |
| 24547  | 2  | 2  | Married/li     | 1  | High school or l | 6  | Homemake    | 25 | 2   | No       |      | 2   | No      |
| 24557  | 2  | 2  | Married/li     | 2  | Some college     | 1  | Working, fi | 11 | 2   | No       |      | 1   | Yes     |
| 24559  | 2  | 2  | Married/li     | 1  | High school or l | 1  | Working, fi | 33 | 2   | No       |      | 1   | Yes     |
| 24567  | 2  | 2  | Married/li     | 2  | Some college     | 1  | Working, fi | 11 | 2   | No       |      | 2   | No      |
| 24568  | 2  | 2  | Married/li     | 3  | College degree   | 4  | Retired     | 36 | 2   | No       |      | 2   | No      |
| 24577  | 2  | 2  | Married/li     | 1  | High school or l | 4  | Retired     | 10 | 1   | Yes      | 1    | 1   | Yes     |
| 24581  | 2  | 2  | Married/li     | 3  | College degree   | 1  | Working, fi | 7  | 2   | No       |      | 1   | Yes     |
| 24588  | 2  | 2  | Married/li     | 1  | High school or l | 6  | Homemake    | 24 | 2   | No       |      | 2   | No      |
| 24604  | 2  | 2  | Married/li     | 1  | High school or l | 4  | Retired     | 38 | 1   | Yes      | 1    | 2   | No      |
| 24612  | 2  | 2  | Married/li     | 1  | High school or l | 1  | Working, fi | 30 | 2   | No       |      | 1   | Yes     |
| 24621  | 2  | 2  | Married/li     | 1  | High school or l | 1  | Working, fi | 3  | 2   | No       |      | 2   | No      |
| 24625  | 2  | 2  | Married/li     | 2  | Some college     | 6  | Homemake    | 34 | 2   | No       |      | 1   | Yes     |
| 24627  | 2  | 2  | Married/li     | 1  | High school or l | 4  | Retired     | 11 | 2   | No       |      | 1   | Yes     |
| 24640  | 2  | 4  | Widow/wi       | 1  | High school or l | 4  | Retired     | 29 | 2   | No       |      | 1   | Yes     |
| 24644  | 2  | 2  | Married/li     | 2  | Some college     | 4  | Retired     | 13 | 2   | No       |      | 2   | No      |

| respid | Q5 | Q6 | Marital Status | Q7 | Education        | Q8 | Work        | Q9 | Q10 | Diabetes | Q10a | Q11 | High BP |
|--------|----|----|----------------|----|------------------|----|-------------|----|-----|----------|------|-----|---------|
| 24664  | 2  | 2  | Married/li     | 1  | High school or l | 4  | Retired     | 10 | 1   | Yes      | 1    | 1   | Yes     |
| 24669  | 2  | 2  | Married/li     | 3  | College degree   | 1  | Working, fi | 11 | 2   | No       |      | 2   | No      |
| 24685  | 2  | 2  | Married/li     | 3  | College degree   | 6  | Homemake    | 18 | 2   | No       |      | 2   | No      |
| 24687  | 2  | 2  | Married/li     | 3  | College degree   | 1  | Working, fi | 32 | 2   | No       |      | 2   | No      |
| 24688  | 2  | 2  | Married/li     | 3  | College degree   | 1  | Working, fi | 11 | 2   | No       |      | 2   | No      |
| 24691  | 2  | 2  | Married/li     | 2  | Some college     | 1  | Working, fi | 11 | 2   | No       |      | 1   | Yes     |
| 24693  | 2  | 2  | Married/li     | 1  | High school or l | 1  | Working, fi | 9  | 2   | No       |      | 1   | Yes     |
| 24706  | 2  | 2  | Married/li     | 1  | High school or l | 1  | Working, fi | 8  | 2   | No       |      | 2   | No      |
| 24710  | 2  | 2  | Married/li     | 3  | College degree   | 1  | Working, fi | 11 | 2   | No       |      | 2   | No      |
| 24717  | 2  | 2  | Married/li     | 2  | Some college     | 1  | Working, fi | 10 | 2   | No       |      | 2   | No      |
| 24720  | 2  | 2  | Married/li     | 1  | High school or l | 6  | Homemake    | 99 | 2   | No       |      | 2   | No      |
| 24731  | 2  | 2  | Married/li     | 2  | Some college     | 4  | Retired     | 10 | 2   | No       |      | 1   | Yes     |
| 24732  | 2  | 5  | Prefer not     | 3  | College degree   | 2  | Working, p  | 1  | 2   | No       |      | 1   | Yes     |
| 24733  | 2  | 2  | Married/li     | 1  | High school or l | 4  | Retired     | 31 | 2   | No       |      | 1   | Yes     |
| 24747  | 2  | 2  | Married/li     | 1  | High school or l | 4  | Retired     | 26 | 2   | No       |      | 2   | No      |
| 24750  | 2  | 2  | Married/li     | 2  | Some college     | 1  | Working, fi | 9  | 2   | No       |      | 2   | No      |
| 24758  | 2  | 2  | Married/li     | 1  | High school or l | 4  | Retired     | 11 | 2   | No       |      | 2   | No      |
| 24760  | 2  | 2  | Married/li     | 1  | High school or l | 1  | Working, fi | 12 | 2   | No       |      | 2   | No      |
| 24765  | 2  | 2  | Married/li     | 1  | High school or l | 1  | Working, fi | 7  | 2   | No       |      | 2   | No      |
| 24772  | 2  | 2  | Married/li     | 1  | High school or l | 1  | Working, fi | 13 | 2   | No       |      | 2   | No      |
| 24779  | 2  | 2  | Married/li     | 3  | College degree   | 1  | Working, fi | 10 | 2   | No       |      | 2   | No      |
| 24794  | 2  | 2  | Married/li     | 1  | High school or l | 2  | Working, p  | 35 | 2   | No       |      | 2   | No      |
| 24796  | 2  | 2  | Married/li     | 2  | Some college     | 4  | Retired     | 12 | 1   | Yes      | 1    | 1   | Yes     |
| 24797  | 2  | 2  | Married/li     | 1  | High school or l | 4  | Retired     | 1  | 2   | No       |      | 2   | No      |
| 24800  | 2  | 2  | Married/li     | 2  | Some college     | 1  | Working, fi | 11 | 2   | No       |      | 2   | No      |
| 24813  | 2  | 2  | Married/li     | 1  | High school or l | 1  | Working, fi | 27 | 2   | No       |      | 2   | No      |
| 24815  | 2  | 2  | Married/li     | 1  | High school or l | 6  | Homemake    | 16 | 2   | No       |      | 2   | No      |
| 24821  | 2  | 2  | Married/li     | 1  | High school or l | 4  | Retired     | 99 | 2   | No       |      | 2   | No      |
| 24822  | 2  | 2  | Married/li     | 1  | High school or l | 1  | Working, fi | 8  | 2   | No       |      | 2   | No      |
| 24831  | 2  | 5  | Prefer not     | 1  | High school or l | 4  | Retired     | 99 | 2   | No       |      | 2   | No      |
| 24835  | 2  | 2  | Married/li     | 1  | High school or l | 6  | Homemake    | 25 | 2   | No       |      | 2   | No      |
| 24843  | 2  | 2  | Married/li     | 2  | Some college     | 6  | Homemake    | 25 | 1   | Yes      | 1    | 1   | Yes     |

| respid | Q5 | Q6 | Marital Status | Q7 | Education        | Q8 | Work        | Q9 | Q10 | Diabetes | Q10a | Q11 | High BP |
|--------|----|----|----------------|----|------------------|----|-------------|----|-----|----------|------|-----|---------|
| 24844  | 2  | 2  | Married/li     | 2  | Some college     | 1  | Working, fi | 12 | 1   | Yes      | 1    | 1   | Yes     |
| 24860  | 2  | 2  | Married/li     | 3  | College degree   | 1  | Working, fi | 12 | 2   | No       |      | 2   | No      |
| 24861  | 2  | 4  | Widow/wi       | 1  | High school or l | 4  | Retired     | 99 | 2   | No       |      | 1   | Yes     |
| 24865  | 2  | 2  | Married/li     | 2  | Some college     | 1  | Working, fi | 11 | 2   | No       |      | 1   | Yes     |
| 24870  | 2  | 2  | Married/li     | 2  | Some college     | 1  | Working, fi | 9  | 2   | No       |      | 2   | No      |
| 24887  | 2  | 2  | Married/li     | 1  | High school or l | 1  | Working, fi | 6  | 2   | No       |      | 2   | No      |
| 24897  | 2  | 2  | Married/li     | 3  | College degree   | 4  | Retired     | 10 | 1   | Yes      | 2    | 2   | No      |
| 24902  | 2  | 2  | Married/li     | 1  | High school or l | 2  | Working, p  | 26 | 1   | Yes      | 1    | 1   | Yes     |
| 24914  | 2  | 2  | Married/li     | 3  | College degree   | 4  | Retired     | 11 | 2   | No       |      | 2   | No      |
| 24921  | 2  | 2  | Married/li     | 3  | College degree   | 1  | Working, fi | 33 | 2   | No       |      | 2   | No      |
| 24922  | 2  | 2  | Married/li     | 1  | High school or l | 1  | Working, fi | 9  | 2   | No       |      | 2   | No      |
| 24924  | 2  | 2  | Married/li     | 1  | High school or l | 1  | Working, fi | 31 | 2   | No       |      | 2   | No      |
| 24927  | 2  | 2  | Married/li     | 3  | College degree   | 4  | Retired     | 11 | 2   | No       |      | 2   | No      |
| 24936  | 2  | 2  | Married/li     | 1  | High school or l | 4  | Retired     | 7  | 2   | No       |      | 1   | Yes     |
| 24937  | 2  | 2  | Married/li     | 3  | College degree   | 1  | Working, fi | 1  | 2   | No       |      | 2   | No      |
| 24942  | 2  | 2  | Married/li     | 1  | High school or l | 1  | Working, fi | 27 | 2   | No       |      | 2   | No      |
| 24947  | 2  | 2  | Married/li     | 3  | College degree   | 1  | Working, fi | 12 | 2   | No       |      | 2   | No      |
| 24953  | 2  | 2  | Married/li     | 1  | High school or l | 4  | Retired     | 25 | 2   | No       |      | 1   | Yes     |
| 24954  | 2  | 2  | Married/li     | 1  | High school or l | 4  | Retired     | 9  | 1   | Yes      | 1    | 1   | Yes     |
| 24960  | 2  | 2  | Married/li     | 2  | Some college     | 4  | Retired     | 8  | 2   | No       |      | 1   | Yes     |
| 24965  | 2  | 2  | Married/li     | 1  | High school or l | 4  | Retired     | 5  | 2   | No       |      | 1   | Yes     |
| 24975  | 2  | 4  | Widow/wi       | 1  | High school or l | 6  | Homemake    | 36 | 2   | No       |      | 1   | Yes     |
| 24983  | 2  | 2  | Married/li     | 2  | Some college     | 1  | Working, fi | 11 | 2   | No       |      | 1   | Yes     |
| 24985  | 2  | 2  | Married/li     | 1  | High school or l | 1  | Working, fi | 26 | 2   | No       |      | 2   | No      |
| 24990  | 2  | 2  | Married/li     | 3  | College degree   | 1  | Working, fi | 33 | 2   | No       |      | 1   | Yes     |
| 25000  | 2  | 2  | Married/li     | 1  | High school or l | 1  | Working, fi | 30 | 2   | No       |      | 1   | Yes     |
| 25007  | 2  | 2  | Married/li     | 3  | College degree   | 4  | Retired     | 13 | 2   | No       |      | 1   | Yes     |
| 25008  | 2  | 2  | Married/li     | 1  | High school or l | 3  | Unemploy    | 7  | 2   | No       |      | 2   | No      |
| 25010  | 2  | 2  | Married/li     | 1  | High school or l | 1  | Working, fi | 28 | 2   | No       |      | 2   | No      |
| 25016  | 2  | 2  | Married/li     | 3  | College degree   | 1  | Working, fi | 1  | 2   | No       |      | 2   | No      |
| 25021  | 2  | 2  | Married/li     | 1  | High school or l | 6  | Homemake    | 99 | 2   | No       |      | 2   | No      |
| 25040  | 2  | 2  | Married/li     | 1  | High school or l | 4  | Retired     | 6  | 2   | No       |      | 2   | No      |

| respid | Q5 | Q6 | Marital Status | Q7 | Education        | Q8 | Work        | Q9 | Q10 | Diabetes | Q10a | Q11 | High BP |
|--------|----|----|----------------|----|------------------|----|-------------|----|-----|----------|------|-----|---------|
| 25043  | 2  | 2  | Married/li     | 3  | College degree   | 1  | Working, fi | 11 | 2   | No       |      | 2   | No      |
| 25055  | 2  | 2  | Married/li     | 3  | College degree   | 1  | Working, fi | 12 | 2   | No       |      | 2   | No      |
| 25057  | 2  | 2  | Married/li     | 3  | College degree   | 1  | Working, fi | 11 | 2   | No       |      | 2   | No      |
| 25060  | 2  | 2  | Married/li     | 3  | College degree   | 1  | Working, fi | 11 | 2   | No       |      | 2   | No      |
| 25062  | 2  | 2  | Married/li     | 3  | College degree   | 1  | Working, fi | 11 | 2   | No       |      | 2   | No      |
| 25064  | 2  | 2  | Married/li     | 3  | College degree   | 1  | Working, fi | 24 | 1   | Yes      | 1    | 1   | Yes     |
| 25069  | 2  | 2  | Married/li     | 1  | High school or l | 1  | Working, fi | 10 | 2   | No       |      | 2   | No      |
| 25077  | 2  | 2  | Married/li     | 3  | College degree   | 1  | Working, fi | 30 | 2   | No       |      | 2   | No      |
| 25088  | 2  | 2  | Married/li     | 3  | College degree   | 4  | Retired     | 12 | 2   | No       |      | 2   | No      |
| 25093  | 2  | 2  | Married/li     | 3  | College degree   | 4  | Retired     | 11 | 2   | No       |      | 2   | No      |
| 25121  | 2  | 2  | Married/li     | 3  | College degree   | 1  | Working, fi | 9  | 2   | No       |      | 2   | No      |
| 25140  | 2  | 2  | Married/li     | 2  | Some college     | 1  | Working, fi | 11 | 2   | No       |      | 1   | Yes     |
| 25144  | 2  | 2  | Married/li     | 1  | High school or l | 6  | Homemake    | 33 | 2   | No       |      | 1   | Yes     |
| 25149  | 2  | 2  | Married/li     | 1  | High school or l | 6  | Homemake    | 16 | 1   | Yes      | 1    | 1   | Yes     |
| 25159  | 2  | 2  | Married/li     | 3  | College degree   | 4  | Retired     | 6  | 2   | No       |      | 2   | No      |
| 25191  | 2  | 2  | Married/li     | 3  | College degree   | 4  | Retired     | 8  | 2   | No       |      | 1   | Yes     |
| 25193  | 2  | 2  | Married/li     | 3  | College degree   | 4  | Retired     | 11 | 1   | Yes      | 1    | 1   | Yes     |
| 25202  | 2  | 2  | Married/li     | 2  | Some college     | 1  | Working, fi | 11 | 2   | No       |      | 1   | Yes     |
| 25215  | 2  | 2  | Married/li     | 3  | College degree   | 1  | Working, fi | 11 | 1   | Yes      | 1    | 2   | No      |
| 25229  | 2  | 2  | Married/li     | 1  | High school or l | 4  | Retired     | 26 | 2   | No       |      | 1   | Yes     |
| 25231  | 2  | 2  | Married/li     | 1  | High school or l | 1  | Working, fi | 26 | 2   | No       |      | 2   | No      |
| 25236  | 2  | 2  | Married/li     | 1  | High school or l | 4  | Retired     | 13 | 2   | No       |      | 1   | Yes     |
| 25242  | 2  | 2  | Married/li     | 1  | High school or l | 1  | Working, fi | 11 | 2   | No       |      | 2   | No      |
| 25252  | 2  | 2  | Married/li     | 2  | Some college     | 4  | Retired     | 11 | 2   | No       |      | 2   | No      |
| 25253  | 2  | 2  | Married/li     | 2  | Some college     | 4  | Retired     | 12 | 1   | Yes      | 1    | 1   | Yes     |
| 25256  | 2  | 2  | Married/li     | 2  | Some college     | 1  | Working, fi | 11 | 2   | No       |      | 1   | Yes     |
| 25260  | 2  | 2  | Married/li     | 2  | Some college     | 4  | Retired     | 10 | 2   | No       |      | 2   | No      |
| 25261  | 2  | 2  | Married/li     | 3  | College degree   | 1  | Working, fi | 11 | 1   | Yes      | 1    | 1   | Yes     |
| 25280  | 2  | 2  | Married/li     | 4  | Postgraduate     | 4  | Retired     | 13 | 2   | No       |      | 2   | No      |
| 25282  | 2  | 2  | Married/li     | 3  | College degree   | 1  | Working, fi | 18 | 2   | No       |      | 1   | Yes     |
| 25289  | 2  | 2  | Married/li     | 1  | High school or l | 4  | Retired     | 8  | 2   | No       |      | 1   | Yes     |
| 25303  | 2  | 2  | Married/li     | 2  | Some college     | 1  | Working, fi | 1  | 2   | No       |      | 2   | No      |



| respid | Q5 | Q6 | Marital Status | Q7 | Education        | Q8 | Work        | Q9 | Q10 | Diabetes | Q10a | Q11 | High BP |
|--------|----|----|----------------|----|------------------|----|-------------|----|-----|----------|------|-----|---------|
| 25304  | 2  | 2  | Married/li     | 3  | College degree   | 4  | Retired     | 30 | 1   | Yes      | 1    | 2   | No      |
| 25309  | 2  | 2  | Married/li     | 2  | Some college     | 6  | Homemake    | 9  | 2   | No       |      | 2   | No      |
| 25317  | 2  | 2  | Married/li     | 3  | College degree   | 1  | Working, fi | 35 | 1   | Yes      | 2    | 1   | Yes     |
| 25318  | 2  | 2  | Married/li     | 2  | Some college     | 1  | Working, fi | 11 | 1   | Yes      | 1    | 1   | Yes     |
| 25320  | 2  | 2  | Married/li     | 3  | College degree   | 1  | Working, fi | 8  | 2   | No       |      | 2   | No      |
| 25324  | 2  | 2  | Married/li     | 2  | Some college     | 1  | Working, fi | 11 | 2   | No       |      | 1   | Yes     |
| 25331  | 2  | 2  | Married/li     | 3  | College degree   | 1  | Working, fi | 11 | 2   | No       |      | 2   | No      |
| 25340  | 2  | 2  | Married/li     | 1  | High school or l | 2  | Working, p  | 1  | 2   | No       |      | 2   | No      |
| 25342  | 2  | 2  | Married/li     | 1  | High school or l | 4  | Retired     | 8  | 2   | No       |      | 1   | Yes     |
| 25350  | 2  | 1  | Single         | 3  | College degree   | 1  | Working, fi | 32 | 2   | No       |      | 2   | No      |
| 25352  | 2  | 2  | Married/li     | 1  | High school or l | 6  | Homemake    | 19 | 2   | No       |      | 2   | No      |
| 25358  | 2  | 2  | Married/li     | 3  | College degree   | 6  | Homemake    | 20 | 2   | No       |      | 2   | No      |
| 25375  | 2  | 2  | Married/li     | 3  | College degree   | 1  | Working, fi | 2  | 2   | No       |      | 2   | No      |
| 25386  | 2  | 2  | Married/li     | 1  | High school or l | 4  | Retired     | 7  | 2   | No       |      | 2   | No      |
| 25388  | 2  | 2  | Married/li     | 2  | Some college     | 4  | Retired     | 8  | 2   | No       |      | 2   | No      |
| 25390  | 2  | 2  | Married/li     | 2  | Some college     | 1  | Working, fi | 33 | 2   | No       |      | 2   | No      |
| 25391  | 2  | 2  | Married/li     | 3  | College degree   | 1  | Working, fi | 12 | 2   | No       |      | 2   | No      |
| 25400  | 2  | 2  | Married/li     | 3  | College degree   | 1  | Working, fi | 8  | 2   | No       |      | 2   | No      |
| 25413  | 2  | 2  | Married/li     | 2  | Some college     | 1  | Working, fi | 11 | 2   | No       |      | 1   | Yes     |
| 25424  | 2  | 2  | Married/li     | 2  | Some college     | 2  | Working, p  | 11 | 2   | No       |      | 2   | No      |
| 25426  | 2  | 2  | Married/li     | 1  | High school or l | 9  | Other       | 34 | 1   | Yes      | 1    | 1   | Yes     |
| 25430  | 2  | 2  | Married/li     | 1  | High school or l | 1  | Working, fi | 12 | 2   | No       |      | 2   | No      |
| 25434  | 2  | 4  | Widow/wi       | 1  | High school or l | 6  | Homemake    | 17 | 2   | No       |      | 2   | No      |
| 25439  | 2  | 2  | Married/li     | 2  | Some college     | 1  | Working, fi | 13 | 1   | Yes      | 1    | 1   | Yes     |
| 25441  | 2  | 2  | Married/li     | 3  | College degree   | 1  | Working, fi | 11 | 2   | No       |      | 2   | No      |
| 25445  | 2  | 2  | Married/li     | 3  | College degree   | 1  | Working, fi | 11 | 2   | No       |      | 1   | Yes     |
| 25451  | 2  | 2  | Married/li     | 3  | College degree   | 2  | Working, p  | 9  | 2   | No       |      | 2   | No      |
| 25469  | 2  | 2  | Married/li     | 2  | Some college     | 1  | Working, fi | 11 | 2   | No       |      | 1   | Yes     |
| 25471  | 2  | 2  | Married/li     | 2  | Some college     | 4  | Retired     | 9  | 2   | No       |      | 2   | No      |
| 25476  | 2  | 2  | Married/li     | 3  | College degree   | 1  | Working, fi | 8  | 2   | No       |      | 2   | No      |
| 25480  | 2  | 2  | Married/li     | 2  | Some college     | 4  | Retired     | 7  | 2   | No       |      | 2   | No      |
| 25482  | 2  | 2  | Married/li     | 2  | Some college     | 1  | Working, fi | 3  | 2   | No       |      | 2   | No      |

| respid | Q5 | Q6 | Marital Status | Q7 | Education        | Q8 | Work        | Q9 | Q10 | Diabetes | Q10a | Q11 | High BP |
|--------|----|----|----------------|----|------------------|----|-------------|----|-----|----------|------|-----|---------|
| 25500  | 2  | 2  | Married/li     | 2  | Some college     | 2  | Working, p  | 5  | 2   | No       |      | 1   | Yes     |
| 25516  | 2  | 2  | Married/li     | 1  | High school or l | 6  | Homemake    | 1  | 2   | No       |      | 2   | No      |
| 25521  | 2  | 2  | Married/li     | 3  | College degree   | 1  | Working, fi | 11 | 2   | No       |      | 2   | No      |
| 25525  | 2  | 2  | Married/li     | 2  | Some college     | 4  | Retired     | 8  | 2   | No       |      | 2   | No      |
| 25530  | 2  | 2  | Married/li     | 1  | High school or l | 1  | Working, fi | 1  | 2   | No       |      | 1   | Yes     |
| 25555  | 2  | 2  | Married/li     | 1  | High school or l | 2  | Working, p  | 14 | 2   | No       |      | 1   | Yes     |
| 25558  | 2  | 2  | Married/li     | 2  | Some college     | 1  | Working, fi | 11 | 2   | No       |      | 2   | No      |
| 25561  | 2  | 2  | Married/li     | 3  | College degree   | 1  | Working, fi | 12 | 2   | No       |      | 1   | Yes     |
| 25566  | 2  | 2  | Married/li     | 3  | College degree   | 1  | Working, fi | 8  | 2   | No       |      | 2   | No      |
| 25571  | 2  | 2  | Married/li     | 1  | High school or l | 4  | Retired     | 27 | 2   | No       |      | 1   | Yes     |
| 25572  | 2  | 2  | Married/li     | 1  | High school or l | 4  | Retired     | 26 | 2   | No       |      | 2   | No      |
| 25574  | 2  | 1  | Single         | 3  | College degree   | 1  | Working, fi | 1  | 2   | No       |      | 2   | No      |
| 25588  | 2  | 2  | Married/li     | 1  | High school or l | 1  | Working, fi | 34 | 2   | No       |      | 2   | No      |
| 25591  | 2  | 2  | Married/li     | 3  | College degree   | 1  | Working, fi | 11 | 2   | No       |      | 2   | No      |
| 25599  | 2  | 2  | Married/li     | 3  | College degree   | 4  | Retired     | 12 | 2   | No       |      | 2   | No      |
| 25604  | 2  | 2  | Married/li     | 1  | High school or l | 4  | Retired     | 25 | 2   | No       |      | 2   | No      |
| 25614  | 2  | 2  | Married/li     | 1  | High school or l | 1  | Working, fi | 33 | 2   | No       |      | 2   | No      |
| 25634  | 2  | 2  | Married/li     | 2  | Some college     | 1  | Working, fi | 11 | 1   | Yes      | 1    | 1   | Yes     |
| 25642  | 2  | 4  | Widow/wi       | 3  | College degree   | 4  | Retired     | 27 | 2   | No       |      | 2   | No      |
| 25647  | 2  | 2  | Married/li     | 3  | College degree   | 4  | Retired     | 11 | 2   | No       |      | 2   | No      |
| 25653  | 2  | 2  | Married/li     | 1  | High school or l | 4  | Retired     | 2  | 2   | No       |      | 2   | No      |
| 25654  | 2  | 2  | Married/li     | 1  | High school or l | 6  | Homemake    | 25 | 2   | No       |      | 2   | No      |
| 25660  | 2  | 1  | Single         | 3  | College degree   | 1  | Working, fi | 30 | 2   | No       |      | 2   | No      |
| 25664  | 2  | 2  | Married/li     | 1  | High school or l | 1  | Working, fi | 26 | 2   | No       |      | 2   | No      |
| 25665  | 2  | 2  | Married/li     | 3  | College degree   | 1  | Working, fi | 13 | 2   | No       |      | 2   | No      |
| 25672  | 2  | 2  | Married/li     | 1  | High school or l | 4  | Retired     | 32 | 2   | No       |      | 2   | No      |
| 25677  | 2  | 2  | Married/li     | 3  | College degree   | 1  | Working, fi | 11 | 2   | No       |      | 1   | Yes     |
| 25685  | 2  | 2  | Married/li     | 2  | Some college     | 4  | Retired     | 8  | 2   | No       |      | 2   | No      |
| 25699  | 2  | 2  | Married/li     | 3  | College degree   | 1  | Working, fi | 36 | 1   | Yes      | 1    | 1   | Yes     |
| 25703  | 2  | 2  | Married/li     | 2  | Some college     | 3  | Unemploy    | 99 | 2   | No       |      | 2   | No      |
| 25704  | 2  | 2  | Married/li     | 2  | Some college     | 1  | Working, fi | 10 | 2   | No       |      | 2   | No      |
| 25705  | 2  | 2  | Married/li     | 3  | College degree   | 1  | Working, fi | 12 | 2   | No       |      | 2   | No      |

| respid | Q5 | Q6 | Marital Status | Q7 | Education        | Q8 | Work        | Q9 | Q10 | Diabetes | Q10a | Q11 | High BP |
|--------|----|----|----------------|----|------------------|----|-------------|----|-----|----------|------|-----|---------|
| 25711  | 2  | 2  | Married/li     | 1  | High school or l | 6  | Homemake    | 27 | 2   | No       |      | 2   | No      |
| 25727  | 2  | 2  | Married/li     | 3  | College degree   | 1  | Working, fi | 11 | 1   | Yes      | 1    | 1   | Yes     |
| 25728  | 2  | 2  | Married/li     | 3  | College degree   | 1  | Working, fi | 13 | 2   | No       |      | 2   | No      |
| 25733  | 2  | 2  | Married/li     | 3  | College degree   | 1  | Working, fi | 11 | 2   | No       |      | 1   | Yes     |
| 25735  | 2  | 2  | Married/li     | 1  | High school or l | 1  | Working, fi | 28 | 2   | No       |      | 2   | No      |
| 25736  | 2  | 2  | Married/li     | 1  | High school or l | 4  | Retired     | 3  | 2   | No       |      | 2   | No      |
| 25742  | 2  | 1  | Single         | 2  | Some college     | 1  | Working, fi | 4  | 2   | No       |      | 2   | No      |
| 25750  | 2  | 2  | Married/li     | 2  | Some college     | 1  | Working, fi | 11 | 2   | No       |      | 2   | No      |
| 25754  | 2  | 2  | Married/li     | 1  | High school or l | 1  | Working, fi | 25 | 2   | No       |      | 2   | No      |
| 25776  | 2  | 2  | Married/li     | 1  | High school or l | 4  | Retired     | 5  | 2   | No       |      | 1   | Yes     |
| 25778  | 2  | 2  | Married/li     | 1  | High school or l | 1  | Working, fi | 99 | 2   | No       |      | 2   | No      |
| 25796  | 2  | 2  | Married/li     | 1  | High school or l | 4  | Retired     | 12 | 2   | No       |      | 2   | No      |
| 25852  | 2  | 2  | Married/li     | 4  | Postgraduate     | 4  | Retired     | 14 | 2   | No       |      | 2   | No      |
| 25858  | 2  | 2  | Married/li     | 2  | Some college     | 4  | Retired     | 9  | 2   | No       |      | 2   | No      |
| 25859  | 2  | 2  | Married/li     | 2  | Some college     | 1  | Working, fi | 4  | 2   | No       |      | 1   | Yes     |
| 25886  | 2  | 2  | Married/li     | 2  | Some college     | 1  | Working, fi | 29 | 2   | No       |      | 1   | Yes     |
| 25890  | 2  | 2  | Married/li     | 2  | Some college     | 4  | Retired     | 14 | 2   | No       |      | 1   | Yes     |
| 25897  | 2  | 2  | Married/li     | 1  | High school or l | 4  | Retired     | 25 | 2   | No       |      | 2   | No      |
| 25903  | 2  | 2  | Married/li     | 3  | College degree   | 1  | Working, fi | 1  | 2   | No       |      | 2   | No      |
| 25905  | 2  | 2  | Married/li     | 3  | College degree   | 1  | Working, fi | 7  | 2   | No       |      | 2   | No      |
| 25917  | 2  | 2  | Married/li     | 3  | College degree   | 1  | Working, fi | 7  | 2   | No       |      | 2   | No      |
| 25918  | 2  | 2  | Married/li     | 2  | Some college     | 1  | Working, fi | 33 | 2   | No       |      | 1   | Yes     |
| 25928  | 2  | 2  | Married/li     | 3  | College degree   | 1  | Working, fi | 11 | 2   | No       |      | 1   | Yes     |
| 25930  | 2  | 2  | Married/li     | 2  | Some college     | 1  | Working, fi | 9  | 2   | No       |      | 2   | No      |
| 25949  | 2  | 2  | Married/li     | 2  | Some college     | 6  | Homemake    | 36 | 2   | No       |      | 2   | No      |
| 25955  | 2  | 1  | Single         | 1  | High school or l | 4  | Retired     | 2  | 2   | No       |      | 2   | No      |
| 25959  | 2  | 2  | Married/li     | 1  | High school or l | 6  | Homemake    | 33 | 2   | No       |      | 2   | No      |
| 25964  | 2  | 2  | Married/li     | 1  | High school or l | 1  | Working, fi | 29 | 1   | Yes      | 1    | 1   | Yes     |
| 25972  | 2  | 2  | Married/li     | 3  | College degree   | 1  | Working, fi | 2  | 2   | No       |      | 2   | No      |
| 25999  | 2  | 2  | Married/li     | 3  | College degree   | 4  | Retired     | 13 | 2   | No       |      | 2   | No      |
| 26019  | 2  | 2  | Married/li     | 1  | High school or l | 6  | Homemake    | 1  | 2   | No       |      | 1   | Yes     |
| 26025  | 2  | 2  | Married/li     | 1  | High school or l | 1  | Working, fi | 99 | 2   | No       |      | 2   | No      |

| respid | Q5 | Q6 | Marital Status | Q7 | Education        | Q8 | Work        | Q9 | Q10 | Diabetes | Q10a | Q11 | High BP |
|--------|----|----|----------------|----|------------------|----|-------------|----|-----|----------|------|-----|---------|
| 26039  | 2  | 2  | Married/li     | 2  | Some college     | 1  | Working, fi | 8  | 2   | No       |      | 2   | No      |
| 26055  | 2  | 2  | Married/li     | 1  | High school or l | 1  | Working, fi | 11 | 2   | No       |      | 1   | Yes     |
| 26061  | 2  | 2  | Married/li     | 1  | High school or l | 1  | Working, fi | 31 | 2   | No       |      | 2   | No      |
| 26076  | 2  | 2  | Married/li     | 2  | Some college     | 1  | Working, fi | 12 | 2   | No       |      | 2   | No      |
| 26088  | 2  | 2  | Married/li     | 1  | High school or l | 2  | Working, p  | 14 | 2   | No       |      | 2   | No      |
| 26094  | 2  | 2  | Married/li     | 2  | Some college     | 4  | Retired     | 13 | 2   | No       |      | 2   | No      |
| 26104  | 2  | 2  | Married/li     | 2  | Some college     | 1  | Working, fi | 37 | 1   | Yes      | 1    | 1   | Yes     |
| 26131  | 2  | 2  | Married/li     | 3  | College degree   | 1  | Working, fi | 6  | 2   | No       |      | 2   | No      |
| 26134  | 2  | 2  | Married/li     | 2  | Some college     | 1  | Working, fi | 8  | 2   | No       |      | 2   | No      |
| 26160  | 2  | 2  | Married/li     | 1  | High school or l | 1  | Working, fi | 13 | 2   | No       |      | 1   | Yes     |
| 26168  | 2  | 2  | Married/li     | 1  | High school or l | 4  | Retired     | 28 | 2   | No       |      | 2   | No      |
| 26170  | 2  | 2  | Married/li     | 2  | Some college     | 1  | Working, fi | 99 | 2   | No       |      | 2   | No      |
| 26191  | 2  | 2  | Married/li     | 3  | College degree   | 2  | Working, p  | 17 | 2   | No       |      | 1   | Yes     |
| 26192  | 2  | 2  | Married/li     | 2  | Some college     | 6  | Homemake    | 2  | 2   | No       |      | 2   | No      |
| 26195  | 2  | 2  | Married/li     | 1  | High school or l | 4  | Retired     | 11 | 2   | No       |      | 2   | No      |
| 26198  | 2  | 2  | Married/li     | 1  | High school or l | 4  | Retired     | 8  | 2   | No       |      | 2   | No      |
| 26199  | 2  | 2  | Married/li     | 1  | High school or l | 6  | Homemake    | 25 | 1   | Yes      | 1    | 2   | No      |
| 26201  | 2  | 4  | Widow/wi       | 1  | High school or l | 1  | Working, fi | 32 | 2   | No       |      | 2   | No      |
| 26202  | 2  | 2  | Married/li     | 1  | High school or l | 1  | Working, fi | 29 | 1   | Yes      | 1    | 1   | Yes     |
| 26226  | 2  | 1  | Single         | 3  | College degree   | 1  | Working, fi | 11 | 2   | No       |      | 2   | No      |
| 26233  | 2  | 2  | Married/li     | 1  | High school or l | 4  | Retired     | 12 | 2   | No       |      | 1   | Yes     |
| 26236  | 2  | 4  | Widow/wi       | 1  | High school or l | 4  | Retired     | 37 | 1   | Yes      | 1    | 2   | No      |
| 26242  | 2  | 2  | Married/li     | 2  | Some college     | 6  | Homemake    | 36 | 2   | No       |      | 2   | No      |
| 26244  | 2  | 2  | Married/li     | 3  | College degree   | 1  | Working, fi | 8  | 2   | No       |      | 1   | Yes     |
| 26250  | 2  | 2  | Married/li     | 3  | College degree   | 1  | Working, fi | 8  | 2   | No       |      | 2   | No      |
| 26266  | 2  | 4  | Widow/wi       | 1  | High school or l | 3  | Unemploy    | 16 | 2   | No       |      | 2   | No      |
| 26274  | 2  | 2  | Married/li     | 3  | College degree   | 2  | Working, p  | 11 | 1   | Yes      | 1    | 2   | No      |
| 26286  | 2  | 2  | Married/li     | 2  | Some college     | 4  | Retired     | 25 | 1   | Yes      | 1    | 1   | Yes     |
| 26288  | 2  | 2  | Married/li     | 2  | Some college     | 1  | Working, fi | 2  | 2   | No       |      | 2   | No      |
| 26295  | 2  | 2  | Married/li     | 2  | Some college     | 1  | Working, fi | 99 | 2   | No       |      | 2   | No      |
| 26296  | 2  | 2  | Married/li     | 1  | High school or l | 1  | Working, fi | 25 | 2   | No       |      | 2   | No      |
| 26297  | 2  | 1  | Single         | 3  | College degree   | 1  | Working, fi | 1  | 2   | No       |      | 2   | No      |

| respid | Q5 | Q6 | Marital Status | Q7 | Education        | Q8 | Work        | Q9 | Q10 | Diabetes | Q10a | Q11 | High BP |
|--------|----|----|----------------|----|------------------|----|-------------|----|-----|----------|------|-----|---------|
| 26300  | 2  | 2  | Married/li     | 1  | High school or l | 1  | Working, fi | 33 | 2   | No       |      | 2   | No      |
| 26317  | 2  | 2  | Married/li     | 1  | High school or l | 4  | Retired     | 25 | 2   | No       |      | 2   | No      |
| 26343  | 2  | 1  | Single         | 1  | High school or l | 2  | Working, p  | 11 | 2   | No       |      | 2   | No      |
| 26367  | 2  | 2  | Married/li     | 1  | High school or l | 4  | Retired     | 32 | 2   | No       |      | 2   | No      |
| 26372  | 2  | 2  | Married/li     | 2  | Some college     | 1  | Working, fi | 35 | 2   | No       |      | 1   | Yes     |
| 26403  | 2  | 2  | Married/li     | 2  | Some college     | 1  | Working, fi | 33 | 2   | No       |      | 2   | No      |
| 26423  | 2  | 2  | Married/li     | 3  | College degree   | 4  | Retired     | 27 | 2   | No       |      | 2   | No      |
| 26430  | 2  | 2  | Married/li     | 3  | College degree   | 1  | Working, fi | 34 | 2   | No       |      | 2   | No      |
| 26437  | 2  | 2  | Married/li     | 2  | Some college     | 4  | Retired     | 12 | 2   | No       |      | 1   | Yes     |
| 26457  | 2  | 2  | Married/li     | 2  | Some college     | 1  | Working, fi | 12 | 2   | No       |      | 2   | No      |
| 26466  | 2  | 3  | Divorced       | 3  | College degree   | 1  | Working, fi | 11 | 2   | No       |      | 2   | No      |
| 26467  | 2  | 2  | Married/li     | 3  | College degree   | 1  | Working, fi | 2  | 2   | No       |      | 2   | No      |
| 26469  | 2  | 2  | Married/li     | 3  | College degree   | 1  | Working, fi | 11 | 2   | No       |      | 2   | No      |
| 26494  | 2  | 2  | Married/li     | 1  | High school or l | 6  | Homemake    | 30 | 2   | No       |      | 2   | No      |
| 26510  | 2  | 2  | Married/li     | 1  | High school or l | 6  | Homemake    | 99 | 2   | No       |      | 2   | No      |
| 26519  | 2  | 2  | Married/li     | 1  | High school or l | 6  | Homemake    | 35 | 2   | No       |      | 2   | No      |
| 26525  | 2  | 2  | Married/li     | 1  | High school or l | 4  | Retired     | 33 | 1   | Yes      | 1    | 2   | No      |
| 26529  | 2  | 2  | Married/li     | 2  | Some college     | 4  | Retired     | 8  | 2   | No       |      | 2   | No      |
| 26533  | 2  | 1  | Single         | 3  | College degree   | 1  | Working, fi | 25 | 2   | No       |      | 2   | No      |
| 26556  | 2  | 2  | Married/li     | 1  | High school or l | 1  | Working, fi | 31 | 2   | No       |      | 1   | Yes     |
| 26559  | 2  | 2  | Married/li     | 3  | College degree   | 4  | Retired     | 12 | 2   | No       |      | 2   | No      |
| 26565  | 2  | 2  | Married/li     | 1  | High school or l | 4  | Retired     | 11 | 2   | No       |      | 1   | Yes     |
| 26576  | 2  | 3  | Divorced       | 2  | Some college     | 2  | Working, p  | 7  | 2   | No       |      | 2   | No      |
| 26601  | 2  | 2  | Married/li     | 2  | Some college     | 1  | Working, fi | 11 | 1   | Yes      | 1    | 1   | Yes     |
| 26607  | 2  | 2  | Married/li     | 1  | High school or l | 6  | Homemake    | 29 | 2   | No       |      | 1   | Yes     |
| 26611  | 2  | 2  | Married/li     | 3  | College degree   | 1  | Working, fi | 12 | 2   | No       |      | 2   | No      |
| 26619  | 2  | 2  | Married/li     | 1  | High school or l | 1  | Working, fi | 21 | 2   | No       |      | 2   | No      |
| 26631  | 2  | 2  | Married/li     | 3  | College degree   | 4  | Retired     | 33 | 1   | Yes      | 1    | 1   | Yes     |
| 26654  | 2  | 2  | Married/li     | 3  | College degree   | 2  | Working, p  | 11 | 1   | Yes      | 1    | 1   | Yes     |
| 26656  | 2  | 2  | Married/li     | 3  | College degree   | 6  | Homemake    | 33 | 2   | No       |      | 1   | Yes     |
| 26664  | 2  | 2  | Married/li     | 1  | High school or l | 1  | Working, fi | 28 | 1   | Yes      | 1    | 1   | Yes     |
| 26667  | 2  | 2  | Married/li     | 3  | College degree   | 2  | Working, p  | 27 | 2   | No       |      | 2   | No      |

| respid | Q5 | Q6 | Marital Status | Q7 | Education        | Q8 | Work        | Q9 | Q10 | Diabetes | Q10a | Q11 | High BP |
|--------|----|----|----------------|----|------------------|----|-------------|----|-----|----------|------|-----|---------|
| 26674  | 2  | 2  | Married/li     | 3  | College degree   | 1  | Working, fi | 13 | 1   | Yes      | 1    | 2   | No      |
| 26678  | 2  | 2  | Married/li     | 2  | Some college     | 4  | Retired     | 25 | 2   | No       |      | 1   | Yes     |
| 26693  | 2  | 2  | Married/li     | 1  | High school or l | 1  | Working, fi | 26 | 2   | No       |      | 2   | No      |
| 26696  | 2  | 2  | Married/li     | 1  | High school or l | 2  | Working, p  | 99 | 2   | No       |      | 1   | Yes     |
| 26703  | 2  | 2  | Married/li     | 1  | High school or l | 6  | Homemake    | 5  | 1   | Yes      | 1    | 1   | Yes     |
| 26705  | 2  | 2  | Married/li     | 1  | High school or l | 1  | Working, fi | 3  | 2   | No       |      | 2   | No      |
| 26706  | 2  | 2  | Married/li     | 2  | Some college     | 1  | Working, fi | 33 | 2   | No       |      | 1   | Yes     |
| 26716  | 2  | 2  | Married/li     | 3  | College degree   | 1  | Working, fi | 12 | 2   | No       |      | 2   | No      |
| 26721  | 2  | 2  | Married/li     | 1  | High school or l | 1  | Working, fi | 34 | 2   | No       |      | 2   | No      |
| 26730  | 2  | 2  | Married/li     | 3  | College degree   | 1  | Working, fi | 99 | 2   | No       |      | 2   | No      |
| 26752  | 2  | 2  | Married/li     | 3  | College degree   | 8  | Other worl  | 13 | 2   | No       |      | 2   | No      |
| 26755  | 2  | 2  | Married/li     | 1  | High school or l | 1  | Working, fi | 15 | 2   | No       |      | 2   | No      |
| 26791  | 2  | 2  | Married/li     | 2  | Some college     | 1  | Working, fi | 31 | 2   | No       |      | 2   | No      |
| 26804  | 2  | 2  | Married/li     | 1  | High school or l | 4  | Retired     | 32 | 2   | No       |      | 1   | Yes     |
| 26810  | 2  | 2  | Married/li     | 1  | High school or l | 6  | Homemake    | 19 | 1   | Yes      | 1    | 2   | No      |
| 26813  | 2  | 2  | Married/li     | 2  | Some college     | 4  | Retired     | 9  | 1   | Yes      | 1    | 1   | Yes     |
| 26833  | 2  | 2  | Married/li     | 1  | High school or l | 6  | Homemake    | 31 | 2   | No       |      | 2   | No      |
| 26880  | 2  | 2  | Married/li     | 3  | College degree   | 1  | Working, fi | 12 | 2   | No       |      | 2   | No      |
| 26884  | 2  | 2  | Married/li     | 3  | College degree   | 1  | Working, fi | 11 | 2   | No       |      | 2   | No      |
| 26885  | 2  | 2  | Married/li     | 3  | College degree   | 4  | Retired     | 11 | 2   | No       |      | 2   | No      |
| 26890  | 2  | 2  | Married/li     | 2  | Some college     | 4  | Retired     | 10 | 2   | No       |      | 1   | Yes     |
| 26937  | 2  | 2  | Married/li     | 3  | College degree   | 1  | Working, fi | 20 | 1   | Yes      | 1    | 1   | Yes     |
| 26939  | 2  | 2  | Married/li     | 1  | High school or l | 6  | Homemake    | 29 | 2   | No       |      | 2   | No      |
| 26941  | 2  | 2  | Married/li     | 3  | College degree   | 1  | Working, fi | 11 | 2   | No       |      | 2   | No      |
| 26992  | 2  | 4  | Widow/wi       | 1  | High school or l | 4  | Retired     | 26 | 2   | No       |      | 1   | Yes     |
| 27037  | 2  | 2  | Married/li     | 1  | High school or l | 1  | Working, fi | 9  | 2   | No       |      | 2   | No      |
| 27045  | 2  | 2  | Married/li     | 3  | College degree   | 1  | Working, fi | 10 | 2   | No       |      | 2   | No      |
| 27053  | 2  | 4  | Widow/wi       | 1  | High school or l | 8  | Other worl  | 15 | 2   | No       |      | 2   | No      |
| 27060  | 2  | 2  | Married/li     | 3  | College degree   | 1  | Working, fi | 10 | 2   | No       |      | 2   | No      |
| 27076  | 2  | 2  | Married/li     | 2  | Some college     | 1  | Working, fi | 11 | 2   | No       |      | 2   | No      |
| 27124  | 2  | 2  | Married/li     | 2  | Some college     | 1  | Working, fi | 12 | 2   | No       |      | 2   | No      |
| 27125  | 2  | 2  | Married/li     | 1  | High school or l | 1  | Working, fi | 28 | 1   | Yes      | 1    | 2   | No      |

| respid | Q5 | Q6 | Marital Status | Q7 | Education        | Q8 | Work        | Q9 | Q10 | Diabetes | Q10a | Q11 | High BP |
|--------|----|----|----------------|----|------------------|----|-------------|----|-----|----------|------|-----|---------|
| 27132  | 2  | 2  | Married/li     | 2  | Some college     | 1  | Working, fi | 6  | 2   | No       |      | 2   | No      |
| 27166  | 2  | 2  | Married/li     | 2  | Some college     | 1  | Working, fi | 12 | 2   | No       |      | 2   | No      |
| 27190  | 2  | 2  | Married/li     | 1  | High school or l | 1  | Working, fi | 1  | 2   | No       |      | 2   | No      |
| 27199  | 2  | 2  | Married/li     | 3  | College degree   | 4  | Retired     | 13 | 1   | Yes      | 1    | 1   | Yes     |
| 27221  | 2  | 2  | Married/li     | 3  | College degree   | 1  | Working, fi | 10 | 2   | No       |      | 2   | No      |
| 27233  | 2  | 2  | Married/li     | 2  | Some college     | 6  | Homemake    | 27 | 2   | No       |      | 1   | Yes     |
| 27241  | 2  | 2  | Married/li     | 1  | High school or l | 1  | Working, fi | 27 | 2   | No       |      | 2   | No      |
| 27244  | 2  | 2  | Married/li     | 2  | Some college     | 4  | Retired     | 14 | 1   | Yes      | 1    | 1   | Yes     |
| 27245  | 2  | 2  | Married/li     | 2  | Some college     | 4  | Retired     | 10 | 2   | No       |      | 1   | Yes     |
| 27246  | 2  | 2  | Married/li     | 3  | College degree   | 1  | Working, fi | 21 | 2   | No       |      | 1   | Yes     |
| 27253  | 2  | 2  | Married/li     | 1  | High school or l | 4  | Retired     | 10 | 2   | No       |      | 2   | No      |
| 27255  | 2  | 2  | Married/li     | 3  | College degree   | 4  | Retired     | 12 | 1   | Yes      | 1    | 2   | No      |
| 27267  | 2  | 2  | Married/li     | 1  | High school or l | 1  | Working, fi | 29 | 2   | No       |      | 1   | Yes     |
| 27283  | 2  | 3  | Divorced       | 1  | High school or l | 4  | Retired     | 33 | 2   | No       |      | 2   | No      |
| 27289  | 2  | 2  | Married/li     | 1  | High school or l | 3  | Unemploy    | 16 | 2   | No       |      | 1   | Yes     |
| 27302  | 2  | 2  | Married/li     | 3  | College degree   | 1  | Working, fi | 5  | 2   | No       |      | 2   | No      |
| 27317  | 2  | 4  | Widow/wi       | 2  | Some college     | 1  | Working, fi | 25 | 2   | No       |      | 2   | No      |
| 27319  | 2  | 2  | Married/li     | 2  | Some college     | 1  | Working, fi | 8  | 2   | No       |      | 2   | No      |
| 27331  | 2  | 2  | Married/li     | 3  | College degree   | 1  | Working, fi | 8  | 2   | No       |      | 2   | No      |
| 27333  | 2  | 2  | Married/li     | 3  | College degree   | 2  | Working, p  | 12 | 2   | No       |      | 1   | Yes     |
| 27340  | 2  | 2  | Married/li     | 1  | High school or l | 1  | Working, fi | 13 | 2   | No       |      | 2   | No      |
| 27362  | 2  | 2  | Married/li     | 1  | High school or l | 4  | Retired     | 1  | 2   | No       |      | 1   | Yes     |
| 27370  | 2  | 2  | Married/li     | 3  | College degree   | 4  | Retired     | 25 | 2   | No       |      | 1   | Yes     |
| 27379  | 2  | 2  | Married/li     | 3  | College degree   | 1  | Working, fi | 30 | 2   | No       |      | 1   | Yes     |
| 27386  | 2  | 2  | Married/li     | 2  | Some college     | 4  | Retired     | 12 | 2   | No       |      | 2   | No      |
| 27398  | 2  | 2  | Married/li     | 3  | College degree   | 1  | Working, fi | 11 | 2   | No       |      | 2   | No      |
| 27404  | 2  | 2  | Married/li     | 3  | College degree   | 4  | Retired     | 14 | 2   | No       |      | 2   | No      |
| 27408  | 2  | 4  | Widow/wi       | 1  | High school or l | 1  | Working, fi | 18 | 2   | No       |      | 2   | No      |
| 27412  | 2  | 2  | Married/li     | 3  | College degree   | 4  | Retired     | 11 | 2   | No       |      | 1   | Yes     |
| 27426  | 2  | 2  | Married/li     | 2  | Some college     | 4  | Retired     | 8  | 2   | No       |      | 1   | Yes     |
| 27455  | 2  | 1  | Single         | 1  | High school or l | 4  | Retired     | 99 | 2   | No       |      | 2   | No      |
| 27464  | 2  | 2  | Married/li     | 3  | College degree   | 4  | Retired     | 37 | 1   | Yes      | 1    | 2   | No      |

| respid | Q5 | Q6 | Marital Status | Q7 | Education        | Q8 | Work        | Q9 | Q10 | Diabetes | Q10a | Q11 | High BP |
|--------|----|----|----------------|----|------------------|----|-------------|----|-----|----------|------|-----|---------|
| 27484  | 2  | 2  | Married/li     | 2  | Some college     | 4  | Retired     | 3  | 1   | Yes      | 1    | 1   | Yes     |
| 27493  | 2  | 2  | Married/li     | 1  | High school or l | 4  | Retired     | 13 | 2   | No       |      | 1   | Yes     |
| 27512  | 2  | 2  | Married/li     | 3  | College degree   | 4  | Retired     | 13 | 2   | No       |      | 2   | No      |
| 27525  | 2  | 2  | Married/li     | 2  | Some college     | 1  | Working, fi | 13 | 2   | No       |      | 2   | No      |
| 27532  | 2  | 2  | Married/li     | 1  | High school or l | 4  | Retired     | 2  | 2   | No       |      | 1   | Yes     |
| 27539  | 2  | 2  | Married/li     | 2  | Some college     | 4  | Retired     | 6  | 2   | No       |      | 2   | No      |
| 27540  | 2  | 2  | Married/li     | 1  | High school or l | 4  | Retired     | 7  | 2   | No       |      | 2   | No      |
| 27552  | 2  | 2  | Married/li     | 1  | High school or l | 4  | Retired     | 8  | 1   | Yes      | 1    | 1   | Yes     |
| 27562  | 2  | 2  | Married/li     | 4  | Postgraduate     | 1  | Working, fi | 12 | 2   | No       |      | 2   | No      |
| 27568  | 2  | 4  | Widow/wi       | 1  | High school or l | 4  | Retired     | 25 | 2   | No       |      | 2   | No      |
| 27574  | 2  | 2  | Married/li     | 3  | College degree   | 4  | Retired     | 12 | 1   | Yes      | 1    | 1   | Yes     |
| 27575  | 2  | 2  | Married/li     | 1  | High school or l | 6  | Homemake    | 25 | 2   | No       |      | 2   | No      |
| 27577  | 2  | 2  | Married/li     | 3  | College degree   | 2  | Working, p  | 11 | 1   | Yes      | 1    | 2   | No      |
| 27589  | 2  | 2  | Married/li     | 1  | High school or l | 2  | Working, p  | 2  | 2   | No       |      | 2   | No      |
| 27593  | 2  | 2  | Married/li     | 2  | Some college     | 4  | Retired     | 13 | 2   | No       |      | 2   | No      |
| 27594  | 2  | 2  | Married/li     | 1  | High school or l | 4  | Retired     | 34 | 2   | No       |      | 2   | No      |
| 27595  | 2  | 2  | Married/li     | 4  | Postgraduate     | 2  | Working, p  | 13 | 2   | No       |      | 1   | Yes     |
| 27598  | 2  | 2  | Married/li     | 2  | Some college     | 4  | Retired     | 11 | 1   | Yes      | 2    | 2   | No      |
| 27620  | 2  | 1  | Single         | 3  | College degree   | 1  | Working, fi | 7  | 2   | No       |      | 1   | Yes     |
| 27621  | 2  | 2  | Married/li     | 1  | High school or l | 2  | Working, p  | 11 | 2   | No       |      | 1   | Yes     |
| 27628  | 2  | 2  | Married/li     | 1  | High school or l | 1  | Working, fi | 26 | 1   | Yes      | 1    | 1   | Yes     |
| 27633  | 2  | 2  | Married/li     | 2  | Some college     | 4  | Retired     | 12 | 2   | No       |      | 2   | No      |
| 27643  | 2  | 2  | Married/li     | 3  | College degree   | 1  | Working, fi | 8  | 2   | No       |      | 2   | No      |
| 27644  | 2  | 2  | Married/li     | 3  | College degree   | 1  | Working, fi | 9  | 1   | Yes      | 1    | 2   | No      |
| 27668  | 2  | 2  | Married/li     | 3  | College degree   | 1  | Working, fi | 12 | 2   | No       |      | 2   | No      |
| 27681  | 2  | 2  | Married/li     | 1  | High school or l | 4  | Retired     | 4  | 2   | No       |      | 1   | Yes     |
| 27691  | 2  | 2  | Married/li     | 3  | College degree   | 1  | Working, fi | 10 | 2   | No       |      | 2   | No      |
| 27693  | 2  | 1  | Single         | 4  | Postgraduate     | 1  | Working, fi | 34 | 2   | No       |      | 2   | No      |
| 27703  | 2  | 2  | Married/li     | 1  | High school or l | 6  | Homemake    | 31 | 1   | Yes      | 1    | 1   | Yes     |
| 27708  | 2  | 2  | Married/li     | 1  | High school or l | 6  | Homemake    | 15 | 2   | No       |      | 2   | No      |
| 27719  | 2  | 2  | Married/li     | 1  | High school or l | 1  | Working, fi | 29 | 2   | No       |      | 2   | No      |
| 27720  | 2  | 2  | Married/li     | 1  | High school or l | 4  | Retired     | 30 | 1   | Yes      | 1    | 1   | Yes     |



| respid | Q5 | Q6 | Marital Status | Q7 | Education        | Q8 | Work        | Q9 | Q10 | Diabetes | Q10a | Q11 | High BP |
|--------|----|----|----------------|----|------------------|----|-------------|----|-----|----------|------|-----|---------|
| 27723  | 2  | 2  | Married/li     | 2  | Some college     | 9  | Other       | 31 | 2   | No       |      | 1   | Yes     |
| 27725  | 2  | 4  | Widow/wi       | 1  | High school or l | 6  | Homemake    | 29 | 2   | No       |      | 2   | No      |
| 27734  | 2  | 2  | Married/li     | 3  | College degree   | 6  | Homemake    | 8  | 2   | No       |      | 1   | Yes     |
| 27744  | 2  | 2  | Married/li     | 2  | Some college     | 2  | Working, p  | 10 | 1   | Yes      | 1    | 2   | No      |
| 27749  | 2  | 2  | Married/li     | 2  | Some college     | 4  | Retired     | 11 | 2   | No       |      | 2   | No      |
| 27762  | 2  | 2  | Married/li     | 2  | Some college     | 4  | Retired     | 9  | 2   | No       |      | 2   | No      |
| 27808  | 2  | 4  | Widow/wi       | 1  | High school or l | 6  | Homemake    | 4  | 1   | Yes      | 1    | 1   | Yes     |
| 27810  | 2  | 2  | Married/li     | 2  | Some college     | 1  | Working, fi | 14 | 1   | Yes      | 1    | 1   | Yes     |
| 27812  | 2  | 2  | Married/li     | 3  | College degree   | 1  | Working, fi | 14 | 2   | No       |      | 1   | Yes     |
| 27815  | 2  | 2  | Married/li     | 3  | College degree   | 1  | Working, fi | 31 | 2   | No       |      | 2   | No      |
| 27818  | 2  | 2  | Married/li     | 1  | High school or l | 6  | Homemake    | 31 | 1   | Yes      | 1    | 2   | No      |
| 27823  | 2  | 2  | Married/li     | 3  | College degree   | 6  | Homemake    | 25 | 1   | Yes      | 1    | 1   | Yes     |
| 27841  | 2  | 2  | Married/li     | 2  | Some college     | 1  | Working, fi | 36 | 2   | No       |      | 2   | No      |
| 27843  | 2  | 2  | Married/li     | 2  | Some college     | 1  | Working, fi | 12 | 2   | No       |      | 2   | No      |
| 27851  | 2  | 2  | Married/li     | 2  | Some college     | 4  | Retired     | 11 | 2   | No       |      | 1   | Yes     |
| 27858  | 2  | 4  | Widow/wi       | 1  | High school or l | 6  | Homemake    | 25 | 2   | No       |      | 2   | No      |
| 27859  | 2  | 2  | Married/li     | 1  | High school or l | 1  | Working, fi | 32 | 2   | No       |      | 1   | Yes     |
| 27869  | 2  | 2  | Married/li     | 2  | Some college     | 4  | Retired     | 13 | 2   | No       |      | 1   | Yes     |
| 27872  | 2  | 2  | Married/li     | 1  | High school or l | 4  | Retired     | 6  | 2   | No       |      | 2   | No      |
| 27873  | 2  | 2  | Married/li     | 1  | High school or l | 4  | Retired     | 4  | 2   | No       |      | 2   | No      |
| 27884  | 2  | 2  | Married/li     | 3  | College degree   | 2  | Working, p  | 26 | 2   | No       |      | 2   | No      |
| 27904  | 2  | 4  | Widow/wi       | 2  | Some college     | 6  | Homemake    | 33 | 2   | No       |      | 2   | No      |
| 27915  | 2  | 2  | Married/li     | 3  | College degree   | 2  | Working, p  | 10 | 1   | Yes      | 2    | 2   | No      |
| 27918  | 2  | 2  | Married/li     | 2  | Some college     | 4  | Retired     | 28 | 2   | No       |      | 2   | No      |
| 27937  | 2  | 4  | Widow/wi       | 1  | High school or l | 1  | Working, fi | 27 | 2   | No       |      | 2   | No      |
| 27943  | 2  | 2  | Married/li     | 1  | High school or l | 6  | Homemake    | 99 | 2   | No       |      | 2   | No      |
| 27948  | 2  | 2  | Married/li     | 1  | High school or l | 6  | Homemake    | 99 | 2   | No       |      | 2   | No      |
| 27971  | 2  | 2  | Married/li     | 3  | College degree   | 1  | Working, fi | 12 | 2   | No       |      | 2   | No      |
| 27991  | 2  | 2  | Married/li     | 1  | High school or l | 4  | Retired     | 32 | 2   | No       |      | 2   | No      |
| 28000  | 2  | 2  | Married/li     | 1  | High school or l | 1  | Working, fi | 34 | 1   | Yes      | 1    | 2   | No      |
| 28011  | 2  | 2  | Married/li     | 3  | College degree   | 4  | Retired     | 33 | 2   | No       |      | 2   | No      |
| 28022  | 2  | 3  | Divorced       | 2  | Some college     | 1  | Working, fi | 5  | 2   | No       |      | 2   | No      |

| respid | Q5 | Q6 | Marital Status | Q7 | Education        | Q8 | Work        | Q9 | Q10 | Diabetes | Q10a | Q11 | High BP |
|--------|----|----|----------------|----|------------------|----|-------------|----|-----|----------|------|-----|---------|
| 28025  | 2  | 2  | Married/li     | 2  | Some college     | 1  | Working, fi | 10 | 1   | Yes      | 2    | 2   | No      |
| 28041  | 2  | 2  | Married/li     | 3  | College degree   | 1  | Working, fi | 38 | 2   | No       |      | 2   | No      |
| 28057  | 2  | 2  | Married/li     | 2  | Some college     | 4  | Retired     | 10 | 2   | No       |      | 2   | No      |
| 28080  | 2  | 2  | Married/li     | 3  | College degree   | 1  | Working, fi | 99 | 2   | No       |      | 1   | Yes     |
| 28098  | 2  | 2  | Married/li     | 2  | Some college     | 1  | Working, fi | 29 | 2   | No       |      | 2   | No      |
| 28104  | 2  | 2  | Married/li     | 3  | College degree   | 4  | Retired     | 10 | 2   | No       |      | 1   | Yes     |
| 28109  | 2  | 2  | Married/li     | 4  | Postgraduate     | 1  | Working, fi | 26 | 2   | No       |      | 2   | No      |
| 28129  | 2  | 2  | Married/li     | 1  | High school or l | 2  | Working, p  | 2  | 2   | No       |      | 2   | No      |
| 28141  | 2  | 4  | Widow/wi       | 1  | High school or l | 1  | Working, fi | 33 | 2   | No       |      | 2   | No      |
| 28143  | 2  | 2  | Married/li     | 3  | College degree   | 2  | Working, p  | 12 | 2   | No       |      | 2   | No      |
| 28149  | 2  | 3  | Divorced       | 1  | High school or l | 6  | Homemake    | 27 | 2   | No       |      | 1   | Yes     |
| 28151  | 2  | 2  | Married/li     | 3  | College degree   | 1  | Working, fi | 34 | 2   | No       |      | 2   | No      |
| 28161  | 2  | 2  | Married/li     | 3  | College degree   | 1  | Working, fi | 13 | 2   | No       |      | 2   | No      |
| 28169  | 2  | 2  | Married/li     | 2  | Some college     | 4  | Retired     | 31 | 2   | No       |      | 2   | No      |
| 28194  | 2  | 2  | Married/li     | 1  | High school or l | 1  | Working, fi | 33 | 2   | No       |      | 1   | Yes     |
| 28197  | 2  | 2  | Married/li     | 1  | High school or l | 1  | Working, fi | 1  | 2   | No       |      | 2   | No      |
| 28206  | 2  | 2  | Married/li     | 1  | High school or l | 6  | Homemake    | 28 | 1   | Yes      | 1    | 1   | Yes     |
| 28218  | 2  | 2  | Married/li     | 3  | College degree   | 1  | Working, fi | 14 | 2   | No       |      | 2   | No      |
| 28227  | 2  | 2  | Married/li     | 3  | College degree   | 1  | Working, fi | 38 | 2   | No       |      | 2   | No      |
| 28235  | 2  | 5  | Prefer not     | 2  | Some college     | 4  | Retired     | 4  | 2   | No       |      | 2   | No      |
| 28246  | 2  | 2  | Married/li     | 3  | College degree   | 1  | Working, fi | 6  | 2   | No       |      | 2   | No      |
| 28259  | 2  | 2  | Married/li     | 1  | High school or l | 4  | Retired     | 13 | 2   | No       |      | 2   | No      |
| 28263  | 2  | 1  | Single         | 1  | High school or l | 6  | Homemake    | 14 | 2   | No       |      | 2   | No      |
| 28267  | 2  | 2  | Married/li     | 1  | High school or l | 4  | Retired     | 6  | 2   | No       |      | 2   | No      |
| 28274  | 2  | 2  | Married/li     | 3  | College degree   | 1  | Working, fi | 9  | 2   | No       |      | 2   | No      |
| 28278  | 2  | 2  | Married/li     | 3  | College degree   | 1  | Working, fi | 5  | 2   | No       |      | 2   | No      |
| 28288  | 2  | 2  | Married/li     | 2  | Some college     | 1  | Working, fi | 1  | 2   | No       |      | 2   | No      |
| 28308  | 2  | 2  | Married/li     | 3  | College degree   | 1  | Working, fi | 1  | 2   | No       |      | 2   | No      |
| 28309  | 2  | 1  | Single         | 1  | High school or l | 4  | Retired     | 31 | 2   | No       |      | 1   | Yes     |
| 28323  | 2  | 2  | Married/li     | 1  | High school or l | 6  | Homemake    | 18 | 2   | No       |      | 2   | No      |
| 28335  | 2  | 2  | Married/li     | 4  | Postgraduate     | 1  | Working, fi | 12 | 1   | Yes      | 2    | 2   | No      |
| 28354  | 2  | 2  | Married/li     | 3  | College degree   | 1  | Working, fi | 13 | 1   | Yes      | 2    | 1   | Yes     |

| respid | Q5 | Q6 | Marital Status | Q7 | Education        | Q8 | Work        | Q9 | Q10 | Diabetes | Q10a | Q11 | High BP |
|--------|----|----|----------------|----|------------------|----|-------------|----|-----|----------|------|-----|---------|
| 28355  | 2  | 4  | Widow/wi       | 1  | High school or l | 4  | Retired     | 9  | 1   | Yes      | 1    | 1   | Yes     |
| 28356  | 2  | 2  | Married/li     | 2  | Some college     | 4  | Retired     | 3  | 2   | No       |      | 2   | No      |
| 28357  | 2  | 2  | Married/li     | 1  | High school or l | 4  | Retired     | 14 | 2   | No       |      | 1   | Yes     |
| 28363  | 2  | 2  | Married/li     | 3  | College degree   | 4  | Retired     | 11 | 2   | No       |      | 2   | No      |
| 28366  | 2  | 2  | Married/li     | 3  | College degree   | 1  | Working, fi | 11 | 2   | No       |      | 2   | No      |
| 28372  | 2  | 2  | Married/li     | 2  | Some college     | 1  | Working, fi | 14 | 2   | No       |      | 2   | No      |
| 28381  | 2  | 2  | Married/li     | 1  | High school or l | 4  | Retired     | 3  | 2   | No       |      | 2   | No      |
| 28388  | 2  | 2  | Married/li     | 2  | Some college     | 1  | Working, fi | 34 | 2   | No       |      | 2   | No      |
| 28413  | 2  | 2  | Married/li     | 4  | Postgraduate     | 1  | Working, fi | 12 | 1   | Yes      | 2    | 1   | Yes     |
| 28421  | 2  | 2  | Married/li     | 3  | College degree   | 1  | Working, fi | 11 | 2   | No       |      | 2   | No      |
| 28430  | 2  | 2  | Married/li     | 3  | College degree   | 1  | Working, fi | 11 | 2   | No       |      | 2   | No      |
| 28439  | 2  | 2  | Married/li     | 3  | College degree   | 1  | Working, fi | 12 | 1   | Yes      | 2    | 2   | No      |
| 28458  | 2  | 2  | Married/li     | 3  | College degree   | 1  | Working, fi | 14 | 1   | Yes      | 1    | 1   | Yes     |
| 28461  | 2  | 2  | Married/li     | 1  | High school or l | 4  | Retired     | 6  | 2   | No       |      | 2   | No      |
| 28466  | 2  | 2  | Married/li     | 2  | Some college     | 1  | Working, fi | 5  | 2   | No       |      | 1   | Yes     |
| 28492  | 2  | 2  | Married/li     | 2  | Some college     | 1  | Working, fi | 12 | 1   | Yes      | 2    | 2   | No      |
| 28534  | 2  | 2  | Married/li     | 2  | Some college     | 4  | Retired     | 3  | 2   | No       |      | 2   | No      |
| 28537  | 2  | 2  | Married/li     | 3  | College degree   | 4  | Retired     | 10 | 1   | Yes      | 1    | 2   | No      |
| 28560  | 2  | 2  | Married/li     | 1  | High school or l | 4  | Retired     | 11 | 2   | No       |      | 2   | No      |
| 28566  | 2  | 4  | Widow/wi       | 1  | High school or l | 5  | Permanent   | 99 | 2   | No       |      | 2   | No      |
| 28569  | 2  | 2  | Married/li     | 3  | College degree   | 4  | Retired     | 11 | 2   | No       |      | 1   | Yes     |
| 28584  | 2  | 1  | Single         | 2  | Some college     | 4  | Retired     | 10 | 2   | No       |      | 1   | Yes     |
| 28590  | 2  | 2  | Married/li     | 3  | College degree   | 4  | Retired     | 11 | 2   | No       |      | 2   | No      |
| 28596  | 2  | 2  | Married/li     | 3  | College degree   | 1  | Working, fi | 32 | 2   | No       |      | 1   | Yes     |
| 28608  | 2  | 2  | Married/li     | 2  | Some college     | 2  | Working, p  | 10 | 2   | No       |      | 2   | No      |
| 28631  | 2  | 2  | Married/li     | 3  | College degree   | 1  | Working, fi | 38 | 1   | Yes      | 1    | 1   | Yes     |
| 28644  | 2  | 2  | Married/li     | 1  | High school or l | 6  | Homemake    | 35 | 2   | No       |      | 2   | No      |
| 28646  | 2  | 2  | Married/li     | 2  | Some college     | 4  | Retired     | 11 | 2   | No       |      | 1   | Yes     |
| 28665  | 2  | 2  | Married/li     | 2  | Some college     | 4  | Retired     | 29 | 2   | No       |      | 2   | No      |
| 28686  | 2  | 2  | Married/li     | 1  | High school or l | 1  | Working, fi | 11 | 2   | No       |      | 2   | No      |
| 28704  | 2  | 2  | Married/li     | 1  | High school or l | 6  | Homemake    | 20 | 2   | No       |      | 2   | No      |
| 28719  | 2  | 2  | Married/li     | 1  | High school or l | 1  | Working, fi | 11 | 2   | No       |      | 1   | Yes     |

| respid | Q5 | Q6 | Marital Status | Q7 | Education        | Q8 | Work        | Q9 | Q10 | Diabetes | Q10a | Q11 | High BP |
|--------|----|----|----------------|----|------------------|----|-------------|----|-----|----------|------|-----|---------|
| 28736  | 2  | 2  | Married/li     | 1  | High school or l | 4  | Retired     | 27 | 2   | No       |      | 1   | Yes     |
| 28739  | 2  | 2  | Married/li     | 2  | Some college     | 1  | Working, fi | 10 | 2   | No       |      | 2   | No      |
| 28758  | 2  | 4  | Widow/wi       | 1  | High school or l | 5  | Permanent   | 28 | 1   | Yes      | 1    | 1   | Yes     |
| 28761  | 2  | 2  | Married/li     | 1  | High school or l | 4  | Retired     | 14 | 2   | No       |      | 2   | No      |
| 28770  | 2  | 2  | Married/li     | 2  | Some college     | 1  | Working, fi | 14 | 1   | Yes      | 1    | 2   | No      |
| 28774  | 2  | 2  | Married/li     | 3  | College degree   | 2  | Working, p  | 8  | 2   | No       |      | 2   | No      |
| 28778  | 2  | 2  | Married/li     | 3  | College degree   | 1  | Working, fi | 13 | 2   | No       |      | 1   | Yes     |
| 28783  | 2  | 2  | Married/li     | 3  | College degree   | 1  | Working, fi | 12 | 2   | No       |      | 1   | Yes     |
| 28785  | 2  | 2  | Married/li     | 2  | Some college     | 4  | Retired     | 27 | 2   | No       |      | 1   | Yes     |
| 28797  | 2  | 2  | Married/li     | 1  | High school or l | 4  | Retired     | 6  | 1   | Yes      | 1    | 1   | Yes     |
| 28801  | 2  | 2  | Married/li     | 1  | High school or l | 4  | Retired     | 12 | 1   | Yes      | 1    | 2   | No      |
| 28821  | 2  | 2  | Married/li     | 1  | High school or l | 1  | Working, fi | 11 | 2   | No       |      | 2   | No      |
| 28827  | 2  | 2  | Married/li     | 1  | High school or l | 4  | Retired     | 27 | 2   | No       |      | 1   | Yes     |
| 28828  | 2  | 4  | Widow/wi       | 2  | Some college     | 4  | Retired     | 34 | 2   | No       |      | 2   | No      |
| 28871  | 2  | 2  | Married/li     | 1  | High school or l | 6  | Homemake    | 25 | 2   | No       |      | 2   | No      |
| 28876  | 2  | 2  | Married/li     | 2  | Some college     | 2  | Working, p  | 10 | 1   | Yes      | 1    | 2   | No      |
| 28891  | 2  | 2  | Married/li     | 2  | Some college     | 2  | Working, p  | 14 | 1   | Yes      | 1    | 2   | No      |
| 28898  | 2  | 2  | Married/li     | 3  | College degree   | 1  | Working, fi | 13 | 2   | No       |      | 2   | No      |
| 28909  | 2  | 2  | Married/li     | 1  | High school or l | 1  | Working, fi | 12 | 1   | Yes      | 1    | 2   | No      |
| 28930  | 2  | 2  | Married/li     | 2  | Some college     | 4  | Retired     | 26 | 2   | No       |      | 2   | No      |
| 28935  | 2  | 3  | Divorced       | 1  | High school or l | 1  | Working, fi | 31 | 2   | No       |      | 2   | No      |
| 28964  | 2  | 2  | Married/li     | 1  | High school or l | 4  | Retired     | 12 | 2   | No       |      | 2   | No      |
| 28965  | 2  | 5  | Prefer not     | 1  | High school or l | 3  | Unemploye   | 99 | 2   | No       |      | 2   | No      |
| 28967  | 2  | 2  | Married/li     | 3  | College degree   | 4  | Retired     | 13 | 1   | Yes      | 1    | 2   | No      |
| 28975  | 2  | 4  | Widow/wi       | 1  | High school or l | 6  | Homemake    | 18 | 2   | No       |      | 2   | No      |
| 28982  | 2  | 2  | Married/li     | 3  | College degree   | 4  | Retired     | 11 | 2   | No       |      | 2   | No      |
| 28989  | 2  | 2  | Married/li     | 3  | College degree   | 2  | Working, p  | 10 | 2   | No       |      | 1   | Yes     |
| 29003  | 2  | 2  | Married/li     | 2  | Some college     | 4  | Retired     | 10 | 2   | No       |      | 2   | No      |
| 29004  | 2  | 2  | Married/li     | 1  | High school or l | 6  | Homemake    | 33 | 2   | No       |      | 1   | Yes     |
| 29007  | 2  | 4  | Widow/wi       | 1  | High school or l | 4  | Retired     | 32 | 1   | Yes      | 1    | 2   | No      |
| 29008  | 2  | 3  | Divorced       | 1  | High school or l | 4  | Retired     | 25 | 2   | No       |      | 1   | Yes     |
| 29011  | 2  | 2  | Married/li     | 1  | High school or l | 4  | Retired     | 12 | 2   | No       |      | 2   | No      |

| respid | Q5 | Q6 | Marital Status | Q7 | Education        | Q8 | Work        | Q9 | Q10 | Diabetes | Q10a | Q11 | High BP |
|--------|----|----|----------------|----|------------------|----|-------------|----|-----|----------|------|-----|---------|
| 29012  | 2  | 2  | Married/li     | 1  | High school or l | 4  | Retired     | 36 | 2   | No       |      | 2   | No      |
| 29014  | 2  | 2  | Married/li     | 1  | High school or l | 6  | Homemake    | 33 | 2   | No       |      | 1   | Yes     |
| 29016  | 2  | 2  | Married/li     | 3  | College degree   | 1  | Working, fi | 32 | 2   | No       |      | 2   | No      |
| 29018  | 2  | 2  | Married/li     | 1  | High school or l | 1  | Working, fi | 27 | 2   | No       |      | 1   | Yes     |
| 29048  | 2  | 2  | Married/li     | 2  | Some college     | 1  | Working, fi | 33 | 2   | No       |      | 2   | No      |
| 29184  | 2  | 3  | Divorced       | 1  | High school or l | 1  | Working, fi | 26 | 2   | No       |      | 2   | No      |
| 29237  | 2  | 2  | Married/li     | 3  | College degree   | 1  | Working, fi | 1  | 2   | No       |      | 2   | No      |
| 29252  | 2  | 2  | Married/li     | 1  | High school or l | 4  | Retired     | 9  | 2   | No       |      | 2   | No      |
| 29267  | 2  | 2  | Married/li     | 2  | Some college     | 4  | Retired     | 8  | 2   | No       |      | 2   | No      |
| 29276  | 2  | 1  | Single         | 2  | Some college     | 1  | Working, fi | 10 | 2   | No       |      | 1   | Yes     |
| 29281  | 2  | 4  | Widow/wi       | 1  | High school or l | 6  | Homemake    | 26 | 2   | No       |      | 1   | Yes     |
| 29285  | 2  | 2  | Married/li     | 1  | High school or l | 1  | Working, fi | 17 | 2   | No       |      | 2   | No      |
| 29291  | 2  | 2  | Married/li     | 1  | High school or l | 2  | Working, p  | 9  | 1   | Yes      | 1    | 1   | Yes     |
| 29304  | 2  | 2  | Married/li     | 3  | College degree   | 1  | Working, fi | 35 | 2   | No       |      | 1   | Yes     |
| 29323  | 2  | 2  | Married/li     | 1  | High school or l | 6  | Homemake    | 31 | 2   | No       |      | 1   | Yes     |
| 29330  | 2  | 2  | Married/li     | 1  | High school or l | 4  | Retired     | 4  | 1   | Yes      | 1    | 2   | No      |
| 29357  | 2  | 2  | Married/li     | 1  | High school or l | 4  | Retired     | 12 | 2   | No       |      | 2   | No      |
| 29416  | 2  | 2  | Married/li     | 3  | College degree   | 2  | Working, p  | 18 | 2   | No       |      | 2   | No      |
| 29432  | 2  | 2  | Married/li     | 3  | College degree   | 4  | Retired     | 11 | 2   | No       |      | 2   | No      |
| 29482  | 2  | 2  | Married/li     | 2  | Some college     | 1  | Working, fi | 33 | 2   | No       |      | 2   | No      |
| 29506  | 2  | 2  | Married/li     | 4  | Postgraduate     | 1  | Working, fi | 35 | 2   | No       |      | 1   | Yes     |
| 29509  | 2  | 2  | Married/li     | 3  | College degree   | 4  | Retired     | 36 | 2   | No       |      | 1   | Yes     |
| 29512  | 2  | 2  | Married/li     | 3  | College degree   | 1  | Working, fi | 32 | 2   | No       |      | 2   | No      |
| 29519  | 2  | 2  | Married/li     | 1  | High school or l | 1  | Working, fi | 34 | 2   | No       |      | 2   | No      |
| 29520  | 2  | 2  | Married/li     | 1  | High school or l | 1  | Working, fi | 27 | 2   | No       |      | 2   | No      |
| 29521  | 2  | 2  | Married/li     | 2  | Some college     | 1  | Working, fi | 31 | 2   | No       |      | 2   | No      |
| 29529  | 2  | 2  | Married/li     | 1  | High school or l | 4  | Retired     | 8  | 2   | No       |      | 1   | Yes     |
| 29532  | 2  | 2  | Married/li     | 1  | High school or l | 4  | Retired     | 4  | 2   | No       |      | 1   | Yes     |
| 29547  | 2  | 2  | Married/li     | 1  | High school or l | 6  | Homemake    | 99 | 2   | No       |      | 2   | No      |
| 29551  | 2  | 2  | Married/li     | 3  | College degree   | 1  | Working, fi | 35 | 2   | No       |      | 1   | Yes     |
| 29584  | 2  | 2  | Married/li     | 2  | Some college     | 4  | Retired     | 30 | 1   | Yes      | 2    | 1   | Yes     |
| 29591  | 2  | 2  | Married/li     | 1  | High school or l | 1  | Working, fi | 13 | 2   | No       |      | 2   | No      |

| respid | Q5 | Q6 | Marital Status | Q7 | Education        | Q8 | Work        | Q9 | Q10 | Diabetes | Q10a | Q11 | High BP |
|--------|----|----|----------------|----|------------------|----|-------------|----|-----|----------|------|-----|---------|
| 29613  | 2  | 3  | Divorced       | 3  | College degree   | 1  | Working, fi | 18 | 2   | No       |      | 2   | No      |
| 29615  | 2  | 2  | Married/li     | 1  | High school or l | 4  | Retired     | 12 | 2   | No       |      | 2   | No      |
| 29625  | 2  | 2  | Married/li     | 1  | High school or l | 4  | Retired     | 12 | 2   | No       |      | 2   | No      |
| 29660  | 2  | 2  | Married/li     | 3  | College degree   | 1  | Working, fi | 13 | 2   | No       |      | 2   | No      |
| 29677  | 2  | 2  | Married/li     | 2  | Some college     | 6  | Homemake    | 30 | 2   | No       |      | 2   | No      |
| 29700  | 2  | 2  | Married/li     | 1  | High school or l | 4  | Retired     | 10 | 1   | Yes      | 1    | 1   | Yes     |
| 29715  | 2  | 2  | Married/li     | 3  | College degree   | 4  | Retired     | 6  | 2   | No       |      | 2   | No      |
| 29720  | 2  | 4  | Widow/wi       | 1  | High school or l | 4  | Retired     | 12 | 2   | No       |      | 2   | No      |
| 29730  | 2  | 2  | Married/li     | 1  | High school or l | 1  | Working, fi | 34 | 2   | No       |      | 2   | No      |
| 29734  | 2  | 2  | Married/li     | 1  | High school or l | 4  | Retired     | 13 | 2   | No       |      | 2   | No      |
| 29754  | 2  | 2  | Married/li     | 1  | High school or l | 6  | Homemake    | 99 | 2   | No       |      | 2   | No      |
| 29771  | 2  | 2  | Married/li     | 1  | High school or l | 1  | Working, fi | 33 | 2   | No       |      | 2   | No      |
| 29774  | 2  | 2  | Married/li     | 2  | Some college     | 4  | Retired     | 27 | 2   | No       |      | 2   | No      |
| 29783  | 2  | 3  | Divorced       | 1  | High school or l | 1  | Working, fi | 32 | 2   | No       |      | 2   | No      |
| 29812  | 2  | 2  | Married/li     | 1  | High school or l | 6  | Homemake    | 35 | 2   | No       |      | 2   | No      |
| 29813  | 2  | 1  | Single         | 2  | Some college     | 4  | Retired     | 10 | 2   | No       |      | 2   | No      |
| 29814  | 2  | 2  | Married/li     | 2  | Some college     | 4  | Retired     | 11 | 2   | No       |      | 2   | No      |
| 29820  | 2  | 2  | Married/li     | 2  | Some college     | 1  | Working, fi | 33 | 2   | No       |      | 1   | Yes     |
| 29906  | 2  | 2  | Married/li     | 3  | College degree   | 4  | Retired     | 12 | 2   | No       |      | 1   | Yes     |
| 29907  | 2  | 2  | Married/li     | 1  | High school or l | 2  | Working, p  | 26 | 2   | No       |      | 2   | No      |
| 29928  | 2  | 2  | Married/li     | 1  | High school or l | 6  | Homemake    | 99 | 2   | No       |      | 2   | No      |
| 29932  | 2  | 2  | Married/li     | 3  | College degree   | 1  | Working, fi | 32 | 2   | No       |      | 1   | Yes     |
| 29958  | 2  | 2  | Married/li     | 1  | High school or l | 1  | Working, fi | 20 | 2   | No       |      | 2   | No      |
| 29982  | 2  | 2  | Married/li     | 1  | High school or l | 6  | Homemake    | 30 | 2   | No       |      | 2   | No      |
| 29989  | 2  | 2  | Married/li     | 2  | Some college     | 4  | Retired     | 27 | 2   | No       |      | 2   | No      |
| 29994  | 2  | 2  | Married/li     | 2  | Some college     | 4  | Retired     | 12 | 2   | No       |      | 2   | No      |
| 30005  | 2  | 2  | Married/li     | 1  | High school or l | 1  | Working, fi | 25 | 2   | No       |      | 2   | No      |
| 30077  | 2  | 4  | Widow/wi       | 1  | High school or l | 4  | Retired     | 27 | 2   | No       |      | 1   | Yes     |
| 30098  | 2  | 1  | Single         | 4  | Postgraduate     | 1  | Working, fi | 33 | 2   | No       |      | 2   | No      |
| 30107  | 2  | 2  | Married/li     | 1  | High school or l | 1  | Working, fi | 26 | 2   | No       |      | 1   | Yes     |
| 30154  | 2  | 2  | Married/li     | 4  | Postgraduate     | 4  | Retired     | 11 | 2   | No       |      | 1   | Yes     |
| 30159  | 2  | 2  | Married/li     | 2  | Some college     | 4  | Retired     | 27 | 2   | No       |      | 1   | Yes     |

| respid | Q5 | Q6 | Marital Status | Q7 | Education        | Q8 | Work        | Q9 | Q10 | Diabetes | Q10a | Q11 | High BP |
|--------|----|----|----------------|----|------------------|----|-------------|----|-----|----------|------|-----|---------|
| 30162  | 2  | 4  | Widow/wid      | 1  | High school or l | 6  | Homemaker   | 30 | 2   | No       |      | 2   | No      |
| 30163  | 2  | 1  | Single         | 1  | High school or l | 4  | Retired     | 30 | 2   | No       |      | 2   | No      |
| 30189  | 2  | 4  | Widow/wid      | 2  | Some college     | 6  | Homemaker   | 31 | 2   | No       |      | 2   | No      |
| 30230  | 2  | 2  | Married/liv    | 2  | Some college     | 6  | Homemaker   | 35 | 2   | No       |      | 2   | No      |
| 30259  | 2  | 2  | Married/liv    | 3  | College degree   | 1  | Working, fi | 33 | 1   | Yes      | 1    | 2   | No      |
| 30284  | 2  | 2  | Married/liv    | 1  | High school or l | 4  | Retired     | 25 | 2   | No       |      | 2   | No      |
| 30296  | 2  | 2  | Married/liv    | 1  | High school or l | 4  | Retired     | 31 | 2   | No       |      | 2   | No      |
| 30330  | 2  | 2  | Married/liv    | 2  | Some college     | 1  | Working, fi | 11 | 2   | No       |      | 1   | Yes     |
| 30341  | 2  | 2  | Married/liv    | 1  | High school or l | 1  | Working, fi | 34 | 2   | No       |      | 2   | No      |
| 30352  | 2  | 2  | Married/liv    | 1  | High school or l | 4  | Retired     | 27 | 2   | No       |      | 1   | Yes     |
| 30379  | 2  | 2  | Married/liv    | 3  | College degree   | 4  | Retired     | 34 | 2   | No       |      | 2   | No      |
| 30424  | 2  | 2  | Married/liv    | 1  | High school or l | 1  | Working, fi | 34 | 2   | No       |      | 2   | No      |
| 30447  | 2  | 2  | Married/liv    | 2  | Some college     | 4  | Retired     | 8  | 2   | No       |      | 2   | No      |
| 30477  | 2  | 2  | Married/liv    | 2  | Some college     | 1  | Working, fi | 12 | 1   | Yes      | 1    | 1   | Yes     |
| 30503  | 2  | 4  | Widow/wid      | 1  | High school or l | 6  | Homemaker   | 33 | 2   | No       |      | 1   | Yes     |
| 30515  | 2  | 2  | Married/liv    | 3  | College degree   | 4  | Retired     | 13 | 2   | No       |      | 1   | Yes     |
| 30516  | 2  | 1  | Single         | 3  | College degree   | 1  | Working, fi | 32 | 2   | No       |      | 2   | No      |
| 30623  | 2  | 2  | Married/liv    | 1  | High school or l | 4  | Retired     | 9  | 1   | Yes      | 1    | 1   | Yes     |
| 30639  | 2  | 1  | Single         | 2  | Some college     | 4  | Retired     | 10 | 2   | No       |      | 2   | No      |
| 30670  | 2  | 2  | Married/liv    | 1  | High school or l | 1  | Working, fi | 27 | 2   | No       |      | 2   | No      |
| 30697  | 2  | 2  | Married/liv    | 3  | College degree   | 4  | Retired     | 34 | 2   | No       |      | 2   | No      |
| 30735  | 2  | 1  | Single         | 2  | Some college     | 1  | Working, fi | 32 | 2   | No       |      | 2   | No      |
| 30742  | 2  | 2  | Married/liv    | 1  | High school or l | 4  | Retired     | 33 | 2   | No       |      | 1   | Yes     |
| 30751  | 2  | 2  | Married/liv    | 2  | Some college     | 4  | Retired     | 11 | 2   | No       |      | 2   | No      |
| 30789  | 2  | 2  | Married/liv    | 1  | High school or l | 4  | Retired     | 33 | 2   | No       |      | 2   | No      |
| 30867  | 2  | 2  | Married/liv    | 3  | College degree   | 1  | Working, fi | 12 | 2   | No       |      | 1   | Yes     |
| 30876  | 2  | 2  | Married/liv    | 2  | Some college     | 4  | Retired     | 5  | 2   | No       |      | 2   | No      |
| 30877  | 2  | 4  | Widow/wid      | 2  | Some college     | 4  | Retired     | 27 | 2   | No       |      | 2   | No      |
| 30887  | 2  | 2  | Married/liv    | 3  | College degree   | 4  | Retired     | 10 | 2   | No       |      | 2   | No      |
| 30891  | 2  | 2  | Married/liv    | 1  | High school or l | 4  | Retired     | 9  | 2   | No       |      | 1   | Yes     |
| 31030  | 2  | 2  | Married/liv    | 1  | High school or l | 4  | Retired     | 5  | 2   | No       |      | 1   | Yes     |
| 31059  | 2  | 1  | Single         | 3  | College degree   | 1  | Working, fi | 30 | 2   | No       |      | 1   | Yes     |

| respid | Q5 | Q6 | Marital Status | Q7 | Education        | Q8 | Work        | Q9 | Q10 | Diabetes | Q10a | Q11 | High BP |
|--------|----|----|----------------|----|------------------|----|-------------|----|-----|----------|------|-----|---------|
| 31082  | 2  | 2  | Married/li     | 2  | Some college     | 1  | Working, fi | 28 | 2   | No       |      | 2   | No      |
| 31106  | 2  | 2  | Married/li     | 1  | High school or l | 1  | Working, fi | 33 | 2   | No       |      | 2   | No      |
| 31110  | 2  | 2  | Married/li     | 1  | High school or l | 4  | Retired     | 2  | 2   | No       |      | 2   | No      |
| 31265  | 2  | 2  | Married/li     | 2  | Some college     | 1  | Working, fi | 13 | 2   | No       |      | 2   | No      |
| 31266  | 2  | 2  | Married/li     | 2  | Some college     | 4  | Retired     | 13 | 2   | No       |      | 2   | No      |
| 31267  | 2  | 2  | Married/li     | 2  | Some college     | 4  | Retired     | 13 | 2   | No       |      | 2   | No      |
| 31310  | 2  | 5  | Prefer not     | 2  | Some college     | 1  | Working, fi | 30 | 2   | No       |      | 2   | No      |
| 31325  | 2  | 2  | Married/li     | 1  | High school or l | 1  | Working, fi | 10 | 2   | No       |      | 2   | No      |
| 31367  | 2  | 2  | Married/li     | 3  | College degree   | 4  | Retired     | 10 | 2   | No       |      | 2   | No      |
| 31389  | 2  | 1  | Single         | 3  | College degree   | 4  | Retired     | 12 | 2   | No       |      | 2   | No      |
| 31440  | 2  | 4  | Widow/wi       | 1  | High school or l | 4  | Retired     | 30 | 2   | No       |      | 1   | Yes     |
| 31465  | 2  | 2  | Married/li     | 3  | College degree   | 4  | Retired     | 18 | 2   | No       |      | 1   | Yes     |
| 31477  | 2  | 1  | Single         | 3  | College degree   | 1  | Working, fi | 18 | 2   | No       |      | 2   | No      |
| 31491  | 2  | 2  | Married/li     | 1  | High school or l | 4  | Retired     | 33 | 2   | No       |      | 1   | Yes     |
| 31494  | 2  | 2  | Married/li     | 3  | College degree   | 4  | Retired     | 10 | 2   | No       |      | 2   | No      |
| 31509  | 2  | 2  | Married/li     | 4  | Postgraduate     | 4  | Retired     | 13 | 2   | No       |      | 2   | No      |
| 31533  | 2  | 2  | Married/li     | 3  | College degree   | 4  | Retired     | 12 | 2   | No       |      | 2   | No      |
| 31547  | 2  | 3  | Divorced       | 1  | High school or l | 4  | Retired     | 99 | 1   | Yes      | 1    | 2   | No      |
| 31558  | 2  | 2  | Married/li     | 1  | High school or l | 6  | Homemake    | 29 | 2   | No       |      | 2   | No      |
| 31579  | 2  | 2  | Married/li     | 1  | High school or l | 1  | Working, fi | 38 | 2   | No       |      | 2   | No      |
| 31591  | 2  | 2  | Married/li     | 2  | Some college     | 4  | Retired     | 9  | 2   | No       |      | 2   | No      |
| 31596  | 2  | 2  | Married/li     | 2  | Some college     | 1  | Working, fi | 9  | 2   | No       |      | 2   | No      |
| 31601  | 2  | 2  | Married/li     | 3  | College degree   | 4  | Retired     | 7  | 2   | No       |      | 1   | Yes     |
| 31605  | 2  | 2  | Married/li     | 1  | High school or l | 4  | Retired     | 9  | 2   | No       |      | 2   | No      |
| 31637  | 2  | 2  | Married/li     | 3  | College degree   | 1  | Working, fi | 13 | 2   | No       |      | 2   | No      |
| 31646  | 2  | 2  | Married/li     | 1  | High school or l | 4  | Retired     | 9  | 2   | No       |      | 2   | No      |
| 31647  | 2  | 4  | Widow/wi       | 1  | High school or l | 6  | Homemake    | 30 | 2   | No       |      | 1   | Yes     |
| 31650  | 2  | 2  | Married/li     | 2  | Some college     | 1  | Working, fi | 33 | 2   | No       |      | 1   | Yes     |
| 31651  | 2  | 2  | Married/li     | 2  | Some college     | 1  | Working, fi | 11 | 2   | No       |      | 2   | No      |
| 31657  | 2  | 2  | Married/li     | 3  | College degree   | 4  | Retired     | 12 | 2   | No       |      | 2   | No      |
| 31660  | 2  | 2  | Married/li     | 2  | Some college     | 6  | Homemake    | 31 | 2   | No       |      | 1   | Yes     |
| 31661  | 2  | 2  | Married/li     | 2  | Some college     | 1  | Working, fi | 11 | 2   | No       |      | 2   | No      |



| respid | Q5 | Q6 | Marital Status | Q7 | Education        | Q8 | Work        | Q9 | Q10 | Diabetes | Q10a | Q11 | High BP |
|--------|----|----|----------------|----|------------------|----|-------------|----|-----|----------|------|-----|---------|
| 31667  | 2  | 2  | Married/li     | 2  | Some college     | 1  | Working, fi | 11 | 2   | No       |      | 2   | No      |
| 31674  | 2  | 2  | Married/li     | 2  | Some college     | 1  | Working, fi | 11 | 2   | No       |      | 2   | No      |
| 31686  | 2  | 2  | Married/li     | 2  | Some college     | 4  | Retired     | 9  | 2   | No       |      | 1   | Yes     |
| 31693  | 2  | 2  | Married/li     | 1  | High school or l | 1  | Working, fi | 11 | 2   | No       |      | 2   | No      |
| 31716  | 2  | 2  | Married/li     | 2  | Some college     | 1  | Working, fi | 7  | 2   | No       |      | 2   | No      |
| 31818  | 2  | 1  | Single         | 1  | High school or l | 4  | Retired     | 10 | 2   | No       |      | 2   | No      |
| 31886  | 2  | 2  | Married/li     | 2  | Some college     | 4  | Retired     | 11 | 2   | No       |      | 1   | Yes     |
| 31945  | 2  | 2  | Married/li     | 3  | College degree   | 1  | Working, fi | 11 | 1   | Yes      | 1    | 1   | Yes     |
| 31957  | 2  | 4  | Widow/wi       | 1  | High school or l | 2  | Working, p  | 30 | 2   | No       |      | 1   | Yes     |
| 31966  | 2  | 2  | Married/li     | 3  | College degree   | 2  | Working, p  | 17 | 2   | No       |      | 1   | Yes     |
| 31978  | 2  | 2  | Married/li     | 1  | High school or l | 4  | Retired     | 28 | 2   | No       |      | 1   | Yes     |
| 31999  | 2  | 2  | Married/li     | 2  | Some college     | 2  | Working, p  | 31 | 2   | No       |      | 2   | No      |
| 32026  | 2  | 2  | Married/li     | 1  | High school or l | 6  | Homemake    | 18 | 2   | No       |      | 1   | Yes     |
| 32033  | 2  | 2  | Married/li     | 2  | Some college     | 4  | Retired     | 99 | 2   | No       |      | 2   | No      |
| 32037  | 2  | 2  | Married/li     | 2  | Some college     | 4  | Retired     | 13 | 2   | No       |      | 2   | No      |
| 32038  | 2  | 2  | Married/li     | 2  | Some college     | 4  | Retired     | 12 | 2   | No       |      | 2   | No      |
| 32047  | 2  | 2  | Married/li     | 3  | College degree   | 1  | Working, fi | 1  | 2   | No       |      | 2   | No      |
| 32053  | 2  | 2  | Married/li     | 3  | College degree   | 4  | Retired     | 12 | 2   | No       |      | 2   | No      |
| 32069  | 2  | 4  | Widow/wi       | 1  | High school or l | 6  | Homemake    | 31 | 2   | No       |      | 1   | Yes     |
| 32081  | 2  | 2  | Married/li     | 3  | College degree   | 4  | Retired     | 11 | 2   | No       |      | 1   | Yes     |
| 32123  | 2  | 2  | Married/li     | 1  | High school or l | 6  | Homemake    | 27 | 2   | No       |      | 2   | No      |
| 32130  | 2  | 2  | Married/li     | 1  | High school or l | 4  | Retired     | 10 | 2   | No       |      | 2   | No      |
| 32141  | 2  | 2  | Married/li     | 2  | Some college     | 4  | Retired     | 11 | 2   | No       |      | 2   | No      |
| 32158  | 2  | 2  | Married/li     | 3  | College degree   | 4  | Retired     | 12 | 2   | No       |      | 2   | No      |
| 32165  | 2  | 2  | Married/li     | 1  | High school or l | 1  | Working, fi | 34 | 2   | No       |      | 1   | Yes     |
| 32180  | 2  | 4  | Widow/wi       | 1  | High school or l | 1  | Working, fi | 31 | 2   | No       |      | 2   | No      |
| 32221  | 2  | 2  | Married/li     | 1  | High school or l | 4  | Retired     | 4  | 1   | Yes      | 1    | 1   | Yes     |
| 32292  | 2  | 2  | Married/li     | 2  | Some college     | 2  | Working, p  | 99 | 2   | No       |      | 2   | No      |
| 32318  | 2  | 2  | Married/li     | 1  | High school or l | 6  | Homemake    | 28 | 2   | No       |      | 2   | No      |
| 32346  | 2  | 1  | Single         | 3  | College degree   | 1  | Working, fi | 17 | 2   | No       |      | 1   | Yes     |
| 32402  | 2  | 1  | Single         | 3  | College degree   | 1  | Working, fi | 27 | 2   | No       |      | 1   | Yes     |
| 32422  | 2  | 2  | Married/li     | 2  | Some college     | 4  | Retired     | 11 | 2   | No       |      | 2   | No      |

| respid | Q5 | Q6 | Marital Status | Q7 | Education        | Q8 | Work        | Q9 | Q10 | Diabetes | Q10a | Q11 | High BP |
|--------|----|----|----------------|----|------------------|----|-------------|----|-----|----------|------|-----|---------|
| 32439  | 2  | 2  | Married/li     | 2  | Some college     | 4  | Retired     | 12 | 2   | No       |      | 2   | No      |
| 32507  | 2  | 2  | Married/li     | 3  | College degree   | 1  | Working, fi | 26 | 2   | No       |      | 2   | No      |
| 32522  | 2  | 1  | Single         | 3  | College degree   | 4  | Retired     | 10 | 2   | No       |      | 2   | No      |
| 32535  | 2  | 1  | Single         | 3  | College degree   | 4  | Retired     | 11 | 2   | No       |      | 2   | No      |
| 32546  | 2  | 2  | Married/li     | 1  | High school or l | 6  | Homemake    | 4  | 2   | No       |      | 2   | No      |
| 32553  | 2  | 1  | Single         | 2  | Some college     | 4  | Retired     | 12 | 2   | No       |      | 2   | No      |
| 32570  | 2  | 1  | Single         | 3  | College degree   | 1  | Working, fi | 34 | 2   | No       |      | 2   | No      |
| 32592  | 2  | 2  | Married/li     | 3  | College degree   | 4  | Retired     | 11 | 2   | No       |      | 1   | Yes     |
| 32605  | 2  | 2  | Married/li     | 2  | Some college     | 4  | Retired     | 33 | 2   | No       |      | 2   | No      |
| 32630  | 2  | 2  | Married/li     | 2  | Some college     | 4  | Retired     | 5  | 2   | No       |      | 2   | No      |
| 32642  | 2  | 2  | Married/li     | 1  | High school or l | 2  | Working, p  | 14 | 2   | No       |      | 1   | Yes     |
| 32646  | 2  | 4  | Widow/wi       | 1  | High school or l | 1  | Working, fi | 30 | 2   | No       |      | 2   | No      |
| 32665  | 2  | 2  | Married/li     | 1  | High school or l | 4  | Retired     | 33 | 2   | No       |      | 2   | No      |
| 32677  | 2  | 4  | Widow/wi       | 1  | High school or l | 5  | Permanent   | 27 | 2   | No       |      | 2   | No      |
| 32694  | 2  | 4  | Widow/wi       | 1  | High school or l | 4  | Retired     | 32 | 2   | No       |      | 1   | Yes     |
| 32698  | 2  | 2  | Married/li     | 1  | High school or l | 6  | Homemake    | 26 | 2   | No       |      | 2   | No      |
| 32754  | 2  | 2  | Married/li     | 1  | High school or l | 6  | Homemake    | 15 | 2   | No       |      | 1   | Yes     |
| 32799  | 2  | 2  | Married/li     | 2  | Some college     | 1  | Working, fi | 11 | 1   | Yes      | 1    | 2   | No      |
| 32816  | 2  | 2  | Married/li     | 2  | Some college     | 1  | Working, fi | 27 | 2   | No       |      | 1   | Yes     |
| 32819  | 2  | 2  | Married/li     | 1  | High school or l | 4  | Retired     | 2  | 1   | Yes      | 1    | 1   | Yes     |
| 32840  | 2  | 2  | Married/li     | 3  | College degree   | 4  | Retired     | 11 | 2   | No       |      | 2   | No      |
| 32861  | 2  | 2  | Married/li     | 1  | High school or l | 1  | Working, fi | 99 | 2   | No       |      | 1   | Yes     |
| 32866  | 2  | 2  | Married/li     | 2  | Some college     | 1  | Working, fi | 27 | 2   | No       |      | 2   | No      |
| 32889  | 2  | 2  | Married/li     | 2  | Some college     | 1  | Working, fi | 36 | 2   | No       |      | 2   | No      |
| 32960  | 2  | 2  | Married/li     | 3  | College degree   | 1  | Working, fi | 36 | 2   | No       |      | 2   | No      |
| 32965  | 2  | 2  | Married/li     | 1  | High school or l | 6  | Homemake    | 33 | 2   | No       |      | 2   | No      |
| 32986  | 2  | 2  | Married/li     | 1  | High school or l | 4  | Retired     | 13 | 2   | No       |      | 2   | No      |
| 33005  | 2  | 2  | Married/li     | 1  | High school or l | 6  | Homemake    | 28 | 1   | Yes      | 1    | 1   | Yes     |
| 33054  | 2  | 2  | Married/li     | 3  | College degree   | 1  | Working, fi | 13 | 2   | No       |      | 1   | Yes     |
| 33072  | 2  | 1  | Single         | 3  | College degree   | 1  | Working, fi | 36 | 2   | No       |      | 2   | No      |
| 33095  | 2  | 2  | Married/li     | 1  | High school or l | 4  | Retired     | 26 | 1   | Yes      | 1    | 1   | Yes     |
| 33099  | 2  | 2  | Married/li     | 1  | High school or l | 4  | Retired     | 12 | 2   | No       |      | 1   | Yes     |

| respid | Q5 | Q6 | Marital Status | Q7 | Education        | Q8 | Work        | Q9 | Q10 | Diabetes | Q10a | Q11 | High BP |
|--------|----|----|----------------|----|------------------|----|-------------|----|-----|----------|------|-----|---------|
| 33121  | 2  | 2  | Married/li     | 3  | College degree   | 1  | Working, fi | 5  | 1   | Yes      | 1    | 1   | Yes     |
| 33152  | 2  | 3  | Divorced       | 1  | High school or l | 1  | Working, fi | 28 | 2   | No       |      | 1   | Yes     |
| 33159  | 2  | 2  | Married/li     | 3  | College degree   | 4  | Retired     | 11 | 2   | No       |      | 1   | Yes     |
| 33189  | 2  | 2  | Married/li     | 2  | Some college     | 4  | Retired     | 33 | 2   | No       |      | 1   | Yes     |
| 33198  | 2  | 2  | Married/li     | 4  | Postgraduate     | 4  | Retired     | 11 | 1   | Yes      | 1    | 1   | Yes     |
| 33202  | 2  | 2  | Married/li     | 2  | Some college     | 1  | Working, fi | 16 | 1   | Yes      | 1    | 1   | Yes     |
| 33204  | 2  | 4  | Widow/wi       | 1  | High school or l | 4  | Retired     | 25 | 2   | No       |      | 2   | No      |
| 33224  | 2  | 2  | Married/li     | 2  | Some college     | 1  | Working, fi | 27 | 2   | No       |      | 2   | No      |
| 33272  | 2  | 2  | Married/li     | 2  | Some college     | 4  | Retired     | 6  | 1   | Yes      | 2    | 1   | Yes     |
| 33294  | 2  | 2  | Married/li     | 1  | High school or l | 6  | Homemake    | 25 | 1   | Yes      | 1    | 1   | Yes     |
| 33300  | 2  | 2  | Married/li     | 2  | Some college     | 4  | Retired     | 10 | 2   | No       |      | 2   | No      |
| 33314  | 2  | 2  | Married/li     | 3  | College degree   | 4  | Retired     | 2  | 1   | Yes      | 1    | 1   | Yes     |
| 33338  | 2  | 2  | Married/li     | 1  | High school or l | 4  | Retired     | 14 | 2   | No       |      | 2   | No      |
| 33350  | 2  | 2  | Married/li     | 2  | Some college     | 4  | Retired     | 11 | 2   | No       |      | 2   | No      |
| 33362  | 2  | 2  | Married/li     | 2  | Some college     | 4  | Retired     | 11 | 2   | No       |      | 2   | No      |
| 33368  | 2  | 2  | Married/li     | 1  | High school or l | 4  | Retired     | 11 | 2   | No       |      | 2   | No      |
| 33374  | 2  | 2  | Married/li     | 3  | College degree   | 4  | Retired     | 8  | 1   | Yes      | 1    | 2   | No      |
| 33380  | 2  | 2  | Married/li     | 3  | College degree   | 1  | Working, fi | 13 | 2   | No       |      | 1   | Yes     |
| 33385  | 2  | 2  | Married/li     | 2  | Some college     | 4  | Retired     | 11 | 2   | No       |      | 2   | No      |
| 33402  | 2  | 2  | Married/li     | 2  | Some college     | 4  | Retired     | 7  | 1   | Yes      | 1    | 2   | No      |
| 33414  | 2  | 4  | Widow/wi       | 2  | Some college     | 4  | Retired     | 9  | 2   | No       |      | 2   | No      |
| 33439  | 2  | 2  | Married/li     | 2  | Some college     | 4  | Retired     | 7  | 1   | Yes      | 1    | 2   | No      |
| 33449  | 2  | 2  | Married/li     | 3  | College degree   | 4  | Retired     | 12 | 2   | No       |      | 2   | No      |
| 33533  | 2  | 2  | Married/li     | 2  | Some college     | 1  | Working, fi | 22 | 2   | No       |      | 2   | No      |
| 33540  | 2  | 2  | Married/li     | 1  | High school or l | 6  | Homemake    | 99 | 2   | No       |      | 2   | No      |
| 33556  | 2  | 2  | Married/li     | 1  | High school or l | 1  | Working, fi | 18 | 2   | No       |      | 2   | No      |
| 33615  | 2  | 1  | Single         | 3  | College degree   | 2  | Working, p  | 16 | 2   | No       |      | 2   | No      |
| 33694  | 2  | 2  | Married/li     | 2  | Some college     | 1  | Working, fi | 33 | 1   | Yes      | 1    | 1   | Yes     |
| 33717  | 2  | 3  | Divorced       | 1  | High school or l | 4  | Retired     | 5  | 1   | Yes      | 1    | 1   | Yes     |
| 33729  | 2  | 2  | Married/li     | 1  | High school or l | 8  | Other worl  | 15 | 2   | No       |      | 1   | Yes     |
| 33746  | 2  | 4  | Widow/wi       | 1  | High school or l | 9  | Other       | 15 | 1   | Yes      | 1    | 2   | No      |
| 33764  | 2  | 2  | Married/li     | 1  | High school or l | 4  | Retired     | 11 | 2   | No       |      | 2   | No      |

| respid | Q5 | Q6 | Marital Status | Q7 | Education        | Q8 | Work        | Q9 | Q10 | Diabetes | Q10a | Q11 | High BP |
|--------|----|----|----------------|----|------------------|----|-------------|----|-----|----------|------|-----|---------|
| 33790  | 2  | 2  | Married/li     | 1  | High school or l | 6  | Homemake    | 27 | 1   | Yes      | 1    | 1   | Yes     |
| 33868  | 2  | 2  | Married/li     | 2  | Some college     | 4  | Retired     | 8  | 2   | No       |      | 1   | Yes     |
| 33872  | 2  | 2  | Married/li     | 1  | High school or l | 4  | Retired     | 2  | 1   | Yes      | 1    | 2   | No      |
| 33883  | 2  | 2  | Married/li     | 1  | High school or l | 4  | Retired     | 5  | 2   | No       |      | 2   | No      |
| 33884  | 2  | 2  | Married/li     | 3  | College degree   | 6  | Homemake    | 31 | 2   | No       |      | 2   | No      |
| 33900  | 2  | 2  | Married/li     | 3  | College degree   | 1  | Working, fi | 99 | 2   | No       |      | 2   | No      |
| 33933  | 2  | 2  | Married/li     | 3  | College degree   | 6  | Homemake    | 13 | 2   | No       |      | 1   | Yes     |
| 33949  | 2  | 2  | Married/li     | 1  | High school or l | 5  | Permanent   | 99 | 1   | Yes      | 1    | 1   | Yes     |
| 34005  | 2  | 2  | Married/li     | 1  | High school or l | 4  | Retired     | 2  | 2   | No       |      | 1   | Yes     |
| 34016  | 2  | 2  | Married/li     | 1  | High school or l | 2  | Working, p  | 15 | 2   | No       |      | 2   | No      |
| 34041  | 2  | 2  | Married/li     | 3  | College degree   | 1  | Working, fi | 12 | 2   | No       |      | 2   | No      |
| 34053  | 2  | 2  | Married/li     | 1  | High school or l | 2  | Working, p  | 32 | 2   | No       |      | 1   | Yes     |
| 34056  | 2  | 2  | Married/li     | 3  | College degree   | 4  | Retired     | 29 | 2   | No       |      | 2   | No      |
| 34093  | 2  | 1  | Single         | 1  | High school or l | 4  | Retired     | 1  | 2   | No       |      | 2   | No      |
| 34112  | 2  | 2  | Married/li     | 3  | College degree   | 4  | Retired     | 12 | 2   | No       |      | 1   | Yes     |
| 34136  | 2  | 2  | Married/li     | 2  | Some college     | 1  | Working, fi | 14 | 2   | No       |      | 2   | No      |
| 34138  | 2  | 1  | Single         | 3  | College degree   | 4  | Retired     | 25 | 2   | No       |      | 2   | No      |
| 34139  | 2  | 2  | Married/li     | 2  | Some college     | 4  | Retired     | 12 | 1   | Yes      | 1    | 1   | Yes     |
| 34189  | 2  | 4  | Widow/wi       | 2  | Some college     | 4  | Retired     | 6  | 2   | No       |      | 1   | Yes     |
| 34239  | 2  | 1  | Single         | 1  | High school or l | 4  | Retired     | 25 | 2   | No       |      | 2   | No      |
| 34240  | 2  | 2  | Married/li     | 1  | High school or l | 6  | Homemake    | 18 | 1   | Yes      | 1    | 1   | Yes     |
| 34241  | 2  | 2  | Married/li     | 4  | Postgraduate     | 1  | Working, fi | 21 | 2   | No       |      | 2   | No      |
| 34259  | 2  | 2  | Married/li     | 3  | College degree   | 1  | Working, fi | 10 | 2   | No       |      | 1   | Yes     |
| 34303  | 2  | 2  | Married/li     | 1  | High school or l | 4  | Retired     | 1  | 1   | Yes      | 1    | 1   | Yes     |
| 34306  | 2  | 2  | Married/li     | 1  | High school or l | 4  | Retired     | 4  | 2   | No       |      | 1   | Yes     |
| 34395  | 2  | 2  | Married/li     | 1  | High school or l | 4  | Retired     | 27 | 2   | No       |      | 1   | Yes     |
| 34463  | 2  | 4  | Widow/wi       | 2  | Some college     | 4  | Retired     | 32 | 2   | No       |      | 1   | Yes     |
| 34466  | 2  | 2  | Married/li     | 2  | Some college     | 1  | Working, fi | 3  | 2   | No       |      | 2   | No      |
| 34471  | 2  | 2  | Married/li     | 1  | High school or l | 4  | Retired     | 11 | 2   | No       |      | 1   | Yes     |
| 34489  | 2  | 2  | Married/li     | 1  | High school or l | 4  | Retired     | 6  | 2   | No       |      | 1   | Yes     |
| 34518  | 2  | 2  | Married/li     | 3  | College degree   | 6  | Homemake    | 21 | 1   | Yes      | 1    | 1   | Yes     |
| 34542  | 2  | 2  | Married/li     | 3  | College degree   | 1  | Working, fi | 20 | 2   | No       |      | 1   | Yes     |

| respid | Q5 | Q6 | Marital Status | Q7 | Education        | Q8 | Work        | Q9 | Q10 | Diabetes | Q10a | Q11 | High BP |
|--------|----|----|----------------|----|------------------|----|-------------|----|-----|----------|------|-----|---------|
| 34595  | 2  | 2  | Married/li     | 1  | High school or l | 6  | Homemake    | 17 | 2   | No       |      | 2   | No      |
| 34604  | 2  | 2  | Married/li     | 1  | High school or l | 6  | Homemake    | 15 | 2   | No       |      | 2   | No      |
| 34631  | 2  | 4  | Widow/wi       | 1  | High school or l | 5  | Permanent   | 26 | 1   | Yes      | 1    | 1   | Yes     |
| 34665  | 2  | 2  | Married/li     | 1  | High school or l | 1  | Working, fi | 33 | 2   | No       |      | 1   | Yes     |
| 34716  | 2  | 2  | Married/li     | 1  | High school or l | 1  | Working, fi | 28 | 1   | Yes      | 1    | 1   | Yes     |
| 34729  | 2  | 2  | Married/li     | 1  | High school or l | 1  | Working, fi | 20 | 2   | No       |      | 2   | No      |
| 34772  | 2  | 2  | Married/li     | 1  | High school or l | 4  | Retired     | 99 | 2   | No       |      | 1   | Yes     |
| 34800  | 2  | 2  | Married/li     | 1  | High school or l | 6  | Homemake    | 99 | 2   | No       |      | 2   | No      |
| 34819  | 2  | 2  | Married/li     | 1  | High school or l | 1  | Working, fi | 7  | 2   | No       |      | 1   | Yes     |
| 34829  | 2  | 2  | Married/li     | 1  | High school or l | 4  | Retired     | 14 | 1   | Yes      | 1    | 2   | No      |
| 34831  | 2  | 2  | Married/li     | 2  | Some college     | 4  | Retired     | 8  | 2   | No       |      | 2   | No      |
| 34839  | 2  | 2  | Married/li     | 1  | High school or l | 4  | Retired     | 30 | 2   | No       |      | 2   | No      |
| 34868  | 2  | 2  | Married/li     | 2  | Some college     | 4  | Retired     | 11 | 2   | No       |      | 2   | No      |
| 34869  | 2  | 4  | Widow/wi       | 1  | High school or l | 9  | Other       | 1  | 2   | No       |      | 1   | Yes     |
| 34882  | 2  | 4  | Widow/wi       | 1  | High school or l | 9  | Other       | 1  | 2   | No       |      | 1   | Yes     |
| 34895  | 2  | 2  | Married/li     | 2  | Some college     | 1  | Working, fi | 8  | 2   | No       |      | 1   | Yes     |
| 34901  | 2  | 4  | Widow/wi       | 1  | High school or l | 9  | Other       | 7  | 2   | No       |      | 1   | Yes     |
| 34904  | 2  | 2  | Married/li     | 3  | College degree   | 4  | Retired     | 10 | 2   | No       |      | 1   | Yes     |
| 34907  | 2  | 4  | Widow/wi       | 1  | High school or l | 4  | Retired     | 1  | 2   | No       |      | 1   | Yes     |
| 34914  | 2  | 2  | Married/li     | 1  | High school or l | 4  | Retired     | 12 | 2   | No       |      | 1   | Yes     |
| 34918  | 2  | 2  | Married/li     | 1  | High school or l | 4  | Retired     | 12 | 2   | No       |      | 1   | Yes     |
| 34924  | 2  | 4  | Widow/wi       | 2  | Some college     | 4  | Retired     | 5  | 2   | No       |      | 2   | No      |
| 34933  | 2  | 2  | Married/li     | 3  | College degree   | 4  | Retired     | 14 | 2   | No       |      | 2   | No      |
| 34938  | 2  | 2  | Married/li     | 2  | Some college     | 2  | Working, p  | 13 | 2   | No       |      | 1   | Yes     |
| 34952  | 2  | 2  | Married/li     | 1  | High school or l | 2  | Working, p  | 3  | 2   | No       |      | 2   | No      |
| 34959  | 2  | 2  | Married/li     | 1  | High school or l | 4  | Retired     | 1  | 2   | No       |      | 1   | Yes     |
| 34972  | 2  | 4  | Widow/wi       | 1  | High school or l | 6  | Homemake    | 1  | 2   | No       |      | 1   | Yes     |
| 34973  | 2  | 2  | Married/li     | 1  | High school or l | 4  | Retired     | 11 | 1   | Yes      | 1    | 1   | Yes     |
| 34975  | 2  | 2  | Married/li     | 1  | High school or l | 4  | Retired     | 11 | 2   | No       |      | 2   | No      |
| 34977  | 2  | 2  | Married/li     | 1  | High school or l | 4  | Retired     | 14 | 2   | No       |      | 2   | No      |
| 34978  | 2  | 4  | Widow/wi       | 1  | High school or l | 4  | Retired     | 1  | 2   | No       |      | 1   | Yes     |
| 34980  | 2  | 2  | Married/li     | 1  | High school or l | 4  | Retired     | 10 | 2   | No       |      | 2   | No      |

| respid | Q5 | Q6 | Marital Status | Q7 | Education        | Q8 | Work        | Q9 | Q10 | Diabetes | Q10a | Q11 | High BP |
|--------|----|----|----------------|----|------------------|----|-------------|----|-----|----------|------|-----|---------|
| 34984  | 2  | 2  | Married/li     | 2  | Some college     | 2  | Working, p  | 11 | 2   | No       |      | 1   | Yes     |
| 34986  | 2  | 2  | Married/li     | 1  | High school or l | 4  | Retired     | 4  | 1   | Yes      | 1    | 1   | Yes     |
| 34994  | 2  | 2  | Married/li     | 2  | Some college     | 4  | Retired     | 14 | 2   | No       |      | 1   | Yes     |
| 34996  | 2  | 2  | Married/li     | 1  | High school or l | 4  | Retired     | 3  | 2   | No       |      | 1   | Yes     |
| 35003  | 2  | 2  | Married/li     | 3  | College degree   | 1  | Working, fi | 11 | 2   | No       |      | 1   | Yes     |
| 35014  | 2  | 2  | Married/li     | 1  | High school or l | 4  | Retired     | 4  | 2   | No       |      | 2   | No      |
| 35029  | 2  | 1  | Single         | 4  | Postgraduate     | 1  | Working, fi | 7  | 2   | No       |      | 2   | No      |
| 35030  | 2  | 4  | Widow/wi       | 1  | High school or l | 3  | Unemploye   | 3  | 1   | Yes      | 1    | 2   | No      |
| 35037  | 2  | 4  | Widow/wi       | 1  | High school or l | 6  | Homemake    | 3  | 2   | No       |      | 1   | Yes     |
| 35043  | 2  | 1  | Single         | 2  | Some college     | 1  | Working, fi | 25 | 2   | No       |      | 2   | No      |
| 35048  | 2  | 2  | Married/li     | 3  | College degree   | 1  | Working, fi | 12 | 2   | No       |      | 2   | No      |
| 35055  | 2  | 2  | Married/li     | 1  | High school or l | 6  | Homemake    | 6  | 2   | No       |      | 2   | No      |
| 35067  | 2  | 2  | Married/li     | 2  | Some college     | 4  | Retired     | 12 | 2   | No       |      | 2   | No      |
| 35072  | 2  | 2  | Married/li     | 1  | High school or l | 4  | Retired     | 2  | 2   | No       |      | 1   | Yes     |
| 35078  | 2  | 2  | Married/li     | 1  | High school or l | 4  | Retired     | 1  | 1   | Yes      | 1    | 1   | Yes     |
| 35084  | 2  | 5  | Prefer not     | 1  | High school or l | 4  | Retired     | 99 | 2   | No       |      | 2   | No      |
| 35095  | 2  | 5  | Prefer not     | 1  | High school or l | 4  | Retired     | 8  | 2   | No       |      | 2   | No      |
| 35096  | 2  | 2  | Married/li     | 1  | High school or l | 4  | Retired     | 12 | 2   | No       |      | 2   | No      |
| 35097  | 2  | 2  | Married/li     | 1  | High school or l | 4  | Retired     | 11 | 2   | No       |      | 1   | Yes     |
| 35098  | 2  | 2  | Married/li     | 2  | Some college     | 4  | Retired     | 11 | 2   | No       |      | 2   | No      |
| 35109  | 2  | 2  | Married/li     | 2  | Some college     | 4  | Retired     | 8  | 2   | No       |      | 1   | Yes     |
| 35114  | 2  | 4  | Widow/wi       | 1  | High school or l | 4  | Retired     | 1  | 2   | No       |      | 1   | Yes     |
| 35115  | 2  | 2  | Married/li     | 1  | High school or l | 4  | Retired     | 2  | 2   | No       |      | 2   | No      |
| 35124  | 2  | 2  | Married/li     | 2  | Some college     | 4  | Retired     | 10 | 2   | No       |      | 2   | No      |
| 35125  | 2  | 2  | Married/li     | 1  | High school or l | 4  | Retired     | 5  | 2   | No       |      | 1   | Yes     |
| 35141  | 2  | 4  | Widow/wi       | 1  | High school or l | 4  | Retired     | 2  | 2   | No       |      | 1   | Yes     |
| 35142  | 2  | 2  | Married/li     | 2  | Some college     | 4  | Retired     | 8  | 2   | No       |      | 2   | No      |
| 35145  | 2  | 4  | Widow/wi       | 1  | High school or l | 4  | Retired     | 11 | 2   | No       |      | 2   | No      |
| 35149  | 2  | 2  | Married/li     | 1  | High school or l | 4  | Retired     | 2  | 2   | No       |      | 1   | Yes     |
| 35159  | 2  | 4  | Widow/wi       | 1  | High school or l | 4  | Retired     | 7  | 2   | No       |      | 1   | Yes     |
| 35163  | 2  | 4  | Widow/wi       | 1  | High school or l | 5  | Permanent   | 11 | 1   | Yes      | 1    | 1   | Yes     |
| 35174  | 2  | 2  | Married/li     | 1  | High school or l | 4  | Retired     | 13 | 2   | No       |      | 1   | Yes     |

| respid | Q5 | Q6 | Marital Status | Q7 | Education        | Q8 | Work        | Q9 | Q10 | Diabetes | Q10a | Q11 | High BP |
|--------|----|----|----------------|----|------------------|----|-------------|----|-----|----------|------|-----|---------|
| 35188  | 2  | 2  | Married/li     | 3  | College degree   | 4  | Retired     | 11 | 2   | No       |      | 2   | No      |
| 35189  | 2  | 2  | Married/li     | 1  | High school or l | 4  | Retired     | 8  | 1   | Yes      | 1    | 2   | No      |
| 35201  | 2  | 2  | Married/li     | 1  | High school or l | 4  | Retired     | 3  | 1   | Yes      | 1    | 1   | Yes     |
| 35215  | 2  | 2  | Married/li     | 2  | Some college     | 4  | Retired     | 8  | 2   | No       |      | 2   | No      |
| 35228  | 2  | 2  | Married/li     | 1  | High school or l | 6  | Homemake    | 10 | 2   | No       |      | 1   | Yes     |
| 35235  | 2  | 2  | Married/li     | 1  | High school or l | 4  | Retired     | 1  | 2   | No       |      | 1   | Yes     |
| 35239  | 2  | 2  | Married/li     | 1  | High school or l | 4  | Retired     | 13 | 2   | No       |      | 2   | No      |
| 35243  | 2  | 2  | Married/li     | 3  | College degree   | 4  | Retired     | 8  | 2   | No       |      | 1   | Yes     |
| 35245  | 2  | 2  | Married/li     | 1  | High school or l | 4  | Retired     | 8  | 2   | No       |      | 2   | No      |
| 35259  | 2  | 3  | Divorced       | 3  | College degree   | 1  | Working, fi | 34 | 2   | No       |      | 2   | No      |
| 35265  | 2  | 4  | Widow/wi       | 1  | High school or l | 4  | Retired     | 9  | 2   | No       |      | 2   | No      |
| 35272  | 2  | 4  | Widow/wi       | 1  | High school or l | 4  | Retired     | 8  | 2   | No       |      | 1   | Yes     |
| 35280  | 2  | 2  | Married/li     | 1  | High school or l | 4  | Retired     | 25 | 2   | No       |      | 2   | No      |
| 35298  | 2  | 2  | Married/li     | 1  | High school or l | 1  | Working, fi | 6  | 2   | No       |      | 2   | No      |
| 35305  | 2  | 2  | Married/li     | 1  | High school or l | 4  | Retired     | 2  | 1   | Yes      | 1    | 1   | Yes     |
| 35306  | 2  | 2  | Married/li     | 1  | High school or l | 4  | Retired     | 8  | 2   | No       |      | 2   | No      |
| 35307  | 2  | 2  | Married/li     | 2  | Some college     | 4  | Retired     | 11 | 2   | No       |      | 2   | No      |
| 35311  | 2  | 4  | Widow/wi       | 1  | High school or l | 6  | Homemake    | 1  | 2   | No       |      | 2   | No      |
| 35322  | 2  | 2  | Married/li     | 1  | High school or l | 4  | Retired     | 9  | 2   | No       |      | 1   | Yes     |
| 35323  | 2  | 2  | Married/li     | 1  | High school or l | 4  | Retired     | 1  | 1   | Yes      | 1    | 1   | Yes     |
| 35327  | 2  | 2  | Married/li     | 1  | High school or l | 6  | Homemake    | 2  | 2   | No       |      | 1   | Yes     |
| 35366  | 2  | 2  | Married/li     | 1  | High school or l | 1  | Working, fi | 5  | 2   | No       |      | 2   | No      |
| 35378  | 2  | 1  | Single         | 2  | Some college     | 4  | Retired     | 11 | 2   | No       |      | 2   | No      |
| 35389  | 2  | 2  | Married/li     | 1  | High school or l | 9  | Other       | 28 | 2   | No       |      | 1   | Yes     |
| 35390  | 2  | 2  | Married/li     | 1  | High school or l | 4  | Retired     | 6  | 2   | No       |      | 1   | Yes     |
| 35395  | 2  | 2  | Married/li     | 1  | High school or l | 4  | Retired     | 2  | 2   | No       |      | 1   | Yes     |
| 35411  | 2  | 2  | Married/li     | 2  | Some college     | 4  | Retired     | 1  | 2   | No       |      | 2   | No      |
| 35423  | 2  | 2  | Married/li     | 2  | Some college     | 1  | Working, fi | 5  | 2   | No       |      | 2   | No      |
| 35425  | 2  | 2  | Married/li     | 1  | High school or l | 4  | Retired     | 7  | 2   | No       |      | 1   | Yes     |
| 35434  | 2  | 5  | Prefer not     | 1  | High school or l | 7  | Student     | 99 | 2   | No       |      | 1   | Yes     |
| 35462  | 2  | 2  | Married/li     | 1  | High school or l | 4  | Retired     | 2  | 2   | No       |      | 1   | Yes     |
| 35478  | 2  | 2  | Married/li     | 2  | Some college     | 4  | Retired     | 13 | 2   | No       |      | 2   | No      |

| respid | Q5 | Q6 | Marital Status | Q7 | Education        | Q8 | Work        | Q9 | Q10 | Diabetes | Q10a | Q11 | High BP |
|--------|----|----|----------------|----|------------------|----|-------------|----|-----|----------|------|-----|---------|
| 35481  | 2  | 2  | Married/li     | 2  | Some college     | 1  | Working, fi | 11 | 1   | Yes      | 1    | 1   | Yes     |
| 35498  | 2  | 2  | Married/li     | 1  | High school or l | 1  | Working, fi | 8  | 2   | No       |      | 2   | No      |
| 35499  | 2  | 2  | Married/li     | 1  | High school or l | 4  | Retired     | 5  | 2   | No       |      | 2   | No      |
| 35502  | 2  | 2  | Married/li     | 1  | High school or l | 4  | Retired     | 12 | 2   | No       |      | 2   | No      |
| 35503  | 2  | 2  | Married/li     | 1  | High school or l | 4  | Retired     | 7  | 2   | No       |      | 2   | No      |
| 35504  | 2  | 2  | Married/li     | 1  | High school or l | 4  | Retired     | 1  | 1   | Yes      | 1    | 2   | No      |
| 35508  | 2  | 2  | Married/li     | 1  | High school or l | 6  | Homemake    | 11 | 1   | Yes      | 1    | 1   | Yes     |
| 35513  | 2  | 2  | Married/li     | 2  | Some college     | 4  | Retired     | 13 | 1   | Yes      | 2    | 1   | Yes     |
| 35516  | 2  | 4  | Widow/wi       | 1  | High school or l | 4  | Retired     | 3  | 2   | No       |      | 1   | Yes     |
| 35519  | 2  | 4  | Widow/wi       | 1  | High school or l | 4  | Retired     | 11 | 1   | Yes      | 1    | 1   | Yes     |
| 35530  | 2  | 3  | Divorced       | 1  | High school or l | 1  | Working, fi | 22 | 2   | No       |      | 1   | Yes     |
| 35533  | 2  | 2  | Married/li     | 1  | High school or l | 4  | Retired     | 8  | 1   | Yes      | 1    | 2   | No      |
| 35561  | 2  | 2  | Married/li     | 1  | High school or l | 4  | Retired     | 7  | 1   | Yes      | 1    | 1   | Yes     |
| 35565  | 2  | 2  | Married/li     | 1  | High school or l | 4  | Retired     | 7  | 2   | No       |      | 2   | No      |
| 35588  | 2  | 4  | Widow/wi       | 1  | High school or l | 4  | Retired     | 14 | 2   | No       |      | 1   | Yes     |
| 35598  | 2  | 4  | Widow/wi       | 1  | High school or l | 4  | Retired     | 2  | 2   | No       |      | 1   | Yes     |
| 35607  | 2  | 2  | Married/li     | 1  | High school or l | 1  | Working, fi | 11 | 2   | No       |      | 1   | Yes     |
| 35638  | 2  | 2  | Married/li     | 1  | High school or l | 6  | Homemake    | 13 | 2   | No       |      | 2   | No      |
| 35642  | 2  | 2  | Married/li     | 2  | Some college     | 1  | Working, fi | 36 | 2   | No       |      | 2   | No      |
| 35643  | 2  | 2  | Married/li     | 3  | College degree   | 4  | Retired     | 12 | 2   | No       |      | 2   | No      |
| 35680  | 2  | 2  | Married/li     | 3  | College degree   | 1  | Working, fi | 11 | 2   | No       |      | 2   | No      |
| 35697  | 2  | 2  | Married/li     | 3  | College degree   | 1  | Working, fi | 32 | 2   | No       |      | 2   | No      |
| 35703  | 2  | 2  | Married/li     | 1  | High school or l | 4  | Retired     | 1  | 2   | No       |      | 1   | Yes     |
| 35709  | 2  | 2  | Married/li     | 1  | High school or l | 9  | Other       | 2  | 2   | No       |      | 2   | No      |
| 35710  | 2  | 2  | Married/li     | 1  | High school or l | 1  | Working, fi | 34 | 2   | No       |      | 2   | No      |
| 35721  | 2  | 4  | Widow/wi       | 1  | High school or l | 3  | Unemploy    | 99 | 1   | Yes      | 1    | 2   | No      |
| 35723  | 2  | 2  | Married/li     | 1  | High school or l | 4  | Retired     | 7  | 2   | No       |      | 2   | No      |
| 35736  | 2  | 2  | Married/li     | 1  | High school or l | 4  | Retired     | 1  | 1   | Yes      | 1    | 1   | Yes     |
| 35739  | 2  | 4  | Widow/wi       | 1  | High school or l | 4  | Retired     | 1  | 1   | Yes      | 1    | 1   | Yes     |
| 35745  | 2  | 2  | Married/li     | 1  | High school or l | 6  | Homemake    | 99 | 2   | No       |      | 1   | Yes     |
| 35748  | 2  | 2  | Married/li     | 2  | Some college     | 4  | Retired     | 14 | 2   | No       |      | 2   | No      |
| 35750  | 2  | 2  | Married/li     | 1  | High school or l | 6  | Homemake    | 33 | 2   | No       |      | 2   | No      |



| respid | Q5 | Q6 | Marital Status | Q7 | Education        | Q8 | Work        | Q9 | Q10 | Diabetes | Q10a | Q11 | High BP |
|--------|----|----|----------------|----|------------------|----|-------------|----|-----|----------|------|-----|---------|
| 35752  | 2  | 2  | Married/li     | 1  | High school or l | 4  | Retired     | 2  | 2   | No       |      | 1   | Yes     |
| 35773  | 2  | 3  | Divorced       | 1  | High school or l | 3  | Unemploye   | 2  | 2   | No       |      | 2   | No      |
| 35779  | 2  | 2  | Married/li     | 2  | Some college     | 4  | Retired     | 4  | 2   | No       |      | 2   | No      |
| 35791  | 2  | 2  | Married/li     | 2  | Some college     | 4  | Retired     | 10 | 2   | No       |      | 1   | Yes     |
| 35801  | 2  | 2  | Married/li     | 1  | High school or l | 4  | Retired     | 3  | 2   | No       |      | 2   | No      |
| 35802  | 2  | 2  | Married/li     | 1  | High school or l | 4  | Retired     | 8  | 2   | No       |      | 2   | No      |
| 35837  | 2  | 2  | Married/li     | 2  | Some college     | 4  | Retired     | 6  | 2   | No       |      | 1   | Yes     |
| 35853  | 2  | 4  | Widow/wi       | 1  | High school or l | 3  | Unemploye   | 1  | 2   | No       |      | 2   | No      |
| 35858  | 2  | 2  | Married/li     | 1  | High school or l | 4  | Retired     | 7  | 2   | No       |      | 1   | Yes     |
| 35860  | 2  | 4  | Widow/wi       | 1  | High school or l | 4  | Retired     | 11 | 1   | Yes      | 1    | 2   | No      |
| 35875  | 2  | 2  | Married/li     | 3  | College degree   | 1  | Working, fi | 10 | 2   | No       |      | 2   | No      |
| 35883  | 2  | 2  | Married/li     | 1  | High school or l | 4  | Retired     | 13 | 2   | No       |      | 2   | No      |
| 35890  | 2  | 2  | Married/li     | 1  | High school or l | 4  | Retired     | 7  | 2   | No       |      | 1   | Yes     |
| 35898  | 2  | 2  | Married/li     | 1  | High school or l | 4  | Retired     | 10 | 2   | No       |      | 1   | Yes     |
| 35901  | 2  | 4  | Widow/wi       | 1  | High school or l | 4  | Retired     | 99 | 1   | Yes      | 1    | 1   | Yes     |
| 35914  | 2  | 4  | Widow/wi       | 3  | College degree   | 4  | Retired     | 11 | 1   | Yes      | 1    | 1   | Yes     |
| 35924  | 2  | 2  | Married/li     | 1  | High school or l | 6  | Homemake    | 19 | 2   | No       |      | 2   | No      |
| 35950  | 2  | 2  | Married/li     | 1  | High school or l | 9  | Other       | 99 | 2   | No       |      | 2   | No      |
| 35961  | 2  | 2  | Married/li     | 1  | High school or l | 4  | Retired     | 5  | 2   | No       |      | 1   | Yes     |
| 35966  | 2  | 4  | Widow/wi       | 2  | Some college     | 4  | Retired     | 13 | 2   | No       |      | 1   | Yes     |
| 35967  | 2  | 2  | Married/li     | 2  | Some college     | 1  | Working, fi | 13 | 1   | Yes      | 1    | 1   | Yes     |
| 35971  | 2  | 4  | Widow/wi       | 1  | High school or l | 4  | Retired     | 4  | 2   | No       |      | 2   | No      |
| 35974  | 2  | 2  | Married/li     | 1  | High school or l | 8  | Other worl  | 3  | 2   | No       |      | 2   | No      |
| 35983  | 2  | 4  | Widow/wi       | 1  | High school or l | 4  | Retired     | 13 | 1   | Yes      | 1    | 2   | No      |
| 35992  | 2  | 2  | Married/li     | 1  | High school or l | 4  | Retired     | 4  | 1   | Yes      | 1    | 2   | No      |
| 36010  | 2  | 2  | Married/li     | 1  | High school or l | 4  | Retired     | 8  | 2   | No       |      | 2   | No      |
| 36019  | 2  | 2  | Married/li     | 3  | College degree   | 4  | Retired     | 12 | 2   | No       |      | 2   | No      |
| 36029  | 2  | 2  | Married/li     | 3  | College degree   | 4  | Retired     | 11 | 2   | No       |      | 2   | No      |
| 36033  | 2  | 2  | Married/li     | 1  | High school or l | 4  | Retired     | 4  | 2   | No       |      | 2   | No      |
| 36042  | 2  | 4  | Widow/wi       | 1  | High school or l | 4  | Retired     | 11 | 2   | No       |      | 2   | No      |
| 36043  | 2  | 4  | Widow/wi       | 1  | High school or l | 4  | Retired     | 11 | 1   | Yes      | 1    | 1   | Yes     |
| 36048  | 2  | 4  | Widow/wi       | 1  | High school or l | 4  | Retired     | 1  | 1   | Yes      | 1    | 1   | Yes     |

| respid | Q5 | Q6 | Marital Status | Q7 | Education        | Q8 | Work        | Q9 | Q10 | Diabetes | Q10a | Q11 | High BP |
|--------|----|----|----------------|----|------------------|----|-------------|----|-----|----------|------|-----|---------|
| 36050  | 2  | 2  | Married/li     | 1  | High school or l | 4  | Retired     | 5  | 2   | No       |      | 1   | Yes     |
| 36062  | 2  | 2  | Married/li     | 1  | High school or l | 4  | Retired     | 7  | 2   | No       |      | 1   | Yes     |
| 36063  | 2  | 2  | Married/li     | 3  | College degree   | 1  | Working, fi | 13 | 2   | No       |      | 2   | No      |
| 36092  | 2  | 2  | Married/li     | 3  | College degree   | 4  | Retired     | 14 | 2   | No       |      | 1   | Yes     |
| 36097  | 2  | 2  | Married/li     | 2  | Some college     | 1  | Working, fi | 7  | 2   | No       |      | 1   | Yes     |
| 36108  | 2  | 2  | Married/li     | 2  | Some college     | 1  | Working, fi | 13 | 2   | No       |      | 2   | No      |
| 36113  | 2  | 2  | Married/li     | 2  | Some college     | 4  | Retired     | 8  | 2   | No       |      | 1   | Yes     |
| 36117  | 2  | 2  | Married/li     | 2  | Some college     | 6  | Homemake    | 29 | 1   | Yes      | 2    | 2   | No      |
| 36129  | 2  | 2  | Married/li     | 1  | High school or l | 4  | Retired     | 12 | 2   | No       |      | 2   | No      |
| 36144  | 2  | 2  | Married/li     | 3  | College degree   | 4  | Retired     | 11 | 2   | No       |      | 1   | Yes     |
| 36152  | 2  | 2  | Married/li     | 1  | High school or l | 4  | Retired     | 3  | 2   | No       |      | 2   | No      |
| 36154  | 2  | 2  | Married/li     | 3  | College degree   | 4  | Retired     | 8  | 2   | No       |      | 2   | No      |
| 36155  | 2  | 4  | Widow/wi       | 1  | High school or l | 6  | Homemake    | 12 | 1   | Yes      | 1    | 1   | Yes     |
| 36167  | 2  | 2  | Married/li     | 2  | Some college     | 1  | Working, fi | 11 | 2   | No       |      | 2   | No      |
| 36172  | 2  | 2  | Married/li     | 3  | College degree   | 2  | Working, p  | 12 | 2   | No       |      | 2   | No      |
| 36173  | 2  | 3  | Divorced       | 1  | High school or l | 4  | Retired     | 25 | 2   | No       |      | 2   | No      |
| 36174  | 2  | 2  | Married/li     | 3  | College degree   | 4  | Retired     | 11 | 2   | No       |      | 2   | No      |
| 36182  | 2  | 2  | Married/li     | 1  | High school or l | 4  | Retired     | 2  | 2   | No       |      | 1   | Yes     |
| 36192  | 2  | 2  | Married/li     | 1  | High school or l | 6  | Homemake    | 3  | 2   | No       |      | 1   | Yes     |
| 36195  | 2  | 2  | Married/li     | 2  | Some college     | 4  | Retired     | 10 | 2   | No       |      | 1   | Yes     |
| 36204  | 2  | 2  | Married/li     | 1  | High school or l | 8  | Other worl  | 4  | 2   | No       |      | 2   | No      |
| 36205  | 2  | 4  | Widow/wi       | 3  | College degree   | 1  | Working, fi | 12 | 2   | No       |      | 1   | Yes     |
| 36208  | 2  | 2  | Married/li     | 2  | Some college     | 4  | Retired     | 12 | 2   | No       |      | 2   | No      |
| 36216  | 2  | 2  | Married/li     | 1  | High school or l | 4  | Retired     | 7  | 2   | No       |      | 2   | No      |
| 36221  | 2  | 4  | Widow/wi       | 1  | High school or l | 6  | Homemake    | 1  | 2   | No       |      | 1   | Yes     |
| 36244  | 2  | 2  | Married/li     | 2  | Some college     | 1  | Working, fi | 11 | 2   | No       |      | 2   | No      |
| 36255  | 2  | 2  | Married/li     | 2  | Some college     | 4  | Retired     | 10 | 1   | Yes      | 1    | 2   | No      |
| 36259  | 2  | 2  | Married/li     | 1  | High school or l | 4  | Retired     | 3  | 2   | No       |      | 2   | No      |
| 36262  | 2  | 2  | Married/li     | 1  | High school or l | 4  | Retired     | 12 | 1   | Yes      | 1    | 1   | Yes     |
| 36268  | 2  | 2  | Married/li     | 3  | College degree   | 4  | Retired     | 6  | 2   | No       |      | 2   | No      |
| 36308  | 2  | 2  | Married/li     | 1  | High school or l | 4  | Retired     | 9  | 2   | No       |      | 1   | Yes     |
| 36324  | 2  | 2  | Married/li     | 1  | High school or l | 4  | Retired     | 7  | 2   | No       |      | 1   | Yes     |

| respid | Q5 | Q6 | Marital Status | Q7 | Education        | Q8 | Work        | Q9 | Q10 | Diabetes | Q10a | Q11 | High BP |
|--------|----|----|----------------|----|------------------|----|-------------|----|-----|----------|------|-----|---------|
| 36330  | 2  | 4  | Widow/wid      | 1  | High school or l | 4  | Retired     | 2  | 2   | No       |      | 1   | Yes     |
| 36331  | 2  | 4  | Widow/wid      | 1  | High school or l | 4  | Retired     | 9  | 1   | Yes      | 2    | 1   | Yes     |
| 36336  | 2  | 1  | Single         | 1  | High school or l | 4  | Retired     | 4  | 2   | No       |      | 2   | No      |
| 36337  | 2  | 2  | Married/li     | 1  | High school or l | 4  | Retired     | 5  | 2   | No       |      | 2   | No      |
| 36364  | 2  | 2  | Married/li     | 1  | High school or l | 4  | Retired     | 5  | 2   | No       |      | 1   | Yes     |
| 36365  | 2  | 2  | Married/li     | 1  | High school or l | 4  | Retired     | 11 | 2   | No       |      | 2   | No      |
| 36396  | 2  | 2  | Married/li     | 1  | High school or l | 4  | Retired     | 5  | 1   | Yes      | 1    | 1   | Yes     |
| 36403  | 2  | 2  | Married/li     | 1  | High school or l | 4  | Retired     | 11 | 2   | No       |      | 1   | Yes     |
| 36410  | 2  | 2  | Married/li     | 3  | College degree   | 4  | Retired     | 99 | 2   | No       |      | 1   | Yes     |
| 36413  | 2  | 2  | Married/li     | 1  | High school or l | 4  | Retired     | 3  | 2   | No       |      | 2   | No      |
| 36422  | 2  | 2  | Married/li     | 1  | High school or l | 4  | Retired     | 10 | 2   | No       |      | 1   | Yes     |
| 36424  | 2  | 2  | Married/li     | 1  | High school or l | 4  | Retired     | 1  | 2   | No       |      | 1   | Yes     |
| 36425  | 2  | 2  | Married/li     | 3  | College degree   | 1  | Working, fi | 12 | 2   | No       |      | 1   | Yes     |
| 36432  | 2  | 2  | Married/li     | 1  | High school or l | 4  | Retired     | 11 | 2   | No       |      | 1   | Yes     |
| 36435  | 2  | 2  | Married/li     | 2  | Some college     | 4  | Retired     | 12 | 2   | No       |      | 1   | Yes     |
| 36446  | 2  | 4  | Widow/wid      | 1  | High school or l | 3  | Unemploye   | 15 | 2   | No       |      | 1   | Yes     |
| 36451  | 2  | 2  | Married/li     | 1  | High school or l | 6  | Homemake    | 2  | 2   | No       |      | 1   | Yes     |
| 36453  | 2  | 2  | Married/li     | 3  | College degree   | 1  | Working, fi | 5  | 2   | No       |      | 2   | No      |
| 36459  | 2  | 2  | Married/li     | 1  | High school or l | 2  | Working, p  | 11 | 2   | No       |      | 1   | Yes     |
| 36464  | 2  | 2  | Married/li     | 1  | High school or l | 4  | Retired     | 11 | 2   | No       |      | 2   | No      |
| 36465  | 2  | 4  | Widow/wid      | 1  | High school or l | 4  | Retired     | 11 | 2   | No       |      | 1   | Yes     |
| 36466  | 2  | 2  | Married/li     | 2  | Some college     | 4  | Retired     | 11 | 1   | Yes      | 1    | 2   | No      |
| 36476  | 2  | 2  | Married/li     | 1  | High school or l | 4  | Retired     | 12 | 2   | No       |      | 2   | No      |
| 36487  | 2  | 2  | Married/li     | 1  | High school or l | 4  | Retired     | 13 | 2   | No       |      | 1   | Yes     |
| 36488  | 2  | 2  | Married/li     | 3  | College degree   | 4  | Retired     | 99 | 2   | No       |      | 1   | Yes     |
| 36500  | 2  | 4  | Widow/wid      | 1  | High school or l | 3  | Unemploye   | 6  | 2   | No       |      | 2   | No      |
| 36504  | 2  | 2  | Married/li     | 1  | High school or l | 4  | Retired     | 12 | 2   | No       |      | 2   | No      |
| 36513  | 2  | 2  | Married/li     | 1  | High school or l | 4  | Retired     | 11 | 2   | No       |      | 1   | Yes     |
| 36515  | 2  | 2  | Married/li     | 1  | High school or l | 4  | Retired     | 12 | 2   | No       |      | 1   | Yes     |
| 36521  | 2  | 2  | Married/li     | 2  | Some college     | 4  | Retired     | 7  | 2   | No       |      | 2   | No      |
| 36530  | 2  | 2  | Married/li     | 1  | High school or l | 4  | Retired     | 12 | 1   | Yes      | 1    | 1   | Yes     |
| 36556  | 2  | 4  | Widow/wid      | 1  | High school or l | 4  | Retired     | 14 | 2   | No       |      | 1   | Yes     |

| respid | Q5 | Q6 | Marital Status | Q7 | Education        | Q8 | Work        | Q9 | Q10 | Diabetes | Q10a | Q11 | High BP |
|--------|----|----|----------------|----|------------------|----|-------------|----|-----|----------|------|-----|---------|
| 36564  | 2  | 2  | Married/li     | 1  | High school or l | 4  | Retired     | 6  | 1   | Yes      | 1    | 1   | Yes     |
| 36584  | 2  | 4  | Widow/wi       | 1  | High school or l | 4  | Retired     | 2  | 2   | No       |      | 2   | No      |
| 36585  | 2  | 2  | Married/li     | 1  | High school or l | 4  | Retired     | 14 | 2   | No       |      | 2   | No      |
| 36586  | 2  | 2  | Married/li     | 3  | College degree   | 1  | Working, fi | 31 | 2   | No       |      | 1   | Yes     |
| 36606  | 2  | 2  | Married/li     | 1  | High school or l | 4  | Retired     | 30 | 1   | Yes      | 1    | 2   | No      |
| 36615  | 2  | 2  | Married/li     | 2  | Some college     | 4  | Retired     | 8  | 2   | No       |      | 1   | Yes     |
| 36628  | 2  | 2  | Married/li     | 1  | High school or l | 2  | Working, p  | 30 | 1   | Yes      | 1    | 1   | Yes     |
| 36630  | 2  | 2  | Married/li     | 3  | College degree   | 1  | Working, fi | 6  | 2   | No       |      | 2   | No      |
| 36631  | 2  | 2  | Married/li     | 2  | Some college     | 4  | Retired     | 12 | 2   | No       |      | 1   | Yes     |
| 36636  | 2  | 2  | Married/li     | 1  | High school or l | 4  | Retired     | 2  | 2   | No       |      | 2   | No      |
| 36637  | 2  | 2  | Married/li     | 1  | High school or l | 4  | Retired     | 6  | 2   | No       |      | 2   | No      |
| 36651  | 2  | 2  | Married/li     | 3  | College degree   | 4  | Retired     | 9  | 2   | No       |      | 1   | Yes     |
| 36661  | 2  | 2  | Married/li     | 1  | High school or l | 4  | Retired     | 11 | 2   | No       |      | 2   | No      |
| 36670  | 2  | 4  | Widow/wi       | 1  | High school or l | 4  | Retired     | 12 | 2   | No       |      | 1   | Yes     |
| 36671  | 2  | 2  | Married/li     | 3  | College degree   | 1  | Working, fi | 13 | 2   | No       |      | 2   | No      |
| 36688  | 2  | 2  | Married/li     | 2  | Some college     | 4  | Retired     | 11 | 2   | No       |      | 2   | No      |
| 36694  | 2  | 5  | Prefer not     | 2  | Some college     | 4  | Retired     | 11 | 2   | No       |      | 1   | Yes     |
| 36696  | 2  | 2  | Married/li     | 1  | High school or l | 4  | Retired     | 11 | 2   | No       |      | 2   | No      |
| 36703  | 2  | 2  | Married/li     | 1  | High school or l | 1  | Working, fi | 1  | 2   | No       |      | 2   | No      |
| 36719  | 2  | 2  | Married/li     | 2  | Some college     | 4  | Retired     | 13 | 2   | No       |      | 2   | No      |
| 36721  | 2  | 2  | Married/li     | 2  | Some college     | 4  | Retired     | 13 | 2   | No       |      | 2   | No      |
| 36740  | 2  | 2  | Married/li     | 1  | High school or l | 4  | Retired     | 1  | 2   | No       |      | 2   | No      |
| 36755  | 2  | 2  | Married/li     | 2  | Some college     | 1  | Working, fi | 4  | 2   | No       |      | 2   | No      |
| 36765  | 2  | 2  | Married/li     | 1  | High school or l | 4  | Retired     | 11 | 2   | No       |      | 1   | Yes     |
| 36770  | 2  | 4  | Widow/wi       | 1  | High school or l | 6  | Homemake    | 1  | 2   | No       |      | 1   | Yes     |
| 36773  | 2  | 2  | Married/li     | 3  | College degree   | 1  | Working, fi | 11 | 2   | No       |      | 2   | No      |
| 36813  | 2  | 2  | Married/li     | 1  | High school or l | 4  | Retired     | 11 | 2   | No       |      | 2   | No      |
| 36819  | 2  | 2  | Married/li     | 3  | College degree   | 4  | Retired     | 3  | 2   | No       |      | 1   | Yes     |
| 36820  | 2  | 2  | Married/li     | 1  | High school or l | 6  | Homemake    | 1  | 2   | No       |      | 1   | Yes     |
| 36821  | 2  | 1  | Single         | 1  | High school or l | 6  | Homemake    | 99 | 2   | No       |      | 1   | Yes     |
| 36827  | 2  | 4  | Widow/wi       | 1  | High school or l | 4  | Retired     | 1  | 2   | No       |      | 1   | Yes     |
| 36835  | 2  | 2  | Married/li     | 1  | High school or l | 4  | Retired     | 7  | 2   | No       |      | 2   | No      |

| respid | Q5 | Q6 | Marital Status | Q7 | Education        | Q8 | Work        | Q9 | Q10 | Diabetes | Q10a | Q11 | High BP |
|--------|----|----|----------------|----|------------------|----|-------------|----|-----|----------|------|-----|---------|
| 36837  | 2  | 5  | Prefer not     | 1  | High school or l | 4  | Retired     | 1  | 2   | No       |      | 1   | Yes     |
| 36849  | 2  | 2  | Married/li     | 1  | High school or l | 4  | Retired     | 13 | 2   | No       |      | 2   | No      |
| 36851  | 2  | 2  | Married/li     | 1  | High school or l | 4  | Retired     | 1  | 2   | No       |      | 1   | Yes     |
| 36868  | 2  | 2  | Married/li     | 1  | High school or l | 4  | Retired     | 1  | 2   | No       |      | 1   | Yes     |
| 36870  | 2  | 2  | Married/li     | 1  | High school or l | 4  | Retired     | 5  | 2   | No       |      | 2   | No      |
| 36871  | 2  | 2  | Married/li     | 1  | High school or l | 4  | Retired     | 11 | 2   | No       |      | 2   | No      |
| 36874  | 2  | 2  | Married/li     | 1  | High school or l | 4  | Retired     | 5  | 2   | No       |      | 1   | Yes     |
| 36878  | 2  | 2  | Married/li     | 3  | College degree   | 4  | Retired     | 2  | 2   | No       |      | 1   | Yes     |
| 36887  | 2  | 2  | Married/li     | 1  | High school or l | 1  | Working, fi | 3  | 2   | No       |      | 2   | No      |
| 36889  | 2  | 4  | Widow/wi       | 1  | High school or l | 9  | Other       | 2  | 2   | No       |      | 1   | Yes     |
| 36891  | 2  | 5  | Prefer not     | 1  | High school or l | 4  | Retired     | 11 | 2   | No       |      | 1   | Yes     |
| 36903  | 2  | 2  | Married/li     | 1  | High school or l | 4  | Retired     | 3  | 1   | Yes      | 1    | 1   | Yes     |
| 36905  | 2  | 2  | Married/li     | 1  | High school or l | 4  | Retired     | 8  | 2   | No       |      | 2   | No      |
| 36913  | 2  | 2  | Married/li     | 3  | College degree   | 4  | Retired     | 11 | 2   | No       |      | 2   | No      |
| 36949  | 2  | 2  | Married/li     | 1  | High school or l | 4  | Retired     | 1  | 2   | No       |      | 1   | Yes     |
| 36954  | 2  | 2  | Married/li     | 1  | High school or l | 4  | Retired     | 2  | 2   | No       |      | 1   | Yes     |
| 36962  | 2  | 5  | Prefer not     | 1  | High school or l | 4  | Retired     | 11 | 1   | Yes      | 1    | 1   | Yes     |
| 36965  | 2  | 2  | Married/li     | 3  | College degree   | 4  | Retired     | 7  | 1   | Yes      | 1    | 2   | No      |
| 36970  | 2  | 2  | Married/li     | 2  | Some college     | 4  | Retired     | 13 | 2   | No       |      | 2   | No      |
| 36979  | 2  | 5  | Prefer not     | 1  | High school or l | 9  | Other       | 8  | 2   | No       |      | 1   | Yes     |
| 36990  | 2  | 2  | Married/li     | 1  | High school or l | 4  | Retired     | 1  | 1   | Yes      | 1    | 1   | Yes     |
| 36991  | 2  | 2  | Married/li     | 2  | Some college     | 4  | Retired     | 2  | 2   | No       |      | 1   | Yes     |
| 36992  | 2  | 2  | Married/li     | 1  | High school or l | 9  | Other       | 1  | 2   | No       |      | 2   | No      |
| 37015  | 2  | 2  | Married/li     | 1  | High school or l | 9  | Other       | 1  | 2   | No       |      | 1   | Yes     |
| 37017  | 2  | 2  | Married/li     | 3  | College degree   | 4  | Retired     | 8  | 2   | No       |      | 2   | No      |
| 37020  | 2  | 1  | Single         | 1  | High school or l | 4  | Retired     | 4  | 2   | No       |      | 2   | No      |
| 37033  | 2  | 2  | Married/li     | 2  | Some college     | 4  | Retired     | 11 | 1   | Yes      | 1    | 1   | Yes     |
| 37041  | 2  | 2  | Married/li     | 1  | High school or l | 4  | Retired     | 12 | 1   | Yes      | 1    | 2   | No      |
| 37048  | 2  | 4  | Widow/wi       | 1  | High school or l | 4  | Retired     | 5  | 1   | Yes      | 1    | 1   | Yes     |
| 37050  | 2  | 2  | Married/li     | 1  | High school or l | 4  | Retired     | 5  | 2   | No       |      | 2   | No      |
| 37054  | 2  | 2  | Married/li     | 1  | High school or l | 6  | Homemaki    | 4  | 2   | No       |      | 1   | Yes     |
| 37057  | 2  | 4  | Widow/wi       | 1  | High school or l | 4  | Retired     | 3  | 2   | No       |      | 2   | No      |

| respid | Q5 | Q6 | Marital Status | Q7 | Education        | Q8 | Work        | Q9 | Q10 | Diabetes | Q10a | Q11 | High BP |
|--------|----|----|----------------|----|------------------|----|-------------|----|-----|----------|------|-----|---------|
| 37067  | 2  | 2  | Married/li     | 1  | High school or l | 4  | Retired     | 1  | 2   | No       |      | 1   | Yes     |
| 37074  | 2  | 4  | Widow/wi       | 1  | High school or l | 3  | Unemploy    | 2  | 2   | No       |      | 2   | No      |
| 37088  | 2  | 1  | Single         | 1  | High school or l | 4  | Retired     | 1  | 1   | Yes      | 1    | 2   | No      |
| 37090  | 2  | 2  | Married/li     | 1  | High school or l | 4  | Retired     | 11 | 1   | Yes      | 1    | 2   | No      |
| 37110  | 2  | 2  | Married/li     | 1  | High school or l | 4  | Retired     | 13 | 2   | No       |      | 2   | No      |
| 37122  | 2  | 4  | Widow/wi       | 1  | High school or l | 4  | Retired     | 9  | 1   | Yes      | 1    | 2   | No      |
| 37124  | 2  | 2  | Married/li     | 1  | High school or l | 4  | Retired     | 7  | 1   | Yes      | 1    | 1   | Yes     |
| 37126  | 2  | 2  | Married/li     | 3  | College degree   | 4  | Retired     | 14 | 2   | No       |      | 2   | No      |
| 37129  | 2  | 2  | Married/li     | 1  | High school or l | 4  | Retired     | 1  | 2   | No       |      | 1   | Yes     |
| 37130  | 2  | 4  | Widow/wi       | 1  | High school or l | 4  | Retired     | 1  | 2   | No       |      | 1   | Yes     |
| 37142  | 2  | 2  | Married/li     | 3  | College degree   | 4  | Retired     | 11 | 2   | No       |      | 1   | Yes     |
| 37160  | 2  | 2  | Married/li     | 1  | High school or l | 4  | Retired     | 1  | 1   | Yes      | 1    | 2   | No      |
| 37168  | 2  | 2  | Married/li     | 1  | High school or l | 1  | Working, fi | 1  | 1   | Yes      | 2    | 2   | No      |
| 37169  | 2  | 2  | Married/li     | 3  | College degree   | 4  | Retired     | 2  | 1   | Yes      | 1    | 1   | Yes     |
| 37191  | 2  | 2  | Married/li     | 1  | High school or l | 4  | Retired     | 2  | 2   | No       |      | 1   | Yes     |
| 37197  | 2  | 2  | Married/li     | 2  | Some college     | 1  | Working, fi | 9  | 1   | Yes      | 1    | 1   | Yes     |
| 37204  | 2  | 2  | Married/li     | 1  | High school or l | 4  | Retired     | 1  | 2   | No       |      | 2   | No      |
| 37213  | 2  | 2  | Married/li     | 2  | Some college     | 1  | Working, fi | 10 | 1   | Yes      | 1    | 2   | No      |
| 37238  | 2  | 2  | Married/li     | 1  | High school or l | 4  | Retired     | 14 | 2   | No       |      | 1   | Yes     |
| 37242  | 2  | 2  | Married/li     | 2  | Some college     | 4  | Retired     | 1  | 1   | Yes      | 1    | 2   | No      |
| 37243  | 2  | 2  | Married/li     | 2  | Some college     | 4  | Retired     | 7  | 1   | Yes      | 1    | 2   | No      |
| 37275  | 2  | 2  | Married/li     | 2  | Some college     | 4  | Retired     | 6  | 2   | No       |      | 1   | Yes     |
| 37305  | 2  | 2  | Married/li     | 2  | Some college     | 4  | Retired     | 8  | 2   | No       |      | 1   | Yes     |
| 37357  | 2  | 2  | Married/li     | 2  | Some college     | 2  | Working, p  | 6  | 1   | Yes      | 1    | 2   | No      |
| 37365  | 2  | 2  | Married/li     | 1  | High school or l | 4  | Retired     | 11 | 1   | Yes      | 1    | 2   | No      |
| 37370  | 2  | 2  | Married/li     | 3  | College degree   | 1  | Working, fi | 33 | 2   | No       |      | 1   | Yes     |
| 37406  | 2  | 2  | Married/li     | 3  | College degree   | 4  | Retired     | 11 | 2   | No       |      | 2   | No      |
| 37410  | 2  | 4  | Widow/wi       | 1  | High school or l | 4  | Retired     | 1  | 2   | No       |      | 1   | Yes     |
| 37411  | 2  | 2  | Married/li     | 3  | College degree   | 1  | Working, fi | 10 | 2   | No       |      | 2   | No      |
| 37427  | 2  | 2  | Married/li     | 1  | High school or l | 4  | Retired     | 9  | 2   | No       |      | 2   | No      |
| 37437  | 2  | 2  | Married/li     | 1  | High school or l | 4  | Retired     | 6  | 1   | Yes      | 1    | 2   | No      |
| 37440  | 2  | 2  | Married/li     | 3  | College degree   | 2  | Working, p  | 36 | 2   | No       |      | 1   | Yes     |

| respid | Q5 | Q6 | Marital Status | Q7 | Education        | Q8 | Work        | Q9 | Q10 | Diabetes | Q10a | Q11 | High BP |
|--------|----|----|----------------|----|------------------|----|-------------|----|-----|----------|------|-----|---------|
| 37452  | 2  | 2  | Married/li     | 1  | High school or l | 4  | Retired     | 3  | 1   | Yes      | 1    | 2   | No      |
| 37465  | 2  | 2  | Married/li     | 2  | Some college     | 1  | Working, fi | 9  | 1   | Yes      | 1    | 2   | No      |
| 37468  | 2  | 2  | Married/li     | 1  | High school or l | 4  | Retired     | 12 | 1   | Yes      | 1    | 2   | No      |
| 37469  | 2  | 2  | Married/li     | 1  | High school or l | 4  | Retired     | 10 | 2   | No       |      | 1   | Yes     |
| 37477  | 2  | 2  | Married/li     | 1  | High school or l | 4  | Retired     | 10 | 2   | No       |      | 1   | Yes     |
| 37509  | 2  | 4  | Widow/wi       | 1  | High school or l | 4  | Retired     | 9  | 2   | No       |      | 1   | Yes     |
| 37513  | 2  | 2  | Married/li     | 2  | Some college     | 4  | Retired     | 6  | 1   | Yes      | 1    | 2   | No      |
| 37534  | 2  | 2  | Married/li     | 1  | High school or l | 4  | Retired     | 11 | 1   | Yes      | 1    | 1   | Yes     |
| 37537  | 2  | 2  | Married/li     | 1  | High school or l | 4  | Retired     | 3  | 1   | Yes      | 1    | 2   | No      |
| 37560  | 2  | 2  | Married/li     | 1  | High school or l | 4  | Retired     | 10 | 2   | No       |      | 1   | Yes     |
| 37566  | 2  | 2  | Married/li     | 2  | Some college     | 1  | Working, fi | 12 | 1   | Yes      | 1    | 2   | No      |
| 37572  | 2  | 2  | Married/li     | 1  | High school or l | 4  | Retired     | 12 | 2   | No       |      | 1   | Yes     |
| 37574  | 2  | 2  | Married/li     | 1  | High school or l | 4  | Retired     | 11 | 2   | No       |      | 1   | Yes     |
| 37575  | 2  | 2  | Married/li     | 1  | High school or l | 1  | Working, fi | 11 | 1   | Yes      | 1    | 2   | No      |
| 37590  | 2  | 2  | Married/li     | 1  | High school or l | 4  | Retired     | 7  | 1   | Yes      | 1    | 2   | No      |
| 37593  | 2  | 2  | Married/li     | 1  | High school or l | 6  | Homemake    | 99 | 2   | No       |      | 2   | No      |
| 37599  | 2  | 2  | Married/li     | 1  | High school or l | 6  | Homemake    | 1  | 2   | No       |      | 2   | No      |
| 37641  | 2  | 2  | Married/li     | 1  | High school or l | 6  | Homemake    | 99 | 2   | No       |      | 1   | Yes     |
| 37651  | 2  | 2  | Married/li     | 2  | Some college     | 4  | Retired     | 10 | 2   | No       |      | 2   | No      |
| 37670  | 2  | 2  | Married/li     | 1  | High school or l | 4  | Retired     | 6  | 2   | No       |      | 2   | No      |
| 37680  | 2  | 2  | Married/li     | 1  | High school or l | 4  | Retired     | 5  | 1   | Yes      | 1    | 2   | No      |
| 37690  | 2  | 2  | Married/li     | 1  | High school or l | 1  | Working, fi | 10 | 1   | Yes      | 1    | 1   | Yes     |
| 37694  | 2  | 2  | Married/li     | 1  | High school or l | 4  | Retired     | 2  | 2   | No       |      | 2   | No      |
| 37705  | 2  | 2  | Married/li     | 3  | College degree   | 1  | Working, fi | 12 | 2   | No       |      | 1   | Yes     |
| 37710  | 2  | 2  | Married/li     | 3  | College degree   | 4  | Retired     | 7  | 2   | No       |      | 2   | No      |
| 37719  | 2  | 2  | Married/li     | 1  | High school or l | 4  | Retired     | 11 | 1   | Yes      | 1    | 1   | Yes     |
| 37741  | 2  | 2  | Married/li     | 2  | Some college     | 1  | Working, fi | 11 | 1   | Yes      | 1    | 1   | Yes     |
| 37752  | 2  | 2  | Married/li     | 1  | High school or l | 4  | Retired     | 9  | 2   | No       |      | 2   | No      |
| 37755  | 2  | 2  | Married/li     | 1  | High school or l | 4  | Retired     | 6  | 2   | No       |      | 1   | Yes     |
| 37757  | 2  | 2  | Married/li     | 1  | High school or l | 4  | Retired     | 7  | 1   | Yes      | 1    | 2   | No      |
| 37783  | 2  | 2  | Married/li     | 1  | High school or l | 1  | Working, fi | 1  | 2   | No       |      | 1   | Yes     |
| 37793  | 2  | 2  | Married/li     | 3  | College degree   | 4  | Retired     | 11 | 2   | No       |      | 1   | Yes     |

| respid | Q5 | Q6 | Marital Status | Q7 | Education        | Q8 | Work        | Q9 | Q10 | Diabetes | Q10a | Q11 | High BP |
|--------|----|----|----------------|----|------------------|----|-------------|----|-----|----------|------|-----|---------|
| 37800  | 2  | 2  | Married/li     | 2  | Some college     | 4  | Retired     | 10 | 2   | No       |      | 2   | No      |
| 37801  | 2  | 2  | Married/li     | 1  | High school or l | 2  | Working, p  | 2  | 2   | No       |      | 2   | No      |
| 37820  | 2  | 2  | Married/li     | 3  | College degree   | 4  | Retired     | 5  | 1   | Yes      | 1    | 2   | No      |
| 37826  | 2  | 2  | Married/li     | 1  | High school or l | 4  | Retired     | 6  | 1   | Yes      | 1    | 1   | Yes     |
| 37835  | 2  | 2  | Married/li     | 3  | College degree   | 1  | Working, fi | 8  | 1   | Yes      | 1    | 2   | No      |
| 37839  | 2  | 2  | Married/li     | 2  | Some college     | 1  | Working, fi | 9  | 1   | Yes      | 1    | 1   | Yes     |
| 37871  | 2  | 2  | Married/li     | 2  | Some college     | 6  | Homemake    | 11 | 1   | Yes      | 1    | 2   | No      |
| 37876  | 2  | 2  | Married/li     | 1  | High school or l | 4  | Retired     | 11 | 1   | Yes      | 2    | 2   | No      |
| 37879  | 2  | 2  | Married/li     | 1  | High school or l | 4  | Retired     | 99 | 2   | No       |      | 2   | No      |
| 37894  | 2  | 2  | Married/li     | 1  | High school or l | 4  | Retired     | 8  | 2   | No       |      | 2   | No      |
| 37895  | 2  | 2  | Married/li     | 3  | College degree   | 4  | Retired     | 11 | 2   | No       |      | 2   | No      |
| 37901  | 2  | 2  | Married/li     | 1  | High school or l | 4  | Retired     | 11 | 1   | Yes      | 1    | 1   | Yes     |
| 37926  | 2  | 2  | Married/li     | 1  | High school or l | 4  | Retired     | 8  | 1   | Yes      | 1    | 2   | No      |
| 37937  | 2  | 2  | Married/li     | 3  | College degree   | 1  | Working, fi | 9  | 1   | Yes      | 1    | 2   | No      |
| 37938  | 2  | 2  | Married/li     | 1  | High school or l | 9  | Other       | 4  | 2   | No       |      | 2   | No      |
| 37959  | 2  | 1  | Single         | 1  | High school or l | 4  | Retired     | 1  | 2   | No       |      | 2   | No      |
| 37970  | 2  | 2  | Married/li     | 1  | High school or l | 4  | Retired     | 12 | 1   | Yes      | 1    | 1   | Yes     |
| 37972  | 2  | 2  | Married/li     | 3  | College degree   | 4  | Retired     | 11 | 2   | No       |      | 2   | No      |
| 37988  | 2  | 2  | Married/li     | 1  | High school or l | 4  | Retired     | 2  | 1   | Yes      | 1    | 1   | Yes     |
| 37989  | 2  | 2  | Married/li     | 2  | Some college     | 4  | Retired     | 10 | 1   | Yes      | 1    | 2   | No      |
| 38000  | 2  | 4  | Widow/wi       | 1  | High school or l | 4  | Retired     | 5  | 2   | No       |      | 1   | Yes     |
| 38028  | 2  | 2  | Married/li     | 2  | Some college     | 6  | Homemake    | 11 | 2   | No       |      | 1   | Yes     |
| 38042  | 2  | 2  | Married/li     | 2  | Some college     | 4  | Retired     | 10 | 1   | Yes      | 1    | 1   | Yes     |
| 38052  | 2  | 4  | Widow/wi       | 2  | Some college     | 9  | Other       | 12 | 2   | No       |      | 2   | No      |
| 38056  | 2  | 4  | Widow/wi       | 1  | High school or l | 4  | Retired     | 5  | 2   | No       |      | 2   | No      |
| 38106  | 2  | 2  | Married/li     | 1  | High school or l | 4  | Retired     | 10 | 1   | Yes      | 1    | 1   | Yes     |
| 38114  | 2  | 2  | Married/li     | 2  | Some college     | 4  | Retired     | 12 | 2   | No       |      | 2   | No      |
| 38134  | 2  | 2  | Married/li     | 1  | High school or l | 4  | Retired     | 6  | 2   | No       |      | 2   | No      |
| 38135  | 2  | 4  | Widow/wi       | 1  | High school or l | 6  | Homemake    | 7  | 2   | No       |      | 1   | Yes     |
| 38139  | 2  | 2  | Married/li     | 2  | Some college     | 1  | Working, fi | 9  | 1   | Yes      | 2    | 2   | No      |
| 38160  | 2  | 2  | Married/li     | 1  | High school or l | 4  | Retired     | 7  | 1   | Yes      | 1    | 1   | Yes     |
| 38164  | 2  | 2  | Married/li     | 2  | Some college     | 4  | Retired     | 10 | 2   | No       |      | 1   | Yes     |



| respid | Q5 | Q6 | Marital Status | Q7 | Education        | Q8 | Work        | Q9 | Q10 | Diabetes | Q10a | Q11 | High BP |
|--------|----|----|----------------|----|------------------|----|-------------|----|-----|----------|------|-----|---------|
| 38168  | 2  | 2  | Married/li     | 1  | High school or l | 4  | Retired     | 1  | 2   | No       |      | 2   | No      |
| 38173  | 2  | 2  | Married/li     | 3  | College degree   | 4  | Retired     | 4  | 2   | No       |      | 2   | No      |
| 38193  | 2  | 2  | Married/li     | 1  | High school or l | 4  | Retired     | 11 | 1   | Yes      | 1    | 2   | No      |
| 38204  | 2  | 2  | Married/li     | 2  | Some college     | 4  | Retired     | 1  | 1   | Yes      | 1    | 1   | Yes     |
| 38206  | 2  | 2  | Married/li     | 2  | Some college     | 4  | Retired     | 7  | 1   | Yes      | 1    | 2   | No      |
| 38233  | 2  | 2  | Married/li     | 1  | High school or l | 4  | Retired     | 10 | 1   | Yes      | 1    | 1   | Yes     |
| 38242  | 2  | 4  | Widow/wi       | 2  | Some college     | 4  | Retired     | 8  | 1   | Yes      | 2    | 1   | Yes     |
| 38245  | 2  | 2  | Married/li     | 2  | Some college     | 4  | Retired     | 13 | 1   | Yes      | 1    | 2   | No      |
| 38261  | 2  | 2  | Married/li     | 2  | Some college     | 4  | Retired     | 11 | 1   | Yes      | 1    | 1   | Yes     |
| 38288  | 2  | 2  | Married/li     | 1  | High school or l | 9  | Other       | 7  | 2   | No       |      | 1   | Yes     |
| 38296  | 2  | 2  | Married/li     | 2  | Some college     | 1  | Working, fi | 12 | 2   | No       |      | 1   | Yes     |
| 38299  | 2  | 2  | Married/li     | 3  | College degree   | 4  | Retired     | 11 | 1   | Yes      | 1    | 2   | No      |
| 38300  | 2  | 2  | Married/li     | 1  | High school or l | 4  | Retired     | 2  | 2   | No       |      | 2   | No      |
| 38303  | 2  | 2  | Married/li     | 3  | College degree   | 4  | Retired     | 6  | 1   | Yes      | 1    | 1   | Yes     |
| 38317  | 2  | 4  | Widow/wi       | 1  | High school or l | 4  | Retired     | 6  | 2   | No       |      | 2   | No      |
| 38328  | 2  | 2  | Married/li     | 1  | High school or l | 4  | Retired     | 11 | 2   | No       |      | 2   | No      |
| 38333  | 2  | 2  | Married/li     | 3  | College degree   | 4  | Retired     | 12 | 2   | No       |      | 1   | Yes     |
| 38336  | 2  | 2  | Married/li     | 3  | College degree   | 1  | Working, fi | 13 | 1   | Yes      | 1    | 1   | Yes     |
| 38338  | 2  | 2  | Married/li     | 1  | High school or l | 4  | Retired     | 3  | 2   | No       |      | 2   | No      |
| 38342  | 2  | 4  | Widow/wi       | 1  | High school or l | 4  | Retired     | 3  | 2   | No       |      | 2   | No      |
| 38360  | 2  | 2  | Married/li     | 1  | High school or l | 4  | Retired     | 8  | 2   | No       |      | 2   | No      |
| 38362  | 2  | 2  | Married/li     | 1  | High school or l | 4  | Retired     | 11 | 1   | Yes      | 1    | 1   | Yes     |
| 38364  | 2  | 2  | Married/li     | 1  | High school or l | 4  | Retired     | 1  | 2   | No       |      | 1   | Yes     |
| 38402  | 2  | 2  | Married/li     | 1  | High school or l | 4  | Retired     | 11 | 1   | Yes      | 1    | 1   | Yes     |
| 38423  | 2  | 2  | Married/li     | 2  | Some college     | 4  | Retired     | 11 | 1   | Yes      | 1    | 1   | Yes     |
| 38424  | 2  | 4  | Widow/wi       | 1  | High school or l | 9  | Other       | 1  | 1   | Yes      | 1    | 2   | No      |
| 38435  | 2  | 2  | Married/li     | 2  | Some college     | 1  | Working, fi | 9  | 2   | No       |      | 2   | No      |
| 38450  | 2  | 2  | Married/li     | 1  | High school or l | 4  | Retired     | 4  | 2   | No       |      | 2   | No      |
| 38455  | 2  | 2  | Married/li     | 1  | High school or l | 4  | Retired     | 2  | 2   | No       |      | 1   | Yes     |
| 38467  | 2  | 2  | Married/li     | 1  | High school or l | 4  | Retired     | 11 | 1   | Yes      | 2    | 2   | No      |
| 38468  | 2  | 2  | Married/li     | 1  | High school or l | 4  | Retired     | 1  | 1   | Yes      | 1    | 2   | No      |
| 38472  | 2  | 2  | Married/li     | 1  | High school or l | 4  | Retired     | 4  | 1   | Yes      | 2    | 1   | Yes     |

| respid | Q5 | Q6 | Marital Status | Q7 | Education        | Q8 | Work        | Q9 | Q10 | Diabetes | Q10a | Q11 | High BP |
|--------|----|----|----------------|----|------------------|----|-------------|----|-----|----------|------|-----|---------|
| 38484  | 2  | 5  | Prefer not     | 1  | High school or l | 4  | Retired     | 4  | 2   | No       |      | 2   | No      |
| 38498  | 2  | 4  | Widow/wi       | 1  | High school or l | 4  | Retired     | 3  | 2   | No       |      | 1   | Yes     |
| 38507  | 2  | 2  | Married/li     | 2  | Some college     | 1  | Working, fi | 7  | 1   | Yes      | 1    | 2   | No      |
| 38511  | 2  | 2  | Married/li     | 1  | High school or l | 1  | Working, fi | 31 | 1   | Yes      | 1    | 1   | Yes     |
| 38524  | 2  | 2  | Married/li     | 4  | Postgraduate     | 4  | Retired     | 13 | 1   | Yes      | 1    | 1   | Yes     |
| 38526  | 2  | 2  | Married/li     | 1  | High school or l | 4  | Retired     | 7  | 2   | No       |      | 2   | No      |
| 38534  | 2  | 2  | Married/li     | 1  | High school or l | 4  | Retired     | 3  | 1   | Yes      | 1    | 2   | No      |
| 38536  | 2  | 4  | Widow/wi       | 1  | High school or l | 4  | Retired     | 4  | 2   | No       |      | 2   | No      |
| 38539  | 2  | 2  | Married/li     | 1  | High school or l | 4  | Retired     | 11 | 2   | No       |      | 1   | Yes     |
| 38547  | 2  | 5  | Prefer not     | 1  | High school or l | 9  | Other       | 99 | 2   | No       |      | 2   | No      |
| 38549  | 2  | 2  | Married/li     | 2  | Some college     | 4  | Retired     | 9  | 2   | No       |      | 1   | Yes     |
| 38575  | 2  | 2  | Married/li     | 2  | Some college     | 4  | Retired     | 10 | 1   | Yes      | 1    | 1   | Yes     |
| 38579  | 2  | 2  | Married/li     | 1  | High school or l | 4  | Retired     | 6  | 2   | No       |      | 2   | No      |
| 38585  | 2  | 2  | Married/li     | 1  | High school or l | 4  | Retired     | 2  | 2   | No       |      | 1   | Yes     |
| 38589  | 2  | 2  | Married/li     | 3  | College degree   | 4  | Retired     | 1  | 2   | No       |      | 1   | Yes     |
| 38595  | 2  | 2  | Married/li     | 2  | Some college     | 1  | Working, fi | 12 | 1   | Yes      | 1    | 1   | Yes     |
| 38602  | 2  | 2  | Married/li     | 2  | Some college     | 4  | Retired     | 10 | 1   | Yes      | 1    | 1   | Yes     |
| 38603  | 2  | 2  | Married/li     | 3  | College degree   | 1  | Working, fi | 13 | 2   | No       |      | 2   | No      |
| 38612  | 2  | 2  | Married/li     | 1  | High school or l | 8  | Other worl  | 1  | 1   | Yes      | 1    | 1   | Yes     |
| 38621  | 2  | 2  | Married/li     | 2  | Some college     | 4  | Retired     | 11 | 2   | No       |      | 2   | No      |
| 38624  | 2  | 2  | Married/li     | 1  | High school or l | 6  | Homemake    | 10 | 1   | Yes      | 1    | 1   | Yes     |
| 38636  | 2  | 2  | Married/li     | 1  | High school or l | 4  | Retired     | 99 | 2   | No       |      | 2   | No      |
| 38656  | 2  | 2  | Married/li     | 1  | High school or l | 4  | Retired     | 1  | 2   | No       |      | 2   | No      |
| 38668  | 2  | 2  | Married/li     | 3  | College degree   | 4  | Retired     | 11 | 2   | No       |      | 2   | No      |
| 38675  | 2  | 2  | Married/li     | 3  | College degree   | 4  | Retired     | 12 | 2   | No       |      | 1   | Yes     |
| 38676  | 2  | 3  | Divorced       | 1  | High school or l | 6  | Homemake    | 2  | 2   | No       |      | 2   | No      |
| 38682  | 2  | 2  | Married/li     | 1  | High school or l | 4  | Retired     | 9  | 1   | Yes      | 1    | 1   | Yes     |
| 38689  | 2  | 2  | Married/li     | 1  | High school or l | 4  | Retired     | 13 | 2   | No       |      | 1   | Yes     |
| 38702  | 2  | 4  | Widow/wi       | 1  | High school or l | 6  | Homemake    | 11 | 2   | No       |      | 2   | No      |
| 38704  | 2  | 2  | Married/li     | 3  | College degree   | 4  | Retired     | 11 | 2   | No       |      | 1   | Yes     |
| 38713  | 2  | 2  | Married/li     | 1  | High school or l | 1  | Working, fi | 12 | 2   | No       |      | 2   | No      |
| 38718  | 2  | 2  | Married/li     | 1  | High school or l | 4  | Retired     | 4  | 2   | No       |      | 1   | Yes     |

| respid | Q5 | Q6 | Marital Status | Q7 | Education        | Q8 | Work        | Q9 | Q10 | Diabetes | Q10a | Q11 | High BP |
|--------|----|----|----------------|----|------------------|----|-------------|----|-----|----------|------|-----|---------|
| 38725  | 2  | 4  | Widow/wid      | 1  | High school or l | 5  | Permanent   | 1  | 1   | Yes      | 1    | 2   | No      |
| 38730  | 2  | 2  | Married/li     | 2  | Some college     | 4  | Retired     | 9  | 1   | Yes      | 1    | 1   | Yes     |
| 38737  | 2  | 2  | Married/li     | 1  | High school or l | 4  | Retired     | 8  | 1   | Yes      | 1    | 1   | Yes     |
| 38738  | 2  | 2  | Married/li     | 2  | Some college     | 4  | Retired     | 11 | 2   | No       |      | 1   | Yes     |
| 38744  | 2  | 2  | Married/li     | 1  | High school or l | 4  | Retired     | 5  | 2   | No       |      | 2   | No      |
| 38746  | 2  | 4  | Widow/wid      | 1  | High school or l | 9  | Other       | 3  | 2   | No       |      | 2   | No      |
| 38753  | 2  | 4  | Widow/wid      | 1  | High school or l | 9  | Other       | 1  | 2   | No       |      | 2   | No      |
| 38756  | 2  | 2  | Married/li     | 1  | High school or l | 4  | Retired     | 3  | 1   | Yes      | 1    | 2   | No      |
| 38760  | 2  | 2  | Married/li     | 1  | High school or l | 6  | Homemake    | 32 | 2   | No       |      | 1   | Yes     |
| 38762  | 2  | 2  | Married/li     | 3  | College degree   | 1  | Working, fi | 12 | 2   | No       |      | 1   | Yes     |
| 38765  | 2  | 5  | Prefer not     | 1  | High school or l | 9  | Other       | 6  | 2   | No       |      | 2   | No      |
| 38769  | 2  | 2  | Married/li     | 3  | College degree   | 4  | Retired     | 14 | 2   | No       |      | 1   | Yes     |
| 38781  | 2  | 2  | Married/li     | 2  | Some college     | 4  | Retired     | 11 | 2   | No       |      | 2   | No      |
| 38786  | 2  | 2  | Married/li     | 4  | Postgraduate     | 4  | Retired     | 12 | 2   | No       |      | 1   | Yes     |
| 38790  | 2  | 4  | Widow/wid      | 1  | High school or l | 4  | Retired     | 8  | 1   | Yes      | 1    | 1   | Yes     |
| 38793  | 2  | 2  | Married/li     | 1  | High school or l | 4  | Retired     | 1  | 1   | Yes      | 1    | 1   | Yes     |
| 38797  | 2  | 2  | Married/li     | 2  | Some college     | 4  | Retired     | 11 | 2   | No       |      | 2   | No      |
| 38802  | 2  | 2  | Married/li     | 1  | High school or l | 4  | Retired     | 10 | 2   | No       |      | 2   | No      |
| 38815  | 2  | 2  | Married/li     | 1  | High school or l | 4  | Retired     | 7  | 2   | No       |      | 1   | Yes     |
| 38826  | 2  | 2  | Married/li     | 3  | College degree   | 4  | Retired     | 12 | 1   | Yes      | 1    | 2   | No      |
| 38828  | 2  | 2  | Married/li     | 2  | Some college     | 1  | Working, fi | 8  | 2   | No       |      | 1   | Yes     |
| 38829  | 2  | 5  | Prefer not     | 1  | High school or l | 4  | Retired     | 99 | 1   | Yes      | 1    | 1   | Yes     |
| 38835  | 2  | 2  | Married/li     | 1  | High school or l | 4  | Retired     | 11 | 2   | No       |      | 1   | Yes     |
| 38842  | 2  | 2  | Married/li     | 2  | Some college     | 1  | Working, fi | 12 | 1   | Yes      | 1    | 2   | No      |
| 38853  | 2  | 2  | Married/li     | 2  | Some college     | 4  | Retired     | 11 | 2   | No       |      | 1   | Yes     |
| 38855  | 2  | 2  | Married/li     | 2  | Some college     | 4  | Retired     | 11 | 2   | No       |      | 1   | Yes     |
| 38860  | 2  | 2  | Married/li     | 3  | College degree   | 4  | Retired     | 5  | 1   | Yes      | 1    | 2   | No      |
| 38869  | 2  | 2  | Married/li     | 1  | High school or l | 4  | Retired     | 3  | 2   | No       |      | 1   | Yes     |
| 38882  | 2  | 2  | Married/li     | 3  | College degree   | 1  | Working, fi | 12 | 1   | Yes      | 1    | 2   | No      |
| 38897  | 2  | 4  | Widow/wid      | 1  | High school or l | 9  | Other       | 5  | 2   | No       |      | 2   | No      |
| 38903  | 2  | 1  | Single         | 1  | High school or l | 2  | Working, p  | 4  | 1   | Yes      | 1    | 1   | Yes     |
| 38910  | 2  | 2  | Married/li     | 3  | College degree   | 1  | Working, fi | 11 | 1   | Yes      | 1    | 2   | No      |

| respid | Q5 | Q6 | Marital Status | Q7 | Education        | Q8 | Work        | Q9 | Q10 | Diabetes | Q10a | Q11 | High BP |
|--------|----|----|----------------|----|------------------|----|-------------|----|-----|----------|------|-----|---------|
| 38948  | 2  | 2  | Married/li     | 4  | Postgraduate     | 1  | Working, fi | 12 | 1   | Yes      | 1    | 2   | No      |
| 38949  | 2  | 4  | Widow/wi       | 1  | High school or l | 4  | Retired     | 2  | 2   | No       |      | 1   | Yes     |
| 38953  | 2  | 2  | Married/li     | 3  | College degree   | 6  | Homemake    | 11 | 1   | Yes      | 2    | 1   | Yes     |
| 38989  | 2  | 4  | Widow/wi       | 1  | High school or l | 6  | Homemake    | 1  | 1   | Yes      | 1    | 2   | No      |
| 38997  | 2  | 2  | Married/li     | 1  | High school or l | 4  | Retired     | 3  | 2   | No       |      | 2   | No      |
| 38999  | 2  | 2  | Married/li     | 1  | High school or l | 4  | Retired     | 8  | 1   | Yes      | 1    | 2   | No      |
| 39002  | 2  | 2  | Married/li     | 2  | Some college     | 4  | Retired     | 12 | 1   | Yes      | 1    | 1   | Yes     |
| 39003  | 2  | 2  | Married/li     | 2  | Some college     | 1  | Working, fi | 12 | 1   | Yes      | 1    | 2   | No      |
| 39006  | 2  | 2  | Married/li     | 2  | Some college     | 4  | Retired     | 12 | 2   | No       |      | 1   | Yes     |
| 39014  | 2  | 2  | Married/li     | 1  | High school or l | 4  | Retired     | 10 | 2   | No       |      | 2   | No      |
| 39017  | 2  | 2  | Married/li     | 2  | Some college     | 4  | Retired     | 11 | 2   | No       |      | 2   | No      |
| 39018  | 2  | 2  | Married/li     | 4  | Postgraduate     | 1  | Working, fi | 14 | 2   | No       |      | 2   | No      |
| 39025  | 2  | 2  | Married/li     | 3  | College degree   | 4  | Retired     | 12 | 1   | Yes      | 1    | 1   | Yes     |
| 39031  | 2  | 2  | Married/li     | 1  | High school or l | 1  | Working, fi | 12 | 1   | Yes      | 1    | 2   | No      |
| 39061  | 2  | 2  | Married/li     | 1  | High school or l | 1  | Working, fi | 11 | 1   | Yes      | 1    | 2   | No      |
| 39131  | 2  | 2  | Married/li     | 1  | High school or l | 1  | Working, fi | 1  | 2   | No       |      | 2   | No      |
| 39153  | 2  | 2  | Married/li     | 1  | High school or l | 4  | Retired     | 1  | 1   | Yes      | 1    | 1   | Yes     |
| 39194  | 2  | 2  | Married/li     | 1  | High school or l | 4  | Retired     | 1  | 1   | Yes      | 1    | 2   | No      |
| 39204  | 2  | 2  | Married/li     | 1  | High school or l | 4  | Retired     | 10 | 1   | Yes      | 1    | 2   | No      |
| 39208  | 2  | 4  | Widow/wi       | 1  | High school or l | 4  | Retired     | 1  | 2   | No       |      | 1   | Yes     |
| 39213  | 2  | 2  | Married/li     | 1  | High school or l | 4  | Retired     | 5  | 1   | Yes      | 1    | 2   | No      |
| 39231  | 2  | 2  | Married/li     | 3  | College degree   | 4  | Retired     | 8  | 1   | Yes      | 1    | 2   | No      |
| 39251  | 2  | 2  | Married/li     | 1  | High school or l | 4  | Retired     | 5  | 1   | Yes      | 1    | 2   | No      |
| 39257  | 2  | 2  | Married/li     | 2  | Some college     | 4  | Retired     | 6  | 1   | Yes      | 1    | 2   | No      |
| 39262  | 2  | 2  | Married/li     | 2  | Some college     | 4  | Retired     | 6  | 1   | Yes      | 1    | 2   | No      |
| 39269  | 2  | 2  | Married/li     | 1  | High school or l | 4  | Retired     | 7  | 1   | Yes      | 1    | 2   | No      |
| 39272  | 2  | 2  | Married/li     | 2  | Some college     | 4  | Retired     | 1  | 1   | Yes      | 1    | 2   | No      |
| 39280  | 2  | 2  | Married/li     | 2  | Some college     | 4  | Retired     | 10 | 1   | Yes      | 1    | 2   | No      |
| 39294  | 2  | 2  | Married/li     | 1  | High school or l | 4  | Retired     | 5  | 1   | Yes      | 1    | 2   | No      |
| 39297  | 2  | 2  | Married/li     | 2  | Some college     | 4  | Retired     | 10 | 1   | Yes      | 1    | 2   | No      |
| 39300  | 2  | 2  | Married/li     | 1  | High school or l | 4  | Retired     | 6  | 2   | No       |      | 1   | Yes     |
| 39307  | 2  | 2  | Married/li     | 2  | Some college     | 4  | Retired     | 5  | 1   | Yes      | 1    | 2   | No      |

| respid | Q5 | Q6 | Marital Status | Q7 | Education        | Q8 | Work        | Q9 | Q10 | Diabetes | Q10a | Q11 | High BP |
|--------|----|----|----------------|----|------------------|----|-------------|----|-----|----------|------|-----|---------|
| 39320  | 2  | 2  | Married/li     | 2  | Some college     | 4  | Retired     | 5  | 1   | Yes      | 1    | 1   | Yes     |
| 39333  | 2  | 2  | Married/li     | 1  | High school or l | 2  | Working, p  | 6  | 2   | No       |      | 1   | Yes     |
| 39335  | 2  | 2  | Married/li     | 2  | Some college     | 4  | Retired     | 11 | 1   | Yes      | 1    | 1   | Yes     |
| 39339  | 2  | 2  | Married/li     | 3  | College degree   | 4  | Retired     | 8  | 1   | Yes      | 1    | 1   | Yes     |
| 39375  | 2  | 2  | Married/li     | 1  | High school or l | 4  | Retired     | 1  | 2   | No       |      | 1   | Yes     |
| 39377  | 2  | 2  | Married/li     | 1  | High school or l | 4  | Retired     | 4  | 2   | No       |      | 1   | Yes     |
| 39380  | 2  | 2  | Married/li     | 3  | College degree   | 4  | Retired     | 7  | 1   | Yes      | 1    | 2   | No      |
| 39425  | 2  | 2  | Married/li     | 1  | High school or l | 6  | Homemake    | 28 | 2   | No       |      | 2   | No      |
| 39590  | 2  | 2  | Married/li     | 1  | High school or l | 6  | Homemake    | 33 | 2   | No       |      | 2   | No      |
| 40529  | 2  | 2  | Married/li     | 1  | High school or l | 6  | Homemake    | 28 | 2   | No       |      | 2   | No      |
| 40702  | 2  | 2  | Married/li     | 1  | High school or l | 6  | Homemake    | 25 | 2   | No       |      | 2   | No      |
| 40788  | 2  | 2  | Married/li     | 1  | High school or l | 4  | Retired     | 32 | 1   | Yes      | 1    | 1   | Yes     |
| 40841  | 2  | 2  | Married/li     | 1  | High school or l | 8  | Other worl  | 31 | 2   | No       |      | 2   | No      |
| 40965  | 2  | 2  | Married/li     | 1  | High school or l | 1  | Working, fi | 25 | 2   | No       |      | 1   | Yes     |
| 41092  | 2  | 2  | Married/li     | 1  | High school or l | 4  | Retired     | 99 | 2   | No       |      | 1   | Yes     |
| 41534  | 2  | 2  | Married/li     | 1  | High school or l | 1  | Working, fi | 25 | 2   | No       |      | 1   | Yes     |
| 41919  | 2  | 4  | Widow/wi       | 1  | High school or l | 6  | Homemake    | 25 | 1   | Yes      | 1    | 1   | Yes     |
| 42110  | 2  | 2  | Married/li     | 1  | High school or l | 3  | Unemploy    | 30 | 1   | Yes      | 1    | 2   | No      |
| 42135  | 2  | 2  | Married/li     | 3  | College degree   | 1  | Working, fi | 11 | 2   | No       |      | 2   | No      |
| 42142  | 2  | 1  | Single         | 2  | Some college     | 1  | Working, fi | 28 | 2   | No       |      | 2   | No      |
| 42163  | 2  | 2  | Married/li     | 1  | High school or l | 6  | Homemake    | 33 | 1   | Yes      | 1    | 1   | Yes     |
| 42164  | 2  | 4  | Widow/wi       | 1  | High school or l | 4  | Retired     | 9  | 2   | No       |      | 2   | No      |
| 42172  | 2  | 2  | Married/li     | 1  | High school or l | 4  | Retired     | 2  | 2   | No       |      | 1   | Yes     |
| 42177  | 2  | 2  | Married/li     | 3  | College degree   | 1  | Working, fi | 12 | 2   | No       |      | 1   | Yes     |
| 42181  | 2  | 2  | Married/li     | 2  | Some college     | 4  | Retired     | 11 | 2   | No       |      | 1   | Yes     |
| 42193  | 2  | 4  | Widow/wi       | 1  | High school or l | 4  | Retired     | 4  | 2   | No       |      | 1   | Yes     |
| 42196  | 2  | 2  | Married/li     | 1  | High school or l | 4  | Retired     | 13 | 2   | No       |      | 1   | Yes     |
| 42202  | 2  | 2  | Married/li     | 1  | High school or l | 4  | Retired     | 13 | 2   | No       |      | 1   | Yes     |
| 42248  | 2  | 2  | Married/li     | 1  | High school or l | 4  | Retired     | 6  | 1   | Yes      | 1    | 1   | Yes     |
| 42283  | 2  | 2  | Married/li     | 2  | Some college     | 1  | Working, fi | 31 | 2   | No       |      | 2   | No      |
| 42284  | 2  | 2  | Married/li     | 3  | College degree   | 1  | Working, fi | 34 | 1   | Yes      | 1    | 1   | Yes     |
| 42323  | 2  | 2  | Married/li     | 4  | Postgraduate     | 1  | Working, fi | 33 | 2   | No       |      | 2   | No      |

| respid | Q5 | Q6 | Marital Status | Q7 | Education        | Q8 | Work        | Q9 | Q10 | Diabetes | Q10a | Q11 | High BP |
|--------|----|----|----------------|----|------------------|----|-------------|----|-----|----------|------|-----|---------|
| 42349  | 2  | 2  | Married/li     | 1  | High school or l | 1  | Working, fi | 33 | 2   | No       |      | 2   | No      |
| 42351  | 2  | 2  | Married/li     | 3  | College degree   | 1  | Working, fi | 30 | 2   | No       |      | 2   | No      |
| 42357  | 2  | 2  | Married/li     | 3  | College degree   | 1  | Working, fi | 26 | 2   | No       |      | 2   | No      |
| 42366  | 2  | 1  | Single         | 3  | College degree   | 1  | Working, fi | 26 | 2   | No       |      | 2   | No      |
| 42380  | 2  | 2  | Married/li     | 2  | Some college     | 4  | Retired     | 35 | 2   | No       |      | 1   | Yes     |
| 42414  | 2  | 1  | Single         | 1  | High school or l | 1  | Working, fi | 27 | 2   | No       |      | 1   | Yes     |
| 42420  | 2  | 2  | Married/li     | 3  | College degree   | 1  | Working, fi | 33 | 1   | Yes      | 1    | 1   | Yes     |
| 42454  | 2  | 1  | Single         | 1  | High school or l | 8  | Other worl  | 16 | 2   | No       |      | 2   | No      |
| 42458  | 2  | 2  | Married/li     | 1  | High school or l | 6  | Homemake    | 26 | 2   | No       |      | 1   | Yes     |
| 42461  | 2  | 1  | Single         | 3  | College degree   | 1  | Working, fi | 17 | 2   | No       |      | 1   | Yes     |
| 42488  | 2  | 2  | Married/li     | 1  | High school or l | 1  | Working, fi | 31 | 2   | No       |      | 2   | No      |
| 42511  | 2  | 2  | Married/li     | 1  | High school or l | 4  | Retired     | 5  | 2   | No       |      | 2   | No      |
| 42512  | 2  | 2  | Married/li     | 3  | College degree   | 4  | Retired     | 33 | 2   | No       |      | 2   | No      |
| 42530  | 2  | 2  | Married/li     | 1  | High school or l | 1  | Working, fi | 17 | 1   | Yes      | 1    | 2   | No      |
| 42531  | 2  | 2  | Married/li     | 1  | High school or l | 4  | Retired     | 6  | 1   | Yes      | 1    | 2   | No      |
| 42533  | 2  | 3  | Divorced       | 1  | High school or l | 4  | Retired     | 33 | 1   | Yes      | 2    | 1   | Yes     |
| 42549  | 2  | 2  | Married/li     | 1  | High school or l | 1  | Working, fi | 31 | 2   | No       |      | 2   | No      |
| 42550  | 2  | 4  | Widow/wi       | 1  | High school or l | 6  | Homemake    | 30 | 1   | Yes      | 1    | 1   | Yes     |
| 42553  | 2  | 4  | Widow/wi       | 1  | High school or l | 6  | Homemake    | 18 | 2   | No       |      | 2   | No      |
| 42562  | 2  | 2  | Married/li     | 3  | College degree   | 1  | Working, fi | 38 | 1   | Yes      | 1    | 1   | Yes     |
| 42567  | 2  | 2  | Married/li     | 1  | High school or l | 1  | Working, fi | 28 | 2   | No       |      | 2   | No      |
| 42589  | 2  | 2  | Married/li     | 3  | College degree   | 2  | Working, p  | 16 | 2   | No       |      | 1   | Yes     |
| 42604  | 2  | 2  | Married/li     | 3  | College degree   | 1  | Working, fi | 19 | 2   | No       |      | 1   | Yes     |
| 42618  | 2  | 1  | Single         | 1  | High school or l | 2  | Working, p  | 1  | 2   | No       |      | 2   | No      |
| 42621  | 2  | 2  | Married/li     | 1  | High school or l | 1  | Working, fi | 32 | 2   | No       |      | 1   | Yes     |
| 42627  | 2  | 1  | Single         | 3  | College degree   | 1  | Working, fi | 16 | 2   | No       |      | 2   | No      |
| 42641  | 2  | 2  | Married/li     | 1  | High school or l | 1  | Working, fi | 22 | 2   | No       |      | 1   | Yes     |
| 42655  | 2  | 2  | Married/li     | 3  | College degree   | 4  | Retired     | 14 | 1   | Yes      | 1    | 1   | Yes     |
| 42666  | 2  | 2  | Married/li     | 3  | College degree   | 1  | Working, fi | 20 | 2   | No       |      | 1   | Yes     |
| 42667  | 2  | 2  | Married/li     | 1  | High school or l | 1  | Working, fi | 28 | 2   | No       |      | 1   | Yes     |
| 42697  | 2  | 2  | Married/li     | 1  | High school or l | 6  | Homemake    | 18 | 2   | No       |      | 2   | No      |
| 42703  | 2  | 2  | Married/li     | 1  | High school or l | 1  | Working, fi | 21 | 1   | Yes      | 1    | 1   | Yes     |

| respid | Q5 | Q6 | Marital Status | Q7 | Education        | Q8 | Work        | Q9 | Q10 | Diabetes | Q10a | Q11 | High BP |
|--------|----|----|----------------|----|------------------|----|-------------|----|-----|----------|------|-----|---------|
| 42712  | 2  | 2  | Married/li     | 3  | College degree   | 1  | Working, fi | 18 | 2   | No       |      | 1   | Yes     |
| 42731  | 2  | 2  | Married/li     | 3  | College degree   | 1  | Working, fi | 19 | 2   | No       |      | 1   | Yes     |
| 42780  | 2  | 2  | Married/li     | 2  | Some college     | 1  | Working, fi | 31 | 2   | No       |      | 2   | No      |
| 42785  | 2  | 2  | Married/li     | 2  | Some college     | 2  | Working, p  | 32 | 2   | No       |      | 2   | No      |
| 42788  | 2  | 2  | Married/li     | 1  | High school or l | 1  | Working, fi | 17 | 2   | No       |      | 2   | No      |
| 42802  | 2  | 2  | Married/li     | 3  | College degree   | 1  | Working, fi | 4  | 2   | No       |      | 1   | Yes     |
| 42818  | 2  | 2  | Married/li     | 3  | College degree   | 1  | Working, fi | 25 | 2   | No       |      | 2   | No      |
| 42821  | 2  | 1  | Single         | 3  | College degree   | 1  | Working, fi | 17 | 2   | No       |      | 2   | No      |
| 42824  | 2  | 1  | Single         | 4  | Postgraduate     | 1  | Working, fi | 2  | 1   | Yes      | 1    | 1   | Yes     |
| 42831  | 2  | 5  | Prefer not     | 1  | High school or l | 4  | Retired     | 5  | 2   | No       |      | 1   | Yes     |
| 42836  | 2  | 2  | Married/li     | 1  | High school or l | 6  | Homemake    | 31 | 2   | No       |      | 2   | No      |
| 42864  | 2  | 4  | Widow/wi       | 3  | College degree   | 6  | Homemake    | 20 | 2   | No       |      | 1   | Yes     |
| 42875  | 2  | 2  | Married/li     | 3  | College degree   | 1  | Working, fi | 19 | 2   | No       |      | 1   | Yes     |
| 42891  | 2  | 2  | Married/li     | 2  | Some college     | 1  | Working, fi | 22 | 2   | No       |      | 2   | No      |
| 42897  | 2  | 2  | Married/li     | 3  | College degree   | 6  | Homemake    | 33 | 2   | No       |      | 2   | No      |
| 42900  | 2  | 2  | Married/li     | 1  | High school or l | 4  | Retired     | 1  | 2   | No       |      | 1   | Yes     |
| 42902  | 2  | 2  | Married/li     | 4  | Postgraduate     | 4  | Retired     | 12 | 1   | Yes      | 1    | 1   | Yes     |
| 42921  | 2  | 2  | Married/li     | 1  | High school or l | 6  | Homemake    | 32 | 2   | No       |      | 1   | Yes     |
| 42925  | 2  | 2  | Married/li     | 1  | High school or l | 1  | Working, fi | 19 | 2   | No       |      | 2   | No      |
| 42944  | 2  | 2  | Married/li     | 4  | Postgraduate     | 1  | Working, fi | 21 | 2   | No       |      | 2   | No      |
| 42950  | 2  | 2  | Married/li     | 2  | Some college     | 1  | Working, fi | 99 | 2   | No       |      | 2   | No      |
| 42963  | 2  | 2  | Married/li     | 1  | High school or l | 4  | Retired     | 6  | 2   | No       |      | 2   | No      |
| 42967  | 2  | 2  | Married/li     | 1  | High school or l | 1  | Working, fi | 24 | 2   | No       |      | 1   | Yes     |
| 42985  | 2  | 4  | Widow/wi       | 1  | High school or l | 9  | Other       | 29 | 2   | No       |      | 1   | Yes     |
| 42990  | 2  | 2  | Married/li     | 3  | College degree   | 8  | Other worl  | 20 | 2   | No       |      | 1   | Yes     |
| 42996  | 2  | 3  | Divorced       | 1  | High school or l | 4  | Retired     | 33 | 2   | No       |      | 2   | No      |
| 43002  | 2  | 4  | Widow/wi       | 1  | High school or l | 1  | Working, fi | 34 | 1   | Yes      | 1    | 2   | No      |
| 43004  | 2  | 2  | Married/li     | 4  | Postgraduate     | 2  | Working, p  | 11 | 2   | No       |      | 2   | No      |
| 43012  | 2  | 1  | Single         | 3  | College degree   | 1  | Working, fi | 16 | 2   | No       |      | 2   | No      |
| 43027  | 2  | 2  | Married/li     | 3  | College degree   | 4  | Retired     | 14 | 1   | Yes      | 1    | 1   | Yes     |
| 43028  | 2  | 2  | Married/li     | 4  | Postgraduate     | 4  | Retired     | 30 | 2   | No       |      | 1   | Yes     |
| 43029  | 2  | 4  | Widow/wi       | 1  | High school or l | 6  | Homemake    | 1  | 2   | No       |      | 1   | Yes     |

| respid | Q5 | Q6 | Marital Status | Q7 | Education        | Q8 | Work        | Q9 | Q10 | Diabetes | Q10a | Q11 | High BP |
|--------|----|----|----------------|----|------------------|----|-------------|----|-----|----------|------|-----|---------|
| 43031  | 2  | 2  | Married/li     | 4  | Postgraduate     | 1  | Working, fi | 30 | 2   | No       |      | 2   | No      |
| 43042  | 2  | 2  | Married/li     | 4  | Postgraduate     | 1  | Working, fi | 30 | 2   | No       |      | 1   | Yes     |
| 43054  | 2  | 2  | Married/li     | 1  | High school or l | 4  | Retired     | 13 | 2   | No       |      | 2   | No      |
| 43058  | 2  | 2  | Married/li     | 2  | Some college     | 1  | Working, fi | 35 | 2   | No       |      | 1   | Yes     |
| 43064  | 2  | 4  | Widow/wi       | 1  | High school or l | 4  | Retired     | 2  | 2   | No       |      | 1   | Yes     |
| 43069  | 2  | 2  | Married/li     | 1  | High school or l | 6  | Homemake    | 1  | 2   | No       |      | 1   | Yes     |
| 43071  | 2  | 2  | Married/li     | 2  | Some college     | 1  | Working, fi | 32 | 2   | No       |      | 2   | No      |
| 43072  | 2  | 2  | Married/li     | 3  | College degree   | 1  | Working, fi | 14 | 1   | Yes      | 1    | 2   | No      |
| 43077  | 2  | 2  | Married/li     | 1  | High school or l | 4  | Retired     | 1  | 2   | No       |      | 1   | Yes     |
| 43078  | 2  | 2  | Married/li     | 3  | College degree   | 4  | Retired     | 14 | 1   | Yes      | 1    | 1   | Yes     |
| 43082  | 2  | 2  | Married/li     | 1  | High school or l | 6  | Homemake    | 17 | 2   | No       |      | 1   | Yes     |
| 43092  | 2  | 2  | Married/li     | 3  | College degree   | 1  | Working, fi | 18 | 1   | Yes      | 1    | 1   | Yes     |
| 43096  | 2  | 2  | Married/li     | 3  | College degree   | 1  | Working, fi | 30 | 2   | No       |      | 2   | No      |
| 43109  | 2  | 2  | Married/li     | 1  | High school or l | 6  | Homemake    | 25 | 2   | No       |      | 2   | No      |
| 43113  | 2  | 2  | Married/li     | 1  | High school or l | 4  | Retired     | 2  | 2   | No       |      | 1   | Yes     |
| 43123  | 2  | 2  | Married/li     | 1  | High school or l | 6  | Homemake    | 26 | 2   | No       |      | 2   | No      |
| 43127  | 2  | 2  | Married/li     | 2  | Some college     | 1  | Working, fi | 20 | 2   | No       |      | 1   | Yes     |
| 43128  | 2  | 2  | Married/li     | 2  | Some college     | 1  | Working, fi | 26 | 2   | No       |      | 2   | No      |
| 43129  | 2  | 2  | Married/li     | 1  | High school or l | 1  | Working, fi | 99 | 2   | No       |      | 2   | No      |
| 43133  | 2  | 2  | Married/li     | 3  | College degree   | 4  | Retired     | 10 | 1   | Yes      | 1    | 2   | No      |
| 43140  | 2  | 2  | Married/li     | 1  | High school or l | 6  | Homemake    | 25 | 2   | No       |      | 2   | No      |
| 43143  | 2  | 2  | Married/li     | 3  | College degree   | 4  | Retired     | 13 | 1   | Yes      | 1    | 1   | Yes     |
| 43149  | 2  | 2  | Married/li     | 3  | College degree   | 4  | Retired     | 13 | 1   | Yes      | 1    | 2   | No      |
| 43150  | 2  | 2  | Married/li     | 3  | College degree   | 4  | Retired     | 12 | 1   | Yes      | 1    | 2   | No      |
| 43153  | 2  | 4  | Widow/wi       | 1  | High school or l | 4  | Retired     | 6  | 1   | Yes      | 1    | 1   | Yes     |
| 43170  | 2  | 2  | Married/li     | 4  | Postgraduate     | 1  | Working, fi | 35 | 2   | No       |      | 1   | Yes     |
| 43187  | 2  | 2  | Married/li     | 1  | High school or l | 6  | Homemake    | 18 | 2   | No       |      | 2   | No      |
| 43188  | 2  | 2  | Married/li     | 1  | High school or l | 6  | Homemake    | 17 | 2   | No       |      | 2   | No      |
| 43198  | 2  | 2  | Married/li     | 2  | Some college     | 1  | Working, fi | 11 | 2   | No       |      | 2   | No      |
| 43208  | 2  | 2  | Married/li     | 1  | High school or l | 6  | Homemake    | 15 | 2   | No       |      | 2   | No      |
| 43216  | 2  | 2  | Married/li     | 2  | Some college     | 9  | Other       | 4  | 2   | No       |      | 2   | No      |
| 43222  | 2  | 2  | Married/li     | 3  | College degree   | 1  | Working, fi | 13 | 1   | Yes      | 1    | 2   | No      |



| respid | Q5 | Q6 | Marital Status | Q7 | Education        | Q8 | Work        | Q9 | Q10 | Diabetes | Q10a | Q11 | High BP |
|--------|----|----|----------------|----|------------------|----|-------------|----|-----|----------|------|-----|---------|
| 43224  | 2  | 2  | Married/li     | 1  | High school or l | 6  | Homemake    | 3  | 2   | No       |      | 1   | Yes     |
| 43230  | 2  | 2  | Married/li     | 3  | College degree   | 1  | Working, fi | 13 | 1   | Yes      | 1    | 2   | No      |
| 43231  | 2  | 2  | Married/li     | 3  | College degree   | 1  | Working, fi | 13 | 1   | Yes      | 1    | 2   | No      |
| 43265  | 2  | 2  | Married/li     | 3  | College degree   | 1  | Working, fi | 14 | 1   | Yes      | 1    | 1   | Yes     |
| 43270  | 2  | 2  | Married/li     | 3  | College degree   | 1  | Working, fi | 12 | 1   | Yes      | 1    | 1   | Yes     |
| 43283  | 2  | 2  | Married/li     | 3  | College degree   | 1  | Working, fi | 12 | 1   | Yes      | 1    | 1   | Yes     |
| 43295  | 2  | 2  | Married/li     | 3  | College degree   | 1  | Working, fi | 13 | 1   | Yes      | 1    | 1   | Yes     |
| 43297  | 2  | 2  | Married/li     | 2  | Some college     | 1  | Working, fi | 3  | 2   | No       |      | 2   | No      |
| 43299  | 2  | 2  | Married/li     | 1  | High school or l | 4  | Retired     | 2  | 2   | No       |      | 2   | No      |
| 43307  | 2  | 2  | Married/li     | 1  | High school or l | 6  | Homemake    | 30 | 2   | No       |      | 1   | Yes     |
| 43316  | 2  | 2  | Married/li     | 3  | College degree   | 1  | Working, fi | 13 | 1   | Yes      | 1    | 1   | Yes     |
| 43318  | 2  | 2  | Married/li     | 3  | College degree   | 1  | Working, fi | 13 | 1   | Yes      | 1    | 2   | No      |
| 43319  | 2  | 2  | Married/li     | 3  | College degree   | 1  | Working, fi | 32 | 2   | No       |      | 1   | Yes     |
| 43324  | 2  | 2  | Married/li     | 3  | College degree   | 1  | Working, fi | 13 | 1   | Yes      | 1    | 2   | No      |
| 43325  | 2  | 2  | Married/li     | 1  | High school or l | 6  | Homemake    | 25 | 1   | Yes      | 1    | 1   | Yes     |
| 43327  | 2  | 2  | Married/li     | 1  | High school or l | 1  | Working, fi | 29 | 2   | No       |      | 2   | No      |
| 43338  | 2  | 2  | Married/li     | 2  | Some college     | 1  | Working, fi | 9  | 2   | No       |      | 2   | No      |
| 43342  | 2  | 2  | Married/li     | 1  | High school or l | 1  | Working, fi | 29 | 2   | No       |      | 2   | No      |
| 43348  | 2  | 2  | Married/li     | 3  | College degree   | 1  | Working, fi | 99 | 2   | No       |      | 2   | No      |
| 43395  | 2  | 2  | Married/li     | 3  | College degree   | 1  | Working, fi | 12 | 1   | Yes      | 1    | 2   | No      |
| 43404  | 2  | 2  | Married/li     | 3  | College degree   | 1  | Working, fi | 12 | 1   | Yes      | 1    | 2   | No      |
| 43406  | 2  | 4  | Widow/wi       | 1  | High school or l | 6  | Homemake    | 19 | 2   | No       |      | 1   | Yes     |
| 43407  | 2  | 2  | Married/li     | 1  | High school or l | 9  | Other       | 1  | 2   | No       |      | 2   | No      |
| 43411  | 2  | 2  | Married/li     | 3  | College degree   | 6  | Homemake    | 16 | 2   | No       |      | 2   | No      |
| 43416  | 2  | 2  | Married/li     | 3  | College degree   | 1  | Working, fi | 13 | 1   | Yes      | 1    | 2   | No      |
| 43428  | 2  | 2  | Married/li     | 2  | Some college     | 1  | Working, fi | 5  | 2   | No       |      | 2   | No      |
| 43429  | 2  | 2  | Married/li     | 1  | High school or l | 9  | Other       | 29 | 1   | Yes      | 1    | 1   | Yes     |
| 43432  | 2  | 2  | Married/li     | 2  | Some college     | 1  | Working, fi | 31 | 2   | No       |      | 2   | No      |
| 43443  | 2  | 2  | Married/li     | 1  | High school or l | 2  | Working, p  | 32 | 2   | No       |      | 2   | No      |
| 43455  | 2  | 4  | Widow/wi       | 1  | High school or l | 6  | Homemake    | 38 | 2   | No       |      | 2   | No      |
| 43457  | 2  | 2  | Married/li     | 3  | College degree   | 1  | Working, fi | 16 | 2   | No       |      | 2   | No      |
| 43458  | 2  | 2  | Married/li     | 3  | College degree   | 1  | Working, fi | 30 | 2   | No       |      | 2   | No      |

| respid | Q5 | Q6 | Marital Status | Q7 | Education        | Q8 | Work        | Q9 | Q10 | Diabetes | Q10a | Q11 | High BP |
|--------|----|----|----------------|----|------------------|----|-------------|----|-----|----------|------|-----|---------|
| 43477  | 2  | 2  | Married/li     | 1  | High school or l | 4  | Retired     | 8  | 1   | Yes      | 1    | 2   | No      |
| 43520  | 2  | 1  | Single         | 3  | College degree   | 1  | Working, fi | 17 | 2   | No       |      | 2   | No      |
| 43521  | 2  | 4  | Widow/wi       | 1  | High school or l | 6  | Homemake    | 26 | 2   | No       |      | 2   | No      |
| 43550  | 2  | 2  | Married/li     | 1  | High school or l | 1  | Working, fi | 22 | 2   | No       |      | 2   | No      |
| 43551  | 2  | 2  | Married/li     | 1  | High school or l | 4  | Retired     | 31 | 2   | No       |      | 1   | Yes     |
| 43554  | 2  | 2  | Married/li     | 1  | High school or l | 4  | Retired     | 7  | 1   | Yes      | 1    | 1   | Yes     |
| 43560  | 2  | 2  | Married/li     | 1  | High school or l | 4  | Retired     | 17 | 2   | No       |      | 1   | Yes     |
| 43569  | 2  | 3  | Divorced       | 1  | High school or l | 3  | Unemploye   | 99 | 1   | Yes      | 1    | 1   | Yes     |
| 43583  | 2  | 2  | Married/li     | 1  | High school or l | 6  | Homemake    | 17 | 2   | No       |      | 1   | Yes     |
| 43590  | 2  | 2  | Married/li     | 1  | High school or l | 5  | Permanent   | 25 | 1   | Yes      | 1    | 1   | Yes     |
| 43591  | 2  | 2  | Married/li     | 1  | High school or l | 1  | Working, fi | 9  | 1   | Yes      | 2    | 1   | Yes     |
| 43595  | 2  | 2  | Married/li     | 1  | High school or l | 1  | Working, fi | 28 | 2   | No       |      | 2   | No      |
| 43599  | 2  | 4  | Widow/wi       | 3  | College degree   | 4  | Retired     | 33 | 2   | No       |      | 1   | Yes     |
| 43606  | 2  | 2  | Married/li     | 1  | High school or l | 1  | Working, fi | 29 | 2   | No       |      | 2   | No      |
| 43609  | 2  | 4  | Widow/wi       | 1  | High school or l | 2  | Working, p  | 15 | 2   | No       |      | 1   | Yes     |
| 43629  | 2  | 4  | Widow/wi       | 1  | High school or l | 2  | Working, p  | 27 | 2   | No       |      | 2   | No      |
| 43636  | 2  | 1  | Single         | 1  | High school or l | 1  | Working, fi | 27 | 2   | No       |      | 2   | No      |
| 43661  | 2  | 2  | Married/li     | 3  | College degree   | 1  | Working, fi | 21 | 2   | No       |      | 1   | Yes     |
| 43668  | 2  | 1  | Single         | 3  | College degree   | 1  | Working, fi | 17 | 2   | No       |      | 2   | No      |
| 43672  | 2  | 2  | Married/li     | 1  | High school or l | 2  | Working, p  | 29 | 2   | No       |      | 2   | No      |
| 43677  | 2  | 2  | Married/li     | 1  | High school or l | 4  | Retired     | 9  | 1   | Yes      | 1    | 1   | Yes     |
| 43683  | 2  | 2  | Married/li     | 1  | High school or l | 6  | Homemake    | 25 | 2   | No       |      | 1   | Yes     |
| 43708  | 2  | 2  | Married/li     | 1  | High school or l | 1  | Working, fi | 12 | 2   | No       |      | 2   | No      |
| 43713  | 2  | 2  | Married/li     | 3  | College degree   | 4  | Retired     | 33 | 2   | No       |      | 2   | No      |
| 43718  | 2  | 2  | Married/li     | 1  | High school or l | 4  | Retired     | 25 | 2   | No       |      | 2   | No      |
| 43725  | 2  | 2  | Married/li     | 1  | High school or l | 1  | Working, fi | 18 | 2   | No       |      | 2   | No      |
| 43747  | 2  | 2  | Married/li     | 1  | High school or l | 6  | Homemake    | 32 | 2   | No       |      | 1   | Yes     |
| 43755  | 2  | 2  | Married/li     | 1  | High school or l | 6  | Homemake    | 31 | 2   | No       |      | 2   | No      |
| 43770  | 2  | 2  | Married/li     | 3  | College degree   | 1  | Working, fi | 32 | 2   | No       |      | 2   | No      |
| 43775  | 2  | 2  | Married/li     | 2  | Some college     | 1  | Working, fi | 13 | 1   | Yes      | 1    | 2   | No      |
| 43788  | 2  | 2  | Married/li     | 2  | Some college     | 1  | Working, fi | 29 | 2   | No       |      | 2   | No      |
| 43790  | 2  | 2  | Married/li     | 3  | College degree   | 1  | Working, fi | 12 | 1   | Yes      | 1    | 2   | No      |

| respid | Q5 | Q6 | Marital Status | Q7 | Education        | Q8 | Work        | Q9 | Q10 | Diabetes | Q10a | Q11 | High BP |
|--------|----|----|----------------|----|------------------|----|-------------|----|-----|----------|------|-----|---------|
| 43797  | 2  | 2  | Married/li     | 3  | College degree   | 1  | Working, fi | 12 | 1   | Yes      | 1    | 2   | No      |
| 43798  | 2  | 2  | Married/li     | 3  | College degree   | 1  | Working, fi | 12 | 1   | Yes      | 1    | 1   | Yes     |
| 43811  | 2  | 2  | Married/li     | 3  | College degree   | 1  | Working, fi | 12 | 1   | Yes      | 1    | 2   | No      |
| 43819  | 2  | 2  | Married/li     | 3  | College degree   | 1  | Working, fi | 12 | 1   | Yes      | 1    | 2   | No      |
| 43821  | 2  | 2  | Married/li     | 3  | College degree   | 1  | Working, fi | 12 | 1   | Yes      | 1    | 2   | No      |
| 43822  | 2  | 1  | Single         | 2  | Some college     | 3  | Unemploy    | 99 | 2   | No       |      | 2   | No      |
| 43825  | 2  | 2  | Married/li     | 2  | Some college     | 1  | Working, fi | 28 | 1   | Yes      | 1    | 2   | No      |
| 43826  | 2  | 2  | Married/li     | 1  | High school or l | 4  | Retired     | 33 | 1   | Yes      | 1    | 2   | No      |
| 43831  | 2  | 2  | Married/li     | 1  | High school or l | 1  | Working, fi | 33 | 1   | Yes      | 1    | 1   | Yes     |
| 43836  | 2  | 2  | Married/li     | 3  | College degree   | 1  | Working, fi | 12 | 2   | No       |      | 1   | Yes     |
| 43852  | 2  | 2  | Married/li     | 2  | Some college     | 1  | Working, fi | 11 | 2   | No       |      | 2   | No      |
| 43857  | 2  | 3  | Divorced       | 3  | College degree   | 4  | Retired     | 9  | 2   | No       |      | 1   | Yes     |
| 43858  | 2  | 3  | Divorced       | 4  | Postgraduate     | 8  | Other worl  | 16 | 2   | No       |      | 1   | Yes     |
| 43859  | 2  | 2  | Married/li     | 2  | Some college     | 1  | Working, fi | 12 | 2   | No       |      | 2   | No      |
| 43863  | 2  | 2  | Married/li     | 1  | High school or l | 6  | Homemake    | 5  | 2   | No       |      | 2   | No      |
| 43868  | 2  | 2  | Married/li     | 2  | Some college     | 1  | Working, fi | 12 | 2   | No       |      | 2   | No      |
| 43872  | 2  | 2  | Married/li     | 2  | Some college     | 1  | Working, fi | 12 | 2   | No       |      | 2   | No      |
| 43874  | 2  | 2  | Married/li     | 2  | Some college     | 1  | Working, fi | 12 | 2   | No       |      | 2   | No      |
| 43882  | 2  | 2  | Married/li     | 3  | College degree   | 1  | Working, fi | 18 | 2   | No       |      | 2   | No      |
| 43886  | 2  | 4  | Widow/wi       | 1  | High school or l | 2  | Working, p  | 25 | 2   | No       |      | 2   | No      |
| 43903  | 2  | 4  | Widow/wi       | 1  | High school or l | 6  | Homemake    | 2  | 2   | No       |      | 1   | Yes     |
| 43929  | 2  | 2  | Married/li     | 3  | College degree   | 1  | Working, fi | 35 | 2   | No       |      | 2   | No      |
| 43932  | 2  | 2  | Married/li     | 3  | College degree   | 6  | Homemake    | 21 | 2   | No       |      | 2   | No      |
| 43936  | 2  | 2  | Married/li     | 3  | College degree   | 6  | Homemake    | 19 | 2   | No       |      | 2   | No      |
| 43962  | 2  | 2  | Married/li     | 3  | College degree   | 4  | Retired     | 25 | 2   | No       |      | 1   | Yes     |
| 43964  | 2  | 2  | Married/li     | 1  | High school or l | 6  | Homemake    | 11 | 2   | No       |      | 2   | No      |
| 43968  | 2  | 5  | Prefer not     | 1  | High school or l | 9  | Other       | 1  | 2   | No       |      | 2   | No      |
| 43979  | 2  | 3  | Divorced       | 2  | Some college     | 1  | Working, fi | 12 | 1   | Yes      | 1    | 2   | No      |
| 44006  | 2  | 1  | Single         | 3  | College degree   | 1  | Working, fi | 36 | 2   | No       |      | 1   | Yes     |
| 44009  | 2  | 5  | Prefer not     | 4  | Postgraduate     | 9  | Other       | 99 | 1   | Yes      | 1    | 2   | No      |
| 44023  | 2  | 1  | Single         | 3  | College degree   | 2  | Working, p  | 15 | 2   | No       |      | 1   | Yes     |
| 44035  | 2  | 2  | Married/li     | 3  | College degree   | 1  | Working, fi | 12 | 2   | No       |      | 2   | No      |

| respid | Q5 | Q6 | Marital Status | Q7 | Education        | Q8 | Work        | Q9 | Q10 | Diabetes | Q10a | Q11 | High BP |
|--------|----|----|----------------|----|------------------|----|-------------|----|-----|----------|------|-----|---------|
| 44038  | 2  | 2  | Married/li     | 1  | High school or l | 4  | Retired     | 32 | 2   | No       |      | 1   | Yes     |
| 44039  | 2  | 2  | Married/li     | 2  | Some college     | 1  | Working, fi | 12 | 2   | No       |      | 2   | No      |
| 44043  | 2  | 4  | Widow/wi       | 1  | High school or l | 1  | Working, fi | 28 | 2   | No       |      | 1   | Yes     |
| 44048  | 2  | 2  | Married/li     | 2  | Some college     | 1  | Working, fi | 13 | 2   | No       |      | 2   | No      |
| 44050  | 2  | 3  | Divorced       | 2  | Some college     | 1  | Working, fi | 32 | 2   | No       |      | 2   | No      |
| 44051  | 2  | 2  | Married/li     | 2  | Some college     | 1  | Working, fi | 12 | 2   | No       |      | 2   | No      |
| 44061  | 2  | 2  | Married/li     | 3  | College degree   | 1  | Working, fi | 12 | 2   | No       |      | 2   | No      |
| 44063  | 2  | 2  | Married/li     | 3  | College degree   | 1  | Working, fi | 13 | 1   | Yes      | 1    | 2   | No      |
| 44072  | 2  | 2  | Married/li     | 3  | College degree   | 1  | Working, fi | 12 | 2   | No       |      | 2   | No      |
| 44075  | 2  | 2  | Married/li     | 3  | College degree   | 1  | Working, fi | 13 | 2   | No       |      | 2   | No      |
| 44089  | 2  | 2  | Married/li     | 3  | College degree   | 1  | Working, fi | 13 | 2   | No       |      | 2   | No      |
| 44090  | 2  | 2  | Married/li     | 2  | Some college     | 1  | Working, fi | 11 | 1   | Yes      | 1    | 1   | Yes     |
| 44091  | 2  | 2  | Married/li     | 3  | College degree   | 1  | Working, fi | 12 | 2   | No       |      | 2   | No      |
| 44092  | 2  | 2  | Married/li     | 1  | High school or l | 4  | Retired     | 32 | 2   | No       |      | 2   | No      |
| 44110  | 2  | 2  | Married/li     | 3  | College degree   | 1  | Working, fi | 13 | 2   | No       |      | 2   | No      |
| 44112  | 2  | 2  | Married/li     | 2  | Some college     | 1  | Working, fi | 13 | 2   | No       |      | 2   | No      |
| 44114  | 2  | 2  | Married/li     | 2  | Some college     | 1  | Working, fi | 12 | 2   | No       |      | 2   | No      |
| 44143  | 2  | 2  | Married/li     | 1  | High school or l | 1  | Working, fi | 21 | 2   | No       |      | 2   | No      |
| 44179  | 2  | 2  | Married/li     | 3  | College degree   | 1  | Working, fi | 23 | 2   | No       |      | 1   | Yes     |
| 44234  | 2  | 2  | Married/li     | 3  | College degree   | 1  | Working, fi | 17 | 2   | No       |      | 1   | Yes     |
| 44236  | 2  | 2  | Married/li     | 3  | College degree   | 1  | Working, fi | 3  | 2   | No       |      | 1   | Yes     |
| 44239  | 2  | 2  | Married/li     | 2  | Some college     | 1  | Working, fi | 13 | 2   | No       |      | 2   | No      |
| 44241  | 2  | 2  | Married/li     | 2  | Some college     | 1  | Working, fi | 13 | 2   | No       |      | 2   | No      |
| 44253  | 2  | 2  | Married/li     | 4  | Postgraduate     | 1  | Working, fi | 1  | 2   | No       |      | 2   | No      |
| 44260  | 2  | 2  | Married/li     | 3  | College degree   | 1  | Working, fi | 13 | 2   | No       |      | 2   | No      |
| 44261  | 2  | 2  | Married/li     | 2  | Some college     | 1  | Working, fi | 12 | 2   | No       |      | 2   | No      |
| 44263  | 2  | 2  | Married/li     | 2  | Some college     | 1  | Working, fi | 12 | 2   | No       |      | 2   | No      |
| 44264  | 2  | 2  | Married/li     | 1  | High school or l | 1  | Working, fi | 33 | 2   | No       |      | 1   | Yes     |
| 44265  | 2  | 2  | Married/li     | 3  | College degree   | 1  | Working, fi | 27 | 2   | No       |      | 2   | No      |
| 44267  | 2  | 2  | Married/li     | 2  | Some college     | 1  | Working, fi | 12 | 2   | No       |      | 2   | No      |
| 44306  | 2  | 2  | Married/li     | 2  | Some college     | 4  | Retired     | 11 | 1   | Yes      | 1    | 2   | No      |
| 44309  | 2  | 2  | Married/li     | 2  | Some college     | 1  | Working, fi | 10 | 1   | Yes      | 1    | 1   | Yes     |

| respid | Q5 | Q6 | Marital Status | Q7 | Education        | Q8 | Work        | Q9 | Q10 | Diabetes | Q10a | Q11 | High BP |
|--------|----|----|----------------|----|------------------|----|-------------|----|-----|----------|------|-----|---------|
| 44310  | 2  | 1  | Single         | 3  | College degree   | 3  | Unemploye   | 18 | 2   | No       |      | 2   | No      |
| 44361  | 2  | 4  | Widow/wi       | 1  | High school or l | 4  | Retired     | 5  | 1   | Yes      | 1    | 1   | Yes     |
| 44380  | 2  | 2  | Married/li     | 2  | Some college     | 1  | Working, fi | 15 | 2   | No       |      | 2   | No      |
| 44386  | 2  | 2  | Married/li     | 2  | Some college     | 3  | Unemploye   | 16 | 2   | No       |      | 2   | No      |
| 44419  | 2  | 2  | Married/li     | 1  | High school or l | 1  | Working, fi | 27 | 2   | No       |      | 2   | No      |
| 44426  | 2  | 1  | Single         | 3  | College degree   | 1  | Working, fi | 34 | 2   | No       |      | 2   | No      |
| 44479  | 2  | 2  | Married/li     | 1  | High school or l | 4  | Retired     | 5  | 2   | No       |      | 1   | Yes     |
| 44484  | 2  | 1  | Single         | 1  | High school or l | 3  | Unemploye   | 15 | 1   | Yes      | 1    | 1   | Yes     |
| 44487  | 2  | 2  | Married/li     | 1  | High school or l | 1  | Working, fi | 4  | 1   | Yes      | 1    | 2   | No      |
| 44509  | 2  | 3  | Divorced       | 1  | High school or l | 1  | Working, fi | 16 | 2   | No       |      | 2   | No      |
| 44540  | 2  | 2  | Married/li     | 1  | High school or l | 4  | Retired     | 10 | 1   | Yes      | 1    | 1   | Yes     |
| 44551  | 2  | 2  | Married/li     | 2  | Some college     | 1  | Working, fi | 32 | 2   | No       |      | 2   | No      |
| 44553  | 2  | 2  | Married/li     | 1  | High school or l | 1  | Working, fi | 9  | 2   | No       |      | 2   | No      |
| 44650  | 2  | 2  | Married/li     | 2  | Some college     | 2  | Working, p  | 19 | 2   | No       |      | 2   | No      |
| 44665  | 2  | 2  | Married/li     | 1  | High school or l | 4  | Retired     | 10 | 1   | Yes      | 1    | 1   | Yes     |
| 44779  | 2  | 2  | Married/li     | 3  | College degree   | 2  | Working, p  | 34 | 2   | No       |      | 2   | No      |
| 44797  | 2  | 2  | Married/li     | 1  | High school or l | 1  | Working, fi | 16 | 2   | No       |      | 1   | Yes     |
| 44807  | 2  | 3  | Divorced       | 1  | High school or l | 1  | Working, fi | 16 | 2   | No       |      | 2   | No      |
| 44815  | 2  | 2  | Married/li     | 2  | Some college     | 4  | Retired     | 11 | 1   | Yes      | 1    | 1   | Yes     |
| 44836  | 2  | 2  | Married/li     | 1  | High school or l | 6  | Homemake    | 17 | 2   | No       |      | 2   | No      |
| 44868  | 2  | 4  | Widow/wi       | 1  | High school or l | 4  | Retired     | 5  | 1   | Yes      | 1    | 2   | No      |
| 44927  | 2  | 2  | Married/li     | 2  | Some college     | 1  | Working, fi | 5  | 1   | Yes      | 2    | 2   | No      |
| 44983  | 2  | 2  | Married/li     | 1  | High school or l | 1  | Working, fi | 27 | 2   | No       |      | 2   | No      |
| 45040  | 2  | 3  | Divorced       | 1  | High school or l | 2  | Working, p  | 16 | 2   | No       |      | 2   | No      |
| 45051  | 2  | 2  | Married/li     | 3  | College degree   | 6  | Homemake    | 23 | 2   | No       |      | 2   | No      |
| 45067  | 2  | 2  | Married/li     | 1  | High school or l | 1  | Working, fi | 23 | 2   | No       |      | 2   | No      |
| 45074  | 2  | 2  | Married/li     | 1  | High school or l | 4  | Retired     | 1  | 2   | No       |      | 2   | No      |
| 45115  | 2  | 2  | Married/li     | 3  | College degree   | 6  | Homemake    | 16 | 2   | No       |      | 2   | No      |
| 45187  | 2  | 2  | Married/li     | 3  | College degree   | 1  | Working, fi | 12 | 1   | Yes      | 1    | 1   | Yes     |
| 45221  | 2  | 2  | Married/li     | 3  | College degree   | 1  | Working, fi | 8  | 1   | Yes      | 1    | 1   | Yes     |
| 45279  | 2  | 2  | Married/li     | 1  | High school or l | 6  | Homemake    | 18 | 2   | No       |      | 2   | No      |
| 45308  | 2  | 2  | Married/li     | 3  | College degree   | 1  | Working, fi | 19 | 2   | No       |      | 1   | Yes     |

| respid | Q5 | Q6 | Marital Status | Q7 | Education        | Q8 | Work        | Q9 | Q10 | Diabetes | Q10a | Q11 | High BP |
|--------|----|----|----------------|----|------------------|----|-------------|----|-----|----------|------|-----|---------|
| 45317  | 2  | 2  | Married/liv    | 2  | Some college     | 1  | Working, fi | 33 | 2   | No       |      | 2   | No      |
| 45379  | 2  | 4  | Widow/wid      | 1  | High school or l | 4  | Retired     | 1  | 1   | Yes      | 1    | 1   | Yes     |
| 45451  | 2  | 3  | Divorced       | 1  | High school or l | 6  | Homemaker   | 26 | 1   | Yes      | 1    | 2   | No      |
| 45472  | 2  | 2  | Married/liv    | 2  | Some college     | 4  | Retired     | 11 | 1   | Yes      | 1    | 1   | Yes     |
| 45474  | 2  | 2  | Married/liv    | 2  | Some college     | 1  | Working, fi | 12 | 1   | Yes      | 1    | 1   | Yes     |
| 45544  | 2  | 2  | Married/liv    | 4  | Postgraduate     | 1  | Working, fi | 11 | 2   | No       |      | 1   | Yes     |
| 45561  | 2  | 2  | Married/liv    | 1  | High school or l | 1  | Working, fi | 17 | 2   | No       |      | 2   | No      |
| 45596  | 2  | 2  | Married/liv    | 1  | High school or l | 1  | Working, fi | 19 | 2   | No       |      | 2   | No      |

---

**Instrum**

---

**Symptom**

---

**Type of R****Descripti**Height in  
CM      Weight  
KG

| respid | Q11a | Q12 | Cardiac<br>Disease | Q12a | Q13 | Hyperlipid<br>emia | Q13a | Q14 | Neuro | Q14a | Q15_1 | Q15_2 | Q15_3 | Q16_1 |
|--------|------|-----|--------------------|------|-----|--------------------|------|-----|-------|------|-------|-------|-------|-------|
| 241    | 2    | 2   | No                 |      | 2   | No                 |      | 2   | No    |      |       |       | 166   | 65    |
| 242    | 2    | 2   | No                 |      | 2   | No                 |      | 2   | No    |      |       |       | 168   | 70    |
| 243    | 1    | 2   | No                 |      | 1   | Yes                | 2    | 2   | No    |      |       |       | 174   | 68    |
| 244    | 2    | 2   | No                 |      | 1   | Yes                | 2    | 2   | No    |      |       |       | 170   | 83    |
| 245    |      | 2   | No                 |      | 2   | No                 |      | 2   | No    |      |       |       | 165   | 60    |
| 246    |      | 2   | No                 |      | 1   | Yes                | 2    | 2   | No    |      |       |       | 174   | 70    |
| 247    |      | 2   | No                 |      | 1   | Yes                | 2    | 2   | No    |      |       |       | 178   | 84    |
| 253    |      | 2   | No                 |      | 2   | No                 |      | 2   | No    |      |       |       | 160   | 60    |
| 256    |      | 2   | No                 |      | 2   | No                 |      | 2   | No    |      |       |       | 175   | 75    |
| 257    |      | 2   | No                 |      | 2   | No                 |      | 2   | No    |      |       |       | 165   | 51    |
| 258    | 2    | 2   | No                 |      | 2   | No                 |      | 2   | No    |      |       |       | 172   | 72    |
| 259    |      | 2   | No                 |      | 1   | Yes                | 1    | 2   | No    |      |       |       | 154   | 60    |
| 263    | 2    | 2   | No                 |      | 2   | No                 |      | 2   | No    |      |       |       | 170   | 73    |
| 264    |      | 2   | No                 |      | 2   | No                 |      | 2   | No    |      |       |       | 164   | 62    |
| 265    |      | 2   | No                 |      | 1   | Yes                | 2    | 2   | No    |      |       |       | 175   | 76    |
| 266    |      | 2   | No                 |      | 2   | No                 |      | 2   | No    |      |       |       | 157   | 53    |
| 268    | 2    | 2   | No                 |      | 1   | Yes                | 2    | 2   | No    |      |       |       | 177   | 75    |
| 270    |      | 2   | No                 |      | 2   | No                 |      | 2   | No    |      |       |       | 160   | 45    |
| 272    | 1    | 2   | No                 |      | 1   | Yes                | 1    | 2   | No    |      |       |       | 172   | 72    |
| 274    |      | 2   | No                 |      | 2   | No                 |      | 2   | No    |      |       |       | 173   | 65    |

| respid | Q11a | Q12 | Cardiac Disease | Q12a | Q13 | Hyperlipidemia | Q13a | Q14 | Neuro | Q14a | Q15_1 | Q15_2 | Q15_3 | Q16_1 |
|--------|------|-----|-----------------|------|-----|----------------|------|-----|-------|------|-------|-------|-------|-------|
| 275    |      | 2   | No              |      | 2   | No             |      | 2   | No    |      |       |       | 166   | 48    |
| 276    |      | 2   | No              |      | 1   | Yes            | 1    | 2   | No    |      |       |       | 152   | 50    |
| 277    | 2    | 2   | No              |      | 2   | No             |      | 2   | No    |      |       |       | 170   | 75    |
| 279    | 2    | 2   | No              |      | 2   | No             |      | 2   | No    |      |       |       | 183   | 65    |
| 286    |      | 2   | No              |      | 1   | Yes            | 2    | 2   | No    |      |       |       | 163   | 58    |
| 290    |      | 2   | No              |      | 1   | Yes            | 2    | 2   | No    |      |       |       | 175   | 81    |
| 291    |      | 2   | No              |      | 2   | No             |      | 2   | No    |      |       |       | 156   | 51    |
| 295    |      | 1   | Yes             | 2    | 2   | No             |      | 2   | No    |      |       |       | 167   | 55    |
| 297    |      | 2   | No              |      | 1   | Yes            | 2    | 2   | No    |      |       |       | 172   | 78    |
| 299    |      | 2   | No              |      | 2   | No             |      | 2   | No    |      |       |       | 173   | 60    |
| 300    | 2    | 2   | No              |      | 1   | Yes            | 2    | 2   | No    |      |       |       | 171   | 61    |
| 303    |      | 2   | No              |      | 2   | No             |      | 2   | No    |      |       |       | 171   | 73    |
| 304    |      | 2   | No              |      | 1   | Yes            | 2    | 2   | No    |      |       |       | 160   | 56    |
| 306    |      | 1   | Yes             | 2    | 2   | No             |      | 2   | No    |      |       |       | 168   | 57    |
| 307    |      | 2   | No              |      | 2   | No             |      | 2   | No    |      |       |       | 158   | 52    |
| 312    | 2    | 2   | No              |      | 2   | No             |      | 2   | No    |      |       |       | 163   | 55    |
| 315    |      | 2   | No              |      | 2   | No             |      | 2   | No    |      |       |       | 174   | 68    |
| 317    |      | 2   | No              |      | 1   | Yes            | 2    | 2   | No    |      |       |       | 170   | 75    |
| 322    |      | 2   | No              |      | 2   | No             |      | 2   | No    |      |       |       | 158   | 50    |
| 335    |      | 2   | No              |      | 2   | No             |      | 2   | No    |      |       |       | 153   | 50    |
| 374    |      | 2   | No              |      | 1   | Yes            | 2    | 2   | No    |      |       |       | 170   | 73    |
| 378    | 1    | 2   | No              |      | 2   | No             |      | 2   | No    |      |       |       | 170   | 60    |
| 380    |      | 2   | No              |      | 2   | No             |      | 2   | No    |      |       |       | 184   | 75    |
| 382    |      | 2   | No              |      | 2   | No             |      | 2   | No    |      |       |       | 170   | 60    |
| 384    |      | 2   | No              |      | 2   | No             |      | 2   | No    |      |       |       | 180   | 80    |
| 385    |      | 2   | No              |      | 2   | No             |      | 2   | No    |      |       |       | 165   | 57    |
| 395    |      | 2   | No              |      | 2   | No             |      | 2   | No    |      |       |       | 170   | 64    |
| 396    |      | 2   | No              |      | 2   | No             |      | 2   | No    |      |       |       | 166   | 58    |
| 398    |      | 2   | No              |      | 2   | No             |      | 2   | No    |      |       |       | 170   | 61    |
| 402    |      | 2   | No              |      | 2   | No             |      | 2   | No    |      |       |       | 165   | 57    |
| 414    | 1    | 2   | No              |      | 1   | Yes            | 2    | 2   | No    |      |       |       | 176   | 65    |
| 415    |      | 2   | No              |      | 2   | No             |      | 2   | No    |      |       |       | 169   | 70    |



| respid | Q11a | Q12 | Cardiac Disease | Q12a | Q13 | Hyperlipidemia | Q13a | Q14 | Neuro | Q14a | Q15_1 | Q15_2 | Q15_3 | Q16_1 |
|--------|------|-----|-----------------|------|-----|----------------|------|-----|-------|------|-------|-------|-------|-------|
| 416    |      | 2   | No              |      | 1   | Yes            | 1    | 2   | No    |      |       |       | 175   | 105   |
| 420    | 2    | 2   | No              |      | 1   | Yes            | 1    | 2   | No    |      |       |       | 178   | 87    |
| 421    |      | 2   | No              |      | 1   | Yes            | 2    | 2   | No    |      |       |       | 169   | 80    |
| 422    | 1    | 2   | No              |      | 2   | No             |      | 2   | No    |      |       |       | 165   | 70    |
| 423    |      | 2   | No              |      | 2   | No             |      | 2   | No    |      |       |       | 179   | 78    |
| 424    |      | 2   | No              |      | 2   | No             |      | 2   | No    |      |       |       | 165   | 65    |
| 425    |      | 2   | No              |      | 2   | No             |      | 2   | No    |      |       |       | 175   | 84    |
| 428    |      | 2   | No              |      | 2   | No             |      | 2   | No    |      |       |       | 175   | 65    |
| 429    |      | 2   | No              |      | 1   | Yes            | 2    | 2   | No    |      |       |       | 160   | 57    |
| 431    |      | 2   | No              |      | 2   | No             |      | 2   | No    |      |       |       | 171   | 63    |
| 437    | 1    | 2   | No              |      | 1   | Yes            | 1    | 2   | No    |      |       |       | 168   | 78    |
| 438    |      | 2   | No              |      | 1   | Yes            | 2    | 1   | Yes   | 2    |       |       | 169   | 59    |
| 441    | 1    | 2   | No              |      | 2   | No             |      | 2   | No    |      |       |       | 160   | 51    |
| 444    | 2    | 2   | No              |      | 1   | Yes            | 2    | 2   | No    |      |       |       | 173   | 70    |
| 448    | 1    | 2   | No              |      | 1   | Yes            | 1    | 2   | No    |      |       |       | 172   | 78    |
| 449    |      | 2   | No              |      | 2   | No             |      | 2   | No    |      |       |       | 167   | 52    |
| 457    |      | 2   | No              |      | 1   | Yes            | 2    | 2   | No    |      |       |       | 157   | 50    |
| 460    | 1    | 2   | No              |      | 1   | Yes            | 1    | 2   | No    |      |       |       | 180   | 81    |
| 469    | 1    | 2   | No              |      | 2   | No             |      | 2   | No    |      |       |       | 167   | 60    |
| 471    |      | 2   | No              |      | 2   | No             |      | 2   | No    |      |       |       | 155   | 48    |
| 473    | 1    | 1   | Yes             | 1    | 1   | Yes            | 1    | 2   | No    |      |       |       | 175   | 90    |
| 476    | 1    | 2   | No              |      | 1   | Yes            | 1    | 2   | No    |      |       |       | 167   | 71    |
| 479    | 1    | 2   | No              |      | 2   | No             |      | 2   | No    |      |       |       | 174   | 74    |
| 485    | 2    | 2   | No              |      | 2   | No             |      | 2   | No    |      |       |       | 170   | 52    |
| 488    | 1    | 2   | No              |      | 2   | No             |      | 2   | No    |      |       |       | 157   | 56    |
| 494    |      | 2   | No              |      | 2   | No             |      | 2   | No    |      |       |       | 161   | 58    |
| 496    |      | 2   | No              |      | 2   | No             |      | 2   | No    |      |       |       | 164   | 64    |
| 501    |      | 2   | No              |      | 2   | No             |      | 2   | No    |      |       |       | 167   | 64    |
| 502    | 1    | 2   | No              |      | 2   | No             |      | 2   | No    |      |       |       | 170   | 74    |
| 503    |      | 2   | No              |      | 2   | No             |      | 2   | No    |      |       |       | 167   | 47    |
| 506    |      | 2   | No              |      | 2   | No             |      | 2   | No    |      |       |       | 165   | 69    |
| 514    | 2    | 2   | No              |      | 2   | No             |      | 2   | No    |      |       |       | 163   | 59    |

| respid | Q11a | Q12 | Cardiac Disease | Q12a | Q13 | Hyperlipidemia | Q13a | Q14 | Neuro | Q14a | Q15_1 | Q15_2 | Q15_3 | Q16_1 |
|--------|------|-----|-----------------|------|-----|----------------|------|-----|-------|------|-------|-------|-------|-------|
| 515    |      | 2   | No              |      | 2   | No             |      | 2   | No    |      |       |       | 168   | 56    |
| 516    |      | 1   | Yes             | 2    | 2   | No             |      | 2   | No    |      |       |       | 156   | 49    |
| 519    |      | 1   | Yes             | 2    | 1   | Yes            | 2    | 2   | No    |      |       |       | 165   | 65    |
| 522    |      | 2   | No              |      | 2   | No             |      | 2   | No    |      |       |       | 175   | 70    |
| 525    | 1    | 2   | No              |      | 1   | Yes            | 2    | 2   | No    |      |       |       | 168   | 65    |
| 528    |      | 2   | No              |      | 2   | No             |      | 2   | No    |      |       |       | 173   | 58    |
| 532    |      | 2   | No              |      | 2   | No             |      | 2   | No    |      |       |       | 167   | 67    |
| 536    |      | 2   | No              |      | 2   | No             |      | 2   | No    |      |       |       | 155   | 64    |
| 539    |      | 2   | No              |      | 2   | No             |      | 2   | No    |      |       |       | 165   | 60    |
| 540    |      | 2   | No              |      | 2   | No             |      | 2   | No    |      |       |       | 161   | 48    |
| 547    | 1    | 2   | No              |      | 2   | No             |      | 2   | No    |      |       |       | 172   | 73    |
| 551    |      | 2   | No              |      | 2   | No             |      | 2   | No    |      |       |       | 174   | 65    |
| 554    |      | 2   | No              |      | 2   | No             |      | 2   | No    |      |       |       | 177   | 75    |
| 558    | 2    | 2   | No              |      | 1   | Yes            | 2    | 2   | No    |      |       |       | 182   | 84    |
| 563    |      | 2   | No              |      | 2   | No             |      | 2   | No    |      |       |       | 160   | 55    |
| 564    |      | 2   | No              |      | 1   | Yes            | 2    | 2   | No    |      |       |       | 172   | 68    |
| 565    |      | 2   | No              |      | 2   | No             |      | 2   | No    |      |       |       | 177   | 74    |
| 567    |      | 2   | No              |      | 2   | No             |      | 2   | No    |      |       |       | 160   | 70    |
| 569    |      | 2   | No              |      | 2   | No             |      | 2   | No    |      |       |       | 153   | 47    |
| 572    |      | 2   | No              |      | 2   | No             |      | 2   | No    |      |       |       | 168   | 60    |
| 574    |      | 2   | No              |      | 2   | No             |      | 2   | No    |      |       |       | 155   | 57    |
| 583    |      | 2   | No              |      | 1   | Yes            | 2    | 2   | No    |      |       |       | 170   | 78    |
| 589    |      | 2   | No              |      | 2   | No             |      | 2   | No    |      |       |       | 172   | 75    |
| 592    |      | 2   | No              |      | 1   | Yes            | 1    | 2   | No    |      |       |       | 176   | 72    |
| 593    |      | 1   | Yes             | 2    | 2   | No             |      | 2   | No    |      |       |       | 150   | 30    |
| 594    | 1    | 1   | Yes             | 2    | 1   | Yes            | 2    | 2   | No    |      |       |       | 160   | 50    |
| 597    | 2    | 2   | No              |      | 2   | No             |      | 2   | No    |      |       |       | 171   | 61    |
| 601    |      | 2   | No              |      | 2   | No             |      | 2   | No    |      |       |       | 146   | 48    |
| 607    |      | 2   | No              |      | 2   | No             |      | 2   | No    |      |       |       | 175   | 78    |
| 610    |      | 2   | No              |      | 2   | No             |      | 2   | No    |      |       |       | 170   | 60    |
| 612    | 1    | 2   | No              |      | 2   | No             |      | 2   | No    |      |       |       | 160   | 62    |
| 627    |      | 2   | No              |      | 2   | No             |      | 2   | No    |      |       |       | 170   | 70    |

| respid | Q11a | Q12 | Cardiac Disease | Q12a | Q13 | Hyperlipidemia | Q13a | Q14 | Neuro | Q14a | Q15_1 | Q15_2 | Q15_3 | Q16_1 |
|--------|------|-----|-----------------|------|-----|----------------|------|-----|-------|------|-------|-------|-------|-------|
| 631    |      | 2   | No              |      | 2   | No             |      | 2   | No    |      |       |       | 170   | 82    |
| 633    | 1    | 2   | No              |      | 2   | No             |      | 2   | No    |      |       |       | 167   | 65    |
| 636    |      | 2   | No              |      | 2   | No             |      | 2   | No    |      |       |       | 154   | 54    |
| 656    |      | 2   | No              |      | 2   | No             |      | 2   | No    |      |       |       | 163   | 65    |
| 659    |      | 2   | No              |      | 2   | No             |      | 2   | No    |      |       |       | 170   | 65    |
| 670    | 1    | 2   | No              |      | 1   | Yes            | 1    | 2   | No    |      |       |       | 168   | 65    |
| 672    |      | 2   | No              |      | 2   | No             |      | 2   | No    |      |       |       | 157   | 47    |
| 673    |      | 2   | No              |      | 2   | No             |      | 2   | No    |      |       |       | 150   | 45    |
| 675    |      | 2   | No              |      | 2   | No             |      | 2   | No    |      |       |       | 162   | 57    |
| 676    |      | 2   | No              |      | 2   | No             |      | 2   | No    |      |       |       | 172   | 65    |
| 679    |      | 2   | No              |      | 2   | No             |      | 2   | No    |      |       |       | 164   | 48    |
| 683    |      | 2   | No              |      | 2   | No             |      | 2   | No    |      |       |       | 170   | 65    |
| 684    | 1    | 2   | No              |      | 1   | Yes            | 1    | 2   | No    |      |       |       | 170   | 72    |
| 690    |      | 2   | No              |      | 2   | No             |      | 2   | No    |      |       |       | 164   | 59    |
| 701    |      | 2   | No              |      | 2   | No             |      | 2   | No    |      |       |       | 165   | 60    |
| 709    |      | 2   | No              |      | 1   | Yes            | 2    | 2   | No    |      |       |       | 171   | 70    |
| 719    |      | 2   | No              |      | 2   | No             |      | 2   | No    |      |       |       | 162   | 58    |
| 726    |      | 2   | No              |      | 2   | No             |      | 2   | No    |      |       |       | 150   | 45    |
| 730    |      | 2   | No              |      | 2   | No             |      | 2   | No    |      |       |       | 178   | 73    |
| 731    | 1    | 2   | No              |      | 1   | Yes            | 1    | 2   | No    |      |       |       | 168   | 78    |
| 732    |      | 2   | No              |      | 1   | Yes            | 2    | 2   | No    |      |       |       | 168   | 80    |
| 733    |      | 2   | No              |      | 2   | No             |      | 2   | No    |      |       |       | 160   | 56    |
| 735    |      | 2   | No              |      | 2   | No             |      | 2   | No    |      |       |       | 167   | 80    |
| 738    |      | 2   | No              |      | 2   | No             |      | 2   | No    |      |       |       | 167   | 63    |
| 740    |      | 2   | No              |      | 2   | No             |      | 2   | No    |      |       |       | 157   | 43    |
| 742    |      | 2   | No              |      | 2   | No             |      | 2   | No    |      |       |       | 174   | 67    |
| 744    |      | 2   | No              |      | 2   | No             |      | 2   | No    |      |       |       | 160   | 49    |
| 749    |      | 2   | No              |      | 1   | Yes            | 1    | 2   | No    |      | 5     | 2     |       | 48    |
| 751    |      | 2   | No              |      | 2   | No             |      | 2   | No    |      |       |       | 160   | 55    |
| 752    |      | 2   | No              |      | 2   | No             |      | 2   | No    |      |       |       | 175   | 78    |
| 753    | 1    | 2   | No              |      | 2   | No             |      | 2   | No    |      |       |       | 170   | 70    |
| 755    | 1    | 2   | No              |      | 2   | No             |      | 2   | No    |      |       |       | 172   | 65    |

| respid | Q11a | Q12 | Cardiac Disease | Q12a | Q13 | Hyperlipidemia | Q13a | Q14 | Neuro | Q14a | Q15_1 | Q15_2 | Q15_3 | Q16_1 |
|--------|------|-----|-----------------|------|-----|----------------|------|-----|-------|------|-------|-------|-------|-------|
| 756    |      | 2   | No              |      | 2   | No             |      | 2   | No    |      |       |       | 147   | 60    |
| 759    |      | 2   | No              |      | 1   | Yes            | 1    | 2   | No    |      |       |       | 151   | 50    |
| 760    |      | 2   | No              |      | 2   | No             |      | 2   | No    |      |       |       | 158   | 52    |
| 763    |      | 2   | No              |      | 1   | Yes            | 1    | 2   | No    |      |       |       | 168   | 68    |
| 764    |      | 2   | No              |      | 2   | No             |      | 2   | No    |      |       |       | 168   | 56    |
| 765    |      | 2   | No              |      | 2   | No             |      | 2   | No    |      |       |       | 146   | 45    |
| 766    |      | 2   | No              |      | 1   | Yes            | 2    | 2   | No    |      |       |       | 172   | 76    |
| 767    |      | 2   | No              |      | 2   | No             |      | 2   | No    |      |       |       | 167   | 100   |
| 771    | 1    | 1   | Yes             | 1    | 1   | Yes            | 1    | 2   | No    |      |       |       | 178   | 90    |
| 773    |      | 2   | No              |      | 1   | Yes            | 2    | 2   | No    |      |       |       | 173   | 62    |
| 774    | 2    | 2   | No              |      | 2   | No             |      | 2   | No    |      |       |       | 170   | 71    |
| 775    |      | 2   | No              |      | 2   | No             |      | 2   | No    |      |       |       | 146   | 48    |
| 776    | 1    | 2   | No              |      | 2   | No             |      | 2   | No    |      |       |       | 172   | 77    |
| 778    |      | 2   | No              |      | 1   | Yes            | 2    | 2   | No    |      |       |       | 172   | 60    |
| 780    |      | 2   | No              |      | 2   | No             |      | 2   | No    |      |       |       | 176   | 73    |
| 781    |      | 2   | No              |      | 1   | Yes            | 2    | 2   | No    |      |       |       | 174   | 70    |
| 782    |      | 2   | No              |      | 1   | Yes            | 2    | 2   | No    |      |       |       | 157   | 62    |
| 783    | 1    | 1   | Yes             | 2    | 1   | Yes            | 1    | 2   | No    |      |       |       | 140   | 35    |
| 786    | 1    | 1   | Yes             | 2    | 1   | Yes            | 1    | 2   | No    |      |       |       | 170   | 66    |
| 788    |      | 2   | No              |      | 2   | No             |      | 2   | No    |      |       |       | 178   | 72    |
| 792    |      | 2   | No              |      | 2   | No             |      | 2   | No    |      |       |       | 170   | 67    |
| 794    |      | 2   | No              |      | 2   | No             |      | 2   | No    |      |       |       | 163   | 64    |
| 795    |      | 2   | No              |      | 2   | No             |      | 2   | No    |      | 6     | 0     |       | 83    |
| 799    | 2    | 2   | No              |      | 2   | No             |      | 2   | No    |      |       |       | 174   | 75    |
| 800    |      | 2   | No              |      | 2   | No             |      | 2   | No    |      |       |       | 177   | 105   |
| 801    |      | 2   | No              |      | 1   | Yes            | 2    | 2   | No    |      |       |       | 180   | 85    |
| 804    |      | 2   | No              |      | 2   | No             |      | 2   | No    |      |       |       | 153   | 47    |
| 806    |      | 2   | No              |      | 2   | No             |      | 2   | No    |      |       |       | 172   | 70    |
| 807    |      | 2   | No              |      | 1   | Yes            | 2    | 1   | Yes   | 1    |       |       | 168   | 75    |
| 808    | 1    | 2   | No              |      | 1   | Yes            | 2    | 2   | No    |      |       |       | 173   | 89    |
| 809    |      | 2   | No              |      | 2   | No             |      | 2   | No    |      |       |       | 167   | 55    |
| 811    |      | 2   | No              |      | 1   | Yes            | 2    | 2   | No    |      |       |       | 162   | 57    |

| respid | Q11a | Q12 | Cardiac Disease | Q12a | Q13 | Hyperlipidemia | Q13a | Q14 | Neuro | Q14a | Q15_1 | Q15_2 | Q15_3 | Q16_1 |
|--------|------|-----|-----------------|------|-----|----------------|------|-----|-------|------|-------|-------|-------|-------|
| 812    | 2    | 2   | No              |      | 1   | Yes            | 2    | 2   | No    |      |       |       | 171   | 93    |
| 815    |      | 2   | No              |      | 2   | No             |      | 2   | No    |      |       |       | 172   | 80    |
| 817    |      | 2   | No              |      | 2   | No             |      | 2   | No    |      |       |       | 167   | 56    |
| 818    |      | 2   | No              |      | 1   | Yes            | 2    | 2   | No    |      |       |       | 150   | 45    |
| 819    |      | 2   | No              |      | 1   | Yes            | 2    | 2   | No    |      |       |       | 175   | 80    |
| 821    |      | 2   | No              |      | 1   | Yes            | 2    | 2   | No    |      |       |       | 159   | 63    |
| 824    |      | 2   | No              |      | 2   | No             |      | 2   | No    |      |       |       | 176   | 84    |
| 825    |      | 2   | No              |      | 1   | Yes            | 2    | 2   | No    |      |       |       | 167   | 60    |
| 828    |      | 2   | No              |      | 2   | No             |      | 2   | No    |      |       |       | 158   | 57    |
| 832    |      | 2   | No              |      | 1   | Yes            | 1    | 2   | No    |      |       |       | 166   | 74    |
| 834    |      | 2   | No              |      | 2   | No             |      | 2   | No    |      |       |       | 165   | 70    |
| 835    | 1    | 2   | No              |      | 2   | No             |      | 2   | No    |      |       |       | 168   | 69    |
| 836    |      | 2   | No              |      | 2   | No             |      | 2   | No    |      |       |       | 183   | 94    |
| 837    |      | 2   | No              |      | 2   | No             |      | 2   | No    |      |       |       | 148   | 49    |
| 840    |      | 2   | No              |      | 1   | Yes            | 2    | 2   | No    |      |       |       | 170   | 60    |
| 841    |      | 2   | No              |      | 1   | Yes            | 2    | 2   | No    |      |       |       | 160   | 55    |
| 845    |      | 2   | No              |      | 2   | No             |      | 2   | No    |      |       |       | 163   | 70    |
| 846    |      | 2   | No              |      | 2   | No             |      | 2   | No    |      |       |       | 155   | 55    |
| 849    |      | 2   | No              |      | 2   | No             |      | 2   | No    |      |       |       | 178   | 80    |
| 852    |      | 2   | No              |      | 2   | No             |      | 2   | No    |      |       |       | 160   | 47    |
| 854    |      | 2   | No              |      | 2   | No             |      | 2   | No    |      |       |       | 169   | 90    |
| 856    |      | 2   | No              |      | 2   | No             |      | 2   | No    |      |       |       | 170   | 60    |
| 858    |      | 2   | No              |      | 2   | No             |      | 2   | No    |      |       |       | 172   | 76    |
| 859    |      | 2   | No              |      | 1   | Yes            | 2    | 2   | No    |      |       |       | 163   | 55    |
| 861    |      | 1   | Yes             | 2    | 2   | No             |      | 2   | No    |      |       |       | 158   | 65    |
| 863    |      | 2   | No              |      | 2   | No             |      | 2   | No    |      |       |       | 170   | 60    |
| 864    | 2    | 2   | No              |      | 1   | Yes            | 2    | 2   | No    |      |       |       | 173   | 101   |
| 866    |      | 2   | No              |      | 2   | No             |      | 2   | No    |      |       |       | 172   | 70    |
| 869    | 2    | 2   | No              |      | 2   | No             |      | 2   | No    |      |       |       | 182   | 82    |
| 870    |      | 2   | No              |      | 2   | No             |      | 2   | No    |      |       |       | 178   | 70    |
| 871    | 1    | 2   | No              |      | 2   | No             |      | 2   | No    |      |       |       | 160   | 65    |
| 873    | 2    | 2   | No              |      | 2   | No             |      | 2   | No    |      |       |       | 170   | 70    |

| respid | Q11a | Q12 | Cardiac Disease | Q12a | Q13 | Hyperlipidemia | Q13a | Q14 | Neuro | Q14a | Q15_1 | Q15_2 | Q15_3 | Q16_1 |
|--------|------|-----|-----------------|------|-----|----------------|------|-----|-------|------|-------|-------|-------|-------|
| 879    |      | 2   | No              |      | 1   | Yes            | 2    | 2   | No    |      |       |       | 167   | 64    |
| 880    |      | 2   | No              |      | 2   | No             |      | 2   | No    |      |       |       | 156   | 58    |
| 881    |      | 2   | No              |      | 2   | No             |      | 2   | No    |      |       |       | 174   | 73    |
| 882    |      | 2   | No              |      | 1   | Yes            | 2    | 2   | No    |      |       |       | 165   | 72    |
| 885    |      | 2   | No              |      | 2   | No             |      | 2   | No    |      |       |       | 160   | 70    |
| 886    | 2    | 2   | No              |      | 1   | Yes            | 2    | 2   | No    |      |       |       | 163   | 90    |
| 887    |      | 2   | No              |      | 1   | Yes            | 2    | 2   | No    |      |       |       | 163   | 70    |
| 888    | 1    | 2   | No              |      | 2   | No             |      | 2   | No    |      |       |       | 167   | 95    |
| 889    |      | 2   | No              |      | 1   | Yes            | 2    | 2   | No    |      |       |       | 155   | 51    |
| 890    | 2    | 2   | No              |      | 1   | Yes            | 2    | 2   | No    |      |       |       | 170   | 74    |
| 900    |      | 2   | No              |      | 2   | No             |      | 2   | No    |      |       |       | 167   | 63    |
| 901    |      | 2   | No              |      | 2   | No             |      | 2   | No    |      |       |       | 175   | 70    |
| 902    | 2    | 2   | No              |      | 1   | Yes            | 1    | 2   | No    |      |       |       | 168   | 106   |
| 903    |      | 2   | No              |      | 2   | No             |      | 2   | No    |      |       |       | 175   | 73    |
| 906    |      | 2   | No              |      | 1   | Yes            | 2    | 2   | No    |      |       |       | 150   | 57    |
| 907    |      | 2   | No              |      | 1   | Yes            | 2    | 2   | No    |      |       |       | 156   | 51    |
| 908    |      | 1   | Yes             | 2    | 2   | No             |      | 2   | No    |      |       |       | 161   | 58    |
| 910    | 1    | 2   | No              |      | 2   | No             |      | 2   | No    |      |       |       | 162   | 62    |
| 911    | 1    | 2   | No              |      | 1   | Yes            | 1    | 2   | No    |      |       |       | 176   | 112   |
| 912    |      | 2   | No              |      | 1   | Yes            | 2    | 2   | No    |      |       |       | 170   | 68    |
| 915    |      | 2   | No              |      | 2   | No             |      | 2   | No    |      |       |       | 178   | 71    |
| 923    | 1    | 2   | No              |      | 1   | Yes            | 1    | 2   | No    |      |       |       | 172   | 88    |
| 925    |      | 2   | No              |      | 2   | No             |      | 2   | No    |      |       |       | 152   | 74    |
| 926    | 2    | 2   | No              |      | 1   | Yes            | 2    | 2   | No    |      |       |       | 160   | 75    |
| 929    |      | 2   | No              |      | 2   | No             |      | 2   | No    |      |       |       | 160   | 55    |
| 932    |      | 1   | Yes             | 1    | 2   | No             |      | 2   | No    |      |       |       | 155   | 67    |
| 933    | 1    | 2   | No              |      | 1   | Yes            | 1    | 2   | No    |      |       |       | 167   | 69    |
| 934    |      | 2   | No              |      | 2   | No             |      | 2   | No    |      |       |       | 165   | 60    |
| 938    | 2    | 2   | No              |      | 1   | Yes            | 2    | 2   | No    |      |       |       | 171   | 85    |
| 941    |      | 2   | No              |      | 2   | No             |      | 2   | No    |      |       |       | 172   | 65    |
| 942    |      | 2   | No              |      | 2   | No             |      | 2   | No    |      |       |       | 175   | 68    |
| 943    |      | 2   | No              |      | 2   | No             |      | 2   | No    |      |       |       | 167   | 66    |

| respid | Q11a | Q12 | Cardiac Disease | Q12a | Q13 | Hyperlipidemia | Q13a | Q14 | Neuro | Q14a | Q15_1 | Q15_2 | Q15_3 | Q16_1 |
|--------|------|-----|-----------------|------|-----|----------------|------|-----|-------|------|-------|-------|-------|-------|
| 945    | 2    | 2   | No              |      | 2   | No             |      | 2   | No    |      |       |       | 162   | 70    |
| 946    | 1    | 2   | No              |      | 2   | No             |      | 2   | No    |      |       |       | 161   | 63    |
| 947    |      | 2   | No              |      | 2   | No             |      | 2   | No    |      |       |       | 172   | 70    |
| 948    | 1    | 2   | No              |      | 2   | No             |      | 2   | No    |      |       |       | 174   | 70    |
| 949    |      | 2   | No              |      | 2   | No             |      | 2   | No    |      |       |       | 180   | 70    |
| 952    |      | 2   | No              |      | 2   | No             |      | 2   | No    |      |       |       | 160   | 48    |
| 956    |      | 2   | No              |      | 1   | Yes            | 1    | 2   | No    |      |       |       | 165   | 50    |
| 957    |      | 2   | No              |      | 2   | No             |      | 2   | No    |      |       |       | 153   | 49    |
| 959    | 1    | 2   | No              |      | 1   | Yes            | 2    | 2   | No    |      |       |       | 170   | 110   |
| 961    |      | 2   | No              |      | 1   | Yes            | 2    | 2   | No    |      |       |       | 175   | 77    |
| 962    | 1    | 2   | No              |      | 1   | Yes            | 1    | 1   | Yes   | 1    |       |       | 164   | 60    |
| 965    |      | 2   | No              |      | 2   | No             |      | 2   | No    |      |       |       | 162   | 66    |
| 967    | 2    | 2   | No              |      | 2   | No             |      | 2   | No    |      |       |       | 161   | 53    |
| 969    |      | 2   | No              |      | 2   | No             |      | 2   | No    |      |       |       | 157   | 56    |
| 970    |      | 2   | No              |      | 2   | No             |      | 2   | No    |      |       |       | 166   | 65    |
| 973    |      | 2   | No              |      | 2   | No             |      | 2   | No    |      |       |       | 172   | 89    |
| 974    | 1    | 2   | No              |      | 1   | Yes            | 2    | 2   | No    |      |       |       | 166   | 74    |
| 975    | 2    | 2   | No              |      | 2   | No             |      | 2   | No    |      |       |       | 168   | 52    |
| 976    |      | 2   | No              |      | 1   | Yes            | 1    | 2   | No    |      |       |       | 170   | 64    |
| 977    |      | 2   | No              |      | 1   | Yes            | 2    | 2   | No    |      |       |       | 171   | 60    |
| 979    |      | 2   | No              |      | 2   | No             |      | 2   | No    |      |       |       | 170   | 61    |
| 981    |      | 2   | No              |      | 1   | Yes            | 2    | 2   | No    |      |       |       | 168   | 68    |
| 983    |      | 2   | No              |      | 1   | Yes            | 2    | 2   | No    |      |       |       | 165   | 102   |
| 987    |      | 2   | No              |      | 2   | No             |      | 2   | No    |      |       |       | 170   | 70    |
| 991    |      | 2   | No              |      | 2   | No             |      | 2   | No    |      |       |       | 170   | 68    |
| 992    |      | 2   | No              |      | 2   | No             |      | 2   | No    |      |       |       | 176   | 76    |
| 993    |      | 2   | No              |      | 2   | No             |      | 2   | No    |      |       |       | 160   | 74    |
| 994    |      | 2   | No              |      | 2   | No             |      | 2   | No    |      |       |       | 165   | 70    |
| 995    |      | 2   | No              |      | 2   | No             |      | 2   | No    |      |       |       | 166   | 63    |
| 998    | 1    | 2   | No              |      | 2   | No             |      | 2   | No    |      |       |       | 153   | 48    |
| 1000   |      | 2   | No              |      | 2   | No             |      | 1   | Yes   | 1    |       |       | 172   | 66    |
| 1001   | 2    | 2   | No              |      | 2   | No             |      | 2   | No    |      |       |       | 168   | 66    |

| respid | Q11a | Q12 | Cardiac Disease | Q12a | Q13 | Hyperlipidemia | Q13a | Q14 | Neuro | Q14a | Q15_1 | Q15_2 | Q15_3 | Q16_1 |
|--------|------|-----|-----------------|------|-----|----------------|------|-----|-------|------|-------|-------|-------|-------|
| 1002   |      | 2   | No              |      | 2   | No             |      | 2   | No    |      |       |       | 165   | 68    |
| 1004   |      | 2   | No              |      | 1   | Yes            | 2    | 2   | No    |      |       |       | 173   | 79    |
| 1005   |      | 2   | No              |      | 1   | Yes            | 2    | 2   | No    |      |       |       | 160   | 50    |
| 1006   | 1    | 2   | No              |      | 1   | Yes            | 1    | 2   | No    |      |       |       | 162   | 85    |
| 1007   |      | 2   | No              |      | 1   | Yes            | 2    | 2   | No    |      |       |       | 158   | 77    |
| 1009   |      | 2   | No              |      | 2   | No             |      | 2   | No    |      |       |       | 176   | 75    |
| 1013   |      | 2   | No              |      | 2   | No             |      | 2   | No    |      |       |       | 162   | 45    |
| 1015   | 1    | 2   | No              |      | 2   | No             |      | 2   | No    |      |       |       | 165   | 62    |
| 1020   |      | 2   | No              |      | 1   | Yes            | 1    | 2   | No    |      |       |       | 175   | 73    |
| 1022   |      | 2   | No              |      | 2   | No             |      | 2   | No    |      |       |       | 176   | 68    |
| 1024   |      | 2   | No              |      | 2   | No             |      | 2   | No    |      |       |       | 160   | 57    |
| 1025   |      | 2   | No              |      | 2   | No             |      | 2   | No    |      |       |       | 157   | 52    |
| 1027   |      | 2   | No              |      | 2   | No             |      | 2   | No    |      |       |       | 170   | 71    |
| 1031   |      | 2   | No              |      | 1   | Yes            | 2    | 2   | No    |      |       |       | 178   | 88    |
| 1037   | 1    | 2   | No              |      | 1   | Yes            | 2    | 2   | No    |      |       |       | 170   | 70    |
| 1039   |      | 2   | No              |      | 2   | No             |      | 2   | No    |      |       |       | 178   | 83    |
| 1040   |      | 2   | No              |      | 2   | No             |      | 2   | No    |      |       |       | 165   | 63    |
| 1056   | 1    | 2   | No              |      | 2   | No             |      | 2   | No    |      |       |       | 169   | 75    |
| 1057   | 1    | 2   | No              |      | 2   | No             |      | 2   | No    |      |       |       | 170   | 66    |
| 1062   |      | 2   | No              |      | 2   | No             |      | 2   | No    |      |       |       | 175   | 75    |
| 1069   |      | 2   | No              |      | 2   | No             |      | 2   | No    |      |       |       | 165   | 60    |
| 1070   |      | 2   | No              |      | 2   | No             |      | 2   | No    |      |       |       | 152   | 58    |
| 1072   |      | 2   | No              |      | 1   | Yes            | 2    | 2   | No    |      |       |       | 170   | 95    |
| 1076   |      | 2   | No              |      | 2   | No             |      | 2   | No    |      |       |       | 160   | 70    |
| 1077   |      | 2   | No              |      | 2   | No             |      | 2   | No    |      |       |       | 175   | 65    |
| 1078   |      | 2   | No              |      | 2   | No             |      | 2   | No    |      |       |       | 161   | 59    |
| 1080   |      | 2   | No              |      | 2   | No             |      | 2   | No    |      |       |       | 172   | 75    |
| 1094   |      | 2   | No              |      | 2   | No             |      | 2   | No    |      |       |       | 167   | 55    |
| 1098   | 1    | 2   | No              |      | 1   | Yes            | 2    | 2   | No    |      |       |       | 169   | 63    |
| 1099   |      | 2   | No              |      | 2   | No             |      | 2   | No    |      |       |       | 165   | 61    |
| 1102   |      | 1   | Yes             | 2    | 1   | Yes            | 2    | 2   | No    |      |       |       | 175   | 60    |
| 1110   |      | 2   | No              |      | 2   | No             |      | 2   | No    |      |       |       | 173   | 70    |



| respid | Q11a | Q12 | Cardiac Disease | Q12a | Q13 | Hyperlipidemia | Q13a | Q14 | Neuro | Q14a | Q15_1 | Q15_2 | Q15_3 | Q16_1 |
|--------|------|-----|-----------------|------|-----|----------------|------|-----|-------|------|-------|-------|-------|-------|
| 1117   | 1    | 2   | No              |      | 2   | No             |      | 2   | No    |      |       |       | 165   | 65    |
| 1119   |      | 2   | No              |      | 2   | No             |      | 2   | No    |      | 6     | 6     |       | 60    |
| 1126   |      | 2   | No              |      | 2   | No             |      | 2   | No    |      |       |       | 160   | 50    |
| 1127   |      | 2   | No              |      | 2   | No             |      | 2   | No    |      |       |       | 162   | 59    |
| 1130   |      | 2   | No              |      | 2   | No             |      | 2   | No    |      |       |       | 159   | 65    |
| 1131   |      | 2   | No              |      | 2   | No             |      | 2   | No    |      |       |       | 170   | 70    |
| 1135   |      | 2   | No              |      | 1   | Yes            | 2    | 2   | No    |      |       |       | 175   | 75    |
| 1138   | 1    | 2   | No              |      | 1   | Yes            | 1    | 2   | No    |      |       |       | 161   | 69    |
| 1139   |      | 2   | No              |      | 2   | No             |      | 2   | No    |      |       |       | 155   | 55    |
| 1140   |      | 2   | No              |      | 2   | No             |      | 2   | No    |      |       |       | 160   | 54    |
| 1142   |      | 2   | No              |      | 2   | No             |      | 2   | No    |      |       |       | 156   | 45    |
| 1143   |      | 2   | No              |      | 2   | No             |      | 2   | No    |      |       |       | 157   | 47    |
| 1145   |      | 2   | No              |      | 1   | Yes            | 1    | 2   | No    |      |       |       | 170   | 84    |
| 1149   |      | 1   | Yes             | 2    | 2   | No             |      | 2   | No    |      |       |       | 158   | 65    |
| 1152   | 2    | 2   | No              |      | 1   | Yes            | 2    | 2   | No    |      |       |       | 168   | 82    |
| 1160   | 2    | 2   | No              |      | 1   | Yes            | 2    | 2   | No    |      |       |       | 170   | 60    |
| 1164   |      | 2   | No              |      | 2   | No             |      | 2   | No    |      |       |       | 160   | 47    |
| 1165   |      | 2   | No              |      | 2   | No             |      | 2   | No    |      |       |       | 155   | 44    |
| 1169   | 1    | 2   | No              |      | 2   | No             |      | 2   | No    |      |       |       | 156   | 55    |
| 1170   |      | 2   | No              |      | 1   | Yes            | 2    | 2   | No    |      |       |       | 173   | 90    |
| 1179   |      | 2   | No              |      | 2   | No             |      | 2   | No    |      | 5     | 5     |       | 55    |
| 1180   |      | 2   | No              |      | 2   | No             |      | 2   | No    |      |       |       | 162   | 53    |
| 1183   |      | 2   | No              |      | 2   | No             |      | 2   | No    |      |       |       | 168   | 61    |
| 1187   |      | 2   | No              |      | 2   | No             |      | 2   | No    |      |       |       | 172   | 70    |
| 1188   | 1    | 2   | No              |      | 2   | No             |      | 2   | No    |      |       |       | 160   | 68    |
| 1193   |      | 2   | No              |      | 2   | No             |      | 2   | No    |      |       |       | 176   | 65    |
| 1194   |      | 2   | No              |      | 2   | No             |      | 2   | No    |      |       |       | 163   | 55    |
| 1197   |      | 2   | No              |      | 1   | Yes            | 2    | 2   | No    |      |       |       | 170   | 58    |
| 1202   |      | 2   | No              |      | 2   | No             |      | 2   | No    |      |       |       | 163   | 53    |
| 1204   |      | 2   | No              |      | 2   | No             |      | 2   | No    |      |       |       | 170   | 55    |
| 1211   |      | 2   | No              |      | 2   | No             |      | 2   | No    |      |       |       | 172   | 63    |
| 1224   |      | 2   | No              |      | 1   | Yes            | 2    | 2   | No    |      |       |       | 165   | 72    |

| respid | Q11a | Q12 | Cardiac Disease | Q12a | Q13 | Hyperlipidemia | Q13a | Q14 | Neuro | Q14a | Q15_1 | Q15_2 | Q15_3 | Q16_1 |
|--------|------|-----|-----------------|------|-----|----------------|------|-----|-------|------|-------|-------|-------|-------|
| 1225   |      | 2   | No              |      | 2   | No             |      | 2   | No    |      |       |       | 164   | 55    |
| 1230   |      | 2   | No              |      | 2   | No             |      | 2   | No    |      |       |       | 158   | 54    |
| 1232   |      | 2   | No              |      | 2   | No             |      | 2   | No    |      |       |       | 160   | 49    |
| 1233   |      | 2   | No              |      | 1   | Yes            | 2    | 2   | No    |      |       |       | 172   | 70    |
| 1234   |      | 2   | No              |      | 2   | No             |      | 2   | No    |      |       |       | 157   | 43    |
| 1235   | 1    | 2   | No              |      | 1   | Yes            | 1    | 1   | Yes   | 1    |       |       | 163   | 67    |
| 1236   |      | 2   | No              |      | 2   | No             |      | 2   | No    |      |       |       | 152   | 43    |
| 1237   |      | 2   | No              |      | 2   | No             |      | 2   | No    |      |       |       | 160   | 46    |
| 1238   | 1    | 2   | No              |      | 2   | No             |      | 2   | No    |      |       |       | 173   | 70    |
| 1239   |      | 2   | No              |      | 2   | No             |      | 2   | No    |      |       |       | 158   | 52    |
| 1241   | 1    | 2   | No              |      | 2   | No             |      | 2   | No    |      |       |       | 165   | 60    |
| 1242   |      | 2   | No              |      | 1   | Yes            | 2    | 2   | No    |      |       |       | 168   | 89    |
| 1244   | 1    | 2   | No              |      | 1   | Yes            | 2    | 2   | No    |      |       |       | 168   | 64    |
| 1245   | 1    | 2   | No              |      | 1   | Yes            | 2    | 2   | No    |      |       |       | 173   | 83    |
| 1247   |      | 2   | No              |      | 2   | No             |      | 2   | No    |      |       |       | 166   | 62    |
| 1248   |      | 2   | No              |      | 1   | Yes            | 2    | 2   | No    |      |       |       | 155   | 60    |
| 1249   |      | 2   | No              |      | 2   | No             |      | 2   | No    |      |       |       | 183   | 76    |
| 1250   |      | 2   | No              |      | 2   | No             |      | 2   | No    |      |       |       | 170   | 70    |
| 1251   |      | 2   | No              |      | 2   | No             |      | 2   | No    |      |       |       | 175   | 67    |
| 1252   |      | 2   | No              |      | 2   | No             |      | 2   | No    |      |       |       | 165   | 63    |
| 1253   |      | 2   | No              |      | 2   | No             |      | 2   | No    |      |       |       | 166   | 59    |
| 1254   |      | 2   | No              |      | 2   | No             |      | 2   | No    |      |       |       | 151   | 40    |
| 1258   | 1    | 2   | No              |      | 1   | Yes            | 1    | 2   | No    |      |       |       | 173   | 85    |
| 1260   |      | 2   | No              |      | 2   | No             |      | 2   | No    |      |       |       | 155   | 62    |
| 1261   |      | 2   | No              |      | 2   | No             |      | 2   | No    |      |       |       | 165   | 60    |
| 1262   | 1    | 1   | Yes             | 1    | 2   | No             |      | 2   | No    |      |       |       | 170   | 62    |
| 1263   |      | 2   | No              |      | 2   | No             |      | 2   | No    |      |       |       | 173   | 63    |
| 1264   |      | 2   | No              |      | 2   | No             |      | 2   | No    |      |       |       | 157   | 61    |
| 1265   |      | 2   | No              |      | 2   | No             |      | 1   | Yes   | 1    |       |       | 170   | 76    |
| 1266   |      | 2   | No              |      | 2   | No             |      | 2   | No    |      |       |       | 170   | 73    |
| 1270   | 1    | 1   | Yes             | 1    | 2   | No             |      | 2   | No    |      |       |       | 180   | 95    |
| 1272   | 1    | 1   | Yes             | 2    | 2   | No             |      | 2   | No    |      |       |       | 168   | 65    |

| respid | Q11a | Q12 | Cardiac Disease | Q12a | Q13 | Hyperlipidemia | Q13a | Q14 | Neuro | Q14a | Q15_1 | Q15_2 | Q15_3 | Q16_1 |
|--------|------|-----|-----------------|------|-----|----------------|------|-----|-------|------|-------|-------|-------|-------|
| 1273   |      | 2   | No              |      | 1   | Yes            | 1    | 2   | No    |      |       |       | 168   | 63    |
| 1276   |      | 2   | No              |      | 2   | No             |      | 2   | No    |      |       |       | 172   | 65    |
| 1277   |      | 2   | No              |      | 2   | No             |      | 2   | No    |      |       |       | 172   | 75    |
| 1278   |      | 2   | No              |      | 1   | Yes            | 2    | 2   | No    |      |       |       | 172   | 68    |
| 1280   |      | 2   | No              |      | 2   | No             |      | 2   | No    |      |       |       | 156   | 58    |
| 1281   |      | 2   | No              |      | 2   | No             |      | 2   | No    |      |       |       | 158   | 45    |
| 1282   |      | 2   | No              |      | 1   | Yes            | 2    | 2   | No    |      |       |       | 172   | 68    |
| 1283   |      | 2   | No              |      | 2   | No             |      | 2   | No    |      |       |       | 178   | 60    |
| 1288   |      | 1   | Yes             | 1    | 2   | No             |      | 2   | No    |      |       |       | 153   | 67    |
| 1289   |      | 2   | No              |      | 2   | No             |      | 2   | No    |      |       |       | 158   | 51    |
| 1290   |      | 2   | No              |      | 2   | No             |      | 2   | No    |      |       |       | 170   | 65    |
| 1291   |      | 2   | No              |      | 2   | No             |      | 2   | No    |      |       |       | 172   | 62    |
| 1293   |      | 2   | No              |      | 2   | No             |      | 2   | No    |      |       |       | 165   | 54    |
| 1294   |      | 2   | No              |      | 1   | Yes            | 2    | 2   | No    |      |       |       | 175   | 75    |
| 1295   | 1    | 2   | No              |      | 1   | Yes            | 1    | 2   | No    |      |       |       | 175   | 81    |
| 1296   |      | 2   | No              |      | 2   | No             |      | 2   | No    |      |       |       | 150   | 44    |
| 1297   |      | 2   | No              |      | 1   | Yes            | 2    | 2   | No    |      |       |       | 158   | 60    |
| 1298   | 2    | 2   | No              |      | 2   | No             |      | 2   | No    |      |       |       | 162   | 56    |
| 1300   | 2    | 2   | No              |      | 1   | Yes            | 2    | 2   | No    |      |       |       | 172   | 80    |
| 1302   |      | 2   | No              |      | 2   | No             |      | 2   | No    |      |       |       | 158   | 49    |
| 1303   | 2    | 2   | No              |      | 1   | Yes            | 2    | 2   | No    |      | 5     | 0     |       | 83    |
| 1304   |      | 2   | No              |      | 2   | No             |      | 2   | No    |      |       |       | 173   | 61    |
| 1305   | 1    | 2   | No              |      | 1   | Yes            | 2    | 2   | No    |      |       |       | 173   | 65    |
| 1307   |      | 2   | No              |      | 2   | No             |      | 2   | No    |      |       |       | 179   | 75    |
| 1312   |      | 2   | No              |      | 1   | Yes            | 1    | 2   | No    |      |       |       | 160   | 50    |
| 1313   |      | 2   | No              |      | 1   | Yes            | 1    | 2   | No    |      |       |       | 151   | 65    |
| 1314   |      | 2   | No              |      | 1   | Yes            | 1    | 2   | No    |      |       |       | 160   | 65    |
| 1317   |      | 2   | No              |      | 2   | No             |      | 2   | No    |      |       |       | 161   | 49    |
| 1318   |      | 2   | No              |      | 2   | No             |      | 2   | No    |      |       |       | 173   | 63    |
| 1319   |      | 2   | No              |      | 2   | No             |      | 2   | No    |      |       |       | 165   | 70    |
| 1321   |      | 2   | No              |      | 2   | No             |      | 2   | No    |      |       |       | 168   | 69    |
| 1324   | 1    | 2   | No              |      | 1   | Yes            | 1    | 2   | No    |      |       |       | 171   | 83    |

| respid | Q11a | Q12 | Cardiac Disease | Q12a | Q13 | Hyperlipidemia | Q13a | Q14 | Neuro | Q14a | Q15_1 | Q15_2 | Q15_3 | Q16_1 |
|--------|------|-----|-----------------|------|-----|----------------|------|-----|-------|------|-------|-------|-------|-------|
| 1325   |      | 2   | No              |      | 2   | No             |      | 2   | No    |      |       |       | 169   | 68    |
| 1326   |      | 2   | No              |      | 2   | No             |      | 2   | No    |      |       |       | 176   | 70    |
| 1327   |      | 2   | No              |      | 2   | No             |      | 2   | No    |      |       |       | 173   | 67    |
| 1329   |      | 2   | No              |      | 1   | Yes            | 2    | 2   | No    |      |       |       | 169   | 85    |
| 1330   |      | 2   | No              |      | 2   | No             |      | 2   | No    |      |       |       | 153   | 56    |
| 1331   |      | 2   | No              |      | 2   | No             |      | 2   | No    |      |       |       | 165   | 66    |
| 1335   | 1    | 2   | No              |      | 1   | Yes            | 2    | 2   | No    |      |       |       | 160   | 60    |
| 1337   |      | 2   | No              |      | 2   | No             |      | 2   | No    |      |       |       | 160   | 50    |
| 1341   |      | 2   | No              |      | 2   | No             |      | 2   | No    |      |       |       | 158   | 51    |
| 1342   |      | 2   | No              |      | 2   | No             |      | 2   | No    |      |       |       | 170   | 66    |
| 1344   | 2    | 2   | No              |      | 2   | No             |      | 2   | No    |      |       |       | 174   | 76    |
| 1345   | 1    | 1   | Yes             | 2    | 2   | No             |      | 2   | No    |      |       |       | 163   | 52    |
| 1346   |      | 2   | No              |      | 2   | No             |      | 2   | No    |      |       |       | 168   | 68    |
| 1350   | 1    | 2   | No              |      | 2   | No             |      | 2   | No    |      |       |       | 162   | 58    |
| 1352   |      | 2   | No              |      | 2   | No             |      | 2   | No    |      | 5     | 1     |       | 45    |
| 1353   |      | 1   | Yes             | 2    | 2   | No             |      | 2   | No    |      |       |       | 174   | 64    |
| 1354   |      | 2   | No              |      | 1   | Yes            | 2    | 2   | No    |      |       |       | 170   | 55    |
| 1355   |      | 2   | No              |      | 2   | No             |      | 2   | No    |      |       |       | 173   | 83    |
| 1357   |      | 2   | No              |      | 2   | No             |      | 2   | No    |      |       |       | 167   | 58    |
| 1360   |      | 2   | No              |      | 2   | No             |      | 2   | No    |      |       |       | 160   | 48    |
| 1362   | 1    | 2   | No              |      | 2   | No             |      | 2   | No    |      |       |       | 156   | 70    |
| 1363   |      | 2   | No              |      | 1   | Yes            | 2    | 2   | No    |      |       |       | 157   | 90    |
| 1367   |      | 2   | No              |      | 2   | No             |      | 2   | No    |      |       |       | 170   | 62    |
| 1369   |      | 2   | No              |      | 2   | No             |      | 2   | No    |      |       |       | 167   | 53    |
| 1371   |      | 2   | No              |      | 2   | No             |      | 2   | No    |      |       |       | 160   | 47    |
| 1372   | 1    | 2   | No              |      | 2   | No             |      | 2   | No    |      |       |       | 171   | 85    |
| 1375   | 2    | 2   | No              |      | 1   | Yes            | 2    | 2   | No    |      |       |       | 180   | 72    |
| 1377   |      | 2   | No              |      | 1   | Yes            | 1    | 2   | No    |      |       |       | 164   | 68    |
| 1379   | 1    | 1   | Yes             | 1    | 2   | No             |      | 2   | No    |      |       |       | 162   | 53    |
| 1380   | 1    | 2   | No              |      | 1   | Yes            | 2    | 2   | No    |      |       |       | 170   | 75    |
| 1382   |      | 2   | No              |      | 1   | Yes            | 2    | 2   | No    |      |       |       | 162   | 60    |
| 1383   |      | 2   | No              |      | 2   | No             |      | 2   | No    |      |       |       | 150   | 65    |

| respid | Q11a | Q12 | Cardiac Disease | Q12a | Q13 | Hyperlipidemia | Q13a | Q14 | Neuro | Q14a | Q15_1 | Q15_2 | Q15_3 | Q16_1 |
|--------|------|-----|-----------------|------|-----|----------------|------|-----|-------|------|-------|-------|-------|-------|
| 1384   |      | 2   | No              |      | 2   | No             |      | 2   | No    |      |       |       | 147   | 57    |
| 1385   |      | 2   | No              |      | 2   | No             |      | 2   | No    |      |       |       | 170   | 60    |
| 1387   |      | 2   | No              |      | 2   | No             |      | 2   | No    |      |       |       | 164   | 65    |
| 1388   |      | 2   | No              |      | 2   | No             |      | 2   | No    |      |       |       | 175   | 70    |
| 1389   |      | 2   | No              |      | 2   | No             |      | 2   | No    |      |       |       | 153   | 50    |
| 1390   |      | 2   | No              |      | 2   | No             |      | 2   | No    |      |       |       | 163   | 52    |
| 1395   |      | 2   | No              |      | 2   | No             |      | 2   | No    |      |       |       | 168   | 80    |
| 1396   |      | 2   | No              |      | 1   | Yes            | 2    | 2   | No    |      |       |       | 162   | 70    |
| 1397   | 1    | 2   | No              |      | 1   | Yes            | 1    | 2   | No    |      |       |       | 172   | 68    |
| 1398   |      | 2   | No              |      | 2   | No             |      | 2   | No    |      |       |       | 165   | 61    |
| 1399   |      | 2   | No              |      | 2   | No             |      | 2   | No    |      |       |       | 170   | 65    |
| 1403   |      | 2   | No              |      | 2   | No             |      | 2   | No    |      |       |       | 165   | 53    |
| 1405   | 1    | 2   | No              |      | 2   | No             |      | 2   | No    |      |       |       | 162   | 74    |
| 1406   |      | 2   | No              |      | 2   | No             |      | 2   | No    |      |       |       | 163   | 53    |
| 1407   | 1    | 2   | No              |      | 2   | No             |      | 2   | No    |      |       |       | 160   | 54    |
| 1408   |      | 2   | No              |      | 2   | No             |      | 2   | No    |      |       |       | 167   | 78    |
| 1409   |      | 2   | No              |      | 2   | No             |      | 2   | No    |      |       |       | 173   | 78    |
| 1410   |      | 1   | Yes             | 2    | 2   | No             |      | 2   | No    |      |       |       | 155   | 60    |
| 1411   |      | 2   | No              |      | 2   | No             |      | 2   | No    |      |       |       | 168   | 58    |
| 1412   |      | 2   | No              |      | 2   | No             |      | 2   | No    |      |       |       | 179   | 66    |
| 1413   |      | 2   | No              |      | 2   | No             |      | 2   | No    |      |       |       | 165   | 65    |
| 1414   |      | 2   | No              |      | 2   | No             |      | 2   | No    |      |       |       | 175   | 70    |
| 1415   | 1    | 2   | No              |      | 2   | No             |      | 2   | No    |      |       |       | 171   | 77    |
| 1416   |      | 2   | No              |      | 2   | No             |      | 2   | No    |      |       |       | 174   | 70    |
| 1417   |      | 2   | No              |      | 1   | Yes            | 2    | 2   | No    |      |       |       | 156   | 65    |
| 1418   | 2    | 2   | No              |      | 1   | Yes            | 2    | 2   | No    |      |       |       | 169   | 72    |
| 1419   | 1    | 2   | No              |      | 2   | No             |      | 2   | No    |      |       |       | 174   | 72    |
| 1420   |      | 2   | No              |      | 2   | No             |      | 2   | No    |      |       |       | 178   | 71    |
| 1421   | 2    | 2   | No              |      | 1   | Yes            | 2    | 2   | No    |      |       |       | 178   | 75    |
| 1422   | 2    | 2   | No              |      | 1   | Yes            | 2    | 2   | No    |      |       |       | 160   | 44    |
| 1423   |      | 2   | No              |      | 1   | Yes            | 2    | 2   | No    |      |       |       | 172   | 66    |
| 1424   |      | 2   | No              |      | 2   | No             |      | 2   | No    |      |       |       | 165   | 64    |

| respid | Q11a | Q12 | Cardiac Disease | Q12a | Q13 | Hyperlipidemia | Q13a | Q14 | Neuro | Q14a | Q15_1 | Q15_2 | Q15_3 | Q16_1 |
|--------|------|-----|-----------------|------|-----|----------------|------|-----|-------|------|-------|-------|-------|-------|
| 1429   |      | 2   | No              |      | 2   | No             |      | 2   | No    |      |       |       | 179   | 70    |
| 1430   | 1    | 2   | No              |      | 2   | No             |      | 2   | No    |      |       |       | 167   | 57    |
| 1431   |      | 2   | No              |      | 2   | No             |      | 2   | No    |      |       |       | 167   | 58    |
| 1433   |      | 2   | No              |      | 2   | No             |      | 2   | No    |      |       |       | 168   | 56    |
| 1435   |      | 2   | No              |      | 2   | No             |      | 2   | No    |      |       |       | 168   | 70    |
| 1436   |      | 2   | No              |      | 2   | No             |      | 2   | No    |      |       |       | 180   | 56    |
| 1438   | 1    | 2   | No              |      | 2   | No             |      | 2   | No    |      |       |       | 169   | 59    |
| 1439   | 2    | 2   | No              |      | 1   | Yes            | 2    | 2   | No    |      |       |       | 172   | 85    |
| 1441   |      | 2   | No              |      | 2   | No             |      | 2   | No    |      |       |       | 169   | 65    |
| 1442   | 2    | 2   | No              |      | 2   | No             |      | 2   | No    |      |       |       | 175   | 65    |
| 1443   |      | 2   | No              |      | 1   | Yes            | 2    | 2   | No    |      |       |       | 169   | 54    |
| 1444   |      | 2   | No              |      | 2   | No             |      | 2   | No    |      |       |       | 159   | 50    |
| 1445   | 1    | 2   | No              |      | 2   | No             |      | 2   | No    |      |       |       | 176   | 84    |
| 1446   |      | 2   | No              |      | 2   | No             |      | 2   | No    |      |       |       | 150   | 47    |
| 1447   |      | 2   | No              |      | 2   | No             |      | 2   | No    |      |       |       | 162   | 65    |
| 1449   |      | 2   | No              |      | 1   | Yes            | 2    | 2   | No    |      |       |       | 158   | 58    |
| 1450   |      | 2   | No              |      | 2   | No             |      | 2   | No    |      |       |       | 170   |       |
| 1451   |      | 2   | No              |      | 2   | No             |      | 2   | No    |      |       |       | 158   | 48    |
| 1452   |      | 2   | No              |      | 2   | No             |      | 2   | No    |      |       |       | 157   | 47    |
| 1453   | 1    | 1   | Yes             | 1    | 1   | Yes            | 1    | 2   | No    |      |       |       | 162   | 60    |
| 1454   |      | 2   | No              |      | 2   | No             |      | 2   | No    |      |       |       | 170   | 60    |
| 1456   | 1    | 2   | No              |      | 1   | Yes            | 2    | 2   | No    |      |       |       | 170   | 68    |
| 1457   | 1    | 2   | No              |      | 1   | Yes            | 1    | 2   | No    |      |       |       | 167   | 68    |
| 1459   |      | 2   | No              |      | 2   | No             |      | 2   | No    |      |       |       | 185   | 89    |
| 1460   |      | 2   | No              |      | 2   | No             |      | 2   | No    |      |       |       | 174   | 75    |
| 1463   | 1    | 2   | No              |      | 1   | Yes            | 1    | 2   | No    |      |       |       | 176   | 100   |
| 1465   |      | 2   | No              |      | 2   | No             |      | 2   | No    |      |       |       | 162   | 56    |
| 1467   | 1    | 2   | No              |      | 1   | Yes            | 2    | 2   | No    |      |       |       | 180   | 90    |
| 1470   |      | 2   | No              |      | 1   | Yes            | 2    | 2   | No    |      |       |       | 172   | 78    |
| 1471   | 1    | 2   | No              |      | 2   | No             |      | 2   | No    |      |       |       | 170   | 53    |
| 1472   |      | 2   | No              |      | 2   | No             |      | 2   | No    |      |       |       | 162   | 50    |
| 1474   |      | 2   | No              |      | 2   | No             |      | 2   | No    |      |       |       | 163   | 43    |

| respid | Q11a | Q12 | Cardiac Disease | Q12a | Q13 | Hyperlipidemia | Q13a | Q14 | Neuro | Q14a | Q15_1 | Q15_2 | Q15_3 | Q16_1 |
|--------|------|-----|-----------------|------|-----|----------------|------|-----|-------|------|-------|-------|-------|-------|
| 1475   | 1    | 2   | No              |      | 1   | Yes            | 1    | 2   | No    |      |       |       | 180   | 105   |
| 1477   | 2    | 2   | No              |      | 2   | No             |      | 2   | No    |      |       |       | 183   | 95    |
| 1478   |      | 2   | No              |      | 2   | No             |      | 2   | No    |      |       |       | 154   | 58    |
| 1480   |      | 2   | No              |      | 2   | No             |      | 2   | No    |      |       |       | 170   | 66    |
| 1481   |      | 2   | No              |      | 2   | No             |      | 2   | No    |      |       |       | 163   | 55    |
| 1483   |      | 2   | No              |      | 2   | No             |      | 2   | No    |      |       |       | 178   | 75    |
| 1484   | 2    | 2   | No              |      | 1   | Yes            | 2    | 2   | No    |      |       |       | 175   | 80    |
| 1485   |      | 2   | No              |      | 1   | Yes            | 2    | 2   | No    |      |       |       | 181   | 88    |
| 1486   | 1    | 2   | No              |      | 1   | Yes            | 2    | 2   | No    |      |       |       | 170   | 67    |
| 1487   | 1    | 2   | No              |      | 1   | Yes            | 2    | 2   | No    |      |       |       | 170   | 65    |
| 1488   |      | 1   | Yes             | 1    | 2   | No             |      | 2   | No    |      |       |       | 174   | 73    |
| 1489   | 1    | 2   | No              |      | 1   | Yes            | 2    | 2   | No    |      |       |       | 166   | 67    |
| 1490   | 2    | 2   | No              |      | 2   | No             |      | 2   | No    |      |       |       | 175   | 85    |
| 1491   | 1    | 2   | No              |      | 2   | No             |      | 2   | No    |      |       |       | 160   | 65    |
| 1492   |      | 2   | No              |      | 2   | No             |      | 2   | No    |      |       |       | 159   | 52    |
| 1494   |      | 2   | No              |      | 2   | No             |      | 2   | No    |      |       |       | 170   | 75    |
| 1495   |      | 2   | No              |      | 2   | No             |      | 2   | No    |      |       |       | 166   | 75    |
| 1496   |      | 2   | No              |      | 1   | Yes            | 1    | 2   | No    |      |       |       | 180   | 83    |
| 1498   | 1    | 1   | Yes             | 1    | 2   | No             |      | 2   | No    |      |       |       | 175   | 78    |
| 1499   |      | 1   | Yes             | 2    | 2   | No             |      | 2   | No    |      |       |       | 165   | 60    |
| 1500   | 1    | 2   | No              |      | 1   | Yes            | 2    | 2   | No    |      |       |       | 165   | 70    |
| 1501   |      | 2   | No              |      | 2   | No             |      | 2   | No    |      |       |       | 172   | 75    |
| 1503   |      | 2   | No              |      | 2   | No             |      | 2   | No    |      |       |       | 162   | 58    |
| 1504   |      | 2   | No              |      | 2   | No             |      | 2   | No    |      |       |       | 163   | 67    |
| 1508   | 1    | 2   | No              |      | 1   | Yes            | 2    | 2   | No    |      |       |       | 178   | 75    |
| 1509   | 1    | 2   | No              |      | 1   | Yes            | 2    | 2   | No    |      |       |       | 173   | 78    |
| 1511   |      | 2   | No              |      | 2   | No             |      | 2   | No    |      |       |       | 171   | 72    |
| 1512   | 1    | 2   | No              |      | 1   | Yes            | 2    | 2   | No    |      |       |       | 170   | 71    |
| 1513   |      | 2   | No              |      | 2   | No             |      | 2   | No    |      |       |       | 170   | 70    |
| 1515   | 2    | 2   | No              |      | 2   | No             |      | 2   | No    |      |       |       | 177   | 65    |
| 1517   |      | 2   | No              |      | 1   | Yes            | 1    | 2   | No    |      |       |       | 171   | 67    |
| 1518   |      | 2   | No              |      | 2   | No             |      | 2   | No    |      |       |       | 150   | 60    |

| respid | Q11a | Q12 | Cardiac Disease | Q12a | Q13 | Hyperlipidemia | Q13a | Q14 | Neuro | Q14a | Q15_1 | Q15_2 | Q15_3 | Q16_1 |
|--------|------|-----|-----------------|------|-----|----------------|------|-----|-------|------|-------|-------|-------|-------|
| 1519   |      | 2   | No              |      | 1   | Yes            | 1    | 2   | No    |      |       |       | 163   | 65    |
| 1520   | 1    | 2   | No              |      | 1   | Yes            | 2    | 2   | No    |      |       |       | 162   | 90    |
| 1521   |      | 2   | No              |      | 2   | No             |      | 2   | No    |      |       |       | 165   | 55    |
| 1522   |      | 2   | No              |      | 2   | No             |      | 2   | No    |      |       |       | 160   | 52    |
| 1523   | 2    | 2   | No              |      | 2   | No             |      | 2   | No    |      |       |       | 182   | 72    |
| 1524   |      | 2   | No              |      | 2   | No             |      | 2   | No    |      |       |       | 165   | 60    |
| 1525   |      | 2   | No              |      | 2   | No             |      | 2   | No    |      |       |       | 156   | 52    |
| 1526   |      | 2   | No              |      | 2   | No             |      | 2   | No    |      |       |       | 176   | 72    |
| 1527   | 1    | 1   | Yes             | 1    | 1   | Yes            | 1    | 2   | No    |      |       |       | 174   | 75    |
| 1534   |      | 1   | Yes             | 1    | 1   | Yes            | 1    | 2   | No    |      |       |       | 178   | 80    |
| 1535   |      | 2   | No              |      | 2   | No             |      | 2   | No    |      |       |       | 177   | 70    |
| 1536   |      | 2   | No              |      | 2   | No             |      | 2   | No    |      |       |       | 180   | 68    |
| 1538   |      | 2   | No              |      | 2   | No             |      | 2   | No    |      |       |       | 168   | 67    |
| 1539   |      | 2   | No              |      | 2   | No             |      | 2   | No    |      |       |       | 168   | 78    |
| 1540   |      | 2   | No              |      | 2   | No             |      | 2   | No    |      |       |       | 154   | 52    |
| 1541   | 1    | 2   | No              |      | 1   | Yes            | 1    | 2   | No    |      |       |       | 177   | 68    |
| 1542   | 2    | 2   | No              |      | 2   | No             |      | 2   | No    |      |       |       | 176   | 90    |
| 1543   |      | 2   | No              |      | 2   | No             |      | 2   | No    |      |       |       | 160   | 54    |
| 1545   |      | 2   | No              |      | 2   | No             |      | 2   | No    |      |       |       | 163   | 68    |
| 1546   | 2    | 2   | No              |      | 1   | Yes            | 2    | 2   | No    |      |       |       | 167   | 65    |
| 1548   | 1    | 2   | No              |      | 2   | No             |      | 2   | No    |      |       |       | 156   | 57    |
| 1549   |      | 2   | No              |      | 1   | Yes            | 2    | 2   | No    |      |       |       | 177   | 78    |
| 1551   |      | 2   | No              |      | 2   | No             |      | 2   | No    |      |       |       | 160   | 58    |
| 1552   |      | 2   | No              |      | 1   | Yes            | 2    | 2   | No    |      |       |       | 168   | 65    |
| 1556   |      | 2   | No              |      | 2   | No             |      | 2   | No    |      |       |       | 170   | 60    |
| 1557   |      | 2   | No              |      | 2   | No             |      | 2   | No    |      |       |       | 159   | 47    |
| 1558   | 2    | 2   | No              |      | 2   | No             |      | 2   | No    |      |       |       | 168   | 74    |
| 1561   |      | 2   | No              |      | 2   | No             |      | 2   | No    |      |       |       | 171   | 75    |
| 1562   |      | 2   | No              |      | 2   | No             |      | 2   | No    |      |       |       | 177   | 63    |
| 1563   |      | 2   | No              |      | 2   | No             |      | 2   | No    |      |       |       | 178   | 90    |
| 1564   | 2    | 2   | No              |      | 2   | No             |      | 2   | No    |      |       |       | 170   | 76    |
| 1565   |      | 2   | No              |      | 2   | No             |      | 2   | No    |      |       |       | 163   | 57    |



| respid | Q11a | Q12 | Cardiac Disease | Q12a | Q13 | Hyperlipidemia | Q13a | Q14 | Neuro | Q14a | Q15_1 | Q15_2 | Q15_3 | Q16_1 |
|--------|------|-----|-----------------|------|-----|----------------|------|-----|-------|------|-------|-------|-------|-------|
| 1566   |      | 2   | No              |      | 2   | No             |      | 2   | No    |      |       |       | 174   | 72    |
| 1567   |      | 2   | No              |      | 2   | No             |      | 2   | No    |      |       |       | 164   | 60    |
| 1569   |      | 2   | No              |      | 2   | No             |      | 2   | No    |      |       |       | 172   | 55    |
| 1570   |      | 1   | Yes             | 1    | 2   | No             |      | 2   | No    |      |       |       | 158   | 65    |
| 1574   |      | 2   | No              |      | 2   | No             |      | 2   | No    |      |       |       | 178   | 72    |
| 1575   |      | 2   | No              |      | 1   | Yes            | 2    | 2   | No    |      |       |       | 167   | 58    |
| 1576   |      | 2   | No              |      | 2   | No             |      | 2   | No    |      |       |       | 160   | 60    |
| 1577   | 2    | 2   | No              |      | 2   | No             |      | 2   | No    |      |       |       | 177   | 86    |
| 1581   |      | 2   | No              |      | 2   | No             |      | 2   | No    |      |       |       | 158   | 50    |
| 1583   |      | 2   | No              |      | 1   | Yes            | 1    | 2   | No    |      |       |       | 171   | 62    |
| 1585   |      | 2   | No              |      | 2   | No             |      | 2   | No    |      |       |       | 172   | 78    |
| 1586   |      | 2   | No              |      | 2   | No             |      | 2   | No    |      |       |       | 165   | 63    |
| 1588   |      | 2   | No              |      | 2   | No             |      | 2   | No    |      |       |       | 172   | 63    |
| 1590   |      | 2   | No              |      | 2   | No             |      | 2   | No    |      |       |       | 174   | 62    |
| 1592   |      | 2   | No              |      | 2   | No             |      | 2   | No    |      |       |       | 158   | 57    |
| 1594   | 2    | 2   | No              |      | 2   | No             |      | 2   | No    |      |       |       | 173   | 77    |
| 1598   | 1    | 1   | Yes             | 1    | 2   | No             |      | 2   | No    |      |       |       | 160   | 54    |
| 1599   | 1    | 2   | No              |      | 1   | Yes            | 1    | 2   | No    |      |       |       | 164   | 87    |
| 1600   |      | 2   | No              |      | 2   | No             |      | 2   | No    |      |       |       | 170   | 50    |
| 1602   |      | 2   | No              |      | 2   | No             |      | 2   | No    |      |       |       | 158   | 50    |
| 1603   |      | 2   | No              |      | 2   | No             |      | 2   | No    |      |       |       | 155   | 50    |
| 1604   |      | 2   | No              |      | 2   | No             |      | 2   | No    |      |       |       | 153   | 48    |
| 1605   |      | 2   | No              |      | 1   | Yes            | 1    | 2   | No    |      |       |       | 165   | 67    |
| 1606   | 2    | 2   | No              |      | 1   | Yes            | 1    | 2   | No    |      |       |       | 170   | 66    |
| 1610   | 1    | 2   | No              |      | 1   | Yes            | 2    | 2   | No    |      |       |       | 168   | 70    |
| 1611   |      | 2   | No              |      | 1   | Yes            | 1    | 2   | No    |      |       |       | 166   | 76    |
| 1612   |      | 2   | No              |      | 2   | No             |      | 2   | No    |      |       |       | 173   | 65    |
| 1613   |      | 2   | No              |      | 2   | No             |      | 2   | No    |      |       |       | 162   | 70    |
| 1615   |      | 2   | No              |      | 2   | No             |      | 2   | No    |      |       |       | 167   | 59    |
| 1616   |      | 2   | No              |      | 1   | Yes            | 2    | 2   | No    |      |       |       | 168   | 78    |
| 1617   |      | 2   | No              |      | 2   | No             |      | 2   | No    |      |       |       | 170   | 70    |
| 1618   | 2    | 2   | No              |      | 2   | No             |      | 2   | No    |      |       |       | 178   | 75    |

| respid | Q11a | Q12 | Cardiac Disease | Q12a | Q13 | Hyperlipidemia | Q13a | Q14 | Neuro | Q14a | Q15_1 | Q15_2 | Q15_3 | Q16_1 |
|--------|------|-----|-----------------|------|-----|----------------|------|-----|-------|------|-------|-------|-------|-------|
| 1620   |      | 2   | No              |      | 2   | No             |      | 2   | No    |      |       |       | 169   | 55    |
| 1621   | 1    | 1   | Yes             | 2    | 2   | No             |      | 2   | No    |      |       |       | 168   | 65    |
| 1622   |      | 2   | No              |      | 2   | No             |      | 2   | No    |      |       |       | 176   | 78    |
| 1623   | 2    | 2   | No              |      | 1   | Yes            | 2    | 2   | No    |      |       |       | 176   | 62    |
| 1624   |      | 2   | No              |      | 2   | No             |      | 2   | No    |      |       |       | 162   | 58    |
| 1625   |      | 2   | No              |      | 2   | No             |      | 2   | No    |      |       |       | 175   | 70    |
| 1626   |      | 2   | No              |      | 2   | No             |      | 2   | No    |      |       |       | 155   | 60    |
| 1627   |      | 2   | No              |      | 2   | No             |      | 2   | No    |      |       |       | 162   | 60    |
| 1629   |      | 2   | No              |      | 2   | No             |      | 2   | No    |      |       |       | 173   | 77    |
| 1630   |      | 2   | No              |      | 1   | Yes            | 1    | 2   | No    |      |       |       | 175   | 105   |
| 1631   |      | 2   | No              |      | 2   | No             |      | 2   | No    |      |       |       | 172   | 70    |
| 1634   |      | 2   | No              |      | 1   | Yes            | 2    | 2   | No    |      |       |       | 156   | 50    |
| 1635   |      | 2   | No              |      | 1   | Yes            | 2    | 2   | No    |      |       |       | 170   | 72    |
| 1636   | 2    | 2   | No              |      | 1   | Yes            | 2    | 2   | No    |      |       |       | 183   | 83    |
| 1637   |      | 2   | No              |      | 2   | No             |      | 2   | No    |      |       |       | 170   | 74    |
| 1640   |      | 2   | No              |      | 2   | No             |      | 2   | No    |      |       |       | 152   | 40    |
| 1642   |      | 2   | No              |      | 2   | No             |      | 2   | No    |      |       |       | 163   | 59    |
| 1643   |      | 1   | Yes             | 1    | 2   | No             |      | 2   | No    |      |       |       | 167   | 75    |
| 1644   | 1    | 2   | No              |      | 1   | Yes            | 1    | 2   | No    |      |       |       | 170   | 92    |
| 1645   |      | 2   | No              |      | 1   | Yes            | 1    | 2   | No    |      |       |       | 157   | 44    |
| 1646   |      | 2   | No              |      | 2   | No             |      | 1   | Yes   | 1    |       |       | 154   | 54    |
| 1647   |      | 2   | No              |      | 2   | No             |      | 2   | No    |      |       |       | 176   | 80    |
| 1650   | 2    | 2   | No              |      | 1   | Yes            | 2    | 2   | No    |      |       |       | 175   | 80    |
| 1654   |      | 2   | No              |      | 2   | No             |      | 2   | No    |      |       |       | 169   | 65    |
| 1656   |      | 2   | No              |      | 2   | No             |      | 2   | No    |      |       |       | 172   | 78    |
| 1657   |      | 2   | No              |      | 2   | No             |      | 2   | No    |      |       |       | 164   | 64    |
| 1659   | 1    | 2   | No              |      | 1   | Yes            | 1    | 2   | No    |      |       |       | 176   | 63    |
| 1662   |      | 2   | No              |      | 2   | No             |      | 2   | No    |      |       |       | 162   | 51    |
| 1663   |      | 2   | No              |      | 2   | No             |      | 2   | No    |      |       |       | 160   | 52    |
| 1664   |      | 2   | No              |      | 2   | No             |      | 2   | No    |      |       |       | 156   | 50    |
| 1665   |      | 2   | No              |      | 2   | No             |      | 2   | No    |      |       |       | 160   | 70    |
| 1667   |      | 2   | No              |      | 2   | No             |      | 2   | No    |      |       |       | 173   | 73    |

| respid | Q11a | Q12 | Cardiac Disease | Q12a | Q13 | Hyperlipidemia | Q13a | Q14 | Neuro | Q14a | Q15_1 | Q15_2 | Q15_3 | Q16_1 |
|--------|------|-----|-----------------|------|-----|----------------|------|-----|-------|------|-------|-------|-------|-------|
| 1668   |      | 2   | No              |      | 1   | Yes            | 2    | 2   | No    |      |       |       | 178   | 95    |
| 1670   |      | 2   | No              |      | 1   | Yes            | 2    | 2   | No    |      |       |       | 170   | 73    |
| 1671   | 1    | 2   | No              |      | 1   | Yes            | 1    | 2   | No    |      |       |       | 180   | 84    |
| 1673   |      | 2   | No              |      | 2   | No             |      | 2   | No    |      |       |       | 156   | 65    |
| 1674   |      | 2   | No              |      | 2   | No             |      | 2   | No    |      |       |       | 172   | 75    |
| 1676   | 2    | 2   | No              |      | 2   | No             |      | 2   | No    |      |       |       | 161   | 60    |
| 1677   |      | 2   | No              |      | 2   | No             |      | 2   | No    |      |       |       | 164   | 63    |
| 1678   | 1    | 2   | No              |      | 2   | No             |      | 2   | No    |      |       |       | 169   | 73    |
| 1680   |      | 2   | No              |      | 2   | No             |      | 2   | No    |      |       |       | 160   | 50    |
| 1681   |      | 2   | No              |      | 1   | Yes            | 2    | 2   | No    |      |       |       | 170   | 63    |
| 1683   |      | 2   | No              |      | 1   | Yes            | 2    | 2   | No    |      |       |       | 167   | 58    |
| 1685   |      | 2   | No              |      | 2   | No             |      | 2   | No    |      |       |       | 160   | 51    |
| 1686   | 1    | 2   | No              |      | 2   | No             |      | 2   | No    |      |       |       | 158   | 65    |
| 1690   |      | 2   | No              |      | 1   | Yes            | 2    | 2   | No    |      |       |       | 170   | 85    |
| 1691   | 1    | 2   | No              |      | 1   | Yes            | 2    | 2   | No    |      |       |       | 158   | 76    |
| 1692   |      | 2   | No              |      | 1   | Yes            | 2    | 2   | No    |      |       |       | 169   | 72    |
| 1693   |      | 2   | No              |      | 1   | Yes            | 2    | 2   | No    |      |       |       | 175   | 85    |
| 1695   |      | 2   | No              |      | 2   | No             |      | 2   | No    |      |       |       | 160   | 55    |
| 1696   |      | 2   | No              |      | 2   | No             |      | 2   | No    |      |       |       | 175   | 75    |
| 1698   |      | 2   | No              |      | 1   | Yes            | 2    | 2   | No    |      |       |       | 165   | 65    |
| 1699   |      | 2   | No              |      | 2   | No             |      | 2   | No    |      |       |       | 158   | 58    |
| 1701   |      | 2   | No              |      | 2   | No             |      | 2   | No    |      |       |       | 175   | 66    |
| 1702   |      | 2   | No              |      | 2   | No             |      | 2   | No    |      |       |       | 156   | 47    |
| 1703   |      | 2   | No              |      | 2   | No             |      | 2   | No    |      |       |       | 162   | 52    |
| 1705   |      | 2   | No              |      | 2   | No             |      | 2   | No    |      |       |       | 160   | 60    |
| 1706   | 2    | 2   | No              |      | 2   | No             |      | 2   | No    |      |       |       | 172   | 73    |
| 1708   |      | 2   | No              |      | 2   | No             |      | 2   | No    |      |       |       | 170   | 67    |
| 1711   |      | 2   | No              |      | 2   | No             |      | 2   | No    |      |       |       | 155   | 54    |
| 1712   | 1    | 1   | Yes             | 2    | 1   | Yes            | 1    | 2   | No    |      |       |       | 167   | 72    |
| 1713   |      | 2   | No              |      | 2   | No             |      | 2   | No    |      |       |       | 150   | 45    |
| 1715   |      | 2   | No              |      | 2   | No             |      | 2   | No    |      |       |       | 160   | 57    |
| 1717   |      | 2   | No              |      | 2   | No             |      | 2   | No    |      |       |       | 172   | 72    |

| respid | Q11a | Q12 | Cardiac Disease | Q12a | Q13 | Hyperlipidemia | Q13a | Q14 | Neuro | Q14a | Q15_1 | Q15_2 | Q15_3 | Q16_1 |
|--------|------|-----|-----------------|------|-----|----------------|------|-----|-------|------|-------|-------|-------|-------|
| 1718   | 1    | 1   | Yes             | 1    | 1   | Yes            | 1    | 2   | No    |      |       |       | 168   | 83    |
| 1719   |      | 2   | No              |      | 1   | Yes            | 1    | 2   | No    |      |       |       | 163   | 58    |
| 1721   | 1    | 1   | Yes             | 2    | 2   | No             |      | 2   | No    |      |       |       | 175   | 80    |
| 1722   | 1    | 2   | No              |      | 2   | No             |      | 2   | No    |      |       |       | 153   | 58    |
| 1724   |      | 2   | No              |      | 1   | Yes            | 2    | 2   | No    |      |       |       | 165   | 60    |
| 1725   |      | 2   | No              |      | 2   | No             |      | 2   | No    |      |       |       | 158   | 63    |
| 1726   |      | 2   | No              |      | 1   | Yes            | 2    | 2   | No    |      |       |       | 170   | 67    |
| 1727   | 2    | 2   | No              |      | 1   | Yes            | 2    | 2   | No    |      |       |       | 172   | 76    |
| 1728   |      | 2   | No              |      | 2   | No             |      | 2   | No    |      |       |       | 172   | 67    |
| 1731   | 1    | 2   | No              |      | 1   | Yes            | 2    | 2   | No    |      |       |       | 168   | 59    |
| 1733   |      | 2   | No              |      | 1   | Yes            | 2    | 2   | No    |      |       |       | 167   | 60    |
| 1734   | 2    | 1   | Yes             | 2    | 2   | No             |      | 2   | No    |      |       |       | 173   | 70    |
| 1735   | 1    | 2   | No              |      | 2   | No             |      | 2   | No    |      |       |       | 174   | 76    |
| 1736   |      | 1   | Yes             | 2    | 1   | Yes            | 2    | 2   | No    |      |       |       | 152   | 50    |
| 1737   |      | 2   | No              |      | 2   | No             |      | 2   | No    |      |       |       | 172   | 52    |
| 1738   | 1    | 2   | No              |      | 1   | Yes            | 2    | 2   | No    |      |       |       | 157   | 49    |
| 1743   |      | 2   | No              |      | 1   | Yes            | 2    | 2   | No    |      |       |       | 150   | 47    |
| 1755   |      | 2   | No              |      | 2   | No             |      | 2   | No    |      |       |       | 162   | 61    |
| 1756   |      | 2   | No              |      | 2   | No             |      | 2   | No    |      |       |       | 151   | 60    |
| 1757   |      | 2   | No              |      | 2   | No             |      | 2   | No    |      |       |       | 158   | 50    |
| 1758   | 1    | 1   | Yes             | 1    | 1   | Yes            | 1    | 2   | No    |      |       |       | 158   | 50    |
| 1759   | 2    | 2   | No              |      | 1   | Yes            | 2    | 2   | No    |      |       |       | 176   | 70    |
| 1761   | 1    | 2   | No              |      | 2   | No             |      | 2   | No    |      |       |       | 164   | 60    |
| 1762   |      | 2   | No              |      | 2   | No             |      | 2   | No    |      |       |       | 158   | 45    |
| 1764   |      | 2   | No              |      | 2   | No             |      | 2   | No    |      |       |       | 162   | 43    |
| 1767   |      | 2   | No              |      | 2   | No             |      | 2   | No    |      |       |       | 159   | 48    |
| 1768   |      | 2   | No              |      | 1   | Yes            | 2    | 2   | No    |      |       |       | 175   | 69    |
| 1769   |      | 2   | No              |      | 2   | No             |      | 2   | No    |      |       |       | 167   | 67    |
| 1770   | 2    | 1   | Yes             | 2    | 2   | No             |      | 2   | No    |      |       |       | 168   | 72    |
| 1771   | 2    | 2   | No              |      | 1   | Yes            | 1    | 2   | No    |      |       |       | 178   | 60    |
| 1776   | 1    | 2   | No              |      | 2   | No             |      | 2   | No    |      |       |       | 167   | 69    |
| 1777   |      | 2   | No              |      | 2   | No             |      | 2   | No    |      |       |       | 160   | 55    |

| respid | Q11a | Q12 | Cardiac Disease | Q12a | Q13 | Hyperlipidemia | Q13a | Q14 | Neuro | Q14a | Q15_1 | Q15_2 | Q15_3 | Q16_1 |
|--------|------|-----|-----------------|------|-----|----------------|------|-----|-------|------|-------|-------|-------|-------|
| 1778   | 2    | 2   | No              |      | 1   | Yes            | 1    | 2   | No    |      |       |       | 172   | 68    |
| 1779   |      | 2   | No              |      | 1   | Yes            | 2    | 2   | No    |      |       |       | 174   | 68    |
| 1780   | 1    | 2   | No              |      | 2   | No             |      | 2   | No    |      |       |       | 172   | 61    |
| 1781   |      | 2   | No              |      | 2   | No             |      | 2   | No    |      |       |       | 176   | 75    |
| 1783   |      | 2   | No              |      | 2   | No             |      | 2   | No    |      |       |       | 155   | 50    |
| 1784   | 1    | 2   | No              |      | 1   | Yes            | 1    | 2   | No    |      |       |       | 173   | 85    |
| 1785   |      | 2   | No              |      | 2   | No             |      | 2   | No    |      |       |       | 180   | 67    |
| 1788   |      | 2   | No              |      | 2   | No             |      | 2   | No    |      |       |       | 173   | 104   |
| 1792   |      | 2   | No              |      | 2   | No             |      | 2   | No    |      |       |       | 158   | 55    |
| 1794   |      | 2   | No              |      | 2   | No             |      | 2   | No    |      |       |       | 156   | 49    |
| 1798   |      | 2   | No              |      | 1   | Yes            | 2    | 2   | No    |      |       |       | 158   | 69    |
| 1799   |      | 2   | No              |      | 1   | Yes            | 2    | 2   | No    |      |       |       | 164   | 68    |
| 1800   |      | 2   | No              |      | 2   | No             |      | 2   | No    |      |       |       | 165   | 68    |
| 1804   |      | 2   | No              |      | 2   | No             |      | 2   | No    |      |       |       | 161   | 55    |
| 1806   | 1    | 1   | Yes             | 2    | 2   | No             |      | 2   | No    |      |       |       | 154   | 58    |
| 1807   |      | 2   | No              |      | 2   | No             |      | 2   | No    |      |       |       | 157   | 56    |
| 1808   |      | 2   | No              |      | 2   | No             |      | 2   | No    |      |       |       | 176   | 72    |
| 1809   |      | 2   | No              |      | 1   | Yes            | 2    | 2   | No    |      |       |       | 167   | 54    |
| 1811   |      | 2   | No              |      | 1   | Yes            | 2    | 2   | No    |      |       |       | 170   | 55    |
| 1812   | 1    | 2   | No              |      | 2   | No             |      | 2   | No    |      |       |       | 170   | 74    |
| 1813   |      | 2   | No              |      | 2   | No             |      | 2   | No    |      |       |       | 170   | 60    |
| 1814   |      | 2   | No              |      | 2   | No             |      | 2   | No    |      |       |       | 157   | 50    |
| 1815   |      | 2   | No              |      | 2   | No             |      | 2   | No    |      |       |       | 155   | 59    |
| 1817   |      | 1   | Yes             | 2    | 2   | No             |      | 2   | No    |      |       |       | 150   | 48    |
| 1820   |      | 2   | No              |      | 2   | No             |      | 2   | No    |      |       |       | 170   | 63    |
| 1821   |      | 2   | No              |      | 1   | Yes            | 1    | 2   | No    |      |       |       | 170   | 76    |
| 1822   | 2    | 2   | No              |      | 2   | No             |      | 2   | No    |      |       |       | 180   | 93    |
| 1823   | 1    | 2   | No              |      | 1   | Yes            | 1    | 2   | No    |      |       |       | 173   | 68    |
| 1824   |      | 2   | No              |      | 1   | Yes            | 1    | 2   | No    |      |       |       | 163   | 66    |
| 1826   |      | 2   | No              |      | 2   | No             |      | 2   | No    |      |       |       | 168   | 65    |
| 1828   |      | 2   | No              |      | 2   | No             |      | 2   | No    |      |       |       | 184   | 83    |
| 1829   |      | 2   | No              |      | 2   | No             |      | 2   | No    |      |       |       | 150   | 53    |

| respid | Q11a | Q12 | Cardiac Disease | Q12a | Q13 | Hyperlipidemia | Q13a | Q14 | Neuro | Q14a | Q15_1 | Q15_2 | Q15_3 | Q16_1 |
|--------|------|-----|-----------------|------|-----|----------------|------|-----|-------|------|-------|-------|-------|-------|
| 1830   | 1    | 2   | No              |      | 2   | No             |      | 2   | No    |      |       |       | 172   | 73    |
| 1831   |      | 2   | No              |      | 2   | No             |      | 2   | No    |      |       |       | 182   | 65    |
| 1832   |      | 2   | No              |      | 2   | No             |      | 2   | No    |      |       |       | 158   | 70    |
| 1836   | 1    | 2   | No              |      | 2   | No             |      | 2   | No    |      |       |       | 161   | 52    |
| 1838   |      | 2   | No              |      | 1   | Yes            | 2    | 2   | No    |      |       |       | 162   | 65    |
| 1839   |      | 2   | No              |      | 1   | Yes            | 2    | 2   | No    |      |       |       | 170   | 70    |
| 1840   | 2    | 2   | No              |      | 2   | No             |      | 2   | No    |      |       |       | 180   | 68    |
| 1841   | 2    | 1   | Yes             | 1    | 2   | No             |      | 2   | No    |      |       |       | 168   | 65    |
| 1842   | 1    | 2   | No              |      | 1   | Yes            | 1    | 2   | No    |      |       |       | 164   | 69    |
| 1843   | 2    | 2   | No              |      | 1   | Yes            | 1    | 2   | No    |      |       |       | 168   | 68    |
| 1844   |      | 2   | No              |      | 2   | No             |      | 2   | No    |      |       |       | 168   | 65    |
| 1845   |      | 2   | No              |      | 2   | No             |      | 2   | No    |      |       |       | 162   | 65    |
| 1849   | 1    | 2   | No              |      | 2   | No             |      | 2   | No    |      |       |       | 158   | 52    |
| 1850   |      | 2   | No              |      | 2   | No             |      | 2   | No    |      |       |       | 158   | 48    |
| 1851   | 1    | 2   | No              |      | 1   | Yes            | 1    | 2   | No    |      |       |       | 173   | 62    |
| 1852   |      | 2   | No              |      | 2   | No             |      | 2   | No    |      |       |       | 167   | 57    |
| 1857   |      | 2   | No              |      | 1   | Yes            | 2    | 2   | No    |      |       |       | 171   | 75    |
| 1858   | 1    | 2   | No              |      | 2   | No             |      | 2   | No    |      |       |       | 165   | 70    |
| 1861   |      | 2   | No              |      | 2   | No             |      | 2   | No    |      |       |       | 163   | 53    |
| 1862   |      | 2   | No              |      | 2   | No             |      | 2   | No    |      |       |       | 152   | 44    |
| 1863   |      | 2   | No              |      | 2   | No             |      | 2   | No    |      |       |       | 162   | 53    |
| 1864   |      | 2   | No              |      | 2   | No             |      | 2   | No    |      |       |       | 162   | 65    |
| 1865   |      | 2   | No              |      | 2   | No             |      | 2   | No    |      |       |       | 178   | 83    |
| 1867   |      | 2   | No              |      | 2   | No             |      | 2   | No    |      |       |       | 165   | 62    |
| 1868   |      | 1   | Yes             | 1    | 1   | Yes            | 1    | 2   | No    |      |       |       | 165   | 78    |
| 1869   |      | 2   | No              |      | 2   | No             |      | 2   | No    |      |       |       | 172   | 65    |
| 1870   |      | 2   | No              |      | 2   | No             |      | 2   | No    |      |       |       | 174   | 70    |
| 1871   |      | 2   | No              |      | 1   | Yes            | 2    | 2   | No    |      |       |       | 168   | 65    |
| 1872   |      | 2   | No              |      | 1   | Yes            | 2    | 2   | No    |      |       |       | 175   | 79    |
| 1873   |      | 2   | No              |      | 2   | No             |      | 2   | No    |      |       |       | 165   | 61    |
| 1876   |      | 2   | No              |      | 2   | No             |      | 2   | No    |      |       |       | 170   | 60    |
| 1877   |      | 2   | No              |      | 1   | Yes            | 2    | 2   | No    |      |       |       | 176   | 60    |

| respid | Q11a | Q12 | Cardiac Disease | Q12a | Q13 | Hyperlipidemia | Q13a | Q14 | Neuro | Q14a | Q15_1 | Q15_2 | Q15_3 | Q16_1 |
|--------|------|-----|-----------------|------|-----|----------------|------|-----|-------|------|-------|-------|-------|-------|
| 1878   |      | 2   | No              |      | 2   | No             |      | 2   | No    |      |       |       | 176   | 64    |
| 1879   | 1    | 2   | No              |      | 2   | No             |      | 2   | No    |      |       |       | 170   | 65    |
| 1880   |      | 2   | No              |      | 2   | No             |      | 2   | No    |      |       |       | 173   | 69    |
| 1881   |      | 1   | Yes             | 2    | 2   | No             |      | 2   | No    |      |       |       | 162   | 58    |
| 1883   | 1    | 2   | No              |      | 1   | Yes            | 2    | 2   | No    |      |       |       | 169   | 63    |
| 1886   |      | 2   | No              |      | 2   | No             |      | 2   | No    |      |       |       | 178   | 80    |
| 1888   | 1    | 1   | Yes             | 1    | 1   | Yes            | 1    | 2   | No    |      |       |       | 165   | 73    |
| 1889   | 1    | 2   | No              |      | 2   | No             |      | 2   | No    |      |       |       | 170   | 65    |
| 1890   | 2    | 2   | No              |      | 2   | No             |      | 2   | No    |      |       |       | 178   | 78    |
| 1891   |      | 2   | No              |      | 2   | No             |      | 2   | No    |      |       |       | 170   | 75    |
| 1893   |      | 2   | No              |      | 2   | No             |      | 2   | No    |      |       |       | 160   | 48    |
| 1894   |      | 2   | No              |      | 1   | Yes            | 2    | 2   | No    |      |       |       | 153   | 72    |
| 1895   | 2    | 2   | No              |      | 1   | Yes            | 2    | 2   | No    |      |       |       | 168   | 63    |
| 1896   |      | 2   | No              |      | 1   | Yes            | 2    | 2   | No    |      |       |       | 180   | 72    |
| 1897   |      | 2   | No              |      | 1   | Yes            | 1    | 2   | No    |      |       |       | 167   | 70    |
| 1898   | 1    | 2   | No              |      | 1   | Yes            | 1    | 2   | No    |      |       |       | 157   | 55    |
| 1899   | 2    | 2   | No              |      | 1   | Yes            | 2    | 2   | No    |      |       |       | 170   | 67    |
| 1900   | 2    | 2   | No              |      | 1   | Yes            | 2    | 2   | No    |      |       |       | 163   | 93    |
| 1903   |      | 2   | No              |      | 2   | No             |      | 2   | No    |      |       |       | 160   | 53    |
| 1906   |      | 2   | No              |      | 2   | No             |      | 2   | No    |      |       |       | 168   | 73    |
| 1907   | 1    | 2   | No              |      | 2   | No             |      | 2   | No    |      |       |       | 165   | 60    |
| 1908   |      | 2   | No              |      | 1   | Yes            | 2    | 2   | No    |      | 5     | 3     |       | 52    |
| 1909   | 2    | 1   | Yes             | 2    | 1   | Yes            | 2    | 2   | No    |      |       |       | 162   | 77    |
| 1910   |      | 2   | No              |      | 2   | No             |      | 2   | No    |      |       |       | 175   | 60    |
| 1911   |      | 2   | No              |      | 2   | No             |      | 2   | No    |      |       |       | 168   | 70    |
| 1912   |      | 2   | No              |      | 2   | No             |      | 2   | No    |      |       |       | 163   | 70    |
| 1917   |      | 2   | No              |      | 2   | No             |      | 2   | No    |      |       |       | 156   | 58    |
| 1918   |      | 2   | No              |      | 2   | No             |      | 2   | No    |      |       |       | 146   | 48    |
| 1919   |      | 2   | No              |      | 2   | No             |      | 2   | No    |      |       |       | 175   | 78    |
| 1922   |      | 2   | No              |      | 2   | No             |      | 2   | No    |      |       |       | 155   | 55    |
| 1925   |      | 2   | No              |      | 2   | No             |      | 2   | No    |      |       |       | 153   | 70    |
| 1926   |      | 2   | No              |      | 2   | No             |      | 2   | No    |      |       |       | 181   | 76    |

| respid | Q11a | Q12 | Cardiac Disease | Q12a | Q13 | Hyperlipidemia | Q13a | Q14 | Neuro | Q14a | Q15_1 | Q15_2 | Q15_3 | Q16_1 |
|--------|------|-----|-----------------|------|-----|----------------|------|-----|-------|------|-------|-------|-------|-------|
| 1927   |      | 2   | No              |      | 2   | No             |      | 2   | No    |      |       |       | 155   | 55    |
| 1928   |      | 2   | No              |      | 2   | No             |      | 2   | No    |      |       |       | 160   | 50    |
| 1929   |      | 2   | No              |      | 2   | No             |      | 2   | No    |      |       |       | 168   | 70    |
| 1934   |      | 2   | No              |      | 1   | Yes            | 2    | 2   | No    |      |       |       | 160   | 50    |
| 1935   |      | 2   | No              |      | 1   | Yes            | 1    | 2   | No    |      |       |       | 167   | 85    |
| 1936   |      | 2   | No              |      | 2   | No             |      | 2   | No    |      |       |       | 170   | 54    |
| 1937   |      | 2   | No              |      | 2   | No             |      | 2   | No    |      |       |       | 168   | 58    |
| 1938   |      | 2   | No              |      | 2   | No             |      | 2   | No    |      |       |       | 155   | 48    |
| 1939   |      | 2   | No              |      | 2   | No             |      | 2   | No    |      |       |       | 150   | 45    |
| 1940   |      | 2   | No              |      | 1   | Yes            | 1    | 2   | No    |      |       |       | 167   | 64    |
| 1941   |      | 2   | No              |      | 2   | No             |      | 2   | No    |      |       |       | 163   | 52    |
| 1948   |      | 2   | No              |      | 2   | No             |      | 2   | No    |      |       |       | 153   | 48    |
| 1950   |      | 2   | No              |      | 1   | Yes            | 2    | 2   | No    |      |       |       | 177   | 85    |
| 1955   |      | 2   | No              |      | 1   | Yes            | 2    | 2   | No    |      |       |       | 168   | 68    |
| 1958   | 1    | 2   | No              |      | 1   | Yes            | 1    | 2   | No    |      |       |       | 162   | 56    |
| 1960   |      | 2   | No              |      | 2   | No             |      | 2   | No    |      |       |       | 167   | 65    |
| 1961   |      | 2   | No              |      | 1   | Yes            | 2    | 2   | No    |      |       |       | 165   | 60    |
| 1962   |      | 2   | No              |      | 2   | No             |      | 2   | No    |      | 5     | 3     |       | 65    |
| 1965   |      | 2   | No              |      | 2   | No             |      | 2   | No    |      |       |       | 165   | 52    |
| 1966   |      | 2   | No              |      | 2   | No             |      | 2   | No    |      |       |       | 170   | 71    |
| 1967   |      | 2   | No              |      | 1   | Yes            | 2    | 2   | No    |      |       |       | 165   | 67    |
| 1968   |      | 1   | Yes             | 2    | 1   | Yes            | 2    | 2   | No    |      |       |       | 150   | 52    |
| 1973   |      | 2   | No              |      | 2   | No             |      | 2   | No    |      |       |       | 162   | 52    |
| 1974   | 1    | 1   | Yes             | 2    | 2   | No             |      | 2   | No    |      |       |       | 157   | 53    |
| 1975   |      | 2   | No              |      | 2   | No             |      | 2   | No    |      |       |       | 162   | 58    |
| 1977   |      | 2   | No              |      | 1   | Yes            | 2    | 2   | No    |      |       |       | 158   | 47    |
| 1978   |      | 2   | No              |      | 2   | No             |      | 2   | No    |      |       |       | 163   | 48    |
| 1979   |      | 2   | No              |      | 2   | No             |      | 2   | No    |      |       |       | 165   | 56    |
| 1982   |      | 2   | No              |      | 2   | No             |      | 2   | No    |      |       |       | 168   | 75    |
| 1983   |      | 2   | No              |      | 2   | No             |      | 2   | No    |      |       |       | 172   | 78    |
| 1987   |      | 2   | No              |      | 1   | Yes            | 1    | 2   | No    |      |       |       | 167   | 75    |
| 1988   |      | 2   | No              |      | 2   | No             |      | 2   | No    |      |       |       | 170   | 60    |



| respid | Q11a | Q12 | Cardiac Disease | Q12a | Q13 | Hyperlipidemia | Q13a | Q14 | Neuro | Q14a | Q15_1 | Q15_2 | Q15_3 | Q16_1 |
|--------|------|-----|-----------------|------|-----|----------------|------|-----|-------|------|-------|-------|-------|-------|
| 1991   |      | 2   | No              |      | 2   | No             |      | 2   | No    |      |       |       | 160   | 58    |
| 1992   |      | 2   | No              |      | 2   | No             |      | 2   | No    |      |       |       | 172   | 64    |
| 1993   |      | 2   | No              |      | 2   | No             |      | 2   | No    |      |       |       | 164   | 57    |
| 1994   |      | 2   | No              |      | 2   | No             |      | 2   | No    |      |       |       | 157   | 65    |
| 1995   |      | 2   | No              |      | 2   | No             |      | 2   | No    |      |       |       | 160   | 47    |
| 1996   | 1    | 1   | Yes             | 1    | 1   | Yes            | 1    | 2   | No    |      |       |       | 155   | 67    |
| 1997   |      | 2   | No              |      | 2   | No             |      | 2   | No    |      |       |       | 153   | 56    |
| 1998   |      | 2   | No              |      | 2   | No             |      | 2   | No    |      |       |       | 173   | 71    |
| 1999   |      | 2   | No              |      | 2   | No             |      | 2   | No    |      |       |       | 171   | 64    |
| 2000   | 2    | 1   | Yes             | 2    | 2   | No             |      | 2   | No    |      |       |       | 175   | 53    |
| 2001   |      | 2   | No              |      | 2   | No             |      | 2   | No    |      |       |       | 161   | 49    |
| 2002   |      | 2   | No              |      | 1   | Yes            | 2    | 2   | No    |      |       |       | 150   | 50    |
| 2003   |      | 2   | No              |      | 2   | No             |      | 2   | No    |      |       |       | 172   | 80    |
| 2004   |      | 2   | No              |      | 2   | No             |      | 2   | No    |      |       |       | 165   | 70    |
| 2005   | 1    | 2   | No              |      | 2   | No             |      | 2   | No    |      |       |       | 161   | 52    |
| 2007   | 1    | 1   | Yes             | 1    | 1   | Yes            | 1    | 2   | No    |      |       |       | 165   | 70    |
| 2009   |      | 2   | No              |      | 2   | No             |      | 2   | No    |      |       |       | 178   | 92    |
| 2010   |      | 2   | No              |      | 2   | No             |      | 2   | No    |      |       |       | 177   | 78    |
| 2011   |      | 2   | No              |      | 2   | No             |      | 2   | No    |      |       |       | 159   | 52    |
| 2013   |      | 2   | No              |      | 2   | No             |      | 2   | No    |      |       |       | 170   | 68    |
| 2014   | 1    | 2   | No              |      | 2   | No             |      | 2   | No    |      |       |       | 172   | 78    |
| 2017   | 2    | 2   | No              |      | 1   | Yes            | 2    | 2   | No    |      |       |       | 167   | 70    |
| 2020   |      | 2   | No              |      | 2   | No             |      | 2   | No    |      |       |       | 163   | 48    |
| 2023   | 1    | 2   | No              |      | 1   | Yes            | 2    | 2   | No    |      |       |       | 167   | 71    |
| 2024   |      | 2   | No              |      | 1   | Yes            | 1    | 2   | No    |      |       |       | 168   | 68    |
| 2029   |      | 2   | No              |      | 2   | No             |      | 2   | No    |      |       |       | 173   | 65    |
| 2030   | 2    | 2   | No              |      | 2   | No             |      | 2   | No    |      |       |       | 160   | 48    |
| 2031   |      | 1   | Yes             | 1    | 2   | No             |      | 2   | No    |      |       |       | 174   | 63    |
| 2032   | 1    | 2   | No              |      | 2   | No             |      | 2   | No    |      |       |       | 165   | 57    |
| 2033   |      | 2   | No              |      | 2   | No             |      | 2   | No    |      |       |       | 167   | 59    |
| 2034   |      | 2   | No              |      | 1   | Yes            | 2    | 2   | No    |      |       |       | 170   | 71    |
| 2036   | 2    | 2   | No              |      | 2   | No             |      | 2   | No    |      |       |       | 164   | 55    |

| respid | Q11a | Q12 | Cardiac Disease | Q12a | Q13 | Hyperlipidemia | Q13a | Q14 | Neuro | Q14a | Q15_1 | Q15_2 | Q15_3 | Q16_1 |
|--------|------|-----|-----------------|------|-----|----------------|------|-----|-------|------|-------|-------|-------|-------|
| 2037   |      | 2   | No              |      | 2   | No             |      | 2   | No    |      |       |       | 158   | 52    |
| 2038   |      | 2   | No              |      | 2   | No             |      | 2   | No    |      |       |       | 170   | 70    |
| 2039   | 2    | 2   | No              |      | 1   | Yes            | 2    | 2   | No    |      |       |       | 170   | 80    |
| 2040   |      | 2   | No              |      | 2   | No             |      | 2   | No    |      |       |       | 154   | 63    |
| 2041   |      | 2   | No              |      | 2   | No             |      | 2   | No    |      |       |       | 158   | 53    |
| 2042   |      | 2   | No              |      | 2   | No             |      | 2   | No    |      |       |       | 156   | 47    |
| 2043   |      | 1   | Yes             | 2    | 2   | No             |      | 2   | No    |      |       |       | 163   | 57    |
| 2051   |      | 1   | Yes             | 1    | 1   | Yes            | 1    | 2   | No    |      |       |       | 172   | 80    |
| 2052   |      | 2   | No              |      | 2   | No             |      | 2   | No    |      |       |       | 175   | 75    |
| 2053   |      | 2   | No              |      | 1   | Yes            | 2    | 2   | No    |      |       |       | 153   | 58    |
| 2054   |      | 2   | No              |      | 2   | No             |      | 2   | No    |      |       |       | 150   | 48    |
| 2055   |      | 2   | No              |      | 2   | No             |      | 2   | No    |      |       |       | 155   | 44    |
| 2056   |      | 2   | No              |      | 1   | Yes            | 1    | 2   | No    |      |       |       | 159   | 57    |
| 2057   |      | 2   | No              |      | 2   | No             |      | 2   | No    |      |       |       | 175   | 82    |
| 2059   |      | 2   | No              |      | 2   | No             |      | 2   | No    |      |       |       | 167   | 62    |
| 2063   |      | 2   | No              |      | 2   | No             |      | 2   | No    |      |       |       | 160   | 60    |
| 2066   |      | 2   | No              |      | 1   | Yes            | 2    | 2   | No    |      |       |       | 158   | 77    |
| 2068   |      | 2   | No              |      | 2   | No             |      | 2   | No    |      |       |       | 153   | 53    |
| 2069   |      | 2   | No              |      | 2   | No             |      | 2   | No    |      |       |       | 156   | 48    |
| 2070   |      | 2   | No              |      | 2   | No             |      | 2   | No    |      |       |       | 165   | 60    |
| 2071   |      | 2   | No              |      | 1   | Yes            | 1    | 2   | No    |      |       |       | 165   | 78    |
| 2073   |      | 2   | No              |      | 2   | No             |      | 2   | No    |      |       |       | 170   | 62    |
| 2077   |      | 2   | No              |      | 2   | No             |      | 2   | No    |      |       |       | 158   | 62    |
| 2079   |      | 2   | No              |      | 2   | No             |      | 2   | No    |      |       |       | 173   | 82    |
| 2080   |      | 1   | Yes             | 1    | 2   | No             |      | 1   | Yes   | 1    |       |       | 155   | 65    |
| 2081   | 1    | 2   | No              |      | 1   | Yes            | 1    | 2   | No    |      |       |       | 170   | 80    |
| 2084   |      | 2   | No              |      | 2   | No             |      | 2   | No    |      |       |       | 165   | 56    |
| 2085   | 1    | 2   | No              |      | 2   | No             |      | 2   | No    |      |       |       | 155   | 62    |
| 2087   |      | 2   | No              |      | 2   | No             |      | 2   | No    |      |       |       | 160   | 54    |
| 2089   | 1    | 2   | No              |      | 2   | No             |      | 2   | No    |      |       |       | 163   | 61    |
| 2093   | 1    | 2   | No              |      | 1   | Yes            | 2    | 2   | No    |      |       |       | 176   | 79    |
| 2094   |      | 1   | Yes             | 2    | 2   | No             |      | 2   | No    |      |       |       | 176   | 80    |

| respid | Q11a | Q12 | Cardiac Disease | Q12a | Q13 | Hyperlipidemia | Q13a | Q14 | Neuro | Q14a | Q15_1 | Q15_2 | Q15_3 | Q16_1 |
|--------|------|-----|-----------------|------|-----|----------------|------|-----|-------|------|-------|-------|-------|-------|
| 2095   |      | 2   | No              |      | 2   | No             |      | 2   | No    |      |       |       | 176   | 79    |
| 2097   | 1    | 2   | No              |      | 1   | Yes            | 2    | 2   | No    |      |       |       | 173   | 70    |
| 2099   | 1    | 2   | No              |      | 2   | No             |      | 2   | No    |      |       |       | 160   | 54    |
| 2100   |      | 2   | No              |      | 2   | No             |      | 2   | No    |      |       |       | 158   | 48    |
| 2101   |      | 2   | No              |      | 1   | Yes            | 2    | 2   | No    |      |       |       | 162   | 62    |
| 2103   |      | 2   | No              |      | 2   | No             |      | 2   | No    |      |       |       | 170   | 64    |
| 2104   | 1    | 2   | No              |      | 2   | No             |      | 2   | No    |      |       |       | 162   | 62    |
| 2106   |      | 2   | No              |      | 1   | Yes            | 2    | 2   | No    |      |       |       | 180   | 91    |
| 2111   |      | 2   | No              |      | 1   | Yes            | 2    | 2   | No    |      |       |       | 163   | 72    |
| 2113   | 1    | 2   | No              |      | 2   | No             |      | 2   | No    |      |       |       | 170   | 60    |
| 2115   |      | 2   | No              |      | 2   | No             |      | 2   | No    |      |       |       | 182   | 63    |
| 2119   | 1    | 2   | No              |      | 1   | Yes            | 2    | 2   | No    |      |       |       | 178   | 93    |
| 2120   |      | 2   | No              |      | 2   | No             |      | 2   | No    |      |       |       | 172   | 64    |
| 2123   |      | 2   | No              |      | 2   | No             |      | 2   | No    |      |       |       | 173   | 80    |
| 2124   |      | 2   | No              |      | 1   | Yes            | 1    | 2   | No    |      |       |       | 168   | 72    |
| 2130   |      | 2   | No              |      | 2   | No             |      | 2   | No    |      |       |       | 183   | 95    |
| 2131   |      | 2   | No              |      | 1   | Yes            | 2    | 2   | No    |      |       |       | 150   | 49    |
| 2133   | 1    | 2   | No              |      | 1   | Yes            | 1    | 2   | No    |      |       |       | 170   | 80    |
| 2139   | 1    | 2   | No              |      | 1   | Yes            | 1    | 1   | Yes   | 1    |       |       | 163   | 68    |
| 2141   |      | 2   | No              |      | 2   | No             |      | 2   | No    |      |       |       | 167   | 85    |
| 2143   |      | 2   | No              |      | 2   | No             |      | 2   | No    |      |       |       | 171   | 60    |
| 2144   |      | 2   | No              |      | 2   | No             |      | 2   | No    |      |       |       | 162   | 58    |
| 2147   |      | 2   | No              |      | 2   | No             |      | 2   | No    |      |       |       | 162   | 52    |
| 2151   |      | 2   | No              |      | 2   | No             |      | 2   | No    |      |       |       | 182   | 84    |
| 2153   |      | 2   | No              |      | 2   | No             |      | 2   | No    |      |       |       | 160   | 55    |
| 2154   |      | 2   | No              |      | 2   | No             |      | 2   | No    |      |       |       | 156   | 44    |
| 2155   | 2    | 2   | No              |      | 1   | Yes            | 2    | 2   | No    |      |       |       | 180   | 81    |
| 2159   |      | 2   | No              |      | 2   | No             |      | 2   | No    |      |       |       | 160   | 60    |
| 2160   |      | 2   | No              |      | 1   | Yes            | 2    | 2   | No    |      |       |       | 155   | 60    |
| 2161   | 1    | 2   | No              |      | 2   | No             |      | 2   | No    |      |       |       | 167   | 95    |
| 2163   |      | 2   | No              |      | 2   | No             |      | 2   | No    |      |       |       | 165   | 67    |
| 2164   |      | 2   | No              |      | 2   | No             |      | 2   | No    |      |       |       | 170   | 68    |

| respid | Q11a | Q12 | Cardiac Disease | Q12a | Q13 | Hyperlipidemia | Q13a | Q14 | Neuro | Q14a | Q15_1 | Q15_2 | Q15_3 | Q16_1 |
|--------|------|-----|-----------------|------|-----|----------------|------|-----|-------|------|-------|-------|-------|-------|
| 2168   |      | 2   | No              |      | 1   | Yes            | 2    | 2   | No    |      |       |       | 175   | 78    |
| 2169   |      | 2   | No              |      | 2   | No             |      | 1   | Yes   | 1    |       |       | 176   | 74    |
| 2170   | 2    | 2   | No              |      | 1   | Yes            | 2    | 2   | No    |      |       |       | 163   | 65    |
| 2171   |      | 2   | No              |      | 2   | No             |      | 2   | No    |      |       |       | 169   | 69    |
| 2172   |      | 2   | No              |      | 2   | No             |      | 2   | No    |      |       |       | 183   | 80    |
| 2173   |      | 2   | No              |      | 2   | No             |      | 2   | No    |      |       |       | 155   | 50    |
| 2174   |      | 2   | No              |      | 2   | No             |      | 2   | No    |      |       |       | 160   | 58    |
| 2175   | 2    | 2   | No              |      | 1   | Yes            | 2    | 2   | No    |      |       |       | 151   | 50    |
| 2176   |      | 1   | Yes             | 2    | 1   | Yes            | 2    | 2   | No    |      |       |       | 172   | 68    |
| 2177   | 1    | 1   | Yes             | 1    | 1   | Yes            | 1    | 2   | No    |      |       |       | 178   | 80    |
| 2179   |      | 2   | No              |      | 1   | Yes            | 2    | 2   | No    |      |       |       | 153   | 58    |
| 2181   |      | 2   | No              |      | 2   | No             |      | 2   | No    |      |       |       | 170   | 72    |
| 2182   | 1    | 2   | No              |      | 2   | No             |      | 2   | No    |      |       |       | 158   | 62    |
| 2183   |      | 2   | No              |      | 1   | Yes            | 2    | 2   | No    |      |       |       | 170   | 63    |
| 2184   |      | 2   | No              |      | 1   | Yes            | 2    | 2   | No    |      | 5     | 3     |       | 57    |
| 2185   |      | 2   | No              |      | 2   | No             |      | 2   | No    |      |       |       | 170   | 58    |
| 2186   |      | 2   | No              |      | 2   | No             |      | 2   | No    |      |       |       | 167   | 62    |
| 2187   |      | 2   | No              |      | 2   | No             |      | 2   | No    |      |       |       | 171   | 77    |
| 2188   |      | 2   | No              |      | 1   | Yes            | 2    | 2   | No    |      |       |       | 162   | 55    |
| 2189   |      | 2   | No              |      | 2   | No             |      | 2   | No    |      |       |       | 162   | 52    |
| 2190   |      | 2   | No              |      | 2   | No             |      | 2   | No    |      |       |       | 162   | 57    |
| 2193   | 2    | 2   | No              |      | 1   | Yes            | 2    | 2   | No    |      |       |       | 152   | 58    |
| 2195   |      | 2   | No              |      | 1   | Yes            | 2    | 2   | No    |      |       |       | 157   | 51    |
| 2198   |      | 2   | No              |      | 1   | Yes            | 2    | 2   | No    |      |       |       | 168   | 64    |
| 2200   |      | 2   | No              |      | 2   | No             |      | 2   | No    |      |       |       | 150   | 40    |
| 2205   |      | 2   | No              |      | 2   | No             |      | 2   | No    |      |       |       | 177   | 70    |
| 2208   |      | 2   | No              |      | 2   | No             |      | 2   | No    |      |       |       | 160   | 60    |
| 2209   | 1    | 2   | No              |      | 2   | No             |      | 2   | No    |      |       |       | 168   | 51    |
| 2210   | 1    | 2   | No              |      | 2   | No             |      | 2   | No    |      |       |       | 163   | 75    |
| 2211   |      | 2   | No              |      | 2   | No             |      | 2   | No    |      |       |       | 170   | 72    |
| 2213   |      | 2   | No              |      | 2   | No             |      | 2   | No    |      |       |       | 160   | 70    |
| 2214   |      | 2   | No              |      | 1   | Yes            | 2    | 2   | No    |      |       |       | 152   | 47    |

| respid | Q11a | Q12 | Cardiac Disease | Q12a | Q13 | Hyperlipidemia | Q13a | Q14 | Neuro | Q14a | Q15_1 | Q15_2 | Q15_3 | Q16_1 |
|--------|------|-----|-----------------|------|-----|----------------|------|-----|-------|------|-------|-------|-------|-------|
| 2216   | 1    | 2   | No              |      | 1   | Yes            | 1    | 2   | No    |      |       |       | 174   | 67    |
| 2220   | 2    | 2   | No              |      | 2   | No             |      | 2   | No    |      |       |       | 160   | 65    |
| 2225   |      | 2   | No              |      | 2   | No             |      | 2   | No    |      |       |       | 175   | 85    |
| 2227   | 1    | 2   | No              |      | 1   | Yes            | 2    | 2   | No    |      |       |       | 163   | 72    |
| 2228   | 1    | 2   | No              |      | 2   | No             |      | 2   | No    |      |       |       | 165   | 60    |
| 2229   | 1    | 2   | No              |      | 2   | No             |      | 2   | No    |      |       |       | 170   | 65    |
| 2230   |      | 2   | No              |      | 2   | No             |      | 2   | No    |      |       |       | 170   | 65    |
| 2236   |      | 2   | No              |      | 2   | No             |      | 2   | No    |      |       |       | 155   | 47    |
| 2238   |      | 2   | No              |      | 2   | No             |      | 2   | No    |      |       |       | 185   | 85    |
| 2239   |      | 2   | No              |      | 2   | No             |      | 2   | No    |      |       |       | 177   | 74    |
| 2240   |      | 2   | No              |      | 2   | No             |      | 2   | No    |      |       |       | 170   | 62    |
| 2241   | 1    | 1   | Yes             | 1    | 1   | Yes            | 1    | 2   | No    |      |       |       | 150   | 50    |
| 2243   |      | 2   | No              |      | 2   | No             |      | 2   | No    |      |       |       | 154   | 50    |
| 2245   |      | 2   | No              |      | 2   | No             |      | 2   | No    |      |       |       | 159   | 48    |
| 2247   | 2    | 2   | No              |      | 1   | Yes            | 1    | 2   | No    |      |       |       | 163   | 59    |
| 2248   |      | 2   | No              |      | 2   | No             |      | 2   | No    |      |       |       | 158   | 55    |
| 2249   | 1    | 2   | No              |      | 1   | Yes            | 2    | 2   | No    |      |       |       | 160   | 63    |
| 2254   |      | 2   | No              |      | 1   | Yes            | 1    | 2   | No    |      |       |       | 158   | 54    |
| 2256   |      | 2   | No              |      | 1   | Yes            | 2    | 2   | No    |      |       |       | 168   | 67    |
| 2259   | 1    | 2   | No              |      | 2   | No             |      | 2   | No    |      |       |       | 172   | 100   |
| 2261   | 1    | 2   | No              |      | 2   | No             |      | 2   | No    |      |       |       | 158   | 65    |
| 2262   |      | 2   | No              |      | 2   | No             |      | 2   | No    |      |       |       | 173   | 70    |
| 2263   |      | 2   | No              |      | 1   | Yes            | 2    | 2   | No    |      |       |       | 158   | 60    |
| 2264   |      | 2   | No              |      | 2   | No             |      | 2   | No    |      |       |       | 155   | 47    |
| 2265   |      | 2   | No              |      | 2   | No             |      | 2   | No    |      |       |       | 170   | 70    |
| 2270   |      | 2   | No              |      | 1   | Yes            | 2    | 1   | Yes   | 1    |       |       | 174   | 75    |
| 2271   | 2    | 2   | No              |      | 1   | Yes            | 2    | 2   | No    |      |       |       | 173   | 83    |
| 2272   |      | 2   | No              |      | 2   | No             |      | 2   | No    |      |       |       | 179   | 65    |
| 2273   |      | 1   | Yes             | 2    | 2   | No             |      | 2   | No    |      |       |       | 164   | 53    |
| 2274   |      | 2   | No              |      | 2   | No             |      | 2   | No    |      |       |       | 167   | 52    |
| 2276   |      | 2   | No              |      | 2   | No             |      | 2   | No    |      |       |       | 160   | 59    |
| 2277   |      | 1   | Yes             | 2    | 1   | Yes            | 2    | 2   | No    |      |       |       | 158   | 54    |

| respid | Q11a | Q12 | Cardiac Disease | Q12a | Q13 | Hyperlipidemia | Q13a | Q14 | Neuro | Q14a | Q15_1 | Q15_2 | Q15_3 | Q16_1 |
|--------|------|-----|-----------------|------|-----|----------------|------|-----|-------|------|-------|-------|-------|-------|
| 2281   |      | 2   | No              |      | 2   | No             |      | 2   | No    |      |       |       | 158   | 50    |
| 2288   |      | 2   | No              |      | 2   | No             |      | 2   | No    |      |       |       | 180   | 76    |
| 2290   |      | 2   | No              |      | 2   | No             |      | 2   | No    |      |       |       | 153   | 60    |
| 2294   | 1    | 2   | No              |      | 1   | Yes            | 1    | 2   | No    |      |       |       | 160   | 70    |
| 2295   |      | 2   | No              |      | 2   | No             |      | 2   | No    |      |       |       | 160   | 54    |
| 2296   | 1    | 2   | No              |      | 1   | Yes            | 1    | 2   | No    |      |       |       | 160   | 52    |
| 2297   |      | 2   | No              |      | 2   | No             |      | 2   | No    |      |       |       | 165   | 60    |
| 2298   |      | 2   | No              |      | 2   | No             |      | 2   | No    |      |       |       | 179   | 69    |
| 2301   |      | 2   | No              |      | 2   | No             |      | 2   | No    |      |       |       | 171   | 62    |
| 2302   |      | 2   | No              |      | 2   | No             |      | 2   | No    |      | 5     | 0     |       | 48    |
| 2303   |      | 2   | No              |      | 2   | No             |      | 2   | No    |      |       |       | 160   | 54    |
| 2305   | 1    | 2   | No              |      | 1   | Yes            | 2    | 2   | No    |      |       |       | 163   | 72    |
| 2309   |      | 2   | No              |      | 2   | No             |      | 2   | No    |      |       |       | 160   | 67    |
| 2310   |      | 2   | No              |      | 2   | No             |      | 2   | No    |      |       |       | 180   | 75    |
| 2311   |      | 2   | No              |      | 2   | No             |      | 2   | No    |      |       |       | 162   | 55    |
| 2313   |      | 2   | No              |      | 1   | Yes            | 2    | 2   | No    |      |       |       | 173   | 61    |
| 2316   |      | 2   | No              |      | 2   | No             |      | 2   | No    |      |       |       | 174   | 73    |
| 2317   |      | 2   | No              |      | 2   | No             |      | 2   | No    |      |       |       | 160   | 55    |
| 2318   | 2    | 2   | No              |      | 2   | No             |      | 2   | No    |      |       |       | 160   | 55    |
| 2319   |      | 2   | No              |      | 2   | No             |      | 2   | No    |      |       |       | 164   | 85    |
| 2321   |      | 2   | No              |      | 2   | No             |      | 2   | No    |      |       |       | 171   | 70    |
| 2324   |      | 2   | No              |      | 1   | Yes            | 2    | 2   | No    |      |       |       | 164   | 68    |
| 2328   |      | 2   | No              |      | 2   | No             |      | 2   | No    |      |       |       | 163   | 60    |
| 2329   |      | 2   | No              |      | 2   | No             |      | 2   | No    |      |       |       | 167   | 83    |
| 2330   | 1    | 2   | No              |      | 2   | No             |      | 2   | No    |      |       |       | 165   | 50    |
| 2333   |      | 2   | No              |      | 1   | Yes            | 2    | 2   | No    |      |       |       | 158   | 51    |
| 2334   |      | 2   | No              |      | 2   | No             |      | 2   | No    |      |       |       | 158   | 58    |
| 2338   |      | 2   | No              |      | 2   | No             |      | 2   | No    |      |       |       | 160   | 58    |
| 2341   |      | 2   | No              |      | 2   | No             |      | 2   | No    |      |       |       | 183   | 85    |
| 2342   |      | 2   | No              |      | 1   | Yes            | 2    | 2   | No    |      |       |       | 157   | 54    |
| 2343   |      | 2   | No              |      | 2   | No             |      | 2   | No    |      |       |       | 175   | 80    |
| 2346   |      | 2   | No              |      | 2   | No             |      | 2   | No    |      |       |       | 154   | 44    |

| respid | Q11a | Q12 | Cardiac Disease | Q12a | Q13 | Hyperlipidemia | Q13a | Q14 | Neuro | Q14a | Q15_1 | Q15_2 | Q15_3 | Q16_1 |
|--------|------|-----|-----------------|------|-----|----------------|------|-----|-------|------|-------|-------|-------|-------|
| 2347   | 1    | 2   | No              |      | 2   | No             |      | 2   | No    |      |       |       | 175   | 75    |
| 2348   |      | 2   | No              |      | 2   | No             |      | 2   | No    |      |       |       | 165   | 62    |
| 2349   |      | 2   | No              |      | 2   | No             |      | 2   | No    |      |       |       | 158   | 60    |
| 2350   |      | 2   | No              |      | 2   | No             |      | 2   | No    |      |       |       | 167   | 66    |
| 2351   |      | 2   | No              |      | 2   | No             |      | 2   | No    |      |       |       | 168   | 64    |
| 2352   | 1    | 2   | No              |      | 2   | No             |      | 2   | No    |      |       |       | 168   | 69    |
| 2359   |      | 2   | No              |      | 1   | Yes            | 2    | 2   | No    |      |       |       | 180   | 80    |
| 2362   |      | 2   | No              |      | 2   | No             |      | 2   | No    |      |       |       | 183   | 72    |
| 2363   |      | 2   | No              |      | 2   | No             |      | 2   | No    |      |       |       | 160   | 56    |
| 2365   |      | 2   | No              |      | 2   | No             |      | 2   | No    |      |       |       | 160   | 55    |
| 2367   | 1    | 2   | No              |      | 1   | Yes            | 2    | 2   | No    |      |       |       | 178   | 85    |
| 2368   | 2    | 2   | No              |      | 2   | No             |      | 2   | No    |      |       |       | 162   | 70    |
| 2369   | 1    | 2   | No              |      | 2   | No             |      | 2   | No    |      |       |       | 177   | 85    |
| 2372   |      | 2   | No              |      | 2   | No             |      | 2   | No    |      |       |       | 158   | 50    |
| 2374   | 2    | 2   | No              |      | 1   | Yes            | 2    | 2   | No    |      |       |       | 160   | 50    |
| 2376   |      | 2   | No              |      | 2   | No             |      | 2   | No    |      |       |       | 170   | 70    |
| 2379   | 1    | 2   | No              |      | 2   | No             |      | 2   | No    |      |       |       | 170   | 65    |
| 2380   | 1    | 2   | No              |      | 1   | Yes            | 1    | 2   | No    |      |       |       | 163   | 73    |
| 2381   |      | 2   | No              |      | 1   | Yes            | 1    | 2   | No    |      |       |       | 154   | 47    |
| 2382   |      | 2   | No              |      | 1   | Yes            | 1    | 2   | No    |      |       |       | 171   | 72    |
| 2385   |      | 2   | No              |      | 2   | No             |      | 2   | No    |      |       |       | 165   | 53    |
| 2387   |      | 2   | No              |      | 1   | Yes            | 2    | 2   | No    |      |       |       | 168   | 58    |
| 2388   | 1    | 2   | No              |      | 1   | Yes            | 1    | 2   | No    |      |       |       | 175   | 75    |
| 2389   | 1    | 2   | No              |      | 1   | Yes            | 1    | 2   | No    |      |       |       | 167   | 90    |
| 2391   |      | 2   | No              |      | 1   | Yes            | 2    | 2   | No    |      |       |       | 150   | 50    |
| 2392   |      | 2   | No              |      | 2   | No             |      | 2   | No    |      |       |       | 173   | 61    |
| 2393   |      | 2   | No              |      | 2   | No             |      | 2   | No    |      |       |       | 168   | 65    |
| 2394   |      | 2   | No              |      | 1   | Yes            | 2    | 2   | No    |      |       |       | 163   | 58    |
| 2397   |      | 2   | No              |      | 2   | No             |      | 2   | No    |      |       |       | 165   | 65    |
| 2398   |      | 2   | No              |      | 2   | No             |      | 2   | No    |      |       |       | 155   | 45    |
| 2400   |      | 2   | No              |      | 2   | No             |      | 2   | No    |      |       |       | 172   | 67    |
| 2402   |      | 2   | No              |      | 2   | No             |      | 2   | No    |      |       |       | 162   | 49    |

| respid | Q11a | Q12 | Cardiac Disease | Q12a | Q13 | Hyperlipidemia | Q13a | Q14 | Neuro | Q14a | Q15_1 | Q15_2 | Q15_3 | Q16_1 |
|--------|------|-----|-----------------|------|-----|----------------|------|-----|-------|------|-------|-------|-------|-------|
| 2406   |      | 2   | No              |      | 1   | Yes            | 2    | 2   | No    |      |       |       | 170   | 70    |
| 2408   |      | 2   | No              |      | 2   | No             |      | 2   | No    |      |       |       | 160   | 68    |
| 2410   | 2    | 2   | No              |      | 2   | No             |      | 2   | No    |      |       |       | 170   | 61    |
| 2411   | 1    | 2   | No              |      | 1   | Yes            | 1    | 2   | No    |      |       |       | 170   | 70    |
| 2412   |      | 2   | No              |      | 2   | No             |      | 2   | No    |      |       |       | 172   | 70    |
| 2414   | 1    | 2   | No              |      | 2   | No             |      | 2   | No    |      |       |       | 160   | 60    |
| 2421   |      | 2   | No              |      | 2   | No             |      | 2   | No    |      |       |       | 162   | 49    |
| 2423   |      | 2   | No              |      | 1   | Yes            | 2    | 2   | No    |      |       |       | 167   | 75    |
| 2424   | 1    | 2   | No              |      | 1   | Yes            | 1    | 2   | No    |      |       |       | 173   | 79    |
| 2425   | 2    | 2   | No              |      | 2   | No             |      | 2   | No    |      |       |       | 157   | 57    |
| 2426   | 1    | 2   | No              |      | 1   | Yes            | 1    | 2   | No    |      |       |       | 175   | 67    |
| 2429   | 2    | 2   | No              |      | 1   | Yes            | 1    | 2   | No    |      |       |       | 162   | 65    |
| 2430   | 1    | 2   | No              |      | 1   | Yes            | 2    | 2   | No    |      |       |       | 169   | 65    |
| 2432   |      | 2   | No              |      | 2   | No             |      | 2   | No    |      |       |       | 177   | 84    |
| 2433   |      | 2   | No              |      | 2   | No             |      | 2   | No    |      |       |       | 163   | 58    |
| 2434   |      | 2   | No              |      | 1   | Yes            | 2    | 2   | No    |      |       |       | 165   | 62    |
| 2435   |      | 2   | No              |      | 2   | No             |      | 2   | No    |      |       |       | 160   | 58    |
| 2436   |      | 2   | No              |      | 2   | No             |      | 2   | No    |      |       |       | 150   | 60    |
| 2439   |      | 2   | No              |      | 2   | No             |      | 2   | No    |      |       |       | 156   | 51    |
| 2440   | 1    | 2   | No              |      | 2   | No             |      | 2   | No    |      |       |       | 169   | 67    |
| 2441   |      | 2   | No              |      | 2   | No             |      | 2   | No    |      |       |       | 172   | 76    |
| 2446   |      | 2   | No              |      | 1   | Yes            | 2    | 2   | No    |      |       |       | 170   | 72    |
| 2448   |      | 2   | No              |      | 2   | No             |      | 2   | No    |      |       |       | 175   | 80    |
| 2449   |      | 2   | No              |      | 1   | Yes            | 2    | 2   | No    |      |       |       | 172   | 76    |
| 2451   | 1    | 2   | No              |      | 2   | No             |      | 2   | No    |      |       |       | 176   | 76    |
| 2452   | 1    | 2   | No              |      | 1   | Yes            | 2    | 2   | No    |      |       |       | 169   | 72    |
| 2455   | 1    | 2   | No              |      | 2   | No             |      | 2   | No    |      |       |       | 174   | 73    |
| 2457   |      | 2   | No              |      | 2   | No             |      | 2   | No    |      |       |       | 158   | 42    |
| 2458   |      | 2   | No              |      | 2   | No             |      | 2   | No    |      |       |       | 159   | 53    |
| 2459   |      | 2   | No              |      | 2   | No             |      | 2   | No    |      |       |       | 164   | 60    |
| 2460   |      | 2   | No              |      | 2   | No             |      | 2   | No    |      |       |       | 172   | 63    |
| 2462   | 1    | 1   | Yes             | 1    | 1   | Yes            | 1    | 1   | Yes   | 2    |       |       | 165   | 50    |



| respid | Q11a | Q12 | Cardiac Disease | Q12a | Q13 | Hyperlipidemia | Q13a | Q14 | Neuro | Q14a | Q15_1 | Q15_2 | Q15_3 | Q16_1 |
|--------|------|-----|-----------------|------|-----|----------------|------|-----|-------|------|-------|-------|-------|-------|
| 2464   | 1    | 2   | No              |      | 1   | Yes            | 2    | 2   | No    |      |       |       | 174   | 65    |
| 2465   |      | 2   | No              |      | 1   | Yes            | 2    | 2   | No    |      |       |       | 156   | 53    |
| 2468   | 2    | 2   | No              |      | 1   | Yes            | 2    | 2   | No    |      |       |       | 156   | 49    |
| 2469   | 2    | 2   | No              |      | 1   | Yes            | 2    | 2   | No    |      |       |       | 165   | 57    |
| 2470   |      | 2   | No              |      | 2   | No             |      | 2   | No    |      |       |       | 165   | 53    |
| 2471   | 1    | 2   | No              |      | 1   | Yes            | 1    | 2   | No    |      |       |       | 167   | 80    |
| 2472   | 2    | 2   | No              |      | 2   | No             |      | 2   | No    |      |       |       | 179   | 98    |
| 2474   |      | 2   | No              |      | 2   | No             |      | 2   | No    |      |       |       | 163   | 68    |
| 2476   |      | 2   | No              |      | 2   | No             |      | 2   | No    |      |       |       | 183   | 88    |
| 2478   |      | 2   | No              |      | 2   | No             |      | 2   | No    |      |       |       | 178   | 87    |
| 2479   | 1    | 2   | No              |      | 1   | Yes            | 1    | 2   | No    |      |       |       | 167   | 75    |
| 2480   |      | 2   | No              |      | 1   | Yes            | 1    | 2   | No    |      |       |       | 170   | 62    |
| 2482   | 2    | 2   | No              |      | 2   | No             |      | 2   | No    |      |       |       | 171   | 53    |
| 2486   |      | 2   | No              |      | 2   | No             |      | 2   | No    |      |       |       | 164   | 49    |
| 2488   |      | 1   | Yes             | 1    | 2   | No             |      | 2   | No    |      |       |       | 150   | 46    |
| 2489   |      | 2   | No              |      | 1   | Yes            | 2    | 2   | No    |      |       |       | 160   | 52    |
| 2491   |      | 2   | No              |      | 2   | No             |      | 2   | No    |      |       |       | 175   | 75    |
| 2495   | 1    | 2   | No              |      | 2   | No             |      | 2   | No    |      |       |       | 176   | 74    |
| 2496   |      | 2   | No              |      | 1   | Yes            | 1    | 2   | No    |      |       |       | 170   | 67    |
| 2498   |      | 2   | No              |      | 2   | No             |      | 2   | No    |      |       |       | 155   | 43    |
| 2501   |      | 2   | No              |      | 2   | No             |      | 2   | No    |      |       |       | 165   | 65    |
| 2502   |      | 2   | No              |      | 2   | No             |      | 2   | No    |      |       |       | 178   | 65    |
| 2503   | 1    | 1   | Yes             | 1    | 2   | No             |      | 2   | No    |      |       |       | 165   | 76    |
| 2504   |      | 2   | No              |      | 2   | No             |      | 2   | No    |      |       |       | 174   | 70    |
| 2507   |      | 2   | No              |      | 2   | No             |      | 2   | No    |      |       |       | 160   | 55    |
| 2509   |      | 2   | No              |      | 1   | Yes            | 2    | 2   | No    |      |       |       | 152   | 62    |
| 2512   |      | 2   | No              |      | 1   | Yes            | 2    | 2   | No    |      |       |       | 164   | 63    |
| 2514   |      | 2   | No              |      | 1   | Yes            | 2    | 2   | No    |      |       |       | 172   | 78    |
| 2516   | 1    | 2   | No              |      | 2   | No             |      | 2   | No    |      |       |       | 171   | 70    |
| 2517   |      | 2   | No              |      | 1   | Yes            | 2    | 2   | No    |      |       |       | 173   | 85    |
| 2521   |      | 2   | No              |      | 2   | No             |      | 2   | No    |      |       |       | 163   | 77    |
| 2522   |      | 2   | No              |      | 2   | No             |      | 2   | No    |      |       |       | 170   | 60    |

| respid | Q11a | Q12 | Cardiac Disease | Q12a | Q13 | Hyperlipidemia | Q13a | Q14 | Neuro | Q14a | Q15_1 | Q15_2 | Q15_3 | Q16_1 |
|--------|------|-----|-----------------|------|-----|----------------|------|-----|-------|------|-------|-------|-------|-------|
| 2524   |      | 2   | No              |      | 2   | No             |      | 2   | No    |      |       |       | 168   | 70    |
| 2525   |      | 2   | No              |      | 2   | No             |      | 2   | No    |      |       |       | 154   | 53    |
| 2526   |      | 2   | No              |      | 1   | Yes            | 2    | 2   | No    |      |       |       | 178   | 86    |
| 2527   |      | 2   | No              |      | 2   | No             |      | 2   | No    |      | 5     | 2     |       | 58    |
| 2528   |      | 1   | Yes             | 2    | 2   | No             |      | 2   | No    |      |       |       | 163   | 52    |
| 2531   |      | 2   | No              |      | 2   | No             |      | 2   | No    |      |       |       | 160   | 60    |
| 2533   | 1    | 2   | No              |      | 2   | No             |      | 2   | No    |      |       |       | 172   | 78    |
| 2535   |      | 2   | No              |      | 2   | No             |      | 2   | No    |      |       |       | 176   | 70    |
| 2536   |      | 2   | No              |      | 2   | No             |      | 2   | No    |      |       |       | 170   | 65    |
| 2539   |      | 2   | No              |      | 2   | No             |      | 2   | No    |      |       |       | 166   | 57    |
| 2540   | 2    | 2   | No              |      | 2   | No             |      | 2   | No    |      |       |       | 170   | 68    |
| 2543   |      | 2   | No              |      | 1   | Yes            | 2    | 2   | No    |      |       |       | 168   | 100   |
| 2546   |      | 2   | No              |      | 2   | No             |      | 2   | No    |      |       |       | 157   | 43    |
| 2547   | 2    | 2   | No              |      | 1   | Yes            | 2    | 2   | No    |      |       |       | 156   | 70    |
| 2549   |      | 2   | No              |      | 1   | Yes            | 2    | 2   | No    |      |       |       | 162   | 72    |
| 2553   |      | 2   | No              |      | 2   | No             |      | 2   | No    |      |       |       | 173   | 88    |
| 2554   |      | 2   | No              |      | 2   | No             |      | 2   | No    |      |       |       | 164   | 57    |
| 2555   |      | 2   | No              |      | 1   | Yes            | 2    | 2   | No    |      |       |       | 172   | 85    |
| 2556   | 2    | 2   | No              |      | 1   | Yes            | 2    | 2   | No    |      |       |       | 171   | 69    |
| 2557   |      | 2   | No              |      | 2   | No             |      | 2   | No    |      |       |       | 160   | 55    |
| 2559   |      | 2   | No              |      | 2   | No             |      | 2   | No    |      |       |       | 175   | 65    |
| 2560   | 1    | 2   | No              |      | 1   | Yes            | 2    | 2   | No    |      |       |       | 160   | 60    |
| 2561   |      | 2   | No              |      | 2   | No             |      | 2   | No    |      |       |       | 170   | 70    |
| 2566   | 1    | 2   | No              |      | 1   | Yes            | 2    | 2   | No    |      |       |       | 177   | 70    |
| 2567   | 1    | 2   | No              |      | 2   | No             |      | 2   | No    |      |       |       | 151   | 60    |
| 2570   |      | 2   | No              |      | 2   | No             |      | 2   | No    |      |       |       | 172   | 70    |
| 2574   |      | 2   | No              |      | 2   | No             |      | 2   | No    |      |       |       | 151   | 40    |
| 2578   |      | 1   | Yes             | 2    | 2   | No             |      | 2   | No    |      |       |       | 169   | 62    |
| 2580   |      | 2   | No              |      | 1   | Yes            | 2    | 2   | No    |      |       |       | 172   | 76    |
| 2590   | 1    | 2   | No              |      | 2   | No             |      | 2   | No    |      |       |       | 168   | 70    |
| 2593   |      | 2   | No              |      | 2   | No             |      | 2   | No    |      |       |       | 178   | 66    |
| 2594   |      | 2   | No              |      | 1   | Yes            | 2    | 2   | No    |      |       |       | 170   | 68    |

| respid | Q11a | Q12 | Cardiac Disease | Q12a | Q13 | Hyperlipidemia | Q13a | Q14 | Neuro | Q14a | Q15_1 | Q15_2 | Q15_3 | Q16_1 |
|--------|------|-----|-----------------|------|-----|----------------|------|-----|-------|------|-------|-------|-------|-------|
| 2595   |      | 2   | No              |      | 2   | No             |      | 2   | No    |      |       |       | 169   | 70    |
| 2596   |      | 2   | No              |      | 2   | No             |      | 2   | No    |      |       |       | 168   | 61    |
| 2597   |      | 2   | No              |      | 2   | No             |      | 2   | No    |      |       |       | 171   | 62    |
| 2598   |      | 2   | No              |      | 2   | No             |      | 2   | No    |      |       |       | 168   | 65    |
| 2602   |      | 2   | No              |      | 2   | No             |      | 2   | No    |      |       |       | 155   | 44    |
| 2605   | 1    | 1   | Yes             | 1    | 1   | Yes            | 1    | 2   | No    |      |       |       | 170   | 78    |
| 2606   |      | 2   | No              |      | 1   | Yes            | 2    | 2   | No    |      |       |       | 171   | 70    |
| 2607   |      | 2   | No              |      | 2   | No             |      | 2   | No    |      |       |       | 160   | 48    |
| 2608   |      | 2   | No              |      | 2   | No             |      | 2   | No    |      |       |       | 182   | 78    |
| 2609   |      | 2   | No              |      | 2   | No             |      | 2   | No    |      |       |       | 170   | 65    |
| 2610   |      | 2   | No              |      | 1   | Yes            | 2    | 2   | No    |      |       |       | 156   | 62    |
| 2614   |      | 2   | No              |      | 2   | No             |      | 2   | No    |      |       |       | 170   | 69    |
| 2615   | 1    | 2   | No              |      | 2   | No             |      | 2   | No    |      |       |       | 178   | 90    |
| 2616   |      | 2   | No              |      | 1   | Yes            | 1    | 2   | No    |      |       |       | 168   | 58    |
| 2618   |      | 2   | No              |      | 2   | No             |      | 2   | No    |      |       |       | 174   | 65    |
| 2630   | 1    | 1   | Yes             | 2    | 2   | No             |      | 1   | Yes   | 1    |       |       | 175   | 40    |
| 2633   |      | 2   | No              |      | 1   | Yes            | 1    | 2   | No    |      | 5     | 8     |       | 72    |
| 2637   |      | 2   | No              |      | 2   | No             |      | 2   | No    |      |       |       | 168   | 58    |
| 2638   |      | 2   | No              |      | 1   | Yes            | 2    | 2   | No    |      |       |       | 167   | 53    |
| 2641   |      | 2   | No              |      | 2   | No             |      | 2   | No    |      | 5     | 4     |       | 55    |
| 2644   |      | 2   | No              |      | 2   | No             |      | 2   | No    |      |       |       | 161   | 52    |
| 2645   |      | 1   | Yes             | 1    | 1   | Yes            | 1    | 2   | No    |      | 5     | 5     |       |       |
| 2646   |      | 2   | No              |      | 2   | No             |      | 2   | No    |      |       |       | 168   | 65    |
| 2648   |      | 2   | No              |      | 2   | No             |      | 2   | No    |      |       |       | 180   | 70    |
| 2651   |      | 2   | No              |      | 2   | No             |      | 2   | No    |      |       |       | 175   | 80    |
| 2652   |      | 2   | No              |      | 1   | Yes            | 2    | 2   | No    |      |       |       | 165   | 70    |
| 2653   | 1    | 2   | No              |      | 1   | Yes            | 2    | 2   | No    |      |       |       | 178   | 94    |
| 2656   | 1    | 2   | No              |      | 2   | No             |      | 2   | No    |      |       |       | 171   | 84    |
| 2657   |      | 2   | No              |      | 2   | No             |      | 2   | No    |      |       |       | 187   | 84    |
| 2658   |      | 2   | No              |      | 1   | Yes            | 1    | 2   | No    |      |       |       | 165   | 59    |
| 2661   |      | 2   | No              |      | 2   | No             |      | 1   | Yes   | 2    | 5     | 0     |       | 45    |
| 2663   |      | 2   | No              |      | 1   | Yes            | 2    | 2   | No    |      |       |       | 172   | 60    |

| respid | Q11a | Q12 | Cardiac Disease | Q12a | Q13 | Hyperlipidemia | Q13a | Q14 | Neuro | Q14a | Q15_1 | Q15_2 | Q15_3 | Q16_1 |
|--------|------|-----|-----------------|------|-----|----------------|------|-----|-------|------|-------|-------|-------|-------|
| 2665   | 1    | 2   | No              |      | 1   | Yes            | 1    | 2   | No    |      |       |       | 165   | 62    |
| 2670   | 1    | 2   | No              |      | 2   | No             |      | 2   | No    |      |       |       | 168   | 66    |
| 2672   |      | 2   | No              |      | 2   | No             |      | 2   | No    |      |       |       | 179   | 78    |
| 2673   |      | 2   | No              |      | 2   | No             |      | 2   | No    |      |       |       | 175   | 70    |
| 2677   |      | 2   | No              |      | 2   | No             |      | 2   | No    |      |       |       | 172   | 65    |
| 2686   | 1    | 2   | No              |      | 2   | No             |      | 2   | No    |      |       |       | 178   | 75    |
| 2688   | 1    | 2   | No              |      | 1   | Yes            | 2    | 2   | No    |      |       |       | 172   | 76    |
| 2689   |      | 2   | No              |      | 2   | No             |      | 2   | No    |      |       |       | 171   | 71    |
| 2691   | 2    | 2   | No              |      | 1   | Yes            | 2    | 2   | No    |      |       |       | 172   | 85    |
| 2695   |      | 2   | No              |      | 2   | No             |      | 2   | No    |      |       |       | 170   | 68    |
| 2696   |      | 2   | No              |      | 1   | Yes            | 2    | 2   | No    |      |       |       | 167   | 56    |
| 2697   |      | 2   | No              |      | 2   | No             |      | 2   | No    |      |       |       | 181   | 87    |
| 2698   |      | 2   | No              |      | 1   | Yes            | 2    | 2   | No    |      |       |       | 170   | 85    |
| 2703   |      | 2   | No              |      | 1   | Yes            | 2    | 2   | No    |      |       |       | 166   | 74    |
| 2704   |      | 2   | No              |      | 2   | No             |      | 2   | No    |      |       |       | 165   | 50    |
| 2706   |      | 2   | No              |      | 2   | No             |      | 2   | No    |      |       |       | 180   | 70    |
| 2707   |      | 2   | No              |      | 1   | Yes            | 2    | 2   | No    |      |       |       | 160   | 70    |
| 2710   |      | 2   | No              |      | 2   | No             |      | 2   | No    |      |       |       | 171   | 95    |
| 2711   |      | 2   | No              |      | 2   | No             |      | 2   | No    |      |       |       | 158   | 50    |
| 2712   |      | 2   | No              |      | 1   | Yes            | 2    | 2   | No    |      |       |       | 171   | 65    |
| 2713   |      | 2   | No              |      | 2   | No             |      | 2   | No    |      |       |       | 178   | 75    |
| 2721   | 2    | 2   | No              |      | 2   | No             |      | 2   | No    |      |       |       | 170   | 85    |
| 2730   |      | 2   | No              |      | 2   | No             |      | 2   | No    |      |       |       | 158   | 53    |
| 2731   | 1    | 2   | No              |      | 1   | Yes            | 2    | 2   | No    |      |       |       | 174   | 88    |
| 2732   |      | 2   | No              |      | 2   | No             |      | 2   | No    |      |       |       | 162   | 63    |
| 2733   |      | 2   | No              |      | 2   | No             |      | 2   | No    |      |       |       | 173   | 63    |
| 2735   |      | 2   | No              |      | 2   | No             |      | 2   | No    |      |       |       | 143   | 43    |
| 2736   |      | 2   | No              |      | 2   | No             |      | 2   | No    |      |       |       | 163   | 53    |
| 2740   | 2    | 2   | No              |      | 2   | No             |      | 2   | No    |      |       |       | 168   | 60    |
| 2741   |      | 2   | No              |      | 2   | No             |      | 2   | No    |      |       |       | 170   | 67    |
| 2742   |      | 2   | No              |      | 1   | Yes            | 1    | 2   | No    |      |       |       | 172   | 75    |
| 2743   |      | 1   | Yes             | 1    | 2   | No             |      | 2   | No    |      |       |       | 164   | 68    |

| respid | Q11a | Q12 | Cardiac Disease | Q12a | Q13 | Hyperlipidemia | Q13a | Q14 | Neuro | Q14a | Q15_1 | Q15_2 | Q15_3 | Q16_1 |
|--------|------|-----|-----------------|------|-----|----------------|------|-----|-------|------|-------|-------|-------|-------|
| 2744   | 2    | 2   | No              |      | 2   | No             |      | 2   | No    |      |       |       | 173   | 63    |
| 2745   |      | 2   | No              |      | 2   | No             |      | 2   | No    |      |       |       | 160   | 42    |
| 2749   |      | 2   | No              |      | 2   | No             |      | 2   | No    |      |       |       | 161   | 73    |
| 2751   |      | 2   | No              |      | 1   | Yes            | 2    | 2   | No    |      |       |       | 167   | 52    |
| 2754   |      | 2   | No              |      | 2   | No             |      | 2   | No    |      |       |       | 169   | 56    |
| 2755   |      | 2   | No              |      | 2   | No             |      | 2   | No    |      |       |       | 178   | 80    |
| 2757   |      | 2   | No              |      | 2   | No             |      | 2   | No    |      |       |       | 170   | 60    |
| 2758   |      | 1   | Yes             | 1    | 1   | Yes            | 1    | 2   | No    |      |       |       | 173   | 69    |
| 2759   |      | 2   | No              |      | 1   | Yes            | 2    | 2   | No    |      |       |       | 175   | 60    |
| 2761   |      | 2   | No              |      | 2   | No             |      | 2   | No    |      |       |       | 158   | 58    |
| 2762   |      | 2   | No              |      | 2   | No             |      | 2   | No    |      |       |       | 166   | 65    |
| 2763   |      | 2   | No              |      | 2   | No             |      | 2   | No    |      |       |       | 159   | 52    |
| 2764   | 2    | 2   | No              |      | 2   | No             |      | 2   | No    |      |       |       | 180   | 89    |
| 2765   |      | 2   | No              |      | 2   | No             |      | 2   | No    |      |       |       | 160   | 58    |
| 2766   | 1    | 2   | No              |      | 1   | Yes            | 2    | 2   | No    |      |       |       | 171   | 62    |
| 2767   | 2    | 2   | No              |      | 1   | Yes            | 2    | 2   | No    |      |       |       | 170   | 80    |
| 2769   |      | 2   | No              |      | 1   | Yes            | 2    | 2   | No    |      |       |       | 163   | 60    |
| 2770   | 1    | 2   | No              |      | 1   | Yes            | 2    | 2   | No    |      |       |       | 167   | 63    |
| 2771   |      | 2   | No              |      | 2   | No             |      | 2   | No    |      |       |       | 155   | 70    |
| 2774   |      | 2   | No              |      | 2   | No             |      | 2   | No    |      |       |       | 168   | 79    |
| 2777   |      | 2   | No              |      | 2   | No             |      | 2   | No    |      |       |       | 162   | 55    |
| 2778   |      | 2   | No              |      | 1   | Yes            | 2    | 2   | No    |      |       |       | 183   | 106   |
| 2781   | 2    | 2   | No              |      | 1   | Yes            | 2    | 2   | No    |      |       |       | 181   | 97    |
| 2782   |      | 2   | No              |      | 1   | Yes            | 2    | 2   | No    |      |       |       | 174   | 60    |
| 2784   |      | 2   | No              |      | 2   | No             |      | 2   | No    |      |       |       | 165   | 55    |
| 2785   |      | 2   | No              |      | 2   | No             |      | 2   | No    |      |       |       | 167   | 45    |
| 2786   |      | 2   | No              |      | 2   | No             |      | 2   | No    |      |       |       | 160   | 65    |
| 2787   |      | 2   | No              |      | 2   | No             |      | 2   | No    |      |       |       | 164   | 56    |
| 2789   |      | 2   | No              |      | 1   | Yes            | 2    | 2   | No    |      |       |       | 160   | 58    |
| 2790   |      | 2   | No              |      | 2   | No             |      | 2   | No    |      |       |       | 163   | 56    |
| 2791   |      | 2   | No              |      | 2   | No             |      | 2   | No    |      |       |       | 161   | 46    |
| 2793   |      | 2   | No              |      | 2   | No             |      | 2   | No    |      |       |       | 175   | 64    |

| respid | Q11a | Q12 | Cardiac Disease | Q12a | Q13 | Hyperlipidemia | Q13a | Q14 | Neuro | Q14a | Q15_1 | Q15_2 | Q15_3 | Q16_1 |
|--------|------|-----|-----------------|------|-----|----------------|------|-----|-------|------|-------|-------|-------|-------|
| 2797   |      | 2   | No              |      | 2   | No             |      | 2   | No    |      |       |       | 165   | 58    |
| 2798   |      | 2   | No              |      | 2   | No             |      | 2   | No    |      |       |       | 175   | 70    |
| 2799   |      | 2   | No              |      | 1   | Yes            | 1    | 2   | No    |      |       |       | 176   | 74    |
| 2801   | 1    | 2   | No              |      | 1   | Yes            | 1    | 2   | No    |      |       |       | 171   | 63    |
| 2802   | 1    | 2   | No              |      | 1   | Yes            | 1    | 2   | No    |      |       |       | 160   | 68    |
| 2803   |      | 2   | No              |      | 2   | No             |      | 2   | No    |      |       |       | 168   | 58    |
| 2804   |      | 1   | Yes             | 2    | 1   | Yes            | 2    | 2   | No    |      |       |       | 160   | 50    |
| 2807   |      | 2   | No              |      | 2   | No             |      | 2   | No    |      |       |       | 185   | 75    |
| 2809   |      | 2   | No              |      | 2   | No             |      | 2   | No    |      |       |       | 158   | 50    |
| 2810   | 2    | 1   | Yes             | 2    | 1   | Yes            | 1    | 2   | No    |      |       |       | 163   | 50    |
| 2812   |      | 2   | No              |      | 2   | No             |      | 2   | No    |      |       |       | 181   | 92    |
| 2814   |      | 2   | No              |      | 2   | No             |      | 2   | No    |      |       |       | 165   | 63    |
| 2815   | 1    | 2   | No              |      | 1   | Yes            | 1    | 2   | No    |      |       |       | 174   | 85    |
| 2816   |      | 2   | No              |      | 2   | No             |      | 2   | No    |      |       |       | 169   | 62    |
| 2817   |      | 2   | No              |      | 2   | No             |      | 2   | No    |      |       |       | 179   | 70    |
| 2819   | 2    | 2   | No              |      | 1   | Yes            | 2    | 2   | No    |      |       |       | 178   | 75    |
| 2820   |      | 2   | No              |      | 2   | No             |      | 2   | No    |      |       |       | 165   | 64    |
| 2821   |      | 2   | No              |      | 2   | No             |      | 2   | No    |      |       |       | 160   | 65    |
| 2822   |      | 2   | No              |      | 2   | No             |      | 2   | No    |      |       |       | 155   | 48    |
| 2823   |      | 2   | No              |      | 2   | No             |      | 2   | No    |      |       |       | 171   | 74    |
| 2824   |      | 2   | No              |      | 2   | No             |      | 2   | No    |      |       |       | 162   | 51    |
| 2825   |      | 2   | No              |      | 2   | No             |      | 2   | No    |      |       |       | 172   | 78    |
| 2826   |      | 2   | No              |      | 2   | No             |      | 2   | No    |      |       |       | 163   | 51    |
| 2827   |      | 2   | No              |      | 2   | No             |      | 2   | No    |      |       |       | 165   | 56    |
| 2828   | 2    | 1   | Yes             | 1    | 1   | Yes            | 1    | 2   | No    |      |       |       | 170   | 66    |
| 2829   |      | 2   | No              |      | 2   | No             |      | 2   | No    |      |       |       | 172   | 64    |
| 2830   |      | 2   | No              |      | 2   | No             |      | 2   | No    |      |       |       | 170   | 63    |
| 2831   |      | 2   | No              |      | 1   | Yes            | 2    | 2   | No    |      |       |       | 173   | 79    |
| 2832   |      | 2   | No              |      | 2   | No             |      | 2   | No    |      |       |       | 165   | 75    |
| 2833   |      | 2   | No              |      | 2   | No             |      | 2   | No    |      |       |       | 157   | 60    |
| 2834   |      | 2   | No              |      | 2   | No             |      | 2   | No    |      |       |       | 174   | 78    |
| 2835   | 2    | 1   | Yes             | 1    | 1   | Yes            | 2    | 1   | Yes   | 2    |       |       | 175   | 75    |

| respid | Q11a | Q12 | Cardiac Disease | Q12a | Q13 | Hyperlipidemia | Q13a | Q14 | Neuro | Q14a | Q15_1 | Q15_2 | Q15_3 | Q16_1 |
|--------|------|-----|-----------------|------|-----|----------------|------|-----|-------|------|-------|-------|-------|-------|
| 2836   |      | 2   | No              |      | 2   | No             |      | 2   | No    |      |       |       | 172   | 86    |
| 2837   | 1    | 2   | No              |      | 1   | Yes            | 1    | 2   | No    |      |       |       | 168   | 70    |
| 2838   |      | 2   | No              |      | 2   | No             |      | 2   | No    |      |       |       | 156   | 59    |
| 2844   | 1    | 2   | No              |      | 1   | Yes            | 1    | 2   | No    |      |       |       | 156   | 53    |
| 2845   |      | 2   | No              |      | 1   | Yes            | 2    | 2   | No    |      |       |       | 173   | 65    |
| 2847   |      | 1   | Yes             | 2    | 2   | No             |      | 2   | No    |      |       |       | 155   | 60    |
| 2848   |      | 2   | No              |      | 1   | Yes            | 2    | 2   | No    |      |       |       | 171   | 64    |
| 2849   |      | 2   | No              |      | 2   | No             |      | 2   | No    |      |       |       | 169   | 67    |
| 2851   |      | 1   | Yes             | 2    | 2   | No             |      | 2   | No    |      |       |       | 154   | 53    |
| 2852   | 2    | 2   | No              |      | 1   | Yes            | 2    | 2   | No    |      |       |       | 161   | 60    |
| 2853   |      | 2   | No              |      | 2   | No             |      | 2   | No    |      |       |       | 157   | 45    |
| 2854   |      | 2   | No              |      | 2   | No             |      | 2   | No    |      |       |       | 171   | 55    |
| 2856   |      | 2   | No              |      | 2   | No             |      | 2   | No    |      |       |       | 177   | 75    |
| 2857   | 1    | 2   | No              |      | 1   | Yes            | 1    | 2   | No    |      |       |       | 173   | 80    |
| 2858   |      | 2   | No              |      | 2   | No             |      | 2   | No    |      |       |       | 174   | 70    |
| 2859   |      | 2   | No              |      | 2   | No             |      | 2   | No    |      |       |       | 176   | 71    |
| 2860   |      | 2   | No              |      | 2   | No             |      | 2   | No    |      |       |       | 159   | 52    |
| 2861   |      | 2   | No              |      | 1   | Yes            | 1    | 2   | No    |      |       |       | 173   | 70    |
| 2863   | 2    | 2   | No              |      | 1   | Yes            | 2    | 2   | No    |      |       |       | 185   | 80    |
| 2864   |      | 2   | No              |      | 2   | No             |      | 2   | No    |      |       |       | 151   | 42    |
| 2866   |      | 2   | No              |      | 2   | No             |      | 2   | No    |      |       |       | 157   | 61    |
| 2872   |      | 2   | No              |      | 1   | Yes            | 2    | 2   | No    |      |       |       | 180   | 73    |
| 2875   |      | 2   | No              |      | 2   | No             |      | 2   | No    |      |       |       | 156   | 58    |
| 2879   |      | 2   | No              |      | 1   | Yes            | 2    | 2   | No    |      |       |       | 175   | 82    |
| 2881   |      | 2   | No              |      | 2   | No             |      | 2   | No    |      |       |       | 163   | 54    |
| 2882   | 1    | 2   | No              |      | 1   | Yes            | 2    | 2   | No    |      |       |       | 174   | 95    |
| 2883   |      | 2   | No              |      | 2   | No             |      | 2   | No    |      |       |       | 168   | 67    |
| 2884   |      | 2   | No              |      | 2   | No             |      | 2   | No    |      |       |       | 173   | 68    |
| 2885   |      | 2   | No              |      | 2   | No             |      | 2   | No    |      |       |       | 166   | 48    |
| 2887   |      | 2   | No              |      | 2   | No             |      | 2   | No    |      |       |       | 171   | 68    |
| 2888   |      | 2   | No              |      | 1   | Yes            | 2    | 2   | No    |      |       |       | 171   | 94    |
| 2890   |      | 2   | No              |      | 2   | No             |      | 2   | No    |      |       |       | 174   | 67    |

| respid | Q11a | Q12 | Cardiac Disease | Q12a | Q13 | Hyperlipidemia | Q13a | Q14 | Neuro | Q14a | Q15_1 | Q15_2 | Q15_3 | Q16_1 |
|--------|------|-----|-----------------|------|-----|----------------|------|-----|-------|------|-------|-------|-------|-------|
| 2891   |      | 2   | No              |      | 2   | No             |      | 2   | No    |      |       |       | 160   | 65    |
| 2892   |      | 2   | No              |      | 2   | No             |      | 2   | No    |      |       |       | 164   | 82    |
| 2895   |      | 2   | No              |      | 1   | Yes            | 2    | 2   | No    |      |       |       | 170   | 68    |
| 2899   |      | 2   | No              |      | 2   | No             |      | 2   | No    |      |       |       | 186   | 94    |
| 2900   |      | 2   | No              |      | 2   | No             |      | 2   | No    |      |       |       | 172   | 88    |
| 2902   |      | 2   | No              |      | 2   | No             |      | 2   | No    |      |       |       | 157   | 52    |
| 2903   |      | 2   | No              |      | 2   | No             |      | 2   | No    |      |       |       | 165   | 57    |
| 2904   |      | 2   | No              |      | 2   | No             |      | 2   | No    |      |       |       | 174   | 74    |
| 2906   |      | 2   | No              |      | 2   | No             |      | 2   | No    |      |       |       | 157   | 53    |
| 2908   |      | 2   | No              |      | 2   | No             |      | 2   | No    |      |       |       | 160   | 58    |
| 2910   |      | 2   | No              |      | 2   | No             |      | 2   | No    |      |       |       | 155   | 70    |
| 2917   |      | 2   | No              |      | 1   | Yes            | 2    | 2   | No    |      |       |       | 172   | 63    |
| 2918   | 1    | 2   | No              |      | 1   | Yes            | 1    | 2   | No    |      |       |       | 178   | 95    |
| 2919   | 1    | 1   | Yes             | 1    | 1   | Yes            | 1    | 2   | No    |      |       |       | 178   | 86    |
| 2920   |      | 2   | No              |      | 1   | Yes            | 2    | 2   | No    |      |       |       | 175   | 78    |
| 2921   |      | 2   | No              |      | 2   | No             |      | 2   | No    |      |       |       | 175   | 65    |
| 2922   |      | 2   | No              |      | 2   | No             |      | 2   | No    |      |       |       | 184   | 93    |
| 2923   |      | 2   | No              |      | 2   | No             |      | 2   | No    |      |       |       | 169   | 80    |
| 2924   |      | 2   | No              |      | 2   | No             |      | 2   | No    |      |       |       | 166   | 59    |
| 2926   |      | 2   | No              |      | 1   | Yes            | 1    | 2   | No    |      |       |       | 168   | 55    |
| 2928   |      | 2   | No              |      | 2   | No             |      | 2   | No    |      |       |       | 170   | 70    |
| 2930   |      | 2   | No              |      | 2   | No             |      | 2   | No    |      |       |       | 152   | 47    |
| 2931   |      | 2   | No              |      | 2   | No             |      | 2   | No    |      |       |       | 170   | 60    |
| 2933   |      | 2   | No              |      | 2   | No             |      | 2   | No    |      |       |       | 170   | 58    |
| 2935   |      | 2   | No              |      | 2   | No             |      | 2   | No    |      |       |       | 178   | 65    |
| 2936   |      | 2   | No              |      | 2   | No             |      | 2   | No    |      |       |       | 175   | 85    |
| 2937   | 1    | 2   | No              |      | 2   | No             |      | 2   | No    |      |       |       | 173   | 60    |
| 2938   |      | 2   | No              |      | 2   | No             |      | 2   | No    |      |       |       | 172   | 70    |
| 2944   | 2    | 2   | No              |      | 1   | Yes            | 2    | 2   | No    |      |       |       | 170   | 63    |
| 2945   |      | 2   | No              |      | 2   | No             |      | 2   | No    |      |       |       | 172   | 72    |
| 2947   | 1    | 2   | No              |      | 2   | No             |      | 2   | No    |      |       |       | 170   | 66    |
| 2949   |      | 1   | Yes             | 1    | 2   | No             |      | 2   | No    |      |       |       | 163   | 57    |



| respid | Q11a | Q12 | Cardiac Disease | Q12a | Q13 | Hyperlipidemia | Q13a | Q14 | Neuro | Q14a | Q15_1 | Q15_2 | Q15_3 | Q16_1 |
|--------|------|-----|-----------------|------|-----|----------------|------|-----|-------|------|-------|-------|-------|-------|
| 2951   |      | 2   | No              |      | 2   | No             |      | 2   | No    |      |       |       | 163   | 57    |
| 2952   | 1    | 2   | No              |      | 1   | Yes            | 2    | 2   | No    |      |       |       | 169   | 90    |
| 2953   |      | 2   | No              |      | 2   | No             |      | 2   | No    |      |       |       | 158   | 49    |
| 2955   |      | 2   | No              |      | 1   | Yes            | 2    | 2   | No    |      |       |       | 170   | 74    |
| 2957   | 1    | 2   | No              |      | 1   | Yes            | 1    | 2   | No    |      |       |       | 170   | 65    |
| 2958   |      | 2   | No              |      | 2   | No             |      | 2   | No    |      |       |       | 158   | 58    |
| 2960   |      | 2   | No              |      | 2   | No             |      | 2   | No    |      |       |       | 155   | 54    |
| 2963   |      | 2   | No              |      | 2   | No             |      | 2   | No    |      |       |       | 175   | 67    |
| 2964   |      | 2   | No              |      | 1   | Yes            | 2    | 2   | No    |      |       |       | 153   | 72    |
| 2967   |      | 2   | No              |      | 2   | No             |      | 2   | No    |      |       |       | 163   | 47    |
| 2968   |      | 2   | No              |      | 2   | No             |      | 2   | No    |      |       |       | 160   | 59    |
| 2971   | 2    | 2   | No              |      | 1   | Yes            | 2    | 2   | No    |      |       |       | 155   | 58    |
| 2974   |      | 2   | No              |      | 2   | No             |      | 2   | No    |      |       |       | 167   | 62    |
| 2975   |      | 2   | No              |      | 2   | No             |      | 2   | No    |      |       |       | 150   | 54    |
| 2982   |      | 2   | No              |      | 2   | No             |      | 2   | No    |      |       |       | 159   | 63    |
| 2983   |      | 2   | No              |      | 2   | No             |      | 2   | No    |      |       |       | 175   | 70    |
| 2985   |      | 2   | No              |      | 2   | No             |      | 2   | No    |      |       |       | 163   | 57    |
| 2986   | 2    | 2   | No              |      | 1   | Yes            | 2    | 2   | No    |      |       |       | 181   | 92    |
| 2987   |      | 2   | No              |      | 2   | No             |      | 2   | No    |      |       |       | 153   | 50    |
| 2988   | 1    | 2   | No              |      | 1   | Yes            | 1    | 2   | No    |      |       |       | 168   | 65    |
| 2993   |      | 2   | No              |      | 2   | No             |      | 2   | No    |      |       |       | 165   | 63    |
| 2996   |      | 2   | No              |      | 2   | No             |      | 2   | No    |      |       |       | 170   | 82    |
| 2997   | 1    | 2   | No              |      | 1   | Yes            | 2    | 2   | No    |      |       |       | 168   | 75    |
| 2998   |      | 2   | No              |      | 2   | No             |      | 2   | No    |      |       |       | 165   | 52    |
| 3004   |      | 2   | No              |      | 2   | No             |      | 2   | No    |      |       |       | 171   | 70    |
| 3007   | 1    | 2   | No              |      | 1   | Yes            | 2    | 2   | No    |      |       |       | 174   | 89    |
| 3011   |      | 2   | No              |      | 1   | Yes            | 1    | 2   | No    |      |       |       | 175   | 83    |
| 3012   | 1    | 2   | No              |      | 1   | Yes            | 1    | 2   | No    |      |       |       | 173   | 67    |
| 3013   |      | 2   | No              |      | 2   | No             |      | 2   | No    |      |       |       | 180   | 88    |
| 3014   |      | 2   | No              |      | 2   | No             |      | 2   | No    |      |       |       | 158   | 63    |
| 3015   |      | 2   | No              |      | 1   | Yes            | 2    | 2   | No    |      |       |       | 169   | 73    |
| 3016   |      | 2   | No              |      | 2   | No             |      | 2   | No    |      |       |       | 152   | 45    |

| respid | Q11a | Q12 | Cardiac Disease | Q12a | Q13 | Hyperlipidemia | Q13a | Q14 | Neuro | Q14a | Q15_1 | Q15_2 | Q15_3 | Q16_1 |
|--------|------|-----|-----------------|------|-----|----------------|------|-----|-------|------|-------|-------|-------|-------|
| 3017   |      | 2   | No              |      | 2   | No             |      | 2   | No    |      |       |       | 172   | 47    |
| 3020   |      | 2   | No              |      | 2   | No             |      | 2   | No    |      |       |       | 171   | 60    |
| 3022   |      | 2   | No              |      | 2   | No             |      | 2   | No    |      |       |       | 167   | 69    |
| 3023   |      | 2   | No              |      | 1   | Yes            | 2    | 2   | No    |      |       |       | 173   | 74    |
| 3026   |      | 2   | No              |      | 1   | Yes            | 2    | 2   | No    |      |       |       | 165   | 53    |
| 3038   | 1    | 2   | No              |      | 1   | Yes            | 1    | 2   | No    |      |       |       | 169   | 64    |
| 3039   | 1    | 1   | Yes             | 1    | 1   | Yes            | 1    | 2   | No    |      |       |       | 158   | 52    |
| 3040   |      | 2   | No              |      | 1   | Yes            | 2    | 2   | No    |      |       |       | 178   | 85    |
| 3041   |      | 2   | No              |      | 2   | No             |      | 2   | No    |      |       |       | 152   | 45    |
| 3042   |      | 2   | No              |      | 2   | No             |      | 2   | No    |      |       |       | 157   | 45    |
| 3044   |      | 2   | No              |      | 1   | Yes            | 2    | 2   | No    |      |       |       | 165   | 70    |
| 3050   |      | 2   | No              |      | 2   | No             |      | 2   | No    |      |       |       | 170   | 50    |
| 3052   |      | 2   | No              |      | 2   | No             |      | 2   | No    |      |       |       | 162   | 69    |
| 3056   |      | 2   | No              |      | 2   | No             |      | 2   | No    |      |       |       | 165   | 80    |
| 3059   |      | 2   | No              |      | 2   | No             |      | 2   | No    |      |       |       | 165   | 55    |
| 3060   |      | 2   | No              |      | 1   | Yes            | 2    | 2   | No    |      |       |       | 168   | 56    |
| 3063   |      | 2   | No              |      | 2   | No             |      | 2   | No    |      |       |       | 166   | 50    |
| 3065   | 1    | 2   | No              |      | 2   | No             |      | 2   | No    |      |       |       | 167   | 72    |
| 3067   | 2    | 2   | No              |      | 1   | Yes            | 2    | 2   | No    |      |       |       | 170   | 66    |
| 3068   |      | 2   | No              |      | 2   | No             |      | 2   | No    |      |       |       | 165   | 65    |
| 3072   |      | 2   | No              |      | 2   | No             |      | 2   | No    |      |       |       | 170   | 70    |
| 3074   |      | 2   | No              |      | 1   | Yes            | 2    | 2   | No    |      |       |       | 183   | 105   |
| 3075   | 2    | 2   | No              |      | 2   | No             |      | 2   | No    |      |       |       | 162   | 55    |
| 3076   | 2    | 2   | No              |      | 2   | No             |      | 2   | No    |      |       |       | 155   | 47    |
| 3079   | 1    | 2   | No              |      | 2   | No             |      | 2   | No    |      |       |       | 173   | 96    |
| 3082   | 1    | 2   | No              |      | 1   | Yes            | 1    | 2   | No    |      |       |       | 173   | 59    |
| 3083   |      | 2   | No              |      | 2   | No             |      | 2   | No    |      |       |       | 173   | 67    |
| 3084   | 2    | 2   | No              |      | 1   | Yes            | 1    | 2   | No    |      |       |       | 180   | 83    |
| 3085   |      | 2   | No              |      | 2   | No             |      | 2   | No    |      |       |       | 150   | 50    |
| 3090   |      | 2   | No              |      | 2   | No             |      | 2   | No    |      |       |       | 164   | 58    |
| 3091   |      | 2   | No              |      | 2   | No             |      | 2   | No    |      |       |       | 156   | 53    |
| 3092   | 1    | 2   | No              |      | 2   | No             |      | 2   | No    |      |       |       | 153   | 55    |

| respid | Q11a | Q12 | Cardiac Disease | Q12a | Q13 | Hyperlipidemia | Q13a | Q14 | Neuro | Q14a | Q15_1 | Q15_2 | Q15_3 | Q16_1 |
|--------|------|-----|-----------------|------|-----|----------------|------|-----|-------|------|-------|-------|-------|-------|
| 3095   |      | 2   | No              |      | 2   | No             |      | 2   | No    |      |       |       | 168   | 60    |
| 3096   | 1    | 2   | No              |      | 1   | Yes            | 1    | 2   | No    |      |       |       | 173   | 87    |
| 3097   | 2    | 2   | No              |      | 2   | No             |      | 2   | No    |      |       |       | 158   | 67    |
| 3099   | 1    | 2   | No              |      | 1   | Yes            | 1    | 1   | Yes   | 1    |       |       | 173   | 77    |
| 3101   |      | 2   | No              |      | 2   | No             |      | 2   | No    |      |       |       | 150   | 60    |
| 3103   |      | 2   | No              |      | 2   | No             |      | 2   | No    |      |       |       | 175   | 82    |
| 3104   |      | 2   | No              |      | 2   | No             |      | 2   | No    |      |       |       | 172   | 72    |
| 3105   |      | 2   | No              |      | 2   | No             |      | 2   | No    |      |       |       | 175   | 70    |
| 3107   |      | 2   | No              |      | 2   | No             |      | 2   | No    |      |       |       | 165   | 75    |
| 3108   |      | 2   | No              |      | 2   | No             |      | 2   | No    |      |       |       | 176   | 85    |
| 3109   |      | 2   | No              |      | 2   | No             |      | 2   | No    |      |       |       | 158   | 52    |
| 3116   |      | 2   | No              |      | 2   | No             |      | 2   | No    |      |       |       | 160   | 56    |
| 3117   |      | 2   | No              |      | 2   | No             |      | 2   | No    |      |       |       | 164   | 53    |
| 3119   | 2    | 2   | No              |      | 2   | No             |      | 2   | No    |      |       |       | 175   | 90    |
| 3120   | 1    | 2   | No              |      | 2   | No             |      | 2   | No    |      |       |       | 162   | 65    |
| 3130   |      | 2   | No              |      | 2   | No             |      | 2   | No    |      |       |       | 158   | 66    |
| 3131   |      | 2   | No              |      | 2   | No             |      | 2   | No    |      |       |       | 153   | 51    |
| 3133   | 1    | 2   | No              |      | 1   | Yes            | 2    | 2   | No    |      |       |       | 175   | 75    |
| 3134   |      | 2   | No              |      | 2   | No             |      | 2   | No    |      |       |       | 163   | 83    |
| 3135   | 1    | 2   | No              |      | 1   | Yes            | 1    | 2   | No    |      |       |       | 187   | 120   |
| 3145   | 1    | 2   | No              |      | 2   | No             |      | 2   | No    |      |       |       | 170   | 62    |
| 3147   |      | 2   | No              |      | 2   | No             |      | 2   | No    |      |       |       | 157   | 49    |
| 3152   |      | 2   | No              |      | 2   | No             |      | 2   | No    |      |       |       | 177   | 72    |
| 3155   | 2    | 1   | Yes             | 2    | 1   | Yes            | 1    | 2   | No    |      |       |       | 157   | 52    |
| 3156   |      | 2   | No              |      | 2   | No             |      | 2   | No    |      |       |       | 165   | 50    |
| 3157   |      | 2   | No              |      | 2   | No             |      | 2   | No    |      |       |       | 173   | 65    |
| 3166   |      | 1   | Yes             | 2    | 1   | Yes            | 1    | 2   | No    |      |       |       | 168   | 68    |
| 3169   |      | 2   | No              |      | 2   | No             |      | 2   | No    |      |       |       | 166   | 59    |
| 3179   |      | 2   | No              |      | 2   | No             |      | 1   | Yes   | 1    |       |       | 158   | 58    |
| 3181   |      | 2   | No              |      | 2   | No             |      | 2   | No    |      |       |       | 159   | 57    |
| 3185   |      | 2   | No              |      | 2   | No             |      | 2   | No    |      |       |       | 165   | 52    |
| 3190   |      | 2   | No              |      | 2   | No             |      | 2   | No    |      |       |       | 170   | 58    |

| respid | Q11a | Q12 | Cardiac Disease | Q12a | Q13 | Hyperlipidemia | Q13a | Q14 | Neuro | Q14a | Q15_1 | Q15_2 | Q15_3 | Q16_1 |
|--------|------|-----|-----------------|------|-----|----------------|------|-----|-------|------|-------|-------|-------|-------|
| 3191   | 1    | 2   | No              |      | 2   | No             |      | 2   | No    |      |       |       | 174   | 84    |
| 3192   | 1    | 2   | No              |      | 2   | No             |      | 2   | No    |      |       |       | 162   | 80    |
| 3193   |      | 2   | No              |      | 1   | Yes            | 2    | 2   | No    |      |       |       | 170   | 74    |
| 3195   |      | 2   | No              |      | 2   | No             |      | 2   | No    |      |       |       | 180   | 71    |
| 3202   |      | 2   | No              |      | 2   | No             |      | 2   | No    |      |       |       | 169   | 57    |
| 3204   |      | 2   | No              |      | 2   | No             |      | 2   | No    |      |       |       | 170   | 62    |
| 3208   |      | 2   | No              |      | 2   | No             |      | 2   | No    |      |       |       | 169   | 75    |
| 3212   |      | 2   | No              |      | 1   | Yes            | 2    | 2   | No    |      |       |       | 169   | 75    |
| 3218   | 2    | 2   | No              |      | 2   | No             |      | 2   | No    |      |       |       | 178   | 82    |
| 3219   |      | 2   | No              |      | 2   | No             |      | 2   | No    |      |       |       | 160   | 52    |
| 3220   | 1    | 2   | No              |      | 2   | No             |      | 2   | No    |      |       |       | 158   | 49    |
| 3221   | 2    | 2   | No              |      | 1   | Yes            | 2    | 2   | No    |      |       |       | 151   | 50    |
| 3223   |      | 2   | No              |      | 2   | No             |      | 2   | No    |      |       |       | 160   | 61    |
| 3231   |      | 2   | No              |      | 2   | No             |      | 2   | No    |      |       |       | 158   | 44    |
| 3232   |      | 2   | No              |      | 2   | No             |      | 2   | No    |      |       |       | 165   | 55    |
| 3234   |      | 2   | No              |      | 2   | No             |      | 2   | No    |      |       |       | 172   | 75    |
| 3235   |      | 2   | No              |      | 2   | No             |      | 2   | No    |      |       |       | 165   | 57    |
| 3237   | 1    | 2   | No              |      | 1   | Yes            | 2    | 2   | No    |      |       |       | 160   | 51    |
| 3238   |      | 2   | No              |      | 1   | Yes            | 2    | 2   | No    |      |       |       | 172   | 75    |
| 3240   |      | 2   | No              |      | 1   | Yes            | 2    | 2   | No    |      |       |       | 173   | 80    |
| 3241   |      | 2   | No              |      | 2   | No             |      | 2   | No    |      |       |       | 158   | 52    |
| 3243   |      | 2   | No              |      | 2   | No             |      | 2   | No    |      |       |       | 150   | 43    |
| 3244   |      | 2   | No              |      | 2   | No             |      | 2   | No    |      |       |       | 158   | 54    |
| 3247   |      | 2   | No              |      | 1   | Yes            | 1    | 2   | No    |      |       |       | 175   | 87    |
| 3250   |      | 2   | No              |      | 1   | Yes            | 2    | 2   | No    |      |       |       | 165   | 65    |
| 3251   | 1    | 2   | No              |      | 2   | No             |      | 2   | No    |      |       |       | 163   | 56    |
| 3255   |      | 2   | No              |      | 2   | No             |      | 2   | No    |      |       |       | 160   | 65    |
| 3256   |      | 2   | No              |      | 2   | No             |      | 2   | No    |      |       |       | 174   | 68    |
| 3257   | 2    | 2   | No              |      | 2   | No             |      | 2   | No    |      |       |       | 165   | 60    |
| 3258   |      | 2   | No              |      | 2   | No             |      | 2   | No    |      |       |       | 164   | 65    |
| 3259   |      | 2   | No              |      | 2   | No             |      | 2   | No    |      |       |       | 163   | 53    |
| 3260   | 2    | 2   | No              |      | 2   | No             |      | 2   | No    |      |       |       | 181   | 95    |

| respid | Q11a | Q12 | Cardiac Disease | Q12a | Q13 | Hyperlipidemia | Q13a | Q14 | Neuro | Q14a | Q15_1 | Q15_2 | Q15_3 | Q16_1 |
|--------|------|-----|-----------------|------|-----|----------------|------|-----|-------|------|-------|-------|-------|-------|
| 3261   |      | 2   | No              |      | 2   | No             |      | 2   | No    |      |       |       | 170   | 64    |
| 3262   | 2    | 2   | No              |      | 1   | Yes            | 2    | 2   | No    |      |       |       | 175   | 100   |
| 3264   |      | 2   | No              |      | 1   | Yes            | 2    | 2   | No    |      |       |       | 170   | 56    |
| 3265   | 2    | 2   | No              |      | 2   | No             |      | 2   | No    |      |       |       | 170   | 80    |
| 3267   |      | 2   | No              |      | 2   | No             |      | 2   | No    |      |       |       | 176   | 80    |
| 3268   |      | 2   | No              |      | 2   | No             |      | 2   | No    |      |       |       | 158   | 58    |
| 3270   |      | 2   | No              |      | 2   | No             |      | 2   | No    |      |       |       | 173   | 68    |
| 3271   | 1    | 2   | No              |      | 2   | No             |      | 2   | No    |      |       |       | 178   | 65    |
| 3274   |      | 2   | No              |      | 2   | No             |      | 2   | No    |      |       |       | 160   | 70    |
| 3276   |      | 2   | No              |      | 2   | No             |      | 2   | No    |      |       |       | 165   | 69    |
| 3277   |      | 2   | No              |      | 2   | No             |      | 2   | No    |      |       |       | 156   | 64    |
| 3279   |      | 2   | No              |      | 2   | No             |      | 2   | No    |      |       |       | 168   | 88    |
| 3281   |      | 2   | No              |      | 2   | No             |      | 2   | No    |      |       |       | 171   | 68    |
| 3283   |      | 1   | Yes             | 2    | 1   | Yes            | 2    | 2   | No    |      | 5     | 6     |       | 67    |
| 3285   | 2    | 2   | No              |      | 2   | No             |      | 2   | No    |      |       |       | 170   | 74    |
| 3286   |      | 2   | No              |      | 2   | No             |      | 2   | No    |      |       |       | 175   | 62    |
| 3287   |      | 2   | No              |      | 2   | No             |      | 2   | No    |      |       |       | 177   | 73    |
| 3289   | 2    | 2   | No              |      | 1   | Yes            | 2    | 2   | No    |      |       |       | 160   | 75    |
| 3290   |      | 2   | No              |      | 2   | No             |      | 2   | No    |      |       |       | 170   | 65    |
| 3291   |      | 2   | No              |      | 2   | No             |      | 2   | No    |      |       |       | 182   | 75    |
| 3292   | 1    | 1   | Yes             | 2    | 1   | Yes            | 1    | 2   | No    |      |       |       | 160   | 70    |
| 3293   |      | 2   | No              |      | 2   | No             |      | 2   | No    |      |       |       | 169   | 62    |
| 3294   | 1    | 2   | No              |      | 1   | Yes            | 2    | 2   | No    |      |       |       | 170   | 91    |
| 3296   |      | 2   | No              |      | 2   | No             |      | 2   | No    |      |       |       | 153   | 46    |
| 3306   |      | 2   | No              |      | 2   | No             |      | 2   | No    |      |       |       | 156   | 60    |
| 3307   |      | 2   | No              |      | 1   | Yes            | 1    | 1   | Yes   | 1    |       |       | 165   | 62    |
| 3308   |      | 2   | No              |      | 2   | No             |      | 2   | No    |      |       |       | 161   | 51    |
| 3312   | 1    | 2   | No              |      | 2   | No             |      | 2   | No    |      |       |       | 175   | 85    |
| 3313   |      | 2   | No              |      | 1   | Yes            | 2    | 2   | No    |      |       |       | 166   | 65    |
| 3316   |      | 2   | No              |      | 2   | No             |      | 2   | No    |      |       |       | 180   | 82    |
| 3317   | 1    | 2   | No              |      | 1   | Yes            | 1    | 2   | No    |      |       |       | 165   | 62    |
| 3320   |      | 2   | No              |      | 2   | No             |      | 2   | No    |      |       |       | 172   | 72    |

| respid | Q11a | Q12 | Cardiac Disease | Q12a | Q13 | Hyperlipidemia | Q13a | Q14 | Neuro | Q14a | Q15_1 | Q15_2 | Q15_3 | Q16_1 |
|--------|------|-----|-----------------|------|-----|----------------|------|-----|-------|------|-------|-------|-------|-------|
| 3321   | 1    | 2   | No              |      | 1   | Yes            | 2    | 2   | No    |      |       |       | 171   | 61    |
| 3322   |      | 2   | No              |      | 2   | No             |      | 2   | No    |      |       |       | 165   | 59    |
| 3323   |      | 2   | No              |      | 2   | No             |      | 2   | No    |      |       |       | 155   | 41    |
| 3325   |      | 2   | No              |      | 2   | No             |      | 2   | No    |      |       |       | 160   | 59    |
| 3332   |      | 2   | No              |      | 1   | Yes            | 2    | 2   | No    |      |       |       | 166   | 65    |
| 3334   |      | 2   | No              |      | 2   | No             |      | 2   | No    |      |       |       | 175   | 50    |
| 3335   | 1    | 1   | Yes             | 1    | 1   | Yes            | 1    | 2   | No    |      |       |       | 168   | 62    |
| 3341   |      | 2   | No              |      | 2   | No             |      | 2   | No    |      | 5     | 3     |       | 52    |
| 3345   | 2    | 2   | No              |      | 2   | No             |      | 2   | No    |      |       |       | 170   | 54    |
| 3346   |      | 2   | No              |      | 2   | No             |      | 2   | No    |      |       |       | 164   | 94    |
| 3349   | 2    | 2   | No              |      | 2   | No             |      | 2   | No    |      |       |       | 170   | 75    |
| 3351   |      | 2   | No              |      | 2   | No             |      | 2   | No    |      |       |       | 157   | 53    |
| 3353   |      | 2   | No              |      | 2   | No             |      | 2   | No    |      |       |       | 162   | 56    |
| 3354   |      | 2   | No              |      | 2   | No             |      | 2   | No    |      |       |       | 147   | 60    |
| 3356   |      | 2   | No              |      | 2   | No             |      | 2   | No    |      |       |       | 157   | 51    |
| 3357   |      | 2   | No              |      | 2   | No             |      | 2   | No    |      |       |       | 160   | 50    |
| 3360   |      | 2   | No              |      | 2   | No             |      | 2   | No    |      |       |       | 165   | 65    |
| 3361   |      | 1   | Yes             | 1    | 1   | Yes            | 2    | 2   | No    |      |       |       | 168   | 64    |
| 3362   |      | 2   | No              |      | 1   | Yes            | 1    | 2   | No    |      |       |       | 174   | 76    |
| 3363   |      | 2   | No              |      | 1   | Yes            | 2    | 2   | No    |      |       |       | 167   | 50    |
| 3364   | 1    | 1   | Yes             | 1    | 1   | Yes            | 1    | 2   | No    |      |       |       | 168   | 77    |
| 3368   |      | 2   | No              |      | 1   | Yes            | 2    | 2   | No    |      |       |       | 183   | 78    |
| 3370   |      | 2   | No              |      | 2   | No             |      | 2   | No    |      |       |       | 170   | 65    |
| 3371   |      | 2   | No              |      | 2   | No             |      | 2   | No    |      |       |       | 172   | 80    |
| 3379   |      | 2   | No              |      | 1   | Yes            | 1    | 2   | No    |      |       |       | 162   | 52    |
| 3380   |      | 2   | No              |      | 2   | No             |      | 2   | No    |      |       |       | 172   | 75    |
| 3382   | 2    | 2   | No              |      | 2   | No             |      | 2   | No    |      |       |       | 170   | 52    |
| 3384   |      | 2   | No              |      | 2   | No             |      | 2   | No    |      |       |       | 170   | 60    |
| 3385   |      | 2   | No              |      | 2   | No             |      | 2   | No    |      |       |       | 167   | 56    |
| 3388   |      | 2   | No              |      | 2   | No             |      | 2   | No    |      |       |       | 171   | 75    |
| 3392   |      | 2   | No              |      | 2   | No             |      | 2   | No    |      |       |       | 162   | 49    |
| 3393   |      | 1   | Yes             | 2    | 2   | No             |      | 2   | No    |      |       |       | 160   | 60    |

| respid | Q11a | Q12 | Cardiac Disease | Q12a | Q13 | Hyperlipidemia | Q13a | Q14 | Neuro | Q14a | Q15_1 | Q15_2 | Q15_3 | Q16_1 |
|--------|------|-----|-----------------|------|-----|----------------|------|-----|-------|------|-------|-------|-------|-------|
| 3394   |      | 2   | No              |      | 2   | No             |      | 2   | No    |      |       |       | 169   | 70    |
| 3395   | 2    | 2   | No              |      | 1   | Yes            | 2    | 2   | No    |      |       |       | 174   | 88    |
| 3396   |      | 2   | No              |      | 2   | No             |      | 2   | No    |      |       |       | 175   | 62    |
| 3397   | 1    | 2   | No              |      | 2   | No             |      | 2   | No    |      |       |       | 163   | 70    |
| 3398   |      | 2   | No              |      | 1   | Yes            | 2    | 2   | No    |      |       |       | 167   | 56    |
| 3399   | 2    | 2   | No              |      | 1   | Yes            | 2    | 2   | No    |      |       |       | 176   | 85    |
| 3400   |      | 2   | No              |      | 2   | No             |      | 2   | No    |      |       |       | 174   | 70    |
| 3401   | 1    | 2   | No              |      | 1   | Yes            | 2    | 2   | No    |      |       |       | 169   | 76    |
| 3402   |      | 1   | Yes             | 2    | 1   | Yes            | 2    | 2   | No    |      |       |       | 172   | 66    |
| 3403   | 2    | 2   | No              |      | 2   | No             |      | 2   | No    |      |       |       | 172   | 52    |
| 3405   | 1    | 2   | No              |      | 1   | Yes            | 1    | 2   | No    |      |       |       | 150   | 65    |
| 3407   | 2    | 2   | No              |      | 2   | No             |      | 2   | No    |      |       |       | 167   | 65    |
| 3410   |      | 2   | No              |      | 2   | No             |      | 2   | No    |      |       |       | 173   | 83    |
| 3411   |      | 2   | No              |      | 2   | No             |      | 2   | No    |      |       |       | 174   | 64    |
| 3413   |      | 2   | No              |      | 2   | No             |      | 2   | No    |      |       |       | 175   | 50    |
| 3414   |      | 2   | No              |      | 1   | Yes            | 2    | 2   | No    |      |       |       | 168   | 62    |
| 3420   |      | 2   | No              |      | 2   | No             |      | 2   | No    |      |       |       | 152   | 74    |
| 3421   | 1    | 1   | Yes             | 1    | 1   | Yes            | 1    | 2   | No    |      | 5     | 3     |       | 50    |
| 3425   |      | 2   | No              |      | 2   | No             |      | 2   | No    |      |       |       | 171   | 79    |
| 3426   | 1    | 2   | No              |      | 1   | Yes            | 1    | 2   | No    |      |       |       | 174   | 60    |
| 3429   | 1    | 2   | No              |      | 1   | Yes            | 1    | 2   | No    |      |       |       | 160   | 64    |
| 3430   | 1    | 2   | No              |      | 1   | Yes            | 1    | 2   | No    |      |       |       | 174   | 79    |
| 3433   |      | 2   | No              |      | 2   | No             |      | 2   | No    |      |       |       | 160   | 56    |
| 3434   | 1    | 2   | No              |      | 1   | Yes            | 2    | 2   | No    |      |       |       | 168   | 65    |
| 3437   | 1    | 2   | No              |      | 2   | No             |      | 2   | No    |      |       |       | 160   | 88    |
| 3439   |      | 2   | No              |      | 2   | No             |      | 2   | No    |      |       |       | 164   | 64    |
| 3441   |      | 2   | No              |      | 2   | No             |      | 2   | No    |      |       |       | 163   | 59    |
| 3442   |      | 2   | No              |      | 2   | No             |      | 2   | No    |      |       |       | 158   | 60    |
| 3444   |      | 2   | No              |      | 2   | No             |      | 2   | No    |      |       |       | 166   | 52    |
| 3445   |      | 2   | No              |      | 2   | No             |      | 2   | No    |      |       |       | 170   | 49    |
| 3450   | 2    | 2   | No              |      | 1   | Yes            | 1    | 2   | No    |      |       |       | 184   | 84    |
| 3452   |      | 2   | No              |      | 2   | No             |      | 2   | No    |      |       |       | 157   | 50    |

| respid | Q11a | Q12 | Cardiac Disease | Q12a | Q13 | Hyperlipidemia | Q13a | Q14 | Neuro | Q14a | Q15_1 | Q15_2 | Q15_3 | Q16_1 |
|--------|------|-----|-----------------|------|-----|----------------|------|-----|-------|------|-------|-------|-------|-------|
| 3456   |      | 2   | No              |      | 2   | No             |      | 2   | No    |      |       |       | 173   | 83    |
| 3459   |      | 2   | No              |      | 2   | No             |      | 2   | No    |      |       |       | 160   | 62    |
| 3460   |      | 2   | No              |      | 2   | No             |      | 2   | No    |      |       |       | 175   | 70    |
| 3461   |      | 2   | No              |      | 2   | No             |      | 2   | No    |      |       |       | 160   | 58    |
| 3466   | 2    | 2   | No              |      | 1   | Yes            | 2    | 2   | No    |      |       |       | 172   | 78    |
| 3471   |      | 2   | No              |      | 2   | No             |      | 2   | No    |      |       |       | 165   | 60    |
| 3473   | 1    | 2   | No              |      | 1   | Yes            | 1    | 2   | No    |      |       |       | 172   | 71    |
| 3475   | 1    | 2   | No              |      | 1   | Yes            | 1    | 2   | No    |      |       |       | 162   | 60    |
| 3476   | 1    | 2   | No              |      | 2   | No             |      | 2   | No    |      |       |       | 169   | 66    |
| 3477   | 1    | 2   | No              |      | 1   | Yes            | 1    | 2   | No    |      |       |       | 168   | 60    |
| 3478   |      | 2   | No              |      | 2   | No             |      | 2   | No    |      |       |       | 161   | 65    |
| 3479   |      | 2   | No              |      | 2   | No             |      | 2   | No    |      |       |       | 154   | 70    |
| 3482   | 2    | 2   | No              |      | 2   | No             |      | 2   | No    |      |       |       | 169   | 78    |
| 3483   |      | 2   | No              |      | 2   | No             |      | 2   | No    |      |       |       | 158   | 60    |
| 3485   |      | 2   | No              |      | 2   | No             |      | 2   | No    |      |       |       | 162   | 68    |
| 3489   |      | 2   | No              |      | 2   | No             |      | 2   | No    |      |       |       | 160   | 62    |
| 3490   |      | 2   | No              |      | 2   | No             |      | 2   | No    |      |       |       | 165   | 60    |
| 3491   |      | 2   | No              |      | 2   | No             |      | 2   | No    |      |       |       | 155   | 45    |
| 3494   |      | 2   | No              |      | 2   | No             |      | 2   | No    |      |       |       | 163   | 55    |
| 3495   |      | 2   | No              |      | 1   | Yes            | 2    | 2   | No    |      |       |       | 168   | 70    |
| 3501   |      | 2   | No              |      | 2   | No             |      | 2   | No    |      |       |       | 175   | 82    |
| 3506   |      | 2   | No              |      | 2   | No             |      | 2   | No    |      | 5     | 8     |       | 64    |
| 3507   |      | 2   | No              |      | 2   | No             |      | 2   | No    |      |       |       | 176   | 76    |
| 3517   | 2    | 2   | No              |      | 1   | Yes            | 2    | 2   | No    |      |       |       | 183   | 110   |
| 3520   |      | 2   | No              |      | 2   | No             |      | 2   | No    |      |       |       | 169   | 85    |
| 3521   |      | 2   | No              |      | 2   | No             |      | 2   | No    |      |       |       | 168   | 62    |
| 3522   |      | 2   | No              |      | 2   | No             |      | 2   | No    |      |       |       | 165   | 65    |
| 3524   |      | 2   | No              |      | 1   | Yes            | 2    | 2   | No    |      |       |       | 173   | 80    |
| 3527   |      | 2   | No              |      | 2   | No             |      | 2   | No    |      |       |       | 175   | 84    |
| 3528   |      | 2   | No              |      | 2   | No             |      | 2   | No    |      |       |       | 170   | 57    |
| 3529   |      | 2   | No              |      | 2   | No             |      | 2   | No    |      |       |       | 170   | 55    |
| 3536   |      | 2   | No              |      | 1   | Yes            | 2    | 2   | No    |      |       |       | 162   | 55    |



| respid | Q11a | Q12 | Cardiac Disease | Q12a | Q13 | Hyperlipidemia | Q13a | Q14 | Neuro | Q14a | Q15_1 | Q15_2 | Q15_3 | Q16_1 |
|--------|------|-----|-----------------|------|-----|----------------|------|-----|-------|------|-------|-------|-------|-------|
| 3537   | 1    | 2   | No              |      | 1   | Yes            | 2    | 2   | No    |      |       |       | 170   | 110   |
| 3538   | 1    | 2   | No              |      | 2   | No             |      | 2   | No    |      | 5     | 11    |       | 82    |
| 3540   |      | 2   | No              |      | 1   | Yes            | 1    | 2   | No    |      |       |       | 162   | 54    |
| 3545   | 1    | 1   | Yes             | 1    | 1   | Yes            | 1    | 2   | No    |      |       |       | 183   | 93    |
| 3547   | 2    | 2   | No              |      | 2   | No             |      | 2   | No    |      |       |       | 173   | 77    |
| 3554   |      | 2   | No              |      | 2   | No             |      | 2   | No    |      |       |       | 164   | 59    |
| 3556   | 1    | 2   | No              |      | 2   | No             |      | 2   | No    |      |       |       | 172   | 70    |
| 3557   |      | 2   | No              |      | 2   | No             |      | 2   | No    |      |       |       | 170   | 69    |
| 3559   | 1    | 2   | No              |      | 1   | Yes            | 1    | 2   | No    |      |       |       | 170   | 68    |
| 3560   |      | 2   | No              |      | 2   | No             |      | 2   | No    |      |       |       | 172   | 77    |
| 3562   | 2    | 2   | No              |      | 2   | No             |      | 2   | No    |      |       |       | 175   | 75    |
| 3564   | 1    | 2   | No              |      | 1   | Yes            | 1    | 2   | No    |      |       |       | 163   | 65    |
| 3565   | 1    | 2   | No              |      | 2   | No             |      | 2   | No    |      | 5     | 11    |       | 65    |
| 3568   |      | 2   | No              |      | 1   | Yes            | 1    | 2   | No    |      |       |       | 174   | 70    |
| 3572   | 1    | 2   | No              |      | 2   | No             |      | 2   | No    |      |       |       | 174   | 84    |
| 3578   |      | 2   | No              |      | 2   | No             |      | 2   | No    |      |       |       | 156   | 60    |
| 3581   |      | 2   | No              |      | 2   | No             |      | 2   | No    |      |       |       | 162   | 51    |
| 3583   |      | 2   | No              |      | 2   | No             |      | 2   | No    |      |       |       | 166   | 43    |
| 3588   | 2    | 2   | No              |      | 1   | Yes            | 2    | 2   | No    |      |       |       | 180   | 83    |
| 3591   |      | 2   | No              |      | 2   | No             |      | 2   | No    |      |       |       | 176   | 71    |
| 3594   |      | 2   | No              |      | 2   | No             |      | 2   | No    |      |       |       | 176   | 80    |
| 3595   |      | 2   | No              |      | 1   | Yes            | 2    | 2   | No    |      |       |       | 172   | 82    |
| 3596   |      | 2   | No              |      | 2   | No             |      | 1   | Yes   | 1    |       |       | 162   | 55    |
| 3597   |      | 2   | No              |      | 2   | No             |      | 2   | No    |      |       |       | 174   | 65    |
| 3598   |      | 2   | No              |      | 2   | No             |      | 2   | No    |      |       |       | 159   | 78    |
| 3600   |      | 2   | No              |      | 2   | No             |      | 2   | No    |      |       |       | 165   | 47    |
| 3602   |      | 2   | No              |      | 2   | No             |      | 2   | No    |      |       |       | 152   | 45    |
| 3604   |      | 2   | No              |      | 2   | No             |      | 2   | No    |      |       |       | 173   | 62    |
| 3605   |      | 2   | No              |      | 2   | No             |      | 2   | No    |      |       |       | 170   | 73    |
| 3606   |      | 2   | No              |      | 2   | No             |      | 2   | No    |      |       |       | 162   | 56    |
| 3607   | 2    | 2   | No              |      | 2   | No             |      | 2   | No    |      |       |       | 158   | 60    |
| 3610   |      | 2   | No              |      | 2   | No             |      | 2   | No    |      |       |       | 162   | 73    |

| respid | Q11a | Q12 | Cardiac Disease | Q12a | Q13 | Hyperlipidemia | Q13a | Q14 | Neuro | Q14a | Q15_1 | Q15_2 | Q15_3 | Q16_1 |
|--------|------|-----|-----------------|------|-----|----------------|------|-----|-------|------|-------|-------|-------|-------|
| 3611   |      | 2   | No              |      | 2   | No             |      | 2   | No    |      |       |       | 170   | 69    |
| 3612   |      | 2   | No              |      | 2   | No             |      | 2   | No    |      |       |       | 172   | 85    |
| 3614   |      | 2   | No              |      | 2   | No             |      | 2   | No    |      |       |       | 166   | 80    |
| 3616   |      | 2   | No              |      | 2   | No             |      | 2   | No    |      |       |       | 165   | 61    |
| 3617   |      | 2   | No              |      | 2   | No             |      | 2   | No    |      |       |       | 155   | 48    |
| 3618   |      | 2   | No              |      | 2   | No             |      | 2   | No    |      |       |       | 159   | 53    |
| 3619   |      | 2   | No              |      | 1   | Yes            | 2    | 2   | No    |      |       |       | 168   | 57    |
| 3621   |      | 2   | No              |      | 1   | Yes            | 2    | 2   | No    |      |       |       | 175   | 74    |
| 3622   |      | 1   | Yes             | 1    | 2   | No             |      | 2   | No    |      |       |       | 168   | 70    |
| 3624   | 1    | 2   | No              |      | 1   | Yes            | 2    | 2   | No    |      |       |       | 176   | 79    |
| 3626   |      | 2   | No              |      | 2   | No             |      | 2   | No    |      |       |       | 178   | 55    |
| 3629   |      | 2   | No              |      | 2   | No             |      | 2   | No    |      |       |       | 165   | 50    |
| 3631   |      | 2   | No              |      | 2   | No             |      | 2   | No    |      |       |       | 171   | 95    |
| 3632   |      | 2   | No              |      | 2   | No             |      | 2   | No    |      |       |       | 170   | 65    |
| 3638   |      | 2   | No              |      | 2   | No             |      | 2   | No    |      |       |       | 172   | 63    |
| 3640   |      | 2   | No              |      | 2   | No             |      | 2   | No    |      |       |       | 161   | 55    |
| 3641   |      | 2   | No              |      | 2   | No             |      | 2   | No    |      |       |       | 166   | 58    |
| 3645   |      | 2   | No              |      | 1   | Yes            | 2    | 2   | No    |      |       |       | 175   | 68    |
| 3650   | 1    | 2   | No              |      | 2   | No             |      | 2   | No    |      |       |       | 174   | 84    |
| 3653   | 1    | 2   | No              |      | 1   | Yes            | 2    | 2   | No    |      |       |       | 174   | 73    |
| 3655   |      | 2   | No              |      | 2   | No             |      | 2   | No    |      |       |       | 176   | 76    |
| 3657   |      | 2   | No              |      | 2   | No             |      | 2   | No    |      |       |       | 163   | 56    |
| 3658   | 2    | 2   | No              |      | 2   | No             |      | 2   | No    |      |       |       | 161   | 61    |
| 3659   |      | 2   | No              |      | 2   | No             |      | 2   | No    |      |       |       | 172   | 60    |
| 3664   | 1    | 2   | No              |      | 1   | Yes            | 1    | 2   | No    |      |       |       | 170   | 65    |
| 3665   |      | 1   | Yes             | 1    | 1   | Yes            | 1    | 2   | No    |      |       |       | 171   | 82    |
| 3667   |      | 2   | No              |      | 2   | No             |      | 2   | No    |      |       |       | 172   | 69    |
| 3668   |      | 2   | No              |      | 1   | Yes            | 1    | 2   | No    |      |       |       | 168   | 77    |
| 3675   |      | 2   | No              |      | 2   | No             |      | 2   | No    |      |       |       | 162   | 68    |
| 3678   |      | 2   | No              |      | 2   | No             |      | 2   | No    |      |       |       | 152   | 52    |
| 3680   |      | 2   | No              |      | 2   | No             |      | 2   | No    |      |       |       | 165   | 60    |
| 3684   | 2    | 2   | No              |      | 1   | Yes            | 2    | 2   | No    |      |       |       | 170   | 65    |

| respid | Q11a | Q12 | Cardiac Disease | Q12a | Q13 | Hyperlipidemia | Q13a | Q14 | Neuro | Q14a | Q15_1 | Q15_2 | Q15_3 | Q16_1 |
|--------|------|-----|-----------------|------|-----|----------------|------|-----|-------|------|-------|-------|-------|-------|
| 3685   |      | 2   | No              |      | 2   | No             |      | 2   | No    |      |       |       | 148   | 43    |
| 3687   |      | 2   | No              |      | 1   | Yes            | 2    | 2   | No    |      |       |       | 175   | 70    |
| 3689   | 1    | 2   | No              |      | 2   | No             |      | 2   | No    |      |       |       | 175   | 80    |
| 3690   |      | 2   | No              |      | 2   | No             |      | 2   | No    |      |       |       | 168   | 65    |
| 3693   |      | 2   | No              |      | 2   | No             |      | 2   | No    |      |       |       | 175   | 84    |
| 3694   |      | 2   | No              |      | 2   | No             |      | 2   | No    |      |       |       | 162   | 60    |
| 3695   |      | 2   | No              |      | 2   | No             |      | 2   | No    |      |       |       | 159   | 48    |
| 3700   |      | 2   | No              |      | 2   | No             |      | 2   | No    |      |       |       | 148   | 47    |
| 3701   | 2    | 2   | No              |      | 1   | Yes            | 1    | 2   | No    |      |       |       | 171   | 75    |
| 3703   |      | 2   | No              |      | 2   | No             |      | 2   | No    |      |       |       | 160   | 48    |
| 3704   | 1    | 1   | Yes             | 1    | 1   | Yes            | 1    | 2   | No    |      |       |       | 174   | 60    |
| 3705   |      | 2   | No              |      | 2   | No             |      | 2   | No    |      |       |       | 182   | 78    |
| 3709   |      | 2   | No              |      | 2   | No             |      | 2   | No    |      |       |       | 162   | 58    |
| 3710   |      | 2   | No              |      | 1   | Yes            | 1    | 2   | No    |      |       |       | 168   | 72    |
| 3722   | 1    | 2   | No              |      | 2   | No             |      | 2   | No    |      |       |       | 176   | 87    |
| 3725   | 1    | 2   | No              |      | 2   | No             |      | 2   | No    |      |       |       | 170   | 85    |
| 3726   |      | 2   | No              |      | 2   | No             |      | 2   | No    |      |       |       | 158   | 51    |
| 3727   |      | 2   | No              |      | 1   | Yes            | 1    | 2   | No    |      |       |       | 160   | 63    |
| 3728   |      | 2   | No              |      | 2   | No             |      | 2   | No    |      |       |       | 169   | 54    |
| 3729   |      | 2   | No              |      | 2   | No             |      | 2   | No    |      |       |       | 163   | 59    |
| 3731   |      | 2   | No              |      | 2   | No             |      | 2   | No    |      |       |       | 160   | 62    |
| 3738   |      | 2   | No              |      | 1   | Yes            | 2    | 2   | No    |      |       |       | 168   | 60    |
| 3739   |      | 2   | No              |      | 2   | No             |      | 2   | No    |      |       |       | 153   | 52    |
| 3740   | 2    | 2   | No              |      | 1   | Yes            | 2    | 2   | No    |      |       |       | 175   | 84    |
| 3749   | 1    | 2   | No              |      | 2   | No             |      | 2   | No    |      |       |       | 166   | 70    |
| 3758   |      | 2   | No              |      | 2   | No             |      | 2   | No    |      |       |       | 167   | 53    |
| 3762   |      | 2   | No              |      | 2   | No             |      | 2   | No    |      |       |       | 163   | 55    |
| 3765   |      | 2   | No              |      | 2   | No             |      | 2   | No    |      |       |       | 153   | 51    |
| 3770   |      | 2   | No              |      | 2   | No             |      | 2   | No    |      |       |       | 163   | 55    |
| 3771   |      | 2   | No              |      | 2   | No             |      | 2   | No    |      |       |       | 150   | 48    |
| 3778   |      | 2   | No              |      | 2   | No             |      | 2   | No    |      |       |       | 158   | 55    |
| 3779   |      | 2   | No              |      | 2   | No             |      | 2   | No    |      |       |       | 163   | 58    |

| respid | Q11a | Q12 | Cardiac Disease | Q12a | Q13 | Hyperlipidemia | Q13a | Q14 | Neuro | Q14a | Q15_1 | Q15_2 | Q15_3 | Q16_1 |
|--------|------|-----|-----------------|------|-----|----------------|------|-----|-------|------|-------|-------|-------|-------|
| 3780   |      | 2   | No              |      | 2   | No             |      | 2   | No    |      |       |       | 170   | 75    |
| 3782   |      | 2   | No              |      | 2   | No             |      | 2   | No    |      |       |       | 152   | 52    |
| 3784   |      | 2   | No              |      | 2   | No             |      | 2   | No    |      |       |       | 180   | 70    |
| 3787   |      | 2   | No              |      | 1   | Yes            | 2    | 2   | No    |      |       |       | 155   | 55    |
| 3790   | 2    | 2   | No              |      | 1   | Yes            | 2    | 2   | No    |      |       |       | 178   | 89    |
| 3791   |      | 2   | No              |      | 1   | Yes            | 1    | 2   | No    |      |       |       | 170   | 93    |
| 3793   |      | 2   | No              |      | 1   | Yes            | 2    | 2   | No    |      |       |       | 176   | 82    |
| 3795   |      | 2   | No              |      | 2   | No             |      | 2   | No    |      |       |       | 160   | 65    |
| 3799   |      | 2   | No              |      | 2   | No             |      | 2   | No    |      |       |       | 180   | 79    |
| 3801   |      | 2   | No              |      | 1   | Yes            | 2    | 2   | No    |      |       |       | 168   | 64    |
| 3804   |      | 2   | No              |      | 2   | No             |      | 2   | No    |      |       |       | 166   | 66    |
| 3809   |      | 2   | No              |      | 2   | No             |      | 2   | No    |      |       |       | 165   | 58    |
| 3810   |      | 2   | No              |      | 1   | Yes            | 2    | 2   | No    |      |       |       | 163   | 73    |
| 3813   |      | 2   | No              |      | 2   | No             |      | 2   | No    |      |       |       | 180   | 70    |
| 3816   |      | 2   | No              |      | 2   | No             |      | 2   | No    |      |       |       | 160   | 70    |
| 3820   |      | 2   | No              |      | 2   | No             |      | 2   | No    |      |       |       | 145   | 50    |
| 3821   |      | 2   | No              |      | 2   | No             |      | 2   | No    |      |       |       | 170   | 75    |
| 3823   |      | 1   | Yes             | 2    | 1   | Yes            | 2    | 2   | No    |      |       |       | 155   | 42    |
| 3828   |      | 2   | No              |      | 2   | No             |      | 2   | No    |      |       |       | 158   | 68    |
| 3829   |      | 2   | No              |      | 2   | No             |      | 2   | No    |      |       |       | 168   | 70    |
| 3832   |      | 2   | No              |      | 2   | No             |      | 2   | No    |      |       |       | 165   | 105   |
| 3835   |      | 2   | No              |      | 2   | No             |      | 2   | No    |      |       |       | 168   | 68    |
| 3837   | 1    | 2   | No              |      | 2   | No             |      | 2   | No    |      |       |       | 163   | 52    |
| 3838   |      | 2   | No              |      | 2   | No             |      | 2   | No    |      |       |       | 161   | 53    |
| 3839   | 1    | 2   | No              |      | 1   | Yes            | 1    | 2   | No    |      |       |       | 172   | 88    |
| 3840   |      | 2   | No              |      | 2   | No             |      | 2   | No    |      |       |       | 160   | 60    |
| 3842   |      | 2   | No              |      | 2   | No             |      | 2   | No    |      |       |       | 153   | 45    |
| 3843   |      | 2   | No              |      | 2   | No             |      | 2   | No    |      |       |       | 160   | 51    |
| 3844   | 2    | 1   | Yes             | 2    | 1   | Yes            | 2    | 2   | No    |      |       |       | 160   | 60    |
| 3850   |      | 2   | No              |      | 2   | No             |      | 2   | No    |      |       |       | 175   | 65    |
| 3851   |      | 2   | No              |      | 2   | No             |      | 2   | No    |      |       |       | 167   | 62    |
| 3856   |      | 2   | No              |      | 2   | No             |      | 2   | No    |      |       |       | 164   | 65    |

| respid | Q11a | Q12 | Cardiac Disease | Q12a | Q13 | Hyperlipidemia | Q13a | Q14 | Neuro | Q14a | Q15_1 | Q15_2 | Q15_3 | Q16_1 |
|--------|------|-----|-----------------|------|-----|----------------|------|-----|-------|------|-------|-------|-------|-------|
| 3859   | 1    | 2   | No              |      | 2   | No             |      | 2   | No    |      |       |       | 175   | 77    |
| 3860   | 1    | 2   | No              |      | 2   | No             |      | 2   | No    |      |       |       | 176   | 88    |
| 3863   |      | 2   | No              |      | 2   | No             |      | 2   | No    |      |       |       | 178   | 70    |
| 3866   |      | 2   | No              |      | 2   | No             |      | 2   | No    |      |       |       | 165   | 65    |
| 3867   |      | 2   | No              |      | 2   | No             |      | 2   | No    |      |       |       | 165   | 64    |
| 3870   |      | 2   | No              |      | 1   | Yes            | 2    | 2   | No    |      |       |       | 176   | 84    |
| 3873   |      | 2   | No              |      | 2   | No             |      | 2   | No    |      |       |       | 153   | 42    |
| 3875   |      | 2   | No              |      | 2   | No             |      | 2   | No    |      |       |       | 170   | 56    |
| 3878   |      | 2   | No              |      | 2   | No             |      | 2   | No    |      |       |       | 154   | 44    |
| 3881   |      | 2   | No              |      | 2   | No             |      | 2   | No    |      |       |       | 157   | 61    |
| 3883   | 2    | 2   | No              |      | 1   | Yes            | 2    | 2   | No    |      |       |       | 164   | 69    |
| 3884   |      | 2   | No              |      | 2   | No             |      | 2   | No    |      |       |       | 171   | 65    |
| 3885   | 1    | 2   | No              |      | 1   | Yes            | 1    | 2   | No    |      |       |       | 170   | 65    |
| 3886   | 1    | 2   | No              |      | 2   | No             |      | 2   | No    |      |       |       | 161   | 67    |
| 3887   |      | 2   | No              |      | 2   | No             |      | 2   | No    |      |       |       | 166   | 58    |
| 3888   |      | 2   | No              |      | 2   | No             |      | 2   | No    |      |       |       | 164   | 82    |
| 3889   | 1    | 2   | No              |      | 2   | No             |      | 2   | No    |      |       |       | 165   | 60    |
| 3890   |      | 2   | No              |      | 2   | No             |      | 2   | No    |      |       |       | 175   | 68    |
| 3896   |      | 2   | No              |      | 2   | No             |      | 2   | No    |      |       |       | 157   | 55    |
| 3902   | 1    | 1   | Yes             | 1    | 1   | Yes            | 1    | 2   | No    |      | 5     | 3     |       | 50    |
| 3909   |      | 2   | No              |      | 2   | No             |      | 2   | No    |      |       |       | 164   | 54    |
| 3912   |      | 2   | No              |      | 2   | No             |      | 2   | No    |      |       |       | 165   | 65    |
| 3922   |      | 1   | Yes             | 2    | 2   | No             |      | 2   | No    |      |       |       | 170   | 49    |
| 3928   |      | 2   | No              |      | 2   | No             |      | 2   | No    |      |       |       | 158   | 49    |
| 3930   |      | 2   | No              |      | 1   | Yes            | 2    | 2   | No    |      |       |       | 176   | 84    |
| 3931   |      | 2   | No              |      | 2   | No             |      | 2   | No    |      |       |       | 153   | 48    |
| 3933   | 1    | 2   | No              |      | 1   | Yes            | 1    | 2   | No    |      |       |       | 167   | 85    |
| 3935   |      | 2   | No              |      | 2   | No             |      | 2   | No    |      |       |       | 152   | 52    |
| 3937   |      | 2   | No              |      | 2   | No             |      | 2   | No    |      |       |       | 165   | 50    |
| 3939   |      | 2   | No              |      | 2   | No             |      | 2   | No    |      |       |       | 170   | 78    |
| 3942   | 2    | 2   | No              |      | 1   | Yes            | 1    | 2   | No    |      |       |       | 182   | 78    |
| 3943   |      | 2   | No              |      | 2   | No             |      | 2   | No    |      |       |       | 155   | 40    |

| respid | Q11a | Q12 | Cardiac Disease | Q12a | Q13 | Hyperlipidemia | Q13a | Q14 | Neuro | Q14a | Q15_1 | Q15_2 | Q15_3 | Q16_1 |
|--------|------|-----|-----------------|------|-----|----------------|------|-----|-------|------|-------|-------|-------|-------|
| 3944   |      | 2   | No              |      | 2   | No             |      | 2   | No    |      |       |       | 170   | 58    |
| 3945   | 1    | 2   | No              |      | 1   | Yes            | 2    | 2   | No    |      |       |       | 167   | 75    |
| 3947   |      | 2   | No              |      | 1   | Yes            | 2    | 2   | No    |      |       |       | 168   | 52    |
| 3948   |      | 2   | No              |      | 2   | No             |      | 2   | No    |      |       |       | 180   | 70    |
| 3951   | 1    | 2   | No              |      | 2   | No             |      | 2   | No    |      |       |       | 175   | 77    |
| 3959   |      | 2   | No              |      | 2   | No             |      | 2   | No    |      |       |       | 178   | 85    |
| 3969   | 1    | 2   | No              |      | 1   | Yes            | 2    | 2   | No    |      |       |       | 176   | 95    |
| 3973   |      | 2   | No              |      | 2   | No             |      | 2   | No    |      |       |       | 167   | 63    |
| 3975   |      | 2   | No              |      | 2   | No             |      | 2   | No    |      |       |       | 176   | 80    |
| 3976   |      | 2   | No              |      | 2   | No             |      | 2   | No    |      |       |       | 172   | 85    |
| 3977   |      | 2   | No              |      | 2   | No             |      | 2   | No    |      |       |       | 168   | 69    |
| 3978   |      | 2   | No              |      | 2   | No             |      | 2   | No    |      |       |       | 168   | 58    |
| 3994   | 1    | 2   | No              |      | 1   | Yes            | 1    | 2   | No    |      |       |       | 168   | 86    |
| 3995   |      | 2   | No              |      | 2   | No             |      | 2   | No    |      |       |       | 156   | 46    |
| 3997   | 2    | 2   | No              |      | 2   | No             |      | 2   | No    |      |       |       | 178   | 75    |
| 3998   |      | 2   | No              |      | 2   | No             |      | 2   | No    |      |       |       | 172   | 72    |
| 3999   |      | 2   | No              |      | 2   | No             |      | 2   | No    |      |       |       | 155   | 60    |
| 4002   |      | 2   | No              |      | 1   | Yes            | 2    | 2   | No    |      |       |       | 165   | 52    |
| 4004   |      | 2   | No              |      | 2   | No             |      | 2   | No    |      |       |       | 170   | 55    |
| 4005   |      | 2   | No              |      | 2   | No             |      | 2   | No    |      |       |       | 164   | 60    |
| 4006   |      | 2   | No              |      | 1   | Yes            | 1    | 2   | No    |      |       |       | 165   | 62    |
| 4008   |      | 2   | No              |      | 2   | No             |      | 2   | No    |      |       |       | 175   | 70    |
| 4010   |      | 1   | Yes             | 2    | 2   | No             |      | 2   | No    |      |       |       | 178   | 66    |
| 4011   | 2    | 2   | No              |      | 1   | Yes            | 2    | 2   | No    |      |       |       | 174   | 62    |
| 4013   | 1    | 2   | No              |      | 2   | No             |      | 2   | No    |      |       |       | 167   | 65    |
| 4014   |      | 2   | No              |      | 2   | No             |      | 2   | No    |      |       |       | 164   | 76    |
| 4016   | 1    | 2   | No              |      | 1   | Yes            | 1    | 2   | No    |      |       |       | 180   | 110   |
| 4017   |      | 1   | Yes             | 2    | 1   | Yes            | 1    | 2   | No    |      | 6     | 6     |       | 85    |
| 4019   |      | 2   | No              |      | 1   | Yes            | 2    | 2   | No    |      |       |       | 171   | 80    |
| 4021   |      | 2   | No              |      | 2   | No             |      | 2   | No    |      |       |       | 160   | 42    |
| 4023   |      | 2   | No              |      | 1   | Yes            | 2    | 2   | No    |      |       |       | 157   | 61    |
| 4024   |      | 1   | Yes             | 2    | 2   | No             |      | 2   | No    |      |       |       | 177   | 79    |

| respid | Q11a | Q12 | Cardiac Disease | Q12a | Q13 | Hyperlipidemia | Q13a | Q14 | Neuro | Q14a | Q15_1 | Q15_2 | Q15_3 | Q16_1 |
|--------|------|-----|-----------------|------|-----|----------------|------|-----|-------|------|-------|-------|-------|-------|
| 4025   |      | 2   | No              |      | 2   | No             |      | 2   | No    |      |       |       | 160   | 53    |
| 4027   |      | 2   | No              |      | 2   | No             |      | 2   | No    |      |       |       | 168   | 62    |
| 4032   |      | 2   | No              |      | 2   | No             |      | 2   | No    |      |       |       | 160   | 62    |
| 4034   |      | 2   | No              |      | 2   | No             |      | 2   | No    |      |       |       | 177   | 70    |
| 4035   |      | 2   | No              |      | 2   | No             |      | 2   | No    |      |       |       | 173   | 60    |
| 4037   | 2    | 2   | No              |      | 1   | Yes            | 1    | 2   | No    |      |       |       | 173   | 62    |
| 4040   |      | 2   | No              |      | 2   | No             |      | 2   | No    |      |       |       | 161   | 50    |
| 4041   |      | 2   | No              |      | 2   | No             |      | 2   | No    |      |       |       | 186   | 110   |
| 4042   |      | 2   | No              |      | 2   | No             |      | 2   | No    |      |       |       | 163   | 50    |
| 4043   |      | 2   | No              |      | 1   | Yes            | 2    | 2   | No    |      |       |       | 158   | 72    |
| 4045   |      | 2   | No              |      | 1   | Yes            | 2    | 2   | No    |      |       |       | 160   | 52    |
| 4046   |      | 2   | No              |      | 1   | Yes            | 2    | 2   | No    |      |       |       | 175   | 65    |
| 4048   |      | 2   | No              |      | 2   | No             |      | 2   | No    |      |       |       | 160   | 60    |
| 4049   |      | 2   | No              |      | 2   | No             |      | 2   | No    |      |       |       | 177   | 79    |
| 4050   |      | 2   | No              |      | 1   | Yes            | 2    | 2   | No    |      |       |       | 155   | 60    |
| 4052   |      | 2   | No              |      | 2   | No             |      | 2   | No    |      |       |       | 178   | 76    |
| 4053   |      | 2   | No              |      | 2   | No             |      | 2   | No    |      |       |       | 182   | 80    |
| 4060   |      | 2   | No              |      | 2   | No             |      | 2   | No    |      |       |       | 173   | 88    |
| 4065   |      | 2   | No              |      | 2   | No             |      | 2   | No    |      |       |       | 173   | 72    |
| 4066   | 1    | 1   | Yes             | 1    | 2   | No             |      | 2   | No    |      |       |       | 163   | 52    |
| 4067   |      | 2   | No              |      | 2   | No             |      | 2   | No    |      |       |       | 175   | 83    |
| 4068   | 2    | 2   | No              |      | 2   | No             |      | 2   | No    |      |       |       | 170   | 55    |
| 4069   |      | 2   | No              |      | 2   | No             |      | 2   | No    |      |       |       | 155   | 63    |
| 4070   |      | 2   | No              |      | 2   | No             |      | 2   | No    |      |       |       | 175   | 80    |
| 4071   | 2    | 2   | No              |      | 1   | Yes            | 2    | 2   | No    |      |       |       | 175   | 70    |
| 4072   |      | 2   | No              |      | 2   | No             |      | 2   | No    |      |       |       | 170   | 57    |
| 4073   | 1    | 2   | No              |      | 1   | Yes            | 2    | 2   | No    |      |       |       | 172   | 77    |
| 4074   |      | 2   | No              |      | 1   | Yes            | 2    | 2   | No    |      |       |       | 175   | 81    |
| 4075   | 2    | 2   | No              |      | 1   | Yes            | 2    | 2   | No    |      |       |       | 175   | 85    |
| 4078   |      | 2   | No              |      | 1   | Yes            | 1    | 2   | No    |      |       |       | 173   | 75    |
| 4080   | 1    | 2   | No              |      | 1   | Yes            | 1    | 2   | No    |      |       |       | 176   | 84    |
| 4081   |      | 2   | No              |      | 2   | No             |      | 2   | No    |      |       |       | 172   | 85    |

| respid | Q11a | Q12 | Cardiac Disease | Q12a | Q13 | Hyperlipidemia | Q13a | Q14 | Neuro | Q14a | Q15_1 | Q15_2 | Q15_3 | Q16_1 |
|--------|------|-----|-----------------|------|-----|----------------|------|-----|-------|------|-------|-------|-------|-------|
| 4082   |      | 2   | No              |      | 2   | No             |      | 2   | No    |      |       |       | 165   | 60    |
| 4083   |      | 2   | No              |      | 1   | Yes            | 2    | 2   | No    |      |       |       | 181   | 90    |
| 4084   |      | 2   | No              |      | 1   | Yes            | 2    | 2   | No    |      |       |       | 160   | 48    |
| 4086   |      | 2   | No              |      | 2   | No             |      | 2   | No    |      |       |       | 164   | 51    |
| 4087   | 1    | 2   | No              |      | 1   | Yes            | 1    | 2   | No    |      |       |       | 163   | 76    |
| 4088   |      | 2   | No              |      | 2   | No             |      | 2   | No    |      |       |       | 178   | 80    |
| 4089   |      | 2   | No              |      | 2   | No             |      | 2   | No    |      |       |       | 145   | 55    |
| 4090   |      | 2   | No              |      | 2   | No             |      | 2   | No    |      | 5     | 9     |       | 75    |
| 4093   | 1    | 1   | Yes             | 1    | 1   | Yes            | 1    | 2   | No    |      |       |       | 170   | 87    |
| 4094   |      | 2   | No              |      | 2   | No             |      | 2   | No    |      |       |       | 173   | 59    |
| 4095   | 2    | 2   | No              |      | 1   | Yes            | 2    | 2   | No    |      |       |       | 165   | 59    |
| 4096   |      | 2   | No              |      | 2   | No             |      | 2   | No    |      |       |       | 168   | 53    |
| 4098   |      | 2   | No              |      | 2   | No             |      | 2   | No    |      |       |       | 165   | 78    |
| 4103   |      | 2   | No              |      | 1   | Yes            | 2    | 2   | No    |      |       |       | 180   | 84    |
| 4104   |      | 2   | No              |      | 1   | Yes            | 2    | 2   | No    |      |       |       | 164   | 64    |
| 4107   |      | 2   | No              |      | 2   | No             |      | 2   | No    |      |       |       | 180   | 83    |
| 4109   |      | 2   | No              |      | 2   | No             |      | 2   | No    |      |       |       | 160   | 48    |
| 4110   |      | 2   | No              |      | 2   | No             |      | 2   | No    |      |       |       | 167   | 56    |
| 4113   |      | 2   | No              |      | 2   | No             |      | 2   | No    |      |       |       | 153   | 50    |
| 4114   | 1    | 2   | No              |      | 2   | No             |      | 2   | No    |      |       |       | 172   | 84    |
| 4116   |      | 2   | No              |      | 1   | Yes            | 1    | 2   | No    |      |       |       | 160   | 72    |
| 4119   | 2    | 2   | No              |      | 2   | No             |      | 2   | No    |      |       |       | 177   | 73    |
| 4120   |      | 2   | No              |      | 2   | No             |      | 2   | No    |      |       |       | 159   | 70    |
| 4121   |      | 2   | No              |      | 2   | No             |      | 2   | No    |      |       |       | 150   | 62    |
| 4122   | 1    | 2   | No              |      | 1   | Yes            | 1    | 2   | No    |      |       |       | 166   | 72    |
| 4124   |      | 2   | No              |      | 2   | No             |      | 2   | No    |      |       |       | 161   | 58    |
| 4126   |      | 2   | No              |      | 1   | Yes            | 2    | 2   | No    |      |       |       | 155   | 50    |
| 4127   |      | 2   | No              |      | 2   | No             |      | 2   | No    |      |       |       | 170   | 63    |
| 4131   |      | 2   | No              |      | 2   | No             |      | 2   | No    |      |       |       | 161   | 53    |
| 4134   |      | 2   | No              |      | 2   | No             |      | 2   | No    |      |       |       | 160   | 59    |
| 4144   | 1    | 2   | No              |      | 2   | No             |      | 2   | No    |      |       |       | 172   | 74    |
| 4145   |      | 2   | No              |      | 2   | No             |      | 2   | No    |      |       |       | 181   | 108   |



| respid | Q11a | Q12 | Cardiac Disease | Q12a | Q13 | Hyperlipidemia | Q13a | Q14 | Neuro | Q14a | Q15_1 | Q15_2 | Q15_3 | Q16_1 |
|--------|------|-----|-----------------|------|-----|----------------|------|-----|-------|------|-------|-------|-------|-------|
| 4146   | 1    | 2   | No              |      | 2   | No             |      | 2   | No    |      |       |       | 174   | 80    |
| 4147   |      | 2   | No              |      | 1   | Yes            | 2    | 2   | No    |      |       |       | 175   | 75    |
| 4149   |      | 2   | No              |      | 2   | No             |      | 2   | No    |      |       |       | 154   | 60    |
| 4150   |      | 2   | No              |      | 2   | No             |      | 2   | No    |      |       |       | 174   | 71    |
| 4151   |      | 2   | No              |      | 2   | No             |      | 2   | No    |      |       |       | 164   | 54    |
| 4153   |      | 2   | No              |      | 2   | No             |      | 2   | No    |      |       |       | 153   | 47    |
| 4155   |      | 2   | No              |      | 2   | No             |      | 2   | No    |      |       |       | 150   | 50    |
| 4157   | 1    | 2   | No              |      | 2   | No             |      | 2   | No    |      |       |       | 172   | 75    |
| 4159   |      | 2   | No              |      | 2   | No             |      | 2   | No    |      |       |       | 162   | 52    |
| 4160   |      | 2   | No              |      | 2   | No             |      | 2   | No    |      |       |       | 175   | 70    |
| 4161   |      | 2   | No              |      | 1   | Yes            | 2    | 2   | No    |      |       |       | 168   | 77    |
| 4163   |      | 2   | No              |      | 2   | No             |      | 2   | No    |      |       |       | 151   | 53    |
| 4164   | 2    | 2   | No              |      | 2   | No             |      | 2   | No    |      |       |       | 172   | 70    |
| 4165   |      | 2   | No              |      | 2   | No             |      | 2   | No    |      |       |       | 161   | 51    |
| 4166   |      | 2   | No              |      | 1   | Yes            | 2    | 2   | No    |      |       |       | 172   | 63    |
| 4167   |      | 2   | No              |      | 2   | No             |      | 2   | No    |      |       |       | 150   | 50    |
| 4170   |      | 2   | No              |      | 2   | No             |      | 2   | No    |      |       |       | 156   | 47    |
| 4172   |      | 2   | No              |      | 1   | Yes            | 2    | 2   | No    |      |       |       | 170   | 62    |
| 4173   |      | 2   | No              |      | 2   | No             |      | 2   | No    |      |       |       | 167   | 61    |
| 4180   |      | 2   | No              |      | 1   | Yes            | 2    | 2   | No    |      |       |       | 161   | 58    |
| 4185   |      | 2   | No              |      | 2   | No             |      | 2   | No    |      |       |       | 173   | 70    |
| 4187   |      | 2   | No              |      | 1   | Yes            | 2    | 2   | No    |      |       |       | 163   | 65    |
| 4190   |      | 2   | No              |      | 1   | Yes            | 1    | 2   | No    |      |       |       | 178   | 73    |
| 4191   | 2    | 2   | No              |      | 2   | No             |      | 2   | No    |      |       |       | 165   | 54    |
| 4193   | 1    | 2   | No              |      | 2   | No             |      | 2   | No    |      |       |       | 154   | 60    |
| 4194   | 2    | 2   | No              |      | 1   | Yes            | 2    | 2   | No    |      |       |       | 165   | 75    |
| 4195   | 2    | 2   | No              |      | 1   | Yes            | 2    | 2   | No    |      |       |       | 171   | 75    |
| 4196   |      | 2   | No              |      | 2   | No             |      | 2   | No    |      |       |       | 155   | 50    |
| 4197   |      | 2   | No              |      | 2   | No             |      | 2   | No    |      |       |       | 150   | 55    |
| 4198   |      | 2   | No              |      | 2   | No             |      | 2   | No    |      |       |       | 175   | 73    |
| 4199   |      | 2   | No              |      | 2   | No             |      | 2   | No    |      |       |       | 153   | 45    |
| 4205   |      | 2   | No              |      | 2   | No             |      | 2   | No    |      |       |       | 160   | 63    |

| respid | Q11a | Q12 | Cardiac Disease | Q12a | Q13 | Hyperlipidemia | Q13a | Q14 | Neuro | Q14a | Q15_1 | Q15_2 | Q15_3 | Q16_1 |
|--------|------|-----|-----------------|------|-----|----------------|------|-----|-------|------|-------|-------|-------|-------|
| 4206   |      | 2   | No              |      | 2   | No             |      | 1   | Yes   | 2    |       |       | 165   | 80    |
| 4207   |      | 2   | No              |      | 2   | No             |      | 2   | No    |      |       |       | 171   | 71    |
| 4214   |      | 2   | No              |      | 2   | No             |      | 2   | No    |      |       |       | 167   | 58    |
| 4215   |      | 2   | No              |      | 2   | No             |      | 2   | No    |      |       |       | 178   | 84    |
| 4217   |      | 2   | No              |      | 2   | No             |      | 2   | No    |      |       |       | 178   | 72    |
| 4219   |      | 2   | No              |      | 2   | No             |      | 2   | No    |      |       |       | 164   | 59    |
| 4223   |      | 2   | No              |      | 2   | No             |      | 2   | No    |      |       |       | 160   | 55    |
| 4226   |      | 2   | No              |      | 1   | Yes            | 1    | 2   | No    |      |       |       | 180   | 85    |
| 4229   |      | 2   | No              |      | 1   | Yes            | 2    | 2   | No    |      |       |       | 165   | 60    |
| 4230   |      | 2   | No              |      | 2   | No             |      | 2   | No    |      |       |       | 173   | 74    |
| 4232   |      | 2   | No              |      | 2   | No             |      | 2   | No    |      |       |       | 150   | 47    |
| 4233   | 2    | 2   | No              |      | 2   | No             |      | 2   | No    |      |       |       | 168   | 60    |
| 4234   |      | 2   | No              |      | 2   | No             |      | 2   | No    |      |       |       | 154   | 42    |
| 4235   |      | 1   | Yes             | 2    | 1   | Yes            | 2    | 2   | No    |      |       |       | 175   | 85    |
| 4236   |      | 2   | No              |      | 2   | No             |      | 2   | No    |      |       |       | 159   | 61    |
| 4237   |      | 2   | No              |      | 2   | No             |      | 2   | No    |      |       |       | 153   | 55    |
| 4238   | 2    | 2   | No              |      | 2   | No             |      | 2   | No    |      |       |       | 172   | 80    |
| 4240   |      | 2   | No              |      | 2   | No             |      | 2   | No    |      |       |       | 160   | 63    |
| 4241   |      | 2   | No              |      | 2   | No             |      | 2   | No    |      |       |       | 169   | 59    |
| 4247   |      | 2   | No              |      | 2   | No             |      | 2   | No    |      |       |       | 173   | 65    |
| 4250   |      | 2   | No              |      | 2   | No             |      | 2   | No    |      |       |       | 160   | 70    |
| 4251   | 1    | 2   | No              |      | 2   | No             |      | 2   | No    |      |       |       | 165   | 77    |
| 4253   |      | 2   | No              |      | 1   | Yes            | 2    | 2   | No    |      |       |       | 172   | 70    |
| 4254   |      | 2   | No              |      | 2   | No             |      | 2   | No    |      |       |       | 152   | 52    |
| 4258   | 2    | 1   | Yes             | 2    | 1   | Yes            | 2    | 2   | No    |      |       |       | 168   | 88    |
| 4260   |      | 2   | No              |      | 2   | No             |      | 2   | No    |      |       |       | 159   | 50    |
| 4263   |      | 2   | No              |      | 2   | No             |      | 2   | No    |      |       |       | 155   | 57    |
| 4265   |      | 2   | No              |      | 2   | No             |      | 2   | No    |      |       |       | 178   | 80    |
| 4266   | 1    | 2   | No              |      | 1   | Yes            | 2    | 2   | No    |      |       |       | 176   | 72    |
| 4267   | 1    | 2   | No              |      | 2   | No             |      | 2   | No    |      |       |       | 176   | 78    |
| 4270   |      | 2   | No              |      | 2   | No             |      | 2   | No    |      |       |       | 170   | 70    |
| 4273   |      | 2   | No              |      | 2   | No             |      | 2   | No    |      |       |       | 150   | 49    |

| respid | Q11a | Q12 | Cardiac Disease | Q12a | Q13 | Hyperlipidemia | Q13a | Q14 | Neuro | Q14a | Q15_1 | Q15_2 | Q15_3 | Q16_1 |
|--------|------|-----|-----------------|------|-----|----------------|------|-----|-------|------|-------|-------|-------|-------|
| 4280   |      | 2   | No              |      | 2   | No             |      | 2   | No    |      |       |       | 173   | 75    |
| 4281   | 2    | 2   | No              |      | 2   | No             |      | 2   | No    |      |       |       | 170   | 75    |
| 4282   |      | 2   | No              |      | 2   | No             |      | 2   | No    |      |       |       | 173   | 67    |
| 4283   |      | 2   | No              |      | 2   | No             |      | 2   | No    |      |       |       | 163   | 58    |
| 4286   | 1    | 2   | No              |      | 1   | Yes            | 2    | 2   | No    |      |       |       | 165   | 81    |
| 4287   |      | 2   | No              |      | 2   | No             |      | 2   | No    |      |       |       | 175   | 57    |
| 4289   |      | 2   | No              |      | 2   | No             |      | 2   | No    |      |       |       | 156   | 44    |
| 4290   |      | 2   | No              |      | 2   | No             |      | 2   | No    |      |       |       | 173   | 64    |
| 4291   |      | 2   | No              |      | 1   | Yes            | 2    | 2   | No    |      |       |       | 151   | 57    |
| 4292   | 2    | 2   | No              |      | 2   | No             |      | 2   | No    |      |       |       | 180   | 80    |
| 4293   |      | 2   | No              |      | 2   | No             |      | 2   | No    |      |       |       | 172   | 85    |
| 4294   |      | 2   | No              |      | 2   | No             |      | 2   | No    |      |       |       | 159   | 47    |
| 4295   |      | 2   | No              |      | 2   | No             |      | 2   | No    |      |       |       | 160   | 43    |
| 4296   |      | 2   | No              |      | 2   | No             |      | 2   | No    |      |       |       | 171   | 47    |
| 4297   | 1    | 1   | Yes             | 2    | 1   | Yes            | 1    | 2   | No    |      |       |       | 174   | 80    |
| 4298   |      | 2   | No              |      | 1   | Yes            | 2    | 2   | No    |      |       |       | 155   | 57    |
| 4299   | 2    | 2   | No              |      | 1   | Yes            | 2    | 2   | No    |      |       |       | 162   | 72    |
| 4300   |      | 2   | No              |      | 2   | No             |      | 2   | No    |      |       |       | 165   | 53    |
| 4301   |      | 2   | No              |      | 2   | No             |      | 2   | No    |      |       |       | 158   | 47    |
| 4302   |      | 2   | No              |      | 2   | No             |      | 2   | No    |      |       |       | 158   | 62    |
| 4304   |      | 2   | No              |      | 1   | Yes            | 2    | 2   | No    |      |       |       | 170   | 69    |
| 4305   |      | 2   | No              |      | 1   | Yes            | 2    | 2   | No    |      |       |       | 178   | 75    |
| 4307   |      | 2   | No              |      | 2   | No             |      | 2   | No    |      |       |       | 179   | 65    |
| 4308   |      | 2   | No              |      | 2   | No             |      | 2   | No    |      |       |       | 177   | 82    |
| 4312   |      | 2   | No              |      | 2   | No             |      | 2   | No    |      |       |       | 163   | 55    |
| 4314   | 2    | 2   | No              |      | 2   | No             |      | 2   | No    |      |       |       | 159   | 52    |
| 4316   | 2    | 2   | No              |      | 2   | No             |      | 2   | No    |      |       |       | 175   | 88    |
| 4317   | 2    | 2   | No              |      | 2   | No             |      | 2   | No    |      |       |       | 163   | 70    |
| 4319   |      | 2   | No              |      | 2   | No             |      | 2   | No    |      |       |       | 158   | 56    |
| 4323   |      | 2   | No              |      | 2   | No             |      | 2   | No    |      |       |       | 158   | 51    |
| 4337   |      | 2   | No              |      | 2   | No             |      | 2   | No    |      |       |       | 166   | 55    |
| 4341   |      | 2   | No              |      | 2   | No             |      | 2   | No    |      |       |       | 160   | 48    |

| respid | Q11a | Q12 | Cardiac Disease | Q12a | Q13 | Hyperlipidemia | Q13a | Q14 | Neuro | Q14a | Q15_1 | Q15_2 | Q15_3 | Q16_1 |
|--------|------|-----|-----------------|------|-----|----------------|------|-----|-------|------|-------|-------|-------|-------|
| 4342   | 2    | 2   | No              |      | 1   | Yes            | 2    | 1   | Yes   | 1    |       |       | 167   | 80    |
| 4344   |      | 2   | No              |      | 2   | No             |      | 2   | No    |      |       |       | 170   | 67    |
| 4345   |      | 2   | No              |      | 2   | No             |      | 2   | No    |      |       |       | 160   | 59    |
| 4346   |      | 2   | No              |      | 1   | Yes            | 1    | 2   | No    |      |       |       | 155   | 60    |
| 4347   |      | 2   | No              |      | 2   | No             |      | 2   | No    |      |       |       | 175   | 65    |
| 4350   |      | 2   | No              |      | 2   | No             |      | 2   | No    |      |       |       | 165   | 58    |
| 4352   |      | 2   | No              |      | 2   | No             |      | 2   | No    |      |       |       | 160   | 50    |
| 4353   |      | 2   | No              |      | 2   | No             |      | 2   | No    |      |       |       | 162   | 62    |
| 4355   |      | 2   | No              |      | 1   | Yes            | 2    | 2   | No    |      |       |       | 173   | 70    |
| 4356   |      | 2   | No              |      | 2   | No             |      | 2   | No    |      |       |       | 172   | 68    |
| 4358   |      | 2   | No              |      | 1   | Yes            | 2    | 2   | No    |      |       |       | 174   | 71    |
| 4359   | 2    | 2   | No              |      | 2   | No             |      | 2   | No    |      |       |       | 167   | 73    |
| 4360   |      | 2   | No              |      | 2   | No             |      | 2   | No    |      |       |       | 184   | 79    |
| 4361   | 1    | 2   | No              |      | 1   | Yes            | 2    | 2   | No    |      |       |       | 177   | 77    |
| 4363   |      | 2   | No              |      | 2   | No             |      | 2   | No    |      |       |       | 167   | 60    |
| 4364   |      | 2   | No              |      | 1   | Yes            | 2    | 2   | No    |      |       |       | 159   | 65    |
| 4365   | 1    | 2   | No              |      | 2   | No             |      | 1   | Yes   | 1    |       |       | 160   | 65    |
| 4367   |      | 2   | No              |      | 2   | No             |      | 2   | No    |      |       |       | 173   | 60    |
| 4369   |      | 2   | No              |      | 2   | No             |      | 2   | No    |      |       |       | 172   | 62    |
| 4373   | 2    | 2   | No              |      | 2   | No             |      | 2   | No    |      |       |       | 154   | 54    |
| 4374   |      | 2   | No              |      | 2   | No             |      | 2   | No    |      |       |       | 155   | 58    |
| 4375   |      | 2   | No              |      | 2   | No             |      | 2   | No    |      |       |       | 164   | 53    |
| 4378   |      | 2   | No              |      | 1   | Yes            | 2    | 2   | No    |      |       |       | 151   | 58    |
| 4379   |      | 2   | No              |      | 2   | No             |      | 2   | No    |      |       |       | 165   | 55    |
| 4382   |      | 2   | No              |      | 1   | Yes            | 1    | 2   | No    |      |       |       | 179   | 95    |
| 4383   |      | 2   | No              |      | 2   | No             |      | 2   | No    |      |       |       | 161   | 60    |
| 4384   |      | 2   | No              |      | 2   | No             |      | 2   | No    |      |       |       | 168   | 74    |
| 4385   |      | 2   | No              |      | 2   | No             |      | 2   | No    |      |       |       | 169   | 76    |
| 4388   |      | 2   | No              |      | 2   | No             |      | 2   | No    |      |       |       | 172   | 80    |
| 4389   |      | 2   | No              |      | 1   | Yes            | 2    | 2   | No    |      |       |       | 164   | 63    |
| 4391   |      | 2   | No              |      | 2   | No             |      | 2   | No    |      |       |       | 156   | 49    |
| 4392   |      | 2   | No              |      | 2   | No             |      | 2   | No    |      |       |       | 172   | 64    |

| respid | Q11a | Q12 | Cardiac Disease | Q12a | Q13 | Hyperlipidemia | Q13a | Q14 | Neuro | Q14a | Q15_1 | Q15_2 | Q15_3 | Q16_1 |
|--------|------|-----|-----------------|------|-----|----------------|------|-----|-------|------|-------|-------|-------|-------|
| 4393   |      | 2   | No              |      | 2   | No             |      | 2   | No    |      |       |       | 160   | 45    |
| 4395   |      | 2   | No              |      | 2   | No             |      | 2   | No    |      |       |       | 170   | 65    |
| 4397   |      | 2   | No              |      | 2   | No             |      | 2   | No    |      |       |       | 163   | 60    |
| 4398   |      | 2   | No              |      | 1   | Yes            | 2    | 2   | No    |      |       |       | 160   | 80    |
| 4399   |      | 2   | No              |      | 2   | No             |      | 2   | No    |      |       |       | 171   | 80    |
| 4400   |      | 2   | No              |      | 2   | No             |      | 2   | No    |      |       |       | 180   | 65    |
| 4401   |      | 2   | No              |      | 2   | No             |      | 2   | No    |      |       |       | 160   | 81    |
| 4402   |      | 2   | No              |      | 2   | No             |      | 2   | No    |      |       |       | 162   | 65    |
| 4404   |      | 2   | No              |      | 2   | No             |      | 2   | No    |      |       |       | 161   | 52    |
| 4405   | 1    | 2   | No              |      | 2   | No             |      | 2   | No    |      |       |       | 167   | 89    |
| 4407   | 1    | 1   | Yes             | 2    | 2   | No             |      | 2   | No    |      |       |       | 180   | 95    |
| 4408   |      | 2   | No              |      | 2   | No             |      | 2   | No    |      |       |       | 167   | 59    |
| 4411   |      | 2   | No              |      | 2   | No             |      | 2   | No    |      |       |       | 179   | 85    |
| 4420   |      | 2   | No              |      | 2   | No             |      | 2   | No    |      |       |       | 160   | 66    |
| 4421   |      | 2   | No              |      | 2   | No             |      | 2   | No    |      |       |       | 158   | 53    |
| 4424   |      | 2   | No              |      | 2   | No             |      | 2   | No    |      |       |       | 173   | 65    |
| 4425   |      | 2   | No              |      | 2   | No             |      | 2   | No    |      |       |       | 162   | 49    |
| 4427   |      | 2   | No              |      | 1   | Yes            | 2    | 2   | No    |      |       |       | 165   | 65    |
| 4430   |      | 2   | No              |      | 2   | No             |      | 2   | No    |      |       |       | 150   | 55    |
| 4431   |      | 2   | No              |      | 2   | No             |      | 2   | No    |      |       |       | 160   | 55    |
| 4432   |      | 2   | No              |      | 2   | No             |      | 2   | No    |      |       |       | 170   | 58    |
| 4436   |      | 2   | No              |      | 2   | No             |      | 2   | No    |      |       |       | 160   | 59    |
| 4439   |      | 2   | No              |      | 1   | Yes            | 2    | 2   | No    |      |       |       | 171   | 73    |
| 4451   |      | 2   | No              |      | 2   | No             |      | 2   | No    |      |       |       | 170   | 74    |
| 4452   | 1    | 2   | No              |      | 2   | No             |      | 2   | No    |      |       |       | 175   | 68    |
| 4458   | 1    | 2   | No              |      | 2   | No             |      | 2   | No    |      |       |       | 173   | 75    |
| 4464   |      | 2   | No              |      | 2   | No             |      | 2   | No    |      |       |       | 154   | 51    |
| 4465   | 1    | 2   | No              |      | 2   | No             |      | 2   | No    |      |       |       | 162   | 63    |
| 4467   | 1    | 2   | No              |      | 2   | No             |      | 2   | No    |      |       |       | 170   | 64    |
| 4470   |      | 2   | No              |      | 1   | Yes            | 2    | 2   | No    |      |       |       | 170   | 71    |
| 4471   |      | 2   | No              |      | 2   | No             |      | 2   | No    |      |       |       | 170   | 63    |
| 4472   |      | 2   | No              |      | 1   | Yes            | 2    | 2   | No    |      |       |       | 166   | 61    |

| respid | Q11a | Q12 | Cardiac Disease | Q12a | Q13 | Hyperlipidemia | Q13a | Q14 | Neuro | Q14a | Q15_1 | Q15_2 | Q15_3 | Q16_1 |
|--------|------|-----|-----------------|------|-----|----------------|------|-----|-------|------|-------|-------|-------|-------|
| 4473   |      | 2   | No              |      | 2   | No             |      | 2   | No    |      |       |       | 178   | 71    |
| 4475   |      | 2   | No              |      | 2   | No             |      | 2   | No    |      |       |       | 160   | 53    |
| 4476   |      | 2   | No              |      | 2   | No             |      | 2   | No    |      |       |       | 160   | 50    |
| 4478   |      | 2   | No              |      | 2   | No             |      | 2   | No    |      |       |       | 174   | 66    |
| 4485   |      | 2   | No              |      | 2   | No             |      | 2   | No    |      |       |       | 171   | 75    |
| 4486   |      | 2   | No              |      | 2   | No             |      | 2   | No    |      |       |       | 158   | 54    |
| 4490   |      | 2   | No              |      | 2   | No             |      | 2   | No    |      |       |       | 171   | 52    |
| 4502   |      | 2   | No              |      | 2   | No             |      | 2   | No    |      |       |       | 178   | 78    |
| 4503   |      | 2   | No              |      | 2   | No             |      | 2   | No    |      |       |       | 155   | 67    |
| 4504   |      | 2   | No              |      | 2   | No             |      | 2   | No    |      |       |       | 166   | 58    |
| 4506   |      | 2   | No              |      | 2   | No             |      | 2   | No    |      |       |       | 163   | 53    |
| 4508   |      | 2   | No              |      | 2   | No             |      | 2   | No    |      |       |       | 162   | 70    |
| 4515   | 1    | 2   | No              |      | 2   | No             |      | 2   | No    |      |       |       | 176   | 74    |
| 4516   |      | 2   | No              |      | 1   | Yes            | 2    | 2   | No    |      |       |       | 167   | 70    |
| 4519   | 1    | 1   | Yes             | 1    | 1   | Yes            | 2    | 2   | No    |      |       |       | 166   | 92    |
| 4523   |      | 2   | No              |      | 2   | No             |      | 2   | No    |      |       |       | 165   | 52    |
| 4525   | 1    | 2   | No              |      | 2   | No             |      | 2   | No    |      |       |       | 179   | 75    |
| 4526   |      | 2   | No              |      | 2   | No             |      | 2   | No    |      |       |       | 173   | 57    |
| 4528   |      | 2   | No              |      | 2   | No             |      | 2   | No    |      |       |       | 165   | 60    |
| 4530   |      | 2   | No              |      | 2   | No             |      | 2   | No    |      |       |       | 174   | 85    |
| 4531   |      | 2   | No              |      | 2   | No             |      | 2   | No    |      |       |       | 163   | 80    |
| 4532   |      | 2   | No              |      | 2   | No             |      | 2   | No    |      |       |       | 172   | 70    |
| 4537   | 1    | 2   | No              |      | 1   | Yes            | 1    | 2   | No    |      |       |       | 171   | 77    |
| 4538   |      | 2   | No              |      | 2   | No             |      | 2   | No    |      |       |       | 160   | 53    |
| 4539   |      | 2   | No              |      | 2   | No             |      | 2   | No    |      |       |       | 158   | 74    |
| 4541   |      | 2   | No              |      | 2   | No             |      | 2   | No    |      |       |       | 170   | 65    |
| 4543   |      | 2   | No              |      | 2   | No             |      | 2   | No    |      |       |       | 163   | 70    |
| 4544   |      | 2   | No              |      | 2   | No             |      | 2   | No    |      |       |       | 160   | 60    |
| 4546   |      | 2   | No              |      | 1   | Yes            | 1    | 2   | No    |      |       |       | 165   | 72    |
| 4547   | 1    | 2   | No              |      | 2   | No             |      | 2   | No    |      |       |       | 153   | 63    |
| 4549   | 2    | 2   | No              |      | 2   | No             |      | 2   | No    |      |       |       | 152   | 80    |
| 4550   |      | 2   | No              |      | 2   | No             |      | 2   | No    |      |       |       | 172   | 50    |

| respid | Q11a | Q12 | Cardiac Disease | Q12a | Q13 | Hyperlipidemia | Q13a | Q14 | Neuro | Q14a | Q15_1 | Q15_2 | Q15_3 | Q16_1 |
|--------|------|-----|-----------------|------|-----|----------------|------|-----|-------|------|-------|-------|-------|-------|
| 4551   |      | 2   | No              |      | 1   | Yes            | 2    | 2   | No    |      |       |       | 178   | 88    |
| 4554   |      | 2   | No              |      | 2   | No             |      | 2   | No    |      |       |       | 170   | 55    |
| 4557   |      | 2   | No              |      | 2   | No             |      | 2   | No    |      |       |       | 170   | 65    |
| 4565   |      | 2   | No              |      | 2   | No             |      | 2   | No    |      |       |       | 154   | 51    |
| 4568   |      | 2   | No              |      | 2   | No             |      | 2   | No    |      |       |       | 174   | 70    |
| 4569   |      | 2   | No              |      | 2   | No             |      | 2   | No    |      |       |       | 157   | 60    |
| 4570   |      | 2   | No              |      | 2   | No             |      | 2   | No    |      |       |       | 168   | 65    |
| 4572   |      | 2   | No              |      | 2   | No             |      | 2   | No    |      |       |       | 160   | 78    |
| 4574   | 1    | 2   | No              |      | 1   | Yes            | 2    | 2   | No    |      |       |       | 175   | 65    |
| 4576   |      | 2   | No              |      | 2   | No             |      | 2   | No    |      |       |       | 157   | 59    |
| 4578   | 1    | 2   | No              |      | 1   | Yes            | 1    | 2   | No    |      |       |       | 175   | 80    |
| 4579   |      | 2   | No              |      | 2   | No             |      | 2   | No    |      |       |       | 168   | 63    |
| 4580   |      | 2   | No              |      | 2   | No             |      | 2   | No    |      |       |       | 155   | 54    |
| 4581   |      | 2   | No              |      | 2   | No             |      | 2   | No    |      |       |       | 173   | 66    |
| 4584   |      | 2   | No              |      | 2   | No             |      | 2   | No    |      |       |       | 170   | 80    |
| 4586   |      | 2   | No              |      | 1   | Yes            | 2    | 2   | No    |      |       |       | 172   | 73    |
| 4587   |      | 2   | No              |      | 2   | No             |      | 2   | No    |      |       |       | 160   | 45    |
| 4590   | 1    | 2   | No              |      | 1   | Yes            | 2    | 2   | No    |      |       |       | 164   | 65    |
| 4592   |      | 2   | No              |      | 2   | No             |      | 2   | No    |      |       |       | 160   | 48    |
| 4593   | 2    | 2   | No              |      | 2   | No             |      | 2   | No    |      |       |       | 166   | 58    |
| 4595   |      | 2   | No              |      | 2   | No             |      | 2   | No    |      |       |       | 172   | 81    |
| 4597   |      | 2   | No              |      | 2   | No             |      | 2   | No    |      |       |       | 160   | 70    |
| 4598   |      | 2   | No              |      | 2   | No             |      | 2   | No    |      |       |       | 172   | 75    |
| 4599   |      | 2   | No              |      | 2   | No             |      | 2   | No    |      |       |       | 170   | 50    |
| 4600   |      | 2   | No              |      | 2   | No             |      | 2   | No    |      |       |       | 160   | 70    |
| 4601   |      | 2   | No              |      | 2   | No             |      | 2   | No    |      |       |       | 158   | 40    |
| 4608   |      | 2   | No              |      | 2   | No             |      | 2   | No    |      |       |       | 165   | 68    |
| 4609   |      | 2   | No              |      | 2   | No             |      | 2   | No    |      |       |       | 172   | 74    |
| 4611   |      | 2   | No              |      | 2   | No             |      | 2   | No    |      |       |       | 153   | 61    |
| 4612   |      | 2   | No              |      | 2   | No             |      | 2   | No    |      |       |       | 165   | 70    |
| 4613   |      | 2   | No              |      | 1   | Yes            | 2    | 2   | No    |      |       |       | 174   | 80    |
| 4616   | 1    | 2   | No              |      | 2   | No             |      | 2   | No    |      |       |       | 173   | 78    |

| respid | Q11a | Q12 | Cardiac Disease | Q12a | Q13 | Hyperlipidemia | Q13a | Q14 | Neuro | Q14a | Q15_1 | Q15_2 | Q15_3 | Q16_1 |
|--------|------|-----|-----------------|------|-----|----------------|------|-----|-------|------|-------|-------|-------|-------|
| 4617   |      | 2   | No              |      | 2   | No             |      | 2   | No    |      |       |       | 162   | 65    |
| 4620   |      | 2   | No              |      | 2   | No             |      | 2   | No    |      |       |       | 158   | 48    |
| 4621   | 1    | 2   | No              |      | 2   | No             |      | 2   | No    |      |       |       | 170   | 80    |
| 4622   | 2    | 2   | No              |      | 2   | No             |      | 2   | No    |      |       |       | 176   | 82    |
| 4624   |      | 2   | No              |      | 1   | Yes            | 2    | 2   | No    |      |       |       | 165   | 60    |
| 4625   |      | 2   | No              |      | 2   | No             |      | 2   | No    |      |       |       | 174   | 65    |
| 4627   | 1    | 2   | No              |      | 1   | Yes            | 1    | 2   | No    |      |       |       | 167   | 76    |
| 4628   |      | 2   | No              |      | 2   | No             |      | 2   | No    |      |       |       | 170   | 60    |
| 4629   | 2    | 2   | No              |      | 2   | No             |      | 2   | No    |      |       |       | 171   | 55    |
| 4630   |      | 2   | No              |      | 2   | No             |      | 2   | No    |      |       |       | 156   | 66    |
| 4632   |      | 2   | No              |      | 2   | No             |      | 2   | No    |      |       |       | 173   | 70    |
| 4634   |      | 1   | Yes             | 2    | 2   | No             |      | 2   | No    |      |       |       | 160   | 52    |
| 4635   | 1    | 2   | No              |      | 2   | No             |      | 2   | No    |      |       |       | 173   | 70    |
| 4636   |      | 2   | No              |      | 1   | Yes            | 2    | 2   | No    |      |       |       | 173   | 70    |
| 4637   |      | 2   | No              |      | 2   | No             |      | 2   | No    |      |       |       | 170   | 70    |
| 4638   | 2    | 2   | No              |      | 2   | No             |      | 2   | No    |      |       |       | 174   | 66    |
| 4639   |      | 2   | No              |      | 2   | No             |      | 2   | No    |      |       |       | 162   | 68    |
| 4641   |      | 2   | No              |      | 2   | No             |      | 2   | No    |      |       |       | 160   | 65    |
| 4643   |      | 2   | No              |      | 1   | Yes            | 2    | 2   | No    |      |       |       | 183   | 76    |
| 4645   |      | 2   | No              |      | 2   | No             |      | 2   | No    |      |       |       | 168   | 65    |
| 4646   |      | 2   | No              |      | 1   | Yes            | 2    | 2   | No    |      |       |       | 158   | 53    |
| 4647   |      | 1   | Yes             | 2    | 2   | No             |      | 1   | Yes   | 1    |       |       | 163   | 50    |
| 4648   |      | 2   | No              |      | 2   | No             |      | 2   | No    |      |       |       | 161   | 59    |
| 4649   |      | 2   | No              |      | 1   | Yes            | 2    | 2   | No    |      |       |       | 161   | 65    |
| 4650   | 1    | 2   | No              |      | 1   | Yes            | 2    | 2   | No    |      |       |       | 165   | 85    |
| 4651   | 1    | 2   | No              |      | 2   | No             |      | 2   | No    |      |       |       | 165   | 80    |
| 4652   |      | 2   | No              |      | 2   | No             |      | 2   | No    |      |       |       | 158   | 49    |
| 4653   |      | 2   | No              |      | 2   | No             |      | 2   | No    |      |       |       | 160   | 58    |
| 4657   |      | 2   | No              |      | 2   | No             |      | 2   | No    |      |       |       | 171   | 70    |
| 4660   |      | 2   | No              |      | 2   | No             |      | 2   | No    |      |       |       | 150   | 40    |
| 4661   |      | 2   | No              |      | 2   | No             |      | 2   | No    |      |       |       | 163   | 49    |
| 4662   | 1    | 2   | No              |      | 1   | Yes            | 2    | 2   | No    |      |       |       | 158   | 60    |



| respid | Q11a | Q12 | Cardiac Disease | Q12a | Q13 | Hyperlipidemia | Q13a | Q14 | Neuro | Q14a | Q15_1 | Q15_2 | Q15_3 | Q16_1 |
|--------|------|-----|-----------------|------|-----|----------------|------|-----|-------|------|-------|-------|-------|-------|
| 4667   |      | 2   | No              |      | 2   | No             |      | 2   | No    |      |       |       | 173   | 66    |
| 4669   |      | 2   | No              |      | 2   | No             |      | 2   | No    |      |       |       | 165   | 53    |
| 4671   |      | 2   | No              |      | 2   | No             |      | 2   | No    |      |       |       | 175   | 80    |
| 4672   | 2    | 2   | No              |      | 1   | Yes            | 2    | 2   | No    |      |       |       | 175   | 90    |
| 4673   | 1    | 2   | No              |      | 1   | Yes            | 2    | 2   | No    |      |       |       | 160   | 65    |
| 4677   |      | 2   | No              |      | 2   | No             |      | 2   | No    |      |       |       | 156   | 54    |
| 4679   |      | 2   | No              |      | 2   | No             |      | 2   | No    |      |       |       | 175   | 70    |
| 4683   |      | 2   | No              |      | 2   | No             |      | 2   | No    |      |       |       | 172   | 62    |
| 4684   |      | 2   | No              |      | 2   | No             |      | 2   | No    |      |       |       | 162   | 62    |
| 4685   |      | 2   | No              |      | 1   | Yes            | 2    | 2   | No    |      |       |       | 172   | 81    |
| 4686   |      | 2   | No              |      | 2   | No             |      | 2   | No    |      |       |       | 172   | 80    |
| 4687   | 1    | 2   | No              |      | 1   | Yes            | 2    | 2   | No    |      |       |       | 178   | 85    |
| 4688   |      | 2   | No              |      | 1   | Yes            | 2    | 2   | No    |      |       |       | 175   | 70    |
| 4691   |      | 2   | No              |      | 2   | No             |      | 2   | No    |      |       |       | 180   | 80    |
| 4692   |      | 2   | No              |      | 2   | No             |      | 2   | No    |      |       |       | 158   | 53    |
| 4694   | 2    | 1   | Yes             | 2    | 1   | Yes            | 2    | 2   | No    |      |       |       | 160   | 56    |
| 4695   |      | 2   | No              |      | 1   | Yes            | 1    | 2   | No    |      |       |       | 173   | 78    |
| 4696   | 1    | 2   | No              |      | 1   | Yes            | 2    | 2   | No    |      |       |       | 170   | 76    |
| 4697   |      | 2   | No              |      | 2   | No             |      | 2   | No    |      |       |       | 166   | 52    |
| 4698   | 1    | 2   | No              |      | 2   | No             |      | 2   | No    |      |       |       | 170   | 70    |
| 4699   | 1    | 2   | No              |      | 1   | Yes            | 1    | 2   | No    |      |       |       | 168   | 63    |
| 4701   |      | 2   | No              |      | 2   | No             |      | 2   | No    |      |       |       | 150   | 50    |
| 4703   |      | 2   | No              |      | 1   | Yes            | 2    | 2   | No    |      |       |       | 175   | 95    |
| 4704   | 1    | 2   | No              |      | 1   | Yes            | 1    | 1   | Yes   | 1    |       |       | 175   | 81    |
| 4705   |      | 2   | No              |      | 2   | No             |      | 2   | No    |      |       |       | 162   | 56    |
| 4706   |      | 2   | No              |      | 2   | No             |      | 2   | No    |      |       |       | 170   | 76    |
| 4707   |      | 2   | No              |      | 2   | No             |      | 2   | No    |      |       |       | 153   | 63    |
| 4708   | 1    | 2   | No              |      | 2   | No             |      | 2   | No    |      |       |       | 150   | 58    |
| 4710   |      | 2   | No              |      | 2   | No             |      | 2   | No    |      |       |       | 170   | 80    |
| 4711   |      | 1   | Yes             | 2    | 1   | Yes            | 1    | 2   | No    |      |       |       | 170   | 75    |
| 4715   |      | 2   | No              |      | 2   | No             |      | 2   | No    |      |       |       | 160   | 60    |
| 4716   |      | 2   | No              |      | 2   | No             |      | 2   | No    |      |       |       | 160   | 60    |

| respid | Q11a | Q12 | Cardiac Disease | Q12a | Q13 | Hyperlipidemia | Q13a | Q14 | Neuro | Q14a | Q15_1 | Q15_2 | Q15_3 | Q16_1 |
|--------|------|-----|-----------------|------|-----|----------------|------|-----|-------|------|-------|-------|-------|-------|
| 4717   | 1    | 2   | No              |      | 2   | No             |      | 1   | Yes   | 2    |       |       | 160   | 65    |
| 4718   | 2    | 2   | No              |      | 1   | Yes            | 2    | 2   | No    |      |       |       | 170   | 70    |
| 4722   | 1    | 1   | Yes             | 1    | 1   | Yes            | 1    | 2   | No    |      |       |       | 180   | 80    |
| 4727   | 1    | 2   | No              |      | 1   | Yes            | 2    | 1   | Yes   | 2    |       |       | 175   | 65    |
| 4728   | 1    | 2   | No              |      | 2   | No             |      | 2   | No    |      |       |       | 174   | 82    |
| 4729   | 1    | 2   | No              |      | 2   | No             |      | 2   | No    |      |       |       | 173   | 82    |
| 4732   |      | 2   | No              |      | 2   | No             |      | 2   | No    |      |       |       | 170   | 70    |
| 4733   |      | 2   | No              |      | 2   | No             |      | 2   | No    |      |       |       | 168   | 51    |
| 4734   |      | 2   | No              |      | 2   | No             |      | 2   | No    |      |       |       | 172   | 72    |
| 4735   | 1    | 2   | No              |      | 2   | No             |      | 2   | No    |      |       |       | 169   | 72    |
| 4737   |      | 2   | No              |      | 2   | No             |      | 2   | No    |      |       |       | 170   | 81    |
| 4738   |      | 2   | No              |      | 2   | No             |      | 2   | No    |      |       |       | 170   | 50    |
| 4740   |      | 2   | No              |      | 2   | No             |      | 2   | No    |      |       |       | 168   | 51    |
| 4741   | 1    | 2   | No              |      | 1   | Yes            | 2    | 2   | No    |      |       |       | 170   | 77    |
| 4743   |      | 2   | No              |      | 2   | No             |      | 2   | No    |      |       |       | 156   | 54    |
| 4746   | 1    | 2   | No              |      | 1   | Yes            | 1    | 2   | No    |      |       |       | 175   | 67    |
| 4750   | 1    | 2   | No              |      | 1   | Yes            | 1    | 2   | No    |      |       |       | 171   | 72    |
| 4752   |      | 2   | No              |      | 2   | No             |      | 2   | No    |      |       |       | 173   | 72    |
| 4753   |      | 2   | No              |      | 1   | Yes            | 2    | 2   | No    |      |       |       | 158   | 51    |
| 4754   | 2    | 2   | No              |      | 2   | No             |      | 2   | No    |      |       |       | 168   | 70    |
| 4755   |      | 2   | No              |      | 2   | No             |      | 2   | No    |      |       |       | 158   | 46    |
| 4758   |      | 2   | No              |      | 2   | No             |      | 2   | No    |      |       |       | 165   | 55    |
| 4766   |      | 2   | No              |      | 2   | No             |      | 2   | No    |      |       |       | 172   | 65    |
| 4767   |      | 2   | No              |      | 2   | No             |      | 2   | No    |      |       |       | 167   | 63    |
| 4768   | 1    | 2   | No              |      | 1   | Yes            | 2    | 2   | No    |      |       |       | 173   | 73    |
| 4769   | 1    | 2   | No              |      | 1   | Yes            | 1    | 2   | No    |      |       |       | 173   | 79    |
| 4771   | 1    | 2   | No              |      | 2   | No             |      | 2   | No    |      |       |       | 170   | 58    |
| 4772   | 2    | 2   | No              |      | 2   | No             |      | 2   | No    |      |       |       | 162   | 53    |
| 4773   |      | 2   | No              |      | 2   | No             |      | 2   | No    |      |       |       | 165   | 60    |
| 4774   |      | 2   | No              |      | 2   | No             |      | 2   | No    |      |       |       | 153   | 40    |
| 4776   |      | 2   | No              |      | 2   | No             |      | 2   | No    |      |       |       | 170   | 67    |
| 4777   |      | 2   | No              |      | 2   | No             |      | 2   | No    |      |       |       | 160   | 48    |

| respid | Q11a | Q12 | Cardiac Disease | Q12a | Q13 | Hyperlipidemia | Q13a | Q14 | Neuro | Q14a | Q15_1 | Q15_2 | Q15_3 | Q16_1 |
|--------|------|-----|-----------------|------|-----|----------------|------|-----|-------|------|-------|-------|-------|-------|
| 4779   | 1    | 2   | No              |      | 2   | No             |      | 2   | No    |      |       |       | 160   | 52    |
| 4780   |      | 2   | No              |      | 2   | No             |      | 2   | No    |      |       |       | 158   | 53    |
| 4781   |      | 2   | No              |      | 2   | No             |      | 2   | No    |      |       |       | 170   | 62    |
| 4783   |      | 1   | Yes             | 1    | 2   | No             |      | 2   | No    |      |       |       | 162   | 65    |
| 4784   |      | 2   | No              |      | 2   | No             |      | 2   | No    |      |       |       | 175   | 68    |
| 4785   |      | 2   | No              |      | 2   | No             |      | 2   | No    |      |       |       | 164   | 80    |
| 4788   |      | 2   | No              |      | 2   | No             |      | 2   | No    |      |       |       | 178   | 78    |
| 4789   | 1    | 2   | No              |      | 1   | Yes            | 1    | 2   | No    |      |       |       | 172   | 90    |
| 4790   |      | 2   | No              |      | 2   | No             |      | 2   | No    |      |       |       | 170   | 60    |
| 4791   |      | 2   | No              |      | 2   | No             |      | 2   | No    |      |       |       | 170   | 65    |
| 4794   |      | 2   | No              |      | 2   | No             |      | 2   | No    |      |       |       | 168   | 80    |
| 4795   | 1    | 2   | No              |      | 2   | No             |      | 2   | No    |      |       |       | 176   | 74    |
| 4797   |      | 2   | No              |      | 2   | No             |      | 2   | No    |      |       |       | 175   | 75    |
| 4802   |      | 2   | No              |      | 1   | Yes            | 2    | 2   | No    |      |       |       | 168   | 67    |
| 4803   | 1    | 2   | No              |      | 1   | Yes            | 1    | 2   | No    |      |       |       | 177   | 94    |
| 4804   |      | 2   | No              |      | 1   | Yes            | 2    | 2   | No    |      |       |       | 173   | 72    |
| 4805   |      | 2   | No              |      | 1   | Yes            | 1    | 2   | No    |      |       |       | 167   | 72    |
| 4807   |      | 2   | No              |      | 2   | No             |      | 2   | No    |      |       |       | 158   | 55    |
| 4808   |      | 2   | No              |      | 2   | No             |      | 2   | No    |      |       |       | 180   | 70    |
| 4809   |      | 1   | Yes             | 2    | 1   | Yes            | 2    | 1   | Yes   | 2    |       |       | 174   | 62    |
| 4811   |      | 2   | No              |      | 2   | No             |      | 2   | No    |      |       |       | 163   | 55    |
| 4817   |      | 2   | No              |      | 2   | No             |      | 2   | No    |      |       |       | 160   | 55    |
| 4819   | 2    | 2   | No              |      | 1   | Yes            | 2    | 2   | No    |      |       |       | 173   | 72    |
| 4820   |      | 2   | No              |      | 2   | No             |      | 2   | No    |      |       |       | 162   | 60    |
| 4821   |      | 2   | No              |      | 1   | Yes            | 1    | 2   | No    |      |       |       | 173   | 75    |
| 4822   |      | 1   | Yes             | 2    | 2   | No             |      | 2   | No    |      |       |       | 169   | 62    |
| 4823   |      | 2   | No              |      | 2   | No             |      | 2   | No    |      |       |       | 163   | 68    |
| 4825   |      | 2   | No              |      | 2   | No             |      | 2   | No    |      |       |       | 160   | 48    |
| 4826   |      | 2   | No              |      | 2   | No             |      | 2   | No    |      | 5     | 7     |       | 66    |
| 4830   |      | 2   | No              |      | 2   | No             |      | 2   | No    |      |       |       | 160   | 53    |
| 4832   |      | 2   | No              |      | 2   | No             |      | 2   | No    |      |       |       | 170   | 60    |
| 4838   |      | 2   | No              |      | 2   | No             |      | 2   | No    |      |       |       | 154   | 48    |

| respid | Q11a | Q12 | Cardiac Disease | Q12a | Q13 | Hyperlipidemia | Q13a | Q14 | Neuro | Q14a | Q15_1 | Q15_2 | Q15_3 | Q16_1 |
|--------|------|-----|-----------------|------|-----|----------------|------|-----|-------|------|-------|-------|-------|-------|
| 4840   |      | 2   | No              |      | 2   | No             |      | 2   | No    |      |       |       | 172   | 76    |
| 4841   |      | 2   | No              |      | 1   | Yes            | 1    | 2   | No    |      |       |       | 168   | 65    |
| 4843   |      | 2   | No              |      | 1   | Yes            | 2    | 2   | No    |      |       |       | 179   | 86    |
| 4845   |      | 2   | No              |      | 2   | No             |      | 2   | No    |      |       |       | 172   | 70    |
| 4846   |      | 2   | No              |      | 1   | Yes            | 2    | 2   | No    |      |       |       | 170   | 92    |
| 4848   |      | 2   | No              |      | 2   | No             |      | 2   | No    |      |       |       | 165   | 65    |
| 4853   | 2    | 2   | No              |      | 2   | No             |      | 2   | No    |      |       |       | 183   | 82    |
| 4854   |      | 2   | No              |      | 2   | No             |      | 2   | No    |      |       |       | 172   | 68    |
| 4859   |      | 2   | No              |      | 2   | No             |      | 2   | No    |      |       |       | 168   | 78    |
| 4861   |      | 2   | No              |      | 1   | Yes            | 1    | 2   | No    |      |       |       | 161   | 51    |
| 4864   |      | 2   | No              |      | 2   | No             |      | 2   | No    |      |       |       | 173   | 68    |
| 4867   |      | 2   | No              |      | 2   | No             |      | 2   | No    |      |       |       | 170   | 70    |
| 4870   |      | 2   | No              |      | 2   | No             |      | 2   | No    |      |       |       | 162   | 60    |
| 4872   |      | 2   | No              |      | 2   | No             |      | 2   | No    |      |       |       | 171   | 60    |
| 4873   | 1    | 2   | No              |      | 1   | Yes            | 2    | 2   | No    |      |       |       | 165   | 76    |
| 4874   |      | 2   | No              |      | 2   | No             |      | 2   | No    |      |       |       | 160   | 55    |
| 4878   |      | 2   | No              |      | 2   | No             |      | 2   | No    |      |       |       | 165   | 69    |
| 4880   | 1    | 2   | No              |      | 1   | Yes            | 1    | 2   | No    |      |       |       | 155   | 65    |
| 4881   | 1    | 2   | No              |      | 2   | No             |      | 2   | No    |      |       |       | 170   | 79    |
| 4882   |      | 2   | No              |      | 1   | Yes            | 2    | 2   | No    |      |       |       | 160   | 52    |
| 4883   |      | 2   | No              |      | 2   | No             |      | 2   | No    |      |       |       | 178   | 75    |
| 4885   |      | 2   | No              |      | 2   | No             |      | 2   | No    |      |       |       | 174   | 84    |
| 4889   | 1    | 2   | No              |      | 2   | No             |      | 2   | No    |      |       |       | 170   | 85    |
| 4890   | 2    | 2   | No              |      | 1   | Yes            | 2    | 2   | No    |      |       |       | 173   | 88    |
| 4891   | 1    | 2   | No              |      | 1   | Yes            | 1    | 2   | No    |      |       |       | 171   | 80    |
| 4894   |      | 2   | No              |      | 2   | No             |      | 2   | No    |      |       |       | 153   | 40    |
| 4895   | 1    | 2   | No              |      | 1   | Yes            | 1    | 2   | No    |      |       |       | 169   | 70    |
| 4896   |      | 2   | No              |      | 1   | Yes            | 2    | 2   | No    |      |       |       | 165   | 75    |
| 4897   |      | 2   | No              |      | 2   | No             |      | 2   | No    |      |       |       | 163   | 53    |
| 4898   |      | 2   | No              |      | 1   | Yes            | 1    | 2   | No    |      |       |       | 175   | 80    |
| 4899   |      | 2   | No              |      | 2   | No             |      | 2   | No    |      |       |       | 177   | 68    |
| 4900   |      | 1   | Yes             | 2    | 1   | Yes            | 2    | 2   | No    |      |       |       | 178   | 78    |

| respid | Q11a | Q12 | Cardiac Disease | Q12a | Q13 | Hyperlipidemia | Q13a | Q14 | Neuro | Q14a | Q15_1 | Q15_2 | Q15_3 | Q16_1 |
|--------|------|-----|-----------------|------|-----|----------------|------|-----|-------|------|-------|-------|-------|-------|
| 4901   |      | 2   | No              |      | 2   | No             |      | 2   | No    |      |       |       | 176   | 86    |
| 4903   |      | 2   | No              |      | 2   | No             |      | 2   | No    |      |       |       | 178   | 68    |
| 4904   |      | 2   | No              |      | 2   | No             |      | 2   | No    |      |       |       | 168   | 84    |
| 4908   |      | 2   | No              |      | 2   | No             |      | 2   | No    |      |       |       | 163   | 58    |
| 4909   |      | 2   | No              |      | 1   | Yes            | 1    | 2   | No    |      |       |       | 163   | 75    |
| 4913   |      | 2   | No              |      | 2   | No             |      | 2   | No    |      |       |       | 175   | 70    |
| 4917   |      | 2   | No              |      | 2   | No             |      | 2   | No    |      |       |       | 160   | 47    |
| 4918   |      | 2   | No              |      | 2   | No             |      | 2   | No    |      |       |       | 161   | 53    |
| 4920   |      | 2   | No              |      | 2   | No             |      | 2   | No    |      |       |       | 168   | 80    |
| 4921   | 1    | 1   | Yes             | 1    | 1   | Yes            | 1    | 2   | No    |      |       |       | 172   | 89    |
| 4925   | 1    | 2   | No              |      | 2   | No             |      | 2   | No    |      |       |       | 155   | 63    |
| 4926   |      | 2   | No              |      | 1   | Yes            | 2    | 2   | No    |      |       |       | 168   | 71    |
| 4927   |      | 2   | No              |      | 2   | No             |      | 2   | No    |      |       |       | 168   | 74    |
| 4928   |      | 2   | No              |      | 2   | No             |      | 2   | No    |      |       |       | 174   | 75    |
| 4929   | 1    | 2   | No              |      | 1   | Yes            | 2    | 2   | No    |      |       |       | 176   | 100   |
| 4930   |      | 2   | No              |      | 1   | Yes            | 2    | 2   | No    |      |       |       | 160   | 65    |
| 4931   |      | 2   | No              |      | 1   | Yes            | 2    | 2   | No    |      |       |       | 162   | 62    |
| 4932   | 2    | 2   | No              |      | 2   | No             |      | 2   | No    |      |       |       | 162   | 57    |
| 4933   | 2    | 2   | No              |      | 1   | Yes            | 2    | 2   | No    |      |       |       | 178   | 83    |
| 4934   |      | 2   | No              |      | 2   | No             |      | 2   | No    |      |       |       | 173   | 73    |
| 5934   |      | 2   | No              |      | 2   | No             |      | 2   | No    |      |       |       | 170   | 70    |
| 5935   |      | 2   | No              |      | 1   | Yes            | 2    | 2   | No    |      |       |       | 150   | 70    |
| 5936   |      | 2   | No              |      | 2   | No             |      | 2   | No    |      |       |       | 164   | 58    |
| 5938   |      | 2   | No              |      | 1   | Yes            | 2    | 2   | No    |      |       |       | 170   | 73    |
| 5939   |      | 2   | No              |      | 2   | No             |      | 2   | No    |      |       |       | 163   | 69    |
| 5940   |      | 2   | No              |      | 2   | No             |      | 2   | No    |      |       |       | 158   | 48    |
| 5942   |      | 2   | No              |      | 2   | No             |      | 2   | No    |      |       |       | 178   | 78    |
| 5944   |      | 2   | No              |      | 2   | No             |      | 2   | No    |      |       |       | 175   | 85    |
| 5951   | 1    | 2   | No              |      | 2   | No             |      | 2   | No    |      |       |       | 169   | 70    |
| 5952   |      | 2   | No              |      | 2   | No             |      | 2   | No    |      |       |       | 158   | 54    |
| 5954   |      | 2   | No              |      | 2   | No             |      | 2   | No    |      | 5     | 7     |       | 75    |
| 5956   |      | 2   | No              |      | 2   | No             |      | 2   | No    |      |       |       | 164   | 62    |

| respid | Q11a | Q12 | Cardiac Disease | Q12a | Q13 | Hyperlipidemia | Q13a | Q14 | Neuro | Q14a | Q15_1 | Q15_2 | Q15_3 | Q16_1 |
|--------|------|-----|-----------------|------|-----|----------------|------|-----|-------|------|-------|-------|-------|-------|
| 5957   | 1    | 2   | No              |      | 1   | Yes            | 1    | 2   | No    |      |       |       | 162   | 82    |
| 5958   | 2    | 2   | No              |      | 2   | No             |      | 2   | No    |      |       |       | 172   | 72    |
| 5959   |      | 2   | No              |      | 2   | No             |      | 2   | No    |      |       |       | 161   | 53    |
| 5960   | 1    | 2   | No              |      | 1   | Yes            | 2    | 2   | No    |      |       |       | 183   | 72    |
| 5963   |      | 2   | No              |      | 2   | No             |      | 2   | No    |      |       |       | 158   | 89    |
| 5966   |      | 2   | No              |      | 2   | No             |      | 2   | No    |      |       |       | 171   | 60    |
| 5968   | 1    | 2   | No              |      | 2   | No             |      | 2   | No    |      |       |       | 170   | 75    |
| 5974   |      | 2   | No              |      | 2   | No             |      | 2   | No    |      |       |       | 158   | 62    |
| 5975   |      | 2   | No              |      | 1   | Yes            | 1    | 2   | No    |      |       |       | 162   | 61    |
| 5976   |      | 1   | Yes             | 1    | 2   | No             |      | 2   | No    |      |       |       | 173   | 73    |
| 5977   |      | 2   | No              |      | 1   | Yes            | 2    | 2   | No    |      |       |       | 159   | 46    |
| 5978   | 1    | 2   | No              |      | 2   | No             |      | 2   | No    |      |       |       | 175   | 65    |
| 5979   |      | 2   | No              |      | 2   | No             |      | 2   | No    |      |       |       | 158   | 51    |
| 5983   |      | 2   | No              |      | 2   | No             |      | 2   | No    |      |       |       | 155   | 70    |
| 5984   |      | 2   | No              |      | 1   | Yes            | 1    | 2   | No    |      |       |       | 168   | 83    |
| 5990   |      | 2   | No              |      | 2   | No             |      | 2   | No    |      |       |       | 155   | 60    |
| 5991   |      | 2   | No              |      | 2   | No             |      | 2   | No    |      |       |       | 165   | 99    |
| 5992   |      | 2   | No              |      | 2   | No             |      | 2   | No    |      |       |       | 172   | 85    |
| 5993   |      | 2   | No              |      | 2   | No             |      | 2   | No    |      |       |       | 155   | 45    |
| 5994   |      | 2   | No              |      | 2   | No             |      | 2   | No    |      |       |       | 160   | 60    |
| 5996   |      | 2   | No              |      | 2   | No             |      | 2   | No    |      |       |       | 163   | 61    |
| 6001   | 1    | 2   | No              |      | 2   | No             |      | 2   | No    |      |       |       | 165   | 58    |
| 6003   |      | 2   | No              |      | 2   | No             |      | 2   | No    |      |       |       | 158   | 50    |
| 6004   | 2    | 2   | No              |      | 2   | No             |      | 2   | No    |      |       |       | 170   | 61    |
| 6005   |      | 2   | No              |      | 1   | Yes            | 2    | 2   | No    |      |       |       | 181   | 88    |
| 6006   |      | 2   | No              |      | 2   | No             |      | 2   | No    |      |       |       | 155   | 49    |
| 6008   |      | 2   | No              |      | 2   | No             |      | 2   | No    |      | 5     | 6     |       | 80    |
| 6009   |      | 2   | No              |      | 2   | No             |      | 2   | No    |      |       |       | 164   | 49    |
| 6014   |      | 2   | No              |      | 2   | No             |      | 2   | No    |      |       |       | 156   | 58    |
| 6016   |      | 2   | No              |      | 2   | No             |      | 2   | No    |      |       |       | 173   | 63    |
| 6017   |      | 2   | No              |      | 2   | No             |      | 2   | No    |      |       |       | 153   | 55    |
| 6018   |      | 2   | No              |      | 2   | No             |      | 2   | No    |      |       |       | 165   | 68    |

| respid | Q11a | Q12 | Cardiac Disease | Q12a | Q13 | Hyperlipidemia | Q13a | Q14 | Neuro | Q14a | Q15_1 | Q15_2 | Q15_3 | Q16_1 |
|--------|------|-----|-----------------|------|-----|----------------|------|-----|-------|------|-------|-------|-------|-------|
| 6020   |      | 2   | No              |      | 2   | No             |      | 2   | No    |      |       |       | 166   | 75    |
| 6021   |      | 2   | No              |      | 2   | No             |      | 2   | No    |      |       |       | 155   | 75    |
| 6024   | 2    | 2   | No              |      | 1   | Yes            | 2    | 2   | No    |      |       |       | 167   | 59    |
| 6025   | 1    | 2   | No              |      | 2   | No             |      | 2   | No    |      |       |       | 162   | 80    |
| 6026   |      | 2   | No              |      | 1   | Yes            | 2    | 2   | No    |      |       |       | 158   | 48    |
| 6032   |      | 2   | No              |      | 2   | No             |      | 2   | No    |      |       |       | 165   | 75    |
| 6035   |      | 2   | No              |      | 2   | No             |      | 2   | No    |      |       |       | 165   | 62    |
| 6038   |      | 2   | No              |      | 1   | Yes            | 2    | 2   | No    |      |       |       | 167   | 74    |
| 6043   |      | 2   | No              |      | 1   | Yes            | 2    | 2   | No    |      |       |       | 157   | 54    |
| 6044   |      | 2   | No              |      | 2   | No             |      | 2   | No    |      |       |       | 165   | 58    |
| 6046   | 2    | 2   | No              |      | 2   | No             |      | 2   | No    |      |       |       | 174   | 63    |
| 6047   |      | 2   | No              |      | 2   | No             |      | 2   | No    |      |       |       | 157   | 43    |
| 6048   |      | 2   | No              |      | 2   | No             |      | 2   | No    |      |       |       | 150   | 43    |
| 6050   | 2    | 2   | No              |      | 1   | Yes            | 1    | 2   | No    |      |       |       | 172   | 68    |
| 6051   |      | 2   | No              |      | 2   | No             |      | 2   | No    |      |       |       | 162   | 64    |
| 6053   |      | 2   | No              |      | 2   | No             |      | 2   | No    |      |       |       | 150   | 60    |
| 6054   |      | 2   | No              |      | 1   | Yes            | 2    | 2   | No    |      |       |       | 175   | 69    |
| 6056   |      | 2   | No              |      | 2   | No             |      | 2   | No    |      |       |       | 173   | 73    |
| 6058   |      | 2   | No              |      | 2   | No             |      | 2   | No    |      |       |       | 153   | 47    |
| 6060   |      | 2   | No              |      | 1   | Yes            | 2    | 2   | No    |      |       |       | 170   | 80    |
| 6061   |      | 2   | No              |      | 2   | No             |      | 2   | No    |      |       |       | 150   | 47    |
| 6062   |      | 2   | No              |      | 2   | No             |      | 2   | No    |      |       |       | 157   | 51    |
| 6067   |      | 2   | No              |      | 2   | No             |      | 2   | No    |      |       |       | 154   | 45    |
| 6070   |      | 2   | No              |      | 2   | No             |      | 2   | No    |      |       |       | 151   | 40    |
| 6074   | 1    | 1   | Yes             | 2    | 2   | No             |      | 2   | No    |      |       |       | 148   | 52    |
| 6076   |      | 2   | No              |      | 2   | No             |      | 2   | No    |      |       |       | 158   | 60    |
| 6078   |      | 2   | No              |      | 2   | No             |      | 2   | No    |      |       |       | 153   | 65    |
| 6081   |      | 2   | No              |      | 2   | No             |      | 2   | No    |      |       |       | 168   | 61    |
| 6085   |      | 2   | No              |      | 2   | No             |      | 2   | No    |      |       |       | 168   | 60    |
| 6088   |      | 2   | No              |      | 2   | No             |      | 2   | No    |      |       |       | 170   | 82    |
| 6092   |      | 2   | No              |      | 2   | No             |      | 2   | No    |      |       |       | 181   | 82    |
| 6095   | 1    | 2   | No              |      | 1   | Yes            | 1    | 2   | No    |      |       |       | 172   | 63    |

| respid | Q11a | Q12 | Cardiac Disease | Q12a | Q13 | Hyperlipidemia | Q13a | Q14 | Neuro | Q14a | Q15_1 | Q15_2 | Q15_3 | Q16_1 |
|--------|------|-----|-----------------|------|-----|----------------|------|-----|-------|------|-------|-------|-------|-------|
| 6098   | 1    | 2   | No              |      | 2   | No             |      | 2   | No    |      |       |       | 160   | 60    |
| 6101   |      | 2   | No              |      | 2   | No             |      | 2   | No    |      |       |       | 166   | 69    |
| 6102   |      | 2   | No              |      | 1   | Yes            | 2    | 2   | No    |      |       |       | 162   | 55    |
| 6105   |      | 2   | No              |      | 2   | No             |      | 2   | No    |      |       |       | 161   | 53    |
| 6106   |      | 2   | No              |      | 2   | No             |      | 2   | No    |      |       |       | 176   | 73    |
| 6107   |      | 2   | No              |      | 1   | Yes            | 2    | 2   | No    |      | 5     | 7     |       | 90    |
| 6111   | 2    | 2   | No              |      | 1   | Yes            | 1    | 2   | No    |      |       |       | 168   | 79    |
| 6112   |      | 2   | No              |      | 1   | Yes            | 1    | 2   | No    |      |       |       | 160   | 66    |
| 6113   | 2    | 2   | No              |      | 1   | Yes            | 2    | 2   | No    |      |       |       | 172   | 74    |
| 6115   |      | 1   | Yes             | 2    | 1   | Yes            | 2    | 2   | No    |      |       |       | 170   | 47    |
| 6116   |      | 2   | No              |      | 2   | No             |      | 2   | No    |      |       |       | 162   | 70    |
| 6117   |      | 2   | No              |      | 2   | No             |      | 2   | No    |      | 6     | 1     |       | 57    |
| 6124   |      | 2   | No              |      | 1   | Yes            | 2    | 2   | No    |      |       |       | 165   | 60    |
| 6125   |      | 2   | No              |      | 2   | No             |      | 2   | No    |      |       |       | 176   | 83    |
| 6128   |      | 2   | No              |      | 2   | No             |      | 2   | No    |      |       |       | 160   | 60    |
| 6133   |      | 2   | No              |      | 2   | No             |      | 2   | No    |      |       |       | 160   | 45    |
| 6134   |      | 2   | No              |      | 2   | No             |      | 2   | No    |      |       |       | 157   | 57    |
| 6135   | 1    | 2   | No              |      | 1   | Yes            | 1    | 2   | No    |      |       |       | 176   | 76    |
| 6138   |      | 2   | No              |      | 2   | No             |      | 2   | No    |      |       |       | 167   | 66    |
| 6140   | 1    | 2   | No              |      | 2   | No             |      | 2   | No    |      |       |       | 168   | 73    |
| 6143   | 1    | 2   | No              |      | 2   | No             |      | 2   | No    |      |       |       | 180   | 82    |
| 6147   |      | 2   | No              |      | 2   | No             |      | 2   | No    |      |       |       | 157   | 45    |
| 6154   |      | 1   | Yes             | 2    | 1   | Yes            | 2    | 2   | No    |      |       |       | 160   | 60    |
| 6162   |      | 2   | No              |      | 2   | No             |      | 2   | No    |      |       |       | 174   | 65    |
| 6165   |      | 2   | No              |      | 1   | Yes            | 1    | 2   | No    |      |       |       | 157   | 50    |
| 6166   | 2    | 2   | No              |      | 1   | Yes            | 1    | 2   | No    |      |       |       | 175   | 74    |
| 6173   |      | 2   | No              |      | 1   | Yes            | 2    | 2   | No    |      |       |       | 168   | 72    |
| 6180   |      | 2   | No              |      | 2   | No             |      | 2   | No    |      | 6     | 1     |       | 75    |
| 6184   |      | 2   | No              |      | 2   | No             |      | 2   | No    |      |       |       | 158   | 52    |
| 6185   | 1    | 2   | No              |      | 2   | No             |      | 2   | No    |      |       |       | 170   | 85    |
| 6186   |      | 2   | No              |      | 2   | No             |      | 2   | No    |      |       |       | 160   | 75    |
| 6188   |      | 2   | No              |      | 2   | No             |      | 2   | No    |      |       |       | 167   | 60    |



| respid | Q11a | Q12 | Cardiac Disease | Q12a | Q13 | Hyperlipidemia | Q13a | Q14 | Neuro | Q14a | Q15_1 | Q15_2 | Q15_3 | Q16_1 |
|--------|------|-----|-----------------|------|-----|----------------|------|-----|-------|------|-------|-------|-------|-------|
| 6192   |      | 1   | Yes             | 2    | 1   | Yes            | 2    | 2   | No    |      |       |       | 154   | 53    |
| 6194   |      | 2   | No              |      | 2   | No             |      | 2   | No    |      |       |       | 175   | 78    |
| 6195   |      | 2   | No              |      | 1   | Yes            | 2    | 2   | No    |      |       |       | 157   | 55    |
| 6196   |      | 2   | No              |      | 2   | No             |      | 2   | No    |      |       |       | 163   | 50    |
| 6199   | 2    | 2   | No              |      | 1   | Yes            | 2    | 2   | No    |      |       |       | 175   | 75    |
| 6200   |      | 2   | No              |      | 2   | No             |      | 2   | No    |      |       |       | 175   | 80    |
| 6201   |      | 2   | No              |      | 2   | No             |      | 2   | No    |      |       |       | 179   | 78    |
| 6202   |      | 2   | No              |      | 2   | No             |      | 2   | No    |      | 5     | 5     |       | 65    |
| 6203   |      | 2   | No              |      | 1   | Yes            | 2    | 2   | No    |      |       |       | 173   | 85    |
| 6205   | 2    | 2   | No              |      | 1   | Yes            | 2    | 2   | No    |      |       |       | 158   | 60    |
| 6210   | 1    | 2   | No              |      | 2   | No             |      | 2   | No    |      |       |       | 171   | 88    |
| 6212   |      | 2   | No              |      | 2   | No             |      | 2   | No    |      |       |       | 173   | 73    |
| 6216   |      | 1   | Yes             | 2    | 1   | Yes            | 2    | 2   | No    |      |       |       | 155   | 42    |
| 6218   |      | 2   | No              |      | 1   | Yes            | 1    | 2   | No    |      |       |       | 171   | 85    |
| 6221   |      | 2   | No              |      | 1   | Yes            | 2    | 2   | No    |      |       |       | 165   | 60    |
| 6224   |      | 2   | No              |      | 2   | No             |      | 2   | No    |      |       |       | 176   | 75    |
| 6225   |      | 2   | No              |      | 2   | No             |      | 2   | No    |      |       |       | 179   | 70    |
| 6227   |      | 2   | No              |      | 2   | No             |      | 2   | No    |      |       |       | 177   | 87    |
| 6230   | 1    | 2   | No              |      | 2   | No             |      | 2   | No    |      |       |       | 168   | 73    |
| 6231   |      | 2   | No              |      | 1   | Yes            | 2    | 2   | No    |      |       |       | 167   | 95    |
| 6233   |      | 2   | No              |      | 2   | No             |      | 2   | No    |      |       |       | 161   | 53    |
| 6234   |      | 2   | No              |      | 2   | No             |      | 2   | No    |      |       |       | 155   | 46    |
| 6235   | 1    | 2   | No              |      | 2   | No             |      | 2   | No    |      |       |       | 171   | 84    |
| 6237   |      | 2   | No              |      | 2   | No             |      | 2   | No    |      |       |       | 178   | 75    |
| 6240   |      | 2   | No              |      | 2   | No             |      | 2   | No    |      |       |       | 160   | 60    |
| 6248   | 2    | 2   | No              |      | 2   | No             |      | 2   | No    |      |       |       | 170   | 85    |
| 6249   |      | 2   | No              |      | 1   | Yes            | 2    | 2   | No    |      |       |       | 180   | 70    |
| 6252   |      | 2   | No              |      | 2   | No             |      | 2   | No    |      |       |       | 160   | 58    |
| 6254   |      | 2   | No              |      | 2   | No             |      | 2   | No    |      |       |       | 168   | 80    |
| 6269   |      | 2   | No              |      | 2   | No             |      | 2   | No    |      |       |       | 160   | 50    |
| 6304   | 1    | 2   | No              |      | 2   | No             |      | 2   | No    |      | 5     | 5     |       | 60    |
| 6334   | 1    | 2   | No              |      | 1   | Yes            | 2    | 2   | No    |      |       |       | 162   | 58    |

| respid | Q11a | Q12 | Cardiac Disease | Q12a | Q13 | Hyperlipidemia | Q13a | Q14 | Neuro | Q14a | Q15_1 | Q15_2 | Q15_3 | Q16_1 |
|--------|------|-----|-----------------|------|-----|----------------|------|-----|-------|------|-------|-------|-------|-------|
| 6341   |      | 2   | No              |      | 1   | Yes            | 2    | 2   | No    |      |       |       | 168   | 65    |
| 6350   | 1    | 2   | No              |      | 2   | No             |      | 2   | No    |      |       |       | 160   | 50    |
| 6370   |      | 2   | No              |      | 2   | No             |      | 2   | No    |      |       |       | 160   | 55    |
| 6384   |      | 2   | No              |      | 2   | No             |      | 2   | No    |      |       |       | 146   | 46    |
| 6400   |      | 2   | No              |      | 2   | No             |      | 2   | No    |      |       |       | 172   | 80    |
| 6418   |      | 2   | No              |      | 2   | No             |      | 2   | No    |      |       |       | 165   | 70    |
| 6467   |      | 2   | No              |      | 2   | No             |      | 2   | No    |      |       |       | 170   | 75    |
| 6469   |      | 2   | No              |      | 2   | No             |      | 2   | No    |      |       |       | 172   | 76    |
| 6474   |      | 2   | No              |      | 2   | No             |      | 2   | No    |      |       |       | 165   | 54    |
| 6475   |      | 2   | No              |      | 2   | No             |      | 2   | No    |      |       |       | 172   | 85    |
| 6476   |      | 2   | No              |      | 2   | No             |      | 2   | No    |      |       |       | 160   | 52    |
| 6477   | 1    | 2   | No              |      | 2   | No             |      | 2   | No    |      |       |       | 169   | 78    |
| 6480   |      | 2   | No              |      | 2   | No             |      | 2   | No    |      |       |       | 184   | 84    |
| 6481   |      | 2   | No              |      | 1   | Yes            | 1    | 2   | No    |      |       |       | 158   | 60    |
| 6485   |      | 2   | No              |      | 2   | No             |      | 2   | No    |      |       |       | 145   | 39    |
| 6488   | 2    | 2   | No              |      | 1   | Yes            | 1    | 2   | No    |      |       |       | 175   | 72    |
| 6495   |      | 2   | No              |      | 1   | Yes            | 1    | 2   | No    |      |       |       | 170   | 72    |
| 6499   | 2    | 2   | No              |      | 1   | Yes            | 2    | 2   | No    |      |       |       | 169   | 60    |
| 6500   |      | 2   | No              |      | 2   | No             |      | 2   | No    |      |       |       | 180   | 75    |
| 6504   |      | 2   | No              |      | 2   | No             |      | 2   | No    |      |       |       | 170   | 60    |
| 6507   | 1    | 2   | No              |      | 2   | No             |      | 2   | No    |      |       |       | 175   | 51    |
| 6512   | 1    | 2   | No              |      | 1   | Yes            | 2    | 2   | No    |      |       |       | 170   | 95    |
| 6525   |      | 2   | No              |      | 1   | Yes            | 1    | 2   | No    |      |       |       | 147   | 52    |
| 6532   |      | 2   | No              |      | 2   | No             |      | 2   | No    |      |       |       | 164   | 52    |
| 6535   |      | 2   | No              |      | 2   | No             |      | 2   | No    |      |       |       | 166   | 59    |
| 6546   |      | 2   | No              |      | 2   | No             |      | 2   | No    |      |       |       | 170   | 60    |
| 6551   |      | 2   | No              |      | 2   | No             |      | 2   | No    |      |       |       | 169   | 56    |
| 6556   |      | 2   | No              |      | 1   | Yes            | 2    | 2   | No    |      |       |       | 158   | 70    |
| 6566   | 1    | 2   | No              |      | 1   | Yes            | 2    | 2   | No    |      |       |       | 174   | 78    |
| 6569   |      | 2   | No              |      | 2   | No             |      | 2   | No    |      |       |       | 160   | 52    |
| 6574   |      | 2   | No              |      | 2   | No             |      | 2   | No    |      |       |       | 158   | 55    |
| 6576   |      | 2   | No              |      | 1   | Yes            | 2    | 2   | No    |      |       |       | 165   | 54    |

| respid | Q11a | Q12 | Cardiac Disease | Q12a | Q13 | Hyperlipidemia | Q13a | Q14 | Neuro | Q14a | Q15_1 | Q15_2 | Q15_3 | Q16_1 |
|--------|------|-----|-----------------|------|-----|----------------|------|-----|-------|------|-------|-------|-------|-------|
| 6580   |      | 2   | No              |      | 2   | No             |      | 2   | No    |      |       |       | 178   | 72    |
| 6584   |      | 2   | No              |      | 2   | No             |      | 2   | No    |      |       |       | 165   | 65    |
| 6585   |      | 2   | No              |      | 2   | No             |      | 2   | No    |      |       |       | 173   | 80    |
| 6589   |      | 2   | No              |      | 2   | No             |      | 2   | No    |      |       |       | 160   | 51    |
| 6590   |      | 2   | No              |      | 2   | No             |      | 2   | No    |      |       |       | 156   | 46    |
| 6598   |      | 2   | No              |      | 2   | No             |      | 2   | No    |      |       |       | 183   | 75    |
| 6603   |      | 2   | No              |      | 1   | Yes            | 1    | 2   | No    |      |       |       | 165   | 60    |
| 6618   |      | 2   | No              |      | 2   | No             |      | 2   | No    |      |       |       | 180   | 60    |
| 6630   | 1    | 2   | No              |      | 2   | No             |      | 2   | No    |      |       |       | 175   | 80    |
| 6636   |      | 2   | No              |      | 2   | No             |      | 2   | No    |      |       |       | 160   | 60    |
| 6649   |      | 2   | No              |      | 2   | No             |      | 2   | No    |      |       |       | 168   | 65    |
| 6675   |      | 2   | No              |      | 1   | Yes            | 2    | 2   | No    |      |       |       | 165   | 45    |
| 6678   |      | 2   | No              |      | 2   | No             |      | 2   | No    |      |       |       | 177   | 85    |
| 6681   |      | 2   | No              |      | 2   | No             |      | 2   | No    |      |       |       | 168   | 50    |
| 6684   |      | 2   | No              |      | 2   | No             |      | 2   | No    |      |       |       | 170   | 60    |
| 6688   |      | 1   | Yes             | 2    | 2   | No             |      | 2   | No    |      |       |       | 159   | 53    |
| 6691   |      | 2   | No              |      | 2   | No             |      | 2   | No    |      |       |       | 165   | 62    |
| 6694   |      | 2   | No              |      | 2   | No             |      | 2   | No    |      |       |       | 160   | 52    |
| 6696   |      | 2   | No              |      | 2   | No             |      | 2   | No    |      |       |       | 164   | 60    |
| 6720   |      | 2   | No              |      | 2   | No             |      | 2   | No    |      |       |       | 163   | 50    |
| 6722   |      | 2   | No              |      | 1   | Yes            | 2    | 1   | Yes   | 2    |       |       | 162   | 52    |
| 6724   |      | 2   | No              |      | 2   | No             |      | 2   | No    |      |       |       | 165   | 65    |
| 6725   | 2    | 2   | No              |      | 2   | No             |      | 2   | No    |      |       |       | 165   | 68    |
| 6727   |      | 2   | No              |      | 2   | No             |      | 2   | No    |      |       |       | 172   | 75    |
| 6734   |      | 2   | No              |      | 2   | No             |      | 2   | No    |      |       |       | 160   | 52    |
| 6739   | 1    | 2   | No              |      | 1   | Yes            | 2    | 2   | No    |      |       |       | 175   | 72    |
| 6743   | 1    | 1   | Yes             | 1    | 1   | Yes            | 1    | 2   | No    |      |       |       | 178   | 90    |
| 6749   |      | 2   | No              |      | 2   | No             |      | 1   | Yes   | 2    |       |       | 176   | 76    |
| 6756   |      | 2   | No              |      | 2   | No             |      | 2   | No    |      |       |       | 163   | 65    |
| 6764   |      | 2   | No              |      | 1   | Yes            | 2    | 2   | No    |      |       |       | 160   | 65    |
| 6765   |      | 2   | No              |      | 2   | No             |      | 2   | No    |      |       |       | 160   | 52    |
| 6768   |      | 2   | No              |      | 1   | Yes            | 2    | 2   | No    |      |       |       | 174   | 74    |

| respid | Q11a | Q12 | Cardiac Disease | Q12a | Q13 | Hyperlipidemia | Q13a | Q14 | Neuro | Q14a | Q15_1 | Q15_2 | Q15_3 | Q16_1 |
|--------|------|-----|-----------------|------|-----|----------------|------|-----|-------|------|-------|-------|-------|-------|
| 6773   |      | 2   | No              |      | 2   | No             |      | 2   | No    |      |       |       | 160   | 64    |
| 6775   | 2    | 2   | No              |      | 1   | Yes            | 2    | 2   | No    |      |       |       | 165   | 52    |
| 6777   |      | 2   | No              |      | 2   | No             |      | 2   | No    |      |       |       | 165   | 55    |
| 6779   |      | 2   | No              |      | 1   | Yes            | 2    | 2   | No    |      |       |       | 152   | 46    |
| 6790   |      | 2   | No              |      | 2   | No             |      | 2   | No    |      |       |       | 161   | 45    |
| 6797   |      | 2   | No              |      | 2   | No             |      | 2   | No    |      |       |       | 155   | 44    |
| 6798   | 1    | 2   | No              |      | 2   | No             |      | 1   | Yes   | 1    |       |       | 160   | 60    |
| 6808   |      | 2   | No              |      | 2   | No             |      | 2   | No    |      |       |       | 165   | 60    |
| 6810   |      | 2   | No              |      | 2   | No             |      | 2   | No    |      |       |       | 162   | 60    |
| 6811   |      | 2   | No              |      | 1   | Yes            | 2    | 2   | No    |      |       |       | 170   | 65    |
| 6812   |      | 2   | No              |      | 2   | No             |      | 2   | No    |      |       |       | 166   | 60    |
| 6814   | 1    | 2   | No              |      | 2   | No             |      | 2   | No    |      |       |       | 172   | 60    |
| 6819   |      | 2   | No              |      | 1   | Yes            | 2    | 2   | No    |      |       |       | 172   | 80    |
| 6820   |      | 2   | No              |      | 2   | No             |      | 2   | No    |      |       |       | 175   | 70    |
| 6832   |      | 2   | No              |      | 2   | No             |      | 2   | No    |      |       |       | 173   | 65    |
| 6854   |      | 2   | No              |      | 2   | No             |      | 2   | No    |      |       |       | 168   | 65    |
| 6855   |      | 2   | No              |      | 2   | No             |      | 2   | No    |      |       |       | 168   | 65    |
| 6857   |      | 2   | No              |      | 2   | No             |      | 2   | No    |      |       |       | 168   | 55    |
| 6858   |      | 2   | No              |      | 2   | No             |      | 2   | No    |      |       |       | 160   | 54    |
| 6859   |      | 2   | No              |      | 2   | No             |      | 2   | No    |      |       |       | 160   | 65    |
| 6860   |      | 2   | No              |      | 2   | No             |      | 2   | No    |      |       |       | 165   | 50    |
| 6862   | 1    | 2   | No              |      | 2   | No             |      | 2   | No    |      |       |       | 157   | 46    |
| 6879   |      | 2   | No              |      | 2   | No             |      | 2   | No    |      |       |       | 160   | 55    |
| 6893   |      | 2   | No              |      | 2   | No             |      | 2   | No    |      |       |       | 182   | 63    |
| 6898   |      | 2   | No              |      | 2   | No             |      | 2   | No    |      |       |       | 165   | 50    |
| 6902   |      | 2   | No              |      | 2   | No             |      | 2   | No    |      |       |       | 175   | 85    |
| 6903   |      | 2   | No              |      | 2   | No             |      | 1   | Yes   | 1    |       |       | 157   | 55    |
| 6907   | 1    | 2   | No              |      | 2   | No             |      | 2   | No    |      |       |       | 166   | 60    |
| 6908   |      | 2   | No              |      | 2   | No             |      | 2   | No    |      |       |       | 160   | 61    |
| 6912   |      | 2   | No              |      | 2   | No             |      | 2   | No    |      |       |       | 168   | 62    |
| 6915   |      | 2   | No              |      | 2   | No             |      | 2   | No    |      |       |       | 161   | 50    |
| 6916   |      | 2   | No              |      | 2   | No             |      | 2   | No    |      |       |       | 165   | 65    |

| respid | Q11a | Q12 | Cardiac Disease | Q12a | Q13 | Hyperlipidemia | Q13a | Q14 | Neuro | Q14a | Q15_1 | Q15_2 | Q15_3 | Q16_1 |
|--------|------|-----|-----------------|------|-----|----------------|------|-----|-------|------|-------|-------|-------|-------|
| 6917   |      | 2   | No              |      | 2   | No             |      | 2   | No    |      |       |       | 163   | 51    |
| 6923   |      | 2   | No              |      | 2   | No             |      | 2   | No    |      | 5     | 10    |       | 60    |
| 6934   |      | 2   | No              |      | 1   | Yes            | 2    | 2   | No    |      |       |       | 162   | 64    |
| 6937   |      | 2   | No              |      | 2   | No             |      | 2   | No    |      |       |       | 152   | 48    |
| 6945   |      | 2   | No              |      | 1   | Yes            | 2    | 2   | No    |      |       |       | 178   | 70    |
| 6954   | 2    | 2   | No              |      | 2   | No             |      | 2   | No    |      |       |       | 175   | 66    |
| 6956   | 1    | 1   | Yes             | 2    | 2   | No             |      | 2   | No    |      |       |       | 158   | 60    |
| 6958   |      | 2   | No              |      | 2   | No             |      | 2   | No    |      |       |       | 178   | 80    |
| 6961   |      | 1   | Yes             | 2    | 1   | Yes            | 2    | 2   | No    |      |       |       | 155   | 55    |
| 6963   |      | 2   | No              |      | 1   | Yes            | 2    | 2   | No    |      |       |       | 160   | 52    |
| 6964   |      | 2   | No              |      | 2   | No             |      | 2   | No    |      |       |       | 165   | 52    |
| 6976   |      | 2   | No              |      | 2   | No             |      | 2   | No    |      |       |       | 162   | 45    |
| 6977   |      | 2   | No              |      | 2   | No             |      | 2   | No    |      |       |       | 166   | 60    |
| 7000   | 1    | 2   | No              |      | 2   | No             |      | 2   | No    |      |       |       | 170   | 70    |
| 7001   |      | 2   | No              |      | 2   | No             |      | 2   | No    |      |       |       | 163   | 52    |
| 7005   |      | 2   | No              |      | 2   | No             |      | 2   | No    |      |       |       | 178   | 75    |
| 7006   | 1    | 2   | No              |      | 2   | No             |      | 2   | No    |      |       |       | 160   | 55    |
| 7008   |      | 2   | No              |      | 2   | No             |      | 2   | No    |      |       |       | 156   | 55    |
| 7009   | 1    | 2   | No              |      | 2   | No             |      | 2   | No    |      |       |       | 160   | 60    |
| 7019   | 1    | 2   | No              |      | 1   | Yes            | 2    | 2   | No    |      |       |       | 173   | 75    |
| 7021   |      | 2   | No              |      | 2   | No             |      | 2   | No    |      |       |       | 160   | 58    |
| 7026   |      | 2   | No              |      | 2   | No             |      | 2   | No    |      |       |       | 176   | 78    |
| 7030   | 1    | 1   | Yes             | 1    | 1   | Yes            | 1    | 1   | Yes   | 1    |       |       | 170   | 60    |
| 7034   | 2    | 2   | No              |      | 2   | No             |      | 2   | No    |      |       |       | 170   | 68    |
| 7039   |      | 2   | No              |      | 2   | No             |      | 2   | No    |      |       |       | 160   | 45    |
| 7041   |      | 2   | No              |      | 2   | No             |      | 2   | No    |      |       |       | 172   | 77    |
| 7047   |      | 2   | No              |      | 2   | No             |      | 2   | No    |      |       |       | 155   | 56    |
| 7051   |      | 2   | No              |      | 1   | Yes            | 2    | 2   | No    |      |       |       | 165   | 61    |
| 7052   |      | 2   | No              |      | 2   | No             |      | 2   | No    |      |       |       | 168   | 73    |
| 7059   |      | 2   | No              |      | 1   | Yes            | 2    | 2   | No    |      |       |       | 158   | 60    |
| 7062   |      | 2   | No              |      | 2   | No             |      | 2   | No    |      |       |       | 155   | 57    |
| 7065   |      | 2   | No              |      | 1   | Yes            | 2    | 2   | No    |      |       |       | 162   | 68    |

| respid | Q11a | Q12 | Cardiac Disease | Q12a | Q13 | Hyperlipidemia | Q13a | Q14 | Neuro | Q14a | Q15_1 | Q15_2 | Q15_3 | Q16_1 |
|--------|------|-----|-----------------|------|-----|----------------|------|-----|-------|------|-------|-------|-------|-------|
| 7066   |      | 2   | No              |      | 2   | No             |      | 2   | No    |      |       |       | 158   | 58    |
| 7069   |      | 2   | No              |      | 2   | No             |      | 2   | No    |      |       |       | 159   | 52    |
| 7070   |      | 2   | No              |      | 2   | No             |      | 2   | No    |      |       |       | 175   | 65    |
| 7073   |      | 2   | No              |      | 2   | No             |      | 2   | No    |      |       |       | 168   | 68    |
| 7078   |      | 2   | No              |      | 2   | No             |      | 2   | No    |      |       |       | 182   | 82    |
| 7083   |      | 2   | No              |      | 2   | No             |      | 2   | No    |      |       |       | 170   | 63    |
| 7084   |      | 2   | No              |      | 2   | No             |      | 2   | No    |      |       |       | 170   | 63    |
| 7085   |      | 2   | No              |      | 2   | No             |      | 2   | No    |      |       |       | 170   | 120   |
| 7088   |      | 2   | No              |      | 2   | No             |      | 2   | No    |      |       |       | 170   | 70    |
| 7090   |      | 2   | No              |      | 1   | Yes            | 2    | 2   | No    |      |       |       | 175   | 120   |
| 7095   |      | 2   | No              |      | 2   | No             |      | 2   | No    |      |       |       | 160   | 95    |
| 7100   |      | 2   | No              |      | 2   | No             |      | 2   | No    |      |       |       | 170   | 65    |
| 7102   | 1    | 1   | Yes             | 1    | 1   | Yes            | 1    | 2   | No    |      |       |       | 172   | 77    |
| 7103   |      | 2   | No              |      | 2   | No             |      | 2   | No    |      |       |       | 150   | 65    |
| 7108   |      | 2   | No              |      | 2   | No             |      | 2   | No    |      |       |       | 160   | 52    |
| 7109   |      | 2   | No              |      | 2   | No             |      | 2   | No    |      |       |       | 160   | 65    |
| 7110   |      | 2   | No              |      | 2   | No             |      | 2   | No    |      |       |       | 175   | 65    |
| 7112   |      | 2   | No              |      | 2   | No             |      | 2   | No    |      |       |       | 158   | 47    |
| 7114   |      | 2   | No              |      | 2   | No             |      | 2   | No    |      |       |       | 165   | 65    |
| 7116   |      | 2   | No              |      | 2   | No             |      | 2   | No    |      |       |       | 175   | 77    |
| 7117   |      | 2   | No              |      | 2   | No             |      | 2   | No    |      |       |       | 155   | 60    |
| 7118   | 1    | 2   | No              |      | 1   | Yes            | 2    | 2   | No    |      |       |       | 170   | 70    |
| 7120   | 1    | 2   | No              |      | 1   | Yes            | 1    | 2   | No    |      |       |       | 160   | 120   |
| 7124   |      | 2   | No              |      | 2   | No             |      | 2   | No    |      |       |       | 160   | 58    |
| 7130   |      | 2   | No              |      | 2   | No             |      | 2   | No    |      |       |       | 173   | 65    |
| 7135   |      | 2   | No              |      | 2   | No             |      | 2   | No    |      |       |       | 163   | 65    |
| 7137   | 1    | 2   | No              |      | 1   | Yes            | 2    | 2   | No    |      |       |       | 160   | 68    |
| 7140   |      | 2   | No              |      | 2   | No             |      | 2   | No    |      |       |       | 167   | 51    |
| 7141   |      | 2   | No              |      | 2   | No             |      | 2   | No    |      |       |       | 157   | 57    |
| 7148   |      | 2   | No              |      | 2   | No             |      | 2   | No    |      |       |       | 148   | 49    |
| 7152   |      | 2   | No              |      | 2   | No             |      | 2   | No    |      |       |       | 172   | 65    |
| 7154   |      | 2   | No              |      | 1   | Yes            | 2    | 2   | No    |      |       |       | 169   | 87    |

| respid | Q11a | Q12 | Cardiac Disease | Q12a | Q13 | Hyperlipidemia | Q13a | Q14 | Neuro | Q14a | Q15_1 | Q15_2 | Q15_3 | Q16_1 |
|--------|------|-----|-----------------|------|-----|----------------|------|-----|-------|------|-------|-------|-------|-------|
| 7156   |      | 2   | No              |      | 1   | Yes            | 2    | 2   | No    |      |       |       | 156   | 50    |
| 7158   |      | 2   | No              |      | 2   | No             |      | 2   | No    |      |       |       | 166   | 55    |
| 7159   |      | 2   | No              |      | 2   | No             |      | 2   | No    |      |       |       | 155   | 53    |
| 7161   | 1    | 2   | No              |      | 2   | No             |      | 2   | No    |      |       |       | 167   | 95    |
| 7164   |      | 2   | No              |      | 1   | Yes            | 2    | 2   | No    |      |       |       | 161   | 62    |
| 7166   |      | 2   | No              |      | 2   | No             |      | 2   | No    |      |       |       | 170   | 80    |
| 7167   |      | 2   | No              |      | 2   | No             |      | 2   | No    |      |       |       | 170   | 70    |
| 7168   |      | 2   | No              |      | 2   | No             |      | 2   | No    |      |       |       | 164   | 57    |
| 7170   |      | 2   | No              |      | 2   | No             |      | 2   | No    |      |       |       | 165   | 55    |
| 7171   |      | 2   | No              |      | 2   | No             |      | 2   | No    |      |       |       | 159   | 51    |
| 7172   |      | 2   | No              |      | 2   | No             |      | 2   | No    |      |       |       | 158   | 51    |
| 7173   |      | 2   | No              |      | 2   | No             |      | 2   | No    |      |       |       | 170   | 53    |
| 7175   |      | 2   | No              |      | 2   | No             |      | 2   | No    |      |       |       | 157   | 60    |
| 7176   |      | 1   | Yes             | 2    | 1   | Yes            | 2    | 2   | No    |      |       |       | 174   | 85    |
| 7180   |      | 2   | No              |      | 2   | No             |      | 2   | No    |      |       |       | 172   | 80    |
| 7183   |      | 2   | No              |      | 1   | Yes            | 2    | 2   | No    |      |       |       | 171   | 68    |
| 7189   | 2    | 2   | No              |      | 1   | Yes            | 2    | 2   | No    |      |       |       | 176   | 72    |
| 7193   |      | 2   | No              |      | 2   | No             |      | 2   | No    |      |       |       | 173   | 83    |
| 7194   |      | 2   | No              |      | 1   | Yes            | 2    | 2   | No    |      |       |       | 163   | 60    |
| 7195   |      | 2   | No              |      | 2   | No             |      | 2   | No    |      |       |       | 158   | 50    |
| 7200   |      | 2   | No              |      | 2   | No             |      | 2   | No    |      |       |       | 165   | 58    |
| 7201   | 1    | 2   | No              |      | 1   | Yes            | 2    | 2   | No    |      |       |       | 157   | 50    |
| 7205   | 1    | 2   | No              |      | 1   | Yes            | 1    | 2   | No    |      | 5     | 3     |       | 64    |
| 7207   |      | 2   | No              |      | 2   | No             |      | 2   | No    |      |       |       | 180   | 78    |
| 7208   |      | 2   | No              |      | 2   | No             |      | 2   | No    |      |       |       | 167   | 65    |
| 7210   |      | 2   | No              |      | 2   | No             |      | 2   | No    |      |       |       | 150   | 50    |
| 7211   |      | 2   | No              |      | 2   | No             |      | 2   | No    |      |       |       | 172   | 89    |
| 7217   | 1    | 1   | Yes             | 1    | 2   | No             |      | 1   | Yes   | 2    |       |       | 165   | 55    |
| 7218   |      | 2   | No              |      | 2   | No             |      | 2   | No    |      |       |       | 168   | 85    |
| 7220   |      | 2   | No              |      | 2   | No             |      | 2   | No    |      |       |       | 173   | 65    |
| 7225   |      | 2   | No              |      | 2   | No             |      | 2   | No    |      |       |       | 164   | 59    |
| 7228   | 2    | 2   | No              |      | 2   | No             |      | 2   | No    |      |       |       | 170   | 85    |

| respid | Q11a | Q12 | Cardiac Disease | Q12a | Q13 | Hyperlipidemia | Q13a | Q14 | Neuro | Q14a | Q15_1 | Q15_2 | Q15_3 | Q16_1 |
|--------|------|-----|-----------------|------|-----|----------------|------|-----|-------|------|-------|-------|-------|-------|
| 7230   |      | 2   | No              |      | 2   | No             |      | 2   | No    |      |       |       | 162   | 57    |
| 7233   | 1    | 2   | No              |      | 1   | Yes            | 2    | 2   | No    |      |       |       | 176   | 72    |
| 7234   |      | 2   | No              |      | 1   | Yes            | 2    | 2   | No    |      |       |       | 168   | 69    |
| 7235   |      | 2   | No              |      | 2   | No             |      | 2   | No    |      |       |       | 171   | 71    |
| 7236   |      | 2   | No              |      | 2   | No             |      | 2   | No    |      |       |       | 175   | 80    |
| 7241   |      | 2   | No              |      | 1   | Yes            | 2    | 2   | No    |      |       |       | 176   | 73    |
| 7251   |      | 2   | No              |      | 2   | No             |      | 2   | No    |      |       |       | 173   | 70    |
| 7253   |      | 2   | No              |      | 1   | Yes            | 1    | 2   | No    |      |       |       | 170   | 65    |
| 7259   |      | 2   | No              |      | 2   | No             |      | 2   | No    |      |       |       | 164   | 62    |
| 7260   |      | 2   | No              |      | 1   | Yes            | 2    | 2   | No    |      |       |       | 164   | 80    |
| 7261   |      | 1   | Yes             | 2    | 1   | Yes            | 2    | 2   | No    |      |       |       | 174   | 85    |
| 7263   |      | 2   | No              |      | 2   | No             |      | 2   | No    |      |       |       | 170   | 58    |
| 7265   |      | 2   | No              |      | 2   | No             |      | 2   | No    |      |       |       | 161   | 52    |
| 7268   |      | 1   | Yes             | 1    | 2   | No             |      | 2   | No    |      |       |       | 162   | 62    |
| 7269   |      | 2   | No              |      | 1   | Yes            | 2    | 2   | No    |      |       |       | 162   | 65    |
| 7271   | 1    | 1   | Yes             | 1    | 1   | Yes            | 1    | 1   | Yes   | 1    |       |       | 171   | 68    |
| 7276   | 1    | 2   | No              |      | 1   | Yes            | 1    | 2   | No    |      |       |       | 158   | 60    |
| 7280   |      | 2   | No              |      | 2   | No             |      | 2   | No    |      |       |       | 180   | 90    |
| 7283   |      | 2   | No              |      | 2   | No             |      | 2   | No    |      |       |       | 156   | 50    |
| 7284   | 2    | 2   | No              |      | 1   | Yes            | 2    | 2   | No    |      |       |       | 165   | 75    |
| 7286   | 1    | 2   | No              |      | 2   | No             |      | 2   | No    |      |       |       | 168   | 77    |
| 7287   |      | 2   | No              |      | 2   | No             |      | 2   | No    |      |       |       | 178   | 70    |
| 7288   |      | 2   | No              |      | 2   | No             |      | 2   | No    |      |       |       | 150   | 65    |
| 7294   |      | 2   | No              |      | 2   | No             |      | 2   | No    |      |       |       | 150   | 70    |
| 7295   |      | 2   | No              |      | 2   | No             |      | 2   | No    |      |       |       | 163   | 65    |
| 7296   |      | 2   | No              |      | 2   | No             |      | 2   | No    |      |       |       | 176   | 70    |
| 7297   |      | 2   | No              |      | 2   | No             |      | 2   | No    |      |       |       | 167   | 70    |
| 7299   |      | 2   | No              |      | 2   | No             |      | 2   | No    |      |       |       | 155   | 55    |
| 7300   |      | 2   | No              |      | 1   | Yes            | 1    | 1   | Yes   | 1    |       |       | 180   | 80    |
| 7301   |      | 2   | No              |      | 2   | No             |      | 2   | No    |      |       |       | 173   | 72    |
| 7302   |      | 2   | No              |      | 2   | No             |      | 2   | No    |      |       |       | 165   | 68    |
| 7306   | 1    | 2   | No              |      | 2   | No             |      | 2   | No    |      |       |       | 158   | 70    |



| respid | Q11a | Q12 | Cardiac Disease | Q12a | Q13 | Hyperlipidemia | Q13a | Q14 | Neuro | Q14a | Q15_1 | Q15_2 | Q15_3 | Q16_1 |
|--------|------|-----|-----------------|------|-----|----------------|------|-----|-------|------|-------|-------|-------|-------|
| 7313   |      | 1   | Yes             | 2    | 2   | No             |      | 2   | No    |      |       |       | 170   | 68    |
| 7315   |      | 2   | No              |      | 2   | No             |      | 2   | No    |      |       |       | 156   | 67    |
| 7317   |      | 2   | No              |      | 2   | No             |      | 2   | No    |      |       |       | 152   | 48    |
| 7321   |      | 2   | No              |      | 2   | No             |      | 2   | No    |      |       |       | 174   | 76    |
| 7322   | 1    | 2   | No              |      | 2   | No             |      | 2   | No    |      |       |       | 173   | 76    |
| 7323   |      | 2   | No              |      | 2   | No             |      | 2   | No    |      |       |       | 173   | 70    |
| 7333   |      | 2   | No              |      | 1   | Yes            | 2    | 2   | No    |      |       |       | 173   | 61    |
| 7335   |      | 2   | No              |      | 2   | No             |      | 2   | No    |      |       |       | 160   | 60    |
| 7336   |      | 2   | No              |      | 2   | No             |      | 2   | No    |      |       |       | 162   | 55    |
| 7337   |      | 2   | No              |      | 2   | No             |      | 2   | No    |      |       |       | 165   | 55    |
| 7338   |      | 2   | No              |      | 2   | No             |      | 2   | No    |      |       |       | 168   | 65    |
| 7340   |      | 2   | No              |      | 1   | Yes            | 2    | 2   | No    |      |       |       | 166   | 56    |
| 7341   | 1    | 2   | No              |      | 1   | Yes            | 1    | 2   | No    |      |       |       | 148   | 50    |
| 7342   |      | 2   | No              |      | 2   | No             |      | 2   | No    |      |       |       | 160   | 60    |
| 7344   |      | 2   | No              |      | 2   | No             |      | 2   | No    |      |       |       | 160   | 55    |
| 7346   | 1    | 2   | No              |      | 1   | Yes            | 2    | 2   | No    |      |       |       | 158   | 67    |
| 7347   |      | 2   | No              |      | 2   | No             |      | 2   | No    |      |       |       | 157   | 52    |
| 7349   |      | 2   | No              |      | 2   | No             |      | 2   | No    |      |       |       | 168   | 68    |
| 7352   | 1    | 2   | No              |      | 2   | No             |      | 2   | No    |      |       |       | 164   | 64    |
| 7353   |      | 2   | No              |      | 2   | No             |      | 2   | No    |      |       |       | 173   | 62    |
| 7355   | 2    | 2   | No              |      | 1   | Yes            | 2    | 2   | No    |      |       |       | 170   | 80    |
| 7356   |      | 2   | No              |      | 2   | No             |      | 2   | No    |      |       |       | 158   | 65    |
| 7360   |      | 2   | No              |      | 2   | No             |      | 2   | No    |      | 5     | 0     |       | 40    |
| 7371   | 1    | 2   | No              |      | 2   | No             |      | 2   | No    |      |       |       | 170   | 62    |
| 7376   | 1    | 2   | No              |      | 2   | No             |      | 2   | No    |      |       |       | 163   | 60    |
| 7379   |      | 2   | No              |      | 2   | No             |      | 2   | No    |      |       |       | 162   | 50    |
| 7381   |      | 2   | No              |      | 1   | Yes            | 2    | 2   | No    |      |       |       | 178   | 85    |
| 7386   |      | 2   | No              |      | 2   | No             |      | 2   | No    |      |       |       | 165   | 55    |
| 7389   | 2    | 1   | Yes             | 2    | 2   | No             |      | 2   | No    |      |       |       | 172   | 80    |
| 7390   |      | 2   | No              |      | 2   | No             |      | 2   | No    |      |       |       | 163   | 61    |
| 7393   |      | 2   | No              |      | 2   | No             |      | 2   | No    |      |       |       | 180   | 75    |
| 7394   |      | 2   | No              |      | 2   | No             |      | 2   | No    |      |       |       | 172   | 68    |

| respid | Q11a | Q12 | Cardiac Disease | Q12a | Q13 | Hyperlipidemia | Q13a | Q14 | Neuro | Q14a | Q15_1 | Q15_2 | Q15_3 | Q16_1 |
|--------|------|-----|-----------------|------|-----|----------------|------|-----|-------|------|-------|-------|-------|-------|
| 7396   |      | 2   | No              |      | 1   | Yes            | 2    | 2   | No    |      |       |       | 167   | 52    |
| 7400   |      | 2   | No              |      | 2   | No             |      | 2   | No    |      |       |       | 170   | 65    |
| 7401   |      | 2   | No              |      | 2   | No             |      | 2   | No    |      |       |       | 172   | 75    |
| 7403   | 2    | 2   | No              |      | 1   | Yes            | 2    | 2   | No    |      |       |       | 172   | 81    |
| 7406   |      | 2   | No              |      | 2   | No             |      | 2   | No    |      |       |       | 175   | 70    |
| 7409   | 1    | 2   | No              |      | 1   | Yes            | 1    | 2   | No    |      |       |       | 176   | 85    |
| 7410   |      | 2   | No              |      | 2   | No             |      | 2   | No    |      |       |       | 172   | 70    |
| 7412   |      | 2   | No              |      | 2   | No             |      | 2   | No    |      |       |       | 173   | 78    |
| 7414   |      | 2   | No              |      | 2   | No             |      | 2   | No    |      |       |       | 156   | 60    |
| 7415   |      | 2   | No              |      | 2   | No             |      | 2   | No    |      |       |       | 166   | 60    |
| 7417   |      | 2   | No              |      | 2   | No             |      | 2   | No    |      |       |       | 172   | 69    |
| 7421   |      | 2   | No              |      | 2   | No             |      | 2   | No    |      |       |       | 180   | 65    |
| 7425   |      | 2   | No              |      | 2   | No             |      | 2   | No    |      |       |       | 175   | 79    |
| 7430   |      | 2   | No              |      | 2   | No             |      | 2   | No    |      |       |       | 175   | 60    |
| 7432   |      | 2   | No              |      | 2   | No             |      | 2   | No    |      |       |       | 170   | 70    |
| 7433   | 1    | 2   | No              |      | 1   | Yes            | 1    | 2   | No    |      |       |       | 160   | 60    |
| 7442   | 1    | 2   | No              |      | 2   | No             |      | 2   | No    |      | 5     | 1     |       | 65    |
| 7445   |      | 1   | Yes             | 2    | 2   | No             |      | 2   | No    |      |       |       | 164   | 53    |
| 7446   |      | 2   | No              |      | 2   | No             |      | 2   | No    |      |       |       | 172   | 67    |
| 7449   |      | 2   | No              |      | 2   | No             |      | 2   | No    |      |       |       | 170   | 60    |
| 7450   |      | 2   | No              |      | 2   | No             |      | 2   | No    |      |       |       | 160   | 62    |
| 7451   |      | 2   | No              |      | 2   | No             |      | 2   | No    |      |       |       | 170   | 68    |
| 7459   |      | 2   | No              |      | 1   | Yes            | 2    | 2   | No    |      |       |       | 176   | 83    |
| 7462   |      | 2   | No              |      | 2   | No             |      | 2   | No    |      |       |       | 160   | 64    |
| 7463   | 2    | 2   | No              |      | 1   | Yes            | 2    | 2   | No    |      |       |       | 163   | 60    |
| 7469   |      | 2   | No              |      | 2   | No             |      | 2   | No    |      |       |       | 175   | 69    |
| 7482   |      | 2   | No              |      | 2   | No             |      | 2   | No    |      |       |       | 171   | 61    |
| 7484   | 2    | 2   | No              |      | 1   | Yes            | 2    | 2   | No    |      |       |       | 161   | 58    |
| 7486   |      | 2   | No              |      | 2   | No             |      | 2   | No    |      | 5     | 7     |       | 75    |
| 7496   |      | 2   | No              |      | 2   | No             |      | 2   | No    |      |       |       | 159   | 56    |
| 7502   |      | 2   | No              |      | 1   | Yes            | 2    | 2   | No    |      |       |       | 176   | 82    |
| 7504   | 2    | 2   | No              |      | 1   | Yes            | 2    | 2   | No    |      |       |       | 172   | 78    |

| respid | Q11a | Q12 | Cardiac Disease | Q12a | Q13 | Hyperlipidemia | Q13a | Q14 | Neuro | Q14a | Q15_1 | Q15_2 | Q15_3 | Q16_1 |
|--------|------|-----|-----------------|------|-----|----------------|------|-----|-------|------|-------|-------|-------|-------|
| 7509   | 2    | 1   | Yes             | 1    | 1   | Yes            | 2    | 2   | No    |      |       |       | 177   | 95    |
| 7513   |      | 2   | No              |      | 1   | Yes            | 2    | 2   | No    |      |       |       | 155   | 58    |
| 7514   | 2    | 2   | No              |      | 2   | No             |      | 2   | No    |      |       |       | 170   | 90    |
| 7520   |      | 2   | No              |      | 2   | No             |      | 2   | No    |      |       |       | 159   | 61    |
| 7523   |      | 2   | No              |      | 2   | No             |      | 2   | No    |      |       |       | 150   | 48    |
| 7526   |      | 2   | No              |      | 2   | No             |      | 2   | No    |      |       |       | 169   | 65    |
| 7529   |      | 1   | Yes             | 2    | 2   | No             |      | 2   | No    |      |       |       | 168   | 55    |
| 7534   |      | 2   | No              |      | 2   | No             |      | 2   | No    |      |       |       | 156   | 70    |
| 7536   | 2    | 2   | No              |      | 1   | Yes            | 1    | 2   | No    |      |       |       | 161   | 65    |
| 7540   |      | 2   | No              |      | 2   | No             |      | 2   | No    |      |       |       | 162   | 62    |
| 7541   |      | 2   | No              |      | 2   | No             |      | 2   | No    |      |       |       | 175   | 65    |
| 7542   |      | 2   | No              |      | 2   | No             |      | 2   | No    |      |       |       | 160   | 50    |
| 7555   | 2    | 2   | No              |      | 1   | Yes            | 2    | 2   | No    |      |       |       | 173   | 77    |
| 7566   |      | 2   | No              |      | 2   | No             |      | 2   | No    |      |       |       | 158   | 68    |
| 7568   | 2    | 1   | Yes             | 2    | 1   | Yes            | 2    | 2   | No    |      |       |       | 178   | 68    |
| 7570   |      | 2   | No              |      | 1   | Yes            | 1    | 2   | No    |      |       |       | 168   | 65    |
| 7572   |      | 2   | No              |      | 2   | No             |      | 2   | No    |      |       |       | 160   | 60    |
| 7573   | 2    | 2   | No              |      | 1   | Yes            | 1    | 2   | No    |      |       |       | 152   | 60    |
| 7576   |      | 2   | No              |      | 2   | No             |      | 2   | No    |      |       |       | 157   | 42    |
| 7577   |      | 2   | No              |      | 2   | No             |      | 2   | No    |      |       |       | 160   | 50    |
| 7583   |      | 2   | No              |      | 2   | No             |      | 2   | No    |      |       |       | 182   | 70    |
| 7584   | 2    | 2   | No              |      | 1   | Yes            | 2    | 2   | No    |      |       |       | 175   | 70    |
| 7585   | 1    | 1   | Yes             | 1    | 1   | Yes            | 1    | 2   | No    |      | 5     | 3     |       | 50    |
| 7586   |      | 2   | No              |      | 2   | No             |      | 2   | No    |      |       |       | 155   | 55    |
| 7587   |      | 2   | No              |      | 2   | No             |      | 2   | No    |      |       |       | 170   | 55    |
| 7588   |      | 2   | No              |      | 2   | No             |      | 2   | No    |      |       |       | 174   | 72    |
| 7596   |      | 2   | No              |      | 1   | Yes            | 2    | 2   | No    |      |       |       | 178   | 88    |
| 7599   |      | 2   | No              |      | 2   | No             |      | 2   | No    |      |       |       | 155   | 60    |
| 7600   |      | 2   | No              |      | 1   | Yes            | 1    | 2   | No    |      |       |       | 175   | 70    |
| 7602   | 1    | 1   | Yes             | 1    | 1   | Yes            | 1    | 2   | No    |      |       |       | 166   | 67    |
| 7613   |      | 2   | No              |      | 2   | No             |      | 2   | No    |      |       |       | 165   | 72    |
| 7620   |      | 2   | No              |      | 2   | No             |      | 2   | No    |      |       |       | 168   | 54    |

| respid | Q11a | Q12 | Cardiac Disease | Q12a | Q13 | Hyperlipidemia | Q13a | Q14 | Neuro | Q14a | Q15_1 | Q15_2 | Q15_3 | Q16_1 |
|--------|------|-----|-----------------|------|-----|----------------|------|-----|-------|------|-------|-------|-------|-------|
| 7623   |      | 2   | No              |      | 1   | Yes            | 2    | 2   | No    |      |       |       | 173   | 73    |
| 7635   |      | 2   | No              |      | 2   | No             |      | 2   | No    |      |       |       | 168   | 80    |
| 7636   |      | 2   | No              |      | 2   | No             |      | 2   | No    |      |       |       | 165   | 66    |
| 7643   |      | 2   | No              |      | 2   | No             |      | 2   | No    |      |       |       | 158   | 59    |
| 7645   |      | 2   | No              |      | 2   | No             |      | 2   | No    |      |       |       | 168   | 53    |
| 7649   | 1    | 1   | Yes             | 1    | 1   | Yes            | 1    | 2   | No    |      |       |       | 164   | 70    |
| 7651   |      | 2   | No              |      | 2   | No             |      | 2   | No    |      |       |       | 162   | 60    |
| 7652   |      | 2   | No              |      | 1   | Yes            | 2    | 2   | No    |      | 5     | 8     |       | 75    |
| 7655   |      | 2   | No              |      | 2   | No             |      | 2   | No    |      |       |       | 167   | 62    |
| 7657   |      | 2   | No              |      | 2   | No             |      | 2   | No    |      |       |       | 170   | 70    |
| 7675   |      | 2   | No              |      | 2   | No             |      | 2   | No    |      |       |       | 159   | 48    |
| 7676   | 1    | 1   | Yes             | 1    | 2   | No             |      | 2   | No    |      |       |       | 175   | 89    |
| 7684   |      | 2   | No              |      | 2   | No             |      | 2   | No    |      | 5     | 1     |       | 60    |
| 7693   |      | 2   | No              |      | 2   | No             |      | 2   | No    |      |       |       | 170   | 70    |
| 7694   | 1    | 1   | Yes             | 1    | 1   | Yes            | 1    | 2   | No    |      |       |       | 165   | 60    |
| 7695   | 2    | 1   | Yes             | 2    | 1   | Yes            | 2    | 2   | No    |      |       |       | 170   | 75    |
| 7696   | 1    | 1   | Yes             | 1    | 2   | No             |      | 2   | No    |      |       |       | 165   | 60    |
| 7698   |      | 2   | No              |      | 2   | No             |      | 2   | No    |      |       |       | 157   | 78    |
| 7700   |      | 2   | No              |      | 2   | No             |      | 2   | No    |      |       |       | 160   | 62    |
| 7701   | 2    | 2   | No              |      | 2   | No             |      | 2   | No    |      |       |       | 165   | 65    |
| 7704   | 1    | 2   | No              |      | 2   | No             |      | 2   | No    |      |       |       | 160   | 59    |
| 7709   |      | 2   | No              |      | 2   | No             |      | 2   | No    |      |       |       | 170   | 66    |
| 7713   |      | 2   | No              |      | 2   | No             |      | 2   | No    |      |       |       | 173   | 76    |
| 7714   |      | 2   | No              |      | 2   | No             |      | 2   | No    |      |       |       | 158   | 58    |
| 7718   | 1    | 2   | No              |      | 1   | Yes            | 1    | 2   | No    |      |       |       | 175   | 90    |
| 7720   |      | 2   | No              |      | 2   | No             |      | 2   | No    |      |       |       | 176   | 79    |
| 7721   |      | 2   | No              |      | 2   | No             |      | 2   | No    |      |       |       | 162   | 55    |
| 7722   | 1    | 2   | No              |      | 1   | Yes            | 2    | 2   | No    |      |       |       | 163   | 73    |
| 7724   |      | 2   | No              |      | 2   | No             |      | 2   | No    |      |       |       | 176   | 85    |
| 7728   |      | 2   | No              |      | 2   | No             |      | 2   | No    |      |       |       | 170   | 50    |
| 7731   |      | 2   | No              |      | 1   | Yes            | 2    | 2   | No    |      |       |       | 168   | 67    |
| 7735   |      | 1   | Yes             | 1    | 2   | No             |      | 2   | No    |      |       |       | 175   | 65    |

| respid | Q11a | Q12 | Cardiac Disease | Q12a | Q13 | Hyperlipidemia | Q13a | Q14 | Neuro | Q14a | Q15_1 | Q15_2 | Q15_3 | Q16_1 |
|--------|------|-----|-----------------|------|-----|----------------|------|-----|-------|------|-------|-------|-------|-------|
| 7737   | 1    | 1   | Yes             | 2    | 1   | Yes            | 2    | 2   | No    |      |       |       | 169   | 75    |
| 7741   |      | 2   | No              |      | 2   | No             |      | 2   | No    |      | 6     | 7     |       | 68    |
| 7746   |      | 2   | No              |      | 1   | Yes            | 2    | 2   | No    |      |       |       | 165   | 68    |
| 7747   |      | 2   | No              |      | 1   | Yes            | 2    | 2   | No    |      |       |       | 164   | 67    |
| 7748   |      | 2   | No              |      | 2   | No             |      | 2   | No    |      |       |       | 180   | 70    |
| 7750   |      | 2   | No              |      | 2   | No             |      | 2   | No    |      |       |       | 160   | 75    |
| 7754   |      | 2   | No              |      | 2   | No             |      | 2   | No    |      |       |       | 163   | 65    |
| 7755   | 1    | 2   | No              |      | 1   | Yes            | 2    | 2   | No    |      |       |       | 160   | 59    |
| 7762   |      | 2   | No              |      | 2   | No             |      | 2   | No    |      |       |       | 160   | 50    |
| 7764   |      | 2   | No              |      | 1   | Yes            | 2    | 2   | No    |      |       |       | 174   | 80    |
| 7766   |      | 2   | No              |      | 2   | No             |      | 2   | No    |      |       |       | 160   | 48    |
| 7768   |      | 2   | No              |      | 1   | Yes            | 2    | 2   | No    |      |       |       | 160   | 65    |
| 7770   | 1    | 2   | No              |      | 2   | No             |      | 2   | No    |      |       |       | 170   | 55    |
| 7771   |      | 2   | No              |      | 1   | Yes            | 2    | 2   | No    |      |       |       | 167   | 65    |
| 7777   |      | 2   | No              |      | 2   | No             |      | 2   | No    |      |       |       | 172   | 75    |
| 7778   |      | 2   | No              |      | 2   | No             |      | 2   | No    |      |       |       | 170   | 74    |
| 7783   | 1    | 2   | No              |      | 2   | No             |      | 2   | No    |      |       |       | 170   | 65    |
| 7789   |      | 2   | No              |      | 2   | No             |      | 2   | No    |      |       |       | 163   | 55    |
| 7790   | 1    | 2   | No              |      | 2   | No             |      | 1   | Yes   | 1    |       |       | 155   | 60    |
| 7795   | 2    | 2   | No              |      | 2   | No             |      | 2   | No    |      |       |       | 170   | 85    |
| 7807   |      | 2   | No              |      | 2   | No             |      | 2   | No    |      |       |       | 175   | 68    |
| 7808   | 1    | 2   | No              |      | 1   | Yes            | 1    | 2   | No    |      |       |       | 168   | 74    |
| 7818   |      | 2   | No              |      | 1   | Yes            | 1    | 2   | No    |      |       |       | 168   | 70    |
| 7820   |      | 2   | No              |      | 2   | No             |      | 2   | No    |      |       |       | 168   | 56    |
| 7831   | 1    | 2   | No              |      | 2   | No             |      | 2   | No    |      |       |       | 168   | 68    |
| 7832   | 1    | 2   | No              |      | 1   | Yes            | 1    | 2   | No    |      |       |       | 176   | 70    |
| 7837   |      | 2   | No              |      | 2   | No             |      | 2   | No    |      |       |       | 176   | 71    |
| 7841   | 2    | 2   | No              |      | 1   | Yes            | 1    | 2   | No    |      |       |       | 172   | 80    |
| 7845   |      | 2   | No              |      | 1   | Yes            | 1    | 2   | No    |      |       |       | 162   | 62    |
| 7853   |      | 2   | No              |      | 1   | Yes            | 1    | 2   | No    |      |       |       | 175   | 75    |
| 7854   |      | 2   | No              |      | 2   | No             |      | 2   | No    |      |       |       | 155   | 49    |
| 7862   |      | 2   | No              |      | 2   | No             |      | 2   | No    |      |       |       | 174   | 75    |

| respid | Q11a | Q12 | Cardiac Disease | Q12a | Q13 | Hyperlipidemia | Q13a | Q14 | Neuro | Q14a | Q15_1 | Q15_2 | Q15_3 | Q16_1 |
|--------|------|-----|-----------------|------|-----|----------------|------|-----|-------|------|-------|-------|-------|-------|
| 7871   |      | 2   | No              |      | 2   | No             |      | 2   | No    |      | 5     | 11    |       | 50    |
| 7875   |      | 2   | No              |      | 2   | No             |      | 2   | No    |      |       |       | 161   | 52    |
| 7880   |      | 2   | No              |      | 2   | No             |      | 2   | No    |      |       |       | 174   | 70    |
| 7881   |      | 2   | No              |      | 1   | Yes            | 2    | 2   | No    |      |       |       | 158   | 58    |
| 7883   |      | 2   | No              |      | 1   | Yes            | 2    | 2   | No    |      |       |       | 172   | 80    |
| 7896   |      | 1   | Yes             | 1    | 2   | No             |      | 2   | No    |      |       |       | 173   | 72    |
| 7905   |      | 2   | No              |      | 2   | No             |      | 2   | No    |      |       |       | 168   | 53    |
| 7919   |      | 2   | No              |      | 2   | No             |      | 2   | No    |      |       |       | 171   | 60    |
| 7928   |      | 2   | No              |      | 1   | Yes            | 1    | 2   | No    |      |       |       | 173   | 75    |
| 7929   |      | 2   | No              |      | 1   | Yes            | 2    | 2   | No    |      |       |       | 158   | 48    |
| 7938   |      | 2   | No              |      | 1   | Yes            | 1    | 2   | No    |      |       |       | 174   | 75    |
| 7940   |      | 2   | No              |      | 2   | No             |      | 2   | No    |      |       |       | 181   | 85    |
| 7941   |      | 2   | No              |      | 1   | Yes            | 2    | 2   | No    |      |       |       | 170   | 81    |
| 7952   |      | 2   | No              |      | 2   | No             |      | 2   | No    |      |       |       | 167   | 65    |
| 7962   |      | 2   | No              |      | 2   | No             |      | 2   | No    |      |       |       | 166   | 69    |
| 7968   | 2    | 2   | No              |      | 2   | No             |      | 2   | No    |      |       |       | 172   | 65    |
| 7972   | 2    | 2   | No              |      | 1   | Yes            | 2    | 2   | No    |      |       |       | 178   | 84    |
| 7983   | 1    | 2   | No              |      | 1   | Yes            | 2    | 2   | No    |      |       |       | 180   | 90    |
| 7990   | 1    | 2   | No              |      | 2   | No             |      | 2   | No    |      |       |       | 165   | 70    |
| 7993   | 1    | 2   | No              |      | 2   | No             |      | 2   | No    |      |       |       | 160   | 50    |
| 8005   |      | 2   | No              |      | 2   | No             |      | 2   | No    |      |       |       | 162   | 59    |
| 8008   | 1    | 1   | Yes             | 1    | 2   | No             |      | 2   | No    |      |       |       | 157   | 57    |
| 8012   | 2    | 2   | No              |      | 2   | No             |      | 2   | No    |      |       |       | 160   | 52    |
| 8021   |      | 2   | No              |      | 2   | No             |      | 2   | No    |      |       |       | 172   | 62    |
| 8024   | 1    | 2   | No              |      | 1   | Yes            | 2    | 2   | No    |      |       |       | 150   | 60    |
| 8043   |      | 2   | No              |      | 2   | No             |      | 2   | No    |      |       |       | 165   | 50    |
| 8051   |      | 2   | No              |      | 2   | No             |      | 1   | Yes   | 1    | 5     | 3     |       | 58    |
| 8056   |      | 1   | Yes             | 2    | 2   | No             |      | 2   | No    |      |       |       | 159   | 51    |
| 8061   |      | 2   | No              |      | 2   | No             |      | 2   | No    |      |       |       | 172   | 75    |
| 8066   | 1    | 2   | No              |      | 2   | No             |      | 2   | No    |      |       |       | 167   | 80    |
| 8069   | 1    | 2   | No              |      | 1   | Yes            | 1    | 2   | No    |      |       |       | 160   | 65    |
| 8071   | 1    | 1   | Yes             | 1    | 2   | No             |      | 1   | Yes   | 1    |       |       | 160   | 60    |

| respid | Q11a | Q12 | Cardiac Disease | Q12a | Q13 | Hyperlipidemia | Q13a | Q14 | Neuro | Q14a | Q15_1 | Q15_2 | Q15_3 | Q16_1 |
|--------|------|-----|-----------------|------|-----|----------------|------|-----|-------|------|-------|-------|-------|-------|
| 8072   |      | 2   | No              |      | 2   | No             |      | 2   | No    |      |       |       | 165   | 75    |
| 8076   |      | 2   | No              |      | 1   | Yes            | 2    | 2   | No    |      |       |       | 168   | 70    |
| 8080   |      | 2   | No              |      | 1   | Yes            | 2    | 2   | No    |      |       |       | 170   | 64    |
| 8083   |      | 2   | No              |      | 1   | Yes            | 2    | 2   | No    |      |       |       | 171   | 68    |
| 8093   | 1    | 2   | No              |      | 2   | No             |      | 2   | No    |      |       |       | 165   | 64    |
| 8095   | 1    | 2   | No              |      | 1   | Yes            | 2    | 2   | No    |      |       |       | 167   | 76    |
| 8099   |      | 2   | No              |      | 2   | No             |      | 2   | No    |      |       |       | 175   | 75    |
| 8100   |      | 2   | No              |      | 1   | Yes            | 2    | 2   | No    |      |       |       | 180   | 70    |
| 8103   |      | 2   | No              |      | 2   | No             |      | 2   | No    |      |       |       | 170   | 67    |
| 8104   |      | 2   | No              |      | 2   | No             |      | 1   | Yes   | 1    |       |       | 170   | 52    |
| 8115   | 1    | 2   | No              |      | 2   | No             |      | 2   | No    |      |       |       | 165   | 72    |
| 8121   | 1    | 2   | No              |      | 2   | No             |      | 2   | No    |      |       |       | 174   | 85    |
| 8128   |      | 2   | No              |      | 2   | No             |      | 2   | No    |      | 5     | 6     |       | 60    |
| 8130   |      | 2   | No              |      | 2   | No             |      | 2   | No    |      |       |       | 155   | 46    |
| 8131   |      | 2   | No              |      | 2   | No             |      | 2   | No    |      |       |       | 163   | 60    |
| 8133   |      | 2   | No              |      | 1   | Yes            | 1    | 2   | No    |      |       |       | 160   | 51    |
| 8143   | 1    | 2   | No              |      | 2   | No             |      | 2   | No    |      | 5     | 4     |       | 78    |
| 8144   |      | 2   | No              |      | 1   | Yes            | 2    | 2   | No    |      |       |       | 165   | 65    |
| 8146   |      | 2   | No              |      | 1   | Yes            | 2    | 2   | No    |      |       |       | 170   | 80    |
| 8148   |      | 2   | No              |      | 2   | No             |      | 2   | No    |      |       |       | 177   | 90    |
| 8157   |      | 2   | No              |      | 2   | No             |      | 2   | No    |      |       |       | 171   | 64    |
| 8164   |      | 2   | No              |      | 2   | No             |      | 2   | No    |      |       |       | 158   | 65    |
| 8173   |      | 2   | No              |      | 2   | No             |      | 2   | No    |      |       |       | 167   | 65    |
| 8176   |      | 2   | No              |      | 2   | No             |      | 2   | No    |      |       |       | 158   | 58    |
| 8179   | 1    | 2   | No              |      | 2   | No             |      | 2   | No    |      |       |       | 170   | 74    |
| 8181   |      | 2   | No              |      | 2   | No             |      | 2   | No    |      |       |       | 155   | 78    |
| 8182   |      | 2   | No              |      | 2   | No             |      | 2   | No    |      |       |       | 158   | 53    |
| 8196   |      | 2   | No              |      | 2   | No             |      | 2   | No    |      |       |       | 170   | 68    |
| 8200   |      | 2   | No              |      | 2   | No             |      | 2   | No    |      |       |       | 156   | 51    |
| 8203   |      | 2   | No              |      | 2   | No             |      | 2   | No    |      |       |       | 167   | 65    |
| 8204   |      | 2   | No              |      | 1   | Yes            | 2    | 2   | No    |      |       |       | 155   | 60    |
| 8206   |      | 2   | No              |      | 2   | No             |      | 2   | No    |      |       |       | 168   | 63    |

| respid | Q11a | Q12 | Cardiac Disease | Q12a | Q13 | Hyperlipidemia | Q13a | Q14 | Neuro | Q14a | Q15_1 | Q15_2 | Q15_3 | Q16_1 |
|--------|------|-----|-----------------|------|-----|----------------|------|-----|-------|------|-------|-------|-------|-------|
| 8208   |      | 2   | No              |      | 2   | No             |      | 2   | No    |      |       |       | 163   | 55    |
| 8212   | 2    | 2   | No              |      | 1   | Yes            | 2    | 2   | No    |      |       |       | 171   | 75    |
| 8222   |      | 2   | No              |      | 1   | Yes            | 2    | 2   | No    |      |       |       | 159   | 53    |
| 8223   |      | 2   | No              |      | 2   | No             |      | 2   | No    |      |       |       | 170   | 120   |
| 8225   | 1    | 2   | No              |      | 1   | Yes            | 1    | 2   | No    |      |       |       | 165   | 97    |
| 8226   |      | 2   | No              |      | 2   | No             |      | 2   | No    |      |       |       | 165   | 70    |
| 8228   | 1    | 2   | No              |      | 1   | Yes            | 2    | 2   | No    |      |       |       | 180   | 85    |
| 8229   |      | 2   | No              |      | 2   | No             |      | 2   | No    |      |       |       | 169   | 66    |
| 8239   | 1    | 1   | Yes             | 1    | 2   | No             |      | 2   | No    |      |       |       | 170   | 65    |
| 8246   |      | 1   | Yes             | 2    | 2   | No             |      | 2   | No    |      |       |       | 167   | 51    |
| 8258   | 2    | 2   | No              |      | 1   | Yes            | 2    | 2   | No    |      |       |       | 166   | 80    |
| 8260   |      | 2   | No              |      | 2   | No             |      | 2   | No    |      |       |       | 160   | 49    |
| 8262   | 2    | 2   | No              |      | 2   | No             |      | 2   | No    |      |       |       | 178   | 70    |
| 8263   |      | 2   | No              |      | 2   | No             |      | 2   | No    |      |       |       | 173   | 75    |
| 8267   | 1    | 2   | No              |      | 2   | No             |      | 2   | No    |      |       |       | 161   | 79    |
| 8271   |      | 2   | No              |      | 2   | No             |      | 2   | No    |      |       |       | 164   | 62    |
| 8274   |      | 2   | No              |      | 2   | No             |      | 2   | No    |      |       |       | 172   | 72    |
| 8275   | 2    | 2   | No              |      | 1   | Yes            | 2    | 2   | No    |      |       |       | 165   | 68    |
| 8279   | 1    | 2   | No              |      | 2   | No             |      | 2   | No    |      |       |       | 153   | 48    |
| 8285   | 1    | 2   | No              |      | 1   | Yes            | 2    | 2   | No    |      |       |       | 164   | 70    |
| 8287   | 1    | 1   | Yes             | 1    | 1   | Yes            | 1    | 2   | No    |      |       |       | 174   | 70    |
| 8289   | 1    | 2   | No              |      | 1   | Yes            | 2    | 2   | No    |      |       |       | 170   | 85    |
| 8291   |      | 2   | No              |      | 1   | Yes            | 2    | 2   | No    |      |       |       | 160   | 55    |
| 8299   |      | 2   | No              |      | 2   | No             |      | 2   | No    |      |       |       | 175   | 85    |
| 8301   | 1    | 1   | Yes             | 1    | 2   | No             |      | 2   | No    |      |       |       | 159   | 49    |
| 8302   |      | 2   | No              |      | 2   | No             |      | 2   | No    |      |       |       | 168   | 70    |
| 8308   | 2    | 2   | No              |      | 1   | Yes            | 2    | 2   | No    |      |       |       | 158   | 55    |
| 8313   | 1    | 2   | No              |      | 1   | Yes            | 2    | 2   | No    |      |       |       | 172   | 80    |
| 8316   |      | 2   | No              |      | 2   | No             |      | 2   | No    |      |       |       | 167   | 55    |
| 8317   |      | 2   | No              |      | 2   | No             |      | 2   | No    |      |       |       | 158   | 50    |
| 8319   |      | 2   | No              |      | 2   | No             |      | 2   | No    |      |       |       | 172   | 65    |
| 8323   | 1    | 2   | No              |      | 2   | No             |      | 2   | No    |      |       |       | 155   | 60    |



| respid | Q11a | Q12 | Cardiac Disease | Q12a | Q13 | Hyperlipidemia | Q13a | Q14 | Neuro | Q14a | Q15_1 | Q15_2 | Q15_3 | Q16_1 |
|--------|------|-----|-----------------|------|-----|----------------|------|-----|-------|------|-------|-------|-------|-------|
| 8324   |      | 2   | No              |      | 1   | Yes            | 2    | 2   | No    |      |       |       | 163   | 49    |
| 8327   | 1    | 2   | No              |      | 2   | No             |      | 2   | No    |      |       |       | 170   | 80    |
| 8328   | 2    | 2   | No              |      | 2   | No             |      | 2   | No    |      |       |       | 162   | 56    |
| 8342   |      | 2   | No              |      | 1   | Yes            | 2    | 2   | No    |      |       |       | 170   | 80    |
| 8350   |      | 2   | No              |      | 2   | No             |      | 2   | No    |      |       |       | 162   | 56    |
| 8352   |      | 2   | No              |      | 2   | No             |      | 2   | No    |      |       |       | 155   | 53    |
| 8353   |      | 2   | No              |      | 1   | Yes            | 2    | 2   | No    |      |       |       | 172   | 80    |
| 8356   | 1    | 2   | No              |      | 2   | No             |      | 2   | No    |      |       |       | 155   | 60    |
| 8367   |      | 2   | No              |      | 1   | Yes            | 1    | 2   | No    |      |       |       | 160   | 65    |
| 8373   | 1    | 2   | No              |      | 2   | No             |      | 2   | No    |      |       |       | 180   | 90    |
| 8379   |      | 2   | No              |      | 2   | No             |      | 2   | No    |      |       |       | 172   | 62    |
| 8382   |      | 2   | No              |      | 2   | No             |      | 2   | No    |      |       |       | 165   | 80    |
| 8387   | 1    | 2   | No              |      | 2   | No             |      | 2   | No    |      |       |       | 158   | 115   |
| 8409   | 1    | 2   | No              |      | 2   | No             |      | 2   | No    |      |       |       | 150   | 100   |
| 8410   |      | 2   | No              |      | 2   | No             |      | 2   | No    |      |       |       | 160   | 50    |
| 8412   |      | 1   | Yes             | 2    | 1   | Yes            | 2    | 2   | No    |      |       |       | 157   | 57    |
| 8415   |      | 2   | No              |      | 2   | No             |      | 2   | No    |      |       |       | 159   | 58    |
| 8417   |      | 2   | No              |      | 1   | Yes            | 2    | 2   | No    |      |       |       | 175   | 90    |
| 8422   | 1    | 2   | No              |      | 2   | No             |      | 2   | No    |      |       |       | 171   | 65    |
| 8430   |      | 2   | No              |      | 2   | No             |      | 2   | No    |      |       |       | 156   | 49    |
| 8434   |      | 2   | No              |      | 2   | No             |      | 2   | No    |      |       |       | 153   | 46    |
| 8436   |      | 2   | No              |      | 2   | No             |      | 2   | No    |      |       |       | 170   | 65    |
| 8446   |      | 2   | No              |      | 2   | No             |      | 2   | No    |      |       |       | 170   | 65    |
| 8447   | 1    | 1   | Yes             | 2    | 2   | No             |      | 2   | No    |      |       |       | 170   | 70    |
| 8448   |      | 2   | No              |      | 2   | No             |      | 2   | No    |      |       |       | 157   | 50    |
| 8455   | 1    | 2   | No              |      | 1   | Yes            | 2    | 2   | No    |      |       |       | 165   | 78    |
| 8456   |      | 2   | No              |      | 2   | No             |      | 2   | No    |      |       |       | 178   | 69    |
| 8459   |      | 2   | No              |      | 2   | No             |      | 2   | No    |      |       |       | 155   | 50    |
| 8460   |      | 2   | No              |      | 2   | No             |      | 2   | No    |      |       |       | 150   | 52    |
| 8464   | 2    | 1   | Yes             | 2    | 1   | Yes            | 2    | 2   | No    |      |       |       | 165   | 80    |
| 8470   |      | 2   | No              |      | 1   | Yes            | 2    | 2   | No    |      |       |       | 150   | 53    |
| 8473   |      | 2   | No              |      | 2   | No             |      | 2   | No    |      |       |       | 155   | 52    |

| respid | Q11a | Q12 | Cardiac Disease | Q12a | Q13 | Hyperlipidemia | Q13a | Q14 | Neuro | Q14a | Q15_1 | Q15_2 | Q15_3 | Q16_1 |
|--------|------|-----|-----------------|------|-----|----------------|------|-----|-------|------|-------|-------|-------|-------|
| 8486   |      | 2   | No              |      | 2   | No             |      | 2   | No    |      |       |       | 155   | 52    |
| 8487   |      | 2   | No              |      | 2   | No             |      | 2   | No    |      |       |       | 152   | 52    |
| 8489   | 2    | 1   | Yes             | 2    | 2   | No             |      | 2   | No    |      |       |       | 158   | 64    |
| 8494   |      | 2   | No              |      | 2   | No             |      | 2   | No    |      |       |       | 167   | 65    |
| 8495   | 1    | 2   | No              |      | 1   | Yes            | 1    | 2   | No    |      |       |       | 158   | 48    |
| 8497   |      | 2   | No              |      | 2   | No             |      | 2   | No    |      |       |       | 163   | 50    |
| 8510   |      | 2   | No              |      | 1   | Yes            | 1    | 2   | No    |      |       |       | 166   | 80    |
| 8515   | 1    | 2   | No              |      | 1   | Yes            | 2    | 2   | No    |      |       |       | 148   | 86    |
| 8526   |      | 2   | No              |      | 2   | No             |      | 2   | No    |      |       |       | 158   | 63    |
| 8530   |      | 2   | No              |      | 2   | No             |      | 2   | No    |      |       |       | 153   | 50    |
| 8532   | 1    | 2   | No              |      | 2   | No             |      | 2   | No    |      |       |       | 175   | 80    |
| 8533   |      | 2   | No              |      | 2   | No             |      | 2   | No    |      |       |       | 161   | 68    |
| 8534   |      | 2   | No              |      | 2   | No             |      | 2   | No    |      |       |       | 168   | 60    |
| 8572   | 1    | 2   | No              |      | 1   | Yes            | 1    | 2   | No    |      |       |       | 173   | 68    |
| 8582   |      | 2   | No              |      | 2   | No             |      | 2   | No    |      |       |       | 165   | 63    |
| 8584   | 1    | 2   | No              |      | 1   | Yes            | 2    | 2   | No    |      |       |       | 168   | 72    |
| 8585   |      | 2   | No              |      | 1   | Yes            | 2    | 2   | No    |      |       |       | 165   | 45    |
| 8586   |      | 2   | No              |      | 2   | No             |      | 2   | No    |      |       |       | 168   | 80    |
| 8589   |      | 2   | No              |      | 2   | No             |      | 2   | No    |      |       |       | 170   | 78    |
| 8593   | 1    | 2   | No              |      | 2   | No             |      | 2   | No    |      |       |       | 156   | 68    |
| 8594   | 1    | 2   | No              |      | 2   | No             |      | 2   | No    |      |       |       | 152   | 55    |
| 8601   |      | 2   | No              |      | 2   | No             |      | 2   | No    |      |       |       | 158   | 66    |
| 8603   |      | 2   | No              |      | 2   | No             |      | 2   | No    |      |       |       | 176   | 76    |
| 8604   |      | 2   | No              |      | 2   | No             |      | 2   | No    |      |       |       | 159   | 55    |
| 8605   |      | 2   | No              |      | 1   | Yes            | 2    | 2   | No    |      |       |       | 160   | 42    |
| 8607   |      | 2   | No              |      | 2   | No             |      | 2   | No    |      |       |       | 173   | 68    |
| 8623   |      | 2   | No              |      | 2   | No             |      | 2   | No    |      |       |       | 164   | 65    |
| 8626   |      | 2   | No              |      | 1   | Yes            | 1    | 2   | No    |      |       |       | 173   | 63    |
| 8638   | 1    | 2   | No              |      | 1   | Yes            | 1    | 2   | No    |      |       |       | 155   | 52    |
| 8640   |      | 2   | No              |      | 2   | No             |      | 1   | Yes   | 2    |       |       | 155   | 40    |
| 8641   |      | 2   | No              |      | 1   | Yes            | 1    | 2   | No    |      |       |       | 179   | 92    |
| 8643   |      | 2   | No              |      | 2   | No             |      | 2   | No    |      |       |       | 164   | 78    |

| respid | Q11a | Q12 | Cardiac Disease | Q12a | Q13 | Hyperlipidemia | Q13a | Q14 | Neuro | Q14a | Q15_1 | Q15_2 | Q15_3 | Q16_1 |
|--------|------|-----|-----------------|------|-----|----------------|------|-----|-------|------|-------|-------|-------|-------|
| 8644   |      | 2   | No              |      | 2   | No             |      | 2   | No    |      |       |       | 160   | 52    |
| 8646   | 1    | 2   | No              |      | 2   | No             |      | 2   | No    |      |       |       | 158   | 51    |
| 8647   |      | 2   | No              |      | 2   | No             |      | 2   | No    |      |       |       | 160   | 75    |
| 8649   |      | 2   | No              |      | 2   | No             |      | 2   | No    |      |       |       | 173   | 75    |
| 8650   |      | 2   | No              |      | 2   | No             |      | 2   | No    |      |       |       | 160   | 45    |
| 8658   |      | 2   | No              |      | 2   | No             |      | 2   | No    |      |       |       | 162   | 54    |
| 8659   |      | 2   | No              |      | 1   | Yes            | 2    | 2   | No    |      |       |       | 172   | 75    |
| 8669   | 2    | 2   | No              |      | 1   | Yes            | 2    | 2   | No    |      |       |       | 173   | 71    |
| 8672   |      | 2   | No              |      | 2   | No             |      | 2   | No    |      |       |       | 170   | 72    |
| 8673   | 2    | 2   | No              |      | 1   | Yes            | 2    | 2   | No    |      |       |       | 159   | 62    |
| 8676   |      | 2   | No              |      | 2   | No             |      | 2   | No    |      |       |       | 170   | 65    |
| 8677   |      | 2   | No              |      | 2   | No             |      | 2   | No    |      |       |       | 166   | 93    |
| 8681   |      | 2   | No              |      | 2   | No             |      | 2   | No    |      |       |       | 159   | 70    |
| 8688   | 2    | 2   | No              |      | 1   | Yes            | 2    | 2   | No    |      |       |       | 172   | 70    |
| 8689   |      | 2   | No              |      | 1   | Yes            | 2    | 2   | No    |      |       |       | 170   | 84    |
| 8690   |      | 2   | No              |      | 1   | Yes            | 2    | 2   | No    |      |       |       | 173   | 70    |
| 8693   | 2    | 2   | No              |      | 2   | No             |      | 2   | No    |      |       |       | 175   | 72    |
| 8694   |      | 2   | No              |      | 1   | Yes            | 2    | 2   | No    |      |       |       | 166   | 63    |
| 8699   |      | 2   | No              |      | 2   | No             |      | 2   | No    |      |       |       | 174   | 73    |
| 8700   |      | 2   | No              |      | 2   | No             |      | 2   | No    |      |       |       | 180   | 75    |
| 8703   |      | 2   | No              |      | 2   | No             |      | 2   | No    |      |       |       | 166   | 60    |
| 8704   |      | 2   | No              |      | 2   | No             |      | 2   | No    |      |       |       | 166   | 68    |
| 8706   |      | 2   | No              |      | 2   | No             |      | 2   | No    |      |       |       | 172   | 58    |
| 8709   | 1    | 2   | No              |      | 1   | Yes            | 2    | 2   | No    |      |       |       | 177   | 80    |
| 8715   |      | 2   | No              |      | 1   | Yes            | 2    | 2   | No    |      |       |       | 173   | 81    |
| 8728   | 1    | 2   | No              |      | 2   | No             |      | 2   | No    |      |       |       | 158   | 60    |
| 8729   |      | 2   | No              |      | 2   | No             |      | 2   | No    |      |       |       | 173   | 62    |
| 8730   |      | 2   | No              |      | 1   | Yes            | 2    | 2   | No    |      |       |       | 155   | 48    |
| 8742   |      | 2   | No              |      | 1   | Yes            | 2    | 2   | No    |      |       |       | 162   | 54    |
| 8748   |      | 2   | No              |      | 2   | No             |      | 2   | No    |      |       |       | 158   | 51    |
| 8749   |      | 2   | No              |      | 1   | Yes            | 2    | 2   | No    |      |       |       | 165   | 68    |
| 8750   |      | 2   | No              |      | 2   | No             |      | 2   | No    |      |       |       | 183   | 85    |

| respid | Q11a | Q12 | Cardiac Disease | Q12a | Q13 | Hyperlipidemia | Q13a | Q14 | Neuro | Q14a | Q15_1 | Q15_2 | Q15_3 | Q16_1 |
|--------|------|-----|-----------------|------|-----|----------------|------|-----|-------|------|-------|-------|-------|-------|
| 8751   |      | 2   | No              |      | 1   | Yes            | 2    | 2   | No    |      |       |       | 180   | 88    |
| 8752   | 1    | 2   | No              |      | 1   | Yes            | 2    | 2   | No    |      |       |       | 165   | 78    |
| 8754   |      | 2   | No              |      | 1   | Yes            | 2    | 2   | No    |      |       |       | 170   | 75    |
| 8757   |      | 2   | No              |      | 1   | Yes            | 2    | 2   | No    |      |       |       | 178   | 90    |
| 8760   |      | 2   | No              |      | 1   | Yes            | 2    | 2   | No    |      |       |       | 163   | 75    |
| 8761   |      | 2   | No              |      | 2   | No             |      | 2   | No    |      |       |       | 176   | 65    |
| 8762   |      | 2   | No              |      | 1   | Yes            | 2    | 2   | No    |      |       |       | 168   | 75    |
| 8763   |      | 2   | No              |      | 2   | No             |      | 2   | No    |      |       |       | 170   | 68    |
| 8764   |      | 2   | No              |      | 2   | No             |      | 2   | No    |      |       |       | 160   | 60    |
| 8765   |      | 2   | No              |      | 2   | No             |      | 2   | No    |      |       |       | 170   | 68    |
| 8766   |      | 2   | No              |      | 1   | Yes            | 2    | 2   | No    |      |       |       | 165   | 60    |
| 8767   | 2    | 2   | No              |      | 2   | No             |      | 2   | No    |      |       |       | 150   | 52    |
| 8768   |      | 2   | No              |      | 2   | No             |      | 2   | No    |      |       |       | 155   | 55    |
| 8770   |      | 2   | No              |      | 2   | No             |      | 2   | No    |      |       |       | 173   | 70    |
| 8771   | 2    | 2   | No              |      | 1   | Yes            | 2    | 2   | No    |      |       |       | 160   | 48    |
| 8773   |      | 2   | No              |      | 2   | No             |      | 2   | No    |      |       |       | 163   | 78    |
| 8774   | 1    | 1   | Yes             | 1    | 1   | Yes            | 1    | 2   | No    |      |       |       | 180   | 90    |
| 8776   |      | 2   | No              |      | 2   | No             |      | 2   | No    |      |       |       | 166   | 57    |
| 8777   |      | 2   | No              |      | 2   | No             |      | 2   | No    |      |       |       | 156   | 52    |
| 8778   | 1    | 2   | No              |      | 1   | Yes            | 1    | 2   | No    |      |       |       | 158   | 75    |
| 8779   |      | 2   | No              |      | 1   | Yes            | 2    | 2   | No    |      |       |       | 180   | 84    |
| 8784   |      | 2   | No              |      | 1   | Yes            | 2    | 2   | No    |      |       |       | 170   | 82    |
| 8786   | 1    | 2   | No              |      | 2   | No             |      | 2   | No    |      |       |       | 170   | 77    |
| 8787   |      | 2   | No              |      | 2   | No             |      | 2   | No    |      |       |       | 168   | 60    |
| 8790   |      | 2   | No              |      | 2   | No             |      | 2   | No    |      |       |       | 168   | 59    |
| 8791   |      | 2   | No              |      | 2   | No             |      | 2   | No    |      |       |       | 178   | 80    |
| 8793   |      | 2   | No              |      | 2   | No             |      | 2   | No    |      |       |       | 160   | 52    |
| 8795   |      | 2   | No              |      | 2   | No             |      | 2   | No    |      |       |       | 155   | 45    |
| 8797   |      | 2   | No              |      | 2   | No             |      | 2   | No    |      |       |       | 160   | 66    |
| 8801   | 1    | 1   | Yes             | 1    | 1   | Yes            | 1    | 2   | No    |      |       |       | 168   | 75    |
| 8802   |      | 2   | No              |      | 2   | No             |      | 2   | No    |      |       |       | 162   | 70    |
| 8807   |      | 2   | No              |      | 2   | No             |      | 2   | No    |      |       |       | 176   | 69    |

| respid | Q11a | Q12 | Cardiac Disease | Q12a | Q13 | Hyperlipidemia | Q13a | Q14 | Neuro | Q14a | Q15_1 | Q15_2 | Q15_3 | Q16_1 |
|--------|------|-----|-----------------|------|-----|----------------|------|-----|-------|------|-------|-------|-------|-------|
| 8813   |      | 2   | No              |      | 2   | No             |      | 2   | No    |      |       |       | 170   | 80    |
| 8817   |      | 2   | No              |      | 2   | No             |      | 2   | No    |      |       |       | 155   | 60    |
| 8818   |      | 2   | No              |      | 1   | Yes            | 2    | 2   | No    |      |       |       | 176   | 83    |
| 8821   |      | 2   | No              |      | 2   | No             |      | 2   | No    |      |       |       | 160   | 60    |
| 8822   |      | 2   | No              |      | 2   | No             |      | 2   | No    |      |       |       | 165   | 55    |
| 8823   |      | 2   | No              |      | 2   | No             |      | 2   | No    |      |       |       | 157   | 60    |
| 8824   | 1    | 2   | No              |      | 2   | No             |      | 2   | No    |      |       |       | 170   | 70    |
| 8825   |      | 2   | No              |      | 1   | Yes            | 1    | 2   | No    |      |       |       | 162   | 68    |
| 8834   | 1    | 2   | No              |      | 2   | No             |      | 1   | Yes   | 1    |       |       | 172   | 55    |
| 8840   |      | 1   | Yes             | 1    | 2   | No             |      | 1   | Yes   | 2    | 5     | 3     |       | 60    |
| 8843   |      | 1   | Yes             | 1    | 1   | Yes            | 1    | 1   | Yes   | 1    |       |       | 172   | 50    |
| 8846   | 1    | 2   | No              |      | 1   | Yes            | 1    | 2   | No    |      |       |       | 170   | 80    |
| 8862   |      | 2   | No              |      | 2   | No             |      | 2   | No    |      |       |       | 170   | 65    |
| 8866   | 1    | 2   | No              |      | 1   | Yes            | 1    | 2   | No    |      |       |       | 170   | 63    |
| 8869   |      | 1   | Yes             | 2    | 1   | Yes            | 1    | 2   | No    |      |       |       | 172   | 70    |
| 8872   |      | 2   | No              |      | 2   | No             |      | 2   | No    |      |       |       | 165   | 115   |
| 8903   |      | 2   | No              |      | 2   | No             |      | 2   | No    |      |       |       | 173   | 67    |
| 8909   |      | 2   | No              |      | 2   | No             |      | 2   | No    |      |       |       | 160   | 58    |
| 8926   |      | 2   | No              |      | 2   | No             |      | 2   | No    |      |       |       | 158   | 50    |
| 8936   |      | 2   | No              |      | 2   | No             |      | 2   | No    |      |       |       | 154   | 50    |
| 8945   |      | 2   | No              |      | 2   | No             |      | 2   | No    |      |       |       | 158   | 51    |
| 8954   |      | 2   | No              |      | 1   | Yes            | 1    | 2   | No    |      |       |       | 176   | 75    |
| 8955   |      | 2   | No              |      | 2   | No             |      | 2   | No    |      |       |       | 158   | 52    |
| 8958   | 2    | 2   | No              |      | 1   | Yes            | 2    | 2   | No    |      |       |       | 168   | 72    |
| 8959   |      | 2   | No              |      | 2   | No             |      | 2   | No    |      |       |       | 164   | 54    |
| 8960   |      | 2   | No              |      | 2   | No             |      | 2   | No    |      |       |       | 170   | 72    |
| 8976   |      | 2   | No              |      | 2   | No             |      | 2   | No    |      |       |       | 158   | 55    |
| 8977   |      | 2   | No              |      | 1   | Yes            | 2    | 2   | No    |      |       |       | 161   | 58    |
| 8979   |      | 2   | No              |      | 2   | No             |      | 2   | No    |      |       |       | 175   | 80    |
| 8985   |      | 2   | No              |      | 2   | No             |      | 2   | No    |      |       |       | 160   | 54    |
| 8994   |      | 2   | No              |      | 2   | No             |      | 2   | No    |      |       |       | 170   | 60    |
| 8997   | 1    | 2   | No              |      | 2   | No             |      | 2   | No    |      |       |       | 178   | 80    |

| respid | Q11a | Q12 | Cardiac Disease | Q12a | Q13 | Hyperlipidemia | Q13a | Q14 | Neuro | Q14a | Q15_1 | Q15_2 | Q15_3 | Q16_1 |
|--------|------|-----|-----------------|------|-----|----------------|------|-----|-------|------|-------|-------|-------|-------|
| 9002   |      | 2   | No              |      | 2   | No             |      | 2   | No    |      |       |       | 170   | 55    |
| 9005   |      | 2   | No              |      | 2   | No             |      | 2   | No    |      |       |       | 158   | 80    |
| 9017   |      | 2   | No              |      | 2   | No             |      | 2   | No    |      |       |       | 163   | 52    |
| 9018   |      | 2   | No              |      | 1   | Yes            | 2    | 2   | No    |      |       |       | 175   | 76    |
| 9021   | 1    | 2   | No              |      | 2   | No             |      | 2   | No    |      |       |       | 176   | 75    |
| 9029   | 1    | 2   | No              |      | 2   | No             |      | 2   | No    |      |       |       | 175   | 75    |
| 9035   |      | 2   | No              |      | 1   | Yes            | 2    | 2   | No    |      |       |       | 165   | 67    |
| 9038   | 2    | 2   | No              |      | 2   | No             |      | 2   | No    |      |       |       | 178   | 90    |
| 9039   |      | 2   | No              |      | 2   | No             |      | 2   | No    |      |       |       | 167   | 64    |
| 9040   | 1    | 1   | Yes             | 1    | 1   | Yes            | 1    | 2   | No    |      |       |       | 163   | 58    |
| 9042   |      | 2   | No              |      | 2   | No             |      | 2   | No    |      |       |       | 178   | 67    |
| 9043   |      | 2   | No              |      | 2   | No             |      | 2   | No    |      |       |       | 172   | 80    |
| 9045   |      | 2   | No              |      | 1   | Yes            | 2    | 2   | No    |      |       |       | 173   | 65    |
| 9051   |      | 2   | No              |      | 1   | Yes            | 2    | 2   | No    |      |       |       | 183   | 103   |
| 9067   |      | 2   | No              |      | 2   | No             |      | 2   | No    |      |       |       | 175   | 64    |
| 9069   |      | 2   | No              |      | 2   | No             |      | 2   | No    |      |       |       | 172   | 72    |
| 9073   | 1    | 1   | Yes             | 2    | 1   | Yes            | 1    | 2   | No    |      |       |       | 178   | 85    |
| 9084   |      | 2   | No              |      | 1   | Yes            | 2    | 2   | No    |      |       |       | 153   | 48    |
| 9096   |      | 2   | No              |      | 2   | No             |      | 2   | No    |      |       |       | 160   | 54    |
| 9100   |      | 2   | No              |      | 2   | No             |      | 2   | No    |      |       |       | 160   | 55    |
| 9107   | 1    | 2   | No              |      | 2   | No             |      | 2   | No    |      |       |       | 183   | 72    |
| 9110   | 2    | 2   | No              |      | 1   | Yes            | 2    | 2   | No    |      |       |       | 175   | 68    |
| 9120   |      | 2   | No              |      | 2   | No             |      | 2   | No    |      |       |       | 156   | 61    |
| 9122   | 1    | 2   | No              |      | 1   | Yes            | 1    | 2   | No    |      |       |       | 172   | 85    |
| 9130   |      | 2   | No              |      | 2   | No             |      | 2   | No    |      |       |       | 155   | 66    |
| 9134   |      | 2   | No              |      | 2   | No             |      | 2   | No    |      |       |       | 158   | 48    |
| 9137   |      | 2   | No              |      | 2   | No             |      | 2   | No    |      |       |       | 160   | 60    |
| 9139   |      | 2   | No              |      | 2   | No             |      | 2   | No    |      |       |       | 160   | 60    |
| 9144   |      | 2   | No              |      | 2   | No             |      | 2   | No    |      |       |       | 163   | 55    |
| 9157   |      | 2   | No              |      | 1   | Yes            | 1    | 2   | No    |      |       |       | 182   | 93    |
| 9166   |      | 2   | No              |      | 2   | No             |      | 2   | No    |      |       |       | 168   | 73    |
| 9177   |      | 2   | No              |      | 2   | No             |      | 2   | No    |      |       |       | 176   | 65    |

| respid | Q11a | Q12 | Cardiac Disease | Q12a | Q13 | Hyperlipidemia | Q13a | Q14 | Neuro | Q14a | Q15_1 | Q15_2 | Q15_3 | Q16_1 |
|--------|------|-----|-----------------|------|-----|----------------|------|-----|-------|------|-------|-------|-------|-------|
| 9181   |      | 2   | No              |      | 2   | No             |      | 2   | No    |      | 6     | 2     |       | 60    |
| 9183   |      | 2   | No              |      | 2   | No             |      | 2   | No    |      |       |       | 185   | 88    |
| 9184   | 1    | 2   | No              |      | 1   | Yes            | 2    | 2   | No    |      |       |       | 177   | 90    |
| 9188   |      | 2   | No              |      | 2   | No             |      | 2   | No    |      |       |       | 168   | 62    |
| 9197   |      | 2   | No              |      | 2   | No             |      | 2   | No    |      |       |       | 169   | 78    |
| 9200   |      | 2   | No              |      | 2   | No             |      | 2   | No    |      |       |       | 164   | 60    |
| 9205   |      | 2   | No              |      | 2   | No             |      | 2   | No    |      |       |       | 163   | 57    |
| 9207   |      | 2   | No              |      | 2   | No             |      | 2   | No    |      |       |       | 163   | 49    |
| 9213   |      | 2   | No              |      | 2   | No             |      | 2   | No    |      |       |       | 172   | 65    |
| 9216   | 2    | 2   | No              |      | 1   | Yes            | 1    | 2   | No    |      |       |       | 175   | 73    |
| 9217   |      | 2   | No              |      | 2   | No             |      | 2   | No    |      |       |       | 180   | 78    |
| 9218   |      | 2   | No              |      | 2   | No             |      | 2   | No    |      |       |       | 158   | 45    |
| 9219   |      | 2   | No              |      | 1   | Yes            | 1    | 2   | No    |      |       |       | 160   | 55    |
| 9220   |      | 2   | No              |      | 2   | No             |      | 2   | No    |      |       |       | 160   | 50    |
| 9221   | 2    | 2   | No              |      | 1   | Yes            | 2    | 2   | No    |      |       |       | 172   | 72    |
| 9223   | 1    | 2   | No              |      | 1   | Yes            | 2    | 2   | No    |      |       |       | 160   | 60    |
| 9228   |      | 2   | No              |      | 2   | No             |      | 2   | No    |      |       |       | 160   | 45    |
| 9230   |      | 2   | No              |      | 2   | No             |      | 2   | No    |      |       |       | 173   | 63    |
| 9231   |      | 2   | No              |      | 2   | No             |      | 2   | No    |      |       |       | 160   | 52    |
| 9233   |      | 2   | No              |      | 2   | No             |      | 1   | Yes   | 1    |       |       | 172   | 65    |
| 9235   |      | 2   | No              |      | 2   | No             |      | 2   | No    |      |       |       | 163   | 55    |
| 9237   |      | 2   | No              |      | 2   | No             |      | 2   | No    |      |       |       | 155   | 58    |
| 9242   |      | 2   | No              |      | 1   | Yes            | 2    | 2   | No    |      |       |       | 163   | 70    |
| 9250   |      | 2   | No              |      | 2   | No             |      | 2   | No    |      |       |       | 170   | 68    |
| 9253   |      | 2   | No              |      | 2   | No             |      | 2   | No    |      |       |       | 160   | 45    |
| 9257   |      | 2   | No              |      | 2   | No             |      | 2   | No    |      |       |       | 165   | 65    |
| 9263   |      | 2   | No              |      | 2   | No             |      | 2   | No    |      |       |       | 178   | 68    |
| 9267   |      | 2   | No              |      | 2   | No             |      | 2   | No    |      |       |       | 185   | 90    |
| 9272   |      | 2   | No              |      | 2   | No             |      | 2   | No    |      |       |       | 176   | 78    |
| 9279   |      | 2   | No              |      | 1   | Yes            | 2    | 2   | No    |      |       |       | 170   | 82    |
| 9281   |      | 2   | No              |      | 1   | Yes            | 1    | 2   | No    |      |       |       | 170   | 60    |
| 9285   |      | 2   | No              |      | 2   | No             |      | 2   | No    |      |       |       | 174   | 72    |

| respid | Q11a | Q12 | Cardiac Disease | Q12a | Q13 | Hyperlipidemia | Q13a | Q14 | Neuro | Q14a | Q15_1 | Q15_2 | Q15_3 | Q16_1 |
|--------|------|-----|-----------------|------|-----|----------------|------|-----|-------|------|-------|-------|-------|-------|
| 9286   |      | 2   | No              |      | 2   | No             |      | 2   | No    |      |       |       | 164   | 56    |
| 9294   |      | 2   | No              |      | 1   | Yes            | 2    | 2   | No    |      |       |       | 176   | 68    |
| 9295   | 1    | 2   | No              |      | 2   | No             |      | 2   | No    |      |       |       | 157   | 70    |
| 9297   |      | 2   | No              |      | 2   | No             |      | 2   | No    |      |       |       | 170   | 60    |
| 9299   |      | 2   | No              |      | 2   | No             |      | 2   | No    |      |       |       | 178   | 75    |
| 9309   |      | 2   | No              |      | 2   | No             |      | 2   | No    |      |       |       | 160   | 50    |
| 9315   |      | 2   | No              |      | 2   | No             |      | 2   | No    |      |       |       | 162   | 63    |
| 9320   |      | 1   | Yes             | 1    | 2   | No             |      | 2   | No    |      |       |       | 170   | 65    |
| 9324   |      | 2   | No              |      | 2   | No             |      | 2   | No    |      |       |       | 168   | 70    |
| 9326   |      | 1   | Yes             | 1    | 2   | No             |      | 2   | No    |      |       |       | 160   | 55    |
| 9333   |      | 2   | No              |      | 2   | No             |      | 2   | No    |      |       |       | 156   | 50    |
| 9334   | 1    | 2   | No              |      | 1   | Yes            | 1    | 2   | No    |      |       |       | 162   | 58    |
| 9336   | 1    | 2   | No              |      | 2   | No             |      | 2   | No    |      |       |       | 155   | 45    |
| 9337   |      | 2   | No              |      | 2   | No             |      | 2   | No    |      |       |       | 169   | 66    |
| 9342   |      | 2   | No              |      | 2   | No             |      | 2   | No    |      |       |       | 155   | 45    |
| 9347   | 1    | 2   | No              |      | 2   | No             |      | 2   | No    |      |       |       | 165   | 70    |
| 9352   |      | 2   | No              |      | 1   | Yes            | 2    | 2   | No    |      |       |       | 164   | 52    |
| 9355   |      | 2   | No              |      | 2   | No             |      | 2   | No    |      |       |       | 172   | 70    |
| 9356   |      | 2   | No              |      | 2   | No             |      | 2   | No    |      |       |       | 164   | 65    |
| 9359   | 1    | 2   | No              |      | 1   | Yes            | 1    | 2   | No    |      |       |       | 170   | 85    |
| 9368   |      | 2   | No              |      | 2   | No             |      | 2   | No    |      | 5     | 5     |       | 57    |
| 9375   |      | 2   | No              |      | 2   | No             |      | 2   | No    |      |       |       | 174   | 65    |
| 9384   |      | 2   | No              |      | 2   | No             |      | 2   | No    |      |       |       | 158   | 45    |
| 9388   |      | 2   | No              |      | 2   | No             |      | 2   | No    |      |       |       | 172   | 70    |
| 9397   | 1    | 1   | Yes             | 1    | 1   | Yes            | 1    | 1   | Yes   | 1    |       |       | 174   | 85    |
| 9400   |      | 2   | No              |      | 2   | No             |      | 2   | No    |      |       |       | 170   | 60    |
| 9401   |      | 2   | No              |      | 2   | No             |      | 2   | No    |      |       |       | 180   | 70    |
| 9402   |      | 2   | No              |      | 2   | No             |      | 2   | No    |      |       |       | 158   | 57    |
| 9417   | 1    | 2   | No              |      | 2   | No             |      | 2   | No    |      |       |       | 168   | 75    |
| 9424   | 2    | 2   | No              |      | 1   | Yes            | 2    | 2   | No    |      |       |       | 180   | 89    |
| 9427   |      | 2   | No              |      | 2   | No             |      | 2   | No    |      |       |       | 170   | 60    |
| 9429   |      | 2   | No              |      | 1   | Yes            | 2    | 2   | No    |      |       |       | 175   | 83    |



| respid | Q11a | Q12 | Cardiac Disease | Q12a | Q13 | Hyperlipidemia | Q13a | Q14 | Neuro | Q14a | Q15_1 | Q15_2 | Q15_3 | Q16_1 |
|--------|------|-----|-----------------|------|-----|----------------|------|-----|-------|------|-------|-------|-------|-------|
| 9437   | 1    | 2   | No              |      | 1   | Yes            | 1    | 2   | No    |      |       |       | 160   | 70    |
| 9442   |      | 2   | No              |      | 2   | No             |      | 2   | No    |      |       |       | 165   | 80    |
| 9446   |      | 1   | Yes             | 1    | 2   | No             |      | 2   | No    |      |       |       | 164   | 65    |
| 9447   |      | 2   | No              |      | 2   | No             |      | 2   | No    |      |       |       | 160   | 64    |
| 9448   | 1    | 2   | No              |      | 2   | No             |      | 2   | No    |      |       |       | 155   | 68    |
| 9449   |      | 2   | No              |      | 2   | No             |      | 2   | No    |      |       |       | 170   | 60    |
| 9455   | 1    | 2   | No              |      | 2   | No             |      | 2   | No    |      |       |       | 160   | 65    |
| 9459   |      | 2   | No              |      | 2   | No             |      | 2   | No    |      |       |       | 173   | 70    |
| 9460   |      | 2   | No              |      | 2   | No             |      | 2   | No    |      |       |       | 160   | 80    |
| 9461   |      | 2   | No              |      | 2   | No             |      | 2   | No    |      |       |       | 179   | 70    |
| 9463   |      | 2   | No              |      | 2   | No             |      | 2   | No    |      |       |       | 150   | 67    |
| 9464   |      | 2   | No              |      | 2   | No             |      | 2   | No    |      |       |       | 170   | 65    |
| 9466   | 2    | 2   | No              |      | 1   | Yes            | 2    | 2   | No    |      |       |       | 176   | 98    |
| 9477   | 1    | 2   | No              |      | 2   | No             |      | 2   | No    |      |       |       | 157   | 50    |
| 9482   |      | 2   | No              |      | 1   | Yes            | 1    | 2   | No    |      |       |       | 182   | 70    |
| 9486   |      | 2   | No              |      | 2   | No             |      | 2   | No    |      |       |       | 169   | 73    |
| 9488   | 1    | 2   | No              |      | 1   | Yes            | 2    | 2   | No    |      |       |       | 175   | 70    |
| 9489   |      | 2   | No              |      | 2   | No             |      | 2   | No    |      |       |       | 150   | 50    |
| 9496   |      | 2   | No              |      | 2   | No             |      | 2   | No    |      | 5     | 6     |       | 55    |
| 9499   |      | 2   | No              |      | 2   | No             |      | 2   | No    |      |       |       | 172   | 63    |
| 9512   |      | 2   | No              |      | 2   | No             |      | 2   | No    |      |       |       | 153   | 55    |
| 9514   |      | 2   | No              |      | 2   | No             |      | 2   | No    |      |       |       | 163   | 55    |
| 9516   | 2    | 2   | No              |      | 2   | No             |      | 2   | No    |      | 5     | 8     |       | 50    |
| 9517   | 1    | 1   | Yes             | 1    | 2   | No             |      | 2   | No    |      |       |       | 168   | 78    |
| 9520   |      | 2   | No              |      | 1   | Yes            | 2    | 2   | No    |      |       |       | 165   | 65    |
| 9527   |      | 2   | No              |      | 2   | No             |      | 2   | No    |      |       |       | 170   | 70    |
| 9532   |      | 1   | Yes             | 1    | 2   | No             |      | 2   | No    |      |       |       | 175   | 55    |
| 9533   |      | 2   | No              |      | 2   | No             |      | 2   | No    |      |       |       | 171   | 73    |
| 9543   | 2    | 2   | No              |      | 2   | No             |      | 2   | No    |      |       |       | 171   | 58    |
| 9550   |      | 2   | No              |      | 2   | No             |      | 2   | No    |      | 5     | 7     |       | 60    |
| 9553   |      | 2   | No              |      | 1   | Yes            | 2    | 2   | No    |      |       |       | 160   | 55    |
| 9555   |      | 2   | No              |      | 1   | Yes            | 2    | 2   | No    |      |       |       | 155   | 51    |

| respid | Q11a | Q12 | Cardiac Disease | Q12a | Q13 | Hyperlipidemia | Q13a | Q14 | Neuro | Q14a | Q15_1 | Q15_2 | Q15_3 | Q16_1 |
|--------|------|-----|-----------------|------|-----|----------------|------|-----|-------|------|-------|-------|-------|-------|
| 9565   | 1    | 2   | No              |      | 2   | No             |      | 2   | No    |      |       |       | 155   | 56    |
| 9583   |      | 2   | No              |      | 2   | No             |      | 2   | No    |      |       |       | 175   | 82    |
| 9594   |      | 2   | No              |      | 2   | No             |      | 2   | No    |      |       |       | 172   | 72    |
| 9596   | 2    | 2   | No              |      | 1   | Yes            | 2    | 2   | No    |      |       |       | 161   | 65    |
| 9600   | 1    | 2   | No              |      | 1   | Yes            | 1    | 2   | No    |      |       |       | 152   | 43    |
| 9602   | 2    | 2   | No              |      | 2   | No             |      | 2   | No    |      |       |       | 172   | 70    |
| 9606   |      | 2   | No              |      | 2   | No             |      | 1   | Yes   | 2    |       |       | 172   | 75    |
| 9608   | 1    | 2   | No              |      | 1   | Yes            | 2    | 2   | No    |      |       |       | 172   | 78    |
| 9610   | 1    | 2   | No              |      | 1   | Yes            | 1    | 2   | No    |      |       |       | 160   | 70    |
| 9612   |      | 2   | No              |      | 2   | No             |      | 2   | No    |      |       |       | 170   | 65    |
| 9613   |      | 2   | No              |      | 2   | No             |      | 2   | No    |      |       |       | 172   | 76    |
| 9614   |      | 2   | No              |      | 1   | Yes            | 2    | 2   | No    |      |       |       | 165   | 66    |
| 9620   |      | 2   | No              |      | 1   | Yes            | 2    | 2   | No    |      |       |       | 175   | 92    |
| 9628   |      | 2   | No              |      | 1   | Yes            | 2    | 2   | No    |      |       |       | 159   | 60    |
| 9631   | 1    | 2   | No              |      | 2   | No             |      | 2   | No    |      |       |       | 174   | 75    |
| 9632   |      | 2   | No              |      | 2   | No             |      | 2   | No    |      |       |       | 168   | 73    |
| 9633   |      | 2   | No              |      | 1   | Yes            | 2    | 2   | No    |      |       |       | 178   | 45    |
| 9639   |      | 2   | No              |      | 2   | No             |      | 2   | No    |      |       |       | 174   | 72    |
| 9640   |      | 1   | Yes             | 2    | 2   | No             |      | 2   | No    |      |       |       | 153   | 47    |
| 9642   |      | 2   | No              |      | 2   | No             |      | 2   | No    |      |       |       | 163   | 60    |
| 9653   |      | 2   | No              |      | 2   | No             |      | 2   | No    |      |       |       | 178   | 80    |
| 9658   |      | 2   | No              |      | 2   | No             |      | 2   | No    |      |       |       | 156   | 57    |
| 9659   |      | 2   | No              |      | 1   | Yes            | 2    | 2   | No    |      |       |       | 153   | 64    |
| 9661   |      | 2   | No              |      | 2   | No             |      | 2   | No    |      |       |       | 155   | 49    |
| 9664   |      | 2   | No              |      | 2   | No             |      | 2   | No    |      |       |       | 170   | 86    |
| 9665   |      | 2   | No              |      | 2   | No             |      | 2   | No    |      |       |       | 167   | 62    |
| 9666   |      | 2   | No              |      | 1   | Yes            | 1    | 1   | Yes   | 1    |       |       | 172   | 60    |
| 9667   | 1    | 2   | No              |      | 2   | No             |      | 2   | No    |      |       |       | 155   | 50    |
| 9668   |      | 2   | No              |      | 2   | No             |      | 2   | No    |      |       |       | 160   | 55    |
| 9670   | 1    | 2   | No              |      | 2   | No             |      | 2   | No    |      |       |       | 170   | 80    |
| 9671   |      | 2   | No              |      | 2   | No             |      | 2   | No    |      |       |       | 165   | 67    |
| 9681   |      | 2   | No              |      | 2   | No             |      | 2   | No    |      |       |       | 168   | 72    |

| respid | Q11a | Q12 | Cardiac Disease | Q12a | Q13 | Hyperlipidemia | Q13a | Q14 | Neuro | Q14a | Q15_1 | Q15_2 | Q15_3 | Q16_1 |
|--------|------|-----|-----------------|------|-----|----------------|------|-----|-------|------|-------|-------|-------|-------|
| 9684   |      | 2   | No              |      | 1   | Yes            | 1    | 2   | No    |      |       |       | 176   | 82    |
| 9685   |      | 2   | No              |      | 2   | No             |      | 2   | No    |      |       |       | 175   | 70    |
| 9686   |      | 2   | No              |      | 2   | No             |      | 2   | No    |      |       |       | 177   | 68    |
| 9688   |      | 2   | No              |      | 2   | No             |      | 2   | No    |      |       |       | 173   | 75    |
| 9692   |      | 2   | No              |      | 2   | No             |      | 2   | No    |      |       |       | 165   | 60    |
| 9693   |      | 2   | No              |      | 2   | No             |      | 2   | No    |      |       |       | 163   | 55    |
| 9698   |      | 2   | No              |      | 2   | No             |      | 2   | No    |      |       |       | 177   | 57    |
| 9699   |      | 2   | No              |      | 2   | No             |      | 2   | No    |      |       |       | 158   | 62    |
| 9701   |      | 2   | No              |      | 2   | No             |      | 2   | No    |      |       |       | 165   | 60    |
| 9702   |      | 2   | No              |      | 2   | No             |      | 2   | No    |      |       |       | 165   | 66    |
| 9709   | 2    | 2   | No              |      | 2   | No             |      | 2   | No    |      | 5     | 6     |       | 80    |
| 9713   | 1    | 1   | Yes             | 1    | 2   | No             |      | 1   | Yes   | 1    |       |       | 160   | 60    |
| 9715   |      | 2   | No              |      | 2   | No             |      | 2   | No    |      |       |       | 174   | 85    |
| 9721   |      | 2   | No              |      | 2   | No             |      | 2   | No    |      |       |       | 159   | 55    |
| 9725   |      | 1   | Yes             | 2    | 1   | Yes            | 2    | 2   | No    |      |       |       | 160   | 48    |
| 9729   |      | 2   | No              |      | 2   | No             |      | 2   | No    |      |       |       | 179   | 69    |
| 9731   |      | 2   | No              |      | 2   | No             |      | 2   | No    |      |       |       | 157   | 68    |
| 9736   |      | 2   | No              |      | 2   | No             |      | 2   | No    |      |       |       | 169   | 70    |
| 9740   |      | 2   | No              |      | 2   | No             |      | 2   | No    |      |       |       | 164   | 56    |
| 9741   |      | 2   | No              |      | 2   | No             |      | 2   | No    |      |       |       | 170   | 65    |
| 9749   | 1    | 2   | No              |      | 2   | No             |      | 2   | No    |      | 5     | 6     |       | 75    |
| 9750   |      | 2   | No              |      | 2   | No             |      | 2   | No    |      |       |       | 175   | 80    |
| 9751   |      | 2   | No              |      | 2   | No             |      | 2   | No    |      |       |       | 156   | 50    |
| 9753   |      | 2   | No              |      | 2   | No             |      | 2   | No    |      |       |       | 165   | 70    |
| 9754   |      | 2   | No              |      | 2   | No             |      | 2   | No    |      |       |       | 167   | 65    |
| 9756   |      | 2   | No              |      | 2   | No             |      | 2   | No    |      |       |       | 168   | 64    |
| 9758   | 1    | 2   | No              |      | 2   | No             |      | 1   | Yes   | 1    |       |       | 161   | 50    |
| 9759   |      | 2   | No              |      | 2   | No             |      | 2   | No    |      |       |       | 153   | 58    |
| 9760   |      | 2   | No              |      | 2   | No             |      | 2   | No    |      |       |       | 157   | 43    |
| 9761   |      | 2   | No              |      | 2   | No             |      | 2   | No    |      |       |       | 158   | 44    |
| 9762   | 2    | 2   | No              |      | 1   | Yes            | 2    | 2   | No    |      |       |       | 171   | 74    |
| 9764   |      | 2   | No              |      | 2   | No             |      | 2   | No    |      |       |       | 165   | 53    |

| respid | Q11a | Q12 | Cardiac Disease | Q12a | Q13 | Hyperlipidemia | Q13a | Q14 | Neuro | Q14a | Q15_1 | Q15_2 | Q15_3 | Q16_1 |
|--------|------|-----|-----------------|------|-----|----------------|------|-----|-------|------|-------|-------|-------|-------|
| 9768   | 1    | 2   | No              |      | 2   | No             |      | 2   | No    |      |       |       | 180   | 90    |
| 9769   |      | 2   | No              |      | 2   | No             |      | 2   | No    |      |       |       | 156   | 55    |
| 9770   |      | 2   | No              |      | 2   | No             |      | 2   | No    |      |       |       | 158   | 45    |
| 9771   |      | 2   | No              |      | 2   | No             |      | 2   | No    |      |       |       | 164   | 60    |
| 9772   | 2    | 1   | Yes             | 2    | 1   | Yes            | 2    | 2   | No    |      |       |       | 168   | 85    |
| 9773   | 2    | 2   | No              |      | 2   | No             |      | 2   | No    |      |       |       | 174   | 75    |
| 9776   |      | 2   | No              |      | 2   | No             |      | 2   | No    |      |       |       | 158   | 52    |
| 9786   |      | 2   | No              |      | 2   | No             |      | 2   | No    |      |       |       | 158   | 59    |
| 9790   |      | 2   | No              |      | 2   | No             |      | 2   | No    |      |       |       | 154   | 49    |
| 9791   |      | 2   | No              |      | 2   | No             |      | 2   | No    |      |       |       | 160   | 52    |
| 9794   |      | 2   | No              |      | 1   | Yes            | 1    | 2   | No    |      |       |       | 175   | 82    |
| 9797   |      | 1   | Yes             | 2    | 1   | Yes            | 1    | 2   | No    |      |       |       | 160   | 63    |
| 9799   |      | 2   | No              |      | 2   | No             |      | 2   | No    |      |       |       | 164   | 78    |
| 9804   | 2    | 2   | No              |      | 1   | Yes            | 2    | 2   | No    |      |       |       | 172   | 72    |
| 9805   |      | 2   | No              |      | 2   | No             |      | 2   | No    |      |       |       | 169   | 78    |
| 9806   |      | 2   | No              |      | 2   | No             |      | 2   | No    |      |       |       | 176   | 69    |
| 9807   |      | 2   | No              |      | 2   | No             |      | 1   | Yes   | 1    |       |       | 154   | 54    |
| 9813   |      | 2   | No              |      | 1   | Yes            | 2    | 2   | No    |      |       |       | 156   | 45    |
| 9817   |      | 2   | No              |      | 2   | No             |      | 2   | No    |      |       |       | 163   | 65    |
| 9823   |      | 2   | No              |      | 2   | No             |      | 2   | No    |      |       |       | 166   | 60    |
| 9826   |      | 2   | No              |      | 2   | No             |      | 2   | No    |      |       |       | 170   | 70    |
| 9830   |      | 2   | No              |      | 2   | No             |      | 2   | No    |      |       |       | 158   | 47    |
| 9835   |      | 2   | No              |      | 2   | No             |      | 2   | No    |      |       |       | 158   | 52    |
| 9836   |      | 2   | No              |      | 2   | No             |      | 2   | No    |      |       |       | 165   | 55    |
| 9841   |      | 2   | No              |      | 2   | No             |      | 2   | No    |      |       |       | 175   | 68    |
| 9842   |      | 2   | No              |      | 2   | No             |      | 2   | No    |      |       |       | 183   | 75    |
| 9844   |      | 2   | No              |      | 2   | No             |      | 2   | No    |      |       |       | 160   | 60    |
| 9847   |      | 2   | No              |      | 2   | No             |      | 2   | No    |      |       |       | 165   | 70    |
| 9851   |      | 2   | No              |      | 2   | No             |      | 2   | No    |      |       |       | 160   | 55    |
| 9852   |      | 2   | No              |      | 2   | No             |      | 2   | No    |      |       |       | 170   | 83    |
| 9854   | 1    | 2   | No              |      | 2   | No             |      | 2   | No    |      |       |       | 155   | 55    |
| 9855   |      | 2   | No              |      | 2   | No             |      | 2   | No    |      |       |       | 152   | 42    |

| respid | Q11a | Q12 | Cardiac Disease | Q12a | Q13 | Hyperlipidemia | Q13a | Q14 | Neuro | Q14a | Q15_1 | Q15_2 | Q15_3 | Q16_1 |
|--------|------|-----|-----------------|------|-----|----------------|------|-----|-------|------|-------|-------|-------|-------|
| 9856   | 1    | 2   | No              |      | 2   | No             |      | 2   | No    |      |       |       | 162   |       |
| 9862   | 1    | 2   | No              |      | 1   | Yes            | 1    | 2   | No    |      |       |       | 180   | 78    |
| 9863   |      | 2   | No              |      | 2   | No             |      | 2   | No    |      |       |       | 180   | 90    |
| 9866   |      | 2   | No              |      | 2   | No             |      | 2   | No    |      |       |       | 158   | 45    |
| 9867   |      | 1   | Yes             | 1    | 2   | No             |      | 2   | No    |      |       |       | 169   | 60    |
| 9868   | 1    | 2   | No              |      | 1   | Yes            | 1    | 2   | No    |      |       |       | 170   | 73    |
| 9869   |      | 2   | No              |      | 2   | No             |      | 2   | No    |      |       |       | 174   | 72    |
| 9878   | 1    | 1   | Yes             | 1    | 2   | No             |      | 2   | No    |      |       |       | 165   | 55    |
| 9879   |      | 2   | No              |      | 2   | No             |      | 2   | No    |      |       |       | 172   | 76    |
| 9881   |      | 2   | No              |      | 2   | No             |      | 2   | No    |      |       |       | 169   | 71    |
| 9882   |      | 2   | No              |      | 1   | Yes            | 2    | 2   | No    |      |       |       | 168   | 65    |
| 9884   | 1    | 2   | No              |      | 1   | Yes            | 2    | 2   | No    |      |       |       | 177   | 95    |
| 9885   |      | 2   | No              |      | 2   | No             |      | 2   | No    |      |       |       | 176   | 92    |
| 9888   |      | 1   | Yes             | 2    | 2   | No             |      | 2   | No    |      |       |       | 154   | 55    |
| 9889   |      | 2   | No              |      | 2   | No             |      | 2   | No    |      |       |       | 167   | 68    |
| 9894   | 1    | 2   | No              |      | 2   | No             |      | 2   | No    |      |       |       | 174   | 73    |
| 9895   |      | 2   | No              |      | 2   | No             |      | 2   | No    |      |       |       | 174   | 72    |
| 9896   | 1    | 2   | No              |      | 1   | Yes            | 2    | 2   | No    |      |       |       | 160   | 80    |
| 9897   |      | 2   | No              |      | 1   | Yes            | 2    | 2   | No    |      |       |       | 172   | 70    |
| 9905   |      | 2   | No              |      | 2   | No             |      | 2   | No    |      |       |       | 169   | 71    |
| 9907   |      | 2   | No              |      | 1   | Yes            | 2    | 2   | No    |      |       |       | 160   | 70    |
| 9908   | 1    | 2   | No              |      | 2   | No             |      | 2   | No    |      |       |       | 167   | 67    |
| 9909   |      | 2   | No              |      | 2   | No             |      | 2   | No    |      |       |       | 168   | 72    |
| 9910   |      | 2   | No              |      | 2   | No             |      | 2   | No    |      |       |       | 170   | 70    |
| 9913   | 1    | 2   | No              |      | 2   | No             |      | 2   | No    |      |       |       | 170   | 61    |
| 9914   |      | 2   | No              |      | 2   | No             |      | 2   | No    |      |       |       | 157   | 52    |
| 9915   |      | 2   | No              |      | 1   | Yes            | 2    | 2   | No    |      |       |       | 167   | 68    |
| 9916   |      | 2   | No              |      | 2   | No             |      | 2   | No    |      |       |       | 165   | 63    |
| 9918   |      | 2   | No              |      | 2   | No             |      | 2   | No    |      |       |       | 177   | 70    |
| 9919   |      | 2   | No              |      | 2   | No             |      | 2   | No    |      |       |       | 164   | 64    |
| 9922   |      | 2   | No              |      | 1   | Yes            | 1    | 2   | No    |      |       |       | 177   | 75    |
| 9930   |      | 2   | No              |      | 2   | No             |      | 2   | No    |      |       |       | 165   | 55    |

| respid | Q11a | Q12 | Cardiac Disease | Q12a | Q13 | Hyperlipidemia | Q13a | Q14 | Neuro | Q14a | Q15_1 | Q15_2 | Q15_3 | Q16_1 |
|--------|------|-----|-----------------|------|-----|----------------|------|-----|-------|------|-------|-------|-------|-------|
| 9934   | 2    | 2   | No              |      | 2   | No             |      | 2   | No    |      |       |       | 170   | 70    |
| 9936   |      | 2   | No              |      | 2   | No             |      | 2   | No    |      |       |       | 169   | 66    |
| 9938   |      | 2   | No              |      | 2   | No             |      | 2   | No    |      |       |       | 160   | 52    |
| 9940   |      | 2   | No              |      | 2   | No             |      | 1   | Yes   | 1    |       |       | 170   | 65    |
| 9944   |      | 1   | Yes             | 2    | 1   | Yes            | 1    | 2   | No    |      |       |       | 162   | 64    |
| 9945   |      | 2   | No              |      | 2   | No             |      | 2   | No    |      |       |       | 170   | 75    |
| 9948   |      | 2   | No              |      | 1   | Yes            | 2    | 2   | No    |      |       |       | 154   | 60    |
| 9949   | 1    | 2   | No              |      | 1   | Yes            | 1    | 2   | No    |      |       |       | 150   | 65    |
| 9951   | 2    | 1   | Yes             | 1    | 2   | No             |      | 2   | No    |      |       |       | 162   | 70    |
| 9952   |      | 2   | No              |      | 1   | Yes            | 2    | 2   | No    |      |       |       | 155   | 65    |
| 9954   |      | 2   | No              |      | 2   | No             |      | 2   | No    |      |       |       | 156   | 45    |
| 9955   |      | 2   | No              |      | 1   | Yes            | 2    | 2   | No    |      |       |       | 158   | 55    |
| 9956   |      | 2   | No              |      | 2   | No             |      | 2   | No    |      |       |       | 165   | 66    |
| 9957   | 1    | 2   | No              |      | 1   | Yes            | 1    | 2   | No    |      |       |       | 150   |       |
| 9958   |      | 2   | No              |      | 2   | No             |      | 2   | No    |      |       |       | 169   | 78    |
| 9959   | 1    | 2   | No              |      | 2   | No             |      | 2   | No    |      |       |       | 160   | 50    |
| 9960   | 1    | 2   | No              |      | 2   | No             |      | 2   | No    |      |       |       | 184   | 85    |
| 9961   | 1    | 2   | No              |      | 2   | No             |      | 2   | No    |      |       |       | 178   | 69    |
| 9962   | 1    | 2   | No              |      | 1   | Yes            | 1    | 1   | Yes   | 1    |       |       | 170   | 50    |
| 9969   |      | 2   | No              |      | 1   | Yes            | 1    | 2   | No    |      | 5     | 6     |       | 60    |
| 9982   |      | 2   | No              |      | 1   | Yes            | 2    | 2   | No    |      |       |       | 176   | 63    |
| 9984   | 2    | 2   | No              |      | 1   | Yes            | 2    | 2   | No    |      |       |       | 165   | 67    |
| 9990   |      | 2   | No              |      | 1   | Yes            | 2    | 2   | No    |      |       |       | 172   | 74    |
| 9992   | 1    | 2   | No              |      | 2   | No             |      | 2   | No    |      |       |       | 165   | 60    |
| 9993   | 1    | 2   | No              |      | 1   | Yes            | 2    | 2   | No    |      |       |       | 179   | 93    |
| 9997   | 1    | 1   | Yes             | 1    | 2   | No             |      | 2   | No    |      |       |       | 165   | 64    |
| 9999   |      | 2   | No              |      | 2   | No             |      | 2   | No    |      |       |       | 163   | 70    |
| 10000  | 1    | 2   | No              |      | 2   | No             |      | 2   | No    |      |       |       | 174   | 83    |
| 10005  |      | 2   | No              |      | 1   | Yes            | 2    | 2   | No    |      |       |       | 165   | 85    |
| 10014  |      | 2   | No              |      | 2   | No             |      | 2   | No    |      |       |       | 172   | 62    |
| 10016  |      | 2   | No              |      | 1   | Yes            | 1    | 2   | No    |      |       |       | 155   | 65    |
| 10017  | 1    | 1   | Yes             | 1    | 1   | Yes            | 1    | 2   | No    |      |       |       | 170   | 70    |

| respid | Q11a | Q12 | Cardiac Disease | Q12a | Q13 | Hyperlipidemia | Q13a | Q14 | Neuro | Q14a | Q15_1 | Q15_2 | Q15_3 | Q16_1 |
|--------|------|-----|-----------------|------|-----|----------------|------|-----|-------|------|-------|-------|-------|-------|
| 10018  |      | 2   | No              |      | 2   | No             |      | 2   | No    |      |       |       | 170   | 70    |
| 10021  |      | 2   | No              |      | 2   | No             |      | 2   | No    |      |       |       | 168   | 66    |
| 10025  | 2    | 1   | Yes             | 1    | 1   | Yes            | 2    | 2   | No    |      |       |       | 155   | 55    |
| 10027  |      | 2   | No              |      | 2   | No             |      | 2   | No    |      |       |       | 179   | 62    |
| 10028  | 1    | 2   | No              |      | 2   | No             |      | 2   | No    |      |       |       | 168   | 72    |
| 10031  | 1    | 2   | No              |      | 1   | Yes            | 1    | 2   | No    |      |       |       | 168   | 68    |
| 10036  |      | 1   | Yes             | 1    | 2   | No             |      | 2   | No    |      |       |       | 155   | 52    |
| 10037  |      | 2   | No              |      | 2   | No             |      | 2   | No    |      |       |       | 153   | 61    |
| 10038  | 1    | 2   | No              |      | 1   | Yes            | 2    | 2   | No    |      |       |       | 171   | 87    |
| 10039  |      | 2   | No              |      | 2   | No             |      | 2   | No    |      |       |       | 165   | 45    |
| 10041  |      | 2   | No              |      | 2   | No             |      | 2   | No    |      |       |       | 170   | 72    |
| 10045  |      | 2   | No              |      | 2   | No             |      | 2   | No    |      |       |       | 171   | 72    |
| 10046  | 1    | 2   | No              |      | 2   | No             |      | 2   | No    |      |       |       | 180   | 91    |
| 10047  | 1    | 2   | No              |      | 1   | Yes            | 1    | 2   | No    |      |       |       | 169   | 59    |
| 10048  |      | 2   | No              |      | 2   | No             |      | 2   | No    |      |       |       | 160   | 47    |
| 10049  |      | 2   | No              |      | 1   | Yes            | 2    | 2   | No    |      |       |       | 165   | 71    |
| 10051  |      | 2   | No              |      | 2   | No             |      | 2   | No    |      |       |       | 183   | 85    |
| 10052  |      | 2   | No              |      | 2   | No             |      | 2   | No    |      |       |       | 172   | 68    |
| 10056  |      | 2   | No              |      | 1   | Yes            | 2    | 2   | No    |      |       |       | 163   | 65    |
| 10061  |      | 2   | No              |      | 2   | No             |      | 2   | No    |      |       |       | 175   | 70    |
| 10064  |      | 2   | No              |      | 2   | No             |      | 2   | No    |      |       |       | 170   | 70    |
| 10066  |      | 2   | No              |      | 2   | No             |      | 2   | No    |      |       |       | 160   | 70    |
| 10069  |      | 2   | No              |      | 2   | No             |      | 2   | No    |      |       |       | 169   | 65    |
| 10071  |      | 2   | No              |      | 2   | No             |      | 2   | No    |      |       |       | 175   | 79    |
| 10074  |      | 2   | No              |      | 2   | No             |      | 2   | No    |      |       |       | 175   | 54    |
| 10079  | 1    | 2   | No              |      | 2   | No             |      | 2   | No    |      |       |       | 173   | 75    |
| 10087  |      | 2   | No              |      | 1   | Yes            | 1    | 2   | No    |      |       |       | 170   | 70    |
| 10095  |      | 2   | No              |      | 2   | No             |      | 2   | No    |      |       |       | 172   | 82    |
| 10097  |      | 1   | Yes             | 1    | 1   | Yes            | 1    | 2   | No    |      |       |       | 153   | 67    |
| 10100  |      | 2   | No              |      | 1   | Yes            | 2    | 2   | No    |      |       |       | 177   | 74    |
| 10105  |      | 1   | Yes             | 2    | 2   | No             |      | 2   | No    |      |       |       | 167   | 60    |
| 10107  |      | 2   | No              |      | 2   | No             |      | 2   | No    |      |       |       | 170   | 71    |

| respid | Q11a | Q12 | Cardiac Disease | Q12a | Q13 | Hyperlipidemia | Q13a | Q14 | Neuro | Q14a | Q15_1 | Q15_2 | Q15_3 | Q16_1 |
|--------|------|-----|-----------------|------|-----|----------------|------|-----|-------|------|-------|-------|-------|-------|
| 10111  |      | 2   | No              |      | 2   | No             |      | 2   | No    |      |       |       | 169   | 75    |
| 10116  |      | 2   | No              |      | 2   | No             |      | 2   | No    |      |       |       | 163   | 57    |
| 10118  |      | 2   | No              |      | 2   | No             |      | 2   | No    |      |       |       | 162   | 60    |
| 10123  |      | 2   | No              |      | 2   | No             |      | 2   | No    |      |       |       | 166   | 60    |
| 10124  |      | 2   | No              |      | 1   | Yes            | 2    | 1   | Yes   | 1    |       |       | 160   | 50    |
| 10130  |      | 2   | No              |      | 1   | Yes            | 2    | 2   | No    |      |       |       | 173   | 68    |
| 10134  |      | 2   | No              |      | 2   | No             |      | 2   | No    |      |       |       | 159   | 52    |
| 10135  |      | 2   | No              |      | 2   | No             |      | 2   | No    |      | 5     | 10    |       | 73    |
| 10136  |      | 2   | No              |      | 2   | No             |      | 2   | No    |      |       |       | 160   | 62    |
| 10141  |      | 2   | No              |      | 2   | No             |      | 2   | No    |      |       |       | 170   | 70    |
| 10142  |      | 2   | No              |      | 2   | No             |      | 2   | No    |      |       |       | 153   | 53    |
| 10143  |      | 2   | No              |      | 2   | No             |      | 2   | No    |      |       |       | 174   | 74    |
| 10145  |      | 2   | No              |      | 1   | Yes            | 2    | 2   | No    |      |       |       | 173   | 80    |
| 10149  | 2    | 2   | No              |      | 1   | Yes            | 1    | 2   | No    |      |       |       | 157   | 66    |
| 10150  | 1    | 1   | Yes             | 1    | 2   | No             |      | 2   | No    |      |       |       | 165   | 62    |
| 10151  | 1    | 2   | No              |      | 2   | No             |      | 2   | No    |      |       |       | 169   | 67    |
| 10152  | 2    | 2   | No              |      | 1   | Yes            | 2    | 2   | No    |      |       |       | 171   | 72    |
| 10153  |      | 2   | No              |      | 2   | No             |      | 2   | No    |      |       |       | 177   | 70    |
| 10156  | 2    | 2   | No              |      | 2   | No             |      | 2   | No    |      |       |       | 165   | 65    |
| 10160  |      | 2   | No              |      | 2   | No             |      | 2   | No    |      |       |       | 155   | 38    |
| 10161  | 1    | 2   | No              |      | 1   | Yes            | 1    | 2   | No    |      |       |       | 170   | 78    |
| 10167  | 1    | 2   | No              |      | 2   | No             |      | 2   | No    |      |       |       | 170   | 60    |
| 10171  |      | 2   | No              |      | 2   | No             |      | 2   | No    |      |       |       | 160   | 56    |
| 10172  |      | 2   | No              |      | 2   | No             |      | 2   | No    |      |       |       | 171   | 71    |
| 10176  |      | 2   | No              |      | 1   | Yes            | 1    | 2   | No    |      |       |       | 179   | 75    |
| 10177  |      | 2   | No              |      | 2   | No             |      | 2   | No    |      |       |       | 153   | 52    |
| 10182  | 1    | 2   | No              |      | 1   | Yes            | 1    | 2   | No    |      |       |       | 160   | 65    |
| 10184  | 1    | 2   | No              |      | 2   | No             |      | 2   | No    |      |       |       | 170   | 66    |
| 10186  | 1    | 2   | No              |      | 2   | No             |      | 2   | No    |      |       |       | 162   | 75    |
| 10189  | 2    | 2   | No              |      | 1   | Yes            | 2    | 2   | No    |      |       |       | 178   | 78    |
| 10191  |      | 2   | No              |      | 2   | No             |      | 2   | No    |      | 5     | 6     |       | 65    |
| 10192  | 1    | 2   | No              |      | 2   | No             |      | 2   | No    |      |       |       | 165   | 59    |



| respid | Q11a | Q12 | Cardiac Disease | Q12a | Q13 | Hyperlipidemia | Q13a | Q14 | Neuro | Q14a | Q15_1 | Q15_2 | Q15_3 | Q16_1 |
|--------|------|-----|-----------------|------|-----|----------------|------|-----|-------|------|-------|-------|-------|-------|
| 10195  | 1    | 2   | No              |      | 1   | Yes            | 1    | 2   | No    |      |       |       | 176   | 90    |
| 10199  |      | 2   | No              |      | 2   | No             |      | 2   | No    |      |       |       | 172   | 60    |
| 10201  |      | 2   | No              |      | 1   | Yes            | 1    | 2   | No    |      |       |       | 165   | 71    |
| 10213  |      | 2   | No              |      | 2   | No             |      | 2   | No    |      |       |       | 150   | 50    |
| 10222  |      | 2   | No              |      | 2   | No             |      | 2   | No    |      | 5     | 7     |       | 60    |
| 10224  | 1    | 2   | No              |      | 2   | No             |      | 2   | No    |      |       |       | 148   | 50    |
| 10245  |      | 2   | No              |      | 2   | No             |      | 2   | No    |      |       |       | 170   | 60    |
| 10254  | 2    | 1   | Yes             | 1    | 1   | Yes            | 1    | 2   | No    |      |       |       | 170   | 60    |
| 10255  | 1    | 1   | Yes             | 1    | 1   | Yes            | 2    | 2   | No    |      |       |       | 173   | 82    |
| 10257  | 2    | 2   | No              |      | 2   | No             |      | 1   | Yes   | 2    |       |       | 172   | 50    |
| 10260  | 1    | 1   | Yes             | 1    | 1   | Yes            | 1    | 2   | No    |      |       |       | 165   | 57    |
| 10261  | 1    | 2   | No              |      | 2   | No             |      | 2   | No    |      |       |       | 173   | 66    |
| 10263  | 1    | 2   | No              |      | 2   | No             |      | 2   | No    |      |       |       | 148   | 40    |
| 10264  | 1    | 2   | No              |      | 2   | No             |      | 2   | No    |      |       |       | 176   | 85    |
| 10268  |      | 2   | No              |      | 1   | Yes            | 1    | 2   | No    |      |       |       | 170   | 76    |
| 10269  | 1    | 1   | Yes             | 1    | 1   | Yes            | 1    | 2   | No    |      |       |       | 178   | 91    |
| 10270  |      | 2   | No              |      | 2   | No             |      | 2   | No    |      |       |       | 173   | 78    |
| 10282  |      | 2   | No              |      | 2   | No             |      | 2   | No    |      |       |       | 173   | 82    |
| 10285  |      | 2   | No              |      | 2   | No             |      | 2   | No    |      |       |       | 168   | 56    |
| 10288  |      | 2   | No              |      | 2   | No             |      | 2   | No    |      |       |       | 175   | 75    |
| 10291  |      | 2   | No              |      | 2   | No             |      | 2   | No    |      |       |       | 171   | 67    |
| 10292  |      | 2   | No              |      | 2   | No             |      | 2   | No    |      |       |       | 166   | 61    |
| 10304  | 1    | 2   | No              |      | 2   | No             |      | 2   | No    |      |       |       | 175   | 68    |
| 10305  |      | 2   | No              |      | 2   | No             |      | 2   | No    |      |       |       | 165   | 60    |
| 10310  |      | 1   | Yes             | 2    | 1   | Yes            | 2    | 2   | No    |      |       |       | 180   | 73    |
| 10324  |      | 2   | No              |      | 2   | No             |      | 2   | No    |      |       |       | 158   | 50    |
| 10325  |      | 2   | No              |      | 2   | No             |      | 2   | No    |      |       |       | 162   | 52    |
| 10326  |      | 2   | No              |      | 2   | No             |      | 2   | No    |      |       |       | 170   | 63    |
| 10329  |      | 2   | No              |      | 1   | Yes            | 2    | 2   | No    |      |       |       | 165   | 55    |
| 10332  | 2    | 2   | No              |      | 2   | No             |      | 2   | No    |      |       |       | 166   | 70    |
| 10337  |      | 2   | No              |      | 1   | Yes            | 2    | 2   | No    |      |       |       | 164   | 64    |
| 10341  | 1    | 2   | No              |      | 1   | Yes            | 1    | 2   | No    |      |       |       | 158   | 50    |

| respid | Q11a | Q12 | Cardiac Disease | Q12a | Q13 | Hyperlipidemia | Q13a | Q14 | Neuro | Q14a | Q15_1 | Q15_2 | Q15_3 | Q16_1 |
|--------|------|-----|-----------------|------|-----|----------------|------|-----|-------|------|-------|-------|-------|-------|
| 10353  | 1    | 2   | No              |      | 1   | Yes            | 1    | 2   | No    |      |       |       | 167   | 62    |
| 10354  |      | 2   | No              |      | 2   | No             |      | 2   | No    |      |       |       | 158   | 58    |
| 10359  |      | 1   | Yes             | 2    | 2   | No             |      | 2   | No    |      |       |       | 167   | 48    |
| 10360  |      | 2   | No              |      | 2   | No             |      | 2   | No    |      |       |       | 167   | 53    |
| 10362  |      | 2   | No              |      | 2   | No             |      | 2   | No    |      |       |       | 178   | 66    |
| 10364  | 1    | 2   | No              |      | 2   | No             |      | 2   | No    |      |       |       | 168   | 72    |
| 10366  | 1    | 2   | No              |      | 1   | Yes            | 1    | 2   | No    |      |       |       | 170   | 65    |
| 10367  |      | 2   | No              |      | 2   | No             |      | 2   | No    |      |       |       | 150   | 45    |
| 10371  |      | 2   | No              |      | 2   | No             |      | 2   | No    |      |       |       | 172   | 65    |
| 10374  |      | 2   | No              |      | 1   | Yes            | 2    | 2   | No    |      | 4     | 11    |       | 55    |
| 10375  |      | 2   | No              |      | 2   | No             |      | 2   | No    |      |       |       | 155   | 56    |
| 10376  |      | 2   | No              |      | 2   | No             |      | 2   | No    |      |       |       | 168   | 67    |
| 10377  |      | 2   | No              |      | 2   | No             |      | 2   | No    |      |       |       | 173   | 92    |
| 10378  |      | 2   | No              |      | 2   | No             |      | 2   | No    |      |       |       | 181   | 93    |
| 10387  |      | 2   | No              |      | 2   | No             |      | 2   | No    |      |       |       | 167   | 70    |
| 10396  |      | 2   | No              |      | 2   | No             |      | 2   | No    |      |       |       | 174   | 70    |
| 10397  | 1    | 2   | No              |      | 2   | No             |      | 2   | No    |      |       |       | 170   | 65    |
| 10399  | 2    | 1   | Yes             | 2    | 1   | Yes            | 2    | 2   | No    |      |       |       | 168   | 80    |
| 10405  |      | 2   | No              |      | 2   | No             |      | 2   | No    |      |       |       | 172   | 72    |
| 10406  |      | 2   | No              |      | 2   | No             |      | 2   | No    |      |       |       | 157   | 62    |
| 10408  |      | 2   | No              |      | 2   | No             |      | 2   | No    |      |       |       | 178   | 78    |
| 10409  |      | 2   | No              |      | 2   | No             |      | 2   | No    |      |       |       | 165   | 85    |
| 10412  |      | 2   | No              |      | 2   | No             |      | 2   | No    |      |       |       | 175   | 72    |
| 10413  |      | 2   | No              |      | 2   | No             |      | 2   | No    |      |       |       | 168   | 61    |
| 10419  |      | 2   | No              |      | 2   | No             |      | 2   | No    |      |       |       | 171   | 72    |
| 10423  | 1    | 1   | Yes             | 2    | 1   | Yes            | 1    | 2   | No    |      | 6     | 8     |       | 80    |
| 10426  |      | 2   | No              |      | 2   | No             |      | 1   | Yes   | 1    |       |       | 168   | 50    |
| 10446  |      | 2   | No              |      | 2   | No             |      | 2   | No    |      |       |       | 169   | 63    |
| 10448  |      | 2   | No              |      | 1   | Yes            | 1    | 2   | No    |      |       |       | 177   | 95    |
| 10450  |      | 2   | No              |      | 1   | Yes            | 2    | 2   | No    |      |       |       | 160   | 53    |
| 10455  |      | 2   | No              |      | 1   | Yes            | 2    | 2   | No    |      |       |       | 166   | 68    |
| 10460  | 1    | 2   | No              |      | 1   | Yes            | 1    | 2   | No    |      |       |       | 164   | 55    |

| respid | Q11a | Q12 | Cardiac Disease | Q12a | Q13 | Hyperlipidemia | Q13a | Q14 | Neuro | Q14a | Q15_1 | Q15_2 | Q15_3 | Q16_1 |
|--------|------|-----|-----------------|------|-----|----------------|------|-----|-------|------|-------|-------|-------|-------|
| 10461  | 1    | 1   | Yes             | 1    | 1   | Yes            | 1    | 2   | No    |      |       |       | 166   | 74    |
| 10471  |      | 1   | Yes             | 1    | 1   | Yes            | 1    | 2   | No    |      |       |       | 165   | 55    |
| 10472  | 1    | 2   | No              |      | 2   | No             |      | 2   | No    |      |       |       | 170   | 70    |
| 10491  | 1    | 2   | No              |      | 2   | No             |      | 2   | No    |      |       |       | 180   | 70    |
| 10493  |      | 1   | Yes             | 2    | 1   | Yes            | 2    | 2   | No    |      |       |       | 157   | 62    |
| 10498  |      | 2   | No              |      | 2   | No             |      | 2   | No    |      |       |       | 155   | 51    |
| 10533  |      | 2   | No              |      | 2   | No             |      | 2   | No    |      |       |       | 152   | 48    |
| 10539  | 1    | 2   | No              |      | 2   | No             |      | 2   | No    |      |       |       | 168   | 61    |
| 10540  |      | 2   | No              |      | 1   | Yes            | 2    | 2   | No    |      |       |       | 168   | 62    |
| 10557  |      | 2   | No              |      | 2   | No             |      | 2   | No    |      |       |       | 170   | 70    |
| 10558  |      | 2   | No              |      | 2   | No             |      | 2   | No    |      |       |       | 175   | 60    |
| 10559  | 1    | 1   | Yes             | 1    | 2   | No             |      | 2   | No    |      |       |       | 165   | 60    |
| 10564  |      | 2   | No              |      | 2   | No             |      | 2   | No    |      |       |       | 163   | 60    |
| 10570  | 1    | 2   | No              |      | 2   | No             |      | 2   | No    |      |       |       | 160   | 50    |
| 10572  |      | 2   | No              |      | 2   | No             |      | 2   | No    |      |       |       | 155   | 49    |
| 10576  |      | 2   | No              |      | 2   | No             |      | 2   | No    |      |       |       | 173   | 64    |
| 10582  |      | 2   | No              |      | 1   | Yes            | 1    | 2   | No    |      |       |       | 160   | 57    |
| 10593  | 1    | 2   | No              |      | 2   | No             |      | 2   | No    |      |       |       | 160   | 68    |
| 10596  | 1    | 2   | No              |      | 1   | Yes            | 1    | 2   | No    |      |       |       | 160   | 45    |
| 10615  |      | 2   | No              |      | 2   | No             |      | 2   | No    |      |       |       | 165   | 50    |
| 10616  |      | 2   | No              |      | 1   | Yes            | 2    | 2   | No    |      |       |       | 180   | 80    |
| 10623  |      | 2   | No              |      | 1   | Yes            | 2    | 2   | No    |      |       |       | 172   | 85    |
| 10626  |      | 2   | No              |      | 2   | No             |      | 2   | No    |      |       |       | 160   | 55    |
| 10627  |      | 2   | No              |      | 2   | No             |      | 2   | No    |      |       |       | 175   | 65    |
| 10629  |      | 2   | No              |      | 2   | No             |      | 1   | Yes   | 1    |       |       | 174   | 50    |
| 10632  |      | 2   | No              |      | 2   | No             |      | 2   | No    |      |       |       | 170   | 60    |
| 10641  |      | 2   | No              |      | 2   | No             |      | 2   | No    |      |       |       | 164   | 55    |
| 10648  |      | 2   | No              |      | 2   | No             |      | 2   | No    |      |       |       | 168   | 56    |
| 10651  | 1    | 1   | Yes             | 1    | 2   | No             |      | 1   | Yes   | 1    |       |       | 156   | 55    |
| 10654  |      | 2   | No              |      | 2   | No             |      | 2   | No    |      |       |       | 165   | 56    |
| 10673  |      | 2   | No              |      | 2   | No             |      | 2   | No    |      | 5     | 5     |       | 55    |
| 10675  | 1    | 2   | No              |      | 2   | No             |      | 2   | No    |      |       |       | 165   | 65    |

| respid | Q11a | Q12 | Cardiac Disease | Q12a | Q13 | Hyperlipidemia | Q13a | Q14 | Neuro | Q14a | Q15_1 | Q15_2 | Q15_3 | Q16_1 |
|--------|------|-----|-----------------|------|-----|----------------|------|-----|-------|------|-------|-------|-------|-------|
| 10689  |      | 1   | Yes             | 1    | 1   | Yes            | 1    | 1   | Yes   | 2    |       |       | 177   | 65    |
| 10692  |      | 2   | No              |      | 2   | No             |      | 2   | No    |      |       |       | 160   | 55    |
| 10694  |      | 2   | No              |      | 2   | No             |      | 2   | No    |      |       |       | 175   | 70    |
| 10695  |      | 2   | No              |      | 2   | No             |      | 2   | No    |      |       |       | 160   | 50    |
| 10702  | 1    | 2   | No              |      | 2   | No             |      | 2   | No    |      |       |       | 154   | 62    |
| 10703  |      | 2   | No              |      | 2   | No             |      | 2   | No    |      |       |       | 168   | 75    |
| 10708  |      | 2   | No              |      | 1   | Yes            | 2    | 2   | No    |      | 5     | 7     |       | 72    |
| 10719  |      | 2   | No              |      | 2   | No             |      | 2   | No    |      |       |       | 177   | 84    |
| 10722  |      | 2   | No              |      | 2   | No             |      | 2   | No    |      |       |       | 159   | 48    |
| 10723  | 1    | 2   | No              |      | 1   | Yes            | 1    | 2   | No    |      |       |       | 165   | 60    |
| 10726  |      | 2   | No              |      | 1   | Yes            | 2    | 2   | No    |      |       |       | 169   | 62    |
| 10727  |      | 2   | No              |      | 2   | No             |      | 2   | No    |      |       |       | 170   | 60    |
| 10730  |      | 2   | No              |      | 1   | Yes            | 2    | 2   | No    |      |       |       | 167   | 70    |
| 10731  |      | 2   | No              |      | 2   | No             |      | 2   | No    |      |       |       | 170   | 70    |
| 10737  |      | 2   | No              |      | 1   | Yes            | 2    | 2   | No    |      |       |       | 172   | 62    |
| 10743  |      | 2   | No              |      | 1   | Yes            | 1    | 2   | No    |      |       |       | 155   | 51    |
| 10763  |      | 2   | No              |      | 1   | Yes            | 2    | 2   | No    |      |       |       | 177   | 82    |
| 10777  |      | 2   | No              |      | 2   | No             |      | 2   | No    |      |       |       | 171   | 86    |
| 10787  | 1    | 2   | No              |      | 2   | No             |      | 2   | No    |      |       |       | 172   | 74    |
| 10798  |      | 2   | No              |      | 2   | No             |      | 2   | No    |      |       |       | 175   | 65    |
| 10800  | 2    | 2   | No              |      | 2   | No             |      | 2   | No    |      |       |       | 176   | 76    |
| 10802  |      | 2   | No              |      | 2   | No             |      | 2   | No    |      |       |       | 170   | 56    |
| 10803  |      | 1   | Yes             | 1    | 2   | No             |      | 1   | Yes   | 1    |       |       | 163   | 60    |
| 10808  |      | 2   | No              |      | 2   | No             |      | 2   | No    |      |       |       | 158   | 49    |
| 10810  |      | 1   | Yes             | 2    | 2   | No             |      | 2   | No    |      |       |       | 176   | 92    |
| 10819  | 1    | 2   | No              |      | 1   | Yes            | 1    | 2   | No    |      |       |       | 166   | 68    |
| 10825  | 1    | 1   | Yes             | 1    | 2   | No             |      | 2   | No    |      |       |       | 160   | 70    |
| 10827  |      | 1   | Yes             | 1    | 1   | Yes            | 1    | 2   | No    |      | 5     | 8     |       | 74    |
| 10830  | 1    | 2   | No              |      | 1   | Yes            | 1    | 2   | No    |      |       |       | 164   | 62    |
| 10847  |      | 2   | No              |      | 2   | No             |      | 2   | No    |      |       |       | 175   | 82    |
| 10849  |      | 2   | No              |      | 1   | Yes            | 2    | 2   | No    |      |       |       | 180   | 80    |
| 10852  |      | 2   | No              |      | 2   | No             |      | 2   | No    |      |       |       | 168   | 58    |

| respid | Q11a | Q12 | Cardiac Disease | Q12a | Q13 | Hyperlipidemia | Q13a | Q14 | Neuro | Q14a | Q15_1 | Q15_2 | Q15_3 | Q16_1 |
|--------|------|-----|-----------------|------|-----|----------------|------|-----|-------|------|-------|-------|-------|-------|
| 10854  |      | 2   | No              |      | 1   | Yes            | 2    | 2   | No    |      |       |       | 168   | 70    |
| 10857  |      | 2   | No              |      | 2   | No             |      | 2   | No    |      |       |       | 160   | 115   |
| 10861  | 1    | 1   | Yes             | 1    | 1   | Yes            | 2    | 2   | No    |      |       |       | 153   | 100   |
| 10862  |      | 2   | No              |      | 2   | No             |      | 2   | No    |      |       |       | 170   | 60    |
| 10870  | 1    | 1   | Yes             | 2    | 2   | No             |      | 2   | No    |      |       |       | 170   | 65    |
| 10873  |      | 2   | No              |      | 2   | No             |      | 2   | No    |      |       |       | 170   | 48    |
| 10881  | 1    | 2   | No              |      | 2   | No             |      | 2   | No    |      |       |       | 160   | 65    |
| 10893  |      | 2   | No              |      | 2   | No             |      | 2   | No    |      |       |       | 155   | 50    |
| 10898  |      | 2   | No              |      | 1   | Yes            | 2    | 2   | No    |      |       |       | 156   | 44    |
| 10899  | 1    | 2   | No              |      | 2   | No             |      | 2   | No    |      |       |       | 170   | 60    |
| 10905  |      | 2   | No              |      | 2   | No             |      | 2   | No    |      |       |       | 175   | 65    |
| 10910  |      | 2   | No              |      | 2   | No             |      | 2   | No    |      |       |       | 170   | 65    |
| 10911  |      | 2   | No              |      | 2   | No             |      | 2   | No    |      |       |       | 162   | 54    |
| 10912  |      | 2   | No              |      | 2   | No             |      | 2   | No    |      |       |       | 160   | 54    |
| 10913  |      | 1   | Yes             | 1    | 1   | Yes            | 1    | 2   | No    |      |       |       | 160   | 60    |
| 10918  | 1    | 2   | No              |      | 2   | No             |      | 2   | No    |      |       |       | 150   | 57    |
| 10995  |      | 2   | No              |      | 2   | No             |      | 2   | No    |      |       |       | 150   | 43    |
| 11002  |      | 2   | No              |      | 1   | Yes            | 1    | 2   | No    |      |       |       | 166   | 55    |
| 11003  |      | 2   | No              |      | 2   | No             |      | 2   | No    |      |       |       | 176   | 82    |
| 11005  | 1    | 2   | No              |      | 2   | No             |      | 2   | No    |      |       |       | 177   | 69    |
| 11015  |      | 2   | No              |      | 2   | No             |      | 2   | No    |      |       |       | 155   | 60    |
| 11016  |      | 2   | No              |      | 2   | No             |      | 2   | No    |      |       |       | 176   | 88    |
| 11017  | 1    | 2   | No              |      | 2   | No             |      | 2   | No    |      |       |       | 178   | 88    |
| 11020  |      | 2   | No              |      | 2   | No             |      | 2   | No    |      |       |       | 170   | 65    |
| 11024  |      | 2   | No              |      | 2   | No             |      | 2   | No    |      |       |       | 170   | 65    |
| 11026  |      | 2   | No              |      | 1   | Yes            | 2    | 2   | No    |      |       |       | 163   | 85    |
| 11028  | 2    | 2   | No              |      | 1   | Yes            | 2    | 2   | No    |      |       |       | 174   | 74    |
| 11029  |      | 2   | No              |      | 2   | No             |      | 2   | No    |      |       |       | 175   | 65    |
| 11030  | 1    | 2   | No              |      | 1   | Yes            | 2    | 2   | No    |      |       |       | 170   | 71    |
| 11031  |      | 2   | No              |      | 2   | No             |      | 2   | No    |      |       |       | 158   | 60    |
| 11038  | 1    | 2   | No              |      | 2   | No             |      | 2   | No    |      |       |       | 150   | 60    |
| 11051  |      | 2   | No              |      | 2   | No             |      | 2   | No    |      |       |       | 161   | 50    |

| respid | Q11a | Q12 | Cardiac Disease | Q12a | Q13 | Hyperlipidemia | Q13a | Q14 | Neuro | Q14a | Q15_1 | Q15_2 | Q15_3 | Q16_1 |
|--------|------|-----|-----------------|------|-----|----------------|------|-----|-------|------|-------|-------|-------|-------|
| 11052  |      | 2   | No              |      | 2   | No             |      | 2   | No    |      |       |       | 175   | 65    |
| 11053  |      | 2   | No              |      | 2   | No             |      | 2   | No    |      |       |       | 164   | 65    |
| 11054  |      | 2   | No              |      | 2   | No             |      | 2   | No    |      |       |       | 175   | 67    |
| 11063  | 1    | 2   | No              |      | 2   | No             |      | 2   | No    |      |       |       | 159   | 58    |
| 11075  | 1    | 1   | Yes             | 1    | 1   | Yes            | 1    | 2   | No    |      |       |       | 175   | 89    |
| 11083  |      | 2   | No              |      | 2   | No             |      | 2   | No    |      |       |       | 170   | 70    |
| 11092  |      | 2   | No              |      | 2   | No             |      | 2   | No    |      |       |       | 160   | 48    |
| 11118  |      | 2   | No              |      | 2   | No             |      | 2   | No    |      |       |       | 180   | 55    |
| 11119  | 1    | 2   | No              |      | 1   | Yes            | 1    | 2   | No    |      |       |       | 175   | 65    |
| 11134  |      | 2   | No              |      | 2   | No             |      | 2   | No    |      |       |       | 180   | 85    |
| 11139  |      | 2   | No              |      | 2   | No             |      | 2   | No    |      | 5     | 4     |       | 65    |
| 11154  |      | 2   | No              |      | 2   | No             |      | 2   | No    |      |       |       | 170   | 54    |
| 11166  |      | 2   | No              |      | 1   | Yes            | 2    | 2   | No    |      |       |       | 167   | 70    |
| 11168  |      | 2   | No              |      | 2   | No             |      | 2   | No    |      |       |       | 170   | 65    |
| 11176  | 1    | 2   | No              |      | 2   | No             |      | 2   | No    |      |       |       | 178   | 70    |
| 11183  | 1    | 2   | No              |      | 1   | Yes            | 1    | 2   | No    |      |       |       | 165   | 55    |
| 11189  |      | 2   | No              |      | 2   | No             |      | 2   | No    |      |       |       | 173   | 70    |
| 11196  | 1    | 1   | Yes             | 1    | 2   | No             |      | 1   | Yes   | 1    |       |       | 160   | 80    |
| 11200  |      | 2   | No              |      | 1   | Yes            | 2    | 2   | No    |      |       |       | 171   | 80    |
| 11201  |      | 2   | No              |      | 1   | Yes            | 2    | 2   | No    |      |       |       | 173   | 95    |
| 11211  | 1    | 2   | No              |      | 1   | Yes            | 1    | 2   | No    |      |       |       | 160   | 80    |
| 11218  |      | 2   | No              |      | 2   | No             |      | 2   | No    |      |       |       | 160   | 75    |
| 11219  |      | 2   | No              |      | 2   | No             |      | 2   | No    |      |       |       | 165   | 52    |
| 11221  |      | 2   | No              |      | 2   | No             |      | 2   | No    |      |       |       | 150   | 48    |
| 11222  | 2    | 2   | No              |      | 2   | No             |      | 2   | No    |      |       |       | 160   | 70    |
| 11230  | 1    | 2   | No              |      | 2   | No             |      | 2   | No    |      |       |       | 165   | 85    |
| 11236  | 1    | 2   | No              |      | 1   | Yes            | 1    | 2   | No    |      |       |       | 160   | 75    |
| 11237  | 1    | 1   | Yes             | 1    | 2   | No             |      | 2   | No    |      |       |       | 174   | 64    |
| 11240  | 1    | 2   | No              |      | 1   | Yes            | 2    | 2   | No    |      |       |       | 158   | 62    |
| 11244  | 1    | 1   | Yes             | 1    | 2   | No             |      | 2   | No    |      |       |       | 162   | 76    |
| 11249  |      | 2   | No              |      | 2   | No             |      | 2   | No    |      |       |       | 172   | 62    |
| 11252  | 1    | 2   | No              |      | 1   | Yes            | 1    | 2   | No    |      |       |       | 166   | 77    |

| respid | Q11a | Q12 | Cardiac Disease | Q12a | Q13 | Hyperlipidemia | Q13a | Q14 | Neuro | Q14a | Q15_1 | Q15_2 | Q15_3 | Q16_1 |
|--------|------|-----|-----------------|------|-----|----------------|------|-----|-------|------|-------|-------|-------|-------|
| 11254  |      | 2   | No              |      | 2   | No             |      | 2   | No    |      |       |       | 165   | 65    |
| 11255  | 1    | 1   | Yes             | 1    | 2   | No             |      | 2   | No    |      |       |       | 151   | 60    |
| 11258  | 1    | 2   | No              |      | 1   | Yes            | 1    | 2   | No    |      |       |       | 165   | 74    |
| 11260  | 1    | 2   | No              |      | 2   | No             |      | 2   | No    |      |       |       | 173   | 80    |
| 11264  | 1    | 1   | Yes             | 1    | 2   | No             |      | 2   | No    |      |       |       | 165   | 69    |
| 11266  |      | 2   | No              |      | 2   | No             |      | 2   | No    |      |       |       | 170   | 66    |
| 11268  | 1    | 1   | Yes             | 1    | 1   | Yes            | 1    | 1   | Yes   | 1    |       |       | 171   | 78    |
| 11269  |      | 2   | No              |      | 1   | Yes            | 2    | 2   | No    |      |       |       | 172   | 89    |
| 11272  | 1    | 2   | No              |      | 2   | No             |      | 2   | No    |      |       |       | 173   | 76    |
| 11273  |      | 2   | No              |      | 2   | No             |      | 2   | No    |      |       |       | 159   | 60    |
| 11275  |      | 2   | No              |      | 1   | Yes            | 2    | 2   | No    |      |       |       | 155   | 48    |
| 11276  |      | 2   | No              |      | 2   | No             |      | 2   | No    |      |       |       | 152   | 50    |
| 11278  |      | 2   | No              |      | 2   | No             |      | 2   | No    |      |       |       | 158   | 50    |
| 11288  |      | 2   | No              |      | 1   | Yes            | 2    | 2   | No    |      |       |       | 183   | 110   |
| 11289  | 2    | 2   | No              |      | 2   | No             |      | 2   | No    |      |       |       | 158   | 56    |
| 11291  |      | 2   | No              |      | 1   | Yes            | 2    | 2   | No    |      |       |       | 175   | 80    |
| 11295  |      | 2   | No              |      | 2   | No             |      | 2   | No    |      |       |       | 166   | 62    |
| 11297  |      | 2   | No              |      | 2   | No             |      | 2   | No    |      |       |       | 162   | 66    |
| 11304  | 2    | 2   | No              |      | 2   | No             |      | 2   | No    |      |       |       | 169   | 57    |
| 11305  |      | 2   | No              |      | 1   | Yes            | 2    | 2   | No    |      |       |       | 173   | 61    |
| 11311  |      | 2   | No              |      | 2   | No             |      | 2   | No    |      |       |       | 158   | 48    |
| 11313  |      | 2   | No              |      | 2   | No             |      | 2   | No    |      |       |       | 176   | 69    |
| 11315  |      | 2   | No              |      | 2   | No             |      | 2   | No    |      |       |       | 168   | 65    |
| 11316  |      | 2   | No              |      | 2   | No             |      | 2   | No    |      |       |       | 165   | 60    |
| 11318  |      | 2   | No              |      | 2   | No             |      | 2   | No    |      | 5     | 3     |       | 49    |
| 11323  |      | 2   | No              |      | 2   | No             |      | 2   | No    |      |       |       | 162   | 42    |
| 11331  |      | 2   | No              |      | 1   | Yes            | 2    | 2   | No    |      | 5     | 3     |       | 62    |
| 11333  |      | 1   | Yes             | 1    | 2   | No             |      | 2   | No    |      |       |       | 166   | 58    |
| 11334  | 2    | 2   | No              |      | 2   | No             |      | 2   | No    |      |       |       | 174   | 80    |
| 11340  |      | 2   | No              |      | 2   | No             |      | 2   | No    |      |       |       | 174   | 70    |
| 11345  | 2    | 2   | No              |      | 1   | Yes            | 2    | 2   | No    |      |       |       | 169   | 70    |
| 11354  |      | 2   | No              |      | 1   | Yes            | 2    | 2   | No    |      |       |       | 167   | 69    |

| respid | Q11a | Q12 | Cardiac Disease | Q12a | Q13 | Hyperlipidemia | Q13a | Q14 | Neuro | Q14a | Q15_1 | Q15_2 | Q15_3 | Q16_1 |
|--------|------|-----|-----------------|------|-----|----------------|------|-----|-------|------|-------|-------|-------|-------|
| 11360  |      | 2   | No              |      | 2   | No             |      | 2   | No    |      |       |       | 175   | 75    |
| 11361  |      | 2   | No              |      | 2   | No             |      | 2   | No    |      |       |       | 168   | 56    |
| 11367  |      | 2   | No              |      | 2   | No             |      | 2   | No    |      |       |       | 165   | 45    |
| 11370  |      | 2   | No              |      | 1   | Yes            | 2    | 2   | No    |      |       |       | 172   | 60    |
| 11371  | 1    | 2   | No              |      | 2   | No             |      | 2   | No    |      |       |       | 162   | 60    |
| 11372  | 2    | 2   | No              |      | 2   | No             |      | 2   | No    |      |       |       | 155   | 60    |
| 11373  |      | 1   | Yes             | 2    | 1   | Yes            | 2    | 2   | No    |      |       |       | 166   | 53    |
| 11382  |      | 2   | No              |      | 2   | No             |      | 2   | No    |      |       |       | 178   | 75    |
| 11394  | 2    | 2   | No              |      | 2   | No             |      | 2   | No    |      |       |       | 180   | 90    |
| 11395  | 2    | 2   | No              |      | 2   | No             |      | 2   | No    |      |       |       | 180   | 65    |
| 11397  |      | 2   | No              |      | 1   | Yes            | 2    | 2   | No    |      |       |       | 174   | 70    |
| 11402  |      | 2   | No              |      | 2   | No             |      | 2   | No    |      |       |       | 170   | 65    |
| 11409  | 1    | 2   | No              |      | 1   | Yes            | 1    | 2   | No    |      |       |       | 180   | 76    |
| 11410  |      | 2   | No              |      | 2   | No             |      | 2   | No    |      |       |       | 160   | 70    |
| 11411  |      | 2   | No              |      | 2   | No             |      | 2   | No    |      |       |       | 170   | 66    |
| 11418  |      | 2   | No              |      | 1   | Yes            | 2    | 2   | No    |      |       |       | 182   | 78    |
| 11425  | 2    | 2   | No              |      | 2   | No             |      | 2   | No    |      |       |       | 153   | 56    |
| 11429  | 1    | 1   | Yes             | 1    | 2   | No             |      | 2   | No    |      |       |       | 174   | 60    |
| 11430  | 1    | 2   | No              |      | 2   | No             |      | 2   | No    |      |       |       | 176   | 75    |
| 11431  | 1    | 1   | Yes             | 1    | 1   | Yes            | 1    | 1   | Yes   | 1    |       |       | 169   | 64    |
| 11432  |      | 2   | No              |      | 2   | No             |      | 2   | No    |      |       |       | 173   | 60    |
| 11433  | 2    | 2   | No              |      | 2   | No             |      | 2   | No    |      |       |       | 165   | 73    |
| 11435  |      | 2   | No              |      | 1   | Yes            | 2    | 2   | No    |      |       |       | 168   | 60    |
| 11436  |      | 2   | No              |      | 2   | No             |      | 2   | No    |      |       |       | 160   | 65    |
| 11437  |      | 2   | No              |      | 1   | Yes            | 1    | 2   | No    |      | 5     | 5     |       | 55    |
| 11439  |      | 2   | No              |      | 2   | No             |      | 2   | No    |      |       |       | 170   | 80    |
| 11440  |      | 2   | No              |      | 2   | No             |      | 2   | No    |      |       |       | 160   | 48    |
| 11447  |      | 2   | No              |      | 2   | No             |      | 2   | No    |      |       |       | 180   | 70    |
| 11455  | 1    | 2   | No              |      | 2   | No             |      | 2   | No    |      |       |       | 162   | 65    |
| 11456  |      | 2   | No              |      | 2   | No             |      | 2   | No    |      |       |       | 154   | 56    |
| 11461  | 1    | 2   | No              |      | 2   | No             |      | 2   | No    |      |       |       | 175   | 75    |
| 11463  | 1    | 2   | No              |      | 2   | No             |      | 2   | No    |      |       |       | 175   | 70    |



| respid | Q11a | Q12 | Cardiac Disease | Q12a | Q13 | Hyperlipidemia | Q13a | Q14 | Neuro | Q14a | Q15_1 | Q15_2 | Q15_3 | Q16_1 |
|--------|------|-----|-----------------|------|-----|----------------|------|-----|-------|------|-------|-------|-------|-------|
| 11470  |      | 2   | No              |      | 1   | Yes            | 2    | 2   | No    |      |       |       | 175   | 110   |
| 11472  |      | 2   | No              |      | 2   | No             |      | 2   | No    |      |       |       | 177   | 70    |
| 11475  |      | 2   | No              |      | 2   | No             |      | 2   | No    |      |       |       | 169   | 63    |
| 11476  |      | 2   | No              |      | 2   | No             |      | 2   | No    |      |       |       | 160   | 54    |
| 11482  |      | 2   | No              |      | 2   | No             |      | 2   | No    |      |       |       | 155   | 55    |
| 11501  | 1    | 2   | No              |      | 2   | No             |      | 2   | No    |      |       |       | 180   | 80    |
| 11503  | 1    | 2   | No              |      | 1   | Yes            | 2    | 2   | No    |      |       |       | 171   | 80    |
| 11505  |      | 2   | No              |      | 2   | No             |      | 2   | No    |      |       |       | 157   | 61    |
| 11510  |      | 2   | No              |      | 2   | No             |      | 2   | No    |      |       |       | 160   | 55    |
| 11519  |      | 2   | No              |      | 2   | No             |      | 2   | No    |      |       |       | 168   | 65    |
| 11527  |      | 2   | No              |      | 2   | No             |      | 2   | No    |      |       |       | 175   | 65    |
| 11529  |      | 2   | No              |      | 2   | No             |      | 2   | No    |      |       |       | 160   | 55    |
| 11530  | 2    | 2   | No              |      | 2   | No             |      | 2   | No    |      |       |       | 158   | 45    |
| 11536  | 1    | 2   | No              |      | 2   | No             |      | 2   | No    |      |       |       | 165   | 75    |
| 11543  |      | 2   | No              |      | 2   | No             |      | 2   | No    |      |       |       | 170   | 71    |
| 11548  |      | 2   | No              |      | 2   | No             |      | 2   | No    |      |       |       | 170   | 70    |
| 11566  |      | 2   | No              |      | 2   | No             |      | 2   | No    |      |       |       | 165   | 65    |
| 11570  |      | 2   | No              |      | 1   | Yes            | 2    | 2   | No    |      |       |       | 162   | 58    |
| 11571  | 1    | 1   | Yes             | 1    | 2   | No             |      | 2   | No    |      |       |       | 168   | 75    |
| 11578  |      | 2   | No              |      | 2   | No             |      | 2   | No    |      |       |       | 168   | 68    |
| 11579  |      | 2   | No              |      | 2   | No             |      | 2   | No    |      |       |       | 156   | 54    |
| 11581  |      | 2   | No              |      | 2   | No             |      | 2   | No    |      |       |       | 178   | 76    |
| 11582  |      | 2   | No              |      | 1   | Yes            | 2    | 2   | No    |      |       |       | 159   | 50    |
| 11583  |      | 2   | No              |      | 2   | No             |      | 2   | No    |      |       |       | 172   | 72    |
| 11589  |      | 2   | No              |      | 2   | No             |      | 2   | No    |      | 4     | 5     |       | 60    |
| 11590  |      | 2   | No              |      | 2   | No             |      | 2   | No    |      |       |       | 170   | 68    |
| 11592  |      | 2   | No              |      | 2   | No             |      | 2   | No    |      |       |       | 172   | 77    |
| 11596  |      | 2   | No              |      | 2   | No             |      | 2   | No    |      |       |       | 170   | 68    |
| 11598  |      | 2   | No              |      | 2   | No             |      | 2   | No    |      |       |       | 174   | 70    |
| 11602  |      | 2   | No              |      | 1   | Yes            | 2    | 2   | No    |      |       |       | 168   | 68    |
| 11605  |      | 2   | No              |      | 2   | No             |      | 2   | No    |      |       |       | 171   | 66    |
| 11618  |      | 2   | No              |      | 2   | No             |      | 2   | No    |      |       |       | 170   | 64    |

| respid | Q11a | Q12 | Cardiac Disease | Q12a | Q13 | Hyperlipidemia | Q13a | Q14 | Neuro | Q14a | Q15_1 | Q15_2 | Q15_3 | Q16_1 |
|--------|------|-----|-----------------|------|-----|----------------|------|-----|-------|------|-------|-------|-------|-------|
| 11621  | 2    | 1   | Yes             | 2    | 2   | No             |      | 2   | No    |      |       |       | 178   | 75    |
| 11630  |      | 2   | No              |      | 2   | No             |      | 2   | No    |      |       |       | 172   | 52    |
| 11636  | 1    | 2   | No              |      | 1   | Yes            | 1    | 2   | No    |      |       |       | 160   | 50    |
| 11640  | 2    | 2   | No              |      | 1   | Yes            | 2    | 2   | No    |      |       |       | 170   | 120   |
| 11658  |      | 2   | No              |      | 2   | No             |      | 2   | No    |      |       |       | 180   | 65    |
| 11665  |      | 2   | No              |      | 1   | Yes            | 2    | 2   | No    |      |       |       | 155   | 53    |
| 11666  | 1    | 2   | No              |      | 1   | Yes            | 1    | 1   | Yes   | 1    |       |       | 165   | 75    |
| 11667  | 2    | 2   | No              |      | 2   | No             |      | 2   | No    |      |       |       | 175   | 70    |
| 11674  |      | 2   | No              |      | 2   | No             |      | 2   | No    |      |       |       | 165   | 57    |
| 11680  |      | 2   | No              |      | 2   | No             |      | 2   | No    |      |       |       | 164   | 55    |
| 11683  |      | 2   | No              |      | 2   | No             |      | 2   | No    |      |       |       | 180   | 70    |
| 11688  | 1    | 2   | No              |      | 1   | Yes            | 1    | 2   | No    |      |       |       | 175   | 65    |
| 11690  |      | 2   | No              |      | 2   | No             |      | 2   | No    |      |       |       | 168   | 51    |
| 11694  |      | 2   | No              |      | 2   | No             |      | 2   | No    |      |       |       | 167   | 64    |
| 11705  |      | 2   | No              |      | 1   | Yes            | 1    | 2   | No    |      |       |       | 165   | 55    |
| 11720  | 1    | 2   | No              |      | 1   | Yes            | 2    | 2   | No    |      |       |       | 165   | 65    |
| 11724  |      | 2   | No              |      | 2   | No             |      | 2   | No    |      |       |       | 166   | 51    |
| 11738  |      | 1   | Yes             | 1    | 1   | Yes            | 1    | 2   | No    |      |       |       | 162   | 52    |
| 11744  |      | 2   | No              |      | 2   | No             |      | 2   | No    |      |       |       | 175   | 60    |
| 11745  |      | 2   | No              |      | 1   | Yes            | 2    | 2   | No    |      |       |       | 160   | 58    |
| 11747  |      | 2   | No              |      | 2   | No             |      | 2   | No    |      |       |       | 166   | 50    |
| 11755  | 1    | 2   | No              |      | 1   | Yes            | 1    | 2   | No    |      |       |       | 163   | 58    |
| 11756  |      | 1   | Yes             | 1    | 1   | Yes            | 1    | 2   | No    |      |       |       | 177   | 75    |
| 11772  | 2    | 2   | No              |      | 2   | No             |      | 2   | No    |      |       |       | 152   | 54    |
| 11773  |      | 2   | No              |      | 2   | No             |      | 2   | No    |      |       |       | 166   | 51    |
| 11778  |      | 2   | No              |      | 2   | No             |      | 2   | No    |      |       |       | 175   | 70    |
| 11790  |      | 2   | No              |      | 1   | Yes            | 2    | 2   | No    |      |       |       | 172   | 68    |
| 11794  |      | 2   | No              |      | 2   | No             |      | 2   | No    |      |       |       | 165   | 51    |
| 11795  | 1    | 1   | Yes             | 1    | 1   | Yes            | 1    | 2   | No    |      |       |       | 170   | 60    |
| 11799  | 1    | 1   | Yes             | 1    | 2   | No             |      | 2   | No    |      |       |       | 174   | 80    |
| 11803  |      | 2   | No              |      | 2   | No             |      | 2   | No    |      |       |       | 168   | 71    |
| 11806  | 1    | 2   | No              |      | 1   | Yes            | 1    | 2   | No    |      |       |       | 165   | 80    |

| respid | Q11a | Q12 | Cardiac Disease | Q12a | Q13 | Hyperlipidemia | Q13a | Q14 | Neuro | Q14a | Q15_1 | Q15_2 | Q15_3 | Q16_1 |
|--------|------|-----|-----------------|------|-----|----------------|------|-----|-------|------|-------|-------|-------|-------|
| 11808  |      | 2   | No              |      | 2   | No             |      | 2   | No    |      |       |       | 160   | 65    |
| 11810  |      | 2   | No              |      | 2   | No             |      | 2   | No    |      |       |       | 165   | 51    |
| 11811  |      | 2   | No              |      | 2   | No             |      | 2   | No    |      |       |       | 166   | 52    |
| 11812  |      | 2   | No              |      | 2   | No             |      | 2   | No    |      |       |       | 168   | 55    |
| 11813  |      | 2   | No              |      | 2   | No             |      | 2   | No    |      |       |       | 170   | 67    |
| 11821  | 1    | 2   | No              |      | 2   | No             |      | 2   | No    |      |       |       | 160   | 60    |
| 11827  |      | 2   | No              |      | 2   | No             |      | 2   | No    |      |       |       | 166   | 51    |
| 11831  | 1    | 2   | No              |      | 2   | No             |      | 2   | No    |      |       |       | 179   | 60    |
| 11841  |      | 2   | No              |      | 2   | No             |      | 2   | No    |      |       |       | 167   | 51    |
| 11872  |      | 1   | Yes             | 2    | 2   | No             |      | 2   | No    |      |       |       | 163   | 60    |
| 11898  |      | 2   | No              |      | 2   | No             |      | 2   | No    |      |       |       | 180   | 100   |
| 11902  | 1    | 1   | Yes             | 1    | 2   | No             |      | 2   | No    |      |       |       | 172   | 70    |
| 11912  |      | 2   | No              |      | 2   | No             |      | 2   | No    |      |       |       | 168   | 55    |
| 11926  |      | 2   | No              |      | 2   | No             |      | 2   | No    |      |       |       | 172   | 71    |
| 11928  |      | 2   | No              |      | 2   | No             |      | 2   | No    |      |       |       | 170   | 65    |
| 11932  | 1    | 2   | No              |      | 1   | Yes            | 2    | 2   | No    |      |       |       | 171   | 88    |
| 11934  |      | 2   | No              |      | 2   | No             |      | 2   | No    |      |       |       | 173   | 75    |
| 11941  | 1    | 2   | No              |      | 2   | No             |      | 1   | Yes   | 1    |       |       | 170   | 62    |
| 11942  |      | 2   | No              |      | 1   | Yes            | 2    | 2   | No    |      |       |       | 171   | 70    |
| 11943  | 1    | 2   | No              |      | 2   | No             |      | 2   | No    |      |       |       | 186   | 100   |
| 11944  | 1    | 2   | No              |      | 1   | Yes            | 1    | 2   | No    |      |       |       | 155   | 50    |
| 11955  | 1    | 2   | No              |      | 1   | Yes            | 1    | 2   | No    |      |       |       | 165   | 49    |
| 11958  | 1    | 2   | No              |      | 2   | No             |      | 2   | No    |      |       |       | 171   | 74    |
| 11968  | 1    | 2   | No              |      | 2   | No             |      | 2   | No    |      |       |       | 168   | 60    |
| 11979  | 1    | 2   | No              |      | 2   | No             |      | 2   | No    |      |       |       | 160   | 55    |
| 11988  |      | 2   | No              |      | 2   | No             |      | 2   | No    |      |       |       | 170   |       |
| 11999  | 1    | 2   | No              |      | 2   | No             |      | 2   | No    |      |       |       | 163   | 40    |
| 12002  |      | 2   | No              |      | 2   | No             |      | 2   | No    |      |       |       | 176   | 65    |
| 12004  | 1    | 2   | No              |      | 2   | No             |      | 2   | No    |      |       |       | 165   | 60    |
| 12008  |      | 2   | No              |      | 1   | Yes            | 2    | 2   | No    |      |       |       | 162   | 60    |
| 12013  | 1    | 2   | No              |      | 2   | No             |      | 2   | No    |      |       |       | 158   | 60    |
| 12018  |      | 2   | No              |      | 1   | Yes            | 2    | 2   | No    |      |       |       | 170   | 68    |

| respid | Q11a | Q12 | Cardiac Disease | Q12a | Q13 | Hyperlipidemia | Q13a | Q14 | Neuro | Q14a | Q15_1 | Q15_2 | Q15_3 | Q16_1 |
|--------|------|-----|-----------------|------|-----|----------------|------|-----|-------|------|-------|-------|-------|-------|
| 12023  | 1    | 2   | No              |      | 1   | Yes            | 1    | 2   | No    |      |       |       | 160   | 67    |
| 12027  |      | 2   | No              |      | 2   | No             |      | 2   | No    |      |       |       | 162   | 64    |
| 12030  |      | 2   | No              |      | 2   | No             |      | 2   | No    |      |       |       | 160   | 50    |
| 12031  | 1    | 1   | Yes             | 1    | 2   | No             |      | 2   | No    |      |       |       | 165   | 65    |
| 12036  |      | 2   | No              |      | 1   | Yes            | 1    | 2   | No    |      |       |       | 172   | 60    |
| 12037  | 1    | 2   | No              |      | 1   | Yes            | 1    | 2   | No    |      |       |       | 170   | 75    |
| 12038  |      | 2   | No              |      | 2   | No             |      | 2   | No    |      |       |       | 168   | 75    |
| 12039  |      | 2   | No              |      | 2   | No             |      | 2   | No    |      |       |       | 170   | 60    |
| 12045  |      | 1   | Yes             | 1    | 2   | No             |      | 2   | No    |      |       |       | 156   | 53    |
| 12046  |      | 2   | No              |      | 2   | No             |      | 2   | No    |      | 4     | 5     |       | 57    |
| 12054  |      | 1   | Yes             | 1    | 2   | No             |      | 2   | No    |      | 6     | 9     |       | 50    |
| 12055  |      | 2   | No              |      | 2   | No             |      | 2   | No    |      |       |       | 160   | 68    |
| 12069  | 1    | 2   | No              |      | 2   | No             |      | 2   | No    |      |       |       | 178   | 60    |
| 12070  | 1    | 2   | No              |      | 1   | Yes            | 1    | 2   | No    |      |       |       | 171   | 68    |
| 12074  |      | 2   | No              |      | 2   | No             |      | 2   | No    |      |       |       | 155   | 50    |
| 12075  |      | 2   | No              |      | 2   | No             |      | 2   | No    |      |       |       | 170   | 80    |
| 12078  |      | 2   | No              |      | 1   | Yes            | 1    | 2   | No    |      |       |       | 172   | 80    |
| 12089  | 1    | 2   | No              |      | 2   | No             |      | 2   | No    |      |       |       | 163   | 90    |
| 12091  |      | 2   | No              |      | 2   | No             |      | 2   | No    |      |       |       | 165   | 52    |
| 12092  | 1    | 1   | Yes             | 1    | 1   | Yes            | 1    | 2   | No    |      |       |       | 158   | 72    |
| 12108  |      | 1   | Yes             | 1    | 1   | Yes            | 1    | 2   | No    |      |       |       | 180   | 65    |
| 12111  |      | 2   | No              |      | 1   | Yes            | 1    | 2   | No    |      |       |       | 168   | 60    |
| 12112  |      | 2   | No              |      | 2   | No             |      | 2   | No    |      |       |       | 168   | 56    |
| 12126  |      | 2   | No              |      | 1   | Yes            | 2    | 2   | No    |      |       |       | 172   | 72    |
| 12132  |      | 2   | No              |      | 2   | No             |      | 2   | No    |      |       |       | 170   | 62    |
| 12150  | 1    | 1   | Yes             | 1    | 1   | Yes            | 1    | 2   | No    |      | 5     | 11    |       | 65    |
| 12152  |      | 2   | No              |      | 2   | No             |      | 2   | No    |      |       |       | 168   | 73    |
| 12154  |      | 2   | No              |      | 2   | No             |      | 2   | No    |      |       |       | 176   | 70    |
| 12157  |      | 2   | No              |      | 2   | No             |      | 2   | No    |      |       |       | 173   | 65    |
| 12165  |      | 2   | No              |      | 2   | No             |      | 2   | No    |      |       |       | 158   | 57    |
| 12169  | 1    | 2   | No              |      | 1   | Yes            | 2    | 2   | No    |      |       |       | 170   | 80    |
| 12182  |      | 2   | No              |      | 2   | No             |      | 2   | No    |      |       |       | 170   | 70    |

| respid | Q11a | Q12 | Cardiac Disease | Q12a | Q13 | Hyperlipidemia | Q13a | Q14 | Neuro | Q14a | Q15_1 | Q15_2 | Q15_3 | Q16_1 |
|--------|------|-----|-----------------|------|-----|----------------|------|-----|-------|------|-------|-------|-------|-------|
| 12198  |      | 2   | No              |      | 2   | No             |      | 2   | No    |      |       |       | 160   | 56    |
| 12199  |      | 2   | No              |      | 2   | No             |      | 2   | No    |      |       |       | 170   | 70    |
| 12202  |      | 2   | No              |      | 2   | No             |      | 2   | No    |      |       |       | 160   | 47    |
| 12207  |      | 2   | No              |      | 2   | No             |      | 2   | No    |      |       |       | 172   | 58    |
| 12208  | 1    | 2   | No              |      | 1   | Yes            | 1    | 2   | No    |      |       |       | 175   | 82    |
| 12210  |      | 2   | No              |      | 2   | No             |      | 2   | No    |      |       |       | 162   | 55    |
| 12219  |      | 2   | No              |      | 2   | No             |      | 2   | No    |      |       |       | 150   | 65    |
| 12224  | 2    | 2   | No              |      | 1   | Yes            | 2    | 2   | No    |      |       |       | 160   | 65    |
| 12230  | 1    | 2   | No              |      | 1   | Yes            | 2    | 2   | No    |      |       |       | 170   | 80    |
| 12238  | 1    | 2   | No              |      | 2   | No             |      | 2   | No    |      |       |       | 155   | 70    |
| 12239  |      | 2   | No              |      | 2   | No             |      | 2   | No    |      |       |       | 165   | 55    |
| 12243  | 2    | 2   | No              |      | 2   | No             |      | 2   | No    |      |       |       | 170   | 65    |
| 12245  | 1    | 1   | Yes             | 1    | 2   | No             |      | 2   | No    |      |       |       | 185   | 80    |
| 12246  |      | 2   | No              |      | 2   | No             |      | 2   | No    |      |       |       | 156   | 62    |
| 12247  | 1    | 2   | No              |      | 2   | No             |      | 2   | No    |      |       |       | 173   | 70    |
| 12248  | 2    | 2   | No              |      | 2   | No             |      | 2   | No    |      |       |       | 170   | 65    |
| 12249  |      | 2   | No              |      | 2   | No             |      | 2   | No    |      | 4     | 6     |       | 55    |
| 12258  |      | 2   | No              |      | 2   | No             |      | 2   | No    |      |       |       | 168   | 70    |
| 12265  |      | 2   | No              |      | 2   | No             |      | 2   | No    |      |       |       | 161   | 62    |
| 12269  |      | 2   | No              |      | 2   | No             |      | 2   | No    |      |       |       | 155   | 60    |
| 12270  | 1    | 1   | Yes             | 1    | 1   | Yes            | 1    | 2   | No    |      |       |       | 171   | 75    |
| 12279  |      | 2   | No              |      | 1   | Yes            | 2    | 2   | No    |      |       |       | 172   | 76    |
| 12280  |      | 2   | No              |      | 1   | Yes            | 2    | 2   | No    |      |       |       | 169   | 64    |
| 12282  |      | 2   | No              |      | 1   | Yes            | 2    | 2   | No    |      |       |       | 160   | 68    |
| 12283  |      | 2   | No              |      | 2   | No             |      | 2   | No    |      |       |       | 158   | 57    |
| 12287  |      | 2   | No              |      | 2   | No             |      | 2   | No    |      |       |       | 170   | 60    |
| 12288  |      | 2   | No              |      | 2   | No             |      | 2   | No    |      |       |       | 168   | 64    |
| 12290  |      | 2   | No              |      | 2   | No             |      | 2   | No    |      |       |       | 167   | 60    |
| 12292  |      | 2   | No              |      | 2   | No             |      | 2   | No    |      |       |       | 155   | 52    |
| 12294  |      | 2   | No              |      | 2   | No             |      | 2   | No    |      |       |       | 171   | 70    |
| 12296  |      | 2   | No              |      | 2   | No             |      | 2   | No    |      |       |       | 175   | 72    |
| 12307  |      | 2   | No              |      | 2   | No             |      | 2   | No    |      |       |       | 150   | 45    |

| respid | Q11a | Q12 | Cardiac Disease | Q12a | Q13 | Hyperlipidemia | Q13a | Q14 | Neuro | Q14a | Q15_1 | Q15_2 | Q15_3 | Q16_1 |
|--------|------|-----|-----------------|------|-----|----------------|------|-----|-------|------|-------|-------|-------|-------|
| 12309  | 1    | 2   | No              |      | 1   | Yes            | 2    | 2   | No    |      |       |       | 173   | 76    |
| 12312  | 1    | 2   | No              |      | 1   | Yes            | 1    | 2   | No    |      |       |       | 168   | 83    |
| 12317  |      | 2   | No              |      | 2   | No             |      | 2   | No    |      |       |       | 160   | 59    |
| 12319  |      | 2   | No              |      | 2   | No             |      | 2   | No    |      |       |       | 168   | 120   |
| 12320  |      | 2   | No              |      | 1   | Yes            | 2    | 2   | No    |      |       |       | 171   | 70    |
| 12322  | 2    | 2   | No              |      | 2   | No             |      | 2   | No    |      |       |       | 174   | 68    |
| 12328  |      | 2   | No              |      | 2   | No             |      | 2   | No    |      |       |       | 162   | 63    |
| 12331  | 1    | 2   | No              |      | 1   | Yes            | 1    | 2   | No    |      |       |       | 174   | 87    |
| 12332  |      | 2   | No              |      | 1   | Yes            | 2    | 2   | No    |      |       |       | 165   | 72    |
| 12334  |      | 2   | No              |      | 2   | No             |      | 2   | No    |      |       |       | 162   | 77    |
| 12337  |      | 2   | No              |      | 2   | No             |      | 2   | No    |      |       |       | 176   | 69    |
| 12338  |      | 2   | No              |      | 1   | Yes            | 2    | 2   | No    |      |       |       | 173   | 73    |
| 12342  |      | 2   | No              |      | 1   | Yes            | 1    | 2   | No    |      |       |       | 164   | 74    |
| 12349  |      | 2   | No              |      | 2   | No             |      | 2   | No    |      |       |       | 156   | 46    |
| 12352  | 1    | 2   | No              |      | 1   | Yes            | 1    | 2   | No    |      |       |       | 172   | 73    |
| 12355  |      | 2   | No              |      | 2   | No             |      | 2   | No    |      |       |       | 167   | 59    |
| 12357  | 2    | 2   | No              |      | 2   | No             |      | 2   | No    |      |       |       | 172   | 65    |
| 12358  | 1    | 2   | No              |      | 1   | Yes            | 1    | 2   | No    |      |       |       | 168   | 89    |
| 12371  |      | 2   | No              |      | 2   | No             |      | 2   | No    |      |       |       | 165   | 68    |
| 12372  |      | 2   | No              |      | 2   | No             |      | 2   | No    |      |       |       | 156   | 49    |
| 12373  | 1    | 1   | Yes             | 1    | 2   | No             |      | 2   | No    |      |       |       | 168   | 75    |
| 12379  |      | 2   | No              |      | 2   | No             |      | 2   | No    |      |       |       | 183   | 85    |
| 12381  | 2    | 2   | No              |      | 2   | No             |      | 2   | No    |      |       |       | 158   | 53    |
| 12383  |      | 2   | No              |      | 2   | No             |      | 2   | No    |      |       |       | 176   | 82    |
| 12384  |      | 2   | No              |      | 2   | No             |      | 2   | No    |      |       |       | 166   | 57    |
| 12386  | 2    | 2   | No              |      | 2   | No             |      | 2   | No    |      |       |       | 162   | 68    |
| 12389  |      | 2   | No              |      | 2   | No             |      | 2   | No    |      |       |       | 160   | 70    |
| 12392  |      | 2   | No              |      | 2   | No             |      | 2   | No    |      |       |       | 160   | 60    |
| 12396  |      | 2   | No              |      | 2   | No             |      | 2   | No    |      |       |       | 159   | 59    |
| 12397  |      | 2   | No              |      | 2   | No             |      | 2   | No    |      |       |       | 154   | 40    |
| 12399  | 2    | 2   | No              |      | 2   | No             |      | 2   | No    |      |       |       | 157   | 55    |
| 12400  | 2    | 2   | No              |      | 1   | Yes            | 2    | 2   | No    |      |       |       | 177   | 73    |

| respid | Q11a | Q12 | Cardiac Disease | Q12a | Q13 | Hyperlipidemia | Q13a | Q14 | Neuro | Q14a | Q15_1 | Q15_2 | Q15_3 | Q16_1 |
|--------|------|-----|-----------------|------|-----|----------------|------|-----|-------|------|-------|-------|-------|-------|
| 12406  | 1    | 2   | No              |      | 1   | Yes            | 2    | 2   | No    |      |       |       | 159   | 62    |
| 12407  |      | 2   | No              |      | 1   | Yes            | 1    | 2   | No    |      |       |       | 165   | 60    |
| 12410  |      | 2   | No              |      | 2   | No             |      | 2   | No    |      |       |       | 155   | 53    |
| 12413  | 2    | 2   | No              |      | 1   | Yes            | 2    | 2   | No    |      |       |       | 162   | 63    |
| 12416  | 1    | 2   | No              |      | 2   | No             |      | 2   | No    |      |       |       | 166   | 77    |
| 12419  | 1    | 2   | No              |      | 1   | Yes            | 2    | 2   | No    |      |       |       | 173   | 65    |
| 12422  | 1    | 2   | No              |      | 1   | Yes            | 1    | 2   | No    |      |       |       | 170   | 65    |
| 12423  | 1    | 2   | No              |      | 1   | Yes            | 1    | 2   | No    |      |       |       | 160   | 59    |
| 12429  |      | 2   | No              |      | 2   | No             |      | 2   | No    |      |       |       | 163   | 55    |
| 12434  | 1    | 2   | No              |      | 1   | Yes            | 2    | 2   | No    |      |       |       | 163   | 63    |
| 12435  | 1    | 2   | No              |      | 1   | Yes            | 2    | 2   | No    |      |       |       | 168   | 72    |
| 12436  | 1    | 2   | No              |      | 2   | No             |      | 2   | No    |      |       |       | 170   | 71    |
| 12442  |      | 2   | No              |      | 1   | Yes            | 1    | 2   | No    |      |       |       | 163   | 58    |
| 12449  |      | 2   | No              |      | 2   | No             |      | 2   | No    |      |       |       | 160   | 54    |
| 12451  |      | 2   | No              |      | 2   | No             |      | 2   | No    |      |       |       | 180   | 75    |
| 12456  |      | 2   | No              |      | 2   | No             |      | 2   | No    |      |       |       | 162   | 64    |
| 12457  |      | 2   | No              |      | 2   | No             |      | 2   | No    |      |       |       | 167   | 78    |
| 12458  |      | 2   | No              |      | 2   | No             |      | 2   | No    |      |       |       | 160   | 48    |
| 12461  |      | 2   | No              |      | 2   | No             |      | 2   | No    |      |       |       | 160   | 55    |
| 12462  |      | 2   | No              |      | 2   | No             |      | 2   | No    |      |       |       | 178   | 90    |
| 12463  | 1    | 2   | No              |      | 2   | No             |      | 2   | No    |      |       |       | 160   | 55    |
| 12466  |      | 2   | No              |      | 2   | No             |      | 2   | No    |      |       |       | 172   | 68    |
| 12470  |      | 2   | No              |      | 2   | No             |      | 2   | No    |      |       |       | 175   | 81    |
| 12471  |      | 2   | No              |      | 2   | No             |      | 2   | No    |      |       |       | 174   | 68    |
| 12472  |      | 2   | No              |      | 2   | No             |      | 2   | No    |      |       |       | 172   | 90    |
| 12478  | 1    | 2   | No              |      | 2   | No             |      | 2   | No    |      |       |       | 174   | 60    |
| 12479  | 1    | 2   | No              |      | 2   | No             |      | 2   | No    |      |       |       | 175   | 65    |
| 12481  |      | 2   | No              |      | 2   | No             |      | 2   | No    |      |       |       | 158   | 56    |
| 12482  | 2    | 2   | No              |      | 1   | Yes            | 2    | 2   | No    |      |       |       | 161   | 62    |
| 12483  | 1    | 2   | No              |      | 1   | Yes            | 1    | 2   | No    |      |       |       | 170   | 80    |
| 12496  | 2    | 2   | No              |      | 1   | Yes            | 2    | 2   | No    |      |       |       | 160   | 67    |
| 12497  |      | 2   | No              |      | 2   | No             |      | 2   | No    |      |       |       | 155   | 55    |

| respid | Q11a | Q12 | Cardiac Disease | Q12a | Q13 | Hyperlipidemia | Q13a | Q14 | Neuro | Q14a | Q15_1 | Q15_2 | Q15_3 | Q16_1 |
|--------|------|-----|-----------------|------|-----|----------------|------|-----|-------|------|-------|-------|-------|-------|
| 12498  |      | 2   | No              |      | 2   | No             |      | 2   | No    |      |       |       | 159   | 47    |
| 12500  |      | 2   | No              |      | 2   | No             |      | 2   | No    |      |       |       | 176   | 74    |
| 12501  |      | 2   | No              |      | 2   | No             |      | 2   | No    |      |       |       | 160   | 54    |
| 12502  |      | 2   | No              |      | 1   | Yes            | 2    | 2   | No    |      |       |       | 165   | 70    |
| 12503  |      | 2   | No              |      | 1   | Yes            | 2    | 2   | No    |      |       |       | 152   | 48    |
| 12505  |      | 2   | No              |      | 1   | Yes            | 2    | 2   | No    |      |       |       | 165   | 71    |
| 12508  |      | 2   | No              |      | 1   | Yes            | 2    | 2   | No    |      |       |       | 160   | 48    |
| 12509  |      | 2   | No              |      | 1   | Yes            | 1    | 2   | No    |      |       |       | 175   | 82    |
| 12510  |      | 2   | No              |      | 2   | No             |      | 2   | No    |      |       |       | 172   | 72    |
| 12512  |      | 2   | No              |      | 1   | Yes            | 2    | 2   | No    |      |       |       | 158   | 57    |
| 12514  |      | 2   | No              |      | 2   | No             |      | 2   | No    |      |       |       | 160   | 50    |
| 12515  |      | 2   | No              |      | 2   | No             |      | 2   | No    |      |       |       | 162   | 58    |
| 12520  |      | 2   | No              |      | 1   | Yes            | 2    | 2   | No    |      |       |       | 172   | 68    |
| 12522  |      | 2   | No              |      | 2   | No             |      | 2   | No    |      |       |       | 164   | 55    |
| 12526  |      | 2   | No              |      | 2   | No             |      | 2   | No    |      |       |       | 175   | 66    |
| 12527  |      | 2   | No              |      | 2   | No             |      | 2   | No    |      |       |       | 151   | 51    |
| 12528  |      | 2   | No              |      | 2   | No             |      | 2   | No    |      |       |       | 163   | 65    |
| 12530  |      | 2   | No              |      | 2   | No             |      | 2   | No    |      |       |       | 166   | 75    |
| 12535  |      | 2   | No              |      | 2   | No             |      | 2   | No    |      |       |       | 161   | 58    |
| 12539  | 1    | 2   | No              |      | 1   | Yes            | 1    | 2   | No    |      |       |       | 160   | 63    |
| 12541  | 1    | 1   | Yes             | 1    | 2   | No             |      | 2   | No    |      |       |       | 175   | 75    |
| 12542  | 2    | 2   | No              |      | 2   | No             |      | 2   | No    |      |       |       | 154   | 54    |
| 12545  |      | 2   | No              |      | 1   | Yes            | 2    | 2   | No    |      |       |       | 158   | 54    |
| 12547  | 1    | 2   | No              |      | 2   | No             |      | 2   | No    |      |       |       | 158   | 57    |
| 12549  | 1    | 2   | No              |      | 2   | No             |      | 2   | No    |      |       |       | 170   | 55    |
| 12550  | 2    | 2   | No              |      | 2   | No             |      | 2   | No    |      |       |       | 162   | 48    |
| 12555  |      | 2   | No              |      | 2   | No             |      | 2   | No    |      |       |       | 168   | 60    |
| 12557  | 1    | 1   | Yes             | 1    | 2   | No             |      | 2   | No    |      |       |       | 150   | 51    |
| 12559  |      | 2   | No              |      | 1   | Yes            | 2    | 2   | No    |      |       |       | 160   | 46    |
| 12561  |      | 2   | No              |      | 2   | No             |      | 2   | No    |      |       |       | 161   | 55    |
| 12562  |      | 2   | No              |      | 2   | No             |      | 2   | No    |      |       |       | 162   | 63    |
| 12563  |      | 2   | No              |      | 2   | No             |      | 2   | No    |      | 5     | 3     |       | 56    |



| respid | Q11a | Q12 | Cardiac Disease | Q12a | Q13 | Hyperlipidemia | Q13a | Q14 | Neuro | Q14a | Q15_1 | Q15_2 | Q15_3 | Q16_1 |
|--------|------|-----|-----------------|------|-----|----------------|------|-----|-------|------|-------|-------|-------|-------|
| 12565  |      | 2   | No              |      | 2   | No             |      | 2   | No    |      |       |       | 162   | 57    |
| 12566  |      | 2   | No              |      | 2   | No             |      | 2   | No    |      |       |       | 160   | 55    |
| 12570  | 1    | 2   | No              |      | 2   | No             |      | 2   | No    |      |       |       | 164   | 65    |
| 12571  |      | 2   | No              |      | 2   | No             |      | 2   | No    |      |       |       | 153   | 54    |
| 12572  |      | 2   | No              |      | 2   | No             |      | 2   | No    |      |       |       | 178   | 73    |
| 12578  |      | 2   | No              |      | 2   | No             |      | 2   | No    |      |       |       | 158   | 54    |
| 12579  |      | 2   | No              |      | 2   | No             |      | 2   | No    |      |       |       | 175   | 75    |
| 12581  |      | 2   | No              |      | 2   | No             |      | 2   | No    |      |       |       | 160   | 55    |
| 12582  |      | 2   | No              |      | 2   | No             |      | 2   | No    |      |       |       | 155   | 70    |
| 12585  |      | 2   | No              |      | 2   | No             |      | 2   | No    |      |       |       | 152   | 49    |
| 12586  |      | 1   | Yes             | 2    | 2   | No             |      | 2   | No    |      |       |       | 150   | 48    |
| 12588  | 1    | 2   | No              |      | 1   | Yes            | 1    | 2   | No    |      |       |       | 163   | 80    |
| 12589  | 1    | 2   | No              |      | 1   | Yes            | 2    | 2   | No    |      |       |       | 158   | 62    |
| 12590  |      | 2   | No              |      | 2   | No             |      | 2   | No    |      |       |       | 158   | 60    |
| 12591  |      | 2   | No              |      | 2   | No             |      | 2   | No    |      |       |       | 174   | 68    |
| 12593  |      | 2   | No              |      | 2   | No             |      | 2   | No    |      |       |       | 170   | 55    |
| 12594  |      | 2   | No              |      | 2   | No             |      | 2   | No    |      |       |       | 158   | 53    |
| 12599  |      | 2   | No              |      | 2   | No             |      | 2   | No    |      |       |       | 159   | 50    |
| 12600  |      | 2   | No              |      | 2   | No             |      | 2   | No    |      |       |       | 151   | 54    |
| 12602  |      | 2   | No              |      | 1   | Yes            | 2    | 2   | No    |      |       |       | 159   | 63    |
| 12606  |      | 1   | Yes             | 2    | 1   | Yes            | 2    | 2   | No    |      |       |       | 152   | 55    |
| 12607  |      | 2   | No              |      | 2   | No             |      | 2   | No    |      |       |       | 170   | 60    |
| 12608  |      | 2   | No              |      | 2   | No             |      | 2   | No    |      |       |       | 175   | 77    |
| 12610  |      | 2   | No              |      | 2   | No             |      | 2   | No    |      |       |       | 163   | 63    |
| 12611  |      | 2   | No              |      | 2   | No             |      | 2   | No    |      |       |       | 167   | 65    |
| 12613  | 1    | 2   | No              |      | 1   | Yes            | 2    | 2   | No    |      |       |       | 163   | 73    |
| 12616  |      | 2   | No              |      | 2   | No             |      | 2   | No    |      |       |       | 158   | 54    |
| 12617  | 1    | 2   | No              |      | 2   | No             |      | 2   | No    |      |       |       | 163   | 50    |
| 12619  |      | 2   | No              |      | 2   | No             |      | 2   | No    |      |       |       | 160   | 53    |
| 12622  |      | 2   | No              |      | 2   | No             |      | 2   | No    |      |       |       | 160   | 50    |
| 12628  |      | 2   | No              |      | 2   | No             |      | 2   | No    |      |       |       | 160   | 63    |
| 12631  |      | 2   | No              |      | 2   | No             |      | 2   | No    |      |       |       | 163   | 65    |

| respid | Q11a | Q12 | Cardiac Disease | Q12a | Q13 | Hyperlipidemia | Q13a | Q14 | Neuro | Q14a | Q15_1 | Q15_2 | Q15_3 | Q16_1 |
|--------|------|-----|-----------------|------|-----|----------------|------|-----|-------|------|-------|-------|-------|-------|
| 12635  |      | 2   | No              |      | 2   | No             |      | 2   | No    |      |       |       | 162   | 63    |
| 12638  |      | 2   | No              |      | 2   | No             |      | 2   | No    |      |       |       | 162   | 50    |
| 12639  |      | 2   | No              |      | 2   | No             |      | 2   | No    |      |       |       | 160   | 65    |
| 12640  |      | 2   | No              |      | 2   | No             |      | 2   | No    |      |       |       | 160   | 65    |
| 12643  |      | 2   | No              |      | 2   | No             |      | 1   | Yes   | 2    |       |       | 160   | 60    |
| 12646  | 1    | 2   | No              |      | 1   | Yes            | 1    | 2   | No    |      |       |       | 169   | 84    |
| 12648  | 1    | 2   | No              |      | 1   | Yes            | 2    | 2   | No    |      |       |       | 160   | 65    |
| 12650  |      | 2   | No              |      | 2   | No             |      | 2   | No    |      |       |       | 176   | 76    |
| 12651  |      | 2   | No              |      | 1   | Yes            | 2    | 2   | No    |      |       |       | 162   | 49    |
| 12658  |      | 2   | No              |      | 2   | No             |      | 2   | No    |      |       |       | 160   | 68    |
| 12662  |      | 2   | No              |      | 2   | No             |      | 2   | No    |      |       |       | 163   | 54    |
| 12663  |      | 2   | No              |      | 2   | No             |      | 2   | No    |      |       |       | 171   | 68    |
| 12664  | 1    | 2   | No              |      | 1   | Yes            | 1    | 2   | No    |      |       |       | 182   | 90    |
| 12669  | 1    | 1   | Yes             | 1    | 1   | Yes            | 1    | 2   | No    |      | 5     | 3     |       | 50    |
| 12670  |      | 2   | No              |      | 2   | No             |      | 2   | No    |      |       |       | 162   | 58    |
| 12673  |      | 2   | No              |      | 2   | No             |      | 2   | No    |      |       |       | 167   | 65    |
| 12675  |      | 1   | Yes             | 2    | 2   | No             |      | 2   | No    |      |       |       | 158   | 59    |
| 12677  |      | 2   | No              |      | 2   | No             |      | 2   | No    |      |       |       | 160   | 56    |
| 12679  |      | 2   | No              |      | 2   | No             |      | 2   | No    |      |       |       | 158   | 51    |
| 12682  |      | 2   | No              |      | 2   | No             |      | 2   | No    |      |       |       | 176   | 72    |
| 12696  |      | 2   | No              |      | 2   | No             |      | 2   | No    |      |       |       | 160   | 52    |
| 12697  |      | 2   | No              |      | 2   | No             |      | 2   | No    |      |       |       | 160   | 52    |
| 12699  |      | 2   | No              |      | 2   | No             |      | 2   | No    |      |       |       | 165   | 49    |
| 12700  |      | 2   | No              |      | 2   | No             |      | 2   | No    |      |       |       | 162   | 58    |
| 12701  | 2    | 2   | No              |      | 2   | No             |      | 2   | No    |      |       |       | 167   | 63    |
| 12702  |      | 2   | No              |      | 2   | No             |      | 2   | No    |      |       |       | 157   | 48    |
| 12704  | 1    | 1   | Yes             | 1    | 1   | Yes            | 1    | 1   | Yes   | 1    |       |       | 170   | 80    |
| 12705  | 1    | 2   | No              |      | 2   | No             |      | 2   | No    |      |       |       | 162   | 56    |
| 12709  |      | 2   | No              |      | 2   | No             |      | 2   | No    |      |       |       | 175   | 86    |
| 12710  |      | 2   | No              |      | 2   | No             |      | 2   | No    |      |       |       | 163   | 55    |
| 12713  |      | 2   | No              |      | 2   | No             |      | 2   | No    |      |       |       | 150   | 43    |
| 12716  |      | 2   | No              |      | 2   | No             |      | 2   | No    |      |       |       | 165   | 67    |

| respid | Q11a | Q12 | Cardiac Disease | Q12a | Q13 | Hyperlipidemia | Q13a | Q14 | Neuro | Q14a | Q15_1 | Q15_2 | Q15_3 | Q16_1 |
|--------|------|-----|-----------------|------|-----|----------------|------|-----|-------|------|-------|-------|-------|-------|
| 12719  |      | 2   | No              |      | 2   | No             |      | 2   | No    |      |       |       | 167   | 55    |
| 12720  |      | 2   | No              |      | 2   | No             |      | 2   | No    |      |       |       | 165   | 58    |
| 12723  |      | 2   | No              |      | 2   | No             |      | 2   | No    |      |       |       | 160   | 70    |
| 12726  |      | 2   | No              |      | 2   | No             |      | 2   | No    |      |       |       | 163   | 48    |
| 12728  |      | 2   | No              |      | 2   | No             |      | 2   | No    |      |       |       | 164   | 56    |
| 12729  |      | 2   | No              |      | 2   | No             |      | 2   | No    |      |       |       | 158   | 60    |
| 12731  |      | 2   | No              |      | 2   | No             |      | 2   | No    |      |       |       | 165   | 56    |
| 12732  |      | 2   | No              |      | 2   | No             |      | 2   | No    |      |       |       | 163   | 58    |
| 12733  |      | 2   | No              |      | 2   | No             |      | 2   | No    |      |       |       | 164   | 50    |
| 12736  |      | 2   | No              |      | 2   | No             |      | 2   | No    |      |       |       | 175   | 73    |
| 12737  |      | 2   | No              |      | 2   | No             |      | 2   | No    |      |       |       | 163   | 56    |
| 12739  |      | 2   | No              |      | 2   | No             |      | 2   | No    |      |       |       | 178   | 84    |
| 12742  |      | 2   | No              |      | 2   | No             |      | 2   | No    |      |       |       | 158   | 49    |
| 12743  | 1    | 2   | No              |      | 1   | Yes            | 1    | 2   | No    |      |       |       | 168   | 65    |
| 12744  |      | 2   | No              |      | 1   | Yes            | 2    | 2   | No    |      |       |       | 160   | 54    |
| 12747  |      | 2   | No              |      | 2   | No             |      | 2   | No    |      |       |       | 180   | 85    |
| 12751  |      | 2   | No              |      | 2   | No             |      | 2   | No    |      |       |       | 175   | 62    |
| 12754  |      | 2   | No              |      | 2   | No             |      | 2   | No    |      |       |       | 166   | 60    |
| 12756  |      | 1   | Yes             | 1    | 2   | No             |      | 2   | No    |      |       |       | 158   | 57    |
| 12757  |      | 2   | No              |      | 2   | No             |      | 2   | No    |      |       |       | 162   | 53    |
| 12760  |      | 1   | Yes             | 1    | 2   | No             |      | 2   | No    |      |       |       | 159   | 59    |
| 12761  |      | 2   | No              |      | 2   | No             |      | 2   | No    |      |       |       | 162   | 56    |
| 12762  |      | 2   | No              |      | 2   | No             |      | 2   | No    |      |       |       | 160   | 55    |
| 12766  |      | 2   | No              |      | 2   | No             |      | 2   | No    |      |       |       | 170   | 67    |
| 12769  |      | 2   | No              |      | 2   | No             |      | 2   | No    |      |       |       | 178   | 79    |
| 12770  |      | 2   | No              |      | 2   | No             |      | 2   | No    |      |       |       | 170   | 55    |
| 12773  |      | 2   | No              |      | 2   | No             |      | 2   | No    |      | 5     | 2     |       | 45    |
| 12780  | 2    | 2   | No              |      | 2   | No             |      | 1   | Yes   | 2    |       |       | 174   | 74    |
| 12789  | 1    | 2   | No              |      | 2   | No             |      | 2   | No    |      |       |       | 152   | 58    |
| 12792  | 1    | 2   | No              |      | 2   | No             |      | 2   | No    |      |       |       | 170   | 70    |
| 12795  |      | 2   | No              |      | 2   | No             |      | 2   | No    |      |       |       | 171   | 68    |
| 12804  |      | 2   | No              |      | 2   | No             |      | 2   | No    |      |       |       | 170   | 70    |

| respid | Q11a | Q12 | Cardiac Disease | Q12a | Q13 | Hyperlipidemia | Q13a | Q14 | Neuro | Q14a | Q15_1 | Q15_2 | Q15_3 | Q16_1 |
|--------|------|-----|-----------------|------|-----|----------------|------|-----|-------|------|-------|-------|-------|-------|
| 12811  |      | 2   | No              |      | 2   | No             |      | 2   | No    |      |       |       | 155   | 55    |
| 12813  | 2    | 2   | No              |      | 2   | No             |      | 2   | No    |      |       |       | 155   | 53    |
| 12814  |      | 2   | No              |      | 2   | No             |      | 2   | No    |      |       |       | 169   | 68    |
| 12815  |      | 2   | No              |      | 2   | No             |      | 2   | No    |      |       |       | 155   | 58    |
| 12816  |      | 2   | No              |      | 2   | No             |      | 2   | No    |      |       |       | 175   | 90    |
| 12817  |      | 2   | No              |      | 2   | No             |      | 2   | No    |      |       |       | 158   | 52    |
| 12818  |      | 2   | No              |      | 1   | Yes            | 1    | 2   | No    |      |       |       | 164   | 46    |
| 12819  |      | 2   | No              |      | 2   | No             |      | 2   | No    |      |       |       | 168   | 71    |
| 12820  |      | 2   | No              |      | 2   | No             |      | 2   | No    |      |       |       | 160   | 65    |
| 12821  |      | 2   | No              |      | 2   | No             |      | 2   | No    |      |       |       | 164   | 50    |
| 12824  | 1    | 2   | No              |      | 1   | Yes            | 1    | 2   | No    |      |       |       | 154   | 60    |
| 12827  |      | 2   | No              |      | 2   | No             |      | 2   | No    |      |       |       | 174   | 78    |
| 12836  |      | 2   | No              |      | 2   | No             |      | 2   | No    |      |       |       | 175   | 62    |
| 12837  |      | 2   | No              |      | 1   | Yes            | 2    | 2   | No    |      |       |       | 162   | 90    |
| 12838  | 1    | 2   | No              |      | 1   | Yes            | 1    | 2   | No    |      |       |       | 150   | 59    |
| 12845  |      | 2   | No              |      | 1   | Yes            | 2    | 2   | No    |      |       |       | 154   | 52    |
| 12847  | 1    | 2   | No              |      | 1   | Yes            | 1    | 2   | No    |      |       |       | 176   | 70    |
| 12849  |      | 2   | No              |      | 2   | No             |      | 2   | No    |      |       |       | 170   | 65    |
| 12850  |      | 2   | No              |      | 1   | Yes            | 1    | 2   | No    |      |       |       | 158   | 45    |
| 12852  | 2    | 2   | No              |      | 1   | Yes            | 2    | 2   | No    |      |       |       | 170   | 81    |
| 12853  |      | 2   | No              |      | 2   | No             |      | 2   | No    |      |       |       | 170   | 65    |
| 12854  |      | 2   | No              |      | 1   | Yes            | 1    | 2   | No    |      |       |       | 167   | 60    |
| 12860  |      | 2   | No              |      | 2   | No             |      | 2   | No    |      |       |       | 172   | 65    |
| 12861  |      | 2   | No              |      | 2   | No             |      | 2   | No    |      |       |       | 168   | 67    |
| 12863  |      | 2   | No              |      | 1   | Yes            | 1    | 2   | No    |      |       |       | 162   | 55    |
| 12865  |      | 2   | No              |      | 2   | No             |      | 2   | No    |      |       |       | 165   | 65    |
| 12870  |      | 2   | No              |      | 2   | No             |      | 2   | No    |      |       |       | 148   | 50    |
| 12871  | 1    | 2   | No              |      | 1   | Yes            | 2    | 2   | No    |      |       |       | 168   | 70    |
| 12873  | 1    | 2   | No              |      | 1   | Yes            | 1    | 2   | No    |      |       |       | 166   | 74    |
| 12877  |      | 2   | No              |      | 2   | No             |      | 2   | No    |      |       |       | 165   | 65    |
| 12880  |      | 2   | No              |      | 2   | No             |      | 2   | No    |      |       |       | 164   | 57    |
| 12881  |      | 1   | Yes             | 2    | 1   | Yes            | 2    | 2   | No    |      |       |       | 162   | 55    |

| respid | Q11a | Q12 | Cardiac Disease | Q12a | Q13 | Hyperlipidemia | Q13a | Q14 | Neuro | Q14a | Q15_1 | Q15_2 | Q15_3 | Q16_1 |
|--------|------|-----|-----------------|------|-----|----------------|------|-----|-------|------|-------|-------|-------|-------|
| 12882  |      | 2   | No              |      | 2   | No             |      | 2   | No    |      |       |       | 172   | 68    |
| 12883  |      | 2   | No              |      | 1   | Yes            | 1    | 2   | No    |      |       |       | 161   | 53    |
| 12885  |      | 2   | No              |      | 1   | Yes            | 2    | 2   | No    |      |       |       | 173   | 72    |
| 12887  |      | 2   | No              |      | 2   | No             |      | 2   | No    |      |       |       | 163   | 52    |
| 12889  |      | 2   | No              |      | 1   | Yes            | 2    | 2   | No    |      |       |       | 154   | 53    |
| 12890  |      | 2   | No              |      | 1   | Yes            | 2    | 2   | No    |      |       |       | 178   | 75    |
| 12891  | 1    | 2   | No              |      | 1   | Yes            | 2    | 2   | No    |      |       |       | 159   | 64    |
| 12892  | 1    | 2   | No              |      | 1   | Yes            | 1    | 2   | No    |      |       |       | 150   | 70    |
| 12893  |      | 2   | No              |      | 2   | No             |      | 2   | No    |      |       |       | 170   | 57    |
| 12895  | 1    | 2   | No              |      | 1   | Yes            | 1    | 2   | No    |      |       |       | 163   | 74    |
| 12898  | 2    | 1   | Yes             | 1    | 2   | No             |      | 2   | No    |      |       |       | 173   | 70    |
| 12907  | 1    | 2   | No              |      | 1   | Yes            | 2    | 2   | No    |      |       |       | 173   | 80    |
| 12908  |      | 2   | No              |      | 1   | Yes            | 1    | 2   | No    |      |       |       | 154   | 50    |
| 12909  |      | 2   | No              |      | 1   | Yes            | 2    | 2   | No    |      |       |       | 167   | 55    |
| 12914  |      | 2   | No              |      | 2   | No             |      | 2   | No    |      |       |       | 162   | 71    |
| 12915  |      | 1   | Yes             | 1    | 2   | No             |      | 2   | No    |      |       |       | 150   | 45    |
| 12916  |      | 2   | No              |      | 2   | No             |      | 2   | No    |      |       |       | 168   | 65    |
| 12921  |      | 2   | No              |      | 2   | No             |      | 2   | No    |      |       |       | 160   | 54    |
| 12922  | 1    | 2   | No              |      | 1   | Yes            | 1    | 2   | No    |      |       |       | 163   | 70    |
| 12923  |      | 1   | Yes             | 1    | 1   | Yes            | 1    | 2   | No    |      |       |       | 169   | 80    |
| 12926  |      | 2   | No              |      | 1   | Yes            | 1    | 2   | No    |      |       |       | 180   | 75    |
| 12927  |      | 2   | No              |      | 2   | No             |      | 2   | No    |      |       |       | 157   | 50    |
| 12932  | 2    | 2   | No              |      | 2   | No             |      | 2   | No    |      |       |       | 177   | 86    |
| 12936  |      | 2   | No              |      | 2   | No             |      | 2   | No    |      |       |       | 175   | 77    |
| 12937  |      | 2   | No              |      | 2   | No             |      | 2   | No    |      |       |       | 159   | 45    |
| 12938  | 1    | 2   | No              |      | 1   | Yes            | 1    | 2   | No    |      |       |       | 160   | 70    |
| 12939  |      | 2   | No              |      | 1   | Yes            | 2    | 2   | No    |      |       |       | 167   | 63    |
| 12940  | 1    | 2   | No              |      | 1   | Yes            | 1    | 2   | No    |      |       |       | 155   | 75    |
| 12945  |      | 2   | No              |      | 1   | Yes            | 1    | 2   | No    |      |       |       | 154   | 50    |
| 12946  |      | 2   | No              |      | 1   | Yes            | 2    | 2   | No    |      |       |       | 153   | 50    |
| 12947  |      | 2   | No              |      | 2   | No             |      | 2   | No    |      |       |       | 175   | 70    |
| 12948  | 2    | 2   | No              |      | 2   | No             |      | 2   | No    |      |       |       | 175   | 72    |

| respid | Q11a | Q12 | Cardiac Disease | Q12a | Q13 | Hyperlipidemia | Q13a | Q14 | Neuro | Q14a | Q15_1 | Q15_2 | Q15_3 | Q16_1 |
|--------|------|-----|-----------------|------|-----|----------------|------|-----|-------|------|-------|-------|-------|-------|
| 12951  | 1    | 1   | Yes             | 1    | 2   | No             |      | 2   | No    |      |       |       | 156   | 66    |
| 12952  |      | 2   | No              |      | 2   | No             |      | 2   | No    |      |       |       | 158   | 53    |
| 12954  |      | 2   | No              |      | 2   | No             |      | 2   | No    |      |       |       | 158   | 60    |
| 12960  |      | 2   | No              |      | 2   | No             |      | 2   | No    |      |       |       | 167   | 60    |
| 12961  |      | 2   | No              |      | 1   | Yes            | 1    | 2   | No    |      |       |       | 165   | 57    |
| 12962  |      | 2   | No              |      | 2   | No             |      | 2   | No    |      |       |       | 147   | 43    |
| 12963  |      | 2   | No              |      | 2   | No             |      | 2   | No    |      |       |       | 165   | 59    |
| 12964  | 2    | 2   | No              |      | 1   | Yes            | 2    | 2   | No    |      |       |       | 155   | 70    |
| 12966  |      | 2   | No              |      | 2   | No             |      | 2   | No    |      |       |       | 165   | 50    |
| 12967  | 1    | 2   | No              |      | 1   | Yes            | 2    | 2   | No    |      |       |       | 171   | 65    |
| 12969  | 2    | 2   | No              |      | 2   | No             |      | 2   | No    |      |       |       | 174   | 70    |
| 12970  |      | 2   | No              |      | 1   | Yes            | 1    | 2   | No    |      |       |       | 164   | 65    |
| 12974  |      | 2   | No              |      | 2   | No             |      | 2   | No    |      |       |       | 175   | 72    |
| 12979  |      | 2   | No              |      | 2   | No             |      | 2   | No    |      |       |       | 164   | 63    |
| 12980  |      | 2   | No              |      | 2   | No             |      | 2   | No    |      |       |       | 164   | 50    |
| 12983  |      | 2   | No              |      | 2   | No             |      | 2   | No    |      |       |       | 156   | 55    |
| 12988  |      | 2   | No              |      | 1   | Yes            | 2    | 2   | No    |      |       |       | 155   | 61    |
| 12994  |      | 2   | No              |      | 2   | No             |      | 2   | No    |      |       |       | 160   | 75    |
| 12995  |      | 2   | No              |      | 2   | No             |      | 2   | No    |      |       |       | 155   | 53    |
| 12996  |      | 2   | No              |      | 1   | Yes            | 1    | 2   | No    |      |       |       | 152   | 50    |
| 12998  |      | 2   | No              |      | 1   | Yes            | 2    | 2   | No    |      |       |       | 162   | 52    |
| 12999  | 2    | 2   | No              |      | 2   | No             |      | 2   | No    |      |       |       | 164   | 106   |
| 13001  |      | 2   | No              |      | 2   | No             |      | 2   | No    |      |       |       | 175   | 75    |
| 13005  |      | 2   | No              |      | 2   | No             |      | 2   | No    |      |       |       | 163   | 52    |
| 13006  |      | 2   | No              |      | 2   | No             |      | 2   | No    |      |       |       | 155   | 55    |
| 13007  | 1    | 2   | No              |      | 1   | Yes            | 1    | 2   | No    |      |       |       | 159   | 67    |
| 13011  |      | 2   | No              |      | 2   | No             |      | 2   | No    |      |       |       | 160   | 56    |
| 13012  |      | 2   | No              |      | 2   | No             |      | 2   | No    |      |       |       | 153   | 45    |
| 13013  | 1    | 2   | No              |      | 1   | Yes            | 1    | 2   | No    |      |       |       | 160   | 70    |
| 13016  |      | 2   | No              |      | 2   | No             |      | 1   | Yes   | 2    |       |       | 176   | 74    |
| 13018  | 1    | 2   | No              |      | 1   | Yes            | 2    | 2   | No    |      |       |       | 177   | 82    |
| 13020  |      | 2   | No              |      | 2   | No             |      | 2   | No    |      |       |       | 170   | 78    |

| respid | Q11a | Q12 | Cardiac Disease | Q12a | Q13 | Hyperlipidemia | Q13a | Q14 | Neuro | Q14a | Q15_1 | Q15_2 | Q15_3 | Q16_1 |
|--------|------|-----|-----------------|------|-----|----------------|------|-----|-------|------|-------|-------|-------|-------|
| 13024  |      | 2   | No              |      | 2   | No             |      | 2   | No    |      |       |       | 170   | 65    |
| 13025  |      | 2   | No              |      | 1   | Yes            | 2    | 2   | No    |      |       |       | 156   | 49    |
| 13027  |      | 2   | No              |      | 2   | No             |      | 2   | No    |      |       |       | 162   | 50    |
| 13031  | 2    | 2   | No              |      | 2   | No             |      | 2   | No    |      |       |       | 175   | 64    |
| 13032  |      | 2   | No              |      | 1   | Yes            | 1    | 2   | No    |      |       |       | 175   | 75    |
| 13034  |      | 2   | No              |      | 2   | No             |      | 2   | No    |      |       |       | 165   | 55    |
| 13036  |      | 2   | No              |      | 2   | No             |      | 2   | No    |      |       |       | 155   | 50    |
| 13037  |      | 2   | No              |      | 2   | No             |      | 2   | No    |      |       |       | 153   | 50    |
| 13038  | 1    | 1   | Yes             | 2    | 1   | Yes            | 2    | 2   | No    |      |       |       | 160   | 70    |
| 13039  |      | 2   | No              |      | 2   | No             |      | 2   | No    |      |       |       | 160   | 58    |
| 13040  | 2    | 2   | No              |      | 1   | Yes            | 2    | 2   | No    |      |       |       | 160   | 68    |
| 13041  | 1    | 2   | No              |      | 1   | Yes            | 1    | 2   | No    |      |       |       | 160   | 70    |
| 13045  | 1    | 2   | No              |      | 2   | No             |      | 2   | No    |      |       |       | 167   | 60    |
| 13046  | 1    | 2   | No              |      | 1   | Yes            | 1    | 2   | No    |      |       |       | 152   | 50    |
| 13048  |      | 2   | No              |      | 2   | No             |      | 2   | No    |      |       |       | 156   | 49    |
| 13051  |      | 2   | No              |      | 2   | No             |      | 2   | No    |      | 6     | 7     |       | 55    |
| 13053  |      | 2   | No              |      | 2   | No             |      | 2   | No    |      |       |       | 158   | 55    |
| 13055  |      | 2   | No              |      | 2   | No             |      | 2   | No    |      |       |       | 155   | 52    |
| 13059  | 1    | 2   | No              |      | 1   | Yes            | 1    | 2   | No    |      |       |       | 151   | 52    |
| 13068  | 1    | 2   | No              |      | 2   | No             |      | 2   | No    |      |       |       | 155   | 50    |
| 13069  |      | 2   | No              |      | 2   | No             |      | 2   | No    |      |       |       | 158   | 53    |
| 13076  |      | 2   | No              |      | 1   | Yes            | 2    | 2   | No    |      |       |       | 155   | 60    |
| 13081  |      | 2   | No              |      | 2   | No             |      | 2   | No    |      |       |       | 155   | 54    |
| 13082  |      | 2   | No              |      | 2   | No             |      | 2   | No    |      |       |       | 161   | 52    |
| 13084  |      | 1   | Yes             | 2    | 2   | No             |      | 2   | No    |      |       |       | 158   | 56    |
| 13085  | 1    | 2   | No              |      | 2   | No             |      | 2   | No    |      |       |       | 176   | 81    |
| 13086  |      | 2   | No              |      | 1   | Yes            | 1    | 2   | No    |      |       |       | 145   | 49    |
| 13093  | 1    | 2   | No              |      | 1   | Yes            | 2    | 2   | No    |      |       |       | 155   | 50    |
| 13094  |      | 2   | No              |      | 2   | No             |      | 2   | No    |      |       |       | 162   | 56    |
| 13097  |      | 2   | No              |      | 2   | No             |      | 2   | No    |      |       |       | 160   | 70    |
| 13098  | 1    | 2   | No              |      | 1   | Yes            | 2    | 2   | No    |      |       |       | 165   | 58    |
| 13099  |      | 2   | No              |      | 2   | No             |      | 2   | No    |      |       |       | 160   | 52    |

| respid | Q11a | Q12 | Cardiac Disease | Q12a | Q13 | Hyperlipidemia | Q13a | Q14 | Neuro | Q14a | Q15_1 | Q15_2 | Q15_3 | Q16_1 |
|--------|------|-----|-----------------|------|-----|----------------|------|-----|-------|------|-------|-------|-------|-------|
| 13100  | 1    | 2   | No              |      | 1   | Yes            | 1    | 2   | No    |      |       |       | 160   | 58    |
| 13101  |      | 2   | No              |      | 1   | Yes            | 2    | 2   | No    |      |       |       | 164   | 65    |
| 13103  |      | 2   | No              |      | 2   | No             |      | 2   | No    |      |       |       | 170   | 65    |
| 13105  |      | 2   | No              |      | 2   | No             |      | 2   | No    |      |       |       | 157   | 52    |
| 13106  |      | 2   | No              |      | 2   | No             |      | 2   | No    |      |       |       | 160   | 49    |
| 13107  |      | 2   | No              |      | 1   | Yes            | 2    | 2   | No    |      |       |       | 157   | 50    |
| 13110  |      | 2   | No              |      | 1   | Yes            | 2    | 2   | No    |      |       |       | 160   | 61    |
| 13118  |      | 2   | No              |      | 2   | No             |      | 2   | No    |      |       |       | 155   | 55    |
| 13120  | 1    | 1   | Yes             | 1    | 1   | Yes            | 1    | 2   | No    |      |       |       | 155   | 75    |
| 13130  | 2    | 2   | No              |      | 2   | No             |      | 2   | No    |      |       |       | 172   | 74    |
| 13133  |      | 2   | No              |      | 2   | No             |      | 2   | No    |      |       |       | 159   | 56    |
| 13134  |      | 2   | No              |      | 2   | No             |      | 2   | No    |      |       |       | 165   | 63    |
| 13139  |      | 2   | No              |      | 2   | No             |      | 2   | No    |      |       |       | 158   | 60    |
| 13142  |      | 2   | No              |      | 2   | No             |      | 2   | No    |      |       |       | 165   | 58    |
| 13143  |      | 2   | No              |      | 2   | No             |      | 2   | No    |      |       |       | 155   | 52    |
| 13145  |      | 1   | Yes             | 1    | 2   | No             |      | 2   | No    |      |       |       | 157   | 54    |
| 13148  |      | 2   | No              |      | 2   | No             |      | 2   | No    |      |       |       | 180   | 82    |
| 13149  |      | 2   | No              |      | 2   | No             |      | 2   | No    |      |       |       | 172   | 62    |
| 13151  |      | 2   | No              |      | 1   | Yes            | 1    | 2   | No    |      |       |       | 156   | 62    |
| 13153  |      | 2   | No              |      | 2   | No             |      | 2   | No    |      |       |       | 161   | 50    |
| 13158  |      | 2   | No              |      | 2   | No             |      | 2   | No    |      |       |       | 155   | 43    |
| 13160  | 1    | 2   | No              |      | 1   | Yes            | 1    | 2   | No    |      |       |       | 165   | 70    |
| 13162  |      | 2   | No              |      | 2   | No             |      | 2   | No    |      |       |       | 165   | 60    |
| 13169  |      | 1   | Yes             | 2    | 1   | Yes            | 1    | 2   | No    |      |       |       | 172   | 60    |
| 13172  |      | 1   | Yes             | 2    | 1   | Yes            | 2    | 2   | No    |      |       |       | 162   | 65    |
| 13173  |      | 2   | No              |      | 2   | No             |      | 2   | No    |      |       |       | 159   | 46    |
| 13176  |      | 2   | No              |      | 1   | Yes            | 1    | 2   | No    |      |       |       | 159   | 63    |
| 13179  |      | 2   | No              |      | 2   | No             |      | 2   | No    |      |       |       | 161   | 58    |
| 13184  | 1    | 2   | No              |      | 1   | Yes            | 1    | 2   | No    |      | 5     | 7     |       | 60    |
| 13185  |      | 2   | No              |      | 2   | No             |      | 2   | No    |      |       |       | 162   | 61    |
| 13186  |      | 2   | No              |      | 1   | Yes            | 2    | 2   | No    |      |       |       | 153   | 43    |
| 13188  | 2    | 2   | No              |      | 1   | Yes            | 1    | 2   | No    |      |       |       | 163   | 62    |



| respid | Q11a | Q12 | Cardiac Disease | Q12a | Q13 | Hyperlipidemia | Q13a | Q14 | Neuro | Q14a | Q15_1 | Q15_2 | Q15_3 | Q16_1 |
|--------|------|-----|-----------------|------|-----|----------------|------|-----|-------|------|-------|-------|-------|-------|
| 13190  | 1    | 2   | No              |      | 1   | Yes            | 1    | 2   | No    |      |       |       | 170   | 69    |
| 13192  |      | 2   | No              |      | 2   | No             |      | 2   | No    |      |       |       | 157   | 63    |
| 13193  |      | 2   | No              |      | 2   | No             |      | 2   | No    |      |       |       | 163   | 53    |
| 13201  |      | 2   | No              |      | 2   | No             |      | 2   | No    |      |       |       | 163   | 57    |
| 13207  |      | 2   | No              |      | 2   | No             |      | 2   | No    |      |       |       | 150   | 45    |
| 13208  |      | 2   | No              |      | 2   | No             |      | 2   | No    |      |       |       | 160   | 70    |
| 13209  | 2    | 2   | No              |      | 1   | Yes            | 2    | 2   | No    |      |       |       | 165   | 70    |
| 13212  |      | 2   | No              |      | 2   | No             |      | 2   | No    |      |       |       | 165   | 52    |
| 13215  |      | 2   | No              |      | 2   | No             |      | 2   | No    |      |       |       | 160   | 53    |
| 13218  | 1    | 2   | No              |      | 2   | No             |      | 2   | No    |      |       |       | 158   | 56    |
| 13219  |      | 2   | No              |      | 2   | No             |      | 2   | No    |      |       |       | 165   | 70    |
| 13224  |      | 2   | No              |      | 2   | No             |      | 2   | No    |      |       |       | 161   | 51    |
| 13225  |      | 2   | No              |      | 1   | Yes            | 2    | 2   | No    |      |       |       | 158   | 55    |
| 13226  |      | 2   | No              |      | 1   | Yes            | 1    | 2   | No    |      |       |       | 165   | 70    |
| 13232  |      | 2   | No              |      | 2   | No             |      | 2   | No    |      |       |       | 155   | 65    |
| 13237  |      | 2   | No              |      | 2   | No             |      | 2   | No    |      |       |       | 163   | 59    |
| 13239  |      | 2   | No              |      | 2   | No             |      | 2   | No    |      |       |       | 156   | 55    |
| 13241  |      | 2   | No              |      | 1   | Yes            | 2    | 2   | No    |      |       |       | 158   | 61    |
| 13243  |      | 2   | No              |      | 2   | No             |      | 2   | No    |      |       |       | 158   | 58    |
| 13247  | 2    | 1   | Yes             | 2    | 2   | No             |      | 2   | No    |      |       |       | 167   | 56    |
| 13248  | 1    | 2   | No              |      | 1   | Yes            | 2    | 2   | No    |      |       |       | 155   | 53    |
| 13251  | 1    | 2   | No              |      | 2   | No             |      | 2   | No    |      |       |       | 159   | 61    |
| 13256  |      | 2   | No              |      | 2   | No             |      | 2   | No    |      |       |       | 159   | 52    |
| 13260  | 2    | 2   | No              |      | 2   | No             |      | 2   | No    |      |       |       | 177   | 88    |
| 13261  | 2    | 2   | No              |      | 2   | No             |      | 2   | No    |      |       |       | 156   | 48    |
| 13264  |      | 2   | No              |      | 2   | No             |      | 2   | No    |      |       |       | 163   | 53    |
| 13273  |      | 2   | No              |      | 2   | No             |      | 2   | No    |      |       |       | 159   | 59    |
| 13274  |      | 2   | No              |      | 2   | No             |      | 2   | No    |      |       |       | 160   | 47    |
| 13276  |      | 2   | No              |      | 2   | No             |      | 2   | No    |      |       |       | 164   | 57    |
| 13278  |      | 2   | No              |      | 2   | No             |      | 2   | No    |      |       |       | 158   | 60    |
| 13279  | 1    | 2   | No              |      | 1   | Yes            | 1    | 2   | No    |      |       |       | 160   | 54    |
| 13282  |      | 2   | No              |      | 2   | No             |      | 2   | No    |      |       |       | 154   | 49    |

| respid | Q11a | Q12 | Cardiac Disease | Q12a | Q13 | Hyperlipidemia | Q13a | Q14 | Neuro | Q14a | Q15_1 | Q15_2 | Q15_3 | Q16_1 |
|--------|------|-----|-----------------|------|-----|----------------|------|-----|-------|------|-------|-------|-------|-------|
| 13283  |      | 2   | No              |      | 2   | No             |      | 2   | No    |      |       |       | 178   | 73    |
| 13285  |      | 2   | No              |      | 1   | Yes            | 2    | 2   | No    |      |       |       | 151   | 48    |
| 13286  |      | 2   | No              |      | 2   | No             |      | 2   | No    |      |       |       | 150   | 46    |
| 13299  |      | 2   | No              |      | 1   | Yes            | 2    | 2   | No    |      |       |       | 162   | 65    |
| 13300  | 1    | 2   | No              |      | 1   | Yes            | 1    | 1   | Yes   | 2    |       |       | 154   | 55    |
| 13301  |      | 2   | No              |      | 2   | No             |      | 2   | No    |      |       |       | 167   | 59    |
| 13303  | 1    | 2   | No              |      | 2   | No             |      | 2   | No    |      |       |       | 160   | 53    |
| 13304  |      | 2   | No              |      | 2   | No             |      | 2   | No    |      |       |       | 151   | 48    |
| 13307  |      | 2   | No              |      | 2   | No             |      | 2   | No    |      |       |       | 152   | 40    |
| 13308  |      | 2   | No              |      | 2   | No             |      | 2   | No    |      |       |       | 150   | 45    |
| 13312  | 2    | 2   | No              |      | 1   | Yes            | 2    | 2   | No    |      |       |       | 156   | 70    |
| 13313  |      | 2   | No              |      | 2   | No             |      | 2   | No    |      |       |       | 163   | 58    |
| 13314  | 1    | 2   | No              |      | 2   | No             |      | 2   | No    |      |       |       | 160   | 60    |
| 13318  |      | 2   | No              |      | 1   | Yes            | 2    | 2   | No    |      |       |       | 161   | 52    |
| 13320  |      | 2   | No              |      | 2   | No             |      | 2   | No    |      |       |       | 160   | 50    |
| 13322  | 1    | 2   | No              |      | 2   | No             |      | 2   | No    |      |       |       | 160   | 60    |
| 13324  |      | 2   | No              |      | 2   | No             |      | 2   | No    |      |       |       | 160   | 55    |
| 13325  | 1    | 2   | No              |      | 1   | Yes            | 1    | 2   | No    |      |       |       | 156   | 59    |
| 13327  | 2    | 2   | No              |      | 2   | No             |      | 2   | No    |      |       |       | 164   | 70    |
| 13330  | 2    | 2   | No              |      | 1   | Yes            | 2    | 2   | No    |      |       |       | 160   | 59    |
| 13332  | 1    | 2   | No              |      | 1   | Yes            | 1    | 2   | No    |      |       |       | 180   | 95    |
| 13333  | 1    | 2   | No              |      | 1   | Yes            | 1    | 2   | No    |      |       |       | 160   | 63    |
| 13334  | 1    | 2   | No              |      | 2   | No             |      | 2   | No    |      |       |       | 167   | 78    |
| 13351  | 1    | 1   | Yes             | 1    | 2   | No             |      | 2   | No    |      |       |       | 186   | 62    |
| 13353  |      | 2   | No              |      | 2   | No             |      | 2   | No    |      |       |       | 166   | 50    |
| 13354  |      | 2   | No              |      | 2   | No             |      | 2   | No    |      |       |       | 155   | 58    |
| 13355  |      | 2   | No              |      | 1   | Yes            | 2    | 2   | No    |      |       |       | 161   | 68    |
| 13358  |      | 2   | No              |      | 2   | No             |      | 2   | No    |      |       |       | 162   | 53    |
| 13359  |      | 2   | No              |      | 2   | No             |      | 2   | No    |      |       |       | 156   | 50    |
| 13360  |      | 2   | No              |      | 2   | No             |      | 2   | No    |      |       |       | 152   | 56    |
| 13364  |      | 2   | No              |      | 1   | Yes            | 2    | 2   | No    |      |       |       | 156   | 60    |
| 13365  | 1    | 2   | No              |      | 1   | Yes            | 1    | 2   | No    |      |       |       | 165   | 69    |

| respid | Q11a | Q12 | Cardiac Disease | Q12a | Q13 | Hyperlipidemia | Q13a | Q14 | Neuro | Q14a | Q15_1 | Q15_2 | Q15_3 | Q16_1 |
|--------|------|-----|-----------------|------|-----|----------------|------|-----|-------|------|-------|-------|-------|-------|
| 13368  |      | 2   | No              |      | 1   | Yes            | 2    | 2   | No    |      |       |       | 153   | 55    |
| 13370  |      | 2   | No              |      | 1   | Yes            | 1    | 2   | No    |      |       |       | 162   | 54    |
| 13375  | 1    | 2   | No              |      | 2   | No             |      | 2   | No    |      |       |       | 156   | 65    |
| 13384  |      | 2   | No              |      | 2   | No             |      | 2   | No    |      |       |       | 158   | 53    |
| 13387  |      | 2   | No              |      | 2   | No             |      | 2   | No    |      |       |       | 161   | 65    |
| 13395  |      | 2   | No              |      | 1   | Yes            | 2    | 2   | No    |      |       |       | 163   | 58    |
| 13398  | 1    | 2   | No              |      | 1   | Yes            | 1    | 2   | No    |      |       |       | 156   | 73    |
| 13404  |      | 2   | No              |      | 2   | No             |      | 2   | No    |      |       |       | 145   | 47    |
| 13405  |      | 2   | No              |      | 2   | No             |      | 2   | No    |      |       |       | 155   | 35    |
| 13408  | 1    | 2   | No              |      | 2   | No             |      | 2   | No    |      |       |       | 160   | 45    |
| 13411  | 1    | 2   | No              |      | 1   | Yes            | 2    | 2   | No    |      |       |       | 154   | 73    |
| 13413  |      | 2   | No              |      | 2   | No             |      | 2   | No    |      |       |       | 157   | 47    |
| 13419  |      | 2   | No              |      | 1   | Yes            | 2    | 2   | No    |      |       |       | 154   | 47    |
| 13420  |      | 2   | No              |      | 2   | No             |      | 2   | No    |      |       |       | 159   | 52    |
| 13427  | 1    | 2   | No              |      | 2   | No             |      | 2   | No    |      |       |       | 163   | 61    |
| 13441  | 1    | 2   | No              |      | 1   | Yes            | 1    | 2   | No    |      |       |       | 165   | 69    |
| 13444  |      | 2   | No              |      | 2   | No             |      | 2   | No    |      |       |       | 158   | 60    |
| 13456  |      | 2   | No              |      | 2   | No             |      | 2   | No    |      |       |       | 175   | 65    |
| 13466  |      | 2   | No              |      | 1   | Yes            | 2    | 2   | No    |      |       |       | 160   | 46    |
| 13468  |      | 2   | No              |      | 2   | No             |      | 2   | No    |      |       |       | 155   | 58    |
| 13475  |      | 2   | No              |      | 2   | No             |      | 2   | No    |      |       |       | 160   | 53    |
| 13484  |      | 2   | No              |      | 1   | Yes            | 2    | 2   | No    |      |       |       | 154   | 55    |
| 13486  |      | 2   | No              |      | 2   | No             |      | 2   | No    |      |       |       | 165   | 58    |
| 13487  | 1    | 2   | No              |      | 1   | Yes            | 1    | 2   | No    |      |       |       | 165   | 57    |
| 13491  |      | 2   | No              |      | 1   | Yes            | 1    | 2   | No    |      |       |       | 162   | 68    |
| 13496  | 2    | 2   | No              |      | 2   | No             |      | 2   | No    |      |       |       | 161   | 53    |
| 13497  | 2    | 2   | No              |      | 2   | No             |      | 2   | No    |      |       |       | 162   | 70    |
| 13498  |      | 2   | No              |      | 1   | Yes            | 2    | 2   | No    |      |       |       | 160   | 60    |
| 13502  |      | 2   | No              |      | 2   | No             |      | 2   | No    |      |       |       | 160   | 60    |
| 13503  |      | 1   | Yes             | 1    | 2   | No             |      | 2   | No    |      |       |       | 158   | 60    |
| 13505  | 1    | 2   | No              |      | 1   | Yes            | 1    | 2   | No    |      |       |       | 160   | 65    |
| 13509  | 1    | 2   | No              |      | 2   | No             |      | 2   | No    |      |       |       | 160   | 50    |

| respid | Q11a | Q12 | Cardiac Disease | Q12a | Q13 | Hyperlipidemia | Q13a | Q14 | Neuro | Q14a | Q15_1 | Q15_2 | Q15_3 | Q16_1 |
|--------|------|-----|-----------------|------|-----|----------------|------|-----|-------|------|-------|-------|-------|-------|
| 13510  |      | 2   | No              |      | 2   | No             |      | 2   | No    |      |       |       | 160   | 55    |
| 13518  |      | 1   | Yes             | 1    | 2   | No             |      | 2   | No    |      |       |       | 164   | 57    |
| 13521  |      | 2   | No              |      | 2   | No             |      | 2   | No    |      |       |       | 158   | 60    |
| 13523  | 1    | 2   | No              |      | 1   | Yes            | 1    | 2   | No    |      |       |       | 162   | 53    |
| 13528  |      | 2   | No              |      | 2   | No             |      | 2   | No    |      |       |       | 152   | 64    |
| 13531  |      | 2   | No              |      | 2   | No             |      | 2   | No    |      |       |       | 165   | 55    |
| 13532  |      | 2   | No              |      | 2   | No             |      | 2   | No    |      |       |       | 157   | 55    |
| 13533  |      | 2   | No              |      | 1   | Yes            | 1    | 2   | No    |      |       |       | 164   | 50    |
| 13534  |      | 2   | No              |      | 2   | No             |      | 2   | No    |      |       |       | 156   | 58    |
| 13535  | 1    | 2   | No              |      | 2   | No             |      | 2   | No    |      |       |       | 159   | 56    |
| 13538  | 1    | 2   | No              |      | 1   | Yes            | 1    | 2   | No    |      |       |       | 165   | 70    |
| 13540  |      | 2   | No              |      | 2   | No             |      | 2   | No    |      |       |       | 157   | 52    |
| 13541  |      | 2   | No              |      | 2   | No             |      | 2   | No    |      |       |       | 157   | 55    |
| 13542  |      | 2   | No              |      | 1   | Yes            | 2    | 2   | No    |      |       |       | 160   | 58    |
| 13550  |      | 2   | No              |      | 2   | No             |      | 2   | No    |      |       |       | 172   | 69    |
| 13553  | 1    | 1   | Yes             | 1    | 1   | Yes            | 1    | 2   | No    |      |       |       | 157   | 60    |
| 13554  |      | 2   | No              |      | 1   | Yes            | 1    | 2   | No    |      |       |       | 164   | 49    |
| 13555  | 2    | 2   | No              |      | 2   | No             |      | 2   | No    |      |       |       | 150   | 40    |
| 13556  |      | 2   | No              |      | 2   | No             |      | 2   | No    |      |       |       | 176   | 45    |
| 13563  |      | 1   | Yes             | 2    | 2   | No             |      | 2   | No    |      |       |       | 158   | 56    |
| 13564  | 2    | 2   | No              |      | 1   | Yes            | 1    | 2   | No    |      |       |       | 160   | 50    |
| 13567  |      | 2   | No              |      | 2   | No             |      | 2   | No    |      |       |       | 160   | 72    |
| 13568  | 1    | 1   | Yes             | 2    | 2   | No             |      | 2   | No    |      |       |       | 168   | 77    |
| 13570  |      | 2   | No              |      | 2   | No             |      | 2   | No    |      |       |       | 160   | 56    |
| 13573  |      | 2   | No              |      | 2   | No             |      | 2   | No    |      |       |       | 160   | 51    |
| 13575  |      | 2   | No              |      | 2   | No             |      | 2   | No    |      |       |       | 160   | 55    |
| 13577  | 1    | 1   | Yes             | 1    | 1   | Yes            | 2    | 1   | Yes   | 1    |       |       | 169   | 77    |
| 13580  | 1    | 2   | No              |      | 2   | No             |      | 1   | Yes   | 1    |       |       | 168   | 77    |
| 13582  |      | 2   | No              |      | 1   | Yes            | 2    | 2   | No    |      |       |       | 160   | 50    |
| 13584  | 1    | 1   | Yes             | 1    | 2   | No             |      | 2   | No    |      |       |       | 168   | 77    |
| 13585  |      | 2   | No              |      | 1   | Yes            | 1    | 2   | No    |      |       |       | 158   | 55    |
| 13586  |      | 2   | No              |      | 1   | Yes            | 2    | 2   | No    |      |       |       | 163   | 68    |

| respid | Q11a | Q12 | Cardiac Disease | Q12a | Q13 | Hyperlipidemia | Q13a | Q14 | Neuro | Q14a | Q15_1 | Q15_2 | Q15_3 | Q16_1 |
|--------|------|-----|-----------------|------|-----|----------------|------|-----|-------|------|-------|-------|-------|-------|
| 13587  | 2    | 2   | No              |      | 1   | Yes            | 2    | 2   | No    |      |       |       | 170   | 72    |
| 13592  | 1    | 2   | No              |      | 1   | Yes            | 2    | 1   | Yes   | 2    |       |       | 169   | 77    |
| 13596  |      | 2   | No              |      | 2   | No             |      | 2   | No    |      |       |       | 155   | 53    |
| 13597  |      | 2   | No              |      | 2   | No             |      | 2   | No    |      |       |       | 158   | 49    |
| 13599  |      | 2   | No              |      | 2   | No             |      | 2   | No    |      |       |       | 160   | 55    |
| 13601  |      | 2   | No              |      | 2   | No             |      | 2   | No    |      |       |       | 164   | 58    |
| 13604  |      | 2   | No              |      | 2   | No             |      | 2   | No    |      |       |       | 178   | 85    |
| 13608  | 1    | 2   | No              |      | 2   | No             |      | 2   | No    |      |       |       | 170   | 70    |
| 13616  |      | 2   | No              |      | 1   | Yes            | 2    | 2   | No    |      |       |       | 154   | 48    |
| 13618  |      | 2   | No              |      | 2   | No             |      | 2   | No    |      |       |       | 160   | 55    |
| 13619  |      | 2   | No              |      | 2   | No             |      | 2   | No    |      |       |       | 163   | 53    |
| 13626  |      | 2   | No              |      | 2   | No             |      | 2   | No    |      |       |       | 164   | 51    |
| 13628  |      | 1   | Yes             | 2    | 2   | No             |      | 2   | No    |      |       |       | 175   | 75    |
| 13640  | 2    | 2   | No              |      | 2   | No             |      | 2   | No    |      |       |       | 169   | 71    |
| 13645  |      | 2   | No              |      | 1   | Yes            | 2    | 2   | No    |      |       |       | 169   | 69    |
| 13648  |      | 2   | No              |      | 2   | No             |      | 2   | No    |      |       |       | 171   | 65    |
| 13653  |      | 2   | No              |      | 2   | No             |      | 2   | No    |      |       |       | 180   | 60    |
| 13655  |      | 2   | No              |      | 2   | No             |      | 2   | No    |      |       |       | 170   | 60    |
| 13662  |      | 2   | No              |      | 1   | Yes            | 1    | 2   | No    |      |       |       | 179   | 74    |
| 13670  |      | 2   | No              |      | 2   | No             |      | 2   | No    |      |       |       | 172   | 66    |
| 13673  |      | 2   | No              |      | 1   | Yes            | 1    | 2   | No    |      |       |       | 147   | 52    |
| 13674  |      | 2   | No              |      | 2   | No             |      | 2   | No    |      |       |       | 160   | 50    |
| 13675  | 1    | 2   | No              |      | 1   | Yes            | 1    | 1   | Yes   | 1    |       |       | 170   | 76    |
| 13678  |      | 2   | No              |      | 1   | Yes            | 1    | 2   | No    |      |       |       | 165   | 51    |
| 13680  |      | 2   | No              |      | 2   | No             |      | 2   | No    |      |       |       | 167   | 79    |
| 13681  |      | 2   | No              |      | 1   | Yes            | 1    | 2   | No    |      |       |       | 165   | 62    |
| 13683  | 1    | 2   | No              |      | 1   | Yes            | 1    | 2   | No    |      |       |       | 160   | 56    |
| 13684  |      | 2   | No              |      | 2   | No             |      | 2   | No    |      |       |       | 163   | 58    |
| 13685  |      | 2   | No              |      | 2   | No             |      | 2   | No    |      |       |       | 158   | 54    |
| 13687  |      | 2   | No              |      | 2   | No             |      | 2   | No    |      |       |       | 165   | 60    |
| 13690  |      | 2   | No              |      | 2   | No             |      | 2   | No    |      |       |       | 170   | 70    |
| 13700  |      | 2   | No              |      | 1   | Yes            | 2    | 1   | Yes   | 2    |       |       | 166   | 55    |

| respid | Q11a | Q12 | Cardiac Disease | Q12a | Q13 | Hyperlipidemia | Q13a | Q14 | Neuro | Q14a | Q15_1 | Q15_2 | Q15_3 | Q16_1 |
|--------|------|-----|-----------------|------|-----|----------------|------|-----|-------|------|-------|-------|-------|-------|
| 13705  |      | 2   | No              |      | 1   | Yes            | 2    | 2   | No    |      |       |       | 175   | 85    |
| 13710  |      | 2   | No              |      | 1   | Yes            | 2    | 2   | No    |      |       |       | 166   | 64    |
| 13711  | 2    | 2   | No              |      | 2   | No             |      | 2   | No    |      |       |       | 175   | 74    |
| 13713  |      | 2   | No              |      | 2   | No             |      | 2   | No    |      |       |       | 165   | 55    |
| 13716  |      | 2   | No              |      | 2   | No             |      | 2   | No    |      |       |       | 175   | 65    |
| 13721  |      | 2   | No              |      | 2   | No             |      | 2   | No    |      |       |       | 160   | 60    |
| 13722  | 1    | 2   | No              |      | 2   | No             |      | 2   | No    |      |       |       | 173   | 80    |
| 13723  | 1    | 2   | No              |      | 2   | No             |      | 2   | No    |      |       |       | 172   | 72    |
| 13726  | 1    | 2   | No              |      | 1   | Yes            | 1    | 2   | No    |      |       |       | 170   | 60    |
| 13728  |      | 2   | No              |      | 1   | Yes            | 1    | 2   | No    |      |       |       | 179   | 70    |
| 13730  |      | 2   | No              |      | 2   | No             |      | 2   | No    |      |       |       | 170   | 65    |
| 13734  | 2    | 2   | No              |      | 2   | No             |      | 2   | No    |      |       |       | 180   | 91    |
| 13736  |      | 2   | No              |      | 2   | No             |      | 2   | No    |      |       |       | 160   | 42    |
| 13737  |      | 2   | No              |      | 2   | No             |      | 2   | No    |      |       |       | 176   | 67    |
| 13739  |      | 2   | No              |      | 2   | No             |      | 2   | No    |      |       |       | 163   | 55    |
| 13742  |      | 2   | No              |      | 2   | No             |      | 2   | No    |      |       |       | 173   | 70    |
| 13746  |      | 2   | No              |      | 2   | No             |      | 2   | No    |      |       |       | 160   | 56    |
| 13747  |      | 2   | No              |      | 2   | No             |      | 2   | No    |      |       |       | 176   | 62    |
| 13749  |      | 2   | No              |      | 2   | No             |      | 2   | No    |      |       |       | 160   | 53    |
| 13751  |      | 2   | No              |      | 1   | Yes            | 1    | 2   | No    |      |       |       | 173   | 84    |
| 13752  | 1    | 2   | No              |      | 1   | Yes            | 1    | 2   | No    |      |       |       | 160   | 70    |
| 13756  | 2    | 1   | Yes             | 1    | 1   | Yes            | 1    | 2   | No    |      |       |       | 147   | 46    |
| 13757  | 2    | 2   | No              |      | 2   | No             |      | 2   | No    |      |       |       | 162   | 61    |
| 13767  |      | 2   | No              |      | 2   | No             |      | 2   | No    |      |       |       | 166   | 60    |
| 13771  |      | 2   | No              |      | 2   | No             |      | 2   | No    |      |       |       | 163   | 59    |
| 13772  |      | 2   | No              |      | 2   | No             |      | 2   | No    |      |       |       | 182   | 64    |
| 13779  |      | 2   | No              |      | 1   | Yes            | 2    | 2   | No    |      |       |       | 180   | 90    |
| 13782  |      | 2   | No              |      | 1   | Yes            | 2    | 2   | No    |      |       |       | 162   | 53    |
| 13783  |      | 2   | No              |      | 2   | No             |      | 2   | No    |      |       |       | 167   | 75    |
| 13785  | 1    | 2   | No              |      | 2   | No             |      | 2   | No    |      |       |       | 166   | 90    |
| 13786  |      | 2   | No              |      | 2   | No             |      | 2   | No    |      |       |       | 150   | 40    |
| 13792  | 1    | 2   | No              |      | 1   | Yes            | 1    | 2   | No    |      |       |       | 170   | 63    |

| respid | Q11a | Q12 | Cardiac Disease | Q12a | Q13 | Hyperlipidemia | Q13a | Q14 | Neuro | Q14a | Q15_1 | Q15_2 | Q15_3 | Q16_1 |
|--------|------|-----|-----------------|------|-----|----------------|------|-----|-------|------|-------|-------|-------|-------|
| 13796  | 1    | 2   | No              |      | 1   | Yes            | 1    | 2   | No    |      |       |       | 170   | 75    |
| 13798  |      | 2   | No              |      | 2   | No             |      | 2   | No    |      |       |       | 170   | 65    |
| 13799  |      | 2   | No              |      | 2   | No             |      | 2   | No    |      |       |       | 172   | 74    |
| 13804  | 2    | 2   | No              |      | 2   | No             |      | 2   | No    |      |       |       | 180   | 85    |
| 13805  |      | 2   | No              |      | 2   | No             |      | 2   | No    |      |       |       | 150   | 45    |
| 13810  | 1    | 2   | No              |      | 1   | Yes            | 1    | 2   | No    |      |       |       | 165   | 68    |
| 13811  |      | 2   | No              |      | 2   | No             |      | 2   | No    |      |       |       | 160   | 60    |
| 13819  | 2    | 2   | No              |      | 2   | No             |      | 2   | No    |      |       |       | 160   | 60    |
| 13821  | 1    | 1   | Yes             | 1    | 2   | No             |      | 2   | No    |      | 5     | 7     |       | 60    |
| 13824  | 1    | 2   | No              |      | 1   | Yes            | 2    | 2   | No    |      |       |       | 177   | 78    |
| 13828  |      | 2   | No              |      | 2   | No             |      | 2   | No    |      |       |       | 158   | 65    |
| 13829  | 1    | 2   | No              |      | 2   | No             |      | 2   | No    |      |       |       | 170   | 62    |
| 13831  | 1    | 2   | No              |      | 2   | No             |      | 2   | No    |      |       |       | 173   | 80    |
| 13833  |      | 2   | No              |      | 2   | No             |      | 2   | No    |      |       |       | 168   | 62    |
| 13835  |      | 2   | No              |      | 2   | No             |      | 2   | No    |      |       |       | 177   | 75    |
| 13838  |      | 2   | No              |      | 2   | No             |      | 2   | No    |      |       |       | 170   | 73    |
| 13839  | 1    | 1   | Yes             | 1    | 1   | Yes            | 1    | 1   | Yes   | 1    |       |       | 168   | 65    |
| 13845  |      | 2   | No              |      | 2   | No             |      | 2   | No    |      |       |       | 169   | 80    |
| 13846  | 1    | 2   | No              |      | 1   | Yes            | 2    | 2   | No    |      |       |       | 160   | 72    |
| 13853  | 1    | 2   | No              |      | 1   | Yes            | 1    | 2   | No    |      |       |       | 167   | 56    |
| 13855  | 1    | 1   | Yes             | 1    | 1   | Yes            | 1    | 1   | Yes   | 1    |       |       | 170   | 62    |
| 13858  | 1    | 2   | No              |      | 2   | No             |      | 2   | No    |      |       |       | 156   | 50    |
| 13860  |      | 2   | No              |      | 2   | No             |      | 2   | No    |      |       |       | 180   | 80    |
| 13865  | 1    | 1   | Yes             | 1    | 1   | Yes            | 1    | 2   | No    |      |       |       | 174   | 70    |
| 13870  |      | 2   | No              |      | 2   | No             |      | 2   | No    |      |       |       | 173   | 65    |
| 13872  |      | 2   | No              |      | 2   | No             |      | 2   | No    |      |       |       | 159   | 55    |
| 13873  |      | 2   | No              |      | 1   | Yes            | 2    | 2   | No    |      |       |       | 162   | 59    |
| 13874  |      | 2   | No              |      | 2   | No             |      | 2   | No    |      |       |       | 165   | 68    |
| 13875  | 1    | 1   | Yes             | 1    | 1   | Yes            | 1    | 1   | Yes   | 1    |       |       | 170   | 62    |
| 13881  | 2    | 2   | No              |      | 2   | No             |      | 2   | No    |      |       |       | 174   | 66    |
| 13887  |      | 1   | Yes             | 2    | 2   | No             |      | 2   | No    |      |       |       | 170   | 120   |
| 13888  | 1    | 2   | No              |      | 1   | Yes            | 1    | 2   | No    |      |       |       | 170   | 62    |

| respid | Q11a | Q12 | Cardiac Disease | Q12a | Q13 | Hyperlipidemia | Q13a | Q14 | Neuro | Q14a | Q15_1 | Q15_2 | Q15_3 | Q16_1 |
|--------|------|-----|-----------------|------|-----|----------------|------|-----|-------|------|-------|-------|-------|-------|
| 13889  | 1    | 2   | No              |      | 1   | Yes            | 1    | 2   | No    |      |       |       | 170   | 62    |
| 13895  |      | 2   | No              |      | 2   | No             |      | 2   | No    |      |       |       | 175   | 74    |
| 13897  |      | 2   | No              |      | 2   | No             |      | 2   | No    |      |       |       | 159   | 58    |
| 13898  | 1    | 2   | No              |      | 1   | Yes            | 2    | 2   | No    |      |       |       | 174   | 80    |
| 13901  |      | 2   | No              |      | 2   | No             |      | 2   | No    |      |       |       | 165   | 65    |
| 13902  |      | 1   | Yes             | 1    | 1   | Yes            | 1    | 1   | Yes   | 1    |       |       | 170   | 65    |
| 13903  |      | 2   | No              |      | 2   | No             |      | 2   | No    |      |       |       | 150   | 64    |
| 13905  | 1    | 1   | Yes             | 1    | 1   | Yes            | 1    | 1   | Yes   | 1    |       |       | 170   | 62    |
| 13908  |      | 2   | No              |      | 2   | No             |      | 2   | No    |      |       |       | 160   | 65    |
| 13909  | 2    | 2   | No              |      | 2   | No             |      | 2   | No    |      |       |       | 170   | 88    |
| 13910  | 1    | 1   | Yes             | 1    | 1   | Yes            | 1    | 1   | Yes   | 1    |       |       | 165   | 67    |
| 13911  |      | 2   | No              |      | 2   | No             |      | 2   | No    |      |       |       | 145   | 69    |
| 13914  |      | 2   | No              |      | 2   | No             |      | 2   | No    |      |       |       | 165   | 60    |
| 13920  |      | 2   | No              |      | 2   | No             |      | 2   | No    |      |       |       | 170   | 61    |
| 13926  |      | 2   | No              |      | 1   | Yes            | 2    | 2   | No    |      |       |       | 162   | 52    |
| 13929  | 1    | 1   | Yes             | 1    | 1   | Yes            | 1    | 1   | Yes   | 1    |       |       | 170   | 62    |
| 13930  |      | 2   | No              |      | 2   | No             |      | 2   | No    |      |       |       | 170   | 60    |
| 13931  |      | 2   | No              |      | 2   | No             |      | 2   | No    |      |       |       | 150   | 50    |
| 13932  | 2    | 2   | No              |      | 2   | No             |      | 1   | Yes   | 2    |       |       | 170   | 80    |
| 13934  |      | 2   | No              |      | 2   | No             |      | 2   | No    |      |       |       | 163   | 62    |
| 13938  |      | 2   | No              |      | 1   | Yes            | 2    | 2   | No    |      |       |       | 165   | 55    |
| 13942  |      | 2   | No              |      | 2   | No             |      | 2   | No    |      |       |       | 155   | 58    |
| 13945  |      | 2   | No              |      | 2   | No             |      | 2   | No    |      |       |       | 155   | 58    |
| 13947  |      | 2   | No              |      | 2   | No             |      | 2   | No    |      |       |       | 165   | 58    |
| 13948  |      | 2   | No              |      | 2   | No             |      | 2   | No    |      |       |       | 164   | 58    |
| 13959  | 2    | 2   | No              |      | 1   | Yes            | 2    | 2   | No    |      |       |       | 174   | 79    |
| 13962  |      | 2   | No              |      | 2   | No             |      | 2   | No    |      |       |       | 172   | 69    |
| 13963  |      | 2   | No              |      | 2   | No             |      | 2   | No    |      |       |       | 162   | 65    |
| 13964  |      | 2   | No              |      | 2   | No             |      | 2   | No    |      |       |       | 164   | 58    |
| 13966  | 1    | 1   | Yes             | 1    | 1   | Yes            | 1    | 1   | Yes   | 1    |       |       | 170   | 62    |
| 13968  |      | 2   | No              |      | 2   | No             |      | 2   | No    |      |       |       | 160   | 56    |
| 13971  | 1    | 2   | No              |      | 1   | Yes            | 1    | 2   | No    |      |       |       | 170   | 86    |



| respid | Q11a | Q12 | Cardiac Disease | Q12a | Q13 | Hyperlipidemia | Q13a | Q14 | Neuro | Q14a | Q15_1 | Q15_2 | Q15_3 | Q16_1 |
|--------|------|-----|-----------------|------|-----|----------------|------|-----|-------|------|-------|-------|-------|-------|
| 13979  | 2    | 2   | No              |      | 1   | Yes            | 2    | 2   | No    |      |       |       | 160   | 67    |
| 13980  |      | 2   | No              |      | 1   | Yes            | 2    | 2   | No    |      |       |       | 164   | 53    |
| 13981  |      | 2   | No              |      | 1   | Yes            | 2    | 2   | No    |      |       |       | 162   | 67    |
| 13982  | 1    | 2   | No              |      | 1   | Yes            | 1    | 2   | No    |      |       |       | 172   | 71    |
| 13984  |      | 2   | No              |      | 2   | No             |      | 2   | No    |      |       |       | 170   | 61    |
| 13989  |      | 2   | No              |      | 2   | No             |      | 2   | No    |      |       |       | 178   | 78    |
| 13990  | 1    | 2   | No              |      | 2   | No             |      | 2   | No    |      |       |       | 166   | 60    |
| 13992  |      | 1   | Yes             | 2    | 2   | No             |      | 1   | Yes   | 1    |       |       | 166   | 63    |
| 13998  |      | 2   | No              |      | 2   | No             |      | 2   | No    |      |       |       | 162   | 47    |
| 13999  |      | 2   | No              |      | 2   | No             |      | 2   | No    |      |       |       | 161   | 62    |
| 14000  | 1    | 2   | No              |      | 2   | No             |      | 2   | No    |      |       |       | 173   | 85    |
| 14003  | 1    | 2   | No              |      | 1   | Yes            | 1    | 2   | No    |      |       |       | 174   | 67    |
| 14004  | 1    | 2   | No              |      | 2   | No             |      | 2   | No    |      |       |       | 160   | 54    |
| 14006  |      | 2   | No              |      | 2   | No             |      | 2   | No    |      |       |       | 173   | 72    |
| 14007  |      | 2   | No              |      | 2   | No             |      | 2   | No    |      |       |       | 159   | 57    |
| 14008  |      | 2   | No              |      | 2   | No             |      | 2   | No    |      |       |       | 165   | 61    |
| 14013  |      | 2   | No              |      | 2   | No             |      | 2   | No    |      |       |       | 163   | 55    |
| 14015  | 1    | 2   | No              |      | 1   | Yes            | 1    | 2   | No    |      |       |       | 158   | 55    |
| 14018  | 1    | 2   | No              |      | 1   | Yes            | 1    | 2   | No    |      |       |       | 165   | 53    |
| 14021  |      | 2   | No              |      | 2   | No             |      | 2   | No    |      |       |       | 150   | 45    |
| 14023  | 2    | 2   | No              |      | 2   | No             |      | 2   | No    |      |       |       | 158   | 56    |
| 14024  |      | 2   | No              |      | 1   | Yes            | 2    | 2   | No    |      |       |       | 176   | 86    |
| 14026  |      | 2   | No              |      | 2   | No             |      | 2   | No    |      |       |       | 175   | 68    |
| 14030  | 1    | 2   | No              |      | 2   | No             |      | 2   | No    |      |       |       | 170   | 80    |
| 14032  |      | 2   | No              |      | 2   | No             |      | 2   | No    |      |       |       | 172   | 60    |
| 14040  |      | 2   | No              |      | 2   | No             |      | 2   | No    |      |       |       | 174   | 71    |
| 14045  |      | 2   | No              |      | 2   | No             |      | 2   | No    |      |       |       | 168   | 70    |
| 14048  |      | 2   | No              |      | 2   | No             |      | 2   | No    |      |       |       | 157   | 56    |
| 14049  | 1    | 1   | Yes             | 1    | 2   | No             |      | 2   | No    |      |       |       | 171   | 65    |
| 14050  |      | 2   | No              |      | 2   | No             |      | 2   | No    |      |       |       | 158   | 53    |
| 14051  | 1    | 1   | Yes             | 1    | 1   | Yes            | 1    | 1   | Yes   | 1    |       |       | 162   | 60    |
| 14052  | 2    | 2   | No              |      | 1   | Yes            | 2    | 2   | No    |      |       |       | 165   | 55    |

| respid | Q11a | Q12 | Cardiac Disease | Q12a | Q13 | Hyperlipidemia | Q13a | Q14 | Neuro | Q14a | Q15_1 | Q15_2 | Q15_3 | Q16_1 |
|--------|------|-----|-----------------|------|-----|----------------|------|-----|-------|------|-------|-------|-------|-------|
| 14054  |      | 2   | No              |      | 2   | No             |      | 2   | No    |      |       |       | 154   | 48    |
| 14055  |      | 2   | No              |      | 2   | No             |      | 2   | No    |      |       |       | 150   | 60    |
| 14057  |      | 2   | No              |      | 1   | Yes            | 1    | 2   | No    |      |       |       | 158   | 72    |
| 14058  | 1    | 2   | No              |      | 1   | Yes            | 2    | 2   | No    |      |       |       | 152   | 53    |
| 14059  |      | 2   | No              |      | 1   | Yes            | 1    | 2   | No    |      |       |       | 166   | 61    |
| 14060  |      | 2   | No              |      | 2   | No             |      | 2   | No    |      |       |       | 160   | 65    |
| 14061  |      | 2   | No              |      | 2   | No             |      | 2   | No    |      |       |       | 171   | 68    |
| 14071  |      | 2   | No              |      | 1   | Yes            | 1    | 2   | No    |      |       |       | 154   | 51    |
| 14073  | 1    | 2   | No              |      | 1   | Yes            | 1    | 2   | No    |      |       |       | 172   | 68    |
| 14074  |      | 2   | No              |      | 2   | No             |      | 2   | No    |      |       |       | 156   | 56    |
| 14076  |      | 2   | No              |      | 2   | No             |      | 2   | No    |      |       |       | 160   | 53    |
| 14080  | 1    | 2   | No              |      | 2   | No             |      | 2   | No    |      |       |       | 173   | 70    |
| 14082  |      | 2   | No              |      | 2   | No             |      | 2   | No    |      |       |       | 174   | 80    |
| 14083  | 1    | 2   | No              |      | 2   | No             |      | 2   | No    |      |       |       | 160   | 52    |
| 14084  | 1    | 2   | No              |      | 2   | No             |      | 2   | No    |      |       |       | 156   | 55    |
| 14085  |      | 2   | No              |      | 2   | No             |      | 2   | No    |      |       |       | 170   | 70    |
| 14086  |      | 2   | No              |      | 2   | No             |      | 2   | No    |      |       |       | 180   | 63    |
| 14088  |      | 2   | No              |      | 2   | No             |      | 2   | No    |      |       |       | 155   | 52    |
| 14090  |      | 2   | No              |      | 2   | No             |      | 2   | No    |      |       |       | 169   | 62    |
| 14092  | 1    | 2   | No              |      | 1   | Yes            | 1    | 2   | No    |      |       |       | 170   | 68    |
| 14093  |      | 2   | No              |      | 2   | No             |      | 2   | No    |      | 5     | 5     |       | 60    |
| 14096  |      | 2   | No              |      | 2   | No             |      | 2   | No    |      |       |       | 161   | 54    |
| 14103  |      | 2   | No              |      | 2   | No             |      | 2   | No    |      |       |       | 171   | 67    |
| 14105  |      | 2   | No              |      | 1   | Yes            | 2    | 2   | No    |      |       |       | 162   | 62    |
| 14106  |      | 2   | No              |      | 2   | No             |      | 2   | No    |      |       |       | 170   | 73    |
| 14107  | 1    | 1   | Yes             | 1    | 1   | Yes            | 1    | 1   | Yes   | 1    |       |       | 170   | 62    |
| 14108  | 1    | 2   | No              |      | 1   | Yes            | 1    | 2   | No    |      |       |       | 170   | 62    |
| 14112  |      | 2   | No              |      | 2   | No             |      | 2   | No    |      |       |       | 148   | 50    |
| 14114  |      | 2   | No              |      | 1   | Yes            | 2    | 2   | No    |      |       |       | 158   | 54    |
| 14115  | 1    | 2   | No              |      | 1   | Yes            | 1    | 2   | No    |      |       |       | 157   | 62    |
| 14116  |      | 2   | No              |      | 2   | No             |      | 2   | No    |      |       |       | 175   | 80    |
| 14117  |      | 2   | No              |      | 2   | No             |      | 2   | No    |      |       |       | 168   | 55    |

| respid | Q11a | Q12 | Cardiac Disease | Q12a | Q13 | Hyperlipidemia | Q13a | Q14 | Neuro | Q14a | Q15_1 | Q15_2 | Q15_3 | Q16_1 |
|--------|------|-----|-----------------|------|-----|----------------|------|-----|-------|------|-------|-------|-------|-------|
| 14118  |      | 2   | No              |      | 2   | No             |      | 2   | No    |      |       |       | 171   | 65    |
| 14119  |      | 2   | No              |      | 2   | No             |      | 2   | No    |      |       |       | 163   | 65    |
| 14127  |      | 2   | No              |      | 2   | No             |      | 2   | No    |      |       |       | 172   | 60    |
| 14129  | 1    | 2   | No              |      | 2   | No             |      | 2   | No    |      |       |       | 155   | 56    |
| 14131  |      | 2   | No              |      | 1   | Yes            | 2    | 2   | No    |      |       |       | 165   | 71    |
| 14132  |      | 2   | No              |      | 2   | No             |      | 2   | No    |      |       |       | 170   | 71    |
| 14133  | 1    | 2   | No              |      | 1   | Yes            | 1    | 2   | No    |      |       |       | 170   | 62    |
| 14134  | 1    | 2   | No              |      | 2   | No             |      | 2   | No    |      |       |       | 170   | 82    |
| 14135  |      | 2   | No              |      | 2   | No             |      | 2   | No    |      |       |       | 158   | 61    |
| 14136  |      | 2   | No              |      | 1   | Yes            | 2    | 2   | No    |      |       |       | 153   | 64    |
| 14138  |      | 2   | No              |      | 2   | No             |      | 2   | No    |      |       |       | 169   | 68    |
| 14139  |      | 2   | No              |      | 1   | Yes            | 1    | 2   | No    |      |       |       | 158   | 65    |
| 14140  |      | 2   | No              |      | 2   | No             |      | 2   | No    |      |       |       | 155   | 51    |
| 14141  |      | 2   | No              |      | 2   | No             |      | 2   | No    |      |       |       | 170   | 72    |
| 14143  |      | 2   | No              |      | 2   | No             |      | 2   | No    |      |       |       | 176   | 75    |
| 14146  | 1    | 2   | No              |      | 2   | No             |      | 2   | No    |      |       |       | 161   | 55    |
| 14147  |      | 2   | No              |      | 2   | No             |      | 2   | No    |      |       |       | 169   | 50    |
| 14148  | 1    | 1   | Yes             | 1    | 2   | No             |      | 2   | No    |      |       |       | 160   | 60    |
| 14151  | 1    | 2   | No              |      | 1   | Yes            | 1    | 2   | No    |      |       |       | 161   | 66    |
| 14152  |      | 2   | No              |      | 2   | No             |      | 2   | No    |      |       |       | 163   | 58    |
| 14153  |      | 2   | No              |      | 2   | No             |      | 2   | No    |      |       |       | 159   | 62    |
| 14154  |      | 2   | No              |      | 1   | Yes            | 2    | 2   | No    |      |       |       | 167   | 68    |
| 14158  |      | 2   | No              |      | 2   | No             |      | 2   | No    |      |       |       | 163   | 60    |
| 14159  | 1    | 1   | Yes             | 1    | 1   | Yes            | 1    | 1   | Yes   | 1    |       |       | 170   | 62    |
| 14160  |      | 2   | No              |      | 2   | No             |      | 2   | No    |      |       |       | 170   | 64    |
| 14161  |      | 2   | No              |      | 2   | No             |      | 2   | No    |      |       |       | 173   | 62    |
| 14162  | 1    | 2   | No              |      | 2   | No             |      | 2   | No    |      |       |       | 172   | 99    |
| 14165  |      | 2   | No              |      | 2   | No             |      | 2   | No    |      |       |       | 170   | 61    |
| 14166  |      | 2   | No              |      | 2   | No             |      | 2   | No    |      |       |       | 169   | 67    |
| 14167  |      | 2   | No              |      | 2   | No             |      | 2   | No    |      |       |       | 156   | 70    |
| 14169  |      | 2   | No              |      | 2   | No             |      | 2   | No    |      |       |       | 160   | 60    |
| 14170  |      | 2   | No              |      | 1   | Yes            | 2    | 2   | No    |      |       |       | 163   | 73    |

| respid | Q11a | Q12 | Cardiac Disease | Q12a | Q13 | Hyperlipidemia | Q13a | Q14 | Neuro | Q14a | Q15_1 | Q15_2 | Q15_3 | Q16_1 |
|--------|------|-----|-----------------|------|-----|----------------|------|-----|-------|------|-------|-------|-------|-------|
| 14172  |      | 2   | No              |      | 2   | No             |      | 2   | No    |      |       |       | 170   | 70    |
| 14173  |      | 2   | No              |      | 2   | No             |      | 2   | No    |      |       |       | 160   | 64    |
| 14174  | 1    | 2   | No              |      | 1   | Yes            | 2    | 2   | No    |      |       |       | 159   | 64    |
| 14175  |      | 2   | No              |      | 1   | Yes            | 1    | 2   | No    |      |       |       | 165   | 60    |
| 14176  |      | 1   | Yes             | 2    | 1   | Yes            | 2    | 2   | No    |      |       |       | 175   | 79    |
| 14178  |      | 2   | No              |      | 2   | No             |      | 2   | No    |      |       |       | 171   | 69    |
| 14179  |      | 2   | No              |      | 2   | No             |      | 2   | No    |      |       |       | 165   | 62    |
| 14180  |      | 2   | No              |      | 2   | No             |      | 2   | No    |      |       |       | 175   | 75    |
| 14183  | 1    | 1   | Yes             | 1    | 1   | Yes            | 1    | 1   | Yes   | 1    |       |       | 170   | 62    |
| 14185  |      | 2   | No              |      | 1   | Yes            | 1    | 2   | No    |      |       |       | 168   | 60    |
| 14187  |      | 2   | No              |      | 1   | Yes            | 1    | 2   | No    |      |       |       | 152   | 45    |
| 14189  | 1    | 2   | No              |      | 1   | Yes            | 1    | 2   | No    |      |       |       | 153   | 50    |
| 14191  |      | 2   | No              |      | 2   | No             |      | 2   | No    |      |       |       | 180   | 70    |
| 14192  |      | 2   | No              |      | 2   | No             |      | 2   | No    |      |       |       | 166   | 55    |
| 14195  | 2    | 2   | No              |      | 1   | Yes            | 2    | 2   | No    |      |       |       | 158   | 55    |
| 14197  |      | 2   | No              |      | 1   | Yes            | 2    | 2   | No    |      |       |       | 150   | 50    |
| 14203  | 1    | 2   | No              |      | 1   | Yes            | 1    | 2   | No    |      |       |       | 172   | 69    |
| 14204  |      | 2   | No              |      | 1   | Yes            | 1    | 2   | No    |      |       |       | 152   | 52    |
| 14205  | 1    | 2   | No              |      | 1   | Yes            | 1    | 2   | No    |      |       |       | 159   | 57    |
| 14208  |      | 2   | No              |      | 2   | No             |      | 2   | No    |      |       |       | 169   | 55    |
| 14211  |      | 2   | No              |      | 2   | No             |      | 2   | No    |      |       |       | 156   | 42    |
| 14214  |      | 2   | No              |      | 2   | No             |      | 2   | No    |      |       |       | 164   | 68    |
| 14215  |      | 2   | No              |      | 2   | No             |      | 2   | No    |      |       |       | 170   | 58    |
| 14216  |      | 2   | No              |      | 2   | No             |      | 2   | No    |      |       |       | 173   | 67    |
| 14218  | 1    | 2   | No              |      | 2   | No             |      | 2   | No    |      |       |       | 162   | 63    |
| 14220  | 1    | 2   | No              |      | 2   | No             |      | 2   | No    |      |       |       | 178   | 74    |
| 14223  |      | 2   | No              |      | 2   | No             |      | 2   | No    |      |       |       | 153   | 53    |
| 14225  | 2    | 1   | Yes             | 2    | 1   | Yes            | 2    | 2   | No    |      |       |       | 164   | 63    |
| 14226  |      | 2   | No              |      | 2   | No             |      | 2   | No    |      |       |       | 170   | 88    |
| 14228  | 1    | 1   | Yes             | 1    | 1   | Yes            | 1    | 1   | Yes   | 1    |       |       | 170   | 62    |
| 14231  |      | 2   | No              |      | 2   | No             |      | 2   | No    |      |       |       | 160   | 50    |
| 14233  |      | 2   | No              |      | 2   | No             |      | 2   | No    |      |       |       | 160   | 60    |

| respid | Q11a | Q12 | Cardiac Disease | Q12a | Q13 | Hyperlipidemia | Q13a | Q14 | Neuro | Q14a | Q15_1 | Q15_2 | Q15_3 | Q16_1 |
|--------|------|-----|-----------------|------|-----|----------------|------|-----|-------|------|-------|-------|-------|-------|
| 14237  |      | 2   | No              |      | 2   | No             |      | 2   | No    |      |       |       | 160   | 50    |
| 14238  | 1    | 1   | Yes             | 1    | 2   | No             |      | 2   | No    |      |       |       | 174   | 72    |
| 14243  |      | 2   | No              |      | 2   | No             |      | 2   | No    |      |       |       | 174   | 62    |
| 14245  |      | 2   | No              |      | 2   | No             |      | 2   | No    |      | 4     | 5     |       | 50    |
| 14246  | 1    | 1   | Yes             | 1    | 1   | Yes            | 1    | 1   | Yes   | 1    |       |       | 170   | 62    |
| 14248  | 2    | 2   | No              |      | 2   | No             |      | 2   | No    |      |       |       | 158   | 48    |
| 14250  |      | 2   | No              |      | 2   | No             |      | 2   | No    |      |       |       | 159   | 59    |
| 14253  |      | 2   | No              |      | 1   | Yes            | 2    | 2   | No    |      |       |       | 157   | 50    |
| 14254  |      | 2   | No              |      | 2   | No             |      | 2   | No    |      |       |       | 170   | 65    |
| 14255  |      | 2   | No              |      | 2   | No             |      | 2   | No    |      |       |       | 152   | 40    |
| 14257  |      | 2   | No              |      | 2   | No             |      | 2   | No    |      |       |       | 160   | 55    |
| 14258  |      | 2   | No              |      | 2   | No             |      | 2   | No    |      |       |       | 163   | 60    |
| 14259  | 1    | 2   | No              |      | 2   | No             |      | 2   | No    |      |       |       | 172   | 82    |
| 14260  | 1    | 2   | No              |      | 2   | No             |      | 2   | No    |      |       |       | 163   | 58    |
| 14261  | 1    | 1   | Yes             | 1    | 1   | Yes            | 1    | 1   | Yes   | 1    |       |       | 170   | 62    |
| 14263  | 1    | 2   | No              |      | 1   | Yes            | 2    | 2   | No    |      |       |       | 161   | 65    |
| 14264  | 2    | 2   | No              |      | 2   | No             |      | 2   | No    |      |       |       | 156   | 48    |
| 14266  | 1    | 2   | No              |      | 2   | No             |      | 2   | No    |      |       |       | 167   | 57    |
| 14267  | 1    | 1   | Yes             | 1    | 1   | Yes            | 1    | 1   | Yes   | 1    |       |       | 170   | 62    |
| 14268  |      | 2   | No              |      | 1   | Yes            | 2    | 2   | No    |      |       |       | 173   | 84    |
| 14275  | 2    | 2   | No              |      | 2   | No             |      | 2   | No    |      |       |       | 160   | 59    |
| 14278  |      | 2   | No              |      | 2   | No             |      | 2   | No    |      |       |       | 162   | 57    |
| 14279  |      | 2   | No              |      | 2   | No             |      | 2   | No    |      |       |       | 178   | 78    |
| 14280  |      | 1   | Yes             | 2    | 2   | No             |      | 1   | Yes   | 1    |       |       | 160   | 70    |
| 14281  |      | 2   | No              |      | 2   | No             |      | 2   | No    |      |       |       | 153   | 55    |
| 14282  | 1    | 1   | Yes             | 1    | 1   | Yes            | 1    | 1   | Yes   | 1    |       |       | 170   | 62    |
| 14283  |      | 2   | No              |      | 1   | Yes            | 2    | 2   | No    |      |       |       | 170   | 73    |
| 14286  |      | 2   | No              |      | 2   | No             |      | 2   | No    |      |       |       | 162   | 47    |
| 14287  |      | 2   | No              |      | 2   | No             |      | 2   | No    |      |       |       | 167   | 68    |
| 14288  | 1    | 2   | No              |      | 1   | Yes            | 1    | 2   | No    |      |       |       | 163   | 58    |
| 14291  |      | 2   | No              |      | 2   | No             |      | 2   | No    |      |       |       | 165   | 63    |
| 14292  |      | 2   | No              |      | 1   | Yes            | 1    | 2   | No    |      |       |       | 178   | 75    |

| respid | Q11a | Q12 | Cardiac Disease | Q12a | Q13 | Hyperlipidemia | Q13a | Q14 | Neuro | Q14a | Q15_1 | Q15_2 | Q15_3 | Q16_1 |
|--------|------|-----|-----------------|------|-----|----------------|------|-----|-------|------|-------|-------|-------|-------|
| 14293  |      | 2   | No              |      | 2   | No             |      | 2   | No    |      |       |       | 165   | 55    |
| 14304  | 1    | 1   | Yes             | 1    | 1   | Yes            | 1    | 1   | Yes   | 1    |       |       | 170   | 60    |
| 14308  |      | 2   | No              |      | 2   | No             |      | 2   | No    |      |       |       | 169   | 80    |
| 14313  |      | 2   | No              |      | 2   | No             |      | 2   | No    |      |       |       | 160   | 54    |
| 14314  | 1    | 2   | No              |      | 1   | Yes            | 1    | 2   | No    |      |       |       | 169   | 67    |
| 14316  |      | 2   | No              |      | 1   | Yes            | 1    | 2   | No    |      |       |       | 150   | 51    |
| 14317  |      | 1   | Yes             | 2    | 2   | No             |      | 2   | No    |      |       |       | 169   | 78    |
| 14318  |      | 2   | No              |      | 2   | No             |      | 2   | No    |      |       |       | 155   | 57    |
| 14319  |      | 2   | No              |      | 1   | Yes            | 2    | 2   | No    |      |       |       | 168   | 78    |
| 14320  | 1    | 1   | Yes             | 1    | 1   | Yes            | 1    | 1   | Yes   | 1    |       |       | 170   | 62    |
| 14321  |      | 2   | No              |      | 2   | No             |      | 2   | No    |      |       |       | 151   | 46    |
| 14322  | 1    | 2   | No              |      | 1   | Yes            | 1    | 2   | No    |      |       |       | 170   | 62    |
| 14326  | 2    | 2   | No              |      | 1   | Yes            | 2    | 2   | No    |      |       |       | 160   | 65    |
| 14327  | 1    | 1   | Yes             | 1    | 1   | Yes            | 1    | 1   | Yes   | 1    |       |       | 170   | 60    |
| 14328  |      | 2   | No              |      | 1   | Yes            | 1    | 2   | No    |      |       |       | 165   | 63    |
| 14330  |      | 2   | No              |      | 2   | No             |      | 2   | No    |      |       |       | 164   | 50    |
| 14332  |      | 2   | No              |      | 2   | No             |      | 2   | No    |      |       |       | 154   | 59    |
| 14334  |      | 2   | No              |      | 2   | No             |      | 2   | No    |      |       |       | 160   | 55    |
| 14336  | 2    | 2   | No              |      | 2   | No             |      | 2   | No    |      |       |       | 158   | 71    |
| 14337  |      | 2   | No              |      | 2   | No             |      | 2   | No    |      |       |       | 162   | 51    |
| 14339  |      | 2   | No              |      | 2   | No             |      | 2   | No    |      |       |       | 145   | 50    |
| 14340  |      | 2   | No              |      | 2   | No             |      | 2   | No    |      |       |       | 155   | 41    |
| 14341  |      | 2   | No              |      | 2   | No             |      | 2   | No    |      |       |       | 175   | 60    |
| 14344  |      | 2   | No              |      | 2   | No             |      | 2   | No    |      |       |       | 180   | 80    |
| 14345  |      | 2   | No              |      | 1   | Yes            | 2    | 2   | No    |      |       |       | 175   | 76    |
| 14346  |      | 2   | No              |      | 2   | No             |      | 2   | No    |      | 4     | 5     |       | 65    |
| 14348  |      | 2   | No              |      | 1   | Yes            | 2    | 2   | No    |      |       |       | 174   | 80    |
| 14349  | 2    | 2   | No              |      | 1   | Yes            | 2    | 2   | No    |      |       |       | 166   | 64    |
| 14358  | 1    | 2   | No              |      | 2   | No             |      | 2   | No    |      |       |       | 170   | 62    |
| 14360  |      | 2   | No              |      | 2   | No             |      | 2   | No    |      |       |       | 155   | 48    |
| 14362  | 2    | 2   | No              |      | 2   | No             |      | 2   | No    |      |       |       | 158   | 68    |
| 14366  |      | 1   | Yes             | 1    | 2   | No             |      | 2   | No    |      |       |       | 170   | 78    |

| respid | Q11a | Q12 | Cardiac Disease | Q12a | Q13 | Hyperlipidemia | Q13a | Q14 | Neuro | Q14a | Q15_1 | Q15_2 | Q15_3 | Q16_1 |
|--------|------|-----|-----------------|------|-----|----------------|------|-----|-------|------|-------|-------|-------|-------|
| 14367  |      | 2   | No              |      | 1   | Yes            | 1    | 2   | No    |      |       |       | 162   | 64    |
| 14369  |      | 2   | No              |      | 2   | No             |      | 2   | No    |      |       |       | 168   | 48    |
| 14371  |      | 2   | No              |      | 2   | No             |      | 2   | No    |      |       |       | 161   | 60    |
| 14372  |      | 2   | No              |      | 1   | Yes            | 1    | 2   | No    |      |       |       | 162   | 50    |
| 14374  |      | 2   | No              |      | 2   | No             |      | 2   | No    |      |       |       | 160   | 70    |
| 14376  |      | 2   | No              |      | 1   | Yes            | 2    | 2   | No    |      |       |       | 153   | 50    |
| 14377  | 1    | 2   | No              |      | 2   | No             |      | 2   | No    |      |       |       | 153   | 46    |
| 14378  |      | 2   | No              |      | 2   | No             |      | 2   | No    |      |       |       | 159   | 61    |
| 14379  |      | 2   | No              |      | 1   | Yes            | 2    | 2   | No    |      |       |       | 169   | 74    |
| 14381  |      | 2   | No              |      | 1   | Yes            | 2    | 2   | No    |      |       |       | 169   | 74    |
| 14383  |      | 2   | No              |      | 2   | No             |      | 2   | No    |      |       |       | 165   | 80    |
| 14384  |      | 2   | No              |      | 2   | No             |      | 2   | No    |      |       |       | 165   | 63    |
| 14385  | 1    | 1   | Yes             | 1    | 1   | Yes            | 1    | 1   | Yes   | 1    |       |       | 170   | 60    |
| 14386  |      | 1   | Yes             | 1    | 2   | No             |      | 2   | No    |      |       |       | 156   | 56    |
| 14390  | 1    | 2   | No              |      | 1   | Yes            | 2    | 2   | No    |      |       |       | 162   | 69    |
| 14391  |      | 2   | No              |      | 2   | No             |      | 2   | No    |      |       |       | 162   | 60    |
| 14392  | 1    | 2   | No              |      | 2   | No             |      | 2   | No    |      |       |       | 175   | 65    |
| 14393  |      | 2   | No              |      | 1   | Yes            | 1    | 2   | No    |      |       |       | 162   | 54    |
| 14394  |      | 2   | No              |      | 2   | No             |      | 2   | No    |      |       |       | 160   | 60    |
| 14395  |      | 2   | No              |      | 2   | No             |      | 2   | No    |      |       |       | 172   | 82    |
| 14396  |      | 2   | No              |      | 2   | No             |      | 2   | No    |      | 5     | 6     |       | 50    |
| 14397  |      | 2   | No              |      | 2   | No             |      | 2   | No    |      |       |       | 168   | 65    |
| 14398  |      | 2   | No              |      | 2   | No             |      | 2   | No    |      |       |       | 163   | 50    |
| 14399  |      | 2   | No              |      | 2   | No             |      | 2   | No    |      |       |       | 160   | 50    |
| 14400  |      | 2   | No              |      | 1   | Yes            | 2    | 2   | No    |      |       |       | 154   | 54    |
| 14403  |      | 2   | No              |      | 2   | No             |      | 2   | No    |      |       |       | 161   | 55    |
| 14404  |      | 2   | No              |      | 1   | Yes            | 1    | 2   | No    |      |       |       | 160   | 60    |
| 14405  |      | 2   | No              |      | 2   | No             |      | 2   | No    |      |       |       | 174   | 75    |
| 14407  | 2    | 2   | No              |      | 2   | No             |      | 2   | No    |      |       |       | 168   | 89    |
| 14408  |      | 1   | Yes             | 1    | 2   | No             |      | 2   | No    |      | 5     | 8     |       | 70    |
| 14410  | 1    | 1   | Yes             | 1    | 1   | Yes            | 1    | 1   | Yes   | 1    |       |       | 165   | 70    |
| 14415  | 1    | 2   | No              |      | 1   | Yes            | 1    | 2   | No    |      |       |       | 177   | 74    |

| respid | Q11a | Q12 | Cardiac Disease | Q12a | Q13 | Hyperlipidemia | Q13a | Q14 | Neuro | Q14a | Q15_1 | Q15_2 | Q15_3 | Q16_1 |
|--------|------|-----|-----------------|------|-----|----------------|------|-----|-------|------|-------|-------|-------|-------|
| 14419  |      | 2   | No              |      | 2   | No             |      | 2   | No    |      |       |       | 157   | 57    |
| 14420  |      | 2   | No              |      | 2   | No             |      | 2   | No    |      |       |       | 160   | 50    |
| 14421  |      | 2   | No              |      | 2   | No             |      | 2   | No    |      |       |       | 172   | 75    |
| 14423  |      | 2   | No              |      | 2   | No             |      | 2   | No    |      |       |       | 177   | 60    |
| 14424  | 1    | 2   | No              |      | 2   | No             |      | 2   | No    |      |       |       | 171   | 84    |
| 14425  | 2    | 2   | No              |      | 2   | No             |      | 2   | No    |      |       |       | 163   | 70    |
| 14426  |      | 2   | No              |      | 2   | No             |      | 2   | No    |      |       |       | 172   | 69    |
| 14427  |      | 2   | No              |      | 2   | No             |      | 2   | No    |      |       |       | 166   | 56    |
| 14428  | 1    | 1   | Yes             | 1    | 1   | Yes            | 1    | 1   | Yes   | 1    |       |       | 170   | 62    |
| 14431  |      | 2   | No              |      | 2   | No             |      | 2   | No    |      |       |       | 165   | 60    |
| 14433  |      | 2   | No              |      | 2   | No             |      | 2   | No    |      |       |       | 183   | 90    |
| 14434  |      | 2   | No              |      | 2   | No             |      | 2   | No    |      |       |       | 163   | 72    |
| 14435  |      | 2   | No              |      | 1   | Yes            | 2    | 2   | No    |      |       |       | 154   | 53    |
| 14436  |      | 2   | No              |      | 2   | No             |      | 2   | No    |      |       |       | 150   | 65    |
| 14438  | 2    | 2   | No              |      | 2   | No             |      | 2   | No    |      |       |       | 173   | 76    |
| 14442  | 1    | 2   | No              |      | 2   | No             |      | 2   | No    |      |       |       | 156   | 53    |
| 14447  |      | 2   | No              |      | 2   | No             |      | 2   | No    |      |       |       | 170   | 61    |
| 14448  | 2    | 2   | No              |      | 2   | No             |      | 2   | No    |      |       |       | 166   | 75    |
| 14450  | 1    | 2   | No              |      | 1   | Yes            | 1    | 2   | No    |      |       |       | 165   | 65    |
| 14451  |      | 2   | No              |      | 1   | Yes            | 1    | 2   | No    |      |       |       | 157   | 51    |
| 14454  | 1    | 2   | No              |      | 2   | No             |      | 1   | Yes   | 1    |       |       | 170   | 75    |
| 14455  |      | 2   | No              |      | 1   | Yes            | 2    | 2   | No    |      |       |       | 149   | 70    |
| 14456  |      | 2   | No              |      | 2   | No             |      | 2   | No    |      |       |       | 176   | 70    |
| 14457  | 1    | 1   | Yes             | 1    | 1   | Yes            | 1    | 1   | Yes   | 1    |       |       | 170   | 80    |
| 14458  | 1    | 1   | Yes             | 1    | 1   | Yes            | 1    | 1   | Yes   | 1    |       |       | 172   | 62    |
| 14459  |      | 2   | No              |      | 2   | No             |      | 2   | No    |      |       |       | 159   | 70    |
| 14460  |      | 2   | No              |      | 2   | No             |      | 2   | No    |      |       |       | 171   | 66    |
| 14464  |      | 2   | No              |      | 2   | No             |      | 2   | No    |      |       |       | 158   | 49    |
| 14465  | 1    | 2   | No              |      | 1   | Yes            | 2    | 2   | No    |      |       |       | 174   | 76    |
| 14466  |      | 2   | No              |      | 2   | No             |      | 2   | No    |      |       |       | 170   | 66    |
| 14467  | 1    | 1   | Yes             | 1    | 2   | No             |      | 2   | No    |      |       |       | 160   | 59    |
| 14470  | 1    | 2   | No              |      | 2   | No             |      | 2   | No    |      |       |       | 153   | 58    |



| respid | Q11a | Q12 | Cardiac Disease | Q12a | Q13 | Hyperlipidemia | Q13a | Q14 | Neuro | Q14a | Q15_1 | Q15_2 | Q15_3 | Q16_1 |
|--------|------|-----|-----------------|------|-----|----------------|------|-----|-------|------|-------|-------|-------|-------|
| 14472  |      | 2   | No              |      | 2   | No             |      | 2   | No    |      |       |       | 169   | 57    |
| 14473  |      | 2   | No              |      | 2   | No             |      | 2   | No    |      |       |       | 158   | 55    |
| 14474  |      | 2   | No              |      | 2   | No             |      | 2   | No    |      |       |       | 158   | 65    |
| 14477  |      | 2   | No              |      | 2   | No             |      | 2   | No    |      |       |       | 165   | 45    |
| 14478  |      | 2   | No              |      | 2   | No             |      | 2   | No    |      |       |       | 162   | 53    |
| 14479  |      | 2   | No              |      | 2   | No             |      | 2   | No    |      |       |       | 172   | 71    |
| 14484  | 2    | 2   | No              |      | 1   | Yes            | 2    | 2   | No    |      |       |       | 163   | 73    |
| 14485  |      | 2   | No              |      | 2   | No             |      | 2   | No    |      |       |       | 175   | 67    |
| 14486  | 2    | 2   | No              |      | 1   | Yes            | 2    | 2   | No    |      |       |       | 176   |       |
| 14487  | 2    | 2   | No              |      | 2   | No             |      | 2   | No    |      |       |       | 175   | 73    |
| 14488  |      | 2   | No              |      | 2   | No             |      | 2   | No    |      |       |       | 170   | 60    |
| 14491  |      | 2   | No              |      | 1   | Yes            | 2    | 2   | No    |      |       |       | 168   | 68    |
| 14495  |      | 2   | No              |      | 2   | No             |      | 2   | No    |      |       |       | 158   | 65    |
| 14500  |      | 2   | No              |      | 2   | No             |      | 2   | No    |      |       |       | 161   | 51    |
| 14502  |      | 2   | No              |      | 2   | No             |      | 2   | No    |      |       |       | 169   | 68    |
| 14504  | 1    | 2   | No              |      | 2   | No             |      | 1   | Yes   | 1    |       |       | 175   | 75    |
| 14505  | 1    | 1   | Yes             | 1    | 1   | Yes            | 1    | 1   | Yes   | 2    |       |       | 162   | 70    |
| 14507  |      | 2   | No              |      | 2   | No             |      | 2   | No    |      |       |       | 169   | 75    |
| 14517  |      | 2   | No              |      | 1   | Yes            | 2    | 2   | No    |      |       |       | 153   | 52    |
| 14518  |      | 2   | No              |      | 2   | No             |      | 2   | No    |      |       |       | 161   | 53    |
| 14519  |      | 2   | No              |      | 2   | No             |      | 2   | No    |      |       |       | 154   | 44    |
| 14521  | 1    | 1   | Yes             | 1    | 1   | Yes            | 1    | 2   | No    |      |       |       | 176   | 62    |
| 14522  | 1    | 2   | No              |      | 2   | No             |      | 2   | No    |      |       |       | 160   | 65    |
| 14526  |      | 2   | No              |      | 1   | Yes            | 2    | 2   | No    |      |       |       | 160   | 67    |
| 14528  | 1    | 1   | Yes             | 1    | 1   | Yes            | 1    | 2   | No    |      |       |       | 170   | 70    |
| 14529  |      | 2   | No              |      | 2   | No             |      | 2   | No    |      |       |       | 170   | 70    |
| 14530  | 1    | 2   | No              |      | 1   | Yes            | 1    | 2   | No    |      |       |       | 170   | 65    |
| 14531  |      | 1   | Yes             | 1    | 1   | Yes            | 1    | 2   | No    |      |       |       | 175   | 75    |
| 14534  | 1    | 2   | No              |      | 2   | No             |      | 1   | Yes   | 1    |       |       | 170   | 60    |
| 14538  | 1    | 2   | No              |      | 2   | No             |      | 2   | No    |      |       |       | 170   | 74    |
| 14539  |      | 2   | No              |      | 2   | No             |      | 2   | No    |      |       |       | 176   | 78    |
| 14545  |      | 2   | No              |      | 2   | No             |      | 2   | No    |      |       |       | 160   | 56    |

| respid | Q11a | Q12 | Cardiac Disease | Q12a | Q13 | Hyperlipidemia | Q13a | Q14 | Neuro | Q14a | Q15_1 | Q15_2 | Q15_3 | Q16_1 |
|--------|------|-----|-----------------|------|-----|----------------|------|-----|-------|------|-------|-------|-------|-------|
| 14546  |      | 2   | No              |      | 2   | No             |      | 2   | No    |      |       |       | 156   | 59    |
| 14551  |      | 2   | No              |      | 2   | No             |      | 2   | No    |      |       |       | 165   | 92    |
| 14553  | 1    | 2   | No              |      | 2   | No             |      | 2   | No    |      |       |       | 170   | 62    |
| 14557  |      | 2   | No              |      | 2   | No             |      | 2   | No    |      |       |       | 160   | 55    |
| 14558  | 2    | 1   | Yes             | 2    | 2   | No             |      | 2   | No    |      |       |       | 169   | 72    |
| 14559  | 1    | 1   | Yes             | 1    | 1   | Yes            | 1    | 2   | No    |      |       |       | 166   | 61    |
| 14560  |      | 2   | No              |      | 2   | No             |      | 2   | No    |      |       |       | 156   | 63    |
| 14563  |      | 2   | No              |      | 2   | No             |      | 2   | No    |      |       |       | 160   | 60    |
| 14565  |      | 2   | No              |      | 2   | No             |      | 2   | No    |      |       |       | 165   | 60    |
| 14571  |      | 1   | Yes             | 2    | 1   | Yes            | 1    | 1   | Yes   | 1    |       |       | 162   | 75    |
| 14572  | 2    | 1   | Yes             | 2    | 2   | No             |      | 2   | No    |      |       |       | 170   | 60    |
| 14573  |      | 2   | No              |      | 1   | Yes            | 2    | 2   | No    |      |       |       | 155   | 50    |
| 14575  |      | 2   | No              |      | 2   | No             |      | 2   | No    |      |       |       | 165   | 56    |
| 14576  | 1    | 1   | Yes             | 1    | 2   | No             |      | 2   | No    |      |       |       | 158   | 52    |
| 14578  | 1    | 2   | No              |      | 1   | Yes            | 1    | 2   | No    |      |       |       | 156   | 67    |
| 14579  |      | 2   | No              |      | 2   | No             |      | 2   | No    |      |       |       | 162   | 61    |
| 14580  |      | 2   | No              |      | 2   | No             |      | 2   | No    |      |       |       | 176   | 89    |
| 14582  | 1    | 2   | No              |      | 1   | Yes            | 2    | 2   | No    |      |       |       | 158   | 49    |
| 14585  |      | 2   | No              |      | 1   | Yes            | 2    | 2   | No    |      |       |       | 155   | 58    |
| 14588  |      | 2   | No              |      | 2   | No             |      | 2   | No    |      |       |       | 160   | 45    |
| 14590  | 1    | 2   | No              |      | 1   | Yes            | 2    | 2   | No    |      |       |       | 180   | 78    |
| 14592  |      | 2   | No              |      | 1   | Yes            | 1    | 2   | No    |      |       |       | 155   | 57    |
| 14593  | 2    | 1   | Yes             | 2    | 2   | No             |      | 2   | No    |      |       |       | 169   | 66    |
| 14595  | 1    | 2   | No              |      | 2   | No             |      | 1   | Yes   | 1    |       |       | 176   | 76    |
| 14597  |      | 2   | No              |      | 1   | Yes            | 2    | 2   | No    |      |       |       | 160   | 68    |
| 14600  | 1    | 2   | No              |      | 2   | No             |      | 2   | No    |      |       |       | 163   | 76    |
| 14602  |      | 2   | No              |      | 2   | No             |      | 2   | No    |      |       |       | 170   | 62    |
| 14604  | 1    | 2   | No              |      | 1   | Yes            | 1    | 2   | No    |      |       |       | 173   | 65    |
| 14605  |      | 2   | No              |      | 2   | No             |      | 2   | No    |      |       |       | 165   | 70    |
| 14609  |      | 2   | No              |      | 2   | No             |      | 2   | No    |      |       |       | 158   | 55    |
| 14610  |      | 2   | No              |      | 2   | No             |      | 2   | No    |      |       |       | 180   | 82    |
| 14611  | 2    | 2   | No              |      | 2   | No             |      | 2   | No    |      |       |       | 164   | 61    |

| respid | Q11a | Q12 | Cardiac Disease | Q12a | Q13 | Hyperlipidemia | Q13a | Q14 | Neuro | Q14a | Q15_1 | Q15_2 | Q15_3 | Q16_1 |
|--------|------|-----|-----------------|------|-----|----------------|------|-----|-------|------|-------|-------|-------|-------|
| 14612  |      | 2   | No              |      | 1   | Yes            | 2    | 2   | No    |      |       |       | 174   | 81    |
| 14614  |      | 2   | No              |      | 2   | No             |      | 2   | No    |      |       |       | 168   | 50    |
| 14615  |      | 2   | No              |      | 2   | No             |      | 2   | No    |      |       |       | 157   | 68    |
| 14618  | 1    | 1   | Yes             | 1    | 1   | Yes            | 1    | 1   | Yes   | 1    | 5     | 9     |       |       |
| 14621  |      | 2   | No              |      | 2   | No             |      | 2   | No    |      |       |       | 162   | 53    |
| 14624  |      | 2   | No              |      | 2   | No             |      | 2   | No    |      |       |       | 161   | 53    |
| 14626  |      | 2   | No              |      | 1   | Yes            | 2    | 2   | No    |      |       |       | 154   | 55    |
| 14627  |      | 2   | No              |      | 2   | No             |      | 2   | No    |      |       |       | 160   | 48    |
| 14628  | 1    | 1   | Yes             | 1    | 1   | Yes            | 1    | 1   | Yes   | 1    |       |       | 159   | 75    |
| 14631  |      | 2   | No              |      | 2   | No             |      | 2   | No    |      |       |       | 165   | 68    |
| 14633  | 1    | 1   | Yes             | 1    | 2   | No             |      | 2   | No    |      |       |       | 166   | 52    |
| 14642  |      | 2   | No              |      | 2   | No             |      | 2   | No    |      |       |       | 175   | 65    |
| 14647  |      | 2   | No              |      | 2   | No             |      | 2   | No    |      |       |       | 173   | 72    |
| 14658  |      | 2   | No              |      | 2   | No             |      | 2   | No    |      |       |       | 175   | 80    |
| 14659  | 1    | 1   | Yes             | 1    | 1   | Yes            | 1    | 1   | Yes   | 1    |       |       | 172   | 65    |
| 14660  |      | 2   | No              |      | 2   | No             |      | 2   | No    |      |       |       | 170   | 68    |
| 14661  |      | 1   | Yes             | 1    | 2   | No             |      | 2   | No    |      |       |       | 169   | 75    |
| 14662  | 2    | 1   | Yes             | 2    | 1   | Yes            | 1    | 1   | Yes   | 1    |       |       | 170   | 80    |
| 14663  | 1    | 1   | Yes             | 2    | 2   | No             |      | 2   | No    |      |       |       | 182   | 86    |
| 14670  | 2    | 2   | No              |      | 2   | No             |      | 2   | No    |      |       |       | 169   | 76    |
| 14671  |      | 2   | No              |      | 2   | No             |      | 2   | No    |      |       |       | 168   | 70    |
| 14672  | 1    | 2   | No              |      | 1   | Yes            | 2    | 1   | Yes   | 1    |       |       | 168   | 65    |
| 14675  |      | 2   | No              |      | 2   | No             |      | 2   | No    |      |       |       | 168   | 60    |
| 14676  | 2    | 2   | No              |      | 2   | No             |      | 2   | No    |      |       |       | 171   | 75    |
| 14677  | 2    | 1   | Yes             | 1    | 2   | No             |      | 1   | Yes   | 1    |       |       | 150   | 60    |
| 14678  |      | 1   | Yes             | 2    | 2   | No             |      | 1   | Yes   | 2    |       |       | 169   | 75    |
| 14681  |      | 1   | Yes             | 1    | 2   | No             |      | 2   | No    |      |       |       | 168   | 68    |
| 14684  | 1    | 2   | No              |      | 2   | No             |      | 2   | No    |      |       |       | 166   | 65    |
| 14688  |      | 2   | No              |      | 2   | No             |      | 2   | No    |      | 4     | 5     |       | 67    |
| 14690  |      | 2   | No              |      | 2   | No             |      | 2   | No    |      |       |       | 165   | 65    |
| 14694  | 1    | 2   | No              |      | 1   | Yes            | 1    | 1   | Yes   | 1    |       |       | 178   | 76    |
| 14696  |      | 2   | No              |      | 2   | No             |      | 2   | No    |      |       |       | 170   | 62    |

| respid | Q11a | Q12 | Cardiac Disease | Q12a | Q13 | Hyperlipidemia | Q13a | Q14 | Neuro | Q14a | Q15_1 | Q15_2 | Q15_3 | Q16_1 |
|--------|------|-----|-----------------|------|-----|----------------|------|-----|-------|------|-------|-------|-------|-------|
| 14700  |      | 2   | No              |      | 2   | No             |      | 2   | No    |      |       |       | 150   | 50    |
| 14701  | 2    | 2   | No              |      | 1   | Yes            | 2    | 2   | No    |      |       |       | 172   | 80    |
| 14703  | 1    | 1   | Yes             | 1    | 1   | Yes            | 1    | 1   | Yes   | 1    |       |       | 162   | 70    |
| 14707  |      | 2   | No              |      | 2   | No             |      | 2   | No    |      |       |       | 175   | 62    |
| 14711  | 1    | 2   | No              |      | 1   | Yes            | 1    | 1   | Yes   | 1    |       |       | 180   | 75    |
| 14714  |      | 2   | No              |      | 2   | No             |      | 2   | No    |      | 4     | 5     |       | 52    |
| 14715  | 1    | 1   | Yes             | 1    | 1   | Yes            | 1    | 1   | Yes   | 1    |       |       | 170   | 56    |
| 14716  |      | 1   | Yes             | 1    | 1   | Yes            | 1    | 2   | No    |      |       |       | 155   | 60    |
| 14720  |      | 2   | No              |      | 2   | No             |      | 2   | No    |      |       |       | 171   | 72    |
| 14725  | 2    | 2   | No              |      | 1   | Yes            | 2    | 2   | No    |      |       |       | 168   | 53    |
| 14726  |      | 2   | No              |      | 2   | No             |      | 2   | No    |      |       |       | 163   | 72    |
| 14734  |      | 2   | No              |      | 2   | No             |      | 2   | No    |      |       |       | 160   | 76    |
| 14735  |      | 2   | No              |      | 2   | No             |      | 2   | No    |      |       |       | 169   | 69    |
| 14736  | 1    | 1   | Yes             | 1    | 1   | Yes            | 1    | 2   | No    |      |       |       | 172   | 63    |
| 14740  |      | 2   | No              |      | 2   | No             |      | 2   | No    |      |       |       | 174   | 79    |
| 14745  |      | 1   | Yes             | 2    | 2   | No             |      | 2   | No    |      |       |       | 174   | 75    |
| 14747  | 2    | 2   | No              |      | 2   | No             |      | 2   | No    |      |       |       | 168   | 82    |
| 14750  | 2    | 2   | No              |      | 1   | Yes            | 2    | 1   | Yes   | 1    |       |       | 173   | 75    |
| 14751  |      | 1   | Yes             | 1    | 2   | No             |      | 2   | No    |      |       |       | 171   | 78    |
| 14753  |      | 1   | Yes             | 1    | 2   | No             |      | 2   | No    |      |       |       | 174   | 85    |
| 14756  |      | 2   | No              |      | 2   | No             |      | 2   | No    |      |       |       | 156   | 43    |
| 14780  |      | 2   | No              |      | 2   | No             |      | 2   | No    |      |       |       | 160   | 60    |
| 14782  |      | 2   | No              |      | 2   | No             |      | 2   | No    |      |       |       | 170   | 58    |
| 14800  | 1    | 1   | Yes             | 1    | 1   | Yes            | 1    | 1   | Yes   | 1    |       |       | 165   | 58    |
| 14801  |      | 2   | No              |      | 2   | No             |      | 2   | No    |      |       |       | 165   | 70    |
| 14802  | 1    | 1   | Yes             | 1    | 1   | Yes            | 1    | 1   | Yes   | 1    |       |       | 150   | 60    |
| 14805  |      | 2   | No              |      | 2   | No             |      | 2   | No    |      |       |       | 163   | 64    |
| 14811  |      | 2   | No              |      | 2   | No             |      | 2   | No    |      |       |       | 159   | 58    |
| 14814  | 1    | 1   | Yes             | 1    | 1   | Yes            | 1    | 2   | No    |      |       |       | 160   | 65    |
| 14822  | 1    | 1   | Yes             | 1    | 1   | Yes            | 1    | 1   | Yes   | 1    |       |       | 170   | 62    |
| 14827  | 1    | 1   | Yes             | 1    | 1   | Yes            | 1    | 1   | Yes   | 1    |       |       | 159   | 120   |
| 14828  |      | 2   | No              |      | 2   | No             |      | 2   | No    |      |       |       | 168   | 60    |

| respid | Q11a | Q12 | Cardiac Disease | Q12a | Q13 | Hyperlipidemia | Q13a | Q14 | Neuro | Q14a | Q15_1 | Q15_2 | Q15_3 | Q16_1 |
|--------|------|-----|-----------------|------|-----|----------------|------|-----|-------|------|-------|-------|-------|-------|
| 14830  | 1    | 2   | No              |      | 2   | No             |      | 2   | No    |      |       |       | 165   | 62    |
| 14832  | 1    | 1   | Yes             | 2    | 2   | No             |      | 2   | No    |      |       |       | 158   | 60    |
| 14835  |      | 2   | No              |      | 2   | No             |      | 2   | No    |      |       |       | 164   | 64    |
| 14841  |      | 1   | Yes             | 2    | 2   | No             |      | 2   | No    |      |       |       | 165   | 65    |
| 14849  |      | 2   | No              |      | 2   | No             |      | 2   | No    |      |       |       | 154   | 50    |
| 14850  |      | 2   | No              |      | 2   | No             |      | 2   | No    |      |       |       | 175   | 75    |
| 14851  | 2    | 2   | No              |      | 2   | No             |      | 2   | No    |      |       |       | 166   | 58    |
| 14856  |      | 2   | No              |      | 2   | No             |      | 2   | No    |      |       |       | 158   | 58    |
| 14862  | 1    | 1   | Yes             | 1    | 1   | Yes            | 1    | 1   | Yes   | 1    |       |       | 170   | 62    |
| 14863  |      | 2   | No              |      | 2   | No             |      | 2   | No    |      |       |       | 162   | 75    |
| 14864  |      | 2   | No              |      | 2   | No             |      | 2   | No    |      |       |       | 165   | 60    |
| 14866  |      | 2   | No              |      | 2   | No             |      | 2   | No    |      |       |       | 155   | 55    |
| 14867  |      | 2   | No              |      | 2   | No             |      | 2   | No    |      |       |       | 158   | 58    |
| 14868  |      | 2   | No              |      | 2   | No             |      | 2   | No    |      |       |       | 170   | 60    |
| 14870  |      | 2   | No              |      | 2   | No             |      | 2   | No    |      |       |       | 175   | 58    |
| 14873  |      | 2   | No              |      | 2   | No             |      | 2   | No    |      |       |       | 175   | 63    |
| 14878  |      | 2   | No              |      | 2   | No             |      | 2   | No    |      |       |       | 162   | 100   |
| 14879  | 1    | 2   | No              |      | 1   | Yes            | 2    | 2   | No    |      |       |       | 171   | 70    |
| 14881  | 1    | 2   | No              |      | 2   | No             |      | 2   | No    |      |       |       | 159   | 60    |
| 14888  | 1    | 1   | Yes             | 1    | 1   | Yes            | 1    | 1   | Yes   | 1    |       |       | 165   | 50    |
| 14895  |      | 2   | No              |      | 2   | No             |      | 2   | No    |      |       |       | 161   | 64    |
| 14900  | 1    | 1   | Yes             | 1    | 1   | Yes            | 1    | 1   | Yes   | 1    |       |       | 164   | 51    |
| 14912  |      | 2   | No              |      | 2   | No             |      | 2   | No    |      |       |       | 172   | 60    |
| 14922  | 1    | 1   | Yes             | 1    | 1   | Yes            | 1    | 1   | Yes   | 1    |       |       | 170   | 62    |
| 14923  | 1    | 1   | Yes             | 1    | 1   | Yes            | 1    | 1   | Yes   | 1    |       |       | 161   | 46    |
| 14924  | 1    | 1   | Yes             | 1    | 1   | Yes            | 1    | 2   | No    |      |       |       | 174   | 120   |
| 14925  |      | 2   | No              |      | 1   | Yes            | 1    | 1   | Yes   | 1    |       |       | 163   | 70    |
| 14926  |      | 2   | No              |      | 2   | No             |      | 2   | No    |      |       |       | 161   | 59    |
| 14927  |      | 2   | No              |      | 2   | No             |      | 2   | No    |      |       |       | 161   | 55    |
| 14930  |      | 2   | No              |      | 2   | No             |      | 2   | No    |      |       |       | 165   | 54    |
| 14937  |      | 2   | No              |      | 2   | No             |      | 2   | No    |      |       |       | 168   | 58    |
| 14938  | 1    | 1   | Yes             | 1    | 1   | Yes            | 1    | 1   | Yes   | 1    |       |       | 165   | 56    |

| respid | Q11a | Q12 | Cardiac Disease | Q12a | Q13 | Hyperlipidemia | Q13a | Q14 | Neuro | Q14a | Q15_1 | Q15_2 | Q15_3 | Q16_1 |
|--------|------|-----|-----------------|------|-----|----------------|------|-----|-------|------|-------|-------|-------|-------|
| 14939  |      | 2   | No              |      | 2   | No             |      | 2   | No    |      |       |       | 170   | 56    |
| 14942  |      | 2   | No              |      | 2   | No             |      | 2   | No    |      |       |       | 165   | 55    |
| 14943  |      | 2   | No              |      | 2   | No             |      | 2   | No    |      |       |       | 169   | 61    |
| 14953  |      | 2   | No              |      | 2   | No             |      | 2   | No    |      |       |       | 162   | 63    |
| 14954  |      | 2   | No              |      | 2   | No             |      | 2   | No    |      |       |       | 163   | 52    |
| 14955  | 1    | 1   | Yes             | 1    | 2   | No             |      | 2   | No    |      |       |       | 175   | 60    |
| 14957  |      | 2   | No              |      | 1   | Yes            | 1    | 2   | No    |      |       |       | 155   | 50    |
| 14958  | 1    | 1   | Yes             | 1    | 1   | Yes            | 1    | 1   | Yes   | 1    |       |       | 162   | 52    |
| 14959  |      | 1   | Yes             | 1    | 2   | No             |      | 2   | No    |      |       |       | 155   | 58    |
| 14961  |      | 2   | No              |      | 2   | No             |      | 2   | No    |      |       |       | 168   | 52    |
| 14963  |      | 2   | No              |      | 2   | No             |      | 2   | No    |      |       |       | 168   | 68    |
| 14964  |      | 2   | No              |      | 2   | No             |      | 2   | No    |      |       |       | 178   | 76    |
| 14965  |      | 2   | No              |      | 2   | No             |      | 2   | No    |      |       |       | 162   | 53    |
| 14967  |      | 2   | No              |      | 1   | Yes            | 2    | 1   | Yes   | 2    |       |       | 172   | 50    |
| 14970  | 1    | 1   | Yes             | 1    | 1   | Yes            | 1    | 1   | Yes   | 1    |       |       | 163   | 54    |
| 14972  |      | 2   | No              |      | 2   | No             |      | 2   | No    |      |       |       | 164   | 58    |
| 14975  | 1    | 1   | Yes             | 1    | 1   | Yes            | 1    | 2   | No    |      |       |       | 159   | 65    |
| 14977  |      | 2   | No              |      | 2   | No             |      | 2   | No    |      |       |       | 165   | 58    |
| 14982  | 1    | 1   | Yes             | 1    | 1   | Yes            | 1    | 2   | No    |      |       |       | 170   | 95    |
| 14985  |      | 2   | No              |      | 2   | No             |      | 2   | No    |      |       |       | 170   | 67    |
| 14986  | 2    | 2   | No              |      | 2   | No             |      | 2   | No    |      |       |       | 160   | 60    |
| 14987  |      | 2   | No              |      | 2   | No             |      | 2   | No    |      |       |       | 158   | 52    |
| 14988  | 1    | 1   | Yes             | 1    | 1   | Yes            | 1    | 1   | Yes   | 1    |       |       | 163   | 45    |
| 14989  | 2    | 1   | Yes             | 2    | 1   | Yes            | 2    | 2   | No    |      |       |       | 160   | 80    |
| 14993  |      | 2   | No              |      | 2   | No             |      | 2   | No    |      |       |       | 170   | 65    |
| 15001  |      | 2   | No              |      | 2   | No             |      | 2   | No    |      |       |       | 178   | 76    |
| 15002  | 1    | 1   | Yes             | 1    | 2   | No             |      | 1   | Yes   | 1    |       |       | 160   | 50    |
| 15006  |      | 1   | Yes             | 2    | 1   | Yes            | 1    | 2   | No    |      |       |       | 172   | 73    |
| 15007  |      | 2   | No              |      | 2   | No             |      | 2   | No    |      |       |       | 161   | 55    |
| 15014  |      | 2   | No              |      | 2   | No             |      | 2   | No    |      |       |       | 170   | 56    |
| 15020  |      | 2   | No              |      | 1   | Yes            | 2    | 2   | No    |      |       |       | 174   | 64    |
| 15021  |      | 2   | No              |      | 2   | No             |      | 2   | No    |      |       |       | 162   | 62    |

| respid | Q11a | Q12 | Cardiac Disease | Q12a | Q13 | Hyperlipidemia | Q13a | Q14 | Neuro | Q14a | Q15_1 | Q15_2 | Q15_3 | Q16_1 |
|--------|------|-----|-----------------|------|-----|----------------|------|-----|-------|------|-------|-------|-------|-------|
| 15023  | 1    | 1   | Yes             | 1    | 1   | Yes            | 1    | 1   | Yes   | 1    |       |       | 159   | 53    |
| 15030  |      | 2   | No              |      | 2   | No             |      | 2   | No    |      |       |       | 161   | 52    |
| 15032  |      | 2   | No              |      | 2   | No             |      | 2   | No    |      |       |       | 156   | 50    |
| 15033  |      | 2   | No              |      | 1   | Yes            | 2    | 1   | Yes   | 1    |       |       | 160   | 68    |
| 15034  |      | 2   | No              |      | 2   | No             |      | 2   | No    |      |       |       | 170   | 63    |
| 15035  |      | 2   | No              |      | 2   | No             |      | 2   | No    |      |       |       | 166   | 63    |
| 15037  |      | 2   | No              |      | 2   | No             |      | 2   | No    |      |       |       | 169   | 78    |
| 15039  |      | 2   | No              |      | 2   | No             |      | 2   | No    |      |       |       | 162   | 62    |
| 15040  |      | 2   | No              |      | 2   | No             |      | 2   | No    |      |       |       | 177   | 82    |
| 15042  |      | 2   | No              |      | 2   | No             |      | 2   | No    |      |       |       | 167   | 64    |
| 15044  |      | 2   | No              |      | 2   | No             |      | 2   | No    |      |       |       | 163   | 53    |
| 15045  |      | 2   | No              |      | 2   | No             |      | 2   | No    |      |       |       | 166   | 60    |
| 15046  |      | 2   | No              |      | 2   | No             |      | 2   | No    |      |       |       | 172   | 62    |
| 15052  |      | 2   | No              |      | 2   | No             |      | 1   | Yes   | 1    |       |       | 162   | 67    |
| 15058  | 1    | 2   | No              |      | 2   | No             |      | 2   | No    |      |       |       | 160   | 60    |
| 15063  |      | 2   | No              |      | 2   | No             |      | 2   | No    |      |       |       | 162   | 63    |
| 15066  |      | 2   | No              |      | 2   | No             |      | 2   | No    |      |       |       | 178   | 65    |
| 15069  | 1    | 2   | No              |      | 1   | Yes            | 2    | 2   | No    |      |       |       | 169   | 70    |
| 15071  | 1    | 1   | Yes             | 1    | 1   | Yes            | 1    | 1   | Yes   | 1    |       |       | 178   | 60    |
| 15076  |      | 1   | Yes             | 1    | 2   | No             |      | 2   | No    |      |       |       | 168   | 77    |
| 15078  |      | 2   | No              |      | 2   | No             |      | 2   | No    |      |       |       | 157   | 54    |
| 15087  |      | 2   | No              |      | 2   | No             |      | 2   | No    |      |       |       | 160   | 60    |
| 15090  | 2    | 2   | No              |      | 2   | No             |      | 2   | No    |      |       |       | 162   | 62    |
| 15091  | 1    | 2   | No              |      | 2   | No             |      | 2   | No    |      |       |       | 150   | 75    |
| 15092  |      | 2   | No              |      | 2   | No             |      | 2   | No    |      |       |       | 170   | 60    |
| 15096  | 1    | 2   | No              |      | 2   | No             |      | 2   | No    |      |       |       | 175   | 68    |
| 15106  |      | 2   | No              |      | 2   | No             |      | 2   | No    |      |       |       | 162   | 62    |
| 15108  |      | 1   | Yes             | 1    | 2   | No             |      | 2   | No    |      |       |       | 155   | 54    |
| 15113  |      | 2   | No              |      | 2   | No             |      | 2   | No    |      |       |       | 165   | 70    |
| 15116  |      | 2   | No              |      | 2   | No             |      | 2   | No    |      |       |       | 156   | 55    |
| 15119  | 1    | 2   | No              |      | 2   | No             |      | 2   | No    |      |       |       | 175   | 70    |
| 15120  |      | 2   | No              |      | 2   | No             |      | 2   | No    |      |       |       | 175   | 65    |

| respid | Q11a | Q12 | Cardiac Disease | Q12a | Q13 | Hyperlipidemia | Q13a | Q14 | Neuro | Q14a | Q15_1 | Q15_2 | Q15_3 | Q16_1 |
|--------|------|-----|-----------------|------|-----|----------------|------|-----|-------|------|-------|-------|-------|-------|
| 15121  |      | 2   | No              |      | 2   | No             |      | 2   | No    |      |       |       | 169   | 60    |
| 15123  |      | 2   | No              |      | 2   | No             |      | 2   | No    |      | 4     | 5     |       | 65    |
| 15124  |      | 2   | No              |      | 2   | No             |      | 2   | No    |      |       |       | 170   | 55    |
| 15128  |      | 2   | No              |      | 2   | No             |      | 2   | No    |      |       |       | 165   | 50    |
| 15131  |      | 2   | No              |      | 2   | No             |      | 2   | No    |      |       |       | 157   | 55    |
| 15136  |      | 2   | No              |      | 2   | No             |      | 2   | No    |      |       |       | 158   | 60    |
| 15137  | 1    | 2   | No              |      | 2   | No             |      | 2   | No    |      |       |       | 168   | 65    |
| 15141  |      | 2   | No              |      | 2   | No             |      | 2   | No    |      |       |       | 174   | 70    |
| 15144  |      | 2   | No              |      | 2   | No             |      | 2   | No    |      |       |       | 158   | 60    |
| 15147  |      | 2   | No              |      | 1   | Yes            | 1    | 2   | No    |      |       |       | 170   | 64    |
| 15151  | 1    | 2   | No              |      | 2   | No             |      | 2   | No    |      |       |       | 165   | 100   |
| 15154  |      | 2   | No              |      | 2   | No             |      | 2   | No    |      |       |       | 156   | 58    |
| 15157  | 1    | 2   | No              |      | 2   | No             |      | 2   | No    |      |       |       | 180   | 90    |
| 15164  | 1    | 1   | Yes             | 1    | 2   | No             |      | 2   | No    |      |       |       | 162   | 50    |
| 15168  | 1    | 2   | No              |      | 2   | No             |      | 2   | No    |      |       |       | 180   | 65    |
| 15169  |      | 2   | No              |      | 2   | No             |      | 2   | No    |      |       |       | 169   | 64    |
| 15172  |      | 2   | No              |      | 2   | No             |      | 2   | No    |      |       |       | 165   | 56    |
| 15177  |      | 2   | No              |      | 2   | No             |      | 2   | No    |      |       |       | 154   | 53    |
| 15178  |      | 1   | Yes             | 1    | 2   | No             |      | 2   | No    |      |       |       | 155   | 50    |
| 15180  | 1    | 1   | Yes             | 1    | 1   | Yes            | 1    | 1   | Yes   | 1    |       |       | 170   | 62    |
| 15181  |      | 2   | No              |      | 2   | No             |      | 2   | No    |      |       |       | 172   | 60    |
| 15182  |      | 2   | No              |      | 2   | No             |      | 2   | No    |      |       |       | 177   | 64    |
| 15183  |      | 2   | No              |      | 2   | No             |      | 2   | No    |      | 4     | 5     |       | 60    |
| 15188  |      | 2   | No              |      | 2   | No             |      | 2   | No    |      |       |       | 159   | 60    |
| 15190  | 1    | 1   | Yes             | 1    | 1   | Yes            | 1    | 1   | Yes   | 1    |       |       | 165   | 50    |
| 15195  |      | 2   | No              |      | 2   | No             |      | 2   | No    |      |       |       | 156   | 45    |
| 15201  | 1    | 1   | Yes             | 1    | 1   | Yes            | 1    | 1   | Yes   | 2    |       |       | 162   | 44    |
| 15203  |      | 2   | No              |      | 2   | No             |      | 2   | No    |      |       |       | 180   | 75    |
| 15204  |      | 2   | No              |      | 2   | No             |      | 2   | No    |      |       |       | 180   | 80    |
| 15207  | 2    | 2   | No              |      | 2   | No             |      | 2   | No    |      |       |       | 161   | 50    |
| 15208  |      | 1   | Yes             | 1    | 1   | Yes            | 1    | 1   | Yes   | 1    |       |       | 160   | 52    |
| 15209  |      | 2   | No              |      | 2   | No             |      | 2   | No    |      |       |       | 174   | 69    |



| respid | Q11a | Q12 | Cardiac Disease | Q12a | Q13 | Hyperlipidemia | Q13a | Q14 | Neuro | Q14a | Q15_1 | Q15_2 | Q15_3 | Q16_1 |
|--------|------|-----|-----------------|------|-----|----------------|------|-----|-------|------|-------|-------|-------|-------|
| 15212  |      | 2   | No              |      | 2   | No             |      | 2   | No    |      |       |       | 162   | 56    |
| 15213  |      | 2   | No              |      | 2   | No             |      | 2   | No    |      |       |       | 176   | 74    |
| 15219  |      | 2   | No              |      | 2   | No             |      | 2   | No    |      |       |       | 176   | 72    |
| 15220  |      | 2   | No              |      | 2   | No             |      | 2   | No    |      |       |       | 175   | 64    |
| 15221  |      | 2   | No              |      | 2   | No             |      | 2   | No    |      |       |       | 161   | 52    |
| 15223  | 1    | 1   | Yes             | 1    | 1   | Yes            | 1    | 1   | Yes   | 1    |       |       | 170   | 62    |
| 15224  |      | 2   | No              |      | 2   | No             |      | 2   | No    |      |       |       | 180   | 74    |
| 15225  |      | 2   | No              |      | 2   | No             |      | 2   | No    |      |       |       | 165   | 55    |
| 15226  |      | 2   | No              |      | 2   | No             |      | 2   | No    |      |       |       | 159   | 50    |
| 15230  |      | 2   | No              |      | 2   | No             |      | 2   | No    |      |       |       | 162   | 53    |
| 15231  | 1    | 1   | Yes             | 1    | 1   | Yes            | 1    | 1   | Yes   | 1    |       |       | 161   | 50    |
| 15232  |      | 2   | No              |      | 2   | No             |      | 2   | No    |      | 4     | 5     |       | 65    |
| 15237  |      | 2   | No              |      | 2   | No             |      | 2   | No    |      |       |       | 170   | 67    |
| 15239  |      | 2   | No              |      | 2   | No             |      | 2   | No    |      |       |       | 161   | 49    |
| 15241  |      | 2   | No              |      | 2   | No             |      | 2   | No    |      |       |       | 166   | 58    |
| 15242  | 1    | 2   | No              |      | 2   | No             |      | 2   | No    |      |       |       | 162   | 48    |
| 15247  |      | 2   | No              |      | 2   | No             |      | 2   | No    |      |       |       | 166   | 59    |
| 15248  |      | 2   | No              |      | 2   | No             |      | 2   | No    |      |       |       | 146   | 50    |
| 15251  |      | 2   | No              |      | 2   | No             |      | 2   | No    |      | 5     | 6     |       | 50    |
| 15257  |      | 2   | No              |      | 1   | Yes            | 2    | 2   | No    |      |       |       | 160   | 60    |
| 15260  |      | 2   | No              |      | 2   | No             |      | 2   | No    |      |       |       | 164   | 53    |
| 15261  | 1    | 1   | Yes             | 1    | 1   | Yes            | 1    | 1   | Yes   | 1    |       |       | 168   | 62    |
| 15262  |      | 2   | No              |      | 2   | No             |      | 2   | No    |      |       |       | 176   | 63    |
| 15263  |      | 2   | No              |      | 2   | No             |      | 2   | No    |      |       |       | 176   | 76    |
| 15265  |      | 2   | No              |      | 2   | No             |      | 2   | No    |      |       |       | 163   | 56    |
| 15266  |      | 2   | No              |      | 2   | No             |      | 2   | No    |      |       |       | 169   | 74    |
| 15268  |      | 2   | No              |      | 2   | No             |      | 2   | No    |      |       |       | 174   | 86    |
| 15269  |      | 2   | No              |      | 2   | No             |      | 2   | No    |      |       |       | 168   | 73    |
| 15270  | 2    | 2   | No              |      | 1   | Yes            | 2    | 2   | No    |      |       |       | 175   | 76    |
| 15273  | 1    | 1   | Yes             | 1    | 1   | Yes            | 1    | 2   | No    |      |       |       | 170   | 62    |
| 15276  | 1    | 1   | Yes             | 1    | 1   | Yes            | 1    | 1   | Yes   | 1    |       |       | 173   | 60    |
| 15277  |      | 2   | No              |      | 2   | No             |      | 2   | No    |      |       |       | 163   | 56    |

| respid | Q11a | Q12 | Cardiac Disease | Q12a | Q13 | Hyperlipidemia | Q13a | Q14 | Neuro | Q14a | Q15_1 | Q15_2 | Q15_3 | Q16_1 |
|--------|------|-----|-----------------|------|-----|----------------|------|-----|-------|------|-------|-------|-------|-------|
| 15282  |      | 2   | No              |      | 2   | No             |      | 2   | No    |      |       |       | 160   | 75    |
| 15284  |      | 2   | No              |      | 2   | No             |      | 2   | No    |      |       |       | 168   | 55    |
| 15285  |      | 2   | No              |      | 2   | No             |      | 2   | No    |      |       |       | 155   | 46    |
| 15286  | 1    | 2   | No              |      | 1   | Yes            | 2    | 1   | Yes   | 1    |       |       | 162   | 50    |
| 15288  | 2    | 1   | Yes             | 1    | 1   | Yes            | 1    | 1   | Yes   | 1    |       |       | 168   | 72    |
| 15292  | 1    | 1   | Yes             | 1    | 1   | Yes            | 1    | 1   | Yes   | 1    |       |       | 175   | 65    |
| 15296  |      | 2   | No              |      | 2   | No             |      | 2   | No    |      |       |       | 167   | 65    |
| 15297  |      | 2   | No              |      | 2   | No             |      | 2   | No    |      |       |       | 158   | 50    |
| 15298  |      | 2   | No              |      | 2   | No             |      | 2   | No    |      |       |       | 159   | 50    |
| 15301  |      | 2   | No              |      | 2   | No             |      | 2   | No    |      |       |       | 155   | 55    |
| 15302  |      | 2   | No              |      | 1   | Yes            | 1    | 2   | No    |      |       |       | 168   | 79    |
| 15305  |      | 2   | No              |      | 2   | No             |      | 2   | No    |      |       |       | 168   | 60    |
| 15307  |      | 2   | No              |      | 2   | No             |      | 2   | No    |      |       |       | 178   | 78    |
| 15308  |      | 2   | No              |      | 2   | No             |      | 2   | No    |      |       |       | 165   | 65    |
| 15309  | 1    | 1   | Yes             | 1    | 2   | No             |      | 2   | No    |      |       |       | 192   | 71    |
| 15311  |      | 2   | No              |      | 2   | No             |      | 2   | No    |      |       |       | 173   | 55    |
| 15315  |      | 2   | No              |      | 2   | No             |      | 2   | No    |      |       |       | 171   | 67    |
| 15316  |      | 2   | No              |      | 2   | No             |      | 2   | No    |      |       |       | 160   | 59    |
| 15318  |      | 2   | No              |      | 2   | No             |      | 2   | No    |      |       |       | 158   | 55    |
| 15321  | 1    | 1   | Yes             | 1    | 1   | Yes            | 1    | 1   | Yes   | 1    |       |       | 175   | 62    |
| 15322  | 1    | 2   | No              |      | 2   | No             |      | 2   | No    |      |       |       | 166   | 62    |
| 15324  |      | 2   | No              |      | 2   | No             |      | 2   | No    |      |       |       | 150   | 51    |
| 15326  | 2    | 2   | No              |      | 2   | No             |      | 2   | No    |      |       |       | 176   | 88    |
| 15327  | 1    | 2   | No              |      | 2   | No             |      | 2   | No    |      |       |       | 174   | 73    |
| 15328  |      | 2   | No              |      | 2   | No             |      | 2   | No    |      |       |       | 160   | 50    |
| 15330  |      | 2   | No              |      | 2   | No             |      | 2   | No    |      |       |       | 158   | 57    |
| 15332  |      | 2   | No              |      | 2   | No             |      | 2   | No    |      |       |       | 160   | 50    |
| 15333  |      | 2   | No              |      | 2   | No             |      | 2   | No    |      |       |       | 155   | 42    |
| 15334  |      | 2   | No              |      | 2   | No             |      | 2   | No    |      |       |       | 176   | 89    |
| 15336  | 1    | 1   | Yes             | 1    | 1   | Yes            | 1    | 1   | Yes   | 1    |       |       | 175   | 64    |
| 15337  |      | 1   | Yes             | 2    | 1   | Yes            | 2    | 2   | No    |      |       |       | 160   | 50    |
| 15338  |      | 2   | No              |      | 2   | No             |      | 2   | No    |      |       |       | 157   | 48    |

| respid | Q11a | Q12 | Cardiac Disease | Q12a | Q13 | Hyperlipidemia | Q13a | Q14 | Neuro | Q14a | Q15_1 | Q15_2 | Q15_3 | Q16_1 |
|--------|------|-----|-----------------|------|-----|----------------|------|-----|-------|------|-------|-------|-------|-------|
| 15339  |      | 1   | Yes             | 2    | 2   | No             |      | 2   | No    |      |       |       | 160   | 52    |
| 15341  |      | 2   | No              |      | 2   | No             |      | 2   | No    |      |       |       | 172   | 70    |
| 15344  |      | 2   | No              |      | 2   | No             |      | 2   | No    |      |       |       | 165   | 75    |
| 15345  |      | 2   | No              |      | 2   | No             |      | 2   | No    |      |       |       | 158   | 45    |
| 15350  |      | 2   | No              |      | 2   | No             |      | 2   | No    |      |       |       | 158   | 50    |
| 15351  |      | 2   | No              |      | 1   | Yes            | 1    | 2   | No    |      |       |       | 164   | 79    |
| 15352  |      | 2   | No              |      | 2   | No             |      | 2   | No    |      |       |       | 161   | 53    |
| 15372  |      | 2   | No              |      | 2   | No             |      | 2   | No    |      |       |       | 176   | 69    |
| 15373  | 1    | 1   | Yes             | 1    | 1   | Yes            | 1    | 1   | Yes   | 1    |       |       | 170   | 70    |
| 15376  | 1    | 2   | No              |      | 1   | Yes            | 1    | 2   | No    |      |       |       | 170   | 65    |
| 15377  |      | 2   | No              |      | 2   | No             |      | 2   | No    |      |       |       | 163   | 51    |
| 15382  | 2    | 2   | No              |      | 2   | No             |      | 2   | No    |      |       |       | 170   | 75    |
| 15383  | 1    | 1   | Yes             | 2    | 2   | No             |      | 2   | No    |      |       |       | 181   | 78    |
| 15385  |      | 2   | No              |      | 2   | No             |      | 2   | No    |      |       |       | 150   | 65    |
| 15390  |      | 2   | No              |      | 2   | No             |      | 2   | No    |      |       |       | 157   | 47    |
| 15399  |      | 2   | No              |      | 2   | No             |      | 2   | No    |      |       |       | 155   | 50    |
| 15404  | 2    | 2   | No              |      | 2   | No             |      | 2   | No    |      |       |       | 172   | 74    |
| 15410  |      | 2   | No              |      | 2   | No             |      | 2   | No    |      |       |       | 160   | 55    |
| 15411  | 1    | 1   | Yes             | 1    | 1   | Yes            | 1    | 2   | No    |      |       |       | 165   | 53    |
| 15412  | 1    | 2   | No              |      | 2   | No             |      | 2   | No    |      |       |       | 160   | 65    |
| 15413  |      | 2   | No              |      | 2   | No             |      | 2   | No    |      |       |       | 170   | 75    |
| 15414  |      | 2   | No              |      | 2   | No             |      | 2   | No    |      |       |       | 162   | 51    |
| 15417  |      | 2   | No              |      | 1   | Yes            | 1    | 2   | No    |      |       |       | 162   | 65    |
| 15418  | 1    | 2   | No              |      | 2   | No             |      | 2   | No    |      |       |       | 175   | 77    |
| 15421  |      | 2   | No              |      | 2   | No             |      | 2   | No    |      |       |       | 165   | 56    |
| 15423  |      | 2   | No              |      | 2   | No             |      | 2   | No    |      |       |       | 167   | 69    |
| 15425  | 1    | 2   | No              |      | 1   | Yes            | 1    | 2   | No    |      |       |       | 158   | 49    |
| 15426  | 1    | 1   | Yes             | 1    | 1   | Yes            | 1    | 1   | Yes   | 1    |       |       | 175   | 60    |
| 15430  |      | 1   | Yes             | 1    | 2   | No             |      | 2   | No    |      |       |       | 176   | 67    |
| 15431  |      | 2   | No              |      | 2   | No             |      | 2   | No    |      |       |       | 155   | 59    |
| 15435  |      | 2   | No              |      | 2   | No             |      | 2   | No    |      |       |       | 160   | 46    |
| 15436  |      | 2   | No              |      | 2   | No             |      | 2   | No    |      |       |       | 172   | 65    |

| respid | Q11a | Q12 | Cardiac Disease | Q12a | Q13 | Hyperlipidemia | Q13a | Q14 | Neuro | Q14a | Q15_1 | Q15_2 | Q15_3 | Q16_1 |
|--------|------|-----|-----------------|------|-----|----------------|------|-----|-------|------|-------|-------|-------|-------|
| 15437  |      | 2   | No              |      | 1   | Yes            | 1    | 2   | No    |      |       |       | 157   | 54    |
| 15438  |      | 2   | No              |      | 2   | No             |      | 2   | No    |      |       |       | 165   | 53    |
| 15439  | 1    | 2   | No              |      | 2   | No             |      | 2   | No    |      |       |       | 172   | 75    |
| 15441  | 1    | 1   | Yes             | 1    | 1   | Yes            | 1    | 1   | Yes   | 1    |       |       | 160   | 52    |
| 15443  |      | 2   | No              |      | 1   | Yes            | 2    | 2   | No    |      |       |       | 163   | 55    |
| 15446  |      | 2   | No              |      | 1   | Yes            | 1    | 2   | No    |      |       |       | 169   | 75    |
| 15449  | 1    | 1   | Yes             | 1    | 1   | Yes            | 1    | 2   | No    |      |       |       | 172   | 49    |
| 15451  |      | 2   | No              |      | 2   | No             |      | 2   | No    |      |       |       | 164   | 53    |
| 15452  |      | 2   | No              |      | 2   | No             |      | 2   | No    |      |       |       | 156   | 56    |
| 15454  |      | 2   | No              |      | 1   | Yes            | 2    | 2   | No    |      | 5     | 6     |       | 58    |
| 15456  |      | 2   | No              |      | 1   | Yes            | 2    | 2   | No    |      |       |       | 175   | 78    |
| 15457  |      | 2   | No              |      | 2   | No             |      | 2   | No    |      |       |       | 158   | 55    |
| 15458  |      | 2   | No              |      | 2   | No             |      | 2   | No    |      |       |       | 169   | 55    |
| 15462  | 2    | 2   | No              |      | 1   | Yes            | 1    | 2   | No    |      |       |       | 172   | 68    |
| 15467  |      | 2   | No              |      | 2   | No             |      | 2   | No    |      |       |       | 160   | 60    |
| 15470  | 1    | 2   | No              |      | 1   | Yes            | 1    | 2   | No    |      |       |       | 163   | 102   |
| 15472  |      | 2   | No              |      | 2   | No             |      | 2   | No    |      |       |       | 168   | 56    |
| 15476  | 1    | 2   | No              |      | 1   | Yes            | 1    | 2   | No    |      |       |       | 158   | 53    |
| 15477  |      | 2   | No              |      | 2   | No             |      | 2   | No    |      |       |       | 162   | 52    |
| 15488  |      | 2   | No              |      | 2   | No             |      | 2   | No    |      |       |       | 153   | 45    |
| 15489  |      | 1   | Yes             | 2    | 2   | No             |      | 2   | No    |      |       |       | 152   | 58    |
| 15490  |      | 2   | No              |      | 2   | No             |      | 2   | No    |      |       |       | 160   | 49    |
| 15496  | 1    | 2   | No              |      | 1   | Yes            | 1    | 2   | No    |      |       |       | 154   | 68    |
| 15497  |      | 2   | No              |      | 1   | Yes            | 2    | 1   | Yes   | 1    |       |       | 158   | 50    |
| 15498  | 1    | 2   | No              |      | 2   | No             |      | 2   | No    |      |       |       | 180   | 78    |
| 15509  |      | 2   | No              |      | 2   | No             |      | 2   | No    |      |       |       | 162   | 58    |
| 15510  |      | 2   | No              |      | 2   | No             |      | 2   | No    |      |       |       | 164   | 55    |
| 15516  |      | 2   | No              |      | 2   | No             |      | 2   | No    |      |       |       | 165   | 57    |
| 15519  |      | 2   | No              |      | 2   | No             |      | 2   | No    |      |       |       | 155   | 51    |
| 15520  |      | 2   | No              |      | 2   | No             |      | 2   | No    |      |       |       | 159   | 52    |
| 15524  |      | 2   | No              |      | 1   | Yes            | 2    | 2   | No    |      |       |       | 152   | 44    |
| 15525  |      | 2   | No              |      | 2   | No             |      | 2   | No    |      |       |       | 173   | 72    |

| respid | Q11a | Q12 | Cardiac Disease | Q12a | Q13 | Hyperlipidemia | Q13a | Q14 | Neuro | Q14a | Q15_1 | Q15_2 | Q15_3 | Q16_1 |
|--------|------|-----|-----------------|------|-----|----------------|------|-----|-------|------|-------|-------|-------|-------|
| 15526  |      | 2   | No              |      | 2   | No             |      | 2   | No    |      |       |       | 169   | 59    |
| 15531  |      | 2   | No              |      | 2   | No             |      | 2   | No    |      |       |       | 165   | 55    |
| 15532  |      | 2   | No              |      | 2   | No             |      | 2   | No    |      |       |       | 162   | 58    |
| 15534  | 1    | 1   | Yes             | 1    | 1   | Yes            | 1    | 2   | No    |      |       |       | 160   | 50    |
| 15535  |      | 2   | No              |      | 2   | No             |      | 2   | No    |      |       |       | 165   | 65    |
| 15539  |      | 2   | No              |      | 2   | No             |      | 2   | No    |      |       |       | 158   | 52    |
| 15550  |      | 2   | No              |      | 2   | No             |      | 2   | No    |      |       |       | 173   | 65    |
| 15556  |      | 2   | No              |      | 2   | No             |      | 2   | No    |      |       |       | 161   | 51    |
| 15558  |      | 2   | No              |      | 2   | No             |      | 2   | No    |      |       |       | 165   | 65    |
| 15565  | 2    | 2   | No              |      | 2   | No             |      | 2   | No    |      |       |       | 163   | 57    |
| 15567  |      | 2   | No              |      | 2   | No             |      | 2   | No    |      |       |       | 168   | 68    |
| 15568  |      | 2   | No              |      | 2   | No             |      | 2   | No    |      |       |       | 165   | 56    |
| 15571  |      | 2   | No              |      | 2   | No             |      | 2   | No    |      |       |       | 170   | 65    |
| 15573  |      | 2   | No              |      | 1   | Yes            | 2    | 2   | No    |      |       |       | 174   | 93    |
| 15574  |      | 2   | No              |      | 2   | No             |      | 2   | No    |      |       |       | 165   | 56    |
| 15576  | 1    | 1   | Yes             | 1    | 2   | No             |      | 2   | No    |      |       |       | 165   | 120   |
| 15587  |      | 2   | No              |      | 2   | No             |      | 2   | No    |      |       |       | 158   | 58    |
| 15588  |      | 1   | Yes             | 1    | 2   | No             |      | 2   | No    |      |       |       | 164   | 62    |
| 15593  | 1    | 2   | No              |      | 2   | No             |      | 2   | No    |      |       |       | 176   | 84    |
| 15597  |      | 2   | No              |      | 2   | No             |      | 2   | No    |      |       |       | 158   | 53    |
| 15598  | 1    | 2   | No              |      | 1   | Yes            | 2    | 2   | No    |      |       |       | 173   | 68    |
| 15599  |      | 2   | No              |      | 2   | No             |      | 2   | No    |      |       |       | 165   | 57    |
| 15601  |      | 2   | No              |      | 2   | No             |      | 2   | No    |      |       |       | 172   | 65    |
| 15604  |      | 2   | No              |      | 2   | No             |      | 2   | No    |      |       |       | 160   | 52    |
| 15611  | 1    | 2   | No              |      | 2   | No             |      | 2   | No    |      |       |       | 172   | 95    |
| 15613  |      | 2   | No              |      | 2   | No             |      | 1   | Yes   | 1    |       |       | 164   | 78    |
| 15614  | 1    | 2   | No              |      | 1   | Yes            | 1    | 2   | No    |      |       |       | 165   | 57    |
| 15617  | 1    | 2   | No              |      | 2   | No             |      | 2   | No    |      |       |       | 156   | 52    |
| 15622  |      | 2   | No              |      | 2   | No             |      | 2   | No    |      |       |       | 158   | 46    |
| 15623  |      | 2   | No              |      | 2   | No             |      | 2   | No    |      |       |       | 162   | 55    |
| 15625  | 1    | 2   | No              |      | 2   | No             |      | 2   | No    |      |       |       | 171   | 80    |
| 15627  |      | 2   | No              |      | 1   | Yes            | 2    | 2   | No    |      |       |       | 174   | 68    |

| respid | Q11a | Q12 | Cardiac Disease | Q12a | Q13 | Hyperlipidemia | Q13a | Q14 | Neuro | Q14a | Q15_1 | Q15_2 | Q15_3 | Q16_1 |
|--------|------|-----|-----------------|------|-----|----------------|------|-----|-------|------|-------|-------|-------|-------|
| 15628  | 2    | 2   | No              |      | 2   | No             |      | 2   | No    |      |       |       | 171   | 67    |
| 15633  |      | 2   | No              |      | 2   | No             |      | 2   | No    |      |       |       | 174   | 75    |
| 15634  |      | 2   | No              |      | 2   | No             |      | 2   | No    |      |       |       | 170   | 75    |
| 15637  | 1    | 1   | Yes             | 1    | 2   | No             |      | 2   | No    |      |       |       | 176   | 85    |
| 15644  |      | 2   | No              |      | 2   | No             |      | 2   | No    |      |       |       | 177   | 72    |
| 15645  |      | 2   | No              |      | 2   | No             |      | 2   | No    |      |       |       | 171   | 67    |
| 15649  |      | 2   | No              |      | 2   | No             |      | 2   | No    |      |       |       | 165   | 51    |
| 15650  | 1    | 2   | No              |      | 2   | No             |      | 2   | No    |      |       |       | 173   | 79    |
| 15651  |      | 2   | No              |      | 2   | No             |      | 2   | No    |      |       |       | 165   | 60    |
| 15657  |      | 2   | No              |      | 2   | No             |      | 2   | No    |      |       |       | 170   | 51    |
| 15658  |      | 2   | No              |      | 2   | No             |      | 2   | No    |      |       |       | 160   | 48    |
| 15660  |      | 2   | No              |      | 2   | No             |      | 2   | No    |      |       |       | 180   | 76    |
| 15667  |      | 2   | No              |      | 2   | No             |      | 2   | No    |      |       |       | 163   | 57    |
| 15671  |      | 2   | No              |      | 2   | No             |      | 2   | No    |      |       |       | 158   | 52    |
| 15679  | 1    | 2   | No              |      | 1   | Yes            | 2    | 2   | No    |      |       |       | 163   | 70    |
| 15712  |      | 2   | No              |      | 2   | No             |      | 2   | No    |      |       |       | 156   | 49    |
| 15715  |      | 2   | No              |      | 2   | No             |      | 2   | No    |      |       |       | 175   | 65    |
| 15749  |      | 2   | No              |      | 2   | No             |      | 2   | No    |      |       |       | 162   | 65    |
| 15754  |      | 2   | No              |      | 2   | No             |      | 2   | No    |      |       |       | 183   | 74    |
| 15756  |      | 2   | No              |      | 2   | No             |      | 2   | No    |      |       |       | 171   | 55    |
| 15773  |      | 1   | Yes             | 1    | 1   | Yes            | 1    | 2   | No    |      |       |       | 163   | 68    |
| 15774  |      | 2   | No              |      | 2   | No             |      | 2   | No    |      |       |       | 174   | 76    |
| 15776  |      | 2   | No              |      | 1   | Yes            | 2    | 2   | No    |      |       |       | 176   | 76    |
| 15777  |      | 2   | No              |      | 2   | No             |      | 2   | No    |      |       |       | 163   | 68    |
| 15779  |      | 2   | No              |      | 2   | No             |      | 2   | No    |      |       |       | 162   | 55    |
| 15780  |      | 2   | No              |      | 2   | No             |      | 2   | No    |      |       |       | 185   | 78    |
| 15792  | 2    | 2   | No              |      | 2   | No             |      | 2   | No    |      |       |       | 176   | 70    |
| 15793  |      | 2   | No              |      | 2   | No             |      | 2   | No    |      |       |       | 159   | 58    |
| 15796  |      | 1   | Yes             | 1    | 2   | No             |      | 2   | No    |      |       |       | 169   | 76    |
| 15798  |      | 2   | No              |      | 2   | No             |      | 2   | No    |      |       |       | 158   | 61    |
| 15809  |      | 2   | No              |      | 2   | No             |      | 2   | No    |      |       |       | 176   | 72    |
| 15810  |      | 2   | No              |      | 2   | No             |      | 2   | No    |      |       |       | 150   | 73    |

| respid | Q11a | Q12 | Cardiac Disease | Q12a | Q13 | Hyperlipidemia | Q13a | Q14 | Neuro | Q14a | Q15_1 | Q15_2 | Q15_3 | Q16_1 |
|--------|------|-----|-----------------|------|-----|----------------|------|-----|-------|------|-------|-------|-------|-------|
| 15815  |      | 2   | No              |      | 2   | No             |      | 2   | No    |      |       |       | 160   | 65    |
| 15816  | 1    | 2   | No              |      | 2   | No             |      | 2   | No    |      |       |       | 169   | 73    |
| 15817  |      | 2   | No              |      | 2   | No             |      | 2   | No    |      |       |       | 160   | 46    |
| 15821  |      | 2   | No              |      | 2   | No             |      | 2   | No    |      |       |       | 158   | 68    |
| 15823  |      | 2   | No              |      | 1   | Yes            | 2    | 2   | No    |      |       |       | 160   | 60    |
| 15834  | 1    | 2   | No              |      | 2   | No             |      | 2   | No    |      |       |       | 174   | 83    |
| 15835  |      | 2   | No              |      | 2   | No             |      | 2   | No    |      |       |       | 156   | 45    |
| 15836  |      | 2   | No              |      | 2   | No             |      | 2   | No    |      |       |       | 164   | 57    |
| 15837  |      | 2   | No              |      | 2   | No             |      | 2   | No    |      |       |       | 160   | 55    |
| 15839  |      | 1   | Yes             | 2    | 2   | No             |      | 2   | No    |      |       |       | 166   | 67    |
| 15840  |      | 2   | No              |      | 2   | No             |      | 2   | No    |      |       |       | 163   | 53    |
| 15844  | 1    | 2   | No              |      | 1   | Yes            | 1    | 2   | No    |      |       |       | 172   | 70    |
| 15845  | 1    | 2   | No              |      | 1   | Yes            | 1    | 2   | No    |      |       |       | 170   | 64    |
| 15847  |      | 2   | No              |      | 2   | No             |      | 2   | No    |      |       |       | 156   | 68    |
| 15848  |      | 1   | Yes             | 1    | 1   | Yes            | 1    | 2   | No    |      |       |       | 158   | 70    |
| 15849  |      | 2   | No              |      | 2   | No             |      | 2   | No    |      |       |       | 164   | 75    |
| 15857  |      | 2   | No              |      | 2   | No             |      | 2   | No    |      |       |       | 158   | 52    |
| 15858  |      | 2   | No              |      | 2   | No             |      | 2   | No    |      |       |       | 169   | 65    |
| 15862  | 1    | 1   | Yes             | 1    | 1   | Yes            | 1    | 1   | Yes   | 1    |       |       | 170   | 65    |
| 15866  |      | 2   | No              |      | 2   | No             |      | 2   | No    |      |       |       | 163   | 53    |
| 15870  |      | 2   | No              |      | 2   | No             |      | 2   | No    |      |       |       | 160   | 49    |
| 15871  |      | 2   | No              |      | 2   | No             |      | 2   | No    |      |       |       | 173   | 68    |
| 15872  | 2    | 2   | No              |      | 2   | No             |      | 2   | No    |      |       |       | 167   | 73    |
| 15873  |      | 2   | No              |      | 2   | No             |      | 2   | No    |      |       |       | 171   | 69    |
| 15874  | 2    | 2   | No              |      | 2   | No             |      | 2   | No    |      |       |       | 160   | 50    |
| 15875  |      | 2   | No              |      | 1   | Yes            | 1    | 2   | No    |      |       |       | 177   | 55    |
| 15876  | 1    | 1   | Yes             | 1    | 2   | No             |      | 2   | No    |      |       |       | 168   | 68    |
| 15882  |      | 2   | No              |      | 2   | No             |      | 2   | No    |      |       |       | 170   | 62    |
| 15884  |      | 2   | No              |      | 1   | Yes            | 2    | 2   | No    |      |       |       | 159   | 57    |
| 15890  | 2    | 2   | No              |      | 2   | No             |      | 2   | No    |      |       |       | 159   | 69    |
| 15892  | 1    | 2   | No              |      | 1   | Yes            | 1    | 2   | No    |      |       |       | 155   | 60    |
| 15908  |      | 2   | No              |      | 2   | No             |      | 2   | No    |      |       |       | 170   | 74    |

| respid | Q11a | Q12 | Cardiac Disease | Q12a | Q13 | Hyperlipidemia | Q13a | Q14 | Neuro | Q14a | Q15_1 | Q15_2 | Q15_3 | Q16_1 |
|--------|------|-----|-----------------|------|-----|----------------|------|-----|-------|------|-------|-------|-------|-------|
| 15914  |      | 2   | No              |      | 2   | No             |      | 2   | No    |      |       |       | 160   | 48    |
| 15932  |      | 2   | No              |      | 2   | No             |      | 2   | No    |      |       |       | 170   | 67    |
| 15933  |      | 2   | No              |      | 2   | No             |      | 2   | No    |      |       |       | 168   | 70    |
| 15938  |      | 2   | No              |      | 2   | No             |      | 2   | No    |      |       |       | 168   | 66    |
| 15940  | 1    | 2   | No              |      | 1   | Yes            | 1    | 1   | Yes   | 1    |       |       | 155   | 49    |
| 15945  |      | 2   | No              |      | 2   | No             |      | 2   | No    |      |       |       | 161   | 56    |
| 15947  |      | 1   | Yes             | 1    | 2   | No             |      | 2   | No    |      |       |       | 169   | 67    |
| 15950  |      | 2   | No              |      | 2   | No             |      | 2   | No    |      |       |       | 162   | 51    |
| 15951  |      | 2   | No              |      | 1   | Yes            | 2    | 2   | No    |      |       |       | 153   | 46    |
| 15952  |      | 2   | No              |      | 2   | No             |      | 2   | No    |      |       |       | 162   | 58    |
| 15953  | 1    | 2   | No              |      | 1   | Yes            | 1    | 2   | No    |      |       |       | 158   | 62    |
| 15954  |      | 2   | No              |      | 2   | No             |      | 2   | No    |      |       |       | 162   | 55    |
| 15957  | 1    | 1   | Yes             | 2    | 1   | Yes            | 2    | 1   | Yes   | 1    |       |       | 159   | 60    |
| 15965  |      | 2   | No              |      | 2   | No             |      | 2   | No    |      |       |       | 165   | 56    |
| 15966  |      | 1   | Yes             | 1    | 2   | No             |      | 2   | No    |      |       |       | 170   | 63    |
| 15967  |      | 2   | No              |      | 1   | Yes            | 1    | 2   | No    |      |       |       | 173   | 86    |
| 15968  |      | 2   | No              |      | 2   | No             |      | 2   | No    |      |       |       | 173   | 65    |
| 15970  |      | 2   | No              |      | 2   | No             |      | 2   | No    |      |       |       | 160   | 48    |
| 15973  |      | 2   | No              |      | 2   | No             |      | 2   | No    |      |       |       | 160   | 53    |
| 15974  |      | 2   | No              |      | 2   | No             |      | 2   | No    |      |       |       | 163   | 58    |
| 15975  |      | 2   | No              |      | 2   | No             |      | 2   | No    |      |       |       | 160   | 55    |
| 15980  | 1    | 1   | Yes             | 1    | 1   | Yes            | 1    | 1   | Yes   | 1    |       |       | 162   | 60    |
| 15984  |      | 2   | No              |      | 2   | No             |      | 2   | No    |      |       |       | 171   | 79    |
| 15985  | 1    | 1   | Yes             | 1    | 1   | Yes            | 1    | 2   | No    |      |       |       | 168   | 66    |
| 15994  |      | 2   | No              |      | 2   | No             |      | 2   | No    |      |       |       | 155   | 56    |
| 15995  | 1    | 2   | No              |      | 2   | No             |      | 2   | No    |      |       |       | 168   | 66    |
| 16000  |      | 1   | Yes             | 1    | 2   | No             |      | 2   | No    |      |       |       | 169   | 87    |
| 16004  |      | 2   | No              |      | 2   | No             |      | 2   | No    |      |       |       | 161   | 52    |
| 16005  |      | 2   | No              |      | 2   | No             |      | 2   | No    |      |       |       | 163   | 53    |
| 16006  |      | 2   | No              |      | 2   | No             |      | 2   | No    |      |       |       | 150   | 60    |
| 16009  |      | 2   | No              |      | 2   | No             |      | 2   | No    |      |       |       | 168   | 70    |
| 16017  |      | 2   | No              |      | 2   | No             |      | 2   | No    |      |       |       | 162   | 58    |



| respid | Q11a | Q12 | Cardiac Disease | Q12a | Q13 | Hyperlipidemia | Q13a | Q14 | Neuro | Q14a | Q15_1 | Q15_2 | Q15_3 | Q16_1 |
|--------|------|-----|-----------------|------|-----|----------------|------|-----|-------|------|-------|-------|-------|-------|
| 16019  | 1    | 2   | No              |      | 2   | No             |      | 2   | No    |      |       |       | 169   | 48    |
| 16021  |      | 2   | No              |      | 2   | No             |      | 2   | No    |      |       |       | 160   | 48    |
| 16024  |      | 2   | No              |      | 2   | No             |      | 2   | No    |      |       |       | 163   | 61    |
| 16026  | 1    | 2   | No              |      | 1   | Yes            | 1    | 2   | No    |      |       |       | 166   | 72    |
| 16029  |      | 2   | No              |      | 2   | No             |      | 2   | No    |      |       |       | 171   | 67    |
| 16031  | 1    | 2   | No              |      | 1   | Yes            | 2    | 2   | No    |      |       |       | 176   | 75    |
| 16037  |      | 2   | No              |      | 2   | No             |      | 2   | No    |      |       |       | 165   | 60    |
| 16043  |      | 2   | No              |      | 2   | No             |      | 2   | No    |      |       |       | 170   | 62    |
| 16044  |      | 2   | No              |      | 2   | No             |      | 2   | No    |      |       |       | 160   | 60    |
| 16047  | 2    | 2   | No              |      | 2   | No             |      | 2   | No    |      |       |       | 166   | 59    |
| 16048  | 1    | 2   | No              |      | 1   | Yes            | 2    | 2   | No    |      |       |       | 165   | 65    |
| 16049  |      | 2   | No              |      | 2   | No             |      | 2   | No    |      |       |       | 163   | 50    |
| 16051  |      | 2   | No              |      | 2   | No             |      | 2   | No    |      |       |       | 150   | 52    |
| 16053  |      | 2   | No              |      | 2   | No             |      | 2   | No    |      |       |       | 162   | 60    |
| 16054  |      | 2   | No              |      | 2   | No             |      | 2   | No    |      |       |       | 158   | 54    |
| 16069  |      | 2   | No              |      | 2   | No             |      | 2   | No    |      |       |       | 165   | 60    |
| 16070  |      | 2   | No              |      | 1   | Yes            | 2    | 2   | No    |      |       |       | 170   | 64    |
| 16074  |      | 2   | No              |      | 2   | No             |      | 2   | No    |      |       |       | 175   | 78    |
| 16076  |      | 2   | No              |      | 2   | No             |      | 2   | No    |      |       |       | 160   | 55    |
| 16078  |      | 2   | No              |      | 2   | No             |      | 2   | No    |      |       |       | 172   | 79    |
| 16081  |      | 2   | No              |      | 2   | No             |      | 2   | No    |      |       |       | 159   | 52    |
| 16085  |      | 2   | No              |      | 2   | No             |      | 2   | No    |      |       |       | 159   | 53    |
| 16088  | 1    | 2   | No              |      | 2   | No             |      | 2   | No    |      |       |       | 170   | 60    |
| 16091  |      | 2   | No              |      | 2   | No             |      | 2   | No    |      |       |       | 159   | 55    |
| 16092  |      | 2   | No              |      | 2   | No             |      | 2   | No    |      |       |       | 176   | 65    |
| 16093  |      | 2   | No              |      | 2   | No             |      | 2   | No    |      |       |       | 170   | 65    |
| 16097  |      | 2   | No              |      | 2   | No             |      | 2   | No    |      |       |       | 173   | 78    |
| 16100  |      | 2   | No              |      | 1   | Yes            | 2    | 2   | No    |      |       |       | 149   | 75    |
| 16101  |      | 2   | No              |      | 2   | No             |      | 2   | No    |      |       |       | 150   | 44    |
| 16105  |      | 2   | No              |      | 2   | No             |      | 2   | No    |      |       |       | 158   | 45    |
| 16118  | 1    | 1   | Yes             | 1    | 1   | Yes            | 1    | 2   | No    |      |       |       | 167   | 66    |
| 16129  |      | 2   | No              |      | 2   | No             |      | 2   | No    |      |       |       | 172   | 67    |

| respid | Q11a | Q12 | Cardiac Disease | Q12a | Q13 | Hyperlipidemia | Q13a | Q14 | Neuro | Q14a | Q15_1 | Q15_2 | Q15_3 | Q16_1 |
|--------|------|-----|-----------------|------|-----|----------------|------|-----|-------|------|-------|-------|-------|-------|
| 16130  |      | 2   | No              |      | 2   | No             |      | 2   | No    |      |       |       | 174   | 63    |
| 16131  | 1    | 2   | No              |      | 1   | Yes            | 2    | 1   | Yes   | 1    |       |       | 175   | 45    |
| 16136  |      | 2   | No              |      | 2   | No             |      | 2   | No    |      |       |       | 160   | 54    |
| 16137  |      | 2   | No              |      | 2   | No             |      | 2   | No    |      |       |       | 157   | 56    |
| 16138  |      | 2   | No              |      | 2   | No             |      | 2   | No    |      |       |       | 160   | 53    |
| 16139  |      | 2   | No              |      | 2   | No             |      | 2   | No    |      |       |       | 157   | 57    |
| 16140  |      | 2   | No              |      | 2   | No             |      | 2   | No    |      |       |       | 170   | 59    |
| 16145  | 1    | 2   | No              |      | 1   | Yes            | 1    | 2   | No    |      |       |       | 163   | 62    |
| 16150  |      | 2   | No              |      | 2   | No             |      | 2   | No    |      |       |       | 166   | 77    |
| 16151  |      | 2   | No              |      | 1   | Yes            | 2    | 2   | No    |      |       |       | 147   | 48    |
| 16153  |      | 2   | No              |      | 2   | No             |      | 2   | No    |      |       |       | 176   | 70    |
| 16164  |      | 2   | No              |      | 2   | No             |      | 2   | No    |      |       |       | 171   | 68    |
| 16168  | 2    | 2   | No              |      | 1   | Yes            | 2    | 2   | No    |      |       |       | 165   | 70    |
| 16173  |      | 2   | No              |      | 1   | Yes            | 2    | 2   | No    |      |       |       | 160   | 55    |
| 16174  |      | 2   | No              |      | 2   | No             |      | 2   | No    |      |       |       | 186   | 110   |
| 16177  |      | 2   | No              |      | 2   | No             |      | 2   | No    |      |       |       | 167   | 59    |
| 16185  | 1    | 2   | No              |      | 1   | Yes            | 1    | 2   | No    |      |       |       | 177   | 78    |
| 16189  |      | 2   | No              |      | 2   | No             |      | 2   | No    |      |       |       | 153   | 62    |
| 16192  |      | 2   | No              |      | 2   | No             |      | 2   | No    |      | 5     | 7     |       | 57    |
| 16193  |      | 2   | No              |      | 1   | Yes            | 2    | 2   | No    |      |       |       | 160   | 62    |
| 16194  |      | 2   | No              |      | 2   | No             |      | 2   | No    |      |       |       | 176   | 74    |
| 16196  |      | 2   | No              |      | 1   | Yes            | 2    | 2   | No    |      |       |       | 165   | 62    |
| 16202  | 1    | 1   | Yes             | 1    | 1   | Yes            | 2    | 2   | No    |      |       |       | 160   | 60    |
| 16205  |      | 2   | No              |      | 2   | No             |      | 2   | No    |      |       |       | 162   | 59    |
| 16206  |      | 2   | No              |      | 1   | Yes            | 1    | 2   | No    |      |       |       | 158   | 60    |
| 16208  |      | 2   | No              |      | 2   | No             |      | 2   | No    |      |       |       | 176   | 72    |
| 16211  |      | 2   | No              |      | 2   | No             |      | 2   | No    |      | 5     | 1     |       | 55    |
| 16212  |      | 2   | No              |      | 2   | No             |      | 2   | No    |      |       |       | 160   | 57    |
| 16215  |      | 2   | No              |      | 1   | Yes            | 1    | 2   | No    |      |       |       | 165   | 52    |
| 16217  |      | 2   | No              |      | 2   | No             |      | 2   | No    |      |       |       | 180   | 74    |
| 16221  |      | 2   | No              |      | 2   | No             |      | 1   | Yes   | 1    |       |       | 164   | 64    |
| 16226  |      | 2   | No              |      | 2   | No             |      | 2   | No    |      |       |       | 153   | 51    |

| respid | Q11a | Q12 | Cardiac Disease | Q12a | Q13 | Hyperlipidemia | Q13a | Q14 | Neuro | Q14a | Q15_1 | Q15_2 | Q15_3 | Q16_1 |
|--------|------|-----|-----------------|------|-----|----------------|------|-----|-------|------|-------|-------|-------|-------|
| 16228  |      | 2   | No              |      | 1   | Yes            | 2    | 2   | No    |      |       |       | 160   | 60    |
| 16229  | 2    | 2   | No              |      | 1   | Yes            | 2    | 2   | No    |      |       |       | 173   | 82    |
| 16230  |      | 2   | No              |      | 2   | No             |      | 2   | No    |      |       |       | 166   | 62    |
| 16231  |      | 2   | No              |      | 2   | No             |      | 2   | No    |      |       |       | 175   | 69    |
| 16232  |      | 2   | No              |      | 1   | Yes            | 1    | 2   | No    |      |       |       | 168   | 68    |
| 16234  |      | 2   | No              |      | 1   | Yes            | 1    | 2   | No    |      |       |       | 170   | 70    |
| 16235  |      | 1   | Yes             | 2    | 1   | Yes            | 1    | 1   | Yes   | 1    |       |       | 170   | 60    |
| 16236  | 1    | 2   | No              |      | 1   | Yes            | 1    | 2   | No    |      |       |       | 169   | 68    |
| 16237  |      | 2   | No              |      | 1   | Yes            | 1    | 2   | No    |      |       |       | 170   | 70    |
| 16238  | 2    | 2   | No              |      | 1   | Yes            | 2    | 2   | No    |      |       |       | 154   | 53    |
| 16239  |      | 2   | No              |      | 2   | No             |      | 2   | No    |      |       |       | 154   | 43    |
| 16243  |      | 2   | No              |      | 1   | Yes            | 2    | 2   | No    |      |       |       | 165   | 65    |
| 16248  |      | 2   | No              |      | 2   | No             |      | 2   | No    |      |       |       | 171   | 68    |
| 16249  |      | 2   | No              |      | 2   | No             |      | 2   | No    |      |       |       | 156   | 43    |
| 16251  |      | 2   | No              |      | 2   | No             |      | 2   | No    |      |       |       | 153   | 51    |
| 16263  |      | 2   | No              |      | 1   | Yes            | 2    | 2   | No    |      |       |       | 159   | 58    |
| 16265  |      | 2   | No              |      | 1   | Yes            | 2    | 2   | No    |      |       |       | 167   | 58    |
| 16269  |      | 2   | No              |      | 2   | No             |      | 2   | No    |      |       |       | 168   | 62    |
| 16272  | 1    | 2   | No              |      | 1   | Yes            | 2    | 2   | No    |      |       |       | 153   | 51    |
| 16273  |      | 2   | No              |      | 2   | No             |      | 2   | No    |      |       |       | 165   | 56    |
| 16281  |      | 2   | No              |      | 2   | No             |      | 2   | No    |      |       |       | 158   | 52    |
| 16282  |      | 2   | No              |      | 1   | Yes            | 2    | 2   | No    |      |       |       | 156   | 75    |
| 16287  |      | 2   | No              |      | 1   | Yes            | 2    | 2   | No    |      |       |       | 172   | 72    |
| 16290  |      | 2   | No              |      | 2   | No             |      | 2   | No    |      |       |       | 165   | 63    |
| 16294  |      | 2   | No              |      | 2   | No             |      | 2   | No    |      |       |       | 181   | 73    |
| 16295  |      | 2   | No              |      | 2   | No             |      | 2   | No    |      |       |       | 178   | 80    |
| 16296  | 2    | 2   | No              |      | 2   | No             |      | 2   | No    |      |       |       | 157   | 60    |
| 16299  | 1    | 2   | No              |      | 2   | No             |      | 2   | No    |      |       |       | 170   | 76    |
| 16302  |      | 2   | No              |      | 2   | No             |      | 2   | No    |      |       |       | 176   | 85    |
| 16303  |      | 2   | No              |      | 1   | Yes            | 1    | 2   | No    |      |       |       | 167   | 85    |
| 16304  | 1    | 2   | No              |      | 1   | Yes            | 2    | 2   | No    |      |       |       | 160   | 45    |
| 16306  |      | 2   | No              |      | 2   | No             |      | 2   | No    |      |       |       | 160   | 60    |

| respid | Q11a | Q12 | Cardiac Disease | Q12a | Q13 | Hyperlipidemia | Q13a | Q14 | Neuro | Q14a | Q15_1 | Q15_2 | Q15_3 | Q16_1 |
|--------|------|-----|-----------------|------|-----|----------------|------|-----|-------|------|-------|-------|-------|-------|
| 16318  |      | 2   | No              |      | 2   | No             |      | 2   | No    |      |       |       | 163   | 66    |
| 16320  |      | 2   | No              |      | 1   | Yes            | 2    | 2   | No    |      |       |       | 171   | 70    |
| 16321  |      | 2   | No              |      | 2   | No             |      | 2   | No    |      |       |       | 179   | 74    |
| 16322  |      | 2   | No              |      | 1   | Yes            | 2    | 2   | No    |      |       |       | 176   | 71    |
| 16324  |      | 2   | No              |      | 1   | Yes            | 1    | 2   | No    |      |       |       | 164   | 68    |
| 16326  | 2    | 2   | No              |      | 1   | Yes            | 2    | 2   | No    |      |       |       | 171   | 69    |
| 16328  | 1    | 2   | No              |      | 2   | No             |      | 2   | No    |      |       |       | 150   | 60    |
| 16336  | 1    | 2   | No              |      | 2   | No             |      | 2   | No    |      |       |       | 160   | 51    |
| 16341  | 1    | 2   | No              |      | 2   | No             |      | 2   | No    |      |       |       | 163   | 52    |
| 16342  |      | 2   | No              |      | 2   | No             |      | 2   | No    |      |       |       | 160   | 55    |
| 16343  | 1    | 2   | No              |      | 2   | No             |      | 1   | Yes   | 1    |       |       | 155   | 44    |
| 16345  |      | 2   | No              |      | 2   | No             |      | 2   | No    |      |       |       | 170   | 98    |
| 16349  |      | 2   | No              |      | 2   | No             |      | 2   | No    |      |       |       | 165   | 51    |
| 16355  |      | 2   | No              |      | 2   | No             |      | 2   | No    |      |       |       | 175   | 70    |
| 16364  | 1    | 2   | No              |      | 2   | No             |      | 2   | No    |      |       |       | 175   | 80    |
| 16374  |      | 2   | No              |      | 2   | No             |      | 2   | No    |      |       |       | 168   | 58    |
| 16375  |      | 2   | No              |      | 2   | No             |      | 2   | No    |      |       |       | 172   | 80    |
| 16376  |      | 2   | No              |      | 1   | Yes            | 1    | 2   | No    |      |       |       | 168   | 70    |
| 16393  |      | 2   | No              |      | 2   | No             |      | 2   | No    |      |       |       | 152   | 48    |
| 16394  |      | 2   | No              |      | 2   | No             |      | 2   | No    |      |       |       | 152   | 48    |
| 16395  |      | 2   | No              |      | 1   | Yes            | 2    | 1   | Yes   | 1    |       |       | 172   | 69    |
| 16397  | 2    | 2   | No              |      | 2   | No             |      | 2   | No    |      |       |       | 174   | 70    |
| 16398  | 1    | 2   | No              |      | 1   | Yes            | 1    | 2   | No    |      |       |       | 163   | 56    |
| 16402  |      | 2   | No              |      | 2   | No             |      | 2   | No    |      |       |       | 175   | 63    |
| 16405  |      | 2   | No              |      | 1   | Yes            | 2    | 2   | No    |      |       |       | 183   | 93    |
| 16416  | 2    | 2   | No              |      | 2   | No             |      | 2   | No    |      |       |       | 173   | 80    |
| 16422  |      | 2   | No              |      | 1   | Yes            | 1    | 1   | Yes   | 1    |       |       | 178   | 80    |
| 16429  |      | 2   | No              |      | 2   | No             |      | 2   | No    |      |       |       | 160   | 56    |
| 16430  |      | 2   | No              |      | 1   | Yes            | 2    | 2   | No    |      |       |       | 160   | 58    |
| 16432  | 2    | 2   | No              |      | 2   | No             |      | 2   | No    |      |       |       | 171   | 62    |
| 16433  | 2    | 2   | No              |      | 2   | No             |      | 2   | No    |      |       |       | 166   | 70    |
| 16434  |      | 2   | No              |      | 1   | Yes            | 1    | 2   | No    |      |       |       | 173   | 73    |

| respid | Q11a | Q12 | Cardiac Disease | Q12a | Q13 | Hyperlipidemia | Q13a | Q14 | Neuro | Q14a | Q15_1 | Q15_2 | Q15_3 | Q16_1 |
|--------|------|-----|-----------------|------|-----|----------------|------|-----|-------|------|-------|-------|-------|-------|
| 16437  |      | 2   | No              |      | 2   | No             |      | 1   | Yes   | 2    |       |       | 154   | 47    |
| 16439  |      | 2   | No              |      | 2   | No             |      | 2   | No    |      |       |       | 173   | 70    |
| 16440  |      | 2   | No              |      | 1   | Yes            | 2    | 2   | No    |      |       |       | 164   | 67    |
| 16441  | 2    | 2   | No              |      | 1   | Yes            | 1    | 2   | No    |      |       |       | 170   | 50    |
| 16442  |      | 2   | No              |      | 2   | No             |      | 2   | No    |      |       |       | 170   | 120   |
| 16450  |      | 2   | No              |      | 2   | No             |      | 2   | No    |      |       |       | 153   | 59    |
| 16451  | 1    | 1   | Yes             | 1    | 2   | No             |      | 2   | No    |      |       |       | 168   | 85    |
| 16452  |      | 2   | No              |      | 2   | No             |      | 2   | No    |      |       |       | 164   | 64    |
| 16467  |      | 2   | No              |      | 2   | No             |      | 2   | No    |      |       |       | 160   | 43    |
| 16468  |      | 2   | No              |      | 2   | No             |      | 2   | No    |      |       |       | 165   | 65    |
| 16469  | 1    | 2   | No              |      | 1   | Yes            | 1    | 2   | No    |      |       |       | 175   | 69    |
| 16470  |      | 2   | No              |      | 2   | No             |      | 2   | No    |      |       |       | 165   | 73    |
| 16471  | 1    | 2   | No              |      | 2   | No             |      | 2   | No    |      |       |       | 146   | 45    |
| 16473  |      | 2   | No              |      | 2   | No             |      | 2   | No    |      |       |       | 165   | 50    |
| 16476  |      | 2   | No              |      | 1   | Yes            | 1    | 2   | No    |      |       |       | 177   | 88    |
| 16478  |      | 2   | No              |      | 2   | No             |      | 2   | No    |      |       |       | 171   | 75    |
| 16484  |      | 2   | No              |      | 2   | No             |      | 2   | No    |      |       |       | 160   | 57    |
| 16499  | 2    | 2   | No              |      | 1   | Yes            | 2    | 2   | No    |      |       |       | 160   | 65    |
| 16502  |      | 2   | No              |      | 2   | No             |      | 2   | No    |      |       |       | 168   | 58    |
| 16505  |      | 2   | No              |      | 2   | No             |      | 2   | No    |      |       |       | 152   | 50    |
| 16514  | 2    | 2   | No              |      | 1   | Yes            | 2    | 2   | No    |      |       |       | 180   | 80    |
| 16515  |      | 2   | No              |      | 2   | No             |      | 2   | No    |      |       |       | 175   | 70    |
| 16517  | 1    | 1   | Yes             | 1    | 2   | No             |      | 1   | Yes   | 1    | 5     | 1     |       | 50    |
| 16518  | 1    | 2   | No              |      | 2   | No             |      | 2   | No    |      |       |       | 173   | 65    |
| 16519  |      | 2   | No              |      | 2   | No             |      | 2   | No    |      |       |       | 170   | 72    |
| 16525  |      | 2   | No              |      | 2   | No             |      | 2   | No    |      |       |       | 165   | 67    |
| 16526  |      | 1   | Yes             | 2    | 2   | No             |      | 2   | No    |      |       |       | 165   | 65    |
| 16530  | 1    | 2   | No              |      | 1   | Yes            | 1    | 2   | No    |      |       |       | 161   | 55    |
| 16532  | 1    | 2   | No              |      | 2   | No             |      | 2   | No    |      |       |       | 178   | 80    |
| 16536  | 1    | 2   | No              |      | 2   | No             |      | 2   | No    |      |       |       | 168   | 74    |
| 16537  |      | 2   | No              |      | 2   | No             |      | 2   | No    |      |       |       | 155   | 46    |
| 16541  |      | 2   | No              |      | 1   | Yes            | 2    | 2   | No    |      |       |       | 173   | 75    |

| respid | Q11a | Q12 | Cardiac Disease | Q12a | Q13 | Hyperlipidemia | Q13a | Q14 | Neuro | Q14a | Q15_1 | Q15_2 | Q15_3 | Q16_1 |
|--------|------|-----|-----------------|------|-----|----------------|------|-----|-------|------|-------|-------|-------|-------|
| 16543  |      | 2   | No              |      | 2   | No             |      | 2   | No    |      |       |       | 170   | 63    |
| 16544  | 2    | 2   | No              |      | 2   | No             |      | 2   | No    |      | 6     | 5     |       | 63    |
| 16545  |      | 2   | No              |      | 1   | Yes            | 2    | 2   | No    |      |       |       | 165   | 60    |
| 16546  |      | 2   | No              |      | 2   | No             |      | 2   | No    |      |       |       | 164   | 57    |
| 16548  |      | 2   | No              |      | 2   | No             |      | 2   | No    |      |       |       | 169   | 67    |
| 16552  | 2    | 2   | No              |      | 1   | Yes            | 2    | 2   | No    |      |       |       | 163   | 65    |
| 16559  | 1    | 2   | No              |      | 2   | No             |      | 2   | No    |      |       |       | 155   | 120   |
| 16564  | 1    | 2   | No              |      | 1   | Yes            | 1    | 2   | No    |      |       |       | 158   | 96    |
| 16565  | 1    | 1   | Yes             | 1    | 1   | Yes            | 1    | 1   | Yes   | 1    |       |       | 180   | 75    |
| 16567  |      | 2   | No              |      | 2   | No             |      | 2   | No    |      |       |       | 160   | 48    |
| 16571  |      | 2   | No              |      | 2   | No             |      | 2   | No    |      |       |       | 163   | 53    |
| 16572  | 1    | 2   | No              |      | 1   | Yes            | 1    | 2   | No    |      |       |       | 156   | 50    |
| 16579  |      | 2   | No              |      | 2   | No             |      | 2   | No    |      |       |       | 152   | 47    |
| 16588  | 1    | 2   | No              |      | 1   | Yes            | 1    | 2   | No    |      |       |       | 165   | 68    |
| 16599  |      | 2   | No              |      | 1   | Yes            | 2    | 2   | No    |      |       |       | 163   | 69    |
| 16605  | 1    | 1   | Yes             | 1    | 2   | No             |      | 2   | No    |      |       |       | 165   | 93    |
| 16622  |      | 2   | No              |      | 1   | Yes            | 2    | 2   | No    |      |       |       | 155   | 70    |
| 16635  |      | 2   | No              |      | 2   | No             |      | 2   | No    |      |       |       | 165   | 60    |
| 16638  |      | 2   | No              |      | 2   | No             |      | 2   | No    |      |       |       | 158   | 57    |
| 16652  |      | 2   | No              |      | 2   | No             |      | 2   | No    |      |       |       | 157   | 49    |
| 16656  | 1    | 2   | No              |      | 2   | No             |      | 2   | No    |      |       |       | 168   | 65    |
| 16671  | 1    | 2   | No              |      | 2   | No             |      | 2   | No    |      |       |       | 175   | 75    |
| 16676  |      | 2   | No              |      | 2   | No             |      | 2   | No    |      |       |       | 170   | 67    |
| 16678  | 1    | 2   | No              |      | 2   | No             |      | 2   | No    |      |       |       | 168   | 68    |
| 16702  |      | 2   | No              |      | 1   | Yes            | 2    | 2   | No    |      |       |       | 175   | 75    |
| 16705  |      | 2   | No              |      | 1   | Yes            | 1    | 2   | No    |      |       |       | 168   | 50    |
| 16707  | 1    | 2   | No              |      | 1   | Yes            | 1    | 2   | No    |      |       |       | 165   | 62    |
| 16711  |      | 2   | No              |      | 2   | No             |      | 2   | No    |      |       |       | 148   | 55    |
| 16712  | 2    | 2   | No              |      | 2   | No             |      | 2   | No    |      |       |       | 170   | 61    |
| 16716  |      | 2   | No              |      | 2   | No             |      | 2   | No    |      |       |       | 168   | 88    |
| 16724  |      | 2   | No              |      | 1   | Yes            | 2    | 2   | No    |      |       |       | 165   | 50    |
| 16727  | 1    | 2   | No              |      | 1   | Yes            | 1    | 2   | No    |      |       |       | 170   | 71    |

| respid | Q11a | Q12 | Cardiac Disease | Q12a | Q13 | Hyperlipidemia | Q13a | Q14 | Neuro | Q14a | Q15_1 | Q15_2 | Q15_3 | Q16_1 |
|--------|------|-----|-----------------|------|-----|----------------|------|-----|-------|------|-------|-------|-------|-------|
| 16734  | 1    | 2   | No              |      | 2   | No             |      | 2   | No    |      |       |       | 159   | 48    |
| 16740  |      | 2   | No              |      | 2   | No             |      | 2   | No    |      |       |       | 168   | 65    |
| 16748  |      | 2   | No              |      | 2   | No             |      | 2   | No    |      |       |       | 168   | 59    |
| 16759  |      | 2   | No              |      | 2   | No             |      | 2   | No    |      |       |       | 170   | 72    |
| 16761  |      | 2   | No              |      | 1   | Yes            | 2    | 2   | No    |      |       |       | 174   | 80    |
| 16763  |      | 2   | No              |      | 1   | Yes            | 2    | 2   | No    |      |       |       | 175   | 68    |
| 16764  |      | 2   | No              |      | 2   | No             |      | 2   | No    |      |       |       | 168   | 68    |
| 16766  | 1    | 2   | No              |      | 2   | No             |      | 2   | No    |      |       |       | 166   | 56    |
| 16767  | 2    | 2   | No              |      | 1   | Yes            | 2    | 2   | No    |      |       |       | 175   | 75    |
| 16776  |      | 2   | No              |      | 2   | No             |      | 2   | No    |      |       |       | 164   | 48    |
| 16781  |      | 2   | No              |      | 1   | Yes            | 2    | 2   | No    |      |       |       | 162   | 56    |
| 16793  | 1    | 2   | No              |      | 1   | Yes            | 1    | 2   | No    |      |       |       | 165   | 70    |
| 16796  |      | 2   | No              |      | 2   | No             |      | 2   | No    |      |       |       | 161   | 58    |
| 16810  |      | 2   | No              |      | 2   | No             |      | 2   | No    |      |       |       | 166   | 55    |
| 16811  |      | 2   | No              |      | 1   | Yes            | 2    | 2   | No    |      |       |       | 165   | 48    |
| 16813  |      | 2   | No              |      | 2   | No             |      | 2   | No    |      |       |       | 180   | 75    |
| 16814  |      | 2   | No              |      | 2   | No             |      | 2   | No    |      |       |       | 168   | 75    |
| 16831  |      | 2   | No              |      | 2   | No             |      | 2   | No    |      |       |       | 166   | 52    |
| 16833  |      | 2   | No              |      | 2   | No             |      | 2   | No    |      |       |       | 163   | 50    |
| 16839  |      | 2   | No              |      | 1   | Yes            | 2    | 2   | No    |      |       |       | 172   | 70    |
| 16843  |      | 2   | No              |      | 2   | No             |      | 2   | No    |      |       |       | 162   | 58    |
| 16860  | 1    | 2   | No              |      | 1   | Yes            | 2    | 2   | No    |      |       |       | 163   | 55    |
| 16871  |      | 2   | No              |      | 2   | No             |      | 2   | No    |      |       |       | 170   | 60    |
| 16881  | 1    | 1   | Yes             | 1    | 1   | Yes            | 1    | 2   | No    |      |       |       | 154   | 65    |
| 16884  | 1    | 2   | No              |      | 1   | Yes            | 1    | 2   | No    |      |       |       | 153   | 65    |
| 16891  |      | 2   | No              |      | 2   | No             |      | 2   | No    |      |       |       | 175   | 60    |
| 16909  |      | 2   | No              |      | 2   | No             |      | 2   | No    |      |       |       | 165   | 56    |
| 16911  |      | 2   | No              |      | 2   | No             |      | 2   | No    |      |       |       | 155   | 55    |
| 16922  | 1    | 2   | No              |      | 2   | No             |      | 2   | No    |      |       |       | 160   | 55    |
| 16935  | 1    | 2   | No              |      | 2   | No             |      | 2   | No    |      |       |       | 176   | 55    |
| 16942  |      | 2   | No              |      | 2   | No             |      | 2   | No    |      |       |       | 170   | 60    |
| 16950  | 2    | 2   | No              |      | 2   | No             |      | 2   | No    |      |       |       | 160   | 58    |

| respid | Q11a | Q12 | Cardiac Disease | Q12a | Q13 | Hyperlipidemia | Q13a | Q14 | Neuro | Q14a | Q15_1 | Q15_2 | Q15_3 | Q16_1 |
|--------|------|-----|-----------------|------|-----|----------------|------|-----|-------|------|-------|-------|-------|-------|
| 16952  |      | 2   | No              |      | 1   | Yes            | 2    | 2   | No    |      |       |       | 160   | 46    |
| 16963  |      | 2   | No              |      | 2   | No             |      | 2   | No    |      |       |       | 172   | 54    |
| 16967  |      | 2   | No              |      | 2   | No             |      | 2   | No    |      |       |       | 170   | 68    |
| 16970  |      | 2   | No              |      | 2   | No             |      | 2   | No    |      |       |       | 166   | 62    |
| 16976  | 1    | 2   | No              |      | 1   | Yes            | 1    | 2   | No    |      |       |       | 173   | 75    |
| 16982  |      | 2   | No              |      | 2   | No             |      | 2   | No    |      |       |       | 171   | 75    |
| 16995  |      | 2   | No              |      | 2   | No             |      | 2   | No    |      |       |       | 166   | 64    |
| 17004  | 1    | 2   | No              |      | 2   | No             |      | 2   | No    |      |       |       | 168   | 75    |
| 17006  |      | 2   | No              |      | 1   | Yes            | 2    | 2   | No    |      |       |       | 170   | 76    |
| 17009  |      | 2   | No              |      | 1   | Yes            | 1    | 2   | No    |      |       |       | 172   | 78    |
| 17021  | 1    | 2   | No              |      | 2   | No             |      | 2   | No    |      |       |       | 150   | 56    |
| 17040  |      | 2   | No              |      | 2   | No             |      | 2   | No    |      |       |       | 158   | 58    |
| 17041  | 1    | 2   | No              |      | 2   | No             |      | 2   | No    |      |       |       | 174   | 72    |
| 17044  |      | 2   | No              |      | 1   | Yes            | 1    | 2   | No    |      |       |       | 153   | 51    |
| 17046  |      | 2   | No              |      | 2   | No             |      | 2   | No    |      |       |       | 155   | 60    |
| 17052  | 1    | 2   | No              |      | 1   | Yes            | 1    | 2   | No    |      |       |       | 167   | 72    |
| 17055  |      | 2   | No              |      | 2   | No             |      | 2   | No    |      |       |       | 163   | 72    |
| 17108  | 1    | 2   | No              |      | 1   | Yes            | 1    | 2   | No    |      |       |       | 160   | 80    |
| 17109  |      | 2   | No              |      | 2   | No             |      | 2   | No    |      |       |       | 162   | 68    |
| 17113  |      | 2   | No              |      | 2   | No             |      | 2   | No    |      |       |       | 176   | 75    |
| 17115  |      | 2   | No              |      | 1   | Yes            | 2    | 2   | No    |      |       |       | 165   | 65    |
| 17132  |      | 2   | No              |      | 2   | No             |      | 2   | No    |      |       |       | 160   | 70    |
| 17135  | 1    | 2   | No              |      | 1   | Yes            | 1    | 2   | No    |      |       |       | 162   | 54    |
| 17138  | 2    | 2   | No              |      | 2   | No             |      | 2   | No    |      |       |       | 155   | 48    |
| 17141  | 2    | 2   | No              |      | 2   | No             |      | 2   | No    |      |       |       | 166   | 63    |
| 17143  |      | 2   | No              |      | 1   | Yes            | 2    | 2   | No    |      |       |       | 162   | 83    |
| 17148  | 1    | 2   | No              |      | 2   | No             |      | 2   | No    |      |       |       | 171   | 85    |
| 17151  | 2    | 2   | No              |      | 2   | No             |      | 2   | No    |      |       |       | 175   | 65    |
| 17153  | 2    | 2   | No              |      | 1   | Yes            | 2    | 2   | No    |      |       |       | 174   | 69    |
| 17154  | 1    | 2   | No              |      | 1   | Yes            | 2    | 2   | No    |      |       |       | 175   | 67    |
| 17157  | 1    | 2   | No              |      | 2   | No             |      | 2   | No    |      |       |       | 171   | 79    |
| 17160  |      | 2   | No              |      | 2   | No             |      | 2   | No    |      |       |       | 164   | 66    |



| respid | Q11a | Q12 | Cardiac Disease | Q12a | Q13 | Hyperlipidemia | Q13a | Q14 | Neuro | Q14a | Q15_1 | Q15_2 | Q15_3 | Q16_1 |
|--------|------|-----|-----------------|------|-----|----------------|------|-----|-------|------|-------|-------|-------|-------|
| 17167  |      | 2   | No              |      | 1   | Yes            | 2    | 2   | No    |      |       |       | 174   | 65    |
| 17169  | 1    | 2   | No              |      | 2   | No             |      | 2   | No    |      |       |       | 169   | 66    |
| 17174  |      | 2   | No              |      | 2   | No             |      | 2   | No    |      |       |       | 180   | 85    |
| 17179  |      | 2   | No              |      | 2   | No             |      | 2   | No    |      |       |       | 175   | 70    |
| 17180  |      | 2   | No              |      | 1   | Yes            | 2    | 2   | No    |      |       |       | 180   | 85    |
| 17182  |      | 2   | No              |      | 2   | No             |      | 2   | No    |      |       |       | 169   | 66    |
| 17184  | 1    | 2   | No              |      | 2   | No             |      | 2   | No    |      |       |       | 167   | 92    |
| 17186  | 1    | 2   | No              |      | 2   | No             |      | 2   | No    |      |       |       | 172   | 84    |
| 17187  | 2    | 2   | No              |      | 2   | No             |      | 2   | No    |      |       |       | 173   | 71    |
| 17192  | 1    | 2   | No              |      | 1   | Yes            | 2    | 2   | No    |      |       |       | 167   | 63    |
| 17197  | 1    | 2   | No              |      | 1   | Yes            | 1    | 2   | No    |      |       |       | 165   | 67    |
| 17217  |      | 2   | No              |      | 2   | No             |      | 2   | No    |      |       |       | 160   | 58    |
| 17226  | 1    | 2   | No              |      | 2   | No             |      | 2   | No    |      |       |       | 177   | 84    |
| 17228  | 2    | 2   | No              |      | 2   | No             |      | 2   | No    |      |       |       | 170   | 65    |
| 17245  | 1    | 2   | No              |      | 1   | Yes            | 2    | 2   | No    |      |       |       | 174   | 78    |
| 17247  |      | 2   | No              |      | 2   | No             |      | 2   | No    |      |       |       | 158   | 53    |
| 17258  |      | 2   | No              |      | 2   | No             |      | 2   | No    |      |       |       | 160   | 45    |
| 17259  | 1    | 2   | No              |      | 2   | No             |      | 2   | No    |      |       |       | 163   | 69    |
| 17262  |      | 2   | No              |      | 2   | No             |      | 2   | No    |      |       |       | 176   | 67    |
| 17265  |      | 2   | No              |      | 1   | Yes            | 2    | 2   | No    |      |       |       | 153   | 49    |
| 17281  | 2    | 2   | No              |      | 1   | Yes            | 2    | 2   | No    |      |       |       | 170   | 60    |
| 17282  | 2    | 2   | No              |      | 2   | No             |      | 2   | No    |      |       |       | 156   | 55    |
| 17293  |      | 2   | No              |      | 2   | No             |      | 2   | No    |      |       |       | 168   | 70    |
| 17306  |      | 2   | No              |      | 2   | No             |      | 2   | No    |      |       |       | 155   | 63    |
| 17312  | 1    | 2   | No              |      | 2   | No             |      | 2   | No    |      |       |       | 167   | 60    |
| 17318  | 1    | 2   | No              |      | 2   | No             |      | 2   | No    |      |       |       | 165   | 60    |
| 17328  | 1    | 2   | No              |      | 1   | Yes            | 2    | 2   | No    |      |       |       | 159   | 52    |
| 17343  |      | 2   | No              |      | 2   | No             |      | 2   | No    |      |       |       | 174   | 70    |
| 17344  |      | 2   | No              |      | 2   | No             |      | 2   | No    |      |       |       | 162   | 55    |
| 17348  |      | 2   | No              |      | 2   | No             |      | 2   | No    |      |       |       | 170   | 65    |
| 17352  |      | 2   | No              |      | 2   | No             |      | 2   | No    |      |       |       | 165   | 58    |
| 17355  |      | 2   | No              |      | 1   | Yes            | 2    | 2   | No    |      |       |       | 171   | 65    |

| respid | Q11a | Q12 | Cardiac Disease | Q12a | Q13 | Hyperlipidemia | Q13a | Q14 | Neuro | Q14a | Q15_1 | Q15_2 | Q15_3 | Q16_1 |
|--------|------|-----|-----------------|------|-----|----------------|------|-----|-------|------|-------|-------|-------|-------|
| 17356  | 2    | 2   | No              |      | 1   | Yes            | 2    | 2   | No    |      |       |       | 160   | 67    |
| 17359  |      | 2   | No              |      | 2   | No             |      | 2   | No    |      |       |       | 160   | 56    |
| 17373  |      | 2   | No              |      | 1   | Yes            | 2    | 2   | No    |      |       |       | 175   | 78    |
| 17381  |      | 2   | No              |      | 2   | No             |      | 2   | No    |      |       |       | 158   | 45    |
| 17388  |      | 2   | No              |      | 2   | No             |      | 2   | No    |      |       |       | 168   | 63    |
| 17394  | 1    | 2   | No              |      | 2   | No             |      | 2   | No    |      |       |       | 153   | 68    |
| 17401  | 1    | 2   | No              |      | 2   | No             |      | 2   | No    |      |       |       | 160   | 65    |
| 17403  |      | 2   | No              |      | 2   | No             |      | 2   | No    |      |       |       | 160   | 51    |
| 17411  |      | 2   | No              |      | 2   | No             |      | 2   | No    |      |       |       | 160   | 50    |
| 17423  |      | 2   | No              |      | 1   | Yes            | 2    | 2   | No    |      |       |       | 159   | 50    |
| 17427  |      | 2   | No              |      | 2   | No             |      | 2   | No    |      |       |       | 173   | 70    |
| 17433  |      | 2   | No              |      | 2   | No             |      | 2   | No    |      |       |       | 170   | 65    |
| 17441  |      | 2   | No              |      | 1   | Yes            | 2    | 2   | No    |      |       |       | 167   | 73    |
| 17442  | 1    | 1   | Yes             | 1    | 2   | No             |      | 2   | No    |      |       |       | 165   | 66    |
| 17447  | 1    | 2   | No              |      | 1   | Yes            | 1    | 2   | No    |      |       |       | 165   | 58    |
| 17458  |      | 2   | No              |      | 2   | No             |      | 2   | No    |      |       |       | 157   | 65    |
| 17474  |      | 2   | No              |      | 2   | No             |      | 2   | No    |      |       |       | 163   | 58    |
| 17475  | 1    | 2   | No              |      | 1   | Yes            | 2    | 2   | No    |      |       |       | 165   | 65    |
| 17476  | 1    | 2   | No              |      | 1   | Yes            | 2    | 1   | Yes   | 2    |       |       | 179   | 78    |
| 17480  |      | 2   | No              |      | 2   | No             |      | 2   | No    |      |       |       | 158   | 50    |
| 17484  | 1    | 2   | No              |      | 2   | No             |      | 2   | No    |      |       |       | 154   | 59    |
| 17490  |      | 2   | No              |      | 2   | No             |      | 2   | No    |      |       |       | 155   | 60    |
| 17491  |      | 2   | No              |      | 2   | No             |      | 2   | No    |      |       |       | 163   | 70    |
| 17500  | 2    | 2   | No              |      | 1   | Yes            | 2    | 2   | No    |      |       |       | 175   | 80    |
| 17507  | 2    | 2   | No              |      | 2   | No             |      | 2   | No    |      |       |       | 177   | 82    |
| 17517  | 2    | 1   | Yes             | 2    | 2   | No             |      | 2   | No    |      |       |       | 165   | 68    |
| 17520  | 2    | 2   | No              |      | 2   | No             |      | 2   | No    |      |       |       | 173   | 61    |
| 17521  | 1    | 2   | No              |      | 2   | No             |      | 2   | No    |      |       |       | 168   | 69    |
| 17531  |      | 2   | No              |      | 2   | No             |      | 2   | No    |      |       |       | 160   | 60    |
| 17540  |      | 2   | No              |      | 2   | No             |      | 2   | No    |      |       |       | 157   | 52    |
| 17550  |      | 2   | No              |      | 2   | No             |      | 2   | No    |      |       |       | 172   | 72    |
| 17551  |      | 2   | No              |      | 1   | Yes            | 2    | 2   | No    |      |       |       | 156   | 53    |

| respid | Q11a | Q12 | Cardiac Disease | Q12a | Q13 | Hyperlipidemia | Q13a | Q14 | Neuro | Q14a | Q15_1 | Q15_2 | Q15_3 | Q16_1 |
|--------|------|-----|-----------------|------|-----|----------------|------|-----|-------|------|-------|-------|-------|-------|
| 17555  | 1    | 2   | No              |      | 2   | No             |      | 2   | No    |      |       |       | 170   | 75    |
| 17556  |      | 2   | No              |      | 2   | No             |      | 2   | No    |      |       |       | 170   | 75    |
| 17574  |      | 2   | No              |      | 1   | Yes            | 1    | 2   | No    |      |       |       | 176   | 69    |
| 17575  |      | 2   | No              |      | 2   | No             |      | 2   | No    |      |       |       | 160   | 48    |
| 17582  | 1    | 2   | No              |      | 2   | No             |      | 2   | No    |      |       |       | 155   | 60    |
| 17587  | 1    | 2   | No              |      | 2   | No             |      | 2   | No    |      |       |       | 168   | 64    |
| 17601  | 1    | 2   | No              |      | 2   | No             |      | 2   | No    |      |       |       | 176   | 70    |
| 17607  | 1    | 2   | No              |      | 1   | Yes            | 1    | 2   | No    |      |       |       | 170   | 60    |
| 17609  | 2    | 2   | No              |      | 2   | No             |      | 2   | No    |      |       |       | 155   | 41    |
| 17611  |      | 2   | No              |      | 2   | No             |      | 2   | No    |      |       |       | 164   | 56    |
| 17613  |      | 2   | No              |      | 2   | No             |      | 2   | No    |      |       |       | 168   | 70    |
| 17615  |      | 2   | No              |      | 2   | No             |      | 1   | Yes   | 1    |       |       | 163   | 80    |
| 17620  | 1    | 2   | No              |      | 2   | No             |      | 2   | No    |      |       |       | 170   | 67    |
| 17624  | 1    | 2   | No              |      | 2   | No             |      | 2   | No    |      |       |       | 179   | 90    |
| 17635  | 1    | 2   | No              |      | 1   | Yes            | 1    | 2   | No    |      |       |       | 174   | 74    |
| 17643  |      | 2   | No              |      | 2   | No             |      | 2   | No    |      |       |       | 158   | 60    |
| 17645  |      | 1   | Yes             | 1    | 2   | No             |      | 2   | No    |      |       |       | 162   | 53    |
| 17646  |      | 2   | No              |      | 2   | No             |      | 2   | No    |      |       |       | 162   | 56    |
| 17649  | 1    | 2   | No              |      | 1   | Yes            | 2    | 2   | No    |      |       |       | 172   | 65    |
| 17658  |      | 2   | No              |      | 2   | No             |      | 2   | No    |      |       |       | 178   | 80    |
| 17666  |      | 2   | No              |      | 2   | No             |      | 2   | No    |      |       |       | 167   | 58    |
| 17670  |      | 2   | No              |      | 1   | Yes            | 2    | 2   | No    |      |       |       | 158   | 56    |
| 17678  |      | 2   | No              |      | 2   | No             |      | 2   | No    |      |       |       | 155   | 50    |
| 17679  |      | 2   | No              |      | 2   | No             |      | 2   | No    |      |       |       | 160   | 58    |
| 17695  |      | 2   | No              |      | 1   | Yes            | 2    | 2   | No    |      |       |       | 155   | 50    |
| 17697  | 2    | 2   | No              |      | 2   | No             |      | 2   | No    |      |       |       | 167   | 70    |
| 17698  | 1    | 2   | No              |      | 1   | Yes            | 2    | 2   | No    |      |       |       | 170   | 64    |
| 17723  | 1    | 2   | No              |      | 1   | Yes            | 1    | 2   | No    |      |       |       | 158   | 55    |
| 17727  |      | 2   | No              |      | 2   | No             |      | 2   | No    |      |       |       | 162   | 60    |
| 17734  |      | 2   | No              |      | 2   | No             |      | 2   | No    |      |       |       | 155   | 50    |
| 17737  | 2    | 2   | No              |      | 2   | No             |      | 2   | No    |      |       |       | 158   | 51    |
| 17748  |      | 2   | No              |      | 2   | No             |      | 2   | No    |      |       |       | 172   | 69    |

| respid | Q11a | Q12 | Cardiac Disease | Q12a | Q13 | Hyperlipidemia | Q13a | Q14 | Neuro | Q14a | Q15_1 | Q15_2 | Q15_3 | Q16_1 |
|--------|------|-----|-----------------|------|-----|----------------|------|-----|-------|------|-------|-------|-------|-------|
| 17749  |      | 2   | No              |      | 2   | No             |      | 2   | No    |      |       |       | 160   | 55    |
| 17754  | 2    | 2   | No              |      | 2   | No             |      | 2   | No    |      |       |       | 155   | 60    |
| 17766  |      | 2   | No              |      | 1   | Yes            | 1    | 2   | No    |      |       |       | 160   | 49    |
| 17777  |      | 2   | No              |      | 2   | No             |      | 2   | No    |      |       |       | 155   | 52    |
| 17780  |      | 2   | No              |      | 1   | Yes            | 1    | 2   | No    |      |       |       | 172   | 81    |
| 17788  | 1    | 2   | No              |      | 2   | No             |      | 2   | No    |      |       |       | 178   | 80    |
| 17801  | 2    | 1   | Yes             | 2    | 2   | No             |      | 2   | No    |      |       |       | 173   | 71    |
| 17803  |      | 2   | No              |      | 2   | No             |      | 2   | No    |      |       |       | 152   | 46    |
| 17807  |      | 2   | No              |      | 2   | No             |      | 2   | No    |      |       |       | 153   | 48    |
| 17808  |      | 2   | No              |      | 2   | No             |      | 2   | No    |      |       |       | 178   | 75    |
| 17809  |      | 2   | No              |      | 1   | Yes            | 2    | 2   | No    |      |       |       | 162   | 60    |
| 17821  |      | 2   | No              |      | 2   | No             |      | 2   | No    |      |       |       | 168   | 67    |
| 17827  | 1    | 2   | No              |      | 1   | Yes            | 1    | 2   | No    |      |       |       | 170   | 70    |
| 17834  | 2    | 2   | No              |      | 1   | Yes            | 2    | 2   | No    |      |       |       | 172   | 60    |
| 17838  |      | 2   | No              |      | 2   | No             |      | 2   | No    |      |       |       | 165   | 60    |
| 17842  |      | 2   | No              |      | 2   | No             |      | 2   | No    |      |       |       | 156   | 64    |
| 17862  | 1    | 2   | No              |      | 1   | Yes            | 1    | 2   | No    |      |       |       | 176   | 72    |
| 17863  |      | 2   | No              |      | 2   | No             |      | 2   | No    |      |       |       | 150   | 45    |
| 17871  | 1    | 2   | No              |      | 1   | Yes            | 1    | 2   | No    |      |       |       | 172   | 75    |
| 17872  |      | 2   | No              |      | 1   | Yes            | 2    | 2   | No    |      |       |       | 170   | 75    |
| 17903  |      | 2   | No              |      | 1   | Yes            | 1    | 2   | No    |      |       |       | 160   | 50    |
| 17906  |      | 2   | No              |      | 1   | Yes            | 1    | 2   | No    |      |       |       | 175   | 60    |
| 17910  | 1    | 1   | Yes             | 1    | 1   | Yes            | 1    | 1   | Yes   | 1    |       |       | 167   | 55    |
| 17922  | 1    | 1   | Yes             | 1    | 1   | Yes            | 1    | 2   | No    |      |       |       | 165   | 63    |
| 17923  |      | 2   | No              |      | 2   | No             |      | 2   | No    |      |       |       | 168   | 64    |
| 17925  |      | 2   | No              |      | 2   | No             |      | 2   | No    |      |       |       | 165   | 65    |
| 17926  |      | 2   | No              |      | 2   | No             |      | 2   | No    |      |       |       | 172   | 70    |
| 17937  |      | 2   | No              |      | 2   | No             |      | 2   | No    |      |       |       | 159   | 51    |
| 17956  |      | 2   | No              |      | 2   | No             |      | 2   | No    |      |       |       | 175   | 80    |
| 17958  |      | 2   | No              |      | 1   | Yes            | 2    | 2   | No    |      |       |       | 165   | 58    |
| 17985  |      | 2   | No              |      | 2   | No             |      | 2   | No    |      |       |       | 179   | 68    |
| 17989  | 2    | 2   | No              |      | 1   | Yes            | 2    | 2   | No    |      |       |       | 163   | 65    |

| respid | Q11a | Q12 | Cardiac Disease | Q12a | Q13 | Hyperlipidemia | Q13a | Q14 | Neuro | Q14a | Q15_1 | Q15_2 | Q15_3 | Q16_1 |
|--------|------|-----|-----------------|------|-----|----------------|------|-----|-------|------|-------|-------|-------|-------|
| 17995  |      | 2   | No              |      | 2   | No             |      | 2   | No    |      |       |       | 164   | 55    |
| 18000  |      | 1   | Yes             | 1    | 2   | No             |      | 2   | No    |      |       |       | 155   | 58    |
| 18010  | 1    | 2   | No              |      | 2   | No             |      | 2   | No    |      |       |       | 169   | 65    |
| 18015  |      | 2   | No              |      | 2   | No             |      | 2   | No    |      |       |       | 170   | 88    |
| 18018  |      | 2   | No              |      | 2   | No             |      | 2   | No    |      |       |       | 160   | 64    |
| 18031  |      | 1   | Yes             | 1    | 1   | Yes            | 1    | 2   | No    |      |       |       | 155   | 55    |
| 18033  |      | 2   | No              |      | 2   | No             |      | 2   | No    |      |       |       | 157   | 57    |
| 18036  |      | 2   | No              |      | 2   | No             |      | 2   | No    |      |       |       | 160   | 70    |
| 18041  | 1    | 1   | Yes             | 1    | 2   | No             |      | 2   | No    |      |       |       | 170   | 70    |
| 18068  |      | 2   | No              |      | 2   | No             |      | 2   | No    |      |       |       | 163   | 60    |
| 18080  | 1    | 2   | No              |      | 1   | Yes            | 2    | 2   | No    |      |       |       | 168   | 75    |
| 18081  | 1    | 2   | No              |      | 2   | No             |      | 2   | No    |      |       |       | 167   | 60    |
| 18083  | 2    | 2   | No              |      | 1   | Yes            | 2    | 2   | No    |      |       |       | 179   | 73    |
| 18113  | 1    | 2   | No              |      | 2   | No             |      | 2   | No    |      |       |       | 174   | 86    |
| 18115  |      | 2   | No              |      | 2   | No             |      | 2   | No    |      |       |       | 170   | 71    |
| 18117  |      | 2   | No              |      | 2   | No             |      | 2   | No    |      |       |       | 163   | 59    |
| 18129  |      | 2   | No              |      | 2   | No             |      | 2   | No    |      |       |       | 158   | 57    |
| 18132  |      | 2   | No              |      | 2   | No             |      | 2   | No    |      |       |       | 160   | 50    |
| 18146  | 1    | 2   | No              |      | 2   | No             |      | 2   | No    |      |       |       | 173   | 73    |
| 18147  | 1    | 2   | No              |      | 1   | Yes            | 1    | 2   | No    |      |       |       | 170   | 65    |
| 18153  |      | 2   | No              |      | 2   | No             |      | 2   | No    |      |       |       | 158   | 51    |
| 18154  |      | 2   | No              |      | 1   | Yes            | 2    | 2   | No    |      |       |       | 172   | 60    |
| 18157  |      | 2   | No              |      | 1   | Yes            | 2    | 2   | No    |      |       |       | 170   | 110   |
| 18166  | 1    | 2   | No              |      | 2   | No             |      | 2   | No    |      |       |       | 165   | 62    |
| 18169  |      | 2   | No              |      | 2   | No             |      | 2   | No    |      |       |       | 165   | 58    |
| 18171  | 1    | 2   | No              |      | 2   | No             |      | 2   | No    |      |       |       | 165   | 55    |
| 18173  |      | 2   | No              |      | 2   | No             |      | 2   | No    |      |       |       | 158   | 56    |
| 18204  | 1    | 2   | No              |      | 2   | No             |      | 2   | No    |      |       |       | 169   | 60    |
| 18210  | 2    | 2   | No              |      | 1   | Yes            | 2    | 2   | No    |      |       |       | 169   | 100   |
| 18212  |      | 2   | No              |      | 2   | No             |      | 2   | No    |      |       |       | 166   | 72    |
| 18220  | 1    | 2   | No              |      | 1   | Yes            | 1    | 2   | No    |      |       |       | 164   | 61    |
| 18221  |      | 2   | No              |      | 2   | No             |      | 2   | No    |      |       |       | 160   | 60    |

| respid | Q11a | Q12 | Cardiac Disease | Q12a | Q13 | Hyperlipidemia | Q13a | Q14 | Neuro | Q14a | Q15_1 | Q15_2 | Q15_3 | Q16_1 |
|--------|------|-----|-----------------|------|-----|----------------|------|-----|-------|------|-------|-------|-------|-------|
| 18228  |      | 2   | No              |      | 1   | Yes            | 2    | 2   | No    |      |       |       | 163   | 67    |
| 18231  |      | 2   | No              |      | 2   | No             |      | 2   | No    |      |       |       | 176   | 80    |
| 18233  |      | 2   | No              |      | 2   | No             |      | 2   | No    |      |       |       | 175   | 65    |
| 18235  | 1    | 2   | No              |      | 2   | No             |      | 2   | No    |      |       |       | 173   | 80    |
| 18237  | 1    | 2   | No              |      | 2   | No             |      | 2   | No    |      |       |       | 168   | 80    |
| 18250  | 1    | 2   | No              |      | 2   | No             |      | 2   | No    |      |       |       | 160   | 60    |
| 18253  |      | 2   | No              |      | 2   | No             |      | 2   | No    |      |       |       | 165   | 47    |
| 18264  |      | 2   | No              |      | 2   | No             |      | 2   | No    |      |       |       | 156   | 54    |
| 18285  |      | 2   | No              |      | 1   | Yes            | 2    | 2   | No    |      |       |       | 160   | 53    |
| 18287  | 1    | 2   | No              |      | 2   | No             |      | 2   | No    |      |       |       | 176   | 70    |
| 18296  |      | 2   | No              |      | 2   | No             |      | 2   | No    |      |       |       | 158   | 55    |
| 18299  |      | 2   | No              |      | 2   | No             |      | 2   | No    |      |       |       | 166   | 70    |
| 18313  |      | 2   | No              |      | 2   | No             |      | 2   | No    |      |       |       | 155   | 48    |
| 18321  |      | 2   | No              |      | 2   | No             |      | 2   | No    |      |       |       | 164   | 55    |
| 18324  | 1    | 2   | No              |      | 2   | No             |      | 2   | No    |      |       |       | 170   | 65    |
| 18329  | 1    | 2   | No              |      | 2   | No             |      | 2   | No    |      |       |       | 175   | 70    |
| 18332  |      | 2   | No              |      | 2   | No             |      | 2   | No    |      |       |       | 153   | 53    |
| 18339  |      | 2   | No              |      | 2   | No             |      | 2   | No    |      |       |       | 163   | 64    |
| 18340  |      | 2   | No              |      | 2   | No             |      | 2   | No    |      |       |       | 167   | 63    |
| 18348  |      | 2   | No              |      | 2   | No             |      | 2   | No    |      |       |       | 158   | 54    |
| 18355  | 1    | 2   | No              |      | 2   | No             |      | 2   | No    |      |       |       | 184   | 85    |
| 18360  | 1    | 2   | No              |      | 2   | No             |      | 2   | No    |      |       |       | 169   | 60    |
| 18380  |      | 2   | No              |      | 1   | Yes            | 2    | 2   | No    |      |       |       | 161   | 54    |
| 18403  |      | 2   | No              |      | 1   | Yes            | 2    | 2   | No    |      |       |       | 162   | 52    |
| 18405  |      | 2   | No              |      | 2   | No             |      | 2   | No    |      |       |       | 168   | 49    |
| 18409  |      | 2   | No              |      | 2   | No             |      | 2   | No    |      |       |       | 170   | 75    |
| 18445  |      | 2   | No              |      | 2   | No             |      | 2   | No    |      |       |       | 177   | 80    |
| 18458  | 1    | 2   | No              |      | 1   | Yes            | 1    | 2   | No    |      |       |       | 168   | 64    |
| 18477  |      | 1   | Yes             | 2    | 2   | No             |      | 2   | No    |      |       |       | 159   | 53    |
| 18481  | 1    | 2   | No              |      | 2   | No             |      | 2   | No    |      |       |       | 175   | 90    |
| 18491  |      | 2   | No              |      | 2   | No             |      | 2   | No    |      |       |       | 176   | 67    |
| 18492  | 1    | 2   | No              |      | 2   | No             |      | 2   | No    |      |       |       | 159   | 66    |

| respid | Q11a | Q12 | Cardiac Disease | Q12a | Q13 | Hyperlipidemia | Q13a | Q14 | Neuro | Q14a | Q15_1 | Q15_2 | Q15_3 | Q16_1 |
|--------|------|-----|-----------------|------|-----|----------------|------|-----|-------|------|-------|-------|-------|-------|
| 18494  |      | 2   | No              |      | 2   | No             |      | 2   | No    |      |       |       | 158   | 54    |
| 18495  | 1    | 2   | No              |      | 2   | No             |      | 2   | No    |      |       |       | 162   | 64    |
| 18496  |      | 2   | No              |      | 1   | Yes            | 1    | 2   | No    |      |       |       | 146   | 56    |
| 18507  | 2    | 1   | Yes             | 1    | 1   | Yes            | 2    | 1   | Yes   | 1    |       |       | 163   | 83    |
| 18509  | 1    | 2   | No              |      | 2   | No             |      | 2   | No    |      |       |       | 165   | 70    |
| 18510  |      | 2   | No              |      | 2   | No             |      | 2   | No    |      |       |       | 155   | 60    |
| 18513  | 1    | 2   | No              |      | 1   | Yes            | 2    | 2   | No    |      |       |       | 163   | 60    |
| 18525  |      | 2   | No              |      | 2   | No             |      | 2   | No    |      |       |       | 175   | 65    |
| 18526  |      | 2   | No              |      | 2   | No             |      | 2   | No    |      |       |       | 160   | 60    |
| 18527  | 1    | 2   | No              |      | 1   | Yes            | 2    | 2   | No    |      |       |       | 169   | 68    |
| 18536  |      | 2   | No              |      | 2   | No             |      | 2   | No    |      |       |       | 162   | 52    |
| 18540  |      | 2   | No              |      | 2   | No             |      | 2   | No    |      |       |       | 165   | 58    |
| 18548  |      | 2   | No              |      | 2   | No             |      | 2   | No    |      |       |       | 155   | 65    |
| 18550  |      | 2   | No              |      | 2   | No             |      | 2   | No    |      |       |       | 162   | 50    |
| 18556  | 1    | 2   | No              |      | 1   | Yes            | 1    | 2   | No    |      |       |       | 163   | 65    |
| 18561  | 1    | 2   | No              |      | 2   | No             |      | 2   | No    |      |       |       | 177   | 86    |
| 18577  |      | 2   | No              |      | 1   | Yes            | 2    | 2   | No    |      |       |       | 172   | 65    |
| 18580  |      | 2   | No              |      | 1   | Yes            | 2    | 2   | No    |      |       |       | 164   | 68    |
| 18633  |      | 2   | No              |      | 2   | No             |      | 2   | No    |      |       |       | 158   | 45    |
| 18635  |      | 1   | Yes             | 1    | 2   | No             |      | 2   | No    |      |       |       | 170   | 78    |
| 18636  |      | 2   | No              |      | 2   | No             |      | 2   | No    |      |       |       | 164   | 50    |
| 18645  |      | 2   | No              |      | 2   | No             |      | 2   | No    |      |       |       | 160   | 50    |
| 18649  |      | 2   | No              |      | 2   | No             |      | 2   | No    |      |       |       | 158   | 55    |
| 18664  |      | 2   | No              |      | 2   | No             |      | 2   | No    |      |       |       | 168   | 70    |
| 18668  | 2    | 2   | No              |      | 1   | Yes            | 2    | 2   | No    |      |       |       | 175   | 75    |
| 18682  | 1    | 2   | No              |      | 1   | Yes            | 1    | 2   | No    |      |       |       | 175   | 70    |
| 18685  |      | 2   | No              |      | 2   | No             |      | 2   | No    |      |       |       | 163   | 45    |
| 18688  | 1    | 2   | No              |      | 1   | Yes            | 1    | 2   | No    |      |       |       | 150   | 52    |
| 18689  |      | 1   | Yes             | 1    | 2   | No             |      | 2   | No    |      |       |       | 164   | 69    |
| 18693  |      | 2   | No              |      | 2   | No             |      | 2   | No    |      |       |       | 155   | 45    |
| 18694  | 1    | 1   | Yes             | 1    | 1   | Yes            | 2    | 2   | No    |      |       |       | 155   | 54    |
| 18705  |      | 2   | No              |      | 1   | Yes            | 2    | 2   | No    |      |       |       | 172   | 80    |

| respid | Q11a | Q12 | Cardiac Disease | Q12a | Q13 | Hyperlipidemia | Q13a | Q14 | Neuro | Q14a | Q15_1 | Q15_2 | Q15_3 | Q16_1 |
|--------|------|-----|-----------------|------|-----|----------------|------|-----|-------|------|-------|-------|-------|-------|
| 18710  | 2    | 2   | No              |      | 2   | No             |      | 2   | No    |      |       |       | 167   | 75    |
| 18715  |      | 2   | No              |      | 1   | Yes            | 1    | 2   | No    |      |       |       | 155   | 55    |
| 18718  |      | 2   | No              |      | 2   | No             |      | 2   | No    |      |       |       | 165   | 60    |
| 18727  |      | 2   | No              |      | 2   | No             |      | 2   | No    |      |       |       | 160   | 55    |
| 18732  |      | 2   | No              |      | 2   | No             |      | 2   | No    |      |       |       | 156   | 45    |
| 18735  |      | 1   | Yes             | 1    | 2   | No             |      | 2   | No    |      |       |       | 155   | 48    |
| 18742  |      | 2   | No              |      | 1   | Yes            | 2    | 2   | No    |      |       |       | 168   | 67    |
| 18745  | 1    | 1   | Yes             | 1    | 2   | No             |      | 2   | No    |      |       |       | 167   | 68    |
| 18747  |      | 2   | No              |      | 2   | No             |      | 2   | No    |      |       |       | 158   | 56    |
| 18750  |      | 2   | No              |      | 2   | No             |      | 2   | No    |      |       |       | 153   | 68    |
| 18751  | 1    | 2   | No              |      | 1   | Yes            | 1    | 2   | No    |      |       |       | 170   | 60    |
| 18753  |      | 1   | Yes             | 1    | 2   | No             |      | 2   | No    |      |       |       | 154   | 57    |
| 18754  | 1    | 2   | No              |      | 2   | No             |      | 2   | No    |      |       |       | 155   | 55    |
| 18759  | 1    | 1   | Yes             | 2    | 1   | Yes            | 1    | 2   | No    |      |       |       | 153   | 60    |
| 18780  |      | 2   | No              |      | 2   | No             |      | 2   | No    |      |       |       | 165   | 110   |
| 18782  | 1    | 2   | No              |      | 2   | No             |      | 2   | No    |      |       |       | 158   | 50    |
| 18807  | 1    | 1   | Yes             | 1    | 1   | Yes            | 1    | 1   | Yes   | 1    |       |       | 162   | 50    |
| 18815  | 1    | 2   | No              |      | 1   | Yes            | 1    | 2   | No    |      |       |       | 170   | 80    |
| 18818  |      | 2   | No              |      | 2   | No             |      | 2   | No    |      |       |       | 155   | 62    |
| 18820  | 1    | 2   | No              |      | 1   | Yes            | 1    | 2   | No    |      |       |       | 159   | 50    |
| 18823  | 1    | 2   | No              |      | 1   | Yes            | 1    | 2   | No    |      | 5     | 2     |       | 60    |
| 18825  |      | 2   | No              |      | 2   | No             |      | 2   | No    |      |       |       | 160   | 45    |
| 18828  | 1    | 1   | Yes             | 1    | 1   | Yes            | 2    | 2   | No    |      |       |       | 170   | 80    |
| 18832  |      | 2   | No              |      | 2   | No             |      | 2   | No    |      |       |       | 160   | 55    |
| 18834  | 1    | 2   | No              |      | 1   | Yes            | 1    | 2   | No    |      |       |       | 153   | 60    |
| 18835  | 2    | 2   | No              |      | 2   | No             |      | 2   | No    |      |       |       | 170   | 50    |
| 18837  |      | 2   | No              |      | 2   | No             |      | 2   | No    |      |       |       | 158   | 55    |
| 18842  | 1    | 2   | No              |      | 2   | No             |      | 2   | No    |      |       |       | 163   | 55    |
| 18846  |      | 2   | No              |      | 2   | No             |      | 2   | No    |      |       |       | 153   | 59    |
| 18855  |      | 2   | No              |      | 2   | No             |      | 2   | No    |      | 4     | 5     |       | 60    |
| 18856  | 1    | 2   | No              |      | 2   | No             |      | 2   | No    |      |       |       | 177   | 82    |
| 18887  |      | 2   | No              |      | 1   | Yes            | 1    | 2   | No    |      |       |       | 167   | 75    |



| respid | Q11a | Q12 | Cardiac Disease | Q12a | Q13 | Hyperlipidemia | Q13a | Q14 | Neuro | Q14a | Q15_1 | Q15_2 | Q15_3 | Q16_1 |
|--------|------|-----|-----------------|------|-----|----------------|------|-----|-------|------|-------|-------|-------|-------|
| 18903  | 1    | 2   | No              |      | 1   | Yes            | 1    | 2   | No    |      | 5     | 10    |       | 68    |
| 18906  |      | 2   | No              |      | 2   | No             |      | 2   | No    |      |       |       | 172   | 75    |
| 18910  |      | 2   | No              |      | 2   | No             |      | 2   | No    |      |       |       | 160   | 53    |
| 18919  | 1    | 2   | No              |      | 1   | Yes            | 1    | 2   | No    |      |       |       | 173   | 70    |
| 18928  |      | 2   | No              |      | 2   | No             |      | 2   | No    |      |       |       | 148   | 60    |
| 18931  |      | 2   | No              |      | 1   | Yes            | 2    | 2   | No    |      |       |       | 170   | 77    |
| 18939  |      | 2   | No              |      | 2   | No             |      | 2   | No    |      |       |       | 172   | 70    |
| 18946  |      | 2   | No              |      | 2   | No             |      | 2   | No    |      |       |       | 156   | 50    |
| 18952  |      | 2   | No              |      | 1   | Yes            | 1    | 2   | No    |      |       |       | 156   | 45    |
| 18954  | 1    | 2   | No              |      | 2   | No             |      | 2   | No    |      |       |       | 170   | 69    |
| 18982  |      | 2   | No              |      | 2   | No             |      | 2   | No    |      |       |       | 160   | 55    |
| 18986  |      | 2   | No              |      | 1   | Yes            | 1    | 2   | No    |      |       |       | 178   | 80    |
| 18989  |      | 2   | No              |      | 2   | No             |      | 2   | No    |      |       |       | 170   | 65    |
| 18990  |      | 2   | No              |      | 1   | Yes            | 2    | 2   | No    |      |       |       | 170   | 66    |
| 18996  |      | 2   | No              |      | 1   | Yes            | 1    | 2   | No    |      |       |       | 172   | 75    |
| 18998  |      | 2   | No              |      | 2   | No             |      | 2   | No    |      |       |       | 160   | 50    |
| 19009  |      | 2   | No              |      | 1   | Yes            | 2    | 2   | No    |      |       |       | 165   | 48    |
| 19010  |      | 2   | No              |      | 2   | No             |      | 2   | No    |      |       |       | 155   | 59    |
| 19017  |      | 2   | No              |      | 2   | No             |      | 2   | No    |      |       |       | 165   | 55    |
| 19018  |      | 2   | No              |      | 2   | No             |      | 2   | No    |      |       |       | 174   | 65    |
| 19020  |      | 2   | No              |      | 1   | Yes            | 2    | 2   | No    |      | 5     | 8     |       | 65    |
| 19027  | 1    | 2   | No              |      | 1   | Yes            | 2    | 2   | No    |      |       |       | 156   | 60    |
| 19035  |      | 1   | Yes             | 2    | 1   | Yes            | 2    | 2   | No    |      |       |       | 157   | 47    |
| 19037  | 1    | 2   | No              |      | 2   | No             |      | 2   | No    |      |       |       | 170   | 70    |
| 19048  |      | 2   | No              |      | 1   | Yes            | 2    | 2   | No    |      |       |       | 175   | 62    |
| 19051  |      | 2   | No              |      | 2   | No             |      | 2   | No    |      |       |       | 159   | 65    |
| 19054  | 2    | 2   | No              |      | 2   | No             |      | 2   | No    |      |       |       | 176   | 77    |
| 19057  |      | 2   | No              |      | 2   | No             |      | 2   | No    |      |       |       | 157   | 53    |
| 19073  |      | 2   | No              |      | 2   | No             |      | 2   | No    |      |       |       | 151   | 40    |
| 19075  |      | 2   | No              |      | 2   | No             |      | 2   | No    |      |       |       | 165   | 45    |
| 19079  | 1    | 2   | No              |      | 2   | No             |      | 2   | No    |      |       |       | 166   | 75    |
| 19087  |      | 2   | No              |      | 2   | No             |      | 2   | No    |      |       |       | 163   | 54    |

| respid | Q11a | Q12 | Cardiac Disease | Q12a | Q13 | Hyperlipidemia | Q13a | Q14 | Neuro | Q14a | Q15_1 | Q15_2 | Q15_3 | Q16_1 |
|--------|------|-----|-----------------|------|-----|----------------|------|-----|-------|------|-------|-------|-------|-------|
| 19090  |      | 2   | No              |      | 2   | No             |      | 2   | No    |      |       |       | 160   | 50    |
| 19093  |      | 2   | No              |      | 2   | No             |      | 2   | No    |      |       |       | 170   | 70    |
| 19099  | 1    | 2   | No              |      | 1   | Yes            | 2    | 2   | No    |      |       |       | 158   | 60    |
| 19100  |      | 2   | No              |      | 1   | Yes            | 2    | 2   | No    |      |       |       | 157   | 53    |
| 19101  |      | 2   | No              |      | 2   | No             |      | 2   | No    |      | 5     | 3     |       | 52    |
| 19105  |      | 1   | Yes             | 1    | 2   | No             |      | 2   | No    |      |       |       | 160   | 44    |
| 19111  |      | 2   | No              |      | 2   | No             |      | 2   | No    |      |       |       | 170   | 74    |
| 19112  | 1    | 2   | No              |      | 1   | Yes            | 1    | 2   | No    |      |       |       | 165   | 70    |
| 19117  | 1    | 2   | No              |      | 1   | Yes            | 1    | 2   | No    |      |       |       | 172   | 65    |
| 19122  |      | 2   | No              |      | 1   | Yes            | 2    | 2   | No    |      |       |       | 160   | 60    |
| 19126  |      | 2   | No              |      | 1   | Yes            | 2    | 2   | No    |      |       |       | 174   | 93    |
| 19127  | 1    | 2   | No              |      | 2   | No             |      | 2   | No    |      |       |       | 150   | 58    |
| 19131  | 1    | 2   | No              |      | 1   | Yes            | 2    | 2   | No    |      |       |       | 171   | 80    |
| 19134  |      | 2   | No              |      | 2   | No             |      | 2   | No    |      |       |       | 165   | 55    |
| 19149  |      | 2   | No              |      | 2   | No             |      | 2   | No    |      |       |       | 164   | 64    |
| 19151  | 1    | 2   | No              |      | 2   | No             |      | 2   | No    |      |       |       | 175   | 75    |
| 19164  |      | 2   | No              |      | 1   | Yes            | 2    | 2   | No    |      |       |       | 173   | 67    |
| 19166  | 2    | 2   | No              |      | 1   | Yes            | 2    | 2   | No    |      |       |       | 178   | 82    |
| 19172  |      | 2   | No              |      | 2   | No             |      | 2   | No    |      |       |       | 170   | 56    |
| 19173  |      | 2   | No              |      | 2   | No             |      | 2   | No    |      |       |       | 160   | 62    |
| 19180  |      | 2   | No              |      | 2   | No             |      | 2   | No    |      |       |       | 170   | 65    |
| 19185  | 2    | 2   | No              |      | 1   | Yes            | 2    | 2   | No    |      |       |       | 170   | 66    |
| 19189  |      | 2   | No              |      | 2   | No             |      | 2   | No    |      |       |       | 160   | 57    |
| 19191  |      | 2   | No              |      | 2   | No             |      | 2   | No    |      |       |       | 173   | 58    |
| 19198  | 1    | 2   | No              |      | 2   | No             |      | 2   | No    |      |       |       | 153   | 65    |
| 19203  | 2    | 2   | No              |      | 2   | No             |      | 2   | No    |      |       |       | 175   | 68    |
| 19209  |      | 2   | No              |      | 2   | No             |      | 2   | No    |      |       |       | 160   | 53    |
| 19210  |      | 2   | No              |      | 2   | No             |      | 2   | No    |      |       |       | 160   | 65    |
| 19218  |      | 2   | No              |      | 2   | No             |      | 2   | No    |      |       |       | 160   | 47    |
| 19220  |      | 2   | No              |      | 1   | Yes            | 2    | 2   | No    |      |       |       | 172   | 85    |
| 19225  |      | 2   | No              |      | 2   | No             |      | 2   | No    |      |       |       | 175   | 75    |
| 19227  |      | 2   | No              |      | 2   | No             |      | 2   | No    |      |       |       | 172   | 77    |

| respid | Q11a | Q12 | Cardiac Disease | Q12a | Q13 | Hyperlipidemia | Q13a | Q14 | Neuro | Q14a | Q15_1 | Q15_2 | Q15_3 | Q16_1 |
|--------|------|-----|-----------------|------|-----|----------------|------|-----|-------|------|-------|-------|-------|-------|
| 19228  |      | 2   | No              |      | 2   | No             |      | 2   | No    |      |       |       | 172   | 72    |
| 19243  | 1    | 2   | No              |      | 2   | No             |      | 2   | No    |      |       |       | 160   | 53    |
| 19244  |      | 2   | No              |      | 2   | No             |      | 2   | No    |      |       |       | 150   | 50    |
| 19246  |      | 2   | No              |      | 2   | No             |      | 2   | No    |      |       |       | 163   | 55    |
| 19248  |      | 2   | No              |      | 1   | Yes            | 2    | 2   | No    |      |       |       | 176   | 83    |
| 19249  | 1    | 2   | No              |      | 1   | Yes            | 2    | 2   | No    |      |       |       | 171   | 85    |
| 19252  |      | 2   | No              |      | 2   | No             |      | 2   | No    |      |       |       | 153   | 62    |
| 19255  |      | 2   | No              |      | 1   | Yes            | 1    | 2   | No    |      |       |       | 170   | 70    |
| 19257  |      | 2   | No              |      | 2   | No             |      | 2   | No    |      |       |       | 160   | 55    |
| 19274  |      | 2   | No              |      | 2   | No             |      | 2   | No    |      |       |       | 162   | 65    |
| 19279  |      | 2   | No              |      | 2   | No             |      | 2   | No    |      |       |       | 150   | 45    |
| 19291  |      | 2   | No              |      | 2   | No             |      | 2   | No    |      |       |       | 169   | 62    |
| 19292  |      | 2   | No              |      | 2   | No             |      | 2   | No    |      |       |       | 167   | 51    |
| 19308  |      | 2   | No              |      | 2   | No             |      | 2   | No    |      |       |       | 162   | 64    |
| 19310  | 1    | 2   | No              |      | 1   | Yes            | 2    | 2   | No    |      |       |       | 165   | 65    |
| 19311  | 1    | 2   | No              |      | 1   | Yes            | 1    | 2   | No    |      |       |       | 166   | 72    |
| 19326  |      | 2   | No              |      | 1   | Yes            | 2    | 2   | No    |      |       |       | 146   | 55    |
| 19327  |      | 2   | No              |      | 2   | No             |      | 2   | No    |      |       |       | 177   | 75    |
| 19329  | 1    | 2   | No              |      | 2   | No             |      | 2   | No    |      |       |       | 160   | 65    |
| 19330  | 1    | 2   | No              |      | 2   | No             |      | 2   | No    |      |       |       | 170   | 70    |
| 19333  | 1    | 1   | Yes             | 1    | 1   | Yes            | 1    | 2   | No    |      |       |       | 160   | 75    |
| 19336  |      | 2   | No              |      | 2   | No             |      | 2   | No    |      |       |       | 153   | 45    |
| 19343  |      | 1   | Yes             | 1    | 2   | No             |      | 2   | No    |      |       |       | 168   | 58    |
| 19348  |      | 2   | No              |      | 2   | No             |      | 2   | No    |      |       |       | 165   | 55    |
| 19349  |      | 2   | No              |      | 2   | No             |      | 2   | No    |      |       |       | 160   | 50    |
| 19352  | 2    | 2   | No              |      | 1   | Yes            | 2    | 2   | No    |      |       |       | 165   | 67    |
| 19356  |      | 2   | No              |      | 1   | Yes            | 1    | 2   | No    |      |       |       | 166   | 67    |
| 19357  |      | 2   | No              |      | 2   | No             |      | 2   | No    |      |       |       | 180   | 60    |
| 19358  |      | 2   | No              |      | 2   | No             |      | 2   | No    |      |       |       | 160   | 45    |
| 19367  |      | 2   | No              |      | 1   | Yes            | 2    | 2   | No    |      |       |       | 182   | 83    |
| 19376  |      | 2   | No              |      | 2   | No             |      | 2   | No    |      |       |       | 155   | 56    |
| 19377  | 1    | 2   | No              |      | 1   | Yes            | 1    | 2   | No    |      |       |       | 169   | 108   |

| respid | Q11a | Q12 | Cardiac Disease | Q12a | Q13 | Hyperlipidemia | Q13a | Q14 | Neuro | Q14a | Q15_1 | Q15_2 | Q15_3 | Q16_1 |
|--------|------|-----|-----------------|------|-----|----------------|------|-----|-------|------|-------|-------|-------|-------|
| 19380  |      | 2   | No              |      | 1   | Yes            | 2    | 2   | No    |      |       |       | 168   | 78    |
| 19384  |      | 2   | No              |      | 2   | No             |      | 2   | No    |      |       |       | 168   | 68    |
| 19391  |      | 2   | No              |      | 1   | Yes            | 2    | 2   | No    |      |       |       | 172   | 66    |
| 19397  |      | 2   | No              |      | 2   | No             |      | 2   | No    |      |       |       | 155   | 50    |
| 19398  |      | 2   | No              |      | 1   | Yes            | 2    | 2   | No    |      |       |       | 164   | 50    |
| 19401  |      | 2   | No              |      | 2   | No             |      | 2   | No    |      |       |       | 160   | 55    |
| 19402  |      | 2   | No              |      | 1   | Yes            | 2    | 2   | No    |      |       |       | 160   | 118   |
| 19403  |      | 2   | No              |      | 2   | No             |      | 2   | No    |      |       |       | 160   | 55    |
| 19405  |      | 2   | No              |      | 2   | No             |      | 2   | No    |      |       |       | 173   | 76    |
| 19407  |      | 2   | No              |      | 2   | No             |      | 2   | No    |      |       |       | 158   | 50    |
| 19415  |      | 2   | No              |      | 2   | No             |      | 2   | No    |      |       |       | 165   | 54    |
| 19420  |      | 2   | No              |      | 2   | No             |      | 2   | No    |      |       |       | 170   | 60    |
| 19423  | 1    | 2   | No              |      | 2   | No             |      | 2   | No    |      |       |       | 175   | 90    |
| 19424  | 1    | 2   | No              |      | 2   | No             |      | 2   | No    |      |       |       | 159   | 55    |
| 19426  |      | 1   | Yes             | 2    | 2   | No             |      | 2   | No    |      |       |       | 163   | 49    |
| 19429  |      | 2   | No              |      | 2   | No             |      | 2   | No    |      |       |       | 162   | 60    |
| 19435  |      | 2   | No              |      | 2   | No             |      | 2   | No    |      |       |       | 160   | 60    |
| 19441  |      | 2   | No              |      | 1   | Yes            | 2    | 2   | No    |      |       |       | 165   | 60    |
| 19450  |      | 2   | No              |      | 2   | No             |      | 2   | No    |      |       |       | 177   | 65    |
| 19456  | 1    | 2   | No              |      | 1   | Yes            | 1    | 2   | No    |      |       |       | 162   | 60    |
| 19457  |      | 2   | No              |      | 2   | No             |      | 2   | No    |      |       |       | 157   | 45    |
| 19463  |      | 2   | No              |      | 2   | No             |      | 2   | No    |      |       |       | 160   | 53    |
| 19467  | 2    | 2   | No              |      | 2   | No             |      | 2   | No    |      |       |       | 165   | 60    |
| 19468  | 2    | 2   | No              |      | 2   | No             |      | 2   | No    |      |       |       | 180   | 85    |
| 19471  |      | 2   | No              |      | 2   | No             |      | 2   | No    |      |       |       | 160   | 53    |
| 19473  |      | 2   | No              |      | 2   | No             |      | 2   | No    |      |       |       | 175   | 58    |
| 19478  | 1    | 1   | Yes             | 1    | 1   | Yes            | 1    | 2   | No    |      |       |       | 172   | 72    |
| 19480  |      | 2   | No              |      | 2   | No             |      | 2   | No    |      |       |       | 164   | 60    |
| 19481  |      | 2   | No              |      | 2   | No             |      | 2   | No    |      |       |       | 160   | 52    |
| 19484  |      | 2   | No              |      | 2   | No             |      | 2   | No    |      |       |       | 178   | 108   |
| 19487  |      | 2   | No              |      | 2   | No             |      | 2   | No    |      |       |       | 171   | 60    |
| 19491  | 1    | 2   | No              |      | 2   | No             |      | 2   | No    |      |       |       | 166   | 65    |

| respid | Q11a | Q12 | Cardiac Disease | Q12a | Q13 | Hyperlipidemia | Q13a | Q14 | Neuro | Q14a | Q15_1 | Q15_2 | Q15_3 | Q16_1 |
|--------|------|-----|-----------------|------|-----|----------------|------|-----|-------|------|-------|-------|-------|-------|
| 19495  |      | 2   | No              |      | 2   | No             |      | 2   | No    |      |       |       | 170   | 68    |
| 19498  |      | 2   | No              |      | 1   | Yes            | 2    | 2   | No    |      |       |       | 160   | 65    |
| 19500  |      | 2   | No              |      | 2   | No             |      | 2   | No    |      |       |       | 166   | 70    |
| 19501  | 1    | 2   | No              |      | 1   | Yes            | 2    | 2   | No    |      |       |       | 165   | 70    |
| 19503  |      | 2   | No              |      | 1   | Yes            | 2    | 2   | No    |      |       |       | 160   | 51    |
| 19506  |      | 2   | No              |      | 2   | No             |      | 2   | No    |      |       |       | 168   | 60    |
| 19508  |      | 2   | No              |      | 2   | No             |      | 2   | No    |      |       |       | 162   | 46    |
| 19509  |      | 2   | No              |      | 1   | Yes            | 2    | 2   | No    |      |       |       | 168   | 60    |
| 19518  |      | 2   | No              |      | 1   | Yes            | 2    | 2   | No    |      |       |       | 165   | 65    |
| 19520  |      | 1   | Yes             | 2    | 2   | No             |      | 1   | Yes   | 1    |       |       | 175   | 65    |
| 19536  |      | 1   | Yes             | 2    | 1   | Yes            | 2    | 2   | No    |      |       |       | 160   | 70    |
| 19538  | 1    | 2   | No              |      | 2   | No             |      | 2   | No    |      |       |       | 155   | 54    |
| 19541  | 2    | 2   | No              |      | 1   | Yes            | 2    | 2   | No    |      |       |       | 165   | 63    |
| 19548  |      | 2   | No              |      | 2   | No             |      | 2   | No    |      |       |       | 168   | 62    |
| 19553  |      | 2   | No              |      | 2   | No             |      | 2   | No    |      |       |       | 172   | 65    |
| 19556  |      | 2   | No              |      | 2   | No             |      | 2   | No    |      |       |       | 153   | 47    |
| 19559  |      | 2   | No              |      | 2   | No             |      | 2   | No    |      |       |       | 160   | 40    |
| 19561  |      | 2   | No              |      | 1   | Yes            | 2    | 2   | No    |      |       |       | 160   | 56    |
| 19562  | 1    | 1   | Yes             | 2    | 2   | No             |      | 2   | No    |      |       |       | 153   | 52    |
| 19564  |      | 2   | No              |      | 2   | No             |      | 2   | No    |      |       |       | 170   | 72    |
| 19567  | 1    | 2   | No              |      | 1   | Yes            | 1    | 2   | No    |      |       |       | 165   | 72    |
| 19571  |      | 2   | No              |      | 2   | No             |      | 2   | No    |      |       |       | 171   | 65    |
| 19576  |      | 2   | No              |      | 2   | No             |      | 2   | No    |      |       |       | 173   | 68    |
| 19578  |      | 2   | No              |      | 2   | No             |      | 2   | No    |      |       |       | 160   | 53    |
| 19606  |      | 2   | No              |      | 1   | Yes            | 2    | 2   | No    |      |       |       | 162   | 80    |
| 19607  |      | 2   | No              |      | 2   | No             |      | 2   | No    |      |       |       | 166   | 65    |
| 19608  |      | 2   | No              |      | 2   | No             |      | 2   | No    |      |       |       | 167   | 65    |
| 19612  |      | 2   | No              |      | 2   | No             |      | 2   | No    |      |       |       | 160   | 60    |
| 19618  |      | 2   | No              |      | 2   | No             |      | 2   | No    |      |       |       | 160   | 60    |
| 19621  |      | 2   | No              |      | 2   | No             |      | 2   | No    |      |       |       | 155   | 55    |
| 19624  |      | 2   | No              |      | 2   | No             |      | 2   | No    |      |       |       | 175   | 80    |
| 19630  |      | 2   | No              |      | 2   | No             |      | 2   | No    |      |       |       | 161   | 46    |

| respid | Q11a | Q12 | Cardiac Disease | Q12a | Q13 | Hyperlipidemia | Q13a | Q14 | Neuro | Q14a | Q15_1 | Q15_2 | Q15_3 | Q16_1 |
|--------|------|-----|-----------------|------|-----|----------------|------|-----|-------|------|-------|-------|-------|-------|
| 19637  |      | 2   | No              |      | 1   | Yes            | 2    | 2   | No    |      |       |       | 170   | 70    |
| 19639  |      | 2   | No              |      | 2   | No             |      | 2   | No    |      |       |       | 170   | 61    |
| 19647  |      | 2   | No              |      | 1   | Yes            | 2    | 2   | No    |      |       |       | 163   | 53    |
| 19648  |      | 2   | No              |      | 2   | No             |      | 2   | No    |      |       |       | 165   | 65    |
| 19660  |      | 2   | No              |      | 2   | No             |      | 2   | No    |      |       |       | 175   | 80    |
| 19662  | 1    | 1   | Yes             | 2    | 1   | Yes            | 2    | 2   | No    |      |       |       | 165   | 60    |
| 19669  |      | 2   | No              |      | 2   | No             |      | 2   | No    |      |       |       | 164   | 105   |
| 19680  |      | 2   | No              |      | 2   | No             |      | 2   | No    |      |       |       | 160   | 42    |
| 19682  |      | 2   | No              |      | 2   | No             |      | 2   | No    |      |       |       | 157   | 50    |
| 19686  |      | 2   | No              |      | 2   | No             |      | 2   | No    |      |       |       | 165   | 60    |
| 19700  |      | 2   | No              |      | 2   | No             |      | 2   | No    |      |       |       | 160   | 46    |
| 19701  |      | 2   | No              |      | 2   | No             |      | 2   | No    |      |       |       | 166   | 58    |
| 19704  |      | 2   | No              |      | 2   | No             |      | 2   | No    |      |       |       | 167   | 62    |
| 19706  |      | 2   | No              |      | 2   | No             |      | 2   | No    |      |       |       | 162   | 52    |
| 19707  |      | 2   | No              |      | 2   | No             |      | 2   | No    |      |       |       | 173   | 72    |
| 19717  | 1    | 2   | No              |      | 2   | No             |      | 2   | No    |      |       |       | 165   | 68    |
| 19718  |      | 2   | No              |      | 2   | No             |      | 2   | No    |      |       |       | 155   | 44    |
| 19721  |      | 1   | Yes             | 2    | 2   | No             |      | 2   | No    |      |       |       | 165   | 60    |
| 19722  |      | 2   | No              |      | 2   | No             |      | 2   | No    |      | 5     | 10    |       | 70    |
| 19729  |      | 2   | No              |      | 2   | No             |      | 2   | No    |      |       |       | 173   | 70    |
| 19738  |      | 2   | No              |      | 2   | No             |      | 2   | No    |      | 5     | 3     |       | 53    |
| 19741  |      | 2   | No              |      | 2   | No             |      | 2   | No    |      |       |       | 160   | 54    |
| 19742  |      | 2   | No              |      | 2   | No             |      | 2   | No    |      |       |       | 174   | 71    |
| 19747  | 1    | 2   | No              |      | 1   | Yes            | 2    | 2   | No    |      |       |       | 157   | 70    |
| 19748  |      | 2   | No              |      | 1   | Yes            | 2    | 2   | No    |      |       |       | 165   | 65    |
| 19749  |      | 2   | No              |      | 2   | No             |      | 2   | No    |      |       |       | 168   | 59    |
| 19756  |      | 2   | No              |      | 1   | Yes            | 2    | 2   | No    |      |       |       | 165   | 68    |
| 19771  |      | 1   | Yes             | 2    | 2   | No             |      | 2   | No    |      |       |       | 163   | 50    |
| 19772  |      | 2   | No              |      | 1   | Yes            | 1    | 2   | No    |      |       |       | 160   | 55    |
| 19775  | 2    | 2   | No              |      | 1   | Yes            | 2    | 2   | No    |      |       |       | 165   | 73    |
| 19783  |      | 2   | No              |      | 2   | No             |      | 2   | No    |      |       |       | 155   | 48    |
| 19787  |      | 1   | Yes             | 2    | 1   | Yes            | 2    | 2   | No    |      |       |       | 176   | 65    |

| respid | Q11a | Q12 | Cardiac Disease | Q12a | Q13 | Hyperlipidemia | Q13a | Q14 | Neuro | Q14a | Q15_1 | Q15_2 | Q15_3 | Q16_1 |
|--------|------|-----|-----------------|------|-----|----------------|------|-----|-------|------|-------|-------|-------|-------|
| 19790  |      | 2   | No              |      | 2   | No             |      | 2   | No    |      |       |       | 165   | 48    |
| 19797  |      | 2   | No              |      | 2   | No             |      | 2   | No    |      |       |       | 165   | 50    |
| 19802  |      | 2   | No              |      | 2   | No             |      | 2   | No    |      |       |       | 152   | 45    |
| 19808  | 1    | 2   | No              |      | 2   | No             |      | 2   | No    |      |       |       | 175   | 66    |
| 19810  |      | 2   | No              |      | 1   | Yes            | 2    | 2   | No    |      |       |       | 160   | 55    |
| 19811  |      | 2   | No              |      | 2   | No             |      | 2   | No    |      |       |       | 165   | 57    |
| 19812  |      | 2   | No              |      | 2   | No             |      | 2   | No    |      |       |       | 160   | 51    |
| 19821  | 2    | 2   | No              |      | 1   | Yes            | 2    | 2   | No    |      |       |       | 170   | 70    |
| 19826  |      | 2   | No              |      | 2   | No             |      | 2   | No    |      |       |       | 170   | 70    |
| 19827  |      | 2   | No              |      | 2   | No             |      | 2   | No    |      |       |       | 158   | 60    |
| 19830  |      | 2   | No              |      | 2   | No             |      | 2   | No    |      | 5     | 6     |       |       |
| 19834  |      | 2   | No              |      | 2   | No             |      | 2   | No    |      |       |       | 158   | 49    |
| 19838  |      | 2   | No              |      | 2   | No             |      | 2   | No    |      |       |       | 173   | 72    |
| 19843  |      | 2   | No              |      | 2   | No             |      | 2   | No    |      |       |       | 170   | 55    |
| 19845  |      | 2   | No              |      | 2   | No             |      | 2   | No    |      |       |       | 174   | 64    |
| 19846  | 1    | 2   | No              |      | 1   | Yes            | 1    | 2   | No    |      |       |       | 172   | 68    |
| 19852  | 1    | 2   | No              |      | 1   | Yes            | 1    | 2   | No    |      |       |       | 175   | 80    |
| 19855  |      | 2   | No              |      | 2   | No             |      | 2   | No    |      |       |       | 165   | 53    |
| 19858  |      | 2   | No              |      | 2   | No             |      | 2   | No    |      |       |       | 168   | 74    |
| 19861  | 1    | 2   | No              |      | 2   | No             |      | 2   | No    |      |       |       | 163   | 59    |
| 19863  |      | 2   | No              |      | 2   | No             |      | 2   | No    |      |       |       | 168   | 56    |
| 19868  |      | 2   | No              |      | 1   | Yes            | 2    | 2   | No    |      |       |       | 171   | 70    |
| 19874  |      | 2   | No              |      | 2   | No             |      | 2   | No    |      |       |       | 165   | 55    |
| 19876  |      | 2   | No              |      | 2   | No             |      | 2   | No    |      |       |       | 172   | 65    |
| 19880  |      | 2   | No              |      | 2   | No             |      | 2   | No    |      |       |       | 155   | 70    |
| 19885  |      | 2   | No              |      | 2   | No             |      | 2   | No    |      |       |       | 170   | 60    |
| 19890  |      | 2   | No              |      | 2   | No             |      | 2   | No    |      |       |       | 172   | 60    |
| 19894  |      | 2   | No              |      | 2   | No             |      | 2   | No    |      |       |       | 168   | 50    |
| 19895  |      | 1   | Yes             | 1    | 2   | No             |      | 2   | No    |      |       |       | 175   | 75    |
| 19897  |      | 2   | No              |      | 2   | No             |      | 2   | No    |      |       |       | 162   | 55    |
| 19906  |      | 2   | No              |      | 1   | Yes            | 2    | 2   | No    |      |       |       | 165   | 62    |
| 19908  | 1    | 2   | No              |      | 2   | No             |      | 2   | No    |      |       |       | 160   | 53    |

| respid | Q11a | Q12 | Cardiac Disease | Q12a | Q13 | Hyperlipidemia | Q13a | Q14 | Neuro | Q14a | Q15_1 | Q15_2 | Q15_3 | Q16_1 |
|--------|------|-----|-----------------|------|-----|----------------|------|-----|-------|------|-------|-------|-------|-------|
| 19912  |      | 2   | No              |      | 1   | Yes            | 2    | 2   | No    |      |       |       | 158   | 55    |
| 19913  | 1    | 2   | No              |      | 2   | No             |      | 2   | No    |      |       |       | 160   | 50    |
| 19914  |      | 2   | No              |      | 2   | No             |      | 2   | No    |      |       |       | 159   | 61    |
| 19918  | 1    | 2   | No              |      | 1   | Yes            | 2    | 2   | No    |      |       |       | 167   | 80    |
| 19924  |      | 2   | No              |      | 2   | No             |      | 2   | No    |      |       |       | 165   | 50    |
| 19936  |      | 2   | No              |      | 2   | No             |      | 2   | No    |      |       |       | 169   | 61    |
| 19940  |      | 2   | No              |      | 2   | No             |      | 2   | No    |      |       |       | 158   | 50    |
| 19945  | 1    | 2   | No              |      | 1   | Yes            | 2    | 2   | No    |      |       |       | 173   | 75    |
| 19948  |      | 2   | No              |      | 2   | No             |      | 2   | No    |      |       |       | 160   | 49    |
| 19959  | 1    | 2   | No              |      | 2   | No             |      | 2   | No    |      |       |       | 163   | 60    |
| 19961  | 1    | 2   | No              |      | 1   | Yes            | 2    | 2   | No    |      |       |       | 165   | 89    |
| 19962  |      | 2   | No              |      | 1   | Yes            | 1    | 2   | No    |      |       |       | 158   | 67    |
| 19965  |      | 2   | No              |      | 2   | No             |      | 2   | No    |      |       |       | 163   | 57    |
| 19966  |      | 2   | No              |      | 2   | No             |      | 2   | No    |      |       |       | 162   | 49    |
| 19973  |      | 2   | No              |      | 2   | No             |      | 2   | No    |      | 5     | 6     |       | 52    |
| 19981  |      | 2   | No              |      | 1   | Yes            | 1    | 2   | No    |      |       |       | 154   | 65    |
| 19986  |      | 2   | No              |      | 1   | Yes            | 2    | 2   | No    |      |       |       | 180   | 80    |
| 19989  |      | 2   | No              |      | 2   | No             |      | 2   | No    |      |       |       | 170   | 65    |
| 19998  |      | 2   | No              |      | 1   | Yes            | 1    | 2   | No    |      |       |       | 157   | 47    |
| 20001  |      | 2   | No              |      | 2   | No             |      | 2   | No    |      |       |       | 175   | 70    |
| 20005  |      | 2   | No              |      | 2   | No             |      | 2   | No    |      |       |       | 160   | 65    |
| 20013  |      | 2   | No              |      | 2   | No             |      | 2   | No    |      |       |       | 162   | 76    |
| 20015  |      | 2   | No              |      | 2   | No             |      | 2   | No    |      |       |       | 174   | 72    |
| 20017  | 1    | 2   | No              |      | 1   | Yes            | 1    | 2   | No    |      |       |       | 156   | 58    |
| 20020  |      | 2   | No              |      | 2   | No             |      | 2   | No    |      |       |       | 161   | 113   |
| 20021  |      | 2   | No              |      | 2   | No             |      | 2   | No    |      |       |       | 168   | 65    |
| 20026  | 2    | 2   | No              |      | 2   | No             |      | 2   | No    |      |       |       | 166   | 62    |
| 20028  |      | 2   | No              |      | 2   | No             |      | 2   | No    |      |       |       | 180   | 68    |
| 20030  |      | 2   | No              |      | 2   | No             |      | 2   | No    |      |       |       | 159   | 55    |
| 20031  |      | 2   | No              |      | 2   | No             |      | 2   | No    |      |       |       | 165   | 62    |
| 20034  |      | 2   | No              |      | 2   | No             |      | 2   | No    |      |       |       | 150   | 52    |
| 20035  |      | 2   | No              |      | 2   | No             |      | 2   | No    |      |       |       | 160   | 52    |



| respid | Q11a | Q12 | Cardiac Disease | Q12a | Q13 | Hyperlipidemia | Q13a | Q14 | Neuro | Q14a | Q15_1 | Q15_2 | Q15_3 | Q16_1 |
|--------|------|-----|-----------------|------|-----|----------------|------|-----|-------|------|-------|-------|-------|-------|
| 20040  |      | 2   | No              |      | 2   | No             |      | 2   | No    |      |       |       | 165   | 65    |
| 20045  | 2    | 2   | No              |      | 2   | No             |      | 2   | No    |      |       |       | 160   | 70    |
| 20048  | 1    | 1   | Yes             | 1    | 2   | No             |      | 1   | Yes   | 1    |       |       | 150   | 60    |
| 20053  | 1    | 2   | No              |      | 2   | No             |      | 2   | No    |      |       |       | 160   | 90    |
| 20064  | 1    | 2   | No              |      | 1   | Yes            | 2    | 2   | No    |      |       |       | 180   | 90    |
| 20071  |      | 2   | No              |      | 2   | No             |      | 2   | No    |      |       |       | 173   | 60    |
| 20072  |      | 2   | No              |      | 2   | No             |      | 2   | No    |      |       |       | 177   | 77    |
| 20076  |      | 2   | No              |      | 2   | No             |      | 2   | No    |      |       |       | 159   | 65    |
| 20081  | 1    | 2   | No              |      | 1   | Yes            | 1    | 2   | No    |      |       |       | 169   | 75    |
| 20082  | 1    | 1   | Yes             | 1    | 1   | Yes            | 1    | 1   | Yes   | 1    |       |       | 175   | 75    |
| 20083  | 1    | 1   | Yes             | 1    | 2   | No             |      | 2   | No    |      |       |       | 153   | 45    |
| 20088  | 2    | 2   | No              |      | 1   | Yes            | 2    | 2   | No    |      |       |       | 178   | 83    |
| 20089  |      | 2   | No              |      | 2   | No             |      | 2   | No    |      |       |       | 172   | 63    |
| 20099  | 2    | 2   | No              |      | 1   | Yes            | 2    | 2   | No    |      |       |       | 176   | 65    |
| 20101  |      | 2   | No              |      | 1   | Yes            | 2    | 2   | No    |      |       |       | 168   | 74    |
| 20102  |      | 2   | No              |      | 2   | No             |      | 2   | No    |      |       |       | 155   | 60    |
| 20109  | 1    | 2   | No              |      | 2   | No             |      | 2   | No    |      |       |       | 165   | 89    |
| 20118  |      | 2   | No              |      | 1   | Yes            | 2    | 2   | No    |      |       |       | 148   | 50    |
| 20119  |      | 2   | No              |      | 2   | No             |      | 2   | No    |      |       |       | 174   | 60    |
| 20124  |      | 2   | No              |      | 1   | Yes            | 1    | 2   | No    |      |       |       | 154   | 47    |
| 20126  |      | 2   | No              |      | 2   | No             |      | 2   | No    |      |       |       | 163   | 60    |
| 20130  |      | 2   | No              |      | 2   | No             |      | 2   | No    |      |       |       | 165   | 52    |
| 20131  |      | 1   | Yes             | 2    | 2   | No             |      | 2   | No    |      |       |       | 160   | 52    |
| 20134  |      | 2   | No              |      | 2   | No             |      | 2   | No    |      |       |       | 155   | 51    |
| 20146  |      | 2   | No              |      | 2   | No             |      | 2   | No    |      | 5     | 0     |       | 60    |
| 20152  |      | 2   | No              |      | 2   | No             |      | 2   | No    |      |       |       | 167   | 60    |
| 20155  |      | 2   | No              |      | 2   | No             |      | 2   | No    |      |       |       | 158   | 66    |
| 20156  |      | 2   | No              |      | 2   | No             |      | 2   | No    |      |       |       | 160   | 62    |
| 20157  |      | 2   | No              |      | 2   | No             |      | 2   | No    |      |       |       | 170   | 70    |
| 20164  |      | 2   | No              |      | 2   | No             |      | 2   | No    |      |       |       | 155   | 59    |
| 20168  |      | 2   | No              |      | 2   | No             |      | 2   | No    |      |       |       | 158   | 62    |
| 20173  | 2    | 2   | No              |      | 2   | No             |      | 2   | No    |      |       |       | 170   | 67    |

| respid | Q11a | Q12 | Cardiac Disease | Q12a | Q13 | Hyperlipidemia | Q13a | Q14 | Neuro | Q14a | Q15_1 | Q15_2 | Q15_3 | Q16_1 |
|--------|------|-----|-----------------|------|-----|----------------|------|-----|-------|------|-------|-------|-------|-------|
| 20174  |      | 2   | No              |      | 2   | No             |      | 2   | No    |      |       |       | 160   | 48    |
| 20175  |      | 2   | No              |      | 2   | No             |      | 2   | No    |      |       |       | 175   | 65    |
| 20189  |      | 2   | No              |      | 2   | No             |      | 2   | No    |      |       |       | 178   | 100   |
| 20190  |      | 2   | No              |      | 2   | No             |      | 2   | No    |      |       |       | 158   | 60    |
| 20201  |      | 2   | No              |      | 2   | No             |      | 2   | No    |      |       |       | 161   | 59    |
| 20202  |      | 2   | No              |      | 2   | No             |      | 2   | No    |      |       |       | 175   | 83    |
| 20204  |      | 2   | No              |      | 2   | No             |      | 2   | No    |      |       |       | 170   | 70    |
| 20206  |      | 2   | No              |      | 2   | No             |      | 2   | No    |      |       |       | 163   | 52    |
| 20207  |      | 2   | No              |      | 2   | No             |      | 2   | No    |      |       |       | 165   | 63    |
| 20212  | 1    | 2   | No              |      | 1   | Yes            | 2    | 2   | No    |      |       |       | 175   | 75    |
| 20213  |      | 1   | Yes             | 1    | 2   | No             |      | 2   | No    |      |       |       | 156   | 70    |
| 20217  |      | 2   | No              |      | 1   | Yes            | 2    | 2   | No    |      |       |       | 165   | 68    |
| 20222  | 1    | 2   | No              |      | 2   | No             |      | 2   | No    |      |       |       | 165   | 68    |
| 20227  |      | 2   | No              |      | 2   | No             |      | 2   | No    |      |       |       | 162   | 55    |
| 20228  |      | 2   | No              |      | 2   | No             |      | 2   | No    |      |       |       | 158   | 55    |
| 20238  | 2    | 2   | No              |      | 1   | Yes            | 1    | 2   | No    |      |       |       | 169   | 70    |
| 20242  |      | 2   | No              |      | 2   | No             |      | 2   | No    |      |       |       | 170   | 70    |
| 20246  |      | 2   | No              |      | 1   | Yes            | 2    | 2   | No    |      |       |       | 156   | 58    |
| 20255  | 1    | 2   | No              |      | 2   | No             |      | 2   | No    |      |       |       | 155   | 50    |
| 20256  |      | 2   | No              |      | 1   | Yes            | 2    | 2   | No    |      |       |       | 170   | 70    |
| 20259  | 1    | 2   | No              |      | 1   | Yes            | 2    | 2   | No    |      |       |       | 165   | 70    |
| 20262  |      | 2   | No              |      | 1   | Yes            | 2    | 2   | No    |      |       |       | 168   | 65    |
| 20274  | 1    | 2   | No              |      | 2   | No             |      | 2   | No    |      |       |       | 181   | 86    |
| 20283  |      | 2   | No              |      | 1   | Yes            | 2    | 2   | No    |      |       |       | 158   | 63    |
| 20284  |      | 2   | No              |      | 2   | No             |      | 2   | No    |      |       |       | 165   | 62    |
| 20291  |      | 2   | No              |      | 2   | No             |      | 2   | No    |      |       |       | 160   | 52    |
| 20292  |      | 2   | No              |      | 2   | No             |      | 2   | No    |      |       |       | 165   | 55    |
| 20293  |      | 1   | Yes             | 2    | 1   | Yes            | 2    | 2   | No    |      |       |       | 160   | 58    |
| 20298  |      | 2   | No              |      | 2   | No             |      | 2   | No    |      |       |       | 160   | 55    |
| 20301  |      | 2   | No              |      | 2   | No             |      | 2   | No    |      |       |       | 162   | 65    |
| 20303  | 1    | 2   | No              |      | 2   | No             |      | 2   | No    |      |       |       | 175   | 75    |
| 20309  |      | 2   | No              |      | 2   | No             |      | 2   | No    |      |       |       | 165   | 54    |

| respid | Q11a | Q12 | Cardiac Disease | Q12a | Q13 | Hyperlipidemia | Q13a | Q14 | Neuro | Q14a | Q15_1 | Q15_2 | Q15_3 | Q16_1 |
|--------|------|-----|-----------------|------|-----|----------------|------|-----|-------|------|-------|-------|-------|-------|
| 20318  | 1    | 2   | No              |      | 1   | Yes            | 2    | 2   | No    |      |       |       | 180   | 75    |
| 20324  |      | 2   | No              |      | 1   | Yes            | 2    | 2   | No    |      | 5     | 7     |       | 70    |
| 20335  |      | 2   | No              |      | 2   | No             |      | 2   | No    |      |       |       | 163   | 75    |
| 20336  |      | 2   | No              |      | 2   | No             |      | 2   | No    |      |       |       | 153   | 52    |
| 20339  |      | 2   | No              |      | 2   | No             |      | 2   | No    |      |       |       | 172   | 70    |
| 20348  |      | 2   | No              |      | 2   | No             |      | 2   | No    |      |       |       | 161   | 51    |
| 20351  |      | 2   | No              |      | 1   | Yes            | 1    | 2   | No    |      |       |       | 172   | 65    |
| 20353  |      | 2   | No              |      | 2   | No             |      | 2   | No    |      |       |       | 164   | 68    |
| 20356  | 1    | 2   | No              |      | 2   | No             |      | 2   | No    |      |       |       | 157   | 52    |
| 20357  |      | 2   | No              |      | 2   | No             |      | 2   | No    |      |       |       | 163   | 60    |
| 20366  |      | 2   | No              |      | 1   | Yes            | 2    | 2   | No    |      |       |       | 170   | 75    |
| 20369  |      | 2   | No              |      | 2   | No             |      | 2   | No    |      | 5     | 9     |       | 70    |
| 20372  |      | 2   | No              |      | 1   | Yes            | 2    | 2   | No    |      |       |       | 173   | 81    |
| 20375  |      | 2   | No              |      | 2   | No             |      | 2   | No    |      |       |       | 145   | 42    |
| 20379  |      | 2   | No              |      | 2   | No             |      | 2   | No    |      |       |       | 156   | 45    |
| 20380  |      | 2   | No              |      | 2   | No             |      | 2   | No    |      |       |       | 155   | 55    |
| 20396  |      | 2   | No              |      | 1   | Yes            | 2    | 2   | No    |      |       |       | 162   | 52    |
| 20398  | 1    | 2   | No              |      | 1   | Yes            | 1    | 2   | No    |      |       |       | 158   | 80    |
| 20412  |      | 2   | No              |      | 2   | No             |      | 2   | No    |      |       |       | 164   | 65    |
| 20415  |      | 2   | No              |      | 1   | Yes            | 1    | 2   | No    |      |       |       | 162   | 62    |
| 20424  |      | 2   | No              |      | 2   | No             |      | 2   | No    |      |       |       | 155   | 50    |
| 20434  |      | 2   | No              |      | 1   | Yes            | 2    | 2   | No    |      |       |       | 156   | 62    |
| 20435  | 2    | 2   | No              |      | 2   | No             |      | 2   | No    |      |       |       | 174   | 70    |
| 20440  |      | 2   | No              |      | 2   | No             |      | 2   | No    |      |       |       | 171   | 62    |
| 20441  |      | 2   | No              |      | 2   | No             |      | 2   | No    |      |       |       | 175   | 62    |
| 20445  |      | 2   | No              |      | 1   | Yes            | 2    | 2   | No    |      |       |       | 178   | 65    |
| 20446  | 1    | 2   | No              |      | 1   | Yes            | 1    | 2   | No    |      |       |       | 160   | 100   |
| 20450  |      | 2   | No              |      | 2   | No             |      | 2   | No    |      |       |       | 153   | 53    |
| 20453  |      | 2   | No              |      | 2   | No             |      | 2   | No    |      | 5     | 5     |       | 60    |
| 20458  |      | 2   | No              |      | 2   | No             |      | 2   | No    |      |       |       | 160   | 54    |
| 20464  | 1    | 2   | No              |      | 2   | No             |      | 2   | No    |      |       |       | 183   | 70    |
| 20471  |      | 2   | No              |      | 1   | Yes            | 1    | 2   | No    |      |       |       | 162   | 55    |

| respid | Q11a | Q12 | Cardiac Disease | Q12a | Q13 | Hyperlipidemia | Q13a | Q14 | Neuro | Q14a | Q15_1 | Q15_2 | Q15_3 | Q16_1 |
|--------|------|-----|-----------------|------|-----|----------------|------|-----|-------|------|-------|-------|-------|-------|
| 20473  | 1    | 1   | Yes             | 1    | 1   | Yes            | 1    | 2   | No    |      |       |       | 170   | 65    |
| 20474  |      | 2   | No              |      | 1   | Yes            | 1    | 2   | No    |      |       |       | 161   | 72    |
| 20477  |      | 2   | No              |      | 2   | No             |      | 2   | No    |      |       |       | 152   | 48    |
| 20479  |      | 2   | No              |      | 2   | No             |      | 2   | No    |      |       |       | 160   | 60    |
| 20485  |      | 2   | No              |      | 2   | No             |      | 2   | No    |      |       |       | 159   | 56    |
| 20487  |      | 2   | No              |      | 2   | No             |      | 2   | No    |      |       |       | 145   | 42    |
| 20488  |      | 2   | No              |      | 2   | No             |      | 2   | No    |      |       |       | 180   | 70    |
| 20494  |      | 2   | No              |      | 1   | Yes            | 2    | 2   | No    |      |       |       | 152   | 48    |
| 20502  | 1    | 2   | No              |      | 1   | Yes            | 1    | 2   | No    |      |       |       | 170   | 65    |
| 20503  |      | 2   | No              |      | 1   | Yes            | 2    | 2   | No    |      |       |       | 160   | 46    |
| 20510  |      | 2   | No              |      | 1   | Yes            | 1    | 2   | No    |      |       |       | 180   | 79    |
| 20512  |      | 2   | No              |      | 2   | No             |      | 2   | No    |      |       |       | 165   | 53    |
| 20516  |      | 2   | No              |      | 1   | Yes            | 2    | 2   | No    |      |       |       | 159   | 60    |
| 20522  |      | 2   | No              |      | 1   | Yes            | 2    | 2   | No    |      |       |       | 145   | 45    |
| 20527  |      | 2   | No              |      | 2   | No             |      | 2   | No    |      |       |       | 150   | 65    |
| 20529  | 1    | 2   | No              |      | 1   | Yes            | 2    | 2   | No    |      |       |       | 177   | 90    |
| 20535  | 1    | 2   | No              |      | 1   | Yes            | 1    | 2   | No    |      |       |       | 180   | 83    |
| 20543  | 2    | 2   | No              |      | 2   | No             |      | 2   | No    |      |       |       | 179   | 75    |
| 20546  |      | 2   | No              |      | 2   | No             |      | 2   | No    |      |       |       | 158   | 63    |
| 20548  |      | 2   | No              |      | 2   | No             |      | 2   | No    |      |       |       | 173   | 81    |
| 20552  | 1    | 2   | No              |      | 2   | No             |      | 2   | No    |      |       |       | 172   | 80    |
| 20556  | 1    | 2   | No              |      | 1   | Yes            | 2    | 2   | No    |      |       |       | 165   | 70    |
| 20566  | 1    | 2   | No              |      | 1   | Yes            | 1    | 2   | No    |      |       |       | 170   | 60    |
| 20576  | 2    | 2   | No              |      | 2   | No             |      | 2   | No    |      |       |       | 170   | 72    |
| 20587  |      | 2   | No              |      | 2   | No             |      | 2   | No    |      |       |       | 169   | 60    |
| 20589  |      | 2   | No              |      | 2   | No             |      | 2   | No    |      |       |       | 177   | 70    |
| 20593  |      | 2   | No              |      | 2   | No             |      | 2   | No    |      |       |       | 163   | 50    |
| 20594  |      | 2   | No              |      | 2   | No             |      | 2   | No    |      |       |       | 167   | 46    |
| 20602  |      | 2   | No              |      | 1   | Yes            | 1    | 2   | No    |      |       |       | 160   | 58    |
| 20607  |      | 2   | No              |      | 1   | Yes            | 2    | 1   | Yes   | 1    |       |       | 153   | 57    |
| 20608  | 2    | 2   | No              |      | 2   | No             |      | 2   | No    |      |       |       | 170   | 65    |
| 20611  | 1    | 2   | No              |      | 1   | Yes            | 1    | 2   | No    |      |       |       | 160   | 60    |

| respid | Q11a | Q12 | Cardiac Disease | Q12a | Q13 | Hyperlipidemia | Q13a | Q14 | Neuro | Q14a | Q15_1 | Q15_2 | Q15_3 | Q16_1 |
|--------|------|-----|-----------------|------|-----|----------------|------|-----|-------|------|-------|-------|-------|-------|
| 20612  |      | 2   | No              |      | 2   | No             |      | 2   | No    |      |       |       | 158   | 49    |
| 20615  |      | 2   | No              |      | 1   | Yes            | 2    | 2   | No    |      |       |       | 170   | 75    |
| 20625  |      | 2   | No              |      | 1   | Yes            | 2    | 2   | No    |      |       |       | 169   | 64    |
| 20630  |      | 2   | No              |      | 1   | Yes            | 2    | 2   | No    |      |       |       | 160   | 59    |
| 20639  |      | 2   | No              |      | 2   | No             |      | 2   | No    |      |       |       | 152   | 55    |
| 20643  |      | 2   | No              |      | 2   | No             |      | 2   | No    |      |       |       | 175   | 60    |
| 20645  |      | 2   | No              |      | 1   | Yes            | 2    | 2   | No    |      |       |       | 172   | 70    |
| 20647  | 2    | 2   | No              |      | 1   | Yes            | 2    | 2   | No    |      |       |       | 170   | 70    |
| 20652  |      | 2   | No              |      | 2   | No             |      | 2   | No    |      |       |       | 166   | 52    |
| 20661  |      | 2   | No              |      | 2   | No             |      | 2   | No    |      |       |       | 155   | 52    |
| 20665  |      | 2   | No              |      | 1   | Yes            | 2    | 2   | No    |      |       |       | 154   | 60    |
| 20679  |      | 2   | No              |      | 2   | No             |      | 2   | No    |      |       |       | 168   | 65    |
| 20682  |      | 2   | No              |      | 2   | No             |      | 2   | No    |      |       |       | 172   | 81    |
| 20683  |      | 2   | No              |      | 2   | No             |      | 2   | No    |      |       |       | 180   | 65    |
| 20700  | 1    | 2   | No              |      | 1   | Yes            | 1    | 2   | No    |      |       |       | 166   | 50    |
| 20702  | 1    | 2   | No              |      | 2   | No             |      | 2   | No    |      |       |       | 158   | 62    |
| 20709  |      | 2   | No              |      | 1   | Yes            | 1    | 2   | No    |      |       |       | 161   | 72    |
| 20715  | 2    | 2   | No              |      | 1   | Yes            | 2    | 1   | Yes   | 2    |       |       | 180   | 65    |
| 20718  |      | 2   | No              |      | 2   | No             |      | 2   | No    |      |       |       | 173   | 70    |
| 20722  |      | 2   | No              |      | 2   | No             |      | 2   | No    |      |       |       | 172   | 74    |
| 20729  |      | 2   | No              |      | 1   | Yes            | 2    | 2   | No    |      |       |       | 151   | 50    |
| 20732  |      | 2   | No              |      | 2   | No             |      | 2   | No    |      |       |       | 168   | 58    |
| 20746  | 1    | 2   | No              |      | 1   | Yes            | 1    | 2   | No    |      |       |       | 179   | 73    |
| 20747  |      | 2   | No              |      | 2   | No             |      | 1   | Yes   | 2    |       |       | 160   | 50    |
| 20758  |      | 2   | No              |      | 2   | No             |      | 2   | No    |      |       |       | 167   | 57    |
| 20767  |      | 2   | No              |      | 1   | Yes            | 1    | 2   | No    |      |       |       | 161   | 54    |
| 20777  |      | 2   | No              |      | 2   | No             |      | 2   | No    |      |       |       | 173   | 73    |
| 20778  |      | 2   | No              |      | 2   | No             |      | 2   | No    |      |       |       | 165   | 56    |
| 20780  |      | 2   | No              |      | 2   | No             |      | 2   | No    |      |       |       | 160   | 60    |
| 20800  |      | 2   | No              |      | 2   | No             |      | 2   | No    |      |       |       | 160   | 55    |
| 20810  |      | 2   | No              |      | 2   | No             |      | 2   | No    |      |       |       | 172   | 70    |
| 20814  |      | 2   | No              |      | 2   | No             |      | 2   | No    |      |       |       | 158   | 50    |

| respid | Q11a | Q12 | Cardiac Disease | Q12a | Q13 | Hyperlipidemia | Q13a | Q14 | Neuro | Q14a | Q15_1 | Q15_2 | Q15_3 | Q16_1 |
|--------|------|-----|-----------------|------|-----|----------------|------|-----|-------|------|-------|-------|-------|-------|
| 20816  |      | 2   | No              |      | 1   | Yes            | 2    | 2   | No    |      |       |       | 165   | 62    |
| 20832  |      | 2   | No              |      | 2   | No             |      | 2   | No    |      |       |       | 156   | 42    |
| 20838  |      | 2   | No              |      | 2   | No             |      | 2   | No    |      |       |       | 173   | 74    |
| 20841  | 1    | 2   | No              |      | 1   | Yes            | 1    | 2   | No    |      |       |       | 155   | 56    |
| 20848  | 1    | 2   | No              |      | 2   | No             |      | 2   | No    |      |       |       | 168   | 58    |
| 20850  |      | 2   | No              |      | 2   | No             |      | 2   | No    |      |       |       | 160   | 90    |
| 20851  | 1    | 2   | No              |      | 1   | Yes            | 1    | 2   | No    |      |       |       | 158   | 65    |
| 20861  |      | 2   | No              |      | 2   | No             |      | 2   | No    |      |       |       | 172   | 71    |
| 20870  |      | 2   | No              |      | 2   | No             |      | 2   | No    |      |       |       | 165   | 58    |
| 20880  | 1    | 2   | No              |      | 2   | No             |      | 2   | No    |      |       |       | 175   | 90    |
| 20883  |      | 2   | No              |      | 2   | No             |      | 2   | No    |      |       |       | 176   | 74    |
| 20894  | 1    | 1   | Yes             | 1    | 2   | No             |      | 2   | No    |      |       |       | 165   | 75    |
| 20896  | 1    | 2   | No              |      | 2   | No             |      | 2   | No    |      |       |       | 178   | 69    |
| 20901  | 1    | 2   | No              |      | 1   | Yes            | 1    | 2   | No    |      |       |       | 170   | 65    |
| 20903  |      | 1   | Yes             | 2    | 2   | No             |      | 2   | No    |      |       |       | 158   | 65    |
| 20909  |      | 2   | No              |      | 2   | No             |      | 2   | No    |      |       |       | 160   | 55    |
| 20919  |      | 2   | No              |      | 1   | Yes            | 2    | 2   | No    |      |       |       | 178   | 88    |
| 20925  | 1    | 2   | No              |      | 2   | No             |      | 2   | No    |      |       |       | 152   | 55    |
| 20935  | 1    | 2   | No              |      | 1   | Yes            | 1    | 1   | Yes   | 1    |       |       | 173   | 88    |
| 20939  |      | 2   | No              |      | 1   | Yes            | 2    | 2   | No    |      |       |       | 165   | 80    |
| 20956  | 1    | 2   | No              |      | 1   | Yes            | 1    | 2   | No    |      |       |       | 172   | 88    |
| 20970  |      | 2   | No              |      | 2   | No             |      | 2   | No    |      |       |       | 160   | 60    |
| 20974  |      | 2   | No              |      | 2   | No             |      | 2   | No    |      |       |       | 173   | 62    |
| 20975  |      | 2   | No              |      | 2   | No             |      | 2   | No    |      |       |       | 170   | 65    |
| 20984  | 1    | 2   | No              |      | 2   | No             |      | 2   | No    |      |       |       | 173   | 55    |
| 20988  |      | 2   | No              |      | 2   | No             |      | 2   | No    |      |       |       | 175   | 70    |
| 20996  | 1    | 2   | No              |      | 2   | No             |      | 2   | No    |      |       |       | 165   | 65    |
| 20998  |      | 2   | No              |      | 2   | No             |      | 2   | No    |      |       |       | 155   | 50    |
| 21007  |      | 2   | No              |      | 2   | No             |      | 2   | No    |      |       |       | 172   | 64    |
| 21008  |      | 2   | No              |      | 2   | No             |      | 2   | No    |      |       |       | 167   | 64    |
| 21014  |      | 2   | No              |      | 1   | Yes            | 1    | 2   | No    |      |       |       | 159   | 55    |
| 21020  |      | 2   | No              |      | 2   | No             |      | 2   | No    |      |       |       | 170   | 70    |

| respid | Q11a | Q12 | Cardiac Disease | Q12a | Q13 | Hyperlipidemia | Q13a | Q14 | Neuro | Q14a | Q15_1 | Q15_2 | Q15_3 | Q16_1 |
|--------|------|-----|-----------------|------|-----|----------------|------|-----|-------|------|-------|-------|-------|-------|
| 21022  | 1    | 2   | No              |      | 2   | No             |      | 2   | No    |      |       |       | 170   | 80    |
| 21024  |      | 2   | No              |      | 1   | Yes            | 2    | 2   | No    |      |       |       | 150   | 60    |
| 21026  |      | 1   | Yes             | 2    | 2   | No             |      | 2   | No    |      |       |       | 171   | 68    |
| 21027  |      | 2   | No              |      | 2   | No             |      | 2   | No    |      |       |       | 175   | 65    |
| 21030  |      | 2   | No              |      | 2   | No             |      | 2   | No    |      |       |       | 160   | 52    |
| 21032  |      | 2   | No              |      | 2   | No             |      | 2   | No    |      |       |       | 160   | 55    |
| 21040  | 2    | 2   | No              |      | 2   | No             |      | 2   | No    |      |       |       | 159   | 51    |
| 21045  |      | 2   | No              |      | 1   | Yes            | 2    | 2   | No    |      |       |       | 170   | 85    |
| 21058  |      | 2   | No              |      | 2   | No             |      | 2   | No    |      |       |       | 169   | 55    |
| 21064  | 1    | 2   | No              |      | 1   | Yes            | 2    | 2   | No    |      |       |       | 160   | 59    |
| 21073  |      | 2   | No              |      | 2   | No             |      | 2   | No    |      |       |       | 152   | 50    |
| 21086  |      | 2   | No              |      | 2   | No             |      | 2   | No    |      |       |       | 173   | 70    |
| 21092  | 1    | 2   | No              |      | 2   | No             |      | 2   | No    |      |       |       | 175   | 80    |
| 21096  | 1    | 2   | No              |      | 1   | Yes            | 1    | 2   | No    |      | 6     | 7     |       | 65    |
| 21103  | 1    | 2   | No              |      | 2   | No             |      | 2   | No    |      |       |       | 171   | 60    |
| 21120  |      | 2   | No              |      | 2   | No             |      | 2   | No    |      |       |       | 165   | 66    |
| 21125  | 2    | 2   | No              |      | 2   | No             |      | 2   | No    |      |       |       | 175   | 75    |
| 21126  |      | 2   | No              |      | 2   | No             |      | 2   | No    |      |       |       | 170   | 64    |
| 21132  |      | 2   | No              |      | 2   | No             |      | 2   | No    |      |       |       | 152   | 46    |
| 21139  | 1    | 2   | No              |      | 1   | Yes            | 1    | 2   | No    |      |       |       | 170   | 65    |
| 21147  | 1    | 2   | No              |      | 2   | No             |      | 2   | No    |      |       |       | 150   | 55    |
| 21148  | 1    | 1   | Yes             | 1    | 1   | Yes            | 1    | 1   | Yes   | 1    |       |       | 178   | 73    |
| 21149  | 1    | 2   | No              |      | 2   | No             |      | 2   | No    |      |       |       | 155   | 56    |
| 21164  |      | 2   | No              |      | 1   | Yes            | 2    | 2   | No    |      |       |       | 167   | 55    |
| 21165  | 2    | 2   | No              |      | 1   | Yes            | 1    | 2   | No    |      |       |       | 178   | 75    |
| 21171  |      | 2   | No              |      | 2   | No             |      | 2   | No    |      |       |       | 153   | 42    |
| 21176  |      | 2   | No              |      | 2   | No             |      | 2   | No    |      |       |       | 164   | 55    |
| 21187  |      | 2   | No              |      | 2   | No             |      | 2   | No    |      |       |       | 158   | 55    |
| 21192  | 1    | 2   | No              |      | 1   | Yes            | 2    | 2   | No    |      | 5     | 4     |       | 62    |
| 21198  |      | 2   | No              |      | 2   | No             |      | 2   | No    |      |       |       | 153   | 70    |
| 21199  |      | 2   | No              |      | 1   | Yes            | 2    | 2   | No    |      |       |       | 163   | 56    |
| 21206  |      | 2   | No              |      | 2   | No             |      | 2   | No    |      |       |       | 158   | 55    |

| respid | Q11a | Q12 | Cardiac Disease | Q12a | Q13 | Hyperlipidemia | Q13a | Q14 | Neuro | Q14a | Q15_1 | Q15_2 | Q15_3 | Q16_1 |
|--------|------|-----|-----------------|------|-----|----------------|------|-----|-------|------|-------|-------|-------|-------|
| 21212  | 2    | 2   | No              |      | 1   | Yes            | 2    | 2   | No    |      |       |       | 175   | 75    |
| 21216  |      | 2   | No              |      | 2   | No             |      | 2   | No    |      |       |       | 160   | 53    |
| 21217  |      | 2   | No              |      | 2   | No             |      | 2   | No    |      |       |       | 179   | 65    |
| 21228  |      | 2   | No              |      | 1   | Yes            | 1    | 2   | No    |      |       |       | 171   | 70    |
| 21229  |      | 2   | No              |      | 2   | No             |      | 2   | No    |      |       |       | 160   | 80    |
| 21230  | 1    | 2   | No              |      | 2   | No             |      | 2   | No    |      |       |       | 160   | 60    |
| 21243  |      | 2   | No              |      | 2   | No             |      | 2   | No    |      |       |       | 158   | 54    |
| 21247  |      | 2   | No              |      | 2   | No             |      | 2   | No    |      |       |       | 160   | 60    |
| 21253  |      | 2   | No              |      | 2   | No             |      | 2   | No    |      |       |       | 169   | 63    |
| 21264  |      | 2   | No              |      | 2   | No             |      | 2   | No    |      |       |       | 168   | 76    |
| 21265  | 2    | 2   | No              |      | 2   | No             |      | 2   | No    |      |       |       | 156   | 69    |
| 21273  |      | 2   | No              |      | 2   | No             |      | 2   | No    |      |       |       | 174   | 76    |
| 21275  |      | 2   | No              |      | 2   | No             |      | 2   | No    |      |       |       | 154   | 53    |
| 21278  |      | 2   | No              |      | 2   | No             |      | 2   | No    |      |       |       | 160   | 80    |
| 21291  |      | 2   | No              |      | 2   | No             |      | 2   | No    |      |       |       | 165   | 54    |
| 21298  |      | 2   | No              |      | 2   | No             |      | 2   | No    |      |       |       | 170   | 60    |
| 21301  | 1    | 2   | No              |      | 1   | Yes            | 1    | 2   | No    |      |       |       | 178   | 75    |
| 21312  |      | 2   | No              |      | 2   | No             |      | 2   | No    |      |       |       | 183   | 80    |
| 21323  |      | 2   | No              |      | 1   | Yes            | 2    | 2   | No    |      |       |       | 167   | 63    |
| 21325  | 2    | 2   | No              |      | 2   | No             |      | 2   | No    |      |       |       | 167   | 49    |
| 21341  |      | 1   | Yes             | 2    | 2   | No             |      | 2   | No    |      |       |       | 161   | 45    |
| 21349  |      | 2   | No              |      | 1   | Yes            | 2    | 2   | No    |      |       |       | 166   | 68    |
| 21350  | 1    | 2   | No              |      | 2   | No             |      | 2   | No    |      |       |       | 156   | 56    |
| 21354  | 2    | 2   | No              |      | 2   | No             |      | 2   | No    |      |       |       | 170   | 65    |
| 21372  |      | 2   | No              |      | 2   | No             |      | 2   | No    |      |       |       | 150   | 48    |
| 21373  |      | 2   | No              |      | 2   | No             |      | 2   | No    |      |       |       | 157   | 46    |
| 21378  |      | 2   | No              |      | 2   | No             |      | 2   | No    |      |       |       | 152   | 50    |
| 21393  |      | 2   | No              |      | 2   | No             |      | 2   | No    |      |       |       | 152   | 45    |
| 21401  |      | 2   | No              |      | 2   | No             |      | 2   | No    |      |       |       | 180   | 70    |
| 21405  |      | 1   | Yes             | 1    | 2   | No             |      | 2   | No    |      |       |       | 167   | 72    |
| 21406  |      | 2   | No              |      | 2   | No             |      | 2   | No    |      |       |       | 165   | 45    |
| 21407  |      | 2   | No              |      | 1   | Yes            | 1    | 2   | No    |      |       |       | 165   | 65    |



| respid | Q11a | Q12 | Cardiac Disease | Q12a | Q13 | Hyperlipidemia | Q13a | Q14 | Neuro | Q14a | Q15_1 | Q15_2 | Q15_3 | Q16_1 |
|--------|------|-----|-----------------|------|-----|----------------|------|-----|-------|------|-------|-------|-------|-------|
| 21418  |      | 2   | No              |      | 2   | No             |      | 2   | No    |      |       |       | 167   | 65    |
| 21420  |      | 2   | No              |      | 1   | Yes            | 2    | 2   | No    |      |       |       | 170   | 75    |
| 21421  |      | 2   | No              |      | 2   | No             |      | 2   | No    |      |       |       | 155   | 55    |
| 21446  |      | 2   | No              |      | 2   | No             |      | 2   | No    |      |       |       | 150   | 70    |
| 21449  |      | 2   | No              |      | 1   | Yes            | 2    | 2   | No    |      |       |       | 170   | 70    |
| 21452  |      | 2   | No              |      | 2   | No             |      | 2   | No    |      |       |       | 159   | 51    |
| 21455  |      | 2   | No              |      | 1   | Yes            | 1    | 2   | No    |      |       |       | 175   | 70    |
| 21469  |      | 2   | No              |      | 2   | No             |      | 2   | No    |      |       |       | 168   | 65    |
| 21471  |      | 2   | No              |      | 2   | No             |      | 2   | No    |      |       |       | 170   | 61    |
| 21472  |      | 2   | No              |      | 2   | No             |      | 2   | No    |      |       |       | 158   | 49    |
| 21474  |      | 2   | No              |      | 2   | No             |      | 2   | No    |      |       |       | 163   | 80    |
| 21479  |      | 2   | No              |      | 2   | No             |      | 2   | No    |      |       |       | 160   | 60    |
| 21485  |      | 2   | No              |      | 2   | No             |      | 2   | No    |      |       |       | 172   | 75    |
| 21512  |      | 2   | No              |      | 2   | No             |      | 2   | No    |      |       |       | 173   | 70    |
| 21513  |      | 2   | No              |      | 2   | No             |      | 2   | No    |      |       |       | 150   | 50    |
| 21514  |      | 2   | No              |      | 2   | No             |      | 2   | No    |      |       |       | 170   | 75    |
| 21520  |      | 2   | No              |      | 1   | Yes            | 1    | 2   | No    |      |       |       | 162   | 61    |
| 21539  | 1    | 2   | No              |      | 1   | Yes            | 1    | 2   | No    |      |       |       | 162   | 53    |
| 21553  | 1    | 2   | No              |      | 1   | Yes            | 1    | 2   | No    |      |       |       | 165   | 56    |
| 21560  |      | 2   | No              |      | 2   | No             |      | 2   | No    |      |       |       | 160   | 52    |
| 21561  |      | 2   | No              |      | 2   | No             |      | 2   | No    |      |       |       | 168   | 80    |
| 21563  | 1    | 2   | No              |      | 2   | No             |      | 2   | No    |      |       |       | 162   | 80    |
| 21565  |      | 1   | Yes             | 1    | 2   | No             |      | 2   | No    |      |       |       | 168   | 72    |
| 21582  | 1    | 2   | No              |      | 1   | Yes            | 1    | 2   | No    |      |       |       | 163   | 55    |
| 21584  |      | 2   | No              |      | 2   | No             |      | 2   | No    |      |       |       | 175   | 74    |
| 21585  |      | 2   | No              |      | 2   | No             |      | 2   | No    |      |       |       | 169   | 66    |
| 21586  |      | 2   | No              |      | 2   | No             |      | 2   | No    |      |       |       | 162   | 68    |
| 21587  |      | 2   | No              |      | 2   | No             |      | 2   | No    |      |       |       | 160   | 45    |
| 21590  |      | 2   | No              |      | 2   | No             |      | 2   | No    |      |       |       | 168   | 68    |
| 21601  |      | 2   | No              |      | 2   | No             |      | 2   | No    |      |       |       | 168   | 68    |
| 21611  | 1    | 2   | No              |      | 1   | Yes            | 1    | 2   | No    |      |       |       | 160   | 60    |
| 21612  | 1    | 1   | Yes             | 1    | 2   | No             |      | 2   | No    |      |       |       | 170   | 82    |

| respid | Q11a | Q12 | Cardiac Disease | Q12a | Q13 | Hyperlipidemia | Q13a | Q14 | Neuro | Q14a | Q15_1 | Q15_2 | Q15_3 | Q16_1 |
|--------|------|-----|-----------------|------|-----|----------------|------|-----|-------|------|-------|-------|-------|-------|
| 21625  | 2    | 2   | No              |      | 2   | No             |      | 2   | No    |      |       |       | 158   | 65    |
| 21633  |      | 2   | No              |      | 2   | No             |      | 2   | No    |      |       |       | 170   | 68    |
| 21640  |      | 2   | No              |      | 1   | Yes            | 2    | 2   | No    |      |       |       | 173   | 68    |
| 21647  |      | 2   | No              |      | 2   | No             |      | 2   | No    |      |       |       | 178   | 60    |
| 21648  |      | 2   | No              |      | 1   | Yes            | 1    | 2   | No    |      |       |       | 175   | 65    |
| 21656  |      | 2   | No              |      | 2   | No             |      | 2   | No    |      |       |       | 153   | 50    |
| 21657  |      | 2   | No              |      | 1   | Yes            | 1    | 2   | No    |      |       |       | 150   | 53    |
| 21658  |      | 2   | No              |      | 2   | No             |      | 2   | No    |      |       |       | 170   | 80    |
| 21665  |      | 2   | No              |      | 2   | No             |      | 2   | No    |      |       |       | 153   | 55    |
| 21666  |      | 2   | No              |      | 2   | No             |      | 2   | No    |      |       |       | 168   | 67    |
| 21668  | 1    | 1   | Yes             | 1    | 1   | Yes            | 1    | 2   | No    |      |       |       | 175   | 78    |
| 21673  |      | 2   | No              |      | 2   | No             |      | 2   | No    |      |       |       | 159   | 63    |
| 21681  |      | 2   | No              |      | 2   | No             |      | 2   | No    |      |       |       | 168   | 67    |
| 21682  |      | 2   | No              |      | 2   | No             |      | 2   | No    |      |       |       | 170   | 68    |
| 21685  | 1    | 2   | No              |      | 2   | No             |      | 2   | No    |      |       |       | 171   | 81    |
| 21692  |      | 2   | No              |      | 2   | No             |      | 2   | No    |      |       |       | 165   | 68    |
| 21697  |      | 2   | No              |      | 1   | Yes            | 2    | 2   | No    |      |       |       | 150   | 52    |
| 21711  |      | 2   | No              |      | 2   | No             |      | 2   | No    |      |       |       | 158   | 40    |
| 21715  | 1    | 2   | No              |      | 1   | Yes            | 1    | 2   | No    |      |       |       | 156   | 72    |
| 21726  |      | 2   | No              |      | 2   | No             |      | 2   | No    |      |       |       | 170   | 50    |
| 21748  |      | 2   | No              |      | 2   | No             |      | 2   | No    |      |       |       | 162   | 45    |
| 21761  |      | 2   | No              |      | 2   | No             |      | 2   | No    |      |       |       | 160   | 55    |
| 21769  | 1    | 2   | No              |      | 2   | No             |      | 2   | No    |      |       |       | 165   | 59    |
| 21774  | 1    | 1   | Yes             | 1    | 1   | Yes            | 1    | 2   | No    |      |       |       | 166   | 72    |
| 21778  |      | 2   | No              |      | 1   | Yes            | 2    | 2   | No    |      |       |       | 168   | 62    |
| 21785  |      | 2   | No              |      | 2   | No             |      | 2   | No    |      |       |       | 168   | 66    |
| 21799  | 1    | 2   | No              |      | 1   | Yes            | 1    | 2   | No    |      |       |       | 165   | 63    |
| 21820  | 1    | 2   | No              |      | 1   | Yes            | 1    | 2   | No    |      | 5     | 1     |       | 68    |
| 21837  |      | 2   | No              |      | 2   | No             |      | 2   | No    |      |       |       | 158   | 50    |
| 21845  | 1    | 2   | No              |      | 2   | No             |      | 2   | No    |      | 5     | 2     |       | 50    |
| 21846  |      | 2   | No              |      | 2   | No             |      | 2   | No    |      |       |       | 154   | 54    |
| 21849  |      | 2   | No              |      | 2   | No             |      | 2   | No    |      |       |       | 177   | 85    |

| respid | Q11a | Q12 | Cardiac Disease | Q12a | Q13 | Hyperlipidemia | Q13a | Q14 | Neuro | Q14a | Q15_1 | Q15_2 | Q15_3 | Q16_1 |
|--------|------|-----|-----------------|------|-----|----------------|------|-----|-------|------|-------|-------|-------|-------|
| 21850  |      | 1   | Yes             | 1    | 2   | No             |      | 1   | Yes   | 1    |       |       | 153   | 66    |
| 21855  |      | 2   | No              |      | 2   | No             |      | 2   | No    |      |       |       | 170   | 65    |
| 21859  |      | 2   | No              |      | 2   | No             |      | 2   | No    |      |       |       | 173   | 65    |
| 21861  |      | 2   | No              |      | 1   | Yes            | 2    | 2   | No    |      |       |       | 165   | 68    |
| 21866  |      | 2   | No              |      | 2   | No             |      | 2   | No    |      |       |       | 160   | 58    |
| 21873  |      | 2   | No              |      | 2   | No             |      | 2   | No    |      |       |       | 180   | 65    |
| 21876  | 1    | 2   | No              |      | 2   | No             |      | 2   | No    |      | 5     | 7     |       | 70    |
| 21882  |      | 2   | No              |      | 2   | No             |      | 2   | No    |      |       |       | 158   | 56    |
| 21884  |      | 2   | No              |      | 2   | No             |      | 2   | No    |      |       |       | 157   | 65    |
| 21887  | 2    | 2   | No              |      | 1   | Yes            | 2    | 2   | No    |      |       |       | 172   | 75    |
| 21892  |      | 2   | No              |      | 2   | No             |      | 2   | No    |      |       |       | 168   | 70    |
| 21907  |      | 2   | No              |      | 2   | No             |      | 2   | No    |      |       |       | 152   | 49    |
| 21910  | 1    | 1   | Yes             | 1    | 1   | Yes            | 1    | 1   | Yes   | 1    |       |       | 172   | 80    |
| 21912  |      | 2   | No              |      | 1   | Yes            | 1    | 2   | No    |      |       |       | 153   | 55    |
| 21914  |      | 2   | No              |      | 2   | No             |      | 2   | No    |      |       |       | 178   | 65    |
| 21925  |      | 2   | No              |      | 2   | No             |      | 2   | No    |      |       |       | 175   | 70    |
| 21937  |      | 2   | No              |      | 2   | No             |      | 2   | No    |      |       |       | 162   | 51    |
| 21938  |      | 2   | No              |      | 2   | No             |      | 2   | No    |      |       |       | 161   | 52    |
| 21940  |      | 2   | No              |      | 2   | No             |      | 2   | No    |      |       |       | 166   | 74    |
| 21942  |      | 2   | No              |      | 2   | No             |      | 2   | No    |      |       |       | 155   | 47    |
| 21947  |      | 2   | No              |      | 2   | No             |      | 2   | No    |      |       |       | 175   | 62    |
| 21948  | 1    | 1   | Yes             | 1    | 1   | Yes            | 1    | 2   | No    |      |       |       | 165   | 65    |
| 21961  |      | 2   | No              |      | 1   | Yes            | 1    | 2   | No    |      |       |       | 160   | 50    |
| 21977  |      | 2   | No              |      | 2   | No             |      | 2   | No    |      |       |       | 165   | 63    |
| 21983  |      | 2   | No              |      | 2   | No             |      | 2   | No    |      |       |       | 160   | 60    |
| 21986  | 1    | 2   | No              |      | 1   | Yes            | 2    | 2   | No    |      |       |       | 165   | 55    |
| 21988  | 1    | 2   | No              |      | 2   | No             |      | 2   | No    |      |       |       | 172   | 75    |
| 21996  |      | 2   | No              |      | 1   | Yes            | 2    | 2   | No    |      |       |       | 158   | 64    |
| 21997  |      | 1   | Yes             | 2    | 2   | No             |      | 2   | No    |      |       |       | 163   | 85    |
| 22005  |      | 2   | No              |      | 2   | No             |      | 2   | No    |      |       |       | 170   | 65    |
| 22013  |      | 2   | No              |      | 2   | No             |      | 2   | No    |      |       |       | 160   | 60    |
| 22018  |      | 2   | No              |      | 2   | No             |      | 2   | No    |      |       |       | 163   | 45    |

| respid | Q11a | Q12 | Cardiac Disease | Q12a | Q13 | Hyperlipidemia | Q13a | Q14 | Neuro | Q14a | Q15_1 | Q15_2 | Q15_3 | Q16_1 |
|--------|------|-----|-----------------|------|-----|----------------|------|-----|-------|------|-------|-------|-------|-------|
| 22019  | 2    | 2   | No              |      | 2   | No             |      | 2   | No    |      |       |       | 163   | 60    |
| 22071  |      | 2   | No              |      | 2   | No             |      | 2   | No    |      |       |       | 155   | 50    |
| 22082  | 1    | 2   | No              |      | 2   | No             |      | 2   | No    |      |       |       | 158   | 60    |
| 22085  |      | 2   | No              |      | 2   | No             |      | 2   | No    |      |       |       | 158   | 50    |
| 22092  |      | 2   | No              |      | 2   | No             |      | 2   | No    |      |       |       | 154   | 51    |
| 22097  |      | 2   | No              |      | 2   | No             |      | 2   | No    |      |       |       | 163   | 55    |
| 22111  |      | 2   | No              |      | 2   | No             |      | 2   | No    |      |       |       | 154   | 70    |
| 22118  |      | 2   | No              |      | 2   | No             |      | 2   | No    |      |       |       | 176   | 92    |
| 22132  |      | 2   | No              |      | 2   | No             |      | 2   | No    |      |       |       | 160   | 60    |
| 22133  |      | 2   | No              |      | 2   | No             |      | 2   | No    |      |       |       | 175   | 75    |
| 22139  |      | 2   | No              |      | 2   | No             |      | 2   | No    |      |       |       | 167   | 60    |
| 22142  | 1    | 2   | No              |      | 1   | Yes            | 1    | 2   | No    |      |       |       | 174   | 70    |
| 22146  |      | 2   | No              |      | 2   | No             |      | 2   | No    |      |       |       | 155   | 60    |
| 22181  |      | 2   | No              |      | 2   | No             |      | 2   | No    |      |       |       | 172   | 65    |
| 22202  |      | 2   | No              |      | 2   | No             |      | 2   | No    |      |       |       | 167   | 72    |
| 22214  |      | 2   | No              |      | 2   | No             |      | 2   | No    |      |       |       | 158   | 55    |
| 22223  |      | 2   | No              |      | 2   | No             |      | 2   | No    |      |       |       | 158   | 58    |
| 22227  |      | 2   | No              |      | 2   | No             |      | 2   | No    |      |       |       | 160   | 65    |
| 22229  |      | 2   | No              |      | 2   | No             |      | 2   | No    |      |       |       | 168   | 65    |
| 22239  |      | 2   | No              |      | 2   | No             |      | 2   | No    |      |       |       | 155   | 58    |
| 22245  | 1    | 1   | Yes             | 1    | 1   | Yes            | 1    | 1   | Yes   | 1    |       |       | 170   | 80    |
| 22256  |      | 2   | No              |      | 2   | No             |      | 2   | No    |      |       |       | 155   | 70    |
| 22260  |      | 2   | No              |      | 1   | Yes            | 1    | 2   | No    |      |       |       | 158   | 63    |
| 22298  | 1    | 2   | No              |      | 1   | Yes            | 2    | 2   | No    |      |       |       | 165   | 68    |
| 22321  |      | 2   | No              |      | 2   | No             |      | 2   | No    |      |       |       | 160   | 50    |
| 22340  |      | 2   | No              |      | 2   | No             |      | 2   | No    |      |       |       | 158   | 58    |
| 22346  |      | 2   | No              |      | 2   | No             |      | 2   | No    |      |       |       | 170   | 65    |
| 22356  | 2    | 2   | No              |      | 1   | Yes            | 2    | 2   | No    |      |       |       | 173   | 76    |
| 22361  | 1    | 2   | No              |      | 1   | Yes            | 1    | 2   | No    |      |       |       | 160   | 75    |
| 22364  |      | 2   | No              |      | 2   | No             |      | 2   | No    |      |       |       | 170   | 61    |
| 22368  |      | 2   | No              |      | 2   | No             |      | 2   | No    |      |       |       | 170   | 65    |
| 22374  |      | 2   | No              |      | 2   | No             |      | 2   | No    |      |       |       | 155   | 50    |

| respid | Q11a | Q12 | Cardiac Disease | Q12a | Q13 | Hyperlipidemia | Q13a | Q14 | Neuro | Q14a | Q15_1 | Q15_2 | Q15_3 | Q16_1 |
|--------|------|-----|-----------------|------|-----|----------------|------|-----|-------|------|-------|-------|-------|-------|
| 22375  |      | 2   | No              |      | 2   | No             |      | 2   | No    |      |       |       | 161   | 54    |
| 22377  | 1    | 2   | No              |      | 2   | No             |      | 2   | No    |      |       |       | 150   | 68    |
| 22383  |      | 2   | No              |      | 2   | No             |      | 2   | No    |      |       |       | 175   | 68    |
| 22387  |      | 2   | No              |      | 2   | No             |      | 2   | No    |      |       |       | 160   | 65    |
| 22392  |      | 2   | No              |      | 2   | No             |      | 2   | No    |      |       |       | 160   | 115   |
| 22393  |      | 2   | No              |      | 2   | No             |      | 2   | No    |      |       |       | 163   | 63    |
| 22394  |      | 2   | No              |      | 2   | No             |      | 2   | No    |      |       |       | 160   | 51    |
| 22395  |      | 2   | No              |      | 2   | No             |      | 2   | No    |      |       |       | 150   | 55    |
| 22401  | 1    | 1   | Yes             | 2    | 1   | Yes            | 1    | 2   | No    |      |       |       | 168   | 61    |
| 22407  |      | 2   | No              |      | 2   | No             |      | 2   | No    |      |       |       | 169   | 62    |
| 22410  |      | 2   | No              |      | 2   | No             |      | 2   | No    |      |       |       | 172   | 70    |
| 22418  |      | 2   | No              |      | 1   | Yes            | 2    | 2   | No    |      |       |       | 150   | 75    |
| 22421  |      | 2   | No              |      | 2   | No             |      | 2   | No    |      |       |       | 182   | 80    |
| 22423  |      | 2   | No              |      | 2   | No             |      | 2   | No    |      |       |       | 185   | 80    |
| 22425  |      | 2   | No              |      | 2   | No             |      | 2   | No    |      |       |       | 156   | 68    |
| 22427  |      | 2   | No              |      | 2   | No             |      | 2   | No    |      |       |       | 173   |       |
| 22431  | 1    | 1   | Yes             | 1    | 1   | Yes            | 1    | 2   | No    |      |       |       | 165   | 75    |
| 22435  |      | 2   | No              |      | 2   | No             |      | 2   | No    |      |       |       | 178   | 62    |
| 22436  |      | 2   | No              |      | 2   | No             |      | 2   | No    |      |       |       | 178   | 90    |
| 22442  |      | 2   | No              |      | 2   | No             |      | 2   | No    |      |       |       | 185   | 80    |
| 22444  |      | 2   | No              |      | 2   | No             |      | 2   | No    |      |       |       | 176   | 56    |
| 22445  |      | 2   | No              |      | 1   | Yes            | 2    | 2   | No    |      |       |       | 152   | 56    |
| 22446  |      | 2   | No              |      | 2   | No             |      | 2   | No    |      |       |       | 155   | 58    |
| 22448  |      | 2   | No              |      | 2   | No             |      | 2   | No    |      |       |       | 158   | 60    |
| 22449  |      | 2   | No              |      | 2   | No             |      | 2   | No    |      |       |       | 165   | 50    |
| 22450  |      | 2   | No              |      | 2   | No             |      | 2   | No    |      |       |       | 170   | 70    |
| 22453  | 1    | 2   | No              |      | 1   | Yes            | 1    | 2   | No    |      | 5     | 3     |       | 60    |
| 22465  |      | 2   | No              |      | 2   | No             |      | 2   | No    |      |       |       | 160   | 55    |
| 22472  | 1    | 2   | No              |      | 2   | No             |      | 2   | No    |      |       |       | 180   | 75    |
| 22475  | 2    | 2   | No              |      | 2   | No             |      | 2   | No    |      |       |       | 163   | 70    |
| 22478  | 1    | 2   | No              |      | 2   | No             |      | 2   | No    |      |       |       | 160   | 50    |
| 22491  |      | 2   | No              |      | 2   | No             |      | 1   | Yes   | 1    | 5     | 10    |       |       |

| respid | Q11a | Q12 | Cardiac Disease | Q12a | Q13 | Hyperlipidemia | Q13a | Q14 | Neuro | Q14a | Q15_1 | Q15_2 | Q15_3 | Q16_1 |
|--------|------|-----|-----------------|------|-----|----------------|------|-----|-------|------|-------|-------|-------|-------|
| 22497  | 1    | 2   | No              |      | 1   | Yes            | 2    | 2   | No    |      |       |       | 148   | 84    |
| 22498  |      | 2   | No              |      | 2   | No             |      | 2   | No    |      |       |       | 165   | 55    |
| 22499  |      | 2   | No              |      | 2   | No             |      | 2   | No    |      |       |       | 150   | 82    |
| 22503  | 1    | 2   | No              |      | 2   | No             |      | 2   | No    |      |       |       | 160   | 78    |
| 22507  |      | 2   | No              |      | 2   | No             |      | 2   | No    |      |       |       | 160   | 48    |
| 22513  | 1    | 2   | No              |      | 1   | Yes            | 2    | 2   | No    |      |       |       | 155   | 56    |
| 22517  | 2    | 2   | No              |      | 2   | No             |      | 2   | No    |      |       |       | 150   | 58    |
| 22524  | 1    | 2   | No              |      | 1   | Yes            | 2    | 2   | No    |      |       |       | 165   | 72    |
| 22528  |      | 2   | No              |      | 2   | No             |      | 2   | No    |      |       |       | 168   | 63    |
| 22544  | 1    | 2   | No              |      | 2   | No             |      | 2   | No    |      |       |       | 170   | 110   |
| 22571  |      | 2   | No              |      | 2   | No             |      | 2   | No    |      |       |       | 150   | 48    |
| 22576  |      | 2   | No              |      | 2   | No             |      | 2   | No    |      |       |       | 170   | 68    |
| 22579  |      | 2   | No              |      | 2   | No             |      | 2   | No    |      |       |       | 167   | 75    |
| 22583  |      | 2   | No              |      | 1   | Yes            | 2    | 2   | No    |      |       |       | 158   | 54    |
| 22591  |      | 2   | No              |      | 2   | No             |      | 2   | No    |      |       |       | 178   | 70    |
| 22592  |      | 2   | No              |      | 2   | No             |      | 2   | No    |      |       |       | 155   | 45    |
| 22612  |      | 2   | No              |      | 1   | Yes            | 2    | 2   | No    |      |       |       | 156   | 47    |
| 22613  |      | 2   | No              |      | 1   | Yes            | 2    | 2   | No    |      |       |       | 174   | 80    |
| 22615  | 1    | 1   | Yes             | 2    | 1   | Yes            | 2    | 2   | No    |      |       |       | 178   | 75    |
| 22621  | 1    | 2   | No              |      | 1   | Yes            | 1    | 2   | No    |      |       |       | 168   | 70    |
| 22625  |      | 2   | No              |      | 2   | No             |      | 2   | No    |      |       |       | 153   | 55    |
| 22628  | 1    | 2   | No              |      | 1   | Yes            | 1    | 2   | No    |      |       |       | 158   | 65    |
| 22632  | 1    | 2   | No              |      | 2   | No             |      | 2   | No    |      |       |       | 165   | 55    |
| 22639  |      | 2   | No              |      | 2   | No             |      | 2   | No    |      |       |       | 168   | 75    |
| 22648  |      | 2   | No              |      | 2   | No             |      | 2   | No    |      |       |       | 155   | 57    |
| 22649  |      | 2   | No              |      | 2   | No             |      | 2   | No    |      |       |       | 171   | 76    |
| 22655  |      | 2   | No              |      | 2   | No             |      | 2   | No    |      |       |       | 160   | 50    |
| 22659  |      | 2   | No              |      | 2   | No             |      | 2   | No    |      |       |       | 160   | 70    |
| 22660  |      | 2   | No              |      | 1   | Yes            | 1    | 2   | No    |      |       |       | 170   | 70    |
| 22666  |      | 2   | No              |      | 2   | No             |      | 2   | No    |      |       |       | 160   | 60    |
| 22667  |      | 2   | No              |      | 1   | Yes            | 1    | 2   | No    |      |       |       | 175   | 75    |
| 22670  |      | 2   | No              |      | 2   | No             |      | 2   | No    |      |       |       | 174   | 74    |

| respid | Q11a | Q12 | Cardiac Disease | Q12a | Q13 | Hyperlipidemia | Q13a | Q14 | Neuro | Q14a | Q15_1 | Q15_2 | Q15_3 | Q16_1 |
|--------|------|-----|-----------------|------|-----|----------------|------|-----|-------|------|-------|-------|-------|-------|
| 22681  |      | 2   | No              |      | 2   | No             |      | 2   | No    |      |       |       | 172   | 62    |
| 22683  |      | 2   | No              |      | 1   | Yes            | 1    | 2   | No    |      |       |       | 156   | 53    |
| 22688  | 1    | 2   | No              |      | 2   | No             |      | 2   | No    |      |       |       | 155   | 40    |
| 22695  |      | 2   | No              |      | 2   | No             |      | 2   | No    |      |       |       | 175   | 77    |
| 22696  |      | 2   | No              |      | 2   | No             |      | 2   | No    |      |       |       | 160   | 50    |
| 22705  | 2    | 2   | No              |      | 2   | No             |      | 2   | No    |      |       |       | 165   | 65    |
| 22718  | 1    | 2   | No              |      | 2   | No             |      | 2   | No    |      |       |       | 170   | 80    |
| 22720  | 1    | 2   | No              |      | 2   | No             |      | 2   | No    |      |       |       | 160   | 52    |
| 22724  |      | 2   | No              |      | 1   | Yes            | 2    | 2   | No    |      |       |       | 169   | 57    |
| 22728  | 2    | 2   | No              |      | 2   | No             |      | 2   | No    |      |       |       | 164   | 45    |
| 22751  | 2    | 2   | No              |      | 2   | No             |      | 2   | No    |      |       |       | 160   | 53    |
| 22782  |      | 2   | No              |      | 2   | No             |      | 2   | No    |      |       |       | 168   | 53    |
| 22786  |      | 2   | No              |      | 2   | No             |      | 2   | No    |      |       |       | 173   | 85    |
| 22788  |      | 2   | No              |      | 2   | No             |      | 2   | No    |      |       |       | 160   | 58    |
| 22810  |      | 2   | No              |      | 2   | No             |      | 2   | No    |      |       |       | 160   | 70    |
| 22816  |      | 2   | No              |      | 2   | No             |      | 2   | No    |      |       |       | 150   | 55    |
| 22818  | 1    | 2   | No              |      | 2   | No             |      | 2   | No    |      |       |       | 162   | 54    |
| 22854  |      | 2   | No              |      | 2   | No             |      | 2   | No    |      |       |       | 160   | 45    |
| 22858  |      | 2   | No              |      | 2   | No             |      | 2   | No    |      |       |       | 160   | 55    |
| 22862  |      | 2   | No              |      | 2   | No             |      | 2   | No    |      |       |       | 160   | 58    |
| 22865  | 2    | 2   | No              |      | 1   | Yes            | 2    | 2   | No    |      |       |       | 176   | 69    |
| 22868  |      | 2   | No              |      | 2   | No             |      | 2   | No    |      |       |       | 150   | 50    |
| 22869  | 1    | 2   | No              |      | 1   | Yes            | 1    | 2   | No    |      |       |       | 175   | 77    |
| 22873  |      | 2   | No              |      | 2   | No             |      | 2   | No    |      |       |       | 158   | 48    |
| 22875  |      | 2   | No              |      | 2   | No             |      | 2   | No    |      |       |       | 181   | 78    |
| 22876  |      | 2   | No              |      | 2   | No             |      | 2   | No    |      | 5     | 5     |       | 62    |
| 22882  |      | 2   | No              |      | 2   | No             |      | 2   | No    |      |       |       | 159   | 56    |
| 22884  |      | 2   | No              |      | 1   | Yes            | 1    | 2   | No    |      | 5     | 3     |       | 45    |
| 22887  |      | 2   | No              |      | 2   | No             |      | 2   | No    |      |       |       | 156   | 69    |
| 22888  | 1    | 2   | No              |      | 2   | No             |      | 2   | No    |      |       |       | 148   | 52    |
| 22900  |      | 2   | No              |      | 2   | No             |      | 2   | No    |      |       |       | 172   | 66    |
| 22901  |      | 2   | No              |      | 2   | No             |      | 2   | No    |      |       |       | 160   | 60    |

| respid | Q11a | Q12 | Cardiac Disease | Q12a | Q13 | Hyperlipidemia | Q13a | Q14 | Neuro | Q14a | Q15_1 | Q15_2 | Q15_3 | Q16_1 |
|--------|------|-----|-----------------|------|-----|----------------|------|-----|-------|------|-------|-------|-------|-------|
| 22912  |      | 2   | No              |      | 2   | No             |      | 2   | No    |      |       |       | 183   | 78    |
| 22913  |      | 2   | No              |      | 2   | No             |      | 2   | No    |      |       |       | 165   | 55    |
| 22921  | 1    | 2   | No              |      | 2   | No             |      | 2   | No    |      |       |       | 172   | 75    |
| 22925  |      | 2   | No              |      | 1   | Yes            | 2    | 2   | No    |      |       |       | 172   | 66    |
| 22940  |      | 2   | No              |      | 2   | No             |      | 2   | No    |      |       |       | 156   | 60    |
| 22941  | 1    | 2   | No              |      | 1   | Yes            | 2    | 2   | No    |      |       |       | 152   | 80    |
| 22947  | 1    | 2   | No              |      | 1   | Yes            | 2    | 2   | No    |      |       |       | 172   | 101   |
| 22948  |      | 2   | No              |      | 2   | No             |      | 2   | No    |      |       |       | 180   | 80    |
| 22964  | 1    | 2   | No              |      | 1   | Yes            | 2    | 2   | No    |      |       |       | 158   | 52    |
| 22966  |      | 1   | Yes             | 2    | 2   | No             |      | 2   | No    |      |       |       | 176   | 105   |
| 22969  | 1    | 2   | No              |      | 1   | Yes            | 2    | 2   | No    |      |       |       | 177   | 56    |
| 22971  |      | 2   | No              |      | 2   | No             |      | 2   | No    |      |       |       | 160   | 55    |
| 22988  | 1    | 2   | No              |      | 2   | No             |      | 2   | No    |      |       |       | 160   | 65    |
| 22990  |      | 2   | No              |      | 2   | No             |      | 2   | No    |      |       |       | 148   | 56    |
| 23000  | 1    | 2   | No              |      | 2   | No             |      | 2   | No    |      |       |       | 163   | 65    |
| 23016  |      | 2   | No              |      | 2   | No             |      | 2   | No    |      |       |       | 165   | 50    |
| 23026  |      | 2   | No              |      | 1   | Yes            | 2    | 2   | No    |      |       |       | 160   | 80    |
| 23035  |      | 2   | No              |      | 2   | No             |      | 2   | No    |      |       |       | 170   | 76    |
| 23037  | 1    | 2   | No              |      | 2   | No             |      | 2   | No    |      |       |       | 168   | 56    |
| 23044  |      | 2   | No              |      | 2   | No             |      | 2   | No    |      |       |       | 150   | 44    |
| 23046  |      | 1   | Yes             | 2    | 2   | No             |      | 2   | No    |      |       |       | 170   | 70    |
| 23047  |      | 2   | No              |      | 1   | Yes            | 2    | 2   | No    |      |       |       | 160   | 79    |
| 23049  |      | 2   | No              |      | 2   | No             |      | 2   | No    |      |       |       | 165   | 55    |
| 23055  | 1    | 2   | No              |      | 1   | Yes            | 1    | 2   | No    |      |       |       | 175   | 87    |
| 23066  |      | 2   | No              |      | 2   | No             |      | 2   | No    |      |       |       | 162   | 60    |
| 23075  | 1    | 1   | Yes             | 1    | 2   | No             |      | 2   | No    |      |       |       | 155   | 45    |
| 23081  |      | 2   | No              |      | 2   | No             |      | 2   | No    |      |       |       | 160   | 80    |
| 23087  |      | 2   | No              |      | 2   | No             |      | 2   | No    |      |       |       | 170   | 59    |
| 23094  |      | 2   | No              |      | 2   | No             |      | 2   | No    |      |       |       | 158   | 50    |
| 23099  |      | 2   | No              |      | 2   | No             |      | 2   | No    |      |       |       | 173   | 69    |
| 23101  |      | 2   | No              |      | 2   | No             |      | 2   | No    |      |       |       | 163   | 53    |
| 23105  |      | 2   | No              |      | 2   | No             |      | 2   | No    |      |       |       | 175   | 70    |



| respid | Q11a | Q12 | Cardiac Disease | Q12a | Q13 | Hyperlipidemia | Q13a | Q14 | Neuro | Q14a | Q15_1 | Q15_2 | Q15_3 | Q16_1 |
|--------|------|-----|-----------------|------|-----|----------------|------|-----|-------|------|-------|-------|-------|-------|
| 23115  |      | 2   | No              |      | 2   | No             |      | 2   | No    |      |       |       | 150   | 45    |
| 23121  |      | 1   | Yes             | 2    | 2   | No             |      | 2   | No    |      |       |       | 163   | 53    |
| 23127  |      | 2   | No              |      | 2   | No             |      | 2   | No    |      |       |       | 165   | 65    |
| 23131  |      | 2   | No              |      | 2   | No             |      | 2   | No    |      |       |       | 158   | 48    |
| 23134  |      | 2   | No              |      | 2   | No             |      | 2   | No    |      |       |       | 155   | 52    |
| 23145  |      | 2   | No              |      | 2   | No             |      | 2   | No    |      |       |       | 170   | 66    |
| 23151  |      | 2   | No              |      | 1   | Yes            | 2    | 2   | No    |      |       |       | 170   | 76    |
| 23161  |      | 2   | No              |      | 2   | No             |      | 2   | No    |      |       |       | 152   | 58    |
| 23169  | 1    | 2   | No              |      | 1   | Yes            | 1    | 2   | No    |      |       |       | 160   | 60    |
| 23173  |      | 2   | No              |      | 1   | Yes            | 1    | 2   | No    |      |       |       | 163   | 53    |
| 23174  | 1    | 2   | No              |      | 2   | No             |      | 2   | No    |      |       |       | 167   | 68    |
| 23186  | 2    | 2   | No              |      | 1   | Yes            | 2    | 2   | No    |      |       |       | 158   | 58    |
| 23195  |      | 2   | No              |      | 2   | No             |      | 2   | No    |      |       |       | 160   | 75    |
| 23197  | 1    | 2   | No              |      | 1   | Yes            | 2    | 2   | No    |      |       |       | 175   | 100   |
| 23198  |      | 2   | No              |      | 2   | No             |      | 2   | No    |      |       |       | 170   | 65    |
| 23203  |      | 2   | No              |      | 2   | No             |      | 2   | No    |      |       |       | 175   | 75    |
| 23204  | 1    | 1   | Yes             | 1    | 2   | No             |      | 2   | No    |      |       |       | 173   | 78    |
| 23212  | 1    | 2   | No              |      | 2   | No             |      | 2   | No    |      |       |       | 162   | 60    |
| 23214  | 1    | 2   | No              |      | 2   | No             |      | 2   | No    |      |       |       | 162   | 70    |
| 23221  | 1    | 1   | Yes             | 1    | 1   | Yes            | 1    | 2   | No    |      |       |       | 170   | 70    |
| 23237  | 1    | 2   | No              |      | 2   | No             |      | 2   | No    |      |       |       | 163   | 65    |
| 23251  |      | 2   | No              |      | 1   | Yes            | 1    | 2   | No    |      |       |       | 161   | 60    |
| 23254  |      | 2   | No              |      | 2   | No             |      | 2   | No    |      |       |       | 174   | 60    |
| 23262  | 2    | 2   | No              |      | 2   | No             |      | 2   | No    |      |       |       | 166   | 55    |
| 23267  |      | 1   | Yes             | 2    | 2   | No             |      | 2   | No    |      |       |       | 172   | 55    |
| 23268  | 1    | 2   | No              |      | 1   | Yes            | 1    | 2   | No    |      |       |       | 160   | 63    |
| 23273  |      | 2   | No              |      | 2   | No             |      | 2   | No    |      |       |       | 159   | 55    |
| 23278  |      | 2   | No              |      | 2   | No             |      | 2   | No    |      |       |       | 170   | 65    |
| 23279  | 1    | 1   | Yes             | 1    | 1   | Yes            | 1    | 2   | No    |      |       |       | 167   | 70    |
| 23281  |      | 2   | No              |      | 2   | No             |      | 1   | Yes   | 2    |       |       | 170   | 65    |
| 23282  |      | 2   | No              |      | 1   | Yes            | 2    | 2   | No    |      |       |       | 173   | 90    |
| 23283  |      | 2   | No              |      | 2   | No             |      | 2   | No    |      |       |       | 163   | 65    |

| respid | Q11a | Q12 | Cardiac Disease | Q12a | Q13 | Hyperlipidemia | Q13a | Q14 | Neuro | Q14a | Q15_1 | Q15_2 | Q15_3 | Q16_1 |
|--------|------|-----|-----------------|------|-----|----------------|------|-----|-------|------|-------|-------|-------|-------|
| 23285  |      | 2   | No              |      | 2   | No             |      | 2   | No    |      |       |       | 168   | 70    |
| 23305  | 1    | 2   | No              |      | 2   | No             |      | 2   | No    |      |       |       | 155   | 58    |
| 23309  |      | 2   | No              |      | 1   | Yes            | 1    | 2   | No    |      |       |       | 161   | 59    |
| 23310  |      | 2   | No              |      | 1   | Yes            | 2    | 2   | No    |      |       |       | 180   | 75    |
| 23311  | 1    | 2   | No              |      | 1   | Yes            | 2    | 2   | No    |      |       |       | 160   | 82    |
| 23312  |      | 2   | No              |      | 2   | No             |      | 2   | No    |      |       |       | 165   | 65    |
| 23319  | 1    | 2   | No              |      | 1   | Yes            | 1    | 2   | No    |      |       |       | 167   | 75    |
| 23320  |      | 2   | No              |      | 2   | No             |      | 2   | No    |      |       |       | 170   | 72    |
| 23322  | 1    | 2   | No              |      | 2   | No             |      | 2   | No    |      |       |       | 155   | 80    |
| 23334  |      | 2   | No              |      | 2   | No             |      | 2   | No    |      |       |       | 155   | 50    |
| 23340  |      | 2   | No              |      | 1   | Yes            | 1    | 2   | No    |      |       |       | 161   | 72    |
| 23346  |      | 2   | No              |      | 2   | No             |      | 2   | No    |      |       |       | 151   | 57    |
| 23353  | 2    | 2   | No              |      | 2   | No             |      | 2   | No    |      |       |       | 168   | 70    |
| 23363  | 1    | 2   | No              |      | 1   | Yes            | 1    | 2   | No    |      |       |       | 165   | 60    |
| 23364  | 1    | 2   | No              |      | 1   | Yes            | 1    | 2   | No    |      |       |       | 163   | 60    |
| 23376  |      | 2   | No              |      | 2   | No             |      | 2   | No    |      |       |       | 162   | 50    |
| 23378  |      | 2   | No              |      | 2   | No             |      | 2   | No    |      |       |       | 168   | 65    |
| 23382  |      | 2   | No              |      | 2   | No             |      | 2   | No    |      |       |       | 172   | 70    |
| 23383  |      | 2   | No              |      | 2   | No             |      | 2   | No    |      |       |       | 170   | 80    |
| 23390  |      | 2   | No              |      | 1   | Yes            | 2    | 2   | No    |      |       |       | 176   | 74    |
| 23395  |      | 2   | No              |      | 2   | No             |      | 2   | No    |      |       |       | 170   | 55    |
| 23398  | 1    | 2   | No              |      | 1   | Yes            | 2    | 2   | No    |      |       |       | 160   | 52    |
| 23399  |      | 2   | No              |      | 1   | Yes            | 2    | 2   | No    |      |       |       | 166   | 72    |
| 23406  |      | 2   | No              |      | 2   | No             |      | 2   | No    |      |       |       | 165   | 58    |
| 23418  |      | 2   | No              |      | 2   | No             |      | 2   | No    |      |       |       | 170   | 75    |
| 23427  |      | 2   | No              |      | 2   | No             |      | 2   | No    |      |       |       | 158   | 50    |
| 23428  |      | 1   | Yes             | 1    | 2   | No             |      | 2   | No    |      |       |       | 162   | 50    |
| 23435  |      | 2   | No              |      | 1   | Yes            | 2    | 2   | No    |      |       |       | 171   | 60    |
| 23439  |      | 2   | No              |      | 2   | No             |      | 2   | No    |      |       |       | 160   | 53    |
| 23440  |      | 2   | No              |      | 2   | No             |      | 2   | No    |      |       |       | 168   | 70    |
| 23444  | 1    | 2   | No              |      | 1   | Yes            | 1    | 2   | No    |      |       |       | 165   | 85    |
| 23445  | 1    | 1   | Yes             | 1    | 1   | Yes            | 1    | 1   | Yes   | 1    |       |       | 186   | 88    |

| respid | Q11a | Q12 | Cardiac Disease | Q12a | Q13 | Hyperlipidemia | Q13a | Q14 | Neuro | Q14a | Q15_1 | Q15_2 | Q15_3 | Q16_1 |
|--------|------|-----|-----------------|------|-----|----------------|------|-----|-------|------|-------|-------|-------|-------|
| 23455  |      | 2   | No              |      | 2   | No             |      | 2   | No    |      |       |       | 160   | 50    |
| 23467  |      | 2   | No              |      | 2   | No             |      | 2   | No    |      |       |       | 166   | 70    |
| 23478  |      | 2   | No              |      | 1   | Yes            | 2    | 2   | No    |      |       |       | 172   | 73    |
| 23492  | 2    | 2   | No              |      | 2   | No             |      | 2   | No    |      |       |       | 178   | 115   |
| 23498  |      | 1   | Yes             | 2    | 1   | Yes            | 2    | 2   | No    |      |       |       | 155   | 48    |
| 23511  |      | 2   | No              |      | 2   | No             |      | 2   | No    |      |       |       | 167   | 52    |
| 23514  |      | 1   | Yes             | 2    | 2   | No             |      | 2   | No    |      |       |       | 165   | 62    |
| 23515  |      | 2   | No              |      | 2   | No             |      | 2   | No    |      |       |       | 170   | 70    |
| 23522  |      | 2   | No              |      | 2   | No             |      | 2   | No    |      |       |       | 170   | 55    |
| 23524  |      | 2   | No              |      | 2   | No             |      | 2   | No    |      |       |       | 155   | 46    |
| 23531  | 2    | 2   | No              |      | 1   | Yes            | 2    | 2   | No    |      |       |       | 175   | 80    |
| 23532  |      | 2   | No              |      | 1   | Yes            | 2    | 2   | No    |      |       |       | 158   | 47    |
| 23533  |      | 2   | No              |      | 2   | No             |      | 2   | No    |      |       |       | 162   | 53    |
| 23534  |      | 2   | No              |      | 1   | Yes            | 2    | 2   | No    |      |       |       | 172   | 65    |
| 23538  | 1    | 2   | No              |      | 2   | No             |      | 2   | No    |      |       |       | 160   | 53    |
| 23539  |      | 2   | No              |      | 2   | No             |      | 2   | No    |      |       |       | 188   | 95    |
| 23548  | 2    | 2   | No              |      | 1   | Yes            | 2    | 2   | No    |      |       |       | 160   | 57    |
| 23553  | 1    | 2   | No              |      | 1   | Yes            | 1    | 2   | No    |      |       |       | 170   | 75    |
| 23556  | 1    | 2   | No              |      | 2   | No             |      | 2   | No    |      |       |       | 158   | 50    |
| 23563  |      | 2   | No              |      | 2   | No             |      | 2   | No    |      |       |       | 170   | 65    |
| 23572  |      | 2   | No              |      | 2   | No             |      | 2   | No    |      |       |       | 167   | 75    |
| 23575  |      | 2   | No              |      | 2   | No             |      | 2   | No    |      |       |       | 160   | 53    |
| 23576  |      | 2   | No              |      | 2   | No             |      | 2   | No    |      |       |       | 180   | 55    |
| 23577  |      | 2   | No              |      | 2   | No             |      | 2   | No    |      |       |       | 170   | 69    |
| 23578  | 1    | 1   | Yes             | 1    | 1   | Yes            | 1    | 2   | No    |      |       |       | 156   | 54    |
| 23587  | 2    | 2   | No              |      | 1   | Yes            | 1    | 2   | No    |      | 5     | 8     |       | 87    |
| 23597  |      | 2   | No              |      | 2   | No             |      | 2   | No    |      |       |       | 158   | 45    |
| 23598  |      | 2   | No              |      | 1   | Yes            | 2    | 2   | No    |      |       |       | 168   | 66    |
| 23604  |      | 2   | No              |      | 2   | No             |      | 2   | No    |      |       |       | 166   | 53    |
| 23617  |      | 2   | No              |      | 2   | No             |      | 2   | No    |      |       |       | 153   | 46    |
| 23620  |      | 2   | No              |      | 1   | Yes            | 2    | 2   | No    |      |       |       | 175   | 76    |
| 23621  |      | 2   | No              |      | 2   | No             |      | 2   | No    |      |       |       | 150   | 45    |

| respid | Q11a | Q12 | Cardiac Disease | Q12a | Q13 | Hyperlipidemia | Q13a | Q14 | Neuro | Q14a | Q15_1 | Q15_2 | Q15_3 | Q16_1 |
|--------|------|-----|-----------------|------|-----|----------------|------|-----|-------|------|-------|-------|-------|-------|
| 23625  |      | 2   | No              |      | 2   | No             |      | 2   | No    |      |       |       | 170   | 75    |
| 23629  |      | 2   | No              |      | 1   | Yes            | 2    | 2   | No    |      |       |       | 165   | 63    |
| 23635  |      | 2   | No              |      | 2   | No             |      | 2   | No    |      |       |       | 156   | 50    |
| 23636  |      | 2   | No              |      | 2   | No             |      | 2   | No    |      |       |       | 157   | 55    |
| 23637  |      | 2   | No              |      | 2   | No             |      | 2   | No    |      |       |       | 172   | 67    |
| 23638  |      | 2   | No              |      | 2   | No             |      | 2   | No    |      |       |       | 163   | 62    |
| 23644  | 1    | 2   | No              |      | 2   | No             |      | 2   | No    |      |       |       | 156   | 54    |
| 23645  | 1    | 2   | No              |      | 1   | Yes            | 2    | 2   | No    |      |       |       | 158   | 60    |
| 23649  | 1    | 2   | No              |      | 2   | No             |      | 2   | No    |      |       |       | 173   | 78    |
| 23654  | 1    | 2   | No              |      | 1   | Yes            | 1    | 2   | No    |      |       |       | 168   | 58    |
| 23662  |      | 2   | No              |      | 2   | No             |      | 2   | No    |      |       |       | 160   | 52    |
| 23664  |      | 2   | No              |      | 2   | No             |      | 2   | No    |      |       |       | 160   | 43    |
| 23665  |      | 2   | No              |      | 2   | No             |      | 2   | No    |      |       |       | 180   | 80    |
| 23666  |      | 1   | Yes             | 2    | 2   | No             |      | 2   | No    |      |       |       | 157   | 53    |
| 23671  |      | 2   | No              |      | 2   | No             |      | 2   | No    |      |       |       | 168   | 60    |
| 23672  | 1    | 2   | No              |      | 2   | No             |      | 2   | No    |      |       |       | 170   | 82    |
| 23685  | 1    | 2   | No              |      | 1   | Yes            | 1    | 2   | No    |      |       |       | 179   | 90    |
| 23686  |      | 2   | No              |      | 2   | No             |      | 2   | No    |      |       |       | 168   | 62    |
| 23689  | 1    | 1   | Yes             | 1    | 1   | Yes            | 1    | 2   | No    |      |       |       | 165   | 75    |
| 23690  |      | 2   | No              |      | 2   | No             |      | 2   | No    |      |       |       | 180   | 80    |
| 23695  | 1    | 2   | No              |      | 1   | Yes            | 2    | 2   | No    |      |       |       | 153   | 65    |
| 23700  |      | 2   | No              |      | 1   | Yes            | 2    | 2   | No    |      |       |       | 180   | 92    |
| 23714  |      | 1   | Yes             | 1    | 2   | No             |      | 2   | No    |      |       |       | 155   | 60    |
| 23719  | 1    | 2   | No              |      | 2   | No             |      | 2   | No    |      |       |       | 170   | 75    |
| 23720  |      | 2   | No              |      | 2   | No             |      | 2   | No    |      |       |       | 155   | 58    |
| 23721  |      | 2   | No              |      | 1   | Yes            | 2    | 2   | No    |      |       |       | 173   | 75    |
| 23729  |      | 2   | No              |      | 2   | No             |      | 2   | No    |      |       |       | 170   | 70    |
| 23730  |      | 2   | No              |      | 2   | No             |      | 2   | No    |      |       |       | 175   | 71    |
| 23732  |      | 2   | No              |      | 1   | Yes            | 2    | 2   | No    |      |       |       | 164   | 50    |
| 23736  |      | 2   | No              |      | 1   | Yes            | 2    | 2   | No    |      |       |       | 170   | 75    |
| 23754  |      | 2   | No              |      | 2   | No             |      | 2   | No    |      |       |       | 158   | 50    |
| 23756  |      | 2   | No              |      | 2   | No             |      | 2   | No    |      |       |       | 172   | 65    |

| respid | Q11a | Q12 | Cardiac Disease | Q12a | Q13 | Hyperlipidemia | Q13a | Q14 | Neuro | Q14a | Q15_1 | Q15_2 | Q15_3 | Q16_1 |
|--------|------|-----|-----------------|------|-----|----------------|------|-----|-------|------|-------|-------|-------|-------|
| 23759  |      | 2   | No              |      | 2   | No             |      | 2   | No    |      |       |       | 161   | 62    |
| 23761  |      | 2   | No              |      | 2   | No             |      | 2   | No    |      |       |       | 157   | 52    |
| 23766  |      | 2   | No              |      | 1   | Yes            | 2    | 2   | No    |      |       |       | 172   | 70    |
| 23768  |      | 2   | No              |      | 2   | No             |      | 2   | No    |      |       |       | 180   | 70    |
| 23773  |      | 2   | No              |      | 1   | Yes            | 2    | 2   | No    |      |       |       | 168   | 66    |
| 23781  |      | 2   | No              |      | 2   | No             |      | 2   | No    |      |       |       | 156   | 45    |
| 23782  | 1    | 2   | No              |      | 2   | No             |      | 2   | No    |      |       |       | 165   | 68    |
| 23787  |      | 2   | No              |      | 2   | No             |      | 2   | No    |      |       |       | 165   | 55    |
| 23788  | 1    | 1   | Yes             | 2    | 1   | Yes            | 2    | 1   | Yes   | 2    |       |       | 154   | 51    |
| 23790  |      | 2   | No              |      | 2   | No             |      | 2   | No    |      |       |       | 160   | 53    |
| 23794  |      | 2   | No              |      | 2   | No             |      | 2   | No    |      |       |       | 170   | 65    |
| 23795  |      | 2   | No              |      | 2   | No             |      | 1   | Yes   | 2    |       |       | 164   | 70    |
| 23801  |      | 2   | No              |      | 2   | No             |      | 2   | No    |      |       |       | 165   | 70    |
| 23806  |      | 2   | No              |      | 2   | No             |      | 2   | No    |      |       |       | 160   | 51    |
| 23809  |      | 2   | No              |      | 2   | No             |      | 2   | No    |      |       |       | 175   | 75    |
| 23813  |      | 2   | No              |      | 2   | No             |      | 2   | No    |      |       |       | 158   | 53    |
| 23815  |      | 2   | No              |      | 2   | No             |      | 2   | No    |      |       |       | 162   | 70    |
| 23821  |      | 2   | No              |      | 2   | No             |      | 2   | No    |      |       |       | 170   | 62    |
| 23825  |      | 2   | No              |      | 2   | No             |      | 2   | No    |      | 5     | 2     |       | 55    |
| 23826  |      | 2   | No              |      | 2   | No             |      | 2   | No    |      |       |       | 177   | 85    |
| 23830  |      | 2   | No              |      | 1   | Yes            | 2    | 2   | No    |      |       |       | 156   | 48    |
| 23833  | 1    | 2   | No              |      | 2   | No             |      | 2   | No    |      |       |       | 160   | 53    |
| 23837  |      | 2   | No              |      | 1   | Yes            | 2    | 2   | No    |      |       |       | 166   | 72    |
| 23848  |      | 2   | No              |      | 2   | No             |      | 2   | No    |      |       |       | 155   | 55    |
| 23850  |      | 2   | No              |      | 2   | No             |      | 2   | No    |      |       |       | 157   | 63    |
| 23870  | 1    | 2   | No              |      | 2   | No             |      | 2   | No    |      |       |       | 173   | 75    |
| 23877  |      | 2   | No              |      | 2   | No             |      | 2   | No    |      |       |       | 165   | 75    |
| 23880  | 1    | 2   | No              |      | 2   | No             |      | 2   | No    |      |       |       | 170   | 62    |
| 23882  |      | 1   | Yes             | 2    | 2   | No             |      | 2   | No    |      |       |       | 162   | 55    |
| 23888  |      | 2   | No              |      | 2   | No             |      | 2   | No    |      |       |       | 163   | 45    |
| 23908  |      | 2   | No              |      | 1   | Yes            | 1    | 2   | No    |      |       |       | 167   | 78    |
| 23914  |      | 2   | No              |      | 1   | Yes            | 2    | 2   | No    |      |       |       | 156   | 48    |

| respid | Q11a | Q12 | Cardiac Disease | Q12a | Q13 | Hyperlipidemia | Q13a | Q14 | Neuro | Q14a | Q15_1 | Q15_2 | Q15_3 | Q16_1 |
|--------|------|-----|-----------------|------|-----|----------------|------|-----|-------|------|-------|-------|-------|-------|
| 23916  |      | 2   | No              |      | 2   | No             |      | 2   | No    |      |       |       | 160   | 65    |
| 23922  |      | 2   | No              |      | 1   | Yes            | 2    | 2   | No    |      |       |       | 172   | 80    |
| 23932  |      | 2   | No              |      | 2   | No             |      | 2   | No    |      |       |       | 165   | 80    |
| 23934  |      | 2   | No              |      | 2   | No             |      | 2   | No    |      |       |       | 160   | 47    |
| 23942  |      | 2   | No              |      | 2   | No             |      | 2   | No    |      |       |       | 165   | 73    |
| 23945  | 1    | 2   | No              |      | 1   | Yes            | 2    | 2   | No    |      |       |       | 172   | 80    |
| 23948  |      | 2   | No              |      | 2   | No             |      | 2   | No    |      |       |       | 165   | 58    |
| 23955  |      | 2   | No              |      | 2   | No             |      | 2   | No    |      |       |       | 180   | 75    |
| 23956  | 1    | 1   | Yes             | 1    | 2   | No             |      | 2   | No    |      |       |       | 158   | 58    |
| 23978  | 1    | 2   | No              |      | 2   | No             |      | 2   | No    |      |       |       | 179   | 75    |
| 23981  |      | 2   | No              |      | 2   | No             |      | 2   | No    |      |       |       | 157   | 55    |
| 23982  | 1    | 2   | No              |      | 2   | No             |      | 2   | No    |      |       |       | 175   | 62    |
| 23991  |      | 2   | No              |      | 2   | No             |      | 2   | No    |      |       |       | 160   | 60    |
| 23994  | 1    | 2   | No              |      | 2   | No             |      | 2   | No    |      |       |       | 173   | 55    |
| 23995  | 1    | 2   | No              |      | 1   | Yes            | 1    | 2   | No    |      |       |       | 175   | 77    |
| 23999  | 1    | 2   | No              |      | 1   | Yes            | 1    | 2   | No    |      |       |       | 167   | 71    |
| 24005  |      | 1   | Yes             | 1    | 2   | No             |      | 2   | No    |      |       |       | 162   | 53    |
| 24018  |      | 2   | No              |      | 2   | No             |      | 2   | No    |      |       |       | 150   | 40    |
| 24021  |      | 2   | No              |      | 2   | No             |      | 2   | No    |      |       |       | 156   | 63    |
| 24035  |      | 2   | No              |      | 1   | Yes            | 2    | 2   | No    |      |       |       | 176   | 90    |
| 24040  |      | 2   | No              |      | 2   | No             |      | 2   | No    |      |       |       | 174   | 110   |
| 24043  |      | 2   | No              |      | 2   | No             |      | 2   | No    |      |       |       | 175   | 75    |
| 24046  |      | 2   | No              |      | 2   | No             |      | 2   | No    |      |       |       | 180   | 80    |
| 24047  | 2    | 1   | Yes             | 2    | 1   | Yes            | 2    | 2   | No    |      |       |       | 160   | 50    |
| 24048  |      | 2   | No              |      | 2   | No             |      | 2   | No    |      |       |       | 176   | 68    |
| 24062  |      | 2   | No              |      | 1   | Yes            | 2    | 2   | No    |      |       |       | 172   | 65    |
| 24063  |      | 2   | No              |      | 2   | No             |      | 2   | No    |      |       |       | 170   | 70    |
| 24066  | 1    | 2   | No              |      | 2   | No             |      | 2   | No    |      |       |       | 165   | 55    |
| 24069  |      | 2   | No              |      | 2   | No             |      | 2   | No    |      |       |       | 159   | 61    |
| 24070  |      | 2   | No              |      | 2   | No             |      | 2   | No    |      |       |       | 162   | 50    |
| 24074  |      | 2   | No              |      | 1   | Yes            | 2    | 2   | No    |      |       |       | 163   | 62    |
| 24080  |      | 2   | No              |      | 1   | Yes            | 2    | 2   | No    |      |       |       | 158   | 56    |

| respid | Q11a | Q12 | Cardiac Disease | Q12a | Q13 | Hyperlipidemia | Q13a | Q14 | Neuro | Q14a | Q15_1 | Q15_2 | Q15_3 | Q16_1 |
|--------|------|-----|-----------------|------|-----|----------------|------|-----|-------|------|-------|-------|-------|-------|
| 24082  |      | 2   | No              |      | 2   | No             |      | 2   | No    |      |       |       | 160   | 50    |
| 24088  |      | 2   | No              |      | 2   | No             |      | 2   | No    |      |       |       | 158   | 48    |
| 24089  | 1    | 2   | No              |      | 2   | No             |      | 2   | No    |      |       |       | 175   | 68    |
| 24091  |      | 2   | No              |      | 2   | No             |      | 2   | No    |      |       |       | 155   | 57    |
| 24095  |      | 2   | No              |      | 2   | No             |      | 2   | No    |      |       |       | 161   | 45    |
| 24100  | 1    | 2   | No              |      | 2   | No             |      | 2   | No    |      |       |       | 155   | 65    |
| 24105  | 2    | 2   | No              |      | 2   | No             |      | 2   | No    |      |       |       | 170   | 69    |
| 24107  | 1    | 1   | Yes             | 1    | 1   | Yes            | 1    | 2   | No    |      | 5     | 5     |       | 60    |
| 24108  |      | 2   | No              |      | 2   | No             |      | 2   | No    |      |       |       | 160   | 50    |
| 24113  |      | 2   | No              |      | 2   | No             |      | 1   | Yes   | 1    |       |       | 157   | 50    |
| 24120  |      | 1   | Yes             | 2    | 2   | No             |      | 2   | No    |      |       |       | 154   | 52    |
| 24122  | 1    | 2   | No              |      | 1   | Yes            | 1    | 2   | No    |      |       |       | 172   | 65    |
| 24123  | 1    | 2   | No              |      | 1   | Yes            | 1    | 2   | No    |      |       |       | 150   | 80    |
| 24125  | 1    | 2   | No              |      | 2   | No             |      | 2   | No    |      |       |       | 163   | 89    |
| 24132  |      | 2   | No              |      | 2   | No             |      | 2   | No    |      |       |       | 168   | 65    |
| 24139  |      | 2   | No              |      | 1   | Yes            | 2    | 2   | No    |      |       |       | 175   | 75    |
| 24140  |      | 2   | No              |      | 2   | No             |      | 2   | No    |      |       |       | 170   | 70    |
| 24143  |      | 1   | Yes             | 2    | 2   | No             |      | 2   | No    |      |       |       | 166   | 63    |
| 24150  | 1    | 2   | No              |      | 1   | Yes            | 1    | 2   | No    |      |       |       | 168   | 80    |
| 24153  |      | 2   | No              |      | 2   | No             |      | 2   | No    |      |       |       | 170   | 70    |
| 24161  |      | 2   | No              |      | 2   | No             |      | 2   | No    |      |       |       | 180   | 72    |
| 24168  |      | 2   | No              |      | 2   | No             |      | 2   | No    |      |       |       | 175   | 80    |
| 24179  |      | 2   | No              |      | 1   | Yes            | 2    | 2   | No    |      |       |       | 168   | 62    |
| 24182  | 2    | 2   | No              |      | 1   | Yes            | 2    | 2   | No    |      |       |       | 170   | 70    |
| 24194  |      | 2   | No              |      | 2   | No             |      | 2   | No    |      |       |       | 173   | 74    |
| 24206  |      | 2   | No              |      | 2   | No             |      | 2   | No    |      |       |       | 172   | 70    |
| 24214  |      | 2   | No              |      | 2   | No             |      | 2   | No    |      |       |       | 168   | 60    |
| 24215  |      | 2   | No              |      | 1   | Yes            | 2    | 2   | No    |      |       |       | 170   | 65    |
| 24224  |      | 2   | No              |      | 2   | No             |      | 2   | No    |      |       |       | 168   | 56    |
| 24225  |      | 2   | No              |      | 2   | No             |      | 2   | No    |      |       |       | 160   | 58    |
| 24227  |      | 2   | No              |      | 2   | No             |      | 2   | No    |      |       |       | 150   | 52    |
| 24229  |      | 2   | No              |      | 2   | No             |      | 2   | No    |      |       |       | 166   | 53    |

| respid | Q11a | Q12 | Cardiac Disease | Q12a | Q13 | Hyperlipidemia | Q13a | Q14 | Neuro | Q14a | Q15_1 | Q15_2 | Q15_3 | Q16_1 |
|--------|------|-----|-----------------|------|-----|----------------|------|-----|-------|------|-------|-------|-------|-------|
| 24230  |      | 2   | No              |      | 2   | No             |      | 2   | No    |      |       |       | 170   | 65    |
| 24232  |      | 2   | No              |      | 2   | No             |      | 2   | No    |      |       |       | 160   | 62    |
| 24253  | 1    | 2   | No              |      | 1   | Yes            | 1    | 2   | No    |      |       |       | 165   | 70    |
| 24267  | 2    | 2   | No              |      | 1   | Yes            | 2    | 2   | No    |      |       |       | 160   | 60    |
| 24274  |      | 1   | Yes             | 2    | 1   | Yes            | 2    | 2   | No    |      |       |       | 175   | 75    |
| 24275  | 1    | 2   | No              |      | 2   | No             |      | 2   | No    |      |       |       | 172   | 76    |
| 24277  |      | 2   | No              |      | 1   | Yes            | 2    | 2   | No    |      |       |       | 174   | 70    |
| 24280  |      | 2   | No              |      | 2   | No             |      | 2   | No    |      |       |       | 165   | 56    |
| 24285  |      | 2   | No              |      | 1   | Yes            | 2    | 2   | No    |      |       |       | 175   | 86    |
| 24293  |      | 2   | No              |      | 2   | No             |      | 2   | No    |      |       |       | 161   | 65    |
| 24295  | 1    | 1   | Yes             | 1    | 2   | No             |      | 2   | No    |      |       |       | 156   | 51    |
| 24299  |      | 2   | No              |      | 2   | No             |      | 2   | No    |      |       |       | 158   | 55    |
| 24303  |      | 2   | No              |      | 1   | Yes            | 2    | 2   | No    |      |       |       | 180   | 86    |
| 24308  |      | 1   | Yes             | 1    | 2   | No             |      | 2   | No    |      |       |       | 167   | 77    |
| 24322  |      | 2   | No              |      | 2   | No             |      | 2   | No    |      |       |       | 160   | 58    |
| 24325  |      | 2   | No              |      | 2   | No             |      | 2   | No    |      |       |       | 164   | 60    |
| 24328  |      | 2   | No              |      | 2   | No             |      | 2   | No    |      |       |       | 162   | 45    |
| 24334  | 1    | 2   | No              |      | 1   | Yes            | 1    | 2   | No    |      |       |       | 170   | 75    |
| 24342  |      | 2   | No              |      | 2   | No             |      | 2   | No    |      |       |       | 158   | 55    |
| 24343  |      | 2   | No              |      | 2   | No             |      | 2   | No    |      |       |       | 181   | 90    |
| 24348  |      | 2   | No              |      | 1   | Yes            | 2    | 2   | No    |      |       |       | 171   | 78    |
| 24352  |      | 2   | No              |      | 1   | Yes            | 2    | 2   | No    |      |       |       | 160   | 68    |
| 24354  |      | 2   | No              |      | 1   | Yes            | 1    | 2   | No    |      |       |       | 160   | 70    |
| 24357  |      | 2   | No              |      | 2   | No             |      | 2   | No    |      |       |       | 165   | 60    |
| 24360  | 1    | 2   | No              |      | 1   | Yes            | 1    | 2   | No    |      |       |       | 165   | 60    |
| 24369  |      | 2   | No              |      | 2   | No             |      | 2   | No    |      |       |       | 155   | 64    |
| 24373  |      | 2   | No              |      | 2   | No             |      | 2   | No    |      |       |       | 153   | 55    |
| 24398  | 1    | 2   | No              |      | 1   | Yes            | 1    | 2   | No    |      |       |       | 150   | 50    |
| 24402  |      | 2   | No              |      | 2   | No             |      | 2   | No    |      |       |       | 156   | 58    |
| 24405  |      | 2   | No              |      | 2   | No             |      | 2   | No    |      |       |       | 168   | 52    |
| 24407  |      | 2   | No              |      | 2   | No             |      | 2   | No    |      |       |       | 162   | 65    |
| 24413  |      | 2   | No              |      | 1   | Yes            | 1    | 2   | No    |      |       |       | 153   | 52    |



| respid | Q11a | Q12 | Cardiac Disease | Q12a | Q13 | Hyperlipidemia | Q13a | Q14 | Neuro | Q14a | Q15_1 | Q15_2 | Q15_3 | Q16_1 |
|--------|------|-----|-----------------|------|-----|----------------|------|-----|-------|------|-------|-------|-------|-------|
| 24443  | 1    | 2   | No              |      | 2   | No             |      | 2   | No    |      |       |       | 155   | 40    |
| 24451  |      | 2   | No              |      | 2   | No             |      | 2   | No    |      |       |       | 165   | 60    |
| 24459  |      | 2   | No              |      | 2   | No             |      | 2   | No    |      |       |       | 167   | 71    |
| 24465  |      | 2   | No              |      | 2   | No             |      | 2   | No    |      |       |       | 155   | 55    |
| 24481  | 1    | 2   | No              |      | 2   | No             |      | 2   | No    |      |       |       | 162   | 50    |
| 24482  |      | 1   | Yes             | 2    | 2   | No             |      | 2   | No    |      |       |       | 163   | 65    |
| 24491  |      | 2   | No              |      | 2   | No             |      | 2   | No    |      |       |       | 155   | 53    |
| 24495  |      | 2   | No              |      | 2   | No             |      | 2   | No    |      |       |       | 177   | 75    |
| 24497  | 1    | 2   | No              |      | 1   | Yes            | 1    | 2   | No    |      |       |       | 172   | 60    |
| 24511  | 1    | 2   | No              |      | 2   | No             |      | 2   | No    |      |       |       | 166   | 65    |
| 24513  |      | 2   | No              |      | 2   | No             |      | 2   | No    |      |       |       | 170   | 65    |
| 24516  | 1    | 1   | Yes             | 1    | 1   | Yes            | 1    | 2   | No    |      | 5     | 7     |       | 72    |
| 24518  |      | 2   | No              |      | 1   | Yes            | 1    | 2   | No    |      |       |       | 152   | 54    |
| 24524  |      | 2   | No              |      | 2   | No             |      | 2   | No    |      |       |       | 160   | 70    |
| 24528  |      | 2   | No              |      | 2   | No             |      | 2   | No    |      |       |       | 170   | 71    |
| 24531  |      | 2   | No              |      | 2   | No             |      | 2   | No    |      |       |       | 176   | 66    |
| 24533  | 1    | 2   | No              |      | 1   | Yes            | 2    | 2   | No    |      |       |       | 170   | 80    |
| 24547  |      | 2   | No              |      | 2   | No             |      | 2   | No    |      |       |       | 158   | 45    |
| 24557  | 1    | 1   | Yes             | 1    | 2   | No             |      | 2   | No    |      |       |       | 170   | 60    |
| 24559  | 1    | 2   | No              |      | 1   | Yes            | 1    | 2   | No    |      |       |       | 156   | 68    |
| 24567  |      | 2   | No              |      | 2   | No             |      | 2   | No    |      |       |       | 161   | 61    |
| 24568  |      | 2   | No              |      | 1   | Yes            | 2    | 2   | No    |      |       |       | 180   | 90    |
| 24577  | 1    | 2   | No              |      | 1   | Yes            | 2    | 1   | Yes   | 1    |       |       | 175   | 71    |
| 24581  | 2    | 2   | No              |      | 2   | No             |      | 2   | No    |      |       |       | 162   | 62    |
| 24588  |      | 2   | No              |      | 2   | No             |      | 2   | No    |      |       |       | 158   | 53    |
| 24604  |      | 1   | Yes             | 2    | 1   | Yes            | 2    | 2   | No    |      |       |       | 165   | 65    |
| 24612  | 1    | 2   | No              |      | 1   | Yes            | 1    | 2   | No    |      |       |       | 163   | 75    |
| 24621  |      | 2   | No              |      | 2   | No             |      | 2   | No    |      |       |       | 155   | 55    |
| 24625  | 1    | 2   | No              |      | 2   | No             |      | 2   | No    |      |       |       | 156   | 67    |
| 24627  | 2    | 2   | No              |      | 2   | No             |      | 2   | No    |      |       |       | 160   | 48    |
| 24640  | 1    | 2   | No              |      | 2   | No             |      | 2   | No    |      |       |       | 152   | 55    |
| 24644  |      | 2   | No              |      | 2   | No             |      | 2   | No    |      |       |       | 163   | 48    |

| respid | Q11a | Q12 | Cardiac Disease | Q12a | Q13 | Hyperlipidemia | Q13a | Q14 | Neuro | Q14a | Q15_1 | Q15_2 | Q15_3 | Q16_1 |
|--------|------|-----|-----------------|------|-----|----------------|------|-----|-------|------|-------|-------|-------|-------|
| 24664  | 1    | 2   | No              |      | 1   | Yes            | 2    | 2   | No    |      |       |       | 180   | 65    |
| 24669  |      | 2   | No              |      | 2   | No             |      | 2   | No    |      |       |       | 178   | 70    |
| 24685  |      | 2   | No              |      | 2   | No             |      | 2   | No    |      |       |       | 153   | 49    |
| 24687  |      | 2   | No              |      | 2   | No             |      | 2   | No    |      |       |       | 160   | 65    |
| 24688  |      | 2   | No              |      | 2   | No             |      | 2   | No    |      |       |       | 173   | 74    |
| 24691  | 1    | 1   | Yes             | 1    | 2   | No             |      | 2   | No    |      |       |       | 165   | 65    |
| 24693  | 1    | 2   | No              |      | 1   | Yes            | 2    | 2   | No    |      |       |       | 175   | 93    |
| 24706  |      | 2   | No              |      | 2   | No             |      | 2   | No    |      |       |       | 160   | 50    |
| 24710  |      | 2   | No              |      | 2   | No             |      | 2   | No    |      | 5     | 0     |       | 60    |
| 24717  |      | 2   | No              |      | 2   | No             |      | 2   | No    |      |       |       | 170   | 70    |
| 24720  |      | 2   | No              |      | 2   | No             |      | 2   | No    |      |       |       | 167   | 54    |
| 24731  | 1    | 2   | No              |      | 1   | Yes            | 1    | 2   | No    |      |       |       | 167   | 74    |
| 24732  | 1    | 2   | No              |      | 2   | No             |      | 1   | Yes   | 1    |       |       | 184   | 68    |
| 24733  | 1    | 2   | No              |      | 2   | No             |      | 2   | No    |      |       |       | 155   | 46    |
| 24747  |      | 2   | No              |      | 1   | Yes            | 1    | 2   | No    |      |       |       | 156   | 52    |
| 24750  |      | 2   | No              |      | 2   | No             |      | 2   | No    |      |       |       | 170   | 75    |
| 24758  |      | 2   | No              |      | 2   | No             |      | 2   | No    |      |       |       | 158   | 55    |
| 24760  |      | 2   | No              |      | 2   | No             |      | 2   | No    |      |       |       | 155   | 50    |
| 24765  |      | 2   | No              |      | 2   | No             |      | 2   | No    |      |       |       | 162   | 50    |
| 24772  |      | 2   | No              |      | 2   | No             |      | 2   | No    |      |       |       | 155   | 50    |
| 24779  |      | 2   | No              |      | 2   | No             |      | 2   | No    |      |       |       | 170   | 60    |
| 24794  |      | 2   | No              |      | 2   | No             |      | 2   | No    |      |       |       | 170   | 60    |
| 24796  | 1    | 2   | No              |      | 2   | No             |      | 2   | No    |      |       |       | 165   | 60    |
| 24797  |      | 2   | No              |      | 2   | No             |      | 2   | No    |      |       |       | 170   | 50    |
| 24800  |      | 2   | No              |      | 1   | Yes            | 2    | 2   | No    |      |       |       | 170   | 78    |
| 24813  |      | 2   | No              |      | 1   | Yes            | 2    | 2   | No    |      |       |       | 165   | 75    |
| 24815  |      | 2   | No              |      | 1   | Yes            | 2    | 2   | No    |      |       |       | 158   | 50    |
| 24821  |      | 2   | No              |      | 1   | Yes            | 1    | 2   | No    |      |       |       | 165   | 55    |
| 24822  |      | 2   | No              |      | 1   | Yes            | 2    | 2   | No    |      |       |       | 152   | 48    |
| 24831  |      | 2   | No              |      | 2   | No             |      | 1   | Yes   | 1    |       |       | 153   | 40    |
| 24835  |      | 2   | No              |      | 2   | No             |      | 2   | No    |      |       |       | 172   | 58    |
| 24843  | 1    | 2   | No              |      | 2   | No             |      | 2   | No    |      |       |       | 165   | 78    |

| respid | Q11a | Q12 | Cardiac Disease | Q12a | Q13 | Hyperlipidemia | Q13a | Q14 | Neuro | Q14a | Q15_1 | Q15_2 | Q15_3 | Q16_1 |
|--------|------|-----|-----------------|------|-----|----------------|------|-----|-------|------|-------|-------|-------|-------|
| 24844  | 1    | 2   | No              |      | 2   | No             |      | 2   | No    |      |       |       | 170   | 70    |
| 24860  |      | 2   | No              |      | 2   | No             |      | 2   | No    |      |       |       | 172   | 65    |
| 24861  | 1    | 2   | No              |      | 1   | Yes            | 2    | 2   | No    |      |       |       | 155   | 72    |
| 24865  | 1    | 1   | Yes             | 1    | 2   | No             |      | 2   | No    |      |       |       | 165   | 63    |
| 24870  |      | 2   | No              |      | 2   | No             |      | 2   | No    |      | 4     | 5     |       | 60    |
| 24887  |      | 2   | No              |      | 2   | No             |      | 2   | No    |      |       |       | 160   | 68    |
| 24897  |      | 2   | No              |      | 2   | No             |      | 2   | No    |      |       |       | 175   | 68    |
| 24902  | 1    | 2   | No              |      | 1   | Yes            | 1    | 2   | No    |      |       |       | 170   | 60    |
| 24914  |      | 2   | No              |      | 2   | No             |      | 2   | No    |      |       |       | 157   | 50    |
| 24921  |      | 2   | No              |      | 2   | No             |      | 2   | No    |      |       |       | 160   | 45    |
| 24922  |      | 2   | No              |      | 1   | Yes            | 2    | 2   | No    |      |       |       | 174   | 66    |
| 24924  |      | 2   | No              |      | 2   | No             |      | 2   | No    |      |       |       | 168   | 55    |
| 24927  |      | 2   | No              |      | 2   | No             |      | 2   | No    |      |       |       | 160   | 50    |
| 24936  | 1    | 2   | No              |      | 1   | Yes            | 1    | 2   | No    |      |       |       | 163   | 46    |
| 24937  |      | 2   | No              |      | 2   | No             |      | 2   | No    |      |       |       | 160   | 56    |
| 24942  |      | 2   | No              |      | 1   | Yes            | 2    | 2   | No    |      |       |       | 173   | 80    |
| 24947  |      | 2   | No              |      | 1   | Yes            | 2    | 2   | No    |      |       |       | 158   | 64    |
| 24953  | 1    | 2   | No              |      | 2   | No             |      | 2   | No    |      |       |       | 170   | 78    |
| 24954  | 1    | 1   | Yes             | 1    | 1   | Yes            | 1    | 2   | No    |      |       |       | 165   | 59    |
| 24960  | 1    | 2   | No              |      | 1   | Yes            | 2    | 2   | No    |      |       |       | 165   | 54    |
| 24965  | 2    | 2   | No              |      | 2   | No             |      | 2   | No    |      |       |       | 166   | 68    |
| 24975  | 1    | 2   | No              |      | 2   | No             |      | 2   | No    |      |       |       | 151   | 53    |
| 24983  | 1    | 1   | Yes             | 1    | 2   | No             |      | 2   | No    |      |       |       | 162   | 68    |
| 24985  |      | 2   | No              |      | 1   | Yes            | 2    | 2   | No    |      |       |       | 168   | 74    |
| 24990  | 1    | 2   | No              |      | 1   | Yes            | 2    | 2   | No    |      |       |       | 162   | 92    |
| 25000  | 1    | 2   | No              |      | 2   | No             |      | 2   | No    |      |       |       | 160   | 50    |
| 25007  | 1    | 2   | No              |      | 2   | No             |      | 2   | No    |      |       |       | 170   | 60    |
| 25008  |      | 2   | No              |      | 2   | No             |      | 2   | No    |      |       |       | 162   | 55    |
| 25010  |      | 2   | No              |      | 2   | No             |      | 2   | No    |      |       |       | 165   | 53    |
| 25016  |      | 2   | No              |      | 2   | No             |      | 2   | No    |      |       |       | 175   | 65    |
| 25021  |      | 2   | No              |      | 1   | Yes            | 2    | 2   | No    |      |       |       | 150   | 80    |
| 25040  |      | 2   | No              |      | 2   | No             |      | 2   | No    |      |       |       | 172   | 80    |

| respid | Q11a | Q12 | Cardiac Disease | Q12a | Q13 | Hyperlipidemia | Q13a | Q14 | Neuro | Q14a | Q15_1 | Q15_2 | Q15_3 | Q16_1 |
|--------|------|-----|-----------------|------|-----|----------------|------|-----|-------|------|-------|-------|-------|-------|
| 25043  |      | 2   | No              |      | 1   | Yes            | 2    | 2   | No    |      |       |       | 175   | 75    |
| 25055  |      | 2   | No              |      | 2   | No             |      | 2   | No    |      |       |       | 168   | 70    |
| 25057  |      | 2   | No              |      | 2   | No             |      | 2   | No    |      |       |       | 173   | 72    |
| 25060  |      | 2   | No              |      | 2   | No             |      | 2   | No    |      |       |       | 172   | 79    |
| 25062  |      | 2   | No              |      | 2   | No             |      | 2   | No    |      |       |       | 173   | 71    |
| 25064  | 1    | 2   | No              |      | 2   | No             |      | 2   | No    |      |       |       | 160   | 53    |
| 25069  |      | 2   | No              |      | 2   | No             |      | 2   | No    |      |       |       | 155   | 47    |
| 25077  |      | 2   | No              |      | 2   | No             |      | 2   | No    |      |       |       | 164   | 50    |
| 25088  |      | 2   | No              |      | 1   | Yes            | 1    | 2   | No    |      |       |       | 160   | 60    |
| 25093  |      | 2   | No              |      | 1   | Yes            | 2    | 2   | No    |      |       |       | 170   | 70    |
| 25121  |      | 2   | No              |      | 2   | No             |      | 2   | No    |      | 5     | 7     |       | 60    |
| 25140  | 1    | 1   | Yes             | 1    | 2   | No             |      | 2   | No    |      |       |       | 160   | 58    |
| 25144  | 1    | 2   | No              |      | 1   | Yes            | 1    | 2   | No    |      |       |       | 160   | 65    |
| 25149  | 1    | 2   | No              |      | 1   | Yes            | 1    | 2   | No    |      |       |       | 160   | 70    |
| 25159  |      | 2   | No              |      | 1   | Yes            | 1    | 2   | No    |      |       |       | 170   | 70    |
| 25191  | 2    | 2   | No              |      | 2   | No             |      | 2   | No    |      |       |       | 170   | 67    |
| 25193  | 1    | 2   | No              |      | 2   | No             |      | 2   | No    |      |       |       | 164   | 56    |
| 25202  | 1    | 1   | Yes             | 1    | 2   | No             |      | 2   | No    |      |       |       | 158   | 60    |
| 25215  |      | 2   | No              |      | 2   | No             |      | 2   | No    |      |       |       | 178   | 70    |
| 25229  | 1    | 2   | No              |      | 2   | No             |      | 2   | No    |      |       |       | 170   | 80    |
| 25231  |      | 2   | No              |      | 2   | No             |      | 2   | No    |      |       |       | 160   | 53    |
| 25236  | 2    | 2   | No              |      | 2   | No             |      | 2   | No    |      |       |       | 162   | 70    |
| 25242  |      | 2   | No              |      | 2   | No             |      | 2   | No    |      |       |       | 170   | 65    |
| 25252  |      | 2   | No              |      | 2   | No             |      | 2   | No    |      |       |       | 167   | 65    |
| 25253  | 1    | 2   | No              |      | 1   | Yes            | 1    | 2   | No    |      |       |       | 161   | 52    |
| 25256  | 1    | 1   | Yes             | 1    | 2   | No             |      | 2   | No    |      |       |       | 160   | 70    |
| 25260  |      | 2   | No              |      | 2   | No             |      | 2   | No    |      |       |       | 179   | 73    |
| 25261  | 1    | 2   | No              |      | 2   | No             |      | 2   | No    |      |       |       | 173   | 64    |
| 25280  |      | 2   | No              |      | 2   | No             |      | 2   | No    |      |       |       | 160   | 50    |
| 25282  | 2    | 2   | No              |      | 1   | Yes            | 1    | 2   | No    |      |       |       | 162   | 60    |
| 25289  | 1    | 2   | No              |      | 2   | No             |      | 2   | No    |      |       |       | 170   | 120   |
| 25303  |      | 2   | No              |      | 2   | No             |      | 2   | No    |      |       |       | 156   | 45    |

| respid | Q11a | Q12 | Cardiac Disease | Q12a | Q13 | Hyperlipidemia | Q13a | Q14 | Neuro | Q14a | Q15_1 | Q15_2 | Q15_3 | Q16_1 |
|--------|------|-----|-----------------|------|-----|----------------|------|-----|-------|------|-------|-------|-------|-------|
| 25304  |      | 2   | No              |      | 2   | No             |      | 2   | No    |      |       |       | 173   | 58    |
| 25309  |      | 2   | No              |      | 2   | No             |      | 2   | No    |      |       |       | 160   | 55    |
| 25317  | 1    | 2   | No              |      | 2   | No             |      | 2   | No    |      |       |       | 168   | 70    |
| 25318  | 1    | 2   | No              |      | 1   | Yes            | 1    | 2   | No    |      |       |       | 165   | 70    |
| 25320  |      | 2   | No              |      | 2   | No             |      | 2   | No    |      |       |       | 170   | 55    |
| 25324  | 1    | 1   | Yes             | 1    | 2   | No             |      | 2   | No    |      |       |       | 161   | 52    |
| 25331  |      | 2   | No              |      | 2   | No             |      | 2   | No    |      |       |       | 160   | 65    |
| 25340  |      | 2   | No              |      | 2   | No             |      | 2   | No    |      |       |       | 158   | 63    |
| 25342  | 2    | 2   | No              |      | 2   | No             |      | 2   | No    |      | 5     | 2     |       | 65    |
| 25350  |      | 2   | No              |      | 2   | No             |      | 2   | No    |      |       |       | 152   | 42    |
| 25352  |      | 2   | No              |      | 2   | No             |      | 2   | No    |      |       |       | 165   | 55    |
| 25358  |      | 2   | No              |      | 2   | No             |      | 2   | No    |      |       |       | 155   | 48    |
| 25375  |      | 2   | No              |      | 2   | No             |      | 2   | No    |      |       |       | 162   | 61    |
| 25386  |      | 2   | No              |      | 2   | No             |      | 2   | No    |      |       |       | 169   | 80    |
| 25388  |      | 2   | No              |      | 2   | No             |      | 2   | No    |      |       |       | 168   | 62    |
| 25390  |      | 2   | No              |      | 2   | No             |      | 2   | No    |      |       |       | 163   | 63    |
| 25391  |      | 2   | No              |      | 2   | No             |      | 2   | No    |      |       |       | 168   | 68    |
| 25400  |      | 2   | No              |      | 2   | No             |      | 2   | No    |      |       |       | 160   | 55    |
| 25413  | 1    | 1   | Yes             | 1    | 2   | No             |      | 2   | No    |      |       |       | 165   | 80    |
| 25424  |      | 2   | No              |      | 2   | No             |      | 2   | No    |      |       |       | 177   | 74    |
| 25426  | 1    | 2   | No              |      | 2   | No             |      | 2   | No    |      |       |       | 160   | 70    |
| 25430  |      | 2   | No              |      | 2   | No             |      | 2   | No    |      |       |       | 159   | 60    |
| 25434  |      | 2   | No              |      | 2   | No             |      | 2   | No    |      |       |       | 158   | 55    |
| 25439  | 2    | 2   | No              |      | 1   | Yes            | 2    | 2   | No    |      |       |       | 168   | 75    |
| 25441  |      | 2   | No              |      | 1   | Yes            | 2    | 2   | No    |      |       |       | 165   | 75    |
| 25445  | 1    | 2   | No              |      | 2   | No             |      | 2   | No    |      |       |       | 174   | 55    |
| 25451  |      | 2   | No              |      | 2   | No             |      | 2   | No    |      |       |       | 175   | 75    |
| 25469  | 1    | 1   | Yes             | 1    | 2   | No             |      | 2   | No    |      |       |       | 160   | 80    |
| 25471  |      | 1   | Yes             | 1    | 2   | No             |      | 2   | No    |      |       |       | 165   | 60    |
| 25476  |      | 2   | No              |      | 2   | No             |      | 2   | No    |      |       |       | 170   | 55    |
| 25480  |      | 2   | No              |      | 1   | Yes            | 2    | 2   | No    |      |       |       | 175   | 72    |
| 25482  |      | 2   | No              |      | 2   | No             |      | 2   | No    |      |       |       | 165   | 60    |

| respid | Q11a | Q12 | Cardiac Disease | Q12a | Q13 | Hyperlipidemia | Q13a | Q14 | Neuro | Q14a | Q15_1 | Q15_2 | Q15_3 | Q16_1 |
|--------|------|-----|-----------------|------|-----|----------------|------|-----|-------|------|-------|-------|-------|-------|
| 25500  | 1    | 2   | No              |      | 1   | Yes            | 1    | 2   | No    |      |       |       | 160   | 70    |
| 25516  |      | 2   | No              |      | 2   | No             |      | 2   | No    |      |       |       | 168   | 69    |
| 25521  |      | 2   | No              |      | 1   | Yes            | 1    | 2   | No    |      |       |       | 178   | 78    |
| 25525  |      | 2   | No              |      | 2   | No             |      | 2   | No    |      |       |       | 175   | 75    |
| 25530  | 1    | 1   | Yes             | 2    | 2   | No             |      | 2   | No    |      | 5     | 8     |       | 65    |
| 25555  | 2    | 2   | No              |      | 1   | Yes            | 1    | 2   | No    |      |       |       | 160   | 106   |
| 25558  |      | 1   | Yes             | 1    | 1   | Yes            | 1    | 2   | No    |      |       |       | 165   | 65    |
| 25561  | 1    | 2   | No              |      | 2   | No             |      | 2   | No    |      |       |       | 170   | 70    |
| 25566  |      | 2   | No              |      | 2   | No             |      | 2   | No    |      |       |       | 168   | 58    |
| 25571  | 2    | 2   | No              |      | 2   | No             |      | 2   | No    |      |       |       | 155   | 52    |
| 25572  |      | 2   | No              |      | 2   | No             |      | 2   | No    |      |       |       | 165   | 70    |
| 25574  |      | 2   | No              |      | 2   | No             |      | 2   | No    |      |       |       | 178   | 77    |
| 25588  |      | 2   | No              |      | 2   | No             |      | 2   | No    |      |       |       | 150   | 47    |
| 25591  |      | 2   | No              |      | 2   | No             |      | 2   | No    |      |       |       | 168   | 58    |
| 25599  |      | 2   | No              |      | 2   | No             |      | 2   | No    |      |       |       | 160   | 70    |
| 25604  |      | 2   | No              |      | 1   | Yes            | 2    | 2   | No    |      |       |       | 165   | 52    |
| 25614  |      | 2   | No              |      | 2   | No             |      | 2   | No    |      |       |       | 158   | 54    |
| 25634  | 1    | 2   | No              |      | 1   | Yes            | 1    | 2   | No    |      |       |       | 170   | 65    |
| 25642  |      | 2   | No              |      | 2   | No             |      | 2   | No    |      |       |       | 160   | 50    |
| 25647  |      | 2   | No              |      | 1   | Yes            | 2    | 2   | No    |      |       |       | 169   | 54    |
| 25653  |      | 2   | No              |      | 2   | No             |      | 2   | No    |      |       |       | 170   | 60    |
| 25654  |      | 2   | No              |      | 1   | Yes            | 2    | 1   | Yes   | 2    |       |       | 150   | 65    |
| 25660  |      | 2   | No              |      | 1   | Yes            | 2    | 2   | No    |      |       |       | 169   | 62    |
| 25664  |      | 2   | No              |      | 2   | No             |      | 2   | No    |      |       |       | 165   | 62    |
| 25665  |      | 2   | No              |      | 1   | Yes            | 2    | 2   | No    |      |       |       | 177   | 75    |
| 25672  |      | 2   | No              |      | 2   | No             |      | 2   | No    |      |       |       | 160   | 50    |
| 25677  | 2    | 2   | No              |      | 1   | Yes            | 2    | 2   | No    |      |       |       | 170   | 60    |
| 25685  |      | 1   | Yes             | 1    | 2   | No             |      | 2   | No    |      |       |       | 178   | 55    |
| 25699  | 1    | 1   | Yes             | 1    | 1   | Yes            | 1    | 2   | No    |      |       |       | 168   | 70    |
| 25703  |      | 2   | No              |      | 2   | No             |      | 2   | No    |      |       |       | 172   | 77    |
| 25704  |      | 2   | No              |      | 2   | No             |      | 2   | No    |      |       |       | 175   | 70    |
| 25705  |      | 2   | No              |      | 2   | No             |      | 2   | No    |      |       |       | 160   | 47    |

| respid | Q11a | Q12 | Cardiac Disease | Q12a | Q13 | Hyperlipidemia | Q13a | Q14 | Neuro | Q14a | Q15_1 | Q15_2 | Q15_3 | Q16_1 |
|--------|------|-----|-----------------|------|-----|----------------|------|-----|-------|------|-------|-------|-------|-------|
| 25711  |      | 2   | No              |      | 2   | No             |      | 2   | No    |      |       |       | 160   | 65    |
| 25727  | 1    | 2   | No              |      | 2   | No             |      | 2   | No    |      |       |       | 173   | 78    |
| 25728  |      | 2   | No              |      | 2   | No             |      | 2   | No    |      |       |       | 169   | 55    |
| 25733  | 1    | 1   | Yes             | 2    | 1   | Yes            | 1    | 2   | No    |      |       |       | 160   | 65    |
| 25735  |      | 2   | No              |      | 2   | No             |      | 2   | No    |      |       |       | 168   | 60    |
| 25736  |      | 2   | No              |      | 2   | No             |      | 2   | No    |      |       |       | 159   | 70    |
| 25742  |      | 2   | No              |      | 1   | Yes            | 1    | 2   | No    |      |       |       | 170   | 60    |
| 25750  |      | 2   | No              |      | 2   | No             |      | 2   | No    |      |       |       | 175   | 80    |
| 25754  |      | 2   | No              |      | 2   | No             |      | 2   | No    |      |       |       | 168   | 68    |
| 25776  | 1    | 2   | No              |      | 1   | Yes            | 2    | 2   | No    |      |       |       | 163   | 75    |
| 25778  |      | 2   | No              |      | 2   | No             |      | 2   | No    |      |       |       | 175   | 68    |
| 25796  |      | 2   | No              |      | 1   | Yes            | 2    | 2   | No    |      |       |       | 165   | 62    |
| 25852  |      | 2   | No              |      | 2   | No             |      | 2   | No    |      |       |       | 165   | 55    |
| 25858  |      | 2   | No              |      | 1   | Yes            | 2    | 2   | No    |      |       |       | 160   | 55    |
| 25859  | 1    | 2   | No              |      | 2   | No             |      | 2   | No    |      |       |       | 168   | 80    |
| 25886  | 1    | 2   | No              |      | 2   | No             |      | 2   | No    |      |       |       | 170   | 80    |
| 25890  | 1    | 2   | No              |      | 1   | Yes            | 1    | 2   | No    |      |       |       | 173   | 80    |
| 25897  |      | 1   | Yes             | 1    | 2   | No             |      | 2   | No    |      |       |       | 161   | 61    |
| 25903  |      | 2   | No              |      | 2   | No             |      | 2   | No    |      | 4     | 8     |       | 60    |
| 25905  |      | 2   | No              |      | 2   | No             |      | 2   | No    |      |       |       | 168   | 55    |
| 25917  |      | 2   | No              |      | 2   | No             |      | 2   | No    |      |       |       | 158   | 65    |
| 25918  | 2    | 2   | No              |      | 2   | No             |      | 2   | No    |      |       |       | 166   | 70    |
| 25928  | 1    | 2   | No              |      | 1   | Yes            | 2    | 2   | No    |      |       |       | 173   | 80    |
| 25930  |      | 2   | No              |      | 2   | No             |      | 2   | No    |      |       |       | 162   | 55    |
| 25949  |      | 2   | No              |      | 2   | No             |      | 2   | No    |      |       |       | 156   | 50    |
| 25955  |      | 2   | No              |      | 2   | No             |      | 2   | No    |      |       |       | 155   | 53    |
| 25959  |      | 2   | No              |      | 2   | No             |      | 2   | No    |      |       |       | 156   | 59    |
| 25964  | 1    | 2   | No              |      | 1   | Yes            | 1    | 2   | No    |      |       |       | 174   | 86    |
| 25972  |      | 2   | No              |      | 1   | Yes            | 2    | 2   | No    |      |       |       | 165   | 64    |
| 25999  |      | 2   | No              |      | 2   | No             |      | 2   | No    |      |       |       | 170   | 62    |
| 26019  | 1    | 2   | No              |      | 2   | No             |      | 2   | No    |      |       |       | 160   | 65    |
| 26025  |      | 2   | No              |      | 2   | No             |      | 2   | No    |      |       |       | 165   | 75    |

| respid | Q11a | Q12 | Cardiac Disease | Q12a | Q13 | Hyperlipidemia | Q13a | Q14 | Neuro | Q14a | Q15_1 | Q15_2 | Q15_3 | Q16_1 |
|--------|------|-----|-----------------|------|-----|----------------|------|-----|-------|------|-------|-------|-------|-------|
| 26039  |      | 2   | No              |      | 2   | No             |      | 2   | No    |      |       |       | 174   | 68    |
| 26055  | 1    | 2   | No              |      | 2   | No             |      | 2   | No    |      |       |       | 162   | 65    |
| 26061  |      | 2   | No              |      | 2   | No             |      | 2   | No    |      |       |       | 155   | 54    |
| 26076  |      | 2   | No              |      | 2   | No             |      | 2   | No    |      |       |       | 173   | 80    |
| 26088  |      | 2   | No              |      | 2   | No             |      | 2   | No    |      |       |       | 178   | 75    |
| 26094  |      | 2   | No              |      | 2   | No             |      | 2   | No    |      |       |       | 178   | 75    |
| 26104  | 1    | 2   | No              |      | 2   | No             |      | 2   | No    |      |       |       | 160   | 45    |
| 26131  |      | 2   | No              |      | 2   | No             |      | 2   | No    |      |       |       | 168   | 60    |
| 26134  |      | 2   | No              |      | 1   | Yes            | 2    | 2   | No    |      |       |       | 171   | 65    |
| 26160  | 1    | 2   | No              |      | 1   | Yes            | 2    | 2   | No    |      |       |       | 167   | 66    |
| 26168  |      | 2   | No              |      | 2   | No             |      | 2   | No    |      |       |       | 169   | 75    |
| 26170  |      | 2   | No              |      | 2   | No             |      | 2   | No    |      |       |       | 151   | 47    |
| 26191  | 1    | 2   | No              |      | 2   | No             |      | 2   | No    |      |       |       | 160   | 65    |
| 26192  |      | 2   | No              |      | 2   | No             |      | 2   | No    |      |       |       | 165   | 60    |
| 26195  |      | 2   | No              |      | 2   | No             |      | 2   | No    |      |       |       | 170   | 70    |
| 26198  |      | 2   | No              |      | 2   | No             |      | 2   | No    |      |       |       | 160   | 65    |
| 26199  |      | 2   | No              |      | 1   | Yes            | 1    | 2   | No    |      |       |       | 150   | 60    |
| 26201  |      | 2   | No              |      | 2   | No             |      | 2   | No    |      |       |       | 160   | 65    |
| 26202  | 1    | 2   | No              |      | 1   | Yes            | 1    | 2   | No    |      |       |       | 174   | 86    |
| 26226  |      | 2   | No              |      | 1   | Yes            | 1    | 1   | Yes   | 2    |       |       | 162   | 54    |
| 26233  | 1    | 2   | No              |      | 2   | No             |      | 2   | No    |      |       |       | 156   | 55    |
| 26236  |      | 2   | No              |      | 2   | No             |      | 2   | No    |      |       |       | 150   | 50    |
| 26242  |      | 2   | No              |      | 2   | No             |      | 2   | No    |      |       |       | 156   | 50    |
| 26244  | 1    | 1   | Yes             | 1    | 1   | Yes            | 1    | 2   | No    |      |       |       | 182   | 88    |
| 26250  |      | 2   | No              |      | 2   | No             |      | 2   | No    |      |       |       | 165   | 50    |
| 26266  |      | 2   | No              |      | 2   | No             |      | 2   | No    |      |       |       | 160   | 64    |
| 26274  |      | 1   | Yes             | 2    | 2   | No             |      | 2   | No    |      |       |       | 175   | 65    |
| 26286  | 1    | 2   | No              |      | 2   | No             |      | 2   | No    |      |       |       | 158   | 57    |
| 26288  |      | 2   | No              |      | 1   | Yes            | 1    | 2   | No    |      |       |       | 158   | 65    |
| 26295  |      | 2   | No              |      | 2   | No             |      | 2   | No    |      |       |       | 152   | 48    |
| 26296  |      | 2   | No              |      | 2   | No             |      | 2   | No    |      |       |       | 164   | 70    |
| 26297  |      | 2   | No              |      | 2   | No             |      | 2   | No    |      |       |       | 172   | 62    |



| respid | Q11a | Q12 | Cardiac Disease | Q12a | Q13 | Hyperlipidemia | Q13a | Q14 | Neuro | Q14a | Q15_1 | Q15_2 | Q15_3 | Q16_1 |
|--------|------|-----|-----------------|------|-----|----------------|------|-----|-------|------|-------|-------|-------|-------|
| 26300  |      | 2   | No              |      | 2   | No             |      | 2   | No    |      |       |       | 168   | 60    |
| 26317  |      | 2   | No              |      | 2   | No             |      | 2   | No    |      |       |       | 152   | 58    |
| 26343  |      | 2   | No              |      | 2   | No             |      | 2   | No    |      |       |       | 172   | 65    |
| 26367  |      | 2   | No              |      | 2   | No             |      | 2   | No    |      |       |       | 148   | 40    |
| 26372  | 1    | 2   | No              |      | 2   | No             |      | 2   | No    |      |       |       | 164   | 60    |
| 26403  |      | 2   | No              |      | 2   | No             |      | 2   | No    |      |       |       | 168   | 61    |
| 26423  |      | 2   | No              |      | 1   | Yes            | 2    | 2   | No    |      |       |       | 174   | 45    |
| 26430  |      | 2   | No              |      | 2   | No             |      | 2   | No    |      |       |       | 173   | 72    |
| 26437  | 1    | 2   | No              |      | 2   | No             |      | 2   | No    |      |       |       | 169   | 69    |
| 26457  |      | 2   | No              |      | 2   | No             |      | 2   | No    |      |       |       | 158   | 48    |
| 26466  |      | 2   | No              |      | 2   | No             |      | 2   | No    |      |       |       | 176   | 80    |
| 26467  |      | 2   | No              |      | 2   | No             |      | 2   | No    |      |       |       | 158   | 63    |
| 26469  |      | 2   | No              |      | 2   | No             |      | 2   | No    |      |       |       | 160   | 56    |
| 26494  |      | 2   | No              |      | 2   | No             |      | 2   | No    |      |       |       | 150   | 65    |
| 26510  |      | 2   | No              |      | 2   | No             |      | 2   | No    |      |       |       | 160   | 73    |
| 26519  |      | 2   | No              |      | 1   | Yes            | 2    | 2   | No    |      |       |       | 155   | 48    |
| 26525  |      | 2   | No              |      | 2   | No             |      | 2   | No    |      |       |       | 160   | 45    |
| 26529  |      | 2   | No              |      | 2   | No             |      | 2   | No    |      |       |       | 172   | 55    |
| 26533  |      | 2   | No              |      | 2   | No             |      | 2   | No    |      |       |       | 175   | 85    |
| 26556  | 2    | 2   | No              |      | 2   | No             |      | 2   | No    |      |       |       | 158   | 55    |
| 26559  |      | 2   | No              |      | 2   | No             |      | 2   | No    |      |       |       | 162   | 62    |
| 26565  | 1    | 2   | No              |      | 1   | Yes            | 1    | 2   | No    |      |       |       | 172   | 60    |
| 26576  |      | 1   | Yes             | 2    | 1   | Yes            | 1    | 2   | No    |      |       |       | 177   | 78    |
| 26601  | 1    | 2   | No              |      | 2   | No             |      | 2   | No    |      |       |       | 173   | 75    |
| 26607  | 1    | 2   | No              |      | 2   | No             |      | 2   | No    |      |       |       | 154   | 63    |
| 26611  |      | 2   | No              |      | 2   | No             |      | 2   | No    |      |       |       | 155   | 46    |
| 26619  |      | 2   | No              |      | 2   | No             |      | 2   | No    |      |       |       | 162   | 62    |
| 26631  | 1    | 2   | No              |      | 2   | No             |      | 2   | No    |      |       |       | 170   | 65    |
| 26654  | 2    | 2   | No              |      | 2   | No             |      | 2   | No    |      |       |       | 171   | 63    |
| 26656  | 1    | 1   | Yes             | 2    | 2   | No             |      | 2   | No    |      |       |       | 151   | 62    |
| 26664  | 1    | 2   | No              |      | 2   | No             |      | 2   | No    |      |       |       | 155   | 55    |
| 26667  |      | 2   | No              |      | 2   | No             |      | 2   | No    |      |       |       | 168   | 63    |

| respid | Q11a | Q12 | Cardiac Disease | Q12a | Q13 | Hyperlipidemia | Q13a | Q14 | Neuro | Q14a | Q15_1 | Q15_2 | Q15_3 | Q16_1 |
|--------|------|-----|-----------------|------|-----|----------------|------|-----|-------|------|-------|-------|-------|-------|
| 26674  |      | 2   | No              |      | 2   | No             |      | 2   | No    |      |       |       | 160   | 65    |
| 26678  | 1    | 2   | No              |      | 1   | Yes            | 1    | 2   | No    |      |       |       | 171   | 77    |
| 26693  |      | 2   | No              |      | 2   | No             |      | 2   | No    |      |       |       | 178   | 65    |
| 26696  | 1    | 2   | No              |      | 1   | Yes            | 1    | 1   | Yes   | 2    |       |       | 167   | 100   |
| 26703  | 1    | 1   | Yes             | 1    | 1   | Yes            | 1    | 2   | No    |      |       |       | 155   | 62    |
| 26705  |      | 2   | No              |      | 1   | Yes            | 2    | 2   | No    |      |       |       | 158   | 45    |
| 26706  | 1    | 2   | No              |      | 1   | Yes            | 1    | 2   | No    |      |       |       | 170   | 70    |
| 26716  |      | 2   | No              |      | 2   | No             |      | 2   | No    |      |       |       | 165   | 65    |
| 26721  |      | 2   | No              |      | 2   | No             |      | 2   | No    |      |       |       | 163   | 80    |
| 26730  |      | 1   | Yes             | 2    | 1   | Yes            | 2    | 2   | No    |      |       |       | 158   | 55    |
| 26752  |      | 2   | No              |      | 2   | No             |      | 2   | No    |      |       |       | 157   | 50    |
| 26755  |      | 2   | No              |      | 1   | Yes            | 2    | 2   | No    |      |       |       | 155   | 70    |
| 26791  |      | 2   | No              |      | 2   | No             |      | 2   | No    |      |       |       | 170   | 65    |
| 26804  | 1    | 1   | Yes             | 1    | 2   | No             |      | 2   | No    |      |       |       | 160   | 55    |
| 26810  |      | 2   | No              |      | 2   | No             |      | 2   | No    |      |       |       | 163   | 60    |
| 26813  | 1    | 2   | No              |      | 1   | Yes            | 2    | 2   | No    |      |       |       | 165   | 56    |
| 26833  |      | 2   | No              |      | 2   | No             |      | 2   | No    |      |       |       | 150   | 50    |
| 26880  |      | 2   | No              |      | 2   | No             |      | 2   | No    |      |       |       | 140   | 45    |
| 26884  |      | 2   | No              |      | 2   | No             |      | 2   | No    |      |       |       | 161   | 55    |
| 26885  |      | 2   | No              |      | 1   | Yes            | 2    | 2   | No    |      |       |       | 169   | 64    |
| 26890  | 1    | 2   | No              |      | 1   | Yes            | 1    | 2   | No    |      |       |       | 165   | 72    |
| 26937  | 1    | 2   | No              |      | 1   | Yes            | 2    | 1   | Yes   | 2    |       |       | 170   | 70    |
| 26939  |      | 2   | No              |      | 2   | No             |      | 2   | No    |      |       |       | 160   | 60    |
| 26941  |      | 2   | No              |      | 1   | Yes            | 2    | 2   | No    |      |       |       | 165   | 70    |
| 26992  | 1    | 1   | Yes             | 1    | 1   | Yes            | 1    | 2   | No    |      |       |       | 160   | 58    |
| 27037  |      | 2   | No              |      | 2   | No             |      | 2   | No    |      |       |       | 150   | 55    |
| 27045  |      | 2   | No              |      | 2   | No             |      | 2   | No    |      |       |       | 165   | 60    |
| 27053  |      | 2   | No              |      | 2   | No             |      | 1   | Yes   | 1    |       |       | 160   | 48    |
| 27060  |      | 2   | No              |      | 2   | No             |      | 2   | No    |      |       |       | 160   | 60    |
| 27076  |      | 2   | No              |      | 2   | No             |      | 2   | No    |      |       |       | 162   | 68    |
| 27124  |      | 2   | No              |      | 2   | No             |      | 2   | No    |      |       |       | 160   | 65    |
| 27125  |      | 2   | No              |      | 2   | No             |      | 2   | No    |      |       |       | 176   | 65    |

| respid | Q11a | Q12 | Cardiac Disease | Q12a | Q13 | Hyperlipidemia | Q13a | Q14 | Neuro | Q14a | Q15_1 | Q15_2 | Q15_3 | Q16_1 |
|--------|------|-----|-----------------|------|-----|----------------|------|-----|-------|------|-------|-------|-------|-------|
| 27132  |      | 2   | No              |      | 2   | No             |      | 2   | No    |      |       |       | 178   | 65    |
| 27166  |      | 2   | No              |      | 2   | No             |      | 2   | No    |      |       |       | 163   | 67    |
| 27190  |      | 2   | No              |      | 2   | No             |      | 2   | No    |      |       |       | 160   |       |
| 27199  | 1    | 2   | No              |      | 1   | Yes            | 1    | 2   | No    |      |       |       | 172   | 72    |
| 27221  |      | 2   | No              |      | 2   | No             |      | 2   | No    |      |       |       | 160   | 60    |
| 27233  | 1    | 2   | No              |      | 1   | Yes            | 1    | 2   | No    |      |       |       | 153   | 54    |
| 27241  |      | 2   | No              |      | 1   | Yes            | 1    | 2   | No    |      |       |       | 162   | 60    |
| 27244  | 1    | 2   | No              |      | 2   | No             |      | 2   | No    |      |       |       | 187   | 95    |
| 27245  | 1    | 2   | No              |      | 2   | No             |      | 2   | No    |      |       |       | 160   | 55    |
| 27246  | 1    | 2   | No              |      | 1   | Yes            | 1    | 2   | No    |      |       |       | 150   | 65    |
| 27253  |      | 2   | No              |      | 2   | No             |      | 2   | No    |      |       |       | 167   | 60    |
| 27255  |      | 2   | No              |      | 2   | No             |      | 2   | No    |      |       |       | 170   | 55    |
| 27267  | 1    | 2   | No              |      | 2   | No             |      | 2   | No    |      |       |       | 168   | 50    |
| 27283  |      | 2   | No              |      | 2   | No             |      | 2   | No    |      |       |       | 160   | 49    |
| 27289  | 2    | 2   | No              |      | 2   | No             |      | 2   | No    |      |       |       | 154   | 60    |
| 27302  |      | 2   | No              |      | 2   | No             |      | 2   | No    |      |       |       | 157   | 60    |
| 27317  |      | 2   | No              |      | 2   | No             |      | 2   | No    |      |       |       | 153   | 65    |
| 27319  |      | 1   | Yes             | 2    | 1   | Yes            | 2    | 2   | No    |      |       |       | 163   | 70    |
| 27331  |      | 2   | No              |      | 2   | No             |      | 2   | No    |      |       |       | 172   | 70    |
| 27333  | 2    | 2   | No              |      | 2   | No             |      | 2   | No    |      |       |       | 170   | 58    |
| 27340  |      | 2   | No              |      | 2   | No             |      | 2   | No    |      |       |       | 164   | 70    |
| 27362  | 1    | 2   | No              |      | 1   | Yes            | 1    | 2   | No    |      |       |       | 174   | 54    |
| 27370  | 1    | 2   | No              |      | 2   | No             |      | 2   | No    |      |       |       | 170   | 70    |
| 27379  | 1    | 2   | No              |      | 1   | Yes            | 2    | 2   | No    |      |       |       | 160   | 70    |
| 27386  |      | 2   | No              |      | 2   | No             |      | 2   | No    |      |       |       | 160   | 48    |
| 27398  |      | 2   | No              |      | 2   | No             |      | 2   | No    |      |       |       | 163   | 56    |
| 27404  |      | 2   | No              |      | 2   | No             |      | 2   | No    |      |       |       | 156   | 105   |
| 27408  |      | 2   | No              |      | 1   | Yes            | 1    | 2   | No    |      |       |       | 160   | 58    |
| 27412  | 1    | 2   | No              |      | 2   | No             |      | 2   | No    |      |       |       | 165   | 50    |
| 27426  | 1    | 2   | No              |      | 2   | No             |      | 2   | No    |      |       |       | 155   | 45    |
| 27455  |      | 2   | No              |      | 2   | No             |      | 2   | No    |      |       |       | 154   | 50    |
| 27464  |      | 1   | Yes             | 1    | 2   | No             |      | 2   | No    |      |       |       | 156   | 66    |

| respid | Q11a | Q12 | Cardiac Disease | Q12a | Q13 | Hyperlipidemia | Q13a | Q14 | Neuro | Q14a | Q15_1 | Q15_2 | Q15_3 | Q16_1 |
|--------|------|-----|-----------------|------|-----|----------------|------|-----|-------|------|-------|-------|-------|-------|
| 27484  | 1    | 1   | Yes             | 1    | 2   | No             |      | 2   | No    |      |       |       | 175   | 80    |
| 27493  | 1    | 2   | No              |      | 2   | No             |      | 2   | No    |      |       |       | 155   | 62    |
| 27512  |      | 2   | No              |      | 2   | No             |      | 2   | No    |      |       |       | 172   | 80    |
| 27525  |      | 1   | Yes             | 2    | 2   | No             |      | 2   | No    |      |       |       | 173   | 85    |
| 27532  | 1    | 2   | No              |      | 2   | No             |      | 2   | No    |      |       |       | 165   | 45    |
| 27539  |      | 2   | No              |      | 2   | No             |      | 2   | No    |      |       |       | 160   | 55    |
| 27540  |      | 2   | No              |      | 2   | No             |      | 2   | No    |      |       |       | 171   | 75    |
| 27552  | 1    | 2   | No              |      | 2   | No             |      | 2   | No    |      | 5     | 5     |       | 90    |
| 27562  |      | 2   | No              |      | 2   | No             |      | 2   | No    |      |       |       | 165   | 50    |
| 27568  |      | 2   | No              |      | 2   | No             |      | 2   | No    |      |       |       | 147   | 43    |
| 27574  | 1    | 1   | Yes             | 1    | 1   | Yes            | 1    | 2   | No    |      |       |       | 170   | 65    |
| 27575  |      | 2   | No              |      | 2   | No             |      | 2   | No    |      |       |       | 160   | 85    |
| 27577  |      | 2   | No              |      | 2   | No             |      | 2   | No    |      |       |       | 169   | 56    |
| 27589  |      | 2   | No              |      | 2   | No             |      | 2   | No    |      | 5     | 5     |       | 47    |
| 27593  |      | 2   | No              |      | 2   | No             |      | 2   | No    |      |       |       | 160   | 51    |
| 27594  |      | 2   | No              |      | 1   | Yes            | 2    | 2   | No    |      |       |       | 168   | 75    |
| 27595  | 1    | 1   | Yes             | 1    | 1   | Yes            | 1    | 2   | No    |      | 5     | 2     |       | 49    |
| 27598  |      | 1   | Yes             | 2    | 1   | Yes            | 2    | 2   | No    |      |       |       | 163   | 48    |
| 27620  | 1    | 2   | No              |      | 2   | No             |      | 2   | No    |      |       |       | 175   | 65    |
| 27621  | 2    | 2   | No              |      | 2   | No             |      | 2   | No    |      |       |       | 166   | 65    |
| 27628  | 1    | 2   | No              |      | 2   | No             |      | 2   | No    |      |       |       | 175   | 80    |
| 27633  |      | 1   | Yes             | 2    | 2   | No             |      | 2   | No    |      |       |       | 153   | 51    |
| 27643  |      | 2   | No              |      | 2   | No             |      | 2   | No    |      |       |       | 168   | 50    |
| 27644  |      | 2   | No              |      | 2   | No             |      | 2   | No    |      |       |       | 170   | 78    |
| 27668  |      | 2   | No              |      | 1   | Yes            | 2    | 2   | No    |      |       |       | 160   | 55    |
| 27681  | 2    | 2   | No              |      | 2   | No             |      | 2   | No    |      |       |       | 122   | 55    |
| 27691  |      | 2   | No              |      | 2   | No             |      | 2   | No    |      |       |       | 155   | 58    |
| 27693  |      | 1   | Yes             | 2    | 2   | No             |      | 2   | No    |      |       |       | 168   | 86    |
| 27703  | 1    | 1   | Yes             | 1    | 1   | Yes            | 1    | 2   | No    |      |       |       | 155   | 50    |
| 27708  |      | 1   | Yes             | 1    | 1   | Yes            | 2    | 2   | No    |      |       |       | 160   | 50    |
| 27719  |      | 2   | No              |      | 2   | No             |      | 2   | No    |      |       |       | 160   | 60    |
| 27720  | 1    | 2   | No              |      | 1   | Yes            | 1    | 2   | No    |      |       |       | 170   | 76    |

| respid | Q11a | Q12 | Cardiac Disease | Q12a | Q13 | Hyperlipidemia | Q13a | Q14 | Neuro | Q14a | Q15_1 | Q15_2 | Q15_3 | Q16_1 |
|--------|------|-----|-----------------|------|-----|----------------|------|-----|-------|------|-------|-------|-------|-------|
| 27723  | 1    | 2   | No              |      | 2   | No             |      | 2   | No    |      |       |       | 155   | 55    |
| 27725  |      | 2   | No              |      | 2   | No             |      | 2   | No    |      |       |       | 153   | 52    |
| 27734  | 2    | 2   | No              |      | 2   | No             |      | 2   | No    |      |       |       | 170   | 120   |
| 27744  |      | 2   | No              |      | 2   | No             |      | 2   | No    |      |       |       | 174   | 63    |
| 27749  |      | 2   | No              |      | 2   | No             |      | 2   | No    |      |       |       | 170   | 115   |
| 27762  |      | 2   | No              |      | 2   | No             |      | 2   | No    |      |       |       | 158   | 55    |
| 27808  | 1    | 2   | No              |      | 2   | No             |      | 2   | No    |      |       |       | 155   | 49    |
| 27810  | 1    | 2   | No              |      | 1   | Yes            | 1    | 2   | No    |      |       |       | 170   | 70    |
| 27812  | 1    | 2   | No              |      | 2   | No             |      | 2   | No    |      |       |       | 168   | 65    |
| 27815  |      | 2   | No              |      | 2   | No             |      | 2   | No    |      |       |       | 158   | 58    |
| 27818  |      | 2   | No              |      | 2   | No             |      | 2   | No    |      |       |       | 155   | 65    |
| 27823  | 1    | 2   | No              |      | 1   | Yes            | 1    | 2   | No    |      |       |       | 152   | 50    |
| 27841  |      | 2   | No              |      | 2   | No             |      | 2   | No    |      |       |       | 160   | 50    |
| 27843  |      | 2   | No              |      | 2   | No             |      | 2   | No    |      |       |       | 159   | 48    |
| 27851  | 1    | 2   | No              |      | 1   | Yes            | 2    | 2   | No    |      |       |       | 155   | 46    |
| 27858  |      | 1   | Yes             | 2    | 2   | No             |      | 2   | No    |      |       |       | 160   | 62    |
| 27859  | 1    | 2   | No              |      | 2   | No             |      | 2   | No    |      |       |       | 170   | 80    |
| 27869  | 1    | 2   | No              |      | 2   | No             |      | 2   | No    |      |       |       | 160   | 55    |
| 27872  |      | 2   | No              |      | 2   | No             |      | 2   | No    |      |       |       | 162   | 54    |
| 27873  |      | 2   | No              |      | 2   | No             |      | 2   | No    |      |       |       | 155   | 55    |
| 27884  |      | 2   | No              |      | 2   | No             |      | 2   | No    |      |       |       | 158   | 68    |
| 27904  |      | 2   | No              |      | 2   | No             |      | 2   | No    |      |       |       | 162   | 60    |
| 27915  |      | 2   | No              |      | 2   | No             |      | 2   | No    |      |       |       | 173   | 62    |
| 27918  |      | 2   | No              |      | 2   | No             |      | 2   | No    |      |       |       | 158   | 60    |
| 27937  |      | 2   | No              |      | 2   | No             |      | 2   | No    |      |       |       | 175   | 76    |
| 27943  |      | 2   | No              |      | 2   | No             |      | 2   | No    |      |       |       | 165   | 51    |
| 27948  |      | 2   | No              |      | 2   | No             |      | 2   | No    |      |       |       | 151   | 82    |
| 27971  |      | 2   | No              |      | 2   | No             |      | 2   | No    |      |       |       | 163   | 55    |
| 27991  |      | 2   | No              |      | 2   | No             |      | 2   | No    |      |       |       | 150   | 60    |
| 28000  |      | 2   | No              |      | 2   | No             |      | 2   | No    |      |       |       | 162   | 82    |
| 28011  |      | 2   | No              |      | 2   | No             |      | 2   | No    |      |       |       | 154   | 50    |
| 28022  |      | 2   | No              |      | 2   | No             |      | 2   | No    |      |       |       | 160   | 60    |

| respid | Q11a | Q12 | Cardiac Disease | Q12a | Q13 | Hyperlipidemia | Q13a | Q14 | Neuro | Q14a | Q15_1 | Q15_2 | Q15_3 | Q16_1 |
|--------|------|-----|-----------------|------|-----|----------------|------|-----|-------|------|-------|-------|-------|-------|
| 28025  |      | 2   | No              |      | 2   | No             |      | 2   | No    |      |       |       | 165   | 58    |
| 28041  |      | 2   | No              |      | 1   | Yes            | 2    | 2   | No    |      |       |       | 176   | 74    |
| 28057  |      | 2   | No              |      | 2   | No             |      | 2   | No    |      |       |       | 173   | 59    |
| 28080  | 1    | 2   | No              |      | 2   | No             |      | 2   | No    |      |       |       | 166   | 60    |
| 28098  |      | 2   | No              |      | 1   | Yes            | 2    | 2   | No    |      |       |       | 157   | 54    |
| 28104  | 1    | 2   | No              |      | 2   | No             |      | 2   | No    |      |       |       | 160   | 60    |
| 28109  |      | 2   | No              |      | 2   | No             |      | 2   | No    |      |       |       | 170   | 65    |
| 28129  |      | 1   | Yes             | 2    | 2   | No             |      | 2   | No    |      |       |       | 160   | 60    |
| 28141  |      | 2   | No              |      | 2   | No             |      | 2   | No    |      |       |       | 158   | 60    |
| 28143  |      | 1   | Yes             | 1    | 2   | No             |      | 2   | No    |      |       |       | 161   | 53    |
| 28149  | 1    | 2   | No              |      | 1   | Yes            | 1    | 2   | No    |      |       |       | 152   | 85    |
| 28151  |      | 2   | No              |      | 1   | Yes            | 2    | 2   | No    |      |       |       | 174   | 72    |
| 28161  |      | 2   | No              |      | 2   | No             |      | 2   | No    |      |       |       | 178   | 70    |
| 28169  |      | 2   | No              |      | 2   | No             |      | 2   | No    |      |       |       | 174   | 84    |
| 28194  | 1    | 2   | No              |      | 1   | Yes            | 1    | 2   | No    |      |       |       | 150   | 50    |
| 28197  |      | 2   | No              |      | 2   | No             |      | 2   | No    |      |       |       | 170   | 65    |
| 28206  | 1    | 2   | No              |      | 2   | No             |      | 2   | No    |      |       |       | 161   | 62    |
| 28218  |      | 2   | No              |      | 2   | No             |      | 2   | No    |      |       |       | 166   | 60    |
| 28227  |      | 2   | No              |      | 1   | Yes            | 2    | 2   | No    |      |       |       | 176   | 73    |
| 28235  |      | 2   | No              |      | 2   | No             |      | 2   | No    |      |       |       | 152   | 50    |
| 28246  |      | 2   | No              |      | 2   | No             |      | 2   | No    |      | 5     | 2     |       | 45    |
| 28259  |      | 2   | No              |      | 2   | No             |      | 2   | No    |      |       |       | 160   | 52    |
| 28263  |      | 2   | No              |      | 2   | No             |      | 2   | No    |      |       |       | 155   | 51    |
| 28267  |      | 2   | No              |      | 2   | No             |      | 2   | No    |      |       |       | 178   | 65    |
| 28274  |      | 2   | No              |      | 2   | No             |      | 2   | No    |      |       |       | 170   | 70    |
| 28278  |      | 2   | No              |      | 2   | No             |      | 2   | No    |      |       |       | 155   | 60    |
| 28288  |      | 1   | Yes             | 2    | 2   | No             |      | 2   | No    |      |       |       | 159   | 94    |
| 28308  |      | 2   | No              |      | 2   | No             |      | 2   | No    |      |       |       | 168   | 66    |
| 28309  | 1    | 2   | No              |      | 1   | Yes            | 2    | 2   | No    |      |       |       | 155   | 60    |
| 28323  |      | 2   | No              |      | 2   | No             |      | 2   | No    |      |       |       | 155   | 58    |
| 28335  |      | 1   | Yes             | 1    | 2   | No             |      | 1   | Yes   | 2    |       |       | 168   | 77    |
| 28354  | 2    | 2   | No              |      | 2   | No             |      | 2   | No    |      |       |       | 168   | 77    |

| respid | Q11a | Q12 | Cardiac Disease | Q12a | Q13 | Hyperlipidemia | Q13a | Q14 | Neuro | Q14a | Q15_1 | Q15_2 | Q15_3 | Q16_1 |
|--------|------|-----|-----------------|------|-----|----------------|------|-----|-------|------|-------|-------|-------|-------|
| 28355  | 1    | 2   | No              |      | 1   | Yes            | 1    | 2   | No    |      |       |       | 168   | 55    |
| 28356  |      | 2   | No              |      | 2   | No             |      | 1   | Yes   | 1    |       |       | 160   | 66    |
| 28357  | 1    | 2   | No              |      | 2   | No             |      | 2   | No    |      |       |       | 175   | 58    |
| 28363  |      | 2   | No              |      | 2   | No             |      | 2   | No    |      |       |       | 170   | 60    |
| 28366  |      | 2   | No              |      | 2   | No             |      | 2   | No    |      |       |       | 175   | 65    |
| 28372  |      | 2   | No              |      | 2   | No             |      | 2   | No    |      |       |       | 160   | 48    |
| 28381  |      | 2   | No              |      | 1   | Yes            | 2    | 2   | No    |      |       |       | 170   | 75    |
| 28388  |      | 2   | No              |      | 2   | No             |      | 2   | No    |      |       |       | 165   | 68    |
| 28413  | 2    | 2   | No              |      | 2   | No             |      | 2   | No    |      |       |       | 168   | 77    |
| 28421  |      | 2   | No              |      | 2   | No             |      | 2   | No    |      |       |       | 165   | 65    |
| 28430  |      | 2   | No              |      | 2   | No             |      | 2   | No    |      |       |       | 168   | 77    |
| 28439  |      | 2   | No              |      | 2   | No             |      | 2   | No    |      |       |       | 168   | 77    |
| 28458  | 2    | 2   | No              |      | 1   | Yes            | 1    | 2   | No    |      |       |       | 170   | 75    |
| 28461  |      | 2   | No              |      | 2   | No             |      | 2   | No    |      |       |       | 172   | 65    |
| 28466  | 2    | 2   | No              |      | 2   | No             |      | 2   | No    |      |       |       | 162   | 65    |
| 28492  |      | 2   | No              |      | 2   | No             |      | 2   | No    |      |       |       | 170   | 56    |
| 28534  |      | 2   | No              |      | 2   | No             |      | 2   | No    |      |       |       | 160   | 63    |
| 28537  |      | 2   | No              |      | 2   | No             |      | 2   | No    |      |       |       | 177   | 77    |
| 28560  |      | 2   | No              |      | 2   | No             |      | 2   | No    |      |       |       | 172   | 65    |
| 28566  |      | 2   | No              |      | 2   | No             |      | 1   | Yes   | 2    |       |       | 145   | 47    |
| 28569  | 1    | 2   | No              |      | 1   | Yes            | 2    | 2   | No    |      |       |       | 175   | 72    |
| 28584  | 2    | 2   | No              |      | 2   | No             |      | 2   | No    |      |       |       | 172   | 60    |
| 28590  |      | 2   | No              |      | 2   | No             |      | 2   | No    |      |       |       | 168   | 62    |
| 28596  | 1    | 2   | No              |      | 2   | No             |      | 2   | No    |      |       |       | 172   | 65    |
| 28608  |      | 2   | No              |      | 2   | No             |      | 2   | No    |      |       |       | 168   | 69    |
| 28631  | 1    | 1   | Yes             | 1    | 1   | Yes            | 1    | 2   | No    |      |       |       | 160   | 40    |
| 28644  |      | 2   | No              |      | 2   | No             |      | 2   | No    |      |       |       | 160   | 63    |
| 28646  | 1    | 2   | No              |      | 1   | Yes            | 1    | 2   | No    |      |       |       | 155   | 61    |
| 28665  |      | 2   | No              |      | 2   | No             |      | 2   | No    |      |       |       | 165   | 75    |
| 28686  |      | 2   | No              |      | 2   | No             |      | 2   | No    |      |       |       | 172   | 65    |
| 28704  |      | 2   | No              |      | 2   | No             |      | 2   | No    |      |       |       | 163   | 59    |
| 28719  | 2    | 2   | No              |      | 2   | No             |      | 2   | No    |      |       |       | 178   | 65    |

| respid | Q11a | Q12 | Cardiac Disease | Q12a | Q13 | Hyperlipidemia | Q13a | Q14 | Neuro | Q14a | Q15_1 | Q15_2 | Q15_3 | Q16_1 |
|--------|------|-----|-----------------|------|-----|----------------|------|-----|-------|------|-------|-------|-------|-------|
| 28736  | 1    | 2   | No              |      | 2   | No             |      | 2   | No    |      |       |       | 170   | 70    |
| 28739  |      | 2   | No              |      | 2   | No             |      | 2   | No    |      |       |       | 170   | 70    |
| 28758  | 1    | 2   | No              |      | 2   | No             |      | 2   | No    |      |       |       | 145   | 45    |
| 28761  |      | 1   | Yes             | 1    | 2   | No             |      | 2   | No    |      |       |       | 160   | 60    |
| 28770  |      | 2   | No              |      | 1   | Yes            | 1    | 2   | No    |      |       |       | 168   | 70    |
| 28774  |      | 2   | No              |      | 2   | No             |      | 2   | No    |      |       |       | 163   | 61    |
| 28778  | 1    | 2   | No              |      | 1   | Yes            | 1    | 2   | No    |      |       |       | 175   | 100   |
| 28783  | 2    | 1   | Yes             | 2    | 2   | No             |      | 2   | No    |      |       |       | 180   | 80    |
| 28785  | 1    | 2   | No              |      | 2   | No             |      | 2   | No    |      |       |       | 175   | 70    |
| 28797  | 1    | 2   | No              |      | 2   | No             |      | 2   | No    |      |       |       | 165   | 68    |
| 28801  |      | 1   | Yes             | 1    | 2   | No             |      | 2   | No    |      |       |       | 168   | 68    |
| 28821  |      | 2   | No              |      | 2   | No             |      | 2   | No    |      |       |       | 155   | 50    |
| 28827  | 1    | 2   | No              |      | 2   | No             |      | 2   | No    |      |       |       | 171   | 70    |
| 28828  |      | 2   | No              |      | 1   | Yes            | 2    | 2   | No    |      |       |       | 160   | 62    |
| 28871  |      | 2   | No              |      | 2   | No             |      | 2   | No    |      |       |       | 156   | 70    |
| 28876  |      | 2   | No              |      | 2   | No             |      | 2   | No    |      |       |       | 168   | 57    |
| 28891  |      | 1   | Yes             | 1    | 2   | No             |      | 2   | No    |      |       |       | 171   | 70    |
| 28898  |      | 2   | No              |      | 2   | No             |      | 2   | No    |      |       |       | 162   | 66    |
| 28909  |      | 2   | No              |      | 1   | Yes            | 2    | 2   | No    |      |       |       | 175   | 83    |
| 28930  |      | 2   | No              |      | 2   | No             |      | 2   | No    |      |       |       | 160   | 60    |
| 28935  |      | 2   | No              |      | 1   | Yes            | 2    | 2   | No    |      |       |       | 163   | 65    |
| 28964  |      | 2   | No              |      | 2   | No             |      | 2   | No    |      |       |       | 165   | 71    |
| 28965  |      | 2   | No              |      | 2   | No             |      | 2   | No    |      |       |       | 169   | 78    |
| 28967  |      | 2   | No              |      | 2   | No             |      | 2   | No    |      |       |       | 172   | 76    |
| 28975  |      | 2   | No              |      | 2   | No             |      | 2   | No    |      |       |       | 157   | 48    |
| 28982  |      | 2   | No              |      | 1   | Yes            | 2    | 2   | No    |      |       |       | 169   | 64    |
| 28989  | 1    | 2   | No              |      | 2   | No             |      | 2   | No    |      |       |       | 176   | 68    |
| 29003  |      | 2   | No              |      | 2   | No             |      | 2   | No    |      |       |       | 172   | 68    |
| 29004  | 1    | 2   | No              |      | 2   | No             |      | 2   | No    |      |       |       | 160   | 65    |
| 29007  |      | 2   | No              |      | 1   | Yes            | 1    | 2   | No    |      |       |       | 161   | 55    |
| 29008  | 1    | 1   | Yes             | 1    | 2   | No             |      | 1   | Yes   | 1    |       |       | 150   | 60    |
| 29011  |      | 2   | No              |      | 2   | No             |      | 2   | No    |      | 5     | 2     |       | 66    |



| respid | Q11a | Q12 | Cardiac Disease | Q12a | Q13 | Hyperlipidemia | Q13a | Q14 | Neuro | Q14a | Q15_1 | Q15_2 | Q15_3 | Q16_1 |
|--------|------|-----|-----------------|------|-----|----------------|------|-----|-------|------|-------|-------|-------|-------|
| 29012  |      | 2   | No              |      | 2   | No             |      | 2   | No    |      |       |       | 172   | 78    |
| 29014  | 1    | 2   | No              |      | 2   | No             |      | 2   | No    |      |       |       | 160   | 67    |
| 29016  |      | 1   | Yes             | 2    | 2   | No             |      | 2   | No    |      |       |       | 160   | 60    |
| 29018  | 1    | 2   | No              |      | 1   | Yes            | 2    | 2   | No    |      |       |       | 160   | 50    |
| 29048  |      | 2   | No              |      | 2   | No             |      | 2   | No    |      |       |       | 168   | 60    |
| 29184  |      | 2   | No              |      | 2   | No             |      | 2   | No    |      |       |       | 165   | 52    |
| 29237  |      | 2   | No              |      | 2   | No             |      | 2   | No    |      |       |       | 162   | 57    |
| 29252  |      | 2   | No              |      | 2   | No             |      | 2   | No    |      |       |       | 166   | 110   |
| 29267  |      | 2   | No              |      | 2   | No             |      | 2   | No    |      |       |       | 178   | 78    |
| 29276  | 1    | 2   | No              |      | 2   | No             |      | 2   | No    |      |       |       | 180   | 70    |
| 29281  | 1    | 2   | No              |      | 1   | Yes            | 1    | 2   | No    |      |       |       | 155   | 60    |
| 29285  |      | 2   | No              |      | 2   | No             |      | 2   | No    |      |       |       | 170   | 65    |
| 29291  | 1    | 1   | Yes             | 1    | 1   | Yes            | 1    | 2   | No    |      |       |       | 176   | 80    |
| 29304  | 1    | 2   | No              |      | 2   | No             |      | 2   | No    |      |       |       | 165   | 70    |
| 29323  | 2    | 2   | No              |      | 1   | Yes            | 2    | 2   | No    |      |       |       | 155   | 45    |
| 29330  |      | 2   | No              |      | 2   | No             |      | 2   | No    |      |       |       | 168   | 65    |
| 29357  |      | 2   | No              |      | 2   | No             |      | 2   | No    |      |       |       | 175   | 70    |
| 29416  |      | 2   | No              |      | 2   | No             |      | 2   | No    |      |       |       | 178   | 65    |
| 29432  |      | 2   | No              |      | 1   | Yes            | 2    | 2   | No    |      |       |       | 169   | 64    |
| 29482  |      | 2   | No              |      | 2   | No             |      | 2   | No    |      |       |       | 160   | 48    |
| 29506  | 2    | 1   | Yes             | 2    | 1   | Yes            | 1    | 2   | No    |      |       |       | 175   | 105   |
| 29509  | 1    | 1   | Yes             | 1    | 2   | No             |      | 2   | No    |      |       |       | 176   | 71    |
| 29512  |      | 2   | No              |      | 2   | No             |      | 2   | No    |      |       |       | 158   | 45    |
| 29519  |      | 2   | No              |      | 2   | No             |      | 2   | No    |      |       |       | 154   | 48    |
| 29520  |      | 2   | No              |      | 2   | No             |      | 2   | No    |      |       |       | 155   | 58    |
| 29521  |      | 2   | No              |      | 2   | No             |      | 2   | No    |      |       |       | 150   | 40    |
| 29529  | 1    | 2   | No              |      | 2   | No             |      | 2   | No    |      |       |       | 160   | 55    |
| 29532  | 1    | 2   | No              |      | 2   | No             |      | 2   | No    |      |       |       | 167   | 87    |
| 29547  |      | 2   | No              |      | 1   | Yes            | 1    | 2   | No    |      |       |       | 155   | 38    |
| 29551  | 1    | 2   | No              |      | 2   | No             |      | 2   | No    |      |       |       | 168   | 70    |
| 29584  | 2    | 1   | Yes             | 2    | 1   | Yes            | 1    | 2   | No    |      |       |       | 160   | 63    |
| 29591  |      | 2   | No              |      | 2   | No             |      | 2   | No    |      |       |       | 166   | 62    |

| respid | Q11a | Q12 | Cardiac Disease | Q12a | Q13 | Hyperlipidemia | Q13a | Q14 | Neuro | Q14a | Q15_1 | Q15_2 | Q15_3 | Q16_1 |
|--------|------|-----|-----------------|------|-----|----------------|------|-----|-------|------|-------|-------|-------|-------|
| 29613  |      | 2   | No              |      | 2   | No             |      | 2   | No    |      |       |       | 158   | 62    |
| 29615  |      | 2   | No              |      | 2   | No             |      | 2   | No    |      |       |       | 160   | 60    |
| 29625  |      | 2   | No              |      | 1   | Yes            | 2    | 2   | No    |      |       |       | 178   | 100   |
| 29660  |      | 2   | No              |      | 2   | No             |      | 2   | No    |      |       |       | 156   | 60    |
| 29677  |      | 2   | No              |      | 2   | No             |      | 2   | No    |      |       |       | 158   | 53    |
| 29700  | 1    | 2   | No              |      | 2   | No             |      | 2   | No    |      |       |       | 176   | 90    |
| 29715  |      | 2   | No              |      | 2   | No             |      | 2   | No    |      |       |       | 170   | 60    |
| 29720  |      | 2   | No              |      | 2   | No             |      | 2   | No    |      |       |       | 160   | 60    |
| 29730  |      | 2   | No              |      | 2   | No             |      | 2   | No    |      |       |       | 170   | 55    |
| 29734  |      | 2   | No              |      | 2   | No             |      | 2   | No    |      |       |       | 163   | 65    |
| 29754  |      | 2   | No              |      | 2   | No             |      | 2   | No    |      |       |       | 152   | 50    |
| 29771  |      | 2   | No              |      | 2   | No             |      | 2   | No    |      |       |       | 168   | 55    |
| 29774  |      | 2   | No              |      | 1   | Yes            | 2    | 2   | No    |      |       |       | 168   | 100   |
| 29783  |      | 2   | No              |      | 2   | No             |      | 2   | No    |      |       |       | 160   | 60    |
| 29812  |      | 2   | No              |      | 2   | No             |      | 2   | No    |      |       |       | 160   | 63    |
| 29813  |      | 2   | No              |      | 2   | No             |      | 2   | No    |      |       |       | 175   | 76    |
| 29814  |      | 2   | No              |      | 2   | No             |      | 2   | No    |      |       |       | 160   | 60    |
| 29820  | 1    | 2   | No              |      | 1   | Yes            | 2    | 2   | No    |      |       |       | 170   | 70    |
| 29906  | 1    | 2   | No              |      | 1   | Yes            | 2    | 2   | No    |      |       |       | 162   | 67    |
| 29907  |      | 2   | No              |      | 1   | Yes            | 2    | 2   | No    |      |       |       | 162   | 67    |
| 29928  |      | 2   | No              |      | 1   | Yes            | 2    | 2   | No    |      |       |       | 163   | 55    |
| 29932  | 1    | 2   | No              |      | 1   | Yes            | 2    | 2   | No    |      |       |       | 160   | 65    |
| 29958  |      | 2   | No              |      | 2   | No             |      | 2   | No    |      |       |       | 160   | 55    |
| 29982  |      | 2   | No              |      | 2   | No             |      | 2   | No    |      |       |       | 156   | 45    |
| 29989  |      | 2   | No              |      | 2   | No             |      | 2   | No    |      | 5     | 5     |       | 65    |
| 29994  |      | 2   | No              |      | 2   | No             |      | 2   | No    |      |       |       | 164   | 64    |
| 30005  |      | 2   | No              |      | 2   | No             |      | 2   | No    |      |       |       | 157   | 50    |
| 30077  | 1    | 2   | No              |      | 2   | No             |      | 2   | No    |      | 5     | 10    |       | 52    |
| 30098  |      | 2   | No              |      | 2   | No             |      | 2   | No    |      |       |       | 178   | 90    |
| 30107  | 1    | 1   | Yes             | 1    | 2   | No             |      | 2   | No    |      |       |       | 160   | 45    |
| 30154  | 2    | 1   | Yes             | 2    | 1   | Yes            | 2    | 2   | No    |      |       |       | 165   | 65    |
| 30159  | 1    | 2   | No              |      | 2   | No             |      | 2   | No    |      |       |       | 175   | 70    |

| respid | Q11a | Q12 | Cardiac Disease | Q12a | Q13 | Hyperlipidemia | Q13a | Q14 | Neuro | Q14a | Q15_1 | Q15_2 | Q15_3 | Q16_1 |
|--------|------|-----|-----------------|------|-----|----------------|------|-----|-------|------|-------|-------|-------|-------|
| 30162  |      | 2   | No              |      | 2   | No             |      | 2   | No    |      |       |       | 156   | 60    |
| 30163  |      | 2   | No              |      | 2   | No             |      | 2   | No    |      |       |       | 175   | 68    |
| 30189  |      | 2   | No              |      | 2   | No             |      | 2   | No    |      |       |       | 160   | 53    |
| 30230  |      | 2   | No              |      | 2   | No             |      | 2   | No    |      |       |       | 155   | 55    |
| 30259  |      | 2   | No              |      | 2   | No             |      | 2   | No    |      |       |       | 170   | 70    |
| 30284  |      | 2   | No              |      | 2   | No             |      | 2   | No    |      |       |       | 170   | 68    |
| 30296  |      | 2   | No              |      | 2   | No             |      | 2   | No    |      |       |       | 158   | 53    |
| 30330  | 1    | 2   | No              |      | 2   | No             |      | 2   | No    |      |       |       | 172   | 80    |
| 30341  |      | 2   | No              |      | 2   | No             |      | 2   | No    |      |       |       | 158   | 73    |
| 30352  | 1    | 2   | No              |      | 2   | No             |      | 2   | No    |      |       |       | 155   | 50    |
| 30379  |      | 2   | No              |      | 2   | No             |      | 2   | No    |      |       |       | 166   | 77    |
| 30424  |      | 2   | No              |      | 2   | No             |      | 2   | No    |      |       |       | 160   | 62    |
| 30447  |      | 2   | No              |      | 2   | No             |      | 2   | No    |      |       |       | 160   | 55    |
| 30477  | 1    | 1   | Yes             | 1    | 1   | Yes            | 1    | 2   | No    |      |       |       | 175   | 80    |
| 30503  | 1    | 2   | No              |      | 1   | Yes            | 1    | 2   | No    |      |       |       | 160   | 60    |
| 30515  | 1    | 2   | No              |      | 1   | Yes            | 1    | 2   | No    |      |       |       | 168   | 60    |
| 30516  |      | 2   | No              |      | 2   | No             |      | 2   | No    |      |       |       | 160   | 55    |
| 30623  | 1    | 1   | Yes             | 1    | 2   | No             |      | 2   | No    |      |       |       | 167   | 65    |
| 30639  |      | 2   | No              |      | 2   | No             |      | 2   | No    |      |       |       | 170   | 70    |
| 30670  |      | 2   | No              |      | 2   | No             |      | 2   | No    |      |       |       | 168   | 50    |
| 30697  |      | 2   | No              |      | 2   | No             |      | 2   | No    |      |       |       | 162   | 62    |
| 30735  |      | 2   | No              |      | 1   | Yes            | 1    | 2   | No    |      |       |       | 160   | 60    |
| 30742  | 1    | 2   | No              |      | 1   | Yes            | 2    | 2   | No    |      |       |       | 166   | 68    |
| 30751  |      | 2   | No              |      | 2   | No             |      | 2   | No    |      |       |       | 170   | 67    |
| 30789  |      | 2   | No              |      | 2   | No             |      | 2   | No    |      |       |       | 167   | 65    |
| 30867  | 2    | 1   | Yes             | 2    | 1   | Yes            | 1    | 1   | Yes   | 2    |       |       | 168   | 77    |
| 30876  |      | 2   | No              |      | 2   | No             |      | 2   | No    |      |       |       | 170   | 60    |
| 30877  |      | 2   | No              |      | 2   | No             |      | 2   | No    |      |       |       | 180   | 75    |
| 30887  |      | 2   | No              |      | 2   | No             |      | 2   | No    |      |       |       | 178   | 76    |
| 30891  | 1    | 1   | Yes             | 2    | 2   | No             |      | 2   | No    |      |       |       | 165   | 68    |
| 31030  | 2    | 2   | No              |      | 2   | No             |      | 2   | No    |      |       |       | 160   | 60    |
| 31059  | 1    | 2   | No              |      | 1   | Yes            | 2    | 2   | No    |      |       |       | 147   | 63    |

| respid | Q11a | Q12 | Cardiac Disease | Q12a | Q13 | Hyperlipidemia | Q13a | Q14 | Neuro | Q14a | Q15_1 | Q15_2 | Q15_3 | Q16_1 |
|--------|------|-----|-----------------|------|-----|----------------|------|-----|-------|------|-------|-------|-------|-------|
| 31082  |      | 2   | No              |      | 2   | No             |      | 2   | No    |      |       |       | 168   | 50    |
| 31106  |      | 2   | No              |      | 1   | Yes            | 2    | 2   | No    |      |       |       | 160   | 65    |
| 31110  |      | 2   | No              |      | 2   | No             |      | 2   | No    |      |       |       | 172   | 72    |
| 31265  |      | 2   | No              |      | 2   | No             |      | 2   | No    |      |       |       | 156   | 55    |
| 31266  |      | 2   | No              |      | 2   | No             |      | 2   | No    |      |       |       | 164   | 65    |
| 31267  |      | 2   | No              |      | 2   | No             |      | 2   | No    |      |       |       | 160   | 60    |
| 31310  |      | 2   | No              |      | 2   | No             |      | 2   | No    |      |       |       | 168   | 70    |
| 31325  |      | 2   | No              |      | 2   | No             |      | 2   | No    |      |       |       | 185   | 70    |
| 31367  |      | 2   | No              |      | 2   | No             |      | 2   | No    |      |       |       | 188   | 78    |
| 31389  |      | 2   | No              |      | 2   | No             |      | 2   | No    |      |       |       | 171   | 50    |
| 31440  | 1    | 2   | No              |      | 1   | Yes            | 1    | 2   | No    |      |       |       | 150   | 60    |
| 31465  | 2    | 2   | No              |      | 2   | No             |      | 2   | No    |      |       |       | 160   | 70    |
| 31477  |      | 2   | No              |      | 2   | No             |      | 2   | No    |      |       |       | 160   | 50    |
| 31491  | 1    | 2   | No              |      | 1   | Yes            | 2    | 2   | No    |      |       |       | 158   | 67    |
| 31494  |      | 2   | No              |      | 2   | No             |      | 2   | No    |      |       |       | 170   | 55    |
| 31509  |      | 2   | No              |      | 2   | No             |      | 2   | No    |      |       |       | 178   | 68    |
| 31533  |      | 2   | No              |      | 2   | No             |      | 2   | No    |      |       |       | 170   | 65    |
| 31547  |      | 2   | No              |      | 1   | Yes            | 1    | 2   | No    |      |       |       | 153   | 62    |
| 31558  |      | 2   | No              |      | 1   | Yes            | 2    | 2   | No    |      |       |       | 150   | 58    |
| 31579  |      | 2   | No              |      | 2   | No             |      | 2   | No    |      |       |       | 164   | 50    |
| 31591  |      | 2   | No              |      | 2   | No             |      | 2   | No    |      |       |       | 155   | 54    |
| 31596  |      | 2   | No              |      | 2   | No             |      | 2   | No    |      |       |       | 160   | 50    |
| 31601  | 2    | 2   | No              |      | 2   | No             |      | 2   | No    |      |       |       | 178   | 70    |
| 31605  |      | 2   | No              |      | 2   | No             |      | 2   | No    |      |       |       | 160   | 60    |
| 31637  |      | 2   | No              |      | 2   | No             |      | 2   | No    |      |       |       | 164   | 47    |
| 31646  |      | 2   | No              |      | 2   | No             |      | 2   | No    |      |       |       | 156   | 57    |
| 31647  | 1    | 2   | No              |      | 1   | Yes            | 1    | 2   | No    |      |       |       | 141   | 67    |
| 31650  | 1    | 2   | No              |      | 2   | No             |      | 2   | No    |      |       |       | 168   | 62    |
| 31651  |      | 2   | No              |      | 2   | No             |      | 2   | No    |      | 5     | 8     |       | 50    |
| 31657  |      | 2   | No              |      | 2   | No             |      | 2   | No    |      |       |       | 170   | 66    |
| 31660  | 1    | 2   | No              |      | 1   | Yes            | 1    | 2   | No    |      |       |       | 155   | 58    |
| 31661  |      | 2   | No              |      | 2   | No             |      | 2   | No    |      | 5     | 6     |       | 55    |

| respid | Q11a | Q12 | Cardiac Disease | Q12a | Q13 | Hyperlipidemia | Q13a | Q14 | Neuro | Q14a | Q15_1 | Q15_2 | Q15_3 | Q16_1 |
|--------|------|-----|-----------------|------|-----|----------------|------|-----|-------|------|-------|-------|-------|-------|
| 31667  |      | 2   | No              |      | 2   | No             |      | 2   | No    |      | 5     | 7     |       | 56    |
| 31674  |      | 2   | No              |      | 2   | No             |      | 2   | No    |      | 5     | 6     |       | 60    |
| 31686  | 1    | 2   | No              |      | 1   | Yes            | 1    | 2   | No    |      |       |       | 165   | 71    |
| 31693  |      | 2   | No              |      | 2   | No             |      | 2   | No    |      |       |       | 170   | 71    |
| 31716  |      | 2   | No              |      | 2   | No             |      | 2   | No    |      |       |       | 170   | 62    |
| 31818  |      | 2   | No              |      | 2   | No             |      | 2   | No    |      |       |       | 175   | 76    |
| 31886  | 1    | 2   | No              |      | 1   | Yes            | 2    | 2   | No    |      |       |       | 175   | 77    |
| 31945  | 1    | 2   | No              |      | 2   | No             |      | 2   | No    |      |       |       | 170   | 65    |
| 31957  | 1    | 1   | Yes             | 2    | 1   | Yes            | 2    | 2   | No    |      |       |       | 158   | 65    |
| 31966  | 1    | 2   | No              |      | 2   | No             |      | 2   | No    |      |       |       | 175   | 75    |
| 31978  | 1    | 2   | No              |      | 1   | Yes            | 1    | 2   | No    |      |       |       | 160   | 75    |
| 31999  |      | 1   | Yes             | 1    | 1   | Yes            | 1    | 2   | No    |      |       |       | 155   | 79    |
| 32026  | 1    | 2   | No              |      | 2   | No             |      | 1   | Yes   | 1    |       |       | 158   | 50    |
| 32033  |      | 2   | No              |      | 2   | No             |      | 2   | No    |      |       |       | 158   | 48    |
| 32037  |      | 2   | No              |      | 2   | No             |      | 2   | No    |      |       |       | 159   | 55    |
| 32038  |      | 2   | No              |      | 2   | No             |      | 2   | No    |      |       |       | 165   | 65    |
| 32047  |      | 2   | No              |      | 2   | No             |      | 2   | No    |      |       |       | 160   | 55    |
| 32053  |      | 2   | No              |      | 2   | No             |      | 2   | No    |      |       |       | 170   | 66    |
| 32069  | 1    | 2   | No              |      | 2   | No             |      | 2   | No    |      |       |       | 156   | 65    |
| 32081  | 1    | 1   | Yes             | 1    | 2   | No             |      | 2   | No    |      |       |       | 175   | 65    |
| 32123  |      | 2   | No              |      | 2   | No             |      | 2   | No    |      |       |       | 159   | 60    |
| 32130  |      | 2   | No              |      | 1   | Yes            | 1    | 2   | No    |      |       |       | 157   | 58    |
| 32141  |      | 2   | No              |      | 2   | No             |      | 2   | No    |      |       |       | 169   | 68    |
| 32158  |      | 2   | No              |      | 2   | No             |      | 2   | No    |      |       |       | 180   | 80    |
| 32165  | 1    | 2   | No              |      | 1   | Yes            | 1    | 2   | No    |      |       |       | 170   | 65    |
| 32180  |      | 2   | No              |      | 2   | No             |      | 2   | No    |      |       |       | 149   | 50    |
| 32221  | 1    | 1   | Yes             | 1    | 2   | No             |      | 2   | No    |      |       |       | 165   | 60    |
| 32292  |      | 2   | No              |      | 1   | Yes            | 1    | 2   | No    |      |       |       | 165   | 63    |
| 32318  |      | 2   | No              |      | 2   | No             |      | 2   | No    |      |       |       | 160   | 53    |
| 32346  | 2    | 2   | No              |      | 2   | No             |      | 2   | No    |      |       |       | 167   | 65    |
| 32402  | 1    | 2   | No              |      | 1   | Yes            | 1    | 2   | No    |      |       |       | 170   | 70    |
| 32422  |      | 2   | No              |      | 2   | No             |      | 2   | No    |      |       |       | 162   | 60    |

| respid | Q11a | Q12 | Cardiac Disease | Q12a | Q13 | Hyperlipidemia | Q13a | Q14 | Neuro | Q14a | Q15_1 | Q15_2 | Q15_3 | Q16_1 |
|--------|------|-----|-----------------|------|-----|----------------|------|-----|-------|------|-------|-------|-------|-------|
| 32439  |      | 2   | No              |      | 2   | No             |      | 2   | No    |      |       |       | 167   | 78    |
| 32507  |      | 2   | No              |      | 2   | No             |      | 2   | No    |      |       |       | 165   | 85    |
| 32522  |      | 2   | No              |      | 2   | No             |      | 2   | No    |      |       |       | 175   | 60    |
| 32535  |      | 2   | No              |      | 2   | No             |      | 2   | No    |      |       |       | 170   | 70    |
| 32546  |      | 2   | No              |      | 2   | No             |      | 2   | No    |      |       |       | 159   | 45    |
| 32553  |      | 2   | No              |      | 2   | No             |      | 2   | No    |      |       |       | 171   | 65    |
| 32570  |      | 2   | No              |      | 2   | No             |      | 2   | No    |      |       |       | 179   | 65    |
| 32592  | 2    | 1   | Yes             | 1    | 2   | No             |      | 2   | No    |      |       |       | 170   | 65    |
| 32605  |      | 1   | Yes             | 2    | 2   | No             |      | 2   | No    |      |       |       | 155   | 57    |
| 32630  |      | 2   | No              |      | 2   | No             |      | 2   | No    |      | 6     | 7     |       | 75    |
| 32642  | 1    | 1   | Yes             | 1    | 2   | No             |      | 2   | No    |      | 5     | 6     |       | 120   |
| 32646  |      | 2   | No              |      | 1   | Yes            | 1    | 2   | No    |      |       |       | 150   | 70    |
| 32665  |      | 2   | No              |      | 2   | No             |      | 2   | No    |      |       |       | 156   | 60    |
| 32677  |      | 2   | No              |      | 1   | Yes            | 1    | 2   | No    |      |       |       | 150   | 65    |
| 32694  | 1    | 2   | No              |      | 1   | Yes            | 1    | 2   | No    |      |       |       | 156   | 80    |
| 32698  |      | 2   | No              |      | 2   | No             |      | 2   | No    |      |       |       | 158   | 63    |
| 32754  | 1    | 2   | No              |      | 2   | No             |      | 1   | Yes   | 1    |       |       | 157   | 64    |
| 32799  |      | 2   | No              |      | 1   | Yes            | 2    | 2   | No    |      |       |       | 168   | 65    |
| 32816  | 1    | 2   | No              |      | 2   | No             |      | 2   | No    |      |       |       | 172   | 80    |
| 32819  | 1    | 2   | No              |      | 2   | No             |      | 2   | No    |      |       |       | 160   | 48    |
| 32840  |      | 1   | Yes             | 1    | 2   | No             |      | 2   | No    |      |       |       | 163   | 62    |
| 32861  | 1    | 2   | No              |      | 2   | No             |      | 2   | No    |      |       |       | 170   | 80    |
| 32866  |      | 2   | No              |      | 2   | No             |      | 2   | No    |      |       |       | 158   | 50    |
| 32889  |      | 2   | No              |      | 2   | No             |      | 2   | No    |      |       |       | 165   | 55    |
| 32960  |      | 2   | No              |      | 2   | No             |      | 2   | No    |      |       |       | 175   | 65    |
| 32965  |      | 2   | No              |      | 2   | No             |      | 2   | No    |      |       |       | 152   | 45    |
| 32986  |      | 2   | No              |      | 2   | No             |      | 2   | No    |      |       |       | 166   | 70    |
| 33005  | 1    | 2   | No              |      | 2   | No             |      | 2   | No    |      |       |       | 158   | 61    |
| 33054  | 1    | 2   | No              |      | 1   | Yes            | 2    | 2   | No    |      | 5     | 6     |       | 73    |
| 33072  |      | 2   | No              |      | 1   | Yes            | 2    | 2   | No    |      |       |       | 165   | 57    |
| 33095  | 1    | 1   | Yes             | 1    | 2   | No             |      | 2   | No    |      |       |       | 175   | 70    |
| 33099  | 1    | 2   | No              |      | 2   | No             |      | 2   | No    |      |       |       | 168   | 65    |

| respid | Q11a | Q12 | Cardiac Disease | Q12a | Q13 | Hyperlipidemia | Q13a | Q14 | Neuro | Q14a | Q15_1 | Q15_2 | Q15_3 | Q16_1 |
|--------|------|-----|-----------------|------|-----|----------------|------|-----|-------|------|-------|-------|-------|-------|
| 33121  | 1    | 2   | No              |      | 2   | No             |      | 2   | No    |      |       |       | 171   | 75    |
| 33152  | 2    | 2   | No              |      | 1   | Yes            | 2    | 1   | Yes   | 1    |       |       | 160   | 55    |
| 33159  | 1    | 1   | Yes             | 1    | 2   | No             |      | 2   | No    |      |       |       | 175   | 70    |
| 33189  | 1    | 2   | No              |      | 2   | No             |      | 2   | No    |      |       |       | 165   | 70    |
| 33198  | 1    | 1   | Yes             | 1    | 2   | No             |      | 2   | No    |      |       |       | 164   | 57    |
| 33202  | 1    | 1   | Yes             | 1    | 1   | Yes            | 1    | 2   | No    |      |       |       | 170   | 70    |
| 33204  |      | 2   | No              |      | 2   | No             |      | 2   | No    |      |       |       | 175   | 75    |
| 33224  |      | 2   | No              |      | 2   | No             |      | 2   | No    |      |       |       | 170   | 64    |
| 33272  | 1    | 2   | No              |      | 2   | No             |      | 2   | No    |      |       |       | 155   | 60    |
| 33294  | 1    | 1   | Yes             | 2    | 1   | Yes            | 1    | 2   | No    |      |       |       | 154   | 78    |
| 33300  |      | 2   | No              |      | 2   | No             |      | 2   | No    |      | 4     | 7     |       | 60    |
| 33314  | 1    | 2   | No              |      | 1   | Yes            | 1    | 2   | No    |      | 5     | 4     |       | 46    |
| 33338  |      | 2   | No              |      | 2   | No             |      | 2   | No    |      |       |       | 168   | 49    |
| 33350  |      | 2   | No              |      | 2   | No             |      | 2   | No    |      |       |       | 170   | 68    |
| 33362  |      | 2   | No              |      | 2   | No             |      | 2   | No    |      |       |       | 172   | 70    |
| 33368  |      | 2   | No              |      | 2   | No             |      | 2   | No    |      | 5     | 8     |       | 66    |
| 33374  |      | 2   | No              |      | 1   | Yes            | 1    | 2   | No    |      |       |       | 170   | 80    |
| 33380  | 1    | 2   | No              |      | 1   | Yes            | 1    | 2   | No    |      |       |       | 176   | 75    |
| 33385  |      | 2   | No              |      | 2   | No             |      | 2   | No    |      |       |       | 176   | 72    |
| 33402  |      | 2   | No              |      | 2   | No             |      | 2   | No    |      |       |       | 175   | 75    |
| 33414  |      | 2   | No              |      | 2   | No             |      | 2   | No    |      |       |       | 170   | 70    |
| 33439  |      | 2   | No              |      | 2   | No             |      | 2   | No    |      |       |       | 169   | 69    |
| 33449  |      | 2   | No              |      | 2   | No             |      | 2   | No    |      |       |       | 175   | 73    |
| 33533  |      | 1   | Yes             | 1    | 1   | Yes            | 1    | 2   | No    |      |       |       | 164   | 55    |
| 33540  |      | 2   | No              |      | 2   | No             |      | 2   | No    |      |       |       | 150   | 35    |
| 33556  |      | 2   | No              |      | 2   | No             |      | 2   | No    |      |       |       | 158   | 60    |
| 33615  |      | 2   | No              |      | 2   | No             |      | 2   | No    |      |       |       | 158   | 48    |
| 33694  | 1    | 2   | No              |      | 1   | Yes            | 1    | 2   | No    |      |       |       | 170   | 88    |
| 33717  | 1    | 1   | Yes             | 1    | 2   | No             |      | 2   | No    |      |       |       | 175   | 80    |
| 33729  | 1    | 2   | No              |      | 1   | Yes            | 1    | 2   | No    |      |       |       | 165   | 57    |
| 33746  |      | 2   | No              |      | 1   | Yes            | 1    | 2   | No    |      |       |       | 156   | 60    |
| 33764  |      | 2   | No              |      | 2   | No             |      | 2   | No    |      |       |       | 160   | 48    |

| respid | Q11a | Q12 | Cardiac Disease | Q12a | Q13 | Hyperlipidemia | Q13a | Q14 | Neuro | Q14a | Q15_1 | Q15_2 | Q15_3 | Q16_1 |
|--------|------|-----|-----------------|------|-----|----------------|------|-----|-------|------|-------|-------|-------|-------|
| 33790  | 1    | 1   | Yes             | 1    | 2   | No             |      | 2   | No    |      |       |       | 151   | 54    |
| 33868  | 2    | 2   | No              |      | 1   | Yes            | 2    | 2   | No    |      |       |       | 167   | 52    |
| 33872  |      | 2   | No              |      | 2   | No             |      | 2   | No    |      |       |       | 170   | 60    |
| 33883  |      | 2   | No              |      | 2   | No             |      | 2   | No    |      |       |       | 158   | 60    |
| 33884  |      | 2   | No              |      | 2   | No             |      | 2   | No    |      |       |       | 168   | 65    |
| 33900  |      | 2   | No              |      | 2   | No             |      | 2   | No    |      |       |       | 156   | 57    |
| 33933  | 1    | 1   | Yes             | 1    | 2   | No             |      | 1   | Yes   | 1    |       |       | 156   | 52    |
| 33949  | 2    | 2   | No              |      | 1   | Yes            | 2    | 2   | No    |      |       |       | 170   | 62    |
| 34005  | 1    | 1   | Yes             | 1    | 2   | No             |      | 2   | No    |      |       |       | 175   | 70    |
| 34016  |      | 2   | No              |      | 2   | No             |      | 2   | No    |      |       |       | 158   | 63    |
| 34041  |      | 2   | No              |      | 2   | No             |      | 2   | No    |      |       |       | 162   | 58    |
| 34053  | 1    | 1   | Yes             | 2    | 2   | No             |      | 2   | No    |      |       |       | 156   | 50    |
| 34056  |      | 1   | Yes             | 1    | 2   | No             |      | 2   | No    |      |       |       | 160   | 50    |
| 34093  |      | 1   | Yes             | 2    | 2   | No             |      | 2   | No    |      | 4     | 4     |       | 53    |
| 34112  | 1    | 2   | No              |      | 2   | No             |      | 2   | No    |      |       |       | 160   | 53    |
| 34136  |      | 2   | No              |      | 2   | No             |      | 2   | No    |      |       |       | 170   | 65    |
| 34138  |      | 2   | No              |      | 2   | No             |      | 2   | No    |      |       |       | 152   | 56    |
| 34139  | 1    | 2   | No              |      | 2   | No             |      | 2   | No    |      |       |       | 172   | 60    |
| 34189  | 1    | 2   | No              |      | 2   | No             |      | 2   | No    |      |       |       | 160   | 66    |
| 34239  |      | 2   | No              |      | 1   | Yes            | 2    | 2   | No    |      |       |       | 153   | 55    |
| 34240  | 1    | 2   | No              |      | 1   | Yes            | 2    | 2   | No    |      |       |       | 160   | 65    |
| 34241  |      | 2   | No              |      | 2   | No             |      | 2   | No    |      |       |       | 168   | 63    |
| 34259  | 2    | 2   | No              |      | 2   | No             |      | 2   | No    |      | 5     | 7     |       | 66    |
| 34303  | 1    | 1   | Yes             | 1    | 1   | Yes            | 1    | 2   | No    |      |       |       | 170   | 70    |
| 34306  | 1    | 2   | No              |      | 2   | No             |      | 2   | No    |      |       |       | 165   | 52    |
| 34395  | 1    | 2   | No              |      | 1   | Yes            | 1    | 2   | No    |      |       |       | 163   | 78    |
| 34463  | 1    | 1   | Yes             | 1    | 2   | No             |      | 2   | No    |      |       |       | 172   | 70    |
| 34466  |      | 1   | Yes             | 2    | 2   | No             |      | 2   | No    |      |       |       | 171   | 60    |
| 34471  | 1    | 1   | Yes             | 2    | 1   | Yes            | 2    | 2   | No    |      |       |       | 156   | 60    |
| 34489  | 1    | 2   | No              |      | 2   | No             |      | 2   | No    |      |       |       | 160   | 60    |
| 34518  | 1    | 2   | No              |      | 1   | Yes            | 1    | 2   | No    |      |       |       | 158   | 73    |
| 34542  | 2    | 2   | No              |      | 1   | Yes            | 2    | 2   | No    |      |       |       | 163   | 52    |



| respid | Q11a | Q12 | Cardiac Disease | Q12a | Q13 | Hyperlipidemia | Q13a | Q14 | Neuro | Q14a | Q15_1 | Q15_2 | Q15_3 | Q16_1 |
|--------|------|-----|-----------------|------|-----|----------------|------|-----|-------|------|-------|-------|-------|-------|
| 34595  |      | 2   | No              |      | 2   | No             |      | 2   | No    |      |       |       | 162   | 58    |
| 34604  |      | 2   | No              |      | 2   | No             |      | 2   | No    |      |       |       | 155   | 56    |
| 34631  | 1    | 2   | No              |      | 1   | Yes            | 1    | 2   | No    |      |       |       | 155   | 74    |
| 34665  | 2    | 2   | No              |      | 1   | Yes            | 2    | 2   | No    |      |       |       | 161   | 67    |
| 34716  | 1    | 2   | No              |      | 2   | No             |      | 2   | No    |      |       |       | 176   | 78    |
| 34729  |      | 2   | No              |      | 2   | No             |      | 2   | No    |      |       |       | 175   | 70    |
| 34772  | 1    | 1   | Yes             | 1    | 2   | No             |      | 1   | Yes   | 1    |       |       | 160   | 65    |
| 34800  |      | 2   | No              |      | 1   | Yes            | 2    | 2   | No    |      |       |       | 155   | 60    |
| 34819  | 2    | 2   | No              |      | 2   | No             |      | 2   | No    |      |       |       | 164   | 50    |
| 34829  |      | 2   | No              |      | 1   | Yes            | 1    | 2   | No    |      |       |       | 160   | 55    |
| 34831  |      | 2   | No              |      | 1   | Yes            | 1    | 2   | No    |      |       |       | 155   | 47    |
| 34839  |      | 2   | No              |      | 1   | Yes            | 2    | 2   | No    |      |       |       | 155   | 55    |
| 34868  |      | 2   | No              |      | 2   | No             |      | 2   | No    |      |       |       | 159   | 60    |
| 34869  | 1    | 2   | No              |      | 2   | No             |      | 2   | No    |      |       |       | 170   | 65    |
| 34882  | 1    | 2   | No              |      | 2   | No             |      | 2   | No    |      |       |       | 160   | 45    |
| 34895  | 1    | 2   | No              |      | 2   | No             |      | 2   | No    |      | 5     | 9     |       | 80    |
| 34901  | 2    | 2   | No              |      | 2   | No             |      | 2   | No    |      |       |       | 161   | 65    |
| 34904  | 1    | 2   | No              |      | 1   | Yes            | 1    | 2   | No    |      |       |       | 160   | 60    |
| 34907  | 2    | 2   | No              |      | 2   | No             |      | 2   | No    |      |       |       | 163   | 48    |
| 34914  | 1    | 2   | No              |      | 1   | Yes            | 1    | 1   | Yes   | 1    |       |       | 165   | 70    |
| 34918  | 1    | 2   | No              |      | 1   | Yes            | 1    | 2   | No    |      |       |       | 167   | 76    |
| 34924  |      | 2   | No              |      | 2   | No             |      | 2   | No    |      |       |       | 165   | 65    |
| 34933  |      | 2   | No              |      | 2   | No             |      | 2   | No    |      |       |       | 170   | 60    |
| 34938  | 1    | 2   | No              |      | 2   | No             |      | 2   | No    |      |       |       | 175   | 62    |
| 34952  |      | 2   | No              |      | 2   | No             |      | 2   | No    |      |       |       | 173   | 63    |
| 34959  | 2    | 2   | No              |      | 1   | Yes            | 2    | 2   | No    |      |       |       | 172   | 100   |
| 34972  | 2    | 2   | No              |      | 1   | Yes            | 1    | 2   | No    |      |       |       | 158   | 115   |
| 34973  | 1    | 1   | Yes             | 2    | 1   | Yes            | 2    | 2   | No    |      |       |       | 170   | 65    |
| 34975  |      | 2   | No              |      | 2   | No             |      | 2   | No    |      |       |       | 170   | 63    |
| 34977  |      | 1   | Yes             | 1    | 2   | No             |      | 2   | No    |      |       |       | 176   | 72    |
| 34978  | 1    | 1   | Yes             | 1    | 2   | No             |      | 2   | No    |      |       |       | 148   | 60    |
| 34980  |      | 2   | No              |      | 2   | No             |      | 2   | No    |      |       |       | 185   | 66    |

| respid | Q11a | Q12 | Cardiac Disease | Q12a | Q13 | Hyperlipidemia | Q13a | Q14 | Neuro | Q14a | Q15_1 | Q15_2 | Q15_3 | Q16_1 |
|--------|------|-----|-----------------|------|-----|----------------|------|-----|-------|------|-------|-------|-------|-------|
| 34984  | 1    | 1   | Yes             | 1    | 1   | Yes            | 1    | 2   | No    |      |       |       | 160   | 53    |
| 34986  | 1    | 2   | No              |      | 2   | No             |      | 2   | No    |      |       |       | 170   | 70    |
| 34994  | 1    | 2   | No              |      | 2   | No             |      | 2   | No    |      | 5     | 6     |       | 65    |
| 34996  | 1    | 2   | No              |      | 2   | No             |      | 2   | No    |      |       |       | 160   | 65    |
| 35003  | 1    | 2   | No              |      | 1   | Yes            | 1    | 2   | No    |      |       |       | 177   | 70    |
| 35014  |      | 2   | No              |      | 1   | Yes            | 2    | 2   | No    |      |       |       | 154   | 46    |
| 35029  |      | 1   | Yes             | 2    | 2   | No             |      | 2   | No    |      |       |       | 164   | 67    |
| 35030  |      | 2   | No              |      | 2   | No             |      | 2   | No    |      |       |       | 165   | 60    |
| 35037  | 1    | 2   | No              |      | 2   | No             |      | 2   | No    |      |       |       | 152   | 40    |
| 35043  |      | 2   | No              |      | 2   | No             |      | 2   | No    |      |       |       | 168   | 65    |
| 35048  |      | 2   | No              |      | 2   | No             |      | 2   | No    |      |       |       | 178   | 71    |
| 35055  |      | 2   | No              |      | 2   | No             |      | 2   | No    |      |       |       | 153   | 40    |
| 35067  |      | 2   | No              |      | 2   | No             |      | 2   | No    |      |       |       | 158   | 55    |
| 35072  | 1    | 1   | Yes             | 2    | 2   | No             |      | 2   | No    |      |       |       | 160   | 70    |
| 35078  | 1    | 2   | No              |      | 1   | Yes            | 1    | 2   | No    |      |       |       | 165   | 80    |
| 35084  |      | 2   | No              |      | 1   | Yes            | 1    | 2   | No    |      |       |       | 168   | 64    |
| 35095  |      | 2   | No              |      | 2   | No             |      | 2   | No    |      |       |       | 175   | 70    |
| 35096  |      | 2   | No              |      | 2   | No             |      | 2   | No    |      |       |       | 161   | 57    |
| 35097  | 1    | 2   | No              |      | 1   | Yes            | 1    | 2   | No    |      |       |       | 172   | 70    |
| 35098  |      | 2   | No              |      | 2   | No             |      | 2   | No    |      |       |       | 170   | 60    |
| 35109  | 1    | 1   | Yes             | 1    | 1   | Yes            | 2    | 1   | Yes   | 1    |       |       | 165   | 55    |
| 35114  | 1    | 2   | No              |      | 2   | No             |      | 2   | No    |      |       |       | 160   | 43    |
| 35115  |      | 2   | No              |      | 2   | No             |      | 2   | No    |      |       |       | 158   | 55    |
| 35124  |      | 2   | No              |      | 2   | No             |      | 2   | No    |      |       |       | 155   | 49    |
| 35125  | 2    | 2   | No              |      | 1   | Yes            | 2    | 2   | No    |      |       |       | 165   | 60    |
| 35141  | 1    | 2   | No              |      | 2   | No             |      | 2   | No    |      |       |       | 163   | 45    |
| 35142  |      | 2   | No              |      | 1   | Yes            | 1    | 2   | No    |      |       |       | 156   | 90    |
| 35145  |      | 2   | No              |      | 2   | No             |      | 2   | No    |      |       |       | 152   | 35    |
| 35149  | 1    | 2   | No              |      | 2   | No             |      | 2   | No    |      |       |       | 160   | 80    |
| 35159  | 1    | 2   | No              |      | 1   | Yes            | 1    | 2   | No    |      |       |       | 160   | 58    |
| 35163  | 1    | 2   | No              |      | 1   | Yes            | 1    | 2   | No    |      |       |       | 155   | 51    |
| 35174  | 1    | 2   | No              |      | 1   | Yes            | 1    | 1   | Yes   | 1    |       |       | 155   | 60    |

| respid | Q11a | Q12 | Cardiac Disease | Q12a | Q13 | Hyperlipidemia | Q13a | Q14 | Neuro | Q14a | Q15_1 | Q15_2 | Q15_3 | Q16_1 |
|--------|------|-----|-----------------|------|-----|----------------|------|-----|-------|------|-------|-------|-------|-------|
| 35188  |      | 2   | No              |      | 2   | No             |      | 2   | No    |      |       |       | 165   | 60    |
| 35189  |      | 1   | Yes             | 1    | 2   | No             |      | 2   | No    |      |       |       | 158   | 60    |
| 35201  | 1    | 2   | No              |      | 2   | No             |      | 2   | No    |      |       |       | 150   | 50    |
| 35215  |      | 2   | No              |      | 2   | No             |      | 2   | No    |      | 5     | 9     |       | 60    |
| 35228  | 1    | 2   | No              |      | 2   | No             |      | 2   | No    |      |       |       | 165   | 70    |
| 35235  | 1    | 2   | No              |      | 1   | Yes            | 2    | 2   | No    |      |       |       | 158   | 116   |
| 35239  |      | 2   | No              |      | 2   | No             |      | 2   | No    |      |       |       | 178   | 75    |
| 35243  | 1    | 2   | No              |      | 1   | Yes            | 1    | 1   | Yes   | 1    |       |       | 175   | 65    |
| 35245  |      | 1   | Yes             | 1    | 2   | No             |      | 2   | No    |      |       |       | 169   | 102   |
| 35259  |      | 2   | No              |      | 1   | Yes            | 2    | 2   | No    |      |       |       | 184   | 84    |
| 35265  |      | 2   | No              |      | 2   | No             |      | 2   | No    |      |       |       | 168   | 65    |
| 35272  | 1    | 1   | Yes             | 1    | 1   | Yes            | 1    | 1   | Yes   | 1    |       |       | 150   | 56    |
| 35280  |      | 2   | No              |      | 2   | No             |      | 2   | No    |      |       |       | 155   | 52    |
| 35298  |      | 2   | No              |      | 2   | No             |      | 2   | No    |      |       |       | 171   | 75    |
| 35305  | 1    | 2   | No              |      | 2   | No             |      | 2   | No    |      |       |       | 155   | 60    |
| 35306  |      | 2   | No              |      | 2   | No             |      | 2   | No    |      |       |       | 170   | 70    |
| 35307  |      | 2   | No              |      | 2   | No             |      | 2   | No    |      |       |       | 175   | 55    |
| 35311  |      | 2   | No              |      | 1   | Yes            | 1    | 2   | No    |      |       |       | 155   | 70    |
| 35322  | 1    | 2   | No              |      | 2   | No             |      | 2   | No    |      |       |       | 170   | 55    |
| 35323  | 1    | 1   | Yes             | 1    | 2   | No             |      | 2   | No    |      |       |       | 170   | 60    |
| 35327  | 1    | 1   | Yes             | 1    | 1   | Yes            | 2    | 2   | No    |      |       |       | 158   | 56    |
| 35366  |      | 2   | No              |      | 2   | No             |      | 2   | No    |      |       |       | 178   | 70    |
| 35378  |      | 2   | No              |      | 2   | No             |      | 2   | No    |      |       |       | 158   | 60    |
| 35389  | 2    | 2   | No              |      | 2   | No             |      | 2   | No    |      |       |       | 169   | 85    |
| 35390  | 1    | 2   | No              |      | 1   | Yes            | 1    | 2   | No    |      |       |       | 175   | 72    |
| 35395  | 1    | 2   | No              |      | 1   | Yes            | 2    | 2   | No    |      |       |       | 170   | 80    |
| 35411  |      | 2   | No              |      | 1   | Yes            | 2    | 2   | No    |      |       |       | 175   | 70    |
| 35423  |      | 2   | No              |      | 2   | No             |      | 2   | No    |      |       |       | 172   | 72    |
| 35425  | 1    | 2   | No              |      | 1   | Yes            | 2    | 2   | No    |      |       |       | 160   | 65    |
| 35434  | 1    | 2   | No              |      | 2   | No             |      | 2   | No    |      |       |       | 150   | 60    |
| 35462  | 1    | 2   | No              |      | 1   | Yes            | 1    | 1   | Yes   | 1    |       |       | 155   | 55    |
| 35478  |      | 1   | Yes             | 1    | 2   | No             |      | 2   | No    |      |       |       | 165   | 60    |

| respid | Q11a | Q12 | Cardiac Disease | Q12a | Q13 | Hyperlipidemia | Q13a | Q14 | Neuro | Q14a | Q15_1 | Q15_2 | Q15_3 | Q16_1 |
|--------|------|-----|-----------------|------|-----|----------------|------|-----|-------|------|-------|-------|-------|-------|
| 35481  | 1    | 1   | Yes             | 1    | 2   | No             |      | 2   | No    |      |       |       | 170   | 50    |
| 35498  |      | 2   | No              |      | 2   | No             |      | 2   | No    |      |       |       | 176   | 68    |
| 35499  |      | 2   | No              |      | 2   | No             |      | 2   | No    |      |       |       | 170   | 65    |
| 35502  |      | 1   | Yes             | 1    | 2   | No             |      | 2   | No    |      | 5     | 4     |       | 45    |
| 35503  |      | 2   | No              |      | 2   | No             |      | 2   | No    |      |       |       | 165   | 55    |
| 35504  |      | 2   | No              |      | 2   | No             |      | 2   | No    |      |       |       | 165   | 65    |
| 35508  | 1    | 1   | Yes             | 1    | 1   | Yes            | 1    | 2   | No    |      |       |       | 163   | 75    |
| 35513  | 1    | 1   | Yes             | 1    | 1   | Yes            | 1    | 2   | No    |      |       |       | 172   | 63    |
| 35516  | 1    | 2   | No              |      | 2   | No             |      | 2   | No    |      |       |       | 176   | 75    |
| 35519  | 1    | 1   | Yes             | 1    | 1   | Yes            | 1    | 2   | No    |      |       |       | 163   | 70    |
| 35530  | 2    | 2   | No              |      | 2   | No             |      | 2   | No    |      |       |       | 159   | 63    |
| 35533  |      | 2   | No              |      | 2   | No             |      | 1   | Yes   | 1    |       |       | 157   | 60    |
| 35561  | 1    | 2   | No              |      | 2   | No             |      | 2   | No    |      |       |       | 160   | 65    |
| 35565  |      | 2   | No              |      | 2   | No             |      | 2   | No    |      |       |       | 175   | 65    |
| 35588  | 2    | 2   | No              |      | 2   | No             |      | 2   | No    |      |       |       | 160   | 50    |
| 35598  | 1    | 2   | No              |      | 2   | No             |      | 2   | No    |      |       |       | 173   | 80    |
| 35607  | 1    | 2   | No              |      | 2   | No             |      | 2   | No    |      |       |       | 175   | 55    |
| 35638  |      | 2   | No              |      | 2   | No             |      | 2   | No    |      |       |       | 158   | 42    |
| 35642  |      | 2   | No              |      | 2   | No             |      | 2   | No    |      |       |       | 184   | 85    |
| 35643  |      | 2   | No              |      | 2   | No             |      | 2   | No    |      |       |       | 175   | 65    |
| 35680  |      | 2   | No              |      | 2   | No             |      | 2   | No    |      |       |       | 155   | 46    |
| 35697  |      | 2   | No              |      | 1   | Yes            | 1    | 2   | No    |      |       |       | 168   | 60    |
| 35703  | 1    | 2   | No              |      | 2   | No             |      | 2   | No    |      |       |       | 155   | 50    |
| 35709  |      | 2   | No              |      | 2   | No             |      | 2   | No    |      |       |       | 176   | 65    |
| 35710  |      | 2   | No              |      | 2   | No             |      | 2   | No    |      |       |       | 171   | 63    |
| 35721  |      | 1   | Yes             | 2    | 1   | Yes            | 1    | 2   | No    |      |       |       | 160   | 80    |
| 35723  |      | 1   | Yes             | 2    | 2   | No             |      | 2   | No    |      | 5     | 10    |       | 47    |
| 35736  | 1    | 1   | Yes             | 1    | 1   | Yes            | 1    | 2   | No    |      |       |       | 150   | 35    |
| 35739  | 1    | 2   | No              |      | 2   | No             |      | 2   | No    |      |       |       | 148   | 44    |
| 35745  | 1    | 2   | No              |      | 2   | No             |      | 2   | No    |      |       |       | 150   | 46    |
| 35748  |      | 2   | No              |      | 2   | No             |      | 2   | No    |      |       |       | 172   | 62    |
| 35750  |      | 2   | No              |      | 1   | Yes            | 2    | 2   | No    |      |       |       | 165   | 85    |

| respid | Q11a | Q12 | Cardiac Disease | Q12a | Q13 | Hyperlipidemia | Q13a | Q14 | Neuro | Q14a | Q15_1 | Q15_2 | Q15_3 | Q16_1 |
|--------|------|-----|-----------------|------|-----|----------------|------|-----|-------|------|-------|-------|-------|-------|
| 35752  | 1    | 2   | No              |      | 2   | No             |      | 2   | No    |      |       |       | 170   | 70    |
| 35773  |      | 2   | No              |      | 2   | No             |      | 2   | No    |      |       |       | 150   | 45    |
| 35779  |      | 2   | No              |      | 2   | No             |      | 2   | No    |      |       |       | 168   | 60    |
| 35791  | 1    | 1   | Yes             | 1    | 2   | No             |      | 2   | No    |      |       |       | 170   | 60    |
| 35801  |      | 2   | No              |      | 2   | No             |      | 2   | No    |      |       |       | 155   | 60    |
| 35802  |      | 2   | No              |      | 2   | No             |      | 2   | No    |      |       |       | 155   | 61    |
| 35837  | 1    | 2   | No              |      | 1   | Yes            | 1    | 1   | Yes   | 1    |       |       | 158   | 58    |
| 35853  |      | 2   | No              |      | 2   | No             |      | 2   | No    |      |       |       | 150   | 63    |
| 35858  | 1    | 2   | No              |      | 2   | No             |      | 2   | No    |      |       |       | 170   | 65    |
| 35860  |      | 2   | No              |      | 1   | Yes            | 1    | 2   | No    |      |       |       | 154   | 65    |
| 35875  |      | 2   | No              |      | 2   | No             |      | 2   | No    |      |       |       | 162   | 53    |
| 35883  |      | 2   | No              |      | 2   | No             |      | 2   | No    |      |       |       | 172   | 65    |
| 35890  | 1    | 2   | No              |      | 1   | Yes            | 1    | 2   | No    |      |       |       | 156   | 65    |
| 35898  | 1    | 2   | No              |      | 1   | Yes            | 1    | 2   | No    |      |       |       | 163   | 58    |
| 35901  | 1    | 2   | No              |      | 2   | No             |      | 1   | Yes   | 1    |       |       | 153   | 42    |
| 35914  | 1    | 2   | No              |      | 2   | No             |      | 2   | No    |      |       |       | 164   | 60    |
| 35924  |      | 2   | No              |      | 2   | No             |      | 2   | No    |      |       |       | 158   | 48    |
| 35950  |      | 2   | No              |      | 2   | No             |      | 2   | No    |      |       |       | 172   | 68    |
| 35961  | 2    | 2   | No              |      | 2   | No             |      | 2   | No    |      |       |       | 165   | 72    |
| 35966  | 1    | 2   | No              |      | 2   | No             |      | 2   | No    |      |       |       | 149   | 50    |
| 35967  | 1    | 2   | No              |      | 2   | No             |      | 2   | No    |      |       |       | 165   | 68    |
| 35971  |      | 2   | No              |      | 2   | No             |      | 2   | No    |      |       |       | 173   | 54    |
| 35974  |      | 2   | No              |      | 1   | Yes            | 1    | 2   | No    |      |       |       | 150   | 60    |
| 35983  |      | 2   | No              |      | 1   | Yes            | 1    | 1   | Yes   | 1    |       |       | 162   | 80    |
| 35992  |      | 2   | No              |      | 2   | No             |      | 2   | No    |      |       |       | 158   | 42    |
| 36010  |      | 2   | No              |      | 1   | Yes            | 2    | 2   | No    |      |       |       | 161   | 60    |
| 36019  |      | 2   | No              |      | 2   | No             |      | 2   | No    |      |       |       | 165   | 65    |
| 36029  |      | 2   | No              |      | 2   | No             |      | 2   | No    |      |       |       | 162   | 67    |
| 36033  |      | 2   | No              |      | 2   | No             |      | 2   | No    |      |       |       | 160   | 55    |
| 36042  |      | 2   | No              |      | 2   | No             |      | 2   | No    |      |       |       | 158   | 45    |
| 36043  | 1    | 2   | No              |      | 1   | Yes            | 1    | 2   | No    |      | 5     | 6     |       | 64    |
| 36048  | 1    | 2   | No              |      | 1   | Yes            | 1    | 2   | No    |      |       |       | 154   | 60    |

| respid | Q11a | Q12 | Cardiac Disease | Q12a | Q13 | Hyperlipidemia | Q13a | Q14 | Neuro | Q14a | Q15_1 | Q15_2 | Q15_3 | Q16_1 |
|--------|------|-----|-----------------|------|-----|----------------|------|-----|-------|------|-------|-------|-------|-------|
| 36050  | 1    | 2   | No              |      | 2   | No             |      | 2   | No    |      |       |       | 160   | 60    |
| 36062  | 1    | 2   | No              |      | 2   | No             |      | 2   | No    |      |       |       | 160   | 60    |
| 36063  |      | 2   | No              |      | 2   | No             |      | 2   | No    |      |       |       | 170   | 70    |
| 36092  | 1    | 1   | Yes             | 2    | 2   | No             |      | 2   | No    |      |       |       | 166   | 68    |
| 36097  | 2    | 2   | No              |      | 2   | No             |      | 2   | No    |      |       |       | 156   | 60    |
| 36108  |      | 2   | No              |      | 2   | No             |      | 2   | No    |      |       |       | 165   | 65    |
| 36113  | 1    | 2   | No              |      | 1   | Yes            | 1    | 2   | No    |      |       |       | 168   | 57    |
| 36117  |      | 2   | No              |      | 1   | Yes            | 2    | 2   | No    |      |       |       | 160   | 50    |
| 36129  |      | 2   | No              |      | 2   | No             |      | 2   | No    |      |       |       | 170   | 75    |
| 36144  | 1    | 2   | No              |      | 2   | No             |      | 2   | No    |      |       |       | 162   | 60    |
| 36152  |      | 2   | No              |      | 2   | No             |      | 2   | No    |      |       |       | 160   | 55    |
| 36154  |      | 2   | No              |      | 2   | No             |      | 2   | No    |      |       |       | 160   | 50    |
| 36155  | 1    | 2   | No              |      | 2   | No             |      | 2   | No    |      |       |       | 170   | 60    |
| 36167  |      | 2   | No              |      | 2   | No             |      | 2   | No    |      |       |       | 168   | 71    |
| 36172  |      | 2   | No              |      | 2   | No             |      | 2   | No    |      |       |       | 173   | 72    |
| 36173  |      | 2   | No              |      | 2   | No             |      | 2   | No    |      |       |       | 160   | 70    |
| 36174  |      | 2   | No              |      | 2   | No             |      | 2   | No    |      |       |       | 170   | 65    |
| 36182  | 2    | 2   | No              |      | 1   | Yes            | 1    | 2   | No    |      |       |       | 155   | 70    |
| 36192  | 1    | 2   | No              |      | 2   | No             |      | 2   | No    |      | 4     | 6     |       | 55    |
| 36195  | 2    | 2   | No              |      | 1   | Yes            | 2    | 2   | No    |      |       |       | 173   | 78    |
| 36204  |      | 2   | No              |      | 2   | No             |      | 2   | No    |      |       |       | 162   | 58    |
| 36205  | 1    | 2   | No              |      | 2   | No             |      | 1   | Yes   | 1    |       |       | 163   | 48    |
| 36208  |      | 2   | No              |      | 1   | Yes            | 2    | 2   | No    |      |       |       | 169   | 70    |
| 36216  |      | 2   | No              |      | 2   | No             |      | 2   | No    |      |       |       | 160   | 58    |
| 36221  | 1    | 1   | Yes             | 2    | 1   | Yes            | 2    | 2   | No    |      |       |       | 150   | 60    |
| 36244  |      | 2   | No              |      | 2   | No             |      | 2   | No    |      |       |       | 171   | 72    |
| 36255  |      | 2   | No              |      | 2   | No             |      | 2   | No    |      |       |       | 174   | 60    |
| 36259  |      | 2   | No              |      | 2   | No             |      | 2   | No    |      |       |       | 161   | 52    |
| 36262  | 1    | 2   | No              |      | 2   | No             |      | 2   | No    |      |       |       | 170   | 70    |
| 36268  |      | 2   | No              |      | 2   | No             |      | 2   | No    |      |       |       | 177   | 70    |
| 36308  | 1    | 2   | No              |      | 2   | No             |      | 2   | No    |      |       |       | 163   | 42    |
| 36324  | 1    | 1   | Yes             | 1    | 1   | Yes            | 2    | 2   | No    |      |       |       | 168   | 70    |

| respid | Q11a | Q12 | Cardiac Disease | Q12a | Q13 | Hyperlipidemia | Q13a | Q14 | Neuro | Q14a | Q15_1 | Q15_2 | Q15_3 | Q16_1 |
|--------|------|-----|-----------------|------|-----|----------------|------|-----|-------|------|-------|-------|-------|-------|
| 36330  | 1    | 2   | No              |      | 2   | No             |      | 2   | No    |      |       |       | 156   | 66    |
| 36331  | 1    | 2   | No              |      | 1   | Yes            | 1    | 2   | No    |      |       |       | 159   | 70    |
| 36336  |      | 2   | No              |      | 2   | No             |      | 2   | No    |      |       |       | 170   | 65    |
| 36337  |      | 2   | No              |      | 2   | No             |      | 2   | No    |      |       |       | 168   | 65    |
| 36364  | 1    | 2   | No              |      | 1   | Yes            | 1    | 2   | No    |      |       |       | 165   | 75    |
| 36365  |      | 2   | No              |      | 2   | No             |      | 2   | No    |      |       |       | 172   | 65    |
| 36396  | 1    | 1   | Yes             | 1    | 2   | No             |      | 2   | No    |      |       |       | 165   | 50    |
| 36403  | 1    | 2   | No              |      | 2   | No             |      | 2   | No    |      |       |       | 170   | 65    |
| 36410  | 1    | 2   | No              |      | 2   | No             |      | 2   | No    |      |       |       | 165   | 65    |
| 36413  |      | 2   | No              |      | 2   | No             |      | 2   | No    |      |       |       | 155   | 65    |
| 36422  | 1    | 2   | No              |      | 1   | Yes            | 1    | 2   | No    |      |       |       | 170   | 65    |
| 36424  | 1    | 2   | No              |      | 2   | No             |      | 2   | No    |      |       |       | 166   | 70    |
| 36425  | 1    | 2   | No              |      | 1   | Yes            | 1    | 2   | No    |      |       |       | 170   | 62    |
| 36432  | 1    | 2   | No              |      | 2   | No             |      | 2   | No    |      |       |       | 168   | 70    |
| 36435  | 1    | 2   | No              |      | 2   | No             |      | 2   | No    |      |       |       | 170   | 60    |
| 36446  | 1    | 2   | No              |      | 2   | No             |      | 2   | No    |      |       |       | 158   | 63    |
| 36451  | 1    | 2   | No              |      | 1   | Yes            | 1    | 2   | No    |      |       |       | 160   | 110   |
| 36453  |      | 2   | No              |      | 2   | No             |      | 2   | No    |      |       |       | 170   | 60    |
| 36459  | 2    | 2   | No              |      | 2   | No             |      | 2   | No    |      |       |       | 155   | 52    |
| 36464  |      | 2   | No              |      | 2   | No             |      | 2   | No    |      |       |       | 163   | 52    |
| 36465  | 1    | 2   | No              |      | 2   | No             |      | 2   | No    |      |       |       | 165   | 60    |
| 36466  |      | 2   | No              |      | 2   | No             |      | 2   | No    |      |       |       | 160   | 55    |
| 36476  |      | 2   | No              |      | 1   | Yes            | 2    | 2   | No    |      |       |       | 172   | 70    |
| 36487  | 2    | 1   | Yes             | 2    | 2   | No             |      | 2   | No    |      |       |       | 170   | 69    |
| 36488  | 1    | 2   | No              |      | 2   | No             |      | 2   | No    |      |       |       | 176   | 60    |
| 36500  |      | 2   | No              |      | 2   | No             |      | 2   | No    |      |       |       | 155   | 45    |
| 36504  |      | 2   | No              |      | 1   | Yes            | 1    | 2   | No    |      |       |       | 155   | 60    |
| 36513  | 1    | 1   | Yes             | 1    | 2   | No             |      | 2   | No    |      |       |       | 160   | 60    |
| 36515  | 1    | 2   | No              |      | 1   | Yes            | 1    | 2   | No    |      |       |       | 168   | 62    |
| 36521  |      | 2   | No              |      | 2   | No             |      | 2   | No    |      |       |       | 159   | 63    |
| 36530  | 2    | 2   | No              |      | 2   | No             |      | 2   | No    |      |       |       | 170   | 70    |
| 36556  | 1    | 2   | No              |      | 2   | No             |      | 2   | No    |      |       |       | 155   | 46    |

| respid | Q11a | Q12 | Cardiac Disease | Q12a | Q13 | Hyperlipidemia | Q13a | Q14 | Neuro | Q14a | Q15_1 | Q15_2 | Q15_3 | Q16_1 |
|--------|------|-----|-----------------|------|-----|----------------|------|-----|-------|------|-------|-------|-------|-------|
| 36564  | 1    | 1   | Yes             | 1    | 2   | No             |      | 1   | Yes   | 1    |       |       | 178   | 70    |
| 36584  |      | 2   | No              |      | 2   | No             |      | 2   | No    |      |       |       | 175   | 65    |
| 36585  |      | 2   | No              |      | 2   | No             |      | 2   | No    |      |       |       | 168   | 66    |
| 36586  | 1    | 2   | No              |      | 2   | No             |      | 2   | No    |      |       |       | 174   | 73    |
| 36606  |      | 2   | No              |      | 1   | Yes            | 2    | 2   | No    |      |       |       | 163   | 65    |
| 36615  | 2    | 1   | Yes             | 2    | 2   | No             |      | 2   | No    |      |       |       | 156   | 60    |
| 36628  | 1    | 2   | No              |      | 1   | Yes            | 1    | 2   | No    |      |       |       | 158   | 68    |
| 36630  |      | 2   | No              |      | 2   | No             |      | 2   | No    |      |       |       | 160   | 50    |
| 36631  | 1    | 1   | Yes             | 1    | 2   | No             |      | 2   | No    |      |       |       | 180   | 80    |
| 36636  |      | 2   | No              |      | 1   | Yes            | 2    | 2   | No    |      |       |       | 158   | 50    |
| 36637  |      | 2   | No              |      | 2   | No             |      | 2   | No    |      |       |       | 154   | 54    |
| 36651  | 1    | 2   | No              |      | 2   | No             |      | 2   | No    |      |       |       | 175   | 75    |
| 36661  |      | 2   | No              |      | 2   | No             |      | 2   | No    |      |       |       | 173   | 74    |
| 36670  | 1    | 2   | No              |      | 2   | No             |      | 2   | No    |      |       |       | 165   | 48    |
| 36671  |      | 2   | No              |      | 1   | Yes            | 2    | 2   | No    |      |       |       | 170   | 65    |
| 36688  |      | 2   | No              |      | 2   | No             |      | 2   | No    |      |       |       | 172   | 60    |
| 36694  | 1    | 2   | No              |      | 2   | No             |      | 2   | No    |      |       |       | 165   | 45    |
| 36696  |      | 2   | No              |      | 2   | No             |      | 2   | No    |      |       |       | 170   | 50    |
| 36703  |      | 2   | No              |      | 2   | No             |      | 2   | No    |      |       |       | 165   | 60    |
| 36719  |      | 2   | No              |      | 2   | No             |      | 2   | No    |      |       |       | 156   | 55    |
| 36721  |      | 2   | No              |      | 2   | No             |      | 2   | No    |      |       |       | 165   | 62    |
| 36740  |      | 2   | No              |      | 2   | No             |      | 2   | No    |      |       |       | 170   | 60    |
| 36755  |      | 2   | No              |      | 2   | No             |      | 2   | No    |      |       |       | 162   | 110   |
| 36765  | 1    | 2   | No              |      | 1   | Yes            | 2    | 2   | No    |      |       |       | 163   | 70    |
| 36770  | 1    | 2   | No              |      | 2   | No             |      | 2   | No    |      |       |       | 166   | 55    |
| 36773  |      | 2   | No              |      | 2   | No             |      | 2   | No    |      |       |       | 173   | 70    |
| 36813  |      | 1   | Yes             | 2    | 2   | No             |      | 2   | No    |      |       |       | 158   | 45    |
| 36819  | 1    | 2   | No              |      | 1   | Yes            | 1    | 2   | No    |      |       |       | 170   | 55    |
| 36820  | 1    | 2   | No              |      | 2   | No             |      | 2   | No    |      |       |       | 160   | 55    |
| 36821  | 1    | 2   | No              |      | 2   | No             |      | 2   | No    |      |       |       | 165   | 65    |
| 36827  | 1    | 1   | Yes             | 1    | 1   | Yes            | 1    | 2   | No    |      |       |       | 155   | 65    |
| 36835  |      | 2   | No              |      | 2   | No             |      | 2   | No    |      |       |       | 162   | 65    |



| respid | Q11a | Q12 | Cardiac Disease | Q12a | Q13 | Hyperlipidemia | Q13a | Q14 | Neuro | Q14a | Q15_1 | Q15_2 | Q15_3 | Q16_1 |
|--------|------|-----|-----------------|------|-----|----------------|------|-----|-------|------|-------|-------|-------|-------|
| 36837  | 1    | 1   | Yes             | 1    | 2   | No             |      | 2   | No    |      | 5     | 1     |       | 40    |
| 36849  |      | 2   | No              |      | 2   | No             |      | 1   | Yes   | 1    |       |       | 165   | 65    |
| 36851  | 1    | 2   | No              |      | 2   | No             |      | 2   | No    |      |       |       | 163   | 68    |
| 36868  | 2    | 2   | No              |      | 2   | No             |      | 2   | No    |      |       |       | 167   | 60    |
| 36870  |      | 2   | No              |      | 1   | Yes            | 2    | 2   | No    |      |       |       | 167   | 75    |
| 36871  |      | 1   | Yes             | 1    | 2   | No             |      | 2   | No    |      |       |       | 168   | 50    |
| 36874  | 1    | 2   | No              |      | 2   | No             |      | 2   | No    |      |       |       | 170   | 70    |
| 36878  | 1    | 2   | No              |      | 1   | Yes            | 1    | 2   | No    |      | 5     | 2     |       | 50    |
| 36887  |      | 2   | No              |      | 2   | No             |      | 2   | No    |      |       |       | 168   | 55    |
| 36889  | 1    | 2   | No              |      | 2   | No             |      | 2   | No    |      |       |       | 160   | 60    |
| 36891  | 1    | 2   | No              |      | 2   | No             |      | 2   | No    |      |       |       | 170   | 62    |
| 36903  | 1    | 2   | No              |      | 1   | Yes            | 2    | 2   | No    |      |       |       | 168   | 73    |
| 36905  |      | 2   | No              |      | 2   | No             |      | 1   | Yes   | 1    |       |       | 155   | 55    |
| 36913  |      | 2   | No              |      | 1   | Yes            | 2    | 2   | No    |      |       |       | 169   | 64    |
| 36949  | 1    | 2   | No              |      | 1   | Yes            | 1    | 2   | No    |      |       |       | 155   | 40    |
| 36954  | 1    | 2   | No              |      | 1   | Yes            | 2    | 2   | No    |      | 5     | 4     |       | 51    |
| 36962  | 1    | 2   | No              |      | 1   | Yes            | 1    | 2   | No    |      |       |       | 156   | 49    |
| 36965  |      | 2   | No              |      | 1   | Yes            | 1    | 2   | No    |      |       |       | 170   | 55    |
| 36970  |      | 2   | No              |      | 2   | No             |      | 2   | No    |      | 5     | 4     |       | 50    |
| 36979  | 1    | 2   | No              |      | 1   | Yes            | 1    | 1   | Yes   | 1    |       |       | 168   | 72    |
| 36990  | 1    | 2   | No              |      | 1   | Yes            | 1    | 2   | No    |      | 5     | 2     |       | 50    |
| 36991  | 1    | 1   | Yes             | 1    | 2   | No             |      | 2   | No    |      |       |       | 175   | 76    |
| 36992  |      | 2   | No              |      | 2   | No             |      | 2   | No    |      |       |       | 170   | 78    |
| 37015  | 2    | 2   | No              |      | 1   | Yes            | 2    | 2   | No    |      |       |       | 165   | 65    |
| 37017  |      | 2   | No              |      | 2   | No             |      | 2   | No    |      |       |       | 170   | 60    |
| 37020  |      | 2   | No              |      | 2   | No             |      | 2   | No    |      |       |       | 158   | 55    |
| 37033  | 2    | 2   | No              |      | 1   | Yes            | 2    | 2   | No    |      |       |       | 165   | 65    |
| 37041  |      | 1   | Yes             | 1    | 2   | No             |      | 1   | Yes   | 1    |       |       | 170   | 70    |
| 37048  | 2    | 2   | No              |      | 2   | No             |      | 2   | No    |      |       |       | 158   | 58    |
| 37050  |      | 2   | No              |      | 2   | No             |      | 2   | No    |      |       |       | 162   | 52    |
| 37054  | 1    | 2   | No              |      | 2   | No             |      | 2   | No    |      |       |       | 152   | 67    |
| 37057  |      | 2   | No              |      | 2   | No             |      | 2   | No    |      |       |       | 150   | 62    |

| respid | Q11a | Q12 | Cardiac Disease | Q12a | Q13 | Hyperlipidemia | Q13a | Q14 | Neuro | Q14a | Q15_1 | Q15_2 | Q15_3 | Q16_1 |
|--------|------|-----|-----------------|------|-----|----------------|------|-----|-------|------|-------|-------|-------|-------|
| 37067  | 1    | 2   | No              |      | 2   | No             |      | 2   | No    |      |       |       | 170   | 110   |
| 37074  |      | 1   | Yes             | 2    | 2   | No             |      | 1   | Yes   | 1    |       |       | 159   | 62    |
| 37088  |      | 2   | No              |      | 2   | No             |      | 2   | No    |      |       |       | 156   | 76    |
| 37090  |      | 2   | No              |      | 2   | No             |      | 2   | No    |      |       |       | 170   | 70    |
| 37110  |      | 2   | No              |      | 2   | No             |      | 2   | No    |      |       |       | 180   | 80    |
| 37122  |      | 2   | No              |      | 2   | No             |      | 2   | No    |      |       |       | 168   | 68    |
| 37124  | 1    | 2   | No              |      | 2   | No             |      | 2   | No    |      |       |       | 170   | 68    |
| 37126  |      | 2   | No              |      | 2   | No             |      | 2   | No    |      | 5     | 3     |       | 55    |
| 37129  | 1    | 2   | No              |      | 2   | No             |      | 2   | No    |      |       |       | 165   | 80    |
| 37130  | 1    | 2   | No              |      | 1   | Yes            | 1    | 2   | No    |      |       |       | 150   | 35    |
| 37142  | 1    | 1   | Yes             | 1    | 2   | No             |      | 2   | No    |      |       |       | 170   | 80    |
| 37160  |      | 2   | No              |      | 2   | No             |      | 2   | No    |      |       |       | 172   | 65    |
| 37168  |      | 2   | No              |      | 1   | Yes            | 2    | 2   | No    |      |       |       | 158   | 58    |
| 37169  | 1    | 2   | No              |      | 1   | Yes            | 1    | 2   | No    |      |       |       | 168   | 55    |
| 37191  | 1    | 1   | Yes             | 1    | 1   | Yes            | 1    | 2   | No    |      |       |       | 165   | 65    |
| 37197  | 1    | 1   | Yes             | 1    | 2   | No             |      | 1   | Yes   | 2    |       |       | 168   | 70    |
| 37204  |      | 2   | No              |      | 2   | No             |      | 2   | No    |      |       |       | 162   | 45    |
| 37213  |      | 2   | No              |      | 2   | No             |      | 2   | No    |      |       |       | 173   | 70    |
| 37238  | 1    | 1   | Yes             | 1    | 1   | Yes            | 1    | 2   | No    |      |       |       | 155   | 55    |
| 37242  |      | 2   | No              |      | 1   | Yes            | 1    | 2   | No    |      |       |       | 165   | 58    |
| 37243  |      | 2   | No              |      | 2   | No             |      | 2   | No    |      |       |       | 172   | 88    |
| 37275  | 1    | 2   | No              |      | 2   | No             |      | 2   | No    |      |       |       | 160   | 55    |
| 37305  | 1    | 2   | No              |      | 2   | No             |      | 2   | No    |      |       |       | 166   | 65    |
| 37357  |      | 2   | No              |      | 2   | No             |      | 2   | No    |      |       |       | 158   | 65    |
| 37365  |      | 2   | No              |      | 2   | No             |      | 2   | No    |      |       |       | 160   | 100   |
| 37370  | 1    | 2   | No              |      | 2   | No             |      | 2   | No    |      |       |       | 175   | 70    |
| 37406  |      | 2   | No              |      | 2   | No             |      | 2   | No    |      |       |       | 162   | 58    |
| 37410  | 2    | 2   | No              |      | 2   | No             |      | 1   | Yes   | 1    |       |       | 140   | 90    |
| 37411  |      | 2   | No              |      | 2   | No             |      | 2   | No    |      |       |       | 165   | 65    |
| 37427  |      | 1   | Yes             | 1    | 2   | No             |      | 2   | No    |      |       |       | 155   | 55    |
| 37437  |      | 2   | No              |      | 2   | No             |      | 2   | No    |      |       |       | 162   | 77    |
| 37440  | 1    | 2   | No              |      | 2   | No             |      | 1   | Yes   | 1    |       |       | 167   | 75    |

| respid | Q11a | Q12 | Cardiac Disease | Q12a | Q13 | Hyperlipidemia | Q13a | Q14 | Neuro | Q14a | Q15_1 | Q15_2 | Q15_3 | Q16_1 |
|--------|------|-----|-----------------|------|-----|----------------|------|-----|-------|------|-------|-------|-------|-------|
| 37452  |      | 2   | No              |      | 1   | Yes            | 2    | 2   | No    |      |       |       | 164   | 55    |
| 37465  |      | 1   | Yes             | 2    | 2   | No             |      | 2   | No    |      |       |       | 175   | 75    |
| 37468  |      | 1   | Yes             | 1    | 2   | No             |      | 2   | No    |      |       |       | 162   | 46    |
| 37469  | 1    | 2   | No              |      | 2   | No             |      | 2   | No    |      |       |       | 164   | 67    |
| 37477  | 1    | 2   | No              |      | 2   | No             |      | 2   | No    |      |       |       | 165   | 60    |
| 37509  | 2    | 2   | No              |      | 2   | No             |      | 2   | No    |      |       |       | 160   | 60    |
| 37513  |      | 2   | No              |      | 2   | No             |      | 2   | No    |      |       |       | 155   | 78    |
| 37534  | 2    | 2   | No              |      | 2   | No             |      | 2   | No    |      |       |       | 174   | 66    |
| 37537  |      | 2   | No              |      | 2   | No             |      | 2   | No    |      |       |       | 150   | 57    |
| 37560  | 1    | 2   | No              |      | 2   | No             |      | 2   | No    |      |       |       | 163   | 63    |
| 37566  |      | 2   | No              |      | 2   | No             |      | 2   | No    |      |       |       | 172   | 70    |
| 37572  | 1    | 2   | No              |      | 2   | No             |      | 2   | No    |      |       |       | 160   | 106   |
| 37574  | 1    | 2   | No              |      | 2   | No             |      | 2   | No    |      |       |       | 165   | 65    |
| 37575  |      | 2   | No              |      | 2   | No             |      | 2   | No    |      |       |       | 162   | 50    |
| 37590  |      | 2   | No              |      | 2   | No             |      | 2   | No    |      |       |       | 158   | 82    |
| 37593  |      | 2   | No              |      | 2   | No             |      | 2   | No    |      |       |       | 152   | 48    |
| 37599  |      | 2   | No              |      | 2   | No             |      | 2   | No    |      |       |       | 163   | 50    |
| 37641  | 1    | 2   | No              |      | 2   | No             |      | 2   | No    |      |       |       | 150   | 45    |
| 37651  |      | 2   | No              |      | 2   | No             |      | 2   | No    |      |       |       | 160   | 52    |
| 37670  |      | 2   | No              |      | 2   | No             |      | 2   | No    |      |       |       | 154   | 56    |
| 37680  |      | 2   | No              |      | 2   | No             |      | 2   | No    |      |       |       | 162   | 82    |
| 37690  | 2    | 2   | No              |      | 2   | No             |      | 2   | No    |      |       |       | 158   | 60    |
| 37694  |      | 2   | No              |      | 2   | No             |      | 2   | No    |      |       |       | 160   | 60    |
| 37705  | 1    | 2   | No              |      | 2   | No             |      | 2   | No    |      |       |       | 170   | 75    |
| 37710  |      | 2   | No              |      | 2   | No             |      | 2   | No    |      |       |       | 155   | 45    |
| 37719  | 1    | 2   | No              |      | 1   | Yes            | 1    | 2   | No    |      |       |       | 152   | 55    |
| 37741  | 1    | 1   | Yes             | 1    | 1   | Yes            | 1    | 2   | No    |      | 5     | 6     |       | 50    |
| 37752  |      | 2   | No              |      | 2   | No             |      | 2   | No    |      |       |       | 169   | 65    |
| 37755  | 1    | 2   | No              |      | 1   | Yes            | 2    | 2   | No    |      |       |       | 135   | 50    |
| 37757  |      | 2   | No              |      | 2   | No             |      | 2   | No    |      |       |       | 157   | 55    |
| 37783  | 1    | 2   | No              |      | 2   | No             |      | 2   | No    |      |       |       | 165   | 55    |
| 37793  | 2    | 2   | No              |      | 2   | No             |      | 2   | No    |      |       |       | 158   | 63    |

| respid | Q11a | Q12 | Cardiac Disease | Q12a | Q13 | Hyperlipidemia | Q13a | Q14 | Neuro | Q14a | Q15_1 | Q15_2 | Q15_3 | Q16_1 |
|--------|------|-----|-----------------|------|-----|----------------|------|-----|-------|------|-------|-------|-------|-------|
| 37800  |      | 2   | No              |      | 2   | No             |      | 2   | No    |      |       |       | 165   | 65    |
| 37801  |      | 2   | No              |      | 2   | No             |      | 2   | No    |      |       |       | 158   | 55    |
| 37820  |      | 2   | No              |      | 2   | No             |      | 2   | No    |      | 6     | 2     |       | 70    |
| 37826  | 1    | 2   | No              |      | 2   | No             |      | 2   | No    |      |       |       | 158   | 70    |
| 37835  |      | 2   | No              |      | 2   | No             |      | 2   | No    |      |       |       | 162   | 58    |
| 37839  | 2    | 2   | No              |      | 2   | No             |      | 2   | No    |      |       |       | 160   | 58    |
| 37871  |      | 2   | No              |      | 2   | No             |      | 2   | No    |      |       |       | 162   | 65    |
| 37876  |      | 1   | Yes             | 1    | 2   | No             |      | 2   | No    |      |       |       | 160   | 63    |
| 37879  |      | 2   | No              |      | 2   | No             |      | 2   | No    |      | 5     | 0     |       | 74    |
| 37894  |      | 2   | No              |      | 2   | No             |      | 2   | No    |      |       |       | 165   | 65    |
| 37895  |      | 2   | No              |      | 2   | No             |      | 2   | No    |      |       |       | 162   | 50    |
| 37901  | 1    | 1   | Yes             | 1    | 2   | No             |      | 2   | No    |      |       |       | 170   | 55    |
| 37926  |      | 2   | No              |      | 2   | No             |      | 2   | No    |      |       |       | 160   | 50    |
| 37937  |      | 2   | No              |      | 2   | No             |      | 2   | No    |      |       |       | 154   | 54    |
| 37938  |      | 2   | No              |      | 2   | No             |      | 2   | No    |      |       |       | 155   | 56    |
| 37959  |      | 1   | Yes             | 1    | 1   | Yes            | 2    | 2   | No    |      | 5     | 1     |       | 55    |
| 37970  | 1    | 2   | No              |      | 1   | Yes            | 2    | 2   | No    |      |       |       | 154   | 51    |
| 37972  |      | 2   | No              |      | 1   | Yes            | 1    | 2   | No    |      |       |       | 156   | 62    |
| 37988  | 1    | 2   | No              |      | 1   | Yes            | 1    | 2   | No    |      |       |       | 162   | 50    |
| 37989  |      | 2   | No              |      | 1   | Yes            | 1    | 2   | No    |      |       |       | 156   | 65    |
| 38000  | 1    | 1   | Yes             | 1    | 1   | Yes            | 1    | 2   | No    |      |       |       | 162   | 50    |
| 38028  | 1    | 2   | No              |      | 2   | No             |      | 2   | No    |      |       |       | 159   | 59    |
| 38042  | 2    | 2   | No              |      | 1   | Yes            | 2    | 2   | No    |      |       |       | 162   | 57    |
| 38052  |      | 2   | No              |      | 2   | No             |      | 1   | Yes   | 1    |       |       | 155   | 55    |
| 38056  |      | 2   | No              |      | 2   | No             |      | 2   | No    |      |       |       | 155   | 50    |
| 38106  | 1    | 2   | No              |      | 2   | No             |      | 2   | No    |      |       |       | 158   | 56    |
| 38114  |      | 2   | No              |      | 2   | No             |      | 2   | No    |      |       |       | 170   | 65    |
| 38134  |      | 2   | No              |      | 1   | Yes            | 2    | 2   | No    |      |       |       | 140   | 53    |
| 38135  | 1    | 1   | Yes             | 1    | 1   | Yes            | 2    | 2   | No    |      |       |       | 160   | 40    |
| 38139  |      | 2   | No              |      | 1   | Yes            | 1    | 1   | Yes   | 1    |       |       | 160   | 56    |
| 38160  | 1    | 2   | No              |      | 2   | No             |      | 2   | No    |      |       |       | 172   | 78    |
| 38164  | 1    | 1   | Yes             | 2    | 2   | No             |      | 2   | No    |      |       |       | 160   | 50    |

| respid | Q11a | Q12 | Cardiac Disease | Q12a | Q13 | Hyperlipidemia | Q13a | Q14 | Neuro | Q14a | Q15_1 | Q15_2 | Q15_3 | Q16_1 |
|--------|------|-----|-----------------|------|-----|----------------|------|-----|-------|------|-------|-------|-------|-------|
| 38168  |      | 2   | No              |      | 2   | No             |      | 2   | No    |      |       |       | 170   | 50    |
| 38173  |      | 2   | No              |      | 2   | No             |      | 2   | No    |      |       |       | 170   | 50    |
| 38193  |      | 1   | Yes             | 1    | 2   | No             |      | 2   | No    |      |       |       | 161   | 59    |
| 38204  | 1    | 2   | No              |      | 1   | Yes            | 1    | 2   | No    |      |       |       | 155   | 55    |
| 38206  |      | 2   | No              |      | 2   | No             |      | 2   | No    |      |       |       | 156   | 53    |
| 38233  | 1    | 1   | Yes             | 1    | 1   | Yes            | 1    | 2   | No    |      |       |       | 180   | 72    |
| 38242  | 1    | 2   | No              |      | 2   | No             |      | 2   | No    |      |       |       | 155   | 55    |
| 38245  |      | 2   | No              |      | 2   | No             |      | 2   | No    |      |       |       | 180   | 75    |
| 38261  | 1    | 2   | No              |      | 2   | No             |      | 2   | No    |      |       |       | 162   | 64    |
| 38288  | 2    | 2   | No              |      | 2   | No             |      | 2   | No    |      |       |       | 150   | 46    |
| 38296  | 1    | 2   | No              |      | 2   | No             |      | 2   | No    |      |       |       | 158   | 52    |
| 38299  |      | 2   | No              |      | 2   | No             |      | 2   | No    |      |       |       | 170   | 60    |
| 38300  |      | 1   | Yes             | 1    | 2   | No             |      | 2   | No    |      |       |       | 170   | 60    |
| 38303  | 1    | 2   | No              |      | 1   | Yes            | 1    | 2   | No    |      |       |       | 174   | 78    |
| 38317  |      | 1   | Yes             | 2    | 2   | No             |      | 2   | No    |      |       |       | 155   | 55    |
| 38328  |      | 2   | No              |      | 2   | No             |      | 2   | No    |      |       |       | 170   | 55    |
| 38333  | 1    | 2   | No              |      | 2   | No             |      | 2   | No    |      |       |       | 169   | 80    |
| 38336  | 1    | 2   | No              |      | 2   | No             |      | 2   | No    |      |       |       | 180   | 70    |
| 38338  |      | 2   | No              |      | 2   | No             |      | 2   | No    |      |       |       | 148   | 60    |
| 38342  |      | 2   | No              |      | 2   | No             |      | 2   | No    |      |       |       | 160   | 58    |
| 38360  |      | 2   | No              |      | 1   | Yes            | 2    | 2   | No    |      |       |       | 172   | 66    |
| 38362  | 1    | 2   | No              |      | 1   | Yes            | 1    | 2   | No    |      |       |       | 168   | 65    |
| 38364  | 1    | 2   | No              |      | 2   | No             |      | 1   | Yes   | 2    |       |       | 170   | 66    |
| 38402  | 1    | 1   | Yes             | 1    | 1   | Yes            | 1    | 2   | No    |      |       |       | 171   | 65    |
| 38423  | 1    | 2   | No              |      | 2   | No             |      | 2   | No    |      |       |       | 161   | 49    |
| 38424  |      | 2   | No              |      | 1   | Yes            | 1    | 1   | Yes   | 1    |       |       | 155   | 46    |
| 38435  |      | 2   | No              |      | 2   | No             |      | 2   | No    |      |       |       | 153   | 62    |
| 38450  |      | 2   | No              |      | 2   | No             |      | 2   | No    |      |       |       | 152   | 69    |
| 38455  | 1    | 2   | No              |      | 1   | Yes            | 1    | 2   | No    |      |       |       | 165   | 50    |
| 38467  |      | 1   | Yes             | 1    | 1   | Yes            | 1    | 2   | No    |      |       |       | 155   | 38    |
| 38468  |      | 2   | No              |      | 2   | No             |      | 2   | No    |      |       |       | 175   | 65    |
| 38472  | 2    | 2   | No              |      | 2   | No             |      | 2   | No    |      |       |       | 155   | 60    |

| respid | Q11a | Q12 | Cardiac Disease | Q12a | Q13 | Hyperlipidemia | Q13a | Q14 | Neuro | Q14a | Q15_1 | Q15_2 | Q15_3 | Q16_1 |
|--------|------|-----|-----------------|------|-----|----------------|------|-----|-------|------|-------|-------|-------|-------|
| 38484  |      | 2   | No              |      | 2   | No             |      | 2   | No    |      |       |       | 173   | 60    |
| 38498  | 1    | 2   | No              |      | 1   | Yes            | 1    | 1   | Yes   | 1    |       |       | 166   | 53    |
| 38507  |      | 2   | No              |      | 2   | No             |      | 2   | No    |      |       |       | 165   | 50    |
| 38511  | 1    | 2   | No              |      | 2   | No             |      | 2   | No    |      |       |       | 160   | 60    |
| 38524  | 1    | 2   | No              |      | 1   | Yes            | 1    | 2   | No    |      |       |       | 175   | 80    |
| 38526  |      | 2   | No              |      | 2   | No             |      | 2   | No    |      |       |       | 165   | 65    |
| 38534  |      | 2   | No              |      | 1   | Yes            | 2    | 2   | No    |      |       |       | 158   | 50    |
| 38536  |      | 2   | No              |      | 2   | No             |      | 2   | No    |      |       |       | 165   | 45    |
| 38539  | 1    | 2   | No              |      | 1   | Yes            | 2    | 2   | No    |      |       |       | 168   | 65    |
| 38547  |      | 2   | No              |      | 2   | No             |      | 2   | No    |      |       |       | 166   | 62    |
| 38549  | 1    | 2   | No              |      | 2   | No             |      | 2   | No    |      |       |       | 168   | 50    |
| 38575  | 2    | 2   | No              |      | 2   | No             |      | 2   | No    |      |       |       | 161   | 57    |
| 38579  |      | 1   | Yes             | 2    | 2   | No             |      | 2   | No    |      |       |       | 158   | 68    |
| 38585  | 2    | 2   | No              |      | 2   | No             |      | 2   | No    |      |       |       | 175   | 65    |
| 38589  | 1    | 2   | No              |      | 1   | Yes            | 1    | 2   | No    |      |       |       | 171   | 60    |
| 38595  | 1    | 1   | Yes             | 1    | 1   | Yes            | 1    | 1   | Yes   | 1    |       |       | 160   | 62    |
| 38602  | 2    | 2   | No              |      | 2   | No             |      | 2   | No    |      |       |       | 161   | 50    |
| 38603  |      | 2   | No              |      | 2   | No             |      | 2   | No    |      |       |       | 166   | 68    |
| 38612  | 1    | 2   | No              |      | 2   | No             |      | 2   | No    |      |       |       | 160   | 50    |
| 38621  |      | 2   | No              |      | 2   | No             |      | 2   | No    |      |       |       | 158   | 58    |
| 38624  | 1    | 2   | No              |      | 2   | No             |      | 2   | No    |      |       |       | 155   | 50    |
| 38636  |      | 2   | No              |      | 2   | No             |      | 2   | No    |      |       |       | 154   | 52    |
| 38656  |      | 1   | Yes             | 2    | 2   | No             |      | 2   | No    |      |       |       | 163   | 62    |
| 38668  |      | 2   | No              |      | 1   | Yes            | 2    | 2   | No    |      |       |       | 169   | 64    |
| 38675  | 1    | 2   | No              |      | 2   | No             |      | 2   | No    |      |       |       | 171   | 78    |
| 38676  |      | 2   | No              |      | 2   | No             |      | 1   | Yes   | 2    |       |       | 165   | 62    |
| 38682  | 1    | 2   | No              |      | 1   | Yes            | 1    | 2   | No    |      |       |       | 180   | 75    |
| 38689  | 2    | 1   | Yes             | 1    | 1   | Yes            | 2    | 2   | No    |      |       |       | 168   | 75    |
| 38702  |      | 2   | No              |      | 2   | No             |      | 2   | No    |      |       |       | 148   | 44    |
| 38704  | 1    | 2   | No              |      | 1   | Yes            | 2    | 2   | No    |      |       |       | 165   | 49    |
| 38713  |      | 2   | No              |      | 2   | No             |      | 2   | No    |      |       |       | 170   | 60    |
| 38718  | 1    | 2   | No              |      | 1   | Yes            | 1    | 2   | No    |      |       |       | 165   | 65    |

| respid | Q11a | Q12 | Cardiac Disease | Q12a | Q13 | Hyperlipidemia | Q13a | Q14 | Neuro | Q14a | Q15_1 | Q15_2 | Q15_3 | Q16_1 |
|--------|------|-----|-----------------|------|-----|----------------|------|-----|-------|------|-------|-------|-------|-------|
| 38725  |      | 2   | No              |      | 1   | Yes            | 2    | 1   | Yes   | 1    |       |       | 150   | 80    |
| 38730  | 2    | 2   | No              |      | 2   | No             |      | 2   | No    |      |       |       | 163   | 65    |
| 38737  | 1    | 2   | No              |      | 2   | No             |      | 2   | No    |      | 6     | 2     |       | 56    |
| 38738  | 1    | 2   | No              |      | 2   | No             |      | 2   | No    |      |       |       | 160   | 55    |
| 38744  |      | 2   | No              |      | 2   | No             |      | 2   | No    |      |       |       | 160   | 69    |
| 38746  |      | 2   | No              |      | 2   | No             |      | 2   | No    |      |       |       | 160   | 55    |
| 38753  |      | 2   | No              |      | 2   | No             |      | 2   | No    |      |       |       | 142   | 80    |
| 38756  |      | 2   | No              |      | 2   | No             |      | 2   | No    |      |       |       | 168   | 46    |
| 38760  | 1    | 2   | No              |      | 1   | Yes            | 1    | 2   | No    |      |       |       | 158   | 60    |
| 38762  | 1    | 2   | No              |      | 2   | No             |      | 2   | No    |      |       |       | 158   | 53    |
| 38765  |      | 2   | No              |      | 2   | No             |      | 2   | No    |      |       |       | 156   | 45    |
| 38769  | 1    | 2   | No              |      | 1   | Yes            | 1    | 2   | No    |      |       |       | 170   | 58    |
| 38781  |      | 2   | No              |      | 2   | No             |      | 2   | No    |      |       |       | 153   | 51    |
| 38786  | 1    | 2   | No              |      | 2   | No             |      | 2   | No    |      |       |       | 165   | 50    |
| 38790  | 1    | 2   | No              |      | 1   | Yes            | 1    | 2   | No    |      |       |       | 155   | 55    |
| 38793  | 1    | 2   | No              |      | 2   | No             |      | 2   | No    |      |       |       | 160   | 54    |
| 38797  |      | 2   | No              |      | 2   | No             |      | 2   | No    |      |       |       | 164   | 62    |
| 38802  |      | 2   | No              |      | 2   | No             |      | 2   | No    |      |       |       | 170   | 60    |
| 38815  | 1    | 2   | No              |      | 2   | No             |      | 2   | No    |      |       |       | 165   | 75    |
| 38826  |      | 2   | No              |      | 2   | No             |      | 2   | No    |      |       |       | 162   | 51    |
| 38828  | 1    | 2   | No              |      | 1   | Yes            | 2    | 2   | No    |      |       |       | 169   | 75    |
| 38829  | 1    | 2   | No              |      | 2   | No             |      | 2   | No    |      |       |       | 163   | 50    |
| 38835  | 1    | 2   | No              |      | 2   | No             |      | 2   | No    |      | 5     | 10    |       | 50    |
| 38842  |      | 2   | No              |      | 1   | Yes            | 1    | 2   | No    |      |       |       | 155   | 60    |
| 38853  | 1    | 2   | No              |      | 2   | No             |      | 2   | No    |      |       |       | 177   | 75    |
| 38855  | 1    | 2   | No              |      | 1   | Yes            | 2    | 2   | No    |      |       |       | 168   | 56    |
| 38860  |      | 2   | No              |      | 2   | No             |      | 2   | No    |      |       |       | 165   | 55    |
| 38869  | 1    | 2   | No              |      | 1   | Yes            | 1    | 2   | No    |      |       |       | 156   | 62    |
| 38882  |      | 1   | Yes             | 1    | 2   | No             |      | 2   | No    |      |       |       | 156   | 58    |
| 38897  |      | 2   | No              |      | 2   | No             |      | 2   | No    |      |       |       | 150   | 38    |
| 38903  | 1    | 2   | No              |      | 2   | No             |      | 2   | No    |      |       |       | 180   | 80    |
| 38910  |      | 2   | No              |      | 1   | Yes            | 1    | 2   | No    |      |       |       | 165   | 55    |

| respid | Q11a | Q12 | Cardiac Disease | Q12a | Q13 | Hyperlipidemia | Q13a | Q14 | Neuro | Q14a | Q15_1 | Q15_2 | Q15_3 | Q16_1 |
|--------|------|-----|-----------------|------|-----|----------------|------|-----|-------|------|-------|-------|-------|-------|
| 38948  |      | 2   | No              |      | 1   | Yes            | 1    | 2   | No    |      |       |       | 153   | 55    |
| 38949  | 1    | 2   | No              |      | 1   | Yes            | 1    | 2   | No    |      |       |       | 175   | 120   |
| 38953  | 2    | 2   | No              |      | 2   | No             |      | 2   | No    |      |       |       | 157   | 59    |
| 38989  |      | 2   | No              |      | 1   | Yes            | 1    | 2   | No    |      |       |       | 150   | 46    |
| 38997  |      | 2   | No              |      | 1   | Yes            | 1    | 2   | No    |      |       |       | 150   | 45    |
| 38999  |      | 2   | No              |      | 2   | No             |      | 2   | No    |      |       |       | 168   | 65    |
| 39002  | 1    | 2   | No              |      | 1   | Yes            | 1    | 2   | No    |      |       |       | 164   | 55    |
| 39003  |      | 1   | Yes             | 2    | 2   | No             |      | 2   | No    |      |       |       | 162   | 63    |
| 39006  | 1    | 2   | No              |      | 1   | Yes            | 1    | 2   | No    |      |       |       | 166   | 59    |
| 39014  |      | 2   | No              |      | 2   | No             |      | 2   | No    |      |       |       | 163   | 53    |
| 39017  |      | 1   | Yes             | 2    | 1   | Yes            | 2    | 2   | No    |      |       |       | 167   | 66    |
| 39018  |      | 2   | No              |      | 2   | No             |      | 2   | No    |      |       |       | 158   | 62    |
| 39025  | 1    | 1   | Yes             | 1    | 2   | No             |      | 2   | No    |      |       |       | 163   | 52    |
| 39031  |      | 1   | Yes             | 1    | 2   | No             |      | 2   | No    |      |       |       | 165   | 65    |
| 39061  |      | 1   | Yes             | 1    | 2   | No             |      | 2   | No    |      |       |       | 161   | 68    |
| 39131  |      | 2   | No              |      | 2   | No             |      | 2   | No    |      |       |       | 160   | 63    |
| 39153  | 1    | 2   | No              |      | 2   | No             |      | 2   | No    |      |       |       | 162   | 66    |
| 39194  |      | 2   | No              |      | 2   | No             |      | 2   | No    |      |       |       | 160   | 45    |
| 39204  |      | 2   | No              |      | 2   | No             |      | 2   | No    |      |       |       | 160   | 50    |
| 39208  | 1    | 2   | No              |      | 1   | Yes            | 2    | 2   | No    |      |       |       | 157   | 53    |
| 39213  |      | 2   | No              |      | 2   | No             |      | 2   | No    |      |       |       | 169   | 81    |
| 39231  |      | 2   | No              |      | 2   | No             |      | 2   | No    |      |       |       | 156   | 46    |
| 39251  |      | 2   | No              |      | 2   | No             |      | 2   | No    |      |       |       | 159   | 79    |
| 39257  |      | 2   | No              |      | 2   | No             |      | 2   | No    |      |       |       | 155   | 73    |
| 39262  |      | 2   | No              |      | 2   | No             |      | 2   | No    |      |       |       | 152   | 75    |
| 39269  |      | 2   | No              |      | 2   | No             |      | 2   | No    |      |       |       | 161   | 80    |
| 39272  |      | 2   | No              |      | 2   | No             |      | 2   | No    |      |       |       | 155   | 49    |
| 39280  |      | 2   | No              |      | 2   | No             |      | 2   | No    |      |       |       | 163   | 60    |
| 39294  |      | 2   | No              |      | 2   | No             |      | 2   | No    |      |       |       | 153   | 82    |
| 39297  |      | 2   | No              |      | 2   | No             |      | 2   | No    |      |       |       | 164   | 61    |
| 39300  | 1    | 2   | No              |      | 2   | No             |      | 2   | No    |      |       |       | 155   | 70    |
| 39307  |      | 2   | No              |      | 2   | No             |      | 2   | No    |      |       |       | 156   | 65    |



| respid | Q11a | Q12 | Cardiac Disease | Q12a | Q13 | Hyperlipidemia | Q13a | Q14 | Neuro | Q14a | Q15_1 | Q15_2 | Q15_3 | Q16_1 |
|--------|------|-----|-----------------|------|-----|----------------|------|-----|-------|------|-------|-------|-------|-------|
| 39320  | 1    | 2   | No              |      | 2   | No             |      | 2   | No    |      |       |       | 162   | 79    |
| 39333  | 1    | 2   | No              |      | 1   | Yes            | 1    | 2   | No    |      |       |       | 170   | 70    |
| 39335  | 2    | 2   | No              |      | 1   | Yes            | 2    | 1   | Yes   | 1    |       |       | 150   | 65    |
| 39339  | 1    | 2   | No              |      | 2   | No             |      | 2   | No    |      |       |       | 161   | 76    |
| 39375  | 1    | 1   | Yes             | 1    | 1   | Yes            | 1    | 1   | Yes   | 1    |       |       | 162   | 42    |
| 39377  | 2    | 2   | No              |      | 2   | No             |      | 2   | No    |      |       |       | 152   | 61    |
| 39380  |      | 2   | No              |      | 1   | Yes            | 1    | 2   | No    |      |       |       | 156   | 65    |
| 39425  |      | 2   | No              |      | 2   | No             |      | 2   | No    |      |       |       | 165   | 60    |
| 39590  |      | 2   | No              |      | 2   | No             |      | 2   | No    |      |       |       | 150   | 60    |
| 40529  |      | 2   | No              |      | 2   | No             |      | 2   | No    |      |       |       | 160   | 60    |
| 40702  |      | 2   | No              |      | 2   | No             |      | 2   | No    |      |       |       | 152   | 54    |
| 40788  | 1    | 2   | No              |      | 2   | No             |      | 2   | No    |      |       |       | 163   | 65    |
| 40841  |      | 2   | No              |      | 2   | No             |      | 2   | No    |      |       |       | 158   | 60    |
| 40965  | 1    | 2   | No              |      | 2   | No             |      | 2   | No    |      |       |       | 180   | 78    |
| 41092  | 1    | 2   | No              |      | 2   | No             |      | 2   | No    |      |       |       | 170   | 67    |
| 41534  | 1    | 2   | No              |      | 1   | Yes            | 1    | 2   | No    |      |       |       | 160   | 58    |
| 41919  | 1    | 2   | No              |      | 2   | No             |      | 2   | No    |      |       |       | 146   | 62    |
| 42110  |      | 2   | No              |      | 2   | No             |      | 2   | No    |      |       |       | 176   | 86    |
| 42135  |      | 2   | No              |      | 1   | Yes            | 1    | 2   | No    |      |       |       | 171   | 75    |
| 42142  |      | 2   | No              |      | 2   | No             |      | 2   | No    |      |       |       | 173   | 76    |
| 42163  | 1    | 2   | No              |      | 2   | No             |      | 2   | No    |      |       |       | 149   | 48    |
| 42164  |      | 2   | No              |      | 2   | No             |      | 2   | No    |      |       |       | 160   | 52    |
| 42172  | 2    | 2   | No              |      | 1   | Yes            | 2    | 2   | No    |      |       |       | 155   | 40    |
| 42177  | 1    | 2   | No              |      | 1   | Yes            | 1    | 2   | No    |      |       |       | 162   | 72    |
| 42181  | 2    | 2   | No              |      | 2   | No             |      | 2   | No    |      |       |       | 168   | 64    |
| 42193  | 1    | 1   | Yes             | 1    | 2   | No             |      | 2   | No    |      |       |       | 167   | 40    |
| 42196  | 1    | 2   | No              |      | 2   | No             |      | 2   | No    |      |       |       | 168   | 72    |
| 42202  | 1    | 2   | No              |      | 2   | No             |      | 2   | No    |      |       |       | 167   | 52    |
| 42248  | 1    | 2   | No              |      | 1   | Yes            | 1    | 2   | No    |      |       |       | 176   | 75    |
| 42283  |      | 2   | No              |      | 1   | Yes            | 2    | 2   | No    |      |       |       | 172   | 82    |
| 42284  | 1    | 2   | No              |      | 1   | Yes            | 1    | 2   | No    |      |       |       | 158   | 60    |
| 42323  |      | 2   | No              |      | 2   | No             |      | 2   | No    |      |       |       | 166   | 68    |

| respid | Q11a | Q12 | Cardiac Disease | Q12a | Q13 | Hyperlipidemia | Q13a | Q14 | Neuro | Q14a | Q15_1 | Q15_2 | Q15_3 | Q16_1 |
|--------|------|-----|-----------------|------|-----|----------------|------|-----|-------|------|-------|-------|-------|-------|
| 42349  |      | 2   | No              |      | 2   | No             |      | 2   | No    |      |       |       | 161   | 58    |
| 42351  |      | 2   | No              |      | 2   | No             |      | 2   | No    |      |       |       | 165   | 58    |
| 42357  |      | 2   | No              |      | 2   | No             |      | 2   | No    |      |       |       | 155   | 60    |
| 42366  |      | 2   | No              |      | 2   | No             |      | 2   | No    |      |       |       | 170   | 74    |
| 42380  | 1    | 2   | No              |      | 1   | Yes            | 1    | 2   | No    |      |       |       | 165   | 75    |
| 42414  | 2    | 2   | No              |      | 2   | No             |      | 2   | No    |      |       |       | 160   | 80    |
| 42420  | 1    | 1   | Yes             | 1    | 1   | Yes            | 1    | 2   | No    |      |       |       | 170   | 60    |
| 42454  |      | 2   | No              |      | 2   | No             |      | 2   | No    |      |       |       | 162   | 58    |
| 42458  | 1    | 2   | No              |      | 2   | No             |      | 2   | No    |      |       |       | 158   | 50    |
| 42461  | 2    | 2   | No              |      | 1   | Yes            | 1    | 2   | No    |      |       |       | 170   | 69    |
| 42488  |      | 2   | No              |      | 2   | No             |      | 2   | No    |      |       |       | 155   | 55    |
| 42511  |      | 2   | No              |      | 2   | No             |      | 2   | No    |      |       |       | 149   | 63    |
| 42512  |      | 2   | No              |      | 2   | No             |      | 2   | No    |      |       |       | 162   | 53    |
| 42530  |      | 2   | No              |      | 1   | Yes            | 1    | 1   | Yes   | 1    |       |       | 163   | 57    |
| 42531  |      | 2   | No              |      | 1   | Yes            | 2    | 2   | No    |      |       |       | 175   | 80    |
| 42533  | 2    | 2   | No              |      | 1   | Yes            | 2    | 2   | No    |      |       |       | 152   | 54    |
| 42549  |      | 2   | No              |      | 2   | No             |      | 2   | No    |      |       |       | 152   | 50    |
| 42550  | 1    | 1   | Yes             | 1    | 2   | No             |      | 2   | No    |      |       |       | 152   | 60    |
| 42553  |      | 2   | No              |      | 1   | Yes            | 2    | 2   | No    |      |       |       | 153   | 48    |
| 42562  | 1    | 2   | No              |      | 1   | Yes            | 1    | 2   | No    |      |       |       | 160   | 58    |
| 42567  |      | 2   | No              |      | 2   | No             |      | 2   | No    |      |       |       | 152   | 50    |
| 42589  | 1    | 2   | No              |      | 2   | No             |      | 2   | No    |      |       |       | 166   | 70    |
| 42604  | 2    | 2   | No              |      | 2   | No             |      | 2   | No    |      |       |       | 178   | 64    |
| 42618  |      | 2   | No              |      | 2   | No             |      | 2   | No    |      |       |       | 165   | 52    |
| 42621  | 1    | 2   | No              |      | 2   | No             |      | 2   | No    |      |       |       | 168   | 65    |
| 42627  |      | 2   | No              |      | 2   | No             |      | 2   | No    |      |       |       | 157   | 46    |
| 42641  | 2    | 2   | No              |      | 1   | Yes            | 1    | 2   | No    |      |       |       | 174   | 83    |
| 42655  | 1    | 2   | No              |      | 2   | No             |      | 2   | No    |      | 4     | 1     |       | 80    |
| 42666  | 1    | 2   | No              |      | 1   | Yes            | 2    | 2   | No    |      |       |       | 165   | 50    |
| 42667  | 1    | 2   | No              |      | 1   | Yes            | 2    | 2   | No    |      |       |       | 176   | 90    |
| 42697  |      | 2   | No              |      | 2   | No             |      | 2   | No    |      |       |       | 162   | 66    |
| 42703  | 1    | 2   | No              |      | 1   | Yes            | 2    | 2   | No    |      |       |       | 174   | 85    |

| respid | Q11a | Q12 | Cardiac Disease | Q12a | Q13 | Hyperlipidemia | Q13a | Q14 | Neuro | Q14a | Q15_1 | Q15_2 | Q15_3 | Q16_1 |
|--------|------|-----|-----------------|------|-----|----------------|------|-----|-------|------|-------|-------|-------|-------|
| 42712  | 2    | 2   | No              |      | 1   | Yes            | 2    | 2   | No    |      |       |       | 173   | 78    |
| 42731  | 1    | 2   | No              |      | 1   | Yes            | 1    | 2   | No    |      |       |       | 179   | 76    |
| 42780  |      | 2   | No              |      | 1   | Yes            | 2    | 2   | No    |      |       |       | 175   | 80    |
| 42785  |      | 2   | No              |      | 2   | No             |      | 2   | No    |      |       |       | 157   | 42    |
| 42788  |      | 2   | No              |      | 2   | No             |      | 2   | No    |      |       |       | 172   | 66    |
| 42802  | 1    | 2   | No              |      | 1   | Yes            | 2    | 2   | No    |      |       |       | 168   | 61    |
| 42818  |      | 1   | Yes             | 1    | 2   | No             |      | 2   | No    |      |       |       | 175   | 57    |
| 42821  |      | 2   | No              |      | 2   | No             |      | 2   | No    |      |       |       | 160   | 52    |
| 42824  | 1    | 2   | No              |      | 1   | Yes            | 1    | 2   | No    |      |       |       | 153   | 60    |
| 42831  | 2    | 2   | No              |      | 1   | Yes            | 2    | 2   | No    |      |       |       | 160   | 110   |
| 42836  |      | 2   | No              |      | 1   | Yes            | 2    | 2   | No    |      |       |       | 162   | 58    |
| 42864  | 1    | 2   | No              |      | 2   | No             |      | 2   | No    |      |       |       | 165   | 62    |
| 42875  | 2    | 2   | No              |      | 2   | No             |      | 2   | No    |      |       |       | 174   | 80    |
| 42891  |      | 2   | No              |      | 2   | No             |      | 2   | No    |      |       |       | 163   | 59    |
| 42897  |      | 1   | Yes             | 2    | 2   | No             |      | 2   | No    |      |       |       | 171   | 59    |
| 42900  | 2    | 2   | No              |      | 2   | No             |      | 2   | No    |      |       |       | 156   | 55    |
| 42902  | 1    | 1   | Yes             | 1    | 2   | No             |      | 1   | Yes   | 1    |       |       | 170   | 60    |
| 42921  | 1    | 2   | No              |      | 1   | Yes            | 1    | 2   | No    |      |       |       | 180   | 78    |
| 42925  |      | 2   | No              |      | 2   | No             |      | 2   | No    |      |       |       | 160   | 72    |
| 42944  |      | 2   | No              |      | 2   | No             |      | 2   | No    |      |       |       | 172   | 70    |
| 42950  |      | 2   | No              |      | 2   | No             |      | 2   | No    |      |       |       | 152   | 48    |
| 42963  |      | 2   | No              |      | 2   | No             |      | 2   | No    |      |       |       | 155   | 60    |
| 42967  | 1    | 2   | No              |      | 2   | No             |      | 2   | No    |      |       |       | 175   | 70    |
| 42985  | 1    | 2   | No              |      | 1   | Yes            | 1    | 2   | No    |      |       |       | 156   | 50    |
| 42990  | 1    | 2   | No              |      | 1   | Yes            | 2    | 2   | No    |      |       |       | 173   | 65    |
| 42996  |      | 2   | No              |      | 2   | No             |      | 2   | No    |      |       |       | 168   | 60    |
| 43002  |      | 2   | No              |      | 1   | Yes            | 2    | 2   | No    |      |       |       | 160   | 75    |
| 43004  |      | 2   | No              |      | 2   | No             |      | 2   | No    |      |       |       | 167   | 60    |
| 43012  |      | 2   | No              |      | 2   | No             |      | 2   | No    |      |       |       | 162   | 50    |
| 43027  | 1    | 2   | No              |      | 2   | No             |      | 2   | No    |      |       |       | 165   | 70    |
| 43028  | 1    | 2   | No              |      | 1   | Yes            | 2    | 2   | No    |      |       |       | 163   | 70    |
| 43029  | 2    | 2   | No              |      | 2   | No             |      | 2   | No    |      |       |       | 159   | 50    |

| respid | Q11a | Q12 | Cardiac Disease | Q12a | Q13 | Hyperlipidemia | Q13a | Q14 | Neuro | Q14a | Q15_1 | Q15_2 | Q15_3 | Q16_1 |
|--------|------|-----|-----------------|------|-----|----------------|------|-----|-------|------|-------|-------|-------|-------|
| 43031  |      | 2   | No              |      | 2   | No             |      | 2   | No    |      |       |       | 157   | 43    |
| 43042  | 1    | 2   | No              |      | 2   | No             |      | 2   | No    |      |       |       | 170   | 60    |
| 43054  |      | 2   | No              |      | 2   | No             |      | 2   | No    |      |       |       | 165   | 71    |
| 43058  | 1    | 2   | No              |      | 1   | Yes            | 2    | 2   | No    |      |       |       | 171   | 85    |
| 43064  | 1    | 1   | Yes             | 1    | 1   | Yes            | 1    | 2   | No    |      |       |       | 175   | 75    |
| 43069  | 2    | 2   | No              |      | 2   | No             |      | 2   | No    |      | 5     | 6     |       | 63    |
| 43071  |      | 2   | No              |      | 2   | No             |      | 2   | No    |      |       |       | 168   | 72    |
| 43072  |      | 2   | No              |      | 2   | No             |      | 2   | No    |      |       |       | 180   | 70    |
| 43077  | 2    | 2   | No              |      | 1   | Yes            | 2    | 1   | Yes   | 2    |       |       | 152   | 50    |
| 43078  | 1    | 2   | No              |      | 2   | No             |      | 2   | No    |      |       |       | 168   | 75    |
| 43082  | 1    | 2   | No              |      | 2   | No             |      | 2   | No    |      |       |       | 150   | 58    |
| 43092  | 1    | 2   | No              |      | 2   | No             |      | 2   | No    |      |       |       | 168   | 65    |
| 43096  |      | 2   | No              |      | 2   | No             |      | 2   | No    |      |       |       | 172   | 72    |
| 43109  |      | 2   | No              |      | 2   | No             |      | 2   | No    |      |       |       | 156   | 52    |
| 43113  | 1    | 2   | No              |      | 2   | No             |      | 2   | No    |      |       |       | 150   | 50    |
| 43123  |      | 2   | No              |      | 1   | Yes            | 1    | 2   | No    |      |       |       | 155   | 50    |
| 43127  | 1    | 2   | No              |      | 2   | No             |      | 2   | No    |      |       |       | 175   | 72    |
| 43128  |      | 2   | No              |      | 2   | No             |      | 2   | No    |      |       |       | 165   | 57    |
| 43129  |      | 2   | No              |      | 2   | No             |      | 2   | No    |      |       |       | 153   | 52    |
| 43133  |      | 2   | No              |      | 2   | No             |      | 2   | No    |      |       |       | 160   | 62    |
| 43140  |      | 2   | No              |      | 2   | No             |      | 2   | No    |      |       |       | 165   | 66    |
| 43143  | 1    | 2   | No              |      | 2   | No             |      | 2   | No    |      |       |       | 168   | 75    |
| 43149  |      | 2   | No              |      | 2   | No             |      | 2   | No    |      |       |       | 167   | 58    |
| 43150  |      | 2   | No              |      | 2   | No             |      | 1   | Yes   | 1    |       |       | 168   | 68    |
| 43153  | 1    | 1   | Yes             | 2    | 1   | Yes            | 2    | 2   | No    |      |       |       | 162   | 65    |
| 43170  | 1    | 2   | No              |      | 2   | No             |      | 2   | No    |      |       |       | 172   | 76    |
| 43187  |      | 2   | No              |      | 1   | Yes            | 2    | 2   | No    |      |       |       | 160   | 57    |
| 43188  |      | 2   | No              |      | 2   | No             |      | 2   | No    |      |       |       | 155   | 53    |
| 43198  |      | 2   | No              |      | 2   | No             |      | 2   | No    |      |       |       | 161   | 52    |
| 43208  |      | 2   | No              |      | 2   | No             |      | 2   | No    |      |       |       | 168   | 58    |
| 43216  |      | 2   | No              |      | 1   | Yes            | 2    | 2   | No    |      |       |       | 180   | 73    |
| 43222  |      | 2   | No              |      | 2   | No             |      | 2   | No    |      |       |       | 170   | 75    |

| respid | Q11a | Q12 | Cardiac Disease | Q12a | Q13 | Hyperlipidemia | Q13a | Q14 | Neuro | Q14a | Q15_1 | Q15_2 | Q15_3 | Q16_1 |
|--------|------|-----|-----------------|------|-----|----------------|------|-----|-------|------|-------|-------|-------|-------|
| 43224  | 1    | 2   | No              |      | 1   | Yes            | 2    | 2   | No    |      |       |       | 160   | 72    |
| 43230  |      | 2   | No              |      | 1   | Yes            | 1    | 2   | No    |      |       |       | 169   | 85    |
| 43231  |      | 2   | No              |      | 2   | No             |      | 2   | No    |      |       |       | 167   | 70    |
| 43265  | 2    | 2   | No              |      | 2   | No             |      | 2   | No    |      |       |       | 175   | 70    |
| 43270  | 1    | 1   | Yes             | 2    | 2   | No             |      | 2   | No    |      |       |       | 175   | 75    |
| 43283  | 2    | 1   | Yes             | 2    | 2   | No             |      | 2   | No    |      |       |       | 168   | 75    |
| 43295  | 1    | 2   | No              |      | 2   | No             |      | 2   | No    |      |       |       | 169   | 85    |
| 43297  |      | 2   | No              |      | 2   | No             |      | 2   | No    |      |       |       | 178   | 70    |
| 43299  |      | 2   | No              |      | 2   | No             |      | 2   | No    |      |       |       | 164   | 55    |
| 43307  | 1    | 1   | Yes             | 2    | 1   | Yes            | 1    | 2   | No    |      |       |       | 152   | 55    |
| 43316  | 1    | 2   | No              |      | 2   | No             |      | 2   | No    |      |       |       | 175   | 80    |
| 43318  |      | 2   | No              |      | 2   | No             |      | 2   | No    |      |       |       | 175   | 80    |
| 43319  | 1    | 2   | No              |      | 2   | No             |      | 2   | No    |      |       |       | 179   | 72    |
| 43324  |      | 2   | No              |      | 2   | No             |      | 2   | No    |      |       |       | 175   | 80    |
| 43325  | 1    | 2   | No              |      | 2   | No             |      | 2   | No    |      |       |       | 152   | 64    |
| 43327  |      | 2   | No              |      | 2   | No             |      | 2   | No    |      |       |       | 160   | 55    |
| 43338  |      | 2   | No              |      | 2   | No             |      | 2   | No    |      |       |       | 168   | 56    |
| 43342  |      | 2   | No              |      | 2   | No             |      | 2   | No    |      |       |       | 155   | 73    |
| 43348  |      | 2   | No              |      | 2   | No             |      | 2   | No    |      |       |       | 159   | 56    |
| 43395  |      | 2   | No              |      | 2   | No             |      | 2   | No    |      |       |       | 176   | 78    |
| 43404  |      | 2   | No              |      | 2   | No             |      | 2   | No    |      |       |       | 175   | 80    |
| 43406  | 1    | 2   | No              |      | 2   | No             |      | 2   | No    |      |       |       | 158   | 58    |
| 43407  |      | 2   | No              |      | 2   | No             |      | 2   | No    |      |       |       | 168   | 55    |
| 43411  |      | 2   | No              |      | 2   | No             |      | 2   | No    |      |       |       | 163   | 59    |
| 43416  |      | 1   | Yes             | 2    | 1   | Yes            | 2    | 1   | Yes   | 1    |       |       | 175   | 80    |
| 43428  |      | 2   | No              |      | 2   | No             |      | 2   | No    |      |       |       | 172   | 70    |
| 43429  | 1    | 2   | No              |      | 1   | Yes            | 2    | 2   | No    |      |       |       | 165   | 66    |
| 43432  |      | 2   | No              |      | 2   | No             |      | 2   | No    |      |       |       | 165   | 65    |
| 43443  |      | 2   | No              |      | 2   | No             |      | 2   | No    |      |       |       | 152   | 43    |
| 43455  |      | 2   | No              |      | 2   | No             |      | 2   | No    |      |       |       | 171   | 78    |
| 43457  |      | 2   | No              |      | 2   | No             |      | 2   | No    |      |       |       | 178   | 73    |
| 43458  |      | 2   | No              |      | 2   | No             |      | 2   | No    |      |       |       | 160   | 58    |

| respid | Q11a | Q12 | Cardiac Disease | Q12a | Q13 | Hyperlipidemia | Q13a | Q14 | Neuro | Q14a | Q15_1 | Q15_2 | Q15_3 | Q16_1 |
|--------|------|-----|-----------------|------|-----|----------------|------|-----|-------|------|-------|-------|-------|-------|
| 43477  |      | 1   | Yes             | 1    | 2   | No             |      | 2   | No    |      |       |       | 167   | 66    |
| 43520  |      | 2   | No              |      | 2   | No             |      | 2   | No    |      |       |       | 160   | 55    |
| 43521  |      | 2   | No              |      | 2   | No             |      | 2   | No    |      |       |       | 158   | 70    |
| 43550  |      | 2   | No              |      | 2   | No             |      | 2   | No    |      |       |       | 158   | 60    |
| 43551  | 1    | 2   | No              |      | 1   | Yes            | 1    | 2   | No    |      |       |       | 168   | 70    |
| 43554  | 1    | 2   | No              |      | 2   | No             |      | 2   | No    |      |       |       | 159   | 52    |
| 43560  | 1    | 2   | No              |      | 1   | Yes            | 1    | 2   | No    |      |       |       | 176   | 74    |
| 43569  | 2    | 2   | No              |      | 2   | No             |      | 2   | No    |      |       |       | 175   | 65    |
| 43583  | 2    | 2   | No              |      | 2   | No             |      | 2   | No    |      |       |       | 159   | 52    |
| 43590  | 1    | 2   | No              |      | 1   | Yes            | 1    | 2   | No    |      |       |       | 152   | 48    |
| 43591  | 1    | 2   | No              |      | 1   | Yes            | 2    | 2   | No    |      |       |       | 174   | 74    |
| 43595  |      | 2   | No              |      | 2   | No             |      | 2   | No    |      |       |       | 150   | 55    |
| 43599  | 1    | 2   | No              |      | 2   | No             |      | 2   | No    |      |       |       | 155   | 56    |
| 43606  |      | 2   | No              |      | 2   | No             |      | 2   | No    |      |       |       | 155   | 50    |
| 43609  | 2    | 2   | No              |      | 2   | No             |      | 2   | No    |      |       |       | 160   | 56    |
| 43629  |      | 2   | No              |      | 1   | Yes            | 2    | 2   | No    |      |       |       | 158   | 85    |
| 43636  |      | 2   | No              |      | 1   | Yes            | 2    | 2   | No    |      |       |       | 159   | 69    |
| 43661  | 1    | 2   | No              |      | 1   | Yes            | 1    | 2   | No    |      |       |       | 175   | 85    |
| 43668  |      | 2   | No              |      | 2   | No             |      | 2   | No    |      |       |       | 175   | 68    |
| 43672  |      | 2   | No              |      | 2   | No             |      | 2   | No    |      |       |       | 160   | 58    |
| 43677  | 2    | 2   | No              |      | 2   | No             |      | 2   | No    |      |       |       | 165   | 50    |
| 43683  | 1    | 2   | No              |      | 2   | No             |      | 2   | No    |      |       |       | 155   | 55    |
| 43708  |      | 2   | No              |      | 2   | No             |      | 2   | No    |      | 5     | 7     |       | 60    |
| 43713  |      | 2   | No              |      | 1   | Yes            | 2    | 2   | No    |      |       |       | 160   | 58    |
| 43718  |      | 2   | No              |      | 2   | No             |      | 2   | No    |      |       |       | 170   | 70    |
| 43725  |      | 2   | No              |      | 2   | No             |      | 2   | No    |      |       |       | 153   | 56    |
| 43747  | 1    | 2   | No              |      | 2   | No             |      | 2   | No    |      |       |       | 162   | 78    |
| 43755  |      | 2   | No              |      | 2   | No             |      | 1   | Yes   | 2    |       |       | 158   | 66    |
| 43770  |      | 2   | No              |      | 2   | No             |      | 2   | No    |      |       |       | 171   | 72    |
| 43775  |      | 2   | No              |      | 2   | No             |      | 2   | No    |      |       |       | 168   | 55    |
| 43788  |      | 2   | No              |      | 2   | No             |      | 2   | No    |      |       |       | 183   | 75    |
| 43790  |      | 2   | No              |      | 2   | No             |      | 2   | No    |      |       |       | 167   | 56    |

| respid | Q11a | Q12 | Cardiac Disease | Q12a | Q13 | Hyperlipidemia | Q13a | Q14 | Neuro | Q14a | Q15_1 | Q15_2 | Q15_3 | Q16_1 |
|--------|------|-----|-----------------|------|-----|----------------|------|-----|-------|------|-------|-------|-------|-------|
| 43797  |      | 2   | No              |      | 2   | No             |      | 2   | No    |      |       |       | 169   | 57    |
| 43798  | 2    | 2   | No              |      | 2   | No             |      | 2   | No    |      |       |       | 169   | 59    |
| 43811  |      | 2   | No              |      | 2   | No             |      | 2   | No    |      |       |       | 169   | 70    |
| 43819  |      | 2   | No              |      | 2   | No             |      | 2   | No    |      |       |       | 168   | 70    |
| 43821  |      | 2   | No              |      | 2   | No             |      | 2   | No    |      |       |       | 169   | 60    |
| 43822  |      | 2   | No              |      | 2   | No             |      | 2   | No    |      |       |       | 150   | 60    |
| 43825  |      | 2   | No              |      | 2   | No             |      | 2   | No    |      |       |       | 155   | 54    |
| 43826  |      | 2   | No              |      | 2   | No             |      | 2   | No    |      |       |       | 172   | 83    |
| 43831  | 1    | 1   | Yes             | 1    | 2   | No             |      | 2   | No    |      |       |       | 155   | 70    |
| 43836  | 1    | 2   | No              |      | 2   | No             |      | 2   | No    |      |       |       | 169   | 70    |
| 43852  |      | 2   | No              |      | 2   | No             |      | 2   | No    |      |       |       | 168   | 53    |
| 43857  | 1    | 1   | Yes             | 1    | 2   | No             |      | 2   | No    |      |       |       | 156   | 51    |
| 43858  | 1    | 2   | No              |      | 2   | No             |      | 2   | No    |      |       |       | 170   | 60    |
| 43859  |      | 2   | No              |      | 2   | No             |      | 2   | No    |      |       |       | 168   | 58    |
| 43863  |      | 2   | No              |      | 2   | No             |      | 2   | No    |      |       |       | 158   | 44    |
| 43868  |      | 2   | No              |      | 2   | No             |      | 2   | No    |      |       |       | 170   | 70    |
| 43872  |      | 2   | No              |      | 2   | No             |      | 2   | No    |      |       |       | 170   | 70    |
| 43874  |      | 2   | No              |      | 2   | No             |      | 2   | No    |      |       |       | 168   | 70    |
| 43882  |      | 2   | No              |      | 2   | No             |      | 2   | No    |      |       |       | 165   | 55    |
| 43886  |      | 2   | No              |      | 2   | No             |      | 2   | No    |      |       |       | 158   | 80    |
| 43903  | 1    | 2   | No              |      | 2   | No             |      | 2   | No    |      |       |       | 142   | 42    |
| 43929  |      | 2   | No              |      | 1   | Yes            | 1    | 2   | No    |      |       |       | 176   | 77    |
| 43932  |      | 2   | No              |      | 1   | Yes            | 2    | 2   | No    |      |       |       | 165   | 55    |
| 43936  |      | 2   | No              |      | 2   | No             |      | 2   | No    |      |       |       | 160   | 52    |
| 43962  | 2    | 2   | No              |      | 2   | No             |      | 2   | No    |      |       |       | 158   | 55    |
| 43964  |      | 2   | No              |      | 2   | No             |      | 2   | No    |      |       |       | 155   | 45    |
| 43968  |      | 1   | Yes             | 1    | 2   | No             |      | 2   | No    |      |       |       | 156   | 56    |
| 43979  |      | 2   | No              |      | 2   | No             |      | 2   | No    |      |       |       | 161   | 58    |
| 44006  | 1    | 1   | Yes             | 2    | 1   | Yes            | 1    | 2   | No    |      |       |       | 172   | 85    |
| 44009  |      | 2   | No              |      | 2   | No             |      | 2   | No    |      |       |       | 150   | 95    |
| 44023  | 2    | 2   | No              |      | 1   | Yes            | 1    | 2   | No    |      |       |       | 160   | 66    |
| 44035  |      | 2   | No              |      | 2   | No             |      | 2   | No    |      |       |       | 175   | 70    |

| respid | Q11a | Q12 | Cardiac Disease | Q12a | Q13 | Hyperlipidemia | Q13a | Q14 | Neuro | Q14a | Q15_1 | Q15_2 | Q15_3 | Q16_1 |
|--------|------|-----|-----------------|------|-----|----------------|------|-----|-------|------|-------|-------|-------|-------|
| 44038  | 1    | 1   | Yes             | 1    | 2   | No             |      | 2   | No    |      |       |       | 168   | 56    |
| 44039  |      | 2   | No              |      | 2   | No             |      | 2   | No    |      |       |       | 168   | 70    |
| 44043  | 1    | 2   | No              |      | 2   | No             |      | 2   | No    |      |       |       | 151   | 48    |
| 44048  |      | 2   | No              |      | 2   | No             |      | 2   | No    |      |       |       | 170   | 60    |
| 44050  |      | 2   | No              |      | 2   | No             |      | 2   | No    |      |       |       | 168   | 78    |
| 44051  |      | 2   | No              |      | 2   | No             |      | 2   | No    |      |       |       | 169   | 60    |
| 44061  |      | 2   | No              |      | 2   | No             |      | 2   | No    |      |       |       | 170   | 70    |
| 44063  |      | 2   | No              |      | 2   | No             |      | 2   | No    |      |       |       | 170   | 58    |
| 44072  |      | 2   | No              |      | 2   | No             |      | 2   | No    |      |       |       | 172   | 60    |
| 44075  |      | 2   | No              |      | 2   | No             |      | 2   | No    |      |       |       | 170   | 70    |
| 44089  |      | 2   | No              |      | 2   | No             |      | 2   | No    |      |       |       | 165   | 70    |
| 44090  | 1    | 2   | No              |      | 1   | Yes            | 1    | 2   | No    |      |       |       | 176   | 85    |
| 44091  |      | 2   | No              |      | 2   | No             |      | 2   | No    |      |       |       | 170   | 70    |
| 44092  |      | 1   | Yes             | 2    | 2   | No             |      | 2   | No    |      |       |       | 150   | 46    |
| 44110  |      | 2   | No              |      | 2   | No             |      | 2   | No    |      |       |       | 165   | 75    |
| 44112  |      | 2   | No              |      | 2   | No             |      | 2   | No    |      |       |       | 168   | 70    |
| 44114  |      | 2   | No              |      | 2   | No             |      | 2   | No    |      |       |       | 170   | 70    |
| 44143  |      | 2   | No              |      | 2   | No             |      | 2   | No    |      |       |       | 172   | 71    |
| 44179  | 1    | 2   | No              |      | 2   | No             |      | 2   | No    |      |       |       | 173   | 80    |
| 44234  | 2    | 2   | No              |      | 2   | No             |      | 2   | No    |      |       |       | 180   | 73    |
| 44236  | 2    | 2   | No              |      | 1   | Yes            | 2    | 2   | No    |      |       |       | 170   | 65    |
| 44239  |      | 1   | Yes             | 2    | 2   | No             |      | 2   | No    |      |       |       | 169   | 70    |
| 44241  |      | 2   | No              |      | 2   | No             |      | 2   | No    |      |       |       | 170   | 70    |
| 44253  |      | 2   | No              |      | 1   | Yes            | 1    | 2   | No    |      |       |       | 176   | 70    |
| 44260  |      | 2   | No              |      | 2   | No             |      | 2   | No    |      |       |       | 167   | 70    |
| 44261  |      | 2   | No              |      | 2   | No             |      | 2   | No    |      |       |       | 175   | 75    |
| 44263  |      | 1   | Yes             | 2    | 2   | No             |      | 2   | No    |      |       |       | 180   | 85    |
| 44264  | 1    | 2   | No              |      | 2   | No             |      | 2   | No    |      |       |       | 155   | 59    |
| 44265  |      | 2   | No              |      | 2   | No             |      | 2   | No    |      |       |       | 170   | 70    |
| 44267  |      | 2   | No              |      | 2   | No             |      | 2   | No    |      |       |       | 170   | 80    |
| 44306  |      | 2   | No              |      | 2   | No             |      | 2   | No    |      |       |       | 158   | 62    |
| 44309  | 1    | 2   | No              |      | 1   | Yes            | 1    | 2   | No    |      | 5     | 4     |       | 59    |



| respid | Q11a | Q12 | Cardiac Disease | Q12a | Q13 | Hyperlipidemia | Q13a | Q14 | Neuro | Q14a | Q15_1 | Q15_2 | Q15_3 | Q16_1 |
|--------|------|-----|-----------------|------|-----|----------------|------|-----|-------|------|-------|-------|-------|-------|
| 44310  |      | 2   | No              |      | 2   | No             |      | 2   | No    |      |       |       | 150   | 43    |
| 44361  | 1    | 2   | No              |      | 2   | No             |      | 2   | No    |      |       |       | 159   | 65    |
| 44380  |      | 2   | No              |      | 2   | No             |      | 2   | No    |      |       |       | 167   | 60    |
| 44386  |      | 2   | No              |      | 2   | No             |      | 2   | No    |      |       |       | 170   | 60    |
| 44419  |      | 2   | No              |      | 1   | Yes            | 2    | 2   | No    |      |       |       | 155   | 70    |
| 44426  |      | 2   | No              |      | 2   | No             |      | 2   | No    |      |       |       | 175   | 75    |
| 44479  | 2    | 2   | No              |      | 1   | Yes            | 2    | 2   | No    |      |       |       | 172   | 70    |
| 44484  | 1    | 1   | Yes             | 1    | 1   | Yes            | 1    | 1   | Yes   | 1    |       |       | 166   | 60    |
| 44487  |      | 2   | No              |      | 2   | No             |      | 2   | No    |      |       |       | 168   | 65    |
| 44509  |      | 2   | No              |      | 2   | No             |      | 2   | No    |      |       |       | 159   | 70    |
| 44540  | 2    | 1   | Yes             | 2    | 2   | No             |      | 2   | No    |      |       |       | 162   | 60    |
| 44551  |      | 2   | No              |      | 1   | Yes            | 2    | 2   | No    |      |       |       | 175   | 82    |
| 44553  |      | 2   | No              |      | 2   | No             |      | 2   | No    |      |       |       | 177   | 75    |
| 44650  |      | 2   | No              |      | 2   | No             |      | 2   | No    |      |       |       | 163   | 52    |
| 44665  | 2    | 2   | No              |      | 2   | No             |      | 2   | No    |      |       |       | 166   | 46    |
| 44779  |      | 2   | No              |      | 1   | Yes            | 2    | 2   | No    |      |       |       | 169   | 91    |
| 44797  | 1    | 2   | No              |      | 1   | Yes            | 2    | 2   | No    |      |       |       | 163   | 55    |
| 44807  |      | 2   | No              |      | 2   | No             |      | 2   | No    |      |       |       | 159   | 62    |
| 44815  | 1    | 2   | No              |      | 2   | No             |      | 2   | No    |      |       |       | 166   | 60    |
| 44836  |      | 2   | No              |      | 2   | No             |      | 2   | No    |      |       |       | 163   | 52    |
| 44868  |      | 2   | No              |      | 2   | No             |      | 2   | No    |      |       |       | 177   | 70    |
| 44927  |      | 2   | No              |      | 2   | No             |      | 2   | No    |      |       |       | 160   | 53    |
| 44983  |      | 2   | No              |      | 2   | No             |      | 2   | No    |      |       |       | 170   | 55    |
| 45040  |      | 2   | No              |      | 2   | No             |      | 2   | No    |      |       |       | 151   | 54    |
| 45051  |      | 2   | No              |      | 1   | Yes            | 2    | 1   | Yes   | 1    |       |       | 160   | 53    |
| 45067  |      | 2   | No              |      | 1   | Yes            | 2    | 2   | No    |      |       |       | 162   | 69    |
| 45074  |      | 2   | No              |      | 1   | Yes            | 2    | 2   | No    |      |       |       | 165   | 40    |
| 45115  |      | 2   | No              |      | 2   | No             |      | 2   | No    |      |       |       | 165   | 54    |
| 45187  | 1    | 2   | No              |      | 1   | Yes            | 1    | 2   | No    |      |       |       | 164   | 62    |
| 45221  | 1    | 2   | No              |      | 1   | Yes            | 1    | 2   | No    |      |       |       | 172   | 75    |
| 45279  |      | 2   | No              |      | 2   | No             |      | 2   | No    |      |       |       | 160   | 48    |
| 45308  | 2    | 2   | No              |      | 1   | Yes            | 2    | 2   | No    |      |       |       | 174   | 75    |

| respid | Q11a | Q12 | Cardiac Disease | Q12a | Q13 | Hyperlipidemia | Q13a | Q14 | Neuro | Q14a | Q15_1 | Q15_2 | Q15_3 | Q16_1 |
|--------|------|-----|-----------------|------|-----|----------------|------|-----|-------|------|-------|-------|-------|-------|
| 45317  |      | 2   | No              |      | 2   | No             |      | 2   | No    |      |       |       | 170   | 79    |
| 45379  | 1    | 2   | No              |      | 2   | No             |      | 2   | No    |      |       |       | 182   | 70    |
| 45451  |      | 2   | No              |      | 2   | No             |      | 2   | No    |      |       |       | 163   | 67    |
| 45472  | 1    | 2   | No              |      | 2   | No             |      | 1   | Yes   | 1    |       |       | 170   | 66    |
| 45474  | 1    | 2   | No              |      | 1   | Yes            | 1    | 2   | No    |      |       |       | 178   | 84    |
| 45544  | 1    | 1   | Yes             | 1    | 2   | No             |      | 2   | No    |      |       |       | 171   | 65    |
| 45561  |      | 2   | No              |      | 2   | No             |      | 2   | No    |      |       |       | 168   | 58    |
| 45596  |      | 2   | No              |      | 2   | No             |      | 2   | No    |      |       |       | 169   | 64    |

---

**Instrum****IPSS/ICS**

---

**Symptom**

Postmicturition

---

**Type of R**

Symptom

Bother

**Descripti** Weight  
Pound

Incomplete emptying

Symptom Bother

| respid | Q16_2 | Q17 | Smoke | Q17a_1 | Q18 | Alcohol | Q19_1 | Q19a_1 |
|--------|-------|-----|-------|--------|-----|---------|-------|--------|
| 241    |       | 2   | No    |        | 1   | Yes     | 1     | 1      |
| 242    |       | 1   | Yes   | 16     | 1   | Yes     | 0     |        |
| 243    |       | 1   | Yes   | 7      | 1   | Yes     | 3     | 2      |
| 244    |       | 1   | Yes   | 20     | 1   | Yes     | 2     | 3      |
| 245    |       | 2   | No    |        | 2   | No      | 1     | 1      |
| 246    |       | 2   | No    |        | 1   | Yes     | 1     | 1      |
| 247    |       | 2   | No    |        | 1   | Yes     | 4     | 2      |
| 253    |       | 2   | No    |        | 2   | No      | 1     | 1      |
| 256    |       | 2   | No    |        | 1   | Yes     | 4     | 2      |
| 257    |       | 2   | No    |        | 2   | No      | 1     | 1      |
| 258    |       | 1   | Yes   | 10     | 1   | Yes     | 0     |        |
| 259    |       | 2   | No    |        | 2   | No      | 1     | 0      |
| 263    |       | 2   | No    |        | 1   | Yes     | 1     | 1      |
| 264    |       | 2   | No    |        | 2   | No      | 0     |        |
| 265    |       | 1   | Yes   | 15     | 1   | Yes     | 4     | 2      |
| 266    |       | 2   | No    |        | 2   | No      | 0     |        |
| 268    |       | 2   | No    |        | 1   | Yes     | 1     | 1      |
| 270    |       | 2   | No    |        | 2   | No      | 0     |        |
| 272    |       | 2   | No    |        | 1   | Yes     | 1     | 1      |
| 274    |       | 2   | No    |        | 2   | No      | 1     | 0      |

| respid | Q16_2 | Q17 | Smoke | Q17a_1 | Q18 | Alcohol | Q19_1 | Q19a_1 |
|--------|-------|-----|-------|--------|-----|---------|-------|--------|
| 275    |       | 2   | No    |        | 2   | No      | 0     |        |
| 276    |       | 2   | No    |        | 1   | Yes     | 0     |        |
| 277    |       | 1   | Yes   | 10     | 2   | No      | 1     | 1      |
| 279    |       | 1   | Yes   | 15     | 1   | Yes     | 2     | 2      |
| 286    |       | 2   | No    |        | 2   | No      | 1     | 1      |
| 290    |       | 2   | No    |        | 1   | Yes     | 1     | 1      |
| 291    |       | 2   | No    |        | 2   | No      | 2     | 1      |
| 295    |       | 2   | No    |        | 2   | No      | 0     |        |
| 297    |       | 2   | No    |        | 1   | Yes     | 3     | 2      |
| 299    |       | 1   | Yes   | 20     | 1   | Yes     | 2     | 1      |
| 300    |       | 1   | Yes   | 10     | 2   | No      | 1     | 1      |
| 303    |       | 2   | No    |        | 2   | No      | 1     | 0      |
| 304    |       | 2   | No    |        | 2   | No      | 0     |        |
| 306    |       | 2   | No    |        | 2   | No      | 1     | 1      |
| 307    |       | 2   | No    |        | 2   | No      | 1     | 1      |
| 312    |       | 2   | No    |        | 2   | No      | 5     | 3      |
| 315    |       | 1   | Yes   | 15     | 2   | No      | 1     | 1      |
| 317    |       | 1   | Yes   | 10     | 2   | No      | 1     | 0      |
| 322    |       | 2   | No    |        | 2   | No      | 1     | 1      |
| 335    |       | 2   | No    |        | 2   | No      | 0     |        |
| 374    |       | 2   | No    |        | 2   | No      | 3     | 2      |
| 378    |       | 1   | Yes   | 3      | 2   | No      | 1     | 1      |
| 380    |       | 1   | Yes   | 10     | 2   | No      | 1     | 1      |
| 382    |       | 1   | Yes   | 12     | 2   | No      | 5     | 3      |
| 384    |       | 1   | Yes   | 6      | 1   | Yes     | 1     | 2      |
| 385    |       | 1   | Yes   | 15     | 1   | Yes     | 1     | 1      |
| 395    |       | 2   | No    |        | 2   | No      | 1     | 2      |
| 396    |       | 2   | No    |        | 2   | No      | 0     |        |
| 398    |       | 2   | No    |        | 2   | No      | 0     |        |
| 402    |       | 2   | No    |        | 2   | No      | 5     | 3      |
| 414    |       | 1   | Yes   | 20     | 2   | No      | 1     | 1      |
| 415    |       | 2   | No    |        | 1   | Yes     | 0     |        |

| respid | Q16_2 | Q17 | Smoke | Q17a_1 | Q18 | Alcohol | Q19_1 | Q19a_1 |
|--------|-------|-----|-------|--------|-----|---------|-------|--------|
| 416    |       | 1   | Yes   | 20     | 2   | No      | 0     |        |
| 420    |       | 2   | No    |        | 1   | Yes     | 2     | 2      |
| 421    |       | 2   | No    |        | 1   | Yes     | 3     | 2      |
| 422    |       | 2   | No    |        | 1   | Yes     | 0     |        |
| 423    |       | 2   | No    |        | 1   | Yes     | 0     |        |
| 424    |       | 2   | No    |        | 2   | No      | 0     |        |
| 425    |       | 1   | Yes   | 20     | 1   | Yes     | 4     | 1      |
| 428    |       | 1   | Yes   | 6      | 2   | No      | 1     | 0      |
| 429    |       | 2   | No    |        | 2   | No      | 0     |        |
| 431    |       | 2   | No    |        | 2   | No      | 0     |        |
| 437    |       | 2   | No    |        | 2   | No      | 0     |        |
| 438    |       | 2   | No    |        | 2   | No      | 1     | 0      |
| 441    |       | 2   | No    |        | 2   | No      | 1     | 1      |
| 444    |       | 2   | No    |        | 2   | No      | 1     | 1      |
| 448    |       | 1   | Yes   | 20     | 1   | Yes     | 0     |        |
| 449    |       | 2   | No    |        | 2   | No      | 3     | 1      |
| 457    |       | 2   | No    |        | 1   | Yes     | 3     | 2      |
| 460    |       | 2   | No    |        | 1   | Yes     | 1     | 0      |
| 469    |       | 1   | Yes   | 15     | 2   | No      | 3     | 2      |
| 471    |       | 2   | No    |        | 2   | No      | 1     | 1      |
| 473    |       | 1   | Yes   | 10     | 2   | No      | 3     | 3      |
| 476    |       | 2   | No    |        | 2   | No      | 1     | 1      |
| 479    |       | 2   | No    |        | 2   | No      | 0     |        |
| 485    |       | 1   | Yes   | 13     | 2   | No      | 1     | 0      |
| 488    |       | 2   | No    |        | 2   | No      | 1     | 1      |
| 494    |       | 2   | No    |        | 2   | No      | 0     |        |
| 496    |       | 1   | Yes   | 15     | 1   | Yes     | 1     | 0      |
| 501    |       | 2   | No    |        | 2   | No      | 0     |        |
| 502    |       | 2   | No    |        | 1   | Yes     | 3     | 2      |
| 503    |       | 2   | No    |        | 2   | No      | 0     |        |
| 506    |       | 2   | No    |        | 1   | Yes     | 1     | 0      |
| 514    |       | 2   | No    |        | 2   | No      | 2     | 1      |

| respid | Q16_2 | Q17 | Smoke | Q17a_1 | Q18 | Alcohol | Q19_1 | Q19a_1 |
|--------|-------|-----|-------|--------|-----|---------|-------|--------|
| 515    |       | 1   | Yes   | 10     | 1   | Yes     | 1     | 1      |
| 516    |       | 2   | No    |        | 2   | No      | 0     |        |
| 519    |       | 2   | No    |        | 2   | No      | 0     |        |
| 522    |       | 1   | Yes   | 5      | 1   | Yes     | 0     |        |
| 525    |       | 2   | No    |        | 2   | No      | 1     | 0      |
| 528    |       | 2   | No    |        | 2   | No      | 0     |        |
| 532    |       | 1   | Yes   | 20     | 1   | Yes     | 1     | 0      |
| 536    |       | 1   | Yes   | 7      | 1   | Yes     | 1     | 1      |
| 539    |       | 2   | No    |        | 2   | No      | 0     |        |
| 540    |       | 2   | No    |        | 2   | No      | 1     | 1      |
| 547    |       | 2   | No    |        | 2   | No      | 0     |        |
| 551    |       | 2   | No    |        | 1   | Yes     | 0     |        |
| 554    |       | 1   | Yes   | 10     | 1   | Yes     | 1     | 1      |
| 558    |       | 2   | No    |        | 1   | Yes     | 1     | 1      |
| 563    |       | 2   | No    |        | 2   | No      | 0     |        |
| 564    |       | 2   | No    |        | 2   | No      | 1     | 1      |
| 565    |       | 1   | Yes   | 10     | 1   | Yes     | 1     | 0      |
| 567    |       | 2   | No    |        | 2   | No      | 0     |        |
| 569    |       | 2   | No    |        | 2   | No      | 0     |        |
| 572    |       | 2   | No    |        | 2   | No      | 1     | 1      |
| 574    |       | 2   | No    |        | 2   | No      | 0     |        |
| 583    |       | 1   | Yes   | 10     | 2   | No      | 1     | 1      |
| 589    |       | 2   | No    |        | 2   | No      | 0     |        |
| 592    |       | 2   | No    |        | 2   | No      | 0     |        |
| 593    |       | 2   | No    |        | 2   | No      | 0     |        |
| 594    |       | 1   | Yes   | 10     | 2   | No      | 3     | 2      |
| 597    |       | 1   | Yes   | 15     | 1   | Yes     | 2     | 0      |
| 601    |       | 2   | No    |        | 2   | No      | 1     | 0      |
| 607    |       | 1   | Yes   | 19     | 2   | No      | 1     | 1      |
| 610    |       | 2   | No    |        | 1   | Yes     | 0     |        |
| 612    |       | 2   | No    |        | 2   | No      | 4     | 3      |
| 627    |       | 1   | Yes   | 15     | 2   | No      | 4     | 1      |

| respid | Q16_2 | Q17 | Smoke | Q17a_1 | Q18 | Alcohol | Q19_1 | Q19a_1 |
|--------|-------|-----|-------|--------|-----|---------|-------|--------|
| 631    |       | 1   | Yes   | 6      | 1   | Yes     | 0     |        |
| 633    |       | 2   | No    |        | 1   | Yes     | 1     | 1      |
| 636    |       | 2   | No    |        | 1   | Yes     | 0     |        |
| 656    |       | 2   | No    |        | 1   | Yes     | 1     | 1      |
| 659    |       | 1   | Yes   | 20     | 1   | Yes     | 0     |        |
| 670    |       | 1   | Yes   | 5      | 1   | Yes     | 5     | 0      |
| 672    |       | 2   | No    |        | 2   | No      | 0     |        |
| 673    |       | 2   | No    |        | 2   | No      | 1     | 2      |
| 675    |       | 2   | No    |        | 1   | Yes     | 0     |        |
| 676    |       | 1   | Yes   | 20     | 2   | No      | 2     | 1      |
| 679    |       | 1   | Yes   | 12     | 1   | Yes     | 1     | 1      |
| 683    |       | 1   | Yes   | 5      | 1   | Yes     | 1     | 1      |
| 684    |       | 2   | No    |        | 1   | Yes     | 3     | 1      |
| 690    |       | 2   | No    |        | 2   | No      | 1     | 0      |
| 701    |       | 1   | Yes   | 20     | 2   | No      | 5     | 3      |
| 709    |       | 2   | No    |        | 1   | Yes     | 4     | 2      |
| 719    |       | 2   | No    |        | 2   | No      | 0     |        |
| 726    |       | 2   | No    |        | 2   | No      | 0     |        |
| 730    |       | 2   | No    |        | 2   | No      | 1     | 1      |
| 731    |       | 2   | No    |        | 2   | No      | 0     |        |
| 732    |       | 1   | Yes   | 20     | 2   | No      | 0     |        |
| 733    |       | 2   | No    |        | 1   | Yes     | 0     |        |
| 735    |       | 2   | No    |        | 2   | No      | 0     |        |
| 738    |       | 1   | Yes   | 6      | 1   | Yes     | 1     | 1      |
| 740    |       | 2   | No    |        | 2   | No      | 1     | 0      |
| 742    |       | 2   | No    |        | 2   | No      | 0     |        |
| 744    |       | 2   | No    |        | 2   | No      | 0     |        |
| 749    |       | 2   | No    |        | 2   | No      | 1     | 0      |
| 751    |       | 1   | Yes   | 10     | 2   | No      | 0     |        |
| 752    |       | 1   | Yes   | 20     | 2   | No      | 1     | 1      |
| 753    |       | 2   | No    |        | 1   | Yes     | 2     | 2      |
| 755    |       | 1   | Yes   | 15     | 2   | No      | 1     | 1      |

| respid | Q16_2 | Q17 | Smoke | Q17a_1 | Q18 | Alcohol | Q19_1 | Q19a_1 |
|--------|-------|-----|-------|--------|-----|---------|-------|--------|
| 756    |       | 2   | No    |        | 2   | No      | 0     |        |
| 759    |       | 2   | No    |        | 2   | No      | 0     |        |
| 760    |       | 2   | No    |        | 2   | No      | 1     | 1      |
| 763    |       | 2   | No    |        | 2   | No      | 0     |        |
| 764    |       | 2   | No    |        | 2   | No      | 0     |        |
| 765    |       | 2   | No    |        | 2   | No      | 0     |        |
| 766    |       | 1   | Yes   | 3      | 2   | No      | 1     | 0      |
| 767    |       | 2   | No    |        | 2   | No      | 1     | 1      |
| 771    |       | 2   | No    |        | 2   | No      | 3     | 2      |
| 773    |       | 2   | No    |        | 2   | No      | 1     | 0      |
| 774    |       | 2   | No    |        | 1   | Yes     | 1     | 1      |
| 775    |       | 2   | No    |        | 2   | No      | 5     | 1      |
| 776    |       | 2   | No    |        | 2   | No      | 1     | 1      |
| 778    |       | 1   | Yes   | 40     | 2   | No      | 3     | 2      |
| 780    |       | 1   | Yes   | 10     | 1   | Yes     | 3     | 2      |
| 781    |       | 2   | No    |        | 2   | No      | 0     |        |
| 782    |       | 2   | No    |        | 2   | No      | 0     |        |
| 783    |       | 2   | No    |        | 2   | No      | 3     | 1      |
| 786    |       | 1   | Yes   | 15     | 2   | No      | 3     | 3      |
| 788    |       | 2   | No    |        | 2   | No      | 0     |        |
| 792    |       | 2   | No    |        | 2   | No      | 0     |        |
| 794    |       | 1   | Yes   | 10     | 1   | Yes     | 4     | 3      |
| 795    |       | 1   | Yes   | 8      | 2   | No      | 0     |        |
| 799    |       | 2   | No    |        | 2   | No      | 1     | 1      |
| 800    |       | 2   | No    |        | 2   | No      | 0     |        |
| 801    |       | 2   | No    |        | 2   | No      | 5     | 2      |
| 804    |       | 2   | No    |        | 2   | No      | 0     |        |
| 806    |       | 1   | Yes   | 20     | 2   | No      | 0     |        |
| 807    |       | 2   | No    |        | 2   | No      | 1     | 1      |
| 808    |       | 2   | No    |        | 2   | No      | 5     | 3      |
| 809    |       | 2   | No    |        | 2   | No      | 5     | 2      |
| 811    |       | 2   | No    |        | 2   | No      | 0     |        |



| respid | Q16_2 | Q17 | Smoke | Q17a_1 | Q18 | Alcohol | Q19_1 | Q19a_1 |
|--------|-------|-----|-------|--------|-----|---------|-------|--------|
| 812    |       | 2   | No    |        | 2   | No      | 1     | 0      |
| 815    |       | 2   | No    |        | 2   | No      | 0     |        |
| 817    |       | 2   | No    |        | 1   | Yes     | 0     |        |
| 818    |       | 2   | No    |        | 2   | No      | 0     |        |
| 819    |       | 1   | Yes   | 15     | 2   | No      | 5     | 1      |
| 821    |       | 2   | No    |        | 2   | No      | 5     | 1      |
| 824    |       | 1   | Yes   | 2      | 2   | No      | 5     | 2      |
| 825    |       | 2   | No    |        | 2   | No      | 0     |        |
| 828    |       | 2   | No    |        | 2   | No      | 0     |        |
| 832    |       | 2   | No    |        | 2   | No      | 2     | 1      |
| 834    |       | 2   | No    |        | 2   | No      | 0     |        |
| 835    |       | 2   | No    |        | 2   | No      | 3     | 2      |
| 836    |       | 2   | No    |        | 2   | No      | 0     |        |
| 837    |       | 2   | No    |        | 2   | No      | 0     |        |
| 840    |       | 2   | No    |        | 2   | No      | 1     | 1      |
| 841    |       | 2   | No    |        | 2   | No      | 0     |        |
| 845    |       | 2   | No    |        | 2   | No      | 0     |        |
| 846    |       | 2   | No    |        | 2   | No      | 1     | 0      |
| 849    |       | 2   | No    |        | 2   | No      | 1     | 0      |
| 852    |       | 2   | No    |        | 2   | No      | 0     |        |
| 854    |       | 2   | No    |        | 2   | No      | 5     | 1      |
| 856    |       | 2   | No    |        | 1   | Yes     | 0     |        |
| 858    |       | 2   | No    |        | 2   | No      | 1     | 0      |
| 859    |       | 1   | Yes   | 7      | 2   | No      | 2     | 2      |
| 861    |       | 2   | No    |        | 2   | No      | 1     | 1      |
| 863    |       | 2   | No    |        | 2   | No      | 0     |        |
| 864    |       | 2   | No    |        | 2   | No      | 3     | 3      |
| 866    |       | 2   | No    |        | 1   | Yes     | 1     | 1      |
| 869    |       | 2   | No    |        | 2   | No      | 0     |        |
| 870    |       | 2   | No    |        | 2   | No      | 0     |        |
| 871    |       | 2   | No    |        | 2   | No      | 0     |        |
| 873    |       | 2   | No    |        | 1   | Yes     | 5     | 3      |

| respid | Q16_2 | Q17 | Smoke | Q17a_1 | Q18 | Alcohol | Q19_1 | Q19a_1 |
|--------|-------|-----|-------|--------|-----|---------|-------|--------|
| 879    |       | 1   | Yes   | 28     | 2   | No      | 0     |        |
| 880    |       | 2   | No    |        | 2   | No      | 0     |        |
| 881    |       | 2   | No    |        | 1   | Yes     | 1     | 3      |
| 882    |       | 2   | No    |        | 2   | No      | 1     | 0      |
| 885    |       | 1   | Yes   | 20     | 1   | Yes     | 0     |        |
| 886    |       | 1   | Yes   | 22     | 2   | No      | 2     | 1      |
| 887    |       | 2   | No    |        | 1   | Yes     | 4     | 2      |
| 888    |       | 1   | Yes   | 15     | 2   | No      | 0     |        |
| 889    |       | 2   | No    |        | 2   | No      | 4     | 3      |
| 890    |       | 1   | Yes   | 10     | 1   | Yes     | 2     | 1      |
| 900    |       | 2   | No    |        | 2   | No      | 0     |        |
| 901    |       | 2   | No    |        | 2   | No      | 1     | 1      |
| 902    |       | 2   | No    |        | 2   | No      | 1     | 1      |
| 903    |       | 1   | Yes   | 10     | 2   | No      | 0     |        |
| 906    |       | 2   | No    |        | 2   | No      | 0     |        |
| 907    |       | 2   | No    |        | 2   | No      | 1     | 1      |
| 908    |       | 2   | No    |        | 2   | No      | 0     |        |
| 910    |       | 2   | No    |        | 2   | No      | 0     |        |
| 911    |       | 1   | Yes   | 20     | 2   | No      | 1     | 1      |
| 912    |       | 1   | Yes   | 20     | 2   | No      | 2     | 1      |
| 915    |       | 1   | Yes   | 40     | 2   | No      | 0     |        |
| 923    |       | 1   | Yes   | 20     | 1   | Yes     | 1     | 2      |
| 925    |       | 2   | No    |        | 2   | No      | 0     |        |
| 926    |       | 2   | No    |        | 2   | No      | 1     | 0      |
| 929    |       | 2   | No    |        | 2   | No      | 0     |        |
| 932    |       | 2   | No    |        | 2   | No      | 0     |        |
| 933    |       | 2   | No    |        | 2   | No      | 2     | 1      |
| 934    |       | 2   | No    |        | 2   | No      | 0     |        |
| 938    |       | 1   | Yes   | 3      | 2   | No      | 2     | 1      |
| 941    |       | 2   | No    |        | 2   | No      | 0     |        |
| 942    |       | 1   | Yes   | 40     | 1   | Yes     | 0     |        |
| 943    |       | 2   | No    |        | 2   | No      | 0     |        |

| respid | Q16_2 | Q17 | Smoke | Q17a_1 | Q18 | Alcohol | Q19_1 | Q19a_1 |
|--------|-------|-----|-------|--------|-----|---------|-------|--------|
| 945    |       | 2   | No    |        | 1   | Yes     | 0     |        |
| 946    |       | 2   | No    |        | 1   | Yes     | 0     |        |
| 947    |       | 2   | No    |        | 2   | No      | 1     | 0      |
| 948    |       | 1   | Yes   | 15     | 2   | No      | 0     |        |
| 949    |       | 1   | Yes   | 20     | 2   | No      | 0     |        |
| 952    |       | 2   | No    |        | 2   | No      | 0     |        |
| 956    |       | 2   | No    |        | 2   | No      | 2     | 1      |
| 957    |       | 2   | No    |        | 2   | No      | 0     |        |
| 959    |       | 2   | No    |        | 2   | No      | 1     | 1      |
| 961    |       | 2   | No    |        | 2   | No      | 1     | 1      |
| 962    |       | 2   | No    |        | 2   | No      | 2     | 3      |
| 965    |       | 2   | No    |        | 2   | No      | 1     | 1      |
| 967    |       | 2   | No    |        | 2   | No      | 1     | 1      |
| 969    |       | 2   | No    |        | 2   | No      | 0     |        |
| 970    |       | 2   | No    |        | 2   | No      | 0     |        |
| 973    |       | 1   | Yes   | 3      | 1   | Yes     | 0     |        |
| 974    |       | 2   | No    |        | 2   | No      | 3     | 1      |
| 975    |       | 2   | No    |        | 2   | No      | 1     | 1      |
| 976    |       | 2   | No    |        | 2   | No      | 0     |        |
| 977    |       | 1   | Yes   | 1      | 1   | Yes     | 1     | 1      |
| 979    |       | 2   | No    |        | 2   | No      | 1     | 1      |
| 981    |       | 2   | No    |        | 2   | No      | 0     |        |
| 983    |       | 2   | No    |        | 2   | No      | 0     |        |
| 987    |       | 2   | No    |        | 2   | No      | 1     | 1      |
| 991    |       | 2   | No    |        | 2   | No      | 0     |        |
| 992    |       | 1   | Yes   | 20     | 1   | Yes     | 0     |        |
| 993    |       | 1   | Yes   | 3      | 2   | No      | 0     |        |
| 994    |       | 2   | No    |        | 1   | Yes     | 0     |        |
| 995    |       | 2   | No    |        | 2   | No      | 5     | 2      |
| 998    |       | 2   | No    |        | 2   | No      | 2     | 2      |
| 1000   |       | 2   | No    |        | 2   | No      | 1     | 1      |
| 1001   |       | 2   | No    |        | 2   | No      | 4     | 2      |

| respid | Q16_2 | Q17 | Smoke | Q17a_1 | Q18 | Alcohol | Q19_1 | Q19a_1 |
|--------|-------|-----|-------|--------|-----|---------|-------|--------|
| 1002   |       | 2   | No    |        | 2   | No      | 0     |        |
| 1004   |       | 2   | No    |        | 1   | Yes     | 0     |        |
| 1005   |       | 2   | No    |        | 2   | No      | 1     | 1      |
| 1006   |       | 2   | No    |        | 2   | No      | 3     | 1      |
| 1007   |       | 2   | No    |        | 2   | No      | 0     |        |
| 1009   |       | 1   | Yes   | 5      | 2   | No      | 0     |        |
| 1013   |       | 2   | No    |        | 2   | No      | 0     |        |
| 1015   |       | 2   | No    |        | 2   | No      | 0     |        |
| 1020   |       | 1   | Yes   | 10     | 1   | Yes     | 1     | 1      |
| 1022   |       | 2   | No    |        | 2   | No      | 0     |        |
| 1024   |       | 2   | No    |        | 2   | No      | 1     | 1      |
| 1025   |       | 2   | No    |        | 2   | No      | 0     |        |
| 1027   |       | 2   | No    |        | 2   | No      | 1     | 1      |
| 1031   |       | 2   | No    |        | 2   | No      | 0     |        |
| 1037   |       | 2   | No    |        | 2   | No      | 0     |        |
| 1039   |       | 2   | No    |        | 2   | No      | 0     |        |
| 1040   |       | 1   | Yes   | 20     | 2   | No      | 1     | 1      |
| 1056   |       | 2   | No    |        | 2   | No      | 1     | 1      |
| 1057   |       | 1   | Yes   | 12     | 2   | No      | 0     |        |
| 1062   |       | 2   | No    |        | 1   | Yes     | 0     |        |
| 1069   |       | 2   | No    |        | 2   | No      | 1     | 0      |
| 1070   |       | 2   | No    |        | 1   | Yes     | 0     |        |
| 1072   |       | 2   | No    |        | 2   | No      | 1     | 2      |
| 1076   |       | 2   | No    |        | 2   | No      | 0     |        |
| 1077   |       | 1   | Yes   | 20     | 2   | No      | 0     |        |
| 1078   |       | 2   | No    |        | 2   | No      | 0     |        |
| 1080   |       | 2   | No    |        | 2   | No      | 0     |        |
| 1094   |       | 1   | Yes   | 15     | 2   | No      | 0     |        |
| 1098   |       | 2   | No    |        | 2   | No      | 1     | 1      |
| 1099   |       | 2   | No    |        | 2   | No      | 1     | 1      |
| 1102   |       | 2   | No    |        | 2   | No      | 2     | 1      |
| 1110   |       | 2   | No    |        | 2   | No      | 1     | 0      |

| respid | Q16_2 | Q17 | Smoke | Q17a_1 | Q18 | Alcohol | Q19_1 | Q19a_1 |
|--------|-------|-----|-------|--------|-----|---------|-------|--------|
| 1117   |       | 2   | No    |        | 2   | No      | 1     | 1      |
| 1119   |       | 2   | No    |        | 2   | No      | 0     |        |
| 1126   |       | 1   | Yes   | 14     | 2   | No      | 1     | 1      |
| 1127   |       | 2   | No    |        | 2   | No      | 0     |        |
| 1130   |       | 2   | No    |        | 2   | No      | 0     |        |
| 1131   |       | 2   | No    |        | 2   | No      | 0     |        |
| 1135   |       | 2   | No    |        | 2   | No      | 1     | 3      |
| 1138   |       | 2   | No    |        | 2   | No      | 1     | 2      |
| 1139   |       | 2   | No    |        | 2   | No      | 0     |        |
| 1140   |       | 2   | No    |        | 2   | No      | 0     |        |
| 1142   |       | 2   | No    |        | 2   | No      | 0     |        |
| 1143   |       | 2   | No    |        | 2   | No      | 0     |        |
| 1145   |       | 2   | No    |        | 2   | No      | 0     |        |
| 1149   |       | 2   | No    |        | 2   | No      | 0     |        |
| 1152   |       | 2   | No    |        | 2   | No      | 1     | 1      |
| 1160   |       | 1   | Yes   | 30     | 1   | Yes     | 1     | 1      |
| 1164   |       | 2   | No    |        | 2   | No      | 0     |        |
| 1165   |       | 2   | No    |        | 2   | No      | 0     |        |
| 1169   |       | 1   | Yes   | 5      | 1   | Yes     | 0     |        |
| 1170   |       | 1   | Yes   | 5      | 1   | Yes     | 1     | 0      |
| 1179   |       | 2   | No    |        | 2   | No      | 0     |        |
| 1180   |       | 1   | Yes   | 6      | 2   | No      | 0     |        |
| 1183   |       | 2   | No    |        | 2   | No      | 0     |        |
| 1187   |       | 2   | No    |        | 2   | No      | 0     |        |
| 1188   |       | 2   | No    |        | 2   | No      | 4     | 2      |
| 1193   |       | 1   | Yes   | 20     | 1   | Yes     | 0     |        |
| 1194   |       | 2   | No    |        | 2   | No      | 1     | 1      |
| 1197   |       | 2   | No    |        | 2   | No      | 0     |        |
| 1202   |       | 2   | No    |        | 2   | No      | 0     |        |
| 1204   |       | 2   | No    |        | 2   | No      | 3     | 3      |
| 1211   |       | 2   | No    |        | 2   | No      | 2     | 1      |
| 1224   |       | 2   | No    |        | 2   | No      | 1     | 1      |

| respid | Q16_2 | Q17 | Smoke | Q17a_1 | Q18 | Alcohol | Q19_1 | Q19a_1 |
|--------|-------|-----|-------|--------|-----|---------|-------|--------|
| 1225   |       | 2   | No    |        | 2   | No      | 0     |        |
| 1230   |       | 2   | No    |        | 2   | No      | 0     |        |
| 1232   |       | 2   | No    |        | 2   | No      | 0     |        |
| 1233   |       | 1   | Yes   | 15     | 2   | No      | 1     | 2      |
| 1234   |       | 2   | No    |        | 2   | No      | 0     |        |
| 1235   |       | 2   | No    |        | 2   | No      | 1     | 1      |
| 1236   |       | 2   | No    |        | 2   | No      | 4     | 1      |
| 1237   |       | 2   | No    |        | 1   | Yes     | 0     |        |
| 1238   |       | 1   | Yes   | 5      | 1   | Yes     | 2     | 1      |
| 1239   |       | 2   | No    |        | 2   | No      | 1     | 1      |
| 1241   |       | 2   | No    |        | 2   | No      | 4     | 2      |
| 1242   |       | 2   | No    |        | 2   | No      | 0     |        |
| 1244   |       | 2   | No    |        | 2   | No      | 1     | 2      |
| 1245   |       | 2   | No    |        | 2   | No      | 0     |        |
| 1247   |       | 2   | No    |        | 2   | No      | 5     | 3      |
| 1248   |       | 2   | No    |        | 2   | No      | 0     |        |
| 1249   |       | 1   | Yes   | 12     | 2   | No      | 4     | 2      |
| 1250   |       | 2   | No    |        | 2   | No      | 0     |        |
| 1251   |       | 2   | No    |        | 2   | No      | 0     |        |
| 1252   |       | 2   | No    |        | 1   | Yes     | 0     |        |
| 1253   |       | 2   | No    |        | 2   | No      | 0     |        |
| 1254   |       | 1   | Yes   | 20     | 2   | No      | 4     | 3      |
| 1258   |       | 2   | No    |        | 2   | No      | 0     |        |
| 1260   |       | 1   | Yes   | 10     | 1   | Yes     | 0     |        |
| 1261   |       | 2   | No    |        | 2   | No      | 1     | 0      |
| 1262   |       | 2   | No    |        | 2   | No      | 4     | 2      |
| 1263   |       | 2   | No    |        | 2   | No      | 4     | 3      |
| 1264   |       | 2   | No    |        | 2   | No      | 1     | 1      |
| 1265   |       | 2   | No    |        | 2   | No      | 1     | 1      |
| 1266   |       | 1   | Yes   | 6      | 1   | Yes     | 2     | 1      |
| 1270   |       | 2   | No    |        | 2   | No      | 0     |        |
| 1272   |       | 2   | No    |        | 2   | No      | 2     | 2      |

| respid | Q16_2 | Q17 | Smoke | Q17a_1 | Q18 | Alcohol | Q19_1 | Q19a_1 |
|--------|-------|-----|-------|--------|-----|---------|-------|--------|
| 1273   |       | 2   | No    |        | 2   | No      | 1     | 1      |
| 1276   |       | 2   | No    |        | 2   | No      | 1     | 2      |
| 1277   |       | 2   | No    |        | 2   | No      | 1     | 1      |
| 1278   |       | 2   | No    |        | 1   | Yes     | 1     | 1      |
| 1280   |       | 2   | No    |        | 2   | No      | 0     |        |
| 1281   |       | 2   | No    |        | 2   | No      | 1     | 1      |
| 1282   |       | 2   | No    |        | 2   | No      | 1     | 1      |
| 1283   |       | 1   | Yes   | 20     | 1   | Yes     | 0     |        |
| 1288   |       | 2   | No    |        | 2   | No      | 0     |        |
| 1289   |       | 2   | No    |        | 2   | No      | 1     | 0      |
| 1290   |       | 2   | No    |        | 2   | No      | 2     | 1      |
| 1291   |       | 2   | No    |        | 2   | No      | 0     |        |
| 1293   |       | 2   | No    |        | 2   | No      | 0     |        |
| 1294   |       | 1   | Yes   | 15     | 2   | No      | 4     | 2      |
| 1295   |       | 2   | No    |        | 2   | No      | 1     | 1      |
| 1296   |       | 2   | No    |        | 1   | Yes     | 1     | 0      |
| 1297   |       | 2   | No    |        | 2   | No      | 1     | 2      |
| 1298   |       | 1   | Yes   | 14     | 1   | Yes     | 1     | 0      |
| 1300   |       | 1   | Yes   | 5      | 1   | Yes     | 3     | 1      |
| 1302   |       | 2   | No    |        | 2   | No      | 1     | 0      |
| 1303   |       | 2   | No    |        | 2   | No      | 1     | 1      |
| 1304   |       | 1   | Yes   | 20     | 1   | Yes     | 4     | 2      |
| 1305   |       | 1   | Yes   | 10     | 1   | Yes     | 1     | 1      |
| 1307   |       | 2   | No    |        | 2   | No      | 1     | 0      |
| 1312   |       | 2   | No    |        | 2   | No      | 0     |        |
| 1313   |       | 2   | No    |        | 2   | No      | 0     |        |
| 1314   |       | 2   | No    |        | 2   | No      | 1     | 1      |
| 1317   |       | 1   | Yes   | 15     | 2   | No      | 0     |        |
| 1318   |       | 1   | Yes   | 10     | 2   | No      | 0     |        |
| 1319   |       | 2   | No    |        | 2   | No      | 1     | 1      |
| 1321   |       | 2   | No    |        | 2   | No      | 0     |        |
| 1324   |       | 2   | No    |        | 1   | Yes     | 3     | 2      |

| respid | Q16_2 | Q17 | Smoke | Q17a_1 | Q18 | Alcohol | Q19_1 | Q19a_1 |
|--------|-------|-----|-------|--------|-----|---------|-------|--------|
| 1325   |       | 2   | No    |        | 2   | No      | 1     | 1      |
| 1326   |       | 1   | Yes   | 15     | 2   | No      | 0     |        |
| 1327   |       | 1   | Yes   | 20     | 1   | Yes     | 0     |        |
| 1329   |       | 2   | No    |        | 2   | No      | 2     | 1      |
| 1330   |       | 2   | No    |        | 2   | No      | 1     | 1      |
| 1331   |       | 1   | Yes   | 16     | 1   | Yes     | 0     |        |
| 1335   |       | 2   | No    |        | 2   | No      | 1     | 1      |
| 1337   |       | 2   | No    |        | 2   | No      | 0     |        |
| 1341   |       | 2   | No    |        | 2   | No      | 0     |        |
| 1342   |       | 2   | No    |        | 2   | No      | 0     |        |
| 1344   |       | 1   | Yes   | 15     | 1   | Yes     | 1     | 1      |
| 1345   |       | 2   | No    |        | 2   | No      | 3     | 2      |
| 1346   |       | 1   | Yes   | 15     | 1   | Yes     | 1     | 1      |
| 1350   |       | 1   | Yes   | 15     | 2   | No      | 1     | 1      |
| 1352   |       | 2   | No    |        | 2   | No      | 0     |        |
| 1353   |       | 1   | Yes   | 15     | 2   | No      | 1     | 2      |
| 1354   |       | 2   | No    |        | 2   | No      | 3     | 1      |
| 1355   |       | 2   | No    |        | 2   | No      | 1     | 1      |
| 1357   |       | 1   | Yes   | 40     | 1   | Yes     | 5     | 2      |
| 1360   |       | 2   | No    |        | 2   | No      | 0     |        |
| 1362   |       | 2   | No    |        | 2   | No      | 1     | 1      |
| 1363   |       | 2   | No    |        | 2   | No      | 2     | 1      |
| 1367   |       | 2   | No    |        | 2   | No      | 1     | 1      |
| 1369   |       | 1   | Yes   | 10     | 1   | Yes     | 1     | 1      |
| 1371   |       | 2   | No    |        | 2   | No      | 0     |        |
| 1372   |       | 2   | No    |        | 2   | No      | 0     |        |
| 1375   |       | 1   | Yes   | 5      | 1   | Yes     | 0     |        |
| 1377   |       | 2   | No    |        | 2   | No      | 1     | 1      |
| 1379   |       | 1   | Yes   | 2      | 2   | No      | 0     |        |
| 1380   |       | 2   | No    |        | 1   | Yes     | 0     |        |
| 1382   |       | 2   | No    |        | 2   | No      | 0     |        |
| 1383   |       | 2   | No    |        | 2   | No      | 0     |        |



| respid | Q16_2 | Q17 | Smoke | Q17a_1 | Q18 | Alcohol | Q19_1 | Q19a_1 |
|--------|-------|-----|-------|--------|-----|---------|-------|--------|
| 1384   |       | 2   | No    |        | 2   | No      | 0     |        |
| 1385   |       | 1   | Yes   | 20     | 1   | Yes     | 1     | 2      |
| 1387   |       | 1   | Yes   | 9      | 2   | No      | 3     | 0      |
| 1388   |       | 1   | Yes   | 15     | 2   | No      | 0     |        |
| 1389   |       | 2   | No    |        | 2   | No      | 0     |        |
| 1390   |       | 2   | No    |        | 2   | No      | 1     | 0      |
| 1395   |       | 1   | Yes   | 20     | 2   | No      | 1     | 0      |
| 1396   |       | 2   | No    |        | 2   | No      | 0     |        |
| 1397   |       | 2   | No    |        | 2   | No      | 4     | 2      |
| 1398   |       | 1   | Yes   | 20     | 1   | Yes     | 1     | 0      |
| 1399   |       | 2   | No    |        | 1   | Yes     | 1     | 0      |
| 1403   |       | 2   | No    |        | 2   | No      | 0     |        |
| 1405   |       | 2   | No    |        | 1   | Yes     | 0     |        |
| 1406   |       | 1   | Yes   | 10     | 2   | No      | 2     | 1      |
| 1407   |       | 2   | No    |        | 2   | No      | 2     | 2      |
| 1408   |       | 2   | No    |        | 2   | No      | 0     |        |
| 1409   |       | 1   | Yes   | 15     | 1   | Yes     | 0     |        |
| 1410   |       | 2   | No    |        | 2   | No      | 5     | 4      |
| 1411   |       | 2   | No    |        | 2   | No      | 3     | 1      |
| 1412   |       | 2   | No    |        | 2   | No      | 0     |        |
| 1413   |       | 2   | No    |        | 2   | No      | 1     | 1      |
| 1414   |       | 2   | No    |        | 2   | No      | 1     | 1      |
| 1415   |       | 2   | No    |        | 1   | Yes     | 1     | 1      |
| 1416   |       | 2   | No    |        | 2   | No      | 1     | 2      |
| 1417   |       | 2   | No    |        | 2   | No      | 0     |        |
| 1418   |       | 2   | No    |        | 1   | Yes     | 1     | 0      |
| 1419   |       | 2   | No    |        | 2   | No      | 2     | 1      |
| 1420   |       | 1   | Yes   | 6      | 1   | Yes     | 0     |        |
| 1421   |       | 2   | No    |        | 1   | Yes     | 3     | 2      |
| 1422   |       | 2   | No    |        | 1   | Yes     | 1     | 0      |
| 1423   |       | 2   | No    |        | 1   | Yes     | 1     | 1      |
| 1424   |       | 2   | No    |        | 2   | No      | 4     | 1      |

| respid | Q16_2 | Q17 | Smoke | Q17a_1 | Q18 | Alcohol | Q19_1 | Q19a_1 |
|--------|-------|-----|-------|--------|-----|---------|-------|--------|
| 1429   |       | 1   | Yes   | 20     | 1   | Yes     | 0     |        |
| 1430   |       | 2   | No    |        | 2   | No      | 1     | 1      |
| 1431   |       | 2   | No    |        | 1   | Yes     | 4     | 1      |
| 1433   |       | 2   | No    |        | 1   | Yes     | 1     | 1      |
| 1435   |       | 2   | No    |        | 2   | No      | 0     |        |
| 1436   |       | 1   | Yes   | 15     | 2   | No      | 1     | 0      |
| 1438   |       | 2   | No    |        | 2   | No      | 0     |        |
| 1439   |       | 2   | No    |        | 2   | No      | 1     | 0      |
| 1441   |       | 2   | No    |        | 2   | No      | 1     | 0      |
| 1442   |       | 1   | Yes   | 20     | 2   | No      | 0     |        |
| 1443   |       | 1   | Yes   | 4      | 2   | No      | 0     |        |
| 1444   |       | 2   | No    |        | 2   | No      | 0     |        |
| 1445   |       | 1   | Yes   | 10     | 2   | No      | 1     | 0      |
| 1446   |       | 2   | No    |        | 2   | No      | 1     | 1      |
| 1447   |       | 2   | No    |        | 1   | Yes     | 1     | 0      |
| 1449   |       | 2   | No    |        | 2   | No      | 0     |        |
| 1450   | 80    | 2   | No    |        | 2   | No      | 3     | 2      |
| 1451   |       | 2   | No    |        | 1   | Yes     | 0     |        |
| 1452   |       | 2   | No    |        | 2   | No      | 0     |        |
| 1453   |       | 2   | No    |        | 1   | Yes     | 3     | 2      |
| 1454   |       | 2   | No    |        | 2   | No      | 1     | 1      |
| 1456   |       | 1   | Yes   | 6      | 1   | Yes     | 0     |        |
| 1457   |       | 1   | Yes   | 12     | 1   | Yes     | 2     | 2      |
| 1459   |       | 2   | No    |        | 2   | No      | 0     |        |
| 1460   |       | 2   | No    |        | 2   | No      | 0     |        |
| 1463   |       | 2   | No    |        | 2   | No      | 1     | 0      |
| 1465   |       | 2   | No    |        | 2   | No      | 0     |        |
| 1467   |       | 2   | No    |        | 1   | Yes     | 0     |        |
| 1470   |       | 2   | No    |        | 2   | No      | 2     | 2      |
| 1471   |       | 2   | No    |        | 1   | Yes     | 4     | 2      |
| 1472   |       | 2   | No    |        | 2   | No      | 0     |        |
| 1474   |       | 2   | No    |        | 2   | No      | 2     | 2      |

| respid | Q16_2 | Q17 | Smoke | Q17a_1 | Q18 | Alcohol | Q19_1 | Q19a_1 |
|--------|-------|-----|-------|--------|-----|---------|-------|--------|
| 1475   |       | 2   | No    |        | 1   | Yes     | 3     | 2      |
| 1477   |       | 2   | No    |        | 2   | No      | 0     |        |
| 1478   |       | 2   | No    |        | 1   | Yes     | 1     | 1      |
| 1480   |       | 2   | No    |        | 2   | No      | 0     |        |
| 1481   |       | 2   | No    |        | 2   | No      | 1     | 1      |
| 1483   |       | 2   | No    |        | 2   | No      | 0     |        |
| 1484   |       | 2   | No    |        | 2   | No      | 1     | 1      |
| 1485   |       | 2   | No    |        | 2   | No      | 4     | 1      |
| 1486   |       | 2   | No    |        | 2   | No      | 1     | 1      |
| 1487   |       | 1   | Yes   | 10     | 1   | Yes     | 3     | 2      |
| 1488   |       | 2   | No    |        | 2   | No      | 0     |        |
| 1489   |       | 2   | No    |        | 1   | Yes     | 1     | 1      |
| 1490   |       | 2   | No    |        | 2   | No      | 1     | 1      |
| 1491   |       | 2   | No    |        | 1   | Yes     | 3     | 2      |
| 1492   |       | 2   | No    |        | 2   | No      | 0     |        |
| 1494   |       | 2   | No    |        | 2   | No      | 0     |        |
| 1495   |       | 2   | No    |        | 2   | No      | 5     | 2      |
| 1496   |       | 1   | Yes   | 6      | 1   | Yes     | 0     |        |
| 1498   |       | 2   | No    |        | 2   | No      | 1     | 2      |
| 1499   |       | 2   | No    |        | 2   | No      | 0     |        |
| 1500   |       | 2   | No    |        | 2   | No      | 1     | 1      |
| 1501   |       | 2   | No    |        | 2   | No      | 0     |        |
| 1503   |       | 2   | No    |        | 2   | No      | 0     |        |
| 1504   |       | 2   | No    |        | 2   | No      | 0     |        |
| 1508   |       | 2   | No    |        | 2   | No      | 3     | 1      |
| 1509   |       | 1   | Yes   | 20     | 2   | No      | 5     | 3      |
| 1511   |       | 2   | No    |        | 2   | No      | 4     | 3      |
| 1512   |       | 1   | Yes   | 7      | 2   | No      | 3     | 1      |
| 1513   |       | 2   | No    |        | 1   | Yes     | 0     |        |
| 1515   |       | 1   | Yes   | 15     | 2   | No      | 1     | 1      |
| 1517   |       | 2   | No    |        | 2   | No      | 1     | 1      |
| 1518   |       | 2   | No    |        | 2   | No      | 0     |        |

| respid | Q16_2 | Q17 | Smoke | Q17a_1 | Q18 | Alcohol | Q19_1 | Q19a_1 |
|--------|-------|-----|-------|--------|-----|---------|-------|--------|
| 1519   |       | 1   | Yes   | 10     | 1   | Yes     | 3     | 2      |
| 1520   |       | 2   | No    |        | 2   | No      | 0     |        |
| 1521   |       | 2   | No    |        | 1   | Yes     | 0     |        |
| 1522   |       | 2   | No    |        | 2   | No      | 1     | 0      |
| 1523   |       | 1   | Yes   | 15     | 1   | Yes     | 5     | 3      |
| 1524   |       | 1   | Yes   | 4      | 2   | No      | 0     |        |
| 1525   |       | 2   | No    |        | 2   | No      | 0     |        |
| 1526   |       | 1   | Yes   | 19     | 2   | No      | 2     | 1      |
| 1527   |       | 2   | No    |        | 2   | No      | 0     |        |
| 1534   |       | 1   | Yes   | 20     | 1   | Yes     | 2     | 2      |
| 1535   |       | 2   | No    |        | 2   | No      | 0     |        |
| 1536   |       | 1   | Yes   | 20     | 1   | Yes     | 1     | 2      |
| 1538   |       | 2   | No    |        | 2   | No      | 5     | 2      |
| 1539   |       | 2   | No    |        | 2   | No      | 0     |        |
| 1540   |       | 2   | No    |        | 2   | No      | 1     | 0      |
| 1541   |       | 2   | No    |        | 1   | Yes     | 0     |        |
| 1542   |       | 2   | No    |        | 1   | Yes     | 1     | 0      |
| 1543   |       | 2   | No    |        | 2   | No      | 1     | 1      |
| 1545   |       | 2   | No    |        | 2   | No      | 1     | 2      |
| 1546   |       | 2   | No    |        | 2   | No      | 1     | 0      |
| 1548   |       | 2   | No    |        | 2   | No      | 0     |        |
| 1549   |       | 2   | No    |        | 2   | No      | 0     |        |
| 1551   |       | 1   | Yes   | 20     | 1   | Yes     | 0     |        |
| 1552   |       | 1   | Yes   | 3      | 1   | Yes     | 1     | 0      |
| 1556   |       | 1   | Yes   | 10     | 2   | No      | 0     |        |
| 1557   |       | 2   | No    |        | 2   | No      | 0     |        |
| 1558   |       | 1   | Yes   | 12     | 1   | Yes     | 1     | 1      |
| 1561   |       | 2   | No    |        | 2   | No      | 0     |        |
| 1562   |       | 2   | No    |        | 2   | No      | 0     |        |
| 1563   |       | 2   | No    |        | 2   | No      | 0     |        |
| 1564   |       | 2   | No    |        | 1   | Yes     | 1     | 3      |
| 1565   |       | 2   | No    |        | 2   | No      | 0     |        |

| respid | Q16_2 | Q17 | Smoke | Q17a_1 | Q18 | Alcohol | Q19_1 | Q19a_1 |
|--------|-------|-----|-------|--------|-----|---------|-------|--------|
| 1566   |       | 2   | No    |        | 2   | No      | 0     |        |
| 1567   |       | 2   | No    |        | 2   | No      | 5     | 1      |
| 1569   |       | 1   | Yes   | 20     | 2   | No      | 0     |        |
| 1570   |       | 2   | No    |        | 2   | No      | 0     |        |
| 1574   |       | 1   | Yes   | 10     | 1   | Yes     | 1     | 1      |
| 1575   |       | 2   | No    |        | 2   | No      | 0     |        |
| 1576   |       | 1   | Yes   | 7      | 2   | No      | 5     | 0      |
| 1577   |       | 2   | No    |        | 2   | No      | 1     | 0      |
| 1581   |       | 2   | No    |        | 2   | No      | 2     | 1      |
| 1583   |       | 2   | No    |        | 1   | Yes     | 4     | 2      |
| 1585   |       | 2   | No    |        | 2   | No      | 0     |        |
| 1586   |       | 2   | No    |        | 1   | Yes     | 0     |        |
| 1588   |       | 2   | No    |        | 2   | No      | 1     | 0      |
| 1590   |       | 2   | No    |        | 2   | No      | 0     |        |
| 1592   |       | 2   | No    |        | 2   | No      | 0     |        |
| 1594   |       | 1   | Yes   | 20     | 1   | Yes     | 1     | 1      |
| 1598   |       | 2   | No    |        | 2   | No      | 0     |        |
| 1599   |       | 2   | No    |        | 2   | No      | 1     | 1      |
| 1600   |       | 1   | Yes   | 10     | 1   | Yes     | 0     |        |
| 1602   |       | 2   | No    |        | 1   | Yes     | 0     |        |
| 1603   |       | 2   | No    |        | 2   | No      | 0     |        |
| 1604   |       | 2   | No    |        | 2   | No      | 1     | 1      |
| 1605   |       | 2   | No    |        | 2   | No      | 5     | 4      |
| 1606   |       | 2   | No    |        | 2   | No      | 5     | 2      |
| 1610   |       | 2   | No    |        | 2   | No      | 1     | 0      |
| 1611   |       | 2   | No    |        | 2   | No      | 2     | 2      |
| 1612   |       | 2   | No    |        | 1   | Yes     | 1     | 1      |
| 1613   |       | 2   | No    |        | 2   | No      | 4     | 3      |
| 1615   |       | 1   | Yes   | 15     | 1   | Yes     | 2     | 1      |
| 1616   |       | 2   | No    |        | 2   | No      | 1     | 1      |
| 1617   |       | 2   | No    |        | 2   | No      | 1     | 1      |
| 1618   |       | 2   | No    |        | 2   | No      | 5     | 3      |

| respid | Q16_2 | Q17 | Smoke | Q17a_1 | Q18 | Alcohol | Q19_1 | Q19a_1 |
|--------|-------|-----|-------|--------|-----|---------|-------|--------|
| 1620   |       | 2   | No    |        | 2   | No      | 0     |        |
| 1621   |       | 1   | Yes   | 20     | 1   | Yes     | 3     | 2      |
| 1622   |       | 2   | No    |        | 2   | No      | 0     |        |
| 1623   |       | 2   | No    |        | 2   | No      | 1     | 1      |
| 1624   |       | 2   | No    |        | 2   | No      | 0     |        |
| 1625   |       | 2   | No    |        | 2   | No      | 0     |        |
| 1626   |       | 2   | No    |        | 2   | No      | 0     |        |
| 1627   |       | 2   | No    |        | 1   | Yes     | 1     | 1      |
| 1629   |       | 2   | No    |        | 2   | No      | 3     | 2      |
| 1630   |       | 1   | Yes   | 20     | 2   | No      | 0     |        |
| 1631   |       | 2   | No    |        | 1   | Yes     | 0     |        |
| 1634   |       | 2   | No    |        | 2   | No      | 1     | 1      |
| 1635   |       | 2   | No    |        | 2   | No      | 1     | 1      |
| 1636   |       | 2   | No    |        | 1   | Yes     | 0     |        |
| 1637   |       | 2   | No    |        | 2   | No      | 0     |        |
| 1640   |       | 2   | No    |        | 2   | No      | 0     |        |
| 1642   |       | 2   | No    |        | 2   | No      | 0     |        |
| 1643   |       | 2   | No    |        | 2   | No      | 2     | 1      |
| 1644   |       | 2   | No    |        | 2   | No      | 2     | 2      |
| 1645   |       | 2   | No    |        | 2   | No      | 1     | 1      |
| 1646   |       | 2   | No    |        | 2   | No      | 0     |        |
| 1647   |       | 2   | No    |        | 1   | Yes     | 1     | 0      |
| 1650   |       | 2   | No    |        | 2   | No      | 5     | 1      |
| 1654   |       | 2   | No    |        | 2   | No      | 2     | 1      |
| 1656   |       | 1   | Yes   | 10     | 2   | No      | 4     | 2      |
| 1657   |       | 1   | Yes   | 12     | 1   | Yes     | 3     | 3      |
| 1659   |       | 1   | Yes   | 10     | 2   | No      | 1     | 2      |
| 1662   |       | 2   | No    |        | 2   | No      | 1     | 1      |
| 1663   |       | 2   | No    |        | 2   | No      | 1     | 1      |
| 1664   |       | 2   | No    |        | 2   | No      | 0     |        |
| 1665   |       | 1   | Yes   | 20     | 1   | Yes     | 0     |        |
| 1667   |       | 1   | Yes   | 5      | 1   | Yes     | 1     | 1      |

| respid | Q16_2 | Q17 | Smoke | Q17a_1 | Q18 | Alcohol | Q19_1 | Q19a_1 |
|--------|-------|-----|-------|--------|-----|---------|-------|--------|
| 1668   |       | 1   | Yes   | 30     | 2   | No      | 1     | 1      |
| 1670   |       | 2   | No    |        | 2   | No      | 1     | 1      |
| 1671   |       | 1   | Yes   | 7      | 2   | No      | 0     |        |
| 1673   |       | 2   | No    |        | 2   | No      | 0     |        |
| 1674   |       | 2   | No    |        | 2   | No      | 0     |        |
| 1676   |       | 1   | Yes   | 15     | 2   | No      | 1     | 1      |
| 1677   |       | 1   | Yes   | 12     | 1   | Yes     | 0     |        |
| 1678   |       | 2   | No    |        | 2   | No      | 0     |        |
| 1680   |       | 2   | No    |        | 1   | Yes     | 0     |        |
| 1681   |       | 2   | No    |        | 2   | No      | 1     | 0      |
| 1683   |       | 2   | No    |        | 2   | No      | 0     |        |
| 1685   |       | 2   | No    |        | 1   | Yes     | 1     | 1      |
| 1686   |       | 2   | No    |        | 2   | No      | 1     | 1      |
| 1690   |       | 2   | No    |        | 2   | No      | 1     | 0      |
| 1691   |       | 2   | No    |        | 2   | No      | 0     |        |
| 1692   |       | 2   | No    |        | 2   | No      | 1     | 1      |
| 1693   |       | 1   | Yes   | 5      | 1   | Yes     | 2     | 3      |
| 1695   |       | 2   | No    |        | 2   | No      | 0     |        |
| 1696   |       | 1   | Yes   | 20     | 2   | No      | 3     | 2      |
| 1698   |       | 2   | No    |        | 2   | No      | 1     | 1      |
| 1699   |       | 2   | No    |        | 2   | No      | 0     |        |
| 1701   |       | 2   | No    |        | 1   | Yes     | 0     |        |
| 1702   |       | 2   | No    |        | 2   | No      | 0     |        |
| 1703   |       | 2   | No    |        | 2   | No      | 0     |        |
| 1705   |       | 2   | No    |        | 2   | No      | 1     | 1      |
| 1706   |       | 2   | No    |        | 1   | Yes     | 0     |        |
| 1708   |       | 2   | No    |        | 2   | No      | 0     |        |
| 1711   |       | 2   | No    |        | 2   | No      | 1     | 1      |
| 1712   |       | 2   | No    |        | 2   | No      | 2     | 1      |
| 1713   |       | 2   | No    |        | 2   | No      | 1     | 1      |
| 1715   |       | 2   | No    |        | 2   | No      | 0     |        |
| 1717   |       | 1   | Yes   | 20     | 2   | No      | 0     |        |

| respid | Q16_2 | Q17 | Smoke | Q17a_1 | Q18 | Alcohol | Q19_1 | Q19a_1 |
|--------|-------|-----|-------|--------|-----|---------|-------|--------|
| 1718   |       | 2   | No    |        | 1   | Yes     | 5     | 4      |
| 1719   |       | 2   | No    |        | 2   | No      | 1     | 0      |
| 1721   |       | 2   | No    |        | 2   | No      | 0     |        |
| 1722   |       | 2   | No    |        | 2   | No      | 1     | 1      |
| 1724   |       | 2   | No    |        | 2   | No      | 0     |        |
| 1725   |       | 2   | No    |        | 2   | No      | 0     |        |
| 1726   |       | 2   | No    |        | 2   | No      | 1     | 1      |
| 1727   |       | 2   | No    |        | 1   | Yes     | 0     |        |
| 1728   |       | 2   | No    |        | 2   | No      | 0     |        |
| 1731   |       | 2   | No    |        | 2   | No      | 3     | 2      |
| 1733   |       | 2   | No    |        | 2   | No      | 0     |        |
| 1734   |       | 1   | Yes   | 20     | 1   | Yes     | 1     | 1      |
| 1735   |       | 2   | No    |        | 2   | No      | 0     |        |
| 1736   |       | 2   | No    |        | 2   | No      | 0     |        |
| 1737   |       | 1   | Yes   | 1      | 2   | No      | 0     |        |
| 1738   |       | 2   | No    |        | 2   | No      | 1     | 1      |
| 1743   |       | 2   | No    |        | 2   | No      | 5     | 2      |
| 1755   |       | 2   | No    |        | 1   | Yes     | 2     | 2      |
| 1756   |       | 2   | No    |        | 2   | No      | 1     | 2      |
| 1757   |       | 2   | No    |        | 2   | No      | 1     | 1      |
| 1758   |       | 2   | No    |        | 2   | No      | 1     | 1      |
| 1759   |       | 1   | Yes   | 15     | 1   | Yes     | 4     | 2      |
| 1761   |       | 2   | No    |        | 2   | No      | 0     |        |
| 1762   |       | 2   | No    |        | 2   | No      | 0     |        |
| 1764   |       | 2   | No    |        | 2   | No      | 0     |        |
| 1767   |       | 2   | No    |        | 2   | No      | 1     | 0      |
| 1768   |       | 2   | No    |        | 1   | Yes     | 4     | 1      |
| 1769   |       | 2   | No    |        | 2   | No      | 1     | 1      |
| 1770   |       | 2   | No    |        | 1   | Yes     | 0     |        |
| 1771   |       | 2   | No    |        | 2   | No      | 1     | 1      |
| 1776   |       | 1   | Yes   | 10     | 2   | No      | 1     | 1      |
| 1777   |       | 2   | No    |        | 2   | No      | 0     |        |



| respid | Q16_2 | Q17 | Smoke | Q17a_1 | Q18 | Alcohol | Q19_1 | Q19a_1 |
|--------|-------|-----|-------|--------|-----|---------|-------|--------|
| 1778   |       | 2   | No    |        | 2   | No      | 4     | 1      |
| 1779   |       | 1   | Yes   | 16     | 1   | Yes     | 1     | 0      |
| 1780   |       | 2   | No    |        | 1   | Yes     | 1     | 1      |
| 1781   |       | 1   | Yes   | 5      | 2   | No      | 0     |        |
| 1783   |       | 2   | No    |        | 2   | No      | 0     |        |
| 1784   |       | 1   | Yes   | 10     | 1   | Yes     | 5     | 4      |
| 1785   |       | 2   | No    |        | 2   | No      | 1     | 0      |
| 1788   |       | 2   | No    |        | 2   | No      | 1     | 2      |
| 1792   |       | 2   | No    |        | 2   | No      | 1     | 0      |
| 1794   |       | 1   | Yes   | 3      | 1   | Yes     | 0     |        |
| 1798   |       | 2   | No    |        | 2   | No      | 5     | 4      |
| 1799   |       | 2   | No    |        | 1   | Yes     | 0     |        |
| 1800   |       | 1   | Yes   | 7      | 2   | No      | 0     |        |
| 1804   |       | 1   | Yes   | 25     | 2   | No      | 1     | 1      |
| 1806   |       | 2   | No    |        | 2   | No      | 1     | 1      |
| 1807   |       | 2   | No    |        | 2   | No      | 0     |        |
| 1808   |       | 2   | No    |        | 1   | Yes     | 1     | 1      |
| 1809   |       | 2   | No    |        | 2   | No      | 1     | 0      |
| 1811   |       | 2   | No    |        | 2   | No      | 1     | 1      |
| 1812   |       | 2   | No    |        | 2   | No      | 1     | 0      |
| 1813   |       | 1   | Yes   | 20     | 2   | No      | 1     | 2      |
| 1814   |       | 2   | No    |        | 2   | No      | 0     |        |
| 1815   |       | 2   | No    |        | 2   | No      | 1     | 1      |
| 1817   |       | 1   | Yes   | 10     | 2   | No      | 0     |        |
| 1820   |       | 1   | Yes   | 4      | 1   | Yes     | 0     |        |
| 1821   |       | 2   | No    |        | 2   | No      | 2     | 2      |
| 1822   |       | 1   | Yes   | 20     | 2   | No      | 0     |        |
| 1823   |       | 1   | Yes   | 20     | 2   | No      | 5     | 2      |
| 1824   |       | 1   | Yes   | 20     | 2   | No      | 0     |        |
| 1826   |       | 2   | No    |        | 2   | No      | 0     |        |
| 1828   |       | 2   | No    |        | 2   | No      | 0     |        |
| 1829   |       | 2   | No    |        | 2   | No      | 0     |        |

| respid | Q16_2 | Q17 | Smoke | Q17a_1 | Q18 | Alcohol | Q19_1 | Q19a_1 |
|--------|-------|-----|-------|--------|-----|---------|-------|--------|
| 1830   |       | 2   | No    |        | 2   | No      | 2     | 1      |
| 1831   |       | 1   | Yes   | 10     | 1   | Yes     | 0     |        |
| 1832   |       | 2   | No    |        | 2   | No      | 0     |        |
| 1836   |       | 2   | No    |        | 2   | No      | 1     | 1      |
| 1838   |       | 2   | No    |        | 2   | No      | 1     | 1      |
| 1839   |       | 2   | No    |        | 2   | No      | 1     | 2      |
| 1840   |       | 2   | No    |        | 1   | Yes     | 1     | 1      |
| 1841   |       | 1   | Yes   | 20     | 2   | No      | 1     | 0      |
| 1842   |       | 1   | Yes   | 20     | 2   | No      | 0     |        |
| 1843   |       | 2   | No    |        | 2   | No      | 1     | 2      |
| 1844   |       | 2   | No    |        | 2   | No      | 1     | 1      |
| 1845   |       | 2   | No    |        | 2   | No      | 0     |        |
| 1849   |       | 2   | No    |        | 2   | No      | 0     |        |
| 1850   |       | 2   | No    |        | 2   | No      | 1     | 1      |
| 1851   |       | 2   | No    |        | 1   | Yes     | 0     |        |
| 1852   |       | 2   | No    |        | 2   | No      | 0     |        |
| 1857   |       | 1   | Yes   | 19     | 1   | Yes     | 5     | 1      |
| 1858   |       | 2   | No    |        | 2   | No      | 3     | 1      |
| 1861   |       | 2   | No    |        | 2   | No      | 0     |        |
| 1862   |       | 2   | No    |        | 2   | No      | 0     |        |
| 1863   |       | 1   | Yes   | 23     | 2   | No      | 0     |        |
| 1864   |       | 2   | No    |        | 2   | No      | 2     | 2      |
| 1865   |       | 1   | Yes   | 10     | 1   | Yes     | 0     |        |
| 1867   |       | 2   | No    |        | 2   | No      | 0     |        |
| 1868   |       | 2   | No    |        | 2   | No      | 5     | 1      |
| 1869   |       | 2   | No    |        | 2   | No      | 1     | 0      |
| 1870   |       | 2   | No    |        | 2   | No      | 0     |        |
| 1871   |       | 2   | No    |        | 1   | Yes     | 2     | 2      |
| 1872   |       | 2   | No    |        | 2   | No      | 0     |        |
| 1873   |       | 2   | No    |        | 2   | No      | 1     | 1      |
| 1876   |       | 2   | No    |        | 2   | No      | 0     |        |
| 1877   |       | 1   | Yes   | 3      | 1   | Yes     | 0     |        |

| respid | Q16_2 | Q17 | Smoke | Q17a_1 | Q18 | Alcohol | Q19_1 | Q19a_1 |
|--------|-------|-----|-------|--------|-----|---------|-------|--------|
| 1878   |       | 1   | Yes   | 4      | 2   | No      | 1     | 1      |
| 1879   |       | 2   | No    |        | 2   | No      | 1     | 3      |
| 1880   |       | 1   | Yes   | 20     | 2   | No      | 1     | 0      |
| 1881   |       | 2   | No    |        | 2   | No      | 1     | 1      |
| 1883   |       | 2   | No    |        | 2   | No      | 2     | 1      |
| 1886   |       | 2   | No    |        | 2   | No      | 1     | 1      |
| 1888   |       | 1   | Yes   | 20     | 1   | Yes     | 2     | 3      |
| 1889   |       | 2   | No    |        | 1   | Yes     | 3     | 2      |
| 1890   |       | 1   | Yes   | 12     | 2   | No      | 3     | 2      |
| 1891   |       | 2   | No    |        | 2   | No      | 0     |        |
| 1893   |       | 2   | No    |        | 1   | Yes     | 0     |        |
| 1894   |       | 2   | No    |        | 2   | No      | 1     | 1      |
| 1895   |       | 1   | Yes   | 6      | 2   | No      | 2     | 2      |
| 1896   |       | 1   | Yes   | 10     | 1   | Yes     | 1     | 1      |
| 1897   |       | 2   | No    |        | 2   | No      | 3     | 2      |
| 1898   |       | 1   | Yes   | 15     | 1   | Yes     | 3     | 2      |
| 1899   |       | 1   | Yes   | 10     | 1   | Yes     | 3     | 2      |
| 1900   |       | 1   | Yes   | 22     | 2   | No      | 0     |        |
| 1903   |       | 1   | Yes   | 10     | 2   | No      | 1     | 1      |
| 1906   |       | 2   | No    |        | 1   | Yes     | 0     |        |
| 1907   |       | 2   | No    |        | 2   | No      | 5     | 3      |
| 1908   |       | 2   | No    |        | 1   | Yes     | 0     |        |
| 1909   |       | 2   | No    |        | 2   | No      | 2     | 2      |
| 1910   |       | 2   | No    |        | 1   | Yes     | 0     |        |
| 1911   |       | 2   | No    |        | 1   | Yes     | 1     | 1      |
| 1912   |       | 2   | No    |        | 2   | No      | 0     |        |
| 1917   |       | 2   | No    |        | 2   | No      | 0     |        |
| 1918   |       | 2   | No    |        | 2   | No      | 4     | 2      |
| 1919   |       | 2   | No    |        | 1   | Yes     | 0     |        |
| 1922   |       | 2   | No    |        | 2   | No      | 0     |        |
| 1925   |       | 2   | No    |        | 2   | No      | 0     |        |
| 1926   |       | 2   | No    |        | 2   | No      | 1     | 1      |

| respid | Q16_2 | Q17 | Smoke | Q17a_1 | Q18 | Alcohol | Q19_1 | Q19a_1 |
|--------|-------|-----|-------|--------|-----|---------|-------|--------|
| 1927   |       | 2   | No    |        | 2   | No      | 0     |        |
| 1928   |       | 2   | No    |        | 2   | No      | 0     |        |
| 1929   |       | 1   | Yes   | 15     | 2   | No      | 0     |        |
| 1934   |       | 1   | Yes   | 20     | 2   | No      | 1     | 2      |
| 1935   |       | 2   | No    |        | 2   | No      | 0     |        |
| 1936   |       | 2   | No    |        | 1   | Yes     | 2     | 2      |
| 1937   |       | 2   | No    |        | 2   | No      | 0     |        |
| 1938   |       | 2   | No    |        | 1   | Yes     | 0     |        |
| 1939   |       | 2   | No    |        | 2   | No      | 1     | 1      |
| 1940   |       | 2   | No    |        | 2   | No      | 0     |        |
| 1941   |       | 2   | No    |        | 2   | No      | 0     |        |
| 1948   |       | 2   | No    |        | 2   | No      | 0     |        |
| 1950   |       | 2   | No    |        | 2   | No      | 2     | 3      |
| 1955   |       | 1   | Yes   | 20     | 1   | Yes     | 3     | 2      |
| 1958   |       | 2   | No    |        | 2   | No      | 1     | 0      |
| 1960   |       | 2   | No    |        | 2   | No      | 0     |        |
| 1961   |       | 1   | Yes   | 20     | 2   | No      | 0     |        |
| 1962   |       | 2   | No    |        | 2   | No      | 0     |        |
| 1965   |       | 2   | No    |        | 2   | No      | 0     |        |
| 1966   |       | 2   | No    |        | 2   | No      | 0     |        |
| 1967   |       | 1   | Yes   | 15     | 1   | Yes     | 0     |        |
| 1968   |       | 2   | No    |        | 2   | No      | 1     | 1      |
| 1973   |       | 2   | No    |        | 2   | No      | 0     |        |
| 1974   |       | 2   | No    |        | 2   | No      | 2     | 2      |
| 1975   |       | 2   | No    |        | 2   | No      | 0     |        |
| 1977   |       | 2   | No    |        | 2   | No      | 0     |        |
| 1978   |       | 2   | No    |        | 2   | No      | 0     |        |
| 1979   |       | 2   | No    |        | 2   | No      | 5     | 4      |
| 1982   |       | 2   | No    |        | 2   | No      | 0     |        |
| 1983   |       | 1   | Yes   | 10     | 2   | No      | 0     |        |
| 1987   |       | 2   | No    |        | 2   | No      | 3     | 2      |
| 1988   |       | 2   | No    |        | 1   | Yes     | 1     | 2      |

| respid | Q16_2 | Q17 | Smoke | Q17a_1 | Q18 | Alcohol | Q19_1 | Q19a_1 |
|--------|-------|-----|-------|--------|-----|---------|-------|--------|
| 1991   |       | 2   | No    |        | 2   | No      | 0     |        |
| 1992   |       | 1   | Yes   | 10     | 1   | Yes     | 0     |        |
| 1993   |       | 2   | No    |        | 1   | Yes     | 0     |        |
| 1994   |       | 2   | No    |        | 2   | No      | 1     | 1      |
| 1995   |       | 2   | No    |        | 2   | No      | 5     | 0      |
| 1996   |       | 2   | No    |        | 2   | No      | 1     | 1      |
| 1997   |       | 2   | No    |        | 2   | No      | 1     | 0      |
| 1998   |       | 2   | No    |        | 2   | No      | 1     | 1      |
| 1999   |       | 2   | No    |        | 1   | Yes     | 3     | 3      |
| 2000   |       | 1   | Yes   | 12     | 1   | Yes     | 2     | 1      |
| 2001   |       | 2   | No    |        | 2   | No      | 0     |        |
| 2002   |       | 2   | No    |        | 2   | No      | 1     | 0      |
| 2003   |       | 2   | No    |        | 1   | Yes     | 0     |        |
| 2004   |       | 2   | No    |        | 2   | No      | 0     |        |
| 2005   |       | 2   | No    |        | 2   | No      | 1     | 0      |
| 2007   |       | 1   | Yes   | 15     | 1   | Yes     | 2     | 2      |
| 2009   |       | 2   | No    |        | 1   | Yes     | 0     |        |
| 2010   |       | 2   | No    |        | 1   | Yes     | 0     |        |
| 2011   |       | 2   | No    |        | 2   | No      | 0     |        |
| 2013   |       | 2   | No    |        | 2   | No      | 1     | 0      |
| 2014   |       | 2   | No    |        | 2   | No      | 3     | 2      |
| 2017   |       | 2   | No    |        | 2   | No      | 1     | 1      |
| 2020   |       | 2   | No    |        | 2   | No      | 0     |        |
| 2023   |       | 1   | Yes   | 6      | 2   | No      | 2     | 2      |
| 2024   |       | 2   | No    |        | 2   | No      | 0     |        |
| 2029   |       | 2   | No    |        | 1   | Yes     | 1     | 1      |
| 2030   |       | 2   | No    |        | 2   | No      | 0     |        |
| 2031   |       | 2   | No    |        | 1   | Yes     | 1     | 1      |
| 2032   |       | 2   | No    |        | 2   | No      | 4     | 2      |
| 2033   |       | 2   | No    |        | 2   | No      | 0     |        |
| 2034   |       | 2   | No    |        | 2   | No      | 3     | 2      |
| 2036   |       | 2   | No    |        | 1   | Yes     | 5     | 3      |

| respid | Q16_2 | Q17 | Smoke | Q17a_1 | Q18 | Alcohol | Q19_1 | Q19a_1 |
|--------|-------|-----|-------|--------|-----|---------|-------|--------|
| 2037   |       | 2   | No    |        | 2   | No      | 1     | 2      |
| 2038   |       | 2   | No    |        | 1   | Yes     | 1     | 0      |
| 2039   |       | 2   | No    |        | 1   | Yes     | 3     | 2      |
| 2040   |       | 2   | No    |        | 2   | No      | 0     |        |
| 2041   |       | 2   | No    |        | 2   | No      | 0     |        |
| 2042   |       | 2   | No    |        | 2   | No      | 0     |        |
| 2043   |       | 2   | No    |        | 2   | No      | 1     | 1      |
| 2051   |       | 2   | No    |        | 2   | No      | 0     |        |
| 2052   |       | 1   | Yes   | 20     | 2   | No      | 0     |        |
| 2053   |       | 2   | No    |        | 2   | No      | 0     |        |
| 2054   |       | 2   | No    |        | 2   | No      | 0     |        |
| 2055   |       | 2   | No    |        | 2   | No      | 0     |        |
| 2056   |       | 2   | No    |        | 2   | No      | 1     | 1      |
| 2057   |       | 2   | No    |        | 1   | Yes     | 0     |        |
| 2059   |       | 2   | No    |        | 1   | Yes     | 0     |        |
| 2063   |       | 2   | No    |        | 2   | No      | 0     |        |
| 2066   |       | 2   | No    |        | 2   | No      | 0     |        |
| 2068   |       | 2   | No    |        | 2   | No      | 0     |        |
| 2069   |       | 2   | No    |        | 2   | No      | 0     |        |
| 2070   |       | 2   | No    |        | 2   | No      | 0     |        |
| 2071   |       | 1   | Yes   | 20     | 2   | No      | 2     | 1      |
| 2073   |       | 2   | No    |        | 2   | No      | 0     |        |
| 2077   |       | 2   | No    |        | 2   | No      | 2     | 1      |
| 2079   |       | 1   | Yes   | 15     | 2   | No      | 0     |        |
| 2080   |       | 2   | No    |        | 2   | No      | 0     |        |
| 2081   |       | 1   | Yes   | 10     | 1   | Yes     | 3     | 2      |
| 2084   |       | 2   | No    |        | 2   | No      | 0     |        |
| 2085   |       | 2   | No    |        | 2   | No      | 0     |        |
| 2087   |       | 2   | No    |        | 2   | No      | 5     | 2      |
| 2089   |       | 2   | No    |        | 2   | No      | 0     |        |
| 2093   |       | 2   | No    |        | 2   | No      | 0     |        |
| 2094   |       | 1   | Yes   | 10     | 1   | Yes     | 3     | 2      |

| respid | Q16_2 | Q17 | Smoke | Q17a_1 | Q18 | Alcohol | Q19_1 | Q19a_1 |
|--------|-------|-----|-------|--------|-----|---------|-------|--------|
| 2095   |       | 2   | No    |        | 2   | No      | 2     | 3      |
| 2097   |       | 2   | No    |        | 2   | No      | 0     |        |
| 2099   |       | 2   | No    |        | 2   | No      | 3     | 2      |
| 2100   |       | 2   | No    |        | 2   | No      | 0     |        |
| 2101   |       | 2   | No    |        | 2   | No      | 1     | 1      |
| 2103   |       | 2   | No    |        | 2   | No      | 2     | 1      |
| 2104   |       | 2   | No    |        | 2   | No      | 0     |        |
| 2106   |       | 1   | Yes   | 5      | 1   | Yes     | 4     | 2      |
| 2111   |       | 2   | No    |        | 2   | No      | 3     | 2      |
| 2113   |       | 1   | Yes   | 15     | 2   | No      | 0     |        |
| 2115   |       | 1   | Yes   | 10     | 1   | Yes     | 0     |        |
| 2119   |       | 2   | No    |        | 2   | No      | 1     | 1      |
| 2120   |       | 2   | No    |        | 2   | No      | 0     |        |
| 2123   |       | 2   | No    |        | 2   | No      | 0     |        |
| 2124   |       | 1   | Yes   | 10     | 2   | No      | 1     | 2      |
| 2130   |       | 2   | No    |        | 2   | No      | 0     |        |
| 2131   |       | 2   | No    |        | 2   | No      | 4     | 1      |
| 2133   |       | 1   | Yes   | 20     | 1   | Yes     | 5     | 4      |
| 2139   |       | 2   | No    |        | 2   | No      | 3     | 1      |
| 2141   |       | 2   | No    |        | 2   | No      | 0     |        |
| 2143   |       | 2   | No    |        | 2   | No      | 0     |        |
| 2144   |       | 2   | No    |        | 2   | No      | 0     |        |
| 2147   |       | 2   | No    |        | 2   | No      | 0     |        |
| 2151   |       | 1   | Yes   | 15     | 2   | No      | 1     | 1      |
| 2153   |       | 2   | No    |        | 1   | Yes     | 0     |        |
| 2154   |       | 2   | No    |        | 2   | No      | 0     |        |
| 2155   |       | 2   | No    |        | 2   | No      | 3     | 3      |
| 2159   |       | 2   | No    |        | 2   | No      | 3     | 0      |
| 2160   |       | 1   | Yes   | 5      | 1   | Yes     | 3     | 2      |
| 2161   |       | 1   | Yes   | 8      | 2   | No      | 0     |        |
| 2163   |       | 2   | No    |        | 1   | Yes     | 1     | 1      |
| 2164   |       | 2   | No    |        | 1   | Yes     | 0     |        |

| respid | Q16_2 | Q17 | Smoke | Q17a_1 | Q18 | Alcohol | Q19_1 | Q19a_1 |
|--------|-------|-----|-------|--------|-----|---------|-------|--------|
| 2168   |       | 1   | Yes   | 20     | 2   | No      | 1     | 1      |
| 2169   |       | 1   | Yes   | 20     | 2   | No      | 1     | 1      |
| 2170   |       | 2   | No    |        | 1   | Yes     | 1     | 0      |
| 2171   |       | 1   | Yes   | 15     | 1   | Yes     | 1     | 1      |
| 2172   |       | 1   | Yes   | 20     | 2   | No      | 2     | 2      |
| 2173   |       | 2   | No    |        | 2   | No      | 5     | 2      |
| 2174   |       | 2   | No    |        | 2   | No      | 0     |        |
| 2175   |       | 2   | No    |        | 2   | No      | 1     | 0      |
| 2176   |       | 2   | No    |        | 2   | No      | 2     | 1      |
| 2177   |       | 1   | Yes   | 10     | 2   | No      | 4     | 3      |
| 2179   |       | 2   | No    |        | 2   | No      | 1     | 0      |
| 2181   |       | 1   | Yes   | 3      | 2   | No      | 0     |        |
| 2182   |       | 2   | No    |        | 2   | No      | 0     |        |
| 2183   |       | 1   | Yes   | 10     | 1   | Yes     | 2     | 1      |
| 2184   |       | 2   | No    |        | 1   | Yes     | 2     | 1      |
| 2185   |       | 2   | No    |        | 2   | No      | 0     |        |
| 2186   |       | 2   | No    |        | 1   | Yes     | 1     | 1      |
| 2187   |       | 2   | No    |        | 1   | Yes     | 2     | 1      |
| 2188   |       | 2   | No    |        | 2   | No      | 0     |        |
| 2189   |       | 1   | Yes   | 5      | 2   | No      | 0     |        |
| 2190   |       | 2   | No    |        | 2   | No      | 0     |        |
| 2193   |       | 2   | No    |        | 2   | No      | 1     | 1      |
| 2195   |       | 2   | No    |        | 2   | No      | 0     |        |
| 2198   |       | 2   | No    |        | 2   | No      | 1     | 0      |
| 2200   |       | 2   | No    |        | 2   | No      | 2     | 1      |
| 2205   |       | 2   | No    |        | 2   | No      | 3     | 2      |
| 2208   |       | 2   | No    |        | 2   | No      | 0     |        |
| 2209   |       | 2   | No    |        | 1   | Yes     | 4     | 2      |
| 2210   |       | 2   | No    |        | 2   | No      | 5     | 3      |
| 2211   |       | 2   | No    |        | 2   | No      | 1     | 1      |
| 2213   |       | 2   | No    |        | 2   | No      | 0     |        |
| 2214   |       | 2   | No    |        | 2   | No      | 2     | 2      |



| respid | Q16_2 | Q17 | Smoke | Q17a_1 | Q18 | Alcohol | Q19_1 | Q19a_1 |
|--------|-------|-----|-------|--------|-----|---------|-------|--------|
| 2216   |       | 1   | Yes   | 10     | 2   | No      | 1     | 0      |
| 2220   |       | 2   | No    |        | 2   | No      | 0     |        |
| 2225   |       | 2   | No    |        | 2   | No      | 1     | 1      |
| 2227   |       | 1   | Yes   | 80     | 2   | No      | 1     | 1      |
| 2228   |       | 2   | No    |        | 2   | No      | 2     | 1      |
| 2229   |       | 2   | No    |        | 1   | Yes     | 0     |        |
| 2230   |       | 1   | Yes   | 10     | 2   | No      | 0     |        |
| 2236   |       | 2   | No    |        | 2   | No      | 0     |        |
| 2238   |       | 1   | Yes   | 5      | 1   | Yes     | 5     | 4      |
| 2239   |       | 2   | No    |        | 2   | No      | 0     |        |
| 2240   |       | 1   | Yes   | 15     | 1   | Yes     | 0     |        |
| 2241   |       | 2   | No    |        | 2   | No      | 2     | 1      |
| 2243   |       | 2   | No    |        | 2   | No      | 0     |        |
| 2245   |       | 2   | No    |        | 2   | No      | 0     |        |
| 2247   |       | 2   | No    |        | 2   | No      | 2     | 1      |
| 2248   |       | 2   | No    |        | 2   | No      | 0     |        |
| 2249   |       | 2   | No    |        | 2   | No      | 0     |        |
| 2254   |       | 2   | No    |        | 2   | No      | 1     | 0      |
| 2256   |       | 2   | No    |        | 2   | No      | 1     | 1      |
| 2259   |       | 2   | No    |        | 2   | No      | 0     |        |
| 2261   |       | 2   | No    |        | 2   | No      | 0     |        |
| 2262   |       | 2   | No    |        | 2   | No      | 0     |        |
| 2263   |       | 2   | No    |        | 2   | No      | 0     |        |
| 2264   |       | 2   | No    |        | 2   | No      | 0     |        |
| 2265   |       | 2   | No    |        | 2   | No      | 0     |        |
| 2270   |       | 1   | Yes   | 20     | 1   | Yes     | 1     | 2      |
| 2271   |       | 2   | No    |        | 2   | No      | 0     |        |
| 2272   |       | 2   | No    |        | 2   | No      | 0     |        |
| 2273   |       | 2   | No    |        | 2   | No      | 1     | 1      |
| 2274   |       | 2   | No    |        | 2   | No      | 1     | 0      |
| 2276   |       | 2   | No    |        | 1   | Yes     | 1     | 1      |
| 2277   |       | 2   | No    |        | 2   | No      | 4     | 2      |

| respid | Q16_2 | Q17 | Smoke | Q17a_1 | Q18 | Alcohol | Q19_1 | Q19a_1 |
|--------|-------|-----|-------|--------|-----|---------|-------|--------|
| 2281   |       | 2   | No    |        | 2   | No      | 0     |        |
| 2288   |       | 2   | No    |        | 2   | No      | 0     |        |
| 2290   |       | 2   | No    |        | 2   | No      | 1     | 1      |
| 2294   |       | 2   | No    |        | 2   | No      | 0     |        |
| 2295   |       | 2   | No    |        | 2   | No      | 1     | 0      |
| 2296   |       | 2   | No    |        | 2   | No      | 0     |        |
| 2297   |       | 2   | No    |        | 2   | No      | 0     |        |
| 2298   |       | 2   | No    |        | 1   | Yes     | 0     |        |
| 2301   |       | 1   | Yes   | 15     | 2   | No      | 2     | 2      |
| 2302   |       | 2   | No    |        | 2   | No      | 1     | 1      |
| 2303   |       | 2   | No    |        | 2   | No      | 0     |        |
| 2305   |       | 2   | No    |        | 1   | Yes     | 0     |        |
| 2309   |       | 2   | No    |        | 2   | No      | 0     |        |
| 2310   |       | 2   | No    |        | 2   | No      | 0     |        |
| 2311   |       | 2   | No    |        | 2   | No      | 1     | 2      |
| 2313   |       | 1   | Yes   | 10     | 1   | Yes     | 2     | 2      |
| 2316   |       | 2   | No    |        | 2   | No      | 0     |        |
| 2317   |       | 2   | No    |        | 2   | No      | 0     |        |
| 2318   |       | 2   | No    |        | 2   | No      | 1     | 2      |
| 2319   |       | 2   | No    |        | 2   | No      | 0     |        |
| 2321   |       | 2   | No    |        | 2   | No      | 4     | 2      |
| 2324   |       | 2   | No    |        | 2   | No      | 0     |        |
| 2328   |       | 2   | No    |        | 2   | No      | 0     |        |
| 2329   |       | 2   | No    |        | 1   | Yes     | 0     |        |
| 2330   |       | 2   | No    |        | 2   | No      | 3     | 2      |
| 2333   |       | 2   | No    |        | 2   | No      | 2     | 1      |
| 2334   |       | 2   | No    |        | 2   | No      | 3     | 2      |
| 2338   |       | 2   | No    |        | 2   | No      | 0     |        |
| 2341   |       | 1   | Yes   | 5      | 2   | No      | 0     |        |
| 2342   |       | 2   | No    |        | 1   | Yes     | 3     | 2      |
| 2343   |       | 1   | Yes   | 20     | 1   | Yes     | 2     | 3      |
| 2346   |       | 2   | No    |        | 2   | No      | 0     |        |

| respid | Q16_2 | Q17 | Smoke | Q17a_1 | Q18 | Alcohol | Q19_1 | Q19a_1 |
|--------|-------|-----|-------|--------|-----|---------|-------|--------|
| 2347   |       | 2   | No    |        | 1   | Yes     | 2     | 1      |
| 2348   |       | 1   | Yes   | 23     | 1   | Yes     | 0     |        |
| 2349   |       | 1   | Yes   | 10     | 2   | No      | 3     | 3      |
| 2350   |       | 2   | No    |        | 2   | No      | 0     |        |
| 2351   |       | 1   | Yes   | 5      | 2   | No      | 0     |        |
| 2352   |       | 1   | Yes   | 20     | 2   | No      | 0     |        |
| 2359   |       | 2   | No    |        | 2   | No      | 0     |        |
| 2362   |       | 1   | Yes   | 20     | 1   | Yes     | 0     |        |
| 2363   |       | 2   | No    |        | 2   | No      | 0     |        |
| 2365   |       | 1   | Yes   | 25     | 2   | No      | 1     | 1      |
| 2367   |       | 2   | No    |        | 2   | No      | 2     | 1      |
| 2368   |       | 2   | No    |        | 1   | Yes     | 0     |        |
| 2369   |       | 2   | No    |        | 2   | No      | 1     | 0      |
| 2372   |       | 2   | No    |        | 2   | No      | 0     |        |
| 2374   |       | 1   | Yes   | 12     | 1   | Yes     | 3     | 2      |
| 2376   |       | 2   | No    |        | 2   | No      | 0     |        |
| 2379   |       | 2   | No    |        | 2   | No      | 4     | 2      |
| 2380   |       | 1   | Yes   | 10     | 2   | No      | 0     |        |
| 2381   |       | 2   | No    |        | 2   | No      | 1     | 2      |
| 2382   |       | 1   | Yes   | 12     | 2   | No      | 1     | 1      |
| 2385   |       | 2   | No    |        | 2   | No      | 1     | 3      |
| 2387   |       | 1   | Yes   | 20     | 2   | No      | 2     | 2      |
| 2388   |       | 1   | Yes   | 20     | 2   | No      | 0     |        |
| 2389   |       | 2   | No    |        | 2   | No      | 0     |        |
| 2391   |       | 2   | No    |        | 2   | No      | 3     | 0      |
| 2392   |       | 1   | Yes   | 15     | 1   | Yes     | 1     | 1      |
| 2393   |       | 2   | No    |        | 1   | Yes     | 0     |        |
| 2394   |       | 2   | No    |        | 2   | No      | 1     | 1      |
| 2397   |       | 1   | Yes   | 1      | 2   | No      | 1     | 1      |
| 2398   |       | 2   | No    |        | 2   | No      | 2     | 1      |
| 2400   |       | 1   | Yes   | 2      | 1   | Yes     | 3     | 1      |
| 2402   |       | 2   | No    |        | 2   | No      | 3     | 1      |

| respid | Q16_2 | Q17 | Smoke | Q17a_1 | Q18 | Alcohol | Q19_1 | Q19a_1 |
|--------|-------|-----|-------|--------|-----|---------|-------|--------|
| 2406   |       | 2   | No    |        | 2   | No      | 0     |        |
| 2408   |       | 2   | No    |        | 2   | No      | 1     | 0      |
| 2410   |       | 1   | Yes   | 7      | 1   | Yes     | 5     | 2      |
| 2411   |       | 1   | Yes   | 25     | 1   | Yes     | 2     | 2      |
| 2412   |       | 1   | Yes   | 10     | 2   | No      | 0     |        |
| 2414   |       | 2   | No    |        | 2   | No      | 3     | 2      |
| 2421   |       | 2   | No    |        | 2   | No      | 0     |        |
| 2423   |       | 2   | No    |        | 2   | No      | 1     | 1      |
| 2424   |       | 2   | No    |        | 1   | Yes     | 1     | 1      |
| 2425   |       | 2   | No    |        | 2   | No      | 0     |        |
| 2426   |       | 1   | Yes   | 15     | 2   | No      | 1     | 1      |
| 2429   |       | 2   | No    |        | 2   | No      | 3     | 2      |
| 2430   |       | 2   | No    |        | 2   | No      | 1     | 1      |
| 2432   |       | 2   | No    |        | 2   | No      | 1     | 1      |
| 2433   |       | 2   | No    |        | 2   | No      | 0     |        |
| 2434   |       | 2   | No    |        | 2   | No      | 1     | 1      |
| 2435   |       | 2   | No    |        | 2   | No      | 0     |        |
| 2436   |       | 2   | No    |        | 2   | No      | 1     | 0      |
| 2439   |       | 2   | No    |        | 2   | No      | 0     |        |
| 2440   |       | 1   | Yes   | 10     | 2   | No      | 1     | 1      |
| 2441   |       | 1   | Yes   | 18     | 2   | No      | 0     |        |
| 2446   |       | 2   | No    |        | 2   | No      | 1     | 1      |
| 2448   |       | 1   | Yes   | 15     | 1   | Yes     | 1     | 2      |
| 2449   |       | 2   | No    |        | 2   | No      | 3     | 0      |
| 2451   |       | 2   | No    |        | 2   | No      | 0     |        |
| 2452   |       | 1   | Yes   | 10     | 1   | Yes     | 0     |        |
| 2455   |       | 2   | No    |        | 2   | No      | 0     |        |
| 2457   |       | 2   | No    |        | 2   | No      | 2     | 2      |
| 2458   |       | 2   | No    |        | 2   | No      | 1     | 1      |
| 2459   |       | 2   | No    |        | 2   | No      | 0     |        |
| 2460   |       | 2   | No    |        | 2   | No      | 0     |        |
| 2462   |       | 2   | No    |        | 1   | Yes     | 2     | 2      |

| respid | Q16_2 | Q17 | Smoke | Q17a_1 | Q18 | Alcohol | Q19_1 | Q19a_1 |
|--------|-------|-----|-------|--------|-----|---------|-------|--------|
| 2464   |       | 1   | Yes   | 20     | 1   | Yes     | 3     | 3      |
| 2465   |       | 2   | No    |        | 2   | No      | 1     | 1      |
| 2468   |       | 2   | No    |        | 1   | Yes     | 1     | 1      |
| 2469   |       | 2   | No    |        | 2   | No      | 0     |        |
| 2470   |       | 2   | No    |        | 2   | No      | 0     |        |
| 2471   |       | 2   | No    |        | 1   | Yes     | 4     | 2      |
| 2472   |       | 1   | Yes   | 15     | 1   | Yes     | 0     |        |
| 2474   |       | 2   | No    |        | 2   | No      | 0     |        |
| 2476   |       | 2   | No    |        | 1   | Yes     | 5     | 2      |
| 2478   |       | 2   | No    |        | 2   | No      | 0     |        |
| 2479   |       | 1   | Yes   | 15     | 2   | No      | 4     | 3      |
| 2480   |       | 1   | Yes   | 6      | 2   | No      | 0     |        |
| 2482   |       | 1   | Yes   | 20     | 2   | No      | 1     | 0      |
| 2486   |       | 1   | Yes   | 10     | 2   | No      | 0     |        |
| 2488   |       | 2   | No    |        | 2   | No      | 3     | 2      |
| 2489   |       | 2   | No    |        | 2   | No      | 2     | 1      |
| 2491   |       | 2   | No    |        | 2   | No      | 0     |        |
| 2495   |       | 1   | Yes   | 10     | 2   | No      | 1     | 1      |
| 2496   |       | 2   | No    |        | 2   | No      | 0     |        |
| 2498   |       | 2   | No    |        | 1   | Yes     | 1     | 1      |
| 2501   |       | 1   | Yes   | 20     | 1   | Yes     | 5     | 3      |
| 2502   |       | 1   | Yes   | 10     | 1   | Yes     | 3     | 2      |
| 2503   |       | 2   | No    |        | 2   | No      | 3     | 2      |
| 2504   |       | 2   | No    |        | 2   | No      | 0     |        |
| 2507   |       | 2   | No    |        | 2   | No      | 0     |        |
| 2509   |       | 2   | No    |        | 2   | No      | 1     | 1      |
| 2512   |       | 2   | No    |        | 2   | No      | 1     | 1      |
| 2514   |       | 1   | Yes   | 18     | 1   | Yes     | 1     | 0      |
| 2516   |       | 2   | No    |        | 2   | No      | 0     |        |
| 2517   |       | 2   | No    |        | 2   | No      | 1     | 1      |
| 2521   |       | 2   | No    |        | 2   | No      | 1     | 1      |
| 2522   |       | 2   | No    |        | 2   | No      | 0     |        |

| respid | Q16_2 | Q17 | Smoke | Q17a_1 | Q18 | Alcohol | Q19_1 | Q19a_1 |
|--------|-------|-----|-------|--------|-----|---------|-------|--------|
| 2524   |       | 2   | No    |        | 2   | No      | 0     |        |
| 2525   |       | 2   | No    |        | 2   | No      | 0     |        |
| 2526   |       | 2   | No    |        | 2   | No      | 1     | 3      |
| 2527   |       | 2   | No    |        | 2   | No      | 0     |        |
| 2528   |       | 2   | No    |        | 2   | No      | 1     | 1      |
| 2531   |       | 2   | No    |        | 2   | No      | 0     |        |
| 2533   |       | 1   | Yes   | 20     | 2   | No      | 1     | 1      |
| 2535   |       | 2   | No    |        | 2   | No      | 0     |        |
| 2536   |       | 2   | No    |        | 1   | Yes     | 5     | 3      |
| 2539   |       | 2   | No    |        | 2   | No      | 0     |        |
| 2540   |       | 2   | No    |        | 2   | No      | 0     |        |
| 2543   |       | 2   | No    |        | 2   | No      | 0     |        |
| 2546   |       | 1   | Yes   | 4      | 1   | Yes     | 0     |        |
| 2547   |       | 2   | No    |        | 2   | No      | 1     | 1      |
| 2549   |       | 2   | No    |        | 2   | No      | 0     |        |
| 2553   |       | 2   | No    |        | 2   | No      | 1     | 0      |
| 2554   |       | 2   | No    |        | 2   | No      | 0     |        |
| 2555   |       | 2   | No    |        | 2   | No      | 0     |        |
| 2556   |       | 2   | No    |        | 2   | No      | 0     |        |
| 2557   |       | 1   | Yes   | 10     | 2   | No      | 0     |        |
| 2559   |       | 2   | No    |        | 2   | No      | 0     |        |
| 2560   |       | 2   | No    |        | 1   | Yes     | 3     | 3      |
| 2561   |       | 2   | No    |        | 2   | No      | 0     |        |
| 2566   |       | 2   | No    |        | 1   | Yes     | 1     | 0      |
| 2567   |       | 2   | No    |        | 2   | No      | 0     |        |
| 2570   |       | 2   | No    |        | 2   | No      | 0     |        |
| 2574   |       | 1   | Yes   | 22     | 2   | No      | 3     | 3      |
| 2578   |       | 2   | No    |        | 1   | Yes     | 0     |        |
| 2580   |       | 2   | No    |        | 2   | No      | 0     |        |
| 2590   |       | 2   | No    |        | 2   | No      | 1     | 0      |
| 2593   |       | 2   | No    |        | 2   | No      | 0     |        |
| 2594   |       | 1   | Yes   | 20     | 2   | No      | 1     | 1      |

| respid | Q16_2 | Q17 | Smoke | Q17a_1 | Q18 | Alcohol | Q19_1 | Q19a_1 |
|--------|-------|-----|-------|--------|-----|---------|-------|--------|
| 2595   |       | 2   | No    |        | 2   | No      | 1     | 1      |
| 2596   |       | 1   | Yes   | 30     | 1   | Yes     | 3     | 1      |
| 2597   |       | 2   | No    |        | 2   | No      | 4     | 3      |
| 2598   |       | 2   | No    |        | 2   | No      | 0     |        |
| 2602   |       | 2   | No    |        | 2   | No      | 0     |        |
| 2605   |       | 1   | Yes   | 10     | 1   | Yes     | 4     | 3      |
| 2606   |       | 1   | Yes   | 15     | 2   | No      | 0     |        |
| 2607   |       | 2   | No    |        | 2   | No      | 0     |        |
| 2608   |       | 1   | Yes   | 7      | 2   | No      | 0     |        |
| 2609   |       | 2   | No    |        | 2   | No      | 1     | 1      |
| 2610   |       | 2   | No    |        | 1   | Yes     | 0     |        |
| 2614   |       | 1   | Yes   | 2      | 2   | No      | 0     |        |
| 2615   |       | 2   | No    |        | 1   | Yes     | 0     |        |
| 2616   |       | 2   | No    |        | 2   | No      | 0     |        |
| 2618   |       | 2   | No    |        | 1   | Yes     | 1     | 0      |
| 2630   |       | 2   | No    |        | 2   | No      | 4     | 2      |
| 2633   |       | 2   | No    |        | 2   | No      | 0     |        |
| 2637   |       | 1   | Yes   | 40     | 1   | Yes     | 4     | 2      |
| 2638   |       | 2   | No    |        | 2   | No      | 5     | 2      |
| 2641   |       | 2   | No    |        | 2   | No      | 0     |        |
| 2644   |       | 2   | No    |        | 2   | No      | 0     |        |
| 2645   | 125   | 2   | No    |        | 2   | No      | 1     | 0      |
| 2646   |       | 2   | No    |        | 2   | No      | 0     |        |
| 2648   |       | 2   | No    |        | 2   | No      | 1     | 1      |
| 2651   |       | 2   | No    |        | 2   | No      | 0     |        |
| 2652   |       | 2   | No    |        | 2   | No      | 3     | 1      |
| 2653   |       | 2   | No    |        | 2   | No      | 1     | 1      |
| 2656   |       | 2   | No    |        | 2   | No      | 0     |        |
| 2657   |       | 2   | No    |        | 2   | No      | 0     |        |
| 2658   |       | 2   | No    |        | 2   | No      | 1     | 0      |
| 2661   |       | 2   | No    |        | 2   | No      | 0     |        |
| 2663   |       | 2   | No    |        | 2   | No      | 1     | 1      |

| respid | Q16_2 | Q17 | Smoke | Q17a_1 | Q18 | Alcohol | Q19_1 | Q19a_1 |
|--------|-------|-----|-------|--------|-----|---------|-------|--------|
| 2665   |       | 1   | Yes   | 20     | 1   | Yes     | 0     |        |
| 2670   |       | 2   | No    |        | 2   | No      | 0     |        |
| 2672   |       | 2   | No    |        | 2   | No      | 0     |        |
| 2673   |       | 2   | No    |        | 2   | No      | 0     |        |
| 2677   |       | 2   | No    |        | 2   | No      | 0     |        |
| 2686   |       | 2   | No    |        | 2   | No      | 3     | 4      |
| 2688   |       | 2   | No    |        | 1   | Yes     | 3     | 1      |
| 2689   |       | 2   | No    |        | 2   | No      | 2     | 1      |
| 2691   |       | 2   | No    |        | 2   | No      | 0     |        |
| 2695   |       | 2   | No    |        | 2   | No      | 0     |        |
| 2696   |       | 2   | No    |        | 2   | No      | 5     | 1      |
| 2697   |       | 1   | Yes   | 22     | 2   | No      | 0     |        |
| 2698   |       | 2   | No    |        | 2   | No      | 0     |        |
| 2703   |       | 2   | No    |        | 2   | No      | 1     | 1      |
| 2704   |       | 2   | No    |        | 2   | No      | 0     |        |
| 2706   |       | 1   | Yes   | 15     | 2   | No      | 1     | 0      |
| 2707   |       | 1   | Yes   | 8      | 2   | No      | 4     | 3      |
| 2710   |       | 2   | No    |        | 2   | No      | 0     |        |
| 2711   |       | 2   | No    |        | 2   | No      | 1     | 2      |
| 2712   |       | 2   | No    |        | 2   | No      | 1     | 1      |
| 2713   |       | 1   | Yes   | 20     | 2   | No      | 0     |        |
| 2721   |       | 2   | No    |        | 1   | Yes     | 0     |        |
| 2730   |       | 2   | No    |        | 2   | No      | 0     |        |
| 2731   |       | 1   | Yes   | 15     | 1   | Yes     | 1     | 2      |
| 2732   |       | 2   | No    |        | 1   | Yes     | 0     |        |
| 2733   |       | 1   | Yes   | 15     | 1   | Yes     | 1     | 1      |
| 2735   |       | 2   | No    |        | 2   | No      | 0     |        |
| 2736   |       | 2   | No    |        | 1   | Yes     | 1     | 1      |
| 2740   |       | 1   | Yes   | 20     | 1   | Yes     | 1     | 1      |
| 2741   |       | 2   | No    |        | 2   | No      | 2     | 2      |
| 2742   |       | 2   | No    |        | 2   | No      | 2     | 2      |
| 2743   |       | 1   | Yes   | 20     | 2   | No      | 4     | 1      |



| respid | Q16_2 | Q17 | Smoke | Q17a_1 | Q18 | Alcohol | Q19_1 | Q19a_1 |
|--------|-------|-----|-------|--------|-----|---------|-------|--------|
| 2744   |       | 2   | No    |        | 2   | No      | 5     | 0      |
| 2745   |       | 2   | No    |        | 1   | Yes     | 4     | 3      |
| 2749   |       | 2   | No    |        | 2   | No      | 0     |        |
| 2751   |       | 1   | Yes   | 7      | 2   | No      | 1     | 0      |
| 2754   |       | 1   | Yes   | 20     | 2   | No      | 1     | 1      |
| 2755   |       | 1   | Yes   | 17     | 2   | No      | 2     | 2      |
| 2757   |       | 2   | No    |        | 2   | No      | 0     |        |
| 2758   |       | 1   | Yes   | 14     | 2   | No      | 1     | 1      |
| 2759   |       | 1   | Yes   | 10     | 1   | Yes     | 1     | 2      |
| 2761   |       | 2   | No    |        | 2   | No      | 0     |        |
| 2762   |       | 2   | No    |        | 2   | No      | 5     | 3      |
| 2763   |       | 2   | No    |        | 1   | Yes     | 0     |        |
| 2764   |       | 1   | Yes   | 16     | 1   | Yes     | 5     | 2      |
| 2765   |       | 2   | No    |        | 2   | No      | 1     | 1      |
| 2766   |       | 1   | Yes   | 15     | 1   | Yes     | 1     | 0      |
| 2767   |       | 1   | Yes   | 24     | 2   | No      | 0     |        |
| 2769   |       | 2   | No    |        | 1   | Yes     | 1     | 1      |
| 2770   |       | 1   | Yes   | 10     | 1   | Yes     | 4     | 1      |
| 2771   |       | 2   | No    |        | 2   | No      | 1     | 1      |
| 2774   |       | 2   | No    |        | 2   | No      | 1     | 1      |
| 2777   |       | 1   | Yes   | 5      | 1   | Yes     | 2     | 2      |
| 2778   |       | 1   | Yes   | 35     | 2   | No      | 1     | 1      |
| 2781   |       | 1   | Yes   | 20     | 1   | Yes     | 1     | 1      |
| 2782   |       | 2   | No    |        | 2   | No      | 1     | 1      |
| 2784   |       | 2   | No    |        | 2   | No      | 1     | 2      |
| 2785   |       | 2   | No    |        | 2   | No      | 1     | 2      |
| 2786   |       | 2   | No    |        | 2   | No      | 0     |        |
| 2787   |       | 2   | No    |        | 2   | No      | 0     |        |
| 2789   |       | 2   | No    |        | 1   | Yes     | 3     | 2      |
| 2790   |       | 2   | No    |        | 2   | No      | 1     | 2      |
| 2791   |       | 2   | No    |        | 2   | No      | 0     |        |
| 2793   |       | 1   | Yes   | 15     | 1   | Yes     | 4     | 3      |

| respid | Q16_2 | Q17 | Smoke | Q17a_1 | Q18 | Alcohol | Q19_1 | Q19a_1 |
|--------|-------|-----|-------|--------|-----|---------|-------|--------|
| 2797   |       | 1   | Yes   | 15     | 1   | Yes     | 3     | 1      |
| 2798   |       | 1   | Yes   | 15     | 1   | Yes     | 0     |        |
| 2799   |       | 1   | Yes   | 10     | 1   | Yes     | 1     | 1      |
| 2801   |       | 1   | Yes   | 25     | 2   | No      | 1     | 1      |
| 2802   |       | 1   | Yes   | 10     | 2   | No      | 0     |        |
| 2803   |       | 2   | No    |        | 2   | No      | 1     | 1      |
| 2804   |       | 2   | No    |        | 2   | No      | 3     | 2      |
| 2807   |       | 2   | No    |        | 2   | No      | 0     |        |
| 2809   |       | 2   | No    |        | 2   | No      | 0     |        |
| 2810   |       | 2   | No    |        | 2   | No      | 1     | 1      |
| 2812   |       | 1   | Yes   | 3      | 2   | No      | 0     |        |
| 2814   |       | 2   | No    |        | 2   | No      | 1     | 0      |
| 2815   |       | 2   | No    |        | 1   | Yes     | 1     | 0      |
| 2816   |       | 1   | Yes   | 10     | 2   | No      | 3     | 1      |
| 2817   |       | 1   | Yes   | 20     | 1   | Yes     | 0     |        |
| 2819   |       | 1   | Yes   | 10     | 1   | Yes     | 1     | 1      |
| 2820   |       | 2   | No    |        | 2   | No      | 0     |        |
| 2821   |       | 2   | No    |        | 2   | No      | 0     |        |
| 2822   |       | 2   | No    |        | 2   | No      | 3     | 3      |
| 2823   |       | 1   | Yes   | 19     | 1   | Yes     | 5     | 2      |
| 2824   |       | 2   | No    |        | 1   | Yes     | 0     |        |
| 2825   |       | 1   | Yes   | 10     | 1   | Yes     | 1     | 0      |
| 2826   |       | 2   | No    |        | 2   | No      | 1     | 0      |
| 2827   |       | 2   | No    |        | 2   | No      | 0     |        |
| 2828   |       | 2   | No    |        | 2   | No      | 5     | 2      |
| 2829   |       | 1   | Yes   | 10     | 1   | Yes     | 2     | 2      |
| 2830   |       | 1   | Yes   | 10     | 1   | Yes     | 1     | 1      |
| 2831   |       | 2   | No    |        | 1   | Yes     | 0     |        |
| 2832   |       | 1   | Yes   | 10     | 2   | No      | 1     | 2      |
| 2833   |       | 2   | No    |        | 2   | No      | 0     |        |
| 2834   |       | 1   | Yes   | 15     | 1   | Yes     | 1     | 1      |
| 2835   |       | 1   | Yes   | 3      | 1   | Yes     | 4     | 2      |

| respid | Q16_2 | Q17 | Smoke | Q17a_1 | Q18 | Alcohol | Q19_1 | Q19a_1 |
|--------|-------|-----|-------|--------|-----|---------|-------|--------|
| 2836   |       | 1   | Yes   | 10     | 2   | No      | 3     | 2      |
| 2837   |       | 1   | Yes   | 20     | 2   | No      | 1     | 1      |
| 2838   |       | 2   | No    |        | 2   | No      | 4     | 1      |
| 2844   |       | 2   | No    |        | 2   | No      | 5     | 3      |
| 2845   |       | 1   | Yes   | 5      | 2   | No      | 0     |        |
| 2847   |       | 2   | No    |        | 2   | No      | 5     | 4      |
| 2848   |       | 1   | Yes   | 5      | 2   | No      | 1     | 0      |
| 2849   |       | 1   | Yes   | 15     | 2   | No      | 2     | 1      |
| 2851   |       | 2   | No    |        | 2   | No      | 0     |        |
| 2852   |       | 2   | No    |        | 2   | No      | 1     | 0      |
| 2853   |       | 2   | No    |        | 2   | No      | 2     | 2      |
| 2854   |       | 1   | Yes   | 14     | 1   | Yes     | 0     |        |
| 2856   |       | 1   | Yes   | 25     | 2   | No      | 1     | 0      |
| 2857   |       | 1   | Yes   | 15     | 1   | Yes     | 1     | 1      |
| 2858   |       | 1   | Yes   | 10     | 2   | No      | 1     | 1      |
| 2859   |       | 1   | Yes   | 18     | 1   | Yes     | 1     | 2      |
| 2860   |       | 2   | No    |        | 2   | No      | 1     | 1      |
| 2861   |       | 1   | Yes   | 18     | 1   | Yes     | 3     | 2      |
| 2863   |       | 1   | Yes   | 8      | 1   | Yes     | 1     | 0      |
| 2864   |       | 2   | No    |        | 2   | No      | 1     | 0      |
| 2866   |       | 2   | No    |        | 2   | No      | 1     | 2      |
| 2872   |       | 1   | Yes   | 10     | 2   | No      | 1     | 1      |
| 2875   |       | 2   | No    |        | 2   | No      | 1     | 1      |
| 2879   |       | 1   | Yes   | 10     | 1   | Yes     | 0     |        |
| 2881   |       | 2   | No    |        | 2   | No      | 1     | 1      |
| 2882   |       | 2   | No    |        | 2   | No      | 0     |        |
| 2883   |       | 2   | No    |        | 2   | No      | 1     | 0      |
| 2884   |       | 2   | No    |        | 2   | No      | 1     | 2      |
| 2885   |       | 2   | No    |        | 2   | No      | 0     |        |
| 2887   |       | 2   | No    |        | 2   | No      | 0     |        |
| 2888   |       | 2   | No    |        | 2   | No      | 0     |        |
| 2890   |       | 2   | No    |        | 1   | Yes     | 1     | 1      |

| respid | Q16_2 | Q17 | Smoke | Q17a_1 | Q18 | Alcohol | Q19_1 | Q19a_1 |
|--------|-------|-----|-------|--------|-----|---------|-------|--------|
| 2891   |       | 2   | No    |        | 2   | No      | 0     |        |
| 2892   |       | 2   | No    |        | 2   | No      | 0     |        |
| 2895   |       | 1   | Yes   | 20     | 1   | Yes     | 3     | 1      |
| 2899   |       | 2   | No    |        | 2   | No      | 1     | 1      |
| 2900   |       | 1   | Yes   | 24     | 2   | No      | 0     |        |
| 2902   |       | 2   | No    |        | 2   | No      | 5     | 3      |
| 2903   |       | 1   | Yes   | 10     | 1   | Yes     | 0     |        |
| 2904   |       | 2   | No    |        | 2   | No      | 0     |        |
| 2906   |       | 2   | No    |        | 2   | No      | 1     | 1      |
| 2908   |       | 2   | No    |        | 1   | Yes     | 0     |        |
| 2910   |       | 2   | No    |        | 2   | No      | 0     |        |
| 2917   |       | 1   | Yes   | 10     | 1   | Yes     | 2     | 2      |
| 2918   |       | 2   | No    |        | 2   | No      | 1     | 1      |
| 2919   |       | 2   | No    |        | 2   | No      | 1     | 3      |
| 2920   |       | 2   | No    |        | 2   | No      | 0     |        |
| 2921   |       | 1   | Yes   | 15     | 2   | No      | 4     | 2      |
| 2922   |       | 2   | No    |        | 1   | Yes     | 0     |        |
| 2923   |       | 1   | Yes   | 15     | 2   | No      | 0     |        |
| 2924   |       | 2   | No    |        | 2   | No      | 2     | 3      |
| 2926   |       | 2   | No    |        | 2   | No      | 2     | 1      |
| 2928   |       | 1   | Yes   | 20     | 2   | No      | 1     | 1      |
| 2930   |       | 2   | No    |        | 2   | No      | 0     |        |
| 2931   |       | 1   | Yes   | 4      | 2   | No      | 5     | 1      |
| 2933   |       | 1   | Yes   | 10     | 2   | No      | 1     | 0      |
| 2935   |       | 2   | No    |        | 1   | Yes     | 1     | 1      |
| 2936   |       | 2   | No    |        | 2   | No      | 0     |        |
| 2937   |       | 1   | Yes   | 20     | 1   | Yes     | 1     | 1      |
| 2938   |       | 2   | No    |        | 1   | Yes     | 1     | 1      |
| 2944   |       | 2   | No    |        | 2   | No      | 1     | 1      |
| 2945   |       | 1   | Yes   | 7      | 2   | No      | 0     |        |
| 2947   |       | 2   | No    |        | 2   | No      | 2     | 0      |
| 2949   |       | 2   | No    |        | 2   | No      | 0     |        |

| respid | Q16_2 | Q17 | Smoke | Q17a_1 | Q18 | Alcohol | Q19_1 | Q19a_1 |
|--------|-------|-----|-------|--------|-----|---------|-------|--------|
| 2951   |       | 2   | No    |        | 1   | Yes     | 3     | 3      |
| 2952   |       | 1   | Yes   | 5      | 1   | Yes     | 3     | 1      |
| 2953   |       | 2   | No    |        | 2   | No      | 0     |        |
| 2955   |       | 1   | Yes   | 10     | 2   | No      | 1     | 0      |
| 2957   |       | 1   | Yes   | 6      | 1   | Yes     | 0     |        |
| 2958   |       | 2   | No    |        | 2   | No      | 0     |        |
| 2960   |       | 2   | No    |        | 2   | No      | 0     |        |
| 2963   |       | 1   | Yes   | 25     | 2   | No      | 0     |        |
| 2964   |       | 2   | No    |        | 2   | No      | 1     | 1      |
| 2967   |       | 2   | No    |        | 2   | No      | 0     |        |
| 2968   |       | 2   | No    |        | 2   | No      | 0     |        |
| 2971   |       | 2   | No    |        | 2   | No      | 4     | 2      |
| 2974   |       | 2   | No    |        | 2   | No      | 0     |        |
| 2975   |       | 2   | No    |        | 2   | No      | 0     |        |
| 2982   |       | 2   | No    |        | 2   | No      | 0     |        |
| 2983   |       | 2   | No    |        | 2   | No      | 0     |        |
| 2985   |       | 2   | No    |        | 2   | No      | 0     |        |
| 2986   |       | 1   | Yes   | 25     | 1   | Yes     | 3     | 3      |
| 2987   |       | 2   | No    |        | 2   | No      | 0     |        |
| 2988   |       | 2   | No    |        | 2   | No      | 3     | 2      |
| 2993   |       | 1   | Yes   | 14     | 1   | Yes     | 1     | 0      |
| 2996   |       | 2   | No    |        | 2   | No      | 0     |        |
| 2997   |       | 2   | No    |        | 2   | No      | 5     | 3      |
| 2998   |       | 2   | No    |        | 2   | No      | 0     |        |
| 3004   |       | 2   | No    |        | 2   | No      | 0     |        |
| 3007   |       | 2   | No    |        | 1   | Yes     | 2     | 2      |
| 3011   |       | 2   | No    |        | 1   | Yes     | 5     | 2      |
| 3012   |       | 2   | No    |        | 2   | No      | 0     |        |
| 3013   |       | 2   | No    |        | 2   | No      | 0     |        |
| 3014   |       | 1   | Yes   | 10     | 2   | No      | 0     |        |
| 3015   |       | 2   | No    |        | 2   | No      | 1     | 1      |
| 3016   |       | 2   | No    |        | 2   | No      | 0     |        |

| respid | Q16_2 | Q17 | Smoke | Q17a_1 | Q18 | Alcohol | Q19_1 | Q19a_1 |
|--------|-------|-----|-------|--------|-----|---------|-------|--------|
| 3017   |       | 2   | No    |        | 2   | No      | 0     |        |
| 3020   |       | 2   | No    |        | 1   | Yes     | 3     | 2      |
| 3022   |       | 2   | No    |        | 2   | No      | 0     |        |
| 3023   |       | 2   | No    |        | 2   | No      | 0     |        |
| 3026   |       | 2   | No    |        | 2   | No      | 1     | 1      |
| 3038   |       | 1   | Yes   | 25     | 1   | Yes     | 1     | 0      |
| 3039   |       | 2   | No    |        | 2   | No      | 0     |        |
| 3040   |       | 1   | Yes   | 6      | 1   | Yes     | 1     | 2      |
| 3041   |       | 2   | No    |        | 2   | No      | 0     |        |
| 3042   |       | 2   | No    |        | 2   | No      | 0     |        |
| 3044   |       | 2   | No    |        | 2   | No      | 0     |        |
| 3050   |       | 1   | Yes   | 10     | 2   | No      | 0     |        |
| 3052   |       | 2   | No    |        | 2   | No      | 1     | 0      |
| 3056   |       | 2   | No    |        | 1   | Yes     | 2     | 2      |
| 3059   |       | 2   | No    |        | 2   | No      | 0     |        |
| 3060   |       | 2   | No    |        | 2   | No      | 2     | 1      |
| 3063   |       | 2   | No    |        | 2   | No      | 1     | 2      |
| 3065   |       | 1   | Yes   | 20     | 2   | No      | 1     | 0      |
| 3067   |       | 2   | No    |        | 1   | Yes     | 3     | 2      |
| 3068   |       | 2   | No    |        | 2   | No      | 0     |        |
| 3072   |       | 2   | No    |        | 2   | No      | 1     | 2      |
| 3074   |       | 1   | Yes   | 20     | 2   | No      | 2     | 2      |
| 3075   |       | 1   | Yes   | 14     | 1   | Yes     | 1     | 0      |
| 3076   |       | 1   | Yes   | 8      | 1   | Yes     | 0     |        |
| 3079   |       | 2   | No    |        | 2   | No      | 0     |        |
| 3082   |       | 1   | Yes   | 4      | 1   | Yes     | 2     | 2      |
| 3083   |       | 2   | No    |        | 1   | Yes     | 0     |        |
| 3084   |       | 2   | No    |        | 2   | No      | 0     |        |
| 3085   |       | 2   | No    |        | 2   | No      | 0     |        |
| 3090   |       | 2   | No    |        | 2   | No      | 0     |        |
| 3091   |       | 2   | No    |        | 2   | No      | 3     | 2      |
| 3092   |       | 2   | No    |        | 2   | No      | 1     | 1      |

| respid | Q16_2 | Q17 | Smoke | Q17a_1 | Q18 | Alcohol | Q19_1 | Q19a_1 |
|--------|-------|-----|-------|--------|-----|---------|-------|--------|
| 3095   |       | 1   | Yes   | 10     | 1   | Yes     | 1     | 1      |
| 3096   |       | 1   | Yes   | 20     | 1   | Yes     | 4     | 4      |
| 3097   |       | 2   | No    |        | 1   | Yes     | 0     |        |
| 3099   |       | 1   | Yes   | 12     | 1   | Yes     | 5     | 3      |
| 3101   |       | 2   | No    |        | 2   | No      | 0     |        |
| 3103   |       | 1   | Yes   | 8      | 2   | No      | 0     |        |
| 3104   |       | 2   | No    |        | 2   | No      | 0     |        |
| 3105   |       | 2   | No    |        | 2   | No      | 0     |        |
| 3107   |       | 1   | Yes   | 5      | 2   | No      | 0     |        |
| 3108   |       | 2   | No    |        | 2   | No      | 4     | 3      |
| 3109   |       | 2   | No    |        | 2   | No      | 0     |        |
| 3116   |       | 2   | No    |        | 2   | No      | 0     |        |
| 3117   |       | 2   | No    |        | 1   | Yes     | 1     | 1      |
| 3119   |       | 2   | No    |        | 2   | No      | 0     |        |
| 3120   |       | 1   | Yes   | 10     | 1   | Yes     | 1     | 0      |
| 3130   |       | 2   | No    |        | 2   | No      | 5     | 3      |
| 3131   |       | 2   | No    |        | 2   | No      | 1     | 2      |
| 3133   |       | 2   | No    |        | 2   | No      | 0     |        |
| 3134   |       | 2   | No    |        | 2   | No      | 2     | 1      |
| 3135   |       | 2   | No    |        | 2   | No      | 1     | 1      |
| 3145   |       | 2   | No    |        | 2   | No      | 0     |        |
| 3147   |       | 2   | No    |        | 2   | No      | 0     |        |
| 3152   |       | 2   | No    |        | 1   | Yes     | 1     | 1      |
| 3155   |       | 2   | No    |        | 1   | Yes     | 4     | 3      |
| 3156   |       | 2   | No    |        | 2   | No      | 0     |        |
| 3157   |       | 1   | Yes   | 7      | 1   | Yes     | 1     | 2      |
| 3166   |       | 2   | No    |        | 2   | No      | 1     | 1      |
| 3169   |       | 2   | No    |        | 2   | No      | 1     | 0      |
| 3179   |       | 2   | No    |        | 2   | No      | 0     |        |
| 3181   |       | 2   | No    |        | 2   | No      | 1     | 0      |
| 3185   |       | 2   | No    |        | 2   | No      | 0     |        |
| 3190   |       | 2   | No    |        | 2   | No      | 5     | 2      |

| respid | Q16_2 | Q17 | Smoke | Q17a_1 | Q18 | Alcohol | Q19_1 | Q19a_1 |
|--------|-------|-----|-------|--------|-----|---------|-------|--------|
| 3191   |       | 2   | No    |        | 2   | No      | 0     |        |
| 3192   |       | 2   | No    |        | 2   | No      | 0     |        |
| 3193   |       | 2   | No    |        | 2   | No      | 5     | 0      |
| 3195   |       | 2   | No    |        | 2   | No      | 1     | 0      |
| 3202   |       | 2   | No    |        | 2   | No      | 0     |        |
| 3204   |       | 2   | No    |        | 2   | No      | 0     |        |
| 3208   |       | 1   | Yes   | 5      | 2   | No      | 1     | 0      |
| 3212   |       | 2   | No    |        | 2   | No      | 3     | 2      |
| 3218   |       | 1   | Yes   | 30     | 2   | No      | 0     |        |
| 3219   |       | 2   | No    |        | 2   | No      | 0     |        |
| 3220   |       | 2   | No    |        | 1   | Yes     | 1     | 1      |
| 3221   |       | 2   | No    |        | 2   | No      | 1     | 0      |
| 3223   |       | 2   | No    |        | 2   | No      | 0     |        |
| 3231   |       | 2   | No    |        | 2   | No      | 1     | 1      |
| 3232   |       | 2   | No    |        | 2   | No      | 3     | 2      |
| 3234   |       | 2   | No    |        | 2   | No      | 1     | 1      |
| 3235   |       | 1   | Yes   | 19     | 2   | No      | 0     |        |
| 3237   |       | 2   | No    |        | 2   | No      | 0     |        |
| 3238   |       | 2   | No    |        | 2   | No      | 0     |        |
| 3240   |       | 1   | Yes   | 10     | 1   | Yes     | 0     |        |
| 3241   |       | 2   | No    |        | 2   | No      | 0     |        |
| 3243   |       | 2   | No    |        | 2   | No      | 1     | 1      |
| 3244   |       | 1   | Yes   | 10     | 2   | No      | 1     | 1      |
| 3247   |       | 2   | No    |        | 1   | Yes     | 0     |        |
| 3250   |       | 2   | No    |        | 1   | Yes     | 0     |        |
| 3251   |       | 1   | Yes   | 10     | 2   | No      | 2     | 2      |
| 3255   |       | 2   | No    |        | 2   | No      | 0     |        |
| 3256   |       | 1   | Yes   | 15     | 2   | No      | 1     | 0      |
| 3257   |       | 2   | No    |        | 2   | No      | 0     |        |
| 3258   |       | 2   | No    |        | 1   | Yes     | 0     |        |
| 3259   |       | 2   | No    |        | 1   | Yes     | 1     | 1      |
| 3260   |       | 2   | No    |        | 2   | No      | 0     |        |



| respid | Q16_2 | Q17 | Smoke | Q17a_1 | Q18 | Alcohol | Q19_1 | Q19a_1 |
|--------|-------|-----|-------|--------|-----|---------|-------|--------|
| 3261   |       | 2   | No    |        | 2   | No      | 0     |        |
| 3262   |       | 2   | No    |        | 2   | No      | 5     | 2      |
| 3264   |       | 2   | No    |        | 2   | No      | 3     | 3      |
| 3265   |       | 1   | Yes   | 20     | 1   | Yes     | 1     | 0      |
| 3267   |       | 2   | No    |        | 1   | Yes     | 1     | 0      |
| 3268   |       | 2   | No    |        | 2   | No      | 1     | 0      |
| 3270   |       | 1   | Yes   | 20     | 2   | No      | 0     |        |
| 3271   |       | 1   | Yes   | 20     | 2   | No      | 0     |        |
| 3274   |       | 2   | No    |        | 2   | No      | 0     |        |
| 3276   |       | 2   | No    |        | 2   | No      | 0     |        |
| 3277   |       | 2   | No    |        | 2   | No      | 0     |        |
| 3279   |       | 1   | Yes   | 10     | 2   | No      | 0     |        |
| 3281   |       | 1   | Yes   | 10     | 1   | Yes     | 0     |        |
| 3283   |       | 2   | No    |        | 2   | No      | 2     | 2      |
| 3285   |       | 1   | Yes   | 5      | 1   | Yes     | 3     | 3      |
| 3286   |       | 2   | No    |        | 1   | Yes     | 1     | 1      |
| 3287   |       | 1   | Yes   | 7      | 1   | Yes     | 1     | 0      |
| 3289   |       | 2   | No    |        | 2   | No      | 1     | 0      |
| 3290   |       | 2   | No    |        | 2   | No      | 0     |        |
| 3291   |       | 1   | Yes   | 20     | 1   | Yes     | 1     | 1      |
| 3292   |       | 2   | No    |        | 2   | No      | 3     | 3      |
| 3293   |       | 1   | Yes   | 11     | 1   | Yes     | 2     | 2      |
| 3294   |       | 2   | No    |        | 2   | No      | 1     | 1      |
| 3296   |       | 2   | No    |        | 2   | No      | 0     |        |
| 3306   |       | 2   | No    |        | 2   | No      | 0     |        |
| 3307   |       | 2   | No    |        | 2   | No      | 2     | 3      |
| 3308   |       | 1   | Yes   | 5      | 1   | Yes     | 0     |        |
| 3312   |       | 1   | Yes   | 1      | 2   | No      | 0     |        |
| 3313   |       | 2   | No    |        | 2   | No      | 1     | 1      |
| 3316   |       | 2   | No    |        | 2   | No      | 0     |        |
| 3317   |       | 2   | No    |        | 2   | No      | 4     | 3      |
| 3320   |       | 2   | No    |        | 2   | No      | 1     | 1      |

| respid | Q16_2 | Q17 | Smoke | Q17a_1 | Q18 | Alcohol | Q19_1 | Q19a_1 |
|--------|-------|-----|-------|--------|-----|---------|-------|--------|
| 3321   |       | 2   | No    |        | 1   | Yes     | 1     | 1      |
| 3322   |       | 1   | Yes   | 18     | 2   | No      | 0     |        |
| 3323   |       | 2   | No    |        | 2   | No      | 0     |        |
| 3325   |       | 2   | No    |        | 2   | No      | 0     |        |
| 3332   |       | 2   | No    |        | 2   | No      | 0     |        |
| 3334   |       | 1   | Yes   | 1      | 2   | No      | 0     |        |
| 3335   |       | 1   | Yes   | 10     | 2   | No      | 0     |        |
| 3341   |       | 2   | No    |        | 2   | No      | 0     |        |
| 3345   |       | 1   | Yes   | 20     | 2   | No      | 0     |        |
| 3346   |       | 1   | Yes   | 2      | 2   | No      | 1     | 1      |
| 3349   |       | 1   | Yes   | 10     | 1   | Yes     | 0     |        |
| 3351   |       | 2   | No    |        | 2   | No      | 0     |        |
| 3353   |       | 1   | Yes   | 7      | 2   | No      | 1     | 1      |
| 3354   |       | 2   | No    |        | 2   | No      | 1     | 1      |
| 3356   |       | 2   | No    |        | 2   | No      | 0     |        |
| 3357   |       | 2   | No    |        | 2   | No      | 3     | 2      |
| 3360   |       | 1   | Yes   | 20     | 2   | No      | 0     |        |
| 3361   |       | 2   | No    |        | 2   | No      | 1     | 1      |
| 3362   |       | 1   | Yes   | 10     | 2   | No      | 1     | 0      |
| 3363   |       | 1   | Yes   | 30     | 2   | No      | 0     |        |
| 3364   |       | 2   | No    |        | 1   | Yes     | 3     | 3      |
| 3368   |       | 1   | Yes   | 10     | 2   | No      | 1     | 0      |
| 3370   |       | 2   | No    |        | 1   | Yes     | 0     |        |
| 3371   |       | 2   | No    |        | 2   | No      | 0     |        |
| 3379   |       | 2   | No    |        | 2   | No      | 1     | 0      |
| 3380   |       | 2   | No    |        | 2   | No      | 1     | 1      |
| 3382   |       | 1   | Yes   | 12     | 1   | Yes     | 0     |        |
| 3384   |       | 2   | No    |        | 2   | No      | 0     |        |
| 3385   |       | 2   | No    |        | 2   | No      | 0     |        |
| 3388   |       | 2   | No    |        | 2   | No      | 0     |        |
| 3392   |       | 2   | No    |        | 2   | No      | 1     | 1      |
| 3393   |       | 2   | No    |        | 2   | No      | 0     |        |

| respid | Q16_2 | Q17 | Smoke | Q17a_1 | Q18 | Alcohol | Q19_1 | Q19a_1 |
|--------|-------|-----|-------|--------|-----|---------|-------|--------|
| 3394   |       | 2   | No    |        | 1   | Yes     | 4     | 2      |
| 3395   |       | 2   | No    |        | 1   | Yes     | 0     |        |
| 3396   |       | 2   | No    |        | 2   | No      | 3     | 1      |
| 3397   |       | 1   | Yes   | 25     | 1   | Yes     | 1     | 1      |
| 3398   |       | 2   | No    |        | 2   | No      | 1     | 1      |
| 3399   |       | 2   | No    |        | 2   | No      | 0     |        |
| 3400   |       | 2   | No    |        | 2   | No      | 5     | 1      |
| 3401   |       | 2   | No    |        | 1   | Yes     | 4     | 3      |
| 3402   |       | 1   | Yes   | 3      | 2   | No      | 3     | 3      |
| 3403   |       | 2   | No    |        | 2   | No      | 1     | 0      |
| 3405   |       | 2   | No    |        | 2   | No      | 0     |        |
| 3407   |       | 1   | Yes   | 15     | 1   | Yes     | 1     | 1      |
| 3410   |       | 2   | No    |        | 2   | No      | 0     |        |
| 3411   |       | 2   | No    |        | 2   | No      | 0     |        |
| 3413   |       | 1   | Yes   | 1      | 2   | No      | 0     |        |
| 3414   |       | 2   | No    |        | 2   | No      | 1     | 1      |
| 3420   |       | 2   | No    |        | 2   | No      | 0     |        |
| 3421   |       | 1   | Yes   | 15     | 1   | Yes     | 4     | 3      |
| 3425   |       | 1   | Yes   | 3      | 2   | No      | 1     | 1      |
| 3426   |       | 1   | Yes   | 12     | 1   | Yes     | 1     | 0      |
| 3429   |       | 2   | No    |        | 2   | No      | 0     |        |
| 3430   |       | 1   | Yes   | 20     | 2   | No      | 3     | 3      |
| 3433   |       | 2   | No    |        | 2   | No      | 4     | 1      |
| 3434   |       | 2   | No    |        | 2   | No      | 1     | 2      |
| 3437   |       | 2   | No    |        | 2   | No      | 0     |        |
| 3439   |       | 2   | No    |        | 1   | Yes     | 2     | 1      |
| 3441   |       | 1   | Yes   | 20     | 2   | No      | 1     | 1      |
| 3442   |       | 2   | No    |        | 2   | No      | 1     | 1      |
| 3444   |       | 2   | No    |        | 2   | No      | 0     |        |
| 3445   |       | 2   | No    |        | 2   | No      | 0     |        |
| 3450   |       | 1   | Yes   | 20     | 1   | Yes     | 1     | 1      |
| 3452   |       | 1   | Yes   | 7      | 2   | No      | 0     |        |

| respid | Q16_2 | Q17 | Smoke | Q17a_1 | Q18 | Alcohol | Q19_1 | Q19a_1 |
|--------|-------|-----|-------|--------|-----|---------|-------|--------|
| 3456   |       | 2   | No    |        | 2   | No      | 1     | 0      |
| 3459   |       | 1   | Yes   | 25     | 1   | Yes     | 0     |        |
| 3460   |       | 2   | No    |        | 2   | No      | 0     |        |
| 3461   |       | 2   | No    |        | 2   | No      | 0     |        |
| 3466   |       | 1   | Yes   | 5      | 2   | No      | 1     | 1      |
| 3471   |       | 2   | No    |        | 2   | No      | 1     | 2      |
| 3473   |       | 1   | Yes   | 15     | 2   | No      | 0     |        |
| 3475   |       | 2   | No    |        | 1   | Yes     | 2     | 3      |
| 3476   |       | 1   | Yes   | 10     | 1   | Yes     | 1     | 0      |
| 3477   |       | 2   | No    |        | 2   | No      | 0     |        |
| 3478   |       | 2   | No    |        | 2   | No      | 0     |        |
| 3479   |       | 2   | No    |        | 2   | No      | 0     |        |
| 3482   |       | 2   | No    |        | 2   | No      | 2     | 2      |
| 3483   |       | 2   | No    |        | 2   | No      | 0     |        |
| 3485   |       | 2   | No    |        | 2   | No      | 1     | 1      |
| 3489   |       | 1   | Yes   | 25     | 1   | Yes     | 0     |        |
| 3490   |       | 2   | No    |        | 2   | No      | 0     |        |
| 3491   |       | 1   | Yes   | 8      | 1   | Yes     | 0     |        |
| 3494   |       | 2   | No    |        | 2   | No      | 1     | 1      |
| 3495   |       | 1   | Yes   | 10     | 2   | No      | 4     | 2      |
| 3501   |       | 2   | No    |        | 2   | No      | 0     |        |
| 3506   |       | 2   | No    |        | 2   | No      | 1     | 1      |
| 3507   |       | 1   | Yes   | 10     | 2   | No      | 0     |        |
| 3517   |       | 2   | No    |        | 1   | Yes     | 1     | 1      |
| 3520   |       | 2   | No    |        | 2   | No      | 1     | 0      |
| 3521   |       | 2   | No    |        | 2   | No      | 0     |        |
| 3522   |       | 2   | No    |        | 2   | No      | 0     |        |
| 3524   |       | 1   | Yes   | 10     | 2   | No      | 0     |        |
| 3527   |       | 2   | No    |        | 2   | No      | 0     |        |
| 3528   |       | 1   | Yes   | 10     | 2   | No      | 0     |        |
| 3529   |       | 2   | No    |        | 2   | No      | 1     | 1      |
| 3536   |       | 2   | No    |        | 2   | No      | 0     |        |

| respid | Q16_2 | Q17 | Smoke | Q17a_1 | Q18 | Alcohol | Q19_1 | Q19a_1 |
|--------|-------|-----|-------|--------|-----|---------|-------|--------|
| 3537   |       | 2   | No    |        | 2   | No      | 0     |        |
| 3538   |       | 1   | Yes   | 20     | 2   | No      | 2     | 2      |
| 3540   |       | 2   | No    |        | 2   | No      | 3     | 2      |
| 3545   |       | 1   | Yes   | 20     | 2   | No      | 0     |        |
| 3547   |       | 1   | Yes   | 25     | 1   | Yes     | 3     | 2      |
| 3554   |       | 2   | No    |        | 2   | No      | 0     |        |
| 3556   |       | 2   | No    |        | 1   | Yes     | 1     | 1      |
| 3557   |       | 2   | No    |        | 1   | Yes     | 0     |        |
| 3559   |       | 2   | No    |        | 2   | No      | 0     |        |
| 3560   |       | 2   | No    |        | 2   | No      | 3     | 2      |
| 3562   |       | 2   | No    |        | 1   | Yes     | 0     |        |
| 3564   |       | 2   | No    |        | 2   | No      | 3     | 2      |
| 3565   |       | 2   | No    |        | 1   | Yes     | 1     | 3      |
| 3568   |       | 1   | Yes   | 6      | 1   | Yes     | 2     | 2      |
| 3572   |       | 1   | Yes   | 10     | 1   | Yes     | 0     |        |
| 3578   |       | 2   | No    |        | 2   | No      | 0     |        |
| 3581   |       | 2   | No    |        | 2   | No      | 0     |        |
| 3583   |       | 2   | No    |        | 2   | No      | 1     | 1      |
| 3588   |       | 2   | No    |        | 1   | Yes     | 1     | 0      |
| 3591   |       | 1   | Yes   | 1      | 1   | Yes     | 0     |        |
| 3594   |       | 2   | No    |        | 2   | No      | 0     |        |
| 3595   |       | 1   | Yes   | 15     | 1   | Yes     | 1     | 1      |
| 3596   |       | 2   | No    |        | 2   | No      | 0     |        |
| 3597   |       | 1   | Yes   | 19     | 1   | Yes     | 2     | 1      |
| 3598   |       | 2   | No    |        | 2   | No      | 0     |        |
| 3600   |       | 2   | No    |        | 2   | No      | 0     |        |
| 3602   |       | 2   | No    |        | 2   | No      | 0     |        |
| 3604   |       | 2   | No    |        | 2   | No      | 1     | 0      |
| 3605   |       | 2   | No    |        | 2   | No      | 1     | 1      |
| 3606   |       | 2   | No    |        | 2   | No      | 0     |        |
| 3607   |       | 2   | No    |        | 2   | No      | 0     |        |
| 3610   |       | 2   | No    |        | 2   | No      | 0     |        |

| respid | Q16_2 | Q17 | Smoke | Q17a_1 | Q18 | Alcohol | Q19_1 | Q19a_1 |
|--------|-------|-----|-------|--------|-----|---------|-------|--------|
| 3611   |       | 2   | No    |        | 2   | No      | 0     |        |
| 3612   |       | 1   | Yes   | 30     | 2   | No      | 0     |        |
| 3614   |       | 2   | No    |        | 2   | No      | 0     |        |
| 3616   |       | 1   | Yes   | 10     | 2   | No      | 0     |        |
| 3617   |       | 2   | No    |        | 2   | No      | 1     | 2      |
| 3618   |       | 2   | No    |        | 2   | No      | 0     |        |
| 3619   |       | 2   | No    |        | 2   | No      | 3     | 2      |
| 3621   |       | 2   | No    |        | 2   | No      | 5     | 2      |
| 3622   |       | 2   | No    |        | 2   | No      | 1     | 2      |
| 3624   |       | 2   | No    |        | 2   | No      | 1     | 1      |
| 3626   |       | 2   | No    |        | 2   | No      | 0     |        |
| 3629   |       | 2   | No    |        | 2   | No      | 0     |        |
| 3631   |       | 1   | Yes   | 10     | 2   | No      | 2     | 0      |
| 3632   |       | 2   | No    |        | 2   | No      | 0     |        |
| 3638   |       | 2   | No    |        | 2   | No      | 1     | 0      |
| 3640   |       | 2   | No    |        | 2   | No      | 0     |        |
| 3641   |       | 2   | No    |        | 2   | No      | 1     | 1      |
| 3645   |       | 2   | No    |        | 2   | No      | 2     | 2      |
| 3650   |       | 1   | Yes   | 10     | 1   | Yes     | 0     |        |
| 3653   |       | 2   | No    |        | 1   | Yes     | 3     | 2      |
| 3655   |       | 1   | Yes   | 20     | 2   | No      | 1     | 2      |
| 3657   |       | 2   | No    |        | 2   | No      | 1     | 1      |
| 3658   |       | 2   | No    |        | 2   | No      | 0     |        |
| 3659   |       | 2   | No    |        | 2   | No      | 0     |        |
| 3664   |       | 1   | Yes   | 10     | 1   | Yes     | 3     | 3      |
| 3665   |       | 2   | No    |        | 2   | No      | 0     |        |
| 3667   |       | 2   | No    |        | 2   | No      | 0     |        |
| 3668   |       | 2   | No    |        | 2   | No      | 4     | 3      |
| 3675   |       | 2   | No    |        | 2   | No      | 0     |        |
| 3678   |       | 2   | No    |        | 2   | No      | 0     |        |
| 3680   |       | 2   | No    |        | 2   | No      | 0     |        |
| 3684   |       | 1   | Yes   | 20     | 1   | Yes     | 1     | 2      |

| respid | Q16_2 | Q17 | Smoke | Q17a_1 | Q18 | Alcohol | Q19_1 | Q19a_1 |
|--------|-------|-----|-------|--------|-----|---------|-------|--------|
| 3685   |       | 1   | Yes   | 15     | 2   | No      | 4     | 2      |
| 3687   |       | 2   | No    |        | 2   | No      | 2     | 1      |
| 3689   |       | 1   | Yes   | 10     | 2   | No      | 3     | 3      |
| 3690   |       | 1   | Yes   | 1      | 1   | Yes     | 5     | 1      |
| 3693   |       | 2   | No    |        | 2   | No      | 0     |        |
| 3694   |       | 2   | No    |        | 2   | No      | 0     |        |
| 3695   |       | 2   | No    |        | 2   | No      | 0     |        |
| 3700   |       | 2   | No    |        | 2   | No      | 0     |        |
| 3701   |       | 2   | No    |        | 1   | Yes     | 1     | 1      |
| 3703   |       | 2   | No    |        | 2   | No      | 0     |        |
| 3704   |       | 1   | Yes   | 15     | 1   | Yes     | 2     | 2      |
| 3705   |       | 1   | Yes   | 7      | 2   | No      | 0     |        |
| 3709   |       | 1   | Yes   | 12     | 1   | Yes     | 0     |        |
| 3710   |       | 1   | Yes   | 10     | 2   | No      | 2     | 3      |
| 3722   |       | 2   | No    |        | 2   | No      | 0     |        |
| 3725   |       | 2   | No    |        | 2   | No      | 2     | 0      |
| 3726   |       | 2   | No    |        | 2   | No      | 0     |        |
| 3727   |       | 2   | No    |        | 2   | No      | 0     |        |
| 3728   |       | 1   | Yes   | 12     | 1   | Yes     | 1     | 1      |
| 3729   |       | 2   | No    |        | 2   | No      | 0     |        |
| 3731   |       | 1   | Yes   | 25     | 1   | Yes     | 0     |        |
| 3738   |       | 2   | No    |        | 2   | No      | 0     |        |
| 3739   |       | 2   | No    |        | 2   | No      | 0     |        |
| 3740   |       | 2   | No    |        | 1   | Yes     | 0     |        |
| 3749   |       | 2   | No    |        | 2   | No      | 1     | 2      |
| 3758   |       | 1   | Yes   | 20     | 2   | No      | 4     | 3      |
| 3762   |       | 2   | No    |        | 2   | No      | 0     |        |
| 3765   |       | 2   | No    |        | 2   | No      | 0     |        |
| 3770   |       | 2   | No    |        | 2   | No      | 0     |        |
| 3771   |       | 2   | No    |        | 2   | No      | 0     |        |
| 3778   |       | 2   | No    |        | 2   | No      | 1     | 1      |
| 3779   |       | 1   | Yes   | 8      | 1   | Yes     | 1     | 1      |

| respid | Q16_2 | Q17 | Smoke | Q17a_1 | Q18 | Alcohol | Q19_1 | Q19a_1 |
|--------|-------|-----|-------|--------|-----|---------|-------|--------|
| 3780   |       | 2   | No    |        | 1   | Yes     | 1     | 1      |
| 3782   |       | 2   | No    |        | 2   | No      | 2     | 1      |
| 3784   |       | 1   | Yes   | 10     | 1   | Yes     | 0     |        |
| 3787   |       | 2   | No    |        | 2   | No      | 0     |        |
| 3790   |       | 2   | No    |        | 2   | No      | 3     | 2      |
| 3791   |       | 2   | No    |        | 2   | No      | 1     | 1      |
| 3793   |       | 1   | Yes   | 3      | 1   | Yes     | 4     | 3      |
| 3795   |       | 2   | No    |        | 2   | No      | 0     |        |
| 3799   |       | 2   | No    |        | 1   | Yes     | 0     |        |
| 3801   |       | 1   | Yes   | 15     | 2   | No      | 1     | 2      |
| 3804   |       | 1   | Yes   | 15     | 1   | Yes     | 3     | 2      |
| 3809   |       | 2   | No    |        | 2   | No      | 0     |        |
| 3810   |       | 2   | No    |        | 2   | No      | 0     |        |
| 3813   |       | 1   | Yes   | 10     | 1   | Yes     | 0     |        |
| 3816   |       | 2   | No    |        | 2   | No      | 1     | 1      |
| 3820   |       | 2   | No    |        | 2   | No      | 0     |        |
| 3821   |       | 2   | No    |        | 2   | No      | 0     |        |
| 3823   |       | 2   | No    |        | 2   | No      | 3     | 2      |
| 3828   |       | 2   | No    |        | 2   | No      | 0     |        |
| 3829   |       | 1   | Yes   | 5      | 1   | Yes     | 1     | 1      |
| 3832   |       | 2   | No    |        | 2   | No      | 0     |        |
| 3835   |       | 1   | Yes   | 10     | 2   | No      | 0     |        |
| 3837   |       | 2   | No    |        | 2   | No      | 1     | 1      |
| 3838   |       | 2   | No    |        | 2   | No      | 1     | 1      |
| 3839   |       | 1   | Yes   | 25     | 1   | Yes     | 3     | 3      |
| 3840   |       | 2   | No    |        | 2   | No      | 0     |        |
| 3842   |       | 2   | No    |        | 1   | Yes     | 0     |        |
| 3843   |       | 2   | No    |        | 2   | No      | 0     |        |
| 3844   |       | 2   | No    |        | 2   | No      | 1     | 1      |
| 3850   |       | 2   | No    |        | 2   | No      | 0     |        |
| 3851   |       | 2   | No    |        | 1   | Yes     | 0     |        |
| 3856   |       | 2   | No    |        | 2   | No      | 4     | 2      |



| respid | Q16_2 | Q17 | Smoke | Q17a_1 | Q18 | Alcohol | Q19_1 | Q19a_1 |
|--------|-------|-----|-------|--------|-----|---------|-------|--------|
| 3859   |       | 1   | Yes   | 20     | 1   | Yes     | 2     | 2      |
| 3860   |       | 2   | No    |        | 2   | No      | 1     | 1      |
| 3863   |       | 2   | No    |        | 2   | No      | 1     | 1      |
| 3866   |       | 1   | Yes   | 20     | 2   | No      | 0     |        |
| 3867   |       | 2   | No    |        | 2   | No      | 0     |        |
| 3870   |       | 2   | No    |        | 2   | No      | 0     |        |
| 3873   |       | 2   | No    |        | 2   | No      | 1     | 2      |
| 3875   |       | 1   | Yes   | 3      | 1   | Yes     | 0     |        |
| 3878   |       | 2   | No    |        | 2   | No      | 2     | 2      |
| 3881   |       | 2   | No    |        | 2   | No      | 1     | 0      |
| 3883   |       | 1   | Yes   | 20     | 1   | Yes     | 3     | 3      |
| 3884   |       | 2   | No    |        | 1   | Yes     | 0     |        |
| 3885   |       | 1   | Yes   | 10     | 1   | Yes     | 4     | 3      |
| 3886   |       | 1   | Yes   | 15     | 2   | No      | 1     | 1      |
| 3887   |       | 1   | Yes   | 15     | 2   | No      | 0     |        |
| 3888   |       | 2   | No    |        | 2   | No      | 0     |        |
| 3889   |       | 2   | No    |        | 2   | No      | 2     | 2      |
| 3890   |       | 2   | No    |        | 2   | No      | 0     |        |
| 3896   |       | 2   | No    |        | 2   | No      | 1     | 2      |
| 3902   |       | 1   | Yes   | 15     | 1   | Yes     | 4     | 3      |
| 3909   |       | 2   | No    |        | 2   | No      | 0     |        |
| 3912   |       | 1   | Yes   | 20     | 1   | Yes     | 4     | 3      |
| 3922   |       | 1   | Yes   | 15     | 1   | Yes     | 0     |        |
| 3928   |       | 2   | No    |        | 2   | No      | 1     | 0      |
| 3930   |       | 2   | No    |        | 2   | No      | 0     |        |
| 3931   |       | 2   | No    |        | 2   | No      | 0     |        |
| 3933   |       | 1   | Yes   | 15     | 1   | Yes     | 1     | 1      |
| 3935   |       | 2   | No    |        | 2   | No      | 1     | 1      |
| 3937   |       | 2   | No    |        | 2   | No      | 5     | 0      |
| 3939   |       | 1   | Yes   | 8      | 2   | No      | 2     | 2      |
| 3942   |       | 1   | Yes   | 15     | 1   | Yes     | 1     | 0      |
| 3943   |       | 2   | No    |        | 2   | No      | 1     | 1      |

| respid | Q16_2 | Q17 | Smoke | Q17a_1 | Q18 | Alcohol | Q19_1 | Q19a_1 |
|--------|-------|-----|-------|--------|-----|---------|-------|--------|
| 3944   |       | 2   | No    |        | 2   | No      | 0     |        |
| 3945   |       | 1   | Yes   | 20     | 1   | Yes     | 0     |        |
| 3947   |       | 1   | Yes   | 16     | 2   | No      | 1     | 1      |
| 3948   |       | 2   | No    |        | 2   | No      | 2     | 1      |
| 3951   |       | 2   | No    |        | 2   | No      | 1     | 1      |
| 3959   |       | 1   | Yes   | 10     | 2   | No      | 1     | 0      |
| 3969   |       | 2   | No    |        | 1   | Yes     | 5     | 4      |
| 3973   |       | 2   | No    |        | 2   | No      | 2     | 2      |
| 3975   |       | 2   | No    |        | 2   | No      | 1     | 1      |
| 3976   |       | 2   | No    |        | 2   | No      | 0     |        |
| 3977   |       | 2   | No    |        | 2   | No      | 3     | 2      |
| 3978   |       | 2   | No    |        | 2   | No      | 0     |        |
| 3994   |       | 2   | No    |        | 2   | No      | 2     | 2      |
| 3995   |       | 2   | No    |        | 2   | No      | 5     | 3      |
| 3997   |       | 1   | Yes   | 30     | 1   | Yes     | 1     | 0      |
| 3998   |       | 2   | No    |        | 2   | No      | 1     | 0      |
| 3999   |       | 2   | No    |        | 2   | No      | 1     | 1      |
| 4002   |       | 1   | Yes   | 5      | 2   | No      | 1     | 2      |
| 4004   |       | 1   | Yes   | 5      | 2   | No      | 2     | 2      |
| 4005   |       | 2   | No    |        | 2   | No      | 0     |        |
| 4006   |       | 1   | Yes   | 20     | 1   | Yes     | 3     | 2      |
| 4008   |       | 1   | Yes   | 8      | 1   | Yes     | 0     |        |
| 4010   |       | 1   | Yes   | 18     | 2   | No      | 1     | 1      |
| 4011   |       | 1   | Yes   | 15     | 1   | Yes     | 5     | 3      |
| 4013   |       | 2   | No    |        | 2   | No      | 2     | 1      |
| 4014   |       | 2   | No    |        | 2   | No      | 1     | 1      |
| 4016   |       | 1   | Yes   | 18     | 2   | No      | 1     | 1      |
| 4017   |       | 2   | No    |        | 2   | No      | 0     |        |
| 4019   |       | 2   | No    |        | 2   | No      | 0     |        |
| 4021   |       | 2   | No    |        | 2   | No      | 0     |        |
| 4023   |       | 2   | No    |        | 2   | No      | 1     | 1      |
| 4024   |       | 2   | No    |        | 2   | No      | 0     |        |

| respid | Q16_2 | Q17 | Smoke | Q17a_1 | Q18 | Alcohol | Q19_1 | Q19a_1 |
|--------|-------|-----|-------|--------|-----|---------|-------|--------|
| 4025   |       | 2   | No    |        | 2   | No      | 1     | 1      |
| 4027   |       | 2   | No    |        | 1   | Yes     | 0     |        |
| 4032   |       | 2   | No    |        | 2   | No      | 0     |        |
| 4034   |       | 1   | Yes   | 20     | 1   | Yes     | 0     |        |
| 4035   |       | 1   | Yes   | 20     | 1   | Yes     | 3     | 2      |
| 4037   |       | 1   | Yes   | 5      | 1   | Yes     | 2     | 1      |
| 4040   |       | 2   | No    |        | 2   | No      | 1     | 1      |
| 4041   |       | 2   | No    |        | 2   | No      | 1     | 1      |
| 4042   |       | 1   | Yes   | 6      | 2   | No      | 0     |        |
| 4043   |       | 2   | No    |        | 2   | No      | 0     |        |
| 4045   |       | 2   | No    |        | 2   | No      | 1     | 1      |
| 4046   |       | 1   | Yes   | 10     | 2   | No      | 3     | 2      |
| 4048   |       | 2   | No    |        | 2   | No      | 0     |        |
| 4049   |       | 1   | Yes   | 8      | 1   | Yes     | 1     | 1      |
| 4050   |       | 2   | No    |        | 2   | No      | 0     |        |
| 4052   |       | 2   | No    |        | 1   | Yes     | 0     |        |
| 4053   |       | 2   | No    |        | 2   | No      | 0     |        |
| 4060   |       | 2   | No    |        | 2   | No      | 0     |        |
| 4065   |       | 1   | Yes   | 30     | 2   | No      | 2     | 2      |
| 4066   |       | 2   | No    |        | 2   | No      | 4     | 2      |
| 4067   |       | 2   | No    |        | 2   | No      | 1     | 1      |
| 4068   |       | 1   | Yes   | 3      | 1   | Yes     | 3     | 2      |
| 4069   |       | 2   | No    |        | 2   | No      | 0     |        |
| 4070   |       | 2   | No    |        | 1   | Yes     | 0     |        |
| 4071   |       | 2   | No    |        | 2   | No      | 3     | 2      |
| 4072   |       | 2   | No    |        | 2   | No      | 0     |        |
| 4073   |       | 2   | No    |        | 2   | No      | 1     | 0      |
| 4074   |       | 1   | Yes   | 12     | 1   | Yes     | 0     |        |
| 4075   |       | 2   | No    |        | 2   | No      | 0     |        |
| 4078   |       | 1   | Yes   | 15     | 2   | No      | 0     |        |
| 4080   |       | 1   | Yes   | 8      | 2   | No      | 1     | 1      |
| 4081   |       | 2   | No    |        | 2   | No      | 0     |        |

| respid | Q16_2 | Q17 | Smoke | Q17a_1 | Q18 | Alcohol | Q19_1 | Q19a_1 |
|--------|-------|-----|-------|--------|-----|---------|-------|--------|
| 4082   |       | 2   | No    |        | 2   | No      | 0     |        |
| 4083   |       | 2   | No    |        | 2   | No      | 1     | 2      |
| 4084   |       | 2   | No    |        | 2   | No      | 0     |        |
| 4086   |       | 2   | No    |        | 2   | No      | 0     |        |
| 4087   |       | 1   | Yes   | 13     | 1   | Yes     | 1     | 2      |
| 4088   |       | 1   | Yes   | 30     | 1   | Yes     | 1     | 0      |
| 4089   |       | 2   | No    |        | 2   | No      | 0     |        |
| 4090   |       | 2   | No    |        | 2   | No      | 0     |        |
| 4093   |       | 1   | Yes   | 30     | 2   | No      | 3     | 1      |
| 4094   |       | 2   | No    |        | 2   | No      | 0     |        |
| 4095   |       | 2   | No    |        | 2   | No      | 1     | 0      |
| 4096   |       | 2   | No    |        | 1   | Yes     | 0     |        |
| 4098   |       | 1   | Yes   | 10     | 2   | No      | 0     |        |
| 4103   |       | 2   | No    |        | 2   | No      | 2     | 1      |
| 4104   |       | 2   | No    |        | 2   | No      | 1     | 1      |
| 4107   |       | 2   | No    |        | 2   | No      | 0     |        |
| 4109   |       | 2   | No    |        | 2   | No      | 0     |        |
| 4110   |       | 2   | No    |        | 2   | No      | 0     |        |
| 4113   |       | 2   | No    |        | 2   | No      | 0     |        |
| 4114   |       | 1   | Yes   | 20     | 1   | Yes     | 0     |        |
| 4116   |       | 1   | Yes   | 20     | 2   | No      | 1     | 1      |
| 4119   |       | 1   | Yes   | 5      | 2   | No      | 0     |        |
| 4120   |       | 2   | No    |        | 2   | No      | 0     |        |
| 4121   |       | 2   | No    |        | 2   | No      | 0     |        |
| 4122   |       | 2   | No    |        | 1   | Yes     | 4     | 2      |
| 4124   |       | 2   | No    |        | 2   | No      | 0     |        |
| 4126   |       | 2   | No    |        | 2   | No      | 0     |        |
| 4127   |       | 2   | No    |        | 2   | No      | 5     | 3      |
| 4131   |       | 2   | No    |        | 2   | No      | 1     | 0      |
| 4134   |       | 2   | No    |        | 2   | No      | 1     | 1      |
| 4144   |       | 2   | No    |        | 2   | No      | 0     |        |
| 4145   |       | 2   | No    |        | 2   | No      | 1     | 1      |

| respid | Q16_2 | Q17 | Smoke | Q17a_1 | Q18 | Alcohol | Q19_1 | Q19a_1 |
|--------|-------|-----|-------|--------|-----|---------|-------|--------|
| 4146   |       | 1   | Yes   | 15     | 2   | No      | 0     |        |
| 4147   |       | 1   | Yes   | 15     | 2   | No      | 1     | 1      |
| 4149   |       | 2   | No    |        | 2   | No      | 1     | 2      |
| 4150   |       | 2   | No    |        | 2   | No      | 0     |        |
| 4151   |       | 2   | No    |        | 2   | No      | 1     | 1      |
| 4153   |       | 2   | No    |        | 2   | No      | 3     | 1      |
| 4155   |       | 2   | No    |        | 2   | No      | 2     | 3      |
| 4157   |       | 2   | No    |        | 2   | No      | 0     |        |
| 4159   |       | 2   | No    |        | 2   | No      | 1     | 0      |
| 4160   |       | 1   | Yes   | 15     | 1   | Yes     | 1     | 1      |
| 4161   |       | 2   | No    |        | 1   | Yes     | 0     |        |
| 4163   |       | 2   | No    |        | 2   | No      | 0     |        |
| 4164   |       | 1   | Yes   | 10     | 1   | Yes     | 1     | 1      |
| 4165   |       | 1   | Yes   | 5      | 1   | Yes     | 0     |        |
| 4166   |       | 1   | Yes   | 8      | 2   | No      | 1     | 1      |
| 4167   |       | 2   | No    |        | 2   | No      | 0     |        |
| 4170   |       | 2   | No    |        | 2   | No      | 1     | 1      |
| 4172   |       | 1   | Yes   | 7      | 2   | No      | 0     |        |
| 4173   |       | 2   | No    |        | 1   | Yes     | 3     | 1      |
| 4180   |       | 2   | No    |        | 2   | No      | 2     | 1      |
| 4185   |       | 1   | Yes   | 7      | 1   | Yes     | 2     | 2      |
| 4187   |       | 2   | No    |        | 2   | No      | 0     |        |
| 4190   |       | 1   | Yes   | 6      | 2   | No      | 1     | 0      |
| 4191   |       | 1   | Yes   | 7      | 1   | Yes     | 1     | 1      |
| 4193   |       | 2   | No    |        | 2   | No      | 0     |        |
| 4194   |       | 2   | No    |        | 1   | Yes     | 0     |        |
| 4195   |       | 1   | Yes   | 8      | 1   | Yes     | 1     | 0      |
| 4196   |       | 2   | No    |        | 2   | No      | 0     |        |
| 4197   |       | 2   | No    |        | 2   | No      | 0     |        |
| 4198   |       | 2   | No    |        | 2   | No      | 0     |        |
| 4199   |       | 2   | No    |        | 2   | No      | 0     |        |
| 4205   |       | 2   | No    |        | 2   | No      | 0     |        |

| respid | Q16_2 | Q17 | Smoke | Q17a_1 | Q18 | Alcohol | Q19_1 | Q19a_1 |
|--------|-------|-----|-------|--------|-----|---------|-------|--------|
| 4206   |       | 1   | Yes   | 2      | 2   | No      | 0     |        |
| 4207   |       | 2   | No    |        | 1   | Yes     | 5     | 3      |
| 4214   |       | 2   | No    |        | 2   | No      | 0     |        |
| 4215   |       | 2   | No    |        | 2   | No      | 1     | 0      |
| 4217   |       | 1   | Yes   | 10     | 2   | No      | 0     |        |
| 4219   |       | 2   | No    |        | 2   | No      | 1     | 0      |
| 4223   |       | 2   | No    |        | 2   | No      | 1     | 2      |
| 4226   |       | 2   | No    |        | 2   | No      | 1     | 0      |
| 4229   |       | 2   | No    |        | 1   | Yes     | 0     |        |
| 4230   |       | 2   | No    |        | 1   | Yes     | 0     |        |
| 4232   |       | 2   | No    |        | 2   | No      | 0     |        |
| 4233   |       | 1   | Yes   | 10     | 1   | Yes     | 0     |        |
| 4234   |       | 2   | No    |        | 2   | No      | 0     |        |
| 4235   |       | 2   | No    |        | 2   | No      | 1     | 1      |
| 4236   |       | 2   | No    |        | 2   | No      | 0     |        |
| 4237   |       | 2   | No    |        | 2   | No      | 1     | 1      |
| 4238   |       | 1   | Yes   | 16     | 1   | Yes     | 0     |        |
| 4240   |       | 2   | No    |        | 2   | No      | 2     | 1      |
| 4241   |       | 1   | Yes   | 10     | 2   | No      | 0     |        |
| 4247   |       | 2   | No    |        | 2   | No      | 0     |        |
| 4250   |       | 2   | No    |        | 2   | No      | 5     | 0      |
| 4251   |       | 2   | No    |        | 2   | No      | 0     |        |
| 4253   |       | 2   | No    |        | 2   | No      | 3     | 2      |
| 4254   |       | 2   | No    |        | 2   | No      | 0     |        |
| 4258   |       | 2   | No    |        | 1   | Yes     | 1     | 1      |
| 4260   |       | 2   | No    |        | 2   | No      | 0     |        |
| 4263   |       | 2   | No    |        | 2   | No      | 0     |        |
| 4265   |       | 1   | Yes   | 15     | 2   | No      | 0     |        |
| 4266   |       | 2   | No    |        | 1   | Yes     | 5     | 1      |
| 4267   |       | 2   | No    |        | 1   | Yes     | 2     | 2      |
| 4270   |       | 1   | Yes   | 20     | 1   | Yes     | 0     |        |
| 4273   |       | 2   | No    |        | 1   | Yes     | 1     | 2      |

| respid | Q16_2 | Q17 | Smoke | Q17a_1 | Q18 | Alcohol | Q19_1 | Q19a_1 |
|--------|-------|-----|-------|--------|-----|---------|-------|--------|
| 4280   |       | 2   | No    |        | 2   | No      | 1     | 0      |
| 4281   |       | 2   | No    |        | 2   | No      | 0     |        |
| 4282   |       | 2   | No    |        | 2   | No      | 0     |        |
| 4283   |       | 2   | No    |        | 2   | No      | 0     |        |
| 4286   |       | 1   | Yes   | 10     | 2   | No      | 5     | 2      |
| 4287   |       | 2   | No    |        | 2   | No      | 5     | 1      |
| 4289   |       | 2   | No    |        | 2   | No      | 1     | 2      |
| 4290   |       | 2   | No    |        | 2   | No      | 1     | 2      |
| 4291   |       | 2   | No    |        | 2   | No      | 1     | 0      |
| 4292   |       | 2   | No    |        | 2   | No      | 1     | 0      |
| 4293   |       | 2   | No    |        | 2   | No      | 0     |        |
| 4294   |       | 2   | No    |        | 2   | No      | 0     |        |
| 4295   |       | 2   | No    |        | 2   | No      | 0     |        |
| 4296   |       | 2   | No    |        | 2   | No      | 3     | 2      |
| 4297   |       | 2   | No    |        | 1   | Yes     | 1     | 2      |
| 4298   |       | 1   | Yes   | 12     | 2   | No      | 0     |        |
| 4299   |       | 2   | No    |        | 2   | No      | 1     | 1      |
| 4300   |       | 2   | No    |        | 2   | No      | 0     |        |
| 4301   |       | 2   | No    |        | 2   | No      | 0     |        |
| 4302   |       | 2   | No    |        | 2   | No      | 0     |        |
| 4304   |       | 2   | No    |        | 2   | No      | 0     |        |
| 4305   |       | 1   | Yes   | 12     | 2   | No      | 1     | 1      |
| 4307   |       | 2   | No    |        | 2   | No      | 1     | 0      |
| 4308   |       | 1   | Yes   | 15     | 2   | No      | 1     | 1      |
| 4312   |       | 2   | No    |        | 2   | No      | 0     |        |
| 4314   |       | 1   | Yes   | 15     | 2   | No      | 1     | 1      |
| 4316   |       | 2   | No    |        | 2   | No      | 0     |        |
| 4317   |       | 1   | Yes   | 5      | 2   | No      | 3     | 3      |
| 4319   |       | 2   | No    |        | 2   | No      | 2     | 3      |
| 4323   |       | 2   | No    |        | 2   | No      | 3     | 1      |
| 4337   |       | 2   | No    |        | 2   | No      | 0     |        |
| 4341   |       | 1   | Yes   | 10     | 2   | No      | 1     | 1      |

| respid | Q16_2 | Q17 | Smoke | Q17a_1 | Q18 | Alcohol | Q19_1 | Q19a_1 |
|--------|-------|-----|-------|--------|-----|---------|-------|--------|
| 4342   |       | 1   | Yes   | 17     | 2   | No      | 0     |        |
| 4344   |       | 2   | No    |        | 2   | No      | 1     | 1      |
| 4345   |       | 2   | No    |        | 2   | No      | 2     | 2      |
| 4346   |       | 2   | No    |        | 2   | No      | 0     |        |
| 4347   |       | 1   | Yes   | 20     | 1   | Yes     | 0     |        |
| 4350   |       | 2   | No    |        | 2   | No      | 0     |        |
| 4352   |       | 1   | Yes   | 2      | 2   | No      | 0     |        |
| 4353   |       | 2   | No    |        | 2   | No      | 0     |        |
| 4355   |       | 1   | Yes   | 5      | 2   | No      | 1     | 0      |
| 4356   |       | 1   | Yes   | 40     | 1   | Yes     | 3     | 2      |
| 4358   |       | 2   | No    |        | 2   | No      | 0     |        |
| 4359   |       | 2   | No    |        | 1   | Yes     | 0     |        |
| 4360   |       | 1   | Yes   | 10     | 2   | No      | 1     | 1      |
| 4361   |       | 1   | Yes   | 60     | 2   | No      | 4     | 3      |
| 4363   |       | 1   | Yes   | 10     | 2   | No      | 0     |        |
| 4364   |       | 1   | Yes   | 10     | 1   | Yes     | 1     | 1      |
| 4365   |       | 2   | No    |        | 2   | No      | 1     | 2      |
| 4367   |       | 2   | No    |        | 2   | No      | 0     |        |
| 4369   |       | 2   | No    |        | 2   | No      | 1     | 1      |
| 4373   |       | 2   | No    |        | 1   | Yes     | 3     | 2      |
| 4374   |       | 2   | No    |        | 2   | No      | 1     | 1      |
| 4375   |       | 2   | No    |        | 2   | No      | 0     |        |
| 4378   |       | 2   | No    |        | 2   | No      | 0     |        |
| 4379   |       | 1   | Yes   | 20     | 1   | Yes     | 1     | 1      |
| 4382   |       | 2   | No    |        | 1   | Yes     | 1     | 1      |
| 4383   |       | 2   | No    |        | 2   | No      | 0     |        |
| 4384   |       | 2   | No    |        | 1   | Yes     | 1     | 1      |
| 4385   |       | 1   | Yes   | 10     | 2   | No      | 1     | 2      |
| 4388   |       | 2   | No    |        | 1   | Yes     | 1     | 1      |
| 4389   |       | 2   | No    |        | 2   | No      | 0     |        |
| 4391   |       | 2   | No    |        | 2   | No      | 0     |        |
| 4392   |       | 1   | Yes   | 15     | 1   | Yes     | 1     | 1      |



| respid | Q16_2 | Q17 | Smoke | Q17a_1 | Q18 | Alcohol | Q19_1 | Q19a_1 |
|--------|-------|-----|-------|--------|-----|---------|-------|--------|
| 4393   |       | 2   | No    |        | 2   | No      | 1     | 0      |
| 4395   |       | 2   | No    |        | 1   | Yes     | 0     |        |
| 4397   |       | 2   | No    |        | 2   | No      | 0     |        |
| 4398   |       | 2   | No    |        | 2   | No      | 0     |        |
| 4399   |       | 1   | Yes   | 20     | 2   | No      | 1     | 0      |
| 4400   |       | 2   | No    |        | 2   | No      | 0     |        |
| 4401   |       | 2   | No    |        | 2   | No      | 0     |        |
| 4402   |       | 2   | No    |        | 2   | No      | 1     | 0      |
| 4404   |       | 2   | No    |        | 2   | No      | 1     | 1      |
| 4405   |       | 2   | No    |        | 2   | No      | 0     |        |
| 4407   |       | 2   | No    |        | 2   | No      | 3     | 2      |
| 4408   |       | 2   | No    |        | 1   | Yes     | 1     | 1      |
| 4411   |       | 1   | Yes   | 20     | 1   | Yes     | 0     |        |
| 4420   |       | 2   | No    |        | 2   | No      | 0     |        |
| 4421   |       | 2   | No    |        | 2   | No      | 0     |        |
| 4424   |       | 1   | Yes   | 25     | 1   | Yes     | 3     | 3      |
| 4425   |       | 2   | No    |        | 2   | No      | 1     | 1      |
| 4427   |       | 2   | No    |        | 2   | No      | 1     | 0      |
| 4430   |       | 2   | No    |        | 2   | No      | 0     |        |
| 4431   |       | 2   | No    |        | 2   | No      | 0     |        |
| 4432   |       | 2   | No    |        | 2   | No      | 0     |        |
| 4436   |       | 2   | No    |        | 2   | No      | 1     | 0      |
| 4439   |       | 2   | No    |        | 2   | No      | 0     |        |
| 4451   |       | 1   | Yes   | 13     | 2   | No      | 1     | 1      |
| 4452   |       | 2   | No    |        | 2   | No      | 2     | 2      |
| 4458   |       | 1   | Yes   | 20     | 1   | Yes     | 0     |        |
| 4464   |       | 2   | No    |        | 2   | No      | 1     | 1      |
| 4465   |       | 2   | No    |        | 1   | Yes     | 1     | 1      |
| 4467   |       | 2   | No    |        | 2   | No      | 0     |        |
| 4470   |       | 1   | Yes   | 10     | 2   | No      | 3     | 2      |
| 4471   |       | 2   | No    |        | 2   | No      | 1     | 0      |
| 4472   |       | 2   | No    |        | 1   | Yes     | 0     |        |

| respid | Q16_2 | Q17 | Smoke | Q17a_1 | Q18 | Alcohol | Q19_1 | Q19a_1 |
|--------|-------|-----|-------|--------|-----|---------|-------|--------|
| 4473   |       | 2   | No    |        | 2   | No      | 0     |        |
| 4475   |       | 2   | No    |        | 2   | No      | 0     |        |
| 4476   |       | 2   | No    |        | 2   | No      | 1     | 1      |
| 4478   |       | 2   | No    |        | 2   | No      | 0     |        |
| 4485   |       | 2   | No    |        | 2   | No      | 0     |        |
| 4486   |       | 2   | No    |        | 2   | No      | 1     | 1      |
| 4490   |       | 2   | No    |        | 2   | No      | 0     |        |
| 4502   |       | 1   | Yes   | 10     | 2   | No      | 0     |        |
| 4503   |       | 2   | No    |        | 2   | No      | 4     | 3      |
| 4504   |       | 2   | No    |        | 2   | No      | 0     |        |
| 4506   |       | 2   | No    |        | 2   | No      | 0     |        |
| 4508   |       | 1   | Yes   | 20     | 2   | No      | 0     |        |
| 4515   |       | 1   | Yes   | 10     | 2   | No      | 0     |        |
| 4516   |       | 2   | No    |        | 2   | No      | 3     | 2      |
| 4519   |       | 1   | Yes   | 5      | 2   | No      | 0     |        |
| 4523   |       | 2   | No    |        | 2   | No      | 0     |        |
| 4525   |       | 2   | No    |        | 1   | Yes     | 1     | 1      |
| 4526   |       | 1   | Yes   | 12     | 2   | No      | 0     |        |
| 4528   |       | 2   | No    |        | 2   | No      | 0     |        |
| 4530   |       | 2   | No    |        | 2   | No      | 0     |        |
| 4531   |       | 2   | No    |        | 1   | Yes     | 1     | 1      |
| 4532   |       | 2   | No    |        | 2   | No      | 1     | 1      |
| 4537   |       | 2   | No    |        | 2   | No      | 1     | 1      |
| 4538   |       | 2   | No    |        | 2   | No      | 0     |        |
| 4539   |       | 2   | No    |        | 2   | No      | 2     | 1      |
| 4541   |       | 1   | Yes   | 5      | 1   | Yes     | 3     | 3      |
| 4543   |       | 2   | No    |        | 2   | No      | 0     |        |
| 4544   |       | 2   | No    |        | 2   | No      | 0     |        |
| 4546   |       | 2   | No    |        | 2   | No      | 0     |        |
| 4547   |       | 2   | No    |        | 2   | No      | 0     |        |
| 4549   |       | 2   | No    |        | 2   | No      | 0     |        |
| 4550   |       | 1   | Yes   | 20     | 1   | Yes     | 0     |        |

| respid | Q16_2 | Q17 | Smoke | Q17a_1 | Q18 | Alcohol | Q19_1 | Q19a_1 |
|--------|-------|-----|-------|--------|-----|---------|-------|--------|
| 4551   |       | 2   | No    |        | 2   | No      | 1     | 1      |
| 4554   |       | 1   | Yes   | 20     | 1   | Yes     | 0     |        |
| 4557   |       | 2   | No    |        | 1   | Yes     | 0     |        |
| 4565   |       | 2   | No    |        | 2   | No      | 0     |        |
| 4568   |       | 2   | No    |        | 2   | No      | 1     | 0      |
| 4569   |       | 2   | No    |        | 2   | No      | 0     |        |
| 4570   |       | 2   | No    |        | 2   | No      | 1     | 1      |
| 4572   |       | 2   | No    |        | 1   | Yes     | 0     |        |
| 4574   |       | 1   | Yes   | 20     | 2   | No      | 2     | 2      |
| 4576   |       | 2   | No    |        | 2   | No      | 1     | 1      |
| 4578   |       | 1   | Yes   | 20     | 2   | No      | 0     |        |
| 4579   |       | 1   | Yes   | 10     | 2   | No      | 0     |        |
| 4580   |       | 2   | No    |        | 2   | No      | 2     | 3      |
| 4581   |       | 2   | No    |        | 2   | No      | 0     |        |
| 4584   |       | 1   | Yes   | 10     | 1   | Yes     | 0     |        |
| 4586   |       | 2   | No    |        | 1   | Yes     | 4     | 3      |
| 4587   |       | 1   | Yes   | 8      | 1   | Yes     | 3     | 2      |
| 4590   |       | 2   | No    |        | 1   | Yes     | 0     |        |
| 4592   |       | 2   | No    |        | 2   | No      | 1     | 0      |
| 4593   |       | 2   | No    |        | 2   | No      | 1     | 0      |
| 4595   |       | 2   | No    |        | 2   | No      | 1     | 1      |
| 4597   |       | 1   | Yes   | 20     | 1   | Yes     | 0     |        |
| 4598   |       | 2   | No    |        | 2   | No      | 1     | 2      |
| 4599   |       | 1   | Yes   | 10     | 2   | No      | 1     | 1      |
| 4600   |       | 2   | No    |        | 2   | No      | 0     |        |
| 4601   |       | 2   | No    |        | 2   | No      | 3     | 1      |
| 4608   |       | 2   | No    |        | 1   | Yes     | 3     | 1      |
| 4609   |       | 2   | No    |        | 2   | No      | 1     | 0      |
| 4611   |       | 2   | No    |        | 2   | No      | 1     | 1      |
| 4612   |       | 1   | Yes   | 20     | 1   | Yes     | 3     | 2      |
| 4613   |       | 2   | No    |        | 2   | No      | 0     |        |
| 4616   |       | 1   | Yes   | 20     | 2   | No      | 1     | 1      |

| respid | Q16_2 | Q17 | Smoke | Q17a_1 | Q18 | Alcohol | Q19_1 | Q19a_1 |
|--------|-------|-----|-------|--------|-----|---------|-------|--------|
| 4617   |       | 2   | No    |        | 2   | No      | 0     |        |
| 4620   |       | 2   | No    |        | 2   | No      | 1     | 1      |
| 4621   |       | 2   | No    |        | 2   | No      | 0     |        |
| 4622   |       | 2   | No    |        | 2   | No      | 1     | 1      |
| 4624   |       | 2   | No    |        | 2   | No      | 1     | 1      |
| 4625   |       | 2   | No    |        | 1   | Yes     | 2     | 2      |
| 4627   |       | 1   | Yes   | 20     | 2   | No      | 5     | 3      |
| 4628   |       | 1   | Yes   | 15     | 1   | Yes     | 1     | 2      |
| 4629   |       | 1   | Yes   | 20     | 1   | Yes     | 0     |        |
| 4630   |       | 2   | No    |        | 2   | No      | 1     | 1      |
| 4632   |       | 1   | Yes   | 20     | 1   | Yes     | 0     |        |
| 4634   |       | 2   | No    |        | 2   | No      | 2     | 1      |
| 4635   |       | 2   | No    |        | 2   | No      | 4     | 4      |
| 4636   |       | 1   | Yes   | 5      | 1   | Yes     | 0     |        |
| 4637   |       | 1   | Yes   | 10     | 2   | No      | 1     | 1      |
| 4638   |       | 2   | No    |        | 2   | No      | 4     | 3      |
| 4639   |       | 2   | No    |        | 2   | No      | 2     | 1      |
| 4641   |       | 2   | No    |        | 2   | No      | 0     |        |
| 4643   |       | 2   | No    |        | 2   | No      | 0     |        |
| 4645   |       | 1   | Yes   | 15     | 2   | No      | 1     | 0      |
| 4646   |       | 2   | No    |        | 2   | No      | 1     | 1      |
| 4647   |       | 2   | No    |        | 2   | No      | 0     |        |
| 4648   |       | 2   | No    |        | 2   | No      | 0     |        |
| 4649   |       | 2   | No    |        | 2   | No      | 3     | 2      |
| 4650   |       | 2   | No    |        | 1   | Yes     | 4     | 3      |
| 4651   |       | 1   | Yes   | 10     | 2   | No      | 3     | 2      |
| 4652   |       | 2   | No    |        | 2   | No      | 1     | 1      |
| 4653   |       | 2   | No    |        | 2   | No      | 0     |        |
| 4657   |       | 1   | Yes   | 5      | 2   | No      | 0     |        |
| 4660   |       | 2   | No    |        | 2   | No      | 4     | 2      |
| 4661   |       | 1   | Yes   | 12     | 2   | No      | 0     |        |
| 4662   |       | 1   | Yes   | 15     | 2   | No      | 0     |        |

| respid | Q16_2 | Q17 | Smoke | Q17a_1 | Q18 | Alcohol | Q19_1 | Q19a_1 |
|--------|-------|-----|-------|--------|-----|---------|-------|--------|
| 4667   |       | 2   | No    |        | 1   | Yes     | 0     |        |
| 4669   |       | 2   | No    |        | 2   | No      | 0     |        |
| 4671   |       | 2   | No    |        | 2   | No      | 0     |        |
| 4672   |       | 1   | Yes   | 10     | 1   | Yes     | 3     | 0      |
| 4673   |       | 2   | No    |        | 2   | No      | 0     |        |
| 4677   |       | 2   | No    |        | 1   | Yes     | 0     |        |
| 4679   |       | 2   | No    |        | 2   | No      | 2     | 1      |
| 4683   |       | 2   | No    |        | 2   | No      | 1     | 1      |
| 4684   |       | 2   | No    |        | 2   | No      | 0     |        |
| 4685   |       | 1   | Yes   | 25     | 1   | Yes     | 1     | 0      |
| 4686   |       | 2   | No    |        | 2   | No      | 2     | 1      |
| 4687   |       | 1   | Yes   | 3      | 1   | Yes     | 0     |        |
| 4688   |       | 2   | No    |        | 2   | No      | 1     | 1      |
| 4691   |       | 2   | No    |        | 2   | No      | 0     |        |
| 4692   |       | 2   | No    |        | 2   | No      | 0     |        |
| 4694   |       | 2   | No    |        | 2   | No      | 1     | 1      |
| 4695   |       | 1   | Yes   | 35     | 1   | Yes     | 1     | 1      |
| 4696   |       | 2   | No    |        | 2   | No      | 2     | 1      |
| 4697   |       | 2   | No    |        | 2   | No      | 0     |        |
| 4698   |       | 2   | No    |        | 1   | Yes     | 2     | 1      |
| 4699   |       | 2   | No    |        | 2   | No      | 0     |        |
| 4701   |       | 2   | No    |        | 2   | No      | 0     |        |
| 4703   |       | 1   | Yes   | 20     | 2   | No      | 5     | 0      |
| 4704   |       | 2   | No    |        | 1   | Yes     | 4     | 3      |
| 4705   |       | 2   | No    |        | 1   | Yes     | 0     |        |
| 4706   |       | 2   | No    |        | 2   | No      | 0     |        |
| 4707   |       | 2   | No    |        | 2   | No      | 0     |        |
| 4708   |       | 1   | Yes   | 7      | 2   | No      | 1     | 1      |
| 4710   |       | 1   | Yes   | 35     | 2   | No      | 1     | 0      |
| 4711   |       | 2   | No    |        | 1   | Yes     | 4     | 2      |
| 4715   |       | 2   | No    |        | 2   | No      | 0     |        |
| 4716   |       | 2   | No    |        | 1   | Yes     | 1     | 2      |

| respid | Q16_2 | Q17 | Smoke | Q17a_1 | Q18 | Alcohol | Q19_1 | Q19a_1 |
|--------|-------|-----|-------|--------|-----|---------|-------|--------|
| 4717   |       | 2   | No    |        | 2   | No      | 0     |        |
| 4718   |       | 1   | Yes   | 20     | 1   | Yes     | 1     | 1      |
| 4722   |       | 2   | No    |        | 2   | No      | 0     |        |
| 4727   |       | 2   | No    |        | 2   | No      | 1     | 2      |
| 4728   |       | 1   | Yes   | 7      | 2   | No      | 2     | 2      |
| 4729   |       | 1   | Yes   | 7      | 2   | No      | 5     | 0      |
| 4732   |       | 1   | Yes   | 20     | 2   | No      | 1     | 1      |
| 4733   |       | 2   | No    |        | 2   | No      | 0     |        |
| 4734   |       | 1   | Yes   | 25     | 2   | No      | 4     | 2      |
| 4735   |       | 1   | Yes   | 10     | 1   | Yes     | 0     |        |
| 4737   |       | 1   | Yes   | 6      | 1   | Yes     | 0     |        |
| 4738   |       | 1   | Yes   | 15     | 2   | No      | 1     | 1      |
| 4740   |       | 2   | No    |        | 2   | No      | 0     |        |
| 4741   |       | 1   | Yes   | 20     | 2   | No      | 1     | 1      |
| 4743   |       | 2   | No    |        | 2   | No      | 0     |        |
| 4746   |       | 1   | Yes   | 15     | 2   | No      | 1     | 1      |
| 4750   |       | 2   | No    |        | 1   | Yes     | 1     | 0      |
| 4752   |       | 2   | No    |        | 1   | Yes     | 1     | 0      |
| 4753   |       | 2   | No    |        | 2   | No      | 1     | 1      |
| 4754   |       | 2   | No    |        | 2   | No      | 3     | 2      |
| 4755   |       | 1   | Yes   | 13     | 1   | Yes     | 2     | 2      |
| 4758   |       | 2   | No    |        | 2   | No      | 1     | 2      |
| 4766   |       | 2   | No    |        | 2   | No      | 0     |        |
| 4767   |       | 2   | No    |        | 2   | No      | 1     | 2      |
| 4768   |       | 2   | No    |        | 2   | No      | 1     | 1      |
| 4769   |       | 2   | No    |        | 1   | Yes     | 3     | 1      |
| 4771   |       | 2   | No    |        | 1   | Yes     | 4     | 3      |
| 4772   |       | 2   | No    |        | 2   | No      | 0     |        |
| 4773   |       | 2   | No    |        | 2   | No      | 0     |        |
| 4774   |       | 2   | No    |        | 1   | Yes     | 1     | 1      |
| 4776   |       | 2   | No    |        | 2   | No      | 1     | 1      |
| 4777   |       | 2   | No    |        | 2   | No      | 2     | 0      |

| respid | Q16_2 | Q17 | Smoke | Q17a_1 | Q18 | Alcohol | Q19_1 | Q19a_1 |
|--------|-------|-----|-------|--------|-----|---------|-------|--------|
| 4779   |       | 2   | No    |        | 2   | No      | 0     |        |
| 4780   |       | 2   | No    |        | 2   | No      | 1     | 0      |
| 4781   |       | 1   | Yes   | 7      | 2   | No      | 4     | 2      |
| 4783   |       | 2   | No    |        | 2   | No      | 2     | 2      |
| 4784   |       | 2   | No    |        | 1   | Yes     | 0     |        |
| 4785   |       | 2   | No    |        | 1   | Yes     | 0     |        |
| 4788   |       | 2   | No    |        | 2   | No      | 0     |        |
| 4789   |       | 1   | Yes   | 20     | 2   | No      | 1     | 1      |
| 4790   |       | 1   | Yes   | 10     | 2   | No      | 1     | 0      |
| 4791   |       | 2   | No    |        | 2   | No      | 0     |        |
| 4794   |       | 1   | Yes   | 20     | 2   | No      | 0     |        |
| 4795   |       | 2   | No    |        | 2   | No      | 0     |        |
| 4797   |       | 1   | Yes   | 20     | 1   | Yes     | 0     |        |
| 4802   |       | 1   | Yes   | 15     | 1   | Yes     | 4     | 2      |
| 4803   |       | 1   | Yes   | 10     | 1   | Yes     | 3     | 2      |
| 4804   |       | 2   | No    |        | 1   | Yes     | 0     |        |
| 4805   |       | 2   | No    |        | 1   | Yes     | 1     | 1      |
| 4807   |       | 2   | No    |        | 2   | No      | 0     |        |
| 4808   |       | 1   | Yes   | 10     | 1   | Yes     | 1     | 1      |
| 4809   |       | 2   | No    |        | 1   | Yes     | 3     | 2      |
| 4811   |       | 2   | No    |        | 2   | No      | 0     |        |
| 4817   |       | 2   | No    |        | 2   | No      | 0     |        |
| 4819   |       | 2   | No    |        | 2   | No      | 0     |        |
| 4820   |       | 2   | No    |        | 2   | No      | 0     |        |
| 4821   |       | 2   | No    |        | 1   | Yes     | 0     |        |
| 4822   |       | 2   | No    |        | 1   | Yes     | 1     | 1      |
| 4823   |       | 2   | No    |        | 2   | No      | 0     |        |
| 4825   |       | 1   | Yes   | 15     | 2   | No      | 4     | 2      |
| 4826   |       | 2   | No    |        | 2   | No      | 0     |        |
| 4830   |       | 1   | Yes   | 5      | 2   | No      | 0     |        |
| 4832   |       | 2   | No    |        | 2   | No      | 0     |        |
| 4838   |       | 2   | No    |        | 2   | No      | 1     | 1      |

| respid | Q16_2 | Q17 | Smoke | Q17a_1 | Q18 | Alcohol | Q19_1 | Q19a_1 |
|--------|-------|-----|-------|--------|-----|---------|-------|--------|
| 4840   |       | 1   | Yes   | 6      | 2   | No      | 0     |        |
| 4841   |       | 2   | No    |        | 1   | Yes     | 0     |        |
| 4843   |       | 2   | No    |        | 1   | Yes     | 0     |        |
| 4845   |       | 1   | Yes   | 10     | 1   | Yes     | 0     |        |
| 4846   |       | 2   | No    |        | 2   | No      | 2     | 1      |
| 4848   |       | 2   | No    |        | 2   | No      | 3     | 2      |
| 4853   |       | 2   | No    |        | 2   | No      | 0     |        |
| 4854   |       | 1   | Yes   | 20     | 2   | No      | 0     |        |
| 4859   |       | 2   | No    |        | 2   | No      | 0     |        |
| 4861   |       | 2   | No    |        | 2   | No      | 0     |        |
| 4864   |       | 1   | Yes   | 30     | 1   | Yes     | 1     | 2      |
| 4867   |       | 2   | No    |        | 1   | Yes     | 0     |        |
| 4870   |       | 2   | No    |        | 2   | No      | 1     | 0      |
| 4872   |       | 1   | Yes   | 10     | 2   | No      | 1     | 1      |
| 4873   |       | 2   | No    |        | 2   | No      | 1     | 3      |
| 4874   |       | 2   | No    |        | 2   | No      | 1     | 1      |
| 4878   |       | 2   | No    |        | 1   | Yes     | 0     |        |
| 4880   |       | 2   | No    |        | 2   | No      | 0     |        |
| 4881   |       | 1   | Yes   | 25     | 1   | Yes     | 1     | 1      |
| 4882   |       | 2   | No    |        | 2   | No      | 1     | 1      |
| 4883   |       | 2   | No    |        | 2   | No      | 0     |        |
| 4885   |       | 2   | No    |        | 2   | No      | 0     |        |
| 4889   |       | 2   | No    |        | 2   | No      | 0     |        |
| 4890   |       | 2   | No    |        | 1   | Yes     | 0     |        |
| 4891   |       | 2   | No    |        | 2   | No      | 0     |        |
| 4894   |       | 2   | No    |        | 2   | No      | 1     | 1      |
| 4895   |       | 1   | Yes   | 40     | 1   | Yes     | 5     | 4      |
| 4896   |       | 2   | No    |        | 1   | Yes     | 0     |        |
| 4897   |       | 2   | No    |        | 2   | No      | 0     |        |
| 4898   |       | 2   | No    |        | 2   | No      | 1     | 1      |
| 4899   |       | 2   | No    |        | 2   | No      | 0     |        |
| 4900   |       | 1   | Yes   | 5      | 2   | No      | 2     | 2      |



| respid | Q16_2 | Q17 | Smoke | Q17a_1 | Q18 | Alcohol | Q19_1 | Q19a_1 |
|--------|-------|-----|-------|--------|-----|---------|-------|--------|
| 4901   |       | 1   | Yes   | 10     | 2   | No      | 1     | 1      |
| 4903   |       | 2   | No    |        | 2   | No      | 0     |        |
| 4904   |       | 1   | Yes   | 20     | 1   | Yes     | 0     |        |
| 4908   |       | 1   | Yes   | 2      | 1   | Yes     | 0     |        |
| 4909   |       | 1   | Yes   | 20     | 2   | No      | 2     | 2      |
| 4913   |       | 2   | No    |        | 2   | No      | 0     |        |
| 4917   |       | 1   | Yes   | 5      | 2   | No      | 1     | 0      |
| 4918   |       | 2   | No    |        | 2   | No      | 1     | 0      |
| 4920   |       | 1   | Yes   | 20     | 2   | No      | 0     |        |
| 4921   |       | 2   | No    |        | 2   | No      | 1     | 0      |
| 4925   |       | 2   | No    |        | 2   | No      | 0     |        |
| 4926   |       | 2   | No    |        | 2   | No      | 0     |        |
| 4927   |       | 1   | Yes   | 10     | 2   | No      | 0     |        |
| 4928   |       | 1   | Yes   | 20     | 1   | Yes     | 2     | 2      |
| 4929   |       | 2   | No    |        | 2   | No      | 0     |        |
| 4930   |       | 2   | No    |        | 2   | No      | 1     | 2      |
| 4931   |       | 1   | Yes   | 20     | 2   | No      | 1     | 1      |
| 4932   |       | 2   | No    |        | 1   | Yes     | 3     | 2      |
| 4933   |       | 1   | Yes   | 20     | 2   | No      | 1     | 1      |
| 4934   |       | 1   | Yes   | 1      | 1   | Yes     | 0     |        |
| 5934   |       | 2   | No    |        | 2   | No      | 1     | 2      |
| 5935   |       | 2   | No    |        | 2   | No      | 3     | 1      |
| 5936   |       | 2   | No    |        | 2   | No      | 1     | 0      |
| 5938   |       | 1   | Yes   | 15     | 2   | No      | 0     |        |
| 5939   |       | 2   | No    |        | 2   | No      | 0     |        |
| 5940   |       | 2   | No    |        | 2   | No      | 1     | 1      |
| 5942   |       | 2   | No    |        | 2   | No      | 0     |        |
| 5944   |       | 2   | No    |        | 2   | No      | 1     | 1      |
| 5951   |       | 1   | Yes   | 20     | 2   | No      | 1     | 2      |
| 5952   |       | 2   | No    |        | 2   | No      | 0     |        |
| 5954   |       | 2   | No    |        | 2   | No      | 1     | 1      |
| 5956   |       | 1   | Yes   | 10     | 1   | Yes     | 0     |        |

| respid | Q16_2 | Q17 | Smoke | Q17a_1 | Q18 | Alcohol | Q19_1 | Q19a_1 |
|--------|-------|-----|-------|--------|-----|---------|-------|--------|
| 5957   |       | 2   | No    |        | 2   | No      | 3     | 1      |
| 5958   |       | 2   | No    |        | 1   | Yes     | 5     | 2      |
| 5959   |       | 2   | No    |        | 2   | No      | 0     |        |
| 5960   |       | 1   | Yes   | 15     | 2   | No      | 1     | 1      |
| 5963   |       | 2   | No    |        | 2   | No      | 0     |        |
| 5966   |       | 2   | No    |        | 1   | Yes     | 0     |        |
| 5968   |       | 2   | No    |        | 2   | No      | 0     |        |
| 5974   |       | 2   | No    |        | 2   | No      | 0     |        |
| 5975   |       | 2   | No    |        | 2   | No      | 0     |        |
| 5976   |       | 2   | No    |        | 1   | Yes     | 0     |        |
| 5977   |       | 2   | No    |        | 1   | Yes     | 0     |        |
| 5978   |       | 2   | No    |        | 2   | No      | 1     | 1      |
| 5979   |       | 2   | No    |        | 2   | No      | 0     |        |
| 5983   |       | 2   | No    |        | 2   | No      | 0     |        |
| 5984   |       | 1   | Yes   | 25     | 2   | No      | 0     |        |
| 5990   |       | 1   | Yes   | 2      | 1   | Yes     | 5     | 0      |
| 5991   |       | 2   | No    |        | 2   | No      | 0     |        |
| 5992   |       | 2   | No    |        | 2   | No      | 0     |        |
| 5993   |       | 2   | No    |        | 2   | No      | 2     | 1      |
| 5994   |       | 2   | No    |        | 2   | No      | 0     |        |
| 5996   |       | 2   | No    |        | 2   | No      | 0     |        |
| 6001   |       | 1   | Yes   | 20     | 2   | No      | 2     | 2      |
| 6003   |       | 2   | No    |        | 2   | No      | 0     |        |
| 6004   |       | 2   | No    |        | 2   | No      | 3     | 2      |
| 6005   |       | 1   | Yes   | 20     | 1   | Yes     | 1     | 1      |
| 6006   |       | 2   | No    |        | 2   | No      | 0     |        |
| 6008   |       | 2   | No    |        | 1   | Yes     | 1     | 2      |
| 6009   |       | 2   | No    |        | 1   | Yes     | 1     | 2      |
| 6014   |       | 2   | No    |        | 2   | No      | 0     |        |
| 6016   |       | 2   | No    |        | 2   | No      | 1     | 1      |
| 6017   |       | 2   | No    |        | 2   | No      | 0     |        |
| 6018   |       | 1   | Yes   | 20     | 2   | No      | 1     | 0      |

| respid | Q16_2 | Q17 | Smoke | Q17a_1 | Q18 | Alcohol | Q19_1 | Q19a_1 |
|--------|-------|-----|-------|--------|-----|---------|-------|--------|
| 6020   |       | 2   | No    |        | 2   | No      | 1     | 1      |
| 6021   |       | 2   | No    |        | 2   | No      | 0     |        |
| 6024   |       | 2   | No    |        | 2   | No      | 0     |        |
| 6025   |       | 2   | No    |        | 2   | No      | 2     | 1      |
| 6026   |       | 2   | No    |        | 2   | No      | 1     | 0      |
| 6032   |       | 2   | No    |        | 2   | No      | 1     | 1      |
| 6035   |       | 2   | No    |        | 2   | No      | 1     | 0      |
| 6038   |       | 2   | No    |        | 2   | No      | 0     |        |
| 6043   |       | 2   | No    |        | 2   | No      | 2     | 1      |
| 6044   |       | 2   | No    |        | 2   | No      | 0     |        |
| 6046   |       | 1   | Yes   | 20     | 2   | No      | 0     |        |
| 6047   |       | 2   | No    |        | 2   | No      | 0     |        |
| 6048   |       | 2   | No    |        | 2   | No      | 2     | 1      |
| 6050   |       | 2   | No    |        | 2   | No      | 3     | 2      |
| 6051   |       | 2   | No    |        | 2   | No      | 2     | 1      |
| 6053   |       | 2   | No    |        | 2   | No      | 1     | 0      |
| 6054   |       | 2   | No    |        | 2   | No      | 1     | 1      |
| 6056   |       | 2   | No    |        | 2   | No      | 0     |        |
| 6058   |       | 2   | No    |        | 2   | No      | 1     | 1      |
| 6060   |       | 2   | No    |        | 2   | No      | 2     | 2      |
| 6061   |       | 1   | Yes   | 10     | 2   | No      | 0     |        |
| 6062   |       | 2   | No    |        | 2   | No      | 1     | 1      |
| 6067   |       | 2   | No    |        | 2   | No      | 0     |        |
| 6070   |       | 2   | No    |        | 2   | No      | 0     |        |
| 6074   |       | 2   | No    |        | 2   | No      | 0     |        |
| 6076   |       | 2   | No    |        | 1   | Yes     | 0     |        |
| 6078   |       | 2   | No    |        | 2   | No      | 0     |        |
| 6081   |       | 2   | No    |        | 2   | No      | 0     |        |
| 6085   |       | 2   | No    |        | 2   | No      | 0     |        |
| 6088   |       | 2   | No    |        | 2   | No      | 0     |        |
| 6092   |       | 2   | No    |        | 2   | No      | 2     | 1      |
| 6095   |       | 1   | Yes   | 20     | 1   | Yes     | 1     | 1      |

| respid | Q16_2 | Q17 | Smoke | Q17a_1 | Q18 | Alcohol | Q19_1 | Q19a_1 |
|--------|-------|-----|-------|--------|-----|---------|-------|--------|
| 6098   |       | 2   | No    |        | 2   | No      | 0     |        |
| 6101   |       | 2   | No    |        | 1   | Yes     | 0     |        |
| 6102   |       | 2   | No    |        | 2   | No      | 1     | 1      |
| 6105   |       | 2   | No    |        | 2   | No      | 0     |        |
| 6106   |       | 1   | Yes   | 10     | 1   | Yes     | 1     | 1      |
| 6107   |       | 2   | No    |        | 2   | No      | 1     | 0      |
| 6111   |       | 2   | No    |        | 2   | No      | 0     |        |
| 6112   |       | 2   | No    |        | 2   | No      | 0     |        |
| 6113   |       | 1   | Yes   | 2      | 2   | No      | 4     | 2      |
| 6115   |       | 2   | No    |        | 2   | No      | 1     | 1      |
| 6116   |       | 2   | No    |        | 1   | Yes     | 0     |        |
| 6117   |       | 2   | No    |        | 2   | No      | 1     | 2      |
| 6124   |       | 1   | Yes   | 20     | 1   | Yes     | 4     | 2      |
| 6125   |       | 2   | No    |        | 2   | No      | 1     | 0      |
| 6128   |       | 2   | No    |        | 2   | No      | 0     |        |
| 6133   |       | 2   | No    |        | 2   | No      | 0     |        |
| 6134   |       | 2   | No    |        | 2   | No      | 0     |        |
| 6135   |       | 2   | No    |        | 2   | No      | 5     | 3      |
| 6138   |       | 2   | No    |        | 2   | No      | 2     | 1      |
| 6140   |       | 2   | No    |        | 2   | No      | 1     | 1      |
| 6143   |       | 1   | Yes   | 5      | 2   | No      | 0     |        |
| 6147   |       | 2   | No    |        | 2   | No      | 3     | 2      |
| 6154   |       | 2   | No    |        | 2   | No      | 0     |        |
| 6162   |       | 2   | No    |        | 2   | No      | 0     |        |
| 6165   |       | 2   | No    |        | 2   | No      | 1     | 1      |
| 6166   |       | 2   | No    |        | 2   | No      | 2     | 1      |
| 6173   |       | 2   | No    |        | 2   | No      | 5     | 3      |
| 6180   |       | 2   | No    |        | 2   | No      | 2     | 2      |
| 6184   |       | 2   | No    |        | 2   | No      | 2     | 2      |
| 6185   |       | 2   | No    |        | 2   | No      | 1     | 1      |
| 6186   |       | 2   | No    |        | 2   | No      | 0     |        |
| 6188   |       | 2   | No    |        | 2   | No      | 1     | 1      |

| respid | Q16_2 | Q17 | Smoke | Q17a_1 | Q18 | Alcohol | Q19_1 | Q19a_1 |
|--------|-------|-----|-------|--------|-----|---------|-------|--------|
| 6192   |       | 2   | No    |        | 2   | No      | 3     | 2      |
| 6194   |       | 2   | No    |        | 1   | Yes     | 0     |        |
| 6195   |       | 2   | No    |        | 2   | No      | 0     |        |
| 6196   |       | 2   | No    |        | 2   | No      | 0     |        |
| 6199   |       | 2   | No    |        | 2   | No      | 3     | 2      |
| 6200   |       | 2   | No    |        | 1   | Yes     | 0     |        |
| 6201   |       | 2   | No    |        | 2   | No      | 0     |        |
| 6202   |       | 2   | No    |        | 2   | No      | 0     |        |
| 6203   |       | 1   | Yes   | 25     | 2   | No      | 0     |        |
| 6205   |       | 2   | No    |        | 2   | No      | 0     |        |
| 6210   |       | 2   | No    |        | 2   | No      | 2     | 1      |
| 6212   |       | 2   | No    |        | 2   | No      | 2     | 1      |
| 6216   |       | 2   | No    |        | 2   | No      | 1     | 2      |
| 6218   |       | 2   | No    |        | 2   | No      | 3     | 2      |
| 6221   |       | 2   | No    |        | 2   | No      | 3     | 1      |
| 6224   |       | 1   | Yes   | 20     | 1   | Yes     | 1     | 0      |
| 6225   |       | 1   | Yes   | 10     | 2   | No      | 1     | 1      |
| 6227   |       | 2   | No    |        | 2   | No      | 1     | 0      |
| 6230   |       | 2   | No    |        | 2   | No      | 0     |        |
| 6231   |       | 2   | No    |        | 2   | No      | 0     |        |
| 6233   |       | 2   | No    |        | 2   | No      | 5     | 0      |
| 6234   |       | 2   | No    |        | 2   | No      | 1     | 1      |
| 6235   |       | 2   | No    |        | 2   | No      | 0     |        |
| 6237   |       | 2   | No    |        | 2   | No      | 0     |        |
| 6240   |       | 2   | No    |        | 2   | No      | 0     |        |
| 6248   |       | 1   | Yes   | 15     | 2   | No      | 0     |        |
| 6249   |       | 1   | Yes   | 20     | 2   | No      | 0     |        |
| 6252   |       | 2   | No    |        | 2   | No      | 0     |        |
| 6254   |       | 1   | Yes   | 25     | 2   | No      | 1     | 1      |
| 6269   |       | 2   | No    |        | 2   | No      | 1     | 1      |
| 6304   |       | 2   | No    |        | 2   | No      | 0     |        |
| 6334   |       | 2   | No    |        | 1   | Yes     | 1     | 1      |

| respid | Q16_2 | Q17 | Smoke | Q17a_1 | Q18 | Alcohol | Q19_1 | Q19a_1 |
|--------|-------|-----|-------|--------|-----|---------|-------|--------|
| 6341   |       | 2   | No    |        | 2   | No      | 0     |        |
| 6350   |       | 2   | No    |        | 2   | No      | 2     | 2      |
| 6370   |       | 1   | Yes   | 10     | 2   | No      | 1     | 0      |
| 6384   |       | 2   | No    |        | 2   | No      | 0     |        |
| 6400   |       | 2   | No    |        | 2   | No      | 0     |        |
| 6418   |       | 2   | No    |        | 2   | No      | 0     |        |
| 6467   |       | 1   | Yes   | 10     | 1   | Yes     | 1     | 1      |
| 6469   |       | 2   | No    |        | 2   | No      | 0     |        |
| 6474   |       | 2   | No    |        | 2   | No      | 0     |        |
| 6475   |       | 2   | No    |        | 2   | No      | 0     |        |
| 6476   |       | 2   | No    |        | 2   | No      | 2     | 1      |
| 6477   |       | 2   | No    |        | 1   | Yes     | 3     | 1      |
| 6480   |       | 2   | No    |        | 2   | No      | 1     | 1      |
| 6481   |       | 1   | Yes   | 8      | 2   | No      | 3     | 3      |
| 6485   |       | 2   | No    |        | 2   | No      | 0     |        |
| 6488   |       | 2   | No    |        | 2   | No      | 3     | 2      |
| 6495   |       | 2   | No    |        | 1   | Yes     | 4     | 1      |
| 6499   |       | 1   | Yes   | 10     | 2   | No      | 3     | 3      |
| 6500   |       | 2   | No    |        | 2   | No      | 2     | 2      |
| 6504   |       | 2   | No    |        | 1   | Yes     | 4     | 2      |
| 6507   |       | 2   | No    |        | 2   | No      | 4     | 1      |
| 6512   |       | 2   | No    |        | 2   | No      | 1     | 1      |
| 6525   |       | 2   | No    |        | 2   | No      | 5     | 2      |
| 6532   |       | 2   | No    |        | 2   | No      | 0     |        |
| 6535   |       | 1   | Yes   | 17     | 1   | Yes     | 0     |        |
| 6546   |       | 2   | No    |        | 2   | No      | 0     |        |
| 6551   |       | 2   | No    |        | 2   | No      | 3     | 4      |
| 6556   |       | 2   | No    |        | 2   | No      | 0     |        |
| 6566   |       | 1   | Yes   | 10     | 2   | No      | 4     | 3      |
| 6569   |       | 2   | No    |        | 2   | No      | 0     |        |
| 6574   |       | 2   | No    |        | 2   | No      | 0     |        |
| 6576   |       | 2   | No    |        | 1   | Yes     | 4     | 2      |

| respid | Q16_2 | Q17 | Smoke | Q17a_1 | Q18 | Alcohol | Q19_1 | Q19a_1 |
|--------|-------|-----|-------|--------|-----|---------|-------|--------|
| 6580   |       | 2   | No    |        | 2   | No      | 0     |        |
| 6584   |       | 2   | No    |        | 2   | No      | 0     |        |
| 6585   |       | 2   | No    |        | 1   | Yes     | 2     | 1      |
| 6589   |       | 2   | No    |        | 2   | No      | 0     |        |
| 6590   |       | 2   | No    |        | 1   | Yes     | 0     |        |
| 6598   |       | 2   | No    |        | 2   | No      | 0     |        |
| 6603   |       | 1   | Yes   | 2      | 1   | Yes     | 0     |        |
| 6618   |       | 2   | No    |        | 2   | No      | 1     | 0      |
| 6630   |       | 1   | Yes   | 20     | 1   | Yes     | 0     |        |
| 6636   |       | 2   | No    |        | 2   | No      | 2     | 1      |
| 6649   |       | 1   | Yes   | 18     | 2   | No      | 0     |        |
| 6675   |       | 2   | No    |        | 2   | No      | 0     |        |
| 6678   |       | 2   | No    |        | 1   | Yes     | 0     |        |
| 6681   |       | 2   | No    |        | 2   | No      | 0     |        |
| 6684   |       | 2   | No    |        | 2   | No      | 0     |        |
| 6688   |       | 2   | No    |        | 2   | No      | 0     |        |
| 6691   |       | 1   | Yes   | 8      | 2   | No      | 0     |        |
| 6694   |       | 2   | No    |        | 2   | No      | 1     | 1      |
| 6696   |       | 2   | No    |        | 2   | No      | 0     |        |
| 6720   |       | 2   | No    |        | 2   | No      | 3     | 3      |
| 6722   |       | 2   | No    |        | 2   | No      | 4     | 4      |
| 6724   |       | 1   | Yes   | 10     | 2   | No      | 0     |        |
| 6725   |       | 2   | No    |        | 1   | Yes     | 0     |        |
| 6727   |       | 2   | No    |        | 2   | No      | 0     |        |
| 6734   |       | 2   | No    |        | 2   | No      | 1     | 1      |
| 6739   |       | 1   | Yes   | 3      | 2   | No      | 1     | 1      |
| 6743   |       | 1   | Yes   | 20     | 2   | No      | 1     | 2      |
| 6749   |       | 2   | No    |        | 1   | Yes     | 0     |        |
| 6756   |       | 2   | No    |        | 2   | No      | 2     | 1      |
| 6764   |       | 2   | No    |        | 2   | No      | 0     |        |
| 6765   |       | 2   | No    |        | 2   | No      | 1     | 1      |
| 6768   |       | 2   | No    |        | 2   | No      | 1     | 1      |

| respid | Q16_2 | Q17 | Smoke | Q17a_1 | Q18 | Alcohol | Q19_1 | Q19a_1 |
|--------|-------|-----|-------|--------|-----|---------|-------|--------|
| 6773   |       | 2   | No    |        | 2   | No      | 0     |        |
| 6775   |       | 1   | Yes   | 10     | 2   | No      | 1     | 1      |
| 6777   |       | 2   | No    |        | 2   | No      | 1     | 0      |
| 6779   |       | 2   | No    |        | 2   | No      | 0     |        |
| 6790   |       | 2   | No    |        | 2   | No      | 1     | 2      |
| 6797   |       | 2   | No    |        | 2   | No      | 0     |        |
| 6798   |       | 2   | No    |        | 2   | No      | 1     | 2      |
| 6808   |       | 2   | No    |        | 2   | No      | 0     |        |
| 6810   |       | 2   | No    |        | 2   | No      | 0     |        |
| 6811   |       | 1   | Yes   | 10     | 1   | Yes     | 4     | 1      |
| 6812   |       | 2   | No    |        | 2   | No      | 1     | 2      |
| 6814   |       | 1   | Yes   | 25     | 1   | Yes     | 0     |        |
| 6819   |       | 2   | No    |        | 1   | Yes     | 0     |        |
| 6820   |       | 2   | No    |        | 2   | No      | 2     | 2      |
| 6832   |       | 1   | Yes   | 15     | 2   | No      | 0     |        |
| 6854   |       | 2   | No    |        | 2   | No      | 0     |        |
| 6855   |       | 2   | No    |        | 2   | No      | 0     |        |
| 6857   |       | 2   | No    |        | 2   | No      | 0     |        |
| 6858   |       | 2   | No    |        | 2   | No      | 1     | 1      |
| 6859   |       | 2   | No    |        | 2   | No      | 1     | 1      |
| 6860   |       | 2   | No    |        | 2   | No      | 1     | 2      |
| 6862   |       | 2   | No    |        | 2   | No      | 0     |        |
| 6879   |       | 2   | No    |        | 2   | No      | 0     |        |
| 6893   |       | 1   | Yes   | 10     | 1   | Yes     | 0     |        |
| 6898   |       | 2   | No    |        | 2   | No      | 0     |        |
| 6902   |       | 1   | Yes   | 10     | 1   | Yes     | 1     | 2      |
| 6903   |       | 1   | Yes   | 1      | 2   | No      | 2     | 1      |
| 6907   |       | 2   | No    |        | 2   | No      | 3     | 3      |
| 6908   |       | 2   | No    |        | 2   | No      | 0     |        |
| 6912   |       | 2   | No    |        | 2   | No      | 0     |        |
| 6915   |       | 2   | No    |        | 2   | No      | 1     | 1      |
| 6916   |       | 2   | No    |        | 2   | No      | 0     |        |



| respid | Q16_2 | Q17 | Smoke | Q17a_1 | Q18 | Alcohol | Q19_1 | Q19a_1 |
|--------|-------|-----|-------|--------|-----|---------|-------|--------|
| 6917   |       | 2   | No    |        | 1   | Yes     | 2     | 2      |
| 6923   |       | 1   | Yes   | 6      | 2   | No      | 0     |        |
| 6934   |       | 1   | Yes   | 10     | 2   | No      | 1     | 0      |
| 6937   |       | 2   | No    |        | 1   | Yes     | 0     |        |
| 6945   |       | 1   | Yes   | 10     | 2   | No      | 1     | 2      |
| 6954   |       | 2   | No    |        | 1   | Yes     | 5     | 1      |
| 6956   |       | 2   | No    |        | 2   | No      | 1     | 1      |
| 6958   |       | 2   | No    |        | 1   | Yes     | 0     |        |
| 6961   |       | 2   | No    |        | 2   | No      | 1     | 0      |
| 6963   |       | 2   | No    |        | 2   | No      | 1     | 0      |
| 6964   |       | 2   | No    |        | 2   | No      | 0     |        |
| 6976   |       | 2   | No    |        | 2   | No      | 0     |        |
| 6977   |       | 2   | No    |        | 2   | No      | 2     | 1      |
| 7000   |       | 1   | Yes   | 15     | 1   | Yes     | 1     | 2      |
| 7001   |       | 2   | No    |        | 2   | No      | 0     |        |
| 7005   |       | 2   | No    |        | 2   | No      | 0     |        |
| 7006   |       | 2   | No    |        | 2   | No      | 1     | 1      |
| 7008   |       | 2   | No    |        | 1   | Yes     | 2     | 3      |
| 7009   |       | 2   | No    |        | 2   | No      | 0     |        |
| 7019   |       | 2   | No    |        | 2   | No      | 0     |        |
| 7021   |       | 2   | No    |        | 2   | No      | 1     | 2      |
| 7026   |       | 2   | No    |        | 2   | No      | 2     | 2      |
| 7030   |       | 1   | Yes   | 1      | 1   | Yes     | 3     | 3      |
| 7034   |       | 2   | No    |        | 2   | No      | 0     |        |
| 7039   |       | 2   | No    |        | 2   | No      | 1     | 1      |
| 7041   |       | 2   | No    |        | 2   | No      | 0     |        |
| 7047   |       | 2   | No    |        | 2   | No      | 0     |        |
| 7051   |       | 2   | No    |        | 2   | No      | 1     | 0      |
| 7052   |       | 1   | Yes   | 5      | 2   | No      | 1     | 1      |
| 7059   |       | 2   | No    |        | 2   | No      | 1     | 2      |
| 7062   |       | 2   | No    |        | 2   | No      | 1     | 1      |
| 7065   |       | 2   | No    |        | 2   | No      | 1     | 0      |

| respid | Q16_2 | Q17 | Smoke | Q17a_1 | Q18 | Alcohol | Q19_1 | Q19a_1 |
|--------|-------|-----|-------|--------|-----|---------|-------|--------|
| 7066   |       | 2   | No    |        | 2   | No      | 0     |        |
| 7069   |       | 2   | No    |        | 2   | No      | 0     |        |
| 7070   |       | 2   | No    |        | 2   | No      | 0     |        |
| 7073   |       | 2   | No    |        | 2   | No      | 0     |        |
| 7078   |       | 2   | No    |        | 2   | No      | 5     | 2      |
| 7083   |       | 2   | No    |        | 1   | Yes     | 2     | 2      |
| 7084   |       | 2   | No    |        | 1   | Yes     | 4     | 3      |
| 7085   |       | 1   | Yes   | 10     | 1   | Yes     | 0     |        |
| 7088   |       | 2   | No    |        | 1   | Yes     | 1     | 2      |
| 7090   |       | 2   | No    |        | 1   | Yes     | 2     | 2      |
| 7095   |       | 2   | No    |        | 2   | No      | 1     | 1      |
| 7100   |       | 2   | No    |        | 2   | No      | 0     |        |
| 7102   |       | 2   | No    |        | 2   | No      | 3     | 2      |
| 7103   |       | 2   | No    |        | 2   | No      | 0     |        |
| 7108   |       | 2   | No    |        | 2   | No      | 1     | 0      |
| 7109   |       | 2   | No    |        | 2   | No      | 0     |        |
| 7110   |       | 2   | No    |        | 2   | No      | 0     |        |
| 7112   |       | 2   | No    |        | 2   | No      | 0     |        |
| 7114   |       | 2   | No    |        | 2   | No      | 0     |        |
| 7116   |       | 1   | Yes   | 10     | 2   | No      | 1     | 1      |
| 7117   |       | 2   | No    |        | 2   | No      | 0     |        |
| 7118   |       | 2   | No    |        | 2   | No      | 3     | 3      |
| 7120   |       | 2   | No    |        | 2   | No      | 1     | 2      |
| 7124   |       | 2   | No    |        | 2   | No      | 0     |        |
| 7130   |       | 1   | Yes   | 5      | 1   | Yes     | 1     | 1      |
| 7135   |       | 2   | No    |        | 2   | No      | 1     | 1      |
| 7137   |       | 1   | Yes   | 7      | 2   | No      | 1     | 3      |
| 7140   |       | 1   | Yes   | 6      | 1   | Yes     | 0     |        |
| 7141   |       | 2   | No    |        | 2   | No      | 0     |        |
| 7148   |       | 2   | No    |        | 2   | No      | 0     |        |
| 7152   |       | 2   | No    |        | 2   | No      | 0     |        |
| 7154   |       | 2   | No    |        | 2   | No      | 0     |        |

| respid | Q16_2 | Q17 | Smoke | Q17a_1 | Q18 | Alcohol | Q19_1 | Q19a_1 |
|--------|-------|-----|-------|--------|-----|---------|-------|--------|
| 7156   |       | 2   | No    |        | 2   | No      | 1     | 1      |
| 7158   |       | 2   | No    |        | 2   | No      | 0     |        |
| 7159   |       | 2   | No    |        | 1   | Yes     | 0     |        |
| 7161   |       | 1   | Yes   | 10     | 2   | No      | 0     |        |
| 7164   |       | 2   | No    |        | 2   | No      | 1     | 0      |
| 7166   |       | 1   | Yes   | 10     | 2   | No      | 0     |        |
| 7167   |       | 2   | No    |        | 2   | No      | 0     |        |
| 7168   |       | 2   | No    |        | 2   | No      | 0     |        |
| 7170   |       | 2   | No    |        | 2   | No      | 0     |        |
| 7171   |       | 2   | No    |        | 2   | No      | 0     |        |
| 7172   |       | 2   | No    |        | 2   | No      | 0     |        |
| 7173   |       | 2   | No    |        | 2   | No      | 1     | 1      |
| 7175   |       | 2   | No    |        | 2   | No      | 0     |        |
| 7176   |       | 2   | No    |        | 2   | No      | 3     | 1      |
| 7180   |       | 2   | No    |        | 2   | No      | 0     |        |
| 7183   |       | 2   | No    |        | 2   | No      | 1     | 1      |
| 7189   |       | 2   | No    |        | 2   | No      | 0     |        |
| 7193   |       | 2   | No    |        | 2   | No      | 1     | 0      |
| 7194   |       | 2   | No    |        | 2   | No      | 5     | 1      |
| 7195   |       | 2   | No    |        | 2   | No      | 0     |        |
| 7200   |       | 2   | No    |        | 2   | No      | 0     |        |
| 7201   |       | 2   | No    |        | 2   | No      | 3     | 2      |
| 7205   |       | 2   | No    |        | 2   | No      | 3     | 3      |
| 7207   |       | 2   | No    |        | 2   | No      | 0     |        |
| 7208   |       | 2   | No    |        | 2   | No      | 0     |        |
| 7210   |       | 1   | Yes   | 20     | 2   | No      | 0     |        |
| 7211   |       | 2   | No    |        | 2   | No      | 0     |        |
| 7217   |       | 2   | No    |        | 2   | No      | 0     |        |
| 7218   |       | 2   | No    |        | 2   | No      | 0     |        |
| 7220   |       | 1   | Yes   | 15     | 2   | No      | 0     |        |
| 7225   |       | 1   | Yes   | 12     | 1   | Yes     | 0     |        |
| 7228   |       | 1   | Yes   | 20     | 2   | No      | 0     |        |

| respid | Q16_2 | Q17 | Smoke | Q17a_1 | Q18 | Alcohol | Q19_1 | Q19a_1 |
|--------|-------|-----|-------|--------|-----|---------|-------|--------|
| 7230   |       | 1   | Yes   | 7      | 2   | No      | 1     | 1      |
| 7233   |       | 2   | No    |        | 2   | No      | 1     | 1      |
| 7234   |       | 2   | No    |        | 2   | No      | 2     | 1      |
| 7235   |       | 1   | Yes   | 10     | 2   | No      | 0     |        |
| 7236   |       | 2   | No    |        | 2   | No      | 0     |        |
| 7241   |       | 2   | No    |        | 1   | Yes     | 0     |        |
| 7251   |       | 1   | Yes   | 20     | 1   | Yes     | 1     | 1      |
| 7253   |       | 1   | Yes   | 20     | 1   | Yes     | 1     | 2      |
| 7259   |       | 2   | No    |        | 2   | No      | 1     | 1      |
| 7260   |       | 2   | No    |        | 2   | No      | 0     |        |
| 7261   |       | 2   | No    |        | 2   | No      | 2     | 2      |
| 7263   |       | 2   | No    |        | 2   | No      | 0     |        |
| 7265   |       | 2   | No    |        | 2   | No      | 0     |        |
| 7268   |       | 2   | No    |        | 2   | No      | 0     |        |
| 7269   |       | 2   | No    |        | 2   | No      | 0     |        |
| 7271   |       | 1   | Yes   | 2      | 1   | Yes     | 3     | 2      |
| 7276   |       | 2   | No    |        | 2   | No      | 2     | 3      |
| 7280   |       | 1   | Yes   | 8      | 2   | No      | 2     | 1      |
| 7283   |       | 2   | No    |        | 2   | No      | 1     | 0      |
| 7284   |       | 2   | No    |        | 2   | No      | 1     | 1      |
| 7286   |       | 2   | No    |        | 2   | No      | 5     | 0      |
| 7287   |       | 1   | Yes   | 10     | 1   | Yes     | 0     |        |
| 7288   |       | 2   | No    |        | 2   | No      | 0     |        |
| 7294   |       | 2   | No    |        | 2   | No      | 0     |        |
| 7295   |       | 2   | No    |        | 2   | No      | 0     |        |
| 7296   |       | 2   | No    |        | 2   | No      | 1     | 1      |
| 7297   |       | 2   | No    |        | 2   | No      | 0     |        |
| 7299   |       | 2   | No    |        | 2   | No      | 1     | 1      |
| 7300   |       | 1   | Yes   | 10     | 1   | Yes     | 2     | 1      |
| 7301   |       | 1   | Yes   | 12     | 2   | No      | 1     | 1      |
| 7302   |       | 2   | No    |        | 2   | No      | 0     |        |
| 7306   |       | 2   | No    |        | 2   | No      | 0     |        |

| respid | Q16_2 | Q17 | Smoke | Q17a_1 | Q18 | Alcohol | Q19_1 | Q19a_1 |
|--------|-------|-----|-------|--------|-----|---------|-------|--------|
| 7313   |       | 1   | Yes   | 10     | 2   | No      | 2     | 2      |
| 7315   |       | 2   | No    |        | 2   | No      | 0     |        |
| 7317   |       | 2   | No    |        | 1   | Yes     | 0     |        |
| 7321   |       | 2   | No    |        | 2   | No      | 0     |        |
| 7322   |       | 2   | No    |        | 2   | No      | 1     | 1      |
| 7323   |       | 1   | Yes   | 4      | 1   | Yes     | 1     | 1      |
| 7333   |       | 2   | No    |        | 2   | No      | 4     | 3      |
| 7335   |       | 2   | No    |        | 2   | No      | 1     | 2      |
| 7336   |       | 2   | No    |        | 2   | No      | 0     |        |
| 7337   |       | 1   | Yes   | 5      | 2   | No      | 1     | 1      |
| 7338   |       | 2   | No    |        | 1   | Yes     | 0     |        |
| 7340   |       | 2   | No    |        | 2   | No      | 0     |        |
| 7341   |       | 2   | No    |        | 2   | No      | 2     | 2      |
| 7342   |       | 1   | Yes   | 8      | 2   | No      | 0     |        |
| 7344   |       | 2   | No    |        | 2   | No      | 1     | 1      |
| 7346   |       | 2   | No    |        | 2   | No      | 1     | 2      |
| 7347   |       | 2   | No    |        | 2   | No      | 0     |        |
| 7349   |       | 2   | No    |        | 2   | No      | 2     | 1      |
| 7352   |       | 2   | No    |        | 2   | No      | 1     | 1      |
| 7353   |       | 2   | No    |        | 2   | No      | 0     |        |
| 7355   |       | 2   | No    |        | 2   | No      | 0     |        |
| 7356   |       | 2   | No    |        | 2   | No      | 0     |        |
| 7360   |       | 2   | No    |        | 1   | Yes     | 3     | 3      |
| 7371   |       | 2   | No    |        | 2   | No      | 0     |        |
| 7376   |       | 1   | Yes   | 2      | 1   | Yes     | 1     | 2      |
| 7379   |       | 2   | No    |        | 1   | Yes     | 0     |        |
| 7381   |       | 1   | Yes   | 7      | 1   | Yes     | 1     | 1      |
| 7386   |       | 2   | No    |        | 2   | No      | 2     | 1      |
| 7389   |       | 2   | No    |        | 2   | No      | 0     |        |
| 7390   |       | 2   | No    |        | 2   | No      | 5     | 3      |
| 7393   |       | 2   | No    |        | 2   | No      | 0     |        |
| 7394   |       | 1   | Yes   | 6      | 1   | Yes     | 0     |        |

| respid | Q16_2 | Q17 | Smoke | Q17a_1 | Q18 | Alcohol | Q19_1 | Q19a_1 |
|--------|-------|-----|-------|--------|-----|---------|-------|--------|
| 7396   |       | 2   | No    |        | 1   | Yes     | 1     | 1      |
| 7400   |       | 2   | No    |        | 2   | No      | 0     |        |
| 7401   |       | 2   | No    |        | 2   | No      | 1     | 1      |
| 7403   |       | 2   | No    |        | 2   | No      | 0     |        |
| 7406   |       | 1   | Yes   | 5      | 1   | Yes     | 1     | 4      |
| 7409   |       | 2   | No    |        | 2   | No      | 0     |        |
| 7410   |       | 1   | Yes   | 10     | 1   | Yes     | 4     | 3      |
| 7412   |       | 2   | No    |        | 2   | No      | 2     | 2      |
| 7414   |       | 2   | No    |        | 2   | No      | 0     |        |
| 7415   |       | 2   | No    |        | 2   | No      | 2     | 2      |
| 7417   |       | 1   | Yes   | 20     | 2   | No      | 1     | 1      |
| 7421   |       | 1   | Yes   | 10     | 2   | No      | 3     | 2      |
| 7425   |       | 2   | No    |        | 2   | No      | 1     | 1      |
| 7430   |       | 1   | Yes   | 4      | 1   | Yes     | 1     | 0      |
| 7432   |       | 2   | No    |        | 2   | No      | 1     | 1      |
| 7433   |       | 2   | No    |        | 2   | No      | 0     |        |
| 7442   |       | 2   | No    |        | 1   | Yes     | 1     | 0      |
| 7445   |       | 2   | No    |        | 2   | No      | 0     |        |
| 7446   |       | 2   | No    |        | 2   | No      | 0     |        |
| 7449   |       | 2   | No    |        | 2   | No      | 0     |        |
| 7450   |       | 2   | No    |        | 2   | No      | 0     |        |
| 7451   |       | 2   | No    |        | 2   | No      | 1     | 1      |
| 7459   |       | 2   | No    |        | 2   | No      | 2     | 1      |
| 7462   |       | 2   | No    |        | 2   | No      | 1     | 1      |
| 7463   |       | 2   | No    |        | 2   | No      | 0     |        |
| 7469   |       | 1   | Yes   | 6      | 2   | No      | 0     |        |
| 7482   |       | 2   | No    |        | 2   | No      | 0     |        |
| 7484   |       | 2   | No    |        | 2   | No      | 1     | 1      |
| 7486   |       | 2   | No    |        | 2   | No      | 1     | 1      |
| 7496   |       | 2   | No    |        | 2   | No      | 0     |        |
| 7502   |       | 1   | Yes   | 30     | 2   | No      | 1     | 0      |
| 7504   |       | 2   | No    |        | 2   | No      | 1     | 1      |

| respid | Q16_2 | Q17 | Smoke | Q17a_1 | Q18 | Alcohol | Q19_1 | Q19a_1 |
|--------|-------|-----|-------|--------|-----|---------|-------|--------|
| 7509   |       | 2   | No    |        | 1   | Yes     | 3     | 4      |
| 7513   |       | 2   | No    |        | 2   | No      | 4     | 2      |
| 7514   |       | 1   | Yes   | 10     | 1   | Yes     | 0     |        |
| 7520   |       | 2   | No    |        | 2   | No      | 0     |        |
| 7523   |       | 2   | No    |        | 2   | No      | 0     |        |
| 7526   |       | 2   | No    |        | 2   | No      | 0     |        |
| 7529   |       | 1   | Yes   | 5      | 1   | Yes     | 1     | 2      |
| 7534   |       | 2   | No    |        | 2   | No      | 0     |        |
| 7536   |       | 1   | Yes   | 15     | 1   | Yes     | 2     | 2      |
| 7540   |       | 2   | No    |        | 2   | No      | 0     |        |
| 7541   |       | 2   | No    |        | 2   | No      | 3     | 1      |
| 7542   |       | 2   | No    |        | 2   | No      | 0     |        |
| 7555   |       | 2   | No    |        | 2   | No      | 0     |        |
| 7566   |       | 2   | No    |        | 2   | No      | 5     | 2      |
| 7568   |       | 1   | Yes   | 10     | 2   | No      | 0     |        |
| 7570   |       | 2   | No    |        | 1   | Yes     | 2     | 1      |
| 7572   |       | 2   | No    |        | 2   | No      | 0     |        |
| 7573   |       | 2   | No    |        | 2   | No      | 3     | 2      |
| 7576   |       | 2   | No    |        | 2   | No      | 0     |        |
| 7577   |       | 2   | No    |        | 2   | No      | 0     |        |
| 7583   |       | 2   | No    |        | 2   | No      | 0     |        |
| 7584   |       | 1   | Yes   | 30     | 1   | Yes     | 0     |        |
| 7585   |       | 1   | Yes   | 12     | 1   | Yes     | 4     | 4      |
| 7586   |       | 2   | No    |        | 2   | No      | 1     | 1      |
| 7587   |       | 1   | Yes   | 20     | 1   | Yes     | 0     |        |
| 7588   |       | 2   | No    |        | 1   | Yes     | 2     | 1      |
| 7596   |       | 2   | No    |        | 2   | No      | 0     |        |
| 7599   |       | 2   | No    |        | 2   | No      | 0     |        |
| 7600   |       | 1   | Yes   | 20     | 1   | Yes     | 1     | 1      |
| 7602   |       | 2   | No    |        | 2   | No      | 1     | 1      |
| 7613   |       | 1   | Yes   | 13     | 2   | No      | 0     |        |
| 7620   |       | 2   | No    |        | 1   | Yes     | 1     | 1      |

| respid | Q16_2 | Q17 | Smoke | Q17a_1 | Q18 | Alcohol | Q19_1 | Q19a_1 |
|--------|-------|-----|-------|--------|-----|---------|-------|--------|
| 7623   |       | 2   | No    |        | 2   | No      | 1     | 1      |
| 7635   |       | 1   | Yes   | 10     | 1   | Yes     | 1     | 0      |
| 7636   |       | 2   | No    |        | 2   | No      | 3     | 2      |
| 7643   |       | 1   | Yes   | 2      | 1   | Yes     | 2     | 2      |
| 7645   |       | 2   | No    |        | 2   | No      | 0     |        |
| 7649   |       | 2   | No    |        | 2   | No      | 3     | 3      |
| 7651   |       | 2   | No    |        | 2   | No      | 0     |        |
| 7652   |       | 2   | No    |        | 2   | No      | 5     | 4      |
| 7655   |       | 2   | No    |        | 2   | No      | 0     |        |
| 7657   |       | 1   | Yes   | 5      | 1   | Yes     | 0     |        |
| 7675   |       | 2   | No    |        | 2   | No      | 0     |        |
| 7676   |       | 2   | No    |        | 1   | Yes     | 4     | 2      |
| 7684   |       | 2   | No    |        | 2   | No      | 0     |        |
| 7693   |       | 2   | No    |        | 2   | No      | 2     | 2      |
| 7694   |       | 2   | No    |        | 1   | Yes     | 3     | 4      |
| 7695   |       | 1   | Yes   | 30     | 1   | Yes     | 0     |        |
| 7696   |       | 2   | No    |        | 1   | Yes     | 3     | 4      |
| 7698   |       | 2   | No    |        | 2   | No      | 0     |        |
| 7700   |       | 2   | No    |        | 1   | Yes     | 0     |        |
| 7701   |       | 1   | Yes   | 10     | 2   | No      | 0     |        |
| 7704   |       | 2   | No    |        | 2   | No      | 0     |        |
| 7709   |       | 1   | Yes   | 10     | 2   | No      | 1     | 1      |
| 7713   |       | 2   | No    |        | 2   | No      | 0     |        |
| 7714   |       | 2   | No    |        | 2   | No      | 0     |        |
| 7718   |       | 1   | Yes   | 20     | 1   | Yes     | 4     | 4      |
| 7720   |       | 2   | No    |        | 2   | No      | 0     |        |
| 7721   |       | 2   | No    |        | 2   | No      | 1     | 1      |
| 7722   |       | 2   | No    |        | 2   | No      | 1     | 0      |
| 7724   |       | 1   | Yes   | 1      | 2   | No      | 4     | 3      |
| 7728   |       | 2   | No    |        | 1   | Yes     | 0     |        |
| 7731   |       | 1   | Yes   | 12     | 2   | No      | 1     | 1      |
| 7735   |       | 2   | No    |        | 2   | No      | 0     |        |



| respid | Q16_2 | Q17 | Smoke | Q17a_1 | Q18 | Alcohol | Q19_1 | Q19a_1 |
|--------|-------|-----|-------|--------|-----|---------|-------|--------|
| 7737   |       | 1   | Yes   | 26     | 1   | Yes     | 2     | 2      |
| 7741   |       | 2   | No    |        | 2   | No      | 0     |        |
| 7746   |       | 1   | Yes   | 15     | 1   | Yes     | 0     |        |
| 7747   |       | 2   | No    |        | 2   | No      | 0     |        |
| 7748   |       | 1   | Yes   | 20     | 2   | No      | 0     |        |
| 7750   |       | 2   | No    |        | 2   | No      | 0     |        |
| 7754   |       | 2   | No    |        | 2   | No      | 1     | 1      |
| 7755   |       | 2   | No    |        | 2   | No      | 0     |        |
| 7762   |       | 2   | No    |        | 2   | No      | 0     |        |
| 7764   |       | 1   | Yes   | 40     | 2   | No      | 0     |        |
| 7766   |       | 2   | No    |        | 2   | No      | 0     |        |
| 7768   |       | 2   | No    |        | 2   | No      | 0     |        |
| 7770   |       | 1   | Yes   | 5      | 1   | Yes     | 1     | 1      |
| 7771   |       | 2   | No    |        | 2   | No      | 0     |        |
| 7777   |       | 2   | No    |        | 2   | No      | 0     |        |
| 7778   |       | 2   | No    |        | 2   | No      | 0     |        |
| 7783   |       | 1   | Yes   | 10     | 1   | Yes     | 4     | 3      |
| 7789   |       | 2   | No    |        | 2   | No      | 0     |        |
| 7790   |       | 2   | No    |        | 2   | No      | 1     | 2      |
| 7795   |       | 2   | No    |        | 1   | Yes     | 2     | 1      |
| 7807   |       | 2   | No    |        | 2   | No      | 0     |        |
| 7808   |       | 1   | Yes   | 10     | 2   | No      | 1     | 1      |
| 7818   |       | 2   | No    |        | 2   | No      | 0     |        |
| 7820   |       | 1   | Yes   | 10     | 2   | No      | 0     |        |
| 7831   |       | 2   | No    |        | 2   | No      | 0     |        |
| 7832   |       | 2   | No    |        | 1   | Yes     | 1     | 0      |
| 7837   |       | 2   | No    |        | 2   | No      | 1     | 1      |
| 7841   |       | 2   | No    |        | 1   | Yes     | 2     | 3      |
| 7845   |       | 1   | Yes   | 8      | 2   | No      | 3     | 2      |
| 7853   |       | 2   | No    |        | 2   | No      | 1     | 1      |
| 7854   |       | 2   | No    |        | 2   | No      | 0     |        |
| 7862   |       | 2   | No    |        | 2   | No      | 3     | 3      |

| respid | Q16_2 | Q17 | Smoke | Q17a_1 | Q18 | Alcohol | Q19_1 | Q19a_1 |
|--------|-------|-----|-------|--------|-----|---------|-------|--------|
| 7871   |       | 2   | No    |        | 2   | No      | 0     |        |
| 7875   |       | 2   | No    |        | 2   | No      | 1     | 0      |
| 7880   |       | 2   | No    |        | 2   | No      | 1     | 1      |
| 7881   |       | 2   | No    |        | 1   | Yes     | 0     |        |
| 7883   |       | 2   | No    |        | 1   | Yes     | 1     | 2      |
| 7896   |       | 2   | No    |        | 2   | No      | 0     |        |
| 7905   |       | 2   | No    |        | 2   | No      | 0     |        |
| 7919   |       | 2   | No    |        | 2   | No      | 0     |        |
| 7928   |       | 2   | No    |        | 1   | Yes     | 2     | 3      |
| 7929   |       | 2   | No    |        | 2   | No      | 0     |        |
| 7938   |       | 2   | No    |        | 1   | Yes     | 3     | 2      |
| 7940   |       | 1   | Yes   | 15     | 2   | No      | 0     |        |
| 7941   |       | 2   | No    |        | 1   | Yes     | 3     | 2      |
| 7952   |       | 2   | No    |        | 2   | No      | 0     |        |
| 7962   |       | 2   | No    |        | 2   | No      | 0     |        |
| 7968   |       | 2   | No    |        | 1   | Yes     | 2     | 1      |
| 7972   |       | 2   | No    |        | 2   | No      | 1     | 1      |
| 7983   |       | 1   | Yes   | 15     | 1   | Yes     | 1     | 1      |
| 7990   |       | 2   | No    |        | 2   | No      | 0     |        |
| 7993   |       | 2   | No    |        | 2   | No      | 0     |        |
| 8005   |       | 2   | No    |        | 2   | No      | 0     |        |
| 8008   |       | 2   | No    |        | 2   | No      | 0     |        |
| 8012   |       | 2   | No    |        | 2   | No      | 2     | 2      |
| 8021   |       | 2   | No    |        | 2   | No      | 0     |        |
| 8024   |       | 2   | No    |        | 2   | No      | 0     |        |
| 8043   |       | 2   | No    |        | 2   | No      | 0     |        |
| 8051   |       | 2   | No    |        | 2   | No      | 0     |        |
| 8056   |       | 1   | Yes   | 20     | 2   | No      | 1     | 1      |
| 8061   |       | 2   | No    |        | 2   | No      | 1     | 2      |
| 8066   |       | 1   | Yes   | 10     | 2   | No      | 0     |        |
| 8069   |       | 2   | No    |        | 2   | No      | 0     |        |
| 8071   |       | 2   | No    |        | 2   | No      | 0     |        |

| respid | Q16_2 | Q17 | Smoke | Q17a_1 | Q18 | Alcohol | Q19_1 | Q19a_1 |
|--------|-------|-----|-------|--------|-----|---------|-------|--------|
| 8072   |       | 2   | No    |        | 2   | No      | 0     |        |
| 8076   |       | 2   | No    |        | 2   | No      | 0     |        |
| 8080   |       | 2   | No    |        | 2   | No      | 1     | 1      |
| 8083   |       | 2   | No    |        | 1   | Yes     | 1     | 1      |
| 8093   |       | 2   | No    |        | 2   | No      | 1     | 1      |
| 8095   |       | 1   | Yes   | 2      | 1   | Yes     | 3     | 2      |
| 8099   |       | 2   | No    |        | 2   | No      | 0     |        |
| 8100   |       | 2   | No    |        | 2   | No      | 0     |        |
| 8103   |       | 2   | No    |        | 2   | No      | 0     |        |
| 8104   |       | 1   | Yes   | 20     | 2   | No      | 2     | 2      |
| 8115   |       | 2   | No    |        | 1   | Yes     | 4     | 2      |
| 8121   |       | 1   | Yes   | 10     | 1   | Yes     | 0     |        |
| 8128   |       | 2   | No    |        | 2   | No      | 0     |        |
| 8130   |       | 2   | No    |        | 2   | No      | 0     |        |
| 8131   |       | 2   | No    |        | 2   | No      | 0     |        |
| 8133   |       | 2   | No    |        | 2   | No      | 0     |        |
| 8143   |       | 2   | No    |        | 2   | No      | 1     | 1      |
| 8144   |       | 2   | No    |        | 2   | No      | 0     |        |
| 8146   |       | 1   | Yes   | 25     | 1   | Yes     | 0     |        |
| 8148   |       | 2   | No    |        | 2   | No      | 0     |        |
| 8157   |       | 2   | No    |        | 2   | No      | 0     |        |
| 8164   |       | 2   | No    |        | 2   | No      | 0     |        |
| 8173   |       | 2   | No    |        | 2   | No      | 0     |        |
| 8176   |       | 2   | No    |        | 1   | Yes     | 0     |        |
| 8179   |       | 2   | No    |        | 2   | No      | 0     |        |
| 8181   |       | 2   | No    |        | 2   | No      | 0     |        |
| 8182   |       | 2   | No    |        | 2   | No      | 0     |        |
| 8196   |       | 1   | Yes   | 10     | 1   | Yes     | 0     |        |
| 8200   |       | 2   | No    |        | 2   | No      | 0     |        |
| 8203   |       | 2   | No    |        | 2   | No      | 0     |        |
| 8204   |       | 2   | No    |        | 2   | No      | 3     | 3      |
| 8206   |       | 2   | No    |        | 2   | No      | 0     |        |

| respid | Q16_2 | Q17 | Smoke | Q17a_1 | Q18 | Alcohol | Q19_1 | Q19a_1 |
|--------|-------|-----|-------|--------|-----|---------|-------|--------|
| 8208   |       | 2   | No    |        | 2   | No      | 0     |        |
| 8212   |       | 2   | No    |        | 2   | No      | 0     |        |
| 8222   |       | 2   | No    |        | 2   | No      | 5     | 2      |
| 8223   |       | 2   | No    |        | 2   | No      | 0     |        |
| 8225   |       | 2   | No    |        | 1   | Yes     | 0     |        |
| 8226   |       | 2   | No    |        | 2   | No      | 0     |        |
| 8228   |       | 2   | No    |        | 2   | No      | 0     |        |
| 8229   |       | 1   | Yes   | 10     | 1   | Yes     | 0     |        |
| 8239   |       | 2   | No    |        | 1   | Yes     | 0     |        |
| 8246   |       | 2   | No    |        | 2   | No      | 4     | 2      |
| 8258   |       | 1   | Yes   | 1      | 1   | Yes     | 2     | 2      |
| 8260   |       | 2   | No    |        | 2   | No      | 0     |        |
| 8262   |       | 2   | No    |        | 1   | Yes     | 2     | 1      |
| 8263   |       | 1   | Yes   | 20     | 2   | No      | 2     | 1      |
| 8267   |       | 2   | No    |        | 2   | No      | 1     | 1      |
| 8271   |       | 1   | Yes   | 10     | 2   | No      | 2     | 2      |
| 8274   |       | 2   | No    |        | 1   | Yes     | 1     | 1      |
| 8275   |       | 1   | Yes   | 10     | 1   | Yes     | 3     | 2      |
| 8279   |       | 2   | No    |        | 2   | No      | 2     | 1      |
| 8285   |       | 1   | Yes   | 20     | 2   | No      | 3     | 3      |
| 8287   |       | 2   | No    |        | 2   | No      | 4     | 4      |
| 8289   |       | 2   | No    |        | 2   | No      | 1     | 0      |
| 8291   |       | 2   | No    |        | 2   | No      | 0     |        |
| 8299   |       | 2   | No    |        | 2   | No      | 0     |        |
| 8301   |       | 2   | No    |        | 2   | No      | 0     |        |
| 8302   |       | 2   | No    |        | 2   | No      | 1     | 0      |
| 8308   |       | 2   | No    |        | 1   | Yes     | 0     |        |
| 8313   |       | 2   | No    |        | 1   | Yes     | 1     | 0      |
| 8316   |       | 1   | Yes   | 15     | 2   | No      | 2     | 2      |
| 8317   |       | 2   | No    |        | 2   | No      | 0     |        |
| 8319   |       | 2   | No    |        | 2   | No      | 0     |        |
| 8323   |       | 1   | Yes   | 30     | 2   | No      | 3     | 2      |

| respid | Q16_2 | Q17 | Smoke | Q17a_1 | Q18 | Alcohol | Q19_1 | Q19a_1 |
|--------|-------|-----|-------|--------|-----|---------|-------|--------|
| 8324   |       | 2   | No    |        | 2   | No      | 0     |        |
| 8327   |       | 1   | Yes   | 8      | 2   | No      | 4     | 4      |
| 8328   |       | 2   | No    |        | 2   | No      | 1     | 1      |
| 8342   |       | 2   | No    |        | 1   | Yes     | 1     | 1      |
| 8350   |       | 2   | No    |        | 2   | No      | 0     |        |
| 8352   |       | 2   | No    |        | 2   | No      | 0     |        |
| 8353   |       | 1   | Yes   | 20     | 2   | No      | 0     |        |
| 8356   |       | 2   | No    |        | 2   | No      | 0     |        |
| 8367   |       | 2   | No    |        | 2   | No      | 0     |        |
| 8373   |       | 1   | Yes   | 20     | 1   | Yes     | 1     | 1      |
| 8379   |       | 2   | No    |        | 2   | No      | 0     |        |
| 8382   |       | 2   | No    |        | 1   | Yes     | 0     |        |
| 8387   |       | 2   | No    |        | 2   | No      | 0     |        |
| 8409   |       | 2   | No    |        | 2   | No      | 1     | 1      |
| 8410   |       | 2   | No    |        | 2   | No      | 0     |        |
| 8412   |       | 2   | No    |        | 1   | Yes     | 2     | 2      |
| 8415   |       | 2   | No    |        | 2   | No      | 1     | 2      |
| 8417   |       | 1   | Yes   | 20     | 1   | Yes     | 1     | 1      |
| 8422   |       | 1   | Yes   | 30     | 1   | Yes     | 1     | 1      |
| 8430   |       | 2   | No    |        | 2   | No      | 1     | 2      |
| 8434   |       | 2   | No    |        | 2   | No      | 0     |        |
| 8436   |       | 2   | No    |        | 2   | No      | 0     |        |
| 8446   |       | 2   | No    |        | 1   | Yes     | 2     | 1      |
| 8447   |       | 2   | No    |        | 2   | No      | 0     |        |
| 8448   |       | 2   | No    |        | 2   | No      | 0     |        |
| 8455   |       | 2   | No    |        | 1   | Yes     | 5     | 2      |
| 8456   |       | 2   | No    |        | 2   | No      | 0     |        |
| 8459   |       | 2   | No    |        | 2   | No      | 0     |        |
| 8460   |       | 2   | No    |        | 2   | No      | 0     |        |
| 8464   |       | 1   | Yes   | 20     | 1   | Yes     | 1     | 3      |
| 8470   |       | 2   | No    |        | 2   | No      | 1     | 1      |
| 8473   |       | 2   | No    |        | 2   | No      | 1     | 1      |

| respid | Q16_2 | Q17 | Smoke | Q17a_1 | Q18 | Alcohol | Q19_1 | Q19a_1 |
|--------|-------|-----|-------|--------|-----|---------|-------|--------|
| 8486   |       | 2   | No    |        | 2   | No      | 0     |        |
| 8487   |       | 2   | No    |        | 2   | No      | 1     | 1      |
| 8489   |       | 2   | No    |        | 2   | No      | 2     | 2      |
| 8494   |       | 2   | No    |        | 2   | No      | 0     |        |
| 8495   |       | 1   | Yes   | 5      | 1   | Yes     | 3     | 4      |
| 8497   |       | 2   | No    |        | 1   | Yes     | 0     |        |
| 8510   |       | 2   | No    |        | 1   | Yes     | 1     | 1      |
| 8515   |       | 2   | No    |        | 2   | No      | 3     | 2      |
| 8526   |       | 2   | No    |        | 2   | No      | 0     |        |
| 8530   |       | 2   | No    |        | 2   | No      | 0     |        |
| 8532   |       | 2   | No    |        | 2   | No      | 4     | 1      |
| 8533   |       | 2   | No    |        | 2   | No      | 0     |        |
| 8534   |       | 2   | No    |        | 1   | Yes     | 1     | 1      |
| 8572   |       | 2   | No    |        | 2   | No      | 2     | 2      |
| 8582   |       | 1   | Yes   | 20     | 2   | No      | 1     | 1      |
| 8584   |       | 1   | Yes   | 1      | 2   | No      | 1     | 1      |
| 8585   |       | 2   | No    |        | 2   | No      | 0     |        |
| 8586   |       | 1   | Yes   | 20     | 2   | No      | 0     |        |
| 8589   |       | 1   | Yes   | 23     | 2   | No      | 1     | 1      |
| 8593   |       | 2   | No    |        | 2   | No      | 0     |        |
| 8594   |       | 2   | No    |        | 2   | No      | 0     |        |
| 8601   |       | 2   | No    |        | 2   | No      | 4     | 1      |
| 8603   |       | 1   | Yes   | 8      | 2   | No      | 1     | 1      |
| 8604   |       | 2   | No    |        | 2   | No      | 0     |        |
| 8605   |       | 2   | No    |        | 2   | No      | 0     |        |
| 8607   |       | 1   | Yes   | 10     | 2   | No      | 1     | 1      |
| 8623   |       | 2   | No    |        | 2   | No      | 5     | 1      |
| 8626   |       | 2   | No    |        | 1   | Yes     | 2     | 2      |
| 8638   |       | 2   | No    |        | 2   | No      | 2     | 1      |
| 8640   |       | 2   | No    |        | 2   | No      | 0     |        |
| 8641   |       | 1   | Yes   | 15     | 1   | Yes     | 3     | 2      |
| 8643   |       | 1   | Yes   | 5      | 2   | No      | 0     |        |

| respid | Q16_2 | Q17 | Smoke | Q17a_1 | Q18 | Alcohol | Q19_1 | Q19a_1 |
|--------|-------|-----|-------|--------|-----|---------|-------|--------|
| 8644   |       | 2   | No    |        | 1   | Yes     | 1     | 1      |
| 8646   |       | 2   | No    |        | 2   | No      | 0     |        |
| 8647   |       | 2   | No    |        | 2   | No      | 0     |        |
| 8649   |       | 1   | Yes   | 20     | 2   | No      | 3     | 1      |
| 8650   |       | 2   | No    |        | 2   | No      | 0     |        |
| 8658   |       | 1   | Yes   | 20     | 2   | No      | 0     |        |
| 8659   |       | 1   | Yes   | 10     | 2   | No      | 1     | 1      |
| 8669   |       | 2   | No    |        | 2   | No      | 3     | 2      |
| 8672   |       | 2   | No    |        | 2   | No      | 1     | 1      |
| 8673   |       | 2   | No    |        | 2   | No      | 0     |        |
| 8676   |       | 1   | Yes   | 20     | 1   | Yes     | 0     |        |
| 8677   |       | 2   | No    |        | 2   | No      | 0     |        |
| 8681   |       | 2   | No    |        | 2   | No      | 0     |        |
| 8688   |       | 1   | Yes   | 20     | 1   | Yes     | 1     | 1      |
| 8689   |       | 1   | Yes   | 20     | 1   | Yes     | 0     |        |
| 8690   |       | 1   | Yes   | 15     | 1   | Yes     | 4     | 2      |
| 8693   |       | 1   | Yes   | 25     | 2   | No      | 1     | 1      |
| 8694   |       | 2   | No    |        | 2   | No      | 1     | 1      |
| 8699   |       | 1   | Yes   | 20     | 2   | No      | 1     | 1      |
| 8700   |       | 1   | Yes   | 10     | 2   | No      | 0     |        |
| 8703   |       | 2   | No    |        | 2   | No      | 0     |        |
| 8704   |       | 2   | No    |        | 2   | No      | 0     |        |
| 8706   |       | 2   | No    |        | 2   | No      | 1     | 2      |
| 8709   |       | 1   | Yes   | 15     | 1   | Yes     | 0     |        |
| 8715   |       | 1   | Yes   | 5      | 2   | No      | 0     |        |
| 8728   |       | 2   | No    |        | 2   | No      | 0     |        |
| 8729   |       | 2   | No    |        | 1   | Yes     | 1     | 1      |
| 8730   |       | 2   | No    |        | 2   | No      | 0     |        |
| 8742   |       | 2   | No    |        | 2   | No      | 3     | 1      |
| 8748   |       | 2   | No    |        | 2   | No      | 0     |        |
| 8749   |       | 1   | Yes   | 15     | 1   | Yes     | 0     |        |
| 8750   |       | 2   | No    |        | 2   | No      | 2     | 1      |

| respid | Q16_2 | Q17 | Smoke | Q17a_1 | Q18 | Alcohol | Q19_1 | Q19a_1 |
|--------|-------|-----|-------|--------|-----|---------|-------|--------|
| 8751   |       | 2   | No    |        | 2   | No      | 0     |        |
| 8752   |       | 2   | No    |        | 1   | Yes     | 5     | 2      |
| 8754   |       | 2   | No    |        | 2   | No      | 1     | 1      |
| 8757   |       | 2   | No    |        | 2   | No      | 0     |        |
| 8760   |       | 2   | No    |        | 2   | No      | 2     | 0      |
| 8761   |       | 2   | No    |        | 2   | No      | 3     | 1      |
| 8762   |       | 1   | Yes   | 18     | 2   | No      | 0     |        |
| 8763   |       | 2   | No    |        | 1   | Yes     | 0     |        |
| 8764   |       | 2   | No    |        | 2   | No      | 0     |        |
| 8765   |       | 2   | No    |        | 2   | No      | 1     | 0      |
| 8766   |       | 2   | No    |        | 2   | No      | 0     |        |
| 8767   |       | 2   | No    |        | 2   | No      | 0     |        |
| 8768   |       | 2   | No    |        | 2   | No      | 0     |        |
| 8770   |       | 1   | Yes   | 10     | 2   | No      | 0     |        |
| 8771   |       | 2   | No    |        | 2   | No      | 0     |        |
| 8773   |       | 2   | No    |        | 2   | No      | 1     | 1      |
| 8774   |       | 1   | Yes   | 20     | 1   | Yes     | 1     | 1      |
| 8776   |       | 2   | No    |        | 2   | No      | 0     |        |
| 8777   |       | 2   | No    |        | 2   | No      | 0     |        |
| 8778   |       | 1   | Yes   | 5      | 2   | No      | 2     | 1      |
| 8779   |       | 1   | Yes   | 6      | 1   | Yes     | 0     |        |
| 8784   |       | 2   | No    |        | 2   | No      | 4     | 2      |
| 8786   |       | 1   | Yes   | 20     | 2   | No      | 0     |        |
| 8787   |       | 2   | No    |        | 2   | No      | 1     | 1      |
| 8790   |       | 2   | No    |        | 2   | No      | 0     |        |
| 8791   |       | 1   | Yes   | 20     | 2   | No      | 3     | 4      |
| 8793   |       | 2   | No    |        | 2   | No      | 0     |        |
| 8795   |       | 2   | No    |        | 2   | No      | 0     |        |
| 8797   |       | 2   | No    |        | 2   | No      | 0     |        |
| 8801   |       | 2   | No    |        | 2   | No      | 0     |        |
| 8802   |       | 2   | No    |        | 1   | Yes     | 0     |        |
| 8807   |       | 1   | Yes   | 10     | 2   | No      | 0     |        |



| respid | Q16_2 | Q17 | Smoke | Q17a_1 | Q18 | Alcohol | Q19_1 | Q19a_1 |
|--------|-------|-----|-------|--------|-----|---------|-------|--------|
| 8813   |       | 2   | No    |        | 1   | Yes     | 0     |        |
| 8817   |       | 2   | No    |        | 2   | No      | 2     | 1      |
| 8818   |       | 2   | No    |        | 1   | Yes     | 1     | 1      |
| 8821   |       | 2   | No    |        | 2   | No      | 0     |        |
| 8822   |       | 2   | No    |        | 2   | No      | 0     |        |
| 8823   |       | 2   | No    |        | 2   | No      | 0     |        |
| 8824   |       | 2   | No    |        | 2   | No      | 1     | 1      |
| 8825   |       | 2   | No    |        | 2   | No      | 0     |        |
| 8834   |       | 1   | Yes   | 1      | 1   | Yes     | 4     | 2      |
| 8840   |       | 2   | No    |        | 2   | No      | 1     | 1      |
| 8843   |       | 1   | Yes   | 10     | 1   | Yes     | 2     | 0      |
| 8846   |       | 1   | Yes   | 20     | 2   | No      | 0     |        |
| 8862   |       | 2   | No    |        | 2   | No      | 0     |        |
| 8866   |       | 2   | No    |        | 2   | No      | 1     | 0      |
| 8869   |       | 1   | Yes   | 20     | 1   | Yes     | 0     |        |
| 8872   |       | 2   | No    |        | 2   | No      | 0     |        |
| 8903   |       | 2   | No    |        | 1   | Yes     | 0     |        |
| 8909   |       | 2   | No    |        | 2   | No      | 0     |        |
| 8926   |       | 2   | No    |        | 1   | Yes     | 0     |        |
| 8936   |       | 2   | No    |        | 2   | No      | 0     |        |
| 8945   |       | 2   | No    |        | 2   | No      | 0     |        |
| 8954   |       | 1   | Yes   | 10     | 1   | Yes     | 0     |        |
| 8955   |       | 2   | No    |        | 2   | No      | 4     | 2      |
| 8958   |       | 1   | Yes   | 10     | 1   | Yes     | 0     |        |
| 8959   |       | 2   | No    |        | 2   | No      | 0     |        |
| 8960   |       | 2   | No    |        | 2   | No      | 0     |        |
| 8976   |       | 2   | No    |        | 2   | No      | 0     |        |
| 8977   |       | 2   | No    |        | 2   | No      | 0     |        |
| 8979   |       | 2   | No    |        | 2   | No      | 0     |        |
| 8985   |       | 2   | No    |        | 2   | No      | 0     |        |
| 8994   |       | 1   | Yes   | 20     | 1   | Yes     | 0     |        |
| 8997   |       | 2   | No    |        | 2   | No      | 2     | 2      |

| respid | Q16_2 | Q17 | Smoke | Q17a_1 | Q18 | Alcohol | Q19_1 | Q19a_1 |
|--------|-------|-----|-------|--------|-----|---------|-------|--------|
| 9002   |       | 2   | No    |        | 2   | No      | 0     |        |
| 9005   |       | 2   | No    |        | 2   | No      | 2     | 1      |
| 9017   |       | 2   | No    |        | 2   | No      | 0     |        |
| 9018   |       | 2   | No    |        | 2   | No      | 0     |        |
| 9021   |       | 2   | No    |        | 1   | Yes     | 1     | 1      |
| 9029   |       | 2   | No    |        | 2   | No      | 3     | 3      |
| 9035   |       | 1   | Yes   | 10     | 2   | No      | 1     | 1      |
| 9038   |       | 1   | Yes   | 10     | 1   | Yes     | 0     |        |
| 9039   |       | 2   | No    |        | 2   | No      | 0     |        |
| 9040   |       | 2   | No    |        | 2   | No      | 0     |        |
| 9042   |       | 2   | No    |        | 2   | No      | 0     |        |
| 9043   |       | 1   | Yes   | 5      | 1   | Yes     | 1     | 0      |
| 9045   |       | 2   | No    |        | 2   | No      | 1     | 1      |
| 9051   |       | 2   | No    |        | 2   | No      | 0     |        |
| 9067   |       | 2   | No    |        | 2   | No      | 0     |        |
| 9069   |       | 1   | Yes   | 20     | 1   | Yes     | 1     | 2      |
| 9073   |       | 2   | No    |        | 2   | No      | 2     | 2      |
| 9084   |       | 2   | No    |        | 2   | No      | 2     | 1      |
| 9096   |       | 2   | No    |        | 2   | No      | 0     |        |
| 9100   |       | 2   | No    |        | 2   | No      | 0     |        |
| 9107   |       | 1   | Yes   | 15     | 2   | No      | 0     |        |
| 9110   |       | 1   | Yes   | 10     | 1   | Yes     | 0     |        |
| 9120   |       | 2   | No    |        | 2   | No      | 0     |        |
| 9122   |       | 1   | Yes   | 3      | 1   | Yes     | 4     | 4      |
| 9130   |       | 2   | No    |        | 2   | No      | 0     |        |
| 9134   |       | 2   | No    |        | 1   | Yes     | 2     | 2      |
| 9137   |       | 2   | No    |        | 2   | No      | 1     | 1      |
| 9139   |       | 1   | Yes   | 5      | 2   | No      | 1     | 0      |
| 9144   |       | 2   | No    |        | 2   | No      | 0     |        |
| 9157   |       | 2   | No    |        | 1   | Yes     | 0     |        |
| 9166   |       | 1   | Yes   | 15     | 2   | No      | 0     |        |
| 9177   |       | 2   | No    |        | 1   | Yes     | 4     | 3      |

| respid | Q16_2 | Q17 | Smoke | Q17a_1 | Q18 | Alcohol | Q19_1 | Q19a_1 |
|--------|-------|-----|-------|--------|-----|---------|-------|--------|
| 9181   |       | 2   | No    |        | 2   | No      | 0     |        |
| 9183   |       | 2   | No    |        | 2   | No      | 0     |        |
| 9184   |       | 2   | No    |        | 1   | Yes     | 0     |        |
| 9188   |       | 1   | Yes   | 6      | 2   | No      | 0     |        |
| 9197   |       | 2   | No    |        | 2   | No      | 2     | 2      |
| 9200   |       | 2   | No    |        | 1   | Yes     | 2     | 2      |
| 9205   |       | 2   | No    |        | 2   | No      | 2     | 2      |
| 9207   |       | 2   | No    |        | 2   | No      | 0     |        |
| 9213   |       | 1   | Yes   | 10     | 2   | No      | 1     | 1      |
| 9216   |       | 2   | No    |        | 2   | No      | 2     | 1      |
| 9217   |       | 1   | Yes   | 10     | 2   | No      | 0     |        |
| 9218   |       | 2   | No    |        | 2   | No      | 0     |        |
| 9219   |       | 1   | Yes   | 3      | 1   | Yes     | 1     | 2      |
| 9220   |       | 2   | No    |        | 2   | No      | 0     |        |
| 9221   |       | 2   | No    |        | 2   | No      | 2     | 1      |
| 9223   |       | 1   | Yes   | 6      | 1   | Yes     | 3     | 4      |
| 9228   |       | 2   | No    |        | 2   | No      | 0     |        |
| 9230   |       | 2   | No    |        | 2   | No      | 0     |        |
| 9231   |       | 2   | No    |        | 2   | No      | 0     |        |
| 9233   |       | 2   | No    |        | 1   | Yes     | 0     |        |
| 9235   |       | 2   | No    |        | 2   | No      | 1     | 0      |
| 9237   |       | 2   | No    |        | 2   | No      | 0     |        |
| 9242   |       | 2   | No    |        | 2   | No      | 0     |        |
| 9250   |       | 2   | No    |        | 2   | No      | 0     |        |
| 9253   |       | 2   | No    |        | 2   | No      | 1     | 3      |
| 9257   |       | 2   | No    |        | 2   | No      | 0     |        |
| 9263   |       | 1   | Yes   | 5      | 2   | No      | 0     |        |
| 9267   |       | 1   | Yes   | 15     | 1   | Yes     | 1     | 2      |
| 9272   |       | 1   | Yes   | 10     | 2   | No      | 1     | 1      |
| 9279   |       | 2   | No    |        | 2   | No      | 0     |        |
| 9281   |       | 2   | No    |        | 2   | No      | 0     |        |
| 9285   |       | 2   | No    |        | 1   | Yes     | 5     | 1      |

| respid | Q16_2 | Q17 | Smoke | Q17a_1 | Q18 | Alcohol | Q19_1 | Q19a_1 |
|--------|-------|-----|-------|--------|-----|---------|-------|--------|
| 9286   |       | 2   | No    |        | 2   | No      | 1     | 2      |
| 9294   |       | 2   | No    |        | 1   | Yes     | 0     |        |
| 9295   |       | 2   | No    |        | 2   | No      | 0     |        |
| 9297   |       | 1   | Yes   | 10     | 2   | No      | 2     | 1      |
| 9299   |       | 2   | No    |        | 2   | No      | 1     | 2      |
| 9309   |       | 2   | No    |        | 2   | No      | 1     | 2      |
| 9315   |       | 2   | No    |        | 2   | No      | 0     |        |
| 9320   |       | 2   | No    |        | 2   | No      | 0     |        |
| 9324   |       | 2   | No    |        | 2   | No      | 0     |        |
| 9326   |       | 2   | No    |        | 2   | No      | 1     | 1      |
| 9333   |       | 2   | No    |        | 2   | No      | 0     |        |
| 9334   |       | 2   | No    |        | 1   | Yes     | 1     | 1      |
| 9336   |       | 2   | No    |        | 2   | No      | 0     |        |
| 9337   |       | 1   | Yes   | 15     | 2   | No      | 0     |        |
| 9342   |       | 2   | No    |        | 2   | No      | 1     | 1      |
| 9347   |       | 2   | No    |        | 2   | No      | 0     |        |
| 9352   |       | 2   | No    |        | 1   | Yes     | 4     | 1      |
| 9355   |       | 2   | No    |        | 2   | No      | 0     |        |
| 9356   |       | 2   | No    |        | 2   | No      | 1     | 2      |
| 9359   |       | 1   | Yes   | 1      | 2   | No      | 1     | 1      |
| 9368   |       | 2   | No    |        | 2   | No      | 0     |        |
| 9375   |       | 1   | Yes   | 10     | 2   | No      | 1     | 1      |
| 9384   |       | 2   | No    |        | 2   | No      | 0     |        |
| 9388   |       | 2   | No    |        | 2   | No      | 1     | 1      |
| 9397   |       | 2   | No    |        | 1   | Yes     | 5     | 4      |
| 9400   |       | 2   | No    |        | 2   | No      | 1     | 1      |
| 9401   |       | 2   | No    |        | 2   | No      | 2     | 4      |
| 9402   |       | 2   | No    |        | 2   | No      | 0     |        |
| 9417   |       | 2   | No    |        | 2   | No      | 2     | 1      |
| 9424   |       | 2   | No    |        | 2   | No      | 0     |        |
| 9427   |       | 2   | No    |        | 2   | No      | 0     |        |
| 9429   |       | 2   | No    |        | 1   | Yes     | 1     | 0      |

| respid | Q16_2 | Q17 | Smoke | Q17a_1 | Q18 | Alcohol | Q19_1 | Q19a_1 |
|--------|-------|-----|-------|--------|-----|---------|-------|--------|
| 9437   |       | 2   | No    |        | 2   | No      | 4     | 3      |
| 9442   |       | 1   | Yes   | 5      | 1   | Yes     | 1     | 3      |
| 9446   |       | 1   | Yes   | 3      | 1   | Yes     | 1     | 1      |
| 9447   |       | 2   | No    |        | 2   | No      | 0     |        |
| 9448   |       | 2   | No    |        | 2   | No      | 1     | 0      |
| 9449   |       | 1   | Yes   | 3      | 1   | Yes     | 1     | 1      |
| 9455   |       | 2   | No    |        | 2   | No      | 0     |        |
| 9459   |       | 1   | Yes   | 5      | 1   | Yes     | 1     | 1      |
| 9460   |       | 2   | No    |        | 2   | No      | 1     | 0      |
| 9461   |       | 2   | No    |        | 2   | No      | 1     | 2      |
| 9463   |       | 2   | No    |        | 2   | No      | 0     |        |
| 9464   |       | 1   | Yes   | 10     | 1   | Yes     | 1     | 1      |
| 9466   |       | 2   | No    |        | 2   | No      | 1     | 0      |
| 9477   |       | 2   | No    |        | 2   | No      | 0     |        |
| 9482   |       | 1   | Yes   | 1      | 1   | Yes     | 1     | 1      |
| 9486   |       | 2   | No    |        | 2   | No      | 2     | 1      |
| 9488   |       | 2   | No    |        | 2   | No      | 3     | 3      |
| 9489   |       | 2   | No    |        | 2   | No      | 0     |        |
| 9496   |       | 2   | No    |        | 2   | No      | 0     |        |
| 9499   |       | 2   | No    |        | 2   | No      | 1     | 0      |
| 9512   |       | 2   | No    |        | 2   | No      | 0     |        |
| 9514   |       | 1   | Yes   | 20     | 1   | Yes     | 1     | 1      |
| 9516   |       | 2   | No    |        | 2   | No      | 0     |        |
| 9517   |       | 2   | No    |        | 2   | No      | 2     | 1      |
| 9520   |       | 1   | Yes   | 30     | 1   | Yes     | 0     |        |
| 9527   |       | 2   | No    |        | 2   | No      | 1     | 1      |
| 9532   |       | 1   | Yes   | 20     | 1   | Yes     | 1     | 2      |
| 9533   |       | 2   | No    |        | 2   | No      | 0     |        |
| 9543   |       | 1   | Yes   | 10     | 2   | No      | 1     | 1      |
| 9550   |       | 1   | Yes   | 10     | 1   | Yes     | 3     | 1      |
| 9553   |       | 2   | No    |        | 2   | No      | 0     |        |
| 9555   |       | 2   | No    |        | 2   | No      | 4     | 2      |

| respid | Q16_2 | Q17 | Smoke | Q17a_1 | Q18 | Alcohol | Q19_1 | Q19a_1 |
|--------|-------|-----|-------|--------|-----|---------|-------|--------|
| 9565   |       | 1   | Yes   | 10     | 2   | No      | 1     | 1      |
| 9583   |       | 1   | Yes   | 20     | 2   | No      | 1     | 2      |
| 9594   |       | 2   | No    |        | 2   | No      | 0     |        |
| 9596   |       | 2   | No    |        | 2   | No      | 1     | 1      |
| 9600   |       | 2   | No    |        | 2   | No      | 1     | 2      |
| 9602   |       | 2   | No    |        | 2   | No      | 1     | 1      |
| 9606   |       | 1   | Yes   | 22     | 1   | Yes     | 0     |        |
| 9608   |       | 2   | No    |        | 1   | Yes     | 0     |        |
| 9610   |       | 2   | No    |        | 2   | No      | 1     | 1      |
| 9612   |       | 1   | Yes   | 1      | 1   | Yes     | 0     |        |
| 9613   |       | 1   | Yes   | 6      | 1   | Yes     | 0     |        |
| 9614   |       | 1   | Yes   | 15     | 1   | Yes     | 4     | 2      |
| 9620   |       | 1   | Yes   | 25     | 2   | No      | 1     | 1      |
| 9628   |       | 2   | No    |        | 2   | No      | 0     |        |
| 9631   |       | 1   | Yes   | 2      | 1   | Yes     | 0     |        |
| 9632   |       | 2   | No    |        | 2   | No      | 0     |        |
| 9633   |       | 2   | No    |        | 2   | No      | 0     |        |
| 9639   |       | 1   | Yes   | 5      | 1   | Yes     | 0     |        |
| 9640   |       | 2   | No    |        | 2   | No      | 3     | 1      |
| 9642   |       | 1   | Yes   | 6      | 1   | Yes     | 0     |        |
| 9653   |       | 1   | Yes   | 5      | 1   | Yes     | 2     | 1      |
| 9658   |       | 2   | No    |        | 2   | No      | 3     | 1      |
| 9659   |       | 2   | No    |        | 2   | No      | 1     | 2      |
| 9661   |       | 2   | No    |        | 2   | No      | 0     |        |
| 9664   |       | 2   | No    |        | 2   | No      | 0     |        |
| 9665   |       | 2   | No    |        | 2   | No      | 2     | 1      |
| 9666   |       | 2   | No    |        | 2   | No      | 2     | 3      |
| 9667   |       | 2   | No    |        | 1   | Yes     | 0     |        |
| 9668   |       | 1   | Yes   | 5      | 1   | Yes     | 0     |        |
| 9670   |       | 1   | Yes   | 16     | 1   | Yes     | 0     |        |
| 9671   |       | 2   | No    |        | 2   | No      | 0     |        |
| 9681   |       | 1   | Yes   | 20     | 1   | Yes     | 0     |        |

| respid | Q16_2 | Q17 | Smoke | Q17a_1 | Q18 | Alcohol | Q19_1 | Q19a_1 |
|--------|-------|-----|-------|--------|-----|---------|-------|--------|
| 9684   |       | 1   | Yes   | 30     | 2   | No      | 0     |        |
| 9685   |       | 2   | No    |        | 2   | No      | 0     |        |
| 9686   |       | 1   | Yes   | 12     | 2   | No      | 5     | 3      |
| 9688   |       | 2   | No    |        | 2   | No      | 1     | 2      |
| 9692   |       | 2   | No    |        | 2   | No      | 0     |        |
| 9693   |       | 2   | No    |        | 2   | No      | 3     | 1      |
| 9698   |       | 2   | No    |        | 2   | No      | 1     | 1      |
| 9699   |       | 2   | No    |        | 2   | No      | 0     |        |
| 9701   |       | 1   | Yes   | 20     | 2   | No      | 0     |        |
| 9702   |       | 1   | Yes   | 10     | 2   | No      | 0     |        |
| 9709   |       | 2   | No    |        | 2   | No      | 2     | 1      |
| 9713   |       | 2   | No    |        | 2   | No      | 0     |        |
| 9715   |       | 2   | No    |        | 2   | No      | 0     |        |
| 9721   |       | 2   | No    |        | 2   | No      | 0     |        |
| 9725   |       | 2   | No    |        | 2   | No      | 1     | 0      |
| 9729   |       | 2   | No    |        | 2   | No      | 2     | 2      |
| 9731   |       | 2   | No    |        | 2   | No      | 0     |        |
| 9736   |       | 2   | No    |        | 2   | No      | 1     | 1      |
| 9740   |       | 2   | No    |        | 2   | No      | 0     |        |
| 9741   |       | 2   | No    |        | 1   | Yes     | 0     |        |
| 9749   |       | 1   | Yes   | 5      | 1   | Yes     | 1     | 1      |
| 9750   |       | 2   | No    |        | 1   | Yes     | 1     | 1      |
| 9751   |       | 2   | No    |        | 2   | No      | 3     | 2      |
| 9753   |       | 2   | No    |        | 2   | No      | 1     | 1      |
| 9754   |       | 2   | No    |        | 2   | No      | 5     | 4      |
| 9756   |       | 1   | Yes   | 30     | 1   | Yes     | 5     | 1      |
| 9758   |       | 2   | No    |        | 2   | No      | 2     | 2      |
| 9759   |       | 2   | No    |        | 2   | No      | 0     |        |
| 9760   |       | 1   | Yes   | 4      | 1   | Yes     | 1     | 1      |
| 9761   |       | 2   | No    |        | 2   | No      | 0     |        |
| 9762   |       | 2   | No    |        | 1   | Yes     | 2     | 3      |
| 9764   |       | 2   | No    |        | 2   | No      | 0     |        |

| respid | Q16_2 | Q17 | Smoke | Q17a_1 | Q18 | Alcohol | Q19_1 | Q19a_1 |
|--------|-------|-----|-------|--------|-----|---------|-------|--------|
| 9768   |       | 2   | No    |        | 2   | No      | 0     |        |
| 9769   |       | 2   | No    |        | 2   | No      | 0     |        |
| 9770   |       | 2   | No    |        | 2   | No      | 0     |        |
| 9771   |       | 2   | No    |        | 1   | Yes     | 0     |        |
| 9772   |       | 2   | No    |        | 1   | Yes     | 0     |        |
| 9773   |       | 2   | No    |        | 2   | No      | 1     | 2      |
| 9776   |       | 2   | No    |        | 2   | No      | 1     | 0      |
| 9786   |       | 1   | Yes   | 20     | 2   | No      | 3     | 2      |
| 9790   |       | 2   | No    |        | 2   | No      | 0     |        |
| 9791   |       | 1   | Yes   | 8      | 1   | Yes     | 0     |        |
| 9794   |       | 2   | No    |        | 2   | No      | 2     | 2      |
| 9797   |       | 2   | No    |        | 2   | No      | 0     |        |
| 9799   |       | 2   | No    |        | 2   | No      | 1     | 1      |
| 9804   |       | 1   | Yes   | 10     | 2   | No      | 0     |        |
| 9805   |       | 1   | Yes   | 7      | 1   | Yes     | 1     | 1      |
| 9806   |       | 1   | Yes   | 10     | 2   | No      | 1     | 1      |
| 9807   |       | 2   | No    |        | 2   | No      | 0     |        |
| 9813   |       | 2   | No    |        | 2   | No      | 1     | 1      |
| 9817   |       | 2   | No    |        | 2   | No      | 0     |        |
| 9823   |       | 2   | No    |        | 2   | No      | 0     |        |
| 9826   |       | 2   | No    |        | 2   | No      | 0     |        |
| 9830   |       | 2   | No    |        | 2   | No      | 1     | 1      |
| 9835   |       | 2   | No    |        | 2   | No      | 0     |        |
| 9836   |       | 2   | No    |        | 2   | No      | 0     |        |
| 9841   |       | 1   | Yes   | 5      | 2   | No      | 0     |        |
| 9842   |       | 2   | No    |        | 2   | No      | 0     |        |
| 9844   |       | 2   | No    |        | 2   | No      | 1     | 1      |
| 9847   |       | 1   | Yes   | 1      | 2   | No      | 0     |        |
| 9851   |       | 2   | No    |        | 2   | No      | 0     |        |
| 9852   |       | 2   | No    |        | 2   | No      | 2     | 1      |
| 9854   |       | 2   | No    |        | 2   | No      | 0     |        |
| 9855   |       | 2   | No    |        | 2   | No      | 1     | 1      |



| respid | Q16_2 | Q17 | Smoke | Q17a_1 | Q18 | Alcohol | Q19_1 | Q19a_1 |
|--------|-------|-----|-------|--------|-----|---------|-------|--------|
| 9856   | 161   | 2   | No    |        | 2   | No      | 0     |        |
| 9862   |       | 2   | No    |        | 2   | No      | 1     | 1      |
| 9863   |       | 2   | No    |        | 1   | Yes     | 0     |        |
| 9866   |       | 2   | No    |        | 2   | No      | 1     | 1      |
| 9867   |       | 2   | No    |        | 2   | No      | 0     |        |
| 9868   |       | 2   | No    |        | 2   | No      | 3     | 2      |
| 9869   |       | 2   | No    |        | 2   | No      | 1     | 1      |
| 9878   |       | 2   | No    |        | 2   | No      | 1     | 1      |
| 9879   |       | 2   | No    |        | 1   | Yes     | 5     | 2      |
| 9881   |       | 2   | No    |        | 2   | No      | 1     | 1      |
| 9882   |       | 2   | No    |        | 2   | No      | 1     | 1      |
| 9884   |       | 2   | No    |        | 2   | No      | 0     |        |
| 9885   |       | 1   | Yes   | 15     | 2   | No      | 0     |        |
| 9888   |       | 2   | No    |        | 2   | No      | 0     |        |
| 9889   |       | 2   | No    |        | 2   | No      | 0     |        |
| 9894   |       | 2   | No    |        | 1   | Yes     | 3     | 2      |
| 9895   |       | 2   | No    |        | 1   | Yes     | 1     | 1      |
| 9896   |       | 2   | No    |        | 2   | No      | 4     | 4      |
| 9897   |       | 2   | No    |        | 2   | No      | 2     | 2      |
| 9905   |       | 2   | No    |        | 2   | No      | 1     | 1      |
| 9907   |       | 2   | No    |        | 2   | No      | 1     | 1      |
| 9908   |       | 2   | No    |        | 2   | No      | 0     |        |
| 9909   |       | 2   | No    |        | 2   | No      | 0     |        |
| 9910   |       | 1   | Yes   | 20     | 1   | Yes     | 4     | 2      |
| 9913   |       | 2   | No    |        | 2   | No      | 1     | 1      |
| 9914   |       | 2   | No    |        | 1   | Yes     | 1     | 1      |
| 9915   |       | 2   | No    |        | 2   | No      | 0     |        |
| 9916   |       | 2   | No    |        | 1   | Yes     | 1     | 0      |
| 9918   |       | 1   | Yes   | 3      | 2   | No      | 0     |        |
| 9919   |       | 2   | No    |        | 2   | No      | 1     | 0      |
| 9922   |       | 1   | Yes   | 1      | 2   | No      | 2     | 3      |
| 9930   |       | 2   | No    |        | 2   | No      | 0     |        |

| respid | Q16_2 | Q17 | Smoke | Q17a_1 | Q18 | Alcohol | Q19_1 | Q19a_1 |
|--------|-------|-----|-------|--------|-----|---------|-------|--------|
| 9934   |       | 2   | No    |        | 2   | No      | 0     |        |
| 9936   |       | 2   | No    |        | 2   | No      | 2     | 2      |
| 9938   |       | 2   | No    |        | 2   | No      | 0     |        |
| 9940   |       | 2   | No    |        | 2   | No      | 0     |        |
| 9944   |       | 2   | No    |        | 2   | No      | 1     | 1      |
| 9945   |       | 2   | No    |        | 2   | No      | 1     | 0      |
| 9948   |       | 1   | Yes   | 3      | 2   | No      | 5     | 2      |
| 9949   |       | 2   | No    |        | 2   | No      | 2     | 2      |
| 9951   |       | 1   | Yes   | 5      | 2   | No      | 1     | 1      |
| 9952   |       | 2   | No    |        | 2   | No      | 1     | 1      |
| 9954   |       | 2   | No    |        | 2   | No      | 0     |        |
| 9955   |       | 2   | No    |        | 2   | No      | 0     |        |
| 9956   |       | 1   | Yes   | 15     | 2   | No      | 3     | 2      |
| 9957   | 160   | 2   | No    |        | 2   | No      | 0     |        |
| 9958   |       | 2   | No    |        | 2   | No      | 2     | 1      |
| 9959   |       | 2   | No    |        | 1   | Yes     | 1     | 2      |
| 9960   |       | 2   | No    |        | 1   | Yes     | 1     | 1      |
| 9961   |       | 1   | Yes   | 20     | 1   | Yes     | 2     | 1      |
| 9962   |       | 2   | No    |        | 2   | No      | 1     | 0      |
| 9969   |       | 2   | No    |        | 1   | Yes     | 4     | 2      |
| 9982   |       | 2   | No    |        | 1   | Yes     | 5     | 2      |
| 9984   |       | 2   | No    |        | 2   | No      | 3     | 2      |
| 9990   |       | 2   | No    |        | 2   | No      | 1     | 1      |
| 9992   |       | 2   | No    |        | 2   | No      | 1     | 2      |
| 9993   |       | 2   | No    |        | 1   | Yes     | 0     |        |
| 9997   |       | 2   | No    |        | 2   | No      | 0     |        |
| 9999   |       | 2   | No    |        | 2   | No      | 0     |        |
| 10000  |       | 1   | Yes   | 2      | 2   | No      | 1     | 1      |
| 10005  |       | 2   | No    |        | 2   | No      | 2     | 1      |
| 10014  |       | 2   | No    |        | 2   | No      | 0     |        |
| 10016  |       | 2   | No    |        | 2   | No      | 3     | 4      |
| 10017  |       | 1   | Yes   | 10     | 1   | Yes     | 1     | 1      |

| respid | Q16_2 | Q17 | Smoke | Q17a_1 | Q18 | Alcohol | Q19_1 | Q19a_1 |
|--------|-------|-----|-------|--------|-----|---------|-------|--------|
| 10018  |       | 2   | No    |        | 2   | No      | 3     | 2      |
| 10021  |       | 2   | No    |        | 2   | No      | 1     | 1      |
| 10025  |       | 2   | No    |        | 2   | No      | 0     |        |
| 10027  |       | 2   | No    |        | 2   | No      | 0     |        |
| 10028  |       | 2   | No    |        | 2   | No      | 0     |        |
| 10031  |       | 2   | No    |        | 2   | No      | 1     | 1      |
| 10036  |       | 2   | No    |        | 2   | No      | 1     | 2      |
| 10037  |       | 2   | No    |        | 2   | No      | 1     | 1      |
| 10038  |       | 2   | No    |        | 1   | Yes     | 1     | 1      |
| 10039  |       | 2   | No    |        | 2   | No      | 0     |        |
| 10041  |       | 1   | Yes   | 4      | 1   | Yes     | 3     | 0      |
| 10045  |       | 2   | No    |        | 2   | No      | 4     | 3      |
| 10046  |       | 2   | No    |        | 2   | No      | 2     | 2      |
| 10047  |       | 1   | Yes   | 1      | 2   | No      | 2     | 1      |
| 10048  |       | 2   | No    |        | 2   | No      | 0     |        |
| 10049  |       | 1   | Yes   | 20     | 2   | No      | 5     | 2      |
| 10051  |       | 2   | No    |        | 2   | No      | 1     | 1      |
| 10052  |       | 1   | Yes   | 15     | 1   | Yes     | 1     | 1      |
| 10056  |       | 2   | No    |        | 1   | Yes     | 1     | 0      |
| 10061  |       | 2   | No    |        | 2   | No      | 5     | 1      |
| 10064  |       | 1   | Yes   | 6      | 2   | No      | 1     | 0      |
| 10066  |       | 2   | No    |        | 2   | No      | 0     |        |
| 10069  |       | 2   | No    |        | 2   | No      | 0     |        |
| 10071  |       | 2   | No    |        | 2   | No      | 1     | 2      |
| 10074  |       | 1   | Yes   | 15     | 2   | No      | 5     | 0      |
| 10079  |       | 2   | No    |        | 2   | No      | 0     |        |
| 10087  |       | 1   | Yes   | 30     | 2   | No      | 1     | 2      |
| 10095  |       | 2   | No    |        | 2   | No      | 0     |        |
| 10097  |       | 2   | No    |        | 2   | No      | 2     | 3      |
| 10100  |       | 2   | No    |        | 2   | No      | 1     | 1      |
| 10105  |       | 2   | No    |        | 2   | No      | 0     |        |
| 10107  |       | 2   | No    |        | 1   | Yes     | 2     | 1      |

| respid | Q16_2 | Q17 | Smoke | Q17a_1 | Q18 | Alcohol | Q19_1 | Q19a_1 |
|--------|-------|-----|-------|--------|-----|---------|-------|--------|
| 10111  |       | 2   | No    |        | 2   | No      | 0     |        |
| 10116  |       | 1   | Yes   | 5      | 2   | No      | 1     | 1      |
| 10118  |       | 2   | No    |        | 2   | No      | 0     |        |
| 10123  |       | 1   | Yes   | 15     | 1   | Yes     | 0     |        |
| 10124  |       | 2   | No    |        | 2   | No      | 1     | 1      |
| 10130  |       | 2   | No    |        | 1   | Yes     | 1     | 1      |
| 10134  |       | 2   | No    |        | 2   | No      | 1     | 0      |
| 10135  |       | 2   | No    |        | 2   | No      | 0     |        |
| 10136  |       | 2   | No    |        | 2   | No      | 0     |        |
| 10141  |       | 1   | Yes   | 10     | 2   | No      | 2     | 1      |
| 10142  |       | 2   | No    |        | 2   | No      | 0     |        |
| 10143  |       | 2   | No    |        | 2   | No      | 0     |        |
| 10145  |       | 2   | No    |        | 2   | No      | 0     |        |
| 10149  |       | 2   | No    |        | 2   | No      | 1     | 1      |
| 10150  |       | 2   | No    |        | 2   | No      | 1     | 0      |
| 10151  |       | 1   | Yes   | 10     | 2   | No      | 0     |        |
| 10152  |       | 2   | No    |        | 2   | No      | 4     | 2      |
| 10153  |       | 2   | No    |        | 1   | Yes     | 0     |        |
| 10156  |       | 2   | No    |        | 2   | No      | 0     |        |
| 10160  |       | 2   | No    |        | 2   | No      | 1     | 2      |
| 10161  |       | 2   | No    |        | 2   | No      | 1     | 1      |
| 10167  |       | 1   | Yes   | 2      | 2   | No      | 1     | 3      |
| 10171  |       | 2   | No    |        | 2   | No      | 0     |        |
| 10172  |       | 2   | No    |        | 1   | Yes     | 0     |        |
| 10176  |       | 1   | Yes   | 20     | 2   | No      | 1     | 1      |
| 10177  |       | 2   | No    |        | 2   | No      | 0     |        |
| 10182  |       | 1   | Yes   | 5      | 1   | Yes     | 3     | 2      |
| 10184  |       | 1   | Yes   | 20     | 2   | No      | 0     |        |
| 10186  |       | 2   | No    |        | 2   | No      | 0     |        |
| 10189  |       | 2   | No    |        | 1   | Yes     | 4     | 2      |
| 10191  |       | 2   | No    |        | 2   | No      | 0     |        |
| 10192  |       | 2   | No    |        | 1   | Yes     | 0     |        |

| respid | Q16_2 | Q17 | Smoke | Q17a_1 | Q18 | Alcohol | Q19_1 | Q19a_1 |
|--------|-------|-----|-------|--------|-----|---------|-------|--------|
| 10195  |       | 2   | No    |        | 1   | Yes     | 0     |        |
| 10199  |       | 2   | No    |        | 2   | No      | 0     |        |
| 10201  |       | 2   | No    |        | 2   | No      | 3     | 2      |
| 10213  |       | 2   | No    |        | 2   | No      | 0     |        |
| 10222  |       | 2   | No    |        | 2   | No      | 3     | 2      |
| 10224  |       | 2   | No    |        | 2   | No      | 0     |        |
| 10245  |       | 2   | No    |        | 2   | No      | 0     |        |
| 10254  |       | 2   | No    |        | 2   | No      | 1     | 1      |
| 10255  |       | 1   | Yes   | 6      | 1   | Yes     | 2     | 3      |
| 10257  |       | 2   | No    |        | 2   | No      | 0     |        |
| 10260  |       | 2   | No    |        | 2   | No      | 1     | 1      |
| 10261  |       | 1   | Yes   | 12     | 2   | No      | 1     | 1      |
| 10263  |       | 2   | No    |        | 2   | No      | 5     | 4      |
| 10264  |       | 2   | No    |        | 2   | No      | 2     | 1      |
| 10268  |       | 2   | No    |        | 1   | Yes     | 2     | 2      |
| 10269  |       | 2   | No    |        | 2   | No      | 1     | 1      |
| 10270  |       | 2   | No    |        | 2   | No      | 0     |        |
| 10282  |       | 2   | No    |        | 2   | No      | 0     |        |
| 10285  |       | 2   | No    |        | 2   | No      | 0     |        |
| 10288  |       | 1   | Yes   | 20     | 2   | No      | 0     |        |
| 10291  |       | 2   | No    |        | 2   | No      | 0     |        |
| 10292  |       | 2   | No    |        | 2   | No      | 0     |        |
| 10304  |       | 2   | No    |        | 2   | No      | 0     |        |
| 10305  |       | 2   | No    |        | 2   | No      | 5     | 2      |
| 10310  |       | 2   | No    |        | 2   | No      | 1     | 1      |
| 10324  |       | 1   | Yes   | 5      | 1   | Yes     | 0     |        |
| 10325  |       | 2   | No    |        | 2   | No      | 1     | 0      |
| 10326  |       | 2   | No    |        | 2   | No      | 4     | 2      |
| 10329  |       | 2   | No    |        | 2   | No      | 0     |        |
| 10332  |       | 2   | No    |        | 2   | No      | 0     |        |
| 10337  |       | 1   | Yes   | 12     | 1   | Yes     | 1     | 1      |
| 10341  |       | 2   | No    |        | 2   | No      | 1     | 1      |

| respid | Q16_2 | Q17 | Smoke | Q17a_1 | Q18 | Alcohol | Q19_1 | Q19a_1 |
|--------|-------|-----|-------|--------|-----|---------|-------|--------|
| 10353  |       | 1   | Yes   | 15     | 2   | No      | 1     | 1      |
| 10354  |       | 2   | No    |        | 2   | No      | 0     |        |
| 10359  |       | 2   | No    |        | 2   | No      | 1     | 1      |
| 10360  |       | 2   | No    |        | 2   | No      | 0     |        |
| 10362  |       | 1   | Yes   | 5      | 1   | Yes     | 1     | 2      |
| 10364  |       | 2   | No    |        | 2   | No      | 1     | 1      |
| 10366  |       | 1   | Yes   | 10     | 2   | No      | 4     | 3      |
| 10367  |       | 2   | No    |        | 2   | No      | 1     | 0      |
| 10371  |       | 1   | Yes   | 10     | 2   | No      | 0     |        |
| 10374  |       | 2   | No    |        | 2   | No      | 4     | 2      |
| 10375  |       | 1   | Yes   | 10     | 1   | Yes     | 0     |        |
| 10376  |       | 2   | No    |        | 2   | No      | 0     |        |
| 10377  |       | 1   | Yes   | 5      | 2   | No      | 1     | 1      |
| 10378  |       | 2   | No    |        | 2   | No      | 1     | 1      |
| 10387  |       | 2   | No    |        | 2   | No      | 0     |        |
| 10396  |       | 1   | Yes   | 6      | 2   | No      | 1     | 1      |
| 10397  |       | 1   | Yes   | 2      | 1   | Yes     | 0     |        |
| 10399  |       | 2   | No    |        | 2   | No      | 4     | 3      |
| 10405  |       | 2   | No    |        | 2   | No      | 0     |        |
| 10406  |       | 1   | Yes   | 10     | 1   | Yes     | 0     |        |
| 10408  |       | 2   | No    |        | 2   | No      | 0     |        |
| 10409  |       | 2   | No    |        | 2   | No      | 0     |        |
| 10412  |       | 2   | No    |        | 1   | Yes     | 0     |        |
| 10413  |       | 2   | No    |        | 2   | No      | 0     |        |
| 10419  |       | 2   | No    |        | 2   | No      | 1     | 1      |
| 10423  |       | 1   | Yes   | 10     | 1   | Yes     | 4     | 3      |
| 10426  |       | 2   | No    |        | 2   | No      | 0     |        |
| 10446  |       | 2   | No    |        | 1   | Yes     | 4     | 2      |
| 10448  |       | 1   | Yes   | 4      | 2   | No      | 0     |        |
| 10450  |       | 2   | No    |        | 2   | No      | 0     |        |
| 10455  |       | 2   | No    |        | 2   | No      | 3     | 2      |
| 10460  |       | 2   | No    |        | 2   | No      | 0     |        |

| respid | Q16_2 | Q17 | Smoke | Q17a_1 | Q18 | Alcohol | Q19_1 | Q19a_1 |
|--------|-------|-----|-------|--------|-----|---------|-------|--------|
| 10461  |       | 2   | No    |        | 2   | No      | 0     |        |
| 10471  |       | 2   | No    |        | 2   | No      | 0     |        |
| 10472  |       | 2   | No    |        | 2   | No      | 0     |        |
| 10491  |       | 2   | No    |        | 1   | Yes     | 1     | 3      |
| 10493  |       | 2   | No    |        | 2   | No      | 1     | 2      |
| 10498  |       | 2   | No    |        | 2   | No      | 0     |        |
| 10533  |       | 2   | No    |        | 2   | No      | 0     |        |
| 10539  |       | 2   | No    |        | 2   | No      | 0     |        |
| 10540  |       | 1   | Yes   | 5      | 2   | No      | 1     | 1      |
| 10557  |       | 2   | No    |        | 2   | No      | 2     | 2      |
| 10558  |       | 2   | No    |        | 2   | No      | 1     | 3      |
| 10559  |       | 2   | No    |        | 2   | No      | 1     | 2      |
| 10564  |       | 2   | No    |        | 2   | No      | 2     | 2      |
| 10570  |       | 2   | No    |        | 2   | No      | 0     |        |
| 10572  |       | 2   | No    |        | 2   | No      | 0     |        |
| 10576  |       | 2   | No    |        | 1   | Yes     | 3     | 1      |
| 10582  |       | 1   | Yes   | 5      | 1   | Yes     | 0     |        |
| 10593  |       | 2   | No    |        | 2   | No      | 0     |        |
| 10596  |       | 1   | Yes   | 20     | 1   | Yes     | 0     |        |
| 10615  |       | 2   | No    |        | 2   | No      | 0     |        |
| 10616  |       | 1   | Yes   | 10     | 1   | Yes     | 1     | 1      |
| 10623  |       | 2   | No    |        | 2   | No      | 0     |        |
| 10626  |       | 2   | No    |        | 2   | No      | 0     |        |
| 10627  |       | 2   | No    |        | 2   | No      | 2     | 2      |
| 10629  |       | 2   | No    |        | 2   | No      | 3     | 2      |
| 10632  |       | 2   | No    |        | 2   | No      | 4     | 2      |
| 10641  |       | 2   | No    |        | 2   | No      | 0     |        |
| 10648  |       | 1   | Yes   | 7      | 2   | No      | 2     | 2      |
| 10651  |       | 2   | No    |        | 2   | No      | 1     | 1      |
| 10654  |       | 2   | No    |        | 2   | No      | 0     |        |
| 10673  |       | 2   | No    |        | 2   | No      | 0     |        |
| 10675  |       | 2   | No    |        | 1   | Yes     | 3     | 2      |

| respid | Q16_2 | Q17 | Smoke | Q17a_1 | Q18 | Alcohol | Q19_1 | Q19a_1 |
|--------|-------|-----|-------|--------|-----|---------|-------|--------|
| 10689  |       | 1   | Yes   | 5      | 2   | No      | 0     |        |
| 10692  |       | 2   | No    |        | 2   | No      | 0     |        |
| 10694  |       | 2   | No    |        | 2   | No      | 0     |        |
| 10695  |       | 1   | Yes   | 20     | 2   | No      | 3     | 1      |
| 10702  |       | 2   | No    |        | 2   | No      | 1     | 1      |
| 10703  |       | 2   | No    |        | 1   | Yes     | 1     | 1      |
| 10708  |       | 2   | No    |        | 2   | No      | 1     | 1      |
| 10719  |       | 2   | No    |        | 1   | Yes     | 0     |        |
| 10722  |       | 2   | No    |        | 2   | No      | 1     | 1      |
| 10723  |       | 2   | No    |        | 2   | No      | 1     | 0      |
| 10726  |       | 2   | No    |        | 1   | Yes     | 0     |        |
| 10727  |       | 2   | No    |        | 2   | No      | 0     |        |
| 10730  |       | 2   | No    |        | 2   | No      | 0     |        |
| 10731  |       | 2   | No    |        | 2   | No      | 0     |        |
| 10737  |       | 2   | No    |        | 2   | No      | 0     |        |
| 10743  |       | 2   | No    |        | 2   | No      | 1     | 0      |
| 10763  |       | 2   | No    |        | 2   | No      | 0     |        |
| 10777  |       | 2   | No    |        | 2   | No      | 0     |        |
| 10787  |       | 1   | Yes   | 25     | 1   | Yes     | 3     | 2      |
| 10798  |       | 2   | No    |        | 2   | No      | 3     | 3      |
| 10800  |       | 2   | No    |        | 2   | No      | 0     |        |
| 10802  |       | 2   | No    |        | 2   | No      | 1     | 1      |
| 10803  |       | 2   | No    |        | 1   | Yes     | 2     | 2      |
| 10808  |       | 2   | No    |        | 2   | No      | 0     |        |
| 10810  |       | 1   | Yes   | 12     | 2   | No      | 2     | 2      |
| 10819  |       | 2   | No    |        | 2   | No      | 0     |        |
| 10825  |       | 2   | No    |        | 2   | No      | 0     |        |
| 10827  |       | 2   | No    |        | 1   | Yes     | 2     | 1      |
| 10830  |       | 2   | No    |        | 2   | No      | 3     | 1      |
| 10847  |       | 2   | No    |        | 2   | No      | 0     |        |
| 10849  |       | 1   | Yes   | 14     | 1   | Yes     | 1     | 2      |
| 10852  |       | 2   | No    |        | 2   | No      | 0     |        |



| respid | Q16_2 | Q17 | Smoke | Q17a_1 | Q18 | Alcohol | Q19_1 | Q19a_1 |
|--------|-------|-----|-------|--------|-----|---------|-------|--------|
| 10854  |       | 2   | No    |        | 2   | No      | 4     | 3      |
| 10857  |       | 2   | No    |        | 2   | No      | 0     |        |
| 10861  |       | 2   | No    |        | 2   | No      | 2     | 2      |
| 10862  |       | 2   | No    |        | 2   | No      | 0     |        |
| 10870  |       | 1   | Yes   | 15     | 2   | No      | 0     |        |
| 10873  |       | 1   | Yes   | 3      | 1   | Yes     | 4     | 1      |
| 10881  |       | 2   | No    |        | 2   | No      | 0     |        |
| 10893  |       | 2   | No    |        | 2   | No      | 0     |        |
| 10898  |       | 2   | No    |        | 2   | No      | 0     |        |
| 10899  |       | 2   | No    |        | 1   | Yes     | 0     |        |
| 10905  |       | 2   | No    |        | 2   | No      | 1     | 0      |
| 10910  |       | 2   | No    |        | 2   | No      | 0     |        |
| 10911  |       | 2   | No    |        | 2   | No      | 1     | 1      |
| 10912  |       | 2   | No    |        | 2   | No      | 0     |        |
| 10913  |       | 2   | No    |        | 2   | No      | 0     |        |
| 10918  |       | 2   | No    |        | 2   | No      | 0     |        |
| 10995  |       | 1   | Yes   | 4      | 2   | No      | 0     |        |
| 11002  |       | 2   | No    |        | 2   | No      | 1     | 1      |
| 11003  |       | 2   | No    |        | 2   | No      | 1     | 1      |
| 11005  |       | 1   | Yes   | 15     | 1   | Yes     | 4     | 2      |
| 11015  |       | 2   | No    |        | 1   | Yes     | 0     |        |
| 11016  |       | 1   | Yes   | 10     | 1   | Yes     | 0     |        |
| 11017  |       | 2   | No    |        | 2   | No      | 0     |        |
| 11020  |       | 2   | No    |        | 2   | No      | 1     | 1      |
| 11024  |       | 1   | Yes   | 40     | 2   | No      | 0     |        |
| 11026  |       | 2   | No    |        | 2   | No      | 2     | 1      |
| 11028  |       | 1   | Yes   | 15     | 1   | Yes     | 2     | 2      |
| 11029  |       | 2   | No    |        | 2   | No      | 1     | 2      |
| 11030  |       | 2   | No    |        | 2   | No      | 1     | 1      |
| 11031  |       | 2   | No    |        | 2   | No      | 0     |        |
| 11038  |       | 2   | No    |        | 2   | No      | 0     |        |
| 11051  |       | 2   | No    |        | 2   | No      | 0     |        |

| respid | Q16_2 | Q17 | Smoke | Q17a_1 | Q18 | Alcohol | Q19_1 | Q19a_1 |
|--------|-------|-----|-------|--------|-----|---------|-------|--------|
| 11052  |       | 2   | No    |        | 2   | No      | 1     | 1      |
| 11053  |       | 2   | No    |        | 2   | No      | 1     | 1      |
| 11054  |       | 2   | No    |        | 2   | No      | 2     | 2      |
| 11063  |       | 2   | No    |        | 2   | No      | 0     |        |
| 11075  |       | 1   | Yes   | 20     | 1   | Yes     | 3     | 1      |
| 11083  |       | 2   | No    |        | 2   | No      | 0     |        |
| 11092  |       | 2   | No    |        | 2   | No      | 0     |        |
| 11118  |       | 2   | No    |        | 2   | No      | 0     |        |
| 11119  |       | 1   | Yes   | 15     | 2   | No      | 2     | 4      |
| 11134  |       | 2   | No    |        | 2   | No      | 0     |        |
| 11139  |       | 1   | Yes   | 5      | 2   | No      | 0     |        |
| 11154  |       | 1   | Yes   | 20     | 1   | Yes     | 0     |        |
| 11166  |       | 1   | Yes   | 3      | 1   | Yes     | 0     |        |
| 11168  |       | 2   | No    |        | 1   | Yes     | 0     |        |
| 11176  |       | 2   | No    |        | 1   | Yes     | 2     | 2      |
| 11183  |       | 1   | Yes   | 5      | 1   | Yes     | 1     | 2      |
| 11189  |       | 2   | No    |        | 2   | No      | 2     | 0      |
| 11196  |       | 2   | No    |        | 2   | No      | 4     | 3      |
| 11200  |       | 2   | No    |        | 2   | No      | 3     | 3      |
| 11201  |       | 2   | No    |        | 2   | No      | 1     | 1      |
| 11211  |       | 2   | No    |        | 2   | No      | 4     | 3      |
| 11218  |       | 2   | No    |        | 2   | No      | 1     | 0      |
| 11219  |       | 2   | No    |        | 2   | No      | 1     | 0      |
| 11221  |       | 2   | No    |        | 2   | No      | 1     | 1      |
| 11222  |       | 2   | No    |        | 2   | No      | 0     |        |
| 11230  |       | 2   | No    |        | 2   | No      | 3     | 2      |
| 11236  |       | 2   | No    |        | 2   | No      | 3     | 2      |
| 11237  |       | 2   | No    |        | 1   | Yes     | 3     | 2      |
| 11240  |       | 2   | No    |        | 2   | No      | 3     | 2      |
| 11244  |       | 2   | No    |        | 2   | No      | 3     | 2      |
| 11249  |       | 2   | No    |        | 2   | No      | 1     | 1      |
| 11252  |       | 2   | No    |        | 2   | No      | 3     | 2      |

| respid | Q16_2 | Q17 | Smoke | Q17a_1 | Q18 | Alcohol | Q19_1 | Q19a_1 |
|--------|-------|-----|-------|--------|-----|---------|-------|--------|
| 11254  |       | 2   | No    |        | 2   | No      | 2     | 1      |
| 11255  |       | 2   | No    |        | 2   | No      | 1     | 3      |
| 11258  |       | 2   | No    |        | 2   | No      | 3     | 3      |
| 11260  |       | 2   | No    |        | 2   | No      | 1     | 1      |
| 11264  |       | 2   | No    |        | 2   | No      | 3     | 2      |
| 11266  |       | 1   | Yes   | 10     | 2   | No      | 1     | 2      |
| 11268  |       | 1   | Yes   | 20     | 1   | Yes     | 4     | 2      |
| 11269  |       | 1   | Yes   | 2      | 1   | Yes     | 0     |        |
| 11272  |       | 1   | Yes   | 5      | 2   | No      | 1     | 1      |
| 11273  |       | 2   | No    |        | 2   | No      | 0     |        |
| 11275  |       | 2   | No    |        | 2   | No      | 0     |        |
| 11276  |       | 2   | No    |        | 2   | No      | 0     |        |
| 11278  |       | 2   | No    |        | 2   | No      | 1     | 1      |
| 11288  |       | 2   | No    |        | 1   | Yes     | 0     |        |
| 11289  |       | 2   | No    |        | 2   | No      | 0     |        |
| 11291  |       | 2   | No    |        | 2   | No      | 0     |        |
| 11295  |       | 2   | No    |        | 2   | No      | 0     |        |
| 11297  |       | 2   | No    |        | 2   | No      | 0     |        |
| 11304  |       | 1   | Yes   | 5      | 1   | Yes     | 1     | 3      |
| 11305  |       | 2   | No    |        | 1   | Yes     | 0     |        |
| 11311  |       | 2   | No    |        | 2   | No      | 0     |        |
| 11313  |       | 2   | No    |        | 2   | No      | 0     |        |
| 11315  |       | 2   | No    |        | 2   | No      | 3     | 4      |
| 11316  |       | 2   | No    |        | 2   | No      | 3     | 4      |
| 11318  |       | 2   | No    |        | 1   | Yes     | 3     | 3      |
| 11323  |       | 2   | No    |        | 2   | No      | 0     |        |
| 11331  |       | 2   | No    |        | 1   | Yes     | 0     |        |
| 11333  |       | 2   | No    |        | 2   | No      | 2     | 2      |
| 11334  |       | 1   | Yes   | 20     | 1   | Yes     | 1     | 2      |
| 11340  |       | 2   | No    |        | 1   | Yes     | 4     | 2      |
| 11345  |       | 1   | Yes   | 20     | 1   | Yes     | 1     | 1      |
| 11354  |       | 2   | No    |        | 2   | No      | 0     |        |

| respid | Q16_2 | Q17 | Smoke | Q17a_1 | Q18 | Alcohol | Q19_1 | Q19a_1 |
|--------|-------|-----|-------|--------|-----|---------|-------|--------|
| 11360  |       | 2   | No    |        | 2   | No      | 0     |        |
| 11361  |       | 2   | No    |        | 2   | No      | 2     | 2      |
| 11367  |       | 2   | No    |        | 2   | No      | 0     |        |
| 11370  |       | 1   | Yes   | 10     | 1   | Yes     | 0     |        |
| 11371  |       | 2   | No    |        | 2   | No      | 2     | 2      |
| 11372  |       | 2   | No    |        | 2   | No      | 2     | 3      |
| 11373  |       | 2   | No    |        | 2   | No      | 0     |        |
| 11382  |       | 2   | No    |        | 2   | No      | 0     |        |
| 11394  |       | 1   | Yes   | 20     | 1   | Yes     | 0     |        |
| 11395  |       | 1   | Yes   | 6      | 1   | Yes     | 1     | 1      |
| 11397  |       | 2   | No    |        | 1   | Yes     | 0     |        |
| 11402  |       | 2   | No    |        | 1   | Yes     | 4     | 2      |
| 11409  |       | 1   | Yes   | 6      | 1   | Yes     | 0     |        |
| 11410  |       | 2   | No    |        | 2   | No      | 0     |        |
| 11411  |       | 2   | No    |        | 2   | No      | 0     |        |
| 11418  |       | 1   | Yes   | 20     | 1   | Yes     | 1     | 1      |
| 11425  |       | 2   | No    |        | 2   | No      | 2     | 2      |
| 11429  |       | 2   | No    |        | 2   | No      | 1     | 0      |
| 11430  |       | 1   | Yes   | 10     | 1   | Yes     | 2     | 2      |
| 11431  |       | 1   | Yes   | 15     | 1   | Yes     | 3     | 2      |
| 11432  |       | 1   | Yes   | 15     | 1   | Yes     | 0     |        |
| 11433  |       | 1   | Yes   | 20     | 1   | Yes     | 4     | 3      |
| 11435  |       | 2   | No    |        | 2   | No      | 2     | 1      |
| 11436  |       | 2   | No    |        | 2   | No      | 1     | 1      |
| 11437  |       | 2   | No    |        | 2   | No      | 2     | 1      |
| 11439  |       | 2   | No    |        | 2   | No      | 0     |        |
| 11440  |       | 2   | No    |        | 1   | Yes     | 0     |        |
| 11447  |       | 2   | No    |        | 2   | No      | 0     |        |
| 11455  |       | 2   | No    |        | 2   | No      | 0     |        |
| 11456  |       | 2   | No    |        | 2   | No      | 2     | 3      |
| 11461  |       | 2   | No    |        | 1   | Yes     | 1     | 1      |
| 11463  |       | 1   | Yes   | 5      | 1   | Yes     | 1     | 2      |

| respid | Q16_2 | Q17 | Smoke | Q17a_1 | Q18 | Alcohol | Q19_1 | Q19a_1 |
|--------|-------|-----|-------|--------|-----|---------|-------|--------|
| 11470  |       | 1   | Yes   | 15     | 2   | No      | 1     | 2      |
| 11472  |       | 2   | No    |        | 1   | Yes     | 0     |        |
| 11475  |       | 2   | No    |        | 2   | No      | 0     |        |
| 11476  |       | 2   | No    |        | 2   | No      | 1     | 2      |
| 11482  |       | 2   | No    |        | 2   | No      | 2     | 3      |
| 11501  |       | 1   | Yes   | 6      | 1   | Yes     | 1     | 2      |
| 11503  |       | 2   | No    |        | 2   | No      | 1     | 2      |
| 11505  |       | 1   | Yes   | 10     | 1   | Yes     | 0     |        |
| 11510  |       | 2   | No    |        | 2   | No      | 1     | 2      |
| 11519  |       | 1   | Yes   | 20     | 1   | Yes     | 0     |        |
| 11527  |       | 2   | No    |        | 2   | No      | 4     | 4      |
| 11529  |       | 2   | No    |        | 2   | No      | 2     | 2      |
| 11530  |       | 1   | Yes   | 10     | 1   | Yes     | 2     | 2      |
| 11536  |       | 1   | Yes   | 2      | 2   | No      | 5     | 4      |
| 11543  |       | 1   | Yes   | 10     | 2   | No      | 2     | 2      |
| 11548  |       | 2   | No    |        | 2   | No      | 0     |        |
| 11566  |       | 2   | No    |        | 2   | No      | 0     |        |
| 11570  |       | 2   | No    |        | 2   | No      | 4     | 3      |
| 11571  |       | 2   | No    |        | 2   | No      | 0     |        |
| 11578  |       | 2   | No    |        | 2   | No      | 0     |        |
| 11579  |       | 2   | No    |        | 2   | No      | 0     |        |
| 11581  |       | 1   | Yes   | 8      | 1   | Yes     | 2     | 4      |
| 11582  |       | 2   | No    |        | 2   | No      | 0     |        |
| 11583  |       | 1   | Yes   | 2      | 1   | Yes     | 0     |        |
| 11589  |       | 2   | No    |        | 2   | No      | 1     | 2      |
| 11590  |       | 2   | No    |        | 2   | No      | 0     |        |
| 11592  |       | 2   | No    |        | 2   | No      | 0     |        |
| 11596  |       | 2   | No    |        | 2   | No      | 0     |        |
| 11598  |       | 1   | Yes   | 2      | 2   | No      | 1     | 2      |
| 11602  |       | 2   | No    |        | 2   | No      | 1     | 2      |
| 11605  |       | 1   | Yes   | 10     | 1   | Yes     | 0     |        |
| 11618  |       | 2   | No    |        | 2   | No      | 0     |        |

| respid | Q16_2 | Q17 | Smoke | Q17a_1 | Q18 | Alcohol | Q19_1 | Q19a_1 |
|--------|-------|-----|-------|--------|-----|---------|-------|--------|
| 11621  |       | 1   | Yes   | 15     | 1   | Yes     | 0     |        |
| 11630  |       | 2   | No    |        | 2   | No      | 2     | 2      |
| 11636  |       | 2   | No    |        | 2   | No      | 0     |        |
| 11640  |       | 2   | No    |        | 1   | Yes     | 0     |        |
| 11658  |       | 2   | No    |        | 1   | Yes     | 1     | 1      |
| 11665  |       | 2   | No    |        | 2   | No      | 0     |        |
| 11666  |       | 2   | No    |        | 2   | No      | 1     | 2      |
| 11667  |       | 1   | Yes   | 20     | 1   | Yes     | 2     | 1      |
| 11674  |       | 2   | No    |        | 2   | No      | 0     |        |
| 11680  |       | 2   | No    |        | 2   | No      | 0     |        |
| 11683  |       | 1   | Yes   | 10     | 2   | No      | 3     | 2      |
| 11688  |       | 1   | Yes   | 10     | 1   | Yes     | 0     |        |
| 11690  |       | 2   | No    |        | 2   | No      | 0     |        |
| 11694  |       | 2   | No    |        | 2   | No      | 0     |        |
| 11705  |       | 2   | No    |        | 2   | No      | 0     |        |
| 11720  |       | 1   | Yes   | 16     | 2   | No      | 2     | 2      |
| 11724  |       | 2   | No    |        | 2   | No      | 0     |        |
| 11738  |       | 2   | No    |        | 2   | No      | 1     | 1      |
| 11744  |       | 2   | No    |        | 2   | No      | 1     | 3      |
| 11745  |       | 2   | No    |        | 2   | No      | 1     | 3      |
| 11747  |       | 2   | No    |        | 2   | No      | 0     |        |
| 11755  |       | 2   | No    |        | 2   | No      | 1     | 2      |
| 11756  |       | 1   | Yes   | 15     | 2   | No      | 0     |        |
| 11772  |       | 2   | No    |        | 2   | No      | 2     | 1      |
| 11773  |       | 2   | No    |        | 2   | No      | 0     |        |
| 11778  |       | 1   | Yes   | 10     | 1   | Yes     | 5     | 2      |
| 11790  |       | 1   | Yes   | 20     | 2   | No      | 3     | 2      |
| 11794  |       | 2   | No    |        | 2   | No      | 0     |        |
| 11795  |       | 1   | Yes   | 8      | 1   | Yes     | 2     | 3      |
| 11799  |       | 1   | Yes   | 10     | 2   | No      | 3     | 2      |
| 11803  |       | 1   | Yes   | 5      | 2   | No      | 1     | 1      |
| 11806  |       | 2   | No    |        | 1   | Yes     | 4     | 3      |

| respid | Q16_2 | Q17 | Smoke | Q17a_1 | Q18 | Alcohol | Q19_1 | Q19a_1 |
|--------|-------|-----|-------|--------|-----|---------|-------|--------|
| 11808  |       | 2   | No    |        | 2   | No      | 0     |        |
| 11810  |       | 2   | No    |        | 2   | No      | 0     |        |
| 11811  |       | 2   | No    |        | 2   | No      | 0     |        |
| 11812  |       | 1   | Yes   | 2      | 1   | Yes     | 3     | 2      |
| 11813  |       | 1   | Yes   | 6      | 1   | Yes     | 1     | 1      |
| 11821  |       | 2   | No    |        | 2   | No      | 0     |        |
| 11827  |       | 2   | No    |        | 2   | No      | 0     |        |
| 11831  |       | 1   | Yes   | 1      | 1   | Yes     | 3     | 3      |
| 11841  |       | 2   | No    |        | 2   | No      | 0     |        |
| 11872  |       | 2   | No    |        | 2   | No      | 0     |        |
| 11898  |       | 2   | No    |        | 2   | No      | 0     |        |
| 11902  |       | 2   | No    |        | 2   | No      | 3     | 3      |
| 11912  |       | 2   | No    |        | 2   | No      | 0     |        |
| 11926  |       | 1   | Yes   | 20     | 2   | No      | 0     |        |
| 11928  |       | 2   | No    |        | 2   | No      | 3     | 4      |
| 11932  |       | 2   | No    |        | 1   | Yes     | 1     | 1      |
| 11934  |       | 1   | Yes   | 10     | 2   | No      | 0     |        |
| 11941  |       | 2   | No    |        | 1   | Yes     | 1     | 2      |
| 11942  |       | 1   | Yes   | 18     | 2   | No      | 0     |        |
| 11943  |       | 2   | No    |        | 2   | No      | 4     | 3      |
| 11944  |       | 2   | No    |        | 1   | Yes     | 1     | 2      |
| 11955  |       | 2   | No    |        | 2   | No      | 0     |        |
| 11958  |       | 2   | No    |        | 2   | No      | 2     | 2      |
| 11968  |       | 1   | Yes   | 10     | 1   | Yes     | 2     | 2      |
| 11979  |       | 2   | No    |        | 1   | Yes     | 2     | 2      |
| 11988  | 150   | 2   | No    |        | 2   | No      | 0     |        |
| 11999  |       | 1   | Yes   | 2      | 2   | No      | 3     | 3      |
| 12002  |       | 2   | No    |        | 2   | No      | 1     | 1      |
| 12004  |       | 2   | No    |        | 2   | No      | 1     | 0      |
| 12008  |       | 2   | No    |        | 2   | No      | 1     | 0      |
| 12013  |       | 2   | No    |        | 2   | No      | 0     |        |
| 12018  |       | 1   | Yes   | 3      | 1   | Yes     | 1     | 1      |

| respid | Q16_2 | Q17 | Smoke | Q17a_1 | Q18 | Alcohol | Q19_1 | Q19a_1 |
|--------|-------|-----|-------|--------|-----|---------|-------|--------|
| 12023  |       | 2   | No    |        | 2   | No      | 1     | 0      |
| 12027  |       | 2   | No    |        | 2   | No      | 2     | 3      |
| 12030  |       | 2   | No    |        | 2   | No      | 0     |        |
| 12031  |       | 2   | No    |        | 2   | No      | 1     | 1      |
| 12036  |       | 1   | Yes   | 5      | 2   | No      | 1     | 2      |
| 12037  |       | 2   | No    |        | 1   | Yes     | 2     | 3      |
| 12038  |       | 1   | Yes   | 7      | 1   | Yes     | 5     | 4      |
| 12039  |       | 2   | No    |        | 2   | No      | 0     |        |
| 12045  |       | 2   | No    |        | 2   | No      | 1     | 1      |
| 12046  |       | 2   | No    |        | 2   | No      | 1     | 1      |
| 12054  |       | 1   | Yes   | 8      | 1   | Yes     | 1     | 1      |
| 12055  |       | 2   | No    |        | 2   | No      | 1     | 1      |
| 12069  |       | 2   | No    |        | 2   | No      | 0     |        |
| 12070  |       | 1   | Yes   | 15     | 1   | Yes     | 2     | 3      |
| 12074  |       | 2   | No    |        | 1   | Yes     | 0     |        |
| 12075  |       | 1   | Yes   | 5      | 2   | No      | 3     | 2      |
| 12078  |       | 1   | Yes   | 5      | 1   | Yes     | 3     | 2      |
| 12089  |       | 2   | No    |        | 2   | No      | 0     |        |
| 12091  |       | 2   | No    |        | 2   | No      | 2     | 2      |
| 12092  |       | 2   | No    |        | 2   | No      | 0     |        |
| 12108  |       | 1   | Yes   | 3      | 1   | Yes     | 1     | 1      |
| 12111  |       | 1   | Yes   | 6      | 1   | Yes     | 5     | 4      |
| 12112  |       | 2   | No    |        | 2   | No      | 3     | 2      |
| 12126  |       | 1   | Yes   | 13     | 2   | No      | 0     |        |
| 12132  |       | 2   | No    |        | 2   | No      | 3     | 1      |
| 12150  |       | 1   | Yes   | 10     | 1   | Yes     | 3     | 3      |
| 12152  |       | 1   | Yes   | 5      | 2   | No      | 1     | 1      |
| 12154  |       | 1   | Yes   | 9      | 1   | Yes     | 1     | 1      |
| 12157  |       | 2   | No    |        | 2   | No      | 2     | 1      |
| 12165  |       | 2   | No    |        | 1   | Yes     | 0     |        |
| 12169  |       | 1   | Yes   | 15     | 1   | Yes     | 3     | 2      |
| 12182  |       | 2   | No    |        | 2   | No      | 5     | 4      |



| respid | Q16_2 | Q17 | Smoke | Q17a_1 | Q18 | Alcohol | Q19_1 | Q19a_1 |
|--------|-------|-----|-------|--------|-----|---------|-------|--------|
| 12198  |       | 2   | No    |        | 1   | Yes     | 0     |        |
| 12199  |       | 1   | Yes   | 5      | 2   | No      | 0     |        |
| 12202  |       | 2   | No    |        | 2   | No      | 0     |        |
| 12207  |       | 2   | No    |        | 2   | No      | 0     |        |
| 12208  |       | 1   | Yes   | 10     | 1   | Yes     | 1     | 1      |
| 12210  |       | 2   | No    |        | 2   | No      | 1     | 1      |
| 12219  |       | 2   | No    |        | 2   | No      | 4     | 3      |
| 12224  |       | 1   | Yes   | 15     | 2   | No      | 0     |        |
| 12230  |       | 2   | No    |        | 2   | No      | 2     | 2      |
| 12238  |       | 2   | No    |        | 2   | No      | 0     |        |
| 12239  |       | 2   | No    |        | 2   | No      | 0     |        |
| 12243  |       | 1   | Yes   | 20     | 1   | Yes     | 0     |        |
| 12245  |       | 1   | Yes   | 15     | 1   | Yes     | 2     | 1      |
| 12246  |       | 2   | No    |        | 2   | No      | 4     | 3      |
| 12247  |       | 2   | No    |        | 2   | No      | 0     |        |
| 12248  |       | 1   | Yes   | 10     | 2   | No      | 0     |        |
| 12249  |       | 2   | No    |        | 2   | No      | 2     | 1      |
| 12258  |       | 1   | Yes   | 12     | 2   | No      | 3     | 3      |
| 12265  |       | 2   | No    |        | 2   | No      | 3     | 3      |
| 12269  |       | 2   | No    |        | 1   | Yes     | 0     |        |
| 12270  |       | 2   | No    |        | 2   | No      | 2     | 1      |
| 12279  |       | 1   | Yes   | 2      | 2   | No      | 0     |        |
| 12280  |       | 2   | No    |        | 2   | No      | 5     | 2      |
| 12282  |       | 2   | No    |        | 1   | Yes     | 0     |        |
| 12283  |       | 2   | No    |        | 2   | No      | 0     |        |
| 12287  |       | 2   | No    |        | 2   | No      | 5     | 0      |
| 12288  |       | 2   | No    |        | 2   | No      | 1     | 1      |
| 12290  |       | 2   | No    |        | 2   | No      | 0     |        |
| 12292  |       | 2   | No    |        | 2   | No      | 1     | 1      |
| 12294  |       | 2   | No    |        | 2   | No      | 0     |        |
| 12296  |       | 2   | No    |        | 1   | Yes     | 2     | 1      |
| 12307  |       | 2   | No    |        | 2   | No      | 0     |        |

| respid | Q16_2 | Q17 | Smoke | Q17a_1 | Q18 | Alcohol | Q19_1 | Q19a_1 |
|--------|-------|-----|-------|--------|-----|---------|-------|--------|
| 12309  |       | 1   | Yes   | 20     | 2   | No      | 5     | 3      |
| 12312  |       | 1   | Yes   | 15     | 1   | Yes     | 1     | 1      |
| 12317  |       | 2   | No    |        | 2   | No      | 1     | 1      |
| 12319  |       | 1   | Yes   | 5      | 1   | Yes     | 0     |        |
| 12320  |       | 1   | Yes   | 15     | 1   | Yes     | 1     | 1      |
| 12322  |       | 1   | Yes   | 25     | 1   | Yes     | 1     | 1      |
| 12328  |       | 2   | No    |        | 2   | No      | 1     | 1      |
| 12331  |       | 1   | Yes   | 35     | 1   | Yes     | 4     | 3      |
| 12332  |       | 2   | No    |        | 1   | Yes     | 0     |        |
| 12334  |       | 2   | No    |        | 2   | No      | 2     | 1      |
| 12337  |       | 1   | Yes   | 10     | 1   | Yes     | 4     | 2      |
| 12338  |       | 1   | Yes   | 10     | 2   | No      | 0     |        |
| 12342  |       | 2   | No    |        | 1   | Yes     | 1     | 1      |
| 12349  |       | 2   | No    |        | 2   | No      | 0     |        |
| 12352  |       | 2   | No    |        | 2   | No      | 1     | 1      |
| 12355  |       | 2   | No    |        | 2   | No      | 1     | 1      |
| 12357  |       | 2   | No    |        | 2   | No      | 2     | 1      |
| 12358  |       | 2   | No    |        | 2   | No      | 0     |        |
| 12371  |       | 2   | No    |        | 1   | Yes     | 2     | 2      |
| 12372  |       | 2   | No    |        | 2   | No      | 0     |        |
| 12373  |       | 2   | No    |        | 2   | No      | 1     | 2      |
| 12379  |       | 2   | No    |        | 2   | No      | 0     |        |
| 12381  |       | 2   | No    |        | 1   | Yes     | 4     | 3      |
| 12383  |       | 1   | Yes   | 10     | 2   | No      | 1     | 1      |
| 12384  |       | 2   | No    |        | 2   | No      | 0     |        |
| 12386  |       | 1   | Yes   | 20     | 2   | No      | 0     |        |
| 12389  |       | 2   | No    |        | 2   | No      | 0     |        |
| 12392  |       | 1   | Yes   | 8      | 2   | No      | 0     |        |
| 12396  |       | 2   | No    |        | 2   | No      | 0     |        |
| 12397  |       | 1   | Yes   | 7      | 2   | No      | 1     | 0      |
| 12399  |       | 2   | No    |        | 2   | No      | 3     | 1      |
| 12400  |       | 1   | Yes   | 15     | 1   | Yes     | 2     | 3      |

| respid | Q16_2 | Q17 | Smoke | Q17a_1 | Q18 | Alcohol | Q19_1 | Q19a_1 |
|--------|-------|-----|-------|--------|-----|---------|-------|--------|
| 12406  |       | 2   | No    |        | 2   | No      | 4     | 1      |
| 12407  |       | 1   | Yes   | 12     | 2   | No      | 1     | 1      |
| 12410  |       | 2   | No    |        | 2   | No      | 0     |        |
| 12413  |       | 2   | No    |        | 2   | No      | 0     |        |
| 12416  |       | 1   | Yes   | 10     | 1   | Yes     | 2     | 2      |
| 12419  |       | 1   | Yes   | 3      | 1   | Yes     | 2     | 2      |
| 12422  |       | 2   | No    |        | 2   | No      | 1     | 4      |
| 12423  |       | 2   | No    |        | 1   | Yes     | 0     |        |
| 12429  |       | 2   | No    |        | 2   | No      | 0     |        |
| 12434  |       | 1   | Yes   | 5      | 1   | Yes     | 3     | 3      |
| 12435  |       | 1   | Yes   | 2      | 2   | No      | 1     | 2      |
| 12436  |       | 2   | No    |        | 2   | No      | 3     | 3      |
| 12442  |       | 2   | No    |        | 2   | No      | 0     |        |
| 12449  |       | 2   | No    |        | 2   | No      | 1     | 1      |
| 12451  |       | 1   | Yes   | 20     | 2   | No      | 0     |        |
| 12456  |       | 2   | No    |        | 2   | No      | 2     | 1      |
| 12457  |       | 2   | No    |        | 1   | Yes     | 0     |        |
| 12458  |       | 2   | No    |        | 2   | No      | 0     |        |
| 12461  |       | 2   | No    |        | 2   | No      | 2     | 1      |
| 12462  |       | 2   | No    |        | 2   | No      | 1     | 1      |
| 12463  |       | 1   | Yes   | 5      | 1   | Yes     | 4     | 2      |
| 12466  |       | 1   | Yes   | 20     | 2   | No      | 0     |        |
| 12470  |       | 2   | No    |        | 2   | No      | 1     | 1      |
| 12471  |       | 2   | No    |        | 1   | Yes     | 1     | 1      |
| 12472  |       | 1   | Yes   | 40     | 2   | No      | 5     | 2      |
| 12478  |       | 2   | No    |        | 1   | Yes     | 1     | 1      |
| 12479  |       | 2   | No    |        | 2   | No      | 1     | 2      |
| 12481  |       | 2   | No    |        | 2   | No      | 0     |        |
| 12482  |       | 2   | No    |        | 2   | No      | 1     | 1      |
| 12483  |       | 2   | No    |        | 2   | No      | 0     |        |
| 12496  |       | 2   | No    |        | 2   | No      | 0     |        |
| 12497  |       | 2   | No    |        | 2   | No      | 1     | 1      |

| respid | Q16_2 | Q17 | Smoke | Q17a_1 | Q18 | Alcohol | Q19_1 | Q19a_1 |
|--------|-------|-----|-------|--------|-----|---------|-------|--------|
| 12498  |       | 2   | No    |        | 2   | No      | 3     | 2      |
| 12500  |       | 1   | Yes   | 6      | 2   | No      | 2     | 2      |
| 12501  |       | 2   | No    |        | 2   | No      | 1     | 1      |
| 12502  |       | 2   | No    |        | 1   | Yes     | 1     | 1      |
| 12503  |       | 2   | No    |        | 1   | Yes     | 1     | 0      |
| 12505  |       | 2   | No    |        | 2   | No      | 3     | 2      |
| 12508  |       | 2   | No    |        | 1   | Yes     | 2     | 1      |
| 12509  |       | 2   | No    |        | 2   | No      | 2     | 2      |
| 12510  |       | 1   | Yes   | 20     | 2   | No      | 0     |        |
| 12512  |       | 2   | No    |        | 2   | No      | 2     | 1      |
| 12514  |       | 1   | Yes   | 10     | 1   | Yes     | 1     | 1      |
| 12515  |       | 2   | No    |        | 2   | No      | 3     | 4      |
| 12520  |       | 2   | No    |        | 2   | No      | 0     |        |
| 12522  |       | 2   | No    |        | 2   | No      | 0     |        |
| 12526  |       | 1   | Yes   | 5      | 1   | Yes     | 2     | 1      |
| 12527  |       | 2   | No    |        | 2   | No      | 0     |        |
| 12528  |       | 2   | No    |        | 2   | No      | 1     | 1      |
| 12530  |       | 2   | No    |        | 2   | No      | 1     | 1      |
| 12535  |       | 2   | No    |        | 2   | No      | 0     |        |
| 12539  |       | 1   | Yes   | 10     | 2   | No      | 0     |        |
| 12541  |       | 2   | No    |        | 1   | Yes     | 2     | 1      |
| 12542  |       | 2   | No    |        | 2   | No      | 0     |        |
| 12545  |       | 1   | Yes   | 12     | 1   | Yes     | 3     | 2      |
| 12547  |       | 2   | No    |        | 2   | No      | 3     | 2      |
| 12549  |       | 2   | No    |        | 1   | Yes     | 3     | 2      |
| 12550  |       | 2   | No    |        | 2   | No      | 1     | 1      |
| 12555  |       | 2   | No    |        | 2   | No      | 0     |        |
| 12557  |       | 2   | No    |        | 2   | No      | 0     |        |
| 12559  |       | 2   | No    |        | 2   | No      | 1     | 1      |
| 12561  |       | 2   | No    |        | 2   | No      | 0     |        |
| 12562  |       | 2   | No    |        | 2   | No      | 2     | 1      |
| 12563  |       | 2   | No    |        | 2   | No      | 0     |        |

| respid | Q16_2 | Q17 | Smoke | Q17a_1 | Q18 | Alcohol | Q19_1 | Q19a_1 |
|--------|-------|-----|-------|--------|-----|---------|-------|--------|
| 12565  |       | 1   | Yes   | 10     | 2   | No      | 3     | 1      |
| 12566  |       | 2   | No    |        | 2   | No      | 0     |        |
| 12570  |       | 2   | No    |        | 2   | No      | 0     |        |
| 12571  |       | 2   | No    |        | 2   | No      | 1     | 1      |
| 12572  |       | 2   | No    |        | 2   | No      | 2     | 2      |
| 12578  |       | 2   | No    |        | 2   | No      | 0     |        |
| 12579  |       | 2   | No    |        | 2   | No      | 0     |        |
| 12581  |       | 2   | No    |        | 1   | Yes     | 1     | 0      |
| 12582  |       | 2   | No    |        | 2   | No      | 1     | 2      |
| 12585  |       | 2   | No    |        | 2   | No      | 0     |        |
| 12586  |       | 2   | No    |        | 2   | No      | 0     |        |
| 12588  |       | 2   | No    |        | 2   | No      | 1     | 1      |
| 12589  |       | 2   | No    |        | 2   | No      | 3     | 1      |
| 12590  |       | 2   | No    |        | 2   | No      | 0     |        |
| 12591  |       | 2   | No    |        | 2   | No      | 3     | 3      |
| 12593  |       | 2   | No    |        | 2   | No      | 2     | 2      |
| 12594  |       | 2   | No    |        | 2   | No      | 0     |        |
| 12599  |       | 2   | No    |        | 2   | No      | 0     |        |
| 12600  |       | 2   | No    |        | 2   | No      | 1     | 1      |
| 12602  |       | 1   | Yes   | 20     | 1   | Yes     | 4     | 3      |
| 12606  |       | 2   | No    |        | 2   | No      | 3     | 2      |
| 12607  |       | 2   | No    |        | 2   | No      | 0     |        |
| 12608  |       | 2   | No    |        | 2   | No      | 0     |        |
| 12610  |       | 2   | No    |        | 2   | No      | 2     | 2      |
| 12611  |       | 1   | Yes   | 35     | 1   | Yes     | 0     |        |
| 12613  |       | 2   | No    |        | 2   | No      | 4     | 3      |
| 12616  |       | 2   | No    |        | 2   | No      | 0     |        |
| 12617  |       | 1   | Yes   | 10     | 2   | No      | 0     |        |
| 12619  |       | 2   | No    |        | 2   | No      | 0     |        |
| 12622  |       | 2   | No    |        | 2   | No      | 0     |        |
| 12628  |       | 2   | No    |        | 2   | No      | 0     |        |
| 12631  |       | 2   | No    |        | 2   | No      | 1     | 1      |

| respid | Q16_2 | Q17 | Smoke | Q17a_1 | Q18 | Alcohol | Q19_1 | Q19a_1 |
|--------|-------|-----|-------|--------|-----|---------|-------|--------|
| 12635  |       | 2   | No    |        | 2   | No      | 2     | 2      |
| 12638  |       | 2   | No    |        | 2   | No      | 0     |        |
| 12639  |       | 2   | No    |        | 2   | No      | 1     | 0      |
| 12640  |       | 2   | No    |        | 2   | No      | 1     | 0      |
| 12643  |       | 2   | No    |        | 2   | No      | 0     |        |
| 12646  |       | 1   | Yes   | 20     | 2   | No      | 3     | 4      |
| 12648  |       | 2   | No    |        | 2   | No      | 3     | 3      |
| 12650  |       | 2   | No    |        | 2   | No      | 2     | 1      |
| 12651  |       | 2   | No    |        | 2   | No      | 1     | 1      |
| 12658  |       | 2   | No    |        | 2   | No      | 2     | 2      |
| 12662  |       | 2   | No    |        | 2   | No      | 1     | 1      |
| 12663  |       | 2   | No    |        | 2   | No      | 1     | 1      |
| 12664  |       | 1   | Yes   | 20     | 1   | Yes     | 5     | 4      |
| 12669  |       | 1   | Yes   | 12     | 1   | Yes     | 3     | 3      |
| 12670  |       | 2   | No    |        | 2   | No      | 0     |        |
| 12673  |       | 2   | No    |        | 2   | No      | 0     |        |
| 12675  |       | 2   | No    |        | 2   | No      | 0     |        |
| 12677  |       | 2   | No    |        | 2   | No      | 0     |        |
| 12679  |       | 1   | Yes   | 10     | 2   | No      | 0     |        |
| 12682  |       | 2   | No    |        | 2   | No      | 2     | 2      |
| 12696  |       | 2   | No    |        | 2   | No      | 0     |        |
| 12697  |       | 2   | No    |        | 2   | No      | 0     |        |
| 12699  |       | 2   | No    |        | 2   | No      | 0     |        |
| 12700  |       | 2   | No    |        | 2   | No      | 2     | 2      |
| 12701  |       | 2   | No    |        | 2   | No      | 2     | 2      |
| 12702  |       | 2   | No    |        | 2   | No      | 0     |        |
| 12704  |       | 1   | Yes   | 8      | 1   | Yes     | 4     | 3      |
| 12705  |       | 2   | No    |        | 1   | Yes     | 1     | 1      |
| 12709  |       | 2   | No    |        | 2   | No      | 0     |        |
| 12710  |       | 2   | No    |        | 2   | No      | 0     |        |
| 12713  |       | 2   | No    |        | 1   | Yes     | 0     |        |
| 12716  |       | 2   | No    |        | 2   | No      | 2     | 2      |

| respid | Q16_2 | Q17 | Smoke | Q17a_1 | Q18 | Alcohol | Q19_1 | Q19a_1 |
|--------|-------|-----|-------|--------|-----|---------|-------|--------|
| 12719  |       | 2   | No    |        | 2   | No      | 1     | 1      |
| 12720  |       | 2   | No    |        | 2   | No      | 0     |        |
| 12723  |       | 2   | No    |        | 2   | No      | 1     | 0      |
| 12726  |       | 2   | No    |        | 2   | No      | 0     |        |
| 12728  |       | 2   | No    |        | 2   | No      | 3     | 2      |
| 12729  |       | 2   | No    |        | 2   | No      | 1     | 1      |
| 12731  |       | 2   | No    |        | 2   | No      | 0     |        |
| 12732  |       | 2   | No    |        | 2   | No      | 2     | 3      |
| 12733  |       | 2   | No    |        | 2   | No      | 1     | 1      |
| 12736  |       | 2   | No    |        | 2   | No      | 1     | 0      |
| 12737  |       | 2   | No    |        | 2   | No      | 0     |        |
| 12739  |       | 2   | No    |        | 2   | No      | 1     | 1      |
| 12742  |       | 2   | No    |        | 2   | No      | 0     |        |
| 12743  |       | 1   | Yes   | 2      | 2   | No      | 3     | 3      |
| 12744  |       | 2   | No    |        | 2   | No      | 0     |        |
| 12747  |       | 2   | No    |        | 2   | No      | 0     |        |
| 12751  |       | 1   | Yes   | 6      | 2   | No      | 0     |        |
| 12754  |       | 2   | No    |        | 2   | No      | 0     |        |
| 12756  |       | 2   | No    |        | 2   | No      | 3     | 2      |
| 12757  |       | 2   | No    |        | 2   | No      | 0     |        |
| 12760  |       | 2   | No    |        | 2   | No      | 2     | 2      |
| 12761  |       | 2   | No    |        | 2   | No      | 0     |        |
| 12762  |       | 2   | No    |        | 2   | No      | 3     | 2      |
| 12766  |       | 2   | No    |        | 2   | No      | 4     | 2      |
| 12769  |       | 1   | Yes   | 10     | 2   | No      | 1     | 1      |
| 12770  |       | 2   | No    |        | 2   | No      | 2     | 2      |
| 12773  |       | 2   | No    |        | 2   | No      | 4     | 3      |
| 12780  |       | 1   | Yes   | 20     | 1   | Yes     | 1     | 2      |
| 12789  |       | 2   | No    |        | 2   | No      | 0     |        |
| 12792  |       | 1   | Yes   | 10     | 1   | Yes     | 1     | 2      |
| 12795  |       | 2   | No    |        | 1   | Yes     | 1     | 1      |
| 12804  |       | 2   | No    |        | 2   | No      | 2     | 4      |

| respid | Q16_2 | Q17 | Smoke | Q17a_1 | Q18 | Alcohol | Q19_1 | Q19a_1 |
|--------|-------|-----|-------|--------|-----|---------|-------|--------|
| 12811  |       | 2   | No    |        | 2   | No      | 0     |        |
| 12813  |       | 2   | No    |        | 2   | No      | 2     | 2      |
| 12814  |       | 1   | Yes   | 5      | 2   | No      | 5     | 4      |
| 12815  |       | 2   | No    |        | 2   | No      | 1     | 1      |
| 12816  |       | 2   | No    |        | 2   | No      | 0     |        |
| 12817  |       | 2   | No    |        | 2   | No      | 0     |        |
| 12818  |       | 1   | Yes   | 9      | 2   | No      | 1     | 0      |
| 12819  |       | 1   | Yes   | 20     | 2   | No      | 5     | 2      |
| 12820  |       | 2   | No    |        | 2   | No      | 0     |        |
| 12821  |       | 2   | No    |        | 2   | No      | 0     |        |
| 12824  |       | 2   | No    |        | 2   | No      | 1     | 1      |
| 12827  |       | 1   | Yes   | 7      | 1   | Yes     | 2     | 2      |
| 12836  |       | 1   | Yes   | 12     | 2   | No      | 3     | 2      |
| 12837  |       | 2   | No    |        | 2   | No      | 1     | 1      |
| 12838  |       | 2   | No    |        | 2   | No      | 2     | 1      |
| 12845  |       | 2   | No    |        | 2   | No      | 1     | 1      |
| 12847  |       | 2   | No    |        | 2   | No      | 1     | 2      |
| 12849  |       | 2   | No    |        | 2   | No      | 3     | 3      |
| 12850  |       | 2   | No    |        | 2   | No      | 1     | 1      |
| 12852  |       | 2   | No    |        | 1   | Yes     | 0     |        |
| 12853  |       | 2   | No    |        | 2   | No      | 3     | 3      |
| 12854  |       | 2   | No    |        | 2   | No      | 0     |        |
| 12860  |       | 2   | No    |        | 2   | No      | 0     |        |
| 12861  |       | 2   | No    |        | 2   | No      | 1     | 0      |
| 12863  |       | 2   | No    |        | 2   | No      | 0     |        |
| 12865  |       | 2   | No    |        | 2   | No      | 0     |        |
| 12870  |       | 2   | No    |        | 2   | No      | 3     | 1      |
| 12871  |       | 2   | No    |        | 2   | No      | 5     | 0      |
| 12873  |       | 1   | Yes   | 15     | 2   | No      | 2     | 1      |
| 12877  |       | 2   | No    |        | 2   | No      | 1     | 1      |
| 12880  |       | 2   | No    |        | 2   | No      | 0     |        |
| 12881  |       | 1   | Yes   | 1      | 2   | No      | 1     | 0      |



| respid | Q16_2 | Q17 | Smoke | Q17a_1 | Q18 | Alcohol | Q19_1 | Q19a_1 |
|--------|-------|-----|-------|--------|-----|---------|-------|--------|
| 12882  |       | 2   | No    |        | 2   | No      | 0     |        |
| 12883  |       | 2   | No    |        | 2   | No      | 0     |        |
| 12885  |       | 2   | No    |        | 1   | Yes     | 1     | 2      |
| 12887  |       | 2   | No    |        | 2   | No      | 1     | 1      |
| 12889  |       | 2   | No    |        | 1   | Yes     | 1     | 1      |
| 12890  |       | 2   | No    |        | 2   | No      | 1     | 1      |
| 12891  |       | 1   | Yes   | 8      | 2   | No      | 3     | 1      |
| 12892  |       | 2   | No    |        | 2   | No      | 1     | 2      |
| 12893  |       | 1   | Yes   | 10     | 2   | No      | 0     |        |
| 12895  |       | 2   | No    |        | 2   | No      | 0     |        |
| 12898  |       | 1   | Yes   | 13     | 1   | Yes     | 0     |        |
| 12907  |       | 1   | Yes   | 20     | 1   | Yes     | 2     | 2      |
| 12908  |       | 2   | No    |        | 2   | No      | 0     |        |
| 12909  |       | 2   | No    |        | 2   | No      | 0     |        |
| 12914  |       | 2   | No    |        | 2   | No      | 0     |        |
| 12915  |       | 2   | No    |        | 2   | No      | 3     | 2      |
| 12916  |       | 2   | No    |        | 2   | No      | 0     |        |
| 12921  |       | 2   | No    |        | 2   | No      | 1     | 1      |
| 12922  |       | 2   | No    |        | 2   | No      | 1     | 2      |
| 12923  |       | 2   | No    |        | 1   | Yes     | 3     | 4      |
| 12926  |       | 1   | Yes   | 20     | 1   | Yes     | 0     |        |
| 12927  |       | 2   | No    |        | 2   | No      | 0     |        |
| 12932  |       | 2   | No    |        | 2   | No      | 0     |        |
| 12936  |       | 2   | No    |        | 2   | No      | 0     |        |
| 12937  |       | 2   | No    |        | 2   | No      | 1     | 0      |
| 12938  |       | 2   | No    |        | 2   | No      | 3     | 4      |
| 12939  |       | 2   | No    |        | 2   | No      | 0     |        |
| 12940  |       | 1   | Yes   | 5      | 1   | Yes     | 1     | 1      |
| 12945  |       | 2   | No    |        | 2   | No      | 1     | 2      |
| 12946  |       | 1   | Yes   | 6      | 1   | Yes     | 1     | 1      |
| 12947  |       | 1   | Yes   | 15     | 1   | Yes     | 2     | 1      |
| 12948  |       | 2   | No    |        | 2   | No      | 3     | 2      |

| respid | Q16_2 | Q17 | Smoke | Q17a_1 | Q18 | Alcohol | Q19_1 | Q19a_1 |
|--------|-------|-----|-------|--------|-----|---------|-------|--------|
| 12951  |       | 2   | No    |        | 2   | No      | 5     | 1      |
| 12952  |       | 2   | No    |        | 1   | Yes     | 1     | 1      |
| 12954  |       | 2   | No    |        | 2   | No      | 4     | 3      |
| 12960  |       | 2   | No    |        | 2   | No      | 1     | 2      |
| 12961  |       | 2   | No    |        | 2   | No      | 0     |        |
| 12962  |       | 2   | No    |        | 2   | No      | 0     |        |
| 12963  |       | 1   | Yes   | 20     | 2   | No      | 0     |        |
| 12964  |       | 1   | Yes   | 5      | 1   | Yes     | 0     |        |
| 12966  |       | 1   | Yes   | 30     | 2   | No      | 1     | 0      |
| 12967  |       | 2   | No    |        | 2   | No      | 5     | 3      |
| 12969  |       | 1   | Yes   | 20     | 2   | No      | 1     | 1      |
| 12970  |       | 1   | Yes   | 10     | 2   | No      | 1     | 1      |
| 12974  |       | 2   | No    |        | 2   | No      | 3     | 2      |
| 12979  |       | 2   | No    |        | 2   | No      | 0     |        |
| 12980  |       | 2   | No    |        | 1   | Yes     | 0     |        |
| 12983  |       | 2   | No    |        | 2   | No      | 0     |        |
| 12988  |       | 2   | No    |        | 2   | No      | 0     |        |
| 12994  |       | 2   | No    |        | 1   | Yes     | 1     | 0      |
| 12995  |       | 2   | No    |        | 2   | No      | 0     |        |
| 12996  |       | 2   | No    |        | 1   | Yes     | 0     |        |
| 12998  |       | 1   | Yes   | 12     | 1   | Yes     | 2     | 0      |
| 12999  |       | 2   | No    |        | 2   | No      | 0     |        |
| 13001  |       | 2   | No    |        | 2   | No      | 1     | 2      |
| 13005  |       | 2   | No    |        | 2   | No      | 1     | 1      |
| 13006  |       | 2   | No    |        | 2   | No      | 4     | 4      |
| 13007  |       | 2   | No    |        | 2   | No      | 5     | 2      |
| 13011  |       | 2   | No    |        | 2   | No      | 2     | 1      |
| 13012  |       | 2   | No    |        | 2   | No      | 0     |        |
| 13013  |       | 2   | No    |        | 2   | No      | 3     | 2      |
| 13016  |       | 2   | No    |        | 1   | Yes     | 0     |        |
| 13018  |       | 1   | Yes   | 15     | 1   | Yes     | 1     | 0      |
| 13020  |       | 2   | No    |        | 2   | No      | 0     |        |

| respid | Q16_2 | Q17 | Smoke | Q17a_1 | Q18 | Alcohol | Q19_1 | Q19a_1 |
|--------|-------|-----|-------|--------|-----|---------|-------|--------|
| 13024  |       | 1   | Yes   | 30     | 1   | Yes     | 3     | 2      |
| 13025  |       | 2   | No    |        | 2   | No      | 0     |        |
| 13027  |       | 2   | No    |        | 2   | No      | 1     | 0      |
| 13031  |       | 1   | Yes   | 15     | 1   | Yes     | 2     | 2      |
| 13032  |       | 2   | No    |        | 1   | Yes     | 0     |        |
| 13034  |       | 2   | No    |        | 2   | No      | 1     | 1      |
| 13036  |       | 2   | No    |        | 2   | No      | 1     | 1      |
| 13037  |       | 2   | No    |        | 2   | No      | 0     |        |
| 13038  |       | 2   | No    |        | 1   | Yes     | 3     | 3      |
| 13039  |       | 2   | No    |        | 2   | No      | 1     | 1      |
| 13040  |       | 2   | No    |        | 2   | No      | 1     | 1      |
| 13041  |       | 2   | No    |        | 1   | Yes     | 1     | 2      |
| 13045  |       | 2   | No    |        | 1   | Yes     | 3     | 3      |
| 13046  |       | 2   | No    |        | 2   | No      | 0     |        |
| 13048  |       | 2   | No    |        | 2   | No      | 0     |        |
| 13051  |       | 2   | No    |        | 2   | No      | 3     | 2      |
| 13053  |       | 2   | No    |        | 2   | No      | 0     |        |
| 13055  |       | 2   | No    |        | 2   | No      | 4     | 3      |
| 13059  |       | 2   | No    |        | 1   | Yes     | 4     | 1      |
| 13068  |       | 2   | No    |        | 2   | No      | 1     | 1      |
| 13069  |       | 2   | No    |        | 2   | No      | 0     |        |
| 13076  |       | 2   | No    |        | 2   | No      | 1     | 2      |
| 13081  |       | 2   | No    |        | 1   | Yes     | 0     |        |
| 13082  |       | 1   | Yes   | 10     | 2   | No      | 0     |        |
| 13084  |       | 2   | No    |        | 2   | No      | 3     | 2      |
| 13085  |       | 2   | No    |        | 1   | Yes     | 3     | 2      |
| 13086  |       | 2   | No    |        | 2   | No      | 1     | 0      |
| 13093  |       | 2   | No    |        | 2   | No      | 1     | 1      |
| 13094  |       | 2   | No    |        | 2   | No      | 4     | 3      |
| 13097  |       | 2   | No    |        | 2   | No      | 0     |        |
| 13098  |       | 1   | Yes   | 10     | 1   | Yes     | 1     | 1      |
| 13099  |       | 2   | No    |        | 2   | No      | 3     | 2      |

| respid | Q16_2 | Q17 | Smoke | Q17a_1 | Q18 | Alcohol | Q19_1 | Q19a_1 |
|--------|-------|-----|-------|--------|-----|---------|-------|--------|
| 13100  |       | 2   | No    |        | 2   | No      | 0     |        |
| 13101  |       | 2   | No    |        | 2   | No      | 0     |        |
| 13103  |       | 2   | No    |        | 1   | Yes     | 0     |        |
| 13105  |       | 2   | No    |        | 2   | No      | 0     |        |
| 13106  |       | 2   | No    |        | 2   | No      | 1     | 0      |
| 13107  |       | 2   | No    |        | 2   | No      | 1     | 1      |
| 13110  |       | 2   | No    |        | 1   | Yes     | 1     | 1      |
| 13118  |       | 2   | No    |        | 2   | No      | 1     | 1      |
| 13120  |       | 2   | No    |        | 2   | No      | 2     | 2      |
| 13130  |       | 2   | No    |        | 1   | Yes     | 1     | 1      |
| 13133  |       | 2   | No    |        | 1   | Yes     | 0     |        |
| 13134  |       | 2   | No    |        | 2   | No      | 1     | 0      |
| 13139  |       | 2   | No    |        | 1   | Yes     | 1     | 0      |
| 13142  |       | 2   | No    |        | 2   | No      | 0     |        |
| 13143  |       | 2   | No    |        | 2   | No      | 0     |        |
| 13145  |       | 2   | No    |        | 2   | No      | 1     | 1      |
| 13148  |       | 2   | No    |        | 2   | No      | 1     | 1      |
| 13149  |       | 2   | No    |        | 2   | No      | 0     |        |
| 13151  |       | 2   | No    |        | 1   | Yes     | 5     | 3      |
| 13153  |       | 2   | No    |        | 2   | No      | 1     | 1      |
| 13158  |       | 2   | No    |        | 2   | No      | 0     |        |
| 13160  |       | 2   | No    |        | 2   | No      | 1     | 1      |
| 13162  |       | 1   | Yes   | 6      | 1   | Yes     | 4     | 2      |
| 13169  |       | 1   | Yes   | 20     | 1   | Yes     | 5     | 0      |
| 13172  |       | 2   | No    |        | 2   | No      | 1     | 1      |
| 13173  |       | 2   | No    |        | 2   | No      | 0     |        |
| 13176  |       | 2   | No    |        | 2   | No      | 1     | 0      |
| 13179  |       | 2   | No    |        | 2   | No      | 0     |        |
| 13184  |       | 1   | Yes   | 5      | 2   | No      | 0     |        |
| 13185  |       | 2   | No    |        | 2   | No      | 0     |        |
| 13186  |       | 2   | No    |        | 2   | No      | 0     |        |
| 13188  |       | 2   | No    |        | 2   | No      | 1     | 1      |

| respid | Q16_2 | Q17 | Smoke | Q17a_1 | Q18 | Alcohol | Q19_1 | Q19a_1 |
|--------|-------|-----|-------|--------|-----|---------|-------|--------|
| 13190  |       | 2   | No    |        | 1   | Yes     | 1     | 2      |
| 13192  |       | 2   | No    |        | 2   | No      | 1     | 0      |
| 13193  |       | 2   | No    |        | 2   | No      | 0     |        |
| 13201  |       | 2   | No    |        | 2   | No      | 0     |        |
| 13207  |       | 2   | No    |        | 2   | No      | 0     |        |
| 13208  |       | 2   | No    |        | 2   | No      | 0     |        |
| 13209  |       | 1   | Yes   | 2      | 2   | No      | 3     | 2      |
| 13212  |       | 2   | No    |        | 2   | No      | 0     |        |
| 13215  |       | 2   | No    |        | 2   | No      | 0     |        |
| 13218  |       | 2   | No    |        | 2   | No      | 3     | 2      |
| 13219  |       | 2   | No    |        | 2   | No      | 0     |        |
| 13224  |       | 2   | No    |        | 2   | No      | 0     |        |
| 13225  |       | 2   | No    |        | 2   | No      | 0     |        |
| 13226  |       | 2   | No    |        | 2   | No      | 0     |        |
| 13232  |       | 2   | No    |        | 2   | No      | 0     |        |
| 13237  |       | 2   | No    |        | 1   | Yes     | 1     | 0      |
| 13239  |       | 2   | No    |        | 2   | No      | 0     |        |
| 13241  |       | 2   | No    |        | 2   | No      | 1     | 2      |
| 13243  |       | 2   | No    |        | 2   | No      | 2     | 1      |
| 13247  |       | 2   | No    |        | 2   | No      | 3     | 2      |
| 13248  |       | 2   | No    |        | 1   | Yes     | 1     | 1      |
| 13251  |       | 2   | No    |        | 2   | No      | 0     |        |
| 13256  |       | 2   | No    |        | 2   | No      | 3     | 1      |
| 13260  |       | 2   | No    |        | 2   | No      | 1     | 1      |
| 13261  |       | 2   | No    |        | 2   | No      | 1     | 1      |
| 13264  |       | 2   | No    |        | 2   | No      | 0     |        |
| 13273  |       | 2   | No    |        | 2   | No      | 1     | 1      |
| 13274  |       | 2   | No    |        | 2   | No      | 0     |        |
| 13276  |       | 2   | No    |        | 2   | No      | 0     |        |
| 13278  |       | 2   | No    |        | 2   | No      | 0     |        |
| 13279  |       | 2   | No    |        | 2   | No      | 1     | 0      |
| 13282  |       | 2   | No    |        | 2   | No      | 0     |        |

| respid | Q16_2 | Q17 | Smoke | Q17a_1 | Q18 | Alcohol | Q19_1 | Q19a_1 |
|--------|-------|-----|-------|--------|-----|---------|-------|--------|
| 13283  |       | 2   | No    |        | 1   | Yes     | 0     |        |
| 13285  |       | 2   | No    |        | 2   | No      | 0     |        |
| 13286  |       | 2   | No    |        | 2   | No      | 1     | 1      |
| 13299  |       | 2   | No    |        | 2   | No      | 0     |        |
| 13300  |       | 2   | No    |        | 2   | No      | 2     | 2      |
| 13301  |       | 2   | No    |        | 2   | No      | 0     |        |
| 13303  |       | 2   | No    |        | 2   | No      | 3     | 2      |
| 13304  |       | 2   | No    |        | 2   | No      | 0     |        |
| 13307  |       | 2   | No    |        | 2   | No      | 0     |        |
| 13308  |       | 2   | No    |        | 2   | No      | 0     |        |
| 13312  |       | 2   | No    |        | 2   | No      | 0     |        |
| 13313  |       | 2   | No    |        | 2   | No      | 1     | 0      |
| 13314  |       | 2   | No    |        | 2   | No      | 2     | 1      |
| 13318  |       | 2   | No    |        | 2   | No      | 3     | 2      |
| 13320  |       | 2   | No    |        | 2   | No      | 0     |        |
| 13322  |       | 2   | No    |        | 2   | No      | 1     | 1      |
| 13324  |       | 2   | No    |        | 2   | No      | 0     |        |
| 13325  |       | 2   | No    |        | 2   | No      | 1     | 2      |
| 13327  |       | 2   | No    |        | 2   | No      | 0     |        |
| 13330  |       | 2   | No    |        | 2   | No      | 0     |        |
| 13332  |       | 1   | Yes   | 20     | 2   | No      | 0     |        |
| 13333  |       | 1   | Yes   | 10     | 2   | No      | 0     |        |
| 13334  |       | 2   | No    |        | 2   | No      | 0     |        |
| 13351  |       | 1   | Yes   | 3      | 2   | No      | 0     |        |
| 13353  |       | 2   | No    |        | 2   | No      | 0     |        |
| 13354  |       | 2   | No    |        | 2   | No      | 0     |        |
| 13355  |       | 2   | No    |        | 2   | No      | 0     |        |
| 13358  |       | 2   | No    |        | 2   | No      | 0     |        |
| 13359  |       | 2   | No    |        | 1   | Yes     | 1     | 1      |
| 13360  |       | 2   | No    |        | 2   | No      | 2     | 1      |
| 13364  |       | 2   | No    |        | 2   | No      | 1     | 2      |
| 13365  |       | 1   | Yes   | 20     | 2   | No      | 4     | 2      |

| respid | Q16_2 | Q17 | Smoke | Q17a_1 | Q18 | Alcohol | Q19_1 | Q19a_1 |
|--------|-------|-----|-------|--------|-----|---------|-------|--------|
| 13368  |       | 2   | No    |        | 2   | No      | 0     |        |
| 13370  |       | 2   | No    |        | 2   | No      | 0     |        |
| 13375  |       | 2   | No    |        | 2   | No      | 1     | 0      |
| 13384  |       | 2   | No    |        | 2   | No      | 0     |        |
| 13387  |       | 2   | No    |        | 2   | No      | 0     |        |
| 13395  |       | 2   | No    |        | 2   | No      | 1     | 2      |
| 13398  |       | 1   | Yes   | 10     | 2   | No      | 0     |        |
| 13404  |       | 2   | No    |        | 2   | No      | 0     |        |
| 13405  |       | 2   | No    |        | 2   | No      | 2     | 1      |
| 13408  |       | 2   | No    |        | 2   | No      | 0     |        |
| 13411  |       | 2   | No    |        | 2   | No      | 0     |        |
| 13413  |       | 2   | No    |        | 2   | No      | 5     | 0      |
| 13419  |       | 2   | No    |        | 2   | No      | 1     | 1      |
| 13420  |       | 2   | No    |        | 2   | No      | 0     |        |
| 13427  |       | 1   | Yes   | 10     | 1   | Yes     | 3     | 2      |
| 13441  |       | 2   | No    |        | 2   | No      | 1     | 1      |
| 13444  |       | 2   | No    |        | 2   | No      | 1     | 1      |
| 13456  |       | 1   | Yes   | 5      | 1   | Yes     | 0     |        |
| 13466  |       | 2   | No    |        | 2   | No      | 1     | 0      |
| 13468  |       | 2   | No    |        | 2   | No      | 0     |        |
| 13475  |       | 2   | No    |        | 2   | No      | 0     |        |
| 13484  |       | 2   | No    |        | 2   | No      | 1     | 1      |
| 13486  |       | 2   | No    |        | 2   | No      | 1     | 1      |
| 13487  |       | 2   | No    |        | 2   | No      | 3     | 2      |
| 13491  |       | 2   | No    |        | 2   | No      | 0     |        |
| 13496  |       | 2   | No    |        | 2   | No      | 2     | 1      |
| 13497  |       | 2   | No    |        | 2   | No      | 2     | 1      |
| 13498  |       | 2   | No    |        | 2   | No      | 0     |        |
| 13502  |       | 2   | No    |        | 2   | No      | 0     |        |
| 13503  |       | 2   | No    |        | 2   | No      | 0     |        |
| 13505  |       | 2   | No    |        | 2   | No      | 0     |        |
| 13509  |       | 2   | No    |        | 2   | No      | 1     | 1      |

| respid | Q16_2 | Q17 | Smoke | Q17a_1 | Q18 | Alcohol | Q19_1 | Q19a_1 |
|--------|-------|-----|-------|--------|-----|---------|-------|--------|
| 13510  |       | 2   | No    |        | 2   | No      | 1     | 1      |
| 13518  |       | 1   | Yes   | 4      | 2   | No      | 1     | 1      |
| 13521  |       | 2   | No    |        | 2   | No      | 1     | 1      |
| 13523  |       | 2   | No    |        | 2   | No      | 3     | 2      |
| 13528  |       | 2   | No    |        | 2   | No      | 0     |        |
| 13531  |       | 2   | No    |        | 2   | No      | 0     |        |
| 13532  |       | 2   | No    |        | 1   | Yes     | 0     |        |
| 13533  |       | 2   | No    |        | 2   | No      | 1     | 0      |
| 13534  |       | 2   | No    |        | 2   | No      | 0     |        |
| 13535  |       | 2   | No    |        | 2   | No      | 1     | 0      |
| 13538  |       | 1   | Yes   | 10     | 1   | Yes     | 2     | 2      |
| 13540  |       | 2   | No    |        | 2   | No      | 1     | 1      |
| 13541  |       | 2   | No    |        | 2   | No      | 1     | 1      |
| 13542  |       | 2   | No    |        | 2   | No      | 0     |        |
| 13550  |       | 2   | No    |        | 2   | No      | 0     |        |
| 13553  |       | 2   | No    |        | 2   | No      | 2     | 1      |
| 13554  |       | 2   | No    |        | 2   | No      | 0     |        |
| 13555  |       | 2   | No    |        | 2   | No      | 3     | 2      |
| 13556  |       | 2   | No    |        | 2   | No      | 0     |        |
| 13563  |       | 2   | No    |        | 2   | No      | 1     | 2      |
| 13564  |       | 2   | No    |        | 2   | No      | 1     | 1      |
| 13567  |       | 2   | No    |        | 2   | No      | 0     |        |
| 13568  |       | 2   | No    |        | 1   | Yes     | 1     | 2      |
| 13570  |       | 2   | No    |        | 2   | No      | 0     |        |
| 13573  |       | 2   | No    |        | 2   | No      | 3     | 2      |
| 13575  |       | 2   | No    |        | 2   | No      | 1     | 1      |
| 13577  |       | 1   | Yes   | 3      | 2   | No      | 2     | 1      |
| 13580  |       | 1   | Yes   | 3      | 2   | No      | 1     | 1      |
| 13582  |       | 2   | No    |        | 2   | No      | 0     |        |
| 13584  |       | 2   | No    |        | 2   | No      | 3     | 2      |
| 13585  |       | 2   | No    |        | 2   | No      | 0     |        |
| 13586  |       | 2   | No    |        | 2   | No      | 0     |        |



| respid | Q16_2 | Q17 | Smoke | Q17a_1 | Q18 | Alcohol | Q19_1 | Q19a_1 |
|--------|-------|-----|-------|--------|-----|---------|-------|--------|
| 13587  |       | 2   | No    |        | 2   | No      | 3     | 1      |
| 13592  |       | 2   | No    |        | 2   | No      | 1     | 2      |
| 13596  |       | 2   | No    |        | 2   | No      | 0     |        |
| 13597  |       | 2   | No    |        | 2   | No      | 1     | 1      |
| 13599  |       | 2   | No    |        | 2   | No      | 1     | 1      |
| 13601  |       | 2   | No    |        | 2   | No      | 1     | 0      |
| 13604  |       | 2   | No    |        | 2   | No      | 1     | 1      |
| 13608  |       | 1   | Yes   | 12     | 1   | Yes     | 0     |        |
| 13616  |       | 2   | No    |        | 2   | No      | 0     |        |
| 13618  |       | 2   | No    |        | 2   | No      | 0     |        |
| 13619  |       | 2   | No    |        | 2   | No      | 0     |        |
| 13626  |       | 2   | No    |        | 2   | No      | 0     |        |
| 13628  |       | 1   | Yes   | 15     | 1   | Yes     | 1     | 1      |
| 13640  |       | 1   | Yes   | 13     | 1   | Yes     | 2     | 2      |
| 13645  |       | 2   | No    |        | 2   | No      | 0     |        |
| 13648  |       | 1   | Yes   | 4      | 1   | Yes     | 0     |        |
| 13653  |       | 2   | No    |        | 1   | Yes     | 0     |        |
| 13655  |       | 1   | Yes   | 10     | 2   | No      | 0     |        |
| 13662  |       | 1   | Yes   | 40     | 2   | No      | 0     |        |
| 13670  |       | 2   | No    |        | 2   | No      | 0     |        |
| 13673  |       | 1   | Yes   | 20     | 1   | Yes     | 1     | 0      |
| 13674  |       | 2   | No    |        | 1   | Yes     | 1     | 0      |
| 13675  |       | 2   | No    |        | 1   | Yes     | 5     | 1      |
| 13678  |       | 2   | No    |        | 2   | No      | 1     | 2      |
| 13680  |       | 2   | No    |        | 2   | No      | 1     | 1      |
| 13681  |       | 1   | Yes   | 20     | 1   | Yes     | 0     |        |
| 13683  |       | 2   | No    |        | 2   | No      | 0     |        |
| 13684  |       | 2   | No    |        | 2   | No      | 1     | 1      |
| 13685  |       | 2   | No    |        | 2   | No      | 0     |        |
| 13687  |       | 2   | No    |        | 1   | Yes     | 0     |        |
| 13690  |       | 2   | No    |        | 2   | No      | 2     | 1      |
| 13700  |       | 1   | Yes   | 10     | 1   | Yes     | 5     | 1      |

| respid | Q16_2 | Q17 | Smoke | Q17a_1 | Q18 | Alcohol | Q19_1 | Q19a_1 |
|--------|-------|-----|-------|--------|-----|---------|-------|--------|
| 13705  |       | 2   | No    |        | 2   | No      | 1     | 1      |
| 13710  |       | 1   | Yes   | 20     | 2   | No      | 0     |        |
| 13711  |       | 2   | No    |        | 2   | No      | 1     | 2      |
| 13713  |       | 1   | Yes   | 20     | 2   | No      | 0     |        |
| 13716  |       | 2   | No    |        | 2   | No      | 0     |        |
| 13721  |       | 2   | No    |        | 2   | No      | 1     | 1      |
| 13722  |       | 1   | Yes   | 10     | 2   | No      | 4     | 4      |
| 13723  |       | 2   | No    |        | 2   | No      | 1     | 3      |
| 13726  |       | 2   | No    |        | 2   | No      | 4     | 3      |
| 13728  |       | 2   | No    |        | 1   | Yes     | 2     | 2      |
| 13730  |       | 2   | No    |        | 2   | No      | 1     | 1      |
| 13734  |       | 1   | Yes   | 20     | 2   | No      | 0     |        |
| 13736  |       | 1   | Yes   | 6      | 1   | Yes     | 4     | 4      |
| 13737  |       | 2   | No    |        | 2   | No      | 0     |        |
| 13739  |       | 2   | No    |        | 2   | No      | 0     |        |
| 13742  |       | 2   | No    |        | 2   | No      | 0     |        |
| 13746  |       | 2   | No    |        | 2   | No      | 3     | 0      |
| 13747  |       | 2   | No    |        | 1   | Yes     | 2     | 3      |
| 13749  |       | 2   | No    |        | 2   | No      | 0     |        |
| 13751  |       | 2   | No    |        | 2   | No      | 2     | 2      |
| 13752  |       | 2   | No    |        | 1   | Yes     | 1     | 0      |
| 13756  |       | 2   | No    |        | 2   | No      | 1     | 1      |
| 13757  |       | 2   | No    |        | 2   | No      | 0     |        |
| 13767  |       | 2   | No    |        | 2   | No      | 0     |        |
| 13771  |       | 1   | Yes   | 20     | 2   | No      | 0     |        |
| 13772  |       | 1   | Yes   | 13     | 1   | Yes     | 4     | 4      |
| 13779  |       | 1   | Yes   | 10     | 2   | No      | 0     |        |
| 13782  |       | 2   | No    |        | 2   | No      | 2     | 1      |
| 13783  |       | 2   | No    |        | 2   | No      | 0     |        |
| 13785  |       | 2   | No    |        | 2   | No      | 1     | 0      |
| 13786  |       | 2   | No    |        | 2   | No      | 1     | 1      |
| 13792  |       | 1   | Yes   | 3      | 1   | Yes     | 1     | 2      |

| respid | Q16_2 | Q17 | Smoke | Q17a_1 | Q18 | Alcohol | Q19_1 | Q19a_1 |
|--------|-------|-----|-------|--------|-----|---------|-------|--------|
| 13796  |       | 2   | No    |        | 1   | Yes     | 1     | 1      |
| 13798  |       | 2   | No    |        | 2   | No      | 0     |        |
| 13799  |       | 1   | Yes   | 15     | 1   | Yes     | 4     | 2      |
| 13804  |       | 2   | No    |        | 2   | No      | 0     |        |
| 13805  |       | 2   | No    |        | 2   | No      | 0     |        |
| 13810  |       | 2   | No    |        | 2   | No      | 3     | 3      |
| 13811  |       | 2   | No    |        | 2   | No      | 0     |        |
| 13819  |       | 1   | Yes   | 5      | 2   | No      | 0     |        |
| 13821  |       | 2   | No    |        | 1   | Yes     | 3     | 3      |
| 13824  |       | 2   | No    |        | 2   | No      | 1     | 2      |
| 13828  |       | 2   | No    |        | 2   | No      | 2     | 0      |
| 13829  |       | 2   | No    |        | 2   | No      | 3     | 3      |
| 13831  |       | 2   | No    |        | 1   | Yes     | 0     |        |
| 13833  |       | 2   | No    |        | 2   | No      | 1     | 1      |
| 13835  |       | 1   | Yes   | 14     | 1   | Yes     | 4     | 4      |
| 13838  |       | 2   | No    |        | 2   | No      | 0     |        |
| 13839  |       | 1   | Yes   | 1      | 2   | No      | 4     | 3      |
| 13845  |       | 1   | Yes   | 6      | 1   | Yes     | 0     |        |
| 13846  |       | 2   | No    |        | 2   | No      | 0     |        |
| 13853  |       | 2   | No    |        | 1   | Yes     | 1     | 1      |
| 13855  |       | 1   | Yes   | 2      | 1   | Yes     | 1     | 1      |
| 13858  |       | 2   | No    |        | 2   | No      | 2     | 2      |
| 13860  |       | 1   | Yes   | 12     | 2   | No      | 0     |        |
| 13865  |       | 2   | No    |        | 2   | No      | 2     | 3      |
| 13870  |       | 1   | Yes   | 15     | 2   | No      | 0     |        |
| 13872  |       | 2   | No    |        | 2   | No      | 2     | 4      |
| 13873  |       | 2   | No    |        | 2   | No      | 1     | 1      |
| 13874  |       | 2   | No    |        | 1   | Yes     | 0     |        |
| 13875  |       | 1   | Yes   | 2      | 1   | Yes     | 1     | 1      |
| 13881  |       | 2   | No    |        | 1   | Yes     | 0     |        |
| 13887  |       | 2   | No    |        | 2   | No      | 1     | 0      |
| 13888  |       | 2   | No    |        | 2   | No      | 2     | 2      |

| respid | Q16_2 | Q17 | Smoke | Q17a_1 | Q18 | Alcohol | Q19_1 | Q19a_1 |
|--------|-------|-----|-------|--------|-----|---------|-------|--------|
| 13889  |       | 2   | No    |        | 2   | No      | 1     | 2      |
| 13895  |       | 1   | Yes   | 20     | 1   | Yes     | 4     | 4      |
| 13897  |       | 1   | Yes   | 10     | 1   | Yes     | 0     |        |
| 13898  |       | 2   | No    |        | 2   | No      | 3     | 2      |
| 13901  |       | 2   | No    |        | 2   | No      | 0     |        |
| 13902  |       | 2   | No    |        | 2   | No      | 4     | 3      |
| 13903  |       | 2   | No    |        | 1   | Yes     | 0     |        |
| 13905  |       | 1   | Yes   | 2      | 1   | Yes     | 1     | 0      |
| 13908  |       | 2   | No    |        | 2   | No      | 2     | 1      |
| 13909  |       | 2   | No    |        | 2   | No      | 0     |        |
| 13910  |       | 2   | No    |        | 2   | No      | 3     | 3      |
| 13911  |       | 2   | No    |        | 2   | No      | 0     |        |
| 13914  |       | 2   | No    |        | 2   | No      | 3     | 2      |
| 13920  |       | 2   | No    |        | 2   | No      | 2     | 2      |
| 13926  |       | 1   | Yes   | 2      | 1   | Yes     | 0     |        |
| 13929  |       | 1   | Yes   | 2      | 1   | Yes     | 1     | 0      |
| 13930  |       | 1   | Yes   | 21     | 1   | Yes     | 4     | 4      |
| 13931  |       | 2   | No    |        | 2   | No      | 0     |        |
| 13932  |       | 2   | No    |        | 2   | No      | 2     | 2      |
| 13934  |       | 2   | No    |        | 2   | No      | 2     | 1      |
| 13938  |       | 2   | No    |        | 2   | No      | 3     | 2      |
| 13942  |       | 2   | No    |        | 2   | No      | 0     |        |
| 13945  |       | 2   | No    |        | 2   | No      | 2     | 2      |
| 13947  |       | 1   | Yes   | 20     | 2   | No      | 5     | 3      |
| 13948  |       | 2   | No    |        | 2   | No      | 0     |        |
| 13959  |       | 2   | No    |        | 2   | No      | 3     | 2      |
| 13962  |       | 1   | Yes   | 15     | 1   | Yes     | 0     |        |
| 13963  |       | 2   | No    |        | 2   | No      | 0     |        |
| 13964  |       | 2   | No    |        | 2   | No      | 0     |        |
| 13966  |       | 1   | Yes   | 2      | 1   | Yes     | 1     | 1      |
| 13968  |       | 2   | No    |        | 2   | No      | 0     |        |
| 13971  |       | 2   | No    |        | 2   | No      | 0     |        |

| respid | Q16_2 | Q17 | Smoke | Q17a_1 | Q18 | Alcohol | Q19_1 | Q19a_1 |
|--------|-------|-----|-------|--------|-----|---------|-------|--------|
| 13979  |       | 1   | Yes   | 10     | 1   | Yes     | 3     | 2      |
| 13980  |       | 2   | No    |        | 2   | No      | 2     | 1      |
| 13981  |       | 2   | No    |        | 2   | No      | 1     | 1      |
| 13982  |       | 2   | No    |        | 2   | No      | 1     | 1      |
| 13984  |       | 1   | Yes   | 15     | 2   | No      | 0     |        |
| 13989  |       | 2   | No    |        | 2   | No      | 1     | 0      |
| 13990  |       | 2   | No    |        | 2   | No      | 0     |        |
| 13992  |       | 2   | No    |        | 2   | No      | 5     | 2      |
| 13998  |       | 1   | Yes   | 15     | 2   | No      | 3     | 1      |
| 13999  |       | 2   | No    |        | 2   | No      | 3     | 2      |
| 14000  |       | 2   | No    |        | 2   | No      | 1     | 1      |
| 14003  |       | 2   | No    |        | 1   | Yes     | 1     | 0      |
| 14004  |       | 2   | No    |        | 2   | No      | 0     |        |
| 14006  |       | 1   | Yes   | 15     | 1   | Yes     | 1     | 1      |
| 14007  |       | 2   | No    |        | 2   | No      | 1     | 1      |
| 14008  |       | 2   | No    |        | 2   | No      | 0     |        |
| 14013  |       | 2   | No    |        | 2   | No      | 0     |        |
| 14015  |       | 2   | No    |        | 2   | No      | 1     | 1      |
| 14018  |       | 2   | No    |        | 2   | No      | 1     | 0      |
| 14021  |       | 2   | No    |        | 2   | No      | 0     |        |
| 14023  |       | 2   | No    |        | 1   | Yes     | 1     | 0      |
| 14024  |       | 1   | Yes   | 10     | 1   | Yes     | 1     | 0      |
| 14026  |       | 1   | Yes   | 16     | 2   | No      | 0     |        |
| 14030  |       | 2   | No    |        | 2   | No      | 1     | 2      |
| 14032  |       | 2   | No    |        | 2   | No      | 2     | 1      |
| 14040  |       | 2   | No    |        | 2   | No      | 0     |        |
| 14045  |       | 2   | No    |        | 2   | No      | 0     |        |
| 14048  |       | 1   | Yes   | 2      | 2   | No      | 2     | 2      |
| 14049  |       | 2   | No    |        | 2   | No      | 4     | 2      |
| 14050  |       | 2   | No    |        | 1   | Yes     | 0     |        |
| 14051  |       | 1   | Yes   | 7      | 1   | Yes     | 5     | 4      |
| 14052  |       | 1   | Yes   | 35     | 1   | Yes     | 1     | 1      |

| respid | Q16_2 | Q17 | Smoke | Q17a_1 | Q18 | Alcohol | Q19_1 | Q19a_1 |
|--------|-------|-----|-------|--------|-----|---------|-------|--------|
| 14054  |       | 2   | No    |        | 2   | No      | 1     | 0      |
| 14055  |       | 2   | No    |        | 2   | No      | 0     |        |
| 14057  |       | 1   | Yes   | 20     | 2   | No      | 0     |        |
| 14058  |       | 2   | No    |        | 2   | No      | 0     |        |
| 14059  |       | 2   | No    |        | 1   | Yes     | 0     |        |
| 14060  |       | 2   | No    |        | 2   | No      | 1     | 0      |
| 14061  |       | 2   | No    |        | 2   | No      | 3     | 2      |
| 14071  |       | 2   | No    |        | 2   | No      | 0     |        |
| 14073  |       | 2   | No    |        | 1   | Yes     | 0     |        |
| 14074  |       | 2   | No    |        | 2   | No      | 3     | 2      |
| 14076  |       | 2   | No    |        | 2   | No      | 0     |        |
| 14080  |       | 2   | No    |        | 2   | No      | 0     |        |
| 14082  |       | 1   | Yes   | 7      | 2   | No      | 0     |        |
| 14083  |       | 2   | No    |        | 1   | Yes     | 0     |        |
| 14084  |       | 2   | No    |        | 2   | No      | 0     |        |
| 14085  |       | 2   | No    |        | 2   | No      | 0     |        |
| 14086  |       | 1   | Yes   | 20     | 1   | Yes     | 4     | 3      |
| 14088  |       | 2   | No    |        | 2   | No      | 0     |        |
| 14090  |       | 1   | Yes   | 5      | 2   | No      | 0     |        |
| 14092  |       | 1   | Yes   | 5      | 2   | No      | 1     | 0      |
| 14093  |       | 1   | Yes   | 5      | 2   | No      | 3     | 1      |
| 14096  |       | 2   | No    |        | 1   | Yes     | 1     | 1      |
| 14103  |       | 2   | No    |        | 2   | No      | 2     | 2      |
| 14105  |       | 2   | No    |        | 2   | No      | 0     |        |
| 14106  |       | 2   | No    |        | 2   | No      | 3     | 2      |
| 14107  |       | 1   | Yes   | 2      | 1   | Yes     | 1     | 1      |
| 14108  |       | 2   | No    |        | 2   | No      | 1     | 3      |
| 14112  |       | 2   | No    |        | 2   | No      | 2     | 1      |
| 14114  |       | 1   | Yes   | 13     | 1   | Yes     | 2     | 2      |
| 14115  |       | 2   | No    |        | 2   | No      | 2     | 2      |
| 14116  |       | 2   | No    |        | 1   | Yes     | 0     |        |
| 14117  |       | 2   | No    |        | 2   | No      | 3     | 2      |

| respid | Q16_2 | Q17 | Smoke | Q17a_1 | Q18 | Alcohol | Q19_1 | Q19a_1 |
|--------|-------|-----|-------|--------|-----|---------|-------|--------|
| 14118  |       | 2   | No    |        | 2   | No      | 3     | 2      |
| 14119  |       | 2   | No    |        | 2   | No      | 1     | 0      |
| 14127  |       | 2   | No    |        | 2   | No      | 0     |        |
| 14129  |       | 2   | No    |        | 2   | No      | 0     |        |
| 14131  |       | 2   | No    |        | 2   | No      | 3     | 2      |
| 14132  |       | 2   | No    |        | 2   | No      | 2     | 1      |
| 14133  |       | 2   | No    |        | 2   | No      | 2     | 4      |
| 14134  |       | 1   | Yes   | 10     | 1   | Yes     | 1     | 1      |
| 14135  |       | 2   | No    |        | 2   | No      | 0     |        |
| 14136  |       | 2   | No    |        | 2   | No      | 1     | 1      |
| 14138  |       | 2   | No    |        | 2   | No      | 0     |        |
| 14139  |       | 2   | No    |        | 2   | No      | 0     |        |
| 14140  |       | 2   | No    |        | 2   | No      | 1     | 1      |
| 14141  |       | 2   | No    |        | 1   | Yes     | 0     |        |
| 14143  |       | 1   | Yes   | 12     | 2   | No      | 0     |        |
| 14146  |       | 2   | No    |        | 2   | No      | 0     |        |
| 14147  |       | 1   | Yes   | 25     | 1   | Yes     | 4     | 4      |
| 14148  |       | 2   | No    |        | 2   | No      | 1     | 0      |
| 14151  |       | 1   | Yes   | 10     | 1   | Yes     | 3     | 2      |
| 14152  |       | 2   | No    |        | 1   | Yes     | 2     | 2      |
| 14153  |       | 2   | No    |        | 2   | No      | 0     |        |
| 14154  |       | 2   | No    |        | 2   | No      | 1     | 1      |
| 14158  |       | 2   | No    |        | 1   | Yes     | 1     | 1      |
| 14159  |       | 1   | Yes   | 2      | 1   | Yes     | 1     | 1      |
| 14160  |       | 2   | No    |        | 2   | No      | 2     | 3      |
| 14161  |       | 2   | No    |        | 2   | No      | 2     | 2      |
| 14162  |       | 2   | No    |        | 1   | Yes     | 1     | 1      |
| 14165  |       | 2   | No    |        | 1   | Yes     | 4     | 3      |
| 14166  |       | 1   | Yes   | 3      | 1   | Yes     | 2     | 2      |
| 14167  |       | 2   | No    |        | 2   | No      | 2     | 1      |
| 14169  |       | 2   | No    |        | 2   | No      | 0     |        |
| 14170  |       | 2   | No    |        | 2   | No      | 0     |        |

| respid | Q16_2 | Q17 | Smoke | Q17a_1 | Q18 | Alcohol | Q19_1 | Q19a_1 |
|--------|-------|-----|-------|--------|-----|---------|-------|--------|
| 14172  |       | 1   | Yes   | 10     | 2   | No      | 1     | 2      |
| 14173  |       | 2   | No    |        | 2   | No      | 0     |        |
| 14174  |       | 1   | Yes   | 8      | 2   | No      | 1     | 1      |
| 14175  |       | 1   | Yes   | 12     | 2   | No      | 1     | 1      |
| 14176  |       | 1   | Yes   | 10     | 1   | Yes     | 1     | 1      |
| 14178  |       | 2   | No    |        | 2   | No      | 0     |        |
| 14179  |       | 2   | No    |        | 2   | No      | 0     |        |
| 14180  |       | 2   | No    |        | 1   | Yes     | 2     | 1      |
| 14183  |       | 1   | Yes   | 2      | 1   | Yes     | 1     | 1      |
| 14185  |       | 2   | No    |        | 2   | No      | 0     |        |
| 14187  |       | 2   | No    |        | 1   | Yes     | 3     | 2      |
| 14189  |       | 2   | No    |        | 2   | No      | 0     |        |
| 14191  |       | 2   | No    |        | 2   | No      | 3     | 1      |
| 14192  |       | 2   | No    |        | 2   | No      | 0     |        |
| 14195  |       | 2   | No    |        | 2   | No      | 4     | 2      |
| 14197  |       | 2   | No    |        | 2   | No      | 3     | 2      |
| 14203  |       | 1   | Yes   | 4      | 2   | No      | 2     | 2      |
| 14204  |       | 2   | No    |        | 2   | No      | 1     | 1      |
| 14205  |       | 2   | No    |        | 2   | No      | 0     |        |
| 14208  |       | 2   | No    |        | 1   | Yes     | 0     |        |
| 14211  |       | 2   | No    |        | 1   | Yes     | 4     | 4      |
| 14214  |       | 2   | No    |        | 2   | No      | 0     |        |
| 14215  |       | 1   | Yes   | 15     | 1   | Yes     | 2     | 2      |
| 14216  |       | 1   | Yes   | 10     | 1   | Yes     | 2     | 2      |
| 14218  |       | 1   | Yes   | 3      | 1   | Yes     | 0     |        |
| 14220  |       | 2   | No    |        | 1   | Yes     | 0     |        |
| 14223  |       | 2   | No    |        | 2   | No      | 0     |        |
| 14225  |       | 2   | No    |        | 1   | Yes     | 3     | 2      |
| 14226  |       | 2   | No    |        | 1   | Yes     | 5     | 2      |
| 14228  |       | 1   | Yes   | 2      | 1   | Yes     | 1     | 0      |
| 14231  |       | 2   | No    |        | 2   | No      | 1     | 2      |
| 14233  |       | 2   | No    |        | 2   | No      | 0     |        |



| respid | Q16_2 | Q17 | Smoke | Q17a_1 | Q18 | Alcohol | Q19_1 | Q19a_1 |
|--------|-------|-----|-------|--------|-----|---------|-------|--------|
| 14237  |       | 2   | No    |        | 2   | No      | 0     |        |
| 14238  |       | 1   | Yes   | 12     | 2   | No      | 2     | 1      |
| 14243  |       | 2   | No    |        | 2   | No      | 0     |        |
| 14245  |       | 2   | No    |        | 2   | No      | 0     |        |
| 14246  |       | 1   | Yes   | 2      | 1   | Yes     | 1     | 1      |
| 14248  |       | 2   | No    |        | 2   | No      | 0     |        |
| 14250  |       | 2   | No    |        | 2   | No      | 0     |        |
| 14253  |       | 2   | No    |        | 2   | No      | 1     | 1      |
| 14254  |       | 2   | No    |        | 1   | Yes     | 0     |        |
| 14255  |       | 2   | No    |        | 2   | No      | 0     |        |
| 14257  |       | 2   | No    |        | 2   | No      | 0     |        |
| 14258  |       | 2   | No    |        | 2   | No      | 1     | 1      |
| 14259  |       | 2   | No    |        | 1   | Yes     | 2     | 2      |
| 14260  |       | 2   | No    |        | 2   | No      | 0     |        |
| 14261  |       | 1   | Yes   | 5      | 1   | Yes     | 2     | 2      |
| 14263  |       | 2   | No    |        | 2   | No      | 5     | 3      |
| 14264  |       | 2   | No    |        | 2   | No      | 3     | 1      |
| 14266  |       | 2   | No    |        | 2   | No      | 2     | 1      |
| 14267  |       | 2   | No    |        | 2   | No      | 1     | 2      |
| 14268  |       | 2   | No    |        | 2   | No      | 1     | 1      |
| 14275  |       | 2   | No    |        | 2   | No      | 0     |        |
| 14278  |       | 1   | Yes   | 10     | 2   | No      | 3     | 2      |
| 14279  |       | 1   | Yes   | 20     | 1   | Yes     | 0     |        |
| 14280  |       | 2   | No    |        | 2   | No      | 0     |        |
| 14281  |       | 2   | No    |        | 2   | No      | 0     |        |
| 14282  |       | 2   | No    |        | 2   | No      | 1     | 1      |
| 14283  |       | 2   | No    |        | 1   | Yes     | 2     | 1      |
| 14286  |       | 2   | No    |        | 2   | No      | 0     |        |
| 14287  |       | 2   | No    |        | 1   | Yes     | 0     |        |
| 14288  |       | 2   | No    |        | 2   | No      | 3     | 2      |
| 14291  |       | 1   | Yes   | 15     | 1   | Yes     | 0     |        |
| 14292  |       | 2   | No    |        | 1   | Yes     | 0     |        |

| respid | Q16_2 | Q17 | Smoke | Q17a_1 | Q18 | Alcohol | Q19_1 | Q19a_1 |
|--------|-------|-----|-------|--------|-----|---------|-------|--------|
| 14293  |       | 2   | No    |        | 2   | No      | 1     | 1      |
| 14304  |       | 1   | Yes   | 6      | 1   | Yes     | 4     | 3      |
| 14308  |       | 2   | No    |        | 2   | No      | 4     | 1      |
| 14313  |       | 2   | No    |        | 2   | No      | 0     |        |
| 14314  |       | 1   | Yes   | 15     | 2   | No      | 5     | 3      |
| 14316  |       | 2   | No    |        | 2   | No      | 0     |        |
| 14317  |       | 2   | No    |        | 1   | Yes     | 0     |        |
| 14318  |       | 2   | No    |        | 2   | No      | 4     | 3      |
| 14319  |       | 2   | No    |        | 2   | No      | 1     | 1      |
| 14320  |       | 2   | No    |        | 2   | No      | 1     | 1      |
| 14321  |       | 2   | No    |        | 2   | No      | 0     |        |
| 14322  |       | 2   | No    |        | 2   | No      | 1     | 2      |
| 14326  |       | 2   | No    |        | 2   | No      | 0     |        |
| 14327  |       | 1   | Yes   | 6      | 1   | Yes     | 4     | 3      |
| 14328  |       | 2   | No    |        | 1   | Yes     | 0     |        |
| 14330  |       | 2   | No    |        | 2   | No      | 0     |        |
| 14332  |       | 2   | No    |        | 2   | No      | 0     |        |
| 14334  |       | 2   | No    |        | 2   | No      | 0     |        |
| 14336  |       | 2   | No    |        | 2   | No      | 0     |        |
| 14337  |       | 1   | Yes   | 3      | 2   | No      | 1     | 1      |
| 14339  |       | 2   | No    |        | 2   | No      | 0     |        |
| 14340  |       | 2   | No    |        | 1   | Yes     | 3     | 2      |
| 14341  |       | 2   | No    |        | 2   | No      | 1     | 0      |
| 14344  |       | 1   | Yes   | 5      | 2   | No      | 0     |        |
| 14345  |       | 1   | Yes   | 15     | 1   | Yes     | 1     | 2      |
| 14346  |       | 2   | No    |        | 1   | Yes     | 0     |        |
| 14348  |       | 2   | No    |        | 1   | Yes     | 3     | 2      |
| 14349  |       | 2   | No    |        | 1   | Yes     | 1     | 1      |
| 14358  |       | 2   | No    |        | 2   | No      | 1     | 3      |
| 14360  |       | 2   | No    |        | 2   | No      | 0     |        |
| 14362  |       | 1   | Yes   | 10     | 2   | No      | 0     |        |
| 14366  |       | 1   | Yes   | 7      | 1   | Yes     | 1     | 0      |

| respid | Q16_2 | Q17 | Smoke | Q17a_1 | Q18 | Alcohol | Q19_1 | Q19a_1 |
|--------|-------|-----|-------|--------|-----|---------|-------|--------|
| 14367  |       | 2   | No    |        | 2   | No      | 1     | 1      |
| 14369  |       | 2   | No    |        | 2   | No      | 2     | 2      |
| 14371  |       | 2   | No    |        | 2   | No      | 1     | 1      |
| 14372  |       | 2   | No    |        | 2   | No      | 0     |        |
| 14374  |       | 2   | No    |        | 2   | No      | 0     |        |
| 14376  |       | 2   | No    |        | 2   | No      | 0     |        |
| 14377  |       | 2   | No    |        | 2   | No      | 0     |        |
| 14378  |       | 2   | No    |        | 1   | Yes     | 0     |        |
| 14379  |       | 1   | Yes   | 20     | 2   | No      | 1     | 1      |
| 14381  |       | 2   | No    |        | 2   | No      | 0     |        |
| 14383  |       | 2   | No    |        | 2   | No      | 3     | 2      |
| 14384  |       | 2   | No    |        | 1   | Yes     | 2     | 1      |
| 14385  |       | 1   | Yes   | 6      | 1   | Yes     | 5     | 3      |
| 14386  |       | 2   | No    |        | 2   | No      | 1     | 2      |
| 14390  |       | 2   | No    |        | 1   | Yes     | 1     | 1      |
| 14391  |       | 2   | No    |        | 2   | No      | 0     |        |
| 14392  |       | 1   | Yes   | 3      | 2   | No      | 0     |        |
| 14393  |       | 2   | No    |        | 1   | Yes     | 3     | 3      |
| 14394  |       | 2   | No    |        | 2   | No      | 1     | 1      |
| 14395  |       | 1   | Yes   | 8      | 2   | No      | 0     |        |
| 14396  |       | 1   | Yes   | 10     | 2   | No      | 0     |        |
| 14397  |       | 2   | No    |        | 2   | No      | 4     | 3      |
| 14398  |       | 2   | No    |        | 2   | No      | 0     |        |
| 14399  |       | 2   | No    |        | 2   | No      | 0     |        |
| 14400  |       | 2   | No    |        | 2   | No      | 0     |        |
| 14403  |       | 2   | No    |        | 2   | No      | 1     | 0      |
| 14404  |       | 2   | No    |        | 2   | No      | 1     | 1      |
| 14405  |       | 2   | No    |        | 2   | No      | 0     |        |
| 14407  |       | 2   | No    |        | 1   | Yes     | 0     |        |
| 14408  |       | 1   | Yes   | 5      | 1   | Yes     | 4     | 3      |
| 14410  |       | 1   | Yes   | 1      | 2   | No      | 3     | 3      |
| 14415  |       | 2   | No    |        | 2   | No      | 0     |        |

| respid | Q16_2 | Q17 | Smoke | Q17a_1 | Q18 | Alcohol | Q19_1 | Q19a_1 |
|--------|-------|-----|-------|--------|-----|---------|-------|--------|
| 14419  |       | 2   | No    |        | 2   | No      | 0     |        |
| 14420  |       | 2   | No    |        | 2   | No      | 0     |        |
| 14421  |       | 2   | No    |        | 2   | No      | 0     |        |
| 14423  |       | 1   | Yes   | 20     | 2   | No      | 0     |        |
| 14424  |       | 2   | No    |        | 1   | Yes     | 0     |        |
| 14425  |       | 2   | No    |        | 2   | No      | 2     | 1      |
| 14426  |       | 2   | No    |        | 1   | Yes     | 1     | 1      |
| 14427  |       | 1   | Yes   | 6      | 2   | No      | 0     |        |
| 14428  |       | 1   | Yes   | 5      | 1   | Yes     | 5     | 3      |
| 14431  |       | 2   | No    |        | 2   | No      | 1     | 2      |
| 14433  |       | 1   | Yes   | 18     | 2   | No      | 0     |        |
| 14434  |       | 2   | No    |        | 2   | No      | 1     | 1      |
| 14435  |       | 2   | No    |        | 2   | No      | 0     |        |
| 14436  |       | 2   | No    |        | 1   | Yes     | 3     | 2      |
| 14438  |       | 2   | No    |        | 1   | Yes     | 0     |        |
| 14442  |       | 2   | No    |        | 2   | No      | 3     | 2      |
| 14447  |       | 2   | No    |        | 1   | Yes     | 0     |        |
| 14448  |       | 1   | Yes   | 6      | 1   | Yes     | 0     |        |
| 14450  |       | 2   | No    |        | 2   | No      | 1     | 1      |
| 14451  |       | 2   | No    |        | 2   | No      | 1     | 1      |
| 14454  |       | 2   | No    |        | 1   | Yes     | 2     | 1      |
| 14455  |       | 2   | No    |        | 2   | No      | 0     |        |
| 14456  |       | 1   | Yes   | 20     | 1   | Yes     | 1     | 1      |
| 14457  |       | 1   | Yes   | 3      | 1   | Yes     | 3     | 4      |
| 14458  |       | 1   | Yes   | 3      | 1   | Yes     | 4     | 3      |
| 14459  |       | 2   | No    |        | 2   | No      | 0     |        |
| 14460  |       | 2   | No    |        | 1   | Yes     | 0     |        |
| 14464  |       | 2   | No    |        | 2   | No      | 1     | 1      |
| 14465  |       | 2   | No    |        | 2   | No      | 2     | 1      |
| 14466  |       | 1   | Yes   | 20     | 1   | Yes     | 0     |        |
| 14467  |       | 2   | No    |        | 2   | No      | 1     | 0      |
| 14470  |       | 2   | No    |        | 2   | No      | 3     | 2      |

| respid | Q16_2 | Q17 | Smoke | Q17a_1 | Q18 | Alcohol | Q19_1 | Q19a_1 |
|--------|-------|-----|-------|--------|-----|---------|-------|--------|
| 14472  |       | 1   | Yes   | 15     | 2   | No      | 0     |        |
| 14473  |       | 2   | No    |        | 2   | No      | 0     |        |
| 14474  |       | 2   | No    |        | 2   | No      | 0     |        |
| 14477  |       | 2   | No    |        | 2   | No      | 0     |        |
| 14478  |       | 2   | No    |        | 2   | No      | 0     |        |
| 14479  |       | 1   | Yes   | 8      | 2   | No      | 0     |        |
| 14484  |       | 2   | No    |        | 1   | Yes     | 1     | 0      |
| 14485  |       | 2   | No    |        | 2   | No      | 0     |        |
| 14486  | 80    | 2   | No    |        | 2   | No      | 2     | 2      |
| 14487  |       | 1   | Yes   | 6      | 2   | No      | 0     |        |
| 14488  |       | 2   | No    |        | 2   | No      | 3     | 2      |
| 14491  |       | 1   | Yes   | 15     | 1   | Yes     | 1     | 1      |
| 14495  |       | 2   | No    |        | 2   | No      | 0     |        |
| 14500  |       | 2   | No    |        | 2   | No      | 0     |        |
| 14502  |       | 1   | Yes   | 12     | 2   | No      | 0     |        |
| 14504  |       | 1   | Yes   | 8      | 1   | Yes     | 2     | 2      |
| 14505  |       | 1   | Yes   | 2      | 1   | Yes     | 1     | 2      |
| 14507  |       | 1   | Yes   | 20     | 2   | No      | 0     |        |
| 14517  |       | 2   | No    |        | 2   | No      | 1     | 0      |
| 14518  |       | 2   | No    |        | 2   | No      | 0     |        |
| 14519  |       | 2   | No    |        | 2   | No      | 1     | 0      |
| 14521  |       | 1   | Yes   | 5      | 1   | Yes     | 2     | 2      |
| 14522  |       | 2   | No    |        | 2   | No      | 0     |        |
| 14526  |       | 2   | No    |        | 2   | No      | 0     |        |
| 14528  |       | 1   | Yes   | 5      | 1   | Yes     | 2     | 3      |
| 14529  |       | 2   | No    |        | 1   | Yes     | 3     | 1      |
| 14530  |       | 1   | Yes   | 10     | 1   | Yes     | 2     | 2      |
| 14531  |       | 1   | Yes   | 6      | 1   | Yes     | 2     | 4      |
| 14534  |       | 2   | No    |        | 1   | Yes     | 2     | 1      |
| 14538  |       | 2   | No    |        | 1   | Yes     | 0     |        |
| 14539  |       | 1   | Yes   | 12     | 1   | Yes     | 1     | 1      |
| 14545  |       | 2   | No    |        | 2   | No      | 1     | 0      |

| respid | Q16_2 | Q17 | Smoke | Q17a_1 | Q18 | Alcohol | Q19_1 | Q19a_1 |
|--------|-------|-----|-------|--------|-----|---------|-------|--------|
| 14546  |       | 2   | No    |        | 2   | No      | 1     | 1      |
| 14551  |       | 2   | No    |        | 2   | No      | 1     | 0      |
| 14553  |       | 2   | No    |        | 2   | No      | 1     | 3      |
| 14557  |       | 2   | No    |        | 2   | No      | 0     |        |
| 14558  |       | 2   | No    |        | 1   | Yes     | 0     |        |
| 14559  |       | 1   | Yes   | 6      | 1   | Yes     | 2     | 1      |
| 14560  |       | 1   | Yes   | 4      | 1   | Yes     | 4     | 3      |
| 14563  |       | 2   | No    |        | 2   | No      | 0     |        |
| 14565  |       | 1   | Yes   | 12     | 1   | Yes     | 1     | 0      |
| 14571  |       | 1   | Yes   | 3      | 1   | Yes     | 1     | 4      |
| 14572  |       | 2   | No    |        | 1   | Yes     | 0     |        |
| 14573  |       | 2   | No    |        | 2   | No      | 1     | 1      |
| 14575  |       | 2   | No    |        | 2   | No      | 3     | 2      |
| 14576  |       | 2   | No    |        | 2   | No      | 1     | 1      |
| 14578  |       | 2   | No    |        | 2   | No      | 0     |        |
| 14579  |       | 2   | No    |        | 2   | No      | 0     |        |
| 14580  |       | 2   | No    |        | 1   | Yes     | 0     |        |
| 14582  |       | 2   | No    |        | 2   | No      | 1     | 1      |
| 14585  |       | 2   | No    |        | 2   | No      | 1     | 1      |
| 14588  |       | 2   | No    |        | 2   | No      | 0     |        |
| 14590  |       | 1   | Yes   | 12     | 1   | Yes     | 2     | 1      |
| 14592  |       | 2   | No    |        | 1   | Yes     | 1     | 2      |
| 14593  |       | 2   | No    |        | 1   | Yes     | 0     |        |
| 14595  |       | 2   | No    |        | 1   | Yes     | 1     | 2      |
| 14597  |       | 2   | No    |        | 2   | No      | 1     | 2      |
| 14600  |       | 1   | Yes   | 25     | 2   | No      | 1     | 0      |
| 14602  |       | 2   | No    |        | 2   | No      | 1     | 3      |
| 14604  |       | 1   | Yes   | 4      | 1   | Yes     | 0     |        |
| 14605  |       | 2   | No    |        | 2   | No      | 5     | 1      |
| 14609  |       | 2   | No    |        | 2   | No      | 1     | 1      |
| 14610  |       | 2   | No    |        | 2   | No      | 1     | 0      |
| 14611  |       | 1   | Yes   | 20     | 1   | Yes     | 2     | 1      |

| respid | Q16_2 | Q17 | Smoke | Q17a_1 | Q18 | Alcohol | Q19_1 | Q19a_1 |
|--------|-------|-----|-------|--------|-----|---------|-------|--------|
| 14612  |       | 2   | No    |        | 1   | Yes     | 0     |        |
| 14614  |       | 1   | Yes   | 6      | 2   | No      | 2     | 1      |
| 14615  |       | 2   | No    |        | 2   | No      | 1     | 1      |
| 14618  | 123   | 1   | Yes   | 12     | 1   | Yes     | 4     | 4      |
| 14621  |       | 2   | No    |        | 2   | No      | 0     |        |
| 14624  |       | 1   | Yes   | 7      | 2   | No      | 1     | 0      |
| 14626  |       | 2   | No    |        | 2   | No      | 0     |        |
| 14627  |       | 2   | No    |        | 2   | No      | 2     | 2      |
| 14628  |       | 1   | Yes   | 3      | 1   | Yes     | 1     | 1      |
| 14631  |       | 2   | No    |        | 2   | No      | 0     |        |
| 14633  |       | 1   | Yes   | 6      | 1   | Yes     | 2     | 2      |
| 14642  |       | 1   | Yes   | 5      | 1   | Yes     | 0     |        |
| 14647  |       | 1   | Yes   | 8      | 1   | Yes     | 0     |        |
| 14658  |       | 1   | Yes   | 20     | 1   | Yes     | 2     | 1      |
| 14659  |       | 1   | Yes   | 6      | 1   | Yes     | 2     | 1      |
| 14660  |       | 2   | No    |        | 2   | No      | 0     |        |
| 14661  |       | 1   | Yes   | 6      | 2   | No      | 0     |        |
| 14662  |       | 1   | Yes   | 1      | 2   | No      | 4     | 3      |
| 14663  |       | 2   | No    |        | 1   | Yes     | 0     |        |
| 14670  |       | 2   | No    |        | 2   | No      | 0     |        |
| 14671  |       | 2   | No    |        | 2   | No      | 0     |        |
| 14672  |       | 1   | Yes   | 15     | 1   | Yes     | 2     | 2      |
| 14675  |       | 2   | No    |        | 2   | No      | 0     |        |
| 14676  |       | 1   | Yes   | 6      | 2   | No      | 1     | 0      |
| 14677  |       | 2   | No    |        | 2   | No      | 3     | 1      |
| 14678  |       | 2   | No    |        | 1   | Yes     | 1     | 1      |
| 14681  |       | 1   | Yes   | 5      | 1   | Yes     | 2     | 2      |
| 14684  |       | 2   | No    |        | 2   | No      | 0     |        |
| 14688  |       | 2   | No    |        | 1   | Yes     | 0     |        |
| 14690  |       | 2   | No    |        | 2   | No      | 0     |        |
| 14694  |       | 1   | Yes   | 7      | 1   | Yes     | 2     | 2      |
| 14696  |       | 2   | No    |        | 2   | No      | 1     | 1      |

| respid | Q16_2 | Q17 | Smoke | Q17a_1 | Q18 | Alcohol | Q19_1 | Q19a_1 |
|--------|-------|-----|-------|--------|-----|---------|-------|--------|
| 14700  |       | 2   | No    |        | 2   | No      | 0     |        |
| 14701  |       | 1   | Yes   | 5      | 2   | No      | 0     |        |
| 14703  |       | 1   | Yes   | 2      | 1   | Yes     | 4     | 1      |
| 14707  |       | 2   | No    |        | 2   | No      | 0     |        |
| 14711  |       | 1   | Yes   | 16     | 1   | Yes     | 1     | 1      |
| 14714  |       | 1   | Yes   | 5      | 2   | No      | 2     | 1      |
| 14715  |       | 1   | Yes   | 1      | 1   | Yes     | 3     | 3      |
| 14716  |       | 2   | No    |        | 2   | No      | 0     |        |
| 14720  |       | 2   | No    |        | 1   | Yes     | 1     | 1      |
| 14725  |       | 2   | No    |        | 2   | No      | 1     | 3      |
| 14726  |       | 2   | No    |        | 2   | No      | 1     | 1      |
| 14734  |       | 1   | Yes   | 5      | 1   | Yes     | 0     |        |
| 14735  |       | 2   | No    |        | 1   | Yes     | 0     |        |
| 14736  |       | 1   | Yes   | 6      | 1   | Yes     | 2     | 1      |
| 14740  |       | 2   | No    |        | 1   | Yes     | 0     |        |
| 14745  |       | 2   | No    |        | 2   | No      | 0     |        |
| 14747  |       | 2   | No    |        | 1   | Yes     | 0     |        |
| 14750  |       | 1   | Yes   | 7      | 1   | Yes     | 2     | 2      |
| 14751  |       | 1   | Yes   | 7      | 1   | Yes     | 0     |        |
| 14753  |       | 2   | No    |        | 2   | No      | 0     |        |
| 14756  |       | 2   | No    |        | 1   | Yes     | 4     | 4      |
| 14780  |       | 2   | No    |        | 1   | Yes     | 2     | 1      |
| 14782  |       | 2   | No    |        | 1   | Yes     | 1     | 1      |
| 14800  |       | 2   | No    |        | 2   | No      | 4     | 3      |
| 14801  |       | 1   | Yes   | 20     | 1   | Yes     | 0     |        |
| 14802  |       | 2   | No    |        | 2   | No      | 0     |        |
| 14805  |       | 2   | No    |        | 1   | Yes     | 2     | 2      |
| 14811  |       | 2   | No    |        | 2   | No      | 3     | 3      |
| 14814  |       | 2   | No    |        | 2   | No      | 3     | 2      |
| 14822  |       | 2   | No    |        | 2   | No      | 1     | 1      |
| 14827  |       | 2   | No    |        | 2   | No      | 0     |        |
| 14828  |       | 2   | No    |        | 2   | No      | 4     | 3      |



| respid | Q16_2 | Q17 | Smoke | Q17a_1 | Q18 | Alcohol | Q19_1 | Q19a_1 |
|--------|-------|-----|-------|--------|-----|---------|-------|--------|
| 14830  |       | 2   | No    |        | 2   | No      | 0     |        |
| 14832  |       | 2   | No    |        | 2   | No      | 2     | 1      |
| 14835  |       | 1   | Yes   | 6      | 1   | Yes     | 2     | 1      |
| 14841  |       | 2   | No    |        | 2   | No      | 0     |        |
| 14849  |       | 2   | No    |        | 2   | No      | 2     | 1      |
| 14850  |       | 1   | Yes   | 25     | 1   | Yes     | 0     |        |
| 14851  |       | 2   | No    |        | 2   | No      | 0     |        |
| 14856  |       | 2   | No    |        | 2   | No      | 4     | 3      |
| 14862  |       | 2   | No    |        | 2   | No      | 1     | 1      |
| 14863  |       | 2   | No    |        | 2   | No      | 0     |        |
| 14864  |       | 2   | No    |        | 2   | No      | 0     |        |
| 14866  |       | 2   | No    |        | 2   | No      | 1     | 1      |
| 14867  |       | 2   | No    |        | 2   | No      | 4     | 2      |
| 14868  |       | 1   | Yes   | 10     | 2   | No      | 1     | 0      |
| 14870  |       | 2   | No    |        | 2   | No      | 1     | 1      |
| 14873  |       | 2   | No    |        | 2   | No      | 0     |        |
| 14878  |       | 2   | No    |        | 2   | No      | 0     |        |
| 14879  |       | 2   | No    |        | 2   | No      | 0     |        |
| 14881  |       | 1   | Yes   | 2      | 2   | No      | 3     | 2      |
| 14888  |       | 2   | No    |        | 2   | No      | 3     | 3      |
| 14895  |       | 2   | No    |        | 1   | Yes     | 1     | 1      |
| 14900  |       | 1   | Yes   | 5      | 2   | No      | 2     | 3      |
| 14912  |       | 2   | No    |        | 1   | Yes     | 0     |        |
| 14922  |       | 2   | No    |        | 2   | No      | 1     | 1      |
| 14923  |       | 2   | No    |        | 2   | No      | 3     | 3      |
| 14924  |       | 1   | Yes   | 3      | 2   | No      | 5     | 4      |
| 14925  |       | 2   | No    |        | 2   | No      | 2     | 2      |
| 14926  |       | 2   | No    |        | 2   | No      | 0     |        |
| 14927  |       | 2   | No    |        | 2   | No      | 3     | 2      |
| 14930  |       | 2   | No    |        | 2   | No      | 0     |        |
| 14937  |       | 2   | No    |        | 2   | No      | 3     | 3      |
| 14938  |       | 2   | No    |        | 2   | No      | 4     | 3      |

| respid | Q16_2 | Q17 | Smoke | Q17a_1 | Q18 | Alcohol | Q19_1 | Q19a_1 |
|--------|-------|-----|-------|--------|-----|---------|-------|--------|
| 14939  |       | 2   | No    |        | 2   | No      | 0     |        |
| 14942  |       | 2   | No    |        | 2   | No      | 0     |        |
| 14943  |       | 2   | No    |        | 1   | Yes     | 0     |        |
| 14953  |       | 2   | No    |        | 1   | Yes     | 2     | 2      |
| 14954  |       | 2   | No    |        | 2   | No      | 0     |        |
| 14955  |       | 2   | No    |        | 2   | No      | 1     | 1      |
| 14957  |       | 2   | No    |        | 2   | No      | 1     | 2      |
| 14958  |       | 1   | Yes   | 3      | 2   | No      | 5     | 4      |
| 14959  |       | 2   | No    |        | 2   | No      | 3     | 2      |
| 14961  |       | 1   | Yes   | 15     | 2   | No      | 0     |        |
| 14963  |       | 2   | No    |        | 2   | No      | 3     | 2      |
| 14964  |       | 2   | No    |        | 2   | No      | 0     |        |
| 14965  |       | 2   | No    |        | 2   | No      | 0     |        |
| 14967  |       | 2   | No    |        | 2   | No      | 2     | 4      |
| 14970  |       | 2   | No    |        | 1   | Yes     | 4     | 3      |
| 14972  |       | 2   | No    |        | 1   | Yes     | 2     | 2      |
| 14975  |       | 2   | No    |        | 1   | Yes     | 4     | 3      |
| 14977  |       | 2   | No    |        | 2   | No      | 0     |        |
| 14982  |       | 2   | No    |        | 2   | No      | 1     | 0      |
| 14985  |       | 1   | Yes   | 4      | 2   | No      | 2     | 1      |
| 14986  |       | 2   | No    |        | 2   | No      | 0     |        |
| 14987  |       | 2   | No    |        | 2   | No      | 0     |        |
| 14988  |       | 1   | Yes   | 5      | 2   | No      | 4     | 3      |
| 14989  |       | 2   | No    |        | 2   | No      | 1     | 1      |
| 14993  |       | 1   | Yes   | 6      | 2   | No      | 2     | 1      |
| 15001  |       | 1   | Yes   | 6      | 2   | No      | 0     |        |
| 15002  |       | 2   | No    |        | 2   | No      | 3     | 2      |
| 15006  |       | 2   | No    |        | 2   | No      | 3     | 2      |
| 15007  |       | 2   | No    |        | 2   | No      | 0     |        |
| 15014  |       | 2   | No    |        | 2   | No      | 4     | 3      |
| 15020  |       | 2   | No    |        | 1   | Yes     | 3     | 2      |
| 15021  |       | 2   | No    |        | 2   | No      | 2     | 2      |

| respid | Q16_2 | Q17 | Smoke | Q17a_1 | Q18 | Alcohol | Q19_1 | Q19a_1 |
|--------|-------|-----|-------|--------|-----|---------|-------|--------|
| 15023  |       | 2   | No    |        | 2   | No      | 3     | 2      |
| 15030  |       | 2   | No    |        | 2   | No      | 0     |        |
| 15032  |       | 2   | No    |        | 2   | No      | 0     |        |
| 15033  |       | 2   | No    |        | 2   | No      | 1     | 1      |
| 15034  |       | 1   | Yes   | 8      | 1   | Yes     | 3     | 1      |
| 15035  |       | 1   | Yes   | 7      | 1   | Yes     | 1     | 1      |
| 15037  |       | 2   | No    |        | 2   | No      | 0     |        |
| 15039  |       | 2   | No    |        | 2   | No      | 3     | 3      |
| 15040  |       | 2   | No    |        | 1   | Yes     | 0     |        |
| 15042  |       | 2   | No    |        | 1   | Yes     | 2     | 2      |
| 15044  |       | 2   | No    |        | 2   | No      | 0     |        |
| 15045  |       | 2   | No    |        | 2   | No      | 1     | 0      |
| 15046  |       | 2   | No    |        | 2   | No      | 0     |        |
| 15052  |       | 2   | No    |        | 2   | No      | 1     | 4      |
| 15058  |       | 2   | No    |        | 2   | No      | 0     |        |
| 15063  |       | 2   | No    |        | 2   | No      | 3     | 2      |
| 15066  |       | 2   | No    |        | 2   | No      | 0     |        |
| 15069  |       | 1   | Yes   | 5      | 1   | Yes     | 1     | 0      |
| 15071  |       | 1   | Yes   | 30     | 1   | Yes     | 2     | 3      |
| 15076  |       | 2   | No    |        | 2   | No      | 2     | 1      |
| 15078  |       | 2   | No    |        | 2   | No      | 0     |        |
| 15087  |       | 2   | No    |        | 1   | Yes     | 2     | 1      |
| 15090  |       | 2   | No    |        | 2   | No      | 2     | 3      |
| 15091  |       | 2   | No    |        | 2   | No      | 2     | 2      |
| 15092  |       | 1   | Yes   | 3      | 1   | Yes     | 0     |        |
| 15096  |       | 2   | No    |        | 2   | No      | 1     | 1      |
| 15106  |       | 2   | No    |        | 2   | No      | 4     | 3      |
| 15108  |       | 2   | No    |        | 2   | No      | 0     |        |
| 15113  |       | 2   | No    |        | 2   | No      | 2     | 4      |
| 15116  |       | 2   | No    |        | 2   | No      | 0     |        |
| 15119  |       | 2   | No    |        | 2   | No      | 1     | 1      |
| 15120  |       | 1   | Yes   | 10     | 1   | Yes     | 0     |        |

| respid | Q16_2 | Q17 | Smoke | Q17a_1 | Q18 | Alcohol | Q19_1 | Q19a_1 |
|--------|-------|-----|-------|--------|-----|---------|-------|--------|
| 15121  |       | 1   | Yes   | 8      | 1   | Yes     | 2     | 2      |
| 15123  |       | 2   | No    |        | 2   | No      | 0     |        |
| 15124  |       | 2   | No    |        | 2   | No      | 0     |        |
| 15128  |       | 2   | No    |        | 2   | No      | 0     |        |
| 15131  |       | 2   | No    |        | 1   | Yes     | 0     |        |
| 15136  |       | 2   | No    |        | 2   | No      | 0     |        |
| 15137  |       | 1   | Yes   | 5      | 1   | Yes     | 1     | 1      |
| 15141  |       | 2   | No    |        | 1   | Yes     | 1     | 1      |
| 15144  |       | 2   | No    |        | 1   | Yes     | 1     | 2      |
| 15147  |       | 2   | No    |        | 1   | Yes     | 2     | 2      |
| 15151  |       | 2   | No    |        | 2   | No      | 2     | 1      |
| 15154  |       | 2   | No    |        | 2   | No      | 3     | 3      |
| 15157  |       | 2   | No    |        | 1   | Yes     | 0     |        |
| 15164  |       | 2   | No    |        | 2   | No      | 3     | 3      |
| 15168  |       | 2   | No    |        | 1   | Yes     | 0     |        |
| 15169  |       | 2   | No    |        | 2   | No      | 1     | 2      |
| 15172  |       | 2   | No    |        | 2   | No      | 4     | 3      |
| 15177  |       | 2   | No    |        | 2   | No      | 2     | 2      |
| 15178  |       | 2   | No    |        | 2   | No      | 0     |        |
| 15180  |       | 2   | No    |        | 2   | No      | 1     | 1      |
| 15181  |       | 1   | Yes   | 2      | 2   | No      | 0     |        |
| 15182  |       | 1   | Yes   | 16     | 1   | Yes     | 2     | 2      |
| 15183  |       | 2   | No    |        | 2   | No      | 0     |        |
| 15188  |       | 2   | No    |        | 2   | No      | 0     |        |
| 15190  |       | 2   | No    |        | 2   | No      | 2     | 2      |
| 15195  |       | 2   | No    |        | 2   | No      | 0     |        |
| 15201  |       | 2   | No    |        | 1   | Yes     | 2     | 2      |
| 15203  |       | 2   | No    |        | 1   | Yes     | 0     |        |
| 15204  |       | 2   | No    |        | 2   | No      | 0     |        |
| 15207  |       | 2   | No    |        | 2   | No      | 0     |        |
| 15208  |       | 2   | No    |        | 1   | Yes     | 3     | 2      |
| 15209  |       | 2   | No    |        | 1   | Yes     | 1     | 1      |

| respid | Q16_2 | Q17 | Smoke | Q17a_1 | Q18 | Alcohol | Q19_1 | Q19a_1 |
|--------|-------|-----|-------|--------|-----|---------|-------|--------|
| 15212  |       | 2   | No    |        | 2   | No      | 0     |        |
| 15213  |       | 1   | Yes   | 8      | 1   | Yes     | 3     | 1      |
| 15219  |       | 2   | No    |        | 1   | Yes     | 3     | 2      |
| 15220  |       | 2   | No    |        | 1   | Yes     | 2     | 2      |
| 15221  |       | 2   | No    |        | 2   | No      | 0     |        |
| 15223  |       | 2   | No    |        | 2   | No      | 1     | 1      |
| 15224  |       | 2   | No    |        | 1   | Yes     | 2     | 1      |
| 15225  |       | 2   | No    |        | 2   | No      | 0     |        |
| 15226  |       | 2   | No    |        | 2   | No      | 0     |        |
| 15230  |       | 2   | No    |        | 2   | No      | 0     |        |
| 15231  |       | 2   | No    |        | 1   | Yes     | 3     | 3      |
| 15232  |       | 2   | No    |        | 2   | No      | 0     |        |
| 15237  |       | 2   | No    |        | 2   | No      | 0     |        |
| 15239  |       | 2   | No    |        | 2   | No      | 0     |        |
| 15241  |       | 2   | No    |        | 2   | No      | 0     |        |
| 15242  |       | 1   | Yes   | 4      | 2   | No      | 2     | 1      |
| 15247  |       | 2   | No    |        | 2   | No      | 0     |        |
| 15248  |       | 2   | No    |        | 2   | No      | 0     |        |
| 15251  |       | 2   | No    |        | 2   | No      | 0     |        |
| 15257  |       | 2   | No    |        | 2   | No      | 0     |        |
| 15260  |       | 2   | No    |        | 2   | No      | 0     |        |
| 15261  |       | 2   | No    |        | 2   | No      | 4     | 3      |
| 15262  |       | 1   | Yes   | 20     | 1   | Yes     | 3     | 3      |
| 15263  |       | 1   | Yes   | 5      | 1   | Yes     | 2     | 2      |
| 15265  |       | 2   | No    |        | 2   | No      | 1     | 0      |
| 15266  |       | 2   | No    |        | 2   | No      | 3     | 1      |
| 15268  |       | 2   | No    |        | 1   | Yes     | 0     |        |
| 15269  |       | 1   | Yes   | 3      | 1   | Yes     | 0     |        |
| 15270  |       | 1   | Yes   | 20     | 1   | Yes     | 4     | 3      |
| 15273  |       | 2   | No    |        | 2   | No      | 0     |        |
| 15276  |       | 2   | No    |        | 2   | No      | 4     | 4      |
| 15277  |       | 2   | No    |        | 2   | No      | 0     |        |

| respid | Q16_2 | Q17 | Smoke | Q17a_1 | Q18 | Alcohol | Q19_1 | Q19a_1 |
|--------|-------|-----|-------|--------|-----|---------|-------|--------|
| 15282  |       | 2   | No    |        | 2   | No      | 0     |        |
| 15284  |       | 1   | Yes   | 21     | 1   | Yes     | 2     | 3      |
| 15285  |       | 2   | No    |        | 2   | No      | 1     | 0      |
| 15286  |       | 1   | Yes   | 2      | 1   | Yes     | 3     | 3      |
| 15288  |       | 1   | Yes   | 7      | 1   | Yes     | 2     | 2      |
| 15292  |       | 2   | No    |        | 2   | No      | 4     | 4      |
| 15296  |       | 2   | No    |        | 2   | No      | 0     |        |
| 15297  |       | 2   | No    |        | 2   | No      | 0     |        |
| 15298  |       | 2   | No    |        | 2   | No      | 0     |        |
| 15301  |       | 2   | No    |        | 2   | No      | 0     |        |
| 15302  |       | 1   | Yes   | 5      | 1   | Yes     | 1     | 0      |
| 15305  |       | 2   | No    |        | 1   | Yes     | 1     | 1      |
| 15307  |       | 1   | Yes   | 20     | 2   | No      | 0     |        |
| 15308  |       | 2   | No    |        | 1   | Yes     | 1     | 1      |
| 15309  |       | 2   | No    |        | 2   | No      | 0     |        |
| 15311  |       | 2   | No    |        | 2   | No      | 1     | 1      |
| 15315  |       | 1   | Yes   | 7      | 1   | Yes     | 0     |        |
| 15316  |       | 2   | No    |        | 2   | No      | 0     |        |
| 15318  |       | 2   | No    |        | 2   | No      | 0     |        |
| 15321  |       | 2   | No    |        | 2   | No      | 4     | 4      |
| 15322  |       | 2   | No    |        | 2   | No      | 0     |        |
| 15324  |       | 2   | No    |        | 2   | No      | 1     | 0      |
| 15326  |       | 2   | No    |        | 2   | No      | 0     |        |
| 15327  |       | 2   | No    |        | 2   | No      | 1     | 0      |
| 15328  |       | 2   | No    |        | 2   | No      | 0     |        |
| 15330  |       | 2   | No    |        | 2   | No      | 0     |        |
| 15332  |       | 2   | No    |        | 2   | No      | 0     |        |
| 15333  |       | 2   | No    |        | 1   | Yes     | 0     |        |
| 15334  |       | 2   | No    |        | 1   | Yes     | 0     |        |
| 15336  |       | 2   | No    |        | 2   | No      | 4     | 3      |
| 15337  |       | 2   | No    |        | 2   | No      | 1     | 0      |
| 15338  |       | 2   | No    |        | 2   | No      | 0     |        |

| respid | Q16_2 | Q17 | Smoke | Q17a_1 | Q18 | Alcohol | Q19_1 | Q19a_1 |
|--------|-------|-----|-------|--------|-----|---------|-------|--------|
| 15339  |       | 2   | No    |        | 2   | No      | 5     | 4      |
| 15341  |       | 1   | Yes   | 15     | 2   | No      | 0     |        |
| 15344  |       | 2   | No    |        | 2   | No      | 0     |        |
| 15345  |       | 2   | No    |        | 2   | No      | 1     | 0      |
| 15350  |       | 2   | No    |        | 2   | No      | 0     |        |
| 15351  |       | 2   | No    |        | 1   | Yes     | 0     |        |
| 15352  |       | 2   | No    |        | 2   | No      | 1     | 0      |
| 15372  |       | 2   | No    |        | 1   | Yes     | 0     |        |
| 15373  |       | 2   | No    |        | 2   | No      | 3     | 1      |
| 15376  |       | 1   | Yes   | 10     | 2   | No      | 0     |        |
| 15377  |       | 2   | No    |        | 2   | No      | 0     |        |
| 15382  |       | 1   | Yes   | 8      | 2   | No      | 0     |        |
| 15383  |       | 2   | No    |        | 1   | Yes     | 3     | 2      |
| 15385  |       | 2   | No    |        | 2   | No      | 3     | 2      |
| 15390  |       | 2   | No    |        | 2   | No      | 0     |        |
| 15399  |       | 2   | No    |        | 2   | No      | 0     |        |
| 15404  |       | 1   | Yes   | 15     | 1   | Yes     | 1     | 1      |
| 15410  |       | 2   | No    |        | 2   | No      | 0     |        |
| 15411  |       | 1   | Yes   | 10     | 1   | Yes     | 2     | 1      |
| 15412  |       | 2   | No    |        | 2   | No      | 0     |        |
| 15413  |       | 2   | No    |        | 2   | No      | 3     | 2      |
| 15414  |       | 2   | No    |        | 2   | No      | 0     |        |
| 15417  |       | 2   | No    |        | 2   | No      | 0     |        |
| 15418  |       | 2   | No    |        | 2   | No      | 1     | 1      |
| 15421  |       | 2   | No    |        | 2   | No      | 0     |        |
| 15423  |       | 1   | Yes   | 6      | 2   | No      | 0     |        |
| 15425  |       | 2   | No    |        | 1   | Yes     | 0     |        |
| 15426  |       | 2   | No    |        | 2   | No      | 4     | 4      |
| 15430  |       | 2   | No    |        | 1   | Yes     | 0     |        |
| 15431  |       | 2   | No    |        | 2   | No      | 3     | 3      |
| 15435  |       | 2   | No    |        | 2   | No      | 0     |        |
| 15436  |       | 2   | No    |        | 1   | Yes     | 0     |        |

| respid | Q16_2 | Q17 | Smoke | Q17a_1 | Q18 | Alcohol | Q19_1 | Q19a_1 |
|--------|-------|-----|-------|--------|-----|---------|-------|--------|
| 15437  |       | 2   | No    |        | 2   | No      | 0     |        |
| 15438  |       | 2   | No    |        | 2   | No      | 0     |        |
| 15439  |       | 2   | No    |        | 1   | Yes     | 0     |        |
| 15441  |       | 2   | No    |        | 2   | No      | 4     | 3      |
| 15443  |       | 2   | No    |        | 2   | No      | 1     | 1      |
| 15446  |       | 1   | Yes   | 5      | 2   | No      | 0     |        |
| 15449  |       | 2   | No    |        | 1   | Yes     | 2     | 2      |
| 15451  |       | 2   | No    |        | 1   | Yes     | 3     | 2      |
| 15452  |       | 2   | No    |        | 2   | No      | 3     | 2      |
| 15454  |       | 2   | No    |        | 2   | No      | 1     | 1      |
| 15456  |       | 1   | Yes   | 20     | 1   | Yes     | 1     | 1      |
| 15457  |       | 2   | No    |        | 2   | No      | 0     |        |
| 15458  |       | 1   | Yes   | 12     | 1   | Yes     | 2     | 2      |
| 15462  |       | 2   | No    |        | 1   | Yes     | 2     | 2      |
| 15467  |       | 2   | No    |        | 2   | No      | 1     | 1      |
| 15470  |       | 2   | No    |        | 1   | Yes     | 2     | 2      |
| 15472  |       | 1   | Yes   | 10     | 1   | Yes     | 1     | 1      |
| 15476  |       | 2   | No    |        | 2   | No      | 4     | 1      |
| 15477  |       | 2   | No    |        | 2   | No      | 0     |        |
| 15488  |       | 2   | No    |        | 2   | No      | 1     | 1      |
| 15489  |       | 2   | No    |        | 2   | No      | 1     | 1      |
| 15490  |       | 2   | No    |        | 2   | No      | 0     |        |
| 15496  |       | 1   | Yes   | 8      | 2   | No      | 1     | 1      |
| 15497  |       | 2   | No    |        | 2   | No      | 2     | 2      |
| 15498  |       | 2   | No    |        | 1   | Yes     | 0     |        |
| 15509  |       | 2   | No    |        | 2   | No      | 3     | 2      |
| 15510  |       | 2   | No    |        | 2   | No      | 0     |        |
| 15516  |       | 2   | No    |        | 2   | No      | 0     |        |
| 15519  |       | 2   | No    |        | 2   | No      | 0     |        |
| 15520  |       | 2   | No    |        | 2   | No      | 0     |        |
| 15524  |       | 2   | No    |        | 2   | No      | 1     | 1      |
| 15525  |       | 2   | No    |        | 1   | Yes     | 0     |        |



| respid | Q16_2 | Q17 | Smoke | Q17a_1 | Q18 | Alcohol | Q19_1 | Q19a_1 |
|--------|-------|-----|-------|--------|-----|---------|-------|--------|
| 15526  |       | 2   | No    |        | 2   | No      | 2     | 1      |
| 15531  |       | 2   | No    |        | 2   | No      | 2     | 1      |
| 15532  |       | 2   | No    |        | 2   | No      | 5     | 2      |
| 15534  |       | 2   | No    |        | 2   | No      | 3     | 3      |
| 15535  |       | 2   | No    |        | 2   | No      | 4     | 3      |
| 15539  |       | 2   | No    |        | 2   | No      | 1     | 2      |
| 15550  |       | 2   | No    |        | 2   | No      | 0     |        |
| 15556  |       | 2   | No    |        | 2   | No      | 0     |        |
| 15558  |       | 2   | No    |        | 2   | No      | 4     | 3      |
| 15565  |       | 2   | No    |        | 2   | No      | 0     |        |
| 15567  |       | 2   | No    |        | 2   | No      | 3     | 3      |
| 15568  |       | 2   | No    |        | 2   | No      | 4     | 3      |
| 15571  |       | 1   | Yes   | 15     | 1   | Yes     | 3     | 2      |
| 15573  |       | 2   | No    |        | 2   | No      | 0     |        |
| 15574  |       | 2   | No    |        | 2   | No      | 4     | 3      |
| 15576  |       | 2   | No    |        | 2   | No      | 0     |        |
| 15587  |       | 2   | No    |        | 2   | No      | 3     | 2      |
| 15588  |       | 1   | Yes   | 60     | 1   | Yes     | 5     | 3      |
| 15593  |       | 1   | Yes   | 30     | 2   | No      | 1     | 1      |
| 15597  |       | 2   | No    |        | 2   | No      | 0     |        |
| 15598  |       | 2   | No    |        | 2   | No      | 0     |        |
| 15599  |       | 2   | No    |        | 1   | Yes     | 3     | 1      |
| 15601  |       | 2   | No    |        | 1   | Yes     | 0     |        |
| 15604  |       | 2   | No    |        | 2   | No      | 0     |        |
| 15611  |       | 1   | Yes   | 14     | 2   | No      | 1     | 1      |
| 15613  |       | 1   | Yes   | 10     | 2   | No      | 0     |        |
| 15614  |       | 2   | No    |        | 1   | Yes     | 1     | 0      |
| 15617  |       | 2   | No    |        | 2   | No      | 1     | 1      |
| 15622  |       | 2   | No    |        | 2   | No      | 0     |        |
| 15623  |       | 2   | No    |        | 2   | No      | 0     |        |
| 15625  |       | 1   | Yes   | 20     | 1   | Yes     | 1     | 3      |
| 15627  |       | 2   | No    |        | 2   | No      | 0     |        |

| respid | Q16_2 | Q17 | Smoke | Q17a_1 | Q18 | Alcohol | Q19_1 | Q19a_1 |
|--------|-------|-----|-------|--------|-----|---------|-------|--------|
| 15628  |       | 2   | No    |        | 1   | Yes     | 0     |        |
| 15633  |       | 2   | No    |        | 2   | No      | 3     | 2      |
| 15634  |       | 2   | No    |        | 1   | Yes     | 0     |        |
| 15637  |       | 2   | No    |        | 2   | No      | 0     |        |
| 15644  |       | 2   | No    |        | 2   | No      | 2     | 2      |
| 15645  |       | 2   | No    |        | 2   | No      | 1     | 1      |
| 15649  |       | 2   | No    |        | 2   | No      | 0     |        |
| 15650  |       | 2   | No    |        | 1   | Yes     | 1     | 0      |
| 15651  |       | 2   | No    |        | 2   | No      | 0     |        |
| 15657  |       | 1   | Yes   | 27     | 1   | Yes     | 3     | 3      |
| 15658  |       | 2   | No    |        | 2   | No      | 0     |        |
| 15660  |       | 2   | No    |        | 1   | Yes     | 3     | 2      |
| 15667  |       | 2   | No    |        | 2   | No      | 0     |        |
| 15671  |       | 2   | No    |        | 2   | No      | 0     |        |
| 15679  |       | 2   | No    |        | 1   | Yes     | 3     | 3      |
| 15712  |       | 2   | No    |        | 2   | No      | 0     |        |
| 15715  |       | 2   | No    |        | 2   | No      | 2     | 1      |
| 15749  |       | 2   | No    |        | 2   | No      | 0     |        |
| 15754  |       | 1   | Yes   | 7      | 2   | No      | 2     | 1      |
| 15756  |       | 1   | Yes   | 20     | 1   | Yes     | 2     | 3      |
| 15773  |       | 2   | No    |        | 2   | No      | 0     |        |
| 15774  |       | 2   | No    |        | 2   | No      | 1     | 1      |
| 15776  |       | 2   | No    |        | 1   | Yes     | 3     | 2      |
| 15777  |       | 2   | No    |        | 2   | No      | 3     | 2      |
| 15779  |       | 2   | No    |        | 2   | No      | 0     |        |
| 15780  |       | 2   | No    |        | 2   | No      | 1     | 1      |
| 15792  |       | 1   | Yes   | 20     | 1   | Yes     | 1     | 1      |
| 15793  |       | 2   | No    |        | 2   | No      | 3     | 2      |
| 15796  |       | 2   | No    |        | 2   | No      | 0     |        |
| 15798  |       | 2   | No    |        | 2   | No      | 0     |        |
| 15809  |       | 2   | No    |        | 2   | No      | 1     | 1      |
| 15810  |       | 2   | No    |        | 2   | No      | 0     |        |

| respid | Q16_2 | Q17 | Smoke | Q17a_1 | Q18 | Alcohol | Q19_1 | Q19a_1 |
|--------|-------|-----|-------|--------|-----|---------|-------|--------|
| 15815  |       | 2   | No    |        | 2   | No      | 1     | 1      |
| 15816  |       | 1   | Yes   | 6      | 1   | Yes     | 0     |        |
| 15817  |       | 2   | No    |        | 2   | No      | 0     |        |
| 15821  |       | 2   | No    |        | 2   | No      | 3     | 2      |
| 15823  |       | 2   | No    |        | 2   | No      | 2     | 2      |
| 15834  |       | 1   | Yes   | 7      | 2   | No      | 0     |        |
| 15835  |       | 2   | No    |        | 2   | No      | 0     |        |
| 15836  |       | 2   | No    |        | 2   | No      | 0     |        |
| 15837  |       | 2   | No    |        | 2   | No      | 0     |        |
| 15839  |       | 1   | Yes   | 6      | 2   | No      | 0     |        |
| 15840  |       | 2   | No    |        | 2   | No      | 0     |        |
| 15844  |       | 1   | Yes   | 10     | 1   | Yes     | 0     |        |
| 15845  |       | 2   | No    |        | 2   | No      | 0     |        |
| 15847  |       | 2   | No    |        | 2   | No      | 3     | 2      |
| 15848  |       | 2   | No    |        | 1   | Yes     | 1     | 1      |
| 15849  |       | 1   | Yes   | 7      | 1   | Yes     | 0     |        |
| 15857  |       | 2   | No    |        | 2   | No      | 1     | 1      |
| 15858  |       | 2   | No    |        | 1   | Yes     | 1     | 2      |
| 15862  |       | 2   | No    |        | 2   | No      | 3     | 3      |
| 15866  |       | 2   | No    |        | 2   | No      | 0     |        |
| 15870  |       | 2   | No    |        | 2   | No      | 0     |        |
| 15871  |       | 1   | Yes   | 7      | 2   | No      | 1     | 2      |
| 15872  |       | 1   | Yes   | 5      | 2   | No      | 0     |        |
| 15873  |       | 1   | Yes   | 7      | 1   | Yes     | 0     |        |
| 15874  |       | 2   | No    |        | 2   | No      | 0     |        |
| 15875  |       | 1   | Yes   | 22     | 1   | Yes     | 4     | 3      |
| 15876  |       | 1   | Yes   | 6      | 1   | Yes     | 2     | 2      |
| 15882  |       | 2   | No    |        | 2   | No      | 1     | 2      |
| 15884  |       | 2   | No    |        | 2   | No      | 1     | 2      |
| 15890  |       | 2   | No    |        | 2   | No      | 0     |        |
| 15892  |       | 2   | No    |        | 2   | No      | 1     | 1      |
| 15908  |       | 2   | No    |        | 1   | Yes     | 0     |        |

| respid | Q16_2 | Q17 | Smoke | Q17a_1 | Q18 | Alcohol | Q19_1 | Q19a_1 |
|--------|-------|-----|-------|--------|-----|---------|-------|--------|
| 15914  |       | 2   | No    |        | 2   | No      | 0     |        |
| 15932  |       | 2   | No    |        | 2   | No      | 2     | 2      |
| 15933  |       | 2   | No    |        | 1   | Yes     | 1     | 1      |
| 15938  |       | 2   | No    |        | 1   | Yes     | 1     | 0      |
| 15940  |       | 2   | No    |        | 1   | Yes     | 2     | 1      |
| 15945  |       | 2   | No    |        | 2   | No      | 0     |        |
| 15947  |       | 2   | No    |        | 2   | No      | 0     |        |
| 15950  |       | 2   | No    |        | 2   | No      | 0     |        |
| 15951  |       | 2   | No    |        | 2   | No      | 1     | 2      |
| 15952  |       | 2   | No    |        | 2   | No      | 3     | 2      |
| 15953  |       | 2   | No    |        | 2   | No      | 1     | 1      |
| 15954  |       | 2   | No    |        | 2   | No      | 1     | 2      |
| 15957  |       | 1   | Yes   | 1      | 2   | No      | 3     | 2      |
| 15965  |       | 2   | No    |        | 2   | No      | 4     | 3      |
| 15966  |       | 2   | No    |        | 2   | No      | 0     |        |
| 15967  |       | 2   | No    |        | 2   | No      | 3     | 2      |
| 15968  |       | 1   | Yes   | 15     | 1   | Yes     | 2     | 3      |
| 15970  |       | 2   | No    |        | 2   | No      | 0     |        |
| 15973  |       | 2   | No    |        | 2   | No      | 0     |        |
| 15974  |       | 2   | No    |        | 2   | No      | 0     |        |
| 15975  |       | 2   | No    |        | 2   | No      | 0     |        |
| 15980  |       | 2   | No    |        | 1   | Yes     | 4     | 3      |
| 15984  |       | 2   | No    |        | 1   | Yes     | 0     |        |
| 15985  |       | 1   | Yes   | 9      | 1   | Yes     | 2     | 1      |
| 15994  |       | 2   | No    |        | 2   | No      | 0     |        |
| 15995  |       | 2   | No    |        | 2   | No      | 0     |        |
| 16000  |       | 2   | No    |        | 1   | Yes     | 0     |        |
| 16004  |       | 2   | No    |        | 2   | No      | 0     |        |
| 16005  |       | 2   | No    |        | 2   | No      | 0     |        |
| 16006  |       | 2   | No    |        | 2   | No      | 0     |        |
| 16009  |       | 1   | Yes   | 5      | 1   | Yes     | 0     |        |
| 16017  |       | 2   | No    |        | 2   | No      | 0     |        |

| respid | Q16_2 | Q17 | Smoke | Q17a_1 | Q18 | Alcohol | Q19_1 | Q19a_1 |
|--------|-------|-----|-------|--------|-----|---------|-------|--------|
| 16019  |       | 2   | No    |        | 2   | No      | 0     |        |
| 16021  |       | 2   | No    |        | 2   | No      | 3     | 2      |
| 16024  |       | 2   | No    |        | 2   | No      | 0     |        |
| 16026  |       | 2   | No    |        | 1   | Yes     | 3     | 2      |
| 16029  |       | 1   | Yes   | 20     | 2   | No      | 0     |        |
| 16031  |       | 2   | No    |        | 1   | Yes     | 2     | 2      |
| 16037  |       | 2   | No    |        | 2   | No      | 0     |        |
| 16043  |       | 1   | Yes   | 10     | 2   | No      | 0     |        |
| 16044  |       | 2   | No    |        | 2   | No      | 1     | 0      |
| 16047  |       | 1   | Yes   | 5      | 1   | Yes     | 1     | 2      |
| 16048  |       | 2   | No    |        | 1   | Yes     | 4     | 2      |
| 16049  |       | 2   | No    |        | 2   | No      | 0     |        |
| 16051  |       | 2   | No    |        | 2   | No      | 1     | 0      |
| 16053  |       | 2   | No    |        | 2   | No      | 2     | 2      |
| 16054  |       | 2   | No    |        | 2   | No      | 0     |        |
| 16069  |       | 2   | No    |        | 1   | Yes     | 1     | 1      |
| 16070  |       | 2   | No    |        | 1   | Yes     | 1     | 1      |
| 16074  |       | 2   | No    |        | 2   | No      | 0     |        |
| 16076  |       | 2   | No    |        | 2   | No      | 0     |        |
| 16078  |       | 2   | No    |        | 2   | No      | 0     |        |
| 16081  |       | 2   | No    |        | 2   | No      | 2     | 2      |
| 16085  |       | 2   | No    |        | 2   | No      | 0     |        |
| 16088  |       | 2   | No    |        | 2   | No      | 0     |        |
| 16091  |       | 2   | No    |        | 2   | No      | 0     |        |
| 16092  |       | 2   | No    |        | 1   | Yes     | 1     | 2      |
| 16093  |       | 2   | No    |        | 2   | No      | 1     | 1      |
| 16097  |       | 2   | No    |        | 2   | No      | 1     | 1      |
| 16100  |       | 2   | No    |        | 2   | No      | 1     | 0      |
| 16101  |       | 2   | No    |        | 2   | No      | 0     |        |
| 16105  |       | 2   | No    |        | 2   | No      | 0     |        |
| 16118  |       | 2   | No    |        | 2   | No      | 1     | 2      |
| 16129  |       | 1   | Yes   | 20     | 2   | No      | 0     |        |

| respid | Q16_2 | Q17 | Smoke | Q17a_1 | Q18 | Alcohol | Q19_1 | Q19a_1 |
|--------|-------|-----|-------|--------|-----|---------|-------|--------|
| 16130  |       | 2   | No    |        | 2   | No      | 5     | 2      |
| 16131  |       | 1   | Yes   | 8      | 2   | No      | 2     | 2      |
| 16136  |       | 2   | No    |        | 2   | No      | 0     |        |
| 16137  |       | 2   | No    |        | 2   | No      | 0     |        |
| 16138  |       | 2   | No    |        | 2   | No      | 1     | 2      |
| 16139  |       | 2   | No    |        | 2   | No      | 0     |        |
| 16140  |       | 2   | No    |        | 2   | No      | 0     |        |
| 16145  |       | 2   | No    |        | 2   | No      | 1     | 2      |
| 16150  |       | 2   | No    |        | 1   | Yes     | 0     |        |
| 16151  |       | 2   | No    |        | 2   | No      | 0     |        |
| 16153  |       | 1   | Yes   | 16     | 2   | No      | 0     |        |
| 16164  |       | 2   | No    |        | 2   | No      | 1     | 1      |
| 16168  |       | 1   | Yes   | 2      | 1   | Yes     | 2     | 1      |
| 16173  |       | 2   | No    |        | 2   | No      | 2     | 2      |
| 16174  |       | 2   | No    |        | 2   | No      | 0     |        |
| 16177  |       | 2   | No    |        | 1   | Yes     | 1     | 1      |
| 16185  |       | 1   | Yes   | 10     | 1   | Yes     | 1     | 0      |
| 16189  |       | 2   | No    |        | 2   | No      | 1     | 2      |
| 16192  |       | 2   | No    |        | 1   | Yes     | 0     |        |
| 16193  |       | 2   | No    |        | 2   | No      | 0     |        |
| 16194  |       | 2   | No    |        | 2   | No      | 1     | 2      |
| 16196  |       | 2   | No    |        | 1   | Yes     | 0     |        |
| 16202  |       | 2   | No    |        | 2   | No      | 1     | 2      |
| 16205  |       | 1   | Yes   | 15     | 1   | Yes     | 4     | 2      |
| 16206  |       | 2   | No    |        | 2   | No      | 0     |        |
| 16208  |       | 2   | No    |        | 2   | No      | 0     |        |
| 16211  |       | 2   | No    |        | 1   | Yes     | 0     |        |
| 16212  |       | 2   | No    |        | 2   | No      | 1     | 0      |
| 16215  |       | 2   | No    |        | 2   | No      | 0     |        |
| 16217  |       | 2   | No    |        | 1   | Yes     | 0     |        |
| 16221  |       | 1   | Yes   | 15     | 1   | Yes     | 0     |        |
| 16226  |       | 2   | No    |        | 2   | No      | 1     | 2      |

| respid | Q16_2 | Q17 | Smoke | Q17a_1 | Q18 | Alcohol | Q19_1 | Q19a_1 |
|--------|-------|-----|-------|--------|-----|---------|-------|--------|
| 16228  |       | 2   | No    |        | 2   | No      | 1     | 1      |
| 16229  |       | 1   | Yes   | 4      | 1   | Yes     | 0     |        |
| 16230  |       | 2   | No    |        | 2   | No      | 0     |        |
| 16231  |       | 1   | Yes   | 15     | 1   | Yes     | 5     | 3      |
| 16232  |       | 1   | Yes   | 20     | 1   | Yes     | 4     | 2      |
| 16234  |       | 1   | Yes   | 20     | 2   | No      | 1     | 2      |
| 16235  |       | 1   | Yes   | 1      | 1   | Yes     | 2     | 2      |
| 16236  |       | 2   | No    |        | 1   | Yes     | 1     | 1      |
| 16237  |       | 2   | No    |        | 2   | No      | 0     |        |
| 16238  |       | 1   | Yes   | 1      | 2   | No      | 2     | 2      |
| 16239  |       | 2   | No    |        | 2   | No      | 0     |        |
| 16243  |       | 1   | Yes   | 5      | 2   | No      | 2     | 2      |
| 16248  |       | 1   | Yes   | 40     | 1   | Yes     | 3     | 3      |
| 16249  |       | 2   | No    |        | 2   | No      | 0     |        |
| 16251  |       | 2   | No    |        | 2   | No      | 0     |        |
| 16263  |       | 2   | No    |        | 2   | No      | 0     |        |
| 16265  |       | 2   | No    |        | 1   | Yes     | 4     | 2      |
| 16269  |       | 2   | No    |        | 2   | No      | 0     |        |
| 16272  |       | 2   | No    |        | 2   | No      | 1     | 1      |
| 16273  |       | 2   | No    |        | 2   | No      | 0     |        |
| 16281  |       | 2   | No    |        | 2   | No      | 0     |        |
| 16282  |       | 2   | No    |        | 2   | No      | 0     |        |
| 16287  |       | 2   | No    |        | 2   | No      | 0     |        |
| 16290  |       | 2   | No    |        | 2   | No      | 0     |        |
| 16294  |       | 1   | Yes   | 10     | 2   | No      | 2     | 1      |
| 16295  |       | 2   | No    |        | 1   | Yes     | 1     | 0      |
| 16296  |       | 2   | No    |        | 1   | Yes     | 5     | 2      |
| 16299  |       | 2   | No    |        | 1   | Yes     | 4     | 3      |
| 16302  |       | 1   | Yes   | 10     | 2   | No      | 0     |        |
| 16303  |       | 2   | No    |        | 2   | No      | 1     | 1      |
| 16304  |       | 1   | Yes   | 3      | 1   | Yes     | 1     | 1      |
| 16306  |       | 2   | No    |        | 1   | Yes     | 0     |        |

| respid | Q16_2 | Q17 | Smoke | Q17a_1 | Q18 | Alcohol | Q19_1 | Q19a_1 |
|--------|-------|-----|-------|--------|-----|---------|-------|--------|
| 16318  |       | 2   | No    |        | 1   | Yes     | 0     |        |
| 16320  |       | 1   | Yes   | 15     | 1   | Yes     | 1     | 1      |
| 16321  |       | 2   | No    |        | 1   | Yes     | 1     | 1      |
| 16322  |       | 2   | No    |        | 2   | No      | 5     | 1      |
| 16324  |       | 2   | No    |        | 2   | No      | 0     |        |
| 16326  |       | 2   | No    |        | 1   | Yes     | 1     | 0      |
| 16328  |       | 2   | No    |        | 2   | No      | 0     |        |
| 16336  |       | 2   | No    |        | 2   | No      | 1     | 1      |
| 16341  |       | 1   | Yes   | 35     | 2   | No      | 1     | 0      |
| 16342  |       | 2   | No    |        | 1   | Yes     | 0     |        |
| 16343  |       | 2   | No    |        | 2   | No      | 5     | 1      |
| 16345  |       | 2   | No    |        | 2   | No      | 1     | 2      |
| 16349  |       | 2   | No    |        | 1   | Yes     | 1     | 1      |
| 16355  |       | 1   | Yes   | 15     | 2   | No      | 1     | 2      |
| 16364  |       | 1   | Yes   | 10     | 2   | No      | 0     |        |
| 16374  |       | 2   | No    |        | 2   | No      | 0     |        |
| 16375  |       | 2   | No    |        | 2   | No      | 0     |        |
| 16376  |       | 1   | Yes   | 4      | 1   | Yes     | 2     | 2      |
| 16393  |       | 2   | No    |        | 2   | No      | 2     | 2      |
| 16394  |       | 2   | No    |        | 2   | No      | 2     | 2      |
| 16395  |       | 2   | No    |        | 2   | No      | 1     | 0      |
| 16397  |       | 2   | No    |        | 2   | No      | 1     | 2      |
| 16398  |       | 2   | No    |        | 2   | No      | 1     | 2      |
| 16402  |       | 2   | No    |        | 2   | No      | 0     |        |
| 16405  |       | 2   | No    |        | 1   | Yes     | 0     |        |
| 16416  |       | 2   | No    |        | 1   | Yes     | 1     | 1      |
| 16422  |       | 2   | No    |        | 2   | No      | 2     | 2      |
| 16429  |       | 2   | No    |        | 1   | Yes     | 0     |        |
| 16430  |       | 2   | No    |        | 2   | No      | 0     |        |
| 16432  |       | 1   | Yes   | 10     | 1   | Yes     | 2     | 2      |
| 16433  |       | 1   | Yes   | 17     | 1   | Yes     | 1     | 1      |
| 16434  |       | 1   | Yes   | 2      | 2   | No      | 0     |        |



| respid | Q16_2 | Q17 | Smoke | Q17a_1 | Q18 | Alcohol | Q19_1 | Q19a_1 |
|--------|-------|-----|-------|--------|-----|---------|-------|--------|
| 16437  |       | 2   | No    |        | 2   | No      | 0     |        |
| 16439  |       | 2   | No    |        | 2   | No      | 0     |        |
| 16440  |       | 2   | No    |        | 1   | Yes     | 0     |        |
| 16441  |       | 1   | Yes   | 8      | 2   | No      | 2     | 1      |
| 16442  |       | 2   | No    |        | 2   | No      | 0     |        |
| 16450  |       | 2   | No    |        | 2   | No      | 0     |        |
| 16451  |       | 2   | No    |        | 2   | No      | 0     |        |
| 16452  |       | 2   | No    |        | 2   | No      | 2     | 1      |
| 16467  |       | 2   | No    |        | 2   | No      | 0     |        |
| 16468  |       | 2   | No    |        | 2   | No      | 0     |        |
| 16469  |       | 1   | Yes   | 18     | 1   | Yes     | 2     | 1      |
| 16470  |       | 2   | No    |        | 2   | No      | 0     |        |
| 16471  |       | 2   | No    |        | 2   | No      | 1     | 1      |
| 16473  |       | 2   | No    |        | 2   | No      | 0     |        |
| 16476  |       | 2   | No    |        | 1   | Yes     | 0     |        |
| 16478  |       | 2   | No    |        | 2   | No      | 0     |        |
| 16484  |       | 2   | No    |        | 2   | No      | 0     |        |
| 16499  |       | 2   | No    |        | 2   | No      | 0     |        |
| 16502  |       | 2   | No    |        | 2   | No      | 0     |        |
| 16505  |       | 2   | No    |        | 2   | No      | 0     |        |
| 16514  |       | 2   | No    |        | 2   | No      | 0     |        |
| 16515  |       | 2   | No    |        | 2   | No      | 1     | 1      |
| 16517  |       | 2   | No    |        | 1   | Yes     | 0     |        |
| 16518  |       | 2   | No    |        | 1   | Yes     | 0     |        |
| 16519  |       | 1   | Yes   | 5      | 2   | No      | 1     | 1      |
| 16525  |       | 2   | No    |        | 2   | No      | 1     | 0      |
| 16526  |       | 2   | No    |        | 2   | No      | 0     |        |
| 16530  |       | 2   | No    |        | 2   | No      | 0     |        |
| 16532  |       | 1   | Yes   | 5      | 2   | No      | 0     |        |
| 16536  |       | 2   | No    |        | 1   | Yes     | 1     | 0      |
| 16537  |       | 2   | No    |        | 2   | No      | 1     | 1      |
| 16541  |       | 2   | No    |        | 1   | Yes     | 5     | 4      |

| respid | Q16_2 | Q17 | Smoke | Q17a_1 | Q18 | Alcohol | Q19_1 | Q19a_1 |
|--------|-------|-----|-------|--------|-----|---------|-------|--------|
| 16543  |       | 2   | No    |        | 2   | No      | 2     | 2      |
| 16544  |       | 2   | No    |        | 2   | No      | 1     | 1      |
| 16545  |       | 2   | No    |        | 2   | No      | 1     | 0      |
| 16546  |       | 2   | No    |        | 2   | No      | 3     | 2      |
| 16548  |       | 2   | No    |        | 2   | No      | 1     | 1      |
| 16552  |       | 2   | No    |        | 2   | No      | 5     | 2      |
| 16559  |       | 1   | Yes   | 10     | 1   | Yes     | 0     |        |
| 16564  |       | 1   | Yes   | 15     | 2   | No      | 1     | 1      |
| 16565  |       | 1   | Yes   | 90     | 1   | Yes     | 0     |        |
| 16567  |       | 2   | No    |        | 2   | No      | 1     | 1      |
| 16571  |       | 2   | No    |        | 2   | No      | 0     |        |
| 16572  |       | 2   | No    |        | 2   | No      | 1     | 2      |
| 16579  |       | 2   | No    |        | 2   | No      | 0     |        |
| 16588  |       | 2   | No    |        | 2   | No      | 2     | 3      |
| 16599  |       | 2   | No    |        | 2   | No      | 4     | 2      |
| 16605  |       | 2   | No    |        | 2   | No      | 1     | 0      |
| 16622  |       | 2   | No    |        | 2   | No      | 0     |        |
| 16635  |       | 1   | Yes   | 30     | 1   | Yes     | 1     | 0      |
| 16638  |       | 2   | No    |        | 2   | No      | 5     | 1      |
| 16652  |       | 1   | Yes   | 12     | 1   | Yes     | 1     | 1      |
| 16656  |       | 2   | No    |        | 2   | No      | 0     |        |
| 16671  |       | 2   | No    |        | 2   | No      | 0     |        |
| 16676  |       | 1   | Yes   | 10     | 2   | No      | 1     | 1      |
| 16678  |       | 2   | No    |        | 2   | No      | 2     | 1      |
| 16702  |       | 1   | Yes   | 15     | 2   | No      | 1     | 1      |
| 16705  |       | 1   | Yes   | 8      | 1   | Yes     | 1     | 1      |
| 16707  |       | 1   | Yes   | 2      | 2   | No      | 1     | 1      |
| 16711  |       | 2   | No    |        | 2   | No      | 1     | 1      |
| 16712  |       | 2   | No    |        | 2   | No      | 0     |        |
| 16716  |       | 1   | Yes   | 1      | 1   | Yes     | 0     |        |
| 16724  |       | 2   | No    |        | 1   | Yes     | 1     | 2      |
| 16727  |       | 2   | No    |        | 2   | No      | 1     | 1      |

| respid | Q16_2 | Q17 | Smoke | Q17a_1 | Q18 | Alcohol | Q19_1 | Q19a_1 |
|--------|-------|-----|-------|--------|-----|---------|-------|--------|
| 16734  |       | 2   | No    |        | 2   | No      | 1     | 1      |
| 16740  |       | 1   | Yes   | 8      | 2   | No      | 0     |        |
| 16748  |       | 1   | Yes   | 20     | 2   | No      | 0     |        |
| 16759  |       | 2   | No    |        | 2   | No      | 0     |        |
| 16761  |       | 2   | No    |        | 2   | No      | 0     |        |
| 16763  |       | 2   | No    |        | 1   | Yes     | 1     | 2      |
| 16764  |       | 1   | Yes   | 15     | 1   | Yes     | 4     | 3      |
| 16766  |       | 1   | Yes   | 5      | 1   | Yes     | 0     |        |
| 16767  |       | 1   | Yes   | 10     | 1   | Yes     | 4     | 1      |
| 16776  |       | 2   | No    |        | 2   | No      | 0     |        |
| 16781  |       | 2   | No    |        | 2   | No      | 0     |        |
| 16793  |       | 1   | Yes   | 8      | 1   | Yes     | 3     | 2      |
| 16796  |       | 1   | Yes   | 15     | 1   | Yes     | 5     | 4      |
| 16810  |       | 2   | No    |        | 2   | No      | 0     |        |
| 16811  |       | 2   | No    |        | 1   | Yes     | 1     | 1      |
| 16813  |       | 2   | No    |        | 1   | Yes     | 0     |        |
| 16814  |       | 2   | No    |        | 2   | No      | 1     | 1      |
| 16831  |       | 2   | No    |        | 2   | No      | 1     | 1      |
| 16833  |       | 2   | No    |        | 1   | Yes     | 4     | 3      |
| 16839  |       | 1   | Yes   | 7      | 1   | Yes     | 2     | 2      |
| 16843  |       | 2   | No    |        | 1   | Yes     | 0     |        |
| 16860  |       | 2   | No    |        | 1   | Yes     | 0     |        |
| 16871  |       | 2   | No    |        | 2   | No      | 1     | 1      |
| 16881  |       | 2   | No    |        | 2   | No      | 1     | 2      |
| 16884  |       | 2   | No    |        | 2   | No      | 1     | 0      |
| 16891  |       | 1   | Yes   | 20     | 1   | Yes     | 3     | 3      |
| 16909  |       | 1   | Yes   | 6      | 1   | Yes     | 0     |        |
| 16911  |       | 2   | No    |        | 2   | No      | 0     |        |
| 16922  |       | 1   | Yes   | 10     | 2   | No      | 4     | 3      |
| 16935  |       | 2   | No    |        | 2   | No      | 2     | 1      |
| 16942  |       | 2   | No    |        | 2   | No      | 0     |        |
| 16950  |       | 2   | No    |        | 2   | No      | 0     |        |

| respid | Q16_2 | Q17 | Smoke | Q17a_1 | Q18 | Alcohol | Q19_1 | Q19a_1 |
|--------|-------|-----|-------|--------|-----|---------|-------|--------|
| 16952  |       | 1   | Yes   | 10     | 1   | Yes     | 1     | 2      |
| 16963  |       | 2   | No    |        | 2   | No      | 1     | 1      |
| 16967  |       | 2   | No    |        | 2   | No      | 3     | 3      |
| 16970  |       | 2   | No    |        | 2   | No      | 2     | 2      |
| 16976  |       | 2   | No    |        | 1   | Yes     | 3     | 1      |
| 16982  |       | 2   | No    |        | 2   | No      | 1     | 2      |
| 16995  |       | 1   | Yes   | 10     | 1   | Yes     | 0     |        |
| 17004  |       | 1   | Yes   | 20     | 2   | No      | 1     | 0      |
| 17006  |       | 1   | Yes   | 10     | 2   | No      | 1     | 0      |
| 17009  |       | 2   | No    |        | 1   | Yes     | 3     | 3      |
| 17021  |       | 2   | No    |        | 2   | No      | 0     |        |
| 17040  |       | 2   | No    |        | 2   | No      | 4     | 2      |
| 17041  |       | 2   | No    |        | 2   | No      | 0     |        |
| 17044  |       | 2   | No    |        | 2   | No      | 3     | 2      |
| 17046  |       | 2   | No    |        | 2   | No      | 1     | 1      |
| 17052  |       | 2   | No    |        | 1   | Yes     | 2     | 1      |
| 17055  |       | 2   | No    |        | 2   | No      | 0     |        |
| 17108  |       | 1   | Yes   | 15     | 2   | No      | 5     | 2      |
| 17109  |       | 1   | Yes   | 18     | 2   | No      | 1     | 1      |
| 17113  |       | 2   | No    |        | 2   | No      | 0     |        |
| 17115  |       | 2   | No    |        | 2   | No      | 4     | 3      |
| 17132  |       | 2   | No    |        | 2   | No      | 0     |        |
| 17135  |       | 2   | No    |        | 2   | No      | 2     | 2      |
| 17138  |       | 2   | No    |        | 2   | No      | 1     | 0      |
| 17141  |       | 2   | No    |        | 2   | No      | 0     |        |
| 17143  |       | 1   | Yes   | 8      | 1   | Yes     | 1     | 1      |
| 17148  |       | 2   | No    |        | 2   | No      | 0     |        |
| 17151  |       | 1   | Yes   | 20     | 1   | Yes     | 1     | 1      |
| 17153  |       | 1   | Yes   | 30     | 1   | Yes     | 1     | 2      |
| 17154  |       | 2   | No    |        | 2   | No      | 3     | 2      |
| 17157  |       | 2   | No    |        | 2   | No      | 5     | 2      |
| 17160  |       | 2   | No    |        | 2   | No      | 0     |        |

| respid | Q16_2 | Q17 | Smoke | Q17a_1 | Q18 | Alcohol | Q19_1 | Q19a_1 |
|--------|-------|-----|-------|--------|-----|---------|-------|--------|
| 17167  |       | 1   | Yes   | 10     | 2   | No      | 1     | 1      |
| 17169  |       | 1   | Yes   | 15     | 1   | Yes     | 1     | 0      |
| 17174  |       | 1   | Yes   | 20     | 1   | Yes     | 1     | 3      |
| 17179  |       | 2   | No    |        | 2   | No      | 0     |        |
| 17180  |       | 1   | Yes   | 10     | 2   | No      | 2     | 2      |
| 17182  |       | 2   | No    |        | 2   | No      | 0     |        |
| 17184  |       | 2   | No    |        | 2   | No      | 3     | 2      |
| 17186  |       | 2   | No    |        | 2   | No      | 1     | 1      |
| 17187  |       | 2   | No    |        | 1   | Yes     | 0     |        |
| 17192  |       | 1   | Yes   | 10     | 1   | Yes     | 2     | 2      |
| 17197  |       | 1   | Yes   | 20     | 2   | No      | 0     |        |
| 17217  |       | 2   | No    |        | 2   | No      | 1     | 1      |
| 17226  |       | 2   | No    |        | 1   | Yes     | 2     | 1      |
| 17228  |       | 2   | No    |        | 2   | No      | 4     | 2      |
| 17245  |       | 2   | No    |        | 1   | Yes     | 3     | 2      |
| 17247  |       | 1   | Yes   | 10     | 2   | No      | 0     |        |
| 17258  |       | 2   | No    |        | 2   | No      | 0     |        |
| 17259  |       | 2   | No    |        | 2   | No      | 2     | 1      |
| 17262  |       | 2   | No    |        | 2   | No      | 0     |        |
| 17265  |       | 2   | No    |        | 2   | No      | 0     |        |
| 17281  |       | 1   | Yes   | 10     | 2   | No      | 0     |        |
| 17282  |       | 2   | No    |        | 1   | Yes     | 3     | 1      |
| 17293  |       | 2   | No    |        | 2   | No      | 1     | 1      |
| 17306  |       | 2   | No    |        | 2   | No      | 1     | 2      |
| 17312  |       | 1   | Yes   | 15     | 2   | No      | 1     | 0      |
| 17318  |       | 2   | No    |        | 2   | No      | 5     | 1      |
| 17328  |       | 2   | No    |        | 2   | No      | 4     | 2      |
| 17343  |       | 1   | Yes   | 5      | 2   | No      | 1     | 1      |
| 17344  |       | 2   | No    |        | 2   | No      | 0     |        |
| 17348  |       | 1   | Yes   | 10     | 2   | No      | 1     | 1      |
| 17352  |       | 2   | No    |        | 2   | No      | 0     |        |
| 17355  |       | 2   | No    |        | 2   | No      | 1     | 1      |

| respid | Q16_2 | Q17 | Smoke | Q17a_1 | Q18 | Alcohol | Q19_1 | Q19a_1 |
|--------|-------|-----|-------|--------|-----|---------|-------|--------|
| 17356  |       | 2   | No    |        | 2   | No      | 0     |        |
| 17359  |       | 2   | No    |        | 1   | Yes     | 2     | 1      |
| 17373  |       | 1   | Yes   | 10     | 2   | No      | 1     | 2      |
| 17381  |       | 2   | No    |        | 2   | No      | 0     |        |
| 17388  |       | 2   | No    |        | 1   | Yes     | 1     | 1      |
| 17394  |       | 2   | No    |        | 2   | No      | 1     | 1      |
| 17401  |       | 2   | No    |        | 1   | Yes     | 0     |        |
| 17403  |       | 2   | No    |        | 1   | Yes     | 1     | 0      |
| 17411  |       | 2   | No    |        | 2   | No      | 0     |        |
| 17423  |       | 2   | No    |        | 2   | No      | 0     |        |
| 17427  |       | 2   | No    |        | 2   | No      | 0     |        |
| 17433  |       | 2   | No    |        | 2   | No      | 0     |        |
| 17441  |       | 2   | No    |        | 2   | No      | 0     |        |
| 17442  |       | 1   | Yes   | 10     | 1   | Yes     | 2     | 2      |
| 17447  |       | 2   | No    |        | 2   | No      | 1     | 1      |
| 17458  |       | 2   | No    |        | 2   | No      | 0     |        |
| 17474  |       | 2   | No    |        | 2   | No      | 0     |        |
| 17475  |       | 2   | No    |        | 1   | Yes     | 3     | 2      |
| 17476  |       | 2   | No    |        | 2   | No      | 1     | 2      |
| 17480  |       | 2   | No    |        | 2   | No      | 0     |        |
| 17484  |       | 2   | No    |        | 2   | No      | 0     |        |
| 17490  |       | 2   | No    |        | 2   | No      | 2     | 1      |
| 17491  |       | 2   | No    |        | 2   | No      | 0     |        |
| 17500  |       | 1   | Yes   | 20     | 1   | Yes     | 0     |        |
| 17507  |       | 2   | No    |        | 1   | Yes     | 0     |        |
| 17517  |       | 2   | No    |        | 1   | Yes     | 0     |        |
| 17520  |       | 1   | Yes   | 6      | 2   | No      | 4     | 3      |
| 17521  |       | 2   | No    |        | 2   | No      | 0     |        |
| 17531  |       | 2   | No    |        | 2   | No      | 0     |        |
| 17540  |       | 2   | No    |        | 2   | No      | 0     |        |
| 17550  |       | 2   | No    |        | 2   | No      | 0     |        |
| 17551  |       | 2   | No    |        | 2   | No      | 0     |        |

| respid | Q16_2 | Q17 | Smoke | Q17a_1 | Q18 | Alcohol | Q19_1 | Q19a_1 |
|--------|-------|-----|-------|--------|-----|---------|-------|--------|
| 17555  |       | 2   | No    |        | 2   | No      | 1     | 1      |
| 17556  |       | 2   | No    |        | 1   | Yes     | 0     |        |
| 17574  |       | 2   | No    |        | 1   | Yes     | 3     | 1      |
| 17575  |       | 2   | No    |        | 2   | No      | 0     |        |
| 17582  |       | 2   | No    |        | 1   | Yes     | 1     | 0      |
| 17587  |       | 2   | No    |        | 2   | No      | 0     |        |
| 17601  |       | 1   | Yes   | 10     | 1   | Yes     | 2     | 2      |
| 17607  |       | 2   | No    |        | 1   | Yes     | 4     | 2      |
| 17609  |       | 2   | No    |        | 2   | No      | 0     |        |
| 17611  |       | 2   | No    |        | 2   | No      | 0     |        |
| 17613  |       | 1   | Yes   | 20     | 1   | Yes     | 1     | 1      |
| 17615  |       | 2   | No    |        | 2   | No      | 0     |        |
| 17620  |       | 1   | Yes   | 12     | 2   | No      | 0     |        |
| 17624  |       | 1   | Yes   | 6      | 2   | No      | 2     | 2      |
| 17635  |       | 1   | Yes   | 20     | 1   | Yes     | 0     |        |
| 17643  |       | 2   | No    |        | 2   | No      | 1     | 1      |
| 17645  |       | 2   | No    |        | 2   | No      | 2     | 0      |
| 17646  |       | 2   | No    |        | 2   | No      | 0     |        |
| 17649  |       | 2   | No    |        | 2   | No      | 1     | 1      |
| 17658  |       | 2   | No    |        | 2   | No      | 1     | 1      |
| 17666  |       | 2   | No    |        | 2   | No      | 0     |        |
| 17670  |       | 2   | No    |        | 2   | No      | 0     |        |
| 17678  |       | 2   | No    |        | 2   | No      | 0     |        |
| 17679  |       | 2   | No    |        | 2   | No      | 0     |        |
| 17695  |       | 2   | No    |        | 2   | No      | 1     | 0      |
| 17697  |       | 2   | No    |        | 1   | Yes     | 3     | 1      |
| 17698  |       | 1   | Yes   | 15     | 1   | Yes     | 3     | 1      |
| 17723  |       | 1   | Yes   | 5      | 1   | Yes     | 3     | 2      |
| 17727  |       | 2   | No    |        | 2   | No      | 0     |        |
| 17734  |       | 2   | No    |        | 2   | No      | 0     |        |
| 17737  |       | 2   | No    |        | 2   | No      | 0     |        |
| 17748  |       | 1   | Yes   | 10     | 2   | No      | 4     | 1      |

| respid | Q16_2 | Q17 | Smoke | Q17a_1 | Q18 | Alcohol | Q19_1 | Q19a_1 |
|--------|-------|-----|-------|--------|-----|---------|-------|--------|
| 17749  |       | 2   | No    |        | 2   | No      | 0     |        |
| 17754  |       | 2   | No    |        | 1   | Yes     | 1     | 2      |
| 17766  |       | 1   | Yes   | 20     | 2   | No      | 1     | 1      |
| 17777  |       | 2   | No    |        | 2   | No      | 0     |        |
| 17780  |       | 2   | No    |        | 2   | No      | 3     | 2      |
| 17788  |       | 2   | No    |        | 2   | No      | 1     | 0      |
| 17801  |       | 1   | Yes   | 15     | 1   | Yes     | 5     | 3      |
| 17803  |       | 2   | No    |        | 2   | No      | 0     |        |
| 17807  |       | 2   | No    |        | 2   | No      | 0     |        |
| 17808  |       | 2   | No    |        | 2   | No      | 1     | 1      |
| 17809  |       | 2   | No    |        | 2   | No      | 2     | 1      |
| 17821  |       | 1   | Yes   | 8      | 1   | Yes     | 0     |        |
| 17827  |       | 2   | No    |        | 2   | No      | 2     | 2      |
| 17834  |       | 2   | No    |        | 1   | Yes     | 1     | 1      |
| 17838  |       | 1   | Yes   | 12     | 2   | No      | 1     | 1      |
| 17842  |       | 2   | No    |        | 2   | No      | 0     |        |
| 17862  |       | 2   | No    |        | 1   | Yes     | 1     | 1      |
| 17863  |       | 2   | No    |        | 2   | No      | 0     |        |
| 17871  |       | 2   | No    |        | 1   | Yes     | 3     | 2      |
| 17872  |       | 1   | Yes   | 5      | 1   | Yes     | 1     | 0      |
| 17903  |       | 2   | No    |        | 2   | No      | 3     | 3      |
| 17906  |       | 2   | No    |        | 1   | Yes     | 1     | 1      |
| 17910  |       | 1   | Yes   | 10     | 1   | Yes     | 3     | 2      |
| 17922  |       | 2   | No    |        | 2   | No      | 1     | 1      |
| 17923  |       | 1   | Yes   | 20     | 1   | Yes     | 1     | 2      |
| 17925  |       | 1   | Yes   | 10     | 1   | Yes     | 3     | 2      |
| 17926  |       | 2   | No    |        | 1   | Yes     | 0     |        |
| 17937  |       | 1   | Yes   | 10     | 1   | Yes     | 0     |        |
| 17956  |       | 2   | No    |        | 2   | No      | 0     |        |
| 17958  |       | 1   | Yes   | 5      | 2   | No      | 1     | 1      |
| 17985  |       | 1   | Yes   | 8      | 1   | Yes     | 1     | 0      |
| 17989  |       | 2   | No    |        | 1   | Yes     | 4     | 2      |



| respid | Q16_2 | Q17 | Smoke | Q17a_1 | Q18 | Alcohol | Q19_1 | Q19a_1 |
|--------|-------|-----|-------|--------|-----|---------|-------|--------|
| 17995  |       | 1   | Yes   | 10     | 2   | No      | 1     | 0      |
| 18000  |       | 2   | No    |        | 2   | No      | 0     |        |
| 18010  |       | 2   | No    |        | 2   | No      | 0     |        |
| 18015  |       | 2   | No    |        | 1   | Yes     | 1     | 1      |
| 18018  |       | 2   | No    |        | 2   | No      | 2     | 1      |
| 18031  |       | 2   | No    |        | 2   | No      | 0     |        |
| 18033  |       | 2   | No    |        | 1   | Yes     | 1     | 1      |
| 18036  |       | 2   | No    |        | 2   | No      | 1     | 1      |
| 18041  |       | 2   | No    |        | 2   | No      | 0     |        |
| 18068  |       | 2   | No    |        | 2   | No      | 0     |        |
| 18080  |       | 2   | No    |        | 2   | No      | 0     |        |
| 18081  |       | 1   | Yes   | 15     | 1   | Yes     | 1     | 1      |
| 18083  |       | 1   | Yes   | 15     | 1   | Yes     | 3     | 2      |
| 18113  |       | 2   | No    |        | 1   | Yes     | 3     | 2      |
| 18115  |       | 2   | No    |        | 2   | No      | 2     | 1      |
| 18117  |       | 1   | Yes   | 8      | 2   | No      | 4     | 3      |
| 18129  |       | 2   | No    |        | 2   | No      | 0     |        |
| 18132  |       | 2   | No    |        | 2   | No      | 3     | 2      |
| 18146  |       | 2   | No    |        | 2   | No      | 3     | 0      |
| 18147  |       | 1   | Yes   | 10     | 2   | No      | 3     | 2      |
| 18153  |       | 2   | No    |        | 2   | No      | 0     |        |
| 18154  |       | 2   | No    |        | 2   | No      | 1     | 2      |
| 18157  |       | 1   | Yes   | 5      | 1   | Yes     | 1     | 1      |
| 18166  |       | 2   | No    |        | 2   | No      | 2     | 0      |
| 18169  |       | 1   | Yes   | 15     | 2   | No      | 1     | 0      |
| 18171  |       | 2   | No    |        | 2   | No      | 1     | 1      |
| 18173  |       | 2   | No    |        | 2   | No      | 1     | 2      |
| 18204  |       | 2   | No    |        | 1   | Yes     | 0     |        |
| 18210  |       | 2   | No    |        | 1   | Yes     | 4     | 3      |
| 18212  |       | 2   | No    |        | 1   | Yes     | 0     |        |
| 18220  |       | 1   | Yes   | 35     | 1   | Yes     | 4     | 2      |
| 18221  |       | 2   | No    |        | 2   | No      | 0     |        |

| respid | Q16_2 | Q17 | Smoke | Q17a_1 | Q18 | Alcohol | Q19_1 | Q19a_1 |
|--------|-------|-----|-------|--------|-----|---------|-------|--------|
| 18228  |       | 2   | No    |        | 2   | No      | 1     | 0      |
| 18231  |       | 1   | Yes   | 8      | 2   | No      | 0     |        |
| 18233  |       | 2   | No    |        | 2   | No      | 3     | 2      |
| 18235  |       | 2   | No    |        | 2   | No      | 0     |        |
| 18237  |       | 1   | Yes   | 3      | 1   | Yes     | 0     |        |
| 18250  |       | 2   | No    |        | 2   | No      | 1     | 1      |
| 18253  |       | 2   | No    |        | 2   | No      | 3     | 2      |
| 18264  |       | 2   | No    |        | 2   | No      | 0     |        |
| 18285  |       | 2   | No    |        | 2   | No      | 0     |        |
| 18287  |       | 2   | No    |        | 2   | No      | 0     |        |
| 18296  |       | 2   | No    |        | 2   | No      | 2     | 1      |
| 18299  |       | 2   | No    |        | 2   | No      | 1     | 1      |
| 18313  |       | 2   | No    |        | 2   | No      | 1     | 2      |
| 18321  |       | 2   | No    |        | 1   | Yes     | 2     | 1      |
| 18324  |       | 2   | No    |        | 2   | No      | 0     |        |
| 18329  |       | 2   | No    |        | 2   | No      | 0     |        |
| 18332  |       | 2   | No    |        | 2   | No      | 0     |        |
| 18339  |       | 1   | Yes   | 1      | 1   | Yes     | 4     | 3      |
| 18340  |       | 1   | Yes   | 20     | 2   | No      | 2     | 1      |
| 18348  |       | 2   | No    |        | 2   | No      | 0     |        |
| 18355  |       | 2   | No    |        | 1   | Yes     | 1     | 1      |
| 18360  |       | 1   | Yes   | 15     | 1   | Yes     | 1     | 0      |
| 18380  |       | 2   | No    |        | 2   | No      | 0     |        |
| 18403  |       | 2   | No    |        | 2   | No      | 1     | 1      |
| 18405  |       | 2   | No    |        | 1   | Yes     | 0     |        |
| 18409  |       | 2   | No    |        | 2   | No      | 1     | 2      |
| 18445  |       | 2   | No    |        | 2   | No      | 0     |        |
| 18458  |       | 2   | No    |        | 2   | No      | 0     |        |
| 18477  |       | 2   | No    |        | 2   | No      | 1     | 2      |
| 18481  |       | 2   | No    |        | 2   | No      | 0     |        |
| 18491  |       | 1   | Yes   | 10     | 1   | Yes     | 0     |        |
| 18492  |       | 2   | No    |        | 2   | No      | 0     |        |

| respid | Q16_2 | Q17 | Smoke | Q17a_1 | Q18 | Alcohol | Q19_1 | Q19a_1 |
|--------|-------|-----|-------|--------|-----|---------|-------|--------|
| 18494  |       | 2   | No    |        | 2   | No      | 1     | 1      |
| 18495  |       | 2   | No    |        | 2   | No      | 0     |        |
| 18496  |       | 2   | No    |        | 2   | No      | 0     |        |
| 18507  |       | 2   | No    |        | 2   | No      | 1     | 2      |
| 18509  |       | 2   | No    |        | 2   | No      | 0     |        |
| 18510  |       | 2   | No    |        | 2   | No      | 0     |        |
| 18513  |       | 2   | No    |        | 2   | No      | 0     |        |
| 18525  |       | 2   | No    |        | 1   | Yes     | 0     |        |
| 18526  |       | 2   | No    |        | 2   | No      | 2     | 1      |
| 18527  |       | 2   | No    |        | 1   | Yes     | 1     | 1      |
| 18536  |       | 2   | No    |        | 2   | No      | 0     |        |
| 18540  |       | 2   | No    |        | 2   | No      | 1     | 0      |
| 18548  |       | 2   | No    |        | 2   | No      | 1     | 1      |
| 18550  |       | 2   | No    |        | 2   | No      | 0     |        |
| 18556  |       | 2   | No    |        | 2   | No      | 0     |        |
| 18561  |       | 2   | No    |        | 2   | No      | 0     |        |
| 18577  |       | 2   | No    |        | 2   | No      | 4     | 3      |
| 18580  |       | 2   | No    |        | 1   | Yes     | 1     | 0      |
| 18633  |       | 2   | No    |        | 2   | No      | 1     | 1      |
| 18635  |       | 2   | No    |        | 2   | No      | 1     | 1      |
| 18636  |       | 2   | No    |        | 2   | No      | 0     |        |
| 18645  |       | 2   | No    |        | 2   | No      | 3     | 3      |
| 18649  |       | 2   | No    |        | 2   | No      | 0     |        |
| 18664  |       | 2   | No    |        | 2   | No      | 0     |        |
| 18668  |       | 2   | No    |        | 2   | No      | 0     |        |
| 18682  |       | 2   | No    |        | 2   | No      | 5     | 4      |
| 18685  |       | 2   | No    |        | 2   | No      | 1     | 1      |
| 18688  |       | 2   | No    |        | 2   | No      | 2     | 1      |
| 18689  |       | 2   | No    |        | 1   | Yes     | 2     | 2      |
| 18693  |       | 2   | No    |        | 2   | No      | 2     | 2      |
| 18694  |       | 2   | No    |        | 2   | No      | 1     | 1      |
| 18705  |       | 2   | No    |        | 2   | No      | 0     |        |

| respid | Q16_2 | Q17 | Smoke | Q17a_1 | Q18 | Alcohol | Q19_1 | Q19a_1 |
|--------|-------|-----|-------|--------|-----|---------|-------|--------|
| 18710  |       | 2   | No    |        | 2   | No      | 1     | 1      |
| 18715  |       | 2   | No    |        | 2   | No      | 1     | 2      |
| 18718  |       | 2   | No    |        | 2   | No      | 1     | 1      |
| 18727  |       | 2   | No    |        | 2   | No      | 1     | 1      |
| 18732  |       | 2   | No    |        | 2   | No      | 0     |        |
| 18735  |       | 2   | No    |        | 2   | No      | 0     |        |
| 18742  |       | 2   | No    |        | 2   | No      | 1     | 1      |
| 18745  |       | 1   | Yes   | 20     | 2   | No      | 1     | 0      |
| 18747  |       | 2   | No    |        | 2   | No      | 0     |        |
| 18750  |       | 2   | No    |        | 2   | No      | 1     | 0      |
| 18751  |       | 1   | Yes   | 10     | 1   | Yes     | 1     | 1      |
| 18753  |       | 2   | No    |        | 2   | No      | 0     |        |
| 18754  |       | 2   | No    |        | 2   | No      | 0     |        |
| 18759  |       | 2   | No    |        | 2   | No      | 3     | 2      |
| 18780  |       | 2   | No    |        | 2   | No      | 0     |        |
| 18782  |       | 2   | No    |        | 2   | No      | 0     |        |
| 18807  |       | 1   | Yes   | 5      | 2   | No      | 5     | 3      |
| 18815  |       | 1   | Yes   | 10     | 2   | No      | 1     | 0      |
| 18818  |       | 2   | No    |        | 2   | No      | 2     | 0      |
| 18820  |       | 2   | No    |        | 2   | No      | 1     | 0      |
| 18823  |       | 2   | No    |        | 2   | No      | 5     | 4      |
| 18825  |       | 2   | No    |        | 2   | No      | 0     |        |
| 18828  |       | 2   | No    |        | 2   | No      | 0     |        |
| 18832  |       | 2   | No    |        | 2   | No      | 2     | 1      |
| 18834  |       | 2   | No    |        | 2   | No      | 1     | 1      |
| 18835  |       | 1   | Yes   | 10     | 1   | Yes     | 3     | 3      |
| 18837  |       | 2   | No    |        | 2   | No      | 0     |        |
| 18842  |       | 2   | No    |        | 2   | No      | 0     |        |
| 18846  |       | 2   | No    |        | 2   | No      | 0     |        |
| 18855  |       | 2   | No    |        | 2   | No      | 2     | 1      |
| 18856  |       | 2   | No    |        | 1   | Yes     | 0     |        |
| 18887  |       | 2   | No    |        | 2   | No      | 1     | 1      |

| respid | Q16_2 | Q17 | Smoke | Q17a_1 | Q18 | Alcohol | Q19_1 | Q19a_1 |
|--------|-------|-----|-------|--------|-----|---------|-------|--------|
| 18903  |       | 2   | No    |        | 2   | No      | 1     | 2      |
| 18906  |       | 1   | Yes   | 5      | 1   | Yes     | 2     | 1      |
| 18910  |       | 2   | No    |        | 2   | No      | 0     |        |
| 18919  |       | 1   | Yes   | 5      | 1   | Yes     | 1     | 0      |
| 18928  |       | 2   | No    |        | 1   | Yes     | 1     | 2      |
| 18931  |       | 1   | Yes   | 12     | 2   | No      | 0     |        |
| 18939  |       | 2   | No    |        | 2   | No      | 2     | 2      |
| 18946  |       | 2   | No    |        | 2   | No      | 1     | 1      |
| 18952  |       | 2   | No    |        | 2   | No      | 2     | 1      |
| 18954  |       | 2   | No    |        | 2   | No      | 1     | 0      |
| 18982  |       | 2   | No    |        | 2   | No      | 0     |        |
| 18986  |       | 2   | No    |        | 2   | No      | 0     |        |
| 18989  |       | 1   | Yes   | 6      | 2   | No      | 1     | 4      |
| 18990  |       | 1   | Yes   | 20     | 1   | Yes     | 0     |        |
| 18996  |       | 1   | Yes   | 30     | 2   | No      | 0     |        |
| 18998  |       | 2   | No    |        | 2   | No      | 0     |        |
| 19009  |       | 2   | No    |        | 2   | No      | 2     | 2      |
| 19010  |       | 2   | No    |        | 2   | No      | 0     |        |
| 19017  |       | 2   | No    |        | 2   | No      | 0     |        |
| 19018  |       | 2   | No    |        | 2   | No      | 0     |        |
| 19020  |       | 2   | No    |        | 2   | No      | 0     |        |
| 19027  |       | 2   | No    |        | 2   | No      | 0     |        |
| 19035  |       | 2   | No    |        | 2   | No      | 0     |        |
| 19037  |       | 1   | Yes   | 6      | 2   | No      | 5     | 4      |
| 19048  |       | 2   | No    |        | 2   | No      | 0     |        |
| 19051  |       | 2   | No    |        | 2   | No      | 1     | 2      |
| 19054  |       | 2   | No    |        | 2   | No      | 1     | 1      |
| 19057  |       | 2   | No    |        | 2   | No      | 0     |        |
| 19073  |       | 2   | No    |        | 2   | No      | 0     |        |
| 19075  |       | 2   | No    |        | 2   | No      | 0     |        |
| 19079  |       | 2   | No    |        | 1   | Yes     | 2     | 2      |
| 19087  |       | 2   | No    |        | 2   | No      | 0     |        |

| respid | Q16_2 | Q17 | Smoke | Q17a_1 | Q18 | Alcohol | Q19_1 | Q19a_1 |
|--------|-------|-----|-------|--------|-----|---------|-------|--------|
| 19090  |       | 2   | No    |        | 2   | No      | 1     | 2      |
| 19093  |       | 2   | No    |        | 2   | No      | 1     | 1      |
| 19099  |       | 2   | No    |        | 2   | No      | 2     | 1      |
| 19100  |       | 2   | No    |        | 2   | No      | 0     |        |
| 19101  |       | 1   | Yes   | 6      | 1   | Yes     | 0     |        |
| 19105  |       | 2   | No    |        | 2   | No      | 0     |        |
| 19111  |       | 1   | Yes   | 8      | 2   | No      | 2     | 1      |
| 19112  |       | 2   | No    |        | 2   | No      | 0     |        |
| 19117  |       | 2   | No    |        | 1   | Yes     | 2     | 1      |
| 19122  |       | 2   | No    |        | 2   | No      | 1     | 1      |
| 19126  |       | 2   | No    |        | 2   | No      | 0     |        |
| 19127  |       | 1   | Yes   | 10     | 2   | No      | 1     | 1      |
| 19131  |       | 1   | Yes   | 20     | 2   | No      | 1     | 1      |
| 19134  |       | 2   | No    |        | 2   | No      | 0     |        |
| 19149  |       | 2   | No    |        | 2   | No      | 0     |        |
| 19151  |       | 1   | Yes   | 10     | 1   | Yes     | 1     | 1      |
| 19164  |       | 1   | Yes   | 10     | 2   | No      | 2     | 1      |
| 19166  |       | 2   | No    |        | 2   | No      | 2     | 2      |
| 19172  |       | 2   | No    |        | 2   | No      | 0     |        |
| 19173  |       | 1   | Yes   | 30     | 1   | Yes     | 2     | 2      |
| 19180  |       | 2   | No    |        | 2   | No      | 0     |        |
| 19185  |       | 2   | No    |        | 1   | Yes     | 1     | 0      |
| 19189  |       | 2   | No    |        | 2   | No      | 0     |        |
| 19191  |       | 2   | No    |        | 2   | No      | 0     |        |
| 19198  |       | 2   | No    |        | 2   | No      | 0     |        |
| 19203  |       | 1   | Yes   | 15     | 2   | No      | 0     |        |
| 19209  |       | 2   | No    |        | 2   | No      | 0     |        |
| 19210  |       | 2   | No    |        | 2   | No      | 0     |        |
| 19218  |       | 2   | No    |        | 2   | No      | 0     |        |
| 19220  |       | 1   | Yes   | 2      | 1   | Yes     | 0     |        |
| 19225  |       | 2   | No    |        | 2   | No      | 3     | 2      |
| 19227  |       | 2   | No    |        | 2   | No      | 0     |        |

| respid | Q16_2 | Q17 | Smoke | Q17a_1 | Q18 | Alcohol | Q19_1 | Q19a_1 |
|--------|-------|-----|-------|--------|-----|---------|-------|--------|
| 19228  |       | 1   | Yes   | 15     | 2   | No      | 0     |        |
| 19243  |       | 2   | No    |        | 2   | No      | 1     | 1      |
| 19244  |       | 2   | No    |        | 2   | No      | 2     | 2      |
| 19246  |       | 2   | No    |        | 2   | No      | 0     |        |
| 19248  |       | 1   | Yes   | 20     | 2   | No      | 0     |        |
| 19249  |       | 2   | No    |        | 2   | No      | 0     |        |
| 19252  |       | 2   | No    |        | 2   | No      | 1     | 1      |
| 19255  |       | 2   | No    |        | 1   | Yes     | 1     | 1      |
| 19257  |       | 2   | No    |        | 2   | No      | 0     |        |
| 19274  |       | 2   | No    |        | 2   | No      | 0     |        |
| 19279  |       | 2   | No    |        | 2   | No      | 0     |        |
| 19291  |       | 2   | No    |        | 2   | No      | 0     |        |
| 19292  |       | 1   | Yes   | 15     | 2   | No      | 1     | 1      |
| 19308  |       | 1   | Yes   | 25     | 2   | No      | 2     | 1      |
| 19310  |       | 2   | No    |        | 2   | No      | 1     | 1      |
| 19311  |       | 2   | No    |        | 2   | No      | 1     | 2      |
| 19326  |       | 2   | No    |        | 2   | No      | 0     |        |
| 19327  |       | 1   | Yes   | 6      | 2   | No      | 0     |        |
| 19329  |       | 2   | No    |        | 2   | No      | 0     |        |
| 19330  |       | 1   | Yes   | 5      | 1   | Yes     | 3     | 3      |
| 19333  |       | 2   | No    |        | 2   | No      | 0     |        |
| 19336  |       | 2   | No    |        | 2   | No      | 0     |        |
| 19343  |       | 2   | No    |        | 2   | No      | 1     | 1      |
| 19348  |       | 2   | No    |        | 2   | No      | 0     |        |
| 19349  |       | 2   | No    |        | 2   | No      | 2     | 1      |
| 19352  |       | 1   | Yes   | 4      | 1   | Yes     | 3     | 3      |
| 19356  |       | 2   | No    |        | 2   | No      | 0     |        |
| 19357  |       | 1   | Yes   | 10     | 2   | No      | 1     | 1      |
| 19358  |       | 2   | No    |        | 2   | No      | 2     | 2      |
| 19367  |       | 2   | No    |        | 2   | No      | 2     | 2      |
| 19376  |       | 2   | No    |        | 2   | No      | 0     |        |
| 19377  |       | 2   | No    |        | 2   | No      | 0     |        |

| respid | Q16_2 | Q17 | Smoke | Q17a_1 | Q18 | Alcohol | Q19_1 | Q19a_1 |
|--------|-------|-----|-------|--------|-----|---------|-------|--------|
| 19380  |       | 2   | No    |        | 2   | No      | 1     | 1      |
| 19384  |       | 2   | No    |        | 1   | Yes     | 0     |        |
| 19391  |       | 1   | Yes   | 20     | 2   | No      | 5     | 4      |
| 19397  |       | 2   | No    |        | 2   | No      | 0     |        |
| 19398  |       | 2   | No    |        | 2   | No      | 0     |        |
| 19401  |       | 2   | No    |        | 2   | No      | 0     |        |
| 19402  |       | 2   | No    |        | 2   | No      | 0     |        |
| 19403  |       | 2   | No    |        | 2   | No      | 0     |        |
| 19405  |       | 2   | No    |        | 2   | No      | 0     |        |
| 19407  |       | 2   | No    |        | 2   | No      | 0     |        |
| 19415  |       | 2   | No    |        | 2   | No      | 0     |        |
| 19420  |       | 2   | No    |        | 2   | No      | 0     |        |
| 19423  |       | 1   | Yes   | 20     | 1   | Yes     | 1     | 2      |
| 19424  |       | 2   | No    |        | 2   | No      | 2     | 2      |
| 19426  |       | 2   | No    |        | 2   | No      | 1     | 1      |
| 19429  |       | 2   | No    |        | 2   | No      | 0     |        |
| 19435  |       | 2   | No    |        | 2   | No      | 3     | 3      |
| 19441  |       | 2   | No    |        | 2   | No      | 1     | 1      |
| 19450  |       | 1   | Yes   | 15     | 2   | No      | 0     |        |
| 19456  |       | 2   | No    |        | 2   | No      | 2     | 3      |
| 19457  |       | 2   | No    |        | 2   | No      | 1     | 0      |
| 19463  |       | 2   | No    |        | 2   | No      | 0     |        |
| 19467  |       | 1   | Yes   | 15     | 2   | No      | 5     | 4      |
| 19468  |       | 2   | No    |        | 2   | No      | 0     |        |
| 19471  |       | 2   | No    |        | 2   | No      | 0     |        |
| 19473  |       | 1   | Yes   | 10     | 2   | No      | 2     | 1      |
| 19478  |       | 1   | Yes   | 20     | 1   | Yes     | 2     | 2      |
| 19480  |       | 2   | No    |        | 2   | No      | 0     |        |
| 19481  |       | 2   | No    |        | 2   | No      | 0     |        |
| 19484  |       | 1   | Yes   | 20     | 2   | No      | 0     |        |
| 19487  |       | 2   | No    |        | 2   | No      | 5     | 4      |
| 19491  |       | 1   | Yes   | 10     | 2   | No      | 1     | 1      |



| respid | Q16_2 | Q17 | Smoke | Q17a_1 | Q18 | Alcohol | Q19_1 | Q19a_1 |
|--------|-------|-----|-------|--------|-----|---------|-------|--------|
| 19495  |       | 2   | No    |        | 2   | No      | 1     | 4      |
| 19498  |       | 2   | No    |        | 2   | No      | 1     | 2      |
| 19500  |       | 1   | Yes   | 11     | 1   | Yes     | 1     | 2      |
| 19501  |       | 2   | No    |        | 2   | No      | 3     | 2      |
| 19503  |       | 2   | No    |        | 2   | No      | 0     |        |
| 19506  |       | 2   | No    |        | 2   | No      | 0     |        |
| 19508  |       | 2   | No    |        | 2   | No      | 0     |        |
| 19509  |       | 1   | Yes   | 20     | 2   | No      | 2     | 1      |
| 19518  |       | 2   | No    |        | 2   | No      | 1     | 1      |
| 19520  |       | 2   | No    |        | 2   | No      | 2     | 2      |
| 19536  |       | 2   | No    |        | 2   | No      | 0     |        |
| 19538  |       | 2   | No    |        | 2   | No      | 1     | 3      |
| 19541  |       | 2   | No    |        | 2   | No      | 2     | 1      |
| 19548  |       | 1   | Yes   | 2      | 2   | No      | 3     | 2      |
| 19553  |       | 2   | No    |        | 2   | No      | 0     |        |
| 19556  |       | 2   | No    |        | 1   | Yes     | 0     |        |
| 19559  |       | 2   | No    |        | 2   | No      | 0     |        |
| 19561  |       | 2   | No    |        | 2   | No      | 3     | 2      |
| 19562  |       | 2   | No    |        | 2   | No      | 0     |        |
| 19564  |       | 2   | No    |        | 2   | No      | 1     | 1      |
| 19567  |       | 1   | Yes   | 20     | 1   | Yes     | 3     | 3      |
| 19571  |       | 1   | Yes   | 5      | 2   | No      | 3     | 3      |
| 19576  |       | 1   | Yes   | 15     | 2   | No      | 1     | 2      |
| 19578  |       | 2   | No    |        | 2   | No      | 0     |        |
| 19606  |       | 2   | No    |        | 2   | No      | 0     |        |
| 19607  |       | 2   | No    |        | 2   | No      | 0     |        |
| 19608  |       | 2   | No    |        | 2   | No      | 1     | 3      |
| 19612  |       | 2   | No    |        | 2   | No      | 3     | 3      |
| 19618  |       | 2   | No    |        | 2   | No      | 2     | 2      |
| 19621  |       | 2   | No    |        | 1   | Yes     | 0     |        |
| 19624  |       | 1   | Yes   | 10     | 1   | Yes     | 0     |        |
| 19630  |       | 2   | No    |        | 2   | No      | 0     |        |

| respid | Q16_2 | Q17 | Smoke | Q17a_1 | Q18 | Alcohol | Q19_1 | Q19a_1 |
|--------|-------|-----|-------|--------|-----|---------|-------|--------|
| 19637  |       | 1   | Yes   | 40     | 1   | Yes     | 5     | 4      |
| 19639  |       | 2   | No    |        | 2   | No      | 0     |        |
| 19647  |       | 1   | Yes   | 6      | 2   | No      | 2     | 1      |
| 19648  |       | 2   | No    |        | 1   | Yes     | 1     | 1      |
| 19660  |       | 2   | No    |        | 2   | No      | 0     |        |
| 19662  |       | 2   | No    |        | 2   | No      | 1     | 3      |
| 19669  |       | 2   | No    |        | 2   | No      | 0     |        |
| 19680  |       | 2   | No    |        | 2   | No      | 1     | 0      |
| 19682  |       | 2   | No    |        | 2   | No      | 0     |        |
| 19686  |       | 2   | No    |        | 2   | No      | 0     |        |
| 19700  |       | 2   | No    |        | 2   | No      | 0     |        |
| 19701  |       | 2   | No    |        | 2   | No      | 0     |        |
| 19704  |       | 2   | No    |        | 2   | No      | 0     |        |
| 19706  |       | 2   | No    |        | 2   | No      | 1     | 1      |
| 19707  |       | 1   | Yes   | 15     | 2   | No      | 5     | 1      |
| 19717  |       | 2   | No    |        | 2   | No      | 3     | 3      |
| 19718  |       | 2   | No    |        | 2   | No      | 0     |        |
| 19721  |       | 2   | No    |        | 2   | No      | 2     | 1      |
| 19722  |       | 2   | No    |        | 2   | No      | 0     |        |
| 19729  |       | 2   | No    |        | 2   | No      | 0     |        |
| 19738  |       | 2   | No    |        | 2   | No      | 0     |        |
| 19741  |       | 2   | No    |        | 2   | No      | 0     |        |
| 19742  |       | 2   | No    |        | 2   | No      | 1     | 1      |
| 19747  |       | 2   | No    |        | 2   | No      | 1     | 0      |
| 19748  |       | 2   | No    |        | 2   | No      | 0     |        |
| 19749  |       | 2   | No    |        | 2   | No      | 1     | 1      |
| 19756  |       | 1   | Yes   | 10     | 2   | No      | 3     | 1      |
| 19771  |       | 2   | No    |        | 2   | No      | 0     |        |
| 19772  |       | 2   | No    |        | 2   | No      | 1     | 1      |
| 19775  |       | 1   | Yes   | 15     | 2   | No      | 0     |        |
| 19783  |       | 2   | No    |        | 2   | No      | 0     |        |
| 19787  |       | 1   | Yes   | 20     | 1   | Yes     | 0     |        |

| respid | Q16_2 | Q17 | Smoke | Q17a_1 | Q18 | Alcohol | Q19_1 | Q19a_1 |
|--------|-------|-----|-------|--------|-----|---------|-------|--------|
| 19790  |       | 2   | No    |        | 2   | No      | 0     |        |
| 19797  |       | 2   | No    |        | 2   | No      | 0     |        |
| 19802  |       | 2   | No    |        | 2   | No      | 0     |        |
| 19808  |       | 2   | No    |        | 2   | No      | 0     |        |
| 19810  |       | 2   | No    |        | 2   | No      | 0     |        |
| 19811  |       | 2   | No    |        | 2   | No      | 0     |        |
| 19812  |       | 2   | No    |        | 2   | No      | 0     |        |
| 19821  |       | 1   | Yes   | 5      | 1   | Yes     | 3     | 3      |
| 19826  |       | 1   | Yes   | 5      | 2   | No      | 0     |        |
| 19827  |       | 2   | No    |        | 2   | No      | 0     |        |
| 19830  | 114   | 2   | No    |        | 2   | No      | 0     |        |
| 19834  |       | 2   | No    |        | 2   | No      | 0     |        |
| 19838  |       | 2   | No    |        | 1   | Yes     | 3     | 3      |
| 19843  |       | 2   | No    |        | 2   | No      | 0     |        |
| 19845  |       | 1   | Yes   | 15     | 2   | No      | 1     | 3      |
| 19846  |       | 2   | No    |        | 1   | Yes     | 0     |        |
| 19852  |       | 1   | Yes   | 5      | 1   | Yes     | 1     | 3      |
| 19855  |       | 2   | No    |        | 1   | Yes     | 0     |        |
| 19858  |       | 1   | Yes   | 10     | 1   | Yes     | 1     | 3      |
| 19861  |       | 2   | No    |        | 2   | No      | 1     | 1      |
| 19863  |       | 2   | No    |        | 2   | No      | 0     |        |
| 19868  |       | 2   | No    |        | 2   | No      | 1     | 1      |
| 19874  |       | 2   | No    |        | 2   | No      | 0     |        |
| 19876  |       | 2   | No    |        | 2   | No      | 0     |        |
| 19880  |       | 2   | No    |        | 2   | No      | 0     |        |
| 19885  |       | 2   | No    |        | 2   | No      | 0     |        |
| 19890  |       | 1   | Yes   | 20     | 1   | Yes     | 0     |        |
| 19894  |       | 2   | No    |        | 1   | Yes     | 0     |        |
| 19895  |       | 2   | No    |        | 2   | No      | 0     |        |
| 19897  |       | 2   | No    |        | 2   | No      | 1     | 1      |
| 19906  |       | 2   | No    |        | 2   | No      | 0     |        |
| 19908  |       | 2   | No    |        | 2   | No      | 0     |        |

| respid | Q16_2 | Q17 | Smoke | Q17a_1 | Q18 | Alcohol | Q19_1 | Q19a_1 |
|--------|-------|-----|-------|--------|-----|---------|-------|--------|
| 19912  |       | 2   | No    |        | 2   | No      | 0     |        |
| 19913  |       | 2   | No    |        | 2   | No      | 0     |        |
| 19914  |       | 2   | No    |        | 2   | No      | 2     | 2      |
| 19918  |       | 1   | Yes   | 20     | 1   | Yes     | 3     | 3      |
| 19924  |       | 2   | No    |        | 2   | No      | 1     | 2      |
| 19936  |       | 1   | Yes   | 1      | 2   | No      | 0     |        |
| 19940  |       | 2   | No    |        | 2   | No      | 0     |        |
| 19945  |       | 2   | No    |        | 2   | No      | 2     | 1      |
| 19948  |       | 2   | No    |        | 2   | No      | 0     |        |
| 19959  |       | 2   | No    |        | 2   | No      | 1     | 1      |
| 19961  |       | 2   | No    |        | 2   | No      | 1     | 0      |
| 19962  |       | 2   | No    |        | 2   | No      | 1     | 1      |
| 19965  |       | 2   | No    |        | 2   | No      | 0     |        |
| 19966  |       | 2   | No    |        | 2   | No      | 0     |        |
| 19973  |       | 2   | No    |        | 2   | No      | 1     | 1      |
| 19981  |       | 2   | No    |        | 2   | No      | 2     | 1      |
| 19986  |       | 2   | No    |        | 1   | Yes     | 2     | 1      |
| 19989  |       | 1   | Yes   | 8      | 2   | No      | 0     |        |
| 19998  |       | 2   | No    |        | 2   | No      | 0     |        |
| 20001  |       | 2   | No    |        | 2   | No      | 0     |        |
| 20005  |       | 2   | No    |        | 2   | No      | 0     |        |
| 20013  |       | 2   | No    |        | 2   | No      | 4     | 3      |
| 20015  |       | 2   | No    |        | 1   | Yes     | 0     |        |
| 20017  |       | 1   | Yes   | 5      | 1   | Yes     | 1     | 1      |
| 20020  |       | 2   | No    |        | 2   | No      | 0     |        |
| 20021  |       | 2   | No    |        | 2   | No      | 0     |        |
| 20026  |       | 2   | No    |        | 2   | No      | 0     |        |
| 20028  |       | 2   | No    |        | 2   | No      | 0     |        |
| 20030  |       | 2   | No    |        | 2   | No      | 0     |        |
| 20031  |       | 2   | No    |        | 2   | No      | 0     |        |
| 20034  |       | 2   | No    |        | 2   | No      | 0     |        |
| 20035  |       | 2   | No    |        | 2   | No      | 0     |        |

| respid | Q16_2 | Q17 | Smoke | Q17a_1 | Q18 | Alcohol | Q19_1 | Q19a_1 |
|--------|-------|-----|-------|--------|-----|---------|-------|--------|
| 20040  |       | 2   | No    |        | 2   | No      | 0     |        |
| 20045  |       | 2   | No    |        | 2   | No      | 0     |        |
| 20048  |       | 2   | No    |        | 2   | No      | 5     | 3      |
| 20053  |       | 2   | No    |        | 1   | Yes     | 1     | 0      |
| 20064  |       | 1   | Yes   | 13     | 1   | Yes     | 2     | 2      |
| 20071  |       | 1   | Yes   | 20     | 2   | No      | 0     |        |
| 20072  |       | 2   | No    |        | 1   | Yes     | 2     | 4      |
| 20076  |       | 2   | No    |        | 2   | No      | 0     |        |
| 20081  |       | 1   | Yes   | 10     | 2   | No      | 1     | 1      |
| 20082  |       | 1   | Yes   | 6      | 1   | Yes     | 1     | 0      |
| 20083  |       | 2   | No    |        | 1   | Yes     | 1     | 1      |
| 20088  |       | 2   | No    |        | 2   | No      | 1     | 1      |
| 20089  |       | 2   | No    |        | 2   | No      | 0     |        |
| 20099  |       | 2   | No    |        | 2   | No      | 5     | 0      |
| 20101  |       | 2   | No    |        | 2   | No      | 0     |        |
| 20102  |       | 2   | No    |        | 2   | No      | 0     |        |
| 20109  |       | 2   | No    |        | 2   | No      | 0     |        |
| 20118  |       | 2   | No    |        | 2   | No      | 1     | 1      |
| 20119  |       | 1   | Yes   | 40     | 2   | No      | 0     |        |
| 20124  |       | 2   | No    |        | 2   | No      | 0     |        |
| 20126  |       | 2   | No    |        | 2   | No      | 0     |        |
| 20130  |       | 2   | No    |        | 2   | No      | 0     |        |
| 20131  |       | 2   | No    |        | 2   | No      | 1     | 1      |
| 20134  |       | 2   | No    |        | 2   | No      | 3     | 2      |
| 20146  |       | 2   | No    |        | 2   | No      | 0     |        |
| 20152  |       | 2   | No    |        | 2   | No      | 0     |        |
| 20155  |       | 2   | No    |        | 2   | No      | 0     |        |
| 20156  |       | 2   | No    |        | 2   | No      | 0     |        |
| 20157  |       | 1   | Yes   | 25     | 2   | No      | 0     |        |
| 20164  |       | 2   | No    |        | 2   | No      | 0     |        |
| 20168  |       | 2   | No    |        | 2   | No      | 1     | 1      |
| 20173  |       | 2   | No    |        | 2   | No      | 3     | 3      |

| respid | Q16_2 | Q17 | Smoke | Q17a_1 | Q18 | Alcohol | Q19_1 | Q19a_1 |
|--------|-------|-----|-------|--------|-----|---------|-------|--------|
| 20174  |       | 2   | No    |        | 2   | No      | 0     |        |
| 20175  |       | 2   | No    |        | 2   | No      | 4     | 4      |
| 20189  |       | 1   | Yes   | 5      | 2   | No      | 0     |        |
| 20190  |       | 2   | No    |        | 2   | No      | 0     |        |
| 20201  |       | 2   | No    |        | 2   | No      | 0     |        |
| 20202  |       | 2   | No    |        | 2   | No      | 0     |        |
| 20204  |       | 2   | No    |        | 2   | No      | 0     |        |
| 20206  |       | 2   | No    |        | 2   | No      | 1     | 1      |
| 20207  |       | 2   | No    |        | 2   | No      | 0     |        |
| 20212  |       | 2   | No    |        | 2   | No      | 1     | 1      |
| 20213  |       | 2   | No    |        | 2   | No      | 1     | 0      |
| 20217  |       | 2   | No    |        | 2   | No      | 1     | 1      |
| 20222  |       | 2   | No    |        | 2   | No      | 2     | 1      |
| 20227  |       | 2   | No    |        | 1   | Yes     | 0     |        |
| 20228  |       | 2   | No    |        | 2   | No      | 0     |        |
| 20238  |       | 2   | No    |        | 2   | No      | 0     |        |
| 20242  |       | 2   | No    |        | 2   | No      | 5     | 0      |
| 20246  |       | 2   | No    |        | 2   | No      | 0     |        |
| 20255  |       | 1   | Yes   | 1      | 2   | No      | 2     | 2      |
| 20256  |       | 2   | No    |        | 2   | No      | 3     | 3      |
| 20259  |       | 1   | Yes   | 1      | 2   | No      | 4     | 3      |
| 20262  |       | 2   | No    |        | 2   | No      | 1     | 1      |
| 20274  |       | 1   | Yes   | 10     | 2   | No      | 1     | 0      |
| 20283  |       | 2   | No    |        | 1   | Yes     | 2     | 2      |
| 20284  |       | 2   | No    |        | 2   | No      | 0     |        |
| 20291  |       | 2   | No    |        | 2   | No      | 1     | 1      |
| 20292  |       | 2   | No    |        | 2   | No      | 0     |        |
| 20293  |       | 2   | No    |        | 2   | No      | 0     |        |
| 20298  |       | 2   | No    |        | 2   | No      | 0     |        |
| 20301  |       | 2   | No    |        | 1   | Yes     | 0     |        |
| 20303  |       | 1   | Yes   | 15     | 1   | Yes     | 1     | 1      |
| 20309  |       | 2   | No    |        | 2   | No      | 0     |        |

| respid | Q16_2 | Q17 | Smoke | Q17a_1 | Q18 | Alcohol | Q19_1 | Q19a_1 |
|--------|-------|-----|-------|--------|-----|---------|-------|--------|
| 20318  |       | 1   | Yes   | 20     | 1   | Yes     | 1     | 1      |
| 20324  |       | 1   | Yes   | 12     | 1   | Yes     | 0     |        |
| 20335  |       | 2   | No    |        | 2   | No      | 1     | 0      |
| 20336  |       | 2   | No    |        | 2   | No      | 1     | 1      |
| 20339  |       | 1   | Yes   | 10     | 1   | Yes     | 1     | 2      |
| 20348  |       | 1   | Yes   | 5      | 1   | Yes     | 0     |        |
| 20351  |       | 1   | Yes   | 5      | 1   | Yes     | 0     |        |
| 20353  |       | 2   | No    |        | 2   | No      | 0     |        |
| 20356  |       | 2   | No    |        | 2   | No      | 0     |        |
| 20357  |       | 2   | No    |        | 2   | No      | 0     |        |
| 20366  |       | 2   | No    |        | 2   | No      | 0     |        |
| 20369  |       | 2   | No    |        | 1   | Yes     | 3     | 4      |
| 20372  |       | 1   | Yes   | 25     | 2   | No      | 0     |        |
| 20375  |       | 2   | No    |        | 2   | No      | 0     |        |
| 20379  |       | 2   | No    |        | 2   | No      | 1     | 1      |
| 20380  |       | 2   | No    |        | 2   | No      | 3     | 2      |
| 20396  |       | 2   | No    |        | 2   | No      | 1     | 2      |
| 20398  |       | 2   | No    |        | 2   | No      | 2     | 2      |
| 20412  |       | 2   | No    |        | 2   | No      | 0     |        |
| 20415  |       | 2   | No    |        | 2   | No      | 0     |        |
| 20424  |       | 2   | No    |        | 2   | No      | 0     |        |
| 20434  |       | 2   | No    |        | 2   | No      | 0     |        |
| 20435  |       | 1   | Yes   | 20     | 1   | Yes     | 0     |        |
| 20440  |       | 2   | No    |        | 2   | No      | 0     |        |
| 20441  |       | 2   | No    |        | 1   | Yes     | 0     |        |
| 20445  |       | 1   | Yes   | 10     | 2   | No      | 0     |        |
| 20446  |       | 2   | No    |        | 2   | No      | 3     | 2      |
| 20450  |       | 2   | No    |        | 2   | No      | 0     |        |
| 20453  |       | 2   | No    |        | 2   | No      | 3     | 3      |
| 20458  |       | 2   | No    |        | 2   | No      | 0     |        |
| 20464  |       | 1   | Yes   | 15     | 2   | No      | 1     | 0      |
| 20471  |       | 2   | No    |        | 2   | No      | 0     |        |

| respid | Q16_2 | Q17 | Smoke | Q17a_1 | Q18 | Alcohol | Q19_1 | Q19a_1 |
|--------|-------|-----|-------|--------|-----|---------|-------|--------|
| 20473  |       | 2   | No    |        | 2   | No      | 4     | 0      |
| 20474  |       | 2   | No    |        | 2   | No      | 1     | 1      |
| 20477  |       | 2   | No    |        | 2   | No      | 0     |        |
| 20479  |       | 2   | No    |        | 2   | No      | 1     | 1      |
| 20485  |       | 2   | No    |        | 2   | No      | 0     |        |
| 20487  |       | 2   | No    |        | 2   | No      | 0     |        |
| 20488  |       | 2   | No    |        | 2   | No      | 0     |        |
| 20494  |       | 2   | No    |        | 2   | No      | 3     | 3      |
| 20502  |       | 1   | Yes   | 10     | 1   | Yes     | 4     | 3      |
| 20503  |       | 2   | No    |        | 2   | No      | 0     |        |
| 20510  |       | 1   | Yes   | 4      | 2   | No      | 1     | 0      |
| 20512  |       | 1   | Yes   | 20     | 2   | No      | 0     |        |
| 20516  |       | 2   | No    |        | 2   | No      | 2     | 2      |
| 20522  |       | 2   | No    |        | 2   | No      | 1     | 1      |
| 20527  |       | 2   | No    |        | 2   | No      | 3     | 1      |
| 20529  |       | 2   | No    |        | 1   | Yes     | 1     | 1      |
| 20535  |       | 2   | No    |        | 2   | No      | 4     | 1      |
| 20543  |       | 2   | No    |        | 2   | No      | 0     |        |
| 20546  |       | 2   | No    |        | 1   | Yes     | 1     | 1      |
| 20548  |       | 1   | Yes   | 8      | 2   | No      | 0     |        |
| 20552  |       | 1   | Yes   | 10     | 2   | No      | 0     |        |
| 20556  |       | 2   | No    |        | 2   | No      | 3     | 2      |
| 20566  |       | 1   | Yes   | 8      | 1   | Yes     | 2     | 2      |
| 20576  |       | 2   | No    |        | 2   | No      | 1     | 1      |
| 20587  |       | 2   | No    |        | 2   | No      | 2     | 1      |
| 20589  |       | 1   | Yes   | 2      | 2   | No      | 0     |        |
| 20593  |       | 2   | No    |        | 2   | No      | 0     |        |
| 20594  |       | 1   | Yes   | 20     | 2   | No      | 0     |        |
| 20602  |       | 2   | No    |        | 2   | No      | 1     | 1      |
| 20607  |       | 2   | No    |        | 2   | No      | 0     |        |
| 20608  |       | 2   | No    |        | 2   | No      | 0     |        |
| 20611  |       | 2   | No    |        | 2   | No      | 1     | 1      |



| respid | Q16_2 | Q17 | Smoke | Q17a_1 | Q18 | Alcohol | Q19_1 | Q19a_1 |
|--------|-------|-----|-------|--------|-----|---------|-------|--------|
| 20612  |       | 2   | No    |        | 2   | No      | 1     | 0      |
| 20615  |       | 2   | No    |        | 2   | No      | 1     | 1      |
| 20625  |       | 1   | Yes   | 10     | 2   | No      | 1     | 2      |
| 20630  |       | 2   | No    |        | 2   | No      | 2     | 1      |
| 20639  |       | 2   | No    |        | 2   | No      | 0     |        |
| 20643  |       | 2   | No    |        | 2   | No      | 0     |        |
| 20645  |       | 1   | Yes   | 20     | 1   | Yes     | 0     |        |
| 20647  |       | 2   | No    |        | 2   | No      | 1     | 0      |
| 20652  |       | 2   | No    |        | 2   | No      | 3     | 4      |
| 20661  |       | 2   | No    |        | 2   | No      | 0     |        |
| 20665  |       | 2   | No    |        | 2   | No      | 0     |        |
| 20679  |       | 2   | No    |        | 1   | Yes     | 0     |        |
| 20682  |       | 2   | No    |        | 2   | No      | 3     | 2      |
| 20683  |       | 2   | No    |        | 2   | No      | 0     |        |
| 20700  |       | 2   | No    |        | 2   | No      | 0     |        |
| 20702  |       | 2   | No    |        | 1   | Yes     | 0     |        |
| 20709  |       | 2   | No    |        | 2   | No      | 1     | 0      |
| 20715  |       | 1   | Yes   | 5      | 2   | No      | 4     | 3      |
| 20718  |       | 2   | No    |        | 2   | No      | 0     |        |
| 20722  |       | 2   | No    |        | 2   | No      | 0     |        |
| 20729  |       | 2   | No    |        | 2   | No      | 0     |        |
| 20732  |       | 2   | No    |        | 2   | No      | 0     |        |
| 20746  |       | 1   | Yes   | 6      | 2   | No      | 2     | 2      |
| 20747  |       | 2   | No    |        | 2   | No      | 0     |        |
| 20758  |       | 2   | No    |        | 2   | No      | 5     | 0      |
| 20767  |       | 2   | No    |        | 1   | Yes     | 0     |        |
| 20777  |       | 2   | No    |        | 2   | No      | 0     |        |
| 20778  |       | 2   | No    |        | 2   | No      | 0     |        |
| 20780  |       | 2   | No    |        | 2   | No      | 0     |        |
| 20800  |       | 2   | No    |        | 2   | No      | 0     |        |
| 20810  |       | 2   | No    |        | 2   | No      | 0     |        |
| 20814  |       | 2   | No    |        | 2   | No      | 1     | 0      |

| respid | Q16_2 | Q17 | Smoke | Q17a_1 | Q18 | Alcohol | Q19_1 | Q19a_1 |
|--------|-------|-----|-------|--------|-----|---------|-------|--------|
| 20816  |       | 2   | No    |        | 2   | No      | 3     | 2      |
| 20832  |       | 2   | No    |        | 2   | No      | 1     | 4      |
| 20838  |       | 1   | Yes   | 5      | 2   | No      | 2     | 4      |
| 20841  |       | 2   | No    |        | 2   | No      | 3     | 2      |
| 20848  |       | 2   | No    |        | 2   | No      | 0     |        |
| 20850  |       | 2   | No    |        | 2   | No      | 0     |        |
| 20851  |       | 2   | No    |        | 2   | No      | 0     |        |
| 20861  |       | 2   | No    |        | 2   | No      | 1     | 2      |
| 20870  |       | 2   | No    |        | 1   | Yes     | 1     | 2      |
| 20880  |       | 2   | No    |        | 2   | No      | 0     |        |
| 20883  |       | 2   | No    |        | 2   | No      | 0     |        |
| 20894  |       | 2   | No    |        | 2   | No      | 1     | 1      |
| 20896  |       | 2   | No    |        | 1   | Yes     | 2     | 2      |
| 20901  |       | 1   | Yes   | 1      | 2   | No      | 2     | 2      |
| 20903  |       | 2   | No    |        | 2   | No      | 0     |        |
| 20909  |       | 2   | No    |        | 2   | No      | 0     |        |
| 20919  |       | 2   | No    |        | 2   | No      | 2     | 2      |
| 20925  |       | 2   | No    |        | 2   | No      | 0     |        |
| 20935  |       | 2   | No    |        | 2   | No      | 4     | 0      |
| 20939  |       | 2   | No    |        | 2   | No      | 1     | 2      |
| 20956  |       | 1   | Yes   | 25     | 1   | Yes     | 3     | 3      |
| 20970  |       | 2   | No    |        | 2   | No      | 1     | 0      |
| 20974  |       | 1   | Yes   | 20     | 2   | No      | 1     | 2      |
| 20975  |       | 2   | No    |        | 2   | No      | 0     |        |
| 20984  |       | 2   | No    |        | 2   | No      | 2     | 2      |
| 20988  |       | 2   | No    |        | 2   | No      | 0     |        |
| 20996  |       | 2   | No    |        | 2   | No      | 0     |        |
| 20998  |       | 2   | No    |        | 2   | No      | 1     | 1      |
| 21007  |       | 2   | No    |        | 2   | No      | 0     |        |
| 21008  |       | 2   | No    |        | 2   | No      | 0     |        |
| 21014  |       | 2   | No    |        | 2   | No      | 0     |        |
| 21020  |       | 1   | Yes   | 5      | 2   | No      | 2     | 1      |

| respid | Q16_2 | Q17 | Smoke | Q17a_1 | Q18 | Alcohol | Q19_1 | Q19a_1 |
|--------|-------|-----|-------|--------|-----|---------|-------|--------|
| 21022  |       | 1   | Yes   | 20     | 1   | Yes     | 1     | 1      |
| 21024  |       | 1   | Yes   | 1      | 2   | No      | 0     |        |
| 21026  |       | 1   | Yes   | 8      | 1   | Yes     | 1     | 2      |
| 21027  |       | 2   | No    |        | 1   | Yes     | 0     |        |
| 21030  |       | 2   | No    |        | 2   | No      | 2     | 2      |
| 21032  |       | 2   | No    |        | 2   | No      | 3     | 2      |
| 21040  |       | 2   | No    |        | 2   | No      | 0     |        |
| 21045  |       | 2   | No    |        | 2   | No      | 0     |        |
| 21058  |       | 1   | Yes   | 15     | 2   | No      | 0     |        |
| 21064  |       | 2   | No    |        | 2   | No      | 0     |        |
| 21073  |       | 2   | No    |        | 2   | No      | 0     |        |
| 21086  |       | 1   | Yes   | 4      | 2   | No      | 2     | 3      |
| 21092  |       | 1   | Yes   | 20     | 1   | Yes     | 5     | 4      |
| 21096  |       | 1   | Yes   | 10     | 2   | No      | 2     | 2      |
| 21103  |       | 1   | Yes   | 20     | 1   | Yes     | 1     | 1      |
| 21120  |       | 2   | No    |        | 2   | No      | 2     | 1      |
| 21125  |       | 2   | No    |        | 2   | No      | 0     |        |
| 21126  |       | 2   | No    |        | 2   | No      | 2     | 1      |
| 21132  |       | 2   | No    |        | 2   | No      | 0     |        |
| 21139  |       | 2   | No    |        | 2   | No      | 3     | 1      |
| 21147  |       | 2   | No    |        | 2   | No      | 0     |        |
| 21148  |       | 1   | Yes   | 10     | 1   | Yes     | 0     |        |
| 21149  |       | 2   | No    |        | 2   | No      | 2     | 1      |
| 21164  |       | 2   | No    |        | 2   | No      | 1     | 1      |
| 21165  |       | 2   | No    |        | 2   | No      | 1     | 2      |
| 21171  |       | 2   | No    |        | 2   | No      | 1     | 1      |
| 21176  |       | 2   | No    |        | 2   | No      | 0     |        |
| 21187  |       | 2   | No    |        | 2   | No      | 0     |        |
| 21192  |       | 2   | No    |        | 2   | No      | 0     |        |
| 21198  |       | 2   | No    |        | 2   | No      | 0     |        |
| 21199  |       | 2   | No    |        | 2   | No      | 1     | 2      |
| 21206  |       | 2   | No    |        | 2   | No      | 3     | 3      |

| respid | Q16_2 | Q17 | Smoke | Q17a_1 | Q18 | Alcohol | Q19_1 | Q19a_1 |
|--------|-------|-----|-------|--------|-----|---------|-------|--------|
| 21212  |       | 1   | Yes   | 4      | 2   | No      | 2     | 1      |
| 21216  |       | 2   | No    |        | 2   | No      | 0     |        |
| 21217  |       | 1   | Yes   | 5      | 2   | No      | 3     | 3      |
| 21228  |       | 1   | Yes   | 5      | 2   | No      | 2     | 2      |
| 21229  |       | 2   | No    |        | 2   | No      | 0     |        |
| 21230  |       | 2   | No    |        | 2   | No      | 1     | 1      |
| 21243  |       | 2   | No    |        | 2   | No      | 3     | 2      |
| 21247  |       | 2   | No    |        | 2   | No      | 3     | 1      |
| 21253  |       | 2   | No    |        | 2   | No      | 1     | 1      |
| 21264  |       | 1   | Yes   | 2      | 1   | Yes     | 1     | 1      |
| 21265  |       | 2   | No    |        | 2   | No      | 1     | 0      |
| 21273  |       | 1   | Yes   | 15     | 1   | Yes     | 2     | 2      |
| 21275  |       | 2   | No    |        | 2   | No      | 1     | 0      |
| 21278  |       | 2   | No    |        | 2   | No      | 0     |        |
| 21291  |       | 2   | No    |        | 2   | No      | 3     | 1      |
| 21298  |       | 2   | No    |        | 2   | No      | 0     |        |
| 21301  |       | 1   | Yes   | 8      | 1   | Yes     | 1     | 2      |
| 21312  |       | 1   | Yes   | 20     | 2   | No      | 4     | 3      |
| 21323  |       | 2   | No    |        | 1   | Yes     | 3     | 2      |
| 21325  |       | 2   | No    |        | 2   | No      | 2     | 1      |
| 21341  |       | 2   | No    |        | 2   | No      | 5     | 0      |
| 21349  |       | 2   | No    |        | 2   | No      | 3     | 3      |
| 21350  |       | 2   | No    |        | 2   | No      | 1     | 1      |
| 21354  |       | 1   | Yes   | 5      | 1   | Yes     | 4     | 3      |
| 21372  |       | 2   | No    |        | 2   | No      | 2     | 2      |
| 21373  |       | 2   | No    |        | 2   | No      | 2     | 1      |
| 21378  |       | 1   | Yes   | 7      | 2   | No      | 0     |        |
| 21393  |       | 2   | No    |        | 2   | No      | 0     |        |
| 21401  |       | 1   | Yes   | 1      | 1   | Yes     | 2     | 2      |
| 21405  |       | 2   | No    |        | 2   | No      | 0     |        |
| 21406  |       | 2   | No    |        | 2   | No      | 0     |        |
| 21407  |       | 2   | No    |        | 1   | Yes     | 0     |        |

| respid | Q16_2 | Q17 | Smoke | Q17a_1 | Q18 | Alcohol | Q19_1 | Q19a_1 |
|--------|-------|-----|-------|--------|-----|---------|-------|--------|
| 21418  |       | 2   | No    |        | 2   | No      | 0     |        |
| 21420  |       | 2   | No    |        | 2   | No      | 1     | 0      |
| 21421  |       | 2   | No    |        | 2   | No      | 0     |        |
| 21446  |       | 2   | No    |        | 2   | No      | 5     | 2      |
| 21449  |       | 2   | No    |        | 2   | No      | 2     | 2      |
| 21452  |       | 2   | No    |        | 2   | No      | 0     |        |
| 21455  |       | 1   | Yes   | 21     | 1   | Yes     | 2     | 2      |
| 21469  |       | 2   | No    |        | 2   | No      | 0     |        |
| 21471  |       | 2   | No    |        | 2   | No      | 1     | 1      |
| 21472  |       | 2   | No    |        | 2   | No      | 0     |        |
| 21474  |       | 2   | No    |        | 2   | No      | 0     |        |
| 21479  |       | 2   | No    |        | 2   | No      | 0     |        |
| 21485  |       | 2   | No    |        | 1   | Yes     | 1     | 1      |
| 21512  |       | 2   | No    |        | 2   | No      | 0     |        |
| 21513  |       | 2   | No    |        | 2   | No      | 0     |        |
| 21514  |       | 2   | No    |        | 2   | No      | 2     | 2      |
| 21520  |       | 2   | No    |        | 2   | No      | 0     |        |
| 21539  |       | 2   | No    |        | 1   | Yes     | 2     | 1      |
| 21553  |       | 2   | No    |        | 2   | No      | 0     |        |
| 21560  |       | 2   | No    |        | 2   | No      | 0     |        |
| 21561  |       | 2   | No    |        | 2   | No      | 0     |        |
| 21563  |       | 2   | No    |        | 2   | No      | 1     | 2      |
| 21565  |       | 2   | No    |        | 2   | No      | 0     |        |
| 21582  |       | 2   | No    |        | 2   | No      | 0     |        |
| 21584  |       | 1   | Yes   | 20     | 1   | Yes     | 1     | 1      |
| 21585  |       | 2   | No    |        | 2   | No      | 2     | 2      |
| 21586  |       | 2   | No    |        | 2   | No      | 1     | 0      |
| 21587  |       | 2   | No    |        | 2   | No      | 2     | 2      |
| 21590  |       | 1   | Yes   | 15     | 2   | No      | 1     | 2      |
| 21601  |       | 2   | No    |        | 2   | No      | 2     | 1      |
| 21611  |       | 2   | No    |        | 2   | No      | 2     | 2      |
| 21612  |       | 2   | No    |        | 2   | No      | 1     | 0      |

| respid | Q16_2 | Q17 | Smoke | Q17a_1 | Q18 | Alcohol | Q19_1 | Q19a_1 |
|--------|-------|-----|-------|--------|-----|---------|-------|--------|
| 21625  |       | 2   | No    |        | 2   | No      | 3     | 2      |
| 21633  |       | 2   | No    |        | 2   | No      | 0     |        |
| 21640  |       | 2   | No    |        | 1   | Yes     | 0     |        |
| 21647  |       | 2   | No    |        | 1   | Yes     | 0     |        |
| 21648  |       | 1   | Yes   | 6      | 2   | No      | 4     | 4      |
| 21656  |       | 2   | No    |        | 2   | No      | 0     |        |
| 21657  |       | 2   | No    |        | 2   | No      | 0     |        |
| 21658  |       | 1   | Yes   | 8      | 1   | Yes     | 2     | 2      |
| 21665  |       | 2   | No    |        | 2   | No      | 2     | 2      |
| 21666  |       | 1   | Yes   | 3      | 2   | No      | 5     | 3      |
| 21668  |       | 1   | Yes   | 10     | 1   | Yes     | 1     | 3      |
| 21673  |       | 2   | No    |        | 2   | No      | 1     | 1      |
| 21681  |       | 2   | No    |        | 2   | No      | 2     | 2      |
| 21682  |       | 2   | No    |        | 2   | No      | 0     |        |
| 21685  |       | 1   | Yes   | 20     | 2   | No      | 0     |        |
| 21692  |       | 2   | No    |        | 2   | No      | 0     |        |
| 21697  |       | 2   | No    |        | 2   | No      | 0     |        |
| 21711  |       | 2   | No    |        | 2   | No      | 0     |        |
| 21715  |       | 2   | No    |        | 2   | No      | 5     | 3      |
| 21726  |       | 2   | No    |        | 2   | No      | 0     |        |
| 21748  |       | 2   | No    |        | 2   | No      | 0     |        |
| 21761  |       | 2   | No    |        | 2   | No      | 0     |        |
| 21769  |       | 2   | No    |        | 1   | Yes     | 3     | 2      |
| 21774  |       | 1   | Yes   | 6      | 1   | Yes     | 1     | 1      |
| 21778  |       | 2   | No    |        | 2   | No      | 0     |        |
| 21785  |       | 2   | No    |        | 2   | No      | 2     | 2      |
| 21799  |       | 2   | No    |        | 2   | No      | 2     | 1      |
| 21820  |       | 2   | No    |        | 2   | No      | 4     | 4      |
| 21837  |       | 2   | No    |        | 2   | No      | 0     |        |
| 21845  |       | 1   | Yes   | 20     | 1   | Yes     | 1     | 3      |
| 21846  |       | 2   | No    |        | 2   | No      | 0     |        |
| 21849  |       | 1   | Yes   | 10     | 2   | No      | 0     |        |

| respid | Q16_2 | Q17 | Smoke | Q17a_1 | Q18 | Alcohol | Q19_1 | Q19a_1 |
|--------|-------|-----|-------|--------|-----|---------|-------|--------|
| 21850  |       | 2   | No    |        | 2   | No      | 2     | 2      |
| 21855  |       | 2   | No    |        | 2   | No      | 0     |        |
| 21859  |       | 2   | No    |        | 1   | Yes     | 0     |        |
| 21861  |       | 1   | Yes   | 4      | 2   | No      | 1     | 2      |
| 21866  |       | 2   | No    |        | 2   | No      | 0     |        |
| 21873  |       | 2   | No    |        | 2   | No      | 2     | 2      |
| 21876  |       | 1   | Yes   | 8      | 2   | No      | 0     |        |
| 21882  |       | 2   | No    |        | 2   | No      | 0     |        |
| 21884  |       | 2   | No    |        | 2   | No      | 1     | 1      |
| 21887  |       | 2   | No    |        | 2   | No      | 2     | 2      |
| 21892  |       | 1   | Yes   | 5      | 2   | No      | 0     |        |
| 21907  |       | 2   | No    |        | 2   | No      | 1     | 1      |
| 21910  |       | 1   | Yes   | 15     | 1   | Yes     | 4     | 3      |
| 21912  |       | 2   | No    |        | 2   | No      | 1     | 1      |
| 21914  |       | 2   | No    |        | 2   | No      | 2     | 2      |
| 21925  |       | 1   | Yes   | 10     | 2   | No      | 0     |        |
| 21937  |       | 2   | No    |        | 2   | No      | 0     |        |
| 21938  |       | 2   | No    |        | 2   | No      | 1     | 0      |
| 21940  |       | 2   | No    |        | 2   | No      | 2     | 2      |
| 21942  |       | 2   | No    |        | 2   | No      | 0     |        |
| 21947  |       | 1   | Yes   | 20     | 2   | No      | 0     |        |
| 21948  |       | 2   | No    |        | 2   | No      | 0     |        |
| 21961  |       | 2   | No    |        | 2   | No      | 1     | 1      |
| 21977  |       | 2   | No    |        | 2   | No      | 3     | 3      |
| 21983  |       | 1   | Yes   | 1      | 2   | No      | 0     |        |
| 21986  |       | 2   | No    |        | 1   | Yes     | 3     | 2      |
| 21988  |       | 1   | Yes   | 10     | 2   | No      | 0     |        |
| 21996  |       | 2   | No    |        | 2   | No      | 5     | 3      |
| 21997  |       | 2   | No    |        | 1   | Yes     | 0     |        |
| 22005  |       | 2   | No    |        | 2   | No      | 0     |        |
| 22013  |       | 2   | No    |        | 2   | No      | 0     |        |
| 22018  |       | 2   | No    |        | 2   | No      | 0     |        |

| respid | Q16_2 | Q17 | Smoke | Q17a_1 | Q18 | Alcohol | Q19_1 | Q19a_1 |
|--------|-------|-----|-------|--------|-----|---------|-------|--------|
| 22019  |       | 1   | Yes   | 2      | 1   | Yes     | 3     | 2      |
| 22071  |       | 2   | No    |        | 2   | No      | 0     |        |
| 22082  |       | 2   | No    |        | 2   | No      | 0     |        |
| 22085  |       | 2   | No    |        | 2   | No      | 1     | 0      |
| 22092  |       | 2   | No    |        | 2   | No      | 0     |        |
| 22097  |       | 2   | No    |        | 2   | No      | 0     |        |
| 22111  |       | 2   | No    |        | 2   | No      | 0     |        |
| 22118  |       | 1   | Yes   | 12     | 2   | No      | 0     |        |
| 22132  |       | 2   | No    |        | 2   | No      | 0     |        |
| 22133  |       | 1   | Yes   | 20     | 2   | No      | 1     | 0      |
| 22139  |       | 2   | No    |        | 2   | No      | 0     |        |
| 22142  |       | 2   | No    |        | 1   | Yes     | 1     | 2      |
| 22146  |       | 2   | No    |        | 2   | No      | 0     |        |
| 22181  |       | 2   | No    |        | 2   | No      | 0     |        |
| 22202  |       | 2   | No    |        | 2   | No      | 1     | 0      |
| 22214  |       | 2   | No    |        | 2   | No      | 0     |        |
| 22223  |       | 2   | No    |        | 2   | No      | 0     |        |
| 22227  |       | 2   | No    |        | 2   | No      | 2     | 1      |
| 22229  |       | 1   | Yes   | 20     | 2   | No      | 0     |        |
| 22239  |       | 2   | No    |        | 2   | No      | 3     | 3      |
| 22245  |       | 1   | Yes   | 15     | 1   | Yes     | 4     | 3      |
| 22256  |       | 2   | No    |        | 2   | No      | 0     |        |
| 22260  |       | 1   | Yes   | 1      | 2   | No      | 2     | 2      |
| 22298  |       | 2   | No    |        | 2   | No      | 2     | 1      |
| 22321  |       | 2   | No    |        | 2   | No      | 0     |        |
| 22340  |       | 2   | No    |        | 2   | No      | 0     |        |
| 22346  |       | 2   | No    |        | 2   | No      | 2     | 2      |
| 22356  |       | 2   | No    |        | 2   | No      | 1     | 1      |
| 22361  |       | 2   | No    |        | 2   | No      | 3     | 2      |
| 22364  |       | 2   | No    |        | 2   | No      | 0     |        |
| 22368  |       | 2   | No    |        | 2   | No      | 0     |        |
| 22374  |       | 1   | Yes   | 1      | 2   | No      | 0     |        |



| respid | Q16_2 | Q17 | Smoke | Q17a_1 | Q18 | Alcohol | Q19_1 | Q19a_1 |
|--------|-------|-----|-------|--------|-----|---------|-------|--------|
| 22375  |       | 2   | No    |        | 2   | No      | 0     |        |
| 22377  |       | 2   | No    |        | 2   | No      | 0     |        |
| 22383  |       | 2   | No    |        | 2   | No      | 0     |        |
| 22387  |       | 2   | No    |        | 2   | No      | 3     | 2      |
| 22392  |       | 2   | No    |        | 2   | No      | 0     |        |
| 22393  |       | 2   | No    |        | 2   | No      | 1     | 1      |
| 22394  |       | 2   | No    |        | 2   | No      | 0     |        |
| 22395  |       | 2   | No    |        | 1   | Yes     | 0     |        |
| 22401  |       | 1   | Yes   | 10     | 2   | No      | 0     |        |
| 22407  |       | 2   | No    |        | 2   | No      | 0     |        |
| 22410  |       | 1   | Yes   | 10     | 1   | Yes     | 0     |        |
| 22418  |       | 2   | No    |        | 2   | No      | 0     |        |
| 22421  |       | 2   | No    |        | 2   | No      | 0     |        |
| 22423  |       | 2   | No    |        | 2   | No      | 0     |        |
| 22425  |       | 2   | No    |        | 2   | No      | 0     |        |
| 22427  | 68    | 2   | No    |        | 2   | No      | 1     | 0      |
| 22431  |       | 2   | No    |        | 1   | Yes     | 3     | 4      |
| 22435  |       | 2   | No    |        | 2   | No      | 0     |        |
| 22436  |       | 2   | No    |        | 2   | No      | 0     |        |
| 22442  |       | 2   | No    |        | 2   | No      | 0     |        |
| 22444  |       | 2   | No    |        | 2   | No      | 2     | 3      |
| 22445  |       | 2   | No    |        | 2   | No      | 3     | 2      |
| 22446  |       | 2   | No    |        | 2   | No      | 0     |        |
| 22448  |       | 2   | No    |        | 2   | No      | 1     | 3      |
| 22449  |       | 2   | No    |        | 2   | No      | 0     |        |
| 22450  |       | 1   | Yes   | 7      | 2   | No      | 1     | 2      |
| 22453  |       | 1   | Yes   | 15     | 1   | Yes     | 2     | 2      |
| 22465  |       | 2   | No    |        | 2   | No      | 1     | 1      |
| 22472  |       | 1   | Yes   | 2      | 2   | No      | 2     | 1      |
| 22475  |       | 2   | No    |        | 2   | No      | 2     | 2      |
| 22478  |       | 1   | Yes   | 8      | 2   | No      | 0     |        |
| 22491  | 160   | 2   | No    |        | 2   | No      | 0     |        |

| respid | Q16_2 | Q17 | Smoke | Q17a_1 | Q18 | Alcohol | Q19_1 | Q19a_1 |
|--------|-------|-----|-------|--------|-----|---------|-------|--------|
| 22497  |       | 2   | No    |        | 2   | No      | 2     | 1      |
| 22498  |       | 2   | No    |        | 2   | No      | 3     | 2      |
| 22499  |       | 2   | No    |        | 2   | No      | 3     | 3      |
| 22503  |       | 2   | No    |        | 2   | No      | 0     |        |
| 22507  |       | 2   | No    |        | 2   | No      | 0     |        |
| 22513  |       | 2   | No    |        | 2   | No      | 2     | 2      |
| 22517  |       | 2   | No    |        | 2   | No      | 1     | 0      |
| 22524  |       | 1   | Yes   | 20     | 2   | No      | 5     | 1      |
| 22528  |       | 2   | No    |        | 2   | No      | 0     |        |
| 22544  |       | 1   | Yes   | 30     | 2   | No      | 0     |        |
| 22571  |       | 2   | No    |        | 2   | No      | 0     |        |
| 22576  |       | 2   | No    |        | 2   | No      | 0     |        |
| 22579  |       | 2   | No    |        | 2   | No      | 1     | 1      |
| 22583  |       | 2   | No    |        | 2   | No      | 1     | 1      |
| 22591  |       | 1   | Yes   | 3      | 1   | Yes     | 3     | 2      |
| 22592  |       | 2   | No    |        | 2   | No      | 0     |        |
| 22612  |       | 2   | No    |        | 2   | No      | 0     |        |
| 22613  |       | 2   | No    |        | 1   | Yes     | 1     | 1      |
| 22615  |       | 1   | Yes   | 40     | 2   | No      | 1     | 1      |
| 22621  |       | 1   | Yes   | 5      | 1   | Yes     | 1     | 1      |
| 22625  |       | 2   | No    |        | 2   | No      | 0     |        |
| 22628  |       | 1   | Yes   | 10     | 1   | Yes     | 3     | 2      |
| 22632  |       | 2   | No    |        | 2   | No      | 1     | 2      |
| 22639  |       | 2   | No    |        | 2   | No      | 0     |        |
| 22648  |       | 2   | No    |        | 2   | No      | 3     | 3      |
| 22649  |       | 2   | No    |        | 2   | No      | 1     | 1      |
| 22655  |       | 2   | No    |        | 2   | No      | 0     |        |
| 22659  |       | 2   | No    |        | 2   | No      | 0     |        |
| 22660  |       | 2   | No    |        | 2   | No      | 2     | 1      |
| 22666  |       | 2   | No    |        | 2   | No      | 1     | 2      |
| 22667  |       | 1   | Yes   | 4      | 2   | No      | 1     | 1      |
| 22670  |       | 2   | No    |        | 1   | Yes     | 0     |        |

| respid | Q16_2 | Q17 | Smoke | Q17a_1 | Q18 | Alcohol | Q19_1 | Q19a_1 |
|--------|-------|-----|-------|--------|-----|---------|-------|--------|
| 22681  |       | 2   | No    |        | 2   | No      | 0     |        |
| 22683  |       | 2   | No    |        | 2   | No      | 0     |        |
| 22688  |       | 2   | No    |        | 2   | No      | 0     |        |
| 22695  |       | 2   | No    |        | 2   | No      | 1     | 1      |
| 22696  |       | 2   | No    |        | 2   | No      | 0     |        |
| 22705  |       | 2   | No    |        | 2   | No      | 3     | 2      |
| 22718  |       | 1   | Yes   | 10     | 1   | Yes     | 3     | 2      |
| 22720  |       | 1   | Yes   | 18     | 2   | No      | 0     |        |
| 22724  |       | 2   | No    |        | 2   | No      | 1     | 1      |
| 22728  |       | 2   | No    |        | 2   | No      | 0     |        |
| 22751  |       | 2   | No    |        | 2   | No      | 0     |        |
| 22782  |       | 2   | No    |        | 2   | No      | 5     | 4      |
| 22786  |       | 1   | Yes   | 15     | 2   | No      | 0     |        |
| 22788  |       | 2   | No    |        | 2   | No      | 0     |        |
| 22810  |       | 2   | No    |        | 2   | No      | 1     | 1      |
| 22816  |       | 2   | No    |        | 2   | No      | 0     |        |
| 22818  |       | 2   | No    |        | 2   | No      | 0     |        |
| 22854  |       | 2   | No    |        | 2   | No      | 0     |        |
| 22858  |       | 2   | No    |        | 2   | No      | 0     |        |
| 22862  |       | 2   | No    |        | 2   | No      | 0     |        |
| 22865  |       | 1   | Yes   | 1      | 2   | No      | 1     | 0      |
| 22868  |       | 2   | No    |        | 2   | No      | 0     |        |
| 22869  |       | 2   | No    |        | 1   | Yes     | 2     | 2      |
| 22873  |       | 2   | No    |        | 2   | No      | 0     |        |
| 22875  |       | 1   | Yes   | 15     | 2   | No      | 2     | 0      |
| 22876  |       | 2   | No    |        | 2   | No      | 0     |        |
| 22882  |       | 2   | No    |        | 2   | No      | 0     |        |
| 22884  |       | 1   | Yes   | 4      | 2   | No      | 3     | 2      |
| 22887  |       | 2   | No    |        | 2   | No      | 0     |        |
| 22888  |       | 2   | No    |        | 2   | No      | 0     |        |
| 22900  |       | 2   | No    |        | 2   | No      | 0     |        |
| 22901  |       | 2   | No    |        | 2   | No      | 0     |        |

| respid | Q16_2 | Q17 | Smoke | Q17a_1 | Q18 | Alcohol | Q19_1 | Q19a_1 |
|--------|-------|-----|-------|--------|-----|---------|-------|--------|
| 22912  |       | 1   | Yes   | 20     | 1   | Yes     | 4     | 2      |
| 22913  |       | 2   | No    |        | 1   | Yes     | 0     |        |
| 22921  |       | 1   | Yes   | 10     | 1   | Yes     | 0     |        |
| 22925  |       | 1   | Yes   | 20     | 2   | No      | 0     |        |
| 22940  |       | 2   | No    |        | 2   | No      | 0     |        |
| 22941  |       | 2   | No    |        | 1   | Yes     | 0     |        |
| 22947  |       | 2   | No    |        | 2   | No      | 5     | 2      |
| 22948  |       | 1   | Yes   | 20     | 1   | Yes     | 0     |        |
| 22964  |       | 2   | No    |        | 2   | No      | 1     | 2      |
| 22966  |       | 1   | Yes   | 30     | 1   | Yes     | 1     | 0      |
| 22969  |       | 1   | Yes   | 15     | 2   | No      | 0     |        |
| 22971  |       | 2   | No    |        | 2   | No      | 0     |        |
| 22988  |       | 2   | No    |        | 2   | No      | 0     |        |
| 22990  |       | 2   | No    |        | 2   | No      | 0     |        |
| 23000  |       | 2   | No    |        | 2   | No      | 0     |        |
| 23016  |       | 2   | No    |        | 2   | No      | 0     |        |
| 23026  |       | 1   | Yes   | 20     | 1   | Yes     | 0     |        |
| 23035  |       | 2   | No    |        | 2   | No      | 0     |        |
| 23037  |       | 2   | No    |        | 2   | No      | 1     | 3      |
| 23044  |       | 2   | No    |        | 2   | No      | 1     | 1      |
| 23046  |       | 2   | No    |        | 1   | Yes     | 0     |        |
| 23047  |       | 2   | No    |        | 2   | No      | 0     |        |
| 23049  |       | 2   | No    |        | 2   | No      | 1     | 1      |
| 23055  |       | 2   | No    |        | 1   | Yes     | 0     |        |
| 23066  |       | 2   | No    |        | 2   | No      | 1     | 0      |
| 23075  |       | 2   | No    |        | 2   | No      | 0     |        |
| 23081  |       | 1   | Yes   | 20     | 1   | Yes     | 3     | 0      |
| 23087  |       | 2   | No    |        | 2   | No      | 0     |        |
| 23094  |       | 2   | No    |        | 2   | No      | 0     |        |
| 23099  |       | 1   | Yes   | 1      | 1   | Yes     | 0     |        |
| 23101  |       | 2   | No    |        | 2   | No      | 0     |        |
| 23105  |       | 2   | No    |        | 2   | No      | 0     |        |

| respid | Q16_2 | Q17 | Smoke | Q17a_1 | Q18 | Alcohol | Q19_1 | Q19a_1 |
|--------|-------|-----|-------|--------|-----|---------|-------|--------|
| 23115  |       | 2   | No    |        | 2   | No      | 3     | 2      |
| 23121  |       | 2   | No    |        | 2   | No      | 0     |        |
| 23127  |       | 2   | No    |        | 2   | No      | 0     |        |
| 23131  |       | 2   | No    |        | 2   | No      | 0     |        |
| 23134  |       | 2   | No    |        | 2   | No      | 0     |        |
| 23145  |       | 2   | No    |        | 2   | No      | 0     |        |
| 23151  |       | 2   | No    |        | 1   | Yes     | 0     |        |
| 23161  |       | 2   | No    |        | 2   | No      | 2     | 1      |
| 23169  |       | 2   | No    |        | 2   | No      | 1     | 1      |
| 23173  |       | 2   | No    |        | 2   | No      | 0     |        |
| 23174  |       | 2   | No    |        | 1   | Yes     | 0     |        |
| 23186  |       | 2   | No    |        | 2   | No      | 3     | 3      |
| 23195  |       | 2   | No    |        | 2   | No      | 0     |        |
| 23197  |       | 2   | No    |        | 1   | Yes     | 1     | 1      |
| 23198  |       | 2   | No    |        | 2   | No      | 0     |        |
| 23203  |       | 1   | Yes   | 2      | 2   | No      | 0     |        |
| 23204  |       | 2   | No    |        | 2   | No      | 2     | 2      |
| 23212  |       | 2   | No    |        | 2   | No      | 0     |        |
| 23214  |       | 2   | No    |        | 2   | No      | 2     | 0      |
| 23221  |       | 2   | No    |        | 2   | No      | 3     | 2      |
| 23237  |       | 1   | Yes   | 35     | 2   | No      | 0     |        |
| 23251  |       | 2   | No    |        | 2   | No      | 0     |        |
| 23254  |       | 1   | Yes   | 10     | 1   | Yes     | 0     |        |
| 23262  |       | 2   | No    |        | 2   | No      | 1     | 2      |
| 23267  |       | 2   | No    |        | 2   | No      | 0     |        |
| 23268  |       | 2   | No    |        | 1   | Yes     | 0     |        |
| 23273  |       | 2   | No    |        | 1   | Yes     | 0     |        |
| 23278  |       | 1   | Yes   | 30     | 1   | Yes     | 5     | 1      |
| 23279  |       | 1   | Yes   | 20     | 2   | No      | 0     |        |
| 23281  |       | 2   | No    |        | 2   | No      | 3     | 2      |
| 23282  |       | 1   | Yes   | 20     | 1   | Yes     | 5     | 2      |
| 23283  |       | 2   | No    |        | 2   | No      | 1     | 1      |

| respid | Q16_2 | Q17 | Smoke | Q17a_1 | Q18 | Alcohol | Q19_1 | Q19a_1 |
|--------|-------|-----|-------|--------|-----|---------|-------|--------|
| 23285  |       | 2   | No    |        | 2   | No      | 2     | 2      |
| 23305  |       | 2   | No    |        | 2   | No      | 0     |        |
| 23309  |       | 2   | No    |        | 2   | No      | 0     |        |
| 23310  |       | 1   | Yes   | 30     | 2   | No      | 0     |        |
| 23311  |       | 2   | No    |        | 2   | No      | 1     | 2      |
| 23312  |       | 2   | No    |        | 2   | No      | 1     | 2      |
| 23319  |       | 1   | Yes   | 20     | 2   | No      | 3     | 1      |
| 23320  |       | 2   | No    |        | 2   | No      | 0     |        |
| 23322  |       | 2   | No    |        | 2   | No      | 5     | 2      |
| 23334  |       | 2   | No    |        | 2   | No      | 0     |        |
| 23340  |       | 2   | No    |        | 2   | No      | 1     | 1      |
| 23346  |       | 2   | No    |        | 2   | No      | 0     |        |
| 23353  |       | 1   | Yes   | 15     | 2   | No      | 0     |        |
| 23363  |       | 1   | Yes   | 10     | 1   | Yes     | 3     | 2      |
| 23364  |       | 2   | No    |        | 2   | No      | 3     | 3      |
| 23376  |       | 2   | No    |        | 1   | Yes     | 0     |        |
| 23378  |       | 2   | No    |        | 2   | No      | 0     |        |
| 23382  |       | 2   | No    |        | 2   | No      | 0     |        |
| 23383  |       | 1   | Yes   | 20     | 2   | No      | 0     |        |
| 23390  |       | 2   | No    |        | 2   | No      | 0     |        |
| 23395  |       | 2   | No    |        | 2   | No      | 0     |        |
| 23398  |       | 2   | No    |        | 2   | No      | 1     | 2      |
| 23399  |       | 1   | Yes   | 20     | 2   | No      | 3     | 1      |
| 23406  |       | 2   | No    |        | 2   | No      | 1     | 1      |
| 23418  |       | 2   | No    |        | 2   | No      | 1     | 0      |
| 23427  |       | 2   | No    |        | 2   | No      | 0     |        |
| 23428  |       | 2   | No    |        | 2   | No      | 0     |        |
| 23435  |       | 2   | No    |        | 1   | Yes     | 1     | 1      |
| 23439  |       | 2   | No    |        | 2   | No      | 0     |        |
| 23440  |       | 2   | No    |        | 1   | Yes     | 0     |        |
| 23444  |       | 2   | No    |        | 2   | No      | 1     | 2      |
| 23445  |       | 1   | Yes   | 15     | 1   | Yes     | 0     |        |

| respid | Q16_2 | Q17 | Smoke | Q17a_1 | Q18 | Alcohol | Q19_1 | Q19a_1 |
|--------|-------|-----|-------|--------|-----|---------|-------|--------|
| 23455  |       | 2   | No    |        | 2   | No      | 0     |        |
| 23467  |       | 2   | No    |        | 2   | No      | 1     | 1      |
| 23478  |       | 2   | No    |        | 2   | No      | 2     | 1      |
| 23492  |       | 2   | No    |        | 1   | Yes     | 1     | 1      |
| 23498  |       | 2   | No    |        | 2   | No      | 0     |        |
| 23511  |       | 2   | No    |        | 2   | No      | 0     |        |
| 23514  |       | 2   | No    |        | 2   | No      | 0     |        |
| 23515  |       | 2   | No    |        | 2   | No      | 2     | 1      |
| 23522  |       | 2   | No    |        | 2   | No      | 0     |        |
| 23524  |       | 2   | No    |        | 2   | No      | 0     |        |
| 23531  |       | 1   | Yes   | 15     | 2   | No      | 1     | 1      |
| 23532  |       | 2   | No    |        | 2   | No      | 0     |        |
| 23533  |       | 2   | No    |        | 2   | No      | 0     |        |
| 23534  |       | 1   | Yes   | 5      | 1   | Yes     | 0     |        |
| 23538  |       | 2   | No    |        | 2   | No      | 0     |        |
| 23539  |       | 2   | No    |        | 2   | No      | 3     | 2      |
| 23548  |       | 2   | No    |        | 2   | No      | 1     | 1      |
| 23553  |       | 1   | Yes   | 15     | 1   | Yes     | 0     |        |
| 23556  |       | 2   | No    |        | 2   | No      | 0     |        |
| 23563  |       | 2   | No    |        | 2   | No      | 1     | 1      |
| 23572  |       | 2   | No    |        | 2   | No      | 1     | 0      |
| 23575  |       | 2   | No    |        | 2   | No      | 0     |        |
| 23576  |       | 2   | No    |        | 2   | No      | 1     | 0      |
| 23577  |       | 2   | No    |        | 2   | No      | 0     |        |
| 23578  |       | 2   | No    |        | 2   | No      | 0     |        |
| 23587  |       | 2   | No    |        | 1   | Yes     | 2     | 2      |
| 23597  |       | 2   | No    |        | 2   | No      | 0     |        |
| 23598  |       | 2   | No    |        | 2   | No      | 1     | 1      |
| 23604  |       | 1   | Yes   | 15     | 1   | Yes     | 0     |        |
| 23617  |       | 2   | No    |        | 2   | No      | 0     |        |
| 23620  |       | 1   | Yes   | 5      | 1   | Yes     | 2     | 2      |
| 23621  |       | 2   | No    |        | 2   | No      | 0     |        |

| respid | Q16_2 | Q17 | Smoke | Q17a_1 | Q18 | Alcohol | Q19_1 | Q19a_1 |
|--------|-------|-----|-------|--------|-----|---------|-------|--------|
| 23625  |       | 2   | No    |        | 2   | No      | 1     | 1      |
| 23629  |       | 2   | No    |        | 2   | No      | 0     |        |
| 23635  |       | 2   | No    |        | 2   | No      | 0     |        |
| 23636  |       | 2   | No    |        | 2   | No      | 0     |        |
| 23637  |       | 2   | No    |        | 2   | No      | 4     | 2      |
| 23638  |       | 1   | Yes   | 7      | 2   | No      | 0     |        |
| 23644  |       | 2   | No    |        | 2   | No      | 0     |        |
| 23645  |       | 1   | Yes   | 1      | 2   | No      | 2     | 2      |
| 23649  |       | 2   | No    |        | 2   | No      | 0     |        |
| 23654  |       | 2   | No    |        | 2   | No      | 0     |        |
| 23662  |       | 2   | No    |        | 2   | No      | 1     | 1      |
| 23664  |       | 2   | No    |        | 2   | No      | 0     |        |
| 23665  |       | 2   | No    |        | 2   | No      | 0     |        |
| 23666  |       | 2   | No    |        | 2   | No      | 1     | 1      |
| 23671  |       | 2   | No    |        | 2   | No      | 0     |        |
| 23672  |       | 2   | No    |        | 2   | No      | 1     | 1      |
| 23685  |       | 2   | No    |        | 2   | No      | 1     | 0      |
| 23686  |       | 2   | No    |        | 2   | No      | 3     | 2      |
| 23689  |       | 2   | No    |        | 2   | No      | 3     | 2      |
| 23690  |       | 1   | Yes   | 10     | 1   | Yes     | 2     | 1      |
| 23695  |       | 2   | No    |        | 2   | No      | 2     | 3      |
| 23700  |       | 1   | Yes   | 20     | 2   | No      | 0     |        |
| 23714  |       | 2   | No    |        | 2   | No      | 0     |        |
| 23719  |       | 2   | No    |        | 2   | No      | 0     |        |
| 23720  |       | 2   | No    |        | 2   | No      | 0     |        |
| 23721  |       | 2   | No    |        | 2   | No      | 0     |        |
| 23729  |       | 2   | No    |        | 2   | No      | 0     |        |
| 23730  |       | 2   | No    |        | 2   | No      | 0     |        |
| 23732  |       | 2   | No    |        | 2   | No      | 0     |        |
| 23736  |       | 2   | No    |        | 2   | No      | 0     |        |
| 23754  |       | 2   | No    |        | 2   | No      | 0     |        |
| 23756  |       | 2   | No    |        | 2   | No      | 0     |        |



| respid | Q16_2 | Q17 | Smoke | Q17a_1 | Q18 | Alcohol | Q19_1 | Q19a_1 |
|--------|-------|-----|-------|--------|-----|---------|-------|--------|
| 23759  |       | 2   | No    |        | 2   | No      | 1     | 2      |
| 23761  |       | 1   | Yes   | 5      | 2   | No      | 2     | 1      |
| 23766  |       | 2   | No    |        | 2   | No      | 0     |        |
| 23768  |       | 2   | No    |        | 2   | No      | 3     | 3      |
| 23773  |       | 2   | No    |        | 2   | No      | 0     |        |
| 23781  |       | 2   | No    |        | 2   | No      | 0     |        |
| 23782  |       | 2   | No    |        | 2   | No      | 3     | 3      |
| 23787  |       | 2   | No    |        | 2   | No      | 2     | 1      |
| 23788  |       | 2   | No    |        | 2   | No      | 5     | 2      |
| 23790  |       | 2   | No    |        | 2   | No      | 0     |        |
| 23794  |       | 1   | Yes   | 20     | 2   | No      | 1     | 2      |
| 23795  |       | 2   | No    |        | 2   | No      | 2     | 2      |
| 23801  |       | 2   | No    |        | 2   | No      | 0     |        |
| 23806  |       | 2   | No    |        | 2   | No      | 0     |        |
| 23809  |       | 1   | Yes   | 20     | 1   | Yes     | 1     | 2      |
| 23813  |       | 2   | No    |        | 2   | No      | 0     |        |
| 23815  |       | 2   | No    |        | 2   | No      | 0     |        |
| 23821  |       | 2   | No    |        | 2   | No      | 0     |        |
| 23825  |       | 2   | No    |        | 2   | No      | 1     | 1      |
| 23826  |       | 2   | No    |        | 2   | No      | 0     |        |
| 23830  |       | 2   | No    |        | 2   | No      | 0     |        |
| 23833  |       | 2   | No    |        | 2   | No      | 0     |        |
| 23837  |       | 2   | No    |        | 1   | Yes     | 0     |        |
| 23848  |       | 2   | No    |        | 2   | No      | 1     | 4      |
| 23850  |       | 2   | No    |        | 2   | No      | 0     |        |
| 23870  |       | 2   | No    |        | 2   | No      | 0     |        |
| 23877  |       | 2   | No    |        | 2   | No      | 0     |        |
| 23880  |       | 1   | Yes   | 10     | 1   | Yes     | 0     |        |
| 23882  |       | 2   | No    |        | 2   | No      | 2     | 1      |
| 23888  |       | 2   | No    |        | 2   | No      | 0     |        |
| 23908  |       | 2   | No    |        | 2   | No      | 1     | 2      |
| 23914  |       | 2   | No    |        | 2   | No      | 0     |        |

| respid | Q16_2 | Q17 | Smoke | Q17a_1 | Q18 | Alcohol | Q19_1 | Q19a_1 |
|--------|-------|-----|-------|--------|-----|---------|-------|--------|
| 23916  |       | 2   | No    |        | 2   | No      | 0     |        |
| 23922  |       | 1   | Yes   | 2      | 1   | Yes     | 2     | 1      |
| 23932  |       | 2   | No    |        | 2   | No      | 0     |        |
| 23934  |       | 2   | No    |        | 2   | No      | 0     |        |
| 23942  |       | 2   | No    |        | 2   | No      | 1     | 2      |
| 23945  |       | 1   | Yes   | 25     | 2   | No      | 0     |        |
| 23948  |       | 1   | Yes   | 4      | 2   | No      | 0     |        |
| 23955  |       | 1   | Yes   | 10     | 2   | No      | 0     |        |
| 23956  |       | 2   | No    |        | 1   | Yes     | 1     | 3      |
| 23978  |       | 2   | No    |        | 1   | Yes     | 0     |        |
| 23981  |       | 2   | No    |        | 2   | No      | 0     |        |
| 23982  |       | 2   | No    |        | 1   | Yes     | 0     |        |
| 23991  |       | 2   | No    |        | 2   | No      | 0     |        |
| 23994  |       | 2   | No    |        | 2   | No      | 0     |        |
| 23995  |       | 1   | Yes   | 20     | 2   | No      | 0     |        |
| 23999  |       | 2   | No    |        | 2   | No      | 0     |        |
| 24005  |       | 1   | Yes   | 28     | 1   | Yes     | 4     | 4      |
| 24018  |       | 2   | No    |        | 2   | No      | 0     |        |
| 24021  |       | 2   | No    |        | 2   | No      | 0     |        |
| 24035  |       | 2   | No    |        | 2   | No      | 0     |        |
| 24040  |       | 1   | Yes   | 10     | 2   | No      | 0     |        |
| 24043  |       | 2   | No    |        | 2   | No      | 0     |        |
| 24046  |       | 1   | Yes   | 25     | 1   | Yes     | 2     | 2      |
| 24047  |       | 2   | No    |        | 2   | No      | 2     | 1      |
| 24048  |       | 2   | No    |        | 1   | Yes     | 1     | 1      |
| 24062  |       | 2   | No    |        | 2   | No      | 1     | 2      |
| 24063  |       | 2   | No    |        | 1   | Yes     | 2     | 2      |
| 24066  |       | 2   | No    |        | 2   | No      | 0     |        |
| 24069  |       | 2   | No    |        | 2   | No      | 0     |        |
| 24070  |       | 2   | No    |        | 2   | No      | 0     |        |
| 24074  |       | 2   | No    |        | 2   | No      | 0     |        |
| 24080  |       | 2   | No    |        | 2   | No      | 0     |        |

| respid | Q16_2 | Q17 | Smoke | Q17a_1 | Q18 | Alcohol | Q19_1 | Q19a_1 |
|--------|-------|-----|-------|--------|-----|---------|-------|--------|
| 24082  |       | 2   | No    |        | 2   | No      | 0     |        |
| 24088  |       | 2   | No    |        | 2   | No      | 0     |        |
| 24089  |       | 2   | No    |        | 2   | No      | 0     |        |
| 24091  |       | 2   | No    |        | 2   | No      | 0     |        |
| 24095  |       | 2   | No    |        | 2   | No      | 0     |        |
| 24100  |       | 2   | No    |        | 2   | No      | 0     |        |
| 24105  |       | 2   | No    |        | 2   | No      | 3     | 3      |
| 24107  |       | 2   | No    |        | 2   | No      | 0     |        |
| 24108  |       | 2   | No    |        | 2   | No      | 0     |        |
| 24113  |       | 2   | No    |        | 2   | No      | 0     |        |
| 24120  |       | 2   | No    |        | 2   | No      | 0     |        |
| 24122  |       | 2   | No    |        | 2   | No      | 3     | 2      |
| 24123  |       | 2   | No    |        | 2   | No      | 1     | 1      |
| 24125  |       | 2   | No    |        | 2   | No      | 1     | 1      |
| 24132  |       | 1   | Yes   | 15     | 1   | Yes     | 0     |        |
| 24139  |       | 2   | No    |        | 2   | No      | 3     | 1      |
| 24140  |       | 2   | No    |        | 2   | No      | 0     |        |
| 24143  |       | 2   | No    |        | 2   | No      | 1     | 2      |
| 24150  |       | 2   | No    |        | 2   | No      | 3     | 2      |
| 24153  |       | 2   | No    |        | 2   | No      | 0     |        |
| 24161  |       | 2   | No    |        | 2   | No      | 0     |        |
| 24168  |       | 2   | No    |        | 2   | No      | 0     |        |
| 24179  |       | 2   | No    |        | 2   | No      | 1     | 1      |
| 24182  |       | 2   | No    |        | 1   | Yes     | 2     | 1      |
| 24194  |       | 1   | Yes   | 6      | 2   | No      | 0     |        |
| 24206  |       | 1   | Yes   | 13     | 2   | No      | 0     |        |
| 24214  |       | 2   | No    |        | 2   | No      | 0     |        |
| 24215  |       | 2   | No    |        | 2   | No      | 0     |        |
| 24224  |       | 2   | No    |        | 2   | No      | 0     |        |
| 24225  |       | 2   | No    |        | 2   | No      | 0     |        |
| 24227  |       | 2   | No    |        | 2   | No      | 0     |        |
| 24229  |       | 2   | No    |        | 2   | No      | 0     |        |

| respid | Q16_2 | Q17 | Smoke | Q17a_1 | Q18 | Alcohol | Q19_1 | Q19a_1 |
|--------|-------|-----|-------|--------|-----|---------|-------|--------|
| 24230  |       | 2   | No    |        | 2   | No      | 0     |        |
| 24232  |       | 2   | No    |        | 2   | No      | 1     | 1      |
| 24253  |       | 2   | No    |        | 2   | No      | 1     | 1      |
| 24267  |       | 2   | No    |        | 2   | No      | 0     |        |
| 24274  |       | 2   | No    |        | 2   | No      | 0     |        |
| 24275  |       | 2   | No    |        | 2   | No      | 0     |        |
| 24277  |       | 2   | No    |        | 2   | No      | 0     |        |
| 24280  |       | 2   | No    |        | 2   | No      | 5     | 3      |
| 24285  |       | 1   | Yes   | 18     | 2   | No      | 0     |        |
| 24293  |       | 2   | No    |        | 2   | No      | 0     |        |
| 24295  |       | 2   | No    |        | 2   | No      | 0     |        |
| 24299  |       | 2   | No    |        | 2   | No      | 0     |        |
| 24303  |       | 2   | No    |        | 2   | No      | 1     | 1      |
| 24308  |       | 1   | Yes   | 20     | 1   | Yes     | 1     | 1      |
| 24322  |       | 2   | No    |        | 2   | No      | 0     |        |
| 24325  |       | 2   | No    |        | 2   | No      | 0     |        |
| 24328  |       | 1   | Yes   | 10     | 2   | No      | 0     |        |
| 24334  |       | 2   | No    |        | 2   | No      | 0     |        |
| 24342  |       | 2   | No    |        | 2   | No      | 1     | 0      |
| 24343  |       | 1   | Yes   | 14     | 1   | Yes     | 1     | 2      |
| 24348  |       | 1   | Yes   | 10     | 1   | Yes     | 3     | 3      |
| 24352  |       | 2   | No    |        | 2   | No      | 2     | 2      |
| 24354  |       | 2   | No    |        | 2   | No      | 1     | 1      |
| 24357  |       | 2   | No    |        | 2   | No      | 0     |        |
| 24360  |       | 1   | Yes   | 10     | 1   | Yes     | 3     | 2      |
| 24369  |       | 2   | No    |        | 2   | No      | 2     | 4      |
| 24373  |       | 2   | No    |        | 2   | No      | 0     |        |
| 24398  |       | 1   | Yes   | 2      | 2   | No      | 3     | 3      |
| 24402  |       | 2   | No    |        | 2   | No      | 0     |        |
| 24405  |       | 2   | No    |        | 2   | No      | 0     |        |
| 24407  |       | 2   | No    |        | 2   | No      | 0     |        |
| 24413  |       | 2   | No    |        | 2   | No      | 0     |        |

| respid | Q16_2 | Q17 | Smoke | Q17a_1 | Q18 | Alcohol | Q19_1 | Q19a_1 |
|--------|-------|-----|-------|--------|-----|---------|-------|--------|
| 24443  |       | 2   | No    |        | 2   | No      | 2     | 2      |
| 24451  |       | 2   | No    |        | 2   | No      | 0     |        |
| 24459  |       | 1   | Yes   | 15     | 2   | No      | 2     | 2      |
| 24465  |       | 2   | No    |        | 2   | No      | 0     |        |
| 24481  |       | 2   | No    |        | 2   | No      | 2     | 1      |
| 24482  |       | 2   | No    |        | 2   | No      | 0     |        |
| 24491  |       | 2   | No    |        | 2   | No      | 1     | 1      |
| 24495  |       | 2   | No    |        | 2   | No      | 0     |        |
| 24497  |       | 2   | No    |        | 2   | No      | 1     | 2      |
| 24511  |       | 2   | No    |        | 2   | No      | 0     |        |
| 24513  |       | 2   | No    |        | 2   | No      | 0     |        |
| 24516  |       | 1   | Yes   | 10     | 1   | Yes     | 0     |        |
| 24518  |       | 2   | No    |        | 2   | No      | 1     | 0      |
| 24524  |       | 2   | No    |        | 2   | No      | 0     |        |
| 24528  |       | 2   | No    |        | 2   | No      | 0     |        |
| 24531  |       | 2   | No    |        | 2   | No      | 4     | 4      |
| 24533  |       | 1   | Yes   | 5      | 1   | Yes     | 5     | 3      |
| 24547  |       | 2   | No    |        | 2   | No      | 0     |        |
| 24557  |       | 2   | No    |        | 2   | No      | 3     | 2      |
| 24559  |       | 2   | No    |        | 2   | No      | 5     | 4      |
| 24567  |       | 2   | No    |        | 2   | No      | 0     |        |
| 24568  |       | 1   | Yes   | 2      | 2   | No      | 0     |        |
| 24577  |       | 1   | Yes   | 20     | 2   | No      | 0     |        |
| 24581  |       | 2   | No    |        | 2   | No      | 1     | 0      |
| 24588  |       | 2   | No    |        | 2   | No      | 0     |        |
| 24604  |       | 1   | Yes   | 3      | 2   | No      | 1     | 1      |
| 24612  |       | 2   | No    |        | 1   | Yes     | 2     | 1      |
| 24621  |       | 2   | No    |        | 2   | No      | 3     | 2      |
| 24625  |       | 2   | No    |        | 2   | No      | 0     |        |
| 24627  |       | 2   | No    |        | 2   | No      | 1     | 1      |
| 24640  |       | 2   | No    |        | 2   | No      | 2     | 2      |
| 24644  |       | 2   | No    |        | 2   | No      | 0     |        |

| respid | Q16_2 | Q17 | Smoke | Q17a_1 | Q18 | Alcohol | Q19_1 | Q19a_1 |
|--------|-------|-----|-------|--------|-----|---------|-------|--------|
| 24664  |       | 2   | No    |        | 1   | Yes     | 3     | 2      |
| 24669  |       | 2   | No    |        | 2   | No      | 3     | 1      |
| 24685  |       | 2   | No    |        | 2   | No      | 0     |        |
| 24687  |       | 2   | No    |        | 2   | No      | 3     | 2      |
| 24688  |       | 1   | Yes   | 20     | 2   | No      | 1     | 1      |
| 24691  |       | 2   | No    |        | 2   | No      | 3     | 2      |
| 24693  |       | 1   | Yes   | 20     | 1   | Yes     | 0     |        |
| 24706  |       | 2   | No    |        | 2   | No      | 0     |        |
| 24710  |       | 2   | No    |        | 2   | No      | 0     |        |
| 24717  |       | 2   | No    |        | 2   | No      | 0     |        |
| 24720  |       | 2   | No    |        | 2   | No      | 0     |        |
| 24731  |       | 2   | No    |        | 2   | No      | 2     | 2      |
| 24732  |       | 1   | Yes   | 15     | 2   | No      | 1     | 1      |
| 24733  |       | 2   | No    |        | 2   | No      | 0     |        |
| 24747  |       | 2   | No    |        | 2   | No      | 0     |        |
| 24750  |       | 1   | Yes   | 8      | 1   | Yes     | 2     | 3      |
| 24758  |       | 2   | No    |        | 2   | No      | 2     | 2      |
| 24760  |       | 2   | No    |        | 2   | No      | 0     |        |
| 24765  |       | 2   | No    |        | 2   | No      | 0     |        |
| 24772  |       | 2   | No    |        | 2   | No      | 0     |        |
| 24779  |       | 2   | No    |        | 2   | No      | 2     | 2      |
| 24794  |       | 1   | Yes   | 25     | 2   | No      | 0     |        |
| 24796  |       | 2   | No    |        | 2   | No      | 0     |        |
| 24797  |       | 1   | Yes   | 10     | 2   | No      | 5     | 1      |
| 24800  |       | 2   | No    |        | 1   | Yes     | 2     | 1      |
| 24813  |       | 2   | No    |        | 2   | No      | 3     | 3      |
| 24815  |       | 2   | No    |        | 2   | No      | 1     | 1      |
| 24821  |       | 2   | No    |        | 2   | No      | 0     |        |
| 24822  |       | 2   | No    |        | 2   | No      | 0     |        |
| 24831  |       | 2   | No    |        | 2   | No      | 0     |        |
| 24835  |       | 2   | No    |        | 2   | No      | 0     |        |
| 24843  |       | 2   | No    |        | 2   | No      | 1     | 1      |

| respid | Q16_2 | Q17 | Smoke | Q17a_1 | Q18 | Alcohol | Q19_1 | Q19a_1 |
|--------|-------|-----|-------|--------|-----|---------|-------|--------|
| 24844  |       | 2   | No    |        | 2   | No      | 3     | 2      |
| 24860  |       | 2   | No    |        | 2   | No      | 0     |        |
| 24861  |       | 2   | No    |        | 2   | No      | 2     | 1      |
| 24865  |       | 2   | No    |        | 2   | No      | 3     | 2      |
| 24870  |       | 2   | No    |        | 2   | No      | 0     |        |
| 24887  |       | 2   | No    |        | 2   | No      | 0     |        |
| 24897  |       | 1   | Yes   | 5      | 1   | Yes     | 4     | 3      |
| 24902  |       | 2   | No    |        | 2   | No      | 1     | 2      |
| 24914  |       | 2   | No    |        | 2   | No      | 0     |        |
| 24921  |       | 2   | No    |        | 2   | No      | 1     | 1      |
| 24922  |       | 2   | No    |        | 1   | Yes     | 0     |        |
| 24924  |       | 2   | No    |        | 2   | No      | 0     |        |
| 24927  |       | 2   | No    |        | 2   | No      | 0     |        |
| 24936  |       | 2   | No    |        | 2   | No      | 0     |        |
| 24937  |       | 2   | No    |        | 2   | No      | 1     | 2      |
| 24942  |       | 2   | No    |        | 2   | No      | 4     | 2      |
| 24947  |       | 2   | No    |        | 2   | No      | 1     | 0      |
| 24953  |       | 1   | Yes   | 10     | 1   | Yes     | 0     |        |
| 24954  |       | 1   | Yes   | 12     | 1   | Yes     | 1     | 1      |
| 24960  |       | 1   | Yes   | 5      | 1   | Yes     | 4     | 4      |
| 24965  |       | 2   | No    |        | 2   | No      | 0     |        |
| 24975  |       | 2   | No    |        | 2   | No      | 0     |        |
| 24983  |       | 2   | No    |        | 2   | No      | 3     | 2      |
| 24985  |       | 2   | No    |        | 2   | No      | 0     |        |
| 24990  |       | 2   | No    |        | 2   | No      | 0     |        |
| 25000  |       | 2   | No    |        | 2   | No      | 0     |        |
| 25007  |       | 2   | No    |        | 2   | No      | 2     | 2      |
| 25008  |       | 2   | No    |        | 2   | No      | 0     |        |
| 25010  |       | 2   | No    |        | 1   | Yes     | 0     |        |
| 25016  |       | 2   | No    |        | 2   | No      | 4     | 2      |
| 25021  |       | 2   | No    |        | 2   | No      | 0     |        |
| 25040  |       | 2   | No    |        | 2   | No      | 0     |        |

| respid | Q16_2 | Q17 | Smoke | Q17a_1 | Q18 | Alcohol | Q19_1 | Q19a_1 |
|--------|-------|-----|-------|--------|-----|---------|-------|--------|
| 25043  |       | 1   | Yes   | 6      | 2   | No      | 0     |        |
| 25055  |       | 2   | No    |        | 2   | No      | 0     |        |
| 25057  |       | 1   | Yes   | 12     | 2   | No      | 1     | 1      |
| 25060  |       | 1   | Yes   | 5      | 2   | No      | 2     | 2      |
| 25062  |       | 1   | Yes   | 10     | 2   | No      | 2     | 2      |
| 25064  |       | 2   | No    |        | 2   | No      | 3     | 2      |
| 25069  |       | 2   | No    |        | 2   | No      | 0     |        |
| 25077  |       | 2   | No    |        | 2   | No      | 0     |        |
| 25088  |       | 2   | No    |        | 2   | No      | 0     |        |
| 25093  |       | 1   | Yes   | 20     | 1   | Yes     | 2     | 1      |
| 25121  |       | 2   | No    |        | 2   | No      | 0     |        |
| 25140  |       | 2   | No    |        | 2   | No      | 3     | 2      |
| 25144  |       | 2   | No    |        | 2   | No      | 1     | 0      |
| 25149  |       | 2   | No    |        | 2   | No      | 2     | 2      |
| 25159  |       | 2   | No    |        | 2   | No      | 0     |        |
| 25191  |       | 2   | No    |        | 2   | No      | 0     |        |
| 25193  |       | 2   | No    |        | 2   | No      | 3     | 3      |
| 25202  |       | 2   | No    |        | 2   | No      | 3     | 2      |
| 25215  |       | 1   | Yes   | 15     | 1   | Yes     | 1     | 2      |
| 25229  |       | 2   | No    |        | 2   | No      | 1     | 1      |
| 25231  |       | 2   | No    |        | 2   | No      | 1     | 1      |
| 25236  |       | 2   | No    |        | 2   | No      | 0     |        |
| 25242  |       | 1   | Yes   | 20     | 2   | No      | 0     |        |
| 25252  |       | 2   | No    |        | 2   | No      | 0     |        |
| 25253  |       | 2   | No    |        | 1   | Yes     | 2     | 2      |
| 25256  |       | 2   | No    |        | 2   | No      | 3     | 2      |
| 25260  |       | 2   | No    |        | 2   | No      | 0     |        |
| 25261  |       | 1   | Yes   | 6      | 1   | Yes     | 0     |        |
| 25280  |       | 2   | No    |        | 2   | No      | 0     |        |
| 25282  |       | 2   | No    |        | 2   | No      | 1     | 1      |
| 25289  |       | 2   | No    |        | 2   | No      | 0     |        |
| 25303  |       | 2   | No    |        | 2   | No      | 0     |        |



| respid | Q16_2 | Q17 | Smoke | Q17a_1 | Q18 | Alcohol | Q19_1 | Q19a_1 |
|--------|-------|-----|-------|--------|-----|---------|-------|--------|
| 25304  |       | 2   | No    |        | 2   | No      | 5     | 1      |
| 25309  |       | 1   | Yes   | 3      | 2   | No      | 0     |        |
| 25317  |       | 2   | No    |        | 2   | No      | 3     | 2      |
| 25318  |       | 1   | Yes   | 10     | 1   | Yes     | 3     | 2      |
| 25320  |       | 2   | No    |        | 2   | No      | 0     |        |
| 25324  |       | 2   | No    |        | 2   | No      | 3     | 2      |
| 25331  |       | 2   | No    |        | 2   | No      | 1     | 1      |
| 25340  |       | 2   | No    |        | 2   | No      | 2     | 1      |
| 25342  |       | 2   | No    |        | 2   | No      | 0     |        |
| 25350  |       | 2   | No    |        | 2   | No      | 0     |        |
| 25352  |       | 2   | No    |        | 2   | No      | 0     |        |
| 25358  |       | 2   | No    |        | 2   | No      | 0     |        |
| 25375  |       | 2   | No    |        | 2   | No      | 0     |        |
| 25386  |       | 2   | No    |        | 2   | No      | 0     |        |
| 25388  |       | 2   | No    |        | 1   | Yes     | 5     | 1      |
| 25390  |       | 2   | No    |        | 2   | No      | 2     | 2      |
| 25391  |       | 2   | No    |        | 2   | No      | 0     |        |
| 25400  |       | 2   | No    |        | 2   | No      | 1     | 1      |
| 25413  |       | 2   | No    |        | 2   | No      | 3     | 2      |
| 25424  |       | 1   | Yes   | 10     | 1   | Yes     | 0     |        |
| 25426  |       | 2   | No    |        | 2   | No      | 3     | 2      |
| 25430  |       | 2   | No    |        | 2   | No      | 0     |        |
| 25434  |       | 2   | No    |        | 2   | No      | 1     | 2      |
| 25439  |       | 1   | Yes   | 15     | 1   | Yes     | 1     | 2      |
| 25441  |       | 2   | No    |        | 2   | No      | 0     |        |
| 25445  |       | 2   | No    |        | 2   | No      | 0     |        |
| 25451  |       | 2   | No    |        | 1   | Yes     | 5     | 0      |
| 25469  |       | 2   | No    |        | 2   | No      | 3     | 2      |
| 25471  |       | 1   | Yes   | 10     | 1   | Yes     | 1     | 2      |
| 25476  |       | 2   | No    |        | 2   | No      | 0     |        |
| 25480  |       | 2   | No    |        | 1   | Yes     | 1     | 0      |
| 25482  |       | 2   | No    |        | 2   | No      | 0     |        |

| respid | Q16_2 | Q17 | Smoke | Q17a_1 | Q18 | Alcohol | Q19_1 | Q19a_1 |
|--------|-------|-----|-------|--------|-----|---------|-------|--------|
| 25500  |       | 1   | Yes   | 20     | 2   | No      | 2     | 1      |
| 25516  |       | 2   | No    |        | 2   | No      | 0     |        |
| 25521  |       | 2   | No    |        | 1   | Yes     | 3     | 3      |
| 25525  |       | 1   | Yes   | 8      | 2   | No      | 1     | 1      |
| 25530  |       | 2   | No    |        | 1   | Yes     | 1     | 2      |
| 25555  |       | 1   | Yes   | 5      | 2   | No      | 4     | 3      |
| 25558  |       | 2   | No    |        | 2   | No      | 3     | 1      |
| 25561  |       | 2   | No    |        | 2   | No      | 3     | 2      |
| 25566  |       | 2   | No    |        | 2   | No      | 0     |        |
| 25571  |       | 2   | No    |        | 2   | No      | 1     | 1      |
| 25572  |       | 1   | Yes   | 8      | 2   | No      | 0     |        |
| 25574  |       | 2   | No    |        | 2   | No      | 0     |        |
| 25588  |       | 2   | No    |        | 2   | No      | 0     |        |
| 25591  |       | 2   | No    |        | 2   | No      | 0     |        |
| 25599  |       | 2   | No    |        | 2   | No      | 1     | 1      |
| 25604  |       | 1   | Yes   | 15     | 2   | No      | 1     | 1      |
| 25614  |       | 2   | No    |        | 2   | No      | 3     | 3      |
| 25634  |       | 1   | Yes   | 5      | 1   | Yes     | 3     | 2      |
| 25642  |       | 2   | No    |        | 2   | No      | 0     |        |
| 25647  |       | 1   | Yes   | 12     | 1   | Yes     | 1     | 1      |
| 25653  |       | 2   | No    |        | 2   | No      | 0     |        |
| 25654  |       | 2   | No    |        | 1   | Yes     | 1     | 1      |
| 25660  |       | 2   | No    |        | 2   | No      | 0     |        |
| 25664  |       | 1   | Yes   | 10     | 2   | No      | 0     |        |
| 25665  |       | 1   | Yes   | 6      | 2   | No      | 1     | 3      |
| 25672  |       | 1   | Yes   | 15     | 2   | No      | 4     | 2      |
| 25677  |       | 2   | No    |        | 2   | No      | 1     | 1      |
| 25685  |       | 2   | No    |        | 2   | No      | 4     | 3      |
| 25699  |       | 1   | Yes   | 6      | 1   | Yes     | 3     | 2      |
| 25703  |       | 2   | No    |        | 2   | No      | 0     |        |
| 25704  |       | 1   | Yes   | 3      | 2   | No      | 2     | 1      |
| 25705  |       | 1   | Yes   | 10     | 2   | No      | 1     | 1      |

| respid | Q16_2 | Q17 | Smoke | Q17a_1 | Q18 | Alcohol | Q19_1 | Q19a_1 |
|--------|-------|-----|-------|--------|-----|---------|-------|--------|
| 25711  |       | 2   | No    |        | 2   | No      | 0     |        |
| 25727  |       | 1   | Yes   | 5      | 1   | Yes     | 5     | 3      |
| 25728  |       | 2   | No    |        | 2   | No      | 0     |        |
| 25733  |       | 2   | No    |        | 2   | No      | 3     | 2      |
| 25735  |       | 2   | No    |        | 2   | No      | 0     |        |
| 25736  |       | 2   | No    |        | 2   | No      | 2     | 2      |
| 25742  |       | 2   | No    |        | 2   | No      | 0     |        |
| 25750  |       | 2   | No    |        | 2   | No      | 0     |        |
| 25754  |       | 1   | Yes   | 1      | 1   | Yes     | 0     |        |
| 25776  |       | 2   | No    |        | 2   | No      | 1     | 1      |
| 25778  |       | 2   | No    |        | 2   | No      | 0     |        |
| 25796  |       | 2   | No    |        | 2   | No      | 0     |        |
| 25852  |       | 2   | No    |        | 2   | No      | 0     |        |
| 25858  |       | 2   | No    |        | 2   | No      | 0     |        |
| 25859  |       | 2   | No    |        | 1   | Yes     | 0     |        |
| 25886  |       | 2   | No    |        | 2   | No      | 3     | 3      |
| 25890  |       | 1   | Yes   | 1      | 1   | Yes     | 0     |        |
| 25897  |       | 2   | No    |        | 2   | No      | 0     |        |
| 25903  |       | 2   | No    |        | 2   | No      | 0     |        |
| 25905  |       | 2   | No    |        | 2   | No      | 0     |        |
| 25917  |       | 2   | No    |        | 2   | No      | 0     |        |
| 25918  |       | 2   | No    |        | 2   | No      | 0     |        |
| 25928  |       | 2   | No    |        | 2   | No      | 1     | 1      |
| 25930  |       | 2   | No    |        | 2   | No      | 0     |        |
| 25949  |       | 2   | No    |        | 2   | No      | 0     |        |
| 25955  |       | 2   | No    |        | 2   | No      | 0     |        |
| 25959  |       | 2   | No    |        | 2   | No      | 0     |        |
| 25964  |       | 1   | Yes   | 30     | 2   | No      | 0     |        |
| 25972  |       | 2   | No    |        | 2   | No      | 0     |        |
| 25999  |       | 2   | No    |        | 2   | No      | 2     | 2      |
| 26019  |       | 2   | No    |        | 2   | No      | 0     |        |
| 26025  |       | 2   | No    |        | 2   | No      | 0     |        |

| respid | Q16_2 | Q17 | Smoke | Q17a_1 | Q18 | Alcohol | Q19_1 | Q19a_1 |
|--------|-------|-----|-------|--------|-----|---------|-------|--------|
| 26039  |       | 2   | No    |        | 2   | No      | 0     |        |
| 26055  |       | 2   | No    |        | 2   | No      | 0     |        |
| 26061  |       | 2   | No    |        | 2   | No      | 0     |        |
| 26076  |       | 1   | Yes   | 5      | 2   | No      | 0     |        |
| 26088  |       | 1   | Yes   | 10     | 1   | Yes     | 0     |        |
| 26094  |       | 2   | No    |        | 1   | Yes     | 0     |        |
| 26104  |       | 2   | No    |        | 2   | No      | 1     | 1      |
| 26131  |       | 1   | Yes   | 10     | 2   | No      | 0     |        |
| 26134  |       | 2   | No    |        | 2   | No      | 1     | 1      |
| 26160  |       | 1   | Yes   | 15     | 1   | Yes     | 0     |        |
| 26168  |       | 2   | No    |        | 2   | No      | 3     | 1      |
| 26170  |       | 2   | No    |        | 2   | No      | 0     |        |
| 26191  |       | 2   | No    |        | 2   | No      | 4     | 2      |
| 26192  |       | 2   | No    |        | 2   | No      | 0     |        |
| 26195  |       | 2   | No    |        | 2   | No      | 1     | 1      |
| 26198  |       | 2   | No    |        | 2   | No      | 0     |        |
| 26199  |       | 2   | No    |        | 2   | No      | 1     | 1      |
| 26201  |       | 1   | Yes   | 3      | 2   | No      | 0     |        |
| 26202  |       | 1   | Yes   | 30     | 2   | No      | 0     |        |
| 26226  |       | 2   | No    |        | 2   | No      | 0     |        |
| 26233  |       | 2   | No    |        | 2   | No      | 0     |        |
| 26236  |       | 2   | No    |        | 2   | No      | 0     |        |
| 26242  |       | 2   | No    |        | 2   | No      | 0     |        |
| 26244  |       | 2   | No    |        | 1   | Yes     | 1     | 1      |
| 26250  |       | 2   | No    |        | 2   | No      | 0     |        |
| 26266  |       | 2   | No    |        | 2   | No      | 1     | 0      |
| 26274  |       | 1   | Yes   | 12     | 1   | Yes     | 0     |        |
| 26286  |       | 2   | No    |        | 2   | No      | 2     | 1      |
| 26288  |       | 1   | Yes   | 8      | 2   | No      | 0     |        |
| 26295  |       | 2   | No    |        | 2   | No      | 0     |        |
| 26296  |       | 2   | No    |        | 2   | No      | 2     | 0      |
| 26297  |       | 2   | No    |        | 1   | Yes     | 0     |        |

| respid | Q16_2 | Q17 | Smoke | Q17a_1 | Q18 | Alcohol | Q19_1 | Q19a_1 |
|--------|-------|-----|-------|--------|-----|---------|-------|--------|
| 26300  |       | 2   | No    |        | 2   | No      | 2     | 2      |
| 26317  |       | 2   | No    |        | 2   | No      | 0     |        |
| 26343  |       | 1   | Yes   | 20     | 2   | No      | 0     |        |
| 26367  |       | 2   | No    |        | 2   | No      | 5     | 3      |
| 26372  |       | 2   | No    |        | 2   | No      | 3     | 0      |
| 26403  |       | 2   | No    |        | 2   | No      | 2     | 1      |
| 26423  |       | 2   | No    |        | 2   | No      | 0     |        |
| 26430  |       | 2   | No    |        | 2   | No      | 0     |        |
| 26437  |       | 2   | No    |        | 2   | No      | 3     | 2      |
| 26457  |       | 2   | No    |        | 2   | No      | 0     |        |
| 26466  |       | 2   | No    |        | 2   | No      | 0     |        |
| 26467  |       | 2   | No    |        | 2   | No      | 0     |        |
| 26469  |       | 2   | No    |        | 2   | No      | 1     | 1      |
| 26494  |       | 2   | No    |        | 2   | No      | 0     |        |
| 26510  |       | 2   | No    |        | 2   | No      | 2     | 1      |
| 26519  |       | 1   | Yes   | 10     | 2   | No      | 0     |        |
| 26525  |       | 2   | No    |        | 2   | No      | 3     | 2      |
| 26529  |       | 2   | No    |        | 2   | No      | 0     |        |
| 26533  |       | 2   | No    |        | 2   | No      | 0     |        |
| 26556  |       | 2   | No    |        | 2   | No      | 0     |        |
| 26559  |       | 2   | No    |        | 2   | No      | 3     | 3      |
| 26565  |       | 2   | No    |        | 2   | No      | 1     | 2      |
| 26576  |       | 2   | No    |        | 2   | No      | 3     | 2      |
| 26601  |       | 1   | Yes   | 6      | 2   | No      | 0     |        |
| 26607  |       | 2   | No    |        | 2   | No      | 0     |        |
| 26611  |       | 2   | No    |        | 2   | No      | 1     | 0      |
| 26619  |       | 2   | No    |        | 2   | No      | 0     |        |
| 26631  |       | 2   | No    |        | 2   | No      | 0     |        |
| 26654  |       | 2   | No    |        | 2   | No      | 0     |        |
| 26656  |       | 2   | No    |        | 2   | No      | 1     | 1      |
| 26664  |       | 2   | No    |        | 2   | No      | 0     |        |
| 26667  |       | 2   | No    |        | 2   | No      | 4     | 2      |

| respid | Q16_2 | Q17 | Smoke | Q17a_1 | Q18 | Alcohol | Q19_1 | Q19a_1 |
|--------|-------|-----|-------|--------|-----|---------|-------|--------|
| 26674  |       | 2   | No    |        | 2   | No      | 2     | 3      |
| 26678  |       | 2   | No    |        | 2   | No      | 1     | 1      |
| 26693  |       | 2   | No    |        | 2   | No      | 0     |        |
| 26696  |       | 2   | No    |        | 1   | Yes     | 5     | 4      |
| 26703  |       | 2   | No    |        | 2   | No      | 3     | 3      |
| 26705  |       | 2   | No    |        | 2   | No      | 0     |        |
| 26706  |       | 2   | No    |        | 2   | No      | 2     | 2      |
| 26716  |       | 2   | No    |        | 2   | No      | 2     | 2      |
| 26721  |       | 1   | Yes   | 3      | 2   | No      | 1     | 1      |
| 26730  |       | 2   | No    |        | 2   | No      | 0     |        |
| 26752  |       | 2   | No    |        | 2   | No      | 0     |        |
| 26755  |       | 2   | No    |        | 1   | Yes     | 0     |        |
| 26791  |       | 2   | No    |        | 2   | No      | 0     |        |
| 26804  |       | 2   | No    |        | 2   | No      | 2     | 2      |
| 26810  |       | 2   | No    |        | 2   | No      | 0     |        |
| 26813  |       | 1   | Yes   | 20     | 2   | No      | 2     | 2      |
| 26833  |       | 2   | No    |        | 2   | No      | 2     | 1      |
| 26880  |       | 2   | No    |        | 2   | No      | 1     | 1      |
| 26884  |       | 2   | No    |        | 2   | No      | 0     |        |
| 26885  |       | 1   | Yes   | 6      | 1   | Yes     | 0     |        |
| 26890  |       | 2   | No    |        | 2   | No      | 3     | 3      |
| 26937  |       | 2   | No    |        | 2   | No      | 2     | 2      |
| 26939  |       | 2   | No    |        | 2   | No      | 2     | 1      |
| 26941  |       | 2   | No    |        | 2   | No      | 0     |        |
| 26992  |       | 2   | No    |        | 2   | No      | 1     | 3      |
| 27037  |       | 2   | No    |        | 2   | No      | 0     |        |
| 27045  |       | 2   | No    |        | 2   | No      | 2     | 2      |
| 27053  |       | 2   | No    |        | 1   | Yes     | 3     | 1      |
| 27060  |       | 2   | No    |        | 2   | No      | 2     | 2      |
| 27076  |       | 2   | No    |        | 1   | Yes     | 1     | 1      |
| 27124  |       | 2   | No    |        | 2   | No      | 1     | 0      |
| 27125  |       | 1   | Yes   | 1      | 2   | No      | 1     | 1      |

| respid | Q16_2 | Q17 | Smoke | Q17a_1 | Q18 | Alcohol | Q19_1 | Q19a_1 |
|--------|-------|-----|-------|--------|-----|---------|-------|--------|
| 27132  |       | 2   | No    |        | 2   | No      | 0     |        |
| 27166  |       | 2   | No    |        | 2   | No      | 0     |        |
| 27190  | 200   | 1   | Yes   | 10     | 2   | No      | 1     | 1      |
| 27199  |       | 1   | Yes   | 10     | 1   | Yes     | 0     |        |
| 27221  |       | 2   | No    |        | 2   | No      | 2     | 2      |
| 27233  |       | 2   | No    |        | 2   | No      | 0     |        |
| 27241  |       | 2   | No    |        | 2   | No      | 0     |        |
| 27244  |       | 2   | No    |        | 1   | Yes     | 0     |        |
| 27245  |       | 2   | No    |        | 2   | No      | 3     | 3      |
| 27246  |       | 2   | No    |        | 2   | No      | 1     | 1      |
| 27253  |       | 2   | No    |        | 2   | No      | 2     | 1      |
| 27255  |       | 2   | No    |        | 2   | No      | 2     | 2      |
| 27267  |       | 2   | No    |        | 2   | No      | 0     |        |
| 27283  |       | 2   | No    |        | 2   | No      | 1     | 1      |
| 27289  |       | 2   | No    |        | 2   | No      | 2     | 2      |
| 27302  |       | 2   | No    |        | 2   | No      | 0     |        |
| 27317  |       | 2   | No    |        | 2   | No      | 0     |        |
| 27319  |       | 2   | No    |        | 2   | No      | 0     |        |
| 27331  |       | 2   | No    |        | 2   | No      | 1     | 1      |
| 27333  |       | 1   | Yes   | 8      | 2   | No      | 0     |        |
| 27340  |       | 2   | No    |        | 2   | No      | 0     |        |
| 27362  |       | 1   | Yes   | 2      | 1   | Yes     | 1     | 2      |
| 27370  |       | 2   | No    |        | 2   | No      | 0     |        |
| 27379  |       | 2   | No    |        | 2   | No      | 1     | 2      |
| 27386  |       | 2   | No    |        | 2   | No      | 0     |        |
| 27398  |       | 2   | No    |        | 2   | No      | 0     |        |
| 27404  |       | 2   | No    |        | 2   | No      | 0     |        |
| 27408  |       | 2   | No    |        | 2   | No      | 0     |        |
| 27412  |       | 2   | No    |        | 2   | No      | 2     | 3      |
| 27426  |       | 2   | No    |        | 2   | No      | 1     | 1      |
| 27455  |       | 2   | No    |        | 2   | No      | 0     |        |
| 27464  |       | 1   | Yes   | 1      | 2   | No      | 3     | 2      |

| respid | Q16_2 | Q17 | Smoke | Q17a_1 | Q18 | Alcohol | Q19_1 | Q19a_1 |
|--------|-------|-----|-------|--------|-----|---------|-------|--------|
| 27484  |       | 1   | Yes   | 5      | 2   | No      | 2     | 2      |
| 27493  |       | 2   | No    |        | 2   | No      | 1     | 3      |
| 27512  |       | 1   | Yes   | 20     | 1   | Yes     | 1     | 2      |
| 27525  |       | 2   | No    |        | 1   | Yes     | 3     | 2      |
| 27532  |       | 2   | No    |        | 2   | No      | 1     | 1      |
| 27539  |       | 2   | No    |        | 2   | No      | 0     |        |
| 27540  |       | 2   | No    |        | 1   | Yes     | 1     | 1      |
| 27552  |       | 1   | Yes   | 10     | 1   | Yes     | 2     | 4      |
| 27562  |       | 2   | No    |        | 2   | No      | 0     |        |
| 27568  |       | 2   | No    |        | 2   | No      | 0     |        |
| 27574  |       | 1   | Yes   | 10     | 1   | Yes     | 3     | 3      |
| 27575  |       | 2   | No    |        | 2   | No      | 0     |        |
| 27577  |       | 2   | No    |        | 1   | Yes     | 1     | 1      |
| 27589  |       | 2   | No    |        | 2   | No      | 0     |        |
| 27593  |       | 2   | No    |        | 2   | No      | 0     |        |
| 27594  |       | 2   | No    |        | 2   | No      | 5     | 2      |
| 27595  |       | 1   | Yes   | 10     | 1   | Yes     | 4     | 3      |
| 27598  |       | 2   | No    |        | 2   | No      | 0     |        |
| 27620  |       | 2   | No    |        | 2   | No      | 0     |        |
| 27621  |       | 2   | No    |        | 1   | Yes     | 2     | 1      |
| 27628  |       | 1   | Yes   | 5      | 1   | Yes     | 1     | 0      |
| 27633  |       | 2   | No    |        | 2   | No      | 1     | 1      |
| 27643  |       | 2   | No    |        | 2   | No      | 0     |        |
| 27644  |       | 2   | No    |        | 2   | No      | 4     | 3      |
| 27668  |       | 2   | No    |        | 2   | No      | 0     |        |
| 27681  |       | 1   | Yes   | 3      | 2   | No      | 2     | 1      |
| 27691  |       | 2   | No    |        | 2   | No      | 0     |        |
| 27693  |       | 2   | No    |        | 2   | No      | 5     | 2      |
| 27703  |       | 2   | No    |        | 2   | No      | 4     | 2      |
| 27708  |       | 2   | No    |        | 2   | No      | 3     | 1      |
| 27719  |       | 2   | No    |        | 2   | No      | 2     | 2      |
| 27720  |       | 2   | No    |        | 2   | No      | 0     |        |



| respid | Q16_2 | Q17 | Smoke | Q17a_1 | Q18 | Alcohol | Q19_1 | Q19a_1 |
|--------|-------|-----|-------|--------|-----|---------|-------|--------|
| 27723  |       | 2   | No    |        | 2   | No      | 0     |        |
| 27725  |       | 2   | No    |        | 2   | No      | 1     | 0      |
| 27734  |       | 2   | No    |        | 2   | No      | 2     | 2      |
| 27744  |       | 2   | No    |        | 1   | Yes     | 1     | 1      |
| 27749  |       | 1   | Yes   | 8      | 2   | No      | 2     | 2      |
| 27762  |       | 2   | No    |        | 2   | No      | 3     | 2      |
| 27808  |       | 2   | No    |        | 1   | Yes     | 2     | 2      |
| 27810  |       | 1   | Yes   | 5      | 1   | Yes     | 4     | 4      |
| 27812  |       | 2   | No    |        | 1   | Yes     | 0     |        |
| 27815  |       | 2   | No    |        | 2   | No      | 0     |        |
| 27818  |       | 2   | No    |        | 2   | No      | 0     |        |
| 27823  |       | 2   | No    |        | 2   | No      | 0     |        |
| 27841  |       | 2   | No    |        | 2   | No      | 2     | 1      |
| 27843  |       | 2   | No    |        | 2   | No      | 0     |        |
| 27851  |       | 2   | No    |        | 2   | No      | 1     | 1      |
| 27858  |       | 2   | No    |        | 2   | No      | 0     |        |
| 27859  |       | 1   | Yes   | 5      | 2   | No      | 0     |        |
| 27869  |       | 2   | No    |        | 2   | No      | 0     |        |
| 27872  |       | 2   | No    |        | 2   | No      | 1     | 1      |
| 27873  |       | 2   | No    |        | 2   | No      | 0     |        |
| 27884  |       | 2   | No    |        | 2   | No      | 1     | 1      |
| 27904  |       | 2   | No    |        | 2   | No      | 2     | 2      |
| 27915  |       | 1   | Yes   | 5      | 1   | Yes     | 0     |        |
| 27918  |       | 2   | No    |        | 2   | No      | 1     | 1      |
| 27937  |       | 2   | No    |        | 2   | No      | 1     | 1      |
| 27943  |       | 2   | No    |        | 2   | No      | 2     | 2      |
| 27948  |       | 2   | No    |        | 2   | No      | 0     |        |
| 27971  |       | 2   | No    |        | 2   | No      | 1     | 2      |
| 27991  |       | 2   | No    |        | 2   | No      | 0     |        |
| 28000  |       | 2   | No    |        | 2   | No      | 0     |        |
| 28011  |       | 2   | No    |        | 2   | No      | 3     | 1      |
| 28022  |       | 2   | No    |        | 2   | No      | 0     |        |

| respid | Q16_2 | Q17 | Smoke | Q17a_1 | Q18 | Alcohol | Q19_1 | Q19a_1 |
|--------|-------|-----|-------|--------|-----|---------|-------|--------|
| 28025  |       | 2   | No    |        | 2   | No      | 0     |        |
| 28041  |       | 1   | Yes   | 12     | 1   | Yes     | 0     |        |
| 28057  |       | 2   | No    |        | 2   | No      | 3     | 3      |
| 28080  |       | 2   | No    |        | 2   | No      | 0     |        |
| 28098  |       | 2   | No    |        | 2   | No      | 1     | 0      |
| 28104  |       | 2   | No    |        | 2   | No      | 4     | 3      |
| 28109  |       | 1   | Yes   | 10     | 2   | No      | 3     | 2      |
| 28129  |       | 2   | No    |        | 2   | No      | 0     |        |
| 28141  |       | 2   | No    |        | 2   | No      | 0     |        |
| 28143  |       | 1   | Yes   | 5      | 2   | No      | 0     |        |
| 28149  |       | 2   | No    |        | 2   | No      | 1     | 1      |
| 28151  |       | 2   | No    |        | 2   | No      | 0     |        |
| 28161  |       | 1   | Yes   | 10     | 1   | Yes     | 3     | 3      |
| 28169  |       | 2   | No    |        | 2   | No      | 2     | 1      |
| 28194  |       | 1   | Yes   | 18     | 2   | No      | 1     | 2      |
| 28197  |       | 2   | No    |        | 2   | No      | 0     |        |
| 28206  |       | 2   | No    |        | 2   | No      | 1     | 0      |
| 28218  |       | 2   | No    |        | 1   | Yes     | 1     | 2      |
| 28227  |       | 1   | Yes   | 15     | 1   | Yes     | 0     |        |
| 28235  |       | 2   | No    |        | 2   | No      | 0     |        |
| 28246  |       | 2   | No    |        | 1   | Yes     | 1     | 1      |
| 28259  |       | 2   | No    |        | 2   | No      | 4     | 3      |
| 28263  |       | 2   | No    |        | 2   | No      | 0     |        |
| 28267  |       | 1   | Yes   | 2      | 1   | Yes     | 1     | 1      |
| 28274  |       | 1   | Yes   | 30     | 1   | Yes     | 2     | 0      |
| 28278  |       | 2   | No    |        | 2   | No      | 0     |        |
| 28288  |       | 2   | No    |        | 2   | No      | 0     |        |
| 28308  |       | 2   | No    |        | 2   | No      | 0     |        |
| 28309  |       | 2   | No    |        | 2   | No      | 2     | 2      |
| 28323  |       | 2   | No    |        | 2   | No      | 1     | 2      |
| 28335  |       | 2   | No    |        | 2   | No      | 2     | 2      |
| 28354  |       | 2   | No    |        | 2   | No      | 2     | 2      |

| respid | Q16_2 | Q17 | Smoke | Q17a_1 | Q18 | Alcohol | Q19_1 | Q19a_1 |
|--------|-------|-----|-------|--------|-----|---------|-------|--------|
| 28355  |       | 1   | Yes   | 15     | 1   | Yes     | 2     | 2      |
| 28356  |       | 2   | No    |        | 1   | Yes     | 3     | 2      |
| 28357  |       | 1   | Yes   | 3      | 2   | No      | 1     | 2      |
| 28363  |       | 2   | No    |        | 2   | No      | 0     |        |
| 28366  |       | 2   | No    |        | 2   | No      | 0     |        |
| 28372  |       | 2   | No    |        | 2   | No      | 1     | 2      |
| 28381  |       | 2   | No    |        | 1   | Yes     | 1     | 1      |
| 28388  |       | 2   | No    |        | 2   | No      | 4     | 2      |
| 28413  |       | 2   | No    |        | 2   | No      | 2     | 3      |
| 28421  |       | 2   | No    |        | 2   | No      | 0     |        |
| 28430  |       | 2   | No    |        | 2   | No      | 2     | 2      |
| 28439  |       | 2   | No    |        | 2   | No      | 2     | 3      |
| 28458  |       | 1   | Yes   | 3      | 1   | Yes     | 4     | 3      |
| 28461  |       | 2   | No    |        | 2   | No      | 0     |        |
| 28466  |       | 1   | Yes   | 12     | 1   | Yes     | 3     | 2      |
| 28492  |       | 1   | Yes   | 20     | 2   | No      | 0     |        |
| 28534  |       | 2   | No    |        | 2   | No      | 0     |        |
| 28537  |       | 2   | No    |        | 2   | No      | 2     | 2      |
| 28560  |       | 2   | No    |        | 2   | No      | 0     |        |
| 28566  |       | 2   | No    |        | 2   | No      | 0     |        |
| 28569  |       | 1   | Yes   | 10     | 1   | Yes     | 1     | 0      |
| 28584  |       | 2   | No    |        | 2   | No      | 3     | 3      |
| 28590  |       | 2   | No    |        | 2   | No      | 2     | 2      |
| 28596  |       | 2   | No    |        | 2   | No      | 0     |        |
| 28608  |       | 1   | Yes   | 8      | 1   | Yes     | 0     |        |
| 28631  |       | 2   | No    |        | 2   | No      | 2     | 1      |
| 28644  |       | 2   | No    |        | 2   | No      | 2     | 1      |
| 28646  |       | 2   | No    |        | 2   | No      | 0     |        |
| 28665  |       | 1   | Yes   | 4      | 2   | No      | 0     |        |
| 28686  |       | 1   | Yes   | 20     | 1   | Yes     | 0     |        |
| 28704  |       | 2   | No    |        | 2   | No      | 2     | 1      |
| 28719  |       | 2   | No    |        | 2   | No      | 2     | 1      |

| respid | Q16_2 | Q17 | Smoke | Q17a_1 | Q18 | Alcohol | Q19_1 | Q19a_1 |
|--------|-------|-----|-------|--------|-----|---------|-------|--------|
| 28736  |       | 1   | Yes   | 6      | 1   | Yes     | 3     | 2      |
| 28739  |       | 2   | No    |        | 2   | No      | 2     | 1      |
| 28758  |       | 2   | No    |        | 2   | No      | 5     | 3      |
| 28761  |       | 2   | No    |        | 2   | No      | 2     | 1      |
| 28770  |       | 1   | Yes   | 3      | 1   | Yes     | 4     | 3      |
| 28774  |       | 2   | No    |        | 2   | No      | 0     |        |
| 28778  |       | 2   | No    |        | 1   | Yes     | 3     | 3      |
| 28783  |       | 2   | No    |        | 1   | Yes     | 1     | 2      |
| 28785  |       | 2   | No    |        | 2   | No      | 1     | 0      |
| 28797  |       | 2   | No    |        | 2   | No      | 4     | 2      |
| 28801  |       | 1   | Yes   | 10     | 1   | Yes     | 0     |        |
| 28821  |       | 2   | No    |        | 2   | No      | 0     |        |
| 28827  |       | 1   | Yes   | 6      | 1   | Yes     | 3     | 2      |
| 28828  |       | 2   | No    |        | 2   | No      | 2     | 1      |
| 28871  |       | 2   | No    |        | 2   | No      | 1     | 0      |
| 28876  |       | 1   | Yes   | 8      | 1   | Yes     | 0     |        |
| 28891  |       | 2   | No    |        | 1   | Yes     | 0     |        |
| 28898  |       | 2   | No    |        | 2   | No      | 0     |        |
| 28909  |       | 2   | No    |        | 2   | No      | 4     | 0      |
| 28930  |       | 2   | No    |        | 2   | No      | 2     | 0      |
| 28935  |       | 2   | No    |        | 2   | No      | 5     | 2      |
| 28964  |       | 1   | Yes   | 7      | 2   | No      | 0     |        |
| 28965  |       | 1   | Yes   | 6      | 1   | Yes     | 0     |        |
| 28967  |       | 2   | No    |        | 1   | Yes     | 4     | 3      |
| 28975  |       | 2   | No    |        | 2   | No      | 0     |        |
| 28982  |       | 1   | Yes   | 11     | 1   | Yes     | 0     |        |
| 28989  |       | 1   | Yes   | 7      | 1   | Yes     | 1     | 1      |
| 29003  |       | 1   | Yes   | 10     | 2   | No      | 1     | 1      |
| 29004  |       | 2   | No    |        | 2   | No      | 1     | 1      |
| 29007  |       | 2   | No    |        | 2   | No      | 1     | 1      |
| 29008  |       | 1   | Yes   | 1      | 2   | No      | 0     |        |
| 29011  |       | 2   | No    |        | 2   | No      | 2     | 2      |

| respid | Q16_2 | Q17 | Smoke | Q17a_1 | Q18 | Alcohol | Q19_1 | Q19a_1 |
|--------|-------|-----|-------|--------|-----|---------|-------|--------|
| 29012  |       | 2   | No    |        | 2   | No      | 0     |        |
| 29014  |       | 2   | No    |        | 2   | No      | 0     |        |
| 29016  |       | 2   | No    |        | 2   | No      | 0     |        |
| 29018  |       | 2   | No    |        | 2   | No      | 4     | 2      |
| 29048  |       | 2   | No    |        | 2   | No      | 1     | 2      |
| 29184  |       | 2   | No    |        | 2   | No      | 0     |        |
| 29237  |       | 2   | No    |        | 2   | No      | 0     |        |
| 29252  |       | 1   | Yes   | 10     | 2   | No      | 0     |        |
| 29267  |       | 1   | Yes   | 15     | 2   | No      | 0     |        |
| 29276  |       | 2   | No    |        | 2   | No      | 0     |        |
| 29281  |       | 2   | No    |        | 2   | No      | 5     | 4      |
| 29285  |       | 1   | Yes   | 5      | 1   | Yes     | 0     |        |
| 29291  |       | 1   | Yes   | 10     | 1   | Yes     | 4     | 4      |
| 29304  |       | 1   | Yes   | 8      | 1   | Yes     | 2     | 2      |
| 29323  |       | 2   | No    |        | 2   | No      | 0     |        |
| 29330  |       | 1   | Yes   | 5      | 2   | No      | 1     | 1      |
| 29357  |       | 1   | Yes   | 8      | 2   | No      | 1     | 4      |
| 29416  |       | 1   | Yes   | 5      | 1   | Yes     | 0     |        |
| 29432  |       | 1   | Yes   | 10     | 1   | Yes     | 0     |        |
| 29482  |       | 2   | No    |        | 2   | No      | 2     | 1      |
| 29506  |       | 2   | No    |        | 2   | No      | 2     | 2      |
| 29509  |       | 2   | No    |        | 2   | No      | 3     | 2      |
| 29512  |       | 2   | No    |        | 2   | No      | 2     | 1      |
| 29519  |       | 2   | No    |        | 2   | No      | 1     | 1      |
| 29520  |       | 2   | No    |        | 2   | No      | 0     |        |
| 29521  |       | 2   | No    |        | 2   | No      | 2     | 1      |
| 29529  |       | 2   | No    |        | 2   | No      | 3     | 3      |
| 29532  |       | 2   | No    |        | 2   | No      | 0     |        |
| 29547  |       | 2   | No    |        | 2   | No      | 0     |        |
| 29551  |       | 2   | No    |        | 2   | No      | 0     |        |
| 29584  |       | 2   | No    |        | 1   | Yes     | 3     | 3      |
| 29591  |       | 2   | No    |        | 2   | No      | 3     | 2      |

| respid | Q16_2 | Q17 | Smoke | Q17a_1 | Q18 | Alcohol | Q19_1 | Q19a_1 |
|--------|-------|-----|-------|--------|-----|---------|-------|--------|
| 29613  |       | 2   | No    |        | 2   | No      | 1     | 1      |
| 29615  |       | 2   | No    |        | 2   | No      | 2     | 2      |
| 29625  |       | 2   | No    |        | 1   | Yes     | 2     | 3      |
| 29660  |       | 2   | No    |        | 2   | No      | 2     | 0      |
| 29677  |       | 2   | No    |        | 2   | No      | 0     |        |
| 29700  |       | 1   | Yes   | 10     | 2   | No      | 0     |        |
| 29715  |       | 2   | No    |        | 2   | No      | 5     | 4      |
| 29720  |       | 2   | No    |        | 2   | No      | 0     |        |
| 29730  |       | 2   | No    |        | 2   | No      | 0     |        |
| 29734  |       | 2   | No    |        | 2   | No      | 1     | 1      |
| 29754  |       | 2   | No    |        | 2   | No      | 0     |        |
| 29771  |       | 2   | No    |        | 2   | No      | 0     |        |
| 29774  |       | 2   | No    |        | 2   | No      | 1     | 1      |
| 29783  |       | 2   | No    |        | 1   | Yes     | 0     |        |
| 29812  |       | 2   | No    |        | 2   | No      | 2     | 1      |
| 29813  |       | 2   | No    |        | 2   | No      | 0     |        |
| 29814  |       | 2   | No    |        | 2   | No      | 1     | 2      |
| 29820  |       | 2   | No    |        | 2   | No      | 1     | 1      |
| 29906  |       | 2   | No    |        | 2   | No      | 2     | 1      |
| 29907  |       | 2   | No    |        | 2   | No      | 1     | 0      |
| 29928  |       | 2   | No    |        | 2   | No      | 0     |        |
| 29932  |       | 2   | No    |        | 2   | No      | 2     | 2      |
| 29958  |       | 2   | No    |        | 2   | No      | 3     | 2      |
| 29982  |       | 2   | No    |        | 2   | No      | 1     | 1      |
| 29989  |       | 2   | No    |        | 2   | No      | 2     | 1      |
| 29994  |       | 2   | No    |        | 2   | No      | 1     | 1      |
| 30005  |       | 2   | No    |        | 2   | No      | 5     | 3      |
| 30077  |       | 1   | Yes   | 10     | 2   | No      | 2     | 1      |
| 30098  |       | 2   | No    |        | 2   | No      | 0     |        |
| 30107  |       | 2   | No    |        | 2   | No      | 0     |        |
| 30154  |       | 2   | No    |        | 1   | Yes     | 0     |        |
| 30159  |       | 2   | No    |        | 2   | No      | 1     | 0      |

| respid | Q16_2 | Q17 | Smoke | Q17a_1 | Q18 | Alcohol | Q19_1 | Q19a_1 |
|--------|-------|-----|-------|--------|-----|---------|-------|--------|
| 30162  |       | 2   | No    |        | 2   | No      | 1     | 1      |
| 30163  |       | 2   | No    |        | 2   | No      | 0     |        |
| 30189  |       | 2   | No    |        | 2   | No      | 1     | 1      |
| 30230  |       | 2   | No    |        | 2   | No      | 0     |        |
| 30259  |       | 1   | Yes   | 10     | 2   | No      | 2     | 2      |
| 30284  |       | 2   | No    |        | 2   | No      | 1     | 1      |
| 30296  |       | 2   | No    |        | 2   | No      | 0     |        |
| 30330  |       | 1   | Yes   | 10     | 2   | No      | 2     | 1      |
| 30341  |       | 2   | No    |        | 2   | No      | 2     | 2      |
| 30352  |       | 1   | Yes   | 10     | 1   | Yes     | 3     | 1      |
| 30379  |       | 2   | No    |        | 2   | No      | 2     | 2      |
| 30424  |       | 2   | No    |        | 2   | No      | 1     | 1      |
| 30447  |       | 2   | No    |        | 2   | No      | 0     |        |
| 30477  |       | 1   | Yes   | 8      | 1   | Yes     | 3     | 2      |
| 30503  |       | 2   | No    |        | 2   | No      | 2     | 1      |
| 30515  |       | 1   | Yes   | 1      | 2   | No      | 5     | 3      |
| 30516  |       | 2   | No    |        | 2   | No      | 0     |        |
| 30623  |       | 1   | Yes   | 8      | 1   | Yes     | 2     | 1      |
| 30639  |       | 2   | No    |        | 2   | No      | 0     |        |
| 30670  |       | 1   | Yes   | 10     | 2   | No      | 1     | 2      |
| 30697  |       | 2   | No    |        | 2   | No      | 0     |        |
| 30735  |       | 2   | No    |        | 2   | No      | 1     | 1      |
| 30742  |       | 1   | Yes   | 15     | 1   | Yes     | 1     | 1      |
| 30751  |       | 2   | No    |        | 2   | No      | 4     | 4      |
| 30789  |       | 2   | No    |        | 2   | No      | 0     |        |
| 30867  |       | 1   | Yes   | 2      | 2   | No      | 2     | 3      |
| 30876  |       | 1   | Yes   | 5      | 2   | No      | 0     |        |
| 30877  |       | 2   | No    |        | 2   | No      | 3     | 0      |
| 30887  |       | 2   | No    |        | 2   | No      | 2     | 2      |
| 30891  |       | 1   | Yes   | 6      | 1   | Yes     | 2     | 1      |
| 31030  |       | 2   | No    |        | 2   | No      | 0     |        |
| 31059  |       | 2   | No    |        | 2   | No      | 3     | 2      |

| respid | Q16_2 | Q17 | Smoke | Q17a_1 | Q18 | Alcohol | Q19_1 | Q19a_1 |
|--------|-------|-----|-------|--------|-----|---------|-------|--------|
| 31082  |       | 2   | No    |        | 2   | No      | 0     |        |
| 31106  |       | 2   | No    |        | 2   | No      | 0     |        |
| 31110  |       | 2   | No    |        | 2   | No      | 0     |        |
| 31265  |       | 2   | No    |        | 2   | No      | 3     | 4      |
| 31266  |       | 2   | No    |        | 2   | No      | 3     | 4      |
| 31267  |       | 2   | No    |        | 2   | No      | 3     | 4      |
| 31310  |       | 2   | No    |        | 2   | No      | 1     | 0      |
| 31325  |       | 1   | Yes   | 1      | 2   | No      | 0     |        |
| 31367  |       | 2   | No    |        | 2   | No      | 2     | 1      |
| 31389  |       | 2   | No    |        | 2   | No      | 0     |        |
| 31440  |       | 2   | No    |        | 2   | No      | 0     |        |
| 31465  |       | 2   | No    |        | 2   | No      | 3     | 1      |
| 31477  |       | 2   | No    |        | 2   | No      | 0     |        |
| 31491  |       | 2   | No    |        | 2   | No      | 1     | 1      |
| 31494  |       | 2   | No    |        | 2   | No      | 3     | 2      |
| 31509  |       | 1   | Yes   | 20     | 2   | No      | 4     | 4      |
| 31533  |       | 1   | Yes   | 15     | 2   | No      | 0     |        |
| 31547  |       | 2   | No    |        | 2   | No      | 0     |        |
| 31558  |       | 2   | No    |        | 2   | No      | 0     |        |
| 31579  |       | 1   | Yes   | 10     | 1   | Yes     | 0     |        |
| 31591  |       | 2   | No    |        | 2   | No      | 1     | 2      |
| 31596  |       | 2   | No    |        | 2   | No      | 2     | 2      |
| 31601  |       | 1   | Yes   | 10     | 1   | Yes     | 3     | 3      |
| 31605  |       | 2   | No    |        | 2   | No      | 1     | 1      |
| 31637  |       | 2   | No    |        | 2   | No      | 0     |        |
| 31646  |       | 2   | No    |        | 2   | No      | 0     |        |
| 31647  |       | 2   | No    |        | 2   | No      | 2     | 1      |
| 31650  |       | 2   | No    |        | 2   | No      | 0     |        |
| 31651  |       | 1   | Yes   | 3      | 2   | No      | 4     | 2      |
| 31657  |       | 1   | Yes   | 10     | 2   | No      | 1     | 1      |
| 31660  |       | 2   | No    |        | 2   | No      | 0     |        |
| 31661  |       | 1   | Yes   | 6      | 2   | No      | 3     | 2      |



| respid | Q16_2 | Q17 | Smoke | Q17a_1 | Q18 | Alcohol | Q19_1 | Q19a_1 |
|--------|-------|-----|-------|--------|-----|---------|-------|--------|
| 31667  |       | 1   | Yes   | 5      | 2   | No      | 3     | 1      |
| 31674  |       | 2   | No    |        | 1   | Yes     | 2     | 1      |
| 31686  |       | 2   | No    |        | 2   | No      | 2     | 2      |
| 31693  |       | 2   | No    |        | 1   | Yes     | 0     |        |
| 31716  |       | 2   | No    |        | 1   | Yes     | 0     |        |
| 31818  |       | 2   | No    |        | 1   | Yes     | 0     |        |
| 31886  |       | 1   | Yes   | 15     | 1   | Yes     | 1     | 0      |
| 31945  |       | 1   | Yes   | 6      | 1   | Yes     | 3     | 3      |
| 31957  |       | 2   | No    |        | 2   | No      | 5     | 2      |
| 31966  |       | 2   | No    |        | 1   | Yes     | 1     | 1      |
| 31978  |       | 2   | No    |        | 2   | No      | 1     | 1      |
| 31999  |       | 2   | No    |        | 2   | No      | 0     |        |
| 32026  |       | 2   | No    |        | 2   | No      | 1     | 1      |
| 32033  |       | 2   | No    |        | 2   | No      | 0     |        |
| 32037  |       | 2   | No    |        | 2   | No      | 3     | 4      |
| 32038  |       | 2   | No    |        | 2   | No      | 3     | 4      |
| 32047  |       | 2   | No    |        | 2   | No      | 1     | 2      |
| 32053  |       | 2   | No    |        | 2   | No      | 0     |        |
| 32069  |       | 2   | No    |        | 2   | No      | 3     | 0      |
| 32081  |       | 2   | No    |        | 2   | No      | 2     | 2      |
| 32123  |       | 2   | No    |        | 2   | No      | 0     |        |
| 32130  |       | 2   | No    |        | 2   | No      | 1     | 1      |
| 32141  |       | 1   | Yes   | 10     | 2   | No      | 1     | 1      |
| 32158  |       | 2   | No    |        | 2   | No      | 0     |        |
| 32165  |       | 1   | Yes   | 40     | 1   | Yes     | 0     |        |
| 32180  |       | 2   | No    |        | 2   | No      | 0     |        |
| 32221  |       | 2   | No    |        | 2   | No      | 0     |        |
| 32292  |       | 2   | No    |        | 2   | No      | 0     |        |
| 32318  |       | 2   | No    |        | 2   | No      | 1     | 1      |
| 32346  |       | 2   | No    |        | 2   | No      | 0     |        |
| 32402  |       | 2   | No    |        | 1   | Yes     | 2     | 2      |
| 32422  |       | 2   | No    |        | 2   | No      | 0     |        |

| respid | Q16_2 | Q17 | Smoke | Q17a_1 | Q18 | Alcohol | Q19_1 | Q19a_1 |
|--------|-------|-----|-------|--------|-----|---------|-------|--------|
| 32439  |       | 2   | No    |        | 2   | No      | 0     |        |
| 32507  |       | 2   | No    |        | 2   | No      | 1     | 2      |
| 32522  |       | 2   | No    |        | 2   | No      | 0     |        |
| 32535  |       | 2   | No    |        | 2   | No      | 0     |        |
| 32546  |       | 2   | No    |        | 2   | No      | 0     |        |
| 32553  |       | 2   | No    |        | 2   | No      | 0     |        |
| 32570  |       | 2   | No    |        | 2   | No      | 0     |        |
| 32592  |       | 1   | Yes   | 5      | 2   | No      | 1     | 1      |
| 32605  |       | 2   | No    |        | 2   | No      | 2     | 2      |
| 32630  |       | 1   | Yes   | 5      | 1   | Yes     | 2     | 3      |
| 32642  |       | 1   | Yes   | 10     | 2   | No      | 1     | 2      |
| 32646  |       | 2   | No    |        | 2   | No      | 0     |        |
| 32665  |       | 2   | No    |        | 2   | No      | 3     | 2      |
| 32677  |       | 2   | No    |        | 2   | No      | 0     |        |
| 32694  |       | 2   | No    |        | 2   | No      | 0     |        |
| 32698  |       | 2   | No    |        | 2   | No      | 3     | 2      |
| 32754  |       | 2   | No    |        | 2   | No      | 3     | 3      |
| 32799  |       | 2   | No    |        | 1   | Yes     | 2     | 2      |
| 32816  |       | 2   | No    |        | 2   | No      | 0     |        |
| 32819  |       | 2   | No    |        | 2   | No      | 1     | 2      |
| 32840  |       | 2   | No    |        | 2   | No      | 0     |        |
| 32861  |       | 1   | Yes   | 5      | 1   | Yes     | 2     | 2      |
| 32866  |       | 2   | No    |        | 2   | No      | 0     |        |
| 32889  |       | 2   | No    |        | 2   | No      | 5     | 3      |
| 32960  |       | 2   | No    |        | 1   | Yes     | 1     | 0      |
| 32965  |       | 2   | No    |        | 2   | No      | 1     | 1      |
| 32986  |       | 2   | No    |        | 2   | No      | 1     | 2      |
| 33005  |       | 2   | No    |        | 2   | No      | 0     |        |
| 33054  |       | 2   | No    |        | 2   | No      | 3     | 3      |
| 33072  |       | 1   | Yes   | 10     | 1   | Yes     | 0     |        |
| 33095  |       | 2   | No    |        | 2   | No      | 1     | 1      |
| 33099  |       | 1   | Yes   | 2      | 2   | No      | 1     | 1      |

| respid | Q16_2 | Q17 | Smoke | Q17a_1 | Q18 | Alcohol | Q19_1 | Q19a_1 |
|--------|-------|-----|-------|--------|-----|---------|-------|--------|
| 33121  |       | 2   | No    |        | 1   | Yes     | 0     |        |
| 33152  |       | 2   | No    |        | 2   | No      | 1     | 1      |
| 33159  |       | 1   | Yes   | 5      | 1   | Yes     | 0     |        |
| 33189  |       | 2   | No    |        | 2   | No      | 0     |        |
| 33198  |       | 2   | No    |        | 2   | No      | 1     | 2      |
| 33202  |       | 1   | Yes   | 10     | 1   | Yes     | 2     | 2      |
| 33204  |       | 2   | No    |        | 2   | No      | 0     |        |
| 33224  |       | 2   | No    |        | 2   | No      | 0     |        |
| 33272  |       | 2   | No    |        | 2   | No      | 0     |        |
| 33294  |       | 2   | No    |        | 2   | No      | 0     |        |
| 33300  |       | 2   | No    |        | 2   | No      | 1     | 1      |
| 33314  |       | 2   | No    |        | 2   | No      | 1     | 1      |
| 33338  |       | 2   | No    |        | 2   | No      | 0     |        |
| 33350  |       | 1   | Yes   | 10     | 2   | No      | 4     | 3      |
| 33362  |       | 2   | No    |        | 2   | No      | 3     | 2      |
| 33368  |       | 2   | No    |        | 2   | No      | 0     |        |
| 33374  |       | 1   | Yes   | 3      | 2   | No      | 3     | 2      |
| 33380  |       | 1   | Yes   | 12     | 1   | Yes     | 2     | 2      |
| 33385  |       | 2   | No    |        | 2   | No      | 3     | 2      |
| 33402  |       | 1   | Yes   | 20     | 1   | Yes     | 2     | 1      |
| 33414  |       | 2   | No    |        | 2   | No      | 4     | 2      |
| 33439  |       | 1   | Yes   | 18     | 2   | No      | 2     | 1      |
| 33449  |       | 1   | Yes   | 10     | 2   | No      | 3     | 2      |
| 33533  |       | 2   | No    |        | 1   | Yes     | 1     | 1      |
| 33540  |       | 2   | No    |        | 2   | No      | 0     |        |
| 33556  |       | 2   | No    |        | 2   | No      | 1     | 1      |
| 33615  |       | 2   | No    |        | 2   | No      | 0     |        |
| 33694  |       | 1   | Yes   | 3      | 1   | Yes     | 3     | 3      |
| 33717  |       | 1   | Yes   | 20     | 2   | No      | 0     |        |
| 33729  |       | 2   | No    |        | 1   | Yes     | 1     | 0      |
| 33746  |       | 2   | No    |        | 2   | No      | 1     | 2      |
| 33764  |       | 2   | No    |        | 2   | No      | 0     |        |

| respid | Q16_2 | Q17 | Smoke | Q17a_1 | Q18 | Alcohol | Q19_1 | Q19a_1 |
|--------|-------|-----|-------|--------|-----|---------|-------|--------|
| 33790  |       | 2   | No    |        | 2   | No      | 1     | 1      |
| 33868  |       | 1   | Yes   | 10     | 1   | Yes     | 1     | 1      |
| 33872  |       | 1   | Yes   | 12     | 2   | No      | 1     | 2      |
| 33883  |       | 2   | No    |        | 2   | No      | 0     |        |
| 33884  |       | 2   | No    |        | 2   | No      | 0     |        |
| 33900  |       | 2   | No    |        | 2   | No      | 1     | 1      |
| 33933  |       | 2   | No    |        | 2   | No      | 0     |        |
| 33949  |       | 2   | No    |        | 2   | No      | 1     | 0      |
| 34005  |       | 1   | Yes   | 5      | 2   | No      | 0     |        |
| 34016  |       | 2   | No    |        | 2   | No      | 0     |        |
| 34041  |       | 1   | Yes   | 18     | 2   | No      | 3     | 3      |
| 34053  |       | 2   | No    |        | 2   | No      | 1     | 1      |
| 34056  |       | 2   | No    |        | 2   | No      | 0     |        |
| 34093  |       | 1   | Yes   | 3      | 2   | No      | 1     | 1      |
| 34112  |       | 2   | No    |        | 2   | No      | 1     | 1      |
| 34136  |       | 1   | Yes   | 20     | 1   | Yes     | 4     | 2      |
| 34138  |       | 2   | No    |        | 2   | No      | 0     |        |
| 34139  |       | 2   | No    |        | 1   | Yes     | 1     | 2      |
| 34189  |       | 2   | No    |        | 1   | Yes     | 0     |        |
| 34239  |       | 2   | No    |        | 2   | No      | 1     | 1      |
| 34240  |       | 2   | No    |        | 2   | No      | 1     | 2      |
| 34241  |       | 2   | No    |        | 2   | No      | 1     | 1      |
| 34259  |       | 2   | No    |        | 2   | No      | 3     | 2      |
| 34303  |       | 1   | Yes   | 4      | 2   | No      | 2     | 1      |
| 34306  |       | 2   | No    |        | 2   | No      | 0     |        |
| 34395  |       | 1   | Yes   | 10     | 2   | No      | 3     | 2      |
| 34463  |       | 2   | No    |        | 2   | No      | 2     | 2      |
| 34466  |       | 1   | Yes   | 2      | 2   | No      | 3     | 2      |
| 34471  |       | 2   | No    |        | 2   | No      | 0     |        |
| 34489  |       | 1   | Yes   | 2      | 2   | No      | 1     | 2      |
| 34518  |       | 2   | No    |        | 2   | No      | 3     | 1      |
| 34542  |       | 2   | No    |        | 2   | No      | 2     | 2      |

| respid | Q16_2 | Q17 | Smoke | Q17a_1 | Q18 | Alcohol | Q19_1 | Q19a_1 |
|--------|-------|-----|-------|--------|-----|---------|-------|--------|
| 34595  |       | 2   | No    |        | 2   | No      | 0     |        |
| 34604  |       | 2   | No    |        | 2   | No      | 0     |        |
| 34631  |       | 2   | No    |        | 2   | No      | 2     | 2      |
| 34665  |       | 2   | No    |        | 2   | No      | 0     |        |
| 34716  |       | 2   | No    |        | 2   | No      | 0     |        |
| 34729  |       | 2   | No    |        | 1   | Yes     | 1     | 1      |
| 34772  |       | 2   | No    |        | 2   | No      | 1     | 2      |
| 34800  |       | 2   | No    |        | 2   | No      | 3     | 2      |
| 34819  |       | 2   | No    |        | 2   | No      | 0     |        |
| 34829  |       | 2   | No    |        | 2   | No      | 2     | 2      |
| 34831  |       | 2   | No    |        | 2   | No      | 1     | 1      |
| 34839  |       | 2   | No    |        | 2   | No      | 0     |        |
| 34868  |       | 2   | No    |        | 2   | No      | 2     | 1      |
| 34869  |       | 2   | No    |        | 2   | No      | 0     |        |
| 34882  |       | 1   | Yes   | 10     | 2   | No      | 0     |        |
| 34895  |       | 1   | Yes   | 4      | 1   | Yes     | 2     | 1      |
| 34901  |       | 2   | No    |        | 2   | No      | 2     | 2      |
| 34904  |       | 2   | No    |        | 2   | No      | 2     | 2      |
| 34907  |       | 2   | No    |        | 2   | No      | 2     | 2      |
| 34914  |       | 2   | No    |        | 1   | Yes     | 0     |        |
| 34918  |       | 1   | Yes   | 4      | 2   | No      | 3     | 2      |
| 34924  |       | 2   | No    |        | 2   | No      | 1     | 0      |
| 34933  |       | 2   | No    |        | 2   | No      | 2     | 2      |
| 34938  |       | 1   | Yes   | 20     | 2   | No      | 1     | 1      |
| 34952  |       | 1   | Yes   | 3      | 2   | No      | 3     | 2      |
| 34959  |       | 1   | Yes   | 15     | 2   | No      | 1     | 1      |
| 34972  |       | 2   | No    |        | 2   | No      | 0     |        |
| 34973  |       | 2   | No    |        | 2   | No      | 2     | 2      |
| 34975  |       | 2   | No    |        | 2   | No      | 3     | 3      |
| 34977  |       | 2   | No    |        | 2   | No      | 2     | 2      |
| 34978  |       | 2   | No    |        | 2   | No      | 0     |        |
| 34980  |       | 1   | Yes   | 10     | 1   | Yes     | 0     |        |

| respid | Q16_2 | Q17 | Smoke | Q17a_1 | Q18 | Alcohol | Q19_1 | Q19a_1 |
|--------|-------|-----|-------|--------|-----|---------|-------|--------|
| 34984  |       | 2   | No    |        | 1   | Yes     | 1     | 1      |
| 34986  |       | 2   | No    |        | 2   | No      | 1     | 3      |
| 34994  |       | 2   | No    |        | 2   | No      | 0     |        |
| 34996  |       | 2   | No    |        | 1   | Yes     | 0     |        |
| 35003  |       | 1   | Yes   | 10     | 2   | No      | 0     |        |
| 35014  |       | 2   | No    |        | 2   | No      | 0     |        |
| 35029  |       | 1   | Yes   | 7      | 2   | No      | 2     | 0      |
| 35030  |       | 2   | No    |        | 2   | No      | 3     | 2      |
| 35037  |       | 2   | No    |        | 2   | No      | 0     |        |
| 35043  |       | 2   | No    |        | 2   | No      | 0     |        |
| 35048  |       | 1   | Yes   | 10     | 2   | No      | 0     |        |
| 35055  |       | 2   | No    |        | 2   | No      | 0     |        |
| 35067  |       | 2   | No    |        | 2   | No      | 2     | 2      |
| 35072  |       | 2   | No    |        | 2   | No      | 1     | 0      |
| 35078  |       | 2   | No    |        | 2   | No      | 1     | 1      |
| 35084  |       | 1   | Yes   | 13     | 2   | No      | 0     |        |
| 35095  |       | 2   | No    |        | 2   | No      | 0     |        |
| 35096  |       | 2   | No    |        | 2   | No      | 0     |        |
| 35097  |       | 1   | Yes   | 5      | 1   | Yes     | 3     | 2      |
| 35098  |       | 2   | No    |        | 2   | No      | 2     | 2      |
| 35109  |       | 1   | Yes   | 50     | 1   | Yes     | 4     | 3      |
| 35114  |       | 2   | No    |        | 2   | No      | 0     |        |
| 35115  |       | 2   | No    |        | 2   | No      | 0     |        |
| 35124  |       | 2   | No    |        | 2   | No      | 3     | 2      |
| 35125  |       | 1   | Yes   | 15     | 2   | No      | 0     |        |
| 35141  |       | 2   | No    |        | 2   | No      | 0     |        |
| 35142  |       | 2   | No    |        | 2   | No      | 0     |        |
| 35145  |       | 2   | No    |        | 2   | No      | 0     |        |
| 35149  |       | 2   | No    |        | 2   | No      | 1     | 2      |
| 35159  |       | 2   | No    |        | 2   | No      | 0     |        |
| 35163  |       | 2   | No    |        | 2   | No      | 1     | 1      |
| 35174  |       | 2   | No    |        | 2   | No      | 0     |        |

| respid | Q16_2 | Q17 | Smoke | Q17a_1 | Q18 | Alcohol | Q19_1 | Q19a_1 |
|--------|-------|-----|-------|--------|-----|---------|-------|--------|
| 35188  |       | 2   | No    |        | 2   | No      | 0     |        |
| 35189  |       | 2   | No    |        | 2   | No      | 0     |        |
| 35201  |       | 2   | No    |        | 2   | No      | 2     | 2      |
| 35215  |       | 2   | No    |        | 2   | No      | 0     |        |
| 35228  |       | 2   | No    |        | 2   | No      | 0     |        |
| 35235  |       | 2   | No    |        | 2   | No      | 0     |        |
| 35239  |       | 1   | Yes   | 10     | 1   | Yes     | 3     | 3      |
| 35243  |       | 2   | No    |        | 1   | Yes     | 1     | 2      |
| 35245  |       | 1   | Yes   | 40     | 2   | No      | 2     | 2      |
| 35259  |       | 2   | No    |        | 2   | No      | 0     |        |
| 35265  |       | 2   | No    |        | 2   | No      | 4     | 4      |
| 35272  |       | 2   | No    |        | 2   | No      | 0     |        |
| 35280  |       | 2   | No    |        | 2   | No      | 1     | 1      |
| 35298  |       | 1   | Yes   | 6      | 2   | No      | 0     |        |
| 35305  |       | 2   | No    |        | 2   | No      | 1     | 1      |
| 35306  |       | 1   | Yes   | 5      | 1   | Yes     | 3     | 4      |
| 35307  |       | 2   | No    |        | 2   | No      | 0     |        |
| 35311  |       | 2   | No    |        | 2   | No      | 0     |        |
| 35322  |       | 2   | No    |        | 1   | Yes     | 0     |        |
| 35323  |       | 2   | No    |        | 2   | No      | 1     | 1      |
| 35327  |       | 2   | No    |        | 2   | No      | 0     |        |
| 35366  |       | 1   | Yes   | 5      | 2   | No      | 0     |        |
| 35378  |       | 2   | No    |        | 2   | No      | 1     | 1      |
| 35389  |       | 2   | No    |        | 2   | No      | 3     | 2      |
| 35390  |       | 2   | No    |        | 2   | No      | 0     |        |
| 35395  |       | 1   | Yes   | 6      | 1   | Yes     | 1     | 2      |
| 35411  |       | 1   | Yes   | 10     | 2   | No      | 2     | 2      |
| 35423  |       | 2   | No    |        | 2   | No      | 0     |        |
| 35425  |       | 2   | No    |        | 2   | No      | 0     |        |
| 35434  |       | 2   | No    |        | 2   | No      | 1     | 1      |
| 35462  |       | 2   | No    |        | 2   | No      | 0     |        |
| 35478  |       | 2   | No    |        | 2   | No      | 2     | 2      |

| respid | Q16_2 | Q17 | Smoke | Q17a_1 | Q18 | Alcohol | Q19_1 | Q19a_1 |
|--------|-------|-----|-------|--------|-----|---------|-------|--------|
| 35481  |       | 1   | Yes   | 6      | 1   | Yes     | 2     | 3      |
| 35498  |       | 1   | Yes   | 20     | 2   | No      | 0     |        |
| 35499  |       | 2   | No    |        | 2   | No      | 0     |        |
| 35502  |       | 2   | No    |        | 2   | No      | 2     | 2      |
| 35503  |       | 2   | No    |        | 2   | No      | 0     |        |
| 35504  |       | 2   | No    |        | 1   | Yes     | 0     |        |
| 35508  |       | 2   | No    |        | 2   | No      | 0     |        |
| 35513  |       | 1   | Yes   | 15     | 2   | No      | 1     | 1      |
| 35516  |       | 1   | Yes   | 10     | 2   | No      | 0     |        |
| 35519  |       | 2   | No    |        | 2   | No      | 1     | 2      |
| 35530  |       | 2   | No    |        | 2   | No      | 3     | 2      |
| 35533  |       | 2   | No    |        | 2   | No      | 1     | 2      |
| 35561  |       | 2   | No    |        | 2   | No      | 1     | 3      |
| 35565  |       | 2   | No    |        | 2   | No      | 0     |        |
| 35588  |       | 2   | No    |        | 2   | No      | 0     |        |
| 35598  |       | 2   | No    |        | 1   | Yes     | 0     |        |
| 35607  |       | 1   | Yes   | 20     | 1   | Yes     | 1     | 1      |
| 35638  |       | 2   | No    |        | 2   | No      | 1     | 0      |
| 35642  |       | 2   | No    |        | 2   | No      | 1     | 1      |
| 35643  |       | 2   | No    |        | 2   | No      | 3     | 3      |
| 35680  |       | 2   | No    |        | 2   | No      | 0     |        |
| 35697  |       | 2   | No    |        | 2   | No      | 0     |        |
| 35703  |       | 2   | No    |        | 2   | No      | 0     |        |
| 35709  |       | 1   | Yes   | 20     | 1   | Yes     | 0     |        |
| 35710  |       | 2   | No    |        | 2   | No      | 1     | 2      |
| 35721  |       | 2   | No    |        | 2   | No      | 5     | 1      |
| 35723  |       | 2   | No    |        | 2   | No      | 0     |        |
| 35736  |       | 2   | No    |        | 2   | No      | 1     | 3      |
| 35739  |       | 2   | No    |        | 2   | No      | 0     |        |
| 35745  |       | 2   | No    |        | 2   | No      | 4     | 3      |
| 35748  |       | 2   | No    |        | 1   | Yes     | 4     | 4      |
| 35750  |       | 2   | No    |        | 2   | No      | 0     |        |



| respid | Q16_2 | Q17 | Smoke | Q17a_1 | Q18 | Alcohol | Q19_1 | Q19a_1 |
|--------|-------|-----|-------|--------|-----|---------|-------|--------|
| 35752  |       | 2   | No    |        | 2   | No      | 2     | 3      |
| 35773  |       | 2   | No    |        | 2   | No      | 5     | 1      |
| 35779  |       | 2   | No    |        | 2   | No      | 0     |        |
| 35791  |       | 2   | No    |        | 1   | Yes     | 1     | 1      |
| 35801  |       | 2   | No    |        | 2   | No      | 0     |        |
| 35802  |       | 2   | No    |        | 2   | No      | 0     |        |
| 35837  |       | 2   | No    |        | 2   | No      | 2     | 2      |
| 35853  |       | 2   | No    |        | 2   | No      | 0     |        |
| 35858  |       | 1   | Yes   | 5      | 1   | Yes     | 1     | 0      |
| 35860  |       | 2   | No    |        | 2   | No      | 0     |        |
| 35875  |       | 2   | No    |        | 2   | No      | 4     | 4      |
| 35883  |       | 2   | No    |        | 2   | No      | 1     | 1      |
| 35890  |       | 2   | No    |        | 2   | No      | 1     | 1      |
| 35898  |       | 2   | No    |        | 2   | No      | 0     |        |
| 35901  |       | 2   | No    |        | 2   | No      | 1     | 2      |
| 35914  |       | 2   | No    |        | 2   | No      | 0     |        |
| 35924  |       | 1   | Yes   | 5      | 2   | No      | 3     | 2      |
| 35950  |       | 1   | Yes   | 30     | 1   | Yes     | 5     | 3      |
| 35961  |       | 2   | No    |        | 1   | Yes     | 0     |        |
| 35966  |       | 2   | No    |        | 2   | No      | 1     | 1      |
| 35967  |       | 2   | No    |        | 2   | No      | 0     |        |
| 35971  |       | 2   | No    |        | 2   | No      | 0     |        |
| 35974  |       | 2   | No    |        | 2   | No      | 0     |        |
| 35983  |       | 1   | Yes   | 4      | 2   | No      | 4     | 3      |
| 35992  |       | 2   | No    |        | 2   | No      | 5     | 4      |
| 36010  |       | 2   | No    |        | 2   | No      | 0     |        |
| 36019  |       | 1   | Yes   | 20     | 2   | No      | 1     | 3      |
| 36029  |       | 2   | No    |        | 2   | No      | 1     | 1      |
| 36033  |       | 1   | Yes   | 10     | 1   | Yes     | 0     |        |
| 36042  |       | 2   | No    |        | 2   | No      | 0     |        |
| 36043  |       | 2   | No    |        | 2   | No      | 1     | 2      |
| 36048  |       | 2   | No    |        | 2   | No      | 2     | 2      |

| respid | Q16_2 | Q17 | Smoke | Q17a_1 | Q18 | Alcohol | Q19_1 | Q19a_1 |
|--------|-------|-----|-------|--------|-----|---------|-------|--------|
| 36050  |       | 2   | No    |        | 2   | No      | 2     | 1      |
| 36062  |       | 2   | No    |        | 2   | No      | 2     | 1      |
| 36063  |       | 2   | No    |        | 2   | No      | 0     |        |
| 36092  |       | 2   | No    |        | 2   | No      | 0     |        |
| 36097  |       | 2   | No    |        | 2   | No      | 1     | 1      |
| 36108  |       | 2   | No    |        | 2   | No      | 0     |        |
| 36113  |       | 1   | Yes   | 6      | 1   | Yes     | 4     | 4      |
| 36117  |       | 2   | No    |        | 2   | No      | 1     | 1      |
| 36129  |       | 1   | Yes   | 10     | 1   | Yes     | 1     | 2      |
| 36144  |       | 2   | No    |        | 1   | Yes     | 0     |        |
| 36152  |       | 2   | No    |        | 2   | No      | 0     |        |
| 36154  |       | 2   | No    |        | 2   | No      | 0     |        |
| 36155  |       | 1   | Yes   | 1      | 2   | No      | 0     |        |
| 36167  |       | 2   | No    |        | 2   | No      | 0     |        |
| 36172  |       | 2   | No    |        | 2   | No      | 1     | 1      |
| 36173  |       | 2   | No    |        | 2   | No      | 0     |        |
| 36174  |       | 2   | No    |        | 2   | No      | 1     | 1      |
| 36182  |       | 2   | No    |        | 2   | No      | 0     |        |
| 36192  |       | 2   | No    |        | 2   | No      | 1     | 1      |
| 36195  |       | 2   | No    |        | 1   | Yes     | 3     | 3      |
| 36204  |       | 2   | No    |        | 2   | No      | 1     | 1      |
| 36205  |       | 2   | No    |        | 2   | No      | 0     |        |
| 36208  |       | 1   | Yes   | 20     | 1   | Yes     | 1     | 1      |
| 36216  |       | 2   | No    |        | 2   | No      | 1     | 1      |
| 36221  |       | 2   | No    |        | 2   | No      | 2     | 4      |
| 36244  |       | 2   | No    |        | 2   | No      | 0     |        |
| 36255  |       | 1   | Yes   | 20     | 2   | No      | 1     | 1      |
| 36259  |       | 1   | Yes   | 5      | 2   | No      | 1     | 0      |
| 36262  |       | 2   | No    |        | 2   | No      | 3     | 3      |
| 36268  |       | 1   | Yes   | 5      | 1   | Yes     | 0     |        |
| 36308  |       | 1   | Yes   | 3      | 2   | No      | 2     | 2      |
| 36324  |       | 2   | No    |        | 2   | No      | 0     |        |

| respid | Q16_2 | Q17 | Smoke | Q17a_1 | Q18 | Alcohol | Q19_1 | Q19a_1 |
|--------|-------|-----|-------|--------|-----|---------|-------|--------|
| 36330  |       | 2   | No    |        | 2   | No      | 0     |        |
| 36331  |       | 2   | No    |        | 2   | No      | 4     | 3      |
| 36336  |       | 2   | No    |        | 2   | No      | 2     | 1      |
| 36337  |       | 1   | Yes   | 15     | 1   | Yes     | 1     | 2      |
| 36364  |       | 2   | No    |        | 2   | No      | 0     |        |
| 36365  |       | 1   | Yes   | 5      | 1   | Yes     | 1     | 1      |
| 36396  |       | 2   | No    |        | 2   | No      | 1     | 1      |
| 36403  |       | 1   | Yes   | 30     | 2   | No      | 0     |        |
| 36410  |       | 2   | No    |        | 2   | No      | 0     |        |
| 36413  |       | 2   | No    |        | 1   | Yes     | 1     | 1      |
| 36422  |       | 1   | Yes   | 5      | 2   | No      | 1     | 1      |
| 36424  |       | 2   | No    |        | 2   | No      | 2     | 4      |
| 36425  |       | 1   | Yes   | 5      | 1   | Yes     | 3     | 3      |
| 36432  |       | 2   | No    |        | 1   | Yes     | 0     |        |
| 36435  |       | 1   | Yes   | 10     | 2   | No      | 1     | 3      |
| 36446  |       | 2   | No    |        | 2   | No      | 4     | 3      |
| 36451  |       | 2   | No    |        | 2   | No      | 1     | 2      |
| 36453  |       | 1   | Yes   | 10     | 2   | No      | 0     |        |
| 36459  |       | 2   | No    |        | 2   | No      | 2     | 2      |
| 36464  |       | 2   | No    |        | 2   | No      | 2     | 2      |
| 36465  |       | 2   | No    |        | 2   | No      | 1     | 2      |
| 36466  |       | 2   | No    |        | 2   | No      | 0     |        |
| 36476  |       | 1   | Yes   | 15     | 2   | No      | 0     |        |
| 36487  |       | 2   | No    |        | 2   | No      | 0     |        |
| 36488  |       | 2   | No    |        | 2   | No      | 2     | 2      |
| 36500  |       | 2   | No    |        | 2   | No      | 0     |        |
| 36504  |       | 2   | No    |        | 2   | No      | 1     | 1      |
| 36513  |       | 2   | No    |        | 2   | No      | 2     | 1      |
| 36515  |       | 1   | Yes   | 3      | 2   | No      | 2     | 3      |
| 36521  |       | 2   | No    |        | 2   | No      | 1     | 1      |
| 36530  |       | 2   | No    |        | 2   | No      | 3     | 2      |
| 36556  |       | 2   | No    |        | 2   | No      | 1     | 2      |

| respid | Q16_2 | Q17 | Smoke | Q17a_1 | Q18 | Alcohol | Q19_1 | Q19a_1 |
|--------|-------|-----|-------|--------|-----|---------|-------|--------|
| 36564  |       | 1   | Yes   | 5      | 2   | No      | 3     | 2      |
| 36584  |       | 1   | Yes   | 7      | 2   | No      | 0     |        |
| 36585  |       | 2   | No    |        | 1   | Yes     | 0     |        |
| 36586  |       | 2   | No    |        | 2   | No      | 0     |        |
| 36606  |       | 2   | No    |        | 2   | No      | 4     | 3      |
| 36615  |       | 2   | No    |        | 2   | No      | 2     | 2      |
| 36628  |       | 2   | No    |        | 2   | No      | 2     | 1      |
| 36630  |       | 2   | No    |        | 2   | No      | 0     |        |
| 36631  |       | 1   | Yes   | 5      | 1   | Yes     | 1     | 2      |
| 36636  |       | 2   | No    |        | 2   | No      | 0     |        |
| 36637  |       | 2   | No    |        | 2   | No      | 0     |        |
| 36651  |       | 1   | Yes   | 5      | 1   | Yes     | 1     | 3      |
| 36661  |       | 2   | No    |        | 1   | Yes     | 0     |        |
| 36670  |       | 2   | No    |        | 2   | No      | 1     | 1      |
| 36671  |       | 1   | Yes   | 10     | 2   | No      | 1     | 1      |
| 36688  |       | 2   | No    |        | 2   | No      | 0     |        |
| 36694  |       | 2   | No    |        | 2   | No      | 0     |        |
| 36696  |       | 1   | Yes   | 15     | 2   | No      | 0     |        |
| 36703  |       | 2   | No    |        | 1   | Yes     | 0     |        |
| 36719  |       | 2   | No    |        | 2   | No      | 3     | 4      |
| 36721  |       | 2   | No    |        | 2   | No      | 3     | 4      |
| 36740  |       | 2   | No    |        | 2   | No      | 5     | 4      |
| 36755  |       | 2   | No    |        | 2   | No      | 1     | 1      |
| 36765  |       | 2   | No    |        | 2   | No      | 1     | 3      |
| 36770  |       | 2   | No    |        | 2   | No      | 0     |        |
| 36773  |       | 1   | Yes   | 10     | 1   | Yes     | 1     | 1      |
| 36813  |       | 2   | No    |        | 2   | No      | 0     |        |
| 36819  |       | 1   | Yes   | 5      | 2   | No      | 1     | 1      |
| 36820  |       | 2   | No    |        | 2   | No      | 0     |        |
| 36821  |       | 1   | Yes   | 10     | 2   | No      | 0     |        |
| 36827  |       | 2   | No    |        | 2   | No      | 0     |        |
| 36835  |       | 2   | No    |        | 2   | No      | 0     |        |

| respid | Q16_2 | Q17 | Smoke | Q17a_1 | Q18 | Alcohol | Q19_1 | Q19a_1 |
|--------|-------|-----|-------|--------|-----|---------|-------|--------|
| 36837  |       | 2   | No    |        | 2   | No      | 0     |        |
| 36849  |       | 2   | No    |        | 2   | No      | 1     | 1      |
| 36851  |       | 2   | No    |        | 2   | No      | 0     |        |
| 36868  |       | 1   | Yes   | 15     | 1   | Yes     | 3     | 2      |
| 36870  |       | 2   | No    |        | 2   | No      | 1     | 0      |
| 36871  |       | 2   | No    |        | 2   | No      | 0     |        |
| 36874  |       | 2   | No    |        | 2   | No      | 2     | 2      |
| 36878  |       | 2   | No    |        | 2   | No      | 2     | 2      |
| 36887  |       | 1   | Yes   | 3      | 1   | Yes     | 0     |        |
| 36889  |       | 2   | No    |        | 2   | No      | 0     |        |
| 36891  |       | 2   | No    |        | 2   | No      | 1     | 1      |
| 36903  |       | 2   | No    |        | 2   | No      | 1     | 2      |
| 36905  |       | 2   | No    |        | 2   | No      | 0     |        |
| 36913  |       | 1   | Yes   | 12     | 1   | Yes     | 0     |        |
| 36949  |       | 2   | No    |        | 2   | No      | 1     | 2      |
| 36954  |       | 1   | Yes   | 2      | 2   | No      | 2     | 2      |
| 36962  |       | 2   | No    |        | 2   | No      | 0     |        |
| 36965  |       | 1   | Yes   | 2      | 2   | No      | 2     | 2      |
| 36970  |       | 2   | No    |        | 2   | No      | 0     |        |
| 36979  |       | 2   | No    |        | 2   | No      | 0     |        |
| 36990  |       | 2   | No    |        | 2   | No      | 0     |        |
| 36991  |       | 2   | No    |        | 2   | No      | 1     | 1      |
| 36992  |       | 2   | No    |        | 2   | No      | 4     | 2      |
| 37015  |       | 2   | No    |        | 2   | No      | 0     |        |
| 37017  |       | 1   | Yes   | 2      | 2   | No      | 0     |        |
| 37020  |       | 2   | No    |        | 2   | No      | 0     |        |
| 37033  |       | 2   | No    |        | 1   | Yes     | 1     | 2      |
| 37041  |       | 2   | No    |        | 2   | No      | 1     | 1      |
| 37048  |       | 1   | Yes   | 2      | 2   | No      | 3     | 2      |
| 37050  |       | 2   | No    |        | 1   | Yes     | 0     |        |
| 37054  |       | 2   | No    |        | 2   | No      | 2     | 3      |
| 37057  |       | 2   | No    |        | 2   | No      | 0     |        |

| respid | Q16_2 | Q17 | Smoke | Q17a_1 | Q18 | Alcohol | Q19_1 | Q19a_1 |
|--------|-------|-----|-------|--------|-----|---------|-------|--------|
| 37067  |       | 2   | No    |        | 1   | Yes     | 1     | 0      |
| 37074  |       | 2   | No    |        | 2   | No      | 0     |        |
| 37088  |       | 2   | No    |        | 2   | No      | 1     | 1      |
| 37090  |       | 1   | Yes   | 10     | 2   | No      | 1     | 1      |
| 37110  |       | 1   | Yes   | 8      | 1   | Yes     | 3     | 3      |
| 37122  |       | 1   | Yes   | 2      | 2   | No      | 0     |        |
| 37124  |       | 1   | Yes   | 5      | 2   | No      | 1     | 1      |
| 37126  |       | 1   | Yes   | 2      | 2   | No      | 0     |        |
| 37129  |       | 1   | Yes   | 10     | 2   | No      | 2     | 2      |
| 37130  |       | 2   | No    |        | 2   | No      | 0     |        |
| 37142  |       | 1   | Yes   | 10     | 1   | Yes     | 1     | 2      |
| 37160  |       | 1   | Yes   | 12     | 2   | No      | 0     |        |
| 37168  |       | 2   | No    |        | 2   | No      | 0     |        |
| 37169  |       | 1   | Yes   | 6      | 2   | No      | 2     | 1      |
| 37191  |       | 1   | Yes   | 6      | 2   | No      | 2     | 1      |
| 37197  |       | 2   | No    |        | 2   | No      | 2     | 1      |
| 37204  |       | 2   | No    |        | 2   | No      | 0     |        |
| 37213  |       | 2   | No    |        | 2   | No      | 2     | 2      |
| 37238  |       | 2   | No    |        | 2   | No      | 1     | 1      |
| 37242  |       | 2   | No    |        | 2   | No      | 0     |        |
| 37243  |       | 1   | Yes   | 2      | 2   | No      | 4     | 3      |
| 37275  |       | 2   | No    |        | 2   | No      | 2     | 1      |
| 37305  |       | 2   | No    |        | 2   | No      | 1     | 1      |
| 37357  |       | 2   | No    |        | 2   | No      | 2     | 1      |
| 37365  |       | 2   | No    |        | 2   | No      | 2     | 1      |
| 37370  |       | 2   | No    |        | 2   | No      | 0     |        |
| 37406  |       | 2   | No    |        | 2   | No      | 3     | 3      |
| 37410  |       | 2   | No    |        | 2   | No      | 2     | 2      |
| 37411  |       | 2   | No    |        | 2   | No      | 4     | 3      |
| 37427  |       | 2   | No    |        | 2   | No      | 1     | 2      |
| 37437  |       | 2   | No    |        | 2   | No      | 4     | 4      |
| 37440  |       | 2   | No    |        | 2   | No      | 0     |        |

| respid | Q16_2 | Q17 | Smoke | Q17a_1 | Q18 | Alcohol | Q19_1 | Q19a_1 |
|--------|-------|-----|-------|--------|-----|---------|-------|--------|
| 37452  |       | 2   | No    |        | 2   | No      | 0     |        |
| 37465  |       | 2   | No    |        | 2   | No      | 1     | 1      |
| 37468  |       | 2   | No    |        | 2   | No      | 4     | 4      |
| 37469  |       | 2   | No    |        | 2   | No      | 0     |        |
| 37477  |       | 2   | No    |        | 2   | No      | 2     | 3      |
| 37509  |       | 2   | No    |        | 2   | No      | 0     |        |
| 37513  |       | 2   | No    |        | 2   | No      | 3     | 4      |
| 37534  |       | 2   | No    |        | 2   | No      | 1     | 1      |
| 37537  |       | 2   | No    |        | 2   | No      | 0     |        |
| 37560  |       | 2   | No    |        | 2   | No      | 1     | 0      |
| 37566  |       | 2   | No    |        | 2   | No      | 2     | 2      |
| 37572  |       | 2   | No    |        | 2   | No      | 0     |        |
| 37574  |       | 2   | No    |        | 2   | No      | 0     |        |
| 37575  |       | 2   | No    |        | 2   | No      | 1     | 2      |
| 37590  |       | 2   | No    |        | 2   | No      | 3     | 4      |
| 37593  |       | 2   | No    |        | 2   | No      | 2     | 1      |
| 37599  |       | 2   | No    |        | 2   | No      | 0     |        |
| 37641  |       | 2   | No    |        | 2   | No      | 1     | 0      |
| 37651  |       | 2   | No    |        | 2   | No      | 1     | 1      |
| 37670  |       | 2   | No    |        | 2   | No      | 0     |        |
| 37680  |       | 2   | No    |        | 2   | No      | 0     |        |
| 37690  |       | 2   | No    |        | 2   | No      | 1     | 2      |
| 37694  |       | 1   | Yes   | 12     | 1   | Yes     | 0     |        |
| 37705  |       | 1   | Yes   | 10     | 2   | No      | 0     |        |
| 37710  |       | 2   | No    |        | 2   | No      | 2     | 2      |
| 37719  |       | 2   | No    |        | 2   | No      | 1     | 2      |
| 37741  |       | 2   | No    |        | 2   | No      | 4     | 2      |
| 37752  |       | 2   | No    |        | 2   | No      | 0     |        |
| 37755  |       | 2   | No    |        | 1   | Yes     | 2     | 2      |
| 37757  |       | 2   | No    |        | 2   | No      | 0     |        |
| 37783  |       | 2   | No    |        | 2   | No      | 0     |        |
| 37793  |       | 2   | No    |        | 2   | No      | 4     | 3      |

| respid | Q16_2 | Q17 | Smoke | Q17a_1 | Q18 | Alcohol | Q19_1 | Q19a_1 |
|--------|-------|-----|-------|--------|-----|---------|-------|--------|
| 37800  |       | 2   | No    |        | 2   | No      | 3     | 2      |
| 37801  |       | 2   | No    |        | 1   | Yes     | 0     |        |
| 37820  |       | 2   | No    |        | 2   | No      | 4     | 3      |
| 37826  |       | 2   | No    |        | 2   | No      | 3     | 2      |
| 37835  |       | 2   | No    |        | 2   | No      | 1     | 2      |
| 37839  |       | 2   | No    |        | 2   | No      | 3     | 2      |
| 37871  |       | 1   | Yes   | 2      | 2   | No      | 3     | 3      |
| 37876  |       | 2   | No    |        | 2   | No      | 0     |        |
| 37879  |       | 2   | No    |        | 2   | No      | 1     | 2      |
| 37894  |       | 2   | No    |        | 2   | No      | 0     |        |
| 37895  |       | 2   | No    |        | 2   | No      | 3     | 2      |
| 37901  |       | 2   | No    |        | 2   | No      | 1     | 1      |
| 37926  |       | 2   | No    |        | 2   | No      | 1     | 1      |
| 37937  |       | 2   | No    |        | 2   | No      | 1     | 1      |
| 37938  |       | 2   | No    |        | 2   | No      | 0     |        |
| 37959  |       | 2   | No    |        | 2   | No      | 0     |        |
| 37970  |       | 2   | No    |        | 2   | No      | 0     |        |
| 37972  |       | 1   | Yes   | 3      | 2   | No      | 2     | 3      |
| 37988  |       | 2   | No    |        | 2   | No      | 0     |        |
| 37989  |       | 2   | No    |        | 2   | No      | 1     | 2      |
| 38000  |       | 2   | No    |        | 2   | No      | 1     | 1      |
| 38028  |       | 2   | No    |        | 2   | No      | 3     | 2      |
| 38042  |       | 2   | No    |        | 2   | No      | 2     | 2      |
| 38052  |       | 2   | No    |        | 2   | No      | 2     | 2      |
| 38056  |       | 2   | No    |        | 2   | No      | 0     |        |
| 38106  |       | 2   | No    |        | 2   | No      | 1     | 1      |
| 38114  |       | 2   | No    |        | 2   | No      | 2     | 3      |
| 38134  |       | 2   | No    |        | 2   | No      | 0     |        |
| 38135  |       | 2   | No    |        | 2   | No      | 1     | 1      |
| 38139  |       | 2   | No    |        | 2   | No      | 2     | 3      |
| 38160  |       | 2   | No    |        | 2   | No      | 0     |        |
| 38164  |       | 2   | No    |        | 2   | No      | 5     | 2      |



| respid | Q16_2 | Q17 | Smoke | Q17a_1 | Q18 | Alcohol | Q19_1 | Q19a_1 |
|--------|-------|-----|-------|--------|-----|---------|-------|--------|
| 38168  |       | 2   | No    |        | 2   | No      | 0     |        |
| 38173  |       | 1   | Yes   | 5      | 2   | No      | 0     |        |
| 38193  |       | 2   | No    |        | 2   | No      | 1     | 3      |
| 38204  |       | 2   | No    |        | 2   | No      | 0     |        |
| 38206  |       | 2   | No    |        | 2   | No      | 1     | 1      |
| 38233  |       | 1   | Yes   | 5      | 1   | Yes     | 0     |        |
| 38242  |       | 2   | No    |        | 2   | No      | 2     | 2      |
| 38245  |       | 1   | Yes   | 20     | 2   | No      | 0     |        |
| 38261  |       | 2   | No    |        | 2   | No      | 2     | 2      |
| 38288  |       | 2   | No    |        | 2   | No      | 0     |        |
| 38296  |       | 2   | No    |        | 2   | No      | 1     | 1      |
| 38299  |       | 1   | Yes   | 20     | 2   | No      | 2     | 1      |
| 38300  |       | 2   | No    |        | 1   | Yes     | 0     |        |
| 38303  |       | 1   | Yes   | 20     | 1   | Yes     | 1     | 1      |
| 38317  |       | 2   | No    |        | 2   | No      | 0     |        |
| 38328  |       | 1   | Yes   | 3      | 2   | No      | 4     | 4      |
| 38333  |       | 1   | Yes   | 10     | 2   | No      | 0     |        |
| 38336  |       | 2   | No    |        | 1   | Yes     | 0     |        |
| 38338  |       | 2   | No    |        | 2   | No      | 0     |        |
| 38342  |       | 1   | Yes   | 3      | 2   | No      | 1     | 1      |
| 38360  |       | 1   | Yes   | 50     | 1   | Yes     | 1     | 0      |
| 38362  |       | 1   | Yes   | 3      | 1   | Yes     | 1     | 2      |
| 38364  |       | 1   | Yes   | 15     | 1   | Yes     | 0     |        |
| 38402  |       | 2   | No    |        | 2   | No      | 1     | 1      |
| 38423  |       | 2   | No    |        | 2   | No      | 2     | 2      |
| 38424  |       | 1   | Yes   | 20     | 2   | No      | 0     |        |
| 38435  |       | 2   | No    |        | 2   | No      | 2     | 4      |
| 38450  |       | 2   | No    |        | 2   | No      | 0     |        |
| 38455  |       | 1   | Yes   | 4      | 2   | No      | 0     |        |
| 38467  |       | 1   | Yes   | 1      | 2   | No      | 0     |        |
| 38468  |       | 2   | No    |        | 2   | No      | 2     | 4      |
| 38472  |       | 2   | No    |        | 2   | No      | 1     | 1      |

| respid | Q16_2 | Q17 | Smoke | Q17a_1 | Q18 | Alcohol | Q19_1 | Q19a_1 |
|--------|-------|-----|-------|--------|-----|---------|-------|--------|
| 38484  |       | 1   | Yes   | 5      | 2   | No      | 0     |        |
| 38498  |       | 2   | No    |        | 2   | No      | 0     |        |
| 38507  |       | 2   | No    |        | 2   | No      | 0     |        |
| 38511  |       | 2   | No    |        | 2   | No      | 2     | 1      |
| 38524  |       | 1   | Yes   | 10     | 1   | Yes     | 5     | 3      |
| 38526  |       | 2   | No    |        | 2   | No      | 1     | 0      |
| 38534  |       | 2   | No    |        | 2   | No      | 0     |        |
| 38536  |       | 2   | No    |        | 2   | No      | 0     |        |
| 38539  |       | 1   | Yes   | 6      | 1   | Yes     | 1     | 1      |
| 38547  |       | 2   | No    |        | 2   | No      | 0     |        |
| 38549  |       | 1   | Yes   | 5      | 2   | No      | 1     | 1      |
| 38575  |       | 2   | No    |        | 2   | No      | 2     | 2      |
| 38579  |       | 2   | No    |        | 2   | No      | 2     | 2      |
| 38585  |       | 1   | Yes   | 8      | 2   | No      | 0     |        |
| 38589  |       | 2   | No    |        | 2   | No      | 4     | 3      |
| 38595  |       | 2   | No    |        | 2   | No      | 2     | 2      |
| 38602  |       | 2   | No    |        | 2   | No      | 0     |        |
| 38603  |       | 2   | No    |        | 2   | No      | 2     | 2      |
| 38612  |       | 2   | No    |        | 2   | No      | 0     |        |
| 38621  |       | 2   | No    |        | 2   | No      | 2     | 2      |
| 38624  |       | 2   | No    |        | 2   | No      | 2     | 3      |
| 38636  |       | 2   | No    |        | 2   | No      | 0     |        |
| 38656  |       | 1   | Yes   | 6      | 2   | No      | 0     |        |
| 38668  |       | 1   | Yes   | 12     | 1   | Yes     | 0     |        |
| 38675  |       | 1   | Yes   | 12     | 2   | No      | 0     |        |
| 38676  |       | 2   | No    |        | 2   | No      | 0     |        |
| 38682  |       | 1   | Yes   | 3      | 2   | No      | 4     | 3      |
| 38689  |       | 1   | Yes   | 10     | 2   | No      | 0     |        |
| 38702  |       | 2   | No    |        | 2   | No      | 0     |        |
| 38704  |       | 2   | No    |        | 2   | No      | 4     | 3      |
| 38713  |       | 2   | No    |        | 2   | No      | 2     | 1      |
| 38718  |       | 2   | No    |        | 2   | No      | 1     | 2      |

| respid | Q16_2 | Q17 | Smoke | Q17a_1 | Q18 | Alcohol | Q19_1 | Q19a_1 |
|--------|-------|-----|-------|--------|-----|---------|-------|--------|
| 38725  |       | 2   | No    |        | 2   | No      | 4     | 3      |
| 38730  |       | 2   | No    |        | 2   | No      | 3     | 3      |
| 38737  |       | 2   | No    |        | 2   | No      | 0     |        |
| 38738  |       | 2   | No    |        | 2   | No      | 3     | 2      |
| 38744  |       | 2   | No    |        | 2   | No      | 0     |        |
| 38746  |       | 2   | No    |        | 2   | No      | 0     |        |
| 38753  |       | 2   | No    |        | 2   | No      | 0     |        |
| 38756  |       | 2   | No    |        | 2   | No      | 2     | 2      |
| 38760  |       | 2   | No    |        | 2   | No      | 0     |        |
| 38762  |       | 2   | No    |        | 2   | No      | 3     | 3      |
| 38765  |       | 2   | No    |        | 2   | No      | 0     |        |
| 38769  |       | 2   | No    |        | 1   | Yes     | 2     | 2      |
| 38781  |       | 2   | No    |        | 2   | No      | 3     | 2      |
| 38786  |       | 2   | No    |        | 2   | No      | 0     |        |
| 38790  |       | 1   | Yes   | 8      | 2   | No      | 2     | 2      |
| 38793  |       | 2   | No    |        | 1   | Yes     | 0     |        |
| 38797  |       | 2   | No    |        | 2   | No      | 0     |        |
| 38802  |       | 2   | No    |        | 2   | No      | 3     | 2      |
| 38815  |       | 1   | Yes   | 2      | 2   | No      | 3     | 2      |
| 38826  |       | 2   | No    |        | 2   | No      | 3     | 4      |
| 38828  |       | 1   | Yes   | 2      | 2   | No      | 0     |        |
| 38829  |       | 1   | Yes   | 4      | 2   | No      | 2     | 3      |
| 38835  |       | 2   | No    |        | 1   | Yes     | 3     | 2      |
| 38842  |       | 2   | No    |        | 2   | No      | 2     | 3      |
| 38853  |       | 1   | Yes   | 20     | 1   | Yes     | 1     | 2      |
| 38855  |       | 2   | No    |        | 2   | No      | 4     | 3      |
| 38860  |       | 2   | No    |        | 2   | No      | 3     | 3      |
| 38869  |       | 1   | Yes   | 20     | 2   | No      | 0     |        |
| 38882  |       | 2   | No    |        | 2   | No      | 3     | 4      |
| 38897  |       | 2   | No    |        | 2   | No      | 0     |        |
| 38903  |       | 2   | No    |        | 2   | No      | 1     | 1      |
| 38910  |       | 2   | No    |        | 2   | No      | 4     | 4      |

| respid | Q16_2 | Q17 | Smoke | Q17a_1 | Q18 | Alcohol | Q19_1 | Q19a_1 |
|--------|-------|-----|-------|--------|-----|---------|-------|--------|
| 38948  |       | 2   | No    |        | 2   | No      | 4     | 3      |
| 38949  |       | 1   | Yes   | 8      | 2   | No      | 2     | 2      |
| 38953  |       | 2   | No    |        | 2   | No      | 3     | 3      |
| 38989  |       | 2   | No    |        | 2   | No      | 4     | 3      |
| 38997  |       | 2   | No    |        | 2   | No      | 2     | 2      |
| 38999  |       | 2   | No    |        | 2   | No      | 1     | 1      |
| 39002  |       | 1   | Yes   | 3      | 2   | No      | 4     | 4      |
| 39003  |       | 2   | No    |        | 2   | No      | 4     | 3      |
| 39006  |       | 2   | No    |        | 2   | No      | 1     | 1      |
| 39014  |       | 2   | No    |        | 2   | No      | 0     |        |
| 39017  |       | 1   | Yes   | 5      | 1   | Yes     | 4     | 4      |
| 39018  |       | 2   | No    |        | 2   | No      | 4     | 3      |
| 39025  |       | 2   | No    |        | 2   | No      | 4     | 4      |
| 39031  |       | 2   | No    |        | 2   | No      | 1     | 2      |
| 39061  |       | 2   | No    |        | 2   | No      | 3     | 1      |
| 39131  |       | 1   | Yes   | 1      | 2   | No      | 0     |        |
| 39153  |       | 1   | Yes   | 10     | 2   | No      | 2     | 4      |
| 39194  |       | 2   | No    |        | 2   | No      | 1     | 3      |
| 39204  |       | 1   | Yes   | 10     | 2   | No      | 0     |        |
| 39208  |       | 2   | No    |        | 2   | No      | 2     | 2      |
| 39213  |       | 2   | No    |        | 2   | No      | 1     | 0      |
| 39231  |       | 2   | No    |        | 2   | No      | 0     |        |
| 39251  |       | 2   | No    |        | 2   | No      | 2     | 2      |
| 39257  |       | 2   | No    |        | 2   | No      | 3     | 4      |
| 39262  |       | 2   | No    |        | 2   | No      | 3     | 4      |
| 39269  |       | 2   | No    |        | 2   | No      | 3     | 3      |
| 39272  |       | 2   | No    |        | 2   | No      | 0     |        |
| 39280  |       | 2   | No    |        | 2   | No      | 2     | 1      |
| 39294  |       | 2   | No    |        | 2   | No      | 3     | 4      |
| 39297  |       | 2   | No    |        | 2   | No      | 3     | 2      |
| 39300  |       | 2   | No    |        | 2   | No      | 1     | 2      |
| 39307  |       | 2   | No    |        | 2   | No      | 3     | 4      |

| respid | Q16_2 | Q17 | Smoke | Q17a_1 | Q18 | Alcohol | Q19_1 | Q19a_1 |
|--------|-------|-----|-------|--------|-----|---------|-------|--------|
| 39320  |       | 2   | No    |        | 2   | No      | 2     | 3      |
| 39333  |       | 1   | Yes   | 20     | 2   | No      | 0     |        |
| 39335  |       | 2   | No    |        | 2   | No      | 3     | 4      |
| 39339  |       | 2   | No    |        | 2   | No      | 2     | 2      |
| 39375  |       | 2   | No    |        | 2   | No      | 0     |        |
| 39377  |       | 2   | No    |        | 2   | No      | 1     | 4      |
| 39380  |       | 2   | No    |        | 2   | No      | 3     | 4      |
| 39425  |       | 2   | No    |        | 2   | No      | 0     |        |
| 39590  |       | 2   | No    |        | 2   | No      | 0     |        |
| 40529  |       | 2   | No    |        | 1   | Yes     | 0     |        |
| 40702  |       | 2   | No    |        | 2   | No      | 1     | 0      |
| 40788  |       | 2   | No    |        | 2   | No      | 1     | 1      |
| 40841  |       | 2   | No    |        | 2   | No      | 1     | 1      |
| 40965  |       | 2   | No    |        | 1   | Yes     | 2     | 0      |
| 41092  |       | 1   | Yes   | 10     | 2   | No      | 2     | 1      |
| 41534  |       | 2   | No    |        | 2   | No      | 0     |        |
| 41919  |       | 2   | No    |        | 2   | No      | 1     | 1      |
| 42110  |       | 2   | No    |        | 2   | No      | 0     |        |
| 42135  |       | 1   | Yes   | 20     | 2   | No      | 1     | 1      |
| 42142  |       | 2   | No    |        | 2   | No      | 2     | 1      |
| 42163  |       | 2   | No    |        | 2   | No      | 0     |        |
| 42164  |       | 2   | No    |        | 2   | No      | 0     |        |
| 42172  |       | 2   | No    |        | 2   | No      | 1     | 2      |
| 42177  |       | 2   | No    |        | 2   | No      | 1     | 1      |
| 42181  |       | 2   | No    |        | 2   | No      | 2     | 1      |
| 42193  |       | 1   | Yes   | 4      | 2   | No      | 2     | 2      |
| 42196  |       | 1   | Yes   | 4      | 2   | No      | 1     | 1      |
| 42202  |       | 2   | No    |        | 2   | No      | 1     | 1      |
| 42248  |       | 1   | Yes   | 5      | 1   | Yes     | 1     | 2      |
| 42283  |       | 2   | No    |        | 1   | Yes     | 3     | 1      |
| 42284  |       | 1   | Yes   | 20     | 2   | No      | 1     | 1      |
| 42323  |       | 2   | No    |        | 2   | No      | 0     |        |

| respid | Q16_2 | Q17 | Smoke | Q17a_1 | Q18 | Alcohol | Q19_1 | Q19a_1 |
|--------|-------|-----|-------|--------|-----|---------|-------|--------|
| 42349  |       | 2   | No    |        | 2   | No      | 1     | 1      |
| 42351  |       | 2   | No    |        | 2   | No      | 0     |        |
| 42357  |       | 2   | No    |        | 2   | No      | 0     |        |
| 42366  |       | 2   | No    |        | 2   | No      | 0     |        |
| 42380  |       | 1   | Yes   | 20     | 1   | Yes     | 0     |        |
| 42414  |       | 1   | Yes   | 3      | 1   | Yes     | 2     | 3      |
| 42420  |       | 1   | Yes   | 10     | 1   | Yes     | 3     | 3      |
| 42454  |       | 2   | No    |        | 1   | Yes     | 0     |        |
| 42458  |       | 2   | No    |        | 2   | No      | 0     |        |
| 42461  |       | 2   | No    |        | 1   | Yes     | 1     | 0      |
| 42488  |       | 2   | No    |        | 2   | No      | 1     | 1      |
| 42511  |       | 2   | No    |        | 2   | No      | 0     |        |
| 42512  |       | 2   | No    |        | 2   | No      | 0     |        |
| 42530  |       | 2   | No    |        | 2   | No      | 1     | 2      |
| 42531  |       | 1   | Yes   | 10     | 1   | Yes     | 5     | 3      |
| 42533  |       | 2   | No    |        | 2   | No      | 0     |        |
| 42549  |       | 2   | No    |        | 2   | No      | 1     | 1      |
| 42550  |       | 2   | No    |        | 2   | No      | 1     | 2      |
| 42553  |       | 2   | No    |        | 2   | No      | 0     |        |
| 42562  |       | 1   | Yes   | 10     | 1   | Yes     | 2     | 2      |
| 42567  |       | 2   | No    |        | 2   | No      | 1     | 1      |
| 42589  |       | 2   | No    |        | 2   | No      | 1     | 1      |
| 42604  |       | 2   | No    |        | 1   | Yes     | 2     | 1      |
| 42618  |       | 2   | No    |        | 2   | No      | 0     |        |
| 42621  |       | 2   | No    |        | 2   | No      | 2     | 2      |
| 42627  |       | 2   | No    |        | 2   | No      | 1     | 2      |
| 42641  |       | 2   | No    |        | 1   | Yes     | 1     | 0      |
| 42655  |       | 1   | Yes   | 24     | 1   | Yes     | 1     | 1      |
| 42666  |       | 2   | No    |        | 2   | No      | 0     |        |
| 42667  |       | 2   | No    |        | 2   | No      | 2     | 1      |
| 42697  |       | 2   | No    |        | 2   | No      | 1     | 1      |
| 42703  |       | 2   | No    |        | 1   | Yes     | 2     | 1      |

| respid | Q16_2 | Q17 | Smoke | Q17a_1 | Q18 | Alcohol | Q19_1 | Q19a_1 |
|--------|-------|-----|-------|--------|-----|---------|-------|--------|
| 42712  |       | 2   | No    |        | 2   | No      | 1     | 1      |
| 42731  |       | 1   | Yes   | 15     | 2   | No      | 1     | 2      |
| 42780  |       | 2   | No    |        | 1   | Yes     | 2     | 1      |
| 42785  |       | 2   | No    |        | 2   | No      | 2     | 1      |
| 42788  |       | 1   | Yes   | 15     | 2   | No      | 1     | 1      |
| 42802  |       | 1   | Yes   | 15     | 1   | Yes     | 1     | 2      |
| 42818  |       | 2   | No    |        | 2   | No      | 2     | 2      |
| 42821  |       | 2   | No    |        | 2   | No      | 3     | 2      |
| 42824  |       | 2   | No    |        | 2   | No      | 0     |        |
| 42831  |       | 2   | No    |        | 2   | No      | 0     |        |
| 42836  |       | 2   | No    |        | 2   | No      | 2     | 1      |
| 42864  |       | 2   | No    |        | 2   | No      | 1     | 1      |
| 42875  |       | 1   | Yes   | 15     | 1   | Yes     | 1     | 1      |
| 42891  |       | 1   | Yes   | 10     | 2   | No      | 5     | 3      |
| 42897  |       | 2   | No    |        | 2   | No      | 0     |        |
| 42900  |       | 2   | No    |        | 2   | No      | 0     |        |
| 42902  |       | 1   | Yes   | 5      | 1   | Yes     | 1     | 1      |
| 42921  |       | 2   | No    |        | 1   | Yes     | 1     | 1      |
| 42925  |       | 2   | No    |        | 2   | No      | 0     |        |
| 42944  |       | 2   | No    |        | 2   | No      | 0     |        |
| 42950  |       | 2   | No    |        | 2   | No      | 0     |        |
| 42963  |       | 2   | No    |        | 2   | No      | 0     |        |
| 42967  |       | 2   | No    |        | 2   | No      | 1     | 1      |
| 42985  |       | 2   | No    |        | 2   | No      | 0     |        |
| 42990  |       | 1   | Yes   | 15     | 1   | Yes     | 1     | 1      |
| 42996  |       | 1   | Yes   | 20     | 2   | No      | 3     | 2      |
| 43002  |       | 2   | No    |        | 2   | No      | 3     | 1      |
| 43004  |       | 1   | Yes   | 30     | 2   | No      | 2     | 2      |
| 43012  |       | 2   | No    |        | 2   | No      | 0     |        |
| 43027  |       | 1   | Yes   | 5      | 2   | No      | 0     |        |
| 43028  |       | 2   | No    |        | 2   | No      | 2     | 1      |
| 43029  |       | 2   | No    |        | 1   | Yes     | 1     | 1      |

| respid | Q16_2 | Q17 | Smoke | Q17a_1 | Q18 | Alcohol | Q19_1 | Q19a_1 |
|--------|-------|-----|-------|--------|-----|---------|-------|--------|
| 43031  |       | 2   | No    |        | 2   | No      | 3     | 2      |
| 43042  |       | 2   | No    |        | 2   | No      | 0     |        |
| 43054  |       | 2   | No    |        | 2   | No      | 1     | 1      |
| 43058  |       | 2   | No    |        | 2   | No      | 0     |        |
| 43064  |       | 2   | No    |        | 2   | No      | 1     | 1      |
| 43069  |       | 2   | No    |        | 2   | No      | 1     | 1      |
| 43071  |       | 2   | No    |        | 2   | No      | 0     |        |
| 43072  |       | 1   | Yes   | 50     | 2   | No      | 0     |        |
| 43077  |       | 2   | No    |        | 2   | No      | 1     | 1      |
| 43078  |       | 2   | No    |        | 2   | No      | 0     |        |
| 43082  |       | 2   | No    |        | 2   | No      | 0     |        |
| 43092  |       | 2   | No    |        | 1   | Yes     | 0     |        |
| 43096  |       | 2   | No    |        | 2   | No      | 4     | 2      |
| 43109  |       | 2   | No    |        | 2   | No      | 0     |        |
| 43113  |       | 2   | No    |        | 2   | No      | 0     |        |
| 43123  |       | 2   | No    |        | 2   | No      | 2     | 1      |
| 43127  |       | 1   | Yes   | 5      | 1   | Yes     | 1     | 1      |
| 43128  |       | 1   | Yes   | 3      | 2   | No      | 1     | 1      |
| 43129  |       | 2   | No    |        | 2   | No      | 1     | 1      |
| 43133  |       | 2   | No    |        | 2   | No      | 3     | 2      |
| 43140  |       | 2   | No    |        | 2   | No      | 0     |        |
| 43143  |       | 2   | No    |        | 2   | No      | 0     |        |
| 43149  |       | 2   | No    |        | 2   | No      | 0     |        |
| 43150  |       | 2   | No    |        | 2   | No      | 0     |        |
| 43153  |       | 2   | No    |        | 2   | No      | 3     | 3      |
| 43170  |       | 1   | Yes   | 10     | 2   | No      | 0     |        |
| 43187  |       | 2   | No    |        | 2   | No      | 1     | 1      |
| 43188  |       | 2   | No    |        | 2   | No      | 4     | 2      |
| 43198  |       | 2   | No    |        | 2   | No      | 0     |        |
| 43208  |       | 2   | No    |        | 2   | No      | 0     |        |
| 43216  |       | 2   | No    |        | 2   | No      | 1     | 2      |
| 43222  |       | 2   | No    |        | 2   | No      | 0     |        |



| respid | Q16_2 | Q17 | Smoke | Q17a_1 | Q18 | Alcohol | Q19_1 | Q19a_1 |
|--------|-------|-----|-------|--------|-----|---------|-------|--------|
| 43224  |       | 2   | No    |        | 2   | No      | 0     |        |
| 43230  |       | 2   | No    |        | 2   | No      | 0     |        |
| 43231  |       | 2   | No    |        | 2   | No      | 0     |        |
| 43265  |       | 2   | No    |        | 2   | No      | 0     |        |
| 43270  |       | 2   | No    |        | 2   | No      | 0     |        |
| 43283  |       | 2   | No    |        | 2   | No      | 1     | 1      |
| 43295  |       | 2   | No    |        | 2   | No      | 1     | 1      |
| 43297  |       | 1   | Yes   | 15     | 1   | Yes     | 0     |        |
| 43299  |       | 1   | Yes   | 5      | 2   | No      | 2     | 1      |
| 43307  |       | 2   | No    |        | 2   | No      | 0     |        |
| 43316  |       | 2   | No    |        | 2   | No      | 2     | 2      |
| 43318  |       | 2   | No    |        | 2   | No      | 1     | 1      |
| 43319  |       | 2   | No    |        | 2   | No      | 1     | 1      |
| 43324  |       | 2   | No    |        | 2   | No      | 0     |        |
| 43325  |       | 2   | No    |        | 2   | No      | 1     | 1      |
| 43327  |       | 2   | No    |        | 2   | No      | 2     | 1      |
| 43338  |       | 2   | No    |        | 2   | No      | 1     | 1      |
| 43342  |       | 2   | No    |        | 2   | No      | 1     | 1      |
| 43348  |       | 2   | No    |        | 2   | No      | 0     |        |
| 43395  |       | 2   | No    |        | 2   | No      | 0     |        |
| 43404  |       | 2   | No    |        | 2   | No      | 1     | 1      |
| 43406  |       | 2   | No    |        | 2   | No      | 1     | 1      |
| 43407  |       | 2   | No    |        | 2   | No      | 0     |        |
| 43411  |       | 2   | No    |        | 2   | No      | 1     | 0      |
| 43416  |       | 2   | No    |        | 2   | No      | 3     | 3      |
| 43428  |       | 2   | No    |        | 1   | Yes     | 1     | 0      |
| 43429  |       | 1   | Yes   | 15     | 1   | Yes     | 2     | 1      |
| 43432  |       | 2   | No    |        | 1   | Yes     | 1     | 1      |
| 43443  |       | 2   | No    |        | 2   | No      | 0     |        |
| 43455  |       | 1   | Yes   | 5      | 2   | No      | 0     |        |
| 43457  |       | 2   | No    |        | 2   | No      | 1     | 1      |
| 43458  |       | 2   | No    |        | 2   | No      | 0     |        |

| respid | Q16_2 | Q17 | Smoke | Q17a_1 | Q18 | Alcohol | Q19_1 | Q19a_1 |
|--------|-------|-----|-------|--------|-----|---------|-------|--------|
| 43477  |       | 1   | Yes   | 3      | 2   | No      | 3     | 2      |
| 43520  |       | 2   | No    |        | 2   | No      | 0     |        |
| 43521  |       | 2   | No    |        | 2   | No      | 0     |        |
| 43550  |       | 2   | No    |        | 1   | Yes     | 0     |        |
| 43551  |       | 1   | Yes   | 1      | 2   | No      | 2     | 2      |
| 43554  |       | 2   | No    |        | 2   | No      | 3     | 2      |
| 43560  |       | 1   | Yes   | 5      | 2   | No      | 1     | 1      |
| 43569  |       | 1   | Yes   | 3      | 2   | No      | 0     |        |
| 43583  |       | 2   | No    |        | 2   | No      | 1     | 0      |
| 43590  |       | 2   | No    |        | 2   | No      | 5     | 2      |
| 43591  |       | 2   | No    |        | 1   | Yes     | 0     |        |
| 43595  |       | 2   | No    |        | 2   | No      | 0     |        |
| 43599  |       | 2   | No    |        | 2   | No      | 2     | 2      |
| 43606  |       | 2   | No    |        | 2   | No      | 2     | 2      |
| 43609  |       | 2   | No    |        | 2   | No      | 0     |        |
| 43629  |       | 2   | No    |        | 2   | No      | 0     |        |
| 43636  |       | 2   | No    |        | 2   | No      | 1     | 0      |
| 43661  |       | 1   | Yes   | 20     | 1   | Yes     | 1     | 1      |
| 43668  |       | 1   | Yes   | 10     | 2   | No      | 0     |        |
| 43672  |       | 2   | No    |        | 2   | No      | 0     |        |
| 43677  |       | 2   | No    |        | 2   | No      | 2     | 1      |
| 43683  |       | 2   | No    |        | 2   | No      | 0     |        |
| 43708  |       | 2   | No    |        | 1   | Yes     | 3     | 3      |
| 43713  |       | 2   | No    |        | 1   | Yes     | 1     | 1      |
| 43718  |       | 1   | Yes   | 3      | 2   | No      | 0     |        |
| 43725  |       | 2   | No    |        | 2   | No      | 0     |        |
| 43747  |       | 2   | No    |        | 2   | No      | 2     | 1      |
| 43755  |       | 2   | No    |        | 1   | Yes     | 0     |        |
| 43770  |       | 2   | No    |        | 2   | No      | 2     | 1      |
| 43775  |       | 2   | No    |        | 2   | No      | 2     | 2      |
| 43788  |       | 2   | No    |        | 2   | No      | 0     |        |
| 43790  |       | 2   | No    |        | 2   | No      | 2     | 2      |

| respid | Q16_2 | Q17 | Smoke | Q17a_1 | Q18 | Alcohol | Q19_1 | Q19a_1 |
|--------|-------|-----|-------|--------|-----|---------|-------|--------|
| 43797  |       | 2   | No    |        | 2   | No      | 1     | 1      |
| 43798  |       | 2   | No    |        | 2   | No      | 1     | 2      |
| 43811  |       | 2   | No    |        | 2   | No      | 3     | 2      |
| 43819  |       | 2   | No    |        | 2   | No      | 0     |        |
| 43821  |       | 2   | No    |        | 2   | No      | 1     | 1      |
| 43822  |       | 2   | No    |        | 2   | No      | 0     |        |
| 43825  |       | 2   | No    |        | 2   | No      | 2     | 2      |
| 43826  |       | 2   | No    |        | 2   | No      | 0     |        |
| 43831  |       | 2   | No    |        | 2   | No      | 0     |        |
| 43836  |       | 2   | No    |        | 2   | No      | 1     | 1      |
| 43852  |       | 2   | No    |        | 2   | No      | 2     | 1      |
| 43857  |       | 2   | No    |        | 2   | No      | 0     |        |
| 43858  |       | 2   | No    |        | 2   | No      | 3     | 2      |
| 43859  |       | 2   | No    |        | 2   | No      | 1     | 1      |
| 43863  |       | 2   | No    |        | 2   | No      | 0     |        |
| 43868  |       | 2   | No    |        | 2   | No      | 2     | 1      |
| 43872  |       | 2   | No    |        | 2   | No      | 1     | 1      |
| 43874  |       | 2   | No    |        | 2   | No      | 1     | 1      |
| 43882  |       | 2   | No    |        | 2   | No      | 0     |        |
| 43886  |       | 2   | No    |        | 2   | No      | 0     |        |
| 43903  |       | 2   | No    |        | 2   | No      | 1     | 2      |
| 43929  |       | 1   | Yes   | 8      | 1   | Yes     | 1     | 0      |
| 43932  |       | 2   | No    |        | 2   | No      | 1     | 1      |
| 43936  |       | 2   | No    |        | 1   | Yes     | 0     |        |
| 43962  |       | 2   | No    |        | 2   | No      | 0     |        |
| 43964  |       | 2   | No    |        | 2   | No      | 0     |        |
| 43968  |       | 2   | No    |        | 2   | No      | 0     |        |
| 43979  |       | 2   | No    |        | 2   | No      | 2     | 1      |
| 44006  |       | 2   | No    |        | 2   | No      | 4     | 3      |
| 44009  |       | 2   | No    |        | 2   | No      | 2     | 2      |
| 44023  |       | 2   | No    |        | 2   | No      | 2     | 2      |
| 44035  |       | 2   | No    |        | 2   | No      | 1     | 1      |

| respid | Q16_2 | Q17 | Smoke | Q17a_1 | Q18 | Alcohol | Q19_1 | Q19a_1 |
|--------|-------|-----|-------|--------|-----|---------|-------|--------|
| 44038  |       | 2   | No    |        | 2   | No      | 2     | 2      |
| 44039  |       | 2   | No    |        | 2   | No      | 3     | 2      |
| 44043  |       | 2   | No    |        | 2   | No      | 1     | 1      |
| 44048  |       | 2   | No    |        | 2   | No      | 1     | 2      |
| 44050  |       | 2   | No    |        | 2   | No      | 0     |        |
| 44051  |       | 2   | No    |        | 2   | No      | 1     | 1      |
| 44061  |       | 2   | No    |        | 2   | No      | 1     | 1      |
| 44063  |       | 2   | No    |        | 2   | No      | 1     | 2      |
| 44072  |       | 2   | No    |        | 2   | No      | 1     | 2      |
| 44075  |       | 2   | No    |        | 2   | No      | 3     | 2      |
| 44089  |       | 2   | No    |        | 2   | No      | 1     | 1      |
| 44090  |       | 1   | Yes   | 15     | 1   | Yes     | 0     |        |
| 44091  |       | 2   | No    |        | 2   | No      | 1     | 1      |
| 44092  |       | 2   | No    |        | 2   | No      | 1     | 1      |
| 44110  |       | 2   | No    |        | 2   | No      | 2     | 1      |
| 44112  |       | 2   | No    |        | 2   | No      | 2     | 1      |
| 44114  |       | 2   | No    |        | 2   | No      | 1     | 2      |
| 44143  |       | 2   | No    |        | 1   | Yes     | 2     | 2      |
| 44179  |       | 1   | Yes   | 7      | 1   | Yes     | 1     | 1      |
| 44234  |       | 2   | No    |        | 2   | No      | 1     | 0      |
| 44236  |       | 2   | No    |        | 2   | No      | 0     |        |
| 44239  |       | 2   | No    |        | 2   | No      | 1     | 1      |
| 44241  |       | 2   | No    |        | 2   | No      | 2     | 1      |
| 44253  |       | 2   | No    |        | 2   | No      | 0     |        |
| 44260  |       | 2   | No    |        | 2   | No      | 1     | 2      |
| 44261  |       | 2   | No    |        | 2   | No      | 1     | 1      |
| 44263  |       | 2   | No    |        | 2   | No      | 1     | 1      |
| 44264  |       | 2   | No    |        | 2   | No      | 0     |        |
| 44265  |       | 2   | No    |        | 2   | No      | 0     |        |
| 44267  |       | 2   | No    |        | 2   | No      | 1     | 1      |
| 44306  |       | 2   | No    |        | 2   | No      | 2     | 1      |
| 44309  |       | 2   | No    |        | 2   | No      | 3     | 2      |

| respid | Q16_2 | Q17 | Smoke | Q17a_1 | Q18 | Alcohol | Q19_1 | Q19a_1 |
|--------|-------|-----|-------|--------|-----|---------|-------|--------|
| 44310  |       | 2   | No    |        | 2   | No      | 0     |        |
| 44361  |       | 2   | No    |        | 2   | No      | 0     |        |
| 44380  |       | 2   | No    |        | 2   | No      | 1     | 1      |
| 44386  |       | 2   | No    |        | 1   | Yes     | 0     |        |
| 44419  |       | 2   | No    |        | 2   | No      | 0     |        |
| 44426  |       | 2   | No    |        | 2   | No      | 0     |        |
| 44479  |       | 1   | Yes   | 10     | 1   | Yes     | 1     | 0      |
| 44484  |       | 2   | No    |        | 2   | No      | 1     | 2      |
| 44487  |       | 2   | No    |        | 1   | Yes     | 0     |        |
| 44509  |       | 2   | No    |        | 2   | No      | 1     | 1      |
| 44540  |       | 2   | No    |        | 2   | No      | 2     | 2      |
| 44551  |       | 1   | Yes   | 5      | 2   | No      | 3     | 2      |
| 44553  |       | 2   | No    |        | 1   | Yes     | 0     |        |
| 44650  |       | 2   | No    |        | 2   | No      | 0     |        |
| 44665  |       | 2   | No    |        | 2   | No      | 3     | 2      |
| 44779  |       | 2   | No    |        | 2   | No      | 1     | 1      |
| 44797  |       | 1   | Yes   | 5      | 1   | Yes     | 3     | 2      |
| 44807  |       | 2   | No    |        | 2   | No      | 1     | 1      |
| 44815  |       | 2   | No    |        | 2   | No      | 1     | 1      |
| 44836  |       | 2   | No    |        | 1   | Yes     | 0     |        |
| 44868  |       | 1   | Yes   | 8      | 1   | Yes     | 4     | 2      |
| 44927  |       | 2   | No    |        | 2   | No      | 1     | 1      |
| 44983  |       | 2   | No    |        | 2   | No      | 0     |        |
| 45040  |       | 2   | No    |        | 2   | No      | 1     | 0      |
| 45051  |       | 2   | No    |        | 2   | No      | 1     | 1      |
| 45067  |       | 2   | No    |        | 2   | No      | 3     | 1      |
| 45074  |       | 2   | No    |        | 2   | No      | 0     |        |
| 45115  |       | 2   | No    |        | 2   | No      | 1     | 1      |
| 45187  |       | 1   | Yes   | 20     | 1   | Yes     | 3     | 2      |
| 45221  |       | 2   | No    |        | 1   | Yes     | 1     | 2      |
| 45279  |       | 2   | No    |        | 2   | No      | 1     | 1      |
| 45308  |       | 1   | Yes   | 5      | 1   | Yes     | 2     | 1      |

| respid | Q16_2 | Q17 | Smoke | Q17a_1 | Q18 | Alcohol | Q19_1 | Q19a_1 |
|--------|-------|-----|-------|--------|-----|---------|-------|--------|
| 45317  |       | 2   | No    |        | 2   | No      | 1     | 1      |
| 45379  |       | 1   | Yes   | 17     | 1   | Yes     | 0     |        |
| 45451  |       | 2   | No    |        | 2   | No      | 0     |        |
| 45472  |       | 1   | Yes   | 10     | 2   | No      | 4     | 3      |
| 45474  |       | 1   | Yes   | 15     | 1   | Yes     | 3     | 3      |
| 45544  |       | 2   | No    |        | 2   | No      | 0     |        |
| 45561  |       | 2   | No    |        | 1   | Yes     | 2     | 2      |
| 45596  |       | 1   | Yes   | 10     | 2   | No      | 1     | 2      |

**InstrumIPSS**

**IPSS/ICS**

**Symptom** Storage

Voiding

**Type of R**Symptom

Bother

Symptom

Bother

**Descripti**Frequency

Symptom Bother

Intermittency

Symptom Bother

| respid | Q20_1 | Q20a_1 | Q21_1 | Q21a_1 |
|--------|-------|--------|-------|--------|
| 241    | 1     | 1      | 0     |        |
| 242    | 1     | 1      | 1     | 1      |
| 243    | 2     | 2      | 1     | 2      |
| 244    | 2     | 3      | 2     | 2      |
| 245    | 1     | 1      | 0     |        |
| 246    | 1     | 1      | 1     | 1      |
| 247    | 3     | 2      | 2     | 2      |
| 253    | 0     |        | 0     |        |
| 256    | 1     | 2      | 2     | 2      |
| 257    | 1     | 1      | 0     |        |
| 258    | 1     | 1      | 1     | 0      |
| 259    | 0     |        | 0     |        |
| 263    | 3     | 1      | 3     | 0      |
| 264    | 1     | 0      | 0     |        |
| 265    | 3     | 2      | 2     | 2      |
| 266    | 1     | 1      | 0     |        |
| 268    | 1     | 1      | 1     | 1      |
| 270    | 0     |        | 0     |        |
| 272    | 0     |        | 1     | 1      |
| 274    | 1     | 0      | 1     | 1      |

| respid | Q20_1 | Q20a_1 | Q21_1 | Q21a_1 |
|--------|-------|--------|-------|--------|
| 275    | 0     |        | 0     |        |
| 276    | 2     | 0      | 0     |        |
| 277    | 1     | 1      | 0     |        |
| 279    | 2     | 2      | 1     | 1      |
| 286    | 3     | 2      | 3     | 2      |
| 290    | 1     | 2      | 0     |        |
| 291    | 3     | 1      | 0     |        |
| 295    | 0     |        | 0     |        |
| 297    | 2     | 1      | 1     | 1      |
| 299    | 1     | 1      | 1     | 1      |
| 300    | 2     | 2      | 2     | 2      |
| 303    | 1     | 0      | 0     |        |
| 304    | 1     | 0      | 0     |        |
| 306    | 1     | 0      | 0     |        |
| 307    | 1     | 1      | 0     |        |
| 312    | 5     | 3      | 5     | 3      |
| 315    | 1     | 1      | 1     | 1      |
| 317    | 0     |        | 1     | 0      |
| 322    | 1     | 1      | 1     | 2      |
| 335    | 1     | 2      | 1     | 0      |
| 374    | 3     | 2      | 2     | 2      |
| 378    | 1     | 1      | 1     | 1      |
| 380    | 1     | 1      | 1     | 1      |
| 382    | 2     | 3      | 4     | 3      |
| 384    | 1     | 2      | 2     | 1      |
| 385    | 1     | 1      | 1     | 1      |
| 395    | 1     | 1      | 1     | 2      |
| 396    | 0     |        | 0     |        |
| 398    | 0     |        | 0     |        |
| 402    | 5     | 3      | 4     | 3      |
| 414    | 1     | 2      | 1     | 1      |
| 415    | 0     |        | 0     |        |



| respid | Q20_1 | Q20a_1 | Q21_1 | Q21a_1 |
|--------|-------|--------|-------|--------|
| 416    | 0     |        | 0     |        |
| 420    | 3     | 2      | 2     | 2      |
| 421    | 3     | 2      | 1     | 1      |
| 422    | 1     | 0      | 0     |        |
| 423    | 1     | 0      | 1     | 0      |
| 424    | 1     | 1      | 0     |        |
| 425    | 1     | 0      | 0     |        |
| 428    | 1     | 1      | 0     |        |
| 429    | 1     | 1      | 0     |        |
| 431    | 0     |        | 0     |        |
| 437    | 1     | 1      | 0     |        |
| 438    | 1     | 0      | 5     | 0      |
| 441    | 1     | 1      | 1     | 0      |
| 444    | 0     |        | 0     |        |
| 448    | 1     | 0      | 0     |        |
| 449    | 4     | 1      | 1     | 1      |
| 457    | 3     | 2      | 1     | 1      |
| 460    | 0     |        | 0     |        |
| 469    | 1     | 1      | 1     | 1      |
| 471    | 1     | 1      | 0     |        |
| 473    | 3     | 3      | 0     |        |
| 476    | 1     | 1      | 1     | 1      |
| 479    | 0     |        | 0     |        |
| 485    | 1     | 0      | 0     |        |
| 488    | 1     | 1      | 0     |        |
| 494    | 1     | 0      | 0     |        |
| 496    | 1     | 0      | 0     |        |
| 501    | 0     |        | 0     |        |
| 502    | 3     | 2      | 1     | 2      |
| 503    | 2     | 2      | 0     |        |
| 506    | 1     | 0      | 0     |        |
| 514    | 4     | 2      | 3     | 1      |

| respid | Q20_1 | Q20a_1 | Q21_1 | Q21a_1 |
|--------|-------|--------|-------|--------|
| 515    | 0     |        | 1     | 1      |
| 516    | 1     | 0      | 0     |        |
| 519    | 0     |        | 0     |        |
| 522    | 0     |        | 0     |        |
| 525    | 0     |        | 1     | 1      |
| 528    | 0     |        | 0     |        |
| 532    | 0     |        | 1     | 1      |
| 536    | 1     | 1      | 0     |        |
| 539    | 0     |        | 0     |        |
| 540    | 1     | 1      | 0     |        |
| 547    | 1     | 0      | 0     |        |
| 551    | 1     | 0      | 0     |        |
| 554    | 1     | 2      | 1     | 1      |
| 558    | 1     | 1      | 1     | 1      |
| 563    | 0     |        | 0     |        |
| 564    | 1     | 1      | 1     | 1      |
| 565    | 1     | 1      | 1     | 0      |
| 567    | 1     | 0      | 0     |        |
| 569    | 1     | 0      | 0     |        |
| 572    | 1     | 1      | 1     | 1      |
| 574    | 1     | 2      | 1     | 1      |
| 583    | 1     | 1      | 1     | 1      |
| 589    | 0     |        | 0     |        |
| 592    | 1     | 0      | 1     | 0      |
| 593    | 0     |        | 0     |        |
| 594    | 3     | 2      | 3     | 2      |
| 597    | 2     | 0      | 1     | 1      |
| 601    | 1     | 1      | 1     | 0      |
| 607    | 1     | 1      | 1     | 1      |
| 610    | 1     | 1      | 0     |        |
| 612    | 3     | 3      | 5     | 4      |
| 627    | 0     |        | 0     |        |

| respid | Q20_1 | Q20a_1 | Q21_1 | Q21a_1 |
|--------|-------|--------|-------|--------|
| 631    | 0     |        | 0     |        |
| 633    | 1     | 1      | 0     |        |
| 636    | 0     |        | 3     | 0      |
| 656    | 3     | 0      | 0     |        |
| 659    | 0     |        | 0     |        |
| 670    | 0     |        | 0     |        |
| 672    | 2     | 2      | 0     |        |
| 673    | 1     | 1      | 1     | 1      |
| 675    | 0     |        | 0     |        |
| 676    | 2     | 1      | 2     | 2      |
| 679    | 1     | 1      | 2     | 2      |
| 683    | 1     | 1      | 3     | 2      |
| 684    | 1     | 1      | 0     |        |
| 690    | 1     | 0      | 0     |        |
| 701    | 4     | 3      | 5     | 3      |
| 709    | 3     | 2      | 5     | 3      |
| 719    | 2     | 0      | 0     |        |
| 726    | 1     | 1      | 0     |        |
| 730    | 1     | 0      | 0     |        |
| 731    | 1     | 1      | 1     | 1      |
| 732    | 0     |        | 0     |        |
| 733    | 0     |        | 0     |        |
| 735    | 0     |        | 0     |        |
| 738    | 1     | 0      | 0     |        |
| 740    | 1     | 0      | 0     |        |
| 742    | 1     | 1      | 0     |        |
| 744    | 0     |        | 0     |        |
| 749    | 1     | 1      | 0     |        |
| 751    | 2     | 0      | 0     |        |
| 752    | 1     | 1      | 1     | 1      |
| 753    | 2     | 1      | 1     | 0      |
| 755    | 1     | 1      | 0     |        |

| respid | Q20_1 | Q20a_1 | Q21_1 | Q21a_1 |
|--------|-------|--------|-------|--------|
| 756    | 0     |        | 0     |        |
| 759    | 0     |        | 0     |        |
| 760    | 1     | 1      | 0     |        |
| 763    | 2     | 1      | 2     | 1      |
| 764    | 1     | 0      | 0     |        |
| 765    | 0     |        | 0     |        |
| 766    | 1     | 1      | 1     | 0      |
| 767    | 0     |        | 1     | 0      |
| 771    | 1     | 1      | 0     |        |
| 773    | 1     | 0      | 0     |        |
| 774    | 2     | 0      | 0     |        |
| 775    | 4     | 2      | 5     | 2      |
| 776    | 2     | 1      | 1     | 1      |
| 778    | 2     | 2      | 2     | 2      |
| 780    | 0     |        | 0     |        |
| 781    | 1     | 1      | 0     |        |
| 782    | 2     | 1      | 0     |        |
| 783    | 5     | 2      | 0     |        |
| 786    | 3     | 3      | 3     | 3      |
| 788    | 0     |        | 0     |        |
| 792    | 0     |        | 0     |        |
| 794    | 4     | 3      | 4     | 3      |
| 795    | 0     |        | 0     |        |
| 799    | 2     | 1      | 1     | 1      |
| 800    | 0     |        | 0     |        |
| 801    | 5     | 2      | 5     | 2      |
| 804    | 1     | 0      | 0     |        |
| 806    | 0     |        | 0     |        |
| 807    | 2     | 0      | 1     | 1      |
| 808    | 5     | 3      | 5     | 3      |
| 809    | 1     | 0      | 1     | 1      |
| 811    | 0     |        | 0     |        |

| respid | Q20_1 | Q20a_1 | Q21_1 | Q21a_1 |
|--------|-------|--------|-------|--------|
| 812    | 0     |        | 0     |        |
| 815    | 0     |        | 0     |        |
| 817    | 3     | 0      | 1     | 0      |
| 818    | 1     | 1      | 0     |        |
| 819    | 1     | 1      | 0     |        |
| 821    | 1     | 1      | 1     | 1      |
| 824    | 2     | 1      | 1     | 1      |
| 825    | 0     |        | 0     |        |
| 828    | 0     |        | 0     |        |
| 832    | 2     | 1      | 2     | 1      |
| 834    | 1     | 1      | 1     | 1      |
| 835    | 3     | 3      | 3     | 2      |
| 836    | 0     |        | 0     |        |
| 837    | 1     | 0      | 0     |        |
| 840    | 0     |        | 0     |        |
| 841    | 1     | 0      | 0     |        |
| 845    | 1     | 0      | 0     |        |
| 846    | 1     | 0      | 0     |        |
| 849    | 1     | 0      | 0     |        |
| 852    | 0     |        | 0     |        |
| 854    | 5     | 1      | 5     | 1      |
| 856    | 3     | 0      | 0     |        |
| 858    | 2     | 1      | 0     |        |
| 859    | 3     | 3      | 2     | 1      |
| 861    | 0     |        | 0     |        |
| 863    | 0     |        | 0     |        |
| 864    | 3     | 2      | 0     |        |
| 866    | 0     |        | 0     |        |
| 869    | 1     | 0      | 0     |        |
| 870    | 1     | 1      | 0     |        |
| 871    | 0     |        | 0     |        |
| 873    | 2     | 2      | 3     | 3      |

| respid | Q20_1 | Q20a_1 | Q21_1 | Q21a_1 |
|--------|-------|--------|-------|--------|
| 879    | 1     | 0      | 0     |        |
| 880    | 2     | 0      | 0     |        |
| 881    | 1     | 2      | 0     |        |
| 882    | 1     | 0      | 0     |        |
| 885    | 0     |        | 0     |        |
| 886    | 3     | 1      | 1     | 1      |
| 887    | 5     | 2      | 4     | 2      |
| 888    | 1     | 1      | 0     |        |
| 889    | 3     | 3      | 4     | 4      |
| 890    | 0     |        | 2     | 1      |
| 900    | 0     |        | 0     |        |
| 901    | 4     | 0      | 0     |        |
| 902    | 2     | 2      | 2     | 2      |
| 903    | 0     |        | 0     |        |
| 906    | 4     | 1      | 5     | 1      |
| 907    | 3     | 2      | 1     | 1      |
| 908    | 2     | 1      | 1     | 1      |
| 910    | 0     |        | 0     |        |
| 911    | 1     | 0      | 1     | 0      |
| 912    | 2     | 0      | 0     |        |
| 915    | 0     |        | 0     |        |
| 923    | 2     | 3      | 3     | 4      |
| 925    | 0     |        | 0     |        |
| 926    | 1     | 1      | 0     |        |
| 929    | 0     |        | 0     |        |
| 932    | 0     |        | 0     |        |
| 933    | 2     | 0      | 3     | 2      |
| 934    | 0     |        | 0     |        |
| 938    | 1     | 1      | 2     | 1      |
| 941    | 0     |        | 0     |        |
| 942    | 1     | 1      | 0     |        |
| 943    | 0     |        | 0     |        |

| respid | Q20_1 | Q20a_1 | Q21_1 | Q21a_1 |
|--------|-------|--------|-------|--------|
| 945    | 0     |        | 0     |        |
| 946    | 0     |        | 0     |        |
| 947    | 0     |        | 1     | 0      |
| 948    | 0     |        | 0     |        |
| 949    | 0     |        | 0     |        |
| 952    | 0     |        | 0     |        |
| 956    | 4     | 1      | 0     |        |
| 957    | 0     |        | 0     |        |
| 959    | 1     | 0      | 0     |        |
| 961    | 1     | 0      | 1     | 0      |
| 962    | 3     | 3      | 2     | 3      |
| 965    | 1     | 1      | 1     | 1      |
| 967    | 1     | 1      | 1     | 1      |
| 969    | 0     |        | 0     |        |
| 970    | 0     |        | 0     |        |
| 973    | 2     | 1      | 0     |        |
| 974    | 2     | 1      | 0     |        |
| 975    | 2     | 1      | 1     | 1      |
| 976    | 0     |        | 0     |        |
| 977    | 0     |        | 1     | 0      |
| 979    | 0     |        | 0     |        |
| 981    | 0     |        | 0     |        |
| 983    | 0     |        | 0     |        |
| 987    | 1     | 1      | 1     | 1      |
| 991    | 0     |        | 0     |        |
| 992    | 0     |        | 0     |        |
| 993    | 4     | 0      | 0     |        |
| 994    | 5     | 2      | 0     |        |
| 995    | 3     | 2      | 2     | 2      |
| 998    | 1     | 1      | 1     | 1      |
| 1000   | 5     | 2      | 5     | 2      |
| 1001   | 5     | 2      | 4     | 2      |

| respid | Q20_1 | Q20a_1 | Q21_1 | Q21a_1 |
|--------|-------|--------|-------|--------|
| 1002   | 0     |        | 0     |        |
| 1004   | 0     |        | 0     |        |
| 1005   | 1     | 1      | 0     |        |
| 1006   | 4     | 2      | 3     | 1      |
| 1007   | 0     |        | 0     |        |
| 1009   | 0     |        | 0     |        |
| 1013   | 0     |        | 0     |        |
| 1015   | 0     |        | 0     |        |
| 1020   | 1     | 1      | 2     | 1      |
| 1022   | 2     | 2      | 1     | 2      |
| 1024   | 1     | 1      | 0     |        |
| 1025   | 0     |        | 0     |        |
| 1027   | 0     |        | 0     |        |
| 1031   | 0     |        | 0     |        |
| 1037   | 0     |        | 0     |        |
| 1039   | 0     |        | 0     |        |
| 1040   | 1     | 1      | 1     | 1      |
| 1056   | 3     | 2      | 1     | 1      |
| 1057   | 2     | 1      | 0     |        |
| 1062   | 1     | 0      | 0     |        |
| 1069   | 1     | 0      | 1     | 0      |
| 1070   | 0     |        | 0     |        |
| 1072   | 1     | 1      | 1     | 1      |
| 1076   | 0     |        | 0     |        |
| 1077   | 1     | 0      | 0     |        |
| 1078   | 0     |        | 0     |        |
| 1080   | 0     |        | 0     |        |
| 1094   | 2     | 2      | 0     |        |
| 1098   | 2     | 1      | 2     | 1      |
| 1099   | 1     | 0      | 0     |        |
| 1102   | 2     | 1      | 0     |        |
| 1110   | 0     |        | 0     |        |



| respid | Q20_1 | Q20a_1 | Q21_1 | Q21a_1 |
|--------|-------|--------|-------|--------|
| 1117   | 2     | 1      | 0     |        |
| 1119   | 0     |        | 0     |        |
| 1126   | 0     |        | 1     | 1      |
| 1127   | 0     |        | 0     |        |
| 1130   | 0     |        | 0     |        |
| 1131   | 1     | 0      | 0     |        |
| 1135   | 2     | 3      | 2     | 3      |
| 1138   | 2     | 1      | 2     | 1      |
| 1139   | 0     |        | 0     |        |
| 1140   | 0     |        | 1     | 0      |
| 1142   | 0     |        | 0     |        |
| 1143   | 0     |        | 0     |        |
| 1145   | 0     |        | 0     |        |
| 1149   | 0     |        | 0     |        |
| 1152   | 1     | 0      | 0     |        |
| 1160   | 1     | 2      | 1     | 2      |
| 1164   | 0     |        | 0     |        |
| 1165   | 1     | 1      | 0     |        |
| 1169   | 3     | 2      | 1     | 2      |
| 1170   | 1     | 0      | 0     |        |
| 1179   | 1     | 1      | 0     |        |
| 1180   | 0     |        | 0     |        |
| 1183   | 1     | 1      | 0     |        |
| 1187   | 2     | 0      | 0     |        |
| 1188   | 2     | 1      | 1     | 1      |
| 1193   | 0     |        | 0     |        |
| 1194   | 4     | 1      | 3     | 2      |
| 1197   | 1     | 1      | 0     |        |
| 1202   | 0     |        | 0     |        |
| 1204   | 3     | 3      | 3     | 4      |
| 1211   | 0     |        | 0     |        |
| 1224   | 1     | 0      | 0     |        |

| respid | Q20_1 | Q20a_1 | Q21_1 | Q21a_1 |
|--------|-------|--------|-------|--------|
| 1225   | 0     |        | 1     | 0      |
| 1230   | 0     |        | 0     |        |
| 1232   | 1     | 0      | 1     | 0      |
| 1233   | 3     | 2      | 2     | 2      |
| 1234   | 1     | 0      | 0     |        |
| 1235   | 1     | 2      | 1     | 2      |
| 1236   | 2     | 1      | 1     | 0      |
| 1237   | 0     |        | 0     |        |
| 1238   | 1     | 1      | 0     |        |
| 1239   | 1     | 1      | 0     |        |
| 1241   | 0     |        | 0     |        |
| 1242   | 5     | 0      | 0     |        |
| 1244   | 1     | 1      | 2     | 2      |
| 1245   | 1     | 0      | 1     | 0      |
| 1247   | 3     | 3      | 4     | 3      |
| 1248   | 1     | 1      | 0     |        |
| 1249   | 1     | 2      | 1     | 2      |
| 1250   | 5     | 0      | 0     |        |
| 1251   | 1     | 0      | 1     | 0      |
| 1252   | 0     |        | 0     |        |
| 1253   | 1     | 1      | 1     | 1      |
| 1254   | 3     | 4      | 3     | 3      |
| 1258   | 0     |        | 0     |        |
| 1260   | 2     | 0      | 0     |        |
| 1261   | 1     | 0      | 0     |        |
| 1262   | 1     | 1      | 2     | 2      |
| 1263   | 2     | 3      | 0     |        |
| 1264   | 2     | 1      | 0     |        |
| 1265   | 2     | 2      | 0     |        |
| 1266   | 2     | 1      | 1     | 1      |
| 1270   | 0     |        | 0     |        |
| 1272   | 2     | 2      | 0     |        |

| respid | Q20_1 | Q20a_1 | Q21_1 | Q21a_1 |
|--------|-------|--------|-------|--------|
| 1273   | 0     |        | 0     |        |
| 1276   | 1     | 2      | 1     | 2      |
| 1277   | 0     |        | 0     |        |
| 1278   | 1     | 1      | 1     | 1      |
| 1280   | 1     | 0      | 0     |        |
| 1281   | 1     | 1      | 1     | 1      |
| 1282   | 1     | 1      | 1     | 1      |
| 1283   | 0     |        | 1     | 0      |
| 1288   | 0     |        | 0     |        |
| 1289   | 2     | 0      | 1     | 0      |
| 1290   | 2     | 1      | 2     | 1      |
| 1291   | 0     |        | 0     |        |
| 1293   | 0     |        | 0     |        |
| 1294   | 4     | 2      | 2     | 1      |
| 1295   | 1     | 2      | 1     | 1      |
| 1296   | 3     | 2      | 1     | 1      |
| 1297   | 1     | 2      | 0     |        |
| 1298   | 1     | 1      | 1     | 1      |
| 1300   | 3     | 1      | 4     | 1      |
| 1302   | 1     | 0      | 0     |        |
| 1303   | 0     |        | 0     |        |
| 1304   | 2     | 1      | 0     |        |
| 1305   | 1     | 0      | 1     | 1      |
| 1307   | 0     |        | 0     |        |
| 1312   | 1     | 0      | 0     |        |
| 1313   | 0     |        | 0     |        |
| 1314   | 0     |        | 1     | 2      |
| 1317   | 1     | 1      | 0     |        |
| 1318   | 0     |        | 0     |        |
| 1319   | 1     | 1      | 1     | 1      |
| 1321   | 0     |        | 0     |        |
| 1324   | 3     | 3      | 5     | 4      |

| respid | Q20_1 | Q20a_1 | Q21_1 | Q21a_1 |
|--------|-------|--------|-------|--------|
| 1325   | 1     | 1      | 0     |        |
| 1326   | 0     |        | 0     |        |
| 1327   | 0     |        | 0     |        |
| 1329   | 2     | 2      | 1     | 1      |
| 1330   | 1     | 1      | 0     |        |
| 1331   | 5     | 3      | 0     |        |
| 1335   | 1     | 1      | 1     | 1      |
| 1337   | 1     | 0      | 0     |        |
| 1341   | 1     | 0      | 0     |        |
| 1342   | 0     |        | 0     |        |
| 1344   | 1     | 1      | 3     | 2      |
| 1345   | 4     | 2      | 2     | 1      |
| 1346   | 1     | 0      | 1     | 0      |
| 1350   | 1     | 1      | 1     | 1      |
| 1352   | 0     |        | 0     |        |
| 1353   | 1     | 2      | 1     | 2      |
| 1354   | 0     |        | 0     |        |
| 1355   | 1     | 1      | 0     |        |
| 1357   | 3     | 1      | 0     |        |
| 1360   | 0     |        | 0     |        |
| 1362   | 1     | 1      | 1     | 1      |
| 1363   | 3     | 1      | 1     | 0      |
| 1367   | 1     | 0      | 0     |        |
| 1369   | 1     | 2      | 1     | 1      |
| 1371   | 0     |        | 0     |        |
| 1372   | 0     |        | 0     |        |
| 1375   | 0     |        | 0     |        |
| 1377   | 1     | 1      | 1     | 1      |
| 1379   | 5     | 1      | 5     | 1      |
| 1380   | 1     | 0      | 0     |        |
| 1382   | 1     | 0      | 0     |        |
| 1383   | 0     |        | 0     |        |

| respid | Q20_1 | Q20a_1 | Q21_1 | Q21a_1 |
|--------|-------|--------|-------|--------|
| 1384   | 0     |        | 0     |        |
| 1385   | 1     | 1      | 1     | 1      |
| 1387   | 2     | 1      | 0     |        |
| 1388   | 1     | 0      | 1     | 0      |
| 1389   | 1     | 1      | 1     | 1      |
| 1390   | 1     | 1      | 0     |        |
| 1395   | 1     | 0      | 0     |        |
| 1396   | 1     | 0      | 0     |        |
| 1397   | 1     | 1      | 1     | 1      |
| 1398   | 1     | 0      | 0     |        |
| 1399   | 0     |        | 3     | 0      |
| 1403   | 0     |        | 0     |        |
| 1405   | 3     | 0      | 0     |        |
| 1406   | 1     | 1      | 1     | 1      |
| 1407   | 4     | 3      | 1     | 2      |
| 1408   | 1     | 0      | 0     |        |
| 1409   | 1     | 0      | 0     |        |
| 1410   | 5     | 4      | 5     | 4      |
| 1411   | 1     | 1      | 1     | 1      |
| 1412   | 0     |        | 0     |        |
| 1413   | 1     | 1      | 1     | 0      |
| 1414   | 1     | 0      | 5     | 2      |
| 1415   | 0     |        | 0     |        |
| 1416   | 0     |        | 1     | 2      |
| 1417   | 1     | 0      | 0     |        |
| 1418   | 1     | 0      | 0     |        |
| 1419   | 1     | 1      | 0     |        |
| 1420   | 1     | 0      | 0     |        |
| 1421   | 1     | 1      | 5     | 3      |
| 1422   | 1     | 0      | 0     |        |
| 1423   | 1     | 1      | 2     | 2      |
| 1424   | 4     | 2      | 1     | 2      |

| respid | Q20_1 | Q20a_1 | Q21_1 | Q21a_1 |
|--------|-------|--------|-------|--------|
| 1429   | 0     |        | 0     |        |
| 1430   | 0     |        | 2     | 1      |
| 1431   | 3     | 2      | 3     | 2      |
| 1433   | 1     | 1      | 1     | 1      |
| 1435   | 0     |        | 0     |        |
| 1436   | 0     |        | 1     | 0      |
| 1438   | 0     |        | 0     |        |
| 1439   | 3     | 0      | 0     |        |
| 1441   | 1     | 0      | 1     | 1      |
| 1442   | 1     | 1      | 0     |        |
| 1443   | 0     |        | 0     |        |
| 1444   | 2     | 0      | 0     |        |
| 1445   | 2     | 3      | 1     | 3      |
| 1446   | 1     | 1      | 1     | 1      |
| 1447   | 0     |        | 0     |        |
| 1449   | 3     | 1      | 0     |        |
| 1450   | 2     | 2      | 2     | 2      |
| 1451   | 0     |        | 0     |        |
| 1452   | 0     |        | 0     |        |
| 1453   | 3     | 2      | 3     | 2      |
| 1454   | 1     | 2      | 2     | 2      |
| 1456   | 0     |        | 2     | 2      |
| 1457   | 2     | 2      | 1     | 1      |
| 1459   | 1     | 1      | 1     | 0      |
| 1460   | 1     | 0      | 0     |        |
| 1463   | 1     | 0      | 0     |        |
| 1465   | 0     |        | 0     |        |
| 1467   | 0     |        | 0     |        |
| 1470   | 1     | 1      | 1     | 1      |
| 1471   | 3     | 2      | 3     | 3      |
| 1472   | 0     |        | 0     |        |
| 1474   | 4     | 2      | 3     | 1      |

| respid | Q20_1 | Q20a_1 | Q21_1 | Q21a_1 |
|--------|-------|--------|-------|--------|
| 1475   | 3     | 2      | 2     | 1      |
| 1477   | 1     | 0      | 0     |        |
| 1478   | 1     | 1      | 1     | 1      |
| 1480   | 0     |        | 0     |        |
| 1481   | 1     | 1      | 1     | 1      |
| 1483   | 0     |        | 0     |        |
| 1484   | 0     |        | 1     | 1      |
| 1485   | 1     | 1      | 0     |        |
| 1486   | 3     | 1      | 0     |        |
| 1487   | 3     | 2      | 0     |        |
| 1488   | 0     |        | 0     |        |
| 1489   | 1     | 1      | 1     | 0      |
| 1490   | 1     | 1      | 0     |        |
| 1491   | 3     | 2      | 3     | 1      |
| 1492   | 1     | 1      | 0     |        |
| 1494   | 0     |        | 0     |        |
| 1495   | 3     | 2      | 3     | 2      |
| 1496   | 0     |        | 0     |        |
| 1498   | 1     | 2      | 0     |        |
| 1499   | 1     | 1      | 0     |        |
| 1500   | 1     | 1      | 1     | 1      |
| 1501   | 0     |        | 0     |        |
| 1503   | 0     |        | 0     |        |
| 1504   | 1     | 1      | 0     |        |
| 1508   | 3     | 1      | 2     | 1      |
| 1509   | 1     | 0      | 5     | 2      |
| 1511   | 4     | 3      | 3     | 2      |
| 1512   | 1     | 0      | 1     | 0      |
| 1513   | 2     | 2      | 2     | 2      |
| 1515   | 2     | 1      | 0     |        |
| 1517   | 1     | 1      | 1     | 0      |
| 1518   | 3     | 1      | 0     |        |

| respid | Q20_1 | Q20a_1 | Q21_1 | Q21a_1 |
|--------|-------|--------|-------|--------|
| 1519   | 3     | 2      | 4     | 2      |
| 1520   | 1     | 0      | 0     |        |
| 1521   | 0     |        | 0     |        |
| 1522   | 1     | 0      | 0     |        |
| 1523   | 4     | 3      | 0     |        |
| 1524   | 0     |        | 0     |        |
| 1525   | 1     | 1      | 1     | 1      |
| 1526   | 2     | 1      | 0     |        |
| 1527   | 2     | 0      | 0     |        |
| 1534   | 0     |        | 0     |        |
| 1535   | 0     |        | 0     |        |
| 1536   | 3     | 1      | 1     | 1      |
| 1538   | 3     | 2      | 2     | 2      |
| 1539   | 0     |        | 0     |        |
| 1540   | 1     | 1      | 0     |        |
| 1541   | 1     | 0      | 1     | 0      |
| 1542   | 0     |        | 0     |        |
| 1543   | 1     | 1      | 1     | 1      |
| 1545   | 2     | 2      | 0     |        |
| 1546   | 2     | 1      | 0     |        |
| 1548   | 3     | 3      | 5     | 4      |
| 1549   | 0     |        | 0     |        |
| 1551   | 0     |        | 0     |        |
| 1552   | 1     | 0      | 0     |        |
| 1556   | 0     |        | 0     |        |
| 1557   | 0     |        | 0     |        |
| 1558   | 1     | 0      | 1     | 0      |
| 1561   | 2     | 0      | 0     |        |
| 1562   | 0     |        | 0     |        |
| 1563   | 0     |        | 0     |        |
| 1564   | 3     | 2      | 1     | 2      |
| 1565   | 0     |        | 0     |        |



| respid | Q20_1 | Q20a_1 | Q21_1 | Q21a_1 |
|--------|-------|--------|-------|--------|
| 1566   | 0     |        | 1     | 0      |
| 1567   | 5     | 1      | 0     |        |
| 1569   | 0     |        | 0     |        |
| 1570   | 2     | 0      | 0     |        |
| 1574   | 2     | 1      | 0     |        |
| 1575   | 0     |        | 0     |        |
| 1576   | 1     | 0      | 0     |        |
| 1577   | 0     |        | 2     | 0      |
| 1581   | 3     | 1      | 0     |        |
| 1583   | 2     | 1      | 4     | 2      |
| 1585   | 1     | 0      | 0     |        |
| 1586   | 0     |        | 0     |        |
| 1588   | 1     | 0      | 1     | 0      |
| 1590   | 1     | 0      | 0     |        |
| 1592   | 0     |        | 0     |        |
| 1594   | 2     | 1      | 2     | 1      |
| 1598   | 0     |        | 0     |        |
| 1599   | 2     | 1      | 1     | 1      |
| 1600   | 0     |        | 0     |        |
| 1602   | 0     |        | 0     |        |
| 1603   | 0     |        | 0     |        |
| 1604   | 1     | 0      | 0     |        |
| 1605   | 3     | 3      | 5     | 3      |
| 1606   | 3     | 1      | 0     |        |
| 1610   | 1     | 0      | 1     | 0      |
| 1611   | 2     | 2      | 2     | 2      |
| 1612   | 0     |        | 0     |        |
| 1613   | 4     | 2      | 4     | 2      |
| 1615   | 2     | 2      | 1     | 1      |
| 1616   | 3     | 0      | 1     | 1      |
| 1617   | 3     | 1      | 0     |        |
| 1618   | 1     | 1      | 0     |        |

| respid | Q20_1 | Q20a_1 | Q21_1 | Q21a_1 |
|--------|-------|--------|-------|--------|
| 1620   | 1     | 1      | 1     | 0      |
| 1621   | 3     | 2      | 1     | 1      |
| 1622   | 0     |        | 0     |        |
| 1623   | 0     |        | 0     |        |
| 1624   | 0     |        | 0     |        |
| 1625   | 0     |        | 0     |        |
| 1626   | 0     |        | 0     |        |
| 1627   | 1     | 1      | 0     |        |
| 1629   | 0     |        | 1     | 0      |
| 1630   | 0     |        | 0     |        |
| 1631   | 1     | 0      | 0     |        |
| 1634   | 1     | 1      | 1     | 1      |
| 1635   | 1     | 1      | 0     |        |
| 1636   | 0     |        | 0     |        |
| 1637   | 3     | 0      | 0     |        |
| 1640   | 1     | 0      | 0     |        |
| 1642   | 0     |        | 0     |        |
| 1643   | 2     | 2      | 3     | 2      |
| 1644   | 0     |        | 0     |        |
| 1645   | 1     | 1      | 1     | 1      |
| 1646   | 2     | 0      | 0     |        |
| 1647   | 1     | 0      | 1     | 0      |
| 1650   | 5     | 1      | 5     | 2      |
| 1654   | 0     |        | 0     |        |
| 1656   | 3     | 1      | 0     |        |
| 1657   | 4     | 3      | 4     | 3      |
| 1659   | 0     |        | 0     |        |
| 1662   | 1     | 1      | 1     | 1      |
| 1663   | 2     | 0      | 1     | 1      |
| 1664   | 0     |        | 0     |        |
| 1665   | 0     |        | 1     | 0      |
| 1667   | 2     | 1      | 1     | 1      |

| respid | Q20_1 | Q20a_1 | Q21_1 | Q21a_1 |
|--------|-------|--------|-------|--------|
| 1668   | 1     | 0      | 0     |        |
| 1670   | 1     | 1      | 0     |        |
| 1671   | 1     | 1      | 1     | 0      |
| 1673   | 0     |        | 0     |        |
| 1674   | 0     |        | 0     |        |
| 1676   | 1     | 1      | 0     |        |
| 1677   | 1     | 1      | 0     |        |
| 1678   | 1     | 1      | 0     |        |
| 1680   | 1     | 0      | 0     |        |
| 1681   | 2     | 1      | 1     | 1      |
| 1683   | 0     |        | 0     |        |
| 1685   | 1     | 2      | 1     | 1      |
| 1686   | 1     | 1      | 0     |        |
| 1690   | 1     | 0      | 0     |        |
| 1691   | 1     | 0      | 0     |        |
| 1692   | 4     | 2      | 1     | 1      |
| 1693   | 1     | 2      | 1     | 1      |
| 1695   | 0     |        | 0     |        |
| 1696   | 1     | 1      | 2     | 1      |
| 1698   | 0     |        | 0     |        |
| 1699   | 0     |        | 0     |        |
| 1701   | 1     | 0      | 0     |        |
| 1702   | 0     |        | 0     |        |
| 1703   | 0     |        | 0     |        |
| 1705   | 1     | 1      | 0     |        |
| 1706   | 0     |        | 0     |        |
| 1708   | 0     |        | 0     |        |
| 1711   | 1     | 1      | 1     | 1      |
| 1712   | 3     | 2      | 2     | 1      |
| 1713   | 1     | 0      | 0     |        |
| 1715   | 4     | 1      | 0     |        |
| 1717   | 0     |        | 0     |        |

| respid | Q20_1 | Q20a_1 | Q21_1 | Q21a_1 |
|--------|-------|--------|-------|--------|
| 1718   | 5     | 4      | 5     | 4      |
| 1719   | 0     |        | 0     |        |
| 1721   | 0     |        | 0     |        |
| 1722   | 1     | 1      | 0     |        |
| 1724   | 1     | 1      | 0     |        |
| 1725   | 0     |        | 0     |        |
| 1726   | 1     | 1      | 1     | 1      |
| 1727   | 1     | 0      | 0     |        |
| 1728   | 3     | 2      | 0     |        |
| 1731   | 5     | 1      | 2     | 1      |
| 1733   | 0     |        | 0     |        |
| 1734   | 2     | 0      | 0     |        |
| 1735   | 0     |        | 0     |        |
| 1736   | 0     |        | 0     |        |
| 1737   | 1     | 1      | 0     |        |
| 1738   | 5     | 2      | 1     | 0      |
| 1743   | 3     | 1      | 3     | 1      |
| 1755   | 1     | 2      | 1     | 2      |
| 1756   | 1     | 2      | 0     |        |
| 1757   | 1     | 1      | 1     | 1      |
| 1758   | 1     | 1      | 1     | 1      |
| 1759   | 4     | 2      | 0     |        |
| 1761   | 0     |        | 0     |        |
| 1762   | 0     |        | 0     |        |
| 1764   | 0     |        | 0     |        |
| 1767   | 4     | 2      | 1     | 1      |
| 1768   | 3     | 0      | 2     | 1      |
| 1769   | 1     | 1      | 1     | 1      |
| 1770   | 0     |        | 4     | 0      |
| 1771   | 1     | 1      | 1     | 1      |
| 1776   | 0     |        | 3     | 1      |
| 1777   | 0     |        | 0     |        |

| respid | Q20_1 | Q20a_1 | Q21_1 | Q21a_1 |
|--------|-------|--------|-------|--------|
| 1778   | 5     | 1      | 1     | 0      |
| 1779   | 0     |        | 0     |        |
| 1780   | 1     | 1      | 0     |        |
| 1781   | 0     |        | 0     |        |
| 1783   | 0     |        | 0     |        |
| 1784   | 4     | 3      | 3     | 3      |
| 1785   | 0     |        | 0     |        |
| 1788   | 2     | 1      | 1     | 1      |
| 1792   | 1     | 0      | 0     |        |
| 1794   | 1     | 0      | 0     |        |
| 1798   | 4     | 4      | 4     | 3      |
| 1799   | 4     | 2      | 0     |        |
| 1800   | 0     |        | 0     |        |
| 1804   | 1     | 1      | 1     | 1      |
| 1806   | 1     | 1      | 1     | 1      |
| 1807   | 0     |        | 0     |        |
| 1808   | 1     | 1      | 0     |        |
| 1809   | 1     | 0      | 1     | 0      |
| 1811   | 1     | 1      | 0     |        |
| 1812   | 0     |        | 1     | 0      |
| 1813   | 3     | 2      | 1     | 2      |
| 1814   | 5     | 2      | 0     |        |
| 1815   | 1     | 1      | 0     |        |
| 1817   | 0     |        | 0     |        |
| 1820   | 2     | 1      | 0     |        |
| 1821   | 1     | 2      | 2     | 2      |
| 1822   | 0     |        | 1     | 1      |
| 1823   | 5     | 2      | 5     | 2      |
| 1824   | 0     |        | 0     |        |
| 1826   | 0     |        | 0     |        |
| 1828   | 1     | 0      | 0     |        |
| 1829   | 1     | 0      | 0     |        |

| respid | Q20_1 | Q20a_1 | Q21_1 | Q21a_1 |
|--------|-------|--------|-------|--------|
| 1830   | 0     |        | 1     | 1      |
| 1831   | 0     |        | 0     |        |
| 1832   | 1     | 0      | 0     |        |
| 1836   | 1     | 1      | 1     | 1      |
| 1838   | 2     | 2      | 2     | 1      |
| 1839   | 2     | 2      | 1     | 2      |
| 1840   | 1     | 1      | 1     | 1      |
| 1841   | 0     |        | 0     |        |
| 1842   | 2     | 2      | 0     |        |
| 1843   | 1     | 2      | 0     |        |
| 1844   | 1     | 1      | 1     | 1      |
| 1845   | 5     | 0      | 0     |        |
| 1849   | 0     |        | 0     |        |
| 1850   | 1     | 1      | 0     |        |
| 1851   | 1     | 0      | 0     |        |
| 1852   | 0     |        | 0     |        |
| 1857   | 1     | 1      | 1     | 1      |
| 1858   | 1     | 0      | 0     |        |
| 1861   | 0     |        | 0     |        |
| 1862   | 1     | 0      | 0     |        |
| 1863   | 0     |        | 0     |        |
| 1864   | 2     | 1      | 4     | 0      |
| 1865   | 0     |        | 0     |        |
| 1867   | 0     |        | 0     |        |
| 1868   | 1     | 1      | 5     | 1      |
| 1869   | 1     | 0      | 0     |        |
| 1870   | 0     |        | 0     |        |
| 1871   | 1     | 2      | 2     | 2      |
| 1872   | 0     |        | 0     |        |
| 1873   | 1     | 1      | 0     |        |
| 1876   | 0     |        | 0     |        |
| 1877   | 0     |        | 0     |        |

| respid | Q20_1 | Q20a_1 | Q21_1 | Q21a_1 |
|--------|-------|--------|-------|--------|
| 1878   | 1     | 2      | 0     |        |
| 1879   | 3     | 3      | 0     |        |
| 1880   | 0     |        | 1     | 0      |
| 1881   | 1     | 1      | 1     | 1      |
| 1883   | 3     | 2      | 1     | 1      |
| 1886   | 0     |        | 0     |        |
| 1888   | 2     | 2      | 3     | 3      |
| 1889   | 4     | 3      | 3     | 2      |
| 1890   | 3     | 2      | 2     | 2      |
| 1891   | 0     |        | 0     |        |
| 1893   | 1     | 0      | 0     |        |
| 1894   | 2     | 1      | 1     | 1      |
| 1895   | 3     | 2      | 3     | 1      |
| 1896   | 1     | 1      | 2     | 2      |
| 1897   | 2     | 2      | 1     | 1      |
| 1898   | 5     | 3      | 5     | 2      |
| 1899   | 2     | 2      | 1     | 1      |
| 1900   | 0     |        | 0     |        |
| 1903   | 2     | 1      | 1     | 1      |
| 1906   | 0     |        | 0     |        |
| 1907   | 5     | 3      | 5     | 3      |
| 1908   | 0     |        | 0     |        |
| 1909   | 5     | 3      | 1     | 2      |
| 1910   | 0     |        | 0     |        |
| 1911   | 0     |        | 0     |        |
| 1912   | 0     |        | 0     |        |
| 1917   | 4     | 0      | 0     |        |
| 1918   | 4     | 2      | 5     | 2      |
| 1919   | 0     |        | 0     |        |
| 1922   | 0     |        | 0     |        |
| 1925   | 0     |        | 0     |        |
| 1926   | 1     | 1      | 0     |        |

| respid | Q20_1 | Q20a_1 | Q21_1 | Q21a_1 |
|--------|-------|--------|-------|--------|
| 1927   | 0     |        | 0     |        |
| 1928   | 0     |        | 0     |        |
| 1929   | 0     |        | 0     |        |
| 1934   | 1     | 2      | 0     |        |
| 1935   | 1     | 0      | 0     |        |
| 1936   | 3     | 2      | 3     | 1      |
| 1937   | 0     |        | 0     |        |
| 1938   | 0     |        | 0     |        |
| 1939   | 1     | 1      | 0     |        |
| 1940   | 0     |        | 0     |        |
| 1941   | 0     |        | 0     |        |
| 1948   | 0     |        | 0     |        |
| 1950   | 0     |        | 0     |        |
| 1955   | 2     | 2      | 3     | 2      |
| 1958   | 1     | 0      | 0     |        |
| 1960   | 0     |        | 0     |        |
| 1961   | 0     |        | 0     |        |
| 1962   | 0     |        | 0     |        |
| 1965   | 0     |        | 0     |        |
| 1966   | 0     |        | 0     |        |
| 1967   | 0     |        | 0     |        |
| 1968   | 0     |        | 1     | 1      |
| 1973   | 4     | 1      | 3     | 2      |
| 1974   | 3     | 2      | 2     | 1      |
| 1975   | 0     |        | 0     |        |
| 1977   | 1     | 0      | 0     |        |
| 1978   | 0     |        | 0     |        |
| 1979   | 4     | 4      | 4     | 4      |
| 1982   | 0     |        | 0     |        |
| 1983   | 0     |        | 0     |        |
| 1987   | 1     | 2      | 0     |        |
| 1988   | 3     | 2      | 3     | 2      |



| respid | Q20_1 | Q20a_1 | Q21_1 | Q21a_1 |
|--------|-------|--------|-------|--------|
| 1991   | 4     | 0      | 0     |        |
| 1992   | 1     | 0      | 0     |        |
| 1993   | 3     | 1      | 0     |        |
| 1994   | 1     | 1      | 1     | 1      |
| 1995   | 0     |        | 0     |        |
| 1996   | 1     | 1      | 0     |        |
| 1997   | 0     |        | 0     |        |
| 1998   | 0     |        | 0     |        |
| 1999   | 4     | 3      | 4     | 3      |
| 2000   | 2     | 1      | 2     | 1      |
| 2001   | 1     | 1      | 0     |        |
| 2002   | 0     |        | 0     |        |
| 2003   | 0     |        | 0     |        |
| 2004   | 0     |        | 0     |        |
| 2005   | 1     | 1      | 0     |        |
| 2007   | 3     | 2      | 2     | 2      |
| 2009   | 0     |        | 0     |        |
| 2010   | 0     |        | 0     |        |
| 2011   | 1     | 1      | 0     |        |
| 2013   | 0     |        | 0     |        |
| 2014   | 1     | 1      | 3     | 2      |
| 2017   | 1     | 1      | 1     | 1      |
| 2020   | 0     |        | 0     |        |
| 2023   | 2     | 1      | 1     | 1      |
| 2024   | 2     | 0      | 0     |        |
| 2029   | 0     |        | 0     |        |
| 2030   | 0     |        | 0     |        |
| 2031   | 1     | 1      | 0     |        |
| 2032   | 1     | 2      | 4     | 3      |
| 2033   | 0     |        | 0     |        |
| 2034   | 1     | 1      | 3     | 2      |
| 2036   | 4     | 2      | 5     | 1      |

| respid | Q20_1 | Q20a_1 | Q21_1 | Q21a_1 |
|--------|-------|--------|-------|--------|
| 2037   | 2     | 2      | 2     | 2      |
| 2038   | 0     |        | 0     |        |
| 2039   | 3     | 1      | 3     | 1      |
| 2040   | 0     |        | 0     |        |
| 2041   | 0     |        | 0     |        |
| 2042   | 0     |        | 0     |        |
| 2043   | 1     | 1      | 1     | 1      |
| 2051   | 0     |        | 0     |        |
| 2052   | 0     |        | 0     |        |
| 2053   | 0     |        | 0     |        |
| 2054   | 0     |        | 0     |        |
| 2055   | 0     |        | 0     |        |
| 2056   | 1     | 1      | 1     | 1      |
| 2057   | 2     | 0      | 1     | 1      |
| 2059   | 1     | 0      | 0     |        |
| 2063   | 0     |        | 0     |        |
| 2066   | 3     | 1      | 2     | 1      |
| 2068   | 0     |        | 1     | 1      |
| 2069   | 0     |        | 0     |        |
| 2070   | 0     |        | 0     |        |
| 2071   | 0     |        | 0     |        |
| 2073   | 0     |        | 0     |        |
| 2077   | 3     | 2      | 2     | 2      |
| 2079   | 0     |        | 0     |        |
| 2080   | 0     |        | 0     |        |
| 2081   | 5     | 3      | 3     | 3      |
| 2084   | 0     |        | 0     |        |
| 2085   | 5     | 0      | 0     |        |
| 2087   | 2     | 2      | 0     |        |
| 2089   | 1     | 0      | 1     | 0      |
| 2093   | 0     |        | 0     |        |
| 2094   | 2     | 0      | 1     | 0      |

| respid | Q20_1 | Q20a_1 | Q21_1 | Q21a_1 |
|--------|-------|--------|-------|--------|
| 2095   | 4     | 3      | 1     | 1      |
| 2097   | 0     |        | 0     |        |
| 2099   | 2     | 3      | 2     | 2      |
| 2100   | 1     | 0      | 0     |        |
| 2101   | 0     |        | 0     |        |
| 2103   | 2     | 1      | 0     |        |
| 2104   | 0     |        | 0     |        |
| 2106   | 2     | 1      | 1     | 0      |
| 2111   | 3     | 2      | 3     | 2      |
| 2113   | 0     |        | 0     |        |
| 2115   | 0     |        | 0     |        |
| 2119   | 1     | 1      | 0     |        |
| 2120   | 0     |        | 0     |        |
| 2123   | 0     |        | 0     |        |
| 2124   | 1     | 1      | 0     |        |
| 2130   | 0     |        | 0     |        |
| 2131   | 2     | 1      | 1     | 0      |
| 2133   | 5     | 4      | 1     | 4      |
| 2139   | 1     | 1      | 0     |        |
| 2141   | 0     |        | 0     |        |
| 2143   | 0     |        | 0     |        |
| 2144   | 1     | 0      | 0     |        |
| 2147   | 0     |        | 0     |        |
| 2151   | 1     | 1      | 0     |        |
| 2153   | 0     |        | 0     |        |
| 2154   | 0     |        | 0     |        |
| 2155   | 1     | 0      | 2     | 1      |
| 2159   | 3     | 0      | 2     | 1      |
| 2160   | 2     | 2      | 3     | 3      |
| 2161   | 0     |        | 0     |        |
| 2163   | 3     | 1      | 1     | 0      |
| 2164   | 1     | 0      | 0     |        |

| respid | Q20_1 | Q20a_1 | Q21_1 | Q21a_1 |
|--------|-------|--------|-------|--------|
| 2168   | 0     |        | 0     |        |
| 2169   | 3     | 2      | 0     |        |
| 2170   | 1     | 0      | 1     | 0      |
| 2171   | 1     | 2      | 1     | 2      |
| 2172   | 3     | 2      | 3     | 2      |
| 2173   | 0     |        | 0     |        |
| 2174   | 2     | 2      | 0     |        |
| 2175   | 2     | 2      | 0     |        |
| 2176   | 1     | 0      | 1     | 0      |
| 2177   | 4     | 3      | 3     | 2      |
| 2179   | 1     | 1      | 0     |        |
| 2181   | 1     | 0      | 0     |        |
| 2182   | 1     | 0      | 1     | 0      |
| 2183   | 2     | 1      | 1     | 1      |
| 2184   | 1     | 1      | 1     | 1      |
| 2185   | 0     |        | 0     |        |
| 2186   | 0     |        | 0     |        |
| 2187   | 1     | 1      | 3     | 1      |
| 2188   | 0     |        | 0     |        |
| 2189   | 0     |        | 0     |        |
| 2190   | 1     | 0      | 0     |        |
| 2193   | 1     | 0      | 0     |        |
| 2195   | 5     | 1      | 0     |        |
| 2198   | 0     |        | 1     | 0      |
| 2200   | 0     |        | 0     |        |
| 2205   | 2     | 2      | 2     | 2      |
| 2208   | 0     |        | 0     |        |
| 2209   | 3     | 2      | 2     | 1      |
| 2210   | 2     | 2      | 3     | 2      |
| 2211   | 1     | 1      | 1     | 1      |
| 2213   | 0     |        | 0     |        |
| 2214   | 1     | 3      | 1     | 1      |

| respid | Q20_1 | Q20a_1 | Q21_1 | Q21a_1 |
|--------|-------|--------|-------|--------|
| 2216   | 3     | 0      | 1     | 0      |
| 2220   | 0     |        | 0     |        |
| 2225   | 0     |        | 0     |        |
| 2227   | 0     |        | 1     | 1      |
| 2228   | 2     | 1      | 2     | 0      |
| 2229   | 0     |        | 0     |        |
| 2230   | 0     |        | 0     |        |
| 2236   | 0     |        | 0     |        |
| 2238   | 4     | 4      | 4     | 4      |
| 2239   | 0     |        | 0     |        |
| 2240   | 1     | 0      | 0     |        |
| 2241   | 5     | 2      | 2     | 2      |
| 2243   | 0     |        | 0     |        |
| 2245   | 1     | 0      | 0     |        |
| 2247   | 1     | 1      | 1     | 1      |
| 2248   | 1     | 0      | 0     |        |
| 2249   | 0     |        | 0     |        |
| 2254   | 1     | 0      | 0     |        |
| 2256   | 0     |        | 0     |        |
| 2259   | 0     |        | 0     |        |
| 2261   | 1     | 0      | 0     |        |
| 2262   | 0     |        | 0     |        |
| 2263   | 0     |        | 0     |        |
| 2264   | 1     | 2      | 1     | 1      |
| 2265   | 0     |        | 0     |        |
| 2270   | 1     | 1      | 0     |        |
| 2271   | 1     | 0      | 0     |        |
| 2272   | 1     | 0      | 0     |        |
| 2273   | 1     | 1      | 0     |        |
| 2274   | 3     | 1      | 1     | 0      |
| 2276   | 1     | 1      | 0     |        |
| 2277   | 3     | 2      | 2     | 2      |

| respid | Q20_1 | Q20a_1 | Q21_1 | Q21a_1 |
|--------|-------|--------|-------|--------|
| 2281   | 0     |        | 0     |        |
| 2288   | 2     | 1      | 2     | 1      |
| 2290   | 1     | 1      | 0     |        |
| 2294   | 1     | 1      | 1     | 1      |
| 2295   | 1     | 0      | 0     |        |
| 2296   | 0     |        | 1     | 0      |
| 2297   | 0     |        | 0     |        |
| 2298   | 1     | 0      | 0     |        |
| 2301   | 3     | 2      | 3     | 2      |
| 2302   | 1     | 1      | 1     | 1      |
| 2303   | 0     |        | 0     |        |
| 2305   | 0     |        | 0     |        |
| 2309   | 2     | 1      | 0     |        |
| 2310   | 0     |        | 0     |        |
| 2311   | 1     | 2      | 1     | 2      |
| 2313   | 2     | 1      | 4     | 3      |
| 2316   | 0     |        | 0     |        |
| 2317   | 1     | 0      | 0     |        |
| 2318   | 1     | 2      | 1     | 2      |
| 2319   | 4     | 2      | 2     | 2      |
| 2321   | 4     | 2      | 3     | 2      |
| 2324   | 4     | 1      | 3     | 1      |
| 2328   | 2     | 0      | 0     |        |
| 2329   | 0     |        | 0     |        |
| 2330   | 3     | 2      | 2     | 2      |
| 2333   | 1     | 1      | 1     | 1      |
| 2334   | 2     | 1      | 2     | 1      |
| 2338   | 5     | 0      | 0     |        |
| 2341   | 1     | 1      | 2     | 1      |
| 2342   | 3     | 2      | 0     |        |
| 2343   | 3     | 3      | 1     | 2      |
| 2346   | 2     | 1      | 1     | 0      |

| respid | Q20_1 | Q20a_1 | Q21_1 | Q21a_1 |
|--------|-------|--------|-------|--------|
| 2347   | 1     | 2      | 0     |        |
| 2348   | 1     | 2      | 0     |        |
| 2349   | 3     | 2      | 3     | 2      |
| 2350   | 0     |        | 0     |        |
| 2351   | 1     | 0      | 0     |        |
| 2352   | 0     |        | 0     |        |
| 2359   | 1     | 0      | 0     |        |
| 2362   | 0     |        | 0     |        |
| 2363   | 0     |        | 0     |        |
| 2365   | 0     |        | 0     |        |
| 2367   | 2     | 2      | 3     | 2      |
| 2368   | 0     |        | 0     |        |
| 2369   | 0     |        | 1     | 0      |
| 2372   | 0     |        | 0     |        |
| 2374   | 4     | 1      | 3     | 2      |
| 2376   | 0     |        | 0     |        |
| 2379   | 3     | 2      | 3     | 2      |
| 2380   | 1     | 0      | 0     |        |
| 2381   | 0     |        | 0     |        |
| 2382   | 1     | 1      | 1     | 1      |
| 2385   | 2     | 2      | 1     | 0      |
| 2387   | 4     | 3      | 3     | 3      |
| 2388   | 1     | 1      | 0     |        |
| 2389   | 0     |        | 0     |        |
| 2391   | 1     | 1      | 0     |        |
| 2392   | 3     | 2      | 2     | 1      |
| 2393   | 0     |        | 0     |        |
| 2394   | 3     | 2      | 3     | 2      |
| 2397   | 0     |        | 0     |        |
| 2398   | 2     | 1      | 2     | 1      |
| 2400   | 3     | 0      | 4     | 0      |
| 2402   | 2     | 1      | 0     |        |

| respid | Q20_1 | Q20a_1 | Q21_1 | Q21a_1 |
|--------|-------|--------|-------|--------|
| 2406   | 1     | 0      | 0     |        |
| 2408   | 1     | 0      | 0     |        |
| 2410   | 0     |        | 0     |        |
| 2411   | 2     | 3      | 3     | 2      |
| 2412   | 1     | 2      | 0     |        |
| 2414   | 1     | 2      | 3     | 1      |
| 2421   | 0     |        | 0     |        |
| 2423   | 1     | 2      | 1     | 2      |
| 2424   | 3     | 1      | 3     | 1      |
| 2425   | 0     |        | 0     |        |
| 2426   | 1     | 1      | 1     | 1      |
| 2429   | 4     | 4      | 5     | 4      |
| 2430   | 1     | 1      | 0     |        |
| 2432   | 1     | 1      | 1     | 1      |
| 2433   | 1     | 0      | 2     | 0      |
| 2434   | 1     | 0      | 0     |        |
| 2435   | 1     | 1      | 0     |        |
| 2436   | 1     | 1      | 0     |        |
| 2439   | 0     |        | 0     |        |
| 2440   | 0     |        | 0     |        |
| 2441   | 1     | 1      | 0     |        |
| 2446   | 1     | 1      | 2     | 1      |
| 2448   | 2     | 2      | 2     | 3      |
| 2449   | 1     | 0      | 0     |        |
| 2451   | 1     | 2      | 0     |        |
| 2452   | 1     | 0      | 0     |        |
| 2455   | 0     |        | 0     |        |
| 2457   | 1     | 2      | 1     | 1      |
| 2458   | 1     | 1      | 1     | 1      |
| 2459   | 0     |        | 0     |        |
| 2460   | 0     |        | 0     |        |
| 2462   | 3     | 3      | 2     | 2      |



| respid | Q20_1 | Q20a_1 | Q21_1 | Q21a_1 |
|--------|-------|--------|-------|--------|
| 2464   | 4     | 3      | 1     | 1      |
| 2465   | 3     | 2      | 0     |        |
| 2468   | 1     | 1      | 1     | 1      |
| 2469   | 0     |        | 0     |        |
| 2470   | 2     | 1      | 0     |        |
| 2471   | 3     | 2      | 3     | 2      |
| 2472   | 0     |        | 0     |        |
| 2474   | 1     | 1      | 0     |        |
| 2476   | 1     | 1      | 3     | 3      |
| 2478   | 0     |        | 0     |        |
| 2479   | 4     | 3      | 2     | 3      |
| 2480   | 1     | 0      | 0     |        |
| 2482   | 1     | 0      | 1     | 0      |
| 2486   | 2     | 2      | 0     |        |
| 2488   | 4     | 3      | 4     | 3      |
| 2489   | 5     | 1      | 0     |        |
| 2491   | 1     | 0      | 0     |        |
| 2495   | 1     | 1      | 0     |        |
| 2496   | 0     |        | 1     | 1      |
| 2498   | 3     | 2      | 1     | 1      |
| 2501   | 1     | 1      | 1     | 1      |
| 2502   | 4     | 1      | 3     | 2      |
| 2503   | 3     | 1      | 0     |        |
| 2504   | 0     |        | 0     |        |
| 2507   | 1     | 2      | 1     | 0      |
| 2509   | 5     | 2      | 4     | 2      |
| 2512   | 1     | 1      | 1     | 0      |
| 2514   | 0     |        | 0     |        |
| 2516   | 1     | 1      | 0     |        |
| 2517   | 2     | 1      | 1     | 1      |
| 2521   | 1     | 1      | 0     |        |
| 2522   | 0     |        | 0     |        |

| respid | Q20_1 | Q20a_1 | Q21_1 | Q21a_1 |
|--------|-------|--------|-------|--------|
| 2524   | 1     | 0      | 0     |        |
| 2525   | 1     | 1      | 0     |        |
| 2526   | 0     |        | 0     |        |
| 2527   | 0     |        | 0     |        |
| 2528   | 1     | 1      | 0     |        |
| 2531   | 0     |        | 0     |        |
| 2533   | 3     | 2      | 2     | 1      |
| 2535   | 0     |        | 0     |        |
| 2536   | 2     | 2      | 2     | 2      |
| 2539   | 0     |        | 0     |        |
| 2540   | 0     |        | 0     |        |
| 2543   | 0     |        | 0     |        |
| 2546   | 2     | 1      | 0     |        |
| 2547   | 1     | 2      | 2     | 2      |
| 2549   | 0     |        | 0     |        |
| 2553   | 0     |        | 0     |        |
| 2554   | 0     |        | 0     |        |
| 2555   | 1     | 0      | 0     |        |
| 2556   | 0     |        | 0     |        |
| 2557   | 0     |        | 0     |        |
| 2559   | 1     | 1      | 0     |        |
| 2560   | 3     | 3      | 2     | 2      |
| 2561   | 2     | 1      | 0     |        |
| 2566   | 1     | 0      | 1     | 1      |
| 2567   | 0     |        | 0     |        |
| 2570   | 0     |        | 1     | 1      |
| 2574   | 3     | 4      | 3     | 3      |
| 2578   | 0     |        | 0     |        |
| 2580   | 1     | 2      | 0     |        |
| 2590   | 2     | 0      | 0     |        |
| 2593   | 1     | 0      | 0     |        |
| 2594   | 1     | 1      | 1     | 1      |

| respid | Q20_1 | Q20a_1 | Q21_1 | Q21a_1 |
|--------|-------|--------|-------|--------|
| 2595   | 1     | 1      | 0     |        |
| 2596   | 0     |        | 3     | 0      |
| 2597   | 4     | 3      | 4     | 3      |
| 2598   | 0     |        | 0     |        |
| 2602   | 0     |        | 0     |        |
| 2605   | 4     | 3      | 3     | 3      |
| 2606   | 0     |        | 0     |        |
| 2607   | 1     | 2      | 0     |        |
| 2608   | 0     |        | 0     |        |
| 2609   | 0     |        | 0     |        |
| 2610   | 0     |        | 0     |        |
| 2614   | 0     |        | 0     |        |
| 2615   | 2     | 0      | 0     |        |
| 2616   | 1     | 0      | 0     |        |
| 2618   | 0     |        | 0     |        |
| 2630   | 4     | 2      | 3     | 2      |
| 2633   | 0     |        | 0     |        |
| 2637   | 2     | 1      | 0     |        |
| 2638   | 0     |        | 0     |        |
| 2641   | 1     | 1      | 0     |        |
| 2644   | 0     |        | 0     |        |
| 2645   | 1     | 1      | 0     |        |
| 2646   | 0     |        | 0     |        |
| 2648   | 0     |        | 0     |        |
| 2651   | 0     |        | 0     |        |
| 2652   | 2     | 1      | 2     | 1      |
| 2653   | 1     | 0      | 1     | 1      |
| 2656   | 0     |        | 0     |        |
| 2657   | 0     |        | 0     |        |
| 2658   | 2     | 1      | 2     | 0      |
| 2661   | 1     | 1      | 0     |        |
| 2663   | 1     | 0      | 1     | 1      |

| respid | Q20_1 | Q20a_1 | Q21_1 | Q21a_1 |
|--------|-------|--------|-------|--------|
| 2665   | 1     | 1      | 0     |        |
| 2670   | 1     | 0      | 0     |        |
| 2672   | 1     | 0      | 0     |        |
| 2673   | 0     |        | 0     |        |
| 2677   | 1     | 1      | 1     | 1      |
| 2686   | 3     | 4      | 3     | 3      |
| 2688   | 1     | 1      | 1     | 1      |
| 2689   | 2     | 1      | 0     |        |
| 2691   | 0     |        | 0     |        |
| 2695   | 1     | 2      | 0     |        |
| 2696   | 5     | 1      | 1     | 2      |
| 2697   | 0     |        | 0     |        |
| 2698   | 0     |        | 0     |        |
| 2703   | 2     | 2      | 1     | 1      |
| 2704   | 0     |        | 0     |        |
| 2706   | 3     | 1      | 0     |        |
| 2707   | 2     | 1      | 0     |        |
| 2710   | 0     |        | 0     |        |
| 2711   | 3     | 2      | 0     |        |
| 2712   | 0     |        | 0     |        |
| 2713   | 0     |        | 0     |        |
| 2721   | 0     |        | 0     |        |
| 2730   | 0     |        | 0     |        |
| 2731   | 0     |        | 1     | 2      |
| 2732   | 1     | 0      | 0     |        |
| 2733   | 0     |        | 5     | 3      |
| 2735   | 1     | 1      | 1     | 0      |
| 2736   | 0     |        | 1     | 1      |
| 2740   | 1     | 1      | 0     |        |
| 2741   | 1     | 1      | 1     | 1      |
| 2742   | 1     | 3      | 1     | 3      |
| 2743   | 2     | 0      | 1     | 0      |

| respid | Q20_1 | Q20a_1 | Q21_1 | Q21a_1 |
|--------|-------|--------|-------|--------|
| 2744   | 0     |        | 0     |        |
| 2745   | 3     | 2      | 3     | 2      |
| 2749   | 0     |        | 0     |        |
| 2751   | 0     |        | 1     | 0      |
| 2754   | 0     |        | 1     | 0      |
| 2755   | 1     | 2      | 1     | 2      |
| 2757   | 0     |        | 0     |        |
| 2758   | 1     | 1      | 1     | 1      |
| 2759   | 1     | 0      | 0     |        |
| 2761   | 1     | 0      | 0     |        |
| 2762   | 4     | 3      | 2     | 2      |
| 2763   | 1     | 0      | 0     |        |
| 2764   | 5     | 3      | 2     | 2      |
| 2765   | 1     | 1      | 1     | 1      |
| 2766   | 0     |        | 1     | 0      |
| 2767   | 0     |        | 0     |        |
| 2769   | 2     | 1      | 1     | 1      |
| 2770   | 2     | 1      | 2     | 1      |
| 2771   | 1     | 1      | 0     |        |
| 2774   | 1     | 1      | 1     | 1      |
| 2777   | 3     | 2      | 2     | 2      |
| 2778   | 1     | 1      | 1     | 1      |
| 2781   | 1     | 1      | 1     | 1      |
| 2782   | 1     | 1      | 1     | 1      |
| 2784   | 1     | 2      | 1     | 2      |
| 2785   | 3     | 2      | 1     | 2      |
| 2786   | 1     | 0      | 0     |        |
| 2787   | 0     |        | 0     |        |
| 2789   | 2     | 2      | 2     | 2      |
| 2790   | 1     | 2      | 0     |        |
| 2791   | 1     | 0      | 1     | 0      |
| 2793   | 3     | 3      | 4     | 3      |

| respid | Q20_1 | Q20a_1 | Q21_1 | Q21a_1 |
|--------|-------|--------|-------|--------|
| 2797   | 3     | 1      | 2     | 1      |
| 2798   | 1     | 0      | 0     |        |
| 2799   | 1     | 2      | 3     | 2      |
| 2801   | 1     | 1      | 1     | 1      |
| 2802   | 3     | 1      | 0     |        |
| 2803   | 1     | 2      | 1     | 2      |
| 2804   | 5     | 3      | 3     | 2      |
| 2807   | 0     |        | 0     |        |
| 2809   | 1     | 1      | 0     |        |
| 2810   | 1     | 1      | 0     |        |
| 2812   | 0     |        | 0     |        |
| 2814   | 3     | 0      | 0     |        |
| 2815   | 1     | 1      | 1     | 1      |
| 2816   | 4     | 1      | 0     |        |
| 2817   | 1     | 0      | 0     |        |
| 2819   | 1     | 1      | 1     | 1      |
| 2820   | 2     | 0      | 0     |        |
| 2821   | 0     |        | 0     |        |
| 2822   | 3     | 3      | 2     | 2      |
| 2823   | 1     | 1      | 0     |        |
| 2824   | 1     | 1      | 0     |        |
| 2825   | 1     | 0      | 1     | 0      |
| 2826   | 1     | 0      | 0     |        |
| 2827   | 1     | 1      | 1     | 1      |
| 2828   | 2     | 1      | 0     |        |
| 2829   | 2     | 2      | 2     | 2      |
| 2830   | 1     | 1      | 1     | 1      |
| 2831   | 1     | 0      | 0     |        |
| 2832   | 2     | 2      | 2     | 2      |
| 2833   | 0     |        | 0     |        |
| 2834   | 1     | 1      | 1     | 1      |
| 2835   | 2     | 2      | 3     | 3      |

| respid | Q20_1 | Q20a_1 | Q21_1 | Q21a_1 |
|--------|-------|--------|-------|--------|
| 2836   | 3     | 2      | 3     | 2      |
| 2837   | 2     | 1      | 1     | 1      |
| 2838   | 3     | 2      | 0     |        |
| 2844   | 4     | 3      | 3     | 2      |
| 2845   | 1     | 0      | 0     |        |
| 2847   | 5     | 4      | 5     | 4      |
| 2848   | 1     | 0      | 0     |        |
| 2849   | 1     | 1      | 2     | 1      |
| 2851   | 0     |        | 0     |        |
| 2852   | 1     | 0      | 0     |        |
| 2853   | 2     | 2      | 2     | 2      |
| 2854   | 0     |        | 0     |        |
| 2856   | 1     | 0      | 1     | 1      |
| 2857   | 1     | 1      | 0     |        |
| 2858   | 1     | 1      | 1     | 1      |
| 2859   | 1     | 2      | 1     | 2      |
| 2860   | 1     | 1      | 1     | 1      |
| 2861   | 3     | 2      | 3     | 2      |
| 2863   | 1     | 0      | 0     |        |
| 2864   | 1     | 0      | 0     |        |
| 2866   | 1     | 2      | 1     | 2      |
| 2872   | 1     | 1      | 1     | 1      |
| 2875   | 1     | 2      | 1     | 2      |
| 2879   | 0     |        | 0     |        |
| 2881   | 1     | 1      | 2     | 2      |
| 2882   | 0     |        | 0     |        |
| 2883   | 1     | 0      | 1     | 0      |
| 2884   | 1     | 1      | 3     | 2      |
| 2885   | 1     | 1      | 1     | 0      |
| 2887   | 0     |        | 0     |        |
| 2888   | 2     | 0      | 1     | 1      |
| 2890   | 3     | 1      | 1     | 1      |

| respid | Q20_1 | Q20a_1 | Q21_1 | Q21a_1 |
|--------|-------|--------|-------|--------|
| 2891   | 1     | 0      | 0     |        |
| 2892   | 0     |        | 0     |        |
| 2895   | 3     | 1      | 2     | 0      |
| 2899   | 1     | 1      | 1     | 0      |
| 2900   | 0     |        | 0     |        |
| 2902   | 5     | 3      | 0     |        |
| 2903   | 0     |        | 0     |        |
| 2904   | 1     | 0      | 1     | 0      |
| 2906   | 2     | 1      | 1     | 0      |
| 2908   | 2     | 0      | 0     |        |
| 2910   | 4     | 2      | 2     | 1      |
| 2917   | 3     | 2      | 1     | 2      |
| 2918   | 2     | 1      | 1     | 1      |
| 2919   | 0     |        | 0     |        |
| 2920   | 4     | 0      | 0     |        |
| 2921   | 3     | 2      | 3     | 2      |
| 2922   | 1     | 0      | 0     |        |
| 2923   | 0     |        | 0     |        |
| 2924   | 4     | 3      | 4     | 3      |
| 2926   | 3     | 2      | 2     | 2      |
| 2928   | 1     | 1      | 0     |        |
| 2930   | 0     |        | 0     |        |
| 2931   | 3     | 2      | 0     |        |
| 2933   | 0     |        | 0     |        |
| 2935   | 3     | 1      | 0     |        |
| 2936   | 0     |        | 0     |        |
| 2937   | 1     | 1      | 0     |        |
| 2938   | 0     |        | 0     |        |
| 2944   | 2     | 1      | 1     | 1      |
| 2945   | 1     | 0      | 0     |        |
| 2947   | 0     |        | 0     |        |
| 2949   | 1     | 0      | 0     |        |



| respid | Q20_1 | Q20a_1 | Q21_1 | Q21a_1 |
|--------|-------|--------|-------|--------|
| 2951   | 5     | 3      | 3     | 3      |
| 2952   | 1     | 1      | 0     |        |
| 2953   | 0     |        | 0     |        |
| 2955   | 0     |        | 0     |        |
| 2957   | 0     |        | 0     |        |
| 2958   | 0     |        | 0     |        |
| 2960   | 4     | 2      | 2     | 1      |
| 2963   | 1     | 0      | 0     |        |
| 2964   | 0     |        | 1     | 1      |
| 2967   | 0     |        | 0     |        |
| 2968   | 0     |        | 0     |        |
| 2971   | 3     | 2      | 2     | 1      |
| 2974   | 0     |        | 0     |        |
| 2975   | 0     |        | 0     |        |
| 2982   | 0     |        | 0     |        |
| 2983   | 0     |        | 0     |        |
| 2985   | 0     |        | 0     |        |
| 2986   | 4     | 3      | 4     | 3      |
| 2987   | 1     | 1      | 0     |        |
| 2988   | 2     | 1      | 2     | 1      |
| 2993   | 1     | 0      | 1     | 0      |
| 2996   | 0     |        | 0     |        |
| 2997   | 5     | 4      | 5     | 4      |
| 2998   | 1     | 2      | 0     |        |
| 3004   | 0     |        | 0     |        |
| 3007   | 1     | 2      | 1     | 1      |
| 3011   | 2     | 2      | 3     | 2      |
| 3012   | 4     | 1      | 1     | 1      |
| 3013   | 0     |        | 0     |        |
| 3014   | 0     |        | 0     |        |
| 3015   | 1     | 1      | 1     | 0      |
| 3016   | 0     |        | 0     |        |

| respid | Q20_1 | Q20a_1 | Q21_1 | Q21a_1 |
|--------|-------|--------|-------|--------|
| 3017   | 1     | 0      | 0     |        |
| 3020   | 2     | 2      | 2     | 2      |
| 3022   | 0     |        | 0     |        |
| 3023   | 0     |        | 0     |        |
| 3026   | 1     | 3      | 1     | 3      |
| 3038   | 1     | 0      | 0     |        |
| 3039   | 1     | 2      | 0     |        |
| 3040   | 1     | 1      | 0     |        |
| 3041   | 0     |        | 0     |        |
| 3042   | 1     | 1      | 1     | 1      |
| 3044   | 0     |        | 0     |        |
| 3050   | 0     |        | 0     |        |
| 3052   | 1     | 0      | 1     | 0      |
| 3056   | 2     | 2      | 2     | 2      |
| 3059   | 0     |        | 0     |        |
| 3060   | 1     | 0      | 1     | 0      |
| 3063   | 3     | 2      | 0     |        |
| 3065   | 1     | 0      | 1     | 0      |
| 3067   | 1     | 2      | 1     | 2      |
| 3068   | 0     |        | 0     |        |
| 3072   | 0     |        | 0     |        |
| 3074   | 2     | 2      | 2     | 2      |
| 3075   | 1     | 1      | 1     | 0      |
| 3076   | 2     | 0      | 0     |        |
| 3079   | 1     | 0      | 0     |        |
| 3082   | 4     | 3      | 2     | 2      |
| 3083   | 0     |        | 0     |        |
| 3084   | 3     | 0      | 0     |        |
| 3085   | 1     | 0      | 0     |        |
| 3090   | 0     |        | 0     |        |
| 3091   | 1     | 2      | 2     | 1      |
| 3092   | 1     | 1      | 1     | 1      |

| respid | Q20_1 | Q20a_1 | Q21_1 | Q21a_1 |
|--------|-------|--------|-------|--------|
| 3095   | 1     | 1      | 1     | 1      |
| 3096   | 4     | 4      | 4     | 4      |
| 3097   | 1     | 1      | 3     | 2      |
| 3099   | 4     | 3      | 5     | 3      |
| 3101   | 2     | 2      | 0     |        |
| 3103   | 1     | 1      | 0     |        |
| 3104   | 1     | 1      | 1     | 1      |
| 3105   | 0     |        | 0     |        |
| 3107   | 0     |        | 0     |        |
| 3108   | 3     | 2      | 2     | 2      |
| 3109   | 0     |        | 0     |        |
| 3116   | 2     | 1      | 1     | 1      |
| 3117   | 1     | 1      | 1     | 1      |
| 3119   | 2     | 0      | 0     |        |
| 3120   | 0     |        | 0     |        |
| 3130   | 5     | 3      | 3     | 3      |
| 3131   | 1     | 3      | 0     |        |
| 3133   | 0     |        | 0     |        |
| 3134   | 1     | 2      | 0     |        |
| 3135   | 1     | 0      | 0     |        |
| 3145   | 3     | 1      | 0     |        |
| 3147   | 0     |        | 0     |        |
| 3152   | 1     | 1      | 0     |        |
| 3155   | 5     | 4      | 4     | 2      |
| 3156   | 0     |        | 0     |        |
| 3157   | 2     | 2      | 1     | 2      |
| 3166   | 1     | 1      | 1     | 1      |
| 3169   | 1     | 1      | 0     |        |
| 3179   | 0     |        | 0     |        |
| 3181   | 2     | 1      | 0     |        |
| 3185   | 0     |        | 0     |        |
| 3190   | 2     | 0      | 2     | 1      |

| respid | Q20_1 | Q20a_1 | Q21_1 | Q21a_1 |
|--------|-------|--------|-------|--------|
| 3191   | 0     |        | 0     |        |
| 3192   | 1     | 0      | 1     | 0      |
| 3193   | 5     | 0      | 0     |        |
| 3195   | 1     | 0      | 0     |        |
| 3202   | 5     | 0      | 0     |        |
| 3204   | 1     | 0      | 0     |        |
| 3208   | 1     | 0      | 0     |        |
| 3212   | 1     | 0      | 1     | 0      |
| 3218   | 0     |        | 0     |        |
| 3219   | 2     | 1      | 0     |        |
| 3220   | 1     | 1      | 0     |        |
| 3221   | 2     | 2      | 0     |        |
| 3223   | 0     |        | 0     |        |
| 3231   | 1     | 1      | 1     | 1      |
| 3232   | 2     | 2      | 3     | 2      |
| 3234   | 1     | 1      | 0     |        |
| 3235   | 0     |        | 0     |        |
| 3237   | 1     | 0      | 0     |        |
| 3238   | 1     | 1      | 0     |        |
| 3240   | 0     |        | 0     |        |
| 3241   | 4     | 0      | 0     |        |
| 3243   | 1     | 1      | 1     | 1      |
| 3244   | 1     | 1      | 1     | 1      |
| 3247   | 0     |        | 0     |        |
| 3250   | 0     |        | 0     |        |
| 3251   | 3     | 2      | 2     | 2      |
| 3255   | 0     |        | 0     |        |
| 3256   | 0     |        | 0     |        |
| 3257   | 0     |        | 0     |        |
| 3258   | 0     |        | 0     |        |
| 3259   | 1     | 1      | 0     |        |
| 3260   | 1     | 0      | 0     |        |

| respid | Q20_1 | Q20a_1 | Q21_1 | Q21a_1 |
|--------|-------|--------|-------|--------|
| 3261   | 0     |        | 0     |        |
| 3262   | 2     | 2      | 1     | 2      |
| 3264   | 3     | 3      | 2     | 3      |
| 3265   | 0     |        | 0     |        |
| 3267   | 1     | 0      | 1     | 0      |
| 3268   | 3     | 1      | 1     | 1      |
| 3270   | 1     | 0      | 0     |        |
| 3271   | 1     | 0      | 0     |        |
| 3274   | 0     |        | 0     |        |
| 3276   | 1     | 0      | 0     |        |
| 3277   | 0     |        | 0     |        |
| 3279   | 1     | 1      | 0     |        |
| 3281   | 0     |        | 0     |        |
| 3283   | 4     | 1      | 2     | 2      |
| 3285   | 1     | 1      | 0     |        |
| 3286   | 1     | 1      | 1     | 1      |
| 3287   | 0     |        | 0     |        |
| 3289   | 1     | 1      | 0     |        |
| 3290   | 0     |        | 0     |        |
| 3291   | 0     |        | 0     |        |
| 3292   | 3     | 3      | 3     | 2      |
| 3293   | 3     | 2      | 3     | 2      |
| 3294   | 1     | 1      | 1     | 1      |
| 3296   | 1     | 0      | 0     |        |
| 3306   | 0     |        | 0     |        |
| 3307   | 3     | 3      | 2     | 2      |
| 3308   | 4     | 1      | 0     |        |
| 3312   | 0     |        | 0     |        |
| 3313   | 1     | 1      | 0     |        |
| 3316   | 2     | 0      | 0     |        |
| 3317   | 1     | 3      | 1     | 3      |
| 3320   | 5     | 0      | 0     |        |

| respid | Q20_1 | Q20a_1 | Q21_1 | Q21a_1 |
|--------|-------|--------|-------|--------|
| 3321   | 1     | 1      | 3     | 1      |
| 3322   | 0     |        | 1     | 0      |
| 3323   | 5     | 2      | 0     |        |
| 3325   | 0     |        | 0     |        |
| 3332   | 2     | 0      | 0     |        |
| 3334   | 0     |        | 0     |        |
| 3335   | 0     |        | 0     |        |
| 3341   | 0     |        | 0     |        |
| 3345   | 2     | 1      | 0     |        |
| 3346   | 1     | 1      | 0     |        |
| 3349   | 1     | 1      | 1     | 1      |
| 3351   | 1     | 0      | 0     |        |
| 3353   | 2     | 2      | 0     |        |
| 3354   | 1     | 1      | 0     |        |
| 3356   | 1     | 0      | 0     |        |
| 3357   | 3     | 3      | 2     | 1      |
| 3360   | 5     | 0      | 0     |        |
| 3361   | 1     | 1      | 1     | 1      |
| 3362   | 0     |        | 1     | 0      |
| 3363   | 0     |        | 0     |        |
| 3364   | 4     | 3      | 4     | 4      |
| 3368   | 0     |        | 0     |        |
| 3370   | 0     |        | 0     |        |
| 3371   | 4     | 2      | 1     | 1      |
| 3379   | 1     | 1      | 1     | 0      |
| 3380   | 1     | 1      | 0     |        |
| 3382   | 2     | 1      | 0     |        |
| 3384   | 0     |        | 0     |        |
| 3385   | 5     | 0      | 0     |        |
| 3388   | 0     |        | 0     |        |
| 3392   | 0     |        | 0     |        |
| 3393   | 1     | 0      | 0     |        |

| respid | Q20_1 | Q20a_1 | Q21_1 | Q21a_1 |
|--------|-------|--------|-------|--------|
| 3394   | 4     | 3      | 3     | 3      |
| 3395   | 1     | 0      | 0     |        |
| 3396   | 0     |        | 0     |        |
| 3397   | 3     | 2      | 0     |        |
| 3398   | 1     | 1      | 0     |        |
| 3399   | 0     |        | 0     |        |
| 3400   | 5     | 1      | 5     | 1      |
| 3401   | 4     | 4      | 4     | 4      |
| 3402   | 2     | 2      | 1     | 1      |
| 3403   | 1     | 1      | 1     | 1      |
| 3405   | 0     |        | 0     |        |
| 3407   | 1     | 1      | 1     | 1      |
| 3410   | 1     | 0      | 0     |        |
| 3411   | 1     | 1      | 0     |        |
| 3413   | 0     |        | 0     |        |
| 3414   | 1     | 1      | 0     |        |
| 3420   | 0     |        | 0     |        |
| 3421   | 5     | 4      | 4     | 3      |
| 3425   | 1     | 1      | 0     |        |
| 3426   | 1     | 1      | 0     |        |
| 3429   | 0     |        | 0     |        |
| 3430   | 2     | 1      | 0     |        |
| 3433   | 1     | 1      | 0     |        |
| 3434   | 1     | 2      | 1     | 2      |
| 3437   | 5     | 0      | 0     |        |
| 3439   | 3     | 2      | 4     | 2      |
| 3441   | 1     | 1      | 1     | 1      |
| 3442   | 1     | 2      | 0     |        |
| 3444   | 1     | 0      | 0     |        |
| 3445   | 0     |        | 0     |        |
| 3450   | 2     | 2      | 1     | 1      |
| 3452   | 5     | 1      | 0     |        |

| respid | Q20_1 | Q20a_1 | Q21_1 | Q21a_1 |
|--------|-------|--------|-------|--------|
| 3456   | 2     | 1      | 0     |        |
| 3459   | 0     |        | 0     |        |
| 3460   | 1     | 0      | 0     |        |
| 3461   | 0     |        | 0     |        |
| 3466   | 3     | 1      | 4     | 1      |
| 3471   | 4     | 2      | 0     |        |
| 3473   | 0     |        | 0     |        |
| 3475   | 2     | 3      | 3     | 3      |
| 3476   | 1     | 0      | 1     | 0      |
| 3477   | 0     |        | 0     |        |
| 3478   | 0     |        | 0     |        |
| 3479   | 0     |        | 0     |        |
| 3482   | 2     | 2      | 2     | 2      |
| 3483   | 0     |        | 0     |        |
| 3485   | 1     | 1      | 1     | 0      |
| 3489   | 0     |        | 0     |        |
| 3490   | 0     |        | 0     |        |
| 3491   | 3     | 2      | 0     |        |
| 3494   | 5     | 2      | 1     | 1      |
| 3495   | 5     | 2      | 4     | 2      |
| 3501   | 0     |        | 0     |        |
| 3506   | 5     | 1      | 1     | 0      |
| 3507   | 0     |        | 0     |        |
| 3517   | 1     | 1      | 0     |        |
| 3520   | 1     | 1      | 0     |        |
| 3521   | 1     | 0      | 1     | 0      |
| 3522   | 1     | 0      | 1     | 0      |
| 3524   | 0     |        | 0     |        |
| 3527   | 0     |        | 0     |        |
| 3528   | 1     | 0      | 0     |        |
| 3529   | 1     | 0      | 2     | 1      |
| 3536   | 1     | 0      | 1     | 0      |



| respid | Q20_1 | Q20a_1 | Q21_1 | Q21a_1 |
|--------|-------|--------|-------|--------|
| 3537   | 1     | 0      | 0     |        |
| 3538   | 3     | 2      | 2     | 1      |
| 3540   | 3     | 2      | 3     | 2      |
| 3545   | 0     |        | 0     |        |
| 3547   | 2     | 2      | 2     | 2      |
| 3554   | 4     | 0      | 0     |        |
| 3556   | 0     |        | 0     |        |
| 3557   | 4     | 2      | 5     | 2      |
| 3559   | 0     |        | 1     | 3      |
| 3560   | 3     | 2      | 3     | 2      |
| 3562   | 1     | 0      | 0     |        |
| 3564   | 1     | 1      | 1     | 0      |
| 3565   | 3     | 3      | 2     | 3      |
| 3568   | 3     | 2      | 2     | 2      |
| 3572   | 0     |        | 0     |        |
| 3578   | 0     |        | 0     |        |
| 3581   | 0     |        | 0     |        |
| 3583   | 2     | 1      | 0     |        |
| 3588   | 1     | 1      | 1     | 1      |
| 3591   | 2     | 0      | 0     |        |
| 3594   | 1     | 0      | 1     | 0      |
| 3595   | 2     | 1      | 2     | 1      |
| 3596   | 0     |        | 1     | 0      |
| 3597   | 3     | 2      | 3     | 2      |
| 3598   | 0     |        | 0     |        |
| 3600   | 3     | 1      | 2     | 0      |
| 3602   | 0     |        | 0     |        |
| 3604   | 0     |        | 0     |        |
| 3605   | 1     | 1      | 1     | 1      |
| 3606   | 0     |        | 0     |        |
| 3607   | 0     |        | 0     |        |
| 3610   | 0     |        | 0     |        |

| respid | Q20_1 | Q20a_1 | Q21_1 | Q21a_1 |
|--------|-------|--------|-------|--------|
| 3611   | 1     | 0      | 0     |        |
| 3612   | 3     | 0      | 0     |        |
| 3614   | 0     |        | 0     |        |
| 3616   | 2     | 1      | 0     |        |
| 3617   | 1     | 2      | 1     | 1      |
| 3618   | 0     |        | 0     |        |
| 3619   | 3     | 3      | 3     | 3      |
| 3621   | 1     | 0      | 1     | 1      |
| 3622   | 0     |        | 0     |        |
| 3624   | 2     | 1      | 1     | 1      |
| 3626   | 0     |        | 0     |        |
| 3629   | 0     |        | 0     |        |
| 3631   | 0     |        | 0     |        |
| 3632   | 0     |        | 0     |        |
| 3638   | 1     | 1      | 0     |        |
| 3640   | 1     | 0      | 0     |        |
| 3641   | 2     | 1      | 1     | 1      |
| 3645   | 2     | 2      | 3     | 2      |
| 3650   | 0     |        | 0     |        |
| 3653   | 4     | 2      | 3     | 1      |
| 3655   | 2     | 2      | 0     |        |
| 3657   | 1     | 1      | 0     |        |
| 3658   | 0     |        | 1     | 0      |
| 3659   | 0     |        | 0     |        |
| 3664   | 4     | 3      | 3     | 2      |
| 3665   | 1     | 0      | 0     |        |
| 3667   | 1     | 0      | 0     |        |
| 3668   | 3     | 4      | 3     | 3      |
| 3675   | 0     |        | 0     |        |
| 3678   | 0     |        | 0     |        |
| 3680   | 0     |        | 0     |        |
| 3684   | 2     | 1      | 3     | 3      |

| respid | Q20_1 | Q20a_1 | Q21_1 | Q21a_1 |
|--------|-------|--------|-------|--------|
| 3685   | 4     | 2      | 3     | 2      |
| 3687   | 1     | 1      | 1     | 1      |
| 3689   | 2     | 3      | 1     | 2      |
| 3690   | 0     |        | 0     |        |
| 3693   | 0     |        | 0     |        |
| 3694   | 0     |        | 0     |        |
| 3695   | 0     |        | 0     |        |
| 3700   | 5     | 1      | 0     |        |
| 3701   | 1     | 1      | 2     | 2      |
| 3703   | 1     | 0      | 1     | 0      |
| 3704   | 3     | 2      | 3     | 3      |
| 3705   | 0     |        | 0     |        |
| 3709   | 1     | 0      | 0     |        |
| 3710   | 1     | 2      | 2     | 2      |
| 3722   | 0     |        | 0     |        |
| 3725   | 0     |        | 0     |        |
| 3726   | 0     |        | 0     |        |
| 3727   | 0     |        | 0     |        |
| 3728   | 1     | 1      | 0     |        |
| 3729   | 0     |        | 0     |        |
| 3731   | 0     |        | 0     |        |
| 3738   | 0     |        | 0     |        |
| 3739   | 3     | 1      | 0     |        |
| 3740   | 1     | 0      | 0     |        |
| 3749   | 1     | 1      | 1     | 1      |
| 3758   | 1     | 2      | 4     | 3      |
| 3762   | 0     |        | 0     |        |
| 3765   | 1     | 1      | 0     |        |
| 3770   | 1     | 1      | 0     |        |
| 3771   | 0     |        | 0     |        |
| 3778   | 1     | 1      | 0     |        |
| 3779   | 1     | 1      | 1     | 1      |

| respid | Q20_1 | Q20a_1 | Q21_1 | Q21a_1 |
|--------|-------|--------|-------|--------|
| 3780   | 1     | 1      | 0     |        |
| 3782   | 2     | 1      | 0     |        |
| 3784   | 1     | 2      | 0     |        |
| 3787   | 2     | 2      | 1     | 1      |
| 3790   | 3     | 2      | 4     | 2      |
| 3791   | 3     | 2      | 1     | 0      |
| 3793   | 3     | 3      | 3     | 3      |
| 3795   | 0     |        | 0     |        |
| 3799   | 0     |        | 0     |        |
| 3801   | 3     | 2      | 4     | 2      |
| 3804   | 0     |        | 1     | 1      |
| 3809   | 1     | 1      | 0     |        |
| 3810   | 3     | 0      | 0     |        |
| 3813   | 1     | 1      | 0     |        |
| 3816   | 2     | 1      | 0     |        |
| 3820   | 1     | 0      | 0     |        |
| 3821   | 0     |        | 0     |        |
| 3823   | 4     | 2      | 3     | 2      |
| 3828   | 0     |        | 0     |        |
| 3829   | 1     | 1      | 0     |        |
| 3832   | 0     |        | 0     |        |
| 3835   | 0     |        | 0     |        |
| 3837   | 1     | 1      | 1     | 1      |
| 3838   | 1     | 1      | 0     |        |
| 3839   | 4     | 4      | 3     | 4      |
| 3840   | 0     |        | 0     |        |
| 3842   | 0     |        | 0     |        |
| 3843   | 0     |        | 0     |        |
| 3844   | 3     | 2      | 0     |        |
| 3850   | 0     |        | 0     |        |
| 3851   | 0     |        | 0     |        |
| 3856   | 1     | 1      | 0     |        |

| respid | Q20_1 | Q20a_1 | Q21_1 | Q21a_1 |
|--------|-------|--------|-------|--------|
| 3859   | 5     | 2      | 0     |        |
| 3860   | 0     |        | 0     |        |
| 3863   | 1     | 1      | 1     | 1      |
| 3866   | 0     |        | 0     |        |
| 3867   | 0     |        | 1     | 0      |
| 3870   | 2     | 0      | 0     |        |
| 3873   | 2     | 3      | 1     | 1      |
| 3875   | 0     |        | 0     |        |
| 3878   | 2     | 2      | 0     |        |
| 3881   | 1     | 0      | 0     |        |
| 3883   | 3     | 3      | 3     | 3      |
| 3884   | 3     | 0      | 1     | 1      |
| 3885   | 4     | 3      | 3     | 3      |
| 3886   | 4     | 3      | 2     | 2      |
| 3887   | 1     | 0      | 0     |        |
| 3888   | 0     |        | 0     |        |
| 3889   | 3     | 2      | 2     | 2      |
| 3890   | 2     | 0      | 0     |        |
| 3896   | 1     | 1      | 1     | 1      |
| 3902   | 4     | 3      | 4     | 3      |
| 3909   | 2     | 1      | 0     |        |
| 3912   | 1     | 1      | 1     | 1      |
| 3922   | 0     |        | 0     |        |
| 3928   | 1     | 0      | 1     | 0      |
| 3930   | 2     | 0      | 0     |        |
| 3931   | 0     |        | 0     |        |
| 3933   | 0     |        | 0     |        |
| 3935   | 2     | 1      | 2     | 1      |
| 3937   | 0     |        | 0     |        |
| 3939   | 0     |        | 0     |        |
| 3942   | 1     | 0      | 1     | 0      |
| 3943   | 1     | 1      | 1     | 1      |

| respid | Q20_1 | Q20a_1 | Q21_1 | Q21a_1 |
|--------|-------|--------|-------|--------|
| 3944   | 0     |        | 0     |        |
| 3945   | 0     |        | 0     |        |
| 3947   | 3     | 2      | 0     |        |
| 3948   | 0     |        | 0     |        |
| 3951   | 1     | 1      | 1     | 1      |
| 3959   | 1     | 0      | 0     |        |
| 3969   | 5     | 4      | 5     | 4      |
| 3973   | 2     | 2      | 0     |        |
| 3975   | 1     | 1      | 1     | 1      |
| 3976   | 0     |        | 0     |        |
| 3977   | 3     | 1      | 2     | 1      |
| 3978   | 0     |        | 0     |        |
| 3994   | 0     |        | 1     | 1      |
| 3995   | 5     | 3      | 5     | 3      |
| 3997   | 1     | 0      | 0     |        |
| 3998   | 1     | 0      | 0     |        |
| 3999   | 1     | 1      | 0     |        |
| 4002   | 1     | 2      | 2     | 2      |
| 4004   | 2     | 2      | 2     | 1      |
| 4005   | 0     |        | 0     |        |
| 4006   | 3     | 1      | 1     | 1      |
| 4008   | 1     | 0      | 0     |        |
| 4010   | 0     |        | 0     |        |
| 4011   | 5     | 3      | 3     | 3      |
| 4013   | 2     | 1      | 1     | 1      |
| 4014   | 1     | 1      | 1     | 2      |
| 4016   | 0     |        | 0     |        |
| 4017   | 0     |        | 0     |        |
| 4019   | 0     |        | 0     |        |
| 4021   | 0     |        | 0     |        |
| 4023   | 1     | 1      | 0     |        |
| 4024   | 1     | 0      | 0     |        |

| respid | Q20_1 | Q20a_1 | Q21_1 | Q21a_1 |
|--------|-------|--------|-------|--------|
| 4025   | 1     | 1      | 1     | 1      |
| 4027   | 0     |        | 0     |        |
| 4032   | 0     |        | 0     |        |
| 4034   | 1     | 1      | 1     | 1      |
| 4035   | 2     | 2      | 3     | 2      |
| 4037   | 1     | 1      | 1     | 1      |
| 4040   | 0     |        | 0     |        |
| 4041   | 0     |        | 0     |        |
| 4042   | 5     | 2      | 0     |        |
| 4043   | 0     |        | 0     |        |
| 4045   | 1     | 1      | 1     | 1      |
| 4046   | 3     | 2      | 3     | 2      |
| 4048   | 1     | 0      | 0     |        |
| 4049   | 1     | 0      | 1     | 0      |
| 4050   | 3     | 1      | 0     |        |
| 4052   | 1     | 2      | 0     |        |
| 4053   | 0     |        | 0     |        |
| 4060   | 1     | 0      | 0     |        |
| 4065   | 4     | 3      | 3     | 2      |
| 4066   | 3     | 2      | 3     | 2      |
| 4067   | 1     | 1      | 0     |        |
| 4068   | 3     | 2      | 3     | 2      |
| 4069   | 1     | 0      | 0     |        |
| 4070   | 0     |        | 0     |        |
| 4071   | 3     | 3      | 2     | 2      |
| 4072   | 0     |        | 0     |        |
| 4073   | 1     | 0      | 0     |        |
| 4074   | 1     | 0      | 1     | 0      |
| 4075   | 0     |        | 0     |        |
| 4078   | 1     | 0      | 1     | 0      |
| 4080   | 0     |        | 0     |        |
| 4081   | 0     |        | 0     |        |

| respid | Q20_1 | Q20a_1 | Q21_1 | Q21a_1 |
|--------|-------|--------|-------|--------|
| 4082   | 0     |        | 0     |        |
| 4083   | 2     | 2      | 2     | 2      |
| 4084   | 0     |        | 0     |        |
| 4086   | 0     |        | 0     |        |
| 4087   | 1     | 1      | 1     | 1      |
| 4088   | 4     | 2      | 0     |        |
| 4089   | 2     | 0      | 0     |        |
| 4090   | 0     |        | 0     |        |
| 4093   | 1     | 1      | 0     |        |
| 4094   | 0     |        | 0     |        |
| 4095   | 1     | 0      | 0     |        |
| 4096   | 0     |        | 0     |        |
| 4098   | 0     |        | 0     |        |
| 4103   | 1     | 1      | 1     | 1      |
| 4104   | 0     |        | 0     |        |
| 4107   | 0     |        | 0     |        |
| 4109   | 1     | 0      | 0     |        |
| 4110   | 4     | 3      | 0     |        |
| 4113   | 1     | 1      | 0     |        |
| 4114   | 0     |        | 0     |        |
| 4116   | 1     | 1      | 1     | 1      |
| 4119   | 0     |        | 1     | 0      |
| 4120   | 0     |        | 0     |        |
| 4121   | 1     | 0      | 0     |        |
| 4122   | 3     | 2      | 1     | 1      |
| 4124   | 1     | 0      | 0     |        |
| 4126   | 4     | 1      | 0     |        |
| 4127   | 4     | 3      | 4     | 3      |
| 4131   | 1     | 0      | 0     |        |
| 4134   | 1     | 1      | 1     | 1      |
| 4144   | 1     | 1      | 1     | 1      |
| 4145   | 0     |        | 1     | 1      |



| respid | Q20_1 | Q20a_1 | Q21_1 | Q21a_1 |
|--------|-------|--------|-------|--------|
| 4146   | 1     | 2      | 0     |        |
| 4147   | 1     | 1      | 1     | 1      |
| 4149   | 1     | 2      | 1     | 1      |
| 4150   | 0     |        | 0     |        |
| 4151   | 1     | 2      | 2     | 2      |
| 4153   | 2     | 1      | 1     | 1      |
| 4155   | 2     | 2      | 0     |        |
| 4157   | 0     |        | 0     |        |
| 4159   | 1     | 0      | 1     | 0      |
| 4160   | 1     | 1      | 0     |        |
| 4161   | 3     | 0      | 0     |        |
| 4163   | 0     |        | 0     |        |
| 4164   | 1     | 1      | 1     | 1      |
| 4165   | 2     | 0      | 0     |        |
| 4166   | 1     | 1      | 1     | 1      |
| 4167   | 0     |        | 0     |        |
| 4170   | 3     | 2      | 1     | 1      |
| 4172   | 1     | 0      | 0     |        |
| 4173   | 1     | 1      | 2     | 2      |
| 4180   | 1     | 1      | 1     | 1      |
| 4185   | 1     | 1      | 4     | 3      |
| 4187   | 1     | 0      | 0     |        |
| 4190   | 0     |        | 1     | 0      |
| 4191   | 1     | 0      | 1     | 1      |
| 4193   | 0     |        | 0     |        |
| 4194   | 1     | 0      | 0     |        |
| 4195   | 1     | 0      | 0     |        |
| 4196   | 0     |        | 0     |        |
| 4197   | 0     |        | 5     | 0      |
| 4198   | 0     |        | 1     | 0      |
| 4199   | 0     |        | 0     |        |
| 4205   | 0     |        | 0     |        |

| respid | Q20_1 | Q20a_1 | Q21_1 | Q21a_1 |
|--------|-------|--------|-------|--------|
| 4206   | 0     |        | 0     |        |
| 4207   | 1     | 0      | 5     | 0      |
| 4214   | 1     | 0      | 0     |        |
| 4215   | 1     | 0      | 0     |        |
| 4217   | 0     |        | 1     | 0      |
| 4219   | 0     |        | 0     |        |
| 4223   | 1     | 2      | 1     | 2      |
| 4226   | 1     | 1      | 0     |        |
| 4229   | 1     | 0      | 0     |        |
| 4230   | 1     | 0      | 0     |        |
| 4232   | 1     | 0      | 0     |        |
| 4233   | 0     |        | 0     |        |
| 4234   | 1     | 1      | 0     |        |
| 4235   | 4     | 1      | 4     | 1      |
| 4236   | 2     | 1      | 0     |        |
| 4237   | 1     | 1      | 1     | 1      |
| 4238   | 0     |        | 1     | 0      |
| 4240   | 1     | 1      | 1     | 1      |
| 4241   | 0     |        | 0     |        |
| 4247   | 0     |        | 0     |        |
| 4250   | 5     | 0      | 0     |        |
| 4251   | 0     |        | 0     |        |
| 4253   | 2     | 1      | 2     | 1      |
| 4254   | 1     | 0      | 0     |        |
| 4258   | 2     | 1      | 1     | 2      |
| 4260   | 1     | 0      | 0     |        |
| 4263   | 1     | 0      | 1     | 0      |
| 4265   | 1     | 0      | 0     |        |
| 4266   | 0     |        | 0     |        |
| 4267   | 2     | 2      | 2     | 2      |
| 4270   | 1     | 0      | 0     |        |
| 4273   | 4     | 1      | 2     | 1      |

| respid | Q20_1 | Q20a_1 | Q21_1 | Q21a_1 |
|--------|-------|--------|-------|--------|
| 4280   | 1     | 0      | 0     |        |
| 4281   | 3     | 0      | 1     | 0      |
| 4282   | 1     | 0      | 0     |        |
| 4283   | 0     |        | 0     |        |
| 4286   | 5     | 2      | 5     | 3      |
| 4287   | 3     | 1      | 1     | 1      |
| 4289   | 1     | 2      | 1     | 0      |
| 4290   | 1     | 2      | 1     | 2      |
| 4291   | 1     | 0      | 0     |        |
| 4292   | 1     | 0      | 0     |        |
| 4293   | 1     | 0      | 0     |        |
| 4294   | 0     |        | 0     |        |
| 4295   | 0     |        | 0     |        |
| 4296   | 1     | 1      | 0     |        |
| 4297   | 0     |        | 1     | 1      |
| 4298   | 2     | 2      | 0     |        |
| 4299   | 1     | 0      | 0     |        |
| 4300   | 1     | 0      | 0     |        |
| 4301   | 0     |        | 0     |        |
| 4302   | 0     |        | 0     |        |
| 4304   | 3     | 0      | 0     |        |
| 4305   | 1     | 1      | 2     | 1      |
| 4307   | 1     | 0      | 1     | 0      |
| 4308   | 2     | 1      | 1     | 1      |
| 4312   | 0     |        | 0     |        |
| 4314   | 1     | 2      | 1     | 1      |
| 4316   | 0     |        | 0     |        |
| 4317   | 2     | 3      | 2     | 2      |
| 4319   | 4     | 3      | 0     |        |
| 4323   | 3     | 2      | 3     | 2      |
| 4337   | 3     | 1      | 0     |        |
| 4341   | 1     | 2      | 0     |        |

| respid | Q20_1 | Q20a_1 | Q21_1 | Q21a_1 |
|--------|-------|--------|-------|--------|
| 4342   | 3     | 1      | 1     | 1      |
| 4344   | 1     | 1      | 1     | 1      |
| 4345   | 2     | 2      | 2     | 1      |
| 4346   | 2     | 1      | 0     |        |
| 4347   | 0     |        | 0     |        |
| 4350   | 0     |        | 0     |        |
| 4352   | 0     |        | 0     |        |
| 4353   | 0     |        | 0     |        |
| 4355   | 1     | 0      | 1     | 0      |
| 4356   | 2     | 1      | 1     | 1      |
| 4358   | 0     |        | 0     |        |
| 4359   | 0     |        | 0     |        |
| 4360   | 1     | 1      | 1     | 1      |
| 4361   | 4     | 3      | 4     | 3      |
| 4363   | 4     | 0      | 0     |        |
| 4364   | 2     | 1      | 0     |        |
| 4365   | 1     | 1      | 0     |        |
| 4367   | 0     |        | 0     |        |
| 4369   | 1     | 1      | 1     | 1      |
| 4373   | 3     | 2      | 1     | 1      |
| 4374   | 1     | 1      | 1     | 1      |
| 4375   | 0     |        | 0     |        |
| 4378   | 0     |        | 0     |        |
| 4379   | 1     | 0      | 1     | 1      |
| 4382   | 3     | 0      | 0     |        |
| 4383   | 0     |        | 0     |        |
| 4384   | 2     | 2      | 0     |        |
| 4385   | 1     | 2      | 1     | 2      |
| 4388   | 1     | 1      | 1     | 1      |
| 4389   | 1     | 0      | 0     |        |
| 4391   | 4     | 0      | 0     |        |
| 4392   | 1     | 1      | 1     | 1      |

| respid | Q20_1 | Q20a_1 | Q21_1 | Q21a_1 |
|--------|-------|--------|-------|--------|
| 4393   | 1     | 0      | 1     | 0      |
| 4395   | 1     | 0      | 0     |        |
| 4397   | 0     |        | 0     |        |
| 4398   | 0     |        | 0     |        |
| 4399   | 0     |        | 0     |        |
| 4400   | 0     |        | 0     |        |
| 4401   | 1     | 1      | 0     |        |
| 4402   | 0     |        | 0     |        |
| 4404   | 1     | 1      | 0     |        |
| 4405   | 0     |        | 0     |        |
| 4407   | 3     | 1      | 3     | 1      |
| 4408   | 2     | 2      | 1     | 1      |
| 4411   | 0     |        | 0     |        |
| 4420   | 1     | 0      | 0     |        |
| 4421   | 1     | 0      | 0     |        |
| 4424   | 3     | 3      | 4     | 2      |
| 4425   | 1     | 1      | 1     | 1      |
| 4427   | 1     | 0      | 0     |        |
| 4430   | 1     | 0      | 0     |        |
| 4431   | 0     |        | 0     |        |
| 4432   | 0     |        | 0     |        |
| 4436   | 3     | 1      | 0     |        |
| 4439   | 3     | 0      | 0     |        |
| 4451   | 1     | 1      | 1     | 1      |
| 4452   | 2     | 1      | 2     | 3      |
| 4458   | 0     |        | 0     |        |
| 4464   | 1     | 1      | 2     | 2      |
| 4465   | 1     | 1      | 0     |        |
| 4467   | 0     |        | 1     | 0      |
| 4470   | 4     | 3      | 3     | 2      |
| 4471   | 0     |        | 1     | 0      |
| 4472   | 1     | 1      | 1     | 1      |

| respid | Q20_1 | Q20a_1 | Q21_1 | Q21a_1 |
|--------|-------|--------|-------|--------|
| 4473   | 4     | 2      | 0     |        |
| 4475   | 1     | 0      | 0     |        |
| 4476   | 1     | 0      | 0     |        |
| 4478   | 0     |        | 1     | 0      |
| 4485   | 5     | 0      | 0     |        |
| 4486   | 1     | 1      | 0     |        |
| 4490   | 0     |        | 0     |        |
| 4502   | 0     |        | 0     |        |
| 4503   | 4     | 4      | 0     |        |
| 4504   | 0     |        | 0     |        |
| 4506   | 0     |        | 0     |        |
| 4508   | 0     |        | 0     |        |
| 4515   | 0     |        | 0     |        |
| 4516   | 3     | 2      | 3     | 2      |
| 4519   | 0     |        | 0     |        |
| 4523   | 1     | 2      | 1     | 0      |
| 4525   | 1     | 1      | 1     | 1      |
| 4526   | 1     | 0      | 0     |        |
| 4528   | 0     |        | 0     |        |
| 4530   | 0     |        | 1     | 1      |
| 4531   | 2     | 1      | 1     | 1      |
| 4532   | 2     | 1      | 3     | 1      |
| 4537   | 2     | 0      | 0     |        |
| 4538   | 0     |        | 0     |        |
| 4539   | 1     | 0      | 0     |        |
| 4541   | 2     | 2      | 2     | 1      |
| 4543   | 0     |        | 0     |        |
| 4544   | 0     |        | 0     |        |
| 4546   | 0     |        | 0     |        |
| 4547   | 1     | 0      | 0     |        |
| 4549   | 0     |        | 0     |        |
| 4550   | 5     | 0      | 4     | 0      |

| respid | Q20_1 | Q20a_1 | Q21_1 | Q21a_1 |
|--------|-------|--------|-------|--------|
| 4551   | 0     |        | 0     |        |
| 4554   | 0     |        | 0     |        |
| 4557   | 0     |        | 0     |        |
| 4565   | 1     | 0      | 0     |        |
| 4568   | 1     | 0      | 1     | 0      |
| 4569   | 0     |        | 0     |        |
| 4570   | 0     |        | 0     |        |
| 4572   | 0     |        | 0     |        |
| 4574   | 2     | 2      | 2     | 2      |
| 4576   | 1     | 1      | 1     | 1      |
| 4578   | 1     | 0      | 0     |        |
| 4579   | 0     |        | 0     |        |
| 4580   | 5     | 3      | 5     | 3      |
| 4581   | 0     |        | 0     |        |
| 4584   | 0     |        | 0     |        |
| 4586   | 4     | 3      | 4     | 3      |
| 4587   | 2     | 2      | 3     | 2      |
| 4590   | 1     | 0      | 0     |        |
| 4592   | 0     |        | 0     |        |
| 4593   | 1     | 0      | 0     |        |
| 4595   | 1     | 1      | 0     |        |
| 4597   | 0     |        | 1     | 0      |
| 4598   | 3     | 2      | 1     | 2      |
| 4599   | 1     | 1      | 1     | 1      |
| 4600   | 2     | 1      | 0     |        |
| 4601   | 2     | 2      | 2     | 1      |
| 4608   | 3     | 1      | 3     | 1      |
| 4609   | 1     | 0      | 0     |        |
| 4611   | 3     | 1      | 0     |        |
| 4612   | 2     | 2      | 2     | 2      |
| 4613   | 0     |        | 0     |        |
| 4616   | 2     | 2      | 1     | 1      |

| respid | Q20_1 | Q20a_1 | Q21_1 | Q21a_1 |
|--------|-------|--------|-------|--------|
| 4617   | 0     |        | 0     |        |
| 4620   | 2     | 1      | 2     | 1      |
| 4621   | 0     |        | 0     |        |
| 4622   | 1     | 1      | 3     | 1      |
| 4624   | 1     | 1      | 1     | 1      |
| 4625   | 2     | 2      | 3     | 2      |
| 4627   | 4     | 3      | 5     | 4      |
| 4628   | 1     | 2      | 1     | 2      |
| 4629   | 0     |        | 0     |        |
| 4630   | 1     | 1      | 1     | 1      |
| 4632   | 1     | 0      | 0     |        |
| 4634   | 2     | 1      | 1     | 1      |
| 4635   | 5     | 4      | 5     | 4      |
| 4636   | 0     |        | 0     |        |
| 4637   | 1     | 1      | 1     | 1      |
| 4638   | 4     | 3      | 4     | 3      |
| 4639   | 2     | 1      | 2     | 1      |
| 4641   | 0     |        | 0     |        |
| 4643   | 0     |        | 0     |        |
| 4645   | 0     |        | 0     |        |
| 4646   | 1     | 1      | 1     | 1      |
| 4647   | 0     |        | 0     |        |
| 4648   | 0     |        | 0     |        |
| 4649   | 3     | 2      | 2     | 1      |
| 4650   | 4     | 3      | 1     | 1      |
| 4651   | 2     | 1      | 0     |        |
| 4652   | 1     | 1      | 0     |        |
| 4653   | 0     |        | 0     |        |
| 4657   | 0     |        | 0     |        |
| 4660   | 4     | 2      | 0     |        |
| 4661   | 0     |        | 1     | 0      |
| 4662   | 1     | 1      | 0     |        |



| respid | Q20_1 | Q20a_1 | Q21_1 | Q21a_1 |
|--------|-------|--------|-------|--------|
| 4667   | 3     | 1      | 0     |        |
| 4669   | 5     | 0      | 0     |        |
| 4671   | 0     |        | 0     |        |
| 4672   | 1     | 0      | 1     | 1      |
| 4673   | 0     |        | 0     |        |
| 4677   | 0     |        | 0     |        |
| 4679   | 4     | 1      | 1     | 1      |
| 4683   | 1     | 1      | 0     |        |
| 4684   | 2     | 0      | 0     |        |
| 4685   | 1     | 0      | 0     |        |
| 4686   | 1     | 1      | 0     |        |
| 4687   | 0     |        | 0     |        |
| 4688   | 0     |        | 0     |        |
| 4691   | 0     |        | 0     |        |
| 4692   | 0     |        | 0     |        |
| 4694   | 3     | 2      | 2     | 1      |
| 4695   | 1     | 0      | 0     |        |
| 4696   | 3     | 2      | 1     | 1      |
| 4697   | 0     |        | 0     |        |
| 4698   | 1     | 2      | 3     | 3      |
| 4699   | 0     |        | 0     |        |
| 4701   | 0     |        | 0     |        |
| 4703   | 5     | 0      | 5     | 0      |
| 4704   | 5     | 3      | 4     | 3      |
| 4705   | 0     |        | 0     |        |
| 4706   | 1     | 0      | 0     |        |
| 4707   | 0     |        | 0     |        |
| 4708   | 1     | 1      | 1     | 1      |
| 4710   | 0     |        | 0     |        |
| 4711   | 3     | 2      | 4     | 2      |
| 4715   | 0     |        | 0     |        |
| 4716   | 1     | 1      | 0     |        |

| respid | Q20_1 | Q20a_1 | Q21_1 | Q21a_1 |
|--------|-------|--------|-------|--------|
| 4717   | 0     |        | 0     |        |
| 4718   | 0     |        | 0     |        |
| 4722   | 0     |        | 0     |        |
| 4727   | 1     | 1      | 1     | 1      |
| 4728   | 5     | 3      | 4     | 3      |
| 4729   | 3     | 1      | 0     |        |
| 4732   | 1     | 1      | 0     |        |
| 4733   | 0     |        | 0     |        |
| 4734   | 4     | 2      | 4     | 2      |
| 4735   | 0     |        | 1     | 0      |
| 4737   | 0     |        | 0     |        |
| 4738   | 1     | 1      | 1     | 1      |
| 4740   | 0     |        | 0     |        |
| 4741   | 1     | 1      | 1     | 1      |
| 4743   | 0     |        | 0     |        |
| 4746   | 1     | 1      | 1     | 1      |
| 4750   | 0     |        | 2     | 0      |
| 4752   | 1     | 1      | 1     | 1      |
| 4753   | 1     | 1      | 1     | 1      |
| 4754   | 5     | 3      | 3     | 3      |
| 4755   | 4     | 3      | 2     | 2      |
| 4758   | 1     | 2      | 0     |        |
| 4766   | 0     |        | 0     |        |
| 4767   | 1     | 2      | 1     | 2      |
| 4768   | 1     | 1      | 1     | 1      |
| 4769   | 3     | 1      | 2     | 1      |
| 4771   | 3     | 2      | 5     | 4      |
| 4772   | 3     | 0      | 0     |        |
| 4773   | 0     |        | 0     |        |
| 4774   | 1     | 1      | 1     | 0      |
| 4776   | 2     | 2      | 2     | 2      |
| 4777   | 0     |        | 0     |        |

| respid | Q20_1 | Q20a_1 | Q21_1 | Q21a_1 |
|--------|-------|--------|-------|--------|
| 4779   | 0     |        | 0     |        |
| 4780   | 2     | 1      | 0     |        |
| 4781   | 0     |        | 4     | 1      |
| 4783   | 3     | 2      | 4     | 2      |
| 4784   | 1     | 1      | 1     | 1      |
| 4785   | 2     | 1      | 0     |        |
| 4788   | 0     |        | 0     |        |
| 4789   | 1     | 1      | 1     | 1      |
| 4790   | 0     |        | 1     | 0      |
| 4791   | 0     |        | 0     |        |
| 4794   | 0     |        | 0     |        |
| 4795   | 0     |        | 0     |        |
| 4797   | 1     | 0      | 3     | 2      |
| 4802   | 4     | 1      | 1     | 1      |
| 4803   | 3     | 1      | 0     |        |
| 4804   | 0     |        | 0     |        |
| 4805   | 0     |        | 0     |        |
| 4807   | 0     |        | 0     |        |
| 4808   | 1     | 1      | 0     |        |
| 4809   | 2     | 3      | 4     | 3      |
| 4811   | 0     |        | 0     |        |
| 4817   | 0     |        | 0     |        |
| 4819   | 0     |        | 0     |        |
| 4820   | 0     |        | 0     |        |
| 4821   | 1     | 1      | 0     |        |
| 4822   | 0     |        | 1     | 1      |
| 4823   | 1     | 0      | 0     |        |
| 4825   | 3     | 1      | 4     | 3      |
| 4826   | 0     |        | 0     |        |
| 4830   | 0     |        | 0     |        |
| 4832   | 0     |        | 0     |        |
| 4838   | 1     | 1      | 1     | 1      |

| respid | Q20_1 | Q20a_1 | Q21_1 | Q21a_1 |
|--------|-------|--------|-------|--------|
| 4840   | 1     | 0      | 0     |        |
| 4841   | 0     |        | 0     |        |
| 4843   | 0     |        | 0     |        |
| 4845   | 4     | 2      | 0     |        |
| 4846   | 2     | 1      | 1     | 1      |
| 4848   | 2     | 2      | 0     |        |
| 4853   | 0     |        | 0     |        |
| 4854   | 0     |        | 0     |        |
| 4859   | 1     | 1      | 0     |        |
| 4861   | 0     |        | 0     |        |
| 4864   | 2     | 1      | 0     |        |
| 4867   | 0     |        | 0     |        |
| 4870   | 0     |        | 0     |        |
| 4872   | 1     | 0      | 1     | 2      |
| 4873   | 0     |        | 1     | 3      |
| 4874   | 0     |        | 0     |        |
| 4878   | 0     |        | 0     |        |
| 4880   | 0     |        | 0     |        |
| 4881   | 1     | 1      | 1     | 1      |
| 4882   | 1     | 1      | 1     | 2      |
| 4883   | 1     | 0      | 1     | 0      |
| 4885   | 1     | 1      | 0     |        |
| 4889   | 0     |        | 0     |        |
| 4890   | 0     |        | 0     |        |
| 4891   | 1     | 0      | 0     |        |
| 4894   | 1     | 1      | 0     |        |
| 4895   | 5     | 3      | 4     | 4      |
| 4896   | 1     | 0      | 0     |        |
| 4897   | 0     |        | 0     |        |
| 4898   | 1     | 1      | 1     | 1      |
| 4899   | 0     |        | 0     |        |
| 4900   | 1     | 2      | 1     | 1      |

| respid | Q20_1 | Q20a_1 | Q21_1 | Q21a_1 |
|--------|-------|--------|-------|--------|
| 4901   | 1     | 1      | 1     | 1      |
| 4903   | 1     | 1      | 1     | 0      |
| 4904   | 0     |        | 0     |        |
| 4908   | 2     | 0      | 0     |        |
| 4909   | 1     | 2      | 0     |        |
| 4913   | 1     | 0      | 0     |        |
| 4917   | 1     | 0      | 2     | 1      |
| 4918   | 1     | 0      | 0     |        |
| 4920   | 0     |        | 0     |        |
| 4921   | 2     | 2      | 0     |        |
| 4925   | 0     |        | 0     |        |
| 4926   | 0     |        | 0     |        |
| 4927   | 1     | 0      | 0     |        |
| 4928   | 2     | 1      | 0     |        |
| 4929   | 1     | 1      | 0     |        |
| 4930   | 1     | 2      | 1     | 2      |
| 4931   | 2     | 1      | 1     | 1      |
| 4932   | 2     | 2      | 3     | 2      |
| 4933   | 0     |        | 0     |        |
| 4934   | 1     | 0      | 0     |        |
| 5934   | 1     | 1      | 0     |        |
| 5935   | 0     |        | 2     | 1      |
| 5936   | 0     |        | 0     |        |
| 5938   | 0     |        | 0     |        |
| 5939   | 0     |        | 0     |        |
| 5940   | 3     | 1      | 2     | 2      |
| 5942   | 1     | 1      | 0     |        |
| 5944   | 1     | 1      | 1     | 1      |
| 5951   | 3     | 3      | 0     |        |
| 5952   | 2     | 3      | 0     |        |
| 5954   | 1     | 1      | 1     | 1      |
| 5956   | 2     | 1      | 0     |        |

| respid | Q20_1 | Q20a_1 | Q21_1 | Q21a_1 |
|--------|-------|--------|-------|--------|
| 5957   | 3     | 1      | 1     | 1      |
| 5958   | 1     | 1      | 1     | 1      |
| 5959   | 1     | 1      | 0     |        |
| 5960   | 1     | 1      | 0     |        |
| 5963   | 1     | 1      | 0     |        |
| 5966   | 2     | 1      | 0     |        |
| 5968   | 0     |        | 0     |        |
| 5974   | 0     |        | 0     |        |
| 5975   | 0     |        | 1     | 1      |
| 5976   | 0     |        | 0     |        |
| 5977   | 0     |        | 0     |        |
| 5978   | 1     | 1      | 0     |        |
| 5979   | 0     |        | 0     |        |
| 5983   | 1     | 0      | 0     |        |
| 5984   | 1     | 0      | 1     | 0      |
| 5990   | 0     |        | 0     |        |
| 5991   | 4     | 1      | 0     |        |
| 5992   | 0     |        | 0     |        |
| 5993   | 1     | 1      | 0     |        |
| 5994   | 0     |        | 0     |        |
| 5996   | 1     | 0      | 0     |        |
| 6001   | 2     | 2      | 2     | 2      |
| 6003   | 0     |        | 0     |        |
| 6004   | 3     | 2      | 4     | 3      |
| 6005   | 0     |        | 1     | 1      |
| 6006   | 1     | 0      | 0     |        |
| 6008   | 3     | 2      | 4     | 2      |
| 6009   | 5     | 2      | 0     |        |
| 6014   | 0     |        | 0     |        |
| 6016   | 1     | 1      | 1     | 1      |
| 6017   | 1     | 1      | 0     |        |
| 6018   | 2     | 2      | 0     |        |

| respid | Q20_1 | Q20a_1 | Q21_1 | Q21a_1 |
|--------|-------|--------|-------|--------|
| 6020   | 1     | 1      | 1     | 1      |
| 6021   | 0     |        | 0     |        |
| 6024   | 0     |        | 0     |        |
| 6025   | 1     | 1      | 0     |        |
| 6026   | 0     |        | 0     |        |
| 6032   | 3     | 1      | 1     | 1      |
| 6035   | 1     | 1      | 0     |        |
| 6038   | 5     | 0      | 0     |        |
| 6043   | 3     | 2      | 3     | 2      |
| 6044   | 1     | 1      | 0     |        |
| 6046   | 4     | 1      | 0     |        |
| 6047   | 1     | 0      | 0     |        |
| 6048   | 3     | 1      | 2     | 1      |
| 6050   | 5     | 2      | 1     | 0      |
| 6051   | 2     | 1      | 1     | 1      |
| 6053   | 1     | 0      | 0     |        |
| 6054   | 1     | 0      | 2     | 2      |
| 6056   | 0     |        | 0     |        |
| 6058   | 1     | 1      | 0     |        |
| 6060   | 2     | 2      | 1     | 2      |
| 6061   | 0     |        | 0     |        |
| 6062   | 0     |        | 1     | 1      |
| 6067   | 1     | 0      | 0     |        |
| 6070   | 1     | 2      | 0     |        |
| 6074   | 3     | 2      | 0     |        |
| 6076   | 2     | 1      | 0     |        |
| 6078   | 0     |        | 0     |        |
| 6081   | 0     |        | 0     |        |
| 6085   | 3     | 2      | 4     | 2      |
| 6088   | 0     |        | 0     |        |
| 6092   | 2     | 0      | 0     |        |
| 6095   | 0     |        | 0     |        |

| respid | Q20_1 | Q20a_1 | Q21_1 | Q21a_1 |
|--------|-------|--------|-------|--------|
| 6098   | 0     |        | 0     |        |
| 6101   | 0     |        | 0     |        |
| 6102   | 1     | 1      | 1     | 0      |
| 6105   | 1     | 0      | 0     |        |
| 6106   | 1     | 1      | 1     | 1      |
| 6107   | 0     |        | 0     |        |
| 6111   | 0     |        | 0     |        |
| 6112   | 4     | 2      | 0     |        |
| 6113   | 2     | 1      | 3     | 1      |
| 6115   | 1     | 1      | 0     |        |
| 6116   | 0     |        | 0     |        |
| 6117   | 0     |        | 1     | 3      |
| 6124   | 2     | 1      | 1     | 1      |
| 6125   | 1     | 0      | 0     |        |
| 6128   | 0     |        | 0     |        |
| 6133   | 0     |        | 0     |        |
| 6134   | 1     | 0      | 0     |        |
| 6135   | 2     | 2      | 3     | 2      |
| 6138   | 1     | 1      | 1     | 1      |
| 6140   | 0     |        | 0     |        |
| 6143   | 1     | 0      | 0     |        |
| 6147   | 3     | 2      | 1     | 1      |
| 6154   | 0     |        | 0     |        |
| 6162   | 0     |        | 0     |        |
| 6165   | 5     | 2      | 0     |        |
| 6166   | 2     | 1      | 2     | 1      |
| 6173   | 5     | 3      | 4     | 3      |
| 6180   | 2     | 1      | 2     | 1      |
| 6184   | 3     | 3      | 2     | 2      |
| 6185   | 0     |        | 0     |        |
| 6186   | 1     | 1      | 0     |        |
| 6188   | 1     | 1      | 0     |        |



| respid | Q20_1 | Q20a_1 | Q21_1 | Q21a_1 |
|--------|-------|--------|-------|--------|
| 6192   | 2     | 1      | 3     | 2      |
| 6194   | 0     |        | 0     |        |
| 6195   | 0     |        | 0     |        |
| 6196   | 0     |        | 0     |        |
| 6199   | 1     | 1      | 0     |        |
| 6200   | 0     |        | 0     |        |
| 6201   | 0     |        | 0     |        |
| 6202   | 0     |        | 0     |        |
| 6203   | 0     |        | 0     |        |
| 6205   | 0     |        | 0     |        |
| 6210   | 1     | 1      | 1     | 1      |
| 6212   | 1     | 1      | 1     | 1      |
| 6216   | 4     | 2      | 2     | 2      |
| 6218   | 3     | 3      | 2     | 2      |
| 6221   | 1     | 0      | 1     | 1      |
| 6224   | 0     |        | 0     |        |
| 6225   | 0     |        | 1     | 1      |
| 6227   | 2     | 0      | 1     | 0      |
| 6230   | 0     |        | 0     |        |
| 6231   | 0     |        | 0     |        |
| 6233   | 0     |        | 0     |        |
| 6234   | 1     | 1      | 0     |        |
| 6235   | 0     |        | 0     |        |
| 6237   | 0     |        | 0     |        |
| 6240   | 0     |        | 0     |        |
| 6248   | 0     |        | 0     |        |
| 6249   | 0     |        | 0     |        |
| 6252   | 1     | 2      | 0     |        |
| 6254   | 2     | 1      | 0     |        |
| 6269   | 1     | 1      | 1     | 1      |
| 6304   | 0     |        | 0     |        |
| 6334   | 0     |        | 0     |        |

| respid | Q20_1 | Q20a_1 | Q21_1 | Q21a_1 |
|--------|-------|--------|-------|--------|
| 6341   | 3     | 2      | 1     | 2      |
| 6350   | 2     | 2      | 2     | 2      |
| 6370   | 0     |        | 0     |        |
| 6384   | 0     |        | 1     | 0      |
| 6400   | 1     | 0      | 0     |        |
| 6418   | 0     |        | 0     |        |
| 6467   | 0     |        | 0     |        |
| 6469   | 0     |        | 0     |        |
| 6474   | 0     |        | 0     |        |
| 6475   | 0     |        | 0     |        |
| 6476   | 2     | 1      | 2     | 1      |
| 6477   | 1     | 1      | 0     |        |
| 6480   | 0     |        | 1     | 1      |
| 6481   | 3     | 2      | 3     | 3      |
| 6485   | 1     | 0      | 0     |        |
| 6488   | 2     | 2      | 2     | 2      |
| 6495   | 1     | 3      | 1     | 1      |
| 6499   | 2     | 3      | 1     | 1      |
| 6500   | 3     | 2      | 2     | 2      |
| 6504   | 0     |        | 1     | 2      |
| 6507   | 0     |        | 1     | 1      |
| 6512   | 0     |        | 1     | 1      |
| 6525   | 5     | 3      | 5     | 2      |
| 6532   | 4     | 1      | 2     | 1      |
| 6535   | 1     | 0      | 0     |        |
| 6546   | 0     |        | 0     |        |
| 6551   | 3     | 3      | 3     | 3      |
| 6556   | 0     |        | 0     |        |
| 6566   | 3     | 3      | 2     | 2      |
| 6569   | 0     |        | 0     |        |
| 6574   | 5     | 0      | 0     |        |
| 6576   | 5     | 1      | 2     | 2      |

| respid | Q20_1 | Q20a_1 | Q21_1 | Q21a_1 |
|--------|-------|--------|-------|--------|
| 6580   | 0     |        | 0     |        |
| 6584   | 0     |        | 0     |        |
| 6585   | 1     | 1      | 3     | 1      |
| 6589   | 1     | 0      | 0     |        |
| 6590   | 0     |        | 0     |        |
| 6598   | 0     |        | 0     |        |
| 6603   | 0     |        | 1     | 0      |
| 6618   | 0     |        | 0     |        |
| 6630   | 0     |        | 0     |        |
| 6636   | 0     |        | 1     | 1      |
| 6649   | 0     |        | 0     |        |
| 6675   | 0     |        | 0     |        |
| 6678   | 2     | 0      | 0     |        |
| 6681   | 0     |        | 0     |        |
| 6684   | 1     | 1      | 1     | 1      |
| 6688   | 0     |        | 0     |        |
| 6691   | 0     |        | 0     |        |
| 6694   | 1     | 1      | 1     | 1      |
| 6696   | 0     |        | 0     |        |
| 6720   | 3     | 3      | 3     | 3      |
| 6722   | 4     | 3      | 4     | 3      |
| 6724   | 1     | 0      | 0     |        |
| 6725   | 0     |        | 0     |        |
| 6727   | 0     |        | 0     |        |
| 6734   | 1     | 1      | 1     | 1      |
| 6739   | 3     | 2      | 1     | 0      |
| 6743   | 2     | 2      | 3     | 2      |
| 6749   | 0     |        | 0     |        |
| 6756   | 2     | 1      | 1     | 0      |
| 6764   | 4     | 0      | 0     |        |
| 6765   | 0     |        | 0     |        |
| 6768   | 1     | 0      | 0     |        |

| respid | Q20_1 | Q20a_1 | Q21_1 | Q21a_1 |
|--------|-------|--------|-------|--------|
| 6773   | 0     |        | 0     |        |
| 6775   | 2     | 1      | 0     |        |
| 6777   | 0     |        | 0     |        |
| 6779   | 5     | 0      | 0     |        |
| 6790   | 0     |        | 0     |        |
| 6797   | 0     |        | 0     |        |
| 6798   | 1     | 1      | 0     |        |
| 6808   | 0     |        | 0     |        |
| 6810   | 0     |        | 0     |        |
| 6811   | 5     | 3      | 3     | 1      |
| 6812   | 1     | 1      | 0     |        |
| 6814   | 0     |        | 0     |        |
| 6819   | 0     |        | 0     |        |
| 6820   | 3     | 2      | 0     |        |
| 6832   | 1     | 0      | 0     |        |
| 6854   | 4     | 1      | 5     | 0      |
| 6855   | 0     |        | 0     |        |
| 6857   | 0     |        | 0     |        |
| 6858   | 1     | 0      | 2     | 2      |
| 6859   | 3     | 1      | 0     |        |
| 6860   | 0     |        | 0     |        |
| 6862   | 3     | 1      | 0     |        |
| 6879   | 0     |        | 0     |        |
| 6893   | 0     |        | 0     |        |
| 6898   | 0     |        | 0     |        |
| 6902   | 2     | 2      | 1     | 1      |
| 6903   | 0     |        | 3     | 1      |
| 6907   | 4     | 3      | 3     | 3      |
| 6908   | 0     |        | 0     |        |
| 6912   | 0     |        | 0     |        |
| 6915   | 0     |        | 1     | 1      |
| 6916   | 0     |        | 0     |        |

| respid | Q20_1 | Q20a_1 | Q21_1 | Q21a_1 |
|--------|-------|--------|-------|--------|
| 6917   | 3     | 2      | 3     | 2      |
| 6923   | 0     |        | 0     |        |
| 6934   | 0     |        | 1     | 0      |
| 6937   | 0     |        | 0     |        |
| 6945   | 3     | 0      | 0     |        |
| 6954   | 4     | 1      | 2     | 1      |
| 6956   | 2     | 1      | 0     |        |
| 6958   | 0     |        | 0     |        |
| 6961   | 1     | 0      | 0     |        |
| 6963   | 1     | 0      | 1     | 0      |
| 6964   | 0     |        | 0     |        |
| 6976   | 0     |        | 0     |        |
| 6977   | 0     |        | 0     |        |
| 7000   | 2     | 3      | 2     | 1      |
| 7001   | 0     |        | 0     |        |
| 7005   | 0     |        | 0     |        |
| 7006   | 0     |        | 0     |        |
| 7008   | 3     | 4      | 1     | 3      |
| 7009   | 0     |        | 0     |        |
| 7019   | 3     | 1      | 0     |        |
| 7021   | 2     | 1      | 0     |        |
| 7026   | 3     | 2      | 1     | 1      |
| 7030   | 3     | 3      | 3     | 2      |
| 7034   | 0     |        | 0     |        |
| 7039   | 0     |        | 0     |        |
| 7041   | 0     |        | 0     |        |
| 7047   | 0     |        | 0     |        |
| 7051   | 1     | 0      | 0     |        |
| 7052   | 1     | 1      | 1     | 1      |
| 7059   | 4     | 1      | 1     | 1      |
| 7062   | 0     |        | 0     |        |
| 7065   | 1     | 1      | 0     |        |

| respid | Q20_1 | Q20a_1 | Q21_1 | Q21a_1 |
|--------|-------|--------|-------|--------|
| 7066   | 0     |        | 0     |        |
| 7069   | 2     | 1      | 1     | 0      |
| 7070   | 0     |        | 0     |        |
| 7073   | 0     |        | 0     |        |
| 7078   | 0     |        | 0     |        |
| 7083   | 3     | 2      | 0     |        |
| 7084   | 3     | 3      | 2     | 2      |
| 7085   | 1     | 0      | 0     |        |
| 7088   | 2     | 2      | 1     | 2      |
| 7090   | 2     | 2      | 2     | 2      |
| 7095   | 1     | 1      | 1     | 1      |
| 7100   | 0     |        | 0     |        |
| 7102   | 2     | 1      | 2     | 1      |
| 7103   | 1     | 0      | 0     |        |
| 7108   | 1     | 0      | 1     | 0      |
| 7109   | 3     | 0      | 0     |        |
| 7110   | 0     |        | 0     |        |
| 7112   | 0     |        | 0     |        |
| 7114   | 1     | 0      | 0     |        |
| 7116   | 1     | 0      | 0     |        |
| 7117   | 0     |        | 1     | 3      |
| 7118   | 2     | 2      | 3     | 3      |
| 7120   | 3     | 3      | 3     | 3      |
| 7124   | 3     | 0      | 0     |        |
| 7130   | 2     | 1      | 1     | 1      |
| 7135   | 0     |        | 0     |        |
| 7137   | 2     | 1      | 3     | 2      |
| 7140   | 2     | 0      | 0     |        |
| 7141   | 0     |        | 0     |        |
| 7148   | 0     |        | 0     |        |
| 7152   | 0     |        | 0     |        |
| 7154   | 1     | 0      | 0     |        |

| respid | Q20_1 | Q20a_1 | Q21_1 | Q21a_1 |
|--------|-------|--------|-------|--------|
| 7156   | 1     | 1      | 0     |        |
| 7158   | 2     | 1      | 2     | 1      |
| 7159   | 0     |        | 0     |        |
| 7161   | 0     |        | 0     |        |
| 7164   | 2     | 0      | 0     |        |
| 7166   | 0     |        | 0     |        |
| 7167   | 0     |        | 0     |        |
| 7168   | 0     |        | 0     |        |
| 7170   | 0     |        | 0     |        |
| 7171   | 0     |        | 0     |        |
| 7172   | 0     |        | 0     |        |
| 7173   | 4     | 2      | 1     | 1      |
| 7175   | 1     | 0      | 0     |        |
| 7176   | 2     | 1      | 3     | 1      |
| 7180   | 0     |        | 0     |        |
| 7183   | 1     | 0      | 1     | 1      |
| 7189   | 1     | 0      | 0     |        |
| 7193   | 1     | 0      | 0     |        |
| 7194   | 5     | 2      | 3     | 1      |
| 7195   | 0     |        | 0     |        |
| 7200   | 0     |        | 0     |        |
| 7201   | 5     | 3      | 3     | 2      |
| 7205   | 4     | 3      | 4     | 3      |
| 7207   | 0     |        | 0     |        |
| 7208   | 0     |        | 0     |        |
| 7210   | 5     | 0      | 0     |        |
| 7211   | 0     |        | 0     |        |
| 7217   | 0     |        | 0     |        |
| 7218   | 1     | 0      | 0     |        |
| 7220   | 0     |        | 0     |        |
| 7225   | 0     |        | 0     |        |
| 7228   | 5     | 1      | 0     |        |

| respid | Q20_1 | Q20a_1 | Q21_1 | Q21a_1 |
|--------|-------|--------|-------|--------|
| 7230   | 1     | 1      | 1     | 1      |
| 7233   | 1     | 1      | 0     |        |
| 7234   | 1     | 1      | 1     | 1      |
| 7235   | 0     |        | 0     |        |
| 7236   | 0     |        | 0     |        |
| 7241   | 0     |        | 0     |        |
| 7251   | 1     | 1      | 0     |        |
| 7253   | 4     | 1      | 1     | 2      |
| 7259   | 1     | 0      | 2     | 1      |
| 7260   | 1     | 1      | 0     |        |
| 7261   | 2     | 1      | 2     | 1      |
| 7263   | 0     |        | 0     |        |
| 7265   | 0     |        | 0     |        |
| 7268   | 0     |        | 0     |        |
| 7269   | 0     |        | 0     |        |
| 7271   | 2     | 2      | 2     | 2      |
| 7276   | 4     | 4      | 5     | 4      |
| 7280   | 1     | 1      | 1     | 1      |
| 7283   | 1     | 0      | 0     |        |
| 7284   | 1     | 1      | 1     | 1      |
| 7286   | 0     |        | 0     |        |
| 7287   | 0     |        | 0     |        |
| 7288   | 0     |        | 0     |        |
| 7294   | 0     |        | 0     |        |
| 7295   | 0     |        | 0     |        |
| 7296   | 0     |        | 0     |        |
| 7297   | 0     |        | 0     |        |
| 7299   | 0     |        | 0     |        |
| 7300   | 4     | 1      | 3     | 1      |
| 7301   | 1     | 1      | 0     |        |
| 7302   | 0     |        | 0     |        |
| 7306   | 0     |        | 0     |        |



| respid | Q20_1 | Q20a_1 | Q21_1 | Q21a_1 |
|--------|-------|--------|-------|--------|
| 7313   | 3     | 3      | 3     | 3      |
| 7315   | 1     | 0      | 0     |        |
| 7317   | 4     | 0      | 0     |        |
| 7321   | 1     | 0      | 0     |        |
| 7322   | 1     | 0      | 0     |        |
| 7323   | 1     | 0      | 0     |        |
| 7333   | 4     | 2      | 5     | 3      |
| 7335   | 2     | 2      | 0     |        |
| 7336   | 1     | 0      | 0     |        |
| 7337   | 0     |        | 0     |        |
| 7338   | 0     |        | 0     |        |
| 7340   | 0     |        | 0     |        |
| 7341   | 3     | 2      | 2     | 2      |
| 7342   | 0     |        | 0     |        |
| 7344   | 1     | 1      | 1     | 1      |
| 7346   | 0     |        | 0     |        |
| 7347   | 2     | 1      | 2     | 1      |
| 7349   | 2     | 2      | 1     | 1      |
| 7352   | 1     | 1      | 1     | 1      |
| 7353   | 1     | 0      | 0     |        |
| 7355   | 1     | 0      | 0     |        |
| 7356   | 0     |        | 0     |        |
| 7360   | 3     | 3      | 3     | 3      |
| 7371   | 0     |        | 0     |        |
| 7376   | 1     | 2      | 2     | 2      |
| 7379   | 5     | 2      | 3     | 2      |
| 7381   | 0     |        | 0     |        |
| 7386   | 4     | 1      | 0     |        |
| 7389   | 1     | 0      | 0     |        |
| 7390   | 2     | 2      | 2     | 4      |
| 7393   | 0     |        | 0     |        |
| 7394   | 0     |        | 0     |        |

| respid | Q20_1 | Q20a_1 | Q21_1 | Q21a_1 |
|--------|-------|--------|-------|--------|
| 7396   | 2     | 1      | 1     | 1      |
| 7400   | 2     | 1      | 1     | 1      |
| 7401   | 1     | 0      | 1     | 1      |
| 7403   | 1     | 1      | 0     |        |
| 7406   | 1     | 4      | 1     | 3      |
| 7409   | 0     |        | 0     |        |
| 7410   | 4     | 3      | 2     | 3      |
| 7412   | 3     | 2      | 2     | 2      |
| 7414   | 0     |        | 0     |        |
| 7415   | 2     | 1      | 2     | 1      |
| 7417   | 1     | 1      | 1     | 1      |
| 7421   | 4     | 3      | 4     | 3      |
| 7425   | 3     | 2      | 1     | 1      |
| 7430   | 1     | 0      | 1     | 0      |
| 7432   | 0     |        | 0     |        |
| 7433   | 0     |        | 0     |        |
| 7442   | 1     | 1      | 1     | 0      |
| 7445   | 1     | 1      | 0     |        |
| 7446   | 3     | 1      | 0     |        |
| 7449   | 0     |        | 0     |        |
| 7450   | 0     |        | 0     |        |
| 7451   | 1     | 1      | 1     | 1      |
| 7459   | 1     | 1      | 0     |        |
| 7462   | 0     |        | 0     |        |
| 7463   | 0     |        | 0     |        |
| 7469   | 0     |        | 0     |        |
| 7482   | 0     |        | 0     |        |
| 7484   | 1     | 1      | 1     | 1      |
| 7486   | 0     |        | 0     |        |
| 7496   | 0     |        | 1     | 0      |
| 7502   | 2     | 1      | 0     |        |
| 7504   | 3     | 1      | 1     | 1      |

| respid | Q20_1 | Q20a_1 | Q21_1 | Q21a_1 |
|--------|-------|--------|-------|--------|
| 7509   | 3     | 3      | 5     | 4      |
| 7513   | 5     | 2      | 4     | 2      |
| 7514   | 0     |        | 0     |        |
| 7520   | 1     | 0      | 0     |        |
| 7523   | 0     |        | 0     |        |
| 7526   | 1     | 1      | 0     |        |
| 7529   | 2     | 2      | 2     | 2      |
| 7534   | 0     |        | 0     |        |
| 7536   | 4     | 1      | 2     | 0      |
| 7540   | 0     |        | 0     |        |
| 7541   | 2     | 2      | 2     | 2      |
| 7542   | 0     |        | 0     |        |
| 7555   | 0     |        | 0     |        |
| 7566   | 0     |        | 0     |        |
| 7568   | 3     | 1      | 2     | 1      |
| 7570   | 1     | 1      | 1     | 2      |
| 7572   | 0     |        | 0     |        |
| 7573   | 4     | 3      | 1     | 1      |
| 7576   | 1     | 0      | 0     |        |
| 7577   | 4     | 2      | 0     |        |
| 7583   | 0     |        | 0     |        |
| 7584   | 0     |        | 0     |        |
| 7585   | 4     | 4      | 4     | 4      |
| 7586   | 2     | 0      | 0     |        |
| 7587   | 0     |        | 0     |        |
| 7588   | 3     | 1      | 2     | 1      |
| 7596   | 0     |        | 0     |        |
| 7599   | 0     |        | 0     |        |
| 7600   | 2     | 2      | 2     | 2      |
| 7602   | 0     |        | 0     |        |
| 7613   | 0     |        | 0     |        |
| 7620   | 0     |        | 0     |        |

| respid | Q20_1 | Q20a_1 | Q21_1 | Q21a_1 |
|--------|-------|--------|-------|--------|
| 7623   | 1     | 0      | 0     |        |
| 7635   | 1     | 0      | 0     |        |
| 7636   | 1     | 2      | 0     |        |
| 7643   | 2     | 2      | 2     | 2      |
| 7645   | 1     | 2      | 0     |        |
| 7649   | 3     | 3      | 3     | 3      |
| 7651   | 0     |        | 0     |        |
| 7652   | 4     | 4      | 3     | 4      |
| 7655   | 1     | 2      | 0     |        |
| 7657   | 0     |        | 0     |        |
| 7675   | 5     | 0      | 0     |        |
| 7676   | 2     | 2      | 0     |        |
| 7684   | 1     | 1      | 1     | 1      |
| 7693   | 2     | 1      | 2     | 1      |
| 7694   | 4     | 4      | 4     | 4      |
| 7695   | 0     |        | 0     |        |
| 7696   | 4     | 4      | 4     | 4      |
| 7698   | 0     |        | 0     |        |
| 7700   | 4     | 0      | 0     |        |
| 7701   | 0     |        | 0     |        |
| 7704   | 0     |        | 0     |        |
| 7709   | 0     |        | 0     |        |
| 7713   | 1     | 0      | 0     |        |
| 7714   | 0     |        | 0     |        |
| 7718   | 3     | 3      | 2     | 2      |
| 7720   | 1     | 0      | 0     |        |
| 7721   | 2     | 1      | 1     | 1      |
| 7722   | 0     |        | 0     |        |
| 7724   | 3     | 2      | 2     | 2      |
| 7728   | 0     |        | 0     |        |
| 7731   | 2     | 2      | 1     | 1      |
| 7735   | 1     | 0      | 0     |        |

| respid | Q20_1 | Q20a_1 | Q21_1 | Q21a_1 |
|--------|-------|--------|-------|--------|
| 7737   | 0     |        | 0     |        |
| 7741   | 3     | 0      | 0     |        |
| 7746   | 0     |        | 0     |        |
| 7747   | 1     | 1      | 0     |        |
| 7748   | 0     |        | 0     |        |
| 7750   | 1     | 0      | 0     |        |
| 7754   | 0     |        | 0     |        |
| 7755   | 1     | 1      | 0     |        |
| 7762   | 0     |        | 0     |        |
| 7764   | 0     |        | 0     |        |
| 7766   | 0     |        | 0     |        |
| 7768   | 3     | 2      | 2     | 1      |
| 7770   | 1     | 1      | 0     |        |
| 7771   | 0     |        | 0     |        |
| 7777   | 1     | 0      | 0     |        |
| 7778   | 0     |        | 0     |        |
| 7783   | 3     | 3      | 2     | 2      |
| 7789   | 3     | 1      | 0     |        |
| 7790   | 2     | 3      | 1     | 2      |
| 7795   | 4     | 0      | 2     | 2      |
| 7807   | 0     |        | 0     |        |
| 7808   | 2     | 2      | 1     | 2      |
| 7818   | 4     | 2      | 0     |        |
| 7820   | 0     |        | 0     |        |
| 7831   | 3     | 2      | 0     |        |
| 7832   | 0     |        | 0     |        |
| 7837   | 1     | 1      | 0     |        |
| 7841   | 3     | 3      | 1     | 1      |
| 7845   | 3     | 2      | 2     | 2      |
| 7853   | 1     | 1      | 1     | 1      |
| 7854   | 0     |        | 0     |        |
| 7862   | 3     | 3      | 3     | 3      |

| respid | Q20_1 | Q20a_1 | Q21_1 | Q21a_1 |
|--------|-------|--------|-------|--------|
| 7871   | 0     |        | 0     |        |
| 7875   | 0     |        | 0     |        |
| 7880   | 1     | 1      | 0     |        |
| 7881   | 3     | 1      | 0     |        |
| 7883   | 3     | 3      | 2     | 2      |
| 7896   | 0     |        | 0     |        |
| 7905   | 1     | 0      | 0     |        |
| 7919   | 0     |        | 0     |        |
| 7928   | 3     | 4      | 1     | 3      |
| 7929   | 3     | 0      | 0     |        |
| 7938   | 2     | 0      | 0     |        |
| 7940   | 0     |        | 0     |        |
| 7941   | 2     | 2      | 1     | 3      |
| 7952   | 0     |        | 0     |        |
| 7962   | 0     |        | 0     |        |
| 7968   | 0     |        | 0     |        |
| 7972   | 1     | 1      | 0     |        |
| 7983   | 3     | 2      | 2     | 1      |
| 7990   | 0     |        | 0     |        |
| 7993   | 0     |        | 0     |        |
| 8005   | 0     |        | 0     |        |
| 8008   | 0     |        | 0     |        |
| 8012   | 1     | 1      | 0     |        |
| 8021   | 0     |        | 0     |        |
| 8024   | 0     |        | 1     | 0      |
| 8043   | 0     |        | 0     |        |
| 8051   | 1     | 0      | 0     |        |
| 8056   | 1     | 1      | 0     |        |
| 8061   | 2     | 1      | 0     |        |
| 8066   | 0     |        | 0     |        |
| 8069   | 0     |        | 0     |        |
| 8071   | 0     |        | 0     |        |

| respid | Q20_1 | Q20a_1 | Q21_1 | Q21a_1 |
|--------|-------|--------|-------|--------|
| 8072   | 0     |        | 0     |        |
| 8076   | 4     | 1      | 0     |        |
| 8080   | 1     | 1      | 1     | 1      |
| 8083   | 0     |        | 1     | 1      |
| 8093   | 4     | 1      | 2     | 1      |
| 8095   | 2     | 2      | 2     | 2      |
| 8099   | 1     | 0      | 0     |        |
| 8100   | 2     | 1      | 0     |        |
| 8103   | 0     |        | 0     |        |
| 8104   | 2     | 2      | 0     |        |
| 8115   | 3     | 2      | 2     | 1      |
| 8121   | 2     | 0      | 0     |        |
| 8128   | 0     |        | 0     |        |
| 8130   | 0     |        | 0     |        |
| 8131   | 0     |        | 0     |        |
| 8133   | 1     | 1      | 1     | 1      |
| 8143   | 1     | 1      | 0     |        |
| 8144   | 1     | 1      | 0     |        |
| 8146   | 0     |        | 0     |        |
| 8148   | 0     |        | 0     |        |
| 8157   | 0     |        | 0     |        |
| 8164   | 0     |        | 0     |        |
| 8173   | 0     |        | 0     |        |
| 8176   | 0     |        | 0     |        |
| 8179   | 0     |        | 0     |        |
| 8181   | 0     |        | 0     |        |
| 8182   | 1     | 0      | 0     |        |
| 8196   | 4     | 0      | 0     |        |
| 8200   | 3     | 2      | 0     |        |
| 8203   | 0     |        | 0     |        |
| 8204   | 3     | 4      | 4     | 4      |
| 8206   | 1     | 1      | 0     |        |

| respid | Q20_1 | Q20a_1 | Q21_1 | Q21a_1 |
|--------|-------|--------|-------|--------|
| 8208   | 0     |        | 0     |        |
| 8212   | 0     |        | 0     |        |
| 8222   | 4     | 3      | 4     | 3      |
| 8223   | 2     | 0      | 0     |        |
| 8225   | 0     |        | 0     |        |
| 8226   | 0     |        | 0     |        |
| 8228   | 0     |        | 0     |        |
| 8229   | 0     |        | 0     |        |
| 8239   | 1     | 1      | 1     | 1      |
| 8246   | 2     | 1      | 1     | 1      |
| 8258   | 2     | 2      | 2     | 3      |
| 8260   | 0     |        | 0     |        |
| 8262   | 2     | 2      | 2     | 1      |
| 8263   | 1     | 1      | 1     | 1      |
| 8267   | 1     | 1      | 1     | 1      |
| 8271   | 4     | 3      | 2     | 2      |
| 8274   | 2     | 2      | 0     |        |
| 8275   | 3     | 2      | 3     | 3      |
| 8279   | 1     | 2      | 2     | 2      |
| 8285   | 3     | 2      | 3     | 3      |
| 8287   | 5     | 4      | 5     | 4      |
| 8289   | 0     |        | 2     | 0      |
| 8291   | 0     |        | 0     |        |
| 8299   | 1     | 1      | 0     |        |
| 8301   | 2     | 1      | 0     |        |
| 8302   | 1     | 0      | 0     |        |
| 8308   | 5     | 2      | 0     |        |
| 8313   | 2     | 1      | 0     |        |
| 8316   | 3     | 2      | 2     | 3      |
| 8317   | 1     | 0      | 0     |        |
| 8319   | 5     | 0      | 0     |        |
| 8323   | 4     | 2      | 2     | 1      |



| respid | Q20_1 | Q20a_1 | Q21_1 | Q21a_1 |
|--------|-------|--------|-------|--------|
| 8324   | 5     | 0      | 0     |        |
| 8327   | 2     | 3      | 1     | 2      |
| 8328   | 1     | 1      | 0     |        |
| 8342   | 2     | 2      | 0     |        |
| 8350   | 1     | 1      | 1     | 1      |
| 8352   | 0     |        | 0     |        |
| 8353   | 1     | 0      | 0     |        |
| 8356   | 5     | 0      | 0     |        |
| 8367   | 4     | 2      | 0     |        |
| 8373   | 1     | 1      | 1     | 1      |
| 8379   | 0     |        | 0     |        |
| 8382   | 1     | 0      | 0     |        |
| 8387   | 0     |        | 0     |        |
| 8409   | 0     |        | 1     | 1      |
| 8410   | 0     |        | 0     |        |
| 8412   | 2     | 2      | 2     | 2      |
| 8415   | 1     | 1      | 0     |        |
| 8417   | 1     | 1      | 0     |        |
| 8422   | 0     |        | 1     | 1      |
| 8430   | 5     | 2      | 0     |        |
| 8434   | 0     |        | 0     |        |
| 8436   | 0     |        | 0     |        |
| 8446   | 2     | 1      | 0     |        |
| 8447   | 0     |        | 0     |        |
| 8448   | 2     | 1      | 0     |        |
| 8455   | 2     | 1      | 0     |        |
| 8456   | 1     | 0      | 0     |        |
| 8459   | 0     |        | 0     |        |
| 8460   | 0     |        | 0     |        |
| 8464   | 1     | 1      | 1     | 1      |
| 8470   | 4     | 2      | 0     |        |
| 8473   | 2     | 1      | 0     |        |

| respid | Q20_1 | Q20a_1 | Q21_1 | Q21a_1 |
|--------|-------|--------|-------|--------|
| 8486   | 0     |        | 0     |        |
| 8487   | 2     | 1      | 1     | 1      |
| 8489   | 3     | 2      | 2     | 1      |
| 8494   | 4     | 1      | 0     |        |
| 8495   | 4     | 4      | 5     | 4      |
| 8497   | 0     |        | 0     |        |
| 8510   | 1     | 1      | 1     | 1      |
| 8515   | 3     | 2      | 3     | 2      |
| 8526   | 0     |        | 0     |        |
| 8530   | 0     |        | 0     |        |
| 8532   | 2     | 1      | 0     |        |
| 8533   | 0     |        | 0     |        |
| 8534   | 2     | 1      | 0     |        |
| 8572   | 3     | 2      | 2     | 2      |
| 8582   | 2     | 1      | 1     | 1      |
| 8584   | 1     | 1      | 0     |        |
| 8585   | 0     |        | 0     |        |
| 8586   | 0     |        | 0     |        |
| 8589   | 2     | 2      | 2     | 1      |
| 8593   | 1     | 0      | 0     |        |
| 8594   | 1     | 0      | 0     |        |
| 8601   | 1     | 1      | 0     |        |
| 8603   | 0     |        | 1     | 0      |
| 8604   | 0     |        | 0     |        |
| 8605   | 0     |        | 0     |        |
| 8607   | 1     | 1      | 1     | 1      |
| 8623   | 1     | 1      | 1     | 1      |
| 8626   | 1     | 0      | 2     | 1      |
| 8638   | 2     | 1      | 2     | 1      |
| 8640   | 1     | 1      | 0     |        |
| 8641   | 1     | 1      | 0     |        |
| 8643   | 0     |        | 0     |        |

| respid | Q20_1 | Q20a_1 | Q21_1 | Q21a_1 |
|--------|-------|--------|-------|--------|
| 8644   | 3     | 2      | 0     |        |
| 8646   | 1     | 0      | 0     |        |
| 8647   | 0     |        | 0     |        |
| 8649   | 2     | 2      | 2     | 2      |
| 8650   | 1     | 2      | 1     | 2      |
| 8658   | 0     |        | 0     |        |
| 8659   | 1     | 1      | 0     |        |
| 8669   | 1     | 2      | 2     | 2      |
| 8672   | 3     | 3      | 1     | 1      |
| 8673   | 3     | 2      | 0     |        |
| 8676   | 0     |        | 0     |        |
| 8677   | 0     |        | 0     |        |
| 8681   | 3     | 2      | 0     |        |
| 8688   | 0     |        | 0     |        |
| 8689   | 1     | 0      | 0     |        |
| 8690   | 4     | 2      | 1     | 2      |
| 8693   | 1     | 0      | 0     |        |
| 8694   | 2     | 1      | 1     | 0      |
| 8699   | 1     | 1      | 0     |        |
| 8700   | 0     |        | 0     |        |
| 8703   | 1     | 0      | 0     |        |
| 8704   | 0     |        | 0     |        |
| 8706   | 2     | 2      | 2     | 2      |
| 8709   | 0     |        | 0     |        |
| 8715   | 0     |        | 0     |        |
| 8728   | 1     | 1      | 0     |        |
| 8729   | 0     |        | 0     |        |
| 8730   | 3     | 2      | 0     |        |
| 8742   | 3     | 1      | 3     | 1      |
| 8748   | 1     | 0      | 0     |        |
| 8749   | 1     | 1      | 0     |        |
| 8750   | 2     | 1      | 1     | 0      |

| respid | Q20_1 | Q20a_1 | Q21_1 | Q21a_1 |
|--------|-------|--------|-------|--------|
| 8751   | 0     |        | 0     |        |
| 8752   | 2     | 1      | 0     |        |
| 8754   | 0     |        | 0     |        |
| 8757   | 1     | 1      | 1     | 0      |
| 8760   | 2     | 0      | 0     |        |
| 8761   | 3     | 1      | 2     | 1      |
| 8762   | 1     | 0      | 0     |        |
| 8763   | 1     | 0      | 0     |        |
| 8764   | 2     | 1      | 0     |        |
| 8765   | 0     |        | 0     |        |
| 8766   | 0     |        | 0     |        |
| 8767   | 3     | 1      | 0     |        |
| 8768   | 0     |        | 0     |        |
| 8770   | 0     |        | 0     |        |
| 8771   | 0     |        | 0     |        |
| 8773   | 1     | 1      | 0     |        |
| 8774   | 1     | 1      | 1     | 1      |
| 8776   | 0     |        | 0     |        |
| 8777   | 0     |        | 0     |        |
| 8778   | 2     | 2      | 1     | 1      |
| 8779   | 0     |        | 0     |        |
| 8784   | 2     | 1      | 1     | 0      |
| 8786   | 0     |        | 0     |        |
| 8787   | 1     | 1      | 0     |        |
| 8790   | 0     |        | 0     |        |
| 8791   | 2     | 4      | 3     | 4      |
| 8793   | 0     |        | 0     |        |
| 8795   | 1     | 0      | 0     |        |
| 8797   | 0     |        | 0     |        |
| 8801   | 1     | 2      | 1     | 2      |
| 8802   | 1     | 1      | 0     |        |
| 8807   | 0     |        | 0     |        |

| respid | Q20_1 | Q20a_1 | Q21_1 | Q21a_1 |
|--------|-------|--------|-------|--------|
| 8813   | 0     |        | 0     |        |
| 8817   | 3     | 2      | 2     | 0      |
| 8818   | 1     | 1      | 1     | 1      |
| 8821   | 4     | 0      | 0     |        |
| 8822   | 0     |        | 0     |        |
| 8823   | 2     | 0      | 0     |        |
| 8824   | 1     | 1      | 1     | 1      |
| 8825   | 1     | 0      | 0     |        |
| 8834   | 4     | 3      | 3     | 3      |
| 8840   | 2     | 1      | 2     | 1      |
| 8843   | 1     | 4      | 4     | 1      |
| 8846   | 0     |        | 0     |        |
| 8862   | 0     |        | 0     |        |
| 8866   | 1     | 0      | 0     |        |
| 8869   | 1     | 1      | 0     |        |
| 8872   | 1     | 2      | 0     |        |
| 8903   | 0     |        | 0     |        |
| 8909   | 0     |        | 0     |        |
| 8926   | 2     | 0      | 0     |        |
| 8936   | 1     | 0      | 0     |        |
| 8945   | 0     |        | 0     |        |
| 8954   | 1     | 0      | 1     | 1      |
| 8955   | 2     | 2      | 1     | 1      |
| 8958   | 2     | 2      | 0     |        |
| 8959   | 0     |        | 0     |        |
| 8960   | 0     |        | 0     |        |
| 8976   | 0     |        | 0     |        |
| 8977   | 3     | 1      | 0     |        |
| 8979   | 0     |        | 0     |        |
| 8985   | 0     |        | 0     |        |
| 8994   | 0     |        | 0     |        |
| 8997   | 3     | 3      | 2     | 2      |

| respid | Q20_1 | Q20a_1 | Q21_1 | Q21a_1 |
|--------|-------|--------|-------|--------|
| 9002   | 0     |        | 0     |        |
| 9005   | 2     | 1      | 2     | 1      |
| 9017   | 0     |        | 0     |        |
| 9018   | 0     |        | 0     |        |
| 9021   | 1     | 1      | 0     |        |
| 9029   | 4     | 3      | 3     | 3      |
| 9035   | 1     | 1      | 0     |        |
| 9038   | 1     | 1      | 0     |        |
| 9039   | 0     |        | 0     |        |
| 9040   | 2     | 1      | 0     |        |
| 9042   | 0     |        | 0     |        |
| 9043   | 0     |        | 0     |        |
| 9045   | 0     |        | 0     |        |
| 9051   | 0     |        | 0     |        |
| 9067   | 0     |        | 0     |        |
| 9069   | 1     | 1      | 1     | 1      |
| 9073   | 2     | 2      | 2     | 2      |
| 9084   | 4     | 2      | 2     | 2      |
| 9096   | 0     |        | 0     |        |
| 9100   | 1     | 0      | 0     |        |
| 9107   | 0     |        | 0     |        |
| 9110   | 1     | 1      | 0     |        |
| 9120   | 0     |        | 0     |        |
| 9122   | 4     | 3      | 3     | 3      |
| 9130   | 5     | 0      | 0     |        |
| 9134   | 2     | 2      | 1     | 1      |
| 9137   | 1     | 1      | 1     | 1      |
| 9139   | 1     | 0      | 0     |        |
| 9144   | 0     |        | 0     |        |
| 9157   | 3     | 1      | 0     |        |
| 9166   | 3     | 2      | 1     | 2      |
| 9177   | 3     | 3      | 3     | 2      |

| respid | Q20_1 | Q20a_1 | Q21_1 | Q21a_1 |
|--------|-------|--------|-------|--------|
| 9181   | 0     |        | 0     |        |
| 9183   | 0     |        | 0     |        |
| 9184   | 4     | 2      | 2     | 2      |
| 9188   | 0     |        | 0     |        |
| 9197   | 2     | 2      | 2     | 1      |
| 9200   | 3     | 2      | 1     | 1      |
| 9205   | 0     |        | 0     |        |
| 9207   | 1     | 1      | 0     |        |
| 9213   | 1     | 1      | 0     |        |
| 9216   | 1     | 2      | 1     | 1      |
| 9217   | 0     |        | 0     |        |
| 9218   | 0     |        | 0     |        |
| 9219   | 4     | 2      | 4     | 3      |
| 9220   | 0     |        | 0     |        |
| 9221   | 1     | 1      | 1     | 1      |
| 9223   | 2     | 2      | 3     | 4      |
| 9228   | 0     |        | 0     |        |
| 9230   | 5     | 2      | 0     |        |
| 9231   | 0     |        | 0     |        |
| 9233   | 0     |        | 0     |        |
| 9235   | 1     | 0      | 0     |        |
| 9237   | 1     | 1      | 0     |        |
| 9242   | 1     | 0      | 0     |        |
| 9250   | 0     |        | 0     |        |
| 9253   | 0     |        | 0     |        |
| 9257   | 0     |        | 0     |        |
| 9263   | 0     |        | 0     |        |
| 9267   | 2     | 2      | 1     | 2      |
| 9272   | 1     | 1      | 0     |        |
| 9279   | 0     |        | 0     |        |
| 9281   | 1     | 1      | 0     |        |
| 9285   | 0     |        | 0     |        |

| respid | Q20_1 | Q20a_1 | Q21_1 | Q21a_1 |
|--------|-------|--------|-------|--------|
| 9286   | 1     | 2      | 1     | 2      |
| 9294   | 0     |        | 1     | 1      |
| 9295   | 0     |        | 0     |        |
| 9297   | 2     | 1      | 2     | 1      |
| 9299   | 1     | 2      | 1     | 2      |
| 9309   | 3     | 2      | 1     | 1      |
| 9315   | 0     |        | 0     |        |
| 9320   | 3     | 1      | 0     |        |
| 9324   | 2     | 1      | 0     |        |
| 9326   | 1     | 1      | 0     |        |
| 9333   | 0     |        | 0     |        |
| 9334   | 4     | 1      | 2     | 1      |
| 9336   | 2     | 2      | 2     | 2      |
| 9337   | 0     |        | 0     |        |
| 9342   | 0     |        | 1     | 1      |
| 9347   | 5     | 1      | 0     |        |
| 9352   | 2     | 1      | 1     | 0      |
| 9355   | 0     |        | 0     |        |
| 9356   | 1     | 1      | 0     |        |
| 9359   | 2     | 2      | 1     | 1      |
| 9368   | 0     |        | 0     |        |
| 9375   | 0     |        | 1     | 0      |
| 9384   | 4     | 1      | 0     |        |
| 9388   | 1     | 1      | 1     | 1      |
| 9397   | 1     | 4      | 1     | 4      |
| 9400   | 0     |        | 1     | 1      |
| 9401   | 3     | 3      | 3     | 3      |
| 9402   | 0     |        | 0     |        |
| 9417   | 3     | 2      | 2     | 2      |
| 9424   | 0     |        | 0     |        |
| 9427   | 0     |        | 0     |        |
| 9429   | 1     | 1      | 1     | 0      |



| respid | Q20_1 | Q20a_1 | Q21_1 | Q21a_1 |
|--------|-------|--------|-------|--------|
| 9437   | 2     | 3      | 3     | 3      |
| 9442   | 1     | 3      | 0     |        |
| 9446   | 1     | 1      | 1     | 1      |
| 9447   | 0     |        | 0     |        |
| 9448   | 1     | 0      | 0     |        |
| 9449   | 1     | 1      | 1     | 1      |
| 9455   | 0     |        | 0     |        |
| 9459   | 1     | 2      | 0     |        |
| 9460   | 1     | 1      | 0     |        |
| 9461   | 2     | 0      | 1     | 1      |
| 9463   | 1     | 1      | 0     |        |
| 9464   | 1     | 1      | 1     | 1      |
| 9466   | 1     | 1      | 0     |        |
| 9477   | 0     |        | 0     |        |
| 9482   | 3     | 3      | 2     | 2      |
| 9486   | 1     | 1      | 1     | 1      |
| 9488   | 3     | 3      | 3     | 3      |
| 9489   | 1     | 1      | 0     |        |
| 9496   | 0     |        | 0     |        |
| 9499   | 0     |        | 0     |        |
| 9512   | 1     | 0      | 0     |        |
| 9514   | 1     | 1      | 0     |        |
| 9516   | 0     |        | 1     | 1      |
| 9517   | 1     | 1      | 1     | 1      |
| 9520   | 0     |        | 0     |        |
| 9527   | 0     |        | 0     |        |
| 9532   | 2     | 2      | 1     | 2      |
| 9533   | 0     |        | 0     |        |
| 9543   | 0     |        | 1     | 1      |
| 9550   | 4     | 1      | 2     | 0      |
| 9553   | 0     |        | 0     |        |
| 9555   | 2     | 0      | 1     | 1      |

| respid | Q20_1 | Q20a_1 | Q21_1 | Q21a_1 |
|--------|-------|--------|-------|--------|
| 9565   | 3     | 2      | 3     | 2      |
| 9583   | 1     | 2      | 0     |        |
| 9594   | 3     | 0      | 1     | 0      |
| 9596   | 1     | 1      | 0     |        |
| 9600   | 2     | 2      | 1     | 1      |
| 9602   | 0     |        | 0     |        |
| 9606   | 2     | 0      | 1     | 0      |
| 9608   | 1     | 2      | 0     |        |
| 9610   | 1     | 1      | 1     | 1      |
| 9612   | 1     | 0      | 0     |        |
| 9613   | 1     | 1      | 0     |        |
| 9614   | 4     | 2      | 1     | 1      |
| 9620   | 0     |        | 0     |        |
| 9628   | 2     | 0      | 0     |        |
| 9631   | 0     |        | 0     |        |
| 9632   | 0     |        | 0     |        |
| 9633   | 5     | 1      | 0     |        |
| 9639   | 0     |        | 0     |        |
| 9640   | 1     | 1      | 3     | 2      |
| 9642   | 0     |        | 0     |        |
| 9653   | 2     | 1      | 1     | 1      |
| 9658   | 2     | 0      | 0     |        |
| 9659   | 1     | 1      | 1     | 2      |
| 9661   | 0     |        | 0     |        |
| 9664   | 4     | 0      | 0     |        |
| 9665   | 2     | 1      | 1     | 0      |
| 9666   | 2     | 2      | 1     | 2      |
| 9667   | 0     |        | 0     |        |
| 9668   | 0     |        | 0     |        |
| 9670   | 1     | 1      | 0     |        |
| 9671   | 2     | 0      | 0     |        |
| 9681   | 1     | 1      | 0     |        |

| respid | Q20_1 | Q20a_1 | Q21_1 | Q21a_1 |
|--------|-------|--------|-------|--------|
| 9684   | 1     | 0      | 0     |        |
| 9685   | 0     |        | 0     |        |
| 9686   | 2     | 2      | 5     | 4      |
| 9688   | 1     | 2      | 1     | 1      |
| 9692   | 0     |        | 0     |        |
| 9693   | 3     | 1      | 3     | 2      |
| 9698   | 1     | 1      | 1     | 1      |
| 9699   | 1     | 1      | 0     |        |
| 9701   | 0     |        | 0     |        |
| 9702   | 0     |        | 0     |        |
| 9709   | 1     | 1      | 2     | 1      |
| 9713   | 0     |        | 0     |        |
| 9715   | 0     |        | 0     |        |
| 9721   | 1     | 0      | 0     |        |
| 9725   | 1     | 0      | 0     |        |
| 9729   | 3     | 0      | 2     | 0      |
| 9731   | 0     |        | 0     |        |
| 9736   | 1     | 1      | 0     |        |
| 9740   | 0     |        | 0     |        |
| 9741   | 0     |        | 0     |        |
| 9749   | 1     | 1      | 1     | 1      |
| 9750   | 5     | 1      | 0     |        |
| 9751   | 2     | 3      | 2     | 3      |
| 9753   | 0     |        | 1     | 1      |
| 9754   | 4     | 3      | 3     | 4      |
| 9756   | 5     | 1      | 3     | 2      |
| 9758   | 2     | 3      | 2     | 3      |
| 9759   | 0     |        | 0     |        |
| 9760   | 1     | 1      | 1     | 1      |
| 9761   | 0     |        | 0     |        |
| 9762   | 2     | 2      | 1     | 2      |
| 9764   | 0     |        | 0     |        |

| respid | Q20_1 | Q20a_1 | Q21_1 | Q21a_1 |
|--------|-------|--------|-------|--------|
| 9768   | 0     |        | 0     |        |
| 9769   | 2     | 1      | 0     |        |
| 9770   | 0     |        | 0     |        |
| 9771   | 3     | 2      | 2     | 1      |
| 9772   | 5     | 1      | 0     |        |
| 9773   | 1     | 1      | 1     | 1      |
| 9776   | 1     | 0      | 0     |        |
| 9786   | 2     | 2      | 2     | 2      |
| 9790   | 5     | 0      | 0     |        |
| 9791   | 0     |        | 0     |        |
| 9794   | 2     | 2      | 2     | 2      |
| 9797   | 2     | 0      | 0     |        |
| 9799   | 0     |        | 0     |        |
| 9804   | 0     |        | 0     |        |
| 9805   | 3     | 2      | 1     | 1      |
| 9806   | 0     |        | 0     |        |
| 9807   | 3     | 0      | 0     |        |
| 9813   | 0     |        | 0     |        |
| 9817   | 0     |        | 0     |        |
| 9823   | 0     |        | 0     |        |
| 9826   | 1     | 0      | 0     |        |
| 9830   | 1     | 1      | 0     |        |
| 9835   | 1     | 1      | 0     |        |
| 9836   | 0     |        | 0     |        |
| 9841   | 0     |        | 0     |        |
| 9842   | 0     |        | 0     |        |
| 9844   | 0     |        | 0     |        |
| 9847   | 1     | 1      | 0     |        |
| 9851   | 0     |        | 0     |        |
| 9852   | 3     | 2      | 2     | 2      |
| 9854   | 0     |        | 0     |        |
| 9855   | 1     | 1      | 1     | 1      |

| respid | Q20_1 | Q20a_1 | Q21_1 | Q21a_1 |
|--------|-------|--------|-------|--------|
| 9856   | 2     | 2      | 0     |        |
| 9862   | 1     | 1      | 0     |        |
| 9863   | 0     |        | 0     |        |
| 9866   | 2     | 2      | 1     | 2      |
| 9867   | 4     | 1      | 0     |        |
| 9868   | 1     | 2      | 1     | 2      |
| 9869   | 0     |        | 1     | 0      |
| 9878   | 1     | 1      | 1     | 1      |
| 9879   | 1     | 0      | 4     | 2      |
| 9881   | 1     | 1      | 0     |        |
| 9882   | 0     |        | 1     | 1      |
| 9884   | 0     |        | 0     |        |
| 9885   | 1     | 0      | 0     |        |
| 9888   | 0     |        | 0     |        |
| 9889   | 0     |        | 0     |        |
| 9894   | 4     | 2      | 3     | 2      |
| 9895   | 1     | 1      | 0     |        |
| 9896   | 4     | 4      | 4     | 4      |
| 9897   | 2     | 1      | 1     | 1      |
| 9905   | 1     | 0      | 1     | 1      |
| 9907   | 1     | 1      | 0     |        |
| 9908   | 0     |        | 0     |        |
| 9909   | 1     | 1      | 0     |        |
| 9910   | 4     | 2      | 1     | 1      |
| 9913   | 1     | 1      | 1     | 1      |
| 9914   | 0     |        | 2     | 1      |
| 9915   | 0     |        | 0     |        |
| 9916   | 0     |        | 0     |        |
| 9918   | 0     |        | 0     |        |
| 9919   | 3     | 1      | 0     |        |
| 9922   | 1     | 2      | 0     |        |
| 9930   | 0     |        | 0     |        |

| respid | Q20_1 | Q20a_1 | Q21_1 | Q21a_1 |
|--------|-------|--------|-------|--------|
| 9934   | 0     |        | 0     |        |
| 9936   | 2     | 2      | 1     | 2      |
| 9938   | 1     | 1      | 0     |        |
| 9940   | 0     |        | 0     |        |
| 9944   | 2     | 2      | 1     | 1      |
| 9945   | 0     |        | 0     |        |
| 9948   | 5     | 2      | 5     | 2      |
| 9949   | 2     | 1      | 2     | 1      |
| 9951   | 0     |        | 1     | 1      |
| 9952   | 1     | 1      | 1     | 1      |
| 9954   | 0     |        | 0     |        |
| 9955   | 1     | 0      | 0     |        |
| 9956   | 3     | 2      | 4     | 2      |
| 9957   | 3     | 2      | 0     |        |
| 9958   | 2     | 1      | 1     | 1      |
| 9959   | 1     | 3      | 2     | 1      |
| 9960   | 1     | 1      | 2     | 2      |
| 9961   | 1     | 0      | 0     |        |
| 9962   | 0     |        | 0     |        |
| 9969   | 0     |        | 0     |        |
| 9982   | 5     | 2      | 4     | 3      |
| 9984   | 4     | 0      | 2     | 0      |
| 9990   | 1     | 0      | 0     |        |
| 9992   | 3     | 1      | 2     | 1      |
| 9993   | 1     | 1      | 1     | 2      |
| 9997   | 0     |        | 0     |        |
| 9999   | 2     | 2      | 0     |        |
| 10000  | 0     |        | 1     | 1      |
| 10005  | 3     | 2      | 2     | 2      |
| 10014  | 0     |        | 0     |        |
| 10016  | 5     | 4      | 5     | 4      |
| 10017  | 3     | 2      | 0     |        |

| respid | Q20_1 | Q20a_1 | Q21_1 | Q21a_1 |
|--------|-------|--------|-------|--------|
| 10018  | 2     | 3      | 1     | 2      |
| 10021  | 1     | 1      | 1     | 1      |
| 10025  | 1     | 2      | 0     |        |
| 10027  | 0     |        | 0     |        |
| 10028  | 5     | 0      | 0     |        |
| 10031  | 2     | 1      | 2     | 2      |
| 10036  | 0     |        | 0     |        |
| 10037  | 2     | 1      | 0     |        |
| 10038  | 1     | 0      | 0     |        |
| 10039  | 0     |        | 0     |        |
| 10041  | 3     | 0      | 0     |        |
| 10045  | 4     | 3      | 3     | 2      |
| 10046  | 1     | 3      | 4     | 3      |
| 10047  | 2     | 1      | 2     | 1      |
| 10048  | 1     | 0      | 1     | 0      |
| 10049  | 2     | 2      | 0     |        |
| 10051  | 2     | 1      | 1     | 1      |
| 10052  | 1     | 1      | 3     | 2      |
| 10056  | 0     |        | 0     |        |
| 10061  | 1     | 0      | 5     | 2      |
| 10064  | 2     | 0      | 0     |        |
| 10066  | 0     |        | 0     |        |
| 10069  | 0     |        | 0     |        |
| 10071  | 1     | 2      | 0     |        |
| 10074  | 1     | 0      | 0     |        |
| 10079  | 0     |        | 0     |        |
| 10087  | 1     | 3      | 1     | 3      |
| 10095  | 0     |        | 0     |        |
| 10097  | 2     | 3      | 0     |        |
| 10100  | 2     | 1      | 0     |        |
| 10105  | 0     |        | 0     |        |
| 10107  | 1     | 1      | 4     | 2      |

| respid | Q20_1 | Q20a_1 | Q21_1 | Q21a_1 |
|--------|-------|--------|-------|--------|
| 10111  | 0     |        | 0     |        |
| 10116  | 1     | 1      | 0     |        |
| 10118  | 0     |        | 0     |        |
| 10123  | 0     |        | 0     |        |
| 10124  | 0     |        | 0     |        |
| 10130  | 1     | 1      | 1     | 1      |
| 10134  | 2     | 1      | 0     |        |
| 10135  | 0     |        | 0     |        |
| 10136  | 0     |        | 0     |        |
| 10141  | 2     | 1      | 2     | 1      |
| 10142  | 5     | 0      | 0     |        |
| 10143  | 0     |        | 0     |        |
| 10145  | 1     | 0      | 1     | 0      |
| 10149  | 1     | 2      | 1     | 1      |
| 10150  | 0     |        | 1     | 0      |
| 10151  | 0     |        | 0     |        |
| 10152  | 3     | 2      | 5     | 3      |
| 10153  | 0     |        | 0     |        |
| 10156  | 0     |        | 0     |        |
| 10160  | 0     |        | 0     |        |
| 10161  | 1     | 2      | 1     | 1      |
| 10167  | 3     | 3      | 2     | 3      |
| 10171  | 0     |        | 0     |        |
| 10172  | 0     |        | 0     |        |
| 10176  | 0     |        | 0     |        |
| 10177  | 1     | 2      | 0     |        |
| 10182  | 2     | 2      | 2     | 2      |
| 10184  | 0     |        | 0     |        |
| 10186  | 1     | 2      | 0     |        |
| 10189  | 0     |        | 4     | 2      |
| 10191  | 0     |        | 0     |        |
| 10192  | 1     | 0      | 0     |        |



| respid | Q20_1 | Q20a_1 | Q21_1 | Q21a_1 |
|--------|-------|--------|-------|--------|
| 10195  | 0     |        | 0     |        |
| 10199  | 0     |        | 0     |        |
| 10201  | 1     | 1      | 1     | 1      |
| 10213  | 3     | 1      | 0     |        |
| 10222  | 4     | 2      | 3     | 2      |
| 10224  | 0     |        | 0     |        |
| 10245  | 0     |        | 0     |        |
| 10254  | 0     |        | 0     |        |
| 10255  | 2     | 3      | 2     | 4      |
| 10257  | 2     | 1      | 2     | 1      |
| 10260  | 1     | 1      | 1     | 1      |
| 10261  | 2     | 2      | 0     |        |
| 10263  | 5     | 4      | 4     | 3      |
| 10264  | 1     | 0      | 2     | 0      |
| 10268  | 3     | 1      | 1     | 1      |
| 10269  | 1     | 1      | 0     |        |
| 10270  | 0     |        | 0     |        |
| 10282  | 0     |        | 0     |        |
| 10285  | 0     |        | 0     |        |
| 10288  | 0     |        | 0     |        |
| 10291  | 0     |        | 0     |        |
| 10292  | 3     | 0      | 0     |        |
| 10304  | 0     |        | 0     |        |
| 10305  | 4     | 1      | 3     | 2      |
| 10310  | 0     |        | 1     | 1      |
| 10324  | 4     | 0      | 0     |        |
| 10325  | 3     | 1      | 0     |        |
| 10326  | 2     | 1      | 4     | 3      |
| 10329  | 0     |        | 0     |        |
| 10332  | 1     | 0      | 0     |        |
| 10337  | 1     | 2      | 3     | 2      |
| 10341  | 1     | 1      | 0     |        |

| respid | Q20_1 | Q20a_1 | Q21_1 | Q21a_1 |
|--------|-------|--------|-------|--------|
| 10353  | 1     | 0      | 1     | 1      |
| 10354  | 0     |        | 0     |        |
| 10359  | 1     | 1      | 1     | 1      |
| 10360  | 0     |        | 0     |        |
| 10362  | 0     |        | 0     |        |
| 10364  | 1     | 0      | 0     |        |
| 10366  | 3     | 3      | 2     | 2      |
| 10367  | 0     |        | 0     |        |
| 10371  | 0     |        | 0     |        |
| 10374  | 5     | 1      | 0     |        |
| 10375  | 0     |        | 0     |        |
| 10376  | 0     |        | 0     |        |
| 10377  | 3     | 2      | 1     | 1      |
| 10378  | 1     | 1      | 1     | 1      |
| 10387  | 1     | 0      | 0     |        |
| 10396  | 1     | 1      | 5     | 2      |
| 10397  | 0     |        | 0     |        |
| 10399  | 3     | 3      | 3     | 3      |
| 10405  | 0     |        | 0     |        |
| 10406  | 1     | 0      | 0     |        |
| 10408  | 1     | 0      | 0     |        |
| 10409  | 0     |        | 0     |        |
| 10412  | 0     |        | 0     |        |
| 10413  | 0     |        | 0     |        |
| 10419  | 1     | 1      | 1     | 1      |
| 10423  | 3     | 3      | 3     | 3      |
| 10426  | 1     | 0      | 1     | 0      |
| 10446  | 0     |        | 2     | 1      |
| 10448  | 1     | 0      | 0     |        |
| 10450  | 0     |        | 1     | 1      |
| 10455  | 1     | 0      | 0     |        |
| 10460  | 3     | 0      | 0     |        |

| respid | Q20_1 | Q20a_1 | Q21_1 | Q21a_1 |
|--------|-------|--------|-------|--------|
| 10461  | 0     |        | 1     | 1      |
| 10471  | 0     |        | 0     |        |
| 10472  | 2     | 1      | 0     |        |
| 10491  | 1     | 2      | 2     | 3      |
| 10493  | 3     | 2      | 1     | 2      |
| 10498  | 0     |        | 0     |        |
| 10533  | 1     | 0      | 0     |        |
| 10539  | 1     | 1      | 0     |        |
| 10540  | 0     |        | 0     |        |
| 10557  | 1     | 1      | 0     |        |
| 10558  | 2     | 2      | 2     | 1      |
| 10559  | 0     |        | 0     |        |
| 10564  | 1     | 2      | 2     | 2      |
| 10570  | 0     |        | 0     |        |
| 10572  | 1     | 1      | 0     |        |
| 10576  | 3     | 1      | 0     |        |
| 10582  | 1     | 0      | 0     |        |
| 10593  | 0     |        | 0     |        |
| 10596  | 0     |        | 0     |        |
| 10615  | 0     |        | 0     |        |
| 10616  | 0     |        | 0     |        |
| 10623  | 1     | 1      | 0     |        |
| 10626  | 4     | 1      | 0     |        |
| 10627  | 2     | 2      | 3     | 1      |
| 10629  | 1     | 2      | 0     |        |
| 10632  | 2     | 3      | 3     | 3      |
| 10641  | 0     |        | 0     |        |
| 10648  | 2     | 2      | 2     | 2      |
| 10651  | 1     | 1      | 1     | 1      |
| 10654  | 0     |        | 0     |        |
| 10673  | 2     | 0      | 0     |        |
| 10675  | 2     | 2      | 3     | 2      |

| respid | Q20_1 | Q20a_1 | Q21_1 | Q21a_1 |
|--------|-------|--------|-------|--------|
| 10689  | 1     | 2      | 2     | 2      |
| 10692  | 0     |        | 0     |        |
| 10694  | 0     |        | 0     |        |
| 10695  | 1     | 1      | 0     |        |
| 10702  | 1     | 1      | 1     | 1      |
| 10703  | 1     | 1      | 1     | 1      |
| 10708  | 1     | 0      | 0     |        |
| 10719  | 1     | 1      | 0     |        |
| 10722  | 1     | 1      | 0     |        |
| 10723  | 1     | 0      | 1     | 0      |
| 10726  | 0     |        | 0     |        |
| 10727  | 1     | 0      | 0     |        |
| 10730  | 0     |        | 0     |        |
| 10731  | 0     |        | 0     |        |
| 10737  | 1     | 0      | 0     |        |
| 10743  | 0     |        | 0     |        |
| 10763  | 1     | 0      | 0     |        |
| 10777  | 0     |        | 0     |        |
| 10787  | 3     | 2      | 4     | 2      |
| 10798  | 3     | 3      | 2     | 3      |
| 10800  | 1     | 0      | 0     |        |
| 10802  | 2     | 1      | 1     | 1      |
| 10803  | 3     | 2      | 3     | 3      |
| 10808  | 0     |        | 0     |        |
| 10810  | 0     |        | 3     | 2      |
| 10819  | 0     |        | 0     |        |
| 10825  | 0     |        | 0     |        |
| 10827  | 2     | 1      | 1     | 1      |
| 10830  | 3     | 1      | 3     | 1      |
| 10847  | 1     | 0      | 0     |        |
| 10849  | 1     | 2      | 1     | 2      |
| 10852  | 0     |        | 0     |        |

| respid | Q20_1 | Q20a_1 | Q21_1 | Q21a_1 |
|--------|-------|--------|-------|--------|
| 10854  | 2     | 3      | 3     | 3      |
| 10857  | 0     |        | 0     |        |
| 10861  | 2     | 2      | 3     | 2      |
| 10862  | 0     |        | 0     |        |
| 10870  | 0     |        | 0     |        |
| 10873  | 1     | 0      | 1     | 0      |
| 10881  | 3     | 0      | 0     |        |
| 10893  | 0     |        | 0     |        |
| 10898  | 1     | 1      | 0     |        |
| 10899  | 5     | 1      | 0     |        |
| 10905  | 0     |        | 0     |        |
| 10910  | 0     |        | 0     |        |
| 10911  | 1     | 1      | 0     |        |
| 10912  | 1     | 0      | 0     |        |
| 10913  | 1     | 0      | 0     |        |
| 10918  | 0     |        | 0     |        |
| 10995  | 0     |        | 0     |        |
| 11002  | 1     | 1      | 0     |        |
| 11003  | 1     | 1      | 1     | 1      |
| 11005  | 1     | 1      | 1     | 1      |
| 11015  | 0     |        | 0     |        |
| 11016  | 2     | 4      | 0     |        |
| 11017  | 0     |        | 0     |        |
| 11020  | 1     | 1      | 1     | 1      |
| 11024  | 5     | 0      | 0     |        |
| 11026  | 2     | 1      | 0     |        |
| 11028  | 3     | 2      | 3     | 2      |
| 11029  | 2     | 3      | 3     | 2      |
| 11030  | 0     |        | 0     |        |
| 11031  | 1     | 2      | 0     |        |
| 11038  | 0     |        | 0     |        |
| 11051  | 0     |        | 0     |        |

| respid | Q20_1 | Q20a_1 | Q21_1 | Q21a_1 |
|--------|-------|--------|-------|--------|
| 11052  | 3     | 1      | 2     | 3      |
| 11053  | 1     | 1      | 0     |        |
| 11054  | 2     | 2      | 2     | 2      |
| 11063  | 1     | 1      | 0     |        |
| 11075  | 3     | 2      | 2     | 2      |
| 11083  | 0     |        | 0     |        |
| 11092  | 0     |        | 0     |        |
| 11118  | 1     | 1      | 0     |        |
| 11119  | 1     | 2      | 0     |        |
| 11134  | 0     |        | 0     |        |
| 11139  | 0     |        | 0     |        |
| 11154  | 0     |        | 0     |        |
| 11166  | 0     |        | 0     |        |
| 11168  | 0     |        | 0     |        |
| 11176  | 2     | 2      | 2     | 2      |
| 11183  | 2     | 2      | 2     | 3      |
| 11189  | 1     | 0      | 1     | 0      |
| 11196  | 4     | 3      | 4     | 3      |
| 11200  | 3     | 2      | 2     | 2      |
| 11201  | 1     | 0      | 0     |        |
| 11211  | 3     | 2      | 3     | 2      |
| 11218  | 0     |        | 0     |        |
| 11219  | 1     | 0      | 0     |        |
| 11221  | 2     | 1      | 0     |        |
| 11222  | 0     |        | 0     |        |
| 11230  | 3     | 2      | 3     | 2      |
| 11236  | 3     | 3      | 3     | 2      |
| 11237  | 3     | 1      | 1     | 0      |
| 11240  | 3     | 2      | 3     | 1      |
| 11244  | 4     | 3      | 3     | 2      |
| 11249  | 1     | 1      | 1     | 1      |
| 11252  | 4     | 3      | 3     | 2      |

| respid | Q20_1 | Q20a_1 | Q21_1 | Q21a_1 |
|--------|-------|--------|-------|--------|
| 11254  | 2     | 1      | 2     | 1      |
| 11255  | 5     | 3      | 3     | 3      |
| 11258  | 4     | 2      | 3     | 2      |
| 11260  | 0     |        | 0     |        |
| 11264  | 3     | 2      | 3     | 2      |
| 11266  | 2     | 3      | 2     | 2      |
| 11268  | 3     | 2      | 3     | 3      |
| 11269  | 2     | 1      | 0     |        |
| 11272  | 1     | 1      | 0     |        |
| 11273  | 0     |        | 0     |        |
| 11275  | 2     | 0      | 0     |        |
| 11276  | 1     | 1      | 0     |        |
| 11278  | 1     | 1      | 1     | 1      |
| 11288  | 0     |        | 0     |        |
| 11289  | 0     |        | 0     |        |
| 11291  | 0     |        | 0     |        |
| 11295  | 0     |        | 0     |        |
| 11297  | 2     | 0      | 0     |        |
| 11304  | 2     | 3      | 0     |        |
| 11305  | 0     |        | 0     |        |
| 11311  | 1     | 0      | 0     |        |
| 11313  | 0     |        | 0     |        |
| 11315  | 3     | 4      | 3     | 4      |
| 11316  | 3     | 4      | 3     | 4      |
| 11318  | 3     | 4      | 3     | 3      |
| 11323  | 0     |        | 0     |        |
| 11331  | 2     | 0      | 0     |        |
| 11333  | 2     | 2      | 2     | 2      |
| 11334  | 1     | 2      | 1     | 2      |
| 11340  | 2     | 3      | 1     | 2      |
| 11345  | 1     | 1      | 0     |        |
| 11354  | 1     | 0      | 0     |        |

| respid | Q20_1 | Q20a_1 | Q21_1 | Q21a_1 |
|--------|-------|--------|-------|--------|
| 11360  | 0     |        | 0     |        |
| 11361  | 2     | 2      | 2     | 2      |
| 11367  | 0     |        | 0     |        |
| 11370  | 0     |        | 0     |        |
| 11371  | 2     | 2      | 1     | 1      |
| 11372  | 3     | 3      | 3     | 3      |
| 11373  | 1     | 1      | 0     |        |
| 11382  | 0     |        | 0     |        |
| 11394  | 0     |        | 0     |        |
| 11395  | 1     | 1      | 2     | 0      |
| 11397  | 0     |        | 0     |        |
| 11402  | 2     | 2      | 2     | 2      |
| 11409  | 2     | 2      | 0     |        |
| 11410  | 4     | 1      | 0     |        |
| 11411  | 0     |        | 0     |        |
| 11418  | 1     | 1      | 0     |        |
| 11425  | 2     | 3      | 2     | 3      |
| 11429  | 0     |        | 0     |        |
| 11430  | 3     | 3      | 3     | 3      |
| 11431  | 3     | 1      | 1     | 1      |
| 11432  | 0     |        | 0     |        |
| 11433  | 0     |        | 2     | 2      |
| 11435  | 3     | 1      | 2     | 2      |
| 11436  | 2     | 2      | 0     |        |
| 11437  | 1     | 1      | 1     | 1      |
| 11439  | 0     |        | 0     |        |
| 11440  | 0     |        | 0     |        |
| 11447  | 0     |        | 0     |        |
| 11455  | 1     | 0      | 0     |        |
| 11456  | 2     | 3      | 2     | 3      |
| 11461  | 1     | 1      | 1     | 1      |
| 11463  | 1     | 3      | 2     | 3      |



| respid | Q20_1 | Q20a_1 | Q21_1 | Q21a_1 |
|--------|-------|--------|-------|--------|
| 11470  | 2     | 1      | 0     |        |
| 11472  | 0     |        | 0     |        |
| 11475  | 0     |        | 0     |        |
| 11476  | 0     |        | 0     |        |
| 11482  | 2     | 2      | 2     | 2      |
| 11501  | 0     |        | 1     | 1      |
| 11503  | 1     | 1      | 0     |        |
| 11505  | 0     |        | 0     |        |
| 11510  | 2     | 1      | 0     |        |
| 11519  | 0     |        | 0     |        |
| 11527  | 4     | 4      | 3     | 3      |
| 11529  | 3     | 2      | 2     | 2      |
| 11530  | 1     | 2      | 1     | 1      |
| 11536  | 4     | 4      | 5     | 4      |
| 11543  | 2     | 2      | 1     | 2      |
| 11548  | 1     | 1      | 1     | 2      |
| 11566  | 0     |        | 0     |        |
| 11570  | 3     | 3      | 3     | 4      |
| 11571  | 0     |        | 0     |        |
| 11578  | 0     |        | 0     |        |
| 11579  | 2     | 1      | 1     | 0      |
| 11581  | 3     | 4      | 2     | 4      |
| 11582  | 0     |        | 0     |        |
| 11583  | 0     |        | 0     |        |
| 11589  | 2     | 1      | 1     | 1      |
| 11590  | 0     |        | 0     |        |
| 11592  | 0     |        | 0     |        |
| 11596  | 0     |        | 0     |        |
| 11598  | 2     | 2      | 2     | 2      |
| 11602  | 3     | 2      | 1     | 2      |
| 11605  | 1     | 2      | 1     | 3      |
| 11618  | 1     | 2      | 2     | 2      |

| respid | Q20_1 | Q20a_1 | Q21_1 | Q21a_1 |
|--------|-------|--------|-------|--------|
| 11621  | 1     | 1      | 1     | 1      |
| 11630  | 2     | 2      | 0     |        |
| 11636  | 0     |        | 0     |        |
| 11640  | 4     | 2      | 3     | 2      |
| 11658  | 1     | 1      | 0     |        |
| 11665  | 4     | 2      | 3     | 2      |
| 11666  | 1     | 2      | 1     | 2      |
| 11667  | 2     | 2      | 1     | 2      |
| 11674  | 4     | 0      | 0     |        |
| 11680  | 0     |        | 0     |        |
| 11683  | 3     | 1      | 0     |        |
| 11688  | 0     |        | 0     |        |
| 11690  | 0     |        | 0     |        |
| 11694  | 0     |        | 0     |        |
| 11705  | 5     | 1      | 0     |        |
| 11720  | 2     | 2      | 4     | 3      |
| 11724  | 0     |        | 0     |        |
| 11738  | 1     | 1      | 1     | 1      |
| 11744  | 2     | 3      | 1     | 2      |
| 11745  | 4     | 2      | 0     |        |
| 11747  | 0     |        | 0     |        |
| 11755  | 2     | 1      | 0     |        |
| 11756  | 0     |        | 0     |        |
| 11772  | 1     | 0      | 0     |        |
| 11773  | 0     |        | 0     |        |
| 11778  | 3     | 3      | 2     | 3      |
| 11790  | 3     | 3      | 1     | 2      |
| 11794  | 0     |        | 0     |        |
| 11795  | 2     | 3      | 2     | 2      |
| 11799  | 2     | 3      | 3     | 2      |
| 11803  | 1     | 1      | 1     | 1      |
| 11806  | 4     | 3      | 4     | 3      |

| respid | Q20_1 | Q20a_1 | Q21_1 | Q21a_1 |
|--------|-------|--------|-------|--------|
| 11808  | 2     | 2      | 1     | 2      |
| 11810  | 0     |        | 0     |        |
| 11811  | 0     |        | 0     |        |
| 11812  | 3     | 2      | 3     | 2      |
| 11813  | 1     | 2      | 0     |        |
| 11821  | 0     |        | 0     |        |
| 11827  | 0     |        | 0     |        |
| 11831  | 3     | 3      | 3     | 3      |
| 11841  | 0     |        | 0     |        |
| 11872  | 1     | 2      | 0     |        |
| 11898  | 0     |        | 0     |        |
| 11902  | 2     | 2      | 4     | 4      |
| 11912  | 2     | 1      | 0     |        |
| 11926  | 0     |        | 0     |        |
| 11928  | 3     | 4      | 4     | 3      |
| 11932  | 2     | 0      | 0     |        |
| 11934  | 0     |        | 0     |        |
| 11941  | 2     | 2      | 3     | 3      |
| 11942  | 0     |        | 0     |        |
| 11943  | 3     | 3      | 1     | 3      |
| 11944  | 1     | 1      | 1     | 1      |
| 11955  | 0     |        | 0     |        |
| 11958  | 3     | 2      | 0     |        |
| 11968  | 1     | 1      | 1     | 1      |
| 11979  | 3     | 3      | 3     | 2      |
| 11988  | 0     |        | 0     |        |
| 11999  | 2     | 3      | 3     | 3      |
| 12002  | 0     |        | 0     |        |
| 12004  | 0     |        | 0     |        |
| 12008  | 1     | 0      | 1     | 1      |
| 12013  | 5     | 2      | 0     |        |
| 12018  | 0     |        | 0     |        |

| respid | Q20_1 | Q20a_1 | Q21_1 | Q21a_1 |
|--------|-------|--------|-------|--------|
| 12023  | 2     | 0      | 0     |        |
| 12027  | 3     | 3      | 2     | 4      |
| 12030  | 1     | 1      | 0     |        |
| 12031  | 2     | 1      | 0     |        |
| 12036  | 2     | 2      | 2     | 2      |
| 12037  | 3     | 3      | 3     | 3      |
| 12038  | 4     | 4      | 0     |        |
| 12039  | 0     |        | 0     |        |
| 12045  | 0     |        | 0     |        |
| 12046  | 1     | 1      | 1     | 1      |
| 12054  | 1     | 1      | 1     | 2      |
| 12055  | 2     | 1      | 2     | 1      |
| 12069  | 2     | 2      | 1     | 1      |
| 12070  | 2     | 2      | 3     | 2      |
| 12074  | 1     | 0      | 0     |        |
| 12075  | 3     | 3      | 3     | 3      |
| 12078  | 0     |        | 0     |        |
| 12089  | 1     | 1      | 0     |        |
| 12091  | 2     | 2      | 2     | 2      |
| 12092  | 1     | 2      | 1     | 1      |
| 12108  | 1     | 0      | 1     | 1      |
| 12111  | 5     | 4      | 4     | 4      |
| 12112  | 3     | 3      | 2     | 2      |
| 12126  | 0     |        | 0     |        |
| 12132  | 2     | 2      | 3     | 3      |
| 12150  | 4     | 3      | 3     | 3      |
| 12152  | 1     | 1      | 1     | 1      |
| 12154  | 1     | 1      | 0     |        |
| 12157  | 2     | 2      | 2     | 2      |
| 12165  | 2     | 1      | 1     | 1      |
| 12169  | 3     | 2      | 2     | 2      |
| 12182  | 5     | 4      | 5     | 4      |

| respid | Q20_1 | Q20a_1 | Q21_1 | Q21a_1 |
|--------|-------|--------|-------|--------|
| 12198  | 0     |        | 0     |        |
| 12199  | 0     |        | 0     |        |
| 12202  | 1     | 1      | 0     |        |
| 12207  | 0     |        | 0     |        |
| 12208  | 1     | 1      | 1     | 1      |
| 12210  | 2     | 1      | 0     |        |
| 12219  | 4     | 3      | 3     | 3      |
| 12224  | 0     |        | 0     |        |
| 12230  | 4     | 1      | 2     | 2      |
| 12238  | 0     |        | 0     |        |
| 12239  | 0     |        | 0     |        |
| 12243  | 0     |        | 0     |        |
| 12245  | 1     | 1      | 0     |        |
| 12246  | 4     | 3      | 4     | 3      |
| 12247  | 0     |        | 0     |        |
| 12248  | 3     | 2      | 3     | 3      |
| 12249  | 1     | 1      | 1     | 1      |
| 12258  | 2     | 2      | 2     | 2      |
| 12265  | 4     | 4      | 1     | 1      |
| 12269  | 0     |        | 0     |        |
| 12270  | 0     |        | 0     |        |
| 12279  | 0     |        | 0     |        |
| 12280  | 4     | 2      | 3     | 2      |
| 12282  | 0     |        | 0     |        |
| 12283  | 0     |        | 0     |        |
| 12287  | 0     |        | 0     |        |
| 12288  | 1     | 1      | 1     | 1      |
| 12290  | 0     |        | 0     |        |
| 12292  | 1     | 1      | 0     |        |
| 12294  | 0     |        | 0     |        |
| 12296  | 1     | 1      | 0     |        |
| 12307  | 3     | 2      | 0     |        |

| respid | Q20_1 | Q20a_1 | Q21_1 | Q21a_1 |
|--------|-------|--------|-------|--------|
| 12309  | 0     |        | 5     | 3      |
| 12312  | 2     | 2      | 1     | 2      |
| 12317  | 2     | 1      | 1     | 1      |
| 12319  | 0     |        | 0     |        |
| 12320  | 1     | 0      | 1     | 0      |
| 12322  | 1     | 1      | 0     |        |
| 12328  | 1     | 1      | 1     | 1      |
| 12331  | 4     | 3      | 4     | 3      |
| 12332  | 0     |        | 0     |        |
| 12334  | 0     |        | 1     | 0      |
| 12337  | 0     |        | 1     | 1      |
| 12338  | 0     |        | 0     |        |
| 12342  | 1     | 1      | 1     | 1      |
| 12349  | 0     |        | 0     |        |
| 12352  | 1     | 1      | 1     | 2      |
| 12355  | 1     | 1      | 0     |        |
| 12357  | 2     | 1      | 1     | 1      |
| 12358  | 0     |        | 0     |        |
| 12371  | 0     |        | 0     |        |
| 12372  | 1     | 0      | 0     |        |
| 12373  | 1     | 2      | 0     |        |
| 12379  | 0     |        | 0     |        |
| 12381  | 3     | 3      | 4     | 2      |
| 12383  | 1     | 1      | 1     | 2      |
| 12384  | 1     | 0      | 0     |        |
| 12386  | 0     |        | 0     |        |
| 12389  | 0     |        | 0     |        |
| 12392  | 3     | 1      | 0     |        |
| 12396  | 0     |        | 0     |        |
| 12397  | 1     | 1      | 1     | 0      |
| 12399  | 3     | 2      | 3     | 1      |
| 12400  | 5     | 3      | 3     | 1      |

| respid | Q20_1 | Q20a_1 | Q21_1 | Q21a_1 |
|--------|-------|--------|-------|--------|
| 12406  | 5     | 4      | 3     | 2      |
| 12407  | 1     | 1      | 1     | 1      |
| 12410  | 0     |        | 0     |        |
| 12413  | 0     |        | 0     |        |
| 12416  | 3     | 2      | 3     | 2      |
| 12419  | 0     |        | 0     |        |
| 12422  | 2     | 4      | 2     | 4      |
| 12423  | 1     | 1      | 1     | 1      |
| 12429  | 0     |        | 0     |        |
| 12434  | 3     | 3      | 4     | 3      |
| 12435  | 1     | 1      | 1     | 1      |
| 12436  | 3     | 1      | 0     |        |
| 12442  | 0     |        | 0     |        |
| 12449  | 3     | 2      | 3     | 2      |
| 12451  | 0     |        | 0     |        |
| 12456  | 0     |        | 0     |        |
| 12457  | 0     |        | 0     |        |
| 12458  | 0     |        | 0     |        |
| 12461  | 2     | 1      | 2     | 1      |
| 12462  | 0     |        | 0     |        |
| 12463  | 4     | 2      | 4     | 2      |
| 12466  | 0     |        | 0     |        |
| 12470  | 1     | 1      | 2     | 1      |
| 12471  | 1     | 1      | 0     |        |
| 12472  | 3     | 1      | 0     |        |
| 12478  | 1     | 1      | 1     | 1      |
| 12479  | 1     | 1      | 1     | 2      |
| 12481  | 0     |        | 0     |        |
| 12482  | 1     | 1      | 1     | 1      |
| 12483  | 0     |        | 0     |        |
| 12496  | 3     | 0      | 0     |        |
| 12497  | 1     | 1      | 0     |        |

| respid | Q20_1 | Q20a_1 | Q21_1 | Q21a_1 |
|--------|-------|--------|-------|--------|
| 12498  | 2     | 2      | 2     | 2      |
| 12500  | 3     | 0      | 4     | 3      |
| 12501  | 1     | 1      | 1     | 1      |
| 12502  | 1     | 1      | 1     | 1      |
| 12503  | 1     | 0      | 1     | 0      |
| 12505  | 3     | 3      | 3     | 2      |
| 12508  | 3     | 2      | 3     | 2      |
| 12509  | 2     | 1      | 1     | 1      |
| 12510  | 0     |        | 0     |        |
| 12512  | 3     | 2      | 4     | 2      |
| 12514  | 1     | 1      | 1     | 1      |
| 12515  | 3     | 3      | 0     |        |
| 12520  | 0     |        | 0     |        |
| 12522  | 0     |        | 0     |        |
| 12526  | 3     | 3      | 1     | 3      |
| 12527  | 0     |        | 0     |        |
| 12528  | 1     | 1      | 1     | 1      |
| 12530  | 1     | 1      | 1     | 1      |
| 12535  | 1     | 0      | 0     |        |
| 12539  | 2     | 1      | 0     |        |
| 12541  | 3     | 3      | 3     | 2      |
| 12542  | 0     |        | 0     |        |
| 12545  | 5     | 3      | 4     | 2      |
| 12547  | 3     | 3      | 4     | 2      |
| 12549  | 3     | 2      | 3     | 2      |
| 12550  | 0     |        | 0     |        |
| 12555  | 0     |        | 0     |        |
| 12557  | 1     | 1      | 0     |        |
| 12559  | 1     | 2      | 1     | 0      |
| 12561  | 0     |        | 0     |        |
| 12562  | 2     | 1      | 2     | 2      |
| 12563  | 0     |        | 0     |        |



| respid | Q20_1 | Q20a_1 | Q21_1 | Q21a_1 |
|--------|-------|--------|-------|--------|
| 12565  | 3     | 2      | 5     | 2      |
| 12566  | 0     |        | 0     |        |
| 12570  | 0     |        | 0     |        |
| 12571  | 1     | 0      | 0     |        |
| 12572  | 2     | 2      | 2     | 3      |
| 12578  | 0     |        | 0     |        |
| 12579  | 1     | 0      | 0     |        |
| 12581  | 3     | 1      | 1     | 0      |
| 12582  | 3     | 3      | 1     | 2      |
| 12585  | 1     | 2      | 0     |        |
| 12586  | 5     | 2      | 0     |        |
| 12588  | 1     | 1      | 1     | 1      |
| 12589  | 2     | 1      | 2     | 1      |
| 12590  | 0     |        | 0     |        |
| 12591  | 2     | 3      | 2     | 3      |
| 12593  | 2     | 2      | 2     | 3      |
| 12594  | 0     |        | 0     |        |
| 12599  | 0     |        | 0     |        |
| 12600  | 1     | 1      | 1     | 0      |
| 12602  | 2     | 2      | 3     | 2      |
| 12606  | 2     | 2      | 2     | 2      |
| 12607  | 0     |        | 0     |        |
| 12608  | 0     |        | 0     |        |
| 12610  | 2     | 2      | 2     | 2      |
| 12611  | 0     |        | 0     |        |
| 12613  | 4     | 3      | 4     | 3      |
| 12616  | 0     |        | 0     |        |
| 12617  | 5     | 1      | 5     | 2      |
| 12619  | 0     |        | 0     |        |
| 12622  | 0     |        | 0     |        |
| 12628  | 5     | 0      | 0     |        |
| 12631  | 1     | 1      | 1     | 1      |

| respid | Q20_1 | Q20a_1 | Q21_1 | Q21a_1 |
|--------|-------|--------|-------|--------|
| 12635  | 2     | 2      | 2     | 2      |
| 12638  | 0     |        | 0     |        |
| 12639  | 2     | 0      | 0     |        |
| 12640  | 2     | 0      | 0     |        |
| 12643  | 0     |        | 0     |        |
| 12646  | 4     | 4      | 3     | 3      |
| 12648  | 3     | 3      | 5     | 4      |
| 12650  | 2     | 3      | 3     | 2      |
| 12651  | 1     | 1      | 1     | 1      |
| 12658  | 1     | 1      | 1     | 1      |
| 12662  | 1     | 1      | 1     | 1      |
| 12663  | 2     | 1      | 1     | 3      |
| 12664  | 5     | 4      | 1     | 1      |
| 12669  | 5     | 3      | 3     | 3      |
| 12670  | 0     |        | 0     |        |
| 12673  | 0     |        | 0     |        |
| 12675  | 1     | 0      | 0     |        |
| 12677  | 0     |        | 0     |        |
| 12679  | 0     |        | 0     |        |
| 12682  | 2     | 2      | 2     | 2      |
| 12696  | 0     |        | 0     |        |
| 12697  | 0     |        | 0     |        |
| 12699  | 1     | 1      | 0     |        |
| 12700  | 2     | 1      | 1     | 1      |
| 12701  | 4     | 3      | 2     | 2      |
| 12702  | 0     |        | 0     |        |
| 12704  | 4     | 3      | 4     | 3      |
| 12705  | 1     | 1      | 1     | 1      |
| 12709  | 0     |        | 0     |        |
| 12710  | 0     |        | 0     |        |
| 12713  | 1     | 0      | 0     |        |
| 12716  | 2     | 1      | 2     | 1      |

| respid | Q20_1 | Q20a_1 | Q21_1 | Q21a_1 |
|--------|-------|--------|-------|--------|
| 12719  | 2     | 2      | 1     | 1      |
| 12720  | 0     |        | 0     |        |
| 12723  | 1     | 0      | 1     | 0      |
| 12726  | 0     |        | 0     |        |
| 12728  | 3     | 2      | 3     | 3      |
| 12729  | 1     | 1      | 1     | 1      |
| 12731  | 0     |        | 0     |        |
| 12732  | 3     | 2      | 2     | 2      |
| 12733  | 3     | 2      | 1     | 1      |
| 12736  | 0     |        | 0     |        |
| 12737  | 0     |        | 0     |        |
| 12739  | 1     | 2      | 2     | 2      |
| 12742  | 0     |        | 0     |        |
| 12743  | 4     | 4      | 4     | 4      |
| 12744  | 0     |        | 0     |        |
| 12747  | 0     |        | 0     |        |
| 12751  | 1     | 0      | 0     |        |
| 12754  | 0     |        | 0     |        |
| 12756  | 3     | 3      | 3     | 3      |
| 12757  | 0     |        | 0     |        |
| 12760  | 2     | 2      | 3     | 3      |
| 12761  | 0     |        | 0     |        |
| 12762  | 2     | 2      | 2     | 2      |
| 12766  | 1     | 1      | 0     |        |
| 12769  | 1     | 1      | 0     |        |
| 12770  | 3     | 2      | 3     | 2      |
| 12773  | 4     | 3      | 2     | 3      |
| 12780  | 2     | 2      | 2     | 2      |
| 12789  | 0     |        | 0     |        |
| 12792  | 1     | 2      | 2     | 2      |
| 12795  | 0     |        | 1     | 1      |
| 12804  | 3     | 4      | 1     | 3      |

| respid | Q20_1 | Q20a_1 | Q21_1 | Q21a_1 |
|--------|-------|--------|-------|--------|
| 12811  | 0     |        | 0     |        |
| 12813  | 4     | 3      | 1     | 1      |
| 12814  | 3     | 3      | 0     |        |
| 12815  | 3     | 2      | 0     |        |
| 12816  | 1     | 0      | 1     | 0      |
| 12817  | 0     |        | 3     | 0      |
| 12818  | 3     | 0      | 0     |        |
| 12819  | 0     |        | 0     |        |
| 12820  | 1     | 0      | 1     | 0      |
| 12821  | 0     |        | 0     |        |
| 12824  | 1     | 1      | 1     | 1      |
| 12827  | 1     | 2      | 2     | 3      |
| 12836  | 3     | 2      | 3     | 3      |
| 12837  | 1     | 0      | 1     | 1      |
| 12838  | 1     | 1      | 1     | 1      |
| 12845  | 0     |        | 1     | 0      |
| 12847  | 2     | 1      | 4     | 2      |
| 12849  | 3     | 3      | 3     | 4      |
| 12850  | 1     | 1      | 1     | 1      |
| 12852  | 0     |        | 0     |        |
| 12853  | 3     | 3      | 3     | 4      |
| 12854  | 0     |        | 0     |        |
| 12860  | 0     |        | 0     |        |
| 12861  | 2     | 0      | 0     |        |
| 12863  | 0     |        | 0     |        |
| 12865  | 0     |        | 0     |        |
| 12870  | 2     | 1      | 3     | 1      |
| 12871  | 0     |        | 0     |        |
| 12873  | 1     | 1      | 1     | 1      |
| 12877  | 0     |        | 1     | 1      |
| 12880  | 0     |        | 0     |        |
| 12881  | 1     | 0      | 0     |        |

| respid | Q20_1 | Q20a_1 | Q21_1 | Q21a_1 |
|--------|-------|--------|-------|--------|
| 12882  | 1     | 1      | 0     |        |
| 12883  | 0     |        | 0     |        |
| 12885  | 3     | 2      | 1     | 2      |
| 12887  | 1     | 1      | 1     | 1      |
| 12889  | 1     | 0      | 0     |        |
| 12890  | 0     |        | 0     |        |
| 12891  | 3     | 2      | 2     | 0      |
| 12892  | 1     | 2      | 1     | 3      |
| 12893  | 0     |        | 0     |        |
| 12895  | 0     |        | 0     |        |
| 12898  | 1     | 1      | 0     |        |
| 12907  | 2     | 2      | 0     |        |
| 12908  | 0     |        | 0     |        |
| 12909  | 0     |        | 0     |        |
| 12914  | 0     |        | 0     |        |
| 12915  | 3     | 3      | 3     | 3      |
| 12916  | 0     |        | 0     |        |
| 12921  | 0     |        | 0     |        |
| 12922  | 1     | 2      | 0     |        |
| 12923  | 2     | 3      | 3     | 2      |
| 12926  | 0     |        | 0     |        |
| 12927  | 0     |        | 0     |        |
| 12932  | 0     |        | 1     | 0      |
| 12936  | 0     |        | 0     |        |
| 12937  | 1     | 0      | 0     |        |
| 12938  | 5     | 4      | 2     | 3      |
| 12939  | 0     |        | 0     |        |
| 12940  | 1     | 1      | 1     | 2      |
| 12945  | 2     | 2      | 1     | 1      |
| 12946  | 1     | 2      | 1     | 0      |
| 12947  | 2     | 2      | 2     | 1      |
| 12948  | 3     | 2      | 3     | 2      |

| respid | Q20_1 | Q20a_1 | Q21_1 | Q21a_1 |
|--------|-------|--------|-------|--------|
| 12951  | 0     |        | 1     | 1      |
| 12952  | 4     | 2      | 0     |        |
| 12954  | 3     | 3      | 3     | 2      |
| 12960  | 1     | 2      | 0     |        |
| 12961  | 0     |        | 0     |        |
| 12962  | 0     |        | 0     |        |
| 12963  | 0     |        | 0     |        |
| 12964  | 0     |        | 0     |        |
| 12966  | 0     |        | 0     |        |
| 12967  | 0     |        | 0     |        |
| 12969  | 1     | 1      | 1     | 1      |
| 12970  | 1     | 1      | 1     | 1      |
| 12974  | 3     | 2      | 3     | 2      |
| 12979  | 0     |        | 0     |        |
| 12980  | 1     | 0      | 0     |        |
| 12983  | 1     | 1      | 0     |        |
| 12988  | 0     |        | 0     |        |
| 12994  | 1     | 0      | 1     | 0      |
| 12995  | 1     | 0      | 1     | 0      |
| 12996  | 3     | 0      | 0     |        |
| 12998  | 2     | 0      | 3     | 0      |
| 12999  | 4     | 0      | 0     |        |
| 13001  | 0     |        | 0     |        |
| 13005  | 3     | 1      | 0     |        |
| 13006  | 4     | 4      | 4     | 4      |
| 13007  | 1     | 2      | 1     | 2      |
| 13011  | 1     | 1      | 1     | 1      |
| 13012  | 0     |        | 0     |        |
| 13013  | 4     | 3      | 3     | 2      |
| 13016  | 0     |        | 0     |        |
| 13018  | 0     |        | 1     | 0      |
| 13020  | 0     |        | 0     |        |

| respid | Q20_1 | Q20a_1 | Q21_1 | Q21a_1 |
|--------|-------|--------|-------|--------|
| 13024  | 0     |        | 0     |        |
| 13025  | 0     |        | 0     |        |
| 13027  | 3     | 0      | 0     |        |
| 13031  | 1     | 2      | 0     |        |
| 13032  | 2     | 2      | 2     | 0      |
| 13034  | 2     | 2      | 1     | 1      |
| 13036  | 0     |        | 0     |        |
| 13037  | 0     |        | 0     |        |
| 13038  | 3     | 3      | 3     | 3      |
| 13039  | 0     |        | 0     |        |
| 13040  | 1     | 1      | 1     | 1      |
| 13041  | 1     | 1      | 1     | 1      |
| 13045  | 4     | 3      | 3     | 3      |
| 13046  | 0     |        | 0     |        |
| 13048  | 0     |        | 0     |        |
| 13051  | 2     | 1      | 0     |        |
| 13053  | 0     |        | 0     |        |
| 13055  | 1     | 3      | 1     | 3      |
| 13059  | 2     | 1      | 2     | 2      |
| 13068  | 0     |        | 0     |        |
| 13069  | 0     |        | 0     |        |
| 13076  | 1     | 1      | 1     | 1      |
| 13081  | 0     |        | 0     |        |
| 13082  | 3     | 2      | 0     |        |
| 13084  | 4     | 2      | 4     | 2      |
| 13085  | 3     | 1      | 3     | 1      |
| 13086  | 1     | 0      | 1     | 0      |
| 13093  | 2     | 1      | 1     | 1      |
| 13094  | 3     | 2      | 3     | 2      |
| 13097  | 1     | 1      | 0     |        |
| 13098  | 1     | 1      | 1     | 1      |
| 13099  | 3     | 2      | 3     | 2      |

| respid | Q20_1 | Q20a_1 | Q21_1 | Q21a_1 |
|--------|-------|--------|-------|--------|
| 13100  | 0     |        | 0     |        |
| 13101  | 0     |        | 0     |        |
| 13103  | 0     |        | 0     |        |
| 13105  | 1     | 0      | 0     |        |
| 13106  | 1     | 1      | 1     | 1      |
| 13107  | 3     | 1      | 1     | 1      |
| 13110  | 3     | 2      | 1     | 1      |
| 13118  | 1     | 0      | 1     | 1      |
| 13120  | 3     | 3      | 3     | 3      |
| 13130  | 2     | 0      | 1     | 0      |
| 13133  | 4     | 1      | 0     |        |
| 13134  | 0     |        | 0     |        |
| 13139  | 0     |        | 0     |        |
| 13142  | 0     |        | 0     |        |
| 13143  | 0     |        | 0     |        |
| 13145  | 1     | 1      | 1     | 1      |
| 13148  | 3     | 2      | 1     | 1      |
| 13149  | 0     |        | 0     |        |
| 13151  | 3     | 2      | 3     | 2      |
| 13153  | 1     | 1      | 1     | 1      |
| 13158  | 1     | 0      | 0     |        |
| 13160  | 1     | 1      | 1     | 1      |
| 13162  | 3     | 2      | 3     | 2      |
| 13169  | 0     |        | 2     | 0      |
| 13172  | 1     | 1      | 1     | 1      |
| 13173  | 0     |        | 0     |        |
| 13176  | 1     | 0      | 0     |        |
| 13179  | 1     | 0      | 0     |        |
| 13184  | 4     | 1      | 0     |        |
| 13185  | 0     |        | 0     |        |
| 13186  | 0     |        | 0     |        |
| 13188  | 1     | 1      | 1     | 1      |



| respid | Q20_1 | Q20a_1 | Q21_1 | Q21a_1 |
|--------|-------|--------|-------|--------|
| 13190  | 2     | 2      | 2     | 2      |
| 13192  | 0     |        | 0     |        |
| 13193  | 0     |        | 0     |        |
| 13201  | 0     |        | 0     |        |
| 13207  | 0     |        | 0     |        |
| 13208  | 0     |        | 0     |        |
| 13209  | 2     | 2      | 3     | 2      |
| 13212  | 0     |        | 0     |        |
| 13215  | 1     | 1      | 1     | 1      |
| 13218  | 3     | 2      | 1     | 0      |
| 13219  | 1     | 0      | 0     |        |
| 13224  | 0     |        | 0     |        |
| 13225  | 0     |        | 0     |        |
| 13226  | 0     |        | 0     |        |
| 13232  | 1     | 1      | 0     |        |
| 13237  | 0     |        | 0     |        |
| 13239  | 1     | 0      | 0     |        |
| 13241  | 3     | 2      | 1     | 2      |
| 13243  | 1     | 1      | 1     | 1      |
| 13247  | 1     | 2      | 4     | 1      |
| 13248  | 0     |        | 1     | 1      |
| 13251  | 1     | 0      | 0     |        |
| 13256  | 0     |        | 0     |        |
| 13260  | 1     | 0      | 1     | 0      |
| 13261  | 1     | 2      | 1     | 2      |
| 13264  | 1     | 0      | 0     |        |
| 13273  | 0     |        | 0     |        |
| 13274  | 0     |        | 0     |        |
| 13276  | 1     | 0      | 0     |        |
| 13278  | 0     |        | 0     |        |
| 13279  | 1     | 0      | 0     |        |
| 13282  | 0     |        | 0     |        |

| respid | Q20_1 | Q20a_1 | Q21_1 | Q21a_1 |
|--------|-------|--------|-------|--------|
| 13283  | 1     | 1      | 1     | 1      |
| 13285  | 5     | 3      | 0     |        |
| 13286  | 1     | 1      | 1     | 1      |
| 13299  | 0     |        | 0     |        |
| 13300  | 3     | 2      | 2     | 2      |
| 13301  | 0     |        | 0     |        |
| 13303  | 2     | 2      | 2     | 1      |
| 13304  | 0     |        | 0     |        |
| 13307  | 0     |        | 0     |        |
| 13308  | 0     |        | 0     |        |
| 13312  | 1     | 0      | 0     |        |
| 13313  | 0     |        | 1     | 0      |
| 13314  | 1     | 1      | 1     | 1      |
| 13318  | 1     | 1      | 2     | 2      |
| 13320  | 0     |        | 0     |        |
| 13322  | 1     | 1      | 1     | 1      |
| 13324  | 2     | 1      | 0     |        |
| 13325  | 1     | 2      | 1     | 2      |
| 13327  | 1     | 0      | 0     |        |
| 13330  | 0     |        | 0     |        |
| 13332  | 0     |        | 0     |        |
| 13333  | 1     | 0      | 0     |        |
| 13334  | 0     |        | 0     |        |
| 13351  | 0     |        | 0     |        |
| 13353  | 0     |        | 0     |        |
| 13354  | 1     | 0      | 0     |        |
| 13355  | 1     | 0      | 0     |        |
| 13358  | 1     | 0      | 0     |        |
| 13359  | 1     | 1      | 1     | 1      |
| 13360  | 2     | 1      | 2     | 1      |
| 13364  | 1     | 1      | 3     | 2      |
| 13365  | 3     | 2      | 4     | 3      |

| respid | Q20_1 | Q20a_1 | Q21_1 | Q21a_1 |
|--------|-------|--------|-------|--------|
| 13368  | 0     |        | 0     |        |
| 13370  | 1     | 0      | 0     |        |
| 13375  | 1     | 0      | 0     |        |
| 13384  | 1     | 0      | 0     |        |
| 13387  | 0     |        | 0     |        |
| 13395  | 2     | 2      | 1     | 0      |
| 13398  | 0     |        | 0     |        |
| 13404  | 3     | 2      | 1     | 2      |
| 13405  | 1     | 1      | 1     | 1      |
| 13408  | 0     |        | 0     |        |
| 13411  | 0     |        | 1     | 0      |
| 13413  | 1     | 0      | 0     |        |
| 13419  | 2     | 0      | 0     |        |
| 13420  | 1     | 0      | 0     |        |
| 13427  | 3     | 2      | 2     | 2      |
| 13441  | 1     | 2      | 5     | 4      |
| 13444  | 1     | 1      | 0     |        |
| 13456  | 0     |        | 0     |        |
| 13466  | 1     | 0      | 0     |        |
| 13468  | 1     | 0      | 1     | 0      |
| 13475  | 0     |        | 0     |        |
| 13484  | 0     |        | 0     |        |
| 13486  | 1     | 1      | 1     | 1      |
| 13487  | 3     | 2      | 3     | 2      |
| 13491  | 0     |        | 0     |        |
| 13496  | 0     |        | 0     |        |
| 13497  | 1     | 1      | 1     | 1      |
| 13498  | 2     | 0      | 0     |        |
| 13502  | 0     |        | 0     |        |
| 13503  | 0     |        | 2     | 1      |
| 13505  | 0     |        | 0     |        |
| 13509  | 1     | 1      | 1     | 1      |

| respid | Q20_1 | Q20a_1 | Q21_1 | Q21a_1 |
|--------|-------|--------|-------|--------|
| 13510  | 1     | 1      | 2     | 1      |
| 13518  | 1     | 1      | 0     |        |
| 13521  | 1     | 1      | 1     | 1      |
| 13523  | 1     | 0      | 1     | 1      |
| 13528  | 0     |        | 0     |        |
| 13531  | 1     | 1      | 1     | 1      |
| 13532  | 0     |        | 0     |        |
| 13533  | 0     |        | 0     |        |
| 13534  | 0     |        | 0     |        |
| 13535  | 1     | 1      | 1     | 0      |
| 13538  | 2     | 2      | 2     | 2      |
| 13540  | 1     | 1      | 1     | 0      |
| 13541  | 1     | 1      | 1     | 1      |
| 13542  | 1     | 0      | 0     |        |
| 13550  | 1     | 0      | 0     |        |
| 13553  | 2     | 1      | 1     | 1      |
| 13554  | 0     |        | 0     |        |
| 13555  | 3     | 2      | 3     | 2      |
| 13556  | 1     | 1      | 0     |        |
| 13563  | 2     | 1      | 1     | 1      |
| 13564  | 1     | 1      | 1     | 1      |
| 13567  | 0     |        | 0     |        |
| 13568  | 2     | 2      | 2     | 2      |
| 13570  | 0     |        | 0     |        |
| 13573  | 1     | 1      | 2     | 2      |
| 13575  | 1     | 2      | 1     | 1      |
| 13577  | 2     | 2      | 3     | 3      |
| 13580  | 3     | 2      | 3     | 3      |
| 13582  | 2     | 0      | 2     | 0      |
| 13584  | 3     | 2      | 3     | 3      |
| 13585  | 0     |        | 0     |        |
| 13586  | 1     | 0      | 0     |        |

| respid | Q20_1 | Q20a_1 | Q21_1 | Q21a_1 |
|--------|-------|--------|-------|--------|
| 13587  | 3     | 1      | 1     | 1      |
| 13592  | 3     | 3      | 2     | 3      |
| 13596  | 0     |        | 0     |        |
| 13597  | 1     | 1      | 0     |        |
| 13599  | 1     | 2      | 1     | 2      |
| 13601  | 1     | 0      | 0     |        |
| 13604  | 0     |        | 0     |        |
| 13608  | 0     |        | 0     |        |
| 13616  | 2     | 0      | 0     |        |
| 13618  | 2     | 2      | 0     |        |
| 13619  | 1     | 0      | 0     |        |
| 13626  | 0     |        | 0     |        |
| 13628  | 1     | 1      | 0     |        |
| 13640  | 3     | 2      | 2     | 2      |
| 13645  | 0     |        | 0     |        |
| 13648  | 0     |        | 0     |        |
| 13653  | 0     |        | 0     |        |
| 13655  | 0     |        | 0     |        |
| 13662  | 2     | 0      | 0     |        |
| 13670  | 1     | 1      | 0     |        |
| 13673  | 1     | 0      | 0     |        |
| 13674  | 1     | 1      | 0     |        |
| 13675  | 0     |        | 1     | 0      |
| 13678  | 1     | 2      | 1     | 2      |
| 13680  | 1     | 1      | 1     | 1      |
| 13681  | 0     |        | 0     |        |
| 13683  | 1     | 0      | 0     |        |
| 13684  | 1     | 1      | 3     | 1      |
| 13685  | 0     |        | 0     |        |
| 13687  | 0     |        | 0     |        |
| 13690  | 2     | 0      | 0     |        |
| 13700  | 3     | 2      | 4     | 2      |

| respid | Q20_1 | Q20a_1 | Q21_1 | Q21a_1 |
|--------|-------|--------|-------|--------|
| 13705  | 4     | 1      | 2     | 1      |
| 13710  | 0     |        | 0     |        |
| 13711  | 1     | 2      | 0     |        |
| 13713  | 0     |        | 0     |        |
| 13716  | 1     | 0      | 0     |        |
| 13721  | 2     | 2      | 1     | 1      |
| 13722  | 3     | 4      | 3     | 4      |
| 13723  | 1     | 3      | 2     | 4      |
| 13726  | 3     | 2      | 3     | 2      |
| 13728  | 2     | 1      | 1     | 1      |
| 13730  | 1     | 1      | 1     | 1      |
| 13734  | 0     |        | 0     |        |
| 13736  | 5     | 4      | 4     | 3      |
| 13737  | 2     | 1      | 0     |        |
| 13739  | 0     |        | 0     |        |
| 13742  | 0     |        | 0     |        |
| 13746  | 1     | 1      | 0     |        |
| 13747  | 1     | 0      | 1     | 1      |
| 13749  | 0     |        | 0     |        |
| 13751  | 2     | 1      | 1     | 1      |
| 13752  | 1     | 1      | 1     | 1      |
| 13756  | 1     | 1      | 1     | 1      |
| 13757  | 0     |        | 0     |        |
| 13767  | 2     | 2      | 2     | 1      |
| 13771  | 0     |        | 0     |        |
| 13772  | 4     | 3      | 4     | 4      |
| 13779  | 0     |        | 0     |        |
| 13782  | 0     |        | 0     |        |
| 13783  | 0     |        | 0     |        |
| 13785  | 0     |        | 0     |        |
| 13786  | 0     |        | 1     | 2      |
| 13792  | 1     | 2      | 2     | 2      |

| respid | Q20_1 | Q20a_1 | Q21_1 | Q21a_1 |
|--------|-------|--------|-------|--------|
| 13796  | 0     |        | 1     | 1      |
| 13798  | 0     |        | 0     |        |
| 13799  | 3     | 1      | 2     | 1      |
| 13804  | 0     |        | 0     |        |
| 13805  | 1     | 0      | 0     |        |
| 13810  | 3     | 3      | 2     | 2      |
| 13811  | 0     |        | 0     |        |
| 13819  | 2     | 2      | 0     |        |
| 13821  | 4     | 3      | 4     | 4      |
| 13824  | 2     | 2      | 4     | 3      |
| 13828  | 2     | 1      | 3     | 2      |
| 13829  | 4     | 4      | 4     | 4      |
| 13831  | 0     |        | 0     |        |
| 13833  | 1     | 1      | 1     | 1      |
| 13835  | 5     | 4      | 4     | 4      |
| 13838  | 0     |        | 0     |        |
| 13839  | 3     | 3      | 4     | 4      |
| 13845  | 0     |        | 0     |        |
| 13846  | 0     |        | 0     |        |
| 13853  | 1     | 1      | 1     | 1      |
| 13855  | 2     | 1      | 1     | 1      |
| 13858  | 3     | 2      | 0     |        |
| 13860  | 0     |        | 0     |        |
| 13865  | 5     | 3      | 3     | 3      |
| 13870  | 0     |        | 0     |        |
| 13872  | 3     | 3      | 1     | 2      |
| 13873  | 1     | 1      | 1     | 1      |
| 13874  | 0     |        | 0     |        |
| 13875  | 1     | 3      | 2     | 2      |
| 13881  | 0     |        | 0     |        |
| 13887  | 4     | 1      | 0     |        |
| 13888  | 2     | 2      | 2     | 2      |

| respid | Q20_1 | Q20a_1 | Q21_1 | Q21a_1 |
|--------|-------|--------|-------|--------|
| 13889  | 1     | 3      | 1     | 3      |
| 13895  | 4     | 4      | 4     | 4      |
| 13897  | 0     |        | 0     |        |
| 13898  | 3     | 1      | 2     | 1      |
| 13901  | 0     |        | 0     |        |
| 13902  | 4     | 2      | 4     | 3      |
| 13903  | 0     |        | 0     |        |
| 13905  | 1     | 0      | 0     |        |
| 13908  | 2     | 1      | 2     | 1      |
| 13909  | 0     |        | 1     | 1      |
| 13910  | 2     | 3      | 3     | 3      |
| 13911  | 0     |        | 0     |        |
| 13914  | 1     | 1      | 2     | 1      |
| 13920  | 2     | 2      | 3     | 2      |
| 13926  | 0     |        | 0     |        |
| 13929  | 1     | 2      | 1     | 1      |
| 13930  | 5     | 4      | 4     | 4      |
| 13931  | 0     |        | 0     |        |
| 13932  | 3     | 1      | 0     |        |
| 13934  | 2     | 1      | 1     | 1      |
| 13938  | 4     | 2      | 1     | 2      |
| 13942  | 0     |        | 0     |        |
| 13945  | 1     | 1      | 2     | 1      |
| 13947  | 4     | 3      | 5     | 3      |
| 13948  | 0     |        | 0     |        |
| 13959  | 0     |        | 3     | 1      |
| 13962  | 0     |        | 0     |        |
| 13963  | 0     |        | 1     | 2      |
| 13964  | 1     | 0      | 2     | 1      |
| 13966  | 1     | 1      | 1     | 1      |
| 13968  | 3     | 1      | 0     |        |
| 13971  | 0     |        | 0     |        |



| respid | Q20_1 | Q20a_1 | Q21_1 | Q21a_1 |
|--------|-------|--------|-------|--------|
| 13979  | 3     | 2      | 3     | 2      |
| 13980  | 2     | 1      | 2     | 1      |
| 13981  | 1     | 1      | 1     | 0      |
| 13982  | 1     | 0      | 2     | 1      |
| 13984  | 1     | 2      | 2     | 2      |
| 13989  | 0     |        | 1     | 0      |
| 13990  | 0     |        | 0     |        |
| 13992  | 2     | 2      | 4     | 2      |
| 13998  | 1     | 2      | 2     | 2      |
| 13999  | 2     | 2      | 1     | 1      |
| 14000  | 1     | 0      | 1     | 1      |
| 14003  | 1     | 1      | 0     |        |
| 14004  | 0     |        | 0     |        |
| 14006  | 1     | 0      | 1     | 0      |
| 14007  | 1     | 1      | 1     | 1      |
| 14008  | 0     |        | 0     |        |
| 14013  | 1     | 0      | 0     |        |
| 14015  | 1     | 1      | 1     | 1      |
| 14018  | 1     | 0      | 1     | 0      |
| 14021  | 0     |        | 0     |        |
| 14023  | 1     | 0      | 0     |        |
| 14024  | 1     | 1      | 0     |        |
| 14026  | 1     | 0      | 0     |        |
| 14030  | 1     | 2      | 1     | 2      |
| 14032  | 2     | 1      | 2     | 1      |
| 14040  | 0     |        | 0     |        |
| 14045  | 0     |        | 0     |        |
| 14048  | 1     | 1      | 2     | 1      |
| 14049  | 2     | 3      | 4     | 3      |
| 14050  | 1     | 0      | 0     |        |
| 14051  | 4     | 4      | 3     | 3      |
| 14052  | 1     | 0      | 1     | 0      |

| respid | Q20_1 | Q20a_1 | Q21_1 | Q21a_1 |
|--------|-------|--------|-------|--------|
| 14054  | 3     | 1      | 0     |        |
| 14055  | 0     |        | 0     |        |
| 14057  | 1     | 1      | 1     | 1      |
| 14058  | 1     | 0      | 0     |        |
| 14059  | 0     |        | 0     |        |
| 14060  | 1     | 1      | 1     | 0      |
| 14061  | 3     | 3      | 3     | 3      |
| 14071  | 1     | 0      | 0     |        |
| 14073  | 0     |        | 0     |        |
| 14074  | 4     | 2      | 2     | 2      |
| 14076  | 0     |        | 0     |        |
| 14080  | 0     |        | 0     |        |
| 14082  | 0     |        | 0     |        |
| 14083  | 4     | 2      | 0     |        |
| 14084  | 0     |        | 0     |        |
| 14085  | 0     |        | 0     |        |
| 14086  | 4     | 2      | 3     | 2      |
| 14088  | 0     |        | 0     |        |
| 14090  | 1     | 0      | 0     |        |
| 14092  | 1     | 0      | 0     |        |
| 14093  | 0     |        | 0     |        |
| 14096  | 0     |        | 1     | 1      |
| 14103  | 3     | 2      | 2     | 2      |
| 14105  | 0     |        | 0     |        |
| 14106  | 1     | 1      | 3     | 1      |
| 14107  | 1     | 1      | 1     | 1      |
| 14108  | 1     | 3      | 1     | 3      |
| 14112  | 3     | 1      | 2     | 1      |
| 14114  | 5     | 3      | 5     | 3      |
| 14115  | 3     | 2      | 2     | 2      |
| 14116  | 0     |        | 0     |        |
| 14117  | 1     | 2      | 3     | 2      |

| respid | Q20_1 | Q20a_1 | Q21_1 | Q21a_1 |
|--------|-------|--------|-------|--------|
| 14118  | 1     | 1      | 2     | 2      |
| 14119  | 0     |        | 1     | 0      |
| 14127  | 0     |        | 0     |        |
| 14129  | 1     | 0      | 1     | 0      |
| 14131  | 3     | 2      | 1     | 2      |
| 14132  | 1     | 1      | 0     |        |
| 14133  | 1     | 3      | 1     | 4      |
| 14134  | 1     | 1      | 2     | 1      |
| 14135  | 2     | 1      | 0     |        |
| 14136  | 2     | 2      | 1     | 1      |
| 14138  | 0     |        | 0     |        |
| 14139  | 0     |        | 0     |        |
| 14140  | 2     | 1      | 1     | 2      |
| 14141  | 1     | 0      | 0     |        |
| 14143  | 0     |        | 0     |        |
| 14146  | 0     |        | 0     |        |
| 14147  | 5     | 4      | 4     | 4      |
| 14148  | 1     | 0      | 0     |        |
| 14151  | 2     | 2      | 1     | 1      |
| 14152  | 1     | 1      | 2     | 1      |
| 14153  | 1     | 0      | 1     | 0      |
| 14154  | 0     |        | 1     | 1      |
| 14158  | 2     | 1      | 0     |        |
| 14159  | 1     | 1      | 1     | 3      |
| 14160  | 2     | 3      | 4     | 3      |
| 14161  | 2     | 1      | 2     | 2      |
| 14162  | 1     | 2      | 1     | 1      |
| 14165  | 4     | 3      | 3     | 2      |
| 14166  | 2     | 1      | 2     | 1      |
| 14167  | 1     | 1      | 1     | 0      |
| 14169  | 0     |        | 1     | 1      |
| 14170  | 1     | 0      | 0     |        |

| respid | Q20_1 | Q20a_1 | Q21_1 | Q21a_1 |
|--------|-------|--------|-------|--------|
| 14172  | 2     | 0      | 0     |        |
| 14173  | 0     |        | 0     |        |
| 14174  | 2     | 1      | 0     |        |
| 14175  | 1     | 1      | 1     | 1      |
| 14176  | 1     | 1      | 1     | 1      |
| 14178  | 0     |        | 0     |        |
| 14179  | 1     | 0      | 0     |        |
| 14180  | 2     | 1      | 3     | 2      |
| 14183  | 2     | 2      | 2     | 2      |
| 14185  | 0     |        | 0     |        |
| 14187  | 5     | 2      | 4     | 2      |
| 14189  | 0     |        | 0     |        |
| 14191  | 2     | 1      | 2     | 1      |
| 14192  | 0     |        | 0     |        |
| 14195  | 2     | 2      | 1     | 2      |
| 14197  | 1     | 1      | 1     | 0      |
| 14203  | 2     | 1      | 3     | 2      |
| 14204  | 0     |        | 1     | 0      |
| 14205  | 0     |        | 0     |        |
| 14208  | 0     |        | 0     |        |
| 14211  | 5     | 4      | 3     | 3      |
| 14214  | 0     |        | 0     |        |
| 14215  | 3     | 2      | 1     | 1      |
| 14216  | 3     | 2      | 2     | 2      |
| 14218  | 1     | 1      | 1     | 1      |
| 14220  | 0     |        | 1     | 0      |
| 14223  | 0     |        | 0     |        |
| 14225  | 3     | 1      | 3     | 2      |
| 14226  | 0     |        | 0     |        |
| 14228  | 3     | 3      | 3     | 2      |
| 14231  | 1     | 1      | 1     | 1      |
| 14233  | 3     | 2      | 1     | 2      |

| respid | Q20_1 | Q20a_1 | Q21_1 | Q21a_1 |
|--------|-------|--------|-------|--------|
| 14237  | 0     |        | 1     | 1      |
| 14238  | 1     | 1      | 3     | 2      |
| 14243  | 2     | 0      | 2     | 1      |
| 14245  | 0     |        | 0     |        |
| 14246  | 1     | 1      | 1     | 2      |
| 14248  | 0     |        | 0     |        |
| 14250  | 0     |        | 0     |        |
| 14253  | 2     | 1      | 1     | 1      |
| 14254  | 3     | 1      | 0     |        |
| 14255  | 0     |        | 0     |        |
| 14257  | 1     | 0      | 0     |        |
| 14258  | 0     |        | 1     | 1      |
| 14259  | 2     | 2      | 1     | 1      |
| 14260  | 0     |        | 0     |        |
| 14261  | 1     | 4      | 4     | 2      |
| 14263  | 3     | 2      | 5     | 3      |
| 14264  | 1     | 0      | 1     | 0      |
| 14266  | 2     | 2      | 3     | 1      |
| 14267  | 2     | 2      | 1     | 2      |
| 14268  | 1     | 1      | 0     |        |
| 14275  | 1     | 1      | 1     | 1      |
| 14278  | 3     | 3      | 2     | 2      |
| 14279  | 0     |        | 0     |        |
| 14280  | 0     |        | 0     |        |
| 14281  | 1     | 0      | 0     |        |
| 14282  | 1     | 1      | 2     | 2      |
| 14283  | 3     | 2      | 1     | 1      |
| 14286  | 1     | 0      | 0     |        |
| 14287  | 0     |        | 0     |        |
| 14288  | 4     | 2      | 2     | 2      |
| 14291  | 0     |        | 0     |        |
| 14292  | 0     |        | 0     |        |

| respid | Q20_1 | Q20a_1 | Q21_1 | Q21a_1 |
|--------|-------|--------|-------|--------|
| 14293  | 0     |        | 0     |        |
| 14304  | 5     | 3      | 3     | 4      |
| 14308  | 2     | 1      | 2     | 1      |
| 14313  | 0     |        | 0     |        |
| 14314  | 2     | 2      | 4     | 3      |
| 14316  | 0     |        | 0     |        |
| 14317  | 0     |        | 0     |        |
| 14318  | 3     | 2      | 4     | 2      |
| 14319  | 0     |        | 1     | 0      |
| 14320  | 2     | 2      | 1     | 2      |
| 14321  | 1     | 1      | 1     | 1      |
| 14322  | 1     | 3      | 2     | 3      |
| 14326  | 1     | 2      | 0     |        |
| 14327  | 4     | 4      | 4     | 3      |
| 14328  | 0     |        | 0     |        |
| 14330  | 1     | 0      | 0     |        |
| 14332  | 1     | 0      | 0     |        |
| 14334  | 4     | 0      | 0     |        |
| 14336  | 1     | 1      | 0     |        |
| 14337  | 1     | 1      | 1     | 1      |
| 14339  | 0     |        | 0     |        |
| 14340  | 3     | 2      | 2     | 2      |
| 14341  | 0     |        | 0     |        |
| 14344  | 1     | 0      | 0     |        |
| 14345  | 1     | 1      | 0     |        |
| 14346  | 0     |        | 0     |        |
| 14348  | 0     |        | 2     | 1      |
| 14349  | 1     | 0      | 1     | 0      |
| 14358  | 1     | 3      | 2     | 4      |
| 14360  | 0     |        | 0     |        |
| 14362  | 0     |        | 0     |        |
| 14366  | 2     | 1      | 0     |        |

| respid | Q20_1 | Q20a_1 | Q21_1 | Q21a_1 |
|--------|-------|--------|-------|--------|
| 14367  | 4     | 2      | 0     |        |
| 14369  | 4     | 2      | 3     | 2      |
| 14371  | 0     |        | 0     |        |
| 14372  | 0     |        | 0     |        |
| 14374  | 0     |        | 1     | 1      |
| 14376  | 3     | 2      | 1     | 1      |
| 14377  | 0     |        | 0     |        |
| 14378  | 1     | 0      | 0     |        |
| 14379  | 1     | 0      | 1     | 0      |
| 14381  | 0     |        | 0     |        |
| 14383  | 3     | 2      | 3     | 2      |
| 14384  | 3     | 2      | 2     | 1      |
| 14385  | 4     | 3      | 4     | 4      |
| 14386  | 2     | 2      | 1     | 2      |
| 14390  | 0     |        | 1     | 1      |
| 14391  | 1     | 0      | 0     |        |
| 14392  | 0     |        | 0     |        |
| 14393  | 2     | 4      | 4     | 4      |
| 14394  | 0     |        | 0     |        |
| 14395  | 0     |        | 0     |        |
| 14396  | 0     |        | 0     |        |
| 14397  | 0     |        | 1     | 2      |
| 14398  | 1     | 1      | 0     |        |
| 14399  | 3     | 0      | 3     | 0      |
| 14400  | 2     | 0      | 1     | 0      |
| 14403  | 1     | 0      | 0     |        |
| 14404  | 1     | 1      | 1     | 1      |
| 14405  | 0     |        | 1     | 0      |
| 14407  | 0     |        | 0     |        |
| 14408  | 4     | 3      | 1     | 1      |
| 14410  | 4     | 3      | 5     | 2      |
| 14415  | 1     | 0      | 1     | 0      |

| respid | Q20_1 | Q20a_1 | Q21_1 | Q21a_1 |
|--------|-------|--------|-------|--------|
| 14419  | 1     | 2      | 0     |        |
| 14420  | 0     |        | 0     |        |
| 14421  | 0     |        | 0     |        |
| 14423  | 0     |        | 0     |        |
| 14424  | 0     |        | 0     |        |
| 14425  | 2     | 1      | 1     | 1      |
| 14426  | 0     |        | 0     |        |
| 14427  | 1     | 0      | 0     |        |
| 14428  | 3     | 3      | 4     | 4      |
| 14431  | 3     | 1      | 2     | 1      |
| 14433  | 0     |        | 1     | 0      |
| 14434  | 1     | 1      | 0     |        |
| 14435  | 0     |        | 1     | 0      |
| 14436  | 4     | 3      | 3     | 2      |
| 14438  | 0     |        | 0     |        |
| 14442  | 2     | 3      | 3     | 3      |
| 14447  | 1     | 1      | 0     |        |
| 14448  | 0     |        | 0     |        |
| 14450  | 0     |        | 1     | 1      |
| 14451  | 1     | 0      | 1     | 1      |
| 14454  | 2     | 2      | 1     | 2      |
| 14455  | 0     |        | 0     |        |
| 14456  | 2     | 2      | 1     | 1      |
| 14457  | 5     | 3      | 3     | 4      |
| 14458  | 5     | 2      | 4     | 4      |
| 14459  | 0     |        | 0     |        |
| 14460  | 0     |        | 0     |        |
| 14464  | 1     | 1      | 1     | 1      |
| 14465  | 3     | 1      | 1     | 1      |
| 14466  | 0     |        | 0     |        |
| 14467  | 3     | 0      | 0     |        |
| 14470  | 1     | 1      | 0     |        |



| respid | Q20_1 | Q20a_1 | Q21_1 | Q21a_1 |
|--------|-------|--------|-------|--------|
| 14472  | 0     |        | 0     |        |
| 14473  | 0     |        | 0     |        |
| 14474  | 0     |        | 0     |        |
| 14477  | 5     | 1      | 0     |        |
| 14478  | 0     |        | 0     |        |
| 14479  | 0     |        | 0     |        |
| 14484  | 1     | 0      | 0     |        |
| 14485  | 0     |        | 0     |        |
| 14486  | 2     | 2      | 2     | 2      |
| 14487  | 0     |        | 0     |        |
| 14488  | 3     | 2      | 3     | 2      |
| 14491  | 3     | 1      | 1     | 1      |
| 14495  | 3     | 2      | 0     |        |
| 14500  | 3     | 1      | 0     |        |
| 14502  | 0     |        | 0     |        |
| 14504  | 1     | 2      | 1     | 2      |
| 14505  | 3     | 3      | 4     | 3      |
| 14507  | 0     |        | 0     |        |
| 14517  | 0     |        | 0     |        |
| 14518  | 1     | 0      | 0     |        |
| 14519  | 3     | 0      | 1     | 0      |
| 14521  | 2     | 1      | 2     | 2      |
| 14522  | 0     |        | 0     |        |
| 14526  | 1     | 0      | 0     |        |
| 14528  | 4     | 3      | 4     | 3      |
| 14529  | 0     |        | 0     |        |
| 14530  | 3     | 2      | 0     |        |
| 14531  | 3     | 4      | 3     | 4      |
| 14534  | 2     | 1      | 2     | 1      |
| 14538  | 0     |        | 2     | 1      |
| 14539  | 1     | 1      | 1     | 1      |
| 14545  | 1     | 1      | 1     | 1      |

| respid | Q20_1 | Q20a_1 | Q21_1 | Q21a_1 |
|--------|-------|--------|-------|--------|
| 14546  | 1     | 1      | 1     | 1      |
| 14551  | 1     | 1      | 0     |        |
| 14553  | 1     | 3      | 1     | 3      |
| 14557  | 0     |        | 0     |        |
| 14558  | 0     |        | 0     |        |
| 14559  | 2     | 1      | 2     | 1      |
| 14560  | 2     | 2      | 0     |        |
| 14563  | 1     | 1      | 0     |        |
| 14565  | 0     |        | 0     |        |
| 14571  | 2     | 3      | 2     | 4      |
| 14572  | 0     |        | 0     |        |
| 14573  | 1     | 2      | 1     | 2      |
| 14575  | 2     | 3      | 2     | 3      |
| 14576  | 2     | 2      | 2     | 2      |
| 14578  | 4     | 2      | 1     | 2      |
| 14579  | 0     |        | 0     |        |
| 14580  | 0     |        | 1     | 1      |
| 14582  | 1     | 1      | 1     | 1      |
| 14585  | 2     | 2      | 1     | 1      |
| 14588  | 0     |        | 0     |        |
| 14590  | 2     | 1      | 2     | 2      |
| 14592  | 3     | 3      | 3     | 3      |
| 14593  | 0     |        | 0     |        |
| 14595  | 1     | 2      | 0     |        |
| 14597  | 3     | 2      | 1     | 1      |
| 14600  | 1     | 1      | 0     |        |
| 14602  | 1     | 3      | 1     | 3      |
| 14604  | 0     |        | 0     |        |
| 14605  | 0     |        | 1     | 0      |
| 14609  | 1     | 1      | 1     | 1      |
| 14610  | 0     |        | 0     |        |
| 14611  | 1     | 0      | 0     |        |

| respid | Q20_1 | Q20a_1 | Q21_1 | Q21a_1 |
|--------|-------|--------|-------|--------|
| 14612  | 3     | 3      | 0     |        |
| 14614  | 1     | 1      | 1     | 1      |
| 14615  | 0     |        | 3     | 0      |
| 14618  | 5     | 4      | 3     | 3      |
| 14621  | 0     |        | 0     |        |
| 14624  | 1     | 0      | 1     | 0      |
| 14626  | 0     |        | 0     |        |
| 14627  | 2     | 1      | 1     | 2      |
| 14628  | 4     | 1      | 2     | 4      |
| 14631  | 0     |        | 0     |        |
| 14633  | 2     | 1      | 2     | 1      |
| 14642  | 2     | 2      | 2     | 2      |
| 14647  | 0     |        | 0     |        |
| 14658  | 2     | 1      | 2     | 2      |
| 14659  | 3     | 2      | 2     | 2      |
| 14660  | 0     |        | 0     |        |
| 14661  | 0     |        | 0     |        |
| 14662  | 4     | 4      | 3     | 4      |
| 14663  | 0     |        | 0     |        |
| 14670  | 3     | 4      | 2     | 4      |
| 14671  | 0     |        | 0     |        |
| 14672  | 1     | 2      | 1     | 2      |
| 14675  | 0     |        | 0     |        |
| 14676  | 0     |        | 0     |        |
| 14677  | 4     | 3      | 3     | 2      |
| 14678  | 0     |        | 0     |        |
| 14681  | 2     | 2      | 2     | 2      |
| 14684  | 0     |        | 0     |        |
| 14688  | 0     |        | 0     |        |
| 14690  | 1     | 1      | 1     | 1      |
| 14694  | 2     | 2      | 2     | 2      |
| 14696  | 1     | 1      | 1     | 1      |

| respid | Q20_1 | Q20a_1 | Q21_1 | Q21a_1 |
|--------|-------|--------|-------|--------|
| 14700  | 0     |        | 0     |        |
| 14701  | 3     | 2      | 2     | 2      |
| 14703  | 2     | 1      | 2     | 2      |
| 14707  | 3     | 2      | 0     |        |
| 14711  | 2     | 1      | 2     | 2      |
| 14714  | 0     |        | 0     |        |
| 14715  | 4     | 4      | 3     | 4      |
| 14716  | 0     |        | 0     |        |
| 14720  | 0     |        | 0     |        |
| 14725  | 0     |        | 0     |        |
| 14726  | 2     | 0      | 1     | 1      |
| 14734  | 0     |        | 0     |        |
| 14735  | 0     |        | 0     |        |
| 14736  | 2     | 1      | 2     | 1      |
| 14740  | 0     |        | 0     |        |
| 14745  | 0     |        | 2     | 1      |
| 14747  | 0     |        | 1     | 0      |
| 14750  | 1     | 2      | 3     | 1      |
| 14751  | 0     |        | 0     |        |
| 14753  | 1     | 1      | 2     | 2      |
| 14756  | 5     | 4      | 4     | 4      |
| 14780  | 3     | 2      | 1     | 1      |
| 14782  | 5     | 1      | 0     |        |
| 14800  | 4     | 3      | 5     | 4      |
| 14801  | 0     |        | 0     |        |
| 14802  | 4     | 2      | 3     | 3      |
| 14805  | 3     | 1      | 2     | 1      |
| 14811  | 3     | 2      | 3     | 3      |
| 14814  | 3     | 2      | 3     | 3      |
| 14822  | 1     | 1      | 1     | 1      |
| 14827  | 0     |        | 2     | 2      |
| 14828  | 3     | 2      | 3     | 3      |

| respid | Q20_1 | Q20a_1 | Q21_1 | Q21a_1 |
|--------|-------|--------|-------|--------|
| 14830  | 0     |        | 0     |        |
| 14832  | 2     | 2      | 3     | 0      |
| 14835  | 4     | 3      | 3     | 2      |
| 14841  | 0     |        | 0     |        |
| 14849  | 2     | 1      | 1     | 1      |
| 14850  | 0     |        | 0     |        |
| 14851  | 0     |        | 0     |        |
| 14856  | 3     | 3      | 3     | 3      |
| 14862  | 2     | 1      | 2     | 1      |
| 14863  | 0     |        | 0     |        |
| 14864  | 0     |        | 0     |        |
| 14866  | 0     |        | 1     | 1      |
| 14867  | 4     | 3      | 3     | 2      |
| 14868  | 1     | 0      | 0     |        |
| 14870  | 0     |        | 0     |        |
| 14873  | 0     |        | 0     |        |
| 14878  | 0     |        | 0     |        |
| 14879  | 0     |        | 0     |        |
| 14881  | 3     | 3      | 3     | 3      |
| 14888  | 3     | 2      | 3     | 3      |
| 14895  | 3     | 2      | 2     | 1      |
| 14900  | 3     | 3      | 4     | 3      |
| 14912  | 0     |        | 0     |        |
| 14922  | 2     | 1      | 1     | 1      |
| 14923  | 4     | 3      | 5     | 4      |
| 14924  | 5     | 4      | 5     | 4      |
| 14925  | 3     | 2      | 3     | 3      |
| 14926  | 0     |        | 0     |        |
| 14927  | 3     | 2      | 4     | 2      |
| 14930  | 0     |        | 0     |        |
| 14937  | 3     | 3      | 3     | 2      |
| 14938  | 3     | 3      | 4     | 3      |

| respid | Q20_1 | Q20a_1 | Q21_1 | Q21a_1 |
|--------|-------|--------|-------|--------|
| 14939  | 0     |        | 0     |        |
| 14942  | 0     |        | 0     |        |
| 14943  | 0     |        | 0     |        |
| 14953  | 3     | 2      | 1     | 1      |
| 14954  | 0     |        | 0     |        |
| 14955  | 1     | 1      | 2     | 2      |
| 14957  | 3     | 1      | 1     | 2      |
| 14958  | 4     | 4      | 5     | 4      |
| 14959  | 3     | 3      | 3     | 3      |
| 14961  | 0     |        | 0     |        |
| 14963  | 3     | 3      | 3     | 3      |
| 14964  | 0     |        | 0     |        |
| 14965  | 0     |        | 0     |        |
| 14967  | 3     | 4      | 3     | 4      |
| 14970  | 4     | 4      | 5     | 4      |
| 14972  | 1     | 1      | 1     | 1      |
| 14975  | 4     | 3      | 4     | 3      |
| 14977  | 0     |        | 0     |        |
| 14982  | 2     | 1      | 0     |        |
| 14985  | 2     | 2      | 1     | 1      |
| 14986  | 0     |        | 0     |        |
| 14987  | 0     |        | 0     |        |
| 14988  | 5     | 4      | 5     | 4      |
| 14989  | 4     | 2      | 3     | 2      |
| 14993  | 2     | 1      | 3     | 2      |
| 15001  | 0     |        | 0     |        |
| 15002  | 2     | 3      | 3     | 3      |
| 15006  | 2     | 1      | 2     | 1      |
| 15007  | 1     | 1      | 1     | 1      |
| 15014  | 4     | 3      | 4     | 3      |
| 15020  | 2     | 1      | 2     | 1      |
| 15021  | 3     | 2      | 3     | 3      |

| respid | Q20_1 | Q20a_1 | Q21_1 | Q21a_1 |
|--------|-------|--------|-------|--------|
| 15023  | 4     | 3      | 3     | 4      |
| 15030  | 1     | 1      | 1     | 1      |
| 15032  | 0     |        | 0     |        |
| 15033  | 1     | 1      | 1     | 1      |
| 15034  | 3     | 1      | 3     | 1      |
| 15035  | 2     | 1      | 1     | 1      |
| 15037  | 0     |        | 0     |        |
| 15039  | 3     | 2      | 3     | 3      |
| 15040  | 0     |        | 0     |        |
| 15042  | 3     | 3      | 2     | 2      |
| 15044  | 0     |        | 0     |        |
| 15045  | 0     |        | 0     |        |
| 15046  | 0     |        | 0     |        |
| 15052  | 3     | 4      | 4     | 4      |
| 15058  | 0     |        | 0     |        |
| 15063  | 3     | 2      | 3     | 1      |
| 15066  | 1     | 1      | 0     |        |
| 15069  | 0     |        | 0     |        |
| 15071  | 3     | 2      | 1     | 4      |
| 15076  | 2     | 3      | 2     | 2      |
| 15078  | 0     |        | 0     |        |
| 15087  | 4     | 2      | 2     | 2      |
| 15090  | 3     | 3      | 3     | 3      |
| 15091  | 0     |        | 0     |        |
| 15092  | 0     |        | 0     |        |
| 15096  | 1     | 1      | 1     | 1      |
| 15106  | 3     | 2      | 3     | 2      |
| 15108  | 0     |        | 0     |        |
| 15113  | 0     |        | 0     |        |
| 15116  | 0     |        | 0     |        |
| 15119  | 2     | 1      | 1     | 1      |
| 15120  | 0     |        | 0     |        |

| respid | Q20_1 | Q20a_1 | Q21_1 | Q21a_1 |
|--------|-------|--------|-------|--------|
| 15121  | 3     | 2      | 2     | 2      |
| 15123  | 0     |        | 0     |        |
| 15124  | 1     | 2      | 0     |        |
| 15128  | 0     |        | 0     |        |
| 15131  | 0     |        | 0     |        |
| 15136  | 0     |        | 0     |        |
| 15137  | 1     | 1      | 1     | 1      |
| 15141  | 3     | 2      | 1     | 1      |
| 15144  | 0     |        | 0     |        |
| 15147  | 2     | 2      | 2     | 2      |
| 15151  | 2     | 1      | 1     | 1      |
| 15154  | 4     | 3      | 3     | 2      |
| 15157  | 0     |        | 0     |        |
| 15164  | 3     | 3      | 3     | 3      |
| 15168  | 0     |        | 0     |        |
| 15169  | 1     | 1      | 2     | 1      |
| 15172  | 4     | 3      | 4     | 3      |
| 15177  | 3     | 3      | 2     | 3      |
| 15178  | 0     |        | 0     |        |
| 15180  | 1     | 1      | 1     | 1      |
| 15181  | 0     |        | 0     |        |
| 15182  | 3     | 2      | 2     | 2      |
| 15183  | 0     |        | 0     |        |
| 15188  | 0     |        | 0     |        |
| 15190  | 3     | 4      | 3     | 2      |
| 15195  | 0     |        | 0     |        |
| 15201  | 3     | 4      | 4     | 4      |
| 15203  | 0     |        | 0     |        |
| 15204  | 0     |        | 0     |        |
| 15207  | 0     |        | 0     |        |
| 15208  | 3     | 3      | 3     | 4      |
| 15209  | 2     | 1      | 1     | 1      |



| respid | Q20_1 | Q20a_1 | Q21_1 | Q21a_1 |
|--------|-------|--------|-------|--------|
| 15212  | 0     |        | 0     |        |
| 15213  | 1     | 0      | 1     | 1      |
| 15219  | 1     | 1      | 0     |        |
| 15220  | 3     | 2      | 2     | 2      |
| 15221  | 0     |        | 1     | 1      |
| 15223  | 1     | 1      | 1     | 1      |
| 15224  | 1     | 1      | 0     |        |
| 15225  | 1     | 1      | 0     |        |
| 15226  | 1     | 1      | 0     |        |
| 15230  | 0     |        | 0     |        |
| 15231  | 2     | 4      | 4     | 4      |
| 15232  | 0     |        | 0     |        |
| 15237  | 0     |        | 0     |        |
| 15239  | 0     |        | 0     |        |
| 15241  | 0     |        | 0     |        |
| 15242  | 2     | 1      | 2     | 2      |
| 15247  | 0     |        | 0     |        |
| 15248  | 0     |        | 0     |        |
| 15251  | 0     |        | 0     |        |
| 15257  | 0     |        | 0     |        |
| 15260  | 0     |        | 0     |        |
| 15261  | 4     | 4      | 3     | 3      |
| 15262  | 4     | 3      | 3     | 2      |
| 15263  | 3     | 3      | 0     |        |
| 15265  | 0     |        | 0     |        |
| 15266  | 1     | 0      | 1     | 0      |
| 15268  | 0     |        | 3     | 2      |
| 15269  | 3     | 2      | 0     |        |
| 15270  | 5     | 4      | 5     | 4      |
| 15273  | 2     | 1      | 2     | 1      |
| 15276  | 4     | 4      | 4     | 4      |
| 15277  | 0     |        | 0     |        |

| respid | Q20_1 | Q20a_1 | Q21_1 | Q21a_1 |
|--------|-------|--------|-------|--------|
| 15282  | 4     | 4      | 0     |        |
| 15284  | 4     | 3      | 3     | 3      |
| 15285  | 1     | 1      | 0     |        |
| 15286  | 3     | 3      | 3     | 4      |
| 15288  | 1     | 2      | 1     | 2      |
| 15292  | 4     | 4      | 4     | 2      |
| 15296  | 1     | 0      | 0     |        |
| 15297  | 1     | 1      | 1     | 1      |
| 15298  | 0     |        | 0     |        |
| 15301  | 0     |        | 0     |        |
| 15302  | 0     |        | 0     |        |
| 15305  | 2     | 1      | 1     | 1      |
| 15307  | 1     | 1      | 0     |        |
| 15308  | 2     | 1      | 0     |        |
| 15309  | 0     |        | 1     | 0      |
| 15311  | 1     | 0      | 1     | 0      |
| 15315  | 0     |        | 0     |        |
| 15316  | 0     |        | 0     |        |
| 15318  | 0     |        | 0     |        |
| 15321  | 4     | 3      | 5     | 4      |
| 15322  | 0     |        | 0     |        |
| 15324  | 1     | 0      | 0     |        |
| 15326  | 0     |        | 0     |        |
| 15327  | 1     | 0      | 1     | 1      |
| 15328  | 0     |        | 1     | 3      |
| 15330  | 0     |        | 0     |        |
| 15332  | 0     |        | 0     |        |
| 15333  | 0     |        | 0     |        |
| 15334  | 4     | 2      | 0     |        |
| 15336  | 4     | 4      | 4     | 4      |
| 15337  | 0     |        | 0     |        |
| 15338  | 0     |        | 0     |        |

| respid | Q20_1 | Q20a_1 | Q21_1 | Q21a_1 |
|--------|-------|--------|-------|--------|
| 15339  | 5     | 4      | 3     | 4      |
| 15341  | 1     | 0      | 0     |        |
| 15344  | 0     |        | 0     |        |
| 15345  | 0     |        | 0     |        |
| 15350  | 0     |        | 0     |        |
| 15351  | 0     |        | 0     |        |
| 15352  | 1     | 0      | 0     |        |
| 15372  | 0     |        | 0     |        |
| 15373  | 2     | 3      | 4     | 4      |
| 15376  | 0     |        | 0     |        |
| 15377  | 0     |        | 1     | 1      |
| 15382  | 0     |        | 0     |        |
| 15383  | 1     | 2      | 2     | 1      |
| 15385  | 2     | 3      | 3     | 2      |
| 15390  | 0     |        | 0     |        |
| 15399  | 0     |        | 0     |        |
| 15404  | 2     | 2      | 1     | 1      |
| 15410  | 1     | 1      | 0     |        |
| 15411  | 2     | 2      | 2     | 2      |
| 15412  | 1     | 1      | 0     |        |
| 15413  | 3     | 2      | 2     | 1      |
| 15414  | 0     |        | 0     |        |
| 15417  | 0     |        | 0     |        |
| 15418  | 1     | 1      | 1     | 0      |
| 15421  | 0     |        | 0     |        |
| 15423  | 1     | 0      | 1     | 2      |
| 15425  | 1     | 0      | 0     |        |
| 15426  | 3     | 3      | 3     | 4      |
| 15430  | 0     |        | 0     |        |
| 15431  | 3     | 3      | 2     | 3      |
| 15435  | 0     |        | 0     |        |
| 15436  | 0     |        | 0     |        |

| respid | Q20_1 | Q20a_1 | Q21_1 | Q21a_1 |
|--------|-------|--------|-------|--------|
| 15437  | 0     |        | 0     |        |
| 15438  | 3     | 0      | 0     |        |
| 15439  | 2     | 2      | 0     |        |
| 15441  | 5     | 3      | 4     | 4      |
| 15443  | 0     |        | 1     | 1      |
| 15446  | 1     | 1      | 0     |        |
| 15449  | 1     | 2      | 2     | 2      |
| 15451  | 4     | 3      | 3     | 2      |
| 15452  | 3     | 4      | 3     | 3      |
| 15454  | 0     |        | 1     | 1      |
| 15456  | 4     | 3      | 1     | 2      |
| 15457  | 0     |        | 0     |        |
| 15458  | 3     | 2      | 2     | 2      |
| 15462  | 1     | 1      | 4     | 3      |
| 15467  | 3     | 2      | 3     | 2      |
| 15470  | 3     | 2      | 3     | 2      |
| 15472  | 0     |        | 1     | 1      |
| 15476  | 1     | 1      | 0     |        |
| 15477  | 0     |        | 0     |        |
| 15488  | 2     | 1      | 0     |        |
| 15489  | 2     | 2      | 1     | 1      |
| 15490  | 0     |        | 0     |        |
| 15496  | 1     | 2      | 1     | 1      |
| 15497  | 2     | 2      | 3     | 3      |
| 15498  | 0     |        | 0     |        |
| 15509  | 3     | 2      | 3     | 3      |
| 15510  | 0     |        | 0     |        |
| 15516  | 1     | 2      | 0     |        |
| 15519  | 0     |        | 0     |        |
| 15520  | 0     |        | 1     | 0      |
| 15524  | 4     | 2      | 0     |        |
| 15525  | 0     |        | 0     |        |

| respid | Q20_1 | Q20a_1 | Q21_1 | Q21a_1 |
|--------|-------|--------|-------|--------|
| 15526  | 1     | 0      | 1     | 2      |
| 15531  | 1     | 1      | 1     | 2      |
| 15532  | 3     | 2      | 3     | 2      |
| 15534  | 3     | 3      | 3     | 4      |
| 15535  | 4     | 3      | 4     | 3      |
| 15539  | 1     | 2      | 0     |        |
| 15550  | 0     |        | 0     |        |
| 15556  | 0     |        | 0     |        |
| 15558  | 4     | 3      | 4     | 3      |
| 15565  | 1     | 0      | 0     |        |
| 15567  | 3     | 3      | 3     | 3      |
| 15568  | 4     | 3      | 3     | 3      |
| 15571  | 4     | 2      | 3     | 2      |
| 15573  | 1     | 0      | 0     |        |
| 15574  | 4     | 3      | 4     | 3      |
| 15576  | 0     |        | 0     |        |
| 15587  | 1     | 1      | 2     | 2      |
| 15588  | 3     | 2      | 4     | 3      |
| 15593  | 0     |        | 0     |        |
| 15597  | 1     | 1      | 0     |        |
| 15598  | 3     | 2      | 0     |        |
| 15599  | 2     | 0      | 2     | 1      |
| 15601  | 0     |        | 0     |        |
| 15604  | 0     |        | 0     |        |
| 15611  | 1     | 0      | 0     |        |
| 15613  | 1     | 0      | 0     |        |
| 15614  | 0     |        | 1     | 1      |
| 15617  | 1     | 1      | 3     | 0      |
| 15622  | 0     |        | 0     |        |
| 15623  | 1     | 1      | 0     |        |
| 15625  | 3     | 3      | 3     | 3      |
| 15627  | 0     |        | 0     |        |

| respid | Q20_1 | Q20a_1 | Q21_1 | Q21a_1 |
|--------|-------|--------|-------|--------|
| 15628  | 0     |        | 0     |        |
| 15633  | 2     | 2      | 3     | 2      |
| 15634  | 0     |        | 0     |        |
| 15637  | 0     |        | 0     |        |
| 15644  | 2     | 1      | 1     | 1      |
| 15645  | 1     | 1      | 0     |        |
| 15649  | 0     |        | 0     |        |
| 15650  | 0     |        | 0     |        |
| 15651  | 1     | 0      | 0     |        |
| 15657  | 4     | 4      | 3     | 4      |
| 15658  | 0     |        | 0     |        |
| 15660  | 1     | 1      | 1     | 1      |
| 15667  | 0     |        | 0     |        |
| 15671  | 2     | 0      | 0     |        |
| 15679  | 3     | 3      | 1     | 2      |
| 15712  | 0     |        | 0     |        |
| 15715  | 2     | 1      | 0     |        |
| 15749  | 3     | 1      | 0     |        |
| 15754  | 1     | 1      | 0     |        |
| 15756  | 2     | 3      | 2     | 3      |
| 15773  | 0     |        | 0     |        |
| 15774  | 1     | 0      | 0     |        |
| 15776  | 3     | 3      | 4     | 2      |
| 15777  | 3     | 2      | 3     | 2      |
| 15779  | 0     |        | 0     |        |
| 15780  | 1     | 0      | 1     | 1      |
| 15792  | 1     | 1      | 1     | 1      |
| 15793  | 3     | 2      | 3     | 3      |
| 15796  | 0     |        | 0     |        |
| 15798  | 0     |        | 0     |        |
| 15809  | 1     | 1      | 1     | 2      |
| 15810  | 0     |        | 0     |        |

| respid | Q20_1 | Q20a_1 | Q21_1 | Q21a_1 |
|--------|-------|--------|-------|--------|
| 15815  | 0     |        | 0     |        |
| 15816  | 0     |        | 0     |        |
| 15817  | 0     |        | 0     |        |
| 15821  | 2     | 2      | 2     | 2      |
| 15823  | 2     | 2      | 2     | 2      |
| 15834  | 0     |        | 4     | 4      |
| 15835  | 0     |        | 0     |        |
| 15836  | 0     |        | 0     |        |
| 15837  | 1     | 0      | 0     |        |
| 15839  | 0     |        | 0     |        |
| 15840  | 0     |        | 0     |        |
| 15844  | 0     |        | 0     |        |
| 15845  | 1     | 0      | 0     |        |
| 15847  | 3     | 2      | 3     | 3      |
| 15848  | 0     |        | 1     | 0      |
| 15849  | 0     |        | 0     |        |
| 15857  | 1     | 1      | 1     | 1      |
| 15858  | 1     | 1      | 1     | 1      |
| 15862  | 3     | 4      | 4     | 3      |
| 15866  | 0     |        | 0     |        |
| 15870  | 0     |        | 0     |        |
| 15871  | 1     | 1      | 1     | 2      |
| 15872  | 0     |        | 0     |        |
| 15873  | 2     | 1      | 0     |        |
| 15874  | 0     |        | 0     |        |
| 15875  | 3     | 3      | 4     | 3      |
| 15876  | 2     | 1      | 2     | 2      |
| 15882  | 1     | 3      | 1     | 3      |
| 15884  | 4     | 1      | 1     | 0      |
| 15890  | 0     |        | 0     |        |
| 15892  | 1     | 1      | 1     | 2      |
| 15908  | 0     |        | 0     |        |

| respid | Q20_1 | Q20a_1 | Q21_1 | Q21a_1 |
|--------|-------|--------|-------|--------|
| 15914  | 0     |        | 0     |        |
| 15932  | 2     | 2      | 2     | 2      |
| 15933  | 2     | 2      | 1     | 2      |
| 15938  | 1     | 0      | 1     | 0      |
| 15940  | 3     | 2      | 3     | 4      |
| 15945  | 1     | 1      | 0     |        |
| 15947  | 3     | 3      | 0     |        |
| 15950  | 0     |        | 0     |        |
| 15951  | 2     | 2      | 1     | 1      |
| 15952  | 3     | 3      | 3     | 2      |
| 15953  | 3     | 1      | 0     |        |
| 15954  | 3     | 2      | 0     |        |
| 15957  | 3     | 2      | 4     | 4      |
| 15965  | 4     | 3      | 4     | 3      |
| 15966  | 0     |        | 0     |        |
| 15967  | 0     |        | 0     |        |
| 15968  | 3     | 3      | 2     | 3      |
| 15970  | 1     | 0      | 0     |        |
| 15973  | 0     |        | 0     |        |
| 15974  | 0     |        | 0     |        |
| 15975  | 0     |        | 0     |        |
| 15980  | 4     | 3      | 4     | 2      |
| 15984  | 0     |        | 0     |        |
| 15985  | 2     | 1      | 2     | 2      |
| 15994  | 0     |        | 0     |        |
| 15995  | 0     |        | 0     |        |
| 16000  | 0     |        | 0     |        |
| 16004  | 0     |        | 0     |        |
| 16005  | 0     |        | 0     |        |
| 16006  | 0     |        | 0     |        |
| 16009  | 0     |        | 1     | 0      |
| 16017  | 0     |        | 0     |        |



| respid | Q20_1 | Q20a_1 | Q21_1 | Q21a_1 |
|--------|-------|--------|-------|--------|
| 16019  | 1     | 1      | 1     | 1      |
| 16021  | 3     | 2      | 2     | 2      |
| 16024  | 0     |        | 1     | 0      |
| 16026  | 3     | 2      | 2     | 2      |
| 16029  | 0     |        | 0     |        |
| 16031  | 1     | 1      | 4     | 3      |
| 16037  | 3     | 1      | 0     |        |
| 16043  | 0     |        | 0     |        |
| 16044  | 1     | 0      | 1     | 0      |
| 16047  | 2     | 2      | 3     | 2      |
| 16048  | 3     | 2      | 4     | 3      |
| 16049  | 0     |        | 0     |        |
| 16051  | 0     |        | 0     |        |
| 16053  | 1     | 1      | 1     | 0      |
| 16054  | 3     | 1      | 0     |        |
| 16069  | 1     | 1      | 1     | 1      |
| 16070  | 1     | 1      | 1     | 1      |
| 16074  | 0     |        | 0     |        |
| 16076  | 0     |        | 0     |        |
| 16078  | 0     |        | 0     |        |
| 16081  | 0     |        | 1     | 0      |
| 16085  | 0     |        | 0     |        |
| 16088  | 1     | 0      | 0     |        |
| 16091  | 0     |        | 0     |        |
| 16092  | 0     |        | 1     | 1      |
| 16093  | 4     | 1      | 1     | 1      |
| 16097  | 0     |        | 0     |        |
| 16100  | 1     | 0      | 0     |        |
| 16101  | 2     | 1      | 0     |        |
| 16105  | 0     |        | 0     |        |
| 16118  | 2     | 2      | 2     | 3      |
| 16129  | 1     | 0      | 0     |        |

| respid | Q20_1 | Q20a_1 | Q21_1 | Q21a_1 |
|--------|-------|--------|-------|--------|
| 16130  | 2     | 1      | 0     |        |
| 16131  | 2     | 3      | 3     | 3      |
| 16136  | 0     |        | 0     |        |
| 16137  | 0     |        | 0     |        |
| 16138  | 1     | 2      | 1     | 2      |
| 16139  | 1     | 1      | 0     |        |
| 16140  | 0     |        | 0     |        |
| 16145  | 1     | 1      | 1     | 1      |
| 16150  | 0     |        | 0     |        |
| 16151  | 3     | 1      | 0     |        |
| 16153  | 0     |        | 0     |        |
| 16164  | 4     | 1      | 0     |        |
| 16168  | 3     | 2      | 2     | 1      |
| 16173  | 3     | 2      | 1     | 2      |
| 16174  | 0     |        | 0     |        |
| 16177  | 1     | 1      | 2     | 1      |
| 16185  | 0     |        | 0     |        |
| 16189  | 1     | 2      | 0     |        |
| 16192  | 0     |        | 0     |        |
| 16193  | 0     |        | 0     |        |
| 16194  | 1     | 1      | 1     | 2      |
| 16196  | 0     |        | 0     |        |
| 16202  | 2     | 2      | 2     | 2      |
| 16205  | 2     | 1      | 3     | 2      |
| 16206  | 0     |        | 0     |        |
| 16208  | 0     |        | 0     |        |
| 16211  | 1     | 2      | 1     | 1      |
| 16212  | 1     | 0      | 0     |        |
| 16215  | 0     |        | 0     |        |
| 16217  | 1     | 0      | 1     | 0      |
| 16221  | 1     | 0      | 0     |        |
| 16226  | 1     | 2      | 1     | 1      |

| respid | Q20_1 | Q20a_1 | Q21_1 | Q21a_1 |
|--------|-------|--------|-------|--------|
| 16228  | 1     | 1      | 0     |        |
| 16229  | 1     | 0      | 0     |        |
| 16230  | 0     |        | 0     |        |
| 16231  | 4     | 4      | 3     | 2      |
| 16232  | 1     | 1      | 1     | 1      |
| 16234  | 2     | 1      | 0     |        |
| 16235  | 2     | 2      | 3     | 2      |
| 16236  | 3     | 0      | 4     | 2      |
| 16237  | 0     |        | 0     |        |
| 16238  | 1     | 2      | 0     |        |
| 16239  | 0     |        | 0     |        |
| 16243  | 1     | 0      | 1     | 1      |
| 16248  | 1     | 2      | 3     | 3      |
| 16249  | 0     |        | 0     |        |
| 16251  | 0     |        | 0     |        |
| 16263  | 3     | 0      | 0     |        |
| 16265  | 4     | 2      | 3     | 1      |
| 16269  | 1     | 0      | 0     |        |
| 16272  | 1     | 2      | 1     | 1      |
| 16273  | 0     |        | 0     |        |
| 16281  | 0     |        | 0     |        |
| 16282  | 0     |        | 0     |        |
| 16287  | 3     | 2      | 0     |        |
| 16290  | 0     |        | 0     |        |
| 16294  | 2     | 1      | 1     | 0      |
| 16295  | 0     |        | 0     |        |
| 16296  | 1     | 0      | 0     |        |
| 16299  | 2     | 2      | 3     | 3      |
| 16302  | 1     | 0      | 1     | 0      |
| 16303  | 1     | 1      | 0     |        |
| 16304  | 0     |        | 0     |        |
| 16306  | 1     | 0      | 0     |        |

| respid | Q20_1 | Q20a_1 | Q21_1 | Q21a_1 |
|--------|-------|--------|-------|--------|
| 16318  | 3     | 1      | 0     |        |
| 16320  | 3     | 1      | 1     | 1      |
| 16321  | 1     | 1      | 0     |        |
| 16322  | 5     | 1      | 5     | 1      |
| 16324  | 1     | 0      | 0     |        |
| 16326  | 1     | 1      | 0     |        |
| 16328  | 0     |        | 0     |        |
| 16336  | 1     | 1      | 1     | 2      |
| 16341  | 1     | 0      | 0     |        |
| 16342  | 0     |        | 0     |        |
| 16343  | 2     | 1      | 1     | 1      |
| 16345  | 3     | 1      | 0     |        |
| 16349  | 1     | 1      | 2     | 1      |
| 16355  | 3     | 1      | 3     | 2      |
| 16364  | 1     | 2      | 2     | 2      |
| 16374  | 0     |        | 0     |        |
| 16375  | 0     |        | 0     |        |
| 16376  | 4     | 2      | 2     | 2      |
| 16393  | 2     | 1      | 1     | 1      |
| 16394  | 2     | 1      | 1     | 1      |
| 16395  | 0     |        | 0     |        |
| 16397  | 1     | 1      | 1     | 1      |
| 16398  | 1     | 2      | 2     | 2      |
| 16402  | 1     | 1      | 0     |        |
| 16405  | 1     | 1      | 0     |        |
| 16416  | 1     | 1      | 0     |        |
| 16422  | 2     | 2      | 2     | 2      |
| 16429  | 3     | 0      | 0     |        |
| 16430  | 1     | 0      | 0     |        |
| 16432  | 2     | 2      | 2     | 2      |
| 16433  | 3     | 1      | 0     |        |
| 16434  | 0     |        | 0     |        |

| respid | Q20_1 | Q20a_1 | Q21_1 | Q21a_1 |
|--------|-------|--------|-------|--------|
| 16437  | 1     | 1      | 1     | 0      |
| 16439  | 0     |        | 0     |        |
| 16440  | 1     | 1      | 1     | 0      |
| 16441  | 0     |        | 0     |        |
| 16442  | 0     |        | 0     |        |
| 16450  | 0     |        | 0     |        |
| 16451  | 0     |        | 0     |        |
| 16452  | 3     | 2      | 1     | 1      |
| 16467  | 1     | 0      | 0     |        |
| 16468  | 0     |        | 0     |        |
| 16469  | 1     | 1      | 1     | 1      |
| 16470  | 0     |        | 0     |        |
| 16471  | 4     | 1      | 0     |        |
| 16473  | 3     | 2      | 0     |        |
| 16476  | 0     |        | 1     | 1      |
| 16478  | 1     | 0      | 0     |        |
| 16484  | 0     |        | 0     |        |
| 16499  | 1     | 1      | 0     |        |
| 16502  | 0     |        | 0     |        |
| 16505  | 0     |        | 0     |        |
| 16514  | 5     | 0      | 0     |        |
| 16515  | 1     | 2      | 1     | 2      |
| 16517  | 1     | 1      | 1     | 2      |
| 16518  | 1     | 0      | 0     |        |
| 16519  | 0     |        | 0     |        |
| 16525  | 1     | 1      | 1     | 1      |
| 16526  | 1     | 1      | 0     |        |
| 16530  | 0     |        | 0     |        |
| 16532  | 0     |        | 0     |        |
| 16536  | 0     |        | 0     |        |
| 16537  | 1     | 1      | 1     | 1      |
| 16541  | 3     | 3      | 2     | 2      |

| respid | Q20_1 | Q20a_1 | Q21_1 | Q21a_1 |
|--------|-------|--------|-------|--------|
| 16543  | 1     | 2      | 1     | 2      |
| 16544  | 0     |        | 0     |        |
| 16545  | 1     | 1      | 0     |        |
| 16546  | 3     | 2      | 0     |        |
| 16548  | 1     | 1      | 1     | 0      |
| 16552  | 0     |        | 5     | 2      |
| 16559  | 2     | 0      | 0     |        |
| 16564  | 1     | 2      | 0     |        |
| 16565  | 2     | 1      | 1     | 2      |
| 16567  | 2     | 1      | 1     | 1      |
| 16571  | 0     |        | 0     |        |
| 16572  | 1     | 2      | 0     |        |
| 16579  | 1     | 0      | 0     |        |
| 16588  | 3     | 3      | 4     | 4      |
| 16599  | 1     | 0      | 1     | 0      |
| 16605  | 0     |        | 1     | 0      |
| 16622  | 0     |        | 0     |        |
| 16635  | 0     |        | 0     |        |
| 16638  | 4     | 1      | 4     | 1      |
| 16652  | 1     | 1      | 0     |        |
| 16656  | 0     |        | 0     |        |
| 16671  | 0     |        | 0     |        |
| 16676  | 0     |        | 0     |        |
| 16678  | 1     | 1      | 1     | 1      |
| 16702  | 1     | 1      | 1     | 1      |
| 16705  | 4     | 2      | 3     | 2      |
| 16707  | 0     |        | 0     |        |
| 16711  | 1     | 1      | 1     | 1      |
| 16712  | 0     |        | 0     |        |
| 16716  | 0     |        | 0     |        |
| 16724  | 1     | 2      | 1     | 1      |
| 16727  | 1     | 1      | 1     | 1      |

| respid | Q20_1 | Q20a_1 | Q21_1 | Q21a_1 |
|--------|-------|--------|-------|--------|
| 16734  | 0     |        | 1     | 1      |
| 16740  | 0     |        | 0     |        |
| 16748  | 4     | 0      | 0     |        |
| 16759  | 0     |        | 0     |        |
| 16761  | 0     |        | 0     |        |
| 16763  | 1     | 0      | 1     | 1      |
| 16764  | 4     | 3      | 4     | 2      |
| 16766  | 0     |        | 0     |        |
| 16767  | 2     | 0      | 1     | 0      |
| 16776  | 1     | 0      | 0     |        |
| 16781  | 1     | 0      | 0     |        |
| 16793  | 3     | 2      | 2     | 2      |
| 16796  | 4     | 4      | 5     | 4      |
| 16810  | 2     | 0      | 0     |        |
| 16811  | 1     | 1      | 0     |        |
| 16813  | 0     |        | 0     |        |
| 16814  | 0     |        | 1     | 1      |
| 16831  | 1     | 1      | 1     | 1      |
| 16833  | 4     | 4      | 0     |        |
| 16839  | 1     | 1      | 2     | 0      |
| 16843  | 1     | 1      | 1     | 1      |
| 16860  | 0     |        | 0     |        |
| 16871  | 1     | 1      | 1     | 1      |
| 16881  | 1     | 2      | 1     | 1      |
| 16884  | 1     | 1      | 1     | 0      |
| 16891  | 4     | 2      | 2     | 2      |
| 16909  | 0     |        | 0     |        |
| 16911  | 0     |        | 0     |        |
| 16922  | 3     | 3      | 4     | 3      |
| 16935  | 2     | 2      | 2     | 2      |
| 16942  | 0     |        | 0     |        |
| 16950  | 0     |        | 0     |        |

| respid | Q20_1 | Q20a_1 | Q21_1 | Q21a_1 |
|--------|-------|--------|-------|--------|
| 16952  | 2     | 2      | 2     | 2      |
| 16963  | 0     |        | 2     | 2      |
| 16967  | 4     | 3      | 2     | 1      |
| 16970  | 1     | 2      | 1     | 2      |
| 16976  | 1     | 1      | 3     | 1      |
| 16982  | 1     | 1      | 1     | 1      |
| 16995  | 1     | 0      | 1     | 0      |
| 17004  | 1     | 1      | 1     | 1      |
| 17006  | 0     |        | 1     | 0      |
| 17009  | 2     | 2      | 2     | 3      |
| 17021  | 0     |        | 0     |        |
| 17040  | 3     | 2      | 1     | 1      |
| 17041  | 0     |        | 0     |        |
| 17044  | 1     | 1      | 3     | 2      |
| 17046  | 1     | 1      | 1     | 1      |
| 17052  | 1     | 1      | 1     | 1      |
| 17055  | 0     |        | 0     |        |
| 17108  | 5     | 1      | 1     | 1      |
| 17109  | 1     | 1      | 0     |        |
| 17113  | 0     |        | 0     |        |
| 17115  | 2     | 1      | 5     | 4      |
| 17132  | 0     |        | 0     |        |
| 17135  | 2     | 2      | 1     | 2      |
| 17138  | 1     | 0      | 1     | 1      |
| 17141  | 1     | 1      | 0     |        |
| 17143  | 4     | 0      | 0     |        |
| 17148  | 1     | 0      | 0     |        |
| 17151  | 1     | 1      | 0     |        |
| 17153  | 1     | 1      | 1     | 1      |
| 17154  | 0     |        | 3     | 2      |
| 17157  | 3     | 1      | 3     | 2      |
| 17160  | 1     | 0      | 0     |        |



| respid | Q20_1 | Q20a_1 | Q21_1 | Q21a_1 |
|--------|-------|--------|-------|--------|
| 17167  | 1     | 1      | 1     | 1      |
| 17169  | 4     | 1      | 1     | 0      |
| 17174  | 2     | 2      | 1     | 3      |
| 17179  | 1     | 0      | 0     |        |
| 17180  | 2     | 1      | 1     | 1      |
| 17182  | 1     | 0      | 0     |        |
| 17184  | 1     | 1      | 4     | 3      |
| 17186  | 1     | 0      | 1     | 0      |
| 17187  | 0     |        | 0     |        |
| 17192  | 2     | 1      | 4     | 2      |
| 17197  | 2     | 1      | 0     |        |
| 17217  | 1     | 1      | 1     | 1      |
| 17226  | 1     | 1      | 1     | 0      |
| 17228  | 1     | 2      | 0     |        |
| 17245  | 3     | 2      | 2     | 2      |
| 17247  | 0     |        | 0     |        |
| 17258  | 1     | 0      | 0     |        |
| 17259  | 1     | 1      | 2     | 1      |
| 17262  | 0     |        | 0     |        |
| 17265  | 0     |        | 0     |        |
| 17281  | 1     | 1      | 0     |        |
| 17282  | 1     | 2      | 2     | 2      |
| 17293  | 0     |        | 0     |        |
| 17306  | 1     | 2      | 1     | 2      |
| 17312  | 1     | 0      | 1     | 0      |
| 17318  | 1     | 1      | 1     | 1      |
| 17328  | 4     | 3      | 2     | 2      |
| 17343  | 1     | 1      | 1     | 1      |
| 17344  | 0     |        | 0     |        |
| 17348  | 2     | 0      | 0     |        |
| 17352  | 0     |        | 0     |        |
| 17355  | 1     | 1      | 0     |        |

| respid | Q20_1 | Q20a_1 | Q21_1 | Q21a_1 |
|--------|-------|--------|-------|--------|
| 17356  | 5     | 2      | 1     | 1      |
| 17359  | 1     | 0      | 2     | 0      |
| 17373  | 2     | 3      | 1     | 2      |
| 17381  | 0     |        | 0     |        |
| 17388  | 1     | 0      | 0     |        |
| 17394  | 2     | 2      | 1     | 1      |
| 17401  | 0     |        | 0     |        |
| 17403  | 0     |        | 0     |        |
| 17411  | 0     |        | 0     |        |
| 17423  | 0     |        | 0     |        |
| 17427  | 0     |        | 0     |        |
| 17433  | 1     | 0      | 0     |        |
| 17441  | 0     |        | 0     |        |
| 17442  | 3     | 2      | 1     | 0      |
| 17447  | 1     | 2      | 1     | 2      |
| 17458  | 0     |        | 0     |        |
| 17474  | 1     | 1      | 0     |        |
| 17475  | 3     | 2      | 2     | 2      |
| 17476  | 1     | 2      | 1     | 2      |
| 17480  | 1     | 0      | 0     |        |
| 17484  | 0     |        | 0     |        |
| 17490  | 0     |        | 0     |        |
| 17491  | 2     | 0      | 0     |        |
| 17500  | 1     | 0      | 0     |        |
| 17507  | 1     | 0      | 0     |        |
| 17517  | 1     | 0      | 0     |        |
| 17520  | 1     | 3      | 3     | 2      |
| 17521  | 2     | 0      | 0     |        |
| 17531  | 0     |        | 0     |        |
| 17540  | 0     |        | 0     |        |
| 17550  | 1     | 0      | 0     |        |
| 17551  | 0     |        | 0     |        |

| respid | Q20_1 | Q20a_1 | Q21_1 | Q21a_1 |
|--------|-------|--------|-------|--------|
| 17555  | 1     | 1      | 2     | 1      |
| 17556  | 1     | 0      | 0     |        |
| 17574  | 2     | 1      | 4     | 1      |
| 17575  | 1     | 1      | 0     |        |
| 17582  | 0     |        | 0     |        |
| 17587  | 0     |        | 0     |        |
| 17601  | 1     | 1      | 1     | 1      |
| 17607  | 3     | 3      | 2     | 2      |
| 17609  | 0     |        | 0     |        |
| 17611  | 0     |        | 0     |        |
| 17613  | 0     |        | 2     | 1      |
| 17615  | 0     |        | 0     |        |
| 17620  | 2     | 1      | 1     | 1      |
| 17624  | 3     | 1      | 1     | 1      |
| 17635  | 2     | 1      | 0     |        |
| 17643  | 0     |        | 0     |        |
| 17645  | 2     | 1      | 0     |        |
| 17646  | 2     | 0      | 0     |        |
| 17649  | 1     | 1      | 0     |        |
| 17658  | 1     | 0      | 0     |        |
| 17666  | 0     |        | 0     |        |
| 17670  | 1     | 0      | 0     |        |
| 17678  | 0     |        | 0     |        |
| 17679  | 1     | 1      | 0     |        |
| 17695  | 0     |        | 0     |        |
| 17697  | 3     | 1      | 2     | 1      |
| 17698  | 1     | 2      | 3     | 2      |
| 17723  | 3     | 2      | 2     | 2      |
| 17727  | 1     | 0      | 0     |        |
| 17734  | 0     |        | 0     |        |
| 17737  | 0     |        | 0     |        |
| 17748  | 2     | 1      | 0     |        |

| respid | Q20_1 | Q20a_1 | Q21_1 | Q21a_1 |
|--------|-------|--------|-------|--------|
| 17749  | 0     |        | 0     |        |
| 17754  | 3     | 2      | 3     | 3      |
| 17766  | 3     | 2      | 2     | 2      |
| 17777  | 0     |        | 0     |        |
| 17780  | 3     | 2      | 0     |        |
| 17788  | 1     | 0      | 1     | 0      |
| 17801  | 4     | 3      | 4     | 4      |
| 17803  | 0     |        | 0     |        |
| 17807  | 0     |        | 0     |        |
| 17808  | 1     | 1      | 1     | 1      |
| 17809  | 2     | 1      | 2     | 3      |
| 17821  | 0     |        | 0     |        |
| 17827  | 3     | 2      | 3     | 2      |
| 17834  | 2     | 1      | 3     | 3      |
| 17838  | 1     | 1      | 1     | 1      |
| 17842  | 0     |        | 0     |        |
| 17862  | 1     | 1      | 0     |        |
| 17863  | 0     |        | 0     |        |
| 17871  | 3     | 2      | 3     | 2      |
| 17872  | 1     | 0      | 0     |        |
| 17903  | 4     | 3      | 3     | 2      |
| 17906  | 1     | 1      | 1     | 1      |
| 17910  | 3     | 2      | 3     | 2      |
| 17922  | 1     | 1      | 1     | 1      |
| 17923  | 1     | 1      | 0     |        |
| 17925  | 3     | 2      | 3     | 2      |
| 17926  | 0     |        | 0     |        |
| 17937  | 0     |        | 0     |        |
| 17956  | 2     | 0      | 0     |        |
| 17958  | 2     | 1      | 2     | 2      |
| 17985  | 1     | 0      | 0     |        |
| 17989  | 4     | 2      | 1     | 1      |

| respid | Q20_1 | Q20a_1 | Q21_1 | Q21a_1 |
|--------|-------|--------|-------|--------|
| 17995  | 0     |        | 0     |        |
| 18000  | 1     | 0      | 0     |        |
| 18010  | 0     |        | 0     |        |
| 18015  | 0     |        | 0     |        |
| 18018  | 5     | 2      | 4     | 2      |
| 18031  | 0     |        | 0     |        |
| 18033  | 1     | 1      | 1     | 1      |
| 18036  | 1     | 0      | 0     |        |
| 18041  | 1     | 0      | 0     |        |
| 18068  | 0     |        | 0     |        |
| 18080  | 0     |        | 0     |        |
| 18081  | 1     | 1      | 1     | 0      |
| 18083  | 3     | 2      | 3     | 2      |
| 18113  | 3     | 2      | 3     | 2      |
| 18115  | 2     | 1      | 1     | 1      |
| 18117  | 4     | 3      | 4     | 3      |
| 18129  | 2     | 1      | 2     | 1      |
| 18132  | 3     | 2      | 3     | 2      |
| 18146  | 3     | 0      | 0     |        |
| 18147  | 3     | 3      | 3     | 3      |
| 18153  | 0     |        | 0     |        |
| 18154  | 1     | 2      | 0     |        |
| 18157  | 4     | 1      | 0     |        |
| 18166  | 1     | 0      | 0     |        |
| 18169  | 1     | 0      | 1     | 0      |
| 18171  | 4     | 2      | 0     |        |
| 18173  | 3     | 2      | 0     |        |
| 18204  | 0     |        | 0     |        |
| 18210  | 2     | 2      | 4     | 3      |
| 18212  | 0     |        | 0     |        |
| 18220  | 4     | 3      | 3     | 3      |
| 18221  | 0     |        | 0     |        |

| respid | Q20_1 | Q20a_1 | Q21_1 | Q21a_1 |
|--------|-------|--------|-------|--------|
| 18228  | 0     |        | 0     |        |
| 18231  | 0     |        | 0     |        |
| 18233  | 1     | 2      | 1     | 1      |
| 18235  | 1     | 1      | 0     |        |
| 18237  | 0     |        | 0     |        |
| 18250  | 1     | 1      | 0     |        |
| 18253  | 5     | 3      | 4     | 3      |
| 18264  | 1     | 0      | 0     |        |
| 18285  | 0     |        | 0     |        |
| 18287  | 0     |        | 0     |        |
| 18296  | 0     |        | 0     |        |
| 18299  | 2     | 1      | 1     | 1      |
| 18313  | 2     | 1      | 0     |        |
| 18321  | 1     | 1      | 1     | 1      |
| 18324  | 0     |        | 0     |        |
| 18329  | 0     |        | 0     |        |
| 18332  | 1     | 0      | 0     |        |
| 18339  | 3     | 2      | 3     | 2      |
| 18340  | 1     | 1      | 0     |        |
| 18348  | 0     |        | 0     |        |
| 18355  | 1     | 1      | 2     | 1      |
| 18360  | 1     | 0      | 1     | 0      |
| 18380  | 2     | 1      | 1     | 1      |
| 18403  | 2     | 2      | 2     | 1      |
| 18405  | 3     | 1      | 3     | 1      |
| 18409  | 0     |        | 0     |        |
| 18445  | 1     | 0      | 0     |        |
| 18458  | 2     | 1      | 0     |        |
| 18477  | 2     | 2      | 0     |        |
| 18481  | 1     | 0      | 1     | 0      |
| 18491  | 0     |        | 0     |        |
| 18492  | 1     | 0      | 0     |        |

| respid | Q20_1 | Q20a_1 | Q21_1 | Q21a_1 |
|--------|-------|--------|-------|--------|
| 18494  | 2     | 1      | 0     |        |
| 18495  | 0     |        | 0     |        |
| 18496  | 5     | 1      | 0     |        |
| 18507  | 2     | 1      | 2     | 2      |
| 18509  | 0     |        | 0     |        |
| 18510  | 3     | 2      | 0     |        |
| 18513  | 0     |        | 0     |        |
| 18525  | 0     |        | 0     |        |
| 18526  | 5     | 2      | 2     | 1      |
| 18527  | 3     | 2      | 4     | 3      |
| 18536  | 0     |        | 0     |        |
| 18540  | 0     |        | 0     |        |
| 18548  | 5     | 0      | 0     |        |
| 18550  | 0     |        | 0     |        |
| 18556  | 0     |        | 0     |        |
| 18561  | 0     |        | 0     |        |
| 18577  | 2     | 2      | 4     | 3      |
| 18580  | 0     |        | 0     |        |
| 18633  | 1     | 1      | 1     | 1      |
| 18635  | 1     | 0      | 1     | 1      |
| 18636  | 0     |        | 0     |        |
| 18645  | 2     | 3      | 3     | 2      |
| 18649  | 4     | 2      | 0     |        |
| 18664  | 1     | 0      | 0     |        |
| 18668  | 0     |        | 0     |        |
| 18682  | 5     | 4      | 5     | 4      |
| 18685  | 1     | 2      | 0     |        |
| 18688  | 2     | 1      | 1     | 1      |
| 18689  | 2     | 2      | 2     | 3      |
| 18693  | 3     | 2      | 3     | 3      |
| 18694  | 0     |        | 0     |        |
| 18705  | 0     |        | 0     |        |

| respid | Q20_1 | Q20a_1 | Q21_1 | Q21a_1 |
|--------|-------|--------|-------|--------|
| 18710  | 1     | 1      | 0     |        |
| 18715  | 3     | 3      | 0     |        |
| 18718  | 0     |        | 0     |        |
| 18727  | 1     | 1      | 0     |        |
| 18732  | 0     |        | 0     |        |
| 18735  | 1     | 0      | 0     |        |
| 18742  | 0     |        | 0     |        |
| 18745  | 2     | 0      | 0     |        |
| 18747  | 0     |        | 0     |        |
| 18750  | 1     | 0      | 0     |        |
| 18751  | 1     | 1      | 1     | 1      |
| 18753  | 2     | 0      | 0     |        |
| 18754  | 0     |        | 0     |        |
| 18759  | 3     | 2      | 0     |        |
| 18780  | 0     |        | 0     |        |
| 18782  | 0     |        | 0     |        |
| 18807  | 3     | 4      | 4     | 3      |
| 18815  | 0     |        | 0     |        |
| 18818  | 5     | 0      | 0     |        |
| 18820  | 1     | 1      | 0     |        |
| 18823  | 5     | 4      | 5     | 4      |
| 18825  | 2     | 0      | 0     |        |
| 18828  | 0     |        | 0     |        |
| 18832  | 2     | 1      | 1     | 0      |
| 18834  | 2     | 2      | 1     | 1      |
| 18835  | 4     | 4      | 3     | 3      |
| 18837  | 0     |        | 5     | 2      |
| 18842  | 0     |        | 0     |        |
| 18846  | 0     |        | 0     |        |
| 18855  | 1     | 1      | 0     |        |
| 18856  | 1     | 0      | 0     |        |
| 18887  | 1     | 1      | 1     | 1      |



| respid | Q20_1 | Q20a_1 | Q21_1 | Q21a_1 |
|--------|-------|--------|-------|--------|
| 18903  | 0     |        | 0     |        |
| 18906  | 2     | 2      | 2     | 1      |
| 18910  | 0     |        | 0     |        |
| 18919  | 1     | 0      | 1     | 0      |
| 18928  | 1     | 2      | 0     |        |
| 18931  | 1     | 1      | 1     | 1      |
| 18939  | 2     | 2      | 1     | 1      |
| 18946  | 2     | 1      | 1     | 1      |
| 18952  | 1     | 1      | 2     | 2      |
| 18954  | 1     | 0      | 0     |        |
| 18982  | 0     |        | 0     |        |
| 18986  | 0     |        | 0     |        |
| 18989  | 1     | 4      | 2     | 4      |
| 18990  | 1     | 0      | 0     |        |
| 18996  | 3     | 2      | 0     |        |
| 18998  | 1     | 0      | 0     |        |
| 19009  | 3     | 3      | 2     | 3      |
| 19010  | 0     |        | 0     |        |
| 19017  | 1     | 0      | 0     |        |
| 19018  | 0     |        | 0     |        |
| 19020  | 0     |        | 0     |        |
| 19027  | 3     | 2      | 1     | 1      |
| 19035  | 0     |        | 0     |        |
| 19037  | 3     | 2      | 0     |        |
| 19048  | 1     | 1      | 0     |        |
| 19051  | 0     |        | 1     | 1      |
| 19054  | 1     | 0      | 0     |        |
| 19057  | 0     |        | 0     |        |
| 19073  | 0     |        | 0     |        |
| 19075  | 0     |        | 0     |        |
| 19079  | 2     | 2      | 2     | 2      |
| 19087  | 0     |        | 0     |        |

| respid | Q20_1 | Q20a_1 | Q21_1 | Q21a_1 |
|--------|-------|--------|-------|--------|
| 19090  | 3     | 3      | 1     | 2      |
| 19093  | 1     | 1      | 0     |        |
| 19099  | 3     | 2      | 2     | 1      |
| 19100  | 1     | 0      | 0     |        |
| 19101  | 0     |        | 0     |        |
| 19105  | 2     | 1      | 0     |        |
| 19111  | 1     | 1      | 0     |        |
| 19112  | 0     |        | 0     |        |
| 19117  | 2     | 2      | 0     |        |
| 19122  | 0     |        | 0     |        |
| 19126  | 1     | 0      | 0     |        |
| 19127  | 1     | 1      | 0     |        |
| 19131  | 1     | 1      | 0     |        |
| 19134  | 1     | 0      | 0     |        |
| 19149  | 1     | 1      | 0     |        |
| 19151  | 1     | 1      | 0     |        |
| 19164  | 1     | 1      | 0     |        |
| 19166  | 2     | 1      | 1     | 1      |
| 19172  | 0     |        | 0     |        |
| 19173  | 2     | 2      | 2     | 2      |
| 19180  | 1     | 0      | 1     | 0      |
| 19185  | 2     | 1      | 0     |        |
| 19189  | 5     | 0      | 0     |        |
| 19191  | 0     |        | 0     |        |
| 19198  | 0     |        | 0     |        |
| 19203  | 1     | 0      | 0     |        |
| 19209  | 0     |        | 0     |        |
| 19210  | 0     |        | 0     |        |
| 19218  | 0     |        | 0     |        |
| 19220  | 0     |        | 0     |        |
| 19225  | 0     |        | 1     | 2      |
| 19227  | 0     |        | 0     |        |

| respid | Q20_1 | Q20a_1 | Q21_1 | Q21a_1 |
|--------|-------|--------|-------|--------|
| 19228  | 0     |        | 0     |        |
| 19243  | 2     | 1      | 0     |        |
| 19244  | 2     | 2      | 2     | 2      |
| 19246  | 2     | 1      | 0     |        |
| 19248  | 0     |        | 0     |        |
| 19249  | 1     | 0      | 0     |        |
| 19252  | 0     |        | 0     |        |
| 19255  | 0     |        | 1     | 1      |
| 19257  | 0     |        | 0     |        |
| 19274  | 0     |        | 0     |        |
| 19279  | 0     |        | 0     |        |
| 19291  | 0     |        | 0     |        |
| 19292  | 1     | 2      | 0     |        |
| 19308  | 2     | 1      | 2     | 1      |
| 19310  | 2     | 2      | 0     |        |
| 19311  | 3     | 2      | 0     |        |
| 19326  | 2     | 1      | 0     |        |
| 19327  | 0     |        | 0     |        |
| 19329  | 0     |        | 0     |        |
| 19330  | 3     | 2      | 3     | 2      |
| 19333  | 0     |        | 0     |        |
| 19336  | 1     | 0      | 0     |        |
| 19343  | 1     | 0      | 0     |        |
| 19348  | 0     |        | 0     |        |
| 19349  | 3     | 2      | 2     | 2      |
| 19352  | 4     | 3      | 4     | 3      |
| 19356  | 2     | 1      | 0     |        |
| 19357  | 1     | 1      | 0     |        |
| 19358  | 0     |        | 0     |        |
| 19367  | 2     | 2      | 3     | 2      |
| 19376  | 0     |        | 0     |        |
| 19377  | 1     | 0      | 0     |        |

| respid | Q20_1 | Q20a_1 | Q21_1 | Q21a_1 |
|--------|-------|--------|-------|--------|
| 19380  | 1     | 1      | 2     | 2      |
| 19384  | 3     | 0      | 0     |        |
| 19391  | 3     | 3      | 4     | 4      |
| 19397  | 0     |        | 0     |        |
| 19398  | 1     | 0      | 0     |        |
| 19401  | 0     |        | 0     |        |
| 19402  | 1     | 1      | 0     |        |
| 19403  | 0     |        | 0     |        |
| 19405  | 0     |        | 0     |        |
| 19407  | 0     |        | 0     |        |
| 19415  | 0     |        | 0     |        |
| 19420  | 0     |        | 0     |        |
| 19423  | 2     | 2      | 3     | 3      |
| 19424  | 2     | 1      | 2     | 2      |
| 19426  | 1     | 1      | 0     |        |
| 19429  | 0     |        | 0     |        |
| 19435  | 3     | 2      | 4     | 3      |
| 19441  | 1     | 1      | 0     |        |
| 19450  | 1     | 2      | 1     | 3      |
| 19456  | 2     | 3      | 2     | 3      |
| 19457  | 0     |        | 0     |        |
| 19463  | 0     |        | 0     |        |
| 19467  | 5     | 4      | 4     | 3      |
| 19468  | 0     |        | 0     |        |
| 19471  | 1     | 1      | 0     |        |
| 19473  | 0     |        | 0     |        |
| 19478  | 1     | 3      | 0     |        |
| 19480  | 0     |        | 0     |        |
| 19481  | 0     |        | 0     |        |
| 19484  | 0     |        | 0     |        |
| 19487  | 5     | 4      | 5     | 4      |
| 19491  | 1     | 1      | 1     | 1      |

| respid | Q20_1 | Q20a_1 | Q21_1 | Q21a_1 |
|--------|-------|--------|-------|--------|
| 19495  | 1     | 4      | 1     | 4      |
| 19498  | 1     | 1      | 1     | 1      |
| 19500  | 2     | 1      | 3     | 1      |
| 19501  | 3     | 3      | 3     | 3      |
| 19503  | 0     |        | 0     |        |
| 19506  | 0     |        | 0     |        |
| 19508  | 0     |        | 0     |        |
| 19509  | 3     | 2      | 1     | 0      |
| 19518  | 2     | 1      | 1     | 1      |
| 19520  | 1     | 2      | 1     | 1      |
| 19536  | 0     |        | 0     |        |
| 19538  | 2     | 3      | 0     |        |
| 19541  | 4     | 1      | 2     | 1      |
| 19548  | 4     | 2      | 3     | 2      |
| 19553  | 0     |        | 0     |        |
| 19556  | 0     |        | 0     |        |
| 19559  | 0     |        | 0     |        |
| 19561  | 3     | 2      | 2     | 2      |
| 19562  | 1     | 0      | 0     |        |
| 19564  | 1     | 1      | 1     | 1      |
| 19567  | 4     | 4      | 5     | 4      |
| 19571  | 3     | 3      | 2     | 2      |
| 19576  | 1     | 1      | 1     | 1      |
| 19578  | 0     |        | 0     |        |
| 19606  | 0     |        | 0     |        |
| 19607  | 0     |        | 0     |        |
| 19608  | 2     | 0      | 0     |        |
| 19612  | 3     | 3      | 2     | 2      |
| 19618  | 2     | 2      | 3     | 3      |
| 19621  | 1     | 2      | 0     |        |
| 19624  | 2     | 2      | 2     | 1      |
| 19630  | 0     |        | 0     |        |

| respid | Q20_1 | Q20a_1 | Q21_1 | Q21a_1 |
|--------|-------|--------|-------|--------|
| 19637  | 5     | 2      | 0     |        |
| 19639  | 5     | 0      | 0     |        |
| 19647  | 2     | 1      | 1     | 0      |
| 19648  | 1     | 2      | 1     | 2      |
| 19660  | 0     |        | 0     |        |
| 19662  | 2     | 3      | 2     | 3      |
| 19669  | 0     |        | 0     |        |
| 19680  | 1     | 0      | 0     |        |
| 19682  | 3     | 2      | 0     |        |
| 19686  | 0     |        | 0     |        |
| 19700  | 1     | 1      | 0     |        |
| 19701  | 0     |        | 0     |        |
| 19704  | 0     |        | 0     |        |
| 19706  | 1     | 1      | 2     | 2      |
| 19707  | 2     | 0      | 2     | 0      |
| 19717  | 2     | 3      | 3     | 3      |
| 19718  | 0     |        | 0     |        |
| 19721  | 2     | 1      | 2     | 1      |
| 19722  | 0     |        | 0     |        |
| 19729  | 0     |        | 0     |        |
| 19738  | 3     | 1      | 3     | 3      |
| 19741  | 1     | 2      | 1     | 1      |
| 19742  | 1     | 1      | 2     | 1      |
| 19747  | 1     | 0      | 0     |        |
| 19748  | 2     | 1      | 0     |        |
| 19749  | 0     |        | 0     |        |
| 19756  | 2     | 2      | 0     |        |
| 19771  | 0     |        | 0     |        |
| 19772  | 3     | 2      | 3     | 2      |
| 19775  | 0     |        | 0     |        |
| 19783  | 0     |        | 0     |        |
| 19787  | 0     |        | 0     |        |

| respid | Q20_1 | Q20a_1 | Q21_1 | Q21a_1 |
|--------|-------|--------|-------|--------|
| 19790  | 0     |        | 0     |        |
| 19797  | 4     | 2      | 0     |        |
| 19802  | 0     |        | 0     |        |
| 19808  | 2     | 2      | 0     |        |
| 19810  | 0     |        | 0     |        |
| 19811  | 0     |        | 0     |        |
| 19812  | 0     |        | 1     | 1      |
| 19821  | 2     | 2      | 3     | 2      |
| 19826  | 1     | 1      | 0     |        |
| 19827  | 0     |        | 0     |        |
| 19830  | 0     |        | 0     |        |
| 19834  | 2     | 0      | 0     |        |
| 19838  | 3     | 3      | 2     | 2      |
| 19843  | 0     |        | 0     |        |
| 19845  | 3     | 2      | 2     | 3      |
| 19846  | 0     |        | 0     |        |
| 19852  | 2     | 3      | 1     | 3      |
| 19855  | 0     |        | 0     |        |
| 19858  | 1     | 1      | 1     | 1      |
| 19861  | 3     | 2      | 2     | 2      |
| 19863  | 1     | 0      | 0     |        |
| 19868  | 2     | 1      | 2     | 1      |
| 19874  | 3     | 2      | 0     |        |
| 19876  | 0     |        | 0     |        |
| 19880  | 1     | 1      | 0     |        |
| 19885  | 3     | 0      | 0     |        |
| 19890  | 0     |        | 0     |        |
| 19894  | 0     |        | 0     |        |
| 19895  | 0     |        | 0     |        |
| 19897  | 2     | 1      | 1     | 1      |
| 19906  | 2     | 1      | 0     |        |
| 19908  | 0     |        | 0     |        |

| respid | Q20_1 | Q20a_1 | Q21_1 | Q21a_1 |
|--------|-------|--------|-------|--------|
| 19912  | 0     |        | 0     |        |
| 19913  | 2     | 0      | 2     | 1      |
| 19914  | 3     | 3      | 1     | 1      |
| 19918  | 2     | 2      | 1     | 1      |
| 19924  | 2     | 2      | 1     | 1      |
| 19936  | 0     |        | 0     |        |
| 19940  | 0     |        | 0     |        |
| 19945  | 2     | 1      | 1     | 1      |
| 19948  | 0     |        | 0     |        |
| 19959  | 1     | 0      | 0     |        |
| 19961  | 0     |        | 0     |        |
| 19962  | 2     | 1      | 1     | 1      |
| 19965  | 0     |        | 0     |        |
| 19966  | 1     | 1      | 1     | 1      |
| 19973  | 0     |        | 0     |        |
| 19981  | 3     | 1      | 1     | 1      |
| 19986  | 2     | 1      | 2     | 1      |
| 19989  | 0     |        | 0     |        |
| 19998  | 0     |        | 0     |        |
| 20001  | 2     | 0      | 0     |        |
| 20005  | 0     |        | 0     |        |
| 20013  | 4     | 3      | 4     | 3      |
| 20015  | 1     | 0      | 0     |        |
| 20017  | 3     | 2      | 0     |        |
| 20020  | 0     |        | 0     |        |
| 20021  | 0     |        | 0     |        |
| 20026  | 2     | 1      | 0     |        |
| 20028  | 0     |        | 0     |        |
| 20030  | 0     |        | 0     |        |
| 20031  | 0     |        | 0     |        |
| 20034  | 0     |        | 0     |        |
| 20035  | 0     |        | 0     |        |



| respid | Q20_1 | Q20a_1 | Q21_1 | Q21a_1 |
|--------|-------|--------|-------|--------|
| 20040  | 2     | 1      | 0     |        |
| 20045  | 0     |        | 0     |        |
| 20048  | 3     | 3      | 4     | 2      |
| 20053  | 0     |        | 0     |        |
| 20064  | 2     | 2      | 2     | 2      |
| 20071  | 1     | 0      | 0     |        |
| 20072  | 3     | 4      | 4     | 4      |
| 20076  | 0     |        | 0     |        |
| 20081  | 1     | 1      | 1     | 1      |
| 20082  | 0     |        | 1     | 1      |
| 20083  | 3     | 2      | 0     |        |
| 20088  | 1     | 0      | 1     | 0      |
| 20089  | 1     | 1      | 0     |        |
| 20099  | 0     |        | 0     |        |
| 20101  | 0     |        | 0     |        |
| 20102  | 0     |        | 0     |        |
| 20109  | 0     |        | 0     |        |
| 20118  | 1     | 1      | 0     |        |
| 20119  | 0     |        | 0     |        |
| 20124  | 0     |        | 0     |        |
| 20126  | 0     |        | 0     |        |
| 20130  | 0     |        | 0     |        |
| 20131  | 0     |        | 0     |        |
| 20134  | 2     | 2      | 3     | 3      |
| 20146  | 0     |        | 0     |        |
| 20152  | 0     |        | 0     |        |
| 20155  | 2     | 2      | 0     |        |
| 20156  | 0     |        | 0     |        |
| 20157  | 0     |        | 0     |        |
| 20164  | 0     |        | 0     |        |
| 20168  | 1     | 1      | 1     | 1      |
| 20173  | 3     | 2      | 1     | 3      |

| respid | Q20_1 | Q20a_1 | Q21_1 | Q21a_1 |
|--------|-------|--------|-------|--------|
| 20174  | 0     |        | 0     |        |
| 20175  | 4     | 4      | 3     | 3      |
| 20189  | 0     |        | 0     |        |
| 20190  | 2     | 0      | 0     |        |
| 20201  | 0     |        | 0     |        |
| 20202  | 0     |        | 0     |        |
| 20204  | 0     |        | 0     |        |
| 20206  | 2     | 1      | 0     |        |
| 20207  | 1     | 0      | 0     |        |
| 20212  | 1     | 1      | 1     | 1      |
| 20213  | 1     | 1      | 0     |        |
| 20217  | 2     | 1      | 2     | 1      |
| 20222  | 2     | 1      | 1     | 0      |
| 20227  | 0     |        | 0     |        |
| 20228  | 0     |        | 0     |        |
| 20238  | 1     | 0      | 0     |        |
| 20242  | 0     |        | 0     |        |
| 20246  | 0     |        | 0     |        |
| 20255  | 2     | 2      | 3     | 2      |
| 20256  | 2     | 1      | 3     | 3      |
| 20259  | 3     | 3      | 3     | 2      |
| 20262  | 1     | 0      | 0     |        |
| 20274  | 1     | 0      | 0     |        |
| 20283  | 2     | 2      | 2     | 2      |
| 20284  | 0     |        | 0     |        |
| 20291  | 1     | 0      | 0     |        |
| 20292  | 1     | 1      | 0     |        |
| 20293  | 1     | 1      | 0     |        |
| 20298  | 2     | 1      | 4     | 2      |
| 20301  | 0     |        | 0     |        |
| 20303  | 1     | 1      | 0     |        |
| 20309  | 0     |        | 0     |        |

| respid | Q20_1 | Q20a_1 | Q21_1 | Q21a_1 |
|--------|-------|--------|-------|--------|
| 20318  | 1     | 1      | 0     |        |
| 20324  | 5     | 1      | 0     |        |
| 20335  | 0     |        | 0     |        |
| 20336  | 0     |        | 0     |        |
| 20339  | 0     |        | 0     |        |
| 20348  | 1     | 0      | 0     |        |
| 20351  | 0     |        | 0     |        |
| 20353  | 0     |        | 0     |        |
| 20356  | 0     |        | 0     |        |
| 20357  | 0     |        | 0     |        |
| 20366  | 0     |        | 0     |        |
| 20369  | 4     | 4      | 4     | 3      |
| 20372  | 1     | 0      | 0     |        |
| 20375  | 0     |        | 0     |        |
| 20379  | 1     | 1      | 1     | 1      |
| 20380  | 3     | 0      | 0     |        |
| 20396  | 1     | 2      | 1     | 2      |
| 20398  | 2     | 1      | 1     | 1      |
| 20412  | 1     | 0      | 0     |        |
| 20415  | 0     |        | 1     | 1      |
| 20424  | 5     | 3      | 4     | 2      |
| 20434  | 0     |        | 0     |        |
| 20435  | 3     | 0      | 0     |        |
| 20440  | 0     |        | 0     |        |
| 20441  | 0     |        | 1     | 1      |
| 20445  | 0     |        | 0     |        |
| 20446  | 3     | 2      | 4     | 3      |
| 20450  | 0     |        | 0     |        |
| 20453  | 3     | 3      | 1     | 3      |
| 20458  | 0     |        | 0     |        |
| 20464  | 0     |        | 0     |        |
| 20471  | 0     |        | 0     |        |

| respid | Q20_1 | Q20a_1 | Q21_1 | Q21a_1 |
|--------|-------|--------|-------|--------|
| 20473  | 0     |        | 0     |        |
| 20474  | 0     |        | 1     | 0      |
| 20477  | 0     |        | 0     |        |
| 20479  | 0     |        | 5     | 3      |
| 20485  | 0     |        | 0     |        |
| 20487  | 0     |        | 0     |        |
| 20488  | 0     |        | 0     |        |
| 20494  | 2     | 2      | 1     | 2      |
| 20502  | 4     | 2      | 3     | 2      |
| 20503  | 5     | 3      | 0     |        |
| 20510  | 1     | 0      | 0     |        |
| 20512  | 0     |        | 0     |        |
| 20516  | 1     | 2      | 0     |        |
| 20522  | 1     | 2      | 2     | 2      |
| 20527  | 2     | 1      | 2     | 1      |
| 20529  | 4     | 2      | 1     | 1      |
| 20535  | 3     | 1      | 2     | 1      |
| 20543  | 0     |        | 0     |        |
| 20546  | 0     |        | 0     |        |
| 20548  | 0     |        | 0     |        |
| 20552  | 4     | 0      | 0     |        |
| 20556  | 2     | 1      | 0     |        |
| 20566  | 2     | 3      | 2     | 2      |
| 20576  | 1     | 1      | 1     | 1      |
| 20587  | 1     | 0      | 0     |        |
| 20589  | 0     |        | 0     |        |
| 20593  | 0     |        | 0     |        |
| 20594  | 0     |        | 0     |        |
| 20602  | 1     | 1      | 1     | 1      |
| 20607  | 0     |        | 0     |        |
| 20608  | 1     | 1      | 0     |        |
| 20611  | 1     | 1      | 0     |        |

| respid | Q20_1 | Q20a_1 | Q21_1 | Q21a_1 |
|--------|-------|--------|-------|--------|
| 20612  | 0     |        | 0     |        |
| 20615  | 0     |        | 1     | 1      |
| 20625  | 1     | 2      | 0     |        |
| 20630  | 1     | 0      | 1     | 1      |
| 20639  | 1     | 0      | 0     |        |
| 20643  | 0     |        | 0     |        |
| 20645  | 0     |        | 0     |        |
| 20647  | 0     |        | 0     |        |
| 20652  | 3     | 3      | 4     | 4      |
| 20661  | 1     | 0      | 0     |        |
| 20665  | 0     |        | 0     |        |
| 20679  | 0     |        | 0     |        |
| 20682  | 3     | 2      | 2     | 1      |
| 20683  | 0     |        | 0     |        |
| 20700  | 0     |        | 0     |        |
| 20702  | 1     | 2      | 0     |        |
| 20709  | 0     |        | 0     |        |
| 20715  | 1     | 3      | 3     | 2      |
| 20718  | 0     |        | 0     |        |
| 20722  | 0     |        | 0     |        |
| 20729  | 0     |        | 0     |        |
| 20732  | 0     |        | 0     |        |
| 20746  | 3     | 3      | 3     | 3      |
| 20747  | 0     |        | 0     |        |
| 20758  | 0     |        | 0     |        |
| 20767  | 1     | 2      | 1     | 2      |
| 20777  | 0     |        | 0     |        |
| 20778  | 2     | 0      | 0     |        |
| 20780  | 0     |        | 0     |        |
| 20800  | 1     | 0      | 0     |        |
| 20810  | 0     |        | 0     |        |
| 20814  | 1     | 1      | 1     | 1      |

| respid | Q20_1 | Q20a_1 | Q21_1 | Q21a_1 |
|--------|-------|--------|-------|--------|
| 20816  | 1     | 0      | 0     |        |
| 20832  | 2     | 4      | 0     |        |
| 20838  | 0     |        | 2     | 3      |
| 20841  | 3     | 2      | 4     | 2      |
| 20848  | 0     |        | 0     |        |
| 20850  | 0     |        | 0     |        |
| 20851  | 1     | 1      | 0     |        |
| 20861  | 1     | 0      | 0     |        |
| 20870  | 1     | 2      | 1     | 2      |
| 20880  | 0     |        | 0     |        |
| 20883  | 1     | 0      | 0     |        |
| 20894  | 2     | 1      | 0     |        |
| 20896  | 1     | 2      | 2     | 3      |
| 20901  | 2     | 2      | 3     | 3      |
| 20903  | 0     |        | 0     |        |
| 20909  | 0     |        | 0     |        |
| 20919  | 2     | 1      | 1     | 0      |
| 20925  | 0     |        | 0     |        |
| 20935  | 3     | 0      | 0     |        |
| 20939  | 1     | 1      | 0     |        |
| 20956  | 3     | 4      | 4     | 4      |
| 20970  | 1     | 1      | 0     |        |
| 20974  | 2     | 2      | 2     | 3      |
| 20975  | 0     |        | 0     |        |
| 20984  | 0     |        | 0     |        |
| 20988  | 0     |        | 0     |        |
| 20996  | 2     | 1      | 0     |        |
| 20998  | 1     | 1      | 1     | 1      |
| 21007  | 0     |        | 0     |        |
| 21008  | 0     |        | 0     |        |
| 21014  | 0     |        | 0     |        |
| 21020  | 0     |        | 0     |        |

| respid | Q20_1 | Q20a_1 | Q21_1 | Q21a_1 |
|--------|-------|--------|-------|--------|
| 21022  | 1     | 1      | 2     | 2      |
| 21024  | 0     |        | 0     |        |
| 21026  | 1     | 2      | 1     | 1      |
| 21027  | 3     | 0      | 3     | 0      |
| 21030  | 1     | 2      | 0     |        |
| 21032  | 3     | 3      | 3     | 2      |
| 21040  | 0     |        | 0     |        |
| 21045  | 1     | 0      | 0     |        |
| 21058  | 2     | 0      | 2     | 1      |
| 21064  | 0     |        | 0     |        |
| 21073  | 0     |        | 0     |        |
| 21086  | 3     | 2      | 1     | 1      |
| 21092  | 5     | 4      | 5     | 4      |
| 21096  | 2     | 3      | 3     | 3      |
| 21103  | 2     | 1      | 1     | 1      |
| 21120  | 3     | 3      | 2     | 3      |
| 21125  | 0     |        | 0     |        |
| 21126  | 0     |        | 0     |        |
| 21132  | 0     |        | 0     |        |
| 21139  | 2     | 2      | 3     | 2      |
| 21147  | 0     |        | 0     |        |
| 21148  | 2     | 1      | 0     |        |
| 21149  | 1     | 1      | 1     | 0      |
| 21164  | 0     |        | 0     |        |
| 21165  | 1     | 2      | 0     |        |
| 21171  | 1     | 1      | 1     | 1      |
| 21176  | 0     |        | 0     |        |
| 21187  | 4     | 2      | 3     | 2      |
| 21192  | 3     | 1      | 0     |        |
| 21198  | 0     |        | 0     |        |
| 21199  | 1     | 2      | 1     | 2      |
| 21206  | 2     | 2      | 1     | 1      |

| respid | Q20_1 | Q20a_1 | Q21_1 | Q21a_1 |
|--------|-------|--------|-------|--------|
| 21212  | 0     |        | 1     | 1      |
| 21216  | 0     |        | 0     |        |
| 21217  | 3     | 4      | 4     | 3      |
| 21228  | 3     | 2      | 3     | 2      |
| 21229  | 0     |        | 0     |        |
| 21230  | 2     | 2      | 0     |        |
| 21243  | 4     | 3      | 0     |        |
| 21247  | 1     | 0      | 1     | 0      |
| 21253  | 1     | 1      | 0     |        |
| 21264  | 1     | 3      | 2     | 3      |
| 21265  | 0     |        | 0     |        |
| 21273  | 2     | 1      | 1     | 0      |
| 21275  | 2     | 2      | 0     |        |
| 21278  | 0     |        | 0     |        |
| 21291  | 2     | 2      | 3     | 1      |
| 21298  | 0     |        | 0     |        |
| 21301  | 1     | 3      | 0     |        |
| 21312  | 3     | 3      | 3     | 3      |
| 21323  | 1     | 0      | 1     | 0      |
| 21325  | 3     | 1      | 1     | 1      |
| 21341  | 0     |        | 0     |        |
| 21349  | 2     | 2      | 2     | 3      |
| 21350  | 1     | 1      | 0     |        |
| 21354  | 3     | 4      | 2     | 2      |
| 21372  | 2     | 2      | 2     | 2      |
| 21373  | 2     | 1      | 1     | 1      |
| 21378  | 0     |        | 0     |        |
| 21393  | 0     |        | 0     |        |
| 21401  | 2     | 2      | 1     | 1      |
| 21405  | 1     | 0      | 0     |        |
| 21406  | 0     |        | 0     |        |
| 21407  | 1     | 1      | 0     |        |



| respid | Q20_1 | Q20a_1 | Q21_1 | Q21a_1 |
|--------|-------|--------|-------|--------|
| 21418  | 1     | 0      | 0     |        |
| 21420  | 0     |        | 0     |        |
| 21421  | 0     |        | 0     |        |
| 21446  | 4     | 2      | 2     | 2      |
| 21449  | 2     | 2      | 2     | 2      |
| 21452  | 1     | 1      | 1     | 1      |
| 21455  | 3     | 3      | 4     | 2      |
| 21469  | 0     |        | 0     |        |
| 21471  | 1     | 0      | 0     |        |
| 21472  | 0     |        | 0     |        |
| 21474  | 4     | 0      | 0     |        |
| 21479  | 3     | 2      | 0     |        |
| 21485  | 1     | 1      | 1     | 1      |
| 21512  | 0     |        | 0     |        |
| 21513  | 0     |        | 0     |        |
| 21514  | 2     | 2      | 2     | 2      |
| 21520  | 4     | 2      | 0     |        |
| 21539  | 0     |        | 0     |        |
| 21553  | 5     | 1      | 0     |        |
| 21560  | 4     | 1      | 1     | 1      |
| 21561  | 0     |        | 0     |        |
| 21563  | 2     | 2      | 1     | 1      |
| 21565  | 0     |        | 0     |        |
| 21582  | 1     | 1      | 1     | 1      |
| 21584  | 1     | 1      | 1     | 1      |
| 21585  | 2     | 2      | 2     | 2      |
| 21586  | 0     |        | 0     |        |
| 21587  | 3     | 2      | 3     | 2      |
| 21590  | 4     | 3      | 1     | 1      |
| 21601  | 2     | 1      | 2     | 1      |
| 21611  | 2     | 3      | 2     | 2      |
| 21612  | 0     |        | 0     |        |

| respid | Q20_1 | Q20a_1 | Q21_1 | Q21a_1 |
|--------|-------|--------|-------|--------|
| 21625  | 3     | 2      | 2     | 1      |
| 21633  | 0     |        | 0     |        |
| 21640  | 2     | 0      | 0     |        |
| 21647  | 0     |        | 0     |        |
| 21648  | 5     | 4      | 4     | 4      |
| 21656  | 0     |        | 0     |        |
| 21657  | 0     |        | 0     |        |
| 21658  | 2     | 3      | 2     | 3      |
| 21665  | 2     | 2      | 3     | 3      |
| 21666  | 3     | 3      | 3     | 2      |
| 21668  | 3     | 3      | 4     | 4      |
| 21673  | 1     | 1      | 1     | 1      |
| 21681  | 2     | 1      | 2     | 2      |
| 21682  | 3     | 2      | 0     |        |
| 21685  | 1     | 0      | 0     |        |
| 21692  | 0     |        | 0     |        |
| 21697  | 5     | 0      | 0     |        |
| 21711  | 0     |        | 0     |        |
| 21715  | 5     | 3      | 4     | 3      |
| 21726  | 0     |        | 0     |        |
| 21748  | 0     |        | 0     |        |
| 21761  | 0     |        | 0     |        |
| 21769  | 2     | 2      | 2     | 2      |
| 21774  | 1     | 1      | 1     | 1      |
| 21778  | 0     |        | 0     |        |
| 21785  | 2     | 2      | 2     | 2      |
| 21799  | 3     | 1      | 0     |        |
| 21820  | 4     | 4      | 5     | 4      |
| 21837  | 0     |        | 0     |        |
| 21845  | 4     | 3      | 2     | 3      |
| 21846  | 1     | 0      | 0     |        |
| 21849  | 2     | 0      | 0     |        |

| respid | Q20_1 | Q20a_1 | Q21_1 | Q21a_1 |
|--------|-------|--------|-------|--------|
| 21850  | 3     | 2      | 2     | 2      |
| 21855  | 0     |        | 0     |        |
| 21859  | 1     | 0      | 1     | 0      |
| 21861  | 1     | 0      | 0     |        |
| 21866  | 0     |        | 0     |        |
| 21873  | 2     | 2      | 2     | 2      |
| 21876  | 0     |        | 0     |        |
| 21882  | 0     |        | 0     |        |
| 21884  | 1     | 1      | 1     | 1      |
| 21887  | 2     | 2      | 2     | 2      |
| 21892  | 1     | 1      | 0     |        |
| 21907  | 2     | 1      | 0     |        |
| 21910  | 4     | 3      | 4     | 3      |
| 21912  | 5     | 2      | 2     | 2      |
| 21914  | 1     | 1      | 0     |        |
| 21925  | 0     |        | 0     |        |
| 21937  | 0     |        | 0     |        |
| 21938  | 1     | 0      | 1     | 0      |
| 21940  | 1     | 1      | 1     | 1      |
| 21942  | 0     |        | 0     |        |
| 21947  | 0     |        | 0     |        |
| 21948  | 0     |        | 0     |        |
| 21961  | 0     |        | 0     |        |
| 21977  | 3     | 4      | 3     | 3      |
| 21983  | 0     |        | 0     |        |
| 21986  | 3     | 2      | 2     | 2      |
| 21988  | 0     |        | 0     |        |
| 21996  | 5     | 4      | 1     | 1      |
| 21997  | 0     |        | 0     |        |
| 22005  | 3     | 2      | 3     | 2      |
| 22013  | 3     | 0      | 0     |        |
| 22018  | 0     |        | 0     |        |

| respid | Q20_1 | Q20a_1 | Q21_1 | Q21a_1 |
|--------|-------|--------|-------|--------|
| 22019  | 1     | 2      | 1     | 1      |
| 22071  | 0     |        | 0     |        |
| 22082  | 0     |        | 0     |        |
| 22085  | 0     |        | 0     |        |
| 22092  | 1     | 0      | 0     |        |
| 22097  | 1     | 0      | 0     |        |
| 22111  | 0     |        | 0     |        |
| 22118  | 0     |        | 1     | 1      |
| 22132  | 0     |        | 0     |        |
| 22133  | 5     | 2      | 0     |        |
| 22139  | 0     |        | 0     |        |
| 22142  | 1     | 3      | 3     | 3      |
| 22146  | 0     |        | 0     |        |
| 22181  | 0     |        | 0     |        |
| 22202  | 0     |        | 0     |        |
| 22214  | 0     |        | 0     |        |
| 22223  | 0     |        | 0     |        |
| 22227  | 1     | 1      | 1     | 1      |
| 22229  | 0     |        | 0     |        |
| 22239  | 3     | 2      | 2     | 2      |
| 22245  | 4     | 3      | 4     | 3      |
| 22256  | 0     |        | 0     |        |
| 22260  | 1     | 0      | 0     |        |
| 22298  | 2     | 1      | 3     | 1      |
| 22321  | 0     |        | 0     |        |
| 22340  | 0     |        | 0     |        |
| 22346  | 2     | 2      | 2     | 2      |
| 22356  | 1     | 1      | 1     | 2      |
| 22361  | 3     | 2      | 3     | 2      |
| 22364  | 1     | 0      | 0     |        |
| 22368  | 0     |        | 0     |        |
| 22374  | 0     |        | 0     |        |

| respid | Q20_1 | Q20a_1 | Q21_1 | Q21a_1 |
|--------|-------|--------|-------|--------|
| 22375  | 0     |        | 0     |        |
| 22377  | 0     |        | 0     |        |
| 22383  | 0     |        | 0     |        |
| 22387  | 2     | 2      | 3     | 2      |
| 22392  | 0     |        | 0     |        |
| 22393  | 0     |        | 0     |        |
| 22394  | 2     | 1      | 0     |        |
| 22395  | 0     |        | 0     |        |
| 22401  | 0     |        | 0     |        |
| 22407  | 0     |        | 0     |        |
| 22410  | 1     | 1      | 2     | 2      |
| 22418  | 0     |        | 0     |        |
| 22421  | 0     |        | 0     |        |
| 22423  | 0     |        | 0     |        |
| 22425  | 1     | 1      | 0     |        |
| 22427  | 0     |        | 0     |        |
| 22431  | 3     | 4      | 3     | 4      |
| 22435  | 1     | 0      | 0     |        |
| 22436  | 0     |        | 0     |        |
| 22442  | 0     |        | 0     |        |
| 22444  | 2     | 3      | 3     | 3      |
| 22445  | 3     | 2      | 2     | 1      |
| 22446  | 0     |        | 0     |        |
| 22448  | 1     | 3      | 1     | 3      |
| 22449  | 0     |        | 0     |        |
| 22450  | 2     | 2      | 0     |        |
| 22453  | 1     | 2      | 2     | 3      |
| 22465  | 1     | 1      | 1     | 1      |
| 22472  | 1     | 1      | 1     | 0      |
| 22475  | 3     | 3      | 0     |        |
| 22478  | 2     | 2      | 2     | 3      |
| 22491  | 0     |        | 0     |        |

| respid | Q20_1 | Q20a_1 | Q21_1 | Q21a_1 |
|--------|-------|--------|-------|--------|
| 22497  | 2     | 2      | 2     | 1      |
| 22498  | 2     | 1      | 2     | 2      |
| 22499  | 0     |        | 0     |        |
| 22503  | 0     |        | 0     |        |
| 22507  | 1     | 0      | 0     |        |
| 22513  | 2     | 2      | 2     | 3      |
| 22517  | 0     |        | 0     |        |
| 22524  | 1     | 1      | 1     | 2      |
| 22528  | 0     |        | 0     |        |
| 22544  | 0     |        | 0     |        |
| 22571  | 0     |        | 0     |        |
| 22576  | 0     |        | 0     |        |
| 22579  | 2     | 2      | 0     |        |
| 22583  | 1     | 2      | 1     | 1      |
| 22591  | 3     | 3      | 3     | 2      |
| 22592  | 0     |        | 0     |        |
| 22612  | 0     |        | 0     |        |
| 22613  | 1     | 1      | 1     | 1      |
| 22615  | 1     | 1      | 0     |        |
| 22621  | 0     |        | 0     |        |
| 22625  | 0     |        | 0     |        |
| 22628  | 2     | 1      | 1     | 1      |
| 22632  | 1     | 1      | 0     |        |
| 22639  | 0     |        | 0     |        |
| 22648  | 3     | 3      | 3     | 3      |
| 22649  | 0     |        | 0     |        |
| 22655  | 0     |        | 0     |        |
| 22659  | 0     |        | 0     |        |
| 22660  | 1     | 1      | 0     |        |
| 22666  | 1     | 1      | 1     | 2      |
| 22667  | 0     |        | 0     |        |
| 22670  | 0     |        | 0     |        |

| respid | Q20_1 | Q20a_1 | Q21_1 | Q21a_1 |
|--------|-------|--------|-------|--------|
| 22681  | 0     |        | 0     |        |
| 22683  | 0     |        | 0     |        |
| 22688  | 1     | 0      | 0     |        |
| 22695  | 0     |        | 0     |        |
| 22696  | 0     |        | 0     |        |
| 22705  | 3     | 2      | 3     | 2      |
| 22718  | 4     | 3      | 3     | 3      |
| 22720  | 0     |        | 1     | 1      |
| 22724  | 1     | 0      | 0     |        |
| 22728  | 0     |        | 0     |        |
| 22751  | 1     | 0      | 0     |        |
| 22782  | 5     | 4      | 4     | 4      |
| 22786  | 2     | 1      | 2     | 2      |
| 22788  | 0     |        | 1     | 1      |
| 22810  | 2     | 1      | 2     | 2      |
| 22816  | 0     |        | 0     |        |
| 22818  | 0     |        | 0     |        |
| 22854  | 0     |        | 0     |        |
| 22858  | 1     | 0      | 0     |        |
| 22862  | 0     |        | 0     |        |
| 22865  | 0     |        | 0     |        |
| 22868  | 0     |        | 0     |        |
| 22869  | 1     | 1      | 3     | 2      |
| 22873  | 1     | 1      | 0     |        |
| 22875  | 1     | 0      | 0     |        |
| 22876  | 0     |        | 0     |        |
| 22882  | 1     | 1      | 4     | 4      |
| 22884  | 3     | 2      | 2     | 2      |
| 22887  | 0     |        | 0     |        |
| 22888  | 0     |        | 0     |        |
| 22900  | 0     |        | 0     |        |
| 22901  | 0     |        | 0     |        |

| respid | Q20_1 | Q20a_1 | Q21_1 | Q21a_1 |
|--------|-------|--------|-------|--------|
| 22912  | 2     | 0      | 5     | 0      |
| 22913  | 2     | 0      | 0     |        |
| 22921  | 0     |        | 0     |        |
| 22925  | 0     |        | 0     |        |
| 22940  | 0     |        | 0     |        |
| 22941  | 0     |        | 0     |        |
| 22947  | 1     | 1      | 0     |        |
| 22948  | 0     |        | 0     |        |
| 22964  | 3     | 2      | 1     | 2      |
| 22966  | 2     | 0      | 1     | 0      |
| 22969  | 0     |        | 0     |        |
| 22971  | 0     |        | 0     |        |
| 22988  | 0     |        | 0     |        |
| 22990  | 0     |        | 0     |        |
| 23000  | 0     |        | 0     |        |
| 23016  | 0     |        | 0     |        |
| 23026  | 0     |        | 2     | 0      |
| 23035  | 1     | 0      | 0     |        |
| 23037  | 3     | 3      | 2     | 3      |
| 23044  | 3     | 0      | 1     | 0      |
| 23046  | 0     |        | 0     |        |
| 23047  | 1     | 0      | 0     |        |
| 23049  | 2     | 0      | 0     |        |
| 23055  | 0     |        | 0     |        |
| 23066  | 0     |        | 0     |        |
| 23075  | 2     | 1      | 0     |        |
| 23081  | 2     | 0      | 3     | 1      |
| 23087  | 0     |        | 0     |        |
| 23094  | 0     |        | 0     |        |
| 23099  | 0     |        | 0     |        |
| 23101  | 0     |        | 0     |        |
| 23105  | 0     |        | 0     |        |



| respid | Q20_1 | Q20a_1 | Q21_1 | Q21a_1 |
|--------|-------|--------|-------|--------|
| 23115  | 3     | 2      | 3     | 2      |
| 23121  | 1     | 1      | 0     |        |
| 23127  | 0     |        | 0     |        |
| 23131  | 5     | 0      | 0     |        |
| 23134  | 1     | 1      | 0     |        |
| 23145  | 1     | 0      | 0     |        |
| 23151  | 0     |        | 0     |        |
| 23161  | 1     | 1      | 0     |        |
| 23169  | 1     | 1      | 1     | 1      |
| 23173  | 0     |        | 0     |        |
| 23174  | 0     |        | 0     |        |
| 23186  | 3     | 2      | 2     | 2      |
| 23195  | 0     |        | 0     |        |
| 23197  | 2     | 0      | 1     | 1      |
| 23198  | 0     |        | 0     |        |
| 23203  | 0     |        | 0     |        |
| 23204  | 4     | 2      | 1     | 1      |
| 23212  | 3     | 2      | 0     |        |
| 23214  | 0     |        | 1     | 0      |
| 23221  | 0     |        | 0     |        |
| 23237  | 2     | 0      | 0     |        |
| 23251  | 0     |        | 0     |        |
| 23254  | 0     |        | 0     |        |
| 23262  | 3     | 2      | 3     | 2      |
| 23267  | 0     |        | 1     | 1      |
| 23268  | 5     | 3      | 1     | 2      |
| 23273  | 1     | 1      | 0     |        |
| 23278  | 3     | 1      | 0     |        |
| 23279  | 0     |        | 0     |        |
| 23281  | 2     | 2      | 2     | 1      |
| 23282  | 2     | 2      | 3     | 2      |
| 23283  | 4     | 2      | 0     |        |

| respid | Q20_1 | Q20a_1 | Q21_1 | Q21a_1 |
|--------|-------|--------|-------|--------|
| 23285  | 2     | 0      | 0     |        |
| 23305  | 3     | 1      | 1     | 1      |
| 23309  | 1     | 1      | 0     |        |
| 23310  | 2     | 0      | 0     |        |
| 23311  | 2     | 3      | 0     |        |
| 23312  | 1     | 2      | 1     | 2      |
| 23319  | 4     | 1      | 3     | 1      |
| 23320  | 1     | 0      | 0     |        |
| 23322  | 5     | 2      | 0     |        |
| 23334  | 0     |        | 0     |        |
| 23340  | 0     |        | 0     |        |
| 23346  | 0     |        | 0     |        |
| 23353  | 0     |        | 1     | 0      |
| 23363  | 3     | 2      | 3     | 2      |
| 23364  | 3     | 3      | 3     | 3      |
| 23376  | 0     |        | 0     |        |
| 23378  | 0     |        | 0     |        |
| 23382  | 0     |        | 0     |        |
| 23383  | 0     |        | 0     |        |
| 23390  | 0     |        | 0     |        |
| 23395  | 0     |        | 0     |        |
| 23398  | 0     |        | 1     | 2      |
| 23399  | 1     | 1      | 0     |        |
| 23406  | 3     | 2      | 0     |        |
| 23418  | 0     |        | 2     | 1      |
| 23427  | 2     | 0      | 0     |        |
| 23428  | 1     | 0      | 0     |        |
| 23435  | 1     | 1      | 1     | 1      |
| 23439  | 0     |        | 0     |        |
| 23440  | 0     |        | 0     |        |
| 23444  | 2     | 2      | 0     |        |
| 23445  | 1     | 0      | 1     | 0      |

| respid | Q20_1 | Q20a_1 | Q21_1 | Q21a_1 |
|--------|-------|--------|-------|--------|
| 23455  | 0     |        | 0     |        |
| 23467  | 0     |        | 0     |        |
| 23478  | 4     | 1      | 0     |        |
| 23492  | 0     |        | 1     | 1      |
| 23498  | 1     | 1      | 0     |        |
| 23511  | 0     |        | 0     |        |
| 23514  | 1     | 0      | 0     |        |
| 23515  | 3     | 2      | 2     | 1      |
| 23522  | 0     |        | 0     |        |
| 23524  | 0     |        | 0     |        |
| 23531  | 4     | 1      | 3     | 1      |
| 23532  | 0     |        | 0     |        |
| 23533  | 0     |        | 0     |        |
| 23534  | 0     |        | 0     |        |
| 23538  | 1     | 0      | 0     |        |
| 23539  | 4     | 3      | 2     | 2      |
| 23548  | 0     |        | 0     |        |
| 23553  | 0     |        | 0     |        |
| 23556  | 0     |        | 0     |        |
| 23563  | 2     | 1      | 1     | 1      |
| 23572  | 2     | 1      | 1     | 1      |
| 23575  | 0     |        | 0     |        |
| 23576  | 0     |        | 0     |        |
| 23577  | 0     |        | 0     |        |
| 23578  | 0     |        | 1     | 1      |
| 23587  | 3     | 2      | 3     | 2      |
| 23597  | 0     |        | 0     |        |
| 23598  | 0     |        | 0     |        |
| 23604  | 0     |        | 0     |        |
| 23617  | 5     | 2      | 0     |        |
| 23620  | 1     | 1      | 0     |        |
| 23621  | 0     |        | 0     |        |

| respid | Q20_1 | Q20a_1 | Q21_1 | Q21a_1 |
|--------|-------|--------|-------|--------|
| 23625  | 1     | 0      | 1     | 1      |
| 23629  | 0     |        | 0     |        |
| 23635  | 0     |        | 0     |        |
| 23636  | 0     |        | 0     |        |
| 23637  | 4     | 2      | 4     | 2      |
| 23638  | 0     |        | 0     |        |
| 23644  | 0     |        | 0     |        |
| 23645  | 2     | 1      | 1     | 1      |
| 23649  | 0     |        | 0     |        |
| 23654  | 0     |        | 0     |        |
| 23662  | 0     |        | 1     | 1      |
| 23664  | 0     |        | 0     |        |
| 23665  | 5     | 0      | 0     |        |
| 23666  | 0     |        | 0     |        |
| 23671  | 0     |        | 0     |        |
| 23672  | 0     |        | 0     |        |
| 23685  | 1     | 0      | 0     |        |
| 23686  | 2     | 1      | 1     | 1      |
| 23689  | 3     | 2      | 3     | 2      |
| 23690  | 2     | 1      | 2     | 1      |
| 23695  | 2     | 2      | 1     | 1      |
| 23700  | 0     |        | 0     |        |
| 23714  | 1     | 0      | 0     |        |
| 23719  | 3     | 1      | 1     | 1      |
| 23720  | 1     | 0      | 0     |        |
| 23721  | 0     |        | 0     |        |
| 23729  | 0     |        | 0     |        |
| 23730  | 0     |        | 0     |        |
| 23732  | 0     |        | 0     |        |
| 23736  | 0     |        | 0     |        |
| 23754  | 0     |        | 0     |        |
| 23756  | 0     |        | 0     |        |

| respid | Q20_1 | Q20a_1 | Q21_1 | Q21a_1 |
|--------|-------|--------|-------|--------|
| 23759  | 1     | 1      | 2     | 2      |
| 23761  | 1     | 1      | 0     |        |
| 23766  | 0     |        | 0     |        |
| 23768  | 3     | 2      | 2     | 4      |
| 23773  | 0     |        | 0     |        |
| 23781  | 0     |        | 0     |        |
| 23782  | 3     | 3      | 2     | 1      |
| 23787  | 0     |        | 1     | 1      |
| 23788  | 5     | 2      | 4     | 2      |
| 23790  | 0     |        | 0     |        |
| 23794  | 1     | 1      | 1     | 2      |
| 23795  | 2     | 2      | 1     | 2      |
| 23801  | 0     |        | 0     |        |
| 23806  | 1     | 1      | 1     | 1      |
| 23809  | 1     | 2      | 1     | 2      |
| 23813  | 3     | 1      | 0     |        |
| 23815  | 1     | 0      | 0     |        |
| 23821  | 0     |        | 0     |        |
| 23825  | 3     | 0      | 0     |        |
| 23826  | 1     | 1      | 0     |        |
| 23830  | 0     |        | 0     |        |
| 23833  | 1     | 1      | 0     |        |
| 23837  | 1     | 0      | 0     |        |
| 23848  | 5     | 4      | 5     | 4      |
| 23850  | 0     |        | 0     |        |
| 23870  | 0     |        | 0     |        |
| 23877  | 0     |        | 0     |        |
| 23880  | 4     | 0      | 0     |        |
| 23882  | 0     |        | 0     |        |
| 23888  | 0     |        | 0     |        |
| 23908  | 3     | 2      | 2     | 2      |
| 23914  | 2     | 0      | 0     |        |

| respid | Q20_1 | Q20a_1 | Q21_1 | Q21a_1 |
|--------|-------|--------|-------|--------|
| 23916  | 1     | 1      | 1     | 1      |
| 23922  | 1     | 1      | 1     | 1      |
| 23932  | 1     | 1      | 0     |        |
| 23934  | 0     |        | 0     |        |
| 23942  | 4     | 3      | 1     | 2      |
| 23945  | 0     |        | 0     |        |
| 23948  | 0     |        | 0     |        |
| 23955  | 0     |        | 0     |        |
| 23956  | 2     | 2      | 1     | 4      |
| 23978  | 1     | 1      | 2     | 1      |
| 23981  | 0     |        | 0     |        |
| 23982  | 1     | 1      | 3     | 2      |
| 23991  | 0     |        | 0     |        |
| 23994  | 1     | 0      | 0     |        |
| 23995  | 1     | 0      | 0     |        |
| 23999  | 1     | 0      | 0     |        |
| 24005  | 4     | 4      | 2     | 1      |
| 24018  | 0     |        | 0     |        |
| 24021  | 0     |        | 0     |        |
| 24035  | 0     |        | 0     |        |
| 24040  | 0     |        | 0     |        |
| 24043  | 0     |        | 0     |        |
| 24046  | 2     | 2      | 1     | 1      |
| 24047  | 2     | 1      | 0     |        |
| 24048  | 0     |        | 0     |        |
| 24062  | 1     | 1      | 1     | 1      |
| 24063  | 2     | 2      | 0     |        |
| 24066  | 0     |        | 0     |        |
| 24069  | 0     |        | 0     |        |
| 24070  | 0     |        | 0     |        |
| 24074  | 1     | 0      | 0     |        |
| 24080  | 0     |        | 0     |        |

| respid | Q20_1 | Q20a_1 | Q21_1 | Q21a_1 |
|--------|-------|--------|-------|--------|
| 24082  | 1     | 0      | 0     |        |
| 24088  | 2     | 0      | 1     | 0      |
| 24089  | 1     | 0      | 0     |        |
| 24091  | 0     |        | 0     |        |
| 24095  | 0     |        | 0     |        |
| 24100  | 1     | 1      | 0     |        |
| 24105  | 3     | 3      | 3     | 3      |
| 24107  | 0     |        | 0     |        |
| 24108  | 0     |        | 0     |        |
| 24113  | 1     | 0      | 1     | 0      |
| 24120  | 0     |        | 0     |        |
| 24122  | 5     | 2      | 4     | 2      |
| 24123  | 2     | 1      | 1     | 1      |
| 24125  | 2     | 1      | 0     |        |
| 24132  | 0     |        | 0     |        |
| 24139  | 4     | 1      | 2     | 1      |
| 24140  | 0     |        | 0     |        |
| 24143  | 0     |        | 1     | 2      |
| 24150  | 3     | 2      | 3     | 3      |
| 24153  | 0     |        | 0     |        |
| 24161  | 0     |        | 0     |        |
| 24168  | 1     | 0      | 0     |        |
| 24179  | 1     | 1      | 0     |        |
| 24182  | 2     | 1      | 2     | 1      |
| 24194  | 0     |        | 0     |        |
| 24206  | 0     |        | 0     |        |
| 24214  | 0     |        | 0     |        |
| 24215  | 1     | 0      | 0     |        |
| 24224  | 0     |        | 0     |        |
| 24225  | 1     | 1      | 0     |        |
| 24227  | 0     |        | 0     |        |
| 24229  | 2     | 1      | 2     | 1      |

| respid | Q20_1 | Q20a_1 | Q21_1 | Q21a_1 |
|--------|-------|--------|-------|--------|
| 24230  | 3     | 2      | 0     |        |
| 24232  | 2     | 2      | 2     | 1      |
| 24253  | 1     | 1      | 0     |        |
| 24267  | 0     |        | 0     |        |
| 24274  | 0     |        | 0     |        |
| 24275  | 0     |        | 0     |        |
| 24277  | 0     |        | 0     |        |
| 24280  | 3     | 2      | 5     | 3      |
| 24285  | 1     | 0      | 0     |        |
| 24293  | 0     |        | 0     |        |
| 24295  | 2     | 2      | 0     |        |
| 24299  | 0     |        | 0     |        |
| 24303  | 1     | 1      | 0     |        |
| 24308  | 0     |        | 1     | 1      |
| 24322  | 0     |        | 0     |        |
| 24325  | 0     |        | 0     |        |
| 24328  | 0     |        | 0     |        |
| 24334  | 0     |        | 0     |        |
| 24342  | 1     | 1      | 0     |        |
| 24343  | 2     | 2      | 2     | 2      |
| 24348  | 3     | 4      | 4     | 2      |
| 24352  | 2     | 2      | 3     | 2      |
| 24354  | 2     | 1      | 1     | 1      |
| 24357  | 0     |        | 0     |        |
| 24360  | 3     | 1      | 1     | 1      |
| 24369  | 2     | 4      | 0     |        |
| 24373  | 1     | 1      | 0     |        |
| 24398  | 3     | 3      | 3     | 4      |
| 24402  | 1     | 1      | 0     |        |
| 24405  | 0     |        | 0     |        |
| 24407  | 0     |        | 0     |        |
| 24413  | 0     |        | 0     |        |



| respid | Q20_1 | Q20a_1 | Q21_1 | Q21a_1 |
|--------|-------|--------|-------|--------|
| 24443  | 3     | 2      | 3     | 2      |
| 24451  | 0     |        | 0     |        |
| 24459  | 2     | 3      | 2     | 2      |
| 24465  | 0     |        | 0     |        |
| 24481  | 1     | 1      | 0     |        |
| 24482  | 5     | 0      | 0     |        |
| 24491  | 0     |        | 0     |        |
| 24495  | 0     |        | 0     |        |
| 24497  | 2     | 2      | 1     | 2      |
| 24511  | 0     |        | 0     |        |
| 24513  | 0     |        | 0     |        |
| 24516  | 1     | 2      | 1     | 2      |
| 24518  | 2     | 1      | 0     |        |
| 24524  | 0     |        | 0     |        |
| 24528  | 4     | 1      | 4     | 1      |
| 24531  | 3     | 4      | 3     | 3      |
| 24533  | 5     | 4      | 4     | 3      |
| 24547  | 1     | 0      | 0     |        |
| 24557  | 3     | 2      | 3     | 3      |
| 24559  | 5     | 4      | 5     | 4      |
| 24567  | 0     |        | 0     |        |
| 24568  | 0     |        | 0     |        |
| 24577  | 0     |        | 0     |        |
| 24581  | 1     | 1      | 1     | 1      |
| 24588  | 0     |        | 0     |        |
| 24604  | 5     | 3      | 2     | 3      |
| 24612  | 2     | 1      | 2     | 2      |
| 24621  | 3     | 3      | 1     | 1      |
| 24625  | 2     | 1      | 0     |        |
| 24627  | 0     |        | 0     |        |
| 24640  | 4     | 1      | 0     |        |
| 24644  | 1     | 0      | 0     |        |

| respid | Q20_1 | Q20a_1 | Q21_1 | Q21a_1 |
|--------|-------|--------|-------|--------|
| 24664  | 1     | 2      | 1     | 2      |
| 24669  | 1     | 1      | 0     |        |
| 24685  | 0     |        | 0     |        |
| 24687  | 5     | 2      | 3     | 2      |
| 24688  | 1     | 1      | 1     | 1      |
| 24691  | 4     | 3      | 3     | 2      |
| 24693  | 1     | 1      | 0     |        |
| 24706  | 0     |        | 0     |        |
| 24710  | 0     |        | 0     |        |
| 24717  | 0     |        | 0     |        |
| 24720  | 0     |        | 0     |        |
| 24731  | 2     | 1      | 2     | 2      |
| 24732  | 0     |        | 0     |        |
| 24733  | 0     |        | 0     |        |
| 24747  | 0     |        | 0     |        |
| 24750  | 2     | 3      | 0     |        |
| 24758  | 2     | 2      | 1     | 2      |
| 24760  | 0     |        | 0     |        |
| 24765  | 0     |        | 0     |        |
| 24772  | 0     |        | 0     |        |
| 24779  | 3     | 3      | 3     | 3      |
| 24794  | 4     | 0      | 0     |        |
| 24796  | 2     | 2      | 2     | 2      |
| 24797  | 1     | 0      | 0     |        |
| 24800  | 1     | 0      | 0     |        |
| 24813  | 3     | 3      | 3     | 3      |
| 24815  | 0     |        | 0     |        |
| 24821  | 1     | 0      | 0     |        |
| 24822  | 1     | 1      | 0     |        |
| 24831  | 0     |        | 0     |        |
| 24835  | 0     |        | 0     |        |
| 24843  | 2     | 2      | 1     | 2      |

| respid | Q20_1 | Q20a_1 | Q21_1 | Q21a_1 |
|--------|-------|--------|-------|--------|
| 24844  | 3     | 2      | 3     | 2      |
| 24860  | 0     |        | 0     |        |
| 24861  | 1     | 1      | 2     | 1      |
| 24865  | 4     | 3      | 4     | 3      |
| 24870  | 2     | 0      | 1     | 0      |
| 24887  | 0     |        | 0     |        |
| 24897  | 3     | 2      | 3     | 2      |
| 24902  | 5     | 2      | 1     | 1      |
| 24914  | 0     |        | 0     |        |
| 24921  | 3     | 1      | 1     | 1      |
| 24922  | 1     | 0      | 0     |        |
| 24924  | 0     |        | 0     |        |
| 24927  | 2     | 1      | 0     |        |
| 24936  | 0     |        | 0     |        |
| 24937  | 1     | 2      | 0     |        |
| 24942  | 0     |        | 3     | 2      |
| 24947  | 1     | 0      | 0     |        |
| 24953  | 2     | 0      | 2     | 0      |
| 24954  | 1     | 1      | 1     | 1      |
| 24960  | 4     | 4      | 5     | 4      |
| 24965  | 1     | 0      | 0     |        |
| 24975  | 2     | 1      | 2     | 1      |
| 24983  | 4     | 3      | 3     | 2      |
| 24985  | 0     |        | 0     |        |
| 24990  | 5     | 0      | 0     |        |
| 25000  | 0     |        | 0     |        |
| 25007  | 2     | 2      | 2     | 2      |
| 25008  | 0     |        | 0     |        |
| 25010  | 0     |        | 0     |        |
| 25016  | 2     | 1      | 1     | 1      |
| 25021  | 1     | 3      | 4     | 3      |
| 25040  | 0     |        | 0     |        |

| respid | Q20_1 | Q20a_1 | Q21_1 | Q21a_1 |
|--------|-------|--------|-------|--------|
| 25043  | 0     |        | 0     |        |
| 25055  | 0     |        | 0     |        |
| 25057  | 3     | 1      | 0     |        |
| 25060  | 2     | 1      | 0     |        |
| 25062  | 1     | 0      | 1     | 0      |
| 25064  | 3     | 2      | 3     | 2      |
| 25069  | 0     |        | 0     |        |
| 25077  | 0     |        | 0     |        |
| 25088  | 0     |        | 0     |        |
| 25093  | 2     | 1      | 1     | 1      |
| 25121  | 0     |        | 0     |        |
| 25140  | 4     | 3      | 3     | 2      |
| 25144  | 1     | 1      | 0     |        |
| 25149  | 1     | 1      | 1     | 1      |
| 25159  | 0     |        | 0     |        |
| 25191  | 0     |        | 0     |        |
| 25193  | 2     | 2      | 1     | 1      |
| 25202  | 3     | 2      | 4     | 3      |
| 25215  | 2     | 1      | 1     | 1      |
| 25229  | 3     | 1      | 3     | 2      |
| 25231  | 2     | 1      | 0     |        |
| 25236  | 0     |        | 0     |        |
| 25242  | 1     | 0      | 0     |        |
| 25252  | 0     |        | 0     |        |
| 25253  | 4     | 4      | 3     | 2      |
| 25256  | 4     | 3      | 3     | 2      |
| 25260  | 0     |        | 0     |        |
| 25261  | 4     | 0      | 0     |        |
| 25280  | 4     | 1      | 1     | 1      |
| 25282  | 1     | 1      | 1     | 1      |
| 25289  | 1     | 2      | 2     | 1      |
| 25303  | 0     |        | 0     |        |

| respid | Q20_1 | Q20a_1 | Q21_1 | Q21a_1 |
|--------|-------|--------|-------|--------|
| 25304  | 2     | 1      | 0     |        |
| 25309  | 2     | 1      | 0     |        |
| 25317  | 3     | 2      | 2     | 1      |
| 25318  | 3     | 2      | 3     | 2      |
| 25320  | 0     |        | 0     |        |
| 25324  | 4     | 3      | 3     | 2      |
| 25331  | 2     | 1      | 1     | 1      |
| 25340  | 0     |        | 0     |        |
| 25342  | 1     | 0      | 0     |        |
| 25350  | 0     |        | 0     |        |
| 25352  | 0     |        | 0     |        |
| 25358  | 1     | 0      | 0     |        |
| 25375  | 0     |        | 0     |        |
| 25386  | 0     |        | 0     |        |
| 25388  | 0     |        | 0     |        |
| 25390  | 3     | 2      | 0     |        |
| 25391  | 0     |        | 0     |        |
| 25400  | 4     | 1      | 0     |        |
| 25413  | 4     | 3      | 3     | 2      |
| 25424  | 1     | 1      | 1     | 1      |
| 25426  | 3     | 2      | 3     | 2      |
| 25430  | 0     |        | 0     |        |
| 25434  | 1     | 1      | 1     | 1      |
| 25439  | 2     | 1      | 1     | 1      |
| 25441  | 1     | 1      | 0     |        |
| 25445  | 0     |        | 0     |        |
| 25451  | 0     |        | 0     |        |
| 25469  | 4     | 3      | 3     | 2      |
| 25471  | 3     | 2      | 2     | 2      |
| 25476  | 0     |        | 0     |        |
| 25480  | 1     | 0      | 0     |        |
| 25482  | 0     |        | 0     |        |

| respid | Q20_1 | Q20a_1 | Q21_1 | Q21a_1 |
|--------|-------|--------|-------|--------|
| 25500  | 1     | 4      | 1     | 4      |
| 25516  | 1     | 0      | 0     |        |
| 25521  | 3     | 3      | 3     | 2      |
| 25525  | 1     | 1      | 1     | 2      |
| 25530  | 3     | 3      | 3     | 4      |
| 25555  | 1     | 1      | 2     | 1      |
| 25558  | 2     | 2      | 0     |        |
| 25561  | 3     | 2      | 2     | 3      |
| 25566  | 0     |        | 0     |        |
| 25571  | 1     | 1      | 1     | 1      |
| 25572  | 1     | 0      | 0     |        |
| 25574  | 0     |        | 0     |        |
| 25588  | 0     |        | 0     |        |
| 25591  | 1     | 1      | 1     | 1      |
| 25599  | 1     | 1      | 1     | 1      |
| 25604  | 2     | 2      | 0     |        |
| 25614  | 3     | 3      | 0     |        |
| 25634  | 2     | 2      | 3     | 3      |
| 25642  | 0     |        | 1     | 1      |
| 25647  | 1     | 1      | 0     |        |
| 25653  | 0     |        | 0     |        |
| 25654  | 1     | 0      | 0     |        |
| 25660  | 1     | 0      | 0     |        |
| 25664  | 0     |        | 0     |        |
| 25665  | 0     |        | 0     |        |
| 25672  | 4     | 2      | 4     | 1      |
| 25677  | 2     | 1      | 1     | 1      |
| 25685  | 1     | 2      | 3     | 2      |
| 25699  | 3     | 2      | 3     | 2      |
| 25703  | 0     |        | 0     |        |
| 25704  | 1     | 2      | 2     | 1      |
| 25705  | 1     | 2      | 1     | 1      |

| respid | Q20_1 | Q20a_1 | Q21_1 | Q21a_1 |
|--------|-------|--------|-------|--------|
| 25711  | 0     |        | 0     |        |
| 25727  | 3     | 3      | 0     |        |
| 25728  | 1     | 0      | 0     |        |
| 25733  | 2     | 2      | 1     | 2      |
| 25735  | 0     |        | 0     |        |
| 25736  | 2     | 1      | 2     | 1      |
| 25742  | 0     |        | 0     |        |
| 25750  | 0     |        | 0     |        |
| 25754  | 0     |        | 0     |        |
| 25776  | 1     | 2      | 1     | 2      |
| 25778  | 0     |        | 0     |        |
| 25796  | 1     | 0      | 0     |        |
| 25852  | 1     | 2      | 0     |        |
| 25858  | 1     | 0      | 0     |        |
| 25859  | 0     |        | 0     |        |
| 25886  | 3     | 3      | 2     | 3      |
| 25890  | 1     | 0      | 1     | 1      |
| 25897  | 0     |        | 0     |        |
| 25903  | 0     |        | 0     |        |
| 25905  | 0     |        | 0     |        |
| 25917  | 0     |        | 0     |        |
| 25918  | 0     |        | 0     |        |
| 25928  | 1     | 1      | 1     | 1      |
| 25930  | 0     |        | 0     |        |
| 25949  | 0     |        | 0     |        |
| 25955  | 0     |        | 0     |        |
| 25959  | 0     |        | 0     |        |
| 25964  | 5     | 2      | 0     |        |
| 25972  | 0     |        | 0     |        |
| 25999  | 2     | 2      | 2     | 2      |
| 26019  | 1     | 1      | 0     |        |
| 26025  | 0     |        | 0     |        |

| respid | Q20_1 | Q20a_1 | Q21_1 | Q21a_1 |
|--------|-------|--------|-------|--------|
| 26039  | 1     | 2      | 1     | 2      |
| 26055  | 1     | 1      | 1     | 1      |
| 26061  | 0     |        | 0     |        |
| 26076  | 5     | 0      | 0     |        |
| 26088  | 0     |        | 0     |        |
| 26094  | 0     |        | 0     |        |
| 26104  | 2     | 2      | 3     | 3      |
| 26131  | 0     |        | 0     |        |
| 26134  | 2     | 2      | 1     | 1      |
| 26160  | 0     |        | 0     |        |
| 26168  | 1     | 1      | 0     |        |
| 26170  | 0     |        | 0     |        |
| 26191  | 3     | 2      | 3     | 3      |
| 26192  | 0     |        | 0     |        |
| 26195  | 1     | 1      | 1     | 1      |
| 26198  | 0     |        | 0     |        |
| 26199  | 0     |        | 0     |        |
| 26201  | 0     |        | 0     |        |
| 26202  | 0     |        | 0     |        |
| 26226  | 0     |        | 0     |        |
| 26233  | 1     | 0      | 0     |        |
| 26236  | 0     |        | 0     |        |
| 26242  | 0     |        | 0     |        |
| 26244  | 0     |        | 0     |        |
| 26250  | 0     |        | 0     |        |
| 26266  | 0     |        | 0     |        |
| 26274  | 3     | 1      | 0     |        |
| 26286  | 2     | 1      | 2     | 1      |
| 26288  | 1     | 1      | 1     | 2      |
| 26295  | 0     |        | 0     |        |
| 26296  | 2     | 0      | 2     | 0      |
| 26297  | 0     |        | 0     |        |



| respid | Q20_1 | Q20a_1 | Q21_1 | Q21a_1 |
|--------|-------|--------|-------|--------|
| 26300  | 2     | 2      | 0     |        |
| 26317  | 3     | 0      | 0     |        |
| 26343  | 0     |        | 0     |        |
| 26367  | 3     | 3      | 5     | 3      |
| 26372  | 1     | 0      | 1     | 0      |
| 26403  | 2     | 1      | 0     |        |
| 26423  | 0     |        | 0     |        |
| 26430  | 2     | 0      | 0     |        |
| 26437  | 1     | 1      | 0     |        |
| 26457  | 0     |        | 0     |        |
| 26466  | 0     |        | 0     |        |
| 26467  | 1     | 0      | 0     |        |
| 26469  | 0     |        | 1     | 1      |
| 26494  | 0     |        | 0     |        |
| 26510  | 2     | 1      | 2     | 1      |
| 26519  | 0     |        | 0     |        |
| 26525  | 1     | 1      | 4     | 3      |
| 26529  | 0     |        | 0     |        |
| 26533  | 1     | 0      | 0     |        |
| 26556  | 0     |        | 0     |        |
| 26559  | 2     | 2      | 2     | 3      |
| 26565  | 1     | 2      | 1     | 2      |
| 26576  | 2     | 2      | 2     | 2      |
| 26601  | 0     |        | 0     |        |
| 26607  | 0     |        | 1     | 1      |
| 26611  | 0     |        | 1     | 2      |
| 26619  | 1     | 0      | 1     | 0      |
| 26631  | 0     |        | 0     |        |
| 26654  | 3     | 2      | 0     |        |
| 26656  | 1     | 1      | 2     | 1      |
| 26664  | 0     |        | 0     |        |
| 26667  | 2     | 1      | 1     | 1      |

| respid | Q20_1 | Q20a_1 | Q21_1 | Q21a_1 |
|--------|-------|--------|-------|--------|
| 26674  | 2     | 2      | 2     | 2      |
| 26678  | 1     | 1      | 1     | 1      |
| 26693  | 2     | 1      | 0     |        |
| 26696  | 5     | 4      | 4     | 3      |
| 26703  | 3     | 4      | 4     | 4      |
| 26705  | 1     | 2      | 2     | 2      |
| 26706  | 3     | 2      | 3     | 2      |
| 26716  | 2     | 2      | 3     | 2      |
| 26721  | 1     | 1      | 0     |        |
| 26730  | 1     | 0      | 0     |        |
| 26752  | 0     |        | 0     |        |
| 26755  | 2     | 0      | 0     |        |
| 26791  | 1     | 0      | 0     |        |
| 26804  | 2     | 1      | 1     | 1      |
| 26810  | 1     | 2      | 3     | 0      |
| 26813  | 2     | 2      | 1     | 1      |
| 26833  | 1     | 1      | 1     | 1      |
| 26880  | 2     | 1      | 1     | 1      |
| 26884  | 1     | 1      | 0     |        |
| 26885  | 0     |        | 0     |        |
| 26890  | 2     | 2      | 2     | 1      |
| 26937  | 3     | 2      | 2     | 2      |
| 26939  | 2     | 1      | 1     | 1      |
| 26941  | 0     |        | 0     |        |
| 26992  | 1     | 3      | 0     |        |
| 27037  | 0     |        | 0     |        |
| 27045  | 2     | 3      | 2     | 3      |
| 27053  | 4     | 2      | 3     | 2      |
| 27060  | 2     | 2      | 2     | 1      |
| 27076  | 1     | 2      | 0     |        |
| 27124  | 0     |        | 0     |        |
| 27125  | 0     |        | 0     |        |

| respid | Q20_1 | Q20a_1 | Q21_1 | Q21a_1 |
|--------|-------|--------|-------|--------|
| 27132  | 3     | 1      | 0     |        |
| 27166  | 0     |        | 0     |        |
| 27190  | 1     | 1      | 0     |        |
| 27199  | 5     | 2      | 1     | 2      |
| 27221  | 2     | 2      | 2     | 1      |
| 27233  | 3     | 2      | 0     |        |
| 27241  | 4     | 1      | 0     |        |
| 27244  | 5     | 0      | 0     |        |
| 27245  | 4     | 3      | 4     | 3      |
| 27246  | 2     | 1      | 2     | 2      |
| 27253  | 1     | 1      | 1     | 1      |
| 27255  | 2     | 2      | 3     | 3      |
| 27267  | 1     | 1      | 1     | 1      |
| 27283  | 3     | 3      | 1     | 1      |
| 27289  | 3     | 3      | 1     | 1      |
| 27302  | 5     | 0      | 0     |        |
| 27317  | 0     |        | 0     |        |
| 27319  | 0     |        | 0     |        |
| 27331  | 1     | 1      | 1     | 1      |
| 27333  | 3     | 3      | 0     |        |
| 27340  | 0     |        | 0     |        |
| 27362  | 2     | 1      | 2     | 0      |
| 27370  | 2     | 0      | 0     |        |
| 27379  | 0     |        | 0     |        |
| 27386  | 0     |        | 0     |        |
| 27398  | 0     |        | 0     |        |
| 27404  | 0     |        | 0     |        |
| 27408  | 1     | 0      | 0     |        |
| 27412  | 3     | 2      | 3     | 3      |
| 27426  | 0     |        | 1     | 1      |
| 27455  | 0     |        | 0     |        |
| 27464  | 3     | 2      | 5     | 4      |

| respid | Q20_1 | Q20a_1 | Q21_1 | Q21a_1 |
|--------|-------|--------|-------|--------|
| 27484  | 2     | 1      | 4     | 1      |
| 27493  | 3     | 3      | 2     | 2      |
| 27512  | 0     |        | 1     | 1      |
| 27525  | 2     | 1      | 2     | 1      |
| 27532  | 1     | 1      | 2     | 1      |
| 27539  | 0     |        | 0     |        |
| 27540  | 2     | 2      | 2     | 2      |
| 27552  | 3     | 3      | 1     | 3      |
| 27562  | 0     |        | 0     |        |
| 27568  | 0     |        | 0     |        |
| 27574  | 4     | 3      | 3     | 3      |
| 27575  | 0     |        | 0     |        |
| 27577  | 3     | 2      | 0     |        |
| 27589  | 1     | 1      | 0     |        |
| 27593  | 0     |        | 0     |        |
| 27594  | 5     | 3      | 5     | 3      |
| 27595  | 3     | 3      | 3     | 3      |
| 27598  | 1     | 0      | 0     |        |
| 27620  | 0     |        | 0     |        |
| 27621  | 2     | 1      | 2     | 2      |
| 27628  | 0     |        | 0     |        |
| 27633  | 1     | 1      | 0     |        |
| 27643  | 0     |        | 0     |        |
| 27644  | 3     | 3      | 3     | 3      |
| 27668  | 0     |        | 0     |        |
| 27681  | 2     | 1      | 1     | 1      |
| 27691  | 0     |        | 0     |        |
| 27693  | 2     | 1      | 2     | 1      |
| 27703  | 3     | 2      | 2     | 2      |
| 27708  | 1     | 1      | 1     | 1      |
| 27719  | 2     | 2      | 3     | 2      |
| 27720  | 0     |        | 0     |        |

| respid | Q20_1 | Q20a_1 | Q21_1 | Q21a_1 |
|--------|-------|--------|-------|--------|
| 27723  | 1     | 1      | 1     | 1      |
| 27725  | 0     |        | 0     |        |
| 27734  | 2     | 2      | 2     | 2      |
| 27744  | 3     | 1      | 0     |        |
| 27749  | 3     | 3      | 2     | 3      |
| 27762  | 2     | 2      | 3     | 3      |
| 27808  | 3     | 3      | 1     | 1      |
| 27810  | 4     | 4      | 3     | 3      |
| 27812  | 1     | 0      | 0     |        |
| 27815  | 0     |        | 0     |        |
| 27818  | 0     |        | 0     |        |
| 27823  | 0     |        | 0     |        |
| 27841  | 4     | 2      | 3     | 2      |
| 27843  | 0     |        | 0     |        |
| 27851  | 1     | 1      | 0     |        |
| 27858  | 5     | 0      | 0     |        |
| 27859  | 2     | 1      | 1     | 0      |
| 27869  | 0     |        | 0     |        |
| 27872  | 0     |        | 1     | 1      |
| 27873  | 0     |        | 0     |        |
| 27884  | 3     | 2      | 1     | 1      |
| 27904  | 2     | 2      | 3     | 2      |
| 27915  | 4     | 1      | 0     |        |
| 27918  | 1     | 1      | 0     |        |
| 27937  | 0     |        | 0     |        |
| 27943  | 2     | 2      | 2     | 2      |
| 27948  | 2     | 0      | 0     |        |
| 27971  | 2     | 2      | 1     | 3      |
| 27991  | 0     |        | 0     |        |
| 28000  | 1     | 1      | 0     |        |
| 28011  | 4     | 1      | 0     |        |
| 28022  | 0     |        | 0     |        |

| respid | Q20_1 | Q20a_1 | Q21_1 | Q21a_1 |
|--------|-------|--------|-------|--------|
| 28025  | 0     |        | 0     |        |
| 28041  | 1     | 0      | 0     |        |
| 28057  | 3     | 3      | 3     | 2      |
| 28080  | 0     |        | 0     |        |
| 28098  | 0     |        | 0     |        |
| 28104  | 2     | 2      | 1     | 1      |
| 28109  | 3     | 2      | 3     | 2      |
| 28129  | 0     |        | 0     |        |
| 28141  | 0     |        | 0     |        |
| 28143  | 0     |        | 0     |        |
| 28149  | 0     |        | 0     |        |
| 28151  | 0     |        | 0     |        |
| 28161  | 2     | 1      | 0     |        |
| 28169  | 1     | 1      | 2     | 1      |
| 28194  | 1     | 2      | 2     | 2      |
| 28197  | 0     |        | 0     |        |
| 28206  | 0     |        | 0     |        |
| 28218  | 0     |        | 0     |        |
| 28227  | 0     |        | 0     |        |
| 28235  | 1     | 1      | 0     |        |
| 28246  | 1     | 1      | 1     | 1      |
| 28259  | 2     | 2      | 3     | 3      |
| 28263  | 0     |        | 0     |        |
| 28267  | 1     | 1      | 1     | 2      |
| 28274  | 0     |        | 0     |        |
| 28278  | 0     |        | 0     |        |
| 28288  | 2     | 2      | 0     |        |
| 28308  | 0     |        | 0     |        |
| 28309  | 3     | 2      | 2     | 2      |
| 28323  | 2     | 1      | 1     | 1      |
| 28335  | 3     | 3      | 4     | 3      |
| 28354  | 4     | 3      | 3     | 3      |

| respid | Q20_1 | Q20a_1 | Q21_1 | Q21a_1 |
|--------|-------|--------|-------|--------|
| 28355  | 2     | 2      | 3     | 3      |
| 28356  | 3     | 2      | 2     | 1      |
| 28357  | 0     |        | 0     |        |
| 28363  | 0     |        | 0     |        |
| 28366  | 0     |        | 0     |        |
| 28372  | 1     | 2      | 1     | 2      |
| 28381  | 1     | 1      | 1     | 1      |
| 28388  | 2     | 3      | 3     | 3      |
| 28413  | 3     | 3      | 4     | 3      |
| 28421  | 0     |        | 0     |        |
| 28430  | 3     | 2      | 3     | 2      |
| 28439  | 3     | 2      | 3     | 3      |
| 28458  | 4     | 3      | 4     | 3      |
| 28461  | 0     |        | 0     |        |
| 28466  | 2     | 1      | 0     |        |
| 28492  | 2     | 2      | 0     |        |
| 28534  | 0     |        | 0     |        |
| 28537  | 2     | 2      | 2     | 2      |
| 28560  | 0     |        | 0     |        |
| 28566  | 0     |        | 0     |        |
| 28569  | 1     | 1      | 1     | 1      |
| 28584  | 4     | 3      | 5     | 3      |
| 28590  | 1     | 0      | 1     | 1      |
| 28596  | 0     |        | 0     |        |
| 28608  | 1     | 1      | 1     | 1      |
| 28631  | 2     | 1      | 3     | 2      |
| 28644  | 2     | 1      | 2     | 1      |
| 28646  | 0     |        | 0     |        |
| 28665  | 0     |        | 0     |        |
| 28686  | 0     |        | 0     |        |
| 28704  | 3     | 2      | 3     | 2      |
| 28719  | 1     | 2      | 0     |        |

| respid | Q20_1 | Q20a_1 | Q21_1 | Q21a_1 |
|--------|-------|--------|-------|--------|
| 28736  | 5     | 2      | 2     | 3      |
| 28739  | 2     | 2      | 2     | 3      |
| 28758  | 0     |        | 1     | 2      |
| 28761  | 1     | 1      | 2     | 1      |
| 28770  | 3     | 3      | 2     | 2      |
| 28774  | 0     |        | 0     |        |
| 28778  | 3     | 3      | 4     | 4      |
| 28783  | 2     | 2      | 2     | 2      |
| 28785  | 1     | 0      | 0     |        |
| 28797  | 3     | 2      | 3     | 3      |
| 28801  | 0     |        | 0     |        |
| 28821  | 0     |        | 0     |        |
| 28827  | 4     | 2      | 3     | 2      |
| 28828  | 2     | 1      | 0     |        |
| 28871  | 1     | 1      | 1     | 0      |
| 28876  | 3     | 1      | 0     |        |
| 28891  | 1     | 0      | 2     | 1      |
| 28898  | 0     |        | 0     |        |
| 28909  | 2     | 1      | 0     |        |
| 28930  | 2     | 0      | 1     | 0      |
| 28935  | 3     | 1      | 3     | 1      |
| 28964  | 0     |        | 0     |        |
| 28965  | 0     |        | 0     |        |
| 28967  | 4     | 3      | 3     | 3      |
| 28975  | 0     |        | 0     |        |
| 28982  | 0     |        | 0     |        |
| 28989  | 4     | 2      | 0     |        |
| 29003  | 2     | 2      | 1     | 1      |
| 29004  | 3     | 1      | 0     |        |
| 29007  | 1     | 1      | 1     | 1      |
| 29008  | 0     |        | 0     |        |
| 29011  | 2     | 1      | 1     | 0      |



| respid | Q20_1 | Q20a_1 | Q21_1 | Q21a_1 |
|--------|-------|--------|-------|--------|
| 29012  | 2     | 1      | 2     | 1      |
| 29014  | 0     |        | 0     |        |
| 29016  | 0     |        | 0     |        |
| 29018  | 4     | 2      | 2     | 1      |
| 29048  | 1     | 1      | 0     |        |
| 29184  | 1     | 0      | 0     |        |
| 29237  | 0     |        | 0     |        |
| 29252  | 0     |        | 0     |        |
| 29267  | 0     |        | 1     | 1      |
| 29276  | 0     |        | 0     |        |
| 29281  | 4     | 3      | 3     | 2      |
| 29285  | 1     | 0      | 1     | 0      |
| 29291  | 4     | 4      | 3     | 3      |
| 29304  | 2     | 2      | 2     | 2      |
| 29323  | 0     |        | 0     |        |
| 29330  | 3     | 2      | 1     | 1      |
| 29357  | 1     | 4      | 1     | 4      |
| 29416  | 3     | 0      | 0     |        |
| 29432  | 0     |        | 0     |        |
| 29482  | 2     | 1      | 2     | 1      |
| 29506  | 1     | 3      | 2     | 2      |
| 29509  | 2     | 1      | 2     | 1      |
| 29512  | 1     | 2      | 1     | 2      |
| 29519  | 0     |        | 0     |        |
| 29520  | 0     |        | 0     |        |
| 29521  | 3     | 2      | 2     | 1      |
| 29529  | 3     | 3      | 3     | 3      |
| 29532  | 0     |        | 0     |        |
| 29547  | 0     |        | 0     |        |
| 29551  | 0     |        | 0     |        |
| 29584  | 4     | 3      | 3     | 3      |
| 29591  | 3     | 2      | 3     | 2      |

| respid | Q20_1 | Q20a_1 | Q21_1 | Q21a_1 |
|--------|-------|--------|-------|--------|
| 29613  | 2     | 1      | 0     |        |
| 29615  | 2     | 2      | 0     |        |
| 29625  | 3     | 2      | 3     | 3      |
| 29660  | 1     | 0      | 1     | 0      |
| 29677  | 0     |        | 0     |        |
| 29700  | 1     | 2      | 0     |        |
| 29715  | 4     | 4      | 5     | 4      |
| 29720  | 0     |        | 0     |        |
| 29730  | 0     |        | 0     |        |
| 29734  | 1     | 3      | 1     | 1      |
| 29754  | 0     |        | 0     |        |
| 29771  | 0     |        | 0     |        |
| 29774  | 1     | 1      | 0     |        |
| 29783  | 0     |        | 0     |        |
| 29812  | 1     | 1      | 1     | 1      |
| 29813  | 0     |        | 0     |        |
| 29814  | 1     | 1      | 1     | 1      |
| 29820  | 1     | 1      | 1     | 1      |
| 29906  | 1     | 0      | 0     |        |
| 29907  | 0     |        | 1     | 0      |
| 29928  | 0     |        | 0     |        |
| 29932  | 0     |        | 3     | 2      |
| 29958  | 3     | 2      | 3     | 2      |
| 29982  | 3     | 1      | 1     | 1      |
| 29989  | 1     | 0      | 0     |        |
| 29994  | 1     | 1      | 0     |        |
| 30005  | 2     | 2      | 1     | 3      |
| 30077  | 1     | 0      | 1     | 0      |
| 30098  | 0     |        | 0     |        |
| 30107  | 4     | 1      | 4     | 2      |
| 30154  | 0     |        | 0     |        |
| 30159  | 0     |        | 0     |        |

| respid | Q20_1 | Q20a_1 | Q21_1 | Q21a_1 |
|--------|-------|--------|-------|--------|
| 30162  | 0     |        | 0     |        |
| 30163  | 0     |        | 0     |        |
| 30189  | 2     | 1      | 1     | 1      |
| 30230  | 2     | 0      | 0     |        |
| 30259  | 2     | 3      | 3     | 2      |
| 30284  | 2     | 1      | 0     |        |
| 30296  | 0     |        | 0     |        |
| 30330  | 2     | 0      | 2     | 1      |
| 30341  | 1     | 1      | 1     | 1      |
| 30352  | 2     | 2      | 1     | 2      |
| 30379  | 2     | 2      | 0     |        |
| 30424  | 1     | 1      | 0     |        |
| 30447  | 0     |        | 0     |        |
| 30477  | 3     | 2      | 3     | 3      |
| 30503  | 1     | 2      | 0     |        |
| 30515  | 5     | 3      | 4     | 3      |
| 30516  | 1     | 2      | 2     | 2      |
| 30623  | 2     | 2      | 2     | 1      |
| 30639  | 0     |        | 0     |        |
| 30670  | 1     | 1      | 1     | 0      |
| 30697  | 0     |        | 0     |        |
| 30735  | 0     |        | 0     |        |
| 30742  | 1     | 1      | 1     | 1      |
| 30751  | 4     | 3      | 5     | 4      |
| 30789  | 0     |        | 0     |        |
| 30867  | 2     | 3      | 3     | 2      |
| 30876  | 0     |        | 1     | 0      |
| 30877  | 2     | 0      | 0     |        |
| 30887  | 2     | 2      | 2     | 2      |
| 30891  | 1     | 2      | 2     | 1      |
| 31030  | 0     |        | 0     |        |
| 31059  | 2     | 1      | 2     | 2      |

| respid | Q20_1 | Q20a_1 | Q21_1 | Q21a_1 |
|--------|-------|--------|-------|--------|
| 31082  | 0     |        | 0     |        |
| 31106  | 0     |        | 0     |        |
| 31110  | 0     |        | 0     |        |
| 31265  | 3     | 4      | 3     | 4      |
| 31266  | 3     | 4      | 3     | 4      |
| 31267  | 3     | 4      | 3     | 4      |
| 31310  | 2     | 0      | 0     |        |
| 31325  | 0     |        | 0     |        |
| 31367  | 0     |        | 0     |        |
| 31389  | 0     |        | 0     |        |
| 31440  | 0     |        | 0     |        |
| 31465  | 0     |        | 0     |        |
| 31477  | 1     | 2      | 0     |        |
| 31491  | 2     | 1      | 1     | 1      |
| 31494  | 3     | 2      | 2     | 1      |
| 31509  | 0     |        | 0     |        |
| 31533  | 1     | 2      | 1     | 1      |
| 31547  | 1     | 1      | 0     |        |
| 31558  | 0     |        | 0     |        |
| 31579  | 4     | 2      | 0     |        |
| 31591  | 2     | 1      | 0     |        |
| 31596  | 2     | 2      | 2     | 2      |
| 31601  | 4     | 3      | 3     | 3      |
| 31605  | 1     | 1      | 0     |        |
| 31637  | 1     | 0      | 1     | 0      |
| 31646  | 1     | 1      | 0     |        |
| 31647  | 5     | 2      | 2     | 2      |
| 31650  | 0     |        | 0     |        |
| 31651  | 3     | 2      | 2     | 2      |
| 31657  | 0     |        | 0     |        |
| 31660  | 0     |        | 0     |        |
| 31661  | 2     | 2      | 3     | 2      |

| respid | Q20_1 | Q20a_1 | Q21_1 | Q21a_1 |
|--------|-------|--------|-------|--------|
| 31667  | 2     | 1      | 1     | 1      |
| 31674  | 1     | 1      | 1     | 1      |
| 31686  | 3     | 2      | 2     | 2      |
| 31693  | 0     |        | 0     |        |
| 31716  | 0     |        | 0     |        |
| 31818  | 4     | 0      | 0     |        |
| 31886  | 1     | 0      | 0     |        |
| 31945  | 3     | 3      | 3     | 3      |
| 31957  | 3     | 2      | 3     | 2      |
| 31966  | 1     | 1      | 1     | 1      |
| 31978  | 1     | 1      | 2     | 1      |
| 31999  | 1     | 0      | 0     |        |
| 32026  | 1     | 1      | 1     | 1      |
| 32033  | 0     |        | 1     | 1      |
| 32037  | 3     | 4      | 3     | 4      |
| 32038  | 3     | 4      | 3     | 4      |
| 32047  | 1     | 1      | 1     | 2      |
| 32053  | 0     |        | 0     |        |
| 32069  | 5     | 2      | 3     | 2      |
| 32081  | 2     | 2      | 2     | 1      |
| 32123  | 0     |        | 0     |        |
| 32130  | 1     | 1      | 0     |        |
| 32141  | 0     |        | 0     |        |
| 32158  | 0     |        | 0     |        |
| 32165  | 4     | 1      | 0     |        |
| 32180  | 0     |        | 0     |        |
| 32221  | 1     | 2      | 1     | 3      |
| 32292  | 0     |        | 0     |        |
| 32318  | 1     | 0      | 0     |        |
| 32346  | 1     | 1      | 0     |        |
| 32402  | 2     | 2      | 2     | 2      |
| 32422  | 1     | 1      | 0     |        |

| respid | Q20_1 | Q20a_1 | Q21_1 | Q21a_1 |
|--------|-------|--------|-------|--------|
| 32439  | 1     | 0      | 0     |        |
| 32507  | 2     | 2      | 3     | 2      |
| 32522  | 0     |        | 0     |        |
| 32535  | 0     |        | 0     |        |
| 32546  | 0     |        | 0     |        |
| 32553  | 1     | 0      | 0     |        |
| 32570  | 0     |        | 0     |        |
| 32592  | 0     |        | 0     |        |
| 32605  | 4     | 3      | 3     | 2      |
| 32630  | 2     | 2      | 3     | 2      |
| 32642  | 1     | 2      | 2     | 2      |
| 32646  | 2     | 1      | 0     |        |
| 32665  | 2     | 1      | 2     | 1      |
| 32677  | 0     |        | 0     |        |
| 32694  | 0     |        | 0     |        |
| 32698  | 3     | 2      | 2     | 0      |
| 32754  | 3     | 3      | 3     | 3      |
| 32799  | 3     | 1      | 2     | 1      |
| 32816  | 0     |        | 0     |        |
| 32819  | 1     | 1      | 1     | 2      |
| 32840  | 0     |        | 0     |        |
| 32861  | 1     | 1      | 0     |        |
| 32866  | 0     |        | 0     |        |
| 32889  | 5     | 3      | 5     | 3      |
| 32960  | 0     |        | 0     |        |
| 32965  | 1     | 1      | 1     | 1      |
| 32986  | 1     | 1      | 0     |        |
| 33005  | 0     |        | 1     | 1      |
| 33054  | 3     | 2      | 3     | 3      |
| 33072  | 1     | 1      | 2     | 2      |
| 33095  | 1     | 0      | 0     |        |
| 33099  | 1     | 1      | 0     |        |

| respid | Q20_1 | Q20a_1 | Q21_1 | Q21a_1 |
|--------|-------|--------|-------|--------|
| 33121  | 1     | 1      | 0     |        |
| 33152  | 2     | 1      | 0     |        |
| 33159  | 0     |        | 0     |        |
| 33189  | 1     | 0      | 0     |        |
| 33198  | 3     | 3      | 1     | 1      |
| 33202  | 3     | 2      | 3     | 3      |
| 33204  | 0     |        | 0     |        |
| 33224  | 0     |        | 0     |        |
| 33272  | 1     | 1      | 1     | 2      |
| 33294  | 0     |        | 0     |        |
| 33300  | 1     | 1      | 1     | 1      |
| 33314  | 1     | 1      | 0     |        |
| 33338  | 0     |        | 0     |        |
| 33350  | 4     | 3      | 4     | 3      |
| 33362  | 2     | 2      | 2     | 1      |
| 33368  | 0     |        | 0     |        |
| 33374  | 3     | 2      | 3     | 2      |
| 33380  | 3     | 3      | 3     | 2      |
| 33385  | 1     | 1      | 2     | 1      |
| 33402  | 2     | 1      | 2     | 1      |
| 33414  | 3     | 2      | 2     | 1      |
| 33439  | 2     | 1      | 2     | 1      |
| 33449  | 2     | 2      | 3     | 2      |
| 33533  | 1     | 1      | 1     | 1      |
| 33540  | 0     |        | 0     |        |
| 33556  | 1     | 2      | 1     | 1      |
| 33615  | 0     |        | 0     |        |
| 33694  | 2     | 3      | 2     | 2      |
| 33717  | 1     | 0      | 0     |        |
| 33729  | 0     |        | 1     | 1      |
| 33746  | 1     | 1      | 1     | 1      |
| 33764  | 0     |        | 0     |        |

| respid | Q20_1 | Q20a_1 | Q21_1 | Q21a_1 |
|--------|-------|--------|-------|--------|
| 33790  | 1     | 1      | 1     | 0      |
| 33868  | 3     | 2      | 1     | 1      |
| 33872  | 1     | 1      | 2     | 2      |
| 33883  | 5     | 0      | 0     |        |
| 33884  | 0     |        | 0     |        |
| 33900  | 1     | 1      | 0     |        |
| 33933  | 2     | 0      | 0     |        |
| 33949  | 3     | 0      | 0     |        |
| 34005  | 0     |        | 0     |        |
| 34016  | 0     |        | 0     |        |
| 34041  | 2     | 1      | 2     | 2      |
| 34053  | 1     | 1      | 0     |        |
| 34056  | 4     | 1      | 0     |        |
| 34093  | 0     |        | 0     |        |
| 34112  | 1     | 1      | 0     |        |
| 34136  | 2     | 2      | 3     | 2      |
| 34138  | 2     | 0      | 0     |        |
| 34139  | 1     | 2      | 2     | 1      |
| 34189  | 0     |        | 0     |        |
| 34239  | 1     | 1      | 0     |        |
| 34240  | 1     | 1      | 0     |        |
| 34241  | 0     |        | 0     |        |
| 34259  | 2     | 1      | 0     |        |
| 34303  | 1     | 2      | 3     | 2      |
| 34306  | 1     | 0      | 0     |        |
| 34395  | 3     | 1      | 2     | 1      |
| 34463  | 2     | 1      | 1     | 1      |
| 34466  | 2     | 2      | 3     | 3      |
| 34471  | 0     |        | 0     |        |
| 34489  | 3     | 3      | 3     | 3      |
| 34518  | 2     | 3      | 1     | 0      |
| 34542  | 2     | 2      | 2     | 2      |



| respid | Q20_1 | Q20a_1 | Q21_1 | Q21a_1 |
|--------|-------|--------|-------|--------|
| 34595  | 0     |        | 0     |        |
| 34604  | 0     |        | 0     |        |
| 34631  | 2     | 2      | 2     | 2      |
| 34665  | 3     | 0      | 0     |        |
| 34716  | 0     |        | 0     |        |
| 34729  | 1     | 1      | 0     |        |
| 34772  | 2     | 2      | 2     | 3      |
| 34800  | 3     | 2      | 2     | 2      |
| 34819  | 2     | 1      | 3     | 1      |
| 34829  | 2     | 1      | 3     | 1      |
| 34831  | 0     |        | 0     |        |
| 34839  | 0     |        | 0     |        |
| 34868  | 2     | 1      | 1     | 1      |
| 34869  | 0     |        | 0     |        |
| 34882  | 4     | 3      | 5     | 3      |
| 34895  | 3     | 2      | 3     | 3      |
| 34901  | 3     | 3      | 2     | 1      |
| 34904  | 2     | 2      | 1     | 1      |
| 34907  | 3     | 2      | 3     | 2      |
| 34914  | 1     | 1      | 2     | 1      |
| 34918  | 2     | 2      | 1     | 1      |
| 34924  | 0     |        | 0     |        |
| 34933  | 2     | 2      | 2     | 2      |
| 34938  | 1     | 1      | 1     | 1      |
| 34952  | 3     | 3      | 2     | 2      |
| 34959  | 0     |        | 0     |        |
| 34972  | 1     | 0      | 0     |        |
| 34973  | 1     | 2      | 2     | 3      |
| 34975  | 2     | 3      | 2     | 2      |
| 34977  | 2     | 2      | 1     | 2      |
| 34978  | 1     | 0      | 0     |        |
| 34980  | 0     |        | 0     |        |

| respid | Q20_1 | Q20a_1 | Q21_1 | Q21a_1 |
|--------|-------|--------|-------|--------|
| 34984  | 2     | 2      | 3     | 3      |
| 34986  | 3     | 3      | 2     | 2      |
| 34994  | 1     | 1      | 0     |        |
| 34996  | 1     | 0      | 0     |        |
| 35003  | 2     | 0      | 0     |        |
| 35014  | 1     | 0      | 0     |        |
| 35029  | 2     | 0      | 0     |        |
| 35030  | 3     | 2      | 3     | 2      |
| 35037  | 0     |        | 1     | 1      |
| 35043  | 0     |        | 0     |        |
| 35048  | 0     |        | 0     |        |
| 35055  | 1     | 1      | 0     |        |
| 35067  | 2     | 2      | 2     | 1      |
| 35072  | 1     | 0      | 1     | 1      |
| 35078  | 1     | 1      | 1     | 1      |
| 35084  | 0     |        | 1     | 2      |
| 35095  | 0     |        | 0     |        |
| 35096  | 0     |        | 0     |        |
| 35097  | 2     | 2      | 2     | 2      |
| 35098  | 2     | 1      | 2     | 2      |
| 35109  | 4     | 3      | 4     | 3      |
| 35114  | 0     |        | 0     |        |
| 35115  | 0     |        | 0     |        |
| 35124  | 3     | 2      | 2     | 2      |
| 35125  | 0     |        | 0     |        |
| 35141  | 0     |        | 0     |        |
| 35142  | 0     |        | 0     |        |
| 35145  | 0     |        | 0     |        |
| 35149  | 1     | 3      | 0     |        |
| 35159  | 1     | 0      | 0     |        |
| 35163  | 4     | 1      | 1     | 1      |
| 35174  | 1     | 2      | 1     | 2      |

| respid | Q20_1 | Q20a_1 | Q21_1 | Q21a_1 |
|--------|-------|--------|-------|--------|
| 35188  | 0     |        | 0     |        |
| 35189  | 1     | 1      | 0     |        |
| 35201  | 4     | 3      | 0     |        |
| 35215  | 0     |        | 0     |        |
| 35228  | 0     |        | 0     |        |
| 35235  | 1     | 1      | 0     |        |
| 35239  | 3     | 3      | 4     | 2      |
| 35243  | 0     |        | 1     | 1      |
| 35245  | 1     | 1      | 0     |        |
| 35259  | 0     |        | 0     |        |
| 35265  | 3     | 3      | 0     |        |
| 35272  | 2     | 1      | 1     | 1      |
| 35280  | 1     | 2      | 1     | 1      |
| 35298  | 1     | 0      | 0     |        |
| 35305  | 0     |        | 1     | 1      |
| 35306  | 3     | 3      | 2     | 3      |
| 35307  | 1     | 1      | 0     |        |
| 35311  | 4     | 0      | 0     |        |
| 35322  | 0     |        | 1     | 2      |
| 35323  | 1     | 1      | 0     |        |
| 35327  | 1     | 0      | 0     |        |
| 35366  | 0     |        | 0     |        |
| 35378  | 2     | 2      | 0     |        |
| 35389  | 3     | 2      | 3     | 3      |
| 35390  | 0     |        | 0     |        |
| 35395  | 1     | 2      | 0     |        |
| 35411  | 0     |        | 0     |        |
| 35423  | 0     |        | 0     |        |
| 35425  | 3     | 3      | 0     |        |
| 35434  | 0     |        | 1     | 1      |
| 35462  | 0     |        | 0     |        |
| 35478  | 2     | 2      | 3     | 2      |

| respid | Q20_1 | Q20a_1 | Q21_1 | Q21a_1 |
|--------|-------|--------|-------|--------|
| 35481  | 2     | 4      | 3     | 3      |
| 35498  | 3     | 0      | 1     | 1      |
| 35499  | 0     |        | 0     |        |
| 35502  | 1     | 1      | 0     |        |
| 35503  | 0     |        | 0     |        |
| 35504  | 0     |        | 0     |        |
| 35508  | 0     |        | 0     |        |
| 35513  | 1     | 1      | 1     | 1      |
| 35516  | 0     |        | 0     |        |
| 35519  | 5     | 2      | 0     |        |
| 35530  | 3     | 2      | 3     | 2      |
| 35533  | 0     |        | 0     |        |
| 35561  | 3     | 3      | 1     | 2      |
| 35565  | 0     |        | 0     |        |
| 35588  | 0     |        | 0     |        |
| 35598  | 4     | 0      | 0     |        |
| 35607  | 0     |        | 1     | 1      |
| 35638  | 1     | 0      | 0     |        |
| 35642  | 0     |        | 0     |        |
| 35643  | 0     |        | 1     | 1      |
| 35680  | 0     |        | 0     |        |
| 35697  | 1     | 1      | 1     | 1      |
| 35703  | 0     |        | 0     |        |
| 35709  | 0     |        | 0     |        |
| 35710  | 1     | 2      | 1     | 2      |
| 35721  | 5     | 1      | 5     | 1      |
| 35723  | 0     |        | 1     | 1      |
| 35736  | 1     | 2      | 1     | 2      |
| 35739  | 0     |        | 1     | 1      |
| 35745  | 2     | 2      | 1     | 2      |
| 35748  | 0     |        | 0     |        |
| 35750  | 2     | 2      | 0     |        |

| respid | Q20_1 | Q20a_1 | Q21_1 | Q21a_1 |
|--------|-------|--------|-------|--------|
| 35752  | 3     | 2      | 1     | 1      |
| 35773  | 2     | 1      | 0     |        |
| 35779  | 0     |        | 0     |        |
| 35791  | 1     | 0      | 0     |        |
| 35801  | 1     | 1      | 0     |        |
| 35802  | 0     |        | 0     |        |
| 35837  | 2     | 2      | 0     |        |
| 35853  | 1     | 0      | 0     |        |
| 35858  | 0     |        | 1     | 0      |
| 35860  | 1     | 2      | 1     | 2      |
| 35875  | 3     | 4      | 3     | 3      |
| 35883  | 1     | 1      | 1     | 1      |
| 35890  | 2     | 2      | 0     |        |
| 35898  | 0     |        | 0     |        |
| 35901  | 1     | 3      | 0     |        |
| 35914  | 0     |        | 0     |        |
| 35924  | 2     | 2      | 3     | 2      |
| 35950  | 3     | 2      | 2     | 2      |
| 35961  | 0     |        | 0     |        |
| 35966  | 2     | 1      | 0     |        |
| 35967  | 0     |        | 0     |        |
| 35971  | 0     |        | 0     |        |
| 35974  | 0     |        | 0     |        |
| 35983  | 4     | 3      | 4     | 3      |
| 35992  | 4     | 4      | 3     | 3      |
| 36010  | 1     | 1      | 0     |        |
| 36019  | 5     | 4      | 4     | 4      |
| 36029  | 2     | 1      | 2     | 1      |
| 36033  | 0     |        | 0     |        |
| 36042  | 1     | 0      | 0     |        |
| 36043  | 2     | 1      | 2     | 1      |
| 36048  | 3     | 1      | 2     | 1      |

| respid | Q20_1 | Q20a_1 | Q21_1 | Q21a_1 |
|--------|-------|--------|-------|--------|
| 36050  | 1     | 1      | 0     |        |
| 36062  | 1     | 1      | 1     | 1      |
| 36063  | 0     |        | 0     |        |
| 36092  | 0     |        | 0     |        |
| 36097  | 2     | 2      | 1     | 1      |
| 36108  | 0     |        | 0     |        |
| 36113  | 4     | 4      | 3     | 3      |
| 36117  | 1     | 1      | 0     |        |
| 36129  | 1     | 2      | 0     |        |
| 36144  | 1     | 0      | 0     |        |
| 36152  | 0     |        | 0     |        |
| 36154  | 3     | 1      | 1     | 1      |
| 36155  | 0     |        | 0     |        |
| 36167  | 0     |        | 0     |        |
| 36172  | 1     | 0      | 0     |        |
| 36173  | 0     |        | 0     |        |
| 36174  | 1     | 1      | 1     | 1      |
| 36182  | 2     | 1      | 0     |        |
| 36192  | 0     |        | 1     | 1      |
| 36195  | 3     | 3      | 2     | 2      |
| 36204  | 1     | 1      | 0     |        |
| 36205  | 0     |        | 0     |        |
| 36208  | 1     | 1      | 0     |        |
| 36216  | 1     | 1      | 0     |        |
| 36221  | 3     | 4      | 3     | 4      |
| 36244  | 0     |        | 0     |        |
| 36255  | 1     | 1      | 1     | 1      |
| 36259  | 1     | 0      | 1     | 0      |
| 36262  | 3     | 2      | 2     | 2      |
| 36268  | 0     |        | 0     |        |
| 36308  | 3     | 3      | 0     |        |
| 36324  | 1     | 0      | 0     |        |

| respid | Q20_1 | Q20a_1 | Q21_1 | Q21a_1 |
|--------|-------|--------|-------|--------|
| 36330  | 0     |        | 0     |        |
| 36331  | 3     | 2      | 2     | 0      |
| 36336  | 1     | 0      | 0     |        |
| 36337  | 1     | 1      | 0     |        |
| 36364  | 2     | 1      | 0     |        |
| 36365  | 2     | 2      | 2     | 2      |
| 36396  | 1     | 1      | 0     |        |
| 36403  | 1     | 1      | 0     |        |
| 36410  | 0     |        | 0     |        |
| 36413  | 0     |        | 0     |        |
| 36422  | 1     | 1      | 2     | 2      |
| 36424  | 2     | 4      | 1     | 2      |
| 36425  | 3     | 3      | 4     | 3      |
| 36432  | 0     |        | 0     |        |
| 36435  | 4     | 3      | 4     | 4      |
| 36446  | 4     | 3      | 4     | 3      |
| 36451  | 0     |        | 0     |        |
| 36453  | 0     |        | 0     |        |
| 36459  | 2     | 2      | 2     | 2      |
| 36464  | 2     | 2      | 1     | 1      |
| 36465  | 1     | 1      | 1     | 1      |
| 36466  | 0     |        | 0     |        |
| 36476  | 0     |        | 1     | 2      |
| 36487  | 0     |        | 0     |        |
| 36488  | 2     | 3      | 4     | 3      |
| 36500  | 0     |        | 0     |        |
| 36504  | 2     | 1      | 0     |        |
| 36513  | 0     |        | 0     |        |
| 36515  | 1     | 2      | 1     | 2      |
| 36521  | 1     | 1      | 0     |        |
| 36530  | 2     | 1      | 2     | 2      |
| 36556  | 1     | 2      | 0     |        |

| respid | Q20_1 | Q20a_1 | Q21_1 | Q21a_1 |
|--------|-------|--------|-------|--------|
| 36564  | 2     | 2      | 3     | 2      |
| 36584  | 0     |        | 0     |        |
| 36585  | 0     |        | 0     |        |
| 36586  | 0     |        | 0     |        |
| 36606  | 3     | 4      | 2     | 2      |
| 36615  | 4     | 0      | 1     | 2      |
| 36628  | 1     | 0      | 0     |        |
| 36630  | 3     | 2      | 3     | 2      |
| 36631  | 1     | 2      | 0     |        |
| 36636  | 0     |        | 0     |        |
| 36637  | 1     | 1      | 0     |        |
| 36651  | 1     | 3      | 1     | 3      |
| 36661  | 0     |        | 0     |        |
| 36670  | 1     | 2      | 0     |        |
| 36671  | 1     | 0      | 0     |        |
| 36688  | 0     |        | 0     |        |
| 36694  | 0     |        | 0     |        |
| 36696  | 0     |        | 0     |        |
| 36703  | 0     |        | 0     |        |
| 36719  | 3     | 4      | 3     | 4      |
| 36721  | 3     | 4      | 3     | 4      |
| 36740  | 5     | 0      | 1     | 1      |
| 36755  | 0     |        | 0     |        |
| 36765  | 2     | 2      | 2     | 2      |
| 36770  | 0     |        | 0     |        |
| 36773  | 1     | 1      | 1     | 1      |
| 36813  | 0     |        | 0     |        |
| 36819  | 1     | 1      | 1     | 1      |
| 36820  | 2     | 1      | 0     |        |
| 36821  | 2     | 2      | 0     |        |
| 36827  | 0     |        | 0     |        |
| 36835  | 0     |        | 0     |        |



| respid | Q20_1 | Q20a_1 | Q21_1 | Q21a_1 |
|--------|-------|--------|-------|--------|
| 36837  | 0     |        | 0     |        |
| 36849  | 1     | 1      | 0     |        |
| 36851  | 0     |        | 0     |        |
| 36868  | 2     | 2      | 2     | 2      |
| 36870  | 1     | 0      | 1     | 0      |
| 36871  | 0     |        | 0     |        |
| 36874  | 2     | 2      | 0     |        |
| 36878  | 2     | 2      | 3     | 1      |
| 36887  | 1     | 0      | 0     |        |
| 36889  | 2     | 1      | 0     |        |
| 36891  | 0     |        | 0     |        |
| 36903  | 2     | 2      | 1     | 2      |
| 36905  | 0     |        | 0     |        |
| 36913  | 0     |        | 0     |        |
| 36949  | 1     | 2      | 1     | 2      |
| 36954  | 3     | 3      | 3     | 3      |
| 36962  | 1     | 2      | 1     | 1      |
| 36965  | 2     | 2      | 2     | 2      |
| 36970  | 0     |        | 0     |        |
| 36979  | 2     | 1      | 2     | 1      |
| 36990  | 1     | 1      | 1     | 2      |
| 36991  | 0     |        | 1     | 0      |
| 36992  | 1     | 1      | 0     |        |
| 37015  | 0     |        | 0     |        |
| 37017  | 0     |        | 0     |        |
| 37020  | 0     |        | 0     |        |
| 37033  | 2     | 1      | 1     | 1      |
| 37041  | 3     | 1      | 0     |        |
| 37048  | 3     | 2      | 2     | 1      |
| 37050  | 0     |        | 0     |        |
| 37054  | 2     | 2      | 1     | 1      |
| 37057  | 2     | 2      | 0     |        |

| respid | Q20_1 | Q20a_1 | Q21_1 | Q21a_1 |
|--------|-------|--------|-------|--------|
| 37067  | 0     |        | 0     |        |
| 37074  | 0     |        | 0     |        |
| 37088  | 1     | 1      | 0     |        |
| 37090  | 1     | 0      | 2     | 1      |
| 37110  | 4     | 3      | 3     | 3      |
| 37122  | 0     |        | 0     |        |
| 37124  | 2     | 2      | 1     | 2      |
| 37126  | 0     |        | 0     |        |
| 37129  | 2     | 1      | 5     | 2      |
| 37130  | 1     | 0      | 0     |        |
| 37142  | 1     | 3      | 0     |        |
| 37160  | 0     |        | 0     |        |
| 37168  | 0     |        | 0     |        |
| 37169  | 3     | 2      | 4     | 4      |
| 37191  | 3     | 1      | 1     | 0      |
| 37197  | 3     | 2      | 1     | 1      |
| 37204  | 1     | 2      | 0     |        |
| 37213  | 2     | 2      | 2     | 2      |
| 37238  | 3     | 2      | 0     |        |
| 37242  | 0     |        | 0     |        |
| 37243  | 3     | 4      | 3     | 3      |
| 37275  | 2     | 1      | 0     |        |
| 37305  | 2     | 2      | 1     | 0      |
| 37357  | 2     | 1      | 2     | 1      |
| 37365  | 2     | 2      | 1     | 1      |
| 37370  | 0     |        | 0     |        |
| 37406  | 3     | 2      | 3     | 2      |
| 37410  | 0     |        | 0     |        |
| 37411  | 4     | 3      | 4     | 3      |
| 37427  | 1     | 2      | 0     |        |
| 37437  | 2     | 3      | 2     | 2      |
| 37440  | 2     | 1      | 1     | 1      |

| respid | Q20_1 | Q20a_1 | Q21_1 | Q21a_1 |
|--------|-------|--------|-------|--------|
| 37452  | 1     | 0      | 0     |        |
| 37465  | 2     | 2      | 2     | 2      |
| 37468  | 5     | 4      | 2     | 2      |
| 37469  | 1     | 1      | 0     |        |
| 37477  | 0     |        | 2     | 3      |
| 37509  | 0     |        | 0     |        |
| 37513  | 4     | 3      | 4     | 4      |
| 37534  | 3     | 2      | 2     | 1      |
| 37537  | 0     |        | 0     |        |
| 37560  | 2     | 1      | 1     | 1      |
| 37566  | 3     | 2      | 3     | 2      |
| 37572  | 2     | 1      | 0     |        |
| 37574  | 4     | 2      | 0     |        |
| 37575  | 0     |        | 0     |        |
| 37590  | 3     | 4      | 2     | 1      |
| 37593  | 2     | 0      | 1     | 1      |
| 37599  | 0     |        | 0     |        |
| 37641  | 1     | 0      | 0     |        |
| 37651  | 1     | 1      | 1     | 1      |
| 37670  | 0     |        | 0     |        |
| 37680  | 3     | 1      | 3     | 3      |
| 37690  | 0     |        | 1     | 2      |
| 37694  | 0     |        | 0     |        |
| 37705  | 0     |        | 0     |        |
| 37710  | 2     | 2      | 2     | 2      |
| 37719  | 3     | 3      | 0     |        |
| 37741  | 2     | 1      | 2     | 1      |
| 37752  | 1     | 0      | 0     |        |
| 37755  | 3     | 2      | 4     | 2      |
| 37757  | 0     |        | 0     |        |
| 37783  | 0     |        | 0     |        |
| 37793  | 3     | 3      | 3     | 3      |

| respid | Q20_1 | Q20a_1 | Q21_1 | Q21a_1 |
|--------|-------|--------|-------|--------|
| 37800  | 2     | 1      | 1     | 1      |
| 37801  | 1     | 4      | 0     |        |
| 37820  | 4     | 2      | 4     | 3      |
| 37826  | 3     | 2      | 3     | 2      |
| 37835  | 2     | 1      | 1     | 2      |
| 37839  | 2     | 2      | 2     | 2      |
| 37871  | 4     | 2      | 4     | 3      |
| 37876  | 0     |        | 1     | 1      |
| 37879  | 2     | 1      | 0     |        |
| 37894  | 0     |        | 0     |        |
| 37895  | 2     | 2      | 2     | 2      |
| 37901  | 0     |        | 1     | 2      |
| 37926  | 1     | 1      | 1     | 1      |
| 37937  | 1     | 1      | 1     | 1      |
| 37938  | 0     |        | 0     |        |
| 37959  | 0     |        | 0     |        |
| 37970  | 0     |        | 0     |        |
| 37972  | 3     | 2      | 2     | 2      |
| 37988  | 2     | 1      | 2     | 1      |
| 37989  | 2     | 1      | 2     | 2      |
| 38000  | 0     |        | 0     |        |
| 38028  | 4     | 3      | 3     | 3      |
| 38042  | 2     | 2      | 3     | 2      |
| 38052  | 1     | 1      | 0     |        |
| 38056  | 1     | 0      | 0     |        |
| 38106  | 1     | 1      | 1     | 1      |
| 38114  | 3     | 4      | 3     | 3      |
| 38134  | 0     |        | 0     |        |
| 38135  | 1     | 1      | 0     |        |
| 38139  | 2     | 1      | 1     | 1      |
| 38160  | 1     | 1      | 0     |        |
| 38164  | 2     | 4      | 4     | 2      |

| respid | Q20_1 | Q20a_1 | Q21_1 | Q21a_1 |
|--------|-------|--------|-------|--------|
| 38168  | 0     |        | 0     |        |
| 38173  | 0     |        | 0     |        |
| 38193  | 0     |        | 2     | 3      |
| 38204  | 0     |        | 0     |        |
| 38206  | 1     | 1      | 0     |        |
| 38233  | 1     | 3      | 1     | 3      |
| 38242  | 2     | 2      | 1     | 3      |
| 38245  | 0     |        | 0     |        |
| 38261  | 2     | 2      | 2     | 2      |
| 38288  | 0     |        | 0     |        |
| 38296  | 2     | 2      | 1     | 1      |
| 38299  | 2     | 1      | 1     | 1      |
| 38300  | 3     | 2      | 3     | 2      |
| 38303  | 1     | 0      | 0     |        |
| 38317  | 1     | 0      | 0     |        |
| 38328  | 3     | 3      | 0     |        |
| 38333  | 1     | 2      | 0     |        |
| 38336  | 0     |        | 0     |        |
| 38338  | 0     |        | 1     | 4      |
| 38342  | 0     |        | 0     |        |
| 38360  | 0     |        | 0     |        |
| 38362  | 0     |        | 0     |        |
| 38364  | 0     |        | 0     |        |
| 38402  | 4     | 2      | 1     | 1      |
| 38423  | 1     | 2      | 1     | 3      |
| 38424  | 1     | 0      | 1     | 1      |
| 38435  | 4     | 1      | 2     | 3      |
| 38450  | 0     |        | 0     |        |
| 38455  | 0     |        | 0     |        |
| 38467  | 1     | 3      | 5     | 4      |
| 38468  | 2     | 4      | 0     |        |
| 38472  | 3     | 2      | 0     |        |

| respid | Q20_1 | Q20a_1 | Q21_1 | Q21a_1 |
|--------|-------|--------|-------|--------|
| 38484  | 0     |        | 0     |        |
| 38498  | 0     |        | 0     |        |
| 38507  | 0     |        | 0     |        |
| 38511  | 2     | 1      | 1     | 1      |
| 38524  | 5     | 3      | 4     | 3      |
| 38526  | 2     | 2      | 0     |        |
| 38534  | 1     | 2      | 1     | 1      |
| 38536  | 1     | 1      | 0     |        |
| 38539  | 1     | 1      | 0     |        |
| 38547  | 0     |        | 0     |        |
| 38549  | 1     | 0      | 0     |        |
| 38575  | 2     | 2      | 1     | 1      |
| 38579  | 2     | 2      | 0     |        |
| 38585  | 1     | 1      | 0     |        |
| 38589  | 1     | 3      | 1     | 3      |
| 38595  | 4     | 2      | 2     | 3      |
| 38602  | 0     |        | 0     |        |
| 38603  | 3     | 3      | 2     | 1      |
| 38612  | 1     | 1      | 1     | 1      |
| 38621  | 3     | 3      | 4     | 3      |
| 38624  | 3     | 3      | 2     | 2      |
| 38636  | 0     |        | 0     |        |
| 38656  | 1     | 1      | 0     |        |
| 38668  | 0     |        | 0     |        |
| 38675  | 1     | 1      | 0     |        |
| 38676  | 0     |        | 0     |        |
| 38682  | 2     | 2      | 3     | 2      |
| 38689  | 1     | 0      | 0     |        |
| 38702  | 0     |        | 0     |        |
| 38704  | 3     | 3      | 3     | 3      |
| 38713  | 1     | 0      | 0     |        |
| 38718  | 5     | 0      | 0     |        |

| respid | Q20_1 | Q20a_1 | Q21_1 | Q21a_1 |
|--------|-------|--------|-------|--------|
| 38725  | 0     |        | 0     |        |
| 38730  | 3     | 2      | 3     | 2      |
| 38737  | 2     | 2      | 1     | 1      |
| 38738  | 2     | 3      | 3     | 3      |
| 38744  | 0     |        | 0     |        |
| 38746  | 0     |        | 0     |        |
| 38753  | 0     |        | 0     |        |
| 38756  | 2     | 2      | 2     | 2      |
| 38760  | 1     | 1      | 0     |        |
| 38762  | 5     | 3      | 2     | 2      |
| 38765  | 1     | 1      | 0     |        |
| 38769  | 1     | 1      | 1     | 1      |
| 38781  | 3     | 3      | 4     | 3      |
| 38786  | 0     |        | 0     |        |
| 38790  | 2     | 1      | 1     | 1      |
| 38793  | 0     |        | 0     |        |
| 38797  | 1     | 1      | 0     |        |
| 38802  | 3     | 2      | 3     | 2      |
| 38815  | 3     | 2      | 2     | 2      |
| 38826  | 4     | 4      | 3     | 3      |
| 38828  | 0     |        | 1     | 0      |
| 38829  | 3     | 3      | 2     | 2      |
| 38835  | 2     | 3      | 2     | 2      |
| 38842  | 3     | 2      | 3     | 4      |
| 38853  | 0     |        | 0     |        |
| 38855  | 3     | 2      | 3     | 3      |
| 38860  | 3     | 2      | 2     | 2      |
| 38869  | 2     | 2      | 0     |        |
| 38882  | 4     | 2      | 0     |        |
| 38897  | 4     | 0      | 0     |        |
| 38903  | 1     | 2      | 3     | 4      |
| 38910  | 3     | 3      | 3     | 3      |

| respid | Q20_1 | Q20a_1 | Q21_1 | Q21a_1 |
|--------|-------|--------|-------|--------|
| 38948  | 2     | 2      | 4     | 4      |
| 38949  | 3     | 3      | 4     | 4      |
| 38953  | 3     | 3      | 2     | 2      |
| 38989  | 2     | 1      | 1     | 1      |
| 38997  | 2     | 1      | 3     | 1      |
| 38999  | 2     | 1      | 0     |        |
| 39002  | 2     | 3      | 3     | 3      |
| 39003  | 2     | 4      | 3     | 2      |
| 39006  | 2     | 0      | 0     |        |
| 39014  | 0     |        | 0     |        |
| 39017  | 4     | 4      | 4     | 3      |
| 39018  | 4     | 3      | 4     | 3      |
| 39025  | 3     | 3      | 2     | 3      |
| 39031  | 0     |        | 0     |        |
| 39061  | 0     |        | 1     | 2      |
| 39131  | 0     |        | 0     |        |
| 39153  | 2     | 4      | 5     | 4      |
| 39194  | 1     | 3      | 1     | 3      |
| 39204  | 1     | 1      | 0     |        |
| 39208  | 1     | 1      | 2     | 2      |
| 39213  | 2     | 3      | 2     | 3      |
| 39231  | 0     |        | 1     | 1      |
| 39251  | 0     |        | 1     | 1      |
| 39257  | 2     | 2      | 1     | 2      |
| 39262  | 4     | 4      | 0     |        |
| 39269  | 2     | 3      | 2     | 3      |
| 39272  | 0     |        | 1     | 2      |
| 39280  | 2     | 1      | 2     | 2      |
| 39294  | 2     | 3      | 2     | 2      |
| 39297  | 2     | 2      | 3     | 2      |
| 39300  | 1     | 2      | 0     |        |
| 39307  | 1     | 1      | 0     |        |



| respid | Q20_1 | Q20a_1 | Q21_1 | Q21a_1 |
|--------|-------|--------|-------|--------|
| 39320  | 0     |        | 3     | 4      |
| 39333  | 4     | 0      | 0     |        |
| 39335  | 2     | 3      | 2     | 3      |
| 39339  | 1     | 1      | 0     |        |
| 39375  | 0     |        | 0     |        |
| 39377  | 0     |        | 1     | 4      |
| 39380  | 2     | 2      | 0     |        |
| 39425  | 4     | 1      | 0     |        |
| 39590  | 0     |        | 0     |        |
| 40529  | 0     |        | 0     |        |
| 40702  | 1     | 0      | 1     | 0      |
| 40788  | 0     |        | 0     |        |
| 40841  | 1     | 1      | 0     |        |
| 40965  | 0     |        | 0     |        |
| 41092  | 2     | 1      | 2     | 1      |
| 41534  | 0     |        | 0     |        |
| 41919  | 0     |        | 0     |        |
| 42110  | 0     |        | 0     |        |
| 42135  | 2     | 2      | 1     | 2      |
| 42142  | 3     | 1      | 1     | 0      |
| 42163  | 0     |        | 0     |        |
| 42164  | 0     |        | 0     |        |
| 42172  | 0     |        | 1     | 1      |
| 42177  | 0     |        | 0     |        |
| 42181  | 1     | 0      | 0     |        |
| 42193  | 3     | 2      | 3     | 2      |
| 42196  | 0     |        | 1     | 1      |
| 42202  | 0     |        | 0     |        |
| 42248  | 2     | 1      | 1     | 0      |
| 42283  | 3     | 1      | 3     | 1      |
| 42284  | 1     | 1      | 2     | 1      |
| 42323  | 0     |        | 0     |        |

| respid | Q20_1 | Q20a_1 | Q21_1 | Q21a_1 |
|--------|-------|--------|-------|--------|
| 42349  | 1     | 0      | 0     |        |
| 42351  | 0     |        | 0     |        |
| 42357  | 1     | 0      | 0     |        |
| 42366  | 0     |        | 0     |        |
| 42380  | 3     | 0      | 0     |        |
| 42414  | 3     | 3      | 3     | 1      |
| 42420  | 3     | 3      | 3     | 3      |
| 42454  | 0     |        | 0     |        |
| 42458  | 2     | 1      | 0     |        |
| 42461  | 1     | 0      | 1     | 0      |
| 42488  | 2     | 2      | 1     | 1      |
| 42511  | 1     | 4      | 0     |        |
| 42512  | 0     |        | 0     |        |
| 42530  | 1     | 1      | 1     | 1      |
| 42531  | 3     | 4      | 3     | 3      |
| 42533  | 5     | 4      | 0     |        |
| 42549  | 1     | 1      | 1     | 1      |
| 42550  | 1     | 1      | 2     | 1      |
| 42553  | 0     |        | 0     |        |
| 42562  | 2     | 2      | 2     | 2      |
| 42567  | 0     |        | 0     |        |
| 42589  | 1     | 1      | 1     | 1      |
| 42604  | 2     | 1      | 1     | 0      |
| 42618  | 0     |        | 0     |        |
| 42621  | 3     | 2      | 3     | 2      |
| 42627  | 1     | 1      | 0     |        |
| 42641  | 1     | 0      | 0     |        |
| 42655  | 3     | 2      | 4     | 3      |
| 42666  | 1     | 2      | 0     |        |
| 42667  | 2     | 1      | 2     | 1      |
| 42697  | 2     | 2      | 1     | 1      |
| 42703  | 1     | 0      | 1     | 0      |

| respid | Q20_1 | Q20a_1 | Q21_1 | Q21a_1 |
|--------|-------|--------|-------|--------|
| 42712  | 1     | 1      | 1     | 1      |
| 42731  | 3     | 1      | 1     | 1      |
| 42780  | 2     | 1      | 0     |        |
| 42785  | 1     | 1      | 1     | 1      |
| 42788  | 0     |        | 0     |        |
| 42802  | 2     | 2      | 2     | 1      |
| 42818  | 1     | 1      | 1     | 1      |
| 42821  | 2     | 2      | 2     | 1      |
| 42824  | 1     | 1      | 0     |        |
| 42831  | 1     | 1      | 0     |        |
| 42836  | 2     | 2      | 2     | 1      |
| 42864  | 1     | 1      | 1     | 1      |
| 42875  | 1     | 1      | 0     |        |
| 42891  | 4     | 4      | 4     | 4      |
| 42897  | 1     | 0      | 0     |        |
| 42900  | 0     |        | 1     | 0      |
| 42902  | 1     | 2      | 1     | 2      |
| 42921  | 1     | 1      | 0     |        |
| 42925  | 1     | 1      | 0     |        |
| 42944  | 0     |        | 0     |        |
| 42950  | 0     |        | 0     |        |
| 42963  | 0     |        | 0     |        |
| 42967  | 1     | 1      | 0     |        |
| 42985  | 1     | 0      | 0     |        |
| 42990  | 1     | 2      | 0     |        |
| 42996  | 2     | 0      | 4     | 1      |
| 43002  | 4     | 2      | 1     | 1      |
| 43004  | 2     | 0      | 2     | 1      |
| 43012  | 0     |        | 0     |        |
| 43027  | 0     |        | 0     |        |
| 43028  | 1     | 1      | 0     |        |
| 43029  | 1     | 0      | 0     |        |

| respid | Q20_1 | Q20a_1 | Q21_1 | Q21a_1 |
|--------|-------|--------|-------|--------|
| 43031  | 3     | 2      | 2     | 1      |
| 43042  | 0     |        | 0     |        |
| 43054  | 1     | 1      | 1     | 1      |
| 43058  | 0     |        | 0     |        |
| 43064  | 0     |        | 0     |        |
| 43069  | 1     | 1      | 0     |        |
| 43071  | 0     |        | 0     |        |
| 43072  | 1     | 0      | 0     |        |
| 43077  | 1     | 1      | 1     | 1      |
| 43078  | 0     |        | 0     |        |
| 43082  | 0     |        | 0     |        |
| 43092  | 0     |        | 1     | 1      |
| 43096  | 3     | 2      | 3     | 2      |
| 43109  | 0     |        | 0     |        |
| 43113  | 0     |        | 0     |        |
| 43123  | 2     | 1      | 1     | 0      |
| 43127  | 1     | 1      | 1     | 1      |
| 43128  | 0     |        | 0     |        |
| 43129  | 2     | 1      | 0     |        |
| 43133  | 2     | 2      | 2     | 2      |
| 43140  | 0     |        | 0     |        |
| 43143  | 0     |        | 0     |        |
| 43149  | 0     |        | 0     |        |
| 43150  | 2     | 1      | 2     | 1      |
| 43153  | 3     | 3      | 2     | 2      |
| 43170  | 1     | 0      | 0     |        |
| 43187  | 1     | 1      | 1     | 1      |
| 43188  | 4     | 2      | 1     | 1      |
| 43198  | 0     |        | 0     |        |
| 43208  | 3     | 0      | 0     |        |
| 43216  | 3     | 1      | 1     | 2      |
| 43222  | 0     |        | 3     | 1      |

| respid | Q20_1 | Q20a_1 | Q21_1 | Q21a_1 |
|--------|-------|--------|-------|--------|
| 43224  | 1     | 1      | 0     |        |
| 43230  | 0     |        | 0     |        |
| 43231  | 0     |        | 1     | 2      |
| 43265  | 0     |        | 0     |        |
| 43270  | 2     | 1      | 2     | 2      |
| 43283  | 1     | 2      | 2     | 2      |
| 43295  | 1     | 2      | 2     | 2      |
| 43297  | 1     | 0      | 0     |        |
| 43299  | 1     | 1      | 1     | 2      |
| 43307  | 0     |        | 0     |        |
| 43316  | 2     | 2      | 3     | 1      |
| 43318  | 1     | 1      | 1     | 1      |
| 43319  | 0     |        | 0     |        |
| 43324  | 0     |        | 1     | 1      |
| 43325  | 5     | 4      | 0     |        |
| 43327  | 2     | 0      | 1     | 0      |
| 43338  | 0     |        | 0     |        |
| 43342  | 3     | 1      | 0     |        |
| 43348  | 0     |        | 0     |        |
| 43395  | 1     | 1      | 1     | 1      |
| 43404  | 1     | 1      | 2     | 1      |
| 43406  | 2     | 1      | 1     | 1      |
| 43407  | 0     |        | 0     |        |
| 43411  | 1     | 0      | 1     | 0      |
| 43416  | 1     | 2      | 3     | 0      |
| 43428  | 2     | 1      | 3     | 1      |
| 43429  | 2     | 2      | 2     | 2      |
| 43432  | 1     | 1      | 0     |        |
| 43443  | 0     |        | 0     |        |
| 43455  | 0     |        | 0     |        |
| 43457  | 1     | 1      | 1     | 1      |
| 43458  | 0     |        | 0     |        |

| respid | Q20_1 | Q20a_1 | Q21_1 | Q21a_1 |
|--------|-------|--------|-------|--------|
| 43477  | 4     | 2      | 3     | 3      |
| 43520  | 0     |        | 0     |        |
| 43521  | 3     | 1      | 2     | 1      |
| 43550  | 1     | 0      | 0     |        |
| 43551  | 2     | 2      | 2     | 2      |
| 43554  | 4     | 2      | 3     | 2      |
| 43560  | 1     | 0      | 1     | 0      |
| 43569  | 0     |        | 0     |        |
| 43583  | 0     |        | 0     |        |
| 43590  | 0     |        | 0     |        |
| 43591  | 0     |        | 0     |        |
| 43595  | 0     |        | 0     |        |
| 43599  | 3     | 2      | 1     | 1      |
| 43606  | 2     | 2      | 1     | 1      |
| 43609  | 0     |        | 0     |        |
| 43629  | 2     | 0      | 0     |        |
| 43636  | 2     | 1      | 2     | 1      |
| 43661  | 1     | 0      | 0     |        |
| 43668  | 0     |        | 1     | 0      |
| 43672  | 0     |        | 0     |        |
| 43677  | 2     | 2      | 2     | 2      |
| 43683  | 3     | 2      | 0     |        |
| 43708  | 3     | 2      | 2     | 2      |
| 43713  | 0     |        | 0     |        |
| 43718  | 0     |        | 0     |        |
| 43725  | 1     | 0      | 0     |        |
| 43747  | 1     | 1      | 0     |        |
| 43755  | 5     | 0      | 0     |        |
| 43770  | 1     | 0      | 0     |        |
| 43775  | 2     | 2      | 3     | 1      |
| 43788  | 0     |        | 0     |        |
| 43790  | 3     | 2      | 3     | 2      |

| respid | Q20_1 | Q20a_1 | Q21_1 | Q21a_1 |
|--------|-------|--------|-------|--------|
| 43797  | 2     | 2      | 1     | 2      |
| 43798  | 2     | 1      | 1     | 1      |
| 43811  | 3     | 2      | 2     | 3      |
| 43819  | 1     | 1      | 1     | 1      |
| 43821  | 1     | 2      | 1     | 2      |
| 43822  | 0     |        | 0     |        |
| 43825  | 2     | 2      | 3     | 3      |
| 43826  | 3     | 2      | 3     | 2      |
| 43831  | 4     | 2      | 2     | 2      |
| 43836  | 1     | 1      | 1     | 1      |
| 43852  | 2     | 1      | 2     | 1      |
| 43857  | 1     | 2      | 0     |        |
| 43858  | 2     | 3      | 1     | 2      |
| 43859  | 1     | 1      | 1     | 1      |
| 43863  | 2     | 1      | 0     |        |
| 43868  | 1     | 1      | 1     | 2      |
| 43872  | 2     | 2      | 2     | 2      |
| 43874  | 1     | 2      | 1     | 1      |
| 43882  | 0     |        | 0     |        |
| 43886  | 0     |        | 0     |        |
| 43903  | 3     | 2      | 0     |        |
| 43929  | 1     | 1      | 1     | 0      |
| 43932  | 1     | 0      | 1     | 1      |
| 43936  | 1     | 0      | 0     |        |
| 43962  | 0     |        | 0     |        |
| 43964  | 0     |        | 0     |        |
| 43968  | 1     | 1      | 1     | 2      |
| 43979  | 3     | 2      | 2     | 2      |
| 44006  | 4     | 3      | 4     | 3      |
| 44009  | 2     | 2      | 3     | 3      |
| 44023  | 2     | 2      | 1     | 1      |
| 44035  | 1     | 1      | 1     | 1      |

| respid | Q20_1 | Q20a_1 | Q21_1 | Q21a_1 |
|--------|-------|--------|-------|--------|
| 44038  | 3     | 3      | 2     | 2      |
| 44039  | 2     | 1      | 1     | 1      |
| 44043  | 1     | 1      | 1     | 1      |
| 44048  | 1     | 1      | 1     | 1      |
| 44050  | 3     | 0      | 0     |        |
| 44051  | 1     | 1      | 1     | 1      |
| 44061  | 1     | 2      | 1     | 1      |
| 44063  | 1     | 2      | 1     | 1      |
| 44072  | 1     | 2      | 1     | 2      |
| 44075  | 1     | 2      | 3     | 1      |
| 44089  | 2     | 1      | 1     | 2      |
| 44090  | 5     | 4      | 2     | 3      |
| 44091  | 3     | 2      | 1     | 2      |
| 44092  | 1     | 1      | 1     | 1      |
| 44110  | 1     | 1      | 1     | 1      |
| 44112  | 2     | 1      | 2     | 2      |
| 44114  | 1     | 1      | 1     | 2      |
| 44143  | 2     | 2      | 2     | 2      |
| 44179  | 1     | 1      | 0     |        |
| 44234  | 1     | 0      | 0     |        |
| 44236  | 0     |        | 0     |        |
| 44239  | 1     | 1      | 1     | 2      |
| 44241  | 2     | 1      | 1     | 1      |
| 44253  | 0     |        | 0     |        |
| 44260  | 1     | 1      | 2     | 1      |
| 44261  | 1     | 1      | 1     | 2      |
| 44263  | 1     | 2      | 2     | 1      |
| 44264  | 1     | 0      | 0     |        |
| 44265  | 0     |        | 0     |        |
| 44267  | 1     | 2      | 1     | 0      |
| 44306  | 3     | 1      | 2     | 1      |
| 44309  | 4     | 2      | 4     | 2      |



| respid | Q20_1 | Q20a_1 | Q21_1 | Q21a_1 |
|--------|-------|--------|-------|--------|
| 44310  | 5     | 0      | 0     |        |
| 44361  | 0     |        | 0     |        |
| 44380  | 3     | 1      | 0     |        |
| 44386  | 0     |        | 1     | 0      |
| 44419  | 5     | 1      | 0     |        |
| 44426  | 1     | 1      | 0     |        |
| 44479  | 0     |        | 0     |        |
| 44484  | 0     |        | 0     |        |
| 44487  | 0     |        | 0     |        |
| 44509  | 1     | 1      | 0     |        |
| 44540  | 2     | 1      | 0     |        |
| 44551  | 2     | 2      | 2     | 2      |
| 44553  | 1     | 1      | 0     |        |
| 44650  | 1     | 1      | 0     |        |
| 44665  | 3     | 1      | 1     | 1      |
| 44779  | 2     | 1      | 1     | 0      |
| 44797  | 3     | 2      | 3     | 1      |
| 44807  | 1     | 1      | 0     |        |
| 44815  | 2     | 1      | 3     | 2      |
| 44836  | 2     | 1      | 0     |        |
| 44868  | 3     | 3      | 1     | 1      |
| 44927  | 2     | 1      | 2     | 1      |
| 44983  | 0     |        | 0     |        |
| 45040  | 1     | 0      | 0     |        |
| 45051  | 1     | 0      | 1     | 1      |
| 45067  | 1     | 1      | 1     | 1      |
| 45074  | 0     |        | 0     |        |
| 45115  | 3     | 0      | 0     |        |
| 45187  | 4     | 2      | 3     | 3      |
| 45221  | 3     | 2      | 0     |        |
| 45279  | 3     | 1      | 1     | 1      |
| 45308  | 0     |        | 1     | 1      |

| respid | Q20_1 | Q20a_1 | Q21_1 | Q21a_1 |
|--------|-------|--------|-------|--------|
| 45317  | 0     |        | 0     |        |
| 45379  | 1     | 2      | 1     | 1      |
| 45451  | 0     |        | 0     |        |
| 45472  | 2     | 1      | 2     | 1      |
| 45474  | 3     | 3      | 2     | 4      |
| 45544  | 1     | 4      | 1     | 4      |
| 45561  | 3     | 2      | 1     | 1      |
| 45596  | 3     | 2      | 0     |        |

**InstrumIPSS**

**IPSS/ICS**

**Symptom** Storage

Voiding

**Type of R**Symptom

Bother

Symptom

Bother

**Descripti**Urgency

Symptom Bother

Slow/ Weak stream

Symptom Bother

respid Q22\_1

Q22a\_1

Q23\_1

Q23a\_1

|     |   |   |  |   |   |
|-----|---|---|--|---|---|
| 241 | 0 |   |  | 0 |   |
| 242 | 0 |   |  | 1 | 0 |
| 243 | 1 | 1 |  | 2 | 2 |
| 244 | 2 | 3 |  | 1 | 1 |
| 245 | 1 | 1 |  | 0 |   |
| 246 | 0 |   |  | 1 | 1 |
| 247 | 3 | 3 |  | 2 | 2 |
| 253 | 0 |   |  | 0 |   |
| 256 | 1 | 1 |  | 5 | 2 |
| 257 | 1 | 1 |  | 1 | 1 |
| 258 | 0 |   |  | 1 | 0 |
| 259 | 0 |   |  | 0 |   |
| 263 | 0 |   |  | 0 |   |
| 264 | 0 |   |  | 0 |   |
| 265 | 4 | 3 |  | 4 | 3 |
| 266 | 0 |   |  | 0 |   |
| 268 | 1 | 1 |  | 1 | 1 |
| 270 | 1 | 0 |  | 1 | 0 |
| 272 | 0 |   |  | 3 | 1 |
| 274 | 0 |   |  | 2 | 1 |

| respid | Q22_1 | Q22a_1 | Q23_1 | Q23a_1 |
|--------|-------|--------|-------|--------|
| 275    | 0     |        | 0     |        |
| 276    | 0     |        | 0     |        |
| 277    | 0     |        | 3     | 1      |
| 279    | 1     | 1      | 1     | 1      |
| 286    | 4     | 4      | 2     | 1      |
| 290    | 0     |        | 0     |        |
| 291    | 1     | 0      | 0     |        |
| 295    | 0     |        | 0     |        |
| 297    | 1     | 1      | 3     | 1      |
| 299    | 1     | 1      | 1     | 1      |
| 300    | 1     | 1      | 2     | 2      |
| 303    | 0     |        | 1     | 0      |
| 304    | 0     |        | 1     | 0      |
| 306    | 1     | 2      | 0     |        |
| 307    | 0     |        | 1     | 0      |
| 312    | 5     | 3      | 5     | 3      |
| 315    | 1     | 1      | 1     | 1      |
| 317    | 0     |        | 1     | 1      |
| 322    | 1     | 2      | 1     | 1      |
| 335    | 0     |        | 1     | 1      |
| 374    | 2     | 2      | 3     | 2      |
| 378    | 1     | 1      | 1     | 1      |
| 380    | 1     | 1      | 1     | 1      |
| 382    | 1     | 1      | 5     | 3      |
| 384    | 1     | 1      | 2     | 2      |
| 385    | 1     | 1      | 2     | 1      |
| 395    | 0     |        | 1     | 2      |
| 396    | 0     |        | 0     |        |
| 398    | 0     |        | 0     |        |
| 402    | 4     | 3      | 4     | 3      |
| 414    | 1     | 1      | 3     | 0      |
| 415    | 0     |        | 0     |        |

| respid | Q22_1 | Q22a_1 | Q23_1 | Q23a_1 |
|--------|-------|--------|-------|--------|
| 416    | 0     |        | 0     |        |
| 420    | 1     | 1      | 4     | 2      |
| 421    | 1     | 1      | 1     | 1      |
| 422    | 0     |        | 0     |        |
| 423    | 0     |        | 1     | 0      |
| 424    | 0     |        | 0     |        |
| 425    | 0     |        | 5     | 1      |
| 428    | 0     |        | 0     |        |
| 429    | 0     |        | 0     |        |
| 431    | 0     |        | 1     | 0      |
| 437    | 1     | 0      | 0     |        |
| 438    | 5     | 0      | 0     |        |
| 441    | 0     |        | 1     | 1      |
| 444    | 0     |        | 0     |        |
| 448    | 0     |        | 1     | 0      |
| 449    | 1     | 1      | 1     | 1      |
| 457    | 0     |        | 1     | 0      |
| 460    | 0     |        | 1     | 0      |
| 469    | 1     | 1      | 1     | 2      |
| 471    | 0     |        | 0     |        |
| 473    | 2     | 2      | 0     |        |
| 476    | 1     | 1      | 1     | 1      |
| 479    | 0     |        | 0     |        |
| 485    | 1     | 0      | 0     |        |
| 488    | 1     | 1      | 1     | 1      |
| 494    | 0     |        | 0     |        |
| 496    | 0     |        | 1     | 0      |
| 501    | 0     |        | 0     |        |
| 502    | 2     | 2      | 1     | 2      |
| 503    | 1     | 2      | 0     |        |
| 506    | 0     |        | 0     |        |
| 514    | 1     | 1      | 1     | 1      |

| respid | Q22_1 | Q22a_1 | Q23_1 | Q23a_1 |
|--------|-------|--------|-------|--------|
| 515    | 1     | 1      | 0     |        |
| 516    | 0     |        | 0     |        |
| 519    | 3     | 2      | 2     | 1      |
| 522    | 0     |        | 0     |        |
| 525    | 0     |        | 2     | 0      |
| 528    | 0     |        | 0     |        |
| 532    | 0     |        | 1     | 1      |
| 536    | 1     | 2      | 1     | 1      |
| 539    | 0     |        | 0     |        |
| 540    | 1     | 1      | 0     |        |
| 547    | 1     | 1      | 0     |        |
| 551    | 0     |        | 0     |        |
| 554    | 1     | 1      | 1     | 1      |
| 558    | 1     | 1      | 1     | 1      |
| 563    | 1     | 0      | 1     | 1      |
| 564    | 1     | 1      | 1     | 1      |
| 565    | 1     | 1      | 1     | 0      |
| 567    | 0     |        | 0     |        |
| 569    | 1     | 1      | 1     | 0      |
| 572    | 1     | 1      | 1     | 1      |
| 574    | 0     |        | 0     |        |
| 583    | 1     | 1      | 1     | 1      |
| 589    | 0     |        | 0     |        |
| 592    | 1     | 1      | 1     | 1      |
| 593    | 0     |        | 0     |        |
| 594    | 2     | 3      | 4     | 3      |
| 597    | 0     |        | 1     | 0      |
| 601    | 0     |        | 0     |        |
| 607    | 1     | 1      | 1     | 1      |
| 610    | 0     |        | 1     | 1      |
| 612    | 4     | 4      | 4     | 4      |
| 627    | 0     |        | 1     | 1      |

| respid | Q22_1 | Q22a_1 | Q23_1 | Q23a_1 |
|--------|-------|--------|-------|--------|
| 631    | 0     |        | 0     |        |
| 633    | 1     | 1      | 0     |        |
| 636    | 0     |        | 3     | 0      |
| 656    | 1     | 1      | 0     |        |
| 659    | 0     |        | 0     |        |
| 670    | 0     |        | 5     | 0      |
| 672    | 2     | 0      | 0     |        |
| 673    | 1     | 1      | 1     | 1      |
| 675    | 0     |        | 0     |        |
| 676    | 2     | 2      | 2     | 2      |
| 679    | 1     | 2      | 4     | 2      |
| 683    | 1     | 0      | 1     | 0      |
| 684    | 1     | 1      | 4     | 2      |
| 690    | 0     |        | 1     | 0      |
| 701    | 5     | 3      | 5     | 3      |
| 709    | 1     | 1      | 5     | 3      |
| 719    | 0     |        | 0     |        |
| 726    | 0     |        | 0     |        |
| 730    | 0     |        | 1     | 0      |
| 731    | 0     |        | 0     |        |
| 732    | 0     |        | 0     |        |
| 733    | 0     |        | 0     |        |
| 735    | 0     |        | 0     |        |
| 738    | 0     |        | 0     |        |
| 740    | 0     |        | 1     | 0      |
| 742    | 0     |        | 1     | 1      |
| 744    | 0     |        | 0     |        |
| 749    | 0     |        | 0     |        |
| 751    | 0     |        | 0     |        |
| 752    | 0     |        | 0     |        |
| 753    | 3     | 3      | 1     | 0      |
| 755    | 0     |        | 0     |        |

| respid | Q22_1 | Q22a_1 | Q23_1 | Q23a_1 |
|--------|-------|--------|-------|--------|
| 756    | 0     |        | 0     |        |
| 759    | 0     |        | 0     |        |
| 760    | 0     |        | 1     | 1      |
| 763    | 0     |        | 0     |        |
| 764    | 0     |        | 0     |        |
| 765    | 1     | 0      | 0     |        |
| 766    | 1     | 0      | 1     | 0      |
| 767    | 0     |        | 0     |        |
| 771    | 1     | 1      | 4     | 2      |
| 773    | 0     |        | 1     | 0      |
| 774    | 0     |        | 1     | 0      |
| 775    | 4     | 2      | 3     | 2      |
| 776    | 1     | 1      | 1     | 1      |
| 778    | 1     | 2      | 3     | 2      |
| 780    | 0     |        | 0     |        |
| 781    | 0     |        | 0     |        |
| 782    | 0     |        | 1     | 1      |
| 783    | 1     | 0      | 0     |        |
| 786    | 3     | 2      | 2     | 2      |
| 788    | 0     |        | 0     |        |
| 792    | 0     |        | 1     | 0      |
| 794    | 2     | 3      | 1     | 2      |
| 795    | 0     |        | 0     |        |
| 799    | 1     | 1      | 1     | 1      |
| 800    | 0     |        | 0     |        |
| 801    | 2     | 2      | 2     | 1      |
| 804    | 0     |        | 0     |        |
| 806    | 0     |        | 0     |        |
| 807    | 0     |        | 2     | 1      |
| 808    | 0     |        | 5     | 3      |
| 809    | 0     |        | 0     |        |
| 811    | 0     |        | 0     |        |



| respid | Q22_1 | Q22a_1 | Q23_1 | Q23a_1 |
|--------|-------|--------|-------|--------|
| 812    | 0     |        | 0     |        |
| 815    | 0     |        | 0     |        |
| 817    | 0     |        | 0     |        |
| 818    | 0     |        | 0     |        |
| 819    | 0     |        | 0     |        |
| 821    | 2     | 2      | 0     |        |
| 824    | 0     |        | 0     |        |
| 825    | 0     |        | 0     |        |
| 828    | 0     |        | 1     | 0      |
| 832    | 2     | 1      | 2     | 2      |
| 834    | 1     | 1      | 1     | 1      |
| 835    | 3     | 3      | 3     | 2      |
| 836    | 0     |        | 0     |        |
| 837    | 0     |        | 0     |        |
| 840    | 0     |        | 2     | 1      |
| 841    | 0     |        | 2     | 0      |
| 845    | 0     |        | 0     |        |
| 846    | 0     |        | 0     |        |
| 849    | 0     |        | 1     | 0      |
| 852    | 0     |        | 0     |        |
| 854    | 1     | 1      | 5     | 1      |
| 856    | 0     |        | 0     |        |
| 858    | 0     |        | 0     |        |
| 859    | 1     | 1      | 1     | 0      |
| 861    | 0     |        | 0     |        |
| 863    | 0     |        | 0     |        |
| 864    | 1     | 1      | 3     | 1      |
| 866    | 0     |        | 0     |        |
| 869    | 0     |        | 0     |        |
| 870    | 0     |        | 1     | 1      |
| 871    | 0     |        | 0     |        |
| 873    | 1     | 1      | 4     | 3      |

| respid | Q22_1 | Q22a_1 | Q23_1 | Q23a_1 |
|--------|-------|--------|-------|--------|
| 879    | 0     |        | 0     |        |
| 880    | 0     |        | 0     |        |
| 881    | 0     |        | 1     | 1      |
| 882    | 1     | 1      | 0     |        |
| 885    | 0     |        | 0     |        |
| 886    | 0     |        | 0     |        |
| 887    | 3     | 2      | 3     | 2      |
| 888    | 0     |        | 1     | 0      |
| 889    | 0     |        | 4     | 3      |
| 890    | 1     | 0      | 1     | 0      |
| 900    | 0     |        | 0     |        |
| 901    | 0     |        | 0     |        |
| 902    | 1     | 1      | 0     |        |
| 903    | 0     |        | 0     |        |
| 906    | 1     | 1      | 0     |        |
| 907    | 1     | 1      | 0     |        |
| 908    | 1     | 1      | 1     | 1      |
| 910    | 0     |        | 0     |        |
| 911    | 1     | 1      | 1     | 1      |
| 912    | 1     | 1      | 0     |        |
| 915    | 0     |        | 0     |        |
| 923    | 0     |        | 1     | 1      |
| 925    | 1     | 1      | 0     |        |
| 926    | 0     |        | 0     |        |
| 929    | 0     |        | 0     |        |
| 932    | 5     | 4      | 0     |        |
| 933    | 0     |        | 5     | 3      |
| 934    | 0     |        | 0     |        |
| 938    | 2     | 1      | 2     | 1      |
| 941    | 0     |        | 0     |        |
| 942    | 0     |        | 0     |        |
| 943    | 0     |        | 0     |        |

| respid | Q22_1 | Q22a_1 | Q23_1 | Q23a_1 |
|--------|-------|--------|-------|--------|
| 945    | 0     |        | 0     |        |
| 946    | 0     |        | 0     |        |
| 947    | 0     |        | 2     | 0      |
| 948    | 0     |        | 0     |        |
| 949    | 0     |        | 0     |        |
| 952    | 0     |        | 0     |        |
| 956    | 0     |        | 0     |        |
| 957    | 0     |        | 0     |        |
| 959    | 0     |        | 0     |        |
| 961    | 0     |        | 0     |        |
| 962    | 3     | 3      | 2     | 3      |
| 965    | 0     |        | 0     |        |
| 967    | 1     | 1      | 1     | 1      |
| 969    | 0     |        | 0     |        |
| 970    | 0     |        | 0     |        |
| 973    | 0     |        | 0     |        |
| 974    | 0     |        | 0     |        |
| 975    | 0     |        | 0     |        |
| 976    | 0     |        | 0     |        |
| 977    | 0     |        | 1     | 2      |
| 979    | 0     |        | 0     |        |
| 981    | 0     |        | 0     |        |
| 983    | 0     |        | 0     |        |
| 987    | 0     |        | 1     | 1      |
| 991    | 0     |        | 0     |        |
| 992    | 1     | 0      | 0     |        |
| 993    | 0     |        | 0     |        |
| 994    | 1     | 1      | 0     |        |
| 995    | 1     | 2      | 3     | 2      |
| 998    | 0     |        | 0     |        |
| 1000   | 1     | 1      | 0     |        |
| 1001   | 3     | 2      | 0     |        |

| respid | Q22_1 | Q22a_1 | Q23_1 | Q23a_1 |
|--------|-------|--------|-------|--------|
| 1002   | 0     |        | 0     |        |
| 1004   | 0     |        | 0     |        |
| 1005   | 0     |        | 0     |        |
| 1006   | 2     | 2      | 1     | 1      |
| 1007   | 0     |        | 0     |        |
| 1009   | 0     |        | 0     |        |
| 1013   | 0     |        | 0     |        |
| 1015   | 0     |        | 0     |        |
| 1020   | 2     | 1      | 1     | 1      |
| 1022   | 0     |        | 0     |        |
| 1024   | 0     |        | 0     |        |
| 1025   | 0     |        | 0     |        |
| 1027   | 0     |        | 1     | 1      |
| 1031   | 0     |        | 4     | 1      |
| 1037   | 0     |        | 2     | 0      |
| 1039   | 0     |        | 0     |        |
| 1040   | 0     |        | 1     | 1      |
| 1056   | 2     | 1      | 1     | 0      |
| 1057   | 0     |        | 0     |        |
| 1062   | 0     |        | 0     |        |
| 1069   | 1     | 0      | 1     | 0      |
| 1070   | 0     |        | 0     |        |
| 1072   | 0     |        | 0     |        |
| 1076   | 0     |        | 0     |        |
| 1077   | 0     |        | 0     |        |
| 1078   | 0     |        | 0     |        |
| 1080   | 0     |        | 0     |        |
| 1094   | 2     | 2      | 0     |        |
| 1098   | 0     |        | 0     |        |
| 1099   | 0     |        | 0     |        |
| 1102   | 0     |        | 2     | 0      |
| 1110   | 0     |        | 0     |        |

| respid | Q22_1 | Q22a_1 | Q23_1 | Q23a_1 |
|--------|-------|--------|-------|--------|
| 1117   | 5     | 3      | 0     |        |
| 1119   | 0     |        | 0     |        |
| 1126   | 0     |        | 0     |        |
| 1127   | 0     |        | 0     |        |
| 1130   | 0     |        | 0     |        |
| 1131   | 1     | 1      | 0     |        |
| 1135   | 1     | 4      | 2     | 4      |
| 1138   | 1     | 1      | 1     | 1      |
| 1139   | 0     |        | 0     |        |
| 1140   | 0     |        | 0     |        |
| 1142   | 0     |        | 0     |        |
| 1143   | 0     |        | 0     |        |
| 1145   | 1     | 1      | 1     | 0      |
| 1149   | 0     |        | 0     |        |
| 1152   | 0     |        | 0     |        |
| 1160   | 0     |        | 0     |        |
| 1164   | 0     |        | 0     |        |
| 1165   | 1     | 1      | 0     |        |
| 1169   | 4     | 3      | 0     |        |
| 1170   | 1     | 0      | 0     |        |
| 1179   | 0     |        | 1     | 0      |
| 1180   | 0     |        | 0     |        |
| 1183   | 0     |        | 0     |        |
| 1187   | 0     |        | 0     |        |
| 1188   | 1     | 1      | 2     | 1      |
| 1193   | 0     |        | 1     | 0      |
| 1194   | 3     | 1      | 2     | 2      |
| 1197   | 0     |        | 0     |        |
| 1202   | 0     |        | 0     |        |
| 1204   | 4     | 4      | 3     | 3      |
| 1211   | 0     |        | 0     |        |
| 1224   | 0     |        | 0     |        |

| respid | Q22_1 | Q22a_1 | Q23_1 | Q23a_1 |
|--------|-------|--------|-------|--------|
| 1225   | 0     |        | 1     | 0      |
| 1230   | 0     |        | 0     |        |
| 1232   | 1     | 1      | 0     |        |
| 1233   | 1     | 2      | 3     | 2      |
| 1234   | 0     |        | 0     |        |
| 1235   | 1     | 1      | 1     | 1      |
| 1236   | 2     | 1      | 0     |        |
| 1237   | 1     | 1      | 0     |        |
| 1238   | 0     |        | 0     |        |
| 1239   | 0     |        | 0     |        |
| 1241   | 0     |        | 0     |        |
| 1242   | 0     |        | 0     |        |
| 1244   | 1     | 1      | 4     | 2      |
| 1245   | 0     |        | 4     | 2      |
| 1247   | 3     | 3      | 3     | 3      |
| 1248   | 0     |        | 0     |        |
| 1249   | 0     |        | 4     | 2      |
| 1250   | 0     |        | 0     |        |
| 1251   | 0     |        | 2     | 1      |
| 1252   | 0     |        | 0     |        |
| 1253   | 0     |        | 0     |        |
| 1254   | 2     | 3      | 2     | 2      |
| 1258   | 0     |        | 0     |        |
| 1260   | 1     | 0      | 0     |        |
| 1261   | 0     |        | 1     | 0      |
| 1262   | 0     |        | 2     | 2      |
| 1263   | 5     | 3      | 5     | 3      |
| 1264   | 0     |        | 1     | 0      |
| 1265   | 1     | 1      | 0     |        |
| 1266   | 1     | 1      | 0     |        |
| 1270   | 0     |        | 0     |        |
| 1272   | 3     | 3      | 0     |        |

| respid | Q22_1 | Q22a_1 | Q23_1 | Q23a_1 |
|--------|-------|--------|-------|--------|
| 1273   | 3     | 2      | 1     | 0      |
| 1276   | 1     | 2      | 1     | 2      |
| 1277   | 2     | 1      | 0     |        |
| 1278   | 1     | 1      | 4     | 1      |
| 1280   | 0     |        | 0     |        |
| 1281   | 0     |        | 1     | 1      |
| 1282   | 1     | 2      | 1     | 2      |
| 1283   | 0     |        | 1     | 0      |
| 1288   | 0     |        | 0     |        |
| 1289   | 0     |        | 2     | 1      |
| 1290   | 1     | 1      | 0     |        |
| 1291   | 0     |        | 0     |        |
| 1293   | 1     | 1      | 2     | 1      |
| 1294   | 4     | 2      | 4     | 2      |
| 1295   | 1     | 1      | 4     | 2      |
| 1296   | 2     | 1      | 3     | 2      |
| 1297   | 0     |        | 0     |        |
| 1298   | 2     | 2      | 1     | 1      |
| 1300   | 1     | 1      | 4     | 1      |
| 1302   | 0     |        | 1     | 0      |
| 1303   | 1     | 1      | 0     |        |
| 1304   | 2     | 1      | 2     | 1      |
| 1305   | 0     |        | 1     | 0      |
| 1307   | 1     | 0      | 0     |        |
| 1312   | 0     |        | 1     | 0      |
| 1313   | 0     |        | 0     |        |
| 1314   | 0     |        | 2     | 1      |
| 1317   | 0     |        | 0     |        |
| 1318   | 0     |        | 1     | 0      |
| 1319   | 0     |        | 3     | 2      |
| 1321   | 0     |        | 0     |        |
| 1324   | 2     | 1      | 5     | 4      |

| respid | Q22_1 | Q22a_1 | Q23_1 | Q23a_1 |
|--------|-------|--------|-------|--------|
| 1325   | 0     |        | 0     |        |
| 1326   | 0     |        | 0     |        |
| 1327   | 0     |        | 0     |        |
| 1329   | 1     | 1      | 1     | 0      |
| 1330   | 1     | 1      | 1     | 1      |
| 1331   | 1     | 1      | 1     | 0      |
| 1335   | 1     | 1      | 0     |        |
| 1337   | 0     |        | 0     |        |
| 1341   | 0     |        | 0     |        |
| 1342   | 0     |        | 0     |        |
| 1344   | 1     | 2      | 4     | 3      |
| 1345   | 1     | 0      | 2     | 1      |
| 1346   | 1     | 0      | 0     |        |
| 1350   | 1     | 1      | 1     | 1      |
| 1352   | 0     |        | 0     |        |
| 1353   | 1     | 1      | 1     | 1      |
| 1354   | 0     |        | 1     | 1      |
| 1355   | 0     |        | 0     |        |
| 1357   | 2     | 2      | 0     |        |
| 1360   | 0     |        | 0     |        |
| 1362   | 1     | 1      | 1     | 1      |
| 1363   | 1     | 1      | 0     |        |
| 1367   | 0     |        | 0     |        |
| 1369   | 1     | 1      | 2     | 1      |
| 1371   | 0     |        | 0     |        |
| 1372   | 0     |        | 0     |        |
| 1375   | 0     |        | 0     |        |
| 1377   | 1     | 1      | 1     | 1      |
| 1379   | 2     | 1      | 0     |        |
| 1380   | 0     |        | 1     | 0      |
| 1382   | 1     | 1      | 0     |        |
| 1383   | 0     |        | 0     |        |



| respid | Q22_1 | Q22a_1 | Q23_1 | Q23a_1 |
|--------|-------|--------|-------|--------|
| 1384   | 0     |        | 0     |        |
| 1385   | 1     | 1      | 0     |        |
| 1387   | 1     | 0      | 0     |        |
| 1388   | 0     |        | 0     |        |
| 1389   | 1     | 1      | 1     | 1      |
| 1390   | 1     | 1      | 1     | 1      |
| 1395   | 0     |        | 0     |        |
| 1396   | 0     |        | 1     | 0      |
| 1397   | 2     | 2      | 4     | 3      |
| 1398   | 0     |        | 0     |        |
| 1399   | 0     |        | 0     |        |
| 1403   | 1     | 0      | 0     |        |
| 1405   | 0     |        | 0     |        |
| 1406   | 2     | 1      | 1     | 1      |
| 1407   | 3     | 2      | 1     | 2      |
| 1408   | 0     |        | 0     |        |
| 1409   | 0     |        | 0     |        |
| 1410   | 5     | 4      | 5     | 4      |
| 1411   | 1     | 1      | 1     | 1      |
| 1412   | 1     | 0      | 1     | 0      |
| 1413   | 1     | 1      | 1     | 1      |
| 1414   | 1     | 1      | 5     | 1      |
| 1415   | 0     |        | 0     |        |
| 1416   | 0     |        | 0     |        |
| 1417   | 0     |        | 0     |        |
| 1418   | 0     |        | 0     |        |
| 1419   | 0     |        | 0     |        |
| 1420   | 1     | 1      | 1     | 1      |
| 1421   | 1     | 1      | 5     | 3      |
| 1422   | 0     |        | 0     |        |
| 1423   | 1     | 1      | 2     | 2      |
| 1424   | 1     | 2      | 4     | 2      |

| respid | Q22_1 | Q22a_1 | Q23_1 | Q23a_1 |
|--------|-------|--------|-------|--------|
| 1429   | 0     |        | 0     |        |
| 1430   | 0     |        | 2     | 1      |
| 1431   | 3     | 2      | 3     | 2      |
| 1433   | 1     | 1      | 1     | 1      |
| 1435   | 0     |        | 0     |        |
| 1436   | 0     |        | 3     | 1      |
| 1438   | 0     |        | 0     |        |
| 1439   | 0     |        | 1     | 0      |
| 1441   | 0     |        | 1     | 1      |
| 1442   | 1     | 1      | 0     |        |
| 1443   | 0     |        | 0     |        |
| 1444   | 0     |        | 0     |        |
| 1445   | 4     | 3      | 2     | 2      |
| 1446   | 1     | 2      | 1     | 1      |
| 1447   | 0     |        | 1     | 1      |
| 1449   | 1     | 1      | 0     |        |
| 1450   | 2     | 2      | 2     | 2      |
| 1451   | 3     | 3      | 0     |        |
| 1452   | 0     |        | 0     |        |
| 1453   | 2     | 2      | 3     | 2      |
| 1454   | 1     | 2      | 1     | 2      |
| 1456   | 1     | 1      | 1     | 1      |
| 1457   | 1     | 1      | 2     | 1      |
| 1459   | 1     | 0      | 0     |        |
| 1460   | 0     |        | 0     |        |
| 1463   | 1     | 0      | 0     |        |
| 1465   | 0     |        | 0     |        |
| 1467   | 0     |        | 0     |        |
| 1470   | 1     | 1      | 2     | 1      |
| 1471   | 3     | 3      | 4     | 3      |
| 1472   | 0     |        | 0     |        |
| 1474   | 0     |        | 4     | 2      |

| respid | Q22_1 | Q22a_1 | Q23_1 | Q23a_1 |
|--------|-------|--------|-------|--------|
| 1475   | 1     | 1      | 2     | 1      |
| 1477   | 0     |        | 0     |        |
| 1478   | 0     |        | 0     |        |
| 1480   | 0     |        | 0     |        |
| 1481   | 2     | 2      | 1     | 1      |
| 1483   | 0     |        | 0     |        |
| 1484   | 0     |        | 2     | 0      |
| 1485   | 1     | 1      | 0     |        |
| 1486   | 0     |        | 0     |        |
| 1487   | 0     |        | 0     |        |
| 1488   | 0     |        | 0     |        |
| 1489   | 5     | 4      | 1     | 0      |
| 1490   | 1     | 1      | 0     |        |
| 1491   | 3     | 2      | 2     | 2      |
| 1492   | 0     |        | 1     | 0      |
| 1494   | 0     |        | 0     |        |
| 1495   | 2     | 2      | 3     | 2      |
| 1496   | 1     | 1      | 0     |        |
| 1498   | 0     |        | 1     | 2      |
| 1499   | 0     |        | 0     |        |
| 1500   | 2     | 2      | 2     | 1      |
| 1501   | 0     |        | 0     |        |
| 1503   | 0     |        | 0     |        |
| 1504   | 0     |        | 0     |        |
| 1508   | 2     | 1      | 1     | 1      |
| 1509   | 0     |        | 0     |        |
| 1511   | 2     | 3      | 1     | 2      |
| 1512   | 0     |        | 1     | 0      |
| 1513   | 2     | 1      | 1     | 2      |
| 1515   | 2     | 1      | 0     |        |
| 1517   | 1     | 1      | 3     | 1      |
| 1518   | 3     | 2      | 0     |        |

| respid | Q22_1 | Q22a_1 | Q23_1 | Q23a_1 |
|--------|-------|--------|-------|--------|
| 1519   | 2     | 2      | 3     | 2      |
| 1520   | 0     |        | 0     |        |
| 1521   | 0     |        | 0     |        |
| 1522   | 1     | 1      | 1     | 0      |
| 1523   | 5     | 4      | 0     |        |
| 1524   | 0     |        | 0     |        |
| 1525   | 0     |        | 0     |        |
| 1526   | 1     | 1      | 1     | 1      |
| 1527   | 0     |        | 0     |        |
| 1534   | 0     |        | 0     |        |
| 1535   | 0     |        | 1     | 0      |
| 1536   | 1     | 1      | 3     | 2      |
| 1538   | 1     | 2      | 0     |        |
| 1539   | 0     |        | 2     | 0      |
| 1540   | 0     |        | 0     |        |
| 1541   | 0     |        | 0     |        |
| 1542   | 0     |        | 1     | 0      |
| 1543   | 1     | 1      | 1     | 1      |
| 1545   | 2     | 2      | 0     |        |
| 1546   | 0     |        | 0     |        |
| 1548   | 4     | 3      | 5     | 4      |
| 1549   | 0     |        | 0     |        |
| 1551   | 0     |        | 0     |        |
| 1552   | 0     |        | 0     |        |
| 1556   | 0     |        | 0     |        |
| 1557   | 0     |        | 0     |        |
| 1558   | 1     | 0      | 1     | 0      |
| 1561   | 0     |        | 0     |        |
| 1562   | 0     |        | 0     |        |
| 1563   | 0     |        | 0     |        |
| 1564   | 1     | 2      | 1     | 2      |
| 1565   | 0     |        | 0     |        |

| respid | Q22_1 | Q22a_1 | Q23_1 | Q23a_1 |
|--------|-------|--------|-------|--------|
| 1566   | 0     |        | 0     |        |
| 1567   | 1     | 0      | 0     |        |
| 1569   | 0     |        | 0     |        |
| 1570   | 0     |        | 0     |        |
| 1574   | 0     |        | 1     | 1      |
| 1575   | 0     |        | 0     |        |
| 1576   | 1     | 0      | 0     |        |
| 1577   | 0     |        | 0     |        |
| 1581   | 1     | 1      | 0     |        |
| 1583   | 1     | 2      | 4     | 3      |
| 1585   | 0     |        | 0     |        |
| 1586   | 0     |        | 0     |        |
| 1588   | 0     |        | 1     | 0      |
| 1590   | 0     |        | 0     |        |
| 1592   | 0     |        | 0     |        |
| 1594   | 0     |        | 2     | 1      |
| 1598   | 0     |        | 0     |        |
| 1599   | 1     | 1      | 0     |        |
| 1600   | 1     | 1      | 1     | 0      |
| 1602   | 0     |        | 1     | 0      |
| 1603   | 0     |        | 0     |        |
| 1604   | 1     | 1      | 0     |        |
| 1605   | 3     | 2      | 5     | 4      |
| 1606   | 0     |        | 0     |        |
| 1610   | 0     |        | 1     | 0      |
| 1611   | 0     |        | 2     | 0      |
| 1612   | 0     |        | 0     |        |
| 1613   | 2     | 3      | 4     | 2      |
| 1615   | 2     | 1      | 4     | 2      |
| 1616   | 0     |        | 3     | 2      |
| 1617   | 1     | 1      | 1     | 1      |
| 1618   | 0     |        | 4     | 2      |

| respid | Q22_1 | Q22a_1 | Q23_1 | Q23a_1 |
|--------|-------|--------|-------|--------|
| 1620   | 0     |        | 1     | 0      |
| 1621   | 3     | 2      | 4     | 2      |
| 1622   | 0     |        | 0     |        |
| 1623   | 0     |        | 0     |        |
| 1624   | 0     |        | 0     |        |
| 1625   | 0     |        | 0     |        |
| 1626   | 0     |        | 0     |        |
| 1627   | 1     | 1      | 0     |        |
| 1629   | 0     |        | 4     | 0      |
| 1630   | 0     |        | 0     |        |
| 1631   | 0     |        | 0     |        |
| 1634   | 1     | 1      | 1     | 1      |
| 1635   | 0     |        | 0     |        |
| 1636   | 0     |        | 0     |        |
| 1637   | 0     |        | 0     |        |
| 1640   | 1     | 1      | 0     |        |
| 1642   | 0     |        | 0     |        |
| 1643   | 1     | 2      | 1     | 2      |
| 1644   | 0     |        | 0     |        |
| 1645   | 0     |        | 1     | 1      |
| 1646   | 0     |        | 0     |        |
| 1647   | 0     |        | 1     | 0      |
| 1650   | 2     | 1      | 2     | 2      |
| 1654   | 0     |        | 0     |        |
| 1656   | 0     |        | 0     |        |
| 1657   | 3     | 4      | 2     | 1      |
| 1659   | 1     | 3      | 0     |        |
| 1662   | 1     | 1      | 1     | 1      |
| 1663   | 0     |        | 1     | 2      |
| 1664   | 0     |        | 0     |        |
| 1665   | 0     |        | 0     |        |
| 1667   | 1     | 1      | 0     |        |

| respid | Q22_1 | Q22a_1 | Q23_1 | Q23a_1 |
|--------|-------|--------|-------|--------|
| 1668   | 0     |        | 0     |        |
| 1670   | 1     | 1      | 0     |        |
| 1671   | 1     | 0      | 1     | 0      |
| 1673   | 0     |        | 1     | 0      |
| 1674   | 0     |        | 0     |        |
| 1676   | 0     |        | 3     | 2      |
| 1677   | 1     | 1      | 0     |        |
| 1678   | 1     | 1      | 0     |        |
| 1680   | 0     |        | 0     |        |
| 1681   | 0     |        | 2     | 2      |
| 1683   | 0     |        | 0     |        |
| 1685   | 1     | 1      | 1     | 1      |
| 1686   | 2     | 2      | 1     | 1      |
| 1690   | 0     |        | 1     | 0      |
| 1691   | 1     | 0      | 0     |        |
| 1692   | 1     | 1      | 1     | 1      |
| 1693   | 1     | 2      | 0     |        |
| 1695   | 0     |        | 0     |        |
| 1696   | 1     | 1      | 2     | 2      |
| 1698   | 0     |        | 1     | 0      |
| 1699   | 0     |        | 0     |        |
| 1701   | 0     |        | 0     |        |
| 1702   | 0     |        | 0     |        |
| 1703   | 0     |        | 0     |        |
| 1705   | 0     |        | 0     |        |
| 1706   | 0     |        | 0     |        |
| 1708   | 0     |        | 0     |        |
| 1711   | 1     | 1      | 1     | 1      |
| 1712   | 2     | 1      | 2     | 1      |
| 1713   | 0     |        | 0     |        |
| 1715   | 0     |        | 0     |        |
| 1717   | 0     |        | 0     |        |

| respid | Q22_1 | Q22a_1 | Q23_1 | Q23a_1 |
|--------|-------|--------|-------|--------|
| 1718   | 5     | 4      | 5     | 4      |
| 1719   | 1     | 0      | 0     |        |
| 1721   | 0     |        | 0     |        |
| 1722   | 1     | 1      | 1     | 0      |
| 1724   | 0     |        | 0     |        |
| 1725   | 0     |        | 0     |        |
| 1726   | 1     | 1      | 1     | 1      |
| 1727   | 0     |        | 0     |        |
| 1728   | 1     | 2      | 3     | 2      |
| 1731   | 1     | 1      | 3     | 1      |
| 1733   | 0     |        | 0     |        |
| 1734   | 1     | 2      | 1     | 1      |
| 1735   | 0     |        | 0     |        |
| 1736   | 0     |        | 0     |        |
| 1737   | 1     | 1      | 0     |        |
| 1738   | 1     | 1      | 0     |        |
| 1743   | 1     | 1      | 1     | 0      |
| 1755   | 1     | 2      | 3     | 2      |
| 1756   | 0     |        | 1     | 1      |
| 1757   | 1     | 1      | 0     |        |
| 1758   | 1     | 1      | 0     |        |
| 1759   | 3     | 2      | 3     | 1      |
| 1761   | 1     | 2      | 0     |        |
| 1762   | 0     |        | 0     |        |
| 1764   | 0     |        | 0     |        |
| 1767   | 1     | 1      | 4     | 2      |
| 1768   | 0     |        | 4     | 1      |
| 1769   | 0     |        | 0     |        |
| 1770   | 1     | 0      | 4     | 0      |
| 1771   | 1     | 2      | 1     | 2      |
| 1776   | 1     | 1      | 1     | 1      |
| 1777   | 0     |        | 0     |        |



| respid | Q22_1 | Q22a_1 | Q23_1 | Q23a_1 |
|--------|-------|--------|-------|--------|
| 1778   | 2     | 1      | 4     | 0      |
| 1779   | 0     |        | 0     |        |
| 1780   | 0     |        | 1     | 0      |
| 1781   | 0     |        | 0     |        |
| 1783   | 0     |        | 0     |        |
| 1784   | 2     | 1      | 3     | 1      |
| 1785   | 1     | 1      | 1     | 0      |
| 1788   | 2     | 1      | 2     | 1      |
| 1792   | 0     |        | 1     | 0      |
| 1794   | 0     |        | 0     |        |
| 1798   | 4     | 3      | 4     | 3      |
| 1799   | 0     |        | 0     |        |
| 1800   | 0     |        | 0     |        |
| 1804   | 0     |        | 0     |        |
| 1806   | 1     | 1      | 1     | 1      |
| 1807   | 0     |        | 0     |        |
| 1808   | 0     |        | 0     |        |
| 1809   | 1     | 0      | 1     | 0      |
| 1811   | 1     | 1      | 0     |        |
| 1812   | 0     |        | 5     | 4      |
| 1813   | 1     | 2      | 2     | 2      |
| 1814   | 0     |        | 0     |        |
| 1815   | 0     |        | 0     |        |
| 1817   | 0     |        | 0     |        |
| 1820   | 0     |        | 0     |        |
| 1821   | 0     |        | 3     | 2      |
| 1822   | 0     |        | 0     |        |
| 1823   | 0     |        | 0     |        |
| 1824   | 0     |        | 0     |        |
| 1826   | 0     |        | 0     |        |
| 1828   | 0     |        | 0     |        |
| 1829   | 0     |        | 0     |        |

| respid | Q22_1 | Q22a_1 | Q23_1 | Q23a_1 |
|--------|-------|--------|-------|--------|
| 1830   | 0     |        | 1     | 1      |
| 1831   | 0     |        | 0     |        |
| 1832   | 0     |        | 0     |        |
| 1836   | 2     | 2      | 1     | 1      |
| 1838   | 1     | 2      | 2     | 2      |
| 1839   | 3     | 3      | 2     | 2      |
| 1840   | 1     | 1      | 1     | 1      |
| 1841   | 1     | 0      | 0     |        |
| 1842   | 0     |        | 0     |        |
| 1843   | 0     |        | 0     |        |
| 1844   | 1     | 1      | 1     | 1      |
| 1845   | 0     |        | 0     |        |
| 1849   | 0     |        | 0     |        |
| 1850   | 1     | 1      | 1     | 1      |
| 1851   | 1     | 0      | 2     | 1      |
| 1852   | 0     |        | 0     |        |
| 1857   | 0     |        | 0     |        |
| 1858   | 0     |        | 0     |        |
| 1861   | 0     |        | 0     |        |
| 1862   | 0     |        | 0     |        |
| 1863   | 0     |        | 0     |        |
| 1864   | 0     |        | 0     |        |
| 1865   | 0     |        | 0     |        |
| 1867   | 0     |        | 0     |        |
| 1868   | 0     |        | 0     |        |
| 1869   | 0     |        | 0     |        |
| 1870   | 0     |        | 0     |        |
| 1871   | 3     | 3      | 4     | 3      |
| 1872   | 0     |        | 0     |        |
| 1873   | 1     | 1      | 1     | 1      |
| 1876   | 0     |        | 0     |        |
| 1877   | 0     |        | 0     |        |

| respid | Q22_1 | Q22a_1 | Q23_1 | Q23a_1 |
|--------|-------|--------|-------|--------|
| 1878   | 0     |        | 1     | 1      |
| 1879   | 1     | 2      | 3     | 2      |
| 1880   | 0     |        | 1     | 0      |
| 1881   | 1     | 1      | 0     |        |
| 1883   | 0     |        | 2     | 1      |
| 1886   | 0     |        | 0     |        |
| 1888   | 4     | 3      | 3     | 3      |
| 1889   | 3     | 2      | 4     | 2      |
| 1890   | 2     | 3      | 2     | 2      |
| 1891   | 0     |        | 0     |        |
| 1893   | 0     |        | 0     |        |
| 1894   | 2     | 2      | 2     | 2      |
| 1895   | 1     | 1      | 3     | 1      |
| 1896   | 0     |        | 1     | 1      |
| 1897   | 1     | 0      | 2     | 2      |
| 1898   | 5     | 4      | 4     | 3      |
| 1899   | 1     | 1      | 4     | 3      |
| 1900   | 0     |        | 0     |        |
| 1903   | 0     |        | 0     |        |
| 1906   | 0     |        | 0     |        |
| 1907   | 4     | 3      | 5     | 3      |
| 1908   | 0     |        | 0     |        |
| 1909   | 1     | 2      | 1     | 2      |
| 1910   | 1     | 0      | 0     |        |
| 1911   | 0     |        | 0     |        |
| 1912   | 0     |        | 0     |        |
| 1917   | 0     |        | 0     |        |
| 1918   | 2     | 1      | 4     | 1      |
| 1919   | 3     | 2      | 0     |        |
| 1922   | 0     |        | 0     |        |
| 1925   | 0     |        | 0     |        |
| 1926   | 0     |        | 0     |        |

| respid | Q22_1 | Q22a_1 | Q23_1 | Q23a_1 |
|--------|-------|--------|-------|--------|
| 1927   | 0     |        | 0     |        |
| 1928   | 0     |        | 0     |        |
| 1929   | 0     |        | 0     |        |
| 1934   | 0     |        | 0     |        |
| 1935   | 0     |        | 0     |        |
| 1936   | 1     | 0      | 4     | 1      |
| 1937   | 0     |        | 0     |        |
| 1938   | 0     |        | 0     |        |
| 1939   | 1     | 1      | 0     |        |
| 1940   | 0     |        | 2     | 2      |
| 1941   | 0     |        | 0     |        |
| 1948   | 0     |        | 0     |        |
| 1950   | 0     |        | 0     |        |
| 1955   | 2     | 2      | 3     | 1      |
| 1958   | 1     | 0      | 0     |        |
| 1960   | 0     |        | 1     | 0      |
| 1961   | 0     |        | 0     |        |
| 1962   | 0     |        | 0     |        |
| 1965   | 0     |        | 0     |        |
| 1966   | 0     |        | 0     |        |
| 1967   | 0     |        | 0     |        |
| 1968   | 0     |        | 0     |        |
| 1973   | 0     |        | 0     |        |
| 1974   | 4     | 4      | 1     | 1      |
| 1975   | 0     |        | 0     |        |
| 1977   | 0     |        | 5     | 1      |
| 1978   | 0     |        | 0     |        |
| 1979   | 4     | 4      | 4     | 4      |
| 1982   | 0     |        | 0     |        |
| 1983   | 0     |        | 4     | 1      |
| 1987   | 1     | 2      | 3     | 2      |
| 1988   | 2     | 2      | 0     |        |

| respid | Q22_1 | Q22a_1 | Q23_1 | Q23a_1 |
|--------|-------|--------|-------|--------|
| 1991   | 0     |        | 0     |        |
| 1992   | 0     |        | 0     |        |
| 1993   | 1     | 1      | 0     |        |
| 1994   | 1     | 2      | 2     | 1      |
| 1995   | 0     |        | 0     |        |
| 1996   | 1     | 1      | 0     |        |
| 1997   | 1     | 1      | 0     |        |
| 1998   | 0     |        | 0     |        |
| 1999   | 4     | 3      | 5     | 3      |
| 2000   | 1     | 1      | 3     | 2      |
| 2001   | 0     |        | 0     |        |
| 2002   | 0     |        | 0     |        |
| 2003   | 0     |        | 0     |        |
| 2004   | 0     |        | 0     |        |
| 2005   | 0     |        | 1     | 0      |
| 2007   | 2     | 2      | 0     |        |
| 2009   | 0     |        | 0     |        |
| 2010   | 0     |        | 0     |        |
| 2011   | 0     |        | 0     |        |
| 2013   | 1     | 1      | 0     |        |
| 2014   | 1     | 1      | 3     | 2      |
| 2017   | 1     | 1      | 1     | 1      |
| 2020   | 0     |        | 0     |        |
| 2023   | 0     |        | 1     | 1      |
| 2024   | 0     |        | 0     |        |
| 2029   | 0     |        | 1     | 0      |
| 2030   | 0     |        | 0     |        |
| 2031   | 5     | 3      | 0     |        |
| 2032   | 1     | 2      | 3     | 2      |
| 2033   | 0     |        | 0     |        |
| 2034   | 1     | 1      | 4     | 2      |
| 2036   | 3     | 2      | 3     | 0      |

| respid | Q22_1 | Q22a_1 | Q23_1 | Q23a_1 |
|--------|-------|--------|-------|--------|
| 2037   | 1     | 1      | 1     | 1      |
| 2038   | 0     |        | 1     | 0      |
| 2039   | 1     | 1      | 4     | 1      |
| 2040   | 0     |        | 0     |        |
| 2041   | 0     |        | 0     |        |
| 2042   | 0     |        | 1     | 0      |
| 2043   | 0     |        | 0     |        |
| 2051   | 0     |        | 2     | 1      |
| 2052   | 0     |        | 1     | 0      |
| 2053   | 0     |        | 0     |        |
| 2054   | 0     |        | 0     |        |
| 2055   | 0     |        | 0     |        |
| 2056   | 1     | 1      | 1     | 1      |
| 2057   | 0     |        | 0     |        |
| 2059   | 0     |        | 0     |        |
| 2063   | 0     |        | 0     |        |
| 2066   | 0     |        | 0     |        |
| 2068   | 1     | 1      | 3     | 2      |
| 2069   | 1     | 1      | 1     | 2      |
| 2070   | 0     |        | 0     |        |
| 2071   | 0     |        | 0     |        |
| 2073   | 0     |        | 0     |        |
| 2077   | 2     | 2      | 2     | 1      |
| 2079   | 0     |        | 0     |        |
| 2080   | 4     | 4      | 0     |        |
| 2081   | 2     | 1      | 4     | 3      |
| 2084   | 0     |        | 0     |        |
| 2085   | 0     |        | 5     | 0      |
| 2087   | 1     | 2      | 0     |        |
| 2089   | 0     |        | 1     | 1      |
| 2093   | 0     |        | 0     |        |
| 2094   | 0     |        | 1     | 1      |

| respid | Q22_1 | Q22a_1 | Q23_1 | Q23a_1 |
|--------|-------|--------|-------|--------|
| 2095   | 0     |        | 5     | 3      |
| 2097   | 0     |        | 0     |        |
| 2099   | 3     | 2      | 3     | 2      |
| 2100   | 0     |        | 0     |        |
| 2101   | 0     |        | 0     |        |
| 2103   | 0     |        | 0     |        |
| 2104   | 0     |        | 0     |        |
| 2106   | 0     |        | 0     |        |
| 2111   | 2     | 2      | 4     | 3      |
| 2113   | 0     |        | 0     |        |
| 2115   | 0     |        | 0     |        |
| 2119   | 0     |        | 0     |        |
| 2120   | 0     |        | 0     |        |
| 2123   | 0     |        | 0     |        |
| 2124   | 0     |        | 1     | 3      |
| 2130   | 0     |        | 0     |        |
| 2131   | 3     | 1      | 0     |        |
| 2133   | 1     | 4      | 1     | 4      |
| 2139   | 2     | 1      | 1     | 1      |
| 2141   | 0     |        | 0     |        |
| 2143   | 1     | 2      | 0     |        |
| 2144   | 0     |        | 0     |        |
| 2147   | 0     |        | 0     |        |
| 2151   | 0     |        | 0     |        |
| 2153   | 0     |        | 0     |        |
| 2154   | 0     |        | 0     |        |
| 2155   | 0     |        | 1     | 0      |
| 2159   | 0     |        | 0     |        |
| 2160   | 3     | 2      | 4     | 3      |
| 2161   | 0     |        | 1     | 1      |
| 2163   | 0     |        | 1     | 0      |
| 2164   | 1     | 0      | 0     |        |

| respid | Q22_1 | Q22a_1 | Q23_1 | Q23a_1 |
|--------|-------|--------|-------|--------|
| 2168   | 1     | 1      | 1     | 1      |
| 2169   | 3     | 2      | 1     | 2      |
| 2170   | 1     | 1      | 0     |        |
| 2171   | 0     |        | 1     | 1      |
| 2172   | 2     | 2      | 3     | 2      |
| 2173   | 0     |        | 0     |        |
| 2174   | 0     |        | 0     |        |
| 2175   | 1     | 1      | 2     | 2      |
| 2176   | 0     |        | 1     | 1      |
| 2177   | 3     | 2      | 3     | 2      |
| 2179   | 1     | 1      | 0     |        |
| 2181   | 0     |        | 0     |        |
| 2182   | 0     |        | 0     |        |
| 2183   | 1     | 1      | 2     | 1      |
| 2184   | 1     | 1      | 1     | 1      |
| 2185   | 0     |        | 0     |        |
| 2186   | 2     | 2      | 2     | 1      |
| 2187   | 1     | 1      | 5     | 0      |
| 2188   | 0     |        | 1     | 0      |
| 2189   | 0     |        | 0     |        |
| 2190   | 0     |        | 0     |        |
| 2193   | 0     |        | 0     |        |
| 2195   | 0     |        | 0     |        |
| 2198   | 1     | 0      | 0     |        |
| 2200   | 0     |        | 0     |        |
| 2205   | 2     | 2      | 2     | 2      |
| 2208   | 0     |        | 0     |        |
| 2209   | 2     | 1      | 2     | 1      |
| 2210   | 1     | 1      | 3     | 1      |
| 2211   | 1     | 1      | 2     | 2      |
| 2213   | 0     |        | 0     |        |
| 2214   | 1     | 1      | 1     | 1      |



| respid | Q22_1 | Q22a_1 | Q23_1 | Q23a_1 |
|--------|-------|--------|-------|--------|
| 2216   | 3     | 2      | 3     | 2      |
| 2220   | 0     |        | 0     |        |
| 2225   | 0     |        | 0     |        |
| 2227   | 1     | 1      | 0     |        |
| 2228   | 0     |        | 0     |        |
| 2229   | 0     |        | 1     | 0      |
| 2230   | 0     |        | 0     |        |
| 2236   | 0     |        | 0     |        |
| 2238   | 3     | 3      | 2     | 2      |
| 2239   | 0     |        | 1     | 1      |
| 2240   | 1     | 0      | 0     |        |
| 2241   | 2     | 2      | 2     | 2      |
| 2243   | 0     |        | 0     |        |
| 2245   | 0     |        | 0     |        |
| 2247   | 1     | 1      | 1     | 1      |
| 2248   | 0     |        | 1     | 0      |
| 2249   | 0     |        | 0     |        |
| 2254   | 0     |        | 1     | 0      |
| 2256   | 0     |        | 0     |        |
| 2259   | 0     |        | 0     |        |
| 2261   | 1     | 0      | 0     |        |
| 2262   | 0     |        | 0     |        |
| 2263   | 1     | 1      | 0     |        |
| 2264   | 1     | 1      | 1     | 1      |
| 2265   | 0     |        | 0     |        |
| 2270   | 1     | 1      | 0     |        |
| 2271   | 0     |        | 0     |        |
| 2272   | 0     |        | 0     |        |
| 2273   | 0     |        | 0     |        |
| 2274   | 0     |        | 0     |        |
| 2276   | 1     | 1      | 1     | 1      |
| 2277   | 1     | 1      | 0     |        |

| respid | Q22_1 | Q22a_1 | Q23_1 | Q23a_1 |
|--------|-------|--------|-------|--------|
| 2281   | 0     |        | 0     |        |
| 2288   | 0     |        | 0     |        |
| 2290   | 0     |        | 0     |        |
| 2294   | 0     |        | 1     | 1      |
| 2295   | 0     |        | 0     |        |
| 2296   | 1     | 1      | 1     | 1      |
| 2297   | 0     |        | 0     |        |
| 2298   | 0     |        | 0     |        |
| 2301   | 1     | 1      | 4     | 3      |
| 2302   | 1     | 1      | 0     |        |
| 2303   | 0     |        | 0     |        |
| 2305   | 0     |        | 0     |        |
| 2309   | 0     |        | 0     |        |
| 2310   | 0     |        | 0     |        |
| 2311   | 1     | 2      | 1     | 2      |
| 2313   | 2     | 1      | 5     | 3      |
| 2316   | 0     |        | 0     |        |
| 2317   | 0     |        | 0     |        |
| 2318   | 3     | 2      | 1     | 2      |
| 2319   | 2     | 1      | 1     | 1      |
| 2321   | 3     | 2      | 2     | 1      |
| 2324   | 0     |        | 0     |        |
| 2328   | 0     |        | 0     |        |
| 2329   | 0     |        | 0     |        |
| 2330   | 1     | 1      | 1     | 1      |
| 2333   | 0     |        | 1     | 1      |
| 2334   | 2     | 1      | 2     | 1      |
| 2338   | 0     |        | 0     |        |
| 2341   | 1     | 1      | 0     |        |
| 2342   | 1     | 2      | 1     | 2      |
| 2343   | 0     |        | 4     | 1      |
| 2346   | 0     |        | 0     |        |

| respid | Q22_1 | Q22a_1 | Q23_1 | Q23a_1 |
|--------|-------|--------|-------|--------|
| 2347   | 1     | 1      | 0     |        |
| 2348   | 0     |        | 0     |        |
| 2349   | 2     | 2      | 2     | 2      |
| 2350   | 0     |        | 0     |        |
| 2351   | 1     | 0      | 0     |        |
| 2352   | 2     | 2      | 0     |        |
| 2359   | 1     | 0      | 0     |        |
| 2362   | 0     |        | 0     |        |
| 2363   | 0     |        | 0     |        |
| 2365   | 1     | 0      | 1     | 1      |
| 2367   | 2     | 1      | 2     | 2      |
| 2368   | 0     |        | 0     |        |
| 2369   | 0     |        | 1     | 0      |
| 2372   | 0     |        | 0     |        |
| 2374   | 4     | 2      | 5     | 2      |
| 2376   | 0     |        | 0     |        |
| 2379   | 2     | 1      | 2     | 1      |
| 2380   | 0     |        | 0     |        |
| 2381   | 0     |        | 1     | 1      |
| 2382   | 0     |        | 1     | 1      |
| 2385   | 1     | 2      | 0     |        |
| 2387   | 3     | 3      | 0     |        |
| 2388   | 0     |        | 0     |        |
| 2389   | 1     | 1      | 1     | 1      |
| 2391   | 0     |        | 0     |        |
| 2392   | 3     | 2      | 3     | 1      |
| 2393   | 0     |        | 0     |        |
| 2394   | 4     | 3      | 3     | 2      |
| 2397   | 0     |        | 0     |        |
| 2398   | 2     | 1      | 2     | 1      |
| 2400   | 2     | 0      | 1     | 0      |
| 2402   | 0     |        | 2     | 1      |

| respid | Q22_1 | Q22a_1 | Q23_1 | Q23a_1 |
|--------|-------|--------|-------|--------|
| 2406   | 1     | 1      | 0     |        |
| 2408   | 1     | 0      | 1     | 0      |
| 2410   | 0     |        | 3     | 0      |
| 2411   | 2     | 2      | 2     | 2      |
| 2412   | 0     |        | 0     |        |
| 2414   | 1     | 1      | 2     | 1      |
| 2421   | 0     |        | 0     |        |
| 2423   | 1     | 2      | 2     | 2      |
| 2424   | 1     | 1      | 3     | 1      |
| 2425   | 1     | 1      | 0     |        |
| 2426   | 0     |        | 1     | 1      |
| 2429   | 5     | 4      | 5     | 4      |
| 2430   | 0     |        | 0     |        |
| 2432   | 1     | 1      | 1     | 1      |
| 2433   | 0     |        | 0     |        |
| 2434   | 0     |        | 0     |        |
| 2435   | 2     | 1      | 0     |        |
| 2436   | 0     |        | 0     |        |
| 2439   | 0     |        | 1     | 1      |
| 2440   | 1     | 1      | 0     |        |
| 2441   | 1     | 2      | 0     |        |
| 2446   | 1     | 0      | 1     | 0      |
| 2448   | 1     | 3      | 3     | 2      |
| 2449   | 0     |        | 3     | 0      |
| 2451   | 0     |        | 5     | 3      |
| 2452   | 1     | 0      | 0     |        |
| 2455   | 0     |        | 0     |        |
| 2457   | 2     | 2      | 1     | 1      |
| 2458   | 0     |        | 0     |        |
| 2459   | 0     |        | 0     |        |
| 2460   | 0     |        | 0     |        |
| 2462   | 1     | 2      | 1     | 2      |

| respid | Q22_1 | Q22a_1 | Q23_1 | Q23a_1 |
|--------|-------|--------|-------|--------|
| 2464   | 4     | 3      | 5     | 3      |
| 2465   | 0     |        | 1     | 1      |
| 2468   | 1     | 1      | 1     | 1      |
| 2469   | 0     |        | 0     |        |
| 2470   | 0     |        | 0     |        |
| 2471   | 1     | 2      | 3     | 2      |
| 2472   | 0     |        | 1     | 0      |
| 2474   | 0     |        | 0     |        |
| 2476   | 1     | 1      | 0     |        |
| 2478   | 1     | 1      | 0     |        |
| 2479   | 1     | 1      | 4     | 1      |
| 2480   | 0     |        | 3     | 0      |
| 2482   | 1     | 0      | 1     | 0      |
| 2486   | 0     |        | 0     |        |
| 2488   | 2     | 3      | 5     | 4      |
| 2489   | 2     | 1      | 2     | 1      |
| 2491   | 0     |        | 0     |        |
| 2495   | 0     |        | 0     |        |
| 2496   | 1     | 1      | 1     | 1      |
| 2498   | 2     | 3      | 2     | 2      |
| 2501   | 0     |        | 3     | 0      |
| 2502   | 2     | 3      | 1     | 2      |
| 2503   | 1     | 1      | 0     |        |
| 2504   | 0     |        | 0     |        |
| 2507   | 1     | 0      | 0     |        |
| 2509   | 3     | 2      | 4     | 2      |
| 2512   | 1     | 1      | 0     |        |
| 2514   | 1     | 0      | 0     |        |
| 2516   | 0     |        | 0     |        |
| 2517   | 1     | 1      | 1     | 1      |
| 2521   | 1     | 1      | 1     | 0      |
| 2522   | 0     |        | 0     |        |

| respid | Q22_1 | Q22a_1 | Q23_1 | Q23a_1 |
|--------|-------|--------|-------|--------|
| 2524   | 0     |        | 0     |        |
| 2525   | 0     |        | 0     |        |
| 2526   | 0     |        | 0     |        |
| 2527   | 2     | 2      | 0     |        |
| 2528   | 0     |        | 1     | 1      |
| 2531   | 0     |        | 0     |        |
| 2533   | 0     |        | 3     | 2      |
| 2535   | 0     |        | 0     |        |
| 2536   | 1     | 2      | 2     | 2      |
| 2539   | 0     |        | 0     |        |
| 2540   | 0     |        | 0     |        |
| 2543   | 0     |        | 0     |        |
| 2546   | 2     | 1      | 0     |        |
| 2547   | 1     | 1      | 0     |        |
| 2549   | 1     | 0      | 0     |        |
| 2553   | 0     |        | 1     | 0      |
| 2554   | 0     |        | 0     |        |
| 2555   | 0     |        | 0     |        |
| 2556   | 0     |        | 0     |        |
| 2557   | 0     |        | 0     |        |
| 2559   | 0     |        | 0     |        |
| 2560   | 3     | 3      | 3     | 2      |
| 2561   | 0     |        | 0     |        |
| 2566   | 1     | 1      | 1     | 1      |
| 2567   | 0     |        | 0     |        |
| 2570   | 0     |        | 1     | 1      |
| 2574   | 2     | 3      | 2     | 2      |
| 2578   | 0     |        | 0     |        |
| 2580   | 0     |        | 1     | 2      |
| 2590   | 1     | 1      | 0     |        |
| 2593   | 0     |        | 0     |        |
| 2594   | 1     | 2      | 1     | 1      |

| respid | Q22_1 | Q22a_1 | Q23_1 | Q23a_1 |
|--------|-------|--------|-------|--------|
| 2595   | 1     | 1      | 0     |        |
| 2596   | 0     |        | 0     |        |
| 2597   | 4     | 3      | 4     | 3      |
| 2598   | 0     |        | 0     |        |
| 2602   | 0     |        | 0     |        |
| 2605   | 3     | 2      | 3     | 1      |
| 2606   | 0     |        | 0     |        |
| 2607   | 0     |        | 0     |        |
| 2608   | 0     |        | 0     |        |
| 2609   | 0     |        | 1     | 1      |
| 2610   | 0     |        | 1     | 0      |
| 2614   | 0     |        | 0     |        |
| 2615   | 0     |        | 0     |        |
| 2616   | 0     |        | 0     |        |
| 2618   | 0     |        | 0     |        |
| 2630   | 1     | 2      | 0     |        |
| 2633   | 0     |        | 0     |        |
| 2637   | 1     | 1      | 0     |        |
| 2638   | 1     | 1      | 0     |        |
| 2641   | 0     |        | 0     |        |
| 2644   | 0     |        | 0     |        |
| 2645   | 0     |        | 0     |        |
| 2646   | 0     |        | 0     |        |
| 2648   | 0     |        | 0     |        |
| 2651   | 0     |        | 0     |        |
| 2652   | 2     | 1      | 4     | 1      |
| 2653   | 0     |        | 1     | 1      |
| 2656   | 0     |        | 0     |        |
| 2657   | 0     |        | 0     |        |
| 2658   | 2     | 1      | 0     |        |
| 2661   | 0     |        | 0     |        |
| 2663   | 0     |        | 0     |        |

| respid | Q22_1 | Q22a_1 | Q23_1 | Q23a_1 |
|--------|-------|--------|-------|--------|
| 2665   | 0     |        | 0     |        |
| 2670   | 0     |        | 0     |        |
| 2672   | 1     | 0      | 0     |        |
| 2673   | 0     |        | 0     |        |
| 2677   | 1     | 1      | 1     | 2      |
| 2686   | 2     | 3      | 2     | 2      |
| 2688   | 0     |        | 2     | 2      |
| 2689   | 1     | 1      | 1     | 1      |
| 2691   | 0     |        | 0     |        |
| 2695   | 4     | 4      | 5     | 4      |
| 2696   | 0     |        | 0     |        |
| 2697   | 0     |        | 0     |        |
| 2698   | 0     |        | 0     |        |
| 2703   | 1     | 0      | 0     |        |
| 2704   | 0     |        | 0     |        |
| 2706   | 0     |        | 0     |        |
| 2707   | 0     |        | 0     |        |
| 2710   | 0     |        | 0     |        |
| 2711   | 0     |        | 0     |        |
| 2712   | 0     |        | 0     |        |
| 2713   | 0     |        | 0     |        |
| 2721   | 0     |        | 0     |        |
| 2730   | 0     |        | 0     |        |
| 2731   | 1     | 2      | 1     | 2      |
| 2732   | 0     |        | 3     | 0      |
| 2733   | 0     |        | 4     | 3      |
| 2735   | 1     | 1      | 0     |        |
| 2736   | 1     | 1      | 1     | 1      |
| 2740   | 1     | 1      | 0     |        |
| 2741   | 1     | 1      | 0     |        |
| 2742   | 0     |        | 0     |        |
| 2743   | 0     |        | 0     |        |



| respid | Q22_1 | Q22a_1 | Q23_1 | Q23a_1 |
|--------|-------|--------|-------|--------|
| 2744   | 0     |        | 0     |        |
| 2745   | 3     | 2      | 2     | 2      |
| 2749   | 0     |        | 0     |        |
| 2751   | 1     | 0      | 0     |        |
| 2754   | 0     |        | 1     | 0      |
| 2755   | 1     | 2      | 1     | 2      |
| 2757   | 0     |        | 0     |        |
| 2758   | 0     |        | 2     | 1      |
| 2759   | 1     | 0      | 1     | 0      |
| 2761   | 0     |        | 0     |        |
| 2762   | 0     |        | 1     | 1      |
| 2763   | 0     |        | 0     |        |
| 2764   | 5     | 3      | 5     | 2      |
| 2765   | 0     |        | 0     |        |
| 2766   | 0     |        | 0     |        |
| 2767   | 1     | 0      | 4     | 0      |
| 2769   | 1     | 1      | 1     | 1      |
| 2770   | 1     | 1      | 5     | 3      |
| 2771   | 1     | 1      | 1     | 1      |
| 2774   | 0     |        | 1     | 1      |
| 2777   | 3     | 2      | 1     | 1      |
| 2778   | 1     | 1      | 0     |        |
| 2781   | 1     | 1      | 1     | 1      |
| 2782   | 1     | 1      | 1     | 1      |
| 2784   | 1     | 1      | 3     | 2      |
| 2785   | 4     | 2      | 3     | 2      |
| 2786   | 0     |        | 0     |        |
| 2787   | 0     |        | 0     |        |
| 2789   | 2     | 2      | 3     | 2      |
| 2790   | 1     | 2      | 0     |        |
| 2791   | 0     |        | 1     | 0      |
| 2793   | 2     | 4      | 4     | 3      |

| respid | Q22_1 | Q22a_1 | Q23_1 | Q23a_1 |
|--------|-------|--------|-------|--------|
| 2797   | 1     | 1      | 3     | 1      |
| 2798   | 1     | 1      | 1     | 1      |
| 2799   | 2     | 2      | 2     | 2      |
| 2801   | 0     |        | 1     | 1      |
| 2802   | 2     | 2      | 0     |        |
| 2803   | 1     | 2      | 1     | 2      |
| 2804   | 3     | 2      | 5     | 3      |
| 2807   | 0     |        | 0     |        |
| 2809   | 0     |        | 0     |        |
| 2810   | 1     | 1      | 1     | 1      |
| 2812   | 0     |        | 0     |        |
| 2814   | 0     |        | 0     |        |
| 2815   | 0     |        | 1     | 1      |
| 2816   | 1     | 0      | 1     | 0      |
| 2817   | 0     |        | 0     |        |
| 2819   | 1     | 1      | 0     |        |
| 2820   | 0     |        | 2     | 0      |
| 2821   | 0     |        | 0     |        |
| 2822   | 2     | 2      | 2     | 2      |
| 2823   | 0     |        | 0     |        |
| 2824   | 1     | 1      | 0     |        |
| 2825   | 0     |        | 1     | 1      |
| 2826   | 1     | 0      | 1     | 1      |
| 2827   | 0     |        | 1     | 0      |
| 2828   | 0     |        | 0     |        |
| 2829   | 2     | 2      | 2     | 2      |
| 2830   | 1     | 1      | 1     | 1      |
| 2831   | 1     | 0      | 0     |        |
| 2832   | 2     | 2      | 1     | 1      |
| 2833   | 3     | 0      | 0     |        |
| 2834   | 0     |        | 1     | 1      |
| 2835   | 3     | 4      | 4     | 1      |

| respid | Q22_1 | Q22a_1 | Q23_1 | Q23a_1 |
|--------|-------|--------|-------|--------|
| 2836   | 0     |        | 4     | 2      |
| 2837   | 1     | 1      | 0     |        |
| 2838   | 1     | 0      | 0     |        |
| 2844   | 4     | 3      | 5     | 3      |
| 2845   | 0     |        | 0     |        |
| 2847   | 5     | 4      | 5     | 4      |
| 2848   | 0     |        | 0     |        |
| 2849   | 1     | 0      | 3     | 2      |
| 2851   | 0     |        | 0     |        |
| 2852   | 2     | 2      | 0     |        |
| 2853   | 2     | 2      | 2     | 2      |
| 2854   | 0     |        | 0     |        |
| 2856   | 0     |        | 0     |        |
| 2857   | 1     | 1      | 2     | 1      |
| 2858   | 1     | 1      | 1     | 1      |
| 2859   | 1     | 1      | 2     | 2      |
| 2860   | 1     | 1      | 1     | 1      |
| 2861   | 3     | 2      | 3     | 2      |
| 2863   | 1     | 0      | 1     | 0      |
| 2864   | 1     | 0      | 0     |        |
| 2866   | 0     |        | 1     | 2      |
| 2872   | 0     |        | 1     | 1      |
| 2875   | 0     |        | 1     | 2      |
| 2879   | 0     |        | 0     |        |
| 2881   | 1     | 1      | 1     | 1      |
| 2882   | 0     |        | 0     |        |
| 2883   | 0     |        | 1     | 0      |
| 2884   | 3     | 2      | 2     | 1      |
| 2885   | 1     | 1      | 1     | 1      |
| 2887   | 0     |        | 0     |        |
| 2888   | 0     |        | 0     |        |
| 2890   | 1     | 1      | 1     | 1      |

| respid | Q22_1 | Q22a_1 | Q23_1 | Q23a_1 |
|--------|-------|--------|-------|--------|
| 2891   | 1     | 0      | 0     |        |
| 2892   | 0     |        | 0     |        |
| 2895   | 0     |        | 0     |        |
| 2899   | 0     |        | 1     | 0      |
| 2900   | 0     |        | 0     |        |
| 2902   | 5     | 3      | 0     |        |
| 2903   | 0     |        | 0     |        |
| 2904   | 0     |        | 0     |        |
| 2906   | 1     | 0      | 0     |        |
| 2908   | 0     |        | 0     |        |
| 2910   | 0     |        | 0     |        |
| 2917   | 1     | 2      | 2     | 2      |
| 2918   | 1     | 1      | 1     | 1      |
| 2919   | 0     |        | 0     |        |
| 2920   | 0     |        | 0     |        |
| 2921   | 3     | 2      | 1     | 2      |
| 2922   | 0     |        | 0     |        |
| 2923   | 0     |        | 0     |        |
| 2924   | 4     | 3      | 4     | 3      |
| 2926   | 0     |        | 0     |        |
| 2928   | 0     |        | 0     |        |
| 2930   | 0     |        | 0     |        |
| 2931   | 3     | 2      | 0     |        |
| 2933   | 0     |        | 0     |        |
| 2935   | 0     |        | 1     | 1      |
| 2936   | 0     |        | 0     |        |
| 2937   | 0     |        | 0     |        |
| 2938   | 0     |        | 0     |        |
| 2944   | 1     | 1      | 0     |        |
| 2945   | 2     | 1      | 0     |        |
| 2947   | 0     |        | 0     |        |
| 2949   | 0     |        | 0     |        |

| respid | Q22_1 | Q22a_1 | Q23_1 | Q23a_1 |
|--------|-------|--------|-------|--------|
| 2951   | 3     | 3      | 3     | 3      |
| 2952   | 1     | 1      | 1     | 0      |
| 2953   | 0     |        | 0     |        |
| 2955   | 0     |        | 0     |        |
| 2957   | 0     |        | 0     |        |
| 2958   | 0     |        | 0     |        |
| 2960   | 0     |        | 0     |        |
| 2963   | 0     |        | 1     | 0      |
| 2964   | 1     | 1      | 1     | 0      |
| 2967   | 0     |        | 0     |        |
| 2968   | 0     |        | 0     |        |
| 2971   | 3     | 2      | 3     | 1      |
| 2974   | 0     |        | 0     |        |
| 2975   | 0     |        | 0     |        |
| 2982   | 0     |        | 0     |        |
| 2983   | 0     |        | 0     |        |
| 2985   | 0     |        | 0     |        |
| 2986   | 3     | 3      | 4     | 3      |
| 2987   | 1     | 1      | 0     |        |
| 2988   | 3     | 2      | 0     |        |
| 2993   | 0     |        | 1     | 0      |
| 2996   | 0     |        | 0     |        |
| 2997   | 1     | 1      | 5     | 4      |
| 2998   | 0     |        | 0     |        |
| 3004   | 0     |        | 0     |        |
| 3007   | 1     | 2      | 1     | 2      |
| 3011   | 2     | 1      | 2     | 2      |
| 3012   | 1     | 1      | 0     |        |
| 3013   | 0     |        | 0     |        |
| 3014   | 0     |        | 0     |        |
| 3015   | 0     |        | 0     |        |
| 3016   | 0     |        | 0     |        |

| respid | Q22_1 | Q22a_1 | Q23_1 | Q23a_1 |
|--------|-------|--------|-------|--------|
| 3017   | 0     |        | 0     |        |
| 3020   | 2     | 2      | 2     | 2      |
| 3022   | 0     |        | 0     |        |
| 3023   | 1     | 0      | 0     |        |
| 3026   | 1     | 3      | 2     | 2      |
| 3038   | 1     | 1      | 1     | 1      |
| 3039   | 0     |        | 0     |        |
| 3040   | 0     |        | 0     |        |
| 3041   | 0     |        | 0     |        |
| 3042   | 1     | 1      | 1     | 1      |
| 3044   | 0     |        | 0     |        |
| 3050   | 0     |        | 0     |        |
| 3052   | 0     |        | 0     |        |
| 3056   | 1     | 2      | 2     | 1      |
| 3059   | 0     |        | 0     |        |
| 3060   | 0     |        | 0     |        |
| 3063   | 1     | 0      | 1     | 0      |
| 3065   | 1     | 0      | 0     |        |
| 3067   | 1     | 2      | 3     | 2      |
| 3068   | 0     |        | 0     |        |
| 3072   | 0     |        | 0     |        |
| 3074   | 2     | 2      | 2     | 2      |
| 3075   | 1     | 2      | 2     | 1      |
| 3076   | 0     |        | 1     | 0      |
| 3079   | 0     |        | 0     |        |
| 3082   | 2     | 3      | 2     | 2      |
| 3083   | 0     |        | 1     | 0      |
| 3084   | 0     |        | 0     |        |
| 3085   | 0     |        | 0     |        |
| 3090   | 0     |        | 0     |        |
| 3091   | 0     |        | 1     | 1      |
| 3092   | 1     | 1      | 1     | 1      |

| respid | Q22_1 | Q22a_1 | Q23_1 | Q23a_1 |
|--------|-------|--------|-------|--------|
| 3095   | 1     | 2      | 1     | 0      |
| 3096   | 5     | 4      | 4     | 3      |
| 3097   | 1     | 1      | 3     | 2      |
| 3099   | 4     | 3      | 4     | 3      |
| 3101   | 1     | 2      | 0     |        |
| 3103   | 0     |        | 1     | 1      |
| 3104   | 0     |        | 0     |        |
| 3105   | 0     |        | 0     |        |
| 3107   | 0     |        | 1     | 0      |
| 3108   | 1     | 1      | 0     |        |
| 3109   | 0     |        | 0     |        |
| 3116   | 0     |        | 0     |        |
| 3117   | 0     |        | 0     |        |
| 3119   | 0     |        | 0     |        |
| 3120   | 0     |        | 3     | 0      |
| 3130   | 3     | 3      | 3     | 2      |
| 3131   | 1     | 3      | 0     |        |
| 3133   | 0     |        | 0     |        |
| 3134   | 2     | 2      | 1     | 2      |
| 3135   | 1     | 1      | 0     |        |
| 3145   | 1     | 1      | 0     |        |
| 3147   | 0     |        | 0     |        |
| 3152   | 1     | 1      | 1     | 1      |
| 3155   | 5     | 3      | 3     | 3      |
| 3156   | 0     |        | 0     |        |
| 3157   | 2     | 2      | 3     | 2      |
| 3166   | 0     |        | 0     |        |
| 3169   | 1     | 2      | 0     |        |
| 3179   | 0     |        | 0     |        |
| 3181   | 1     | 1      | 0     |        |
| 3185   | 0     |        | 0     |        |
| 3190   | 0     |        | 1     | 0      |

| respid | Q22_1 | Q22a_1 | Q23_1 | Q23a_1 |
|--------|-------|--------|-------|--------|
| 3191   | 0     |        | 0     |        |
| 3192   | 0     |        | 0     |        |
| 3193   | 2     | 0      | 2     | 0      |
| 3195   | 0     |        | 0     |        |
| 3202   | 0     |        | 0     |        |
| 3204   | 0     |        | 1     | 0      |
| 3208   | 0     |        | 0     |        |
| 3212   | 0     |        | 0     |        |
| 3218   | 0     |        | 0     |        |
| 3219   | 2     | 1      | 0     |        |
| 3220   | 1     | 1      | 0     |        |
| 3221   | 3     | 3      | 2     | 2      |
| 3223   | 0     |        | 0     |        |
| 3231   | 0     |        | 1     | 0      |
| 3232   | 1     | 2      | 3     | 1      |
| 3234   | 1     | 2      | 1     | 2      |
| 3235   | 0     |        | 0     |        |
| 3237   | 0     |        | 0     |        |
| 3238   | 0     |        | 0     |        |
| 3240   | 0     |        | 0     |        |
| 3241   | 0     |        | 0     |        |
| 3243   | 1     | 1      | 1     | 1      |
| 3244   | 3     | 1      | 3     | 1      |
| 3247   | 1     | 0      | 1     | 1      |
| 3250   | 0     |        | 0     |        |
| 3251   | 3     | 3      | 3     | 2      |
| 3255   | 0     |        | 0     |        |
| 3256   | 0     |        | 0     |        |
| 3257   | 0     |        | 0     |        |
| 3258   | 0     |        | 0     |        |
| 3259   | 1     | 1      | 1     | 0      |
| 3260   | 0     |        | 0     |        |



| respid | Q22_1 | Q22a_1 | Q23_1 | Q23a_1 |
|--------|-------|--------|-------|--------|
| 3261   | 0     |        | 0     |        |
| 3262   | 1     | 2      | 5     | 1      |
| 3264   | 1     | 2      | 2     | 2      |
| 3265   | 0     |        | 0     |        |
| 3267   | 1     | 0      | 1     | 0      |
| 3268   | 1     | 0      | 1     | 0      |
| 3270   | 0     |        | 1     | 0      |
| 3271   | 0     |        | 1     | 0      |
| 3274   | 0     |        | 0     |        |
| 3276   | 0     |        | 0     |        |
| 3277   | 0     |        | 0     |        |
| 3279   | 1     | 0      | 0     |        |
| 3281   | 0     |        | 0     |        |
| 3283   | 2     | 1      | 3     | 0      |
| 3285   | 0     |        | 0     |        |
| 3286   | 0     |        | 1     | 1      |
| 3287   | 0     |        | 0     |        |
| 3289   | 0     |        | 0     |        |
| 3290   | 0     |        | 0     |        |
| 3291   | 1     | 1      | 0     |        |
| 3292   | 2     | 2      | 2     | 2      |
| 3293   | 3     | 3      | 1     | 2      |
| 3294   | 1     | 1      | 1     | 1      |
| 3296   | 0     |        | 0     |        |
| 3306   | 0     |        | 0     |        |
| 3307   | 1     | 1      | 0     |        |
| 3308   | 1     | 1      | 0     |        |
| 3312   | 0     |        | 0     |        |
| 3313   | 0     |        | 0     |        |
| 3316   | 0     |        | 0     |        |
| 3317   | 1     | 3      | 1     | 3      |
| 3320   | 2     | 0      | 0     |        |

| respid | Q22_1 | Q22a_1 | Q23_1 | Q23a_1 |
|--------|-------|--------|-------|--------|
| 3321   | 1     | 1      | 2     | 1      |
| 3322   | 1     | 0      | 0     |        |
| 3323   | 0     |        | 0     |        |
| 3325   | 0     |        | 0     |        |
| 3332   | 0     |        | 0     |        |
| 3334   | 0     |        | 2     | 0      |
| 3335   | 1     | 1      | 0     |        |
| 3341   | 0     |        | 0     |        |
| 3345   | 0     |        | 0     |        |
| 3346   | 0     |        | 0     |        |
| 3349   | 1     | 1      | 1     | 1      |
| 3351   | 0     |        | 0     |        |
| 3353   | 0     |        | 0     |        |
| 3354   | 1     | 1      | 0     |        |
| 3356   | 0     |        | 0     |        |
| 3357   | 0     |        | 2     | 1      |
| 3360   | 0     |        | 0     |        |
| 3361   | 0     |        | 0     |        |
| 3362   | 0     |        | 1     | 0      |
| 3363   | 0     |        | 0     |        |
| 3364   | 4     | 3      | 4     | 4      |
| 3368   | 1     | 0      | 0     |        |
| 3370   | 0     |        | 0     |        |
| 3371   | 1     | 2      | 0     |        |
| 3379   | 0     |        | 1     | 0      |
| 3380   | 0     |        | 1     | 1      |
| 3382   | 0     |        | 0     |        |
| 3384   | 0     |        | 0     |        |
| 3385   | 0     |        | 0     |        |
| 3388   | 0     |        | 0     |        |
| 3392   | 1     | 0      | 0     |        |
| 3393   | 0     |        | 0     |        |

| respid | Q22_1 | Q22a_1 | Q23_1 | Q23a_1 |
|--------|-------|--------|-------|--------|
| 3394   | 2     | 1      | 3     | 2      |
| 3395   | 0     |        | 1     | 0      |
| 3396   | 0     |        | 0     |        |
| 3397   | 1     | 1      | 0     |        |
| 3398   | 0     |        | 0     |        |
| 3399   | 0     |        | 0     |        |
| 3400   | 1     | 1      | 0     |        |
| 3401   | 4     | 3      | 3     | 4      |
| 3402   | 2     | 2      | 1     | 1      |
| 3403   | 1     | 1      | 1     | 1      |
| 3405   | 0     |        | 0     |        |
| 3407   | 1     | 1      | 1     | 1      |
| 3410   | 1     | 0      | 0     |        |
| 3411   | 1     | 1      | 1     | 1      |
| 3413   | 0     |        | 0     |        |
| 3414   | 0     |        | 0     |        |
| 3420   | 0     |        | 0     |        |
| 3421   | 4     | 3      | 3     | 3      |
| 3425   | 0     |        | 1     | 0      |
| 3426   | 1     | 1      | 1     | 1      |
| 3429   | 1     | 1      | 0     |        |
| 3430   | 2     | 2      | 0     |        |
| 3433   | 0     |        | 0     |        |
| 3434   | 1     | 2      | 1     | 2      |
| 3437   | 0     |        | 0     |        |
| 3439   | 1     | 1      | 3     | 2      |
| 3441   | 1     | 2      | 1     | 1      |
| 3442   | 0     |        | 0     |        |
| 3444   | 1     | 0      | 0     |        |
| 3445   | 0     |        | 0     |        |
| 3450   | 2     | 2      | 2     | 2      |
| 3452   | 1     | 2      | 1     | 2      |

| respid | Q22_1 | Q22a_1 | Q23_1 | Q23a_1 |
|--------|-------|--------|-------|--------|
| 3456   | 3     | 1      | 0     |        |
| 3459   | 0     |        | 0     |        |
| 3460   | 0     |        | 1     | 0      |
| 3461   | 0     |        | 0     |        |
| 3466   | 1     | 2      | 3     | 2      |
| 3471   | 0     |        | 0     |        |
| 3473   | 0     |        | 0     |        |
| 3475   | 3     | 3      | 3     | 3      |
| 3476   | 0     |        | 0     |        |
| 3477   | 0     |        | 0     |        |
| 3478   | 0     |        | 0     |        |
| 3479   | 0     |        | 0     |        |
| 3482   | 1     | 1      | 2     | 2      |
| 3483   | 0     |        | 0     |        |
| 3485   | 0     |        | 1     | 1      |
| 3489   | 0     |        | 0     |        |
| 3490   | 0     |        | 0     |        |
| 3491   | 2     | 2      | 0     |        |
| 3494   | 2     | 1      | 1     | 1      |
| 3495   | 0     |        | 4     | 2      |
| 3501   | 0     |        | 0     |        |
| 3506   | 0     |        | 4     | 1      |
| 3507   | 0     |        | 1     | 0      |
| 3517   | 1     | 2      | 1     | 2      |
| 3520   | 2     | 2      | 0     |        |
| 3521   | 1     | 0      | 1     | 0      |
| 3522   | 0     |        | 0     |        |
| 3524   | 0     |        | 0     |        |
| 3527   | 0     |        | 0     |        |
| 3528   | 0     |        | 0     |        |
| 3529   | 1     | 0      | 2     | 1      |
| 3536   | 0     |        | 1     | 0      |

| respid | Q22_1 | Q22a_1 | Q23_1 | Q23a_1 |
|--------|-------|--------|-------|--------|
| 3537   | 0     |        | 0     |        |
| 3538   | 0     |        | 4     | 2      |
| 3540   | 1     | 2      | 1     | 2      |
| 3545   | 0     |        | 0     |        |
| 3547   | 1     | 1      | 2     | 2      |
| 3554   | 0     |        | 0     |        |
| 3556   | 0     |        | 0     |        |
| 3557   | 0     |        | 1     | 2      |
| 3559   | 0     |        | 0     |        |
| 3560   | 1     | 1      | 5     | 2      |
| 3562   | 0     |        | 0     |        |
| 3564   | 1     | 1      | 1     | 0      |
| 3565   | 4     | 3      | 1     | 4      |
| 3568   | 1     | 2      | 1     | 2      |
| 3572   | 0     |        | 0     |        |
| 3578   | 0     |        | 0     |        |
| 3581   | 0     |        | 0     |        |
| 3583   | 1     | 1      | 0     |        |
| 3588   | 0     |        | 0     |        |
| 3591   | 0     |        | 0     |        |
| 3594   | 0     |        | 1     | 0      |
| 3595   | 2     | 1      | 2     | 1      |
| 3596   | 0     |        | 0     |        |
| 3597   | 1     | 3      | 2     | 2      |
| 3598   | 0     |        | 0     |        |
| 3600   | 0     |        | 0     |        |
| 3602   | 0     |        | 0     |        |
| 3604   | 0     |        | 0     |        |
| 3605   | 1     | 1      | 1     | 1      |
| 3606   | 0     |        | 0     |        |
| 3607   | 0     |        | 0     |        |
| 3610   | 0     |        | 0     |        |

| respid | Q22_1 | Q22a_1 | Q23_1 | Q23a_1 |
|--------|-------|--------|-------|--------|
| 3611   | 0     |        | 0     |        |
| 3612   | 2     | 0      | 0     |        |
| 3614   | 0     |        | 0     |        |
| 3616   | 0     |        | 0     |        |
| 3617   | 1     | 1      | 0     |        |
| 3618   | 0     |        | 0     |        |
| 3619   | 2     | 2      | 3     | 2      |
| 3621   | 1     | 1      | 2     | 0      |
| 3622   | 1     | 2      | 0     |        |
| 3624   | 0     |        | 0     |        |
| 3626   | 0     |        | 0     |        |
| 3629   | 0     |        | 0     |        |
| 3631   | 0     |        | 0     |        |
| 3632   | 1     | 1      | 0     |        |
| 3638   | 1     | 0      | 0     |        |
| 3640   | 0     |        | 1     | 0      |
| 3641   | 0     |        | 2     | 1      |
| 3645   | 2     | 3      | 4     | 2      |
| 3650   | 0     |        | 0     |        |
| 3653   | 2     | 1      | 3     | 1      |
| 3655   | 1     | 2      | 2     | 2      |
| 3657   | 1     | 1      | 1     | 1      |
| 3658   | 1     | 1      | 1     | 1      |
| 3659   | 0     |        | 0     |        |
| 3664   | 3     | 3      | 2     | 1      |
| 3665   | 1     | 0      | 1     | 0      |
| 3667   | 0     |        | 0     |        |
| 3668   | 4     | 4      | 4     | 3      |
| 3675   | 0     |        | 0     |        |
| 3678   | 0     |        | 0     |        |
| 3680   | 0     |        | 0     |        |
| 3684   | 2     | 2      | 3     | 2      |

| respid | Q22_1 | Q22a_1 | Q23_1 | Q23a_1 |
|--------|-------|--------|-------|--------|
| 3685   | 3     | 2      | 3     | 2      |
| 3687   | 0     |        | 1     | 1      |
| 3689   | 1     | 2      | 2     | 3      |
| 3690   | 0     |        | 0     |        |
| 3693   | 0     |        | 0     |        |
| 3694   | 0     |        | 0     |        |
| 3695   | 0     |        | 0     |        |
| 3700   | 0     |        | 0     |        |
| 3701   | 1     | 1      | 1     | 1      |
| 3703   | 1     | 1      | 1     | 0      |
| 3704   | 4     | 3      | 4     | 3      |
| 3705   | 0     |        | 0     |        |
| 3709   | 0     |        | 0     |        |
| 3710   | 1     | 3      | 3     | 3      |
| 3722   | 0     |        | 0     |        |
| 3725   | 0     |        | 0     |        |
| 3726   | 0     |        | 0     |        |
| 3727   | 0     |        | 0     |        |
| 3728   | 0     |        | 1     | 1      |
| 3729   | 0     |        | 0     |        |
| 3731   | 0     |        | 0     |        |
| 3738   | 0     |        | 0     |        |
| 3739   | 0     |        | 0     |        |
| 3740   | 0     |        | 0     |        |
| 3749   | 1     | 1      | 1     | 1      |
| 3758   | 2     | 3      | 3     | 3      |
| 3762   | 0     |        | 0     |        |
| 3765   | 2     | 1      | 0     |        |
| 3770   | 1     | 1      | 0     |        |
| 3771   | 0     |        | 0     |        |
| 3778   | 0     |        | 0     |        |
| 3779   | 1     | 1      | 2     | 1      |

| respid | Q22_1 | Q22a_1 | Q23_1 | Q23a_1 |
|--------|-------|--------|-------|--------|
| 3780   | 1     | 1      | 1     | 0      |
| 3782   | 0     |        | 0     |        |
| 3784   | 0     |        | 0     |        |
| 3787   | 0     |        | 1     | 0      |
| 3790   | 2     | 2      | 0     |        |
| 3791   | 0     |        | 0     |        |
| 3793   | 3     | 3      | 3     | 3      |
| 3795   | 0     |        | 0     |        |
| 3799   | 0     |        | 0     |        |
| 3801   | 3     | 2      | 3     | 2      |
| 3804   | 2     | 2      | 3     | 3      |
| 3809   | 0     |        | 0     |        |
| 3810   | 1     | 0      | 1     | 0      |
| 3813   | 0     |        | 0     |        |
| 3816   | 0     |        | 1     | 0      |
| 3820   | 0     |        | 1     | 0      |
| 3821   | 0     |        | 0     |        |
| 3823   | 2     | 2      | 2     | 1      |
| 3828   | 1     | 0      | 2     | 0      |
| 3829   | 0     |        | 1     | 0      |
| 3832   | 0     |        | 0     |        |
| 3835   | 0     |        | 0     |        |
| 3837   | 0     |        | 0     |        |
| 3838   | 0     |        | 0     |        |
| 3839   | 3     | 3      | 3     | 2      |
| 3840   | 0     |        | 0     |        |
| 3842   | 0     |        | 0     |        |
| 3843   | 0     |        | 0     |        |
| 3844   | 1     | 1      | 1     | 1      |
| 3850   | 0     |        | 0     |        |
| 3851   | 0     |        | 0     |        |
| 3856   | 1     | 1      | 2     | 1      |



| respid | Q22_1 | Q22a_1 | Q23_1 | Q23a_1 |
|--------|-------|--------|-------|--------|
| 3859   | 2     | 2      | 2     | 1      |
| 3860   | 0     |        | 0     |        |
| 3863   | 0     |        | 1     | 1      |
| 3866   | 0     |        | 0     |        |
| 3867   | 0     |        | 0     |        |
| 3870   | 0     |        | 0     |        |
| 3873   | 1     | 1      | 1     | 1      |
| 3875   | 0     |        | 0     |        |
| 3878   | 2     | 2      | 0     |        |
| 3881   | 0     |        | 0     |        |
| 3883   | 2     | 3      | 3     | 3      |
| 3884   | 1     | 1      | 3     | 0      |
| 3885   | 3     | 3      | 2     | 2      |
| 3886   | 3     | 2      | 3     | 2      |
| 3887   | 0     |        | 0     |        |
| 3888   | 0     |        | 0     |        |
| 3889   | 2     | 2      | 1     | 1      |
| 3890   | 0     |        | 0     |        |
| 3896   | 1     | 1      | 1     | 1      |
| 3902   | 4     | 3      | 3     | 2      |
| 3909   | 0     |        | 0     |        |
| 3912   | 0     |        | 3     | 1      |
| 3922   | 1     | 1      | 0     |        |
| 3928   | 0     |        | 0     |        |
| 3930   | 0     |        | 0     |        |
| 3931   | 0     |        | 1     | 1      |
| 3933   | 1     | 2      | 1     | 0      |
| 3935   | 0     |        | 1     | 1      |
| 3937   | 1     | 0      | 0     |        |
| 3939   | 1     | 1      | 0     |        |
| 3942   | 0     |        | 0     |        |
| 3943   | 0     |        | 0     |        |

| respid | Q22_1 | Q22a_1 | Q23_1 | Q23a_1 |
|--------|-------|--------|-------|--------|
| 3944   | 0     |        | 0     |        |
| 3945   | 0     |        | 0     |        |
| 3947   | 0     |        | 1     | 2      |
| 3948   | 0     |        | 0     |        |
| 3951   | 1     | 1      | 2     | 2      |
| 3959   | 1     | 0      | 0     |        |
| 3969   | 3     | 2      | 5     | 4      |
| 3973   | 0     |        | 0     |        |
| 3975   | 1     | 1      | 0     |        |
| 3976   | 0     |        | 0     |        |
| 3977   | 1     | 1      | 2     | 1      |
| 3978   | 0     |        | 0     |        |
| 3994   | 1     | 0      | 1     | 1      |
| 3995   | 0     |        | 5     | 3      |
| 3997   | 1     | 1      | 3     | 1      |
| 3998   | 0     |        | 1     | 0      |
| 3999   | 0     |        | 0     |        |
| 4002   | 3     | 2      | 3     | 2      |
| 4004   | 1     | 1      | 1     | 1      |
| 4005   | 0     |        | 0     |        |
| 4006   | 1     | 1      | 1     | 2      |
| 4008   | 0     |        | 1     | 0      |
| 4010   | 0     |        | 0     |        |
| 4011   | 3     | 3      | 3     | 3      |
| 4013   | 0     |        | 5     | 1      |
| 4014   | 0     |        | 1     | 1      |
| 4016   | 1     | 1      | 0     |        |
| 4017   | 0     |        | 0     |        |
| 4019   | 0     |        | 0     |        |
| 4021   | 0     |        | 0     |        |
| 4023   | 0     |        | 0     |        |
| 4024   | 0     |        | 0     |        |

| respid | Q22_1 | Q22a_1 | Q23_1 | Q23a_1 |
|--------|-------|--------|-------|--------|
| 4025   | 1     | 1      | 1     | 1      |
| 4027   | 0     |        | 0     |        |
| 4032   | 0     |        | 0     |        |
| 4034   | 0     |        | 1     | 1      |
| 4035   | 2     | 2      | 3     | 2      |
| 4037   | 1     | 1      | 2     | 2      |
| 4040   | 0     |        | 1     | 0      |
| 4041   | 0     |        | 0     |        |
| 4042   | 0     |        | 0     |        |
| 4043   | 0     |        | 0     |        |
| 4045   | 1     | 2      | 1     | 1      |
| 4046   | 0     |        | 2     | 1      |
| 4048   | 0     |        | 0     |        |
| 4049   | 0     |        | 1     | 0      |
| 4050   | 1     | 1      | 2     | 2      |
| 4052   | 0     |        | 1     | 2      |
| 4053   | 0     |        | 0     |        |
| 4060   | 0     |        | 0     |        |
| 4065   | 2     | 2      | 2     | 3      |
| 4066   | 2     | 1      | 2     | 1      |
| 4067   | 1     | 1      | 0     |        |
| 4068   | 3     | 2      | 3     | 2      |
| 4069   | 0     |        | 0     |        |
| 4070   | 0     |        | 0     |        |
| 4071   | 3     | 3      | 2     | 3      |
| 4072   | 0     |        | 1     | 0      |
| 4073   | 1     | 0      | 1     | 0      |
| 4074   | 1     | 0      | 0     |        |
| 4075   | 1     | 2      | 0     |        |
| 4078   | 1     | 0      | 1     | 0      |
| 4080   | 0     |        | 1     | 0      |
| 4081   | 0     |        | 0     |        |

| respid | Q22_1 | Q22a_1 | Q23_1 | Q23a_1 |
|--------|-------|--------|-------|--------|
| 4082   | 0     |        | 0     |        |
| 4083   | 1     | 2      | 1     | 2      |
| 4084   | 0     |        | 0     |        |
| 4086   | 0     |        | 0     |        |
| 4087   | 0     |        | 3     | 2      |
| 4088   | 1     | 2      | 1     | 1      |
| 4089   | 0     |        | 0     |        |
| 4090   | 0     |        | 0     |        |
| 4093   | 1     | 1      | 4     | 1      |
| 4094   | 0     |        | 0     |        |
| 4095   | 0     |        | 1     | 0      |
| 4096   | 0     |        | 0     |        |
| 4098   | 0     |        | 0     |        |
| 4103   | 0     |        | 1     | 1      |
| 4104   | 0     |        | 1     | 1      |
| 4107   | 0     |        | 0     |        |
| 4109   | 0     |        | 0     |        |
| 4110   | 0     |        | 0     |        |
| 4113   | 0     |        | 0     |        |
| 4114   | 0     |        | 0     |        |
| 4116   | 0     |        | 0     |        |
| 4119   | 0     |        | 2     | 0      |
| 4120   | 0     |        | 0     |        |
| 4121   | 0     |        | 0     |        |
| 4122   | 2     | 2      | 2     | 2      |
| 4124   | 1     | 1      | 0     |        |
| 4126   | 0     |        | 0     |        |
| 4127   | 4     | 3      | 3     | 3      |
| 4131   | 1     | 0      | 1     | 0      |
| 4134   | 0     |        | 0     |        |
| 4144   | 1     | 1      | 1     | 1      |
| 4145   | 0     |        | 1     | 1      |

| respid | Q22_1 | Q22a_1 | Q23_1 | Q23a_1 |
|--------|-------|--------|-------|--------|
| 4146   | 0     |        | 1     | 1      |
| 4147   | 0     |        | 0     |        |
| 4149   | 0     |        | 1     | 1      |
| 4150   | 0     |        | 0     |        |
| 4151   | 2     | 2      | 1     | 1      |
| 4153   | 1     | 1      | 1     | 1      |
| 4155   | 0     |        | 0     |        |
| 4157   | 0     |        | 0     |        |
| 4159   | 1     | 0      | 1     | 0      |
| 4160   | 0     |        | 1     | 1      |
| 4161   | 0     |        | 0     |        |
| 4163   | 0     |        | 0     |        |
| 4164   | 1     | 0      | 1     | 0      |
| 4165   | 1     | 1      | 0     |        |
| 4166   | 0     |        | 1     | 1      |
| 4167   | 0     |        | 0     |        |
| 4170   | 2     | 2      | 3     | 2      |
| 4172   | 0     |        | 0     |        |
| 4173   | 1     | 1      | 3     | 2      |
| 4180   | 1     | 1      | 0     |        |
| 4185   | 1     | 2      | 5     | 4      |
| 4187   | 0     |        | 0     |        |
| 4190   | 0     |        | 1     | 0      |
| 4191   | 1     | 0      | 1     | 0      |
| 4193   | 0     |        | 0     |        |
| 4194   | 1     | 0      | 0     |        |
| 4195   | 1     | 1      | 1     | 0      |
| 4196   | 0     |        | 0     |        |
| 4197   | 0     |        | 0     |        |
| 4198   | 0     |        | 0     |        |
| 4199   | 0     |        | 0     |        |
| 4205   | 0     |        | 0     |        |

| respid | Q22_1 | Q22a_1 | Q23_1 | Q23a_1 |
|--------|-------|--------|-------|--------|
| 4206   | 0     |        | 0     |        |
| 4207   | 3     | 2      | 5     | 3      |
| 4214   | 1     | 1      | 0     |        |
| 4215   | 0     |        | 1     | 0      |
| 4217   | 0     |        | 1     | 1      |
| 4219   | 0     |        | 1     | 0      |
| 4223   | 1     | 2      | 1     | 2      |
| 4226   | 0     |        | 0     |        |
| 4229   | 0     |        | 0     |        |
| 4230   | 1     | 0      | 0     |        |
| 4232   | 0     |        | 0     |        |
| 4233   | 0     |        | 1     | 1      |
| 4234   | 0     |        | 0     |        |
| 4235   | 0     |        | 4     | 1      |
| 4236   | 0     |        | 0     |        |
| 4237   | 0     |        | 1     | 0      |
| 4238   | 0     |        | 1     | 1      |
| 4240   | 1     | 1      | 0     |        |
| 4241   | 0     |        | 0     |        |
| 4247   | 0     |        | 1     | 0      |
| 4250   | 0     |        | 0     |        |
| 4251   | 0     |        | 0     |        |
| 4253   | 1     | 1      | 0     |        |
| 4254   | 1     | 0      | 1     | 0      |
| 4258   | 1     | 1      | 1     | 1      |
| 4260   | 0     |        | 0     |        |
| 4263   | 1     | 1      | 1     | 0      |
| 4265   | 0     |        | 1     | 0      |
| 4266   | 0     |        | 0     |        |
| 4267   | 0     |        | 0     |        |
| 4270   | 0     |        | 1     | 0      |
| 4273   | 0     |        | 1     | 1      |

| respid | Q22_1 | Q22a_1 | Q23_1 | Q23a_1 |
|--------|-------|--------|-------|--------|
| 4280   | 0     |        | 0     |        |
| 4281   | 0     |        | 5     | 2      |
| 4282   | 0     |        | 0     |        |
| 4283   | 0     |        | 0     |        |
| 4286   | 0     |        | 5     | 3      |
| 4287   | 0     |        | 0     |        |
| 4289   | 1     | 1      | 1     | 0      |
| 4290   | 2     | 2      | 2     | 2      |
| 4291   | 1     | 1      | 0     |        |
| 4292   | 0     |        | 5     | 0      |
| 4293   | 0     |        | 0     |        |
| 4294   | 1     | 1      | 1     | 1      |
| 4295   | 0     |        | 0     |        |
| 4296   | 3     | 2      | 2     | 2      |
| 4297   | 1     | 1      | 1     | 1      |
| 4298   | 0     |        | 0     |        |
| 4299   | 3     | 2      | 0     |        |
| 4300   | 0     |        | 0     |        |
| 4301   | 0     |        | 0     |        |
| 4302   | 0     |        | 0     |        |
| 4304   | 0     |        | 3     | 2      |
| 4305   | 1     | 2      | 2     | 2      |
| 4307   | 0     |        | 1     | 1      |
| 4308   | 1     | 1      | 1     | 1      |
| 4312   | 0     |        | 0     |        |
| 4314   | 1     | 2      | 2     | 2      |
| 4316   | 0     |        | 0     |        |
| 4317   | 2     | 2      | 3     | 1      |
| 4319   | 4     | 3      | 0     |        |
| 4323   | 2     | 3      | 2     | 1      |
| 4337   | 0     |        | 0     |        |
| 4341   | 0     |        | 0     |        |

| respid | Q22_1 | Q22a_1 | Q23_1 | Q23a_1 |
|--------|-------|--------|-------|--------|
| 4342   | 1     | 1      | 1     | 1      |
| 4344   | 1     | 1      | 4     | 2      |
| 4345   | 1     | 1      | 2     | 1      |
| 4346   | 1     | 1      | 1     | 1      |
| 4347   | 0     |        | 0     |        |
| 4350   | 0     |        | 0     |        |
| 4352   | 0     |        | 0     |        |
| 4353   | 0     |        | 0     |        |
| 4355   | 0     |        | 1     | 0      |
| 4356   | 2     | 2      | 1     | 1      |
| 4358   | 0     |        | 0     |        |
| 4359   | 0     |        | 0     |        |
| 4360   | 1     | 2      | 1     | 1      |
| 4361   | 4     | 3      | 4     | 3      |
| 4363   | 0     |        | 0     |        |
| 4364   | 0     |        | 0     |        |
| 4365   | 0     |        | 1     | 1      |
| 4367   | 0     |        | 0     |        |
| 4369   | 1     | 1      | 1     | 1      |
| 4373   | 1     | 3      | 1     | 3      |
| 4374   | 1     | 1      | 1     | 1      |
| 4375   | 0     |        | 0     |        |
| 4378   | 0     |        | 0     |        |
| 4379   | 1     | 1      | 1     | 0      |
| 4382   | 0     |        | 1     | 1      |
| 4383   | 0     |        | 0     |        |
| 4384   | 3     | 3      | 3     | 2      |
| 4385   | 0     |        | 1     | 2      |
| 4388   | 2     | 1      | 1     | 1      |
| 4389   | 1     | 1      | 0     |        |
| 4391   | 2     | 1      | 0     |        |
| 4392   | 2     | 2      | 3     | 2      |



| respid | Q22_1 | Q22a_1 | Q23_1 | Q23a_1 |
|--------|-------|--------|-------|--------|
| 4393   | 0     |        | 0     |        |
| 4395   | 1     | 1      | 0     |        |
| 4397   | 0     |        | 0     |        |
| 4398   | 0     |        | 1     | 0      |
| 4399   | 0     |        | 0     |        |
| 4400   | 0     |        | 0     |        |
| 4401   | 0     |        | 0     |        |
| 4402   | 0     |        | 0     |        |
| 4404   | 0     |        | 0     |        |
| 4405   | 0     |        | 0     |        |
| 4407   | 0     |        | 0     |        |
| 4408   | 0     |        | 2     | 1      |
| 4411   | 0     |        | 0     |        |
| 4420   | 0     |        | 0     |        |
| 4421   | 0     |        | 0     |        |
| 4424   | 4     | 3      | 3     | 2      |
| 4425   | 0     |        | 1     | 1      |
| 4427   | 1     | 1      | 1     | 1      |
| 4430   | 1     | 0      | 1     | 0      |
| 4431   | 0     |        | 0     |        |
| 4432   | 0     |        | 2     | 1      |
| 4436   | 0     |        | 0     |        |
| 4439   | 0     |        | 0     |        |
| 4451   | 1     | 1      | 1     | 1      |
| 4452   | 3     | 3      | 4     | 3      |
| 4458   | 1     | 1      | 1     | 0      |
| 4464   | 1     | 1      | 2     | 2      |
| 4465   | 1     | 1      | 1     | 1      |
| 4467   | 3     | 1      | 1     | 0      |
| 4470   | 3     | 2      | 1     | 1      |
| 4471   | 0     |        | 1     | 0      |
| 4472   | 0     |        | 1     | 1      |

| respid | Q22_1 | Q22a_1 | Q23_1 | Q23a_1 |
|--------|-------|--------|-------|--------|
| 4473   | 0     |        | 0     |        |
| 4475   | 0     |        | 0     |        |
| 4476   | 1     | 0      | 0     |        |
| 4478   | 0     |        | 0     |        |
| 4485   | 0     |        | 0     |        |
| 4486   | 0     |        | 1     | 1      |
| 4490   | 0     |        | 0     |        |
| 4502   | 0     |        | 0     |        |
| 4503   | 4     | 4      | 0     |        |
| 4504   | 0     |        | 0     |        |
| 4506   | 0     |        | 0     |        |
| 4508   | 0     |        | 0     |        |
| 4515   | 0     |        | 1     | 1      |
| 4516   | 3     | 2      | 3     | 2      |
| 4519   | 0     |        | 0     |        |
| 4523   | 0     |        | 0     |        |
| 4525   | 1     | 1      | 1     | 1      |
| 4526   | 0     |        | 0     |        |
| 4528   | 0     |        | 0     |        |
| 4530   | 0     |        | 0     |        |
| 4531   | 1     | 2      | 2     | 0      |
| 4532   | 2     | 1      | 1     | 1      |
| 4537   | 0     |        | 1     | 0      |
| 4538   | 0     |        | 0     |        |
| 4539   | 0     |        | 0     |        |
| 4541   | 0     |        | 2     | 1      |
| 4543   | 0     |        | 0     |        |
| 4544   | 0     |        | 0     |        |
| 4546   | 0     |        | 0     |        |
| 4547   | 0     |        | 0     |        |
| 4549   | 0     |        | 0     |        |
| 4550   | 0     |        | 0     |        |

| respid | Q22_1 | Q22a_1 | Q23_1 | Q23a_1 |
|--------|-------|--------|-------|--------|
| 4551   | 0     |        | 2     | 0      |
| 4554   | 0     |        | 0     |        |
| 4557   | 0     |        | 0     |        |
| 4565   | 0     |        | 0     |        |
| 4568   | 1     | 0      | 1     | 0      |
| 4569   | 0     |        | 0     |        |
| 4570   | 0     |        | 0     |        |
| 4572   | 0     |        | 0     |        |
| 4574   | 2     | 2      | 3     | 2      |
| 4576   | 1     | 2      | 1     | 1      |
| 4578   | 0     |        | 0     |        |
| 4579   | 0     |        | 0     |        |
| 4580   | 0     |        | 0     |        |
| 4581   | 0     |        | 0     |        |
| 4584   | 0     |        | 0     |        |
| 4586   | 3     | 3      | 0     |        |
| 4587   | 3     | 2      | 3     | 2      |
| 4590   | 0     |        | 1     | 0      |
| 4592   | 0     |        | 0     |        |
| 4593   | 1     | 0      | 0     |        |
| 4595   | 0     |        | 0     |        |
| 4597   | 0     |        | 0     |        |
| 4598   | 1     | 2      | 3     | 2      |
| 4599   | 1     | 2      | 1     | 1      |
| 4600   | 1     | 1      | 0     |        |
| 4601   | 1     | 1      | 1     | 1      |
| 4608   | 1     | 0      | 3     | 0      |
| 4609   | 0     |        | 0     |        |
| 4611   | 0     |        | 1     | 1      |
| 4612   | 2     | 2      | 2     | 2      |
| 4613   | 0     |        | 0     |        |
| 4616   | 1     | 1      | 3     | 2      |

| respid | Q22_1 | Q22a_1 | Q23_1 | Q23a_1 |
|--------|-------|--------|-------|--------|
| 4617   | 0     |        | 0     |        |
| 4620   | 0     |        | 5     | 2      |
| 4621   | 0     |        | 0     |        |
| 4622   | 1     | 1      | 1     | 1      |
| 4624   | 1     | 1      | 1     | 1      |
| 4625   | 1     | 1      | 0     |        |
| 4627   | 4     | 4      | 5     | 3      |
| 4628   | 3     | 2      | 3     | 2      |
| 4629   | 0     |        | 0     |        |
| 4630   | 1     | 1      | 0     |        |
| 4632   | 1     | 1      | 0     |        |
| 4634   | 2     | 1      | 1     | 1      |
| 4635   | 3     | 3      | 0     |        |
| 4636   | 0     |        | 0     |        |
| 4637   | 1     | 1      | 1     | 1      |
| 4638   | 3     | 2      | 2     | 1      |
| 4639   | 1     | 0      | 1     | 0      |
| 4641   | 0     |        | 0     |        |
| 4643   | 0     |        | 0     |        |
| 4645   | 0     |        | 0     |        |
| 4646   | 1     | 1      | 1     | 1      |
| 4647   | 0     |        | 0     |        |
| 4648   | 0     |        | 0     |        |
| 4649   | 0     |        | 0     |        |
| 4650   | 1     | 1      | 2     | 2      |
| 4651   | 5     | 0      | 4     | 2      |
| 4652   | 1     | 1      | 1     | 1      |
| 4653   | 0     |        | 0     |        |
| 4657   | 0     |        | 0     |        |
| 4660   | 1     | 2      | 0     |        |
| 4661   | 0     |        | 0     |        |
| 4662   | 0     |        | 0     |        |

| respid | Q22_1 | Q22a_1 | Q23_1 | Q23a_1 |
|--------|-------|--------|-------|--------|
| 4667   | 1     | 1      | 0     |        |
| 4669   | 1     | 0      | 0     |        |
| 4671   | 0     |        | 0     |        |
| 4672   | 0     |        | 3     | 1      |
| 4673   | 0     |        | 0     |        |
| 4677   | 0     |        | 0     |        |
| 4679   | 1     | 1      | 5     | 2      |
| 4683   | 0     |        | 0     |        |
| 4684   | 0     |        | 0     |        |
| 4685   | 0     |        | 0     |        |
| 4686   | 0     |        | 0     |        |
| 4687   | 0     |        | 0     |        |
| 4688   | 0     |        | 0     |        |
| 4691   | 0     |        | 0     |        |
| 4692   | 0     |        | 1     | 0      |
| 4694   | 0     |        | 2     | 1      |
| 4695   | 3     | 2      | 0     |        |
| 4696   | 0     |        | 1     | 0      |
| 4697   | 0     |        | 0     |        |
| 4698   | 2     | 2      | 2     | 2      |
| 4699   | 0     |        | 0     |        |
| 4701   | 0     |        | 0     |        |
| 4703   | 0     |        | 5     | 2      |
| 4704   | 4     | 4      | 4     | 3      |
| 4705   | 0     |        | 0     |        |
| 4706   | 0     |        | 0     |        |
| 4707   | 0     |        | 0     |        |
| 4708   | 0     |        | 1     | 0      |
| 4710   | 0     |        | 1     | 0      |
| 4711   | 1     | 1      | 3     | 2      |
| 4715   | 0     |        | 0     |        |
| 4716   | 1     | 1      | 0     |        |

| respid | Q22_1 | Q22a_1 | Q23_1 | Q23a_1 |
|--------|-------|--------|-------|--------|
| 4717   | 0     |        | 0     |        |
| 4718   | 0     |        | 0     |        |
| 4722   | 0     |        | 0     |        |
| 4727   | 0     |        | 2     | 1      |
| 4728   | 2     | 2      | 5     | 4      |
| 4729   | 0     |        | 0     |        |
| 4732   | 1     | 1      | 1     | 1      |
| 4733   | 0     |        | 1     | 0      |
| 4734   | 1     | 1      | 1     | 1      |
| 4735   | 0     |        | 0     |        |
| 4737   | 1     | 1      | 0     |        |
| 4738   | 0     |        | 2     | 1      |
| 4740   | 0     |        | 1     | 0      |
| 4741   | 2     | 2      | 1     | 2      |
| 4743   | 0     |        | 0     |        |
| 4746   | 0     |        | 1     | 1      |
| 4750   | 0     |        | 1     | 0      |
| 4752   | 1     | 1      | 1     | 2      |
| 4753   | 1     | 1      | 2     | 1      |
| 4754   | 0     |        | 3     | 3      |
| 4755   | 3     | 3      | 1     | 1      |
| 4758   | 0     |        | 0     |        |
| 4766   | 0     |        | 0     |        |
| 4767   | 1     | 1      | 1     | 1      |
| 4768   | 0     |        | 1     | 1      |
| 4769   | 2     | 1      | 3     | 1      |
| 4771   | 1     | 2      | 5     | 4      |
| 4772   | 0     |        | 1     | 0      |
| 4773   | 0     |        | 0     |        |
| 4774   | 1     | 1      | 1     | 0      |
| 4776   | 1     | 2      | 2     | 1      |
| 4777   | 0     |        | 0     |        |

| respid | Q22_1 | Q22a_1 | Q23_1 | Q23a_1 |
|--------|-------|--------|-------|--------|
| 4779   | 0     |        | 0     |        |
| 4780   | 1     | 1      | 0     |        |
| 4781   | 0     |        | 1     | 0      |
| 4783   | 1     | 2      | 4     | 2      |
| 4784   | 1     | 1      | 1     | 1      |
| 4785   | 0     |        | 3     | 1      |
| 4788   | 0     |        | 0     |        |
| 4789   | 4     | 3      | 1     | 1      |
| 4790   | 0     |        | 0     |        |
| 4791   | 0     |        | 0     |        |
| 4794   | 0     |        | 0     |        |
| 4795   | 0     |        | 0     |        |
| 4797   | 0     |        | 1     | 1      |
| 4802   | 3     | 2      | 4     | 1      |
| 4803   | 5     | 3      | 0     |        |
| 4804   | 0     |        | 0     |        |
| 4805   | 0     |        | 0     |        |
| 4807   | 0     |        | 0     |        |
| 4808   | 0     |        | 0     |        |
| 4809   | 4     | 3      | 4     | 3      |
| 4811   | 0     |        | 0     |        |
| 4817   | 0     |        | 0     |        |
| 4819   | 0     |        | 0     |        |
| 4820   | 0     |        | 0     |        |
| 4821   | 0     |        | 0     |        |
| 4822   | 0     |        | 0     |        |
| 4823   | 1     | 1      | 0     |        |
| 4825   | 0     |        | 2     | 1      |
| 4826   | 0     |        | 0     |        |
| 4830   | 0     |        | 0     |        |
| 4832   | 0     |        | 0     |        |
| 4838   | 1     | 1      | 1     | 1      |

| respid | Q22_1 | Q22a_1 | Q23_1 | Q23a_1 |
|--------|-------|--------|-------|--------|
| 4840   | 2     | 1      | 0     |        |
| 4841   | 0     |        | 0     |        |
| 4843   | 0     |        | 0     |        |
| 4845   | 0     |        | 0     |        |
| 4846   | 1     | 1      | 1     | 1      |
| 4848   | 0     |        | 0     |        |
| 4853   | 0     |        | 0     |        |
| 4854   | 0     |        | 0     |        |
| 4859   | 0     |        | 2     | 0      |
| 4861   | 0     |        | 0     |        |
| 4864   | 0     |        | 3     | 2      |
| 4867   | 0     |        | 0     |        |
| 4870   | 1     | 1      | 0     |        |
| 4872   | 1     | 1      | 1     | 2      |
| 4873   | 0     |        | 1     | 3      |
| 4874   | 0     |        | 1     | 1      |
| 4878   | 1     | 0      | 0     |        |
| 4880   | 0     |        | 1     | 0      |
| 4881   | 0     |        | 4     | 0      |
| 4882   | 0     |        | 2     | 0      |
| 4883   | 0     |        | 1     | 0      |
| 4885   | 0     |        | 0     |        |
| 4889   | 0     |        | 0     |        |
| 4890   | 0     |        | 0     |        |
| 4891   | 0     |        | 1     | 0      |
| 4894   | 0     |        | 0     |        |
| 4895   | 4     | 3      | 5     | 4      |
| 4896   | 0     |        | 0     |        |
| 4897   | 1     | 0      | 0     |        |
| 4898   | 1     | 1      | 1     | 1      |
| 4899   | 0     |        | 0     |        |
| 4900   | 0     |        | 1     | 2      |



| respid | Q22_1 | Q22a_1 | Q23_1 | Q23a_1 |
|--------|-------|--------|-------|--------|
| 4901   | 0     |        | 1     | 0      |
| 4903   | 0     |        | 0     |        |
| 4904   | 0     |        | 0     |        |
| 4908   | 0     |        | 0     |        |
| 4909   | 5     | 2      | 2     | 1      |
| 4913   | 0     |        | 0     |        |
| 4917   | 0     |        | 2     | 0      |
| 4918   | 0     |        | 1     | 0      |
| 4920   | 0     |        | 0     |        |
| 4921   | 2     | 2      | 0     |        |
| 4925   | 1     | 1      | 1     | 1      |
| 4926   | 0     |        | 5     | 1      |
| 4927   | 0     |        | 1     | 0      |
| 4928   | 0     |        | 0     |        |
| 4929   | 0     |        | 0     |        |
| 4930   | 1     | 2      | 1     | 2      |
| 4931   | 0     |        | 1     | 0      |
| 4932   | 2     | 2      | 2     | 2      |
| 4933   | 1     | 0      | 0     |        |
| 4934   | 1     | 0      | 0     |        |
| 5934   | 0     |        | 0     |        |
| 5935   | 0     |        | 3     | 2      |
| 5936   | 1     | 0      | 0     |        |
| 5938   | 0     |        | 0     |        |
| 5939   | 0     |        | 0     |        |
| 5940   | 2     | 2      | 0     |        |
| 5942   | 1     | 1      | 0     |        |
| 5944   | 0     |        | 0     |        |
| 5951   | 2     | 3      | 2     | 2      |
| 5952   | 0     |        | 0     |        |
| 5954   | 0     |        | 0     |        |
| 5956   | 0     |        | 0     |        |

| respid | Q22_1 | Q22a_1 | Q23_1 | Q23a_1 |
|--------|-------|--------|-------|--------|
| 5957   | 1     | 0      | 0     |        |
| 5958   | 0     |        | 1     | 1      |
| 5959   | 3     | 1      | 1     | 1      |
| 5960   | 0     |        | 0     |        |
| 5963   | 0     |        | 0     |        |
| 5966   | 1     | 1      | 0     |        |
| 5968   | 0     |        | 0     |        |
| 5974   | 0     |        | 0     |        |
| 5975   | 0     |        | 0     |        |
| 5976   | 3     | 1      | 0     |        |
| 5977   | 1     | 0      | 0     |        |
| 5978   | 0     |        | 1     | 1      |
| 5979   | 0     |        | 0     |        |
| 5983   | 0     |        | 0     |        |
| 5984   | 1     | 0      | 3     | 1      |
| 5990   | 0     |        | 0     |        |
| 5991   | 0     |        | 0     |        |
| 5992   | 0     |        | 0     |        |
| 5993   | 0     |        | 0     |        |
| 5994   | 1     | 0      | 0     |        |
| 5996   | 0     |        | 0     |        |
| 6001   | 3     | 3      | 1     | 2      |
| 6003   | 0     |        | 0     |        |
| 6004   | 1     | 1      | 0     |        |
| 6005   | 1     | 1      | 4     | 3      |
| 6006   | 0     |        | 0     |        |
| 6008   | 3     | 2      | 4     | 2      |
| 6009   | 0     |        | 0     |        |
| 6014   | 0     |        | 0     |        |
| 6016   | 1     | 1      | 1     | 1      |
| 6017   | 1     | 2      | 1     | 1      |
| 6018   | 1     | 1      | 0     |        |

| respid | Q22_1 | Q22a_1 | Q23_1 | Q23a_1 |
|--------|-------|--------|-------|--------|
| 6020   | 1     | 1      | 1     | 1      |
| 6021   | 0     |        | 0     |        |
| 6024   | 0     |        | 0     |        |
| 6025   | 0     |        | 0     |        |
| 6026   | 0     |        | 1     | 1      |
| 6032   | 0     |        | 1     | 0      |
| 6035   | 0     |        | 0     |        |
| 6038   | 2     | 1      | 0     |        |
| 6043   | 2     | 1      | 2     | 1      |
| 6044   | 0     |        | 0     |        |
| 6046   | 0     |        | 1     | 0      |
| 6047   | 0     |        | 1     | 0      |
| 6048   | 2     | 1      | 0     |        |
| 6050   | 3     | 1      | 4     | 0      |
| 6051   | 1     | 1      | 2     | 1      |
| 6053   | 0     |        | 0     |        |
| 6054   | 0     |        | 1     | 1      |
| 6056   | 0     |        | 0     |        |
| 6058   | 1     | 1      | 1     | 0      |
| 6060   | 0     |        | 1     | 1      |
| 6061   | 0     |        | 0     |        |
| 6062   | 0     |        | 0     |        |
| 6067   | 0     |        | 0     |        |
| 6070   | 0     |        | 1     | 1      |
| 6074   | 0     |        | 0     |        |
| 6076   | 0     |        | 0     |        |
| 6078   | 0     |        | 0     |        |
| 6081   | 0     |        | 0     |        |
| 6085   | 2     | 1      | 0     |        |
| 6088   | 0     |        | 0     |        |
| 6092   | 1     | 1      | 0     |        |
| 6095   | 0     |        | 1     | 0      |

| respid | Q22_1 | Q22a_1 | Q23_1 | Q23a_1 |
|--------|-------|--------|-------|--------|
| 6098   | 0     |        | 0     |        |
| 6101   | 0     |        | 0     |        |
| 6102   | 1     | 1      | 2     | 0      |
| 6105   | 0     |        | 0     |        |
| 6106   | 0     |        | 0     |        |
| 6107   | 0     |        | 0     |        |
| 6111   | 0     |        | 0     |        |
| 6112   | 0     |        | 0     |        |
| 6113   | 3     | 2      | 2     | 1      |
| 6115   | 0     |        | 1     | 2      |
| 6116   | 0     |        | 0     |        |
| 6117   | 0     |        | 0     |        |
| 6124   | 1     | 2      | 3     | 2      |
| 6125   | 0     |        | 0     |        |
| 6128   | 0     |        | 0     |        |
| 6133   | 0     |        | 0     |        |
| 6134   | 0     |        | 0     |        |
| 6135   | 1     | 1      | 0     |        |
| 6138   | 0     |        | 1     | 1      |
| 6140   | 0     |        | 0     |        |
| 6143   | 0     |        | 0     |        |
| 6147   | 0     |        | 0     |        |
| 6154   | 0     |        | 0     |        |
| 6162   | 0     |        | 0     |        |
| 6165   | 1     | 1      | 1     | 0      |
| 6166   | 1     | 1      | 3     | 2      |
| 6173   | 4     | 3      | 0     |        |
| 6180   | 0     |        | 1     | 1      |
| 6184   | 2     | 2      | 2     | 2      |
| 6185   | 1     | 1      | 0     |        |
| 6186   | 0     |        | 0     |        |
| 6188   | 1     | 0      | 0     |        |

| respid | Q22_1 | Q22a_1 | Q23_1 | Q23a_1 |
|--------|-------|--------|-------|--------|
| 6192   | 4     | 4      | 3     | 2      |
| 6194   | 0     |        | 0     |        |
| 6195   | 0     |        | 0     |        |
| 6196   | 0     |        | 0     |        |
| 6199   | 2     | 1      | 0     |        |
| 6200   | 0     |        | 0     |        |
| 6201   | 0     |        | 0     |        |
| 6202   | 0     |        | 0     |        |
| 6203   | 0     |        | 0     |        |
| 6205   | 0     |        | 0     |        |
| 6210   | 1     | 1      | 1     | 1      |
| 6212   | 1     | 1      | 0     |        |
| 6216   | 0     |        | 2     | 2      |
| 6218   | 0     |        | 2     | 2      |
| 6221   | 0     |        | 1     | 0      |
| 6224   | 0     |        | 0     |        |
| 6225   | 0     |        | 1     | 1      |
| 6227   | 0     |        | 0     |        |
| 6230   | 0     |        | 0     |        |
| 6231   | 0     |        | 0     |        |
| 6233   | 0     |        | 0     |        |
| 6234   | 1     | 1      | 1     | 1      |
| 6235   | 0     |        | 0     |        |
| 6237   | 0     |        | 0     |        |
| 6240   | 0     |        | 0     |        |
| 6248   | 0     |        | 0     |        |
| 6249   | 0     |        | 0     |        |
| 6252   | 3     | 3      | 0     |        |
| 6254   | 0     |        | 0     |        |
| 6269   | 1     | 1      | 1     | 1      |
| 6304   | 0     |        | 0     |        |
| 6334   | 1     | 1      | 0     |        |

| respid | Q22_1 | Q22a_1 | Q23_1 | Q23a_1 |
|--------|-------|--------|-------|--------|
| 6341   | 0     |        | 1     | 2      |
| 6350   | 2     | 1      | 2     | 1      |
| 6370   | 0     |        | 0     |        |
| 6384   | 4     | 2      | 0     |        |
| 6400   | 0     |        | 0     |        |
| 6418   | 0     |        | 0     |        |
| 6467   | 0     |        | 0     |        |
| 6469   | 0     |        | 0     |        |
| 6474   | 0     |        | 0     |        |
| 6475   | 0     |        | 0     |        |
| 6476   | 2     | 1      | 2     | 1      |
| 6477   | 0     |        | 0     |        |
| 6480   | 0     |        | 1     | 1      |
| 6481   | 3     | 4      | 2     | 1      |
| 6485   | 0     |        | 0     |        |
| 6488   | 2     | 1      | 1     | 1      |
| 6495   | 0     |        | 1     | 1      |
| 6499   | 2     | 3      | 1     | 0      |
| 6500   | 2     | 1      | 2     | 1      |
| 6504   | 0     |        | 1     | 0      |
| 6507   | 1     | 2      | 5     | 1      |
| 6512   | 1     | 1      | 0     |        |
| 6525   | 4     | 2      | 0     |        |
| 6532   | 0     |        | 1     | 0      |
| 6535   | 0     |        | 0     |        |
| 6546   | 0     |        | 0     |        |
| 6551   | 4     | 4      | 2     | 0      |
| 6556   | 0     |        | 0     |        |
| 6566   | 0     |        | 0     |        |
| 6569   | 0     |        | 0     |        |
| 6574   | 0     |        | 0     |        |
| 6576   | 1     | 0      | 1     | 1      |

| respid | Q22_1 | Q22a_1 | Q23_1 | Q23a_1 |
|--------|-------|--------|-------|--------|
| 6580   | 0     |        | 0     |        |
| 6584   | 0     |        | 0     |        |
| 6585   | 2     | 1      | 3     | 1      |
| 6589   | 0     |        | 0     |        |
| 6590   | 0     |        | 0     |        |
| 6598   | 0     |        | 0     |        |
| 6603   | 1     | 0      | 1     | 0      |
| 6618   | 0     |        | 0     |        |
| 6630   | 0     |        | 0     |        |
| 6636   | 1     | 1      | 0     |        |
| 6649   | 0     |        | 0     |        |
| 6675   | 0     |        | 0     |        |
| 6678   | 1     | 0      | 0     |        |
| 6681   | 0     |        | 0     |        |
| 6684   | 1     | 1      | 1     | 1      |
| 6688   | 0     |        | 0     |        |
| 6691   | 0     |        | 0     |        |
| 6694   | 1     | 1      | 1     | 1      |
| 6696   | 0     |        | 0     |        |
| 6720   | 2     | 2      | 3     | 3      |
| 6722   | 4     | 4      | 4     | 3      |
| 6724   | 0     |        | 0     |        |
| 6725   | 0     |        | 0     |        |
| 6727   | 0     |        | 0     |        |
| 6734   | 1     | 1      | 1     | 1      |
| 6739   | 0     |        | 1     | 0      |
| 6743   | 2     | 2      | 2     | 2      |
| 6749   | 0     |        | 0     |        |
| 6756   | 0     |        | 0     |        |
| 6764   | 0     |        | 0     |        |
| 6765   | 0     |        | 1     | 1      |
| 6768   | 0     |        | 0     |        |

| respid | Q22_1 | Q22a_1 | Q23_1 | Q23a_1 |
|--------|-------|--------|-------|--------|
| 6773   | 0     |        | 0     |        |
| 6775   | 0     |        | 1     | 1      |
| 6777   | 0     |        | 0     |        |
| 6779   | 0     |        | 0     |        |
| 6790   | 0     |        | 0     |        |
| 6797   | 0     |        | 0     |        |
| 6798   | 0     |        | 0     |        |
| 6808   | 0     |        | 0     |        |
| 6810   | 0     |        | 0     |        |
| 6811   | 1     | 1      | 4     | 2      |
| 6812   | 0     |        | 0     |        |
| 6814   | 0     |        | 0     |        |
| 6819   | 0     |        | 0     |        |
| 6820   | 2     | 2      | 2     | 2      |
| 6832   | 0     |        | 0     |        |
| 6854   | 0     |        | 0     |        |
| 6855   | 0     |        | 0     |        |
| 6857   | 0     |        | 0     |        |
| 6858   | 0     |        | 0     |        |
| 6859   | 0     |        | 0     |        |
| 6860   | 0     |        | 0     |        |
| 6862   | 0     |        | 0     |        |
| 6879   | 0     |        | 0     |        |
| 6893   | 0     |        | 0     |        |
| 6898   | 0     |        | 0     |        |
| 6902   | 0     |        | 3     | 1      |
| 6903   | 1     | 2      | 1     | 2      |
| 6907   | 3     | 3      | 1     | 1      |
| 6908   | 0     |        | 0     |        |
| 6912   | 0     |        | 0     |        |
| 6915   | 1     | 2      | 0     |        |
| 6916   | 0     |        | 0     |        |



| respid | Q22_1 | Q22a_1 | Q23_1 | Q23a_1 |
|--------|-------|--------|-------|--------|
| 6917   | 3     | 2      | 2     | 1      |
| 6923   | 0     |        | 0     |        |
| 6934   | 1     | 1      | 0     |        |
| 6937   | 0     |        | 0     |        |
| 6945   | 0     |        | 0     |        |
| 6954   | 1     | 1      | 1     | 0      |
| 6956   | 1     | 2      | 0     |        |
| 6958   | 0     |        | 2     | 1      |
| 6961   | 0     |        | 0     |        |
| 6963   | 0     |        | 0     |        |
| 6964   | 0     |        | 0     |        |
| 6976   | 0     |        | 0     |        |
| 6977   | 0     |        | 0     |        |
| 7000   | 1     | 1      | 2     | 1      |
| 7001   | 0     |        | 0     |        |
| 7005   | 0     |        | 0     |        |
| 7006   | 0     |        | 1     | 1      |
| 7008   | 5     | 4      | 0     |        |
| 7009   | 0     |        | 0     |        |
| 7019   | 0     |        | 1     | 0      |
| 7021   | 0     |        | 0     |        |
| 7026   | 1     | 1      | 1     | 1      |
| 7030   | 3     | 3      | 3     | 3      |
| 7034   | 0     |        | 0     |        |
| 7039   | 1     | 1      | 0     |        |
| 7041   | 0     |        | 0     |        |
| 7047   | 0     |        | 0     |        |
| 7051   | 0     |        | 0     |        |
| 7052   | 1     | 1      | 1     | 1      |
| 7059   | 2     | 1      | 0     |        |
| 7062   | 0     |        | 1     | 1      |
| 7065   | 0     |        | 0     |        |

| respid | Q22_1 | Q22a_1 | Q23_1 | Q23a_1 |
|--------|-------|--------|-------|--------|
| 7066   | 0     |        | 0     |        |
| 7069   | 0     |        | 0     |        |
| 7070   | 0     |        | 0     |        |
| 7073   | 0     |        | 0     |        |
| 7078   | 0     |        | 0     |        |
| 7083   | 3     | 3      | 0     |        |
| 7084   | 3     | 2      | 4     | 3      |
| 7085   | 0     |        | 0     |        |
| 7088   | 1     | 1      | 2     | 2      |
| 7090   | 2     | 1      | 1     | 2      |
| 7095   | 0     |        | 1     | 1      |
| 7100   | 0     |        | 0     |        |
| 7102   | 1     | 1      | 3     | 2      |
| 7103   | 0     |        | 0     |        |
| 7108   | 0     |        | 1     | 0      |
| 7109   | 0     |        | 0     |        |
| 7110   | 0     |        | 0     |        |
| 7112   | 0     |        | 0     |        |
| 7114   | 0     |        | 0     |        |
| 7116   | 0     |        | 0     |        |
| 7117   | 2     | 2      | 1     | 2      |
| 7118   | 4     | 3      | 3     | 3      |
| 7120   | 3     | 3      | 2     | 2      |
| 7124   | 0     |        | 0     |        |
| 7130   | 1     | 1      | 0     |        |
| 7135   | 0     |        | 0     |        |
| 7137   | 3     | 3      | 3     | 4      |
| 7140   | 0     |        | 0     |        |
| 7141   | 0     |        | 0     |        |
| 7148   | 0     |        | 0     |        |
| 7152   | 0     |        | 0     |        |
| 7154   | 0     |        | 0     |        |

| respid | Q22_1 | Q22a_1 | Q23_1 | Q23a_1 |
|--------|-------|--------|-------|--------|
| 7156   | 0     |        | 0     |        |
| 7158   | 0     |        | 0     |        |
| 7159   | 0     |        | 0     |        |
| 7161   | 0     |        | 0     |        |
| 7164   | 0     |        | 0     |        |
| 7166   | 0     |        | 0     |        |
| 7167   | 0     |        | 0     |        |
| 7168   | 0     |        | 0     |        |
| 7170   | 0     |        | 0     |        |
| 7171   | 0     |        | 0     |        |
| 7172   | 0     |        | 0     |        |
| 7173   | 0     |        | 1     | 0      |
| 7175   | 0     |        | 0     |        |
| 7176   | 2     | 1      | 3     | 1      |
| 7180   | 0     |        | 0     |        |
| 7183   | 0     |        | 1     | 1      |
| 7189   | 0     |        | 0     |        |
| 7193   | 1     | 0      | 0     |        |
| 7194   | 2     | 1      | 0     |        |
| 7195   | 0     |        | 0     |        |
| 7200   | 0     |        | 0     |        |
| 7201   | 3     | 3      | 3     | 2      |
| 7205   | 2     | 2      | 2     | 1      |
| 7207   | 0     |        | 0     |        |
| 7208   | 0     |        | 0     |        |
| 7210   | 0     |        | 0     |        |
| 7211   | 0     |        | 0     |        |
| 7217   | 0     |        | 0     |        |
| 7218   | 0     |        | 0     |        |
| 7220   | 0     |        | 0     |        |
| 7225   | 0     |        | 0     |        |
| 7228   | 1     | 1      | 1     | 0      |

| respid | Q22_1 | Q22a_1 | Q23_1 | Q23a_1 |
|--------|-------|--------|-------|--------|
| 7230   | 1     | 1      | 0     |        |
| 7233   | 0     |        | 1     | 1      |
| 7234   | 0     |        | 0     |        |
| 7235   | 0     |        | 0     |        |
| 7236   | 0     |        | 0     |        |
| 7241   | 0     |        | 0     |        |
| 7251   | 0     |        | 0     |        |
| 7253   | 0     |        | 0     |        |
| 7259   | 1     | 1      | 2     | 1      |
| 7260   | 0     |        | 1     | 1      |
| 7261   | 2     | 1      | 2     | 1      |
| 7263   | 0     |        | 0     |        |
| 7265   | 0     |        | 0     |        |
| 7268   | 0     |        | 0     |        |
| 7269   | 0     |        | 0     |        |
| 7271   | 2     | 2      | 2     | 2      |
| 7276   | 0     |        | 0     |        |
| 7280   | 0     |        | 1     | 1      |
| 7283   | 0     |        | 0     |        |
| 7284   | 0     |        | 1     | 1      |
| 7286   | 0     |        | 0     |        |
| 7287   | 0     |        | 0     |        |
| 7288   | 3     | 1      | 0     |        |
| 7294   | 1     | 1      | 0     |        |
| 7295   | 0     |        | 0     |        |
| 7296   | 0     |        | 0     |        |
| 7297   | 1     | 0      | 1     | 1      |
| 7299   | 0     |        | 0     |        |
| 7300   | 2     | 2      | 0     |        |
| 7301   | 0     |        | 1     | 1      |
| 7302   | 0     |        | 0     |        |
| 7306   | 0     |        | 0     |        |

| respid | Q22_1 | Q22a_1 | Q23_1 | Q23a_1 |
|--------|-------|--------|-------|--------|
| 7313   | 3     | 4      | 3     | 3      |
| 7315   | 2     | 1      | 1     | 0      |
| 7317   | 0     |        | 0     |        |
| 7321   | 0     |        | 0     |        |
| 7322   | 0     |        | 0     |        |
| 7323   | 1     | 2      | 1     | 0      |
| 7333   | 0     |        | 4     | 2      |
| 7335   | 2     | 2      | 1     | 2      |
| 7336   | 0     |        | 0     |        |
| 7337   | 0     |        | 0     |        |
| 7338   | 0     |        | 0     |        |
| 7340   | 0     |        | 0     |        |
| 7341   | 2     | 2      | 2     | 2      |
| 7342   | 0     |        | 0     |        |
| 7344   | 1     | 1      | 1     | 1      |
| 7346   | 0     |        | 1     | 2      |
| 7347   | 0     |        | 0     |        |
| 7349   | 0     |        | 1     | 1      |
| 7352   | 0     |        | 0     |        |
| 7353   | 0     |        | 0     |        |
| 7355   | 0     |        | 0     |        |
| 7356   | 0     |        | 0     |        |
| 7360   | 3     | 4      | 2     | 3      |
| 7371   | 0     |        | 0     |        |
| 7376   | 2     | 2      | 2     | 2      |
| 7379   | 0     |        | 0     |        |
| 7381   | 0     |        | 1     | 0      |
| 7386   | 1     | 1      | 0     |        |
| 7389   | 1     | 1      | 1     | 1      |
| 7390   | 1     | 2      | 2     | 2      |
| 7393   | 0     |        | 1     | 0      |
| 7394   | 0     |        | 0     |        |

| respid | Q22_1 | Q22a_1 | Q23_1 | Q23a_1 |
|--------|-------|--------|-------|--------|
| 7396   | 1     | 1      | 2     | 1      |
| 7400   | 2     | 2      | 3     | 2      |
| 7401   | 1     | 0      | 1     | 0      |
| 7403   | 0     |        | 0     |        |
| 7406   | 0     |        | 0     |        |
| 7409   | 0     |        | 0     |        |
| 7410   | 1     | 3      | 1     | 2      |
| 7412   | 3     | 2      | 2     | 2      |
| 7414   | 0     |        | 0     |        |
| 7415   | 0     |        | 0     |        |
| 7417   | 1     | 1      | 1     | 1      |
| 7421   | 4     | 3      | 4     | 3      |
| 7425   | 2     | 2      | 1     | 1      |
| 7430   | 1     | 0      | 1     | 1      |
| 7432   | 0     |        | 0     |        |
| 7433   | 0     |        | 0     |        |
| 7442   | 1     | 0      | 0     |        |
| 7445   | 0     |        | 0     |        |
| 7446   | 1     | 0      | 0     |        |
| 7449   | 0     |        | 0     |        |
| 7450   | 0     |        | 0     |        |
| 7451   | 1     | 1      | 0     |        |
| 7459   | 0     |        | 0     |        |
| 7462   | 0     |        | 1     | 1      |
| 7463   | 0     |        | 0     |        |
| 7469   | 0     |        | 0     |        |
| 7482   | 0     |        | 0     |        |
| 7484   | 1     | 1      | 1     | 1      |
| 7486   | 0     |        | 0     |        |
| 7496   | 0     |        | 0     |        |
| 7502   | 0     |        | 0     |        |
| 7504   | 1     | 1      | 1     | 1      |

| respid | Q22_1 | Q22a_1 | Q23_1 | Q23a_1 |
|--------|-------|--------|-------|--------|
| 7509   | 2     | 3      | 4     | 4      |
| 7513   | 1     | 2      | 4     | 0      |
| 7514   | 0     |        | 0     |        |
| 7520   | 0     |        | 0     |        |
| 7523   | 0     |        | 0     |        |
| 7526   | 1     | 2      | 0     |        |
| 7529   | 1     | 2      | 0     |        |
| 7534   | 0     |        | 0     |        |
| 7536   | 2     | 1      | 1     | 0      |
| 7540   | 0     |        | 0     |        |
| 7541   | 2     | 2      | 2     | 2      |
| 7542   | 0     |        | 0     |        |
| 7555   | 0     |        | 0     |        |
| 7566   | 0     |        | 0     |        |
| 7568   | 0     |        | 0     |        |
| 7570   | 2     | 2      | 2     | 2      |
| 7572   | 0     |        | 0     |        |
| 7573   | 3     | 3      | 1     | 1      |
| 7576   | 0     |        | 0     |        |
| 7577   | 2     | 1      | 0     |        |
| 7583   | 0     |        | 0     |        |
| 7584   | 0     |        | 0     |        |
| 7585   | 4     | 3      | 3     | 2      |
| 7586   | 0     |        | 0     |        |
| 7587   | 0     |        | 0     |        |
| 7588   | 2     | 1      | 2     | 1      |
| 7596   | 0     |        | 1     | 1      |
| 7599   | 0     |        | 0     |        |
| 7600   | 2     | 2      | 2     | 2      |
| 7602   | 0     |        | 0     |        |
| 7613   | 0     |        | 5     | 0      |
| 7620   | 0     |        | 0     |        |

| respid | Q22_1 | Q22a_1 | Q23_1 | Q23a_1 |
|--------|-------|--------|-------|--------|
| 7623   | 0     |        | 0     |        |
| 7635   | 0     |        | 0     |        |
| 7636   | 1     | 2      | 0     |        |
| 7643   | 1     | 2      | 1     | 2      |
| 7645   | 1     | 2      | 1     | 0      |
| 7649   | 3     | 3      | 3     | 4      |
| 7651   | 0     |        | 0     |        |
| 7652   | 1     | 3      | 2     | 2      |
| 7655   | 0     |        | 0     |        |
| 7657   | 0     |        | 0     |        |
| 7675   | 0     |        | 0     |        |
| 7676   | 0     |        | 0     |        |
| 7684   | 1     | 1      | 0     |        |
| 7693   | 2     | 1      | 2     | 0      |
| 7694   | 4     | 4      | 4     | 4      |
| 7695   | 0     |        | 0     |        |
| 7696   | 4     | 4      | 4     | 4      |
| 7698   | 0     |        | 0     |        |
| 7700   | 0     |        | 0     |        |
| 7701   | 0     |        | 0     |        |
| 7704   | 0     |        | 0     |        |
| 7709   | 0     |        | 0     |        |
| 7713   | 0     |        | 0     |        |
| 7714   | 0     |        | 0     |        |
| 7718   | 2     | 1      | 4     | 1      |
| 7720   | 0     |        | 0     |        |
| 7721   | 0     |        | 3     | 2      |
| 7722   | 0     |        | 0     |        |
| 7724   | 1     | 1      | 0     |        |
| 7728   | 0     |        | 0     |        |
| 7731   | 0     |        | 1     | 1      |
| 7735   | 0     |        | 0     |        |



| respid | Q22_1 | Q22a_1 | Q23_1 | Q23a_1 |
|--------|-------|--------|-------|--------|
| 7737   | 0     |        | 1     | 0      |
| 7741   | 0     |        | 0     |        |
| 7746   | 0     |        | 0     |        |
| 7747   | 0     |        | 0     |        |
| 7748   | 0     |        | 0     |        |
| 7750   | 0     |        | 0     |        |
| 7754   | 0     |        | 0     |        |
| 7755   | 0     |        | 1     | 1      |
| 7762   | 0     |        | 0     |        |
| 7764   | 0     |        | 0     |        |
| 7766   | 0     |        | 0     |        |
| 7768   | 2     | 1      | 2     | 1      |
| 7770   | 0     |        | 1     | 1      |
| 7771   | 0     |        | 0     |        |
| 7777   | 0     |        | 0     |        |
| 7778   | 0     |        | 0     |        |
| 7783   | 3     | 4      | 4     | 3      |
| 7789   | 0     |        | 0     |        |
| 7790   | 0     |        | 0     |        |
| 7795   | 1     | 1      | 0     |        |
| 7807   | 0     |        | 0     |        |
| 7808   | 2     | 3      | 3     | 3      |
| 7818   | 0     |        | 0     |        |
| 7820   | 0     |        | 0     |        |
| 7831   | 0     |        | 0     |        |
| 7832   | 0     |        | 0     |        |
| 7837   | 1     | 1      | 0     |        |
| 7841   | 4     | 2      | 0     |        |
| 7845   | 2     | 1      | 2     | 1      |
| 7853   | 0     |        | 0     |        |
| 7854   | 0     |        | 0     |        |
| 7862   | 4     | 3      | 4     | 3      |

| respid | Q22_1 | Q22a_1 | Q23_1 | Q23a_1 |
|--------|-------|--------|-------|--------|
| 7871   | 0     |        | 0     |        |
| 7875   | 1     | 1      | 0     |        |
| 7880   | 1     | 2      | 0     |        |
| 7881   | 0     |        | 0     |        |
| 7883   | 1     | 3      | 1     | 3      |
| 7896   | 0     |        | 0     |        |
| 7905   | 0     |        | 0     |        |
| 7919   | 1     | 1      | 0     |        |
| 7928   | 2     | 4      | 2     | 2      |
| 7929   | 0     |        | 0     |        |
| 7938   | 1     | 0      | 1     | 1      |
| 7940   | 0     |        | 1     | 1      |
| 7941   | 0     |        | 0     |        |
| 7952   | 0     |        | 0     |        |
| 7962   | 0     |        | 0     |        |
| 7968   | 0     |        | 1     | 1      |
| 7972   | 0     |        | 0     |        |
| 7983   | 1     | 1      | 2     | 1      |
| 7990   | 0     |        | 0     |        |
| 7993   | 0     |        | 0     |        |
| 8005   | 0     |        | 0     |        |
| 8008   | 0     |        | 0     |        |
| 8012   | 0     |        | 1     | 0      |
| 8021   | 0     |        | 0     |        |
| 8024   | 0     |        | 0     |        |
| 8043   | 1     | 1      | 0     |        |
| 8051   | 0     |        | 0     |        |
| 8056   | 0     |        | 0     |        |
| 8061   | 0     |        | 2     | 2      |
| 8066   | 0     |        | 0     |        |
| 8069   | 1     | 1      | 0     |        |
| 8071   | 0     |        | 0     |        |

| respid | Q22_1 | Q22a_1 | Q23_1 | Q23a_1 |
|--------|-------|--------|-------|--------|
| 8072   | 0     |        | 0     |        |
| 8076   | 2     | 1      | 0     |        |
| 8080   | 1     | 1      | 0     |        |
| 8083   | 1     | 1      | 0     |        |
| 8093   | 2     | 2      | 1     | 1      |
| 8095   | 3     | 2      | 0     |        |
| 8099   | 0     |        | 0     |        |
| 8100   | 1     | 1      | 1     | 0      |
| 8103   | 0     |        | 0     |        |
| 8104   | 0     |        | 0     |        |
| 8115   | 2     | 1      | 3     | 2      |
| 8121   | 0     |        | 0     |        |
| 8128   | 0     |        | 0     |        |
| 8130   | 0     |        | 0     |        |
| 8131   | 0     |        | 0     |        |
| 8133   | 0     |        | 0     |        |
| 8143   | 0     |        | 1     | 1      |
| 8144   | 0     |        | 0     |        |
| 8146   | 0     |        | 1     | 0      |
| 8148   | 0     |        | 0     |        |
| 8157   | 0     |        | 0     |        |
| 8164   | 0     |        | 0     |        |
| 8173   | 0     |        | 0     |        |
| 8176   | 0     |        | 0     |        |
| 8179   | 0     |        | 0     |        |
| 8181   | 0     |        | 0     |        |
| 8182   | 0     |        | 0     |        |
| 8196   | 0     |        | 0     |        |
| 8200   | 1     | 1      | 0     |        |
| 8203   | 0     |        | 0     |        |
| 8204   | 3     | 3      | 1     | 3      |
| 8206   | 1     | 1      | 0     |        |

| respid | Q22_1 | Q22a_1 | Q23_1 | Q23a_1 |
|--------|-------|--------|-------|--------|
| 8208   | 0     |        | 0     |        |
| 8212   | 0     |        | 0     |        |
| 8222   | 3     | 2      | 3     | 2      |
| 8223   | 0     |        | 0     |        |
| 8225   | 0     |        | 0     |        |
| 8226   | 0     |        | 0     |        |
| 8228   | 0     |        | 0     |        |
| 8229   | 0     |        | 0     |        |
| 8239   | 2     | 1      | 3     | 1      |
| 8246   | 1     | 1      | 4     | 1      |
| 8258   | 2     | 2      | 2     | 2      |
| 8260   | 0     |        | 0     |        |
| 8262   | 0     |        | 0     |        |
| 8263   | 1     | 1      | 1     | 1      |
| 8267   | 1     | 1      | 0     |        |
| 8271   | 1     | 2      | 2     | 2      |
| 8274   | 0     |        | 0     |        |
| 8275   | 3     | 3      | 2     | 3      |
| 8279   | 2     | 2      | 2     | 0      |
| 8285   | 4     | 3      | 3     | 2      |
| 8287   | 5     | 4      | 5     | 4      |
| 8289   | 0     |        | 0     |        |
| 8291   | 1     | 2      | 1     | 1      |
| 8299   | 1     | 2      | 1     | 2      |
| 8301   | 0     |        | 0     |        |
| 8302   | 0     |        | 0     |        |
| 8308   | 1     | 1      | 0     |        |
| 8313   | 0     |        | 0     |        |
| 8316   | 1     | 2      | 2     | 2      |
| 8317   | 0     |        | 0     |        |
| 8319   | 0     |        | 0     |        |
| 8323   | 0     |        | 0     |        |

| respid | Q22_1 | Q22a_1 | Q23_1 | Q23a_1 |
|--------|-------|--------|-------|--------|
| 8324   | 2     | 1      | 0     |        |
| 8327   | 4     | 4      | 0     |        |
| 8328   | 0     |        | 0     |        |
| 8342   | 0     |        | 0     |        |
| 8350   | 0     |        | 0     |        |
| 8352   | 0     |        | 0     |        |
| 8353   | 0     |        | 0     |        |
| 8356   | 0     |        | 0     |        |
| 8367   | 0     |        | 0     |        |
| 8373   | 1     | 1      | 1     | 1      |
| 8379   | 0     |        | 0     |        |
| 8382   | 0     |        | 0     |        |
| 8387   | 0     |        | 0     |        |
| 8409   | 0     |        | 0     |        |
| 8410   | 0     |        | 0     |        |
| 8412   | 0     |        | 0     |        |
| 8415   | 0     |        | 1     | 1      |
| 8417   | 0     |        | 0     |        |
| 8422   | 1     | 1      | 2     | 1      |
| 8430   | 1     | 2      | 0     |        |
| 8434   | 0     |        | 0     |        |
| 8436   | 0     |        | 0     |        |
| 8446   | 0     |        | 1     | 0      |
| 8447   | 0     |        | 0     |        |
| 8448   | 0     |        | 0     |        |
| 8455   | 0     |        | 1     | 1      |
| 8456   | 0     |        | 0     |        |
| 8459   | 0     |        | 0     |        |
| 8460   | 0     |        | 0     |        |
| 8464   | 1     | 1      | 2     | 1      |
| 8470   | 1     | 1      | 0     |        |
| 8473   | 0     |        | 0     |        |

| respid | Q22_1 | Q22a_1 | Q23_1 | Q23a_1 |
|--------|-------|--------|-------|--------|
| 8486   | 0     |        | 0     |        |
| 8487   | 1     | 1      | 0     |        |
| 8489   | 0     |        | 1     | 1      |
| 8494   | 1     | 1      | 0     |        |
| 8495   | 4     | 4      | 4     | 4      |
| 8497   | 0     |        | 0     |        |
| 8510   | 0     |        | 1     | 1      |
| 8515   | 4     | 2      | 2     | 1      |
| 8526   | 0     |        | 0     |        |
| 8530   | 0     |        | 0     |        |
| 8532   | 0     |        | 0     |        |
| 8533   | 0     |        | 0     |        |
| 8534   | 1     | 1      | 0     |        |
| 8572   | 0     |        | 2     | 1      |
| 8582   | 0     |        | 2     | 1      |
| 8584   | 0     |        | 0     |        |
| 8585   | 0     |        | 0     |        |
| 8586   | 0     |        | 0     |        |
| 8589   | 0     |        | 0     |        |
| 8593   | 0     |        | 1     | 0      |
| 8594   | 0     |        | 0     |        |
| 8601   | 0     |        | 0     |        |
| 8603   | 0     |        | 0     |        |
| 8604   | 0     |        | 0     |        |
| 8605   | 0     |        | 0     |        |
| 8607   | 1     | 1      | 1     | 1      |
| 8623   | 0     |        | 1     | 1      |
| 8626   | 1     | 1      | 1     | 0      |
| 8638   | 0     |        | 0     |        |
| 8640   | 0     |        | 0     |        |
| 8641   | 1     | 0      | 0     |        |
| 8643   | 0     |        | 0     |        |

| respid | Q22_1 | Q22a_1 | Q23_1 | Q23a_1 |
|--------|-------|--------|-------|--------|
| 8644   | 1     | 1      | 0     |        |
| 8646   | 0     |        | 0     |        |
| 8647   | 0     |        | 0     |        |
| 8649   | 1     | 1      | 1     | 1      |
| 8650   | 0     |        | 0     |        |
| 8658   | 0     |        | 0     |        |
| 8659   | 0     |        | 1     | 1      |
| 8669   | 1     | 2      | 1     | 2      |
| 8672   | 0     |        | 0     |        |
| 8673   | 1     | 1      | 0     |        |
| 8676   | 0     |        | 0     |        |
| 8677   | 0     |        | 0     |        |
| 8681   | 0     |        | 0     |        |
| 8688   | 0     |        | 2     | 1      |
| 8689   | 0     |        | 1     | 2      |
| 8690   | 0     |        | 0     |        |
| 8693   | 1     | 0      | 1     | 0      |
| 8694   | 1     | 1      | 1     | 1      |
| 8699   | 0     |        | 1     | 1      |
| 8700   | 0     |        | 0     |        |
| 8703   | 0     |        | 0     |        |
| 8704   | 1     | 1      | 0     |        |
| 8706   | 1     | 2      | 2     | 2      |
| 8709   | 1     | 1      | 3     | 1      |
| 8715   | 0     |        | 1     | 0      |
| 8728   | 0     |        | 0     |        |
| 8729   | 0     |        | 0     |        |
| 8730   | 1     | 2      | 0     |        |
| 8742   | 0     |        | 2     | 1      |
| 8748   | 0     |        | 0     |        |
| 8749   | 0     |        | 1     | 0      |
| 8750   | 0     |        | 1     | 0      |

| respid | Q22_1 | Q22a_1 | Q23_1 | Q23a_1 |
|--------|-------|--------|-------|--------|
| 8751   | 0     |        | 0     |        |
| 8752   | 0     |        | 0     |        |
| 8754   | 1     | 0      | 1     | 0      |
| 8757   | 0     |        | 0     |        |
| 8760   | 0     |        | 1     | 0      |
| 8761   | 3     | 2      | 0     |        |
| 8762   | 0     |        | 1     | 1      |
| 8763   | 0     |        | 0     |        |
| 8764   | 0     |        | 3     | 1      |
| 8765   | 0     |        | 0     |        |
| 8766   | 5     | 1      | 0     |        |
| 8767   | 1     | 1      | 0     |        |
| 8768   | 0     |        | 0     |        |
| 8770   | 0     |        | 0     |        |
| 8771   | 0     |        | 0     |        |
| 8773   | 0     |        | 0     |        |
| 8774   | 1     | 1      | 1     | 1      |
| 8776   | 0     |        | 0     |        |
| 8777   | 0     |        | 0     |        |
| 8778   | 1     | 2      | 2     | 2      |
| 8779   | 0     |        | 0     |        |
| 8784   | 1     | 0      | 1     | 1      |
| 8786   | 0     |        | 0     |        |
| 8787   | 1     | 1      | 0     |        |
| 8790   | 0     |        | 0     |        |
| 8791   | 3     | 4      | 3     | 4      |
| 8793   | 0     |        | 0     |        |
| 8795   | 1     | 0      | 0     |        |
| 8797   | 0     |        | 0     |        |
| 8801   | 0     |        | 0     |        |
| 8802   | 0     |        | 0     |        |
| 8807   | 0     |        | 0     |        |



| respid | Q22_1 | Q22a_1 | Q23_1 | Q23a_1 |
|--------|-------|--------|-------|--------|
| 8813   | 0     |        | 0     |        |
| 8817   | 2     | 1      | 2     | 0      |
| 8818   | 1     | 2      | 1     | 0      |
| 8821   | 0     |        | 0     |        |
| 8822   | 0     |        | 0     |        |
| 8823   | 0     |        | 0     |        |
| 8824   | 0     |        | 3     | 2      |
| 8825   | 0     |        | 0     |        |
| 8834   | 2     | 2      | 2     | 2      |
| 8840   | 1     | 1      | 2     | 2      |
| 8843   | 5     | 4      | 5     | 4      |
| 8846   | 0     |        | 0     |        |
| 8862   | 0     |        | 0     |        |
| 8866   | 0     |        | 0     |        |
| 8869   | 0     |        | 0     |        |
| 8872   | 0     |        | 0     |        |
| 8903   | 0     |        | 0     |        |
| 8909   | 0     |        | 0     |        |
| 8926   | 0     |        | 0     |        |
| 8936   | 0     |        | 0     |        |
| 8945   | 0     |        | 0     |        |
| 8954   | 0     |        | 0     |        |
| 8955   | 0     |        | 0     |        |
| 8958   | 0     |        | 0     |        |
| 8959   | 0     |        | 0     |        |
| 8960   | 0     |        | 0     |        |
| 8976   | 0     |        | 0     |        |
| 8977   | 0     |        | 0     |        |
| 8979   | 0     |        | 0     |        |
| 8985   | 0     |        | 0     |        |
| 8994   | 0     |        | 0     |        |
| 8997   | 0     |        | 1     | 2      |

| respid | Q22_1 | Q22a_1 | Q23_1 | Q23a_1 |
|--------|-------|--------|-------|--------|
| 9002   | 0     |        | 0     |        |
| 9005   | 0     |        | 2     | 1      |
| 9017   | 0     |        | 0     |        |
| 9018   | 0     |        | 0     |        |
| 9021   | 0     |        | 1     | 1      |
| 9029   | 4     | 3      | 4     | 3      |
| 9035   | 0     |        | 0     |        |
| 9038   | 0     |        | 0     |        |
| 9039   | 0     |        | 0     |        |
| 9040   | 0     |        | 0     |        |
| 9042   | 0     |        | 1     | 0      |
| 9043   | 0     |        | 1     | 0      |
| 9045   | 0     |        | 0     |        |
| 9051   | 0     |        | 0     |        |
| 9067   | 0     |        | 0     |        |
| 9069   | 1     | 1      | 0     |        |
| 9073   | 1     | 1      | 2     | 2      |
| 9084   | 0     |        | 1     | 2      |
| 9096   | 0     |        | 0     |        |
| 9100   | 0     |        | 0     |        |
| 9107   | 0     |        | 0     |        |
| 9110   | 0     |        | 0     |        |
| 9120   | 0     |        | 0     |        |
| 9122   | 3     | 3      | 0     |        |
| 9130   | 0     |        | 0     |        |
| 9134   | 3     | 3      | 0     |        |
| 9137   | 1     | 1      | 1     | 1      |
| 9139   | 1     | 1      | 0     |        |
| 9144   | 0     |        | 0     |        |
| 9157   | 0     |        | 1     | 1      |
| 9166   | 0     |        | 2     | 1      |
| 9177   | 2     | 1      | 5     | 2      |

| respid | Q22_1 | Q22a_1 | Q23_1 | Q23a_1 |
|--------|-------|--------|-------|--------|
| 9181   | 0     |        | 0     |        |
| 9183   | 0     |        | 0     |        |
| 9184   | 0     |        | 2     | 1      |
| 9188   | 0     |        | 0     |        |
| 9197   | 2     | 0      | 0     |        |
| 9200   | 2     | 2      | 0     |        |
| 9205   | 1     | 2      | 0     |        |
| 9207   | 0     |        | 0     |        |
| 9213   | 0     |        | 0     |        |
| 9216   | 2     | 1      | 1     | 1      |
| 9217   | 0     |        | 0     |        |
| 9218   | 0     |        | 0     |        |
| 9219   | 2     | 2      | 4     | 2      |
| 9220   | 0     |        | 0     |        |
| 9221   | 0     |        | 1     | 2      |
| 9223   | 3     | 3      | 4     | 4      |
| 9228   | 0     |        | 0     |        |
| 9230   | 0     |        | 0     |        |
| 9231   | 1     | 1      | 0     |        |
| 9233   | 0     |        | 0     |        |
| 9235   | 0     |        | 1     | 0      |
| 9237   | 1     | 1      | 0     |        |
| 9242   | 0     |        | 0     |        |
| 9250   | 0     |        | 0     |        |
| 9253   | 2     | 4      | 0     |        |
| 9257   | 0     |        | 1     | 0      |
| 9263   | 0     |        | 0     |        |
| 9267   | 1     | 2      | 2     | 2      |
| 9272   | 0     |        | 1     | 1      |
| 9279   | 0     |        | 0     |        |
| 9281   | 0     |        | 0     |        |
| 9285   | 0     |        | 0     |        |

| respid | Q22_1 | Q22a_1 | Q23_1 | Q23a_1 |
|--------|-------|--------|-------|--------|
| 9286   | 0     |        | 0     |        |
| 9294   | 0     |        | 1     | 1      |
| 9295   | 0     |        | 0     |        |
| 9297   | 1     | 1      | 0     |        |
| 9299   | 0     |        | 0     |        |
| 9309   | 0     |        | 2     | 1      |
| 9315   | 0     |        | 0     |        |
| 9320   | 3     | 1      | 0     |        |
| 9324   | 0     |        | 0     |        |
| 9326   | 0     |        | 0     |        |
| 9333   | 0     |        | 0     |        |
| 9334   | 1     | 1      | 1     | 1      |
| 9336   | 2     | 2      | 0     |        |
| 9337   | 0     |        | 1     | 0      |
| 9342   | 0     |        | 0     |        |
| 9347   | 0     |        | 0     |        |
| 9352   | 1     | 1      | 1     | 0      |
| 9355   | 1     | 0      | 0     |        |
| 9356   | 0     |        | 1     | 1      |
| 9359   | 1     | 1      | 1     | 1      |
| 9368   | 0     |        | 0     |        |
| 9375   | 1     | 0      | 1     | 0      |
| 9384   | 0     |        | 1     | 0      |
| 9388   | 1     | 1      | 5     | 2      |
| 9397   | 2     | 4      | 2     | 4      |
| 9400   | 0     |        | 0     |        |
| 9401   | 3     | 2      | 3     | 3      |
| 9402   | 0     |        | 0     |        |
| 9417   | 2     | 2      | 2     | 2      |
| 9424   | 0     |        | 0     |        |
| 9427   | 0     |        | 0     |        |
| 9429   | 0     |        | 0     |        |

| respid | Q22_1 | Q22a_1 | Q23_1 | Q23a_1 |
|--------|-------|--------|-------|--------|
| 9437   | 3     | 3      | 3     | 3      |
| 9442   | 0     |        | 0     |        |
| 9446   | 1     | 1      | 1     | 1      |
| 9447   | 0     |        | 0     |        |
| 9448   | 0     |        | 0     |        |
| 9449   | 0     |        | 1     | 1      |
| 9455   | 0     |        | 0     |        |
| 9459   | 1     | 1      | 0     |        |
| 9460   | 0     |        | 0     |        |
| 9461   | 0     |        | 0     |        |
| 9463   | 1     | 1      | 0     |        |
| 9464   | 1     | 1      | 1     | 1      |
| 9466   | 1     | 1      | 0     |        |
| 9477   | 0     |        | 0     |        |
| 9482   | 2     | 3      | 2     | 2      |
| 9486   | 1     | 1      | 1     | 1      |
| 9488   | 5     | 4      | 2     | 1      |
| 9489   | 0     |        | 0     |        |
| 9496   | 0     |        | 0     |        |
| 9499   | 0     |        | 1     | 0      |
| 9512   | 0     |        | 0     |        |
| 9514   | 0     |        | 0     |        |
| 9516   | 0     |        | 0     |        |
| 9517   | 2     | 1      | 1     | 1      |
| 9520   | 0     |        | 0     |        |
| 9527   | 1     | 0      | 0     |        |
| 9532   | 0     |        | 1     | 2      |
| 9533   | 0     |        | 0     |        |
| 9543   | 0     |        | 0     |        |
| 9550   | 0     |        | 0     |        |
| 9553   | 0     |        | 0     |        |
| 9555   | 4     | 3      | 1     | 0      |

| respid | Q22_1 | Q22a_1 | Q23_1 | Q23a_1 |
|--------|-------|--------|-------|--------|
| 9565   | 1     | 0      | 0     |        |
| 9583   | 4     | 4      | 0     |        |
| 9594   | 0     |        | 0     |        |
| 9596   | 1     | 1      | 0     |        |
| 9600   | 0     |        | 0     |        |
| 9602   | 0     |        | 0     |        |
| 9606   | 0     |        | 0     |        |
| 9608   | 0     |        | 0     |        |
| 9610   | 1     | 1      | 0     |        |
| 9612   | 0     |        | 0     |        |
| 9613   | 0     |        | 0     |        |
| 9614   | 0     |        | 1     | 2      |
| 9620   | 1     | 0      | 1     | 0      |
| 9628   | 0     |        | 0     |        |
| 9631   | 0     |        | 0     |        |
| 9632   | 0     |        | 1     | 1      |
| 9633   | 1     | 1      | 0     |        |
| 9639   | 0     |        | 0     |        |
| 9640   | 1     | 1      | 2     | 1      |
| 9642   | 0     |        | 0     |        |
| 9653   | 0     |        | 1     | 1      |
| 9658   | 0     |        | 1     | 1      |
| 9659   | 1     | 1      | 1     | 1      |
| 9661   | 0     |        | 0     |        |
| 9664   | 0     |        | 0     |        |
| 9665   | 2     | 2      | 1     | 0      |
| 9666   | 1     | 2      | 2     | 2      |
| 9667   | 1     | 1      | 1     | 2      |
| 9668   | 0     |        | 0     |        |
| 9670   | 0     |        | 0     |        |
| 9671   | 0     |        | 0     |        |
| 9681   | 0     |        | 0     |        |

| respid | Q22_1 | Q22a_1 | Q23_1 | Q23a_1 |
|--------|-------|--------|-------|--------|
| 9684   | 0     |        | 0     |        |
| 9685   | 0     |        | 0     |        |
| 9686   | 0     |        | 5     | 3      |
| 9688   | 1     | 2      | 0     |        |
| 9692   | 1     | 1      | 0     |        |
| 9693   | 2     | 2      | 2     | 1      |
| 9698   | 1     | 1      | 0     |        |
| 9699   | 1     | 1      | 0     |        |
| 9701   | 0     |        | 0     |        |
| 9702   | 0     |        | 0     |        |
| 9709   | 2     | 1      | 2     | 1      |
| 9713   | 0     |        | 0     |        |
| 9715   | 0     |        | 0     |        |
| 9721   | 0     |        | 0     |        |
| 9725   | 0     |        | 1     | 0      |
| 9729   | 2     | 0      | 2     | 0      |
| 9731   | 1     | 1      | 0     |        |
| 9736   | 0     |        | 0     |        |
| 9740   | 0     |        | 0     |        |
| 9741   | 0     |        | 0     |        |
| 9749   | 0     |        | 0     |        |
| 9750   | 1     | 1      | 0     |        |
| 9751   | 3     | 2      | 2     | 3      |
| 9753   | 0     |        | 0     |        |
| 9754   | 3     | 3      | 3     | 3      |
| 9756   | 4     | 3      | 4     | 2      |
| 9758   | 2     | 2      | 1     | 2      |
| 9759   | 0     |        | 0     |        |
| 9760   | 1     | 1      | 1     | 1      |
| 9761   | 0     |        | 0     |        |
| 9762   | 0     |        | 0     |        |
| 9764   | 0     |        | 0     |        |

| respid | Q22_1 | Q22a_1 | Q23_1 | Q23a_1 |
|--------|-------|--------|-------|--------|
| 9768   | 0     |        | 0     |        |
| 9769   | 0     |        | 0     |        |
| 9770   | 0     |        | 0     |        |
| 9771   | 1     | 1      | 2     | 2      |
| 9772   | 0     |        | 0     |        |
| 9773   | 1     | 1      | 1     | 1      |
| 9776   | 0     |        | 0     |        |
| 9786   | 2     | 2      | 2     | 2      |
| 9790   | 0     |        | 0     |        |
| 9791   | 0     |        | 0     |        |
| 9794   | 2     | 2      | 1     | 1      |
| 9797   | 0     |        | 0     |        |
| 9799   | 1     | 1      | 1     | 0      |
| 9804   | 0     |        | 0     |        |
| 9805   | 3     | 2      | 4     | 1      |
| 9806   | 0     |        | 0     |        |
| 9807   | 0     |        | 0     |        |
| 9813   | 0     |        | 3     | 2      |
| 9817   | 0     |        | 0     |        |
| 9823   | 0     |        | 0     |        |
| 9826   | 0     |        | 0     |        |
| 9830   | 0     |        | 0     |        |
| 9835   | 0     |        | 0     |        |
| 9836   | 0     |        | 0     |        |
| 9841   | 0     |        | 0     |        |
| 9842   | 0     |        | 0     |        |
| 9844   | 0     |        | 0     |        |
| 9847   | 0     |        | 0     |        |
| 9851   | 0     |        | 0     |        |
| 9852   | 2     | 2      | 0     |        |
| 9854   | 0     |        | 0     |        |
| 9855   | 0     |        | 1     | 1      |



| respid | Q22_1 | Q22a_1 | Q23_1 | Q23a_1 |
|--------|-------|--------|-------|--------|
| 9856   | 0     |        | 0     |        |
| 9862   | 0     |        | 0     |        |
| 9863   | 0     |        | 0     |        |
| 9866   | 0     |        | 1     | 1      |
| 9867   | 1     | 1      | 3     | 1      |
| 9868   | 1     | 2      | 3     | 3      |
| 9869   | 0     |        | 2     | 1      |
| 9878   | 3     | 2      | 3     | 2      |
| 9879   | 1     | 1      | 4     | 2      |
| 9881   | 1     | 1      | 4     | 1      |
| 9882   | 0     |        | 1     | 1      |
| 9884   | 0     |        | 0     |        |
| 9885   | 0     |        | 0     |        |
| 9888   | 1     | 0      | 0     |        |
| 9889   | 0     |        | 0     |        |
| 9894   | 1     | 2      | 1     | 2      |
| 9895   | 0     |        | 0     |        |
| 9896   | 4     | 3      | 4     | 4      |
| 9897   | 2     | 1      | 1     | 0      |
| 9905   | 0     |        | 2     | 2      |
| 9907   | 0     |        | 0     |        |
| 9908   | 0     |        | 0     |        |
| 9909   | 0     |        | 0     |        |
| 9910   | 5     | 4      | 4     | 2      |
| 9913   | 1     | 1      | 2     | 2      |
| 9914   | 0     |        | 4     | 2      |
| 9915   | 1     | 1      | 0     |        |
| 9916   | 0     |        | 1     | 0      |
| 9918   | 0     |        | 0     |        |
| 9919   | 3     | 1      | 0     |        |
| 9922   | 1     | 2      | 0     |        |
| 9930   | 0     |        | 0     |        |

| respid | Q22_1 | Q22a_1 | Q23_1 | Q23a_1 |
|--------|-------|--------|-------|--------|
| 9934   | 0     |        | 0     |        |
| 9936   | 1     | 1      | 1     | 1      |
| 9938   | 0     |        | 0     |        |
| 9940   | 0     |        | 0     |        |
| 9944   | 1     | 2      | 1     | 2      |
| 9945   | 0     |        | 0     |        |
| 9948   | 3     | 3      | 2     | 2      |
| 9949   | 1     | 1      | 1     | 1      |
| 9951   | 1     | 1      | 1     | 1      |
| 9952   | 1     | 1      | 1     | 1      |
| 9954   | 0     |        | 0     |        |
| 9955   | 0     |        | 0     |        |
| 9956   | 2     | 1      | 4     | 2      |
| 9957   | 2     | 2      | 0     |        |
| 9958   | 1     | 1      | 0     |        |
| 9959   | 0     |        | 1     | 2      |
| 9960   | 1     | 1      | 2     | 2      |
| 9961   | 0     |        | 0     |        |
| 9962   | 0     |        | 0     |        |
| 9969   | 0     |        | 0     |        |
| 9982   | 1     | 1      | 1     | 0      |
| 9984   | 1     | 0      | 0     |        |
| 9990   | 0     |        | 1     | 1      |
| 9992   | 1     | 2      | 2     | 1      |
| 9993   | 1     | 1      | 1     | 2      |
| 9997   | 0     |        | 0     |        |
| 9999   | 0     |        | 0     |        |
| 10000  | 0     |        | 2     | 1      |
| 10005  | 2     | 2      | 0     |        |
| 10014  | 0     |        | 0     |        |
| 10016  | 2     | 4      | 2     | 2      |
| 10017  | 1     | 1      | 1     | 1      |

| respid | Q22_1 | Q22a_1 | Q23_1 | Q23a_1 |
|--------|-------|--------|-------|--------|
| 10018  | 3     | 3      | 0     |        |
| 10021  | 1     | 1      | 1     | 1      |
| 10025  | 0     |        | 0     |        |
| 10027  | 0     |        | 0     |        |
| 10028  | 0     |        | 0     |        |
| 10031  | 1     | 2      | 5     | 3      |
| 10036  | 0     |        | 0     |        |
| 10037  | 0     |        | 0     |        |
| 10038  | 1     | 1      | 1     | 1      |
| 10039  | 0     |        | 0     |        |
| 10041  | 0     |        | 0     |        |
| 10045  | 4     | 2      | 3     | 3      |
| 10046  | 1     | 2      | 3     | 2      |
| 10047  | 0     |        | 2     | 1      |
| 10048  | 1     | 1      | 0     |        |
| 10049  | 0     |        | 0     |        |
| 10051  | 0     |        | 0     |        |
| 10052  | 2     | 1      | 1     | 1      |
| 10056  | 0     |        | 0     |        |
| 10061  | 1     | 1      | 5     | 2      |
| 10064  | 0     |        | 0     |        |
| 10066  | 0     |        | 0     |        |
| 10069  | 0     |        | 0     |        |
| 10071  | 1     | 2      | 0     |        |
| 10074  | 0     |        | 0     |        |
| 10079  | 0     |        | 1     | 0      |
| 10087  | 1     | 3      | 2     | 2      |
| 10095  | 0     |        | 0     |        |
| 10097  | 0     |        | 0     |        |
| 10100  | 1     | 2      | 0     |        |
| 10105  | 0     |        | 0     |        |
| 10107  | 4     | 2      | 5     | 3      |

| respid | Q22_1 | Q22a_1 | Q23_1 | Q23a_1 |
|--------|-------|--------|-------|--------|
| 10111  | 0     |        | 0     |        |
| 10116  | 1     | 1      | 1     | 1      |
| 10118  | 0     |        | 0     |        |
| 10123  | 0     |        | 0     |        |
| 10124  | 0     |        | 0     |        |
| 10130  | 1     | 1      | 3     | 1      |
| 10134  | 0     |        | 0     |        |
| 10135  | 0     |        | 0     |        |
| 10136  | 0     |        | 0     |        |
| 10141  | 2     | 1      | 2     | 1      |
| 10142  | 0     |        | 0     |        |
| 10143  | 0     |        | 1     | 0      |
| 10145  | 1     | 0      | 1     | 0      |
| 10149  | 2     | 1      | 2     | 1      |
| 10150  | 0     |        | 1     | 1      |
| 10151  | 0     |        | 0     |        |
| 10152  | 2     | 2      | 5     | 4      |
| 10153  | 0     |        | 1     | 0      |
| 10156  | 0     |        | 0     |        |
| 10160  | 1     | 2      | 0     |        |
| 10161  | 0     |        | 0     |        |
| 10167  | 4     | 2      | 4     | 2      |
| 10171  | 0     |        | 0     |        |
| 10172  | 0     |        | 0     |        |
| 10176  | 0     |        | 1     | 1      |
| 10177  | 0     |        | 0     |        |
| 10182  | 1     | 0      | 1     | 1      |
| 10184  | 0     |        | 1     | 0      |
| 10186  | 3     | 3      | 0     |        |
| 10189  | 0     |        | 2     | 0      |
| 10191  | 0     |        | 0     |        |
| 10192  | 1     | 1      | 0     |        |

| respid | Q22_1 | Q22a_1 | Q23_1 | Q23a_1 |
|--------|-------|--------|-------|--------|
| 10195  | 0     |        | 0     |        |
| 10199  | 0     |        | 0     |        |
| 10201  | 0     |        | 3     | 2      |
| 10213  | 0     |        | 0     |        |
| 10222  | 4     | 3      | 3     | 2      |
| 10224  | 0     |        | 0     |        |
| 10245  | 0     |        | 0     |        |
| 10254  | 0     |        | 0     |        |
| 10255  | 3     | 2      | 2     | 3      |
| 10257  | 0     |        | 2     | 1      |
| 10260  | 0     |        | 2     | 2      |
| 10261  | 0     |        | 0     |        |
| 10263  | 2     | 4      | 1     | 2      |
| 10264  | 0     |        | 0     |        |
| 10268  | 0     |        | 0     |        |
| 10269  | 2     | 1      | 0     |        |
| 10270  | 0     |        | 0     |        |
| 10282  | 0     |        | 0     |        |
| 10285  | 0     |        | 0     |        |
| 10288  | 0     |        | 0     |        |
| 10291  | 0     |        | 0     |        |
| 10292  | 0     |        | 0     |        |
| 10304  | 0     |        | 0     |        |
| 10305  | 0     |        | 0     |        |
| 10310  | 0     |        | 0     |        |
| 10324  | 0     |        | 0     |        |
| 10325  | 1     | 1      | 0     |        |
| 10326  | 1     | 1      | 3     | 2      |
| 10329  | 0     |        | 0     |        |
| 10332  | 0     |        | 0     |        |
| 10337  | 1     | 1      | 4     | 2      |
| 10341  | 0     |        | 1     | 1      |

| respid | Q22_1 | Q22a_1 | Q23_1 | Q23a_1 |
|--------|-------|--------|-------|--------|
| 10353  | 1     | 1      | 1     | 1      |
| 10354  | 0     |        | 0     |        |
| 10359  | 1     | 2      | 0     |        |
| 10360  | 0     |        | 0     |        |
| 10362  | 0     |        | 0     |        |
| 10364  | 0     |        | 1     | 0      |
| 10366  | 2     | 2      | 2     | 2      |
| 10367  | 0     |        | 0     |        |
| 10371  | 0     |        | 0     |        |
| 10374  | 1     | 1      | 0     |        |
| 10375  | 0     |        | 0     |        |
| 10376  | 0     |        | 0     |        |
| 10377  | 0     |        | 0     |        |
| 10378  | 1     | 1      | 1     | 1      |
| 10387  | 0     |        | 0     |        |
| 10396  | 3     | 2      | 5     | 4      |
| 10397  | 0     |        | 0     |        |
| 10399  | 3     | 3      | 3     | 3      |
| 10405  | 0     |        | 0     |        |
| 10406  | 0     |        | 0     |        |
| 10408  | 0     |        | 0     |        |
| 10409  | 0     |        | 0     |        |
| 10412  | 0     |        | 0     |        |
| 10413  | 0     |        | 0     |        |
| 10419  | 2     | 2      | 2     | 2      |
| 10423  | 3     | 3      | 4     | 3      |
| 10426  | 0     |        | 0     |        |
| 10446  | 0     |        | 1     | 1      |
| 10448  | 0     |        | 0     |        |
| 10450  | 0     |        | 1     | 1      |
| 10455  | 0     |        | 0     |        |
| 10460  | 0     |        | 0     |        |

| respid | Q22_1 | Q22a_1 | Q23_1 | Q23a_1 |
|--------|-------|--------|-------|--------|
| 10461  | 2     | 1      | 0     |        |
| 10471  | 0     |        | 0     |        |
| 10472  | 0     |        | 0     |        |
| 10491  | 2     | 3      | 3     | 3      |
| 10493  | 1     | 2      | 1     | 2      |
| 10498  | 0     |        | 0     |        |
| 10533  | 0     |        | 0     |        |
| 10539  | 1     | 1      | 0     |        |
| 10540  | 0     |        | 1     | 0      |
| 10557  | 0     |        | 3     | 1      |
| 10558  | 1     | 1      | 2     | 1      |
| 10559  | 1     | 1      | 0     |        |
| 10564  | 0     |        | 0     |        |
| 10570  | 0     |        | 0     |        |
| 10572  | 0     |        | 0     |        |
| 10576  | 0     |        | 0     |        |
| 10582  | 0     |        | 1     | 0      |
| 10593  | 0     |        | 0     |        |
| 10596  | 0     |        | 0     |        |
| 10615  | 0     |        | 0     |        |
| 10616  | 0     |        | 0     |        |
| 10623  | 0     |        | 0     |        |
| 10626  | 0     |        | 0     |        |
| 10627  | 2     | 2      | 1     | 1      |
| 10629  | 0     |        | 1     | 2      |
| 10632  | 2     | 2      | 2     | 2      |
| 10641  | 0     |        | 0     |        |
| 10648  | 0     |        | 0     |        |
| 10651  | 1     | 1      | 1     | 1      |
| 10654  | 0     |        | 0     |        |
| 10673  | 0     |        | 0     |        |
| 10675  | 1     | 2      | 3     | 2      |

| respid | Q22_1 | Q22a_1 | Q23_1 | Q23a_1 |
|--------|-------|--------|-------|--------|
| 10689  | 4     | 4      | 3     | 3      |
| 10692  | 0     |        | 0     |        |
| 10694  | 0     |        | 0     |        |
| 10695  | 0     |        | 1     | 1      |
| 10702  | 1     | 1      | 1     | 1      |
| 10703  | 1     | 1      | 1     | 1      |
| 10708  | 0     |        | 0     |        |
| 10719  | 0     |        | 0     |        |
| 10722  | 0     |        | 0     |        |
| 10723  | 1     | 1      | 2     | 0      |
| 10726  | 0     |        | 5     | 0      |
| 10727  | 0     |        | 0     |        |
| 10730  | 0     |        | 1     | 0      |
| 10731  | 0     |        | 0     |        |
| 10737  | 0     |        | 0     |        |
| 10743  | 0     |        | 0     |        |
| 10763  | 0     |        | 0     |        |
| 10777  | 0     |        | 0     |        |
| 10787  | 3     | 2      | 3     | 2      |
| 10798  | 3     | 2      | 3     | 3      |
| 10800  | 0     |        | 0     |        |
| 10802  | 2     | 2      | 2     | 3      |
| 10803  | 3     | 4      | 2     | 1      |
| 10808  | 0     |        | 0     |        |
| 10810  | 0     |        | 0     |        |
| 10819  | 0     |        | 0     |        |
| 10825  | 0     |        | 0     |        |
| 10827  | 1     | 1      | 0     |        |
| 10830  | 2     | 0      | 1     | 1      |
| 10847  | 0     |        | 0     |        |
| 10849  | 1     | 2      | 1     | 1      |
| 10852  | 0     |        | 0     |        |



| respid | Q22_1 | Q22a_1 | Q23_1 | Q23a_1 |
|--------|-------|--------|-------|--------|
| 10854  | 3     | 3      | 3     | 3      |
| 10857  | 0     |        | 0     |        |
| 10861  | 2     | 1      | 2     | 2      |
| 10862  | 0     |        | 0     |        |
| 10870  | 0     |        | 0     |        |
| 10873  | 0     |        | 2     | 0      |
| 10881  | 1     | 0      | 0     |        |
| 10893  | 0     |        | 0     |        |
| 10898  | 0     |        | 0     |        |
| 10899  | 1     | 2      | 0     |        |
| 10905  | 1     | 1      | 0     |        |
| 10910  | 0     |        | 0     |        |
| 10911  | 1     | 1      | 1     | 1      |
| 10912  | 0     |        | 0     |        |
| 10913  | 0     |        | 0     |        |
| 10918  | 0     |        | 0     |        |
| 10995  | 0     |        | 0     |        |
| 11002  | 0     |        | 0     |        |
| 11003  | 1     | 1      | 0     |        |
| 11005  | 1     | 1      | 1     | 1      |
| 11015  | 0     |        | 0     |        |
| 11016  | 0     |        | 1     | 1      |
| 11017  | 0     |        | 0     |        |
| 11020  | 1     | 1      | 1     | 1      |
| 11024  | 0     |        | 0     |        |
| 11026  | 5     | 2      | 2     | 1      |
| 11028  | 3     | 2      | 2     | 2      |
| 11029  | 2     | 3      | 2     | 3      |
| 11030  | 0     |        | 1     | 1      |
| 11031  | 0     |        | 0     |        |
| 11038  | 0     |        | 0     |        |
| 11051  | 0     |        | 0     |        |

| respid | Q22_1 | Q22a_1 | Q23_1 | Q23a_1 |
|--------|-------|--------|-------|--------|
| 11052  | 2     | 2      | 3     | 2      |
| 11053  | 0     |        | 0     |        |
| 11054  | 2     | 2      | 3     | 2      |
| 11063  | 0     |        | 0     |        |
| 11075  | 2     | 1      | 2     | 2      |
| 11083  | 0     |        | 0     |        |
| 11092  | 0     |        | 0     |        |
| 11118  | 0     |        | 0     |        |
| 11119  | 0     |        | 0     |        |
| 11134  | 0     |        | 0     |        |
| 11139  | 0     |        | 0     |        |
| 11154  | 0     |        | 0     |        |
| 11166  | 0     |        | 3     | 0      |
| 11168  | 0     |        | 0     |        |
| 11176  | 2     | 2      | 2     | 2      |
| 11183  | 3     | 3      | 3     | 2      |
| 11189  | 0     |        | 0     |        |
| 11196  | 4     | 3      | 4     | 3      |
| 11200  | 1     | 1      | 3     | 0      |
| 11201  | 0     |        | 0     |        |
| 11211  | 3     | 2      | 3     | 2      |
| 11218  | 1     | 1      | 0     |        |
| 11219  | 0     |        | 0     |        |
| 11221  | 0     |        | 2     | 1      |
| 11222  | 0     |        | 0     |        |
| 11230  | 4     | 2      | 3     | 2      |
| 11236  | 3     | 2      | 4     | 3      |
| 11237  | 1     | 1      | 1     | 1      |
| 11240  | 1     | 1      | 4     | 1      |
| 11244  | 3     | 2      | 3     | 2      |
| 11249  | 1     | 1      | 1     | 1      |
| 11252  | 3     | 3      | 4     | 2      |

| respid | Q22_1 | Q22a_1 | Q23_1 | Q23a_1 |
|--------|-------|--------|-------|--------|
| 11254  | 2     | 1      | 2     | 2      |
| 11255  | 2     | 2      | 0     |        |
| 11258  | 4     | 3      | 3     | 2      |
| 11260  | 0     |        | 1     | 1      |
| 11264  | 4     | 3      | 3     | 2      |
| 11266  | 1     | 3      | 0     |        |
| 11268  | 2     | 2      | 3     | 2      |
| 11269  | 2     | 1      | 0     |        |
| 11272  | 0     |        | 1     | 1      |
| 11273  | 0     |        | 0     |        |
| 11275  | 0     |        | 0     |        |
| 11276  | 0     |        | 0     |        |
| 11278  | 2     | 1      | 1     | 1      |
| 11288  | 0     |        | 0     |        |
| 11289  | 0     |        | 0     |        |
| 11291  | 0     |        | 0     |        |
| 11295  | 0     |        | 0     |        |
| 11297  | 0     |        | 0     |        |
| 11304  | 1     | 4      | 2     | 1      |
| 11305  | 0     |        | 0     |        |
| 11311  | 0     |        | 0     |        |
| 11313  | 0     |        | 0     |        |
| 11315  | 3     | 4      | 3     | 4      |
| 11316  | 3     | 4      | 3     | 4      |
| 11318  | 2     | 3      | 4     | 4      |
| 11323  | 0     |        | 0     |        |
| 11331  | 0     |        | 0     |        |
| 11333  | 1     | 1      | 1     | 1      |
| 11334  | 1     | 2      | 0     |        |
| 11340  | 1     | 1      | 0     |        |
| 11345  | 0     |        | 0     |        |
| 11354  | 0     |        | 1     | 1      |

| respid | Q22_1 | Q22a_1 | Q23_1 | Q23a_1 |
|--------|-------|--------|-------|--------|
| 11360  | 0     |        | 0     |        |
| 11361  | 3     | 2      | 2     | 2      |
| 11367  | 0     |        | 0     |        |
| 11370  | 0     |        | 0     |        |
| 11371  | 3     | 3      | 2     | 1      |
| 11372  | 2     | 2      | 3     | 2      |
| 11373  | 0     |        | 0     |        |
| 11382  | 0     |        | 0     |        |
| 11394  | 0     |        | 0     |        |
| 11395  | 0     |        | 0     |        |
| 11397  | 0     |        | 0     |        |
| 11402  | 0     |        | 0     |        |
| 11409  | 0     |        | 0     |        |
| 11410  | 5     | 1      | 0     |        |
| 11411  | 0     |        | 0     |        |
| 11418  | 0     |        | 0     |        |
| 11425  | 2     | 3      | 2     | 2      |
| 11429  | 0     |        | 0     |        |
| 11430  | 2     | 3      | 2     | 3      |
| 11431  | 0     |        | 1     | 1      |
| 11432  | 0     |        | 0     |        |
| 11433  | 0     |        | 0     |        |
| 11435  | 2     | 1      | 0     |        |
| 11436  | 0     |        | 0     |        |
| 11437  | 1     | 0      | 1     | 2      |
| 11439  | 0     |        | 0     |        |
| 11440  | 0     |        | 0     |        |
| 11447  | 0     |        | 0     |        |
| 11455  | 0     |        | 0     |        |
| 11456  | 2     | 2      | 0     |        |
| 11461  | 1     | 1      | 1     | 1      |
| 11463  | 1     | 2      | 1     | 1      |

| respid | Q22_1 | Q22a_1 | Q23_1 | Q23a_1 |
|--------|-------|--------|-------|--------|
| 11470  | 0     |        | 0     |        |
| 11472  | 0     |        | 0     |        |
| 11475  | 0     |        | 0     |        |
| 11476  | 1     | 3      | 0     |        |
| 11482  | 2     | 2      | 2     | 2      |
| 11501  | 0     |        | 2     | 2      |
| 11503  | 0     |        | 0     |        |
| 11505  | 0     |        | 1     | 0      |
| 11510  | 0     |        | 0     |        |
| 11519  | 0     |        | 0     |        |
| 11527  | 4     | 4      | 4     | 3      |
| 11529  | 2     | 2      | 2     | 2      |
| 11530  | 2     | 1      | 2     | 1      |
| 11536  | 4     | 4      | 5     | 3      |
| 11543  | 0     |        | 0     |        |
| 11548  | 1     | 1      | 2     | 3      |
| 11566  | 0     |        | 0     |        |
| 11570  | 3     | 4      | 2     | 1      |
| 11571  | 0     |        | 2     | 2      |
| 11578  | 0     |        | 0     |        |
| 11579  | 0     |        | 0     |        |
| 11581  | 1     | 3      | 0     |        |
| 11582  | 0     |        | 0     |        |
| 11583  | 0     |        | 0     |        |
| 11589  | 2     | 1      | 1     | 2      |
| 11590  | 0     |        | 0     |        |
| 11592  | 0     |        | 2     | 1      |
| 11596  | 0     |        | 0     |        |
| 11598  | 3     | 3      | 0     |        |
| 11602  | 1     | 1      | 1     | 1      |
| 11605  | 0     |        | 0     |        |
| 11618  | 1     | 2      | 1     | 1      |

| respid | Q22_1 | Q22a_1 | Q23_1 | Q23a_1 |
|--------|-------|--------|-------|--------|
| 11621  | 0     |        | 1     | 2      |
| 11630  | 0     |        | 0     |        |
| 11636  | 0     |        | 0     |        |
| 11640  | 3     | 4      | 3     | 1      |
| 11658  | 0     |        | 0     |        |
| 11665  | 0     |        | 0     |        |
| 11666  | 1     | 2      | 1     | 2      |
| 11667  | 4     | 2      | 3     | 2      |
| 11674  | 0     |        | 0     |        |
| 11680  | 0     |        | 0     |        |
| 11683  | 0     |        | 0     |        |
| 11688  | 0     |        | 0     |        |
| 11690  | 0     |        | 0     |        |
| 11694  | 0     |        | 0     |        |
| 11705  | 0     |        | 0     |        |
| 11720  | 2     | 3      | 1     | 1      |
| 11724  | 0     |        | 0     |        |
| 11738  | 1     | 1      | 1     | 1      |
| 11744  | 1     | 2      | 0     |        |
| 11745  | 0     |        | 0     |        |
| 11747  | 0     |        | 0     |        |
| 11755  | 0     |        | 0     |        |
| 11756  | 0     |        | 0     |        |
| 11772  | 1     | 2      | 0     |        |
| 11773  | 0     |        | 0     |        |
| 11778  | 4     | 3      | 2     | 1      |
| 11790  | 0     |        | 0     |        |
| 11794  | 0     |        | 0     |        |
| 11795  | 2     | 2      | 0     |        |
| 11799  | 3     | 2      | 1     | 2      |
| 11803  | 1     | 1      | 1     | 1      |
| 11806  | 4     | 3      | 4     | 3      |

| respid | Q22_1 | Q22a_1 | Q23_1 | Q23a_1 |
|--------|-------|--------|-------|--------|
| 11808  | 0     |        | 1     | 3      |
| 11810  | 0     |        | 0     |        |
| 11811  | 0     |        | 0     |        |
| 11812  | 3     | 3      | 2     | 2      |
| 11813  | 0     |        | 0     |        |
| 11821  | 0     |        | 0     |        |
| 11827  | 0     |        | 0     |        |
| 11831  | 3     | 3      | 3     | 3      |
| 11841  | 0     |        | 0     |        |
| 11872  | 0     |        | 0     |        |
| 11898  | 0     |        | 0     |        |
| 11902  | 2     | 1      | 3     | 1      |
| 11912  | 0     |        | 0     |        |
| 11926  | 0     |        | 0     |        |
| 11928  | 3     | 3      | 3     | 3      |
| 11932  | 1     | 1      | 1     | 1      |
| 11934  | 0     |        | 0     |        |
| 11941  | 1     | 3      | 2     | 2      |
| 11942  | 0     |        | 0     |        |
| 11943  | 2     | 3      | 3     | 3      |
| 11944  | 0     |        | 1     | 1      |
| 11955  | 0     |        | 0     |        |
| 11958  | 1     | 2      | 0     |        |
| 11968  | 1     | 1      | 0     |        |
| 11979  | 2     | 3      | 3     | 2      |
| 11988  | 0     |        | 0     |        |
| 11999  | 2     | 3      | 0     |        |
| 12002  | 0     |        | 0     |        |
| 12004  | 1     | 0      | 0     |        |
| 12008  | 1     | 1      | 1     | 1      |
| 12013  | 2     | 2      | 0     |        |
| 12018  | 0     |        | 0     |        |

| respid | Q22_1 | Q22a_1 | Q23_1 | Q23a_1 |
|--------|-------|--------|-------|--------|
| 12023  | 2     | 1      | 0     |        |
| 12027  | 2     | 3      | 1     | 3      |
| 12030  | 0     |        | 0     |        |
| 12031  | 0     |        | 2     | 2      |
| 12036  | 1     | 3      | 0     |        |
| 12037  | 2     | 3      | 4     | 3      |
| 12038  | 0     |        | 0     |        |
| 12039  | 0     |        | 0     |        |
| 12045  | 1     | 1      | 0     |        |
| 12046  | 2     | 1      | 2     | 1      |
| 12054  | 2     | 1      | 2     | 2      |
| 12055  | 1     | 1      | 2     | 1      |
| 12069  | 1     | 1      | 1     | 1      |
| 12070  | 2     | 2      | 3     | 1      |
| 12074  | 0     |        | 0     |        |
| 12075  | 3     | 2      | 2     | 1      |
| 12078  | 0     |        | 0     |        |
| 12089  | 0     |        | 0     |        |
| 12091  | 3     | 3      | 3     | 4      |
| 12092  | 1     | 1      | 2     | 1      |
| 12108  | 1     | 4      | 5     | 2      |
| 12111  | 4     | 4      | 5     | 3      |
| 12112  | 3     | 2      | 3     | 2      |
| 12126  | 0     |        | 0     |        |
| 12132  | 3     | 2      | 3     | 2      |
| 12150  | 2     | 3      | 3     | 3      |
| 12152  | 1     | 1      | 1     | 1      |
| 12154  | 0     |        | 1     | 1      |
| 12157  | 3     | 2      | 2     | 2      |
| 12165  | 0     |        | 0     |        |
| 12169  | 0     |        | 2     | 0      |
| 12182  | 4     | 3      | 4     | 3      |



| respid | Q22_1 | Q22a_1 | Q23_1 | Q23a_1 |
|--------|-------|--------|-------|--------|
| 12198  | 0     |        | 0     |        |
| 12199  | 0     |        | 0     |        |
| 12202  | 0     |        | 0     |        |
| 12207  | 1     | 1      | 1     | 1      |
| 12208  | 1     | 1      | 2     | 1      |
| 12210  | 0     |        | 0     |        |
| 12219  | 5     | 3      | 4     | 3      |
| 12224  | 0     |        | 5     | 0      |
| 12230  | 0     |        | 2     | 2      |
| 12238  | 0     |        | 0     |        |
| 12239  | 0     |        | 0     |        |
| 12243  | 0     |        | 0     |        |
| 12245  | 1     | 1      | 1     | 0      |
| 12246  | 4     | 3      | 4     | 3      |
| 12247  | 0     |        | 0     |        |
| 12248  | 3     | 3      | 0     |        |
| 12249  | 2     | 2      | 1     | 1      |
| 12258  | 3     | 3      | 4     | 3      |
| 12265  | 4     | 2      | 3     | 3      |
| 12269  | 0     |        | 0     |        |
| 12270  | 0     |        | 1     | 1      |
| 12279  | 0     |        | 0     |        |
| 12280  | 0     |        | 4     | 2      |
| 12282  | 1     | 2      | 0     |        |
| 12283  | 0     |        | 0     |        |
| 12287  | 0     |        | 0     |        |
| 12288  | 0     |        | 1     | 1      |
| 12290  | 0     |        | 0     |        |
| 12292  | 1     | 1      | 1     | 1      |
| 12294  | 0     |        | 0     |        |
| 12296  | 0     |        | 0     |        |
| 12307  | 0     |        | 0     |        |

| respid | Q22_1 | Q22a_1 | Q23_1 | Q23a_1 |
|--------|-------|--------|-------|--------|
| 12309  | 0     |        | 1     | 0      |
| 12312  | 1     | 2      | 1     | 1      |
| 12317  | 0     |        | 0     |        |
| 12319  | 0     |        | 0     |        |
| 12320  | 1     | 1      | 1     | 0      |
| 12322  | 0     |        | 1     | 1      |
| 12328  | 2     | 1      | 1     | 1      |
| 12331  | 4     | 3      | 3     | 3      |
| 12332  | 0     |        | 1     | 0      |
| 12334  | 0     |        | 0     |        |
| 12337  | 0     |        | 0     |        |
| 12338  | 0     |        | 1     | 0      |
| 12342  | 1     | 1      | 1     | 1      |
| 12349  | 0     |        | 0     |        |
| 12352  | 1     | 1      | 0     |        |
| 12355  | 0     |        | 0     |        |
| 12357  | 2     | 1      | 2     | 1      |
| 12358  | 0     |        | 0     |        |
| 12371  | 2     | 2      | 3     | 1      |
| 12372  | 0     |        | 0     |        |
| 12373  | 0     |        | 1     | 1      |
| 12379  | 0     |        | 0     |        |
| 12381  | 3     | 2      | 4     | 2      |
| 12383  | 0     |        | 1     | 2      |
| 12384  | 0     |        | 0     |        |
| 12386  | 0     |        | 0     |        |
| 12389  | 0     |        | 0     |        |
| 12392  | 0     |        | 0     |        |
| 12396  | 0     |        | 0     |        |
| 12397  | 1     | 1      | 1     | 1      |
| 12399  | 2     | 4      | 2     | 0      |
| 12400  | 5     | 3      | 3     | 2      |

| respid | Q22_1 | Q22a_1 | Q23_1 | Q23a_1 |
|--------|-------|--------|-------|--------|
| 12406  | 5     | 4      | 5     | 1      |
| 12407  | 1     | 1      | 1     | 1      |
| 12410  | 0     |        | 0     |        |
| 12413  | 0     |        | 0     |        |
| 12416  | 4     | 3      | 4     | 2      |
| 12419  | 3     | 1      | 0     |        |
| 12422  | 1     | 4      | 1     | 4      |
| 12423  | 1     | 1      | 1     | 1      |
| 12429  | 0     |        | 0     |        |
| 12434  | 4     | 3      | 3     | 3      |
| 12435  | 1     | 1      | 0     |        |
| 12436  | 2     | 2      | 2     | 2      |
| 12442  | 0     |        | 0     |        |
| 12449  | 3     | 2      | 3     | 2      |
| 12451  | 0     |        | 0     |        |
| 12456  | 2     | 3      | 4     | 4      |
| 12457  | 0     |        | 0     |        |
| 12458  | 0     |        | 0     |        |
| 12461  | 2     | 1      | 0     |        |
| 12462  | 0     |        | 0     |        |
| 12463  | 3     | 3      | 4     | 2      |
| 12466  | 0     |        | 1     | 0      |
| 12470  | 2     | 2      | 3     | 2      |
| 12471  | 0     |        | 1     | 1      |
| 12472  | 0     |        | 0     |        |
| 12478  | 2     | 2      | 1     | 1      |
| 12479  | 0     |        | 1     | 1      |
| 12481  | 0     |        | 0     |        |
| 12482  | 2     | 3      | 3     | 1      |
| 12483  | 0     |        | 0     |        |
| 12496  | 1     | 0      | 1     | 0      |
| 12497  | 1     | 1      | 1     | 1      |

| respid | Q22_1 | Q22a_1 | Q23_1 | Q23a_1 |
|--------|-------|--------|-------|--------|
| 12498  | 3     | 2      | 1     | 0      |
| 12500  | 3     | 1      | 3     | 3      |
| 12501  | 1     | 1      | 1     | 1      |
| 12502  | 1     | 1      | 1     | 1      |
| 12503  | 1     | 0      | 0     |        |
| 12505  | 1     | 1      | 5     | 2      |
| 12508  | 3     | 3      | 2     | 3      |
| 12509  | 1     | 1      | 1     | 1      |
| 12510  | 0     |        | 0     |        |
| 12512  | 3     | 1      | 4     | 2      |
| 12514  | 2     | 2      | 2     | 2      |
| 12515  | 0     |        | 0     |        |
| 12520  | 0     |        | 0     |        |
| 12522  | 0     |        | 0     |        |
| 12526  | 1     | 3      | 3     | 1      |
| 12527  | 0     |        | 0     |        |
| 12528  | 1     | 1      | 2     | 2      |
| 12530  | 1     | 1      | 1     | 1      |
| 12535  | 0     |        | 0     |        |
| 12539  | 1     | 1      | 1     | 0      |
| 12541  | 3     | 2      | 2     | 3      |
| 12542  | 0     |        | 0     |        |
| 12545  | 2     | 2      | 5     | 3      |
| 12547  | 2     | 3      | 2     | 1      |
| 12549  | 2     | 2      | 2     | 2      |
| 12550  | 1     | 1      | 0     |        |
| 12555  | 0     |        | 0     |        |
| 12557  | 0     |        | 1     | 1      |
| 12559  | 1     | 0      | 0     |        |
| 12561  | 0     |        | 0     |        |
| 12562  | 3     | 3      | 2     | 1      |
| 12563  | 0     |        | 1     | 0      |

| respid | Q22_1 | Q22a_1 | Q23_1 | Q23a_1 |
|--------|-------|--------|-------|--------|
| 12565  | 1     | 2      | 4     | 2      |
| 12566  | 0     |        | 0     |        |
| 12570  | 0     |        | 0     |        |
| 12571  | 1     | 1      | 0     |        |
| 12572  | 2     | 3      | 2     | 3      |
| 12578  | 0     |        | 0     |        |
| 12579  | 1     | 0      | 1     | 0      |
| 12581  | 1     | 1      | 1     | 0      |
| 12582  | 1     | 2      | 1     | 2      |
| 12585  | 0     |        | 0     |        |
| 12586  | 0     |        | 1     | 2      |
| 12588  | 2     | 2      | 1     | 1      |
| 12589  | 1     | 2      | 2     | 0      |
| 12590  | 0     |        | 0     |        |
| 12591  | 3     | 3      | 3     | 3      |
| 12593  | 3     | 3      | 3     | 2      |
| 12594  | 0     |        | 0     |        |
| 12599  | 0     |        | 0     |        |
| 12600  | 0     |        | 0     |        |
| 12602  | 3     | 3      | 4     | 2      |
| 12606  | 3     | 3      | 3     | 2      |
| 12607  | 0     |        | 0     |        |
| 12608  | 0     |        | 0     |        |
| 12610  | 3     | 2      | 2     | 2      |
| 12611  | 0     |        | 0     |        |
| 12613  | 5     | 4      | 3     | 3      |
| 12616  | 0     |        | 0     |        |
| 12617  | 2     | 2      | 0     |        |
| 12619  | 1     | 0      | 0     |        |
| 12622  | 0     |        | 0     |        |
| 12628  | 0     |        | 0     |        |
| 12631  | 1     | 1      | 1     | 1      |

| respid | Q22_1 | Q22a_1 | Q23_1 | Q23a_1 |
|--------|-------|--------|-------|--------|
| 12635  | 3     | 2      | 3     | 3      |
| 12638  | 0     |        | 0     |        |
| 12639  | 0     |        | 1     | 0      |
| 12640  | 0     |        | 1     | 0      |
| 12643  | 0     |        | 0     |        |
| 12646  | 2     | 4      | 4     | 4      |
| 12648  | 0     |        | 0     |        |
| 12650  | 3     | 3      | 3     | 3      |
| 12651  | 1     | 1      | 1     | 1      |
| 12658  | 1     | 1      | 2     | 2      |
| 12662  | 1     | 1      | 1     | 1      |
| 12663  | 4     | 3      | 3     | 3      |
| 12664  | 1     | 1      | 1     | 1      |
| 12669  | 4     | 3      | 3     | 2      |
| 12670  | 0     |        | 0     |        |
| 12673  | 0     |        | 0     |        |
| 12675  | 0     |        | 0     |        |
| 12677  | 0     |        | 0     |        |
| 12679  | 0     |        | 0     |        |
| 12682  | 3     | 2      | 2     | 2      |
| 12696  | 1     | 1      | 1     | 1      |
| 12697  | 0     |        | 0     |        |
| 12699  | 0     |        | 0     |        |
| 12700  | 0     |        | 0     |        |
| 12701  | 3     | 3      | 3     | 2      |
| 12702  | 0     |        | 0     |        |
| 12704  | 4     | 3      | 4     | 3      |
| 12705  | 2     | 2      | 0     |        |
| 12709  | 0     |        | 0     |        |
| 12710  | 0     |        | 0     |        |
| 12713  | 1     | 1      | 0     |        |
| 12716  | 1     | 1      | 3     | 4      |

| respid | Q22_1 | Q22a_1 | Q23_1 | Q23a_1 |
|--------|-------|--------|-------|--------|
| 12719  | 1     | 2      | 1     | 1      |
| 12720  | 0     |        | 0     |        |
| 12723  | 0     |        | 3     | 0      |
| 12726  | 0     |        | 0     |        |
| 12728  | 3     | 3      | 3     | 3      |
| 12729  | 1     | 1      | 0     |        |
| 12731  | 0     |        | 0     |        |
| 12732  | 2     | 2      | 3     | 3      |
| 12733  | 4     | 3      | 2     | 1      |
| 12736  | 0     |        | 0     |        |
| 12737  | 0     |        | 0     |        |
| 12739  | 3     | 3      | 3     | 3      |
| 12742  | 0     |        | 0     |        |
| 12743  | 3     | 4      | 3     | 4      |
| 12744  | 0     |        | 0     |        |
| 12747  | 0     |        | 0     |        |
| 12751  | 0     |        | 0     |        |
| 12754  | 0     |        | 0     |        |
| 12756  | 3     | 3      | 3     | 3      |
| 12757  | 0     |        | 0     |        |
| 12760  | 4     | 3      | 3     | 3      |
| 12761  | 0     |        | 0     |        |
| 12762  | 3     | 2      | 2     | 2      |
| 12766  | 0     |        | 0     |        |
| 12769  | 0     |        | 0     |        |
| 12770  | 3     | 2      | 3     | 2      |
| 12773  | 3     | 3      | 4     | 4      |
| 12780  | 0     |        | 5     | 3      |
| 12789  | 0     |        | 0     |        |
| 12792  | 0     |        | 3     | 2      |
| 12795  | 1     | 1      | 1     | 1      |
| 12804  | 1     | 2      | 0     |        |

| respid | Q22_1 | Q22a_1 | Q23_1 | Q23a_1 |
|--------|-------|--------|-------|--------|
| 12811  | 0     |        | 0     |        |
| 12813  | 2     | 2      | 1     | 1      |
| 12814  | 0     |        | 0     |        |
| 12815  | 0     |        | 0     |        |
| 12816  | 0     |        | 1     | 0      |
| 12817  | 0     |        | 3     | 0      |
| 12818  | 0     |        | 1     | 1      |
| 12819  | 0     |        | 0     |        |
| 12820  | 1     | 0      | 1     | 0      |
| 12821  | 0     |        | 0     |        |
| 12824  | 1     | 1      | 1     | 1      |
| 12827  | 0     |        | 1     | 1      |
| 12836  | 3     | 3      | 3     | 3      |
| 12837  | 1     | 1      | 0     |        |
| 12838  | 1     | 1      | 1     | 1      |
| 12845  | 1     | 0      | 1     | 1      |
| 12847  | 0     |        | 2     | 1      |
| 12849  | 4     | 4      | 3     | 4      |
| 12850  | 1     | 1      | 1     | 1      |
| 12852  | 0     |        | 0     |        |
| 12853  | 4     | 4      | 3     | 4      |
| 12854  | 0     |        | 0     |        |
| 12860  | 0     |        | 0     |        |
| 12861  | 0     |        | 0     |        |
| 12863  | 0     |        | 0     |        |
| 12865  | 0     |        | 0     |        |
| 12870  | 1     | 1      | 4     | 1      |
| 12871  | 0     |        | 2     | 0      |
| 12873  | 0     |        | 1     | 1      |
| 12877  | 1     | 1      | 1     | 1      |
| 12880  | 1     | 1      | 0     |        |
| 12881  | 1     | 1      | 0     |        |



| respid | Q22_1 | Q22a_1 | Q23_1 | Q23a_1 |
|--------|-------|--------|-------|--------|
| 12882  | 1     | 1      | 1     | 1      |
| 12883  | 1     | 0      | 0     |        |
| 12885  | 3     | 2      | 3     | 2      |
| 12887  | 1     | 2      | 1     | 1      |
| 12889  | 1     | 1      | 3     | 1      |
| 12890  | 0     |        | 0     |        |
| 12891  | 0     |        | 3     | 1      |
| 12892  | 1     | 3      | 1     | 3      |
| 12893  | 0     |        | 0     |        |
| 12895  | 0     |        | 0     |        |
| 12898  | 1     | 1      | 0     |        |
| 12907  | 2     | 2      | 1     | 2      |
| 12908  | 0     |        | 0     |        |
| 12909  | 0     |        | 0     |        |
| 12914  | 0     |        | 0     |        |
| 12915  | 1     | 2      | 5     | 4      |
| 12916  | 0     |        | 0     |        |
| 12921  | 1     | 1      | 1     | 0      |
| 12922  | 0     |        | 0     |        |
| 12923  | 0     |        | 2     | 2      |
| 12926  | 1     | 1      | 0     |        |
| 12927  | 0     |        | 0     |        |
| 12932  | 0     |        | 1     | 0      |
| 12936  | 0     |        | 0     |        |
| 12937  | 1     | 1      | 1     | 1      |
| 12938  | 3     | 4      | 2     | 2      |
| 12939  | 0     |        | 0     |        |
| 12940  | 2     | 1      | 2     | 2      |
| 12945  | 1     | 2      | 1     | 1      |
| 12946  | 1     | 1      | 2     | 0      |
| 12947  | 2     | 2      | 3     | 1      |
| 12948  | 3     | 2      | 3     | 2      |

| respid | Q22_1 | Q22a_1 | Q23_1 | Q23a_1 |
|--------|-------|--------|-------|--------|
| 12951  | 0     |        | 5     | 2      |
| 12952  | 1     | 1      | 0     |        |
| 12954  | 4     | 3      | 3     | 3      |
| 12960  | 1     | 2      | 0     |        |
| 12961  | 0     |        | 0     |        |
| 12962  | 0     |        | 0     |        |
| 12963  | 0     |        | 0     |        |
| 12964  | 0     |        | 0     |        |
| 12966  | 0     |        | 1     | 0      |
| 12967  | 0     |        | 0     |        |
| 12969  | 0     |        | 0     |        |
| 12970  | 1     | 1      | 0     |        |
| 12974  | 3     | 2      | 3     | 2      |
| 12979  | 0     |        | 0     |        |
| 12980  | 0     |        | 1     | 0      |
| 12983  | 0     |        | 0     |        |
| 12988  | 1     | 1      | 0     |        |
| 12994  | 0     |        | 1     | 1      |
| 12995  | 0     |        | 1     | 0      |
| 12996  | 0     |        | 0     |        |
| 12998  | 0     |        | 2     | 0      |
| 12999  | 0     |        | 0     |        |
| 13001  | 1     | 1      | 0     |        |
| 13005  | 0     |        | 1     | 1      |
| 13006  | 3     | 4      | 5     | 4      |
| 13007  | 0     |        | 5     | 2      |
| 13011  | 3     | 1      | 1     | 1      |
| 13012  | 0     |        | 0     |        |
| 13013  | 3     | 3      | 3     | 3      |
| 13016  | 0     |        | 0     |        |
| 13018  | 1     | 0      | 1     | 1      |
| 13020  | 0     |        | 0     |        |

| respid | Q22_1 | Q22a_1 | Q23_1 | Q23a_1 |
|--------|-------|--------|-------|--------|
| 13024  | 0     |        | 0     |        |
| 13025  | 0     |        | 0     |        |
| 13027  | 0     |        | 1     | 0      |
| 13031  | 0     |        | 0     |        |
| 13032  | 2     | 2      | 2     | 2      |
| 13034  | 1     | 1      | 1     | 1      |
| 13036  | 1     | 2      | 3     | 0      |
| 13037  | 0     |        | 0     |        |
| 13038  | 4     | 3      | 4     | 3      |
| 13039  | 1     | 1      | 0     |        |
| 13040  | 1     | 1      | 1     | 1      |
| 13041  | 1     | 2      | 1     | 2      |
| 13045  | 3     | 3      | 3     | 3      |
| 13046  | 0     |        | 0     |        |
| 13048  | 0     |        | 0     |        |
| 13051  | 0     |        | 0     |        |
| 13053  | 0     |        | 0     |        |
| 13055  | 4     | 3      | 4     | 3      |
| 13059  | 1     | 1      | 4     | 0      |
| 13068  | 0     |        | 0     |        |
| 13069  | 0     |        | 0     |        |
| 13076  | 2     | 2      | 2     | 2      |
| 13081  | 0     |        | 0     |        |
| 13082  | 1     | 1      | 0     |        |
| 13084  | 4     | 3      | 3     | 3      |
| 13085  | 1     | 2      | 3     | 2      |
| 13086  | 0     |        | 4     | 2      |
| 13093  | 2     | 1      | 0     |        |
| 13094  | 3     | 2      | 3     | 2      |
| 13097  | 0     |        | 0     |        |
| 13098  | 1     | 1      | 1     | 1      |
| 13099  | 2     | 1      | 3     | 2      |

| respid | Q22_1 | Q22a_1 | Q23_1 | Q23a_1 |
|--------|-------|--------|-------|--------|
| 13100  | 0     |        | 0     |        |
| 13101  | 0     |        | 0     |        |
| 13103  | 0     |        | 0     |        |
| 13105  | 0     |        | 1     | 0      |
| 13106  | 1     | 1      | 1     | 1      |
| 13107  | 2     | 1      | 1     | 1      |
| 13110  | 3     | 1      | 1     | 1      |
| 13118  | 1     | 1      | 0     |        |
| 13120  | 3     | 3      | 2     | 2      |
| 13130  | 1     | 0      | 0     |        |
| 13133  | 0     |        | 3     | 0      |
| 13134  | 0     |        | 1     | 0      |
| 13139  | 0     |        | 0     |        |
| 13142  | 0     |        | 0     |        |
| 13143  | 0     |        | 0     |        |
| 13145  | 1     | 1      | 1     | 1      |
| 13148  | 0     |        | 1     | 0      |
| 13149  | 0     |        | 0     |        |
| 13151  | 5     | 4      | 3     | 3      |
| 13153  | 1     | 1      | 1     | 1      |
| 13158  | 0     |        | 1     | 0      |
| 13160  | 1     | 1      | 0     |        |
| 13162  | 3     | 2      | 2     | 3      |
| 13169  | 2     | 0      | 0     |        |
| 13172  | 1     | 1      | 2     | 1      |
| 13173  | 0     |        | 0     |        |
| 13176  | 0     |        | 1     | 0      |
| 13179  | 0     |        | 0     |        |
| 13184  | 0     |        | 1     | 1      |
| 13185  | 0     |        | 0     |        |
| 13186  | 0     |        | 0     |        |
| 13188  | 1     | 2      | 2     | 2      |

| respid | Q22_1 | Q22a_1 | Q23_1 | Q23a_1 |
|--------|-------|--------|-------|--------|
| 13190  | 3     | 2      | 3     | 2      |
| 13192  | 1     | 1      | 0     |        |
| 13193  | 0     |        | 0     |        |
| 13201  | 0     |        | 0     |        |
| 13207  | 0     |        | 0     |        |
| 13208  | 0     |        | 0     |        |
| 13209  | 3     | 2      | 3     | 2      |
| 13212  | 1     | 0      | 0     |        |
| 13215  | 0     |        | 1     | 1      |
| 13218  | 1     | 0      | 0     |        |
| 13219  | 0     |        | 0     |        |
| 13224  | 0     |        | 0     |        |
| 13225  | 0     |        | 1     | 0      |
| 13226  | 0     |        | 0     |        |
| 13232  | 0     |        | 0     |        |
| 13237  | 0     |        | 0     |        |
| 13239  | 0     |        | 0     |        |
| 13241  | 0     |        | 1     | 2      |
| 13243  | 1     | 1      | 1     | 1      |
| 13247  | 4     | 1      | 4     | 2      |
| 13248  | 0     |        | 1     | 1      |
| 13251  | 0     |        | 0     |        |
| 13256  | 2     | 0      | 0     |        |
| 13260  | 2     | 1      | 1     | 0      |
| 13261  | 1     | 1      | 1     | 2      |
| 13264  | 1     | 0      | 0     |        |
| 13273  | 1     | 1      | 0     |        |
| 13274  | 0     |        | 0     |        |
| 13276  | 1     | 0      | 0     |        |
| 13278  | 0     |        | 0     |        |
| 13279  | 0     |        | 0     |        |
| 13282  | 0     |        | 0     |        |

| respid | Q22_1 | Q22a_1 | Q23_1 | Q23a_1 |
|--------|-------|--------|-------|--------|
| 13283  | 0     |        | 1     | 1      |
| 13285  | 0     |        | 4     | 3      |
| 13286  | 1     | 1      | 1     | 1      |
| 13299  | 0     |        | 0     |        |
| 13300  | 2     | 2      | 2     | 2      |
| 13301  | 0     |        | 0     |        |
| 13303  | 2     | 2      | 1     | 1      |
| 13304  | 0     |        | 0     |        |
| 13307  | 0     |        | 0     |        |
| 13308  | 0     |        | 0     |        |
| 13312  | 0     |        | 0     |        |
| 13313  | 0     |        | 0     |        |
| 13314  | 1     | 1      | 1     | 1      |
| 13318  | 2     | 2      | 2     | 2      |
| 13320  | 1     | 0      | 0     |        |
| 13322  | 1     | 1      | 1     | 1      |
| 13324  | 0     |        | 0     |        |
| 13325  | 1     | 2      | 1     | 2      |
| 13327  | 1     | 0      | 0     |        |
| 13330  | 0     |        | 1     | 0      |
| 13332  | 1     | 0      | 1     | 0      |
| 13333  | 1     | 1      | 1     | 0      |
| 13334  | 1     | 0      | 0     |        |
| 13351  | 1     | 1      | 1     | 1      |
| 13353  | 1     | 0      | 0     |        |
| 13354  | 0     |        | 0     |        |
| 13355  | 1     | 1      | 0     |        |
| 13358  | 1     | 1      | 0     |        |
| 13359  | 0     |        | 2     | 1      |
| 13360  | 2     | 1      | 2     | 1      |
| 13364  | 1     | 1      | 3     | 2      |
| 13365  | 2     | 2      | 4     | 3      |

| respid | Q22_1 | Q22a_1 | Q23_1 | Q23a_1 |
|--------|-------|--------|-------|--------|
| 13368  | 0     |        | 0     |        |
| 13370  | 0     |        | 0     |        |
| 13375  | 0     |        | 0     |        |
| 13384  | 0     |        | 0     |        |
| 13387  | 1     | 0      | 1     | 1      |
| 13395  | 1     | 1      | 0     |        |
| 13398  | 1     | 1      | 5     | 2      |
| 13404  | 1     | 2      | 1     | 2      |
| 13405  | 1     | 1      | 1     | 0      |
| 13408  | 0     |        | 0     |        |
| 13411  | 0     |        | 1     | 0      |
| 13413  | 0     |        | 0     |        |
| 13419  | 0     |        | 4     | 1      |
| 13420  | 0     |        | 0     |        |
| 13427  | 2     | 2      | 2     | 2      |
| 13441  | 5     | 4      | 5     | 4      |
| 13444  | 1     | 0      | 1     | 0      |
| 13456  | 0     |        | 0     |        |
| 13466  | 1     | 0      | 0     |        |
| 13468  | 0     |        | 1     | 0      |
| 13475  | 0     |        | 0     |        |
| 13484  | 2     | 1      | 1     | 0      |
| 13486  | 0     |        | 1     | 1      |
| 13487  | 1     | 2      | 1     | 2      |
| 13491  | 0     |        | 0     |        |
| 13496  | 1     | 1      | 0     |        |
| 13497  | 1     | 1      | 1     | 1      |
| 13498  | 1     | 0      | 0     |        |
| 13502  | 0     |        | 0     |        |
| 13503  | 2     | 1      | 2     | 1      |
| 13505  | 0     |        | 0     |        |
| 13509  | 1     | 1      | 1     | 1      |

| respid | Q22_1 | Q22a_1 | Q23_1 | Q23a_1 |
|--------|-------|--------|-------|--------|
| 13510  | 1     | 1      | 1     | 2      |
| 13518  | 0     |        | 2     | 2      |
| 13521  | 1     | 1      | 1     | 1      |
| 13523  | 1     | 1      | 3     | 2      |
| 13528  | 0     |        | 0     |        |
| 13531  | 1     | 1      | 0     |        |
| 13532  | 0     |        | 0     |        |
| 13533  | 1     | 0      | 0     |        |
| 13534  | 0     |        | 0     |        |
| 13535  | 0     |        | 3     | 1      |
| 13538  | 2     | 2      | 2     | 2      |
| 13540  | 1     | 2      | 0     |        |
| 13541  | 1     | 1      | 1     | 1      |
| 13542  | 1     | 0      | 0     |        |
| 13550  | 1     | 0      | 0     |        |
| 13553  | 3     | 2      | 1     | 1      |
| 13554  | 0     |        | 0     |        |
| 13555  | 3     | 2      | 2     | 3      |
| 13556  | 0     |        | 0     |        |
| 13563  | 2     | 2      | 1     | 1      |
| 13564  | 1     | 1      | 2     | 1      |
| 13567  | 0     |        | 0     |        |
| 13568  | 2     | 3      | 2     | 2      |
| 13570  | 0     |        | 0     |        |
| 13573  | 2     | 2      | 2     | 2      |
| 13575  | 1     | 2      | 2     | 1      |
| 13577  | 4     | 3      | 3     | 3      |
| 13580  | 3     | 3      | 4     | 3      |
| 13582  | 0     |        | 2     | 0      |
| 13584  | 4     | 2      | 4     | 2      |
| 13585  | 0     |        | 0     |        |
| 13586  | 0     |        | 0     |        |



| respid | Q22_1 | Q22a_1 | Q23_1 | Q23a_1 |
|--------|-------|--------|-------|--------|
| 13587  | 3     | 2      | 1     | 1      |
| 13592  | 2     | 3      | 2     | 3      |
| 13596  | 0     |        | 0     |        |
| 13597  | 1     | 1      | 1     | 1      |
| 13599  | 2     | 1      | 2     | 1      |
| 13601  | 1     | 0      | 1     | 0      |
| 13604  | 1     | 1      | 1     | 1      |
| 13608  | 0     |        | 0     |        |
| 13616  | 0     |        | 0     |        |
| 13618  | 0     |        | 0     |        |
| 13619  | 0     |        | 0     |        |
| 13626  | 0     |        | 0     |        |
| 13628  | 1     | 1      | 0     |        |
| 13640  | 1     | 1      | 0     |        |
| 13645  | 0     |        | 0     |        |
| 13648  | 0     |        | 0     |        |
| 13653  | 0     |        | 0     |        |
| 13655  | 0     |        | 0     |        |
| 13662  | 0     |        | 0     |        |
| 13670  | 0     |        | 0     |        |
| 13673  | 1     | 1      | 1     | 1      |
| 13674  | 1     | 1      | 0     |        |
| 13675  | 0     |        | 0     |        |
| 13678  | 0     |        | 1     | 2      |
| 13680  | 1     | 1      | 1     | 1      |
| 13681  | 0     |        | 0     |        |
| 13683  | 0     |        | 0     |        |
| 13684  | 3     | 1      | 4     | 1      |
| 13685  | 0     |        | 0     |        |
| 13687  | 0     |        | 0     |        |
| 13690  | 0     |        | 0     |        |
| 13700  | 2     | 2      | 2     | 2      |

| respid | Q22_1 | Q22a_1 | Q23_1 | Q23a_1 |
|--------|-------|--------|-------|--------|
| 13705  | 2     | 1      | 2     | 1      |
| 13710  | 0     |        | 0     |        |
| 13711  | 0     |        | 1     | 1      |
| 13713  | 0     |        | 0     |        |
| 13716  | 0     |        | 0     |        |
| 13721  | 1     | 2      | 1     | 2      |
| 13722  | 3     | 4      | 4     | 4      |
| 13723  | 2     | 4      | 1     | 4      |
| 13726  | 1     | 1      | 2     | 0      |
| 13728  | 1     | 1      | 1     | 1      |
| 13730  | 1     | 1      | 1     | 1      |
| 13734  | 0     |        | 0     |        |
| 13736  | 4     | 3      | 4     | 2      |
| 13737  | 0     |        | 0     |        |
| 13739  | 0     |        | 0     |        |
| 13742  | 0     |        | 0     |        |
| 13746  | 0     |        | 1     | 1      |
| 13747  | 0     |        | 0     |        |
| 13749  | 0     |        | 0     |        |
| 13751  | 2     | 2      | 0     |        |
| 13752  | 1     | 1      | 1     | 1      |
| 13756  | 1     | 1      | 1     | 1      |
| 13757  | 0     |        | 0     |        |
| 13767  | 0     |        | 1     | 2      |
| 13771  | 0     |        | 0     |        |
| 13772  | 4     | 4      | 4     | 1      |
| 13779  | 0     |        | 0     |        |
| 13782  | 0     |        | 2     | 0      |
| 13783  | 0     |        | 0     |        |
| 13785  | 0     |        | 1     | 0      |
| 13786  | 1     | 2      | 0     |        |
| 13792  | 2     | 3      | 3     | 1      |

| respid | Q22_1 | Q22a_1 | Q23_1 | Q23a_1 |
|--------|-------|--------|-------|--------|
| 13796  | 0     |        | 1     | 1      |
| 13798  | 0     |        | 0     |        |
| 13799  | 0     |        | 2     | 1      |
| 13804  | 0     |        | 0     |        |
| 13805  | 0     |        | 0     |        |
| 13810  | 3     | 3      | 2     | 2      |
| 13811  | 0     |        | 0     |        |
| 13819  | 2     | 4      | 0     |        |
| 13821  | 4     | 4      | 4     | 3      |
| 13824  | 2     | 2      | 0     |        |
| 13828  | 2     | 1      | 3     | 1      |
| 13829  | 4     | 3      | 3     | 4      |
| 13831  | 0     |        | 0     |        |
| 13833  | 1     | 1      | 1     | 1      |
| 13835  | 3     | 3      | 3     | 2      |
| 13838  | 0     |        | 0     |        |
| 13839  | 4     | 4      | 4     | 4      |
| 13845  | 0     |        | 0     |        |
| 13846  | 0     |        | 0     |        |
| 13853  | 0     |        | 1     | 1      |
| 13855  | 2     | 2      | 3     | 3      |
| 13858  | 0     |        | 0     |        |
| 13860  | 0     |        | 0     |        |
| 13865  | 3     | 2      | 4     | 3      |
| 13870  | 0     |        | 0     |        |
| 13872  | 2     | 4      | 0     |        |
| 13873  | 1     | 1      | 1     | 1      |
| 13874  | 0     |        | 0     |        |
| 13875  | 1     | 1      | 1     | 1      |
| 13881  | 0     |        | 0     |        |
| 13887  | 1     | 1      | 0     |        |
| 13888  | 1     | 1      | 1     | 0      |

| respid | Q22_1 | Q22a_1 | Q23_1 | Q23a_1 |
|--------|-------|--------|-------|--------|
| 13889  | 2     | 3      | 2     | 3      |
| 13895  | 4     | 4      | 3     | 1      |
| 13897  | 0     |        | 0     |        |
| 13898  | 2     | 1      | 3     | 1      |
| 13901  | 0     |        | 0     |        |
| 13902  | 4     | 3      | 3     | 4      |
| 13903  | 0     |        | 0     |        |
| 13905  | 1     | 2      | 1     | 1      |
| 13908  | 2     | 1      | 2     | 1      |
| 13909  | 0     |        | 0     |        |
| 13910  | 4     | 3      | 3     | 3      |
| 13911  | 0     |        | 0     |        |
| 13914  | 2     | 2      | 1     | 1      |
| 13920  | 2     | 1      | 4     | 2      |
| 13926  | 0     |        | 0     |        |
| 13929  | 1     | 1      | 2     | 2      |
| 13930  | 4     | 4      | 4     | 3      |
| 13931  | 0     |        | 0     |        |
| 13932  | 0     |        | 0     |        |
| 13934  | 1     | 0      | 1     | 1      |
| 13938  | 2     | 1      | 2     | 1      |
| 13942  | 0     |        | 1     | 0      |
| 13945  | 3     | 2      | 5     | 1      |
| 13947  | 5     | 3      | 5     | 3      |
| 13948  | 0     |        | 0     |        |
| 13959  | 0     |        | 3     | 0      |
| 13962  | 0     |        | 0     |        |
| 13963  | 0     |        | 0     |        |
| 13964  | 1     | 1      | 1     | 1      |
| 13966  | 2     | 2      | 1     | 2      |
| 13968  | 2     | 1      | 0     |        |
| 13971  | 1     | 1      | 0     |        |

| respid | Q22_1 | Q22a_1 | Q23_1 | Q23a_1 |
|--------|-------|--------|-------|--------|
| 13979  | 3     | 2      | 3     | 2      |
| 13980  | 2     | 1      | 2     | 1      |
| 13981  | 1     | 2      | 1     | 1      |
| 13982  | 0     |        | 1     | 1      |
| 13984  | 1     | 3      | 2     | 3      |
| 13989  | 0     |        | 1     | 0      |
| 13990  | 0     |        | 1     | 0      |
| 13992  | 5     | 3      | 2     | 3      |
| 13998  | 1     | 2      | 2     | 2      |
| 13999  | 2     | 2      | 4     | 3      |
| 14000  | 0     |        | 3     | 1      |
| 14003  | 0     |        | 4     | 2      |
| 14004  | 0     |        | 0     |        |
| 14006  | 1     | 1      | 1     | 1      |
| 14007  | 0     |        | 1     | 1      |
| 14008  | 0     |        | 0     |        |
| 14013  | 1     | 0      | 1     | 0      |
| 14015  | 1     | 1      | 1     | 1      |
| 14018  | 1     | 1      | 1     | 1      |
| 14021  | 1     | 0      | 1     | 1      |
| 14023  | 0     |        | 5     | 0      |
| 14024  | 1     | 1      | 0     |        |
| 14026  | 0     |        | 0     |        |
| 14030  | 1     | 1      | 3     | 1      |
| 14032  | 2     | 1      | 2     | 1      |
| 14040  | 0     |        | 0     |        |
| 14045  | 0     |        | 0     |        |
| 14048  | 1     | 1      | 5     | 0      |
| 14049  | 2     | 3      | 5     | 3      |
| 14050  | 0     |        | 0     |        |
| 14051  | 2     | 3      | 5     | 4      |
| 14052  | 1     | 0      | 0     |        |

| respid | Q22_1 | Q22a_1 | Q23_1 | Q23a_1 |
|--------|-------|--------|-------|--------|
| 14054  | 0     |        | 0     |        |
| 14055  | 0     |        | 0     |        |
| 14057  | 1     | 1      | 0     |        |
| 14058  | 0     |        | 0     |        |
| 14059  | 0     |        | 5     | 0      |
| 14060  | 1     | 0      | 0     |        |
| 14061  | 3     | 3      | 3     | 3      |
| 14071  | 0     |        | 0     |        |
| 14073  | 0     |        | 1     | 0      |
| 14074  | 4     | 2      | 2     | 1      |
| 14076  | 0     |        | 0     |        |
| 14080  | 0     |        | 1     | 0      |
| 14082  | 0     |        | 1     | 0      |
| 14083  | 3     | 2      | 0     |        |
| 14084  | 0     |        | 0     |        |
| 14085  | 0     |        | 0     |        |
| 14086  | 2     | 2      | 3     | 2      |
| 14088  | 0     |        | 0     |        |
| 14090  | 0     |        | 0     |        |
| 14092  | 1     | 1      | 1     | 0      |
| 14093  | 0     |        | 0     |        |
| 14096  | 1     | 1      | 1     | 1      |
| 14103  | 1     | 1      | 4     | 1      |
| 14105  | 0     |        | 0     |        |
| 14106  | 1     | 1      | 1     | 1      |
| 14107  | 1     | 1      | 1     | 1      |
| 14108  | 2     | 4      | 1     | 3      |
| 14112  | 1     | 1      | 2     | 1      |
| 14114  | 3     | 3      | 5     | 3      |
| 14115  | 2     | 2      | 2     | 2      |
| 14116  | 0     |        | 0     |        |
| 14117  | 0     |        | 3     | 2      |

| respid | Q22_1 | Q22a_1 | Q23_1 | Q23a_1 |
|--------|-------|--------|-------|--------|
| 14118  | 1     | 1      | 5     | 1      |
| 14119  | 1     | 0      | 0     |        |
| 14127  | 0     |        | 0     |        |
| 14129  | 1     | 1      | 1     | 1      |
| 14131  | 1     | 1      | 4     | 2      |
| 14132  | 0     |        | 1     | 1      |
| 14133  | 1     | 4      | 1     | 4      |
| 14134  | 1     | 1      | 2     | 1      |
| 14135  | 0     |        | 0     |        |
| 14136  | 1     | 0      | 1     | 1      |
| 14138  | 0     |        | 0     |        |
| 14139  | 0     |        | 0     |        |
| 14140  | 2     | 2      | 1     | 2      |
| 14141  | 0     |        | 0     |        |
| 14143  | 0     |        | 1     | 0      |
| 14146  | 0     |        | 0     |        |
| 14147  | 4     | 4      | 3     | 2      |
| 14148  | 1     | 0      | 1     | 0      |
| 14151  | 1     | 2      | 3     | 1      |
| 14152  | 2     | 1      | 5     | 3      |
| 14153  | 0     |        | 1     | 0      |
| 14154  | 0     |        | 5     | 2      |
| 14158  | 1     | 1      | 0     |        |
| 14159  | 2     | 1      | 1     | 1      |
| 14160  | 2     | 3      | 3     | 3      |
| 14161  | 1     | 1      | 4     | 2      |
| 14162  | 1     | 1      | 1     | 1      |
| 14165  | 3     | 2      | 5     | 3      |
| 14166  | 2     | 1      | 4     | 2      |
| 14167  | 1     | 1      | 1     | 1      |
| 14169  | 1     | 1      | 1     | 1      |
| 14170  | 1     | 1      | 1     | 1      |

| respid | Q22_1 | Q22a_1 | Q23_1 | Q23a_1 |
|--------|-------|--------|-------|--------|
| 14172  | 0     |        | 2     | 2      |
| 14173  | 0     |        | 0     |        |
| 14174  | 0     |        | 1     | 0      |
| 14175  | 1     | 1      | 1     | 1      |
| 14176  | 1     | 1      | 1     | 1      |
| 14178  | 0     |        | 0     |        |
| 14179  | 0     |        | 0     |        |
| 14180  | 3     | 2      | 5     | 4      |
| 14183  | 2     | 1      | 2     | 2      |
| 14185  | 3     | 1      | 1     | 1      |
| 14187  | 1     | 1      | 1     | 1      |
| 14189  | 0     |        | 0     |        |
| 14191  | 2     | 3      | 4     | 2      |
| 14192  | 0     |        | 0     |        |
| 14195  | 4     | 3      | 3     | 2      |
| 14197  | 1     | 1      | 3     | 0      |
| 14203  | 3     | 2      | 5     | 3      |
| 14204  | 1     | 1      | 1     | 1      |
| 14205  | 1     | 0      | 1     | 0      |
| 14208  | 0     |        | 0     |        |
| 14211  | 4     | 3      | 4     | 3      |
| 14214  | 0     |        | 0     |        |
| 14215  | 1     | 1      | 3     | 2      |
| 14216  | 2     | 2      | 3     | 2      |
| 14218  | 0     |        | 0     |        |
| 14220  | 0     |        | 1     | 0      |
| 14223  | 0     |        | 0     |        |
| 14225  | 3     | 2      | 4     | 3      |
| 14226  | 0     |        | 0     |        |
| 14228  | 1     | 1      | 2     | 1      |
| 14231  | 1     | 1      | 1     | 1      |
| 14233  | 1     | 2      | 1     | 2      |



| respid | Q22_1 | Q22a_1 | Q23_1 | Q23a_1 |
|--------|-------|--------|-------|--------|
| 14237  | 1     | 1      | 1     | 1      |
| 14238  | 2     | 2      | 4     | 2      |
| 14243  | 1     | 1      | 0     |        |
| 14245  | 0     |        | 0     |        |
| 14246  | 2     | 2      | 2     | 2      |
| 14248  | 0     |        | 0     |        |
| 14250  | 0     |        | 1     | 1      |
| 14253  | 1     | 1      | 1     | 1      |
| 14254  | 1     | 1      | 0     |        |
| 14255  | 1     | 1      | 0     |        |
| 14257  | 0     |        | 0     |        |
| 14258  | 1     | 2      | 1     | 2      |
| 14259  | 1     | 2      | 3     | 2      |
| 14260  | 0     |        | 0     |        |
| 14261  | 3     | 4      | 4     | 4      |
| 14263  | 5     | 4      | 5     | 4      |
| 14264  | 1     | 1      | 2     | 1      |
| 14266  | 3     | 2      | 1     | 2      |
| 14267  | 2     | 2      | 2     | 2      |
| 14268  | 1     | 1      | 1     | 2      |
| 14275  | 0     |        | 1     | 1      |
| 14278  | 2     | 2      | 3     | 3      |
| 14279  | 0     |        | 0     |        |
| 14280  | 0     |        | 0     |        |
| 14281  | 1     | 0      | 0     |        |
| 14282  | 3     | 0      | 1     | 1      |
| 14283  | 2     | 2      | 3     | 3      |
| 14286  | 0     |        | 0     |        |
| 14287  | 0     |        | 0     |        |
| 14288  | 2     | 2      | 3     | 2      |
| 14291  | 0     |        | 0     |        |
| 14292  | 0     |        | 0     |        |

| respid | Q22_1 | Q22a_1 | Q23_1 | Q23a_1 |
|--------|-------|--------|-------|--------|
| 14293  | 1     | 1      | 1     | 0      |
| 14304  | 4     | 4      | 4     | 4      |
| 14308  | 1     | 1      | 2     | 1      |
| 14313  | 0     |        | 0     |        |
| 14314  | 2     | 2      | 5     | 4      |
| 14316  | 0     |        | 0     |        |
| 14317  | 1     | 0      | 0     |        |
| 14318  | 4     | 3      | 3     | 2      |
| 14319  | 1     | 1      | 3     | 1      |
| 14320  | 2     | 2      | 3     | 2      |
| 14321  | 1     | 1      | 1     | 1      |
| 14322  | 2     | 3      | 1     | 3      |
| 14326  | 4     | 1      | 2     | 2      |
| 14327  | 3     | 4      | 4     | 3      |
| 14328  | 0     |        | 0     |        |
| 14330  | 0     |        | 0     |        |
| 14332  | 0     |        | 0     |        |
| 14334  | 0     |        | 0     |        |
| 14336  | 0     |        | 0     |        |
| 14337  | 1     | 1      | 1     | 1      |
| 14339  | 0     |        | 0     |        |
| 14340  | 2     | 1      | 2     | 1      |
| 14341  | 0     |        | 0     |        |
| 14344  | 0     |        | 0     |        |
| 14345  | 1     | 1      | 3     | 2      |
| 14346  | 0     |        | 0     |        |
| 14348  | 1     | 1      | 4     | 1      |
| 14349  | 1     | 1      | 1     | 1      |
| 14358  | 2     | 3      | 2     | 4      |
| 14360  | 0     |        | 0     |        |
| 14362  | 0     |        | 0     |        |
| 14366  | 0     |        | 0     |        |

| respid | Q22_1 | Q22a_1 | Q23_1 | Q23a_1 |
|--------|-------|--------|-------|--------|
| 14367  | 0     |        | 0     |        |
| 14369  | 2     | 1      | 4     | 3      |
| 14371  | 0     |        | 1     | 1      |
| 14372  | 0     |        | 0     |        |
| 14374  | 0     |        | 1     | 1      |
| 14376  | 1     | 2      | 1     | 1      |
| 14377  | 0     |        | 0     |        |
| 14378  | 0     |        | 0     |        |
| 14379  | 1     | 1      | 0     |        |
| 14381  | 0     |        | 0     |        |
| 14383  | 3     | 2      | 3     | 2      |
| 14384  | 3     | 2      | 2     | 1      |
| 14385  | 3     | 4      | 3     | 4      |
| 14386  | 2     | 3      | 3     | 2      |
| 14390  | 1     | 2      | 1     | 1      |
| 14391  | 0     |        | 0     |        |
| 14392  | 0     |        | 1     | 1      |
| 14393  | 3     | 3      | 4     | 3      |
| 14394  | 4     | 2      | 0     |        |
| 14395  | 0     |        | 0     |        |
| 14396  | 0     |        | 0     |        |
| 14397  | 0     |        | 5     | 3      |
| 14398  | 0     |        | 0     |        |
| 14399  | 0     |        | 0     |        |
| 14400  | 0     |        | 0     |        |
| 14403  | 0     |        | 0     |        |
| 14404  | 0     |        | 0     |        |
| 14405  | 0     |        | 0     |        |
| 14407  | 0     |        | 0     |        |
| 14408  | 0     |        | 0     |        |
| 14410  | 4     | 4      | 2     | 3      |
| 14415  | 0     |        | 1     | 0      |

| respid | Q22_1 | Q22a_1 | Q23_1 | Q23a_1 |
|--------|-------|--------|-------|--------|
| 14419  | 3     | 2      | 0     |        |
| 14420  | 0     |        | 0     |        |
| 14421  | 0     |        | 0     |        |
| 14423  | 0     |        | 0     |        |
| 14424  | 0     |        | 0     |        |
| 14425  | 1     | 1      | 1     | 1      |
| 14426  | 0     |        | 1     | 0      |
| 14427  | 1     | 0      | 0     |        |
| 14428  | 4     | 4      | 4     | 4      |
| 14431  | 2     | 1      | 2     | 1      |
| 14433  | 0     |        | 1     | 1      |
| 14434  | 0     |        | 1     | 0      |
| 14435  | 1     | 1      | 3     | 1      |
| 14436  | 4     | 3      | 3     | 3      |
| 14438  | 0     |        | 0     |        |
| 14442  | 2     | 2      | 3     | 2      |
| 14447  | 1     | 1      | 3     | 2      |
| 14448  | 0     |        | 0     |        |
| 14450  | 1     | 1      | 1     | 1      |
| 14451  | 0     |        | 1     | 1      |
| 14454  | 1     | 1      | 0     |        |
| 14455  | 0     |        | 0     |        |
| 14456  | 1     | 3      | 3     | 3      |
| 14457  | 4     | 3      | 4     | 3      |
| 14458  | 3     | 3      | 2     | 4      |
| 14459  | 0     |        | 0     |        |
| 14460  | 0     |        | 0     |        |
| 14464  | 1     | 1      | 1     | 1      |
| 14465  | 1     | 1      | 4     | 2      |
| 14466  | 0     |        | 1     | 2      |
| 14467  | 0     |        | 1     | 0      |
| 14470  | 1     | 1      | 1     | 1      |

| respid | Q22_1 | Q22a_1 | Q23_1 | Q23a_1 |
|--------|-------|--------|-------|--------|
| 14472  | 0     |        | 3     | 2      |
| 14473  | 0     |        | 0     |        |
| 14474  | 0     |        | 0     |        |
| 14477  | 0     |        | 0     |        |
| 14478  | 0     |        | 0     |        |
| 14479  | 0     |        | 0     |        |
| 14484  | 1     | 0      | 0     |        |
| 14485  | 0     |        | 0     |        |
| 14486  | 2     | 2      | 0     |        |
| 14487  | 0     |        | 0     |        |
| 14488  | 3     | 2      | 3     | 2      |
| 14491  | 1     | 3      | 2     | 2      |
| 14495  | 2     | 2      | 1     | 0      |
| 14500  | 0     |        | 1     | 1      |
| 14502  | 0     |        | 0     |        |
| 14504  | 2     | 1      | 1     | 2      |
| 14505  | 4     | 3      | 4     | 3      |
| 14507  | 0     |        | 1     | 0      |
| 14517  | 1     | 1      | 1     | 2      |
| 14518  | 1     | 1      | 0     |        |
| 14519  | 1     | 0      | 0     |        |
| 14521  | 2     | 1      | 2     | 1      |
| 14522  | 0     |        | 0     |        |
| 14526  | 0     |        | 1     | 0      |
| 14528  | 4     | 3      | 3     | 2      |
| 14529  | 0     |        | 0     |        |
| 14530  | 2     | 1      | 0     |        |
| 14531  | 3     | 4      | 3     | 3      |
| 14534  | 2     | 1      | 2     | 1      |
| 14538  | 2     | 2      | 0     |        |
| 14539  | 1     | 1      | 0     |        |
| 14545  | 1     | 0      | 1     | 0      |

| respid | Q22_1 | Q22a_1 | Q23_1 | Q23a_1 |
|--------|-------|--------|-------|--------|
| 14546  | 1     | 1      | 1     | 1      |
| 14551  | 0     |        | 1     | 0      |
| 14553  | 2     | 4      | 2     | 4      |
| 14557  | 0     |        | 0     |        |
| 14558  | 2     | 3      | 0     |        |
| 14559  | 2     | 1      | 2     | 1      |
| 14560  | 2     | 3      | 4     | 3      |
| 14563  | 1     | 1      | 0     |        |
| 14565  | 0     |        | 0     |        |
| 14571  | 1     | 3      | 5     | 4      |
| 14572  | 1     | 0      | 2     | 2      |
| 14573  | 1     | 2      | 2     | 1      |
| 14575  | 2     | 2      | 3     | 3      |
| 14576  | 2     | 2      | 2     | 1      |
| 14578  | 3     | 2      | 0     |        |
| 14579  | 0     |        | 0     |        |
| 14580  | 0     |        | 0     |        |
| 14582  | 0     |        | 1     | 0      |
| 14585  | 1     | 1      | 1     | 1      |
| 14588  | 0     |        | 0     |        |
| 14590  | 1     | 2      | 2     | 3      |
| 14592  | 3     | 3      | 1     | 2      |
| 14593  | 0     |        | 0     |        |
| 14595  | 1     | 3      | 1     | 3      |
| 14597  | 1     | 1      | 1     | 2      |
| 14600  | 2     | 2      | 0     |        |
| 14602  | 1     | 3      | 1     | 3      |
| 14604  | 1     | 1      | 1     | 1      |
| 14605  | 0     |        | 3     | 1      |
| 14609  | 1     | 1      | 1     | 1      |
| 14610  | 0     |        | 2     | 0      |
| 14611  | 1     | 1      | 2     | 1      |

| respid | Q22_1 | Q22a_1 | Q23_1 | Q23a_1 |
|--------|-------|--------|-------|--------|
| 14612  | 0     |        | 0     |        |
| 14614  | 1     | 1      | 1     | 1      |
| 14615  | 0     |        | 1     | 0      |
| 14618  | 3     | 2      | 2     | 1      |
| 14621  | 0     |        | 0     |        |
| 14624  | 1     | 0      | 1     | 0      |
| 14626  | 0     |        | 0     |        |
| 14627  | 1     | 1      | 2     | 2      |
| 14628  | 2     | 1      | 2     | 2      |
| 14631  | 0     |        | 0     |        |
| 14633  | 2     | 1      | 2     | 2      |
| 14642  | 2     | 2      | 3     | 3      |
| 14647  | 0     |        | 0     |        |
| 14658  | 3     | 2      | 1     | 0      |
| 14659  | 2     | 1      | 2     | 1      |
| 14660  | 0     |        | 0     |        |
| 14661  | 0     |        | 0     |        |
| 14662  | 3     | 4      | 4     | 4      |
| 14663  | 0     |        | 0     |        |
| 14670  | 0     |        | 0     |        |
| 14671  | 0     |        | 0     |        |
| 14672  | 1     | 2      | 1     | 2      |
| 14675  | 0     |        | 0     |        |
| 14676  | 1     | 0      | 1     | 1      |
| 14677  | 3     | 0      | 3     | 4      |
| 14678  | 0     |        | 0     |        |
| 14681  | 2     | 2      | 2     | 2      |
| 14684  | 0     |        | 0     |        |
| 14688  | 0     |        | 0     |        |
| 14690  | 1     | 1      | 1     | 1      |
| 14694  | 3     | 1      | 3     | 2      |
| 14696  | 1     | 1      | 1     | 1      |

| respid | Q22_1 | Q22a_1 | Q23_1 | Q23a_1 |
|--------|-------|--------|-------|--------|
| 14700  | 0     |        | 0     |        |
| 14701  | 2     | 2      | 2     | 2      |
| 14703  | 2     | 2      | 3     | 1      |
| 14707  | 0     |        | 0     |        |
| 14711  | 1     | 2      | 1     | 2      |
| 14714  | 0     |        | 0     |        |
| 14715  | 4     | 4      | 4     | 4      |
| 14716  | 0     |        | 0     |        |
| 14720  | 0     |        | 0     |        |
| 14725  | 0     |        | 0     |        |
| 14726  | 1     | 1      | 1     | 1      |
| 14734  | 0     |        | 0     |        |
| 14735  | 0     |        | 0     |        |
| 14736  | 2     | 1      | 1     | 1      |
| 14740  | 0     |        | 0     |        |
| 14745  | 0     |        | 2     | 1      |
| 14747  | 0     |        | 0     |        |
| 14750  | 3     | 1      | 3     | 2      |
| 14751  | 0     |        | 0     |        |
| 14753  | 0     |        | 0     |        |
| 14756  | 3     | 4      | 4     | 4      |
| 14780  | 2     | 1      | 2     | 0      |
| 14782  | 1     | 1      | 0     |        |
| 14800  | 4     | 3      | 3     | 3      |
| 14801  | 0     |        | 0     |        |
| 14802  | 2     | 3      | 4     | 3      |
| 14805  | 2     | 1      | 2     | 1      |
| 14811  | 3     | 3      | 3     | 3      |
| 14814  | 3     | 3      | 3     | 2      |
| 14822  | 1     | 1      | 2     | 3      |
| 14827  | 0     |        | 1     | 3      |
| 14828  | 3     | 2      | 3     | 2      |



| respid | Q22_1 | Q22a_1 | Q23_1 | Q23a_1 |
|--------|-------|--------|-------|--------|
| 14830  | 0     |        | 0     |        |
| 14832  | 1     | 3      | 2     | 2      |
| 14835  | 3     | 3      | 3     | 3      |
| 14841  | 0     |        | 0     |        |
| 14849  | 2     | 1      | 1     | 1      |
| 14850  | 0     |        | 0     |        |
| 14851  | 0     |        | 0     |        |
| 14856  | 3     | 3      | 3     | 3      |
| 14862  | 1     | 1      | 2     | 1      |
| 14863  | 0     |        | 0     |        |
| 14864  | 0     |        | 0     |        |
| 14866  | 0     |        | 0     |        |
| 14867  | 3     | 3      | 3     | 3      |
| 14868  | 0     |        | 0     |        |
| 14870  | 0     |        | 0     |        |
| 14873  | 0     |        | 0     |        |
| 14878  | 0     |        | 0     |        |
| 14879  | 0     |        | 0     |        |
| 14881  | 3     | 2      | 3     | 3      |
| 14888  | 4     | 3      | 3     | 3      |
| 14895  | 2     | 1      | 1     | 1      |
| 14900  | 3     | 2      | 3     | 2      |
| 14912  | 0     |        | 0     |        |
| 14922  | 1     | 1      | 1     | 1      |
| 14923  | 4     | 4      | 4     | 3      |
| 14924  | 3     | 3      | 2     | 2      |
| 14925  | 3     | 3      | 4     | 3      |
| 14926  | 0     |        | 0     |        |
| 14927  | 3     | 2      | 3     | 2      |
| 14930  | 0     |        | 0     |        |
| 14937  | 3     | 2      | 3     | 2      |
| 14938  | 4     | 3      | 4     | 3      |

| respid | Q22_1 | Q22a_1 | Q23_1 | Q23a_1 |
|--------|-------|--------|-------|--------|
| 14939  | 0     |        | 0     |        |
| 14942  | 0     |        | 0     |        |
| 14943  | 0     |        | 0     |        |
| 14953  | 2     | 2      | 2     | 1      |
| 14954  | 0     |        | 0     |        |
| 14955  | 1     | 2      | 1     | 2      |
| 14957  | 3     | 3      | 0     |        |
| 14958  | 4     | 3      | 4     | 4      |
| 14959  | 3     | 3      | 3     | 2      |
| 14961  | 0     |        | 0     |        |
| 14963  | 3     | 3      | 3     | 3      |
| 14964  | 0     |        | 0     |        |
| 14965  | 0     |        | 0     |        |
| 14967  | 4     | 4      | 4     | 4      |
| 14970  | 4     | 4      | 2     | 1      |
| 14972  | 2     | 1      | 0     |        |
| 14975  | 4     | 3      | 4     | 4      |
| 14977  | 0     |        | 0     |        |
| 14982  | 1     | 1      | 0     |        |
| 14985  | 1     | 1      | 0     |        |
| 14986  | 0     |        | 0     |        |
| 14987  | 0     |        | 0     |        |
| 14988  | 3     | 1      | 2     | 2      |
| 14989  | 4     | 3      | 0     |        |
| 14993  | 1     | 1      | 4     | 3      |
| 15001  | 0     |        | 0     |        |
| 15002  | 5     | 3      | 3     | 4      |
| 15006  | 0     |        | 3     | 1      |
| 15007  | 0     |        | 0     |        |
| 15014  | 4     | 3      | 4     | 3      |
| 15020  | 3     | 1      | 5     | 2      |
| 15021  | 3     | 3      | 3     | 3      |

| respid | Q22_1 | Q22a_1 | Q23_1 | Q23a_1 |
|--------|-------|--------|-------|--------|
| 15023  | 1     | 1      | 2     | 1      |
| 15030  | 0     |        | 0     |        |
| 15032  | 0     |        | 0     |        |
| 15033  | 2     | 2      | 2     | 2      |
| 15034  | 1     | 1      | 4     | 2      |
| 15035  | 2     | 1      | 1     | 1      |
| 15037  | 0     |        | 0     |        |
| 15039  | 3     | 3      | 3     | 2      |
| 15040  | 0     |        | 0     |        |
| 15042  | 2     | 2      | 2     | 1      |
| 15044  | 0     |        | 0     |        |
| 15045  | 1     | 0      | 0     |        |
| 15046  | 0     |        | 0     |        |
| 15052  | 3     | 4      | 4     | 4      |
| 15058  | 1     | 1      | 2     | 1      |
| 15063  | 4     | 2      | 3     | 2      |
| 15066  | 0     |        | 1     | 1      |
| 15069  | 0     |        | 0     |        |
| 15071  | 1     | 3      | 1     | 3      |
| 15076  | 3     | 2      | 1     | 2      |
| 15078  | 0     |        | 0     |        |
| 15087  | 2     | 3      | 2     | 2      |
| 15090  | 3     | 3      | 2     | 2      |
| 15091  | 0     |        | 0     |        |
| 15092  | 0     |        | 0     |        |
| 15096  | 1     | 2      | 2     | 1      |
| 15106  | 3     | 3      | 3     | 2      |
| 15108  | 0     |        | 0     |        |
| 15113  | 0     |        | 0     |        |
| 15116  | 0     |        | 0     |        |
| 15119  | 1     | 1      | 1     | 1      |
| 15120  | 0     |        | 0     |        |

| respid | Q22_1 | Q22a_1 | Q23_1 | Q23a_1 |
|--------|-------|--------|-------|--------|
| 15121  | 3     | 2      | 2     | 2      |
| 15123  | 0     |        | 0     |        |
| 15124  | 1     | 2      | 1     | 3      |
| 15128  | 1     | 1      | 0     |        |
| 15131  | 0     |        | 0     |        |
| 15136  | 0     |        | 0     |        |
| 15137  | 1     | 1      | 1     | 1      |
| 15141  | 3     | 3      | 1     | 1      |
| 15144  | 0     |        | 0     |        |
| 15147  | 2     | 2      | 2     | 2      |
| 15151  | 1     | 2      | 0     |        |
| 15154  | 2     | 2      | 1     | 1      |
| 15157  | 0     |        | 0     |        |
| 15164  | 3     | 3      | 2     | 3      |
| 15168  | 0     |        | 0     |        |
| 15169  | 2     | 1      | 2     | 1      |
| 15172  | 4     | 3      | 4     | 3      |
| 15177  | 3     | 3      | 3     | 2      |
| 15178  | 0     |        | 0     |        |
| 15180  | 1     | 1      | 1     | 1      |
| 15181  | 0     |        | 0     |        |
| 15182  | 3     | 2      | 2     | 1      |
| 15183  | 0     |        | 0     |        |
| 15188  | 0     |        | 0     |        |
| 15190  | 3     | 1      | 1     | 3      |
| 15195  | 0     |        | 0     |        |
| 15201  | 4     | 4      | 4     | 4      |
| 15203  | 0     |        | 0     |        |
| 15204  | 0     |        | 0     |        |
| 15207  | 0     |        | 0     |        |
| 15208  | 4     | 4      | 4     | 4      |
| 15209  | 2     | 2      | 1     | 0      |

| respid | Q22_1 | Q22a_1 | Q23_1 | Q23a_1 |
|--------|-------|--------|-------|--------|
| 15212  | 0     |        | 0     |        |
| 15213  | 0     |        | 1     | 1      |
| 15219  | 0     |        | 1     | 1      |
| 15220  | 2     | 2      | 2     | 2      |
| 15221  | 0     |        | 0     |        |
| 15223  | 1     | 1      | 1     | 1      |
| 15224  | 0     |        | 3     | 1      |
| 15225  | 0     |        | 0     |        |
| 15226  | 0     |        | 0     |        |
| 15230  | 0     |        | 0     |        |
| 15231  | 4     | 4      | 4     | 4      |
| 15232  | 0     |        | 0     |        |
| 15237  | 0     |        | 0     |        |
| 15239  | 0     |        | 0     |        |
| 15241  | 0     |        | 0     |        |
| 15242  | 0     |        | 1     | 2      |
| 15247  | 0     |        | 0     |        |
| 15248  | 0     |        | 0     |        |
| 15251  | 0     |        | 0     |        |
| 15257  | 0     |        | 0     |        |
| 15260  | 0     |        | 0     |        |
| 15261  | 5     | 3      | 4     | 4      |
| 15262  | 3     | 3      | 2     | 3      |
| 15263  | 0     |        | 0     |        |
| 15265  | 0     |        | 0     |        |
| 15266  | 0     |        | 5     | 1      |
| 15268  | 2     | 3      | 0     |        |
| 15269  | 3     | 2      | 0     |        |
| 15270  | 5     | 4      | 5     | 4      |
| 15273  | 0     |        | 2     | 2      |
| 15276  | 4     | 4      | 4     | 4      |
| 15277  | 0     |        | 0     |        |

| respid | Q22_1 | Q22a_1 | Q23_1 | Q23a_1 |
|--------|-------|--------|-------|--------|
| 15282  | 3     | 3      | 0     |        |
| 15284  | 3     | 3      | 2     | 3      |
| 15285  | 0     |        | 2     | 1      |
| 15286  | 0     |        | 3     | 3      |
| 15288  | 1     | 2      | 1     | 3      |
| 15292  | 4     | 3      | 5     | 4      |
| 15296  | 0     |        | 0     |        |
| 15297  | 0     |        | 0     |        |
| 15298  | 0     |        | 0     |        |
| 15301  | 1     | 1      | 0     |        |
| 15302  | 0     |        | 0     |        |
| 15305  | 2     | 2      | 1     | 1      |
| 15307  | 1     | 1      | 0     |        |
| 15308  | 1     | 1      | 0     |        |
| 15309  | 0     |        | 1     | 0      |
| 15311  | 0     |        | 1     | 0      |
| 15315  | 0     |        | 0     |        |
| 15316  | 0     |        | 0     |        |
| 15318  | 0     |        | 0     |        |
| 15321  | 4     | 3      | 4     | 4      |
| 15322  | 0     |        | 1     | 0      |
| 15324  | 1     | 0      | 0     |        |
| 15326  | 0     |        | 0     |        |
| 15327  | 0     |        | 0     |        |
| 15328  | 0     |        | 0     |        |
| 15330  | 0     |        | 0     |        |
| 15332  | 0     |        | 0     |        |
| 15333  | 0     |        | 0     |        |
| 15334  | 0     |        | 0     |        |
| 15336  | 4     | 3      | 3     | 4      |
| 15337  | 0     |        | 0     |        |
| 15338  | 0     |        | 0     |        |

| respid | Q22_1 | Q22a_1 | Q23_1 | Q23a_1 |
|--------|-------|--------|-------|--------|
| 15339  | 3     | 4      | 3     | 4      |
| 15341  | 0     |        | 0     |        |
| 15344  | 0     |        | 0     |        |
| 15345  | 1     | 1      | 0     |        |
| 15350  | 0     |        | 0     |        |
| 15351  | 3     | 3      | 0     |        |
| 15352  | 1     | 0      | 1     | 0      |
| 15372  | 0     |        | 0     |        |
| 15373  | 3     | 4      | 3     | 3      |
| 15376  | 0     |        | 0     |        |
| 15377  | 0     |        | 0     |        |
| 15382  | 0     |        | 0     |        |
| 15383  | 1     | 1      | 3     | 1      |
| 15385  | 3     | 2      | 3     | 3      |
| 15390  | 0     |        | 0     |        |
| 15399  | 0     |        | 0     |        |
| 15404  | 1     | 1      | 1     | 1      |
| 15410  | 0     |        | 0     |        |
| 15411  | 2     | 2      | 2     | 1      |
| 15412  | 2     | 2      | 2     | 1      |
| 15413  | 2     | 1      | 0     |        |
| 15414  | 0     |        | 0     |        |
| 15417  | 0     |        | 1     | 1      |
| 15418  | 1     | 1      | 2     | 1      |
| 15421  | 0     |        | 0     |        |
| 15423  | 0     |        | 0     |        |
| 15425  | 1     | 0      | 1     | 0      |
| 15426  | 5     | 4      | 4     | 4      |
| 15430  | 0     |        | 0     |        |
| 15431  | 3     | 2      | 3     | 3      |
| 15435  | 0     |        | 0     |        |
| 15436  | 0     |        | 0     |        |

| respid | Q22_1 | Q22a_1 | Q23_1 | Q23a_1 |
|--------|-------|--------|-------|--------|
| 15437  | 0     |        | 0     |        |
| 15438  | 0     |        | 0     |        |
| 15439  | 0     |        | 0     |        |
| 15441  | 3     | 4      | 4     | 4      |
| 15443  | 1     | 0      | 0     |        |
| 15446  | 2     | 0      | 1     | 1      |
| 15449  | 2     | 2      | 2     | 2      |
| 15451  | 3     | 2      | 2     | 2      |
| 15452  | 3     | 3      | 3     | 3      |
| 15454  | 0     |        | 0     |        |
| 15456  | 4     | 2      | 3     | 3      |
| 15457  | 0     |        | 0     |        |
| 15458  | 2     | 2      | 1     | 2      |
| 15462  | 3     | 3      | 5     | 4      |
| 15467  | 2     | 1      | 1     | 1      |
| 15470  | 2     | 2      | 2     | 2      |
| 15472  | 0     |        | 1     | 1      |
| 15476  | 1     | 2      | 0     |        |
| 15477  | 0     |        | 0     |        |
| 15488  | 0     |        | 0     |        |
| 15489  | 0     |        | 0     |        |
| 15490  | 0     |        | 0     |        |
| 15496  | 1     | 1      | 5     | 3      |
| 15497  | 2     | 3      | 0     |        |
| 15498  | 0     |        | 0     |        |
| 15509  | 4     | 2      | 3     | 3      |
| 15510  | 0     |        | 0     |        |
| 15516  | 1     | 2      | 1     | 1      |
| 15519  | 0     |        | 0     |        |
| 15520  | 1     | 0      | 0     |        |
| 15524  | 1     | 2      | 0     |        |
| 15525  | 1     | 0      | 0     |        |



| respid | Q22_1 | Q22a_1 | Q23_1 | Q23a_1 |
|--------|-------|--------|-------|--------|
| 15526  | 2     | 0      | 1     | 1      |
| 15531  | 1     | 1      | 1     | 0      |
| 15532  | 0     |        | 0     |        |
| 15534  | 3     | 3      | 3     | 3      |
| 15535  | 4     | 3      | 4     | 3      |
| 15539  | 0     |        | 0     |        |
| 15550  | 0     |        | 1     | 0      |
| 15556  | 0     |        | 0     |        |
| 15558  | 3     | 3      | 4     | 3      |
| 15565  | 0     |        | 0     |        |
| 15567  | 3     | 3      | 3     | 2      |
| 15568  | 4     | 3      | 4     | 3      |
| 15571  | 2     | 2      | 3     | 2      |
| 15573  | 1     | 1      | 0     |        |
| 15574  | 4     | 3      | 3     | 3      |
| 15576  | 0     |        | 0     |        |
| 15587  | 1     | 1      | 2     | 1      |
| 15588  | 0     |        | 3     | 1      |
| 15593  | 1     | 1      | 0     |        |
| 15597  | 0     |        | 0     |        |
| 15598  | 4     | 2      | 0     |        |
| 15599  | 2     | 1      | 3     | 1      |
| 15601  | 0     |        | 0     |        |
| 15604  | 0     |        | 0     |        |
| 15611  | 1     | 0      | 0     |        |
| 15613  | 0     |        | 0     |        |
| 15614  | 0     |        | 3     | 1      |
| 15617  | 3     | 1      | 1     | 0      |
| 15622  | 0     |        | 0     |        |
| 15623  | 0     |        | 0     |        |
| 15625  | 3     | 3      | 3     | 3      |
| 15627  | 0     |        | 0     |        |

| respid | Q22_1 | Q22a_1 | Q23_1 | Q23a_1 |
|--------|-------|--------|-------|--------|
| 15628  | 0     |        | 0     |        |
| 15633  | 1     | 1      | 1     | 2      |
| 15634  | 0     |        | 1     | 0      |
| 15637  | 0     |        | 0     |        |
| 15644  | 2     | 1      | 2     | 1      |
| 15645  | 0     |        | 2     | 1      |
| 15649  | 0     |        | 0     |        |
| 15650  | 0     |        | 1     | 0      |
| 15651  | 0     |        | 0     |        |
| 15657  | 3     | 4      | 2     | 3      |
| 15658  | 0     |        | 0     |        |
| 15660  | 2     | 1      | 2     | 1      |
| 15667  | 1     | 0      | 0     |        |
| 15671  | 0     |        | 0     |        |
| 15679  | 5     | 4      | 5     | 3      |
| 15712  | 0     |        | 0     |        |
| 15715  | 1     | 0      | 1     | 0      |
| 15749  | 0     |        | 0     |        |
| 15754  | 0     |        | 1     | 1      |
| 15756  | 2     | 3      | 1     | 2      |
| 15773  | 0     |        | 1     | 0      |
| 15774  | 0     |        | 1     | 0      |
| 15776  | 3     | 2      | 4     | 3      |
| 15777  | 3     | 2      | 3     | 2      |
| 15779  | 0     |        | 0     |        |
| 15780  | 4     | 1      | 1     | 0      |
| 15792  | 0     |        | 0     |        |
| 15793  | 3     | 3      | 3     | 3      |
| 15796  | 0     |        | 0     |        |
| 15798  | 0     |        | 0     |        |
| 15809  | 2     | 2      | 2     | 2      |
| 15810  | 0     |        | 0     |        |

| respid | Q22_1 | Q22a_1 | Q23_1 | Q23a_1 |
|--------|-------|--------|-------|--------|
| 15815  | 0     |        | 0     |        |
| 15816  | 0     |        | 0     |        |
| 15817  | 0     |        | 0     |        |
| 15821  | 2     | 2      | 3     | 2      |
| 15823  | 2     | 2      | 2     | 2      |
| 15834  | 0     |        | 1     | 2      |
| 15835  | 0     |        | 0     |        |
| 15836  | 0     |        | 0     |        |
| 15837  | 0     |        | 0     |        |
| 15839  | 0     |        | 0     |        |
| 15840  | 0     |        | 0     |        |
| 15844  | 0     |        | 0     |        |
| 15845  | 0     |        | 1     | 0      |
| 15847  | 3     | 2      | 3     | 3      |
| 15848  | 0     |        | 1     | 0      |
| 15849  | 0     |        | 0     |        |
| 15857  | 1     | 1      | 1     | 1      |
| 15858  | 1     | 1      | 1     | 1      |
| 15862  | 4     | 4      | 5     | 3      |
| 15866  | 0     |        | 0     |        |
| 15870  | 0     |        | 0     |        |
| 15871  | 1     | 0      | 2     | 3      |
| 15872  | 0     |        | 0     |        |
| 15873  | 0     |        | 0     |        |
| 15874  | 0     |        | 0     |        |
| 15875  | 3     | 3      | 3     | 3      |
| 15876  | 2     | 2      | 2     | 1      |
| 15882  | 2     | 4      | 2     | 3      |
| 15884  | 0     |        | 2     | 1      |
| 15890  | 0     |        | 0     |        |
| 15892  | 2     | 2      | 1     | 2      |
| 15908  | 0     |        | 0     |        |

| respid | Q22_1 | Q22a_1 | Q23_1 | Q23a_1 |
|--------|-------|--------|-------|--------|
| 15914  | 0     |        | 0     |        |
| 15932  | 2     | 2      | 2     | 2      |
| 15933  | 1     | 2      | 1     | 1      |
| 15938  | 1     | 0      | 1     | 0      |
| 15940  | 5     | 4      | 3     | 1      |
| 15945  | 0     |        | 0     |        |
| 15947  | 0     |        | 0     |        |
| 15950  | 0     |        | 0     |        |
| 15951  | 1     | 1      | 1     | 1      |
| 15952  | 2     | 2      | 3     | 2      |
| 15953  | 1     | 2      | 0     |        |
| 15954  | 5     | 4      | 3     | 2      |
| 15957  | 4     | 3      | 3     | 4      |
| 15965  | 4     | 3      | 4     | 3      |
| 15966  | 0     |        | 0     |        |
| 15967  | 0     |        | 0     |        |
| 15968  | 3     | 3      | 2     | 3      |
| 15970  | 0     |        | 0     |        |
| 15973  | 0     |        | 0     |        |
| 15974  | 0     |        | 0     |        |
| 15975  | 0     |        | 0     |        |
| 15980  | 2     | 1      | 4     | 4      |
| 15984  | 0     |        | 0     |        |
| 15985  | 2     | 2      | 2     | 2      |
| 15994  | 0     |        | 0     |        |
| 15995  | 0     |        | 0     |        |
| 16000  | 0     |        | 0     |        |
| 16004  | 0     |        | 0     |        |
| 16005  | 0     |        | 0     |        |
| 16006  | 0     |        | 0     |        |
| 16009  | 1     | 1      | 1     | 1      |
| 16017  | 0     |        | 0     |        |

| respid | Q22_1 | Q22a_1 | Q23_1 | Q23a_1 |
|--------|-------|--------|-------|--------|
| 16019  | 0     |        | 0     |        |
| 16021  | 1     | 2      | 0     |        |
| 16024  | 0     |        | 0     |        |
| 16026  | 4     | 2      | 2     | 2      |
| 16029  | 0     |        | 0     |        |
| 16031  | 2     | 2      | 5     | 3      |
| 16037  | 0     |        | 0     |        |
| 16043  | 1     | 0      | 2     | 0      |
| 16044  | 0     |        | 0     |        |
| 16047  | 1     | 1      | 2     | 2      |
| 16048  | 5     | 3      | 1     | 1      |
| 16049  | 0     |        | 0     |        |
| 16051  | 1     | 1      | 0     |        |
| 16053  | 1     | 1      | 1     | 0      |
| 16054  | 1     | 1      | 0     |        |
| 16069  | 1     | 1      | 1     | 1      |
| 16070  | 0     |        | 2     | 1      |
| 16074  | 0     |        | 0     |        |
| 16076  | 0     |        | 0     |        |
| 16078  | 0     |        | 0     |        |
| 16081  | 0     |        | 1     | 0      |
| 16085  | 0     |        | 0     |        |
| 16088  | 0     |        | 0     |        |
| 16091  | 0     |        | 1     | 0      |
| 16092  | 1     | 1      | 2     | 2      |
| 16093  | 0     |        | 1     | 1      |
| 16097  | 1     | 1      | 2     | 2      |
| 16100  | 1     | 0      | 1     | 1      |
| 16101  | 0     |        | 0     |        |
| 16105  | 0     |        | 0     |        |
| 16118  | 2     | 3      | 1     | 2      |
| 16129  | 0     |        | 0     |        |

| respid | Q22_1 | Q22a_1 | Q23_1 | Q23a_1 |
|--------|-------|--------|-------|--------|
| 16130  | 1     | 1      | 5     | 2      |
| 16131  | 3     | 3      | 3     | 4      |
| 16136  | 1     | 0      | 1     | 0      |
| 16137  | 0     |        | 1     | 0      |
| 16138  | 1     | 2      | 1     | 1      |
| 16139  | 1     | 1      | 0     |        |
| 16140  | 0     |        | 0     |        |
| 16145  | 1     | 1      | 1     | 0      |
| 16150  | 0     |        | 0     |        |
| 16151  | 0     |        | 0     |        |
| 16153  | 0     |        | 0     |        |
| 16164  | 0     |        | 0     |        |
| 16168  | 1     | 1      | 1     | 1      |
| 16173  | 1     | 2      | 3     | 2      |
| 16174  | 0     |        | 0     |        |
| 16177  | 1     | 1      | 5     | 1      |
| 16185  | 1     | 1      | 1     | 0      |
| 16189  | 0     |        | 0     |        |
| 16192  | 0     |        | 0     |        |
| 16193  | 0     |        | 1     | 0      |
| 16194  | 1     | 2      | 1     | 1      |
| 16196  | 0     |        | 0     |        |
| 16202  | 0     |        | 1     | 2      |
| 16205  | 2     | 2      | 3     | 2      |
| 16206  | 3     | 1      | 0     |        |
| 16208  | 0     |        | 0     |        |
| 16211  | 0     |        | 0     |        |
| 16212  | 0     |        | 0     |        |
| 16215  | 0     |        | 0     |        |
| 16217  | 1     | 0      | 1     | 1      |
| 16221  | 0     |        | 1     | 0      |
| 16226  | 2     | 3      | 1     | 1      |

| respid | Q22_1 | Q22a_1 | Q23_1 | Q23a_1 |
|--------|-------|--------|-------|--------|
| 16228  | 1     | 1      | 0     |        |
| 16229  | 0     |        | 0     |        |
| 16230  | 0     |        | 0     |        |
| 16231  | 4     | 4      | 2     | 1      |
| 16232  | 3     | 3      | 4     | 3      |
| 16234  | 0     |        | 0     |        |
| 16235  | 3     | 2      | 2     | 2      |
| 16236  | 1     | 1      | 3     | 2      |
| 16237  | 0     |        | 0     |        |
| 16238  | 4     | 2      | 3     | 2      |
| 16239  | 0     |        | 0     |        |
| 16243  | 1     | 0      | 0     |        |
| 16248  | 3     | 3      | 3     | 3      |
| 16249  | 0     |        | 0     |        |
| 16251  | 0     |        | 0     |        |
| 16263  | 0     |        | 0     |        |
| 16265  | 3     | 2      | 2     | 0      |
| 16269  | 0     |        | 0     |        |
| 16272  | 0     |        | 1     | 1      |
| 16273  | 0     |        | 0     |        |
| 16281  | 0     |        | 0     |        |
| 16282  | 0     |        | 0     |        |
| 16287  | 0     |        | 1     | 1      |
| 16290  | 0     |        | 0     |        |
| 16294  | 1     | 0      | 1     | 0      |
| 16295  | 0     |        | 0     |        |
| 16296  | 1     | 1      | 0     |        |
| 16299  | 4     | 3      | 3     | 2      |
| 16302  | 0     |        | 1     | 0      |
| 16303  | 0     |        | 0     |        |
| 16304  | 0     |        | 0     |        |
| 16306  | 0     |        | 0     |        |

| respid | Q22_1 | Q22a_1 | Q23_1 | Q23a_1 |
|--------|-------|--------|-------|--------|
| 16318  | 1     | 1      | 0     |        |
| 16320  | 1     | 0      | 1     | 1      |
| 16321  | 1     | 1      | 1     | 1      |
| 16322  | 0     |        | 5     | 1      |
| 16324  | 0     |        | 0     |        |
| 16326  | 1     | 0      | 1     | 1      |
| 16328  | 1     | 1      | 1     | 2      |
| 16336  | 2     | 2      | 0     |        |
| 16341  | 0     |        | 1     | 0      |
| 16342  | 0     |        | 0     |        |
| 16343  | 0     |        | 0     |        |
| 16345  | 1     | 4      | 0     |        |
| 16349  | 1     | 1      | 2     | 1      |
| 16355  | 1     | 2      | 0     |        |
| 16364  | 2     | 2      | 1     | 1      |
| 16374  | 0     |        | 3     | 0      |
| 16375  | 0     |        | 0     |        |
| 16376  | 1     | 3      | 2     | 2      |
| 16393  | 1     | 1      | 1     | 1      |
| 16394  | 0     |        | 0     |        |
| 16395  | 0     |        | 0     |        |
| 16397  | 1     | 1      | 1     | 1      |
| 16398  | 1     | 2      | 2     | 3      |
| 16402  | 1     | 1      | 0     |        |
| 16405  | 0     |        | 3     | 2      |
| 16416  | 1     | 1      | 0     |        |
| 16422  | 2     | 2      | 2     | 2      |
| 16429  | 0     |        | 0     |        |
| 16430  | 0     |        | 0     |        |
| 16432  | 2     | 2      | 2     | 2      |
| 16433  | 1     | 0      | 0     |        |
| 16434  | 0     |        | 0     |        |



| respid | Q22_1 | Q22a_1 | Q23_1 | Q23a_1 |
|--------|-------|--------|-------|--------|
| 16437  | 0     |        | 4     | 0      |
| 16439  | 0     |        | 0     |        |
| 16440  | 1     | 1      | 1     | 0      |
| 16441  | 0     |        | 0     |        |
| 16442  | 0     |        | 0     |        |
| 16450  | 1     | 0      | 0     |        |
| 16451  | 0     |        | 0     |        |
| 16452  | 1     | 1      | 1     | 1      |
| 16467  | 0     |        | 1     | 1      |
| 16468  | 0     |        | 0     |        |
| 16469  | 1     | 1      | 5     | 1      |
| 16470  | 0     |        | 0     |        |
| 16471  | 1     | 1      | 0     |        |
| 16473  | 0     |        | 0     |        |
| 16476  | 0     |        | 0     |        |
| 16478  | 0     |        | 0     |        |
| 16484  | 0     |        | 0     |        |
| 16499  | 0     |        | 0     |        |
| 16502  | 0     |        | 0     |        |
| 16505  | 0     |        | 0     |        |
| 16514  | 0     |        | 0     |        |
| 16515  | 1     | 2      | 1     | 2      |
| 16517  | 1     | 2      | 1     | 3      |
| 16518  | 0     |        | 0     |        |
| 16519  | 0     |        | 0     |        |
| 16525  | 1     | 1      | 1     | 2      |
| 16526  | 0     |        | 0     |        |
| 16530  | 0     |        | 0     |        |
| 16532  | 0     |        | 1     | 0      |
| 16536  | 0     |        | 0     |        |
| 16537  | 1     | 1      | 1     | 1      |
| 16541  | 2     | 2      | 3     | 1      |

| respid | Q22_1 | Q22a_1 | Q23_1 | Q23a_1 |
|--------|-------|--------|-------|--------|
| 16543  | 1     | 2      | 1     | 2      |
| 16544  | 0     |        | 0     |        |
| 16545  | 3     | 2      | 4     | 2      |
| 16546  | 3     | 2      | 0     |        |
| 16548  | 2     | 1      | 1     | 0      |
| 16552  | 0     |        | 0     |        |
| 16559  | 0     |        | 0     |        |
| 16564  | 5     | 4      | 0     |        |
| 16565  | 2     | 2      | 2     | 3      |
| 16567  | 1     | 1      | 1     | 1      |
| 16571  | 0     |        | 0     |        |
| 16572  | 1     | 2      | 0     |        |
| 16579  | 0     |        | 0     |        |
| 16588  | 3     | 4      | 4     | 3      |
| 16599  | 0     |        | 3     | 1      |
| 16605  | 1     | 0      | 0     |        |
| 16622  | 0     |        | 0     |        |
| 16635  | 0     |        | 0     |        |
| 16638  | 0     |        | 0     |        |
| 16652  | 0     |        | 0     |        |
| 16656  | 0     |        | 0     |        |
| 16671  | 0     |        | 0     |        |
| 16676  | 0     |        | 0     |        |
| 16678  | 1     | 1      | 1     | 1      |
| 16702  | 1     | 1      | 1     | 1      |
| 16705  | 1     | 0      | 4     | 1      |
| 16707  | 1     | 1      | 0     |        |
| 16711  | 1     | 1      | 1     | 1      |
| 16712  | 0     |        | 0     |        |
| 16716  | 0     |        | 0     |        |
| 16724  | 1     | 1      | 1     | 1      |
| 16727  | 1     | 1      | 1     | 1      |

| respid | Q22_1 | Q22a_1 | Q23_1 | Q23a_1 |
|--------|-------|--------|-------|--------|
| 16734  | 0     |        | 0     |        |
| 16740  | 0     |        | 0     |        |
| 16748  | 3     | 1      | 0     |        |
| 16759  | 0     |        | 0     |        |
| 16761  | 0     |        | 0     |        |
| 16763  | 0     |        | 1     | 0      |
| 16764  | 3     | 3      | 2     | 2      |
| 16766  | 0     |        | 0     |        |
| 16767  | 0     |        | 0     |        |
| 16776  | 1     | 0      | 0     |        |
| 16781  | 0     |        | 1     | 0      |
| 16793  | 2     | 2      | 2     | 2      |
| 16796  | 5     | 4      | 5     | 4      |
| 16810  | 0     |        | 0     |        |
| 16811  | 1     | 1      | 1     | 1      |
| 16813  | 0     |        | 0     |        |
| 16814  | 0     |        | 1     | 1      |
| 16831  | 1     | 1      | 1     | 1      |
| 16833  | 0     |        | 1     | 1      |
| 16839  | 1     | 1      | 3     | 0      |
| 16843  | 0     |        | 2     | 0      |
| 16860  | 0     |        | 0     |        |
| 16871  | 1     | 1      | 1     | 1      |
| 16881  | 1     | 3      | 2     | 2      |
| 16884  | 0     |        | 0     |        |
| 16891  | 3     | 2      | 1     | 1      |
| 16909  | 1     | 0      | 0     |        |
| 16911  | 0     |        | 0     |        |
| 16922  | 4     | 3      | 5     | 3      |
| 16935  | 1     | 2      | 3     | 2      |
| 16942  | 0     |        | 0     |        |
| 16950  | 0     |        | 0     |        |

| respid | Q22_1 | Q22a_1 | Q23_1 | Q23a_1 |
|--------|-------|--------|-------|--------|
| 16952  | 2     | 3      | 2     | 2      |
| 16963  | 0     |        | 0     |        |
| 16967  | 0     |        | 0     |        |
| 16970  | 2     | 2      | 1     | 1      |
| 16976  | 1     | 2      | 3     | 1      |
| 16982  | 1     | 1      | 3     | 2      |
| 16995  | 0     |        | 1     | 0      |
| 17004  | 1     | 1      | 1     | 1      |
| 17006  | 0     |        | 2     | 0      |
| 17009  | 0     |        | 5     | 3      |
| 17021  | 0     |        | 0     |        |
| 17040  | 2     | 2      | 1     | 1      |
| 17041  | 0     |        | 0     |        |
| 17044  | 3     | 2      | 3     | 2      |
| 17046  | 1     | 1      | 1     | 1      |
| 17052  | 1     | 1      | 1     | 1      |
| 17055  | 0     |        | 0     |        |
| 17108  | 0     |        | 0     |        |
| 17109  | 0     |        | 0     |        |
| 17113  | 0     |        | 0     |        |
| 17115  | 0     |        | 4     | 1      |
| 17132  | 0     |        | 0     |        |
| 17135  | 1     | 2      | 1     | 2      |
| 17138  | 2     | 1      | 0     |        |
| 17141  | 0     |        | 1     | 1      |
| 17143  | 5     | 0      | 0     |        |
| 17148  | 1     | 0      | 3     | 0      |
| 17151  | 1     | 1      | 1     | 1      |
| 17153  | 0     |        | 1     | 0      |
| 17154  | 0     |        | 4     | 3      |
| 17157  | 0     |        | 5     | 2      |
| 17160  | 0     |        | 0     |        |

| respid | Q22_1 | Q22a_1 | Q23_1 | Q23a_1 |
|--------|-------|--------|-------|--------|
| 17167  | 1     | 1      | 5     | 2      |
| 17169  | 1     | 0      | 3     | 1      |
| 17174  | 2     | 1      | 0     |        |
| 17179  | 0     |        | 0     |        |
| 17180  | 1     | 0      | 2     | 0      |
| 17182  | 0     |        | 0     |        |
| 17184  | 2     | 2      | 4     | 3      |
| 17186  | 1     | 0      | 1     | 0      |
| 17187  | 0     |        | 0     |        |
| 17192  | 1     | 1      | 5     | 3      |
| 17197  | 3     | 1      | 3     | 2      |
| 17217  | 0     |        | 0     |        |
| 17226  | 0     |        | 5     | 1      |
| 17228  | 0     |        | 0     |        |
| 17245  | 1     | 1      | 5     | 3      |
| 17247  | 0     |        | 0     |        |
| 17258  | 0     |        | 0     |        |
| 17259  | 2     | 1      | 2     | 0      |
| 17262  | 0     |        | 1     | 0      |
| 17265  | 0     |        | 1     | 1      |
| 17281  | 0     |        | 0     |        |
| 17282  | 1     | 2      | 1     | 3      |
| 17293  | 0     |        | 1     | 0      |
| 17306  | 1     | 2      | 1     | 2      |
| 17312  | 1     | 0      | 1     | 1      |
| 17318  | 1     | 1      | 1     | 1      |
| 17328  | 1     | 1      | 1     | 1      |
| 17343  | 1     | 1      | 1     | 1      |
| 17344  | 0     |        | 0     |        |
| 17348  | 1     | 1      | 1     | 0      |
| 17352  | 0     |        | 0     |        |
| 17355  | 0     |        | 0     |        |

| respid | Q22_1 | Q22a_1 | Q23_1 | Q23a_1 |
|--------|-------|--------|-------|--------|
| 17356  | 1     | 0      | 0     |        |
| 17359  | 0     |        | 0     |        |
| 17373  | 2     | 2      | 2     | 2      |
| 17381  | 0     |        | 0     |        |
| 17388  | 1     | 1      | 1     | 1      |
| 17394  | 3     | 2      | 1     | 1      |
| 17401  | 0     |        | 0     |        |
| 17403  | 1     | 0      | 2     | 0      |
| 17411  | 0     |        | 0     |        |
| 17423  | 0     |        | 0     |        |
| 17427  | 0     |        | 0     |        |
| 17433  | 0     |        | 0     |        |
| 17441  | 0     |        | 0     |        |
| 17442  | 2     | 2      | 3     | 1      |
| 17447  | 2     | 2      | 3     | 2      |
| 17458  | 0     |        | 0     |        |
| 17474  | 0     |        | 0     |        |
| 17475  | 2     | 2      | 2     | 2      |
| 17476  | 1     | 2      | 1     | 2      |
| 17480  | 0     |        | 0     |        |
| 17484  | 0     |        | 1     | 0      |
| 17490  | 0     |        | 0     |        |
| 17491  | 1     | 0      | 0     |        |
| 17500  | 0     |        | 0     |        |
| 17507  | 0     |        | 1     | 0      |
| 17517  | 0     |        | 1     | 0      |
| 17520  | 0     |        | 5     | 2      |
| 17521  | 0     |        | 0     |        |
| 17531  | 0     |        | 0     |        |
| 17540  | 0     |        | 0     |        |
| 17550  | 0     |        | 1     | 0      |
| 17551  | 0     |        | 0     |        |

| respid | Q22_1 | Q22a_1 | Q23_1 | Q23a_1 |
|--------|-------|--------|-------|--------|
| 17555  | 2     | 1      | 1     | 1      |
| 17556  | 1     | 1      | 1     | 0      |
| 17574  | 1     | 1      | 5     | 0      |
| 17575  | 1     | 1      | 0     |        |
| 17582  | 0     |        | 0     |        |
| 17587  | 0     |        | 0     |        |
| 17601  | 1     | 1      | 1     | 1      |
| 17607  | 3     | 2      | 3     | 2      |
| 17609  | 0     |        | 0     |        |
| 17611  | 0     |        | 0     |        |
| 17613  | 0     |        | 0     |        |
| 17615  | 0     |        | 0     |        |
| 17620  | 1     | 1      | 1     | 1      |
| 17624  | 1     | 1      | 2     | 2      |
| 17635  | 1     | 2      | 0     |        |
| 17643  | 1     | 1      | 0     |        |
| 17645  | 3     | 2      | 0     |        |
| 17646  | 0     |        | 0     |        |
| 17649  | 1     | 1      | 0     |        |
| 17658  | 0     |        | 1     | 0      |
| 17666  | 0     |        | 0     |        |
| 17670  | 0     |        | 0     |        |
| 17678  | 0     |        | 0     |        |
| 17679  | 0     |        | 0     |        |
| 17695  | 1     | 0      | 0     |        |
| 17697  | 5     | 2      | 3     | 0      |
| 17698  | 0     |        | 4     | 1      |
| 17723  | 2     | 2      | 1     | 2      |
| 17727  | 0     |        | 0     |        |
| 17734  | 0     |        | 0     |        |
| 17737  | 0     |        | 0     |        |
| 17748  | 1     | 0      | 1     | 1      |

| respid | Q22_1 | Q22a_1 | Q23_1 | Q23a_1 |
|--------|-------|--------|-------|--------|
| 17749  | 0     |        | 0     |        |
| 17754  | 3     | 2      | 2     | 1      |
| 17766  | 1     | 1      | 2     | 1      |
| 17777  | 0     |        | 0     |        |
| 17780  | 0     |        | 4     | 2      |
| 17788  | 0     |        | 1     | 0      |
| 17801  | 3     | 4      | 3     | 2      |
| 17803  | 0     |        | 0     |        |
| 17807  | 0     |        | 0     |        |
| 17808  | 0     |        | 0     |        |
| 17809  | 1     | 1      | 2     | 1      |
| 17821  | 0     |        | 0     |        |
| 17827  | 3     | 2      | 2     | 2      |
| 17834  | 3     | 2      | 3     | 2      |
| 17838  | 1     | 1      | 1     | 1      |
| 17842  | 0     |        | 0     |        |
| 17862  | 0     |        | 2     | 1      |
| 17863  | 0     |        | 0     |        |
| 17871  | 3     | 2      | 3     | 2      |
| 17872  | 0     |        | 1     | 0      |
| 17903  | 2     | 1      | 2     | 1      |
| 17906  | 0     |        | 2     | 1      |
| 17910  | 2     | 2      | 3     | 2      |
| 17922  | 0     |        | 1     | 1      |
| 17923  | 0     |        | 0     |        |
| 17925  | 3     | 2      | 3     | 2      |
| 17926  | 0     |        | 0     |        |
| 17937  | 0     |        | 0     |        |
| 17956  | 0     |        | 0     |        |
| 17958  | 2     | 2      | 3     | 2      |
| 17985  | 1     | 0      | 1     | 0      |
| 17989  | 3     | 2      | 0     |        |



| respid | Q22_1 | Q22a_1 | Q23_1 | Q23a_1 |
|--------|-------|--------|-------|--------|
| 17995  | 0     |        | 1     | 0      |
| 18000  | 0     |        | 0     |        |
| 18010  | 0     |        | 1     | 2      |
| 18015  | 0     |        | 0     |        |
| 18018  | 4     | 3      | 4     | 2      |
| 18031  | 0     |        | 0     |        |
| 18033  | 4     | 2      | 0     |        |
| 18036  | 0     |        | 0     |        |
| 18041  | 0     |        | 0     |        |
| 18068  | 0     |        | 0     |        |
| 18080  | 1     | 0      | 0     |        |
| 18081  | 1     | 1      | 1     | 1      |
| 18083  | 2     | 1      | 3     | 2      |
| 18113  | 3     | 2      | 3     | 2      |
| 18115  | 1     | 1      | 1     | 1      |
| 18117  | 5     | 4      | 4     | 3      |
| 18129  | 0     |        | 0     |        |
| 18132  | 3     | 2      | 4     | 2      |
| 18146  | 0     |        | 3     | 2      |
| 18147  | 4     | 4      | 3     | 3      |
| 18153  | 0     |        | 0     |        |
| 18154  | 1     | 2      | 0     |        |
| 18157  | 0     |        | 0     |        |
| 18166  | 0     |        | 1     | 1      |
| 18169  | 1     | 1      | 0     |        |
| 18171  | 1     | 1      | 1     | 0      |
| 18173  | 0     |        | 0     |        |
| 18204  | 0     |        | 0     |        |
| 18210  | 2     | 2      | 4     | 3      |
| 18212  | 0     |        | 0     |        |
| 18220  | 2     | 3      | 3     | 2      |
| 18221  | 0     |        | 0     |        |

| respid | Q22_1 | Q22a_1 | Q23_1 | Q23a_1 |
|--------|-------|--------|-------|--------|
| 18228  | 1     | 0      | 5     | 0      |
| 18231  | 0     |        | 0     |        |
| 18233  | 1     | 1      | 1     | 1      |
| 18235  | 1     | 0      | 0     |        |
| 18237  | 0     |        | 0     |        |
| 18250  | 0     |        | 0     |        |
| 18253  | 2     | 2      | 3     | 2      |
| 18264  | 0     |        | 0     |        |
| 18285  | 0     |        | 1     | 0      |
| 18287  | 0     |        | 0     |        |
| 18296  | 1     | 1      | 0     |        |
| 18299  | 0     |        | 5     | 1      |
| 18313  | 0     |        | 1     | 1      |
| 18321  | 1     | 2      | 0     |        |
| 18324  | 0     |        | 0     |        |
| 18329  | 0     |        | 0     |        |
| 18332  | 0     |        | 0     |        |
| 18339  | 3     | 3      | 2     | 2      |
| 18340  | 0     |        | 0     |        |
| 18348  | 0     |        | 0     |        |
| 18355  | 1     | 1      | 2     | 1      |
| 18360  | 1     | 0      | 1     | 0      |
| 18380  | 0     |        | 0     |        |
| 18403  | 3     | 2      | 3     | 2      |
| 18405  | 3     | 1      | 3     | 1      |
| 18409  | 0     |        | 0     |        |
| 18445  | 0     |        | 0     |        |
| 18458  | 0     |        | 0     |        |
| 18477  | 0     |        | 0     |        |
| 18481  | 0     |        | 0     |        |
| 18491  | 0     |        | 0     |        |
| 18492  | 0     |        | 0     |        |

| respid | Q22_1 | Q22a_1 | Q23_1 | Q23a_1 |
|--------|-------|--------|-------|--------|
| 18494  | 0     |        | 0     |        |
| 18495  | 0     |        | 0     |        |
| 18496  | 1     | 1      | 0     |        |
| 18507  | 2     | 2      | 2     | 1      |
| 18509  | 0     |        | 0     |        |
| 18510  | 1     | 1      | 0     |        |
| 18513  | 0     |        | 0     |        |
| 18525  | 0     |        | 0     |        |
| 18526  | 0     |        | 0     |        |
| 18527  | 3     | 2      | 4     | 3      |
| 18536  | 0     |        | 0     |        |
| 18540  | 1     | 0      | 0     |        |
| 18548  | 0     |        | 0     |        |
| 18550  | 0     |        | 0     |        |
| 18556  | 0     |        | 0     |        |
| 18561  | 0     |        | 0     |        |
| 18577  | 2     | 2      | 4     | 2      |
| 18580  | 0     |        | 0     |        |
| 18633  | 1     | 1      | 1     | 1      |
| 18635  | 0     |        | 1     | 1      |
| 18636  | 0     |        | 0     |        |
| 18645  | 3     | 3      | 3     | 3      |
| 18649  | 0     |        | 2     | 2      |
| 18664  | 0     |        | 0     |        |
| 18668  | 0     |        | 0     |        |
| 18682  | 5     | 4      | 5     | 4      |
| 18685  | 2     | 1      | 0     |        |
| 18688  | 2     | 1      | 1     | 1      |
| 18689  | 2     | 2      | 3     | 2      |
| 18693  | 3     | 2      | 2     | 3      |
| 18694  | 0     |        | 1     | 1      |
| 18705  | 0     |        | 0     |        |

| respid | Q22_1 | Q22a_1 | Q23_1 | Q23a_1 |
|--------|-------|--------|-------|--------|
| 18710  | 2     | 2      | 3     | 1      |
| 18715  | 1     | 2      | 2     | 2      |
| 18718  | 0     |        | 0     |        |
| 18727  | 1     | 1      | 0     |        |
| 18732  | 0     |        | 0     |        |
| 18735  | 0     |        | 0     |        |
| 18742  | 0     |        | 0     |        |
| 18745  | 0     |        | 0     |        |
| 18747  | 0     |        | 0     |        |
| 18750  | 0     |        | 0     |        |
| 18751  | 1     | 1      | 1     | 1      |
| 18753  | 0     |        | 0     |        |
| 18754  | 0     |        | 0     |        |
| 18759  | 0     |        | 0     |        |
| 18780  | 0     |        | 0     |        |
| 18782  | 0     |        | 0     |        |
| 18807  | 4     | 4      | 5     | 4      |
| 18815  | 0     |        | 0     |        |
| 18818  | 1     | 1      | 0     |        |
| 18820  | 0     |        | 0     |        |
| 18823  | 5     | 4      | 5     | 4      |
| 18825  | 1     | 0      | 0     |        |
| 18828  | 0     |        | 0     |        |
| 18832  | 1     | 1      | 0     |        |
| 18834  | 1     | 1      | 1     | 1      |
| 18835  | 3     | 3      | 3     | 3      |
| 18837  | 0     |        | 0     |        |
| 18842  | 0     |        | 0     |        |
| 18846  | 0     |        | 0     |        |
| 18855  | 0     |        | 0     |        |
| 18856  | 3     | 1      | 0     |        |
| 18887  | 0     |        | 1     | 1      |

| respid | Q22_1 | Q22a_1 | Q23_1 | Q23a_1 |
|--------|-------|--------|-------|--------|
| 18903  | 0     |        | 2     | 3      |
| 18906  | 2     | 2      | 0     |        |
| 18910  | 0     |        | 0     |        |
| 18919  | 1     | 0      | 1     | 0      |
| 18928  | 0     |        | 0     |        |
| 18931  | 0     |        | 4     | 0      |
| 18939  | 1     | 1      | 1     | 1      |
| 18946  | 0     |        | 0     |        |
| 18952  | 3     | 2      | 1     | 1      |
| 18954  | 0     |        | 0     |        |
| 18982  | 0     |        | 0     |        |
| 18986  | 0     |        | 0     |        |
| 18989  | 1     | 4      | 2     | 4      |
| 18990  | 0     |        | 1     | 0      |
| 18996  | 0     |        | 0     |        |
| 18998  | 0     |        | 0     |        |
| 19009  | 1     | 2      | 3     | 2      |
| 19010  | 0     |        | 0     |        |
| 19017  | 0     |        | 0     |        |
| 19018  | 0     |        | 0     |        |
| 19020  | 0     |        | 0     |        |
| 19027  | 2     | 2      | 0     |        |
| 19035  | 0     |        | 0     |        |
| 19037  | 3     | 2      | 0     |        |
| 19048  | 1     | 1      | 0     |        |
| 19051  | 0     |        | 0     |        |
| 19054  | 0     |        | 0     |        |
| 19057  | 0     |        | 0     |        |
| 19073  | 0     |        | 0     |        |
| 19075  | 0     |        | 0     |        |
| 19079  | 0     |        | 2     | 2      |
| 19087  | 0     |        | 0     |        |

| respid | Q22_1 | Q22a_1 | Q23_1 | Q23a_1 |
|--------|-------|--------|-------|--------|
| 19090  | 0     |        | 1     | 2      |
| 19093  | 1     | 1      | 0     |        |
| 19099  | 3     | 2      | 3     | 2      |
| 19100  | 2     | 2      | 0     |        |
| 19101  | 0     |        | 0     |        |
| 19105  | 0     |        | 0     |        |
| 19111  | 0     |        | 0     |        |
| 19112  | 0     |        | 0     |        |
| 19117  | 0     |        | 2     | 1      |
| 19122  | 0     |        | 0     |        |
| 19126  | 0     |        | 0     |        |
| 19127  | 0     |        | 0     |        |
| 19131  | 2     | 1      | 0     |        |
| 19134  | 0     |        | 0     |        |
| 19149  | 0     |        | 1     | 0      |
| 19151  | 0     |        | 0     |        |
| 19164  | 0     |        | 0     |        |
| 19166  | 0     |        | 1     | 0      |
| 19172  | 1     | 1      | 0     |        |
| 19173  | 1     | 2      | 1     | 2      |
| 19180  | 0     |        | 1     | 0      |
| 19185  | 0     |        | 1     | 0      |
| 19189  | 0     |        | 0     |        |
| 19191  | 0     |        | 0     |        |
| 19198  | 0     |        | 1     | 0      |
| 19203  | 0     |        | 0     |        |
| 19209  | 1     | 1      | 0     |        |
| 19210  | 0     |        | 0     |        |
| 19218  | 0     |        | 0     |        |
| 19220  | 0     |        | 0     |        |
| 19225  | 0     |        | 0     |        |
| 19227  | 0     |        | 0     |        |

| respid | Q22_1 | Q22a_1 | Q23_1 | Q23a_1 |
|--------|-------|--------|-------|--------|
| 19228  | 0     |        | 0     |        |
| 19243  | 1     | 1      | 0     |        |
| 19244  | 1     | 1      | 1     | 1      |
| 19246  | 0     |        | 0     |        |
| 19248  | 0     |        | 0     |        |
| 19249  | 1     | 0      | 0     |        |
| 19252  | 0     |        | 0     |        |
| 19255  | 0     |        | 0     |        |
| 19257  | 0     |        | 0     |        |
| 19274  | 0     |        | 0     |        |
| 19279  | 0     |        | 0     |        |
| 19291  | 0     |        | 0     |        |
| 19292  | 0     |        | 0     |        |
| 19308  | 2     | 1      | 2     | 1      |
| 19310  | 0     |        | 0     |        |
| 19311  | 0     |        | 0     |        |
| 19326  | 0     |        | 0     |        |
| 19327  | 0     |        | 0     |        |
| 19329  | 0     |        | 0     |        |
| 19330  | 3     | 2      | 3     | 2      |
| 19333  | 1     | 1      | 1     | 1      |
| 19336  | 0     |        | 0     |        |
| 19343  | 1     | 1      | 0     |        |
| 19348  | 1     | 1      | 0     |        |
| 19349  | 2     | 2      | 3     | 1      |
| 19352  | 2     | 2      | 4     | 2      |
| 19356  | 0     |        | 0     |        |
| 19357  | 2     | 2      | 0     |        |
| 19358  | 0     |        | 0     |        |
| 19367  | 0     |        | 0     |        |
| 19376  | 0     |        | 0     |        |
| 19377  | 0     |        | 0     |        |

| respid | Q22_1 | Q22a_1 | Q23_1 | Q23a_1 |
|--------|-------|--------|-------|--------|
| 19380  | 2     | 1      | 3     | 1      |
| 19384  | 0     |        | 0     |        |
| 19391  | 3     | 4      | 5     | 4      |
| 19397  | 0     |        | 0     |        |
| 19398  | 0     |        | 0     |        |
| 19401  | 0     |        | 0     |        |
| 19402  | 0     |        | 0     |        |
| 19403  | 0     |        | 0     |        |
| 19405  | 0     |        | 0     |        |
| 19407  | 0     |        | 1     | 1      |
| 19415  | 0     |        | 1     | 0      |
| 19420  | 0     |        | 0     |        |
| 19423  | 3     | 3      | 2     | 1      |
| 19424  | 0     |        | 0     |        |
| 19426  | 2     | 2      | 0     |        |
| 19429  | 0     |        | 0     |        |
| 19435  | 4     | 2      | 0     |        |
| 19441  | 1     | 1      | 0     |        |
| 19450  | 1     | 2      | 0     |        |
| 19456  | 3     | 3      | 2     | 3      |
| 19457  | 0     |        | 0     |        |
| 19463  | 0     |        | 0     |        |
| 19467  | 0     |        | 0     |        |
| 19468  | 0     |        | 1     | 0      |
| 19471  | 0     |        | 0     |        |
| 19473  | 0     |        | 3     | 0      |
| 19478  | 0     |        | 0     |        |
| 19480  | 0     |        | 0     |        |
| 19481  | 0     |        | 0     |        |
| 19484  | 0     |        | 0     |        |
| 19487  | 5     | 4      | 0     |        |
| 19491  | 3     | 3      | 2     | 1      |



| respid | Q22_1 | Q22a_1 | Q23_1 | Q23a_1 |
|--------|-------|--------|-------|--------|
| 19495  | 1     | 4      | 1     | 4      |
| 19498  | 1     | 1      | 0     |        |
| 19500  | 0     |        | 4     | 0      |
| 19501  | 2     | 2      | 3     | 2      |
| 19503  | 0     |        | 0     |        |
| 19506  | 0     |        | 0     |        |
| 19508  | 0     |        | 0     |        |
| 19509  | 1     | 2      | 0     |        |
| 19518  | 1     | 1      | 1     | 1      |
| 19520  | 0     |        | 1     | 1      |
| 19536  | 0     |        | 0     |        |
| 19538  | 1     | 3      | 0     |        |
| 19541  | 1     | 1      | 1     | 0      |
| 19548  | 3     | 2      | 0     |        |
| 19553  | 0     |        | 0     |        |
| 19556  | 0     |        | 0     |        |
| 19559  | 0     |        | 0     |        |
| 19561  | 1     | 1      | 5     | 2      |
| 19562  | 0     |        | 0     |        |
| 19564  | 0     |        | 1     | 1      |
| 19567  | 4     | 4      | 4     | 4      |
| 19571  | 2     | 2      | 1     | 1      |
| 19576  | 2     | 1      | 2     | 1      |
| 19578  | 0     |        | 1     | 0      |
| 19606  | 0     |        | 0     |        |
| 19607  | 0     |        | 0     |        |
| 19608  | 0     |        | 0     |        |
| 19612  | 2     | 2      | 2     | 3      |
| 19618  | 1     | 1      | 2     | 1      |
| 19621  | 0     |        | 1     | 1      |
| 19624  | 2     | 3      | 1     | 3      |
| 19630  | 0     |        | 0     |        |

| respid | Q22_1 | Q22a_1 | Q23_1 | Q23a_1 |
|--------|-------|--------|-------|--------|
| 19637  | 0     |        | 5     | 2      |
| 19639  | 0     |        | 0     |        |
| 19647  | 1     | 0      | 1     | 0      |
| 19648  | 2     | 3      | 2     | 4      |
| 19660  | 0     |        | 0     |        |
| 19662  | 3     | 4      | 1     | 1      |
| 19669  | 0     |        | 0     |        |
| 19680  | 0     |        | 0     |        |
| 19682  | 0     |        | 1     | 1      |
| 19686  | 0     |        | 0     |        |
| 19700  | 0     |        | 0     |        |
| 19701  | 0     |        | 0     |        |
| 19704  | 0     |        | 0     |        |
| 19706  | 1     | 0      | 0     |        |
| 19707  | 2     | 0      | 5     | 1      |
| 19717  | 3     | 2      | 2     | 2      |
| 19718  | 0     |        | 1     | 0      |
| 19721  | 1     | 1      | 1     | 1      |
| 19722  | 0     |        | 0     |        |
| 19729  | 0     |        | 0     |        |
| 19738  | 2     | 3      | 3     | 3      |
| 19741  | 1     | 1      | 2     | 1      |
| 19742  | 2     | 2      | 2     | 1      |
| 19747  | 0     |        | 1     | 0      |
| 19748  | 0     |        | 0     |        |
| 19749  | 0     |        | 0     |        |
| 19756  | 0     |        | 1     | 1      |
| 19771  | 0     |        | 0     |        |
| 19772  | 3     | 2      | 3     | 2      |
| 19775  | 0     |        | 0     |        |
| 19783  | 0     |        | 0     |        |
| 19787  | 0     |        | 0     |        |

| respid | Q22_1 | Q22a_1 | Q23_1 | Q23a_1 |
|--------|-------|--------|-------|--------|
| 19790  | 0     |        | 0     |        |
| 19797  | 3     | 1      | 0     |        |
| 19802  | 0     |        | 0     |        |
| 19808  | 0     |        | 0     |        |
| 19810  | 0     |        | 0     |        |
| 19811  | 0     |        | 0     |        |
| 19812  | 1     | 1      | 0     |        |
| 19821  | 1     | 1      | 2     | 2      |
| 19826  | 0     |        | 0     |        |
| 19827  | 0     |        | 0     |        |
| 19830  | 0     |        | 0     |        |
| 19834  | 0     |        | 0     |        |
| 19838  | 2     | 1      | 3     | 1      |
| 19843  | 0     |        | 0     |        |
| 19845  | 2     | 2      | 2     | 3      |
| 19846  | 0     |        | 0     |        |
| 19852  | 0     |        | 0     |        |
| 19855  | 0     |        | 0     |        |
| 19858  | 0     |        | 2     | 0      |
| 19861  | 2     | 3      | 2     | 2      |
| 19863  | 0     |        | 0     |        |
| 19868  | 2     | 1      | 3     | 1      |
| 19874  | 0     |        | 0     |        |
| 19876  | 0     |        | 0     |        |
| 19880  | 1     | 1      | 1     | 2      |
| 19885  | 0     |        | 0     |        |
| 19890  | 0     |        | 0     |        |
| 19894  | 0     |        | 0     |        |
| 19895  | 0     |        | 0     |        |
| 19897  | 1     | 1      | 0     |        |
| 19906  | 0     |        | 0     |        |
| 19908  | 0     |        | 0     |        |

| respid | Q22_1 | Q22a_1 | Q23_1 | Q23a_1 |
|--------|-------|--------|-------|--------|
| 19912  | 0     |        | 0     |        |
| 19913  | 0     |        | 0     |        |
| 19914  | 2     | 1      | 2     | 2      |
| 19918  | 1     | 1      | 2     | 2      |
| 19924  | 1     | 1      | 2     | 0      |
| 19936  | 0     |        | 0     |        |
| 19940  | 0     |        | 0     |        |
| 19945  | 1     | 1      | 1     | 1      |
| 19948  | 0     |        | 0     |        |
| 19959  | 0     |        | 0     |        |
| 19961  | 0     |        | 0     |        |
| 19962  | 0     |        | 4     | 1      |
| 19965  | 0     |        | 0     |        |
| 19966  | 1     | 1      | 1     | 1      |
| 19973  | 1     | 1      | 0     |        |
| 19981  | 1     | 1      | 2     | 1      |
| 19986  | 0     |        | 1     | 1      |
| 19989  | 0     |        | 0     |        |
| 19998  | 0     |        | 0     |        |
| 20001  | 0     |        | 0     |        |
| 20005  | 0     |        | 0     |        |
| 20013  | 4     | 3      | 4     | 3      |
| 20015  | 0     |        | 0     |        |
| 20017  | 4     | 3      | 0     |        |
| 20020  | 0     |        | 0     |        |
| 20021  | 0     |        | 0     |        |
| 20026  | 0     |        | 0     |        |
| 20028  | 0     |        | 0     |        |
| 20030  | 1     | 1      | 0     |        |
| 20031  | 0     |        | 0     |        |
| 20034  | 0     |        | 0     |        |
| 20035  | 0     |        | 0     |        |

| respid | Q22_1 | Q22a_1 | Q23_1 | Q23a_1 |
|--------|-------|--------|-------|--------|
| 20040  | 0     |        | 1     | 1      |
| 20045  | 0     |        | 0     |        |
| 20048  | 2     | 3      | 0     |        |
| 20053  | 0     |        | 0     |        |
| 20064  | 2     | 2      | 1     | 1      |
| 20071  | 2     | 1      | 0     |        |
| 20072  | 0     |        | 2     | 4      |
| 20076  | 0     |        | 0     |        |
| 20081  | 1     | 1      | 1     | 1      |
| 20082  | 1     | 2      | 2     | 2      |
| 20083  | 0     |        | 0     |        |
| 20088  | 1     | 0      | 0     |        |
| 20089  | 0     |        | 0     |        |
| 20099  | 0     |        | 4     | 0      |
| 20101  | 0     |        | 0     |        |
| 20102  | 0     |        | 0     |        |
| 20109  | 0     |        | 0     |        |
| 20118  | 0     |        | 1     | 0      |
| 20119  | 0     |        | 0     |        |
| 20124  | 0     |        | 0     |        |
| 20126  | 0     |        | 0     |        |
| 20130  | 0     |        | 0     |        |
| 20131  | 1     | 1      | 1     | 0      |
| 20134  | 2     | 2      | 2     | 1      |
| 20146  | 0     |        | 0     |        |
| 20152  | 0     |        | 0     |        |
| 20155  | 0     |        | 0     |        |
| 20156  | 0     |        | 0     |        |
| 20157  | 0     |        | 0     |        |
| 20164  | 0     |        | 0     |        |
| 20168  | 1     | 1      | 1     | 1      |
| 20173  | 1     | 2      | 3     | 2      |

| respid | Q22_1 | Q22a_1 | Q23_1 | Q23a_1 |
|--------|-------|--------|-------|--------|
| 20174  | 0     |        | 0     |        |
| 20175  | 3     | 3      | 3     | 4      |
| 20189  | 0     |        | 0     |        |
| 20190  | 0     |        | 0     |        |
| 20201  | 0     |        | 0     |        |
| 20202  | 0     |        | 0     |        |
| 20204  | 0     |        | 0     |        |
| 20206  | 1     | 1      | 1     | 1      |
| 20207  | 0     |        | 0     |        |
| 20212  | 0     |        | 1     | 1      |
| 20213  | 0     |        | 0     |        |
| 20217  | 0     |        | 0     |        |
| 20222  | 0     |        | 1     | 0      |
| 20227  | 0     |        | 0     |        |
| 20228  | 0     |        | 0     |        |
| 20238  | 0     |        | 0     |        |
| 20242  | 0     |        | 0     |        |
| 20246  | 0     |        | 0     |        |
| 20255  | 2     | 2      | 2     | 2      |
| 20256  | 0     |        | 3     | 2      |
| 20259  | 1     | 2      | 1     | 1      |
| 20262  | 0     |        | 0     |        |
| 20274  | 0     |        | 0     |        |
| 20283  | 2     | 2      | 2     | 2      |
| 20284  | 0     |        | 0     |        |
| 20291  | 0     |        | 0     |        |
| 20292  | 0     |        | 0     |        |
| 20293  | 0     |        | 0     |        |
| 20298  | 1     | 2      | 3     | 2      |
| 20301  | 0     |        | 0     |        |
| 20303  | 0     |        | 1     | 1      |
| 20309  | 0     |        | 0     |        |

| respid | Q22_1 | Q22a_1 | Q23_1 | Q23a_1 |
|--------|-------|--------|-------|--------|
| 20318  | 0     |        | 0     |        |
| 20324  | 0     |        | 0     |        |
| 20335  | 0     |        | 1     | 0      |
| 20336  | 0     |        | 0     |        |
| 20339  | 0     |        | 1     | 1      |
| 20348  | 1     | 1      | 0     |        |
| 20351  | 0     |        | 0     |        |
| 20353  | 0     |        | 0     |        |
| 20356  | 0     |        | 0     |        |
| 20357  | 0     |        | 0     |        |
| 20366  | 0     |        | 0     |        |
| 20369  | 3     | 4      | 4     | 3      |
| 20372  | 0     |        | 0     |        |
| 20375  | 0     |        | 0     |        |
| 20379  | 2     | 1      | 0     |        |
| 20380  | 0     |        | 0     |        |
| 20396  | 0     |        | 1     | 2      |
| 20398  | 0     |        | 0     |        |
| 20412  | 0     |        | 0     |        |
| 20415  | 0     |        | 0     |        |
| 20424  | 5     | 4      | 1     | 1      |
| 20434  | 0     |        | 0     |        |
| 20435  | 0     |        | 0     |        |
| 20440  | 0     |        | 1     | 0      |
| 20441  | 1     | 1      | 0     |        |
| 20445  | 0     |        | 0     |        |
| 20446  | 3     | 2      | 3     | 2      |
| 20450  | 0     |        | 0     |        |
| 20453  | 1     | 3      | 0     |        |
| 20458  | 0     |        | 1     | 1      |
| 20464  | 0     |        | 0     |        |
| 20471  | 0     |        | 0     |        |

| respid | Q22_1 | Q22a_1 | Q23_1 | Q23a_1 |
|--------|-------|--------|-------|--------|
| 20473  | 0     |        | 0     |        |
| 20474  | 0     |        | 0     |        |
| 20477  | 0     |        | 0     |        |
| 20479  | 1     | 4      | 0     |        |
| 20485  | 0     |        | 0     |        |
| 20487  | 0     |        | 0     |        |
| 20488  | 0     |        | 0     |        |
| 20494  | 1     | 1      | 3     | 2      |
| 20502  | 4     | 3      | 3     | 2      |
| 20503  | 0     |        | 0     |        |
| 20510  | 0     |        | 2     | 0      |
| 20512  | 0     |        | 0     |        |
| 20516  | 0     |        | 1     | 0      |
| 20522  | 2     | 2      | 0     |        |
| 20527  | 0     |        | 0     |        |
| 20529  | 1     | 1      | 1     | 1      |
| 20535  | 0     |        | 0     |        |
| 20543  | 0     |        | 0     |        |
| 20546  | 1     | 1      | 0     |        |
| 20548  | 0     |        | 0     |        |
| 20552  | 0     |        | 0     |        |
| 20556  | 0     |        | 1     | 1      |
| 20566  | 0     |        | 2     | 2      |
| 20576  | 1     | 1      | 1     | 1      |
| 20587  | 0     |        | 0     |        |
| 20589  | 0     |        | 0     |        |
| 20593  | 0     |        | 0     |        |
| 20594  | 0     |        | 0     |        |
| 20602  | 1     | 1      | 0     |        |
| 20607  | 0     |        | 0     |        |
| 20608  | 0     |        | 0     |        |
| 20611  | 0     |        | 0     |        |



| respid | Q22_1 | Q22a_1 | Q23_1 | Q23a_1 |
|--------|-------|--------|-------|--------|
| 20612  | 0     |        | 0     |        |
| 20615  | 0     |        | 0     |        |
| 20625  | 0     |        | 0     |        |
| 20630  | 1     | 1      | 0     |        |
| 20639  | 0     |        | 0     |        |
| 20643  | 0     |        | 1     | 0      |
| 20645  | 0     |        | 0     |        |
| 20647  | 1     | 1      | 0     |        |
| 20652  | 4     | 3      | 3     | 3      |
| 20661  | 0     |        | 0     |        |
| 20665  | 0     |        | 0     |        |
| 20679  | 0     |        | 0     |        |
| 20682  | 3     | 2      | 2     | 1      |
| 20683  | 0     |        | 0     |        |
| 20700  | 0     |        | 0     |        |
| 20702  | 3     | 3      | 0     |        |
| 20709  | 0     |        | 0     |        |
| 20715  | 3     | 3      | 4     | 2      |
| 20718  | 0     |        | 0     |        |
| 20722  | 0     |        | 0     |        |
| 20729  | 0     |        | 0     |        |
| 20732  | 0     |        | 0     |        |
| 20746  | 1     | 1      | 1     | 1      |
| 20747  | 0     |        | 0     |        |
| 20758  | 0     |        | 0     |        |
| 20767  | 1     | 2      | 0     |        |
| 20777  | 0     |        | 0     |        |
| 20778  | 0     |        | 0     |        |
| 20780  | 0     |        | 0     |        |
| 20800  | 1     | 1      | 0     |        |
| 20810  | 0     |        | 0     |        |
| 20814  | 1     | 1      | 0     |        |

| respid | Q22_1 | Q22a_1 | Q23_1 | Q23a_1 |
|--------|-------|--------|-------|--------|
| 20816  | 0     |        | 0     |        |
| 20832  | 0     |        | 0     |        |
| 20838  | 0     |        | 0     |        |
| 20841  | 3     | 2      | 2     | 1      |
| 20848  | 0     |        | 1     | 0      |
| 20850  | 0     |        | 0     |        |
| 20851  | 0     |        | 0     |        |
| 20861  | 0     |        | 0     |        |
| 20870  | 1     | 2      | 1     | 2      |
| 20880  | 0     |        | 0     |        |
| 20883  | 1     | 1      | 0     |        |
| 20894  | 0     |        | 0     |        |
| 20896  | 2     | 2      | 2     | 2      |
| 20901  | 4     | 3      | 3     | 3      |
| 20903  | 0     |        | 0     |        |
| 20909  | 0     |        | 0     |        |
| 20919  | 0     |        | 0     |        |
| 20925  | 0     |        | 0     |        |
| 20935  | 0     |        | 0     |        |
| 20939  | 1     | 1      | 0     |        |
| 20956  | 4     | 4      | 5     | 4      |
| 20970  | 0     |        | 0     |        |
| 20974  | 1     | 3      | 2     | 2      |
| 20975  | 0     |        | 0     |        |
| 20984  | 0     |        | 1     | 1      |
| 20988  | 0     |        | 0     |        |
| 20996  | 0     |        | 0     |        |
| 20998  | 1     | 1      | 0     |        |
| 21007  | 0     |        | 0     |        |
| 21008  | 0     |        | 0     |        |
| 21014  | 0     |        | 0     |        |
| 21020  | 0     |        | 0     |        |

| respid | Q22_1 | Q22a_1 | Q23_1 | Q23a_1 |
|--------|-------|--------|-------|--------|
| 21022  | 0     |        | 2     | 0      |
| 21024  | 0     |        | 0     |        |
| 21026  | 0     |        | 0     |        |
| 21027  | 0     |        | 0     |        |
| 21030  | 0     |        | 1     | 3      |
| 21032  | 3     | 2      | 3     | 3      |
| 21040  | 0     |        | 0     |        |
| 21045  | 0     |        | 0     |        |
| 21058  | 0     |        | 0     |        |
| 21064  | 0     |        | 0     |        |
| 21073  | 0     |        | 0     |        |
| 21086  | 0     |        | 0     |        |
| 21092  | 4     | 3      | 3     | 3      |
| 21096  | 3     | 2      | 3     | 3      |
| 21103  | 0     |        | 0     |        |
| 21120  | 2     | 2      | 2     | 1      |
| 21125  | 0     |        | 0     |        |
| 21126  | 0     |        | 0     |        |
| 21132  | 0     |        | 0     |        |
| 21139  | 3     | 2      | 2     | 2      |
| 21147  | 0     |        | 0     |        |
| 21148  | 0     |        | 1     | 0      |
| 21149  | 0     |        | 0     |        |
| 21164  | 1     | 1      | 0     |        |
| 21165  | 0     |        | 0     |        |
| 21171  | 2     | 2      | 2     | 2      |
| 21176  | 0     |        | 0     |        |
| 21187  | 3     | 2      | 0     |        |
| 21192  | 2     | 1      | 0     |        |
| 21198  | 0     |        | 0     |        |
| 21199  | 1     | 2      | 1     | 2      |
| 21206  | 2     | 1      | 1     | 1      |

| respid | Q22_1 | Q22a_1 | Q23_1 | Q23a_1 |
|--------|-------|--------|-------|--------|
| 21212  | 0     |        | 0     |        |
| 21216  | 0     |        | 0     |        |
| 21217  | 3     | 3      | 3     | 3      |
| 21228  | 2     | 2      | 1     | 2      |
| 21229  | 0     |        | 0     |        |
| 21230  | 0     |        | 0     |        |
| 21243  | 1     | 1      | 1     | 1      |
| 21247  | 1     | 0      | 0     |        |
| 21253  | 1     | 1      | 0     |        |
| 21264  | 4     | 1      | 2     | 2      |
| 21265  | 0     |        | 0     |        |
| 21273  | 2     | 1      | 2     | 2      |
| 21275  | 0     |        | 0     |        |
| 21278  | 0     |        | 0     |        |
| 21291  | 1     | 0      | 3     | 2      |
| 21298  | 0     |        | 0     |        |
| 21301  | 1     | 3      | 0     |        |
| 21312  | 4     | 3      | 3     | 2      |
| 21323  | 1     | 1      | 0     |        |
| 21325  | 1     | 1      | 1     | 1      |
| 21341  | 0     |        | 0     |        |
| 21349  | 3     | 3      | 2     | 1      |
| 21350  | 0     |        | 0     |        |
| 21354  | 0     |        | 3     | 1      |
| 21372  | 1     | 2      | 1     | 1      |
| 21373  | 1     | 1      | 1     | 1      |
| 21378  | 0     |        | 0     |        |
| 21393  | 0     |        | 0     |        |
| 21401  | 1     | 2      | 1     | 2      |
| 21405  | 0     |        | 0     |        |
| 21406  | 0     |        | 0     |        |
| 21407  | 0     |        | 0     |        |

| respid | Q22_1 | Q22a_1 | Q23_1 | Q23a_1 |
|--------|-------|--------|-------|--------|
| 21418  | 0     |        | 0     |        |
| 21420  | 0     |        | 0     |        |
| 21421  | 0     |        | 0     |        |
| 21446  | 0     |        | 0     |        |
| 21449  | 2     | 2      | 2     | 2      |
| 21452  | 2     | 2      | 0     |        |
| 21455  | 2     | 3      | 2     | 3      |
| 21469  | 0     |        | 0     |        |
| 21471  | 0     |        | 0     |        |
| 21472  | 0     |        | 0     |        |
| 21474  | 0     |        | 0     |        |
| 21479  | 0     |        | 3     | 0      |
| 21485  | 0     |        | 0     |        |
| 21512  | 0     |        | 0     |        |
| 21513  | 0     |        | 0     |        |
| 21514  | 2     | 2      | 2     | 2      |
| 21520  | 0     |        | 0     |        |
| 21539  | 0     |        | 1     | 1      |
| 21553  | 1     | 1      | 0     |        |
| 21560  | 1     | 1      | 0     |        |
| 21561  | 0     |        | 0     |        |
| 21563  | 0     |        | 0     |        |
| 21565  | 0     |        | 0     |        |
| 21582  | 1     | 1      | 0     |        |
| 21584  | 0     |        | 0     |        |
| 21585  | 2     | 2      | 0     |        |
| 21586  | 0     |        | 0     |        |
| 21587  | 2     | 2      | 1     | 1      |
| 21590  | 0     |        | 2     | 0      |
| 21601  | 2     | 1      | 2     | 1      |
| 21611  | 1     | 4      | 3     | 4      |
| 21612  | 0     |        | 0     |        |

| respid | Q22_1 | Q22a_1 | Q23_1 | Q23a_1 |
|--------|-------|--------|-------|--------|
| 21625  | 2     | 1      | 2     | 1      |
| 21633  | 0     |        | 0     |        |
| 21640  | 0     |        | 0     |        |
| 21647  | 0     |        | 0     |        |
| 21648  | 4     | 4      | 4     | 4      |
| 21656  | 0     |        | 0     |        |
| 21657  | 0     |        | 0     |        |
| 21658  | 2     | 3      | 2     | 2      |
| 21665  | 3     | 2      | 2     | 2      |
| 21666  | 3     | 1      | 1     | 1      |
| 21668  | 3     | 3      | 4     | 2      |
| 21673  | 0     |        | 0     |        |
| 21681  | 0     |        | 0     |        |
| 21682  | 3     | 1      | 0     |        |
| 21685  | 0     |        | 1     | 0      |
| 21692  | 0     |        | 0     |        |
| 21697  | 0     |        | 0     |        |
| 21711  | 0     |        | 0     |        |
| 21715  | 5     | 4      | 3     | 2      |
| 21726  | 0     |        | 0     |        |
| 21748  | 0     |        | 0     |        |
| 21761  | 0     |        | 0     |        |
| 21769  | 3     | 2      | 2     | 2      |
| 21774  | 2     | 1      | 2     | 1      |
| 21778  | 0     |        | 0     |        |
| 21785  | 0     |        | 0     |        |
| 21799  | 0     |        | 0     |        |
| 21820  | 5     | 3      | 4     | 3      |
| 21837  | 0     |        | 0     |        |
| 21845  | 3     | 3      | 2     | 2      |
| 21846  | 0     |        | 0     |        |
| 21849  | 0     |        | 0     |        |

| respid | Q22_1 | Q22a_1 | Q23_1 | Q23a_1 |
|--------|-------|--------|-------|--------|
| 21850  | 2     | 2      | 1     | 1      |
| 21855  | 0     |        | 0     |        |
| 21859  | 1     | 0      | 1     | 1      |
| 21861  | 0     |        | 1     | 1      |
| 21866  | 0     |        | 0     |        |
| 21873  | 0     |        | 0     |        |
| 21876  | 0     |        | 0     |        |
| 21882  | 0     |        | 0     |        |
| 21884  | 1     | 1      | 1     | 1      |
| 21887  | 1     | 1      | 2     | 1      |
| 21892  | 0     |        | 0     |        |
| 21907  | 1     | 1      | 0     |        |
| 21910  | 4     | 3      | 4     | 3      |
| 21912  | 2     | 1      | 3     | 1      |
| 21914  | 0     |        | 1     | 1      |
| 21925  | 0     |        | 0     |        |
| 21937  | 0     |        | 0     |        |
| 21938  | 3     | 2      | 1     | 1      |
| 21940  | 0     |        | 4     | 0      |
| 21942  | 0     |        | 0     |        |
| 21947  | 0     |        | 0     |        |
| 21948  | 0     |        | 0     |        |
| 21961  | 0     |        | 0     |        |
| 21977  | 2     | 2      | 2     | 2      |
| 21983  | 0     |        | 0     |        |
| 21986  | 1     | 2      | 2     | 2      |
| 21988  | 0     |        | 0     |        |
| 21996  | 0     |        | 0     |        |
| 21997  | 1     | 1      | 0     |        |
| 22005  | 0     |        | 0     |        |
| 22013  | 0     |        | 0     |        |
| 22018  | 0     |        | 0     |        |

| respid | Q22_1 | Q22a_1 | Q23_1 | Q23a_1 |
|--------|-------|--------|-------|--------|
| 22019  | 2     | 2      | 1     | 1      |
| 22071  | 0     |        | 0     |        |
| 22082  | 0     |        | 0     |        |
| 22085  | 0     |        | 1     | 0      |
| 22092  | 0     |        | 0     |        |
| 22097  | 1     | 0      | 0     |        |
| 22111  | 0     |        | 0     |        |
| 22118  | 0     |        | 0     |        |
| 22132  | 0     |        | 0     |        |
| 22133  | 0     |        | 0     |        |
| 22139  | 0     |        | 0     |        |
| 22142  | 4     | 3      | 4     | 3      |
| 22146  | 0     |        | 1     | 2      |
| 22181  | 0     |        | 0     |        |
| 22202  | 0     |        | 0     |        |
| 22214  | 0     |        | 0     |        |
| 22223  | 0     |        | 0     |        |
| 22227  | 2     | 2      | 2     | 1      |
| 22229  | 0     |        | 0     |        |
| 22239  | 0     |        | 2     | 3      |
| 22245  | 4     | 3      | 4     | 3      |
| 22256  | 0     |        | 0     |        |
| 22260  | 0     |        | 0     |        |
| 22298  | 1     | 1      | 1     | 1      |
| 22321  | 0     |        | 0     |        |
| 22340  | 0     |        | 0     |        |
| 22346  | 3     | 3      | 2     | 2      |
| 22356  | 0     |        | 0     |        |
| 22361  | 2     | 2      | 3     | 2      |
| 22364  | 1     | 0      | 0     |        |
| 22368  | 0     |        | 0     |        |
| 22374  | 2     | 2      | 0     |        |



| respid | Q22_1 | Q22a_1 | Q23_1 | Q23a_1 |
|--------|-------|--------|-------|--------|
| 22375  | 0     |        | 0     |        |
| 22377  | 0     |        | 2     | 0      |
| 22383  | 0     |        | 0     |        |
| 22387  | 2     | 2      | 3     | 2      |
| 22392  | 0     |        | 0     |        |
| 22393  | 1     | 1      | 1     | 1      |
| 22394  | 0     |        | 0     |        |
| 22395  | 0     |        | 0     |        |
| 22401  | 0     |        | 0     |        |
| 22407  | 0     |        | 0     |        |
| 22410  | 0     |        | 0     |        |
| 22418  | 0     |        | 0     |        |
| 22421  | 0     |        | 0     |        |
| 22423  | 0     |        | 0     |        |
| 22425  | 0     |        | 0     |        |
| 22427  | 0     |        | 0     |        |
| 22431  | 2     | 3      | 3     | 4      |
| 22435  | 1     | 1      | 0     |        |
| 22436  | 0     |        | 0     |        |
| 22442  | 0     |        | 0     |        |
| 22444  | 2     | 3      | 3     | 2      |
| 22445  | 2     | 1      | 1     | 1      |
| 22446  | 0     |        | 0     |        |
| 22448  | 1     | 3      | 1     | 3      |
| 22449  | 0     |        | 0     |        |
| 22450  | 1     | 1      | 0     |        |
| 22453  | 2     | 2      | 2     | 1      |
| 22465  | 1     | 1      | 1     | 1      |
| 22472  | 0     |        | 1     | 0      |
| 22475  | 1     | 2      | 0     |        |
| 22478  | 1     | 1      | 2     | 1      |
| 22491  | 0     |        | 0     |        |

| respid | Q22_1 | Q22a_1 | Q23_1 | Q23a_1 |
|--------|-------|--------|-------|--------|
| 22497  | 2     | 1      | 2     | 1      |
| 22498  | 2     | 2      | 2     | 1      |
| 22499  | 0     |        | 0     |        |
| 22503  | 0     |        | 0     |        |
| 22507  | 0     |        | 0     |        |
| 22513  | 1     | 3      | 2     | 2      |
| 22517  | 1     | 0      | 0     |        |
| 22524  | 2     | 2      | 0     |        |
| 22528  | 0     |        | 0     |        |
| 22544  | 1     | 1      | 0     |        |
| 22571  | 0     |        | 0     |        |
| 22576  | 0     |        | 0     |        |
| 22579  | 1     | 2      | 0     |        |
| 22583  | 1     | 1      | 1     | 1      |
| 22591  | 3     | 2      | 3     | 3      |
| 22592  | 0     |        | 0     |        |
| 22612  | 0     |        | 0     |        |
| 22613  | 1     | 2      | 2     | 1      |
| 22615  | 0     |        | 0     |        |
| 22621  | 0     |        | 1     | 0      |
| 22625  | 0     |        | 0     |        |
| 22628  | 1     | 1      | 1     | 1      |
| 22632  | 0     |        | 0     |        |
| 22639  | 0     |        | 0     |        |
| 22648  | 4     | 3      | 4     | 3      |
| 22649  | 4     | 4      | 0     |        |
| 22655  | 0     |        | 0     |        |
| 22659  | 0     |        | 0     |        |
| 22660  | 0     |        | 0     |        |
| 22666  | 0     |        | 0     |        |
| 22667  | 0     |        | 0     |        |
| 22670  | 0     |        | 0     |        |

| respid | Q22_1 | Q22a_1 | Q23_1 | Q23a_1 |
|--------|-------|--------|-------|--------|
| 22681  | 0     |        | 0     |        |
| 22683  | 0     |        | 0     |        |
| 22688  | 0     |        | 0     |        |
| 22695  | 1     | 1      | 0     |        |
| 22696  | 0     |        | 0     |        |
| 22705  | 3     | 2      | 2     | 2      |
| 22718  | 3     | 3      | 2     | 1      |
| 22720  | 5     | 2      | 0     |        |
| 22724  | 0     |        | 0     |        |
| 22728  | 0     |        | 0     |        |
| 22751  | 0     |        | 0     |        |
| 22782  | 3     | 4      | 3     | 3      |
| 22786  | 0     |        | 0     |        |
| 22788  | 0     |        | 1     | 1      |
| 22810  | 1     | 1      | 1     | 1      |
| 22816  | 0     |        | 0     |        |
| 22818  | 0     |        | 0     |        |
| 22854  | 0     |        | 0     |        |
| 22858  | 0     |        | 0     |        |
| 22862  | 0     |        | 0     |        |
| 22865  | 0     |        | 0     |        |
| 22868  | 0     |        | 0     |        |
| 22869  | 1     | 1      | 3     | 2      |
| 22873  | 0     |        | 0     |        |
| 22875  | 0     |        | 0     |        |
| 22876  | 0     |        | 0     |        |
| 22882  | 0     |        | 1     | 0      |
| 22884  | 4     | 3      | 1     | 1      |
| 22887  | 0     |        | 1     | 1      |
| 22888  | 0     |        | 0     |        |
| 22900  | 0     |        | 0     |        |
| 22901  | 0     |        | 0     |        |

| respid | Q22_1 | Q22a_1 | Q23_1 | Q23a_1 |
|--------|-------|--------|-------|--------|
| 22912  | 1     | 0      | 0     |        |
| 22913  | 2     | 1      | 0     |        |
| 22921  | 0     |        | 0     |        |
| 22925  | 0     |        | 0     |        |
| 22940  | 0     |        | 0     |        |
| 22941  | 0     |        | 0     |        |
| 22947  | 2     | 2      | 3     | 2      |
| 22948  | 0     |        | 0     |        |
| 22964  | 1     | 2      | 1     | 1      |
| 22966  | 1     | 1      | 1     | 0      |
| 22969  | 0     |        | 0     |        |
| 22971  | 0     |        | 0     |        |
| 22988  | 0     |        | 0     |        |
| 22990  | 0     |        | 0     |        |
| 23000  | 0     |        | 0     |        |
| 23016  | 0     |        | 0     |        |
| 23026  | 0     |        | 1     | 0      |
| 23035  | 0     |        | 0     |        |
| 23037  | 3     | 3      | 1     | 2      |
| 23044  | 1     | 0      | 0     |        |
| 23046  | 0     |        | 0     |        |
| 23047  | 0     |        | 0     |        |
| 23049  | 3     | 0      | 0     |        |
| 23055  | 0     |        | 0     |        |
| 23066  | 0     |        | 0     |        |
| 23075  | 0     |        | 0     |        |
| 23081  | 0     |        | 2     | 0      |
| 23087  | 0     |        | 0     |        |
| 23094  | 0     |        | 0     |        |
| 23099  | 0     |        | 0     |        |
| 23101  | 0     |        | 0     |        |
| 23105  | 0     |        | 0     |        |

| respid | Q22_1 | Q22a_1 | Q23_1 | Q23a_1 |
|--------|-------|--------|-------|--------|
| 23115  | 3     | 2      | 2     | 2      |
| 23121  | 0     |        | 0     |        |
| 23127  | 0     |        | 0     |        |
| 23131  | 0     |        | 0     |        |
| 23134  | 0     |        | 0     |        |
| 23145  | 0     |        | 0     |        |
| 23151  | 0     |        | 0     |        |
| 23161  | 0     |        | 0     |        |
| 23169  | 1     | 1      | 1     | 1      |
| 23173  | 0     |        | 0     |        |
| 23174  | 1     | 0      | 1     | 0      |
| 23186  | 4     | 4      | 2     | 2      |
| 23195  | 0     |        | 0     |        |
| 23197  | 0     |        | 0     |        |
| 23198  | 0     |        | 0     |        |
| 23203  | 0     |        | 0     |        |
| 23204  | 2     | 2      | 1     | 0      |
| 23212  | 0     |        | 0     |        |
| 23214  | 0     |        | 1     | 0      |
| 23221  | 0     |        | 0     |        |
| 23237  | 0     |        | 0     |        |
| 23251  | 0     |        | 0     |        |
| 23254  | 0     |        | 0     |        |
| 23262  | 1     | 2      | 0     |        |
| 23267  | 0     |        | 0     |        |
| 23268  | 0     |        | 1     | 2      |
| 23273  | 0     |        | 0     |        |
| 23278  | 0     |        | 0     |        |
| 23279  | 0     |        | 0     |        |
| 23281  | 2     | 1      | 3     | 2      |
| 23282  | 3     | 2      | 2     | 2      |
| 23283  | 1     | 1      | 0     |        |

| respid | Q22_1 | Q22a_1 | Q23_1 | Q23a_1 |
|--------|-------|--------|-------|--------|
| 23285  | 0     |        | 0     |        |
| 23305  | 0     |        | 0     |        |
| 23309  | 0     |        | 0     |        |
| 23310  | 0     |        | 1     | 0      |
| 23311  | 0     |        | 0     |        |
| 23312  | 1     | 2      | 1     | 1      |
| 23319  | 0     |        | 4     | 0      |
| 23320  | 0     |        | 0     |        |
| 23322  | 0     |        | 0     |        |
| 23334  | 0     |        | 0     |        |
| 23340  | 0     |        | 0     |        |
| 23346  | 0     |        | 0     |        |
| 23353  | 0     |        | 1     | 0      |
| 23363  | 3     | 2      | 3     | 2      |
| 23364  | 3     | 2      | 3     | 3      |
| 23376  | 0     |        | 0     |        |
| 23378  | 0     |        | 0     |        |
| 23382  | 0     |        | 0     |        |
| 23383  | 0     |        | 0     |        |
| 23390  | 0     |        | 0     |        |
| 23395  | 0     |        | 0     |        |
| 23398  | 1     | 1      | 1     | 0      |
| 23399  | 0     |        | 0     |        |
| 23406  | 0     |        | 0     |        |
| 23418  | 0     |        | 0     |        |
| 23427  | 0     |        | 0     |        |
| 23428  | 0     |        | 0     |        |
| 23435  | 2     | 1      | 1     | 1      |
| 23439  | 0     |        | 0     |        |
| 23440  | 0     |        | 0     |        |
| 23444  | 0     |        | 2     | 0      |
| 23445  | 0     |        | 1     | 0      |

| respid | Q22_1 | Q22a_1 | Q23_1 | Q23a_1 |
|--------|-------|--------|-------|--------|
| 23455  | 0     |        | 0     |        |
| 23467  | 0     |        | 0     |        |
| 23478  | 0     |        | 1     | 1      |
| 23492  | 0     |        | 0     |        |
| 23498  | 0     |        | 0     |        |
| 23511  | 0     |        | 0     |        |
| 23514  | 0     |        | 0     |        |
| 23515  | 3     | 2      | 2     | 1      |
| 23522  | 0     |        | 0     |        |
| 23524  | 0     |        | 0     |        |
| 23531  | 0     |        | 5     | 3      |
| 23532  | 0     |        | 0     |        |
| 23533  | 0     |        | 0     |        |
| 23534  | 0     |        | 0     |        |
| 23538  | 0     |        | 0     |        |
| 23539  | 1     | 2      | 3     | 2      |
| 23548  | 0     |        | 0     |        |
| 23553  | 0     |        | 0     |        |
| 23556  | 0     |        | 0     |        |
| 23563  | 1     | 1      | 2     | 1      |
| 23572  | 1     | 1      | 1     | 0      |
| 23575  | 0     |        | 0     |        |
| 23576  | 0     |        | 0     |        |
| 23577  | 0     |        | 0     |        |
| 23578  | 1     | 1      | 0     |        |
| 23587  | 1     | 1      | 0     |        |
| 23597  | 0     |        | 0     |        |
| 23598  | 0     |        | 1     | 1      |
| 23604  | 0     |        | 0     |        |
| 23617  | 0     |        | 0     |        |
| 23620  | 0     |        | 2     | 1      |
| 23621  | 0     |        | 0     |        |

| respid | Q22_1 | Q22a_1 | Q23_1 | Q23a_1 |
|--------|-------|--------|-------|--------|
| 23625  | 0     |        | 2     | 1      |
| 23629  | 0     |        | 0     |        |
| 23635  | 0     |        | 0     |        |
| 23636  | 0     |        | 0     |        |
| 23637  | 4     | 2      | 4     | 2      |
| 23638  | 0     |        | 0     |        |
| 23644  | 0     |        | 0     |        |
| 23645  | 1     | 2      | 1     | 1      |
| 23649  | 0     |        | 0     |        |
| 23654  | 0     |        | 0     |        |
| 23662  | 0     |        | 0     |        |
| 23664  | 1     | 0      | 0     |        |
| 23665  | 0     |        | 0     |        |
| 23666  | 0     |        | 0     |        |
| 23671  | 0     |        | 0     |        |
| 23672  | 0     |        | 2     | 1      |
| 23685  | 0     |        | 0     |        |
| 23686  | 3     | 2      | 3     | 0      |
| 23689  | 3     | 3      | 3     | 2      |
| 23690  | 2     | 1      | 2     | 1      |
| 23695  | 0     |        | 0     |        |
| 23700  | 0     |        | 0     |        |
| 23714  | 0     |        | 0     |        |
| 23719  | 1     | 2      | 1     | 1      |
| 23720  | 0     |        | 0     |        |
| 23721  | 0     |        | 0     |        |
| 23729  | 0     |        | 0     |        |
| 23730  | 0     |        | 0     |        |
| 23732  | 0     |        | 0     |        |
| 23736  | 0     |        | 0     |        |
| 23754  | 0     |        | 0     |        |
| 23756  | 0     |        | 0     |        |



| respid | Q22_1 | Q22a_1 | Q23_1 | Q23a_1 |
|--------|-------|--------|-------|--------|
| 23759  | 1     | 1      | 0     |        |
| 23761  | 1     | 1      | 0     |        |
| 23766  | 0     |        | 0     |        |
| 23768  | 4     | 3      | 2     | 3      |
| 23773  | 1     | 0      | 0     |        |
| 23781  | 0     |        | 0     |        |
| 23782  | 2     | 1      | 3     | 2      |
| 23787  | 1     | 1      | 1     | 1      |
| 23788  | 5     | 3      | 3     | 2      |
| 23790  | 0     |        | 0     |        |
| 23794  | 0     |        | 2     | 2      |
| 23795  | 1     | 2      | 1     | 2      |
| 23801  | 0     |        | 0     |        |
| 23806  | 0     |        | 0     |        |
| 23809  | 1     | 2      | 1     | 2      |
| 23813  | 0     |        | 0     |        |
| 23815  | 0     |        | 0     |        |
| 23821  | 0     |        | 0     |        |
| 23825  | 0     |        | 0     |        |
| 23826  | 0     |        | 0     |        |
| 23830  | 0     |        | 0     |        |
| 23833  | 0     |        | 0     |        |
| 23837  | 0     |        | 0     |        |
| 23848  | 5     | 4      | 5     | 4      |
| 23850  | 0     |        | 0     |        |
| 23870  | 0     |        | 0     |        |
| 23877  | 0     |        | 0     |        |
| 23880  | 0     |        | 0     |        |
| 23882  | 0     |        | 0     |        |
| 23888  | 0     |        | 0     |        |
| 23908  | 1     | 1      | 0     |        |
| 23914  | 1     | 0      | 0     |        |

| respid | Q22_1 | Q22a_1 | Q23_1 | Q23a_1 |
|--------|-------|--------|-------|--------|
| 23916  | 1     | 1      | 0     |        |
| 23922  | 1     | 1      | 0     |        |
| 23932  | 0     |        | 0     |        |
| 23934  | 0     |        | 0     |        |
| 23942  | 2     | 2      | 0     |        |
| 23945  | 0     |        | 0     |        |
| 23948  | 0     |        | 0     |        |
| 23955  | 0     |        | 0     |        |
| 23956  | 0     |        | 0     |        |
| 23978  | 0     |        | 3     | 2      |
| 23981  | 0     |        | 0     |        |
| 23982  | 3     | 2      | 2     | 2      |
| 23991  | 0     |        | 0     |        |
| 23994  | 0     |        | 0     |        |
| 23995  | 1     | 0      | 0     |        |
| 23999  | 1     | 1      | 0     |        |
| 24005  | 5     | 4      | 1     | 2      |
| 24018  | 0     |        | 0     |        |
| 24021  | 0     |        | 0     |        |
| 24035  | 0     |        | 0     |        |
| 24040  | 0     |        | 1     | 0      |
| 24043  | 0     |        | 0     |        |
| 24046  | 2     | 2      | 2     | 1      |
| 24047  | 0     |        | 0     |        |
| 24048  | 0     |        | 0     |        |
| 24062  | 1     | 1      | 1     | 1      |
| 24063  | 1     | 2      | 0     |        |
| 24066  | 0     |        | 0     |        |
| 24069  | 0     |        | 0     |        |
| 24070  | 0     |        | 0     |        |
| 24074  | 0     |        | 0     |        |
| 24080  | 0     |        | 0     |        |

| respid | Q22_1 | Q22a_1 | Q23_1 | Q23a_1 |
|--------|-------|--------|-------|--------|
| 24082  | 0     |        | 0     |        |
| 24088  | 0     |        | 0     |        |
| 24089  | 0     |        | 0     |        |
| 24091  | 0     |        | 0     |        |
| 24095  | 0     |        | 0     |        |
| 24100  | 1     | 1      | 0     |        |
| 24105  | 2     | 3      | 3     | 2      |
| 24107  | 3     | 2      | 0     |        |
| 24108  | 0     |        | 0     |        |
| 24113  | 1     | 0      | 1     | 0      |
| 24120  | 0     |        | 0     |        |
| 24122  | 3     | 2      | 2     | 0      |
| 24123  | 1     | 1      | 1     | 0      |
| 24125  | 0     |        | 1     | 1      |
| 24132  | 0     |        | 0     |        |
| 24139  | 0     |        | 1     | 1      |
| 24140  | 0     |        | 1     | 0      |
| 24143  | 0     |        | 1     | 2      |
| 24150  | 2     | 2      | 0     |        |
| 24153  | 0     |        | 0     |        |
| 24161  | 0     |        | 0     |        |
| 24168  | 4     | 2      | 2     | 2      |
| 24179  | 0     |        | 0     |        |
| 24182  | 2     | 1      | 1     | 1      |
| 24194  | 0     |        | 0     |        |
| 24206  | 0     |        | 0     |        |
| 24214  | 0     |        | 0     |        |
| 24215  | 0     |        | 0     |        |
| 24224  | 0     |        | 0     |        |
| 24225  | 0     |        | 1     | 1      |
| 24227  | 0     |        | 0     |        |
| 24229  | 0     |        | 0     |        |

| respid | Q22_1 | Q22a_1 | Q23_1 | Q23a_1 |
|--------|-------|--------|-------|--------|
| 24230  | 0     |        | 0     |        |
| 24232  | 2     | 2      | 3     | 2      |
| 24253  | 1     | 1      | 0     |        |
| 24267  | 0     |        | 0     |        |
| 24274  | 0     |        | 0     |        |
| 24275  | 0     |        | 0     |        |
| 24277  | 0     |        | 0     |        |
| 24280  | 2     | 0      | 5     | 3      |
| 24285  | 0     |        | 0     |        |
| 24293  | 0     |        | 0     |        |
| 24295  | 0     |        | 0     |        |
| 24299  | 0     |        | 0     |        |
| 24303  | 0     |        | 0     |        |
| 24308  | 0     |        | 1     | 1      |
| 24322  | 0     |        | 0     |        |
| 24325  | 0     |        | 0     |        |
| 24328  | 0     |        | 0     |        |
| 24334  | 0     |        | 0     |        |
| 24342  | 0     |        | 0     |        |
| 24343  | 3     | 3      | 3     | 2      |
| 24348  | 2     | 3      | 2     | 4      |
| 24352  | 3     | 2      | 3     | 2      |
| 24354  | 1     | 1      | 1     | 1      |
| 24357  | 0     |        | 0     |        |
| 24360  | 1     | 1      | 0     |        |
| 24369  | 0     |        | 0     |        |
| 24373  | 1     | 2      | 0     |        |
| 24398  | 4     | 4      | 3     | 3      |
| 24402  | 0     |        | 0     |        |
| 24405  | 0     |        | 0     |        |
| 24407  | 1     | 0      | 0     |        |
| 24413  | 0     |        | 0     |        |

| respid | Q22_1 | Q22a_1 | Q23_1 | Q23a_1 |
|--------|-------|--------|-------|--------|
| 24443  | 3     | 2      | 2     | 1      |
| 24451  | 0     |        | 0     |        |
| 24459  | 3     | 4      | 3     | 3      |
| 24465  | 0     |        | 0     |        |
| 24481  | 0     |        | 0     |        |
| 24482  | 0     |        | 0     |        |
| 24491  | 1     | 1      | 0     |        |
| 24495  | 0     |        | 0     |        |
| 24497  | 2     | 2      | 2     | 2      |
| 24511  | 0     |        | 0     |        |
| 24513  | 0     |        | 0     |        |
| 24516  | 2     | 2      | 2     | 2      |
| 24518  | 1     | 1      | 0     |        |
| 24524  | 0     |        | 0     |        |
| 24528  | 0     |        | 0     |        |
| 24531  | 3     | 3      | 3     | 3      |
| 24533  | 4     | 3      | 3     | 2      |
| 24547  | 0     |        | 0     |        |
| 24557  | 3     | 2      | 4     | 3      |
| 24559  | 5     | 4      | 0     |        |
| 24567  | 0     |        | 0     |        |
| 24568  | 0     |        | 0     |        |
| 24577  | 0     |        | 0     |        |
| 24581  | 0     |        | 0     |        |
| 24588  | 0     |        | 1     | 0      |
| 24604  | 2     | 4      | 2     | 3      |
| 24612  | 2     | 1      | 2     | 1      |
| 24621  | 3     | 4      | 0     |        |
| 24625  | 0     |        | 0     |        |
| 24627  | 0     |        | 0     |        |
| 24640  | 0     |        | 0     |        |
| 24644  | 0     |        | 0     |        |

| respid | Q22_1 | Q22a_1 | Q23_1 | Q23a_1 |
|--------|-------|--------|-------|--------|
| 24664  | 1     | 1      | 0     |        |
| 24669  | 0     |        | 0     |        |
| 24685  | 0     |        | 0     |        |
| 24687  | 2     | 1      | 2     | 1      |
| 24688  | 1     | 1      | 1     | 1      |
| 24691  | 3     | 2      | 4     | 3      |
| 24693  | 0     |        | 0     |        |
| 24706  | 0     |        | 0     |        |
| 24710  | 0     |        | 0     |        |
| 24717  | 0     |        | 0     |        |
| 24720  | 0     |        | 0     |        |
| 24731  | 1     | 1      | 0     |        |
| 24732  | 0     |        | 1     | 2      |
| 24733  | 0     |        | 0     |        |
| 24747  | 0     |        | 0     |        |
| 24750  | 0     |        | 2     | 3      |
| 24758  | 0     |        | 0     |        |
| 24760  | 0     |        | 0     |        |
| 24765  | 0     |        | 0     |        |
| 24772  | 0     |        | 0     |        |
| 24779  | 3     | 2      | 3     | 2      |
| 24794  | 0     |        | 0     |        |
| 24796  | 2     | 2      | 0     |        |
| 24797  | 0     |        | 0     |        |
| 24800  | 0     |        | 0     |        |
| 24813  | 3     | 3      | 2     | 2      |
| 24815  | 1     | 1      | 0     |        |
| 24821  | 0     |        | 0     |        |
| 24822  | 0     |        | 0     |        |
| 24831  | 0     |        | 0     |        |
| 24835  | 0     |        | 0     |        |
| 24843  | 2     | 2      | 2     | 3      |

| respid | Q22_1 | Q22a_1 | Q23_1 | Q23a_1 |
|--------|-------|--------|-------|--------|
| 24844  | 3     | 2      | 3     | 1      |
| 24860  | 0     |        | 0     |        |
| 24861  | 2     | 1      | 0     |        |
| 24865  | 3     | 2      | 3     | 2      |
| 24870  | 1     | 1      | 1     | 1      |
| 24887  | 0     |        | 0     |        |
| 24897  | 2     | 3      | 0     |        |
| 24902  | 2     | 1      | 0     |        |
| 24914  | 0     |        | 0     |        |
| 24921  | 0     |        | 0     |        |
| 24922  | 0     |        | 0     |        |
| 24924  | 0     |        | 0     |        |
| 24927  | 0     |        | 0     |        |
| 24936  | 0     |        | 0     |        |
| 24937  | 0     |        | 1     | 2      |
| 24942  | 1     | 1      | 2     | 2      |
| 24947  | 0     |        | 0     |        |
| 24953  | 0     |        | 0     |        |
| 24954  | 1     | 1      | 1     | 1      |
| 24960  | 4     | 3      | 5     | 3      |
| 24965  | 0     |        | 0     |        |
| 24975  | 0     |        | 0     |        |
| 24983  | 4     | 3      | 3     | 2      |
| 24985  | 0     |        | 0     |        |
| 24990  | 0     |        | 0     |        |
| 25000  | 0     |        | 0     |        |
| 25007  | 2     | 1      | 1     | 0      |
| 25008  | 0     |        | 0     |        |
| 25010  | 0     |        | 0     |        |
| 25016  | 1     | 1      | 1     | 1      |
| 25021  | 0     |        | 0     |        |
| 25040  | 0     |        | 0     |        |

| respid | Q22_1 | Q22a_1 | Q23_1 | Q23a_1 |
|--------|-------|--------|-------|--------|
| 25043  | 0     |        | 0     |        |
| 25055  | 0     |        | 0     |        |
| 25057  | 0     |        | 1     | 1      |
| 25060  | 0     |        | 0     |        |
| 25062  | 0     |        | 2     | 1      |
| 25064  | 3     | 2      | 3     | 2      |
| 25069  | 0     |        | 0     |        |
| 25077  | 0     |        | 0     |        |
| 25088  | 0     |        | 0     |        |
| 25093  | 0     |        | 2     | 1      |
| 25121  | 0     |        | 0     |        |
| 25140  | 3     | 2      | 4     | 3      |
| 25144  | 0     |        | 0     |        |
| 25149  | 1     | 1      | 1     | 1      |
| 25159  | 0     |        | 0     |        |
| 25191  | 1     | 1      | 0     |        |
| 25193  | 5     | 4      | 0     |        |
| 25202  | 4     | 3      | 3     | 2      |
| 25215  | 1     | 1      | 0     |        |
| 25229  | 1     | 3      | 1     | 1      |
| 25231  | 0     |        | 0     |        |
| 25236  | 0     |        | 0     |        |
| 25242  | 0     |        | 0     |        |
| 25252  | 0     |        | 0     |        |
| 25253  | 2     | 4      | 3     | 1      |
| 25256  | 4     | 3      | 3     | 2      |
| 25260  | 0     |        | 0     |        |
| 25261  | 0     |        | 0     |        |
| 25280  | 0     |        | 0     |        |
| 25282  | 1     | 1      | 1     | 1      |
| 25289  | 2     | 4      | 2     | 2      |
| 25303  | 0     |        | 0     |        |



| respid | Q22_1 | Q22a_1 | Q23_1 | Q23a_1 |
|--------|-------|--------|-------|--------|
| 25304  | 1     | 0      | 0     |        |
| 25309  | 2     | 2      | 0     |        |
| 25317  | 1     | 0      | 2     | 1      |
| 25318  | 3     | 3      | 3     | 3      |
| 25320  | 0     |        | 0     |        |
| 25324  | 4     | 3      | 4     | 3      |
| 25331  | 1     | 1      | 0     |        |
| 25340  | 0     |        | 0     |        |
| 25342  | 0     |        | 0     |        |
| 25350  | 0     |        | 0     |        |
| 25352  | 0     |        | 0     |        |
| 25358  | 0     |        | 1     | 0      |
| 25375  | 0     |        | 0     |        |
| 25386  | 0     |        | 0     |        |
| 25388  | 0     |        | 0     |        |
| 25390  | 1     | 1      | 0     |        |
| 25391  | 0     |        | 0     |        |
| 25400  | 0     |        | 0     |        |
| 25413  | 4     | 3      | 3     | 2      |
| 25424  | 1     | 1      | 0     |        |
| 25426  | 3     | 2      | 3     | 2      |
| 25430  | 0     |        | 0     |        |
| 25434  | 1     | 1      | 1     | 1      |
| 25439  | 3     | 2      | 1     | 1      |
| 25441  | 0     |        | 0     |        |
| 25445  | 0     |        | 0     |        |
| 25451  | 0     |        | 0     |        |
| 25469  | 3     | 2      | 4     | 3      |
| 25471  | 2     | 1      | 2     | 1      |
| 25476  | 0     |        | 0     |        |
| 25480  | 0     |        | 2     | 0      |
| 25482  | 0     |        | 0     |        |

| respid | Q22_1 | Q22a_1 | Q23_1 | Q23a_1 |
|--------|-------|--------|-------|--------|
| 25500  | 3     | 4      | 2     | 4      |
| 25516  | 0     |        | 0     |        |
| 25521  | 2     | 3      | 4     | 3      |
| 25525  | 2     | 2      | 3     | 2      |
| 25530  | 2     | 2      | 1     | 1      |
| 25555  | 1     | 1      | 1     | 1      |
| 25558  | 0     |        | 0     |        |
| 25561  | 3     | 2      | 3     | 3      |
| 25566  | 0     |        | 0     |        |
| 25571  | 0     |        | 0     |        |
| 25572  | 0     |        | 0     |        |
| 25574  | 0     |        | 0     |        |
| 25588  | 0     |        | 0     |        |
| 25591  | 1     | 3      | 1     | 1      |
| 25599  | 2     | 1      | 2     | 1      |
| 25604  | 0     |        | 4     | 2      |
| 25614  | 0     |        | 0     |        |
| 25634  | 2     | 1      | 3     | 3      |
| 25642  | 0     |        | 0     |        |
| 25647  | 0     |        | 0     |        |
| 25653  | 0     |        | 0     |        |
| 25654  | 0     |        | 0     |        |
| 25660  | 0     |        | 0     |        |
| 25664  | 0     |        | 0     |        |
| 25665  | 0     |        | 1     | 3      |
| 25672  | 3     | 3      | 2     | 2      |
| 25677  | 1     | 1      | 1     | 1      |
| 25685  | 1     | 2      | 1     | 2      |
| 25699  | 3     | 2      | 3     | 2      |
| 25703  | 0     |        | 0     |        |
| 25704  | 2     | 2      | 2     | 1      |
| 25705  | 3     | 3      | 1     | 1      |

| respid | Q22_1 | Q22a_1 | Q23_1 | Q23a_1 |
|--------|-------|--------|-------|--------|
| 25711  | 0     |        | 0     |        |
| 25727  | 1     | 3      | 3     | 3      |
| 25728  | 0     |        | 0     |        |
| 25733  | 0     |        | 0     |        |
| 25735  | 0     |        | 0     |        |
| 25736  | 2     | 1      | 0     |        |
| 25742  | 0     |        | 0     |        |
| 25750  | 0     |        | 0     |        |
| 25754  | 0     |        | 0     |        |
| 25776  | 3     | 2      | 3     | 3      |
| 25778  | 0     |        | 0     |        |
| 25796  | 0     |        | 0     |        |
| 25852  | 1     | 2      | 0     |        |
| 25858  | 0     |        | 0     |        |
| 25859  | 0     |        | 0     |        |
| 25886  | 2     | 3      | 2     | 3      |
| 25890  | 1     | 1      | 2     | 0      |
| 25897  | 0     |        | 0     |        |
| 25903  | 0     |        | 0     |        |
| 25905  | 0     |        | 0     |        |
| 25917  | 0     |        | 0     |        |
| 25918  | 0     |        | 0     |        |
| 25928  | 0     |        | 0     |        |
| 25930  | 0     |        | 0     |        |
| 25949  | 1     | 1      | 0     |        |
| 25955  | 0     |        | 0     |        |
| 25959  | 1     | 0      | 0     |        |
| 25964  | 2     | 1      | 0     |        |
| 25972  | 0     |        | 0     |        |
| 25999  | 3     | 2      | 3     | 2      |
| 26019  | 0     |        | 0     |        |
| 26025  | 0     |        | 0     |        |

| respid | Q22_1 | Q22a_1 | Q23_1 | Q23a_1 |
|--------|-------|--------|-------|--------|
| 26039  | 0     |        | 1     | 2      |
| 26055  | 0     |        | 0     |        |
| 26061  | 1     | 1      | 0     |        |
| 26076  | 0     |        | 0     |        |
| 26088  | 0     |        | 0     |        |
| 26094  | 0     |        | 0     |        |
| 26104  | 3     | 3      | 3     | 3      |
| 26131  | 0     |        | 0     |        |
| 26134  | 1     | 2      | 2     | 1      |
| 26160  | 0     |        | 0     |        |
| 26168  | 0     |        | 1     | 1      |
| 26170  | 0     |        | 0     |        |
| 26191  | 3     | 3      | 4     | 3      |
| 26192  | 0     |        | 0     |        |
| 26195  | 1     | 1      | 1     | 1      |
| 26198  | 0     |        | 0     |        |
| 26199  | 1     | 1      | 0     |        |
| 26201  | 0     |        | 0     |        |
| 26202  | 2     | 1      | 0     |        |
| 26226  | 1     | 1      | 0     |        |
| 26233  | 0     |        | 0     |        |
| 26236  | 0     |        | 0     |        |
| 26242  | 0     |        | 0     |        |
| 26244  | 0     |        | 0     |        |
| 26250  | 0     |        | 0     |        |
| 26266  | 0     |        | 0     |        |
| 26274  | 0     |        | 0     |        |
| 26286  | 2     | 1      | 2     | 1      |
| 26288  | 0     |        | 0     |        |
| 26295  | 0     |        | 0     |        |
| 26296  | 0     |        | 2     | 0      |
| 26297  | 0     |        | 0     |        |

| respid | Q22_1 | Q22a_1 | Q23_1 | Q23a_1 |
|--------|-------|--------|-------|--------|
| 26300  | 2     | 2      | 0     |        |
| 26317  | 0     |        | 0     |        |
| 26343  | 0     |        | 0     |        |
| 26367  | 0     |        | 5     | 3      |
| 26372  | 0     |        | 0     |        |
| 26403  | 2     | 1      | 0     |        |
| 26423  | 0     |        | 0     |        |
| 26430  | 0     |        | 0     |        |
| 26437  | 1     | 1      | 0     |        |
| 26457  | 0     |        | 0     |        |
| 26466  | 3     | 0      | 0     |        |
| 26467  | 0     |        | 0     |        |
| 26469  | 0     |        | 0     |        |
| 26494  | 0     |        | 0     |        |
| 26510  | 2     | 1      | 1     | 0      |
| 26519  | 0     |        | 0     |        |
| 26525  | 0     |        | 5     | 3      |
| 26529  | 0     |        | 0     |        |
| 26533  | 0     |        | 0     |        |
| 26556  | 0     |        | 0     |        |
| 26559  | 2     | 2      | 2     | 2      |
| 26565  | 1     | 3      | 2     | 2      |
| 26576  | 2     | 2      | 0     |        |
| 26601  | 0     |        | 0     |        |
| 26607  | 0     |        | 0     |        |
| 26611  | 1     | 0      | 1     | 1      |
| 26619  | 0     |        | 1     | 0      |
| 26631  | 0     |        | 0     |        |
| 26654  | 0     |        | 0     |        |
| 26656  | 0     |        | 1     | 1      |
| 26664  | 0     |        | 0     |        |
| 26667  | 1     | 1      | 1     | 1      |

| respid | Q22_1 | Q22a_1 | Q23_1 | Q23a_1 |
|--------|-------|--------|-------|--------|
| 26674  | 2     | 3      | 3     | 2      |
| 26678  | 1     | 1      | 1     | 1      |
| 26693  | 0     |        | 0     |        |
| 26696  | 5     | 4      | 3     | 2      |
| 26703  | 3     | 4      | 4     | 4      |
| 26705  | 3     | 2      | 3     | 2      |
| 26706  | 2     | 2      | 3     | 3      |
| 26716  | 1     | 1      | 1     | 1      |
| 26721  | 0     |        | 1     | 1      |
| 26730  | 0     |        | 0     |        |
| 26752  | 0     |        | 0     |        |
| 26755  | 2     | 0      | 0     |        |
| 26791  | 0     |        | 0     |        |
| 26804  | 1     | 1      | 1     | 1      |
| 26810  | 2     | 0      | 3     | 3      |
| 26813  | 2     | 2      | 2     | 2      |
| 26833  | 1     | 1      | 1     | 1      |
| 26880  | 0     |        | 1     | 1      |
| 26884  | 1     | 1      | 0     |        |
| 26885  | 0     |        | 0     |        |
| 26890  | 1     | 1      | 2     | 1      |
| 26937  | 1     | 1      | 1     | 1      |
| 26939  | 0     |        | 0     |        |
| 26941  | 0     |        | 0     |        |
| 26992  | 1     | 4      | 1     | 4      |
| 27037  | 0     |        | 0     |        |
| 27045  | 2     | 3      | 2     | 3      |
| 27053  | 5     | 4      | 3     | 0      |
| 27060  | 2     | 2      | 2     | 2      |
| 27076  | 1     | 1      | 0     |        |
| 27124  | 1     | 0      | 0     |        |
| 27125  | 0     |        | 1     | 1      |

| respid | Q22_1 | Q22a_1 | Q23_1 | Q23a_1 |
|--------|-------|--------|-------|--------|
| 27132  | 0     |        | 0     |        |
| 27166  | 0     |        | 0     |        |
| 27190  | 0     |        | 0     |        |
| 27199  | 0     |        | 1     | 1      |
| 27221  | 2     | 2      | 2     | 1      |
| 27233  | 2     | 1      | 0     |        |
| 27241  | 0     |        | 0     |        |
| 27244  | 0     |        | 0     |        |
| 27245  | 4     | 3      | 3     | 3      |
| 27246  | 2     | 2      | 3     | 1      |
| 27253  | 1     | 1      | 1     | 1      |
| 27255  | 3     | 3      | 3     | 3      |
| 27267  | 0     |        | 0     |        |
| 27283  | 3     | 3      | 3     | 0      |
| 27289  | 3     | 3      | 3     | 2      |
| 27302  | 0     |        | 0     |        |
| 27317  | 0     |        | 0     |        |
| 27319  | 0     |        | 0     |        |
| 27331  | 1     | 1      | 1     | 1      |
| 27333  | 0     |        | 0     |        |
| 27340  | 0     |        | 0     |        |
| 27362  | 0     |        | 1     | 2      |
| 27370  | 0     |        | 0     |        |
| 27379  | 1     | 3      | 0     |        |
| 27386  | 0     |        | 0     |        |
| 27398  | 1     | 1      | 0     |        |
| 27404  | 0     |        | 0     |        |
| 27408  | 1     | 0      | 1     | 0      |
| 27412  | 3     | 3      | 3     | 3      |
| 27426  | 2     | 2      | 2     | 1      |
| 27455  | 0     |        | 0     |        |
| 27464  | 0     |        | 4     | 3      |

| respid | Q22_1 | Q22a_1 | Q23_1 | Q23a_1 |
|--------|-------|--------|-------|--------|
| 27484  | 1     | 0      | 1     | 0      |
| 27493  | 2     | 3      | 1     | 1      |
| 27512  | 0     |        | 1     | 2      |
| 27525  | 2     | 1      | 1     | 1      |
| 27532  | 1     | 1      | 1     | 1      |
| 27539  | 0     |        | 0     |        |
| 27540  | 3     | 1      | 0     |        |
| 27552  | 2     | 4      | 3     | 4      |
| 27562  | 0     |        | 0     |        |
| 27568  | 2     | 0      | 0     |        |
| 27574  | 3     | 4      | 2     | 2      |
| 27575  | 0     |        | 0     |        |
| 27577  | 0     |        | 0     |        |
| 27589  | 0     |        | 0     |        |
| 27593  | 0     |        | 0     |        |
| 27594  | 4     | 3      | 5     | 3      |
| 27595  | 4     | 3      | 3     | 2      |
| 27598  | 0     |        | 0     |        |
| 27620  | 0     |        | 0     |        |
| 27621  | 2     | 1      | 2     | 2      |
| 27628  | 1     | 1      | 0     |        |
| 27633  | 0     |        | 0     |        |
| 27643  | 0     |        | 0     |        |
| 27644  | 3     | 2      | 3     | 3      |
| 27668  | 0     |        | 0     |        |
| 27681  | 2     | 2      | 1     | 1      |
| 27691  | 0     |        | 0     |        |
| 27693  | 2     | 1      | 0     |        |
| 27703  | 1     | 1      | 0     |        |
| 27708  | 1     | 1      | 1     | 1      |
| 27719  | 2     | 2      | 5     | 3      |
| 27720  | 0     |        | 0     |        |



| respid | Q22_1 | Q22a_1 | Q23_1 | Q23a_1 |
|--------|-------|--------|-------|--------|
| 27723  | 1     | 1      | 0     |        |
| 27725  | 1     | 1      | 0     |        |
| 27734  | 2     | 2      | 2     | 2      |
| 27744  | 0     |        | 0     |        |
| 27749  | 4     | 3      | 2     | 3      |
| 27762  | 1     | 1      | 1     | 1      |
| 27808  | 2     | 4      | 2     | 3      |
| 27810  | 4     | 4      | 4     | 3      |
| 27812  | 0     |        | 0     |        |
| 27815  | 0     |        | 0     |        |
| 27818  | 0     |        | 0     |        |
| 27823  | 0     |        | 0     |        |
| 27841  | 3     | 3      | 2     | 1      |
| 27843  | 0     |        | 0     |        |
| 27851  | 0     |        | 1     | 0      |
| 27858  | 2     | 1      | 0     |        |
| 27859  | 0     |        | 0     |        |
| 27869  | 0     |        | 0     |        |
| 27872  | 0     |        | 1     | 1      |
| 27873  | 0     |        | 0     |        |
| 27884  | 2     | 1      | 1     | 0      |
| 27904  | 2     | 2      | 2     | 2      |
| 27915  | 0     |        | 0     |        |
| 27918  | 1     | 1      | 0     |        |
| 27937  | 0     |        | 0     |        |
| 27943  | 2     | 2      | 3     | 2      |
| 27948  | 0     |        | 0     |        |
| 27971  | 1     | 3      | 0     |        |
| 27991  | 2     | 1      | 0     |        |
| 28000  | 0     |        | 0     |        |
| 28011  | 1     | 1      | 0     |        |
| 28022  | 0     |        | 0     |        |

| respid | Q22_1 | Q22a_1 | Q23_1 | Q23a_1 |
|--------|-------|--------|-------|--------|
| 28025  | 0     |        | 0     |        |
| 28041  | 0     |        | 0     |        |
| 28057  | 4     | 4      | 3     | 2      |
| 28080  | 0     |        | 0     |        |
| 28098  | 1     | 0      | 0     |        |
| 28104  | 2     | 2      | 1     | 1      |
| 28109  | 0     |        | 0     |        |
| 28129  | 0     |        | 0     |        |
| 28141  | 0     |        | 0     |        |
| 28143  | 0     |        | 0     |        |
| 28149  | 0     |        | 0     |        |
| 28151  | 0     |        | 0     |        |
| 28161  | 1     | 4      | 0     |        |
| 28169  | 1     | 1      | 4     | 1      |
| 28194  | 3     | 2      | 2     | 2      |
| 28197  | 0     |        | 0     |        |
| 28206  | 0     |        | 0     |        |
| 28218  | 0     |        | 0     |        |
| 28227  | 0     |        | 0     |        |
| 28235  | 0     |        | 0     |        |
| 28246  | 0     |        | 0     |        |
| 28259  | 3     | 3      | 3     | 3      |
| 28263  | 0     |        | 0     |        |
| 28267  | 1     | 2      | 1     | 2      |
| 28274  | 0     |        | 0     |        |
| 28278  | 0     |        | 0     |        |
| 28288  | 0     |        | 0     |        |
| 28308  | 0     |        | 0     |        |
| 28309  | 3     | 3      | 3     | 1      |
| 28323  | 1     | 2      | 1     | 1      |
| 28335  | 3     | 3      | 3     | 3      |
| 28354  | 3     | 4      | 3     | 3      |

| respid | Q22_1 | Q22a_1 | Q23_1 | Q23a_1 |
|--------|-------|--------|-------|--------|
| 28355  | 2     | 2      | 2     | 1      |
| 28356  | 2     | 1      | 4     | 2      |
| 28357  | 0     |        | 0     |        |
| 28363  | 0     |        | 0     |        |
| 28366  | 0     |        | 0     |        |
| 28372  | 1     | 2      | 1     | 2      |
| 28381  | 1     | 1      | 1     | 1      |
| 28388  | 2     | 1      | 0     |        |
| 28413  | 3     | 3      | 3     | 3      |
| 28421  | 0     |        | 0     |        |
| 28430  | 3     | 3      | 3     | 3      |
| 28439  | 3     | 3      | 3     | 3      |
| 28458  | 3     | 3      | 2     | 2      |
| 28461  | 0     |        | 0     |        |
| 28466  | 0     |        | 0     |        |
| 28492  | 0     |        | 0     |        |
| 28534  | 0     |        | 0     |        |
| 28537  | 2     | 2      | 2     | 2      |
| 28560  | 0     |        | 0     |        |
| 28566  | 0     |        | 1     | 0      |
| 28569  | 1     | 1      | 0     |        |
| 28584  | 3     | 3      | 3     | 4      |
| 28590  | 0     |        | 3     | 0      |
| 28596  | 0     |        | 0     |        |
| 28608  | 1     | 2      | 0     |        |
| 28631  | 3     | 3      | 3     | 2      |
| 28644  | 2     | 1      | 2     | 1      |
| 28646  | 0     |        | 0     |        |
| 28665  | 0     |        | 0     |        |
| 28686  | 0     |        | 0     |        |
| 28704  | 2     | 2      | 2     | 2      |
| 28719  | 0     |        | 1     | 1      |

| respid | Q22_1 | Q22a_1 | Q23_1 | Q23a_1 |
|--------|-------|--------|-------|--------|
| 28736  | 2     | 2      | 4     | 3      |
| 28739  | 2     | 2      | 3     | 2      |
| 28758  | 5     | 3      | 5     | 3      |
| 28761  | 2     | 1      | 2     | 1      |
| 28770  | 2     | 2      | 2     | 2      |
| 28774  | 0     |        | 0     |        |
| 28778  | 3     | 4      | 4     | 3      |
| 28783  | 1     | 1      | 1     | 1      |
| 28785  | 0     |        | 0     |        |
| 28797  | 2     | 2      | 4     | 3      |
| 28801  | 0     |        | 0     |        |
| 28821  | 0     |        | 0     |        |
| 28827  | 2     | 2      | 4     | 3      |
| 28828  | 0     |        | 0     |        |
| 28871  | 0     |        | 1     | 1      |
| 28876  | 0     |        | 0     |        |
| 28891  | 4     | 1      | 0     |        |
| 28898  | 0     |        | 0     |        |
| 28909  | 1     | 1      | 0     |        |
| 28930  | 1     | 1      | 2     | 0      |
| 28935  | 3     | 2      | 3     | 1      |
| 28964  | 0     |        | 0     |        |
| 28965  | 0     |        | 0     |        |
| 28967  | 1     | 2      | 2     | 1      |
| 28975  | 0     |        | 0     |        |
| 28982  | 0     |        | 0     |        |
| 28989  | 0     |        | 0     |        |
| 29003  | 1     | 1      | 2     | 2      |
| 29004  | 0     |        | 0     |        |
| 29007  | 0     |        | 1     | 1      |
| 29008  | 0     |        | 0     |        |
| 29011  | 1     | 0      | 2     | 1      |

| respid | Q22_1 | Q22a_1 | Q23_1 | Q23a_1 |
|--------|-------|--------|-------|--------|
| 29012  | 2     | 1      | 0     |        |
| 29014  | 0     |        | 0     |        |
| 29016  | 0     |        | 0     |        |
| 29018  | 4     | 3      | 3     | 2      |
| 29048  | 0     |        | 0     |        |
| 29184  | 0     |        | 0     |        |
| 29237  | 0     |        | 0     |        |
| 29252  | 0     |        | 0     |        |
| 29267  | 0     |        | 0     |        |
| 29276  | 0     |        | 0     |        |
| 29281  | 2     | 1      | 2     | 1      |
| 29285  | 0     |        | 0     |        |
| 29291  | 3     | 3      | 3     | 3      |
| 29304  | 2     | 2      | 2     | 2      |
| 29323  | 0     |        | 0     |        |
| 29330  | 1     | 1      | 0     |        |
| 29357  | 1     | 4      | 1     | 4      |
| 29416  | 0     |        | 1     | 0      |
| 29432  | 0     |        | 0     |        |
| 29482  | 1     | 1      | 1     | 1      |
| 29506  | 1     | 3      | 1     | 0      |
| 29509  | 1     | 1      | 0     |        |
| 29512  | 2     | 1      | 2     | 1      |
| 29519  | 0     |        | 0     |        |
| 29520  | 0     |        | 0     |        |
| 29521  | 2     | 2      | 2     | 2      |
| 29529  | 3     | 3      | 3     | 3      |
| 29532  | 0     |        | 0     |        |
| 29547  | 0     |        | 0     |        |
| 29551  | 0     |        | 0     |        |
| 29584  | 3     | 2      | 4     | 4      |
| 29591  | 3     | 3      | 3     | 2      |

| respid | Q22_1 | Q22a_1 | Q23_1 | Q23a_1 |
|--------|-------|--------|-------|--------|
| 29613  | 1     | 0      | 1     | 0      |
| 29615  | 1     | 3      | 0     |        |
| 29625  | 1     | 1      | 1     | 0      |
| 29660  | 0     |        | 0     |        |
| 29677  | 0     |        | 0     |        |
| 29700  | 2     | 3      | 0     |        |
| 29715  | 5     | 4      | 5     | 4      |
| 29720  | 0     |        | 0     |        |
| 29730  | 0     |        | 0     |        |
| 29734  | 1     | 3      | 0     |        |
| 29754  | 0     |        | 0     |        |
| 29771  | 0     |        | 0     |        |
| 29774  | 1     | 1      | 0     |        |
| 29783  | 0     |        | 0     |        |
| 29812  | 1     | 1      | 1     | 1      |
| 29813  | 0     |        | 0     |        |
| 29814  | 1     | 2      | 0     |        |
| 29820  | 1     | 1      | 1     | 1      |
| 29906  | 0     |        | 0     |        |
| 29907  | 1     | 1      | 1     | 0      |
| 29928  | 0     |        | 0     |        |
| 29932  | 0     |        | 0     |        |
| 29958  | 2     | 2      | 2     | 2      |
| 29982  | 0     |        | 0     |        |
| 29989  | 0     |        | 0     |        |
| 29994  | 0     |        | 0     |        |
| 30005  | 1     | 1      | 0     |        |
| 30077  | 0     |        | 0     |        |
| 30098  | 0     |        | 0     |        |
| 30107  | 0     |        | 0     |        |
| 30154  | 0     |        | 0     |        |
| 30159  | 0     |        | 0     |        |

| respid | Q22_1 | Q22a_1 | Q23_1 | Q23a_1 |
|--------|-------|--------|-------|--------|
| 30162  | 0     |        | 0     |        |
| 30163  | 0     |        | 0     |        |
| 30189  | 2     | 2      | 1     | 0      |
| 30230  | 0     |        | 0     |        |
| 30259  | 3     | 2      | 3     | 2      |
| 30284  | 0     |        | 0     |        |
| 30296  | 0     |        | 0     |        |
| 30330  | 2     | 1      | 3     | 2      |
| 30341  | 1     | 2      | 0     |        |
| 30352  | 1     | 2      | 1     | 2      |
| 30379  | 0     |        | 0     |        |
| 30424  | 0     |        | 0     |        |
| 30447  | 0     |        | 0     |        |
| 30477  | 3     | 3      | 3     | 2      |
| 30503  | 0     |        | 0     |        |
| 30515  | 2     | 1      | 4     | 2      |
| 30516  | 3     | 2      | 3     | 2      |
| 30623  | 2     | 2      | 2     | 1      |
| 30639  | 0     |        | 0     |        |
| 30670  | 0     |        | 0     |        |
| 30697  | 0     |        | 0     |        |
| 30735  | 1     | 1      | 0     |        |
| 30742  | 2     | 2      | 0     |        |
| 30751  | 2     | 1      | 4     | 3      |
| 30789  | 0     |        | 0     |        |
| 30867  | 3     | 3      | 3     | 2      |
| 30876  | 0     |        | 1     | 0      |
| 30877  | 0     |        | 0     |        |
| 30887  | 0     |        | 0     |        |
| 30891  | 2     | 2      | 2     | 2      |
| 31030  | 0     |        | 0     |        |
| 31059  | 0     |        | 1     | 2      |

| respid | Q22_1 | Q22a_1 | Q23_1 | Q23a_1 |
|--------|-------|--------|-------|--------|
| 31082  | 0     |        | 0     |        |
| 31106  | 0     |        | 0     |        |
| 31110  | 0     |        | 0     |        |
| 31265  | 3     | 4      | 3     | 4      |
| 31266  | 3     | 4      | 3     | 4      |
| 31267  | 3     | 4      | 3     | 4      |
| 31310  | 0     |        | 0     |        |
| 31325  | 0     |        | 0     |        |
| 31367  | 0     |        | 0     |        |
| 31389  | 0     |        | 0     |        |
| 31440  | 0     |        | 0     |        |
| 31465  | 0     |        | 0     |        |
| 31477  | 0     |        | 0     |        |
| 31491  | 2     | 1      | 0     |        |
| 31494  | 3     | 2      | 3     | 2      |
| 31509  | 0     |        | 0     |        |
| 31533  | 0     |        | 0     |        |
| 31547  | 0     |        | 0     |        |
| 31558  | 0     |        | 0     |        |
| 31579  | 0     |        | 0     |        |
| 31591  | 0     |        | 1     | 1      |
| 31596  | 3     | 3      | 4     | 3      |
| 31601  | 2     | 2      | 3     | 2      |
| 31605  | 0     |        | 1     | 1      |
| 31637  | 0     |        | 1     | 0      |
| 31646  | 1     | 1      | 0     |        |
| 31647  | 1     | 1      | 1     | 3      |
| 31650  | 0     |        | 0     |        |
| 31651  | 1     | 1      | 1     | 1      |
| 31657  | 0     |        | 0     |        |
| 31660  | 1     | 1      | 0     |        |
| 31661  | 3     | 2      | 2     | 1      |



| respid | Q22_1 | Q22a_1 | Q23_1 | Q23a_1 |
|--------|-------|--------|-------|--------|
| 31667  | 1     | 1      | 1     | 1      |
| 31674  | 1     | 1      | 0     |        |
| 31686  | 1     | 1      | 2     | 1      |
| 31693  | 0     |        | 0     |        |
| 31716  | 0     |        | 0     |        |
| 31818  | 0     |        | 0     |        |
| 31886  | 1     | 0      | 1     | 0      |
| 31945  | 2     | 3      | 2     | 3      |
| 31957  | 0     |        | 3     | 2      |
| 31966  | 1     | 1      | 1     | 1      |
| 31978  | 1     | 1      | 2     | 1      |
| 31999  | 0     |        | 0     |        |
| 32026  | 1     | 1      | 1     | 1      |
| 32033  | 0     |        | 0     |        |
| 32037  | 3     | 4      | 3     | 4      |
| 32038  | 3     | 4      | 3     | 4      |
| 32047  | 1     | 2      | 1     | 2      |
| 32053  | 0     |        | 0     |        |
| 32069  | 3     | 2      | 3     | 2      |
| 32081  | 2     | 1      | 2     | 1      |
| 32123  | 0     |        | 1     | 2      |
| 32130  | 0     |        | 1     | 0      |
| 32141  | 0     |        | 0     |        |
| 32158  | 0     |        | 0     |        |
| 32165  | 0     |        | 0     |        |
| 32180  | 0     |        | 0     |        |
| 32221  | 0     |        | 0     |        |
| 32292  | 0     |        | 0     |        |
| 32318  | 1     | 1      | 0     |        |
| 32346  | 1     | 1      | 0     |        |
| 32402  | 2     | 2      | 2     | 2      |
| 32422  | 0     |        | 1     | 1      |

| respid | Q22_1 | Q22a_1 | Q23_1 | Q23a_1 |
|--------|-------|--------|-------|--------|
| 32439  | 0     |        | 0     |        |
| 32507  | 3     | 2      | 3     | 2      |
| 32522  | 0     |        | 0     |        |
| 32535  | 0     |        | 0     |        |
| 32546  | 0     |        | 0     |        |
| 32553  | 0     |        | 0     |        |
| 32570  | 0     |        | 0     |        |
| 32592  | 0     |        | 1     | 1      |
| 32605  | 2     | 1      | 2     | 1      |
| 32630  | 2     | 2      | 2     | 2      |
| 32642  | 0     |        | 1     | 2      |
| 32646  | 0     |        | 0     |        |
| 32665  | 0     |        | 0     |        |
| 32677  | 0     |        | 0     |        |
| 32694  | 0     |        | 0     |        |
| 32698  | 2     | 1      | 0     |        |
| 32754  | 3     | 3      | 3     | 3      |
| 32799  | 2     | 1      | 1     | 1      |
| 32816  | 0     |        | 0     |        |
| 32819  | 1     | 1      | 0     |        |
| 32840  | 0     |        | 0     |        |
| 32861  | 0     |        | 1     | 1      |
| 32866  | 0     |        | 0     |        |
| 32889  | 5     | 4      | 4     | 3      |
| 32960  | 0     |        | 0     |        |
| 32965  | 1     | 1      | 1     | 1      |
| 32986  | 0     |        | 1     | 2      |
| 33005  | 1     | 1      | 1     | 1      |
| 33054  | 2     | 2      | 2     | 1      |
| 33072  | 1     | 3      | 2     | 1      |
| 33095  | 0     |        | 0     |        |
| 33099  | 1     | 2      | 0     |        |

| respid | Q22_1 | Q22a_1 | Q23_1 | Q23a_1 |
|--------|-------|--------|-------|--------|
| 33121  | 0     |        | 0     |        |
| 33152  | 0     |        | 0     |        |
| 33159  | 0     |        | 0     |        |
| 33189  | 0     |        | 0     |        |
| 33198  | 3     | 3      | 2     | 2      |
| 33202  | 3     | 2      | 3     | 3      |
| 33204  | 0     |        | 0     |        |
| 33224  | 0     |        | 0     |        |
| 33272  | 2     | 2      | 1     | 1      |
| 33294  | 0     |        | 0     |        |
| 33300  | 1     | 1      | 1     | 1      |
| 33314  | 0     |        | 1     | 1      |
| 33338  | 0     |        | 0     |        |
| 33350  | 4     | 3      | 4     | 3      |
| 33362  | 1     | 1      | 2     | 2      |
| 33368  | 0     |        | 0     |        |
| 33374  | 4     | 2      | 2     | 1      |
| 33380  | 4     | 3      | 2     | 2      |
| 33385  | 0     |        | 2     | 1      |
| 33402  | 2     | 1      | 1     | 1      |
| 33414  | 0     |        | 0     |        |
| 33439  | 2     | 1      | 2     | 1      |
| 33449  | 2     | 2      | 3     | 2      |
| 33533  | 1     | 1      | 0     |        |
| 33540  | 0     |        | 0     |        |
| 33556  | 1     | 3      | 1     | 0      |
| 33615  | 1     | 2      | 0     |        |
| 33694  | 0     |        | 0     |        |
| 33717  | 0     |        | 0     |        |
| 33729  | 0     |        | 1     | 1      |
| 33746  | 1     | 1      | 1     | 1      |
| 33764  | 2     | 0      | 0     |        |

| respid | Q22_1 | Q22a_1 | Q23_1 | Q23a_1 |
|--------|-------|--------|-------|--------|
| 33790  | 0     |        | 0     |        |
| 33868  | 1     | 1      | 0     |        |
| 33872  | 4     | 3      | 4     | 4      |
| 33883  | 0     |        | 0     |        |
| 33884  | 0     |        | 0     |        |
| 33900  | 1     | 1      | 0     |        |
| 33933  | 0     |        | 1     | 0      |
| 33949  | 4     | 0      | 4     | 1      |
| 34005  | 0     |        | 0     |        |
| 34016  | 0     |        | 0     |        |
| 34041  | 2     | 1      | 3     | 1      |
| 34053  | 0     |        | 0     |        |
| 34056  | 0     |        | 0     |        |
| 34093  | 0     |        | 1     | 2      |
| 34112  | 0     |        | 2     | 1      |
| 34136  | 4     | 3      | 4     | 4      |
| 34138  | 0     |        | 0     |        |
| 34139  | 0     |        | 2     | 1      |
| 34189  | 0     |        | 0     |        |
| 34239  | 1     | 2      | 0     |        |
| 34240  | 1     | 1      | 1     | 1      |
| 34241  | 0     |        | 1     | 1      |
| 34259  | 0     |        | 1     | 1      |
| 34303  | 3     | 2      | 2     | 2      |
| 34306  | 0     |        | 0     |        |
| 34395  | 1     | 0      | 2     | 1      |
| 34463  | 3     | 2      | 1     | 0      |
| 34466  | 0     |        | 1     | 3      |
| 34471  | 0     |        | 0     |        |
| 34489  | 2     | 2      | 3     | 2      |
| 34518  | 2     | 3      | 1     | 0      |
| 34542  | 2     | 2      | 2     | 2      |

| respid | Q22_1 | Q22a_1 | Q23_1 | Q23a_1 |
|--------|-------|--------|-------|--------|
| 34595  | 0     |        | 0     |        |
| 34604  | 1     | 1      | 0     |        |
| 34631  | 2     | 2      | 4     | 0      |
| 34665  | 1     | 0      | 1     | 0      |
| 34716  | 0     |        | 0     |        |
| 34729  | 0     |        | 1     | 1      |
| 34772  | 1     | 2      | 3     | 2      |
| 34800  | 3     | 2      | 2     | 2      |
| 34819  | 3     | 1      | 3     | 1      |
| 34829  | 1     | 0      | 2     | 1      |
| 34831  | 0     |        | 0     |        |
| 34839  | 0     |        | 0     |        |
| 34868  | 0     |        | 0     |        |
| 34869  | 0     |        | 0     |        |
| 34882  | 4     | 3      | 0     |        |
| 34895  | 3     | 4      | 2     | 3      |
| 34901  | 0     |        | 1     | 0      |
| 34904  | 2     | 1      | 2     | 2      |
| 34907  | 0     |        | 1     | 2      |
| 34914  | 0     |        | 0     |        |
| 34918  | 0     |        | 0     |        |
| 34924  | 0     |        | 0     |        |
| 34933  | 2     | 2      | 2     | 2      |
| 34938  | 1     | 1      | 0     |        |
| 34952  | 2     | 3      | 3     | 4      |
| 34959  | 0     |        | 1     | 1      |
| 34972  | 0     |        | 0     |        |
| 34973  | 2     | 2      | 1     | 1      |
| 34975  | 2     | 2      | 1     | 1      |
| 34977  | 1     | 1      | 0     |        |
| 34978  | 0     |        | 1     | 0      |
| 34980  | 0     |        | 0     |        |

| respid | Q22_1 | Q22a_1 | Q23_1 | Q23a_1 |
|--------|-------|--------|-------|--------|
| 34984  | 3     | 2      | 3     | 3      |
| 34986  | 2     | 2      | 2     | 2      |
| 34994  | 0     |        | 0     |        |
| 34996  | 1     | 1      | 0     |        |
| 35003  | 0     |        | 0     |        |
| 35014  | 0     |        | 0     |        |
| 35029  | 0     |        | 0     |        |
| 35030  | 4     | 3      | 2     | 1      |
| 35037  | 1     | 1      | 0     |        |
| 35043  | 0     |        | 0     |        |
| 35048  | 0     |        | 0     |        |
| 35055  | 0     |        | 0     |        |
| 35067  | 3     | 3      | 0     |        |
| 35072  | 0     |        | 0     |        |
| 35078  | 2     | 2      | 2     | 1      |
| 35084  | 0     |        | 1     | 2      |
| 35095  | 0     |        | 0     |        |
| 35096  | 0     |        | 0     |        |
| 35097  | 1     | 1      | 2     | 2      |
| 35098  | 2     | 1      | 2     | 2      |
| 35109  | 4     | 3      | 4     | 3      |
| 35114  | 0     |        | 0     |        |
| 35115  | 0     |        | 0     |        |
| 35124  | 3     | 2      | 3     | 2      |
| 35125  | 0     |        | 0     |        |
| 35141  | 0     |        | 0     |        |
| 35142  | 0     |        | 0     |        |
| 35145  | 0     |        | 0     |        |
| 35149  | 3     | 3      | 0     |        |
| 35159  | 0     |        | 0     |        |
| 35163  | 0     |        | 1     | 1      |
| 35174  | 1     | 2      | 1     | 2      |

| respid | Q22_1 | Q22a_1 | Q23_1 | Q23a_1 |
|--------|-------|--------|-------|--------|
| 35188  | 0     |        | 0     |        |
| 35189  | 1     | 1      | 0     |        |
| 35201  | 4     | 3      | 0     |        |
| 35215  | 0     |        | 0     |        |
| 35228  | 0     |        | 0     |        |
| 35235  | 1     | 1      | 0     |        |
| 35239  | 4     | 3      | 3     | 1      |
| 35243  | 0     |        | 0     |        |
| 35245  | 2     | 4      | 0     |        |
| 35259  | 0     |        | 0     |        |
| 35265  | 0     |        | 0     |        |
| 35272  | 1     | 1      | 1     | 1      |
| 35280  | 2     | 3      | 1     | 1      |
| 35298  | 0     |        | 0     |        |
| 35305  | 0     |        | 0     |        |
| 35306  | 3     | 3      | 3     | 2      |
| 35307  | 0     |        | 0     |        |
| 35311  | 0     |        | 0     |        |
| 35322  | 1     | 2      | 0     |        |
| 35323  | 0     |        | 0     |        |
| 35327  | 0     |        | 0     |        |
| 35366  | 0     |        | 0     |        |
| 35378  | 1     | 1      | 0     |        |
| 35389  | 4     | 3      | 3     | 2      |
| 35390  | 0     |        | 0     |        |
| 35395  | 1     | 2      | 0     |        |
| 35411  | 1     | 3      | 0     |        |
| 35423  | 0     |        | 0     |        |
| 35425  | 0     |        | 0     |        |
| 35434  | 0     |        | 0     |        |
| 35462  | 0     |        | 0     |        |
| 35478  | 3     | 2      | 3     | 2      |

| respid | Q22_1 | Q22a_1 | Q23_1 | Q23a_1 |
|--------|-------|--------|-------|--------|
| 35481  | 3     | 3      | 2     | 3      |
| 35498  | 0     |        | 0     |        |
| 35499  | 0     |        | 0     |        |
| 35502  | 0     |        | 1     | 2      |
| 35503  | 0     |        | 0     |        |
| 35504  | 0     |        | 0     |        |
| 35508  | 2     | 2      | 0     |        |
| 35513  | 4     | 1      | 1     | 1      |
| 35516  | 0     |        | 0     |        |
| 35519  | 1     | 1      | 0     |        |
| 35530  | 2     | 3      | 3     | 2      |
| 35533  | 0     |        | 0     |        |
| 35561  | 1     | 1      | 0     |        |
| 35565  | 0     |        | 0     |        |
| 35588  | 0     |        | 0     |        |
| 35598  | 0     |        | 0     |        |
| 35607  | 0     |        | 0     |        |
| 35638  | 0     |        | 0     |        |
| 35642  | 0     |        | 0     |        |
| 35643  | 0     |        | 2     | 0      |
| 35680  | 0     |        | 0     |        |
| 35697  | 0     |        | 0     |        |
| 35703  | 0     |        | 0     |        |
| 35709  | 0     |        | 0     |        |
| 35710  | 1     | 3      | 0     |        |
| 35721  | 5     | 0      | 4     | 0      |
| 35723  | 0     |        | 0     |        |
| 35736  | 1     | 1      | 1     | 1      |
| 35739  | 0     |        | 1     | 1      |
| 35745  | 1     | 1      | 3     | 1      |
| 35748  | 2     | 4      | 0     |        |
| 35750  | 2     | 2      | 0     |        |



| respid | Q22_1 | Q22a_1 | Q23_1 | Q23a_1 |
|--------|-------|--------|-------|--------|
| 35752  | 4     | 3      | 1     | 2      |
| 35773  | 0     |        | 0     |        |
| 35779  | 0     |        | 0     |        |
| 35791  | 0     |        | 0     |        |
| 35801  | 0     |        | 2     | 1      |
| 35802  | 0     |        | 0     |        |
| 35837  | 3     | 2      | 0     |        |
| 35853  | 0     |        | 0     |        |
| 35858  | 0     |        | 0     |        |
| 35860  | 1     | 1      | 0     |        |
| 35875  | 3     | 4      | 3     | 3      |
| 35883  | 0     |        | 1     | 1      |
| 35890  | 0     |        | 0     |        |
| 35898  | 0     |        | 0     |        |
| 35901  | 0     |        | 1     | 3      |
| 35914  | 0     |        | 0     |        |
| 35924  | 3     | 3      | 3     | 2      |
| 35950  | 3     | 3      | 1     | 1      |
| 35961  | 0     |        | 0     |        |
| 35966  | 0     |        | 0     |        |
| 35967  | 0     |        | 0     |        |
| 35971  | 0     |        | 0     |        |
| 35974  | 0     |        | 0     |        |
| 35983  | 4     | 3      | 4     | 3      |
| 35992  | 5     | 4      | 2     | 2      |
| 36010  | 0     |        | 1     | 0      |
| 36019  | 0     |        | 5     | 4      |
| 36029  | 1     | 1      | 1     | 1      |
| 36033  | 0     |        | 0     |        |
| 36042  | 0     |        | 0     |        |
| 36043  | 0     |        | 0     |        |
| 36048  | 1     | 0      | 0     |        |

| respid | Q22_1 | Q22a_1 | Q23_1 | Q23a_1 |
|--------|-------|--------|-------|--------|
| 36050  | 1     | 1      | 1     | 1      |
| 36062  | 1     | 1      | 0     |        |
| 36063  | 0     |        | 0     |        |
| 36092  | 0     |        | 0     |        |
| 36097  | 0     |        | 0     |        |
| 36108  | 0     |        | 0     |        |
| 36113  | 3     | 4      | 3     | 2      |
| 36117  | 0     |        | 0     |        |
| 36129  | 0     |        | 0     |        |
| 36144  | 0     |        | 0     |        |
| 36152  | 0     |        | 0     |        |
| 36154  | 1     | 2      | 1     | 2      |
| 36155  | 0     |        | 0     |        |
| 36167  | 0     |        | 0     |        |
| 36172  | 0     |        | 2     | 1      |
| 36173  | 0     |        | 0     |        |
| 36174  | 0     |        | 1     | 0      |
| 36182  | 1     | 1      | 0     |        |
| 36192  | 0     |        | 0     |        |
| 36195  | 2     | 2      | 3     | 2      |
| 36204  | 0     |        | 0     |        |
| 36205  | 0     |        | 0     |        |
| 36208  | 0     |        | 0     |        |
| 36216  | 1     | 2      | 1     | 1      |
| 36221  | 1     | 1      | 0     |        |
| 36244  | 0     |        | 0     |        |
| 36255  | 1     | 2      | 1     | 1      |
| 36259  | 1     | 0      | 1     | 0      |
| 36262  | 3     | 2      | 2     | 2      |
| 36268  | 0     |        | 0     |        |
| 36308  | 1     | 1      | 0     |        |
| 36324  | 0     |        | 0     |        |

| respid | Q22_1 | Q22a_1 | Q23_1 | Q23a_1 |
|--------|-------|--------|-------|--------|
| 36330  | 0     |        | 0     |        |
| 36331  | 0     |        | 2     | 0      |
| 36336  | 0     |        | 1     | 0      |
| 36337  | 1     | 2      | 0     |        |
| 36364  | 0     |        | 0     |        |
| 36365  | 2     | 3      | 1     | 2      |
| 36396  | 0     |        | 0     |        |
| 36403  | 0     |        | 0     |        |
| 36410  | 0     |        | 0     |        |
| 36413  | 0     |        | 0     |        |
| 36422  | 1     | 1      | 0     |        |
| 36424  | 0     |        | 0     |        |
| 36425  | 3     | 4      | 4     | 3      |
| 36432  | 0     |        | 0     |        |
| 36435  | 3     | 3      | 4     | 4      |
| 36446  | 4     | 3      | 4     | 3      |
| 36451  | 1     | 1      | 0     |        |
| 36453  | 0     |        | 0     |        |
| 36459  | 2     | 2      | 2     | 1      |
| 36464  | 1     | 1      | 2     | 1      |
| 36465  | 1     | 2      | 1     | 1      |
| 36466  | 0     |        | 0     |        |
| 36476  | 2     | 1      | 1     | 1      |
| 36487  | 0     |        | 0     |        |
| 36488  | 3     | 3      | 1     | 3      |
| 36500  | 0     |        | 0     |        |
| 36504  | 2     | 1      | 2     | 1      |
| 36513  | 0     |        | 0     |        |
| 36515  | 1     | 2      | 1     | 2      |
| 36521  | 2     | 3      | 0     |        |
| 36530  | 2     | 2      | 2     | 2      |
| 36556  | 0     |        | 1     | 2      |

| respid | Q22_1 | Q22a_1 | Q23_1 | Q23a_1 |
|--------|-------|--------|-------|--------|
| 36564  | 4     | 0      | 3     | 2      |
| 36584  | 0     |        | 0     |        |
| 36585  | 0     |        | 0     |        |
| 36586  | 0     |        | 0     |        |
| 36606  | 4     | 4      | 2     | 2      |
| 36615  | 0     |        | 0     |        |
| 36628  | 0     |        | 0     |        |
| 36630  | 3     | 2      | 1     | 0      |
| 36631  | 2     | 3      | 0     |        |
| 36636  | 0     |        | 0     |        |
| 36637  | 0     |        | 1     | 1      |
| 36651  | 0     |        | 0     |        |
| 36661  | 0     |        | 0     |        |
| 36670  | 1     | 2      | 0     |        |
| 36671  | 0     |        | 0     |        |
| 36688  | 0     |        | 0     |        |
| 36694  | 0     |        | 0     |        |
| 36696  | 0     |        | 0     |        |
| 36703  | 0     |        | 0     |        |
| 36719  | 3     | 4      | 3     | 4      |
| 36721  | 3     | 4      | 3     | 4      |
| 36740  | 1     | 1      | 1     | 1      |
| 36755  | 0     |        | 0     |        |
| 36765  | 2     | 2      | 2     | 2      |
| 36770  | 0     |        | 0     |        |
| 36773  | 1     | 1      | 1     | 1      |
| 36813  | 0     |        | 0     |        |
| 36819  | 2     | 2      | 1     | 1      |
| 36820  | 0     |        | 0     |        |
| 36821  | 0     |        | 0     |        |
| 36827  | 0     |        | 0     |        |
| 36835  | 0     |        | 0     |        |

| respid | Q22_1 | Q22a_1 | Q23_1 | Q23a_1 |
|--------|-------|--------|-------|--------|
| 36837  | 1     | 1      | 1     | 1      |
| 36849  | 1     | 1      | 1     | 1      |
| 36851  | 3     | 1      | 0     |        |
| 36868  | 3     | 2      | 3     | 3      |
| 36870  | 0     |        | 0     |        |
| 36871  | 0     |        | 0     |        |
| 36874  | 0     |        | 0     |        |
| 36878  | 3     | 2      | 0     |        |
| 36887  | 0     |        | 0     |        |
| 36889  | 0     |        | 0     |        |
| 36891  | 0     |        | 1     | 1      |
| 36903  | 2     | 2      | 0     |        |
| 36905  | 0     |        | 0     |        |
| 36913  | 0     |        | 0     |        |
| 36949  | 1     | 1      | 1     | 1      |
| 36954  | 2     | 2      | 2     | 2      |
| 36962  | 1     | 1      | 0     |        |
| 36965  | 1     | 2      | 3     | 3      |
| 36970  | 0     |        | 0     |        |
| 36979  | 0     |        | 1     | 2      |
| 36990  | 0     |        | 0     |        |
| 36991  | 0     |        | 2     | 1      |
| 36992  | 1     | 1      | 0     |        |
| 37015  | 0     |        | 0     |        |
| 37017  | 0     |        | 0     |        |
| 37020  | 0     |        | 0     |        |
| 37033  | 1     | 1      | 2     | 1      |
| 37041  | 1     | 1      | 0     |        |
| 37048  | 1     | 0      | 2     | 1      |
| 37050  | 0     |        | 0     |        |
| 37054  | 2     | 4      | 3     | 4      |
| 37057  | 0     |        | 0     |        |

| respid | Q22_1 | Q22a_1 | Q23_1 | Q23a_1 |
|--------|-------|--------|-------|--------|
| 37067  | 0     |        | 1     | 1      |
| 37074  | 0     |        | 0     |        |
| 37088  | 0     |        | 0     |        |
| 37090  | 0     |        | 1     | 1      |
| 37110  | 3     | 3      | 3     | 3      |
| 37122  | 0     |        | 0     |        |
| 37124  | 2     | 2      | 0     |        |
| 37126  | 0     |        | 0     |        |
| 37129  | 2     | 2      | 3     | 1      |
| 37130  | 0     |        | 0     |        |
| 37142  | 2     | 4      | 0     |        |
| 37160  | 0     |        | 1     | 2      |
| 37168  | 0     |        | 0     |        |
| 37169  | 0     |        | 0     |        |
| 37191  | 1     | 0      | 0     |        |
| 37197  | 1     | 3      | 2     | 1      |
| 37204  | 1     | 2      | 0     |        |
| 37213  | 3     | 2      | 2     | 2      |
| 37238  | 0     |        | 0     |        |
| 37242  | 1     | 1      | 0     |        |
| 37243  | 5     | 4      | 2     | 2      |
| 37275  | 2     | 1      | 0     |        |
| 37305  | 1     | 1      | 1     | 1      |
| 37357  | 2     | 1      | 2     | 2      |
| 37365  | 2     | 1      | 2     | 1      |
| 37370  | 0     |        | 0     |        |
| 37406  | 3     | 3      | 4     | 3      |
| 37410  | 1     | 1      | 0     |        |
| 37411  | 4     | 3      | 4     | 3      |
| 37427  | 2     | 2      | 0     |        |
| 37437  | 2     | 2      | 3     | 4      |
| 37440  | 0     |        | 0     |        |

| respid | Q22_1 | Q22a_1 | Q23_1 | Q23a_1 |
|--------|-------|--------|-------|--------|
| 37452  | 0     |        | 0     |        |
| 37465  | 3     | 2      | 2     | 2      |
| 37468  | 1     | 2      | 1     | 2      |
| 37469  | 0     |        | 1     | 0      |
| 37477  | 2     | 3      | 0     |        |
| 37509  | 0     |        | 0     |        |
| 37513  | 3     | 4      | 2     | 3      |
| 37534  | 1     | 0      | 0     |        |
| 37537  | 0     |        | 0     |        |
| 37560  | 2     | 2      | 0     |        |
| 37566  | 2     | 2      | 3     | 2      |
| 37572  | 1     | 2      | 0     |        |
| 37574  | 3     | 2      | 0     |        |
| 37575  | 1     | 2      | 0     |        |
| 37590  | 0     |        | 0     |        |
| 37593  | 1     | 1      | 2     | 2      |
| 37599  | 0     |        | 0     |        |
| 37641  | 0     |        | 0     |        |
| 37651  | 1     | 1      | 1     | 1      |
| 37670  | 0     |        | 1     | 0      |
| 37680  | 0     |        | 1     | 1      |
| 37690  | 0     |        | 2     | 1      |
| 37694  | 0     |        | 0     |        |
| 37705  | 0     |        | 0     |        |
| 37710  | 2     | 2      | 2     | 2      |
| 37719  | 3     | 3      | 0     |        |
| 37741  | 2     | 2      | 2     | 1      |
| 37752  | 0     |        | 1     | 1      |
| 37755  | 4     | 4      | 4     | 4      |
| 37757  | 0     |        | 0     |        |
| 37783  | 0     |        | 0     |        |
| 37793  | 3     | 3      | 4     | 2      |

| respid | Q22_1 | Q22a_1 | Q23_1 | Q23a_1 |
|--------|-------|--------|-------|--------|
| 37800  | 1     | 1      | 3     | 1      |
| 37801  | 0     |        | 0     |        |
| 37820  | 2     | 2      | 2     | 2      |
| 37826  | 2     | 2      | 2     | 1      |
| 37835  | 1     | 2      | 1     | 1      |
| 37839  | 2     | 2      | 2     | 2      |
| 37871  | 3     | 3      | 3     | 3      |
| 37876  | 1     | 3      | 0     |        |
| 37879  | 1     | 2      | 2     | 1      |
| 37894  | 0     |        | 1     | 1      |
| 37895  | 2     | 2      | 2     | 1      |
| 37901  | 2     | 3      | 0     |        |
| 37926  | 1     | 1      | 0     |        |
| 37937  | 2     | 1      | 2     | 1      |
| 37938  | 1     | 4      | 0     |        |
| 37959  | 1     | 1      | 0     |        |
| 37970  | 0     |        | 0     |        |
| 37972  | 2     | 2      | 4     | 3      |
| 37988  | 2     | 1      | 2     | 1      |
| 37989  | 1     | 1      | 1     | 3      |
| 38000  | 1     | 1      | 1     | 1      |
| 38028  | 4     | 3      | 3     | 3      |
| 38042  | 2     | 2      | 2     | 2      |
| 38052  | 0     |        | 0     |        |
| 38056  | 0     |        | 0     |        |
| 38106  | 1     | 2      | 2     | 2      |
| 38114  | 3     | 4      | 4     | 4      |
| 38134  | 0     |        | 0     |        |
| 38135  | 0     |        | 0     |        |
| 38139  | 1     | 3      | 2     | 1      |
| 38160  | 0     |        | 0     |        |
| 38164  | 0     |        | 0     |        |



| respid | Q22_1 | Q22a_1 | Q23_1 | Q23a_1 |
|--------|-------|--------|-------|--------|
| 38168  | 0     |        | 0     |        |
| 38173  | 0     |        | 0     |        |
| 38193  | 1     | 3      | 1     | 3      |
| 38204  | 0     |        | 0     |        |
| 38206  | 1     | 1      | 0     |        |
| 38233  | 2     | 3      | 2     | 3      |
| 38242  | 0     |        | 0     |        |
| 38245  | 1     | 1      | 2     | 1      |
| 38261  | 3     | 2      | 2     | 2      |
| 38288  | 0     |        | 0     |        |
| 38296  | 1     | 1      | 0     |        |
| 38299  | 2     | 1      | 2     | 1      |
| 38300  | 2     | 2      | 3     | 2      |
| 38303  | 0     |        | 1     | 1      |
| 38317  | 0     |        | 0     |        |
| 38328  | 1     | 3      | 3     | 2      |
| 38333  | 0     |        | 0     |        |
| 38336  | 0     |        | 0     |        |
| 38338  | 0     |        | 0     |        |
| 38342  | 2     | 2      | 0     |        |
| 38360  | 0     |        | 0     |        |
| 38362  | 1     | 1      | 2     | 3      |
| 38364  | 1     | 3      | 1     | 2      |
| 38402  | 0     |        | 1     | 0      |
| 38423  | 3     | 4      | 3     | 3      |
| 38424  | 2     | 2      | 2     | 2      |
| 38435  | 2     | 4      | 4     | 4      |
| 38450  | 0     |        | 0     |        |
| 38455  | 1     | 1      | 0     |        |
| 38467  | 0     |        | 0     |        |
| 38468  | 0     |        | 0     |        |
| 38472  | 1     | 0      | 0     |        |

| respid | Q22_1 | Q22a_1 | Q23_1 | Q23a_1 |
|--------|-------|--------|-------|--------|
| 38484  | 0     |        | 0     |        |
| 38498  | 0     |        | 1     | 2      |
| 38507  | 0     |        | 0     |        |
| 38511  | 0     |        | 0     |        |
| 38524  | 4     | 3      | 4     | 3      |
| 38526  | 0     |        | 0     |        |
| 38534  | 1     | 1      | 0     |        |
| 38536  | 1     | 1      | 0     |        |
| 38539  | 0     |        | 0     |        |
| 38547  | 0     |        | 0     |        |
| 38549  | 0     |        | 0     |        |
| 38575  | 1     | 1      | 1     | 1      |
| 38579  | 0     |        | 0     |        |
| 38585  | 0     |        | 0     |        |
| 38589  | 3     | 4      | 3     | 3      |
| 38595  | 2     | 3      | 2     | 3      |
| 38602  | 0     |        | 0     |        |
| 38603  | 1     | 1      | 2     | 2      |
| 38612  | 0     |        | 1     | 1      |
| 38621  | 3     | 3      | 3     | 2      |
| 38624  | 3     | 3      | 0     |        |
| 38636  | 0     |        | 0     |        |
| 38656  | 1     | 1      | 0     |        |
| 38668  | 0     |        | 0     |        |
| 38675  | 0     |        | 0     |        |
| 38676  | 0     |        | 0     |        |
| 38682  | 2     | 1      | 1     | 0      |
| 38689  | 0     |        | 0     |        |
| 38702  | 0     |        | 0     |        |
| 38704  | 3     | 4      | 4     | 3      |
| 38713  | 0     |        | 0     |        |
| 38718  | 0     |        | 2     | 1      |

| respid | Q22_1 | Q22a_1 | Q23_1 | Q23a_1 |
|--------|-------|--------|-------|--------|
| 38725  | 0     |        | 0     |        |
| 38730  | 3     | 2      | 2     | 2      |
| 38737  | 1     | 2      | 2     | 3      |
| 38738  | 3     | 3      | 1     | 2      |
| 38744  | 0     |        | 0     |        |
| 38746  | 0     |        | 0     |        |
| 38753  | 0     |        | 0     |        |
| 38756  | 2     | 2      | 2     | 2      |
| 38760  | 0     |        | 1     | 1      |
| 38762  | 3     | 4      | 4     | 3      |
| 38765  | 0     |        | 0     |        |
| 38769  | 1     | 1      | 1     | 0      |
| 38781  | 3     | 3      | 4     | 3      |
| 38786  | 0     |        | 0     |        |
| 38790  | 0     |        | 1     | 1      |
| 38793  | 0     |        | 0     |        |
| 38797  | 1     | 1      | 1     | 1      |
| 38802  | 3     | 2      | 0     |        |
| 38815  | 3     | 3      | 2     | 1      |
| 38826  | 3     | 3      | 2     | 3      |
| 38828  | 0     |        | 0     |        |
| 38829  | 3     | 3      | 3     | 3      |
| 38835  | 3     | 2      | 3     | 2      |
| 38842  | 3     | 3      | 4     | 3      |
| 38853  | 1     | 2      | 1     | 1      |
| 38855  | 3     | 3      | 3     | 3      |
| 38860  | 4     | 3      | 2     | 1      |
| 38869  | 0     |        | 0     |        |
| 38882  | 2     | 1      | 5     | 4      |
| 38897  | 0     |        | 1     | 1      |
| 38903  | 3     | 4      | 4     | 3      |
| 38910  | 4     | 4      | 2     | 3      |

| respid | Q22_1 | Q22a_1 | Q23_1 | Q23a_1 |
|--------|-------|--------|-------|--------|
| 38948  | 4     | 3      | 2     | 3      |
| 38949  | 1     | 1      | 2     | 1      |
| 38953  | 3     | 3      | 3     | 3      |
| 38989  | 2     | 2      | 2     | 2      |
| 38997  | 2     | 2      | 1     | 1      |
| 38999  | 0     |        | 0     |        |
| 39002  | 3     | 4      | 1     | 2      |
| 39003  | 1     | 1      | 3     | 3      |
| 39006  | 0     |        | 2     | 0      |
| 39014  | 0     |        | 0     |        |
| 39017  | 3     | 3      | 3     | 3      |
| 39018  | 4     | 3      | 4     | 3      |
| 39025  | 1     | 3      | 1     | 3      |
| 39031  | 3     | 3      | 1     | 2      |
| 39061  | 4     | 3      | 0     |        |
| 39131  | 0     |        | 0     |        |
| 39153  | 5     | 2      | 1     | 1      |
| 39194  | 1     | 3      | 1     | 3      |
| 39204  | 0     |        | 0     |        |
| 39208  | 1     | 3      | 0     |        |
| 39213  | 0     |        | 0     |        |
| 39231  | 1     | 1      | 1     | 1      |
| 39251  | 1     | 1      | 2     | 2      |
| 39257  | 1     | 2      | 0     |        |
| 39262  | 0     |        | 2     | 2      |
| 39269  | 2     | 3      | 2     | 2      |
| 39272  | 0     |        | 0     |        |
| 39280  | 2     | 2      | 2     | 2      |
| 39294  | 3     | 3      | 2     | 2      |
| 39297  | 2     | 2      | 2     | 2      |
| 39300  | 1     | 2      | 0     |        |
| 39307  | 1     | 1      | 3     | 4      |

| respid | Q22_1 | Q22a_1 | Q23_1 | Q23a_1 |
|--------|-------|--------|-------|--------|
| 39320  | 0     |        | 2     | 2      |
| 39333  | 0     |        | 0     |        |
| 39335  | 4     | 4      | 4     | 3      |
| 39339  | 1     | 1      | 2     | 2      |
| 39375  | 0     |        | 0     |        |
| 39377  | 0     |        | 0     |        |
| 39380  | 1     | 1      | 2     | 1      |
| 39425  | 0     |        | 0     |        |
| 39590  | 0     |        | 1     | 0      |
| 40529  | 0     |        | 0     |        |
| 40702  | 0     |        | 0     |        |
| 40788  | 0     |        | 1     | 1      |
| 40841  | 0     |        | 0     |        |
| 40965  | 0     |        | 0     |        |
| 41092  | 1     | 0      | 1     | 0      |
| 41534  | 0     |        | 0     |        |
| 41919  | 0     |        | 0     |        |
| 42110  | 0     |        | 0     |        |
| 42135  | 0     |        | 0     |        |
| 42142  | 0     |        | 0     |        |
| 42163  | 0     |        | 0     |        |
| 42164  | 0     |        | 0     |        |
| 42172  | 0     |        | 2     | 2      |
| 42177  | 0     |        | 0     |        |
| 42181  | 0     |        | 1     | 0      |
| 42193  | 2     | 3      | 4     | 3      |
| 42196  | 2     | 2      | 0     |        |
| 42202  | 0     |        | 1     | 1      |
| 42248  | 0     |        | 3     | 2      |
| 42283  | 2     | 0      | 2     | 1      |
| 42284  | 2     | 1      | 2     | 2      |
| 42323  | 0     |        | 0     |        |

| respid | Q22_1 | Q22a_1 | Q23_1 | Q23a_1 |
|--------|-------|--------|-------|--------|
| 42349  | 0     |        | 0     |        |
| 42351  | 0     |        | 0     |        |
| 42357  | 0     |        | 0     |        |
| 42366  | 0     |        | 0     |        |
| 42380  | 0     |        | 0     |        |
| 42414  | 3     | 3      | 3     | 3      |
| 42420  | 3     | 3      | 4     | 3      |
| 42454  | 0     |        | 0     |        |
| 42458  | 0     |        | 0     |        |
| 42461  | 0     |        | 1     | 0      |
| 42488  | 3     | 2      | 0     |        |
| 42511  | 0     |        | 0     |        |
| 42512  | 0     |        | 0     |        |
| 42530  | 1     | 1      | 1     | 2      |
| 42531  | 0     |        | 1     | 2      |
| 42533  | 0     |        | 0     |        |
| 42549  | 0     |        | 0     |        |
| 42550  | 3     | 2      | 1     | 1      |
| 42553  | 0     |        | 0     |        |
| 42562  | 2     | 2      | 2     | 2      |
| 42567  | 1     | 1      | 0     |        |
| 42589  | 1     | 1      | 1     | 1      |
| 42604  | 1     | 0      | 1     | 0      |
| 42618  | 0     |        | 0     |        |
| 42621  | 3     | 2      | 3     | 3      |
| 42627  | 1     | 1      | 0     |        |
| 42641  | 0     |        | 0     |        |
| 42655  | 3     | 2      | 4     | 4      |
| 42666  | 1     | 1      | 0     |        |
| 42667  | 0     |        | 2     | 2      |
| 42697  | 2     | 3      | 1     | 1      |
| 42703  | 1     | 0      | 1     | 0      |

| respid | Q22_1 | Q22a_1 | Q23_1 | Q23a_1 |
|--------|-------|--------|-------|--------|
| 42712  | 2     | 2      | 0     |        |
| 42731  | 1     | 2      | 3     | 1      |
| 42780  | 0     |        | 0     |        |
| 42785  | 1     | 1      | 1     | 1      |
| 42788  | 1     | 1      | 0     |        |
| 42802  | 2     | 3      | 2     | 1      |
| 42818  | 1     | 1      | 1     | 1      |
| 42821  | 2     | 1      | 2     | 0      |
| 42824  | 0     |        | 1     | 1      |
| 42831  | 0     |        | 0     |        |
| 42836  | 2     | 1      | 2     | 1      |
| 42864  | 3     | 2      | 1     | 1      |
| 42875  | 1     | 1      | 0     |        |
| 42891  | 4     | 4      | 4     | 3      |
| 42897  | 0     |        | 0     |        |
| 42900  | 0     |        | 0     |        |
| 42902  | 2     | 1      | 3     | 3      |
| 42921  | 0     |        | 0     |        |
| 42925  | 1     | 1      | 1     | 1      |
| 42944  | 0     |        | 0     |        |
| 42950  | 0     |        | 0     |        |
| 42963  | 0     |        | 0     |        |
| 42967  | 3     | 0      | 1     | 1      |
| 42985  | 0     |        | 0     |        |
| 42990  | 0     |        | 1     | 1      |
| 42996  | 3     | 2      | 3     | 2      |
| 43002  | 1     | 2      | 0     |        |
| 43004  | 0     |        | 0     |        |
| 43012  | 1     | 0      | 0     |        |
| 43027  | 4     | 2      | 0     |        |
| 43028  | 0     |        | 1     | 0      |
| 43029  | 1     | 0      | 1     | 0      |

| respid | Q22_1 | Q22a_1 | Q23_1 | Q23a_1 |
|--------|-------|--------|-------|--------|
| 43031  | 2     | 1      | 1     | 1      |
| 43042  | 0     |        | 0     |        |
| 43054  | 0     |        | 0     |        |
| 43058  | 0     |        | 0     |        |
| 43064  | 1     | 1      | 0     |        |
| 43069  | 0     |        | 0     |        |
| 43071  | 0     |        | 0     |        |
| 43072  | 0     |        | 1     | 0      |
| 43077  | 1     | 1      | 1     | 1      |
| 43078  | 4     | 2      | 4     | 2      |
| 43082  | 0     |        | 0     |        |
| 43092  | 0     |        | 0     |        |
| 43096  | 0     |        | 0     |        |
| 43109  | 0     |        | 0     |        |
| 43113  | 0     |        | 0     |        |
| 43123  | 1     | 0      | 1     | 0      |
| 43127  | 1     | 1      | 1     | 1      |
| 43128  | 0     |        | 1     | 1      |
| 43129  | 0     |        | 0     |        |
| 43133  | 2     | 2      | 2     | 2      |
| 43140  | 0     |        | 0     |        |
| 43143  | 0     |        | 2     | 2      |
| 43149  | 0     |        | 3     | 1      |
| 43150  | 2     | 1      | 1     | 1      |
| 43153  | 4     | 3      | 3     | 2      |
| 43170  | 0     |        | 0     |        |
| 43187  | 1     | 1      | 2     | 1      |
| 43188  | 1     | 3      | 0     |        |
| 43198  | 0     |        | 0     |        |
| 43208  | 0     |        | 0     |        |
| 43216  | 0     |        | 1     | 1      |
| 43222  | 3     | 1      | 0     |        |



| respid | Q22_1 | Q22a_1 | Q23_1 | Q23a_1 |
|--------|-------|--------|-------|--------|
| 43224  | 0     |        | 1     | 1      |
| 43230  | 0     |        | 0     |        |
| 43231  | 2     | 2      | 3     | 2      |
| 43265  | 0     |        | 3     | 1      |
| 43270  | 1     | 2      | 2     | 2      |
| 43283  | 1     | 1      | 1     | 1      |
| 43295  | 2     | 0      | 1     | 1      |
| 43297  | 0     |        | 0     |        |
| 43299  | 3     | 1      | 2     | 3      |
| 43307  | 0     |        | 0     |        |
| 43316  | 1     | 1      | 1     | 1      |
| 43318  | 1     | 1      | 1     | 1      |
| 43319  | 0     |        | 0     |        |
| 43324  | 2     | 1      | 1     | 1      |
| 43325  | 5     | 4      | 0     |        |
| 43327  | 1     | 0      | 2     | 1      |
| 43338  | 0     |        | 1     | 1      |
| 43342  | 0     |        | 1     | 0      |
| 43348  | 1     | 1      | 0     |        |
| 43395  | 1     | 1      | 1     | 1      |
| 43404  | 2     | 2      | 3     | 2      |
| 43406  | 1     | 1      | 1     | 1      |
| 43407  | 0     |        | 0     |        |
| 43411  | 1     | 0      | 1     | 0      |
| 43416  | 3     | 2      | 1     | 2      |
| 43428  | 0     |        | 0     |        |
| 43429  | 2     | 2      | 2     | 2      |
| 43432  | 0     |        | 0     |        |
| 43443  | 0     |        | 0     |        |
| 43455  | 0     |        | 0     |        |
| 43457  | 1     | 1      | 1     | 1      |
| 43458  | 0     |        | 0     |        |

| respid | Q22_1 | Q22a_1 | Q23_1 | Q23a_1 |
|--------|-------|--------|-------|--------|
| 43477  | 3     | 3      | 2     | 1      |
| 43520  | 0     |        | 0     |        |
| 43521  | 0     |        | 0     |        |
| 43550  | 0     |        | 0     |        |
| 43551  | 2     | 2      | 2     | 2      |
| 43554  | 1     | 1      | 2     | 1      |
| 43560  | 1     | 0      | 2     | 1      |
| 43569  | 0     |        | 0     |        |
| 43583  | 1     | 1      | 0     |        |
| 43590  | 0     |        | 1     | 2      |
| 43591  | 0     |        | 0     |        |
| 43595  | 0     |        | 0     |        |
| 43599  | 2     | 2      | 1     | 1      |
| 43606  | 1     | 1      | 0     |        |
| 43609  | 1     | 0      | 0     |        |
| 43629  | 0     |        | 0     |        |
| 43636  | 1     | 1      | 1     | 1      |
| 43661  | 0     |        | 1     | 1      |
| 43668  | 0     |        | 0     |        |
| 43672  | 0     |        | 0     |        |
| 43677  | 2     | 1      | 0     |        |
| 43683  | 2     | 2      | 0     |        |
| 43708  | 2     | 1      | 3     | 2      |
| 43713  | 1     | 1      | 1     | 1      |
| 43718  | 0     |        | 0     |        |
| 43725  | 0     |        | 0     |        |
| 43747  | 2     | 1      | 0     |        |
| 43755  | 0     |        | 0     |        |
| 43770  | 0     |        | 0     |        |
| 43775  | 2     | 2      | 2     | 0      |
| 43788  | 0     |        | 0     |        |
| 43790  | 2     | 3      | 2     | 2      |

| respid | Q22_1 | Q22a_1 | Q23_1 | Q23a_1 |
|--------|-------|--------|-------|--------|
| 43797  | 2     | 1      | 1     | 2      |
| 43798  | 1     | 1      | 1     | 1      |
| 43811  | 2     | 2      | 2     | 1      |
| 43819  | 1     | 1      | 1     | 1      |
| 43821  | 1     | 1      | 1     | 1      |
| 43822  | 0     |        | 0     |        |
| 43825  | 2     | 3      | 3     | 3      |
| 43826  | 1     | 1      | 0     |        |
| 43831  | 2     | 2      | 0     |        |
| 43836  | 1     | 1      | 2     | 1      |
| 43852  | 1     | 1      | 2     | 1      |
| 43857  | 0     |        | 0     |        |
| 43858  | 1     | 1      | 0     |        |
| 43859  | 1     | 0      | 1     | 1      |
| 43863  | 0     |        | 0     |        |
| 43868  | 2     | 1      | 1     | 1      |
| 43872  | 2     | 2      | 1     | 1      |
| 43874  | 1     | 2      | 2     | 2      |
| 43882  | 0     |        | 0     |        |
| 43886  | 0     |        | 0     |        |
| 43903  | 1     | 1      | 0     |        |
| 43929  | 0     |        | 1     | 1      |
| 43932  | 2     | 1      | 0     |        |
| 43936  | 1     | 0      | 1     | 0      |
| 43962  | 0     |        | 0     |        |
| 43964  | 1     | 0      | 0     |        |
| 43968  | 0     |        | 1     | 2      |
| 43979  | 2     | 1      | 0     |        |
| 44006  | 3     | 3      | 2     | 2      |
| 44009  | 0     |        | 0     |        |
| 44023  | 2     | 2      | 1     | 1      |
| 44035  | 1     | 2      | 1     | 1      |

| respid | Q22_1 | Q22a_1 | Q23_1 | Q23a_1 |
|--------|-------|--------|-------|--------|
| 44038  | 1     | 2      | 3     | 2      |
| 44039  | 2     | 1      | 1     | 3      |
| 44043  | 1     | 1      | 2     | 2      |
| 44048  | 1     | 1      | 1     | 2      |
| 44050  | 0     |        | 0     |        |
| 44051  | 1     | 1      | 1     | 1      |
| 44061  | 1     | 2      | 1     | 1      |
| 44063  | 2     | 1      | 1     | 1      |
| 44072  | 1     | 1      | 1     | 1      |
| 44075  | 1     | 2      | 2     | 1      |
| 44089  | 1     | 2      | 3     | 1      |
| 44090  | 4     | 4      | 4     | 3      |
| 44091  | 3     | 1      | 1     | 2      |
| 44092  | 1     | 1      | 0     |        |
| 44110  | 1     | 1      | 1     | 1      |
| 44112  | 2     | 1      | 2     | 1      |
| 44114  | 1     | 1      | 1     | 2      |
| 44143  | 2     | 2      | 2     | 2      |
| 44179  | 0     |        | 1     | 1      |
| 44234  | 1     | 2      | 1     | 1      |
| 44236  | 0     |        | 0     |        |
| 44239  | 1     | 1      | 1     | 1      |
| 44241  | 1     | 1      | 1     | 2      |
| 44253  | 0     |        | 0     |        |
| 44260  | 1     | 1      | 2     | 1      |
| 44261  | 2     | 2      | 1     | 1      |
| 44263  | 0     |        | 2     | 2      |
| 44264  | 0     |        | 0     |        |
| 44265  | 0     |        | 0     |        |
| 44267  | 1     | 2      | 2     | 1      |
| 44306  | 1     | 1      | 0     |        |
| 44309  | 3     | 2      | 3     | 2      |

| respid | Q22_1 | Q22a_1 | Q23_1 | Q23a_1 |
|--------|-------|--------|-------|--------|
| 44310  | 1     | 1      | 0     |        |
| 44361  | 0     |        | 0     |        |
| 44380  | 1     | 2      | 0     |        |
| 44386  | 1     | 1      | 0     |        |
| 44419  | 0     |        | 0     |        |
| 44426  | 1     | 1      | 1     | 1      |
| 44479  | 0     |        | 0     |        |
| 44484  | 0     |        | 1     | 2      |
| 44487  | 0     |        | 0     |        |
| 44509  | 0     |        | 0     |        |
| 44540  | 0     |        | 0     |        |
| 44551  | 2     | 2      | 1     | 1      |
| 44553  | 0     |        | 0     |        |
| 44650  | 1     | 0      | 0     |        |
| 44665  | 2     | 2      | 1     | 2      |
| 44779  | 0     |        | 0     |        |
| 44797  | 3     | 1      | 0     |        |
| 44807  | 0     |        | 1     | 1      |
| 44815  | 2     | 2      | 0     |        |
| 44836  | 0     |        | 0     |        |
| 44868  | 0     |        | 0     |        |
| 44927  | 2     | 2      | 3     | 2      |
| 44983  | 0     |        | 0     |        |
| 45040  | 0     |        | 0     |        |
| 45051  | 1     | 2      | 1     | 2      |
| 45067  | 0     |        | 1     | 1      |
| 45074  | 0     |        | 0     |        |
| 45115  | 1     | 0      | 0     |        |
| 45187  | 2     | 1      | 3     | 2      |
| 45221  | 1     | 3      | 0     |        |
| 45279  | 1     | 1      | 1     | 1      |
| 45308  | 1     | 1      | 2     | 1      |

| respid | Q22_1 | Q22a_1 | Q23_1 | Q23a_1 |
|--------|-------|--------|-------|--------|
| 45317  | 0     |        | 0     |        |
| 45379  | 1     | 1      | 0     |        |
| 45451  | 0     |        | 0     |        |
| 45472  | 2     | 2      | 0     |        |
| 45474  | 2     | 3      | 2     | 3      |
| 45544  | 4     | 4      | 0     |        |
| 45561  | 2     | 2      | 2     | 1      |
| 45596  | 4     | 1      | 1     | 1      |

**InstrumIPSS/ICS**

**IPSS/ICS**

**Symptom** Voiding

Storage

**Type of R**Symptom

Bother

Symptom

Bother

**Descripti**Straining

Symptom Bother

Nocturia

Symptom Bother

respid Q24\_1

Q24a\_1

Q25\_1

Q25a\_1

|     |   |   |   |   |
|-----|---|---|---|---|
| 241 | 1 | 1 | 5 | 2 |
| 242 | 0 |   | 2 | 1 |
| 243 | 1 | 1 | 1 | 1 |
| 244 | 0 |   | 1 | 3 |
| 245 | 1 | 1 | 0 |   |
| 246 | 1 | 1 | 1 | 1 |
| 247 | 3 | 2 | 2 | 2 |
| 253 | 0 |   | 2 | 1 |
| 256 | 5 | 1 | 1 | 3 |
| 257 | 1 | 1 | 3 | 2 |
| 258 | 2 | 1 | 5 | 2 |
| 259 | 1 | 1 | 0 |   |
| 263 | 1 | 0 | 0 |   |
| 264 | 0 |   | 4 | 0 |
| 265 | 4 | 3 | 1 | 2 |
| 266 | 0 |   | 1 | 0 |
| 268 | 1 | 1 | 0 |   |
| 270 | 0 |   | 2 | 0 |
| 272 | 1 | 1 | 1 | 1 |
| 274 | 1 | 1 | 1 | 1 |

| respid | Q24_1 | Q24a_1 | Q25_1 | Q25a_1 |
|--------|-------|--------|-------|--------|
| 275    | 0     |        | 0     |        |
| 276    | 0     |        | 1     | 0      |
| 277    | 0     |        | 0     |        |
| 279    | 1     | 1      | 1     | 1      |
| 286    | 0     |        | 1     | 1      |
| 290    | 0     |        | 1     | 1      |
| 291    | 0     |        | 0     |        |
| 295    | 0     |        | 0     |        |
| 297    | 2     | 2      | 1     | 1      |
| 299    | 1     | 1      | 2     | 1      |
| 300    | 1     | 1      | 1     | 0      |
| 303    | 1     | 0      | 0     |        |
| 304    | 0     |        | 0     |        |
| 306    | 0     |        | 1     | 0      |
| 307    | 0     |        | 2     | 2      |
| 312    | 5     | 3      | 3     | 3      |
| 315    | 1     | 1      | 0     |        |
| 317    | 0     |        | 0     |        |
| 322    | 1     | 1      | 2     | 1      |
| 335    | 2     | 1      | 1     | 1      |
| 374    | 2     | 2      | 1     | 1      |
| 378    | 1     | 1      | 1     | 1      |
| 380    | 1     | 1      | 0     |        |
| 382    | 4     | 3      | 1     | 1      |
| 384    | 1     | 1      | 1     | 2      |
| 385    | 1     | 1      | 5     | 2      |
| 395    | 1     | 2      | 2     | 2      |
| 396    | 0     |        | 0     |        |
| 398    | 0     |        | 0     |        |
| 402    | 4     | 3      | 3     | 3      |
| 414    | 0     |        | 0     |        |
| 415    | 0     |        | 1     | 0      |



| respid | Q24_1 | Q24a_1 | Q25_1 | Q25a_1 |
|--------|-------|--------|-------|--------|
| 416    | 0     |        | 0     |        |
| 420    | 1     | 1      | 4     | 3      |
| 421    | 1     | 1      | 5     | 1      |
| 422    | 0     |        | 2     | 0      |
| 423    | 0     |        | 2     | 1      |
| 424    | 0     |        | 0     |        |
| 425    | 1     | 0      | 2     | 0      |
| 428    | 0     |        | 1     | 0      |
| 429    | 0     |        | 2     | 0      |
| 431    | 0     |        | 0     |        |
| 437    | 0     |        | 1     | 1      |
| 438    | 0     |        | 0     |        |
| 441    | 0     |        | 1     | 1      |
| 444    | 0     |        | 0     |        |
| 448    | 0     |        | 0     |        |
| 449    | 1     | 1      | 5     | 2      |
| 457    | 1     | 1      | 5     | 1      |
| 460    | 0     |        | 0     |        |
| 469    | 1     | 1      | 1     | 1      |
| 471    | 1     | 1      | 3     | 3      |
| 473    | 0     |        | 1     | 1      |
| 476    | 0     |        | 4     | 1      |
| 479    | 0     |        | 1     | 0      |
| 485    | 0     |        | 0     |        |
| 488    | 0     |        | 2     | 1      |
| 494    | 0     |        | 4     | 0      |
| 496    | 0     |        | 0     |        |
| 501    | 0     |        | 0     |        |
| 502    | 3     | 2      | 2     | 2      |
| 503    | 0     |        | 2     | 2      |
| 506    | 0     |        | 0     |        |
| 514    | 1     | 1      | 4     | 2      |

| respid | Q24_1 | Q24a_1 | Q25_1 | Q25a_1 |
|--------|-------|--------|-------|--------|
| 515    | 0     |        | 2     | 1      |
| 516    | 0     |        | 1     | 0      |
| 519    | 0     |        | 3     | 3      |
| 522    | 0     |        | 0     |        |
| 525    | 1     | 1      | 0     |        |
| 528    | 0     |        | 1     | 0      |
| 532    | 1     | 1      | 0     |        |
| 536    | 1     | 2      | 1     | 2      |
| 539    | 0     |        | 1     | 0      |
| 540    | 0     |        | 1     | 0      |
| 547    | 0     |        | 2     | 1      |
| 551    | 0     |        | 0     |        |
| 554    | 1     | 1      | 5     | 3      |
| 558    | 1     | 1      | 1     | 1      |
| 563    | 0     |        | 1     | 0      |
| 564    | 1     | 1      | 2     | 1      |
| 565    | 0     |        | 2     | 1      |
| 567    | 0     |        | 1     | 0      |
| 569    | 1     | 0      | 1     | 0      |
| 572    | 1     | 1      | 1     | 1      |
| 574    | 0     |        | 1     | 2      |
| 583    | 1     | 1      | 5     | 2      |
| 589    | 0     |        | 1     | 0      |
| 592    | 1     | 1      | 1     | 0      |
| 593    | 0     |        | 0     |        |
| 594    | 2     | 3      | 1     | 2      |
| 597    | 1     | 1      | 3     | 0      |
| 601    | 0     |        | 3     | 2      |
| 607    | 1     | 1      | 1     | 1      |
| 610    | 1     | 1      | 0     |        |
| 612    | 4     | 3      | 1     | 2      |
| 627    | 0     |        | 0     |        |

| respid | Q24_1 | Q24a_1 | Q25_1 | Q25a_1 |
|--------|-------|--------|-------|--------|
| 631    | 0     |        | 1     | 0      |
| 633    | 0     |        | 1     | 1      |
| 636    | 0     |        | 1     | 0      |
| 656    | 0     |        | 0     |        |
| 659    | 0     |        | 1     | 1      |
| 670    | 0     |        | 0     |        |
| 672    | 0     |        | 1     | 0      |
| 673    | 1     | 1      | 1     | 1      |
| 675    | 0     |        | 1     | 0      |
| 676    | 2     | 2      | 2     | 2      |
| 679    | 2     | 1      | 1     | 1      |
| 683    | 1     | 0      | 0     |        |
| 684    | 1     | 1      | 1     | 0      |
| 690    | 0     |        | 1     | 0      |
| 701    | 5     | 3      | 2     | 2      |
| 709    | 4     | 3      | 2     | 2      |
| 719    | 0     |        | 1     | 0      |
| 726    | 0     |        | 2     | 1      |
| 730    | 0     |        | 2     | 1      |
| 731    | 0     |        | 1     | 1      |
| 732    | 0     |        | 0     |        |
| 733    | 0     |        | 1     | 0      |
| 735    | 0     |        | 1     | 0      |
| 738    | 0     |        | 0     |        |
| 740    | 0     |        | 1     | 0      |
| 742    | 0     |        | 0     |        |
| 744    | 0     |        | 1     | 0      |
| 749    | 0     |        | 1     | 0      |
| 751    | 0     |        | 1     | 1      |
| 752    | 0     |        | 1     | 2      |
| 753    | 0     |        | 5     | 3      |
| 755    | 0     |        | 1     | 1      |

| respid | Q24_1 | Q24a_1 | Q25_1 | Q25a_1 |
|--------|-------|--------|-------|--------|
| 756    | 0     |        | 0     |        |
| 759    | 0     |        | 1     | 0      |
| 760    | 1     | 1      | 1     | 1      |
| 763    | 0     |        | 1     | 1      |
| 764    | 0     |        | 0     |        |
| 765    | 0     |        | 2     | 0      |
| 766    | 0     |        | 0     |        |
| 767    | 0     |        | 3     | 0      |
| 771    | 0     |        | 2     | 1      |
| 773    | 0     |        | 1     | 1      |
| 774    | 0     |        | 1     | 1      |
| 775    | 2     | 1      | 1     | 1      |
| 776    | 1     | 1      | 1     | 1      |
| 778    | 1     | 1      | 1     | 2      |
| 780    | 0     |        | 2     | 2      |
| 781    | 0     |        | 0     |        |
| 782    | 1     | 1      | 2     | 2      |
| 783    | 0     |        | 5     | 2      |
| 786    | 3     | 2      | 3     | 2      |
| 788    | 0     |        | 0     |        |
| 792    | 0     |        | 1     | 0      |
| 794    | 2     | 2      | 2     | 3      |
| 795    | 0     |        | 1     | 0      |
| 799    | 1     | 1      | 3     | 2      |
| 800    | 0     |        | 0     |        |
| 801    | 2     | 1      | 5     | 3      |
| 804    | 0     |        | 2     | 0      |
| 806    | 0     |        | 0     |        |
| 807    | 2     | 1      | 5     | 1      |
| 808    | 3     | 3      | 2     | 3      |
| 809    | 0     |        | 0     |        |
| 811    | 0     |        | 1     | 0      |

| respid | Q24_1 | Q24a_1 | Q25_1 | Q25a_1 |
|--------|-------|--------|-------|--------|
| 812    | 0     |        | 1     | 1      |
| 815    | 0     |        | 1     | 0      |
| 817    | 0     |        | 0     |        |
| 818    | 0     |        | 1     | 1      |
| 819    | 0     |        | 1     | 0      |
| 821    | 0     |        | 0     |        |
| 824    | 0     |        | 5     | 3      |
| 825    | 0     |        | 1     | 0      |
| 828    | 0     |        | 1     | 1      |
| 832    | 2     | 1      | 3     | 1      |
| 834    | 0     |        | 1     | 0      |
| 835    | 3     | 3      | 3     | 3      |
| 836    | 0     |        | 1     | 0      |
| 837    | 0     |        | 1     | 0      |
| 840    | 1     | 1      | 1     | 1      |
| 841    | 0     |        | 2     | 0      |
| 845    | 0     |        | 0     |        |
| 846    | 0     |        | 1     | 0      |
| 849    | 0     |        | 1     | 0      |
| 852    | 0     |        | 1     | 0      |
| 854    | 5     | 1      | 1     | 0      |
| 856    | 0     |        | 1     | 0      |
| 858    | 0     |        | 1     | 1      |
| 859    | 1     | 0      | 3     | 0      |
| 861    | 0     |        | 1     | 1      |
| 863    | 0     |        | 1     | 0      |
| 864    | 0     |        | 5     | 2      |
| 866    | 0     |        | 1     | 0      |
| 869    | 0     |        | 2     | 0      |
| 870    | 0     |        | 1     | 0      |
| 871    | 0     |        | 1     | 0      |
| 873    | 3     | 3      | 1     | 2      |

| respid | Q24_1 | Q24a_1 | Q25_1 | Q25a_1 |
|--------|-------|--------|-------|--------|
| 879    | 0     |        | 0     |        |
| 880    | 0     |        | 2     | 0      |
| 881    | 0     |        | 1     | 1      |
| 882    | 0     |        | 4     | 2      |
| 885    | 0     |        | 0     |        |
| 886    | 0     |        | 2     | 1      |
| 887    | 4     | 2      | 2     | 2      |
| 888    | 0     |        | 1     | 1      |
| 889    | 0     |        | 1     | 1      |
| 890    | 1     | 0      | 0     |        |
| 900    | 0     |        | 0     |        |
| 901    | 3     | 1      | 2     | 1      |
| 902    | 0     |        | 2     | 2      |
| 903    | 0     |        | 0     |        |
| 906    | 0     |        | 2     | 1      |
| 907    | 0     |        | 2     | 2      |
| 908    | 1     | 1      | 1     | 1      |
| 910    | 0     |        | 1     | 1      |
| 911    | 0     |        | 0     |        |
| 912    | 0     |        | 3     | 2      |
| 915    | 0     |        | 0     |        |
| 923    | 1     | 2      | 4     | 3      |
| 925    | 0     |        | 0     |        |
| 926    | 0     |        | 1     | 0      |
| 929    | 0     |        | 0     |        |
| 932    | 0     |        | 3     | 2      |
| 933    | 0     |        | 5     | 1      |
| 934    | 0     |        | 5     | 1      |
| 938    | 1     | 1      | 2     | 1      |
| 941    | 0     |        | 0     |        |
| 942    | 0     |        | 2     | 1      |
| 943    | 0     |        | 0     |        |

| respid | Q24_1 | Q24a_1 | Q25_1 | Q25a_1 |
|--------|-------|--------|-------|--------|
| 945    | 0     |        | 1     | 0      |
| 946    | 0     |        | 0     |        |
| 947    | 0     |        | 0     |        |
| 948    | 0     |        | 1     | 0      |
| 949    | 0     |        | 2     | 0      |
| 952    | 0     |        | 5     | 0      |
| 956    | 0     |        | 1     | 0      |
| 957    | 0     |        | 1     | 0      |
| 959    | 0     |        | 0     |        |
| 961    | 1     | 0      | 2     | 1      |
| 962    | 2     | 3      | 2     | 4      |
| 965    | 2     | 1      | 1     | 1      |
| 967    | 1     | 1      | 3     | 0      |
| 969    | 0     |        | 1     | 1      |
| 970    | 0     |        | 0     |        |
| 973    | 0     |        | 2     | 0      |
| 974    | 0     |        | 2     | 1      |
| 975    | 0     |        | 3     | 1      |
| 976    | 0     |        | 0     |        |
| 977    | 0     |        | 0     |        |
| 979    | 0     |        | 0     |        |
| 981    | 0     |        | 0     |        |
| 983    | 0     |        | 0     |        |
| 987    | 0     |        | 0     |        |
| 991    | 0     |        | 0     |        |
| 992    | 0     |        | 1     | 0      |
| 993    | 0     |        | 3     | 0      |
| 994    | 0     |        | 2     | 2      |
| 995    | 3     | 2      | 2     | 3      |
| 998    | 0     |        | 1     | 1      |
| 1000   | 1     | 1      | 3     | 2      |
| 1001   | 0     |        | 4     | 2      |

| respid | Q24_1 | Q24a_1 | Q25_1 | Q25a_1 |
|--------|-------|--------|-------|--------|
| 1002   | 0     |        | 0     |        |
| 1004   | 0     |        | 2     | 0      |
| 1005   | 1     | 1      | 1     | 1      |
| 1006   | 0     |        | 2     | 1      |
| 1007   | 0     |        | 0     |        |
| 1009   | 0     |        | 0     |        |
| 1013   | 0     |        | 4     | 2      |
| 1015   | 0     |        | 1     | 0      |
| 1020   | 1     | 1      | 1     | 1      |
| 1022   | 0     |        | 2     | 1      |
| 1024   | 0     |        | 1     | 1      |
| 1025   | 0     |        | 0     |        |
| 1027   | 0     |        | 0     |        |
| 1031   | 0     |        | 0     |        |
| 1037   | 0     |        | 1     | 0      |
| 1039   | 0     |        | 1     | 0      |
| 1040   | 0     |        | 0     |        |
| 1056   | 2     | 2      | 5     | 2      |
| 1057   | 1     | 0      | 1     | 0      |
| 1062   | 0     |        | 0     |        |
| 1069   | 1     | 0      | 1     | 0      |
| 1070   | 0     |        | 1     | 0      |
| 1072   | 0     |        | 1     | 1      |
| 1076   | 0     |        | 1     | 0      |
| 1077   | 0     |        | 1     | 0      |
| 1078   | 0     |        | 1     | 0      |
| 1080   | 0     |        | 0     |        |
| 1094   | 0     |        | 3     | 2      |
| 1098   | 2     | 1      | 2     | 1      |
| 1099   | 0     |        | 1     | 0      |
| 1102   | 0     |        | 1     | 0      |
| 1110   | 0     |        | 0     |        |



| respid | Q24_1 | Q24a_1 | Q25_1 | Q25a_1 |
|--------|-------|--------|-------|--------|
| 1117   | 0     |        | 1     | 1      |
| 1119   | 0     |        | 0     |        |
| 1126   | 1     | 1      | 1     | 0      |
| 1127   | 0     |        | 1     | 0      |
| 1130   | 0     |        | 1     | 0      |
| 1131   | 0     |        | 1     | 0      |
| 1135   | 2     | 4      | 2     | 3      |
| 1138   | 2     | 1      | 1     | 1      |
| 1139   | 0     |        | 0     |        |
| 1140   | 0     |        | 1     | 0      |
| 1142   | 0     |        | 0     |        |
| 1143   | 0     |        | 0     |        |
| 1145   | 0     |        | 1     | 0      |
| 1149   | 0     |        | 0     |        |
| 1152   | 1     | 0      | 1     | 0      |
| 1160   | 0     |        | 1     | 1      |
| 1164   | 0     |        | 0     |        |
| 1165   | 0     |        | 1     | 0      |
| 1169   | 0     |        | 0     |        |
| 1170   | 0     |        | 1     | 1      |
| 1179   | 0     |        | 1     | 1      |
| 1180   | 0     |        | 1     | 0      |
| 1183   | 0     |        | 0     |        |
| 1187   | 0     |        | 1     | 0      |
| 1188   | 0     |        | 1     | 0      |
| 1193   | 0     |        | 0     |        |
| 1194   | 2     | 2      | 2     | 2      |
| 1197   | 0     |        | 1     | 1      |
| 1202   | 0     |        | 0     |        |
| 1204   | 2     | 3      | 5     | 4      |
| 1211   | 0     |        | 0     |        |
| 1224   | 1     | 1      | 2     | 1      |

| respid | Q24_1 | Q24a_1 | Q25_1 | Q25a_1 |
|--------|-------|--------|-------|--------|
| 1225   | 0     |        | 0     |        |
| 1230   | 0     |        | 1     | 1      |
| 1232   | 0     |        | 2     | 2      |
| 1233   | 1     | 2      | 5     | 3      |
| 1234   | 0     |        | 1     | 1      |
| 1235   | 1     | 1      | 2     | 2      |
| 1236   | 0     |        | 2     | 2      |
| 1237   | 0     |        | 3     | 1      |
| 1238   | 0     |        | 1     | 2      |
| 1239   | 0     |        | 1     | 1      |
| 1241   | 0     |        | 1     | 1      |
| 1242   | 0     |        | 0     |        |
| 1244   | 3     | 2      | 5     | 0      |
| 1245   | 1     | 2      | 0     |        |
| 1247   | 3     | 3      | 2     | 3      |
| 1248   | 0     |        | 3     | 1      |
| 1249   | 0     |        | 0     |        |
| 1250   | 0     |        | 0     |        |
| 1251   | 0     |        | 1     | 1      |
| 1252   | 0     |        | 2     | 0      |
| 1253   | 0     |        | 1     | 0      |
| 1254   | 2     | 2      | 5     | 3      |
| 1258   | 0     |        | 1     | 0      |
| 1260   | 0     |        | 1     | 1      |
| 1261   | 0     |        | 1     | 0      |
| 1262   | 0     |        | 3     | 2      |
| 1263   | 3     | 2      | 2     | 3      |
| 1264   | 1     | 1      | 0     |        |
| 1265   | 0     |        | 2     | 2      |
| 1266   | 0     |        | 1     | 1      |
| 1270   | 0     |        | 1     | 0      |
| 1272   | 0     |        | 2     | 2      |

| respid | Q24_1 | Q24a_1 | Q25_1 | Q25a_1 |
|--------|-------|--------|-------|--------|
| 1273   | 0     |        | 0     |        |
| 1276   | 1     | 2      | 1     | 2      |
| 1277   | 0     |        | 1     | 1      |
| 1278   | 4     | 1      | 1     | 3      |
| 1280   | 0     |        | 1     | 0      |
| 1281   | 1     | 1      | 1     | 1      |
| 1282   | 1     | 1      | 3     | 2      |
| 1283   | 0     |        | 0     |        |
| 1288   | 0     |        | 0     |        |
| 1289   | 1     | 1      | 0     |        |
| 1290   | 0     |        | 3     | 2      |
| 1291   | 0     |        | 0     |        |
| 1293   | 0     |        | 1     | 0      |
| 1294   | 1     | 0      | 5     | 2      |
| 1295   | 0     |        | 1     | 1      |
| 1296   | 1     | 3      | 4     | 3      |
| 1297   | 0     |        | 1     | 2      |
| 1298   | 1     | 2      | 2     | 2      |
| 1300   | 2     | 1      | 0     |        |
| 1302   | 0     |        | 1     | 0      |
| 1303   | 0     |        | 2     | 1      |
| 1304   | 0     |        | 4     | 2      |
| 1305   | 1     | 0      | 1     | 0      |
| 1307   | 0     |        | 5     | 1      |
| 1312   | 0     |        | 3     | 0      |
| 1313   | 0     |        | 0     |        |
| 1314   | 0     |        | 0     |        |
| 1317   | 0     |        | 1     | 1      |
| 1318   | 1     | 1      | 2     | 1      |
| 1319   | 1     | 1      | 1     | 0      |
| 1321   | 0     |        | 1     | 0      |
| 1324   | 5     | 3      | 4     | 2      |

| respid | Q24_1 | Q24a_1 | Q25_1 | Q25a_1 |
|--------|-------|--------|-------|--------|
| 1325   | 0     |        | 1     | 2      |
| 1326   | 0     |        | 1     | 0      |
| 1327   | 0     |        | 1     | 0      |
| 1329   | 1     | 1      | 2     | 1      |
| 1330   | 0     |        | 5     | 4      |
| 1331   | 0     |        | 0     |        |
| 1335   | 0     |        | 1     | 1      |
| 1337   | 0     |        | 0     |        |
| 1341   | 1     | 0      | 3     | 0      |
| 1342   | 0     |        | 1     | 0      |
| 1344   | 1     | 1      | 1     | 0      |
| 1345   | 0     |        | 0     |        |
| 1346   | 0     |        | 0     |        |
| 1350   | 1     | 1      | 5     | 1      |
| 1352   | 0     |        | 1     | 0      |
| 1353   | 1     | 1      | 1     | 1      |
| 1354   | 0     |        | 1     | 1      |
| 1355   | 0     |        | 4     | 1      |
| 1357   | 0     |        | 0     |        |
| 1360   | 0     |        | 0     |        |
| 1362   | 1     | 1      | 1     | 0      |
| 1363   | 0     |        | 1     | 1      |
| 1367   | 2     | 1      | 0     |        |
| 1369   | 1     | 1      | 2     | 2      |
| 1371   | 0     |        | 0     |        |
| 1372   | 0     |        | 0     |        |
| 1375   | 0     |        | 0     |        |
| 1377   | 1     | 1      | 1     | 1      |
| 1379   | 0     |        | 1     | 1      |
| 1380   | 0     |        | 3     | 1      |
| 1382   | 0     |        | 0     |        |
| 1383   | 0     |        | 1     | 0      |

| respid | Q24_1 | Q24a_1 | Q25_1 | Q25a_1 |
|--------|-------|--------|-------|--------|
| 1384   | 0     |        | 0     |        |
| 1385   | 1     | 1      | 2     | 1      |
| 1387   | 0     |        | 0     |        |
| 1388   | 1     | 0      | 5     | 2      |
| 1389   | 1     | 1      | 0     |        |
| 1390   | 0     |        | 1     | 0      |
| 1395   | 0     |        | 1     | 0      |
| 1396   | 0     |        | 2     | 0      |
| 1397   | 2     | 1      | 1     | 1      |
| 1398   | 0     |        | 0     |        |
| 1399   | 1     | 0      | 0     |        |
| 1403   | 0     |        | 1     | 0      |
| 1405   | 0     |        | 1     | 0      |
| 1406   | 0     |        | 5     | 1      |
| 1407   | 1     | 1      | 3     | 3      |
| 1408   | 0     |        | 5     | 2      |
| 1409   | 0     |        | 2     | 0      |
| 1410   | 5     | 4      | 5     | 4      |
| 1411   | 1     | 1      | 4     | 1      |
| 1412   | 0     |        | 0     |        |
| 1413   | 0     |        | 1     | 1      |
| 1414   | 0     |        | 2     | 0      |
| 1415   | 0     |        | 1     | 0      |
| 1416   | 0     |        | 1     | 0      |
| 1417   | 0     |        | 0     |        |
| 1418   | 0     |        | 1     | 0      |
| 1419   | 0     |        | 0     |        |
| 1420   | 1     | 1      | 2     | 0      |
| 1421   | 4     | 3      | 3     | 1      |
| 1422   | 1     | 0      | 1     | 0      |
| 1423   | 2     | 2      | 2     | 1      |
| 1424   | 1     | 2      | 5     | 2      |

| respid | Q24_1 | Q24a_1 | Q25_1 | Q25a_1 |
|--------|-------|--------|-------|--------|
| 1429   | 0     |        | 0     |        |
| 1430   | 0     |        | 1     | 1      |
| 1431   | 2     | 2      | 3     | 2      |
| 1433   | 1     | 1      | 2     | 2      |
| 1435   | 0     |        | 0     |        |
| 1436   | 1     | 0      | 1     | 0      |
| 1438   | 0     |        | 0     |        |
| 1439   | 0     |        | 2     | 0      |
| 1441   | 1     | 1      | 5     | 2      |
| 1442   | 0     |        | 0     |        |
| 1443   | 0     |        | 0     |        |
| 1444   | 0     |        | 1     | 0      |
| 1445   | 1     | 2      | 1     | 3      |
| 1446   | 1     | 1      | 3     | 2      |
| 1447   | 0     |        | 1     | 0      |
| 1449   | 0     |        | 2     | 1      |
| 1450   | 2     | 2      | 1     | 2      |
| 1451   | 0     |        | 1     | 3      |
| 1452   | 0     |        | 0     |        |
| 1453   | 2     | 2      | 3     | 2      |
| 1454   | 1     | 2      | 2     | 2      |
| 1456   | 0     |        | 0     |        |
| 1457   | 0     |        | 1     | 2      |
| 1459   | 0     |        | 2     | 0      |
| 1460   | 0     |        | 1     | 0      |
| 1463   | 0     |        | 1     | 0      |
| 1465   | 0     |        | 1     | 0      |
| 1467   | 0     |        | 2     | 0      |
| 1470   | 2     | 1      | 1     | 1      |
| 1471   | 3     | 3      | 2     | 4      |
| 1472   | 0     |        | 1     | 0      |
| 1474   | 1     | 0      | 0     |        |

| respid | Q24_1 | Q24a_1 | Q25_1 | Q25a_1 |
|--------|-------|--------|-------|--------|
| 1475   | 1     | 1      | 4     | 1      |
| 1477   | 0     |        | 1     | 0      |
| 1478   | 0     |        | 1     | 1      |
| 1480   | 0     |        | 0     |        |
| 1481   | 1     | 1      | 2     | 2      |
| 1483   | 0     |        | 1     | 0      |
| 1484   | 0     |        | 3     | 0      |
| 1485   | 1     | 1      | 0     |        |
| 1486   | 1     | 1      | 2     | 1      |
| 1487   | 0     |        | 1     | 2      |
| 1488   | 0     |        | 5     | 1      |
| 1489   | 0     |        | 1     | 2      |
| 1490   | 1     | 1      | 0     |        |
| 1491   | 3     | 2      | 2     | 2      |
| 1492   | 0     |        | 0     |        |
| 1494   | 0     |        | 0     |        |
| 1495   | 3     | 2      | 2     | 2      |
| 1496   | 0     |        | 5     | 1      |
| 1498   | 1     | 2      | 1     | 1      |
| 1499   | 0     |        | 1     | 1      |
| 1500   | 1     | 1      | 4     | 1      |
| 1501   | 0     |        | 1     | 0      |
| 1503   | 0     |        | 0     |        |
| 1504   | 0     |        | 2     | 1      |
| 1508   | 2     | 1      | 2     | 1      |
| 1509   | 0     |        | 1     | 1      |
| 1511   | 1     | 1      | 2     | 2      |
| 1512   | 1     | 1      | 1     | 1      |
| 1513   | 1     | 1      | 2     | 1      |
| 1515   | 1     | 0      | 0     |        |
| 1517   | 0     |        | 1     | 0      |
| 1518   | 0     |        | 1     | 2      |

| respid | Q24_1 | Q24a_1 | Q25_1 | Q25a_1 |
|--------|-------|--------|-------|--------|
| 1519   | 3     | 2      | 5     | 2      |
| 1520   | 0     |        | 0     |        |
| 1521   | 0     |        | 1     | 1      |
| 1522   | 0     |        | 1     | 0      |
| 1523   | 0     |        | 4     | 4      |
| 1524   | 0     |        | 1     | 0      |
| 1525   | 1     | 1      | 1     | 1      |
| 1526   | 2     | 2      | 2     | 3      |
| 1527   | 0     |        | 1     | 0      |
| 1534   | 0     |        | 0     |        |
| 1535   | 0     |        | 0     |        |
| 1536   | 1     | 3      | 3     | 1      |
| 1538   | 2     | 2      | 1     | 2      |
| 1539   | 0     |        | 0     |        |
| 1540   | 1     | 1      | 1     | 1      |
| 1541   | 0     |        | 5     | 0      |
| 1542   | 0     |        | 1     | 1      |
| 1543   | 0     |        | 1     | 1      |
| 1545   | 0     |        | 1     | 2      |
| 1546   | 0     |        | 0     |        |
| 1548   | 5     | 3      | 2     | 3      |
| 1549   | 0     |        | 0     |        |
| 1551   | 0     |        | 0     |        |
| 1552   | 0     |        | 1     | 1      |
| 1556   | 0     |        | 0     |        |
| 1557   | 0     |        | 0     |        |
| 1558   | 1     | 0      | 0     |        |
| 1561   | 0     |        | 1     | 0      |
| 1562   | 0     |        | 1     | 1      |
| 1563   | 0     |        | 1     | 0      |
| 1564   | 2     | 3      | 3     | 3      |
| 1565   | 0     |        | 0     |        |



| respid | Q24_1 | Q24a_1 | Q25_1 | Q25a_1 |
|--------|-------|--------|-------|--------|
| 1566   | 0     |        | 1     | 0      |
| 1567   | 0     |        | 2     | 1      |
| 1569   | 0     |        | 0     |        |
| 1570   | 0     |        | 0     |        |
| 1574   | 0     |        | 3     | 1      |
| 1575   | 0     |        | 2     | 0      |
| 1576   | 0     |        | 0     |        |
| 1577   | 0     |        | 2     | 0      |
| 1581   | 0     |        | 0     |        |
| 1583   | 3     | 3      | 2     | 1      |
| 1585   | 0     |        | 1     | 0      |
| 1586   | 0     |        | 2     | 0      |
| 1588   | 1     | 0      | 1     | 0      |
| 1590   | 0     |        | 0     |        |
| 1592   | 0     |        | 2     | 1      |
| 1594   | 1     | 1      | 3     | 1      |
| 1598   | 0     |        | 1     | 1      |
| 1599   | 1     | 1      | 3     | 2      |
| 1600   | 1     | 1      | 1     | 0      |
| 1602   | 0     |        | 0     |        |
| 1603   | 0     |        | 1     | 1      |
| 1604   | 0     |        | 1     | 1      |
| 1605   | 4     | 3      | 2     | 3      |
| 1606   | 0     |        | 1     | 1      |
| 1610   | 1     | 0      | 1     | 0      |
| 1611   | 0     |        | 0     |        |
| 1612   | 1     | 1      | 0     |        |
| 1613   | 2     | 2      | 3     | 2      |
| 1615   | 1     | 1      | 3     | 2      |
| 1616   | 1     | 1      | 5     | 2      |
| 1617   | 0     |        | 1     | 2      |
| 1618   | 2     | 1      | 2     | 1      |

| respid | Q24_1 | Q24a_1 | Q25_1 | Q25a_1 |
|--------|-------|--------|-------|--------|
| 1620   | 1     | 0      | 5     | 2      |
| 1621   | 1     | 2      | 1     | 2      |
| 1622   | 0     |        | 0     |        |
| 1623   | 0     |        | 0     |        |
| 1624   | 0     |        | 1     | 1      |
| 1625   | 0     |        | 1     | 0      |
| 1626   | 0     |        | 0     |        |
| 1627   | 0     |        | 0     |        |
| 1629   | 0     |        | 0     |        |
| 1630   | 0     |        | 0     |        |
| 1631   | 0     |        | 1     | 0      |
| 1634   | 0     |        | 2     | 1      |
| 1635   | 0     |        | 2     | 1      |
| 1636   | 0     |        | 0     |        |
| 1637   | 0     |        | 0     |        |
| 1640   | 0     |        | 1     | 0      |
| 1642   | 0     |        | 0     |        |
| 1643   | 1     | 2      | 1     | 2      |
| 1644   | 1     | 1      | 0     |        |
| 1645   | 0     |        | 1     | 1      |
| 1646   | 0     |        | 1     | 1      |
| 1647   | 1     | 0      | 1     | 1      |
| 1650   | 5     | 2      | 0     |        |
| 1654   | 0     |        | 2     | 1      |
| 1656   | 0     |        | 0     |        |
| 1657   | 3     | 2      | 2     | 3      |
| 1659   | 0     |        | 0     |        |
| 1662   | 1     | 1      | 1     | 1      |
| 1663   | 1     | 2      | 0     |        |
| 1664   | 0     |        | 0     |        |
| 1665   | 0     |        | 0     |        |
| 1667   | 0     |        | 1     | 1      |

| respid | Q24_1 | Q24a_1 | Q25_1 | Q25a_1 |
|--------|-------|--------|-------|--------|
| 1668   | 0     |        | 1     | 0      |
| 1670   | 1     | 1      | 0     |        |
| 1671   | 1     | 0      | 1     | 0      |
| 1673   | 0     |        | 1     | 0      |
| 1674   | 0     |        | 1     | 1      |
| 1676   | 1     | 1      | 2     | 3      |
| 1677   | 0     |        | 1     | 0      |
| 1678   | 0     |        | 1     | 1      |
| 1680   | 0     |        | 0     |        |
| 1681   | 1     | 1      | 2     | 1      |
| 1683   | 0     |        | 1     | 0      |
| 1685   | 1     | 1      | 1     | 1      |
| 1686   | 0     |        | 1     | 0      |
| 1690   | 0     |        | 1     | 1      |
| 1691   | 0     |        | 3     | 1      |
| 1692   | 1     | 1      | 1     | 1      |
| 1693   | 0     |        | 0     |        |
| 1695   | 0     |        | 2     | 1      |
| 1696   | 0     |        | 1     | 2      |
| 1698   | 0     |        | 1     | 0      |
| 1699   | 0     |        | 1     | 0      |
| 1701   | 0     |        | 0     |        |
| 1702   | 0     |        | 2     | 0      |
| 1703   | 0     |        | 0     |        |
| 1705   | 1     | 1      | 1     | 1      |
| 1706   | 0     |        | 4     | 0      |
| 1708   | 0     |        | 0     |        |
| 1711   | 1     | 1      | 1     | 1      |
| 1712   | 2     | 1      | 1     | 1      |
| 1713   | 0     |        | 2     | 1      |
| 1715   | 0     |        | 1     | 1      |
| 1717   | 0     |        | 0     |        |

| respid | Q24_1 | Q24a_1 | Q25_1 | Q25a_1 |
|--------|-------|--------|-------|--------|
| 1718   | 5     | 4      | 5     | 4      |
| 1719   | 0     |        | 0     |        |
| 1721   | 0     |        | 1     | 1      |
| 1722   | 0     |        | 2     | 0      |
| 1724   | 0     |        | 2     | 1      |
| 1725   | 0     |        | 5     | 0      |
| 1726   | 0     |        | 1     | 1      |
| 1727   | 0     |        | 1     | 0      |
| 1728   | 0     |        | 1     | 3      |
| 1731   | 0     |        | 2     | 2      |
| 1733   | 0     |        | 1     | 0      |
| 1734   | 0     |        | 1     | 0      |
| 1735   | 0     |        | 0     |        |
| 1736   | 0     |        | 1     | 1      |
| 1737   | 0     |        | 2     | 1      |
| 1738   | 0     |        | 3     | 1      |
| 1743   | 2     | 1      | 5     | 3      |
| 1755   | 1     | 2      | 4     | 3      |
| 1756   | 0     |        | 2     | 3      |
| 1757   | 1     | 0      | 1     | 1      |
| 1758   | 1     | 1      | 1     | 1      |
| 1759   | 1     | 1      | 1     | 2      |
| 1761   | 0     |        | 1     | 1      |
| 1762   | 0     |        | 1     | 0      |
| 1764   | 0     |        | 0     |        |
| 1767   | 1     | 1      | 1     | 1      |
| 1768   | 0     |        | 5     | 0      |
| 1769   | 0     |        | 1     | 1      |
| 1770   | 0     |        | 1     | 0      |
| 1771   | 1     | 2      | 2     | 2      |
| 1776   | 0     |        | 1     | 1      |
| 1777   | 0     |        | 1     | 0      |

| respid | Q24_1 | Q24a_1 | Q25_1 | Q25a_1 |
|--------|-------|--------|-------|--------|
| 1778   | 0     |        | 3     | 1      |
| 1779   | 0     |        | 0     |        |
| 1780   | 0     |        | 1     | 1      |
| 1781   | 0     |        | 0     |        |
| 1783   | 0     |        | 2     | 0      |
| 1784   | 4     | 2      | 3     | 2      |
| 1785   | 0     |        | 0     |        |
| 1788   | 2     | 2      | 1     | 2      |
| 1792   | 0     |        | 0     |        |
| 1794   | 0     |        | 0     |        |
| 1798   | 3     | 2      | 5     | 4      |
| 1799   | 0     |        | 3     | 1      |
| 1800   | 0     |        | 1     | 1      |
| 1804   | 0     |        | 5     | 2      |
| 1806   | 1     | 1      | 2     | 1      |
| 1807   | 0     |        | 0     |        |
| 1808   | 0     |        | 1     | 0      |
| 1809   | 0     |        | 2     | 1      |
| 1811   | 0     |        | 1     | 1      |
| 1812   | 1     | 1      | 2     | 3      |
| 1813   | 2     | 2      | 0     |        |
| 1814   | 0     |        | 1     | 1      |
| 1815   | 0     |        | 1     | 1      |
| 1817   | 0     |        | 1     | 1      |
| 1820   | 0     |        | 1     | 2      |
| 1821   | 5     | 3      | 1     | 1      |
| 1822   | 0     |        | 1     | 1      |
| 1823   | 0     |        | 2     | 2      |
| 1824   | 0     |        | 0     |        |
| 1826   | 0     |        | 0     |        |
| 1828   | 1     | 0      | 1     | 0      |
| 1829   | 0     |        | 0     |        |

| respid | Q24_1 | Q24a_1 | Q25_1 | Q25a_1 |
|--------|-------|--------|-------|--------|
| 1830   | 1     | 1      | 1     | 1      |
| 1831   | 0     |        | 1     | 1      |
| 1832   | 0     |        | 1     | 0      |
| 1836   | 1     | 1      | 1     | 1      |
| 1838   | 3     | 2      | 2     | 2      |
| 1839   | 1     | 1      | 2     | 2      |
| 1840   | 2     | 1      | 3     | 1      |
| 1841   | 0     |        | 0     |        |
| 1842   | 1     | 2      | 1     | 3      |
| 1843   | 0     |        | 1     | 1      |
| 1844   | 1     | 1      | 1     | 1      |
| 1845   | 0     |        | 0     |        |
| 1849   | 0     |        | 1     | 0      |
| 1850   | 0     |        | 0     |        |
| 1851   | 0     |        | 1     | 0      |
| 1852   | 0     |        | 0     |        |
| 1857   | 0     |        | 0     |        |
| 1858   | 0     |        | 0     |        |
| 1861   | 0     |        | 1     | 0      |
| 1862   | 0     |        | 0     |        |
| 1863   | 0     |        | 1     | 1      |
| 1864   | 1     | 0      | 1     | 2      |
| 1865   | 0     |        | 0     |        |
| 1867   | 0     |        | 0     |        |
| 1868   | 0     |        | 1     | 1      |
| 1869   | 0     |        | 0     |        |
| 1870   | 0     |        | 1     | 0      |
| 1871   | 0     |        | 1     | 2      |
| 1872   | 0     |        | 1     | 1      |
| 1873   | 0     |        | 1     | 1      |
| 1876   | 0     |        | 0     |        |
| 1877   | 0     |        | 0     |        |

| respid | Q24_1 | Q24a_1 | Q25_1 | Q25a_1 |
|--------|-------|--------|-------|--------|
| 1878   | 0     |        | 3     | 0      |
| 1879   | 0     |        | 2     | 2      |
| 1880   | 0     |        | 1     | 0      |
| 1881   | 0     |        | 1     | 0      |
| 1883   | 3     | 1      | 2     | 1      |
| 1886   | 0     |        | 0     |        |
| 1888   | 3     | 3      | 3     | 2      |
| 1889   | 2     | 1      | 2     | 3      |
| 1890   | 3     | 3      | 1     | 2      |
| 1891   | 0     |        | 1     | 0      |
| 1893   | 0     |        | 1     | 0      |
| 1894   | 2     | 2      | 2     | 1      |
| 1895   | 2     | 2      | 2     | 3      |
| 1896   | 1     | 1      | 0     |        |
| 1897   | 2     | 2      | 2     | 1      |
| 1898   | 4     | 3      | 2     | 4      |
| 1899   | 1     | 1      | 0     |        |
| 1900   | 0     |        | 0     |        |
| 1903   | 0     |        | 1     | 1      |
| 1906   | 0     |        | 1     | 1      |
| 1907   | 5     | 3      | 3     | 3      |
| 1908   | 0     |        | 1     | 0      |
| 1909   | 1     | 1      | 3     | 2      |
| 1910   | 0     |        | 0     |        |
| 1911   | 0     |        | 0     |        |
| 1912   | 0     |        | 0     |        |
| 1917   | 0     |        | 2     | 0      |
| 1918   | 0     |        | 1     | 0      |
| 1919   | 0     |        | 0     |        |
| 1922   | 0     |        | 0     |        |
| 1925   | 0     |        | 0     |        |
| 1926   | 0     |        | 1     | 0      |

| respid | Q24_1 | Q24a_1 | Q25_1 | Q25a_1 |
|--------|-------|--------|-------|--------|
| 1927   | 0     |        | 1     | 0      |
| 1928   | 0     |        | 0     |        |
| 1929   | 0     |        | 3     | 1      |
| 1934   | 0     |        | 0     |        |
| 1935   | 0     |        | 1     | 1      |
| 1936   | 4     | 2      | 0     |        |
| 1937   | 0     |        | 0     |        |
| 1938   | 0     |        | 0     |        |
| 1939   | 0     |        | 0     |        |
| 1940   | 1     | 1      | 0     |        |
| 1941   | 0     |        | 0     |        |
| 1948   | 0     |        | 0     |        |
| 1950   | 0     |        | 0     |        |
| 1955   | 2     | 0      | 2     | 1      |
| 1958   | 1     | 0      | 1     | 0      |
| 1960   | 0     |        | 5     | 0      |
| 1961   | 0     |        | 0     |        |
| 1962   | 0     |        | 2     | 0      |
| 1965   | 0     |        | 0     |        |
| 1966   | 0     |        | 1     | 0      |
| 1967   | 0     |        | 0     |        |
| 1968   | 0     |        | 1     | 1      |
| 1973   | 0     |        | 2     | 1      |
| 1974   | 1     | 1      | 2     | 4      |
| 1975   | 0     |        | 0     |        |
| 1977   | 0     |        | 3     | 2      |
| 1978   | 0     |        | 0     |        |
| 1979   | 4     | 4      | 3     | 3      |
| 1982   | 0     |        | 1     | 0      |
| 1983   | 0     |        | 0     |        |
| 1987   | 0     |        | 1     | 2      |
| 1988   | 0     |        | 2     | 1      |



| respid | Q24_1 | Q24a_1 | Q25_1 | Q25a_1 |
|--------|-------|--------|-------|--------|
| 1991   | 0     |        | 2     | 0      |
| 1992   | 0     |        | 0     |        |
| 1993   | 0     |        | 1     | 3      |
| 1994   | 1     | 1      | 1     | 1      |
| 1995   | 0     |        | 0     |        |
| 1996   | 0     |        | 1     | 0      |
| 1997   | 0     |        | 0     |        |
| 1998   | 1     | 0      | 0     |        |
| 1999   | 4     | 3      | 5     | 4      |
| 2000   | 4     | 3      | 2     | 3      |
| 2001   | 0     |        | 1     | 1      |
| 2002   | 0     |        | 0     |        |
| 2003   | 0     |        | 0     |        |
| 2004   | 0     |        | 1     | 0      |
| 2005   | 0     |        | 1     | 1      |
| 2007   | 0     |        | 2     | 1      |
| 2009   | 0     |        | 3     | 0      |
| 2010   | 0     |        | 0     |        |
| 2011   | 0     |        | 0     |        |
| 2013   | 1     | 1      | 1     | 0      |
| 2014   | 4     | 2      | 3     | 3      |
| 2017   | 1     | 1      | 1     | 1      |
| 2020   | 0     |        | 1     | 0      |
| 2023   | 2     | 2      | 2     | 2      |
| 2024   | 0     |        | 1     | 0      |
| 2029   | 0     |        | 0     |        |
| 2030   | 0     |        | 0     |        |
| 2031   | 0     |        | 5     | 2      |
| 2032   | 1     | 2      | 0     |        |
| 2033   | 0     |        | 0     |        |
| 2034   | 3     | 2      | 5     | 2      |
| 2036   | 4     | 1      | 3     | 1      |

| respid | Q24_1 | Q24a_1 | Q25_1 | Q25a_1 |
|--------|-------|--------|-------|--------|
| 2037   | 1     | 1      | 1     | 3      |
| 2038   | 0     |        | 1     | 0      |
| 2039   | 3     | 1      | 1     | 1      |
| 2040   | 0     |        | 0     |        |
| 2041   | 0     |        | 0     |        |
| 2042   | 0     |        | 0     |        |
| 2043   | 0     |        | 1     | 1      |
| 2051   | 3     | 2      | 0     |        |
| 2052   | 0     |        | 1     | 0      |
| 2053   | 1     | 0      | 0     |        |
| 2054   | 0     |        | 0     |        |
| 2055   | 0     |        | 1     | 0      |
| 2056   | 0     |        | 1     | 1      |
| 2057   | 2     | 1      | 2     | 1      |
| 2059   | 0     |        | 1     | 0      |
| 2063   | 0     |        | 1     | 1      |
| 2066   | 0     |        | 4     | 3      |
| 2068   | 1     | 1      | 2     | 1      |
| 2069   | 1     | 2      | 2     | 1      |
| 2070   | 0     |        | 0     |        |
| 2071   | 0     |        | 1     | 1      |
| 2073   | 0     |        | 0     |        |
| 2077   | 1     | 1      | 1     | 1      |
| 2079   | 0     |        | 0     |        |
| 2080   | 0     |        | 1     | 4      |
| 2081   | 5     | 4      | 4     | 4      |
| 2084   | 0     |        | 0     |        |
| 2085   | 0     |        | 2     | 0      |
| 2087   | 0     |        | 5     | 3      |
| 2089   | 0     |        | 1     | 0      |
| 2093   | 0     |        | 1     | 0      |
| 2094   | 0     |        | 2     | 1      |

| respid | Q24_1 | Q24a_1 | Q25_1 | Q25a_1 |
|--------|-------|--------|-------|--------|
| 2095   | 1     | 1      | 2     | 3      |
| 2097   | 0     |        | 0     |        |
| 2099   | 3     | 3      | 5     | 2      |
| 2100   | 1     | 1      | 1     | 0      |
| 2101   | 0     |        | 1     | 1      |
| 2103   | 0     |        | 0     |        |
| 2104   | 0     |        | 1     | 1      |
| 2106   | 1     | 2      | 1     | 0      |
| 2111   | 4     | 3      | 4     | 3      |
| 2113   | 0     |        | 1     | 0      |
| 2115   | 0     |        | 0     |        |
| 2119   | 0     |        | 1     | 2      |
| 2120   | 0     |        | 0     |        |
| 2123   | 0     |        | 0     |        |
| 2124   | 2     | 3      | 3     | 3      |
| 2130   | 0     |        | 0     |        |
| 2131   | 0     |        | 1     | 0      |
| 2133   | 5     | 4      | 5     | 4      |
| 2139   | 1     | 0      | 2     | 1      |
| 2141   | 0     |        | 0     |        |
| 2143   | 0     |        | 1     | 2      |
| 2144   | 0     |        | 1     | 0      |
| 2147   | 0     |        | 0     |        |
| 2151   | 1     | 1      | 0     |        |
| 2153   | 0     |        | 1     | 0      |
| 2154   | 0     |        | 1     | 2      |
| 2155   | 1     | 1      | 1     | 1      |
| 2159   | 0     |        | 0     |        |
| 2160   | 2     | 1      | 4     | 2      |
| 2161   | 0     |        | 1     | 1      |
| 2163   | 0     |        | 2     | 0      |
| 2164   | 0     |        | 1     | 1      |

| respid | Q24_1 | Q24a_1 | Q25_1 | Q25a_1 |
|--------|-------|--------|-------|--------|
| 2168   | 1     | 1      | 2     | 1      |
| 2169   | 1     | 1      | 2     | 2      |
| 2170   | 0     |        | 1     | 0      |
| 2171   | 0     |        | 1     | 3      |
| 2172   | 4     | 2      | 2     | 2      |
| 2173   | 0     |        | 0     |        |
| 2174   | 0     |        | 2     | 1      |
| 2175   | 1     | 1      | 1     | 0      |
| 2176   | 1     | 0      | 3     | 1      |
| 2177   | 2     | 2      | 2     | 2      |
| 2179   | 0     |        | 1     | 0      |
| 2181   | 0     |        | 0     |        |
| 2182   | 0     |        | 0     |        |
| 2183   | 1     | 1      | 5     | 2      |
| 2184   | 1     | 1      | 1     | 1      |
| 2185   | 0     |        | 0     |        |
| 2186   | 0     |        | 0     |        |
| 2187   | 1     | 0      | 2     | 0      |
| 2188   | 1     | 1      | 1     | 0      |
| 2189   | 0     |        | 0     |        |
| 2190   | 0     |        | 1     | 0      |
| 2193   | 0     |        | 5     | 2      |
| 2195   | 0     |        | 1     | 1      |
| 2198   | 0     |        | 1     | 0      |
| 2200   | 0     |        | 0     |        |
| 2205   | 3     | 2      | 3     | 2      |
| 2208   | 0     |        | 0     |        |
| 2209   | 2     | 1      | 2     | 2      |
| 2210   | 1     | 1      | 1     | 0      |
| 2211   | 1     | 1      | 1     | 1      |
| 2213   | 0     |        | 0     |        |
| 2214   | 0     |        | 1     | 1      |

| respid | Q24_1 | Q24a_1 | Q25_1 | Q25a_1 |
|--------|-------|--------|-------|--------|
| 2216   | 4     | 3      | 1     | 0      |
| 2220   | 0     |        | 1     | 1      |
| 2225   | 0     |        | 1     | 0      |
| 2227   | 0     |        | 0     |        |
| 2228   | 0     |        | 1     | 1      |
| 2229   | 0     |        | 2     | 0      |
| 2230   | 0     |        | 0     |        |
| 2236   | 0     |        | 0     |        |
| 2238   | 5     | 3      | 4     | 4      |
| 2239   | 0     |        | 1     | 2      |
| 2240   | 0     |        | 1     | 0      |
| 2241   | 3     | 2      | 3     | 3      |
| 2243   | 0     |        | 0     |        |
| 2245   | 0     |        | 0     |        |
| 2247   | 1     | 1      | 1     | 0      |
| 2248   | 0     |        | 1     | 0      |
| 2249   | 0     |        | 2     | 1      |
| 2254   | 0     |        | 2     | 1      |
| 2256   | 0     |        | 1     | 1      |
| 2259   | 0     |        | 1     | 0      |
| 2261   | 0     |        | 2     | 1      |
| 2262   | 0     |        | 0     |        |
| 2263   | 0     |        | 1     | 1      |
| 2264   | 2     | 2      | 2     | 2      |
| 2265   | 0     |        | 2     | 1      |
| 2270   | 0     |        | 1     | 0      |
| 2271   | 0     |        | 0     |        |
| 2272   | 0     |        | 1     | 0      |
| 2273   | 1     | 0      | 4     | 2      |
| 2274   | 1     | 0      | 1     | 0      |
| 2276   | 0     |        | 2     | 1      |
| 2277   | 0     |        | 1     | 1      |

| respid | Q24_1 | Q24a_1 | Q25_1 | Q25a_1 |
|--------|-------|--------|-------|--------|
| 2281   | 0     |        | 1     | 0      |
| 2288   | 0     |        | 2     | 0      |
| 2290   | 0     |        | 0     |        |
| 2294   | 1     | 1      | 1     | 1      |
| 2295   | 0     |        | 5     | 1      |
| 2296   | 0     |        | 1     | 1      |
| 2297   | 0     |        | 0     |        |
| 2298   | 0     |        | 3     | 1      |
| 2301   | 1     | 1      | 1     | 1      |
| 2302   | 0     |        | 2     | 1      |
| 2303   | 0     |        | 0     |        |
| 2305   | 0     |        | 0     |        |
| 2309   | 0     |        | 0     |        |
| 2310   | 0     |        | 1     | 0      |
| 2311   | 1     | 2      | 2     | 2      |
| 2313   | 3     | 2      | 5     | 3      |
| 2316   | 0     |        | 0     |        |
| 2317   | 0     |        | 1     | 0      |
| 2318   | 1     | 1      | 2     | 2      |
| 2319   | 2     | 1      | 5     | 3      |
| 2321   | 2     | 1      | 1     | 1      |
| 2324   | 0     |        | 1     | 1      |
| 2328   | 0     |        | 0     |        |
| 2329   | 0     |        | 0     |        |
| 2330   | 1     | 1      | 1     | 1      |
| 2333   | 1     | 1      | 1     | 1      |
| 2334   | 1     | 1      | 1     | 1      |
| 2338   | 0     |        | 0     |        |
| 2341   | 0     |        | 0     |        |
| 2342   | 0     |        | 1     | 2      |
| 2343   | 2     | 1      | 3     | 3      |
| 2346   | 0     |        | 1     | 0      |

| respid | Q24_1 | Q24a_1 | Q25_1 | Q25a_1 |
|--------|-------|--------|-------|--------|
| 2347   | 0     |        | 1     | 1      |
| 2348   | 0     |        | 0     |        |
| 2349   | 2     | 2      | 1     | 1      |
| 2350   | 0     |        | 0     |        |
| 2351   | 0     |        | 1     | 0      |
| 2352   | 0     |        | 0     |        |
| 2359   | 0     |        | 0     |        |
| 2362   | 0     |        | 0     |        |
| 2363   | 0     |        | 1     | 0      |
| 2365   | 0     |        | 1     | 0      |
| 2367   | 2     | 2      | 5     | 3      |
| 2368   | 0     |        | 1     | 0      |
| 2369   | 0     |        | 5     | 2      |
| 2372   | 0     |        | 0     |        |
| 2374   | 1     | 1      | 1     | 0      |
| 2376   | 0     |        | 1     | 0      |
| 2379   | 1     | 1      | 3     | 2      |
| 2380   | 0     |        | 1     | 0      |
| 2381   | 0     |        | 1     | 1      |
| 2382   | 1     | 1      | 2     | 2      |
| 2385   | 0     |        | 1     | 1      |
| 2387   | 0     |        | 2     | 4      |
| 2388   | 0     |        | 1     | 1      |
| 2389   | 0     |        | 1     | 1      |
| 2391   | 0     |        | 1     | 1      |
| 2392   | 1     | 1      | 5     | 2      |
| 2393   | 0     |        | 1     | 0      |
| 2394   | 0     |        | 1     | 2      |
| 2397   | 0     |        | 0     |        |
| 2398   | 2     | 1      | 1     | 1      |
| 2400   | 3     | 0      | 1     | 0      |
| 2402   | 0     |        | 2     | 1      |

| respid | Q24_1 | Q24a_1 | Q25_1 | Q25a_1 |
|--------|-------|--------|-------|--------|
| 2406   | 0     |        | 1     | 0      |
| 2408   | 0     |        | 1     | 0      |
| 2410   | 0     |        | 0     |        |
| 2411   | 2     | 2      | 4     | 2      |
| 2412   | 0     |        | 0     |        |
| 2414   | 2     | 2      | 1     | 2      |
| 2421   | 0     |        | 3     | 1      |
| 2423   | 1     | 2      | 1     | 2      |
| 2424   | 1     | 1      | 1     | 1      |
| 2425   | 0     |        | 1     | 1      |
| 2426   | 2     | 1      | 0     |        |
| 2429   | 5     | 4      | 5     | 4      |
| 2430   | 0     |        | 1     | 0      |
| 2432   | 1     | 1      | 1     | 1      |
| 2433   | 1     | 1      | 0     |        |
| 2434   | 0     |        | 1     | 1      |
| 2435   | 0     |        | 2     | 2      |
| 2436   | 0     |        | 1     | 0      |
| 2439   | 1     | 1      | 5     | 2      |
| 2440   | 0     |        | 1     | 0      |
| 2441   | 0     |        | 1     | 1      |
| 2446   | 0     |        | 1     | 0      |
| 2448   | 1     | 2      | 3     | 3      |
| 2449   | 0     |        | 1     | 0      |
| 2451   | 1     | 3      | 1     | 2      |
| 2452   | 0     |        | 1     | 0      |
| 2455   | 0     |        | 0     |        |
| 2457   | 0     |        | 1     | 1      |
| 2458   | 0     |        | 1     | 0      |
| 2459   | 0     |        | 0     |        |
| 2460   | 0     |        | 1     | 0      |
| 2462   | 1     | 2      | 3     | 2      |



| respid | Q24_1 | Q24a_1 | Q25_1 | Q25a_1 |
|--------|-------|--------|-------|--------|
| 2464   | 4     | 3      | 1     | 2      |
| 2465   | 0     |        | 0     |        |
| 2468   | 1     | 1      | 2     | 0      |
| 2469   | 0     |        | 0     |        |
| 2470   | 0     |        | 0     |        |
| 2471   | 4     | 2      | 2     | 2      |
| 2472   | 0     |        | 4     | 0      |
| 2474   | 0     |        | 3     | 2      |
| 2476   | 5     | 4      | 1     | 0      |
| 2478   | 0     |        | 1     | 1      |
| 2479   | 0     |        | 1     | 1      |
| 2480   | 0     |        | 5     | 2      |
| 2482   | 0     |        | 0     |        |
| 2486   | 0     |        | 1     | 2      |
| 2488   | 5     | 4      | 3     | 3      |
| 2489   | 2     | 1      | 1     | 0      |
| 2491   | 0     |        | 1     | 0      |
| 2495   | 0     |        | 0     |        |
| 2496   | 0     |        | 0     |        |
| 2498   | 1     | 1      | 1     | 2      |
| 2501   | 3     | 1      | 1     | 0      |
| 2502   | 2     | 3      | 1     | 2      |
| 2503   | 0     |        | 1     | 0      |
| 2504   | 0     |        | 1     | 1      |
| 2507   | 0     |        | 1     | 0      |
| 2509   | 1     | 1      | 5     | 2      |
| 2512   | 0     |        | 1     | 1      |
| 2514   | 0     |        | 0     |        |
| 2516   | 0     |        | 0     |        |
| 2517   | 1     | 1      | 1     | 1      |
| 2521   | 1     | 1      | 1     | 1      |
| 2522   | 0     |        | 1     | 0      |

| respid | Q24_1 | Q24a_1 | Q25_1 | Q25a_1 |
|--------|-------|--------|-------|--------|
| 2524   | 0     |        | 0     |        |
| 2525   | 0     |        | 0     |        |
| 2526   | 0     |        | 0     |        |
| 2527   | 0     |        | 0     |        |
| 2528   | 0     |        | 1     | 2      |
| 2531   | 0     |        | 0     |        |
| 2533   | 0     |        | 3     | 2      |
| 2535   | 0     |        | 1     | 0      |
| 2536   | 5     | 4      | 2     | 4      |
| 2539   | 0     |        | 1     | 0      |
| 2540   | 0     |        | 2     | 0      |
| 2543   | 0     |        | 0     |        |
| 2546   | 0     |        | 1     | 1      |
| 2547   | 0     |        | 2     | 1      |
| 2549   | 0     |        | 3     | 0      |
| 2553   | 0     |        | 1     | 0      |
| 2554   | 0     |        | 2     | 0      |
| 2555   | 1     | 0      | 1     | 0      |
| 2556   | 0     |        | 1     | 0      |
| 2557   | 0     |        | 1     | 0      |
| 2559   | 0     |        | 1     | 0      |
| 2560   | 3     | 2      | 1     | 2      |
| 2561   | 0     |        | 1     | 1      |
| 2566   | 0     |        | 1     | 0      |
| 2567   | 0     |        | 0     |        |
| 2570   | 2     | 2      | 2     | 0      |
| 2574   | 3     | 2      | 2     | 3      |
| 2578   | 0     |        | 0     |        |
| 2580   | 0     |        | 2     | 2      |
| 2590   | 0     |        | 1     | 0      |
| 2593   | 0     |        | 0     |        |
| 2594   | 1     | 1      | 5     | 3      |

| respid | Q24_1 | Q24a_1 | Q25_1 | Q25a_1 |
|--------|-------|--------|-------|--------|
| 2595   | 1     | 1      | 0     |        |
| 2596   | 0     |        | 0     |        |
| 2597   | 3     | 2      | 3     | 3      |
| 2598   | 0     |        | 3     | 1      |
| 2602   | 0     |        | 0     |        |
| 2605   | 1     | 1      | 3     | 4      |
| 2606   | 0     |        | 0     |        |
| 2607   | 0     |        | 1     | 1      |
| 2608   | 0     |        | 0     |        |
| 2609   | 2     | 1      | 0     |        |
| 2610   | 0     |        | 1     | 0      |
| 2614   | 0     |        | 0     |        |
| 2615   | 0     |        | 1     | 0      |
| 2616   | 0     |        | 1     | 1      |
| 2618   | 0     |        | 1     | 0      |
| 2630   | 0     |        | 5     | 2      |
| 2633   | 0     |        | 1     | 2      |
| 2637   | 0     |        | 0     |        |
| 2638   | 1     | 1      | 1     | 1      |
| 2641   | 0     |        | 1     | 1      |
| 2644   | 0     |        | 1     | 0      |
| 2645   | 0     |        | 1     | 2      |
| 2646   | 0     |        | 1     | 0      |
| 2648   | 0     |        | 0     |        |
| 2651   | 0     |        | 0     |        |
| 2652   | 2     | 1      | 1     | 1      |
| 2653   | 0     |        | 1     | 1      |
| 2656   | 0     |        | 0     |        |
| 2657   | 0     |        | 0     |        |
| 2658   | 0     |        | 2     | 0      |
| 2661   | 0     |        | 2     | 1      |
| 2663   | 0     |        | 0     |        |

| respid | Q24_1 | Q24a_1 | Q25_1 | Q25a_1 |
|--------|-------|--------|-------|--------|
| 2665   | 0     |        | 1     | 0      |
| 2670   | 0     |        | 2     | 0      |
| 2672   | 0     |        | 5     | 2      |
| 2673   | 0     |        | 0     |        |
| 2677   | 1     | 2      | 1     | 1      |
| 2686   | 1     | 2      | 3     | 4      |
| 2688   | 3     | 2      | 1     | 0      |
| 2689   | 1     | 1      | 0     |        |
| 2691   | 0     |        | 0     |        |
| 2695   | 0     |        | 1     | 1      |
| 2696   | 1     | 1      | 5     | 1      |
| 2697   | 0     |        | 0     |        |
| 2698   | 0     |        | 0     |        |
| 2703   | 0     |        | 1     | 0      |
| 2704   | 0     |        | 1     | 0      |
| 2706   | 1     | 0      | 2     | 1      |
| 2707   | 0     |        | 5     | 1      |
| 2710   | 0     |        | 1     | 0      |
| 2711   | 0     |        | 1     | 0      |
| 2712   | 0     |        | 0     |        |
| 2713   | 0     |        | 0     |        |
| 2721   | 0     |        | 0     |        |
| 2730   | 0     |        | 0     |        |
| 2731   | 1     | 1      | 0     |        |
| 2732   | 0     |        | 1     | 1      |
| 2733   | 5     | 3      | 1     | 0      |
| 2735   | 0     |        | 5     | 1      |
| 2736   | 0     |        | 0     |        |
| 2740   | 0     |        | 2     | 1      |
| 2741   | 1     | 1      | 0     |        |
| 2742   | 0     |        | 0     |        |
| 2743   | 1     | 0      | 1     | 0      |

| respid | Q24_1 | Q24a_1 | Q25_1 | Q25a_1 |
|--------|-------|--------|-------|--------|
| 2744   | 0     |        | 1     | 2      |
| 2745   | 2     | 2      | 1     | 2      |
| 2749   | 0     |        | 1     | 0      |
| 2751   | 0     |        | 5     | 1      |
| 2754   | 1     | 1      | 3     | 1      |
| 2755   | 1     | 2      | 1     | 0      |
| 2757   | 0     |        | 1     | 0      |
| 2758   | 2     | 1      | 1     | 1      |
| 2759   | 1     | 0      | 1     | 0      |
| 2761   | 0     |        | 0     |        |
| 2762   | 1     | 1      | 0     |        |
| 2763   | 0     |        | 1     | 0      |
| 2764   | 3     | 2      | 5     | 3      |
| 2765   | 0     |        | 1     | 1      |
| 2766   | 1     | 0      | 1     | 0      |
| 2767   | 0     |        | 2     | 0      |
| 2769   | 0     |        | 5     | 2      |
| 2770   | 2     | 2      | 1     | 1      |
| 2771   | 1     | 2      | 1     | 1      |
| 2774   | 1     | 1      | 3     | 2      |
| 2777   | 2     | 2      | 3     | 2      |
| 2778   | 1     | 1      | 1     | 1      |
| 2781   | 1     | 1      | 3     | 1      |
| 2782   | 1     | 1      | 1     | 1      |
| 2784   | 1     | 1      | 5     | 3      |
| 2785   | 2     | 2      | 5     | 2      |
| 2786   | 0     |        | 5     | 1      |
| 2787   | 1     | 0      | 0     |        |
| 2789   | 2     | 2      | 2     | 1      |
| 2790   | 0     |        | 5     | 3      |
| 2791   | 1     | 0      | 1     | 2      |
| 2793   | 1     | 1      | 1     | 4      |

| respid | Q24_1 | Q24a_1 | Q25_1 | Q25a_1 |
|--------|-------|--------|-------|--------|
| 2797   | 1     | 0      | 0     |        |
| 2798   | 0     |        | 2     | 0      |
| 2799   | 1     | 1      | 1     | 3      |
| 2801   | 1     | 1      | 0     |        |
| 2802   | 0     |        | 5     | 1      |
| 2803   | 1     | 2      | 5     | 2      |
| 2804   | 4     | 3      | 3     | 1      |
| 2807   | 0     |        | 1     | 0      |
| 2809   | 0     |        | 1     | 0      |
| 2810   | 0     |        | 1     | 1      |
| 2812   | 1     | 1      | 3     | 1      |
| 2814   | 0     |        | 0     |        |
| 2815   | 1     | 1      | 1     | 1      |
| 2816   | 0     |        | 0     |        |
| 2817   | 1     | 0      | 0     |        |
| 2819   | 0     |        | 3     | 1      |
| 2820   | 0     |        | 1     | 0      |
| 2821   | 0     |        | 1     | 1      |
| 2822   | 3     | 2      | 5     | 4      |
| 2823   | 0     |        | 0     |        |
| 2824   | 0     |        | 3     | 1      |
| 2825   | 0     |        | 2     | 1      |
| 2826   | 0     |        | 1     | 0      |
| 2827   | 1     | 0      | 0     |        |
| 2828   | 0     |        | 1     | 1      |
| 2829   | 2     | 2      | 2     | 2      |
| 2830   | 1     | 1      | 1     | 1      |
| 2831   | 1     | 0      | 3     | 1      |
| 2832   | 2     | 2      | 2     | 2      |
| 2833   | 0     |        | 1     | 0      |
| 2834   | 0     |        | 0     |        |
| 2835   | 1     | 3      | 2     | 3      |

| respid | Q24_1 | Q24a_1 | Q25_1 | Q25a_1 |
|--------|-------|--------|-------|--------|
| 2836   | 1     | 2      | 1     | 2      |
| 2837   | 0     |        | 2     | 1      |
| 2838   | 0     |        | 3     | 2      |
| 2844   | 4     | 3      | 2     | 3      |
| 2845   | 0     |        | 0     |        |
| 2847   | 5     | 4      | 5     | 4      |
| 2848   | 1     | 0      | 1     | 0      |
| 2849   | 4     | 2      | 2     | 1      |
| 2851   | 0     |        | 1     | 0      |
| 2852   | 0     |        | 0     |        |
| 2853   | 2     | 2      | 0     |        |
| 2854   | 0     |        | 2     | 0      |
| 2856   | 2     | 1      | 0     |        |
| 2857   | 0     |        | 5     | 1      |
| 2858   | 1     | 1      | 3     | 2      |
| 2859   | 2     | 2      | 2     | 4      |
| 2860   | 0     |        | 1     | 2      |
| 2861   | 3     | 2      | 5     | 2      |
| 2863   | 1     | 0      | 1     | 0      |
| 2864   | 0     |        | 0     |        |
| 2866   | 0     |        | 0     |        |
| 2872   | 0     |        | 0     |        |
| 2875   | 1     | 2      | 1     | 2      |
| 2879   | 0     |        | 0     |        |
| 2881   | 1     | 1      | 2     | 2      |
| 2882   | 0     |        | 0     |        |
| 2883   | 1     | 0      | 0     |        |
| 2884   | 2     | 1      | 2     | 2      |
| 2885   | 0     |        | 1     | 0      |
| 2887   | 0     |        | 0     |        |
| 2888   | 0     |        | 1     | 0      |
| 2890   | 1     | 1      | 1     | 1      |

| respid | Q24_1 | Q24a_1 | Q25_1 | Q25a_1 |
|--------|-------|--------|-------|--------|
| 2891   | 0     |        | 1     | 0      |
| 2892   | 0     |        | 0     |        |
| 2895   | 1     | 0      | 0     |        |
| 2899   | 0     |        | 1     | 1      |
| 2900   | 0     |        | 0     |        |
| 2902   | 4     | 2      | 2     | 2      |
| 2903   | 0     |        | 0     |        |
| 2904   | 0     |        | 1     | 0      |
| 2906   | 0     |        | 1     | 0      |
| 2908   | 0     |        | 3     | 0      |
| 2910   | 0     |        | 2     | 0      |
| 2917   | 2     | 2      | 2     | 2      |
| 2918   | 2     | 1      | 2     | 1      |
| 2919   | 0     |        | 0     |        |
| 2920   | 0     |        | 2     | 1      |
| 2921   | 2     | 2      | 2     | 2      |
| 2922   | 0     |        | 1     | 1      |
| 2923   | 0     |        | 0     |        |
| 2924   | 4     | 3      | 3     | 2      |
| 2926   | 1     | 1      | 2     | 3      |
| 2928   | 0     |        | 0     |        |
| 2930   | 0     |        | 0     |        |
| 2931   | 2     | 1      | 1     | 1      |
| 2933   | 0     |        | 0     |        |
| 2935   | 1     | 1      | 1     | 0      |
| 2936   | 0     |        | 0     |        |
| 2937   | 1     | 0      | 1     | 1      |
| 2938   | 0     |        | 3     | 1      |
| 2944   | 0     |        | 0     |        |
| 2945   | 0     |        | 5     | 0      |
| 2947   | 0     |        | 1     | 1      |
| 2949   | 0     |        | 0     |        |



| respid | Q24_1 | Q24a_1 | Q25_1 | Q25a_1 |
|--------|-------|--------|-------|--------|
| 2951   | 4     | 3      | 5     | 3      |
| 2952   | 1     | 0      | 2     | 1      |
| 2953   | 0     |        | 0     |        |
| 2955   | 0     |        | 0     |        |
| 2957   | 0     |        | 2     | 0      |
| 2958   | 0     |        | 1     | 0      |
| 2960   | 0     |        | 1     | 1      |
| 2963   | 0     |        | 2     | 0      |
| 2964   | 1     | 1      | 0     |        |
| 2967   | 0     |        | 0     |        |
| 2968   | 0     |        | 3     | 1      |
| 2971   | 3     | 2      | 2     | 2      |
| 2974   | 0     |        | 1     | 0      |
| 2975   | 0     |        | 1     | 0      |
| 2982   | 0     |        | 0     |        |
| 2983   | 0     |        | 0     |        |
| 2985   | 0     |        | 2     | 1      |
| 2986   | 4     | 3      | 4     | 3      |
| 2987   | 0     |        | 1     | 1      |
| 2988   | 0     |        | 2     | 1      |
| 2993   | 0     |        | 0     |        |
| 2996   | 0     |        | 1     | 0      |
| 2997   | 2     | 3      | 1     | 1      |
| 2998   | 0     |        | 2     | 2      |
| 3004   | 0     |        | 1     | 0      |
| 3007   | 1     | 2      | 1     | 2      |
| 3011   | 2     | 2      | 2     | 2      |
| 3012   | 0     |        | 2     | 1      |
| 3013   | 0     |        | 2     | 1      |
| 3014   | 0     |        | 0     |        |
| 3015   | 0     |        | 1     | 1      |
| 3016   | 0     |        | 0     |        |

| respid | Q24_1 | Q24a_1 | Q25_1 | Q25a_1 |
|--------|-------|--------|-------|--------|
| 3017   | 1     | 0      | 1     | 0      |
| 3020   | 1     | 1      | 1     | 1      |
| 3022   | 1     | 1      | 1     | 1      |
| 3023   | 0     |        | 1     | 0      |
| 3026   | 0     |        | 1     | 2      |
| 3038   | 1     | 1      | 4     | 1      |
| 3039   | 0     |        | 1     | 2      |
| 3040   | 0     |        | 0     |        |
| 3041   | 0     |        | 0     |        |
| 3042   | 1     | 1      | 1     | 0      |
| 3044   | 0     |        | 2     | 1      |
| 3050   | 0     |        | 1     | 0      |
| 3052   | 1     | 0      | 1     | 0      |
| 3056   | 1     | 1      | 2     | 2      |
| 3059   | 0     |        | 1     | 0      |
| 3060   | 1     | 1      | 1     | 1      |
| 3063   | 1     | 0      | 2     | 2      |
| 3065   | 0     |        | 3     | 0      |
| 3067   | 0     |        | 0     |        |
| 3068   | 0     |        | 0     |        |
| 3072   | 0     |        | 0     |        |
| 3074   | 2     | 2      | 1     | 2      |
| 3075   | 1     | 1      | 2     | 1      |
| 3076   | 0     |        | 0     |        |
| 3079   | 0     |        | 2     | 0      |
| 3082   | 3     | 3      | 4     | 3      |
| 3083   | 1     | 0      | 0     |        |
| 3084   | 0     |        | 1     | 0      |
| 3085   | 0     |        | 1     | 0      |
| 3090   | 0     |        | 0     |        |
| 3091   | 2     | 2      | 1     | 0      |
| 3092   | 1     | 1      | 1     | 1      |

| respid | Q24_1 | Q24a_1 | Q25_1 | Q25a_1 |
|--------|-------|--------|-------|--------|
| 3095   | 1     | 0      | 2     | 0      |
| 3096   | 4     | 4      | 2     | 3      |
| 3097   | 1     | 1      | 1     | 2      |
| 3099   | 4     | 3      | 4     | 3      |
| 3101   | 0     |        | 2     | 2      |
| 3103   | 0     |        | 0     |        |
| 3104   | 1     | 1      | 0     |        |
| 3105   | 0     |        | 0     |        |
| 3107   | 0     |        | 0     |        |
| 3108   | 2     | 1      | 5     | 4      |
| 3109   | 0     |        | 1     | 0      |
| 3116   | 0     |        | 3     | 1      |
| 3117   | 1     | 0      | 5     | 1      |
| 3119   | 0     |        | 1     | 1      |
| 3120   | 0     |        | 2     | 0      |
| 3130   | 0     |        | 1     | 1      |
| 3131   | 1     | 1      | 2     | 2      |
| 3133   | 0     |        | 1     | 0      |
| 3134   | 1     | 2      | 0     |        |
| 3135   | 1     | 0      | 2     | 0      |
| 3145   | 0     |        | 5     | 1      |
| 3147   | 0     |        | 1     | 0      |
| 3152   | 0     |        | 1     | 1      |
| 3155   | 4     | 3      | 2     | 2      |
| 3156   | 0     |        | 0     |        |
| 3157   | 2     | 2      | 1     | 2      |
| 3166   | 0     |        | 1     | 1      |
| 3169   | 0     |        | 1     | 1      |
| 3179   | 0     |        | 4     | 0      |
| 3181   | 0     |        | 1     | 1      |
| 3185   | 0     |        | 0     |        |
| 3190   | 1     | 0      | 5     | 0      |

| respid | Q24_1 | Q24a_1 | Q25_1 | Q25a_1 |
|--------|-------|--------|-------|--------|
| 3191   | 0     |        | 0     |        |
| 3192   | 0     |        | 1     | 0      |
| 3193   | 0     |        | 2     | 0      |
| 3195   | 0     |        | 0     |        |
| 3202   | 0     |        | 1     | 0      |
| 3204   | 0     |        | 0     |        |
| 3208   | 0     |        | 1     | 0      |
| 3212   | 0     |        | 0     |        |
| 3218   | 0     |        | 1     | 0      |
| 3219   | 0     |        | 2     | 1      |
| 3220   | 0     |        | 1     | 1      |
| 3221   | 0     |        | 0     |        |
| 3223   | 0     |        | 1     | 0      |
| 3231   | 1     | 1      | 2     | 2      |
| 3232   | 1     | 1      | 3     | 3      |
| 3234   | 1     | 1      | 1     | 0      |
| 3235   | 0     |        | 0     |        |
| 3237   | 0     |        | 0     |        |
| 3238   | 0     |        | 2     | 1      |
| 3240   | 0     |        | 1     | 0      |
| 3241   | 0     |        | 1     | 1      |
| 3243   | 1     | 1      | 2     | 2      |
| 3244   | 1     | 2      | 1     | 1      |
| 3247   | 0     |        | 0     |        |
| 3250   | 0     |        | 0     |        |
| 3251   | 2     | 2      | 1     | 3      |
| 3255   | 0     |        | 0     |        |
| 3256   | 0     |        | 0     |        |
| 3257   | 0     |        | 2     | 0      |
| 3258   | 0     |        | 0     |        |
| 3259   | 0     |        | 1     | 0      |
| 3260   | 0     |        | 1     | 0      |

| respid | Q24_1 | Q24a_1 | Q25_1 | Q25a_1 |
|--------|-------|--------|-------|--------|
| 3261   | 0     |        | 0     |        |
| 3262   | 0     |        | 3     | 2      |
| 3264   | 1     | 3      | 2     | 2      |
| 3265   | 0     |        | 0     |        |
| 3267   | 1     | 0      | 1     | 1      |
| 3268   | 0     |        | 1     | 0      |
| 3270   | 0     |        | 3     | 0      |
| 3271   | 1     | 0      | 1     | 0      |
| 3274   | 0     |        | 0     |        |
| 3276   | 0     |        | 0     |        |
| 3277   | 0     |        | 5     | 1      |
| 3279   | 0     |        | 0     |        |
| 3281   | 0     |        | 0     |        |
| 3283   | 0     |        | 1     | 3      |
| 3285   | 1     | 1      | 0     |        |
| 3286   | 0     |        | 2     | 1      |
| 3287   | 0     |        | 3     | 0      |
| 3289   | 0     |        | 1     | 0      |
| 3290   | 0     |        | 1     | 0      |
| 3291   | 1     | 0      | 1     | 0      |
| 3292   | 4     | 2      | 4     | 2      |
| 3293   | 2     | 2      | 3     | 3      |
| 3294   | 1     | 1      | 1     | 0      |
| 3296   | 0     |        | 5     | 0      |
| 3306   | 0     |        | 1     | 0      |
| 3307   | 1     | 1      | 2     | 3      |
| 3308   | 0     |        | 2     | 1      |
| 3312   | 0     |        | 4     | 0      |
| 3313   | 0     |        | 1     | 1      |
| 3316   | 0     |        | 1     | 1      |
| 3317   | 1     | 3      | 2     | 3      |
| 3320   | 0     |        | 5     | 1      |

| respid | Q24_1 | Q24a_1 | Q25_1 | Q25a_1 |
|--------|-------|--------|-------|--------|
| 3321   | 1     | 0      | 0     |        |
| 3322   | 1     | 0      | 0     |        |
| 3323   | 0     |        | 1     | 0      |
| 3325   | 0     |        | 0     |        |
| 3332   | 0     |        | 1     | 0      |
| 3334   | 0     |        | 0     |        |
| 3335   | 0     |        | 1     | 0      |
| 3341   | 0     |        | 1     | 0      |
| 3345   | 0     |        | 1     | 1      |
| 3346   | 1     | 0      | 2     | 1      |
| 3349   | 1     | 1      | 1     | 1      |
| 3351   | 0     |        | 1     | 0      |
| 3353   | 2     | 1      | 1     | 1      |
| 3354   | 0     |        | 1     | 1      |
| 3356   | 0     |        | 2     | 0      |
| 3357   | 0     |        | 1     | 2      |
| 3360   | 0     |        | 1     | 2      |
| 3361   | 0     |        | 2     | 1      |
| 3362   | 0     |        | 2     | 1      |
| 3363   | 0     |        | 0     |        |
| 3364   | 4     | 4      | 4     | 4      |
| 3368   | 0     |        | 1     | 0      |
| 3370   | 1     | 0      | 1     | 0      |
| 3371   | 0     |        | 1     | 1      |
| 3379   | 0     |        | 1     | 0      |
| 3380   | 0     |        | 0     |        |
| 3382   | 0     |        | 0     |        |
| 3384   | 0     |        | 1     | 1      |
| 3385   | 0     |        | 5     | 1      |
| 3388   | 0     |        | 1     | 1      |
| 3392   | 1     | 0      | 1     | 1      |
| 3393   | 0     |        | 0     |        |

| respid | Q24_1 | Q24a_1 | Q25_1 | Q25a_1 |
|--------|-------|--------|-------|--------|
| 3394   | 2     | 1      | 3     | 2      |
| 3395   | 0     |        | 5     | 1      |
| 3396   | 0     |        | 0     |        |
| 3397   | 0     |        | 1     | 0      |
| 3398   | 0     |        | 2     | 3      |
| 3399   | 0     |        | 2     | 2      |
| 3400   | 0     |        | 1     | 1      |
| 3401   | 3     | 4      | 3     | 3      |
| 3402   | 3     | 2      | 1     | 2      |
| 3403   | 0     |        | 1     | 1      |
| 3405   | 0     |        | 0     |        |
| 3407   | 1     | 1      | 1     | 1      |
| 3410   | 1     | 0      | 1     | 1      |
| 3411   | 1     | 1      | 1     | 0      |
| 3413   | 0     |        | 0     |        |
| 3414   | 0     |        | 1     | 1      |
| 3420   | 0     |        | 0     |        |
| 3421   | 5     | 4      | 3     | 4      |
| 3425   | 0     |        | 3     | 1      |
| 3426   | 0     |        | 1     | 1      |
| 3429   | 0     |        | 1     | 1      |
| 3430   | 1     | 1      | 2     | 2      |
| 3433   | 0     |        | 1     | 1      |
| 3434   | 1     | 3      | 4     | 3      |
| 3437   | 0     |        | 3     | 0      |
| 3439   | 0     |        | 2     | 3      |
| 3441   | 1     | 1      | 1     | 2      |
| 3442   | 0     |        | 1     | 1      |
| 3444   | 0     |        | 0     |        |
| 3445   | 0     |        | 1     | 0      |
| 3450   | 1     | 2      | 3     | 2      |
| 3452   | 0     |        | 1     | 2      |

| respid | Q24_1 | Q24a_1 | Q25_1 | Q25a_1 |
|--------|-------|--------|-------|--------|
| 3456   | 0     |        | 1     | 0      |
| 3459   | 0     |        | 0     |        |
| 3460   | 0     |        | 0     |        |
| 3461   | 0     |        | 2     | 1      |
| 3466   | 3     | 2      | 3     | 2      |
| 3471   | 3     | 2      | 1     | 2      |
| 3473   | 0     |        | 1     | 0      |
| 3475   | 3     | 3      | 3     | 3      |
| 3476   | 0     |        | 1     | 0      |
| 3477   | 0     |        | 2     | 1      |
| 3478   | 0     |        | 0     |        |
| 3479   | 0     |        | 1     | 1      |
| 3482   | 2     | 2      | 5     | 2      |
| 3483   | 0     |        | 1     | 0      |
| 3485   | 1     | 1      | 1     | 1      |
| 3489   | 0     |        | 0     |        |
| 3490   | 0     |        | 0     |        |
| 3491   | 0     |        | 1     | 2      |
| 3494   | 0     |        | 1     | 0      |
| 3495   | 4     | 2      | 1     | 1      |
| 3501   | 0     |        | 1     | 0      |
| 3506   | 2     | 1      | 2     | 2      |
| 3507   | 1     | 0      | 0     |        |
| 3517   | 1     | 1      | 5     | 1      |
| 3520   | 0     |        | 1     | 1      |
| 3521   | 1     | 1      | 1     | 1      |
| 3522   | 0     |        | 0     |        |
| 3524   | 0     |        | 0     |        |
| 3527   | 0     |        | 1     | 0      |
| 3528   | 0     |        | 2     | 0      |
| 3529   | 1     | 1      | 1     | 1      |
| 3536   | 1     | 0      | 1     | 1      |



| respid | Q24_1 | Q24a_1 | Q25_1 | Q25a_1 |
|--------|-------|--------|-------|--------|
| 3537   | 0     |        | 1     | 0      |
| 3538   | 2     | 1      | 1     | 1      |
| 3540   | 1     | 2      | 2     | 1      |
| 3545   | 1     | 0      | 2     | 0      |
| 3547   | 3     | 2      | 3     | 2      |
| 3554   | 0     |        | 0     |        |
| 3556   | 0     |        | 0     |        |
| 3557   | 0     |        | 1     | 2      |
| 3559   | 0     |        | 1     | 2      |
| 3560   | 4     | 2      | 3     | 3      |
| 3562   | 0     |        | 0     |        |
| 3564   | 1     | 1      | 2     | 1      |
| 3565   | 2     | 4      | 4     | 4      |
| 3568   | 1     | 2      | 3     | 2      |
| 3572   | 0     |        | 0     |        |
| 3578   | 0     |        | 0     |        |
| 3581   | 0     |        | 1     | 0      |
| 3583   | 0     |        | 1     | 2      |
| 3588   | 0     |        | 0     |        |
| 3591   | 0     |        | 2     | 1      |
| 3594   | 0     |        | 2     | 0      |
| 3595   | 2     | 1      | 1     | 1      |
| 3596   | 0     |        | 1     | 1      |
| 3597   | 0     |        | 1     | 1      |
| 3598   | 0     |        | 0     |        |
| 3600   | 0     |        | 5     | 2      |
| 3602   | 0     |        | 1     | 0      |
| 3604   | 0     |        | 0     |        |
| 3605   | 0     |        | 1     | 1      |
| 3606   | 0     |        | 5     | 1      |
| 3607   | 0     |        | 0     |        |
| 3610   | 0     |        | 1     | 0      |

| respid | Q24_1 | Q24a_1 | Q25_1 | Q25a_1 |
|--------|-------|--------|-------|--------|
| 3611   | 0     |        | 1     | 0      |
| 3612   | 2     | 0      | 2     | 1      |
| 3614   | 0     |        | 0     |        |
| 3616   | 0     |        | 1     | 0      |
| 3617   | 0     |        | 4     | 2      |
| 3618   | 0     |        | 0     |        |
| 3619   | 2     | 2      | 2     | 2      |
| 3621   | 0     |        | 2     | 1      |
| 3622   | 0     |        | 1     | 1      |
| 3624   | 0     |        | 1     | 1      |
| 3626   | 0     |        | 1     | 0      |
| 3629   | 0     |        | 1     | 1      |
| 3631   | 0     |        | 1     | 0      |
| 3632   | 1     | 0      | 0     |        |
| 3638   | 0     |        | 1     | 0      |
| 3640   | 1     | 0      | 0     |        |
| 3641   | 0     |        | 2     | 1      |
| 3645   | 4     | 3      | 2     | 3      |
| 3650   | 0     |        | 0     |        |
| 3653   | 2     | 1      | 5     | 1      |
| 3655   | 1     | 2      | 0     |        |
| 3657   | 1     | 1      | 1     | 1      |
| 3658   | 1     | 1      | 2     | 1      |
| 3659   | 0     |        | 1     | 0      |
| 3664   | 3     | 2      | 3     | 3      |
| 3665   | 1     | 1      | 2     | 2      |
| 3667   | 0     |        | 3     | 2      |
| 3668   | 4     | 3      | 3     | 3      |
| 3675   | 0     |        | 0     |        |
| 3678   | 0     |        | 0     |        |
| 3680   | 0     |        | 0     |        |
| 3684   | 0     |        | 1     | 1      |

| respid | Q24_1 | Q24a_1 | Q25_1 | Q25a_1 |
|--------|-------|--------|-------|--------|
| 3685   | 3     | 2      | 3     | 2      |
| 3687   | 1     | 2      | 1     | 3      |
| 3689   | 3     | 4      | 3     | 4      |
| 3690   | 0     |        | 1     | 0      |
| 3693   | 0     |        | 0     |        |
| 3694   | 0     |        | 1     | 0      |
| 3695   | 0     |        | 0     |        |
| 3700   | 0     |        | 1     | 0      |
| 3701   | 0     |        | 2     | 1      |
| 3703   | 0     |        | 1     | 1      |
| 3704   | 4     | 2      | 5     | 4      |
| 3705   | 0     |        | 0     |        |
| 3709   | 0     |        | 1     | 0      |
| 3710   | 3     | 3      | 2     | 2      |
| 3722   | 0     |        | 1     | 1      |
| 3725   | 0     |        | 1     | 0      |
| 3726   | 0     |        | 0     |        |
| 3727   | 0     |        | 0     |        |
| 3728   | 1     | 1      | 1     | 1      |
| 3729   | 0     |        | 5     | 0      |
| 3731   | 0     |        | 0     |        |
| 3738   | 0     |        | 1     | 0      |
| 3739   | 0     |        | 3     | 0      |
| 3740   | 0     |        | 1     | 1      |
| 3749   | 1     | 1      | 1     | 1      |
| 3758   | 3     | 2      | 1     | 1      |
| 3762   | 0     |        | 3     | 2      |
| 3765   | 0     |        | 2     | 0      |
| 3770   | 0     |        | 0     |        |
| 3771   | 0     |        | 0     |        |
| 3778   | 0     |        | 1     | 1      |
| 3779   | 1     | 1      | 0     |        |

| respid | Q24_1 | Q24a_1 | Q25_1 | Q25a_1 |
|--------|-------|--------|-------|--------|
| 3780   | 0     |        | 0     |        |
| 3782   | 1     | 1      | 1     | 1      |
| 3784   | 0     |        | 0     |        |
| 3787   | 1     | 0      | 2     | 0      |
| 3790   | 0     |        | 2     | 1      |
| 3791   | 0     |        | 3     | 1      |
| 3793   | 3     | 3      | 3     | 4      |
| 3795   | 0     |        | 1     | 0      |
| 3799   | 0     |        | 0     |        |
| 3801   | 3     | 3      | 1     | 2      |
| 3804   | 2     | 2      | 1     | 1      |
| 3809   | 0     |        | 1     | 1      |
| 3810   | 0     |        | 1     | 0      |
| 3813   | 0     |        | 0     |        |
| 3816   | 0     |        | 1     | 1      |
| 3820   | 0     |        | 4     | 1      |
| 3821   | 0     |        | 1     | 0      |
| 3823   | 2     | 1      | 1     | 1      |
| 3828   | 0     |        | 1     | 0      |
| 3829   | 0     |        | 1     | 0      |
| 3832   | 0     |        | 1     | 0      |
| 3835   | 0     |        | 2     | 0      |
| 3837   | 0     |        | 1     | 0      |
| 3838   | 0     |        | 4     | 1      |
| 3839   | 4     | 4      | 5     | 4      |
| 3840   | 0     |        | 0     |        |
| 3842   | 0     |        | 0     |        |
| 3843   | 0     |        | 1     | 1      |
| 3844   | 1     | 1      | 2     | 2      |
| 3850   | 0     |        | 1     | 0      |
| 3851   | 0     |        | 0     |        |
| 3856   | 1     | 1      | 1     | 2      |

| respid | Q24_1 | Q24a_1 | Q25_1 | Q25a_1 |
|--------|-------|--------|-------|--------|
| 3859   | 0     |        | 2     | 2      |
| 3860   | 0     |        | 1     | 1      |
| 3863   | 0     |        | 1     | 1      |
| 3866   | 0     |        | 1     | 1      |
| 3867   | 0     |        | 0     |        |
| 3870   | 0     |        | 1     | 0      |
| 3873   | 1     | 1      | 1     | 1      |
| 3875   | 0     |        | 1     | 0      |
| 3878   | 0     |        | 0     |        |
| 3881   | 1     | 1      | 0     |        |
| 3883   | 2     | 3      | 2     | 3      |
| 3884   | 1     | 2      | 3     | 0      |
| 3885   | 2     | 2      | 3     | 3      |
| 3886   | 1     | 1      | 3     | 2      |
| 3887   | 0     |        | 0     |        |
| 3888   | 0     |        | 0     |        |
| 3889   | 2     | 2      | 3     | 3      |
| 3890   | 0     |        | 1     | 0      |
| 3896   | 1     | 1      | 1     | 1      |
| 3902   | 5     | 4      | 4     | 4      |
| 3909   | 0     |        | 3     | 2      |
| 3912   | 3     | 2      | 2     | 2      |
| 3922   | 1     | 0      | 1     | 0      |
| 3928   | 0     |        | 1     | 0      |
| 3930   | 0     |        | 1     | 0      |
| 3931   | 1     | 1      | 2     | 1      |
| 3933   | 0     |        | 1     | 1      |
| 3935   | 0     |        | 1     | 1      |
| 3937   | 0     |        | 1     | 0      |
| 3939   | 0     |        | 1     | 0      |
| 3942   | 1     | 1      | 0     |        |
| 3943   | 0     |        | 2     | 1      |

| respid | Q24_1 | Q24a_1 | Q25_1 | Q25a_1 |
|--------|-------|--------|-------|--------|
| 3944   | 0     |        | 0     |        |
| 3945   | 0     |        | 1     | 0      |
| 3947   | 1     | 1      | 0     |        |
| 3948   | 0     |        | 2     | 1      |
| 3951   | 1     | 1      | 1     | 1      |
| 3959   | 0     |        | 2     | 1      |
| 3969   | 4     | 4      | 2     | 4      |
| 3973   | 0     |        | 1     | 2      |
| 3975   | 0     |        | 2     | 1      |
| 3976   | 0     |        | 0     |        |
| 3977   | 2     | 1      | 1     | 1      |
| 3978   | 0     |        | 0     |        |
| 3994   | 1     | 2      | 5     | 3      |
| 3995   | 5     | 4      | 3     | 3      |
| 3997   | 0     |        | 1     | 1      |
| 3998   | 1     | 0      | 0     |        |
| 3999   | 0     |        | 1     | 1      |
| 4002   | 1     | 2      | 2     | 3      |
| 4004   | 1     | 1      | 1     | 1      |
| 4005   | 0     |        | 0     |        |
| 4006   | 2     | 1      | 2     | 2      |
| 4008   | 0     |        | 0     |        |
| 4010   | 0     |        | 1     | 1      |
| 4011   | 3     | 3      | 1     | 2      |
| 4013   | 2     | 1      | 1     | 0      |
| 4014   | 1     | 2      | 1     | 2      |
| 4016   | 0     |        | 0     |        |
| 4017   | 0     |        | 1     | 1      |
| 4019   | 0     |        | 1     | 0      |
| 4021   | 0     |        | 0     |        |
| 4023   | 0     |        | 0     |        |
| 4024   | 0     |        | 0     |        |

| respid | Q24_1 | Q24a_1 | Q25_1 | Q25a_1 |
|--------|-------|--------|-------|--------|
| 4025   | 1     | 1      | 2     | 1      |
| 4027   | 0     |        | 0     |        |
| 4032   | 0     |        | 0     |        |
| 4034   | 0     |        | 1     | 0      |
| 4035   | 3     | 2      | 1     | 1      |
| 4037   | 1     | 1      | 2     | 2      |
| 4040   | 0     |        | 0     |        |
| 4041   | 0     |        | 5     | 1      |
| 4042   | 0     |        | 2     | 2      |
| 4043   | 0     |        | 0     |        |
| 4045   | 0     |        | 1     | 1      |
| 4046   | 3     | 2      | 2     | 3      |
| 4048   | 0     |        | 2     | 1      |
| 4049   | 0     |        | 1     | 1      |
| 4050   | 1     | 2      | 1     | 3      |
| 4052   | 0     |        | 2     | 3      |
| 4053   | 0     |        | 0     |        |
| 4060   | 0     |        | 0     |        |
| 4065   | 3     | 2      | 1     | 2      |
| 4066   | 0     |        | 0     |        |
| 4067   | 0     |        | 0     |        |
| 4068   | 3     | 2      | 1     | 2      |
| 4069   | 0     |        | 1     | 0      |
| 4070   | 0     |        | 1     | 0      |
| 4071   | 2     | 2      | 2     | 3      |
| 4072   | 0     |        | 3     | 0      |
| 4073   | 1     | 0      | 1     | 0      |
| 4074   | 1     | 0      | 1     | 0      |
| 4075   | 0     |        | 0     |        |
| 4078   | 1     | 0      | 2     | 1      |
| 4080   | 0     |        | 2     | 0      |
| 4081   | 0     |        | 0     |        |

| respid | Q24_1 | Q24a_1 | Q25_1 | Q25a_1 |
|--------|-------|--------|-------|--------|
| 4082   | 0     |        | 5     | 0      |
| 4083   | 1     | 2      | 1     | 1      |
| 4084   | 0     |        | 1     | 0      |
| 4086   | 0     |        | 0     |        |
| 4087   | 0     |        | 0     |        |
| 4088   | 0     |        | 0     |        |
| 4089   | 0     |        | 0     |        |
| 4090   | 0     |        | 3     | 0      |
| 4093   | 3     | 1      | 5     | 1      |
| 4094   | 0     |        | 0     |        |
| 4095   | 1     | 0      | 1     | 1      |
| 4096   | 0     |        | 0     |        |
| 4098   | 0     |        | 1     | 0      |
| 4103   | 1     | 1      | 5     | 2      |
| 4104   | 0     |        | 3     | 0      |
| 4107   | 0     |        | 2     | 0      |
| 4109   | 0     |        | 0     |        |
| 4110   | 0     |        | 3     | 4      |
| 4113   | 0     |        | 0     |        |
| 4114   | 0     |        | 1     | 1      |
| 4116   | 0     |        | 0     |        |
| 4119   | 0     |        | 1     | 0      |
| 4120   | 0     |        | 0     |        |
| 4121   | 0     |        | 1     | 0      |
| 4122   | 3     | 2      | 2     | 1      |
| 4124   | 0     |        | 2     | 1      |
| 4126   | 0     |        | 1     | 1      |
| 4127   | 4     | 3      | 1     | 3      |
| 4131   | 0     |        | 5     | 1      |
| 4134   | 0     |        | 1     | 1      |
| 4144   | 1     | 1      | 1     | 1      |
| 4145   | 1     | 1      | 0     |        |



| respid | Q24_1 | Q24a_1 | Q25_1 | Q25a_1 |
|--------|-------|--------|-------|--------|
| 4146   | 0     |        | 1     | 0      |
| 4147   | 0     |        | 0     |        |
| 4149   | 3     | 2      | 2     | 2      |
| 4150   | 0     |        | 0     |        |
| 4151   | 1     | 1      | 1     | 3      |
| 4153   | 1     | 1      | 1     | 1      |
| 4155   | 0     |        | 2     | 2      |
| 4157   | 0     |        | 1     | 0      |
| 4159   | 0     |        | 0     |        |
| 4160   | 1     | 1      | 1     | 0      |
| 4161   | 0     |        | 1     | 0      |
| 4163   | 0     |        | 1     | 0      |
| 4164   | 0     |        | 3     | 0      |
| 4165   | 0     |        | 2     | 0      |
| 4166   | 0     |        | 0     |        |
| 4167   | 0     |        | 1     | 0      |
| 4170   | 1     | 1      | 1     | 1      |
| 4172   | 1     | 0      | 0     |        |
| 4173   | 3     | 2      | 2     | 3      |
| 4180   | 0     |        | 0     |        |
| 4185   | 4     | 2      | 1     | 2      |
| 4187   | 0     |        | 1     | 0      |
| 4190   | 0     |        | 0     |        |
| 4191   | 0     |        | 1     | 1      |
| 4193   | 0     |        | 0     |        |
| 4194   | 0     |        | 4     | 1      |
| 4195   | 0     |        | 0     |        |
| 4196   | 0     |        | 0     |        |
| 4197   | 0     |        | 5     | 0      |
| 4198   | 0     |        | 1     | 0      |
| 4199   | 0     |        | 1     | 0      |
| 4205   | 0     |        | 1     | 1      |

| respid | Q24_1 | Q24a_1 | Q25_1 | Q25a_1 |
|--------|-------|--------|-------|--------|
| 4206   | 0     |        | 0     |        |
| 4207   | 0     |        | 2     | 2      |
| 4214   | 0     |        | 1     | 0      |
| 4215   | 1     | 0      | 1     | 0      |
| 4217   | 1     | 1      | 0     |        |
| 4219   | 0     |        | 3     | 0      |
| 4223   | 1     | 2      | 1     | 2      |
| 4226   | 0     |        | 1     | 1      |
| 4229   | 0     |        | 1     | 0      |
| 4230   | 0     |        | 1     | 1      |
| 4232   | 0     |        | 0     |        |
| 4233   | 1     | 1      | 2     | 1      |
| 4234   | 0     |        | 2     | 2      |
| 4235   | 3     | 1      | 2     | 1      |
| 4236   | 0     |        | 2     | 1      |
| 4237   | 0     |        | 0     |        |
| 4238   | 0     |        | 0     |        |
| 4240   | 0     |        | 2     | 1      |
| 4241   | 0     |        | 2     | 1      |
| 4247   | 0     |        | 0     |        |
| 4250   | 0     |        | 0     |        |
| 4251   | 0     |        | 1     | 0      |
| 4253   | 1     | 1      | 1     | 1      |
| 4254   | 0     |        | 3     | 0      |
| 4258   | 1     | 1      | 2     | 1      |
| 4260   | 0     |        | 1     | 0      |
| 4263   | 0     |        | 1     | 0      |
| 4265   | 0     |        | 0     |        |
| 4266   | 0     |        | 3     | 1      |
| 4267   | 0     |        | 2     | 1      |
| 4270   | 0     |        | 0     |        |
| 4273   | 1     | 1      | 1     | 1      |

| respid | Q24_1 | Q24a_1 | Q25_1 | Q25a_1 |
|--------|-------|--------|-------|--------|
| 4280   | 0     |        | 1     | 0      |
| 4281   | 2     | 1      | 5     | 0      |
| 4282   | 0     |        | 3     | 0      |
| 4283   | 0     |        | 0     |        |
| 4286   | 0     |        | 5     | 4      |
| 4287   | 0     |        | 0     |        |
| 4289   | 0     |        | 1     | 1      |
| 4290   | 2     | 2      | 2     | 2      |
| 4291   | 0     |        | 1     | 1      |
| 4292   | 1     | 0      | 0     |        |
| 4293   | 0     |        | 0     |        |
| 4294   | 0     |        | 0     |        |
| 4295   | 0     |        | 0     |        |
| 4296   | 0     |        | 1     | 2      |
| 4297   | 1     | 1      | 0     |        |
| 4298   | 0     |        | 2     | 0      |
| 4299   | 0     |        | 0     |        |
| 4300   | 0     |        | 2     | 1      |
| 4301   | 0     |        | 0     |        |
| 4302   | 0     |        | 1     | 0      |
| 4304   | 0     |        | 2     | 0      |
| 4305   | 1     | 2      | 3     | 2      |
| 4307   | 1     | 0      | 1     | 0      |
| 4308   | 0     |        | 0     |        |
| 4312   | 0     |        | 0     |        |
| 4314   | 1     | 2      | 0     |        |
| 4316   | 0     |        | 1     | 0      |
| 4317   | 3     | 2      | 2     | 2      |
| 4319   | 0     |        | 0     |        |
| 4323   | 1     | 1      | 5     | 3      |
| 4337   | 0     |        | 1     | 0      |
| 4341   | 0     |        | 3     | 2      |

| respid | Q24_1 | Q24a_1 | Q25_1 | Q25a_1 |
|--------|-------|--------|-------|--------|
| 4342   | 0     |        | 2     | 2      |
| 4344   | 2     | 2      | 2     | 1      |
| 4345   | 1     | 1      | 5     | 1      |
| 4346   | 1     | 1      | 1     | 1      |
| 4347   | 0     |        | 1     | 0      |
| 4350   | 0     |        | 0     |        |
| 4352   | 0     |        | 3     | 0      |
| 4353   | 0     |        | 0     |        |
| 4355   | 0     |        | 0     |        |
| 4356   | 1     | 2      | 0     |        |
| 4358   | 0     |        | 0     |        |
| 4359   | 0     |        | 0     |        |
| 4360   | 1     | 1      | 1     | 1      |
| 4361   | 3     | 2      | 2     | 3      |
| 4363   | 0     |        | 2     | 0      |
| 4364   | 0     |        | 0     |        |
| 4365   | 1     | 1      | 2     | 1      |
| 4367   | 0     |        | 1     | 0      |
| 4369   | 1     | 1      | 3     | 1      |
| 4373   | 0     |        | 1     | 3      |
| 4374   | 1     | 1      | 1     | 1      |
| 4375   | 0     |        | 0     |        |
| 4378   | 0     |        | 2     | 0      |
| 4379   | 1     | 0      | 4     | 0      |
| 4382   | 0     |        | 1     | 0      |
| 4383   | 0     |        | 0     |        |
| 4384   | 2     | 2      | 1     | 1      |
| 4385   | 1     | 1      | 2     | 1      |
| 4388   | 1     | 1      | 1     | 1      |
| 4389   | 0     |        | 1     | 1      |
| 4391   | 0     |        | 3     | 0      |
| 4392   | 1     | 0      | 0     |        |

| respid | Q24_1 | Q24a_1 | Q25_1 | Q25a_1 |
|--------|-------|--------|-------|--------|
| 4393   | 0     |        | 0     |        |
| 4395   | 1     | 1      | 4     | 1      |
| 4397   | 0     |        | 0     |        |
| 4398   | 0     |        | 0     |        |
| 4399   | 0     |        | 0     |        |
| 4400   | 0     |        | 0     |        |
| 4401   | 0     |        | 1     | 1      |
| 4402   | 0     |        | 0     |        |
| 4404   | 0     |        | 0     |        |
| 4405   | 0     |        | 0     |        |
| 4407   | 1     | 1      | 2     | 2      |
| 4408   | 0     |        | 1     | 1      |
| 4411   | 0     |        | 0     |        |
| 4420   | 0     |        | 0     |        |
| 4421   | 0     |        | 1     | 0      |
| 4424   | 3     | 3      | 2     | 2      |
| 4425   | 0     |        | 3     | 1      |
| 4427   | 0     |        | 0     |        |
| 4430   | 1     | 0      | 0     |        |
| 4431   | 0     |        | 1     | 1      |
| 4432   | 1     | 2      | 0     |        |
| 4436   | 0     |        | 5     | 0      |
| 4439   | 0     |        | 1     | 0      |
| 4451   | 1     | 1      | 2     | 1      |
| 4452   | 3     | 3      | 4     | 3      |
| 4458   | 0     |        | 1     | 0      |
| 4464   | 2     | 2      | 4     | 2      |
| 4465   | 0     |        | 2     | 1      |
| 4467   | 0     |        | 0     |        |
| 4470   | 0     |        | 1     | 1      |
| 4471   | 0     |        | 0     |        |
| 4472   | 1     | 1      | 2     | 2      |

| respid | Q24_1 | Q24a_1 | Q25_1 | Q25a_1 |
|--------|-------|--------|-------|--------|
| 4473   | 0     |        | 0     |        |
| 4475   | 0     |        | 1     | 0      |
| 4476   | 1     | 0      | 2     | 0      |
| 4478   | 1     | 0      | 0     |        |
| 4485   | 0     |        | 0     |        |
| 4486   | 0     |        | 1     | 1      |
| 4490   | 0     |        | 0     |        |
| 4502   | 0     |        | 0     |        |
| 4503   | 0     |        | 1     | 1      |
| 4504   | 0     |        | 1     | 0      |
| 4506   | 0     |        | 1     | 0      |
| 4508   | 0     |        | 2     | 1      |
| 4515   | 0     |        | 2     | 0      |
| 4516   | 3     | 2      | 3     | 2      |
| 4519   | 0     |        | 1     | 0      |
| 4523   | 0     |        | 1     | 0      |
| 4525   | 1     | 1      | 1     | 1      |
| 4526   | 0     |        | 0     |        |
| 4528   | 0     |        | 0     |        |
| 4530   | 0     |        | 1     | 0      |
| 4531   | 1     | 2      | 3     | 2      |
| 4532   | 1     | 1      | 0     |        |
| 4537   | 0     |        | 0     |        |
| 4538   | 0     |        | 5     | 1      |
| 4539   | 0     |        | 0     |        |
| 4541   | 2     | 1      | 0     |        |
| 4543   | 0     |        | 0     |        |
| 4544   | 0     |        | 1     | 0      |
| 4546   | 0     |        | 1     | 4      |
| 4547   | 1     | 0      | 2     | 1      |
| 4549   | 0     |        | 0     |        |
| 4550   | 0     |        | 2     | 0      |

| respid | Q24_1 | Q24a_1 | Q25_1 | Q25a_1 |
|--------|-------|--------|-------|--------|
| 4551   | 0     |        | 0     |        |
| 4554   | 0     |        | 0     |        |
| 4557   | 0     |        | 0     |        |
| 4565   | 0     |        | 3     | 0      |
| 4568   | 0     |        | 1     | 1      |
| 4569   | 0     |        | 1     | 1      |
| 4570   | 0     |        | 2     | 1      |
| 4572   | 0     |        | 1     | 1      |
| 4574   | 3     | 2      | 2     | 0      |
| 4576   | 0     |        | 2     | 4      |
| 4578   | 0     |        | 1     | 0      |
| 4579   | 0     |        | 0     |        |
| 4580   | 0     |        | 1     | 2      |
| 4581   | 0     |        | 0     |        |
| 4584   | 0     |        | 1     | 0      |
| 4586   | 4     | 3      | 3     | 2      |
| 4587   | 2     | 2      | 5     | 3      |
| 4590   | 0     |        | 2     | 0      |
| 4592   | 0     |        | 5     | 1      |
| 4593   | 0     |        | 1     | 0      |
| 4595   | 0     |        | 5     | 2      |
| 4597   | 0     |        | 0     |        |
| 4598   | 0     |        | 1     | 2      |
| 4599   | 1     | 1      | 1     | 2      |
| 4600   | 0     |        | 5     | 1      |
| 4601   | 1     | 1      | 1     | 1      |
| 4608   | 1     | 1      | 2     | 0      |
| 4609   | 1     | 0      | 1     | 0      |
| 4611   | 0     |        | 2     | 1      |
| 4612   | 2     | 2      | 2     | 2      |
| 4613   | 0     |        | 0     |        |
| 4616   | 1     | 1      | 2     | 1      |

| respid | Q24_1 | Q24a_1 | Q25_1 | Q25a_1 |
|--------|-------|--------|-------|--------|
| 4617   | 0     |        | 1     | 2      |
| 4620   | 0     |        | 1     | 1      |
| 4621   | 0     |        | 2     | 0      |
| 4622   | 1     | 1      | 2     | 1      |
| 4624   | 1     | 1      | 0     |        |
| 4625   | 1     | 1      | 3     | 2      |
| 4627   | 3     | 2      | 1     | 3      |
| 4628   | 3     | 2      | 2     | 2      |
| 4629   | 0     |        | 0     |        |
| 4630   | 1     | 1      | 1     | 1      |
| 4632   | 0     |        | 1     | 0      |
| 4634   | 1     | 1      | 1     | 1      |
| 4635   | 1     | 1      | 2     | 3      |
| 4636   | 0     |        | 0     |        |
| 4637   | 1     | 1      | 1     | 1      |
| 4638   | 2     | 1      | 1     | 1      |
| 4639   | 1     | 1      | 1     | 1      |
| 4641   | 0     |        | 0     |        |
| 4643   | 0     |        | 1     | 0      |
| 4645   | 0     |        | 0     |        |
| 4646   | 1     | 1      | 2     | 1      |
| 4647   | 0     |        | 0     |        |
| 4648   | 0     |        | 1     | 0      |
| 4649   | 0     |        | 1     | 1      |
| 4650   | 2     | 2      | 5     | 4      |
| 4651   | 2     | 1      | 1     | 1      |
| 4652   | 0     |        | 2     | 0      |
| 4653   | 0     |        | 0     |        |
| 4657   | 0     |        | 0     |        |
| 4660   | 3     | 3      | 1     | 1      |
| 4661   | 0     |        | 0     |        |
| 4662   | 0     |        | 1     | 0      |



| respid | Q24_1 | Q24a_1 | Q25_1 | Q25a_1 |
|--------|-------|--------|-------|--------|
| 4667   | 0     |        | 1     | 0      |
| 4669   | 0     |        | 1     | 1      |
| 4671   | 0     |        | 0     |        |
| 4672   | 1     | 2      | 1     | 2      |
| 4673   | 0     |        | 1     | 0      |
| 4677   | 0     |        | 0     |        |
| 4679   | 3     | 2      | 1     | 1      |
| 4683   | 0     |        | 0     |        |
| 4684   | 0     |        | 2     | 1      |
| 4685   | 0     |        | 5     | 2      |
| 4686   | 0     |        | 3     | 0      |
| 4687   | 0     |        | 1     | 0      |
| 4688   | 0     |        | 0     |        |
| 4691   | 0     |        | 2     | 1      |
| 4692   | 0     |        | 1     | 1      |
| 4694   | 0     |        | 1     | 1      |
| 4695   | 0     |        | 2     | 1      |
| 4696   | 1     | 0      | 1     | 0      |
| 4697   | 0     |        | 0     |        |
| 4698   | 3     | 2      | 1     | 2      |
| 4699   | 0     |        | 1     | 1      |
| 4701   | 0     |        | 0     |        |
| 4703   | 5     | 2      | 2     | 1      |
| 4704   | 4     | 4      | 4     | 4      |
| 4705   | 0     |        | 1     | 0      |
| 4706   | 0     |        | 1     | 0      |
| 4707   | 0     |        | 0     |        |
| 4708   | 1     | 0      | 1     | 0      |
| 4710   | 0     |        | 1     | 0      |
| 4711   | 3     | 2      | 5     | 3      |
| 4715   | 0     |        | 0     |        |
| 4716   | 1     | 1      | 0     |        |

| respid | Q24_1 | Q24a_1 | Q25_1 | Q25a_1 |
|--------|-------|--------|-------|--------|
| 4717   | 1     | 0      | 1     | 0      |
| 4718   | 0     |        | 2     | 1      |
| 4722   | 0     |        | 1     | 1      |
| 4727   | 0     |        | 1     | 2      |
| 4728   | 5     | 4      | 5     | 4      |
| 4729   | 0     |        | 0     |        |
| 4732   | 1     | 1      | 2     | 1      |
| 4733   | 0     |        | 2     | 0      |
| 4734   | 1     | 1      | 0     |        |
| 4735   | 0     |        | 2     | 0      |
| 4737   | 1     | 1      | 1     | 0      |
| 4738   | 1     | 1      | 1     | 1      |
| 4740   | 0     |        | 2     | 0      |
| 4741   | 1     | 1      | 1     | 1      |
| 4743   | 0     |        | 0     |        |
| 4746   | 1     | 1      | 0     |        |
| 4750   | 0     |        | 0     |        |
| 4752   | 1     | 1      | 0     |        |
| 4753   | 1     | 1      | 5     | 2      |
| 4754   | 3     | 3      | 3     | 2      |
| 4755   | 2     | 1      | 5     | 4      |
| 4758   | 0     |        | 2     | 2      |
| 4766   | 0     |        | 0     |        |
| 4767   | 0     |        | 2     | 2      |
| 4768   | 1     | 1      | 1     | 1      |
| 4769   | 2     | 1      | 1     | 1      |
| 4771   | 5     | 4      | 5     | 3      |
| 4772   | 0     |        | 1     | 0      |
| 4773   | 0     |        | 1     | 0      |
| 4774   | 0     |        | 2     | 1      |
| 4776   | 0     |        | 1     | 1      |
| 4777   | 0     |        | 1     | 1      |

| respid | Q24_1 | Q24a_1 | Q25_1 | Q25a_1 |
|--------|-------|--------|-------|--------|
| 4779   | 0     |        | 0     |        |
| 4780   | 0     |        | 2     | 1      |
| 4781   | 0     |        | 0     |        |
| 4783   | 4     | 2      | 5     | 2      |
| 4784   | 1     | 1      | 1     | 1      |
| 4785   | 1     | 1      | 2     | 2      |
| 4788   | 0     |        | 0     |        |
| 4789   | 1     | 2      | 4     | 3      |
| 4790   | 0     |        | 0     |        |
| 4791   | 0     |        | 0     |        |
| 4794   | 0     |        | 0     |        |
| 4795   | 0     |        | 1     | 0      |
| 4797   | 0     |        | 1     | 1      |
| 4802   | 3     | 2      | 1     | 0      |
| 4803   | 0     |        | 1     | 2      |
| 4804   | 0     |        | 0     |        |
| 4805   | 0     |        | 1     | 0      |
| 4807   | 0     |        | 0     |        |
| 4808   | 0     |        | 1     | 1      |
| 4809   | 3     | 3      | 3     | 3      |
| 4811   | 0     |        | 0     |        |
| 4817   | 0     |        | 0     |        |
| 4819   | 0     |        | 3     | 0      |
| 4820   | 0     |        | 0     |        |
| 4821   | 0     |        | 1     | 2      |
| 4822   | 0     |        | 0     |        |
| 4823   | 0     |        | 2     | 1      |
| 4825   | 1     | 1      | 1     | 0      |
| 4826   | 0     |        | 0     |        |
| 4830   | 0     |        | 2     | 1      |
| 4832   | 0     |        | 0     |        |
| 4838   | 1     | 1      | 1     | 1      |

| respid | Q24_1 | Q24a_1 | Q25_1 | Q25a_1 |
|--------|-------|--------|-------|--------|
| 4840   | 0     |        | 1     | 0      |
| 4841   | 0     |        | 0     |        |
| 4843   | 0     |        | 1     | 0      |
| 4845   | 0     |        | 1     | 2      |
| 4846   | 2     | 1      | 0     |        |
| 4848   | 0     |        | 1     | 0      |
| 4853   | 0     |        | 0     |        |
| 4854   | 0     |        | 0     |        |
| 4859   | 0     |        | 0     |        |
| 4861   | 0     |        | 0     |        |
| 4864   | 1     | 2      | 0     |        |
| 4867   | 0     |        | 0     |        |
| 4870   | 0     |        | 0     |        |
| 4872   | 1     | 2      | 4     | 2      |
| 4873   | 1     | 2      | 1     | 2      |
| 4874   | 0     |        | 1     | 0      |
| 4878   | 0     |        | 1     | 0      |
| 4880   | 0     |        | 0     |        |
| 4881   | 2     | 1      | 3     | 0      |
| 4882   | 2     | 2      | 2     | 3      |
| 4883   | 0     |        | 1     | 0      |
| 4885   | 0     |        | 0     |        |
| 4889   | 0     |        | 0     |        |
| 4890   | 0     |        | 0     |        |
| 4891   | 0     |        | 0     |        |
| 4894   | 0     |        | 1     | 1      |
| 4895   | 5     | 3      | 5     | 4      |
| 4896   | 0     |        | 2     | 0      |
| 4897   | 0     |        | 0     |        |
| 4898   | 1     | 1      | 5     | 1      |
| 4899   | 0     |        | 0     |        |
| 4900   | 2     | 2      | 1     | 2      |

| respid | Q24_1 | Q24a_1 | Q25_1 | Q25a_1 |
|--------|-------|--------|-------|--------|
| 4901   | 1     | 0      | 0     |        |
| 4903   | 0     |        | 1     | 1      |
| 4904   | 0     |        | 1     | 0      |
| 4908   | 0     |        | 1     | 0      |
| 4909   | 2     | 1      | 1     | 1      |
| 4913   | 3     | 1      | 1     | 1      |
| 4917   | 2     | 0      | 1     | 0      |
| 4918   | 0     |        | 5     | 1      |
| 4920   | 0     |        | 0     |        |
| 4921   | 0     |        | 1     | 2      |
| 4925   | 0     |        | 1     | 0      |
| 4926   | 0     |        | 0     |        |
| 4927   | 0     |        | 3     | 0      |
| 4928   | 0     |        | 2     | 0      |
| 4929   | 1     | 0      | 1     | 0      |
| 4930   | 1     | 2      | 5     | 2      |
| 4931   | 0     |        | 0     |        |
| 4932   | 2     | 2      | 2     | 2      |
| 4933   | 0     |        | 1     | 0      |
| 4934   | 0     |        | 1     | 0      |
| 5934   | 0     |        | 0     |        |
| 5935   | 1     | 1      | 2     | 0      |
| 5936   | 1     | 0      | 0     |        |
| 5938   | 0     |        | 0     |        |
| 5939   | 0     |        | 0     |        |
| 5940   | 0     |        | 1     | 0      |
| 5942   | 0     |        | 1     | 0      |
| 5944   | 0     |        | 1     | 1      |
| 5951   | 2     | 3      | 2     | 3      |
| 5952   | 0     |        | 1     | 2      |
| 5954   | 0     |        | 1     | 0      |
| 5956   | 0     |        | 1     | 1      |

| respid | Q24_1 | Q24a_1 | Q25_1 | Q25a_1 |
|--------|-------|--------|-------|--------|
| 5957   | 1     | 0      | 2     | 1      |
| 5958   | 1     | 1      | 2     | 1      |
| 5959   | 0     |        | 1     | 1      |
| 5960   | 0     |        | 1     | 1      |
| 5963   | 0     |        | 2     | 2      |
| 5966   | 0     |        | 1     | 1      |
| 5968   | 0     |        | 1     | 0      |
| 5974   | 0     |        | 2     | 2      |
| 5975   | 0     |        | 1     | 0      |
| 5976   | 0     |        | 0     |        |
| 5977   | 0     |        | 1     | 1      |
| 5978   | 1     | 1      | 1     | 1      |
| 5979   | 0     |        | 1     | 1      |
| 5983   | 0     |        | 1     | 0      |
| 5984   | 0     |        | 0     |        |
| 5990   | 0     |        | 1     | 0      |
| 5991   | 0     |        | 0     |        |
| 5992   | 0     |        | 0     |        |
| 5993   | 0     |        | 0     |        |
| 5994   | 1     | 0      | 0     |        |
| 5996   | 0     |        | 3     | 0      |
| 6001   | 2     | 2      | 2     | 2      |
| 6003   | 0     |        | 1     | 0      |
| 6004   | 5     | 4      | 5     | 2      |
| 6005   | 1     | 1      | 2     | 0      |
| 6006   | 0     |        | 1     | 0      |
| 6008   | 3     | 2      | 1     | 2      |
| 6009   | 0     |        | 1     | 1      |
| 6014   | 0     |        | 0     |        |
| 6016   | 1     | 1      | 1     | 1      |
| 6017   | 0     |        | 2     | 2      |
| 6018   | 1     | 1      | 2     | 1      |

| respid | Q24_1 | Q24a_1 | Q25_1 | Q25a_1 |
|--------|-------|--------|-------|--------|
| 6020   | 1     | 1      | 2     | 3      |
| 6021   | 0     |        | 0     |        |
| 6024   | 0     |        | 1     | 1      |
| 6025   | 0     |        | 1     | 1      |
| 6026   | 0     |        | 2     | 2      |
| 6032   | 1     | 1      | 2     | 2      |
| 6035   | 0     |        | 1     | 1      |
| 6038   | 0     |        | 1     | 1      |
| 6043   | 3     | 2      | 2     | 1      |
| 6044   | 0     |        | 5     | 2      |
| 6046   | 0     |        | 1     | 0      |
| 6047   | 0     |        | 1     | 0      |
| 6048   | 0     |        | 1     | 1      |
| 6050   | 0     |        | 2     | 1      |
| 6051   | 1     | 1      | 1     | 1      |
| 6053   | 0     |        | 4     | 1      |
| 6054   | 0     |        | 1     | 2      |
| 6056   | 0     |        | 1     | 0      |
| 6058   | 0     |        | 2     | 1      |
| 6060   | 0     |        | 2     | 0      |
| 6061   | 0     |        | 0     |        |
| 6062   | 1     | 2      | 2     | 0      |
| 6067   | 0     |        | 1     | 0      |
| 6070   | 0     |        | 1     | 3      |
| 6074   | 0     |        | 2     | 1      |
| 6076   | 0     |        | 1     | 1      |
| 6078   | 0     |        | 0     |        |
| 6081   | 0     |        | 1     | 0      |
| 6085   | 1     | 1      | 2     | 1      |
| 6088   | 0     |        | 0     |        |
| 6092   | 1     | 2      | 5     | 1      |
| 6095   | 0     |        | 1     | 1      |

| respid | Q24_1 | Q24a_1 | Q25_1 | Q25a_1 |
|--------|-------|--------|-------|--------|
| 6098   | 0     |        | 1     | 1      |
| 6101   | 0     |        | 0     |        |
| 6102   | 2     | 1      | 2     | 1      |
| 6105   | 0     |        | 1     | 1      |
| 6106   | 0     |        | 1     | 1      |
| 6107   | 0     |        | 0     |        |
| 6111   | 0     |        | 1     | 0      |
| 6112   | 0     |        | 2     | 1      |
| 6113   | 2     | 1      | 5     | 3      |
| 6115   | 0     |        | 0     |        |
| 6116   | 0     |        | 0     |        |
| 6117   | 0     |        | 2     | 1      |
| 6124   | 4     | 3      | 5     | 3      |
| 6125   | 0     |        | 4     | 1      |
| 6128   | 0     |        | 0     |        |
| 6133   | 0     |        | 1     | 0      |
| 6134   | 0     |        | 1     | 1      |
| 6135   | 0     |        | 0     |        |
| 6138   | 0     |        | 5     | 2      |
| 6140   | 0     |        | 1     | 1      |
| 6143   | 0     |        | 0     |        |
| 6147   | 0     |        | 2     | 2      |
| 6154   | 0     |        | 1     | 0      |
| 6162   | 0     |        | 0     |        |
| 6165   | 0     |        | 5     | 2      |
| 6166   | 3     | 2      | 1     | 0      |
| 6173   | 3     | 3      | 3     | 3      |
| 6180   | 1     | 1      | 1     | 1      |
| 6184   | 3     | 3      | 2     | 3      |
| 6185   | 0     |        | 0     |        |
| 6186   | 0     |        | 3     | 2      |
| 6188   | 0     |        | 1     | 1      |



| respid | Q24_1 | Q24a_1 | Q25_1 | Q25a_1 |
|--------|-------|--------|-------|--------|
| 6192   | 2     | 1      | 0     |        |
| 6194   | 0     |        | 0     |        |
| 6195   | 0     |        | 1     | 0      |
| 6196   | 0     |        | 1     | 0      |
| 6199   | 0     |        | 1     | 1      |
| 6200   | 0     |        | 0     |        |
| 6201   | 0     |        | 4     | 1      |
| 6202   | 0     |        | 2     | 2      |
| 6203   | 0     |        | 1     | 0      |
| 6205   | 0     |        | 1     | 0      |
| 6210   | 1     | 1      | 1     | 1      |
| 6212   | 0     |        | 1     | 1      |
| 6216   | 2     | 1      | 1     | 2      |
| 6218   | 2     | 2      | 3     | 3      |
| 6221   | 0     |        | 1     | 1      |
| 6224   | 0     |        | 1     | 0      |
| 6225   | 0     |        | 0     |        |
| 6227   | 0     |        | 2     | 0      |
| 6230   | 0     |        | 0     |        |
| 6231   | 0     |        | 1     | 1      |
| 6233   | 0     |        | 1     | 1      |
| 6234   | 0     |        | 2     | 1      |
| 6235   | 0     |        | 0     |        |
| 6237   | 0     |        | 0     |        |
| 6240   | 0     |        | 0     |        |
| 6248   | 1     | 1      | 0     |        |
| 6249   | 0     |        | 0     |        |
| 6252   | 0     |        | 0     |        |
| 6254   | 1     | 0      | 5     | 1      |
| 6269   | 1     | 1      | 2     | 1      |
| 6304   | 0     |        | 0     |        |
| 6334   | 0     |        | 5     | 2      |

| respid | Q24_1 | Q24a_1 | Q25_1 | Q25a_1 |
|--------|-------|--------|-------|--------|
| 6341   | 0     |        | 2     | 2      |
| 6350   | 2     | 1      | 2     | 1      |
| 6370   | 0     |        | 0     |        |
| 6384   | 0     |        | 0     |        |
| 6400   | 0     |        | 2     | 0      |
| 6418   | 0     |        | 0     |        |
| 6467   | 0     |        | 2     | 1      |
| 6469   | 0     |        | 1     | 0      |
| 6474   | 0     |        | 1     | 0      |
| 6475   | 0     |        | 0     |        |
| 6476   | 2     | 1      | 1     | 1      |
| 6477   | 0     |        | 1     | 1      |
| 6480   | 1     | 1      | 1     | 1      |
| 6481   | 0     |        | 2     | 2      |
| 6485   | 0     |        | 0     |        |
| 6488   | 2     | 1      | 2     | 1      |
| 6495   | 0     |        | 1     | 1      |
| 6499   | 0     |        | 0     |        |
| 6500   | 1     | 1      | 3     | 2      |
| 6504   | 1     | 0      | 0     |        |
| 6507   | 2     | 2      | 3     | 2      |
| 6512   | 0     |        | 1     | 1      |
| 6525   | 3     | 2      | 3     | 2      |
| 6532   | 0     |        | 1     | 1      |
| 6535   | 0     |        | 0     |        |
| 6546   | 0     |        | 0     |        |
| 6551   | 0     |        | 5     | 3      |
| 6556   | 0     |        | 1     | 1      |
| 6566   | 1     | 1      | 2     | 3      |
| 6569   | 0     |        | 0     |        |
| 6574   | 0     |        | 0     |        |
| 6576   | 5     | 2      | 1     | 1      |

| respid | Q24_1 | Q24a_1 | Q25_1 | Q25a_1 |
|--------|-------|--------|-------|--------|
| 6580   | 0     |        | 0     |        |
| 6584   | 0     |        | 0     |        |
| 6585   | 2     | 1      | 1     | 0      |
| 6589   | 0     |        | 3     | 0      |
| 6590   | 0     |        | 1     | 0      |
| 6598   | 0     |        | 0     |        |
| 6603   | 0     |        | 1     | 1      |
| 6618   | 0     |        | 0     |        |
| 6630   | 0     |        | 1     | 0      |
| 6636   | 0     |        | 1     | 0      |
| 6649   | 0     |        | 0     |        |
| 6675   | 2     | 0      | 1     | 1      |
| 6678   | 0     |        | 0     |        |
| 6681   | 0     |        | 1     | 0      |
| 6684   | 1     | 1      | 1     | 1      |
| 6688   | 0     |        | 0     |        |
| 6691   | 0     |        | 1     | 0      |
| 6694   | 1     | 1      | 2     | 1      |
| 6696   | 0     |        | 1     | 0      |
| 6720   | 3     | 2      | 2     | 3      |
| 6722   | 4     | 4      | 5     | 4      |
| 6724   | 0     |        | 1     | 0      |
| 6725   | 0     |        | 1     | 0      |
| 6727   | 0     |        | 1     | 0      |
| 6734   | 1     | 1      | 2     | 1      |
| 6739   | 0     |        | 5     | 1      |
| 6743   | 1     | 1      | 1     | 2      |
| 6749   | 0     |        | 1     | 0      |
| 6756   | 0     |        | 1     | 1      |
| 6764   | 0     |        | 0     |        |
| 6765   | 0     |        | 0     |        |
| 6768   | 0     |        | 0     |        |

| respid | Q24_1 | Q24a_1 | Q25_1 | Q25a_1 |
|--------|-------|--------|-------|--------|
| 6773   | 0     |        | 1     | 1      |
| 6775   | 2     | 2      | 1     | 1      |
| 6777   | 0     |        | 0     |        |
| 6779   | 0     |        | 0     |        |
| 6790   | 1     | 1      | 0     |        |
| 6797   | 0     |        | 0     |        |
| 6798   | 1     | 1      | 2     | 1      |
| 6808   | 0     |        | 0     |        |
| 6810   | 0     |        | 1     | 1      |
| 6811   | 2     | 1      | 1     | 2      |
| 6812   | 0     |        | 1     | 2      |
| 6814   | 0     |        | 1     | 1      |
| 6819   | 1     | 1      | 1     | 2      |
| 6820   | 0     |        | 1     | 0      |
| 6832   | 0     |        | 0     |        |
| 6854   | 1     | 0      | 5     | 0      |
| 6855   | 0     |        | 0     |        |
| 6857   | 0     |        | 1     | 0      |
| 6858   | 0     |        | 2     | 1      |
| 6859   | 1     | 1      | 1     | 0      |
| 6860   | 1     | 1      | 3     | 0      |
| 6862   | 0     |        | 1     | 0      |
| 6879   | 0     |        | 0     |        |
| 6893   | 1     | 1      | 1     | 1      |
| 6898   | 0     |        | 0     |        |
| 6902   | 1     | 1      | 3     | 2      |
| 6903   | 4     | 2      | 2     | 2      |
| 6907   | 1     | 2      | 2     | 2      |
| 6908   | 0     |        | 0     |        |
| 6912   | 0     |        | 0     |        |
| 6915   | 0     |        | 1     | 1      |
| 6916   | 0     |        | 1     | 1      |

| respid | Q24_1 | Q24a_1 | Q25_1 | Q25a_1 |
|--------|-------|--------|-------|--------|
| 6917   | 1     | 1      | 0     |        |
| 6923   | 0     |        | 5     | 1      |
| 6934   | 0     |        | 0     |        |
| 6937   | 0     |        | 0     |        |
| 6945   | 0     |        | 0     |        |
| 6954   | 1     | 0      | 0     |        |
| 6956   | 0     |        | 2     | 2      |
| 6958   | 0     |        | 0     |        |
| 6961   | 0     |        | 1     | 0      |
| 6963   | 0     |        | 1     | 0      |
| 6964   | 0     |        | 1     | 0      |
| 6976   | 0     |        | 0     |        |
| 6977   | 0     |        | 1     | 1      |
| 7000   | 1     | 1      | 1     | 1      |
| 7001   | 0     |        | 1     | 0      |
| 7005   | 0     |        | 1     | 1      |
| 7006   | 0     |        | 1     | 2      |
| 7008   | 0     |        | 2     | 3      |
| 7009   | 0     |        | 0     |        |
| 7019   | 0     |        | 1     | 0      |
| 7021   | 0     |        | 1     | 0      |
| 7026   | 4     | 3      | 1     | 1      |
| 7030   | 3     | 2      | 3     | 2      |
| 7034   | 0     |        | 0     |        |
| 7039   | 0     |        | 0     |        |
| 7041   | 0     |        | 1     | 0      |
| 7047   | 0     |        | 2     | 0      |
| 7051   | 0     |        | 1     | 0      |
| 7052   | 1     | 1      | 1     | 1      |
| 7059   | 0     |        | 1     | 1      |
| 7062   | 1     | 1      | 2     | 1      |
| 7065   | 0     |        | 1     | 1      |

| respid | Q24_1 | Q24a_1 | Q25_1 | Q25a_1 |
|--------|-------|--------|-------|--------|
| 7066   | 0     |        | 1     | 0      |
| 7069   | 0     |        | 0     |        |
| 7070   | 0     |        | 0     |        |
| 7073   | 0     |        | 0     |        |
| 7078   | 0     |        | 1     | 0      |
| 7083   | 0     |        | 2     | 2      |
| 7084   | 4     | 3      | 3     | 4      |
| 7085   | 1     | 0      | 1     | 0      |
| 7088   | 2     | 2      | 5     | 4      |
| 7090   | 2     | 1      | 2     | 1      |
| 7095   | 1     | 1      | 1     | 1      |
| 7100   | 0     |        | 0     |        |
| 7102   | 2     | 1      | 1     | 1      |
| 7103   | 0     |        | 1     | 0      |
| 7108   | 0     |        | 1     | 0      |
| 7109   | 0     |        | 0     |        |
| 7110   | 0     |        | 0     |        |
| 7112   | 0     |        | 0     |        |
| 7114   | 0     |        | 1     | 1      |
| 7116   | 0     |        | 1     | 0      |
| 7117   | 2     | 1      | 2     | 4      |
| 7118   | 4     | 3      | 3     | 3      |
| 7120   | 1     | 1      | 2     | 2      |
| 7124   | 0     |        | 1     | 1      |
| 7130   | 0     |        | 1     | 0      |
| 7135   | 0     |        | 1     | 0      |
| 7137   | 2     | 2      | 2     | 2      |
| 7140   | 0     |        | 0     |        |
| 7141   | 0     |        | 0     |        |
| 7148   | 0     |        | 1     | 0      |
| 7152   | 0     |        | 0     |        |
| 7154   | 0     |        | 4     | 1      |

| respid | Q24_1 | Q24a_1 | Q25_1 | Q25a_1 |
|--------|-------|--------|-------|--------|
| 7156   | 0     |        | 1     | 1      |
| 7158   | 2     | 1      | 0     |        |
| 7159   | 0     |        | 0     |        |
| 7161   | 0     |        | 0     |        |
| 7164   | 0     |        | 0     |        |
| 7166   | 0     |        | 0     |        |
| 7167   | 0     |        | 0     |        |
| 7168   | 0     |        | 0     |        |
| 7170   | 0     |        | 0     |        |
| 7171   | 0     |        | 1     | 1      |
| 7172   | 0     |        | 0     |        |
| 7173   | 0     |        | 5     | 2      |
| 7175   | 0     |        | 1     | 0      |
| 7176   | 3     | 1      | 2     | 1      |
| 7180   | 0     |        | 1     | 0      |
| 7183   | 1     | 1      | 1     | 1      |
| 7189   | 0     |        | 5     | 1      |
| 7193   | 0     |        | 1     | 0      |
| 7194   | 3     | 0      | 1     | 1      |
| 7195   | 0     |        | 1     | 0      |
| 7200   | 0     |        | 0     |        |
| 7201   | 0     |        | 3     | 2      |
| 7205   | 1     | 1      | 3     | 2      |
| 7207   | 0     |        | 5     | 1      |
| 7208   | 0     |        | 0     |        |
| 7210   | 0     |        | 3     | 1      |
| 7211   | 0     |        | 1     | 0      |
| 7217   | 0     |        | 0     |        |
| 7218   | 0     |        | 0     |        |
| 7220   | 0     |        | 0     |        |
| 7225   | 0     |        | 0     |        |
| 7228   | 0     |        | 2     | 1      |

| respid | Q24_1 | Q24a_1 | Q25_1 | Q25a_1 |
|--------|-------|--------|-------|--------|
| 7230   | 0     |        | 3     | 1      |
| 7233   | 1     | 1      | 1     | 1      |
| 7234   | 0     |        | 1     | 1      |
| 7235   | 0     |        | 0     |        |
| 7236   | 0     |        | 0     |        |
| 7241   | 0     |        | 5     | 1      |
| 7251   | 0     |        | 1     | 0      |
| 7253   | 0     |        | 1     | 0      |
| 7259   | 1     | 1      | 1     | 2      |
| 7260   | 1     | 1      | 0     |        |
| 7261   | 2     | 1      | 2     | 1      |
| 7263   | 0     |        | 1     | 1      |
| 7265   | 0     |        | 0     |        |
| 7268   | 0     |        | 0     |        |
| 7269   | 0     |        | 0     |        |
| 7271   | 3     | 2      | 2     | 2      |
| 7276   | 0     |        | 2     | 2      |
| 7280   | 1     | 1      | 2     | 2      |
| 7283   | 0     |        | 1     | 1      |
| 7284   | 0     |        | 0     |        |
| 7286   | 0     |        | 1     | 2      |
| 7287   | 0     |        | 0     |        |
| 7288   | 0     |        | 2     | 1      |
| 7294   | 0     |        | 2     | 0      |
| 7295   | 0     |        | 1     | 0      |
| 7296   | 0     |        | 0     |        |
| 7297   | 0     |        | 1     | 0      |
| 7299   | 0     |        | 1     | 1      |
| 7300   | 0     |        | 0     |        |
| 7301   | 1     | 1      | 1     | 1      |
| 7302   | 0     |        | 0     |        |
| 7306   | 0     |        | 1     | 0      |



| respid | Q24_1 | Q24a_1 | Q25_1 | Q25a_1 |
|--------|-------|--------|-------|--------|
| 7313   | 4     | 4      | 2     | 3      |
| 7315   | 0     |        | 1     | 1      |
| 7317   | 0     |        | 0     |        |
| 7321   | 1     | 1      | 1     | 0      |
| 7322   | 0     |        | 1     | 0      |
| 7323   | 0     |        | 1     | 2      |
| 7333   | 3     | 2      | 1     | 1      |
| 7335   | 0     |        | 0     |        |
| 7336   | 0     |        | 0     |        |
| 7337   | 1     | 1      | 1     | 1      |
| 7338   | 0     |        | 0     |        |
| 7340   | 0     |        | 0     |        |
| 7341   | 2     | 2      | 3     | 3      |
| 7342   | 0     |        | 0     |        |
| 7344   | 1     | 1      | 3     | 1      |
| 7346   | 0     |        | 2     | 1      |
| 7347   | 0     |        | 0     |        |
| 7349   | 1     | 2      | 2     | 2      |
| 7352   | 0     |        | 1     | 2      |
| 7353   | 0     |        | 2     | 0      |
| 7355   | 0     |        | 5     | 2      |
| 7356   | 0     |        | 0     |        |
| 7360   | 2     | 4      | 2     | 3      |
| 7371   | 0     |        | 1     | 0      |
| 7376   | 1     | 2      | 1     | 1      |
| 7379   | 0     |        | 2     | 2      |
| 7381   | 0     |        | 0     |        |
| 7386   | 0     |        | 1     | 0      |
| 7389   | 0     |        | 1     | 1      |
| 7390   | 3     | 3      | 3     | 4      |
| 7393   | 0     |        | 1     | 0      |
| 7394   | 0     |        | 1     | 1      |

| respid | Q24_1 | Q24a_1 | Q25_1 | Q25a_1 |
|--------|-------|--------|-------|--------|
| 7396   | 1     | 1      | 1     | 1      |
| 7400   | 1     | 2      | 2     | 2      |
| 7401   | 0     |        | 1     | 1      |
| 7403   | 1     | 1      | 2     | 1      |
| 7406   | 0     |        | 1     | 3      |
| 7409   | 0     |        | 1     | 0      |
| 7410   | 1     | 1      | 2     | 3      |
| 7412   | 3     | 2      | 2     | 2      |
| 7414   | 0     |        | 2     | 0      |
| 7415   | 0     |        | 2     | 2      |
| 7417   | 1     | 1      | 2     | 2      |
| 7421   | 4     | 3      | 3     | 3      |
| 7425   | 4     | 2      | 1     | 1      |
| 7430   | 1     | 1      | 1     | 1      |
| 7432   | 0     |        | 0     |        |
| 7433   | 0     |        | 2     | 1      |
| 7442   | 1     | 0      | 1     | 0      |
| 7445   | 0     |        | 2     | 1      |
| 7446   | 0     |        | 2     | 1      |
| 7449   | 0     |        | 0     |        |
| 7450   | 0     |        | 0     |        |
| 7451   | 0     |        | 0     |        |
| 7459   | 0     |        | 5     | 3      |
| 7462   | 2     | 2      | 3     | 2      |
| 7463   | 0     |        | 1     | 0      |
| 7469   | 0     |        | 0     |        |
| 7482   | 0     |        | 1     | 2      |
| 7484   | 1     | 1      | 1     | 0      |
| 7486   | 0     |        | 1     | 1      |
| 7496   | 0     |        | 0     |        |
| 7502   | 0     |        | 3     | 1      |
| 7504   | 0     |        | 1     | 1      |

| respid | Q24_1 | Q24a_1 | Q25_1 | Q25a_1 |
|--------|-------|--------|-------|--------|
| 7509   | 5     | 4      | 5     | 4      |
| 7513   | 2     | 2      | 1     | 2      |
| 7514   | 0     |        | 0     |        |
| 7520   | 0     |        | 0     |        |
| 7523   | 0     |        | 0     |        |
| 7526   | 0     |        | 1     | 1      |
| 7529   | 0     |        | 0     |        |
| 7534   | 0     |        | 0     |        |
| 7536   | 1     | 0      | 5     | 1      |
| 7540   | 0     |        | 1     | 0      |
| 7541   | 2     | 2      | 1     | 2      |
| 7542   | 0     |        | 0     |        |
| 7555   | 0     |        | 1     | 2      |
| 7566   | 0     |        | 0     |        |
| 7568   | 0     |        | 2     | 1      |
| 7570   | 2     | 2      | 2     | 2      |
| 7572   | 0     |        | 1     | 0      |
| 7573   | 2     | 1      | 1     | 1      |
| 7576   | 0     |        | 1     | 0      |
| 7577   | 0     |        | 4     | 4      |
| 7583   | 0     |        | 1     | 0      |
| 7584   | 0     |        | 1     | 0      |
| 7585   | 3     | 3      | 4     | 3      |
| 7586   | 0     |        | 1     | 1      |
| 7587   | 0     |        | 1     | 0      |
| 7588   | 0     |        | 0     |        |
| 7596   | 0     |        | 0     |        |
| 7599   | 0     |        | 0     |        |
| 7600   | 1     | 2      | 2     | 1      |
| 7602   | 0     |        | 0     |        |
| 7613   | 5     | 0      | 0     |        |
| 7620   | 0     |        | 3     | 1      |

| respid | Q24_1 | Q24a_1 | Q25_1 | Q25a_1 |
|--------|-------|--------|-------|--------|
| 7623   | 0     |        | 1     | 1      |
| 7635   | 0     |        | 0     |        |
| 7636   | 0     |        | 1     | 1      |
| 7643   | 2     | 2      | 3     | 2      |
| 7645   | 0     |        | 2     | 3      |
| 7649   | 3     | 2      | 5     | 4      |
| 7651   | 0     |        | 2     | 0      |
| 7652   | 3     | 3      | 2     | 4      |
| 7655   | 0     |        | 1     | 1      |
| 7657   | 0     |        | 1     | 0      |
| 7675   | 0     |        | 2     | 0      |
| 7676   | 1     | 2      | 3     | 1      |
| 7684   | 0     |        | 1     | 1      |
| 7693   | 1     | 0      | 1     | 0      |
| 7694   | 4     | 4      | 3     | 4      |
| 7695   | 0     |        | 1     | 0      |
| 7696   | 4     | 4      | 3     | 4      |
| 7698   | 0     |        | 0     |        |
| 7700   | 0     |        | 1     | 1      |
| 7701   | 0     |        | 1     | 0      |
| 7704   | 0     |        | 0     |        |
| 7709   | 0     |        | 1     | 1      |
| 7713   | 0     |        | 1     | 0      |
| 7714   | 0     |        | 0     |        |
| 7718   | 2     | 1      | 5     | 4      |
| 7720   | 0     |        | 1     | 1      |
| 7721   | 1     | 1      | 2     | 0      |
| 7722   | 0     |        | 1     | 0      |
| 7724   | 2     | 1      | 5     | 4      |
| 7728   | 0     |        | 0     |        |
| 7731   | 0     |        | 3     | 1      |
| 7735   | 0     |        | 0     |        |

| respid | Q24_1 | Q24a_1 | Q25_1 | Q25a_1 |
|--------|-------|--------|-------|--------|
| 7737   | 0     |        | 3     | 2      |
| 7741   | 0     |        | 0     |        |
| 7746   | 0     |        | 0     |        |
| 7747   | 0     |        | 2     | 0      |
| 7748   | 0     |        | 2     | 0      |
| 7750   | 0     |        | 0     |        |
| 7754   | 0     |        | 1     | 0      |
| 7755   | 0     |        | 1     | 1      |
| 7762   | 0     |        | 0     |        |
| 7764   | 0     |        | 3     | 0      |
| 7766   | 0     |        | 0     |        |
| 7768   | 0     |        | 2     | 1      |
| 7770   | 0     |        | 2     | 2      |
| 7771   | 0     |        | 0     |        |
| 7777   | 0     |        | 0     |        |
| 7778   | 0     |        | 0     |        |
| 7783   | 3     | 3      | 3     | 3      |
| 7789   | 0     |        | 0     |        |
| 7790   | 2     | 1      | 0     |        |
| 7795   | 0     |        | 1     | 1      |
| 7807   | 0     |        | 1     | 0      |
| 7808   | 3     | 4      | 2     | 2      |
| 7818   | 0     |        | 2     | 2      |
| 7820   | 0     |        | 0     |        |
| 7831   | 0     |        | 2     | 1      |
| 7832   | 0     |        | 4     | 0      |
| 7837   | 0     |        | 1     | 0      |
| 7841   | 1     | 0      | 1     | 1      |
| 7845   | 2     | 1      | 2     | 1      |
| 7853   | 0     |        | 1     | 1      |
| 7854   | 0     |        | 0     |        |
| 7862   | 2     | 2      | 3     | 3      |

| respid | Q24_1 | Q24a_1 | Q25_1 | Q25a_1 |
|--------|-------|--------|-------|--------|
| 7871   | 0     |        | 1     | 0      |
| 7875   | 0     |        | 4     | 0      |
| 7880   | 0     |        | 2     | 1      |
| 7881   | 0     |        | 1     | 2      |
| 7883   | 0     |        | 1     | 2      |
| 7896   | 0     |        | 1     | 1      |
| 7905   | 0     |        | 0     |        |
| 7919   | 0     |        | 1     | 1      |
| 7928   | 4     | 3      | 2     | 2      |
| 7929   | 0     |        | 1     | 0      |
| 7938   | 1     | 1      | 2     | 1      |
| 7940   | 0     |        | 0     |        |
| 7941   | 0     |        | 1     | 0      |
| 7952   | 0     |        | 0     |        |
| 7962   | 0     |        | 1     | 0      |
| 7968   | 1     | 1      | 1     | 1      |
| 7972   | 0     |        | 1     | 1      |
| 7983   | 2     | 1      | 2     | 1      |
| 7990   | 0     |        | 1     | 0      |
| 7993   | 0     |        | 1     | 0      |
| 8005   | 0     |        | 0     |        |
| 8008   | 0     |        | 0     |        |
| 8012   | 0     |        | 2     | 1      |
| 8021   | 0     |        | 0     |        |
| 8024   | 0     |        | 0     |        |
| 8043   | 0     |        | 0     |        |
| 8051   | 0     |        | 1     | 1      |
| 8056   | 0     |        | 1     | 0      |
| 8061   | 2     | 1      | 1     | 0      |
| 8066   | 0     |        | 0     |        |
| 8069   | 0     |        | 2     | 1      |
| 8071   | 0     |        | 0     |        |

| respid | Q24_1 | Q24a_1 | Q25_1 | Q25a_1 |
|--------|-------|--------|-------|--------|
| 8072   | 0     |        | 1     | 0      |
| 8076   | 1     | 1      | 1     | 0      |
| 8080   | 0     |        | 3     | 1      |
| 8083   | 1     | 1      | 1     | 1      |
| 8093   | 1     | 1      | 1     | 2      |
| 8095   | 2     | 2      | 1     | 2      |
| 8099   | 0     |        | 1     | 0      |
| 8100   | 0     |        | 2     | 1      |
| 8103   | 0     |        | 0     |        |
| 8104   | 1     | 2      | 1     | 0      |
| 8115   | 1     | 1      | 2     | 3      |
| 8121   | 0     |        | 1     | 0      |
| 8128   | 0     |        | 1     | 0      |
| 8130   | 0     |        | 1     | 0      |
| 8131   | 1     | 1      | 2     | 2      |
| 8133   | 0     |        | 0     |        |
| 8143   | 1     | 1      | 1     | 0      |
| 8144   | 0     |        | 0     |        |
| 8146   | 0     |        | 1     | 0      |
| 8148   | 0     |        | 0     |        |
| 8157   | 0     |        | 0     |        |
| 8164   | 0     |        | 0     |        |
| 8173   | 0     |        | 0     |        |
| 8176   | 0     |        | 1     | 0      |
| 8179   | 0     |        | 2     | 0      |
| 8181   | 0     |        | 0     |        |
| 8182   | 0     |        | 1     | 1      |
| 8196   | 0     |        | 5     | 0      |
| 8200   | 0     |        | 1     | 1      |
| 8203   | 0     |        | 1     | 0      |
| 8204   | 0     |        | 3     | 4      |
| 8206   | 0     |        | 0     |        |

| respid | Q24_1 | Q24a_1 | Q25_1 | Q25a_1 |
|--------|-------|--------|-------|--------|
| 8208   | 0     |        | 1     | 0      |
| 8212   | 0     |        | 1     | 1      |
| 8222   | 3     | 3      | 4     | 2      |
| 8223   | 0     |        | 0     |        |
| 8225   | 0     |        | 1     | 0      |
| 8226   | 0     |        | 0     |        |
| 8228   | 0     |        | 3     | 2      |
| 8229   | 0     |        | 4     | 0      |
| 8239   | 1     | 1      | 2     | 1      |
| 8246   | 0     |        | 1     | 0      |
| 8258   | 2     | 2      | 2     | 2      |
| 8260   | 0     |        | 1     | 1      |
| 8262   | 0     |        | 1     | 0      |
| 8263   | 1     | 1      | 1     | 1      |
| 8267   | 1     | 1      | 1     | 1      |
| 8271   | 3     | 3      | 2     | 3      |
| 8274   | 0     |        | 1     | 0      |
| 8275   | 3     | 3      | 3     | 3      |
| 8279   | 1     | 1      | 2     | 1      |
| 8285   | 4     | 3      | 2     | 3      |
| 8287   | 5     | 4      | 5     | 4      |
| 8289   | 3     | 0      | 2     | 1      |
| 8291   | 0     |        | 0     |        |
| 8299   | 1     | 2      | 1     | 1      |
| 8301   | 1     | 1      | 2     | 1      |
| 8302   | 0     |        | 0     |        |
| 8308   | 0     |        | 2     | 3      |
| 8313   | 0     |        | 1     | 1      |
| 8316   | 1     | 1      | 1     | 1      |
| 8317   | 0     |        | 1     | 0      |
| 8319   | 0     |        | 0     |        |
| 8323   | 1     | 0      | 0     |        |



| respid | Q24_1 | Q24a_1 | Q25_1 | Q25a_1 |
|--------|-------|--------|-------|--------|
| 8324   | 0     |        | 1     | 1      |
| 8327   | 0     |        | 1     | 1      |
| 8328   | 0     |        | 1     | 1      |
| 8342   | 1     | 2      | 0     |        |
| 8350   | 0     |        | 1     | 1      |
| 8352   | 0     |        | 0     |        |
| 8353   | 0     |        | 1     | 1      |
| 8356   | 0     |        | 1     | 1      |
| 8367   | 0     |        | 1     | 1      |
| 8373   | 1     | 1      | 1     | 0      |
| 8379   | 0     |        | 0     |        |
| 8382   | 0     |        | 1     | 0      |
| 8387   | 0     |        | 1     | 0      |
| 8409   | 0     |        | 1     | 1      |
| 8410   | 0     |        | 1     | 1      |
| 8412   | 0     |        | 2     | 2      |
| 8415   | 1     | 1      | 1     | 2      |
| 8417   | 1     | 0      | 1     | 0      |
| 8422   | 0     |        | 1     | 1      |
| 8430   | 0     |        | 0     |        |
| 8434   | 0     |        | 1     | 1      |
| 8436   | 0     |        | 0     |        |
| 8446   | 0     |        | 2     | 0      |
| 8447   | 0     |        | 2     | 2      |
| 8448   | 0     |        | 1     | 0      |
| 8455   | 1     | 1      | 0     |        |
| 8456   | 0     |        | 1     | 0      |
| 8459   | 0     |        | 0     |        |
| 8460   | 0     |        | 1     | 0      |
| 8464   | 2     | 2      | 1     | 2      |
| 8470   | 0     |        | 0     |        |
| 8473   | 0     |        | 1     | 1      |

| respid | Q24_1 | Q24a_1 | Q25_1 | Q25a_1 |
|--------|-------|--------|-------|--------|
| 8486   | 0     |        | 1     | 0      |
| 8487   | 0     |        | 2     | 1      |
| 8489   | 0     |        | 0     |        |
| 8494   | 0     |        | 2     | 1      |
| 8495   | 5     | 4      | 4     | 4      |
| 8497   | 0     |        | 1     | 0      |
| 8510   | 0     |        | 2     | 1      |
| 8515   | 2     | 1      | 3     | 2      |
| 8526   | 0     |        | 0     |        |
| 8530   | 0     |        | 0     |        |
| 8532   | 1     | 1      | 1     | 0      |
| 8533   | 0     |        | 0     |        |
| 8534   | 0     |        | 1     | 1      |
| 8572   | 1     | 1      | 2     | 1      |
| 8582   | 0     |        | 1     | 0      |
| 8584   | 0     |        | 0     |        |
| 8585   | 0     |        | 0     |        |
| 8586   | 0     |        | 0     |        |
| 8589   | 0     |        | 3     | 0      |
| 8593   | 0     |        | 1     | 0      |
| 8594   | 0     |        | 2     | 0      |
| 8601   | 0     |        | 0     |        |
| 8603   | 2     | 0      | 1     | 0      |
| 8604   | 0     |        | 0     |        |
| 8605   | 0     |        | 0     |        |
| 8607   | 1     | 1      | 1     | 1      |
| 8623   | 1     | 1      | 3     | 2      |
| 8626   | 2     | 1      | 1     | 1      |
| 8638   | 0     |        | 1     | 1      |
| 8640   | 0     |        | 1     | 0      |
| 8641   | 0     |        | 0     |        |
| 8643   | 0     |        | 5     | 3      |

| respid | Q24_1 | Q24a_1 | Q25_1 | Q25a_1 |
|--------|-------|--------|-------|--------|
| 8644   | 0     |        | 1     | 1      |
| 8646   | 0     |        | 2     | 0      |
| 8647   | 0     |        | 0     |        |
| 8649   | 1     | 1      | 3     | 3      |
| 8650   | 0     |        | 3     | 2      |
| 8658   | 0     |        | 5     | 1      |
| 8659   | 2     | 2      | 1     | 1      |
| 8669   | 1     | 1      | 3     | 3      |
| 8672   | 0     |        | 0     |        |
| 8673   | 0     |        | 1     | 2      |
| 8676   | 0     |        | 1     | 0      |
| 8677   | 0     |        | 0     |        |
| 8681   | 0     |        | 0     |        |
| 8688   | 0     |        | 0     |        |
| 8689   | 0     |        | 2     | 2      |
| 8690   | 0     |        | 1     | 0      |
| 8693   | 0     |        | 0     |        |
| 8694   | 1     | 1      | 3     | 2      |
| 8699   | 1     | 1      | 2     | 2      |
| 8700   | 0     |        | 0     |        |
| 8703   | 0     |        | 2     | 0      |
| 8704   | 0     |        | 1     | 1      |
| 8706   | 1     | 2      | 3     | 3      |
| 8709   | 0     |        | 0     |        |
| 8715   | 1     | 1      | 1     | 0      |
| 8728   | 1     | 1      | 1     | 1      |
| 8729   | 0     |        | 0     |        |
| 8730   | 0     |        | 0     |        |
| 8742   | 1     | 1      | 1     | 1      |
| 8748   | 0     |        | 0     |        |
| 8749   | 0     |        | 0     |        |
| 8750   | 0     |        | 1     | 0      |

| respid | Q24_1 | Q24a_1 | Q25_1 | Q25a_1 |
|--------|-------|--------|-------|--------|
| 8751   | 0     |        | 1     | 0      |
| 8752   | 1     | 1      | 1     | 0      |
| 8754   | 0     |        | 1     | 0      |
| 8757   | 0     |        | 1     | 0      |
| 8760   | 1     | 0      | 1     | 0      |
| 8761   | 2     | 2      | 0     |        |
| 8762   | 0     |        | 1     | 1      |
| 8763   | 0     |        | 1     | 0      |
| 8764   | 0     |        | 1     | 1      |
| 8765   | 0     |        | 1     | 0      |
| 8766   | 0     |        | 2     | 2      |
| 8767   | 0     |        | 5     | 2      |
| 8768   | 0     |        | 1     | 0      |
| 8770   | 0     |        | 1     | 0      |
| 8771   | 0     |        | 0     |        |
| 8773   | 0     |        | 0     |        |
| 8774   | 1     | 1      | 1     | 1      |
| 8776   | 0     |        | 0     |        |
| 8777   | 0     |        | 1     | 0      |
| 8778   | 0     |        | 1     | 0      |
| 8779   | 0     |        | 0     |        |
| 8784   | 1     | 1      | 1     | 0      |
| 8786   | 0     |        | 0     |        |
| 8787   | 0     |        | 1     | 1      |
| 8790   | 0     |        | 0     |        |
| 8791   | 2     | 3      | 2     | 4      |
| 8793   | 0     |        | 0     |        |
| 8795   | 0     |        | 1     | 1      |
| 8797   | 0     |        | 0     |        |
| 8801   | 1     | 2      | 1     | 2      |
| 8802   | 0     |        | 1     | 1      |
| 8807   | 0     |        | 0     |        |

| respid | Q24_1 | Q24a_1 | Q25_1 | Q25a_1 |
|--------|-------|--------|-------|--------|
| 8813   | 0     |        | 1     | 0      |
| 8817   | 1     | 0      | 2     | 0      |
| 8818   | 1     | 1      | 1     | 3      |
| 8821   | 0     |        | 1     | 0      |
| 8822   | 0     |        | 1     | 1      |
| 8823   | 0     |        | 0     |        |
| 8824   | 3     | 2      | 1     | 2      |
| 8825   | 0     |        | 1     | 1      |
| 8834   | 2     | 2      | 2     | 2      |
| 8840   | 2     | 4      | 2     | 2      |
| 8843   | 5     | 4      | 5     | 4      |
| 8846   | 0     |        | 1     | 0      |
| 8862   | 0     |        | 0     |        |
| 8866   | 0     |        | 0     |        |
| 8869   | 0     |        | 0     |        |
| 8872   | 1     | 2      | 2     | 2      |
| 8903   | 0     |        | 0     |        |
| 8909   | 0     |        | 0     |        |
| 8926   | 0     |        | 1     | 0      |
| 8936   | 0     |        | 1     | 1      |
| 8945   | 0     |        | 0     |        |
| 8954   | 0     |        | 1     | 1      |
| 8955   | 0     |        | 2     | 3      |
| 8958   | 0     |        | 0     |        |
| 8959   | 0     |        | 0     |        |
| 8960   | 0     |        | 1     | 0      |
| 8976   | 0     |        | 1     | 0      |
| 8977   | 0     |        | 0     |        |
| 8979   | 0     |        | 0     |        |
| 8985   | 0     |        | 0     |        |
| 8994   | 0     |        | 1     | 0      |
| 8997   | 1     | 0      | 2     | 0      |

| respid | Q24_1 | Q24a_1 | Q25_1 | Q25a_1 |
|--------|-------|--------|-------|--------|
| 9002   | 0     |        | 1     | 0      |
| 9005   | 0     |        | 3     | 2      |
| 9017   | 0     |        | 1     | 0      |
| 9018   | 0     |        | 1     | 0      |
| 9021   | 0     |        | 1     | 0      |
| 9029   | 4     | 3      | 3     | 3      |
| 9035   | 1     | 1      | 1     | 1      |
| 9038   | 0     |        | 0     |        |
| 9039   | 0     |        | 0     |        |
| 9040   | 0     |        | 5     | 0      |
| 9042   | 0     |        | 1     | 0      |
| 9043   | 0     |        | 2     | 0      |
| 9045   | 0     |        | 4     | 0      |
| 9051   | 0     |        | 1     | 0      |
| 9067   | 0     |        | 1     | 0      |
| 9069   | 0     |        | 1     | 2      |
| 9073   | 2     | 2      | 5     | 1      |
| 9084   | 1     | 2      | 2     | 1      |
| 9096   | 0     |        | 0     |        |
| 9100   | 0     |        | 1     | 0      |
| 9107   | 0     |        | 0     |        |
| 9110   | 0     |        | 0     |        |
| 9120   | 0     |        | 0     |        |
| 9122   | 0     |        | 3     | 3      |
| 9130   | 0     |        | 1     | 1      |
| 9134   | 0     |        | 2     | 2      |
| 9137   | 0     |        | 1     | 0      |
| 9139   | 0     |        | 1     | 0      |
| 9144   | 0     |        | 0     |        |
| 9157   | 1     | 0      | 1     | 0      |
| 9166   | 0     |        | 1     | 0      |
| 9177   | 3     | 3      | 3     | 4      |

| respid | Q24_1 | Q24a_1 | Q25_1 | Q25a_1 |
|--------|-------|--------|-------|--------|
| 9181   | 0     |        | 0     |        |
| 9183   | 0     |        | 1     | 1      |
| 9184   | 3     | 2      | 1     | 2      |
| 9188   | 0     |        | 0     |        |
| 9197   | 0     |        | 1     | 0      |
| 9200   | 0     |        | 5     | 3      |
| 9205   | 0     |        | 1     | 0      |
| 9207   | 0     |        | 1     | 1      |
| 9213   | 1     | 1      | 1     | 1      |
| 9216   | 2     | 1      | 2     | 1      |
| 9217   | 0     |        | 0     |        |
| 9218   | 0     |        | 0     |        |
| 9219   | 3     | 1      | 4     | 3      |
| 9220   | 0     |        | 0     |        |
| 9221   | 1     | 2      | 2     | 1      |
| 9223   | 3     | 2      | 1     | 2      |
| 9228   | 0     |        | 0     |        |
| 9230   | 0     |        | 1     | 0      |
| 9231   | 0     |        | 1     | 0      |
| 9233   | 0     |        | 1     | 0      |
| 9235   | 0     |        | 2     | 1      |
| 9237   | 0     |        | 0     |        |
| 9242   | 0     |        | 1     | 0      |
| 9250   | 0     |        | 0     |        |
| 9253   | 0     |        | 4     | 0      |
| 9257   | 0     |        | 0     |        |
| 9263   | 0     |        | 3     | 0      |
| 9267   | 1     | 2      | 1     | 2      |
| 9272   | 0     |        | 1     | 0      |
| 9279   | 0     |        | 0     |        |
| 9281   | 0     |        | 5     | 1      |
| 9285   | 0     |        | 2     | 0      |

| respid | Q24_1 | Q24a_1 | Q25_1 | Q25a_1 |
|--------|-------|--------|-------|--------|
| 9286   | 2     | 2      | 2     | 2      |
| 9294   | 1     | 1      | 0     |        |
| 9295   | 0     |        | 1     | 0      |
| 9297   | 0     |        | 1     | 0      |
| 9299   | 1     | 2      | 1     | 3      |
| 9309   | 1     | 1      | 1     | 0      |
| 9315   | 0     |        | 0     |        |
| 9320   | 0     |        | 1     | 0      |
| 9324   | 0     |        | 1     | 0      |
| 9326   | 2     | 1      | 0     |        |
| 9333   | 0     |        | 1     | 4      |
| 9334   | 1     | 1      | 1     | 1      |
| 9336   | 0     |        | 2     | 1      |
| 9337   | 1     | 0      | 1     | 0      |
| 9342   | 0     |        | 1     | 0      |
| 9347   | 0     |        | 0     |        |
| 9352   | 0     |        | 1     | 0      |
| 9355   | 0     |        | 0     |        |
| 9356   | 1     | 1      | 1     | 2      |
| 9359   | 1     | 1      | 3     | 2      |
| 9368   | 0     |        | 0     |        |
| 9375   | 1     | 0      | 1     | 0      |
| 9384   | 0     |        | 2     | 0      |
| 9388   | 2     | 2      | 1     | 0      |
| 9397   | 2     | 3      | 2     | 3      |
| 9400   | 0     |        | 0     |        |
| 9401   | 3     | 3      | 3     | 2      |
| 9402   | 0     |        | 0     |        |
| 9417   | 2     | 2      | 2     | 2      |
| 9424   | 0     |        | 1     | 0      |
| 9427   | 0     |        | 3     | 0      |
| 9429   | 1     | 0      | 2     | 1      |



| respid | Q24_1 | Q24a_1 | Q25_1 | Q25a_1 |
|--------|-------|--------|-------|--------|
| 9437   | 4     | 3      | 2     | 3      |
| 9442   | 0     |        | 0     |        |
| 9446   | 1     | 1      | 0     |        |
| 9447   | 0     |        | 0     |        |
| 9448   | 0     |        | 2     | 1      |
| 9449   | 0     |        | 0     |        |
| 9455   | 0     |        | 0     |        |
| 9459   | 1     | 1      | 2     | 0      |
| 9460   | 0     |        | 1     | 1      |
| 9461   | 1     | 1      | 0     |        |
| 9463   | 0     |        | 1     | 1      |
| 9464   | 1     | 1      | 2     | 1      |
| 9466   | 0     |        | 0     |        |
| 9477   | 0     |        | 0     |        |
| 9482   | 3     | 3      | 5     | 4      |
| 9486   | 1     | 1      | 1     | 1      |
| 9488   | 4     | 2      | 4     | 2      |
| 9489   | 0     |        | 1     | 1      |
| 9496   | 0     |        | 0     |        |
| 9499   | 0     |        | 1     | 0      |
| 9512   | 0     |        | 1     | 1      |
| 9514   | 0     |        | 0     |        |
| 9516   | 0     |        | 1     | 1      |
| 9517   | 2     | 2      | 2     | 2      |
| 9520   | 0     |        | 1     | 0      |
| 9527   | 0     |        | 1     | 1      |
| 9532   | 0     |        | 1     | 1      |
| 9533   | 0     |        | 0     |        |
| 9543   | 0     |        | 3     | 1      |
| 9550   | 2     | 0      | 1     | 0      |
| 9553   | 0     |        | 1     | 0      |
| 9555   | 0     |        | 1     | 0      |

| respid | Q24_1 | Q24a_1 | Q25_1 | Q25a_1 |
|--------|-------|--------|-------|--------|
| 9565   | 0     |        | 3     | 3      |
| 9583   | 0     |        | 2     | 1      |
| 9594   | 0     |        | 1     | 0      |
| 9596   | 0     |        | 1     | 1      |
| 9600   | 0     |        | 2     | 1      |
| 9602   | 0     |        | 1     | 0      |
| 9606   | 0     |        | 1     | 0      |
| 9608   | 0     |        | 2     | 3      |
| 9610   | 0     |        | 1     | 0      |
| 9612   | 0     |        | 2     | 2      |
| 9613   | 1     | 1      | 0     |        |
| 9614   | 0     |        | 2     | 2      |
| 9620   | 1     | 0      | 0     |        |
| 9628   | 0     |        | 0     |        |
| 9631   | 0     |        | 1     | 1      |
| 9632   | 0     |        | 1     | 1      |
| 9633   | 0     |        | 2     | 1      |
| 9639   | 0     |        | 0     |        |
| 9640   | 0     |        | 2     | 1      |
| 9642   | 0     |        | 1     | 0      |
| 9653   | 1     | 1      | 3     | 1      |
| 9658   | 1     | 1      | 0     |        |
| 9659   | 0     |        | 3     | 3      |
| 9661   | 0     |        | 1     | 0      |
| 9664   | 0     |        | 2     | 1      |
| 9665   | 1     | 0      | 4     | 2      |
| 9666   | 1     | 1      | 2     | 2      |
| 9667   | 0     |        | 1     | 1      |
| 9668   | 0     |        | 0     |        |
| 9670   | 0     |        | 1     | 1      |
| 9671   | 0     |        | 1     | 1      |
| 9681   | 0     |        | 1     | 0      |

| respid | Q24_1 | Q24a_1 | Q25_1 | Q25a_1 |
|--------|-------|--------|-------|--------|
| 9684   | 0     |        | 3     | 2      |
| 9685   | 0     |        | 1     | 2      |
| 9686   | 5     | 4      | 0     |        |
| 9688   | 1     | 0      | 4     | 2      |
| 9692   | 0     |        | 1     | 0      |
| 9693   | 2     | 2      | 3     | 3      |
| 9698   | 1     | 1      | 2     | 1      |
| 9699   | 0     |        | 5     | 1      |
| 9701   | 0     |        | 1     | 0      |
| 9702   | 0     |        | 1     | 0      |
| 9709   | 0     |        | 0     |        |
| 9713   | 0     |        | 0     |        |
| 9715   | 0     |        | 0     |        |
| 9721   | 0     |        | 0     |        |
| 9725   | 0     |        | 1     | 1      |
| 9729   | 2     | 0      | 0     |        |
| 9731   | 1     | 2      | 0     |        |
| 9736   | 0     |        | 1     | 2      |
| 9740   | 0     |        | 0     |        |
| 9741   | 0     |        | 1     | 0      |
| 9749   | 1     | 1      | 1     | 1      |
| 9750   | 0     |        | 2     | 1      |
| 9751   | 1     | 1      | 3     | 3      |
| 9753   | 0     |        | 1     | 1      |
| 9754   | 4     | 3      | 2     | 3      |
| 9756   | 0     |        | 2     | 1      |
| 9758   | 1     | 3      | 3     | 2      |
| 9759   | 0     |        | 2     | 2      |
| 9760   | 1     | 1      | 1     | 1      |
| 9761   | 0     |        | 0     |        |
| 9762   | 0     |        | 1     | 1      |
| 9764   | 0     |        | 1     | 2      |

| respid | Q24_1 | Q24a_1 | Q25_1 | Q25a_1 |
|--------|-------|--------|-------|--------|
| 9768   | 0     |        | 0     |        |
| 9769   | 0     |        | 2     | 1      |
| 9770   | 0     |        | 1     | 0      |
| 9771   | 2     | 2      | 2     | 2      |
| 9772   | 0     |        | 2     | 1      |
| 9773   | 0     |        | 2     | 2      |
| 9776   | 0     |        | 1     | 0      |
| 9786   | 2     | 2      | 1     | 0      |
| 9790   | 0     |        | 0     |        |
| 9791   | 0     |        | 0     |        |
| 9794   | 2     | 1      | 1     | 2      |
| 9797   | 0     |        | 1     | 1      |
| 9799   | 0     |        | 1     | 0      |
| 9804   | 0     |        | 1     | 0      |
| 9805   | 0     |        | 5     | 2      |
| 9806   | 0     |        | 1     | 2      |
| 9807   | 0     |        | 1     | 0      |
| 9813   | 0     |        | 1     | 1      |
| 9817   | 0     |        | 0     |        |
| 9823   | 0     |        | 0     |        |
| 9826   | 0     |        | 1     | 0      |
| 9830   | 0     |        | 3     | 1      |
| 9835   | 0     |        | 1     | 1      |
| 9836   | 0     |        | 1     | 1      |
| 9841   | 0     |        | 0     |        |
| 9842   | 0     |        | 1     | 0      |
| 9844   | 0     |        | 1     | 0      |
| 9847   | 0     |        | 1     | 2      |
| 9851   | 0     |        | 1     | 0      |
| 9852   | 0     |        | 0     |        |
| 9854   | 0     |        | 0     |        |
| 9855   | 1     | 1      | 0     |        |

| respid | Q24_1 | Q24a_1 | Q25_1 | Q25a_1 |
|--------|-------|--------|-------|--------|
| 9856   | 0     |        | 1     | 0      |
| 9862   | 0     |        | 0     |        |
| 9863   | 0     |        | 0     |        |
| 9866   | 1     | 1      | 2     | 2      |
| 9867   | 0     |        | 2     | 2      |
| 9868   | 1     | 2      | 2     | 3      |
| 9869   | 1     | 1      | 0     |        |
| 9878   | 1     | 1      | 1     | 0      |
| 9879   | 1     | 1      | 5     | 2      |
| 9881   | 0     |        | 1     | 0      |
| 9882   | 0     |        | 2     | 0      |
| 9884   | 0     |        | 1     | 1      |
| 9885   | 0     |        | 0     |        |
| 9888   | 1     | 0      | 0     |        |
| 9889   | 0     |        | 1     | 1      |
| 9894   | 2     | 2      | 3     | 2      |
| 9895   | 0     |        | 0     |        |
| 9896   | 5     | 4      | 5     | 4      |
| 9897   | 1     | 1      | 1     | 0      |
| 9905   | 0     |        | 1     | 0      |
| 9907   | 0     |        | 0     |        |
| 9908   | 0     |        | 1     | 0      |
| 9909   | 0     |        | 1     | 2      |
| 9910   | 1     | 1      | 5     | 3      |
| 9913   | 3     | 2      | 2     | 1      |
| 9914   | 2     | 2      | 0     |        |
| 9915   | 0     |        | 4     | 2      |
| 9916   | 0     |        | 1     | 0      |
| 9918   | 0     |        | 0     |        |
| 9919   | 0     |        | 3     | 1      |
| 9922   | 1     | 1      | 1     | 1      |
| 9930   | 0     |        | 1     | 0      |

| respid | Q24_1 | Q24a_1 | Q25_1 | Q25a_1 |
|--------|-------|--------|-------|--------|
| 9934   | 0     |        | 1     | 0      |
| 9936   | 2     | 2      | 1     | 2      |
| 9938   | 0     |        | 0     |        |
| 9940   | 0     |        | 1     | 0      |
| 9944   | 0     |        | 5     | 1      |
| 9945   | 0     |        | 1     | 0      |
| 9948   | 2     | 2      | 2     | 3      |
| 9949   | 1     | 1      | 2     | 1      |
| 9951   | 0     |        | 0     |        |
| 9952   | 1     | 1      | 1     | 1      |
| 9954   | 0     |        | 1     | 0      |
| 9955   | 0     |        | 2     | 0      |
| 9956   | 4     | 3      | 3     | 2      |
| 9957   | 0     |        | 4     | 2      |
| 9958   | 0     |        | 0     |        |
| 9959   | 0     |        | 1     | 2      |
| 9960   | 0     |        | 1     | 1      |
| 9961   | 0     |        | 1     | 0      |
| 9962   | 0     |        | 0     |        |
| 9969   | 0     |        | 2     | 2      |
| 9982   | 2     | 1      | 1     | 0      |
| 9984   | 0     |        | 5     | 1      |
| 9990   | 0     |        | 1     | 0      |
| 9992   | 2     | 1      | 2     | 2      |
| 9993   | 1     | 2      | 1     | 1      |
| 9997   | 0     |        | 2     | 0      |
| 9999   | 0     |        | 1     | 2      |
| 10000  | 1     | 1      | 0     |        |
| 10005  | 1     | 2      | 1     | 2      |
| 10014  | 0     |        | 1     | 0      |
| 10016  | 1     | 2      | 3     | 2      |
| 10017  | 1     | 1      | 2     | 1      |

| respid | Q24_1 | Q24a_1 | Q25_1 | Q25a_1 |
|--------|-------|--------|-------|--------|
| 10018  | 1     | 1      | 1     | 1      |
| 10021  | 1     | 1      | 1     | 1      |
| 10025  | 0     |        | 2     | 2      |
| 10027  | 0     |        | 1     | 0      |
| 10028  | 0     |        | 1     | 0      |
| 10031  | 2     | 2      | 1     | 0      |
| 10036  | 1     | 1      | 0     |        |
| 10037  | 0     |        | 2     | 1      |
| 10038  | 1     | 1      | 1     | 0      |
| 10039  | 0     |        | 0     |        |
| 10041  | 0     |        | 0     |        |
| 10045  | 3     | 3      | 1     | 3      |
| 10046  | 1     | 2      | 5     | 2      |
| 10047  | 0     |        | 1     | 1      |
| 10048  | 1     | 0      | 2     | 1      |
| 10049  | 1     | 1      | 2     | 0      |
| 10051  | 0     |        | 5     | 1      |
| 10052  | 2     | 1      | 2     | 2      |
| 10056  | 0     |        | 1     | 1      |
| 10061  | 0     |        | 2     | 0      |
| 10064  | 1     | 0      | 1     | 0      |
| 10066  | 1     | 0      | 0     |        |
| 10069  | 0     |        | 1     | 0      |
| 10071  | 0     |        | 1     | 1      |
| 10074  | 1     | 0      | 1     | 0      |
| 10079  | 0     |        | 1     | 0      |
| 10087  | 2     | 1      | 2     | 3      |
| 10095  | 0     |        | 1     | 0      |
| 10097  | 0     |        | 0     |        |
| 10100  | 0     |        | 3     | 1      |
| 10105  | 0     |        | 0     |        |
| 10107  | 4     | 3      | 1     | 1      |

| respid | Q24_1 | Q24a_1 | Q25_1 | Q25a_1 |
|--------|-------|--------|-------|--------|
| 10111  | 0     |        | 1     | 1      |
| 10116  | 0     |        | 1     | 1      |
| 10118  | 0     |        | 1     | 0      |
| 10123  | 0     |        | 0     |        |
| 10124  | 0     |        | 3     | 0      |
| 10130  | 0     |        | 0     |        |
| 10134  | 0     |        | 1     | 1      |
| 10135  | 0     |        | 2     | 0      |
| 10136  | 0     |        | 0     |        |
| 10141  | 2     | 1      | 2     | 2      |
| 10142  | 0     |        | 1     | 0      |
| 10143  | 0     |        | 0     |        |
| 10145  | 1     | 0      | 1     | 0      |
| 10149  | 0     |        | 1     | 2      |
| 10150  | 1     | 1      | 0     |        |
| 10151  | 0     |        | 1     | 0      |
| 10152  | 5     | 4      | 3     | 3      |
| 10153  | 1     | 0      | 0     |        |
| 10156  | 0     |        | 1     | 1      |
| 10160  | 0     |        | 1     | 2      |
| 10161  | 0     |        | 1     | 1      |
| 10167  | 2     | 1      | 1     | 0      |
| 10171  | 0     |        | 0     |        |
| 10172  | 0     |        | 2     | 0      |
| 10176  | 0     |        | 1     | 0      |
| 10177  | 2     | 1      | 2     | 2      |
| 10182  | 1     | 1      | 2     | 2      |
| 10184  | 0     |        | 0     |        |
| 10186  | 5     | 2      | 2     | 3      |
| 10189  | 2     | 1      | 2     | 0      |
| 10191  | 0     |        | 0     |        |
| 10192  | 0     |        | 2     | 1      |



| respid | Q24_1 | Q24a_1 | Q25_1 | Q25a_1 |
|--------|-------|--------|-------|--------|
| 10195  | 1     | 0      | 2     | 0      |
| 10199  | 0     |        | 0     |        |
| 10201  | 0     |        | 1     | 1      |
| 10213  | 0     |        | 1     | 0      |
| 10222  | 3     | 2      | 3     | 2      |
| 10224  | 0     |        | 0     |        |
| 10245  | 0     |        | 1     | 0      |
| 10254  | 0     |        | 1     | 0      |
| 10255  | 3     | 4      | 3     | 4      |
| 10257  | 0     |        | 4     | 1      |
| 10260  | 1     | 1      | 2     | 3      |
| 10261  | 0     |        | 1     | 1      |
| 10263  | 4     | 4      | 5     | 4      |
| 10264  | 0     |        | 2     | 1      |
| 10268  | 1     | 1      | 2     | 2      |
| 10269  | 0     |        | 2     | 1      |
| 10270  | 0     |        | 0     |        |
| 10282  | 0     |        | 1     | 1      |
| 10285  | 0     |        | 0     |        |
| 10288  | 0     |        | 1     | 0      |
| 10291  | 0     |        | 0     |        |
| 10292  | 0     |        | 1     | 0      |
| 10304  | 0     |        | 0     |        |
| 10305  | 0     |        | 1     | 1      |
| 10310  | 0     |        | 1     | 1      |
| 10324  | 0     |        | 0     |        |
| 10325  | 1     | 1      | 1     | 1      |
| 10326  | 1     | 2      | 2     | 2      |
| 10329  | 0     |        | 0     |        |
| 10332  | 0     |        | 1     | 0      |
| 10337  | 2     | 2      | 3     | 2      |
| 10341  | 0     |        | 1     | 0      |

| respid | Q24_1 | Q24a_1 | Q25_1 | Q25a_1 |
|--------|-------|--------|-------|--------|
| 10353  | 0     |        | 0     |        |
| 10354  | 0     |        | 0     |        |
| 10359  | 1     | 2      | 2     | 1      |
| 10360  | 0     |        | 1     | 0      |
| 10362  | 0     |        | 1     | 1      |
| 10364  | 0     |        | 1     | 0      |
| 10366  | 2     | 2      | 3     | 3      |
| 10367  | 0     |        | 0     |        |
| 10371  | 0     |        | 0     |        |
| 10374  | 0     |        | 1     | 0      |
| 10375  | 0     |        | 0     |        |
| 10376  | 0     |        | 1     | 0      |
| 10377  | 0     |        | 1     | 1      |
| 10378  | 1     | 1      | 1     | 1      |
| 10387  | 0     |        | 3     | 0      |
| 10396  | 5     | 3      | 2     | 2      |
| 10397  | 0     |        | 1     | 0      |
| 10399  | 3     | 3      | 3     | 3      |
| 10405  | 1     | 1      | 1     | 1      |
| 10406  | 0     |        | 1     | 1      |
| 10408  | 0     |        | 1     | 0      |
| 10409  | 0     |        | 0     |        |
| 10412  | 0     |        | 1     | 0      |
| 10413  | 0     |        | 1     | 0      |
| 10419  | 1     | 1      | 3     | 2      |
| 10423  | 2     | 3      | 3     | 3      |
| 10426  | 1     | 0      | 1     | 0      |
| 10446  | 0     |        | 3     | 1      |
| 10448  | 0     |        | 0     |        |
| 10450  | 1     | 1      | 0     |        |
| 10455  | 0     |        | 1     | 0      |
| 10460  | 0     |        | 0     |        |

| respid | Q24_1 | Q24a_1 | Q25_1 | Q25a_1 |
|--------|-------|--------|-------|--------|
| 10461  | 2     | 1      | 2     | 1      |
| 10471  | 0     |        | 1     | 0      |
| 10472  | 0     |        | 0     |        |
| 10491  | 4     | 4      | 2     | 2      |
| 10493  | 0     |        | 5     | 1      |
| 10498  | 0     |        | 2     | 2      |
| 10533  | 0     |        | 1     | 0      |
| 10539  | 1     | 1      | 0     |        |
| 10540  | 0     |        | 1     | 0      |
| 10557  | 0     |        | 0     |        |
| 10558  | 2     | 2      | 1     | 2      |
| 10559  | 1     | 1      | 2     | 2      |
| 10564  | 0     |        | 1     | 1      |
| 10570  | 0     |        | 0     |        |
| 10572  | 0     |        | 1     | 0      |
| 10576  | 0     |        | 5     | 1      |
| 10582  | 3     | 2      | 4     | 4      |
| 10593  | 0     |        | 1     | 0      |
| 10596  | 0     |        | 2     | 0      |
| 10615  | 0     |        | 0     |        |
| 10616  | 2     | 1      | 0     |        |
| 10623  | 1     | 1      | 0     |        |
| 10626  | 0     |        | 4     | 2      |
| 10627  | 3     | 2      | 2     | 2      |
| 10629  | 0     |        | 2     | 2      |
| 10632  | 2     | 2      | 3     | 3      |
| 10641  | 0     |        | 0     |        |
| 10648  | 1     | 1      | 2     | 0      |
| 10651  | 1     | 1      | 2     | 2      |
| 10654  | 0     |        | 1     | 0      |
| 10673  | 0     |        | 1     | 0      |
| 10675  | 2     | 2      | 1     | 2      |

| respid | Q24_1 | Q24a_1 | Q25_1 | Q25a_1 |
|--------|-------|--------|-------|--------|
| 10689  | 2     | 3      | 3     | 3      |
| 10692  | 0     |        | 0     |        |
| 10694  | 0     |        | 1     | 0      |
| 10695  | 1     | 1      | 0     |        |
| 10702  | 1     | 1      | 1     | 1      |
| 10703  | 1     | 1      | 1     | 1      |
| 10708  | 0     |        | 2     | 0      |
| 10719  | 0     |        | 1     | 1      |
| 10722  | 0     |        | 1     | 0      |
| 10723  | 1     | 0      | 1     | 1      |
| 10726  | 3     | 1      | 2     | 1      |
| 10727  | 0     |        | 0     |        |
| 10730  | 0     |        | 0     |        |
| 10731  | 0     |        | 0     |        |
| 10737  | 0     |        | 1     | 1      |
| 10743  | 0     |        | 1     | 1      |
| 10763  | 0     |        | 1     | 0      |
| 10777  | 0     |        | 0     |        |
| 10787  | 3     | 2      | 1     | 2      |
| 10798  | 2     | 3      | 3     | 2      |
| 10800  | 0     |        | 1     | 1      |
| 10802  | 3     | 2      | 2     | 3      |
| 10803  | 2     | 1      | 2     | 2      |
| 10808  | 0     |        | 1     | 1      |
| 10810  | 1     | 2      | 3     | 2      |
| 10819  | 0     |        | 1     | 0      |
| 10825  | 0     |        | 1     | 0      |
| 10827  | 2     | 1      | 2     | 0      |
| 10830  | 1     | 2      | 1     | 0      |
| 10847  | 0     |        | 1     | 0      |
| 10849  | 1     | 1      | 0     |        |
| 10852  | 0     |        | 1     | 0      |

| respid | Q24_1 | Q24a_1 | Q25_1 | Q25a_1 |
|--------|-------|--------|-------|--------|
| 10854  | 3     | 3      | 2     | 3      |
| 10857  | 0     |        | 2     | 0      |
| 10861  | 2     | 1      | 2     | 1      |
| 10862  | 0     |        | 0     |        |
| 10870  | 0     |        | 1     | 1      |
| 10873  | 3     | 0      | 3     | 0      |
| 10881  | 0     |        | 0     |        |
| 10893  | 0     |        | 0     |        |
| 10898  | 0     |        | 3     | 1      |
| 10899  | 0     |        | 1     | 0      |
| 10905  | 0     |        | 3     | 0      |
| 10910  | 0     |        | 0     |        |
| 10911  | 1     | 1      | 1     | 1      |
| 10912  | 0     |        | 1     | 0      |
| 10913  | 0     |        | 1     | 0      |
| 10918  | 0     |        | 0     |        |
| 10995  | 0     |        | 0     |        |
| 11002  | 0     |        | 1     | 1      |
| 11003  | 0     |        | 1     | 1      |
| 11005  | 2     | 2      | 1     | 1      |
| 11015  | 0     |        | 0     |        |
| 11016  | 3     | 2      | 1     | 2      |
| 11017  | 0     |        | 1     | 0      |
| 11020  | 1     | 1      | 1     | 1      |
| 11024  | 0     |        | 2     | 1      |
| 11026  | 0     |        | 2     | 1      |
| 11028  | 2     | 2      | 2     | 2      |
| 11029  | 2     | 2      | 3     | 3      |
| 11030  | 0     |        | 0     |        |
| 11031  | 0     |        | 1     | 1      |
| 11038  | 0     |        | 0     |        |
| 11051  | 0     |        | 1     | 0      |

| respid | Q24_1 | Q24a_1 | Q25_1 | Q25a_1 |
|--------|-------|--------|-------|--------|
| 11052  | 2     | 3      | 3     | 2      |
| 11053  | 0     |        | 1     | 0      |
| 11054  | 3     | 3      | 2     | 2      |
| 11063  | 0     |        | 1     | 1      |
| 11075  | 2     | 2      | 2     | 1      |
| 11083  | 0     |        | 1     | 1      |
| 11092  | 0     |        | 1     | 0      |
| 11118  | 0     |        | 1     | 1      |
| 11119  | 0     |        | 3     | 2      |
| 11134  | 0     |        | 0     |        |
| 11139  | 0     |        | 0     |        |
| 11154  | 0     |        | 1     | 0      |
| 11166  | 2     | 1      | 0     |        |
| 11168  | 0     |        | 0     |        |
| 11176  | 2     | 2      | 2     | 2      |
| 11183  | 4     | 4      | 2     | 3      |
| 11189  | 0     |        | 0     |        |
| 11196  | 3     | 3      | 3     | 3      |
| 11200  | 0     |        | 1     | 1      |
| 11201  | 0     |        | 1     | 0      |
| 11211  | 3     | 2      | 2     | 2      |
| 11218  | 0     |        | 1     | 0      |
| 11219  | 0     |        | 1     | 1      |
| 11221  | 2     | 1      | 2     | 2      |
| 11222  | 0     |        | 1     | 0      |
| 11230  | 3     | 2      | 2     | 2      |
| 11236  | 3     | 3      | 2     | 3      |
| 11237  | 2     | 2      | 1     | 2      |
| 11240  | 1     | 1      | 5     | 4      |
| 11244  | 3     | 3      | 2     | 2      |
| 11249  | 1     | 1      | 2     | 1      |
| 11252  | 3     | 3      | 2     | 2      |

| respid | Q24_1 | Q24a_1 | Q25_1 | Q25a_1 |
|--------|-------|--------|-------|--------|
| 11254  | 2     | 1      | 1     | 1      |
| 11255  | 0     |        | 2     | 2      |
| 11258  | 4     | 2      | 2     | 2      |
| 11260  | 1     | 1      | 2     | 0      |
| 11264  | 3     | 2      | 4     | 3      |
| 11266  | 1     | 2      | 2     | 3      |
| 11268  | 1     | 2      | 4     | 2      |
| 11269  | 1     | 1      | 2     | 0      |
| 11272  | 0     |        | 5     | 1      |
| 11273  | 0     |        | 0     |        |
| 11275  | 0     |        | 1     | 0      |
| 11276  | 0     |        | 1     | 1      |
| 11278  | 1     | 1      | 2     | 3      |
| 11288  | 0     |        | 0     |        |
| 11289  | 0     |        | 0     |        |
| 11291  | 0     |        | 1     | 1      |
| 11295  | 0     |        | 1     | 1      |
| 11297  | 0     |        | 1     | 0      |
| 11304  | 1     | 3      | 2     | 2      |
| 11305  | 0     |        | 1     | 0      |
| 11311  | 0     |        | 0     |        |
| 11313  | 0     |        | 1     | 1      |
| 11315  | 3     | 4      | 3     | 4      |
| 11316  | 3     | 4      | 3     | 4      |
| 11318  | 3     | 3      | 3     | 4      |
| 11323  | 0     |        | 1     | 0      |
| 11331  | 0     |        | 2     | 1      |
| 11333  | 0     |        | 1     | 1      |
| 11334  | 0     |        | 1     | 2      |
| 11340  | 0     |        | 5     | 3      |
| 11345  | 0     |        | 0     |        |
| 11354  | 0     |        | 1     | 0      |

| respid | Q24_1 | Q24a_1 | Q25_1 | Q25a_1 |
|--------|-------|--------|-------|--------|
| 11360  | 0     |        | 0     |        |
| 11361  | 2     | 2      | 2     | 1      |
| 11367  | 0     |        | 0     |        |
| 11370  | 0     |        | 0     |        |
| 11371  | 4     | 2      | 2     | 2      |
| 11372  | 2     | 1      | 2     | 3      |
| 11373  | 0     |        | 2     | 1      |
| 11382  | 0     |        | 1     | 0      |
| 11394  | 0     |        | 1     | 2      |
| 11395  | 1     | 1      | 1     | 2      |
| 11397  | 0     |        | 0     |        |
| 11402  | 0     |        | 3     | 3      |
| 11409  | 0     |        | 0     |        |
| 11410  | 0     |        | 2     | 1      |
| 11411  | 0     |        | 1     | 1      |
| 11418  | 0     |        | 1     | 1      |
| 11425  | 0     |        | 2     | 3      |
| 11429  | 0     |        | 1     | 0      |
| 11430  | 2     | 2      | 2     | 2      |
| 11431  | 0     |        | 0     |        |
| 11432  | 0     |        | 0     |        |
| 11433  | 0     |        | 4     | 0      |
| 11435  | 0     |        | 3     | 1      |
| 11436  | 0     |        | 1     | 1      |
| 11437  | 2     | 2      | 4     | 3      |
| 11439  | 0     |        | 0     |        |
| 11440  | 0     |        | 1     | 1      |
| 11447  | 0     |        | 1     | 0      |
| 11455  | 0     |        | 1     | 1      |
| 11456  | 2     | 3      | 2     | 2      |
| 11461  | 1     | 1      | 1     | 1      |
| 11463  | 1     | 4      | 1     | 2      |



| respid | Q24_1 | Q24a_1 | Q25_1 | Q25a_1 |
|--------|-------|--------|-------|--------|
| 11470  | 0     |        | 2     | 2      |
| 11472  | 0     |        | 0     |        |
| 11475  | 0     |        | 0     |        |
| 11476  | 0     |        | 3     | 1      |
| 11482  | 0     |        | 2     | 3      |
| 11501  | 0     |        | 2     | 1      |
| 11503  | 0     |        | 2     | 1      |
| 11505  | 0     |        | 1     | 1      |
| 11510  | 0     |        | 1     | 3      |
| 11519  | 0     |        | 0     |        |
| 11527  | 3     | 4      | 4     | 4      |
| 11529  | 2     | 2      | 2     | 2      |
| 11530  | 1     | 1      | 2     | 1      |
| 11536  | 5     | 4      | 4     | 4      |
| 11543  | 1     | 2      | 1     | 2      |
| 11548  | 2     | 2      | 1     | 2      |
| 11566  | 0     |        | 1     | 0      |
| 11570  | 0     |        | 1     | 3      |
| 11571  | 1     | 2      | 2     | 2      |
| 11578  | 0     |        | 0     |        |
| 11579  | 0     |        | 0     |        |
| 11581  | 2     | 3      | 0     |        |
| 11582  | 0     |        | 2     | 1      |
| 11583  | 0     |        | 1     | 0      |
| 11589  | 2     | 1      | 2     | 2      |
| 11590  | 0     |        | 1     | 0      |
| 11592  | 0     |        | 1     | 1      |
| 11596  | 0     |        | 0     |        |
| 11598  | 1     | 2      | 1     | 1      |
| 11602  | 0     |        | 2     | 2      |
| 11605  | 1     | 2      | 1     | 0      |
| 11618  | 3     | 3      | 3     | 2      |

| respid | Q24_1 | Q24a_1 | Q25_1 | Q25a_1 |
|--------|-------|--------|-------|--------|
| 11621  | 1     | 1      | 1     | 2      |
| 11630  | 0     |        | 3     | 0      |
| 11636  | 0     |        | 0     |        |
| 11640  | 2     | 1      | 2     | 3      |
| 11658  | 0     |        | 4     | 1      |
| 11665  | 0     |        | 5     | 2      |
| 11666  | 1     | 2      | 3     | 1      |
| 11667  | 4     | 2      | 2     | 4      |
| 11674  | 0     |        | 0     |        |
| 11680  | 0     |        | 0     |        |
| 11683  | 0     |        | 2     | 0      |
| 11688  | 0     |        | 2     | 2      |
| 11690  | 0     |        | 0     |        |
| 11694  | 0     |        | 0     |        |
| 11705  | 1     | 1      | 1     | 1      |
| 11720  | 2     | 1      | 1     | 2      |
| 11724  | 0     |        | 0     |        |
| 11738  | 1     | 1      | 5     | 2      |
| 11744  | 0     |        | 3     | 2      |
| 11745  | 1     | 3      | 2     | 3      |
| 11747  | 0     |        | 0     |        |
| 11755  | 0     |        | 1     | 1      |
| 11756  | 0     |        | 1     | 3      |
| 11772  | 0     |        | 1     | 0      |
| 11773  | 0     |        | 0     |        |
| 11778  | 0     |        | 3     | 2      |
| 11790  | 0     |        | 5     | 2      |
| 11794  | 0     |        | 0     |        |
| 11795  | 0     |        | 2     | 2      |
| 11799  | 2     | 2      | 2     | 3      |
| 11803  | 1     | 1      | 1     | 1      |
| 11806  | 4     | 3      | 4     | 3      |

| respid | Q24_1 | Q24a_1 | Q25_1 | Q25a_1 |
|--------|-------|--------|-------|--------|
| 11808  | 2     | 2      | 3     | 2      |
| 11810  | 0     |        | 0     |        |
| 11811  | 0     |        | 0     |        |
| 11812  | 2     | 2      | 2     | 2      |
| 11813  | 1     | 2      | 1     | 1      |
| 11821  | 0     |        | 1     | 1      |
| 11827  | 0     |        | 0     |        |
| 11831  | 3     | 3      | 2     | 3      |
| 11841  | 0     |        | 0     |        |
| 11872  | 1     | 2      | 0     |        |
| 11898  | 0     |        | 2     | 0      |
| 11902  | 4     | 4      | 3     | 3      |
| 11912  | 0     |        | 2     | 1      |
| 11926  | 1     | 1      | 1     | 0      |
| 11928  | 3     | 3      | 2     | 3      |
| 11932  | 0     |        | 1     | 0      |
| 11934  | 0     |        | 1     | 0      |
| 11941  | 2     | 2      | 3     | 2      |
| 11942  | 0     |        | 0     |        |
| 11943  | 1     | 3      | 1     | 1      |
| 11944  | 1     | 2      | 1     | 1      |
| 11955  | 0     |        | 0     |        |
| 11958  | 0     |        | 2     | 1      |
| 11968  | 0     |        | 1     | 0      |
| 11979  | 2     | 1      | 2     | 2      |
| 11988  | 0     |        | 0     |        |
| 11999  | 3     | 3      | 2     | 1      |
| 12002  | 0     |        | 1     | 0      |
| 12004  | 0     |        | 0     |        |
| 12008  | 1     | 1      | 1     | 1      |
| 12013  | 0     |        | 3     | 3      |
| 12018  | 0     |        | 1     | 0      |

| respid | Q24_1 | Q24a_1 | Q25_1 | Q25a_1 |
|--------|-------|--------|-------|--------|
| 12023  | 0     |        | 1     | 0      |
| 12027  | 2     | 2      | 3     | 4      |
| 12030  | 0     |        | 4     | 1      |
| 12031  | 1     | 1      | 1     | 0      |
| 12036  | 0     |        | 1     | 2      |
| 12037  | 3     | 3      | 2     | 3      |
| 12038  | 0     |        | 0     |        |
| 12039  | 0     |        | 1     | 0      |
| 12045  | 1     | 1      | 0     |        |
| 12046  | 2     | 1      | 2     | 1      |
| 12054  | 2     | 2      | 1     | 1      |
| 12055  | 2     | 1      | 1     | 1      |
| 12069  | 1     | 1      | 3     | 1      |
| 12070  | 3     | 2      | 3     | 4      |
| 12074  | 0     |        | 2     | 0      |
| 12075  | 1     | 0      | 2     | 2      |
| 12078  | 2     | 2      | 1     | 1      |
| 12089  | 1     | 1      | 1     | 1      |
| 12091  | 3     | 2      | 2     | 3      |
| 12092  | 1     | 1      | 2     | 1      |
| 12108  | 5     | 4      | 5     | 4      |
| 12111  | 4     | 4      | 3     | 4      |
| 12112  | 3     | 3      | 2     | 3      |
| 12126  | 0     |        | 0     |        |
| 12132  | 3     | 2      | 3     | 2      |
| 12150  | 3     | 3      | 3     | 4      |
| 12152  | 1     | 1      | 1     | 1      |
| 12154  | 2     | 1      | 0     |        |
| 12157  | 3     | 2      | 3     | 2      |
| 12165  | 0     |        | 2     | 2      |
| 12169  | 3     | 2      | 2     | 3      |
| 12182  | 4     | 3      | 5     | 3      |

| respid | Q24_1 | Q24a_1 | Q25_1 | Q25a_1 |
|--------|-------|--------|-------|--------|
| 12198  | 0     |        | 0     |        |
| 12199  | 0     |        | 0     |        |
| 12202  | 0     |        | 1     | 0      |
| 12207  | 0     |        | 1     | 1      |
| 12208  | 1     | 1      | 1     | 0      |
| 12210  | 0     |        | 1     | 1      |
| 12219  | 4     | 3      | 4     | 3      |
| 12224  | 0     |        | 1     | 0      |
| 12230  | 1     | 1      | 1     | 1      |
| 12238  | 0     |        | 2     | 1      |
| 12239  | 0     |        | 0     |        |
| 12243  | 0     |        | 0     |        |
| 12245  | 0     |        | 2     | 0      |
| 12246  | 4     | 3      | 3     | 3      |
| 12247  | 0     |        | 1     | 1      |
| 12248  | 0     |        | 1     | 1      |
| 12249  | 0     |        | 1     | 2      |
| 12258  | 3     | 2      | 3     | 2      |
| 12265  | 3     | 3      | 2     | 2      |
| 12269  | 0     |        | 0     |        |
| 12270  | 0     |        | 1     | 0      |
| 12279  | 0     |        | 2     | 0      |
| 12280  | 4     | 3      | 2     | 2      |
| 12282  | 0     |        | 0     |        |
| 12283  | 0     |        | 1     | 0      |
| 12287  | 0     |        | 1     | 0      |
| 12288  | 0     |        | 1     | 1      |
| 12290  | 0     |        | 2     | 0      |
| 12292  | 1     | 1      | 2     | 1      |
| 12294  | 0     |        | 2     | 0      |
| 12296  | 0     |        | 2     | 0      |
| 12307  | 0     |        | 2     | 2      |

| respid | Q24_1 | Q24a_1 | Q25_1 | Q25a_1 |
|--------|-------|--------|-------|--------|
| 12309  | 0     |        | 2     | 3      |
| 12312  | 1     | 1      | 1     | 1      |
| 12317  | 1     | 1      | 1     | 0      |
| 12319  | 0     |        | 1     | 0      |
| 12320  | 0     |        | 0     |        |
| 12322  | 0     |        | 1     | 1      |
| 12328  | 1     | 1      | 2     | 0      |
| 12331  | 4     | 3      | 3     | 3      |
| 12332  | 0     |        | 0     |        |
| 12334  | 0     |        | 2     | 0      |
| 12337  | 0     |        | 5     | 2      |
| 12338  | 1     | 0      | 0     |        |
| 12342  | 1     | 1      | 1     | 0      |
| 12349  | 0     |        | 1     | 0      |
| 12352  | 0     |        | 1     | 1      |
| 12355  | 0     |        | 1     | 1      |
| 12357  | 0     |        | 1     | 0      |
| 12358  | 0     |        | 2     | 2      |
| 12371  | 0     |        | 2     | 1      |
| 12372  | 0     |        | 1     | 0      |
| 12373  | 1     | 1      | 2     | 1      |
| 12379  | 0     |        | 0     |        |
| 12381  | 1     | 2      | 1     | 2      |
| 12383  | 1     | 2      | 2     | 2      |
| 12384  | 0     |        | 0     |        |
| 12386  | 0     |        | 1     | 0      |
| 12389  | 0     |        | 0     |        |
| 12392  | 0     |        | 0     |        |
| 12396  | 0     |        | 1     | 0      |
| 12397  | 1     | 0      | 1     | 1      |
| 12399  | 1     | 1      | 3     | 3      |
| 12400  | 0     |        | 1     | 3      |

| respid | Q24_1 | Q24a_1 | Q25_1 | Q25a_1 |
|--------|-------|--------|-------|--------|
| 12406  | 3     | 2      | 2     | 4      |
| 12407  | 0     |        | 1     | 1      |
| 12410  | 0     |        | 0     |        |
| 12413  | 0     |        | 4     | 0      |
| 12416  | 4     | 3      | 2     | 2      |
| 12419  | 2     | 2      | 2     | 1      |
| 12422  | 1     | 4      | 1     | 2      |
| 12423  | 1     | 1      | 1     | 1      |
| 12429  | 0     |        | 1     | 1      |
| 12434  | 3     | 3      | 3     | 3      |
| 12435  | 1     | 1      | 1     | 0      |
| 12436  | 2     | 1      | 2     | 0      |
| 12442  | 0     |        | 0     |        |
| 12449  | 0     |        | 1     | 1      |
| 12451  | 0     |        | 1     | 0      |
| 12456  | 2     | 4      | 3     | 1      |
| 12457  | 0     |        | 1     | 0      |
| 12458  | 0     |        | 1     | 1      |
| 12461  | 0     |        | 2     | 1      |
| 12462  | 0     |        | 1     | 0      |
| 12463  | 3     | 3      | 2     | 2      |
| 12466  | 1     | 0      | 1     | 0      |
| 12470  | 2     | 3      | 2     | 0      |
| 12471  | 0     |        | 1     | 1      |
| 12472  | 0     |        | 1     | 0      |
| 12478  | 1     | 1      | 1     | 0      |
| 12479  | 1     | 1      | 1     | 0      |
| 12481  | 0     |        | 1     | 1      |
| 12482  | 0     |        | 2     | 0      |
| 12483  | 0     |        | 0     |        |
| 12496  | 0     |        | 0     |        |
| 12497  | 0     |        | 2     | 1      |

| respid | Q24_1 | Q24a_1 | Q25_1 | Q25a_1 |
|--------|-------|--------|-------|--------|
| 12498  | 1     | 1      | 5     | 2      |
| 12500  | 4     | 3      | 2     | 3      |
| 12501  | 0     |        | 1     | 1      |
| 12502  | 1     | 1      | 1     | 1      |
| 12503  | 1     | 0      | 0     |        |
| 12505  | 0     |        | 5     | 2      |
| 12508  | 2     | 2      | 1     | 2      |
| 12509  | 1     | 1      | 1     | 1      |
| 12510  | 0     |        | 0     |        |
| 12512  | 4     | 2      | 1     | 1      |
| 12514  | 1     | 1      | 4     | 3      |
| 12515  | 0     |        | 2     | 0      |
| 12520  | 0     |        | 1     | 0      |
| 12522  | 0     |        | 1     | 0      |
| 12526  | 2     | 2      | 2     | 1      |
| 12527  | 0     |        | 0     |        |
| 12528  | 0     |        | 1     | 1      |
| 12530  | 1     | 1      | 2     | 2      |
| 12535  | 0     |        | 3     | 0      |
| 12539  | 1     | 0      | 1     | 1      |
| 12541  | 3     | 1      | 3     | 2      |
| 12542  | 0     |        | 1     | 0      |
| 12545  | 5     | 3      | 2     | 2      |
| 12547  | 2     | 1      | 3     | 2      |
| 12549  | 2     | 2      | 2     | 2      |
| 12550  | 0     |        | 1     | 0      |
| 12555  | 0     |        | 0     |        |
| 12557  | 1     | 1      | 1     | 1      |
| 12559  | 1     | 0      | 2     | 2      |
| 12561  | 0     |        | 1     | 1      |
| 12562  | 3     | 1      | 2     | 1      |
| 12563  | 0     |        | 0     |        |



| respid | Q24_1 | Q24a_1 | Q25_1 | Q25a_1 |
|--------|-------|--------|-------|--------|
| 12565  | 4     | 2      | 1     | 1      |
| 12566  | 0     |        | 0     |        |
| 12570  | 0     |        | 0     |        |
| 12571  | 0     |        | 0     |        |
| 12572  | 2     | 3      | 2     | 1      |
| 12578  | 0     |        | 0     |        |
| 12579  | 0     |        | 2     | 0      |
| 12581  | 2     | 1      | 2     | 2      |
| 12582  | 1     | 2      | 2     | 2      |
| 12585  | 0     |        | 2     | 2      |
| 12586  | 0     |        | 2     | 2      |
| 12588  | 1     | 1      | 3     | 2      |
| 12589  | 1     | 0      | 1     | 0      |
| 12590  | 0     |        | 1     | 0      |
| 12591  | 3     | 3      | 2     | 2      |
| 12593  | 3     | 3      | 2     | 3      |
| 12594  | 0     |        | 0     |        |
| 12599  | 0     |        | 1     | 0      |
| 12600  | 0     |        | 1     | 0      |
| 12602  | 2     | 1      | 5     | 3      |
| 12606  | 2     | 2      | 3     | 3      |
| 12607  | 0     |        | 0     |        |
| 12608  | 0     |        | 0     |        |
| 12610  | 2     | 2      | 2     | 2      |
| 12611  | 0     |        | 1     | 0      |
| 12613  | 1     | 1      | 1     | 1      |
| 12616  | 0     |        | 1     | 1      |
| 12617  | 0     |        | 1     | 0      |
| 12619  | 1     | 0      | 0     |        |
| 12622  | 0     |        | 0     |        |
| 12628  | 0     |        | 2     | 0      |
| 12631  | 1     | 1      | 2     | 2      |

| respid | Q24_1 | Q24a_1 | Q25_1 | Q25a_1 |
|--------|-------|--------|-------|--------|
| 12635  | 3     | 2      | 2     | 2      |
| 12638  | 0     |        | 0     |        |
| 12639  | 0     |        | 1     | 0      |
| 12640  | 0     |        | 1     | 0      |
| 12643  | 0     |        | 1     | 0      |
| 12646  | 3     | 4      | 3     | 3      |
| 12648  | 0     |        | 2     | 3      |
| 12650  | 3     | 2      | 2     | 1      |
| 12651  | 1     | 1      | 1     | 1      |
| 12658  | 2     | 2      | 1     | 2      |
| 12662  | 1     | 1      | 1     | 1      |
| 12663  | 3     | 3      | 2     | 2      |
| 12664  | 0     |        | 4     | 1      |
| 12669  | 3     | 2      | 4     | 4      |
| 12670  | 0     |        | 1     | 1      |
| 12673  | 0     |        | 0     |        |
| 12675  | 0     |        | 1     | 0      |
| 12677  | 0     |        | 1     | 1      |
| 12679  | 0     |        | 5     | 0      |
| 12682  | 2     | 2      | 2     | 2      |
| 12696  | 0     |        | 1     | 0      |
| 12697  | 0     |        | 1     | 1      |
| 12699  | 0     |        | 1     | 0      |
| 12700  | 1     | 1      | 2     | 1      |
| 12701  | 3     | 2      | 2     | 2      |
| 12702  | 0     |        | 1     | 1      |
| 12704  | 3     | 2      | 3     | 3      |
| 12705  | 0     |        | 5     | 1      |
| 12709  | 0     |        | 1     | 2      |
| 12710  | 0     |        | 1     | 0      |
| 12713  | 0     |        | 1     | 1      |
| 12716  | 4     | 4      | 1     | 0      |

| respid | Q24_1 | Q24a_1 | Q25_1 | Q25a_1 |
|--------|-------|--------|-------|--------|
| 12719  | 0     |        | 0     |        |
| 12720  | 0     |        | 1     | 0      |
| 12723  | 0     |        | 0     |        |
| 12726  | 0     |        | 1     | 0      |
| 12728  | 3     | 3      | 2     | 2      |
| 12729  | 0     |        | 1     | 0      |
| 12731  | 0     |        | 1     | 0      |
| 12732  | 2     | 3      | 2     | 2      |
| 12733  | 0     |        | 5     | 4      |
| 12736  | 0     |        | 0     |        |
| 12737  | 0     |        | 2     | 1      |
| 12739  | 3     | 3      | 3     | 3      |
| 12742  | 0     |        | 2     | 0      |
| 12743  | 4     | 4      | 3     | 4      |
| 12744  | 0     |        | 1     | 1      |
| 12747  | 3     | 2      | 3     | 3      |
| 12751  | 0     |        | 0     |        |
| 12754  | 0     |        | 1     | 1      |
| 12756  | 3     | 3      | 3     | 3      |
| 12757  | 0     |        | 1     | 1      |
| 12760  | 3     | 3      | 2     | 1      |
| 12761  | 0     |        | 2     | 1      |
| 12762  | 2     | 2      | 1     | 2      |
| 12766  | 0     |        | 1     | 0      |
| 12769  | 1     | 1      | 3     | 2      |
| 12770  | 2     | 2      | 2     | 2      |
| 12773  | 3     | 3      | 3     | 3      |
| 12780  | 1     | 1      | 1     | 1      |
| 12789  | 0     |        | 1     | 1      |
| 12792  | 0     |        | 1     | 1      |
| 12795  | 1     | 1      | 1     | 0      |
| 12804  | 0     |        | 1     | 2      |

| respid | Q24_1 | Q24a_1 | Q25_1 | Q25a_1 |
|--------|-------|--------|-------|--------|
| 12811  | 0     |        | 1     | 0      |
| 12813  | 1     | 1      | 1     | 1      |
| 12814  | 0     |        | 0     |        |
| 12815  | 0     |        | 1     | 2      |
| 12816  | 0     |        | 0     |        |
| 12817  | 0     |        | 0     |        |
| 12818  | 0     |        | 1     | 1      |
| 12819  | 0     |        | 1     | 0      |
| 12820  | 0     |        | 1     | 0      |
| 12821  | 0     |        | 1     | 0      |
| 12824  | 2     | 1      | 0     |        |
| 12827  | 0     |        | 2     | 0      |
| 12836  | 3     | 2      | 2     | 3      |
| 12837  | 0     |        | 0     |        |
| 12838  | 1     | 1      | 1     | 1      |
| 12845  | 0     |        | 1     | 0      |
| 12847  | 0     |        | 1     | 2      |
| 12849  | 4     | 3      | 3     | 4      |
| 12850  | 1     | 1      | 5     | 2      |
| 12852  | 0     |        | 2     | 0      |
| 12853  | 4     | 4      | 3     | 3      |
| 12854  | 0     |        | 1     | 1      |
| 12860  | 0     |        | 1     | 0      |
| 12861  | 0     |        | 2     | 1      |
| 12863  | 0     |        | 1     | 0      |
| 12865  | 0     |        | 1     | 0      |
| 12870  | 1     | 1      | 1     | 1      |
| 12871  | 0     |        | 1     | 0      |
| 12873  | 0     |        | 2     | 1      |
| 12877  | 1     | 1      | 1     | 0      |
| 12880  | 0     |        | 2     | 1      |
| 12881  | 0     |        | 1     | 0      |

| respid | Q24_1 | Q24a_1 | Q25_1 | Q25a_1 |
|--------|-------|--------|-------|--------|
| 12882  | 0     |        | 1     | 0      |
| 12883  | 0     |        | 5     | 1      |
| 12885  | 1     | 2      | 1     | 2      |
| 12887  | 1     | 1      | 3     | 2      |
| 12889  | 0     |        | 1     | 0      |
| 12890  | 0     |        | 1     | 1      |
| 12891  | 1     | 1      | 2     | 0      |
| 12892  | 1     | 3      | 4     | 0      |
| 12893  | 0     |        | 0     |        |
| 12895  | 0     |        | 1     | 1      |
| 12898  | 0     |        | 1     | 1      |
| 12907  | 2     | 2      | 3     | 3      |
| 12908  | 0     |        | 1     | 1      |
| 12909  | 0     |        | 0     |        |
| 12914  | 0     |        | 1     | 0      |
| 12915  | 4     | 3      | 3     | 3      |
| 12916  | 0     |        | 0     |        |
| 12921  | 0     |        | 1     | 1      |
| 12922  | 0     |        | 1     | 1      |
| 12923  | 2     | 4      | 3     | 3      |
| 12926  | 1     | 1      | 1     | 1      |
| 12927  | 0     |        | 0     |        |
| 12932  | 2     | 1      | 2     | 1      |
| 12936  | 0     |        | 0     |        |
| 12937  | 0     |        | 1     | 0      |
| 12938  | 1     | 1      | 4     | 3      |
| 12939  | 0     |        | 1     | 0      |
| 12940  | 2     | 2      | 2     | 2      |
| 12945  | 1     | 1      | 1     | 1      |
| 12946  | 1     | 0      | 2     | 2      |
| 12947  | 2     | 2      | 2     | 1      |
| 12948  | 3     | 2      | 4     | 2      |

| respid | Q24_1 | Q24a_1 | Q25_1 | Q25a_1 |
|--------|-------|--------|-------|--------|
| 12951  | 0     |        | 2     | 2      |
| 12952  | 0     |        | 1     | 0      |
| 12954  | 2     | 2      | 1     | 2      |
| 12960  | 0     |        | 1     | 2      |
| 12961  | 0     |        | 1     | 0      |
| 12962  | 0     |        | 1     | 0      |
| 12963  | 0     |        | 1     | 0      |
| 12964  | 0     |        | 0     |        |
| 12966  | 1     | 0      | 0     |        |
| 12967  | 0     |        | 1     | 0      |
| 12969  | 0     |        | 0     |        |
| 12970  | 0     |        | 0     |        |
| 12974  | 3     | 2      | 3     | 2      |
| 12979  | 0     |        | 0     |        |
| 12980  | 0     |        | 0     |        |
| 12983  | 0     |        | 1     | 0      |
| 12988  | 0     |        | 1     | 1      |
| 12994  | 0     |        | 2     | 1      |
| 12995  | 1     | 0      | 1     | 0      |
| 12996  | 0     |        | 2     | 0      |
| 12998  | 0     |        | 1     | 0      |
| 12999  | 1     | 0      | 1     | 0      |
| 13001  | 0     |        | 1     | 0      |
| 13005  | 1     | 1      | 1     | 1      |
| 13006  | 3     | 4      | 2     | 3      |
| 13007  | 1     | 2      | 0     |        |
| 13011  | 1     | 1      | 1     | 1      |
| 13012  | 0     |        | 1     | 0      |
| 13013  | 4     | 2      | 2     | 2      |
| 13016  | 0     |        | 1     | 0      |
| 13018  | 1     | 1      | 3     | 0      |
| 13020  | 0     |        | 0     |        |

| respid | Q24_1 | Q24a_1 | Q25_1 | Q25a_1 |
|--------|-------|--------|-------|--------|
| 13024  | 0     |        | 0     |        |
| 13025  | 0     |        | 0     |        |
| 13027  | 0     |        | 2     | 1      |
| 13031  | 1     | 2      | 1     | 1      |
| 13032  | 2     | 1      | 3     | 2      |
| 13034  | 0     |        | 1     | 1      |
| 13036  | 0     |        | 1     | 1      |
| 13037  | 0     |        | 0     |        |
| 13038  | 4     | 3      | 3     | 3      |
| 13039  | 0     |        | 2     | 0      |
| 13040  | 0     |        | 1     | 1      |
| 13041  | 1     | 1      | 1     | 2      |
| 13045  | 3     | 3      | 3     | 3      |
| 13046  | 0     |        | 1     | 1      |
| 13048  | 0     |        | 1     | 0      |
| 13051  | 0     |        | 1     | 1      |
| 13053  | 0     |        | 1     | 0      |
| 13055  | 4     | 3      | 5     | 4      |
| 13059  | 0     |        | 3     | 1      |
| 13068  | 0     |        | 1     | 0      |
| 13069  | 0     |        | 1     | 0      |
| 13076  | 1     | 1      | 1     | 1      |
| 13081  | 0     |        | 1     | 0      |
| 13082  | 0     |        | 4     | 2      |
| 13084  | 2     | 0      | 1     | 0      |
| 13085  | 0     |        | 2     | 2      |
| 13086  | 3     | 2      | 3     | 3      |
| 13093  | 1     | 1      | 1     | 1      |
| 13094  | 3     | 2      | 3     | 3      |
| 13097  | 0     |        | 1     | 0      |
| 13098  | 1     | 1      | 0     |        |
| 13099  | 2     | 2      | 0     |        |

| respid | Q24_1 | Q24a_1 | Q25_1 | Q25a_1 |
|--------|-------|--------|-------|--------|
| 13100  | 0     |        | 1     | 0      |
| 13101  | 0     |        | 0     |        |
| 13103  | 0     |        | 0     |        |
| 13105  | 0     |        | 0     |        |
| 13106  | 1     | 2      | 2     | 2      |
| 13107  | 0     |        | 2     | 1      |
| 13110  | 1     | 1      | 2     | 2      |
| 13118  | 0     |        | 1     | 1      |
| 13120  | 0     |        | 4     | 4      |
| 13130  | 1     | 0      | 0     |        |
| 13133  | 0     |        | 1     | 1      |
| 13134  | 0     |        | 0     |        |
| 13139  | 0     |        | 0     |        |
| 13142  | 0     |        | 2     | 0      |
| 13143  | 0     |        | 4     | 0      |
| 13145  | 1     | 1      | 5     | 3      |
| 13148  | 1     | 1      | 0     |        |
| 13149  | 0     |        | 1     | 0      |
| 13151  | 3     | 2      | 3     | 3      |
| 13153  | 1     | 1      | 0     |        |
| 13158  | 0     |        | 0     |        |
| 13160  | 1     | 1      | 1     | 1      |
| 13162  | 2     | 2      | 2     | 1      |
| 13169  | 0     |        | 0     |        |
| 13172  | 0     |        | 2     | 2      |
| 13173  | 0     |        | 0     |        |
| 13176  | 0     |        | 1     | 0      |
| 13179  | 0     |        | 0     |        |
| 13184  | 0     |        | 1     | 1      |
| 13185  | 0     |        | 1     | 1      |
| 13186  | 0     |        | 1     | 0      |
| 13188  | 1     | 1      | 2     | 2      |



| respid | Q24_1 | Q24a_1 | Q25_1 | Q25a_1 |
|--------|-------|--------|-------|--------|
| 13190  | 1     | 1      | 2     | 2      |
| 13192  | 0     |        | 0     |        |
| 13193  | 0     |        | 0     |        |
| 13201  | 0     |        | 2     | 1      |
| 13207  | 0     |        | 1     | 1      |
| 13208  | 0     |        | 0     |        |
| 13209  | 3     | 2      | 2     | 2      |
| 13212  | 0     |        | 1     | 0      |
| 13215  | 1     | 3      | 1     | 1      |
| 13218  | 1     | 1      | 3     | 3      |
| 13219  | 0     |        | 0     |        |
| 13224  | 0     |        | 1     | 1      |
| 13225  | 0     |        | 0     |        |
| 13226  | 0     |        | 1     | 0      |
| 13232  | 0     |        | 1     | 1      |
| 13237  | 0     |        | 1     | 1      |
| 13239  | 0     |        | 1     | 1      |
| 13241  | 0     |        | 1     | 1      |
| 13243  | 1     | 2      | 2     | 2      |
| 13247  | 2     | 3      | 1     | 4      |
| 13248  | 0     |        | 1     | 0      |
| 13251  | 0     |        | 2     | 0      |
| 13256  | 0     |        | 0     |        |
| 13260  | 0     |        | 5     | 1      |
| 13261  | 1     | 2      | 3     | 2      |
| 13264  | 0     |        | 0     |        |
| 13273  | 0     |        | 5     | 1      |
| 13274  | 0     |        | 0     |        |
| 13276  | 0     |        | 2     | 1      |
| 13278  | 0     |        | 0     |        |
| 13279  | 0     |        | 1     | 0      |
| 13282  | 0     |        | 2     | 0      |

| respid | Q24_1 | Q24a_1 | Q25_1 | Q25a_1 |
|--------|-------|--------|-------|--------|
| 13283  | 1     | 1      | 3     | 2      |
| 13285  | 1     | 2      | 1     | 1      |
| 13286  | 1     | 1      | 1     | 1      |
| 13299  | 0     |        | 0     |        |
| 13300  | 2     | 2      | 2     | 2      |
| 13301  | 0     |        | 0     |        |
| 13303  | 0     |        | 0     |        |
| 13304  | 0     |        | 1     | 1      |
| 13307  | 0     |        | 2     | 1      |
| 13308  | 0     |        | 1     | 1      |
| 13312  | 0     |        | 1     | 0      |
| 13313  | 1     | 0      | 0     |        |
| 13314  | 1     | 1      | 1     | 1      |
| 13318  | 2     | 2      | 2     | 2      |
| 13320  | 0     |        | 3     | 2      |
| 13322  | 1     | 1      | 1     | 1      |
| 13324  | 0     |        | 2     | 2      |
| 13325  | 1     | 1      | 1     | 2      |
| 13327  | 0     |        | 1     | 0      |
| 13330  | 0     |        | 5     | 1      |
| 13332  | 0     |        | 1     | 1      |
| 13333  | 0     |        | 1     | 1      |
| 13334  | 0     |        | 1     | 0      |
| 13351  | 0     |        | 2     | 2      |
| 13353  | 1     | 0      | 1     | 0      |
| 13354  | 0     |        | 0     |        |
| 13355  | 0     |        | 1     | 0      |
| 13358  | 0     |        | 0     |        |
| 13359  | 2     | 1      | 5     | 1      |
| 13360  | 2     | 1      | 1     | 1      |
| 13364  | 3     | 2      | 1     | 0      |
| 13365  | 3     | 3      | 4     | 4      |

| respid | Q24_1 | Q24a_1 | Q25_1 | Q25a_1 |
|--------|-------|--------|-------|--------|
| 13368  | 1     | 0      | 0     |        |
| 13370  | 0     |        | 1     | 0      |
| 13375  | 0     |        | 0     |        |
| 13384  | 0     |        | 2     | 0      |
| 13387  | 1     | 1      | 0     |        |
| 13395  | 0     |        | 1     | 1      |
| 13398  | 0     |        | 0     |        |
| 13404  | 1     | 2      | 2     | 2      |
| 13405  | 1     | 0      | 1     | 0      |
| 13408  | 0     |        | 0     |        |
| 13411  | 0     |        | 3     | 0      |
| 13413  | 0     |        | 0     |        |
| 13419  | 3     | 1      | 2     | 0      |
| 13420  | 0     |        | 0     |        |
| 13427  | 2     | 2      | 2     | 2      |
| 13441  | 5     | 2      | 1     | 3      |
| 13444  | 1     | 1      | 1     | 1      |
| 13456  | 0     |        | 1     | 0      |
| 13466  | 1     | 0      | 0     |        |
| 13468  | 0     |        | 1     | 0      |
| 13475  | 0     |        | 1     | 0      |
| 13484  | 0     |        | 1     | 1      |
| 13486  | 0     |        | 1     | 0      |
| 13487  | 1     | 1      | 2     | 2      |
| 13491  | 0     |        | 0     |        |
| 13496  | 0     |        | 0     |        |
| 13497  | 1     | 1      | 5     | 2      |
| 13498  | 0     |        | 2     | 2      |
| 13502  | 0     |        | 0     |        |
| 13503  | 2     | 2      | 4     | 2      |
| 13505  | 0     |        | 2     | 0      |
| 13509  | 1     | 1      | 1     | 1      |

| respid | Q24_1 | Q24a_1 | Q25_1 | Q25a_1 |
|--------|-------|--------|-------|--------|
| 13510  | 1     | 1      | 5     | 3      |
| 13518  | 0     |        | 1     | 1      |
| 13521  | 0     |        | 1     | 1      |
| 13523  | 1     | 1      | 5     | 2      |
| 13528  | 0     |        | 5     | 0      |
| 13531  | 0     |        | 1     | 1      |
| 13532  | 0     |        | 1     | 0      |
| 13533  | 0     |        | 1     | 0      |
| 13534  | 0     |        | 0     |        |
| 13535  | 0     |        | 1     | 0      |
| 13538  | 2     | 1      | 2     | 2      |
| 13540  | 0     |        | 1     | 1      |
| 13541  | 1     | 1      | 3     | 2      |
| 13542  | 0     |        | 5     | 0      |
| 13550  | 0     |        | 1     | 0      |
| 13553  | 0     |        | 1     | 1      |
| 13554  | 0     |        | 2     | 1      |
| 13555  | 2     | 2      | 3     | 2      |
| 13556  | 0     |        | 3     | 1      |
| 13563  | 1     | 1      | 1     | 0      |
| 13564  | 1     | 1      | 1     | 1      |
| 13567  | 0     |        | 0     |        |
| 13568  | 2     | 3      | 2     | 3      |
| 13570  | 0     |        | 0     |        |
| 13573  | 2     | 2      | 2     | 2      |
| 13575  | 0     |        | 1     | 2      |
| 13577  | 3     | 3      | 3     | 3      |
| 13580  | 2     | 3      | 2     | 3      |
| 13582  | 2     | 0      | 0     |        |
| 13584  | 2     | 3      | 3     | 2      |
| 13585  | 0     |        | 0     |        |
| 13586  | 0     |        | 2     | 0      |

| respid | Q24_1 | Q24a_1 | Q25_1 | Q25a_1 |
|--------|-------|--------|-------|--------|
| 13587  | 0     |        | 1     | 1      |
| 13592  | 3     | 3      | 3     | 3      |
| 13596  | 0     |        | 1     | 0      |
| 13597  | 0     |        | 2     | 2      |
| 13599  | 2     | 1      | 1     | 1      |
| 13601  | 0     |        | 1     | 0      |
| 13604  | 0     |        | 0     |        |
| 13608  | 0     |        | 1     | 0      |
| 13616  | 0     |        | 1     | 1      |
| 13618  | 0     |        | 5     | 2      |
| 13619  | 0     |        | 1     | 0      |
| 13626  | 0     |        | 0     |        |
| 13628  | 1     | 1      | 1     | 1      |
| 13640  | 0     |        | 2     | 1      |
| 13645  | 0     |        | 1     | 2      |
| 13648  | 0     |        | 0     |        |
| 13653  | 0     |        | 5     | 1      |
| 13655  | 0     |        | 0     |        |
| 13662  | 0     |        | 0     |        |
| 13670  | 0     |        | 1     | 0      |
| 13673  | 0     |        | 1     | 1      |
| 13674  | 0     |        | 1     | 1      |
| 13675  | 1     | 0      | 2     | 0      |
| 13678  | 1     | 2      | 1     | 1      |
| 13680  | 1     | 1      | 5     | 1      |
| 13681  | 0     |        | 1     | 0      |
| 13683  | 0     |        | 1     | 0      |
| 13684  | 3     | 1      | 1     | 1      |
| 13685  | 0     |        | 0     |        |
| 13687  | 0     |        | 0     |        |
| 13690  | 0     |        | 1     | 0      |
| 13700  | 2     | 2      | 1     | 2      |

| respid | Q24_1 | Q24a_1 | Q25_1 | Q25a_1 |
|--------|-------|--------|-------|--------|
| 13705  | 1     | 1      | 2     | 1      |
| 13710  | 0     |        | 0     |        |
| 13711  | 0     |        | 1     | 0      |
| 13713  | 0     |        | 1     | 0      |
| 13716  | 0     |        | 1     | 0      |
| 13721  | 1     | 2      | 4     | 2      |
| 13722  | 4     | 4      | 3     | 3      |
| 13723  | 1     | 4      | 1     | 2      |
| 13726  | 3     | 2      | 4     | 2      |
| 13728  | 1     | 1      | 1     | 1      |
| 13730  | 1     | 1      | 1     | 1      |
| 13734  | 0     |        | 1     | 1      |
| 13736  | 3     | 2      | 4     | 4      |
| 13737  | 0     |        | 1     | 1      |
| 13739  | 0     |        | 1     | 1      |
| 13742  | 0     |        | 0     |        |
| 13746  | 1     | 0      | 1     | 0      |
| 13747  | 0     |        | 1     | 0      |
| 13749  | 0     |        | 1     | 0      |
| 13751  | 2     | 1      | 1     | 1      |
| 13752  | 0     |        | 1     | 0      |
| 13756  | 1     | 1      | 1     | 1      |
| 13757  | 0     |        | 1     | 0      |
| 13767  | 2     | 2      | 1     | 2      |
| 13771  | 0     |        | 1     | 0      |
| 13772  | 4     | 1      | 4     | 4      |
| 13779  | 0     |        | 0     |        |
| 13782  | 1     | 0      | 1     | 1      |
| 13783  | 0     |        | 1     | 0      |
| 13785  | 0     |        | 1     | 1      |
| 13786  | 0     |        | 1     | 2      |
| 13792  | 4     | 3      | 2     | 2      |

| respid | Q24_1 | Q24a_1 | Q25_1 | Q25a_1 |
|--------|-------|--------|-------|--------|
| 13796  | 0     |        | 3     | 1      |
| 13798  | 0     |        | 1     | 0      |
| 13799  | 3     | 2      | 3     | 1      |
| 13804  | 0     |        | 1     | 0      |
| 13805  | 0     |        | 1     | 0      |
| 13810  | 2     | 2      | 2     | 2      |
| 13811  | 0     |        | 1     | 1      |
| 13819  | 0     |        | 1     | 3      |
| 13821  | 4     | 3      | 3     | 3      |
| 13824  | 3     | 2      | 1     | 1      |
| 13828  | 3     | 1      | 1     | 1      |
| 13829  | 4     | 3      | 3     | 3      |
| 13831  | 0     |        | 0     |        |
| 13833  | 1     | 1      | 1     | 1      |
| 13835  | 4     | 2      | 3     | 4      |
| 13838  | 0     |        | 0     |        |
| 13839  | 4     | 4      | 4     | 3      |
| 13845  | 0     |        | 0     |        |
| 13846  | 0     |        | 1     | 0      |
| 13853  | 1     | 1      | 2     | 2      |
| 13855  | 2     | 3      | 3     | 3      |
| 13858  | 2     | 2      | 1     | 1      |
| 13860  | 0     |        | 0     |        |
| 13865  | 3     | 3      | 4     | 4      |
| 13870  | 0     |        | 1     | 0      |
| 13872  | 0     |        | 4     | 4      |
| 13873  | 0     |        | 1     | 1      |
| 13874  | 0     |        | 0     |        |
| 13875  | 2     | 2      | 2     | 2      |
| 13881  | 0     |        | 0     |        |
| 13887  | 1     | 0      | 4     | 2      |
| 13888  | 1     | 1      | 2     | 1      |

| respid | Q24_1 | Q24a_1 | Q25_1 | Q25a_1 |
|--------|-------|--------|-------|--------|
| 13889  | 2     | 3      | 3     | 3      |
| 13895  | 3     | 1      | 4     | 4      |
| 13897  | 0     |        | 0     |        |
| 13898  | 2     | 1      | 0     |        |
| 13901  | 0     |        | 2     | 0      |
| 13902  | 4     | 4      | 3     | 4      |
| 13903  | 0     |        | 2     | 4      |
| 13905  | 1     | 1      | 1     | 1      |
| 13908  | 2     | 1      | 3     | 2      |
| 13909  | 0     |        | 1     | 0      |
| 13910  | 2     | 3      | 2     | 3      |
| 13911  | 0     |        | 0     |        |
| 13914  | 4     | 2      | 4     | 3      |
| 13920  | 5     | 1      | 4     | 3      |
| 13926  | 0     |        | 1     | 0      |
| 13929  | 1     | 1      | 1     | 0      |
| 13930  | 3     | 2      | 4     | 4      |
| 13931  | 0     |        | 0     |        |
| 13932  | 3     | 1      | 2     | 1      |
| 13934  | 1     | 1      | 1     | 0      |
| 13938  | 1     | 1      | 1     | 1      |
| 13942  | 1     | 0      | 0     |        |
| 13945  | 4     | 2      | 4     | 2      |
| 13947  | 5     | 3      | 5     | 3      |
| 13948  | 0     |        | 0     |        |
| 13959  | 0     |        | 1     | 0      |
| 13962  | 0     |        | 1     | 0      |
| 13963  | 1     | 2      | 0     |        |
| 13964  | 0     |        | 1     | 1      |
| 13966  | 1     | 2      | 2     | 1      |
| 13968  | 0     |        | 0     |        |
| 13971  | 0     |        | 1     | 1      |



| respid | Q24_1 | Q24a_1 | Q25_1 | Q25a_1 |
|--------|-------|--------|-------|--------|
| 13979  | 3     | 2      | 3     | 2      |
| 13980  | 2     | 1      | 3     | 1      |
| 13981  | 0     |        | 1     | 1      |
| 13982  | 1     | 1      | 1     | 1      |
| 13984  | 0     |        | 5     | 3      |
| 13989  | 1     | 0      | 0     |        |
| 13990  | 0     |        | 3     | 0      |
| 13992  | 1     | 3      | 4     | 3      |
| 13998  | 2     | 2      | 1     | 1      |
| 13999  | 4     | 1      | 5     | 2      |
| 14000  | 3     | 1      | 0     |        |
| 14003  | 0     |        | 2     | 0      |
| 14004  | 0     |        | 0     |        |
| 14006  | 1     | 1      | 5     | 1      |
| 14007  | 1     | 0      | 1     | 0      |
| 14008  | 0     |        | 0     |        |
| 14013  | 0     |        | 1     | 0      |
| 14015  | 0     |        | 1     | 0      |
| 14018  | 0     |        | 0     |        |
| 14021  | 0     |        | 0     |        |
| 14023  | 0     |        | 0     |        |
| 14024  | 0     |        | 5     | 3      |
| 14026  | 0     |        | 0     |        |
| 14030  | 3     | 2      | 2     | 1      |
| 14032  | 2     | 1      | 2     | 1      |
| 14040  | 0     |        | 0     |        |
| 14045  | 0     |        | 1     | 0      |
| 14048  | 4     | 2      | 4     | 2      |
| 14049  | 4     | 2      | 2     | 4      |
| 14050  | 0     |        | 0     |        |
| 14051  | 4     | 3      | 4     | 4      |
| 14052  | 1     | 1      | 1     | 0      |

| respid | Q24_1 | Q24a_1 | Q25_1 | Q25a_1 |
|--------|-------|--------|-------|--------|
| 14054  | 0     |        | 0     |        |
| 14055  | 0     |        | 0     |        |
| 14057  | 1     | 1      | 2     | 2      |
| 14058  | 0     |        | 2     | 0      |
| 14059  | 0     |        | 1     | 0      |
| 14060  | 0     |        | 0     |        |
| 14061  | 3     | 3      | 3     | 3      |
| 14071  | 0     |        | 1     | 0      |
| 14073  | 0     |        | 1     | 2      |
| 14074  | 2     | 2      | 3     | 3      |
| 14076  | 0     |        | 2     | 0      |
| 14080  | 1     | 0      | 4     | 0      |
| 14082  | 0     |        | 1     | 0      |
| 14083  | 0     |        | 1     | 0      |
| 14084  | 0     |        | 1     | 0      |
| 14085  | 0     |        | 0     |        |
| 14086  | 2     | 2      | 2     | 3      |
| 14088  | 0     |        | 1     | 1      |
| 14090  | 0     |        | 5     | 0      |
| 14092  | 1     | 0      | 1     | 0      |
| 14093  | 0     |        | 0     |        |
| 14096  | 0     |        | 0     |        |
| 14103  | 5     | 2      | 3     | 2      |
| 14105  | 0     |        | 0     |        |
| 14106  | 1     | 1      | 1     | 1      |
| 14107  | 1     | 1      | 2     | 2      |
| 14108  | 1     | 3      | 3     | 3      |
| 14112  | 1     | 1      | 0     |        |
| 14114  | 5     | 3      | 4     | 3      |
| 14115  | 1     | 2      | 3     | 2      |
| 14116  | 0     |        | 1     | 0      |
| 14117  | 1     | 2      | 1     | 1      |

| respid | Q24_1 | Q24a_1 | Q25_1 | Q25a_1 |
|--------|-------|--------|-------|--------|
| 14118  | 4     | 2      | 3     | 1      |
| 14119  | 0     |        | 1     | 0      |
| 14127  | 0     |        | 0     |        |
| 14129  | 0     |        | 5     | 1      |
| 14131  | 3     | 2      | 2     | 2      |
| 14132  | 0     |        | 1     | 0      |
| 14133  | 2     | 4      | 3     | 4      |
| 14134  | 1     | 1      | 2     | 1      |
| 14135  | 0     |        | 2     | 0      |
| 14136  | 1     | 0      | 3     | 4      |
| 14138  | 0     |        | 0     |        |
| 14139  | 0     |        | 0     |        |
| 14140  | 2     | 2      | 2     | 2      |
| 14141  | 0     |        | 0     |        |
| 14143  | 1     | 1      | 0     |        |
| 14146  | 0     |        | 1     | 0      |
| 14147  | 3     | 2      | 5     | 4      |
| 14148  | 0     |        | 1     | 0      |
| 14151  | 3     | 1      | 5     | 2      |
| 14152  | 2     | 1      | 2     | 1      |
| 14153  | 1     | 0      | 1     | 1      |
| 14154  | 0     |        | 0     |        |
| 14158  | 0     |        | 2     | 1      |
| 14159  | 1     | 2      | 1     | 2      |
| 14160  | 3     | 3      | 3     | 3      |
| 14161  | 5     | 2      | 4     | 3      |
| 14162  | 1     | 1      | 2     | 2      |
| 14165  | 4     | 3      | 3     | 2      |
| 14166  | 5     | 2      | 4     | 4      |
| 14167  | 1     | 0      | 1     | 2      |
| 14169  | 0     |        | 1     | 1      |
| 14170  | 0     |        | 0     |        |

| respid | Q24_1 | Q24a_1 | Q25_1 | Q25a_1 |
|--------|-------|--------|-------|--------|
| 14172  | 2     | 2      | 0     |        |
| 14173  | 0     |        | 0     |        |
| 14174  | 1     | 1      | 1     | 2      |
| 14175  | 0     |        | 3     | 2      |
| 14176  | 1     | 1      | 3     | 2      |
| 14178  | 0     |        | 2     | 2      |
| 14179  | 0     |        | 2     | 1      |
| 14180  | 4     | 2      | 4     | 2      |
| 14183  | 2     | 2      | 2     | 1      |
| 14185  | 0     |        | 1     | 1      |
| 14187  | 0     |        | 2     | 2      |
| 14189  | 0     |        | 0     |        |
| 14191  | 5     | 2      | 4     | 2      |
| 14192  | 0     |        | 0     |        |
| 14195  | 1     | 1      | 2     | 3      |
| 14197  | 0     |        | 2     | 1      |
| 14203  | 3     | 2      | 3     | 2      |
| 14204  | 0     |        | 1     | 1      |
| 14205  | 0     |        | 1     | 0      |
| 14208  | 0     |        | 2     | 0      |
| 14211  | 3     | 3      | 4     | 4      |
| 14214  | 0     |        | 1     | 0      |
| 14215  | 3     | 2      | 5     | 3      |
| 14216  | 3     | 3      | 2     | 3      |
| 14218  | 0     |        | 0     |        |
| 14220  | 1     | 0      | 1     | 0      |
| 14223  | 0     |        | 0     |        |
| 14225  | 5     | 3      | 2     | 2      |
| 14226  | 0     |        | 1     | 1      |
| 14228  | 2     | 2      | 1     | 1      |
| 14231  | 2     | 2      | 2     | 2      |
| 14233  | 1     | 2      | 1     | 1      |

| respid | Q24_1 | Q24a_1 | Q25_1 | Q25a_1 |
|--------|-------|--------|-------|--------|
| 14237  | 1     | 1      | 1     | 1      |
| 14238  | 5     | 3      | 3     | 2      |
| 14243  | 1     | 1      | 1     | 1      |
| 14245  | 0     |        | 0     |        |
| 14246  | 3     | 3      | 3     | 4      |
| 14248  | 0     |        | 1     | 2      |
| 14250  | 0     |        | 1     | 0      |
| 14253  | 0     |        | 1     | 0      |
| 14254  | 0     |        | 1     | 1      |
| 14255  | 0     |        | 1     | 1      |
| 14257  | 0     |        | 1     | 0      |
| 14258  | 1     | 1      | 1     | 1      |
| 14259  | 1     | 1      | 2     | 1      |
| 14260  | 0     |        | 0     |        |
| 14261  | 4     | 4      | 5     | 4      |
| 14263  | 3     | 2      | 5     | 4      |
| 14264  | 2     | 1      | 2     | 1      |
| 14266  | 1     | 1      | 0     |        |
| 14267  | 2     | 2      | 2     | 2      |
| 14268  | 0     |        | 1     | 0      |
| 14275  | 1     | 1      | 1     | 1      |
| 14278  | 3     | 2      | 0     |        |
| 14279  | 0     |        | 0     |        |
| 14280  | 0     |        | 0     |        |
| 14281  | 0     |        | 3     | 3      |
| 14282  | 1     | 1      | 2     | 2      |
| 14283  | 2     | 2      | 4     | 2      |
| 14286  | 0     |        | 3     | 0      |
| 14287  | 0     |        | 0     |        |
| 14288  | 2     | 2      | 1     | 1      |
| 14291  | 0     |        | 0     |        |
| 14292  | 0     |        | 0     |        |

| respid | Q24_1 | Q24a_1 | Q25_1 | Q25a_1 |
|--------|-------|--------|-------|--------|
| 14293  | 0     |        | 1     | 1      |
| 14304  | 5     | 3      | 4     | 4      |
| 14308  | 1     | 1      | 2     | 1      |
| 14313  | 0     |        | 0     |        |
| 14314  | 3     | 3      | 0     |        |
| 14316  | 0     |        | 0     |        |
| 14317  | 0     |        | 0     |        |
| 14318  | 3     | 2      | 1     | 3      |
| 14319  | 1     | 0      | 0     |        |
| 14320  | 2     | 2      | 2     | 2      |
| 14321  | 0     |        | 0     |        |
| 14322  | 2     | 4      | 3     | 3      |
| 14326  | 0     |        | 1     | 0      |
| 14327  | 2     | 3      | 3     | 4      |
| 14328  | 0     |        | 0     |        |
| 14330  | 0     |        | 1     | 0      |
| 14332  | 1     | 0      | 1     | 0      |
| 14334  | 0     |        | 1     | 0      |
| 14336  | 0     |        | 1     | 2      |
| 14337  | 1     | 1      | 1     | 1      |
| 14339  | 0     |        | 0     |        |
| 14340  | 2     | 1      | 2     | 3      |
| 14341  | 0     |        | 1     | 0      |
| 14344  | 0     |        | 2     | 0      |
| 14345  | 1     | 1      | 3     | 1      |
| 14346  | 0     |        | 0     |        |
| 14348  | 1     | 1      | 1     | 0      |
| 14349  | 1     | 1      | 1     | 0      |
| 14358  | 2     | 3      | 4     | 4      |
| 14360  | 0     |        | 1     | 0      |
| 14362  | 0     |        | 0     |        |
| 14366  | 0     |        | 0     |        |

| respid | Q24_1 | Q24a_1 | Q25_1 | Q25a_1 |
|--------|-------|--------|-------|--------|
| 14367  | 1     | 1      | 3     | 1      |
| 14369  | 3     | 2      | 3     | 2      |
| 14371  | 1     | 0      | 1     | 0      |
| 14372  | 0     |        | 0     |        |
| 14374  | 1     | 1      | 0     |        |
| 14376  | 0     |        | 1     | 1      |
| 14377  | 0     |        | 0     |        |
| 14378  | 0     |        | 1     | 0      |
| 14379  | 0     |        | 4     | 1      |
| 14381  | 0     |        | 0     |        |
| 14383  | 3     | 2      | 3     | 2      |
| 14384  | 2     | 1      | 1     | 2      |
| 14385  | 4     | 3      | 3     | 2      |
| 14386  | 2     | 3      | 3     | 3      |
| 14390  | 1     | 1      | 1     | 1      |
| 14391  | 0     |        | 5     | 2      |
| 14392  | 0     |        | 1     | 1      |
| 14393  | 2     | 2      | 2     | 3      |
| 14394  | 0     |        | 5     | 2      |
| 14395  | 0     |        | 0     |        |
| 14396  | 0     |        | 0     |        |
| 14397  | 3     | 3      | 1     | 0      |
| 14398  | 0     |        | 0     |        |
| 14399  | 0     |        | 0     |        |
| 14400  | 0     |        | 1     | 3      |
| 14403  | 1     | 0      | 1     | 0      |
| 14404  | 1     | 1      | 1     | 1      |
| 14405  | 1     | 1      | 1     | 0      |
| 14407  | 0     |        | 2     | 0      |
| 14408  | 4     | 4      | 3     | 3      |
| 14410  | 3     | 3      | 3     | 2      |
| 14415  | 0     |        | 1     | 0      |

| respid | Q24_1 | Q24a_1 | Q25_1 | Q25a_1 |
|--------|-------|--------|-------|--------|
| 14419  | 0     |        | 1     | 2      |
| 14420  | 0     |        | 0     |        |
| 14421  | 0     |        | 0     |        |
| 14423  | 0     |        | 1     | 0      |
| 14424  | 0     |        | 2     | 0      |
| 14425  | 1     | 1      | 1     | 1      |
| 14426  | 0     |        | 0     |        |
| 14427  | 0     |        | 4     | 0      |
| 14428  | 4     | 3      | 5     | 3      |
| 14431  | 2     | 1      | 2     | 1      |
| 14433  | 0     |        | 1     | 1      |
| 14434  | 0     |        | 1     | 1      |
| 14435  | 0     |        | 3     | 0      |
| 14436  | 3     | 2      | 4     | 2      |
| 14438  | 1     | 1      | 3     | 0      |
| 14442  | 4     | 3      | 4     | 3      |
| 14447  | 0     |        | 3     | 2      |
| 14448  | 0     |        | 2     | 0      |
| 14450  | 1     | 1      | 1     | 1      |
| 14451  | 0     |        | 0     |        |
| 14454  | 0     |        | 1     | 1      |
| 14455  | 0     |        | 0     |        |
| 14456  | 1     | 1      | 2     | 3      |
| 14457  | 3     | 3      | 4     | 2      |
| 14458  | 3     | 3      | 4     | 4      |
| 14459  | 0     |        | 0     |        |
| 14460  | 2     | 2      | 3     | 1      |
| 14464  | 0     |        | 2     | 1      |
| 14465  | 1     | 1      | 0     |        |
| 14466  | 1     | 1      | 1     | 0      |
| 14467  | 0     |        | 5     | 2      |
| 14470  | 1     | 1      | 2     | 1      |



| respid | Q24_1 | Q24a_1 | Q25_1 | Q25a_1 |
|--------|-------|--------|-------|--------|
| 14472  | 1     | 2      | 0     |        |
| 14473  | 0     |        | 1     | 0      |
| 14474  | 0     |        | 0     |        |
| 14477  | 0     |        | 1     | 1      |
| 14478  | 0     |        | 1     | 0      |
| 14479  | 0     |        | 0     |        |
| 14484  | 0     |        | 1     | 0      |
| 14485  | 0     |        | 0     |        |
| 14486  | 0     |        | 0     |        |
| 14487  | 0     |        | 2     | 1      |
| 14488  | 3     | 2      | 2     | 2      |
| 14491  | 1     | 2      | 1     | 1      |
| 14495  | 0     |        | 1     | 0      |
| 14500  | 0     |        | 5     | 1      |
| 14502  | 0     |        | 2     | 0      |
| 14504  | 1     | 2      | 1     | 2      |
| 14505  | 4     | 4      | 3     | 3      |
| 14507  | 0     |        | 1     | 1      |
| 14517  | 0     |        | 2     | 2      |
| 14518  | 0     |        | 1     | 1      |
| 14519  | 0     |        | 1     | 0      |
| 14521  | 2     | 2      | 2     | 2      |
| 14522  | 0     |        | 1     | 0      |
| 14526  | 0     |        | 0     |        |
| 14528  | 3     | 3      | 4     | 4      |
| 14529  | 1     | 0      | 0     |        |
| 14530  | 0     |        | 2     | 1      |
| 14531  | 4     | 4      | 5     | 4      |
| 14534  | 2     | 3      | 1     | 2      |
| 14538  | 0     |        | 2     | 1      |
| 14539  | 0     |        | 0     |        |
| 14545  | 0     |        | 0     |        |

| respid | Q24_1 | Q24a_1 | Q25_1 | Q25a_1 |
|--------|-------|--------|-------|--------|
| 14546  | 0     |        | 3     | 0      |
| 14551  | 0     |        | 2     | 1      |
| 14553  | 1     | 4      | 4     | 4      |
| 14557  | 0     |        | 0     |        |
| 14558  | 1     | 1      | 2     | 0      |
| 14559  | 2     | 1      | 2     | 1      |
| 14560  | 0     |        | 1     | 3      |
| 14563  | 0     |        | 1     | 1      |
| 14565  | 0     |        | 0     |        |
| 14571  | 4     | 3      | 3     | 3      |
| 14572  | 0     |        | 2     | 1      |
| 14573  | 1     | 2      | 2     | 2      |
| 14575  | 3     | 2      | 2     | 2      |
| 14576  | 2     | 2      | 2     | 1      |
| 14578  | 0     |        | 2     | 2      |
| 14579  | 0     |        | 1     | 1      |
| 14580  | 0     |        | 2     | 2      |
| 14582  | 0     |        | 1     | 1      |
| 14585  | 1     | 1      | 2     | 1      |
| 14588  | 0     |        | 1     | 0      |
| 14590  | 1     | 2      | 3     | 1      |
| 14592  | 1     | 2      | 2     | 2      |
| 14593  | 0     |        | 0     |        |
| 14595  | 0     |        | 1     | 3      |
| 14597  | 1     | 1      | 5     | 3      |
| 14600  | 1     | 0      | 1     | 0      |
| 14602  | 1     | 3      | 4     | 3      |
| 14604  | 2     | 0      | 2     | 1      |
| 14605  | 1     | 0      | 1     | 0      |
| 14609  | 1     | 1      | 5     | 3      |
| 14610  | 1     | 0      | 2     | 1      |
| 14611  | 0     |        | 0     |        |

| respid | Q24_1 | Q24a_1 | Q25_1 | Q25a_1 |
|--------|-------|--------|-------|--------|
| 14612  | 0     |        | 4     | 3      |
| 14614  | 1     | 1      | 2     | 2      |
| 14615  | 0     |        | 2     | 1      |
| 14618  | 2     | 2      | 3     | 3      |
| 14621  | 0     |        | 0     |        |
| 14624  | 1     | 0      | 1     | 0      |
| 14626  | 0     |        | 0     |        |
| 14627  | 1     | 1      | 1     | 1      |
| 14628  | 1     | 2      | 3     | 2      |
| 14631  | 0     |        | 2     | 0      |
| 14633  | 2     | 1      | 3     | 2      |
| 14642  | 2     | 2      | 2     | 2      |
| 14647  | 0     |        | 1     | 1      |
| 14658  | 1     | 1      | 1     | 1      |
| 14659  | 2     | 1      | 2     | 1      |
| 14660  | 0     |        | 2     | 1      |
| 14661  | 0     |        | 2     | 0      |
| 14662  | 3     | 2      | 4     | 4      |
| 14663  | 0     |        | 1     | 0      |
| 14670  | 0     |        | 3     | 2      |
| 14671  | 0     |        | 0     |        |
| 14672  | 2     | 3      | 2     | 1      |
| 14675  | 0     |        | 0     |        |
| 14676  | 2     | 3      | 3     | 4      |
| 14677  | 5     | 2      | 4     | 3      |
| 14678  | 0     |        | 1     | 0      |
| 14681  | 2     | 2      | 2     | 1      |
| 14684  | 0     |        | 1     | 0      |
| 14688  | 0     |        | 0     |        |
| 14690  | 1     | 1      | 2     | 1      |
| 14694  | 1     | 3      | 2     | 2      |
| 14696  | 1     | 1      | 2     | 1      |

| respid | Q24_1 | Q24a_1 | Q25_1 | Q25a_1 |
|--------|-------|--------|-------|--------|
| 14700  | 0     |        | 0     |        |
| 14701  | 2     | 2      | 1     | 1      |
| 14703  | 2     | 2      | 3     | 3      |
| 14707  | 0     |        | 1     | 0      |
| 14711  | 2     | 3      | 1     | 2      |
| 14714  | 0     |        | 0     |        |
| 14715  | 4     | 4      | 3     | 4      |
| 14716  | 0     |        | 1     | 0      |
| 14720  | 1     | 2      | 0     |        |
| 14725  | 0     |        | 1     | 2      |
| 14726  | 1     | 0      | 1     | 2      |
| 14734  | 0     |        | 0     |        |
| 14735  | 0     |        | 2     | 0      |
| 14736  | 2     | 1      | 2     | 1      |
| 14740  | 0     |        | 1     | 1      |
| 14745  | 2     | 1      | 2     | 1      |
| 14747  | 0     |        | 2     | 0      |
| 14750  | 3     | 2      | 2     | 3      |
| 14751  | 0     |        | 1     | 0      |
| 14753  | 0     |        | 1     | 0      |
| 14756  | 3     | 2      | 5     | 4      |
| 14780  | 1     | 1      | 1     | 1      |
| 14782  | 0     |        | 1     | 1      |
| 14800  | 5     | 3      | 3     | 3      |
| 14801  | 0     |        | 3     | 2      |
| 14802  | 3     | 1      | 3     | 3      |
| 14805  | 1     | 1      | 2     | 3      |
| 14811  | 3     | 3      | 4     | 3      |
| 14814  | 3     | 2      | 3     | 2      |
| 14822  | 2     | 1      | 1     | 1      |
| 14827  | 0     |        | 3     | 4      |
| 14828  | 3     | 2      | 4     | 3      |

| respid | Q24_1 | Q24a_1 | Q25_1 | Q25a_1 |
|--------|-------|--------|-------|--------|
| 14830  | 0     |        | 0     |        |
| 14832  | 2     | 3      | 2     | 2      |
| 14835  | 2     | 2      | 3     | 4      |
| 14841  | 0     |        | 0     |        |
| 14849  | 1     | 1      | 0     |        |
| 14850  | 0     |        | 0     |        |
| 14851  | 0     |        | 1     | 4      |
| 14856  | 4     | 3      | 4     | 3      |
| 14862  | 2     | 1      | 1     | 1      |
| 14863  | 0     |        | 1     | 1      |
| 14864  | 0     |        | 2     | 0      |
| 14866  | 0     |        | 1     | 1      |
| 14867  | 3     | 2      | 3     | 3      |
| 14868  | 0     |        | 0     |        |
| 14870  | 0     |        | 1     | 0      |
| 14873  | 0     |        | 0     |        |
| 14878  | 0     |        | 0     |        |
| 14879  | 0     |        | 0     |        |
| 14881  | 3     | 3      | 3     | 2      |
| 14888  | 3     | 3      | 4     | 3      |
| 14895  | 1     | 1      | 0     |        |
| 14900  | 3     | 2      | 2     | 3      |
| 14912  | 0     |        | 0     |        |
| 14922  | 1     | 1      | 1     | 1      |
| 14923  | 4     | 4      | 5     | 3      |
| 14924  | 1     | 1      | 2     | 2      |
| 14925  | 4     | 3      | 3     | 3      |
| 14926  | 0     |        | 2     | 1      |
| 14927  | 4     | 3      | 3     | 3      |
| 14930  | 0     |        | 0     |        |
| 14937  | 3     | 2      | 4     | 3      |
| 14938  | 3     | 3      | 2     | 3      |

| respid | Q24_1 | Q24a_1 | Q25_1 | Q25a_1 |
|--------|-------|--------|-------|--------|
| 14939  | 0     |        | 3     | 3      |
| 14942  | 0     |        | 0     |        |
| 14943  | 0     |        | 0     |        |
| 14953  | 1     | 1      | 1     | 2      |
| 14954  | 0     |        | 1     | 1      |
| 14955  | 1     | 2      | 1     | 2      |
| 14957  | 0     |        | 2     | 2      |
| 14958  | 5     | 2      | 4     | 4      |
| 14959  | 3     | 3      | 3     | 2      |
| 14961  | 0     |        | 0     |        |
| 14963  | 3     | 2      | 5     | 3      |
| 14964  | 0     |        | 1     | 0      |
| 14965  | 0     |        | 2     | 2      |
| 14967  | 4     | 2      | 3     | 3      |
| 14970  | 2     | 2      | 3     | 2      |
| 14972  | 1     | 1      | 3     | 2      |
| 14975  | 5     | 2      | 5     | 3      |
| 14977  | 1     | 1      | 1     | 1      |
| 14982  | 0     |        | 3     | 1      |
| 14985  | 2     | 2      | 3     | 1      |
| 14986  | 0     |        | 0     |        |
| 14987  | 0     |        | 0     |        |
| 14988  | 2     | 3      | 3     | 4      |
| 14989  | 1     | 1      | 3     | 2      |
| 14993  | 3     | 3      | 4     | 3      |
| 15001  | 0     |        | 1     | 0      |
| 15002  | 5     | 3      | 4     | 3      |
| 15006  | 4     | 2      | 3     | 1      |
| 15007  | 1     | 1      | 1     | 1      |
| 15014  | 4     | 3      | 4     | 3      |
| 15020  | 4     | 2      | 3     | 2      |
| 15021  | 3     | 3      | 3     | 3      |

| respid | Q24_1 | Q24a_1 | Q25_1 | Q25a_1 |
|--------|-------|--------|-------|--------|
| 15023  | 4     | 4      | 4     | 4      |
| 15030  | 0     |        | 1     | 1      |
| 15032  | 0     |        | 0     |        |
| 15033  | 2     | 2      | 2     | 2      |
| 15034  | 5     | 2      | 3     | 2      |
| 15035  | 1     | 1      | 0     |        |
| 15037  | 0     |        | 1     | 0      |
| 15039  | 3     | 2      | 5     | 3      |
| 15040  | 0     |        | 0     |        |
| 15042  | 2     | 1      | 0     |        |
| 15044  | 0     |        | 0     |        |
| 15045  | 0     |        | 1     | 0      |
| 15046  | 0     |        | 0     |        |
| 15052  | 4     | 4      | 4     | 3      |
| 15058  | 0     |        | 0     |        |
| 15063  | 3     | 2      | 5     | 2      |
| 15066  | 0     |        | 1     | 1      |
| 15069  | 1     | 0      | 1     | 0      |
| 15071  | 1     | 3      | 2     | 2      |
| 15076  | 3     | 1      | 3     | 3      |
| 15078  | 0     |        | 0     |        |
| 15087  | 2     | 1      | 1     | 3      |
| 15090  | 4     | 3      | 2     | 2      |
| 15091  | 0     |        | 0     |        |
| 15092  | 0     |        | 1     | 0      |
| 15096  | 1     | 1      | 2     | 1      |
| 15106  | 3     | 2      | 5     | 2      |
| 15108  | 0     |        | 0     |        |
| 15113  | 0     |        | 0     |        |
| 15116  | 0     |        | 0     |        |
| 15119  | 1     | 1      | 1     | 1      |
| 15120  | 0     |        | 0     |        |

| respid | Q24_1 | Q24a_1 | Q25_1 | Q25a_1 |
|--------|-------|--------|-------|--------|
| 15121  | 2     | 2      | 1     | 3      |
| 15123  | 0     |        | 0     |        |
| 15124  | 0     |        | 2     | 1      |
| 15128  | 0     |        | 1     | 0      |
| 15131  | 0     |        | 0     |        |
| 15136  | 0     |        | 0     |        |
| 15137  | 1     | 2      | 1     | 1      |
| 15141  | 1     | 2      | 0     |        |
| 15144  | 0     |        | 0     |        |
| 15147  | 2     | 2      | 2     | 2      |
| 15151  | 1     | 1      | 2     | 2      |
| 15154  | 2     | 2      | 3     | 3      |
| 15157  | 0     |        | 0     |        |
| 15164  | 2     | 3      | 4     | 4      |
| 15168  | 0     |        | 0     |        |
| 15169  | 2     | 1      | 2     | 1      |
| 15172  | 4     | 3      | 4     | 3      |
| 15177  | 3     | 3      | 3     | 3      |
| 15178  | 0     |        | 0     |        |
| 15180  | 1     | 1      | 1     | 1      |
| 15181  | 0     |        | 0     |        |
| 15182  | 2     | 2      | 1     | 3      |
| 15183  | 0     |        | 0     |        |
| 15188  | 0     |        | 0     |        |
| 15190  | 4     | 3      | 5     | 3      |
| 15195  | 0     |        | 0     |        |
| 15201  | 5     | 4      | 4     | 4      |
| 15203  | 0     |        | 0     |        |
| 15204  | 1     | 0      | 1     | 0      |
| 15207  | 0     |        | 0     |        |
| 15208  | 4     | 4      | 4     | 4      |
| 15209  | 1     | 1      | 0     |        |



| respid | Q24_1 | Q24a_1 | Q25_1 | Q25a_1 |
|--------|-------|--------|-------|--------|
| 15212  | 0     |        | 0     |        |
| 15213  | 3     | 1      | 3     | 1      |
| 15219  | 2     | 1      | 3     | 0      |
| 15220  | 1     | 1      | 1     | 2      |
| 15221  | 0     |        | 1     | 1      |
| 15223  | 1     | 1      | 1     | 1      |
| 15224  | 4     | 1      | 4     | 2      |
| 15225  | 0     |        | 2     | 1      |
| 15226  | 0     |        | 2     | 1      |
| 15230  | 0     |        | 1     | 1      |
| 15231  | 4     | 4      | 2     | 2      |
| 15232  | 0     |        | 0     |        |
| 15237  | 1     | 1      | 1     | 0      |
| 15239  | 0     |        | 2     | 2      |
| 15241  | 0     |        | 2     | 2      |
| 15242  | 2     | 3      | 3     | 2      |
| 15247  | 0     |        | 2     | 1      |
| 15248  | 0     |        | 0     |        |
| 15251  | 0     |        | 0     |        |
| 15257  | 0     |        | 0     |        |
| 15260  | 0     |        | 1     | 1      |
| 15261  | 4     | 4      | 3     | 4      |
| 15262  | 2     | 3      | 2     | 4      |
| 15263  | 0     |        | 1     | 0      |
| 15265  | 0     |        | 2     | 1      |
| 15266  | 1     | 1      | 2     | 2      |
| 15268  | 0     |        | 2     | 0      |
| 15269  | 0     |        | 1     | 0      |
| 15270  | 1     | 2      | 5     | 3      |
| 15273  | 3     | 1      | 1     | 1      |
| 15276  | 5     | 3      | 4     | 3      |
| 15277  | 0     |        | 1     | 1      |

| respid | Q24_1 | Q24a_1 | Q25_1 | Q25a_1 |
|--------|-------|--------|-------|--------|
| 15282  | 0     |        | 5     | 4      |
| 15284  | 2     | 2      | 1     | 3      |
| 15285  | 0     |        | 1     | 0      |
| 15286  | 4     | 3      | 4     | 3      |
| 15288  | 2     | 3      | 2     | 3      |
| 15292  | 4     | 4      | 4     | 3      |
| 15296  | 0     |        | 1     | 0      |
| 15297  | 1     | 1      | 1     | 1      |
| 15298  | 0     |        | 0     |        |
| 15301  | 0     |        | 1     | 1      |
| 15302  | 0     |        | 1     | 1      |
| 15305  | 1     | 1      | 0     |        |
| 15307  | 0     |        | 0     |        |
| 15308  | 0     |        | 2     | 1      |
| 15309  | 1     | 0      | 1     | 1      |
| 15311  | 0     |        | 4     | 1      |
| 15315  | 0     |        | 2     | 0      |
| 15316  | 0     |        | 1     | 1      |
| 15318  | 0     |        | 0     |        |
| 15321  | 4     | 4      | 5     | 4      |
| 15322  | 1     | 0      | 0     |        |
| 15324  | 0     |        | 2     | 0      |
| 15326  | 1     | 1      | 2     | 0      |
| 15327  | 1     | 1      | 1     | 0      |
| 15328  | 0     |        | 0     |        |
| 15330  | 0     |        | 3     | 2      |
| 15332  | 0     |        | 1     | 0      |
| 15333  | 0     |        | 0     |        |
| 15334  | 3     | 2      | 3     | 2      |
| 15336  | 4     | 4      | 4     | 4      |
| 15337  | 0     |        | 1     | 1      |
| 15338  | 0     |        | 1     | 1      |

| respid | Q24_1 | Q24a_1 | Q25_1 | Q25a_1 |
|--------|-------|--------|-------|--------|
| 15339  | 3     | 4      | 5     | 4      |
| 15341  | 0     |        | 1     | 0      |
| 15344  | 0     |        | 0     |        |
| 15345  | 0     |        | 5     | 1      |
| 15350  | 0     |        | 0     |        |
| 15351  | 0     |        | 2     | 0      |
| 15352  | 0     |        | 2     | 0      |
| 15372  | 0     |        | 2     | 0      |
| 15373  | 4     | 2      | 2     | 2      |
| 15376  | 0     |        | 1     | 0      |
| 15377  | 0     |        | 1     | 1      |
| 15382  | 0     |        | 1     | 0      |
| 15383  | 1     | 1      | 2     | 1      |
| 15385  | 3     | 3      | 3     | 3      |
| 15390  | 0     |        | 1     | 1      |
| 15399  | 0     |        | 0     |        |
| 15404  | 1     | 1      | 1     | 1      |
| 15410  | 0     |        | 1     | 0      |
| 15411  | 2     | 2      | 2     | 2      |
| 15412  | 0     |        | 1     | 0      |
| 15413  | 1     | 0      | 5     | 3      |
| 15414  | 0     |        | 1     | 1      |
| 15417  | 1     | 1      | 0     |        |
| 15418  | 1     | 1      | 1     | 2      |
| 15421  | 1     | 1      | 1     | 1      |
| 15423  | 0     |        | 2     | 1      |
| 15425  | 0     |        | 1     | 0      |
| 15426  | 4     | 4      | 3     | 3      |
| 15430  | 0     |        | 1     | 0      |
| 15431  | 3     | 3      | 3     | 3      |
| 15435  | 0     |        | 0     |        |
| 15436  | 0     |        | 0     |        |

| respid | Q24_1 | Q24a_1 | Q25_1 | Q25a_1 |
|--------|-------|--------|-------|--------|
| 15437  | 0     |        | 0     |        |
| 15438  | 0     |        | 2     | 0      |
| 15439  | 0     |        | 1     | 0      |
| 15441  | 5     | 4      | 3     | 3      |
| 15443  | 0     |        | 1     | 0      |
| 15446  | 0     |        | 2     | 0      |
| 15449  | 2     | 2      | 2     | 2      |
| 15451  | 2     | 2      | 2     | 2      |
| 15452  | 3     | 3      | 3     | 2      |
| 15454  | 0     |        | 1     | 0      |
| 15456  | 1     | 2      | 2     | 3      |
| 15457  | 0     |        | 0     |        |
| 15458  | 0     |        | 1     | 2      |
| 15462  | 4     | 3      | 1     | 1      |
| 15467  | 3     | 0      | 3     | 3      |
| 15470  | 0     |        | 2     | 0      |
| 15472  | 0     |        | 1     | 0      |
| 15476  | 0     |        | 1     | 1      |
| 15477  | 0     |        | 1     | 1      |
| 15488  | 0     |        | 0     |        |
| 15489  | 0     |        | 1     | 2      |
| 15490  | 0     |        | 1     | 1      |
| 15496  | 5     | 3      | 1     | 1      |
| 15497  | 1     | 2      | 2     | 1      |
| 15498  | 0     |        | 0     |        |
| 15509  | 4     | 2      | 5     | 2      |
| 15510  | 0     |        | 1     | 1      |
| 15516  | 1     | 2      | 5     | 3      |
| 15519  | 0     |        | 1     | 0      |
| 15520  | 0     |        | 1     | 1      |
| 15524  | 1     | 1      | 5     | 3      |
| 15525  | 0     |        | 0     |        |

| respid | Q24_1 | Q24a_1 | Q25_1 | Q25a_1 |
|--------|-------|--------|-------|--------|
| 15526  | 0     |        | 1     | 0      |
| 15531  | 0     |        | 1     | 0      |
| 15532  | 0     |        | 0     |        |
| 15534  | 3     | 3      | 3     | 4      |
| 15535  | 4     | 3      | 4     | 3      |
| 15539  | 1     | 1      | 2     | 2      |
| 15550  | 0     |        | 1     | 0      |
| 15556  | 0     |        | 1     | 1      |
| 15558  | 4     | 3      | 4     | 3      |
| 15565  | 0     |        | 0     |        |
| 15567  | 3     | 2      | 5     | 3      |
| 15568  | 3     | 3      | 4     | 3      |
| 15571  | 3     | 2      | 1     | 2      |
| 15573  | 0     |        | 1     | 0      |
| 15574  | 3     | 3      | 4     | 3      |
| 15576  | 0     |        | 2     | 1      |
| 15587  | 1     | 2      | 2     | 1      |
| 15588  | 3     | 2      | 3     | 3      |
| 15593  | 0     |        | 0     |        |
| 15597  | 0     |        | 1     | 1      |
| 15598  | 0     |        | 0     |        |
| 15599  | 1     | 0      | 2     | 1      |
| 15601  | 0     |        | 2     | 0      |
| 15604  | 0     |        | 0     |        |
| 15611  | 0     |        | 0     |        |
| 15613  | 0     |        | 1     | 0      |
| 15614  | 1     | 2      | 0     |        |
| 15617  | 0     |        | 2     | 1      |
| 15622  | 0     |        | 0     |        |
| 15623  | 0     |        | 0     |        |
| 15625  | 1     | 2      | 1     | 1      |
| 15627  | 0     |        | 0     |        |

| respid | Q24_1 | Q24a_1 | Q25_1 | Q25a_1 |
|--------|-------|--------|-------|--------|
| 15628  | 0     |        | 2     | 0      |
| 15633  | 0     |        | 2     | 1      |
| 15634  | 0     |        | 1     | 0      |
| 15637  | 0     |        | 2     | 0      |
| 15644  | 1     | 0      | 2     | 1      |
| 15645  | 0     |        | 1     | 0      |
| 15649  | 0     |        | 1     | 1      |
| 15650  | 0     |        | 1     | 2      |
| 15651  | 0     |        | 2     | 0      |
| 15657  | 2     | 2      | 3     | 4      |
| 15658  | 0     |        | 2     | 1      |
| 15660  | 2     | 1      | 3     | 2      |
| 15667  | 0     |        | 0     |        |
| 15671  | 0     |        | 1     | 0      |
| 15679  | 2     | 2      | 1     | 2      |
| 15712  | 0     |        | 1     | 0      |
| 15715  | 0     |        | 0     |        |
| 15749  | 0     |        | 1     | 0      |
| 15754  | 1     | 1      | 1     | 0      |
| 15756  | 1     | 3      | 0     |        |
| 15773  | 0     |        | 1     | 0      |
| 15774  | 0     |        | 1     | 1      |
| 15776  | 2     | 2      | 1     | 1      |
| 15777  | 2     | 2      | 5     | 3      |
| 15779  | 0     |        | 0     |        |
| 15780  | 3     | 1      | 3     | 2      |
| 15792  | 0     |        | 0     |        |
| 15793  | 3     | 2      | 3     | 2      |
| 15796  | 0     |        | 1     | 0      |
| 15798  | 0     |        | 1     | 0      |
| 15809  | 2     | 2      | 3     | 2      |
| 15810  | 0     |        | 1     | 4      |

| respid | Q24_1 | Q24a_1 | Q25_1 | Q25a_1 |
|--------|-------|--------|-------|--------|
| 15815  | 1     | 2      | 1     | 0      |
| 15816  | 0     |        | 1     | 0      |
| 15817  | 0     |        | 0     |        |
| 15821  | 3     | 2      | 5     | 3      |
| 15823  | 2     | 2      | 1     | 2      |
| 15834  | 0     |        | 2     | 0      |
| 15835  | 0     |        | 0     |        |
| 15836  | 0     |        | 1     | 0      |
| 15837  | 0     |        | 0     |        |
| 15839  | 0     |        | 2     | 0      |
| 15840  | 0     |        | 1     | 1      |
| 15844  | 0     |        | 1     | 1      |
| 15845  | 0     |        | 1     | 0      |
| 15847  | 3     | 2      | 4     | 3      |
| 15848  | 1     | 1      | 2     | 1      |
| 15849  | 0     |        | 2     | 0      |
| 15857  | 1     | 1      | 0     |        |
| 15858  | 1     | 1      | 0     |        |
| 15862  | 5     | 3      | 5     | 4      |
| 15866  | 0     |        | 1     | 1      |
| 15870  | 0     |        | 2     | 1      |
| 15871  | 1     | 2      | 1     | 0      |
| 15872  | 0     |        | 2     | 0      |
| 15873  | 0     |        | 1     | 1      |
| 15874  | 0     |        | 0     |        |
| 15875  | 3     | 3      | 3     | 3      |
| 15876  | 2     | 2      | 2     | 2      |
| 15882  | 1     | 3      | 4     | 4      |
| 15884  | 0     |        | 3     | 3      |
| 15890  | 0     |        | 3     | 2      |
| 15892  | 1     | 2      | 3     | 3      |
| 15908  | 3     | 3      | 1     | 0      |

| respid | Q24_1 | Q24a_1 | Q25_1 | Q25a_1 |
|--------|-------|--------|-------|--------|
| 15914  | 0     |        | 2     | 1      |
| 15932  | 2     | 2      | 3     | 2      |
| 15933  | 1     | 2      | 0     |        |
| 15938  | 0     |        | 1     | 0      |
| 15940  | 2     | 1      | 3     | 2      |
| 15945  | 0     |        | 0     |        |
| 15947  | 0     |        | 2     | 0      |
| 15950  | 0     |        | 1     | 1      |
| 15951  | 0     |        | 2     | 1      |
| 15952  | 3     | 2      | 5     | 3      |
| 15953  | 0     |        | 1     | 0      |
| 15954  | 3     | 2      | 2     | 3      |
| 15957  | 4     | 4      | 4     | 4      |
| 15965  | 4     | 3      | 4     | 3      |
| 15966  | 0     |        | 0     |        |
| 15967  | 0     |        | 1     | 0      |
| 15968  | 2     | 3      | 0     |        |
| 15970  | 0     |        | 1     | 0      |
| 15973  | 0     |        | 1     | 1      |
| 15974  | 0     |        | 0     |        |
| 15975  | 0     |        | 0     |        |
| 15980  | 4     | 3      | 5     | 3      |
| 15984  | 0     |        | 1     | 0      |
| 15985  | 2     | 2      | 3     | 2      |
| 15994  | 0     |        | 0     |        |
| 15995  | 0     |        | 1     | 1      |
| 16000  | 0     |        | 1     | 0      |
| 16004  | 0     |        | 2     | 1      |
| 16005  | 0     |        | 1     | 1      |
| 16006  | 0     |        | 0     |        |
| 16009  | 1     | 0      | 1     | 0      |
| 16017  | 0     |        | 2     | 0      |



| respid | Q24_1 | Q24a_1 | Q25_1 | Q25a_1 |
|--------|-------|--------|-------|--------|
| 16019  | 0     |        | 1     | 0      |
| 16021  | 0     |        | 5     | 2      |
| 16024  | 0     |        | 1     | 1      |
| 16026  | 2     | 2      | 2     | 2      |
| 16029  | 0     |        | 0     |        |
| 16031  | 4     | 3      | 2     | 3      |
| 16037  | 0     |        | 1     | 0      |
| 16043  | 0     |        | 0     |        |
| 16044  | 0     |        | 2     | 1      |
| 16047  | 2     | 2      | 2     | 0      |
| 16048  | 0     |        | 5     | 4      |
| 16049  | 0     |        | 1     | 0      |
| 16051  | 0     |        | 0     |        |
| 16053  | 0     |        | 2     | 2      |
| 16054  | 0     |        | 2     | 1      |
| 16069  | 1     | 1      | 0     |        |
| 16070  | 1     | 1      | 3     | 2      |
| 16074  | 0     |        | 0     |        |
| 16076  | 0     |        | 0     |        |
| 16078  | 0     |        | 0     |        |
| 16081  | 1     | 1      | 0     |        |
| 16085  | 0     |        | 0     |        |
| 16088  | 0     |        | 1     | 0      |
| 16091  | 0     |        | 2     | 1      |
| 16092  | 2     | 2      | 1     | 1      |
| 16093  | 0     |        | 2     | 1      |
| 16097  | 1     | 1      | 0     |        |
| 16100  | 0     |        | 0     |        |
| 16101  | 0     |        | 0     |        |
| 16105  | 0     |        | 0     |        |
| 16118  | 1     | 1      | 3     | 2      |
| 16129  | 0     |        | 2     | 0      |

| respid | Q24_1 | Q24a_1 | Q25_1 | Q25a_1 |
|--------|-------|--------|-------|--------|
| 16130  | 4     | 2      | 2     | 2      |
| 16131  | 3     | 3      | 3     | 3      |
| 16136  | 1     | 0      | 0     |        |
| 16137  | 0     |        | 2     | 0      |
| 16138  | 1     | 1      | 5     | 3      |
| 16139  | 1     | 0      | 1     | 1      |
| 16140  | 0     |        | 1     | 0      |
| 16145  | 1     | 2      | 1     | 1      |
| 16150  | 0     |        | 0     |        |
| 16151  | 1     | 1      | 2     | 1      |
| 16153  | 0     |        | 1     | 0      |
| 16164  | 0     |        | 2     | 1      |
| 16168  | 1     | 1      | 4     | 2      |
| 16173  | 2     | 1      | 3     | 3      |
| 16174  | 0     |        | 2     | 0      |
| 16177  | 1     | 1      | 0     |        |
| 16185  | 0     |        | 1     | 1      |
| 16189  | 0     |        | 0     |        |
| 16192  | 0     |        | 1     | 0      |
| 16193  | 0     |        | 0     |        |
| 16194  | 1     | 2      | 2     | 1      |
| 16196  | 0     |        | 0     |        |
| 16202  | 1     | 2      | 2     | 1      |
| 16205  | 2     | 1      | 5     | 3      |
| 16206  | 0     |        | 2     | 1      |
| 16208  | 0     |        | 0     |        |
| 16211  | 0     |        | 2     | 2      |
| 16212  | 0     |        | 1     | 0      |
| 16215  | 0     |        | 0     |        |
| 16217  | 0     |        | 5     | 1      |
| 16221  | 0     |        | 2     | 1      |
| 16226  | 0     |        | 3     | 3      |

| respid | Q24_1 | Q24a_1 | Q25_1 | Q25a_1 |
|--------|-------|--------|-------|--------|
| 16228  | 1     | 1      | 1     | 1      |
| 16229  | 0     |        | 5     | 1      |
| 16230  | 0     |        | 2     | 0      |
| 16231  | 0     |        | 5     | 1      |
| 16232  | 3     | 3      | 3     | 3      |
| 16234  | 0     |        | 2     | 3      |
| 16235  | 3     | 2      | 2     | 2      |
| 16236  | 1     | 1      | 2     | 0      |
| 16237  | 0     |        | 1     | 1      |
| 16238  | 0     |        | 2     | 1      |
| 16239  | 0     |        | 1     | 1      |
| 16243  | 0     |        | 0     |        |
| 16248  | 3     | 3      | 0     |        |
| 16249  | 0     |        | 1     | 1      |
| 16251  | 0     |        | 0     |        |
| 16263  | 0     |        | 1     | 0      |
| 16265  | 1     | 1      | 1     | 1      |
| 16269  | 0     |        | 3     | 0      |
| 16272  | 0     |        | 5     | 2      |
| 16273  | 0     |        | 0     |        |
| 16281  | 0     |        | 1     | 0      |
| 16282  | 0     |        | 1     | 0      |
| 16287  | 1     | 1      | 1     | 1      |
| 16290  | 0     |        | 1     | 0      |
| 16294  | 1     | 0      | 0     |        |
| 16295  | 1     | 0      | 2     | 0      |
| 16296  | 0     |        | 1     | 1      |
| 16299  | 5     | 4      | 2     | 3      |
| 16302  | 0     |        | 0     |        |
| 16303  | 0     |        | 2     | 1      |
| 16304  | 0     |        | 2     | 1      |
| 16306  | 0     |        | 0     |        |

| respid | Q24_1 | Q24a_1 | Q25_1 | Q25a_1 |
|--------|-------|--------|-------|--------|
| 16318  | 0     |        | 5     | 2      |
| 16320  | 0     |        | 2     | 1      |
| 16321  | 1     | 1      | 3     | 2      |
| 16322  | 4     | 2      | 5     | 2      |
| 16324  | 0     |        | 1     | 0      |
| 16326  | 0     |        | 1     | 1      |
| 16328  | 0     |        | 2     | 1      |
| 16336  | 0     |        | 3     | 2      |
| 16341  | 0     |        | 2     | 0      |
| 16342  | 0     |        | 0     |        |
| 16343  | 3     | 1      | 2     | 1      |
| 16345  | 5     | 4      | 2     | 1      |
| 16349  | 1     | 1      | 1     | 1      |
| 16355  | 0     |        | 1     | 2      |
| 16364  | 1     | 1      | 1     | 1      |
| 16374  | 0     |        | 0     |        |
| 16375  | 0     |        | 0     |        |
| 16376  | 2     | 2      | 2     | 2      |
| 16393  | 0     |        | 1     | 1      |
| 16394  | 0     |        | 1     | 1      |
| 16395  | 0     |        | 1     | 0      |
| 16397  | 1     | 1      | 1     | 1      |
| 16398  | 1     | 3      | 5     | 3      |
| 16402  | 0     |        | 0     |        |
| 16405  | 1     | 0      | 4     | 1      |
| 16416  | 0     |        | 1     | 1      |
| 16422  | 2     | 2      | 2     | 2      |
| 16429  | 0     |        | 0     |        |
| 16430  | 0     |        | 1     | 0      |
| 16432  | 2     | 2      | 3     | 2      |
| 16433  | 1     | 1      | 2     | 1      |
| 16434  | 0     |        | 0     |        |

| respid | Q24_1 | Q24a_1 | Q25_1 | Q25a_1 |
|--------|-------|--------|-------|--------|
| 16437  | 0     |        | 2     | 1      |
| 16439  | 0     |        | 2     | 1      |
| 16440  | 0     |        | 1     | 1      |
| 16441  | 0     |        | 1     | 1      |
| 16442  | 0     |        | 3     | 0      |
| 16450  | 0     |        | 1     | 0      |
| 16451  | 0     |        | 1     | 0      |
| 16452  | 0     |        | 1     | 1      |
| 16467  | 0     |        | 2     | 2      |
| 16468  | 0     |        | 0     |        |
| 16469  | 1     | 1      | 2     | 1      |
| 16470  | 0     |        | 0     |        |
| 16471  | 0     |        | 5     | 1      |
| 16473  | 0     |        | 1     | 1      |
| 16476  | 0     |        | 1     | 1      |
| 16478  | 0     |        | 1     | 1      |
| 16484  | 0     |        | 0     |        |
| 16499  | 0     |        | 1     | 1      |
| 16502  | 0     |        | 0     |        |
| 16505  | 0     |        | 0     |        |
| 16514  | 1     | 0      | 1     | 1      |
| 16515  | 2     | 2      | 1     | 1      |
| 16517  | 1     | 2      | 2     | 2      |
| 16518  | 0     |        | 5     | 1      |
| 16519  | 0     |        | 1     | 0      |
| 16525  | 0     |        | 1     | 1      |
| 16526  | 0     |        | 1     | 1      |
| 16530  | 0     |        | 2     | 0      |
| 16532  | 0     |        | 1     | 2      |
| 16536  | 0     |        | 3     | 0      |
| 16537  | 1     | 1      | 3     | 3      |
| 16541  | 1     | 1      | 2     | 4      |

| respid | Q24_1 | Q24a_1 | Q25_1 | Q25a_1 |
|--------|-------|--------|-------|--------|
| 16543  | 1     | 1      | 1     | 0      |
| 16544  | 0     |        | 1     | 0      |
| 16545  | 1     | 2      | 1     | 1      |
| 16546  | 0     |        | 0     |        |
| 16548  | 0     |        | 1     | 0      |
| 16552  | 5     | 1      | 3     | 2      |
| 16559  | 0     |        | 0     |        |
| 16564  | 0     |        | 1     | 1      |
| 16565  | 2     | 3      | 2     | 3      |
| 16567  | 1     | 1      | 2     | 1      |
| 16571  | 0     |        | 0     |        |
| 16572  | 1     | 1      | 1     | 0      |
| 16579  | 0     |        | 1     | 0      |
| 16588  | 3     | 3      | 4     | 4      |
| 16599  | 0     |        | 0     |        |
| 16605  | 1     | 1      | 2     | 1      |
| 16622  | 0     |        | 0     |        |
| 16635  | 0     |        | 1     | 0      |
| 16638  | 0     |        | 5     | 0      |
| 16652  | 1     | 1      | 5     | 3      |
| 16656  | 0     |        | 1     | 0      |
| 16671  | 0     |        | 0     |        |
| 16676  | 1     | 1      | 0     |        |
| 16678  | 1     | 1      | 1     | 1      |
| 16702  | 1     | 1      | 1     | 0      |
| 16705  | 0     |        | 1     | 0      |
| 16707  | 0     |        | 1     | 2      |
| 16711  | 1     | 1      | 5     | 2      |
| 16712  | 0     |        | 1     | 0      |
| 16716  | 0     |        | 0     |        |
| 16724  | 1     | 1      | 1     | 2      |
| 16727  | 1     | 1      | 1     | 1      |

| respid | Q24_1 | Q24a_1 | Q25_1 | Q25a_1 |
|--------|-------|--------|-------|--------|
| 16734  | 1     | 1      | 2     | 2      |
| 16740  | 0     |        | 1     | 0      |
| 16748  | 1     | 0      | 1     | 1      |
| 16759  | 0     |        | 0     |        |
| 16761  | 0     |        | 0     |        |
| 16763  | 0     |        | 2     | 0      |
| 16764  | 2     | 3      | 3     | 3      |
| 16766  | 0     |        | 1     | 0      |
| 16767  | 0     |        | 1     | 1      |
| 16776  | 0     |        | 1     | 0      |
| 16781  | 0     |        | 0     |        |
| 16793  | 3     | 2      | 0     |        |
| 16796  | 5     | 4      | 5     | 4      |
| 16810  | 0     |        | 0     |        |
| 16811  | 0     |        | 1     | 1      |
| 16813  | 0     |        | 0     |        |
| 16814  | 1     | 1      | 0     |        |
| 16831  | 0     |        | 2     | 2      |
| 16833  | 1     | 2      | 3     | 3      |
| 16839  | 1     | 0      | 2     | 0      |
| 16843  | 0     |        | 3     | 1      |
| 16860  | 0     |        | 0     |        |
| 16871  | 1     | 1      | 1     | 1      |
| 16881  | 1     | 2      | 5     | 2      |
| 16884  | 0     |        | 1     | 1      |
| 16891  | 2     | 2      | 1     | 2      |
| 16909  | 0     |        | 1     | 0      |
| 16911  | 0     |        | 0     |        |
| 16922  | 4     | 3      | 2     | 2      |
| 16935  | 1     | 2      | 3     | 2      |
| 16942  | 0     |        | 0     |        |
| 16950  | 0     |        | 0     |        |

| respid | Q24_1 | Q24a_1 | Q25_1 | Q25a_1 |
|--------|-------|--------|-------|--------|
| 16952  | 3     | 2      | 2     | 3      |
| 16963  | 0     |        | 1     | 1      |
| 16967  | 1     | 1      | 1     | 2      |
| 16970  | 0     |        | 1     | 2      |
| 16976  | 1     | 1      | 5     | 2      |
| 16982  | 1     | 1      | 1     | 1      |
| 16995  | 0     |        | 1     | 0      |
| 17004  | 1     | 1      | 2     | 1      |
| 17006  | 0     |        | 0     |        |
| 17009  | 4     | 4      | 0     |        |
| 17021  | 0     |        | 0     |        |
| 17040  | 0     |        | 1     | 1      |
| 17041  | 0     |        | 0     |        |
| 17044  | 0     |        | 1     | 1      |
| 17046  | 1     | 1      | 1     | 1      |
| 17052  | 1     | 1      | 3     | 1      |
| 17055  | 0     |        | 1     | 0      |
| 17108  | 0     |        | 4     | 1      |
| 17109  | 0     |        | 1     | 0      |
| 17113  | 0     |        | 0     |        |
| 17115  | 5     | 3      | 5     | 1      |
| 17132  | 0     |        | 0     |        |
| 17135  | 1     | 2      | 1     | 1      |
| 17138  | 1     | 0      | 2     | 1      |
| 17141  | 1     | 1      | 0     |        |
| 17143  | 0     |        | 1     | 2      |
| 17148  | 0     |        | 4     | 1      |
| 17151  | 0     |        | 1     | 0      |
| 17153  | 1     | 0      | 2     | 0      |
| 17154  | 3     | 2      | 1     | 2      |
| 17157  | 2     | 2      | 2     | 2      |
| 17160  | 0     |        | 2     | 0      |



| respid | Q24_1 | Q24a_1 | Q25_1 | Q25a_1 |
|--------|-------|--------|-------|--------|
| 17167  | 2     | 2      | 0     |        |
| 17169  | 0     |        | 1     | 0      |
| 17174  | 0     |        | 1     | 0      |
| 17179  | 0     |        | 1     | 0      |
| 17180  | 0     |        | 3     | 0      |
| 17182  | 0     |        | 0     |        |
| 17184  | 3     | 3      | 1     | 3      |
| 17186  | 1     | 0      | 0     |        |
| 17187  | 0     |        | 1     | 0      |
| 17192  | 1     | 1      | 1     | 2      |
| 17197  | 0     |        | 1     | 0      |
| 17217  | 1     | 1      | 1     | 1      |
| 17226  | 1     | 1      | 2     | 2      |
| 17228  | 0     |        | 1     | 1      |
| 17245  | 4     | 3      | 4     | 3      |
| 17247  | 0     |        | 0     |        |
| 17258  | 0     |        | 1     | 0      |
| 17259  | 2     | 1      | 2     | 1      |
| 17262  | 0     |        | 2     | 1      |
| 17265  | 1     | 1      | 1     | 1      |
| 17281  | 0     |        | 2     | 2      |
| 17282  | 2     | 2      | 1     | 3      |
| 17293  | 0     |        | 1     | 0      |
| 17306  | 1     | 2      | 3     | 2      |
| 17312  | 0     |        | 1     | 0      |
| 17318  | 1     | 1      | 5     | 1      |
| 17328  | 2     | 1      | 4     | 2      |
| 17343  | 1     | 1      | 1     | 1      |
| 17344  | 0     |        | 5     | 0      |
| 17348  | 0     |        | 1     | 0      |
| 17352  | 0     |        | 0     |        |
| 17355  | 0     |        | 1     | 1      |

| respid | Q24_1 | Q24a_1 | Q25_1 | Q25a_1 |
|--------|-------|--------|-------|--------|
| 17356  | 0     |        | 3     | 2      |
| 17359  | 1     | 1      | 1     | 1      |
| 17373  | 2     | 2      | 2     | 3      |
| 17381  | 0     |        | 1     | 0      |
| 17388  | 0     |        | 4     | 1      |
| 17394  | 1     | 1      | 4     | 3      |
| 17401  | 0     |        | 0     |        |
| 17403  | 0     |        | 1     | 2      |
| 17411  | 0     |        | 0     |        |
| 17423  | 0     |        | 1     | 3      |
| 17427  | 0     |        | 0     |        |
| 17433  | 0     |        | 0     |        |
| 17441  | 0     |        | 1     | 0      |
| 17442  | 1     | 0      | 5     | 2      |
| 17447  | 1     | 1      | 1     | 1      |
| 17458  | 0     |        | 1     | 0      |
| 17474  | 0     |        | 1     | 0      |
| 17475  | 2     | 2      | 2     | 2      |
| 17476  | 1     | 2      | 5     | 2      |
| 17480  | 0     |        | 0     |        |
| 17484  | 1     | 0      | 1     | 0      |
| 17490  | 0     |        | 1     | 0      |
| 17491  | 0     |        | 0     |        |
| 17500  | 0     |        | 2     | 1      |
| 17507  | 0     |        | 1     | 0      |
| 17517  | 1     | 0      | 5     | 0      |
| 17520  | 5     | 4      | 1     | 0      |
| 17521  | 0     |        | 2     | 0      |
| 17531  | 0     |        | 1     | 0      |
| 17540  | 0     |        | 1     | 0      |
| 17550  | 0     |        | 1     | 0      |
| 17551  | 0     |        | 1     | 0      |

| respid | Q24_1 | Q24a_1 | Q25_1 | Q25a_1 |
|--------|-------|--------|-------|--------|
| 17555  | 1     | 1      | 2     | 3      |
| 17556  | 0     |        | 0     |        |
| 17574  | 2     | 1      | 5     | 2      |
| 17575  | 0     |        | 1     | 1      |
| 17582  | 0     |        | 0     |        |
| 17587  | 0     |        | 0     |        |
| 17601  | 1     | 1      | 1     | 1      |
| 17607  | 4     | 3      | 3     | 3      |
| 17609  | 0     |        | 3     | 0      |
| 17611  | 0     |        | 0     |        |
| 17613  | 2     | 1      | 1     | 0      |
| 17615  | 0     |        | 0     |        |
| 17620  | 1     | 1      | 1     | 1      |
| 17624  | 2     | 2      | 1     | 1      |
| 17635  | 0     |        | 1     | 1      |
| 17643  | 1     | 1      | 1     | 0      |
| 17645  | 0     |        | 1     | 0      |
| 17646  | 0     |        | 1     | 0      |
| 17649  | 1     | 1      | 0     |        |
| 17658  | 0     |        | 1     | 1      |
| 17666  | 0     |        | 0     |        |
| 17670  | 0     |        | 0     |        |
| 17678  | 0     |        | 1     | 1      |
| 17679  | 0     |        | 3     | 1      |
| 17695  | 0     |        | 1     | 0      |
| 17697  | 1     | 0      | 4     | 3      |
| 17698  | 1     | 2      | 2     | 2      |
| 17723  | 2     | 2      | 2     | 2      |
| 17727  | 0     |        | 1     | 0      |
| 17734  | 0     |        | 5     | 0      |
| 17737  | 0     |        | 2     | 0      |
| 17748  | 1     | 1      | 2     | 2      |

| respid | Q24_1 | Q24a_1 | Q25_1 | Q25a_1 |
|--------|-------|--------|-------|--------|
| 17749  | 0     |        | 0     |        |
| 17754  | 2     | 1      | 4     | 2      |
| 17766  | 1     | 1      | 3     | 3      |
| 17777  | 0     |        | 1     | 0      |
| 17780  | 0     |        | 1     | 1      |
| 17788  | 0     |        | 1     | 0      |
| 17801  | 3     | 2      | 1     | 2      |
| 17803  | 0     |        | 2     | 0      |
| 17807  | 0     |        | 1     | 0      |
| 17808  | 0     |        | 0     |        |
| 17809  | 2     | 1      | 3     | 2      |
| 17821  | 0     |        | 0     |        |
| 17827  | 2     | 2      | 3     | 3      |
| 17834  | 2     | 2      | 3     | 2      |
| 17838  | 1     | 1      | 1     | 1      |
| 17842  | 0     |        | 1     | 0      |
| 17862  | 1     | 1      | 1     | 1      |
| 17863  | 0     |        | 1     | 0      |
| 17871  | 3     | 2      | 3     | 2      |
| 17872  | 0     |        | 0     |        |
| 17903  | 2     | 1      | 2     | 1      |
| 17906  | 1     | 1      | 1     | 0      |
| 17910  | 3     | 2      | 2     | 2      |
| 17922  | 1     | 1      | 2     | 2      |
| 17923  | 0     |        | 2     | 1      |
| 17925  | 3     | 2      | 1     | 2      |
| 17926  | 0     |        | 0     |        |
| 17937  | 0     |        | 3     | 0      |
| 17956  | 0     |        | 1     | 0      |
| 17958  | 2     | 2      | 1     | 0      |
| 17985  | 0     |        | 0     |        |
| 17989  | 0     |        | 4     | 3      |

| respid | Q24_1 | Q24a_1 | Q25_1 | Q25a_1 |
|--------|-------|--------|-------|--------|
| 17995  | 0     |        | 0     |        |
| 18000  | 0     |        | 1     | 0      |
| 18010  | 1     | 1      | 0     |        |
| 18015  | 0     |        | 1     | 1      |
| 18018  | 2     | 1      | 4     | 4      |
| 18031  | 0     |        | 1     | 1      |
| 18033  | 1     | 1      | 1     | 1      |
| 18036  | 0     |        | 1     | 0      |
| 18041  | 0     |        | 5     | 2      |
| 18068  | 0     |        | 0     |        |
| 18080  | 0     |        | 0     |        |
| 18081  | 1     | 1      | 1     | 1      |
| 18083  | 3     | 2      | 5     | 3      |
| 18113  | 3     | 2      | 1     | 2      |
| 18115  | 1     | 1      | 1     | 1      |
| 18117  | 5     | 4      | 3     | 4      |
| 18129  | 0     |        | 0     |        |
| 18132  | 3     | 2      | 1     | 1      |
| 18146  | 0     |        | 1     | 0      |
| 18147  | 3     | 3      | 2     | 4      |
| 18153  | 0     |        | 0     |        |
| 18154  | 0     |        | 5     | 2      |
| 18157  | 0     |        | 2     | 0      |
| 18166  | 0     |        | 2     | 2      |
| 18169  | 1     | 0      | 1     | 0      |
| 18171  | 0     |        | 1     | 2      |
| 18173  | 0     |        | 1     | 2      |
| 18204  | 1     | 0      | 3     | 0      |
| 18210  | 4     | 3      | 1     | 2      |
| 18212  | 0     |        | 0     |        |
| 18220  | 2     | 2      | 1     | 2      |
| 18221  | 0     |        | 3     | 0      |

| respid | Q24_1 | Q24a_1 | Q25_1 | Q25a_1 |
|--------|-------|--------|-------|--------|
| 18228  | 0     |        | 0     |        |
| 18231  | 0     |        | 4     | 0      |
| 18233  | 1     | 1      | 2     | 2      |
| 18235  | 0     |        | 0     |        |
| 18237  | 0     |        | 0     |        |
| 18250  | 0     |        | 1     | 2      |
| 18253  | 3     | 3      | 3     | 2      |
| 18264  | 0     |        | 1     | 0      |
| 18285  | 0     |        | 1     | 1      |
| 18287  | 0     |        | 0     |        |
| 18296  | 0     |        | 1     | 1      |
| 18299  | 2     | 1      | 2     | 1      |
| 18313  | 1     | 2      | 1     | 1      |
| 18321  | 0     |        | 2     | 1      |
| 18324  | 0     |        | 0     |        |
| 18329  | 1     | 0      | 1     | 0      |
| 18332  | 0     |        | 1     | 0      |
| 18339  | 3     | 3      | 2     | 3      |
| 18340  | 0     |        | 0     |        |
| 18348  | 0     |        | 1     | 0      |
| 18355  | 1     | 1      | 1     | 1      |
| 18360  | 1     | 0      | 1     | 0      |
| 18380  | 0     |        | 3     | 2      |
| 18403  | 1     | 1      | 2     | 1      |
| 18405  | 3     | 1      | 1     | 1      |
| 18409  | 0     |        | 2     | 0      |
| 18445  | 1     | 0      | 0     |        |
| 18458  | 0     |        | 1     | 1      |
| 18477  | 0     |        | 3     | 2      |
| 18481  | 0     |        | 1     | 0      |
| 18491  | 0     |        | 1     | 0      |
| 18492  | 0     |        | 1     | 0      |

| respid | Q24_1 | Q24a_1 | Q25_1 | Q25a_1 |
|--------|-------|--------|-------|--------|
| 18494  | 0     |        | 5     | 2      |
| 18495  | 0     |        | 0     |        |
| 18496  | 0     |        | 2     | 1      |
| 18507  | 1     | 2      | 2     | 1      |
| 18509  | 0     |        | 0     |        |
| 18510  | 0     |        | 1     | 1      |
| 18513  | 0     |        | 5     | 0      |
| 18525  | 0     |        | 0     |        |
| 18526  | 0     |        | 1     | 1      |
| 18527  | 4     | 3      | 2     | 2      |
| 18536  | 0     |        | 4     | 0      |
| 18540  | 0     |        | 5     | 0      |
| 18548  | 0     |        | 0     |        |
| 18550  | 0     |        | 0     |        |
| 18556  | 0     |        | 1     | 0      |
| 18561  | 0     |        | 0     |        |
| 18577  | 3     | 2      | 2     | 2      |
| 18580  | 0     |        | 1     | 0      |
| 18633  | 1     | 1      | 2     | 2      |
| 18635  | 0     |        | 2     | 2      |
| 18636  | 0     |        | 0     |        |
| 18645  | 3     | 3      | 2     | 3      |
| 18649  | 0     |        | 0     |        |
| 18664  | 0     |        | 1     | 0      |
| 18668  | 0     |        | 1     | 2      |
| 18682  | 5     | 4      | 2     | 2      |
| 18685  | 0     |        | 5     | 2      |
| 18688  | 1     | 1      | 1     | 1      |
| 18689  | 3     | 2      | 4     | 3      |
| 18693  | 3     | 3      | 3     | 3      |
| 18694  | 0     |        | 1     | 0      |
| 18705  | 0     |        | 0     |        |

| respid | Q24_1 | Q24a_1 | Q25_1 | Q25a_1 |
|--------|-------|--------|-------|--------|
| 18710  | 0     |        | 5     | 2      |
| 18715  | 2     | 3      | 1     | 2      |
| 18718  | 0     |        | 0     |        |
| 18727  | 1     | 1      | 1     | 1      |
| 18732  | 0     |        | 1     | 0      |
| 18735  | 0     |        | 1     | 0      |
| 18742  | 0     |        | 1     | 1      |
| 18745  | 0     |        | 3     | 0      |
| 18747  | 0     |        | 1     | 0      |
| 18750  | 0     |        | 0     |        |
| 18751  | 1     | 1      | 1     | 2      |
| 18753  | 0     |        | 3     | 1      |
| 18754  | 0     |        | 0     |        |
| 18759  | 1     | 0      | 1     | 1      |
| 18780  | 0     |        | 2     | 0      |
| 18782  | 0     |        | 1     | 1      |
| 18807  | 4     | 4      | 5     | 4      |
| 18815  | 0     |        | 1     | 0      |
| 18818  | 1     | 0      | 1     | 0      |
| 18820  | 0     |        | 1     | 1      |
| 18823  | 5     | 4      | 5     | 4      |
| 18825  | 0     |        | 3     | 0      |
| 18828  | 0     |        | 0     |        |
| 18832  | 0     |        | 3     | 2      |
| 18834  | 1     | 1      | 2     | 2      |
| 18835  | 3     | 3      | 3     | 3      |
| 18837  | 0     |        | 2     | 2      |
| 18842  | 0     |        | 1     | 1      |
| 18846  | 0     |        | 0     |        |
| 18855  | 0     |        | 1     | 1      |
| 18856  | 0     |        | 0     |        |
| 18887  | 1     | 1      | 1     | 1      |



| respid | Q24_1 | Q24a_1 | Q25_1 | Q25a_1 |
|--------|-------|--------|-------|--------|
| 18903  | 0     |        | 2     | 2      |
| 18906  | 0     |        | 1     | 1      |
| 18910  | 0     |        | 0     |        |
| 18919  | 1     | 0      | 1     | 1      |
| 18928  | 0     |        | 1     | 1      |
| 18931  | 1     | 2      | 4     | 3      |
| 18939  | 0     |        | 0     |        |
| 18946  | 0     |        | 1     | 1      |
| 18952  | 1     | 1      | 1     | 0      |
| 18954  | 0     |        | 1     | 0      |
| 18982  | 0     |        | 0     |        |
| 18986  | 0     |        | 2     | 1      |
| 18989  | 1     | 4      | 2     | 4      |
| 18990  | 0     |        | 1     | 0      |
| 18996  | 0     |        | 2     | 2      |
| 18998  | 0     |        | 1     | 0      |
| 19009  | 3     | 2      | 3     | 2      |
| 19010  | 0     |        | 1     | 0      |
| 19017  | 0     |        | 1     | 1      |
| 19018  | 0     |        | 0     |        |
| 19020  | 0     |        | 1     | 0      |
| 19027  | 0     |        | 0     |        |
| 19035  | 0     |        | 0     |        |
| 19037  | 3     | 2      | 1     | 0      |
| 19048  | 1     | 1      | 1     | 0      |
| 19051  | 0     |        | 2     | 1      |
| 19054  | 0     |        | 0     |        |
| 19057  | 0     |        | 0     |        |
| 19073  | 0     |        | 1     | 1      |
| 19075  | 0     |        | 0     |        |
| 19079  | 0     |        | 5     | 2      |
| 19087  | 0     |        | 0     |        |

| respid | Q24_1 | Q24a_1 | Q25_1 | Q25a_1 |
|--------|-------|--------|-------|--------|
| 19090  | 0     |        | 2     | 3      |
| 19093  | 0     |        | 0     |        |
| 19099  | 2     | 2      | 5     | 2      |
| 19100  | 0     |        | 0     |        |
| 19101  | 0     |        | 1     | 0      |
| 19105  | 0     |        | 1     | 0      |
| 19111  | 1     | 1      | 2     | 2      |
| 19112  | 0     |        | 1     | 0      |
| 19117  | 2     | 2      | 3     | 1      |
| 19122  | 1     | 0      | 0     |        |
| 19126  | 0     |        | 0     |        |
| 19127  | 0     |        | 0     |        |
| 19131  | 1     | 1      | 2     | 2      |
| 19134  | 0     |        | 0     |        |
| 19149  | 0     |        | 0     |        |
| 19151  | 0     |        | 1     | 1      |
| 19164  | 0     |        | 2     | 1      |
| 19166  | 0     |        | 1     | 2      |
| 19172  | 0     |        | 0     |        |
| 19173  | 0     |        | 2     | 2      |
| 19180  | 1     | 0      | 2     | 0      |
| 19185  | 1     | 0      | 2     | 1      |
| 19189  | 0     |        | 1     | 0      |
| 19191  | 0     |        | 0     |        |
| 19198  | 0     |        | 0     |        |
| 19203  | 0     |        | 1     | 0      |
| 19209  | 0     |        | 2     | 1      |
| 19210  | 0     |        | 0     |        |
| 19218  | 0     |        | 0     |        |
| 19220  | 0     |        | 0     |        |
| 19225  | 0     |        | 1     | 2      |
| 19227  | 0     |        | 2     | 0      |

| respid | Q24_1 | Q24a_1 | Q25_1 | Q25a_1 |
|--------|-------|--------|-------|--------|
| 19228  | 0     |        | 1     | 0      |
| 19243  | 1     | 1      | 1     | 2      |
| 19244  | 1     | 1      | 1     | 1      |
| 19246  | 0     |        | 0     |        |
| 19248  | 0     |        | 0     |        |
| 19249  | 0     |        | 1     | 0      |
| 19252  | 0     |        | 2     | 1      |
| 19255  | 1     | 1      | 3     | 1      |
| 19257  | 0     |        | 1     | 1      |
| 19274  | 0     |        | 0     |        |
| 19279  | 0     |        | 0     |        |
| 19291  | 0     |        | 0     |        |
| 19292  | 0     |        | 1     | 1      |
| 19308  | 1     | 1      | 1     | 1      |
| 19310  | 2     | 0      | 2     | 2      |
| 19311  | 0     |        | 1     | 2      |
| 19326  | 0     |        | 1     | 0      |
| 19327  | 0     |        | 0     |        |
| 19329  | 0     |        | 0     |        |
| 19330  | 3     | 2      | 1     | 2      |
| 19333  | 1     | 1      | 2     | 2      |
| 19336  | 0     |        | 1     | 1      |
| 19343  | 0     |        | 1     | 0      |
| 19348  | 0     |        | 1     | 0      |
| 19349  | 3     | 3      | 3     | 2      |
| 19352  | 2     | 2      | 3     | 3      |
| 19356  | 0     |        | 1     | 0      |
| 19357  | 1     | 1      | 0     |        |
| 19358  | 0     |        | 0     |        |
| 19367  | 2     | 2      | 1     | 1      |
| 19376  | 0     |        | 0     |        |
| 19377  | 0     |        | 1     | 0      |

| respid | Q24_1 | Q24a_1 | Q25_1 | Q25a_1 |
|--------|-------|--------|-------|--------|
| 19380  | 1     | 1      | 0     |        |
| 19384  | 0     |        | 1     | 0      |
| 19391  | 3     | 3      | 1     | 2      |
| 19397  | 0     |        | 0     |        |
| 19398  | 0     |        | 0     |        |
| 19401  | 0     |        | 0     |        |
| 19402  | 0     |        | 1     | 0      |
| 19403  | 0     |        | 0     |        |
| 19405  | 0     |        | 0     |        |
| 19407  | 0     |        | 0     |        |
| 19415  | 0     |        | 1     | 0      |
| 19420  | 0     |        | 0     |        |
| 19423  | 2     | 2      | 1     | 1      |
| 19424  | 0     |        | 0     |        |
| 19426  | 0     |        | 0     |        |
| 19429  | 0     |        | 1     | 0      |
| 19435  | 3     | 3      | 3     | 3      |
| 19441  | 0     |        | 1     | 0      |
| 19450  | 0     |        | 1     | 0      |
| 19456  | 2     | 3      | 1     | 3      |
| 19457  | 0     |        | 0     |        |
| 19463  | 0     |        | 1     | 2      |
| 19467  | 0     |        | 1     | 3      |
| 19468  | 0     |        | 1     | 1      |
| 19471  | 0     |        | 1     | 0      |
| 19473  | 0     |        | 0     |        |
| 19478  | 0     |        | 1     | 2      |
| 19480  | 0     |        | 0     |        |
| 19481  | 0     |        | 0     |        |
| 19484  | 0     |        | 0     |        |
| 19487  | 0     |        | 0     |        |
| 19491  | 2     | 1      | 0     |        |

| respid | Q24_1 | Q24a_1 | Q25_1 | Q25a_1 |
|--------|-------|--------|-------|--------|
| 19495  | 1     | 4      | 1     | 4      |
| 19498  | 0     |        | 1     | 1      |
| 19500  | 2     | 2      | 3     | 2      |
| 19501  | 2     | 2      | 3     | 3      |
| 19503  | 0     |        | 0     |        |
| 19506  | 0     |        | 1     | 0      |
| 19508  | 0     |        | 1     | 1      |
| 19509  | 0     |        | 1     | 2      |
| 19518  | 1     | 1      | 2     | 1      |
| 19520  | 1     | 1      | 2     | 1      |
| 19536  | 0     |        | 2     | 0      |
| 19538  | 0     |        | 2     | 2      |
| 19541  | 2     | 1      | 2     | 3      |
| 19548  | 1     | 1      | 2     | 2      |
| 19553  | 0     |        | 0     |        |
| 19556  | 0     |        | 1     | 0      |
| 19559  | 0     |        | 0     |        |
| 19561  | 1     | 2      | 2     | 3      |
| 19562  | 0     |        | 1     | 0      |
| 19564  | 1     | 1      | 1     | 1      |
| 19567  | 3     | 3      | 4     | 4      |
| 19571  | 0     |        | 2     | 1      |
| 19576  | 1     | 1      | 2     | 1      |
| 19578  | 0     |        | 0     |        |
| 19606  | 0     |        | 0     |        |
| 19607  | 0     |        | 0     |        |
| 19608  | 0     |        | 2     | 1      |
| 19612  | 3     | 3      | 2     | 2      |
| 19618  | 1     | 1      | 2     | 2      |
| 19621  | 1     | 1      | 1     | 2      |
| 19624  | 2     | 2      | 5     | 3      |
| 19630  | 0     |        | 0     |        |

| respid | Q24_1 | Q24a_1 | Q25_1 | Q25a_1 |
|--------|-------|--------|-------|--------|
| 19637  | 0     |        | 5     | 2      |
| 19639  | 0     |        | 1     | 0      |
| 19647  | 2     | 1      | 1     | 0      |
| 19648  | 3     | 2      | 2     | 2      |
| 19660  | 0     |        | 1     | 0      |
| 19662  | 2     | 2      | 5     | 3      |
| 19669  | 0     |        | 1     | 0      |
| 19680  | 0     |        | 0     |        |
| 19682  | 0     |        | 1     | 1      |
| 19686  | 0     |        | 0     |        |
| 19700  | 0     |        | 1     | 1      |
| 19701  | 0     |        | 1     | 0      |
| 19704  | 0     |        | 0     |        |
| 19706  | 2     | 1      | 1     | 1      |
| 19707  | 2     | 1      | 1     | 1      |
| 19717  | 2     | 3      | 3     | 3      |
| 19718  | 0     |        | 0     |        |
| 19721  | 2     | 2      | 1     | 1      |
| 19722  | 0     |        | 2     | 0      |
| 19729  | 0     |        | 0     |        |
| 19738  | 2     | 3      | 1     | 2      |
| 19741  | 1     | 1      | 2     | 2      |
| 19742  | 2     | 2      | 2     | 2      |
| 19747  | 0     |        | 5     | 0      |
| 19748  | 0     |        | 1     | 1      |
| 19749  | 0     |        | 1     | 1      |
| 19756  | 1     | 1      | 2     | 2      |
| 19771  | 0     |        | 0     |        |
| 19772  | 3     | 2      | 2     | 2      |
| 19775  | 0     |        | 1     | 0      |
| 19783  | 0     |        | 0     |        |
| 19787  | 0     |        | 1     | 0      |

| respid | Q24_1 | Q24a_1 | Q25_1 | Q25a_1 |
|--------|-------|--------|-------|--------|
| 19790  | 0     |        | 0     |        |
| 19797  | 0     |        | 1     | 1      |
| 19802  | 0     |        | 1     | 0      |
| 19808  | 0     |        | 5     | 1      |
| 19810  | 0     |        | 1     | 0      |
| 19811  | 0     |        | 2     | 1      |
| 19812  | 1     | 0      | 1     | 1      |
| 19821  | 2     | 2      | 1     | 2      |
| 19826  | 0     |        | 1     | 1      |
| 19827  | 0     |        | 1     | 1      |
| 19830  | 0     |        | 1     | 0      |
| 19834  | 0     |        | 5     | 1      |
| 19838  | 1     | 1      | 5     | 2      |
| 19843  | 0     |        | 0     |        |
| 19845  | 2     | 1      | 3     | 2      |
| 19846  | 0     |        | 0     |        |
| 19852  | 0     |        | 2     | 3      |
| 19855  | 0     |        | 4     | 0      |
| 19858  | 2     | 2      | 3     | 2      |
| 19861  | 1     | 2      | 1     | 1      |
| 19863  | 0     |        | 0     |        |
| 19868  | 2     | 1      | 2     | 1      |
| 19874  | 1     | 1      | 1     | 2      |
| 19876  | 0     |        | 0     |        |
| 19880  | 1     | 1      | 2     | 1      |
| 19885  | 0     |        | 1     | 0      |
| 19890  | 0     |        | 0     |        |
| 19894  | 0     |        | 0     |        |
| 19895  | 0     |        | 1     | 0      |
| 19897  | 0     |        | 2     | 1      |
| 19906  | 0     |        | 2     | 1      |
| 19908  | 0     |        | 1     | 0      |

| respid | Q24_1 | Q24a_1 | Q25_1 | Q25a_1 |
|--------|-------|--------|-------|--------|
| 19912  | 0     |        | 1     | 0      |
| 19913  | 0     |        | 2     | 1      |
| 19914  | 3     | 3      | 3     | 4      |
| 19918  | 2     | 2      | 2     | 1      |
| 19924  | 1     | 0      | 3     | 1      |
| 19936  | 0     |        | 0     |        |
| 19940  | 0     |        | 0     |        |
| 19945  | 2     | 2      | 1     | 0      |
| 19948  | 0     |        | 0     |        |
| 19959  | 0     |        | 0     |        |
| 19961  | 0     |        | 2     | 1      |
| 19962  | 0     |        | 2     | 2      |
| 19965  | 0     |        | 1     | 0      |
| 19966  | 1     | 1      | 1     | 1      |
| 19973  | 0     |        | 1     | 0      |
| 19981  | 1     | 1      | 1     | 1      |
| 19986  | 0     |        | 1     | 1      |
| 19989  | 0     |        | 1     | 1      |
| 19998  | 0     |        | 0     |        |
| 20001  | 0     |        | 2     | 0      |
| 20005  | 0     |        | 0     |        |
| 20013  | 4     | 3      | 4     | 3      |
| 20015  | 0     |        | 1     | 0      |
| 20017  | 0     |        | 1     | 1      |
| 20020  | 0     |        | 1     | 0      |
| 20021  | 0     |        | 1     | 0      |
| 20026  | 0     |        | 1     | 1      |
| 20028  | 0     |        | 1     | 0      |
| 20030  | 0     |        | 1     | 0      |
| 20031  | 0     |        | 0     |        |
| 20034  | 0     |        | 1     | 0      |
| 20035  | 0     |        | 0     |        |



| respid | Q24_1 | Q24a_1 | Q25_1 | Q25a_1 |
|--------|-------|--------|-------|--------|
| 20040  | 0     |        | 0     |        |
| 20045  | 0     |        | 2     | 0      |
| 20048  | 0     |        | 0     |        |
| 20053  | 0     |        | 2     | 0      |
| 20064  | 1     | 1      | 1     | 0      |
| 20071  | 1     | 0      | 1     | 1      |
| 20072  | 4     | 4      | 1     | 2      |
| 20076  | 0     |        | 1     | 0      |
| 20081  | 1     | 1      | 1     | 1      |
| 20082  | 2     | 2      | 3     | 2      |
| 20083  | 1     | 1      | 1     | 2      |
| 20088  | 1     | 1      | 1     | 1      |
| 20089  | 0     |        | 1     | 0      |
| 20099  | 0     |        | 1     | 0      |
| 20101  | 0     |        | 1     | 0      |
| 20102  | 0     |        | 2     | 0      |
| 20109  | 0     |        | 1     | 0      |
| 20118  | 0     |        | 1     | 0      |
| 20119  | 0     |        | 1     | 0      |
| 20124  | 0     |        | 0     |        |
| 20126  | 0     |        | 1     | 1      |
| 20130  | 0     |        | 0     |        |
| 20131  | 0     |        | 0     |        |
| 20134  | 3     | 2      | 2     | 3      |
| 20146  | 0     |        | 0     |        |
| 20152  | 0     |        | 0     |        |
| 20155  | 1     | 1      | 2     | 1      |
| 20156  | 0     |        | 0     |        |
| 20157  | 0     |        | 0     |        |
| 20164  | 0     |        | 0     |        |
| 20168  | 1     | 1      | 0     |        |
| 20173  | 1     | 3      | 2     | 3      |

| respid | Q24_1 | Q24a_1 | Q25_1 | Q25a_1 |
|--------|-------|--------|-------|--------|
| 20174  | 0     |        | 1     | 0      |
| 20175  | 3     | 4      | 3     | 4      |
| 20189  | 0     |        | 1     | 0      |
| 20190  | 0     |        | 5     | 1      |
| 20201  | 0     |        | 0     |        |
| 20202  | 0     |        | 1     | 0      |
| 20204  | 0     |        | 0     |        |
| 20206  | 1     | 1      | 2     | 2      |
| 20207  | 0     |        | 0     |        |
| 20212  | 0     |        | 2     | 1      |
| 20213  | 0     |        | 3     | 2      |
| 20217  | 0     |        | 1     | 1      |
| 20222  | 0     |        | 2     | 1      |
| 20227  | 0     |        | 0     |        |
| 20228  | 0     |        | 0     |        |
| 20238  | 0     |        | 1     | 0      |
| 20242  | 0     |        | 0     |        |
| 20246  | 0     |        | 0     |        |
| 20255  | 2     | 2      | 1     | 1      |
| 20256  | 0     |        | 2     | 0      |
| 20259  | 1     | 1      | 1     | 1      |
| 20262  | 0     |        | 0     |        |
| 20274  | 0     |        | 0     |        |
| 20283  | 2     | 1      | 1     | 2      |
| 20284  | 0     |        | 0     |        |
| 20291  | 0     |        | 0     |        |
| 20292  | 0     |        | 1     | 0      |
| 20293  | 0     |        | 1     | 0      |
| 20298  | 3     | 2      | 1     | 2      |
| 20301  | 0     |        | 0     |        |
| 20303  | 1     | 1      | 1     | 0      |
| 20309  | 0     |        | 0     |        |

| respid | Q24_1 | Q24a_1 | Q25_1 | Q25a_1 |
|--------|-------|--------|-------|--------|
| 20318  | 0     |        | 1     | 0      |
| 20324  | 0     |        | 0     |        |
| 20335  | 1     | 1      | 1     | 0      |
| 20336  | 0     |        | 1     | 0      |
| 20339  | 0     |        | 0     |        |
| 20348  | 0     |        | 2     | 1      |
| 20351  | 0     |        | 1     | 0      |
| 20353  | 0     |        | 1     | 1      |
| 20356  | 0     |        | 2     | 0      |
| 20357  | 0     |        | 0     |        |
| 20366  | 0     |        | 0     |        |
| 20369  | 3     | 3      | 4     | 4      |
| 20372  | 0     |        | 4     | 0      |
| 20375  | 0     |        | 1     | 1      |
| 20379  | 1     | 1      | 1     | 0      |
| 20380  | 0     |        | 0     |        |
| 20396  | 0     |        | 1     | 2      |
| 20398  | 1     | 1      | 2     | 1      |
| 20412  | 0     |        | 1     | 1      |
| 20415  | 1     | 1      | 1     | 0      |
| 20424  | 0     |        | 1     | 0      |
| 20434  | 0     |        | 1     | 0      |
| 20435  | 1     | 0      | 2     | 0      |
| 20440  | 0     |        | 1     | 0      |
| 20441  | 0     |        | 0     |        |
| 20445  | 0     |        | 1     | 0      |
| 20446  | 3     | 2      | 3     | 2      |
| 20450  | 0     |        | 1     | 1      |
| 20453  | 1     | 1      | 3     | 3      |
| 20458  | 0     |        | 1     | 0      |
| 20464  | 0     |        | 0     |        |
| 20471  | 0     |        | 2     | 0      |

| respid | Q24_1 | Q24a_1 | Q25_1 | Q25a_1 |
|--------|-------|--------|-------|--------|
| 20473  | 0     |        | 0     |        |
| 20474  | 0     |        | 2     | 0      |
| 20477  | 0     |        | 0     |        |
| 20479  | 1     | 1      | 1     | 1      |
| 20485  | 0     |        | 1     | 0      |
| 20487  | 0     |        | 1     | 1      |
| 20488  | 0     |        | 0     |        |
| 20494  | 0     |        | 5     | 4      |
| 20502  | 3     | 2      | 3     | 3      |
| 20503  | 0     |        | 3     | 4      |
| 20510  | 1     | 0      | 0     |        |
| 20512  | 0     |        | 0     |        |
| 20516  | 0     |        | 0     |        |
| 20522  | 1     | 2      | 1     | 1      |
| 20527  | 0     |        | 0     |        |
| 20529  | 1     | 1      | 2     | 1      |
| 20535  | 0     |        | 1     | 1      |
| 20543  | 0     |        | 1     | 0      |
| 20546  | 0     |        | 1     | 0      |
| 20548  | 0     |        | 1     | 0      |
| 20552  | 0     |        | 1     | 0      |
| 20556  | 2     | 2      | 3     | 2      |
| 20566  | 2     | 2      | 2     | 3      |
| 20576  | 1     | 1      | 0     |        |
| 20587  | 0     |        | 0     |        |
| 20589  | 0     |        | 0     |        |
| 20593  | 0     |        | 0     |        |
| 20594  | 0     |        | 0     |        |
| 20602  | 0     |        | 0     |        |
| 20607  | 0     |        | 0     |        |
| 20608  | 0     |        | 1     | 1      |
| 20611  | 0     |        | 0     |        |

| respid | Q24_1 | Q24a_1 | Q25_1 | Q25a_1 |
|--------|-------|--------|-------|--------|
| 20612  | 1     | 0      | 1     | 0      |
| 20615  | 1     | 1      | 2     | 2      |
| 20625  | 0     |        | 1     | 0      |
| 20630  | 0     |        | 1     | 0      |
| 20639  | 0     |        | 5     | 0      |
| 20643  | 0     |        | 0     |        |
| 20645  | 0     |        | 0     |        |
| 20647  | 0     |        | 0     |        |
| 20652  | 3     | 4      | 2     | 4      |
| 20661  | 0     |        | 0     |        |
| 20665  | 0     |        | 0     |        |
| 20679  | 0     |        | 0     |        |
| 20682  | 2     | 1      | 2     | 2      |
| 20683  | 0     |        | 0     |        |
| 20700  | 0     |        | 1     | 0      |
| 20702  | 0     |        | 5     | 4      |
| 20709  | 1     | 1      | 1     | 0      |
| 20715  | 3     | 2      | 3     | 3      |
| 20718  | 0     |        | 1     | 0      |
| 20722  | 0     |        | 2     | 0      |
| 20729  | 0     |        | 0     |        |
| 20732  | 0     |        | 0     |        |
| 20746  | 1     | 1      | 2     | 1      |
| 20747  | 0     |        | 0     |        |
| 20758  | 0     |        | 0     |        |
| 20767  | 1     | 2      | 3     | 2      |
| 20777  | 0     |        | 1     | 0      |
| 20778  | 0     |        | 3     | 0      |
| 20780  | 0     |        | 0     |        |
| 20800  | 0     |        | 2     | 1      |
| 20810  | 0     |        | 0     |        |
| 20814  | 1     | 1      | 1     | 1      |

| respid | Q24_1 | Q24a_1 | Q25_1 | Q25a_1 |
|--------|-------|--------|-------|--------|
| 20816  | 0     |        | 0     |        |
| 20832  | 0     |        | 0     |        |
| 20838  | 4     | 4      | 2     | 4      |
| 20841  | 3     | 2      | 2     | 2      |
| 20848  | 0     |        | 1     | 0      |
| 20850  | 0     |        | 0     |        |
| 20851  | 0     |        | 2     | 2      |
| 20861  | 0     |        | 1     | 0      |
| 20870  | 1     | 2      | 1     | 2      |
| 20880  | 0     |        | 1     | 0      |
| 20883  | 0     |        | 1     | 0      |
| 20894  | 0     |        | 1     | 0      |
| 20896  | 2     | 3      | 2     | 2      |
| 20901  | 3     | 3      | 3     | 1      |
| 20903  | 0     |        | 0     |        |
| 20909  | 0     |        | 0     |        |
| 20919  | 0     |        | 0     |        |
| 20925  | 0     |        | 1     | 0      |
| 20935  | 0     |        | 3     | 0      |
| 20939  | 0     |        | 1     | 0      |
| 20956  | 4     | 3      | 5     | 4      |
| 20970  | 0     |        | 1     | 1      |
| 20974  | 1     | 1      | 2     | 2      |
| 20975  | 0     |        | 1     | 0      |
| 20984  | 1     | 1      | 1     | 1      |
| 20988  | 0     |        | 0     |        |
| 20996  | 0     |        | 0     |        |
| 20998  | 0     |        | 1     | 1      |
| 21007  | 0     |        | 0     |        |
| 21008  | 0     |        | 0     |        |
| 21014  | 0     |        | 1     | 1      |
| 21020  | 0     |        | 1     | 0      |

| respid | Q24_1 | Q24a_1 | Q25_1 | Q25a_1 |
|--------|-------|--------|-------|--------|
| 21022  | 0     |        | 2     | 1      |
| 21024  | 0     |        | 0     |        |
| 21026  | 1     | 1      | 2     | 1      |
| 21027  | 0     |        | 2     | 0      |
| 21030  | 0     |        | 1     | 1      |
| 21032  | 2     | 3      | 2     | 2      |
| 21040  | 0     |        | 1     | 0      |
| 21045  | 0     |        | 2     | 1      |
| 21058  | 0     |        | 0     |        |
| 21064  | 0     |        | 1     | 0      |
| 21073  | 0     |        | 1     | 0      |
| 21086  | 3     | 2      | 3     | 2      |
| 21092  | 4     | 4      | 4     | 3      |
| 21096  | 2     | 2      | 3     | 3      |
| 21103  | 1     | 2      | 1     | 1      |
| 21120  | 3     | 1      | 3     | 3      |
| 21125  | 0     |        | 0     |        |
| 21126  | 0     |        | 0     |        |
| 21132  | 0     |        | 0     |        |
| 21139  | 3     | 2      | 2     | 2      |
| 21147  | 0     |        | 0     |        |
| 21148  | 0     |        | 5     | 0      |
| 21149  | 0     |        | 1     | 0      |
| 21164  | 0     |        | 1     | 1      |
| 21165  | 0     |        | 1     | 2      |
| 21171  | 1     | 1      | 3     | 2      |
| 21176  | 0     |        | 1     | 0      |
| 21187  | 0     |        | 2     | 1      |
| 21192  | 0     |        | 1     | 0      |
| 21198  | 0     |        | 1     | 0      |
| 21199  | 0     |        | 1     | 2      |
| 21206  | 2     | 2      | 2     | 1      |

| respid | Q24_1 | Q24a_1 | Q25_1 | Q25a_1 |
|--------|-------|--------|-------|--------|
| 21212  | 1     | 1      | 2     | 1      |
| 21216  | 0     |        | 1     | 0      |
| 21217  | 3     | 3      | 2     | 3      |
| 21228  | 2     | 3      | 1     | 2      |
| 21229  | 0     |        | 0     |        |
| 21230  | 0     |        | 2     | 1      |
| 21243  | 0     |        | 1     | 1      |
| 21247  | 0     |        | 2     | 0      |
| 21253  | 0     |        | 2     | 1      |
| 21264  | 4     | 2      | 3     | 2      |
| 21265  | 0     |        | 0     |        |
| 21273  | 1     | 1      | 2     | 1      |
| 21275  | 0     |        | 2     | 1      |
| 21278  | 0     |        | 0     |        |
| 21291  | 3     | 2      | 2     | 2      |
| 21298  | 0     |        | 1     | 0      |
| 21301  | 0     |        | 0     |        |
| 21312  | 5     | 3      | 1     | 3      |
| 21323  | 1     | 1      | 5     | 0      |
| 21325  | 1     | 1      | 2     | 1      |
| 21341  | 0     |        | 1     | 0      |
| 21349  | 2     | 1      | 3     | 3      |
| 21350  | 0     |        | 1     | 0      |
| 21354  | 0     |        | 4     | 3      |
| 21372  | 1     | 2      | 5     | 2      |
| 21373  | 1     | 1      | 0     |        |
| 21378  | 0     |        | 0     |        |
| 21393  | 0     |        | 0     |        |
| 21401  | 1     | 1      | 0     |        |
| 21405  | 0     |        | 0     |        |
| 21406  | 0     |        | 0     |        |
| 21407  | 1     | 0      | 0     |        |



| respid | Q24_1 | Q24a_1 | Q25_1 | Q25a_1 |
|--------|-------|--------|-------|--------|
| 21418  | 0     |        | 0     |        |
| 21420  | 0     |        | 0     |        |
| 21421  | 0     |        | 0     |        |
| 21446  | 0     |        | 3     | 2      |
| 21449  | 2     | 2      | 2     | 2      |
| 21452  | 0     |        | 1     | 0      |
| 21455  | 0     |        | 0     |        |
| 21469  | 0     |        | 1     | 0      |
| 21471  | 0     |        | 1     | 0      |
| 21472  | 0     |        | 1     | 1      |
| 21474  | 0     |        | 0     |        |
| 21479  | 0     |        | 0     |        |
| 21485  | 0     |        | 1     | 1      |
| 21512  | 0     |        | 0     |        |
| 21513  | 0     |        | 1     | 0      |
| 21514  | 0     |        | 0     |        |
| 21520  | 0     |        | 1     | 0      |
| 21539  | 1     | 1      | 1     | 1      |
| 21553  | 0     |        | 1     | 1      |
| 21560  | 0     |        | 1     | 1      |
| 21561  | 0     |        | 1     | 0      |
| 21563  | 0     |        | 2     | 2      |
| 21565  | 0     |        | 0     |        |
| 21582  | 1     | 1      | 3     | 0      |
| 21584  | 0     |        | 0     |        |
| 21585  | 0     |        | 2     | 2      |
| 21586  | 0     |        | 0     |        |
| 21587  | 1     | 0      | 3     | 2      |
| 21590  | 1     | 4      | 3     | 4      |
| 21601  | 2     | 1      | 1     | 1      |
| 21611  | 1     | 2      | 0     |        |
| 21612  | 0     |        | 1     | 0      |

| respid | Q24_1 | Q24a_1 | Q25_1 | Q25a_1 |
|--------|-------|--------|-------|--------|
| 21625  | 2     | 1      | 1     | 1      |
| 21633  | 0     |        | 0     |        |
| 21640  | 0     |        | 2     | 0      |
| 21647  | 0     |        | 1     | 0      |
| 21648  | 3     | 4      | 4     | 4      |
| 21656  | 0     |        | 5     | 1      |
| 21657  | 0     |        | 0     |        |
| 21658  | 1     | 2      | 4     | 3      |
| 21665  | 3     | 3      | 3     | 2      |
| 21666  | 0     |        | 2     | 2      |
| 21668  | 4     | 3      | 3     | 3      |
| 21673  | 1     | 1      | 5     | 2      |
| 21681  | 0     |        | 2     | 0      |
| 21682  | 0     |        | 2     | 0      |
| 21685  | 1     | 1      | 5     | 1      |
| 21692  | 0     |        | 1     | 1      |
| 21697  | 0     |        | 1     | 0      |
| 21711  | 0     |        | 0     |        |
| 21715  | 2     | 1      | 2     | 0      |
| 21726  | 0     |        | 1     | 0      |
| 21748  | 0     |        | 0     |        |
| 21761  | 0     |        | 1     | 0      |
| 21769  | 2     | 2      | 2     | 2      |
| 21774  | 1     | 1      | 2     | 2      |
| 21778  | 0     |        | 0     |        |
| 21785  | 0     |        | 2     | 2      |
| 21799  | 1     | 1      | 2     | 2      |
| 21820  | 4     | 4      | 5     | 4      |
| 21837  | 0     |        | 1     | 0      |
| 21845  | 3     | 2      | 3     | 3      |
| 21846  | 0     |        | 1     | 0      |
| 21849  | 0     |        | 1     | 0      |

| respid | Q24_1 | Q24a_1 | Q25_1 | Q25a_1 |
|--------|-------|--------|-------|--------|
| 21850  | 1     | 1      | 2     | 2      |
| 21855  | 0     |        | 1     | 0      |
| 21859  | 1     | 1      | 0     |        |
| 21861  | 0     |        | 0     |        |
| 21866  | 0     |        | 0     |        |
| 21873  | 0     |        | 0     |        |
| 21876  | 0     |        | 1     | 1      |
| 21882  | 0     |        | 0     |        |
| 21884  | 1     | 1      | 1     | 2      |
| 21887  | 2     | 1      | 0     |        |
| 21892  | 0     |        | 0     |        |
| 21907  | 1     | 1      | 3     | 3      |
| 21910  | 3     | 3      | 3     | 3      |
| 21912  | 2     | 2      | 1     | 0      |
| 21914  | 0     |        | 1     | 1      |
| 21925  | 0     |        | 1     | 0      |
| 21937  | 0     |        | 0     |        |
| 21938  | 0     |        | 2     | 1      |
| 21940  | 0     |        | 5     | 0      |
| 21942  | 0     |        | 1     | 1      |
| 21947  | 0     |        | 0     |        |
| 21948  | 0     |        | 1     | 0      |
| 21961  | 0     |        | 1     | 0      |
| 21977  | 3     | 2      | 3     | 2      |
| 21983  | 0     |        | 0     |        |
| 21986  | 1     | 1      | 2     | 3      |
| 21988  | 0     |        | 1     | 0      |
| 21996  | 0     |        | 1     | 0      |
| 21997  | 0     |        | 2     | 1      |
| 22005  | 0     |        | 1     | 2      |
| 22013  | 0     |        | 1     | 0      |
| 22018  | 0     |        | 0     |        |

| respid | Q24_1 | Q24a_1 | Q25_1 | Q25a_1 |
|--------|-------|--------|-------|--------|
| 22019  | 2     | 3      | 1     | 1      |
| 22071  | 0     |        | 0     |        |
| 22082  | 0     |        | 1     | 0      |
| 22085  | 1     | 0      | 1     | 0      |
| 22092  | 0     |        | 1     | 1      |
| 22097  | 0     |        | 1     | 1      |
| 22111  | 0     |        | 0     |        |
| 22118  | 0     |        | 1     | 1      |
| 22132  | 0     |        | 1     | 0      |
| 22133  | 0     |        | 1     | 0      |
| 22139  | 0     |        | 0     |        |
| 22142  | 4     | 4      | 3     | 4      |
| 22146  | 0     |        | 1     | 2      |
| 22181  | 0     |        | 0     |        |
| 22202  | 0     |        | 0     |        |
| 22214  | 0     |        | 0     |        |
| 22223  | 0     |        | 1     | 0      |
| 22227  | 2     | 1      | 1     | 1      |
| 22229  | 0     |        | 0     |        |
| 22239  | 3     | 4      | 4     | 4      |
| 22245  | 4     | 3      | 4     | 3      |
| 22256  | 0     |        | 1     | 0      |
| 22260  | 0     |        | 0     |        |
| 22298  | 1     | 1      | 2     | 1      |
| 22321  | 0     |        | 1     | 1      |
| 22340  | 0     |        | 0     |        |
| 22346  | 3     | 3      | 4     | 3      |
| 22356  | 0     |        | 3     | 2      |
| 22361  | 4     | 3      | 2     | 2      |
| 22364  | 0     |        | 3     | 1      |
| 22368  | 0     |        | 0     |        |
| 22374  | 1     | 2      | 2     | 3      |

| respid | Q24_1 | Q24a_1 | Q25_1 | Q25a_1 |
|--------|-------|--------|-------|--------|
| 22375  | 0     |        | 4     | 0      |
| 22377  | 0     |        | 1     | 0      |
| 22383  | 0     |        | 0     |        |
| 22387  | 3     | 2      | 1     | 2      |
| 22392  | 0     |        | 0     |        |
| 22393  | 1     | 1      | 1     | 0      |
| 22394  | 0     |        | 1     | 0      |
| 22395  | 0     |        | 0     |        |
| 22401  | 0     |        | 1     | 1      |
| 22407  | 0     |        | 0     |        |
| 22410  | 0     |        | 1     | 0      |
| 22418  | 0     |        | 5     | 0      |
| 22421  | 0     |        | 0     |        |
| 22423  | 0     |        | 0     |        |
| 22425  | 0     |        | 2     | 1      |
| 22427  | 0     |        | 2     | 0      |
| 22431  | 3     | 4      | 5     | 4      |
| 22435  | 0     |        | 2     | 0      |
| 22436  | 0     |        | 0     |        |
| 22442  | 0     |        | 0     |        |
| 22444  | 3     | 3      | 2     | 2      |
| 22445  | 1     | 1      | 4     | 3      |
| 22446  | 0     |        | 0     |        |
| 22448  | 1     | 3      | 1     | 3      |
| 22449  | 0     |        | 1     | 1      |
| 22450  | 1     | 2      | 2     | 2      |
| 22453  | 3     | 3      | 2     | 2      |
| 22465  | 1     | 1      | 3     | 1      |
| 22472  | 0     |        | 1     | 1      |
| 22475  | 2     | 3      | 2     | 3      |
| 22478  | 1     | 2      | 5     | 3      |
| 22491  | 1     | 1      | 1     | 1      |

| respid | Q24_1 | Q24a_1 | Q25_1 | Q25a_1 |
|--------|-------|--------|-------|--------|
| 22497  | 2     | 1      | 2     | 2      |
| 22498  | 2     | 1      | 0     |        |
| 22499  | 0     |        | 2     | 2      |
| 22503  | 0     |        | 5     | 1      |
| 22507  | 0     |        | 0     |        |
| 22513  | 0     |        | 2     | 1      |
| 22517  | 0     |        | 1     | 1      |
| 22524  | 1     | 1      | 2     | 1      |
| 22528  | 0     |        | 1     | 0      |
| 22544  | 1     | 1      | 2     | 1      |
| 22571  | 0     |        | 1     | 0      |
| 22576  | 0     |        | 0     |        |
| 22579  | 0     |        | 2     | 3      |
| 22583  | 0     |        | 4     | 2      |
| 22591  | 4     | 3      | 2     | 2      |
| 22592  | 0     |        | 1     | 1      |
| 22612  | 0     |        | 1     | 0      |
| 22613  | 1     | 1      | 1     | 0      |
| 22615  | 0     |        | 2     | 1      |
| 22621  | 0     |        | 2     | 0      |
| 22625  | 0     |        | 1     | 0      |
| 22628  | 1     | 1      | 0     |        |
| 22632  | 0     |        | 1     | 0      |
| 22639  | 0     |        | 0     |        |
| 22648  | 1     | 2      | 2     | 3      |
| 22649  | 0     |        | 0     |        |
| 22655  | 0     |        | 0     |        |
| 22659  | 0     |        | 0     |        |
| 22660  | 0     |        | 1     | 0      |
| 22666  | 0     |        | 2     | 0      |
| 22667  | 1     | 1      | 1     | 0      |
| 22670  | 0     |        | 0     |        |

| respid | Q24_1 | Q24a_1 | Q25_1 | Q25a_1 |
|--------|-------|--------|-------|--------|
| 22681  | 0     |        | 0     |        |
| 22683  | 0     |        | 0     |        |
| 22688  | 0     |        | 1     | 0      |
| 22695  | 0     |        | 1     | 0      |
| 22696  | 0     |        | 1     | 0      |
| 22705  | 3     | 2      | 3     | 3      |
| 22718  | 0     |        | 1     | 0      |
| 22720  | 2     | 1      | 1     | 1      |
| 22724  | 0     |        | 0     |        |
| 22728  | 0     |        | 1     | 0      |
| 22751  | 0     |        | 1     | 0      |
| 22782  | 5     | 4      | 5     | 4      |
| 22786  | 0     |        | 2     | 3      |
| 22788  | 0     |        | 1     | 1      |
| 22810  | 1     | 1      | 1     | 1      |
| 22816  | 0     |        | 1     | 1      |
| 22818  | 0     |        | 0     |        |
| 22854  | 0     |        | 0     |        |
| 22858  | 0     |        | 1     | 1      |
| 22862  | 0     |        | 2     | 0      |
| 22865  | 0     |        | 1     | 0      |
| 22868  | 0     |        | 1     | 1      |
| 22869  | 4     | 3      | 2     | 2      |
| 22873  | 0     |        | 1     | 1      |
| 22875  | 0     |        | 1     | 0      |
| 22876  | 0     |        | 0     |        |
| 22882  | 0     |        | 1     | 1      |
| 22884  | 1     | 1      | 3     | 3      |
| 22887  | 0     |        | 0     |        |
| 22888  | 0     |        | 1     | 1      |
| 22900  | 0     |        | 0     |        |
| 22901  | 0     |        | 0     |        |

| respid | Q24_1 | Q24a_1 | Q25_1 | Q25a_1 |
|--------|-------|--------|-------|--------|
| 22912  | 0     |        | 0     |        |
| 22913  | 0     |        | 0     |        |
| 22921  | 0     |        | 1     | 0      |
| 22925  | 0     |        | 0     |        |
| 22940  | 0     |        | 0     |        |
| 22941  | 0     |        | 2     | 1      |
| 22947  | 0     |        | 1     | 0      |
| 22948  | 0     |        | 0     |        |
| 22964  | 1     | 2      | 2     | 2      |
| 22966  | 0     |        | 0     |        |
| 22969  | 0     |        | 1     | 0      |
| 22971  | 0     |        | 0     |        |
| 22988  | 0     |        | 0     |        |
| 22990  | 0     |        | 0     |        |
| 23000  | 0     |        | 1     | 0      |
| 23016  | 0     |        | 0     |        |
| 23026  | 1     | 1      | 2     | 2      |
| 23035  | 0     |        | 1     | 0      |
| 23037  | 0     |        | 3     | 3      |
| 23044  | 1     | 0      | 1     | 0      |
| 23046  | 1     | 0      | 1     | 0      |
| 23047  | 0     |        | 0     |        |
| 23049  | 0     |        | 0     |        |
| 23055  | 0     |        | 1     | 0      |
| 23066  | 0     |        | 2     | 0      |
| 23075  | 0     |        | 3     | 0      |
| 23081  | 2     | 0      | 2     | 2      |
| 23087  | 0     |        | 1     | 0      |
| 23094  | 0     |        | 0     |        |
| 23099  | 0     |        | 0     |        |
| 23101  | 0     |        | 0     |        |
| 23105  | 0     |        | 0     |        |



| respid | Q24_1 | Q24a_1 | Q25_1 | Q25a_1 |
|--------|-------|--------|-------|--------|
| 23115  | 3     | 2      | 1     | 2      |
| 23121  | 0     |        | 2     | 2      |
| 23127  | 0     |        | 1     | 0      |
| 23131  | 0     |        | 2     | 0      |
| 23134  | 0     |        | 0     |        |
| 23145  | 0     |        | 1     | 1      |
| 23151  | 0     |        | 1     | 1      |
| 23161  | 0     |        | 2     | 1      |
| 23169  | 1     | 1      | 1     | 1      |
| 23173  | 0     |        | 0     |        |
| 23174  | 1     | 0      | 0     |        |
| 23186  | 2     | 2      | 3     | 3      |
| 23195  | 0     |        | 1     | 0      |
| 23197  | 0     |        | 1     | 0      |
| 23198  | 0     |        | 1     | 0      |
| 23203  | 0     |        | 0     |        |
| 23204  | 1     | 0      | 1     | 2      |
| 23212  | 0     |        | 1     | 0      |
| 23214  | 0     |        | 1     | 0      |
| 23221  | 0     |        | 1     | 0      |
| 23237  | 0     |        | 1     | 0      |
| 23251  | 0     |        | 2     | 0      |
| 23254  | 0     |        | 1     | 0      |
| 23262  | 0     |        | 1     | 3      |
| 23267  | 1     | 1      | 1     | 1      |
| 23268  | 0     |        | 4     | 4      |
| 23273  | 0     |        | 1     | 0      |
| 23278  | 0     |        | 0     |        |
| 23279  | 0     |        | 0     |        |
| 23281  | 3     | 2      | 0     |        |
| 23282  | 1     | 1      | 0     |        |
| 23283  | 0     |        | 1     | 1      |

| respid | Q24_1 | Q24a_1 | Q25_1 | Q25a_1 |
|--------|-------|--------|-------|--------|
| 23285  | 1     | 0      | 1     | 0      |
| 23305  | 1     | 0      | 2     | 2      |
| 23309  | 0     |        | 1     | 0      |
| 23310  | 0     |        | 1     | 1      |
| 23311  | 1     | 2      | 1     | 0      |
| 23312  | 1     | 1      | 1     | 0      |
| 23319  | 0     |        | 1     | 1      |
| 23320  | 1     | 1      | 1     | 0      |
| 23322  | 0     |        | 2     | 2      |
| 23334  | 0     |        | 1     | 1      |
| 23340  | 0     |        | 1     | 0      |
| 23346  | 0     |        | 1     | 0      |
| 23353  | 0     |        | 2     | 0      |
| 23363  | 3     | 2      | 2     | 2      |
| 23364  | 3     | 2      | 2     | 2      |
| 23376  | 0     |        | 0     |        |
| 23378  | 0     |        | 1     | 0      |
| 23382  | 0     |        | 0     |        |
| 23383  | 0     |        | 0     |        |
| 23390  | 0     |        | 0     |        |
| 23395  | 0     |        | 0     |        |
| 23398  | 2     | 1      | 5     | 4      |
| 23399  | 0     |        | 1     | 0      |
| 23406  | 0     |        | 0     |        |
| 23418  | 1     | 0      | 1     | 1      |
| 23427  | 0     |        | 1     | 1      |
| 23428  | 0     |        | 1     | 0      |
| 23435  | 1     | 1      | 2     | 1      |
| 23439  | 0     |        | 2     | 0      |
| 23440  | 0     |        | 0     |        |
| 23444  | 0     |        | 1     | 0      |
| 23445  | 0     |        | 3     | 0      |

| respid | Q24_1 | Q24a_1 | Q25_1 | Q25a_1 |
|--------|-------|--------|-------|--------|
| 23455  | 0     |        | 0     |        |
| 23467  | 0     |        | 1     | 1      |
| 23478  | 0     |        | 5     | 0      |
| 23492  | 1     | 1      | 2     | 1      |
| 23498  | 0     |        | 3     | 1      |
| 23511  | 0     |        | 1     | 2      |
| 23514  | 0     |        | 0     |        |
| 23515  | 1     | 1      | 1     | 0      |
| 23522  | 0     |        | 0     |        |
| 23524  | 0     |        | 0     |        |
| 23531  | 0     |        | 0     |        |
| 23532  | 1     | 0      | 1     | 0      |
| 23533  | 0     |        | 1     | 1      |
| 23534  | 0     |        | 1     | 0      |
| 23538  | 0     |        | 1     | 1      |
| 23539  | 3     | 2      | 0     |        |
| 23548  | 0     |        | 1     | 1      |
| 23553  | 0     |        | 0     |        |
| 23556  | 0     |        | 3     | 0      |
| 23563  | 1     | 1      | 2     | 2      |
| 23572  | 1     | 1      | 1     | 2      |
| 23575  | 0     |        | 1     | 0      |
| 23576  | 0     |        | 1     | 0      |
| 23577  | 0     |        | 1     | 1      |
| 23578  | 0     |        | 2     | 1      |
| 23587  | 1     | 0      | 1     | 0      |
| 23597  | 0     |        | 0     |        |
| 23598  | 1     | 1      | 1     | 1      |
| 23604  | 0     |        | 0     |        |
| 23617  | 0     |        | 0     |        |
| 23620  | 0     |        | 1     | 0      |
| 23621  | 0     |        | 0     |        |

| respid | Q24_1 | Q24a_1 | Q25_1 | Q25a_1 |
|--------|-------|--------|-------|--------|
| 23625  | 2     | 1      | 1     | 1      |
| 23629  | 0     |        | 1     | 0      |
| 23635  | 0     |        | 1     | 0      |
| 23636  | 0     |        | 1     | 1      |
| 23637  | 4     | 2      | 1     | 2      |
| 23638  | 0     |        | 1     | 0      |
| 23644  | 0     |        | 1     | 0      |
| 23645  | 1     | 1      | 4     | 1      |
| 23649  | 0     |        | 0     |        |
| 23654  | 0     |        | 2     | 0      |
| 23662  | 0     |        | 1     | 1      |
| 23664  | 1     | 0      | 0     |        |
| 23665  | 0     |        | 1     | 0      |
| 23666  | 0     |        | 1     | 1      |
| 23671  | 0     |        | 1     | 0      |
| 23672  | 0     |        | 0     |        |
| 23685  | 0     |        | 1     | 1      |
| 23686  | 2     | 0      | 2     | 2      |
| 23689  | 3     | 2      | 5     | 3      |
| 23690  | 2     | 1      | 5     | 2      |
| 23695  | 0     |        | 2     | 1      |
| 23700  | 0     |        | 1     | 0      |
| 23714  | 0     |        | 1     | 0      |
| 23719  | 1     | 1      | 1     | 1      |
| 23720  | 0     |        | 1     | 1      |
| 23721  | 0     |        | 1     | 0      |
| 23729  | 0     |        | 1     | 0      |
| 23730  | 0     |        | 1     | 0      |
| 23732  | 0     |        | 1     | 2      |
| 23736  | 0     |        | 1     | 0      |
| 23754  | 0     |        | 0     |        |
| 23756  | 0     |        | 0     |        |

| respid | Q24_1 | Q24a_1 | Q25_1 | Q25a_1 |
|--------|-------|--------|-------|--------|
| 23759  | 0     |        | 2     | 1      |
| 23761  | 0     |        | 1     | 0      |
| 23766  | 0     |        | 2     | 0      |
| 23768  | 3     | 3      | 2     | 3      |
| 23773  | 0     |        | 0     |        |
| 23781  | 0     |        | 0     |        |
| 23782  | 2     | 1      | 3     | 3      |
| 23787  | 1     | 1      | 1     | 0      |
| 23788  | 3     | 2      | 4     | 2      |
| 23790  | 0     |        | 0     |        |
| 23794  | 0     |        | 1     | 0      |
| 23795  | 1     | 2      | 1     | 0      |
| 23801  | 0     |        | 1     | 0      |
| 23806  | 0     |        | 1     | 0      |
| 23809  | 1     | 2      | 3     | 2      |
| 23813  | 1     | 0      | 2     | 1      |
| 23815  | 0     |        | 1     | 0      |
| 23821  | 0     |        | 1     | 0      |
| 23825  | 0     |        | 5     | 0      |
| 23826  | 0     |        | 0     |        |
| 23830  | 0     |        | 1     | 0      |
| 23833  | 0     |        | 1     | 0      |
| 23837  | 0     |        | 0     |        |
| 23848  | 5     | 4      | 5     | 4      |
| 23850  | 0     |        | 1     | 0      |
| 23870  | 0     |        | 0     |        |
| 23877  | 0     |        | 0     |        |
| 23880  | 0     |        | 1     | 0      |
| 23882  | 0     |        | 1     | 1      |
| 23888  | 0     |        | 0     |        |
| 23908  | 0     |        | 2     | 3      |
| 23914  | 1     | 0      | 1     | 1      |

| respid | Q24_1 | Q24a_1 | Q25_1 | Q25a_1 |
|--------|-------|--------|-------|--------|
| 23916  | 1     | 1      | 0     |        |
| 23922  | 0     |        | 1     | 1      |
| 23932  | 0     |        | 1     | 1      |
| 23934  | 0     |        | 0     |        |
| 23942  | 0     |        | 1     | 2      |
| 23945  | 0     |        | 1     | 0      |
| 23948  | 0     |        | 1     | 1      |
| 23955  | 0     |        | 1     | 0      |
| 23956  | 2     | 3      | 2     | 2      |
| 23978  | 2     | 2      | 2     | 1      |
| 23981  | 0     |        | 0     |        |
| 23982  | 1     | 1      | 1     | 0      |
| 23991  | 0     |        | 1     | 1      |
| 23994  | 1     | 0      | 0     |        |
| 23995  | 0     |        | 0     |        |
| 23999  | 0     |        | 0     |        |
| 24005  | 5     | 4      | 3     | 4      |
| 24018  | 0     |        | 1     | 0      |
| 24021  | 0     |        | 0     |        |
| 24035  | 0     |        | 0     |        |
| 24040  | 0     |        | 1     | 0      |
| 24043  | 0     |        | 0     |        |
| 24046  | 1     | 1      | 2     | 1      |
| 24047  | 0     |        | 1     | 1      |
| 24048  | 0     |        | 1     | 0      |
| 24062  | 1     | 1      | 1     | 1      |
| 24063  | 0     |        | 2     | 0      |
| 24066  | 0     |        | 1     | 0      |
| 24069  | 0     |        | 0     |        |
| 24070  | 0     |        | 1     | 0      |
| 24074  | 0     |        | 1     | 1      |
| 24080  | 0     |        | 0     |        |

| respid | Q24_1 | Q24a_1 | Q25_1 | Q25a_1 |
|--------|-------|--------|-------|--------|
| 24082  | 0     |        | 1     | 0      |
| 24088  | 0     |        | 0     |        |
| 24089  | 0     |        | 0     |        |
| 24091  | 0     |        | 3     | 1      |
| 24095  | 0     |        | 0     |        |
| 24100  | 1     | 1      | 2     | 2      |
| 24105  | 3     | 3      | 3     | 3      |
| 24107  | 3     | 2      | 3     | 2      |
| 24108  | 0     |        | 0     |        |
| 24113  | 0     |        | 1     | 1      |
| 24120  | 0     |        | 0     |        |
| 24122  | 2     | 0      | 4     | 3      |
| 24123  | 1     | 0      | 2     | 0      |
| 24125  | 0     |        | 3     | 2      |
| 24132  | 0     |        | 1     | 0      |
| 24139  | 1     | 1      | 2     | 1      |
| 24140  | 0     |        | 1     | 1      |
| 24143  | 1     | 2      | 1     | 3      |
| 24150  | 2     | 2      | 5     | 4      |
| 24153  | 0     |        | 0     |        |
| 24161  | 0     |        | 0     |        |
| 24168  | 0     |        | 2     | 2      |
| 24179  | 0     |        | 5     | 0      |
| 24182  | 2     | 1      | 2     | 2      |
| 24194  | 0     |        | 1     | 0      |
| 24206  | 0     |        | 0     |        |
| 24214  | 0     |        | 0     |        |
| 24215  | 0     |        | 1     | 1      |
| 24224  | 0     |        | 1     | 0      |
| 24225  | 0     |        | 0     |        |
| 24227  | 0     |        | 0     |        |
| 24229  | 0     |        | 1     | 1      |

| respid | Q24_1 | Q24a_1 | Q25_1 | Q25a_1 |
|--------|-------|--------|-------|--------|
| 24230  | 0     |        | 0     |        |
| 24232  | 2     | 2      | 3     | 2      |
| 24253  | 0     |        | 2     | 1      |
| 24267  | 0     |        | 3     | 0      |
| 24274  | 0     |        | 1     | 0      |
| 24275  | 0     |        | 2     | 3      |
| 24277  | 0     |        | 0     |        |
| 24280  | 5     | 3      | 2     | 2      |
| 24285  | 0     |        | 0     |        |
| 24293  | 0     |        | 0     |        |
| 24295  | 0     |        | 2     | 3      |
| 24299  | 0     |        | 0     |        |
| 24303  | 0     |        | 2     | 1      |
| 24308  | 1     | 1      | 2     | 1      |
| 24322  | 0     |        | 0     |        |
| 24325  | 0     |        | 0     |        |
| 24328  | 0     |        | 0     |        |
| 24334  | 0     |        | 2     | 1      |
| 24342  | 0     |        | 2     | 1      |
| 24343  | 3     | 2      | 1     | 1      |
| 24348  | 4     | 3      | 4     | 4      |
| 24352  | 3     | 2      | 3     | 2      |
| 24354  | 1     | 1      | 1     | 1      |
| 24357  | 0     |        | 1     | 1      |
| 24360  | 0     |        | 1     | 1      |
| 24369  | 0     |        | 3     | 4      |
| 24373  | 1     | 1      | 1     | 1      |
| 24398  | 3     | 4      | 5     | 4      |
| 24402  | 0     |        | 1     | 0      |
| 24405  | 0     |        | 1     | 0      |
| 24407  | 0     |        | 1     | 0      |
| 24413  | 0     |        | 1     | 1      |



| respid | Q24_1 | Q24a_1 | Q25_1 | Q25a_1 |
|--------|-------|--------|-------|--------|
| 24443  | 3     | 2      | 1     | 2      |
| 24451  | 0     |        | 0     |        |
| 24459  | 3     | 4      | 2     | 3      |
| 24465  | 0     |        | 1     | 1      |
| 24481  | 0     |        | 1     | 1      |
| 24482  | 0     |        | 0     |        |
| 24491  | 1     | 1      | 2     | 2      |
| 24495  | 0     |        | 1     | 0      |
| 24497  | 1     | 2      | 2     | 2      |
| 24511  | 0     |        | 1     | 0      |
| 24513  | 0     |        | 1     | 2      |
| 24516  | 2     | 1      | 4     | 2      |
| 24518  | 0     |        | 1     | 0      |
| 24524  | 0     |        | 2     | 0      |
| 24528  | 3     | 2      | 0     |        |
| 24531  | 3     | 4      | 3     | 4      |
| 24533  | 3     | 3      | 3     | 3      |
| 24547  | 0     |        | 3     | 0      |
| 24557  | 3     | 2      | 2     | 2      |
| 24559  | 0     |        | 4     | 4      |
| 24567  | 0     |        | 2     | 1      |
| 24568  | 0     |        | 0     |        |
| 24577  | 0     |        | 0     |        |
| 24581  | 0     |        | 1     | 0      |
| 24588  | 0     |        | 1     | 0      |
| 24604  | 2     | 2      | 3     | 2      |
| 24612  | 2     | 1      | 0     |        |
| 24621  | 2     | 2      | 4     | 0      |
| 24625  | 0     |        | 1     | 2      |
| 24627  | 0     |        | 1     | 1      |
| 24640  | 2     | 1      | 3     | 0      |
| 24644  | 0     |        | 1     | 2      |

| respid | Q24_1 | Q24a_1 | Q25_1 | Q25a_1 |
|--------|-------|--------|-------|--------|
| 24664  | 1     | 1      | 2     | 2      |
| 24669  | 0     |        | 0     |        |
| 24685  | 0     |        | 1     | 0      |
| 24687  | 2     | 1      | 3     | 3      |
| 24688  | 1     | 1      | 1     | 1      |
| 24691  | 3     | 2      | 2     | 2      |
| 24693  | 0     |        | 2     | 1      |
| 24706  | 0     |        | 0     |        |
| 24710  | 0     |        | 0     |        |
| 24717  | 0     |        | 1     | 0      |
| 24720  | 0     |        | 0     |        |
| 24731  | 3     | 3      | 1     | 2      |
| 24732  | 1     | 1      | 0     |        |
| 24733  | 0     |        | 0     |        |
| 24747  | 0     |        | 1     | 0      |
| 24750  | 2     | 3      | 2     | 4      |
| 24758  | 0     |        | 2     | 1      |
| 24760  | 0     |        | 1     | 1      |
| 24765  | 0     |        | 0     |        |
| 24772  | 0     |        | 1     | 1      |
| 24779  | 3     | 2      | 3     | 2      |
| 24794  | 0     |        | 0     |        |
| 24796  | 2     | 2      | 2     | 1      |
| 24797  | 0     |        | 0     |        |
| 24800  | 0     |        | 0     |        |
| 24813  | 2     | 2      | 2     | 2      |
| 24815  | 0     |        | 2     | 1      |
| 24821  | 0     |        | 1     | 0      |
| 24822  | 0     |        | 0     |        |
| 24831  | 1     | 0      | 0     |        |
| 24835  | 0     |        | 0     |        |
| 24843  | 2     | 2      | 2     | 2      |

| respid | Q24_1 | Q24a_1 | Q25_1 | Q25a_1 |
|--------|-------|--------|-------|--------|
| 24844  | 2     | 1      | 2     | 1      |
| 24860  | 0     |        | 0     |        |
| 24861  | 1     | 1      | 5     | 1      |
| 24865  | 4     | 3      | 2     | 2      |
| 24870  | 0     |        | 1     | 0      |
| 24887  | 0     |        | 2     | 0      |
| 24897  | 3     | 1      | 2     | 1      |
| 24902  | 1     | 1      | 3     | 1      |
| 24914  | 0     |        | 1     | 0      |
| 24921  | 0     |        | 0     |        |
| 24922  | 0     |        | 0     |        |
| 24924  | 0     |        | 0     |        |
| 24927  | 0     |        | 2     | 0      |
| 24936  | 0     |        | 1     | 1      |
| 24937  | 1     | 2      | 0     |        |
| 24942  | 2     | 2      | 1     | 1      |
| 24947  | 0     |        | 1     | 0      |
| 24953  | 0     |        | 1     | 0      |
| 24954  | 1     | 1      | 3     | 2      |
| 24960  | 4     | 3      | 3     | 4      |
| 24965  | 0     |        | 0     |        |
| 24975  | 0     |        | 1     | 0      |
| 24983  | 3     | 2      | 2     | 2      |
| 24985  | 0     |        | 1     | 0      |
| 24990  | 0     |        | 2     | 0      |
| 25000  | 0     |        | 1     | 1      |
| 25007  | 2     | 1      | 1     | 0      |
| 25008  | 0     |        | 1     | 0      |
| 25010  | 0     |        | 0     |        |
| 25016  | 0     |        | 1     | 0      |
| 25021  | 0     |        | 5     | 4      |
| 25040  | 0     |        | 0     |        |

| respid | Q24_1 | Q24a_1 | Q25_1 | Q25a_1 |
|--------|-------|--------|-------|--------|
| 25043  | 0     |        | 2     | 1      |
| 25055  | 0     |        | 1     | 0      |
| 25057  | 0     |        | 1     | 0      |
| 25060  | 0     |        | 2     | 1      |
| 25062  | 1     | 1      | 2     | 1      |
| 25064  | 3     | 2      | 4     | 2      |
| 25069  | 0     |        | 0     |        |
| 25077  | 0     |        | 0     |        |
| 25088  | 0     |        | 0     |        |
| 25093  | 3     | 2      | 1     | 2      |
| 25121  | 0     |        | 0     |        |
| 25140  | 3     | 2      | 2     | 2      |
| 25144  | 1     | 0      | 5     | 1      |
| 25149  | 1     | 2      | 1     | 2      |
| 25159  | 0     |        | 1     | 0      |
| 25191  | 0     |        | 2     | 2      |
| 25193  | 2     | 1      | 3     | 4      |
| 25202  | 3     | 2      | 2     | 2      |
| 25215  | 1     | 2      | 2     | 3      |
| 25229  | 1     | 1      | 2     | 3      |
| 25231  | 0     |        | 1     | 1      |
| 25236  | 0     |        | 1     | 1      |
| 25242  | 0     |        | 1     | 0      |
| 25252  | 0     |        | 1     | 0      |
| 25253  | 5     | 4      | 4     | 4      |
| 25256  | 4     | 3      | 2     | 2      |
| 25260  | 0     |        | 1     | 0      |
| 25261  | 0     |        | 1     | 1      |
| 25280  | 0     |        | 1     | 1      |
| 25282  | 1     | 1      | 2     | 1      |
| 25289  | 2     | 2      | 2     | 1      |
| 25303  | 0     |        | 1     | 1      |

| respid | Q24_1 | Q24a_1 | Q25_1 | Q25a_1 |
|--------|-------|--------|-------|--------|
| 25304  | 1     | 0      | 3     | 0      |
| 25309  | 0     |        | 0     |        |
| 25317  | 1     | 1      | 0     |        |
| 25318  | 3     | 2      | 3     | 3      |
| 25320  | 0     |        | 2     | 0      |
| 25324  | 3     | 2      | 2     | 2      |
| 25331  | 0     |        | 1     | 0      |
| 25340  | 0     |        | 3     | 2      |
| 25342  | 0     |        | 1     | 0      |
| 25350  | 0     |        | 1     | 0      |
| 25352  | 0     |        | 0     |        |
| 25358  | 0     |        | 0     |        |
| 25375  | 0     |        | 0     |        |
| 25386  | 0     |        | 1     | 0      |
| 25388  | 0     |        | 0     |        |
| 25390  | 1     | 1      | 2     | 1      |
| 25391  | 0     |        | 1     | 1      |
| 25400  | 0     |        | 1     | 1      |
| 25413  | 3     | 2      | 2     | 2      |
| 25424  | 0     |        | 1     | 0      |
| 25426  | 3     | 2      | 1     | 2      |
| 25430  | 0     |        | 1     | 0      |
| 25434  | 1     | 1      | 1     | 1      |
| 25439  | 1     | 1      | 0     |        |
| 25441  | 0     |        | 1     | 0      |
| 25445  | 0     |        | 2     | 0      |
| 25451  | 0     |        | 0     |        |
| 25469  | 3     | 2      | 2     | 2      |
| 25471  | 1     | 1      | 1     | 1      |
| 25476  | 0     |        | 2     | 1      |
| 25480  | 0     |        | 1     | 1      |
| 25482  | 0     |        | 0     |        |

| respid | Q24_1 | Q24a_1 | Q25_1 | Q25a_1 |
|--------|-------|--------|-------|--------|
| 25500  | 1     | 4      | 2     | 4      |
| 25516  | 0     |        | 2     | 0      |
| 25521  | 2     | 2      | 2     | 2      |
| 25525  | 2     | 1      | 3     | 2      |
| 25530  | 0     |        | 1     | 0      |
| 25555  | 1     | 1      | 1     | 1      |
| 25558  | 0     |        | 2     | 2      |
| 25561  | 3     | 3      | 3     | 3      |
| 25566  | 0     |        | 0     |        |
| 25571  | 0     |        | 1     | 0      |
| 25572  | 0     |        | 0     |        |
| 25574  | 0     |        | 0     |        |
| 25588  | 0     |        | 1     | 0      |
| 25591  | 2     | 1      | 2     | 1      |
| 25599  | 2     | 2      | 1     | 1      |
| 25604  | 0     |        | 1     | 0      |
| 25614  | 0     |        | 1     | 3      |
| 25634  | 1     | 2      | 3     | 2      |
| 25642  | 0     |        | 1     | 1      |
| 25647  | 0     |        | 1     | 0      |
| 25653  | 0     |        | 1     | 0      |
| 25654  | 0     |        | 1     | 0      |
| 25660  | 0     |        | 0     |        |
| 25664  | 0     |        | 0     |        |
| 25665  | 0     |        | 0     |        |
| 25672  | 3     | 2      | 5     | 1      |
| 25677  | 1     | 1      | 1     | 1      |
| 25685  | 1     | 2      | 1     | 0      |
| 25699  | 3     | 2      | 3     | 2      |
| 25703  | 0     |        | 2     | 0      |
| 25704  | 2     | 1      | 2     | 1      |
| 25705  | 0     |        | 1     | 1      |

| respid | Q24_1 | Q24a_1 | Q25_1 | Q25a_1 |
|--------|-------|--------|-------|--------|
| 25711  | 0     |        | 1     | 0      |
| 25727  | 1     | 3      | 4     | 3      |
| 25728  | 1     | 0      | 1     | 1      |
| 25733  | 0     |        | 1     | 2      |
| 25735  | 0     |        | 0     |        |
| 25736  | 0     |        | 2     | 2      |
| 25742  | 0     |        | 1     | 0      |
| 25750  | 0     |        | 1     | 1      |
| 25754  | 0     |        | 0     |        |
| 25776  | 3     | 2      | 5     | 3      |
| 25778  | 0     |        | 0     |        |
| 25796  | 0     |        | 1     | 1      |
| 25852  | 0     |        | 1     | 2      |
| 25858  | 0     |        | 0     |        |
| 25859  | 0     |        | 0     |        |
| 25886  | 2     | 3      | 5     | 3      |
| 25890  | 2     | 1      | 2     | 1      |
| 25897  | 0     |        | 0     |        |
| 25903  | 0     |        | 1     | 0      |
| 25905  | 0     |        | 2     | 0      |
| 25917  | 0     |        | 0     |        |
| 25918  | 0     |        | 3     | 0      |
| 25928  | 0     |        | 1     | 1      |
| 25930  | 0     |        | 0     |        |
| 25949  | 0     |        | 0     |        |
| 25955  | 0     |        | 1     | 0      |
| 25959  | 0     |        | 0     |        |
| 25964  | 2     | 1      | 1     | 2      |
| 25972  | 0     |        | 1     | 1      |
| 25999  | 3     | 2      | 3     | 2      |
| 26019  | 0     |        | 1     | 0      |
| 26025  | 0     |        | 1     | 0      |

| respid | Q24_1 | Q24a_1 | Q25_1 | Q25a_1 |
|--------|-------|--------|-------|--------|
| 26039  | 1     | 2      | 1     | 1      |
| 26055  | 0     |        | 1     | 1      |
| 26061  | 0     |        | 1     | 1      |
| 26076  | 0     |        | 1     | 1      |
| 26088  | 0     |        | 1     | 0      |
| 26094  | 0     |        | 0     |        |
| 26104  | 3     | 3      | 3     | 3      |
| 26131  | 0     |        | 1     | 0      |
| 26134  | 1     | 1      | 2     | 2      |
| 26160  | 0     |        | 0     |        |
| 26168  | 0     |        | 2     | 1      |
| 26170  | 0     |        | 0     |        |
| 26191  | 4     | 3      | 2     | 3      |
| 26192  | 0     |        | 0     |        |
| 26195  | 1     | 1      | 2     | 1      |
| 26198  | 0     |        | 1     | 0      |
| 26199  | 0     |        | 1     | 1      |
| 26201  | 0     |        | 0     |        |
| 26202  | 2     | 1      | 1     | 1      |
| 26226  | 0     |        | 2     | 1      |
| 26233  | 0     |        | 2     | 2      |
| 26236  | 0     |        | 1     | 0      |
| 26242  | 0     |        | 0     |        |
| 26244  | 0     |        | 0     |        |
| 26250  | 0     |        | 2     | 2      |
| 26266  | 0     |        | 0     |        |
| 26274  | 0     |        | 2     | 1      |
| 26286  | 2     | 1      | 2     | 1      |
| 26288  | 0     |        | 0     |        |
| 26295  | 0     |        | 0     |        |
| 26296  | 2     | 0      | 1     | 0      |
| 26297  | 0     |        | 0     |        |



| respid | Q24_1 | Q24a_1 | Q25_1 | Q25a_1 |
|--------|-------|--------|-------|--------|
| 26300  | 0     |        | 1     | 1      |
| 26317  | 0     |        | 0     |        |
| 26343  | 0     |        | 0     |        |
| 26367  | 0     |        | 1     | 0      |
| 26372  | 0     |        | 0     |        |
| 26403  | 0     |        | 1     | 1      |
| 26423  | 0     |        | 1     | 0      |
| 26430  | 0     |        | 0     |        |
| 26437  | 0     |        | 1     | 1      |
| 26457  | 0     |        | 0     |        |
| 26466  | 0     |        | 0     |        |
| 26467  | 0     |        | 0     |        |
| 26469  | 1     | 1      | 2     | 1      |
| 26494  | 0     |        | 1     | 0      |
| 26510  | 1     | 0      | 1     | 1      |
| 26519  | 0     |        | 0     |        |
| 26525  | 0     |        | 1     | 1      |
| 26529  | 0     |        | 0     |        |
| 26533  | 0     |        | 0     |        |
| 26556  | 0     |        | 1     | 2      |
| 26559  | 2     | 2      | 2     | 2      |
| 26565  | 2     | 2      | 2     | 2      |
| 26576  | 3     | 1      | 2     | 2      |
| 26601  | 0     |        | 0     |        |
| 26607  | 0     |        | 2     | 1      |
| 26611  | 1     | 0      | 2     | 1      |
| 26619  | 0     |        | 1     | 0      |
| 26631  | 0     |        | 1     | 1      |
| 26654  | 0     |        | 3     | 2      |
| 26656  | 1     | 1      | 1     | 1      |
| 26664  | 0     |        | 0     |        |
| 26667  | 0     |        | 1     | 1      |

| respid | Q24_1 | Q24a_1 | Q25_1 | Q25a_1 |
|--------|-------|--------|-------|--------|
| 26674  | 3     | 2      | 3     | 2      |
| 26678  | 1     | 1      | 1     | 1      |
| 26693  | 0     |        | 1     | 0      |
| 26696  | 3     | 2      | 3     | 3      |
| 26703  | 4     | 4      | 4     | 4      |
| 26705  | 2     | 2      | 2     | 2      |
| 26706  | 3     | 2      | 1     | 1      |
| 26716  | 0     |        | 0     |        |
| 26721  | 0     |        | 2     | 1      |
| 26730  | 0     |        | 1     | 1      |
| 26752  | 0     |        | 2     | 1      |
| 26755  | 0     |        | 1     | 0      |
| 26791  | 0     |        | 1     | 0      |
| 26804  | 1     | 1      | 1     | 2      |
| 26810  | 1     | 3      | 2     | 0      |
| 26813  | 1     | 1      | 1     | 0      |
| 26833  | 1     | 1      | 1     | 1      |
| 26880  | 2     | 3      | 3     | 2      |
| 26884  | 0     |        | 1     | 1      |
| 26885  | 0     |        | 1     | 1      |
| 26890  | 2     | 2      | 1     | 1      |
| 26937  | 1     | 1      | 1     | 1      |
| 26939  | 1     | 2      | 2     | 2      |
| 26941  | 0     |        | 0     |        |
| 26992  | 5     | 4      | 3     | 4      |
| 27037  | 0     |        | 2     | 1      |
| 27045  | 2     | 2      | 3     | 3      |
| 27053  | 4     | 0      | 3     | 2      |
| 27060  | 2     | 2      | 3     | 2      |
| 27076  | 0     |        | 2     | 2      |
| 27124  | 1     | 0      | 2     | 0      |
| 27125  | 1     | 1      | 1     | 1      |

| respid | Q24_1 | Q24a_1 | Q25_1 | Q25a_1 |
|--------|-------|--------|-------|--------|
| 27132  | 0     |        | 2     | 1      |
| 27166  | 1     | 0      | 1     | 0      |
| 27190  | 0     |        | 1     | 0      |
| 27199  | 0     |        | 2     | 1      |
| 27221  | 2     | 2      | 3     | 2      |
| 27233  | 0     |        | 3     | 3      |
| 27241  | 0     |        | 2     | 1      |
| 27244  | 0     |        | 0     |        |
| 27245  | 3     | 3      | 3     | 3      |
| 27246  | 2     | 2      | 1     | 1      |
| 27253  | 0     |        | 1     | 1      |
| 27255  | 3     | 2      | 2     | 2      |
| 27267  | 0     |        | 1     | 1      |
| 27283  | 0     |        | 2     | 1      |
| 27289  | 2     | 3      | 2     | 2      |
| 27302  | 0     |        | 1     | 0      |
| 27317  | 0     |        | 1     | 0      |
| 27319  | 0     |        | 1     | 0      |
| 27331  | 0     |        | 2     | 1      |
| 27333  | 0     |        | 2     | 2      |
| 27340  | 0     |        | 0     |        |
| 27362  | 3     | 4      | 4     | 4      |
| 27370  | 0     |        | 1     | 0      |
| 27379  | 0     |        | 1     | 1      |
| 27386  | 0     |        | 0     |        |
| 27398  | 0     |        | 0     |        |
| 27404  | 0     |        | 1     | 1      |
| 27408  | 0     |        | 2     | 0      |
| 27412  | 3     | 3      | 3     | 4      |
| 27426  | 1     | 1      | 1     | 2      |
| 27455  | 0     |        | 1     | 1      |
| 27464  | 5     | 3      | 2     | 3      |

| respid | Q24_1 | Q24a_1 | Q25_1 | Q25a_1 |
|--------|-------|--------|-------|--------|
| 27484  | 1     | 1      | 2     | 4      |
| 27493  | 0     |        | 1     | 1      |
| 27512  | 2     | 3      | 3     | 2      |
| 27525  | 1     | 1      | 2     | 1      |
| 27532  | 0     |        | 2     | 0      |
| 27539  | 0     |        | 1     | 0      |
| 27540  | 0     |        | 1     | 1      |
| 27552  | 4     | 4      | 2     | 4      |
| 27562  | 0     |        | 1     | 0      |
| 27568  | 0     |        | 1     | 0      |
| 27574  | 3     | 3      | 3     | 3      |
| 27575  | 0     |        | 1     | 1      |
| 27577  | 0     |        | 1     | 1      |
| 27589  | 0     |        | 1     | 0      |
| 27593  | 0     |        | 1     | 0      |
| 27594  | 5     | 3      | 4     | 3      |
| 27595  | 4     | 3      | 3     | 4      |
| 27598  | 0     |        | 1     | 0      |
| 27620  | 0     |        | 1     | 0      |
| 27621  | 3     | 2      | 3     | 2      |
| 27628  | 0     |        | 1     | 1      |
| 27633  | 0     |        | 2     | 1      |
| 27643  | 0     |        | 2     | 2      |
| 27644  | 3     | 3      | 3     | 3      |
| 27668  | 0     |        | 1     | 0      |
| 27681  | 0     |        | 1     | 0      |
| 27691  | 0     |        | 1     | 0      |
| 27693  | 0     |        | 1     | 1      |
| 27703  | 0     |        | 2     | 1      |
| 27708  | 1     | 1      | 1     | 1      |
| 27719  | 3     | 2      | 2     | 1      |
| 27720  | 0     |        | 1     | 0      |

| respid | Q24_1 | Q24a_1 | Q25_1 | Q25a_1 |
|--------|-------|--------|-------|--------|
| 27723  | 0     |        | 0     |        |
| 27725  | 1     | 0      | 5     | 2      |
| 27734  | 2     | 2      | 1     | 1      |
| 27744  | 0     |        | 2     | 1      |
| 27749  | 4     | 3      | 4     | 3      |
| 27762  | 2     | 1      | 2     | 2      |
| 27808  | 2     | 3      | 2     | 0      |
| 27810  | 4     | 3      | 4     | 3      |
| 27812  | 0     |        | 0     |        |
| 27815  | 0     |        | 0     |        |
| 27818  | 0     |        | 3     | 1      |
| 27823  | 0     |        | 1     | 0      |
| 27841  | 1     | 1      | 2     | 1      |
| 27843  | 0     |        | 0     |        |
| 27851  | 0     |        | 1     | 1      |
| 27858  | 0     |        | 3     | 2      |
| 27859  | 0     |        | 5     | 4      |
| 27869  | 0     |        | 1     | 0      |
| 27872  | 1     | 1      | 1     | 1      |
| 27873  | 0     |        | 1     | 1      |
| 27884  | 0     |        | 1     | 0      |
| 27904  | 2     | 2      | 2     | 2      |
| 27915  | 0     |        | 3     | 2      |
| 27918  | 0     |        | 2     | 1      |
| 27937  | 1     | 1      | 1     | 1      |
| 27943  | 2     | 2      | 3     | 2      |
| 27948  | 0     |        | 5     | 0      |
| 27971  | 1     | 3      | 1     | 2      |
| 27991  | 0     |        | 1     | 0      |
| 28000  | 0     |        | 1     | 1      |
| 28011  | 0     |        | 3     | 1      |
| 28022  | 0     |        | 1     | 0      |

| respid | Q24_1 | Q24a_1 | Q25_1 | Q25a_1 |
|--------|-------|--------|-------|--------|
| 28025  | 0     |        | 1     | 0      |
| 28041  | 0     |        | 1     | 0      |
| 28057  | 4     | 4      | 3     | 4      |
| 28080  | 0     |        | 0     |        |
| 28098  | 0     |        | 1     | 0      |
| 28104  | 0     |        | 2     | 1      |
| 28109  | 0     |        | 3     | 3      |
| 28129  | 0     |        | 4     | 1      |
| 28141  | 0     |        | 0     |        |
| 28143  | 0     |        | 1     | 0      |
| 28149  | 0     |        | 2     | 1      |
| 28151  | 0     |        | 2     | 2      |
| 28161  | 0     |        | 4     | 3      |
| 28169  | 0     |        | 3     | 1      |
| 28194  | 2     | 2      | 5     | 4      |
| 28197  | 0     |        | 0     |        |
| 28206  | 0     |        | 2     | 2      |
| 28218  | 0     |        | 1     | 1      |
| 28227  | 0     |        | 1     | 0      |
| 28235  | 0     |        | 1     | 1      |
| 28246  | 0     |        | 1     | 0      |
| 28259  | 3     | 3      | 2     | 3      |
| 28263  | 0     |        | 1     | 0      |
| 28267  | 1     | 2      | 2     | 2      |
| 28274  | 0     |        | 0     |        |
| 28278  | 0     |        | 1     | 0      |
| 28288  | 0     |        | 1     | 0      |
| 28308  | 0     |        | 0     |        |
| 28309  | 2     | 1      | 3     | 1      |
| 28323  | 1     | 2      | 4     | 2      |
| 28335  | 3     | 3      | 4     | 3      |
| 28354  | 3     | 3      | 3     | 3      |

| respid | Q24_1 | Q24a_1 | Q25_1 | Q25a_1 |
|--------|-------|--------|-------|--------|
| 28355  | 1     | 1      | 2     | 2      |
| 28356  | 1     | 1      | 3     | 1      |
| 28357  | 0     |        | 0     |        |
| 28363  | 0     |        | 1     | 0      |
| 28366  | 0     |        | 1     | 0      |
| 28372  | 1     | 2      | 2     | 2      |
| 28381  | 1     | 1      | 1     | 0      |
| 28388  | 4     | 2      | 2     | 1      |
| 28413  | 3     | 3      | 3     | 3      |
| 28421  | 0     |        | 0     |        |
| 28430  | 3     | 3      | 2     | 3      |
| 28439  | 4     | 2      | 3     | 3      |
| 28458  | 4     | 3      | 3     | 3      |
| 28461  | 0     |        | 1     | 0      |
| 28466  | 0     |        | 2     | 1      |
| 28492  | 0     |        | 1     | 1      |
| 28534  | 0     |        | 0     |        |
| 28537  | 2     | 2      | 3     | 2      |
| 28560  | 0     |        | 1     | 0      |
| 28566  | 0     |        | 1     | 0      |
| 28569  | 1     | 0      | 1     | 1      |
| 28584  | 3     | 3      | 3     | 3      |
| 28590  | 0     |        | 2     | 3      |
| 28596  | 0     |        | 0     |        |
| 28608  | 0     |        | 1     | 1      |
| 28631  | 3     | 3      | 3     | 3      |
| 28644  | 2     | 1      | 5     | 1      |
| 28646  | 0     |        | 1     | 0      |
| 28665  | 0     |        | 0     |        |
| 28686  | 0     |        | 2     | 0      |
| 28704  | 1     | 2      | 1     | 1      |
| 28719  | 0     |        | 1     | 0      |

| respid | Q24_1 | Q24a_1 | Q25_1 | Q25a_1 |
|--------|-------|--------|-------|--------|
| 28736  | 3     | 2      | 0     |        |
| 28739  | 1     | 2      | 2     | 2      |
| 28758  | 4     | 3      | 1     | 3      |
| 28761  | 2     | 1      | 3     | 2      |
| 28770  | 3     | 2      | 2     | 2      |
| 28774  | 0     |        | 1     | 0      |
| 28778  | 4     | 4      | 4     | 4      |
| 28783  | 1     | 1      | 2     | 1      |
| 28785  | 0     |        | 1     | 0      |
| 28797  | 3     | 3      | 3     | 2      |
| 28801  | 0     |        | 3     | 2      |
| 28821  | 0     |        | 0     |        |
| 28827  | 2     | 3      | 0     |        |
| 28828  | 0     |        | 1     | 1      |
| 28871  | 1     | 1      | 1     | 1      |
| 28876  | 0     |        | 2     | 1      |
| 28891  | 4     | 1      | 2     | 0      |
| 28898  | 0     |        | 0     |        |
| 28909  | 0     |        | 2     | 1      |
| 28930  | 1     | 0      | 2     | 0      |
| 28935  | 2     | 0      | 5     | 2      |
| 28964  | 0     |        | 0     |        |
| 28965  | 0     |        | 1     | 0      |
| 28967  | 3     | 2      | 2     | 2      |
| 28975  | 0     |        | 0     |        |
| 28982  | 0     |        | 1     | 1      |
| 28989  | 0     |        | 1     | 1      |
| 29003  | 2     | 2      | 2     | 3      |
| 29004  | 0     |        | 0     |        |
| 29007  | 0     |        | 1     | 2      |
| 29008  | 0     |        | 0     |        |
| 29011  | 1     | 0      | 1     | 0      |



| respid | Q24_1 | Q24a_1 | Q25_1 | Q25a_1 |
|--------|-------|--------|-------|--------|
| 29012  | 0     |        | 5     | 1      |
| 29014  | 0     |        | 0     |        |
| 29016  | 0     |        | 0     |        |
| 29018  | 2     | 1      | 5     | 2      |
| 29048  | 0     |        | 0     |        |
| 29184  | 0     |        | 2     | 1      |
| 29237  | 0     |        | 0     |        |
| 29252  | 0     |        | 0     |        |
| 29267  | 0     |        | 1     | 1      |
| 29276  | 0     |        | 0     |        |
| 29281  | 2     | 1      | 2     | 2      |
| 29285  | 0     |        | 1     | 0      |
| 29291  | 3     | 3      | 4     | 4      |
| 29304  | 2     | 2      | 1     | 2      |
| 29323  | 0     |        | 1     | 1      |
| 29330  | 2     | 1      | 2     | 1      |
| 29357  | 2     | 4      | 1     | 3      |
| 29416  | 0     |        | 1     | 0      |
| 29432  | 0     |        | 1     | 1      |
| 29482  | 1     | 1      | 1     | 1      |
| 29506  | 2     | 1      | 2     | 3      |
| 29509  | 0     |        | 0     |        |
| 29512  | 2     | 2      | 1     | 1      |
| 29519  | 0     |        | 1     | 1      |
| 29520  | 0     |        | 1     | 1      |
| 29521  | 1     | 1      | 2     | 2      |
| 29529  | 3     | 3      | 3     | 4      |
| 29532  | 0     |        | 1     | 0      |
| 29547  | 0     |        | 1     | 2      |
| 29551  | 0     |        | 1     | 0      |
| 29584  | 4     | 4      | 3     | 2      |
| 29591  | 2     | 1      | 2     | 1      |

| respid | Q24_1 | Q24a_1 | Q25_1 | Q25a_1 |
|--------|-------|--------|-------|--------|
| 29613  | 1     | 1      | 5     | 1      |
| 29615  | 0     |        | 1     | 0      |
| 29625  | 1     | 1      | 2     | 1      |
| 29660  | 1     | 2      | 1     | 2      |
| 29677  | 0     |        | 0     |        |
| 29700  | 0     |        | 1     | 0      |
| 29715  | 5     | 4      | 1     | 3      |
| 29720  | 0     |        | 0     |        |
| 29730  | 0     |        | 0     |        |
| 29734  | 0     |        | 0     |        |
| 29754  | 0     |        | 0     |        |
| 29771  | 0     |        | 1     | 0      |
| 29774  | 0     |        | 3     | 1      |
| 29783  | 0     |        | 1     | 1      |
| 29812  | 1     | 1      | 5     | 1      |
| 29813  | 0     |        | 0     |        |
| 29814  | 0     |        | 0     |        |
| 29820  | 1     | 1      | 0     |        |
| 29906  | 0     |        | 3     | 2      |
| 29907  | 0     |        | 5     | 2      |
| 29928  | 0     |        | 0     |        |
| 29932  | 2     | 1      | 1     | 1      |
| 29958  | 2     | 2      | 1     | 2      |
| 29982  | 0     |        | 5     | 1      |
| 29989  | 0     |        | 1     | 1      |
| 29994  | 0     |        | 1     | 0      |
| 30005  | 0     |        | 0     |        |
| 30077  | 0     |        | 1     | 0      |
| 30098  | 0     |        | 0     |        |
| 30107  | 0     |        | 1     | 1      |
| 30154  | 0     |        | 1     | 0      |
| 30159  | 0     |        | 1     | 0      |

| respid | Q24_1 | Q24a_1 | Q25_1 | Q25a_1 |
|--------|-------|--------|-------|--------|
| 30162  | 0     |        | 2     | 1      |
| 30163  | 0     |        | 0     |        |
| 30189  | 0     |        | 4     | 2      |
| 30230  | 0     |        | 3     | 0      |
| 30259  | 2     | 3      | 3     | 3      |
| 30284  | 1     | 0      | 1     | 1      |
| 30296  | 0     |        | 5     | 1      |
| 30330  | 2     | 2      | 1     | 0      |
| 30341  | 0     |        | 1     | 0      |
| 30352  | 2     | 2      | 2     | 2      |
| 30379  | 0     |        | 0     |        |
| 30424  | 0     |        | 0     |        |
| 30447  | 0     |        | 2     | 0      |
| 30477  | 3     | 2      | 4     | 2      |
| 30503  | 0     |        | 1     | 2      |
| 30515  | 5     | 4      | 3     | 3      |
| 30516  | 3     | 2      | 3     | 2      |
| 30623  | 2     | 1      | 2     | 2      |
| 30639  | 0     |        | 1     | 0      |
| 30670  | 0     |        | 4     | 2      |
| 30697  | 0     |        | 1     | 0      |
| 30735  | 0     |        | 1     | 1      |
| 30742  | 0     |        | 1     | 1      |
| 30751  | 5     | 3      | 2     | 1      |
| 30789  | 0     |        | 0     |        |
| 30867  | 3     | 3      | 3     | 3      |
| 30876  | 0     |        | 1     | 0      |
| 30877  | 0     |        | 0     |        |
| 30887  | 0     |        | 2     | 1      |
| 30891  | 2     | 1      | 2     | 2      |
| 31030  | 0     |        | 1     | 0      |
| 31059  | 1     | 2      | 2     | 3      |

| respid | Q24_1 | Q24a_1 | Q25_1 | Q25a_1 |
|--------|-------|--------|-------|--------|
| 31082  | 0     |        | 0     |        |
| 31106  | 0     |        | 1     | 0      |
| 31110  | 0     |        | 1     | 0      |
| 31265  | 3     | 4      | 3     | 4      |
| 31266  | 3     | 4      | 3     | 4      |
| 31267  | 3     | 4      | 3     | 4      |
| 31310  | 0     |        | 5     | 1      |
| 31325  | 0     |        | 1     | 0      |
| 31367  | 0     |        | 0     |        |
| 31389  | 0     |        | 1     | 0      |
| 31440  | 0     |        | 1     | 0      |
| 31465  | 0     |        | 2     | 1      |
| 31477  | 0     |        | 0     |        |
| 31491  | 1     | 1      | 0     |        |
| 31494  | 3     | 2      | 2     | 2      |
| 31509  | 0     |        | 5     | 4      |
| 31533  | 0     |        | 0     |        |
| 31547  | 0     |        | 1     | 1      |
| 31558  | 0     |        | 1     | 0      |
| 31579  | 0     |        | 0     |        |
| 31591  | 0     |        | 2     | 1      |
| 31596  | 4     | 2      | 2     | 2      |
| 31601  | 2     | 2      | 4     | 3      |
| 31605  | 0     |        | 1     | 0      |
| 31637  | 0     |        | 0     |        |
| 31646  | 0     |        | 1     | 0      |
| 31647  | 1     | 2      | 4     | 1      |
| 31650  | 0     |        | 1     | 0      |
| 31651  | 1     | 1      | 2     | 1      |
| 31657  | 0     |        | 0     |        |
| 31660  | 1     | 1      | 2     | 2      |
| 31661  | 2     | 1      | 1     | 1      |

| respid | Q24_1 | Q24a_1 | Q25_1 | Q25a_1 |
|--------|-------|--------|-------|--------|
| 31667  | 1     | 1      | 2     | 1      |
| 31674  | 1     | 0      | 0     |        |
| 31686  | 3     | 3      | 1     | 1      |
| 31693  | 0     |        | 0     |        |
| 31716  | 0     |        | 0     |        |
| 31818  | 0     |        | 0     |        |
| 31886  | 1     | 0      | 1     | 0      |
| 31945  | 3     | 3      | 4     | 3      |
| 31957  | 2     | 2      | 3     | 3      |
| 31966  | 1     | 1      | 2     | 1      |
| 31978  | 2     | 1      | 2     | 1      |
| 31999  | 0     |        | 2     | 1      |
| 32026  | 1     | 1      | 2     | 1      |
| 32033  | 1     | 1      | 2     | 2      |
| 32037  | 3     | 4      | 3     | 4      |
| 32038  | 3     | 4      | 3     | 4      |
| 32047  | 2     | 3      | 2     | 2      |
| 32053  | 0     |        | 0     |        |
| 32069  | 2     | 0      | 1     | 1      |
| 32081  | 1     | 0      | 1     | 0      |
| 32123  | 1     | 2      | 2     | 2      |
| 32130  | 0     |        | 1     | 1      |
| 32141  | 0     |        | 0     |        |
| 32158  | 0     |        | 0     |        |
| 32165  | 0     |        | 2     | 1      |
| 32180  | 0     |        | 0     |        |
| 32221  | 0     |        | 2     | 3      |
| 32292  | 0     |        | 1     | 0      |
| 32318  | 0     |        | 2     | 0      |
| 32346  | 1     | 1      | 2     | 1      |
| 32402  | 2     | 2      | 2     | 2      |
| 32422  | 0     |        | 1     | 1      |

| respid | Q24_1 | Q24a_1 | Q25_1 | Q25a_1 |
|--------|-------|--------|-------|--------|
| 32439  | 0     |        | 1     | 0      |
| 32507  | 3     | 2      | 2     | 3      |
| 32522  | 0     |        | 0     |        |
| 32535  | 0     |        | 0     |        |
| 32546  | 0     |        | 1     | 0      |
| 32553  | 0     |        | 0     |        |
| 32570  | 0     |        | 0     |        |
| 32592  | 0     |        | 2     | 0      |
| 32605  | 2     | 1      | 1     | 0      |
| 32630  | 3     | 2      | 2     | 2      |
| 32642  | 3     | 3      | 2     | 2      |
| 32646  | 0     |        | 5     | 0      |
| 32665  | 0     |        | 1     | 0      |
| 32677  | 0     |        | 1     | 1      |
| 32694  | 0     |        | 1     | 0      |
| 32698  | 0     |        | 3     | 3      |
| 32754  | 2     | 1      | 3     | 4      |
| 32799  | 1     | 1      | 2     | 2      |
| 32816  | 0     |        | 0     |        |
| 32819  | 1     | 1      | 1     | 1      |
| 32840  | 0     |        | 2     | 1      |
| 32861  | 1     | 1      | 1     | 2      |
| 32866  | 0     |        | 1     | 1      |
| 32889  | 1     | 1      | 5     | 3      |
| 32960  | 0     |        | 0     |        |
| 32965  | 1     | 1      | 3     | 1      |
| 32986  | 1     | 3      | 0     |        |
| 33005  | 0     |        | 0     |        |
| 33054  | 2     | 1      | 2     | 2      |
| 33072  | 0     |        | 2     | 2      |
| 33095  | 0     |        | 1     | 0      |
| 33099  | 0     |        | 5     | 0      |

| respid | Q24_1 | Q24a_1 | Q25_1 | Q25a_1 |
|--------|-------|--------|-------|--------|
| 33121  | 0     |        | 1     | 0      |
| 33152  | 1     | 0      | 1     | 0      |
| 33159  | 0     |        | 1     | 0      |
| 33189  | 0     |        | 1     | 0      |
| 33198  | 0     |        | 2     | 3      |
| 33202  | 3     | 3      | 2     | 3      |
| 33204  | 0     |        | 1     | 0      |
| 33224  | 0     |        | 1     | 1      |
| 33272  | 2     | 2      | 2     | 2      |
| 33294  | 0     |        | 0     |        |
| 33300  | 2     | 1      | 2     | 1      |
| 33314  | 0     |        | 1     | 1      |
| 33338  | 0     |        | 1     | 1      |
| 33350  | 4     | 3      | 3     | 3      |
| 33362  | 3     | 2      | 2     | 2      |
| 33368  | 0     |        | 0     |        |
| 33374  | 2     | 1      | 2     | 2      |
| 33380  | 0     |        | 3     | 2      |
| 33385  | 3     | 3      | 1     | 0      |
| 33402  | 2     | 1      | 2     | 1      |
| 33414  | 0     |        | 1     | 2      |
| 33439  | 2     | 1      | 2     | 1      |
| 33449  | 3     | 2      | 2     | 2      |
| 33533  | 0     |        | 1     | 0      |
| 33540  | 0     |        | 1     | 0      |
| 33556  | 0     |        | 2     | 2      |
| 33615  | 0     |        | 1     | 0      |
| 33694  | 0     |        | 0     |        |
| 33717  | 0     |        | 1     | 1      |
| 33729  | 1     | 1      | 1     | 0      |
| 33746  | 0     |        | 0     |        |
| 33764  | 0     |        | 1     | 0      |

| respid | Q24_1 | Q24a_1 | Q25_1 | Q25a_1 |
|--------|-------|--------|-------|--------|
| 33790  | 1     | 0      | 3     | 2      |
| 33868  | 0     |        | 2     | 0      |
| 33872  | 4     | 4      | 4     | 2      |
| 33883  | 1     | 1      | 0     |        |
| 33884  | 0     |        | 1     | 1      |
| 33900  | 1     | 1      | 1     | 1      |
| 33933  | 0     |        | 2     | 2      |
| 33949  | 0     |        | 1     | 0      |
| 34005  | 0     |        | 0     |        |
| 34016  | 0     |        | 0     |        |
| 34041  | 2     | 1      | 2     | 1      |
| 34053  | 0     |        | 1     | 1      |
| 34056  | 0     |        | 0     |        |
| 34093  | 0     |        | 4     | 1      |
| 34112  | 1     | 2      | 1     | 1      |
| 34136  | 4     | 3      | 5     | 4      |
| 34138  | 0     |        | 1     | 0      |
| 34139  | 0     |        | 1     | 1      |
| 34189  | 1     | 2      | 0     |        |
| 34239  | 1     | 1      | 2     | 1      |
| 34240  | 2     | 2      | 2     | 1      |
| 34241  | 0     |        | 1     | 0      |
| 34259  | 2     | 3      | 1     | 1      |
| 34303  | 2     | 2      | 2     | 2      |
| 34306  | 0     |        | 0     |        |
| 34395  | 2     | 2      | 2     | 0      |
| 34463  | 1     | 0      | 5     | 3      |
| 34466  | 2     | 2      | 2     | 1      |
| 34471  | 0     |        | 2     | 1      |
| 34489  | 1     | 3      | 2     | 2      |
| 34518  | 1     | 0      | 0     |        |
| 34542  | 2     | 2      | 2     | 2      |



| respid | Q24_1 | Q24a_1 | Q25_1 | Q25a_1 |
|--------|-------|--------|-------|--------|
| 34595  | 0     |        | 0     |        |
| 34604  | 0     |        | 0     |        |
| 34631  | 3     | 1      | 2     | 3      |
| 34665  | 1     | 1      | 1     | 0      |
| 34716  | 0     |        | 1     | 0      |
| 34729  | 0     |        | 0     |        |
| 34772  | 3     | 3      | 2     | 3      |
| 34800  | 2     | 1      | 2     | 2      |
| 34819  | 2     | 1      | 5     | 2      |
| 34829  | 0     |        | 2     | 1      |
| 34831  | 0     |        | 2     | 2      |
| 34839  | 0     |        | 1     | 0      |
| 34868  | 3     | 2      | 2     | 2      |
| 34869  | 0     |        | 1     | 0      |
| 34882  | 0     |        | 2     | 0      |
| 34895  | 3     | 4      | 3     | 2      |
| 34901  | 2     | 1      | 3     | 0      |
| 34904  | 2     | 2      | 2     | 1      |
| 34907  | 0     |        | 4     | 3      |
| 34914  | 0     |        | 1     | 1      |
| 34918  | 1     | 1      | 1     | 1      |
| 34924  | 0     |        | 1     | 0      |
| 34933  | 2     | 2      | 5     | 2      |
| 34938  | 1     | 1      | 2     | 1      |
| 34952  | 3     | 3      | 3     | 4      |
| 34959  | 0     |        | 2     | 1      |
| 34972  | 0     |        | 5     | 0      |
| 34973  | 0     |        | 2     | 1      |
| 34975  | 2     | 2      | 2     | 1      |
| 34977  | 1     | 1      | 2     | 1      |
| 34978  | 0     |        | 4     | 0      |
| 34980  | 0     |        | 1     | 0      |

| respid | Q24_1 | Q24a_1 | Q25_1 | Q25a_1 |
|--------|-------|--------|-------|--------|
| 34984  | 3     | 2      | 2     | 1      |
| 34986  | 3     | 3      | 1     | 2      |
| 34994  | 0     |        | 2     | 1      |
| 34996  | 1     | 2      | 3     | 2      |
| 35003  | 0     |        | 0     |        |
| 35014  | 0     |        | 0     |        |
| 35029  | 2     | 0      | 1     | 1      |
| 35030  | 2     | 2      | 3     | 3      |
| 35037  | 0     |        | 1     | 1      |
| 35043  | 0     |        | 0     |        |
| 35048  | 0     |        | 0     |        |
| 35055  | 0     |        | 1     | 0      |
| 35067  | 0     |        | 1     | 0      |
| 35072  | 0     |        | 1     | 0      |
| 35078  | 3     | 1      | 1     | 1      |
| 35084  | 0     |        | 0     |        |
| 35095  | 0     |        | 0     |        |
| 35096  | 0     |        | 0     |        |
| 35097  | 2     | 2      | 1     | 1      |
| 35098  | 2     | 1      | 1     | 2      |
| 35109  | 5     | 4      | 4     | 3      |
| 35114  | 0     |        | 2     | 0      |
| 35115  | 0     |        | 2     | 1      |
| 35124  | 2     | 2      | 2     | 1      |
| 35125  | 0     |        | 4     | 0      |
| 35141  | 0     |        | 0     |        |
| 35142  | 0     |        | 4     | 0      |
| 35145  | 0     |        | 0     |        |
| 35149  | 0     |        | 3     | 2      |
| 35159  | 0     |        | 2     | 1      |
| 35163  | 2     | 2      | 3     | 1      |
| 35174  | 0     |        | 5     | 2      |

| respid | Q24_1 | Q24a_1 | Q25_1 | Q25a_1 |
|--------|-------|--------|-------|--------|
| 35188  | 0     |        | 0     |        |
| 35189  | 0     |        | 1     | 1      |
| 35201  | 0     |        | 4     | 2      |
| 35215  | 0     |        | 1     | 0      |
| 35228  | 0     |        | 2     | 0      |
| 35235  | 0     |        | 2     | 1      |
| 35239  | 2     | 1      | 4     | 3      |
| 35243  | 1     | 1      | 1     | 1      |
| 35245  | 0     |        | 2     | 1      |
| 35259  | 0     |        | 0     |        |
| 35265  | 0     |        | 1     | 0      |
| 35272  | 1     | 1      | 1     | 1      |
| 35280  | 1     | 1      | 1     | 1      |
| 35298  | 0     |        | 1     | 0      |
| 35305  | 1     | 1      | 2     | 0      |
| 35306  | 4     | 3      | 3     | 3      |
| 35307  | 0     |        | 1     | 0      |
| 35311  | 0     |        | 2     | 0      |
| 35322  | 1     | 2      | 1     | 0      |
| 35323  | 0     |        | 1     | 0      |
| 35327  | 0     |        | 2     | 0      |
| 35366  | 0     |        | 4     | 1      |
| 35378  | 2     | 1      | 2     | 2      |
| 35389  | 2     | 1      | 3     | 2      |
| 35390  | 0     |        | 1     | 0      |
| 35395  | 0     |        | 2     | 2      |
| 35411  | 0     |        | 0     |        |
| 35423  | 0     |        | 1     | 0      |
| 35425  | 0     |        | 4     | 3      |
| 35434  | 0     |        | 1     | 1      |
| 35462  | 0     |        | 1     | 0      |
| 35478  | 3     | 2      | 3     | 2      |

| respid | Q24_1 | Q24a_1 | Q25_1 | Q25a_1 |
|--------|-------|--------|-------|--------|
| 35481  | 4     | 3      | 4     | 2      |
| 35498  | 0     |        | 1     | 1      |
| 35499  | 0     |        | 0     |        |
| 35502  | 4     | 2      | 2     | 1      |
| 35503  | 0     |        | 0     |        |
| 35504  | 0     |        | 0     |        |
| 35508  | 0     |        | 1     | 1      |
| 35513  | 1     | 1      | 2     | 1      |
| 35516  | 0     |        | 0     |        |
| 35519  | 0     |        | 4     | 2      |
| 35530  | 2     | 1      | 5     | 3      |
| 35533  | 1     | 2      | 1     | 0      |
| 35561  | 2     | 2      | 2     | 2      |
| 35565  | 0     |        | 1     | 0      |
| 35588  | 0     |        | 1     | 0      |
| 35598  | 0     |        | 0     |        |
| 35607  | 0     |        | 1     | 1      |
| 35638  | 0     |        | 0     |        |
| 35642  | 1     | 1      | 1     | 1      |
| 35643  | 1     | 1      | 5     | 1      |
| 35680  | 0     |        | 2     | 1      |
| 35697  | 0     |        | 3     | 1      |
| 35703  | 0     |        | 0     |        |
| 35709  | 0     |        | 1     | 2      |
| 35710  | 0     |        | 1     | 0      |
| 35721  | 5     | 1      | 4     | 1      |
| 35723  | 0     |        | 2     | 0      |
| 35736  | 1     | 2      | 3     | 2      |
| 35739  | 2     | 1      | 1     | 0      |
| 35745  | 3     | 2      | 5     | 3      |
| 35748  | 0     |        | 4     | 4      |
| 35750  | 0     |        | 5     | 1      |

| respid | Q24_1 | Q24a_1 | Q25_1 | Q25a_1 |
|--------|-------|--------|-------|--------|
| 35752  | 1     | 0      | 3     | 1      |
| 35773  | 0     |        | 1     | 1      |
| 35779  | 0     |        | 2     | 1      |
| 35791  | 0     |        | 0     |        |
| 35801  | 0     |        | 2     | 1      |
| 35802  | 0     |        | 1     | 1      |
| 35837  | 0     |        | 3     | 2      |
| 35853  | 0     |        | 1     | 1      |
| 35858  | 0     |        | 2     | 0      |
| 35860  | 0     |        | 2     | 1      |
| 35875  | 3     | 3      | 3     | 4      |
| 35883  | 2     | 2      | 2     | 1      |
| 35890  | 0     |        | 1     | 0      |
| 35898  | 0     |        | 1     | 0      |
| 35901  | 3     | 4      | 2     | 3      |
| 35914  | 0     |        | 1     | 0      |
| 35924  | 3     | 2      | 2     | 2      |
| 35950  | 0     |        | 3     | 2      |
| 35961  | 0     |        | 1     | 0      |
| 35966  | 0     |        | 1     | 1      |
| 35967  | 0     |        | 1     | 0      |
| 35971  | 0     |        | 1     | 0      |
| 35974  | 0     |        | 0     |        |
| 35983  | 4     | 3      | 3     | 4      |
| 35992  | 2     | 2      | 3     | 3      |
| 36010  | 0     |        | 1     | 1      |
| 36019  | 4     | 4      | 3     | 4      |
| 36029  | 1     | 1      | 2     | 3      |
| 36033  | 0     |        | 1     | 0      |
| 36042  | 0     |        | 2     | 1      |
| 36043  | 0     |        | 2     | 1      |
| 36048  | 0     |        | 1     | 0      |

| respid | Q24_1 | Q24a_1 | Q25_1 | Q25a_1 |
|--------|-------|--------|-------|--------|
| 36050  | 1     | 1      | 0     |        |
| 36062  | 0     |        | 2     | 2      |
| 36063  | 0     |        | 0     |        |
| 36092  | 0     |        | 1     | 2      |
| 36097  | 1     | 1      | 1     | 1      |
| 36108  | 0     |        | 2     | 0      |
| 36113  | 4     | 4      | 3     | 4      |
| 36117  | 0     |        | 1     | 1      |
| 36129  | 0     |        | 2     | 2      |
| 36144  | 0     |        | 2     | 0      |
| 36152  | 0     |        | 1     | 0      |
| 36154  | 0     |        | 1     | 1      |
| 36155  | 0     |        | 1     | 0      |
| 36167  | 0     |        | 3     | 0      |
| 36172  | 1     | 0      | 1     | 1      |
| 36173  | 0     |        | 1     | 0      |
| 36174  | 0     |        | 3     | 2      |
| 36182  | 0     |        | 1     | 0      |
| 36192  | 0     |        | 4     | 0      |
| 36195  | 3     | 3      | 3     | 3      |
| 36204  | 0     |        | 1     | 0      |
| 36205  | 5     | 1      | 0     |        |
| 36208  | 0     |        | 0     |        |
| 36216  | 0     |        | 2     | 2      |
| 36221  | 0     |        | 2     | 2      |
| 36244  | 0     |        | 2     | 0      |
| 36255  | 1     | 1      | 2     | 2      |
| 36259  | 0     |        | 1     | 0      |
| 36262  | 3     | 3      | 2     | 2      |
| 36268  | 0     |        | 3     | 1      |
| 36308  | 0     |        | 2     | 1      |
| 36324  | 0     |        | 2     | 1      |

| respid | Q24_1 | Q24a_1 | Q25_1 | Q25a_1 |
|--------|-------|--------|-------|--------|
| 36330  | 0     |        | 4     | 1      |
| 36331  | 0     |        | 3     | 2      |
| 36336  | 0     |        | 1     | 0      |
| 36337  | 0     |        | 2     | 1      |
| 36364  | 1     | 0      | 1     | 1      |
| 36365  | 1     | 2      | 2     | 0      |
| 36396  | 1     | 1      | 1     | 0      |
| 36403  | 0     |        | 1     | 0      |
| 36410  | 0     |        | 1     | 0      |
| 36413  | 0     |        | 1     | 0      |
| 36422  | 0     |        | 1     | 0      |
| 36424  | 2     | 4      | 2     | 4      |
| 36425  | 4     | 2      | 4     | 3      |
| 36432  | 0     |        | 0     |        |
| 36435  | 4     | 4      | 4     | 3      |
| 36446  | 4     | 3      | 3     | 3      |
| 36451  | 1     | 2      | 2     | 3      |
| 36453  | 0     |        | 1     | 1      |
| 36459  | 2     | 2      | 2     | 2      |
| 36464  | 2     | 2      | 4     | 3      |
| 36465  | 1     | 1      | 1     | 0      |
| 36466  | 0     |        | 0     |        |
| 36476  | 2     | 1      | 2     | 1      |
| 36487  | 0     |        | 3     | 0      |
| 36488  | 3     | 4      | 2     | 3      |
| 36500  | 0     |        | 0     |        |
| 36504  | 1     | 1      | 2     | 1      |
| 36513  | 0     |        | 2     | 0      |
| 36515  | 1     | 1      | 2     | 2      |
| 36521  | 2     | 2      | 1     | 1      |
| 36530  | 2     | 2      | 2     | 2      |
| 36556  | 1     | 2      | 2     | 3      |

| respid | Q24_1 | Q24a_1 | Q25_1 | Q25a_1 |
|--------|-------|--------|-------|--------|
| 36564  | 4     | 4      | 5     | 2      |
| 36584  | 0     |        | 1     | 0      |
| 36585  | 0     |        | 0     |        |
| 36586  | 0     |        | 0     |        |
| 36606  | 2     | 2      | 4     | 4      |
| 36615  | 0     |        | 1     | 1      |
| 36628  | 0     |        | 1     | 0      |
| 36630  | 0     |        | 3     | 1      |
| 36631  | 1     | 1      | 2     | 3      |
| 36636  | 0     |        | 1     | 0      |
| 36637  | 0     |        | 1     | 1      |
| 36651  | 0     |        | 1     | 2      |
| 36661  | 0     |        | 1     | 0      |
| 36670  | 1     | 2      | 2     | 1      |
| 36671  | 1     | 0      | 2     | 0      |
| 36688  | 0     |        | 0     |        |
| 36694  | 0     |        | 0     |        |
| 36696  | 0     |        | 0     |        |
| 36703  | 0     |        | 0     |        |
| 36719  | 3     | 4      | 3     | 4      |
| 36721  | 3     | 4      | 3     | 4      |
| 36740  | 2     | 1      | 1     | 1      |
| 36755  | 0     |        | 2     | 0      |
| 36765  | 2     | 2      | 2     | 1      |
| 36770  | 0     |        | 0     |        |
| 36773  | 1     | 1      | 1     | 1      |
| 36813  | 1     | 1      | 2     | 1      |
| 36819  | 1     | 1      | 3     | 1      |
| 36820  | 0     |        | 3     | 1      |
| 36821  | 0     |        | 1     | 0      |
| 36827  | 0     |        | 3     | 2      |
| 36835  | 0     |        | 1     | 1      |



| respid | Q24_1 | Q24a_1 | Q25_1 | Q25a_1 |
|--------|-------|--------|-------|--------|
| 36837  | 0     |        | 2     | 1      |
| 36849  | 0     |        | 2     | 0      |
| 36851  | 0     |        | 2     | 1      |
| 36868  | 2     | 2      | 1     | 2      |
| 36870  | 0     |        | 0     |        |
| 36871  | 0     |        | 0     |        |
| 36874  | 0     |        | 2     | 2      |
| 36878  | 0     |        | 1     | 2      |
| 36887  | 0     |        | 1     | 0      |
| 36889  | 0     |        | 5     | 1      |
| 36891  | 0     |        | 3     | 0      |
| 36903  | 1     | 2      | 2     | 2      |
| 36905  | 0     |        | 1     | 0      |
| 36913  | 0     |        | 1     | 0      |
| 36949  | 1     | 1      | 1     | 1      |
| 36954  | 2     | 2      | 2     | 2      |
| 36962  | 0     |        | 2     | 1      |
| 36965  | 3     | 3      | 1     | 1      |
| 36970  | 0     |        | 1     | 1      |
| 36979  | 1     | 2      | 1     | 2      |
| 36990  | 1     | 1      | 1     | 0      |
| 36991  | 0     |        | 2     | 2      |
| 36992  | 0     |        | 1     | 1      |
| 37015  | 0     |        | 0     |        |
| 37017  | 0     |        | 1     | 0      |
| 37020  | 0     |        | 0     |        |
| 37033  | 2     | 1      | 2     | 2      |
| 37041  | 0     |        | 1     | 0      |
| 37048  | 0     |        | 1     | 0      |
| 37050  | 0     |        | 1     | 2      |
| 37054  | 2     | 1      | 2     | 2      |
| 37057  | 0     |        | 2     | 2      |

| respid | Q24_1 | Q24a_1 | Q25_1 | Q25a_1 |
|--------|-------|--------|-------|--------|
| 37067  | 0     |        | 2     | 1      |
| 37074  | 5     | 0      | 1     | 0      |
| 37088  | 0     |        | 2     | 1      |
| 37090  | 1     | 1      | 2     | 2      |
| 37110  | 3     | 3      | 4     | 3      |
| 37122  | 1     | 1      | 1     | 0      |
| 37124  | 0     |        | 2     | 1      |
| 37126  | 0     |        | 0     |        |
| 37129  | 3     | 2      | 2     | 0      |
| 37130  | 0     |        | 0     |        |
| 37142  | 2     | 3      | 2     | 1      |
| 37160  | 3     | 1      | 3     | 1      |
| 37168  | 0     |        | 1     | 0      |
| 37169  | 0     |        | 2     | 3      |
| 37191  | 0     |        | 1     | 0      |
| 37197  | 2     | 1      | 2     | 2      |
| 37204  | 0     |        | 1     | 1      |
| 37213  | 3     | 2      | 2     | 1      |
| 37238  | 1     | 0      | 2     | 3      |
| 37242  | 1     | 1      | 5     | 1      |
| 37243  | 4     | 4      | 2     | 3      |
| 37275  | 0     |        | 2     | 1      |
| 37305  | 0     |        | 2     | 1      |
| 37357  | 2     | 2      | 2     | 2      |
| 37365  | 2     | 1      | 1     | 1      |
| 37370  | 0     |        | 0     |        |
| 37406  | 3     | 3      | 3     | 3      |
| 37410  | 2     | 2      | 3     | 2      |
| 37411  | 4     | 3      | 4     | 3      |
| 37427  | 0     |        | 3     | 2      |
| 37437  | 3     | 3      | 2     | 3      |
| 37440  | 0     |        | 1     | 1      |

| respid | Q24_1 | Q24a_1 | Q25_1 | Q25a_1 |
|--------|-------|--------|-------|--------|
| 37452  | 0     |        | 0     |        |
| 37465  | 2     | 2      | 2     | 2      |
| 37468  | 2     | 2      | 4     | 2      |
| 37469  | 0     |        | 1     | 1      |
| 37477  | 0     |        | 1     | 0      |
| 37509  | 0     |        | 5     | 0      |
| 37513  | 2     | 2      | 1     | 1      |
| 37534  | 0     |        | 2     | 1      |
| 37537  | 0     |        | 1     | 4      |
| 37560  | 2     | 2      | 1     | 1      |
| 37566  | 2     | 2      | 3     | 2      |
| 37572  | 0     |        | 3     | 3      |
| 37574  | 0     |        | 2     | 0      |
| 37575  | 0     |        | 2     | 3      |
| 37590  | 0     |        | 3     | 4      |
| 37593  | 0     |        | 1     | 1      |
| 37599  | 0     |        | 1     | 0      |
| 37641  | 0     |        | 4     | 2      |
| 37651  | 1     | 1      | 2     | 1      |
| 37670  | 0     |        | 1     | 0      |
| 37680  | 0     |        | 2     | 4      |
| 37690  | 2     | 3      | 1     | 3      |
| 37694  | 0     |        | 0     |        |
| 37705  | 0     |        | 1     | 2      |
| 37710  | 3     | 2      | 2     | 2      |
| 37719  | 0     |        | 5     | 1      |
| 37741  | 2     | 1      | 2     | 1      |
| 37752  | 0     |        | 1     | 0      |
| 37755  | 2     | 1      | 4     | 3      |
| 37757  | 0     |        | 1     | 0      |
| 37783  | 1     | 1      | 0     |        |
| 37793  | 4     | 3      | 4     | 3      |

| respid | Q24_1 | Q24a_1 | Q25_1 | Q25a_1 |
|--------|-------|--------|-------|--------|
| 37800  | 2     | 2      | 4     | 3      |
| 37801  | 0     |        | 2     | 4      |
| 37820  | 4     | 3      | 4     | 2      |
| 37826  | 2     | 2      | 2     | 1      |
| 37835  | 1     | 2      | 2     | 2      |
| 37839  | 2     | 2      | 3     | 2      |
| 37871  | 3     | 3      | 3     | 3      |
| 37876  | 3     | 1      | 1     | 1      |
| 37879  | 2     | 2      | 2     | 1      |
| 37894  | 0     |        | 1     | 1      |
| 37895  | 2     | 2      | 3     | 2      |
| 37901  | 1     | 2      | 1     | 1      |
| 37926  | 0     |        | 1     | 0      |
| 37937  | 2     | 1      | 1     | 2      |
| 37938  | 0     |        | 0     |        |
| 37959  | 0     |        | 2     | 1      |
| 37970  | 0     |        | 0     |        |
| 37972  | 3     | 3      | 3     | 3      |
| 37988  | 2     | 1      | 1     | 1      |
| 37989  | 2     | 2      | 2     | 1      |
| 38000  | 0     |        | 1     | 0      |
| 38028  | 4     | 3      | 3     | 3      |
| 38042  | 2     | 2      | 3     | 2      |
| 38052  | 0     |        | 1     | 2      |
| 38056  | 0     |        | 2     | 1      |
| 38106  | 1     | 2      | 2     | 0      |
| 38114  | 3     | 3      | 4     | 3      |
| 38134  | 0     |        | 2     | 2      |
| 38135  | 1     | 2      | 1     | 1      |
| 38139  | 1     | 1      | 3     | 2      |
| 38160  | 1     | 2      | 1     | 1      |
| 38164  | 1     | 0      | 4     | 2      |

| respid | Q24_1 | Q24a_1 | Q25_1 | Q25a_1 |
|--------|-------|--------|-------|--------|
| 38168  | 0     |        | 0     |        |
| 38173  | 0     |        | 1     | 0      |
| 38193  | 0     |        | 1     | 2      |
| 38204  | 0     |        | 1     | 0      |
| 38206  | 0     |        | 1     | 1      |
| 38233  | 2     | 3      | 2     | 2      |
| 38242  | 3     | 2      | 2     | 2      |
| 38245  | 1     | 1      | 2     | 2      |
| 38261  | 3     | 2      | 4     | 3      |
| 38288  | 0     |        | 2     | 2      |
| 38296  | 0     |        | 2     | 1      |
| 38299  | 2     | 1      | 2     | 1      |
| 38300  | 2     | 1      | 2     | 1      |
| 38303  | 0     |        | 1     | 1      |
| 38317  | 0     |        | 1     | 0      |
| 38328  | 3     | 3      | 3     | 2      |
| 38333  | 0     |        | 1     | 1      |
| 38336  | 0     |        | 1     | 1      |
| 38338  | 0     |        | 0     |        |
| 38342  | 0     |        | 2     | 1      |
| 38360  | 0     |        | 1     | 0      |
| 38362  | 0     |        | 1     | 2      |
| 38364  | 1     | 1      | 0     |        |
| 38402  | 1     | 1      | 3     | 1      |
| 38423  | 2     | 3      | 3     | 2      |
| 38424  | 3     | 4      | 5     | 4      |
| 38435  | 2     | 1      | 2     | 3      |
| 38450  | 0     |        | 0     |        |
| 38455  | 5     | 2      | 2     | 1      |
| 38467  | 0     |        | 3     | 2      |
| 38468  | 1     | 2      | 4     | 3      |
| 38472  | 0     |        | 2     | 2      |

| respid | Q24_1 | Q24a_1 | Q25_1 | Q25a_1 |
|--------|-------|--------|-------|--------|
| 38484  | 0     |        | 1     | 0      |
| 38498  | 0     |        | 1     | 2      |
| 38507  | 0     |        | 1     | 0      |
| 38511  | 0     |        | 1     | 1      |
| 38524  | 4     | 3      | 5     | 3      |
| 38526  | 0     |        | 2     | 1      |
| 38534  | 0     |        | 2     | 1      |
| 38536  | 0     |        | 1     | 0      |
| 38539  | 0     |        | 3     | 0      |
| 38547  | 0     |        | 1     | 0      |
| 38549  | 0     |        | 1     | 0      |
| 38575  | 2     | 1      | 4     | 2      |
| 38579  | 0     |        | 2     | 2      |
| 38585  | 0     |        | 1     | 0      |
| 38589  | 4     | 4      | 5     | 4      |
| 38595  | 2     | 3      | 3     | 2      |
| 38602  | 0     |        | 1     | 0      |
| 38603  | 2     | 1      | 3     | 3      |
| 38612  | 1     | 1      | 2     | 1      |
| 38621  | 3     | 2      | 3     | 3      |
| 38624  | 1     | 1      | 2     | 1      |
| 38636  | 0     |        | 0     |        |
| 38656  | 0     |        | 4     | 0      |
| 38668  | 0     |        | 1     | 1      |
| 38675  | 0     |        | 0     |        |
| 38676  | 1     | 1      | 0     |        |
| 38682  | 1     | 0      | 1     | 1      |
| 38689  | 1     | 1      | 2     | 0      |
| 38702  | 0     |        | 0     |        |
| 38704  | 3     | 3      | 4     | 4      |
| 38713  | 0     |        | 1     | 0      |
| 38718  | 2     | 2      | 1     | 0      |

| respid | Q24_1 | Q24a_1 | Q25_1 | Q25a_1 |
|--------|-------|--------|-------|--------|
| 38725  | 5     | 4      | 2     | 1      |
| 38730  | 3     | 2      | 4     | 2      |
| 38737  | 2     | 2      | 4     | 0      |
| 38738  | 1     | 2      | 3     | 2      |
| 38744  | 0     |        | 0     |        |
| 38746  | 0     |        | 5     | 2      |
| 38753  | 0     |        | 1     | 1      |
| 38756  | 2     | 2      | 3     | 2      |
| 38760  | 1     | 1      | 0     |        |
| 38762  | 3     | 3      | 3     | 2      |
| 38765  | 0     |        | 1     | 2      |
| 38769  | 1     | 0      | 1     | 1      |
| 38781  | 2     | 4      | 4     | 3      |
| 38786  | 0     |        | 1     | 1      |
| 38790  | 1     | 3      | 1     | 1      |
| 38793  | 0     |        | 5     | 0      |
| 38797  | 0     |        | 1     | 1      |
| 38802  | 0     |        | 1     | 1      |
| 38815  | 2     | 1      | 4     | 3      |
| 38826  | 2     | 2      | 4     | 4      |
| 38828  | 0     |        | 1     | 0      |
| 38829  | 3     | 3      | 3     | 3      |
| 38835  | 1     | 2      | 1     | 1      |
| 38842  | 4     | 1      | 1     | 1      |
| 38853  | 0     |        | 1     | 2      |
| 38855  | 3     | 3      | 3     | 3      |
| 38860  | 4     | 3      | 4     | 4      |
| 38869  | 1     | 1      | 2     | 1      |
| 38882  | 1     | 1      | 4     | 3      |
| 38897  | 0     |        | 5     | 0      |
| 38903  | 3     | 4      | 3     | 3      |
| 38910  | 2     | 3      | 4     | 4      |

| respid | Q24_1 | Q24a_1 | Q25_1 | Q25a_1 |
|--------|-------|--------|-------|--------|
| 38948  | 5     | 3      | 3     | 2      |
| 38949  | 1     | 1      | 4     | 4      |
| 38953  | 3     | 2      | 3     | 4      |
| 38989  | 2     | 2      | 2     | 2      |
| 38997  | 2     | 0      | 2     | 0      |
| 38999  | 0     |        | 1     | 1      |
| 39002  | 0     |        | 4     | 4      |
| 39003  | 5     | 1      | 3     | 2      |
| 39006  | 1     | 0      | 1     | 0      |
| 39014  | 0     |        | 0     |        |
| 39017  | 4     | 3      | 5     | 4      |
| 39018  | 4     | 3      | 3     | 3      |
| 39025  | 0     |        | 5     | 4      |
| 39031  | 4     | 2      | 5     | 3      |
| 39061  | 4     | 2      | 4     | 4      |
| 39131  | 0     |        | 1     | 1      |
| 39153  | 3     | 4      | 5     | 4      |
| 39194  | 1     | 3      | 5     | 3      |
| 39204  | 0     |        | 1     | 0      |
| 39208  | 1     | 2      | 1     | 3      |
| 39213  | 2     | 2      | 2     | 3      |
| 39231  | 1     | 1      | 1     | 1      |
| 39251  | 2     | 2      | 1     | 1      |
| 39257  | 2     | 3      | 3     | 4      |
| 39262  | 0     |        | 2     | 2      |
| 39269  | 0     |        | 4     | 4      |
| 39272  | 0     |        | 1     | 1      |
| 39280  | 2     | 2      | 3     | 2      |
| 39294  | 3     | 3      | 0     |        |
| 39297  | 2     | 2      | 3     | 2      |
| 39300  | 0     |        | 1     | 3      |
| 39307  | 0     |        | 2     | 2      |



| respid | Q24_1 | Q24a_1 | Q25_1 | Q25a_1 |
|--------|-------|--------|-------|--------|
| 39320  | 0     |        | 3     | 4      |
| 39333  | 0     |        | 2     | 0      |
| 39335  | 3     | 4      | 3     | 4      |
| 39339  | 0     |        | 0     |        |
| 39375  | 0     |        | 0     |        |
| 39377  | 0     |        | 0     |        |
| 39380  | 0     |        | 2     | 3      |
| 39425  | 0     |        | 2     | 0      |
| 39590  | 0     |        | 0     |        |
| 40529  | 0     |        | 1     | 0      |
| 40702  | 0     |        | 1     | 0      |
| 40788  | 0     |        | 1     | 0      |
| 40841  | 0     |        | 0     |        |
| 40965  | 0     |        | 0     |        |
| 41092  | 1     | 0      | 1     | 0      |
| 41534  | 0     |        | 0     |        |
| 41919  | 0     |        | 1     | 0      |
| 42110  | 0     |        | 0     |        |
| 42135  | 0     |        | 1     | 2      |
| 42142  | 0     |        | 5     | 1      |
| 42163  | 0     |        | 2     | 2      |
| 42164  | 0     |        | 2     | 0      |
| 42172  | 0     |        | 2     | 0      |
| 42177  | 0     |        | 0     |        |
| 42181  | 0     |        | 1     | 0      |
| 42193  | 2     | 1      | 2     | 1      |
| 42196  | 1     | 1      | 1     | 0      |
| 42202  | 0     |        | 1     | 1      |
| 42248  | 1     | 1      | 2     | 3      |
| 42283  | 3     | 2      | 1     | 1      |
| 42284  | 1     | 1      | 1     | 1      |
| 42323  | 0     |        | 0     |        |

| respid | Q24_1 | Q24a_1 | Q25_1 | Q25a_1 |
|--------|-------|--------|-------|--------|
| 42349  | 0     |        | 2     | 0      |
| 42351  | 0     |        | 0     |        |
| 42357  | 0     |        | 0     |        |
| 42366  | 0     |        | 0     |        |
| 42380  | 0     |        | 1     | 1      |
| 42414  | 4     | 2      | 1     | 2      |
| 42420  | 3     | 3      | 2     | 3      |
| 42454  | 0     |        | 0     |        |
| 42458  | 0     |        | 1     | 0      |
| 42461  | 0     |        | 0     |        |
| 42488  | 0     |        | 1     | 1      |
| 42511  | 0     |        | 0     |        |
| 42512  | 0     |        | 1     | 0      |
| 42530  | 1     | 1      | 5     | 3      |
| 42531  | 1     | 3      | 3     | 4      |
| 42533  | 5     | 3      | 5     | 4      |
| 42549  | 0     |        | 1     | 1      |
| 42550  | 1     | 1      | 1     | 1      |
| 42553  | 0     |        | 0     |        |
| 42562  | 2     | 2      | 2     | 2      |
| 42567  | 0     |        | 1     | 1      |
| 42589  | 1     | 1      | 1     | 1      |
| 42604  | 0     |        | 3     | 0      |
| 42618  | 0     |        | 3     | 1      |
| 42621  | 0     |        | 1     | 2      |
| 42627  | 0     |        | 0     |        |
| 42641  | 1     | 1      | 1     | 0      |
| 42655  | 4     | 3      | 3     | 3      |
| 42666  | 0     |        | 1     | 1      |
| 42667  | 0     |        | 1     | 0      |
| 42697  | 1     | 1      | 1     | 1      |
| 42703  | 1     | 0      | 0     |        |

| respid | Q24_1 | Q24a_1 | Q25_1 | Q25a_1 |
|--------|-------|--------|-------|--------|
| 42712  | 1     | 1      | 0     |        |
| 42731  | 1     | 1      | 3     | 1      |
| 42780  | 0     |        | 0     |        |
| 42785  | 1     | 1      | 2     | 1      |
| 42788  | 0     |        | 0     |        |
| 42802  | 2     | 4      | 1     | 0      |
| 42818  | 3     | 2      | 1     | 0      |
| 42821  | 3     | 1      | 5     | 2      |
| 42824  | 0     |        | 5     | 1      |
| 42831  | 0     |        | 3     | 2      |
| 42836  | 2     | 1      | 1     | 1      |
| 42864  | 0     |        | 2     | 2      |
| 42875  | 0     |        | 1     | 0      |
| 42891  | 5     | 4      | 5     | 4      |
| 42897  | 1     | 0      | 1     | 1      |
| 42900  | 1     | 1      | 2     | 2      |
| 42902  | 1     | 0      | 1     | 0      |
| 42921  | 0     |        | 1     | 1      |
| 42925  | 1     | 1      | 1     | 0      |
| 42944  | 0     |        | 0     |        |
| 42950  | 0     |        | 0     |        |
| 42963  | 0     |        | 1     | 1      |
| 42967  | 0     |        | 0     |        |
| 42985  | 0     |        | 0     |        |
| 42990  | 0     |        | 1     | 1      |
| 42996  | 5     | 3      | 3     | 2      |
| 43002  | 1     | 1      | 2     | 1      |
| 43004  | 0     |        | 0     |        |
| 43012  | 0     |        | 1     | 0      |
| 43027  | 4     | 2      | 5     | 1      |
| 43028  | 0     |        | 1     | 0      |
| 43029  | 1     | 0      | 1     | 1      |

| respid | Q24_1 | Q24a_1 | Q25_1 | Q25a_1 |
|--------|-------|--------|-------|--------|
| 43031  | 0     |        | 1     | 1      |
| 43042  | 0     |        | 0     |        |
| 43054  | 0     |        | 1     | 1      |
| 43058  | 0     |        | 2     | 1      |
| 43064  | 0     |        | 3     | 0      |
| 43069  | 1     | 1      | 1     | 1      |
| 43071  | 0     |        | 0     |        |
| 43072  | 0     |        | 1     | 0      |
| 43077  | 1     | 1      | 2     | 1      |
| 43078  | 0     |        | 0     |        |
| 43082  | 0     |        | 0     |        |
| 43092  | 1     | 1      | 0     |        |
| 43096  | 0     |        | 5     | 0      |
| 43109  | 0     |        | 0     |        |
| 43113  | 0     |        | 1     | 0      |
| 43123  | 0     |        | 0     |        |
| 43127  | 0     |        | 2     | 0      |
| 43128  | 0     |        | 1     | 2      |
| 43129  | 0     |        | 1     | 0      |
| 43133  | 2     | 2      | 3     | 2      |
| 43140  | 0     |        | 0     |        |
| 43143  | 3     | 3      | 3     | 1      |
| 43149  | 0     |        | 1     | 1      |
| 43150  | 0     |        | 0     |        |
| 43153  | 4     | 3      | 3     | 2      |
| 43170  | 0     |        | 1     | 0      |
| 43187  | 0     |        | 2     | 2      |
| 43188  | 2     | 2      | 1     | 2      |
| 43198  | 0     |        | 1     | 0      |
| 43208  | 0     |        | 1     | 0      |
| 43216  | 1     | 1      | 1     | 1      |
| 43222  | 0     |        | 1     | 1      |

| respid | Q24_1 | Q24a_1 | Q25_1 | Q25a_1 |
|--------|-------|--------|-------|--------|
| 43224  | 0     |        | 2     | 1      |
| 43230  | 1     | 2      | 1     | 1      |
| 43231  | 2     | 1      | 1     | 1      |
| 43265  | 3     | 1      | 2     | 2      |
| 43270  | 1     | 2      | 1     | 2      |
| 43283  | 1     | 1      | 1     | 1      |
| 43295  | 1     | 1      | 1     | 1      |
| 43297  | 0     |        | 1     | 0      |
| 43299  | 2     | 2      | 2     | 2      |
| 43307  | 0     |        | 2     | 1      |
| 43316  | 1     | 2      | 1     | 1      |
| 43318  | 1     | 1      | 1     | 1      |
| 43319  | 0     |        | 1     | 1      |
| 43324  | 1     | 1      | 1     | 1      |
| 43325  | 0     |        | 3     | 3      |
| 43327  | 1     | 0      | 1     | 0      |
| 43338  | 1     | 1      | 2     | 1      |
| 43342  | 0     |        | 2     | 2      |
| 43348  | 0     |        | 2     | 1      |
| 43395  | 1     | 0      | 2     | 1      |
| 43404  | 2     | 1      | 1     | 1      |
| 43406  | 0     |        | 5     | 2      |
| 43407  | 0     |        | 1     | 0      |
| 43411  | 1     | 0      | 1     | 0      |
| 43416  | 3     | 2      | 3     | 1      |
| 43428  | 0     |        | 2     | 1      |
| 43429  | 2     | 1      | 1     | 1      |
| 43432  | 1     | 0      | 1     | 0      |
| 43443  | 0     |        | 1     | 0      |
| 43455  | 0     |        | 0     |        |
| 43457  | 1     | 1      | 1     | 1      |
| 43458  | 0     |        | 0     |        |

| respid | Q24_1 | Q24a_1 | Q25_1 | Q25a_1 |
|--------|-------|--------|-------|--------|
| 43477  | 2     | 1      | 3     | 2      |
| 43520  | 0     |        | 1     | 1      |
| 43521  | 0     |        | 2     | 0      |
| 43550  | 0     |        | 1     | 0      |
| 43551  | 2     | 2      | 5     | 2      |
| 43554  | 0     |        | 2     | 1      |
| 43560  | 1     | 0      | 3     | 1      |
| 43569  | 0     |        | 3     | 0      |
| 43583  | 0     |        | 0     |        |
| 43590  | 4     | 3      | 2     | 2      |
| 43591  | 0     |        | 1     | 0      |
| 43595  | 0     |        | 0     |        |
| 43599  | 1     | 1      | 2     | 2      |
| 43606  | 0     |        | 3     | 1      |
| 43609  | 0     |        | 2     | 1      |
| 43629  | 0     |        | 1     | 0      |
| 43636  | 0     |        | 2     | 1      |
| 43661  | 0     |        | 0     |        |
| 43668  | 0     |        | 5     | 1      |
| 43672  | 0     |        | 0     |        |
| 43677  | 2     | 1      | 2     | 1      |
| 43683  | 0     |        | 2     | 2      |
| 43708  | 1     | 1      | 2     | 1      |
| 43713  | 1     | 1      | 2     | 1      |
| 43718  | 0     |        | 0     |        |
| 43725  | 0     |        | 1     | 0      |
| 43747  | 0     |        | 2     | 1      |
| 43755  | 0     |        | 1     | 0      |
| 43770  | 1     | 2      | 0     |        |
| 43775  | 2     | 2      | 2     | 1      |
| 43788  | 0     |        | 0     |        |
| 43790  | 2     | 2      | 2     | 3      |

| respid | Q24_1 | Q24a_1 | Q25_1 | Q25a_1 |
|--------|-------|--------|-------|--------|
| 43797  | 1     | 1      | 1     | 1      |
| 43798  | 2     | 1      | 1     | 1      |
| 43811  | 1     | 1      | 2     | 1      |
| 43819  | 1     | 2      | 1     | 1      |
| 43821  | 1     | 2      | 3     | 1      |
| 43822  | 0     |        | 1     | 1      |
| 43825  | 2     | 1      | 2     | 3      |
| 43826  | 0     |        | 2     | 1      |
| 43831  | 0     |        | 2     | 2      |
| 43836  | 1     | 1      | 2     | 2      |
| 43852  | 2     | 2      | 1     | 1      |
| 43857  | 0     |        | 3     | 2      |
| 43858  | 0     |        | 2     | 1      |
| 43859  | 1     | 2      | 2     | 1      |
| 43863  | 0     |        | 0     |        |
| 43868  | 1     | 2      | 2     | 1      |
| 43872  | 1     | 1      | 1     | 1      |
| 43874  | 1     | 3      | 2     | 1      |
| 43882  | 0     |        | 1     | 0      |
| 43886  | 0     |        | 0     |        |
| 43903  | 3     | 3      | 3     | 1      |
| 43929  | 0     |        | 1     | 0      |
| 43932  | 0     |        | 2     | 0      |
| 43936  | 0     |        | 1     | 1      |
| 43962  | 0     |        | 1     | 0      |
| 43964  | 0     |        | 3     | 1      |
| 43968  | 2     | 3      | 2     | 1      |
| 43979  | 1     | 1      | 2     | 1      |
| 44006  | 2     | 2      | 2     | 2      |
| 44009  | 1     | 3      | 1     | 0      |
| 44023  | 2     | 2      | 1     | 1      |
| 44035  | 1     | 1      | 2     | 2      |

| respid | Q24_1 | Q24a_1 | Q25_1 | Q25a_1 |
|--------|-------|--------|-------|--------|
| 44038  | 3     | 3      | 2     | 3      |
| 44039  | 1     | 1      | 2     | 1      |
| 44043  | 1     | 1      | 1     | 1      |
| 44048  | 1     | 1      | 2     | 1      |
| 44050  | 0     |        | 0     |        |
| 44051  | 1     | 1      | 2     | 2      |
| 44061  | 1     | 2      | 2     | 1      |
| 44063  | 1     | 2      | 1     | 2      |
| 44072  | 2     | 1      | 1     | 1      |
| 44075  | 1     | 1      | 1     | 1      |
| 44089  | 2     | 2      | 1     | 1      |
| 44090  | 4     | 4      | 5     | 4      |
| 44091  | 2     | 2      | 1     | 1      |
| 44092  | 0     |        | 2     | 1      |
| 44110  | 1     | 1      | 1     | 1      |
| 44112  | 2     | 1      | 2     | 1      |
| 44114  | 1     | 1      | 1     | 0      |
| 44143  | 2     | 2      | 2     | 2      |
| 44179  | 0     |        | 2     | 1      |
| 44234  | 0     |        | 0     |        |
| 44236  | 0     |        | 1     | 0      |
| 44239  | 1     | 1      | 1     | 1      |
| 44241  | 2     | 2      | 1     | 1      |
| 44253  | 0     |        | 0     |        |
| 44260  | 1     | 1      | 1     | 1      |
| 44261  | 2     | 1      | 1     | 1      |
| 44263  | 1     | 1      | 1     | 1      |
| 44264  | 0     |        | 2     | 1      |
| 44265  | 0     |        | 1     | 0      |
| 44267  | 1     | 1      | 1     | 2      |
| 44306  | 2     | 1      | 1     | 1      |
| 44309  | 3     | 3      | 3     | 3      |



| respid | Q24_1 | Q24a_1 | Q25_1 | Q25a_1 |
|--------|-------|--------|-------|--------|
| 44310  | 0     |        | 1     | 2      |
| 44361  | 0     |        | 2     | 0      |
| 44380  | 0     |        | 2     | 1      |
| 44386  | 0     |        | 0     |        |
| 44419  | 0     |        | 2     | 1      |
| 44426  | 1     | 1      | 3     | 1      |
| 44479  | 0     |        | 0     |        |
| 44484  | 0     |        | 1     | 2      |
| 44487  | 0     |        | 2     | 3      |
| 44509  | 0     |        | 1     | 0      |
| 44540  | 1     | 1      | 1     | 0      |
| 44551  | 1     | 1      | 5     | 2      |
| 44553  | 0     |        | 1     | 0      |
| 44650  | 0     |        | 1     | 1      |
| 44665  | 2     | 2      | 3     | 3      |
| 44779  | 0     |        | 2     | 0      |
| 44797  | 1     | 1      | 1     | 1      |
| 44807  | 0     |        | 5     | 0      |
| 44815  | 2     | 2      | 2     | 1      |
| 44836  | 0     |        | 1     | 0      |
| 44868  | 1     | 1      | 2     | 1      |
| 44927  | 1     | 1      | 2     | 1      |
| 44983  | 0     |        | 0     |        |
| 45040  | 0     |        | 1     | 0      |
| 45051  | 2     | 0      | 0     |        |
| 45067  | 0     |        | 2     | 1      |
| 45074  | 0     |        | 0     |        |
| 45115  | 0     |        | 3     | 1      |
| 45187  | 3     | 3      | 3     | 3      |
| 45221  | 4     | 3      | 2     | 3      |
| 45279  | 0     |        | 1     | 1      |
| 45308  | 1     | 1      | 1     | 1      |

| respid | Q24_1 | Q24a_1 | Q25_1 | Q25a_1 |
|--------|-------|--------|-------|--------|
| 45317  | 0     |        | 1     | 0      |
| 45379  | 0     |        | 1     | 1      |
| 45451  | 0     |        | 1     | 1      |
| 45472  | 2     | 1      | 4     | 4      |
| 45474  | 2     | 3      | 3     | 3      |
| 45544  | 0     |        | 1     | 0      |
| 45561  | 1     | 1      | 0     |        |
| 45596  | 2     | 2      | 1     | 1      |

**Instrum**

**ICS**

**Symptom** Voiding

**Symptom** Voiding

**Type of R** Symptom

Bother

Symptom

Bother

**Descripti** Splitting/spraying

Symptom Bother

Hesitancy

Symptom Bother

| respid | ICS Splitting/spraying: Q26_1 | Q26a_1 | ICS: Hesitancy: Q27_1 | Q27a_1 |
|--------|-------------------------------|--------|-----------------------|--------|
| 241    | 0                             |        | 0                     |        |
| 242    | 0                             |        | 0                     |        |
| 243    | 1                             | 1      | 1                     | 1      |
| 244    | 1                             | 1      | 0                     |        |
| 245    | 0                             |        | 1                     | 1      |
| 246    | 1                             | 1      | 1                     | 1      |
| 247    | 2                             | 1      | 2                     | 2      |
| 253    | 0                             |        | 0                     |        |
| 256    | 0                             |        | 4                     | 3      |
| 257    | 1                             | 1      | 0                     |        |
| 258    | 1                             | 1      | 1                     | 1      |
| 259    | 0                             |        | 0                     |        |
| 263    | 3                             | 1      | 1                     | 0      |
| 264    | 1                             | 0      | 0                     |        |
| 265    | 3                             | 3      | 3                     | 3      |
| 266    | 0                             |        | 0                     |        |
| 268    | 1                             | 1      | 1                     | 1      |
| 270    | 0                             |        | 0                     |        |
| 272    | 1                             | 1      | 1                     | 1      |
| 274    | 0                             |        | 1                     | 1      |

| respid | ICS Splitting/spraying: Q26_1 | Q26a_1 | ICS: Hesitancy: Q27_1 | Q27a_1 |
|--------|-------------------------------|--------|-----------------------|--------|
| 275    | 0                             |        | 0                     |        |
| 276    | 0                             |        | 0                     |        |
| 277    | 1                             | 1      | 1                     | 1      |
| 279    | 1                             | 1      | 1                     | 1      |
| 286    | 1                             | 0      | 0                     |        |
| 290    | 1                             | 1      | 0                     |        |
| 291    | 0                             |        | 0                     |        |
| 295    | 0                             |        | 0                     |        |
| 297    | 0                             |        | 1                     | 1      |
| 299    | 1                             | 1      | 0                     |        |
| 300    | 1                             | 0      | 1                     | 1      |
| 303    | 0                             |        | 1                     | 0      |
| 304    | 0                             |        | 0                     |        |
| 306    | 0                             |        | 0                     |        |
| 307    | 0                             |        | 0                     |        |
| 312    | 4                             | 3      | 4                     | 3      |
| 315    | 0                             |        | 1                     | 1      |
| 317    | 1                             | 0      | 0                     |        |
| 322    | 1                             | 1      | 1                     | 1      |
| 335    | 0                             |        | 1                     | 1      |
| 374    | 2                             | 1      | 2                     | 1      |
| 378    | 1                             | 1      | 1                     | 1      |
| 380    | 1                             | 1      | 1                     | 1      |
| 382    | 1                             | 2      | 1                     | 2      |
| 384    | 3                             | 3      | 1                     | 3      |
| 385    | 1                             | 1      | 1                     | 1      |
| 395    | 0                             |        | 0                     |        |
| 396    | 0                             |        | 0                     |        |
| 398    | 0                             |        | 0                     |        |
| 402    | 4                             | 3      | 4                     | 3      |
| 414    | 1                             | 0      | 0                     |        |
| 415    | 0                             |        | 0                     |        |

| respid | ICS Splitting/spraying: Q26_1 | Q26a_1 | ICS: Hesitancy: Q27_1 | Q27a_1 |
|--------|-------------------------------|--------|-----------------------|--------|
| 416    | 0                             |        | 0                     |        |
| 420    | 2                             | 2      | 1                     | 1      |
| 421    | 2                             | 1      | 1                     | 1      |
| 422    | 0                             |        | 0                     |        |
| 423    | 0                             |        | 0                     |        |
| 424    | 0                             |        | 0                     |        |
| 425    | 5                             | 2      | 1                     | 0      |
| 428    | 1                             | 0      | 1                     | 1      |
| 429    | 0                             |        | 0                     |        |
| 431    | 0                             |        | 1                     | 0      |
| 437    | 0                             |        | 0                     |        |
| 438    | 0                             |        | 0                     |        |
| 441    | 0                             |        | 0                     |        |
| 444    | 1                             | 0      | 0                     |        |
| 448    | 0                             |        | 0                     |        |
| 449    | 1                             | 0      | 1                     | 1      |
| 457    | 0                             |        | 1                     | 1      |
| 460    | 0                             |        | 0                     |        |
| 469    | 0                             |        | 0                     |        |
| 471    | 0                             |        | 0                     |        |
| 473    | 0                             |        | 0                     |        |
| 476    | 1                             | 0      | 0                     |        |
| 479    | 1                             | 1      | 0                     |        |
| 485    | 0                             |        | 0                     |        |
| 488    | 0                             |        | 0                     |        |
| 494    | 0                             |        | 0                     |        |
| 496    | 1                             | 0      | 0                     |        |
| 501    | 0                             |        | 0                     |        |
| 502    | 3                             | 2      | 1                     | 2      |
| 503    | 0                             |        | 0                     |        |
| 506    | 0                             |        | 0                     |        |
| 514    | 1                             | 1      | 1                     | 1      |

| respid | ICS Splitting/spraying: Q26_1 | Q26a_1 | ICS: Hesitancy: Q27_1 | Q27a_1 |
|--------|-------------------------------|--------|-----------------------|--------|
| 515    | 0                             |        | 0                     |        |
| 516    | 0                             |        | 0                     |        |
| 519    | 1                             | 2      | 1                     | 1      |
| 522    | 0                             |        | 0                     |        |
| 525    | 1                             | 1      | 1                     | 1      |
| 528    | 0                             |        | 0                     |        |
| 532    | 1                             | 1      | 1                     | 1      |
| 536    | 1                             | 0      | 0                     |        |
| 539    | 0                             |        | 0                     |        |
| 540    | 0                             |        | 0                     |        |
| 547    | 2                             | 2      | 0                     |        |
| 551    | 0                             |        | 0                     |        |
| 554    | 1                             | 1      | 1                     | 1      |
| 558    | 1                             | 1      | 1                     | 1      |
| 563    | 1                             | 0      | 0                     |        |
| 564    | 2                             | 1      | 1                     | 1      |
| 565    | 0                             |        | 0                     |        |
| 567    | 0                             |        | 0                     |        |
| 569    | 3                             | 2      | 0                     |        |
| 572    | 1                             | 1      | 1                     | 1      |
| 574    | 0                             |        | 0                     |        |
| 583    | 1                             | 1      | 0                     |        |
| 589    | 0                             |        | 0                     |        |
| 592    | 1                             | 0      | 1                     | 2      |
| 593    | 0                             |        | 0                     |        |
| 594    | 3                             | 2      | 3                     | 3      |
| 597    | 1                             | 0      | 0                     |        |
| 601    | 0                             |        | 0                     |        |
| 607    | 1                             | 1      | 1                     | 1      |
| 610    | 0                             |        | 1                     | 1      |
| 612    | 3                             | 2      | 4                     | 3      |
| 627    | 1                             | 1      | 0                     |        |

| respid | ICS Splitting/spraying: Q26_1 | Q26a_1 | ICS: Hesitancy: Q27_1 | Q27a_1 |
|--------|-------------------------------|--------|-----------------------|--------|
| 631    | 0                             |        | 0                     |        |
| 633    | 1                             | 0      | 0                     |        |
| 636    | 0                             |        | 0                     |        |
| 656    | 0                             |        | 0                     |        |
| 659    | 0                             |        | 0                     |        |
| 670    | 0                             |        | 0                     |        |
| 672    | 0                             |        | 0                     |        |
| 673    | 1                             | 1      | 1                     | 1      |
| 675    | 0                             |        | 0                     |        |
| 676    | 2                             | 1      | 2                     | 2      |
| 679    | 1                             | 1      | 2                     | 2      |
| 683    | 0                             |        | 1                     | 0      |
| 684    | 0                             |        | 0                     |        |
| 690    | 0                             |        | 0                     |        |
| 701    | 5                             | 2      | 4                     | 2      |
| 709    | 3                             | 3      | 3                     | 2      |
| 719    | 1                             | 0      | 0                     |        |
| 726    | 0                             |        | 0                     |        |
| 730    | 0                             |        | 0                     |        |
| 731    | 0                             |        | 0                     |        |
| 732    | 0                             |        | 0                     |        |
| 733    | 0                             |        | 0                     |        |
| 735    | 0                             |        | 0                     |        |
| 738    | 1                             | 0      | 1                     | 0      |
| 740    | 0                             |        | 1                     | 0      |
| 742    | 1                             | 2      | 0                     |        |
| 744    | 1                             | 0      | 1                     | 0      |
| 749    | 0                             |        | 1                     | 1      |
| 751    | 0                             |        | 0                     |        |
| 752    | 5                             | 0      | 0                     |        |
| 753    | 1                             | 0      | 0                     |        |
| 755    | 1                             | 1      | 0                     |        |

| respid | ICS Splitting/spraying: Q26_1 | Q26a_1 | ICS: Hesitancy: Q27_1 | Q27a_1 |
|--------|-------------------------------|--------|-----------------------|--------|
| 756    | 0                             |        | 0                     |        |
| 759    | 0                             |        | 0                     |        |
| 760    | 1                             | 0      | 1                     | 0      |
| 763    | 1                             | 1      | 0                     |        |
| 764    | 0                             |        | 0                     |        |
| 765    | 0                             |        | 0                     |        |
| 766    | 1                             | 0      | 1                     | 0      |
| 767    | 1                             | 1      | 1                     | 0      |
| 771    | 1                             | 1      | 1                     | 1      |
| 773    | 1                             | 1      | 1                     | 1      |
| 774    | 1                             | 0      | 0                     |        |
| 775    | 3                             | 1      | 2                     | 1      |
| 776    | 1                             | 1      | 1                     | 1      |
| 778    | 1                             | 1      | 2                     | 1      |
| 780    | 0                             |        | 0                     |        |
| 781    | 1                             | 0      | 0                     |        |
| 782    | 1                             | 1      | 0                     |        |
| 783    | 0                             |        | 1                     | 1      |
| 786    | 3                             | 2      | 3                     | 2      |
| 788    | 0                             |        | 0                     |        |
| 792    | 0                             |        | 0                     |        |
| 794    | 1                             | 2      | 2                     | 2      |
| 795    | 1                             | 0      | 0                     |        |
| 799    | 1                             | 1      | 1                     | 1      |
| 800    | 0                             |        | 0                     |        |
| 801    | 5                             | 2      | 1                     | 1      |
| 804    | 0                             |        | 0                     |        |
| 806    | 1                             | 1      | 0                     |        |
| 807    | 1                             | 0      | 2                     | 1      |
| 808    | 0                             |        | 4                     | 3      |
| 809    | 5                             | 1      | 1                     | 1      |
| 811    | 0                             |        | 0                     |        |



| respid | ICS Splitting/spraying: Q26_1 | Q26a_1 | ICS: Hesitancy: Q27_1 | Q27a_1 |
|--------|-------------------------------|--------|-----------------------|--------|
| 812    | 0                             |        | 0                     |        |
| 815    | 1                             | 0      | 0                     |        |
| 817    | 2                             | 0      | 0                     |        |
| 818    | 0                             |        | 0                     |        |
| 819    | 0                             |        | 1                     | 1      |
| 821    | 0                             |        | 0                     |        |
| 824    | 1                             | 0      | 0                     |        |
| 825    | 3                             | 0      | 0                     |        |
| 828    | 0                             |        | 0                     |        |
| 832    | 2                             | 1      | 2                     | 1      |
| 834    | 0                             |        | 0                     |        |
| 835    | 2                             | 1      | 1                     | 1      |
| 836    | 5                             | 0      | 0                     |        |
| 837    | 0                             |        | 0                     |        |
| 840    | 2                             | 1      | 0                     |        |
| 841    | 0                             |        | 0                     |        |
| 845    | 0                             |        | 0                     |        |
| 846    | 0                             |        | 0                     |        |
| 849    | 1                             | 0      | 0                     |        |
| 852    | 0                             |        | 1                     | 0      |
| 854    | 5                             | 1      | 2                     | 1      |
| 856    | 1                             | 0      | 1                     | 0      |
| 858    | 1                             | 0      | 0                     |        |
| 859    | 1                             | 0      | 1                     | 1      |
| 861    | 1                             | 0      | 0                     |        |
| 863    | 0                             |        | 0                     |        |
| 864    | 0                             |        | 1                     | 0      |
| 866    | 1                             | 0      | 0                     |        |
| 869    | 0                             |        | 0                     |        |
| 870    | 0                             |        | 1                     | 1      |
| 871    | 0                             |        | 0                     |        |
| 873    | 1                             | 2      | 2                     | 1      |

| respid | ICS Splitting/spraying: Q26_1 | Q26a_1 | ICS: Hesitancy: Q27_1 | Q27a_1 |
|--------|-------------------------------|--------|-----------------------|--------|
| 879    | 1                             | 0      | 0                     |        |
| 880    | 0                             |        | 0                     |        |
| 881    | 0                             |        | 1                     | 2      |
| 882    | 0                             |        | 1                     | 0      |
| 885    | 0                             |        | 0                     |        |
| 886    | 0                             |        | 0                     |        |
| 887    | 4                             | 2      | 2                     | 2      |
| 888    | 0                             |        | 0                     |        |
| 889    | 0                             |        | 1                     | 1      |
| 890    | 2                             | 1      | 1                     | 0      |
| 900    | 0                             |        | 0                     |        |
| 901    | 3                             | 1      | 0                     |        |
| 902    | 0                             |        | 1                     | 1      |
| 903    | 1                             | 0      | 0                     |        |
| 906    | 5                             | 2      | 0                     |        |
| 907    | 0                             |        | 0                     |        |
| 908    | 2                             | 1      | 0                     |        |
| 910    | 0                             |        | 0                     |        |
| 911    | 0                             |        | 1                     | 0      |
| 912    | 0                             |        | 0                     |        |
| 915    | 0                             |        | 0                     |        |
| 923    | 1                             | 0      | 2                     | 3      |
| 925    | 0                             |        | 0                     |        |
| 926    | 0                             |        | 0                     |        |
| 929    | 0                             |        | 0                     |        |
| 932    | 5                             | 4      | 0                     |        |
| 933    | 1                             | 0      | 3                     | 3      |
| 934    | 0                             |        | 0                     |        |
| 938    | 2                             | 2      | 1                     | 1      |
| 941    | 0                             |        | 0                     |        |
| 942    | 0                             |        | 0                     |        |
| 943    | 0                             |        | 0                     |        |

| respid | ICS Splitting/spraying: Q26_1 | Q26a_1 | ICS: Hesitancy: Q27_1 | Q27a_1 |
|--------|-------------------------------|--------|-----------------------|--------|
| 945    | 0                             |        | 0                     |        |
| 946    | 0                             |        | 0                     |        |
| 947    | 3                             | 0      | 0                     |        |
| 948    | 0                             |        | 0                     |        |
| 949    | 0                             |        | 0                     |        |
| 952    | 0                             |        | 0                     |        |
| 956    | 0                             |        | 0                     |        |
| 957    | 0                             |        | 0                     |        |
| 959    | 1                             | 0      | 0                     |        |
| 961    | 1                             | 1      | 1                     | 1      |
| 962    | 2                             | 3      | 2                     | 3      |
| 965    | 3                             | 0      | 3                     | 2      |
| 967    | 1                             | 1      | 1                     | 1      |
| 969    | 0                             |        | 0                     |        |
| 970    | 0                             |        | 0                     |        |
| 973    | 0                             |        | 0                     |        |
| 974    | 1                             | 0      | 1                     | 0      |
| 975    | 0                             |        | 0                     |        |
| 976    | 1                             | 1      | 0                     |        |
| 977    | 0                             |        | 1                     | 1      |
| 979    | 1                             | 1      | 0                     |        |
| 981    | 0                             |        | 0                     |        |
| 983    | 0                             |        | 0                     |        |
| 987    | 1                             | 1      | 0                     |        |
| 991    | 0                             |        | 0                     |        |
| 992    | 1                             | 0      | 0                     |        |
| 993    | 0                             |        | 0                     |        |
| 994    | 1                             | 1      | 0                     |        |
| 995    | 1                             | 1      | 1                     | 2      |
| 998    | 0                             |        | 0                     |        |
| 1000   | 0                             |        | 5                     | 1      |
| 1001   | 4                             | 2      | 3                     | 2      |

| respid | ICS Splitting/spraying: Q26_1 | Q26a_1 | ICS: Hesitancy: Q27_1 | Q27a_1 |
|--------|-------------------------------|--------|-----------------------|--------|
| 1002   | 0                             |        | 0                     |        |
| 1004   | 0                             |        | 0                     |        |
| 1005   | 1                             | 1      | 1                     | 1      |
| 1006   | 1                             | 1      | 1                     | 1      |
| 1007   | 0                             |        | 0                     |        |
| 1009   | 0                             |        | 0                     |        |
| 1013   | 2                             | 1      | 0                     |        |
| 1015   | 0                             |        | 0                     |        |
| 1020   | 1                             | 1      | 2                     | 1      |
| 1022   | 0                             |        | 0                     |        |
| 1024   | 0                             |        | 0                     |        |
| 1025   | 0                             |        | 0                     |        |
| 1027   | 1                             | 1      | 0                     |        |
| 1031   | 1                             | 1      | 0                     |        |
| 1037   | 2                             | 0      | 0                     |        |
| 1039   | 0                             |        | 0                     |        |
| 1040   | 1                             | 1      | 1                     | 1      |
| 1056   | 3                             | 2      | 2                     | 2      |
| 1057   | 1                             | 1      | 0                     |        |
| 1062   | 0                             |        | 0                     |        |
| 1069   | 1                             | 0      | 1                     | 0      |
| 1070   | 1                             | 0      | 0                     |        |
| 1072   | 0                             |        | 1                     | 1      |
| 1076   | 1                             | 0      | 0                     |        |
| 1077   | 0                             |        | 0                     |        |
| 1078   | 1                             | 0      | 0                     |        |
| 1080   | 0                             |        | 0                     |        |
| 1094   | 0                             |        | 0                     |        |
| 1098   | 0                             |        | 1                     | 1      |
| 1099   | 0                             |        | 0                     |        |
| 1102   | 0                             |        | 1                     | 0      |
| 1110   | 0                             |        | 0                     |        |

| respid | ICS Splitting/spraying: Q26_1 | Q26a_1 | ICS: Hesitancy: Q27_1 | Q27a_1 |
|--------|-------------------------------|--------|-----------------------|--------|
| 1117   | 4                             | 1      | 0                     |        |
| 1119   | 0                             |        | 0                     |        |
| 1126   | 0                             |        | 3                     | 2      |
| 1127   | 0                             |        | 0                     |        |
| 1130   | 0                             |        | 0                     |        |
| 1131   | 0                             |        | 0                     |        |
| 1135   | 2                             | 3      | 2                     | 3      |
| 1138   | 1                             | 1      | 1                     | 1      |
| 1139   | 0                             |        | 0                     |        |
| 1140   | 0                             |        | 0                     |        |
| 1142   | 0                             |        | 0                     |        |
| 1143   | 0                             |        | 0                     |        |
| 1145   | 1                             | 1      | 0                     |        |
| 1149   | 0                             |        | 0                     |        |
| 1152   | 0                             |        | 0                     |        |
| 1160   | 0                             |        | 0                     |        |
| 1164   | 0                             |        | 0                     |        |
| 1165   | 0                             |        | 0                     |        |
| 1169   | 0                             |        | 0                     |        |
| 1170   | 1                             | 0      | 0                     |        |
| 1179   | 1                             | 0      | 0                     |        |
| 1180   | 0                             |        | 0                     |        |
| 1183   | 0                             |        | 0                     |        |
| 1187   | 0                             |        | 0                     |        |
| 1188   | 1                             | 1      | 0                     |        |
| 1193   | 1                             | 0      | 1                     | 0      |
| 1194   | 2                             | 1      | 2                     | 2      |
| 1197   | 0                             |        | 0                     |        |
| 1202   | 0                             |        | 0                     |        |
| 1204   | 4                             | 4      | 4                     | 4      |
| 1211   | 0                             |        | 0                     |        |
| 1224   | 0                             |        | 1                     | 0      |

| respid | ICS Splitting/spraying: Q26_1 | Q26a_1 | ICS: Hesitancy: Q27_1 | Q27a_1 |
|--------|-------------------------------|--------|-----------------------|--------|
| 1225   | 0                             |        | 0                     |        |
| 1230   | 0                             |        | 0                     |        |
| 1232   | 0                             |        | 0                     |        |
| 1233   | 1                             | 2      | 1                     | 2      |
| 1234   | 0                             |        | 0                     |        |
| 1235   | 1                             | 1      | 0                     |        |
| 1236   | 0                             |        | 0                     |        |
| 1237   | 1                             | 1      | 0                     |        |
| 1238   | 1                             | 1      | 1                     | 1      |
| 1239   | 0                             |        | 0                     |        |
| 1241   | 0                             |        | 2                     | 1      |
| 1242   | 0                             |        | 0                     |        |
| 1244   | 3                             | 0      | 2                     | 1      |
| 1245   | 4                             | 2      | 1                     | 2      |
| 1247   | 2                             | 1      | 2                     | 1      |
| 1248   | 0                             |        | 0                     |        |
| 1249   | 0                             |        | 0                     |        |
| 1250   | 0                             |        | 0                     |        |
| 1251   | 0                             |        | 0                     |        |
| 1252   | 0                             |        | 0                     |        |
| 1253   | 0                             |        | 0                     |        |
| 1254   | 4                             | 2      | 2                     | 3      |
| 1258   | 4                             | 1      | 0                     |        |
| 1260   | 1                             | 0      | 0                     |        |
| 1261   | 0                             |        | 0                     |        |
| 1262   | 2                             | 1      | 0                     |        |
| 1263   | 3                             | 2      | 1                     | 1      |
| 1264   | 0                             |        | 0                     |        |
| 1265   | 0                             |        | 0                     |        |
| 1266   | 0                             |        | 1                     | 1      |
| 1270   | 0                             |        | 0                     |        |
| 1272   | 0                             |        | 1                     | 1      |

| respid | ICS Splitting/spraying: Q26_1 | Q26a_1 | ICS: Hesitancy: Q27_1 | Q27a_1 |
|--------|-------------------------------|--------|-----------------------|--------|
| 1273   | 0                             |        | 0                     |        |
| 1276   | 1                             | 1      | 1                     | 1      |
| 1277   | 0                             |        | 0                     |        |
| 1278   | 0                             |        | 0                     |        |
| 1280   | 0                             |        | 0                     |        |
| 1281   | 0                             |        | 0                     |        |
| 1282   | 1                             | 1      | 1                     | 1      |
| 1283   | 0                             |        | 2                     | 0      |
| 1288   | 0                             |        | 0                     |        |
| 1289   | 1                             | 0      | 2                     | 1      |
| 1290   | 1                             | 2      | 1                     | 1      |
| 1291   | 0                             |        | 0                     |        |
| 1293   | 0                             |        | 0                     |        |
| 1294   | 1                             | 1      | 1                     | 0      |
| 1295   | 2                             | 2      | 0                     |        |
| 1296   | 0                             |        | 1                     | 2      |
| 1297   | 0                             |        | 0                     |        |
| 1298   | 1                             | 2      | 1                     | 2      |
| 1300   | 1                             | 0      | 1                     | 1      |
| 1302   | 0                             |        | 0                     |        |
| 1303   | 1                             | 1      | 1                     | 1      |
| 1304   | 1                             | 0      | 0                     |        |
| 1305   | 1                             | 1      | 1                     | 1      |
| 1307   | 0                             |        | 1                     | 0      |
| 1312   | 0                             |        | 0                     |        |
| 1313   | 0                             |        | 0                     |        |
| 1314   | 0                             |        | 0                     |        |
| 1317   | 1                             | 1      | 0                     |        |
| 1318   | 1                             | 1      | 1                     | 1      |
| 1319   | 0                             |        | 0                     |        |
| 1321   | 1                             | 0      | 0                     |        |
| 1324   | 5                             | 3      | 4                     | 3      |

| respid | ICS Splitting/spraying: Q26_1 | Q26a_1 | ICS: Hesitancy: Q27_1 | Q27a_1 |
|--------|-------------------------------|--------|-----------------------|--------|
| 1325   | 2                             | 1      | 2                     | 2      |
| 1326   | 1                             | 0      | 0                     |        |
| 1327   | 1                             | 1      | 0                     |        |
| 1329   | 0                             |        | 1                     | 0      |
| 1330   | 4                             | 2      | 0                     |        |
| 1331   | 0                             |        | 1                     | 1      |
| 1335   | 1                             | 1      | 0                     |        |
| 1337   | 1                             | 0      | 0                     |        |
| 1341   | 0                             |        | 0                     |        |
| 1342   | 0                             |        | 0                     |        |
| 1344   | 1                             | 1      | 1                     | 1      |
| 1345   | 3                             | 2      | 2                     | 1      |
| 1346   | 0                             |        | 0                     |        |
| 1350   | 1                             | 1      | 1                     | 1      |
| 1352   | 0                             |        | 0                     |        |
| 1353   | 0                             |        | 0                     |        |
| 1354   | 1                             | 1      | 0                     |        |
| 1355   | 0                             |        | 0                     |        |
| 1357   | 5                             | 1      | 0                     |        |
| 1360   | 0                             |        | 0                     |        |
| 1362   | 1                             | 0      | 0                     |        |
| 1363   | 0                             |        | 0                     |        |
| 1367   | 5                             | 0      | 5                     | 3      |
| 1369   | 0                             |        | 1                     | 1      |
| 1371   | 0                             |        | 0                     |        |
| 1372   | 0                             |        | 0                     |        |
| 1375   | 0                             |        | 0                     |        |
| 1377   | 1                             | 0      | 0                     |        |
| 1379   | 0                             |        | 0                     |        |
| 1380   | 0                             |        | 0                     |        |
| 1382   | 0                             |        | 0                     |        |
| 1383   | 0                             |        | 0                     |        |



| respid | ICS Splitting/spraying: Q26_1 | Q26a_1 | ICS: Hesitancy: Q27_1 | Q27a_1 |
|--------|-------------------------------|--------|-----------------------|--------|
| 1384   | 0                             |        | 0                     |        |
| 1385   | 0                             |        | 1                     | 1      |
| 1387   | 0                             |        | 1                     | 0      |
| 1388   | 1                             | 0      | 1                     | 0      |
| 1389   | 1                             | 1      | 0                     |        |
| 1390   | 0                             |        | 1                     | 1      |
| 1395   | 2                             | 0      | 0                     |        |
| 1396   | 0                             |        | 0                     |        |
| 1397   | 4                             | 3      | 1                     | 1      |
| 1398   | 3                             | 0      | 0                     |        |
| 1399   | 0                             |        | 1                     | 0      |
| 1403   | 0                             |        | 0                     |        |
| 1405   | 0                             |        | 0                     |        |
| 1406   | 0                             |        | 0                     |        |
| 1407   | 1                             | 2      | 1                     | 1      |
| 1408   | 0                             |        | 0                     |        |
| 1409   | 0                             |        | 0                     |        |
| 1410   | 5                             | 4      | 5                     | 4      |
| 1411   | 1                             | 1      | 1                     | 1      |
| 1412   | 0                             |        | 0                     |        |
| 1413   | 1                             | 1      | 0                     |        |
| 1414   | 0                             |        | 3                     | 2      |
| 1415   | 0                             |        | 0                     |        |
| 1416   | 0                             |        | 0                     |        |
| 1417   | 0                             |        | 0                     |        |
| 1418   | 0                             |        | 0                     |        |
| 1419   | 1                             | 0      | 0                     |        |
| 1420   | 0                             |        | 1                     | 0      |
| 1421   | 2                             | 2      | 4                     | 3      |
| 1422   | 0                             |        | 0                     |        |
| 1423   | 0                             |        | 1                     | 1      |
| 1424   | 4                             | 2      | 4                     | 3      |

| respid | ICS Splitting/spraying: Q26_1 | Q26a_1 | ICS: Hesitancy: Q27_1 | Q27a_1 |
|--------|-------------------------------|--------|-----------------------|--------|
| 1429   | 0                             |        | 0                     |        |
| 1430   | 2                             | 1      | 1                     | 1      |
| 1431   | 3                             | 2      | 3                     | 2      |
| 1433   | 1                             | 1      | 1                     | 1      |
| 1435   | 0                             |        | 0                     |        |
| 1436   | 1                             | 0      | 0                     |        |
| 1438   | 0                             |        | 0                     |        |
| 1439   | 0                             |        | 0                     |        |
| 1441   | 1                             | 1      | 1                     | 1      |
| 1442   | 1                             | 1      | 0                     |        |
| 1443   | 0                             |        | 0                     |        |
| 1444   | 0                             |        | 0                     |        |
| 1445   | 1                             | 2      | 1                     | 2      |
| 1446   | 1                             | 1      | 1                     | 1      |
| 1447   | 0                             |        | 0                     |        |
| 1449   | 0                             |        | 0                     |        |
| 1450   | 2                             | 2      | 2                     | 2      |
| 1451   | 0                             |        | 0                     |        |
| 1452   | 0                             |        | 0                     |        |
| 1453   | 3                             | 2      | 2                     | 2      |
| 1454   | 1                             | 2      | 1                     | 1      |
| 1456   | 1                             | 1      | 0                     |        |
| 1457   | 1                             | 1      | 0                     |        |
| 1459   | 0                             |        | 0                     |        |
| 1460   | 0                             |        | 0                     |        |
| 1463   | 0                             |        | 0                     |        |
| 1465   | 1                             | 1      | 0                     |        |
| 1467   | 1                             | 0      | 0                     |        |
| 1470   | 1                             | 1      | 1                     | 1      |
| 1471   | 3                             | 3      | 3                     | 2      |
| 1472   | 1                             | 0      | 0                     |        |
| 1474   | 0                             |        | 1                     | 0      |

| respid | ICS Splitting/spraying: Q26_1 | Q26a_1 | ICS: Hesitancy: Q27_1 | Q27a_1 |
|--------|-------------------------------|--------|-----------------------|--------|
| 1475   | 2                             | 1      | 1                     | 1      |
| 1477   | 0                             |        | 0                     |        |
| 1478   | 0                             |        | 0                     |        |
| 1480   | 0                             |        | 0                     |        |
| 1481   | 1                             | 1      | 1                     | 1      |
| 1483   | 0                             |        | 0                     |        |
| 1484   | 1                             | 0      | 0                     |        |
| 1485   | 1                             | 1      | 1                     | 1      |
| 1486   | 1                             | 1      | 1                     | 1      |
| 1487   | 2                             | 2      | 0                     |        |
| 1488   | 1                             | 1      | 0                     |        |
| 1489   | 0                             |        | 0                     |        |
| 1490   | 2                             | 1      | 0                     |        |
| 1491   | 3                             | 2      | 3                     | 2      |
| 1492   | 0                             |        | 0                     |        |
| 1494   | 1                             | 0      | 0                     |        |
| 1495   | 3                             | 3      | 2                     | 2      |
| 1496   | 0                             |        | 0                     |        |
| 1498   | 1                             | 1      | 1                     | 2      |
| 1499   | 1                             | 1      | 0                     |        |
| 1500   | 0                             |        | 1                     | 1      |
| 1501   | 0                             |        | 0                     |        |
| 1503   | 0                             |        | 0                     |        |
| 1504   | 0                             |        | 0                     |        |
| 1508   | 5                             | 1      | 2                     | 1      |
| 1509   | 0                             |        | 0                     |        |
| 1511   | 0                             |        | 1                     | 1      |
| 1512   | 1                             | 1      | 1                     | 1      |
| 1513   | 1                             | 1      | 2                     | 1      |
| 1515   | 0                             |        | 0                     |        |
| 1517   | 0                             |        | 0                     |        |
| 1518   | 0                             |        | 0                     |        |

| respid | ICS Splitting/spraying: Q26_1 | Q26a_1 | ICS: Hesitancy: Q27_1 | Q27a_1 |
|--------|-------------------------------|--------|-----------------------|--------|
| 1519   | 1                             | 1      | 1                     | 2      |
| 1520   | 3                             | 0      | 0                     |        |
| 1521   | 0                             |        | 0                     |        |
| 1522   | 0                             |        | 0                     |        |
| 1523   | 0                             |        | 0                     |        |
| 1524   | 0                             |        | 0                     |        |
| 1525   | 0                             |        | 0                     |        |
| 1526   | 1                             | 1      | 1                     | 1      |
| 1527   | 2                             | 1      | 0                     |        |
| 1534   | 1                             | 1      | 0                     |        |
| 1535   | 0                             |        | 0                     |        |
| 1536   | 3                             | 3      | 1                     | 2      |
| 1538   | 1                             | 2      | 0                     |        |
| 1539   | 2                             | 0      | 0                     |        |
| 1540   | 0                             |        | 0                     |        |
| 1541   | 1                             | 0      | 0                     |        |
| 1542   | 1                             | 0      | 0                     |        |
| 1543   | 1                             | 1      | 1                     | 1      |
| 1545   | 0                             |        | 0                     |        |
| 1546   | 1                             | 0      | 0                     |        |
| 1548   | 3                             | 3      | 1                     | 3      |
| 1549   | 0                             |        | 0                     |        |
| 1551   | 1                             | 0      | 0                     |        |
| 1552   | 2                             | 1      | 0                     |        |
| 1556   | 1                             | 1      | 0                     |        |
| 1557   | 0                             |        | 0                     |        |
| 1558   | 1                             | 0      | 1                     | 0      |
| 1561   | 0                             |        | 1                     | 0      |
| 1562   | 0                             |        | 0                     |        |
| 1563   | 0                             |        | 0                     |        |
| 1564   | 1                             | 2      | 1                     | 1      |
| 1565   | 0                             |        | 0                     |        |

| respid | ICS Splitting/spraying: Q26_1 | Q26a_1 | ICS: Hesitancy: Q27_1 | Q27a_1 |
|--------|-------------------------------|--------|-----------------------|--------|
| 1566   | 0                             |        | 0                     |        |
| 1567   | 1                             | 0      | 0                     |        |
| 1569   | 0                             |        | 0                     |        |
| 1570   | 0                             |        | 0                     |        |
| 1574   | 1                             | 1      | 0                     |        |
| 1575   | 0                             |        | 0                     |        |
| 1576   | 1                             | 0      | 0                     |        |
| 1577   | 0                             |        | 0                     |        |
| 1581   | 1                             | 0      | 0                     |        |
| 1583   | 1                             | 2      | 4                     | 3      |
| 1585   | 0                             |        | 0                     |        |
| 1586   | 0                             |        | 0                     |        |
| 1588   | 1                             | 0      | 0                     |        |
| 1590   | 1                             | 0      | 0                     |        |
| 1592   | 0                             |        | 0                     |        |
| 1594   | 2                             | 1      | 1                     | 1      |
| 1598   | 0                             |        | 0                     |        |
| 1599   | 5                             | 1      | 1                     | 1      |
| 1600   | 1                             | 0      | 1                     | 1      |
| 1602   | 0                             |        | 0                     |        |
| 1603   | 0                             |        | 0                     |        |
| 1604   | 0                             |        | 0                     |        |
| 1605   | 0                             |        | 5                     | 3      |
| 1606   | 0                             |        | 0                     |        |
| 1610   | 0                             |        | 0                     |        |
| 1611   | 1                             | 0      | 0                     |        |
| 1612   | 1                             | 1      | 0                     |        |
| 1613   | 4                             | 3      | 5                     | 3      |
| 1615   | 1                             | 1      | 1                     | 1      |
| 1616   | 1                             | 1      | 0                     |        |
| 1617   | 1                             | 2      | 0                     |        |
| 1618   | 4                             | 2      | 4                     | 3      |

| respid | ICS Splitting/spraying: Q26_1 | Q26a_1 | ICS: Hesitancy: Q27_1 | Q27a_1 |
|--------|-------------------------------|--------|-----------------------|--------|
| 1620   | 0                             |        | 0                     |        |
| 1621   | 1                             | 1      | 1                     | 2      |
| 1622   | 0                             |        | 0                     |        |
| 1623   | 0                             |        | 0                     |        |
| 1624   | 0                             |        | 0                     |        |
| 1625   | 0                             |        | 0                     |        |
| 1626   | 0                             |        | 0                     |        |
| 1627   | 0                             |        | 0                     |        |
| 1629   | 2                             | 0      | 0                     |        |
| 1630   | 0                             |        | 0                     |        |
| 1631   | 0                             |        | 0                     |        |
| 1634   | 0                             |        | 0                     |        |
| 1635   | 3                             | 1      | 0                     |        |
| 1636   | 0                             |        | 0                     |        |
| 1637   | 1                             | 0      | 0                     |        |
| 1640   | 0                             |        | 0                     |        |
| 1642   | 0                             |        | 0                     |        |
| 1643   | 1                             | 2      | 1                     | 1      |
| 1644   | 2                             | 1      | 1                     | 1      |
| 1645   | 0                             |        | 0                     |        |
| 1646   | 0                             |        | 0                     |        |
| 1647   | 2                             | 1      | 1                     | 0      |
| 1650   | 3                             | 1      | 3                     | 2      |
| 1654   | 1                             | 0      | 0                     |        |
| 1656   | 0                             |        | 0                     |        |
| 1657   | 1                             | 0      | 2                     | 2      |
| 1659   | 1                             | 0      | 0                     |        |
| 1662   | 1                             | 1      | 1                     | 1      |
| 1663   | 1                             | 2      | 1                     | 3      |
| 1664   | 0                             |        | 0                     |        |
| 1665   | 1                             | 0      | 0                     |        |
| 1667   | 1                             | 0      | 0                     |        |

| respid | ICS Splitting/spraying: Q26_1 | Q26a_1 | ICS: Hesitancy: Q27_1 | Q27a_1 |
|--------|-------------------------------|--------|-----------------------|--------|
| 1668   | 1                             | 0      | 0                     |        |
| 1670   | 0                             |        | 1                     | 1      |
| 1671   | 0                             |        | 1                     | 0      |
| 1673   | 0                             |        | 0                     |        |
| 1674   | 0                             |        | 0                     |        |
| 1676   | 1                             | 1      | 1                     | 1      |
| 1677   | 0                             |        | 0                     |        |
| 1678   | 1                             | 1      | 0                     |        |
| 1680   | 0                             |        | 0                     |        |
| 1681   | 1                             | 1      | 1                     | 1      |
| 1683   | 0                             |        | 0                     |        |
| 1685   | 1                             | 1      | 1                     | 1      |
| 1686   | 1                             | 0      | 0                     |        |
| 1690   | 3                             | 0      | 1                     | 0      |
| 1691   | 0                             |        | 0                     |        |
| 1692   | 1                             | 2      | 1                     | 1      |
| 1693   | 1                             | 1      | 0                     |        |
| 1695   | 0                             |        | 0                     |        |
| 1696   | 3                             | 0      | 0                     |        |
| 1698   | 0                             |        | 0                     |        |
| 1699   | 0                             |        | 0                     |        |
| 1701   | 0                             |        | 0                     |        |
| 1702   | 0                             |        | 0                     |        |
| 1703   | 0                             |        | 0                     |        |
| 1705   | 0                             |        | 1                     | 1      |
| 1706   | 1                             | 0      | 0                     |        |
| 1708   | 0                             |        | 0                     |        |
| 1711   | 1                             | 1      | 1                     | 1      |
| 1712   | 2                             | 1      | 1                     | 1      |
| 1713   | 0                             |        | 0                     |        |
| 1715   | 0                             |        | 0                     |        |
| 1717   | 0                             |        | 0                     |        |

| respid | ICS Splitting/spraying: Q26_1 | Q26a_1 | ICS: Hesitancy: Q27_1 | Q27a_1 |
|--------|-------------------------------|--------|-----------------------|--------|
| 1718   | 5                             | 4      | 5                     | 4      |
| 1719   | 0                             |        | 0                     |        |
| 1721   | 0                             |        | 0                     |        |
| 1722   | 0                             |        | 0                     |        |
| 1724   | 0                             |        | 0                     |        |
| 1725   | 0                             |        | 0                     |        |
| 1726   | 1                             | 0      | 1                     | 1      |
| 1727   | 0                             |        | 0                     |        |
| 1728   | 1                             | 2      | 0                     |        |
| 1731   | 1                             | 0      | 1                     | 1      |
| 1733   | 1                             | 1      | 0                     |        |
| 1734   | 1                             | 1      | 1                     | 1      |
| 1735   | 0                             |        | 0                     |        |
| 1736   | 0                             |        | 0                     |        |
| 1737   | 1                             | 1      | 0                     |        |
| 1738   | 0                             |        | 0                     |        |
| 1743   | 3                             | 1      | 2                     | 1      |
| 1755   | 2                             | 2      | 2                     | 3      |
| 1756   | 0                             |        | 0                     |        |
| 1757   | 0                             |        | 1                     | 0      |
| 1758   | 1                             | 1      | 1                     | 1      |
| 1759   | 0                             |        | 0                     |        |
| 1761   | 0                             |        | 0                     |        |
| 1762   | 0                             |        | 0                     |        |
| 1764   | 0                             |        | 0                     |        |
| 1767   | 0                             |        | 1                     | 1      |
| 1768   | 3                             | 1      | 0                     |        |
| 1769   | 1                             | 1      | 1                     | 1      |
| 1770   | 3                             | 0      | 0                     |        |
| 1771   | 2                             | 2      | 1                     | 1      |
| 1776   | 1                             | 1      | 0                     |        |
| 1777   | 1                             | 0      | 0                     |        |



| respid | ICS Splitting/spraying: Q26_1 | Q26a_1 | ICS: Hesitancy: Q27_1 | Q27a_1 |
|--------|-------------------------------|--------|-----------------------|--------|
| 1778   | 0                             |        | 0                     |        |
| 1779   | 0                             |        | 0                     |        |
| 1780   | 0                             |        | 0                     |        |
| 1781   | 0                             |        | 0                     |        |
| 1783   | 0                             |        | 0                     |        |
| 1784   | 3                             | 0      | 2                     | 2      |
| 1785   | 0                             |        | 0                     |        |
| 1788   | 2                             | 2      | 2                     | 1      |
| 1792   | 0                             |        | 0                     |        |
| 1794   | 0                             |        | 0                     |        |
| 1798   | 4                             | 3      | 2                     | 2      |
| 1799   | 0                             |        | 0                     |        |
| 1800   | 0                             |        | 0                     |        |
| 1804   | 1                             | 1      | 1                     | 1      |
| 1806   | 0                             |        | 1                     | 1      |
| 1807   | 0                             |        | 0                     |        |
| 1808   | 1                             | 0      | 1                     | 1      |
| 1809   | 0                             |        | 1                     | 1      |
| 1811   | 1                             | 1      | 0                     |        |
| 1812   | 3                             | 2      | 1                     | 1      |
| 1813   | 3                             | 2      | 1                     | 2      |
| 1814   | 0                             |        | 0                     |        |
| 1815   | 0                             |        | 0                     |        |
| 1817   | 1                             | 0      | 0                     |        |
| 1820   | 0                             |        | 1                     | 0      |
| 1821   | 1                             | 0      | 2                     | 2      |
| 1822   | 0                             |        | 0                     |        |
| 1823   | 0                             |        | 0                     |        |
| 1824   | 0                             |        | 0                     |        |
| 1826   | 0                             |        | 0                     |        |
| 1828   | 3                             | 2      | 0                     |        |
| 1829   | 0                             |        | 0                     |        |

| respid | ICS Splitting/spraying: Q26_1 | Q26a_1 | ICS: Hesitancy: Q27_1 | Q27a_1 |
|--------|-------------------------------|--------|-----------------------|--------|
| 1830   | 1                             |        | 1                     | 1      |
| 1831   | 0                             |        | 0                     |        |
| 1832   | 0                             |        | 0                     |        |
| 1836   | 3                             | 2      | 1                     | 1      |
| 1838   | 1                             | 1      | 3                     | 2      |
| 1839   | 0                             |        | 0                     |        |
| 1840   | 0                             |        | 0                     |        |
| 1841   | 0                             |        | 1                     | 0      |
| 1842   | 0                             |        | 1                     | 1      |
| 1843   | 0                             |        | 1                     | 1      |
| 1844   | 1                             | 1      | 1                     | 1      |
| 1845   | 0                             |        | 0                     |        |
| 1849   | 0                             |        | 0                     |        |
| 1850   | 0                             |        | 0                     |        |
| 1851   | 4                             | 2      | 0                     |        |
| 1852   | 0                             |        | 0                     |        |
| 1857   | 0                             |        | 0                     |        |
| 1858   | 0                             |        | 0                     |        |
| 1861   | 0                             |        | 0                     |        |
| 1862   | 0                             |        | 0                     |        |
| 1863   | 0                             |        | 0                     |        |
| 1864   | 4                             | 1      | 0                     |        |
| 1865   | 0                             |        | 0                     |        |
| 1867   | 1                             | 0      | 0                     |        |
| 1868   | 1                             | 1      | 0                     |        |
| 1869   | 1                             | 0      | 0                     |        |
| 1870   | 0                             |        | 0                     |        |
| 1871   | 1                             | 0      | 2                     | 2      |
| 1872   | 0                             |        | 0                     |        |
| 1873   | 1                             | 1      | 0                     |        |
| 1876   | 0                             |        | 0                     |        |
| 1877   | 0                             |        | 0                     |        |

| respid | ICS Splitting/spraying: Q26_1 | Q26a_1 | ICS: Hesitancy: Q27_1 | Q27a_1 |
|--------|-------------------------------|--------|-----------------------|--------|
| 1878   | 0                             |        | 0                     |        |
| 1879   | 3                             | 2      | 0                     |        |
| 1880   | 1                             | 0      | 0                     |        |
| 1881   | 0                             |        | 0                     |        |
| 1883   | 1                             | 1      | 2                     | 1      |
| 1886   | 1                             | 1      | 0                     |        |
| 1888   | 3                             | 3      | 3                     | 3      |
| 1889   | 3                             | 2      | 2                     | 2      |
| 1890   | 4                             | 2      | 2                     | 3      |
| 1891   | 0                             |        | 0                     |        |
| 1893   | 0                             |        | 0                     |        |
| 1894   | 1                             | 1      | 1                     | 0      |
| 1895   | 4                             | 1      | 1                     | 1      |
| 1896   | 0                             |        | 0                     |        |
| 1897   | 1                             | 1      | 1                     | 1      |
| 1898   | 3                             | 2      | 4                     | 3      |
| 1899   | 2                             | 2      | 2                     | 2      |
| 1900   | 0                             |        | 0                     |        |
| 1903   | 0                             |        | 0                     |        |
| 1906   | 0                             |        | 0                     |        |
| 1907   | 4                             | 3      | 3                     | 2      |
| 1908   | 0                             |        | 0                     |        |
| 1909   | 1                             | 0      | 1                     | 1      |
| 1910   | 0                             |        | 0                     |        |
| 1911   | 0                             |        | 0                     |        |
| 1912   | 0                             |        | 0                     |        |
| 1917   | 0                             |        | 0                     |        |
| 1918   | 3                             | 0      | 1                     | 0      |
| 1919   | 3                             | 0      | 0                     |        |
| 1922   | 0                             |        | 0                     |        |
| 1925   | 0                             |        | 0                     |        |
| 1926   | 1                             | 0      | 1                     | 1      |

| respid | ICS Splitting/spraying: Q26_1 | Q26a_1 | ICS: Hesitancy: Q27_1 | Q27a_1 |
|--------|-------------------------------|--------|-----------------------|--------|
| 1927   | 0                             |        | 0                     |        |
| 1928   | 0                             |        | 0                     |        |
| 1929   | 0                             |        | 0                     |        |
| 1934   | 3                             | 1      | 0                     |        |
| 1935   | 1                             | 0      | 0                     |        |
| 1936   | 1                             | 1      | 4                     | 2      |
| 1937   | 0                             |        | 0                     |        |
| 1938   | 0                             |        | 0                     |        |
| 1939   | 0                             |        | 0                     |        |
| 1940   | 1                             | 1      | 1                     | 1      |
| 1941   | 0                             |        | 0                     |        |
| 1948   | 0                             |        | 0                     |        |
| 1950   | 0                             |        | 0                     |        |
| 1955   | 2                             | 0      | 1                     | 0      |
| 1958   | 0                             |        | 1                     | 0      |
| 1960   | 0                             |        | 1                     | 1      |
| 1961   | 0                             |        | 0                     |        |
| 1962   | 0                             |        | 0                     |        |
| 1965   | 0                             |        | 0                     |        |
| 1966   | 0                             |        | 0                     |        |
| 1967   | 0                             |        | 0                     |        |
| 1968   | 0                             |        | 0                     |        |
| 1973   | 0                             |        | 0                     |        |
| 1974   | 1                             | 1      | 2                     | 2      |
| 1975   | 0                             |        | 0                     |        |
| 1977   | 0                             |        | 0                     |        |
| 1978   | 0                             |        | 0                     |        |
| 1979   | 4                             | 3      | 4                     | 3      |
| 1982   | 4                             | 1      | 2                     | 1      |
| 1983   | 1                             | 1      | 0                     |        |
| 1987   | 0                             |        | 0                     |        |
| 1988   | 0                             |        | 0                     |        |

| respid | ICS Splitting/spraying: Q26_1 | Q26a_1 | ICS: Hesitancy: Q27_1 | Q27a_1 |
|--------|-------------------------------|--------|-----------------------|--------|
| 1991   | 0                             |        | 0                     |        |
| 1992   | 1                             | 0      | 0                     |        |
| 1993   | 1                             | 1      | 0                     |        |
| 1994   | 1                             | 1      | 0                     |        |
| 1995   | 0                             |        | 0                     |        |
| 1996   | 0                             |        | 0                     |        |
| 1997   | 0                             |        | 0                     |        |
| 1998   | 0                             |        | 0                     |        |
| 1999   | 5                             | 3      | 4                     | 3      |
| 2000   | 2                             | 1      | 2                     | 2      |
| 2001   | 0                             |        | 0                     |        |
| 2002   | 0                             |        | 0                     |        |
| 2003   | 0                             |        | 0                     |        |
| 2004   | 0                             |        | 0                     |        |
| 2005   | 1                             | 0      | 0                     |        |
| 2007   | 0                             |        | 0                     |        |
| 2009   | 0                             |        | 0                     |        |
| 2010   | 0                             |        | 0                     |        |
| 2011   | 0                             |        | 0                     |        |
| 2013   | 1                             | 0      | 0                     |        |
| 2014   | 2                             | 1      | 3                     | 2      |
| 2017   | 1                             | 1      | 1                     | 1      |
| 2020   | 0                             |        | 0                     |        |
| 2023   | 2                             | 0      | 0                     |        |
| 2024   | 2                             | 0      | 0                     |        |
| 2029   | 0                             |        | 0                     |        |
| 2030   | 0                             |        | 0                     |        |
| 2031   | 0                             |        | 0                     |        |
| 2032   | 1                             | 2      | 1                     | 2      |
| 2033   | 0                             |        | 0                     |        |
| 2034   | 1                             | 1      | 2                     | 1      |
| 2036   | 3                             | 0      | 3                     | 2      |

| respid | ICS Splitting/spraying: Q26_1 | Q26a_1 | ICS: Hesitancy: Q27_1 | Q27a_1 |
|--------|-------------------------------|--------|-----------------------|--------|
| 2037   | 2                             | 2      | 3                     | 2      |
| 2038   | 0                             |        | 0                     |        |
| 2039   | 1                             | 0      | 1                     | 1      |
| 2040   | 0                             |        | 0                     |        |
| 2041   | 0                             |        | 0                     |        |
| 2042   | 0                             |        | 0                     |        |
| 2043   | 0                             |        | 0                     |        |
| 2051   | 0                             |        | 0                     |        |
| 2052   | 1                             | 0      | 0                     |        |
| 2053   | 0                             |        | 0                     |        |
| 2054   | 0                             |        | 0                     |        |
| 2055   | 0                             |        | 0                     |        |
| 2056   | 1                             | 1      | 1                     | 1      |
| 2057   | 2                             | 1      | 1                     | 1      |
| 2059   | 0                             |        | 0                     |        |
| 2063   | 0                             |        | 0                     |        |
| 2066   | 0                             |        | 1                     | 2      |
| 2068   | 0                             |        | 1                     | 1      |
| 2069   | 1                             | 1      | 0                     |        |
| 2070   | 0                             |        | 0                     |        |
| 2071   | 0                             |        | 0                     |        |
| 2073   | 0                             |        | 0                     |        |
| 2077   | 0                             |        | 1                     | 1      |
| 2079   | 0                             |        | 0                     |        |
| 2080   | 0                             |        | 5                     | 4      |
| 2081   | 5                             | 3      | 4                     | 3      |
| 2084   | 0                             |        | 0                     |        |
| 2085   | 0                             |        | 0                     |        |
| 2087   | 0                             |        | 0                     |        |
| 2089   | 0                             |        | 0                     |        |
| 2093   | 0                             |        | 0                     |        |
| 2094   | 1                             | 1      | 1                     | 1      |

| respid | ICS Splitting/spraying: Q26_1 | Q26a_1 | ICS: Hesitancy: Q27_1 | Q27a_1 |
|--------|-------------------------------|--------|-----------------------|--------|
| 2095   | 5                             | 2      | 0                     |        |
| 2097   | 0                             |        | 0                     |        |
| 2099   | 1                             | 2      | 2                     | 3      |
| 2100   | 0                             |        | 0                     |        |
| 2101   | 4                             | 1      | 0                     |        |
| 2103   | 0                             |        | 0                     |        |
| 2104   | 0                             |        | 0                     |        |
| 2106   | 4                             | 3      | 0                     |        |
| 2111   | 3                             | 3      | 4                     | 3      |
| 2113   | 2                             | 0      | 0                     |        |
| 2115   | 0                             |        | 0                     |        |
| 2119   | 2                             | 1      | 1                     | 1      |
| 2120   | 0                             |        | 0                     |        |
| 2123   | 0                             |        | 0                     |        |
| 2124   | 1                             | 2      | 1                     | 1      |
| 2130   | 0                             |        | 0                     |        |
| 2131   | 1                             | 0      | 1                     | 0      |
| 2133   | 1                             | 4      | 5                     | 4      |
| 2139   | 0                             |        | 0                     |        |
| 2141   | 0                             |        | 0                     |        |
| 2143   | 0                             |        | 0                     |        |
| 2144   | 0                             |        | 0                     |        |
| 2147   | 0                             |        | 0                     |        |
| 2151   | 1                             | 1      | 0                     |        |
| 2153   | 0                             |        | 0                     |        |
| 2154   | 0                             |        | 0                     |        |
| 2155   | 2                             | 1      | 1                     | 0      |
| 2159   | 0                             |        | 0                     |        |
| 2160   | 3                             | 2      | 3                     | 2      |
| 2161   | 0                             |        | 0                     |        |
| 2163   | 0                             |        | 0                     |        |
| 2164   | 5                             | 0      | 0                     |        |

| respid | ICS Splitting/spraying: Q26_1 | Q26a_1 | ICS: Hesitancy: Q27_1 | Q27a_1 |
|--------|-------------------------------|--------|-----------------------|--------|
| 2168   | 1                             | 1      | 1                     | 1      |
| 2169   | 0                             |        | 1                     | 1      |
| 2170   | 1                             | 0      | 0                     |        |
| 2171   | 1                             | 1      | 2                     | 2      |
| 2172   | 4                             | 3      | 3                     | 2      |
| 2173   | 1                             | 0      | 0                     |        |
| 2174   | 0                             |        | 0                     |        |
| 2175   | 3                             | 1      | 1                     | 0      |
| 2176   | 1                             | 0      | 0                     |        |
| 2177   | 3                             | 2      | 3                     | 2      |
| 2179   | 1                             | 1      | 0                     |        |
| 2181   | 1                             | 1      | 0                     |        |
| 2182   | 0                             |        | 0                     |        |
| 2183   | 2                             | 1      | 1                     | 1      |
| 2184   | 2                             | 1      | 2                     | 1      |
| 2185   | 0                             |        | 0                     |        |
| 2186   | 0                             |        | 0                     |        |
| 2187   | 1                             | 0      | 1                     | 0      |
| 2188   | 4                             | 1      | 0                     |        |
| 2189   | 0                             |        | 0                     |        |
| 2190   | 1                             | 0      | 0                     |        |
| 2193   | 1                             | 0      | 0                     |        |
| 2195   | 0                             |        | 0                     |        |
| 2198   | 0                             |        | 1                     | 0      |
| 2200   | 0                             |        | 0                     |        |
| 2205   | 2                             | 1      | 3                     | 2      |
| 2208   | 0                             |        | 0                     |        |
| 2209   | 2                             | 1      | 2                     | 1      |
| 2210   | 1                             | 1      | 1                     | 0      |
| 2211   | 2                             | 2      | 1                     | 1      |
| 2213   | 0                             |        | 0                     |        |
| 2214   | 1                             | 1      | 0                     |        |



| respid | ICS Splitting/spraying: Q26_1 | Q26a_1 | ICS: Hesitancy: Q27_1 | Q27a_1 |
|--------|-------------------------------|--------|-----------------------|--------|
| 2216   | 1                             | 0      | 1                     | 1      |
| 2220   | 0                             |        | 0                     |        |
| 2225   | 0                             |        | 0                     |        |
| 2227   | 1                             | 1      | 0                     |        |
| 2228   | 0                             |        | 0                     |        |
| 2229   | 1                             | 0      | 0                     |        |
| 2230   | 0                             |        | 0                     |        |
| 2236   | 0                             |        | 0                     |        |
| 2238   | 4                             | 3      | 4                     | 4      |
| 2239   | 1                             | 1      | 0                     |        |
| 2240   | 0                             |        | 0                     |        |
| 2241   | 2                             | 2      | 2                     | 2      |
| 2243   | 0                             |        | 0                     |        |
| 2245   | 0                             |        | 0                     |        |
| 2247   | 1                             | 1      | 1                     | 0      |
| 2248   | 0                             |        | 0                     |        |
| 2249   | 0                             |        | 0                     |        |
| 2254   | 1                             | 0      | 0                     |        |
| 2256   | 0                             |        | 0                     |        |
| 2259   | 0                             |        | 0                     |        |
| 2261   | 0                             |        | 0                     |        |
| 2262   | 0                             |        | 0                     |        |
| 2263   | 0                             |        | 0                     |        |
| 2264   | 1                             | 1      | 1                     | 2      |
| 2265   | 0                             |        | 0                     |        |
| 2270   | 0                             |        | 0                     |        |
| 2271   | 0                             |        | 0                     |        |
| 2272   | 0                             |        | 0                     |        |
| 2273   | 0                             |        | 1                     | 1      |
| 2274   | 0                             |        | 1                     | 0      |
| 2276   | 1                             | 0      | 0                     |        |
| 2277   | 0                             |        | 0                     |        |

| respid | ICS Splitting/spraying: Q26_1 | Q26a_1 | ICS: Hesitancy: Q27_1 | Q27a_1 |
|--------|-------------------------------|--------|-----------------------|--------|
| 2281   | 0                             |        | 0                     |        |
| 2288   | 1                             | 0      | 0                     |        |
| 2290   | 0                             |        | 0                     |        |
| 2294   | 1                             | 1      | 1                     | 1      |
| 2295   | 1                             | 0      | 0                     |        |
| 2296   | 0                             |        | 0                     |        |
| 2297   | 0                             |        | 0                     |        |
| 2298   | 0                             |        | 0                     |        |
| 2301   | 1                             | 1      | 1                     | 1      |
| 2302   | 0                             |        | 1                     | 1      |
| 2303   | 0                             |        | 0                     |        |
| 2305   | 2                             | 0      | 0                     |        |
| 2309   | 0                             |        | 0                     |        |
| 2310   | 0                             |        | 0                     |        |
| 2311   | 1                             | 2      | 1                     | 2      |
| 2313   | 4                             | 3      | 3                     | 2      |
| 2316   | 0                             |        | 0                     |        |
| 2317   | 0                             |        | 0                     |        |
| 2318   | 1                             | 1      | 0                     |        |
| 2319   | 2                             | 1      | 2                     | 1      |
| 2321   | 3                             | 1      | 3                     | 2      |
| 2324   | 0                             |        | 0                     |        |
| 2328   | 0                             |        | 0                     |        |
| 2329   | 0                             |        | 0                     |        |
| 2330   | 1                             | 1      | 1                     | 1      |
| 2333   | 1                             | 1      | 1                     | 1      |
| 2334   | 1                             | 1      | 1                     | 1      |
| 2338   | 0                             |        | 0                     |        |
| 2341   | 0                             |        | 0                     |        |
| 2342   | 1                             | 2      | 0                     |        |
| 2343   | 4                             | 2      | 3                     | 2      |
| 2346   | 1                             | 0      | 0                     |        |

| respid | ICS Splitting/spraying: Q26_1 | Q26a_1 | ICS: Hesitancy: Q27_1 | Q27a_1 |
|--------|-------------------------------|--------|-----------------------|--------|
| 2347   | 0                             |        | 0                     |        |
| 2348   | 0                             |        | 0                     |        |
| 2349   | 1                             | 0      | 1                     | 1      |
| 2350   | 0                             |        | 0                     |        |
| 2351   | 0                             |        | 0                     |        |
| 2352   | 0                             |        | 0                     |        |
| 2359   | 0                             |        | 0                     |        |
| 2362   | 0                             |        | 0                     |        |
| 2363   | 0                             |        | 0                     |        |
| 2365   | 0                             |        | 0                     |        |
| 2367   | 0                             |        | 1                     | 1      |
| 2368   | 0                             |        | 0                     |        |
| 2369   | 0                             |        | 1                     | 0      |
| 2372   | 0                             |        | 0                     |        |
| 2374   | 0                             |        | 1                     | 1      |
| 2376   | 1                             | 0      | 0                     |        |
| 2379   | 1                             | 1      | 1                     | 1      |
| 2380   | 0                             |        | 0                     |        |
| 2381   | 0                             |        | 0                     |        |
| 2382   | 1                             | 2      | 1                     | 0      |
| 2385   | 2                             | 2      | 1                     | 1      |
| 2387   | 1                             | 0      | 0                     |        |
| 2388   | 0                             |        | 0                     |        |
| 2389   | 0                             |        | 1                     | 1      |
| 2391   | 0                             |        | 0                     |        |
| 2392   | 3                             | 2      | 1                     | 1      |
| 2393   | 0                             |        | 0                     |        |
| 2394   | 1                             | 2      | 0                     |        |
| 2397   | 0                             |        | 1                     | 1      |
| 2398   | 2                             | 1      | 2                     | 1      |
| 2400   | 3                             | 0      | 2                     | 0      |
| 2402   | 0                             |        | 0                     |        |

| respid | ICS Splitting/spraying: Q26_1 | Q26a_1 | ICS: Hesitancy: Q27_1 | Q27a_1 |
|--------|-------------------------------|--------|-----------------------|--------|
| 2406   | 0                             |        | 0                     |        |
| 2408   | 0                             |        | 0                     |        |
| 2410   | 3                             | 2      | 0                     |        |
| 2411   | 3                             | 2      | 3                     | 3      |
| 2412   | 0                             |        | 0                     |        |
| 2414   | 2                             | 1      | 2                     | 2      |
| 2421   | 0                             |        | 0                     |        |
| 2423   | 1                             | 2      | 1                     | 2      |
| 2424   | 1                             | 1      | 1                     | 1      |
| 2425   | 0                             |        | 0                     |        |
| 2426   | 0                             |        | 1                     | 1      |
| 2429   | 5                             | 4      | 5                     | 4      |
| 2430   | 2                             | 1      | 0                     |        |
| 2432   | 1                             | 1      | 1                     | 1      |
| 2433   | 0                             |        | 1                     | 1      |
| 2434   | 1                             | 1      | 1                     | 1      |
| 2435   | 1                             | 0      | 0                     |        |
| 2436   | 0                             |        | 0                     |        |
| 2439   | 0                             |        | 0                     |        |
| 2440   | 0                             |        | 0                     |        |
| 2441   | 2                             | 2      | 0                     |        |
| 2446   | 1                             | 1      | 0                     |        |
| 2448   | 3                             | 2      | 3                     | 2      |
| 2449   | 0                             |        | 0                     |        |
| 2451   | 0                             |        | 1                     | 2      |
| 2452   | 0                             |        | 0                     |        |
| 2455   | 0                             |        | 0                     |        |
| 2457   | 0                             |        | 0                     |        |
| 2458   | 1                             | 0      | 0                     |        |
| 2459   | 0                             |        | 0                     |        |
| 2460   | 0                             |        | 0                     |        |
| 2462   | 2                             | 2      | 1                     | 2      |

| respid | ICS Splitting/spraying: Q26_1 | Q26a_1 | ICS: Hesitancy: Q27_1 | Q27a_1 |
|--------|-------------------------------|--------|-----------------------|--------|
| 2464   | 4                             | 3      | 3                     | 3      |
| 2465   | 0                             |        | 0                     |        |
| 2468   | 1                             | 1      | 1                     | 1      |
| 2469   | 0                             |        | 0                     |        |
| 2470   | 2                             | 1      | 2                     | 1      |
| 2471   | 3                             | 2      | 3                     | 2      |
| 2472   | 1                             | 0      | 0                     |        |
| 2474   | 0                             |        | 0                     |        |
| 2476   | 0                             |        | 5                     | 4      |
| 2478   | 0                             |        | 0                     |        |
| 2479   | 2                             | 1      | 0                     |        |
| 2480   | 0                             |        | 0                     |        |
| 2482   | 0                             |        | 0                     |        |
| 2486   | 0                             |        | 0                     |        |
| 2488   | 5                             | 4      | 4                     | 4      |
| 2489   | 2                             | 0      | 2                     | 0      |
| 2491   | 0                             |        | 0                     |        |
| 2495   | 1                             | 0      | 0                     |        |
| 2496   | 0                             |        | 0                     |        |
| 2498   | 1                             | 1      | 0                     |        |
| 2501   | 3                             | 0      | 3                     | 0      |
| 2502   | 3                             | 2      | 3                     | 2      |
| 2503   | 1                             | 0      | 1                     | 1      |
| 2504   | 0                             |        | 0                     |        |
| 2507   | 0                             |        | 0                     |        |
| 2509   | 4                             | 1      | 4                     | 1      |
| 2512   | 0                             |        | 0                     |        |
| 2514   | 0                             |        | 0                     |        |
| 2516   | 0                             |        | 0                     |        |
| 2517   | 1                             | 0      | 1                     | 1      |
| 2521   | 1                             | 0      | 1                     | 1      |
| 2522   | 0                             |        | 0                     |        |

| respid | ICS Splitting/spraying: Q26_1 | Q26a_1 | ICS: Hesitancy: Q27_1 | Q27a_1 |
|--------|-------------------------------|--------|-----------------------|--------|
| 2524   | 1                             |        | 0                     |        |
| 2525   | 0                             |        | 0                     |        |
| 2526   | 0                             |        | 0                     |        |
| 2527   | 0                             |        | 0                     |        |
| 2528   | 0                             |        | 1                     | 1      |
| 2531   | 0                             |        | 0                     |        |
| 2533   | 2                             | 1      | 1                     | 1      |
| 2535   | 1                             | 0      | 0                     |        |
| 2536   | 4                             | 3      | 0                     |        |
| 2539   | 0                             |        | 0                     |        |
| 2540   | 0                             |        | 0                     |        |
| 2543   | 1                             | 0      | 0                     |        |
| 2546   | 0                             |        | 0                     |        |
| 2547   | 0                             |        | 2                     | 1      |
| 2549   | 3                             | 0      | 0                     |        |
| 2553   | 1                             | 0      | 0                     |        |
| 2554   | 0                             |        | 0                     |        |
| 2555   | 0                             |        | 0                     |        |
| 2556   | 0                             |        | 0                     |        |
| 2557   | 0                             |        | 0                     |        |
| 2559   | 0                             |        | 0                     |        |
| 2560   | 3                             | 2      | 3                     | 2      |
| 2561   | 1                             | 0      | 0                     |        |
| 2566   | 1                             | 0      | 0                     |        |
| 2567   | 0                             |        | 0                     |        |
| 2570   | 1                             | 0      | 0                     |        |
| 2574   | 4                             | 3      | 2                     | 2      |
| 2578   | 1                             | 0      | 0                     |        |
| 2580   | 1                             | 2      | 0                     |        |
| 2590   | 0                             |        | 0                     |        |
| 2593   | 1                             | 0      | 1                     | 0      |
| 2594   | 1                             | 1      | 1                     | 1      |

| respid | ICS Splitting/spraying: Q26_1 | Q26a_1 | ICS: Hesitancy: Q27_1 | Q27a_1 |
|--------|-------------------------------|--------|-----------------------|--------|
| 2595   | 1                             | 0      | 1                     | 1      |
| 2596   | 1                             | 0      | 1                     | 0      |
| 2597   | 3                             | 3      | 3                     | 2      |
| 2598   | 4                             | 1      | 0                     |        |
| 2602   | 0                             |        | 0                     |        |
| 2605   | 1                             | 1      | 0                     |        |
| 2606   | 0                             |        | 0                     |        |
| 2607   | 0                             |        | 0                     |        |
| 2608   | 0                             |        | 0                     |        |
| 2609   | 2                             | 1      | 0                     |        |
| 2610   | 0                             |        | 0                     |        |
| 2614   | 0                             |        | 0                     |        |
| 2615   | 1                             | 1      | 0                     |        |
| 2616   | 0                             |        | 0                     |        |
| 2618   | 1                             | 0      | 0                     |        |
| 2630   | 0                             |        | 0                     |        |
| 2633   | 1                             | 1      | 1                     | 1      |
| 2637   | 1                             | 1      | 0                     |        |
| 2638   | 1                             | 1      | 0                     |        |
| 2641   | 0                             |        | 0                     |        |
| 2644   | 0                             |        | 0                     |        |
| 2645   | 0                             |        | 0                     |        |
| 2646   | 0                             |        | 0                     |        |
| 2648   | 0                             |        | 0                     |        |
| 2651   | 0                             |        | 0                     |        |
| 2652   | 3                             | 1      | 4                     | 1      |
| 2653   | 1                             | 1      | 1                     | 1      |
| 2656   | 0                             |        | 0                     |        |
| 2657   | 1                             | 0      | 0                     |        |
| 2658   | 3                             | 0      | 0                     |        |
| 2661   | 0                             |        | 0                     |        |
| 2663   | 1                             | 1      | 0                     |        |

| respid | ICS Splitting/spraying: Q26_1 | Q26a_1 | ICS: Hesitancy: Q27_1 | Q27a_1 |
|--------|-------------------------------|--------|-----------------------|--------|
| 2665   | 0                             |        | 0                     |        |
| 2670   | 3                             | 0      | 0                     |        |
| 2672   | 0                             |        | 0                     |        |
| 2673   | 0                             |        | 0                     |        |
| 2677   | 1                             | 1      | 1                     | 1      |
| 2686   | 3                             | 3      | 3                     | 3      |
| 2688   | 3                             | 2      | 0                     |        |
| 2689   | 1                             | 1      | 1                     | 1      |
| 2691   | 0                             |        | 0                     |        |
| 2695   | 2                             | 0      | 0                     |        |
| 2696   | 0                             |        | 0                     |        |
| 2697   | 0                             |        | 0                     |        |
| 2698   | 0                             |        | 0                     |        |
| 2703   | 1                             | 0      | 0                     |        |
| 2704   | 0                             |        | 0                     |        |
| 2706   | 0                             |        | 0                     |        |
| 2707   | 2                             | 1      | 1                     | 1      |
| 2710   | 1                             | 0      | 0                     |        |
| 2711   | 0                             |        | 0                     |        |
| 2712   | 0                             |        | 0                     |        |
| 2713   | 0                             |        | 0                     |        |
| 2721   | 0                             |        | 0                     |        |
| 2730   | 1                             | 0      | 0                     |        |
| 2731   | 1                             | 2      | 0                     |        |
| 2732   | 1                             | 0      | 0                     |        |
| 2733   | 2                             | 2      | 2                     | 1      |
| 2735   | 1                             | 1      | 0                     |        |
| 2736   | 0                             |        | 0                     |        |
| 2740   | 0                             |        | 0                     |        |
| 2741   | 1                             | 1      | 1                     | 1      |
| 2742   | 0                             |        | 0                     |        |
| 2743   | 1                             | 0      | 0                     |        |



| respid | ICS Splitting/spraying: Q26_1 | Q26a_1 | ICS: Hesitancy: Q27_1 | Q27a_1 |
|--------|-------------------------------|--------|-----------------------|--------|
| 2744   | 0                             |        | 0                     |        |
| 2745   | 3                             | 2      | 3                     | 2      |
| 2749   | 0                             |        | 0                     |        |
| 2751   | 0                             |        | 0                     |        |
| 2754   | 1                             | 1      | 1                     | 1      |
| 2755   | 1                             | 1      | 1                     | 1      |
| 2757   | 0                             |        | 0                     |        |
| 2758   | 2                             | 2      | 1                     | 1      |
| 2759   | 1                             | 0      | 0                     |        |
| 2761   | 0                             |        | 0                     |        |
| 2762   | 1                             | 1      | 1                     | 1      |
| 2763   | 0                             |        | 0                     |        |
| 2764   | 4                             | 2      | 4                     | 2      |
| 2765   | 2                             | 1      | 0                     |        |
| 2766   | 0                             |        | 1                     | 0      |
| 2767   | 1                             | 0      | 0                     |        |
| 2769   | 2                             | 1      | 0                     |        |
| 2770   | 3                             | 2      | 2                     | 2      |
| 2771   | 1                             | 1      | 2                     | 1      |
| 2774   | 1                             | 1      | 1                     | 1      |
| 2777   | 3                             | 2      | 2                     | 2      |
| 2778   | 0                             |        | 1                     | 1      |
| 2781   | 0                             |        | 1                     | 1      |
| 2782   | 1                             | 1      | 1                     | 1      |
| 2784   | 1                             | 1      | 1                     | 1      |
| 2785   | 1                             | 2      | 1                     | 2      |
| 2786   | 0                             |        | 0                     |        |
| 2787   | 0                             |        | 0                     |        |
| 2789   | 2                             | 2      | 2                     | 2      |
| 2790   | 1                             | 1      | 1                     | 1      |
| 2791   | 0                             |        | 0                     |        |
| 2793   | 0                             |        | 1                     | 2      |

| respid | ICS Splitting/spraying: Q26_1 | Q26a_1 | ICS: Hesitancy: Q27_1 | Q27a_1 |
|--------|-------------------------------|--------|-----------------------|--------|
| 2797   | 2                             | 1      | 1                     | 0      |
| 2798   | 0                             |        | 0                     |        |
| 2799   | 1                             | 1      | 0                     |        |
| 2801   | 0                             |        | 1                     | 1      |
| 2802   | 2                             | 0      | 3                     | 2      |
| 2803   | 2                             | 2      | 1                     | 1      |
| 2804   | 1                             | 0      | 4                     | 1      |
| 2807   | 1                             | 0      | 1                     | 0      |
| 2809   | 0                             |        | 0                     |        |
| 2810   | 0                             |        | 0                     |        |
| 2812   | 1                             | 1      | 0                     |        |
| 2814   | 1                             | 0      | 0                     |        |
| 2815   | 1                             | 1      | 1                     | 2      |
| 2816   | 0                             |        | 1                     | 0      |
| 2817   | 0                             |        | 0                     |        |
| 2819   | 1                             | 1      | 0                     |        |
| 2820   | 1                             | 0      | 0                     |        |
| 2821   | 0                             |        | 0                     |        |
| 2822   | 2                             | 2      | 5                     | 4      |
| 2823   | 0                             |        | 0                     |        |
| 2824   | 1                             | 1      | 0                     |        |
| 2825   | 0                             |        | 1                     | 1      |
| 2826   | 1                             | 1      | 1                     | 0      |
| 2827   | 1                             | 0      | 1                     | 0      |
| 2828   | 0                             |        | 0                     |        |
| 2829   | 2                             | 2      | 2                     | 2      |
| 2830   | 1                             | 1      | 1                     | 1      |
| 2831   | 1                             | 0      | 0                     |        |
| 2832   | 0                             |        | 2                     | 2      |
| 2833   | 0                             |        | 0                     |        |
| 2834   | 1                             | 1      | 0                     |        |
| 2835   | 2                             | 4      | 4                     | 3      |

| respid | ICS Splitting/spraying: Q26_1 | Q26a_1 | ICS: Hesitancy: Q27_1 | Q27a_1 |
|--------|-------------------------------|--------|-----------------------|--------|
| 2836   | 3                             | 2      | 1                     | 2      |
| 2837   | 2                             | 1      | 1                     | 1      |
| 2838   | 2                             | 0      | 1                     | 0      |
| 2844   | 1                             | 1      | 4                     | 3      |
| 2845   | 0                             |        | 0                     |        |
| 2847   | 5                             | 4      | 5                     | 4      |
| 2848   | 0                             |        | 0                     |        |
| 2849   | 2                             | 1      | 3                     | 2      |
| 2851   | 0                             |        | 0                     |        |
| 2852   | 0                             |        | 0                     |        |
| 2853   | 0                             |        | 1                     | 1      |
| 2854   | 0                             |        | 0                     |        |
| 2856   | 0                             |        | 1                     | 1      |
| 2857   | 0                             |        | 1                     | 1      |
| 2858   | 1                             | 1      | 1                     | 1      |
| 2859   | 1                             | 1      | 1                     | 3      |
| 2860   | 1                             | 1      | 0                     |        |
| 2861   | 3                             | 2      | 3                     | 2      |
| 2863   | 0                             |        | 0                     |        |
| 2864   | 0                             |        | 0                     |        |
| 2866   | 0                             |        | 1                     | 1      |
| 2872   | 0                             |        | 0                     |        |
| 2875   | 1                             | 2      | 1                     | 2      |
| 2879   | 0                             |        | 0                     |        |
| 2881   | 1                             | 1      | 0                     |        |
| 2882   | 0                             |        | 0                     |        |
| 2883   | 1                             | 0      | 1                     | 0      |
| 2884   | 2                             | 2      | 2                     | 2      |
| 2885   | 0                             |        | 0                     |        |
| 2887   | 0                             |        | 0                     |        |
| 2888   | 0                             |        | 0                     |        |
| 2890   | 1                             | 1      | 0                     |        |

| respid | ICS Splitting/spraying: Q26_1 | Q26a_1 | ICS: Hesitancy: Q27_1 | Q27a_1 |
|--------|-------------------------------|--------|-----------------------|--------|
| 2891   | 0                             |        | 0                     |        |
| 2892   | 0                             |        | 0                     |        |
| 2895   | 0                             |        | 3                     | 1      |
| 2899   | 0                             |        | 0                     |        |
| 2900   | 1                             | 0      | 0                     |        |
| 2902   | 4                             | 2      | 1                     | 1      |
| 2903   | 0                             |        | 0                     |        |
| 2904   | 0                             |        | 0                     |        |
| 2906   | 0                             |        | 0                     |        |
| 2908   | 0                             |        | 0                     |        |
| 2910   | 0                             |        | 0                     |        |
| 2917   | 1                             | 2      | 1                     | 2      |
| 2918   | 1                             | 1      | 1                     | 1      |
| 2919   | 0                             |        | 0                     |        |
| 2920   | 0                             |        | 0                     |        |
| 2921   | 2                             | 2      | 3                     | 2      |
| 2922   | 0                             |        | 1                     | 0      |
| 2923   | 0                             |        | 0                     |        |
| 2924   | 4                             | 3      | 3                     | 3      |
| 2926   | 0                             |        | 1                     | 0      |
| 2928   | 0                             |        | 0                     |        |
| 2930   | 0                             |        | 0                     |        |
| 2931   | 1                             | 1      | 0                     |        |
| 2933   | 0                             |        | 0                     |        |
| 2935   | 1                             | 1      | 1                     | 1      |
| 2936   | 0                             |        | 0                     |        |
| 2937   | 2                             | 1      | 0                     |        |
| 2938   | 0                             |        | 0                     |        |
| 2944   | 1                             | 0      | 0                     |        |
| 2945   | 0                             |        | 0                     |        |
| 2947   | 1                             | 0      | 0                     |        |
| 2949   | 0                             |        | 0                     |        |

| respid | ICS Splitting/spraying: Q26_1 | Q26a_1 | ICS: Hesitancy: Q27_1 | Q27a_1 |
|--------|-------------------------------|--------|-----------------------|--------|
| 2951   | 0                             |        | 4                     | 3      |
| 2952   | 0                             |        | 0                     |        |
| 2953   | 0                             |        | 0                     |        |
| 2955   | 1                             | 0      | 0                     |        |
| 2957   | 0                             |        | 0                     |        |
| 2958   | 0                             |        | 0                     |        |
| 2960   | 0                             |        | 0                     |        |
| 2963   | 1                             | 0      | 0                     |        |
| 2964   | 1                             | 1      | 0                     |        |
| 2967   | 0                             |        | 0                     |        |
| 2968   | 0                             |        | 0                     |        |
| 2971   | 3                             | 2      | 3                     | 2      |
| 2974   | 0                             |        | 0                     |        |
| 2975   | 0                             |        | 0                     |        |
| 2982   | 0                             |        | 0                     |        |
| 2983   | 0                             |        | 0                     |        |
| 2985   | 0                             |        | 0                     |        |
| 2986   | 3                             | 3      | 4                     | 3      |
| 2987   | 1                             | 1      | 0                     |        |
| 2988   | 0                             |        | 0                     |        |
| 2993   | 0                             |        | 0                     |        |
| 2996   | 0                             |        | 0                     |        |
| 2997   | 1                             | 1      | 2                     | 1      |
| 2998   | 0                             |        | 0                     |        |
| 3004   | 0                             |        | 0                     |        |
| 3007   | 1                             | 2      | 1                     | 2      |
| 3011   | 2                             | 1      | 2                     | 2      |
| 3012   | 1                             | 0      | 0                     |        |
| 3013   | 0                             |        | 0                     |        |
| 3014   | 0                             |        | 0                     |        |
| 3015   | 1                             | 2      | 0                     |        |
| 3016   | 0                             |        | 0                     |        |

| respid | ICS Splitting/spraying: Q26_1 | Q26a_1 | ICS: Hesitancy: Q27_1 | Q27a_1 |
|--------|-------------------------------|--------|-----------------------|--------|
| 3017   | 0                             |        | 1                     | 0      |
| 3020   | 2                             | 2      | 2                     | 1      |
| 3022   | 0                             |        | 0                     |        |
| 3023   | 0                             |        | 0                     |        |
| 3026   | 1                             | 1      | 1                     | 1      |
| 3038   | 1                             | 0      | 1                     | 1      |
| 3039   | 0                             |        | 1                     | 2      |
| 3040   | 1                             | 1      | 0                     |        |
| 3041   | 0                             |        | 0                     |        |
| 3042   | 1                             | 1      | 1                     | 1      |
| 3044   | 0                             |        | 0                     |        |
| 3050   | 0                             |        | 0                     |        |
| 3052   | 2                             | 0      | 1                     | 0      |
| 3056   | 1                             | 1      | 2                     | 1      |
| 3059   | 0                             |        | 0                     |        |
| 3060   | 3                             | 2      | 1                     | 0      |
| 3063   | 1                             | 0      | 1                     | 0      |
| 3065   | 0                             |        | 0                     |        |
| 3067   | 1                             | 2      | 0                     |        |
| 3068   | 0                             |        | 0                     |        |
| 3072   | 0                             |        | 0                     |        |
| 3074   | 2                             | 2      | 2                     | 2      |
| 3075   | 1                             | 1      | 1                     | 1      |
| 3076   | 0                             |        | 0                     |        |
| 3079   | 3                             | 0      | 0                     |        |
| 3082   | 2                             | 2      | 2                     | 3      |
| 3083   | 1                             | 0      | 0                     |        |
| 3084   | 0                             |        | 0                     |        |
| 3085   | 0                             |        | 0                     |        |
| 3090   | 0                             |        | 0                     |        |
| 3091   | 0                             |        | 2                     | 1      |
| 3092   | 1                             | 1      | 1                     | 1      |

| respid | ICS Splitting/spraying: Q26_1 | Q26a_1 | ICS: Hesitancy: Q27_1 | Q27a_1 |
|--------|-------------------------------|--------|-----------------------|--------|
| 3095   | 1                             | 0      | 1                     | 0      |
| 3096   | 4                             | 3      | 3                     | 4      |
| 3097   | 4                             | 2      | 1                     | 1      |
| 3099   | 4                             | 3      | 4                     | 3      |
| 3101   | 0                             |        | 0                     |        |
| 3103   | 1                             | 1      | 0                     |        |
| 3104   | 0                             |        | 0                     |        |
| 3105   | 0                             |        | 0                     |        |
| 3107   | 0                             |        | 0                     |        |
| 3108   | 1                             | 0      | 1                     | 1      |
| 3109   | 0                             |        | 0                     |        |
| 3116   | 0                             |        | 0                     |        |
| 3117   | 0                             |        | 1                     | 0      |
| 3119   | 0                             |        | 0                     |        |
| 3120   | 0                             |        | 0                     |        |
| 3130   | 0                             |        | 0                     |        |
| 3131   | 0                             |        | 1                     | 1      |
| 3133   | 0                             |        | 0                     |        |
| 3134   | 1                             | 0      | 1                     | 1      |
| 3135   | 2                             | 3      | 0                     |        |
| 3145   | 5                             | 1      | 0                     |        |
| 3147   | 0                             |        | 0                     |        |
| 3152   | 1                             | 1      | 0                     |        |
| 3155   | 3                             | 3      | 4                     | 3      |
| 3156   | 0                             |        | 0                     |        |
| 3157   | 3                             | 3      | 2                     | 2      |
| 3166   | 1                             | 1      | 1                     | 1      |
| 3169   | 1                             | 2      | 0                     |        |
| 3179   | 0                             |        | 0                     |        |
| 3181   | 0                             |        | 0                     |        |
| 3185   | 0                             |        | 0                     |        |
| 3190   | 0                             |        | 1                     | 0      |

| respid | ICS Splitting/spraying: Q26_1 | Q26a_1 | ICS: Hesitancy: Q27_1 | Q27a_1 |
|--------|-------------------------------|--------|-----------------------|--------|
| 3191   | 0                             |        | 0                     |        |
| 3192   | 0                             |        | 0                     |        |
| 3193   | 0                             |        | 0                     |        |
| 3195   | 0                             |        | 0                     |        |
| 3202   | 0                             |        | 0                     |        |
| 3204   | 0                             |        | 0                     |        |
| 3208   | 0                             |        | 0                     |        |
| 3212   | 1                             | 0      | 2                     | 1      |
| 3218   | 0                             |        | 0                     |        |
| 3219   | 0                             |        | 0                     |        |
| 3220   | 0                             |        | 0                     |        |
| 3221   | 3                             | 1      | 1                     | 1      |
| 3223   | 0                             |        | 0                     |        |
| 3231   | 1                             | 1      | 1                     | 1      |
| 3232   | 2                             | 2      | 1                     | 1      |
| 3234   | 1                             | 1      | 0                     |        |
| 3235   | 0                             |        | 0                     |        |
| 3237   | 0                             |        | 0                     |        |
| 3238   | 1                             | 0      | 0                     |        |
| 3240   | 0                             |        | 0                     |        |
| 3241   | 1                             | 0      | 0                     |        |
| 3243   | 1                             | 1      | 1                     | 1      |
| 3244   | 1                             | 1      | 1                     | 1      |
| 3247   | 0                             |        | 0                     |        |
| 3250   | 0                             |        | 0                     |        |
| 3251   | 2                             | 3      | 2                     | 3      |
| 3255   | 0                             |        | 0                     |        |
| 3256   | 0                             |        | 0                     |        |
| 3257   | 0                             |        | 0                     |        |
| 3258   | 0                             |        | 0                     |        |
| 3259   | 0                             |        | 0                     |        |
| 3260   | 1                             | 1      | 0                     |        |



| respid | ICS Splitting/spraying: Q26_1 | Q26a_1 | ICS: Hesitancy: Q27_1 | Q27a_1 |
|--------|-------------------------------|--------|-----------------------|--------|
| 3261   | 0                             |        | 0                     |        |
| 3262   | 1                             | 2      | 1                     | 1      |
| 3264   | 2                             | 2      | 1                     | 1      |
| 3265   | 0                             |        | 0                     |        |
| 3267   | 1                             | 1      | 1                     | 0      |
| 3268   | 0                             |        | 0                     |        |
| 3270   | 1                             | 0      | 0                     |        |
| 3271   | 0                             |        | 0                     |        |
| 3274   | 0                             |        | 0                     |        |
| 3276   | 0                             |        | 0                     |        |
| 3277   | 0                             |        | 0                     |        |
| 3279   | 0                             |        | 0                     |        |
| 3281   | 0                             |        | 0                     |        |
| 3283   | 4                             | 3      | 2                     | 2      |
| 3285   | 0                             |        | 1                     | 1      |
| 3286   | 0                             |        | 1                     | 1      |
| 3287   | 0                             |        | 1                     | 1      |
| 3289   | 0                             |        | 1                     | 0      |
| 3290   | 0                             |        | 0                     |        |
| 3291   | 0                             |        | 1                     | 0      |
| 3292   | 2                             | 2      | 2                     | 2      |
| 3293   | 2                             | 2      | 1                     | 1      |
| 3294   | 1                             | 0      | 1                     | 0      |
| 3296   | 0                             |        | 0                     |        |
| 3306   | 0                             |        | 0                     |        |
| 3307   | 1                             | 1      | 0                     |        |
| 3308   | 0                             |        | 0                     |        |
| 3312   | 0                             |        | 0                     |        |
| 3313   | 0                             |        | 0                     |        |
| 3316   | 0                             |        | 0                     |        |
| 3317   | 1                             | 3      | 1                     | 3      |
| 3320   | 5                             | 1      | 0                     |        |

| respid | ICS Splitting/spraying: Q26_1 | Q26a_1 | ICS: Hesitancy: Q27_1 | Q27a_1 |
|--------|-------------------------------|--------|-----------------------|--------|
| 3321   | 1                             | 1      | 0                     |        |
| 3322   | 0                             |        | 0                     |        |
| 3323   | 0                             |        | 0                     |        |
| 3325   | 0                             |        | 0                     |        |
| 3332   | 0                             |        | 0                     |        |
| 3334   | 0                             |        | 0                     |        |
| 3335   | 0                             |        | 0                     |        |
| 3341   | 0                             |        | 0                     |        |
| 3345   | 1                             | 1      | 0                     |        |
| 3346   | 0                             |        | 0                     |        |
| 3349   | 1                             | 1      | 1                     | 1      |
| 3351   | 0                             |        | 0                     |        |
| 3353   | 0                             |        | 1                     | 1      |
| 3354   | 0                             |        | 0                     |        |
| 3356   | 0                             |        | 0                     |        |
| 3357   | 0                             |        | 1                     | 2      |
| 3360   | 0                             |        | 0                     |        |
| 3361   | 2                             | 1      | 0                     |        |
| 3362   | 0                             |        | 1                     | 1      |
| 3363   | 0                             |        | 0                     |        |
| 3364   | 3                             | 3      | 4                     | 4      |
| 3368   | 1                             | 0      | 0                     |        |
| 3370   | 0                             |        | 0                     |        |
| 3371   | 0                             |        | 1                     | 1      |
| 3379   | 1                             | 0      | 0                     |        |
| 3380   | 1                             | 0      | 1                     | 0      |
| 3382   | 0                             |        | 1                     | 1      |
| 3384   | 0                             |        | 0                     |        |
| 3385   | 0                             |        | 0                     |        |
| 3388   | 0                             |        | 0                     |        |
| 3392   | 0                             |        | 0                     |        |
| 3393   | 0                             |        | 0                     |        |

| respid | ICS Splitting/spraying: Q26_1 | Q26a_1 | ICS: Hesitancy: Q27_1 | Q27a_1 |
|--------|-------------------------------|--------|-----------------------|--------|
| 3394   | 3                             | 2      | 5                     | 4      |
| 3395   | 1                             | 0      | 1                     | 0      |
| 3396   | 5                             | 2      | 0                     |        |
| 3397   | 1                             | 1      | 1                     | 1      |
| 3398   | 0                             |        | 0                     |        |
| 3399   | 0                             |        | 0                     |        |
| 3400   | 3                             | 1      | 1                     | 1      |
| 3401   | 3                             | 3      | 4                     | 3      |
| 3402   | 2                             | 1      | 2                     | 2      |
| 3403   | 1                             | 1      | 1                     | 1      |
| 3405   | 0                             |        | 0                     |        |
| 3407   | 1                             | 1      | 1                     | 1      |
| 3410   | 1                             | 0      | 0                     |        |
| 3411   | 1                             | 1      | 1                     | 1      |
| 3413   | 0                             |        | 0                     |        |
| 3414   | 0                             |        | 0                     |        |
| 3420   | 1                             | 0      | 0                     |        |
| 3421   | 3                             | 2      | 1                     | 2      |
| 3425   | 1                             | 0      | 1                     | 1      |
| 3426   | 0                             |        | 0                     |        |
| 3429   | 0                             |        | 0                     |        |
| 3430   | 3                             | 3      | 1                     | 1      |
| 3433   | 0                             |        | 0                     |        |
| 3434   | 1                             | 2      | 1                     | 2      |
| 3437   | 0                             |        | 0                     |        |
| 3439   | 3                             | 2      | 0                     |        |
| 3441   | 1                             | 1      | 1                     | 1      |
| 3442   | 0                             |        | 0                     |        |
| 3444   | 0                             |        | 0                     |        |
| 3445   | 0                             |        | 0                     |        |
| 3450   | 1                             | 1      | 1                     | 2      |
| 3452   | 0                             |        | 0                     |        |

| respid | ICS Splitting/spraying: Q26_1 | Q26a_1 | ICS: Hesitancy: Q27_1 | Q27a_1 |
|--------|-------------------------------|--------|-----------------------|--------|
| 3456   | 1                             | 0      | 0                     |        |
| 3459   | 0                             |        | 0                     |        |
| 3460   | 2                             | 0      | 1                     | 0      |
| 3461   | 0                             |        | 0                     |        |
| 3466   | 2                             | 2      | 3                     | 2      |
| 3471   | 1                             | 1      | 1                     | 1      |
| 3473   | 1                             | 0      | 0                     |        |
| 3475   | 2                             | 3      | 3                     | 3      |
| 3476   | 0                             |        | 0                     |        |
| 3477   | 1                             | 2      | 0                     |        |
| 3478   | 0                             |        | 0                     |        |
| 3479   | 0                             |        | 0                     |        |
| 3482   | 4                             | 3      | 3                     | 2      |
| 3483   | 0                             |        | 0                     |        |
| 3485   | 0                             |        | 1                     | 1      |
| 3489   | 0                             |        | 0                     |        |
| 3490   | 0                             |        | 0                     |        |
| 3491   | 0                             |        | 1                     | 1      |
| 3494   | 1                             | 1      | 1                     | 1      |
| 3495   | 0                             |        | 3                     | 2      |
| 3501   | 0                             |        | 0                     |        |
| 3506   | 1                             | 0      | 0                     |        |
| 3507   | 3                             | 0      | 1                     | 0      |
| 3517   | 1                             | 1      | 1                     | 1      |
| 3520   | 0                             |        | 0                     |        |
| 3521   | 1                             | 0      | 1                     | 0      |
| 3522   | 0                             |        | 0                     |        |
| 3524   | 0                             |        | 0                     |        |
| 3527   | 0                             |        | 0                     |        |
| 3528   | 0                             |        | 0                     |        |
| 3529   | 1                             | 1      | 1                     | 1      |
| 3536   | 1                             | 0      | 1                     | 0      |

| respid | ICS Splitting/spraying: Q26_1 | Q26a_1 | ICS: Hesitancy: Q27_1 | Q27a_1 |
|--------|-------------------------------|--------|-----------------------|--------|
| 3537   | 1                             | 0      | 0                     |        |
| 3538   | 0                             |        | 1                     | 0      |
| 3540   | 3                             | 1      | 1                     | 1      |
| 3545   | 0                             |        | 0                     |        |
| 3547   | 2                             | 2      | 1                     | 1      |
| 3554   | 0                             |        | 0                     |        |
| 3556   | 0                             |        | 0                     |        |
| 3557   | 1                             | 1      | 0                     |        |
| 3559   | 0                             |        | 0                     |        |
| 3560   | 1                             | 0      | 1                     | 1      |
| 3562   | 0                             |        | 1                     | 0      |
| 3564   | 3                             | 1      | 1                     | 1      |
| 3565   | 4                             | 4      | 3                     | 3      |
| 3568   | 3                             | 2      | 1                     | 2      |
| 3572   | 0                             |        | 0                     |        |
| 3578   | 0                             |        | 0                     |        |
| 3581   | 0                             |        | 0                     |        |
| 3583   | 1                             | 1      | 0                     |        |
| 3588   | 1                             | 1      | 0                     |        |
| 3591   | 0                             |        | 0                     |        |
| 3594   | 1                             | 0      | 0                     |        |
| 3595   | 1                             | 1      | 1                     | 1      |
| 3596   | 0                             |        | 1                     | 0      |
| 3597   | 1                             | 1      | 1                     | 1      |
| 3598   | 0                             |        | 0                     |        |
| 3600   | 1                             | 0      | 1                     | 1      |
| 3602   | 0                             |        | 0                     |        |
| 3604   | 5                             | 0      | 0                     |        |
| 3605   | 1                             | 1      | 0                     |        |
| 3606   | 0                             |        | 0                     |        |
| 3607   | 0                             |        | 0                     |        |
| 3610   | 0                             |        | 0                     |        |

| respid | ICS Splitting/spraying: Q26_1 | Q26a_1 | ICS: Hesitancy: Q27_1 | Q27a_1 |
|--------|-------------------------------|--------|-----------------------|--------|
| 3611   | 1                             | 0      | 0                     |        |
| 3612   | 3                             | 1      | 0                     |        |
| 3614   | 0                             |        | 0                     |        |
| 3616   | 0                             |        | 0                     |        |
| 3617   | 1                             | 1      | 0                     |        |
| 3618   | 0                             |        | 0                     |        |
| 3619   | 1                             | 1      | 1                     | 1      |
| 3621   | 0                             |        | 1                     | 1      |
| 3622   | 1                             | 1      | 0                     |        |
| 3624   | 1                             | 1      | 0                     |        |
| 3626   | 0                             |        | 0                     |        |
| 3629   | 0                             |        | 0                     |        |
| 3631   | 0                             |        | 0                     |        |
| 3632   | 1                             | 0      | 0                     |        |
| 3638   | 0                             |        | 1                     | 0      |
| 3640   | 0                             |        | 0                     |        |
| 3641   | 0                             |        | 0                     |        |
| 3645   | 4                             | 3      | 2                     | 2      |
| 3650   | 0                             |        | 0                     |        |
| 3653   | 1                             | 1      | 1                     | 1      |
| 3655   | 1                             | 2      | 1                     | 2      |
| 3657   | 1                             | 1      | 1                     | 1      |
| 3658   | 1                             | 1      | 0                     |        |
| 3659   | 0                             |        | 0                     |        |
| 3664   | 2                             | 2      | 2                     | 2      |
| 3665   | 3                             | 2      | 1                     | 1      |
| 3667   | 0                             |        | 0                     |        |
| 3668   | 3                             | 4      | 3                     | 3      |
| 3675   | 0                             |        | 0                     |        |
| 3678   | 0                             |        | 0                     |        |
| 3680   | 0                             |        | 0                     |        |
| 3684   | 3                             | 3      | 0                     |        |

| respid | ICS Splitting/spraying: Q26_1 | Q26a_1 | ICS: Hesitancy: Q27_1 | Q27a_1 |
|--------|-------------------------------|--------|-----------------------|--------|
| 3685   | 3                             | 2      | 3                     | 2      |
| 3687   | 4                             | 3      | 1                     | 1      |
| 3689   | 0                             |        | 1                     | 2      |
| 3690   | 0                             |        | 0                     |        |
| 3693   | 0                             |        | 0                     |        |
| 3694   | 0                             |        | 0                     |        |
| 3695   | 0                             |        | 0                     |        |
| 3700   | 0                             |        | 0                     |        |
| 3701   | 1                             | 1      | 1                     | 0      |
| 3703   | 0                             |        | 1                     | 0      |
| 3704   | 4                             | 3      | 4                     | 3      |
| 3705   | 0                             |        | 0                     |        |
| 3709   | 1                             | 0      | 0                     |        |
| 3710   | 1                             | 1      | 1                     | 1      |
| 3722   | 1                             | 1      | 0                     |        |
| 3725   | 2                             | 0      | 0                     |        |
| 3726   | 0                             |        | 0                     |        |
| 3727   | 0                             |        | 1                     | 1      |
| 3728   | 1                             | 1      | 1                     | 1      |
| 3729   | 0                             |        | 0                     |        |
| 3731   | 0                             |        | 0                     |        |
| 3738   | 0                             |        | 0                     |        |
| 3739   | 5                             | 2      | 0                     |        |
| 3740   | 0                             |        | 0                     |        |
| 3749   | 1                             | 1      | 1                     | 1      |
| 3758   | 1                             | 1      | 1                     | 1      |
| 3762   | 0                             |        | 0                     |        |
| 3765   | 0                             |        | 0                     |        |
| 3770   | 0                             |        | 0                     |        |
| 3771   | 0                             |        | 0                     |        |
| 3778   | 0                             |        | 0                     |        |
| 3779   | 0                             |        | 1                     | 1      |

| respid | ICS Splitting/spraying: Q26_1 | Q26a_1 | ICS: Hesitancy: Q27_1 | Q27a_1 |
|--------|-------------------------------|--------|-----------------------|--------|
| 3780   | 1                             | 0      | 0                     |        |
| 3782   | 1                             | 0      | 0                     |        |
| 3784   | 1                             | 1      | 0                     |        |
| 3787   | 0                             |        | 1                     | 0      |
| 3790   | 2                             | 1      | 2                     | 0      |
| 3791   | 1                             | 1      | 0                     |        |
| 3793   | 3                             | 3      | 3                     | 3      |
| 3795   | 0                             |        | 0                     |        |
| 3799   | 0                             |        | 0                     |        |
| 3801   | 2                             | 2      | 2                     | 2      |
| 3804   | 2                             | 2      | 2                     | 2      |
| 3809   | 0                             |        | 0                     |        |
| 3810   | 0                             |        | 0                     |        |
| 3813   | 1                             | 1      | 0                     |        |
| 3816   | 1                             | 0      | 0                     |        |
| 3820   | 0                             |        | 1                     | 0      |
| 3821   | 0                             |        | 0                     |        |
| 3823   | 1                             | 0      | 2                     | 1      |
| 3828   | 0                             |        | 0                     |        |
| 3829   | 0                             |        | 0                     |        |
| 3832   | 0                             |        | 0                     |        |
| 3835   | 1                             | 0      | 0                     |        |
| 3837   | 0                             |        | 0                     |        |
| 3838   | 0                             |        | 0                     |        |
| 3839   | 4                             | 2      | 3                     | 4      |
| 3840   | 0                             |        | 0                     |        |
| 3842   | 0                             |        | 0                     |        |
| 3843   | 1                             | 0      | 0                     |        |
| 3844   | 1                             | 1      | 0                     |        |
| 3850   | 0                             |        | 0                     |        |
| 3851   | 0                             |        | 0                     |        |
| 3856   | 0                             |        | 1                     | 1      |



| respid | ICS Splitting/spraying: Q26_1 | Q26a_1 | ICS: Hesitancy: Q27_1 | Q27a_1 |
|--------|-------------------------------|--------|-----------------------|--------|
| 3859   | 2                             | 2      | 4                     | 3      |
| 3860   | 0                             |        | 0                     |        |
| 3863   | 1                             | 1      | 1                     | 1      |
| 3866   | 0                             |        | 1                     | 1      |
| 3867   | 1                             | 0      | 0                     |        |
| 3870   | 2                             | 1      | 0                     |        |
| 3873   | 1                             | 1      | 1                     | 1      |
| 3875   | 0                             |        | 0                     |        |
| 3878   | 0                             |        | 1                     | 1      |
| 3881   | 0                             |        | 0                     |        |
| 3883   | 3                             | 2      | 3                     | 3      |
| 3884   | 0                             |        | 1                     | 1      |
| 3885   | 2                             | 2      | 2                     | 2      |
| 3886   | 2                             | 2      | 2                     | 2      |
| 3887   | 0                             |        | 0                     |        |
| 3888   | 0                             |        | 0                     |        |
| 3889   | 1                             | 1      | 2                     | 2      |
| 3890   | 0                             |        | 0                     |        |
| 3896   | 1                             | 1      | 1                     | 1      |
| 3902   | 3                             | 2      | 2                     | 2      |
| 3909   | 0                             |        | 0                     |        |
| 3912   | 3                             | 2      | 2                     | 2      |
| 3922   | 1                             | 0      | 1                     | 0      |
| 3928   | 0                             |        | 0                     |        |
| 3930   | 1                             | 1      | 0                     |        |
| 3931   | 0                             |        | 0                     |        |
| 3933   | 1                             | 3      | 0                     |        |
| 3935   | 1                             | 1      | 1                     | 0      |
| 3937   | 0                             |        | 0                     |        |
| 3939   | 0                             |        | 1                     | 1      |
| 3942   | 0                             |        | 1                     | 0      |
| 3943   | 0                             |        | 0                     |        |

| respid | ICS Splitting/spraying: Q26_1 | Q26a_1 | ICS: Hesitancy: Q27_1 | Q27a_1 |
|--------|-------------------------------|--------|-----------------------|--------|
| 3944   | 0                             |        | 0                     |        |
| 3945   | 0                             |        | 0                     |        |
| 3947   | 0                             |        | 1                     | 1      |
| 3948   | 1                             | 2      | 0                     |        |
| 3951   | 0                             |        | 0                     |        |
| 3959   | 3                             | 0      | 0                     |        |
| 3969   | 4                             | 4      | 5                     | 4      |
| 3973   | 1                             | 0      | 0                     |        |
| 3975   | 1                             | 0      | 1                     | 1      |
| 3976   | 1                             | 0      | 0                     |        |
| 3977   | 1                             | 1      | 1                     | 1      |
| 3978   | 0                             |        | 0                     |        |
| 3994   | 1                             | 0      | 1                     | 0      |
| 3995   | 0                             |        | 0                     |        |
| 3997   | 0                             |        | 0                     |        |
| 3998   | 1                             | 0      | 0                     |        |
| 3999   | 0                             |        | 0                     |        |
| 4002   | 2                             | 2      | 3                     | 3      |
| 4004   | 1                             | 1      | 1                     | 1      |
| 4005   | 0                             |        | 0                     |        |
| 4006   | 3                             | 1      | 2                     | 2      |
| 4008   | 0                             |        | 0                     |        |
| 4010   | 1                             | 1      | 0                     |        |
| 4011   | 3                             | 2      | 2                     | 2      |
| 4013   | 4                             | 1      | 2                     | 1      |
| 4014   | 1                             | 1      | 1                     | 2      |
| 4016   | 0                             |        | 0                     |        |
| 4017   | 1                             | 0      | 0                     |        |
| 4019   | 0                             |        | 0                     |        |
| 4021   | 0                             |        | 0                     |        |
| 4023   | 0                             |        | 0                     |        |
| 4024   | 0                             |        | 0                     |        |

| respid | ICS Splitting/spraying: Q26_1 | Q26a_1 | ICS: Hesitancy: Q27_1 | Q27a_1 |
|--------|-------------------------------|--------|-----------------------|--------|
| 4025   | 1                             | 1      | 1                     | 1      |
| 4027   | 1                             | 0      | 0                     |        |
| 4032   | 0                             |        | 0                     |        |
| 4034   | 1                             | 0      | 1                     | 1      |
| 4035   | 0                             |        | 0                     |        |
| 4037   | 1                             | 1      | 1                     | 1      |
| 4040   | 0                             |        | 0                     |        |
| 4041   | 5                             | 1      | 0                     |        |
| 4042   | 0                             |        | 0                     |        |
| 4043   | 0                             |        | 1                     | 0      |
| 4045   | 0                             |        | 0                     |        |
| 4046   | 1                             | 1      | 3                     | 2      |
| 4048   | 0                             |        | 0                     |        |
| 4049   | 1                             | 1      | 1                     | 1      |
| 4050   | 1                             | 1      | 0                     |        |
| 4052   | 1                             | 2      | 0                     |        |
| 4053   | 0                             |        | 0                     |        |
| 4060   | 3                             | 0      | 0                     |        |
| 4065   | 0                             |        | 1                     | 1      |
| 4066   | 2                             | 1      | 0                     |        |
| 4067   | 0                             |        | 0                     |        |
| 4068   | 3                             | 2      | 3                     | 2      |
| 4069   | 0                             |        | 0                     |        |
| 4070   | 0                             |        | 2                     | 0      |
| 4071   | 2                             | 3      | 2                     | 3      |
| 4072   | 0                             |        | 1                     | 0      |
| 4073   | 0                             |        | 0                     |        |
| 4074   | 0                             |        | 0                     |        |
| 4075   | 0                             |        | 0                     |        |
| 4078   | 0                             |        | 0                     |        |
| 4080   | 1                             | 1      | 0                     |        |
| 4081   | 0                             |        | 0                     |        |

| respid | ICS Splitting/spraying: Q26_1 | Q26a_1 | ICS: Hesitancy: Q27_1 | Q27a_1 |
|--------|-------------------------------|--------|-----------------------|--------|
| 4082   | 0                             |        | 0                     |        |
| 4083   | 1                             | 1      | 1                     | 1      |
| 4084   | 0                             |        | 0                     |        |
| 4086   | 0                             |        | 0                     |        |
| 4087   | 1                             | 1      | 0                     |        |
| 4088   | 0                             |        | 0                     |        |
| 4089   | 0                             |        | 0                     |        |
| 4090   | 1                             | 2      | 0                     |        |
| 4093   | 0                             |        | 0                     |        |
| 4094   | 1                             | 0      | 0                     |        |
| 4095   | 1                             | 0      | 0                     |        |
| 4096   | 0                             |        | 0                     |        |
| 4098   | 0                             |        | 0                     |        |
| 4103   | 1                             | 1      | 1                     | 1      |
| 4104   | 1                             | 1      | 0                     |        |
| 4107   | 5                             | 2      | 0                     |        |
| 4109   | 0                             |        | 0                     |        |
| 4110   | 0                             |        | 0                     |        |
| 4113   | 0                             |        | 0                     |        |
| 4114   | 1                             | 2      | 0                     |        |
| 4116   | 0                             |        | 0                     |        |
| 4119   | 5                             | 1      | 1                     | 0      |
| 4120   | 0                             |        | 0                     |        |
| 4121   | 0                             |        | 0                     |        |
| 4122   | 1                             | 1      | 1                     | 1      |
| 4124   | 0                             |        | 0                     |        |
| 4126   | 0                             |        | 0                     |        |
| 4127   | 4                             | 3      | 4                     | 3      |
| 4131   | 0                             |        | 0                     |        |
| 4134   | 1                             | 1      | 0                     |        |
| 4144   | 1                             | 1      | 1                     | 1      |
| 4145   | 1                             | 1      | 0                     |        |

| respid | ICS Splitting/spraying: Q26_1 | Q26a_1 | ICS: Hesitancy: Q27_1 | Q27a_1 |
|--------|-------------------------------|--------|-----------------------|--------|
| 4146   | 0                             |        | 0                     |        |
| 4147   | 0                             |        | 0                     |        |
| 4149   | 1                             | 1      | 3                     | 2      |
| 4150   | 0                             |        | 0                     |        |
| 4151   | 2                             | 2      | 1                     | 1      |
| 4153   | 2                             | 1      | 1                     | 1      |
| 4155   | 0                             |        | 0                     |        |
| 4157   | 0                             |        | 1                     | 1      |
| 4159   | 1                             | 1      | 0                     |        |
| 4160   | 1                             | 1      | 1                     | 1      |
| 4161   | 0                             |        | 0                     |        |
| 4163   | 0                             |        | 0                     |        |
| 4164   | 1                             | 1      | 0                     |        |
| 4165   | 0                             |        | 0                     |        |
| 4166   | 0                             |        | 0                     |        |
| 4167   | 0                             |        | 0                     |        |
| 4170   | 2                             | 2      | 1                     | 1      |
| 4172   | 0                             |        | 0                     |        |
| 4173   | 1                             | 1      | 1                     | 1      |
| 4180   | 0                             |        | 0                     |        |
| 4185   | 1                             | 1      | 3                     | 3      |
| 4187   | 0                             |        | 0                     |        |
| 4190   | 0                             |        | 0                     |        |
| 4191   | 1                             | 1      | 1                     | 1      |
| 4193   | 0                             |        | 0                     |        |
| 4194   | 0                             |        | 0                     |        |
| 4195   | 0                             |        | 0                     |        |
| 4196   | 0                             |        | 0                     |        |
| 4197   | 0                             |        | 0                     |        |
| 4198   | 1                             | 0      | 0                     |        |
| 4199   | 0                             |        | 0                     |        |
| 4205   | 0                             |        | 0                     |        |

| respid | ICS Splitting/spraying: Q26_1 | Q26a_1 | ICS: Hesitancy: Q27_1 | Q27a_1 |
|--------|-------------------------------|--------|-----------------------|--------|
| 4206   | 0                             |        | 0                     |        |
| 4207   | 2                             | 2      | 3                     | 1      |
| 4214   | 0                             |        | 0                     |        |
| 4215   | 1                             | 0      | 1                     | 0      |
| 4217   | 0                             |        | 0                     |        |
| 4219   | 0                             |        | 0                     |        |
| 4223   | 1                             | 2      | 1                     | 2      |
| 4226   | 3                             | 2      | 0                     |        |
| 4229   | 0                             |        | 0                     |        |
| 4230   | 1                             | 0      | 0                     |        |
| 4232   | 0                             |        | 0                     |        |
| 4233   | 0                             |        | 0                     |        |
| 4234   | 0                             |        | 0                     |        |
| 4235   | 3                             | 1      | 2                     | 1      |
| 4236   | 1                             | 0      | 0                     |        |
| 4237   | 0                             |        | 0                     |        |
| 4238   | 1                             | 1      | 0                     |        |
| 4240   | 1                             | 1      | 0                     |        |
| 4241   | 0                             |        | 0                     |        |
| 4247   | 0                             |        | 0                     |        |
| 4250   | 0                             |        | 0                     |        |
| 4251   | 0                             |        | 0                     |        |
| 4253   | 0                             |        | 1                     | 0      |
| 4254   | 1                             | 0      | 0                     |        |
| 4258   | 2                             | 1      | 1                     | 1      |
| 4260   | 0                             |        | 0                     |        |
| 4263   | 0                             |        | 0                     |        |
| 4265   | 1                             | 0      | 0                     |        |
| 4266   | 1                             | 0      | 0                     |        |
| 4267   | 3                             | 2      | 0                     |        |
| 4270   | 0                             |        | 0                     |        |
| 4273   | 0                             |        | 1                     | 1      |

| respid | ICS Splitting/spraying: Q26_1 | Q26a_1 | ICS: Hesitancy: Q27_1 | Q27a_1 |
|--------|-------------------------------|--------|-----------------------|--------|
| 4280   | 0                             |        | 0                     |        |
| 4281   | 5                             | 2      | 5                     | 2      |
| 4282   | 0                             |        | 0                     |        |
| 4283   | 0                             |        | 0                     |        |
| 4286   | 2                             | 2      | 5                     | 3      |
| 4287   | 0                             |        | 0                     |        |
| 4289   | 0                             |        | 0                     |        |
| 4290   | 2                             | 2      | 1                     | 2      |
| 4291   | 0                             |        | 0                     |        |
| 4292   | 0                             |        | 1                     | 0      |
| 4293   | 1                             | 0      | 1                     | 0      |
| 4294   | 0                             |        | 0                     |        |
| 4295   | 0                             |        | 0                     |        |
| 4296   | 1                             | 2      | 0                     |        |
| 4297   | 1                             | 1      | 1                     | 1      |
| 4298   | 0                             |        | 0                     |        |
| 4299   | 0                             |        | 0                     |        |
| 4300   | 0                             |        | 0                     |        |
| 4301   | 0                             |        | 0                     |        |
| 4302   | 0                             |        | 0                     |        |
| 4304   | 3                             | 1      | 0                     |        |
| 4305   | 2                             | 2      | 1                     | 1      |
| 4307   | 1                             | 0      | 1                     | 0      |
| 4308   | 0                             |        | 0                     |        |
| 4312   | 0                             |        | 0                     |        |
| 4314   | 0                             |        | 1                     | 2      |
| 4316   | 0                             |        | 0                     |        |
| 4317   | 4                             | 2      | 1                     | 1      |
| 4319   | 4                             | 1      | 0                     |        |
| 4323   | 5                             | 1      | 2                     | 1      |
| 4337   | 3                             | 1      | 0                     |        |
| 4341   | 0                             |        | 0                     |        |

| respid | ICS Splitting/spraying: Q26_1 | Q26a_1 | ICS: Hesitancy: Q27_1 | Q27a_1 |
|--------|-------------------------------|--------|-----------------------|--------|
| 4342   | 1                             | 1      | 0                     |        |
| 4344   | 1                             | 1      | 1                     | 1      |
| 4345   | 0                             |        | 1                     | 1      |
| 4346   | 1                             | 1      | 1                     | 1      |
| 4347   | 0                             |        | 0                     |        |
| 4350   | 0                             |        | 0                     |        |
| 4352   | 1                             | 0      | 0                     |        |
| 4353   | 0                             |        | 0                     |        |
| 4355   | 1                             | 0      | 1                     | 0      |
| 4356   | 0                             |        | 1                     | 2      |
| 4358   | 0                             |        | 0                     |        |
| 4359   | 0                             |        | 0                     |        |
| 4360   | 1                             | 1      | 1                     | 1      |
| 4361   | 3                             | 2      | 3                     | 2      |
| 4363   | 1                             | 0      | 0                     |        |
| 4364   | 0                             |        | 0                     |        |
| 4365   | 1                             | 1      | 1                     | 1      |
| 4367   | 0                             |        | 0                     |        |
| 4369   | 1                             | 1      | 1                     | 1      |
| 4373   | 1                             | 2      | 1                     | 2      |
| 4374   | 1                             | 1      | 1                     | 1      |
| 4375   | 0                             |        | 0                     |        |
| 4378   | 0                             |        | 0                     |        |
| 4379   | 1                             | 1      | 1                     | 1      |
| 4382   | 0                             |        | 0                     |        |
| 4383   | 0                             |        | 0                     |        |
| 4384   | 2                             | 2      | 0                     |        |
| 4385   | 1                             | 1      | 1                     | 1      |
| 4388   | 0                             |        | 1                     | 1      |
| 4389   | 0                             |        | 0                     |        |
| 4391   | 0                             |        | 0                     |        |
| 4392   | 1                             | 1      | 0                     |        |



| respid | ICS Splitting/spraying: Q26_1 | Q26a_1 | ICS: Hesitancy: Q27_1 | Q27a_1 |
|--------|-------------------------------|--------|-----------------------|--------|
| 4393   | 0                             |        | 0                     |        |
| 4395   | 0                             |        | 1                     | 1      |
| 4397   | 1                             | 0      | 0                     |        |
| 4398   | 0                             |        | 0                     |        |
| 4399   | 0                             |        | 0                     |        |
| 4400   | 0                             |        | 0                     |        |
| 4401   | 0                             |        | 0                     |        |
| 4402   | 0                             |        | 0                     |        |
| 4404   | 0                             |        | 0                     |        |
| 4405   | 0                             |        | 0                     |        |
| 4407   | 2                             | 1      | 1                     | 0      |
| 4408   | 1                             | 1      | 0                     |        |
| 4411   | 0                             |        | 0                     |        |
| 4420   | 0                             |        | 0                     |        |
| 4421   | 0                             |        | 0                     |        |
| 4424   | 3                             | 3      | 3                     | 2      |
| 4425   | 0                             |        | 0                     |        |
| 4427   | 1                             | 0      | 0                     |        |
| 4430   | 1                             | 0      | 0                     |        |
| 4431   | 0                             |        | 0                     |        |
| 4432   | 0                             |        | 3                     | 2      |
| 4436   | 0                             |        | 0                     |        |
| 4439   | 0                             |        | 0                     |        |
| 4451   | 1                             | 1      | 1                     | 1      |
| 4452   | 3                             | 3      | 3                     | 3      |
| 4458   | 0                             |        | 0                     |        |
| 4464   | 1                             | 1      | 2                     | 2      |
| 4465   | 1                             | 1      | 0                     |        |
| 4467   | 1                             | 0      | 0                     |        |
| 4470   | 1                             | 0      | 0                     |        |
| 4471   | 1                             | 0      | 2                     | 1      |
| 4472   | 1                             | 1      | 1                     | 1      |

| respid | ICS Splitting/spraying: Q26_1 | Q26a_1 | ICS: Hesitancy: Q27_1 | Q27a_1 |
|--------|-------------------------------|--------|-----------------------|--------|
| 4473   | 0                             |        | 0                     |        |
| 4475   | 0                             |        | 0                     |        |
| 4476   | 0                             |        | 1                     | 0      |
| 4478   | 1                             | 1      | 0                     |        |
| 4485   | 0                             |        | 0                     |        |
| 4486   | 0                             |        | 0                     |        |
| 4490   | 0                             |        | 0                     |        |
| 4502   | 0                             |        | 0                     |        |
| 4503   | 0                             |        | 0                     |        |
| 4504   | 0                             |        | 0                     |        |
| 4506   | 0                             |        | 0                     |        |
| 4508   | 0                             |        | 0                     |        |
| 4515   | 1                             | 1      | 0                     |        |
| 4516   | 3                             | 2      | 3                     | 2      |
| 4519   | 0                             |        | 0                     |        |
| 4523   | 1                             | 1      | 2                     | 1      |
| 4525   | 4                             | 1      | 1                     | 1      |
| 4526   | 0                             |        | 0                     |        |
| 4528   | 0                             |        | 0                     |        |
| 4530   | 0                             |        | 0                     |        |
| 4531   | 2                             | 1      | 2                     | 1      |
| 4532   | 1                             | 1      | 1                     | 1      |
| 4537   | 1                             | 0      | 0                     |        |
| 4538   | 0                             |        | 0                     |        |
| 4539   | 0                             |        | 0                     |        |
| 4541   | 3                             | 1      | 0                     |        |
| 4543   | 0                             |        | 0                     |        |
| 4544   | 0                             |        | 0                     |        |
| 4546   | 0                             |        | 0                     |        |
| 4547   | 0                             |        | 1                     | 0      |
| 4549   | 0                             |        | 0                     |        |
| 4550   | 4                             | 0      | 0                     |        |

| respid | ICS Splitting/spraying: Q26_1 | Q26a_1 | ICS: Hesitancy: Q27_1 | Q27a_1 |
|--------|-------------------------------|--------|-----------------------|--------|
| 4551   | 2                             | 1      | 1                     | 1      |
| 4554   | 0                             |        | 0                     |        |
| 4557   | 0                             |        | 0                     |        |
| 4565   | 1                             | 0      | 0                     |        |
| 4568   | 1                             | 1      | 1                     | 1      |
| 4569   | 0                             |        | 0                     |        |
| 4570   | 1                             | 1      | 0                     |        |
| 4572   | 1                             | 2      | 0                     |        |
| 4574   | 4                             | 2      | 1                     | 1      |
| 4576   | 1                             | 1      | 1                     | 1      |
| 4578   | 0                             |        | 0                     |        |
| 4579   | 0                             |        | 0                     |        |
| 4580   | 1                             | 0      | 0                     |        |
| 4581   | 0                             |        | 0                     |        |
| 4584   | 0                             |        | 1                     | 0      |
| 4586   | 4                             | 2      | 2                     | 1      |
| 4587   | 4                             | 2      | 2                     | 2      |
| 4590   | 1                             | 0      | 0                     |        |
| 4592   | 0                             |        | 0                     |        |
| 4593   | 0                             |        | 0                     |        |
| 4595   | 4                             | 2      | 1                     | 1      |
| 4597   | 1                             | 0      | 0                     |        |
| 4598   | 4                             | 2      | 1                     | 2      |
| 4599   | 2                             | 1      | 1                     | 1      |
| 4600   | 0                             |        | 0                     |        |
| 4601   | 1                             | 1      | 1                     | 1      |
| 4608   | 0                             |        | 1                     | 0      |
| 4609   | 1                             | 0      | 0                     |        |
| 4611   | 0                             |        | 0                     |        |
| 4612   | 2                             | 2      | 2                     | 2      |
| 4613   | 0                             |        | 0                     |        |
| 4616   | 3                             | 2      | 1                     | 1      |

| respid | ICS Splitting/spraying: Q26_1 | Q26a_1 | ICS: Hesitancy: Q27_1 | Q27a_1 |
|--------|-------------------------------|--------|-----------------------|--------|
| 4617   | 0                             |        | 0                     |        |
| 4620   | 0                             |        | 0                     |        |
| 4621   | 0                             |        | 0                     |        |
| 4622   | 1                             | 1      | 0                     |        |
| 4624   | 0                             |        | 1                     | 1      |
| 4625   | 0                             |        | 1                     | 1      |
| 4627   | 5                             | 2      | 1                     | 1      |
| 4628   | 1                             | 2      | 3                     | 2      |
| 4629   | 0                             |        | 0                     |        |
| 4630   | 1                             | 1      | 1                     | 1      |
| 4632   | 1                             | 0      | 0                     |        |
| 4634   | 2                             | 1      | 0                     |        |
| 4635   | 0                             |        | 0                     |        |
| 4636   | 1                             | 0      | 1                     | 0      |
| 4637   | 1                             | 1      | 1                     | 1      |
| 4638   | 4                             | 1      | 4                     | 3      |
| 4639   | 1                             | 0      | 1                     | 0      |
| 4641   | 0                             |        | 0                     |        |
| 4643   | 0                             |        | 0                     |        |
| 4645   | 0                             |        | 0                     |        |
| 4646   | 1                             | 1      | 1                     | 1      |
| 4647   | 0                             |        | 0                     |        |
| 4648   | 0                             |        | 0                     |        |
| 4649   | 0                             |        | 0                     |        |
| 4650   | 3                             | 2      | 1                     | 1      |
| 4651   | 0                             |        | 0                     |        |
| 4652   | 0                             |        | 0                     |        |
| 4653   | 0                             |        | 0                     |        |
| 4657   | 0                             |        | 0                     |        |
| 4660   | 0                             |        | 0                     |        |
| 4661   | 2                             | 1      | 1                     | 1      |
| 4662   | 0                             |        | 0                     |        |

| respid | ICS Splitting/spraying: Q26_1 | Q26a_1 | ICS: Hesitancy: Q27_1 | Q27a_1 |
|--------|-------------------------------|--------|-----------------------|--------|
| 4667   | 0                             |        | 0                     |        |
| 4669   | 0                             |        | 0                     |        |
| 4671   | 0                             |        | 0                     |        |
| 4672   | 0                             |        | 1                     | 1      |
| 4673   | 0                             |        | 0                     |        |
| 4677   | 0                             |        | 0                     |        |
| 4679   | 3                             | 2      | 0                     |        |
| 4683   | 1                             | 0      | 1                     | 1      |
| 4684   | 0                             |        | 0                     |        |
| 4685   | 0                             |        | 0                     |        |
| 4686   | 1                             | 0      | 0                     |        |
| 4687   | 0                             |        | 0                     |        |
| 4688   | 0                             |        | 0                     |        |
| 4691   | 0                             |        | 0                     |        |
| 4692   | 0                             |        | 0                     |        |
| 4694   | 2                             | 1      | 1                     | 1      |
| 4695   | 0                             |        | 0                     |        |
| 4696   | 2                             | 0      | 2                     | 0      |
| 4697   | 0                             |        | 0                     |        |
| 4698   | 2                             | 2      | 1                     | 2      |
| 4699   | 0                             |        | 0                     |        |
| 4701   | 0                             |        | 0                     |        |
| 4703   | 5                             | 1      | 5                     | 2      |
| 4704   | 5                             | 4      | 4                     | 4      |
| 4705   | 0                             |        | 0                     |        |
| 4706   | 0                             |        | 0                     |        |
| 4707   | 0                             |        | 0                     |        |
| 4708   | 1                             | 1      | 1                     | 1      |
| 4710   | 1                             | 0      | 0                     |        |
| 4711   | 2                             | 2      | 2                     | 1      |
| 4715   | 0                             |        | 0                     |        |
| 4716   | 0                             |        | 0                     |        |

| respid | ICS Splitting/spraying: Q26_1 | Q26a_1 | ICS: Hesitancy: Q27_1 | Q27a_1 |
|--------|-------------------------------|--------|-----------------------|--------|
| 4717   | 0                             |        | 1                     | 0      |
| 4718   | 1                             | 1      | 0                     |        |
| 4722   | 1                             | 1      | 1                     | 1      |
| 4727   | 4                             | 2      | 1                     | 1      |
| 4728   | 4                             | 4      | 5                     | 4      |
| 4729   | 0                             |        | 0                     |        |
| 4732   | 1                             | 1      | 0                     |        |
| 4733   | 0                             |        | 0                     |        |
| 4734   | 4                             | 2      | 3                     | 2      |
| 4735   | 1                             | 0      | 1                     | 0      |
| 4737   | 0                             |        | 0                     |        |
| 4738   | 0                             |        | 0                     |        |
| 4740   | 0                             |        | 0                     |        |
| 4741   | 2                             | 1      | 2                     | 2      |
| 4743   | 0                             |        | 0                     |        |
| 4746   | 0                             |        | 1                     | 1      |
| 4750   | 1                             | 0      | 1                     | 0      |
| 4752   | 1                             | 1      | 1                     | 1      |
| 4753   | 1                             | 1      | 0                     |        |
| 4754   | 1                             | 1      | 2                     | 2      |
| 4755   | 4                             | 3      | 2                     | 1      |
| 4758   | 1                             | 0      | 0                     |        |
| 4766   | 0                             |        | 0                     |        |
| 4767   | 0                             |        | 0                     |        |
| 4768   | 0                             |        | 1                     | 1      |
| 4769   | 2                             | 1      | 2                     | 1      |
| 4771   | 5                             | 4      | 4                     | 3      |
| 4772   | 1                             | 0      | 1                     | 1      |
| 4773   | 0                             |        | 0                     |        |
| 4774   | 0                             |        | 0                     |        |
| 4776   | 2                             | 1      | 2                     | 0      |
| 4777   | 0                             |        | 0                     |        |

| respid | ICS Splitting/spraying: Q26_1 | Q26a_1 | ICS: Hesitancy: Q27_1 | Q27a_1 |
|--------|-------------------------------|--------|-----------------------|--------|
| 4779   | 0                             |        | 0                     |        |
| 4780   | 0                             |        | 0                     |        |
| 4781   | 1                             | 0      | 0                     |        |
| 4783   | 3                             | 2      | 3                     | 2      |
| 4784   | 1                             | 1      | 1                     | 1      |
| 4785   | 1                             | 1      | 1                     | 1      |
| 4788   | 0                             |        | 0                     |        |
| 4789   | 3                             | 2      | 1                     | 1      |
| 4790   | 0                             |        | 0                     |        |
| 4791   | 0                             |        | 0                     |        |
| 4794   | 0                             |        | 0                     |        |
| 4795   | 0                             |        | 0                     |        |
| 4797   | 0                             |        | 0                     |        |
| 4802   | 1                             | 1      | 1                     | 1      |
| 4803   | 1                             | 1      | 0                     |        |
| 4804   | 0                             |        | 0                     |        |
| 4805   | 0                             |        | 0                     |        |
| 4807   | 0                             |        | 0                     |        |
| 4808   | 1                             | 0      | 0                     |        |
| 4809   | 3                             | 3      | 3                     | 3      |
| 4811   | 0                             |        | 1                     | 0      |
| 4817   | 0                             |        | 0                     |        |
| 4819   | 1                             | 0      | 0                     |        |
| 4820   | 0                             |        | 0                     |        |
| 4821   | 4                             | 1      | 0                     |        |
| 4822   | 0                             |        | 0                     |        |
| 4823   | 0                             |        | 0                     |        |
| 4825   | 1                             | 1      | 4                     | 2      |
| 4826   | 0                             |        | 0                     |        |
| 4830   | 0                             |        | 0                     |        |
| 4832   | 0                             |        | 0                     |        |
| 4838   | 0                             |        | 0                     |        |

| respid | ICS Splitting/spraying: Q26_1 | Q26a_1 | ICS: Hesitancy: Q27_1 | Q27a_1 |
|--------|-------------------------------|--------|-----------------------|--------|
| 4840   | 0                             |        | 0                     |        |
| 4841   | 0                             |        | 0                     |        |
| 4843   | 0                             |        | 0                     |        |
| 4845   | 0                             |        | 0                     |        |
| 4846   | 3                             | 0      | 1                     | 1      |
| 4848   | 0                             |        | 0                     |        |
| 4853   | 1                             | 0      | 0                     |        |
| 4854   | 0                             |        | 0                     |        |
| 4859   | 2                             | 1      | 0                     |        |
| 4861   | 0                             |        | 0                     |        |
| 4864   | 0                             |        | 2                     | 2      |
| 4867   | 0                             |        | 0                     |        |
| 4870   | 0                             |        | 0                     |        |
| 4872   | 1                             | 2      | 1                     | 1      |
| 4873   | 2                             | 3      | 2                     | 3      |
| 4874   | 1                             | 1      | 0                     |        |
| 4878   | 1                             | 1      | 0                     |        |
| 4880   | 0                             |        | 0                     |        |
| 4881   | 2                             | 1      | 1                     | 0      |
| 4882   | 2                             | 2      | 2                     | 2      |
| 4883   | 0                             |        | 0                     |        |
| 4885   | 0                             |        | 1                     | 0      |
| 4889   | 0                             |        | 0                     |        |
| 4890   | 0                             |        | 0                     |        |
| 4891   | 0                             |        | 0                     |        |
| 4894   | 0                             |        | 1                     | 1      |
| 4895   | 5                             | 4      | 4                     | 4      |
| 4896   | 0                             |        | 0                     |        |
| 4897   | 0                             |        | 0                     |        |
| 4898   | 1                             | 1      | 1                     | 1      |
| 4899   | 0                             |        | 0                     |        |
| 4900   | 3                             | 2      | 1                     | 2      |



| respid | ICS Splitting/spraying: Q26_1 | Q26a_1 | ICS: Hesitancy: Q27_1 | Q27a_1 |
|--------|-------------------------------|--------|-----------------------|--------|
| 4901   | 1                             | 1      | 1                     | 1      |
| 4903   | 1                             | 1      | 1                     | 1      |
| 4904   | 0                             |        | 0                     |        |
| 4908   | 0                             |        | 0                     |        |
| 4909   | 1                             | 2      | 3                     | 1      |
| 4913   | 3                             | 1      | 0                     |        |
| 4917   | 3                             | 0      | 2                     | 1      |
| 4918   | 0                             |        | 1                     | 0      |
| 4920   | 0                             |        | 0                     |        |
| 4921   | 0                             |        | 0                     |        |
| 4925   | 0                             |        | 0                     |        |
| 4926   | 0                             |        | 0                     |        |
| 4927   | 0                             |        | 0                     |        |
| 4928   | 0                             |        | 0                     |        |
| 4929   | 1                             | 0      | 0                     |        |
| 4930   | 0                             |        | 1                     | 2      |
| 4931   | 1                             | 1      | 1                     | 1      |
| 4932   | 2                             | 2      | 2                     | 2      |
| 4933   | 0                             |        | 0                     |        |
| 4934   | 0                             |        | 0                     |        |
| 5934   | 0                             |        | 0                     |        |
| 5935   | 0                             |        | 2                     | 1      |
| 5936   | 0                             |        | 0                     |        |
| 5938   | 0                             |        | 0                     |        |
| 5939   | 0                             |        | 0                     |        |
| 5940   | 0                             |        | 0                     |        |
| 5942   | 1                             | 1      | 1                     | 1      |
| 5944   | 1                             | 0      | 0                     |        |
| 5951   | 3                             | 4      | 2                     | 3      |
| 5952   | 0                             |        | 0                     |        |
| 5954   | 1                             | 1      | 0                     |        |
| 5956   | 0                             |        | 0                     |        |

| respid | ICS Splitting/spraying: Q26_1 | Q26a_1 | ICS: Hesitancy: Q27_1 | Q27a_1 |
|--------|-------------------------------|--------|-----------------------|--------|
| 5957   | 1                             | 1      | 0                     |        |
| 5958   | 1                             | 1      | 1                     | 1      |
| 5959   | 1                             | 1      | 1                     | 1      |
| 5960   | 0                             |        | 0                     |        |
| 5963   | 0                             |        | 0                     |        |
| 5966   | 0                             |        | 0                     |        |
| 5968   | 1                             | 0      | 0                     |        |
| 5974   | 0                             |        | 0                     |        |
| 5975   | 0                             |        | 1                     | 0      |
| 5976   | 1                             | 0      | 0                     |        |
| 5977   | 0                             |        | 0                     |        |
| 5978   | 0                             |        | 1                     | 1      |
| 5979   | 0                             |        | 0                     |        |
| 5983   | 1                             | 0      | 0                     |        |
| 5984   | 1                             | 0      | 0                     |        |
| 5990   | 0                             |        | 0                     |        |
| 5991   | 0                             |        | 0                     |        |
| 5992   | 0                             |        | 0                     |        |
| 5993   | 0                             |        | 2                     | 1      |
| 5994   | 0                             |        | 0                     |        |
| 5996   | 0                             |        | 0                     |        |
| 6001   | 3                             | 2      | 2                     | 2      |
| 6003   | 0                             |        | 0                     |        |
| 6004   | 2                             | 2      | 2                     | 1      |
| 6005   | 2                             | 2      | 1                     | 1      |
| 6006   | 0                             |        | 0                     |        |
| 6008   | 4                             | 2      | 3                     | 2      |
| 6009   | 0                             |        | 0                     |        |
| 6014   | 0                             |        | 0                     |        |
| 6016   | 1                             | 1      | 0                     |        |
| 6017   | 0                             |        | 1                     | 2      |
| 6018   | 1                             | 0      | 1                     | 0      |

| respid | ICS Splitting/spraying: Q26_1 | Q26a_1 | ICS: Hesitancy: Q27_1 | Q27a_1 |
|--------|-------------------------------|--------|-----------------------|--------|
| 6020   | 0                             |        | 0                     |        |
| 6021   | 0                             |        | 0                     |        |
| 6024   | 1                             | 0      | 0                     |        |
| 6025   | 0                             |        | 0                     |        |
| 6026   | 1                             | 1      | 0                     |        |
| 6032   | 1                             | 0      | 1                     | 1      |
| 6035   | 1                             | 0      | 0                     |        |
| 6038   | 2                             | 1      | 0                     |        |
| 6043   | 2                             | 1      | 2                     | 1      |
| 6044   | 0                             |        | 0                     |        |
| 6046   | 1                             | 1      | 0                     |        |
| 6047   | 0                             |        | 1                     | 0      |
| 6048   | 0                             |        | 0                     |        |
| 6050   | 0                             |        | 0                     |        |
| 6051   | 0                             |        | 1                     | 0      |
| 6053   | 0                             |        | 0                     |        |
| 6054   | 3                             | 3      | 1                     | 2      |
| 6056   | 1                             | 0      | 0                     |        |
| 6058   | 0                             |        | 0                     |        |
| 6060   | 4                             | 2      | 0                     |        |
| 6061   | 0                             |        | 0                     |        |
| 6062   | 0                             |        | 0                     |        |
| 6067   | 0                             |        | 0                     |        |
| 6070   | 0                             |        | 0                     |        |
| 6074   | 0                             |        | 0                     |        |
| 6076   | 0                             |        | 0                     |        |
| 6078   | 0                             |        | 0                     |        |
| 6081   | 0                             |        | 0                     |        |
| 6085   | 0                             |        | 1                     | 1      |
| 6088   | 0                             |        | 0                     |        |
| 6092   | 3                             | 0      | 3                     | 3      |
| 6095   | 0                             |        | 0                     |        |

| respid | ICS Splitting/spraying: Q26_1 | Q26a_1 | ICS: Hesitancy: Q27_1 | Q27a_1 |
|--------|-------------------------------|--------|-----------------------|--------|
| 6098   | 0                             |        | 0                     |        |
| 6101   | 0                             |        | 0                     |        |
| 6102   | 0                             |        | 0                     |        |
| 6105   | 2                             | 1      | 0                     |        |
| 6106   | 1                             | 1      | 2                     | 1      |
| 6107   | 0                             |        | 0                     |        |
| 6111   | 0                             |        | 0                     |        |
| 6112   | 0                             |        | 0                     |        |
| 6113   | 1                             | 0      | 2                     | 1      |
| 6115   | 3                             | 1      | 2                     | 2      |
| 6116   | 0                             |        | 0                     |        |
| 6117   | 0                             |        | 0                     |        |
| 6124   | 3                             | 2      | 3                     | 3      |
| 6125   | 0                             |        | 0                     |        |
| 6128   | 0                             |        | 0                     |        |
| 6133   | 0                             |        | 0                     |        |
| 6134   | 0                             |        | 0                     |        |
| 6135   | 0                             |        | 0                     |        |
| 6138   | 0                             |        | 1                     | 1      |
| 6140   | 1                             | 1      | 0                     |        |
| 6143   | 0                             |        | 0                     |        |
| 6147   | 0                             |        | 0                     |        |
| 6154   | 0                             |        | 0                     |        |
| 6162   | 0                             |        | 0                     |        |
| 6165   | 1                             | 1      | 1                     | 0      |
| 6166   | 1                             | 1      | 1                     | 1      |
| 6173   | 5                             | 2      | 1                     | 1      |
| 6180   | 1                             | 1      | 1                     | 1      |
| 6184   | 3                             | 3      | 1                     | 1      |
| 6185   | 3                             | 2      | 0                     |        |
| 6186   | 0                             |        | 0                     |        |
| 6188   | 1                             | 1      | 1                     | 1      |

| respid | ICS Splitting/spraying: Q26_1 | Q26a_1 | ICS: Hesitancy: Q27_1 | Q27a_1 |
|--------|-------------------------------|--------|-----------------------|--------|
| 6192   | 1                             | 0      | 2                     | 1      |
| 6194   | 0                             |        | 0                     |        |
| 6195   | 0                             |        | 0                     |        |
| 6196   | 0                             |        | 0                     |        |
| 6199   | 0                             |        | 1                     | 1      |
| 6200   | 0                             |        | 0                     |        |
| 6201   | 0                             |        | 0                     |        |
| 6202   | 0                             |        | 0                     |        |
| 6203   | 0                             |        | 0                     |        |
| 6205   | 0                             |        | 0                     |        |
| 6210   | 1                             | 1      | 1                     | 1      |
| 6212   | 1                             | 1      | 1                     | 1      |
| 6216   | 1                             | 1      | 2                     | 2      |
| 6218   | 3                             | 2      | 2                     | 2      |
| 6221   | 1                             | 0      | 0                     |        |
| 6224   | 1                             | 0      | 0                     |        |
| 6225   | 0                             |        | 0                     |        |
| 6227   | 1                             | 0      | 0                     |        |
| 6230   | 0                             |        | 0                     |        |
| 6231   | 1                             | 0      | 0                     |        |
| 6233   | 0                             |        | 0                     |        |
| 6234   | 0                             |        | 0                     |        |
| 6235   | 0                             |        | 0                     |        |
| 6237   | 0                             |        | 0                     |        |
| 6240   | 0                             |        | 0                     |        |
| 6248   | 0                             |        | 0                     |        |
| 6249   | 2                             | 0      | 0                     |        |
| 6252   | 0                             |        | 0                     |        |
| 6254   | 0                             |        | 0                     |        |
| 6269   | 1                             | 1      | 0                     |        |
| 6304   | 0                             |        | 0                     |        |
| 6334   | 0                             |        | 1                     | 1      |

| respid | ICS Splitting/spraying: Q26_1 | Q26a_1 | ICS: Hesitancy: Q27_1 | Q27a_1 |
|--------|-------------------------------|--------|-----------------------|--------|
| 6341   | 2                             | 2      | 0                     |        |
| 6350   | 1                             | 1      | 2                     | 1      |
| 6370   | 0                             |        | 0                     |        |
| 6384   | 0                             |        | 0                     |        |
| 6400   | 0                             |        | 0                     |        |
| 6418   | 0                             |        | 0                     |        |
| 6467   | 0                             |        | 0                     |        |
| 6469   | 0                             |        | 0                     |        |
| 6474   | 0                             |        | 0                     |        |
| 6475   | 0                             |        | 0                     |        |
| 6476   | 2                             | 1      | 2                     | 1      |
| 6477   | 1                             | 0      | 0                     |        |
| 6480   | 0                             |        | 0                     |        |
| 6481   | 2                             | 1      | 1                     | 1      |
| 6485   | 1                             | 1      | 0                     |        |
| 6488   | 2                             | 1      | 2                     | 1      |
| 6495   | 1                             | 1      | 3                     | 3      |
| 6499   | 1                             | 0      | 1                     | 0      |
| 6500   | 0                             |        | 1                     | 1      |
| 6504   | 1                             | 0      | 1                     | 0      |
| 6507   | 5                             | 2      | 2                     | 1      |
| 6512   | 0                             |        | 1                     | 1      |
| 6525   | 2                             | 2      | 2                     | 2      |
| 6532   | 0                             |        | 1                     | 1      |
| 6535   | 0                             |        | 0                     |        |
| 6546   | 1                             | 0      | 0                     |        |
| 6551   | 0                             |        | 0                     |        |
| 6556   | 0                             |        | 0                     |        |
| 6566   | 1                             | 1      | 0                     |        |
| 6569   | 0                             |        | 0                     |        |
| 6574   | 0                             |        | 0                     |        |
| 6576   | 2                             | 1      | 0                     |        |

| respid | ICS Splitting/spraying: Q26_1 | Q26a_1 | ICS: Hesitancy: Q27_1 | Q27a_1 |
|--------|-------------------------------|--------|-----------------------|--------|
| 6580   | 0                             |        | 0                     |        |
| 6584   | 0                             |        | 0                     |        |
| 6585   | 1                             | 1      | 1                     | 1      |
| 6589   | 0                             |        | 0                     |        |
| 6590   | 0                             |        | 0                     |        |
| 6598   | 1                             | 0      | 0                     |        |
| 6603   | 0                             |        | 0                     |        |
| 6618   | 0                             |        | 0                     |        |
| 6630   | 0                             |        | 0                     |        |
| 6636   | 1                             | 0      | 0                     |        |
| 6649   | 0                             |        | 0                     |        |
| 6675   | 0                             |        | 0                     |        |
| 6678   | 0                             |        | 0                     |        |
| 6681   | 0                             |        | 0                     |        |
| 6684   | 1                             | 1      | 1                     | 1      |
| 6688   | 0                             |        | 0                     |        |
| 6691   | 0                             |        | 0                     |        |
| 6694   | 1                             | 1      | 1                     | 1      |
| 6696   | 0                             |        | 0                     |        |
| 6720   | 2                             | 3      | 3                     | 2      |
| 6722   | 4                             | 4      | 4                     | 4      |
| 6724   | 0                             |        | 0                     |        |
| 6725   | 0                             |        | 0                     |        |
| 6727   | 0                             |        | 0                     |        |
| 6734   | 1                             | 1      | 1                     | 1      |
| 6739   | 1                             | 0      | 2                     | 2      |
| 6743   | 1                             | 2      | 1                     | 2      |
| 6749   | 0                             |        | 0                     |        |
| 6756   | 1                             | 0      | 0                     |        |
| 6764   | 2                             | 1      | 0                     |        |
| 6765   | 0                             |        | 0                     |        |
| 6768   | 0                             |        | 0                     |        |

| respid | ICS Splitting/spraying: Q26_1 | Q26a_1 | ICS: Hesitancy: Q27_1 | Q27a_1 |
|--------|-------------------------------|--------|-----------------------|--------|
| 6773   | 0                             |        | 0                     |        |
| 6775   | 0                             |        | 0                     |        |
| 6777   | 0                             |        | 0                     |        |
| 6779   | 0                             |        | 0                     |        |
| 6790   | 0                             |        | 0                     |        |
| 6797   | 0                             |        | 0                     |        |
| 6798   | 0                             |        | 1                     | 1      |
| 6808   | 0                             |        | 0                     |        |
| 6810   | 0                             |        | 0                     |        |
| 6811   | 5                             | 2      | 3                     | 2      |
| 6812   | 0                             |        | 0                     |        |
| 6814   | 0                             |        | 0                     |        |
| 6819   | 1                             | 2      | 1                     | 2      |
| 6820   | 1                             | 1      | 1                     | 1      |
| 6832   | 0                             |        | 0                     |        |
| 6854   | 5                             | 0      | 3                     | 0      |
| 6855   | 0                             |        | 0                     |        |
| 6857   | 0                             |        | 0                     |        |
| 6858   | 0                             |        | 0                     |        |
| 6859   | 0                             |        | 0                     |        |
| 6860   | 1                             | 1      | 0                     |        |
| 6862   | 0                             |        | 0                     |        |
| 6879   | 0                             |        | 0                     |        |
| 6893   | 0                             |        | 0                     |        |
| 6898   | 0                             |        | 0                     |        |
| 6902   | 4                             | 1      | 1                     | 1      |
| 6903   | 5                             | 2      | 2                     | 2      |
| 6907   | 2                             | 1      | 1                     | 1      |
| 6908   | 0                             |        | 0                     |        |
| 6912   | 0                             |        | 0                     |        |
| 6915   | 0                             |        | 0                     |        |
| 6916   | 0                             |        | 0                     |        |



| respid | ICS Splitting/spraying: Q26_1 | Q26a_1 | ICS: Hesitancy: Q27_1 | Q27a_1 |
|--------|-------------------------------|--------|-----------------------|--------|
| 6917   | 1                             |        | 0                     |        |
| 6923   | 0                             |        | 0                     |        |
| 6934   | 3                             | 2      | 1                     | 0      |
| 6937   | 0                             |        | 0                     |        |
| 6945   | 0                             |        | 0                     |        |
| 6954   | 1                             | 0      | 0                     |        |
| 6956   | 0                             |        | 0                     |        |
| 6958   | 2                             | 1      | 0                     |        |
| 6961   | 0                             |        | 0                     |        |
| 6963   | 0                             |        | 1                     | 0      |
| 6964   | 0                             |        | 0                     |        |
| 6976   | 0                             |        | 0                     |        |
| 6977   | 0                             |        | 0                     |        |
| 7000   | 2                             | 3      | 1                     | 2      |
| 7001   | 0                             |        | 0                     |        |
| 7005   | 0                             |        | 0                     |        |
| 7006   | 0                             |        | 0                     |        |
| 7008   | 1                             | 0      | 0                     |        |
| 7009   | 0                             |        | 0                     |        |
| 7019   | 1                             | 0      | 0                     |        |
| 7021   | 0                             |        | 0                     |        |
| 7026   | 1                             | 1      | 2                     | 2      |
| 7030   | 3                             | 2      | 3                     | 2      |
| 7034   | 0                             |        | 0                     |        |
| 7039   | 0                             |        | 0                     |        |
| 7041   | 0                             |        | 0                     |        |
| 7047   | 0                             |        | 0                     |        |
| 7051   | 1                             | 0      | 0                     |        |
| 7052   | 1                             | 1      | 1                     | 1      |
| 7059   | 0                             |        | 1                     | 0      |
| 7062   | 0                             |        | 2                     | 1      |
| 7065   | 0                             |        | 0                     |        |

| respid | ICS Splitting/spraying: Q26_1 | Q26a_1 | ICS: Hesitancy: Q27_1 | Q27a_1 |
|--------|-------------------------------|--------|-----------------------|--------|
| 7066   | 0                             |        | 0                     |        |
| 7069   | 0                             |        | 0                     |        |
| 7070   | 0                             |        | 0                     |        |
| 7073   | 0                             |        | 0                     |        |
| 7078   | 0                             |        | 0                     |        |
| 7083   | 0                             |        | 0                     |        |
| 7084   | 5                             | 3      | 2                     | 3      |
| 7085   | 0                             |        | 0                     |        |
| 7088   | 2                             | 2      | 2                     | 1      |
| 7090   | 2                             | 1      | 2                     | 1      |
| 7095   | 0                             |        | 1                     | 1      |
| 7100   | 0                             |        | 0                     |        |
| 7102   | 4                             | 1      | 2                     | 1      |
| 7103   | 0                             |        | 0                     |        |
| 7108   | 1                             | 0      | 1                     | 0      |
| 7109   | 0                             |        | 0                     |        |
| 7110   | 0                             |        | 0                     |        |
| 7112   | 0                             |        | 0                     |        |
| 7114   | 0                             |        | 0                     |        |
| 7116   | 0                             |        | 0                     |        |
| 7117   | 0                             |        | 2                     | 2      |
| 7118   | 2                             | 1      | 3                     | 2      |
| 7120   | 1                             | 1      | 1                     | 1      |
| 7124   | 0                             |        | 0                     |        |
| 7130   | 0                             |        | 0                     |        |
| 7135   | 0                             |        | 0                     |        |
| 7137   | 3                             | 3      | 3                     | 2      |
| 7140   | 0                             |        | 0                     |        |
| 7141   | 0                             |        | 0                     |        |
| 7148   | 0                             |        | 0                     |        |
| 7152   | 0                             |        | 0                     |        |
| 7154   | 1                             | 0      | 0                     |        |

| respid | ICS Splitting/spraying: Q26_1 | Q26a_1 | ICS: Hesitancy: Q27_1 | Q27a_1 |
|--------|-------------------------------|--------|-----------------------|--------|
| 7156   | 1                             | 0      | 1                     | 0      |
| 7158   | 1                             | 0      | 0                     |        |
| 7159   | 0                             |        | 0                     |        |
| 7161   | 0                             |        | 0                     |        |
| 7164   | 0                             |        | 0                     |        |
| 7166   | 0                             |        | 0                     |        |
| 7167   | 0                             |        | 0                     |        |
| 7168   | 0                             |        | 0                     |        |
| 7170   | 0                             |        | 0                     |        |
| 7171   | 0                             |        | 0                     |        |
| 7172   | 0                             |        | 0                     |        |
| 7173   | 2                             | 1      | 1                     | 0      |
| 7175   | 0                             |        | 0                     |        |
| 7176   | 3                             | 1      | 2                     | 1      |
| 7180   | 0                             |        | 0                     |        |
| 7183   | 2                             | 1      | 1                     | 1      |
| 7189   | 0                             |        | 0                     |        |
| 7193   | 0                             |        | 0                     |        |
| 7194   | 0                             |        | 0                     |        |
| 7195   | 0                             |        | 0                     |        |
| 7200   | 0                             |        | 0                     |        |
| 7201   | 0                             |        | 2                     | 1      |
| 7205   | 1                             | 0      | 2                     | 1      |
| 7207   | 0                             |        | 0                     |        |
| 7208   | 0                             |        | 0                     |        |
| 7210   | 0                             |        | 0                     |        |
| 7211   | 0                             |        | 0                     |        |
| 7217   | 0                             |        | 0                     |        |
| 7218   | 0                             |        | 0                     |        |
| 7220   | 0                             |        | 0                     |        |
| 7225   | 1                             | 0      | 0                     |        |
| 7228   | 1                             | 0      | 0                     |        |

| respid | ICS Splitting/spraying: Q26_1 | Q26a_1 | ICS: Hesitancy: Q27_1 | Q27a_1 |
|--------|-------------------------------|--------|-----------------------|--------|
| 7230   | 0                             |        | 0                     |        |
| 7233   | 1                             | 1      | 0                     |        |
| 7234   | 0                             |        | 2                     | 1      |
| 7235   | 0                             |        | 0                     |        |
| 7236   | 0                             |        | 0                     |        |
| 7241   | 3                             | 0      | 0                     |        |
| 7251   | 1                             | 0      | 0                     |        |
| 7253   | 0                             |        | 0                     |        |
| 7259   | 1                             | 1      | 1                     | 1      |
| 7260   | 1                             | 1      | 1                     | 1      |
| 7261   | 2                             | 1      | 3                     | 2      |
| 7263   | 0                             |        | 0                     |        |
| 7265   | 0                             |        | 0                     |        |
| 7268   | 0                             |        | 0                     |        |
| 7269   | 0                             |        | 0                     |        |
| 7271   | 3                             | 2      | 3                     | 2      |
| 7276   | 0                             |        | 0                     |        |
| 7280   | 3                             | 0      | 1                     | 1      |
| 7283   | 0                             |        | 0                     |        |
| 7284   | 1                             | 0      | 1                     | 1      |
| 7286   | 0                             |        | 0                     |        |
| 7287   | 0                             |        | 0                     |        |
| 7288   | 1                             | 0      | 0                     |        |
| 7294   | 0                             |        | 0                     |        |
| 7295   | 0                             |        | 0                     |        |
| 7296   | 0                             |        | 0                     |        |
| 7297   | 1                             | 1      | 1                     | 1      |
| 7299   | 0                             |        | 0                     |        |
| 7300   | 1                             | 1      | 1                     | 1      |
| 7301   | 2                             | 1      | 1                     | 1      |
| 7302   | 0                             |        | 0                     |        |
| 7306   | 0                             |        | 0                     |        |

| respid | ICS Splitting/spraying: Q26_1 | Q26a_1 | ICS: Hesitancy: Q27_1 | Q27a_1 |
|--------|-------------------------------|--------|-----------------------|--------|
| 7313   | 2                             | 2      | 2                     | 2      |
| 7315   | 0                             |        | 0                     |        |
| 7317   | 0                             |        | 0                     |        |
| 7321   | 2                             | 2      | 0                     |        |
| 7322   | 0                             |        | 0                     |        |
| 7323   | 0                             |        | 1                     | 1      |
| 7333   | 4                             | 2      | 5                     | 3      |
| 7335   | 0                             |        | 0                     |        |
| 7336   | 0                             |        | 0                     |        |
| 7337   | 0                             |        | 0                     |        |
| 7338   | 5                             | 0      | 0                     |        |
| 7340   | 1                             | 1      | 0                     |        |
| 7341   | 2                             | 2      | 2                     | 2      |
| 7342   | 0                             |        | 0                     |        |
| 7344   | 0                             |        | 1                     | 1      |
| 7346   | 0                             |        | 0                     |        |
| 7347   | 0                             |        | 0                     |        |
| 7349   | 1                             | 1      | 1                     | 1      |
| 7352   | 2                             | 0      | 0                     |        |
| 7353   | 1                             | 0      | 0                     |        |
| 7355   | 1                             | 1      | 0                     |        |
| 7356   | 0                             |        | 0                     |        |
| 7360   | 4                             | 3      | 3                     | 4      |
| 7371   | 0                             |        | 0                     |        |
| 7376   | 2                             | 2      | 1                     | 2      |
| 7379   | 0                             |        | 0                     |        |
| 7381   | 1                             | 0      | 0                     |        |
| 7386   | 4                             | 2      | 1                     | 1      |
| 7389   | 3                             | 2      | 0                     |        |
| 7390   | 2                             | 3      | 1                     | 4      |
| 7393   | 0                             |        | 0                     |        |
| 7394   | 0                             |        | 0                     |        |

| respid | ICS Splitting/spraying: Q26_1 | Q26a_1 | ICS: Hesitancy: Q27_1 | Q27a_1 |
|--------|-------------------------------|--------|-----------------------|--------|
| 7396   | 1                             | 1      | 0                     |        |
| 7400   | 2                             | 2      | 2                     | 2      |
| 7401   | 1                             | 1      | 1                     | 0      |
| 7403   | 1                             | 2      | 1                     | 1      |
| 7406   | 0                             |        | 1                     | 3      |
| 7409   | 0                             |        | 0                     |        |
| 7410   | 1                             | 1      | 2                     | 2      |
| 7412   | 2                             | 2      | 2                     | 2      |
| 7414   | 0                             |        | 0                     |        |
| 7415   | 0                             |        | 0                     |        |
| 7417   | 1                             | 1      | 1                     | 1      |
| 7421   | 1                             | 2      | 4                     | 3      |
| 7425   | 1                             | 1      | 1                     | 1      |
| 7430   | 2                             | 2      | 1                     | 0      |
| 7432   | 1                             | 0      | 1                     | 0      |
| 7433   | 0                             |        | 0                     |        |
| 7442   | 1                             | 0      | 1                     | 0      |
| 7445   | 0                             |        | 0                     |        |
| 7446   | 0                             |        | 0                     |        |
| 7449   | 0                             |        | 0                     |        |
| 7450   | 0                             |        | 0                     |        |
| 7451   | 0                             |        | 0                     |        |
| 7459   | 0                             |        | 1                     | 0      |
| 7462   | 1                             | 1      | 1                     | 2      |
| 7463   | 0                             |        | 0                     |        |
| 7469   | 0                             |        | 0                     |        |
| 7482   | 0                             |        | 0                     |        |
| 7484   | 0                             |        | 0                     |        |
| 7486   | 1                             | 1      | 0                     |        |
| 7496   | 0                             |        | 0                     |        |
| 7502   | 3                             | 0      | 0                     |        |
| 7504   | 1                             | 1      | 1                     | 1      |

| respid | ICS Splitting/spraying: Q26_1 | Q26a_1 | ICS: Hesitancy: Q27_1 | Q27a_1 |
|--------|-------------------------------|--------|-----------------------|--------|
| 7509   | 5                             | 3      | 5                     | 4      |
| 7513   | 1                             | 0      | 2                     | 1      |
| 7514   | 0                             |        | 0                     |        |
| 7520   | 0                             |        | 0                     |        |
| 7523   | 0                             |        | 0                     |        |
| 7526   | 0                             |        | 0                     |        |
| 7529   | 1                             | 1      | 0                     |        |
| 7534   | 0                             |        | 0                     |        |
| 7536   | 2                             | 0      | 1                     | 0      |
| 7540   | 0                             |        | 0                     |        |
| 7541   | 2                             | 1      | 2                     | 2      |
| 7542   | 0                             |        | 0                     |        |
| 7555   | 0                             |        | 0                     |        |
| 7566   | 0                             |        | 0                     |        |
| 7568   | 2                             | 1      | 0                     |        |
| 7570   | 2                             | 2      | 2                     | 2      |
| 7572   | 0                             |        | 0                     |        |
| 7573   | 1                             | 1      | 1                     | 1      |
| 7576   | 0                             |        | 0                     |        |
| 7577   | 0                             |        | 0                     |        |
| 7583   | 0                             |        | 0                     |        |
| 7584   | 0                             |        | 0                     |        |
| 7585   | 2                             | 4      | 3                     | 4      |
| 7586   | 0                             |        | 2                     | 1      |
| 7587   | 0                             |        | 0                     |        |
| 7588   | 0                             |        | 0                     |        |
| 7596   | 1                             | 1      | 0                     |        |
| 7599   | 0                             |        | 0                     |        |
| 7600   | 1                             | 1      | 1                     | 1      |
| 7602   | 0                             |        | 0                     |        |
| 7613   | 5                             | 0      | 5                     | 0      |
| 7620   | 0                             |        | 0                     |        |

| respid | ICS Splitting/spraying: Q26_1 | Q26a_1 | ICS: Hesitancy: Q27_1 | Q27a_1 |
|--------|-------------------------------|--------|-----------------------|--------|
| 7623   | 1                             | 0      | 0                     |        |
| 7635   | 1                             | 0      | 0                     |        |
| 7636   | 0                             |        | 0                     |        |
| 7643   | 1                             | 1      | 1                     | 1      |
| 7645   | 1                             | 0      | 0                     |        |
| 7649   | 3                             | 3      | 3                     | 3      |
| 7651   | 0                             |        | 0                     |        |
| 7652   | 3                             | 3      | 2                     | 2      |
| 7655   | 0                             |        | 0                     |        |
| 7657   | 0                             |        | 0                     |        |
| 7675   | 0                             |        | 0                     |        |
| 7676   | 1                             | 0      | 1                     | 1      |
| 7684   | 0                             |        | 0                     |        |
| 7693   | 2                             | 1      | 1                     | 0      |
| 7694   | 4                             | 4      | 4                     | 4      |
| 7695   | 0                             |        | 0                     |        |
| 7696   | 4                             | 4      | 4                     | 4      |
| 7698   | 0                             |        | 0                     |        |
| 7700   | 0                             |        | 0                     |        |
| 7701   | 1                             | 0      | 0                     |        |
| 7704   | 0                             |        | 0                     |        |
| 7709   | 0                             |        | 0                     |        |
| 7713   | 1                             | 0      | 0                     |        |
| 7714   | 1                             | 0      | 0                     |        |
| 7718   | 4                             | 1      | 2                     | 1      |
| 7720   | 0                             |        | 0                     |        |
| 7721   | 3                             | 1      | 1                     | 1      |
| 7722   | 0                             |        | 0                     |        |
| 7724   | 2                             | 2      | 3                     | 2      |
| 7728   | 0                             |        | 0                     |        |
| 7731   | 1                             | 1      | 1                     | 1      |
| 7735   | 0                             |        | 0                     |        |



| respid | ICS Splitting/spraying: Q26_1 | Q26a_1 | ICS: Hesitancy: Q27_1 | Q27a_1 |
|--------|-------------------------------|--------|-----------------------|--------|
| 7737   | 1                             | 2      | 0                     |        |
| 7741   | 0                             |        | 0                     |        |
| 7746   | 5                             | 1      | 1                     | 1      |
| 7747   | 0                             |        | 0                     |        |
| 7748   | 0                             |        | 0                     |        |
| 7750   | 0                             |        | 0                     |        |
| 7754   | 0                             |        | 0                     |        |
| 7755   | 1                             | 1      | 0                     |        |
| 7762   | 0                             |        | 0                     |        |
| 7764   | 0                             |        | 0                     |        |
| 7766   | 0                             |        | 0                     |        |
| 7768   | 2                             | 1      | 0                     |        |
| 7770   | 0                             |        | 0                     |        |
| 7771   | 0                             |        | 0                     |        |
| 7777   | 0                             |        | 1                     | 0      |
| 7778   | 0                             |        | 0                     |        |
| 7783   | 3                             | 3      | 4                     | 3      |
| 7789   | 0                             |        | 0                     |        |
| 7790   | 0                             |        | 0                     |        |
| 7795   | 0                             |        | 0                     |        |
| 7807   | 0                             |        | 0                     |        |
| 7808   | 3                             | 2      | 2                     | 2      |
| 7818   | 0                             |        | 0                     |        |
| 7820   | 0                             |        | 0                     |        |
| 7831   | 0                             |        | 0                     |        |
| 7832   | 3                             | 1      | 0                     |        |
| 7837   | 0                             |        | 1                     | 1      |
| 7841   | 0                             |        | 0                     |        |
| 7845   | 2                             | 0      | 1                     | 1      |
| 7853   | 1                             | 1      | 0                     |        |
| 7854   | 0                             |        | 0                     |        |
| 7862   | 2                             | 2      | 2                     | 2      |

| respid | ICS Splitting/spraying: Q26_1 | Q26a_1 | ICS: Hesitancy: Q27_1 | Q27a_1 |
|--------|-------------------------------|--------|-----------------------|--------|
| 7871   | 0                             |        | 0                     |        |
| 7875   | 0                             |        | 0                     |        |
| 7880   | 0                             |        | 0                     |        |
| 7881   | 0                             |        | 0                     |        |
| 7883   | 0                             |        | 0                     |        |
| 7896   | 0                             |        | 0                     |        |
| 7905   | 0                             |        | 0                     |        |
| 7919   | 0                             |        | 0                     |        |
| 7928   | 1                             | 1      | 2                     | 2      |
| 7929   | 0                             |        | 0                     |        |
| 7938   | 1                             | 2      | 2                     | 2      |
| 7940   | 1                             | 1      | 0                     |        |
| 7941   | 1                             | 1      | 0                     |        |
| 7952   | 0                             |        | 0                     |        |
| 7962   | 0                             |        | 0                     |        |
| 7968   | 1                             | 1      | 0                     |        |
| 7972   | 2                             | 1      | 0                     |        |
| 7983   | 3                             | 2      | 2                     | 1      |
| 7990   | 0                             |        | 0                     |        |
| 7993   | 0                             |        | 0                     |        |
| 8005   | 0                             |        | 0                     |        |
| 8008   | 0                             |        | 0                     |        |
| 8012   | 1                             | 0      | 0                     |        |
| 8021   | 0                             |        | 0                     |        |
| 8024   | 0                             |        | 0                     |        |
| 8043   | 0                             |        | 0                     |        |
| 8051   | 0                             |        | 0                     |        |
| 8056   | 1                             | 1      | 0                     |        |
| 8061   | 1                             | 1      | 0                     |        |
| 8066   | 0                             |        | 0                     |        |
| 8069   | 0                             |        | 1                     | 1      |
| 8071   | 1                             | 0      | 0                     |        |

| respid | ICS Splitting/spraying: Q26_1 | Q26a_1 | ICS: Hesitancy: Q27_1 | Q27a_1 |
|--------|-------------------------------|--------|-----------------------|--------|
| 8072   | 0                             |        | 0                     |        |
| 8076   | 1                             | 1      | 1                     | 1      |
| 8080   | 1                             | 1      | 0                     |        |
| 8083   | 0                             |        | 0                     |        |
| 8093   | 2                             | 1      | 1                     | 2      |
| 8095   | 2                             | 2      | 2                     | 2      |
| 8099   | 0                             |        | 0                     |        |
| 8100   | 0                             |        | 0                     |        |
| 8103   | 0                             |        | 0                     |        |
| 8104   | 3                             | 1      | 1                     | 1      |
| 8115   | 2                             | 1      | 1                     | 1      |
| 8121   | 0                             |        | 0                     |        |
| 8128   | 0                             |        | 0                     |        |
| 8130   | 0                             |        | 0                     |        |
| 8131   | 0                             |        | 1                     | 1      |
| 8133   | 0                             |        | 0                     |        |
| 8143   | 1                             | 1      | 1                     | 1      |
| 8144   | 0                             |        | 0                     |        |
| 8146   | 1                             | 0      | 0                     |        |
| 8148   | 0                             |        | 0                     |        |
| 8157   | 0                             |        | 0                     |        |
| 8164   | 0                             |        | 0                     |        |
| 8173   | 0                             |        | 0                     |        |
| 8176   | 0                             |        | 0                     |        |
| 8179   | 0                             |        | 0                     |        |
| 8181   | 0                             |        | 0                     |        |
| 8182   | 0                             |        | 0                     |        |
| 8196   | 1                             | 0      | 0                     |        |
| 8200   | 0                             |        | 0                     |        |
| 8203   | 0                             |        | 0                     |        |
| 8204   | 0                             |        | 3                     | 3      |
| 8206   | 0                             |        | 0                     |        |

| respid | ICS Splitting/spraying: Q26_1 | Q26a_1 | ICS: Hesitancy: Q27_1 | Q27a_1 |
|--------|-------------------------------|--------|-----------------------|--------|
| 8208   | 0                             |        | 0                     |        |
| 8212   | 0                             |        | 0                     |        |
| 8222   | 3                             | 3      | 3                     | 3      |
| 8223   | 0                             |        | 0                     |        |
| 8225   | 1                             | 1      | 0                     |        |
| 8226   | 0                             |        | 0                     |        |
| 8228   | 1                             | 2      | 0                     |        |
| 8229   | 0                             |        | 0                     |        |
| 8239   | 2                             | 1      | 2                     | 0      |
| 8246   | 4                             | 3      | 3                     | 1      |
| 8258   | 2                             | 2      | 1                     | 2      |
| 8260   | 0                             |        | 0                     |        |
| 8262   | 0                             |        | 1                     | 0      |
| 8263   | 1                             | 1      | 1                     | 1      |
| 8267   | 1                             | 1      | 1                     | 1      |
| 8271   | 0                             |        | 1                     | 1      |
| 8274   | 1                             | 0      | 0                     |        |
| 8275   | 2                             | 2      | 2                     | 3      |
| 8279   | 1                             | 1      | 1                     | 1      |
| 8285   | 3                             | 2      | 2                     | 2      |
| 8287   | 5                             | 4      | 5                     | 4      |
| 8289   | 0                             |        | 2                     | 0      |
| 8291   | 1                             | 1      | 0                     |        |
| 8299   | 1                             | 1      | 0                     |        |
| 8301   | 0                             |        | 0                     |        |
| 8302   | 0                             |        | 0                     |        |
| 8308   | 0                             |        | 1                     | 1      |
| 8313   | 0                             |        | 0                     |        |
| 8316   | 4                             | 3      | 1                     | 1      |
| 8317   | 0                             |        | 0                     |        |
| 8319   | 0                             |        | 0                     |        |
| 8323   | 1                             | 0      | 0                     |        |

| respid | ICS Splitting/spraying: Q26_1 | Q26a_1 | ICS: Hesitancy: Q27_1 | Q27a_1 |
|--------|-------------------------------|--------|-----------------------|--------|
| 8324   | 0                             |        | 0                     |        |
| 8327   | 0                             |        | 0                     |        |
| 8328   | 1                             | 0      | 0                     |        |
| 8342   | 1                             | 1      | 0                     |        |
| 8350   | 0                             |        | 1                     | 1      |
| 8352   | 0                             |        | 0                     |        |
| 8353   | 0                             |        | 0                     |        |
| 8356   | 0                             |        | 0                     |        |
| 8367   | 0                             |        | 1                     | 1      |
| 8373   | 2                             | 1      | 1                     | 1      |
| 8379   | 0                             |        | 0                     |        |
| 8382   | 2                             | 1      | 4                     | 1      |
| 8387   | 0                             |        | 0                     |        |
| 8409   | 0                             |        | 0                     |        |
| 8410   | 0                             |        | 0                     |        |
| 8412   | 0                             |        | 1                     | 1      |
| 8415   | 0                             |        | 1                     | 1      |
| 8417   | 0                             |        | 0                     |        |
| 8422   | 1                             | 1      | 1                     | 1      |
| 8430   | 0                             |        | 0                     |        |
| 8434   | 0                             |        | 0                     |        |
| 8436   | 0                             |        | 0                     |        |
| 8446   | 1                             | 1      | 1                     | 0      |
| 8447   | 0                             |        | 0                     |        |
| 8448   | 0                             |        | 0                     |        |
| 8455   | 4                             | 3      | 2                     | 1      |
| 8456   | 0                             |        | 0                     |        |
| 8459   | 1                             | 0      | 0                     |        |
| 8460   | 0                             |        | 0                     |        |
| 8464   | 2                             | 2      | 2                     | 2      |
| 8470   | 0                             |        | 0                     |        |
| 8473   | 0                             |        | 0                     |        |

| respid | ICS Splitting/spraying: Q26_1 | Q26a_1 | ICS: Hesitancy: Q27_1 | Q27a_1 |
|--------|-------------------------------|--------|-----------------------|--------|
| 8486   | 0                             |        | 0                     |        |
| 8487   | 0                             |        | 0                     |        |
| 8489   | 0                             |        | 0                     |        |
| 8494   | 0                             |        | 0                     |        |
| 8495   | 5                             | 4      | 4                     | 4      |
| 8497   | 0                             |        | 0                     |        |
| 8510   | 0                             |        | 0                     |        |
| 8515   | 2                             | 1      | 2                     | 1      |
| 8526   | 0                             |        | 0                     |        |
| 8530   | 0                             |        | 0                     |        |
| 8532   | 4                             | 0      | 0                     |        |
| 8533   | 0                             |        | 0                     |        |
| 8534   | 1                             | 1      | 0                     |        |
| 8572   | 3                             | 3      | 1                     | 1      |
| 8582   | 1                             | 1      | 1                     | 1      |
| 8584   | 1                             | 1      | 0                     |        |
| 8585   | 0                             |        | 0                     |        |
| 8586   | 0                             |        | 0                     |        |
| 8589   | 0                             |        | 1                     | 1      |
| 8593   | 1                             | 0      | 0                     |        |
| 8594   | 1                             | 0      | 0                     |        |
| 8601   | 1                             | 0      | 0                     |        |
| 8603   | 0                             |        | 0                     |        |
| 8604   | 0                             |        | 0                     |        |
| 8605   | 0                             |        | 0                     |        |
| 8607   | 1                             | 1      | 1                     | 1      |
| 8623   | 1                             | 1      | 0                     |        |
| 8626   | 3                             | 2      | 2                     | 1      |
| 8638   | 0                             |        | 0                     |        |
| 8640   | 4                             | 1      | 0                     |        |
| 8641   | 0                             |        | 0                     |        |
| 8643   | 0                             |        | 0                     |        |

| respid | ICS Splitting/spraying: Q26_1 | Q26a_1 | ICS: Hesitancy: Q27_1 | Q27a_1 |
|--------|-------------------------------|--------|-----------------------|--------|
| 8644   | 0                             |        | 0                     |        |
| 8646   | 0                             |        | 0                     |        |
| 8647   | 0                             |        | 0                     |        |
| 8649   | 1                             | 1      | 1                     | 1      |
| 8650   | 1                             | 1      | 0                     |        |
| 8658   | 0                             |        | 0                     |        |
| 8659   | 2                             | 1      | 0                     |        |
| 8669   | 4                             | 1      | 0                     |        |
| 8672   | 0                             |        | 0                     |        |
| 8673   | 0                             |        | 0                     |        |
| 8676   | 0                             |        | 0                     |        |
| 8677   | 0                             |        | 0                     |        |
| 8681   | 0                             |        | 0                     |        |
| 8688   | 2                             | 0      | 0                     |        |
| 8689   | 1                             | 1      | 0                     |        |
| 8690   | 0                             |        | 0                     |        |
| 8693   | 0                             |        | 1                     | 0      |
| 8694   | 1                             | 1      | 1                     | 0      |
| 8699   | 1                             | 1      | 0                     |        |
| 8700   | 0                             |        | 0                     |        |
| 8703   | 1                             | 0      | 0                     |        |
| 8704   | 0                             |        | 0                     |        |
| 8706   | 3                             | 3      | 3                     | 2      |
| 8709   | 3                             | 1      | 0                     |        |
| 8715   | 1                             | 1      | 0                     |        |
| 8728   | 4                             | 2      | 2                     | 1      |
| 8729   | 1                             | 2      | 0                     |        |
| 8730   | 0                             |        | 0                     |        |
| 8742   | 3                             | 0      | 0                     |        |
| 8748   | 0                             |        | 0                     |        |
| 8749   | 1                             | 1      | 0                     |        |
| 8750   | 1                             | 1      | 0                     |        |

| respid | ICS Splitting/spraying: Q26_1 | Q26a_1 | ICS: Hesitancy: Q27_1 | Q27a_1 |
|--------|-------------------------------|--------|-----------------------|--------|
| 8751   | 0                             |        | 0                     |        |
| 8752   | 5                             | 2      | 0                     |        |
| 8754   | 1                             | 1      | 0                     |        |
| 8757   | 1                             | 0      | 0                     |        |
| 8760   | 0                             |        | 1                     | 0      |
| 8761   | 2                             | 2      | 2                     | 1      |
| 8762   | 0                             |        | 0                     |        |
| 8763   | 0                             |        | 0                     |        |
| 8764   | 0                             |        | 0                     |        |
| 8765   | 1                             | 0      | 0                     |        |
| 8766   | 0                             |        | 4                     | 2      |
| 8767   | 0                             |        | 1                     | 0      |
| 8768   | 0                             |        | 0                     |        |
| 8770   | 0                             |        | 0                     |        |
| 8771   | 0                             |        | 0                     |        |
| 8773   | 0                             |        | 1                     | 0      |
| 8774   | 1                             | 1      | 1                     | 1      |
| 8776   | 0                             |        | 0                     |        |
| 8777   | 0                             |        | 0                     |        |
| 8778   | 0                             |        | 1                     | 1      |
| 8779   | 0                             |        | 0                     |        |
| 8784   | 1                             | 0      | 1                     | 1      |
| 8786   | 0                             |        | 0                     |        |
| 8787   | 1                             | 1      | 0                     |        |
| 8790   | 0                             |        | 0                     |        |
| 8791   | 2                             | 3      | 2                     | 3      |
| 8793   | 0                             |        | 0                     |        |
| 8795   | 1                             | 1      | 1                     | 1      |
| 8797   | 4                             | 1      | 0                     |        |
| 8801   | 1                             | 2      | 1                     | 2      |
| 8802   | 0                             |        | 0                     |        |
| 8807   | 0                             |        | 0                     |        |



| respid | ICS Splitting/spraying: Q26_1 | Q26a_1 | ICS: Hesitancy: Q27_1 | Q27a_1 |
|--------|-------------------------------|--------|-----------------------|--------|
| 8813   | 0                             |        | 0                     |        |
| 8817   | 0                             |        | 0                     |        |
| 8818   | 1                             | 1      | 1                     | 1      |
| 8821   | 0                             |        | 0                     |        |
| 8822   | 0                             |        | 0                     |        |
| 8823   | 0                             |        | 0                     |        |
| 8824   | 1                             | 1      | 0                     |        |
| 8825   | 0                             |        | 0                     |        |
| 8834   | 3                             | 2      | 3                     | 3      |
| 8840   | 2                             | 1      | 2                     | 1      |
| 8843   | 5                             | 4      | 5                     | 4      |
| 8846   | 0                             |        | 1                     | 0      |
| 8862   | 0                             |        | 0                     |        |
| 8866   | 0                             |        | 0                     |        |
| 8869   | 3                             | 2      | 0                     |        |
| 8872   | 1                             | 2      | 1                     | 2      |
| 8903   | 0                             |        | 0                     |        |
| 8909   | 0                             |        | 0                     |        |
| 8926   | 0                             |        | 0                     |        |
| 8936   | 0                             |        | 0                     |        |
| 8945   | 0                             |        | 0                     |        |
| 8954   | 1                             | 1      | 0                     |        |
| 8955   | 0                             |        | 1                     | 1      |
| 8958   | 3                             | 1      | 0                     |        |
| 8959   | 0                             |        | 0                     |        |
| 8960   | 0                             |        | 0                     |        |
| 8976   | 0                             |        | 0                     |        |
| 8977   | 0                             |        | 0                     |        |
| 8979   | 0                             |        | 0                     |        |
| 8985   | 0                             |        | 0                     |        |
| 8994   | 0                             |        | 0                     |        |
| 8997   | 5                             | 1      | 2                     | 1      |

| respid | ICS Splitting/spraying: Q26_1 | Q26a_1 | ICS: Hesitancy: Q27_1 | Q27a_1 |
|--------|-------------------------------|--------|-----------------------|--------|
| 9002   | 0                             |        | 0                     |        |
| 9005   | 2                             | 1      | 0                     |        |
| 9017   | 0                             |        | 0                     |        |
| 9018   | 0                             |        | 0                     |        |
| 9021   | 2                             | 2      | 0                     |        |
| 9029   | 3                             | 3      | 3                     | 3      |
| 9035   | 1                             | 1      | 1                     | 1      |
| 9038   | 0                             |        | 0                     |        |
| 9039   | 0                             |        | 0                     |        |
| 9040   | 0                             |        | 0                     |        |
| 9042   | 1                             | 0      | 0                     |        |
| 9043   | 0                             |        | 0                     |        |
| 9045   | 0                             |        | 0                     |        |
| 9051   | 0                             |        | 0                     |        |
| 9067   | 0                             |        | 0                     |        |
| 9069   | 5                             | 3      | 1                     | 1      |
| 9073   | 4                             | 1      | 1                     | 0      |
| 9084   | 1                             | 1      | 1                     | 1      |
| 9096   | 0                             |        | 0                     |        |
| 9100   | 0                             |        | 0                     |        |
| 9107   | 0                             |        | 0                     |        |
| 9110   | 1                             | 1      | 0                     |        |
| 9120   | 0                             |        | 0                     |        |
| 9122   | 0                             |        | 0                     |        |
| 9130   | 0                             |        | 0                     |        |
| 9134   | 0                             |        | 4                     | 4      |
| 9137   | 0                             |        | 0                     |        |
| 9139   | 0                             |        | 0                     |        |
| 9144   | 0                             |        | 0                     |        |
| 9157   | 1                             | 1      | 0                     |        |
| 9166   | 4                             | 3      | 1                     | 1      |
| 9177   | 3                             | 2      | 3                     | 2      |

| respid | ICS Splitting/spraying: Q26_1 | Q26a_1 | ICS: Hesitancy: Q27_1 | Q27a_1 |
|--------|-------------------------------|--------|-----------------------|--------|
| 9181   | 0                             |        | 0                     |        |
| 9183   | 0                             |        | 0                     |        |
| 9184   | 2                             | 1      | 1                     | 1      |
| 9188   | 0                             |        | 0                     |        |
| 9197   | 0                             |        | 0                     |        |
| 9200   | 3                             | 1      | 2                     | 2      |
| 9205   | 0                             |        | 2                     | 2      |
| 9207   | 0                             |        | 0                     |        |
| 9213   | 3                             | 1      | 1                     | 1      |
| 9216   | 1                             | 1      | 1                     | 1      |
| 9217   | 0                             |        | 0                     |        |
| 9218   | 0                             |        | 0                     |        |
| 9219   | 4                             | 1      | 2                     | 1      |
| 9220   | 0                             |        | 0                     |        |
| 9221   | 0                             |        | 0                     |        |
| 9223   | 3                             | 4      | 4                     | 4      |
| 9228   | 0                             |        | 0                     |        |
| 9230   | 1                             | 0      | 0                     |        |
| 9231   | 0                             |        | 0                     |        |
| 9233   | 0                             |        | 0                     |        |
| 9235   | 0                             |        | 0                     |        |
| 9237   | 0                             |        | 0                     |        |
| 9242   | 0                             |        | 0                     |        |
| 9250   | 0                             |        | 0                     |        |
| 9253   | 0                             |        | 0                     |        |
| 9257   | 1                             | 0      | 0                     |        |
| 9263   | 0                             |        | 0                     |        |
| 9267   | 1                             | 2      | 1                     | 1      |
| 9272   | 1                             | 0      | 0                     |        |
| 9279   | 0                             |        | 0                     |        |
| 9281   | 0                             |        | 0                     |        |
| 9285   | 0                             |        | 0                     |        |

| respid | ICS Splitting/spraying: Q26_1 | Q26a_1 | ICS: Hesitancy: Q27_1 | Q27a_1 |
|--------|-------------------------------|--------|-----------------------|--------|
| 9286   | 0                             |        | 1                     | 2      |
| 9294   | 1                             | 2      | 1                     | 2      |
| 9295   | 0                             |        | 0                     |        |
| 9297   | 1                             | 1      | 0                     |        |
| 9299   | 1                             | 0      | 1                     | 1      |
| 9309   | 1                             | 0      | 0                     |        |
| 9315   | 0                             |        | 0                     |        |
| 9320   | 0                             |        | 0                     |        |
| 9324   | 1                             | 0      | 0                     |        |
| 9326   | 0                             |        | 0                     |        |
| 9333   | 0                             |        | 0                     |        |
| 9334   | 1                             | 1      | 1                     | 1      |
| 9336   | 0                             |        | 0                     |        |
| 9337   | 3                             | 1      | 0                     |        |
| 9342   | 1                             | 0      | 1                     | 1      |
| 9347   | 0                             |        | 0                     |        |
| 9352   | 2                             | 1      | 2                     | 1      |
| 9355   | 0                             |        | 1                     | 0      |
| 9356   | 0                             |        | 1                     | 2      |
| 9359   | 1                             | 1      | 1                     | 1      |
| 9368   | 0                             |        | 0                     |        |
| 9375   | 1                             | 0      | 1                     | 0      |
| 9384   | 0                             |        | 0                     |        |
| 9388   | 0                             |        | 1                     | 0      |
| 9397   | 2                             | 4      | 2                     | 3      |
| 9400   | 0                             |        | 1                     | 1      |
| 9401   | 1                             | 2      | 0                     |        |
| 9402   | 0                             |        | 0                     |        |
| 9417   | 3                             | 2      | 3                     | 2      |
| 9424   | 0                             |        | 0                     |        |
| 9427   | 0                             |        | 0                     |        |
| 9429   | 2                             | 1      | 1                     | 1      |

| respid | ICS Splitting/spraying: Q26_1 | Q26a_1 | ICS: Hesitancy: Q27_1 | Q27a_1 |
|--------|-------------------------------|--------|-----------------------|--------|
| 9437   | 3                             | 3      | 3                     | 3      |
| 9442   | 0                             |        | 0                     |        |
| 9446   | 1                             | 1      | 1                     | 1      |
| 9447   | 5                             | 1      | 0                     |        |
| 9448   | 0                             |        | 1                     | 0      |
| 9449   | 1                             | 1      | 1                     | 1      |
| 9455   | 0                             |        | 0                     |        |
| 9459   | 1                             | 1      | 1                     | 1      |
| 9460   | 0                             |        | 0                     |        |
| 9461   | 0                             |        | 1                     | 0      |
| 9463   | 0                             |        | 0                     |        |
| 9464   | 1                             | 1      | 1                     | 1      |
| 9466   | 0                             |        | 0                     |        |
| 9477   | 0                             |        | 0                     |        |
| 9482   | 2                             | 2      | 1                     | 1      |
| 9486   | 1                             | 1      | 1                     | 0      |
| 9488   | 3                             | 3      | 4                     | 3      |
| 9489   | 0                             |        | 0                     |        |
| 9496   | 0                             |        | 0                     |        |
| 9499   | 0                             |        | 0                     |        |
| 9512   | 0                             |        | 0                     |        |
| 9514   | 0                             |        | 0                     |        |
| 9516   | 0                             |        | 0                     |        |
| 9517   | 1                             | 0      | 2                     | 1      |
| 9520   | 0                             |        | 0                     |        |
| 9527   | 0                             |        | 0                     |        |
| 9532   | 0                             |        | 1                     | 1      |
| 9533   | 1                             | 0      | 0                     |        |
| 9543   | 0                             |        | 0                     |        |
| 9550   | 0                             |        | 2                     | 1      |
| 9553   | 0                             |        | 0                     |        |
| 9555   | 2                             | 1      | 0                     |        |

| respid | ICS Splitting/spraying: Q26_1 | Q26a_1 | ICS: Hesitancy: Q27_1 | Q27a_1 |
|--------|-------------------------------|--------|-----------------------|--------|
| 9565   | 3                             |        | 0                     |        |
| 9583   | 0                             |        | 0                     |        |
| 9594   | 0                             |        | 0                     |        |
| 9596   | 0                             |        | 0                     |        |
| 9600   | 0                             |        | 0                     |        |
| 9602   | 0                             |        | 0                     |        |
| 9606   | 1                             | 0      | 0                     |        |
| 9608   | 0                             |        | 0                     |        |
| 9610   | 0                             |        | 0                     |        |
| 9612   | 0                             |        | 0                     |        |
| 9613   | 0                             |        | 0                     |        |
| 9614   | 5                             | 3      | 2                     | 2      |
| 9620   | 3                             | 0      | 1                     | 0      |
| 9628   | 1                             | 0      | 1                     | 0      |
| 9631   | 0                             |        | 0                     |        |
| 9632   | 0                             |        | 0                     |        |
| 9633   | 0                             |        | 0                     |        |
| 9639   | 0                             |        | 0                     |        |
| 9640   | 0                             |        | 0                     |        |
| 9642   | 0                             |        | 0                     |        |
| 9653   | 0                             |        | 1                     | 1      |
| 9658   | 0                             |        | 0                     |        |
| 9659   | 1                             | 1      | 1                     | 1      |
| 9661   | 0                             |        | 0                     |        |
| 9664   | 0                             |        | 0                     |        |
| 9665   | 1                             | 0      | 1                     | 0      |
| 9666   | 0                             |        | 1                     | 1      |
| 9667   | 1                             | 1      | 1                     | 1      |
| 9668   | 0                             |        | 0                     |        |
| 9670   | 1                             | 1      | 0                     |        |
| 9671   | 0                             |        | 0                     |        |
| 9681   | 0                             |        | 0                     |        |

| respid | ICS Splitting/spraying: Q26_1 | Q26a_1 | ICS: Hesitancy: Q27_1 | Q27a_1 |
|--------|-------------------------------|--------|-----------------------|--------|
| 9684   | 3                             | 0      | 0                     |        |
| 9685   | 2                             | 1      | 1                     | 1      |
| 9686   | 3                             | 3      | 2                     | 2      |
| 9688   | 0                             |        | 1                     | 0      |
| 9692   | 2                             | 1      | 0                     |        |
| 9693   | 3                             | 2      | 3                     | 2      |
| 9698   | 1                             | 1      | 1                     | 1      |
| 9699   | 0                             |        | 0                     |        |
| 9701   | 2                             | 1      | 0                     |        |
| 9702   | 0                             |        | 0                     |        |
| 9709   | 3                             | 0      | 0                     |        |
| 9713   | 0                             |        | 0                     |        |
| 9715   | 0                             |        | 0                     |        |
| 9721   | 0                             |        | 0                     |        |
| 9725   | 0                             |        | 0                     |        |
| 9729   | 2                             | 0      | 2                     | 0      |
| 9731   | 0                             |        | 0                     |        |
| 9736   | 1                             | 0      | 0                     |        |
| 9740   | 0                             |        | 0                     |        |
| 9741   | 0                             |        | 0                     |        |
| 9749   | 0                             |        | 1                     | 1      |
| 9750   | 1                             | 1      | 1                     | 0      |
| 9751   | 2                             | 1      | 0                     |        |
| 9753   | 0                             |        | 0                     |        |
| 9754   | 4                             | 3      | 4                     | 3      |
| 9756   | 3                             | 2      | 0                     |        |
| 9758   | 2                             | 2      | 1                     | 2      |
| 9759   | 0                             |        | 0                     |        |
| 9760   | 1                             | 1      | 1                     | 1      |
| 9761   | 0                             |        | 0                     |        |
| 9762   | 3                             | 2      | 2                     | 2      |
| 9764   | 0                             |        | 0                     |        |

| respid | ICS Splitting/spraying: Q26_1 | Q26a_1 | ICS: Hesitancy: Q27_1 | Q27a_1 |
|--------|-------------------------------|--------|-----------------------|--------|
| 9768   | 1                             | 0      | 1                     | 0      |
| 9769   | 0                             |        | 0                     |        |
| 9770   | 0                             |        | 0                     |        |
| 9771   | 2                             | 2      | 1                     | 1      |
| 9772   | 0                             |        | 0                     |        |
| 9773   | 1                             | 1      | 0                     |        |
| 9776   | 0                             |        | 1                     | 0      |
| 9786   | 1                             | 0      | 0                     |        |
| 9790   | 4                             | 0      | 0                     |        |
| 9791   | 1                             | 1      | 0                     |        |
| 9794   | 3                             | 2      | 2                     | 2      |
| 9797   | 0                             |        | 0                     |        |
| 9799   | 0                             |        | 0                     |        |
| 9804   | 0                             |        | 0                     |        |
| 9805   | 3                             | 2      | 0                     |        |
| 9806   | 0                             |        | 1                     | 2      |
| 9807   | 1                             | 0      | 1                     | 0      |
| 9813   | 0                             |        | 0                     |        |
| 9817   | 0                             |        | 0                     |        |
| 9823   | 0                             |        | 0                     |        |
| 9826   | 0                             |        | 0                     |        |
| 9830   | 0                             |        | 0                     |        |
| 9835   | 0                             |        | 0                     |        |
| 9836   | 0                             |        | 0                     |        |
| 9841   | 0                             |        | 0                     |        |
| 9842   | 0                             |        | 0                     |        |
| 9844   | 0                             |        | 1                     | 1      |
| 9847   | 0                             |        | 0                     |        |
| 9851   | 0                             |        | 0                     |        |
| 9852   | 0                             |        | 1                     | 1      |
| 9854   | 0                             |        | 0                     |        |
| 9855   | 0                             |        | 1                     | 1      |



| respid | ICS Splitting/spraying: Q26_1 | Q26a_1 | ICS: Hesitancy: Q27_1 | Q27a_1 |
|--------|-------------------------------|--------|-----------------------|--------|
| 9856   | 0                             |        | 0                     |        |
| 9862   | 0                             |        | 0                     |        |
| 9863   | 0                             |        | 0                     |        |
| 9866   | 0                             |        | 2                     | 1      |
| 9867   | 0                             |        | 0                     |        |
| 9868   | 1                             | 2      | 1                     | 3      |
| 9869   | 0                             |        | 1                     | 0      |
| 9878   | 1                             | 0      | 1                     | 0      |
| 9879   | 1                             | 1      | 1                     | 1      |
| 9881   | 4                             | 1      | 1                     | 0      |
| 9882   | 1                             | 1      | 0                     |        |
| 9884   | 0                             |        | 0                     |        |
| 9885   | 1                             | 0      | 0                     |        |
| 9888   | 0                             |        | 0                     |        |
| 9889   | 1                             | 0      | 0                     |        |
| 9894   | 2                             | 2      | 2                     | 2      |
| 9895   | 0                             |        | 0                     |        |
| 9896   | 5                             | 4      | 5                     | 4      |
| 9897   | 0                             |        | 1                     | 1      |
| 9905   | 0                             |        | 0                     |        |
| 9907   | 0                             |        | 0                     |        |
| 9908   | 0                             |        | 0                     |        |
| 9909   | 1                             | 2      | 0                     |        |
| 9910   | 0                             |        | 0                     |        |
| 9913   | 2                             | 2      | 2                     | 2      |
| 9914   | 3                             | 2      | 2                     | 2      |
| 9915   | 1                             | 0      | 1                     | 1      |
| 9916   | 0                             |        | 0                     |        |
| 9918   | 0                             |        | 0                     |        |
| 9919   | 0                             |        | 0                     |        |
| 9922   | 0                             |        | 1                     | 2      |
| 9930   | 0                             |        | 0                     |        |

| respid | ICS Splitting/spraying: Q26_1 | Q26a_1 | ICS: Hesitancy: Q27_1 | Q27a_1 |
|--------|-------------------------------|--------|-----------------------|--------|
| 9934   | 0                             |        | 0                     |        |
| 9936   | 1                             | 1      | 1                     | 1      |
| 9938   | 0                             |        | 0                     |        |
| 9940   | 0                             |        | 0                     |        |
| 9944   | 0                             |        | 0                     |        |
| 9945   | 0                             |        | 0                     |        |
| 9948   | 2                             | 3      | 0                     |        |
| 9949   | 1                             | 1      | 2                     | 2      |
| 9951   | 1                             | 0      | 1                     | 1      |
| 9952   | 1                             | 1      | 1                     | 1      |
| 9954   | 0                             |        | 0                     |        |
| 9955   | 0                             |        | 0                     |        |
| 9956   | 2                             | 2      | 4                     | 2      |
| 9957   | 0                             |        | 0                     |        |
| 9958   | 0                             |        | 0                     |        |
| 9959   | 0                             |        | 1                     | 1      |
| 9960   | 1                             | 1      | 1                     | 1      |
| 9961   | 2                             | 2      | 0                     |        |
| 9962   | 0                             |        | 0                     |        |
| 9969   | 1                             | 1      | 4                     | 2      |
| 9982   | 1                             | 1      | 1                     | 1      |
| 9984   | 2                             | 0      | 4                     | 1      |
| 9990   | 0                             |        | 1                     | 1      |
| 9992   | 2                             | 1      | 2                     | 2      |
| 9993   | 1                             | 1      | 1                     | 2      |
| 9997   | 0                             |        | 0                     |        |
| 9999   | 0                             |        | 0                     |        |
| 10000  | 1                             | 1      | 1                     | 3      |
| 10005  | 1                             | 1      | 1                     | 2      |
| 10014  | 0                             |        | 0                     |        |
| 10016  | 1                             | 1      | 0                     |        |
| 10017  | 2                             | 1      | 2                     | 1      |

| respid | ICS Splitting/spraying: Q26_1 | Q26a_1 | ICS: Hesitancy: Q27_1 | Q27a_1 |
|--------|-------------------------------|--------|-----------------------|--------|
| 10018  | 0                             |        | 1                     | 1      |
| 10021  | 1                             | 1      | 1                     | 1      |
| 10025  | 0                             |        | 0                     |        |
| 10027  | 0                             |        | 0                     |        |
| 10028  | 0                             |        | 0                     |        |
| 10031  | 1                             | 0      | 3                     | 2      |
| 10036  | 0                             |        | 0                     |        |
| 10037  | 0                             |        | 0                     |        |
| 10038  | 0                             |        | 0                     |        |
| 10039  | 0                             |        | 0                     |        |
| 10041  | 0                             |        | 0                     |        |
| 10045  | 2                             | 1      | 2                     | 1      |
| 10046  | 4                             | 3      | 2                     | 2      |
| 10047  | 0                             |        | 0                     |        |
| 10048  | 1                             | 0      | 0                     |        |
| 10049  | 1                             | 0      | 1                     | 0      |
| 10051  | 1                             | 1      | 0                     |        |
| 10052  | 4                             | 2      | 3                     | 2      |
| 10056  | 0                             |        | 0                     |        |
| 10061  | 0                             |        | 4                     | 1      |
| 10064  | 0                             |        | 0                     |        |
| 10066  | 0                             |        | 0                     |        |
| 10069  | 0                             |        | 0                     |        |
| 10071  | 0                             |        | 0                     |        |
| 10074  | 0                             |        | 0                     |        |
| 10079  | 5                             | 0      | 0                     |        |
| 10087  | 2                             | 3      | 1                     | 3      |
| 10095  | 0                             |        | 5                     | 1      |
| 10097  | 0                             |        | 0                     |        |
| 10100  | 2                             | 1      | 1                     | 0      |
| 10105  | 0                             |        | 0                     |        |
| 10107  | 4                             | 2      | 3                     | 2      |

| respid | ICS Splitting/spraying: Q26_1 | Q26a_1 | ICS: Hesitancy: Q27_1 | Q27a_1 |
|--------|-------------------------------|--------|-----------------------|--------|
| 10111  | 0                             |        | 0                     |        |
| 10116  | 0                             |        | 0                     |        |
| 10118  | 0                             |        | 0                     |        |
| 10123  | 0                             |        | 0                     |        |
| 10124  | 0                             |        | 0                     |        |
| 10130  | 1                             | 1      | 0                     |        |
| 10134  | 1                             | 0      | 1                     | 1      |
| 10135  | 1                             | 0      | 0                     |        |
| 10136  | 0                             |        | 0                     |        |
| 10141  | 2                             | 1      | 2                     | 1      |
| 10142  | 0                             |        | 0                     |        |
| 10143  | 1                             | 0      | 0                     |        |
| 10145  | 1                             | 0      | 1                     | 0      |
| 10149  | 1                             | 1      | 1                     | 1      |
| 10150  | 0                             |        | 1                     | 1      |
| 10151  | 0                             |        | 0                     |        |
| 10152  | 0                             |        | 4                     | 3      |
| 10153  | 1                             | 0      | 1                     | 0      |
| 10156  | 0                             |        | 0                     |        |
| 10160  | 0                             |        | 0                     |        |
| 10161  | 2                             | 1      | 0                     |        |
| 10167  | 0                             |        | 1                     | 1      |
| 10171  | 0                             |        | 0                     |        |
| 10172  | 0                             |        | 0                     |        |
| 10176  | 1                             | 0      | 1                     | 1      |
| 10177  | 0                             |        | 0                     |        |
| 10182  | 1                             | 1      | 1                     | 1      |
| 10184  | 3                             | 0      | 0                     |        |
| 10186  | 0                             |        | 0                     |        |
| 10189  | 0                             |        | 1                     | 0      |
| 10191  | 0                             |        | 0                     |        |
| 10192  | 0                             |        | 0                     |        |

| respid | ICS Splitting/spraying: Q26_1 | Q26a_1 | ICS: Hesitancy: Q27_1 | Q27a_1 |
|--------|-------------------------------|--------|-----------------------|--------|
| 10195  | 0                             |        | 0                     |        |
| 10199  | 0                             |        | 0                     |        |
| 10201  | 2                             | 2      | 0                     |        |
| 10213  | 0                             |        | 0                     |        |
| 10222  | 3                             | 2      | 0                     |        |
| 10224  | 0                             |        | 0                     |        |
| 10245  | 0                             |        | 0                     |        |
| 10254  | 0                             |        | 1                     | 0      |
| 10255  | 3                             | 4      | 4                     | 4      |
| 10257  | 1                             | 0      | 0                     |        |
| 10260  | 1                             | 2      | 1                     | 1      |
| 10261  | 0                             |        | 1                     | 1      |
| 10263  | 4                             | 3      | 4                     | 4      |
| 10264  | 0                             |        | 0                     |        |
| 10268  | 2                             | 1      | 2                     | 1      |
| 10269  | 1                             | 1      | 1                     | 1      |
| 10270  | 0                             |        | 0                     |        |
| 10282  | 0                             |        | 0                     |        |
| 10285  | 0                             |        | 0                     |        |
| 10288  | 0                             |        | 0                     |        |
| 10291  | 0                             |        | 0                     |        |
| 10292  | 0                             |        | 0                     |        |
| 10304  | 0                             |        | 0                     |        |
| 10305  | 0                             |        | 0                     |        |
| 10310  | 1                             | 0      | 1                     | 0      |
| 10324  | 0                             |        | 0                     |        |
| 10325  | 1                             | 0      | 0                     |        |
| 10326  | 2                             | 2      | 1                     | 3      |
| 10329  | 0                             |        | 0                     |        |
| 10332  | 0                             |        | 0                     |        |
| 10337  | 1                             | 2      | 2                     | 2      |
| 10341  | 0                             |        | 0                     |        |

| respid | ICS Splitting/spraying: Q26_1 | Q26a_1 | ICS: Hesitancy: Q27_1 | Q27a_1 |
|--------|-------------------------------|--------|-----------------------|--------|
| 10353  | 1                             | 1      | 0                     |        |
| 10354  | 0                             |        | 0                     |        |
| 10359  | 1                             | 1      | 1                     | 1      |
| 10360  | 0                             |        | 0                     |        |
| 10362  | 0                             |        | 0                     |        |
| 10364  | 0                             |        | 0                     |        |
| 10366  | 2                             | 2      | 3                     | 2      |
| 10367  | 0                             |        | 0                     |        |
| 10371  | 1                             | 0      | 0                     |        |
| 10374  | 2                             | 1      | 0                     |        |
| 10375  | 0                             |        | 0                     |        |
| 10376  | 0                             |        | 0                     |        |
| 10377  | 2                             | 0      | 0                     |        |
| 10378  | 1                             | 1      | 1                     | 1      |
| 10387  | 0                             |        | 0                     |        |
| 10396  | 3                             | 4      | 2                     | 2      |
| 10397  | 0                             |        | 0                     |        |
| 10399  | 3                             | 3      | 3                     | 3      |
| 10405  | 0                             |        | 0                     |        |
| 10406  | 1                             | 0      | 0                     |        |
| 10408  | 0                             |        | 0                     |        |
| 10409  | 0                             |        | 0                     |        |
| 10412  | 0                             |        | 0                     |        |
| 10413  | 0                             |        | 0                     |        |
| 10419  | 2                             | 2      | 1                     | 1      |
| 10423  | 3                             | 3      | 1                     | 1      |
| 10426  | 0                             |        | 1                     | 0      |
| 10446  | 2                             | 1      | 1                     | 1      |
| 10448  | 1                             | 1      | 0                     |        |
| 10450  | 0                             |        | 0                     |        |
| 10455  | 1                             | 1      | 0                     |        |
| 10460  | 0                             |        | 0                     |        |

| respid | ICS Splitting/spraying: Q26_1 | Q26a_1 | ICS: Hesitancy: Q27_1 | Q27a_1 |
|--------|-------------------------------|--------|-----------------------|--------|
| 10461  | 1                             | 1      | 2                     | 2      |
| 10471  | 0                             |        | 0                     |        |
| 10472  | 0                             |        | 0                     |        |
| 10491  | 2                             | 2      | 3                     | 3      |
| 10493  | 1                             | 2      | 1                     | 2      |
| 10498  | 2                             | 1      | 0                     |        |
| 10533  | 0                             |        | 0                     |        |
| 10539  | 0                             |        | 0                     |        |
| 10540  | 0                             |        | 1                     | 0      |
| 10557  | 2                             | 2      | 0                     |        |
| 10558  | 2                             | 2      | 2                     | 2      |
| 10559  | 1                             | 2      | 1                     | 1      |
| 10564  | 0                             |        | 0                     |        |
| 10570  | 0                             |        | 0                     |        |
| 10572  | 0                             |        | 0                     |        |
| 10576  | 1                             | 1      | 1                     | 1      |
| 10582  | 1                             | 0      | 2                     | 1      |
| 10593  | 0                             |        | 0                     |        |
| 10596  | 0                             |        | 0                     |        |
| 10615  | 0                             |        | 0                     |        |
| 10616  | 0                             |        | 0                     |        |
| 10623  | 1                             | 2      | 1                     | 1      |
| 10626  | 0                             |        | 3                     | 1      |
| 10627  | 2                             | 2      | 2                     | 2      |
| 10629  | 0                             |        | 1                     | 2      |
| 10632  | 2                             | 2      | 2                     | 2      |
| 10641  | 0                             |        | 0                     |        |
| 10648  | 2                             | 1      | 0                     |        |
| 10651  | 0                             |        | 0                     |        |
| 10654  | 0                             |        | 0                     |        |
| 10673  | 0                             |        | 0                     |        |
| 10675  | 5                             | 2      | 1                     | 2      |

| respid | ICS Splitting/spraying: Q26_1 | Q26a_1 | ICS: Hesitancy: Q27_1 | Q27a_1 |
|--------|-------------------------------|--------|-----------------------|--------|
| 10689  | 3                             | 4      | 4                     | 3      |
| 10692  | 0                             |        | 0                     |        |
| 10694  | 0                             |        | 0                     |        |
| 10695  | 1                             | 1      | 1                     | 1      |
| 10702  | 2                             | 1      | 1                     | 1      |
| 10703  | 1                             | 1      | 1                     | 1      |
| 10708  | 1                             | 0      | 0                     |        |
| 10719  | 0                             |        | 0                     |        |
| 10722  | 0                             |        | 0                     |        |
| 10723  | 0                             |        | 1                     | 0      |
| 10726  | 2                             | 1      | 3                     | 1      |
| 10727  | 0                             |        | 0                     |        |
| 10730  | 2                             | 1      | 1                     | 1      |
| 10731  | 0                             |        | 0                     |        |
| 10737  | 2                             | 0      | 1                     | 0      |
| 10743  | 0                             |        | 0                     |        |
| 10763  | 0                             |        | 0                     |        |
| 10777  | 0                             |        | 0                     |        |
| 10787  | 4                             | 2      | 1                     | 1      |
| 10798  | 3                             | 3      | 3                     | 3      |
| 10800  | 0                             |        | 0                     |        |
| 10802  | 2                             | 2      | 2                     | 2      |
| 10803  | 2                             | 2      | 3                     | 2      |
| 10808  | 0                             |        | 0                     |        |
| 10810  | 1                             | 1      | 0                     |        |
| 10819  | 5                             | 1      | 0                     |        |
| 10825  | 0                             |        | 0                     |        |
| 10827  | 1                             | 0      | 1                     | 1      |
| 10830  | 0                             |        | 0                     |        |
| 10847  | 0                             |        | 0                     |        |
| 10849  | 5                             | 2      | 1                     | 1      |
| 10852  | 0                             |        | 0                     |        |



| respid | ICS Splitting/spraying: Q26_1 | Q26a_1 | ICS: Hesitancy: Q27_1 | Q27a_1 |
|--------|-------------------------------|--------|-----------------------|--------|
| 10854  | 3                             | 3      | 3                     | 3      |
| 10857  | 0                             |        | 0                     |        |
| 10861  | 0                             |        | 2                     | 1      |
| 10862  | 0                             |        | 0                     |        |
| 10870  | 1                             | 1      | 0                     |        |
| 10873  | 4                             | 2      | 1                     | 0      |
| 10881  | 0                             |        | 0                     |        |
| 10893  | 0                             |        | 0                     |        |
| 10898  | 1                             | 1      | 0                     |        |
| 10899  | 0                             |        | 2                     | 0      |
| 10905  | 1                             | 0      | 0                     |        |
| 10910  | 0                             |        | 0                     |        |
| 10911  | 1                             | 1      | 0                     |        |
| 10912  | 0                             |        | 0                     |        |
| 10913  | 0                             |        | 0                     |        |
| 10918  | 0                             |        | 0                     |        |
| 10995  | 0                             |        | 0                     |        |
| 11002  | 1                             | 0      | 0                     |        |
| 11003  | 0                             |        | 1                     | 0      |
| 11005  | 1                             | 1      | 2                     | 1      |
| 11015  | 0                             |        | 0                     |        |
| 11016  | 2                             | 4      | 2                     | 2      |
| 11017  | 0                             |        | 0                     |        |
| 11020  | 1                             | 1      | 1                     | 1      |
| 11024  | 0                             |        | 0                     |        |
| 11026  | 2                             | 1      | 0                     |        |
| 11028  | 2                             | 2      | 3                     | 2      |
| 11029  | 2                             | 2      | 3                     | 3      |
| 11030  | 0                             |        | 0                     |        |
| 11031  | 0                             |        | 0                     |        |
| 11038  | 0                             |        | 0                     |        |
| 11051  | 0                             |        | 0                     |        |

| respid | ICS Splitting/spraying: Q26_1 | Q26a_1 | ICS: Hesitancy: Q27_1 | Q27a_1 |
|--------|-------------------------------|--------|-----------------------|--------|
| 11052  | 2                             | 2      | 2                     | 3      |
| 11053  | 0                             |        | 0                     |        |
| 11054  | 2                             | 2      | 3                     | 2      |
| 11063  | 0                             |        | 0                     |        |
| 11075  | 2                             | 1      | 2                     | 1      |
| 11083  | 0                             |        | 0                     |        |
| 11092  | 0                             |        | 0                     |        |
| 11118  | 0                             |        | 0                     |        |
| 11119  | 5                             | 1      | 1                     | 1      |
| 11134  | 1                             | 0      | 0                     |        |
| 11139  | 0                             |        | 0                     |        |
| 11154  | 0                             |        | 0                     |        |
| 11166  | 2                             | 1      | 0                     |        |
| 11168  | 0                             |        | 0                     |        |
| 11176  | 2                             | 2      | 1                     | 1      |
| 11183  | 3                             | 2      | 4                     | 3      |
| 11189  | 0                             |        | 0                     |        |
| 11196  | 3                             | 3      | 2                     | 2      |
| 11200  | 0                             |        | 0                     |        |
| 11201  | 0                             |        | 0                     |        |
| 11211  | 3                             | 3      | 3                     | 3      |
| 11218  | 0                             |        | 0                     |        |
| 11219  | 0                             |        | 0                     |        |
| 11221  | 0                             |        | 0                     |        |
| 11222  | 0                             |        | 0                     |        |
| 11230  | 3                             | 2      | 4                     | 3      |
| 11236  | 3                             | 2      | 4                     | 3      |
| 11237  | 3                             | 2      | 3                     | 1      |
| 11240  | 3                             | 2      | 3                     | 2      |
| 11244  | 3                             | 2      | 4                     | 2      |
| 11249  | 1                             | 1      | 1                     | 1      |
| 11252  | 3                             | 3      | 4                     | 2      |

| respid | ICS Splitting/spraying: Q26_1 | Q26a_1 | ICS: Hesitancy: Q27_1 | Q27a_1 |
|--------|-------------------------------|--------|-----------------------|--------|
| 11254  | 2                             | 1      | 1                     | 1      |
| 11255  | 0                             |        | 0                     |        |
| 11258  | 3                             | 2      | 3                     | 3      |
| 11260  | 1                             | 1      | 0                     |        |
| 11264  | 3                             | 2      | 2                     | 2      |
| 11266  | 0                             |        | 1                     | 2      |
| 11268  | 1                             | 2      | 2                     | 2      |
| 11269  | 0                             |        | 0                     |        |
| 11272  | 2                             | 2      | 0                     |        |
| 11273  | 0                             |        | 0                     |        |
| 11275  | 1                             | 0      | 0                     |        |
| 11276  | 1                             | 1      | 0                     |        |
| 11278  | 2                             | 1      | 2                     | 1      |
| 11288  | 0                             |        | 0                     |        |
| 11289  | 0                             |        | 0                     |        |
| 11291  | 0                             |        | 0                     |        |
| 11295  | 0                             |        | 0                     |        |
| 11297  | 0                             |        | 0                     |        |
| 11304  | 1                             | 2      | 2                     | 3      |
| 11305  | 0                             |        | 0                     |        |
| 11311  | 0                             |        | 0                     |        |
| 11313  | 0                             |        | 0                     |        |
| 11315  | 3                             | 4      | 3                     | 4      |
| 11316  | 3                             | 4      | 3                     | 4      |
| 11318  | 3                             | 3      | 3                     | 4      |
| 11323  | 0                             |        | 0                     |        |
| 11331  | 0                             |        | 0                     |        |
| 11333  | 1                             | 1      | 1                     | 1      |
| 11334  | 1                             | 2      | 0                     |        |
| 11340  | 0                             |        | 0                     |        |
| 11345  | 0                             |        | 0                     |        |
| 11354  | 1                             | 0      | 0                     |        |

| respid | ICS Splitting/spraying: Q26_1 | Q26a_1 | ICS: Hesitancy: Q27_1 | Q27a_1 |
|--------|-------------------------------|--------|-----------------------|--------|
| 11360  | 0                             |        | 0                     |        |
| 11361  | 2                             | 2      | 2                     | 2      |
| 11367  | 0                             |        | 0                     |        |
| 11370  | 0                             |        | 0                     |        |
| 11371  | 3                             | 2      | 2                     | 1      |
| 11372  | 3                             | 3      | 2                     | 1      |
| 11373  | 3                             | 2      | 0                     |        |
| 11382  | 0                             |        | 0                     |        |
| 11394  | 0                             |        | 0                     |        |
| 11395  | 0                             |        | 1                     | 1      |
| 11397  | 0                             |        | 0                     |        |
| 11402  | 5                             | 2      | 3                     | 2      |
| 11409  | 0                             |        | 0                     |        |
| 11410  | 0                             |        | 0                     |        |
| 11411  | 0                             |        | 0                     |        |
| 11418  | 1                             | 0      | 0                     |        |
| 11425  | 0                             |        | 0                     |        |
| 11429  | 0                             |        | 0                     |        |
| 11430  | 3                             | 2      | 3                     | 2      |
| 11431  | 3                             | 1      | 1                     | 1      |
| 11432  | 0                             |        | 0                     |        |
| 11433  | 2                             | 2      | 2                     | 2      |
| 11435  | 0                             |        | 2                     | 1      |
| 11436  | 0                             |        | 0                     |        |
| 11437  | 3                             | 3      | 2                     | 2      |
| 11439  | 0                             |        | 0                     |        |
| 11440  | 0                             |        | 0                     |        |
| 11447  | 0                             |        | 0                     |        |
| 11455  | 0                             |        | 0                     |        |
| 11456  | 0                             |        | 0                     |        |
| 11461  | 1                             | 1      | 1                     | 1      |
| 11463  | 1                             | 2      | 1                     | 3      |

| respid | ICS Splitting/spraying: Q26_1 | Q26a_1 | ICS: Hesitancy: Q27_1 | Q27a_1 |
|--------|-------------------------------|--------|-----------------------|--------|
| 11470  | 2                             | 3      | 2                     | 1      |
| 11472  | 0                             |        | 0                     |        |
| 11475  | 0                             |        | 0                     |        |
| 11476  | 0                             |        | 0                     |        |
| 11482  | 0                             |        | 0                     |        |
| 11501  | 1                             | 1      | 0                     |        |
| 11503  | 0                             |        | 0                     |        |
| 11505  | 1                             | 0      | 0                     |        |
| 11510  | 1                             | 0      | 0                     |        |
| 11519  | 0                             |        | 0                     |        |
| 11527  | 3                             | 3      | 3                     | 3      |
| 11529  | 2                             | 2      | 2                     | 2      |
| 11530  | 1                             | 1      | 1                     | 1      |
| 11536  | 5                             | 4      | 5                     | 4      |
| 11543  | 0                             |        | 0                     |        |
| 11548  | 2                             | 3      | 0                     |        |
| 11566  | 3                             | 1      | 0                     |        |
| 11570  | 0                             |        | 0                     |        |
| 11571  | 1                             | 2      | 1                     | 2      |
| 11578  | 0                             |        | 0                     |        |
| 11579  | 0                             |        | 0                     |        |
| 11581  | 2                             | 4      | 0                     |        |
| 11582  | 0                             |        | 1                     | 0      |
| 11583  | 0                             |        | 0                     |        |
| 11589  | 2                             | 1      | 2                     | 1      |
| 11590  | 0                             |        | 0                     |        |
| 11592  | 1                             | 0      | 0                     |        |
| 11596  | 0                             |        | 0                     |        |
| 11598  | 0                             |        | 1                     | 1      |
| 11602  | 1                             | 2      | 0                     |        |
| 11605  | 0                             |        | 1                     | 1      |
| 11618  | 2                             | 3      | 2                     | 2      |

| respid | ICS Splitting/spraying: Q26_1 | Q26a_1 | ICS: Hesitancy: Q27_1 | Q27a_1 |
|--------|-------------------------------|--------|-----------------------|--------|
| 11621  | 5                             | 4      | 1                     | 1      |
| 11630  | 0                             |        | 0                     |        |
| 11636  | 0                             |        | 0                     |        |
| 11640  | 2                             | 2      | 4                     | 3      |
| 11658  | 0                             |        | 0                     |        |
| 11665  | 1                             | 1      | 0                     |        |
| 11666  | 5                             | 4      | 1                     | 2      |
| 11667  | 3                             | 4      | 5                     | 4      |
| 11674  | 0                             |        | 0                     |        |
| 11680  | 0                             |        | 0                     |        |
| 11683  | 0                             |        | 1                     | 1      |
| 11688  | 2                             | 2      | 3                     | 4      |
| 11690  | 0                             |        | 0                     |        |
| 11694  | 0                             |        | 0                     |        |
| 11705  | 0                             |        | 0                     |        |
| 11720  | 2                             | 2      | 2                     | 2      |
| 11724  | 0                             |        | 0                     |        |
| 11738  | 1                             | 1      | 1                     | 1      |
| 11744  | 3                             | 3      | 0                     |        |
| 11745  | 0                             |        | 0                     |        |
| 11747  | 0                             |        | 0                     |        |
| 11755  | 0                             |        | 0                     |        |
| 11756  | 2                             | 3      | 0                     |        |
| 11772  | 0                             |        | 1                     | 0      |
| 11773  | 0                             |        | 0                     |        |
| 11778  | 3                             | 2      | 0                     |        |
| 11790  | 0                             |        | 0                     |        |
| 11794  | 0                             |        | 0                     |        |
| 11795  | 0                             |        | 0                     |        |
| 11799  | 2                             | 3      | 2                     | 2      |
| 11803  | 1                             | 1      | 1                     | 1      |
| 11806  | 4                             | 3      | 4                     | 3      |

| respid | ICS Splitting/spraying: Q26_1 | Q26a_1 | ICS: Hesitancy: Q27_1 | Q27a_1 |
|--------|-------------------------------|--------|-----------------------|--------|
| 11808  | 3                             | 1      | 0                     |        |
| 11810  | 0                             |        | 0                     |        |
| 11811  | 0                             |        | 0                     |        |
| 11812  | 2                             | 2      | 2                     | 2      |
| 11813  | 2                             | 1      | 2                     | 1      |
| 11821  | 0                             |        | 0                     |        |
| 11827  | 0                             |        | 0                     |        |
| 11831  | 3                             | 3      | 3                     | 4      |
| 11841  | 0                             |        | 0                     |        |
| 11872  | 0                             |        | 1                     | 2      |
| 11898  | 0                             |        | 0                     |        |
| 11902  | 2                             | 1      | 4                     | 3      |
| 11912  | 0                             |        | 0                     |        |
| 11926  | 0                             |        | 1                     | 0      |
| 11928  | 4                             | 4      | 4                     | 3      |
| 11932  | 2                             | 0      | 0                     |        |
| 11934  | 0                             |        | 0                     |        |
| 11941  | 1                             | 2      | 0                     |        |
| 11942  | 0                             |        | 0                     |        |
| 11943  | 3                             | 3      | 0                     |        |
| 11944  | 1                             | 1      | 1                     | 2      |
| 11955  | 0                             |        | 0                     |        |
| 11958  | 4                             | 3      | 1                     | 2      |
| 11968  | 1                             | 2      | 1                     | 1      |
| 11979  | 3                             | 2      | 3                     | 2      |
| 11988  | 0                             |        | 0                     |        |
| 11999  | 0                             |        | 4                     | 2      |
| 12002  | 0                             |        | 0                     |        |
| 12004  | 0                             |        | 1                     | 0      |
| 12008  | 1                             | 1      | 1                     | 1      |
| 12013  | 0                             |        | 0                     |        |
| 12018  | 1                             | 1      | 0                     |        |

| respid | ICS Splitting/spraying: Q26_1 | Q26a_1 | ICS: Hesitancy: Q27_1 | Q27a_1 |
|--------|-------------------------------|--------|-----------------------|--------|
| 12023  | 2                             | 0      | 3                     | 1      |
| 12027  | 0                             |        | 2                     | 3      |
| 12030  | 0                             |        | 0                     |        |
| 12031  | 0                             |        | 1                     | 1      |
| 12036  | 0                             |        | 3                     | 2      |
| 12037  | 3                             | 3      | 4                     | 3      |
| 12038  | 0                             |        | 0                     |        |
| 12039  | 0                             |        | 0                     |        |
| 12045  | 0                             |        | 1                     | 1      |
| 12046  | 2                             | 1      | 2                     | 0      |
| 12054  | 1                             | 1      | 1                     | 1      |
| 12055  | 1                             | 1      | 2                     | 1      |
| 12069  | 1                             | 1      | 1                     | 1      |
| 12070  | 3                             | 1      | 4                     | 2      |
| 12074  | 0                             |        | 0                     |        |
| 12075  | 1                             | 0      | 2                     | 2      |
| 12078  | 0                             |        | 0                     |        |
| 12089  | 0                             |        | 0                     |        |
| 12091  | 3                             | 2      | 2                     | 2      |
| 12092  | 1                             | 1      | 1                     | 1      |
| 12108  | 5                             | 4      | 5                     | 4      |
| 12111  | 5                             | 3      | 4                     | 3      |
| 12112  | 2                             | 3      | 3                     | 2      |
| 12126  | 0                             |        | 0                     |        |
| 12132  | 3                             | 3      | 2                     | 4      |
| 12150  | 3                             | 2      | 2                     | 3      |
| 12152  | 1                             | 1      | 1                     | 1      |
| 12154  | 1                             | 1      | 0                     |        |
| 12157  | 2                             | 2      | 3                     | 2      |
| 12165  | 0                             |        | 0                     |        |
| 12169  | 2                             | 0      | 0                     |        |
| 12182  | 5                             | 4      | 5                     | 4      |



| respid | ICS Splitting/spraying: Q26_1 | Q26a_1 | ICS: Hesitancy: Q27_1 | Q27a_1 |
|--------|-------------------------------|--------|-----------------------|--------|
| 12198  | 0                             |        | 0                     |        |
| 12199  | 0                             |        | 0                     |        |
| 12202  | 0                             |        | 0                     |        |
| 12207  | 2                             | 2      | 0                     |        |
| 12208  | 1                             | 1      | 1                     | 1      |
| 12210  | 0                             |        | 0                     |        |
| 12219  | 4                             | 4      | 4                     | 3      |
| 12224  | 5                             | 0      | 1                     | 0      |
| 12230  | 2                             | 2      | 2                     | 2      |
| 12238  | 0                             |        | 0                     |        |
| 12239  | 0                             |        | 0                     |        |
| 12243  | 0                             |        | 0                     |        |
| 12245  | 0                             |        | 0                     |        |
| 12246  | 3                             | 2      | 4                     | 3      |
| 12247  | 0                             |        | 0                     |        |
| 12248  | 0                             |        | 0                     |        |
| 12249  | 0                             |        | 0                     |        |
| 12258  | 3                             | 2      | 3                     | 2      |
| 12265  | 3                             | 3      | 3                     | 2      |
| 12269  | 1                             | 1      | 0                     |        |
| 12270  | 0                             |        | 0                     |        |
| 12279  | 0                             |        | 0                     |        |
| 12280  | 4                             | 1      | 3                     | 3      |
| 12282  | 1                             | 0      | 0                     |        |
| 12283  | 0                             |        | 0                     |        |
| 12287  | 0                             |        | 0                     |        |
| 12288  | 0                             |        | 0                     |        |
| 12290  | 0                             |        | 0                     |        |
| 12292  | 0                             |        | 1                     | 1      |
| 12294  | 0                             |        | 0                     |        |
| 12296  | 1                             | 0      | 0                     |        |
| 12307  | 0                             |        | 0                     |        |

| respid | ICS Splitting/spraying: Q26_1 | Q26a_1 | ICS: Hesitancy: Q27_1 | Q27a_1 |
|--------|-------------------------------|--------|-----------------------|--------|
| 12309  | 5                             | 0      | 0                     |        |
| 12312  | 2                             | 1      | 1                     | 1      |
| 12317  | 0                             |        | 0                     |        |
| 12319  | 0                             |        | 0                     |        |
| 12320  | 1                             | 0      | 0                     |        |
| 12322  | 0                             |        | 0                     |        |
| 12328  | 1                             | 1      | 1                     | 1      |
| 12331  | 3                             | 3      | 3                     | 2      |
| 12332  | 0                             |        | 0                     |        |
| 12334  | 0                             |        | 0                     |        |
| 12337  | 3                             | 1      | 0                     |        |
| 12338  | 0                             |        | 0                     |        |
| 12342  | 1                             | 1      | 1                     | 1      |
| 12349  | 0                             |        | 0                     |        |
| 12352  | 3                             | 1      | 0                     |        |
| 12355  | 0                             |        | 1                     | 0      |
| 12357  | 1                             | 1      | 1                     | 3      |
| 12358  | 1                             | 1      | 0                     |        |
| 12371  | 2                             | 1      | 2                     | 1      |
| 12372  | 0                             |        | 0                     |        |
| 12373  | 1                             | 0      | 1                     | 1      |
| 12379  | 1                             | 0      | 0                     |        |
| 12381  | 2                             | 1      | 2                     | 2      |
| 12383  | 1                             | 2      | 1                     | 2      |
| 12384  | 0                             |        | 0                     |        |
| 12386  | 2                             | 0      | 2                     | 0      |
| 12389  | 0                             |        | 0                     |        |
| 12392  | 0                             |        | 0                     |        |
| 12396  | 1                             | 1      | 1                     | 1      |
| 12397  | 0                             |        | 0                     |        |
| 12399  | 4                             | 3      | 1                     | 2      |
| 12400  | 1                             | 1      | 0                     |        |

| respid | ICS Splitting/spraying: Q26_1 | Q26a_1 | ICS: Hesitancy: Q27_1 | Q27a_1 |
|--------|-------------------------------|--------|-----------------------|--------|
| 12406  | 0                             |        | 3                     | 2      |
| 12407  | 1                             | 1      | 0                     |        |
| 12410  | 0                             |        | 0                     |        |
| 12413  | 0                             |        | 0                     |        |
| 12416  | 4                             | 2      | 4                     | 2      |
| 12419  | 4                             | 3      | 0                     |        |
| 12422  | 1                             | 4      | 1                     | 4      |
| 12423  | 1                             | 1      | 1                     | 1      |
| 12429  | 0                             |        | 0                     |        |
| 12434  | 4                             | 3      | 3                     | 3      |
| 12435  | 1                             | 0      | 0                     |        |
| 12436  | 1                             | 1      | 1                     | 1      |
| 12442  | 0                             |        | 0                     |        |
| 12449  | 0                             |        | 0                     |        |
| 12451  | 0                             |        | 0                     |        |
| 12456  | 3                             | 4      | 5                     | 4      |
| 12457  | 0                             |        | 0                     |        |
| 12458  | 0                             |        | 0                     |        |
| 12461  | 1                             | 1      | 0                     |        |
| 12462  | 0                             |        | 0                     |        |
| 12463  | 3                             | 2      | 4                     | 1      |
| 12466  | 1                             | 0      | 1                     | 0      |
| 12470  | 1                             | 1      | 2                     | 1      |
| 12471  | 1                             | 0      | 0                     |        |
| 12472  | 4                             | 1      | 0                     |        |
| 12478  | 1                             | 0      | 2                     | 0      |
| 12479  | 0                             |        | 0                     |        |
| 12481  | 0                             |        | 0                     |        |
| 12482  | 3                             | 1      | 0                     |        |
| 12483  | 0                             |        | 0                     |        |
| 12496  | 0                             |        | 0                     |        |
| 12497  | 0                             |        | 0                     |        |

| respid | ICS Splitting/spraying: Q26_1 | Q26a_1 | ICS: Hesitancy: Q27_1 | Q27a_1 |
|--------|-------------------------------|--------|-----------------------|--------|
| 12498  | 1                             | 1      | 1                     | 1      |
| 12500  | 2                             | 3      | 2                     | 3      |
| 12501  | 0                             |        | 0                     |        |
| 12502  | 1                             | 1      | 1                     | 1      |
| 12503  | 1                             | 0      | 0                     |        |
| 12505  | 0                             |        | 0                     |        |
| 12508  | 2                             | 1      | 2                     | 2      |
| 12509  | 3                             | 2      | 1                     | 1      |
| 12510  | 0                             |        | 0                     |        |
| 12512  | 2                             | 2      | 3                     | 2      |
| 12514  | 2                             | 2      | 1                     | 2      |
| 12515  | 3                             | 3      | 3                     | 3      |
| 12520  | 1                             | 0      | 0                     |        |
| 12522  | 0                             |        | 0                     |        |
| 12526  | 0                             |        | 2                     | 2      |
| 12527  | 0                             |        | 0                     |        |
| 12528  | 2                             | 2      | 0                     |        |
| 12530  | 0                             |        | 0                     |        |
| 12535  | 0                             |        | 0                     |        |
| 12539  | 0                             |        | 1                     | 0      |
| 12541  | 3                             | 3      | 4                     | 2      |
| 12542  | 0                             |        | 0                     |        |
| 12545  | 1                             | 1      | 5                     | 3      |
| 12547  | 3                             | 3      | 4                     | 2      |
| 12549  | 3                             | 2      | 3                     | 3      |
| 12550  | 3                             | 2      | 0                     |        |
| 12555  | 0                             |        | 0                     |        |
| 12557  | 1                             | 1      | 0                     |        |
| 12559  | 0                             |        | 0                     |        |
| 12561  | 0                             |        | 0                     |        |
| 12562  | 3                             | 3      | 3                     | 3      |
| 12563  | 0                             |        | 0                     |        |

| respid | ICS Splitting/spraying: Q26_1 | Q26a_1 | ICS: Hesitancy: Q27_1 | Q27a_1 |
|--------|-------------------------------|--------|-----------------------|--------|
| 12565  | 0                             |        | 5                     | 2      |
| 12566  | 0                             |        | 0                     |        |
| 12570  | 0                             |        | 0                     |        |
| 12571  | 2                             | 2      | 0                     |        |
| 12572  | 3                             | 3      | 3                     | 3      |
| 12578  | 0                             |        | 0                     |        |
| 12579  | 1                             | 0      | 1                     | 1      |
| 12581  | 0                             |        | 2                     | 1      |
| 12582  | 1                             | 2      | 1                     | 2      |
| 12585  | 0                             |        | 0                     |        |
| 12586  | 0                             |        | 1                     | 1      |
| 12588  | 1                             | 1      | 1                     | 1      |
| 12589  | 1                             | 0      | 1                     | 1      |
| 12590  | 0                             |        | 0                     |        |
| 12591  | 2                             | 2      | 2                     | 2      |
| 12593  | 3                             | 2      | 3                     | 3      |
| 12594  | 0                             |        | 0                     |        |
| 12599  | 0                             |        | 0                     |        |
| 12600  | 0                             |        | 0                     |        |
| 12602  | 4                             | 3      | 3                     | 2      |
| 12606  | 2                             | 2      | 2                     | 2      |
| 12607  | 0                             |        | 0                     |        |
| 12608  | 0                             |        | 0                     |        |
| 12610  | 1                             | 3      | 2                     | 3      |
| 12611  | 0                             |        | 0                     |        |
| 12613  | 1                             | 1      | 1                     | 0      |
| 12616  | 0                             |        | 0                     |        |
| 12617  | 0                             |        | 0                     |        |
| 12619  | 0                             |        | 0                     |        |
| 12622  | 0                             |        | 0                     |        |
| 12628  | 0                             |        | 0                     |        |
| 12631  | 0                             |        | 1                     | 1      |

| respid | ICS Splitting/spraying: Q26_1 | Q26a_1 | ICS: Hesitancy: Q27_1 | Q27a_1 |
|--------|-------------------------------|--------|-----------------------|--------|
| 12635  | 2                             | 3      | 2                     | 3      |
| 12638  | 0                             |        | 0                     |        |
| 12639  | 0                             |        | 0                     |        |
| 12640  | 0                             |        | 0                     |        |
| 12643  | 0                             |        | 0                     |        |
| 12646  | 4                             | 3      | 2                     | 2      |
| 12648  | 0                             |        | 0                     |        |
| 12650  | 2                             | 2      | 2                     | 2      |
| 12651  | 1                             | 1      | 0                     |        |
| 12658  | 2                             | 2      | 2                     | 2      |
| 12662  | 1                             | 1      | 1                     | 1      |
| 12663  | 2                             | 2      | 3                     | 2      |
| 12664  | 1                             | 1      | 0                     |        |
| 12669  | 3                             | 2      | 2                     | 1      |
| 12670  | 0                             |        | 0                     |        |
| 12673  | 0                             |        | 0                     |        |
| 12675  | 1                             | 0      | 0                     |        |
| 12677  | 0                             |        | 0                     |        |
| 12679  | 0                             |        | 0                     |        |
| 12682  | 2                             | 2      | 2                     | 2      |
| 12696  | 1                             | 1      | 1                     | 1      |
| 12697  | 0                             |        | 0                     |        |
| 12699  | 0                             |        | 0                     |        |
| 12700  | 0                             |        | 0                     |        |
| 12701  | 4                             | 3      | 3                     | 3      |
| 12702  | 0                             |        | 0                     |        |
| 12704  | 3                             | 3      | 4                     | 3      |
| 12705  | 0                             |        | 0                     |        |
| 12709  | 0                             |        | 0                     |        |
| 12710  | 0                             |        | 0                     |        |
| 12713  | 0                             |        | 0                     |        |
| 12716  | 4                             | 2      | 3                     | 1      |

| respid | ICS Splitting/spraying: Q26_1 | Q26a_1 | ICS: Hesitancy: Q27_1 | Q27a_1 |
|--------|-------------------------------|--------|-----------------------|--------|
| 12719  | 1                             | 1      | 1                     | 1      |
| 12720  | 0                             |        | 0                     |        |
| 12723  | 0                             |        | 0                     |        |
| 12726  | 0                             |        | 0                     |        |
| 12728  | 2                             | 2      | 3                     | 2      |
| 12729  | 0                             |        | 0                     |        |
| 12731  | 0                             |        | 0                     |        |
| 12732  | 2                             | 2      | 2                     | 2      |
| 12733  | 0                             |        | 1                     | 1      |
| 12736  | 0                             |        | 0                     |        |
| 12737  | 0                             |        | 0                     |        |
| 12739  | 3                             | 3      | 3                     | 3      |
| 12742  | 0                             |        | 0                     |        |
| 12743  | 4                             | 3      | 4                     | 4      |
| 12744  | 0                             |        | 0                     |        |
| 12747  | 3                             | 2      | 3                     | 3      |
| 12751  | 0                             |        | 0                     |        |
| 12754  | 0                             |        | 0                     |        |
| 12756  | 3                             | 3      | 3                     | 3      |
| 12757  | 0                             |        | 0                     |        |
| 12760  | 1                             | 1      | 1                     | 1      |
| 12761  | 0                             |        | 0                     |        |
| 12762  | 3                             | 2      | 2                     | 2      |
| 12766  | 0                             |        | 0                     |        |
| 12769  | 1                             | 1      | 1                     | 1      |
| 12770  | 3                             | 2      | 3                     | 2      |
| 12773  | 3                             | 4      | 3                     | 4      |
| 12780  | 2                             | 1      | 2                     | 1      |
| 12789  | 0                             |        | 0                     |        |
| 12792  | 1                             | 1      | 0                     |        |
| 12795  | 1                             | 1      | 1                     | 1      |
| 12804  | 2                             | 2      | 0                     |        |

| respid | ICS Splitting/spraying: Q26_1 | Q26a_1 | ICS: Hesitancy: Q27_1 | Q27a_1 |
|--------|-------------------------------|--------|-----------------------|--------|
| 12811  | 0                             |        | 0                     |        |
| 12813  | 1                             | 1      | 1                     | 1      |
| 12814  | 0                             |        | 0                     |        |
| 12815  | 1                             | 2      | 0                     |        |
| 12816  | 1                             | 1      | 1                     | 1      |
| 12817  | 2                             | 0      | 0                     |        |
| 12818  | 0                             |        | 0                     |        |
| 12819  | 0                             |        | 0                     |        |
| 12820  | 0                             |        | 0                     |        |
| 12821  | 0                             |        | 1                     | 0      |
| 12824  | 1                             | 1      | 1                     | 1      |
| 12827  | 1                             | 1      | 1                     | 1      |
| 12836  | 3                             | 2      | 3                     | 2      |
| 12837  | 1                             | 1      | 0                     |        |
| 12838  | 0                             |        | 1                     | 1      |
| 12845  | 1                             | 0      | 1                     | 0      |
| 12847  | 1                             | 2      | 0                     |        |
| 12849  | 4                             | 3      | 3                     | 4      |
| 12850  | 1                             | 1      | 1                     | 1      |
| 12852  | 0                             |        | 0                     |        |
| 12853  | 4                             | 3      | 3                     | 4      |
| 12854  | 0                             |        | 0                     |        |
| 12860  | 0                             |        | 0                     |        |
| 12861  | 1                             | 0      | 1                     | 0      |
| 12863  | 0                             |        | 0                     |        |
| 12865  | 0                             |        | 0                     |        |
| 12870  | 1                             | 1      | 1                     | 1      |
| 12871  | 2                             | 2      | 0                     |        |
| 12873  | 1                             | 1      | 1                     | 1      |
| 12877  | 0                             |        | 1                     | 1      |
| 12880  | 0                             |        | 0                     |        |
| 12881  | 0                             |        | 0                     |        |



| respid | ICS Splitting/spraying: Q26_1 | Q26a_1 | ICS: Hesitancy: Q27_1 | Q27a_1 |
|--------|-------------------------------|--------|-----------------------|--------|
| 12882  | 0                             |        | 0                     |        |
| 12883  | 0                             |        | 0                     |        |
| 12885  | 0                             |        | 0                     |        |
| 12887  | 1                             | 1      | 1                     | 2      |
| 12889  | 2                             | 0      | 0                     |        |
| 12890  | 1                             | 0      | 0                     |        |
| 12891  | 0                             |        | 1                     | 1      |
| 12892  | 0                             |        | 0                     |        |
| 12893  | 0                             |        | 0                     |        |
| 12895  | 1                             | 1      | 0                     |        |
| 12898  | 0                             |        | 0                     |        |
| 12907  | 2                             | 2      | 1                     | 2      |
| 12908  | 0                             |        | 0                     |        |
| 12909  | 0                             |        | 0                     |        |
| 12914  | 0                             |        | 0                     |        |
| 12915  | 3                             | 2      | 3                     | 3      |
| 12916  | 0                             |        | 0                     |        |
| 12921  | 0                             |        | 0                     |        |
| 12922  | 1                             | 1      | 0                     |        |
| 12923  | 0                             |        | 2                     | 2      |
| 12926  | 3                             | 1      | 1                     | 1      |
| 12927  | 0                             |        | 0                     |        |
| 12932  | 2                             | 1      | 1                     | 0      |
| 12936  | 0                             |        | 0                     |        |
| 12937  | 0                             |        | 0                     |        |
| 12938  | 2                             | 1      | 1                     | 1      |
| 12939  | 0                             |        | 0                     |        |
| 12940  | 2                             | 2      | 3                     | 3      |
| 12945  | 1                             | 1      | 1                     | 1      |
| 12946  | 0                             |        | 0                     |        |
| 12947  | 2                             | 2      | 2                     | 1      |
| 12948  | 3                             | 2      | 3                     | 2      |

| respid | ICS Splitting/spraying: Q26_1 | Q26a_1 | ICS: Hesitancy: Q27_1 | Q27a_1 |
|--------|-------------------------------|--------|-----------------------|--------|
| 12951  | 0                             |        | 1                     | 1      |
| 12952  | 0                             |        | 0                     |        |
| 12954  | 2                             | 3      | 2                     | 2      |
| 12960  | 0                             |        | 0                     |        |
| 12961  | 0                             |        | 0                     |        |
| 12962  | 0                             |        | 0                     |        |
| 12963  | 1                             | 1      | 0                     |        |
| 12964  | 0                             |        | 0                     |        |
| 12966  | 0                             |        | 1                     | 0      |
| 12967  | 0                             |        | 0                     |        |
| 12969  | 0                             |        | 0                     |        |
| 12970  | 0                             |        | 0                     |        |
| 12974  | 3                             | 2      | 3                     | 2      |
| 12979  | 0                             |        | 0                     |        |
| 12980  | 0                             |        | 3                     | 1      |
| 12983  | 0                             |        | 0                     |        |
| 12988  | 0                             |        | 0                     |        |
| 12994  | 1                             | 0      | 1                     | 0      |
| 12995  | 0                             |        | 1                     | 0      |
| 12996  | 0                             |        | 0                     |        |
| 12998  | 0                             |        | 0                     |        |
| 12999  | 0                             |        | 0                     |        |
| 13001  | 4                             | 2      | 1                     | 1      |
| 13005  | 0                             |        | 0                     |        |
| 13006  | 1                             | 3      | 3                     | 3      |
| 13007  | 1                             | 1      | 1                     | 1      |
| 13011  | 1                             | 1      | 1                     | 1      |
| 13012  | 0                             |        | 0                     |        |
| 13013  | 4                             | 3      | 3                     | 2      |
| 13016  | 0                             |        | 0                     |        |
| 13018  | 1                             | 0      | 1                     | 1      |
| 13020  | 0                             |        | 0                     |        |

| respid | ICS Splitting/spraying: Q26_1 | Q26a_1 | ICS: Hesitancy: Q27_1 | Q27a_1 |
|--------|-------------------------------|--------|-----------------------|--------|
| 13024  | 0                             |        | 0                     |        |
| 13025  | 0                             |        | 0                     |        |
| 13027  | 1                             | 0      | 0                     |        |
| 13031  | 1                             | 2      | 1                     | 2      |
| 13032  | 4                             | 2      | 2                     | 1      |
| 13034  | 1                             | 1      | 0                     |        |
| 13036  | 0                             |        | 0                     |        |
| 13037  | 0                             |        | 0                     |        |
| 13038  | 3                             | 3      | 3                     | 3      |
| 13039  | 0                             |        | 0                     |        |
| 13040  | 1                             | 1      | 0                     |        |
| 13041  | 0                             |        | 0                     |        |
| 13045  | 3                             | 3      | 3                     | 3      |
| 13046  | 0                             |        | 0                     |        |
| 13048  | 0                             |        | 0                     |        |
| 13051  | 0                             |        | 0                     |        |
| 13053  | 0                             |        | 0                     |        |
| 13055  | 3                             | 3      | 3                     | 3      |
| 13059  | 0                             |        | 1                     | 0      |
| 13068  | 0                             |        | 0                     |        |
| 13069  | 0                             |        | 0                     |        |
| 13076  | 1                             | 0      | 1                     | 1      |
| 13081  | 0                             |        | 0                     |        |
| 13082  | 1                             | 1      | 1                     | 1      |
| 13084  | 1                             | 1      | 0                     |        |
| 13085  | 3                             | 2      | 0                     |        |
| 13086  | 0                             |        | 3                     | 2      |
| 13093  | 0                             |        | 1                     | 1      |
| 13094  | 3                             | 2      | 3                     | 2      |
| 13097  | 0                             |        | 0                     |        |
| 13098  | 0                             |        | 1                     | 1      |
| 13099  | 2                             | 2      | 2                     | 2      |

| respid | ICS Splitting/spraying: Q26_1 | Q26a_1 | ICS: Hesitancy: Q27_1 | Q27a_1 |
|--------|-------------------------------|--------|-----------------------|--------|
| 13100  | 0                             |        | 0                     |        |
| 13101  | 0                             |        | 0                     |        |
| 13103  | 0                             |        | 0                     |        |
| 13105  | 0                             |        | 0                     |        |
| 13106  | 1                             | 1      | 1                     | 1      |
| 13107  | 1                             | 0      | 0                     |        |
| 13110  | 0                             |        | 1                     | 0      |
| 13118  | 0                             |        | 0                     |        |
| 13120  | 4                             | 4      | 3                     | 3      |
| 13130  | 0                             |        | 1                     | 0      |
| 13133  | 0                             |        | 0                     |        |
| 13134  | 0                             |        | 0                     |        |
| 13139  | 0                             |        | 1                     | 1      |
| 13142  | 0                             |        | 0                     |        |
| 13143  | 0                             |        | 0                     |        |
| 13145  | 1                             | 1      | 1                     | 1      |
| 13148  | 1                             | 0      | 1                     | 1      |
| 13149  | 0                             |        | 0                     |        |
| 13151  | 2                             | 2      | 5                     | 4      |
| 13153  | 0                             |        | 1                     | 1      |
| 13158  | 0                             |        | 0                     |        |
| 13160  | 1                             | 1      | 1                     | 1      |
| 13162  | 2                             | 3      | 2                     | 3      |
| 13169  | 0                             |        | 0                     |        |
| 13172  | 1                             | 1      | 0                     |        |
| 13173  | 0                             |        | 0                     |        |
| 13176  | 0                             |        | 0                     |        |
| 13179  | 1                             | 0      | 0                     |        |
| 13184  | 0                             |        | 0                     |        |
| 13185  | 0                             |        | 0                     |        |
| 13186  | 0                             |        | 0                     |        |
| 13188  | 1                             | 1      | 1                     | 1      |

| respid | ICS Splitting/spraying: Q26_1 | Q26a_1 | ICS: Hesitancy: Q27_1 | Q27a_1 |
|--------|-------------------------------|--------|-----------------------|--------|
| 13190  | 2                             |        | 2                     | 2      |
| 13192  | 0                             |        | 0                     |        |
| 13193  | 0                             |        | 0                     |        |
| 13201  | 0                             |        | 0                     |        |
| 13207  | 0                             |        | 0                     |        |
| 13208  | 0                             |        | 0                     |        |
| 13209  | 2                             | 1      | 2                     | 2      |
| 13212  | 0                             |        | 0                     |        |
| 13215  | 0                             |        | 1                     | 3      |
| 13218  | 1                             | 1      | 1                     | 1      |
| 13219  | 0                             |        | 0                     |        |
| 13224  | 0                             |        | 0                     |        |
| 13225  | 0                             |        | 0                     |        |
| 13226  | 0                             |        | 0                     |        |
| 13232  | 0                             |        | 0                     |        |
| 13237  | 0                             |        | 0                     |        |
| 13239  | 0                             |        | 0                     |        |
| 13241  | 0                             |        | 0                     |        |
| 13243  | 0                             |        | 0                     |        |
| 13247  | 2                             | 3      | 2                     | 3      |
| 13248  | 0                             |        | 0                     |        |
| 13251  | 0                             |        | 0                     |        |
| 13256  | 0                             |        | 0                     |        |
| 13260  | 3                             | 1      | 0                     |        |
| 13261  | 0                             |        | 1                     | 2      |
| 13264  | 0                             |        | 0                     |        |
| 13273  | 0                             |        | 0                     |        |
| 13274  | 0                             |        | 0                     |        |
| 13276  | 0                             |        | 0                     |        |
| 13278  | 0                             |        | 0                     |        |
| 13279  | 0                             |        | 0                     |        |
| 13282  | 0                             |        | 0                     |        |

| respid | ICS Splitting/spraying: Q26_1 | Q26a_1 | ICS: Hesitancy: Q27_1 | Q27a_1 |
|--------|-------------------------------|--------|-----------------------|--------|
| 13283  | 3                             | 2      | 0                     |        |
| 13285  | 0                             |        | 1                     | 1      |
| 13286  | 1                             | 1      | 0                     |        |
| 13299  | 0                             |        | 0                     |        |
| 13300  | 2                             | 2      | 2                     | 2      |
| 13301  | 0                             |        | 0                     |        |
| 13303  | 0                             |        | 0                     |        |
| 13304  | 0                             |        | 0                     |        |
| 13307  | 0                             |        | 0                     |        |
| 13308  | 0                             |        | 0                     |        |
| 13312  | 0                             |        | 0                     |        |
| 13313  | 1                             | 0      | 1                     | 1      |
| 13314  | 1                             | 1      | 1                     | 1      |
| 13318  | 0                             |        | 0                     |        |
| 13320  | 0                             |        | 0                     |        |
| 13322  | 1                             | 1      | 1                     | 1      |
| 13324  | 0                             |        | 0                     |        |
| 13325  | 1                             | 1      | 0                     |        |
| 13327  | 1                             | 0      | 0                     |        |
| 13330  | 0                             |        | 0                     |        |
| 13332  | 0                             |        | 0                     |        |
| 13333  | 0                             |        | 1                     | 1      |
| 13334  | 0                             |        | 0                     |        |
| 13351  | 1                             | 3      | 2                     | 2      |
| 13353  | 0                             |        | 0                     |        |
| 13354  | 0                             |        | 0                     |        |
| 13355  | 0                             |        | 0                     |        |
| 13358  | 0                             |        | 0                     |        |
| 13359  | 0                             |        | 2                     | 1      |
| 13360  | 2                             | 1      | 2                     | 1      |
| 13364  | 0                             |        | 1                     | 1      |
| 13365  | 3                             | 2      | 4                     | 3      |

| respid | ICS Splitting/spraying: Q26_1 | Q26a_1 | ICS: Hesitancy: Q27_1 | Q27a_1 |
|--------|-------------------------------|--------|-----------------------|--------|
| 13368  | 0                             |        | 0                     |        |
| 13370  | 0                             |        | 0                     |        |
| 13375  | 1                             | 0      | 0                     |        |
| 13384  | 0                             |        | 0                     |        |
| 13387  | 1                             | 0      | 0                     |        |
| 13395  | 1                             | 0      | 0                     |        |
| 13398  | 0                             |        | 1                     | 1      |
| 13404  | 1                             | 2      | 1                     | 2      |
| 13405  | 0                             |        | 1                     | 1      |
| 13408  | 0                             |        | 0                     |        |
| 13411  | 0                             |        | 0                     |        |
| 13413  | 0                             |        | 0                     |        |
| 13419  | 1                             | 0      | 0                     |        |
| 13420  | 0                             |        | 0                     |        |
| 13427  | 2                             | 2      | 2                     | 2      |
| 13441  | 3                             | 2      | 1                     | 1      |
| 13444  | 0                             |        | 1                     | 1      |
| 13456  | 0                             |        | 0                     |        |
| 13466  | 0                             |        | 1                     | 0      |
| 13468  | 1                             | 0      | 0                     |        |
| 13475  | 0                             |        | 0                     |        |
| 13484  | 1                             | 0      | 0                     |        |
| 13486  | 0                             |        | 0                     |        |
| 13487  | 1                             | 1      | 1                     | 1      |
| 13491  | 0                             |        | 0                     |        |
| 13496  | 0                             |        | 0                     |        |
| 13497  | 0                             |        | 1                     | 1      |
| 13498  | 0                             |        | 0                     |        |
| 13502  | 0                             |        | 0                     |        |
| 13503  | 4                             | 2      | 3                     | 2      |
| 13505  | 0                             |        | 0                     |        |
| 13509  | 0                             |        | 0                     |        |

| respid | ICS Splitting/spraying: Q26_1 | Q26a_1 | ICS: Hesitancy: Q27_1 | Q27a_1 |
|--------|-------------------------------|--------|-----------------------|--------|
| 13510  | 1                             | 1      | 1                     | 1      |
| 13518  | 2                             | 1      | 2                     | 1      |
| 13521  | 0                             |        | 0                     |        |
| 13523  | 0                             |        | 1                     | 2      |
| 13528  | 0                             |        | 0                     |        |
| 13531  | 1                             | 1      | 0                     |        |
| 13532  | 0                             |        | 0                     |        |
| 13533  | 1                             | 0      | 0                     |        |
| 13534  | 0                             |        | 0                     |        |
| 13535  | 0                             |        | 0                     |        |
| 13538  | 2                             | 2      | 2                     | 2      |
| 13540  | 1                             | 0      | 1                     | 0      |
| 13541  | 2                             | 2      | 2                     | 2      |
| 13542  | 0                             |        | 0                     |        |
| 13550  | 0                             |        | 0                     |        |
| 13553  | 0                             |        | 0                     |        |
| 13554  | 0                             |        | 0                     |        |
| 13555  | 2                             | 2      | 2                     | 3      |
| 13556  | 1                             | 1      | 0                     |        |
| 13563  | 1                             | 0      | 0                     |        |
| 13564  | 1                             | 1      | 1                     | 1      |
| 13567  | 0                             |        | 0                     |        |
| 13568  | 2                             | 3      | 2                     | 2      |
| 13570  | 0                             |        | 0                     |        |
| 13573  | 2                             | 2      | 2                     | 2      |
| 13575  | 0                             |        | 1                     | 1      |
| 13577  | 3                             | 3      | 3                     | 3      |
| 13580  | 3                             | 3      | 4                     | 3      |
| 13582  | 0                             |        | 0                     |        |
| 13584  | 3                             | 3      | 2                     | 3      |
| 13585  | 0                             |        | 0                     |        |
| 13586  | 0                             |        | 0                     |        |



| respid | ICS Splitting/spraying: Q26_1 | Q26a_1 | ICS: Hesitancy: Q27_1 | Q27a_1 |
|--------|-------------------------------|--------|-----------------------|--------|
| 13587  | 2                             | 1      | 0                     |        |
| 13592  | 3                             | 3      | 3                     | 3      |
| 13596  | 0                             |        | 0                     |        |
| 13597  | 0                             |        | 0                     |        |
| 13599  | 0                             |        | 1                     | 1      |
| 13601  | 0                             |        | 0                     |        |
| 13604  | 1                             | 1      | 0                     |        |
| 13608  | 1                             | 0      | 0                     |        |
| 13616  | 0                             |        | 0                     |        |
| 13618  | 1                             | 2      | 0                     |        |
| 13619  | 0                             |        | 0                     |        |
| 13626  | 0                             |        | 0                     |        |
| 13628  | 1                             | 1      | 1                     | 1      |
| 13640  | 0                             |        | 1                     | 1      |
| 13645  | 1                             | 1      | 1                     | 1      |
| 13648  | 0                             |        | 0                     |        |
| 13653  | 0                             |        | 0                     |        |
| 13655  | 1                             | 1      | 0                     |        |
| 13662  | 3                             | 2      | 0                     |        |
| 13670  | 2                             | 1      | 1                     | 1      |
| 13673  | 1                             | 1      | 0                     |        |
| 13674  | 0                             |        | 0                     |        |
| 13675  | 0                             |        | 0                     |        |
| 13678  | 1                             | 0      | 1                     | 2      |
| 13680  | 1                             | 1      | 1                     | 1      |
| 13681  | 0                             |        | 0                     |        |
| 13683  | 0                             |        | 0                     |        |
| 13684  | 1                             | 1      | 1                     | 1      |
| 13685  | 1                             | 0      | 0                     |        |
| 13687  | 0                             |        | 0                     |        |
| 13690  | 1                             | 1      | 1                     | 1      |
| 13700  | 4                             | 2      | 1                     | 2      |

| respid | ICS Splitting/spraying: Q26_1 | Q26a_1 | ICS: Hesitancy: Q27_1 | Q27a_1 |
|--------|-------------------------------|--------|-----------------------|--------|
| 13705  | 1                             | 1      | 1                     | 1      |
| 13710  | 1                             | 0      | 0                     |        |
| 13711  | 3                             | 3      | 0                     |        |
| 13713  | 0                             |        | 0                     |        |
| 13716  | 0                             |        | 0                     |        |
| 13721  | 1                             | 1      | 1                     | 1      |
| 13722  | 4                             | 4      | 3                     | 3      |
| 13723  | 1                             | 2      | 1                     | 3      |
| 13726  | 0                             |        | 0                     |        |
| 13728  | 1                             | 1      | 1                     | 1      |
| 13730  | 1                             | 1      | 1                     | 1      |
| 13734  | 1                             | 1      | 0                     |        |
| 13736  | 3                             | 2      | 4                     | 2      |
| 13737  | 0                             |        | 0                     |        |
| 13739  | 0                             |        | 0                     |        |
| 13742  | 0                             |        | 0                     |        |
| 13746  | 0                             |        | 1                     | 0      |
| 13747  | 1                             | 1      | 1                     | 1      |
| 13749  | 0                             |        | 0                     |        |
| 13751  | 2                             | 1      | 2                     | 1      |
| 13752  | 0                             |        | 0                     |        |
| 13756  | 1                             | 1      | 1                     | 1      |
| 13757  | 1                             | 0      | 0                     |        |
| 13767  | 1                             | 1      | 1                     | 1      |
| 13771  | 1                             | 1      | 0                     |        |
| 13772  | 4                             | 1      | 4                     | 2      |
| 13779  | 0                             |        | 0                     |        |
| 13782  | 2                             | 0      | 0                     |        |
| 13783  | 0                             |        | 0                     |        |
| 13785  | 0                             |        | 0                     |        |
| 13786  | 0                             |        | 1                     | 1      |
| 13792  | 1                             | 1      | 2                     | 2      |

| respid | ICS Splitting/spraying: Q26_1 | Q26a_1 | ICS: Hesitancy: Q27_1 | Q27a_1 |
|--------|-------------------------------|--------|-----------------------|--------|
| 13796  | 1                             | 1      | 0                     |        |
| 13798  | 0                             |        | 0                     |        |
| 13799  | 4                             | 2      | 2                     | 1      |
| 13804  | 0                             |        | 0                     |        |
| 13805  | 0                             |        | 0                     |        |
| 13810  | 2                             | 2      | 1                     | 1      |
| 13811  | 0                             |        | 0                     |        |
| 13819  | 0                             |        | 0                     |        |
| 13821  | 4                             | 3      | 4                     | 4      |
| 13824  | 0                             |        | 1                     | 1      |
| 13828  | 3                             | 2      | 2                     | 1      |
| 13829  | 4                             | 4      | 4                     | 3      |
| 13831  | 0                             |        | 0                     |        |
| 13833  | 1                             | 1      | 1                     | 1      |
| 13835  | 3                             | 2      | 3                     | 2      |
| 13838  | 0                             |        | 0                     |        |
| 13839  | 4                             | 4      | 4                     | 4      |
| 13845  | 0                             |        | 0                     |        |
| 13846  | 0                             |        | 0                     |        |
| 13853  | 0                             |        | 1                     | 2      |
| 13855  | 2                             | 3      | 2                     | 3      |
| 13858  | 2                             | 1      | 1                     | 1      |
| 13860  | 0                             |        | 0                     |        |
| 13865  | 5                             | 3      | 4                     | 3      |
| 13870  | 0                             |        | 0                     |        |
| 13872  | 0                             |        | 0                     |        |
| 13873  | 1                             | 1      | 1                     | 1      |
| 13874  | 0                             |        | 0                     |        |
| 13875  | 3                             | 1      | 2                     | 1      |
| 13881  | 0                             |        | 0                     |        |
| 13887  | 0                             |        | 1                     | 1      |
| 13888  | 1                             | 1      | 1                     | 1      |

| respid | ICS Splitting/spraying: Q26_1 | Q26a_1 | ICS: Hesitancy: Q27_1 | Q27a_1 |
|--------|-------------------------------|--------|-----------------------|--------|
| 13889  | 2                             | 3      | 1                     | 3      |
| 13895  | 3                             | 1      | 3                     | 2      |
| 13897  | 0                             |        | 0                     |        |
| 13898  | 1                             | 1      | 2                     | 1      |
| 13901  | 0                             |        | 0                     |        |
| 13902  | 4                             | 1      | 5                     | 4      |
| 13903  | 0                             |        | 0                     |        |
| 13905  | 2                             | 1      | 2                     | 1      |
| 13908  | 1                             | 1      | 1                     | 1      |
| 13909  | 0                             |        | 0                     |        |
| 13910  | 4                             | 4      | 4                     | 3      |
| 13911  | 0                             |        | 0                     |        |
| 13914  | 4                             | 3      | 4                     | 3      |
| 13920  | 3                             | 2      | 3                     | 2      |
| 13926  | 0                             |        | 0                     |        |
| 13929  | 1                             | 1      | 1                     | 1      |
| 13930  | 4                             | 2      | 3                     | 2      |
| 13931  | 0                             |        | 0                     |        |
| 13932  | 0                             |        | 3                     | 2      |
| 13934  | 1                             | 1      | 2                     | 2      |
| 13938  | 0                             |        | 1                     | 1      |
| 13942  | 0                             |        | 0                     |        |
| 13945  | 4                             | 2      | 2                     | 2      |
| 13947  | 5                             | 3      | 4                     | 3      |
| 13948  | 0                             |        | 0                     |        |
| 13959  | 1                             | 0      | 1                     | 0      |
| 13962  | 0                             |        | 0                     |        |
| 13963  | 0                             |        | 0                     |        |
| 13964  | 2                             | 1      | 1                     | 1      |
| 13966  | 3                             | 1      | 2                     | 2      |
| 13968  | 0                             |        | 0                     |        |
| 13971  | 0                             |        | 0                     |        |

| respid | ICS Splitting/spraying: Q26_1 | Q26a_1 | ICS: Hesitancy: Q27_1 | Q27a_1 |
|--------|-------------------------------|--------|-----------------------|--------|
| 13979  | 3                             | 2      | 3                     | 2      |
| 13980  | 2                             | 1      | 2                     | 1      |
| 13981  | 0                             |        | 1                     | 0      |
| 13982  | 1                             | 1      | 1                     | 1      |
| 13984  | 2                             | 3      | 0                     |        |
| 13989  | 1                             | 0      | 0                     |        |
| 13990  | 0                             |        | 0                     |        |
| 13992  | 0                             |        | 1                     | 2      |
| 13998  | 0                             |        | 2                     | 2      |
| 13999  | 4                             | 2      | 3                     | 2      |
| 14000  | 0                             |        | 1                     | 1      |
| 14003  | 0                             |        | 0                     |        |
| 14004  | 0                             |        | 0                     |        |
| 14006  | 1                             | 1      | 1                     | 2      |
| 14007  | 1                             | 0      | 0                     |        |
| 14008  | 0                             |        | 0                     |        |
| 14013  | 0                             |        | 0                     |        |
| 14015  | 1                             | 0      | 0                     |        |
| 14018  | 0                             |        | 0                     |        |
| 14021  | 1                             | 3      | 1                     | 0      |
| 14023  | 0                             |        | 0                     |        |
| 14024  | 1                             | 1      | 0                     |        |
| 14026  | 0                             |        | 0                     |        |
| 14030  | 1                             | 1      | 1                     | 1      |
| 14032  | 2                             | 1      | 2                     | 1      |
| 14040  | 0                             |        | 0                     |        |
| 14045  | 0                             |        | 0                     |        |
| 14048  | 2                             | 1      | 2                     | 1      |
| 14049  | 1                             | 1      | 3                     | 2      |
| 14050  | 0                             |        | 0                     |        |
| 14051  | 5                             | 3      | 5                     | 3      |
| 14052  | 1                             | 0      | 1                     | 0      |

| respid | ICS Splitting/spraying: Q26_1 | Q26a_1 | ICS: Hesitancy: Q27_1 | Q27a_1 |
|--------|-------------------------------|--------|-----------------------|--------|
| 14054  | 0                             |        | 0                     |        |
| 14055  | 0                             |        | 0                     |        |
| 14057  | 0                             |        | 1                     | 1      |
| 14058  | 0                             |        | 0                     |        |
| 14059  | 0                             |        | 0                     |        |
| 14060  | 0                             |        | 1                     | 1      |
| 14061  | 3                             | 3      | 4                     | 3      |
| 14071  | 0                             |        | 0                     |        |
| 14073  | 0                             |        | 0                     |        |
| 14074  | 2                             | 3      | 3                     | 2      |
| 14076  | 0                             |        | 0                     |        |
| 14080  | 3                             | 0      | 1                     | 0      |
| 14082  | 1                             | 0      | 0                     |        |
| 14083  | 0                             |        | 0                     |        |
| 14084  | 0                             |        | 0                     |        |
| 14085  | 0                             |        | 0                     |        |
| 14086  | 2                             | 1      | 2                     | 2      |
| 14088  | 0                             |        | 0                     |        |
| 14090  | 0                             |        | 0                     |        |
| 14092  | 0                             |        | 1                     | 0      |
| 14093  | 0                             |        | 0                     |        |
| 14096  | 0                             |        | 1                     | 1      |
| 14103  | 2                             | 2      | 1                     | 1      |
| 14105  | 0                             |        | 0                     |        |
| 14106  | 1                             | 1      | 0                     |        |
| 14107  | 1                             | 2      | 1                     | 1      |
| 14108  | 1                             | 3      | 1                     | 3      |
| 14112  | 1                             | 1      | 0                     |        |
| 14114  | 1                             | 2      | 5                     | 4      |
| 14115  | 1                             | 1      | 0                     |        |
| 14116  | 0                             |        | 0                     |        |
| 14117  | 0                             |        | 1                     | 2      |

| respid | ICS Splitting/spraying: Q26_1 | Q26a_1 | ICS: Hesitancy: Q27_1 | Q27a_1 |
|--------|-------------------------------|--------|-----------------------|--------|
| 14118  | 4                             | 1      | 2                     | 1      |
| 14119  | 0                             |        | 0                     |        |
| 14127  | 0                             |        | 0                     |        |
| 14129  | 3                             | 2      | 0                     |        |
| 14131  | 0                             |        | 0                     |        |
| 14132  | 1                             | 1      | 0                     |        |
| 14133  | 1                             | 4      | 1                     | 4      |
| 14134  | 1                             | 1      | 1                     | 1      |
| 14135  | 0                             |        | 0                     |        |
| 14136  | 1                             | 1      | 0                     |        |
| 14138  | 0                             |        | 0                     |        |
| 14139  | 0                             |        | 0                     |        |
| 14140  | 1                             | 0      | 1                     | 1      |
| 14141  | 0                             |        | 0                     |        |
| 14143  | 1                             | 0      | 1                     | 1      |
| 14146  | 0                             |        | 0                     |        |
| 14147  | 3                             | 2      | 3                     | 3      |
| 14148  | 0                             |        | 0                     |        |
| 14151  | 1                             | 1      | 2                     | 2      |
| 14152  | 2                             | 1      | 2                     | 2      |
| 14153  | 1                             | 0      | 1                     | 0      |
| 14154  | 1                             | 1      | 1                     | 1      |
| 14158  | 0                             |        | 0                     |        |
| 14159  | 2                             | 2      | 1                     | 2      |
| 14160  | 3                             | 3      | 3                     | 3      |
| 14161  | 3                             | 2      | 2                     | 1      |
| 14162  | 1                             | 1      | 1                     | 1      |
| 14165  | 5                             | 3      | 5                     | 3      |
| 14166  | 3                             | 2      | 2                     | 2      |
| 14167  | 1                             | 1      | 1                     | 1      |
| 14169  | 1                             | 1      | 1                     | 1      |
| 14170  | 0                             |        | 0                     |        |

| respid | ICS Splitting/spraying: Q26_1 | Q26a_1 | ICS: Hesitancy: Q27_1 | Q27a_1 |
|--------|-------------------------------|--------|-----------------------|--------|
| 14172  | 1                             | 2      | 2                     | 2      |
| 14173  | 0                             |        | 0                     |        |
| 14174  | 0                             |        | 2                     | 2      |
| 14175  | 1                             | 1      | 0                     |        |
| 14176  | 1                             | 1      | 1                     | 1      |
| 14178  | 0                             |        | 0                     |        |
| 14179  | 0                             |        | 0                     |        |
| 14180  | 3                             | 2      | 3                     | 2      |
| 14183  | 1                             | 4      | 4                     | 4      |
| 14185  | 0                             |        | 1                     | 1      |
| 14187  | 1                             | 1      | 1                     | 0      |
| 14189  | 0                             |        | 1                     | 1      |
| 14191  | 1                             | 1      | 2                     | 2      |
| 14192  | 0                             |        | 0                     |        |
| 14195  | 1                             | 2      | 1                     | 2      |
| 14197  | 0                             |        | 0                     |        |
| 14203  | 3                             | 2      | 3                     | 2      |
| 14204  | 1                             | 0      | 0                     |        |
| 14205  | 0                             |        | 0                     |        |
| 14208  | 0                             |        | 0                     |        |
| 14211  | 2                             | 1      | 3                     | 2      |
| 14214  | 0                             |        | 0                     |        |
| 14215  | 3                             | 3      | 3                     | 3      |
| 14216  | 3                             | 2      | 3                     | 2      |
| 14218  | 1                             | 1      | 1                     | 1      |
| 14220  | 1                             | 0      | 0                     |        |
| 14223  | 0                             |        | 0                     |        |
| 14225  | 1                             | 1      | 2                     | 1      |
| 14226  | 0                             |        | 0                     |        |
| 14228  | 2                             | 1      | 2                     | 1      |
| 14231  | 2                             | 2      | 2                     | 1      |
| 14233  | 1                             | 1      | 1                     | 1      |



| respid | ICS Splitting/spraying: Q26_1 | Q26a_1 | ICS: Hesitancy: Q27_1 | Q27a_1 |
|--------|-------------------------------|--------|-----------------------|--------|
| 14237  | 1                             | 1      | 0                     |        |
| 14238  | 3                             | 3      | 2                     | 2      |
| 14243  | 1                             | 1      | 2                     | 2      |
| 14245  | 0                             |        | 0                     |        |
| 14246  | 3                             | 2      | 2                     | 2      |
| 14248  | 0                             |        | 0                     |        |
| 14250  | 0                             |        | 0                     |        |
| 14253  | 1                             | 0      | 0                     |        |
| 14254  | 1                             | 1      | 0                     |        |
| 14255  | 0                             |        | 0                     |        |
| 14257  | 0                             |        | 0                     |        |
| 14258  | 1                             | 1      | 2                     | 2      |
| 14259  | 2                             | 2      | 1                     | 1      |
| 14260  | 0                             |        | 0                     |        |
| 14261  | 4                             | 4      | 4                     | 4      |
| 14263  | 3                             | 2      | 1                     | 0      |
| 14264  | 1                             | 1      | 2                     | 1      |
| 14266  | 1                             | 3      | 2                     | 1      |
| 14267  | 2                             | 2      | 2                     | 2      |
| 14268  | 0                             |        | 0                     |        |
| 14275  | 0                             |        | 1                     | 1      |
| 14278  | 0                             |        | 2                     | 2      |
| 14279  | 0                             |        | 0                     |        |
| 14280  | 0                             |        | 0                     |        |
| 14281  | 1                             | 1      | 0                     |        |
| 14282  | 2                             | 2      | 2                     | 1      |
| 14283  | 3                             | 2      | 1                     | 0      |
| 14286  | 0                             |        | 0                     |        |
| 14287  | 0                             |        | 0                     |        |
| 14288  | 2                             | 1      | 3                     | 2      |
| 14291  | 0                             |        | 0                     |        |
| 14292  | 0                             |        | 0                     |        |

| respid | ICS Splitting/spraying: Q26_1 | Q26a_1 | ICS: Hesitancy: Q27_1 | Q27a_1 |
|--------|-------------------------------|--------|-----------------------|--------|
| 14293  | 0                             |        | 1                     | 0      |
| 14304  | 4                             | 4      | 4                     | 3      |
| 14308  | 2                             | 1      | 2                     | 1      |
| 14313  | 0                             |        | 0                     |        |
| 14314  | 1                             | 2      | 4                     | 3      |
| 14316  | 0                             |        | 0                     |        |
| 14317  | 0                             |        | 0                     |        |
| 14318  | 3                             | 2      | 4                     | 3      |
| 14319  | 1                             | 0      | 0                     |        |
| 14320  | 3                             | 2      | 2                     | 3      |
| 14321  | 1                             | 1      | 0                     |        |
| 14322  | 1                             | 3      | 2                     | 4      |
| 14326  | 0                             |        | 0                     |        |
| 14327  | 4                             | 4      | 4                     | 3      |
| 14328  | 0                             |        | 0                     |        |
| 14330  | 0                             |        | 0                     |        |
| 14332  | 0                             |        | 0                     |        |
| 14334  | 0                             |        | 0                     |        |
| 14336  | 0                             |        | 0                     |        |
| 14337  | 1                             | 1      | 1                     | 1      |
| 14339  | 0                             |        | 0                     |        |
| 14340  | 2                             | 1      | 2                     | 1      |
| 14341  | 0                             |        | 0                     |        |
| 14344  | 0                             |        | 0                     |        |
| 14345  | 1                             | 1      | 0                     |        |
| 14346  | 0                             |        | 0                     |        |
| 14348  | 1                             | 0      | 5                     | 0      |
| 14349  | 2                             | 2      | 1                     | 1      |
| 14358  | 2                             | 4      | 1                     | 3      |
| 14360  | 0                             |        | 0                     |        |
| 14362  | 0                             |        | 0                     |        |
| 14366  | 0                             |        | 0                     |        |

| respid | ICS Splitting/spraying: Q26_1 | Q26a_1 | ICS: Hesitancy: Q27_1 | Q27a_1 |
|--------|-------------------------------|--------|-----------------------|--------|
| 14367  | 0                             |        | 0                     |        |
| 14369  | 2                             | 1      | 4                     | 2      |
| 14371  | 0                             |        | 0                     |        |
| 14372  | 0                             |        | 0                     |        |
| 14374  | 0                             |        | 2                     | 2      |
| 14376  | 0                             |        | 0                     |        |
| 14377  | 0                             |        | 0                     |        |
| 14378  | 0                             |        | 0                     |        |
| 14379  | 1                             | 1      | 0                     |        |
| 14381  | 0                             |        | 0                     |        |
| 14383  | 3                             | 1      | 1                     | 1      |
| 14384  | 2                             | 1      | 2                     | 1      |
| 14385  | 4                             | 1      | 4                     | 4      |
| 14386  | 3                             | 3      | 3                     | 3      |
| 14390  | 2                             | 2      | 1                     | 1      |
| 14391  | 1                             | 0      | 1                     | 1      |
| 14392  | 0                             |        | 0                     |        |
| 14393  | 1                             | 2      | 1                     | 1      |
| 14394  | 0                             |        | 0                     |        |
| 14395  | 0                             |        | 0                     |        |
| 14396  | 0                             |        | 0                     |        |
| 14397  | 0                             |        | 4                     | 3      |
| 14398  | 0                             |        | 0                     |        |
| 14399  | 0                             |        | 0                     |        |
| 14400  | 0                             |        | 0                     |        |
| 14403  | 0                             |        | 1                     | 0      |
| 14404  | 0                             |        | 0                     |        |
| 14405  | 0                             |        | 0                     |        |
| 14407  | 0                             |        | 0                     |        |
| 14408  | 0                             |        | 5                     | 4      |
| 14410  | 4                             | 2      | 2                     | 3      |
| 14415  | 0                             |        | 1                     | 0      |

| respid | ICS Splitting/spraying: Q26_1 | Q26a_1 | ICS: Hesitancy: Q27_1 | Q27a_1 |
|--------|-------------------------------|--------|-----------------------|--------|
| 14419  | 0                             |        | 0                     |        |
| 14420  | 0                             |        | 0                     |        |
| 14421  | 0                             |        | 0                     |        |
| 14423  | 3                             | 1      | 0                     |        |
| 14424  | 0                             |        | 0                     |        |
| 14425  | 1                             | 1      | 1                     | 1      |
| 14426  | 0                             |        | 0                     |        |
| 14427  | 0                             |        | 0                     |        |
| 14428  | 3                             | 3      | 5                     | 4      |
| 14431  | 2                             | 1      | 2                     | 1      |
| 14433  | 0                             |        | 1                     | 1      |
| 14434  | 0                             |        | 0                     |        |
| 14435  | 0                             |        | 0                     |        |
| 14436  | 0                             |        | 1                     | 1      |
| 14438  | 0                             |        | 0                     |        |
| 14442  | 3                             | 2      | 4                     | 4      |
| 14447  | 1                             | 2      | 0                     |        |
| 14448  | 0                             |        | 0                     |        |
| 14450  | 1                             | 1      | 1                     | 1      |
| 14451  | 0                             |        | 0                     |        |
| 14454  | 0                             |        | 0                     |        |
| 14455  | 0                             |        | 0                     |        |
| 14456  | 1                             | 1      | 1                     | 1      |
| 14457  | 3                             | 3      | 4                     | 4      |
| 14458  | 4                             | 4      | 3                     | 3      |
| 14459  | 0                             |        | 0                     |        |
| 14460  | 2                             | 1      | 1                     | 1      |
| 14464  | 1                             | 1      | 1                     | 1      |
| 14465  | 1                             | 1      | 1                     | 1      |
| 14466  | 1                             | 0      | 0                     |        |
| 14467  | 0                             |        | 1                     | 0      |
| 14470  | 0                             |        | 1                     | 1      |

| respid | ICS Splitting/spraying: Q26_1 | Q26a_1 | ICS: Hesitancy: Q27_1 | Q27a_1 |
|--------|-------------------------------|--------|-----------------------|--------|
| 14472  | 3                             | 3      | 1                     | 1      |
| 14473  | 0                             |        | 0                     |        |
| 14474  | 0                             |        | 0                     |        |
| 14477  | 0                             |        | 0                     |        |
| 14478  | 0                             |        | 0                     |        |
| 14479  | 0                             |        | 0                     |        |
| 14484  | 0                             |        | 0                     |        |
| 14485  | 0                             |        | 0                     |        |
| 14486  | 0                             |        | 0                     |        |
| 14487  | 0                             |        | 0                     |        |
| 14488  | 3                             | 2      | 3                     | 2      |
| 14491  | 1                             | 2      | 1                     | 2      |
| 14495  | 0                             |        | 0                     |        |
| 14500  | 0                             |        | 0                     |        |
| 14502  | 0                             |        | 0                     |        |
| 14504  | 1                             | 2      | 1                     | 2      |
| 14505  | 4                             | 4      | 4                     | 3      |
| 14507  | 0                             |        | 0                     |        |
| 14517  | 1                             | 2      | 0                     |        |
| 14518  | 0                             |        | 0                     |        |
| 14519  | 0                             |        | 0                     |        |
| 14521  | 2                             | 2      | 2                     | 2      |
| 14522  | 0                             |        | 0                     |        |
| 14526  | 0                             |        | 0                     |        |
| 14528  | 4                             | 4      | 4                     | 4      |
| 14529  | 1                             | 0      | 0                     |        |
| 14530  | 0                             |        | 1                     | 0      |
| 14531  | 3                             | 4      | 3                     | 4      |
| 14534  | 1                             | 2      | 1                     | 3      |
| 14538  | 0                             |        | 0                     |        |
| 14539  | 1                             | 0      | 0                     |        |
| 14545  | 1                             | 0      | 1                     | 0      |

| respid | ICS Splitting/spraying: Q26_1 | Q26a_1 | ICS: Hesitancy: Q27_1 | Q27a_1 |
|--------|-------------------------------|--------|-----------------------|--------|
| 14546  | 1                             | 1      | 1                     | 1      |
| 14551  | 2                             | 2      | 0                     |        |
| 14553  | 1                             | 4      | 2                     | 3      |
| 14557  | 0                             |        | 0                     |        |
| 14558  | 0                             |        | 0                     |        |
| 14559  | 2                             | 1      | 2                     | 1      |
| 14560  | 0                             |        | 0                     |        |
| 14563  | 0                             |        | 0                     |        |
| 14565  | 0                             |        | 0                     |        |
| 14571  | 3                             | 3      | 4                     | 4      |
| 14572  | 0                             |        | 0                     |        |
| 14573  | 1                             | 2      | 1                     | 1      |
| 14575  | 2                             | 2      | 2                     | 2      |
| 14576  | 2                             | 1      | 2                     | 1      |
| 14578  | 1                             | 2      | 0                     |        |
| 14579  | 0                             |        | 0                     |        |
| 14580  | 0                             |        | 1                     | 2      |
| 14582  | 1                             | 1      | 1                     | 1      |
| 14585  | 1                             | 1      | 1                     | 1      |
| 14588  | 0                             |        | 0                     |        |
| 14590  | 3                             | 2      | 2                     | 1      |
| 14592  | 1                             | 2      | 0                     |        |
| 14593  | 1                             | 2      | 0                     |        |
| 14595  | 1                             | 2      | 1                     | 2      |
| 14597  | 0                             |        | 1                     | 1      |
| 14600  | 0                             |        | 0                     |        |
| 14602  | 1                             | 3      | 1                     | 3      |
| 14604  | 1                             | 0      | 0                     |        |
| 14605  | 1                             | 0      | 0                     |        |
| 14609  | 1                             | 1      | 1                     | 2      |
| 14610  | 0                             |        | 1                     | 0      |
| 14611  | 1                             | 1      | 0                     |        |

| respid | ICS Splitting/spraying: Q26_1 | Q26a_1 | ICS: Hesitancy: Q27_1 | Q27a_1 |
|--------|-------------------------------|--------|-----------------------|--------|
| 14612  | 0                             |        | 0                     |        |
| 14614  | 3                             | 1      | 2                     | 1      |
| 14615  | 2                             | 1      | 0                     |        |
| 14618  | 3                             | 3      | 3                     | 2      |
| 14621  | 0                             |        | 0                     |        |
| 14624  | 0                             |        | 1                     | 0      |
| 14626  | 0                             |        | 0                     |        |
| 14627  | 2                             | 2      | 1                     | 1      |
| 14628  | 3                             | 3      | 3                     | 3      |
| 14631  | 0                             |        | 0                     |        |
| 14633  | 2                             | 1      | 2                     | 1      |
| 14642  | 3                             | 2      | 2                     | 2      |
| 14647  | 0                             |        | 0                     |        |
| 14658  | 1                             | 1      | 1                     | 1      |
| 14659  | 2                             | 2      | 2                     | 2      |
| 14660  | 0                             |        | 0                     |        |
| 14661  | 0                             |        | 0                     |        |
| 14662  | 4                             | 4      | 4                     | 3      |
| 14663  | 2                             | 1      | 0                     |        |
| 14670  | 2                             | 3      | 0                     |        |
| 14671  | 0                             |        | 0                     |        |
| 14672  | 2                             | 3      | 2                     | 3      |
| 14675  | 0                             |        | 0                     |        |
| 14676  | 0                             |        | 0                     |        |
| 14677  | 3                             | 4      | 4                     | 3      |
| 14678  | 0                             |        | 0                     |        |
| 14681  | 2                             | 2      | 2                     | 2      |
| 14684  | 0                             |        | 0                     |        |
| 14688  | 0                             |        | 0                     |        |
| 14690  | 1                             | 1      | 1                     | 1      |
| 14694  | 1                             | 3      | 2                     | 2      |
| 14696  | 1                             | 1      | 1                     | 1      |

| respid | ICS Splitting/spraying: Q26_1 | Q26a_1 | ICS: Hesitancy: Q27_1 | Q27a_1 |
|--------|-------------------------------|--------|-----------------------|--------|
| 14700  | 0                             |        | 0                     |        |
| 14701  | 2                             | 2      | 2                     | 1      |
| 14703  | 3                             | 1      | 1                     | 3      |
| 14707  | 0                             |        | 0                     |        |
| 14711  | 2                             | 3      | 2                     | 3      |
| 14714  | 0                             |        | 0                     |        |
| 14715  | 4                             | 3      | 4                     | 2      |
| 14716  | 0                             |        | 0                     |        |
| 14720  | 2                             | 2      | 0                     |        |
| 14725  | 1                             | 1      | 0                     |        |
| 14726  | 1                             | 0      | 1                     | 1      |
| 14734  | 0                             |        | 0                     |        |
| 14735  | 0                             |        | 2                     | 1      |
| 14736  | 2                             | 1      | 2                     | 1      |
| 14740  | 0                             |        | 0                     |        |
| 14745  | 2                             | 2      | 2                     | 2      |
| 14747  | 0                             |        | 0                     |        |
| 14750  | 2                             | 3      | 1                     | 2      |
| 14751  | 0                             |        | 0                     |        |
| 14753  | 0                             |        | 0                     |        |
| 14756  | 3                             | 3      | 3                     | 3      |
| 14780  | 3                             | 1      | 2                     | 1      |
| 14782  | 1                             | 1      | 1                     | 1      |
| 14800  | 4                             | 4      | 4                     | 4      |
| 14801  | 0                             |        | 0                     |        |
| 14802  | 4                             | 2      | 3                     | 3      |
| 14805  | 3                             | 2      | 2                     | 2      |
| 14811  | 3                             | 3      | 3                     | 3      |
| 14814  | 3                             | 3      | 4                     | 3      |
| 14822  | 1                             | 1      | 1                     | 1      |
| 14827  | 2                             | 3      | 0                     |        |
| 14828  | 3                             | 3      | 3                     | 3      |



| respid | ICS Splitting/spraying: Q26_1 | Q26a_1 | ICS: Hesitancy: Q27_1 | Q27a_1 |
|--------|-------------------------------|--------|-----------------------|--------|
| 14830  | 0                             |        | 0                     |        |
| 14832  | 2                             | 2      | 2                     | 1      |
| 14835  | 4                             | 1      | 2                     | 2      |
| 14841  | 0                             |        | 0                     |        |
| 14849  | 1                             | 1      | 1                     | 1      |
| 14850  | 0                             |        | 0                     |        |
| 14851  | 0                             |        | 0                     |        |
| 14856  | 3                             | 3      | 3                     | 3      |
| 14862  | 2                             | 1      | 2                     | 1      |
| 14863  | 0                             |        | 0                     |        |
| 14864  | 0                             |        | 0                     |        |
| 14866  | 0                             |        | 0                     |        |
| 14867  | 4                             | 3      | 4                     | 3      |
| 14868  | 0                             |        | 0                     |        |
| 14870  | 0                             |        | 0                     |        |
| 14873  | 0                             |        | 0                     |        |
| 14878  | 1                             | 0      | 0                     |        |
| 14879  | 0                             |        | 0                     |        |
| 14881  | 3                             | 2      | 3                     | 3      |
| 14888  | 3                             | 2      | 3                     | 2      |
| 14895  | 1                             | 1      | 1                     | 1      |
| 14900  | 4                             | 3      | 4                     | 3      |
| 14912  | 0                             |        | 0                     |        |
| 14922  | 1                             | 1      | 1                     | 1      |
| 14923  | 4                             | 4      | 3                     | 4      |
| 14924  | 3                             | 4      | 3                     | 3      |
| 14925  | 4                             | 3      | 3                     | 4      |
| 14926  | 0                             |        | 0                     |        |
| 14927  | 3                             | 3      | 3                     | 3      |
| 14930  | 0                             |        | 0                     |        |
| 14937  | 4                             | 2      | 4                     | 3      |
| 14938  | 4                             | 2      | 3                     | 3      |

| respid | ICS Splitting/spraying: Q26_1 | Q26a_1 | ICS: Hesitancy: Q27_1 | Q27a_1 |
|--------|-------------------------------|--------|-----------------------|--------|
| 14939  | 4                             | 3      | 4                     | 3      |
| 14942  | 0                             |        | 0                     |        |
| 14943  | 0                             |        | 0                     |        |
| 14953  | 3                             | 2      | 1                     | 1      |
| 14954  | 0                             |        | 0                     |        |
| 14955  | 1                             | 2      | 1                     | 2      |
| 14957  | 2                             | 2      | 2                     | 2      |
| 14958  | 5                             | 4      | 3                     | 3      |
| 14959  | 4                             | 2      | 3                     | 2      |
| 14961  | 0                             |        | 0                     |        |
| 14963  | 3                             | 2      | 3                     | 3      |
| 14964  | 0                             |        | 0                     |        |
| 14965  | 1                             | 2      | 0                     |        |
| 14967  | 3                             | 3      | 4                     | 2      |
| 14970  | 2                             | 3      | 2                     | 3      |
| 14972  | 0                             |        | 1                     | 1      |
| 14975  | 5                             | 4      | 3                     | 3      |
| 14977  | 1                             | 1      | 0                     |        |
| 14982  | 1                             | 1      | 1                     | 1      |
| 14985  | 1                             | 0      | 1                     | 0      |
| 14986  | 0                             |        | 0                     |        |
| 14987  | 0                             |        | 0                     |        |
| 14988  | 4                             | 3      | 3                     | 4      |
| 14989  | 1                             | 1      | 1                     | 1      |
| 14993  | 3                             | 2      | 3                     | 1      |
| 15001  | 0                             |        | 0                     |        |
| 15002  | 5                             | 3      | 4                     | 4      |
| 15006  | 4                             | 1      | 2                     | 1      |
| 15007  | 1                             | 1      | 0                     |        |
| 15014  | 4                             | 3      | 4                     | 3      |
| 15020  | 4                             | 2      | 2                     | 2      |
| 15021  | 3                             | 3      | 3                     | 3      |

| respid | ICS Splitting/spraying: Q26_1 | Q26a_1 | ICS: Hesitancy: Q27_1 | Q27a_1 |
|--------|-------------------------------|--------|-----------------------|--------|
| 15023  | 4                             | 4      | 3                     | 4      |
| 15030  | 1                             | 1      | 0                     |        |
| 15032  | 0                             |        | 0                     |        |
| 15033  | 2                             | 2      | 2                     | 2      |
| 15034  | 3                             | 2      | 2                     | 1      |
| 15035  | 1                             | 1      | 1                     | 1      |
| 15037  | 0                             |        | 0                     |        |
| 15039  | 3                             | 2      | 3                     | 3      |
| 15040  | 0                             |        | 0                     |        |
| 15042  | 3                             | 1      | 1                     | 1      |
| 15044  | 0                             |        | 0                     |        |
| 15045  | 0                             |        | 0                     |        |
| 15046  | 0                             |        | 0                     |        |
| 15052  | 4                             | 4      | 4                     | 3      |
| 15058  | 0                             |        | 0                     |        |
| 15063  | 3                             | 3      | 4                     | 3      |
| 15066  | 1                             | 1      | 1                     | 1      |
| 15069  | 1                             | 2      | 1                     | 1      |
| 15071  | 1                             | 2      | 2                     | 2      |
| 15076  | 2                             | 3      | 2                     | 2      |
| 15078  | 0                             |        | 0                     |        |
| 15087  | 3                             | 2      | 2                     | 2      |
| 15090  | 2                             | 2      | 3                     | 1      |
| 15091  | 0                             |        | 1                     | 0      |
| 15092  | 1                             | 0      | 1                     | 1      |
| 15096  | 2                             | 1      | 2                     | 2      |
| 15106  | 3                             | 3      | 3                     | 2      |
| 15108  | 0                             |        | 0                     |        |
| 15113  | 0                             |        | 0                     |        |
| 15116  | 0                             |        | 0                     |        |
| 15119  | 1                             | 1      | 1                     | 1      |
| 15120  | 0                             |        | 0                     |        |

| respid | ICS Splitting/spraying: Q26_1 | Q26a_1 | ICS: Hesitancy: Q27_1 | Q27a_1 |
|--------|-------------------------------|--------|-----------------------|--------|
| 15121  | 3                             | 3      | 2                     | 2      |
| 15123  | 0                             |        | 0                     |        |
| 15124  | 0                             |        | 0                     |        |
| 15128  | 0                             |        | 0                     |        |
| 15131  | 0                             |        | 0                     |        |
| 15136  | 0                             |        | 0                     |        |
| 15137  | 1                             | 1      | 2                     | 2      |
| 15141  | 2                             | 2      | 1                     | 1      |
| 15144  | 0                             |        | 0                     |        |
| 15147  | 2                             | 2      | 2                     | 2      |
| 15151  | 1                             | 2      | 2                     | 1      |
| 15154  | 4                             | 1      | 2                     | 1      |
| 15157  | 0                             |        | 0                     |        |
| 15164  | 2                             | 3      | 3                     | 3      |
| 15168  | 0                             |        | 0                     |        |
| 15169  | 2                             | 1      | 2                     | 1      |
| 15172  | 4                             | 3      | 4                     | 3      |
| 15177  | 4                             | 3      | 3                     | 3      |
| 15178  | 0                             |        | 0                     |        |
| 15180  | 1                             | 1      | 1                     | 1      |
| 15181  | 0                             |        | 0                     |        |
| 15182  | 1                             | 2      | 2                     | 2      |
| 15183  | 0                             |        | 0                     |        |
| 15188  | 0                             |        | 0                     |        |
| 15190  | 4                             | 3      | 4                     | 3      |
| 15195  | 0                             |        | 0                     |        |
| 15201  | 4                             | 4      | 4                     | 4      |
| 15203  | 0                             |        | 0                     |        |
| 15204  | 0                             |        | 0                     |        |
| 15207  | 0                             |        | 0                     |        |
| 15208  | 4                             | 4      | 4                     | 4      |
| 15209  | 1                             | 1      | 1                     | 1      |

| respid | ICS Splitting/spraying: Q26_1 | Q26a_1 | ICS: Hesitancy: Q27_1 | Q27a_1 |
|--------|-------------------------------|--------|-----------------------|--------|
| 15212  | 0                             |        | 0                     |        |
| 15213  | 1                             | 1      | 0                     |        |
| 15219  | 1                             | 1      | 1                     | 1      |
| 15220  | 2                             | 2      | 2                     | 2      |
| 15221  | 0                             |        | 0                     |        |
| 15223  | 1                             | 1      | 1                     | 1      |
| 15224  | 2                             | 2      | 0                     |        |
| 15225  | 0                             |        | 0                     |        |
| 15226  | 0                             |        | 0                     |        |
| 15230  | 0                             |        | 0                     |        |
| 15231  | 2                             | 3      | 4                     | 3      |
| 15232  | 0                             |        | 0                     |        |
| 15237  | 0                             |        | 0                     |        |
| 15239  | 0                             |        | 0                     |        |
| 15241  | 0                             |        | 0                     |        |
| 15242  | 2                             | 1      | 2                     | 1      |
| 15247  | 0                             |        | 0                     |        |
| 15248  | 0                             |        | 0                     |        |
| 15251  | 0                             |        | 0                     |        |
| 15257  | 0                             |        | 0                     |        |
| 15260  | 0                             |        | 0                     |        |
| 15261  | 3                             | 4      | 4                     | 3      |
| 15262  | 3                             | 3      | 2                     | 3      |
| 15263  | 0                             |        | 2                     | 1      |
| 15265  | 0                             |        | 0                     |        |
| 15266  | 3                             | 2      | 1                     | 1      |
| 15268  | 0                             |        | 0                     |        |
| 15269  | 3                             | 2      | 0                     |        |
| 15270  | 4                             | 3      | 1                     | 3      |
| 15273  | 1                             | 2      | 3                     | 2      |
| 15276  | 5                             | 3      | 4                     | 4      |
| 15277  | 0                             |        | 0                     |        |

| respid | ICS Splitting/spraying: Q26_1 | Q26a_1 | ICS: Hesitancy: Q27_1 | Q27a_1 |
|--------|-------------------------------|--------|-----------------------|--------|
| 15282  | 0                             |        | 0                     |        |
| 15284  | 2                             | 2      | 2                     | 2      |
| 15285  | 0                             |        | 0                     |        |
| 15286  | 4                             | 3      | 4                     | 4      |
| 15288  | 2                             | 2      | 2                     | 3      |
| 15292  | 3                             | 2      | 3                     | 4      |
| 15296  | 0                             |        | 0                     |        |
| 15297  | 0                             |        | 0                     |        |
| 15298  | 0                             |        | 0                     |        |
| 15301  | 0                             |        | 0                     |        |
| 15302  | 0                             |        | 0                     |        |
| 15305  | 1                             | 1      | 1                     | 1      |
| 15307  | 0                             |        | 0                     |        |
| 15308  | 1                             | 1      | 0                     |        |
| 15309  | 1                             | 1      | 1                     | 1      |
| 15311  | 1                             | 0      | 0                     |        |
| 15315  | 0                             |        | 1                     | 0      |
| 15316  | 0                             |        | 0                     |        |
| 15318  | 0                             |        | 0                     |        |
| 15321  | 3                             | 3      | 4                     | 4      |
| 15322  | 0                             |        | 1                     | 0      |
| 15324  | 0                             |        | 0                     |        |
| 15326  | 0                             |        | 0                     |        |
| 15327  | 1                             | 0      | 1                     | 1      |
| 15328  | 0                             |        | 0                     |        |
| 15330  | 0                             |        | 0                     |        |
| 15332  | 0                             |        | 0                     |        |
| 15333  | 0                             |        | 0                     |        |
| 15334  | 2                             | 2      | 1                     | 2      |
| 15336  | 4                             | 4      | 4                     | 4      |
| 15337  | 0                             |        | 0                     |        |
| 15338  | 0                             |        | 0                     |        |

| respid | ICS Splitting/spraying: Q26_1 | Q26a_1 | ICS: Hesitancy: Q27_1 | Q27a_1 |
|--------|-------------------------------|--------|-----------------------|--------|
| 15339  | 3                             | 4      | 3                     | 4      |
| 15341  | 0                             |        | 0                     |        |
| 15344  | 0                             |        | 0                     |        |
| 15345  | 0                             |        | 0                     |        |
| 15350  | 0                             |        | 0                     |        |
| 15351  | 0                             |        | 0                     |        |
| 15352  | 0                             |        | 1                     | 0      |
| 15372  | 0                             |        | 0                     |        |
| 15373  | 2                             | 1      | 3                     | 2      |
| 15376  | 0                             |        | 0                     |        |
| 15377  | 0                             |        | 0                     |        |
| 15382  | 0                             |        | 0                     |        |
| 15383  | 1                             | 1      | 1                     | 1      |
| 15385  | 3                             | 3      | 3                     | 3      |
| 15390  | 0                             |        | 0                     |        |
| 15399  | 0                             |        | 0                     |        |
| 15404  | 1                             | 1      | 1                     | 1      |
| 15410  | 1                             | 0      | 0                     |        |
| 15411  | 2                             | 2      | 2                     | 2      |
| 15412  | 2                             | 1      | 0                     |        |
| 15413  | 1                             | 0      | 1                     | 0      |
| 15414  | 0                             |        | 0                     |        |
| 15417  | 0                             |        | 1                     | 1      |
| 15418  | 1                             | 1      | 1                     | 0      |
| 15421  | 0                             |        | 0                     |        |
| 15423  | 0                             |        | 0                     |        |
| 15425  | 0                             |        | 0                     |        |
| 15426  | 5                             | 4      | 4                     | 4      |
| 15430  | 0                             |        | 0                     |        |
| 15431  | 4                             | 3      | 3                     | 3      |
| 15435  | 0                             |        | 0                     |        |
| 15436  | 0                             |        | 0                     |        |

| respid | ICS Splitting/spraying: Q26_1 | Q26a_1 | ICS: Hesitancy: Q27_1 | Q27a_1 |
|--------|-------------------------------|--------|-----------------------|--------|
| 15437  | 0                             |        | 0                     |        |
| 15438  | 0                             |        | 0                     |        |
| 15439  | 0                             |        | 0                     |        |
| 15441  | 4                             | 4      | 3                     | 4      |
| 15443  | 0                             |        | 0                     |        |
| 15446  | 0                             |        | 0                     |        |
| 15449  | 2                             | 2      | 2                     | 2      |
| 15451  | 4                             | 3      | 3                     | 2      |
| 15452  | 3                             | 2      | 3                     | 3      |
| 15454  | 1                             | 1      | 0                     |        |
| 15456  | 3                             | 2      | 1                     | 3      |
| 15457  | 0                             |        | 0                     |        |
| 15458  | 1                             | 2      | 2                     | 2      |
| 15462  | 5                             | 4      | 5                     | 4      |
| 15467  | 4                             | 0      | 2                     | 1      |
| 15470  | 2                             | 1      | 3                     | 2      |
| 15472  | 1                             | 1      | 0                     |        |
| 15476  | 0                             |        | 0                     |        |
| 15477  | 0                             |        | 0                     |        |
| 15488  | 0                             |        | 0                     |        |
| 15489  | 0                             |        | 0                     |        |
| 15490  | 0                             |        | 0                     |        |
| 15496  | 1                             | 0      | 2                     | 1      |
| 15497  | 0                             |        | 1                     | 1      |
| 15498  | 0                             |        | 0                     |        |
| 15509  | 4                             | 3      | 3                     | 3      |
| 15510  | 0                             |        | 0                     |        |
| 15516  | 0                             |        | 1                     | 1      |
| 15519  | 0                             |        | 0                     |        |
| 15520  | 0                             |        | 0                     |        |
| 15524  | 0                             |        | 1                     | 1      |
| 15525  | 1                             | 1      | 0                     |        |



| respid | ICS Splitting/spraying: Q26_1 | Q26a_1 | ICS: Hesitancy: Q27_1 | Q27a_1 |
|--------|-------------------------------|--------|-----------------------|--------|
| 15526  | 1                             | 1      | 1                     | 2      |
| 15531  | 2                             | 2      | 0                     |        |
| 15532  | 0                             |        | 0                     |        |
| 15534  | 3                             | 3      | 3                     | 3      |
| 15535  | 4                             | 3      | 4                     | 3      |
| 15539  | 0                             |        | 0                     |        |
| 15550  | 0                             |        | 0                     |        |
| 15556  | 0                             |        | 0                     |        |
| 15558  | 4                             | 2      | 3                     | 3      |
| 15565  | 0                             |        | 0                     |        |
| 15567  | 3                             | 2      | 3                     | 2      |
| 15568  | 4                             | 3      | 4                     | 3      |
| 15571  | 2                             | 2      | 2                     | 2      |
| 15573  | 1                             | 0      | 0                     |        |
| 15574  | 4                             | 3      | 4                     | 3      |
| 15576  | 0                             |        | 0                     |        |
| 15587  | 2                             | 2      | 2                     | 1      |
| 15588  | 0                             |        | 3                     | 1      |
| 15593  | 0                             |        | 0                     |        |
| 15597  | 0                             |        | 0                     |        |
| 15598  | 0                             |        | 3                     | 0      |
| 15599  | 1                             | 1      | 1                     | 1      |
| 15601  | 0                             |        | 0                     |        |
| 15604  | 0                             |        | 0                     |        |
| 15611  | 0                             |        | 0                     |        |
| 15613  | 0                             |        | 0                     |        |
| 15614  | 0                             |        | 1                     | 1      |
| 15617  | 1                             | 2      | 2                     | 1      |
| 15622  | 0                             |        | 0                     |        |
| 15623  | 0                             |        | 0                     |        |
| 15625  | 3                             | 3      | 1                     | 1      |
| 15627  | 0                             |        | 0                     |        |

| respid | ICS Splitting/spraying: Q26_1 | Q26a_1 | ICS: Hesitancy: Q27_1 | Q27a_1 |
|--------|-------------------------------|--------|-----------------------|--------|
| 15628  | 0                             |        | 0                     |        |
| 15633  | 0                             |        | 0                     |        |
| 15634  | 0                             |        | 0                     |        |
| 15637  | 0                             |        | 0                     |        |
| 15644  | 1                             | 1      | 0                     |        |
| 15645  | 1                             | 0      | 0                     |        |
| 15649  | 0                             |        | 0                     |        |
| 15650  | 0                             |        | 1                     | 0      |
| 15651  | 0                             |        | 0                     |        |
| 15657  | 3                             | 3      | 2                     | 3      |
| 15658  | 0                             |        | 0                     |        |
| 15660  | 2                             | 2      | 0                     |        |
| 15667  | 0                             |        | 0                     |        |
| 15671  | 0                             |        | 0                     |        |
| 15679  | 2                             | 2      | 0                     |        |
| 15712  | 0                             |        | 0                     |        |
| 15715  | 0                             |        | 0                     |        |
| 15749  | 0                             |        | 0                     |        |
| 15754  | 1                             | 1      | 1                     | 1      |
| 15756  | 2                             | 3      | 1                     | 3      |
| 15773  | 0                             |        | 0                     |        |
| 15774  | 1                             | 0      | 0                     |        |
| 15776  | 3                             | 2      | 1                     | 1      |
| 15777  | 3                             | 2      | 3                     | 3      |
| 15779  | 0                             |        | 0                     |        |
| 15780  | 2                             | 1      | 2                     | 1      |
| 15792  | 1                             | 2      | 0                     |        |
| 15793  | 3                             | 2      | 3                     | 3      |
| 15796  | 0                             |        | 0                     |        |
| 15798  | 0                             |        | 0                     |        |
| 15809  | 1                             | 1      | 1                     | 1      |
| 15810  | 0                             |        | 0                     |        |

| respid | ICS Splitting/spraying: Q26_1 | Q26a_1 | ICS: Hesitancy: Q27_1 | Q27a_1 |
|--------|-------------------------------|--------|-----------------------|--------|
| 15815  | 1                             |        | 0                     |        |
| 15816  | 0                             |        | 0                     |        |
| 15817  | 0                             |        | 0                     |        |
| 15821  | 3                             | 2      | 3                     | 2      |
| 15823  | 2                             | 2      | 2                     | 2      |
| 15834  | 0                             |        | 0                     |        |
| 15835  | 0                             |        | 0                     |        |
| 15836  | 0                             |        | 0                     |        |
| 15837  | 1                             | 0      | 0                     |        |
| 15839  | 0                             |        | 3                     | 2      |
| 15840  | 0                             |        | 0                     |        |
| 15844  | 0                             |        | 0                     |        |
| 15845  | 1                             | 0      | 1                     | 0      |
| 15847  | 3                             | 2      | 3                     | 2      |
| 15848  | 1                             | 0      | 1                     | 0      |
| 15849  | 2                             | 1      | 0                     |        |
| 15857  | 1                             | 1      | 0                     |        |
| 15858  | 2                             | 1      | 1                     | 1      |
| 15862  | 4                             | 4      | 4                     | 4      |
| 15866  | 0                             |        | 0                     |        |
| 15870  | 0                             |        | 0                     |        |
| 15871  | 0                             |        | 0                     |        |
| 15872  | 0                             |        | 0                     |        |
| 15873  | 0                             |        | 0                     |        |
| 15874  | 0                             |        | 0                     |        |
| 15875  | 3                             | 3      | 3                     | 3      |
| 15876  | 2                             | 2      | 2                     | 2      |
| 15882  | 1                             | 3      | 1                     | 2      |
| 15884  | 5                             | 2      | 2                     | 2      |
| 15890  | 0                             |        | 0                     |        |
| 15892  | 1                             | 2      | 1                     | 2      |
| 15908  | 0                             |        | 0                     |        |

| respid | ICS Splitting/spraying: Q26_1 | Q26a_1 | ICS: Hesitancy: Q27_1 | Q27a_1 |
|--------|-------------------------------|--------|-----------------------|--------|
| 15914  | 0                             |        | 0                     |        |
| 15932  | 2                             | 1      | 2                     | 2      |
| 15933  | 2                             | 1      | 1                     | 2      |
| 15938  | 1                             | 1      | 1                     | 0      |
| 15940  | 1                             | 1      | 3                     | 4      |
| 15945  | 0                             |        | 0                     |        |
| 15947  | 0                             |        | 0                     |        |
| 15950  | 0                             |        | 0                     |        |
| 15951  | 0                             |        | 0                     |        |
| 15952  | 4                             | 2      | 3                     | 3      |
| 15953  | 1                             | 1      | 0                     |        |
| 15954  | 3                             | 2      | 0                     |        |
| 15957  | 4                             | 4      | 4                     | 4      |
| 15965  | 4                             | 3      | 4                     | 3      |
| 15966  | 0                             |        | 0                     |        |
| 15967  | 0                             |        | 0                     |        |
| 15968  | 3                             | 4      | 1                     | 2      |
| 15970  | 0                             |        | 0                     |        |
| 15973  | 0                             |        | 0                     |        |
| 15974  | 0                             |        | 0                     |        |
| 15975  | 0                             |        | 0                     |        |
| 15980  | 5                             | 4      | 3                     | 2      |
| 15984  | 0                             |        | 0                     |        |
| 15985  | 2                             | 2      | 3                     | 2      |
| 15994  | 0                             |        | 0                     |        |
| 15995  | 0                             |        | 0                     |        |
| 16000  | 0                             |        | 0                     |        |
| 16004  | 0                             |        | 0                     |        |
| 16005  | 0                             |        | 0                     |        |
| 16006  | 0                             |        | 0                     |        |
| 16009  | 1                             | 0      | 0                     |        |
| 16017  | 0                             |        | 0                     |        |

| respid | ICS Splitting/spraying: Q26_1 | Q26a_1 | ICS: Hesitancy: Q27_1 | Q27a_1 |
|--------|-------------------------------|--------|-----------------------|--------|
| 16019  | 0                             |        | 2                     | 0      |
| 16021  | 0                             |        | 0                     |        |
| 16024  | 0                             |        | 0                     |        |
| 16026  | 1                             | 1      | 3                     | 2      |
| 16029  | 0                             |        | 0                     |        |
| 16031  | 4                             | 3      | 4                     | 3      |
| 16037  | 0                             |        | 0                     |        |
| 16043  | 0                             |        | 0                     |        |
| 16044  | 0                             |        | 1                     | 0      |
| 16047  | 1                             | 1      | 2                     | 1      |
| 16048  | 4                             | 2      | 1                     | 2      |
| 16049  | 0                             |        | 0                     |        |
| 16051  | 0                             |        | 0                     |        |
| 16053  | 0                             |        | 1                     | 1      |
| 16054  | 0                             |        | 0                     |        |
| 16069  | 0                             |        | 1                     | 1      |
| 16070  | 2                             | 2      | 1                     | 1      |
| 16074  | 0                             |        | 0                     |        |
| 16076  | 0                             |        | 0                     |        |
| 16078  | 0                             |        | 0                     |        |
| 16081  | 0                             |        | 1                     | 1      |
| 16085  | 0                             |        | 0                     |        |
| 16088  | 0                             |        | 0                     |        |
| 16091  | 0                             |        | 0                     |        |
| 16092  | 1                             | 2      | 1                     | 1      |
| 16093  | 5                             | 1      | 0                     |        |
| 16097  | 0                             |        | 0                     |        |
| 16100  | 1                             | 0      | 0                     |        |
| 16101  | 0                             |        | 0                     |        |
| 16105  | 0                             |        | 0                     |        |
| 16118  | 2                             | 2      | 2                     | 2      |
| 16129  | 0                             |        | 1                     | 0      |

| respid | ICS Splitting/spraying: Q26_1 | Q26a_1 | ICS: Hesitancy: Q27_1 | Q27a_1 |
|--------|-------------------------------|--------|-----------------------|--------|
| 16130  | 4                             | 1      | 0                     |        |
| 16131  | 3                             | 3      | 3                     | 3      |
| 16136  | 0                             |        | 0                     |        |
| 16137  | 0                             |        | 0                     |        |
| 16138  | 1                             | 1      | 1                     | 1      |
| 16139  | 0                             |        | 0                     |        |
| 16140  | 0                             |        | 0                     |        |
| 16145  | 1                             | 1      | 1                     | 1      |
| 16150  | 0                             |        | 0                     |        |
| 16151  | 0                             |        | 1                     | 1      |
| 16153  | 0                             |        | 0                     |        |
| 16164  | 0                             |        | 0                     |        |
| 16168  | 2                             | 1      | 1                     | 1      |
| 16173  | 2                             | 2      | 1                     | 2      |
| 16174  | 1                             | 0      | 0                     |        |
| 16177  | 5                             | 1      | 1                     | 1      |
| 16185  | 0                             |        | 0                     |        |
| 16189  | 0                             |        | 0                     |        |
| 16192  | 0                             |        | 0                     |        |
| 16193  | 0                             |        | 0                     |        |
| 16194  | 1                             | 2      | 1                     | 1      |
| 16196  | 0                             |        | 0                     |        |
| 16202  | 1                             | 2      | 1                     | 1      |
| 16205  | 3                             | 3      | 2                     | 1      |
| 16206  | 0                             |        | 0                     |        |
| 16208  | 0                             |        | 0                     |        |
| 16211  | 2                             | 0      | 0                     |        |
| 16212  | 1                             | 0      | 0                     |        |
| 16215  | 0                             |        | 0                     |        |
| 16217  | 1                             | 1      | 1                     | 1      |
| 16221  | 0                             |        | 0                     |        |
| 16226  | 0                             |        | 1                     | 1      |

| respid | ICS Splitting/spraying: Q26_1 | Q26a_1 | ICS: Hesitancy: Q27_1 | Q27a_1 |
|--------|-------------------------------|--------|-----------------------|--------|
| 16228  | 0                             |        | 0                     |        |
| 16229  | 1                             | 1      | 0                     |        |
| 16230  | 0                             |        | 0                     |        |
| 16231  | 0                             |        | 0                     |        |
| 16232  | 3                             | 2      | 3                     | 2      |
| 16234  | 5                             | 1      | 3                     | 0      |
| 16235  | 2                             | 2      | 2                     | 2      |
| 16236  | 1                             | 1      | 1                     | 1      |
| 16237  | 1                             | 1      | 0                     |        |
| 16238  | 0                             |        | 0                     |        |
| 16239  | 0                             |        | 0                     |        |
| 16243  | 0                             |        | 1                     | 1      |
| 16248  | 1                             | 2      | 1                     | 2      |
| 16249  | 0                             |        | 0                     |        |
| 16251  | 0                             |        | 0                     |        |
| 16263  | 0                             |        | 0                     |        |
| 16265  | 1                             | 0      | 1                     | 0      |
| 16269  | 0                             |        | 0                     |        |
| 16272  | 0                             |        | 0                     |        |
| 16273  | 0                             |        | 0                     |        |
| 16281  | 0                             |        | 0                     |        |
| 16282  | 0                             |        | 0                     |        |
| 16287  | 0                             |        | 0                     |        |
| 16290  | 0                             |        | 0                     |        |
| 16294  | 2                             | 1      | 1                     | 0      |
| 16295  | 1                             | 0      | 1                     | 0      |
| 16296  | 0                             |        | 0                     |        |
| 16299  | 4                             | 2      | 0                     |        |
| 16302  | 0                             |        | 0                     |        |
| 16303  | 0                             |        | 0                     |        |
| 16304  | 1                             | 0      | 0                     |        |
| 16306  | 0                             |        | 0                     |        |

| respid | ICS Splitting/spraying: Q26_1 | Q26a_1 | ICS: Hesitancy: Q27_1 | Q27a_1 |
|--------|-------------------------------|--------|-----------------------|--------|
| 16318  | 0                             |        | 1                     | 1      |
| 16320  | 1                             | 0      | 0                     |        |
| 16321  | 0                             |        | 1                     | 1      |
| 16322  | 4                             | 2      | 5                     | 2      |
| 16324  | 0                             |        | 0                     |        |
| 16326  | 0                             |        | 0                     |        |
| 16328  | 2                             | 2      | 1                     | 1      |
| 16336  | 0                             |        | 1                     | 0      |
| 16341  | 0                             |        | 0                     |        |
| 16342  | 0                             |        | 0                     |        |
| 16343  | 2                             | 1      | 3                     | 1      |
| 16345  | 5                             | 2      | 2                     | 1      |
| 16349  | 1                             | 1      | 1                     | 1      |
| 16355  | 0                             |        | 0                     |        |
| 16364  | 1                             | 1      | 0                     |        |
| 16374  | 0                             |        | 0                     |        |
| 16375  | 0                             |        | 0                     |        |
| 16376  | 3                             | 2      | 1                     | 1      |
| 16393  | 0                             |        | 0                     |        |
| 16394  | 0                             |        | 0                     |        |
| 16395  | 1                             | 0      | 2                     | 3      |
| 16397  | 1                             | 1      | 0                     |        |
| 16398  | 1                             | 2      | 2                     | 2      |
| 16402  | 0                             |        | 0                     |        |
| 16405  | 4                             | 2      | 1                     | 1      |
| 16416  | 1                             | 1      | 0                     |        |
| 16422  | 2                             | 2      | 2                     | 2      |
| 16429  | 0                             |        | 0                     |        |
| 16430  | 0                             |        | 0                     |        |
| 16432  | 2                             | 2      | 3                     | 2      |
| 16433  | 1                             | 1      | 1                     | 1      |
| 16434  | 0                             |        | 0                     |        |



| respid | ICS Splitting/spraying: Q26_1 | Q26a_1 | ICS: Hesitancy: Q27_1 | Q27a_1 |
|--------|-------------------------------|--------|-----------------------|--------|
| 16437  | 0                             |        | 1                     | 0      |
| 16439  | 0                             |        | 0                     |        |
| 16440  | 0                             |        | 0                     |        |
| 16441  | 0                             |        | 0                     |        |
| 16442  | 0                             |        | 0                     |        |
| 16450  | 0                             |        | 0                     |        |
| 16451  | 0                             |        | 0                     |        |
| 16452  | 0                             |        | 0                     |        |
| 16467  | 0                             |        | 0                     |        |
| 16468  | 0                             |        | 0                     |        |
| 16469  | 1                             | 1      | 1                     | 1      |
| 16470  | 0                             |        | 0                     |        |
| 16471  | 0                             |        | 1                     | 1      |
| 16473  | 0                             |        | 0                     |        |
| 16476  | 0                             |        | 0                     |        |
| 16478  | 0                             |        | 0                     |        |
| 16484  | 0                             |        | 0                     |        |
| 16499  | 0                             |        | 0                     |        |
| 16502  | 0                             |        | 0                     |        |
| 16505  | 0                             |        | 0                     |        |
| 16514  | 0                             |        | 0                     |        |
| 16515  | 0                             |        | 1                     | 1      |
| 16517  | 1                             | 2      | 1                     | 1      |
| 16518  | 1                             | 0      | 0                     |        |
| 16519  | 0                             |        | 0                     |        |
| 16525  | 1                             | 1      | 0                     |        |
| 16526  | 0                             |        | 0                     |        |
| 16530  | 1                             | 0      | 0                     |        |
| 16532  | 0                             |        | 0                     |        |
| 16536  | 0                             |        | 0                     |        |
| 16537  | 3                             | 2      | 3                     | 2      |
| 16541  | 4                             | 2      | 4                     | 3      |

| respid | ICS Splitting/spraying: Q26_1 | Q26a_1 | ICS: Hesitancy: Q27_1 | Q27a_1 |
|--------|-------------------------------|--------|-----------------------|--------|
| 16543  | 1                             | 1      | 1                     | 1      |
| 16544  | 0                             |        | 0                     |        |
| 16545  | 0                             |        | 0                     |        |
| 16546  | 0                             |        | 0                     |        |
| 16548  | 0                             |        | 0                     |        |
| 16552  | 0                             |        | 2                     | 2      |
| 16559  | 0                             |        | 0                     |        |
| 16564  | 0                             |        | 0                     |        |
| 16565  | 2                             | 2      | 1                     | 1      |
| 16567  | 1                             | 1      | 1                     | 1      |
| 16571  | 0                             |        | 0                     |        |
| 16572  | 1                             | 1      | 1                     | 1      |
| 16579  | 0                             |        | 0                     |        |
| 16588  | 3                             | 3      | 1                     | 2      |
| 16599  | 0                             |        | 0                     |        |
| 16605  | 1                             | 0      | 1                     | 0      |
| 16622  | 0                             |        | 0                     |        |
| 16635  | 0                             |        | 0                     |        |
| 16638  | 0                             |        | 0                     |        |
| 16652  | 0                             |        | 1                     | 1      |
| 16656  | 0                             |        | 0                     |        |
| 16671  | 0                             |        | 0                     |        |
| 16676  | 2                             | 2      | 0                     |        |
| 16678  | 1                             | 2      | 1                     | 2      |
| 16702  | 1                             | 1      | 1                     | 1      |
| 16705  | 0                             |        | 0                     |        |
| 16707  | 1                             | 2      | 3                     | 3      |
| 16711  | 1                             | 1      | 1                     | 1      |
| 16712  | 0                             |        | 0                     |        |
| 16716  | 0                             |        | 0                     |        |
| 16724  | 0                             |        | 1                     | 2      |
| 16727  | 1                             | 1      | 1                     | 1      |

| respid | ICS Splitting/spraying: Q26_1 | Q26a_1 | ICS: Hesitancy: Q27_1 | Q27a_1 |
|--------|-------------------------------|--------|-----------------------|--------|
| 16734  | 0                             |        | 1                     | 1      |
| 16740  | 0                             |        | 0                     |        |
| 16748  | 0                             |        | 0                     |        |
| 16759  | 1                             | 0      | 0                     |        |
| 16761  | 0                             |        | 0                     |        |
| 16763  | 3                             | 2      | 1                     | 0      |
| 16764  | 4                             | 3      | 4                     | 3      |
| 16766  | 0                             |        | 0                     |        |
| 16767  | 1                             | 0      | 0                     |        |
| 16776  | 0                             |        | 0                     |        |
| 16781  | 0                             |        | 0                     |        |
| 16793  | 2                             | 1      | 2                     | 1      |
| 16796  | 3                             | 3      | 5                     | 3      |
| 16810  | 0                             |        | 0                     |        |
| 16811  | 0                             |        | 0                     |        |
| 16813  | 0                             |        | 0                     |        |
| 16814  | 0                             |        | 1                     | 1      |
| 16831  | 1                             | 1      | 1                     | 1      |
| 16833  | 0                             |        | 1                     | 2      |
| 16839  | 1                             | 0      | 1                     | 0      |
| 16843  | 1                             | 0      | 0                     |        |
| 16860  | 0                             |        | 0                     |        |
| 16871  | 1                             | 1      | 0                     |        |
| 16881  | 1                             | 2      | 2                     | 2      |
| 16884  | 1                             | 1      | 0                     |        |
| 16891  | 1                             | 1      | 1                     | 1      |
| 16909  | 0                             |        | 0                     |        |
| 16911  | 0                             |        | 0                     |        |
| 16922  | 3                             | 2      | 3                     | 2      |
| 16935  | 1                             | 2      | 0                     |        |
| 16942  | 0                             |        | 0                     |        |
| 16950  | 0                             |        | 0                     |        |

| respid | ICS Splitting/spraying: Q26_1 | Q26a_1 | ICS: Hesitancy: Q27_1 | Q27a_1 |
|--------|-------------------------------|--------|-----------------------|--------|
| 16952  | 2                             | 2      | 3                     | 2      |
| 16963  | 2                             | 2      | 0                     |        |
| 16967  | 0                             |        | 0                     |        |
| 16970  | 2                             | 1      | 0                     |        |
| 16976  | 1                             | 1      | 1                     | 2      |
| 16982  | 1                             | 2      | 1                     | 1      |
| 16995  | 1                             | 0      | 1                     | 0      |
| 17004  | 0                             |        | 0                     |        |
| 17006  | 0                             |        | 0                     |        |
| 17009  | 1                             | 3      | 4                     | 3      |
| 17021  | 0                             |        | 0                     |        |
| 17040  | 0                             |        | 1                     | 1      |
| 17041  | 0                             |        | 0                     |        |
| 17044  | 0                             |        | 0                     |        |
| 17046  | 1                             | 1      | 1                     | 1      |
| 17052  | 1                             | 1      | 1                     | 1      |
| 17055  | 0                             |        | 0                     |        |
| 17108  | 0                             |        | 0                     |        |
| 17109  | 0                             |        | 0                     |        |
| 17113  | 0                             |        | 0                     |        |
| 17115  | 4                             | 1      | 2                     | 2      |
| 17132  | 0                             |        | 0                     |        |
| 17135  | 1                             | 1      | 0                     |        |
| 17138  | 1                             | 0      | 0                     |        |
| 17141  | 1                             | 1      | 0                     |        |
| 17143  | 0                             |        | 1                     | 0      |
| 17148  | 0                             |        | 0                     |        |
| 17151  | 0                             |        | 1                     | 0      |
| 17153  | 0                             |        | 0                     |        |
| 17154  | 3                             | 3      | 3                     | 3      |
| 17157  | 5                             | 2      | 3                     | 2      |
| 17160  | 0                             |        | 0                     |        |

| respid | ICS Splitting/spraying: Q26_1 | Q26a_1 | ICS: Hesitancy: Q27_1 | Q27a_1 |
|--------|-------------------------------|--------|-----------------------|--------|
| 17167  | 3                             | 1      | 1                     | 1      |
| 17169  | 1                             | 0      | 0                     |        |
| 17174  | 1                             | 0      | 0                     |        |
| 17179  | 0                             |        | 0                     |        |
| 17180  | 1                             | 1      | 0                     |        |
| 17182  | 0                             |        | 0                     |        |
| 17184  | 2                             | 2      | 2                     | 3      |
| 17186  | 1                             | 0      | 1                     | 0      |
| 17187  | 0                             |        | 0                     |        |
| 17192  | 4                             | 2      | 2                     | 2      |
| 17197  | 0                             |        | 1                     | 0      |
| 17217  | 0                             |        | 1                     | 1      |
| 17226  | 3                             | 1      | 1                     | 1      |
| 17228  | 4                             | 2      | 1                     | 1      |
| 17245  | 4                             | 2      | 4                     | 3      |
| 17247  | 0                             |        | 0                     |        |
| 17258  | 0                             |        | 0                     |        |
| 17259  | 2                             | 1      | 2                     | 1      |
| 17262  | 0                             |        | 0                     |        |
| 17265  | 0                             |        | 1                     | 1      |
| 17281  | 0                             |        | 0                     |        |
| 17282  | 0                             |        | 1                     | 2      |
| 17293  | 0                             |        | 0                     |        |
| 17306  | 1                             | 2      | 1                     | 2      |
| 17312  | 1                             | 0      | 1                     | 0      |
| 17318  | 1                             | 1      | 1                     | 1      |
| 17328  | 1                             | 0      | 3                     | 2      |
| 17343  | 1                             | 1      | 1                     | 1      |
| 17344  | 0                             |        | 0                     |        |
| 17348  | 0                             |        | 0                     |        |
| 17352  | 0                             |        | 0                     |        |
| 17355  | 0                             |        | 0                     |        |

| respid | ICS Splitting/spraying: Q26_1 | Q26a_1 | ICS: Hesitancy: Q27_1 | Q27a_1 |
|--------|-------------------------------|--------|-----------------------|--------|
| 17356  | 0                             |        | 0                     |        |
| 17359  | 1                             | 1      | 1                     | 1      |
| 17373  | 2                             | 3      | 2                     | 3      |
| 17381  | 0                             |        | 0                     |        |
| 17388  | 1                             | 1      | 0                     |        |
| 17394  | 1                             | 1      | 1                     | 1      |
| 17401  | 0                             |        | 0                     |        |
| 17403  | 1                             | 0      | 0                     |        |
| 17411  | 0                             |        | 0                     |        |
| 17423  | 0                             |        | 1                     | 2      |
| 17427  | 0                             |        | 0                     |        |
| 17433  | 0                             |        | 0                     |        |
| 17441  | 0                             |        | 0                     |        |
| 17442  | 1                             | 0      | 1                     | 0      |
| 17447  | 1                             | 1      | 0                     |        |
| 17458  | 0                             |        | 0                     |        |
| 17474  | 0                             |        | 0                     |        |
| 17475  | 2                             | 2      | 2                     | 3      |
| 17476  | 1                             | 1      | 1                     | 1      |
| 17480  | 0                             |        | 0                     |        |
| 17484  | 0                             |        | 0                     |        |
| 17490  | 0                             |        | 0                     |        |
| 17491  | 0                             |        | 0                     |        |
| 17500  | 1                             | 1      | 0                     |        |
| 17507  | 1                             | 0      | 0                     |        |
| 17517  | 1                             | 0      | 1                     | 0      |
| 17520  | 3                             | 1      | 5                     | 1      |
| 17521  | 0                             |        | 0                     |        |
| 17531  | 0                             |        | 0                     |        |
| 17540  | 0                             |        | 0                     |        |
| 17550  | 1                             | 0      | 0                     |        |
| 17551  | 0                             |        | 0                     |        |

| respid | ICS Splitting/spraying: Q26_1 | Q26a_1 | ICS: Hesitancy: Q27_1 | Q27a_1 |
|--------|-------------------------------|--------|-----------------------|--------|
| 17555  | 1                             | 1      | 1                     | 1      |
| 17556  | 1                             | 1      | 1                     | 0      |
| 17574  | 4                             | 0      | 3                     | 1      |
| 17575  | 0                             |        | 0                     |        |
| 17582  | 0                             |        | 0                     |        |
| 17587  | 0                             |        | 0                     |        |
| 17601  | 1                             | 1      | 2                     | 2      |
| 17607  | 2                             | 2      | 3                     | 2      |
| 17609  | 0                             |        | 0                     |        |
| 17611  | 0                             |        | 0                     |        |
| 17613  | 1                             | 0      | 1                     | 1      |
| 17615  | 0                             |        | 0                     |        |
| 17620  | 2                             | 1      | 1                     | 1      |
| 17624  | 3                             | 2      | 3                     | 3      |
| 17635  | 0                             |        | 0                     |        |
| 17643  | 0                             |        | 1                     | 0      |
| 17645  | 0                             |        | 0                     |        |
| 17646  | 0                             |        | 0                     |        |
| 17649  | 0                             |        | 0                     |        |
| 17658  | 1                             | 1      | 0                     |        |
| 17666  | 0                             |        | 0                     |        |
| 17670  | 0                             |        | 0                     |        |
| 17678  | 0                             |        | 1                     | 1      |
| 17679  | 0                             |        | 0                     |        |
| 17695  | 0                             |        | 0                     |        |
| 17697  | 0                             |        | 0                     |        |
| 17698  | 2                             | 2      | 2                     | 2      |
| 17723  | 0                             |        | 0                     |        |
| 17727  | 0                             |        | 0                     |        |
| 17734  | 0                             |        | 0                     |        |
| 17737  | 0                             |        | 0                     |        |
| 17748  | 0                             |        | 0                     |        |

| respid | ICS Splitting/spraying: Q26_1 | Q26a_1 | ICS: Hesitancy: Q27_1 | Q27a_1 |
|--------|-------------------------------|--------|-----------------------|--------|
| 17749  | 0                             |        | 0                     |        |
| 17754  | 2                             | 2      | 2                     | 1      |
| 17766  | 1                             | 1      | 1                     | 1      |
| 17777  | 0                             |        | 0                     |        |
| 17780  | 3                             | 3      | 3                     | 2      |
| 17788  | 0                             |        | 0                     |        |
| 17801  | 1                             | 1      | 1                     | 1      |
| 17803  | 0                             |        | 0                     |        |
| 17807  | 0                             |        | 0                     |        |
| 17808  | 0                             |        | 0                     |        |
| 17809  | 2                             | 1      | 2                     | 1      |
| 17821  | 1                             | 1      | 0                     |        |
| 17827  | 3                             | 2      | 3                     | 2      |
| 17834  | 3                             | 2      | 3                     | 2      |
| 17838  | 1                             | 1      | 1                     | 1      |
| 17842  | 0                             |        | 0                     |        |
| 17862  | 1                             | 1      | 1                     | 1      |
| 17863  | 0                             |        | 0                     |        |
| 17871  | 3                             | 2      | 3                     | 2      |
| 17872  | 1                             | 0      | 0                     |        |
| 17903  | 1                             | 1      | 2                     | 0      |
| 17906  | 1                             | 1      | 1                     | 1      |
| 17910  | 3                             | 2      | 3                     | 2      |
| 17922  | 1                             | 1      | 0                     |        |
| 17923  | 1                             | 2      | 0                     |        |
| 17925  | 3                             | 2      | 2                     | 2      |
| 17926  | 0                             |        | 0                     |        |
| 17937  | 0                             |        | 0                     |        |
| 17956  | 0                             |        | 0                     |        |
| 17958  | 1                             | 1      | 1                     | 2      |
| 17985  | 1                             | 0      | 0                     |        |
| 17989  | 1                             | 2      | 1                     | 2      |



| respid | ICS Splitting/spraying: Q26_1 | Q26a_1 | ICS: Hesitancy: Q27_1 | Q27a_1 |
|--------|-------------------------------|--------|-----------------------|--------|
| 17995  | 0                             |        | 0                     |        |
| 18000  | 0                             |        | 0                     |        |
| 18010  | 0                             |        | 1                     | 1      |
| 18015  | 0                             |        | 0                     |        |
| 18018  | 2                             | 1      | 1                     | 1      |
| 18031  | 0                             |        | 0                     |        |
| 18033  | 1                             | 1      | 3                     | 2      |
| 18036  | 0                             |        | 0                     |        |
| 18041  | 0                             |        | 0                     |        |
| 18068  | 0                             |        | 0                     |        |
| 18080  | 0                             |        | 0                     |        |
| 18081  | 1                             | 0      | 1                     | 1      |
| 18083  | 3                             | 2      | 3                     | 3      |
| 18113  | 3                             | 2      | 1                     | 2      |
| 18115  | 1                             | 1      | 1                     | 1      |
| 18117  | 4                             | 3      | 5                     | 4      |
| 18129  | 1                             | 1      | 0                     |        |
| 18132  | 3                             | 2      | 3                     | 2      |
| 18146  | 3                             | 2      | 0                     |        |
| 18147  | 3                             | 3      | 3                     | 2      |
| 18153  | 0                             |        | 0                     |        |
| 18154  | 0                             |        | 1                     | 2      |
| 18157  | 0                             |        | 0                     |        |
| 18166  | 1                             | 1      | 0                     |        |
| 18169  | 0                             |        | 1                     | 0      |
| 18171  | 0                             |        | 0                     |        |
| 18173  | 0                             |        | 0                     |        |
| 18204  | 0                             |        | 0                     |        |
| 18210  | 3                             | 2      | 3                     | 2      |
| 18212  | 0                             |        | 0                     |        |
| 18220  | 3                             | 2      | 2                     | 2      |
| 18221  | 0                             |        | 0                     |        |

| respid | ICS Splitting/spraying: Q26_1 | Q26a_1 | ICS: Hesitancy: Q27_1 | Q27a_1 |
|--------|-------------------------------|--------|-----------------------|--------|
| 18228  | 0                             |        | 1                     | 0      |
| 18231  | 0                             |        | 0                     |        |
| 18233  | 1                             | 1      | 0                     |        |
| 18235  | 0                             |        | 0                     |        |
| 18237  | 0                             |        | 0                     |        |
| 18250  | 0                             |        | 0                     |        |
| 18253  | 0                             |        | 4                     | 2      |
| 18264  | 0                             |        | 0                     |        |
| 18285  | 0                             |        | 0                     |        |
| 18287  | 0                             |        | 0                     |        |
| 18296  | 0                             |        | 0                     |        |
| 18299  | 0                             |        | 1                     | 1      |
| 18313  | 1                             | 1      | 0                     |        |
| 18321  | 0                             |        | 0                     |        |
| 18324  | 0                             |        | 0                     |        |
| 18329  | 0                             |        | 0                     |        |
| 18332  | 0                             |        | 0                     |        |
| 18339  | 1                             | 1      | 2                     | 2      |
| 18340  | 1                             | 1      | 0                     |        |
| 18348  | 0                             |        | 0                     |        |
| 18355  | 1                             | 1      | 0                     |        |
| 18360  | 1                             | 0      | 1                     | 0      |
| 18380  | 0                             |        | 0                     |        |
| 18403  | 2                             | 2      | 3                     | 2      |
| 18405  | 2                             | 1      | 3                     | 1      |
| 18409  | 1                             | 0      | 0                     |        |
| 18445  | 1                             | 1      | 0                     |        |
| 18458  | 0                             |        | 0                     |        |
| 18477  | 2                             | 0      | 0                     |        |
| 18481  | 0                             |        | 0                     |        |
| 18491  | 0                             |        | 0                     |        |
| 18492  | 2                             | 1      | 0                     |        |

| respid | ICS Splitting/spraying: Q26_1 | Q26a_1 | ICS: Hesitancy: Q27_1 | Q27a_1 |
|--------|-------------------------------|--------|-----------------------|--------|
| 18494  | 0                             |        | 0                     |        |
| 18495  | 0                             |        | 0                     |        |
| 18496  | 0                             |        | 0                     |        |
| 18507  | 1                             | 1      | 2                     | 2      |
| 18509  | 0                             |        | 0                     |        |
| 18510  | 0                             |        | 0                     |        |
| 18513  | 0                             |        | 0                     |        |
| 18525  | 0                             |        | 0                     |        |
| 18526  | 2                             | 1      | 2                     | 0      |
| 18527  | 4                             | 3      | 3                     | 2      |
| 18536  | 0                             |        | 0                     |        |
| 18540  | 0                             |        | 0                     |        |
| 18548  | 0                             |        | 0                     |        |
| 18550  | 0                             |        | 0                     |        |
| 18556  | 0                             |        | 1                     | 0      |
| 18561  | 0                             |        | 0                     |        |
| 18577  | 2                             | 2      | 2                     | 2      |
| 18580  | 0                             |        | 0                     |        |
| 18633  | 0                             |        | 0                     |        |
| 18635  | 1                             | 2      | 1                     | 1      |
| 18636  | 0                             |        | 0                     |        |
| 18645  | 3                             | 3      | 2                     | 1      |
| 18649  | 0                             |        | 0                     |        |
| 18664  | 4                             | 2      | 0                     |        |
| 18668  | 0                             |        | 0                     |        |
| 18682  | 5                             | 3      | 5                     | 4      |
| 18685  | 0                             |        | 0                     |        |
| 18688  | 1                             | 1      | 1                     | 1      |
| 18689  | 2                             | 2      | 2                     | 3      |
| 18693  | 3                             | 3      | 3                     | 3      |
| 18694  | 1                             | 0      | 0                     |        |
| 18705  | 1                             | 0      | 0                     |        |

| respid | ICS Splitting/spraying: Q26_1 | Q26a_1 | ICS: Hesitancy: Q27_1 | Q27a_1 |
|--------|-------------------------------|--------|-----------------------|--------|
| 18710  | 1                             |        | 1                     | 0      |
| 18715  | 2                             |        | 1                     | 0      |
| 18718  | 0                             |        |                       | 1      |
| 18727  | 0                             |        |                       | 0      |
| 18732  | 0                             |        |                       | 0      |
| 18735  | 0                             |        |                       | 0      |
| 18742  | 0                             |        |                       | 1      |
| 18745  | 0                             |        |                       | 0      |
| 18747  | 0                             |        |                       | 0      |
| 18750  | 0                             |        |                       | 1      |
| 18751  | 1                             | 1      |                       | 1      |
| 18753  | 0                             |        |                       | 0      |
| 18754  | 0                             |        |                       | 0      |
| 18759  | 0                             |        |                       | 1      |
| 18780  | 0                             |        |                       | 0      |
| 18782  | 0                             |        |                       | 1      |
| 18807  | 4                             | 4      |                       | 4      |
| 18815  | 1                             | 0      |                       | 0      |
| 18818  | 0                             |        |                       | 0      |
| 18820  | 0                             |        |                       | 0      |
| 18823  | 3                             | 4      |                       | 5      |
| 18825  | 0                             |        |                       | 0      |
| 18828  | 0                             |        |                       | 0      |
| 18832  | 0                             |        |                       | 0      |
| 18834  | 3                             | 1      |                       | 2      |
| 18835  | 3                             | 3      |                       | 3      |
| 18837  | 0                             |        |                       | 0      |
| 18842  | 0                             |        |                       | 0      |
| 18846  | 0                             |        |                       | 0      |
| 18855  | 0                             |        |                       | 0      |
| 18856  | 0                             |        |                       | 0      |
| 18887  | 1                             | 1      |                       | 1      |

| respid | ICS Splitting/spraying: Q26_1 | Q26a_1 | ICS: Hesitancy: Q27_1 | Q27a_1 |
|--------|-------------------------------|--------|-----------------------|--------|
| 18903  | 1                             | 1      | 0                     |        |
| 18906  | 0                             |        | 0                     |        |
| 18910  | 0                             |        | 0                     |        |
| 18919  | 0                             |        | 0                     |        |
| 18928  | 0                             |        | 0                     |        |
| 18931  | 3                             | 0      | 0                     |        |
| 18939  | 2                             | 1      | 1                     | 1      |
| 18946  | 0                             |        | 0                     |        |
| 18952  | 0                             |        | 1                     | 1      |
| 18954  | 0                             |        | 1                     | 0      |
| 18982  | 0                             |        | 0                     |        |
| 18986  | 0                             |        | 0                     |        |
| 18989  | 1                             | 4      | 1                     | 4      |
| 18990  | 0                             |        | 0                     |        |
| 18996  | 0                             |        | 0                     |        |
| 18998  | 1                             | 0      | 0                     |        |
| 19009  | 1                             | 3      | 2                     | 3      |
| 19010  | 0                             |        | 0                     |        |
| 19017  | 0                             |        | 0                     |        |
| 19018  | 1                             | 0      | 0                     |        |
| 19020  | 0                             |        | 0                     |        |
| 19027  | 0                             |        | 0                     |        |
| 19035  | 1                             | 1      | 0                     |        |
| 19037  | 0                             |        | 0                     |        |
| 19048  | 0                             |        | 0                     |        |
| 19051  | 0                             |        | 0                     |        |
| 19054  | 2                             | 2      | 1                     | 1      |
| 19057  | 0                             |        | 0                     |        |
| 19073  | 0                             |        | 0                     |        |
| 19075  | 1                             | 0      | 0                     |        |
| 19079  | 3                             | 2      | 3                     | 2      |
| 19087  | 0                             |        | 0                     |        |

| respid | ICS Splitting/spraying: Q26_1 | Q26a_1 | ICS: Hesitancy: Q27_1 | Q27a_1 |
|--------|-------------------------------|--------|-----------------------|--------|
| 19090  | 0                             |        | 0                     |        |
| 19093  | 1                             | 1      | 0                     |        |
| 19099  | 3                             | 1      | 3                     | 2      |
| 19100  | 0                             |        | 0                     |        |
| 19101  | 0                             |        | 0                     |        |
| 19105  | 0                             |        | 0                     |        |
| 19111  | 2                             | 3      | 3                     | 4      |
| 19112  | 0                             |        | 0                     |        |
| 19117  | 3                             | 2      | 3                     | 1      |
| 19122  | 0                             |        | 0                     |        |
| 19126  | 0                             |        | 0                     |        |
| 19127  | 1                             | 0      | 0                     |        |
| 19131  | 3                             | 2      | 0                     |        |
| 19134  | 0                             |        | 0                     |        |
| 19149  | 0                             |        | 0                     |        |
| 19151  | 0                             |        | 0                     |        |
| 19164  | 1                             | 1      | 1                     | 1      |
| 19166  | 2                             | 0      | 0                     |        |
| 19172  | 0                             |        | 0                     |        |
| 19173  | 1                             | 1      | 1                     | 1      |
| 19180  | 3                             | 0      | 0                     |        |
| 19185  | 1                             | 0      | 1                     | 1      |
| 19189  | 0                             |        | 0                     |        |
| 19191  | 0                             |        | 0                     |        |
| 19198  | 0                             |        | 0                     |        |
| 19203  | 0                             |        | 0                     |        |
| 19209  | 0                             |        | 0                     |        |
| 19210  | 0                             |        | 0                     |        |
| 19218  | 0                             |        | 0                     |        |
| 19220  | 0                             |        | 0                     |        |
| 19225  | 1                             | 2      | 1                     | 1      |
| 19227  | 0                             |        | 0                     |        |

| respid | ICS Splitting/spraying: Q26_1 | Q26a_1 | ICS: Hesitancy: Q27_1 | Q27a_1 |
|--------|-------------------------------|--------|-----------------------|--------|
| 19228  | 0                             |        | 0                     |        |
| 19243  | 0                             |        | 0                     |        |
| 19244  | 1                             | 1      | 1                     | 1      |
| 19246  | 0                             |        | 0                     |        |
| 19248  | 0                             |        | 0                     |        |
| 19249  | 0                             |        | 0                     |        |
| 19252  | 0                             |        | 0                     |        |
| 19255  | 1                             | 1      | 0                     |        |
| 19257  | 0                             |        | 0                     |        |
| 19274  | 0                             |        | 0                     |        |
| 19279  | 0                             |        | 0                     |        |
| 19291  | 0                             |        | 1                     | 0      |
| 19292  | 0                             |        | 0                     |        |
| 19308  | 1                             | 1      | 0                     |        |
| 19310  | 0                             |        | 0                     |        |
| 19311  | 3                             | 3      | 0                     |        |
| 19326  | 0                             |        | 0                     |        |
| 19327  | 0                             |        | 0                     |        |
| 19329  | 0                             |        | 0                     |        |
| 19330  | 3                             | 2      | 3                     | 2      |
| 19333  | 1                             | 1      | 2                     | 2      |
| 19336  | 0                             |        | 0                     |        |
| 19343  | 1                             | 0      | 1                     | 0      |
| 19348  | 0                             |        | 0                     |        |
| 19349  | 2                             | 1      | 2                     | 1      |
| 19352  | 4                             | 2      | 3                     | 1      |
| 19356  | 0                             |        | 0                     |        |
| 19357  | 1                             | 1      | 2                     | 2      |
| 19358  | 0                             |        | 0                     |        |
| 19367  | 1                             | 1      | 0                     |        |
| 19376  | 0                             |        | 0                     |        |
| 19377  | 0                             |        | 0                     |        |

| respid | ICS Splitting/spraying: Q26_1 | Q26a_1 | ICS: Hesitancy: Q27_1 | Q27a_1 |
|--------|-------------------------------|--------|-----------------------|--------|
| 19380  | 0                             |        | 1                     | 1      |
| 19384  | 0                             |        | 0                     |        |
| 19391  | 5                             | 3      | 3                     | 3      |
| 19397  | 0                             |        | 0                     |        |
| 19398  | 0                             |        | 0                     |        |
| 19401  | 0                             |        | 0                     |        |
| 19402  | 0                             |        | 0                     |        |
| 19403  | 0                             |        | 0                     |        |
| 19405  | 0                             |        | 0                     |        |
| 19407  | 1                             | 1      | 0                     |        |
| 19415  | 0                             |        | 0                     |        |
| 19420  | 0                             |        | 0                     |        |
| 19423  | 1                             | 1      | 2                     | 2      |
| 19424  | 2                             | 1      | 3                     | 3      |
| 19426  | 0                             |        | 0                     |        |
| 19429  | 0                             |        | 0                     |        |
| 19435  | 1                             | 1      | 3                     | 1      |
| 19441  | 1                             | 1      | 0                     |        |
| 19450  | 0                             |        | 0                     |        |
| 19456  | 2                             | 3      | 2                     | 3      |
| 19457  | 0                             |        | 0                     |        |
| 19463  | 0                             |        | 0                     |        |
| 19467  | 0                             |        | 5                     | 4      |
| 19468  | 0                             |        | 0                     |        |
| 19471  | 0                             |        | 0                     |        |
| 19473  | 3                             | 0      | 5                     | 3      |
| 19478  | 0                             |        | 2                     | 2      |
| 19480  | 0                             |        | 0                     |        |
| 19481  | 0                             |        | 0                     |        |
| 19484  | 1                             | 0      | 0                     |        |
| 19487  | 0                             |        | 0                     |        |
| 19491  | 1                             | 0      | 1                     | 1      |



| respid | ICS Splitting/spraying: Q26_1 | Q26a_1 | ICS: Hesitancy: Q27_1 | Q27a_1 |
|--------|-------------------------------|--------|-----------------------|--------|
| 19495  | 1                             | 4      | 1                     | 4      |
| 19498  | 0                             |        | 1                     | 1      |
| 19500  | 2                             | 1      | 0                     |        |
| 19501  | 4                             | 3      | 2                     | 2      |
| 19503  | 0                             |        | 0                     |        |
| 19506  | 0                             |        | 0                     |        |
| 19508  | 0                             |        | 0                     |        |
| 19509  | 1                             | 0      | 0                     |        |
| 19518  | 1                             | 1      | 1                     | 1      |
| 19520  | 1                             | 0      | 1                     | 1      |
| 19536  | 0                             |        | 0                     |        |
| 19538  | 0                             |        | 0                     |        |
| 19541  | 0                             |        | 1                     | 1      |
| 19548  | 0                             |        | 0                     |        |
| 19553  | 0                             |        | 0                     |        |
| 19556  | 0                             |        | 0                     |        |
| 19559  | 0                             |        | 0                     |        |
| 19561  | 3                             | 2      | 0                     |        |
| 19562  | 0                             |        | 0                     |        |
| 19564  | 1                             | 1      | 1                     | 1      |
| 19567  | 4                             | 4      | 4                     | 4      |
| 19571  | 1                             | 0      | 1                     | 1      |
| 19576  | 3                             | 2      | 1                     | 1      |
| 19578  | 1                             | 0      | 0                     |        |
| 19606  | 0                             |        | 0                     |        |
| 19607  | 0                             |        | 0                     |        |
| 19608  | 0                             |        | 1                     | 2      |
| 19612  | 2                             | 2      | 3                     | 3      |
| 19618  | 1                             | 1      | 1                     | 1      |
| 19621  | 0                             |        | 0                     |        |
| 19624  | 2                             | 3      | 2                     | 3      |
| 19630  | 0                             |        | 0                     |        |

| respid | ICS Splitting/spraying: Q26_1 | Q26a_1 | ICS: Hesitancy: Q27_1 | Q27a_1 |
|--------|-------------------------------|--------|-----------------------|--------|
| 19637  | 5                             |        | 2                     | 0      |
| 19639  | 1                             |        | 0                     | 0      |
| 19647  | 1                             |        | 0                     | 1      |
| 19648  | 3                             |        | 3                     | 3      |
| 19660  | 0                             |        |                       | 0      |
| 19662  | 0                             |        |                       | 0      |
| 19669  | 0                             |        |                       | 0      |
| 19680  | 1                             |        | 0                     | 0      |
| 19682  | 0                             |        |                       | 0      |
| 19686  | 0                             |        |                       | 0      |
| 19700  | 0                             |        |                       | 1      |
| 19701  | 0                             |        |                       | 0      |
| 19704  | 0                             |        |                       | 0      |
| 19706  | 1                             |        | 1                     | 0      |
| 19707  | 2                             |        | 1                     | 2      |
| 19717  | 2                             |        | 2                     | 2      |
| 19718  | 0                             |        |                       | 0      |
| 19721  | 2                             |        | 1                     | 2      |
| 19722  | 0                             |        |                       | 0      |
| 19729  | 0                             |        |                       | 0      |
| 19738  | 2                             |        | 2                     | 2      |
| 19741  | 0                             |        |                       | 0      |
| 19742  | 2                             |        | 2                     | 2      |
| 19747  | 0                             |        |                       | 0      |
| 19748  | 0                             |        |                       | 0      |
| 19749  | 0                             |        |                       | 0      |
| 19756  | 0                             |        |                       | 0      |
| 19771  | 0                             |        |                       | 0      |
| 19772  | 2                             |        | 2                     | 2      |
| 19775  | 0                             |        |                       | 0      |
| 19783  | 0                             |        |                       | 0      |
| 19787  | 0                             |        |                       | 1      |

| respid | ICS Splitting/spraying: Q26_1 | Q26a_1 | ICS: Hesitancy: Q27_1 | Q27a_1 |
|--------|-------------------------------|--------|-----------------------|--------|
| 19790  | 0                             |        | 0                     |        |
| 19797  | 0                             |        | 0                     |        |
| 19802  | 0                             |        | 0                     |        |
| 19808  | 0                             |        | 0                     |        |
| 19810  | 0                             |        | 0                     |        |
| 19811  | 0                             |        | 0                     |        |
| 19812  | 0                             |        | 0                     |        |
| 19821  | 1                             | 1      | 1                     | 1      |
| 19826  | 0                             |        | 0                     |        |
| 19827  | 0                             |        | 0                     |        |
| 19830  | 0                             |        | 0                     |        |
| 19834  | 2                             | 1      | 0                     |        |
| 19838  | 2                             | 1      | 0                     |        |
| 19843  | 0                             |        | 0                     |        |
| 19845  | 1                             | 2      | 1                     | 2      |
| 19846  | 0                             |        | 0                     |        |
| 19852  | 0                             |        | 2                     | 3      |
| 19855  | 1                             | 1      | 0                     |        |
| 19858  | 3                             | 1      | 0                     |        |
| 19861  | 1                             | 1      | 1                     | 1      |
| 19863  | 0                             |        | 0                     |        |
| 19868  | 2                             | 1      | 1                     | 1      |
| 19874  | 0                             |        | 0                     |        |
| 19876  | 0                             |        | 0                     |        |
| 19880  | 1                             | 2      | 1                     | 1      |
| 19885  | 0                             |        | 0                     |        |
| 19890  | 0                             |        | 0                     |        |
| 19894  | 0                             |        | 0                     |        |
| 19895  | 0                             |        | 0                     |        |
| 19897  | 0                             |        | 0                     |        |
| 19906  | 0                             |        | 0                     |        |
| 19908  | 0                             |        | 0                     |        |

| respid | ICS Splitting/spraying: Q26_1 | Q26a_1 | ICS: Hesitancy: Q27_1 | Q27a_1 |
|--------|-------------------------------|--------|-----------------------|--------|
| 19912  | 0                             |        | 0                     |        |
| 19913  | 2                             | 1      | 1                     | 1      |
| 19914  | 2                             | 3      | 2                     | 2      |
| 19918  | 1                             | 1      | 1                     | 1      |
| 19924  | 3                             | 0      | 2                     | 1      |
| 19936  | 0                             |        | 0                     |        |
| 19940  | 0                             |        | 0                     |        |
| 19945  | 1                             | 1      | 1                     | 1      |
| 19948  | 0                             |        | 0                     |        |
| 19959  | 0                             |        | 0                     |        |
| 19961  | 3                             | 0      | 0                     |        |
| 19962  | 4                             | 0      | 1                     | 1      |
| 19965  | 0                             |        | 0                     |        |
| 19966  | 1                             | 1      | 1                     | 1      |
| 19973  | 0                             |        | 0                     |        |
| 19981  | 2                             | 2      | 2                     | 2      |
| 19986  | 2                             | 1      | 0                     |        |
| 19989  | 0                             |        | 0                     |        |
| 19998  | 0                             |        | 0                     |        |
| 20001  | 0                             |        | 0                     |        |
| 20005  | 0                             |        | 0                     |        |
| 20013  | 4                             | 3      | 4                     | 3      |
| 20015  | 2                             | 0      | 0                     |        |
| 20017  | 0                             |        | 0                     |        |
| 20020  | 0                             |        | 0                     |        |
| 20021  | 0                             |        | 0                     |        |
| 20026  | 0                             |        | 0                     |        |
| 20028  | 1                             | 1      | 0                     |        |
| 20030  | 0                             |        | 1                     | 0      |
| 20031  | 0                             |        | 0                     |        |
| 20034  | 0                             |        | 0                     |        |
| 20035  | 0                             |        | 0                     |        |

| respid | ICS Splitting/spraying: Q26_1 | Q26a_1 | ICS: Hesitancy: Q27_1 | Q27a_1 |
|--------|-------------------------------|--------|-----------------------|--------|
| 20040  | 0                             |        | 0                     |        |
| 20045  | 0                             |        | 0                     |        |
| 20048  | 1                             | 1      | 5                     | 4      |
| 20053  | 0                             |        | 0                     |        |
| 20064  | 1                             | 1      | 1                     | 1      |
| 20071  | 2                             | 1      | 0                     |        |
| 20072  | 4                             | 4      | 4                     | 4      |
| 20076  | 0                             |        | 0                     |        |
| 20081  | 1                             | 0      | 1                     | 1      |
| 20082  | 3                             | 3      | 3                     | 3      |
| 20083  | 0                             |        | 0                     |        |
| 20088  | 2                             | 1      | 1                     | 1      |
| 20089  | 0                             |        | 0                     |        |
| 20099  | 3                             | 0      | 0                     |        |
| 20101  | 0                             |        | 0                     |        |
| 20102  | 1                             | 0      | 1                     | 0      |
| 20109  | 0                             |        | 1                     | 0      |
| 20118  | 0                             |        | 1                     | 1      |
| 20119  | 0                             |        | 0                     |        |
| 20124  | 0                             |        | 0                     |        |
| 20126  | 0                             |        | 0                     |        |
| 20130  | 0                             |        | 0                     |        |
| 20131  | 0                             |        | 1                     | 0      |
| 20134  | 0                             |        | 0                     |        |
| 20146  | 0                             |        | 0                     |        |
| 20152  | 0                             |        | 0                     |        |
| 20155  | 0                             |        | 0                     |        |
| 20156  | 0                             |        | 0                     |        |
| 20157  | 0                             |        | 0                     |        |
| 20164  | 0                             |        | 0                     |        |
| 20168  | 1                             | 1      | 1                     | 1      |
| 20173  | 3                             | 3      | 2                     | 2      |

| respid | ICS Splitting/spraying: Q26_1 | Q26a_1 | ICS: Hesitancy: Q27_1 | Q27a_1 |
|--------|-------------------------------|--------|-----------------------|--------|
| 20174  | 0                             |        | 0                     |        |
| 20175  | 3                             | 3      | 3                     | 3      |
| 20189  | 0                             |        | 0                     |        |
| 20190  | 0                             |        | 0                     |        |
| 20201  | 1                             | 0      | 0                     |        |
| 20202  | 0                             |        | 0                     |        |
| 20204  | 0                             |        | 0                     |        |
| 20206  | 2                             | 2      | 1                     | 1      |
| 20207  | 0                             |        | 0                     |        |
| 20212  | 0                             |        | 0                     |        |
| 20213  | 0                             |        | 0                     |        |
| 20217  | 1                             | 1      | 0                     |        |
| 20222  | 4                             | 2      | 1                     | 1      |
| 20227  | 0                             |        | 0                     |        |
| 20228  | 0                             |        | 0                     |        |
| 20238  | 0                             |        | 0                     |        |
| 20242  | 5                             | 0      | 0                     |        |
| 20246  | 0                             |        | 0                     |        |
| 20255  | 2                             | 2      | 2                     | 2      |
| 20256  | 0                             |        | 2                     | 2      |
| 20259  | 1                             | 1      | 1                     | 1      |
| 20262  | 0                             |        | 0                     |        |
| 20274  | 0                             |        | 1                     | 0      |
| 20283  | 2                             | 2      | 2                     | 2      |
| 20284  | 0                             |        | 0                     |        |
| 20291  | 0                             |        | 0                     |        |
| 20292  | 0                             |        | 0                     |        |
| 20293  | 0                             |        | 0                     |        |
| 20298  | 3                             | 1      | 1                     | 2      |
| 20301  | 0                             |        | 0                     |        |
| 20303  | 0                             |        | 1                     | 1      |
| 20309  | 0                             |        | 0                     |        |

| respid | ICS Splitting/spraying: Q26_1 | Q26a_1 | ICS: Hesitancy: Q27_1 | Q27a_1 |
|--------|-------------------------------|--------|-----------------------|--------|
| 20318  | 1                             |        | 0                     |        |
| 20324  | 0                             |        | 0                     |        |
| 20335  | 2                             |        | 1                     | 2      |
| 20336  | 1                             |        | 0                     |        |
| 20339  | 1                             |        | 1                     |        |
| 20348  | 0                             |        |                       | 0      |
| 20351  | 0                             |        |                       | 0      |
| 20353  | 0                             |        |                       | 0      |
| 20356  | 0                             |        |                       | 0      |
| 20357  | 0                             |        |                       | 0      |
| 20366  | 1                             |        | 0                     |        |
| 20369  | 4                             |        | 4                     | 4      |
| 20372  | 3                             |        | 1                     |        |
| 20375  | 0                             |        |                       | 0      |
| 20379  | 0                             |        |                       | 0      |
| 20380  | 0                             |        |                       | 0      |
| 20396  | 1                             |        | 2                     |        |
| 20398  | 1                             |        | 0                     |        |
| 20412  | 0                             |        |                       | 0      |
| 20415  | 0                             |        |                       | 0      |
| 20424  | 1                             |        | 1                     | 1      |
| 20434  | 0                             |        |                       | 0      |
| 20435  | 1                             |        | 0                     | 1      |
| 20440  | 1                             |        | 1                     | 0      |
| 20441  | 1                             |        | 1                     | 1      |
| 20445  | 1                             |        | 0                     |        |
| 20446  | 3                             |        | 2                     | 3      |
| 20450  | 0                             |        |                       | 0      |
| 20453  | 2                             |        | 3                     | 1      |
| 20458  | 0                             |        |                       | 0      |
| 20464  | 0                             |        |                       | 0      |
| 20471  | 0                             |        |                       | 0      |

| respid | ICS Splitting/spraying: Q26_1 | Q26a_1 | ICS: Hesitancy: Q27_1 | Q27a_1 |
|--------|-------------------------------|--------|-----------------------|--------|
| 20473  | 0                             |        | 0                     |        |
| 20474  | 0                             |        | 0                     |        |
| 20477  | 0                             |        | 0                     |        |
| 20479  | 0                             |        | 0                     |        |
| 20485  | 0                             |        | 0                     |        |
| 20487  | 0                             |        | 0                     |        |
| 20488  | 2                             | 0      | 0                     |        |
| 20494  | 0                             |        | 0                     |        |
| 20502  | 3                             | 2      | 3                     | 3      |
| 20503  | 0                             |        | 0                     |        |
| 20510  | 2                             | 0      | 1                     | 0      |
| 20512  | 0                             |        | 0                     |        |
| 20516  | 2                             | 2      | 2                     | 2      |
| 20522  | 0                             |        | 2                     | 2      |
| 20527  | 0                             |        | 0                     |        |
| 20529  | 1                             | 0      | 1                     | 1      |
| 20535  | 2                             | 0      | 0                     |        |
| 20543  | 0                             |        | 0                     |        |
| 20546  | 0                             |        | 1                     | 0      |
| 20548  | 0                             |        | 0                     |        |
| 20552  | 0                             |        | 0                     |        |
| 20556  | 3                             | 0      | 2                     | 1      |
| 20566  | 2                             | 1      | 2                     | 2      |
| 20576  | 1                             | 1      | 1                     | 1      |
| 20587  | 0                             |        | 0                     |        |
| 20589  | 1                             | 0      | 0                     |        |
| 20593  | 0                             |        | 0                     |        |
| 20594  | 0                             |        | 0                     |        |
| 20602  | 1                             | 0      | 1                     | 1      |
| 20607  | 0                             |        | 0                     |        |
| 20608  | 0                             |        | 0                     |        |
| 20611  | 0                             |        | 0                     |        |



| respid | ICS Splitting/spraying: Q26_1 | Q26a_1 | ICS: Hesitancy: Q27_1 | Q27a_1 |
|--------|-------------------------------|--------|-----------------------|--------|
| 20612  | 0                             |        | 0                     |        |
| 20615  | 0                             |        | 0                     |        |
| 20625  | 0                             |        | 0                     |        |
| 20630  | 0                             |        | 1                     | 0      |
| 20639  | 0                             |        | 0                     |        |
| 20643  | 0                             |        | 0                     |        |
| 20645  | 0                             |        | 0                     |        |
| 20647  | 1                             | 0      | 0                     |        |
| 20652  | 4                             | 4      | 4                     | 4      |
| 20661  | 0                             |        | 0                     |        |
| 20665  | 0                             |        | 0                     |        |
| 20679  | 1                             | 0      | 0                     |        |
| 20682  | 0                             |        | 2                     | 1      |
| 20683  | 0                             |        | 0                     |        |
| 20700  | 0                             |        | 0                     |        |
| 20702  | 0                             |        | 0                     |        |
| 20709  | 0                             |        | 0                     |        |
| 20715  | 3                             | 3      | 3                     | 3      |
| 20718  | 0                             |        | 0                     |        |
| 20722  | 0                             |        | 0                     |        |
| 20729  | 0                             |        | 0                     |        |
| 20732  | 0                             |        | 0                     |        |
| 20746  | 3                             | 2      | 2                     | 1      |
| 20747  | 0                             |        | 0                     |        |
| 20758  | 0                             |        | 1                     | 1      |
| 20767  | 0                             |        | 0                     |        |
| 20777  | 0                             |        | 0                     |        |
| 20778  | 0                             |        | 0                     |        |
| 20780  | 0                             |        | 0                     |        |
| 20800  | 0                             |        | 0                     |        |
| 20810  | 0                             |        | 0                     |        |
| 20814  | 0                             |        | 0                     |        |

| respid | ICS Splitting/spraying: Q26_1 | Q26a_1 | ICS: Hesitancy: Q27_1 | Q27a_1 |
|--------|-------------------------------|--------|-----------------------|--------|
| 20816  | 0                             |        | 1                     | 0      |
| 20832  | 0                             |        | 0                     |        |
| 20838  | 0                             |        | 0                     |        |
| 20841  | 0                             |        | 2                     | 1      |
| 20848  | 0                             |        | 0                     |        |
| 20850  | 0                             |        | 0                     |        |
| 20851  | 0                             |        | 0                     |        |
| 20861  | 0                             |        | 0                     |        |
| 20870  | 1                             | 2      | 1                     | 2      |
| 20880  | 3                             | 2      | 0                     |        |
| 20883  | 1                             | 1      | 0                     |        |
| 20894  | 0                             |        | 0                     |        |
| 20896  | 3                             | 2      | 2                     | 3      |
| 20901  | 2                             | 2      | 2                     | 2      |
| 20903  | 0                             |        | 0                     |        |
| 20909  | 0                             |        | 0                     |        |
| 20919  | 1                             | 0      | 0                     |        |
| 20925  | 1                             | 0      | 0                     |        |
| 20935  | 0                             |        | 0                     |        |
| 20939  | 0                             |        | 1                     | 0      |
| 20956  | 4                             | 3      | 3                     | 2      |
| 20970  | 0                             |        | 0                     |        |
| 20974  | 0                             |        | 2                     | 2      |
| 20975  | 0                             |        | 0                     |        |
| 20984  | 0                             |        | 0                     |        |
| 20988  | 0                             |        | 0                     |        |
| 20996  | 0                             |        | 0                     |        |
| 20998  | 0                             |        | 0                     |        |
| 21007  | 0                             |        | 0                     |        |
| 21008  | 0                             |        | 0                     |        |
| 21014  | 0                             |        | 0                     |        |
| 21020  | 0                             |        | 0                     |        |

| respid | ICS Splitting/spraying: Q26_1 | Q26a_1 | ICS: Hesitancy: Q27_1 | Q27a_1 |
|--------|-------------------------------|--------|-----------------------|--------|
| 21022  | 2                             | 0      | 1                     | 1      |
| 21024  | 0                             |        | 0                     |        |
| 21026  | 0                             |        | 0                     |        |
| 21027  | 0                             |        | 0                     |        |
| 21030  | 0                             |        | 1                     | 2      |
| 21032  | 3                             | 3      | 3                     | 3      |
| 21040  | 0                             |        | 0                     |        |
| 21045  | 0                             |        | 0                     |        |
| 21058  | 1                             | 0      | 1                     | 0      |
| 21064  | 0                             |        | 0                     |        |
| 21073  | 0                             |        | 0                     |        |
| 21086  | 0                             |        | 1                     | 1      |
| 21092  | 3                             | 3      | 4                     | 4      |
| 21096  | 3                             | 3      | 3                     | 2      |
| 21103  | 0                             |        | 1                     | 1      |
| 21120  | 2                             | 1      | 3                     | 2      |
| 21125  | 0                             |        | 0                     |        |
| 21126  | 0                             |        | 0                     |        |
| 21132  | 0                             |        | 0                     |        |
| 21139  | 2                             | 2      | 2                     | 2      |
| 21147  | 0                             |        | 0                     |        |
| 21148  | 0                             |        | 0                     |        |
| 21149  | 1                             | 0      | 0                     |        |
| 21164  | 0                             |        | 1                     | 1      |
| 21165  | 1                             | 2      | 0                     |        |
| 21171  | 1                             | 2      | 2                     | 2      |
| 21176  | 0                             |        | 0                     |        |
| 21187  | 3                             | 0      | 2                     | 0      |
| 21192  | 0                             |        | 0                     |        |
| 21198  | 0                             |        | 0                     |        |
| 21199  | 0                             |        | 0                     |        |
| 21206  | 2                             | 2      | 2                     | 2      |

| respid | ICS Splitting/spraying: Q26_1 | Q26a_1 | ICS: Hesitancy: Q27_1 | Q27a_1 |
|--------|-------------------------------|--------|-----------------------|--------|
| 21212  | 0                             |        | 0                     |        |
| 21216  | 0                             |        | 0                     |        |
| 21217  | 2                             | 2      | 3                     | 3      |
| 21228  | 1                             | 2      | 1                     | 1      |
| 21229  | 0                             |        | 0                     |        |
| 21230  | 0                             |        | 0                     |        |
| 21243  | 2                             | 1      | 2                     | 2      |
| 21247  | 0                             |        | 0                     |        |
| 21253  | 0                             |        | 0                     |        |
| 21264  | 2                             | 2      | 3                     | 2      |
| 21265  | 1                             | 0      | 0                     |        |
| 21273  | 2                             | 2      | 1                     | 1      |
| 21275  | 0                             |        | 0                     |        |
| 21278  | 0                             |        | 0                     |        |
| 21291  | 2                             | 1      | 3                     | 2      |
| 21298  | 0                             |        | 0                     |        |
| 21301  | 1                             | 3      | 0                     |        |
| 21312  | 4                             | 3      | 4                     | 3      |
| 21323  | 0                             |        | 1                     | 1      |
| 21325  | 1                             | 1      | 1                     | 1      |
| 21341  | 0                             |        | 0                     |        |
| 21349  | 2                             | 2      | 2                     | 1      |
| 21350  | 1                             | 1      | 0                     |        |
| 21354  | 0                             |        | 0                     |        |
| 21372  | 2                             | 1      | 1                     | 1      |
| 21373  | 1                             | 1      | 1                     | 1      |
| 21378  | 0                             |        | 0                     |        |
| 21393  | 0                             |        | 0                     |        |
| 21401  | 0                             |        | 1                     | 0      |
| 21405  | 0                             |        | 0                     |        |
| 21406  | 0                             |        | 0                     |        |
| 21407  | 1                             | 0      | 0                     |        |

| respid | ICS Splitting/spraying: Q26_1 | Q26a_1 | ICS: Hesitancy: Q27_1 | Q27a_1 |
|--------|-------------------------------|--------|-----------------------|--------|
| 21418  | 0                             |        | 0                     |        |
| 21420  | 0                             |        | 0                     |        |
| 21421  | 0                             |        | 0                     |        |
| 21446  | 2                             | 2      | 2                     | 2      |
| 21449  | 2                             | 2      | 2                     | 2      |
| 21452  | 0                             |        | 1                     | 1      |
| 21455  | 0                             |        | 1                     | 2      |
| 21469  | 0                             |        | 0                     |        |
| 21471  | 0                             |        | 1                     | 0      |
| 21472  | 0                             |        | 0                     |        |
| 21474  | 0                             |        | 0                     |        |
| 21479  | 3                             | 2      | 0                     |        |
| 21485  | 0                             |        | 0                     |        |
| 21512  | 0                             |        | 0                     |        |
| 21513  | 0                             |        | 0                     |        |
| 21514  | 0                             |        | 2                     | 2      |
| 21520  | 1                             | 1      | 0                     |        |
| 21539  | 1                             | 1      | 0                     |        |
| 21553  | 3                             | 0      | 0                     |        |
| 21560  | 0                             |        | 0                     |        |
| 21561  | 0                             |        | 0                     |        |
| 21563  | 0                             |        | 1                     | 2      |
| 21565  | 0                             |        | 0                     |        |
| 21582  | 1                             | 1      | 1                     | 1      |
| 21584  | 1                             | 1      | 0                     |        |
| 21585  | 0                             |        | 2                     | 2      |
| 21586  | 3                             | 2      | 0                     |        |
| 21587  | 0                             |        | 0                     |        |
| 21590  | 5                             | 1      | 1                     | 3      |
| 21601  | 2                             | 1      | 2                     | 1      |
| 21611  | 2                             | 2      | 1                     | 2      |
| 21612  | 0                             |        | 0                     |        |

| respid | ICS Splitting/spraying: Q26_1 | Q26a_1 | ICS: Hesitancy: Q27_1 | Q27a_1 |
|--------|-------------------------------|--------|-----------------------|--------|
| 21625  | 3                             | 1      | 2                     | 1      |
| 21633  | 0                             |        | 0                     |        |
| 21640  | 0                             |        | 0                     |        |
| 21647  | 0                             |        | 0                     |        |
| 21648  | 2                             | 3      | 4                     | 4      |
| 21656  | 0                             |        | 0                     |        |
| 21657  | 1                             | 0      | 0                     |        |
| 21658  | 2                             | 2      | 2                     | 2      |
| 21665  | 3                             | 2      | 3                     | 3      |
| 21666  | 2                             | 2      | 3                     | 3      |
| 21668  | 4                             | 3      | 4                     | 3      |
| 21673  | 0                             |        | 0                     |        |
| 21681  | 0                             |        | 0                     |        |
| 21682  | 0                             |        | 0                     |        |
| 21685  | 0                             |        | 0                     |        |
| 21692  | 0                             |        | 0                     |        |
| 21697  | 0                             |        | 0                     |        |
| 21711  | 0                             |        | 0                     |        |
| 21715  | 2                             | 1      | 2                     | 1      |
| 21726  | 0                             |        | 0                     |        |
| 21748  | 0                             |        | 0                     |        |
| 21761  | 0                             |        | 0                     |        |
| 21769  | 2                             | 2      | 2                     | 2      |
| 21774  | 1                             | 1      | 1                     | 1      |
| 21778  | 0                             |        | 0                     |        |
| 21785  | 2                             | 2      | 0                     |        |
| 21799  | 1                             | 1      | 0                     |        |
| 21820  | 4                             | 3      | 4                     | 3      |
| 21837  | 0                             |        | 0                     |        |
| 21845  | 2                             | 2      | 2                     | 3      |
| 21846  | 0                             |        | 0                     |        |
| 21849  | 1                             | 0      | 0                     |        |

| respid | ICS Splitting/spraying: Q26_1 | Q26a_1 | ICS: Hesitancy: Q27_1 | Q27a_1 |
|--------|-------------------------------|--------|-----------------------|--------|
| 21850  | 2                             | 1      | 1                     | 1      |
| 21855  | 0                             |        | 0                     |        |
| 21859  | 0                             |        | 0                     |        |
| 21861  | 3                             | 3      | 0                     |        |
| 21866  | 0                             |        | 0                     |        |
| 21873  | 3                             | 2      | 1                     | 1      |
| 21876  | 0                             |        | 0                     |        |
| 21882  | 0                             |        | 0                     |        |
| 21884  | 1                             | 1      | 1                     | 1      |
| 21887  | 1                             | 1      | 1                     | 1      |
| 21892  | 0                             |        | 0                     |        |
| 21907  | 0                             |        | 1                     | 1      |
| 21910  | 3                             | 3      | 3                     | 3      |
| 21912  | 1                             | 1      | 2                     | 1      |
| 21914  | 1                             | 1      | 0                     |        |
| 21925  | 0                             |        | 0                     |        |
| 21937  | 0                             |        | 0                     |        |
| 21938  | 1                             | 0      | 0                     |        |
| 21940  | 1                             | 0      | 0                     |        |
| 21942  | 0                             |        | 0                     |        |
| 21947  | 0                             |        | 0                     |        |
| 21948  | 0                             |        | 0                     |        |
| 21961  | 0                             |        | 0                     |        |
| 21977  | 3                             | 2      | 2                     | 2      |
| 21983  | 0                             |        | 0                     |        |
| 21986  | 1                             | 2      | 2                     | 1      |
| 21988  | 1                             | 0      | 0                     |        |
| 21996  | 0                             |        | 0                     |        |
| 21997  | 0                             |        | 1                     | 1      |
| 22005  | 0                             |        | 0                     |        |
| 22013  | 0                             |        | 0                     |        |
| 22018  | 0                             |        | 0                     |        |

| respid | ICS Splitting/spraying: Q26_1 | Q26a_1 | ICS: Hesitancy: Q27_1 | Q27a_1 |
|--------|-------------------------------|--------|-----------------------|--------|
| 22019  | 1                             | 1      | 1                     | 1      |
| 22071  | 0                             |        | 0                     |        |
| 22082  | 0                             |        | 0                     |        |
| 22085  | 5                             | 0      | 0                     |        |
| 22092  | 0                             |        | 0                     |        |
| 22097  | 0                             |        | 0                     |        |
| 22111  | 0                             |        | 0                     |        |
| 22118  | 1                             | 1      | 0                     |        |
| 22132  | 0                             |        | 0                     |        |
| 22133  | 0                             |        | 0                     |        |
| 22139  | 0                             |        | 0                     |        |
| 22142  | 4                             | 3      | 4                     | 3      |
| 22146  | 0                             |        | 0                     |        |
| 22181  | 0                             |        | 0                     |        |
| 22202  | 1                             | 0      | 0                     |        |
| 22214  | 0                             |        | 0                     |        |
| 22223  | 0                             |        | 0                     |        |
| 22227  | 2                             | 1      | 1                     | 1      |
| 22229  | 0                             |        | 0                     |        |
| 22239  | 0                             |        | 0                     |        |
| 22245  | 4                             | 3      | 4                     | 3      |
| 22256  | 0                             |        | 0                     |        |
| 22260  | 0                             |        | 1                     | 1      |
| 22298  | 2                             | 1      | 2                     | 1      |
| 22321  | 1                             | 1      | 0                     |        |
| 22340  | 0                             |        | 0                     |        |
| 22346  | 2                             | 2      | 1                     | 1      |
| 22356  | 0                             |        | 0                     |        |
| 22361  | 2                             | 2      | 3                     | 2      |
| 22364  | 0                             |        | 0                     |        |
| 22368  | 0                             |        | 0                     |        |
| 22374  | 2                             | 1      | 0                     |        |



| respid | ICS Splitting/spraying: Q26_1 | Q26a_1 | ICS: Hesitancy: Q27_1 | Q27a_1 |
|--------|-------------------------------|--------|-----------------------|--------|
| 22375  | 0                             |        | 0                     |        |
| 22377  | 2                             | 0      | 2                     | 0      |
| 22383  | 0                             |        | 0                     |        |
| 22387  | 5                             | 3      | 3                     | 2      |
| 22392  | 0                             |        | 0                     |        |
| 22393  | 1                             | 1      | 1                     | 1      |
| 22394  | 0                             |        | 0                     |        |
| 22395  | 0                             |        | 0                     |        |
| 22401  | 0                             |        | 0                     |        |
| 22407  | 0                             |        | 0                     |        |
| 22410  | 3                             | 0      | 0                     |        |
| 22418  | 0                             |        | 0                     |        |
| 22421  | 0                             |        | 0                     |        |
| 22423  | 0                             |        | 0                     |        |
| 22425  | 0                             |        | 0                     |        |
| 22427  | 0                             |        | 0                     |        |
| 22431  | 2                             | 2      | 2                     | 2      |
| 22435  | 0                             |        | 0                     |        |
| 22436  | 0                             |        | 0                     |        |
| 22442  | 0                             |        | 0                     |        |
| 22444  | 2                             | 2      | 2                     | 3      |
| 22445  | 2                             | 1      | 1                     | 0      |
| 22446  | 0                             |        | 0                     |        |
| 22448  | 1                             | 1      | 1                     | 2      |
| 22449  | 0                             |        | 0                     |        |
| 22450  | 1                             | 1      | 0                     |        |
| 22453  | 1                             | 1      | 2                     | 2      |
| 22465  | 1                             | 1      | 1                     | 1      |
| 22472  | 1                             | 0      | 1                     | 1      |
| 22475  | 0                             |        | 0                     |        |
| 22478  | 1                             | 1      | 1                     | 1      |
| 22491  | 0                             |        | 1                     | 1      |

| respid | ICS Splitting/spraying: Q26_1 | Q26a_1 | ICS: Hesitancy: Q27_1 | Q27a_1 |
|--------|-------------------------------|--------|-----------------------|--------|
| 22497  | 1                             | 1      | 2                     | 1      |
| 22498  | 1                             | 1      | 1                     | 1      |
| 22499  | 0                             |        | 0                     |        |
| 22503  | 0                             |        | 0                     |        |
| 22507  | 0                             |        | 0                     |        |
| 22513  | 1                             | 0      | 1                     | 1      |
| 22517  | 0                             |        | 0                     |        |
| 22524  | 2                             | 1      | 0                     |        |
| 22528  | 0                             |        | 0                     |        |
| 22544  | 0                             |        | 1                     | 1      |
| 22571  | 0                             |        | 0                     |        |
| 22576  | 0                             |        | 0                     |        |
| 22579  | 0                             |        | 0                     |        |
| 22583  | 1                             | 0      | 0                     |        |
| 22591  | 3                             | 2      | 3                     | 2      |
| 22592  | 0                             |        | 0                     |        |
| 22612  | 0                             |        | 0                     |        |
| 22613  | 4                             | 1      | 1                     | 1      |
| 22615  | 1                             | 1      | 1                     | 1      |
| 22621  | 1                             | 0      | 1                     | 0      |
| 22625  | 0                             |        | 0                     |        |
| 22628  | 0                             |        | 0                     |        |
| 22632  | 0                             |        | 0                     |        |
| 22639  | 0                             |        | 0                     |        |
| 22648  | 0                             |        | 5                     | 3      |
| 22649  | 2                             | 1      | 1                     | 0      |
| 22655  | 0                             |        | 0                     |        |
| 22659  | 0                             |        | 0                     |        |
| 22660  | 0                             |        | 0                     |        |
| 22666  | 0                             |        | 1                     | 0      |
| 22667  | 0                             |        | 0                     |        |
| 22670  | 0                             |        | 0                     |        |

| respid | ICS Splitting/spraying: Q26_1 | Q26a_1 | ICS: Hesitancy: Q27_1 | Q27a_1 |
|--------|-------------------------------|--------|-----------------------|--------|
| 22681  | 0                             |        | 0                     |        |
| 22683  | 1                             | 0      | 1                     | 0      |
| 22688  | 0                             |        | 0                     |        |
| 22695  | 0                             |        | 1                     | 1      |
| 22696  | 0                             |        | 0                     |        |
| 22705  | 3                             | 2      | 3                     | 2      |
| 22718  | 4                             | 1      | 2                     | 1      |
| 22720  | 0                             |        | 2                     | 1      |
| 22724  | 0                             |        | 0                     |        |
| 22728  | 0                             |        | 0                     |        |
| 22751  | 0                             |        | 0                     |        |
| 22782  | 3                             | 2      | 5                     | 4      |
| 22786  | 3                             | 3      | 3                     | 3      |
| 22788  | 1                             | 1      | 0                     |        |
| 22810  | 1                             | 1      | 1                     | 1      |
| 22816  | 0                             |        | 0                     |        |
| 22818  | 0                             |        | 0                     |        |
| 22854  | 0                             |        | 0                     |        |
| 22858  | 0                             |        | 0                     |        |
| 22862  | 0                             |        | 0                     |        |
| 22865  | 1                             | 0      | 0                     |        |
| 22868  | 0                             |        | 0                     |        |
| 22869  | 2                             | 2      | 1                     | 1      |
| 22873  | 0                             |        | 0                     |        |
| 22875  | 3                             | 1      | 1                     | 0      |
| 22876  | 0                             |        | 0                     |        |
| 22882  | 0                             |        | 1                     | 1      |
| 22884  | 0                             |        | 0                     |        |
| 22887  | 0                             |        | 0                     |        |
| 22888  | 0                             |        | 0                     |        |
| 22900  | 0                             |        | 0                     |        |
| 22901  | 0                             |        | 0                     |        |

| respid | ICS Splitting/spraying: Q26_1 | Q26a_1 | ICS: Hesitancy: Q27_1 | Q27a_1 |
|--------|-------------------------------|--------|-----------------------|--------|
| 22912  | 0                             |        | 0                     |        |
| 22913  | 1                             | 1      | 0                     |        |
| 22921  | 0                             |        | 0                     |        |
| 22925  | 1                             | 1      | 0                     |        |
| 22940  | 0                             |        | 0                     |        |
| 22941  | 0                             |        | 2                     | 1      |
| 22947  | 0                             |        | 1                     | 0      |
| 22948  | 0                             |        | 0                     |        |
| 22964  | 1                             | 1      | 1                     | 1      |
| 22966  | 4                             | 3      | 0                     |        |
| 22969  | 0                             |        | 0                     |        |
| 22971  | 0                             |        | 0                     |        |
| 22988  | 0                             |        | 0                     |        |
| 22990  | 0                             |        | 0                     |        |
| 23000  | 0                             |        | 0                     |        |
| 23016  | 0                             |        | 0                     |        |
| 23026  | 2                             | 0      | 3                     | 2      |
| 23035  | 0                             |        | 0                     |        |
| 23037  | 0                             |        | 1                     | 2      |
| 23044  | 0                             |        | 0                     |        |
| 23046  | 0                             |        | 1                     | 0      |
| 23047  | 0                             |        | 0                     |        |
| 23049  | 0                             |        | 0                     |        |
| 23055  | 2                             | 0      | 0                     |        |
| 23066  | 0                             |        | 1                     | 0      |
| 23075  | 0                             |        | 0                     |        |
| 23081  | 2                             | 0      | 0                     |        |
| 23087  | 0                             |        | 0                     |        |
| 23094  | 0                             |        | 0                     |        |
| 23099  | 0                             |        | 0                     |        |
| 23101  | 0                             |        | 0                     |        |
| 23105  | 0                             |        | 0                     |        |

| respid | ICS Splitting/spraying: Q26_1 | Q26a_1 | ICS: Hesitancy: Q27_1 | Q27a_1 |
|--------|-------------------------------|--------|-----------------------|--------|
| 23115  | 2                             | 1      | 1                     | 1      |
| 23121  | 0                             |        | 0                     |        |
| 23127  | 0                             |        | 0                     |        |
| 23131  | 0                             |        | 0                     |        |
| 23134  | 0                             |        | 0                     |        |
| 23145  | 0                             |        | 0                     |        |
| 23151  | 0                             |        | 0                     |        |
| 23161  | 0                             |        | 0                     |        |
| 23169  | 1                             | 1      | 1                     | 1      |
| 23173  | 0                             |        | 0                     |        |
| 23174  | 1                             | 0      | 1                     | 1      |
| 23186  | 0                             |        | 2                     | 2      |
| 23195  | 0                             |        | 0                     |        |
| 23197  | 0                             |        | 0                     |        |
| 23198  | 0                             |        | 0                     |        |
| 23203  | 0                             |        | 0                     |        |
| 23204  | 5                             | 3      | 0                     |        |
| 23212  | 0                             |        | 0                     |        |
| 23214  | 1                             | 0      | 0                     |        |
| 23221  | 1                             | 1      | 0                     |        |
| 23237  | 0                             |        | 0                     |        |
| 23251  | 0                             |        | 0                     |        |
| 23254  | 0                             |        | 0                     |        |
| 23262  | 1                             | 2      | 0                     |        |
| 23267  | 0                             |        | 1                     | 1      |
| 23268  | 5                             | 1      | 0                     |        |
| 23273  | 1                             | 0      | 0                     |        |
| 23278  | 1                             | 1      | 0                     |        |
| 23279  | 0                             |        | 0                     |        |
| 23281  | 3                             | 2      | 3                     | 2      |
| 23282  | 4                             | 2      | 2                     | 2      |
| 23283  | 0                             |        | 0                     |        |

| respid | ICS Splitting/spraying: Q26_1 | Q26a_1 | ICS: Hesitancy: Q27_1 | Q27a_1 |
|--------|-------------------------------|--------|-----------------------|--------|
| 23285  | 0                             |        | 0                     |        |
| 23305  | 0                             |        | 0                     |        |
| 23309  | 0                             |        | 0                     |        |
| 23310  | 2                             | 2      | 0                     |        |
| 23311  | 0                             |        | 1                     | 1      |
| 23312  | 1                             | 1      | 2                     | 2      |
| 23319  | 2                             | 0      | 0                     |        |
| 23320  | 0                             |        | 0                     |        |
| 23322  | 5                             | 2      | 0                     |        |
| 23334  | 0                             |        | 0                     |        |
| 23340  | 0                             |        | 0                     |        |
| 23346  | 0                             |        | 0                     |        |
| 23353  | 1                             | 0      | 0                     |        |
| 23363  | 2                             | 2      | 3                     | 2      |
| 23364  | 2                             | 1      | 3                     | 2      |
| 23376  | 0                             |        | 0                     |        |
| 23378  | 0                             |        | 0                     |        |
| 23382  | 0                             |        | 0                     |        |
| 23383  | 0                             |        | 0                     |        |
| 23390  | 1                             | 1      | 0                     |        |
| 23395  | 0                             |        | 0                     |        |
| 23398  | 0                             |        | 0                     |        |
| 23399  | 0                             |        | 0                     |        |
| 23406  | 3                             | 3      | 0                     |        |
| 23418  | 2                             | 1      | 1                     | 0      |
| 23427  | 0                             |        | 0                     |        |
| 23428  | 0                             |        | 0                     |        |
| 23435  | 1                             | 1      | 1                     | 2      |
| 23439  | 0                             |        | 0                     |        |
| 23440  | 0                             |        | 0                     |        |
| 23444  | 0                             |        | 0                     |        |
| 23445  | 1                             | 0      | 1                     | 0      |

| respid | ICS Splitting/spraying: Q26_1 | Q26a_1 | ICS: Hesitancy: Q27_1 | Q27a_1 |
|--------|-------------------------------|--------|-----------------------|--------|
| 23455  | 0                             |        | 0                     |        |
| 23467  | 2                             | 1      | 0                     |        |
| 23478  | 1                             | 1      | 0                     |        |
| 23492  | 1                             | 1      | 1                     | 1      |
| 23498  | 0                             |        | 0                     |        |
| 23511  | 0                             |        | 0                     |        |
| 23514  | 0                             |        | 0                     |        |
| 23515  | 1                             | 1      | 1                     | 1      |
| 23522  | 0                             |        | 0                     |        |
| 23524  | 0                             |        | 0                     |        |
| 23531  | 1                             | 2      | 0                     |        |
| 23532  | 0                             |        | 0                     |        |
| 23533  | 0                             |        | 0                     |        |
| 23534  | 0                             |        | 0                     |        |
| 23538  | 0                             |        | 0                     |        |
| 23539  | 4                             | 2      | 1                     | 1      |
| 23548  | 0                             |        | 0                     |        |
| 23553  | 0                             |        | 0                     |        |
| 23556  | 0                             |        | 0                     |        |
| 23563  | 0                             |        | 0                     |        |
| 23572  | 3                             | 1      | 0                     |        |
| 23575  | 0                             |        | 0                     |        |
| 23576  | 0                             |        | 0                     |        |
| 23577  | 0                             |        | 0                     |        |
| 23578  | 0                             |        | 0                     |        |
| 23587  | 1                             | 1      | 1                     | 0      |
| 23597  | 0                             |        | 0                     |        |
| 23598  | 1                             | 1      | 0                     |        |
| 23604  | 0                             |        | 0                     |        |
| 23617  | 0                             |        | 0                     |        |
| 23620  | 0                             |        | 0                     |        |
| 23621  | 0                             |        | 0                     |        |

| respid | ICS Splitting/spraying: Q26_1 | Q26a_1 | ICS: Hesitancy: Q27_1 | Q27a_1 |
|--------|-------------------------------|--------|-----------------------|--------|
| 23625  | 0                             |        | 2                     | 2      |
| 23629  | 0                             |        | 0                     |        |
| 23635  | 0                             |        | 0                     |        |
| 23636  | 0                             |        | 0                     |        |
| 23637  | 2                             | 1      | 2                     | 1      |
| 23638  | 0                             |        | 0                     |        |
| 23644  | 0                             |        | 0                     |        |
| 23645  | 0                             |        | 2                     | 0      |
| 23649  | 0                             |        | 0                     |        |
| 23654  | 0                             |        | 0                     |        |
| 23662  | 0                             |        | 0                     |        |
| 23664  | 0                             |        | 0                     |        |
| 23665  | 0                             |        | 0                     |        |
| 23666  | 0                             |        | 0                     |        |
| 23671  | 0                             |        | 0                     |        |
| 23672  | 0                             |        | 0                     |        |
| 23685  | 0                             |        | 0                     |        |
| 23686  | 2                             | 2      | 1                     | 1      |
| 23689  | 2                             | 1      | 3                     | 2      |
| 23690  | 2                             | 1      | 2                     | 1      |
| 23695  | 0                             |        | 2                     | 1      |
| 23700  | 0                             |        | 0                     |        |
| 23714  | 0                             |        | 0                     |        |
| 23719  | 0                             |        | 1                     | 1      |
| 23720  | 0                             |        | 0                     |        |
| 23721  | 0                             |        | 0                     |        |
| 23729  | 0                             |        | 0                     |        |
| 23730  | 0                             |        | 0                     |        |
| 23732  | 0                             |        | 0                     |        |
| 23736  | 0                             |        | 0                     |        |
| 23754  | 0                             |        | 0                     |        |
| 23756  | 0                             |        | 0                     |        |



| respid | ICS Splitting/spraying: Q26_1 | Q26a_1 | ICS: Hesitancy: Q27_1 | Q27a_1 |
|--------|-------------------------------|--------|-----------------------|--------|
| 23759  | 1                             | 0      | 1                     | 1      |
| 23761  | 1                             | 0      | 0                     |        |
| 23766  | 0                             |        | 0                     |        |
| 23768  | 3                             | 3      | 3                     | 4      |
| 23773  | 0                             |        | 0                     |        |
| 23781  | 0                             |        | 0                     |        |
| 23782  | 3                             | 3      | 0                     |        |
| 23787  | 1                             | 1      | 1                     | 0      |
| 23788  | 2                             | 2      | 1                     | 1      |
| 23790  | 0                             |        | 0                     |        |
| 23794  | 3                             | 3      | 2                     | 2      |
| 23795  | 1                             | 2      | 2                     | 2      |
| 23801  | 0                             |        | 0                     |        |
| 23806  | 0                             |        | 0                     |        |
| 23809  | 1                             | 2      | 1                     | 2      |
| 23813  | 0                             |        | 0                     |        |
| 23815  | 0                             |        | 0                     |        |
| 23821  | 0                             |        | 0                     |        |
| 23825  | 0                             |        | 0                     |        |
| 23826  | 0                             |        | 0                     |        |
| 23830  | 0                             |        | 0                     |        |
| 23833  | 0                             |        | 0                     |        |
| 23837  | 0                             |        | 0                     |        |
| 23848  | 5                             | 4      | 5                     | 4      |
| 23850  | 0                             |        | 0                     |        |
| 23870  | 0                             |        | 0                     |        |
| 23877  | 0                             |        | 0                     |        |
| 23880  | 0                             |        | 0                     |        |
| 23882  | 0                             |        | 0                     |        |
| 23888  | 0                             |        | 0                     |        |
| 23908  | 0                             |        | 0                     |        |
| 23914  | 0                             |        | 0                     |        |

| respid | ICS Splitting/spraying: Q26_1 | Q26a_1 | ICS: Hesitancy: Q27_1 | Q27a_1 |
|--------|-------------------------------|--------|-----------------------|--------|
| 23916  | 0                             |        | 0                     |        |
| 23922  | 0                             |        | 0                     |        |
| 23932  | 0                             |        | 0                     |        |
| 23934  | 0                             |        | 0                     |        |
| 23942  | 0                             |        | 0                     |        |
| 23945  | 0                             |        | 0                     |        |
| 23948  | 0                             |        | 0                     |        |
| 23955  | 0                             |        | 0                     |        |
| 23956  | 1                             | 1      | 0                     |        |
| 23978  | 2                             | 2      | 2                     | 2      |
| 23981  | 0                             |        | 0                     |        |
| 23982  | 1                             | 0      | 1                     | 1      |
| 23991  | 0                             |        | 0                     |        |
| 23994  | 0                             |        | 0                     |        |
| 23995  | 0                             |        | 0                     |        |
| 23999  | 1                             | 0      | 1                     | 1      |
| 24005  | 3                             | 2      | 0                     |        |
| 24018  | 0                             |        | 0                     |        |
| 24021  | 0                             |        | 0                     |        |
| 24035  | 0                             |        | 0                     |        |
| 24040  | 3                             | 0      | 0                     |        |
| 24043  | 0                             |        | 0                     |        |
| 24046  | 1                             | 1      | 1                     | 1      |
| 24047  | 1                             | 1      | 1                     | 0      |
| 24048  | 1                             | 1      | 0                     |        |
| 24062  | 1                             | 1      | 1                     | 1      |
| 24063  | 0                             |        | 1                     | 0      |
| 24066  | 0                             |        | 0                     |        |
| 24069  | 0                             |        | 0                     |        |
| 24070  | 0                             |        | 0                     |        |
| 24074  | 0                             |        | 0                     |        |
| 24080  | 0                             |        | 0                     |        |

| respid | ICS Splitting/spraying: Q26_1 | Q26a_1 | ICS: Hesitancy: Q27_1 | Q27a_1 |
|--------|-------------------------------|--------|-----------------------|--------|
| 24082  | 0                             |        | 0                     |        |
| 24088  | 0                             |        | 0                     |        |
| 24089  | 0                             |        | 0                     |        |
| 24091  | 0                             |        | 0                     |        |
| 24095  | 0                             |        | 0                     |        |
| 24100  | 1                             | 1      | 1                     | 0      |
| 24105  | 2                             | 2      | 3                     | 3      |
| 24107  | 0                             |        | 3                     | 2      |
| 24108  | 0                             |        | 0                     |        |
| 24113  | 0                             |        | 0                     |        |
| 24120  | 0                             |        | 0                     |        |
| 24122  | 2                             | 0      | 2                     | 0      |
| 24123  | 0                             |        | 0                     |        |
| 24125  | 0                             |        | 0                     |        |
| 24132  | 0                             |        | 0                     |        |
| 24139  | 2                             | 1      | 0                     |        |
| 24140  | 0                             |        | 0                     |        |
| 24143  | 0                             |        | 0                     |        |
| 24150  | 3                             | 3      | 3                     | 3      |
| 24153  | 0                             |        | 0                     |        |
| 24161  | 0                             |        | 0                     |        |
| 24168  | 4                             | 4      | 0                     |        |
| 24179  | 0                             |        | 0                     |        |
| 24182  | 1                             | 1      | 1                     | 1      |
| 24194  | 0                             |        | 0                     |        |
| 24206  | 0                             |        | 0                     |        |
| 24214  | 0                             |        | 0                     |        |
| 24215  | 1                             | 0      | 0                     |        |
| 24224  | 0                             |        | 0                     |        |
| 24225  | 0                             |        | 0                     |        |
| 24227  | 0                             |        | 0                     |        |
| 24229  | 0                             |        | 0                     |        |

| respid | ICS Splitting/spraying: Q26_1 | Q26a_1 | ICS: Hesitancy: Q27_1 | Q27a_1 |
|--------|-------------------------------|--------|-----------------------|--------|
| 24230  | 0                             |        | 0                     |        |
| 24232  | 2                             | 2      | 2                     | 2      |
| 24253  | 0                             |        | 0                     |        |
| 24267  | 0                             |        | 0                     |        |
| 24274  | 0                             |        | 0                     |        |
| 24275  | 0                             |        | 0                     |        |
| 24277  | 0                             |        | 0                     |        |
| 24280  | 3                             | 1      | 5                     | 4      |
| 24285  | 2                             | 0      | 0                     |        |
| 24293  | 0                             |        | 0                     |        |
| 24295  | 0                             |        | 0                     |        |
| 24299  | 0                             |        | 0                     |        |
| 24303  | 0                             |        | 0                     |        |
| 24308  | 0                             |        | 1                     | 1      |
| 24322  | 0                             |        | 0                     |        |
| 24325  | 0                             |        | 0                     |        |
| 24328  | 0                             |        | 0                     |        |
| 24334  | 0                             |        | 0                     |        |
| 24342  | 0                             |        | 0                     |        |
| 24343  | 3                             | 2      | 2                     | 2      |
| 24348  | 5                             | 2      | 4                     | 4      |
| 24352  | 2                             | 2      | 0                     |        |
| 24354  | 1                             | 1      | 1                     | 1      |
| 24357  | 0                             |        | 0                     |        |
| 24360  | 1                             | 1      | 1                     | 1      |
| 24369  | 0                             |        | 0                     |        |
| 24373  | 0                             |        | 0                     |        |
| 24398  | 2                             | 2      | 3                     | 3      |
| 24402  | 0                             |        | 0                     |        |
| 24405  | 2                             | 0      | 0                     |        |
| 24407  | 0                             |        | 0                     |        |
| 24413  | 0                             |        | 0                     |        |

| respid | ICS Splitting/spraying: Q26_1 | Q26a_1 | ICS: Hesitancy: Q27_1 | Q27a_1 |
|--------|-------------------------------|--------|-----------------------|--------|
| 24443  | 3                             | 1      | 2                     | 2      |
| 24451  | 0                             |        | 0                     |        |
| 24459  | 2                             | 2      | 2                     | 2      |
| 24465  | 0                             |        | 0                     |        |
| 24481  | 0                             |        | 0                     |        |
| 24482  | 0                             |        | 0                     |        |
| 24491  | 1                             | 0      | 1                     | 1      |
| 24495  | 0                             |        | 0                     |        |
| 24497  | 1                             | 2      | 1                     | 2      |
| 24511  | 0                             |        | 0                     |        |
| 24513  | 2                             | 2      | 2                     | 2      |
| 24516  | 2                             | 1      | 2                     | 1      |
| 24518  | 2                             | 0      | 0                     |        |
| 24524  | 0                             |        | 0                     |        |
| 24528  | 0                             |        | 0                     |        |
| 24531  | 3                             | 3      | 3                     | 3      |
| 24533  | 2                             | 2      | 0                     |        |
| 24547  | 0                             |        | 0                     |        |
| 24557  | 3                             | 2      | 4                     | 3      |
| 24559  | 0                             |        | 4                     | 3      |
| 24567  | 0                             |        | 0                     |        |
| 24568  | 0                             |        | 0                     |        |
| 24577  | 0                             |        | 0                     |        |
| 24581  | 0                             |        | 1                     | 0      |
| 24588  | 0                             |        | 0                     |        |
| 24604  | 2                             | 2      | 1                     | 2      |
| 24612  | 2                             | 1      | 2                     | 1      |
| 24621  | 3                             | 2      | 2                     | 0      |
| 24625  | 0                             |        | 0                     |        |
| 24627  | 2                             | 0      | 0                     |        |
| 24640  | 0                             |        | 0                     |        |
| 24644  | 0                             |        | 0                     |        |

| respid | ICS Splitting/spraying: Q26_1 | Q26a_1 | ICS: Hesitancy: Q27_1 | Q27a_1 |
|--------|-------------------------------|--------|-----------------------|--------|
| 24664  | 1                             | 2      | 1                     | 1      |
| 24669  | 0                             |        | 0                     |        |
| 24685  | 0                             |        | 0                     |        |
| 24687  | 2                             | 1      | 2                     | 1      |
| 24688  | 1                             | 1      | 1                     | 1      |
| 24691  | 3                             | 2      | 4                     | 3      |
| 24693  | 0                             |        | 1                     | 1      |
| 24706  | 0                             |        | 0                     |        |
| 24710  | 0                             |        | 0                     |        |
| 24717  | 0                             |        | 0                     |        |
| 24720  | 0                             |        | 0                     |        |
| 24731  | 1                             | 1      | 1                     | 1      |
| 24732  | 0                             |        | 1                     | 1      |
| 24733  | 0                             |        | 0                     |        |
| 24747  | 0                             |        | 0                     |        |
| 24750  | 2                             | 3      | 0                     |        |
| 24758  | 0                             |        | 0                     |        |
| 24760  | 0                             |        | 0                     |        |
| 24765  | 0                             |        | 0                     |        |
| 24772  | 0                             |        | 0                     |        |
| 24779  | 2                             | 3      | 3                     | 2      |
| 24794  | 0                             |        | 0                     |        |
| 24796  | 2                             | 2      | 2                     | 2      |
| 24797  | 1                             | 0      | 0                     |        |
| 24800  | 2                             | 0      | 1                     | 0      |
| 24813  | 2                             | 2      | 2                     | 2      |
| 24815  | 0                             |        | 0                     |        |
| 24821  | 0                             |        | 0                     |        |
| 24822  | 0                             |        | 0                     |        |
| 24831  | 0                             |        | 0                     |        |
| 24835  | 0                             |        | 0                     |        |
| 24843  | 1                             | 1      | 1                     | 1      |

| respid | ICS Splitting/spraying: Q26_1 | Q26a_1 | ICS: Hesitancy: Q27_1 | Q27a_1 |
|--------|-------------------------------|--------|-----------------------|--------|
| 24844  | 2                             | 2      | 3                     | 2      |
| 24860  | 0                             |        | 0                     |        |
| 24861  | 1                             | 0      | 3                     | 0      |
| 24865  | 3                             | 2      | 4                     | 3      |
| 24870  | 1                             | 0      | 1                     | 0      |
| 24887  | 0                             |        | 0                     |        |
| 24897  | 1                             | 1      | 2                     | 1      |
| 24902  | 0                             |        | 0                     |        |
| 24914  | 0                             |        | 0                     |        |
| 24921  | 0                             |        | 0                     |        |
| 24922  | 0                             |        | 0                     |        |
| 24924  | 0                             |        | 0                     |        |
| 24927  | 0                             |        | 0                     |        |
| 24936  | 0                             |        | 0                     |        |
| 24937  | 0                             |        | 0                     |        |
| 24942  | 2                             | 2      | 2                     | 2      |
| 24947  | 0                             |        | 0                     |        |
| 24953  | 2                             | 1      | 0                     |        |
| 24954  | 2                             | 2      | 2                     | 2      |
| 24960  | 3                             | 2      | 4                     | 3      |
| 24965  | 0                             |        | 0                     |        |
| 24975  | 0                             |        | 1                     | 0      |
| 24983  | 3                             | 2      | 4                     | 3      |
| 24985  | 0                             |        | 0                     |        |
| 24990  | 5                             | 1      | 0                     |        |
| 25000  | 0                             |        | 0                     |        |
| 25007  | 2                             | 0      | 2                     | 1      |
| 25008  | 0                             |        | 0                     |        |
| 25010  | 0                             |        | 0                     |        |
| 25016  | 0                             |        | 1                     | 1      |
| 25021  | 0                             |        | 0                     |        |
| 25040  | 0                             |        | 0                     |        |

| respid | ICS Splitting/spraying: Q26_1 | Q26a_1 | ICS: Hesitancy: Q27_1 | Q27a_1 |
|--------|-------------------------------|--------|-----------------------|--------|
| 25043  | 0                             |        | 0                     |        |
| 25055  | 0                             |        | 0                     |        |
| 25057  | 2                             | 1      | 0                     |        |
| 25060  | 0                             |        | 0                     |        |
| 25062  | 2                             | 1      | 1                     | 1      |
| 25064  | 3                             | 2      | 3                     | 2      |
| 25069  | 0                             |        | 0                     |        |
| 25077  | 1                             | 1      | 0                     |        |
| 25088  | 0                             |        | 0                     |        |
| 25093  | 2                             | 2      | 2                     | 2      |
| 25121  | 0                             |        | 0                     |        |
| 25140  | 3                             | 2      | 4                     | 3      |
| 25144  | 5                             | 0      | 0                     |        |
| 25149  | 1                             | 1      | 1                     | 1      |
| 25159  | 5                             | 1      | 0                     |        |
| 25191  | 2                             | 1      | 0                     |        |
| 25193  | 0                             |        | 0                     |        |
| 25202  | 3                             | 2      | 4                     | 3      |
| 25215  | 0                             |        | 1                     | 1      |
| 25229  | 1                             | 1      | 2                     | 2      |
| 25231  | 0                             |        | 0                     |        |
| 25236  | 0                             |        | 0                     |        |
| 25242  | 0                             |        | 0                     |        |
| 25252  | 0                             |        | 0                     |        |
| 25253  | 3                             | 2      | 4                     | 4      |
| 25256  | 3                             | 3      | 4                     | 2      |
| 25260  | 0                             |        | 0                     |        |
| 25261  | 0                             |        | 0                     |        |
| 25280  | 0                             |        | 0                     |        |
| 25282  | 1                             | 1      | 1                     | 1      |
| 25289  | 2                             | 2      | 2                     | 2      |
| 25303  | 0                             |        | 0                     |        |



| respid | ICS Splitting/spraying: Q26_1 | Q26a_1 | ICS: Hesitancy: Q27_1 | Q27a_1 |
|--------|-------------------------------|--------|-----------------------|--------|
| 25304  | 0                             |        | 3                     | 0      |
| 25309  | 0                             |        | 0                     |        |
| 25317  | 3                             | 2      | 1                     | 1      |
| 25318  | 3                             | 2      | 3                     | 2      |
| 25320  | 0                             |        | 0                     |        |
| 25324  | 3                             | 2      | 4                     | 3      |
| 25331  | 0                             |        | 0                     |        |
| 25340  | 0                             |        | 0                     |        |
| 25342  | 0                             |        | 0                     |        |
| 25350  | 0                             |        | 0                     |        |
| 25352  | 0                             |        | 0                     |        |
| 25358  | 0                             |        | 0                     |        |
| 25375  | 0                             |        | 0                     |        |
| 25386  | 2                             | 0      | 0                     |        |
| 25388  | 0                             |        | 0                     |        |
| 25390  | 0                             |        | 0                     |        |
| 25391  | 1                             | 0      | 0                     |        |
| 25400  | 0                             |        | 0                     |        |
| 25413  | 3                             | 2      | 3                     | 2      |
| 25424  | 0                             |        | 1                     | 0      |
| 25426  | 3                             | 2      | 3                     | 2      |
| 25430  | 0                             |        | 0                     |        |
| 25434  | 1                             | 1      | 1                     | 1      |
| 25439  | 0                             |        | 2                     | 2      |
| 25441  | 0                             |        | 0                     |        |
| 25445  | 0                             |        | 0                     |        |
| 25451  | 0                             |        | 0                     |        |
| 25469  | 3                             | 2      | 3                     | 2      |
| 25471  | 2                             | 1      | 2                     | 2      |
| 25476  | 0                             |        | 0                     |        |
| 25480  | 1                             | 0      | 0                     |        |
| 25482  | 0                             |        | 0                     |        |

| respid | ICS Splitting/spraying: Q26_1 | Q26a_1 | ICS: Hesitancy: Q27_1 | Q27a_1 |
|--------|-------------------------------|--------|-----------------------|--------|
| 25500  | 0                             |        | 1                     | 4      |
| 25516  | 0                             |        | 0                     |        |
| 25521  | 4                             | 2      | 3                     | 2      |
| 25525  | 3                             | 2      | 3                     | 2      |
| 25530  | 1                             | 2      | 1                     | 1      |
| 25555  | 1                             | 1      | 3                     | 2      |
| 25558  | 2                             | 2      | 0                     |        |
| 25561  | 3                             | 3      | 3                     | 3      |
| 25566  | 0                             |        | 0                     |        |
| 25571  | 0                             |        | 0                     |        |
| 25572  | 1                             | 0      | 0                     |        |
| 25574  | 0                             |        | 0                     |        |
| 25588  | 0                             |        | 0                     |        |
| 25591  | 1                             | 2      | 1                     | 2      |
| 25599  | 1                             | 2      | 2                     | 2      |
| 25604  | 1                             | 0      | 0                     |        |
| 25614  | 1                             | 1      | 0                     |        |
| 25634  | 3                             | 2      | 4                     | 3      |
| 25642  | 1                             | 1      | 0                     |        |
| 25647  | 0                             |        | 0                     |        |
| 25653  | 0                             |        | 0                     |        |
| 25654  | 0                             |        | 0                     |        |
| 25660  | 0                             |        | 0                     |        |
| 25664  | 0                             |        | 0                     |        |
| 25665  | 1                             | 3      | 1                     | 2      |
| 25672  | 5                             | 2      | 3                     | 2      |
| 25677  | 1                             | 1      | 1                     | 1      |
| 25685  | 2                             | 2      | 2                     | 2      |
| 25699  | 2                             | 1      | 2                     | 1      |
| 25703  | 0                             |        | 0                     |        |
| 25704  | 2                             | 1      | 1                     | 1      |
| 25705  | 1                             | 1      | 0                     |        |

| respid | ICS Splitting/spraying: Q26_1 | Q26a_1 | ICS: Hesitancy: Q27_1 | Q27a_1 |
|--------|-------------------------------|--------|-----------------------|--------|
| 25711  | 0                             |        | 0                     |        |
| 25727  | 1                             | 2      | 0                     |        |
| 25728  | 1                             | 0      | 1                     | 1      |
| 25733  | 3                             | 2      | 2                     | 1      |
| 25735  | 0                             |        | 0                     |        |
| 25736  | 0                             |        | 0                     |        |
| 25742  | 0                             |        | 0                     |        |
| 25750  | 0                             |        | 0                     |        |
| 25754  | 0                             |        | 0                     |        |
| 25776  | 3                             | 2      | 3                     | 3      |
| 25778  | 0                             |        | 0                     |        |
| 25796  | 0                             |        | 0                     |        |
| 25852  | 0                             |        | 1                     | 1      |
| 25858  | 0                             |        | 0                     |        |
| 25859  | 0                             |        | 0                     |        |
| 25886  | 3                             | 3      | 2                     | 2      |
| 25890  | 1                             | 0      | 2                     | 1      |
| 25897  | 0                             |        | 0                     |        |
| 25903  | 0                             |        | 0                     |        |
| 25905  | 0                             |        | 0                     |        |
| 25917  | 0                             |        | 0                     |        |
| 25918  | 0                             |        | 0                     |        |
| 25928  | 2                             | 1      | 0                     |        |
| 25930  | 0                             |        | 0                     |        |
| 25949  | 0                             |        | 0                     |        |
| 25955  | 0                             |        | 0                     |        |
| 25959  | 0                             |        | 0                     |        |
| 25964  | 0                             |        | 0                     |        |
| 25972  | 0                             |        | 0                     |        |
| 25999  | 3                             | 2      | 3                     | 3      |
| 26019  | 0                             |        | 0                     |        |
| 26025  | 0                             |        | 0                     |        |

| respid | ICS Splitting/spraying: Q26_1 | Q26a_1 | ICS: Hesitancy: Q27_1 | Q27a_1 |
|--------|-------------------------------|--------|-----------------------|--------|
| 26039  | 1                             | 1      | 1                     | 2      |
| 26055  | 0                             |        | 0                     |        |
| 26061  | 1                             | 0      | 0                     |        |
| 26076  | 5                             | 0      | 0                     |        |
| 26088  | 1                             | 0      | 0                     |        |
| 26094  | 0                             |        | 0                     |        |
| 26104  | 4                             | 4      | 4                     | 4      |
| 26131  | 0                             |        | 0                     |        |
| 26134  | 1                             | 1      | 1                     | 2      |
| 26160  | 5                             | 0      | 0                     |        |
| 26168  | 2                             | 2      | 0                     |        |
| 26170  | 0                             |        | 0                     |        |
| 26191  | 3                             | 2      | 3                     | 2      |
| 26192  | 0                             |        | 0                     |        |
| 26195  | 1                             | 1      | 1                     | 1      |
| 26198  | 0                             |        | 0                     |        |
| 26199  | 1                             | 0      | 1                     | 2      |
| 26201  | 0                             |        | 0                     |        |
| 26202  | 0                             |        | 0                     |        |
| 26226  | 0                             |        | 0                     |        |
| 26233  | 0                             |        | 0                     |        |
| 26236  | 0                             |        | 0                     |        |
| 26242  | 0                             |        | 0                     |        |
| 26244  | 0                             |        | 0                     |        |
| 26250  | 0                             |        | 0                     |        |
| 26266  | 0                             |        | 1                     | 0      |
| 26274  | 0                             |        | 0                     |        |
| 26286  | 2                             | 1      | 2                     | 1      |
| 26288  | 0                             |        | 1                     | 0      |
| 26295  | 0                             |        | 0                     |        |
| 26296  | 2                             | 1      | 0                     |        |
| 26297  | 0                             |        | 0                     |        |

| respid | ICS Splitting/spraying: Q26_1 | Q26a_1 | ICS: Hesitancy: Q27_1 | Q27a_1 |
|--------|-------------------------------|--------|-----------------------|--------|
| 26300  | 0                             |        | 0                     |        |
| 26317  | 0                             |        | 0                     |        |
| 26343  | 0                             |        | 0                     |        |
| 26367  | 0                             |        | 2                     | 0      |
| 26372  | 0                             |        | 0                     |        |
| 26403  | 0                             |        | 0                     |        |
| 26423  | 0                             |        | 0                     |        |
| 26430  | 0                             |        | 0                     |        |
| 26437  | 0                             |        | 0                     |        |
| 26457  | 0                             |        | 0                     |        |
| 26466  | 0                             |        | 0                     |        |
| 26467  | 0                             |        | 0                     |        |
| 26469  | 0                             |        | 0                     |        |
| 26494  | 1                             | 0      | 0                     |        |
| 26510  | 1                             | 0      | 2                     | 0      |
| 26519  | 0                             |        | 0                     |        |
| 26525  | 0                             |        | 0                     |        |
| 26529  | 0                             |        | 0                     |        |
| 26533  | 0                             |        | 0                     |        |
| 26556  | 1                             | 1      | 0                     |        |
| 26559  | 2                             | 2      | 2                     | 2      |
| 26565  | 2                             | 1      | 1                     | 1      |
| 26576  | 1                             | 1      | 0                     |        |
| 26601  | 0                             |        | 0                     |        |
| 26607  | 1                             | 1      | 1                     | 0      |
| 26611  | 1                             | 1      | 1                     | 2      |
| 26619  | 0                             |        | 0                     |        |
| 26631  | 0                             |        | 0                     |        |
| 26654  | 0                             |        | 0                     |        |
| 26656  | 1                             | 1      | 1                     | 1      |
| 26664  | 0                             |        | 0                     |        |
| 26667  | 3                             | 2      | 3                     | 2      |

| respid | ICS Splitting/spraying: Q26_1 | Q26a_1 | ICS: Hesitancy: Q27_1 | Q27a_1 |
|--------|-------------------------------|--------|-----------------------|--------|
| 26674  | 3                             |        | 2                     | 3      |
| 26678  | 1                             |        | 1                     | 1      |
| 26693  | 0                             |        |                       | 0      |
| 26696  | 3                             |        | 2                     | 2      |
| 26703  | 3                             |        | 4                     | 4      |
| 26705  | 2                             |        | 2                     | 0      |
| 26706  | 2                             |        | 1                     | 2      |
| 26716  | 0                             |        |                       | 0      |
| 26721  | 0                             |        |                       | 0      |
| 26730  | 0                             |        |                       | 0      |
| 26752  | 0                             |        |                       | 0      |
| 26755  | 0                             |        |                       | 0      |
| 26791  | 0                             |        |                       | 0      |
| 26804  | 0                             |        |                       | 0      |
| 26810  | 2                             |        | 0                     | 3      |
| 26813  | 3                             |        | 1                     | 1      |
| 26833  | 1                             |        | 1                     | 1      |
| 26880  | 2                             |        | 1                     | 2      |
| 26884  | 0                             |        |                       | 0      |
| 26885  | 0                             |        |                       | 0      |
| 26890  | 1                             |        | 1                     | 1      |
| 26937  | 1                             |        | 1                     | 1      |
| 26939  | 0                             |        |                       | 0      |
| 26941  | 0                             |        |                       | 0      |
| 26992  | 0                             |        |                       | 2      |
| 27037  | 0                             |        |                       | 0      |
| 27045  | 3                             |        | 2                     | 4      |
| 27053  | 3                             |        | 2                     | 4      |
| 27060  | 2                             |        | 1                     | 2      |
| 27076  | 1                             |        | 1                     | 0      |
| 27124  | 0                             |        |                       | 0      |
| 27125  | 0                             |        |                       | 0      |

| respid | ICS Splitting/spraying: Q26_1 | Q26a_1 | ICS: Hesitancy: Q27_1 | Q27a_1 |
|--------|-------------------------------|--------|-----------------------|--------|
| 27132  | 0                             |        | 0                     |        |
| 27166  | 0                             |        | 0                     |        |
| 27190  | 1                             | 0      | 0                     |        |
| 27199  | 2                             | 1      | 0                     |        |
| 27221  | 2                             | 1      | 2                     | 2      |
| 27233  | 2                             | 0      | 0                     |        |
| 27241  | 0                             |        | 0                     |        |
| 27244  | 0                             |        | 0                     |        |
| 27245  | 3                             | 3      | 2                     | 3      |
| 27246  | 2                             | 1      | 2                     | 2      |
| 27253  | 0                             |        | 0                     |        |
| 27255  | 2                             | 2      | 3                     | 2      |
| 27267  | 1                             | 1      | 0                     |        |
| 27283  | 1                             | 0      | 0                     |        |
| 27289  | 2                             | 3      | 2                     | 2      |
| 27302  | 0                             |        | 0                     |        |
| 27317  | 0                             |        | 0                     |        |
| 27319  | 0                             |        | 0                     |        |
| 27331  | 0                             |        | 0                     |        |
| 27333  | 1                             | 0      | 0                     |        |
| 27340  | 0                             |        | 0                     |        |
| 27362  | 5                             | 3      | 2                     | 3      |
| 27370  | 0                             |        | 0                     |        |
| 27379  | 0                             |        | 1                     | 2      |
| 27386  | 0                             |        | 0                     |        |
| 27398  | 0                             |        | 0                     |        |
| 27404  | 0                             |        | 0                     |        |
| 27408  | 0                             |        | 0                     |        |
| 27412  | 3                             | 3      | 4                     | 3      |
| 27426  | 0                             |        | 0                     |        |
| 27455  | 0                             |        | 0                     |        |
| 27464  | 2                             | 2      | 3                     | 2      |

| respid | ICS Splitting/spraying: Q26_1 | Q26a_1 | ICS: Hesitancy: Q27_1 | Q27a_1 |
|--------|-------------------------------|--------|-----------------------|--------|
| 27484  | 1                             | 1      | 1                     | 1      |
| 27493  | 0                             |        | 0                     |        |
| 27512  | 0                             |        | 0                     |        |
| 27525  | 0                             |        | 0                     |        |
| 27532  | 0                             |        | 1                     | 1      |
| 27539  | 0                             |        | 0                     |        |
| 27540  | 2                             | 2      | 0                     |        |
| 27552  | 2                             | 4      | 3                     | 3      |
| 27562  | 0                             |        | 0                     |        |
| 27568  | 0                             |        | 0                     |        |
| 27574  | 3                             | 2      | 3                     | 3      |
| 27575  | 0                             |        | 0                     |        |
| 27577  | 0                             |        | 0                     |        |
| 27589  | 0                             |        | 0                     |        |
| 27593  | 0                             |        | 0                     |        |
| 27594  | 5                             | 3      | 5                     | 3      |
| 27595  | 3                             | 2      | 3                     | 2      |
| 27598  | 0                             |        | 0                     |        |
| 27620  | 0                             |        | 0                     |        |
| 27621  | 1                             | 1      | 1                     | 1      |
| 27628  | 0                             |        | 0                     |        |
| 27633  | 2                             | 1      | 0                     |        |
| 27643  | 0                             |        | 1                     | 1      |
| 27644  | 3                             | 3      | 3                     | 3      |
| 27668  | 1                             | 0      | 0                     |        |
| 27681  | 0                             |        | 1                     | 1      |
| 27691  | 0                             |        | 0                     |        |
| 27693  | 5                             | 4      | 5                     | 4      |
| 27703  | 2                             | 0      | 0                     |        |
| 27708  | 1                             | 1      | 1                     | 1      |
| 27719  | 3                             | 2      | 3                     | 2      |
| 27720  | 0                             |        | 0                     |        |



| respid | ICS Splitting/spraying: Q26_1 | Q26a_1 | ICS: Hesitancy: Q27_1 | Q27a_1 |
|--------|-------------------------------|--------|-----------------------|--------|
| 27723  | 0                             |        | 0                     |        |
| 27725  | 0                             |        | 0                     |        |
| 27734  | 2                             | 2      | 2                     | 2      |
| 27744  | 0                             |        | 0                     |        |
| 27749  | 4                             | 3      | 4                     | 3      |
| 27762  | 2                             | 1      | 2                     | 1      |
| 27808  | 1                             | 1      | 0                     |        |
| 27810  | 4                             | 3      | 3                     | 3      |
| 27812  | 0                             |        | 0                     |        |
| 27815  | 0                             |        | 0                     |        |
| 27818  | 0                             |        | 0                     |        |
| 27823  | 0                             |        | 0                     |        |
| 27841  | 2                             | 2      | 1                     | 1      |
| 27843  | 0                             |        | 0                     |        |
| 27851  | 1                             | 0      | 0                     |        |
| 27858  | 2                             | 0      | 0                     |        |
| 27859  | 0                             |        | 0                     |        |
| 27869  | 0                             |        | 0                     |        |
| 27872  | 1                             | 1      | 1                     | 1      |
| 27873  | 0                             |        | 0                     |        |
| 27884  | 0                             |        | 1                     | 0      |
| 27904  | 2                             | 2      | 2                     | 2      |
| 27915  | 0                             |        | 0                     |        |
| 27918  | 0                             |        | 0                     |        |
| 27937  | 0                             |        | 0                     |        |
| 27943  | 3                             | 3      | 2                     | 3      |
| 27948  | 0                             |        | 0                     |        |
| 27971  | 0                             |        | 2                     | 2      |
| 27991  | 0                             |        | 0                     |        |
| 28000  | 0                             |        | 0                     |        |
| 28011  | 0                             |        | 1                     | 1      |
| 28022  | 0                             |        | 0                     |        |

| respid | ICS Splitting/spraying: Q26_1 | Q26a_1 | ICS: Hesitancy: Q27_1 | Q27a_1 |
|--------|-------------------------------|--------|-----------------------|--------|
| 28025  | 0                             |        | 0                     |        |
| 28041  | 1                             | 0      | 0                     |        |
| 28057  | 3                             | 2      | 2                     | 2      |
| 28080  | 0                             |        | 0                     |        |
| 28098  | 0                             |        | 0                     |        |
| 28104  | 0                             |        | 0                     |        |
| 28109  | 0                             |        | 0                     |        |
| 28129  | 0                             |        | 3                     | 1      |
| 28141  | 0                             |        | 0                     |        |
| 28143  | 0                             |        | 0                     |        |
| 28149  | 1                             | 0      | 1                     | 1      |
| 28151  | 0                             |        | 0                     |        |
| 28161  | 0                             |        | 0                     |        |
| 28169  | 2                             | 0      | 1                     | 0      |
| 28194  | 3                             | 2      | 2                     | 2      |
| 28197  | 0                             |        | 0                     |        |
| 28206  | 0                             |        | 0                     |        |
| 28218  | 0                             |        | 0                     |        |
| 28227  | 1                             | 0      | 0                     |        |
| 28235  | 0                             |        | 0                     |        |
| 28246  | 2                             | 2      | 1                     | 1      |
| 28259  | 3                             | 2      | 2                     | 2      |
| 28263  | 0                             |        | 0                     |        |
| 28267  | 3                             | 3      | 4                     | 3      |
| 28274  | 0                             |        | 0                     |        |
| 28278  | 0                             |        | 0                     |        |
| 28288  | 0                             |        | 0                     |        |
| 28308  | 0                             |        | 0                     |        |
| 28309  | 4                             | 0      | 2                     | 1      |
| 28323  | 0                             |        | 0                     |        |
| 28335  | 3                             | 3      | 3                     | 3      |
| 28354  | 3                             | 3      | 3                     | 3      |

| respid | ICS Splitting/spraying: Q26_1 | Q26a_1 | ICS: Hesitancy: Q27_1 | Q27a_1 |
|--------|-------------------------------|--------|-----------------------|--------|
| 28355  | 2                             | 1      | 4                     | 3      |
| 28356  | 4                             | 2      | 2                     | 1      |
| 28357  | 1                             | 0      | 0                     |        |
| 28363  | 0                             |        | 0                     |        |
| 28366  | 0                             |        | 0                     |        |
| 28372  | 2                             | 2      | 2                     | 2      |
| 28381  | 1                             | 1      | 1                     | 1      |
| 28388  | 2                             | 1      | 2                     | 2      |
| 28413  | 3                             | 3      | 3                     | 3      |
| 28421  | 0                             |        | 0                     |        |
| 28430  | 2                             | 3      | 3                     | 3      |
| 28439  | 3                             | 3      | 4                     | 3      |
| 28458  | 3                             | 2      | 3                     | 2      |
| 28461  | 0                             |        | 0                     |        |
| 28466  | 0                             |        | 0                     |        |
| 28492  | 0                             |        | 0                     |        |
| 28534  | 0                             |        | 0                     |        |
| 28537  | 2                             | 2      | 2                     | 2      |
| 28560  | 0                             |        | 0                     |        |
| 28566  | 0                             |        | 0                     |        |
| 28569  | 1                             | 1      | 0                     |        |
| 28584  | 4                             | 3      | 4                     | 3      |
| 28590  | 3                             | 2      | 0                     |        |
| 28596  | 0                             |        | 0                     |        |
| 28608  | 0                             |        | 0                     |        |
| 28631  | 4                             | 2      | 4                     | 3      |
| 28644  | 2                             | 1      | 2                     | 1      |
| 28646  | 0                             |        | 0                     |        |
| 28665  | 0                             |        | 0                     |        |
| 28686  | 0                             |        | 0                     |        |
| 28704  | 2                             | 2      | 3                     | 2      |
| 28719  | 3                             | 1      | 0                     |        |

| respid | ICS Splitting/spraying: Q26_1 | Q26a_1 | ICS: Hesitancy: Q27_1 | Q27a_1 |
|--------|-------------------------------|--------|-----------------------|--------|
| 28736  | 1                             | 1      | 1                     | 1      |
| 28739  | 2                             | 2      | 1                     | 1      |
| 28758  | 0                             |        | 1                     | 1      |
| 28761  | 0                             |        | 0                     |        |
| 28770  | 2                             | 1      | 2                     | 2      |
| 28774  | 0                             |        | 0                     |        |
| 28778  | 3                             | 2      | 2                     | 2      |
| 28783  | 2                             | 2      | 1                     | 1      |
| 28785  | 1                             | 0      | 0                     |        |
| 28797  | 4                             | 2      | 2                     | 2      |
| 28801  | 1                             | 0      | 0                     |        |
| 28821  | 0                             |        | 0                     |        |
| 28827  | 1                             | 0      | 0                     |        |
| 28828  | 1                             | 1      | 0                     |        |
| 28871  | 1                             | 1      | 1                     | 1      |
| 28876  | 0                             |        | 0                     |        |
| 28891  | 4                             | 1      | 4                     | 1      |
| 28898  | 0                             |        | 0                     |        |
| 28909  | 0                             |        | 0                     |        |
| 28930  | 0                             |        | 1                     | 0      |
| 28935  | 5                             | 0      | 2                     | 0      |
| 28964  | 0                             |        | 0                     |        |
| 28965  | 0                             |        | 0                     |        |
| 28967  | 4                             | 2      | 2                     | 1      |
| 28975  | 0                             |        | 0                     |        |
| 28982  | 0                             |        | 0                     |        |
| 28989  | 1                             | 0      | 0                     |        |
| 29003  | 2                             | 2      | 1                     | 1      |
| 29004  | 0                             |        | 0                     |        |
| 29007  | 1                             | 1      | 3                     | 2      |
| 29008  | 1                             | 0      | 0                     |        |
| 29011  | 1                             | 1      | 1                     | 1      |

| respid | ICS Splitting/spraying: Q26_1 | Q26a_1 | ICS: Hesitancy: Q27_1 | Q27a_1 |
|--------|-------------------------------|--------|-----------------------|--------|
| 29012  | 2                             | 1      | 2                     | 1      |
| 29014  | 0                             |        | 0                     |        |
| 29016  | 0                             |        | 1                     | 1      |
| 29018  | 2                             | 1      | 3                     | 2      |
| 29048  | 0                             |        | 0                     |        |
| 29184  | 0                             |        | 0                     |        |
| 29237  | 0                             |        | 0                     |        |
| 29252  | 0                             |        | 1                     | 0      |
| 29267  | 0                             |        | 0                     |        |
| 29276  | 0                             |        | 0                     |        |
| 29281  | 2                             | 1      | 2                     | 1      |
| 29285  | 1                             | 0      | 0                     |        |
| 29291  | 4                             | 4      | 3                     | 3      |
| 29304  | 2                             | 2      | 2                     | 2      |
| 29323  | 0                             |        | 0                     |        |
| 29330  | 3                             | 1      | 3                     | 2      |
| 29357  | 2                             | 4      | 1                     | 4      |
| 29416  | 1                             | 0      | 1                     | 0      |
| 29432  | 0                             |        | 0                     |        |
| 29482  | 2                             | 1      | 2                     | 1      |
| 29506  | 4                             | 0      | 3                     | 1      |
| 29509  | 2                             | 1      | 2                     | 1      |
| 29512  | 2                             | 1      | 2                     | 1      |
| 29519  | 0                             |        | 2                     | 1      |
| 29520  | 1                             | 1      | 3                     | 2      |
| 29521  | 2                             | 2      | 2                     | 2      |
| 29529  | 2                             | 3      | 2                     | 3      |
| 29532  | 0                             |        | 0                     |        |
| 29547  | 2                             | 1      | 1                     | 2      |
| 29551  | 0                             |        | 0                     |        |
| 29584  | 3                             | 3      | 3                     | 2      |
| 29591  | 0                             |        | 0                     |        |

| respid | ICS Splitting/spraying: Q26_1 | Q26a_1 | ICS: Hesitancy: Q27_1 | Q27a_1 |
|--------|-------------------------------|--------|-----------------------|--------|
| 29613  | 0                             |        | 1                     | 1      |
| 29615  | 0                             |        | 0                     |        |
| 29625  | 1                             | 1      | 1                     | 1      |
| 29660  | 1                             | 1      | 1                     | 0      |
| 29677  | 0                             |        | 0                     |        |
| 29700  | 0                             |        | 0                     |        |
| 29715  | 5                             | 4      | 5                     | 4      |
| 29720  | 0                             |        | 0                     |        |
| 29730  | 0                             |        | 0                     |        |
| 29734  | 0                             |        | 0                     |        |
| 29754  | 0                             |        | 0                     |        |
| 29771  | 0                             |        | 2                     | 0      |
| 29774  | 0                             |        | 0                     |        |
| 29783  | 0                             |        | 0                     |        |
| 29812  | 1                             | 1      | 1                     | 1      |
| 29813  | 0                             |        | 1                     | 0      |
| 29814  | 0                             |        | 0                     |        |
| 29820  | 1                             | 1      | 1                     | 1      |
| 29906  | 2                             | 2      | 0                     |        |
| 29907  | 3                             | 0      | 1                     | 0      |
| 29928  | 0                             |        | 0                     |        |
| 29932  | 0                             |        | 2                     | 1      |
| 29958  | 2                             | 2      | 2                     | 2      |
| 29982  | 0                             |        | 1                     | 0      |
| 29989  | 0                             |        | 0                     |        |
| 29994  | 1                             | 1      | 0                     |        |
| 30005  | 0                             |        | 1                     | 0      |
| 30077  | 1                             | 0      | 0                     |        |
| 30098  | 0                             |        | 0                     |        |
| 30107  | 0                             |        | 0                     |        |
| 30154  | 0                             |        | 0                     |        |
| 30159  | 0                             |        | 0                     |        |

| respid | ICS Splitting/spraying: Q26_1 | Q26a_1 | ICS: Hesitancy: Q27_1 | Q27a_1 |
|--------|-------------------------------|--------|-----------------------|--------|
| 30162  | 1                             | 2      | 0                     |        |
| 30163  | 0                             |        | 0                     |        |
| 30189  | 1                             | 0      | 1                     | 0      |
| 30230  | 0                             |        | 0                     |        |
| 30259  | 4                             | 3      | 3                     | 2      |
| 30284  | 0                             |        | 1                     | 1      |
| 30296  | 0                             |        | 0                     |        |
| 30330  | 3                             | 1      | 1                     | 1      |
| 30341  | 0                             |        | 1                     | 1      |
| 30352  | 2                             | 2      | 2                     | 3      |
| 30379  | 0                             |        | 0                     |        |
| 30424  | 0                             |        | 1                     | 0      |
| 30447  | 0                             |        | 0                     |        |
| 30477  | 3                             | 3      | 3                     | 2      |
| 30503  | 0                             |        | 0                     |        |
| 30515  | 1                             | 1      | 3                     | 2      |
| 30516  | 3                             | 2      | 3                     | 2      |
| 30623  | 2                             | 1      | 2                     | 1      |
| 30639  | 0                             |        | 0                     |        |
| 30670  | 0                             |        | 0                     |        |
| 30697  | 1                             | 0      | 0                     |        |
| 30735  | 1                             | 1      | 1                     | 1      |
| 30742  | 1                             | 1      | 0                     |        |
| 30751  | 4                             | 2      | 4                     | 2      |
| 30789  | 0                             |        | 0                     |        |
| 30867  | 3                             | 2      | 3                     | 2      |
| 30876  | 0                             |        | 0                     |        |
| 30877  | 0                             |        | 2                     | 0      |
| 30887  | 0                             |        | 0                     |        |
| 30891  | 2                             | 2      | 2                     | 2      |
| 31030  | 0                             |        | 0                     |        |
| 31059  | 2                             | 1      | 2                     | 3      |

| respid | ICS Splitting/spraying: Q26_1 | Q26a_1 | ICS: Hesitancy: Q27_1 | Q27a_1 |
|--------|-------------------------------|--------|-----------------------|--------|
| 31082  | 0                             |        | 0                     |        |
| 31106  | 0                             |        | 0                     |        |
| 31110  | 0                             |        | 0                     |        |
| 31265  | 3                             | 4      | 3                     | 4      |
| 31266  | 3                             | 4      | 3                     | 4      |
| 31267  | 3                             | 4      | 3                     | 4      |
| 31310  | 0                             |        | 1                     | 0      |
| 31325  | 0                             |        | 0                     |        |
| 31367  | 0                             |        | 0                     |        |
| 31389  | 0                             |        | 0                     |        |
| 31440  | 1                             | 0      | 0                     |        |
| 31465  | 1                             | 1      | 0                     |        |
| 31477  | 0                             |        | 0                     |        |
| 31491  | 4                             | 3      | 0                     |        |
| 31494  | 3                             | 2      | 3                     | 2      |
| 31509  | 0                             |        | 0                     |        |
| 31533  | 0                             |        | 0                     |        |
| 31547  | 1                             | 0      | 0                     |        |
| 31558  | 0                             |        | 0                     |        |
| 31579  | 0                             |        | 0                     |        |
| 31591  | 0                             |        | 0                     |        |
| 31596  | 2                             | 2      | 3                     | 2      |
| 31601  | 3                             | 2      | 3                     | 2      |
| 31605  | 1                             | 1      | 0                     |        |
| 31637  | 1                             | 0      | 1                     | 0      |
| 31646  | 0                             |        | 0                     |        |
| 31647  | 0                             |        | 1                     | 3      |
| 31650  | 0                             |        | 0                     |        |
| 31651  | 0                             |        | 0                     |        |
| 31657  | 0                             |        | 0                     |        |
| 31660  | 1                             | 1      | 1                     | 1      |
| 31661  | 1                             | 1      | 2                     | 1      |



| respid | ICS Splitting/spraying: Q26_1 | Q26a_1 | ICS: Hesitancy: Q27_1 | Q27a_1 |
|--------|-------------------------------|--------|-----------------------|--------|
| 31667  | 2                             | 1      | 1                     | 1      |
| 31674  | 1                             | 1      | 1                     | 0      |
| 31686  | 1                             | 1      | 1                     | 1      |
| 31693  | 0                             |        | 0                     |        |
| 31716  | 0                             |        | 0                     |        |
| 31818  | 0                             |        | 0                     |        |
| 31886  | 2                             | 1      | 1                     | 0      |
| 31945  | 2                             | 3      | 1                     | 3      |
| 31957  | 4                             | 1      | 0                     |        |
| 31966  | 1                             | 1      | 1                     | 1      |
| 31978  | 2                             | 1      | 2                     | 1      |
| 31999  | 0                             |        | 0                     |        |
| 32026  | 1                             | 1      | 1                     | 1      |
| 32033  | 0                             |        | 0                     |        |
| 32037  | 3                             | 4      | 3                     | 4      |
| 32038  | 3                             | 4      | 3                     | 4      |
| 32047  | 1                             | 2      | 1                     | 2      |
| 32053  | 0                             |        | 0                     |        |
| 32069  | 0                             |        | 0                     |        |
| 32081  | 2                             | 1      | 1                     | 0      |
| 32123  | 0                             |        | 1                     | 2      |
| 32130  | 1                             | 1      | 0                     |        |
| 32141  | 0                             |        | 0                     |        |
| 32158  | 0                             |        | 0                     |        |
| 32165  | 0                             |        | 0                     |        |
| 32180  | 0                             |        | 0                     |        |
| 32221  | 0                             |        | 0                     |        |
| 32292  | 0                             |        | 1                     | 0      |
| 32318  | 0                             |        | 0                     |        |
| 32346  | 1                             | 1      | 0                     |        |
| 32402  | 2                             | 2      | 2                     | 2      |
| 32422  | 1                             | 1      | 0                     |        |

| respid | ICS Splitting/spraying: Q26_1 | Q26a_1 | ICS: Hesitancy: Q27_1 | Q27a_1 |
|--------|-------------------------------|--------|-----------------------|--------|
| 32439  | 0                             |        | 0                     |        |
| 32507  | 3                             | 2      | 3                     | 2      |
| 32522  | 0                             |        | 0                     |        |
| 32535  | 0                             |        | 0                     |        |
| 32546  | 0                             |        | 0                     |        |
| 32553  | 0                             |        | 0                     |        |
| 32570  | 0                             |        | 0                     |        |
| 32592  | 1                             | 0      | 0                     |        |
| 32605  | 2                             | 1      | 2                     | 0      |
| 32630  | 2                             | 1      | 2                     | 1      |
| 32642  | 3                             | 2      | 2                     | 1      |
| 32646  | 0                             |        | 0                     |        |
| 32665  | 1                             | 1      | 3                     | 2      |
| 32677  | 0                             |        | 0                     |        |
| 32694  | 0                             |        | 0                     |        |
| 32698  | 3                             | 1      | 1                     | 0      |
| 32754  | 2                             | 1      | 2                     | 1      |
| 32799  | 2                             | 1      | 1                     | 1      |
| 32816  | 0                             |        | 0                     |        |
| 32819  | 0                             |        | 0                     |        |
| 32840  | 0                             |        | 0                     |        |
| 32861  | 1                             | 1      | 1                     | 2      |
| 32866  | 0                             |        | 0                     |        |
| 32889  | 4                             | 1      | 0                     |        |
| 32960  | 0                             |        | 0                     |        |
| 32965  | 1                             | 1      | 1                     | 1      |
| 32986  | 0                             |        | 0                     |        |
| 33005  | 0                             |        | 0                     |        |
| 33054  | 2                             | 1      | 2                     | 1      |
| 33072  | 2                             | 1      | 1                     | 1      |
| 33095  | 0                             |        | 1                     | 0      |
| 33099  | 0                             |        | 1                     | 2      |

| respid | ICS Splitting/spraying: Q26_1 | Q26a_1 | ICS: Hesitancy: Q27_1 | Q27a_1 |
|--------|-------------------------------|--------|-----------------------|--------|
| 33121  | 1                             | 0      | 0                     |        |
| 33152  | 0                             |        | 0                     |        |
| 33159  | 0                             |        | 0                     |        |
| 33189  | 0                             |        | 0                     |        |
| 33198  | 0                             |        | 0                     |        |
| 33202  | 2                             | 2      | 3                     | 3      |
| 33204  | 0                             |        | 0                     |        |
| 33224  | 1                             | 1      | 0                     |        |
| 33272  | 1                             | 1      | 2                     | 3      |
| 33294  | 0                             |        | 0                     |        |
| 33300  | 2                             | 1      | 2                     | 1      |
| 33314  | 1                             | 2      | 1                     | 1      |
| 33338  | 0                             |        | 0                     |        |
| 33350  | 4                             | 3      | 4                     | 3      |
| 33362  | 3                             | 1      | 1                     | 1      |
| 33368  | 0                             |        | 0                     |        |
| 33374  | 2                             | 1      | 0                     |        |
| 33380  | 2                             | 4      | 0                     |        |
| 33385  | 2                             | 1      | 1                     | 0      |
| 33402  | 2                             | 1      | 2                     | 1      |
| 33414  | 0                             |        | 0                     |        |
| 33439  | 2                             | 1      | 2                     | 1      |
| 33449  | 2                             | 2      | 2                     | 2      |
| 33533  | 1                             | 1      | 0                     |        |
| 33540  | 0                             |        | 0                     |        |
| 33556  | 0                             |        | 2                     | 0      |
| 33615  | 0                             |        | 0                     |        |
| 33694  | 3                             | 1      | 1                     | 1      |
| 33717  | 0                             |        | 0                     |        |
| 33729  | 0                             |        | 1                     | 2      |
| 33746  | 1                             | 1      | 0                     |        |
| 33764  | 0                             |        | 0                     |        |

| respid | ICS Splitting/spraying: Q26_1 | Q26a_1 | ICS: Hesitancy: Q27_1 | Q27a_1 |
|--------|-------------------------------|--------|-----------------------|--------|
| 33790  | 1                             | 0      | 2                     | 0      |
| 33868  | 3                             | 2      | 1                     | 0      |
| 33872  | 1                             | 3      | 3                     | 2      |
| 33883  | 0                             |        | 0                     |        |
| 33884  | 0                             |        | 1                     | 1      |
| 33900  | 0                             |        | 1                     | 1      |
| 33933  | 0                             |        | 0                     |        |
| 33949  | 1                             | 0      | 0                     |        |
| 34005  | 0                             |        | 0                     |        |
| 34016  | 0                             |        | 0                     |        |
| 34041  | 4                             | 2      | 2                     | 1      |
| 34053  | 0                             |        | 0                     |        |
| 34056  | 0                             |        | 0                     |        |
| 34093  | 0                             |        | 0                     |        |
| 34112  | 0                             |        | 0                     |        |
| 34136  | 5                             | 4      | 4                     | 4      |
| 34138  | 0                             |        | 0                     |        |
| 34139  | 1                             | 1      | 0                     |        |
| 34189  | 2                             | 0      | 0                     |        |
| 34239  | 1                             | 0      | 1                     | 0      |
| 34240  | 1                             | 1      | 1                     | 1      |
| 34241  | 1                             | 1      | 1                     | 1      |
| 34259  | 1                             | 2      | 1                     | 2      |
| 34303  | 1                             | 3      | 1                     | 0      |
| 34306  | 0                             |        | 0                     |        |
| 34395  | 3                             | 1      | 3                     | 1      |
| 34463  | 1                             | 1      | 1                     | 1      |
| 34466  | 2                             | 1      | 2                     | 1      |
| 34471  | 0                             |        | 0                     |        |
| 34489  | 2                             | 2      | 3                     | 2      |
| 34518  | 3                             | 2      | 2                     | 0      |
| 34542  | 2                             | 2      | 2                     | 2      |

| respid | ICS Splitting/spraying: Q26_1 | Q26a_1 | ICS: Hesitancy: Q27_1 | Q27a_1 |
|--------|-------------------------------|--------|-----------------------|--------|
| 34595  | 0                             |        | 0                     |        |
| 34604  | 0                             |        | 0                     |        |
| 34631  | 1                             | 2      | 4                     | 3      |
| 34665  | 0                             |        | 0                     |        |
| 34716  | 0                             |        | 0                     |        |
| 34729  | 0                             |        | 0                     |        |
| 34772  | 2                             | 2      | 2                     | 2      |
| 34800  | 3                             | 2      | 2                     | 1      |
| 34819  | 1                             | 1      | 0                     |        |
| 34829  | 1                             | 1      | 1                     | 1      |
| 34831  | 0                             |        | 0                     |        |
| 34839  | 0                             |        | 1                     | 1      |
| 34868  | 0                             |        | 1                     | 1      |
| 34869  | 0                             |        | 0                     |        |
| 34882  | 0                             |        | 1                     | 1      |
| 34895  | 2                             | 2      | 2                     | 3      |
| 34901  | 4                             | 1      | 2                     | 1      |
| 34904  | 2                             | 2      | 2                     | 1      |
| 34907  | 1                             | 2      | 1                     | 2      |
| 34914  | 0                             |        | 0                     |        |
| 34918  | 1                             | 1      | 0                     |        |
| 34924  | 0                             |        | 0                     |        |
| 34933  | 2                             | 2      | 2                     | 2      |
| 34938  | 1                             | 1      | 1                     | 1      |
| 34952  | 3                             | 4      | 2                     | 3      |
| 34959  | 0                             |        | 0                     |        |
| 34972  | 0                             |        | 0                     |        |
| 34973  | 0                             |        | 1                     | 2      |
| 34975  | 1                             | 1      | 1                     | 1      |
| 34977  | 1                             | 0      | 0                     |        |
| 34978  | 1                             | 0      | 1                     | 1      |
| 34980  | 0                             |        | 0                     |        |

| respid | ICS Splitting/spraying: Q26_1 | Q26a_1 | ICS: Hesitancy: Q27_1 | Q27a_1 |
|--------|-------------------------------|--------|-----------------------|--------|
| 34984  | 2                             | 2      | 2                     | 2      |
| 34986  | 2                             | 2      | 4                     | 3      |
| 34994  | 0                             |        | 0                     |        |
| 34996  | 0                             |        | 1                     | 2      |
| 35003  | 0                             |        | 0                     |        |
| 35014  | 0                             |        | 0                     |        |
| 35029  | 1                             | 1      | 2                     | 1      |
| 35030  | 2                             | 2      | 2                     | 1      |
| 35037  | 1                             | 0      | 1                     | 1      |
| 35043  | 0                             |        | 0                     |        |
| 35048  | 0                             |        | 0                     |        |
| 35055  | 0                             |        | 0                     |        |
| 35067  | 0                             |        | 1                     | 1      |
| 35072  | 1                             | 0      | 1                     | 1      |
| 35078  | 2                             | 1      | 1                     | 1      |
| 35084  | 0                             |        | 0                     |        |
| 35095  | 0                             |        | 0                     |        |
| 35096  | 0                             |        | 0                     |        |
| 35097  | 1                             | 1      | 1                     | 1      |
| 35098  | 2                             | 1      | 2                     | 1      |
| 35109  | 4                             | 3      | 4                     | 3      |
| 35114  | 0                             |        | 0                     |        |
| 35115  | 0                             |        | 0                     |        |
| 35124  | 2                             | 2      | 2                     | 2      |
| 35125  | 1                             | 0      | 0                     |        |
| 35141  | 0                             |        | 0                     |        |
| 35142  | 0                             |        | 0                     |        |
| 35145  | 0                             |        | 0                     |        |
| 35149  | 0                             |        | 0                     |        |
| 35159  | 0                             |        | 0                     |        |
| 35163  | 1                             | 2      | 2                     | 2      |
| 35174  | 1                             | 2      | 1                     | 2      |

| respid | ICS Splitting/spraying: Q26_1 | Q26a_1 | ICS: Hesitancy: Q27_1 | Q27a_1 |
|--------|-------------------------------|--------|-----------------------|--------|
| 35188  | 0                             |        | 0                     |        |
| 35189  | 0                             |        | 0                     |        |
| 35201  | 2                             | 1      | 0                     |        |
| 35215  | 0                             |        | 0                     |        |
| 35228  | 0                             |        | 0                     |        |
| 35235  | 0                             |        | 1                     | 1      |
| 35239  | 2                             | 3      | 2                     | 1      |
| 35243  | 1                             | 1      | 0                     |        |
| 35245  | 2                             | 2      | 0                     |        |
| 35259  | 0                             |        | 0                     |        |
| 35265  | 0                             |        | 0                     |        |
| 35272  | 1                             | 1      | 1                     | 1      |
| 35280  | 2                             | 1      | 2                     | 1      |
| 35298  | 1                             | 0      | 0                     |        |
| 35305  | 0                             |        | 0                     |        |
| 35306  | 0                             |        | 4                     | 3      |
| 35307  | 0                             |        | 0                     |        |
| 35311  | 0                             |        | 0                     |        |
| 35322  | 0                             |        | 2                     | 2      |
| 35323  | 0                             |        | 0                     |        |
| 35327  | 0                             |        | 0                     |        |
| 35366  | 0                             |        | 0                     |        |
| 35378  | 0                             |        | 0                     |        |
| 35389  | 2                             | 0      | 2                     | 0      |
| 35390  | 0                             |        | 0                     |        |
| 35395  | 2                             | 3      | 1                     | 2      |
| 35411  | 0                             |        | 0                     |        |
| 35423  | 0                             |        | 0                     |        |
| 35425  | 0                             |        | 0                     |        |
| 35434  | 0                             |        | 0                     |        |
| 35462  | 0                             |        | 0                     |        |
| 35478  | 3                             | 2      | 3                     | 2      |

| respid | ICS Splitting/spraying: Q26_1 | Q26a_1 | ICS: Hesitancy: Q27_1 | Q27a_1 |
|--------|-------------------------------|--------|-----------------------|--------|
| 35481  | 3                             | 3      | 3                     | 3      |
| 35498  | 1                             | 0      | 0                     |        |
| 35499  | 0                             |        | 0                     |        |
| 35502  | 1                             | 2      | 2                     | 2      |
| 35503  | 0                             |        | 0                     |        |
| 35504  | 0                             |        | 0                     |        |
| 35508  | 0                             |        | 0                     |        |
| 35513  | 2                             | 1      | 1                     | 1      |
| 35516  | 1                             | 0      | 0                     |        |
| 35519  | 0                             |        | 0                     |        |
| 35530  | 2                             | 1      | 2                     | 2      |
| 35533  | 0                             |        | 0                     |        |
| 35561  | 2                             | 2      | 2                     | 1      |
| 35565  | 0                             |        | 0                     |        |
| 35588  | 0                             |        | 0                     |        |
| 35598  | 0                             |        | 0                     |        |
| 35607  | 0                             |        | 0                     |        |
| 35638  | 0                             |        | 0                     |        |
| 35642  | 0                             |        | 1                     | 1      |
| 35643  | 1                             | 3      | 1                     | 2      |
| 35680  | 0                             |        | 0                     |        |
| 35697  | 0                             |        | 0                     |        |
| 35703  | 0                             |        | 0                     |        |
| 35709  | 0                             |        | 0                     |        |
| 35710  | 0                             |        | 1                     | 0      |
| 35721  | 5                             | 1      | 5                     | 3      |
| 35723  | 0                             |        | 0                     |        |
| 35736  | 2                             | 2      | 1                     | 2      |
| 35739  | 1                             | 0      | 1                     | 1      |
| 35745  | 2                             | 2      | 0                     |        |
| 35748  | 0                             |        | 0                     |        |
| 35750  | 0                             |        | 0                     |        |



| respid | ICS Splitting/spraying: Q26_1 | Q26a_1 | ICS: Hesitancy: Q27_1 | Q27a_1 |
|--------|-------------------------------|--------|-----------------------|--------|
| 35752  | 2                             | 1      | 0                     |        |
| 35773  | 0                             |        | 0                     |        |
| 35779  | 0                             |        | 0                     |        |
| 35791  | 0                             |        | 0                     |        |
| 35801  | 0                             |        | 0                     |        |
| 35802  | 0                             |        | 0                     |        |
| 35837  | 0                             |        | 0                     |        |
| 35853  | 0                             |        | 0                     |        |
| 35858  | 0                             |        | 0                     |        |
| 35860  | 0                             |        | 0                     |        |
| 35875  | 3                             | 3      | 3                     | 3      |
| 35883  | 2                             | 2      | 1                     | 1      |
| 35890  | 0                             |        | 0                     |        |
| 35898  | 0                             |        | 0                     |        |
| 35901  | 0                             |        | 2                     | 3      |
| 35914  | 0                             |        | 0                     |        |
| 35924  | 3                             | 2      | 2                     | 2      |
| 35950  | 2                             | 2      | 1                     | 2      |
| 35961  | 0                             |        | 0                     |        |
| 35966  | 0                             |        | 0                     |        |
| 35967  | 0                             |        | 0                     |        |
| 35971  | 0                             |        | 0                     |        |
| 35974  | 0                             |        | 0                     |        |
| 35983  | 3                             | 4      | 3                     | 3      |
| 35992  | 2                             | 1      | 3                     | 2      |
| 36010  | 0                             |        | 0                     |        |
| 36019  | 3                             | 3      | 4                     | 4      |
| 36029  | 2                             | 2      | 2                     | 1      |
| 36033  | 0                             |        | 0                     |        |
| 36042  | 0                             |        | 0                     |        |
| 36043  | 0                             |        | 0                     |        |
| 36048  | 0                             |        | 1                     | 0      |

| respid | ICS Splitting/spraying: Q26_1 | Q26a_1 | ICS: Hesitancy: Q27_1 | Q27a_1 |
|--------|-------------------------------|--------|-----------------------|--------|
| 36050  | 1                             | 2      | 1                     | 1      |
| 36062  | 0                             |        | 0                     |        |
| 36063  | 0                             |        | 0                     |        |
| 36092  | 1                             | 2      | 0                     |        |
| 36097  | 1                             | 1      | 0                     |        |
| 36108  | 0                             |        | 0                     |        |
| 36113  | 4                             | 3      | 3                     | 3      |
| 36117  | 0                             |        | 0                     |        |
| 36129  | 0                             |        | 0                     |        |
| 36144  | 0                             |        | 0                     |        |
| 36152  | 0                             |        | 0                     |        |
| 36154  | 0                             |        | 0                     |        |
| 36155  | 3                             | 0      | 2                     | 0      |
| 36167  | 0                             |        | 0                     |        |
| 36172  | 0                             |        | 0                     |        |
| 36173  | 0                             |        | 0                     |        |
| 36174  | 1                             | 1      | 0                     |        |
| 36182  | 0                             |        | 0                     |        |
| 36192  | 0                             |        | 2                     | 0      |
| 36195  | 3                             | 2      | 2                     | 2      |
| 36204  | 0                             |        | 0                     |        |
| 36205  | 0                             |        | 0                     |        |
| 36208  | 0                             |        | 0                     |        |
| 36216  | 1                             | 1      | 0                     |        |
| 36221  | 2                             | 2      | 2                     | 2      |
| 36244  | 0                             |        | 0                     |        |
| 36255  | 2                             | 2      | 2                     | 1      |
| 36259  | 0                             |        | 1                     | 0      |
| 36262  | 2                             | 2      | 2                     | 2      |
| 36268  | 0                             |        | 0                     |        |
| 36308  | 2                             | 2      | 1                     | 1      |
| 36324  | 0                             |        | 1                     | 0      |

| respid | ICS Splitting/spraying: Q26_1 | Q26a_1 | ICS: Hesitancy: Q27_1 | Q27a_1 |
|--------|-------------------------------|--------|-----------------------|--------|
| 36330  | 0                             |        | 0                     |        |
| 36331  | 1                             | 0      | 3                     | 2      |
| 36336  | 1                             | 0      | 0                     |        |
| 36337  | 0                             |        | 0                     |        |
| 36364  | 1                             | 1      | 1                     | 1      |
| 36365  | 1                             | 2      | 0                     |        |
| 36396  | 0                             |        | 0                     |        |
| 36403  | 0                             |        | 0                     |        |
| 36410  | 0                             |        | 0                     |        |
| 36413  | 0                             |        | 0                     |        |
| 36422  | 1                             | 0      | 1                     | 0      |
| 36424  | 0                             |        | 0                     |        |
| 36425  | 4                             | 3      | 3                     | 3      |
| 36432  | 0                             |        | 1                     | 1      |
| 36435  | 4                             | 3      | 4                     | 4      |
| 36446  | 4                             | 3      | 4                     | 3      |
| 36451  | 2                             | 2      | 1                     | 2      |
| 36453  | 0                             |        | 0                     |        |
| 36459  | 2                             | 2      | 2                     | 2      |
| 36464  | 2                             | 2      | 1                     | 1      |
| 36465  | 1                             | 1      | 0                     |        |
| 36466  | 0                             |        | 0                     |        |
| 36476  | 3                             | 1      | 2                     | 0      |
| 36487  | 0                             |        | 0                     |        |
| 36488  | 1                             | 2      | 1                     | 2      |
| 36500  | 0                             |        | 0                     |        |
| 36504  | 0                             |        | 0                     |        |
| 36513  | 0                             |        | 0                     |        |
| 36515  | 1                             | 1      | 1                     | 1      |
| 36521  | 2                             | 2      | 0                     |        |
| 36530  | 2                             | 2      | 2                     | 2      |
| 36556  | 1                             | 1      | 0                     |        |

| respid | ICS Splitting/spraying: Q26_1 | Q26a_1 | ICS: Hesitancy: Q27_1 | Q27a_1 |
|--------|-------------------------------|--------|-----------------------|--------|
| 36564  | 3                             | 0      | 0                     |        |
| 36584  | 0                             |        | 0                     |        |
| 36585  | 0                             |        | 0                     |        |
| 36586  | 0                             |        | 0                     |        |
| 36606  | 2                             | 2      | 1                     | 1      |
| 36615  | 0                             |        | 0                     |        |
| 36628  | 2                             | 0      | 0                     |        |
| 36630  | 0                             |        | 0                     |        |
| 36631  | 1                             | 1      | 2                     | 4      |
| 36636  | 0                             |        | 0                     |        |
| 36637  | 1                             | 1      | 0                     |        |
| 36651  | 0                             |        | 0                     |        |
| 36661  | 0                             |        | 0                     |        |
| 36670  | 0                             |        | 1                     | 1      |
| 36671  | 1                             | 1      | 2                     | 2      |
| 36688  | 0                             |        | 0                     |        |
| 36694  | 0                             |        | 5                     | 2      |
| 36696  | 0                             |        | 0                     |        |
| 36703  | 0                             |        | 0                     |        |
| 36719  | 3                             | 4      | 3                     | 4      |
| 36721  | 3                             | 4      | 3                     | 4      |
| 36740  | 1                             | 1      | 1                     | 1      |
| 36755  | 0                             |        | 1                     | 1      |
| 36765  | 1                             | 1      | 2                     | 2      |
| 36770  | 0                             |        | 0                     |        |
| 36773  | 1                             | 1      | 1                     | 1      |
| 36813  | 0                             |        | 0                     |        |
| 36819  | 1                             | 1      | 1                     | 1      |
| 36820  | 0                             |        | 0                     |        |
| 36821  | 0                             |        | 0                     |        |
| 36827  | 0                             |        | 0                     |        |
| 36835  | 0                             |        | 0                     |        |

| respid | ICS Splitting/spraying: Q26_1 | Q26a_1 | ICS: Hesitancy: Q27_1 | Q27a_1 |
|--------|-------------------------------|--------|-----------------------|--------|
| 36837  | 0                             |        | 0                     |        |
| 36849  | 0                             |        | 1                     | 1      |
| 36851  | 1                             | 1      | 1                     | 1      |
| 36868  | 2                             | 1      | 2                     | 2      |
| 36870  | 1                             | 0      | 1                     | 0      |
| 36871  | 0                             |        | 0                     |        |
| 36874  | 2                             | 2      | 2                     | 2      |
| 36878  | 2                             | 2      | 0                     |        |
| 36887  | 0                             |        | 0                     |        |
| 36889  | 0                             |        | 0                     |        |
| 36891  | 0                             |        | 1                     | 0      |
| 36903  | 1                             | 2      | 1                     | 2      |
| 36905  | 0                             |        | 0                     |        |
| 36913  | 0                             |        | 0                     |        |
| 36949  | 1                             | 1      | 1                     | 1      |
| 36954  | 3                             | 2      | 2                     | 1      |
| 36962  | 0                             |        | 0                     |        |
| 36965  | 2                             | 2      | 1                     | 1      |
| 36970  | 0                             |        | 0                     |        |
| 36979  | 1                             | 1      | 0                     |        |
| 36990  | 0                             |        | 1                     | 2      |
| 36991  | 3                             | 0      | 1                     | 0      |
| 36992  | 1                             | 0      | 0                     |        |
| 37015  | 0                             |        | 0                     |        |
| 37017  | 0                             |        | 0                     |        |
| 37020  | 0                             |        | 0                     |        |
| 37033  | 2                             | 2      | 2                     | 2      |
| 37041  | 0                             |        | 1                     | 1      |
| 37048  | 1                             | 0      | 0                     |        |
| 37050  | 0                             |        | 0                     |        |
| 37054  | 3                             | 2      | 1                     | 1      |
| 37057  | 0                             |        | 0                     |        |

| respid | ICS Splitting/spraying: Q26_1 | Q26a_1 | ICS: Hesitancy: Q27_1 | Q27a_1 |
|--------|-------------------------------|--------|-----------------------|--------|
| 37067  | 2                             | 2      | 1                     | 0      |
| 37074  | 0                             |        | 3                     | 0      |
| 37088  | 1                             | 1      | 0                     |        |
| 37090  | 2                             | 1      | 2                     | 1      |
| 37110  | 3                             | 3      | 3                     | 3      |
| 37122  | 0                             |        | 0                     |        |
| 37124  | 0                             |        | 0                     |        |
| 37126  | 0                             |        | 0                     |        |
| 37129  | 0                             |        | 2                     | 0      |
| 37130  | 0                             |        | 0                     |        |
| 37142  | 0                             |        | 1                     | 2      |
| 37160  | 2                             | 1      | 1                     | 2      |
| 37168  | 0                             |        | 0                     |        |
| 37169  | 4                             | 0      | 2                     | 1      |
| 37191  | 1                             | 0      | 1                     | 0      |
| 37197  | 3                             | 3      | 2                     | 3      |
| 37204  | 0                             |        | 0                     |        |
| 37213  | 3                             | 2      | 2                     | 2      |
| 37238  | 0                             |        | 1                     | 1      |
| 37242  | 1                             | 1      | 1                     | 1      |
| 37243  | 3                             | 2      | 3                     | 3      |
| 37275  | 0                             |        | 2                     | 1      |
| 37305  | 1                             | 1      | 1                     | 1      |
| 37357  | 2                             | 2      | 2                     | 1      |
| 37365  | 2                             | 1      | 2                     | 2      |
| 37370  | 0                             |        | 0                     |        |
| 37406  | 4                             | 3      | 3                     | 3      |
| 37410  | 5                             | 0      | 0                     |        |
| 37411  | 4                             | 3      | 4                     | 3      |
| 37427  | 0                             |        | 0                     |        |
| 37437  | 2                             | 3      | 3                     | 3      |
| 37440  | 0                             |        | 1                     | 1      |

| respid | ICS Splitting/spraying: Q26_1 | Q26a_1 | ICS: Hesitancy: Q27_1 | Q27a_1 |
|--------|-------------------------------|--------|-----------------------|--------|
| 37452  | 0                             |        | 0                     |        |
| 37465  | 2                             | 2      | 2                     | 1      |
| 37468  | 2                             | 2      | 2                     | 2      |
| 37469  | 1                             | 1      | 2                     | 1      |
| 37477  | 0                             |        | 0                     |        |
| 37509  | 0                             |        | 0                     |        |
| 37513  | 2                             | 1      | 1                     | 1      |
| 37534  | 0                             |        | 0                     |        |
| 37537  | 0                             |        | 0                     |        |
| 37560  | 2                             | 2      | 2                     | 2      |
| 37566  | 3                             | 2      | 2                     | 2      |
| 37572  | 1                             | 3      | 0                     |        |
| 37574  | 0                             |        | 0                     |        |
| 37575  | 0                             |        | 0                     |        |
| 37590  | 0                             |        | 0                     |        |
| 37593  | 1                             | 0      | 1                     | 1      |
| 37599  | 0                             |        | 0                     |        |
| 37641  | 0                             |        | 0                     |        |
| 37651  | 1                             | 1      | 1                     | 1      |
| 37670  | 1                             | 0      | 0                     |        |
| 37680  | 3                             | 4      | 2                     | 1      |
| 37690  | 0                             |        | 0                     |        |
| 37694  | 0                             |        | 0                     |        |
| 37705  | 0                             |        | 0                     |        |
| 37710  | 2                             | 2      | 3                     | 2      |
| 37719  | 0                             |        | 2                     | 2      |
| 37741  | 2                             | 1      | 2                     | 2      |
| 37752  | 1                             | 0      | 0                     |        |
| 37755  | 4                             | 3      | 2                     | 1      |
| 37757  | 0                             |        | 0                     |        |
| 37783  | 1                             | 2      | 0                     |        |
| 37793  | 4                             | 4      | 4                     | 3      |

| respid | ICS Splitting/spraying: Q26_1 | Q26a_1 | ICS: Hesitancy: Q27_1 | Q27a_1 |
|--------|-------------------------------|--------|-----------------------|--------|
| 37800  | 2                             | 2      | 2                     | 2      |
| 37801  | 0                             |        | 0                     |        |
| 37820  | 2                             | 2      | 2                     | 2      |
| 37826  | 2                             | 0      | 2                     | 1      |
| 37835  | 2                             | 2      | 1                     | 1      |
| 37839  | 3                             | 2      | 2                     | 2      |
| 37871  | 4                             | 3      | 3                     | 3      |
| 37876  | 1                             | 3      | 2                     | 2      |
| 37879  | 0                             |        | 0                     |        |
| 37894  | 1                             | 1      | 0                     |        |
| 37895  | 2                             | 1      | 2                     | 1      |
| 37901  | 0                             |        | 0                     |        |
| 37926  | 1                             | 1      | 1                     | 1      |
| 37937  | 1                             | 1      | 1                     | 1      |
| 37938  | 0                             |        | 0                     |        |
| 37959  | 0                             |        | 0                     |        |
| 37970  | 0                             |        | 0                     |        |
| 37972  | 3                             | 3      | 4                     | 3      |
| 37988  | 2                             | 1      | 1                     | 0      |
| 37989  | 0                             |        | 3                     | 3      |
| 38000  | 0                             |        | 2                     | 1      |
| 38028  | 4                             | 4      | 5                     | 4      |
| 38042  | 3                             | 2      | 2                     | 2      |
| 38052  | 1                             | 1      | 1                     | 0      |
| 38056  | 0                             |        | 0                     |        |
| 38106  | 0                             |        | 0                     |        |
| 38114  | 3                             | 3      | 3                     | 4      |
| 38134  | 1                             | 0      | 0                     |        |
| 38135  | 0                             |        | 0                     |        |
| 38139  | 1                             | 2      | 2                     | 2      |
| 38160  | 0                             |        | 2                     | 2      |
| 38164  | 1                             | 0      | 0                     |        |



| respid | ICS Splitting/spraying: Q26_1 | Q26a_1 | ICS: Hesitancy: Q27_1 | Q27a_1 |
|--------|-------------------------------|--------|-----------------------|--------|
| 38168  | 0                             |        | 0                     |        |
| 38173  | 1                             | 0      | 0                     |        |
| 38193  | 3                             | 2      | 3                     | 2      |
| 38204  | 0                             |        | 1                     | 0      |
| 38206  | 0                             |        | 0                     |        |
| 38233  | 1                             | 4      | 0                     |        |
| 38242  | 2                             | 2      | 2                     | 2      |
| 38245  | 2                             | 1      | 1                     | 2      |
| 38261  | 3                             | 2      | 3                     | 2      |
| 38288  | 0                             |        | 0                     |        |
| 38296  | 1                             | 1      | 0                     |        |
| 38299  | 2                             | 2      | 1                     | 1      |
| 38300  | 2                             | 0      | 0                     |        |
| 38303  | 1                             | 1      | 0                     |        |
| 38317  | 0                             |        | 0                     |        |
| 38328  | 1                             | 2      | 0                     |        |
| 38333  | 0                             |        | 0                     |        |
| 38336  | 0                             |        | 0                     |        |
| 38338  | 0                             |        | 0                     |        |
| 38342  | 0                             |        | 0                     |        |
| 38360  | 1                             | 0      | 1                     | 0      |
| 38362  | 1                             | 3      | 2                     | 1      |
| 38364  | 1                             | 1      | 1                     | 3      |
| 38402  | 1                             | 1      | 0                     |        |
| 38423  | 1                             | 2      | 1                     | 2      |
| 38424  | 5                             | 4      | 5                     | 4      |
| 38435  | 3                             | 2      | 2                     | 4      |
| 38450  | 0                             |        | 0                     |        |
| 38455  | 5                             | 3      | 0                     |        |
| 38467  | 3                             | 4      | 0                     |        |
| 38468  | 0                             |        | 3                     | 3      |
| 38472  | 0                             |        | 0                     |        |

| respid | ICS Splitting/spraying: Q26_1 | Q26a_1 | ICS: Hesitancy: Q27_1 | Q27a_1 |
|--------|-------------------------------|--------|-----------------------|--------|
| 38484  | 5                             | 2      | 0                     |        |
| 38498  | 0                             |        | 0                     |        |
| 38507  | 0                             |        | 0                     |        |
| 38511  | 1                             | 1      | 0                     |        |
| 38524  | 4                             | 3      | 4                     | 3      |
| 38526  | 0                             |        | 0                     |        |
| 38534  | 1                             | 2      | 1                     | 1      |
| 38536  | 0                             |        | 0                     |        |
| 38539  | 0                             |        | 0                     |        |
| 38547  | 0                             |        | 0                     |        |
| 38549  | 0                             |        | 1                     | 0      |
| 38575  | 1                             | 1      | 2                     | 2      |
| 38579  | 1                             | 1      | 1                     | 1      |
| 38585  | 0                             |        | 0                     |        |
| 38589  | 4                             | 3      | 4                     | 3      |
| 38595  | 2                             | 2      | 3                     | 3      |
| 38602  | 0                             |        | 0                     |        |
| 38603  | 2                             | 2      | 2                     | 1      |
| 38612  | 0                             |        | 1                     | 1      |
| 38621  | 3                             | 2      | 2                     | 3      |
| 38624  | 0                             |        | 2                     | 2      |
| 38636  | 0                             |        | 0                     |        |
| 38656  | 1                             | 1      | 2                     | 1      |
| 38668  | 0                             |        | 0                     |        |
| 38675  | 0                             |        | 0                     |        |
| 38676  | 1                             | 0      | 0                     |        |
| 38682  | 2                             | 0      | 1                     | 1      |
| 38689  | 0                             |        | 0                     |        |
| 38702  | 0                             |        | 0                     |        |
| 38704  | 4                             | 3      | 3                     | 3      |
| 38713  | 0                             |        | 0                     |        |
| 38718  | 3                             | 2      | 2                     | 1      |

| respid | ICS Splitting/spraying: Q26_1 | Q26a_1 | ICS: Hesitancy: Q27_1 | Q27a_1 |
|--------|-------------------------------|--------|-----------------------|--------|
| 38725  | 0                             |        | 0                     |        |
| 38730  | 3                             | 2      | 3                     | 2      |
| 38737  | 0                             |        | 0                     |        |
| 38738  | 1                             | 2      | 2                     | 2      |
| 38744  | 0                             |        | 0                     |        |
| 38746  | 0                             |        | 0                     |        |
| 38753  | 0                             |        | 0                     |        |
| 38756  | 2                             | 2      | 2                     | 2      |
| 38760  | 1                             | 1      | 1                     | 1      |
| 38762  | 1                             | 2      | 4                     | 3      |
| 38765  | 0                             |        | 0                     |        |
| 38769  | 1                             | 1      | 1                     | 0      |
| 38781  | 3                             | 3      | 4                     | 3      |
| 38786  | 0                             |        | 0                     |        |
| 38790  | 2                             | 2      | 3                     | 3      |
| 38793  | 0                             |        | 0                     |        |
| 38797  | 1                             | 1      | 0                     |        |
| 38802  | 0                             |        | 0                     |        |
| 38815  | 2                             | 1      | 2                     | 1      |
| 38826  | 1                             | 2      | 2                     | 3      |
| 38828  | 0                             |        | 0                     |        |
| 38829  | 3                             | 3      | 3                     | 3      |
| 38835  | 3                             | 2      | 2                     | 2      |
| 38842  | 2                             | 3      | 2                     | 3      |
| 38853  | 0                             |        | 1                     | 1      |
| 38855  | 3                             | 3      | 3                     | 3      |
| 38860  | 4                             | 3      | 2                     | 1      |
| 38869  | 0                             |        | 0                     |        |
| 38882  | 2                             | 3      | 2                     | 2      |
| 38897  | 0                             |        | 0                     |        |
| 38903  | 3                             | 3      | 3                     | 3      |
| 38910  | 1                             | 2      | 2                     | 3      |

| respid | ICS Splitting/spraying: Q26_1 | Q26a_1 | ICS: Hesitancy: Q27_1 | Q27a_1 |
|--------|-------------------------------|--------|-----------------------|--------|
| 38948  | 1                             | 3      | 5                     | 3      |
| 38949  | 0                             |        | 1                     | 1      |
| 38953  | 4                             | 3      | 3                     | 2      |
| 38989  | 3                             | 3      | 2                     | 2      |
| 38997  | 2                             | 0      | 2                     | 1      |
| 38999  | 0                             |        | 0                     |        |
| 39002  | 1                             | 4      | 2                     | 2      |
| 39003  | 1                             | 1      | 1                     | 3      |
| 39006  | 0                             |        | 2                     | 0      |
| 39014  | 0                             |        | 0                     |        |
| 39017  | 4                             | 4      | 3                     | 3      |
| 39018  | 4                             | 3      | 4                     | 3      |
| 39025  | 1                             | 4      | 2                     | 3      |
| 39031  | 2                             | 2      | 1                     | 3      |
| 39061  | 2                             | 1      | 4                     | 3      |
| 39131  | 0                             |        | 0                     |        |
| 39153  | 4                             | 4      | 4                     | 3      |
| 39194  | 1                             | 2      | 1                     | 3      |
| 39204  | 0                             |        | 0                     |        |
| 39208  | 0                             |        | 3                     | 3      |
| 39213  | 0                             |        | 0                     |        |
| 39231  | 1                             | 1      | 1                     | 1      |
| 39251  | 1                             | 2      | 3                     | 3      |
| 39257  | 3                             | 4      | 2                     | 4      |
| 39262  | 0                             |        | 1                     | 1      |
| 39269  | 4                             | 4      | 0                     |        |
| 39272  | 0                             |        | 0                     |        |
| 39280  | 3                             | 2      | 3                     | 2      |
| 39294  | 0                             |        | 2                     | 2      |
| 39297  | 3                             | 2      | 3                     | 2      |
| 39300  | 0                             |        | 0                     |        |
| 39307  | 0                             |        | 1                     | 1      |

| respid | ICS Splitting/spraying: Q26_1 | Q26a_1 | ICS: Hesitancy: Q27_1 | Q27a_1 |
|--------|-------------------------------|--------|-----------------------|--------|
| 39320  | 0                             |        | 2                     | 3      |
| 39333  | 0                             |        | 0                     |        |
| 39335  | 3                             | 3      | 2                     | 2      |
| 39339  | 0                             |        | 0                     |        |
| 39375  | 0                             |        | 0                     |        |
| 39377  | 0                             |        | 0                     |        |
| 39380  | 1                             | 0      | 1                     | 2      |
| 39425  | 0                             |        | 0                     |        |
| 39590  | 0                             |        | 0                     |        |
| 40529  | 0                             |        | 0                     |        |
| 40702  | 1                             | 0      | 1                     | 0      |
| 40788  | 1                             | 1      | 1                     | 1      |
| 40841  | 0                             |        | 0                     |        |
| 40965  | 0                             |        | 0                     |        |
| 41092  | 1                             | 0      | 1                     | 0      |
| 41534  | 0                             |        | 0                     |        |
| 41919  | 0                             |        | 0                     |        |
| 42110  | 0                             |        | 0                     |        |
| 42135  | 1                             | 2      | 1                     | 2      |
| 42142  | 0                             |        | 0                     |        |
| 42163  | 0                             |        | 0                     |        |
| 42164  | 0                             |        | 0                     |        |
| 42172  | 1                             | 0      | 1                     | 1      |
| 42177  | 0                             |        | 0                     |        |
| 42181  | 0                             |        | 0                     |        |
| 42193  | 1                             | 1      | 1                     | 1      |
| 42196  | 0                             |        | 1                     | 1      |
| 42202  | 1                             | 1      | 0                     |        |
| 42248  | 1                             | 1      | 1                     | 1      |
| 42283  | 0                             |        | 0                     |        |
| 42284  | 1                             | 1      | 1                     | 1      |
| 42323  | 0                             |        | 0                     |        |

| respid | ICS Splitting/spraying: Q26_1 | Q26a_1 | ICS: Hesitancy: Q27_1 | Q27a_1 |
|--------|-------------------------------|--------|-----------------------|--------|
| 42349  | 0                             |        | 0                     |        |
| 42351  | 0                             |        | 0                     |        |
| 42357  | 0                             |        | 0                     |        |
| 42366  | 0                             |        | 0                     |        |
| 42380  | 1                             | 0      | 1                     | 1      |
| 42414  | 3                             | 4      | 3                     | 3      |
| 42420  | 3                             | 3      | 3                     | 3      |
| 42454  | 0                             |        | 0                     |        |
| 42458  | 0                             |        | 0                     |        |
| 42461  | 0                             |        | 0                     |        |
| 42488  | 2                             | 1      | 0                     |        |
| 42511  | 0                             |        | 0                     |        |
| 42512  | 0                             |        | 0                     |        |
| 42530  | 1                             | 2      | 1                     | 2      |
| 42531  | 5                             | 4      | 1                     | 3      |
| 42533  | 0                             |        | 0                     |        |
| 42549  | 0                             |        | 0                     |        |
| 42550  | 0                             |        | 0                     |        |
| 42553  | 0                             |        | 0                     |        |
| 42562  | 2                             | 2      | 1                     | 2      |
| 42567  | 0                             |        | 0                     |        |
| 42589  | 1                             | 1      | 1                     | 1      |
| 42604  | 1                             | 1      | 0                     |        |
| 42618  | 0                             |        | 0                     |        |
| 42621  | 3                             | 2      | 2                     | 2      |
| 42627  | 0                             |        | 0                     |        |
| 42641  | 0                             |        | 0                     |        |
| 42655  | 3                             | 4      | 4                     | 3      |
| 42666  | 0                             |        | 1                     | 0      |
| 42667  | 2                             | 0      | 2                     | 0      |
| 42697  | 1                             | 1      | 1                     | 1      |
| 42703  | 0                             |        | 0                     |        |

| respid | ICS Splitting/spraying: Q26_1 | Q26a_1 | ICS: Hesitancy: Q27_1 | Q27a_1 |
|--------|-------------------------------|--------|-----------------------|--------|
| 42712  | 0                             |        | 1                     | 1      |
| 42731  | 1                             | 1      | 1                     | 0      |
| 42780  | 2                             | 0      | 0                     |        |
| 42785  | 1                             | 1      | 1                     | 1      |
| 42788  | 0                             |        | 0                     |        |
| 42802  | 2                             | 0      | 2                     | 1      |
| 42818  | 1                             | 1      | 2                     | 2      |
| 42821  | 1                             | 1      | 1                     | 1      |
| 42824  | 1                             | 0      | 0                     |        |
| 42831  | 0                             |        | 0                     |        |
| 42836  | 2                             | 1      | 2                     | 1      |
| 42864  | 1                             | 1      | 1                     | 1      |
| 42875  | 0                             |        | 0                     |        |
| 42891  | 4                             | 4      | 5                     | 4      |
| 42897  | 0                             |        | 0                     |        |
| 42900  | 0                             |        | 1                     | 1      |
| 42902  | 2                             | 1      | 2                     | 1      |
| 42921  | 1                             | 1      | 0                     |        |
| 42925  | 0                             |        | 0                     |        |
| 42944  | 0                             |        | 0                     |        |
| 42950  | 0                             |        | 0                     |        |
| 42963  | 0                             |        | 0                     |        |
| 42967  | 0                             |        | 1                     | 1      |
| 42985  | 0                             |        | 1                     | 1      |
| 42990  | 0                             |        | 1                     | 2      |
| 42996  | 2                             | 1      | 4                     | 2      |
| 43002  | 3                             | 0      | 1                     | 2      |
| 43004  | 2                             | 1      | 1                     | 1      |
| 43012  | 0                             |        | 0                     |        |
| 43027  | 4                             | 2      | 3                     | 2      |
| 43028  | 1                             | 0      | 0                     |        |
| 43029  | 0                             |        | 1                     | 1      |

| respid | ICS Splitting/spraying: Q26_1 | Q26a_1 | ICS: Hesitancy: Q27_1 | Q27a_1 |
|--------|-------------------------------|--------|-----------------------|--------|
| 43031  | 1                             | 1      | 1                     | 1      |
| 43042  | 0                             |        | 0                     |        |
| 43054  | 0                             |        | 0                     |        |
| 43058  | 1                             | 1      | 0                     |        |
| 43064  | 0                             |        | 0                     |        |
| 43069  | 1                             | 1      | 1                     | 1      |
| 43071  | 0                             |        | 0                     |        |
| 43072  | 0                             |        | 1                     | 0      |
| 43077  | 1                             | 1      | 1                     | 1      |
| 43078  | 4                             | 2      | 3                     | 3      |
| 43082  | 0                             |        | 0                     |        |
| 43092  | 1                             | 1      | 1                     | 1      |
| 43096  | 3                             | 0      | 0                     |        |
| 43109  | 0                             |        | 0                     |        |
| 43113  | 0                             |        | 0                     |        |
| 43123  | 0                             |        | 0                     |        |
| 43127  | 1                             | 0      | 0                     |        |
| 43128  | 1                             | 0      | 1                     | 1      |
| 43129  | 1                             | 0      | 1                     | 0      |
| 43133  | 2                             | 2      | 3                     | 2      |
| 43140  | 0                             |        | 0                     |        |
| 43143  | 3                             | 1      | 0                     |        |
| 43149  | 3                             | 1      | 2                     | 1      |
| 43150  | 1                             | 1      | 2                     | 1      |
| 43153  | 2                             | 2      | 3                     | 3      |
| 43170  | 1                             | 0      | 1                     | 0      |
| 43187  | 1                             | 0      | 1                     | 1      |
| 43188  | 0                             |        | 0                     |        |
| 43198  | 1                             | 1      | 0                     |        |
| 43208  | 0                             |        | 0                     |        |
| 43216  | 1                             | 1      | 1                     | 1      |
| 43222  | 2                             | 2      | 2                     | 1      |



| respid | ICS Splitting/spraying: Q26_1 | Q26a_1 | ICS: Hesitancy: Q27_1 | Q27a_1 |
|--------|-------------------------------|--------|-----------------------|--------|
| 43224  | 1                             | 1      | 0                     |        |
| 43230  | 2                             | 1      | 2                     | 2      |
| 43231  | 1                             | 1      | 1                     | 1      |
| 43265  | 3                             | 3      | 3                     | 3      |
| 43270  | 3                             | 3      | 3                     | 2      |
| 43283  | 2                             | 1      | 1                     | 1      |
| 43295  | 2                             | 2      | 2                     | 1      |
| 43297  | 0                             |        | 0                     |        |
| 43299  | 2                             | 3      | 2                     | 2      |
| 43307  | 1                             | 1      | 0                     |        |
| 43316  | 1                             | 1      | 1                     | 2      |
| 43318  | 2                             | 1      | 1                     | 1      |
| 43319  | 1                             | 1      | 0                     |        |
| 43324  | 1                             | 1      | 1                     | 1      |
| 43325  | 0                             |        | 0                     |        |
| 43327  | 1                             | 0      | 1                     | 0      |
| 43338  | 1                             | 1      | 1                     | 1      |
| 43342  | 5                             | 0      | 0                     |        |
| 43348  | 0                             |        | 0                     |        |
| 43395  | 1                             | 1      | 1                     | 1      |
| 43404  | 2                             | 2      | 2                     | 2      |
| 43406  | 1                             | 1      | 0                     |        |
| 43407  | 0                             |        | 0                     |        |
| 43411  | 1                             | 0      | 1                     | 0      |
| 43416  | 3                             | 1      | 1                     | 1      |
| 43428  | 3                             | 1      | 0                     |        |
| 43429  | 2                             | 2      | 2                     | 2      |
| 43432  | 0                             |        | 1                     | 0      |
| 43443  | 1                             | 0      | 0                     |        |
| 43455  | 0                             |        | 0                     |        |
| 43457  | 1                             | 1      | 1                     | 1      |
| 43458  | 0                             |        | 0                     |        |

| respid | ICS Splitting/spraying: Q26_1 | Q26a_1 | ICS: Hesitancy: Q27_1 | Q27a_1 |
|--------|-------------------------------|--------|-----------------------|--------|
| 43477  | 2                             | 2      | 3                     | 2      |
| 43520  | 0                             |        | 0                     |        |
| 43521  | 0                             |        | 0                     |        |
| 43550  | 0                             |        | 0                     |        |
| 43551  | 2                             | 2      | 2                     | 2      |
| 43554  | 1                             | 1      | 2                     | 2      |
| 43560  | 2                             | 1      | 1                     | 0      |
| 43569  | 0                             |        | 0                     |        |
| 43583  | 0                             |        | 0                     |        |
| 43590  | 1                             | 2      | 2                     | 2      |
| 43591  | 0                             |        | 0                     |        |
| 43595  | 0                             |        | 0                     |        |
| 43599  | 0                             |        | 0                     |        |
| 43606  | 0                             |        | 0                     |        |
| 43609  | 1                             | 1      | 0                     |        |
| 43629  | 0                             |        | 0                     |        |
| 43636  | 0                             |        | 1                     | 1      |
| 43661  | 0                             |        | 0                     |        |
| 43668  | 1                             | 0      | 0                     |        |
| 43672  | 0                             |        | 0                     |        |
| 43677  | 0                             |        | 2                     | 1      |
| 43683  | 0                             |        | 2                     | 2      |
| 43708  | 3                             | 2      | 2                     | 2      |
| 43713  | 1                             | 0      | 2                     | 1      |
| 43718  | 0                             |        | 0                     |        |
| 43725  | 0                             |        | 0                     |        |
| 43747  | 1                             | 0      | 0                     |        |
| 43755  | 4                             | 0      | 0                     |        |
| 43770  | 0                             |        | 3                     | 1      |
| 43775  | 1                             | 2      | 2                     | 1      |
| 43788  | 0                             |        | 0                     |        |
| 43790  | 3                             | 2      | 2                     | 2      |

| respid | ICS Splitting/spraying: Q26_1 | Q26a_1 | ICS: Hesitancy: Q27_1 | Q27a_1 |
|--------|-------------------------------|--------|-----------------------|--------|
| 43797  | 1                             | 1      | 1                     | 1      |
| 43798  | 1                             | 1      | 1                     | 2      |
| 43811  | 2                             | 1      | 1                     | 1      |
| 43819  | 2                             | 1      | 1                     | 1      |
| 43821  | 2                             | 1      | 2                     | 2      |
| 43822  | 0                             |        | 0                     |        |
| 43825  | 2                             | 1      | 1                     | 0      |
| 43826  | 0                             |        | 0                     |        |
| 43831  | 0                             |        | 0                     |        |
| 43836  | 1                             | 1      | 1                     | 2      |
| 43852  | 1                             | 2      | 2                     | 1      |
| 43857  | 0                             |        | 0                     |        |
| 43858  | 1                             | 1      | 0                     |        |
| 43859  | 1                             | 1      | 1                     | 1      |
| 43863  | 0                             |        | 0                     |        |
| 43868  | 1                             | 1      | 1                     | 1      |
| 43872  | 2                             | 2      | 1                     | 2      |
| 43874  | 2                             | 2      | 2                     | 2      |
| 43882  | 0                             |        | 0                     |        |
| 43886  | 0                             |        | 0                     |        |
| 43903  | 2                             | 1      | 0                     |        |
| 43929  | 0                             |        | 0                     |        |
| 43932  | 0                             |        | 1                     | 0      |
| 43936  | 0                             |        | 0                     |        |
| 43962  | 0                             |        | 5                     | 2      |
| 43964  | 0                             |        | 1                     | 0      |
| 43968  | 0                             |        | 0                     |        |
| 43979  | 0                             |        | 2                     | 2      |
| 44006  | 2                             | 2      | 2                     | 2      |
| 44009  | 1                             | 1      | 0                     |        |
| 44023  | 0                             |        | 0                     |        |
| 44035  | 1                             | 1      | 1                     | 1      |

| respid | ICS Splitting/spraying: Q26_1 | Q26a_1 | ICS: Hesitancy: Q27_1 | Q27a_1 |
|--------|-------------------------------|--------|-----------------------|--------|
| 44038  | 2                             | 2      | 1                     | 2      |
| 44039  | 2                             | 1      | 3                     | 3      |
| 44043  | 2                             | 1      | 1                     | 1      |
| 44048  | 1                             | 2      | 1                     | 2      |
| 44050  | 0                             |        | 3                     | 0      |
| 44051  | 1                             | 2      | 1                     | 2      |
| 44061  | 1                             | 2      | 2                     | 1      |
| 44063  | 1                             | 1      | 1                     | 1      |
| 44072  | 2                             | 2      | 1                     | 1      |
| 44075  | 2                             | 1      | 1                     | 1      |
| 44089  | 1                             | 1      | 2                     | 2      |
| 44090  | 4                             | 3      | 3                     | 3      |
| 44091  | 2                             | 2      | 2                     | 1      |
| 44092  | 1                             | 1      | 1                     | 1      |
| 44110  | 1                             | 1      | 1                     | 1      |
| 44112  | 1                             | 1      | 1                     | 1      |
| 44114  | 1                             | 2      | 2                     | 1      |
| 44143  | 2                             | 2      | 2                     | 2      |
| 44179  | 1                             | 1      | 0                     |        |
| 44234  | 1                             | 1      | 0                     |        |
| 44236  | 0                             |        | 0                     |        |
| 44239  | 1                             | 1      | 1                     | 1      |
| 44241  | 2                             | 1      | 1                     | 2      |
| 44253  | 0                             |        | 0                     |        |
| 44260  | 2                             | 2      | 2                     | 1      |
| 44261  | 2                             | 2      | 1                     | 1      |
| 44263  | 1                             | 1      | 2                     | 2      |
| 44264  | 0                             |        | 0                     |        |
| 44265  | 0                             |        | 0                     |        |
| 44267  | 0                             |        | 2                     | 1      |
| 44306  | 0                             |        | 1                     | 1      |
| 44309  | 3                             | 2      | 4                     | 2      |

| respid | ICS Splitting/spraying: Q26_1 | Q26a_1 | ICS: Hesitancy: Q27_1 | Q27a_1 |
|--------|-------------------------------|--------|-----------------------|--------|
| 44310  | 0                             |        | 0                     |        |
| 44361  | 0                             |        | 0                     |        |
| 44380  | 0                             |        | 0                     |        |
| 44386  | 0                             |        | 1                     | 0      |
| 44419  | 0                             |        | 2                     | 1      |
| 44426  | 2                             | 1      | 2                     | 1      |
| 44479  | 0                             |        | 0                     |        |
| 44484  | 0                             |        | 0                     |        |
| 44487  | 1                             | 3      | 0                     |        |
| 44509  | 0                             |        | 0                     |        |
| 44540  | 0                             |        | 1                     | 1      |
| 44551  | 3                             | 1      | 0                     |        |
| 44553  | 1                             | 1      | 0                     |        |
| 44650  | 0                             |        | 0                     |        |
| 44665  | 0                             |        | 2                     | 2      |
| 44779  | 1                             | 1      | 1                     | 0      |
| 44797  | 0                             |        | 1                     | 1      |
| 44807  | 0                             |        | 0                     |        |
| 44815  | 2                             | 1      | 2                     | 1      |
| 44836  | 0                             |        | 0                     |        |
| 44868  | 0                             |        | 1                     | 1      |
| 44927  | 3                             | 2      | 2                     | 2      |
| 44983  | 0                             |        | 0                     |        |
| 45040  | 2                             | 1      | 0                     |        |
| 45051  | 0                             |        | 1                     | 1      |
| 45067  | 0                             |        | 0                     |        |
| 45074  | 0                             |        | 0                     |        |
| 45115  | 0                             |        | 0                     |        |
| 45187  | 4                             | 2      | 2                     | 1      |
| 45221  | 0                             |        | 0                     |        |
| 45279  | 1                             | 1      | 1                     | 1      |
| 45308  | 2                             | 1      | 1                     | 2      |

| respid | ICS Splitting/spraying: Q26_1 | Q26a_1 | ICS: Hesitancy: Q27_1 | Q27a_1 |
|--------|-------------------------------|--------|-----------------------|--------|
| 45317  | 1                             | 0      | 0                     |        |
| 45379  | 1                             | 1      | 1                     | 1      |
| 45451  | 0                             |        | 0                     |        |
| 45472  | 2                             | 2      | 2                     | 2      |
| 45474  | 1                             | 3      | 2                     | 3      |
| 45544  | 5                             | 4      | 5                     | 4      |
| 45561  | 0                             |        | 1                     | 1      |
| 45596  | 0                             |        | 2                     | 0      |

**InstrumICS**

**ICS**

**Symptom** Voiding

Storage

**Type of R**Symptom

Bother

Symptom

Bother

**Descripti**Terminal dribble

Symptom Bother

Urgency with a fear of leaking Symptom Bother

| respid | ICS Terminal Dribble: Q28_1 | Q28a_1 | ICS Urgency with fear of leaking: Q29_1 | Q29a_1 |
|--------|-----------------------------|--------|-----------------------------------------|--------|
| 241    | 0                           |        | 0                                       |        |
| 242    | 0                           |        | 0                                       |        |
| 243    | 1                           | 2      | 1                                       | 1      |
| 244    | 1                           | 1      | 1                                       | 4      |
| 245    | 0                           |        | 1                                       | 1      |
| 246    | 1                           | 1      | 0                                       |        |
| 247    | 5                           | 3      | 1                                       | 1      |
| 253    | 0                           |        | 0                                       |        |
| 256    | 4                           | 2      | 0                                       |        |
| 257    | 0                           |        | 1                                       | 1      |
| 258    | 1                           | 1      | 1                                       | 1      |
| 259    | 1                           | 1      | 0                                       |        |
| 263    | 3                           | 1      | 0                                       |        |
| 264    | 0                           |        | 0                                       |        |
| 265    | 3                           | 3      | 3                                       | 2      |
| 266    | 0                           |        | 0                                       |        |
| 268    | 1                           | 1      | 1                                       | 1      |
| 270    | 0                           |        | 1                                       | 0      |
| 272    | 1                           | 1      | 0                                       |        |
| 274    | 0                           |        | 0                                       |        |

| respid | ICS Terminal Dribble: Q28_1 | Q28a_1 | ICS Urgency with fear of leaking: Q29_1 | Q29a_1 |
|--------|-----------------------------|--------|-----------------------------------------|--------|
| 275    | 0                           |        | 0                                       |        |
| 276    | 0                           |        | 0                                       |        |
| 277    | 3                           | 1      | 0                                       |        |
| 279    | 1                           | 1      | 1                                       | 1      |
| 286    | 1                           | 1      | 3                                       | 2      |
| 290    | 1                           | 1      | 0                                       |        |
| 291    | 0                           |        | 0                                       |        |
| 295    | 0                           |        | 0                                       |        |
| 297    | 1                           | 2      | 1                                       | 1      |
| 299    | 0                           |        | 1                                       | 1      |
| 300    | 1                           | 1      | 1                                       | 1      |
| 303    | 0                           |        | 0                                       |        |
| 304    | 1                           | 0      | 0                                       |        |
| 306    | 1                           | 1      | 0                                       |        |
| 307    | 0                           |        | 0                                       |        |
| 312    | 4                           | 3      | 4                                       | 3      |
| 315    | 1                           | 1      | 1                                       | 0      |
| 317    | 0                           |        | 0                                       |        |
| 322    | 1                           | 2      | 1                                       | 1      |
| 335    | 1                           | 1      | 1                                       | 1      |
| 374    | 2                           | 2      | 3                                       | 2      |
| 378    | 1                           | 1      | 1                                       | 1      |
| 380    | 1                           | 1      | 1                                       | 1      |
| 382    | 3                           | 3      | 1                                       | 1      |
| 384    | 4                           | 3      | 2                                       | 2      |
| 385    | 1                           | 1      | 1                                       | 1      |
| 395    | 1                           | 2      | 0                                       |        |
| 396    | 0                           |        | 0                                       |        |
| 398    | 0                           |        | 0                                       |        |
| 402    | 4                           | 3      | 4                                       | 3      |
| 414    | 2                           | 0      | 0                                       |        |
| 415    | 0                           |        | 0                                       |        |



| respid | ICS Terminal Dribble: Q28_1 | Q28a_1 | ICS Urgency with fear of leaking: Q29_1 | Q29a_1 |
|--------|-----------------------------|--------|-----------------------------------------|--------|
| 416    | 1                           | 0      | 0                                       |        |
| 420    | 3                           | 3      | 1                                       | 2      |
| 421    | 1                           | 1      | 1                                       | 1      |
| 422    | 0                           |        | 1                                       | 0      |
| 423    | 1                           | 0      | 0                                       |        |
| 424    | 0                           |        | 0                                       |        |
| 425    | 1                           | 0      | 0                                       |        |
| 428    | 1                           | 1      | 0                                       |        |
| 429    | 1                           | 0      | 1                                       | 1      |
| 431    | 0                           |        | 0                                       |        |
| 437    | 0                           |        | 0                                       |        |
| 438    | 5                           | 0      | 1                                       | 0      |
| 441    | 0                           |        | 0                                       |        |
| 444    | 0                           |        | 0                                       |        |
| 448    | 1                           | 0      | 0                                       |        |
| 449    | 1                           | 1      | 1                                       | 1      |
| 457    | 1                           | 1      | 1                                       | 2      |
| 460    | 1                           | 0      | 0                                       |        |
| 469    | 1                           | 1      | 1                                       | 1      |
| 471    | 1                           | 2      | 1                                       | 2      |
| 473    | 3                           | 4      | 0                                       |        |
| 476    | 1                           | 1      | 1                                       | 1      |
| 479    | 1                           | 1      | 0                                       |        |
| 485    | 1                           | 0      | 0                                       |        |
| 488    | 0                           |        | 1                                       | 1      |
| 494    | 0                           |        | 1                                       | 0      |
| 496    | 0                           |        | 0                                       |        |
| 501    | 0                           |        | 0                                       |        |
| 502    | 1                           | 2      | 3                                       | 2      |
| 503    | 0                           |        | 1                                       | 1      |
| 506    | 1                           | 0      | 1                                       | 0      |
| 514    | 1                           | 1      | 1                                       | 1      |

| respid | ICS Terminal Dribble: Q28_1 | Q28a_1 | ICS Urgency with fear of leaking: Q29_1 | Q29a_1 |
|--------|-----------------------------|--------|-----------------------------------------|--------|
| 515    | 3                           | 2      | 1                                       | 1      |
| 516    | 1                           | 0      | 0                                       |        |
| 519    | 4                           | 2      | 3                                       | 3      |
| 522    | 0                           |        | 0                                       |        |
| 525    | 0                           |        | 0                                       |        |
| 528    | 0                           |        | 0                                       |        |
| 532    | 1                           | 1      | 1                                       | 1      |
| 536    | 2                           | 1      | 1                                       | 2      |
| 539    | 0                           |        | 0                                       |        |
| 540    | 0                           |        | 1                                       | 0      |
| 547    | 0                           |        | 0                                       |        |
| 551    | 0                           |        | 0                                       |        |
| 554    | 2                           | 2      | 1                                       | 1      |
| 558    | 1                           | 1      | 1                                       | 1      |
| 563    | 0                           |        | 0                                       |        |
| 564    | 1                           | 1      | 1                                       | 1      |
| 565    | 0                           |        | 1                                       | 1      |
| 567    | 0                           |        | 0                                       |        |
| 569    | 1                           | 1      | 1                                       | 1      |
| 572    | 1                           | 1      | 1                                       | 1      |
| 574    | 1                           | 1      | 0                                       |        |
| 583    | 1                           | 1      | 1                                       | 1      |
| 589    | 0                           |        | 0                                       |        |
| 592    | 0                           |        | 1                                       | 1      |
| 593    | 0                           |        | 0                                       |        |
| 594    | 4                           | 3      | 2                                       | 2      |
| 597    | 2                           | 0      | 0                                       |        |
| 601    | 1                           | 1      | 0                                       |        |
| 607    | 2                           | 2      | 0                                       |        |
| 610    | 1                           | 1      | 0                                       |        |
| 612    | 4                           | 3      | 4                                       | 4      |
| 627    | 0                           |        | 0                                       |        |

| respid | ICS Terminal Dribble: Q28_1 | Q28a_1 | ICS Urgency with fear of leaking: Q29_1 | Q29a_1 |
|--------|-----------------------------|--------|-----------------------------------------|--------|
| 631    | 1                           | 0      | 0                                       |        |
| 633    | 0                           |        | 1                                       | 2      |
| 636    | 1                           | 0      | 0                                       |        |
| 656    | 0                           |        | 0                                       |        |
| 659    | 0                           |        | 0                                       |        |
| 670    | 0                           |        | 0                                       |        |
| 672    | 0                           |        | 2                                       | 1      |
| 673    | 1                           | 1      | 1                                       | 1      |
| 675    | 0                           |        | 0                                       |        |
| 676    | 2                           | 2      | 2                                       | 2      |
| 679    | 1                           | 1      | 1                                       | 2      |
| 683    | 2                           | 1      | 0                                       |        |
| 684    | 1                           | 1      | 0                                       |        |
| 690    | 0                           |        | 0                                       |        |
| 701    | 4                           | 2      | 4                                       | 3      |
| 709    | 2                           | 2      | 1                                       | 1      |
| 719    | 0                           |        | 0                                       |        |
| 726    | 0                           |        | 0                                       |        |
| 730    | 1                           | 1      | 0                                       |        |
| 731    | 1                           | 1      | 0                                       |        |
| 732    | 1                           | 1      | 0                                       |        |
| 733    | 0                           |        | 0                                       |        |
| 735    | 0                           |        | 0                                       |        |
| 738    | 1                           | 1      | 0                                       |        |
| 740    | 1                           | 0      | 0                                       |        |
| 742    | 1                           | 1      | 0                                       |        |
| 744    | 0                           |        | 0                                       |        |
| 749    | 1                           | 0      | 0                                       |        |
| 751    | 1                           | 1      | 0                                       |        |
| 752    | 3                           | 2      | 0                                       |        |
| 753    | 1                           | 2      | 0                                       |        |
| 755    | 0                           |        | 0                                       |        |

| respid | ICS Terminal Dribble: Q28_1 | Q28a_1 | ICS Urgency with fear of leaking: Q29_1 | Q29a_1 |
|--------|-----------------------------|--------|-----------------------------------------|--------|
| 756    | 0                           |        | 0                                       |        |
| 759    | 0                           |        | 0                                       |        |
| 760    | 0                           |        | 1                                       | 1      |
| 763    | 1                           | 1      | 0                                       |        |
| 764    | 0                           |        | 0                                       |        |
| 765    | 0                           |        | 0                                       |        |
| 766    | 1                           | 0      | 0                                       |        |
| 767    | 1                           | 1      | 0                                       |        |
| 771    | 2                           | 2      | 0                                       |        |
| 773    | 1                           | 0      | 0                                       |        |
| 774    | 1                           | 0      | 0                                       |        |
| 775    | 2                           | 1      | 0                                       |        |
| 776    | 1                           | 1      | 1                                       | 1      |
| 778    | 2                           | 1      | 1                                       | 1      |
| 780    | 2                           | 2      | 0                                       |        |
| 781    | 0                           |        | 0                                       |        |
| 782    | 0                           |        | 0                                       |        |
| 783    | 0                           |        | 0                                       |        |
| 786    | 3                           | 2      | 4                                       | 2      |
| 788    | 0                           |        | 0                                       |        |
| 792    | 0                           |        | 0                                       |        |
| 794    | 4                           | 4      | 2                                       | 2      |
| 795    | 0                           |        | 0                                       |        |
| 799    | 1                           | 1      | 0                                       |        |
| 800    | 5                           | 0      | 0                                       |        |
| 801    | 1                           | 2      | 1                                       | 1      |
| 804    | 0                           |        | 1                                       | 1      |
| 806    | 0                           |        | 0                                       |        |
| 807    | 0                           |        | 0                                       |        |
| 808    | 5                           | 3      | 4                                       | 3      |
| 809    | 4                           | 2      | 0                                       |        |
| 811    | 0                           |        | 0                                       |        |

| respid | ICS Terminal Dribble: Q28_1 | Q28a_1 | ICS Urgency with fear of leaking: Q29_1 | Q29a_1 |
|--------|-----------------------------|--------|-----------------------------------------|--------|
| 812    | 0                           |        | 0                                       |        |
| 815    | 0                           |        | 0                                       |        |
| 817    | 2                           | 1      | 0                                       |        |
| 818    | 0                           |        | 0                                       |        |
| 819    | 2                           | 1      | 0                                       |        |
| 821    | 2                           | 2      | 2                                       | 2      |
| 824    | 2                           | 2      | 0                                       |        |
| 825    | 0                           |        | 0                                       |        |
| 828    | 1                           | 0      | 0                                       |        |
| 832    | 1                           | 1      | 1                                       | 1      |
| 834    | 1                           | 1      | 1                                       | 1      |
| 835    | 0                           |        | 0                                       |        |
| 836    | 0                           |        | 0                                       |        |
| 837    | 0                           |        | 0                                       |        |
| 840    | 0                           |        | 0                                       |        |
| 841    | 0                           |        | 0                                       |        |
| 845    | 0                           |        | 0                                       |        |
| 846    | 0                           |        | 0                                       |        |
| 849    | 1                           | 0      | 0                                       |        |
| 852    | 1                           | 1      | 0                                       |        |
| 854    | 5                           | 1      | 0                                       |        |
| 856    | 0                           |        | 0                                       |        |
| 858    | 1                           | 1      | 0                                       |        |
| 859    | 1                           | 0      | 1                                       | 1      |
| 861    | 1                           | 1      | 0                                       |        |
| 863    | 0                           |        | 0                                       |        |
| 864    | 3                           | 3      | 1                                       | 1      |
| 866    | 0                           |        | 0                                       |        |
| 869    | 1                           | 1      | 0                                       |        |
| 870    | 1                           | 1      | 1                                       | 1      |
| 871    | 0                           |        | 0                                       |        |
| 873    | 1                           | 1      | 0                                       |        |

| respid | ICS Terminal Dribble: Q28_1 | Q28a_1 | ICS Urgency with fear of leaking: Q29_1 | Q29a_1 |
|--------|-----------------------------|--------|-----------------------------------------|--------|
| 879    | 0                           |        | 0                                       |        |
| 880    | 0                           |        | 0                                       |        |
| 881    | 1                           | 2      | 0                                       |        |
| 882    | 2                           | 0      | 0                                       |        |
| 885    | 0                           |        | 0                                       |        |
| 886    | 0                           |        | 0                                       |        |
| 887    | 5                           | 3      | 4                                       | 3      |
| 888    | 0                           |        | 0                                       |        |
| 889    | 5                           | 4      | 0                                       |        |
| 890    | 1                           | 0      | 0                                       |        |
| 900    | 0                           |        | 0                                       |        |
| 901    | 1                           | 1      | 0                                       |        |
| 902    | 1                           | 1      | 0                                       |        |
| 903    | 0                           |        | 0                                       |        |
| 906    | 1                           | 0      | 0                                       |        |
| 907    | 1                           | 2      | 0                                       |        |
| 908    | 0                           |        | 0                                       |        |
| 910    | 0                           |        | 0                                       |        |
| 911    | 1                           | 1      | 1                                       | 1      |
| 912    | 1                           | 1      | 0                                       |        |
| 915    | 0                           |        | 0                                       |        |
| 923    | 2                           | 4      | 1                                       | 1      |
| 925    | 0                           |        | 0                                       |        |
| 926    | 0                           |        | 0                                       |        |
| 929    | 0                           |        | 0                                       |        |
| 932    | 0                           |        | 5                                       | 4      |
| 933    | 1                           | 3      | 0                                       |        |
| 934    | 0                           |        | 0                                       |        |
| 938    | 2                           | 2      | 1                                       | 1      |
| 941    | 0                           |        | 0                                       |        |
| 942    | 0                           |        | 0                                       |        |
| 943    | 0                           |        | 0                                       |        |

| respid | ICS Terminal Dribble: Q28_1 | Q28a_1 | ICS Urgency with fear of leaking: Q29_1 | Q29a_1 |
|--------|-----------------------------|--------|-----------------------------------------|--------|
| 945    | 0                           |        | 0                                       |        |
| 946    | 0                           |        | 0                                       |        |
| 947    | 1                           | 0      | 0                                       |        |
| 948    | 0                           |        | 0                                       |        |
| 949    | 0                           |        | 0                                       |        |
| 952    | 0                           |        | 0                                       |        |
| 956    | 0                           |        | 0                                       |        |
| 957    | 0                           |        | 0                                       |        |
| 959    | 0                           |        | 0                                       |        |
| 961    | 1                           | 2      | 0                                       |        |
| 962    | 2                           | 4      | 2                                       | 3      |
| 965    | 2                           | 2      | 0                                       |        |
| 967    | 0                           |        | 0                                       |        |
| 969    | 0                           |        | 0                                       |        |
| 970    | 0                           |        | 0                                       |        |
| 973    | 2                           | 3      | 0                                       |        |
| 974    | 1                           | 1      | 0                                       |        |
| 975    | 1                           | 1      | 1                                       | 1      |
| 976    | 2                           | 1      | 0                                       |        |
| 977    | 2                           | 2      | 0                                       |        |
| 979    | 0                           |        | 0                                       |        |
| 981    | 0                           |        | 0                                       |        |
| 983    | 0                           |        | 0                                       |        |
| 987    | 3                           | 3      | 0                                       |        |
| 991    | 0                           |        | 0                                       |        |
| 992    | 0                           |        | 0                                       |        |
| 993    | 0                           |        | 0                                       |        |
| 994    | 0                           |        | 0                                       |        |
| 995    | 1                           | 2      | 0                                       |        |
| 998    | 0                           |        | 0                                       |        |
| 1000   | 5                           | 1      | 1                                       | 1      |
| 1001   | 4                           | 2      | 3                                       | 2      |

| respid | ICS Terminal Dribble: Q28_1 | Q28a_1 | ICS Urgency with fear of leaking: Q29_1 | Q29a_1 |
|--------|-----------------------------|--------|-----------------------------------------|--------|
| 1002   | 0                           |        | 0                                       |        |
| 1004   | 0                           |        | 0                                       |        |
| 1005   | 1                           | 1      | 1                                       | 1      |
| 1006   | 1                           | 1      | 0                                       |        |
| 1007   | 0                           |        | 0                                       |        |
| 1009   | 0                           |        | 0                                       |        |
| 1013   | 2                           | 0      | 0                                       |        |
| 1015   | 0                           |        | 0                                       |        |
| 1020   | 2                           | 1      | 2                                       | 1      |
| 1022   | 2                           | 2      | 0                                       |        |
| 1024   | 0                           |        | 0                                       |        |
| 1025   | 0                           |        | 0                                       |        |
| 1027   | 0                           |        | 0                                       |        |
| 1031   | 1                           | 1      | 0                                       |        |
| 1037   | 2                           | 1      | 0                                       |        |
| 1039   | 0                           |        | 0                                       |        |
| 1040   | 1                           | 1      | 0                                       |        |
| 1056   | 1                           | 1      | 1                                       | 1      |
| 1057   | 1                           | 1      | 0                                       |        |
| 1062   | 0                           |        | 0                                       |        |
| 1069   | 1                           | 0      | 1                                       | 0      |
| 1070   | 1                           | 0      | 0                                       |        |
| 1072   | 3                           | 3      | 1                                       | 1      |
| 1076   | 0                           |        | 0                                       |        |
| 1077   | 4                           | 1      | 0                                       |        |
| 1078   | 0                           |        | 0                                       |        |
| 1080   | 0                           |        | 0                                       |        |
| 1094   | 0                           |        | 1                                       | 2      |
| 1098   | 2                           | 1      | 0                                       |        |
| 1099   | 0                           |        | 0                                       |        |
| 1102   | 2                           | 1      | 0                                       |        |
| 1110   | 0                           |        | 0                                       |        |



| respid | ICS Terminal Dribble: Q28_1 | Q28a_1 | ICS Urgency with fear of leaking: Q29_1 | Q29a_1 |
|--------|-----------------------------|--------|-----------------------------------------|--------|
| 1117   | 5                           | 1      | 0                                       |        |
| 1119   | 0                           |        | 0                                       |        |
| 1126   | 1                           | 2      | 0                                       |        |
| 1127   | 0                           |        | 0                                       |        |
| 1130   | 0                           |        | 0                                       |        |
| 1131   | 0                           |        | 0                                       |        |
| 1135   | 3                           | 3      | 4                                       | 2      |
| 1138   | 1                           | 1      | 0                                       |        |
| 1139   | 0                           |        | 0                                       |        |
| 1140   | 0                           |        | 0                                       |        |
| 1142   | 0                           |        | 0                                       |        |
| 1143   | 0                           |        | 0                                       |        |
| 1145   | 1                           | 2      | 0                                       |        |
| 1149   | 0                           |        | 0                                       |        |
| 1152   | 0                           |        | 0                                       |        |
| 1160   | 1                           | 1      | 0                                       |        |
| 1164   | 0                           |        | 0                                       |        |
| 1165   | 0                           |        | 0                                       |        |
| 1169   | 1                           | 1      | 1                                       | 2      |
| 1170   | 2                           | 1      | 0                                       |        |
| 1179   | 0                           |        | 0                                       |        |
| 1180   | 0                           |        | 0                                       |        |
| 1183   | 0                           |        | 0                                       |        |
| 1187   | 0                           |        | 0                                       |        |
| 1188   | 2                           | 1      | 0                                       |        |
| 1193   | 2                           | 0      | 0                                       |        |
| 1194   | 2                           | 2      | 2                                       | 2      |
| 1197   | 0                           |        | 0                                       |        |
| 1202   | 0                           |        | 0                                       |        |
| 1204   | 4                           | 4      | 4                                       | 4      |
| 1211   | 0                           |        | 0                                       |        |
| 1224   | 0                           |        | 0                                       |        |

| respid | ICS Terminal Dribble: Q28_1 | Q28a_1 | ICS Urgency with fear of leaking: Q29_1 | Q29a_1 |
|--------|-----------------------------|--------|-----------------------------------------|--------|
| 1225   | 0                           |        | 0                                       |        |
| 1230   | 0                           |        | 0                                       |        |
| 1232   | 0                           |        | 0                                       |        |
| 1233   | 3                           | 2      | 4                                       | 2      |
| 1234   | 1                           | 0      | 0                                       |        |
| 1235   | 1                           | 1      | 1                                       | 1      |
| 1236   | 1                           | 1      | 1                                       | 1      |
| 1237   | 0                           |        | 0                                       |        |
| 1238   | 3                           | 2      | 0                                       |        |
| 1239   | 0                           |        | 0                                       |        |
| 1241   | 1                           | 2      | 0                                       |        |
| 1242   | 0                           |        | 0                                       |        |
| 1244   | 1                           | 1      | 0                                       |        |
| 1245   | 3                           | 0      | 0                                       |        |
| 1247   | 3                           | 3      | 3                                       | 3      |
| 1248   | 1                           | 0      | 0                                       |        |
| 1249   | 4                           | 3      | 0                                       |        |
| 1250   | 0                           |        | 0                                       |        |
| 1251   | 0                           |        | 0                                       |        |
| 1252   | 0                           |        | 0                                       |        |
| 1253   | 0                           |        | 0                                       |        |
| 1254   | 3                           | 3      | 3                                       | 4      |
| 1258   | 0                           |        | 0                                       |        |
| 1260   | 1                           | 1      | 0                                       |        |
| 1261   | 1                           | 0      | 0                                       |        |
| 1262   | 4                           | 3      | 0                                       |        |
| 1263   | 3                           | 2      | 4                                       | 3      |
| 1264   | 0                           |        | 1                                       | 2      |
| 1265   | 1                           | 1      | 1                                       | 1      |
| 1266   | 1                           | 1      | 1                                       | 1      |
| 1270   | 1                           | 0      | 0                                       |        |
| 1272   | 1                           | 1      | 3                                       | 3      |

| respid | ICS Terminal Dribble: Q28_1 | Q28a_1 | ICS Urgency with fear of leaking: Q29_1 | Q29a_1 |
|--------|-----------------------------|--------|-----------------------------------------|--------|
| 1273   | 0                           |        | 0                                       |        |
| 1276   | 1                           | 1      | 0                                       |        |
| 1277   | 0                           |        | 0                                       |        |
| 1278   | 3                           | 1      | 1                                       | 1      |
| 1280   | 0                           |        | 0                                       |        |
| 1281   | 0                           |        | 0                                       |        |
| 1282   | 1                           | 2      | 1                                       | 1      |
| 1283   | 0                           |        | 0                                       |        |
| 1288   | 0                           |        | 0                                       |        |
| 1289   | 2                           | 1      | 0                                       |        |
| 1290   | 1                           | 1      | 0                                       |        |
| 1291   | 0                           |        | 0                                       |        |
| 1293   | 0                           |        | 1                                       | 1      |
| 1294   | 1                           | 0      | 0                                       |        |
| 1295   | 3                           | 2      | 0                                       |        |
| 1296   | 0                           |        | 0                                       |        |
| 1297   | 1                           | 1      | 1                                       | 1      |
| 1298   | 1                           | 2      | 1                                       | 2      |
| 1300   | 0                           |        | 2                                       | 1      |
| 1302   | 0                           |        | 0                                       |        |
| 1303   | 1                           | 1      | 1                                       | 1      |
| 1304   | 2                           | 1      | 1                                       | 1      |
| 1305   | 1                           | 1      | 0                                       |        |
| 1307   | 1                           | 0      | 0                                       |        |
| 1312   | 0                           |        | 0                                       |        |
| 1313   | 0                           |        | 0                                       |        |
| 1314   | 1                           | 2      | 0                                       |        |
| 1317   | 0                           |        | 0                                       |        |
| 1318   | 0                           |        | 0                                       |        |
| 1319   | 1                           | 1      | 0                                       |        |
| 1321   | 0                           |        | 0                                       |        |
| 1324   | 4                           | 2      | 1                                       | 1      |

| respid | ICS Terminal Dribble: Q28_1 | Q28a_1 | ICS Urgency with fear of leaking: Q29_1 | Q29a_1 |
|--------|-----------------------------|--------|-----------------------------------------|--------|
| 1325   | 2                           | 2      | 0                                       |        |
| 1326   | 1                           | 0      | 0                                       |        |
| 1327   | 0                           |        | 0                                       |        |
| 1329   | 2                           | 2      | 2                                       | 1      |
| 1330   | 1                           | 1      | 1                                       | 1      |
| 1331   | 1                           | 0      | 1                                       | 0      |
| 1335   | 2                           | 1      | 0                                       |        |
| 1337   | 0                           |        | 0                                       |        |
| 1341   | 1                           | 0      | 1                                       | 0      |
| 1342   | 0                           |        | 0                                       |        |
| 1344   | 1                           | 1      | 1                                       | 1      |
| 1345   | 2                           | 2      | 0                                       |        |
| 1346   | 0                           |        | 1                                       | 0      |
| 1350   | 1                           | 1      | 1                                       | 1      |
| 1352   | 0                           |        | 0                                       |        |
| 1353   | 1                           | 1      | 1                                       | 1      |
| 1354   | 2                           | 2      | 0                                       |        |
| 1355   | 0                           |        | 0                                       |        |
| 1357   | 5                           | 3      | 1                                       | 2      |
| 1360   | 0                           |        | 0                                       |        |
| 1362   | 0                           |        | 0                                       |        |
| 1363   | 1                           | 1      | 1                                       | 1      |
| 1367   | 0                           |        | 0                                       |        |
| 1369   | 1                           | 1      | 0                                       |        |
| 1371   | 0                           |        | 0                                       |        |
| 1372   | 0                           |        | 0                                       |        |
| 1375   | 0                           |        | 0                                       |        |
| 1377   | 0                           |        | 0                                       |        |
| 1379   | 0                           |        | 0                                       |        |
| 1380   | 2                           | 1      | 0                                       |        |
| 1382   | 0                           |        | 0                                       |        |
| 1383   | 0                           |        | 0                                       |        |

| respid | ICS Terminal Dribble: Q28_1 | Q28a_1 | ICS Urgency with fear of leaking: Q29_1 | Q29a_1 |
|--------|-----------------------------|--------|-----------------------------------------|--------|
| 1384   | 0                           |        | 0                                       |        |
| 1385   | 1                           | 1      | 1                                       | 1      |
| 1387   | 1                           | 0      | 0                                       |        |
| 1388   | 0                           |        | 0                                       |        |
| 1389   | 1                           | 1      | 1                                       | 1      |
| 1390   | 1                           | 1      | 0                                       |        |
| 1395   | 0                           |        | 0                                       |        |
| 1396   | 0                           |        | 0                                       |        |
| 1397   | 3                           | 2      | 1                                       | 1      |
| 1398   | 0                           |        | 0                                       |        |
| 1399   | 1                           | 0      | 0                                       |        |
| 1403   | 0                           |        | 0                                       |        |
| 1405   | 0                           |        | 0                                       |        |
| 1406   | 2                           | 1      | 1                                       | 1      |
| 1407   | 1                           | 1      | 2                                       | 2      |
| 1408   | 0                           |        | 0                                       |        |
| 1409   | 0                           |        | 0                                       |        |
| 1410   | 5                           | 4      | 5                                       | 4      |
| 1411   | 1                           | 1      | 0                                       |        |
| 1412   | 1                           | 0      | 0                                       |        |
| 1413   | 1                           | 1      | 1                                       | 1      |
| 1414   | 0                           |        | 0                                       |        |
| 1415   | 0                           |        | 0                                       |        |
| 1416   | 1                           | 2      | 0                                       |        |
| 1417   | 0                           |        | 0                                       |        |
| 1418   | 0                           |        | 0                                       |        |
| 1419   | 0                           |        | 0                                       |        |
| 1420   | 0                           |        | 1                                       | 0      |
| 1421   | 3                           | 1      | 1                                       | 0      |
| 1422   | 1                           | 0      | 0                                       |        |
| 1423   | 1                           | 1      | 0                                       |        |
| 1424   | 4                           | 2      | 0                                       |        |

| respid | ICS Terminal Dribble: Q28_1 | Q28a_1 | ICS Urgency with fear of leaking: Q29_1 | Q29a_1 |
|--------|-----------------------------|--------|-----------------------------------------|--------|
| 1429   | 1                           | 0      | 0                                       |        |
| 1430   | 1                           | 1      | 0                                       |        |
| 1431   | 3                           | 2      | 2                                       | 2      |
| 1433   | 1                           | 1      | 1                                       | 1      |
| 1435   | 0                           |        | 0                                       |        |
| 1436   | 0                           |        | 0                                       |        |
| 1438   | 0                           |        | 0                                       |        |
| 1439   | 1                           | 0      | 0                                       |        |
| 1441   | 1                           | 1      | 1                                       | 1      |
| 1442   | 1                           | 1      | 1                                       | 1      |
| 1443   | 0                           |        | 0                                       |        |
| 1444   | 0                           |        | 0                                       |        |
| 1445   | 1                           | 2      | 1                                       | 3      |
| 1446   | 1                           | 1      | 1                                       | 2      |
| 1447   | 1                           | 0      | 0                                       |        |
| 1449   | 0                           |        | 1                                       | 1      |
| 1450   | 2                           | 2      | 2                                       | 2      |
| 1451   | 1                           | 1      | 0                                       |        |
| 1452   | 0                           |        | 0                                       |        |
| 1453   | 2                           | 2      | 2                                       | 2      |
| 1454   | 1                           | 2      | 1                                       | 2      |
| 1456   | 1                           | 1      | 0                                       |        |
| 1457   | 1                           | 1      | 1                                       | 2      |
| 1459   | 0                           |        | 0                                       |        |
| 1460   | 0                           |        | 0                                       |        |
| 1463   | 0                           |        | 0                                       |        |
| 1465   | 0                           |        | 0                                       |        |
| 1467   | 0                           |        | 0                                       |        |
| 1470   | 1                           | 1      | 0                                       |        |
| 1471   | 4                           | 3      | 2                                       | 1      |
| 1472   | 0                           |        | 0                                       |        |
| 1474   | 0                           |        | 2                                       | 1      |

| respid | ICS Terminal Dribble: Q28_1 | Q28a_1 | ICS Urgency with fear of leaking: Q29_1 | Q29a_1 |
|--------|-----------------------------|--------|-----------------------------------------|--------|
| 1475   | 1                           | 1      | 0                                       |        |
| 1477   | 0                           |        | 0                                       |        |
| 1478   | 1                           | 1      | 1                                       | 1      |
| 1480   | 0                           |        | 0                                       |        |
| 1481   | 1                           | 1      | 1                                       | 1      |
| 1483   | 0                           |        | 0                                       |        |
| 1484   | 2                           | 1      | 0                                       |        |
| 1485   | 1                           | 1      | 0                                       |        |
| 1486   | 1                           | 1      | 0                                       |        |
| 1487   | 5                           | 3      | 0                                       |        |
| 1488   | 5                           | 2      | 1                                       | 1      |
| 1489   | 5                           | 4      | 4                                       | 3      |
| 1490   | 2                           | 0      | 0                                       |        |
| 1491   | 2                           | 2      | 3                                       | 2      |
| 1492   | 0                           |        | 0                                       |        |
| 1494   | 0                           |        | 0                                       |        |
| 1495   | 4                           | 3      | 1                                       | 2      |
| 1496   | 4                           | 1      | 1                                       | 1      |
| 1498   | 1                           | 2      | 0                                       |        |
| 1499   | 0                           |        | 0                                       |        |
| 1500   | 2                           | 1      | 1                                       | 1      |
| 1501   | 0                           |        | 0                                       |        |
| 1503   | 0                           |        | 0                                       |        |
| 1504   | 0                           |        | 0                                       |        |
| 1508   | 3                           | 1      | 0                                       |        |
| 1509   | 5                           | 3      | 1                                       | 0      |
| 1511   | 2                           | 2      | 2                                       | 2      |
| 1512   | 1                           | 1      | 1                                       | 1      |
| 1513   | 1                           | 1      | 1                                       | 1      |
| 1515   | 2                           | 1      | 0                                       |        |
| 1517   | 2                           | 1      | 1                                       | 2      |
| 1518   | 0                           |        | 1                                       | 2      |

| respid | ICS Terminal Dribble: Q28_1 | Q28a_1 | ICS Urgency with fear of leaking: Q29_1 | Q29a_1 |
|--------|-----------------------------|--------|-----------------------------------------|--------|
| 1519   | 2                           | 2      | 2                                       | 2      |
| 1520   | 0                           |        | 0                                       |        |
| 1521   | 0                           |        | 0                                       |        |
| 1522   | 0                           |        | 0                                       |        |
| 1523   | 5                           | 4      | 5                                       | 4      |
| 1524   | 1                           | 0      | 0                                       |        |
| 1525   | 0                           |        | 0                                       |        |
| 1526   | 1                           | 1      | 1                                       | 1      |
| 1527   | 1                           | 1      | 0                                       |        |
| 1534   | 1                           | 1      | 0                                       |        |
| 1535   | 1                           | 0      | 0                                       |        |
| 1536   | 3                           | 3      | 1                                       | 2      |
| 1538   | 1                           | 2      | 1                                       | 2      |
| 1539   | 0                           |        | 0                                       |        |
| 1540   | 0                           |        | 1                                       | 1      |
| 1541   | 1                           | 0      | 0                                       |        |
| 1542   | 0                           |        | 0                                       |        |
| 1543   | 1                           | 1      | 0                                       |        |
| 1545   | 0                           |        | 1                                       | 1      |
| 1546   | 1                           | 1      | 0                                       |        |
| 1548   | 5                           | 4      | 3                                       | 3      |
| 1549   | 0                           |        | 0                                       |        |
| 1551   | 1                           | 0      | 0                                       |        |
| 1552   | 1                           | 1      | 0                                       |        |
| 1556   | 1                           | 0      | 0                                       |        |
| 1557   | 0                           |        | 0                                       |        |
| 1558   | 1                           | 0      | 1                                       | 0      |
| 1561   | 0                           |        | 0                                       |        |
| 1562   | 0                           |        | 0                                       |        |
| 1563   | 0                           |        | 0                                       |        |
| 1564   | 3                           | 3      | 2                                       | 2      |
| 1565   | 0                           |        | 0                                       |        |



| respid | ICS Terminal Dribble: Q28_1 | Q28a_1 | ICS Urgency with fear of leaking: Q29_1 | Q29a_1 |
|--------|-----------------------------|--------|-----------------------------------------|--------|
| 1566   | 0                           |        | 0                                       |        |
| 1567   | 1                           | 1      | 0                                       |        |
| 1569   | 0                           |        | 0                                       |        |
| 1570   | 0                           |        | 0                                       |        |
| 1574   | 1                           | 1      | 0                                       |        |
| 1575   | 0                           |        | 0                                       |        |
| 1576   | 1                           | 0      | 0                                       |        |
| 1577   | 0                           |        | 0                                       |        |
| 1581   | 0                           |        | 0                                       |        |
| 1583   | 1                           | 2      | 0                                       |        |
| 1585   | 0                           |        | 0                                       |        |
| 1586   | 0                           |        | 0                                       |        |
| 1588   | 1                           | 1      | 0                                       |        |
| 1590   | 0                           |        | 0                                       |        |
| 1592   | 0                           |        | 0                                       |        |
| 1594   | 2                           | 1      | 0                                       |        |
| 1598   | 0                           |        | 0                                       |        |
| 1599   | 4                           | 2      | 1                                       | 1      |
| 1600   | 1                           | 1      | 1                                       | 2      |
| 1602   | 0                           |        | 0                                       |        |
| 1603   | 0                           |        | 0                                       |        |
| 1604   | 0                           |        | 2                                       | 2      |
| 1605   | 5                           | 4      | 3                                       | 3      |
| 1606   | 5                           | 1      | 0                                       |        |
| 1610   | 0                           |        | 0                                       |        |
| 1611   | 1                           | 1      | 0                                       |        |
| 1612   | 1                           | 1      | 0                                       |        |
| 1613   | 3                           | 3      | 3                                       | 3      |
| 1615   | 2                           | 1      | 1                                       | 1      |
| 1616   | 0                           |        | 0                                       |        |
| 1617   | 1                           | 1      | 1                                       | 1      |
| 1618   | 5                           | 4      | 0                                       |        |

| respid | ICS Terminal Dribble: Q28_1 | Q28a_1 | ICS Urgency with fear of leaking: Q29_1 | Q29a_1 |
|--------|-----------------------------|--------|-----------------------------------------|--------|
| 1620   | 0                           |        | 0                                       |        |
| 1621   | 2                           | 3      | 1                                       | 3      |
| 1622   | 0                           |        | 0                                       |        |
| 1623   | 3                           | 3      | 0                                       |        |
| 1624   | 0                           |        | 1                                       | 2      |
| 1625   | 0                           |        | 0                                       |        |
| 1626   | 0                           |        | 0                                       |        |
| 1627   | 0                           |        | 0                                       |        |
| 1629   | 2                           | 0      | 0                                       |        |
| 1630   | 1                           | 1      | 0                                       |        |
| 1631   | 0                           |        | 1                                       | 0      |
| 1634   | 1                           | 1      | 1                                       | 1      |
| 1635   | 1                           | 1      | 0                                       |        |
| 1636   | 0                           |        | 0                                       |        |
| 1637   | 1                           | 0      | 0                                       |        |
| 1640   | 0                           |        | 0                                       |        |
| 1642   | 0                           |        | 0                                       |        |
| 1643   | 1                           | 1      | 1                                       | 1      |
| 1644   | 2                           | 1      | 0                                       |        |
| 1645   | 1                           | 1      | 1                                       | 1      |
| 1646   | 0                           |        | 0                                       |        |
| 1647   | 3                           | 1      | 1                                       | 0      |
| 1650   | 5                           | 2      | 3                                       | 2      |
| 1654   | 1                           | 1      | 0                                       |        |
| 1656   | 0                           |        | 0                                       |        |
| 1657   | 4                           | 3      | 4                                       | 3      |
| 1659   | 2                           | 2      | 1                                       | 2      |
| 1662   | 1                           | 1      | 1                                       | 1      |
| 1663   | 0                           |        | 1                                       | 2      |
| 1664   | 1                           | 0      | 0                                       |        |
| 1665   | 0                           |        | 0                                       |        |
| 1667   | 1                           | 1      | 0                                       |        |

| respid | ICS Terminal Dribble: Q28_1 | Q28a_1 | ICS Urgency with fear of leaking: Q29_1 | Q29a_1 |
|--------|-----------------------------|--------|-----------------------------------------|--------|
| 1668   | 1                           | 0      | 0                                       |        |
| 1670   | 0                           |        | 0                                       |        |
| 1671   | 0                           |        | 0                                       |        |
| 1673   | 1                           | 1      | 0                                       |        |
| 1674   | 0                           |        | 0                                       |        |
| 1676   | 2                           | 2      | 0                                       |        |
| 1677   | 0                           |        | 1                                       | 1      |
| 1678   | 0                           |        | 0                                       |        |
| 1680   | 0                           |        | 0                                       |        |
| 1681   | 1                           | 1      | 0                                       |        |
| 1683   | 0                           |        | 0                                       |        |
| 1685   | 1                           | 1      | 1                                       | 1      |
| 1686   | 1                           | 1      | 1                                       | 1      |
| 1690   | 1                           | 1      | 0                                       |        |
| 1691   | 0                           |        | 1                                       | 0      |
| 1692   | 2                           | 2      | 1                                       | 1      |
| 1693   | 0                           |        | 0                                       |        |
| 1695   | 0                           |        | 0                                       |        |
| 1696   | 3                           | 2      | 0                                       |        |
| 1698   | 1                           | 1      | 0                                       |        |
| 1699   | 0                           |        | 0                                       |        |
| 1701   | 0                           |        | 0                                       |        |
| 1702   | 0                           |        | 0                                       |        |
| 1703   | 0                           |        | 0                                       |        |
| 1705   | 0                           |        | 1                                       | 1      |
| 1706   | 0                           |        | 0                                       |        |
| 1708   | 0                           |        | 0                                       |        |
| 1711   | 1                           | 1      | 1                                       | 1      |
| 1712   | 2                           | 1      | 1                                       | 1      |
| 1713   | 1                           | 1      | 0                                       |        |
| 1715   | 0                           |        | 0                                       |        |
| 1717   | 1                           | 0      | 0                                       |        |

| respid | ICS Terminal Dribble: Q28_1 | Q28a_1 | ICS Urgency with fear of leaking: Q29_1 | Q29a_1 |
|--------|-----------------------------|--------|-----------------------------------------|--------|
| 1718   | 5                           | 4      | 5                                       | 4      |
| 1719   | 0                           |        | 0                                       |        |
| 1721   | 0                           |        | 0                                       |        |
| 1722   | 1                           | 0      | 1                                       | 1      |
| 1724   | 0                           |        | 0                                       |        |
| 1725   | 0                           |        | 0                                       |        |
| 1726   | 0                           |        | 0                                       |        |
| 1727   | 0                           |        | 0                                       |        |
| 1728   | 1                           | 2      | 0                                       |        |
| 1731   | 1                           | 0      | 1                                       | 1      |
| 1733   | 0                           |        | 0                                       |        |
| 1734   | 0                           |        | 0                                       |        |
| 1735   | 0                           |        | 0                                       |        |
| 1736   | 1                           | 0      | 1                                       | 0      |
| 1737   | 0                           |        | 0                                       |        |
| 1738   | 1                           | 1      | 0                                       |        |
| 1743   | 2                           | 1      | 1                                       | 0      |
| 1755   | 2                           | 2      | 2                                       | 2      |
| 1756   | 0                           |        | 0                                       |        |
| 1757   | 1                           | 1      | 0                                       |        |
| 1758   | 1                           | 1      | 1                                       | 1      |
| 1759   | 0                           |        | 1                                       | 1      |
| 1761   | 0                           |        | 1                                       | 1      |
| 1762   | 0                           |        | 0                                       |        |
| 1764   | 0                           |        | 0                                       |        |
| 1767   | 1                           | 0      | 0                                       |        |
| 1768   | 5                           | 2      | 0                                       |        |
| 1769   | 1                           | 1      | 0                                       |        |
| 1770   | 0                           |        | 0                                       |        |
| 1771   | 1                           | 2      | 1                                       | 2      |
| 1776   | 2                           | 2      | 1                                       | 2      |
| 1777   | 0                           |        | 0                                       |        |

| respid | ICS Terminal Dribble: Q28_1 | Q28a_1 | ICS Urgency with fear of leaking: Q29_1 | Q29a_1 |
|--------|-----------------------------|--------|-----------------------------------------|--------|
| 1778   | 2                           | 2      | 1                                       | 1      |
| 1779   | 1                           | 2      | 0                                       |        |
| 1780   | 2                           | 1      | 0                                       |        |
| 1781   | 0                           |        | 0                                       |        |
| 1783   | 0                           |        | 0                                       |        |
| 1784   | 4                           | 1      | 2                                       | 1      |
| 1785   | 0                           |        | 0                                       |        |
| 1788   | 3                           | 2      | 2                                       | 2      |
| 1792   | 1                           | 0      | 0                                       |        |
| 1794   | 1                           | 0      | 0                                       |        |
| 1798   | 5                           | 4      | 4                                       | 4      |
| 1799   | 0                           |        | 0                                       |        |
| 1800   | 0                           |        | 0                                       |        |
| 1804   | 1                           | 1      | 0                                       |        |
| 1806   | 1                           | 1      | 1                                       | 1      |
| 1807   | 0                           |        | 0                                       |        |
| 1808   | 1                           | 2      | 0                                       |        |
| 1809   | 0                           |        | 0                                       |        |
| 1811   | 1                           | 1      | 0                                       |        |
| 1812   | 0                           |        | 0                                       |        |
| 1813   | 2                           | 3      | 0                                       |        |
| 1814   | 0                           |        | 1                                       | 1      |
| 1815   | 0                           |        | 0                                       |        |
| 1817   | 1                           | 0      | 0                                       |        |
| 1820   | 0                           |        | 0                                       |        |
| 1821   | 1                           | 1      | 0                                       |        |
| 1822   | 1                           | 1      | 1                                       | 1      |
| 1823   | 5                           | 2      | 0                                       |        |
| 1824   | 2                           | 0      | 0                                       |        |
| 1826   | 0                           |        | 0                                       |        |
| 1828   | 0                           |        | 0                                       |        |
| 1829   | 0                           |        | 0                                       |        |

| respid | ICS Terminal Dribble: Q28_1 | Q28a_1 | ICS Urgency with fear of leaking: Q29_1 | Q29a_1 |
|--------|-----------------------------|--------|-----------------------------------------|--------|
| 1830   | 1                           | 1      | 0                                       |        |
| 1831   | 0                           |        | 0                                       |        |
| 1832   | 0                           |        | 0                                       |        |
| 1836   | 1                           | 1      | 1                                       | 1      |
| 1838   | 4                           | 3      | 2                                       | 2      |
| 1839   | 1                           | 1      | 0                                       |        |
| 1840   | 1                           | 1      | 0                                       |        |
| 1841   | 1                           | 1      | 0                                       |        |
| 1842   | 1                           | 1      | 2                                       | 2      |
| 1843   | 1                           | 1      | 0                                       |        |
| 1844   | 1                           | 1      | 1                                       | 1      |
| 1845   | 0                           |        | 0                                       |        |
| 1849   | 0                           |        | 0                                       |        |
| 1850   | 1                           | 1      | 1                                       | 1      |
| 1851   | 5                           | 2      | 0                                       |        |
| 1852   | 0                           |        | 0                                       |        |
| 1857   | 0                           |        | 0                                       |        |
| 1858   | 0                           |        | 0                                       |        |
| 1861   | 0                           |        | 0                                       |        |
| 1862   | 0                           |        | 0                                       |        |
| 1863   | 0                           |        | 0                                       |        |
| 1864   | 0                           |        | 0                                       |        |
| 1865   | 0                           |        | 0                                       |        |
| 1867   | 0                           |        | 0                                       |        |
| 1868   | 1                           | 2      | 0                                       |        |
| 1869   | 1                           | 0      | 0                                       |        |
| 1870   | 0                           |        | 0                                       |        |
| 1871   | 3                           | 3      | 0                                       |        |
| 1872   | 0                           |        | 0                                       |        |
| 1873   | 0                           |        | 1                                       | 1      |
| 1876   | 0                           |        | 0                                       |        |
| 1877   | 0                           |        | 0                                       |        |

| respid | ICS Terminal Dribble: Q28_1 | Q28a_1 | ICS Urgency with fear of leaking: Q29_1 | Q29a_1 |
|--------|-----------------------------|--------|-----------------------------------------|--------|
| 1878   | 0                           |        | 0                                       |        |
| 1879   | 0                           |        | 1                                       | 2      |
| 1880   | 1                           | 0      | 0                                       |        |
| 1881   | 0                           |        | 1                                       | 0      |
| 1883   | 3                           | 2      | 1                                       | 1      |
| 1886   | 0                           |        | 0                                       |        |
| 1888   | 3                           | 3      | 4                                       | 3      |
| 1889   | 2                           | 2      | 2                                       | 2      |
| 1890   | 4                           | 4      | 2                                       | 3      |
| 1891   | 0                           |        | 0                                       |        |
| 1893   | 0                           |        | 0                                       |        |
| 1894   | 1                           | 1      | 0                                       |        |
| 1895   | 3                           | 2      | 1                                       | 1      |
| 1896   | 3                           | 2      | 1                                       | 1      |
| 1897   | 1                           | 1      | 1                                       | 1      |
| 1898   | 5                           | 3      | 4                                       | 3      |
| 1899   | 1                           | 1      | 1                                       | 1      |
| 1900   | 0                           |        | 0                                       |        |
| 1903   | 0                           |        | 0                                       |        |
| 1906   | 0                           |        | 0                                       |        |
| 1907   | 2                           | 2      | 3                                       | 2      |
| 1908   | 0                           |        | 0                                       |        |
| 1909   | 1                           | 2      | 1                                       | 2      |
| 1910   | 3                           | 1      | 0                                       |        |
| 1911   | 2                           | 2      | 0                                       |        |
| 1912   | 0                           |        | 0                                       |        |
| 1917   | 0                           |        | 0                                       |        |
| 1918   | 0                           |        | 0                                       |        |
| 1919   | 3                           | 1      | 0                                       |        |
| 1922   | 0                           |        | 0                                       |        |
| 1925   | 0                           |        | 0                                       |        |
| 1926   | 1                           | 1      | 0                                       |        |

| respid | ICS Terminal Dribble: Q28_1 | Q28a_1 | ICS Urgency with fear of leaking: Q29_1 | Q29a_1 |
|--------|-----------------------------|--------|-----------------------------------------|--------|
| 1927   | 0                           |        | 1                                       | 0      |
| 1928   | 0                           |        | 0                                       |        |
| 1929   | 0                           |        | 0                                       |        |
| 1934   | 0                           |        | 0                                       |        |
| 1935   | 1                           | 0      | 0                                       |        |
| 1936   | 4                           | 2      | 1                                       | 2      |
| 1937   | 0                           |        | 0                                       |        |
| 1938   | 0                           |        | 0                                       |        |
| 1939   | 0                           |        | 0                                       |        |
| 1940   | 0                           |        | 0                                       |        |
| 1941   | 0                           |        | 0                                       |        |
| 1948   | 0                           |        | 0                                       |        |
| 1950   | 2                           | 3      | 3                                       | 3      |
| 1955   | 3                           | 3      | 2                                       | 2      |
| 1958   | 0                           |        | 0                                       |        |
| 1960   | 1                           | 0      | 0                                       |        |
| 1961   | 0                           |        | 0                                       |        |
| 1962   | 0                           |        | 0                                       |        |
| 1965   | 0                           |        | 0                                       |        |
| 1966   | 0                           |        | 0                                       |        |
| 1967   | 0                           |        | 0                                       |        |
| 1968   | 0                           |        | 1                                       | 1      |
| 1973   | 0                           |        | 0                                       |        |
| 1974   | 3                           | 3      | 5                                       | 4      |
| 1975   | 0                           |        | 0                                       |        |
| 1977   | 0                           |        | 0                                       |        |
| 1978   | 0                           |        | 0                                       |        |
| 1979   | 4                           | 3      | 4                                       | 3      |
| 1982   | 2                           | 1      | 0                                       |        |
| 1983   | 0                           |        | 0                                       |        |
| 1987   | 0                           |        | 0                                       |        |
| 1988   | 0                           |        | 0                                       |        |



| respid | ICS Terminal Dribble: Q28_1 | Q28a_1 | ICS Urgency with fear of leaking: Q29_1 | Q29a_1 |
|--------|-----------------------------|--------|-----------------------------------------|--------|
| 1991   | 4                           | 1      | 1                                       | 1      |
| 1992   | 0                           |        | 0                                       |        |
| 1993   | 0                           |        | 0                                       |        |
| 1994   | 0                           |        | 1                                       | 2      |
| 1995   | 0                           |        | 0                                       |        |
| 1996   | 0                           |        | 1                                       | 1      |
| 1997   | 1                           | 0      | 0                                       |        |
| 1998   | 0                           |        | 0                                       |        |
| 1999   | 4                           | 3      | 3                                       | 3      |
| 2000   | 3                           | 1      | 3                                       | 3      |
| 2001   | 1                           | 1      | 1                                       | 2      |
| 2002   | 0                           |        | 0                                       |        |
| 2003   | 0                           |        | 0                                       |        |
| 2004   | 0                           |        | 0                                       |        |
| 2005   | 0                           |        | 0                                       |        |
| 2007   | 1                           | 0      | 2                                       | 1      |
| 2009   | 1                           | 0      | 0                                       |        |
| 2010   | 0                           |        | 0                                       |        |
| 2011   | 0                           |        | 0                                       |        |
| 2013   | 0                           |        | 0                                       |        |
| 2014   | 3                           | 2      | 0                                       |        |
| 2017   | 1                           | 1      | 1                                       | 1      |
| 2020   | 0                           |        | 0                                       |        |
| 2023   | 3                           | 1      | 1                                       | 1      |
| 2024   | 0                           |        | 0                                       |        |
| 2029   | 0                           |        | 0                                       |        |
| 2030   | 0                           |        | 0                                       |        |
| 2031   | 5                           | 1      | 3                                       | 3      |
| 2032   | 3                           | 3      | 1                                       | 2      |
| 2033   | 0                           |        | 0                                       |        |
| 2034   | 4                           | 2      | 1                                       | 1      |
| 2036   | 3                           | 2      | 3                                       | 3      |

| respid | ICS Terminal Dribble: Q28_1 | Q28a_1 | ICS Urgency with fear of leaking: Q29_1 | Q29a_1 |
|--------|-----------------------------|--------|-----------------------------------------|--------|
| 2037   | 3                           | 2      | 3                                       | 2      |
| 2038   | 0                           |        | 0                                       |        |
| 2039   | 2                           | 1      | 0                                       |        |
| 2040   | 0                           |        | 0                                       |        |
| 2041   | 0                           |        | 0                                       |        |
| 2042   | 0                           |        | 0                                       |        |
| 2043   | 0                           |        | 0                                       |        |
| 2051   | 0                           |        | 0                                       |        |
| 2052   | 1                           | 0      | 0                                       |        |
| 2053   | 0                           |        | 0                                       |        |
| 2054   | 0                           |        | 0                                       |        |
| 2055   | 0                           |        | 0                                       |        |
| 2056   | 1                           | 1      | 1                                       | 1      |
| 2057   | 1                           | 1      | 0                                       |        |
| 2059   | 0                           |        | 0                                       |        |
| 2063   | 0                           |        | 0                                       |        |
| 2066   | 0                           |        | 0                                       |        |
| 2068   | 0                           |        | 0                                       |        |
| 2069   | 1                           | 1      | 1                                       | 1      |
| 2070   | 0                           |        | 0                                       |        |
| 2071   | 1                           | 1      | 0                                       |        |
| 2073   | 0                           |        | 0                                       |        |
| 2077   | 0                           |        | 1                                       | 1      |
| 2079   | 0                           |        | 0                                       |        |
| 2080   | 0                           |        | 5                                       | 4      |
| 2081   | 4                           | 3      | 2                                       | 2      |
| 2084   | 0                           |        | 0                                       |        |
| 2085   | 0                           |        | 0                                       |        |
| 2087   | 0                           |        | 1                                       | 1      |
| 2089   | 1                           | 0      | 1                                       | 1      |
| 2093   | 0                           |        | 0                                       |        |
| 2094   | 4                           | 3      | 0                                       |        |

| respid | ICS Terminal Dribble: Q28_1 | Q28a_1 | ICS Urgency with fear of leaking: Q29_1 | Q29a_1 |
|--------|-----------------------------|--------|-----------------------------------------|--------|
| 2095   | 1                           | 2      | 0                                       |        |
| 2097   | 1                           | 0      | 0                                       |        |
| 2099   | 2                           | 2      | 2                                       | 2      |
| 2100   | 1                           | 1      | 0                                       |        |
| 2101   | 1                           | 1      | 0                                       |        |
| 2103   | 3                           | 2      | 0                                       |        |
| 2104   | 0                           |        | 0                                       |        |
| 2106   | 4                           | 3      | 0                                       |        |
| 2111   | 4                           | 3      | 0                                       |        |
| 2113   | 0                           |        | 0                                       |        |
| 2115   | 0                           |        | 0                                       |        |
| 2119   | 2                           | 3      | 0                                       |        |
| 2120   | 0                           |        | 0                                       |        |
| 2123   | 0                           |        | 0                                       |        |
| 2124   | 2                           | 2      | 0                                       |        |
| 2130   | 0                           |        | 0                                       |        |
| 2131   | 1                           | 1      | 1                                       | 1      |
| 2133   | 5                           | 4      | 4                                       | 3      |
| 2139   | 2                           | 1      | 1                                       | 1      |
| 2141   | 0                           |        | 0                                       |        |
| 2143   | 0                           |        | 0                                       |        |
| 2144   | 0                           |        | 0                                       |        |
| 2147   | 0                           |        | 0                                       |        |
| 2151   | 1                           | 1      | 0                                       |        |
| 2153   | 0                           |        | 0                                       |        |
| 2154   | 0                           |        | 0                                       |        |
| 2155   | 3                           | 2      | 0                                       |        |
| 2159   | 1                           | 0      | 0                                       |        |
| 2160   | 4                           | 3      | 2                                       | 2      |
| 2161   | 0                           |        | 0                                       |        |
| 2163   | 1                           | 0      | 0                                       |        |
| 2164   | 0                           |        | 0                                       |        |

| respid | ICS Terminal Dribble: Q28_1 | Q28a_1 | ICS Urgency with fear of leaking: Q29_1 | Q29a_1 |
|--------|-----------------------------|--------|-----------------------------------------|--------|
| 2168   | 1                           | 1      | 1                                       | 1      |
| 2169   | 1                           | 2      | 1                                       | 2      |
| 2170   | 1                           | 0      | 0                                       |        |
| 2171   | 2                           | 3      | 1                                       | 2      |
| 2172   | 5                           | 4      | 2                                       | 2      |
| 2173   | 0                           |        | 0                                       |        |
| 2174   | 0                           |        | 0                                       |        |
| 2175   | 2                           | 1      | 2                                       | 2      |
| 2176   | 2                           | 2      | 0                                       |        |
| 2177   | 4                           | 3      | 2                                       | 2      |
| 2179   | 0                           |        | 1                                       | 1      |
| 2181   | 0                           |        | 0                                       |        |
| 2182   | 0                           |        | 0                                       |        |
| 2183   | 2                           | 2      | 2                                       | 1      |
| 2184   | 2                           | 1      | 1                                       | 1      |
| 2185   | 0                           |        | 0                                       |        |
| 2186   | 0                           |        | 0                                       |        |
| 2187   | 4                           | 1      | 0                                       |        |
| 2188   | 2                           | 0      | 1                                       | 0      |
| 2189   | 0                           |        | 0                                       |        |
| 2190   | 0                           |        | 0                                       |        |
| 2193   | 0                           |        | 0                                       |        |
| 2195   | 0                           |        | 0                                       |        |
| 2198   | 0                           |        | 0                                       |        |
| 2200   | 0                           |        | 0                                       |        |
| 2205   | 2                           | 2      | 2                                       | 2      |
| 2208   | 0                           |        | 0                                       |        |
| 2209   | 2                           | 1      | 2                                       | 1      |
| 2210   | 1                           | 0      | 0                                       |        |
| 2211   | 2                           | 2      | 0                                       |        |
| 2213   | 0                           |        | 0                                       |        |
| 2214   | 3                           | 2      | 0                                       |        |

| respid | ICS Terminal Dribble: Q28_1 | Q28a_1 | ICS Urgency with fear of<br>leaking: Q29_1 | Q29a_1 |
|--------|-----------------------------|--------|--------------------------------------------|--------|
| 2216   | 1                           | 1      | 2                                          | 1      |
| 2220   | 0                           |        | 0                                          |        |
| 2225   | 0                           |        | 0                                          |        |
| 2227   | 3                           | 2      | 0                                          |        |
| 2228   | 1                           | 1      | 2                                          | 1      |
| 2229   | 0                           |        | 0                                          |        |
| 2230   | 0                           |        | 0                                          |        |
| 2236   | 0                           |        | 0                                          |        |
| 2238   | 4                           | 3      | 4                                          | 3      |
| 2239   | 2                           | 1      | 0                                          |        |
| 2240   | 1                           | 0      | 1                                          | 1      |
| 2241   | 2                           | 2      | 0                                          |        |
| 2243   | 0                           |        | 0                                          |        |
| 2245   | 0                           |        | 0                                          |        |
| 2247   | 1                           | 1      | 0                                          |        |
| 2248   | 0                           |        | 0                                          |        |
| 2249   | 0                           |        | 0                                          |        |
| 2254   | 0                           |        | 0                                          |        |
| 2256   | 1                           | 1      | 0                                          |        |
| 2259   | 0                           |        | 0                                          |        |
| 2261   | 0                           |        | 0                                          |        |
| 2262   | 0                           |        | 0                                          |        |
| 2263   | 1                           | 1      | 1                                          | 1      |
| 2264   | 0                           |        | 0                                          |        |
| 2265   | 0                           |        | 0                                          |        |
| 2270   | 1                           | 1      | 0                                          |        |
| 2271   | 0                           |        | 0                                          |        |
| 2272   | 0                           |        | 0                                          |        |
| 2273   | 0                           |        | 0                                          |        |
| 2274   | 0                           |        | 0                                          |        |
| 2276   | 0                           |        | 1                                          | 1      |
| 2277   | 1                           | 1      | 0                                          |        |

| respid | ICS Terminal Dribble: Q28_1 | Q28a_1 | ICS Urgency with fear of leaking: Q29_1 | Q29a_1 |
|--------|-----------------------------|--------|-----------------------------------------|--------|
| 2281   | 0                           |        | 0                                       |        |
| 2288   | 0                           |        | 0                                       |        |
| 2290   | 0                           |        | 0                                       |        |
| 2294   | 0                           |        | 1                                       | 2      |
| 2295   | 0                           |        | 0                                       |        |
| 2296   | 0                           |        | 0                                       |        |
| 2297   | 0                           |        | 0                                       |        |
| 2298   | 0                           |        | 0                                       |        |
| 2301   | 1                           | 1      | 1                                       | 1      |
| 2302   | 1                           | 1      | 1                                       | 1      |
| 2303   | 0                           |        | 0                                       |        |
| 2305   | 0                           |        | 0                                       |        |
| 2309   | 0                           |        | 0                                       |        |
| 2310   | 0                           |        | 0                                       |        |
| 2311   | 1                           | 2      | 1                                       | 2      |
| 2313   | 5                           | 3      | 3                                       | 2      |
| 2316   | 0                           |        | 0                                       |        |
| 2317   | 0                           |        | 0                                       |        |
| 2318   | 1                           | 1      | 0                                       |        |
| 2319   | 2                           | 1      | 1                                       | 1      |
| 2321   | 4                           | 3      | 3                                       | 3      |
| 2324   | 0                           |        | 0                                       |        |
| 2328   | 0                           |        | 0                                       |        |
| 2329   | 0                           |        | 0                                       |        |
| 2330   | 1                           | 1      | 1                                       | 1      |
| 2333   | 1                           | 1      | 0                                       |        |
| 2334   | 2                           | 1      | 1                                       | 1      |
| 2338   | 0                           |        | 0                                       |        |
| 2341   | 0                           |        | 0                                       |        |
| 2342   | 3                           | 2      | 1                                       | 2      |
| 2343   | 4                           | 3      | 2                                       | 3      |
| 2346   | 1                           | 0      | 1                                       | 1      |

| respid | ICS Terminal Dribble: Q28_1 | Q28a_1 | ICS Urgency with fear of leaking: Q29_1 | Q29a_1 |
|--------|-----------------------------|--------|-----------------------------------------|--------|
| 2347   | 1                           | 1      | 1                                       | 1      |
| 2348   | 0                           |        | 0                                       |        |
| 2349   | 1                           | 1      | 1                                       | 1      |
| 2350   | 0                           |        | 0                                       |        |
| 2351   | 0                           |        | 0                                       |        |
| 2352   | 1                           | 2      | 0                                       |        |
| 2359   | 1                           | 1      | 0                                       |        |
| 2362   | 0                           |        | 0                                       |        |
| 2363   | 0                           |        | 0                                       |        |
| 2365   | 0                           |        | 0                                       |        |
| 2367   | 2                           | 2      | 0                                       |        |
| 2368   | 0                           |        | 0                                       |        |
| 2369   | 2                           | 1      | 0                                       |        |
| 2372   | 0                           |        | 0                                       |        |
| 2374   | 4                           | 1      | 2                                       | 1      |
| 2376   | 0                           |        | 0                                       |        |
| 2379   | 1                           | 1      | 1                                       | 1      |
| 2380   | 0                           |        | 0                                       |        |
| 2381   | 1                           | 0      | 0                                       |        |
| 2382   | 0                           |        | 0                                       |        |
| 2385   | 2                           | 1      | 0                                       |        |
| 2387   | 1                           | 2      | 0                                       |        |
| 2388   | 0                           |        | 0                                       |        |
| 2389   | 1                           | 1      | 1                                       | 1      |
| 2391   | 0                           |        | 0                                       |        |
| 2392   | 3                           | 2      | 2                                       | 2      |
| 2393   | 0                           |        | 0                                       |        |
| 2394   | 1                           | 1      | 4                                       | 4      |
| 2397   | 0                           |        | 0                                       |        |
| 2398   | 2                           | 1      | 2                                       | 1      |
| 2400   | 4                           | 1      | 0                                       |        |
| 2402   | 0                           |        | 0                                       |        |

| respid | ICS Terminal Dribble: Q28_1 | Q28a_1 | ICS Urgency with fear of leaking: Q29_1 | Q29a_1 |
|--------|-----------------------------|--------|-----------------------------------------|--------|
| 2406   | 1                           | 0      | 0                                       |        |
| 2408   | 0                           |        | 1                                       | 0      |
| 2410   | 2                           | 1      | 0                                       |        |
| 2411   | 3                           | 2      | 2                                       | 2      |
| 2412   | 0                           |        | 1                                       | 0      |
| 2414   | 2                           | 2      | 2                                       | 2      |
| 2421   | 0                           |        | 0                                       |        |
| 2423   | 1                           | 2      | 0                                       |        |
| 2424   | 2                           | 1      | 1                                       | 1      |
| 2425   | 1                           | 0      | 0                                       |        |
| 2426   | 1                           | 1      | 0                                       |        |
| 2429   | 5                           | 4      | 5                                       | 4      |
| 2430   | 1                           | 2      | 0                                       |        |
| 2432   | 1                           | 1      | 1                                       | 1      |
| 2433   | 1                           | 1      | 0                                       |        |
| 2434   | 1                           | 2      | 1                                       | 1      |
| 2435   | 0                           |        | 0                                       |        |
| 2436   | 0                           |        | 0                                       |        |
| 2439   | 1                           | 1      | 0                                       |        |
| 2440   | 1                           | 1      | 1                                       | 1      |
| 2441   | 1                           | 2      | 0                                       |        |
| 2446   | 2                           | 1      | 0                                       |        |
| 2448   | 3                           | 2      | 1                                       | 1      |
| 2449   | 1                           | 0      | 1                                       | 0      |
| 2451   | 0                           |        | 0                                       |        |
| 2452   | 0                           |        | 0                                       |        |
| 2455   | 0                           |        | 0                                       |        |
| 2457   | 2                           | 1      | 2                                       | 3      |
| 2458   | 0                           |        | 0                                       |        |
| 2459   | 0                           |        | 0                                       |        |
| 2460   | 0                           |        | 0                                       |        |
| 2462   | 2                           | 2      | 2                                       | 3      |



| respid | ICS Terminal Dribble: Q28_1 | Q28a_1 | ICS Urgency with fear of leaking: Q29_1 | Q29a_1 |
|--------|-----------------------------|--------|-----------------------------------------|--------|
| 2464   | 4                           | 3      | 4                                       | 3      |
| 2465   | 0                           |        | 0                                       |        |
| 2468   | 1                           | 1      | 1                                       | 1      |
| 2469   | 0                           |        | 0                                       |        |
| 2470   | 0                           |        | 0                                       |        |
| 2471   | 3                           | 2      | 2                                       | 2      |
| 2472   | 1                           | 0      | 0                                       |        |
| 2474   | 0                           |        | 0                                       |        |
| 2476   | 5                           | 4      | 1                                       | 1      |
| 2478   | 0                           |        | 0                                       |        |
| 2479   | 0                           |        | 0                                       |        |
| 2480   | 3                           | 1      | 0                                       |        |
| 2482   | 0                           |        | 0                                       |        |
| 2486   | 0                           |        | 0                                       |        |
| 2488   | 4                           | 3      | 1                                       | 2      |
| 2489   | 0                           |        | 0                                       |        |
| 2491   | 0                           |        | 0                                       |        |
| 2495   | 0                           |        | 0                                       |        |
| 2496   | 0                           |        | 1                                       | 1      |
| 2498   | 2                           | 2      | 1                                       | 2      |
| 2501   | 5                           | 4      | 0                                       |        |
| 2502   | 3                           | 2      | 3                                       | 3      |
| 2503   | 2                           | 2      | 1                                       | 1      |
| 2504   | 0                           |        | 0                                       |        |
| 2507   | 0                           |        | 1                                       | 0      |
| 2509   | 4                           | 2      | 1                                       | 2      |
| 2512   | 1                           | 0      | 1                                       | 1      |
| 2514   | 1                           | 0      | 0                                       |        |
| 2516   | 1                           | 0      | 1                                       | 0      |
| 2517   | 1                           | 0      | 0                                       |        |
| 2521   | 1                           | 1      | 0                                       |        |
| 2522   | 0                           |        | 0                                       |        |

| respid | ICS Terminal Dribble: Q28_1 | Q28a_1 | ICS Urgency with fear of leaking: Q29_1 | Q29a_1 |
|--------|-----------------------------|--------|-----------------------------------------|--------|
| 2524   | 0                           |        | 0                                       |        |
| 2525   | 0                           |        | 0                                       |        |
| 2526   | 2                           | 3      | 1                                       | 3      |
| 2527   | 0                           |        | 0                                       |        |
| 2528   | 0                           |        | 0                                       |        |
| 2531   | 0                           |        | 0                                       |        |
| 2533   | 3                           | 2      | 1                                       | 1      |
| 2535   | 0                           |        | 0                                       |        |
| 2536   | 5                           | 4      | 1                                       | 1      |
| 2539   | 0                           |        | 0                                       |        |
| 2540   | 0                           |        | 0                                       |        |
| 2543   | 0                           |        | 0                                       |        |
| 2546   | 0                           |        | 0                                       |        |
| 2547   | 2                           | 2      | 0                                       |        |
| 2549   | 0                           |        | 0                                       |        |
| 2553   | 0                           |        | 0                                       |        |
| 2554   | 0                           |        | 0                                       |        |
| 2555   | 1                           | 0      | 0                                       |        |
| 2556   | 0                           |        | 0                                       |        |
| 2557   | 0                           |        | 0                                       |        |
| 2559   | 0                           |        | 0                                       |        |
| 2560   | 2                           | 3      | 3                                       | 2      |
| 2561   | 0                           |        | 0                                       |        |
| 2566   | 0                           |        | 0                                       |        |
| 2567   | 0                           |        | 0                                       |        |
| 2570   | 4                           | 2      | 0                                       |        |
| 2574   | 3                           | 3      | 2                                       | 2      |
| 2578   | 0                           |        | 0                                       |        |
| 2580   | 2                           | 2      | 0                                       |        |
| 2590   | 0                           |        | 0                                       |        |
| 2593   | 0                           |        | 0                                       |        |
| 2594   | 1                           | 1      | 1                                       | 1      |

| respid | ICS Terminal Dribble: Q28_1 | Q28a_1 | ICS Urgency with fear of leaking: Q29_1 | Q29a_1 |
|--------|-----------------------------|--------|-----------------------------------------|--------|
| 2595   | 1                           | 1      | 0                                       |        |
| 2596   | 4                           | 0      | 0                                       |        |
| 2597   | 3                           | 3      | 2                                       | 3      |
| 2598   | 0                           |        | 0                                       |        |
| 2602   | 0                           |        | 0                                       |        |
| 2605   | 3                           | 3      | 2                                       | 2      |
| 2606   | 0                           |        | 0                                       |        |
| 2607   | 0                           |        | 0                                       |        |
| 2608   | 0                           |        | 0                                       |        |
| 2609   | 2                           | 0      | 0                                       |        |
| 2610   | 0                           |        | 0                                       |        |
| 2614   | 0                           |        | 0                                       |        |
| 2615   | 0                           |        | 0                                       |        |
| 2616   | 0                           |        | 0                                       |        |
| 2618   | 1                           | 1      | 0                                       |        |
| 2630   | 5                           | 2      | 0                                       |        |
| 2633   | 0                           |        | 0                                       |        |
| 2637   | 3                           | 2      | 1                                       | 1      |
| 2638   | 2                           | 2      | 0                                       |        |
| 2641   | 1                           | 2      | 0                                       |        |
| 2644   | 0                           |        | 0                                       |        |
| 2645   | 0                           |        | 0                                       |        |
| 2646   | 0                           |        | 0                                       |        |
| 2648   | 1                           | 0      | 0                                       |        |
| 2651   | 0                           |        | 0                                       |        |
| 2652   | 2                           | 2      | 2                                       | 1      |
| 2653   | 1                           | 1      | 0                                       |        |
| 2656   | 0                           |        | 0                                       |        |
| 2657   | 0                           |        | 0                                       |        |
| 2658   | 0                           |        | 0                                       |        |
| 2661   | 0                           |        | 0                                       |        |
| 2663   | 0                           |        | 0                                       |        |

| respid | ICS Terminal Dribble: Q28_1 | Q28a_1 | ICS Urgency with fear of leaking: Q29_1 | Q29a_1 |
|--------|-----------------------------|--------|-----------------------------------------|--------|
| 2665   | 0                           |        | 0                                       |        |
| 2670   | 0                           |        | 0                                       |        |
| 2672   | 0                           |        | 0                                       |        |
| 2673   | 0                           |        | 0                                       |        |
| 2677   | 1                           | 1      | 0                                       |        |
| 2686   | 3                           | 4      | 4                                       | 3      |
| 2688   | 4                           | 2      | 0                                       |        |
| 2689   | 1                           | 1      | 1                                       | 1      |
| 2691   | 1                           | 0      | 0                                       |        |
| 2695   | 0                           |        | 2                                       | 4      |
| 2696   | 0                           |        | 0                                       |        |
| 2697   | 0                           |        | 0                                       |        |
| 2698   | 0                           |        | 0                                       |        |
| 2703   | 1                           | 0      | 2                                       | 2      |
| 2704   | 0                           |        | 0                                       |        |
| 2706   | 3                           | 2      | 0                                       |        |
| 2707   | 1                           | 1      | 2                                       | 1      |
| 2710   | 0                           |        | 0                                       |        |
| 2711   | 0                           |        | 0                                       |        |
| 2712   | 1                           | 1      | 0                                       |        |
| 2713   | 0                           |        | 0                                       |        |
| 2721   | 0                           |        | 0                                       |        |
| 2730   | 0                           |        | 0                                       |        |
| 2731   | 1                           | 2      | 1                                       | 2      |
| 2732   | 1                           | 0      | 0                                       |        |
| 2733   | 1                           | 1      | 1                                       | 1      |
| 2735   | 1                           | 1      | 0                                       |        |
| 2736   | 1                           | 1      | 0                                       |        |
| 2740   | 1                           | 1      | 0                                       |        |
| 2741   | 1                           | 1      | 0                                       |        |
| 2742   | 4                           | 3      | 0                                       |        |
| 2743   | 1                           | 1      | 0                                       |        |

| respid | ICS Terminal Dribble: Q28_1 | Q28a_1 | ICS Urgency with fear of leaking: Q29_1 | Q29a_1 |
|--------|-----------------------------|--------|-----------------------------------------|--------|
| 2744   | 0                           |        | 0                                       |        |
| 2745   | 3                           | 3      | 3                                       | 2      |
| 2749   | 0                           |        | 1                                       | 0      |
| 2751   | 0                           |        | 0                                       |        |
| 2754   | 3                           | 2      | 0                                       |        |
| 2755   | 1                           | 1      | 1                                       | 1      |
| 2757   | 0                           |        | 0                                       |        |
| 2758   | 2                           | 2      | 0                                       |        |
| 2759   | 0                           |        | 1                                       | 0      |
| 2761   | 0                           |        | 0                                       |        |
| 2762   | 1                           | 1      | 0                                       |        |
| 2763   | 0                           |        | 0                                       |        |
| 2764   | 5                           | 3      | 4                                       | 3      |
| 2765   | 0                           |        | 0                                       |        |
| 2766   | 2                           | 0      | 0                                       |        |
| 2767   | 3                           | 1      | 1                                       | 1      |
| 2769   | 2                           | 1      | 1                                       | 2      |
| 2770   | 5                           | 1      | 1                                       | 1      |
| 2771   | 2                           | 1      | 1                                       | 1      |
| 2774   | 1                           | 1      | 1                                       | 1      |
| 2777   | 2                           | 2      | 2                                       | 2      |
| 2778   | 2                           | 2      | 1                                       | 1      |
| 2781   | 1                           | 1      | 1                                       | 1      |
| 2782   | 1                           | 1      | 1                                       | 1      |
| 2784   | 1                           | 1      | 1                                       | 2      |
| 2785   | 1                           | 2      | 1                                       | 2      |
| 2786   | 0                           |        | 0                                       |        |
| 2787   | 0                           |        | 0                                       |        |
| 2789   | 2                           | 2      | 2                                       | 2      |
| 2790   | 1                           | 2      | 0                                       |        |
| 2791   | 1                           | 0      | 0                                       |        |
| 2793   | 4                           | 3      | 1                                       | 3      |

| respid | ICS Terminal Dribble: Q28_1 | Q28a_1 | ICS Urgency with fear of leaking: Q29_1 | Q29a_1 |
|--------|-----------------------------|--------|-----------------------------------------|--------|
| 2797   | 1                           | 1      | 1                                       | 1      |
| 2798   | 0                           |        | 0                                       |        |
| 2799   | 2                           | 2      | 1                                       | 2      |
| 2801   | 1                           | 1      | 0                                       |        |
| 2802   | 0                           |        | 1                                       | 4      |
| 2803   | 2                           | 2      | 1                                       | 2      |
| 2804   | 1                           | 1      | 2                                       | 1      |
| 2807   | 0                           |        | 0                                       |        |
| 2809   | 0                           |        | 0                                       |        |
| 2810   | 1                           | 1      | 1                                       | 1      |
| 2812   | 1                           | 2      | 0                                       |        |
| 2814   | 1                           | 0      | 0                                       |        |
| 2815   | 2                           | 2      | 1                                       | 1      |
| 2816   | 1                           | 1      | 0                                       |        |
| 2817   | 1                           | 0      | 0                                       |        |
| 2819   | 1                           | 2      | 0                                       |        |
| 2820   | 0                           |        | 0                                       |        |
| 2821   | 0                           |        | 0                                       |        |
| 2822   | 4                           | 3      | 3                                       | 2      |
| 2823   | 0                           |        | 0                                       |        |
| 2824   | 1                           | 1      | 0                                       |        |
| 2825   | 1                           | 1      | 0                                       |        |
| 2826   | 0                           |        | 0                                       |        |
| 2827   | 1                           | 0      | 0                                       |        |
| 2828   | 5                           | 1      | 0                                       |        |
| 2829   | 2                           | 2      | 2                                       | 2      |
| 2830   | 1                           | 1      | 1                                       | 1      |
| 2831   | 0                           |        | 1                                       | 0      |
| 2832   | 2                           | 2      | 2                                       | 2      |
| 2833   | 0                           |        | 0                                       |        |
| 2834   | 3                           | 1      | 0                                       |        |
| 2835   | 1                           | 4      | 3                                       | 4      |

| respid | ICS Terminal Dribble: Q28_1 | Q28a_1 | ICS Urgency with fear of leaking: Q29_1 | Q29a_1 |
|--------|-----------------------------|--------|-----------------------------------------|--------|
| 2836   | 0                           |        | 0                                       |        |
| 2837   | 0                           |        | 0                                       |        |
| 2838   | 5                           | 2      | 0                                       |        |
| 2844   | 3                           | 2      | 4                                       | 3      |
| 2845   | 0                           |        | 0                                       |        |
| 2847   | 5                           | 4      | 5                                       | 4      |
| 2848   | 1                           | 1      | 0                                       |        |
| 2849   | 4                           | 3      | 1                                       | 1      |
| 2851   | 0                           |        | 0                                       |        |
| 2852   | 1                           | 0      | 1                                       | 1      |
| 2853   | 1                           | 0      | 1                                       | 1      |
| 2854   | 0                           |        | 0                                       |        |
| 2856   | 1                           | 1      | 0                                       |        |
| 2857   | 1                           | 1      | 1                                       | 1      |
| 2858   | 0                           |        | 0                                       |        |
| 2859   | 1                           | 2      | 1                                       | 0      |
| 2860   | 1                           | 1      | 1                                       | 2      |
| 2861   | 3                           | 2      | 3                                       | 2      |
| 2863   | 0                           |        | 0                                       |        |
| 2864   | 0                           |        | 1                                       | 0      |
| 2866   | 1                           | 1      | 0                                       |        |
| 2872   | 1                           | 1      | 0                                       |        |
| 2875   | 0                           |        | 0                                       |        |
| 2879   | 0                           |        | 0                                       |        |
| 2881   | 0                           |        | 0                                       |        |
| 2882   | 0                           |        | 0                                       |        |
| 2883   | 1                           | 0      | 0                                       |        |
| 2884   | 2                           | 2      | 2                                       | 1      |
| 2885   | 1                           | 0      | 1                                       | 0      |
| 2887   | 0                           |        | 0                                       |        |
| 2888   | 1                           | 1      | 0                                       |        |
| 2890   | 1                           | 1      | 0                                       |        |

| respid | ICS Terminal Dribble: Q28_1 | Q28a_1 | ICS Urgency with fear of leaking: Q29_1 | Q29a_1 |
|--------|-----------------------------|--------|-----------------------------------------|--------|
| 2891   | 0                           |        | 0                                       |        |
| 2892   | 0                           |        | 0                                       |        |
| 2895   | 2                           | 1      | 0                                       |        |
| 2899   | 1                           | 1      | 0                                       |        |
| 2900   | 1                           | 0      | 0                                       |        |
| 2902   | 4                           | 2      | 4                                       | 3      |
| 2903   | 0                           |        | 0                                       |        |
| 2904   | 0                           |        | 0                                       |        |
| 2906   | 0                           |        | 0                                       |        |
| 2908   | 0                           |        | 0                                       |        |
| 2910   | 0                           |        | 0                                       |        |
| 2917   | 2                           | 3      | 1                                       | 2      |
| 2918   | 1                           | 1      | 1                                       | 1      |
| 2919   | 0                           |        | 0                                       |        |
| 2920   | 0                           |        | 0                                       |        |
| 2921   | 2                           | 1      | 2                                       | 2      |
| 2922   | 1                           | 0      | 0                                       |        |
| 2923   | 0                           |        | 0                                       |        |
| 2924   | 3                           | 3      | 3                                       | 3      |
| 2926   | 0                           |        | 0                                       |        |
| 2928   | 0                           |        | 1                                       | 0      |
| 2930   | 0                           |        | 0                                       |        |
| 2931   | 1                           | 1      | 2                                       | 2      |
| 2933   | 0                           |        | 0                                       |        |
| 2935   | 2                           | 2      | 0                                       |        |
| 2936   | 0                           |        | 0                                       |        |
| 2937   | 2                           | 2      | 0                                       |        |
| 2938   | 1                           | 1      | 0                                       |        |
| 2944   | 4                           | 1      | 0                                       |        |
| 2945   | 0                           |        | 0                                       |        |
| 2947   | 1                           | 1      | 0                                       |        |
| 2949   | 0                           |        | 0                                       |        |



| respid | ICS Terminal Dribble: Q28_1 | Q28a_1 | ICS Urgency with fear of leaking: Q29_1 | Q29a_1 |
|--------|-----------------------------|--------|-----------------------------------------|--------|
| 2951   | 2                           | 3      | 0                                       |        |
| 2952   | 3                           | 1      | 0                                       |        |
| 2953   | 0                           |        | 0                                       |        |
| 2955   | 0                           |        | 0                                       |        |
| 2957   | 5                           | 0      | 0                                       |        |
| 2958   | 0                           |        | 0                                       |        |
| 2960   | 0                           |        | 0                                       |        |
| 2963   | 0                           |        | 0                                       |        |
| 2964   | 1                           | 1      | 1                                       | 0      |
| 2967   | 0                           |        | 0                                       |        |
| 2968   | 0                           |        | 0                                       |        |
| 2971   | 3                           | 2      | 3                                       | 2      |
| 2974   | 0                           |        | 0                                       |        |
| 2975   | 0                           |        | 0                                       |        |
| 2982   | 0                           |        | 0                                       |        |
| 2983   | 0                           |        | 0                                       |        |
| 2985   | 0                           |        | 0                                       |        |
| 2986   | 4                           | 3      | 4                                       | 3      |
| 2987   | 1                           | 1      | 1                                       | 1      |
| 2988   | 4                           | 3      | 0                                       |        |
| 2993   | 1                           | 0      | 0                                       |        |
| 2996   | 0                           |        | 0                                       |        |
| 2997   | 3                           | 3      | 3                                       | 3      |
| 2998   | 0                           |        | 0                                       |        |
| 3004   | 0                           |        | 0                                       |        |
| 3007   | 0                           |        | 0                                       |        |
| 3011   | 2                           | 1      | 2                                       | 2      |
| 3012   | 0                           |        | 0                                       |        |
| 3013   | 0                           |        | 0                                       |        |
| 3014   | 0                           |        | 0                                       |        |
| 3015   | 0                           |        | 0                                       |        |
| 3016   | 0                           |        | 0                                       |        |

| respid | ICS Terminal Dribble: Q28_1 | Q28a_1 | ICS Urgency with fear of leaking: Q29_1 | Q29a_1 |
|--------|-----------------------------|--------|-----------------------------------------|--------|
| 3017   | 0                           |        | 0                                       |        |
| 3020   | 3                           | 2      | 2                                       | 2      |
| 3022   | 0                           |        | 0                                       |        |
| 3023   | 1                           | 1      | 0                                       |        |
| 3026   | 0                           |        | 2                                       | 2      |
| 3038   | 1                           | 1      | 1                                       | 1      |
| 3039   | 0                           |        | 0                                       |        |
| 3040   | 1                           | 2      | 0                                       |        |
| 3041   | 0                           |        | 0                                       |        |
| 3042   | 1                           | 1      | 1                                       | 1      |
| 3044   | 0                           |        | 0                                       |        |
| 3050   | 0                           |        | 0                                       |        |
| 3052   | 2                           | 1      | 0                                       |        |
| 3056   | 2                           | 3      | 1                                       | 2      |
| 3059   | 0                           |        | 0                                       |        |
| 3060   | 1                           | 0      | 0                                       |        |
| 3063   | 1                           | 0      | 2                                       | 1      |
| 3065   | 0                           |        | 0                                       |        |
| 3067   | 3                           | 3      | 1                                       | 1      |
| 3068   | 0                           |        | 0                                       |        |
| 3072   | 0                           |        | 0                                       |        |
| 3074   | 2                           | 2      | 2                                       | 2      |
| 3075   | 1                           | 1      | 1                                       | 2      |
| 3076   | 1                           | 1      | 0                                       |        |
| 3079   | 3                           | 1      | 0                                       |        |
| 3082   | 3                           | 2      | 3                                       | 2      |
| 3083   | 1                           | 0      | 0                                       |        |
| 3084   | 0                           |        | 0                                       |        |
| 3085   | 0                           |        | 0                                       |        |
| 3090   | 0                           |        | 0                                       |        |
| 3091   | 1                           | 1      | 0                                       |        |
| 3092   | 1                           | 1      | 1                                       | 1      |

| respid | ICS Terminal Dribble: Q28_1 | Q28a_1 | ICS Urgency with fear of leaking: Q29_1 | Q29a_1 |
|--------|-----------------------------|--------|-----------------------------------------|--------|
| 3095   | 1                           | 2      | 1                                       | 0      |
| 3096   | 3                           | 3      | 4                                       | 4      |
| 3097   | 0                           |        | 0                                       |        |
| 3099   | 4                           | 3      | 4                                       | 4      |
| 3101   | 0                           |        | 1                                       | 2      |
| 3103   | 0                           |        | 0                                       |        |
| 3104   | 1                           | 1      | 0                                       |        |
| 3105   | 0                           |        | 0                                       |        |
| 3107   | 3                           | 2      | 0                                       |        |
| 3108   | 4                           | 4      | 0                                       |        |
| 3109   | 0                           |        | 0                                       |        |
| 3116   | 0                           |        | 0                                       |        |
| 3117   | 1                           | 0      | 0                                       |        |
| 3119   | 0                           |        | 0                                       |        |
| 3120   | 1                           | 0      | 0                                       |        |
| 3130   | 0                           |        | 0                                       |        |
| 3131   | 1                           | 1      | 1                                       | 3      |
| 3133   | 0                           |        | 0                                       |        |
| 3134   | 1                           | 1      | 0                                       |        |
| 3135   | 2                           | 2      | 1                                       | 0      |
| 3145   | 0                           |        | 0                                       |        |
| 3147   | 0                           |        | 0                                       |        |
| 3152   | 1                           | 1      | 1                                       | 1      |
| 3155   | 5                           | 4      | 5                                       | 4      |
| 3156   | 0                           |        | 0                                       |        |
| 3157   | 3                           | 3      | 1                                       | 2      |
| 3166   | 1                           | 1      | 1                                       | 1      |
| 3169   | 1                           | 1      | 1                                       | 1      |
| 3179   | 0                           |        | 0                                       |        |
| 3181   | 0                           |        | 0                                       |        |
| 3185   | 0                           |        | 0                                       |        |
| 3190   | 2                           | 0      | 0                                       |        |

| respid | ICS Terminal Dribble: Q28_1 | Q28a_1 | ICS Urgency with fear of leaking: Q29_1 | Q29a_1 |
|--------|-----------------------------|--------|-----------------------------------------|--------|
| 3191   | 0                           |        | 0                                       |        |
| 3192   | 2                           | 1      | 0                                       |        |
| 3193   | 0                           |        | 0                                       |        |
| 3195   | 0                           |        | 0                                       |        |
| 3202   | 1                           | 1      | 0                                       |        |
| 3204   | 1                           | 1      | 0                                       |        |
| 3208   | 1                           | 0      | 0                                       |        |
| 3212   | 2                           | 2      | 0                                       |        |
| 3218   | 0                           |        | 0                                       |        |
| 3219   | 0                           |        | 0                                       |        |
| 3220   | 0                           |        | 1                                       | 1      |
| 3221   | 1                           | 1      | 3                                       | 3      |
| 3223   | 0                           |        | 1                                       | 1      |
| 3231   | 1                           | 0      | 0                                       |        |
| 3232   | 3                           | 2      | 2                                       | 1      |
| 3234   | 1                           | 1      | 1                                       | 1      |
| 3235   | 0                           |        | 0                                       |        |
| 3237   | 0                           |        | 0                                       |        |
| 3238   | 0                           |        | 0                                       |        |
| 3240   | 1                           | 0      | 0                                       |        |
| 3241   | 1                           | 0      | 0                                       |        |
| 3243   | 0                           |        | 1                                       | 1      |
| 3244   | 1                           | 1      | 1                                       | 1      |
| 3247   | 1                           | 1      | 0                                       |        |
| 3250   | 1                           | 0      | 0                                       |        |
| 3251   | 2                           | 3      | 2                                       | 3      |
| 3255   | 0                           |        | 0                                       |        |
| 3256   | 0                           |        | 0                                       |        |
| 3257   | 0                           |        | 0                                       |        |
| 3258   | 0                           |        | 0                                       |        |
| 3259   | 1                           | 1      | 2                                       | 2      |
| 3260   | 1                           | 1      | 0                                       |        |

| respid | ICS Terminal Dribble: Q28_1 | Q28a_1 | ICS Urgency with fear of leaking: Q29_1 | Q29a_1 |
|--------|-----------------------------|--------|-----------------------------------------|--------|
| 3261   | 0                           |        | 0                                       |        |
| 3262   | 1                           | 1      | 0                                       |        |
| 3264   | 0                           |        | 1                                       | 2      |
| 3265   | 0                           |        | 0                                       |        |
| 3267   | 1                           | 0      | 0                                       |        |
| 3268   | 1                           | 1      | 0                                       |        |
| 3270   | 1                           | 0      | 0                                       |        |
| 3271   | 1                           | 1      | 0                                       |        |
| 3274   | 0                           |        | 0                                       |        |
| 3276   | 0                           |        | 0                                       |        |
| 3277   | 0                           |        | 0                                       |        |
| 3279   | 0                           |        | 0                                       |        |
| 3281   | 0                           |        | 0                                       |        |
| 3283   | 2                           | 1      | 0                                       |        |
| 3285   | 2                           | 2      | 0                                       |        |
| 3286   | 1                           | 1      | 1                                       | 1      |
| 3287   | 0                           |        | 0                                       |        |
| 3289   | 0                           |        | 0                                       |        |
| 3290   | 0                           |        | 0                                       |        |
| 3291   | 1                           | 0      | 0                                       |        |
| 3292   | 3                           | 2      | 2                                       | 2      |
| 3293   | 1                           | 1      | 2                                       | 2      |
| 3294   | 0                           |        | 0                                       |        |
| 3296   | 1                           | 0      | 0                                       |        |
| 3306   | 0                           |        | 0                                       |        |
| 3307   | 3                           | 3      | 2                                       | 2      |
| 3308   | 0                           |        | 1                                       | 1      |
| 3312   | 1                           | 0      | 0                                       |        |
| 3313   | 0                           |        | 0                                       |        |
| 3316   | 1                           | 2      | 0                                       |        |
| 3317   | 1                           | 3      | 0                                       |        |
| 3320   | 0                           |        | 0                                       |        |

| respid | ICS Terminal Dribble: Q28_1 | Q28a_1 | ICS Urgency with fear of leaking: Q29_1 | Q29a_1 |
|--------|-----------------------------|--------|-----------------------------------------|--------|
| 3321   | 3                           | 1      | 1                                       | 1      |
| 3322   | 0                           |        | 1                                       | 0      |
| 3323   | 0                           |        | 0                                       |        |
| 3325   | 0                           |        | 0                                       |        |
| 3332   | 0                           |        | 0                                       |        |
| 3334   | 2                           | 0      | 0                                       |        |
| 3335   | 1                           | 2      | 0                                       |        |
| 3341   | 0                           |        | 1                                       | 1      |
| 3345   | 1                           | 1      | 0                                       |        |
| 3346   | 1                           | 1      | 0                                       |        |
| 3349   | 1                           | 1      | 0                                       |        |
| 3351   | 0                           |        | 0                                       |        |
| 3353   | 0                           |        | 0                                       |        |
| 3354   | 0                           |        | 1                                       | 1      |
| 3356   | 0                           |        | 0                                       |        |
| 3357   | 0                           |        | 1                                       | 2      |
| 3360   | 0                           |        | 0                                       |        |
| 3361   | 1                           | 1      | 0                                       |        |
| 3362   | 1                           | 0      | 1                                       | 0      |
| 3363   | 0                           |        | 0                                       |        |
| 3364   | 3                           | 3      | 3                                       | 4      |
| 3368   | 1                           | 0      | 0                                       |        |
| 3370   | 1                           | 0      | 0                                       |        |
| 3371   | 0                           |        | 0                                       |        |
| 3379   | 1                           | 0      | 0                                       |        |
| 3380   | 1                           | 1      | 0                                       |        |
| 3382   | 2                           | 2      | 0                                       |        |
| 3384   | 0                           |        | 0                                       |        |
| 3385   | 0                           |        | 0                                       |        |
| 3388   | 0                           |        | 0                                       |        |
| 3392   | 0                           |        | 1                                       | 0      |
| 3393   | 0                           |        | 0                                       |        |

| respid | ICS Terminal Dribble: Q28_1 | Q28a_1 | ICS Urgency with fear of leaking: Q29_1 | Q29a_1 |
|--------|-----------------------------|--------|-----------------------------------------|--------|
| 3394   | 3                           | 2      | 3                                       | 2      |
| 3395   | 1                           | 0      | 1                                       | 0      |
| 3396   | 5                           | 3      | 0                                       |        |
| 3397   | 1                           | 1      | 0                                       |        |
| 3398   | 0                           |        | 0                                       |        |
| 3399   | 1                           | 2      | 0                                       |        |
| 3400   | 2                           | 2      | 1                                       | 1      |
| 3401   | 4                           | 4      | 3                                       | 3      |
| 3402   | 3                           | 2      | 1                                       | 1      |
| 3403   | 1                           | 1      | 1                                       | 1      |
| 3405   | 0                           |        | 0                                       |        |
| 3407   | 1                           | 1      | 1                                       | 1      |
| 3410   | 1                           | 1      | 0                                       |        |
| 3411   | 0                           |        | 0                                       |        |
| 3413   | 0                           |        | 0                                       |        |
| 3414   | 0                           |        | 0                                       |        |
| 3420   | 0                           |        | 0                                       |        |
| 3421   | 4                           | 3      | 4                                       | 4      |
| 3425   | 0                           |        | 0                                       |        |
| 3426   | 1                           | 1      | 1                                       | 2      |
| 3429   | 0                           |        | 0                                       |        |
| 3430   | 2                           | 2      | 0                                       |        |
| 3433   | 0                           |        | 0                                       |        |
| 3434   | 1                           | 3      | 1                                       | 4      |
| 3437   | 0                           |        | 0                                       |        |
| 3439   | 0                           |        | 0                                       |        |
| 3441   | 1                           | 2      | 1                                       | 1      |
| 3442   | 1                           | 1      | 1                                       | 1      |
| 3444   | 0                           |        | 1                                       | 0      |
| 3445   | 0                           |        | 0                                       |        |
| 3450   | 1                           | 0      | 1                                       | 2      |
| 3452   | 0                           |        | 0                                       |        |

| respid | ICS Terminal Dribble: Q28_1 | Q28a_1 | ICS Urgency with fear of leaking: Q29_1 | Q29a_1 |
|--------|-----------------------------|--------|-----------------------------------------|--------|
| 3456   | 0                           |        | 0                                       |        |
| 3459   | 0                           |        | 0                                       |        |
| 3460   | 2                           | 1      | 0                                       |        |
| 3461   | 0                           |        | 0                                       |        |
| 3466   | 3                           | 3      | 1                                       | 1      |
| 3471   | 2                           | 2      | 0                                       |        |
| 3473   | 0                           |        | 0                                       |        |
| 3475   | 3                           | 3      | 3                                       | 2      |
| 3476   | 0                           |        | 1                                       | 0      |
| 3477   | 1                           | 2      | 0                                       |        |
| 3478   | 0                           |        | 0                                       |        |
| 3479   | 0                           |        | 0                                       |        |
| 3482   | 3                           | 3      | 3                                       | 2      |
| 3483   | 0                           |        | 0                                       |        |
| 3485   | 1                           | 0      | 1                                       | 1      |
| 3489   | 0                           |        | 0                                       |        |
| 3490   | 0                           |        | 0                                       |        |
| 3491   | 2                           | 3      | 3                                       | 3      |
| 3494   | 0                           |        | 0                                       |        |
| 3495   | 2                           | 2      | 0                                       |        |
| 3501   | 0                           |        | 0                                       |        |
| 3506   | 2                           | 1      | 0                                       |        |
| 3507   | 0                           |        | 0                                       |        |
| 3517   | 1                           | 1      | 1                                       | 1      |
| 3520   | 1                           | 1      | 0                                       |        |
| 3521   | 1                           | 1      | 0                                       |        |
| 3522   | 0                           |        | 1                                       | 0      |
| 3524   | 0                           |        | 0                                       |        |
| 3527   | 0                           |        | 0                                       |        |
| 3528   | 0                           |        | 0                                       |        |
| 3529   | 1                           | 1      | 0                                       |        |
| 3536   | 1                           | 1      | 0                                       |        |



| respid | ICS Terminal Dribble: Q28_1 | Q28a_1 | ICS Urgency with fear of leaking: Q29_1 | Q29a_1 |
|--------|-----------------------------|--------|-----------------------------------------|--------|
| 3537   | 0                           |        | 0                                       |        |
| 3538   | 3                           | 2      | 0                                       |        |
| 3540   | 1                           | 1      | 3                                       | 1      |
| 3545   | 3                           | 0      | 0                                       |        |
| 3547   | 1                           | 1      | 1                                       | 1      |
| 3554   | 0                           |        | 0                                       |        |
| 3556   | 0                           |        | 0                                       |        |
| 3557   | 2                           | 2      | 0                                       |        |
| 3559   | 0                           |        | 0                                       |        |
| 3560   | 5                           | 2      | 0                                       |        |
| 3562   | 0                           |        | 0                                       |        |
| 3564   | 2                           | 2      | 2                                       | 2      |
| 3565   | 1                           | 4      | 4                                       | 4      |
| 3568   | 3                           | 2      | 1                                       | 2      |
| 3572   | 0                           |        | 0                                       |        |
| 3578   | 0                           |        | 0                                       |        |
| 3581   | 0                           |        | 0                                       |        |
| 3583   | 0                           |        | 0                                       |        |
| 3588   | 1                           | 1      | 1                                       | 1      |
| 3591   | 2                           | 0      | 0                                       |        |
| 3594   | 1                           | 0      | 0                                       |        |
| 3595   | 1                           | 1      | 1                                       | 1      |
| 3596   | 0                           |        | 0                                       |        |
| 3597   | 4                           | 3      | 1                                       | 1      |
| 3598   | 0                           |        | 0                                       |        |
| 3600   | 3                           | 1      | 1                                       | 2      |
| 3602   | 0                           |        | 0                                       |        |
| 3604   | 0                           |        | 0                                       |        |
| 3605   | 0                           |        | 0                                       |        |
| 3606   | 0                           |        | 0                                       |        |
| 3607   | 0                           |        | 0                                       |        |
| 3610   | 0                           |        | 0                                       |        |

| respid | ICS Terminal Dribble: Q28_1 | Q28a_1 | ICS Urgency with fear of leaking: Q29_1 | Q29a_1 |
|--------|-----------------------------|--------|-----------------------------------------|--------|
| 3611   | 0                           |        | 0                                       |        |
| 3612   | 2                           | 1      | 0                                       |        |
| 3614   | 0                           |        | 1                                       | 2      |
| 3616   | 2                           | 1      | 0                                       |        |
| 3617   | 0                           |        | 0                                       |        |
| 3618   | 0                           |        | 0                                       |        |
| 3619   | 0                           |        | 1                                       | 1      |
| 3621   | 3                           | 2      | 0                                       |        |
| 3622   | 2                           | 3      | 0                                       |        |
| 3624   | 1                           | 1      | 0                                       |        |
| 3626   | 0                           |        | 0                                       |        |
| 3629   | 0                           |        | 0                                       |        |
| 3631   | 0                           |        | 1                                       | 0      |
| 3632   | 0                           |        | 0                                       |        |
| 3638   | 1                           | 1      | 1                                       | 0      |
| 3640   | 0                           |        | 0                                       |        |
| 3641   | 0                           |        | 0                                       |        |
| 3645   | 4                           | 2      | 2                                       | 2      |
| 3650   | 0                           |        | 0                                       |        |
| 3653   | 2                           | 1      | 1                                       | 1      |
| 3655   | 1                           | 1      | 2                                       | 1      |
| 3657   | 1                           | 1      | 1                                       | 2      |
| 3658   | 1                           | 0      | 1                                       | 1      |
| 3659   | 0                           |        | 0                                       |        |
| 3664   | 4                           | 2      | 3                                       | 2      |
| 3665   | 3                           | 2      | 0                                       |        |
| 3667   | 1                           | 1      | 0                                       |        |
| 3668   | 3                           | 3      | 3                                       | 3      |
| 3675   | 0                           |        | 0                                       |        |
| 3678   | 0                           |        | 0                                       |        |
| 3680   | 0                           |        | 0                                       |        |
| 3684   | 1                           | 2      | 1                                       | 1      |

| respid | ICS Terminal Dribble: Q28_1 | Q28a_1 | ICS Urgency with fear of leaking: Q29_1 | Q29a_1 |
|--------|-----------------------------|--------|-----------------------------------------|--------|
| 3685   | 3                           | 2      | 3                                       | 2      |
| 3687   | 4                           | 4      | 0                                       |        |
| 3689   | 0                           |        | 2                                       | 1      |
| 3690   | 5                           | 1      | 0                                       |        |
| 3693   | 0                           |        | 0                                       |        |
| 3694   | 0                           |        | 0                                       |        |
| 3695   | 0                           |        | 0                                       |        |
| 3700   | 0                           |        | 0                                       |        |
| 3701   | 0                           |        | 0                                       |        |
| 3703   | 2                           | 2      | 0                                       |        |
| 3704   | 3                           | 3      | 4                                       | 4      |
| 3705   | 0                           |        | 0                                       |        |
| 3709   | 0                           |        | 0                                       |        |
| 3710   | 3                           | 4      | 0                                       |        |
| 3722   | 1                           | 1      | 0                                       |        |
| 3725   | 0                           |        | 0                                       |        |
| 3726   | 1                           | 1      | 0                                       |        |
| 3727   | 0                           |        | 0                                       |        |
| 3728   | 0                           |        | 1                                       | 1      |
| 3729   | 1                           | 0      | 0                                       |        |
| 3731   | 0                           |        | 0                                       |        |
| 3738   | 0                           |        | 0                                       |        |
| 3739   | 0                           |        | 0                                       |        |
| 3740   | 0                           |        | 0                                       |        |
| 3749   | 1                           | 1      | 1                                       | 1      |
| 3758   | 2                           | 2      | 2                                       | 2      |
| 3762   | 0                           |        | 0                                       |        |
| 3765   | 0                           |        | 0                                       |        |
| 3770   | 0                           |        | 0                                       |        |
| 3771   | 0                           |        | 0                                       |        |
| 3778   | 1                           | 1      | 0                                       |        |
| 3779   | 1                           | 1      | 1                                       | 1      |

| respid | ICS Terminal Dribble: Q28_1 | Q28a_1 | ICS Urgency with fear of leaking: Q29_1 | Q29a_1 |
|--------|-----------------------------|--------|-----------------------------------------|--------|
| 3780   | 1                           | 0      | 1                                       | 1      |
| 3782   | 0                           |        | 0                                       |        |
| 3784   | 1                           | 1      | 0                                       |        |
| 3787   | 0                           |        | 0                                       |        |
| 3790   | 1                           | 1      | 1                                       | 2      |
| 3791   | 0                           |        | 1                                       | 1      |
| 3793   | 4                           | 4      | 4                                       | 4      |
| 3795   | 0                           |        | 0                                       |        |
| 3799   | 0                           |        | 0                                       |        |
| 3801   | 1                           | 2      | 2                                       | 2      |
| 3804   | 3                           | 3      | 0                                       |        |
| 3809   | 0                           |        | 0                                       |        |
| 3810   | 0                           |        | 0                                       |        |
| 3813   | 1                           | 2      | 0                                       |        |
| 3816   | 0                           |        | 0                                       |        |
| 3820   | 0                           |        | 0                                       |        |
| 3821   | 0                           |        | 0                                       |        |
| 3823   | 3                           | 2      | 1                                       | 0      |
| 3828   | 0                           |        | 0                                       |        |
| 3829   | 0                           |        | 0                                       |        |
| 3832   | 0                           |        | 0                                       |        |
| 3835   | 0                           |        | 0                                       |        |
| 3837   | 0                           |        | 0                                       |        |
| 3838   | 0                           |        | 1                                       | 1      |
| 3839   | 4                           | 3      | 5                                       | 4      |
| 3840   | 0                           |        | 0                                       |        |
| 3842   | 0                           |        | 0                                       |        |
| 3843   | 0                           |        | 0                                       |        |
| 3844   | 0                           |        | 0                                       |        |
| 3850   | 0                           |        | 0                                       |        |
| 3851   | 0                           |        | 0                                       |        |
| 3856   | 1                           | 1      | 0                                       |        |

| respid | ICS Terminal Dribble: Q28_1 | Q28a_1 | ICS Urgency with fear of leaking: Q29_1 | Q29a_1 |
|--------|-----------------------------|--------|-----------------------------------------|--------|
| 3859   | 2                           | 2      | 2                                       | 3      |
| 3860   | 1                           | 1      | 0                                       |        |
| 3863   | 1                           | 1      | 0                                       |        |
| 3866   | 0                           |        | 0                                       |        |
| 3867   | 0                           |        | 0                                       |        |
| 3870   | 2                           | 1      | 0                                       |        |
| 3873   | 1                           | 1      | 1                                       | 1      |
| 3875   | 0                           |        | 0                                       |        |
| 3878   | 0                           |        | 0                                       |        |
| 3881   | 0                           |        | 0                                       |        |
| 3883   | 3                           | 2      | 4                                       | 2      |
| 3884   | 1                           | 2      | 1                                       | 2      |
| 3885   | 4                           | 3      | 3                                       | 3      |
| 3886   | 3                           | 3      | 2                                       | 1      |
| 3887   | 0                           |        | 0                                       |        |
| 3888   | 0                           |        | 0                                       |        |
| 3889   | 4                           | 2      | 1                                       | 2      |
| 3890   | 0                           |        | 0                                       |        |
| 3896   | 1                           | 1      | 1                                       | 1      |
| 3902   | 4                           | 3      | 3                                       | 2      |
| 3909   | 0                           |        | 1                                       | 0      |
| 3912   | 2                           | 2      | 0                                       |        |
| 3922   | 1                           | 0      | 1                                       | 1      |
| 3928   | 1                           | 0      | 0                                       |        |
| 3930   | 2                           | 1      | 0                                       |        |
| 3931   | 0                           |        | 0                                       |        |
| 3933   | 0                           |        | 0                                       |        |
| 3935   | 0                           |        | 1                                       | 0      |
| 3937   | 0                           |        | 0                                       |        |
| 3939   | 2                           | 2      | 1                                       | 2      |
| 3942   | 1                           | 0      | 0                                       |        |
| 3943   | 0                           |        | 0                                       |        |

| respid | ICS Terminal Dribble: Q28_1 | Q28a_1 | ICS Urgency with fear of leaking: Q29_1 | Q29a_1 |
|--------|-----------------------------|--------|-----------------------------------------|--------|
| 3944   | 0                           |        | 0                                       |        |
| 3945   | 0                           |        | 0                                       |        |
| 3947   | 1                           | 1      | 1                                       | 1      |
| 3948   | 1                           | 2      | 0                                       |        |
| 3951   | 1                           | 1      | 1                                       | 1      |
| 3959   | 1                           | 0      | 0                                       |        |
| 3969   | 5                           | 4      | 5                                       | 4      |
| 3973   | 1                           | 2      | 0                                       |        |
| 3975   | 1                           | 2      | 1                                       | 2      |
| 3976   | 2                           | 0      | 0                                       |        |
| 3977   | 2                           | 2      | 2                                       | 1      |
| 3978   | 0                           |        | 0                                       |        |
| 3994   | 1                           | 1      | 0                                       |        |
| 3995   | 0                           |        | 0                                       |        |
| 3997   | 0                           |        | 0                                       |        |
| 3998   | 1                           | 0      | 0                                       |        |
| 3999   | 0                           |        | 0                                       |        |
| 4002   | 2                           | 2      | 3                                       | 3      |
| 4004   | 1                           | 1      | 1                                       | 1      |
| 4005   | 0                           |        | 0                                       |        |
| 4006   | 2                           | 1      | 2                                       | 2      |
| 4008   | 1                           | 0      | 0                                       |        |
| 4010   | 0                           |        | 0                                       |        |
| 4011   | 3                           | 2      | 3                                       | 3      |
| 4013   | 2                           | 1      | 1                                       | 1      |
| 4014   | 1                           | 1      | 0                                       |        |
| 4016   | 0                           |        | 0                                       |        |
| 4017   | 0                           |        | 0                                       |        |
| 4019   | 1                           | 0      | 1                                       | 1      |
| 4021   | 0                           |        | 0                                       |        |
| 4023   | 0                           |        | 0                                       |        |
| 4024   | 0                           |        | 0                                       |        |

| respid | ICS Terminal Dribble: Q28_1 | Q28a_1 | ICS Urgency with fear of leaking: Q29_1 | Q29a_1 |
|--------|-----------------------------|--------|-----------------------------------------|--------|
| 4025   | 1                           | 1      | 1                                       | 1      |
| 4027   | 0                           |        | 0                                       |        |
| 4032   | 0                           |        | 0                                       |        |
| 4034   | 1                           | 1      | 0                                       |        |
| 4035   | 4                           | 3      | 4                                       | 4      |
| 4037   | 1                           | 1      | 1                                       | 1      |
| 4040   | 0                           |        | 0                                       |        |
| 4041   | 0                           |        | 0                                       |        |
| 4042   | 1                           | 1      | 0                                       |        |
| 4043   | 0                           |        | 1                                       | 3      |
| 4045   | 0                           |        | 1                                       | 1      |
| 4046   | 2                           | 2      | 0                                       |        |
| 4048   | 1                           | 0      | 0                                       |        |
| 4049   | 0                           |        | 1                                       | 1      |
| 4050   | 1                           | 1      | 2                                       | 2      |
| 4052   | 0                           |        | 0                                       |        |
| 4053   | 0                           |        | 0                                       |        |
| 4060   | 0                           |        | 0                                       |        |
| 4065   | 2                           | 2      | 2                                       | 2      |
| 4066   | 0                           |        | 3                                       | 2      |
| 4067   | 0                           |        | 1                                       | 2      |
| 4068   | 3                           | 2      | 3                                       | 2      |
| 4069   | 0                           |        | 0                                       |        |
| 4070   | 0                           |        | 0                                       |        |
| 4071   | 3                           | 2      | 3                                       | 2      |
| 4072   | 0                           |        | 0                                       |        |
| 4073   | 1                           | 0      | 0                                       |        |
| 4074   | 0                           |        | 0                                       |        |
| 4075   | 1                           | 1      | 3                                       | 3      |
| 4078   | 1                           | 1      | 0                                       |        |
| 4080   | 1                           | 0      | 0                                       |        |
| 4081   | 0                           |        | 0                                       |        |

| respid | ICS Terminal Dribble: Q28_1 | Q28a_1 | ICS Urgency with fear of leaking: Q29_1 | Q29a_1 |
|--------|-----------------------------|--------|-----------------------------------------|--------|
| 4082   | 0                           |        | 0                                       |        |
| 4083   | 1                           | 2      | 1                                       | 2      |
| 4084   | 0                           |        | 0                                       |        |
| 4086   | 0                           |        | 0                                       |        |
| 4087   | 2                           | 0      | 0                                       |        |
| 4088   | 2                           | 1      | 1                                       | 1      |
| 4089   | 0                           |        | 0                                       |        |
| 4090   | 0                           |        | 0                                       |        |
| 4093   | 1                           | 0      | 0                                       |        |
| 4094   | 0                           |        | 0                                       |        |
| 4095   | 0                           |        | 0                                       |        |
| 4096   | 0                           |        | 0                                       |        |
| 4098   | 0                           |        | 0                                       |        |
| 4103   | 2                           | 2      | 1                                       | 1      |
| 4104   | 0                           |        | 0                                       |        |
| 4107   | 0                           |        | 0                                       |        |
| 4109   | 0                           |        | 0                                       |        |
| 4110   | 0                           |        | 0                                       |        |
| 4113   | 0                           |        | 1                                       | 1      |
| 4114   | 0                           |        | 0                                       |        |
| 4116   | 1                           | 1      | 0                                       |        |
| 4119   | 0                           |        | 0                                       |        |
| 4120   | 2                           | 1      | 0                                       |        |
| 4121   | 0                           |        | 0                                       |        |
| 4122   | 2                           | 2      | 3                                       | 2      |
| 4124   | 0                           |        | 1                                       | 1      |
| 4126   | 0                           |        | 0                                       |        |
| 4127   | 4                           | 3      | 4                                       | 3      |
| 4131   | 1                           | 0      | 1                                       | 0      |
| 4134   | 3                           | 2      | 0                                       |        |
| 4144   | 1                           | 1      | 0                                       |        |
| 4145   | 0                           |        | 0                                       |        |



| respid | ICS Terminal Dribble: Q28_1 | Q28a_1 | ICS Urgency with fear of leaking: Q29_1 | Q29a_1 |
|--------|-----------------------------|--------|-----------------------------------------|--------|
| 4146   | 0                           |        | 0                                       |        |
| 4147   | 0                           |        | 0                                       |        |
| 4149   | 3                           | 1      | 0                                       |        |
| 4150   | 0                           |        | 0                                       |        |
| 4151   | 3                           | 3      | 2                                       | 2      |
| 4153   | 1                           | 1      | 1                                       | 1      |
| 4155   | 0                           |        | 0                                       |        |
| 4157   | 0                           |        | 0                                       |        |
| 4159   | 1                           | 0      | 0                                       |        |
| 4160   | 1                           | 1      | 0                                       |        |
| 4161   | 0                           |        | 1                                       | 0      |
| 4163   | 1                           | 0      | 0                                       |        |
| 4164   | 1                           | 1      | 0                                       |        |
| 4165   | 0                           |        | 2                                       | 1      |
| 4166   | 2                           | 2      | 0                                       |        |
| 4167   | 0                           |        | 0                                       |        |
| 4170   | 1                           | 1      | 1                                       | 1      |
| 4172   | 1                           | 0      | 0                                       |        |
| 4173   | 3                           | 3      | 1                                       | 1      |
| 4180   | 0                           |        | 0                                       |        |
| 4185   | 4                           | 3      | 0                                       |        |
| 4187   | 0                           |        | 0                                       |        |
| 4190   | 0                           |        | 0                                       |        |
| 4191   | 1                           | 0      | 0                                       |        |
| 4193   | 0                           |        | 0                                       |        |
| 4194   | 1                           | 0      | 0                                       |        |
| 4195   | 0                           |        | 1                                       | 1      |
| 4196   | 0                           |        | 0                                       |        |
| 4197   | 0                           |        | 0                                       |        |
| 4198   | 1                           | 0      | 0                                       |        |
| 4199   | 1                           | 0      | 0                                       |        |
| 4205   | 0                           |        | 0                                       |        |

| respid | ICS Terminal Dribble: Q28_1 | Q28a_1 | ICS Urgency with fear of leaking: Q29_1 | Q29a_1 |
|--------|-----------------------------|--------|-----------------------------------------|--------|
| 4206   | 0                           |        | 0                                       |        |
| 4207   | 3                           | 1      | 2                                       | 1      |
| 4214   | 0                           |        | 0                                       |        |
| 4215   | 1                           | 0      | 1                                       | 0      |
| 4217   | 1                           | 1      | 0                                       |        |
| 4219   | 1                           | 0      | 0                                       |        |
| 4223   | 1                           | 2      | 1                                       | 2      |
| 4226   | 4                           | 2      | 0                                       |        |
| 4229   | 1                           | 0      | 0                                       |        |
| 4230   | 1                           | 1      | 0                                       |        |
| 4232   | 0                           |        | 0                                       |        |
| 4233   | 1                           | 0      | 0                                       |        |
| 4234   | 0                           |        | 0                                       |        |
| 4235   | 3                           | 1      | 1                                       | 1      |
| 4236   | 0                           |        | 0                                       |        |
| 4237   | 0                           |        | 0                                       |        |
| 4238   | 1                           | 0      | 1                                       | 0      |
| 4240   | 1                           | 1      | 1                                       | 1      |
| 4241   | 0                           |        | 0                                       |        |
| 4247   | 0                           |        | 0                                       |        |
| 4250   | 0                           |        | 0                                       |        |
| 4251   | 0                           |        | 0                                       |        |
| 4253   | 2                           | 2      | 2                                       | 2      |
| 4254   | 1                           | 0      | 0                                       |        |
| 4258   | 1                           | 1      | 1                                       | 1      |
| 4260   | 0                           |        | 0                                       |        |
| 4263   | 1                           | 0      | 1                                       | 1      |
| 4265   | 1                           | 0      | 0                                       |        |
| 4266   | 5                           | 2      | 0                                       |        |
| 4267   | 2                           | 2      | 0                                       |        |
| 4270   | 0                           |        | 0                                       |        |
| 4273   | 1                           | 1      | 1                                       | 1      |

| respid | ICS Terminal Dribble: Q28_1 | Q28a_1 | ICS Urgency with fear of leaking: Q29_1 | Q29a_1 |
|--------|-----------------------------|--------|-----------------------------------------|--------|
| 4280   | 1                           | 0      | 0                                       |        |
| 4281   | 5                           | 2      | 0                                       |        |
| 4282   | 0                           |        | 0                                       |        |
| 4283   | 0                           |        | 0                                       |        |
| 4286   | 4                           | 3      | 5                                       | 4      |
| 4287   | 0                           |        | 0                                       |        |
| 4289   | 1                           | 0      | 1                                       | 1      |
| 4290   | 2                           | 2      | 2                                       | 2      |
| 4291   | 0                           |        | 1                                       | 1      |
| 4292   | 1                           | 0      | 0                                       |        |
| 4293   | 0                           |        | 0                                       |        |
| 4294   | 0                           |        | 1                                       | 1      |
| 4295   | 0                           |        | 0                                       |        |
| 4296   | 3                           | 2      | 2                                       | 2      |
| 4297   | 2                           | 2      | 1                                       | 1      |
| 4298   | 0                           |        | 0                                       |        |
| 4299   | 1                           | 1      | 1                                       | 1      |
| 4300   | 0                           |        | 0                                       |        |
| 4301   | 0                           |        | 0                                       |        |
| 4302   | 0                           |        | 0                                       |        |
| 4304   | 3                           | 1      | 0                                       |        |
| 4305   | 2                           | 2      | 1                                       | 1      |
| 4307   | 0                           |        | 0                                       |        |
| 4308   | 0                           |        | 1                                       | 1      |
| 4312   | 0                           |        | 0                                       |        |
| 4314   | 4                           | 1      | 0                                       |        |
| 4316   | 1                           | 0      | 0                                       |        |
| 4317   | 3                           | 2      | 4                                       | 4      |
| 4319   | 0                           |        | 2                                       | 1      |
| 4323   | 2                           | 1      | 2                                       | 1      |
| 4337   | 0                           |        | 0                                       |        |
| 4341   | 1                           | 2      | 0                                       |        |

| respid | ICS Terminal Dribble: Q28_1 | Q28a_1 | ICS Urgency with fear of leaking: Q29_1 | Q29a_1 |
|--------|-----------------------------|--------|-----------------------------------------|--------|
| 4342   | 1                           | 1      | 1                                       | 1      |
| 4344   | 2                           | 2      | 1                                       | 1      |
| 4345   | 1                           | 1      | 0                                       |        |
| 4346   | 1                           | 1      | 1                                       | 1      |
| 4347   | 1                           | 0      | 0                                       |        |
| 4350   | 0                           |        | 0                                       |        |
| 4352   | 0                           |        | 0                                       |        |
| 4353   | 0                           |        | 0                                       |        |
| 4355   | 1                           | 0      | 0                                       |        |
| 4356   | 2                           | 2      | 1                                       | 2      |
| 4358   | 0                           |        | 0                                       |        |
| 4359   | 1                           | 0      | 0                                       |        |
| 4360   | 1                           | 1      | 0                                       |        |
| 4361   | 3                           | 2      | 4                                       | 3      |
| 4363   | 1                           | 0      | 0                                       |        |
| 4364   | 0                           |        | 2                                       | 3      |
| 4365   | 1                           | 1      | 0                                       |        |
| 4367   | 0                           |        | 0                                       |        |
| 4369   | 1                           | 1      | 0                                       |        |
| 4373   | 1                           | 3      | 0                                       |        |
| 4374   | 1                           | 1      | 0                                       |        |
| 4375   | 0                           |        | 0                                       |        |
| 4378   | 0                           |        | 0                                       |        |
| 4379   | 1                           | 0      | 1                                       | 0      |
| 4382   | 0                           |        | 0                                       |        |
| 4383   | 0                           |        | 0                                       |        |
| 4384   | 1                           | 1      | 2                                       | 3      |
| 4385   | 1                           | 1      | 1                                       | 1      |
| 4388   | 1                           | 1      | 1                                       | 1      |
| 4389   | 1                           | 0      | 1                                       | 1      |
| 4391   | 0                           |        | 0                                       |        |
| 4392   | 1                           | 1      | 2                                       | 2      |

| respid | ICS Terminal Dribble: Q28_1 | Q28a_1 | ICS Urgency with fear of leaking: Q29_1 | Q29a_1 |
|--------|-----------------------------|--------|-----------------------------------------|--------|
| 4393   | 1                           |        | 0                                       |        |
| 4395   | 0                           |        | 0                                       |        |
| 4397   | 0                           |        | 0                                       |        |
| 4398   | 0                           |        | 0                                       |        |
| 4399   | 0                           |        | 0                                       |        |
| 4400   | 0                           |        | 0                                       |        |
| 4401   | 1                           | 1      | 0                                       |        |
| 4402   | 0                           |        | 0                                       |        |
| 4404   | 0                           |        | 0                                       |        |
| 4405   | 0                           |        | 0                                       |        |
| 4407   | 1                           | 1      | 0                                       |        |
| 4408   | 1                           | 1      | 0                                       |        |
| 4411   | 0                           |        | 0                                       |        |
| 4420   | 0                           |        | 0                                       |        |
| 4421   | 0                           |        | 0                                       |        |
| 4424   | 4                           | 2      | 3                                       | 3      |
| 4425   | 0                           |        | 0                                       |        |
| 4427   | 1                           | 1      | 0                                       |        |
| 4430   | 1                           | 1      | 0                                       |        |
| 4431   | 0                           |        | 0                                       |        |
| 4432   | 1                           | 1      | 0                                       |        |
| 4436   | 1                           | 0      | 0                                       |        |
| 4439   | 0                           |        | 0                                       |        |
| 4451   | 1                           | 1      | 1                                       | 1      |
| 4452   | 3                           | 3      | 4                                       | 3      |
| 4458   | 0                           |        | 1                                       | 0      |
| 4464   | 3                           | 2      | 0                                       |        |
| 4465   | 1                           | 1      | 1                                       | 2      |
| 4467   | 0                           |        | 1                                       | 1      |
| 4470   | 1                           | 1      | 0                                       |        |
| 4471   | 0                           |        | 0                                       |        |
| 4472   | 1                           | 2      | 0                                       |        |

| respid | ICS Terminal Dribble: Q28_1 | Q28a_1 | ICS Urgency with fear of leaking: Q29_1 | Q29a_1 |
|--------|-----------------------------|--------|-----------------------------------------|--------|
| 4473   | 0                           |        | 0                                       |        |
| 4475   | 0                           |        | 0                                       |        |
| 4476   | 1                           | 0      | 1                                       | 1      |
| 4478   | 1                           | 1      | 0                                       |        |
| 4485   | 0                           |        | 0                                       |        |
| 4486   | 1                           | 1      | 0                                       |        |
| 4490   | 0                           |        | 0                                       |        |
| 4502   | 0                           |        | 0                                       |        |
| 4503   | 0                           |        | 0                                       |        |
| 4504   | 0                           |        | 0                                       |        |
| 4506   | 0                           |        | 0                                       |        |
| 4508   | 0                           |        | 0                                       |        |
| 4515   | 1                           | 1      | 0                                       |        |
| 4516   | 3                           | 2      | 3                                       | 2      |
| 4519   | 0                           |        | 0                                       |        |
| 4523   | 2                           | 1      | 3                                       | 1      |
| 4525   | 1                           | 1      | 1                                       | 1      |
| 4526   | 0                           |        | 0                                       |        |
| 4528   | 0                           |        | 0                                       |        |
| 4530   | 1                           | 0      | 0                                       |        |
| 4531   | 2                           | 2      | 0                                       |        |
| 4532   | 1                           | 1      | 1                                       | 1      |
| 4537   | 1                           | 0      | 0                                       |        |
| 4538   | 0                           |        | 0                                       |        |
| 4539   | 0                           |        | 0                                       |        |
| 4541   | 4                           | 3      | 0                                       |        |
| 4543   | 0                           |        | 0                                       |        |
| 4544   | 0                           |        | 0                                       |        |
| 4546   | 0                           |        | 0                                       |        |
| 4547   | 0                           |        | 1                                       | 0      |
| 4549   | 0                           |        | 0                                       |        |
| 4550   | 4                           | 0      | 0                                       |        |

| respid | ICS Terminal Dribble: Q28_1 | Q28a_1 | ICS Urgency with fear of leaking: Q29_1 | Q29a_1 |
|--------|-----------------------------|--------|-----------------------------------------|--------|
| 4551   | 1                           | 1      | 0                                       |        |
| 4554   | 1                           | 0      | 0                                       |        |
| 4557   | 0                           |        | 0                                       |        |
| 4565   | 0                           |        | 0                                       |        |
| 4568   | 1                           | 1      | 0                                       |        |
| 4569   | 0                           |        | 0                                       |        |
| 4570   | 0                           |        | 0                                       |        |
| 4572   | 0                           |        | 0                                       |        |
| 4574   | 3                           | 1      | 1                                       | 1      |
| 4576   | 1                           | 1      | 1                                       | 1      |
| 4578   | 1                           | 1      | 0                                       |        |
| 4579   | 0                           |        | 0                                       |        |
| 4580   | 0                           |        | 0                                       |        |
| 4581   | 0                           |        | 0                                       |        |
| 4584   | 0                           |        | 0                                       |        |
| 4586   | 2                           | 2      | 2                                       | 2      |
| 4587   | 4                           | 3      | 3                                       | 3      |
| 4590   | 1                           | 0      | 0                                       |        |
| 4592   | 0                           |        | 0                                       |        |
| 4593   | 0                           |        | 1                                       | 0      |
| 4595   | 1                           | 1      | 0                                       |        |
| 4597   | 1                           | 0      | 0                                       |        |
| 4598   | 5                           | 2      | 3                                       | 2      |
| 4599   | 1                           | 1      | 0                                       |        |
| 4600   | 0                           |        | 1                                       | 1      |
| 4601   | 1                           | 1      | 1                                       | 1      |
| 4608   | 3                           | 1      | 0                                       |        |
| 4609   | 1                           | 1      | 0                                       |        |
| 4611   | 2                           | 1      | 1                                       | 1      |
| 4612   | 2                           | 2      | 2                                       | 2      |
| 4613   | 0                           |        | 0                                       |        |
| 4616   | 1                           | 1      | 1                                       | 1      |

| respid | ICS Terminal Dribble: Q28_1 | Q28a_1 | ICS Urgency with fear of leaking: Q29_1 | Q29a_1 |
|--------|-----------------------------|--------|-----------------------------------------|--------|
| 4617   | 0                           |        | 0                                       |        |
| 4620   | 0                           |        | 0                                       |        |
| 4621   | 0                           |        | 0                                       |        |
| 4622   | 2                           | 2      | 1                                       | 2      |
| 4624   | 1                           | 1      | 1                                       | 1      |
| 4625   | 1                           | 1      | 0                                       |        |
| 4627   | 2                           | 1      | 0                                       |        |
| 4628   | 3                           | 2      | 3                                       | 2      |
| 4629   | 0                           |        | 0                                       |        |
| 4630   | 1                           | 1      | 1                                       | 1      |
| 4632   | 0                           |        | 0                                       |        |
| 4634   | 1                           | 1      | 0                                       |        |
| 4635   | 2                           | 3      | 0                                       |        |
| 4636   | 1                           | 0      | 0                                       |        |
| 4637   | 1                           | 1      | 1                                       | 1      |
| 4638   | 2                           | 3      | 1                                       | 1      |
| 4639   | 1                           | 1      | 1                                       | 2      |
| 4641   | 0                           |        | 0                                       |        |
| 4643   | 0                           |        | 0                                       |        |
| 4645   | 0                           |        | 0                                       |        |
| 4646   | 1                           | 2      | 1                                       | 1      |
| 4647   | 0                           |        | 0                                       |        |
| 4648   | 0                           |        | 0                                       |        |
| 4649   | 0                           |        | 0                                       |        |
| 4650   | 2                           | 2      | 1                                       | 1      |
| 4651   | 1                           | 1      | 1                                       | 1      |
| 4652   | 1                           | 1      | 2                                       | 1      |
| 4653   | 0                           |        | 0                                       |        |
| 4657   | 0                           |        | 0                                       |        |
| 4660   | 0                           |        | 0                                       |        |
| 4661   | 0                           |        | 0                                       |        |
| 4662   | 0                           |        | 0                                       |        |



| respid | ICS Terminal Dribble: Q28_1 | Q28a_1 | ICS Urgency with fear of leaking: Q29_1 | Q29a_1 |
|--------|-----------------------------|--------|-----------------------------------------|--------|
| 4667   | 2                           | 1      | 1                                       | 1      |
| 4669   | 0                           |        | 0                                       |        |
| 4671   | 0                           |        | 0                                       |        |
| 4672   | 1                           | 1      | 0                                       |        |
| 4673   | 0                           |        | 0                                       |        |
| 4677   | 0                           |        | 0                                       |        |
| 4679   | 1                           | 1      | 0                                       |        |
| 4683   | 0                           |        | 0                                       |        |
| 4684   | 0                           |        | 0                                       |        |
| 4685   | 0                           |        | 0                                       |        |
| 4686   | 1                           | 0      | 0                                       |        |
| 4687   | 0                           |        | 0                                       |        |
| 4688   | 2                           | 1      | 0                                       |        |
| 4691   | 0                           |        | 0                                       |        |
| 4692   | 0                           |        | 0                                       |        |
| 4694   | 0                           |        | 0                                       |        |
| 4695   | 1                           | 0      | 1                                       | 2      |
| 4696   | 2                           | 1      | 0                                       |        |
| 4697   | 0                           |        | 0                                       |        |
| 4698   | 1                           | 3      | 2                                       | 2      |
| 4699   | 0                           |        | 0                                       |        |
| 4701   | 0                           |        | 0                                       |        |
| 4703   | 5                           | 1      | 5                                       | 1      |
| 4704   | 4                           | 4      | 5                                       | 4      |
| 4705   | 0                           |        | 0                                       |        |
| 4706   | 0                           |        | 0                                       |        |
| 4707   | 0                           |        | 0                                       |        |
| 4708   | 2                           | 1      | 1                                       | 0      |
| 4710   | 1                           | 0      | 0                                       |        |
| 4711   | 3                           | 2      | 2                                       | 1      |
| 4715   | 0                           |        | 0                                       |        |
| 4716   | 1                           | 0      | 0                                       |        |

| respid | ICS Terminal Dribble: Q28_1 | Q28a_1 | ICS Urgency with fear of leaking: Q29_1 | Q29a_1 |
|--------|-----------------------------|--------|-----------------------------------------|--------|
| 4717   | 0                           |        | 0                                       |        |
| 4718   | 1                           | 0      | 0                                       |        |
| 4722   | 1                           | 1      | 1                                       | 1      |
| 4727   | 2                           | 3      | 0                                       |        |
| 4728   | 5                           | 4      | 5                                       | 4      |
| 4729   | 0                           |        | 0                                       |        |
| 4732   | 1                           | 1      | 1                                       | 1      |
| 4733   | 0                           |        | 0                                       |        |
| 4734   | 3                           | 2      | 1                                       | 2      |
| 4735   | 1                           | 0      | 1                                       | 0      |
| 4737   | 0                           |        | 1                                       | 1      |
| 4738   | 1                           | 1      | 0                                       |        |
| 4740   | 0                           |        | 0                                       |        |
| 4741   | 2                           | 1      | 1                                       | 1      |
| 4743   | 0                           |        | 0                                       |        |
| 4746   | 1                           | 1      | 0                                       |        |
| 4750   | 1                           | 0      | 1                                       | 0      |
| 4752   | 1                           | 1      | 1                                       | 2      |
| 4753   | 1                           | 1      | 1                                       | 1      |
| 4754   | 3                           | 3      | 0                                       |        |
| 4755   | 3                           | 2      | 2                                       | 1      |
| 4758   | 0                           |        | 0                                       |        |
| 4766   | 0                           |        | 0                                       |        |
| 4767   | 1                           | 1      | 1                                       | 1      |
| 4768   | 1                           | 1      | 0                                       |        |
| 4769   | 2                           | 1      | 2                                       | 1      |
| 4771   | 5                           | 4      | 1                                       | 2      |
| 4772   | 0                           |        | 0                                       |        |
| 4773   | 0                           |        | 0                                       |        |
| 4774   | 1                           | 0      | 1                                       | 1      |
| 4776   | 3                           | 2      | 3                                       | 3      |
| 4777   | 0                           |        | 0                                       |        |

| respid | ICS Terminal Dribble: Q28_1 | Q28a_1 | ICS Urgency with fear of leaking: Q29_1 | Q29a_1 |
|--------|-----------------------------|--------|-----------------------------------------|--------|
| 4779   | 0                           |        | 0                                       |        |
| 4780   | 1                           | 1      | 1                                       | 1      |
| 4781   | 5                           | 2      | 0                                       |        |
| 4783   | 3                           | 2      | 2                                       | 3      |
| 4784   | 1                           | 1      | 1                                       | 1      |
| 4785   | 2                           | 2      | 1                                       | 1      |
| 4788   | 0                           |        | 0                                       |        |
| 4789   | 1                           | 1      | 3                                       | 3      |
| 4790   | 0                           |        | 0                                       |        |
| 4791   | 0                           |        | 0                                       |        |
| 4794   | 0                           |        | 0                                       |        |
| 4795   | 0                           |        | 0                                       |        |
| 4797   | 4                           | 1      | 0                                       |        |
| 4802   | 3                           | 2      | 2                                       | 2      |
| 4803   | 0                           |        | 1                                       | 1      |
| 4804   | 0                           |        | 0                                       |        |
| 4805   | 1                           | 0      | 0                                       |        |
| 4807   | 0                           |        | 0                                       |        |
| 4808   | 1                           | 2      | 1                                       | 2      |
| 4809   | 3                           | 3      | 3                                       | 3      |
| 4811   | 1                           | 0      | 0                                       |        |
| 4817   | 0                           |        | 0                                       |        |
| 4819   | 1                           | 0      | 0                                       |        |
| 4820   | 0                           |        | 0                                       |        |
| 4821   | 0                           |        | 0                                       |        |
| 4822   | 0                           |        | 0                                       |        |
| 4823   | 0                           |        | 0                                       |        |
| 4825   | 1                           | 2      | 0                                       |        |
| 4826   | 0                           |        | 0                                       |        |
| 4830   | 0                           |        | 0                                       |        |
| 4832   | 0                           |        | 0                                       |        |
| 4838   | 1                           | 1      | 1                                       | 1      |

| respid | ICS Terminal Dribble: Q28_1 | Q28a_1 | ICS Urgency with fear of leaking: Q29_1 | Q29a_1 |
|--------|-----------------------------|--------|-----------------------------------------|--------|
| 4840   | 0                           |        | 1                                       | 1      |
| 4841   | 0                           |        | 0                                       |        |
| 4843   | 1                           | 0      | 0                                       |        |
| 4845   | 2                           | 1      | 0                                       |        |
| 4846   | 3                           | 1      | 2                                       | 1      |
| 4848   | 3                           | 1      | 0                                       |        |
| 4853   | 0                           |        | 0                                       |        |
| 4854   | 1                           | 0      | 0                                       |        |
| 4859   | 1                           | 1      | 0                                       |        |
| 4861   | 0                           |        | 0                                       |        |
| 4864   | 2                           | 2      | 0                                       |        |
| 4867   | 0                           |        | 0                                       |        |
| 4870   | 1                           | 0      | 0                                       |        |
| 4872   | 1                           | 1      | 0                                       |        |
| 4873   | 2                           | 3      | 0                                       |        |
| 4874   | 1                           | 1      | 0                                       |        |
| 4878   | 0                           |        | 0                                       |        |
| 4880   | 0                           |        | 0                                       |        |
| 4881   | 2                           | 0      | 1                                       | 1      |
| 4882   | 1                           | 1      | 1                                       | 1      |
| 4883   | 0                           |        | 0                                       |        |
| 4885   | 0                           |        | 0                                       |        |
| 4889   | 0                           |        | 0                                       |        |
| 4890   | 0                           |        | 0                                       |        |
| 4891   | 1                           | 0      | 0                                       |        |
| 4894   | 1                           | 2      | 0                                       |        |
| 4895   | 4                           | 3      | 4                                       | 4      |
| 4896   | 0                           |        | 0                                       |        |
| 4897   | 0                           |        | 0                                       |        |
| 4898   | 1                           | 1      | 1                                       | 1      |
| 4899   | 0                           |        | 0                                       |        |
| 4900   | 2                           | 3      | 1                                       | 2      |

| respid | ICS Terminal Dribble: Q28_1 | Q28a_1 | ICS Urgency with fear of leaking: Q29_1 | Q29a_1 |
|--------|-----------------------------|--------|-----------------------------------------|--------|
| 4901   | 1                           | 1      | 0                                       |        |
| 4903   | 1                           | 1      | 0                                       |        |
| 4904   | 0                           |        | 0                                       |        |
| 4908   | 0                           |        | 0                                       |        |
| 4909   | 0                           |        | 0                                       |        |
| 4913   | 0                           |        | 0                                       |        |
| 4917   | 2                           | 0      | 0                                       |        |
| 4918   | 0                           |        | 0                                       |        |
| 4920   | 0                           |        | 0                                       |        |
| 4921   | 0                           |        | 1                                       | 0      |
| 4925   | 0                           |        | 0                                       |        |
| 4926   | 1                           | 0      | 0                                       |        |
| 4927   | 1                           | 0      | 0                                       |        |
| 4928   | 1                           | 0      | 0                                       |        |
| 4929   | 1                           | 0      | 0                                       |        |
| 4930   | 0                           |        | 1                                       | 3      |
| 4931   | 2                           | 1      | 1                                       | 1      |
| 4932   | 2                           | 2      | 2                                       | 2      |
| 4933   | 0                           |        | 0                                       |        |
| 4934   | 0                           |        | 0                                       |        |
| 5934   | 0                           |        | 0                                       |        |
| 5935   | 4                           | 2      | 0                                       |        |
| 5936   | 0                           |        | 0                                       |        |
| 5938   | 0                           |        | 0                                       |        |
| 5939   | 1                           | 1      | 1                                       | 1      |
| 5940   | 3                           | 2      | 3                                       | 2      |
| 5942   | 0                           |        | 1                                       | 2      |
| 5944   | 2                           | 2      | 1                                       | 1      |
| 5951   | 4                           | 4      | 0                                       |        |
| 5952   | 0                           |        | 0                                       |        |
| 5954   | 0                           |        | 0                                       |        |
| 5956   | 0                           |        | 0                                       |        |

| respid | ICS Terminal Dribble: Q28_1 | Q28a_1 | ICS Urgency with fear of leaking: Q29_1 | Q29a_1 |
|--------|-----------------------------|--------|-----------------------------------------|--------|
| 5957   | 2                           | 1      | 0                                       |        |
| 5958   | 1                           | 1      | 0                                       |        |
| 5959   | 1                           | 1      | 1                                       | 1      |
| 5960   | 0                           |        | 0                                       |        |
| 5963   | 0                           |        | 0                                       |        |
| 5966   | 0                           |        | 0                                       |        |
| 5968   | 1                           | 1      | 0                                       |        |
| 5974   | 0                           |        | 0                                       |        |
| 5975   | 0                           |        | 0                                       |        |
| 5976   | 0                           |        | 1                                       | 1      |
| 5977   | 0                           |        | 0                                       |        |
| 5978   | 0                           |        | 0                                       |        |
| 5979   | 0                           |        | 0                                       |        |
| 5983   | 0                           |        | 0                                       |        |
| 5984   | 2                           | 1      | 0                                       |        |
| 5990   | 0                           |        | 0                                       |        |
| 5991   | 0                           |        | 0                                       |        |
| 5992   | 0                           |        | 0                                       |        |
| 5993   | 0                           |        | 0                                       |        |
| 5994   | 0                           |        | 0                                       |        |
| 5996   | 0                           |        | 0                                       |        |
| 6001   | 1                           | 2      | 2                                       | 2      |
| 6003   | 0                           |        | 0                                       |        |
| 6004   | 4                           | 4      | 3                                       | 3      |
| 6005   | 2                           | 1      | 0                                       |        |
| 6006   | 0                           |        | 0                                       |        |
| 6008   | 4                           | 2      | 3                                       | 2      |
| 6009   | 1                           | 2      | 0                                       |        |
| 6014   | 0                           |        | 0                                       |        |
| 6016   | 1                           | 1      | 0                                       |        |
| 6017   | 1                           | 2      | 1                                       | 2      |
| 6018   | 1                           | 1      | 0                                       |        |

| respid | ICS Terminal Dribble: Q28_1 | Q28a_1 | ICS Urgency with fear of leaking: Q29_1 | Q29a_1 |
|--------|-----------------------------|--------|-----------------------------------------|--------|
| 6020   | 0                           |        | 1                                       | 1      |
| 6021   | 0                           |        | 0                                       |        |
| 6024   | 0                           |        | 0                                       |        |
| 6025   | 1                           | 1      | 0                                       |        |
| 6026   | 0                           |        | 0                                       |        |
| 6032   | 1                           | 2      | 0                                       |        |
| 6035   | 0                           |        | 0                                       |        |
| 6038   | 2                           | 1      | 1                                       | 1      |
| 6043   | 2                           | 2      | 2                                       | 1      |
| 6044   | 0                           |        | 0                                       |        |
| 6046   | 1                           | 0      | 1                                       | 1      |
| 6047   | 0                           |        | 0                                       |        |
| 6048   | 0                           |        | 0                                       |        |
| 6050   | 3                           | 2      | 1                                       | 1      |
| 6051   | 0                           |        | 0                                       |        |
| 6053   | 0                           |        | 0                                       |        |
| 6054   | 3                           | 3      | 1                                       | 1      |
| 6056   | 0                           |        | 0                                       |        |
| 6058   | 0                           |        | 1                                       | 1      |
| 6060   | 4                           | 2      | 0                                       |        |
| 6061   | 0                           |        | 0                                       |        |
| 6062   | 1                           | 0      | 0                                       |        |
| 6067   | 0                           |        | 0                                       |        |
| 6070   | 0                           |        | 0                                       |        |
| 6074   | 0                           |        | 1                                       | 1      |
| 6076   | 0                           |        | 0                                       |        |
| 6078   | 0                           |        | 0                                       |        |
| 6081   | 0                           |        | 0                                       |        |
| 6085   | 0                           |        | 0                                       |        |
| 6088   | 0                           |        | 0                                       |        |
| 6092   | 2                           | 1      | 0                                       |        |
| 6095   | 0                           |        | 0                                       |        |

| respid | ICS Terminal Dribble: Q28_1 | Q28a_1 | ICS Urgency with fear of leaking: Q29_1 | Q29a_1 |
|--------|-----------------------------|--------|-----------------------------------------|--------|
| 6098   | 0                           |        | 0                                       |        |
| 6101   | 0                           |        | 0                                       |        |
| 6102   | 1                           | 1      | 0                                       |        |
| 6105   | 0                           |        | 0                                       |        |
| 6106   | 2                           | 2      | 0                                       |        |
| 6107   | 0                           |        | 0                                       |        |
| 6111   | 0                           |        | 0                                       |        |
| 6112   | 0                           |        | 0                                       |        |
| 6113   | 3                           | 2      | 2                                       | 1      |
| 6115   | 1                           | 2      | 0                                       |        |
| 6116   | 0                           |        | 0                                       |        |
| 6117   | 1                           | 3      | 0                                       |        |
| 6124   | 3                           | 3      | 2                                       | 1      |
| 6125   | 0                           |        | 0                                       |        |
| 6128   | 0                           |        | 0                                       |        |
| 6133   | 0                           |        | 0                                       |        |
| 6134   | 0                           |        | 1                                       | 1      |
| 6135   | 5                           | 3      | 0                                       |        |
| 6138   | 1                           | 2      | 2                                       | 3      |
| 6140   | 0                           |        | 0                                       |        |
| 6143   | 0                           |        | 0                                       |        |
| 6147   | 0                           |        | 0                                       |        |
| 6154   | 0                           |        | 0                                       |        |
| 6162   | 0                           |        | 0                                       |        |
| 6165   | 0                           |        | 0                                       |        |
| 6166   | 2                           | 1      | 1                                       | 1      |
| 6173   | 1                           | 1      | 0                                       |        |
| 6180   | 2                           | 2      | 1                                       | 1      |
| 6184   | 2                           | 3      | 3                                       | 3      |
| 6185   | 1                           | 1      | 0                                       |        |
| 6186   | 0                           |        | 0                                       |        |
| 6188   | 1                           | 1      | 1                                       | 1      |



| respid | ICS Terminal Dribble: Q28_1 | Q28a_1 | ICS Urgency with fear of leaking: Q29_1 | Q29a_1 |
|--------|-----------------------------|--------|-----------------------------------------|--------|
| 6192   | 3                           | 3      | 4                                       | 3      |
| 6194   | 0                           |        | 0                                       |        |
| 6195   | 0                           |        | 0                                       |        |
| 6196   | 0                           |        | 0                                       |        |
| 6199   | 1                           | 1      | 0                                       |        |
| 6200   | 0                           |        | 0                                       |        |
| 6201   | 0                           |        | 0                                       |        |
| 6202   | 0                           |        | 0                                       |        |
| 6203   | 0                           |        | 0                                       |        |
| 6205   | 0                           |        | 0                                       |        |
| 6210   | 1                           | 1      | 1                                       | 1      |
| 6212   | 1                           | 1      | 1                                       | 1      |
| 6216   | 3                           | 2      | 1                                       | 1      |
| 6218   | 2                           | 2      | 0                                       |        |
| 6221   | 3                           | 2      | 0                                       |        |
| 6224   | 0                           |        | 0                                       |        |
| 6225   | 1                           | 1      | 0                                       |        |
| 6227   | 0                           |        | 0                                       |        |
| 6230   | 0                           |        | 0                                       |        |
| 6231   | 0                           |        | 0                                       |        |
| 6233   | 0                           |        | 0                                       |        |
| 6234   | 0                           |        | 0                                       |        |
| 6235   | 0                           |        | 0                                       |        |
| 6237   | 0                           |        | 0                                       |        |
| 6240   | 0                           |        | 0                                       |        |
| 6248   | 0                           |        | 1                                       | 1      |
| 6249   | 0                           |        | 0                                       |        |
| 6252   | 0                           |        | 1                                       | 2      |
| 6254   | 1                           | 0      | 0                                       |        |
| 6269   | 1                           | 1      | 0                                       |        |
| 6304   | 0                           |        | 0                                       |        |
| 6334   | 0                           |        | 0                                       |        |

| respid | ICS Terminal Dribble: Q28_1 | Q28a_1 | ICS Urgency with fear of leaking: Q29_1 | Q29a_1 |
|--------|-----------------------------|--------|-----------------------------------------|--------|
| 6341   | 5                           | 3      | 2                                       | 2      |
| 6350   | 2                           | 1      | 2                                       | 2      |
| 6370   | 0                           |        | 0                                       |        |
| 6384   | 0                           |        | 0                                       |        |
| 6400   | 0                           |        | 0                                       |        |
| 6418   | 0                           |        | 0                                       |        |
| 6467   | 1                           | 1      | 0                                       |        |
| 6469   | 0                           |        | 0                                       |        |
| 6474   | 1                           | 1      | 0                                       |        |
| 6475   | 0                           |        | 0                                       |        |
| 6476   | 2                           | 1      | 2                                       | 1      |
| 6477   | 1                           | 0      | 0                                       |        |
| 6480   | 0                           |        | 0                                       |        |
| 6481   | 3                           | 1      | 1                                       | 0      |
| 6485   | 0                           |        | 0                                       |        |
| 6488   | 1                           | 1      | 1                                       | 2      |
| 6495   | 4                           | 3      | 3                                       | 2      |
| 6499   | 2                           | 1      | 1                                       | 1      |
| 6500   | 1                           | 1      | 1                                       | 1      |
| 6504   | 2                           | 1      | 0                                       |        |
| 6507   | 0                           |        | 0                                       |        |
| 6512   | 0                           |        | 0                                       |        |
| 6525   | 0                           |        | 3                                       | 2      |
| 6532   | 0                           |        | 0                                       |        |
| 6535   | 0                           |        | 0                                       |        |
| 6546   | 0                           |        | 0                                       |        |
| 6551   | 3                           | 3      | 3                                       | 2      |
| 6556   | 0                           |        | 0                                       |        |
| 6566   | 0                           |        | 0                                       |        |
| 6569   | 0                           |        | 0                                       |        |
| 6574   | 0                           |        | 0                                       |        |
| 6576   | 5                           | 1      | 1                                       | 1      |

| respid | ICS Terminal Dribble: Q28_1 | Q28a_1 | ICS Urgency with fear of leaking: Q29_1 | Q29a_1 |
|--------|-----------------------------|--------|-----------------------------------------|--------|
| 6580   | 0                           |        | 0                                       |        |
| 6584   | 0                           |        | 0                                       |        |
| 6585   | 1                           | 1      | 1                                       | 1      |
| 6589   | 0                           |        | 0                                       |        |
| 6590   | 0                           |        | 0                                       |        |
| 6598   | 1                           | 1      | 0                                       |        |
| 6603   | 0                           |        | 0                                       |        |
| 6618   | 0                           |        | 0                                       |        |
| 6630   | 0                           |        | 0                                       |        |
| 6636   | 1                           | 0      | 0                                       |        |
| 6649   | 0                           |        | 0                                       |        |
| 6675   | 3                           | 2      | 0                                       |        |
| 6678   | 0                           |        | 0                                       |        |
| 6681   | 0                           |        | 0                                       |        |
| 6684   | 1                           | 1      | 1                                       | 1      |
| 6688   | 0                           |        | 0                                       |        |
| 6691   | 0                           |        | 0                                       |        |
| 6694   | 1                           | 1      | 1                                       | 1      |
| 6696   | 0                           |        | 0                                       |        |
| 6720   | 3                           | 3      | 3                                       | 4      |
| 6722   | 4                           | 3      | 4                                       | 4      |
| 6724   | 1                           | 0      | 0                                       |        |
| 6725   | 0                           |        | 0                                       |        |
| 6727   | 0                           |        | 0                                       |        |
| 6734   | 1                           | 1      | 0                                       |        |
| 6739   | 4                           | 3      | 0                                       |        |
| 6743   | 1                           | 2      | 2                                       | 2      |
| 6749   | 0                           |        | 0                                       |        |
| 6756   | 0                           |        | 0                                       |        |
| 6764   | 1                           | 1      | 0                                       |        |
| 6765   | 0                           |        | 0                                       |        |
| 6768   | 1                           | 1      | 0                                       |        |

| respid | ICS Terminal Dribble: Q28_1 | Q28a_1 | ICS Urgency with fear of leaking: Q29_1 | Q29a_1 |
|--------|-----------------------------|--------|-----------------------------------------|--------|
| 6773   | 0                           |        | 0                                       |        |
| 6775   | 1                           | 1      | 0                                       |        |
| 6777   | 0                           |        | 0                                       |        |
| 6779   | 0                           |        | 0                                       |        |
| 6790   | 0                           |        | 1                                       | 1      |
| 6797   | 0                           |        | 0                                       |        |
| 6798   | 0                           |        | 0                                       |        |
| 6808   | 0                           |        | 0                                       |        |
| 6810   | 0                           |        | 0                                       |        |
| 6811   | 3                           | 2      | 2                                       | 2      |
| 6812   | 0                           |        | 0                                       |        |
| 6814   | 1                           | 1      | 0                                       |        |
| 6819   | 2                           | 1      | 0                                       |        |
| 6820   | 2                           | 2      | 2                                       | 1      |
| 6832   | 0                           |        | 0                                       |        |
| 6854   | 2                           | 0      | 0                                       |        |
| 6855   | 0                           |        | 0                                       |        |
| 6857   | 0                           |        | 0                                       |        |
| 6858   | 1                           | 2      | 0                                       |        |
| 6859   | 0                           |        | 0                                       |        |
| 6860   | 1                           | 0      | 0                                       |        |
| 6862   | 0                           |        | 0                                       |        |
| 6879   | 0                           |        | 0                                       |        |
| 6893   | 0                           |        | 0                                       |        |
| 6898   | 0                           |        | 0                                       |        |
| 6902   | 4                           | 2      | 1                                       | 1      |
| 6903   | 4                           | 2      | 2                                       | 2      |
| 6907   | 2                           | 2      | 2                                       | 2      |
| 6908   | 0                           |        | 0                                       |        |
| 6912   | 0                           |        | 0                                       |        |
| 6915   | 3                           | 2      | 1                                       | 1      |
| 6916   | 1                           | 1      | 1                                       | 1      |

| respid | ICS Terminal Dribble: Q28_1 | Q28a_1 | ICS Urgency with fear of leaking: Q29_1 | Q29a_1 |
|--------|-----------------------------|--------|-----------------------------------------|--------|
| 6917   | 0                           |        | 1                                       | 1      |
| 6923   | 0                           |        | 0                                       |        |
| 6934   | 1                           | 0      | 0                                       |        |
| 6937   | 0                           |        | 0                                       |        |
| 6945   | 3                           | 3      | 0                                       |        |
| 6954   | 0                           |        | 0                                       |        |
| 6956   | 1                           | 1      | 0                                       |        |
| 6958   | 0                           |        | 0                                       |        |
| 6961   | 0                           |        | 0                                       |        |
| 6963   | 1                           | 1      | 0                                       |        |
| 6964   | 0                           |        | 0                                       |        |
| 6976   | 0                           |        | 0                                       |        |
| 6977   | 0                           |        | 0                                       |        |
| 7000   | 1                           | 3      | 0                                       |        |
| 7001   | 0                           |        | 0                                       |        |
| 7005   | 1                           | 1      | 0                                       |        |
| 7006   | 0                           |        | 0                                       |        |
| 7008   | 0                           |        | 5                                       | 4      |
| 7009   | 0                           |        | 0                                       |        |
| 7019   | 1                           | 1      | 0                                       |        |
| 7021   | 0                           |        | 0                                       |        |
| 7026   | 1                           | 1      | 1                                       | 1      |
| 7030   | 3                           | 3      | 3                                       | 3      |
| 7034   | 0                           |        | 0                                       |        |
| 7039   | 1                           | 1      | 1                                       | 2      |
| 7041   | 0                           |        | 0                                       |        |
| 7047   | 0                           |        | 0                                       |        |
| 7051   | 1                           | 0      | 0                                       |        |
| 7052   | 1                           | 1      | 1                                       | 1      |
| 7059   | 0                           |        | 0                                       |        |
| 7062   | 2                           | 1      | 1                                       | 1      |
| 7065   | 0                           |        | 0                                       |        |

| respid | ICS Terminal Dribble: Q28_1 | Q28a_1 | ICS Urgency with fear of leaking: Q29_1 | Q29a_1 |
|--------|-----------------------------|--------|-----------------------------------------|--------|
| 7066   | 0                           |        | 0                                       |        |
| 7069   | 0                           |        | 0                                       |        |
| 7070   | 0                           |        | 0                                       |        |
| 7073   | 0                           |        | 0                                       |        |
| 7078   | 0                           |        | 0                                       |        |
| 7083   | 0                           |        | 0                                       |        |
| 7084   | 4                           | 4      | 4                                       | 3      |
| 7085   | 0                           |        | 0                                       |        |
| 7088   | 3                           | 3      | 3                                       | 2      |
| 7090   | 2                           | 1      | 2                                       | 2      |
| 7095   | 1                           | 1      | 0                                       |        |
| 7100   | 0                           |        | 0                                       |        |
| 7102   | 4                           | 1      | 1                                       | 1      |
| 7103   | 0                           |        | 0                                       |        |
| 7108   | 1                           | 0      | 0                                       |        |
| 7109   | 0                           |        | 0                                       |        |
| 7110   | 0                           |        | 0                                       |        |
| 7112   | 0                           |        | 0                                       |        |
| 7114   | 1                           | 1      | 0                                       |        |
| 7116   | 0                           |        | 0                                       |        |
| 7117   | 1                           | 2      | 0                                       |        |
| 7118   | 0                           |        | 0                                       |        |
| 7120   | 3                           | 3      | 3                                       | 2      |
| 7124   | 1                           | 0      | 0                                       |        |
| 7130   | 1                           | 1      | 0                                       |        |
| 7135   | 0                           |        | 0                                       |        |
| 7137   | 2                           | 3      | 2                                       | 2      |
| 7140   | 1                           | 0      | 0                                       |        |
| 7141   | 1                           | 0      | 0                                       |        |
| 7148   | 0                           |        | 0                                       |        |
| 7152   | 0                           |        | 0                                       |        |
| 7154   | 0                           |        | 0                                       |        |

| respid | ICS Terminal Dribble: Q28_1 | Q28a_1 | ICS Urgency with fear of leaking: Q29_1 | Q29a_1 |
|--------|-----------------------------|--------|-----------------------------------------|--------|
| 7156   | 1                           | 1      | 0                                       |        |
| 7158   | 0                           |        | 0                                       |        |
| 7159   | 0                           |        | 0                                       |        |
| 7161   | 0                           |        | 0                                       |        |
| 7164   | 0                           |        | 0                                       |        |
| 7166   | 0                           |        | 0                                       |        |
| 7167   | 0                           |        | 0                                       |        |
| 7168   | 0                           |        | 0                                       |        |
| 7170   | 0                           |        | 0                                       |        |
| 7171   | 1                           | 0      | 0                                       |        |
| 7172   | 0                           |        | 0                                       |        |
| 7173   | 1                           | 1      | 0                                       |        |
| 7175   | 0                           |        | 1                                       | 1      |
| 7176   | 3                           | 2      | 2                                       | 1      |
| 7180   | 0                           |        | 0                                       |        |
| 7183   | 1                           | 0      | 0                                       |        |
| 7189   | 0                           |        | 0                                       |        |
| 7193   | 0                           |        | 0                                       |        |
| 7194   | 0                           |        | 0                                       |        |
| 7195   | 0                           |        | 0                                       |        |
| 7200   | 0                           |        | 0                                       |        |
| 7201   | 2                           | 2      | 2                                       | 2      |
| 7205   | 3                           | 3      | 2                                       | 2      |
| 7207   | 0                           |        | 0                                       |        |
| 7208   | 0                           |        | 0                                       |        |
| 7210   | 0                           |        | 0                                       |        |
| 7211   | 0                           |        | 0                                       |        |
| 7217   | 0                           |        | 0                                       |        |
| 7218   | 0                           |        | 0                                       |        |
| 7220   | 0                           |        | 0                                       |        |
| 7225   | 0                           |        | 0                                       |        |
| 7228   | 1                           | 1      | 0                                       |        |

| respid | ICS Terminal Dribble: Q28_1 | Q28a_1 | ICS Urgency with fear of leaking: Q29_1 | Q29a_1 |
|--------|-----------------------------|--------|-----------------------------------------|--------|
| 7230   | 0                           |        | 1                                       | 1      |
| 7233   | 1                           | 1      | 0                                       |        |
| 7234   | 1                           | 1      | 0                                       |        |
| 7235   | 0                           |        | 0                                       |        |
| 7236   | 0                           |        | 0                                       |        |
| 7241   | 5                           | 2      | 0                                       |        |
| 7251   | 1                           | 0      | 0                                       |        |
| 7253   | 1                           | 1      | 0                                       |        |
| 7259   | 3                           | 1      | 0                                       |        |
| 7260   | 1                           | 1      | 1                                       | 1      |
| 7261   | 3                           | 2      | 2                                       | 1      |
| 7263   | 0                           |        | 0                                       |        |
| 7265   | 0                           |        | 0                                       |        |
| 7268   | 0                           |        | 0                                       |        |
| 7269   | 0                           |        | 0                                       |        |
| 7271   | 3                           | 2      | 3                                       | 2      |
| 7276   | 2                           | 2      | 5                                       | 3      |
| 7280   | 3                           | 2      | 0                                       |        |
| 7283   | 0                           |        | 0                                       |        |
| 7284   | 1                           | 2      | 0                                       |        |
| 7286   | 0                           |        | 0                                       |        |
| 7287   | 0                           |        | 0                                       |        |
| 7288   | 1                           | 1      | 1                                       | 1      |
| 7294   | 0                           |        | 1                                       | 1      |
| 7295   | 0                           |        | 0                                       |        |
| 7296   | 0                           |        | 0                                       |        |
| 7297   | 1                           | 0      | 1                                       | 1      |
| 7299   | 0                           |        | 0                                       |        |
| 7300   | 0                           |        | 1                                       | 1      |
| 7301   | 1                           | 1      | 0                                       |        |
| 7302   | 0                           |        | 0                                       |        |
| 7306   | 0                           |        | 0                                       |        |



| respid | ICS Terminal Dribble: Q28_1 | Q28a_1 | ICS Urgency with fear of leaking: Q29_1 | Q29a_1 |
|--------|-----------------------------|--------|-----------------------------------------|--------|
| 7313   | 5                           | 4      | 2                                       | 3      |
| 7315   | 1                           | 1      | 1                                       | 1      |
| 7317   | 0                           |        | 0                                       |        |
| 7321   | 0                           |        | 0                                       |        |
| 7322   | 1                           | 0      | 0                                       |        |
| 7323   | 2                           | 2      | 0                                       |        |
| 7333   | 4                           | 3      | 4                                       | 3      |
| 7335   | 5                           | 3      | 5                                       | 3      |
| 7336   | 1                           | 0      | 0                                       |        |
| 7337   | 0                           |        | 0                                       |        |
| 7338   | 0                           |        | 0                                       |        |
| 7340   | 1                           | 1      | 0                                       |        |
| 7341   | 2                           | 2      | 0                                       |        |
| 7342   | 0                           |        | 0                                       |        |
| 7344   | 0                           |        | 0                                       |        |
| 7346   | 1                           | 2      | 0                                       |        |
| 7347   | 0                           |        | 0                                       |        |
| 7349   | 0                           |        | 2                                       | 2      |
| 7352   | 1                           | 1      | 0                                       |        |
| 7353   | 1                           | 0      | 0                                       |        |
| 7355   | 0                           |        | 0                                       |        |
| 7356   | 0                           |        | 0                                       |        |
| 7360   | 2                           | 4      | 3                                       | 3      |
| 7371   | 0                           |        | 0                                       |        |
| 7376   | 1                           | 2      | 1                                       | 2      |
| 7379   | 0                           |        | 0                                       |        |
| 7381   | 1                           | 1      | 0                                       |        |
| 7386   | 4                           | 2      | 1                                       | 2      |
| 7389   | 0                           |        | 0                                       |        |
| 7390   | 5                           | 4      | 3                                       | 4      |
| 7393   | 0                           |        | 0                                       |        |
| 7394   | 0                           |        | 0                                       |        |

| respid | ICS Terminal Dribble: Q28_1 | Q28a_1 | ICS Urgency with fear of leaking: Q29_1 | Q29a_1 |
|--------|-----------------------------|--------|-----------------------------------------|--------|
| 7396   | 0                           |        | 1                                       | 1      |
| 7400   | 2                           | 1      | 1                                       | 2      |
| 7401   | 1                           | 1      | 0                                       |        |
| 7403   | 1                           | 1      | 0                                       |        |
| 7406   | 1                           | 4      | 0                                       |        |
| 7409   | 0                           |        | 0                                       |        |
| 7410   | 2                           | 2      | 1                                       | 3      |
| 7412   | 2                           | 2      | 2                                       | 2      |
| 7414   | 0                           |        | 0                                       |        |
| 7415   | 0                           |        | 0                                       |        |
| 7417   | 1                           | 1      | 1                                       | 1      |
| 7421   | 3                           | 3      | 4                                       | 3      |
| 7425   | 1                           | 1      | 1                                       | 1      |
| 7430   | 1                           | 0      | 1                                       | 0      |
| 7432   | 1                           | 1      | 0                                       |        |
| 7433   | 0                           |        | 0                                       |        |
| 7442   | 1                           | 0      | 1                                       | 1      |
| 7445   | 0                           |        | 0                                       |        |
| 7446   | 0                           |        | 0                                       |        |
| 7449   | 0                           |        | 0                                       |        |
| 7450   | 0                           |        | 0                                       |        |
| 7451   | 0                           |        | 0                                       |        |
| 7459   | 1                           | 0      | 0                                       |        |
| 7462   | 3                           | 3      | 2                                       | 3      |
| 7463   | 0                           |        | 0                                       |        |
| 7469   | 0                           |        | 0                                       |        |
| 7482   | 0                           |        | 0                                       |        |
| 7484   | 0                           |        | 0                                       |        |
| 7486   | 0                           |        | 0                                       |        |
| 7496   | 0                           |        | 0                                       |        |
| 7502   | 1                           | 0      | 0                                       |        |
| 7504   | 1                           | 1      | 1                                       | 1      |

| respid | ICS Terminal Dribble: Q28_1 | Q28a_1 | ICS Urgency with fear of leaking: Q29_1 | Q29a_1 |
|--------|-----------------------------|--------|-----------------------------------------|--------|
| 7509   | 5                           | 4      | 3                                       | 3      |
| 7513   | 1                           | 2      | 1                                       | 3      |
| 7514   | 0                           |        | 0                                       |        |
| 7520   | 0                           |        | 0                                       |        |
| 7523   | 0                           |        | 0                                       |        |
| 7526   | 0                           |        | 0                                       |        |
| 7529   | 3                           | 2      | 0                                       |        |
| 7534   | 0                           |        | 0                                       |        |
| 7536   | 3                           | 3      | 1                                       | 0      |
| 7540   | 1                           | 0      | 0                                       |        |
| 7541   | 2                           | 1      | 2                                       | 1      |
| 7542   | 0                           |        | 0                                       |        |
| 7555   | 0                           |        | 0                                       |        |
| 7566   | 5                           | 2      | 0                                       |        |
| 7568   | 0                           |        | 0                                       |        |
| 7570   | 2                           | 2      | 2                                       | 2      |
| 7572   | 0                           |        | 0                                       |        |
| 7573   | 3                           | 4      | 2                                       | 1      |
| 7576   | 0                           |        | 0                                       |        |
| 7577   | 0                           |        | 0                                       |        |
| 7583   | 0                           |        | 0                                       |        |
| 7584   | 0                           |        | 0                                       |        |
| 7585   | 3                           | 4      | 4                                       | 3      |
| 7586   | 0                           |        | 1                                       | 1      |
| 7587   | 0                           |        | 0                                       |        |
| 7588   | 0                           |        | 0                                       |        |
| 7596   | 1                           | 1      | 0                                       |        |
| 7599   | 0                           |        | 0                                       |        |
| 7600   | 2                           | 3      | 3                                       | 2      |
| 7602   | 0                           |        | 0                                       |        |
| 7613   | 5                           | 0      | 0                                       |        |
| 7620   | 1                           | 1      | 0                                       |        |

| respid | ICS Terminal Dribble: Q28_1 | Q28a_1 | ICS Urgency with fear of leaking: Q29_1 | Q29a_1 |
|--------|-----------------------------|--------|-----------------------------------------|--------|
| 7623   | 0                           |        | 0                                       |        |
| 7635   | 5                           | 1      | 0                                       |        |
| 7636   | 0                           |        | 0                                       |        |
| 7643   | 1                           | 1      | 1                                       | 1      |
| 7645   | 0                           |        | 1                                       | 2      |
| 7649   | 3                           | 3      | 3                                       | 3      |
| 7651   | 0                           |        | 0                                       |        |
| 7652   | 3                           | 4      | 2                                       | 2      |
| 7655   | 0                           |        | 0                                       |        |
| 7657   | 0                           |        | 0                                       |        |
| 7675   | 0                           |        | 0                                       |        |
| 7676   | 1                           | 1      | 0                                       |        |
| 7684   | 0                           |        | 0                                       |        |
| 7693   | 2                           | 1      | 1                                       | 0      |
| 7694   | 4                           | 4      | 4                                       | 4      |
| 7695   | 0                           |        | 0                                       |        |
| 7696   | 4                           | 4      | 4                                       | 4      |
| 7698   | 0                           |        | 0                                       |        |
| 7700   | 0                           |        | 0                                       |        |
| 7701   | 0                           |        | 0                                       |        |
| 7704   | 0                           |        | 0                                       |        |
| 7709   | 1                           | 1      | 0                                       |        |
| 7713   | 1                           | 0      | 0                                       |        |
| 7714   | 0                           |        | 0                                       |        |
| 7718   | 4                           | 4      | 4                                       | 4      |
| 7720   | 0                           |        | 0                                       |        |
| 7721   | 1                           | 1      | 1                                       | 1      |
| 7722   | 0                           |        | 0                                       |        |
| 7724   | 5                           | 4      | 2                                       | 2      |
| 7728   | 0                           |        | 0                                       |        |
| 7731   | 1                           | 1      | 0                                       |        |
| 7735   | 0                           |        | 0                                       |        |

| respid | ICS Terminal Dribble: Q28_1 | Q28a_1 | ICS Urgency with fear of leaking: Q29_1 | Q29a_1 |
|--------|-----------------------------|--------|-----------------------------------------|--------|
| 7737   | 1                           | 1      | 0                                       |        |
| 7741   | 1                           | 1      | 0                                       |        |
| 7746   | 0                           |        | 0                                       |        |
| 7747   | 0                           |        | 0                                       |        |
| 7748   | 0                           |        | 0                                       |        |
| 7750   | 0                           |        | 0                                       |        |
| 7754   | 0                           |        | 0                                       |        |
| 7755   | 1                           | 1      | 0                                       |        |
| 7762   | 0                           |        | 0                                       |        |
| 7764   | 0                           |        | 0                                       |        |
| 7766   | 0                           |        | 0                                       |        |
| 7768   | 0                           |        | 2                                       | 1      |
| 7770   | 1                           | 2      | 0                                       |        |
| 7771   | 0                           |        | 0                                       |        |
| 7777   | 0                           |        | 0                                       |        |
| 7778   | 0                           |        | 0                                       |        |
| 7783   | 3                           | 3      | 3                                       | 4      |
| 7789   | 0                           |        | 0                                       |        |
| 7790   | 1                           | 1      | 0                                       |        |
| 7795   | 3                           | 1      | 0                                       |        |
| 7807   | 0                           |        | 0                                       |        |
| 7808   | 4                           | 3      | 1                                       | 1      |
| 7818   | 0                           |        | 0                                       |        |
| 7820   | 0                           |        | 0                                       |        |
| 7831   | 0                           |        | 0                                       |        |
| 7832   | 1                           | 0      | 0                                       |        |
| 7837   | 2                           | 2      | 0                                       |        |
| 7841   | 3                           | 3      | 3                                       | 3      |
| 7845   | 3                           | 2      | 2                                       | 2      |
| 7853   | 1                           | 1      | 0                                       |        |
| 7854   | 0                           |        | 0                                       |        |
| 7862   | 3                           | 3      | 3                                       | 3      |

| respid | ICS Terminal Dribble: Q28_1 | Q28a_1 | ICS Urgency with fear of leaking: Q29_1 | Q29a_1 |
|--------|-----------------------------|--------|-----------------------------------------|--------|
| 7871   | 0                           |        | 0                                       |        |
| 7875   | 1                           | 1      | 0                                       |        |
| 7880   | 0                           |        | 1                                       | 1      |
| 7881   | 0                           |        | 0                                       |        |
| 7883   | 1                           | 3      | 0                                       |        |
| 7896   | 0                           |        | 0                                       |        |
| 7905   | 0                           |        | 0                                       |        |
| 7919   | 0                           |        | 0                                       |        |
| 7928   | 3                           | 2      | 0                                       |        |
| 7929   | 0                           |        | 0                                       |        |
| 7938   | 2                           | 2      | 1                                       | 1      |
| 7940   | 1                           | 1      | 0                                       |        |
| 7941   | 2                           | 1      | 0                                       |        |
| 7952   | 0                           |        | 0                                       |        |
| 7962   | 0                           |        | 0                                       |        |
| 7968   | 0                           |        | 0                                       |        |
| 7972   | 1                           | 1      | 0                                       |        |
| 7983   | 3                           | 2      | 2                                       | 1      |
| 7990   | 1                           | 1      | 0                                       |        |
| 7993   | 0                           |        | 0                                       |        |
| 8005   | 0                           |        | 0                                       |        |
| 8008   | 0                           |        | 0                                       |        |
| 8012   | 1                           | 0      | 0                                       |        |
| 8021   | 0                           |        | 0                                       |        |
| 8024   | 0                           |        | 1                                       | 0      |
| 8043   | 0                           |        | 0                                       |        |
| 8051   | 0                           |        | 1                                       | 0      |
| 8056   | 1                           | 1      | 0                                       |        |
| 8061   | 1                           | 2      | 0                                       |        |
| 8066   | 0                           |        | 0                                       |        |
| 8069   | 1                           | 1      | 1                                       | 1      |
| 8071   | 0                           |        | 0                                       |        |

| respid | ICS Terminal Dribble: Q28_1 | Q28a_1 | ICS Urgency with fear of leaking: Q29_1 | Q29a_1 |
|--------|-----------------------------|--------|-----------------------------------------|--------|
| 8072   | 0                           |        | 0                                       |        |
| 8076   | 2                           | 1      | 0                                       |        |
| 8080   | 1                           | 1      | 1                                       | 1      |
| 8083   | 1                           | 1      | 0                                       |        |
| 8093   | 2                           | 2      | 1                                       | 3      |
| 8095   | 2                           | 2      | 0                                       |        |
| 8099   | 0                           |        | 0                                       |        |
| 8100   | 3                           | 0      | 3                                       | 1      |
| 8103   | 0                           |        | 0                                       |        |
| 8104   | 2                           | 2      | 0                                       |        |
| 8115   | 5                           | 4      | 0                                       |        |
| 8121   | 0                           |        | 0                                       |        |
| 8128   | 0                           |        | 0                                       |        |
| 8130   | 0                           |        | 0                                       |        |
| 8131   | 1                           | 1      | 0                                       |        |
| 8133   | 0                           |        | 0                                       |        |
| 8143   | 1                           | 1      | 0                                       |        |
| 8144   | 0                           |        | 0                                       |        |
| 8146   | 0                           |        | 0                                       |        |
| 8148   | 0                           |        | 0                                       |        |
| 8157   | 0                           |        | 0                                       |        |
| 8164   | 0                           |        | 0                                       |        |
| 8173   | 0                           |        | 0                                       |        |
| 8176   | 0                           |        | 0                                       |        |
| 8179   | 0                           |        | 0                                       |        |
| 8181   | 0                           |        | 0                                       |        |
| 8182   | 1                           | 1      | 0                                       |        |
| 8196   | 1                           | 0      | 0                                       |        |
| 8200   | 1                           | 1      | 0                                       |        |
| 8203   | 0                           |        | 0                                       |        |
| 8204   | 1                           | 4      | 0                                       |        |
| 8206   | 0                           |        | 0                                       |        |

| respid | ICS Terminal Dribble: Q28_1 | Q28a_1 | ICS Urgency with fear of leaking: Q29_1 | Q29a_1 |
|--------|-----------------------------|--------|-----------------------------------------|--------|
| 8208   | 0                           |        | 0                                       |        |
| 8212   | 0                           |        | 0                                       |        |
| 8222   | 4                           | 2      | 3                                       | 2      |
| 8223   | 0                           |        | 0                                       |        |
| 8225   | 0                           |        | 0                                       |        |
| 8226   | 0                           |        | 0                                       |        |
| 8228   | 2                           | 3      | 0                                       |        |
| 8229   | 0                           |        | 0                                       |        |
| 8239   | 2                           | 1      | 2                                       | 1      |
| 8246   | 3                           | 3      | 3                                       | 3      |
| 8258   | 2                           | 2      | 2                                       | 2      |
| 8260   | 0                           |        | 0                                       |        |
| 8262   | 2                           | 1      | 1                                       | 1      |
| 8263   | 1                           | 1      | 1                                       | 1      |
| 8267   | 1                           | 1      | 1                                       | 1      |
| 8271   | 2                           | 2      | 3                                       | 3      |
| 8274   | 2                           | 2      | 0                                       |        |
| 8275   | 2                           | 3      | 2                                       | 2      |
| 8279   | 0                           |        | 0                                       |        |
| 8285   | 4                           | 3      | 3                                       | 3      |
| 8287   | 5                           | 4      | 5                                       | 4      |
| 8289   | 3                           | 1      | 0                                       |        |
| 8291   | 0                           |        | 1                                       | 2      |
| 8299   | 2                           | 2      | 1                                       | 3      |
| 8301   | 1                           | 1      | 0                                       |        |
| 8302   | 0                           |        | 0                                       |        |
| 8308   | 0                           |        | 0                                       |        |
| 8313   | 0                           |        | 0                                       |        |
| 8316   | 3                           | 3      | 1                                       | 2      |
| 8317   | 0                           |        | 0                                       |        |
| 8319   | 0                           |        | 0                                       |        |
| 8323   | 2                           | 2      | 0                                       |        |



| respid | ICS Terminal Dribble: Q28_1 | Q28a_1 | ICS Urgency with fear of leaking: Q29_1 | Q29a_1 |
|--------|-----------------------------|--------|-----------------------------------------|--------|
| 8324   | 0                           |        | 1                                       | 1      |
| 8327   | 5                           | 4      | 2                                       | 2      |
| 8328   | 1                           | 1      | 1                                       | 1      |
| 8342   | 1                           | 2      | 0                                       |        |
| 8350   | 0                           |        | 0                                       |        |
| 8352   | 0                           |        | 0                                       |        |
| 8353   | 0                           |        | 0                                       |        |
| 8356   | 0                           |        | 0                                       |        |
| 8367   | 0                           |        | 0                                       |        |
| 8373   | 1                           | 1      | 0                                       |        |
| 8379   | 0                           |        | 0                                       |        |
| 8382   | 2                           | 1      | 0                                       |        |
| 8387   | 0                           |        | 0                                       |        |
| 8409   | 1                           | 1      | 0                                       |        |
| 8410   | 0                           |        | 0                                       |        |
| 8412   | 1                           | 1      | 0                                       |        |
| 8415   | 0                           |        | 0                                       |        |
| 8417   | 1                           | 1      | 0                                       |        |
| 8422   | 0                           |        | 0                                       |        |
| 8430   | 1                           | 2      | 1                                       | 2      |
| 8434   | 1                           | 1      | 1                                       | 1      |
| 8436   | 0                           |        | 0                                       |        |
| 8446   | 1                           | 0      | 3                                       | 0      |
| 8447   | 1                           | 1      | 0                                       |        |
| 8448   | 1                           | 1      | 0                                       |        |
| 8455   | 1                           | 2      | 0                                       |        |
| 8456   | 1                           | 0      | 0                                       |        |
| 8459   | 0                           |        | 1                                       | 1      |
| 8460   | 0                           |        | 0                                       |        |
| 8464   | 2                           | 2      | 1                                       | 1      |
| 8470   | 1                           | 1      | 0                                       |        |
| 8473   | 0                           |        | 0                                       |        |

| respid | ICS Terminal Dribble: Q28_1 | Q28a_1 | ICS Urgency with fear of leaking: Q29_1 | Q29a_1 |
|--------|-----------------------------|--------|-----------------------------------------|--------|
| 8486   | 0                           |        | 0                                       |        |
| 8487   | 2                           | 1      | 0                                       |        |
| 8489   | 1                           | 1      | 1                                       | 1      |
| 8494   | 0                           |        | 0                                       |        |
| 8495   | 4                           | 4      | 3                                       | 4      |
| 8497   | 0                           |        | 0                                       |        |
| 8510   | 1                           | 1      | 0                                       |        |
| 8515   | 2                           | 2      | 2                                       | 2      |
| 8526   | 0                           |        | 0                                       |        |
| 8530   | 0                           |        | 0                                       |        |
| 8532   | 4                           | 0      | 0                                       |        |
| 8533   | 0                           |        | 0                                       |        |
| 8534   | 0                           |        | 0                                       |        |
| 8572   | 2                           | 1      | 1                                       | 1      |
| 8582   | 2                           | 1      | 0                                       |        |
| 8584   | 1                           | 2      | 0                                       |        |
| 8585   | 0                           |        | 0                                       |        |
| 8586   | 0                           |        | 0                                       |        |
| 8589   | 1                           | 0      | 2                                       | 2      |
| 8593   | 1                           | 0      | 0                                       |        |
| 8594   | 0                           |        | 0                                       |        |
| 8601   | 1                           | 1      | 0                                       |        |
| 8603   | 1                           | 0      | 0                                       |        |
| 8604   | 0                           |        | 0                                       |        |
| 8605   | 0                           |        | 0                                       |        |
| 8607   | 1                           | 1      | 1                                       | 1      |
| 8623   | 0                           |        | 0                                       |        |
| 8626   | 2                           | 1      | 1                                       | 1      |
| 8638   | 0                           |        | 0                                       |        |
| 8640   | 2                           | 2      | 0                                       |        |
| 8641   | 0                           |        | 0                                       |        |
| 8643   | 2                           | 3      | 0                                       |        |

| respid | ICS Terminal Dribble: Q28_1 | Q28a_1 | ICS Urgency with fear of leaking: Q29_1 | Q29a_1 |
|--------|-----------------------------|--------|-----------------------------------------|--------|
| 8644   | 1                           | 1      | 1                                       | 2      |
| 8646   | 0                           |        | 0                                       |        |
| 8647   | 0                           |        | 0                                       |        |
| 8649   | 1                           | 1      | 1                                       | 1      |
| 8650   | 1                           | 1      | 0                                       |        |
| 8658   | 0                           |        | 0                                       |        |
| 8659   | 1                           | 1      | 0                                       |        |
| 8669   | 0                           |        | 0                                       |        |
| 8672   | 3                           | 3      | 0                                       |        |
| 8673   | 1                           | 1      | 0                                       |        |
| 8676   | 0                           |        | 0                                       |        |
| 8677   | 0                           |        | 0                                       |        |
| 8681   | 0                           |        | 0                                       |        |
| 8688   | 0                           |        | 0                                       |        |
| 8689   | 1                           | 3      | 1                                       | 2      |
| 8690   | 3                           | 2      | 0                                       |        |
| 8693   | 0                           |        | 0                                       |        |
| 8694   | 3                           | 2      | 0                                       |        |
| 8699   | 1                           | 1      | 0                                       |        |
| 8700   | 0                           |        | 0                                       |        |
| 8703   | 0                           |        | 0                                       |        |
| 8704   | 1                           | 1      | 0                                       |        |
| 8706   | 2                           | 2      | 2                                       | 2      |
| 8709   | 0                           |        | 0                                       |        |
| 8715   | 1                           | 1      | 0                                       |        |
| 8728   | 3                           | 3      | 0                                       |        |
| 8729   | 0                           |        | 0                                       |        |
| 8730   | 0                           |        | 0                                       |        |
| 8742   | 3                           | 2      | 0                                       |        |
| 8748   | 1                           | 1      | 0                                       |        |
| 8749   | 0                           |        | 0                                       |        |
| 8750   | 2                           | 2      | 0                                       |        |

| respid | ICS Terminal Dribble: Q28_1 | Q28a_1 | ICS Urgency with fear of leaking: Q29_1 | Q29a_1 |
|--------|-----------------------------|--------|-----------------------------------------|--------|
| 8751   | 0                           |        | 0                                       |        |
| 8752   | 0                           |        | 0                                       |        |
| 8754   | 1                           | 1      | 0                                       |        |
| 8757   | 0                           |        | 0                                       |        |
| 8760   | 0                           |        | 1                                       | 0      |
| 8761   | 2                           | 1      | 2                                       | 1      |
| 8762   | 0                           |        | 0                                       |        |
| 8763   | 0                           |        | 0                                       |        |
| 8764   | 1                           | 1      | 0                                       |        |
| 8765   | 1                           | 0      | 0                                       |        |
| 8766   | 4                           | 3      | 5                                       | 3      |
| 8767   | 1                           | 0      | 2                                       | 1      |
| 8768   | 0                           |        | 0                                       |        |
| 8770   | 1                           | 0      | 0                                       |        |
| 8771   | 0                           |        | 0                                       |        |
| 8773   | 0                           |        | 0                                       |        |
| 8774   | 1                           | 1      | 1                                       | 1      |
| 8776   | 0                           |        | 0                                       |        |
| 8777   | 0                           |        | 0                                       |        |
| 8778   | 2                           | 1      | 1                                       | 0      |
| 8779   | 0                           |        | 0                                       |        |
| 8784   | 1                           | 1      | 1                                       | 1      |
| 8786   | 0                           |        | 0                                       |        |
| 8787   | 1                           | 2      | 0                                       |        |
| 8790   | 0                           |        | 0                                       |        |
| 8791   | 3                           | 3      | 2                                       | 3      |
| 8793   | 0                           |        | 0                                       |        |
| 8795   | 0                           |        | 1                                       | 1      |
| 8797   | 0                           |        | 0                                       |        |
| 8801   | 1                           | 2      | 1                                       | 2      |
| 8802   | 0                           |        | 0                                       |        |
| 8807   | 0                           |        | 0                                       |        |

| respid | ICS Terminal Dribble: Q28_1 | Q28a_1 | ICS Urgency with fear of leaking: Q29_1 | Q29a_1 |
|--------|-----------------------------|--------|-----------------------------------------|--------|
| 8813   | 1                           | 1      | 0                                       |        |
| 8817   | 1                           | 0      | 0                                       |        |
| 8818   | 1                           | 1      | 1                                       | 1      |
| 8821   | 0                           |        | 0                                       |        |
| 8822   | 0                           |        | 0                                       |        |
| 8823   | 0                           |        | 0                                       |        |
| 8824   | 0                           |        | 0                                       |        |
| 8825   | 0                           |        | 0                                       |        |
| 8834   | 2                           | 2      | 1                                       | 1      |
| 8840   | 2                           | 1      | 2                                       | 3      |
| 8843   | 5                           | 4      | 5                                       | 4      |
| 8846   | 1                           | 1      | 0                                       |        |
| 8862   | 0                           |        | 0                                       |        |
| 8866   | 1                           | 0      | 0                                       |        |
| 8869   | 0                           |        | 0                                       |        |
| 8872   | 1                           | 2      | 1                                       | 2      |
| 8903   | 0                           |        | 0                                       |        |
| 8909   | 0                           |        | 0                                       |        |
| 8926   | 0                           |        | 0                                       |        |
| 8936   | 0                           |        | 0                                       |        |
| 8945   | 0                           |        | 0                                       |        |
| 8954   | 0                           |        | 0                                       |        |
| 8955   | 0                           |        | 0                                       |        |
| 8958   | 0                           |        | 0                                       |        |
| 8959   | 0                           |        | 0                                       |        |
| 8960   | 0                           |        | 0                                       |        |
| 8976   | 0                           |        | 0                                       |        |
| 8977   | 1                           | 1      | 0                                       |        |
| 8979   | 0                           |        | 0                                       |        |
| 8985   | 0                           |        | 0                                       |        |
| 8994   | 0                           |        | 0                                       |        |
| 8997   | 1                           | 1      | 0                                       |        |

| respid | ICS Terminal Dribble: Q28_1 | Q28a_1 | ICS Urgency with fear of leaking: Q29_1 | Q29a_1 |
|--------|-----------------------------|--------|-----------------------------------------|--------|
| 9002   | 0                           |        | 0                                       |        |
| 9005   | 0                           |        | 0                                       |        |
| 9017   | 0                           |        | 0                                       |        |
| 9018   | 0                           |        | 0                                       |        |
| 9021   | 3                           | 2      | 0                                       |        |
| 9029   | 4                           | 3      | 3                                       | 3      |
| 9035   | 0                           |        | 0                                       |        |
| 9038   | 0                           |        | 0                                       |        |
| 9039   | 0                           |        | 0                                       |        |
| 9040   | 0                           |        | 0                                       |        |
| 9042   | 0                           |        | 0                                       |        |
| 9043   | 0                           |        | 0                                       |        |
| 9045   | 0                           |        | 0                                       |        |
| 9051   | 0                           |        | 0                                       |        |
| 9067   | 0                           |        | 0                                       |        |
| 9069   | 2                           | 2      | 0                                       |        |
| 9073   | 4                           | 3      | 3                                       | 2      |
| 9084   | 1                           | 1      | 1                                       | 1      |
| 9096   | 0                           |        | 0                                       |        |
| 9100   | 0                           |        | 0                                       |        |
| 9107   | 0                           |        | 0                                       |        |
| 9110   | 0                           |        | 0                                       |        |
| 9120   | 0                           |        | 0                                       |        |
| 9122   | 3                           | 2      | 0                                       |        |
| 9130   | 0                           |        | 0                                       |        |
| 9134   | 4                           | 3      | 0                                       |        |
| 9137   | 1                           | 1      | 0                                       |        |
| 9139   | 0                           |        | 0                                       |        |
| 9144   | 0                           |        | 0                                       |        |
| 9157   | 1                           | 1      | 0                                       |        |
| 9166   | 1                           | 1      | 0                                       |        |
| 9177   | 4                           | 2      | 2                                       | 1      |

| respid | ICS Terminal Dribble: Q28_1 | Q28a_1 | ICS Urgency with fear of leaking: Q29_1 | Q29a_1 |
|--------|-----------------------------|--------|-----------------------------------------|--------|
| 9181   | 0                           |        | 0                                       |        |
| 9183   | 0                           |        | 0                                       |        |
| 9184   | 2                           | 1      | 2                                       | 1      |
| 9188   | 0                           |        | 0                                       |        |
| 9197   | 0                           |        | 0                                       |        |
| 9200   | 2                           | 3      | 2                                       | 1      |
| 9205   | 0                           |        | 0                                       |        |
| 9207   | 0                           |        | 0                                       |        |
| 9213   | 0                           |        | 0                                       |        |
| 9216   | 1                           | 1      | 1                                       | 1      |
| 9217   | 0                           |        | 0                                       |        |
| 9218   | 0                           |        | 0                                       |        |
| 9219   | 4                           | 1      | 2                                       | 1      |
| 9220   | 0                           |        | 0                                       |        |
| 9221   | 1                           | 1      | 0                                       |        |
| 9223   | 3                           | 3      | 3                                       | 2      |
| 9228   | 0                           |        | 0                                       |        |
| 9230   | 0                           |        | 0                                       |        |
| 9231   | 1                           | 0      | 0                                       |        |
| 9233   | 1                           | 0      | 0                                       |        |
| 9235   | 1                           | 0      | 0                                       |        |
| 9237   | 0                           |        | 1                                       | 1      |
| 9242   | 0                           |        | 0                                       |        |
| 9250   | 0                           |        | 0                                       |        |
| 9253   | 2                           | 3      | 0                                       |        |
| 9257   | 2                           | 0      | 0                                       |        |
| 9263   | 0                           |        | 0                                       |        |
| 9267   | 1                           | 1      | 1                                       | 1      |
| 9272   | 0                           |        | 1                                       | 1      |
| 9279   | 0                           |        | 0                                       |        |
| 9281   | 0                           |        | 0                                       |        |
| 9285   | 4                           | 1      | 0                                       |        |

| respid | ICS Terminal Dribble: Q28_1 | Q28a_1 | ICS Urgency with fear of leaking: Q29_1 | Q29a_1 |
|--------|-----------------------------|--------|-----------------------------------------|--------|
| 9286   | 0                           |        | 0                                       |        |
| 9294   | 1                           | 2      | 0                                       |        |
| 9295   | 0                           |        | 0                                       |        |
| 9297   | 3                           | 2      | 0                                       |        |
| 9299   | 0                           |        | 0                                       |        |
| 9309   | 1                           | 1      | 0                                       |        |
| 9315   | 0                           |        | 0                                       |        |
| 9320   | 0                           |        | 0                                       |        |
| 9324   | 1                           | 1      | 0                                       |        |
| 9326   | 0                           |        | 0                                       |        |
| 9333   | 0                           |        | 0                                       |        |
| 9334   | 1                           | 1      | 1                                       | 1      |
| 9336   | 2                           | 2      | 1                                       | 1      |
| 9337   | 2                           | 1      | 0                                       |        |
| 9342   | 1                           | 1      | 0                                       |        |
| 9347   | 0                           |        | 0                                       |        |
| 9352   | 3                           | 2      | 1                                       | 1      |
| 9355   | 0                           |        | 0                                       |        |
| 9356   | 1                           | 1      | 0                                       |        |
| 9359   | 1                           | 1      | 0                                       |        |
| 9368   | 0                           |        | 0                                       |        |
| 9375   | 1                           | 0      | 1                                       | 1      |
| 9384   | 0                           |        | 0                                       |        |
| 9388   | 1                           | 0      | 1                                       | 0      |
| 9397   | 3                           | 3      | 2                                       | 2      |
| 9400   | 2                           | 2      | 1                                       | 1      |
| 9401   | 0                           |        | 0                                       |        |
| 9402   | 0                           |        | 0                                       |        |
| 9417   | 3                           | 2      | 2                                       | 2      |
| 9424   | 0                           |        | 0                                       |        |
| 9427   | 0                           |        | 0                                       |        |
| 9429   | 1                           | 1      | 1                                       | 1      |



| respid | ICS Terminal Dribble: Q28_1 | Q28a_1 | ICS Urgency with fear of leaking: Q29_1 | Q29a_1 |
|--------|-----------------------------|--------|-----------------------------------------|--------|
| 9437   | 3                           | 3      | 3                                       | 3      |
| 9442   | 0                           |        | 0                                       |        |
| 9446   | 1                           | 1      | 1                                       | 1      |
| 9447   | 0                           |        | 0                                       |        |
| 9448   | 1                           | 1      | 1                                       | 1      |
| 9449   | 2                           | 2      | 0                                       |        |
| 9455   | 0                           |        | 0                                       |        |
| 9459   | 1                           | 2      | 0                                       |        |
| 9460   | 0                           |        | 0                                       |        |
| 9461   | 1                           | 1      | 1                                       | 1      |
| 9463   | 0                           |        | 0                                       |        |
| 9464   | 1                           | 1      | 0                                       |        |
| 9466   | 2                           | 1      | 0                                       |        |
| 9477   | 0                           |        | 0                                       |        |
| 9482   | 2                           | 1      | 3                                       | 3      |
| 9486   | 1                           | 1      | 1                                       | 1      |
| 9488   | 4                           | 3      | 2                                       | 2      |
| 9489   | 0                           |        | 0                                       |        |
| 9496   | 0                           |        | 0                                       |        |
| 9499   | 1                           | 0      | 0                                       |        |
| 9512   | 0                           |        | 0                                       |        |
| 9514   | 1                           | 0      | 0                                       |        |
| 9516   | 0                           |        | 0                                       |        |
| 9517   | 2                           | 2      | 0                                       |        |
| 9520   | 0                           |        | 0                                       |        |
| 9527   | 1                           | 1      | 0                                       |        |
| 9532   | 3                           | 3      | 1                                       | 1      |
| 9533   | 0                           |        | 0                                       |        |
| 9543   | 5                           | 2      | 0                                       |        |
| 9550   | 2                           | 1      | 0                                       |        |
| 9553   | 0                           |        | 0                                       |        |
| 9555   | 2                           | 1      | 4                                       | 1      |

| respid | ICS Terminal Dribble: Q28_1 | Q28a_1 | ICS Urgency with fear of leaking: Q29_1 | Q29a_1 |
|--------|-----------------------------|--------|-----------------------------------------|--------|
| 9565   | 0                           |        | 0                                       |        |
| 9583   | 5                           | 4      | 0                                       |        |
| 9594   | 0                           |        | 0                                       |        |
| 9596   | 1                           | 1      | 0                                       |        |
| 9600   | 1                           | 1      | 2                                       | 2      |
| 9602   | 1                           | 1      | 0                                       |        |
| 9606   | 1                           | 0      | 0                                       |        |
| 9608   | 0                           |        | 0                                       |        |
| 9610   | 1                           | 1      | 0                                       |        |
| 9612   | 0                           |        | 1                                       | 2      |
| 9613   | 0                           |        | 0                                       |        |
| 9614   | 5                           | 4      | 0                                       |        |
| 9620   | 1                           | 0      | 0                                       |        |
| 9628   | 0                           |        | 0                                       |        |
| 9631   | 0                           |        | 0                                       |        |
| 9632   | 0                           |        | 0                                       |        |
| 9633   | 1                           | 1      | 0                                       |        |
| 9639   | 0                           |        | 0                                       |        |
| 9640   | 0                           |        | 0                                       |        |
| 9642   | 1                           | 0      | 0                                       |        |
| 9653   | 1                           | 1      | 0                                       |        |
| 9658   | 0                           |        | 0                                       |        |
| 9659   | 1                           | 1      | 0                                       |        |
| 9661   | 0                           |        | 0                                       |        |
| 9664   | 2                           | 1      | 1                                       | 0      |
| 9665   | 1                           | 0      | 1                                       | 0      |
| 9666   | 3                           | 1      | 0                                       |        |
| 9667   | 0                           |        | 1                                       | 1      |
| 9668   | 0                           |        | 0                                       |        |
| 9670   | 1                           | 1      | 0                                       |        |
| 9671   | 0                           |        | 0                                       |        |
| 9681   | 1                           | 1      | 0                                       |        |

| respid | ICS Terminal Dribble: Q28_1 | Q28a_1 | ICS Urgency with fear of leaking: Q29_1 | Q29a_1 |
|--------|-----------------------------|--------|-----------------------------------------|--------|
| 9684   | 0                           |        | 0                                       |        |
| 9685   | 2                           | 3      | 0                                       |        |
| 9686   | 3                           | 3      | 0                                       |        |
| 9688   | 1                           | 2      | 0                                       |        |
| 9692   | 0                           |        | 0                                       |        |
| 9693   | 2                           | 1      | 2                                       | 2      |
| 9698   | 0                           |        | 1                                       | 2      |
| 9699   | 0                           |        | 1                                       | 1      |
| 9701   | 0                           |        | 0                                       |        |
| 9702   | 0                           |        | 0                                       |        |
| 9709   | 2                           | 2      | 2                                       | 1      |
| 9713   | 0                           |        | 0                                       |        |
| 9715   | 0                           |        | 0                                       |        |
| 9721   | 0                           |        | 0                                       |        |
| 9725   | 0                           |        | 0                                       |        |
| 9729   | 2                           | 0      | 0                                       |        |
| 9731   | 1                           | 1      | 0                                       |        |
| 9736   | 3                           | 2      | 0                                       |        |
| 9740   | 0                           |        | 0                                       |        |
| 9741   | 0                           |        | 0                                       |        |
| 9749   | 2                           | 2      | 0                                       |        |
| 9750   | 1                           | 1      | 1                                       | 1      |
| 9751   | 2                           | 2      | 2                                       | 2      |
| 9753   | 1                           | 1      | 1                                       | 1      |
| 9754   | 4                           | 3      | 4                                       | 3      |
| 9756   | 4                           | 2      | 3                                       | 2      |
| 9758   | 1                           | 3      | 2                                       | 3      |
| 9759   | 0                           |        | 0                                       |        |
| 9760   | 1                           | 1      | 1                                       | 1      |
| 9761   | 0                           |        | 0                                       |        |
| 9762   | 2                           | 2      | 0                                       |        |
| 9764   | 0                           |        | 0                                       |        |

| respid | ICS Terminal Dribble: Q28_1 | Q28a_1 | ICS Urgency with fear of leaking: Q29_1 | Q29a_1 |
|--------|-----------------------------|--------|-----------------------------------------|--------|
| 9768   | 1                           | 0      | 0                                       |        |
| 9769   | 2                           | 1      | 2                                       | 1      |
| 9770   | 0                           |        | 0                                       |        |
| 9771   | 2                           | 2      | 1                                       | 1      |
| 9772   | 1                           | 1      | 0                                       |        |
| 9773   | 1                           | 1      | 0                                       |        |
| 9776   | 1                           | 0      | 0                                       |        |
| 9786   | 1                           | 1      | 1                                       | 1      |
| 9790   | 0                           |        | 0                                       |        |
| 9791   | 1                           | 1      | 0                                       |        |
| 9794   | 1                           | 1      | 1                                       | 1      |
| 9797   | 0                           |        | 0                                       |        |
| 9799   | 0                           |        | 1                                       | 0      |
| 9804   | 0                           |        | 0                                       |        |
| 9805   | 3                           | 2      | 1                                       | 1      |
| 9806   | 1                           | 2      | 0                                       |        |
| 9807   | 0                           |        | 1                                       | 0      |
| 9813   | 1                           | 0      | 0                                       |        |
| 9817   | 0                           |        | 0                                       |        |
| 9823   | 0                           |        | 0                                       |        |
| 9826   | 0                           |        | 0                                       |        |
| 9830   | 1                           | 0      | 0                                       |        |
| 9835   | 0                           |        | 0                                       |        |
| 9836   | 0                           |        | 0                                       |        |
| 9841   | 0                           |        | 0                                       |        |
| 9842   | 0                           |        | 0                                       |        |
| 9844   | 1                           | 1      | 0                                       |        |
| 9847   | 0                           |        | 0                                       |        |
| 9851   | 0                           |        | 0                                       |        |
| 9852   | 1                           | 1      | 0                                       |        |
| 9854   | 0                           |        | 0                                       |        |
| 9855   | 1                           | 1      | 0                                       |        |

| respid | ICS Terminal Dribble: Q28_1 | Q28a_1 | ICS Urgency with fear of leaking: Q29_1 | Q29a_1 |
|--------|-----------------------------|--------|-----------------------------------------|--------|
| 9856   | 2                           | 1      | 0                                       |        |
| 9862   | 2                           | 1      | 1                                       | 0      |
| 9863   | 0                           |        | 0                                       |        |
| 9866   | 0                           |        | 0                                       |        |
| 9867   | 0                           |        | 1                                       | 2      |
| 9868   | 2                           | 3      | 1                                       | 2      |
| 9869   | 2                           | 1      | 0                                       |        |
| 9878   | 2                           | 1      | 1                                       | 1      |
| 9879   | 1                           | 1      | 0                                       |        |
| 9881   | 1                           | 0      | 1                                       | 0      |
| 9882   | 1                           | 1      | 0                                       |        |
| 9884   | 1                           | 2      | 1                                       | 1      |
| 9885   | 0                           |        | 0                                       |        |
| 9888   | 0                           |        | 0                                       |        |
| 9889   | 1                           | 1      | 0                                       |        |
| 9894   | 2                           | 2      | 2                                       | 2      |
| 9895   | 1                           | 1      | 0                                       |        |
| 9896   | 5                           | 4      | 4                                       | 4      |
| 9897   | 1                           | 2      | 1                                       | 1      |
| 9905   | 2                           | 1      | 0                                       |        |
| 9907   | 0                           |        | 0                                       |        |
| 9908   | 0                           |        | 0                                       |        |
| 9909   | 1                           | 1      | 0                                       |        |
| 9910   | 3                           | 2      | 4                                       | 3      |
| 9913   | 2                           | 1      | 1                                       | 1      |
| 9914   | 4                           | 2      | 0                                       |        |
| 9915   | 0                           |        | 2                                       | 1      |
| 9916   | 0                           |        | 0                                       |        |
| 9918   | 0                           |        | 0                                       |        |
| 9919   | 3                           | 0      | 3                                       | 1      |
| 9922   | 1                           | 3      | 0                                       |        |
| 9930   | 0                           |        | 0                                       |        |

| respid | ICS Terminal Dribble: Q28_1 | Q28a_1 | ICS Urgency with fear of leaking: Q29_1 | Q29a_1 |
|--------|-----------------------------|--------|-----------------------------------------|--------|
| 9934   | 0                           |        | 0                                       |        |
| 9936   | 1                           | 1      | 1                                       | 1      |
| 9938   | 0                           |        | 0                                       |        |
| 9940   | 1                           | 0      | 0                                       |        |
| 9944   | 1                           | 1      | 1                                       | 1      |
| 9945   | 1                           | 0      | 0                                       |        |
| 9948   | 2                           | 3      | 5                                       | 3      |
| 9949   | 2                           | 2      | 2                                       | 2      |
| 9951   | 1                           | 1      | 1                                       | 1      |
| 9952   | 2                           | 1      | 2                                       | 1      |
| 9954   | 0                           |        | 0                                       |        |
| 9955   | 0                           |        | 0                                       |        |
| 9956   | 4                           | 3      | 1                                       | 1      |
| 9957   | 0                           |        | 0                                       |        |
| 9958   | 0                           |        | 0                                       |        |
| 9959   | 3                           | 2      | 0                                       |        |
| 9960   | 1                           | 1      | 1                                       | 1      |
| 9961   | 0                           |        | 1                                       | 1      |
| 9962   | 0                           |        | 0                                       |        |
| 9969   | 5                           | 3      | 0                                       |        |
| 9982   | 4                           | 3      | 0                                       |        |
| 9984   | 3                           | 2      | 0                                       |        |
| 9990   | 1                           | 1      | 0                                       |        |
| 9992   | 1                           | 2      | 1                                       | 2      |
| 9993   | 1                           | 2      | 1                                       | 2      |
| 9997   | 0                           |        | 0                                       |        |
| 9999   | 0                           |        | 0                                       |        |
| 10000  | 1                           | 2      | 0                                       |        |
| 10005  | 1                           | 2      | 3                                       | 3      |
| 10014  | 5                           | 0      | 0                                       |        |
| 10016  | 0                           |        | 1                                       | 1      |
| 10017  | 1                           | 1      | 1                                       | 1      |

| respid | ICS Terminal Dribble: Q28_1 | Q28a_1 | ICS Urgency with fear of leaking: Q29_1 | Q29a_1 |
|--------|-----------------------------|--------|-----------------------------------------|--------|
| 10018  | 3                           | 1      | 0                                       |        |
| 10021  | 1                           | 1      | 1                                       | 1      |
| 10025  | 0                           |        | 1                                       | 2      |
| 10027  | 1                           | 1      | 1                                       | 1      |
| 10028  | 2                           | 1      | 1                                       | 1      |
| 10031  | 2                           | 3      | 0                                       |        |
| 10036  | 1                           | 1      | 0                                       |        |
| 10037  | 1                           | 1      | 1                                       | 1      |
| 10038  | 1                           | 1      | 2                                       | 2      |
| 10039  | 0                           |        | 0                                       |        |
| 10041  | 0                           |        | 0                                       |        |
| 10045  | 3                           | 2      | 1                                       | 1      |
| 10046  | 2                           | 2      | 1                                       | 2      |
| 10047  | 0                           |        | 2                                       | 1      |
| 10048  | 0                           |        | 0                                       |        |
| 10049  | 1                           | 1      | 0                                       |        |
| 10051  | 0                           |        | 0                                       |        |
| 10052  | 4                           | 3      | 2                                       | 2      |
| 10056  | 0                           |        | 0                                       |        |
| 10061  | 0                           |        | 0                                       |        |
| 10064  | 1                           | 0      | 0                                       |        |
| 10066  | 0                           |        | 0                                       |        |
| 10069  | 0                           |        | 0                                       |        |
| 10071  | 2                           | 2      | 0                                       |        |
| 10074  | 1                           | 0      | 0                                       |        |
| 10079  | 3                           | 1      | 0                                       |        |
| 10087  | 2                           | 2      | 2                                       | 2      |
| 10095  | 0                           |        | 0                                       |        |
| 10097  | 0                           |        | 0                                       |        |
| 10100  | 2                           | 2      | 2                                       | 1      |
| 10105  | 1                           | 0      | 0                                       |        |
| 10107  | 1                           | 2      | 2                                       | 2      |

| respid | ICS Terminal Dribble: Q28_1 | Q28a_1 | ICS Urgency with fear of leaking: Q29_1 | Q29a_1 |
|--------|-----------------------------|--------|-----------------------------------------|--------|
| 10111  | 1                           | 1      | 0                                       |        |
| 10116  | 0                           |        | 0                                       |        |
| 10118  | 0                           |        | 0                                       |        |
| 10123  | 0                           |        | 0                                       |        |
| 10124  | 1                           | 1      | 1                                       | 1      |
| 10130  | 1                           | 1      | 1                                       | 1      |
| 10134  | 1                           | 1      | 2                                       | 1      |
| 10135  | 0                           |        | 0                                       |        |
| 10136  | 0                           |        | 0                                       |        |
| 10141  | 2                           | 1      | 2                                       | 1      |
| 10142  | 0                           |        | 0                                       |        |
| 10143  | 1                           | 0      | 0                                       |        |
| 10145  | 1                           | 0      | 1                                       | 0      |
| 10149  | 1                           | 2      | 1                                       | 1      |
| 10150  | 1                           | 1      | 1                                       | 1      |
| 10151  | 1                           | 1      | 1                                       | 1      |
| 10152  | 5                           | 4      | 1                                       | 2      |
| 10153  | 0                           |        | 0                                       |        |
| 10156  | 0                           |        | 0                                       |        |
| 10160  | 0                           |        | 0                                       |        |
| 10161  | 1                           | 1      | 0                                       |        |
| 10167  | 1                           | 1      | 2                                       | 1      |
| 10171  | 0                           |        | 0                                       |        |
| 10172  | 0                           |        | 0                                       |        |
| 10176  | 1                           | 1      | 0                                       |        |
| 10177  | 3                           | 3      | 0                                       |        |
| 10182  | 1                           | 1      | 1                                       | 1      |
| 10184  | 0                           |        | 0                                       |        |
| 10186  | 0                           |        | 5                                       | 3      |
| 10189  | 0                           |        | 0                                       |        |
| 10191  | 0                           |        | 0                                       |        |
| 10192  | 1                           | 1      | 0                                       |        |



| respid | ICS Terminal Dribble: Q28_1 | Q28a_1 | ICS Urgency with fear of leaking: Q29_1 | Q29a_1 |
|--------|-----------------------------|--------|-----------------------------------------|--------|
| 10195  | 1                           | 0      | 0                                       |        |
| 10199  | 0                           |        | 0                                       |        |
| 10201  | 3                           | 2      | 3                                       | 2      |
| 10213  | 0                           |        | 0                                       |        |
| 10222  | 3                           | 2      | 3                                       | 2      |
| 10224  | 0                           |        | 0                                       |        |
| 10245  | 0                           |        | 0                                       |        |
| 10254  | 2                           | 1      | 0                                       |        |
| 10255  | 3                           | 4      | 2                                       | 4      |
| 10257  | 2                           | 1      | 0                                       |        |
| 10260  | 1                           | 2      | 1                                       | 1      |
| 10261  | 0                           |        | 0                                       |        |
| 10263  | 5                           | 4      | 5                                       | 4      |
| 10264  | 0                           |        | 0                                       |        |
| 10268  | 2                           | 3      | 2                                       | 2      |
| 10269  | 0                           |        | 0                                       |        |
| 10270  | 0                           |        | 0                                       |        |
| 10282  | 0                           |        | 0                                       |        |
| 10285  | 0                           |        | 0                                       |        |
| 10288  | 1                           | 0      | 0                                       |        |
| 10291  | 1                           | 0      | 0                                       |        |
| 10292  | 0                           |        | 0                                       |        |
| 10304  | 0                           |        | 0                                       |        |
| 10305  | 0                           |        | 1                                       | 2      |
| 10310  | 1                           | 1      | 0                                       |        |
| 10324  | 0                           |        | 0                                       |        |
| 10325  | 0                           |        | 0                                       |        |
| 10326  | 4                           | 3      | 0                                       |        |
| 10329  | 0                           |        | 0                                       |        |
| 10332  | 1                           | 1      | 0                                       |        |
| 10337  | 2                           | 2      | 0                                       |        |
| 10341  | 0                           |        | 0                                       |        |

| respid | ICS Terminal Dribble: Q28_1 | Q28a_1 | ICS Urgency with fear of leaking: Q29_1 | Q29a_1 |
|--------|-----------------------------|--------|-----------------------------------------|--------|
| 10353  | 2                           | 1      | 1                                       | 1      |
| 10354  | 0                           |        | 0                                       |        |
| 10359  | 1                           | 1      | 1                                       | 1      |
| 10360  | 0                           |        | 0                                       |        |
| 10362  | 1                           | 1      | 0                                       |        |
| 10364  | 1                           | 0      | 0                                       |        |
| 10366  | 4                           | 3      | 2                                       | 2      |
| 10367  | 0                           |        | 0                                       |        |
| 10371  | 0                           |        | 0                                       |        |
| 10374  | 1                           | 1      | 0                                       |        |
| 10375  | 0                           |        | 0                                       |        |
| 10376  | 0                           |        | 0                                       |        |
| 10377  | 1                           | 1      | 0                                       |        |
| 10378  | 1                           | 1      | 1                                       | 1      |
| 10387  | 0                           |        | 0                                       |        |
| 10396  | 5                           | 4      | 5                                       | 4      |
| 10397  | 0                           |        | 0                                       |        |
| 10399  | 2                           | 3      | 3                                       | 3      |
| 10405  | 0                           |        | 0                                       |        |
| 10406  | 0                           |        | 0                                       |        |
| 10408  | 0                           |        | 0                                       |        |
| 10409  | 0                           |        | 0                                       |        |
| 10412  | 0                           |        | 0                                       |        |
| 10413  | 0                           |        | 0                                       |        |
| 10419  | 1                           | 1      | 1                                       | 1      |
| 10423  | 3                           | 3      | 2                                       | 3      |
| 10426  | 1                           | 0      | 1                                       | 0      |
| 10446  | 1                           | 1      | 0                                       |        |
| 10448  | 0                           |        | 0                                       |        |
| 10450  | 0                           |        | 0                                       |        |
| 10455  | 2                           | 1      | 1                                       | 1      |
| 10460  | 2                           | 1      | 0                                       |        |

| respid | ICS Terminal Dribble: Q28_1 | Q28a_1 | ICS Urgency with fear of leaking: Q29_1 | Q29a_1 |
|--------|-----------------------------|--------|-----------------------------------------|--------|
| 10461  | 2                           | 2      | 0                                       |        |
| 10471  | 0                           |        | 0                                       |        |
| 10472  | 0                           |        | 0                                       |        |
| 10491  | 3                           | 4      | 3                                       | 4      |
| 10493  | 1                           | 2      | 1                                       | 2      |
| 10498  | 3                           | 1      | 1                                       | 1      |
| 10533  | 0                           |        | 0                                       |        |
| 10539  | 1                           | 1      | 0                                       |        |
| 10540  | 0                           |        | 0                                       |        |
| 10557  | 3                           | 3      | 0                                       |        |
| 10558  | 1                           | 1      | 1                                       | 2      |
| 10559  | 2                           | 1      | 1                                       | 2      |
| 10564  | 2                           | 2      | 0                                       |        |
| 10570  | 0                           |        | 0                                       |        |
| 10572  | 0                           |        | 0                                       |        |
| 10576  | 1                           | 1      | 0                                       |        |
| 10582  | 2                           | 3      | 4                                       | 1      |
| 10593  | 0                           |        | 0                                       |        |
| 10596  | 0                           |        | 0                                       |        |
| 10615  | 0                           |        | 0                                       |        |
| 10616  | 0                           |        | 0                                       |        |
| 10623  | 0                           |        | 0                                       |        |
| 10626  | 0                           |        | 0                                       |        |
| 10627  | 2                           | 2      | 2                                       | 2      |
| 10629  | 1                           | 2      | 0                                       |        |
| 10632  | 2                           | 3      | 2                                       | 2      |
| 10641  | 0                           |        | 0                                       |        |
| 10648  | 3                           | 3      | 0                                       |        |
| 10651  | 0                           |        | 0                                       |        |
| 10654  | 0                           |        | 0                                       |        |
| 10673  | 0                           |        | 0                                       |        |
| 10675  | 3                           | 2      | 0                                       |        |

| respid | ICS Terminal Dribble: Q28_1 | Q28a_1 | ICS Urgency with fear of leaking: Q29_1 | Q29a_1 |
|--------|-----------------------------|--------|-----------------------------------------|--------|
| 10689  | 3                           | 0      | 1                                       | 1      |
| 10692  | 0                           |        | 0                                       |        |
| 10694  | 0                           |        | 0                                       |        |
| 10695  | 1                           | 1      | 0                                       |        |
| 10702  | 1                           | 1      | 2                                       | 1      |
| 10703  | 1                           | 1      | 1                                       | 1      |
| 10708  | 1                           | 1      | 0                                       |        |
| 10719  | 0                           |        | 0                                       |        |
| 10722  | 0                           |        | 0                                       |        |
| 10723  | 1                           | 0      | 1                                       | 1      |
| 10726  | 1                           | 1      | 0                                       |        |
| 10727  | 0                           |        | 0                                       |        |
| 10730  | 2                           | 2      | 0                                       |        |
| 10731  | 0                           |        | 0                                       |        |
| 10737  | 1                           | 0      | 0                                       |        |
| 10743  | 0                           |        | 0                                       |        |
| 10763  | 0                           |        | 0                                       |        |
| 10777  | 0                           |        | 0                                       |        |
| 10787  | 4                           | 2      | 1                                       | 1      |
| 10798  | 3                           | 3      | 3                                       | 3      |
| 10800  | 0                           |        | 0                                       |        |
| 10802  | 2                           | 2      | 2                                       | 2      |
| 10803  | 3                           | 2      | 3                                       | 2      |
| 10808  | 0                           |        | 0                                       |        |
| 10810  | 4                           | 1      | 0                                       |        |
| 10819  | 0                           |        | 0                                       |        |
| 10825  | 0                           |        | 0                                       |        |
| 10827  | 2                           | 2      | 1                                       | 1      |
| 10830  | 0                           |        | 0                                       |        |
| 10847  | 0                           |        | 0                                       |        |
| 10849  | 5                           | 2      | 0                                       |        |
| 10852  | 0                           |        | 0                                       |        |

| respid | ICS Terminal Dribble: Q28_1 | Q28a_1 | ICS Urgency with fear of leaking: Q29_1 | Q29a_1 |
|--------|-----------------------------|--------|-----------------------------------------|--------|
| 10854  | 3                           | 3      | 3                                       | 3      |
| 10857  | 0                           |        | 0                                       |        |
| 10861  | 2                           | 1      | 2                                       | 1      |
| 10862  | 0                           |        | 0                                       |        |
| 10870  | 1                           | 2      | 0                                       |        |
| 10873  | 2                           | 0      | 0                                       |        |
| 10881  | 1                           | 1      | 0                                       |        |
| 10893  | 0                           |        | 0                                       |        |
| 10898  | 0                           |        | 0                                       |        |
| 10899  | 0                           |        | 1                                       | 2      |
| 10905  | 1                           | 1      | 0                                       |        |
| 10910  | 0                           |        | 0                                       |        |
| 10911  | 1                           | 1      | 1                                       | 1      |
| 10912  | 0                           |        | 0                                       |        |
| 10913  | 0                           |        | 0                                       |        |
| 10918  | 0                           |        | 0                                       |        |
| 10995  | 0                           |        | 0                                       |        |
| 11002  | 1                           | 1      | 0                                       |        |
| 11003  | 0                           |        | 0                                       |        |
| 11005  | 1                           | 1      | 0                                       |        |
| 11015  | 0                           |        | 0                                       |        |
| 11016  | 5                           | 4      | 0                                       |        |
| 11017  | 0                           |        | 0                                       |        |
| 11020  | 1                           | 1      | 1                                       | 1      |
| 11024  | 0                           |        | 0                                       |        |
| 11026  | 0                           |        | 2                                       | 1      |
| 11028  | 2                           | 2      | 2                                       | 2      |
| 11029  | 3                           | 3      | 3                                       | 2      |
| 11030  | 1                           | 1      | 0                                       |        |
| 11031  | 0                           |        | 0                                       |        |
| 11038  | 0                           |        | 0                                       |        |
| 11051  | 0                           |        | 1                                       | 1      |

| respid | ICS Terminal Dribble: Q28_1 | Q28a_1 | ICS Urgency with fear of leaking: Q29_1 | Q29a_1 |
|--------|-----------------------------|--------|-----------------------------------------|--------|
| 11052  | 2                           | 2      | 2                                       | 2      |
| 11053  | 1                           | 1      | 1                                       | 1      |
| 11054  | 2                           | 2      | 2                                       | 2      |
| 11063  | 0                           |        | 0                                       |        |
| 11075  | 2                           | 1      | 2                                       | 2      |
| 11083  | 0                           |        | 0                                       |        |
| 11092  | 0                           |        | 0                                       |        |
| 11118  | 0                           |        | 0                                       |        |
| 11119  | 0                           |        | 0                                       |        |
| 11134  | 0                           |        | 0                                       |        |
| 11139  | 0                           |        | 0                                       |        |
| 11154  | 0                           |        | 0                                       |        |
| 11166  | 3                           | 1      | 0                                       |        |
| 11168  | 0                           |        | 0                                       |        |
| 11176  | 1                           | 2      | 2                                       | 1      |
| 11183  | 4                           | 4      | 2                                       | 2      |
| 11189  | 0                           |        | 0                                       |        |
| 11196  | 3                           | 3      | 3                                       | 2      |
| 11200  | 3                           | 3      | 3                                       | 2      |
| 11201  | 1                           | 1      | 0                                       |        |
| 11211  | 3                           | 2      | 3                                       | 3      |
| 11218  | 0                           |        | 0                                       |        |
| 11219  | 0                           |        | 0                                       |        |
| 11221  | 0                           |        | 2                                       | 1      |
| 11222  | 0                           |        | 0                                       |        |
| 11230  | 4                           | 3      | 4                                       | 2      |
| 11236  | 3                           | 3      | 4                                       | 2      |
| 11237  | 1                           | 1      | 1                                       | 1      |
| 11240  | 5                           | 3      | 3                                       | 3      |
| 11244  | 3                           | 2      | 4                                       | 2      |
| 11249  | 1                           | 1      | 1                                       | 1      |
| 11252  | 3                           | 2      | 3                                       | 2      |

| respid | ICS Terminal Dribble: Q28_1 | Q28a_1 | ICS Urgency with fear of leaking: Q29_1 | Q29a_1 |
|--------|-----------------------------|--------|-----------------------------------------|--------|
| 11254  | 2                           | 1      | 2                                       | 1      |
| 11255  | 0                           |        | 2                                       | 2      |
| 11258  | 4                           | 2      | 3                                       | 3      |
| 11260  | 1                           | 1      | 0                                       |        |
| 11264  | 5                           | 4      | 3                                       | 2      |
| 11266  | 1                           | 3      | 2                                       | 3      |
| 11268  | 3                           | 2      | 1                                       | 2      |
| 11269  | 3                           | 3      | 0                                       |        |
| 11272  | 2                           | 2      | 0                                       |        |
| 11273  | 0                           |        | 0                                       |        |
| 11275  | 0                           |        | 0                                       |        |
| 11276  | 0                           |        | 1                                       | 2      |
| 11278  | 2                           | 1      | 2                                       | 1      |
| 11288  | 0                           |        | 0                                       |        |
| 11289  | 0                           |        | 0                                       |        |
| 11291  | 0                           |        | 0                                       |        |
| 11295  | 0                           |        | 0                                       |        |
| 11297  | 0                           |        | 0                                       |        |
| 11304  | 1                           | 3      | 0                                       |        |
| 11305  | 0                           |        | 0                                       |        |
| 11311  | 0                           |        | 0                                       |        |
| 11313  | 0                           |        | 0                                       |        |
| 11315  | 3                           | 4      | 3                                       | 4      |
| 11316  | 3                           | 4      | 3                                       | 4      |
| 11318  | 3                           | 4      | 3                                       | 4      |
| 11323  | 0                           |        | 0                                       |        |
| 11331  | 1                           | 1      | 0                                       |        |
| 11333  | 1                           | 1      | 0                                       |        |
| 11334  | 1                           | 2      | 2                                       | 2      |
| 11340  | 4                           | 1      | 2                                       | 1      |
| 11345  | 0                           |        | 0                                       |        |
| 11354  | 1                           | 2      | 0                                       |        |

| respid | ICS Terminal Dribble: Q28_1 | Q28a_1 | ICS Urgency with fear of leaking: Q29_1 | Q29a_1 |
|--------|-----------------------------|--------|-----------------------------------------|--------|
| 11360  | 0                           |        | 0                                       |        |
| 11361  | 2                           | 2      | 2                                       | 2      |
| 11367  | 0                           |        | 0                                       |        |
| 11370  | 0                           |        | 0                                       |        |
| 11371  | 3                           | 3      | 4                                       | 4      |
| 11372  | 2                           | 2      | 1                                       | 2      |
| 11373  | 0                           |        | 0                                       |        |
| 11382  | 0                           |        | 0                                       |        |
| 11394  | 0                           |        | 0                                       |        |
| 11395  | 0                           |        | 2                                       | 3      |
| 11397  | 0                           |        | 0                                       |        |
| 11402  | 0                           |        | 0                                       |        |
| 11409  | 0                           |        | 0                                       |        |
| 11410  | 0                           |        | 2                                       | 1      |
| 11411  | 0                           |        | 0                                       |        |
| 11418  | 0                           |        | 0                                       |        |
| 11425  | 0                           |        | 0                                       |        |
| 11429  | 0                           |        | 0                                       |        |
| 11430  | 3                           | 2      | 3                                       | 2      |
| 11431  | 4                           | 2      | 0                                       |        |
| 11432  | 0                           |        | 0                                       |        |
| 11433  | 5                           | 2      | 0                                       |        |
| 11435  | 3                           | 2      | 4                                       | 3      |
| 11436  | 1                           | 1      | 1                                       | 1      |
| 11437  | 2                           | 2      | 2                                       | 2      |
| 11439  | 0                           |        | 0                                       |        |
| 11440  | 0                           |        | 0                                       |        |
| 11447  | 0                           |        | 0                                       |        |
| 11455  | 0                           |        | 0                                       |        |
| 11456  | 0                           |        | 0                                       |        |
| 11461  | 1                           | 1      | 1                                       | 1      |
| 11463  | 2                           | 3      | 3                                       | 2      |



| respid | ICS Terminal Dribble: Q28_1 | Q28a_1 | ICS Urgency with fear of leaking: Q29_1 | Q29a_1 |
|--------|-----------------------------|--------|-----------------------------------------|--------|
| 11470  | 1                           | 3      | 1                                       | 2      |
| 11472  | 0                           |        | 0                                       |        |
| 11475  | 1                           | 1      | 0                                       |        |
| 11476  | 1                           | 0      | 0                                       |        |
| 11482  | 2                           | 2      | 0                                       |        |
| 11501  | 2                           | 2      | 1                                       | 1      |
| 11503  | 0                           |        | 0                                       |        |
| 11505  | 0                           |        | 0                                       |        |
| 11510  | 1                           | 3      | 0                                       |        |
| 11519  | 0                           |        | 0                                       |        |
| 11527  | 4                           | 4      | 3                                       | 3      |
| 11529  | 2                           | 2      | 2                                       | 2      |
| 11530  | 0                           |        | 0                                       |        |
| 11536  | 5                           | 4      | 4                                       | 2      |
| 11543  | 1                           | 2      | 0                                       |        |
| 11548  | 2                           | 2      | 2                                       | 3      |
| 11566  | 0                           |        | 0                                       |        |
| 11570  | 0                           |        | 2                                       | 2      |
| 11571  | 2                           | 2      | 1                                       | 2      |
| 11578  | 0                           |        | 0                                       |        |
| 11579  | 0                           |        | 0                                       |        |
| 11581  | 3                           | 4      | 3                                       | 3      |
| 11582  | 0                           |        | 0                                       |        |
| 11583  | 0                           |        | 0                                       |        |
| 11589  | 2                           | 2      | 2                                       | 1      |
| 11590  | 0                           |        | 0                                       |        |
| 11592  | 1                           | 1      | 0                                       |        |
| 11596  | 0                           |        | 0                                       |        |
| 11598  | 0                           |        | 1                                       | 1      |
| 11602  | 1                           | 2      | 0                                       |        |
| 11605  | 2                           | 3      | 1                                       | 2      |
| 11618  | 4                           | 4      | 2                                       | 2      |

| respid | ICS Terminal Dribble: Q28_1 | Q28a_1 | ICS Urgency with fear of leaking: Q29_1 | Q29a_1 |
|--------|-----------------------------|--------|-----------------------------------------|--------|
| 11621  | 4                           | 2      | 3                                       | 1      |
| 11630  | 0                           |        | 0                                       |        |
| 11636  | 0                           |        | 0                                       |        |
| 11640  | 5                           | 3      | 3                                       | 3      |
| 11658  | 0                           |        | 1                                       | 1      |
| 11665  | 0                           |        | 0                                       |        |
| 11666  | 3                           | 2      | 0                                       |        |
| 11667  | 4                           | 1      | 4                                       | 2      |
| 11674  | 0                           |        | 0                                       |        |
| 11680  | 1                           | 1      | 0                                       |        |
| 11683  | 4                           | 2      | 1                                       | 2      |
| 11688  | 0                           |        | 0                                       |        |
| 11690  | 0                           |        | 0                                       |        |
| 11694  | 0                           |        | 0                                       |        |
| 11705  | 0                           |        | 0                                       |        |
| 11720  | 3                           | 1      | 2                                       | 3      |
| 11724  | 0                           |        | 0                                       |        |
| 11738  | 1                           | 1      | 1                                       | 1      |
| 11744  | 2                           | 3      | 1                                       | 3      |
| 11745  | 0                           |        | 0                                       |        |
| 11747  | 0                           |        | 0                                       |        |
| 11755  | 0                           |        | 0                                       |        |
| 11756  | 0                           |        | 1                                       | 0      |
| 11772  | 2                           | 1      | 0                                       |        |
| 11773  | 0                           |        | 0                                       |        |
| 11778  | 5                           | 3      | 2                                       | 4      |
| 11790  | 2                           | 3      | 0                                       |        |
| 11794  | 0                           |        | 0                                       |        |
| 11795  | 2                           | 2      | 2                                       | 2      |
| 11799  | 2                           | 2      | 2                                       | 2      |
| 11803  | 1                           | 1      | 1                                       | 1      |
| 11806  | 4                           | 3      | 4                                       | 3      |

| respid | ICS Terminal Dribble: Q28_1 | Q28a_1 | ICS Urgency with fear of leaking: Q29_1 | Q29a_1 |
|--------|-----------------------------|--------|-----------------------------------------|--------|
| 11808  | 0                           |        | 0                                       |        |
| 11810  | 0                           |        | 0                                       |        |
| 11811  | 0                           |        | 0                                       |        |
| 11812  | 3                           | 2      | 3                                       | 2      |
| 11813  | 3                           | 3      | 1                                       | 1      |
| 11821  | 0                           |        | 0                                       |        |
| 11827  | 0                           |        | 0                                       |        |
| 11831  | 4                           | 4      | 4                                       | 4      |
| 11841  | 0                           |        | 0                                       |        |
| 11872  | 0                           |        | 0                                       |        |
| 11898  | 0                           |        | 0                                       |        |
| 11902  | 5                           | 4      | 3                                       | 3      |
| 11912  | 0                           |        | 0                                       |        |
| 11926  | 0                           |        | 0                                       |        |
| 11928  | 3                           | 3      | 3                                       | 3      |
| 11932  | 1                           | 1      | 1                                       | 2      |
| 11934  | 0                           |        | 0                                       |        |
| 11941  | 2                           | 3      | 2                                       | 3      |
| 11942  | 0                           |        | 0                                       |        |
| 11943  | 3                           | 3      | 0                                       |        |
| 11944  | 2                           | 2      | 0                                       |        |
| 11955  | 0                           |        | 0                                       |        |
| 11958  | 1                           | 2      | 0                                       |        |
| 11968  | 1                           | 1      | 1                                       | 1      |
| 11979  | 1                           | 2      | 4                                       | 3      |
| 11988  | 0                           |        | 0                                       |        |
| 11999  | 4                           | 3      | 4                                       | 3      |
| 12002  | 0                           |        | 0                                       |        |
| 12004  | 5                           | 1      | 0                                       |        |
| 12008  | 1                           | 1      | 1                                       | 1      |
| 12013  | 0                           |        | 1                                       | 2      |
| 12018  | 0                           |        | 0                                       |        |

| respid | ICS Terminal Dribble: Q28_1 | Q28a_1 | ICS Urgency with fear of leaking: Q29_1 | Q29a_1 |
|--------|-----------------------------|--------|-----------------------------------------|--------|
| 12023  | 3                           | 0      | 1                                       | 1      |
| 12027  | 1                           | 3      | 3                                       | 3      |
| 12030  | 1                           | 0      | 0                                       |        |
| 12031  | 1                           | 1      | 0                                       |        |
| 12036  | 3                           | 3      | 1                                       | 2      |
| 12037  | 3                           | 4      | 4                                       | 4      |
| 12038  | 0                           |        | 0                                       |        |
| 12039  | 0                           |        | 0                                       |        |
| 12045  | 3                           | 2      | 0                                       |        |
| 12046  | 1                           | 0      | 0                                       |        |
| 12054  | 1                           | 1      | 0                                       |        |
| 12055  | 2                           | 1      | 2                                       | 1      |
| 12069  | 1                           | 1      | 1                                       | 1      |
| 12070  | 3                           | 3      | 2                                       | 2      |
| 12074  | 0                           |        | 0                                       |        |
| 12075  | 2                           | 1      | 2                                       | 2      |
| 12078  | 0                           |        | 0                                       |        |
| 12089  | 0                           |        | 0                                       |        |
| 12091  | 3                           | 2      | 3                                       | 2      |
| 12092  | 0                           |        | 2                                       | 2      |
| 12108  | 5                           | 4      | 5                                       | 4      |
| 12111  | 5                           | 4      | 4                                       | 4      |
| 12112  | 3                           | 3      | 2                                       | 2      |
| 12126  | 0                           |        | 0                                       |        |
| 12132  | 2                           | 2      | 3                                       | 2      |
| 12150  | 4                           | 4      | 2                                       | 3      |
| 12152  | 1                           | 1      | 1                                       | 1      |
| 12154  | 0                           |        | 0                                       |        |
| 12157  | 2                           | 2      | 2                                       | 2      |
| 12165  | 0                           |        | 0                                       |        |
| 12169  | 3                           | 2      | 2                                       | 4      |
| 12182  | 5                           | 4      | 5                                       | 4      |

| respid | ICS Terminal Dribble: Q28_1 | Q28a_1 | ICS Urgency with fear of leaking: Q29_1 | Q29a_1 |
|--------|-----------------------------|--------|-----------------------------------------|--------|
| 12198  | 0                           |        | 0                                       |        |
| 12199  | 0                           |        | 0                                       |        |
| 12202  | 0                           |        | 0                                       |        |
| 12207  | 1                           | 1      | 0                                       |        |
| 12208  | 2                           | 2      | 0                                       |        |
| 12210  | 0                           |        | 0                                       |        |
| 12219  | 4                           | 3      | 4                                       | 3      |
| 12224  | 1                           | 0      | 0                                       |        |
| 12230  | 1                           | 2      | 2                                       | 2      |
| 12238  | 0                           |        | 0                                       |        |
| 12239  | 0                           |        | 0                                       |        |
| 12243  | 0                           |        | 0                                       |        |
| 12245  | 1                           | 1      | 0                                       |        |
| 12246  | 2                           | 1      | 3                                       | 2      |
| 12247  | 0                           |        | 0                                       |        |
| 12248  | 2                           | 3      | 2                                       | 3      |
| 12249  | 1                           | 1      | 2                                       | 2      |
| 12258  | 3                           | 2      | 3                                       | 3      |
| 12265  | 2                           | 2      | 2                                       | 2      |
| 12269  | 0                           |        | 0                                       |        |
| 12270  | 1                           | 1      | 0                                       |        |
| 12279  | 0                           |        | 0                                       |        |
| 12280  | 4                           | 3      | 2                                       | 1      |
| 12282  | 0                           |        | 1                                       | 1      |
| 12283  | 1                           | 0      | 0                                       |        |
| 12287  | 0                           |        | 0                                       |        |
| 12288  | 0                           |        | 1                                       | 1      |
| 12290  | 0                           |        | 0                                       |        |
| 12292  | 0                           |        | 1                                       | 1      |
| 12294  | 0                           |        | 0                                       |        |
| 12296  | 0                           |        | 0                                       |        |
| 12307  | 0                           |        | 0                                       |        |

| respid | ICS Terminal Dribble: Q28_1 | Q28a_1 | ICS Urgency with fear of leaking: Q29_1 | Q29a_1 |
|--------|-----------------------------|--------|-----------------------------------------|--------|
| 12309  | 5                           | 3      | 0                                       |        |
| 12312  | 1                           | 1      | 1                                       | 1      |
| 12317  | 0                           |        | 0                                       |        |
| 12319  | 0                           |        | 0                                       |        |
| 12320  | 1                           | 1      | 0                                       |        |
| 12322  | 1                           | 1      | 0                                       |        |
| 12328  | 1                           | 1      | 2                                       | 1      |
| 12331  | 3                           | 3      | 3                                       | 2      |
| 12332  | 1                           | 1      | 0                                       |        |
| 12334  | 1                           | 0      | 1                                       | 0      |
| 12337  | 4                           | 2      | 0                                       |        |
| 12338  | 0                           |        | 0                                       |        |
| 12342  | 1                           | 1      | 1                                       | 1      |
| 12349  | 0                           |        | 0                                       |        |
| 12352  | 4                           | 3      | 1                                       | 1      |
| 12355  | 1                           | 1      | 0                                       |        |
| 12357  | 2                           | 4      | 4                                       | 3      |
| 12358  | 1                           | 2      | 0                                       |        |
| 12371  | 2                           | 2      | 1                                       | 1      |
| 12372  | 0                           |        | 0                                       |        |
| 12373  | 1                           | 1      | 0                                       |        |
| 12379  | 0                           |        | 0                                       |        |
| 12381  | 2                           | 2      | 1                                       | 1      |
| 12383  | 0                           |        | 0                                       |        |
| 12384  | 0                           |        | 0                                       |        |
| 12386  | 1                           | 0      | 0                                       |        |
| 12389  | 0                           |        | 0                                       |        |
| 12392  | 0                           |        | 0                                       |        |
| 12396  | 2                           | 2      | 0                                       |        |
| 12397  | 0                           |        | 0                                       |        |
| 12399  | 0                           |        | 3                                       | 3      |
| 12400  | 3                           | 2      | 2                                       | 2      |

| respid | ICS Terminal Dribble: Q28_1 | Q28a_1 | ICS Urgency with fear of leaking: Q29_1 | Q29a_1 |
|--------|-----------------------------|--------|-----------------------------------------|--------|
| 12406  | 3                           | 2      | 3                                       | 3      |
| 12407  | 1                           | 1      | 0                                       |        |
| 12410  | 1                           | 0      | 0                                       |        |
| 12413  | 0                           |        | 0                                       |        |
| 12416  | 4                           | 3      | 5                                       | 4      |
| 12419  | 0                           |        | 1                                       | 2      |
| 12422  | 1                           | 4      | 2                                       | 3      |
| 12423  | 0                           |        | 1                                       | 1      |
| 12429  | 0                           |        | 0                                       |        |
| 12434  | 3                           | 3      | 4                                       | 3      |
| 12435  | 1                           | 1      | 0                                       |        |
| 12436  | 1                           | 1      | 1                                       | 1      |
| 12442  | 0                           |        | 0                                       |        |
| 12449  | 0                           |        | 0                                       |        |
| 12451  | 1                           | 1      | 0                                       |        |
| 12456  | 4                           | 3      | 4                                       | 3      |
| 12457  | 0                           |        | 0                                       |        |
| 12458  | 0                           |        | 0                                       |        |
| 12461  | 1                           | 1      | 1                                       | 1      |
| 12462  | 1                           | 0      | 0                                       |        |
| 12463  | 3                           | 3      | 4                                       | 2      |
| 12466  | 1                           | 0      | 0                                       |        |
| 12470  | 2                           | 1      | 1                                       | 1      |
| 12471  | 0                           |        | 0                                       |        |
| 12472  | 0                           |        | 0                                       |        |
| 12478  | 3                           | 2      | 2                                       | 1      |
| 12479  | 1                           | 3      | 1                                       | 2      |
| 12481  | 0                           |        | 0                                       |        |
| 12482  | 3                           | 3      | 4                                       | 4      |
| 12483  | 0                           |        | 0                                       |        |
| 12496  | 0                           |        | 0                                       |        |
| 12497  | 1                           | 1      | 1                                       | 1      |

| respid | ICS Terminal Dribble: Q28_1 | Q28a_1 | ICS Urgency with fear of leaking: Q29_1 | Q29a_1 |
|--------|-----------------------------|--------|-----------------------------------------|--------|
| 12498  | 1                           | 1      | 1                                       | 1      |
| 12500  | 3                           | 1      | 4                                       | 1      |
| 12501  | 1                           | 1      | 1                                       | 1      |
| 12502  | 1                           | 1      | 1                                       | 1      |
| 12503  | 0                           |        | 0                                       |        |
| 12505  | 1                           | 1      | 1                                       | 2      |
| 12508  | 2                           | 2      | 2                                       | 2      |
| 12509  | 1                           | 1      | 1                                       | 1      |
| 12510  | 0                           |        | 0                                       |        |
| 12512  | 3                           | 2      | 1                                       | 1      |
| 12514  | 1                           | 1      | 2                                       | 2      |
| 12515  | 4                           | 2      | 3                                       | 3      |
| 12520  | 0                           |        | 0                                       |        |
| 12522  | 0                           |        | 0                                       |        |
| 12526  | 1                           | 2      | 3                                       | 3      |
| 12527  | 0                           |        | 0                                       |        |
| 12528  | 2                           | 2      | 0                                       |        |
| 12530  | 0                           |        | 0                                       |        |
| 12535  | 0                           |        | 0                                       |        |
| 12539  | 1                           | 1      | 0                                       |        |
| 12541  | 4                           | 2      | 4                                       | 3      |
| 12542  | 0                           |        | 0                                       |        |
| 12545  | 4                           | 3      | 1                                       | 2      |
| 12547  | 2                           | 2      | 4                                       | 3      |
| 12549  | 0                           |        | 2                                       | 1      |
| 12550  | 0                           |        | 0                                       |        |
| 12555  | 0                           |        | 0                                       |        |
| 12557  | 0                           |        | 1                                       | 1      |
| 12559  | 1                           | 1      | 0                                       |        |
| 12561  | 0                           |        | 0                                       |        |
| 12562  | 1                           | 2      | 2                                       | 1      |
| 12563  | 0                           |        | 0                                       |        |



| respid | ICS Terminal Dribble: Q28_1 | Q28a_1 | ICS Urgency with fear of leaking: Q29_1 | Q29a_1 |
|--------|-----------------------------|--------|-----------------------------------------|--------|
| 12565  | 3                           |        | 4                                       | 3      |
| 12566  | 0                           |        | 0                                       |        |
| 12570  | 0                           |        | 0                                       |        |
| 12571  | 0                           |        | 1                                       | 0      |
| 12572  | 3                           | 3      | 3                                       | 3      |
| 12578  | 0                           |        | 0                                       |        |
| 12579  | 0                           |        | 0                                       |        |
| 12581  | 0                           |        | 0                                       |        |
| 12582  | 1                           | 2      | 0                                       |        |
| 12585  | 5                           | 3      | 0                                       |        |
| 12586  | 1                           | 1      | 5                                       | 3      |
| 12588  | 2                           | 2      | 1                                       | 1      |
| 12589  | 2                           | 1      | 1                                       | 2      |
| 12590  | 0                           |        | 0                                       |        |
| 12591  | 2                           | 3      | 2                                       | 2      |
| 12593  | 3                           | 3      | 3                                       | 2      |
| 12594  | 0                           |        | 0                                       |        |
| 12599  | 0                           |        | 0                                       |        |
| 12600  | 0                           |        | 0                                       |        |
| 12602  | 5                           | 3      | 3                                       | 3      |
| 12606  | 3                           | 2      | 3                                       | 3      |
| 12607  | 0                           |        | 0                                       |        |
| 12608  | 0                           |        | 0                                       |        |
| 12610  | 2                           | 3      | 2                                       | 3      |
| 12611  | 0                           |        | 0                                       |        |
| 12613  | 2                           | 1      | 4                                       | 3      |
| 12616  | 0                           |        | 0                                       |        |
| 12617  | 1                           | 0      | 0                                       |        |
| 12619  | 1                           | 0      | 0                                       |        |
| 12622  | 0                           |        | 0                                       |        |
| 12628  | 0                           |        | 0                                       |        |
| 12631  | 0                           |        | 1                                       | 1      |

| respid | ICS Terminal Dribble: Q28_1 | Q28a_1 | ICS Urgency with fear of leaking: Q29_1 | Q29a_1 |
|--------|-----------------------------|--------|-----------------------------------------|--------|
| 12635  | 2                           | 2      | 3                                       | 2      |
| 12638  | 0                           |        | 0                                       |        |
| 12639  | 1                           | 0      | 0                                       |        |
| 12640  | 1                           | 0      | 0                                       |        |
| 12643  | 0                           |        | 0                                       |        |
| 12646  | 2                           | 2      | 2                                       | 3      |
| 12648  | 1                           | 1      | 3                                       | 3      |
| 12650  | 2                           | 2      | 2                                       | 2      |
| 12651  | 0                           |        | 1                                       | 1      |
| 12658  | 2                           | 2      | 2                                       | 2      |
| 12662  | 1                           | 1      | 1                                       | 1      |
| 12663  | 2                           | 2      | 3                                       | 3      |
| 12664  | 0                           |        | 1                                       | 1      |
| 12669  | 4                           | 3      | 4                                       | 3      |
| 12670  | 0                           |        | 0                                       |        |
| 12673  | 0                           |        | 0                                       |        |
| 12675  | 0                           |        | 0                                       |        |
| 12677  | 0                           |        | 0                                       |        |
| 12679  | 0                           |        | 0                                       |        |
| 12682  | 2                           | 2      | 3                                       | 2      |
| 12696  | 1                           | 1      | 1                                       | 1      |
| 12697  | 0                           |        | 0                                       |        |
| 12699  | 0                           |        | 0                                       |        |
| 12700  | 0                           |        | 0                                       |        |
| 12701  | 3                           | 3      | 3                                       | 3      |
| 12702  | 0                           |        | 0                                       |        |
| 12704  | 4                           | 3      | 3                                       | 3      |
| 12705  | 0                           |        | 1                                       | 1      |
| 12709  | 0                           |        | 0                                       |        |
| 12710  | 0                           |        | 0                                       |        |
| 12713  | 1                           | 1      | 1                                       | 1      |
| 12716  | 2                           | 3      | 3                                       | 2      |

| respid | ICS Terminal Dribble: Q28_1 | Q28a_1 | ICS Urgency with fear of leaking: Q29_1 | Q29a_1 |
|--------|-----------------------------|--------|-----------------------------------------|--------|
| 12719  | 1                           | 2      | 1                                       | 1      |
| 12720  | 0                           |        | 0                                       |        |
| 12723  | 0                           |        | 0                                       |        |
| 12726  | 0                           |        | 0                                       |        |
| 12728  | 2                           | 2      | 3                                       | 2      |
| 12729  | 1                           | 0      | 1                                       | 1      |
| 12731  | 0                           |        | 0                                       |        |
| 12732  | 2                           | 2      | 3                                       | 3      |
| 12733  | 0                           |        | 3                                       | 1      |
| 12736  | 0                           |        | 0                                       |        |
| 12737  | 0                           |        | 0                                       |        |
| 12739  | 3                           | 3      | 3                                       | 3      |
| 12742  | 0                           |        | 0                                       |        |
| 12743  | 5                           | 4      | 4                                       | 4      |
| 12744  | 0                           |        | 0                                       |        |
| 12747  | 3                           | 3      | 3                                       | 3      |
| 12751  | 0                           |        | 0                                       |        |
| 12754  | 0                           |        | 0                                       |        |
| 12756  | 3                           | 3      | 3                                       | 3      |
| 12757  | 0                           |        | 0                                       |        |
| 12760  | 1                           | 2      | 0                                       |        |
| 12761  | 0                           |        | 0                                       |        |
| 12762  | 2                           | 2      | 2                                       | 2      |
| 12766  | 0                           |        | 0                                       |        |
| 12769  | 1                           | 1      | 0                                       |        |
| 12770  | 2                           | 2      | 2                                       | 2      |
| 12773  | 4                           | 4      | 4                                       | 3      |
| 12780  | 1                           | 2      | 0                                       |        |
| 12789  | 0                           |        | 0                                       |        |
| 12792  | 4                           | 3      | 4                                       | 4      |
| 12795  | 1                           | 1      | 1                                       | 1      |
| 12804  | 0                           |        | 2                                       | 1      |

| respid | ICS Terminal Dribble: Q28_1 | Q28a_1 | ICS Urgency with fear of leaking: Q29_1 | Q29a_1 |
|--------|-----------------------------|--------|-----------------------------------------|--------|
| 12811  | 0                           |        | 0                                       |        |
| 12813  | 1                           | 1      | 1                                       | 1      |
| 12814  | 0                           |        | 0                                       |        |
| 12815  | 3                           | 2      | 0                                       |        |
| 12816  | 0                           |        | 0                                       |        |
| 12817  | 1                           | 0      | 0                                       |        |
| 12818  | 1                           | 1      | 0                                       |        |
| 12819  | 4                           | 2      | 0                                       |        |
| 12820  | 0                           |        | 0                                       |        |
| 12821  | 0                           |        | 0                                       |        |
| 12824  | 2                           | 1      | 1                                       | 1      |
| 12827  | 1                           | 0      | 0                                       |        |
| 12836  | 3                           | 2      | 3                                       | 2      |
| 12837  | 0                           |        | 0                                       |        |
| 12838  | 3                           | 2      | 1                                       | 1      |
| 12845  | 1                           | 0      | 0                                       |        |
| 12847  | 2                           | 1      | 0                                       |        |
| 12849  | 4                           | 4      | 4                                       | 4      |
| 12850  | 0                           |        | 0                                       |        |
| 12852  | 0                           |        | 0                                       |        |
| 12853  | 4                           | 2      | 3                                       | 3      |
| 12854  | 0                           |        | 0                                       |        |
| 12860  | 0                           |        | 0                                       |        |
| 12861  | 0                           |        | 0                                       |        |
| 12863  | 0                           |        | 0                                       |        |
| 12865  | 0                           |        | 0                                       |        |
| 12870  | 1                           | 1      | 0                                       |        |
| 12871  | 0                           |        | 0                                       |        |
| 12873  | 1                           | 1      | 0                                       |        |
| 12877  | 1                           | 1      | 0                                       |        |
| 12880  | 0                           |        | 0                                       |        |
| 12881  | 1                           | 0      | 1                                       | 0      |

| respid | ICS Terminal Dribble: Q28_1 | Q28a_1 | ICS Urgency with fear of leaking: Q29_1 | Q29a_1 |
|--------|-----------------------------|--------|-----------------------------------------|--------|
| 12882  | 0                           |        | 1                                       | 1      |
| 12883  | 0                           |        | 1                                       | 1      |
| 12885  | 0                           |        | 0                                       |        |
| 12887  | 2                           | 2      | 1                                       | 2      |
| 12889  | 0                           |        | 0                                       |        |
| 12890  | 1                           | 1      | 0                                       |        |
| 12891  | 1                           | 1      | 1                                       | 1      |
| 12892  | 0                           |        | 0                                       |        |
| 12893  | 0                           |        | 1                                       | 2      |
| 12895  | 1                           | 1      | 1                                       | 1      |
| 12898  | 1                           | 1      | 0                                       |        |
| 12907  | 0                           |        | 1                                       | 2      |
| 12908  | 0                           |        | 0                                       |        |
| 12909  | 0                           |        | 0                                       |        |
| 12914  | 0                           |        | 0                                       |        |
| 12915  | 2                           | 2      | 1                                       | 1      |
| 12916  | 0                           |        | 0                                       |        |
| 12921  | 0                           |        | 1                                       | 1      |
| 12922  | 0                           |        | 0                                       |        |
| 12923  | 4                           | 4      | 1                                       | 2      |
| 12926  | 1                           | 1      | 0                                       |        |
| 12927  | 0                           |        | 0                                       |        |
| 12932  | 3                           | 2      | 3                                       | 2      |
| 12936  | 1                           | 0      | 0                                       |        |
| 12937  | 1                           | 0      | 1                                       | 0      |
| 12938  | 4                           | 4      | 2                                       | 3      |
| 12939  | 0                           |        | 0                                       |        |
| 12940  | 2                           | 2      | 2                                       | 3      |
| 12945  | 2                           | 2      | 2                                       | 2      |
| 12946  | 1                           | 1      | 0                                       |        |
| 12947  | 2                           | 2      | 2                                       | 1      |
| 12948  | 3                           | 2      | 3                                       | 2      |

| respid | ICS Terminal Dribble: Q28_1 | Q28a_1 | ICS Urgency with fear of leaking: Q29_1 | Q29a_1 |
|--------|-----------------------------|--------|-----------------------------------------|--------|
| 12951  | 0                           |        | 0                                       |        |
| 12952  | 0                           |        | 1                                       | 1      |
| 12954  | 3                           | 3      | 3                                       | 4      |
| 12960  | 0                           |        | 0                                       |        |
| 12961  | 0                           |        | 0                                       |        |
| 12962  | 0                           |        | 0                                       |        |
| 12963  | 2                           | 2      | 0                                       |        |
| 12964  | 0                           |        | 1                                       | 1      |
| 12966  | 1                           | 0      | 0                                       |        |
| 12967  | 5                           | 4      | 1                                       | 3      |
| 12969  | 1                           | 1      | 0                                       |        |
| 12970  | 3                           | 2      | 1                                       | 2      |
| 12974  | 3                           | 2      | 3                                       | 2      |
| 12979  | 0                           |        | 0                                       |        |
| 12980  | 0                           |        | 0                                       |        |
| 12983  | 0                           |        | 0                                       |        |
| 12988  | 0                           |        | 0                                       |        |
| 12994  | 1                           | 1      | 0                                       |        |
| 12995  | 0                           |        | 0                                       |        |
| 12996  | 0                           |        | 0                                       |        |
| 12998  | 0                           |        | 0                                       |        |
| 12999  | 0                           |        | 0                                       |        |
| 13001  | 1                           | 1      | 0                                       |        |
| 13005  | 0                           |        | 0                                       |        |
| 13006  | 3                           | 3      | 4                                       | 4      |
| 13007  | 1                           | 2      | 1                                       | 2      |
| 13011  | 1                           | 1      | 1                                       | 1      |
| 13012  | 0                           |        | 0                                       |        |
| 13013  | 4                           | 3      | 3                                       | 2      |
| 13016  | 0                           |        | 0                                       |        |
| 13018  | 1                           | 0      | 0                                       |        |
| 13020  | 0                           |        | 0                                       |        |

| respid | ICS Terminal Dribble: Q28_1 | Q28a_1 | ICS Urgency with fear of leaking: Q29_1 | Q29a_1 |
|--------|-----------------------------|--------|-----------------------------------------|--------|
| 13024  | 0                           |        | 0                                       |        |
| 13025  | 0                           |        | 0                                       |        |
| 13027  | 0                           |        | 0                                       |        |
| 13031  | 2                           | 2      | 2                                       | 2      |
| 13032  | 2                           | 2      | 2                                       | 2      |
| 13034  | 1                           | 1      | 0                                       |        |
| 13036  | 1                           | 1      | 1                                       | 0      |
| 13037  | 0                           |        | 1                                       | 0      |
| 13038  | 2                           | 2      | 3                                       | 3      |
| 13039  | 0                           |        | 0                                       |        |
| 13040  | 1                           | 1      | 1                                       | 1      |
| 13041  | 0                           |        | 1                                       | 1      |
| 13045  | 3                           | 3      | 3                                       | 3      |
| 13046  | 0                           |        | 0                                       |        |
| 13048  | 0                           |        | 0                                       |        |
| 13051  | 3                           | 2      | 0                                       |        |
| 13053  | 0                           |        | 0                                       |        |
| 13055  | 1                           | 3      | 1                                       | 3      |
| 13059  | 3                           | 1      | 1                                       | 1      |
| 13068  | 0                           |        | 0                                       |        |
| 13069  | 0                           |        | 0                                       |        |
| 13076  | 1                           | 1      | 1                                       | 2      |
| 13081  | 0                           |        | 0                                       |        |
| 13082  | 0                           |        | 1                                       | 1      |
| 13084  | 1                           | 1      | 4                                       | 3      |
| 13085  | 3                           | 2      | 0                                       |        |
| 13086  | 3                           | 2      | 3                                       | 2      |
| 13093  | 2                           | 1      | 0                                       |        |
| 13094  | 3                           | 2      | 3                                       | 2      |
| 13097  | 0                           |        | 0                                       |        |
| 13098  | 1                           | 1      | 1                                       | 1      |
| 13099  | 2                           | 2      | 2                                       | 2      |

| respid | ICS Terminal Dribble: Q28_1 | Q28a_1 | ICS Urgency with fear of leaking: Q29_1 | Q29a_1 |
|--------|-----------------------------|--------|-----------------------------------------|--------|
| 13100  | 1                           | 0      | 0                                       |        |
| 13101  | 0                           |        | 0                                       |        |
| 13103  | 0                           |        | 0                                       |        |
| 13105  | 1                           | 1      | 0                                       |        |
| 13106  | 1                           | 2      | 1                                       | 1      |
| 13107  | 0                           |        | 1                                       | 1      |
| 13110  | 1                           | 0      | 1                                       | 0      |
| 13118  | 0                           |        | 1                                       | 1      |
| 13120  | 3                           | 3      | 2                                       | 2      |
| 13130  | 0                           |        | 0                                       |        |
| 13133  | 0                           |        | 0                                       |        |
| 13134  | 1                           | 0      | 0                                       |        |
| 13139  | 1                           | 1      | 0                                       |        |
| 13142  | 0                           |        | 1                                       | 1      |
| 13143  | 0                           |        | 0                                       |        |
| 13145  | 1                           | 1      | 1                                       | 1      |
| 13148  | 3                           | 1      | 0                                       |        |
| 13149  | 0                           |        | 0                                       |        |
| 13151  | 3                           | 2      | 3                                       | 3      |
| 13153  | 1                           | 1      | 1                                       | 1      |
| 13158  | 0                           |        | 0                                       |        |
| 13160  | 2                           | 2      | 1                                       | 1      |
| 13162  | 4                           | 3      | 3                                       | 3      |
| 13169  | 0                           |        | 0                                       |        |
| 13172  | 2                           | 1      | 2                                       | 2      |
| 13173  | 0                           |        | 0                                       |        |
| 13176  | 0                           |        | 1                                       | 0      |
| 13179  | 0                           |        | 0                                       |        |
| 13184  | 1                           | 1      | 0                                       |        |
| 13185  | 0                           |        | 0                                       |        |
| 13186  | 0                           |        | 0                                       |        |
| 13188  | 1                           | 2      | 1                                       | 1      |



| respid | ICS Terminal Dribble: Q28_1 | Q28a_1 | ICS Urgency with fear of leaking: Q29_1 | Q29a_1 |
|--------|-----------------------------|--------|-----------------------------------------|--------|
| 13190  | 3                           | 2      | 2                                       | 2      |
| 13192  | 0                           |        | 1                                       | 1      |
| 13193  | 0                           |        | 0                                       |        |
| 13201  | 0                           |        | 0                                       |        |
| 13207  | 0                           |        | 0                                       |        |
| 13208  | 0                           |        | 0                                       |        |
| 13209  | 2                           | 2      | 3                                       | 2      |
| 13212  | 0                           |        | 0                                       |        |
| 13215  | 0                           |        | 0                                       |        |
| 13218  | 1                           | 1      | 0                                       |        |
| 13219  | 0                           |        | 0                                       |        |
| 13224  | 0                           |        | 0                                       |        |
| 13225  | 1                           | 0      | 0                                       |        |
| 13226  | 0                           |        | 0                                       |        |
| 13232  | 1                           | 1      | 0                                       |        |
| 13237  | 0                           |        | 0                                       |        |
| 13239  | 0                           |        | 0                                       |        |
| 13241  | 1                           | 1      | 0                                       |        |
| 13243  | 0                           |        | 1                                       | 3      |
| 13247  | 2                           | 2      | 2                                       | 3      |
| 13248  | 1                           | 0      | 0                                       |        |
| 13251  | 0                           |        | 0                                       |        |
| 13256  | 0                           |        | 1                                       | 0      |
| 13260  | 2                           | 1      | 1                                       | 1      |
| 13261  | 0                           |        | 0                                       |        |
| 13264  | 0                           |        | 0                                       |        |
| 13273  | 1                           | 1      | 1                                       | 1      |
| 13274  | 0                           |        | 0                                       |        |
| 13276  | 0                           |        | 0                                       |        |
| 13278  | 0                           |        | 0                                       |        |
| 13279  | 0                           |        | 0                                       |        |
| 13282  | 0                           |        | 0                                       |        |

| respid | ICS Terminal Dribble: Q28_1 | Q28a_1 | ICS Urgency with fear of leaking: Q29_1 | Q29a_1 |
|--------|-----------------------------|--------|-----------------------------------------|--------|
| 13283  | 2                           | 2      | 0                                       |        |
| 13285  | 1                           | 1      | 0                                       |        |
| 13286  | 1                           | 1      | 1                                       | 1      |
| 13299  | 1                           | 0      | 0                                       |        |
| 13300  | 2                           | 2      | 3                                       | 2      |
| 13301  | 0                           |        | 0                                       |        |
| 13303  | 0                           |        | 0                                       |        |
| 13304  | 0                           |        | 0                                       |        |
| 13307  | 0                           |        | 1                                       | 1      |
| 13308  | 0                           |        | 0                                       |        |
| 13312  | 1                           | 0      | 0                                       |        |
| 13313  | 1                           | 0      | 0                                       |        |
| 13314  | 1                           | 1      | 1                                       | 1      |
| 13318  | 1                           | 1      | 1                                       | 1      |
| 13320  | 0                           |        | 0                                       |        |
| 13322  | 1                           | 1      | 1                                       | 1      |
| 13324  | 0                           |        | 0                                       |        |
| 13325  | 1                           | 0      | 1                                       | 1      |
| 13327  | 1                           | 0      | 1                                       | 0      |
| 13330  | 0                           |        | 0                                       |        |
| 13332  | 1                           | 1      | 1                                       | 1      |
| 13333  | 0                           |        | 1                                       | 1      |
| 13334  | 0                           |        | 0                                       |        |
| 13351  | 2                           | 2      | 1                                       | 3      |
| 13353  | 0                           |        | 1                                       | 1      |
| 13354  | 0                           |        | 0                                       |        |
| 13355  | 0                           |        | 1                                       | 1      |
| 13358  | 1                           | 0      | 0                                       |        |
| 13359  | 2                           | 1      | 0                                       |        |
| 13360  | 2                           | 1      | 2                                       | 1      |
| 13364  | 1                           | 0      | 3                                       | 1      |
| 13365  | 5                           | 4      | 3                                       | 3      |

| respid | ICS Terminal Dribble: Q28_1 | Q28a_1 | ICS Urgency with fear of leaking: Q29_1 | Q29a_1 |
|--------|-----------------------------|--------|-----------------------------------------|--------|
| 13368  | 0                           |        | 0                                       |        |
| 13370  | 0                           |        | 0                                       |        |
| 13375  | 1                           | 0      | 1                                       | 0      |
| 13384  | 0                           |        | 0                                       |        |
| 13387  | 0                           |        | 0                                       |        |
| 13395  | 0                           |        | 2                                       | 2      |
| 13398  | 1                           | 1      | 0                                       |        |
| 13404  | 1                           | 2      | 1                                       | 2      |
| 13405  | 0                           |        | 1                                       | 1      |
| 13408  | 0                           |        | 0                                       |        |
| 13411  | 0                           |        | 0                                       |        |
| 13413  | 0                           |        | 0                                       |        |
| 13419  | 3                           | 1      | 0                                       |        |
| 13420  | 0                           |        | 0                                       |        |
| 13427  | 2                           | 2      | 2                                       | 2      |
| 13441  | 1                           | 3      | 5                                       | 4      |
| 13444  | 0                           |        | 0                                       |        |
| 13456  | 0                           |        | 0                                       |        |
| 13466  | 1                           | 0      | 0                                       |        |
| 13468  | 0                           |        | 0                                       |        |
| 13475  | 0                           |        | 0                                       |        |
| 13484  | 0                           |        | 1                                       | 0      |
| 13486  | 1                           | 0      | 0                                       |        |
| 13487  | 1                           | 1      | 1                                       | 1      |
| 13491  | 0                           |        | 0                                       |        |
| 13496  | 0                           |        | 1                                       | 1      |
| 13497  | 1                           | 1      | 1                                       | 1      |
| 13498  | 0                           |        | 0                                       |        |
| 13502  | 0                           |        | 0                                       |        |
| 13503  | 4                           | 2      | 3                                       | 2      |
| 13505  | 0                           |        | 1                                       | 0      |
| 13509  | 0                           |        | 0                                       |        |

| respid | ICS Terminal Dribble: Q28_1 | Q28a_1 | ICS Urgency with fear of leaking: Q29_1 | Q29a_1 |
|--------|-----------------------------|--------|-----------------------------------------|--------|
| 13510  | 1                           | 1      | 1                                       | 1      |
| 13518  | 0                           |        | 2                                       | 2      |
| 13521  | 0                           |        | 0                                       |        |
| 13523  | 1                           | 1      | 1                                       | 1      |
| 13528  | 0                           |        | 0                                       |        |
| 13531  | 0                           |        | 0                                       |        |
| 13532  | 0                           |        | 0                                       |        |
| 13533  | 0                           |        | 1                                       | 1      |
| 13534  | 0                           |        | 0                                       |        |
| 13535  | 0                           |        | 0                                       |        |
| 13538  | 2                           | 2      | 2                                       | 2      |
| 13540  | 2                           | 2      | 1                                       | 2      |
| 13541  | 1                           | 1      | 2                                       | 3      |
| 13542  | 0                           |        | 0                                       |        |
| 13550  | 0                           |        | 1                                       | 1      |
| 13553  | 1                           | 0      | 0                                       |        |
| 13554  | 0                           |        | 1                                       | 0      |
| 13555  | 2                           | 3      | 2                                       | 2      |
| 13556  | 1                           | 1      | 1                                       | 1      |
| 13563  | 1                           | 1      | 2                                       | 1      |
| 13564  | 1                           | 1      | 1                                       | 1      |
| 13567  | 0                           |        | 0                                       |        |
| 13568  | 3                           | 2      | 3                                       | 2      |
| 13570  | 0                           |        | 0                                       |        |
| 13573  | 2                           | 2      | 2                                       | 2      |
| 13575  | 0                           |        | 1                                       | 2      |
| 13577  | 2                           | 3      | 3                                       | 3      |
| 13580  | 3                           | 3      | 3                                       | 3      |
| 13582  | 0                           |        | 0                                       |        |
| 13584  | 2                           | 2      | 3                                       | 2      |
| 13585  | 0                           |        | 0                                       |        |
| 13586  | 0                           |        | 0                                       |        |

| respid | ICS Terminal Dribble: Q28_1 | Q28a_1 | ICS Urgency with fear of leaking: Q29_1 | Q29a_1 |
|--------|-----------------------------|--------|-----------------------------------------|--------|
| 13587  | 0                           |        | 3                                       | 1      |
| 13592  | 3                           | 2      | 3                                       | 3      |
| 13596  | 0                           |        | 1                                       | 0      |
| 13597  | 1                           | 1      | 1                                       | 1      |
| 13599  | 1                           | 1      | 1                                       | 1      |
| 13601  | 1                           | 1      | 0                                       |        |
| 13604  | 3                           | 1      | 1                                       | 1      |
| 13608  | 2                           | 1      | 0                                       |        |
| 13616  | 0                           |        | 0                                       |        |
| 13618  | 0                           |        | 0                                       |        |
| 13619  | 0                           |        | 0                                       |        |
| 13626  | 0                           |        | 0                                       |        |
| 13628  | 1                           | 1      | 2                                       | 1      |
| 13640  | 2                           | 2      | 1                                       | 2      |
| 13645  | 0                           |        | 0                                       |        |
| 13648  | 0                           |        | 0                                       |        |
| 13653  | 0                           |        | 0                                       |        |
| 13655  | 1                           | 1      | 0                                       |        |
| 13662  | 2                           | 1      | 0                                       |        |
| 13670  | 1                           | 1      | 0                                       |        |
| 13673  | 2                           | 1      | 1                                       | 1      |
| 13674  | 1                           | 1      | 1                                       | 1      |
| 13675  | 1                           | 0      | 0                                       |        |
| 13678  | 1                           | 1      | 1                                       | 1      |
| 13680  | 1                           | 1      | 1                                       | 1      |
| 13681  | 0                           |        | 0                                       |        |
| 13683  | 0                           |        | 0                                       |        |
| 13684  | 1                           | 2      | 1                                       | 2      |
| 13685  | 0                           |        | 0                                       |        |
| 13687  | 0                           |        | 0                                       |        |
| 13690  | 1                           | 1      | 0                                       |        |
| 13700  | 5                           | 2      | 2                                       | 2      |

| respid | ICS Terminal Dribble: Q28_1 | Q28a_1 | ICS Urgency with fear of leaking: Q29_1 | Q29a_1 |
|--------|-----------------------------|--------|-----------------------------------------|--------|
| 13705  | 4                           | 3      | 1                                       | 1      |
| 13710  | 0                           |        | 0                                       |        |
| 13711  | 0                           |        | 0                                       |        |
| 13713  | 0                           |        | 0                                       |        |
| 13716  | 0                           |        | 0                                       |        |
| 13721  | 1                           | 1      | 1                                       | 1      |
| 13722  | 3                           | 4      | 3                                       | 3      |
| 13723  | 2                           | 3      | 2                                       | 4      |
| 13726  | 4                           | 1      | 2                                       | 0      |
| 13728  | 1                           | 1      | 1                                       | 1      |
| 13730  | 1                           | 1      | 1                                       | 1      |
| 13734  | 1                           | 1      | 0                                       |        |
| 13736  | 4                           | 2      | 4                                       | 4      |
| 13737  | 0                           |        | 0                                       |        |
| 13739  | 0                           |        | 0                                       |        |
| 13742  | 0                           |        | 0                                       |        |
| 13746  | 0                           |        | 0                                       |        |
| 13747  | 1                           | 1      | 0                                       |        |
| 13749  | 0                           |        | 0                                       |        |
| 13751  | 1                           | 1      | 1                                       | 1      |
| 13752  | 0                           |        | 0                                       |        |
| 13756  | 1                           | 1      | 1                                       | 1      |
| 13757  | 1                           | 1      | 0                                       |        |
| 13767  | 0                           |        | 0                                       |        |
| 13771  | 1                           | 1      | 0                                       |        |
| 13772  | 4                           | 4      | 2                                       | 2      |
| 13779  | 0                           |        | 0                                       |        |
| 13782  | 2                           | 0      | 0                                       |        |
| 13783  | 0                           |        | 0                                       |        |
| 13785  | 1                           | 0      | 0                                       |        |
| 13786  | 0                           |        | 1                                       | 2      |
| 13792  | 3                           | 2      | 4                                       | 3      |

| respid | ICS Terminal Dribble: Q28_1 | Q28a_1 | ICS Urgency with fear of leaking: Q29_1 | Q29a_1 |
|--------|-----------------------------|--------|-----------------------------------------|--------|
| 13796  | 1                           | 2      | 0                                       |        |
| 13798  | 0                           |        | 0                                       |        |
| 13799  | 0                           |        | 1                                       | 1      |
| 13804  | 0                           |        | 0                                       |        |
| 13805  | 0                           |        | 0                                       |        |
| 13810  | 3                           | 3      | 3                                       | 2      |
| 13811  | 0                           |        | 0                                       |        |
| 13819  | 2                           | 2      | 0                                       |        |
| 13821  | 4                           | 4      | 3                                       | 4      |
| 13824  | 5                           | 3      | 2                                       | 1      |
| 13828  | 2                           | 2      | 1                                       | 2      |
| 13829  | 3                           | 3      | 3                                       | 3      |
| 13831  | 0                           |        | 0                                       |        |
| 13833  | 1                           | 2      | 1                                       | 2      |
| 13835  | 4                           | 4      | 2                                       | 3      |
| 13838  | 0                           |        | 0                                       |        |
| 13839  | 4                           | 4      | 4                                       | 4      |
| 13845  | 0                           |        | 0                                       |        |
| 13846  | 0                           |        | 0                                       |        |
| 13853  | 1                           | 1      | 0                                       |        |
| 13855  | 3                           | 2      | 3                                       | 4      |
| 13858  | 0                           |        | 0                                       |        |
| 13860  | 0                           |        | 0                                       |        |
| 13865  | 3                           | 4      | 4                                       | 4      |
| 13870  | 0                           |        | 0                                       |        |
| 13872  | 0                           |        | 0                                       |        |
| 13873  | 1                           | 1      | 1                                       | 1      |
| 13874  | 0                           |        | 0                                       |        |
| 13875  | 2                           | 1      | 2                                       | 0      |
| 13881  | 0                           |        | 0                                       |        |
| 13887  | 1                           | 0      | 0                                       |        |
| 13888  | 0                           |        | 0                                       |        |

| respid | ICS Terminal Dribble: Q28_1 | Q28a_1 | ICS Urgency with fear of leaking: Q29_1 | Q29a_1 |
|--------|-----------------------------|--------|-----------------------------------------|--------|
| 13889  | 2                           | 3      | 2                                       | 3      |
| 13895  | 4                           | 4      | 2                                       | 2      |
| 13897  | 0                           |        | 0                                       |        |
| 13898  | 1                           | 1      | 1                                       | 1      |
| 13901  | 0                           |        | 0                                       |        |
| 13902  | 4                           | 4      | 4                                       | 3      |
| 13903  | 0                           |        | 0                                       |        |
| 13905  | 1                           | 2      | 2                                       | 1      |
| 13908  | 2                           | 1      | 1                                       | 1      |
| 13909  | 0                           |        | 1                                       | 0      |
| 13910  | 4                           | 3      | 3                                       | 4      |
| 13911  | 0                           |        | 0                                       |        |
| 13914  | 5                           | 4      | 3                                       | 2      |
| 13920  | 2                           | 2      | 2                                       | 2      |
| 13926  | 0                           |        | 0                                       |        |
| 13929  | 1                           | 0      | 1                                       | 1      |
| 13930  | 4                           | 2      | 2                                       | 2      |
| 13931  | 0                           |        | 0                                       |        |
| 13932  | 3                           | 2      | 0                                       |        |
| 13934  | 2                           | 1      | 2                                       | 2      |
| 13938  | 1                           | 2      | 0                                       |        |
| 13942  | 0                           |        | 0                                       |        |
| 13945  | 2                           | 2      | 2                                       | 2      |
| 13947  | 5                           | 3      | 4                                       | 3      |
| 13948  | 0                           |        | 0                                       |        |
| 13959  | 2                           | 0      | 0                                       |        |
| 13962  | 1                           | 0      | 0                                       |        |
| 13963  | 0                           |        | 0                                       |        |
| 13964  | 1                           | 1      | 1                                       | 1      |
| 13966  | 2                           | 2      | 2                                       | 2      |
| 13968  | 1                           | 1      | 0                                       |        |
| 13971  | 1                           | 1      | 1                                       | 1      |



| respid | ICS Terminal Dribble: Q28_1 | Q28a_1 | ICS Urgency with fear of leaking: Q29_1 | Q29a_1 |
|--------|-----------------------------|--------|-----------------------------------------|--------|
| 13979  | 3                           | 2      | 3                                       | 2      |
| 13980  | 2                           | 1      | 2                                       | 1      |
| 13981  | 1                           | 0      | 1                                       | 1      |
| 13982  | 2                           | 2      | 0                                       |        |
| 13984  | 5                           | 3      | 0                                       |        |
| 13989  | 1                           | 0      | 0                                       |        |
| 13990  | 0                           |        | 0                                       |        |
| 13992  | 4                           | 2      | 3                                       | 1      |
| 13998  | 2                           | 2      | 3                                       | 2      |
| 13999  | 5                           | 2      | 3                                       | 2      |
| 14000  | 2                           | 1      | 0                                       |        |
| 14003  | 0                           |        | 1                                       | 1      |
| 14004  | 0                           |        | 0                                       |        |
| 14006  | 1                           | 1      | 1                                       | 1      |
| 14007  | 0                           |        | 1                                       | 1      |
| 14008  | 0                           |        | 0                                       |        |
| 14013  | 0                           |        | 0                                       |        |
| 14015  | 1                           | 0      | 0                                       |        |
| 14018  | 1                           | 0      | 0                                       |        |
| 14021  | 1                           | 0      | 1                                       | 1      |
| 14023  | 1                           | 0      | 0                                       |        |
| 14024  | 2                           | 1      | 1                                       | 1      |
| 14026  | 0                           |        | 0                                       |        |
| 14030  | 3                           | 2      | 1                                       | 1      |
| 14032  | 2                           | 1      | 2                                       | 1      |
| 14040  | 0                           |        | 0                                       |        |
| 14045  | 0                           |        | 0                                       |        |
| 14048  | 2                           | 2      | 2                                       | 1      |
| 14049  | 4                           | 3      | 2                                       | 2      |
| 14050  | 0                           |        | 0                                       |        |
| 14051  | 4                           | 4      | 4                                       | 4      |
| 14052  | 1                           | 0      | 0                                       |        |

| respid | ICS Terminal Dribble: Q28_1 | Q28a_1 | ICS Urgency with fear of leaking: Q29_1 | Q29a_1 |
|--------|-----------------------------|--------|-----------------------------------------|--------|
| 14054  | 0                           |        | 0                                       |        |
| 14055  | 0                           |        | 0                                       |        |
| 14057  | 1                           | 1      | 3                                       | 2      |
| 14058  | 0                           |        | 0                                       |        |
| 14059  | 3                           | 0      | 0                                       |        |
| 14060  | 0                           |        | 1                                       | 1      |
| 14061  | 3                           | 3      | 2                                       | 2      |
| 14071  | 0                           |        | 0                                       |        |
| 14073  | 1                           | 2      | 0                                       |        |
| 14074  | 3                           | 2      | 3                                       | 2      |
| 14076  | 0                           |        | 1                                       | 2      |
| 14080  | 1                           | 0      | 0                                       |        |
| 14082  | 0                           |        | 0                                       |        |
| 14083  | 1                           | 1      | 1                                       | 1      |
| 14084  | 0                           |        | 0                                       |        |
| 14085  | 0                           |        | 0                                       |        |
| 14086  | 2                           | 2      | 1                                       | 1      |
| 14088  | 0                           |        | 0                                       |        |
| 14090  | 0                           |        | 0                                       |        |
| 14092  | 0                           |        | 1                                       | 1      |
| 14093  | 0                           |        | 0                                       |        |
| 14096  | 1                           | 1      | 0                                       |        |
| 14103  | 4                           | 2      | 2                                       | 1      |
| 14105  | 0                           |        | 0                                       |        |
| 14106  | 1                           | 1      | 1                                       | 1      |
| 14107  | 1                           | 1      | 1                                       | 1      |
| 14108  | 1                           | 3      | 2                                       | 4      |
| 14112  | 0                           |        | 1                                       | 1      |
| 14114  | 5                           | 3      | 1                                       | 2      |
| 14115  | 0                           |        | 1                                       | 0      |
| 14116  | 0                           |        | 0                                       |        |
| 14117  | 3                           | 2      | 0                                       |        |

| respid | ICS Terminal Dribble: Q28_1 | Q28a_1 | ICS Urgency with fear of leaking: Q29_1 | Q29a_1 |
|--------|-----------------------------|--------|-----------------------------------------|--------|
| 14118  | 4                           | 2      | 1                                       | 1      |
| 14119  | 1                           | 0      | 1                                       | 0      |
| 14127  | 0                           |        | 0                                       |        |
| 14129  | 4                           | 2      | 1                                       | 2      |
| 14131  | 1                           | 0      | 1                                       | 1      |
| 14132  | 0                           |        | 1                                       | 1      |
| 14133  | 2                           | 4      | 1                                       | 4      |
| 14134  | 4                           | 1      | 1                                       | 1      |
| 14135  | 0                           |        | 0                                       |        |
| 14136  | 1                           | 0      | 1                                       | 1      |
| 14138  | 0                           |        | 0                                       |        |
| 14139  | 0                           |        | 0                                       |        |
| 14140  | 1                           | 1      | 2                                       | 2      |
| 14141  | 0                           |        | 0                                       |        |
| 14143  | 0                           |        | 0                                       |        |
| 14146  | 0                           |        | 0                                       |        |
| 14147  | 4                           | 3      | 3                                       | 4      |
| 14148  | 1                           | 0      | 1                                       | 0      |
| 14151  | 2                           | 2      | 3                                       | 3      |
| 14152  | 2                           | 2      | 1                                       | 1      |
| 14153  | 1                           | 1      | 0                                       |        |
| 14154  | 3                           | 2      | 0                                       |        |
| 14158  | 0                           |        | 0                                       |        |
| 14159  | 2                           | 2      | 2                                       | 2      |
| 14160  | 3                           | 3      | 3                                       | 3      |
| 14161  | 1                           | 0      | 2                                       | 2      |
| 14162  | 0                           |        | 1                                       | 1      |
| 14165  | 5                           | 3      | 4                                       | 3      |
| 14166  | 4                           | 2      | 2                                       | 2      |
| 14167  | 1                           | 1      | 1                                       | 1      |
| 14169  | 1                           | 1      | 2                                       | 2      |
| 14170  | 1                           | 2      | 1                                       | 1      |

| respid | ICS Terminal Dribble: Q28_1 | Q28a_1 | ICS Urgency with fear of leaking: Q29_1 | Q29a_1 |
|--------|-----------------------------|--------|-----------------------------------------|--------|
| 14172  | 2                           | 1      | 2                                       | 2      |
| 14173  | 0                           |        | 0                                       |        |
| 14174  | 2                           | 1      | 0                                       |        |
| 14175  | 1                           | 1      | 1                                       | 1      |
| 14176  | 1                           | 1      | 1                                       | 1      |
| 14178  | 0                           |        | 0                                       |        |
| 14179  | 0                           |        | 0                                       |        |
| 14180  | 3                           | 2      | 2                                       | 2      |
| 14183  | 3                           | 3      | 2                                       | 2      |
| 14185  | 0                           |        | 2                                       | 1      |
| 14187  | 1                           | 0      | 0                                       |        |
| 14189  | 0                           |        | 0                                       |        |
| 14191  | 4                           | 2      | 3                                       | 2      |
| 14192  | 0                           |        | 0                                       |        |
| 14195  | 4                           | 3      | 2                                       | 3      |
| 14197  | 1                           | 1      | 0                                       |        |
| 14203  | 3                           | 3      | 2                                       | 2      |
| 14204  | 1                           | 1      | 1                                       | 1      |
| 14205  | 0                           |        | 1                                       | 0      |
| 14208  | 0                           |        | 0                                       |        |
| 14211  | 4                           | 4      | 3                                       | 4      |
| 14214  | 0                           |        | 0                                       |        |
| 14215  | 4                           | 3      | 1                                       | 1      |
| 14216  | 3                           | 2      | 3                                       | 2      |
| 14218  | 0                           |        | 0                                       |        |
| 14220  | 1                           | 0      | 0                                       |        |
| 14223  | 0                           |        | 0                                       |        |
| 14225  | 1                           | 2      | 2                                       | 1      |
| 14226  | 1                           | 2      | 0                                       |        |
| 14228  | 2                           | 2      | 2                                       | 1      |
| 14231  | 1                           | 1      | 1                                       | 1      |
| 14233  | 1                           | 1      | 1                                       | 1      |

| respid | ICS Terminal Dribble: Q28_1 | Q28a_1 | ICS Urgency with fear of leaking: Q29_1 | Q29a_1 |
|--------|-----------------------------|--------|-----------------------------------------|--------|
| 14237  | 0                           |        | 0                                       |        |
| 14238  | 2                           | 2      | 2                                       | 2      |
| 14243  | 3                           | 2      | 1                                       | 1      |
| 14245  | 0                           |        | 0                                       |        |
| 14246  | 1                           | 1      | 2                                       | 3      |
| 14248  | 0                           |        | 0                                       |        |
| 14250  | 0                           |        | 0                                       |        |
| 14253  | 1                           | 1      | 0                                       |        |
| 14254  | 0                           |        | 1                                       | 1      |
| 14255  | 0                           |        | 0                                       |        |
| 14257  | 0                           |        | 0                                       |        |
| 14258  | 1                           | 1      | 1                                       | 0      |
| 14259  | 3                           | 2      | 1                                       | 1      |
| 14260  | 0                           |        | 0                                       |        |
| 14261  | 5                           | 4      | 4                                       | 4      |
| 14263  | 5                           | 4      | 4                                       | 3      |
| 14264  | 2                           | 1      | 0                                       |        |
| 14266  | 3                           | 1      | 1                                       | 1      |
| 14267  | 2                           | 2      | 2                                       | 2      |
| 14268  | 1                           | 1      | 0                                       |        |
| 14275  | 1                           | 1      | 1                                       | 1      |
| 14278  | 1                           | 1      | 2                                       | 3      |
| 14279  | 0                           |        | 0                                       |        |
| 14280  | 0                           |        | 0                                       |        |
| 14281  | 1                           | 0      | 0                                       |        |
| 14282  | 1                           | 1      | 1                                       | 1      |
| 14283  | 3                           | 1      | 4                                       | 3      |
| 14286  | 0                           |        | 0                                       |        |
| 14287  | 0                           |        | 0                                       |        |
| 14288  | 2                           | 1      | 2                                       | 2      |
| 14291  | 0                           |        | 0                                       |        |
| 14292  | 0                           |        | 0                                       |        |

| respid | ICS Terminal Dribble: Q28_1 | Q28a_1 | ICS Urgency with fear of leaking: Q29_1 | Q29a_1 |
|--------|-----------------------------|--------|-----------------------------------------|--------|
| 14293  | 0                           |        | 1                                       | 1      |
| 14304  | 5                           | 4      | 4                                       | 4      |
| 14308  | 2                           | 2      | 1                                       | 1      |
| 14313  | 0                           |        | 0                                       |        |
| 14314  | 1                           | 2      | 1                                       | 1      |
| 14316  | 0                           |        | 0                                       |        |
| 14317  | 0                           |        | 0                                       |        |
| 14318  | 4                           | 3      | 4                                       | 3      |
| 14319  | 3                           | 1      | 1                                       | 0      |
| 14320  | 2                           | 2      | 2                                       | 2      |
| 14321  | 0                           |        | 1                                       | 1      |
| 14322  | 1                           | 3      | 1                                       | 3      |
| 14326  | 0                           |        | 0                                       |        |
| 14327  | 5                           | 4      | 3                                       | 3      |
| 14328  | 0                           |        | 0                                       |        |
| 14330  | 0                           |        | 0                                       |        |
| 14332  | 0                           |        | 0                                       |        |
| 14334  | 0                           |        | 0                                       |        |
| 14336  | 1                           | 0      | 0                                       |        |
| 14337  | 1                           | 1      | 1                                       | 1      |
| 14339  | 0                           |        | 0                                       |        |
| 14340  | 2                           | 1      | 2                                       | 1      |
| 14341  | 0                           |        | 0                                       |        |
| 14344  | 0                           |        | 0                                       |        |
| 14345  | 1                           | 2      | 1                                       | 2      |
| 14346  | 0                           |        | 0                                       |        |
| 14348  | 0                           |        | 0                                       |        |
| 14349  | 1                           | 1      | 1                                       | 1      |
| 14358  | 1                           | 3      | 2                                       | 4      |
| 14360  | 0                           |        | 0                                       |        |
| 14362  | 0                           |        | 0                                       |        |
| 14366  | 0                           |        | 0                                       |        |

| respid | ICS Terminal Dribble: Q28_1 | Q28a_1 | ICS Urgency with fear of leaking: Q29_1 | Q29a_1 |
|--------|-----------------------------|--------|-----------------------------------------|--------|
| 14367  | 1                           | 1      | 0                                       |        |
| 14369  | 4                           | 2      | 2                                       | 1      |
| 14371  | 0                           |        | 0                                       |        |
| 14372  | 0                           |        | 1                                       | 0      |
| 14374  | 0                           |        | 0                                       |        |
| 14376  | 0                           |        | 1                                       | 0      |
| 14377  | 0                           |        | 0                                       |        |
| 14378  | 0                           |        | 1                                       | 0      |
| 14379  | 0                           |        | 1                                       | 1      |
| 14381  | 2                           | 1      | 0                                       |        |
| 14383  | 0                           |        | 0                                       |        |
| 14384  | 2                           | 1      | 2                                       | 1      |
| 14385  | 4                           | 3      | 5                                       | 4      |
| 14386  | 3                           | 3      | 3                                       | 3      |
| 14390  | 1                           | 1      | 1                                       | 2      |
| 14391  | 1                           | 1      | 0                                       |        |
| 14392  | 1                           | 0      | 1                                       | 1      |
| 14393  | 2                           | 1      | 1                                       | 2      |
| 14394  | 0                           |        | 1                                       | 1      |
| 14395  | 0                           |        | 0                                       |        |
| 14396  | 0                           |        | 0                                       |        |
| 14397  | 1                           | 1      | 0                                       |        |
| 14398  | 0                           |        | 0                                       |        |
| 14399  | 0                           |        | 0                                       |        |
| 14400  | 0                           |        | 0                                       |        |
| 14403  | 1                           | 0      | 0                                       |        |
| 14404  | 0                           |        | 0                                       |        |
| 14405  | 2                           | 0      | 0                                       |        |
| 14407  | 0                           |        | 0                                       |        |
| 14408  | 4                           | 3      | 3                                       | 2      |
| 14410  | 4                           | 3      | 3                                       | 3      |
| 14415  | 1                           | 0      | 0                                       |        |

| respid | ICS Terminal Dribble: Q28_1 | Q28a_1 | ICS Urgency with fear of leaking: Q29_1 | Q29a_1 |
|--------|-----------------------------|--------|-----------------------------------------|--------|
| 14419  | 0                           |        | 1                                       | 2      |
| 14420  | 0                           |        | 0                                       |        |
| 14421  | 0                           |        | 0                                       |        |
| 14423  | 0                           |        | 0                                       |        |
| 14424  | 0                           |        | 0                                       |        |
| 14425  | 0                           |        | 0                                       |        |
| 14426  | 1                           | 1      | 0                                       |        |
| 14427  | 0                           |        | 0                                       |        |
| 14428  | 4                           | 4      | 3                                       | 4      |
| 14431  | 2                           | 1      | 2                                       | 1      |
| 14433  | 0                           |        | 1                                       | 0      |
| 14434  | 0                           |        | 1                                       | 1      |
| 14435  | 3                           | 1      | 1                                       | 1      |
| 14436  | 3                           | 2      | 2                                       | 2      |
| 14438  | 0                           |        | 0                                       |        |
| 14442  | 3                           | 2      | 2                                       | 2      |
| 14447  | 3                           | 3      | 0                                       |        |
| 14448  | 0                           |        | 0                                       |        |
| 14450  | 1                           | 1      | 1                                       | 1      |
| 14451  | 0                           |        | 1                                       | 1      |
| 14454  | 2                           | 1      | 1                                       | 1      |
| 14455  | 1                           | 0      | 2                                       | 2      |
| 14456  | 2                           | 2      | 2                                       | 3      |
| 14457  | 4                           | 4      | 4                                       | 1      |
| 14458  | 5                           | 3      | 3                                       | 1      |
| 14459  | 0                           |        | 0                                       |        |
| 14460  | 0                           |        | 0                                       |        |
| 14464  | 1                           | 1      | 1                                       | 1      |
| 14465  | 1                           | 1      | 1                                       | 1      |
| 14466  | 0                           |        | 0                                       |        |
| 14467  | 1                           | 0      | 0                                       |        |
| 14470  | 0                           |        | 1                                       | 1      |



| respid | ICS Terminal Dribble: Q28_1 | Q28a_1 | ICS Urgency with fear of leaking: Q29_1 | Q29a_1 |
|--------|-----------------------------|--------|-----------------------------------------|--------|
| 14472  | 1                           | 1      | 0                                       |        |
| 14473  | 0                           |        | 0                                       |        |
| 14474  | 0                           |        | 0                                       |        |
| 14477  | 0                           |        | 0                                       |        |
| 14478  | 0                           |        | 1                                       | 0      |
| 14479  | 0                           |        | 0                                       |        |
| 14484  | 0                           |        | 0                                       |        |
| 14485  | 0                           |        | 0                                       |        |
| 14486  | 0                           |        | 0                                       |        |
| 14487  | 0                           |        | 0                                       |        |
| 14488  | 3                           | 2      | 3                                       | 2      |
| 14491  | 3                           | 3      | 1                                       | 3      |
| 14495  | 0                           |        | 0                                       |        |
| 14500  | 0                           |        | 0                                       |        |
| 14502  | 0                           |        | 0                                       |        |
| 14504  | 2                           | 2      | 1                                       | 3      |
| 14505  | 4                           | 4      | 4                                       | 4      |
| 14507  | 0                           |        | 0                                       |        |
| 14517  | 0                           |        | 0                                       |        |
| 14518  | 0                           |        | 1                                       | 1      |
| 14519  | 1                           | 0      | 1                                       | 0      |
| 14521  | 2                           | 2      | 2                                       | 2      |
| 14522  | 0                           |        | 0                                       |        |
| 14526  | 0                           |        | 0                                       |        |
| 14528  | 4                           | 4      | 4                                       | 4      |
| 14529  | 1                           | 0      | 0                                       |        |
| 14530  | 1                           | 1      | 1                                       | 1      |
| 14531  | 3                           | 3      | 3                                       | 4      |
| 14534  | 1                           | 2      | 1                                       | 2      |
| 14538  | 0                           |        | 0                                       |        |
| 14539  | 0                           |        | 0                                       |        |
| 14545  | 1                           | 0      | 1                                       | 0      |

| respid | ICS Terminal Dribble: Q28_1 | Q28a_1 | ICS Urgency with fear of leaking: Q29_1 | Q29a_1 |
|--------|-----------------------------|--------|-----------------------------------------|--------|
| 14546  | 1                           | 0      | 1                                       | 1      |
| 14551  | 1                           | 1      | 0                                       |        |
| 14553  | 2                           | 4      | 2                                       | 4      |
| 14557  | 0                           |        | 0                                       |        |
| 14558  | 0                           |        | 0                                       |        |
| 14559  | 2                           | 1      | 2                                       | 2      |
| 14560  | 0                           |        | 0                                       |        |
| 14563  | 0                           |        | 1                                       | 1      |
| 14565  | 0                           |        | 0                                       |        |
| 14571  | 4                           | 3      | 4                                       | 2      |
| 14572  | 0                           |        | 0                                       |        |
| 14573  | 2                           | 2      | 1                                       | 2      |
| 14575  | 2                           | 2      | 2                                       | 2      |
| 14576  | 2                           | 1      | 2                                       | 2      |
| 14578  | 0                           |        | 1                                       | 2      |
| 14579  | 0                           |        | 0                                       |        |
| 14580  | 0                           |        | 0                                       |        |
| 14582  | 3                           | 1      | 0                                       |        |
| 14585  | 1                           | 1      | 1                                       | 1      |
| 14588  | 0                           |        | 0                                       |        |
| 14590  | 2                           | 2      | 3                                       | 2      |
| 14592  | 4                           | 3      | 3                                       | 2      |
| 14593  | 0                           |        | 0                                       |        |
| 14595  | 2                           | 3      | 1                                       | 3      |
| 14597  | 0                           |        | 1                                       | 1      |
| 14600  | 0                           |        | 1                                       | 1      |
| 14602  | 2                           | 4      | 2                                       | 4      |
| 14604  | 0                           |        | 0                                       |        |
| 14605  | 1                           | 1      | 0                                       |        |
| 14609  | 2                           | 2      | 2                                       | 2      |
| 14610  | 1                           | 0      | 0                                       |        |
| 14611  | 1                           | 1      | 1                                       | 1      |

| respid | ICS Terminal Dribble: Q28_1 | Q28a_1 | ICS Urgency with fear of leaking: Q29_1 | Q29a_1 |
|--------|-----------------------------|--------|-----------------------------------------|--------|
| 14612  | 0                           |        | 0                                       |        |
| 14614  | 1                           | 2      | 2                                       | 2      |
| 14615  | 1                           | 1      | 0                                       |        |
| 14618  | 3                           | 3      | 3                                       | 2      |
| 14621  | 0                           |        | 0                                       |        |
| 14624  | 0                           |        | 0                                       |        |
| 14626  | 0                           |        | 0                                       |        |
| 14627  | 2                           | 2      | 2                                       | 1      |
| 14628  | 2                           | 2      | 1                                       | 2      |
| 14631  | 0                           |        | 0                                       |        |
| 14633  | 2                           | 2      | 2                                       | 2      |
| 14642  | 2                           | 2      | 2                                       | 2      |
| 14647  | 0                           |        | 0                                       |        |
| 14658  | 1                           | 1      | 0                                       |        |
| 14659  | 2                           | 1      | 2                                       | 2      |
| 14660  | 0                           |        | 0                                       |        |
| 14661  | 0                           |        | 0                                       |        |
| 14662  | 3                           | 3      | 4                                       | 4      |
| 14663  | 0                           |        | 0                                       |        |
| 14670  | 0                           |        | 0                                       |        |
| 14671  | 0                           |        | 0                                       |        |
| 14672  | 2                           | 3      | 2                                       | 2      |
| 14675  | 0                           |        | 0                                       |        |
| 14676  | 0                           |        | 0                                       |        |
| 14677  | 1                           | 3      | 3                                       | 4      |
| 14678  | 0                           |        | 0                                       |        |
| 14681  | 2                           | 2      | 2                                       | 2      |
| 14684  | 0                           |        | 0                                       |        |
| 14688  | 0                           |        | 0                                       |        |
| 14690  | 1                           | 1      | 1                                       | 1      |
| 14694  | 2                           | 3      | 2                                       | 3      |
| 14696  | 1                           | 1      | 1                                       | 1      |

| respid | ICS Terminal Dribble: Q28_1 | Q28a_1 | ICS Urgency with fear of leaking: Q29_1 | Q29a_1 |
|--------|-----------------------------|--------|-----------------------------------------|--------|
| 14700  | 0                           |        | 0                                       |        |
| 14701  | 2                           | 1      | 2                                       | 1      |
| 14703  | 3                           | 2      | 2                                       | 4      |
| 14707  | 1                           | 1      | 0                                       |        |
| 14711  | 2                           | 2      | 1                                       | 2      |
| 14714  | 0                           |        | 0                                       |        |
| 14715  | 2                           | 1      | 2                                       | 3      |
| 14716  | 0                           |        | 0                                       |        |
| 14720  | 2                           | 4      | 0                                       |        |
| 14725  | 0                           |        | 0                                       |        |
| 14726  | 1                           | 1      | 0                                       |        |
| 14734  | 0                           |        | 0                                       |        |
| 14735  | 0                           |        | 0                                       |        |
| 14736  | 2                           | 1      | 2                                       | 1      |
| 14740  | 0                           |        | 0                                       |        |
| 14745  | 2                           | 3      | 0                                       |        |
| 14747  | 0                           |        | 0                                       |        |
| 14750  | 2                           | 3      | 2                                       | 3      |
| 14751  | 0                           |        | 0                                       |        |
| 14753  | 0                           |        | 0                                       |        |
| 14756  | 4                           | 4      | 3                                       | 4      |
| 14780  | 1                           | 1      | 1                                       | 1      |
| 14782  | 1                           | 1      | 0                                       |        |
| 14800  | 4                           | 4      | 3                                       | 4      |
| 14801  | 0                           |        | 0                                       |        |
| 14802  | 3                           | 3      | 3                                       | 3      |
| 14805  | 2                           | 2      | 3                                       | 3      |
| 14811  | 2                           | 3      | 3                                       | 3      |
| 14814  | 4                           | 3      | 3                                       | 2      |
| 14822  | 1                           | 1      | 2                                       | 2      |
| 14827  | 0                           |        | 5                                       | 3      |
| 14828  | 3                           | 3      | 3                                       | 3      |

| respid | ICS Terminal Dribble: Q28_1 | Q28a_1 | ICS Urgency with fear of leaking: Q29_1 | Q29a_1 |
|--------|-----------------------------|--------|-----------------------------------------|--------|
| 14830  | 0                           |        | 0                                       |        |
| 14832  | 3                           | 2      | 1                                       | 2      |
| 14835  | 3                           | 3      | 2                                       | 3      |
| 14841  | 0                           |        | 0                                       |        |
| 14849  | 1                           | 1      | 1                                       | 1      |
| 14850  | 0                           |        | 0                                       |        |
| 14851  | 0                           |        | 0                                       |        |
| 14856  | 4                           | 3      | 4                                       | 3      |
| 14862  | 1                           | 1      | 1                                       | 1      |
| 14863  | 0                           |        | 0                                       |        |
| 14864  | 0                           |        | 0                                       |        |
| 14866  | 1                           | 1      | 0                                       |        |
| 14867  | 3                           | 3      | 3                                       | 3      |
| 14868  | 0                           |        | 0                                       |        |
| 14870  | 0                           |        | 0                                       |        |
| 14873  | 0                           |        | 0                                       |        |
| 14878  | 1                           | 1      | 0                                       |        |
| 14879  | 0                           |        | 0                                       |        |
| 14881  | 2                           | 2      | 2                                       | 2      |
| 14888  | 3                           | 3      | 3                                       | 3      |
| 14895  | 1                           | 1      | 1                                       | 1      |
| 14900  | 4                           | 4      | 3                                       | 3      |
| 14912  | 0                           |        | 0                                       |        |
| 14922  | 1                           | 1      | 1                                       | 1      |
| 14923  | 4                           | 2      | 4                                       | 4      |
| 14924  | 5                           | 4      | 2                                       | 2      |
| 14925  | 3                           | 4      | 3                                       | 4      |
| 14926  | 0                           |        | 0                                       |        |
| 14927  | 3                           | 3      | 3                                       | 2      |
| 14930  | 0                           |        | 0                                       |        |
| 14937  | 4                           | 1      | 3                                       | 2      |
| 14938  | 4                           | 3      | 4                                       | 2      |

| respid | ICS Terminal Dribble: Q28_1 | Q28a_1 | ICS Urgency with fear of leaking: Q29_1 | Q29a_1 |
|--------|-----------------------------|--------|-----------------------------------------|--------|
| 14939  | 4                           | 3      | 4                                       | 3      |
| 14942  | 0                           |        | 0                                       |        |
| 14943  | 0                           |        | 0                                       |        |
| 14953  | 1                           | 1      | 2                                       | 2      |
| 14954  | 0                           |        | 0                                       |        |
| 14955  | 1                           | 1      | 1                                       | 1      |
| 14957  | 1                           | 1      | 0                                       |        |
| 14958  | 3                           | 3      | 4                                       | 4      |
| 14959  | 3                           | 3      | 3                                       | 3      |
| 14961  | 0                           |        | 0                                       |        |
| 14963  | 3                           | 3      | 3                                       | 2      |
| 14964  | 0                           |        | 0                                       |        |
| 14965  | 0                           |        | 0                                       |        |
| 14967  | 3                           | 3      | 3                                       | 4      |
| 14970  | 3                           | 3      | 4                                       | 4      |
| 14972  | 2                           | 2      | 2                                       | 2      |
| 14975  | 4                           | 3      | 3                                       | 3      |
| 14977  | 0                           |        | 1                                       | 1      |
| 14982  | 0                           |        | 1                                       | 1      |
| 14985  | 1                           | 1      | 3                                       | 2      |
| 14986  | 0                           |        | 0                                       |        |
| 14987  | 0                           |        | 0                                       |        |
| 14988  | 3                           | 4      | 3                                       | 3      |
| 14989  | 4                           | 2      | 2                                       | 2      |
| 14993  | 5                           | 2      | 3                                       | 2      |
| 15001  | 0                           |        | 0                                       |        |
| 15002  | 3                           | 3      | 3                                       | 4      |
| 15006  | 5                           | 1      | 2                                       | 1      |
| 15007  | 0                           |        | 0                                       |        |
| 15014  | 4                           | 3      | 4                                       | 3      |
| 15020  | 4                           | 2      | 2                                       | 3      |
| 15021  | 3                           | 2      | 3                                       | 3      |

| respid | ICS Terminal Dribble: Q28_1 | Q28a_1 | ICS Urgency with fear of leaking: Q29_1 | Q29a_1 |
|--------|-----------------------------|--------|-----------------------------------------|--------|
| 15023  | 3                           | 4      | 4                                       | 4      |
| 15030  | 0                           |        | 0                                       |        |
| 15032  | 0                           |        | 0                                       |        |
| 15033  | 2                           | 2      | 3                                       | 2      |
| 15034  | 4                           | 2      | 1                                       | 1      |
| 15035  | 1                           | 1      | 1                                       | 1      |
| 15037  | 0                           |        | 0                                       |        |
| 15039  | 3                           | 2      | 3                                       | 2      |
| 15040  | 1                           | 4      | 0                                       |        |
| 15042  | 1                           | 1      | 1                                       | 1      |
| 15044  | 0                           |        | 0                                       |        |
| 15045  | 1                           | 0      | 0                                       |        |
| 15046  | 0                           |        | 0                                       |        |
| 15052  | 4                           | 3      | 2                                       | 3      |
| 15058  | 0                           |        | 0                                       |        |
| 15063  | 3                           | 2      | 3                                       | 3      |
| 15066  | 1                           | 1      | 1                                       | 1      |
| 15069  | 3                           | 2      | 0                                       |        |
| 15071  | 1                           | 2      | 1                                       | 2      |
| 15076  | 3                           | 3      | 1                                       | 3      |
| 15078  | 0                           |        | 0                                       |        |
| 15087  | 2                           | 2      | 2                                       | 1      |
| 15090  | 2                           | 2      | 2                                       | 2      |
| 15091  | 0                           |        | 0                                       |        |
| 15092  | 1                           | 1      | 0                                       |        |
| 15096  | 1                           | 1      | 2                                       | 1      |
| 15106  | 4                           | 2      | 3                                       | 3      |
| 15108  | 0                           |        | 0                                       |        |
| 15113  | 0                           |        | 0                                       |        |
| 15116  | 0                           |        | 0                                       |        |
| 15119  | 2                           | 1      | 1                                       | 1      |
| 15120  | 0                           |        | 0                                       |        |

| respid | ICS Terminal Dribble: Q28_1 | Q28a_1 | ICS Urgency with fear of leaking: Q29_1 | Q29a_1 |
|--------|-----------------------------|--------|-----------------------------------------|--------|
| 15121  | 2                           | 2      | 2                                       | 2      |
| 15123  | 0                           |        | 0                                       |        |
| 15124  | 0                           |        | 0                                       |        |
| 15128  | 1                           | 0      | 0                                       |        |
| 15131  | 0                           |        | 0                                       |        |
| 15136  | 0                           |        | 1                                       | 3      |
| 15137  | 1                           | 2      | 2                                       | 2      |
| 15141  | 1                           | 1      | 1                                       | 1      |
| 15144  | 0                           |        | 0                                       |        |
| 15147  | 2                           | 2      | 2                                       | 2      |
| 15151  | 3                           | 3      | 2                                       | 2      |
| 15154  | 3                           | 3      | 4                                       | 4      |
| 15157  | 0                           |        | 0                                       |        |
| 15164  | 3                           | 3      | 2                                       | 3      |
| 15168  | 0                           |        | 0                                       |        |
| 15169  | 2                           | 1      | 2                                       | 1      |
| 15172  | 4                           | 3      | 4                                       | 3      |
| 15177  | 3                           | 3      | 3                                       | 3      |
| 15178  | 0                           |        | 0                                       |        |
| 15180  | 1                           | 1      | 1                                       | 1      |
| 15181  | 1                           | 0      | 0                                       |        |
| 15182  | 2                           | 2      | 2                                       | 2      |
| 15183  | 0                           |        | 0                                       |        |
| 15188  | 0                           |        | 0                                       |        |
| 15190  | 4                           | 4      | 3                                       | 4      |
| 15195  | 0                           |        | 0                                       |        |
| 15201  | 4                           | 4      | 4                                       | 2      |
| 15203  | 0                           |        | 0                                       |        |
| 15204  | 0                           |        | 0                                       |        |
| 15207  | 0                           |        | 0                                       |        |
| 15208  | 4                           | 4      | 4                                       | 4      |
| 15209  | 0                           |        | 0                                       |        |



| respid | ICS Terminal Dribble: Q28_1 | Q28a_1 | ICS Urgency with fear of leaking: Q29_1 | Q29a_1 |
|--------|-----------------------------|--------|-----------------------------------------|--------|
| 15212  | 0                           |        | 0                                       |        |
| 15213  | 3                           | 1      | 1                                       | 1      |
| 15219  | 3                           | 1      | 1                                       | 1      |
| 15220  | 1                           | 2      | 2                                       | 2      |
| 15221  | 0                           |        | 0                                       |        |
| 15223  | 1                           | 1      | 1                                       | 1      |
| 15224  | 2                           | 2      | 0                                       |        |
| 15225  | 0                           |        | 0                                       |        |
| 15226  | 0                           |        | 0                                       |        |
| 15230  | 0                           |        | 0                                       |        |
| 15231  | 4                           | 4      | 4                                       | 4      |
| 15232  | 0                           |        | 0                                       |        |
| 15237  | 0                           |        | 0                                       |        |
| 15239  | 0                           |        | 0                                       |        |
| 15241  | 0                           |        | 0                                       |        |
| 15242  | 1                           | 2      | 2                                       | 2      |
| 15247  | 0                           |        | 0                                       |        |
| 15248  | 0                           |        | 0                                       |        |
| 15251  | 0                           |        | 0                                       |        |
| 15257  | 0                           |        | 0                                       |        |
| 15260  | 0                           |        | 0                                       |        |
| 15261  | 5                           | 3      | 3                                       | 4      |
| 15262  | 2                           | 3      | 2                                       | 3      |
| 15263  | 0                           |        | 0                                       |        |
| 15265  | 0                           |        | 0                                       |        |
| 15266  | 1                           | 1      | 0                                       |        |
| 15268  | 0                           |        | 0                                       |        |
| 15269  | 3                           | 2      | 4                                       | 3      |
| 15270  | 5                           | 4      | 4                                       | 4      |
| 15273  | 1                           | 2      | 2                                       | 2      |
| 15276  | 4                           | 4      | 4                                       | 4      |
| 15277  | 0                           |        | 0                                       |        |

| respid | ICS Terminal Dribble: Q28_1 | Q28a_1 | ICS Urgency with fear of leaking: Q29_1 | Q29a_1 |
|--------|-----------------------------|--------|-----------------------------------------|--------|
| 15282  | 0                           |        | 0                                       |        |
| 15284  | 2                           | 3      | 2                                       | 3      |
| 15285  | 1                           | 0      | 0                                       |        |
| 15286  | 4                           | 4      | 3                                       | 4      |
| 15288  | 2                           | 3      | 2                                       | 2      |
| 15292  | 3                           | 4      | 5                                       | 3      |
| 15296  | 0                           |        | 0                                       |        |
| 15297  | 0                           |        | 0                                       |        |
| 15298  | 0                           |        | 0                                       |        |
| 15301  | 0                           |        | 0                                       |        |
| 15302  | 0                           |        | 3                                       | 2      |
| 15305  | 1                           | 1      | 1                                       | 1      |
| 15307  | 3                           | 0      | 0                                       |        |
| 15308  | 1                           | 1      | 0                                       |        |
| 15309  | 5                           | 2      | 0                                       |        |
| 15311  | 1                           | 0      | 0                                       |        |
| 15315  | 0                           |        | 0                                       |        |
| 15316  | 0                           |        | 1                                       | 1      |
| 15318  | 0                           |        | 0                                       |        |
| 15321  | 4                           | 4      | 3                                       | 4      |
| 15322  | 2                           | 0      | 0                                       |        |
| 15324  | 0                           |        | 1                                       | 0      |
| 15326  | 0                           |        | 0                                       |        |
| 15327  | 1                           | 1      | 1                                       | 0      |
| 15328  | 0                           |        | 0                                       |        |
| 15330  | 0                           |        | 0                                       |        |
| 15332  | 0                           |        | 0                                       |        |
| 15333  | 0                           |        | 0                                       |        |
| 15334  | 0                           |        | 0                                       |        |
| 15336  | 4                           | 4      | 4                                       | 3      |
| 15337  | 0                           |        | 0                                       |        |
| 15338  | 0                           |        | 0                                       |        |

| respid | ICS Terminal Dribble: Q28_1 | Q28a_1 | ICS Urgency with fear of leaking: Q29_1 | Q29a_1 |
|--------|-----------------------------|--------|-----------------------------------------|--------|
| 15339  | 3                           | 4      | 3                                       | 4      |
| 15341  | 1                           | 0      | 0                                       |        |
| 15344  | 0                           |        | 0                                       |        |
| 15345  | 0                           |        | 0                                       |        |
| 15350  | 0                           |        | 0                                       |        |
| 15351  | 2                           | 1      | 0                                       |        |
| 15352  | 0                           |        | 0                                       |        |
| 15372  | 0                           |        | 0                                       |        |
| 15373  | 3                           | 1      | 2                                       | 3      |
| 15376  | 0                           |        | 0                                       |        |
| 15377  | 0                           |        | 0                                       |        |
| 15382  | 0                           |        | 0                                       |        |
| 15383  | 1                           | 1      | 1                                       | 1      |
| 15385  | 3                           | 3      | 3                                       | 3      |
| 15390  | 0                           |        | 0                                       |        |
| 15399  | 0                           |        | 0                                       |        |
| 15404  | 1                           | 1      | 1                                       | 1      |
| 15410  | 1                           | 1      | 0                                       |        |
| 15411  | 2                           | 1      | 2                                       | 2      |
| 15412  | 0                           |        | 1                                       | 1      |
| 15413  | 1                           | 1      | 0                                       |        |
| 15414  | 0                           |        | 0                                       |        |
| 15417  | 1                           | 2      | 0                                       |        |
| 15418  | 0                           |        | 1                                       | 1      |
| 15421  | 0                           |        | 0                                       |        |
| 15423  | 0                           |        | 0                                       |        |
| 15425  | 1                           | 0      | 0                                       |        |
| 15426  | 5                           | 4      | 4                                       | 3      |
| 15430  | 0                           |        | 0                                       |        |
| 15431  | 4                           | 3      | 3                                       | 3      |
| 15435  | 0                           |        | 0                                       |        |
| 15436  | 0                           |        | 0                                       |        |

| respid | ICS Terminal Dribble: Q28_1 | Q28a_1 | ICS Urgency with fear of leaking: Q29_1 | Q29a_1 |
|--------|-----------------------------|--------|-----------------------------------------|--------|
| 15437  | 0                           |        | 0                                       |        |
| 15438  | 0                           |        | 0                                       |        |
| 15439  | 0                           |        | 0                                       |        |
| 15441  | 4                           | 4      | 3                                       | 4      |
| 15443  | 1                           | 0      | 0                                       |        |
| 15446  | 0                           |        | 0                                       |        |
| 15449  | 2                           | 2      | 2                                       | 2      |
| 15451  | 4                           | 3      | 2                                       | 2      |
| 15452  | 3                           | 2      | 3                                       | 2      |
| 15454  | 1                           | 1      | 0                                       |        |
| 15456  | 3                           | 3      | 3                                       | 3      |
| 15457  | 0                           |        | 0                                       |        |
| 15458  | 2                           | 2      | 2                                       | 2      |
| 15462  | 4                           | 3      | 1                                       | 1      |
| 15467  | 2                           | 2      | 1                                       | 2      |
| 15470  | 3                           | 2      | 2                                       | 1      |
| 15472  | 2                           | 2      | 1                                       | 1      |
| 15476  | 0                           |        | 0                                       |        |
| 15477  | 0                           |        | 0                                       |        |
| 15488  | 0                           |        | 0                                       |        |
| 15489  | 1                           | 0      | 0                                       |        |
| 15490  | 0                           |        | 0                                       |        |
| 15496  | 5                           | 1      | 1                                       | 1      |
| 15497  | 5                           | 1      | 1                                       | 1      |
| 15498  | 0                           |        | 0                                       |        |
| 15509  | 3                           | 3      | 3                                       | 2      |
| 15510  | 0                           |        | 0                                       |        |
| 15516  | 1                           | 1      | 0                                       |        |
| 15519  | 0                           |        | 0                                       |        |
| 15520  | 0                           |        | 0                                       |        |
| 15524  | 1                           | 1      | 0                                       |        |
| 15525  | 0                           |        | 0                                       |        |

| respid | ICS Terminal Dribble: Q28_1 | Q28a_1 | ICS Urgency with fear of leaking: Q29_1 | Q29a_1 |
|--------|-----------------------------|--------|-----------------------------------------|--------|
| 15526  | 2                           | 2      | 0                                       |        |
| 15531  | 2                           | 1      | 0                                       |        |
| 15532  | 0                           |        | 0                                       |        |
| 15534  | 3                           | 3      | 3                                       | 3      |
| 15535  | 4                           | 3      | 4                                       | 3      |
| 15539  | 1                           | 2      | 0                                       |        |
| 15550  | 0                           |        | 0                                       |        |
| 15556  | 0                           |        | 0                                       |        |
| 15558  | 4                           | 3      | 4                                       | 3      |
| 15565  | 0                           |        | 0                                       |        |
| 15567  | 2                           | 2      | 3                                       | 3      |
| 15568  | 4                           | 3      | 4                                       | 3      |
| 15571  | 1                           | 1      | 2                                       | 1      |
| 15573  | 1                           | 0      | 0                                       |        |
| 15574  | 4                           | 3      | 4                                       | 3      |
| 15576  | 0                           |        | 0                                       |        |
| 15587  | 4                           | 1      | 1                                       | 2      |
| 15588  | 0                           |        | 0                                       |        |
| 15593  | 0                           |        | 1                                       | 1      |
| 15597  | 0                           |        | 0                                       |        |
| 15598  | 4                           | 2      | 0                                       |        |
| 15599  | 4                           | 2      | 2                                       | 2      |
| 15601  | 0                           |        | 0                                       |        |
| 15604  | 0                           |        | 0                                       |        |
| 15611  | 0                           |        | 0                                       |        |
| 15613  | 0                           |        | 0                                       |        |
| 15614  | 1                           | 1      | 0                                       |        |
| 15617  | 0                           |        | 0                                       |        |
| 15622  | 0                           |        | 0                                       |        |
| 15623  | 0                           |        | 0                                       |        |
| 15625  | 4                           | 4      | 1                                       | 1      |
| 15627  | 0                           |        | 0                                       |        |

| respid | ICS Terminal Dribble: Q28_1 | Q28a_1 | ICS Urgency with fear of leaking: Q29_1 | Q29a_1 |
|--------|-----------------------------|--------|-----------------------------------------|--------|
| 15628  | 0                           |        | 0                                       |        |
| 15633  | 0                           |        | 0                                       |        |
| 15634  | 0                           |        | 0                                       |        |
| 15637  | 0                           |        | 0                                       |        |
| 15644  | 0                           |        | 1                                       | 1      |
| 15645  | 1                           | 0      | 0                                       |        |
| 15649  | 0                           |        | 0                                       |        |
| 15650  | 1                           | 1      | 0                                       |        |
| 15651  | 0                           |        | 1                                       | 0      |
| 15657  | 3                           | 4      | 2                                       | 4      |
| 15658  | 0                           |        | 0                                       |        |
| 15660  | 1                           | 1      | 1                                       | 2      |
| 15667  | 0                           |        | 0                                       |        |
| 15671  | 0                           |        | 0                                       |        |
| 15679  | 3                           | 2      | 3                                       | 2      |
| 15712  | 0                           |        | 0                                       |        |
| 15715  | 0                           |        | 0                                       |        |
| 15749  | 0                           |        | 2                                       | 2      |
| 15754  | 1                           | 1      | 1                                       | 1      |
| 15756  | 1                           | 3      | 0                                       |        |
| 15773  | 1                           | 0      | 0                                       |        |
| 15774  | 1                           | 1      | 0                                       |        |
| 15776  | 3                           | 2      | 2                                       | 2      |
| 15777  | 3                           | 2      | 3                                       | 2      |
| 15779  | 0                           |        | 0                                       |        |
| 15780  | 1                           | 1      | 1                                       | 1      |
| 15792  | 1                           | 1      | 0                                       |        |
| 15793  | 3                           | 2      | 3                                       | 2      |
| 15796  | 0                           |        | 0                                       |        |
| 15798  | 0                           |        | 0                                       |        |
| 15809  | 1                           | 1      | 1                                       | 1      |
| 15810  | 0                           |        | 0                                       |        |

| respid | ICS Terminal Dribble: Q28_1 | Q28a_1 | ICS Urgency with fear of leaking: Q29_1 | Q29a_1 |
|--------|-----------------------------|--------|-----------------------------------------|--------|
| 15815  | 0                           |        | 0                                       |        |
| 15816  | 0                           |        | 0                                       |        |
| 15817  | 0                           |        | 0                                       |        |
| 15821  | 3                           | 2      | 2                                       | 3      |
| 15823  | 2                           | 2      | 2                                       | 2      |
| 15834  | 0                           |        | 0                                       |        |
| 15835  | 0                           |        | 0                                       |        |
| 15836  | 0                           |        | 0                                       |        |
| 15837  | 0                           |        | 0                                       |        |
| 15839  | 0                           |        | 0                                       |        |
| 15840  | 0                           |        | 0                                       |        |
| 15844  | 0                           |        | 0                                       |        |
| 15845  | 1                           | 0      | 0                                       |        |
| 15847  | 3                           | 3      | 2                                       | 2      |
| 15848  | 1                           | 1      | 0                                       |        |
| 15849  | 0                           |        | 0                                       |        |
| 15857  | 1                           | 1      | 0                                       |        |
| 15858  | 0                           |        | 0                                       |        |
| 15862  | 5                           | 4      | 4                                       | 4      |
| 15866  | 0                           |        | 0                                       |        |
| 15870  | 0                           |        | 0                                       |        |
| 15871  | 1                           | 2      | 0                                       |        |
| 15872  | 0                           |        | 0                                       |        |
| 15873  | 0                           |        | 0                                       |        |
| 15874  | 0                           |        | 0                                       |        |
| 15875  | 3                           | 2      | 3                                       | 3      |
| 15876  | 2                           | 2      | 2                                       | 2      |
| 15882  | 3                           | 4      | 1                                       | 4      |
| 15884  | 1                           | 1      | 1                                       | 1      |
| 15890  | 3                           | 2      | 3                                       | 4      |
| 15892  | 1                           | 4      | 1                                       | 3      |
| 15908  | 0                           |        | 0                                       |        |

| respid | ICS Terminal Dribble: Q28_1 | Q28a_1 | ICS Urgency with fear of leaking: Q29_1 | Q29a_1 |
|--------|-----------------------------|--------|-----------------------------------------|--------|
| 15914  | 0                           |        | 0                                       |        |
| 15932  | 2                           | 2      | 2                                       | 2      |
| 15933  | 0                           |        | 0                                       |        |
| 15938  | 1                           | 1      | 1                                       | 1      |
| 15940  | 3                           | 1      | 5                                       | 4      |
| 15945  | 0                           |        | 0                                       |        |
| 15947  | 0                           |        | 0                                       |        |
| 15950  | 0                           |        | 0                                       |        |
| 15951  | 1                           | 1      | 1                                       | 1      |
| 15952  | 3                           | 3      | 4                                       | 3      |
| 15953  | 0                           |        | 2                                       | 2      |
| 15954  | 5                           | 3      | 5                                       | 4      |
| 15957  | 4                           | 4      | 4                                       | 4      |
| 15965  | 4                           | 3      | 4                                       | 3      |
| 15966  | 0                           |        | 0                                       |        |
| 15967  | 0                           |        | 0                                       |        |
| 15968  | 0                           |        | 0                                       |        |
| 15970  | 0                           |        | 0                                       |        |
| 15973  | 0                           |        | 0                                       |        |
| 15974  | 0                           |        | 0                                       |        |
| 15975  | 0                           |        | 0                                       |        |
| 15980  | 4                           | 4      | 4                                       | 3      |
| 15984  | 0                           |        | 0                                       |        |
| 15985  | 2                           | 2      | 2                                       | 2      |
| 15994  | 0                           |        | 0                                       |        |
| 15995  | 0                           |        | 0                                       |        |
| 16000  | 0                           |        | 0                                       |        |
| 16004  | 0                           |        | 0                                       |        |
| 16005  | 0                           |        | 0                                       |        |
| 16006  | 0                           |        | 0                                       |        |
| 16009  | 1                           | 0      | 1                                       | 1      |
| 16017  | 0                           |        | 0                                       |        |



| respid | ICS Terminal Dribble: Q28_1 | Q28a_1 | ICS Urgency with fear of leaking: Q29_1 | Q29a_1 |
|--------|-----------------------------|--------|-----------------------------------------|--------|
| 16019  | 4                           | 3      | 0                                       |        |
| 16021  | 0                           |        | 0                                       |        |
| 16024  | 1                           | 0      | 0                                       |        |
| 16026  | 4                           | 3      | 1                                       | 1      |
| 16029  | 0                           |        | 0                                       |        |
| 16031  | 4                           | 3      | 1                                       | 2      |
| 16037  | 0                           |        | 0                                       |        |
| 16043  | 0                           |        | 1                                       | 1      |
| 16044  | 1                           | 0      | 0                                       |        |
| 16047  | 3                           | 2      | 1                                       | 2      |
| 16048  | 5                           | 4      | 3                                       | 3      |
| 16049  | 0                           |        | 0                                       |        |
| 16051  | 0                           |        | 1                                       | 1      |
| 16053  | 1                           | 1      | 1                                       | 1      |
| 16054  | 0                           |        | 0                                       |        |
| 16069  | 1                           | 1      | 0                                       |        |
| 16070  | 3                           | 2      | 0                                       |        |
| 16074  | 0                           |        | 0                                       |        |
| 16076  | 0                           |        | 0                                       |        |
| 16078  | 0                           |        | 0                                       |        |
| 16081  | 0                           |        | 0                                       |        |
| 16085  | 0                           |        | 0                                       |        |
| 16088  | 0                           |        | 0                                       |        |
| 16091  | 1                           | 2      | 1                                       | 3      |
| 16092  | 2                           | 2      | 0                                       |        |
| 16093  | 5                           | 2      | 0                                       |        |
| 16097  | 1                           | 1      | 1                                       | 1      |
| 16100  | 0                           |        | 1                                       | 0      |
| 16101  | 0                           |        | 0                                       |        |
| 16105  | 0                           |        | 0                                       |        |
| 16118  | 3                           | 3      | 3                                       | 2      |
| 16129  | 0                           |        | 0                                       |        |

| respid | ICS Terminal Dribble: Q28_1 | Q28a_1 | ICS Urgency with fear of leaking: Q29_1 | Q29a_1 |
|--------|-----------------------------|--------|-----------------------------------------|--------|
| 16130  | 5                           | 2      | 3                                       | 2      |
| 16131  | 3                           | 3      | 3                                       | 3      |
| 16136  | 0                           |        | 1                                       | 0      |
| 16137  | 0                           |        | 0                                       |        |
| 16138  | 1                           | 1      | 1                                       | 1      |
| 16139  | 0                           |        | 1                                       | 1      |
| 16140  | 0                           |        | 0                                       |        |
| 16145  | 2                           | 2      | 1                                       | 2      |
| 16150  | 1                           | 0      | 1                                       | 4      |
| 16151  | 1                           | 1      | 0                                       |        |
| 16153  | 0                           |        | 0                                       |        |
| 16164  | 2                           | 2      | 0                                       |        |
| 16168  | 2                           | 1      | 1                                       | 2      |
| 16173  | 2                           | 3      | 0                                       |        |
| 16174  | 0                           |        | 0                                       |        |
| 16177  | 4                           | 1      | 4                                       | 2      |
| 16185  | 1                           | 1      | 1                                       | 1      |
| 16189  | 0                           |        | 0                                       |        |
| 16192  | 0                           |        | 0                                       |        |
| 16193  | 0                           |        | 0                                       |        |
| 16194  | 1                           | 0      | 1                                       | 1      |
| 16196  | 0                           |        | 0                                       |        |
| 16202  | 1                           | 1      | 1                                       | 1      |
| 16205  | 4                           | 3      | 1                                       | 1      |
| 16206  | 0                           |        | 3                                       | 2      |
| 16208  | 0                           |        | 0                                       |        |
| 16211  | 1                           | 1      | 0                                       |        |
| 16212  | 0                           |        | 0                                       |        |
| 16215  | 0                           |        | 0                                       |        |
| 16217  | 1                           | 0      | 0                                       |        |
| 16221  | 1                           | 0      | 0                                       |        |
| 16226  | 1                           | 1      | 1                                       | 3      |

| respid | ICS Terminal Dribble: Q28_1 | Q28a_1 | ICS Urgency with fear of leaking: Q29_1 | Q29a_1 |
|--------|-----------------------------|--------|-----------------------------------------|--------|
| 16228  | 1                           | 1      | 2                                       | 2      |
| 16229  | 1                           | 0      | 0                                       |        |
| 16230  | 0                           |        | 0                                       |        |
| 16231  | 4                           | 2      | 3                                       | 4      |
| 16232  | 4                           | 3      | 1                                       | 3      |
| 16234  | 5                           | 2      | 0                                       |        |
| 16235  | 2                           | 2      | 2                                       | 2      |
| 16236  | 1                           | 1      | 1                                       | 1      |
| 16237  | 0                           |        | 0                                       |        |
| 16238  | 2                           | 3      | 0                                       |        |
| 16239  | 0                           |        | 0                                       |        |
| 16243  | 2                           | 1      | 1                                       | 0      |
| 16248  | 1                           | 2      | 1                                       | 3      |
| 16249  | 0                           |        | 0                                       |        |
| 16251  | 0                           |        | 0                                       |        |
| 16263  | 0                           |        | 0                                       |        |
| 16265  | 1                           | 0      | 1                                       | 0      |
| 16269  | 1                           | 0      | 0                                       |        |
| 16272  | 1                           | 1      | 1                                       | 1      |
| 16273  | 0                           |        | 0                                       |        |
| 16281  | 0                           |        | 0                                       |        |
| 16282  | 0                           |        | 0                                       |        |
| 16287  | 1                           | 1      | 0                                       |        |
| 16290  | 0                           |        | 0                                       |        |
| 16294  | 1                           | 0      | 1                                       | 0      |
| 16295  | 1                           | 1      | 0                                       |        |
| 16296  | 1                           | 1      | 0                                       |        |
| 16299  | 4                           | 2      | 3                                       | 2      |
| 16302  | 0                           |        | 0                                       |        |
| 16303  | 0                           |        | 0                                       |        |
| 16304  | 0                           |        | 0                                       |        |
| 16306  | 0                           |        | 0                                       |        |

| respid | ICS Terminal Dribble: Q28_1 | Q28a_1 | ICS Urgency with fear of leaking: Q29_1 | Q29a_1 |
|--------|-----------------------------|--------|-----------------------------------------|--------|
| 16318  | 1                           | 1      | 1                                       | 1      |
| 16320  | 1                           | 1      | 1                                       | 1      |
| 16321  | 2                           | 1      | 1                                       | 1      |
| 16322  | 4                           | 2      | 0                                       |        |
| 16324  | 0                           |        | 0                                       |        |
| 16326  | 0                           |        | 0                                       |        |
| 16328  | 2                           | 2      | 1                                       | 1      |
| 16336  | 2                           | 2      | 1                                       | 1      |
| 16341  | 0                           |        | 1                                       | 1      |
| 16342  | 0                           |        | 0                                       |        |
| 16343  | 3                           | 1      | 0                                       |        |
| 16345  | 5                           | 1      | 3                                       | 2      |
| 16349  | 1                           | 2      | 0                                       |        |
| 16355  | 0                           |        | 0                                       |        |
| 16364  | 0                           |        | 0                                       |        |
| 16374  | 0                           |        | 0                                       |        |
| 16375  | 0                           |        | 0                                       |        |
| 16376  | 2                           | 1      | 0                                       |        |
| 16393  | 0                           |        | 0                                       |        |
| 16394  | 0                           |        | 1                                       | 2      |
| 16395  | 1                           | 1      | 0                                       |        |
| 16397  | 1                           | 1      | 1                                       | 1      |
| 16398  | 2                           | 2      | 1                                       | 2      |
| 16402  | 0                           |        | 1                                       | 1      |
| 16405  | 1                           | 1      | 0                                       |        |
| 16416  | 0                           |        | 0                                       |        |
| 16422  | 2                           | 2      | 2                                       | 2      |
| 16429  | 0                           |        | 0                                       |        |
| 16430  | 0                           |        | 0                                       |        |
| 16432  | 2                           | 2      | 3                                       | 2      |
| 16433  | 1                           | 1      | 1                                       | 1      |
| 16434  | 0                           |        | 0                                       |        |

| respid | ICS Terminal Dribble: Q28_1 | Q28a_1 | ICS Urgency with fear of leaking: Q29_1 | Q29a_1 |
|--------|-----------------------------|--------|-----------------------------------------|--------|
| 16437  | 2                           | 0      | 0                                       |        |
| 16439  | 0                           |        | 0                                       |        |
| 16440  | 0                           |        | 1                                       | 1      |
| 16441  | 1                           | 2      | 0                                       |        |
| 16442  | 0                           |        | 0                                       |        |
| 16450  | 1                           | 0      | 0                                       |        |
| 16451  | 0                           |        | 0                                       |        |
| 16452  | 0                           |        | 0                                       |        |
| 16467  | 0                           |        | 0                                       |        |
| 16468  | 0                           |        | 0                                       |        |
| 16469  | 1                           | 1      | 1                                       | 1      |
| 16470  | 0                           |        | 0                                       |        |
| 16471  | 1                           | 1      | 1                                       | 1      |
| 16473  | 0                           |        | 0                                       |        |
| 16476  | 0                           |        | 0                                       |        |
| 16478  | 0                           |        | 0                                       |        |
| 16484  | 0                           |        | 0                                       |        |
| 16499  | 0                           |        | 0                                       |        |
| 16502  | 0                           |        | 0                                       |        |
| 16505  | 1                           | 0      | 0                                       |        |
| 16514  | 0                           |        | 0                                       |        |
| 16515  | 1                           | 2      | 1                                       | 1      |
| 16517  | 1                           | 1      | 1                                       | 1      |
| 16518  | 1                           | 1      | 0                                       |        |
| 16519  | 1                           | 1      | 0                                       |        |
| 16525  | 1                           | 1      | 1                                       | 2      |
| 16526  | 0                           |        | 0                                       |        |
| 16530  | 0                           |        | 0                                       |        |
| 16532  | 0                           |        | 0                                       |        |
| 16536  | 0                           |        | 0                                       |        |
| 16537  | 3                           | 2      | 3                                       | 2      |
| 16541  | 3                           | 2      | 2                                       | 1      |

| respid | ICS Terminal Dribble: Q28_1 | Q28a_1 | ICS Urgency with fear of leaking: Q29_1 | Q29a_1 |
|--------|-----------------------------|--------|-----------------------------------------|--------|
| 16543  | 1                           | 0      | 1                                       | 0      |
| 16544  | 0                           |        | 0                                       |        |
| 16545  | 1                           | 1      | 2                                       | 2      |
| 16546  | 1                           | 0      | 1                                       | 0      |
| 16548  | 1                           | 0      | 1                                       | 1      |
| 16552  | 4                           | 2      | 0                                       |        |
| 16559  | 0                           |        | 0                                       |        |
| 16564  | 4                           | 3      | 5                                       | 3      |
| 16565  | 3                           | 1      | 2                                       | 2      |
| 16567  | 1                           | 1      | 1                                       | 1      |
| 16571  | 0                           |        | 0                                       |        |
| 16572  | 1                           | 1      | 1                                       | 2      |
| 16579  | 0                           |        | 0                                       |        |
| 16588  | 2                           | 1      | 3                                       | 4      |
| 16599  | 1                           | 0      | 0                                       |        |
| 16605  | 2                           | 1      | 0                                       |        |
| 16622  | 0                           |        | 0                                       |        |
| 16635  | 1                           | 0      | 0                                       |        |
| 16638  | 0                           |        | 0                                       |        |
| 16652  | 1                           | 1      | 0                                       |        |
| 16656  | 0                           |        | 0                                       |        |
| 16671  | 0                           |        | 0                                       |        |
| 16676  | 0                           |        | 0                                       |        |
| 16678  | 1                           | 1      | 1                                       | 1      |
| 16702  | 1                           | 1      | 1                                       | 1      |
| 16705  | 1                           | 0      | 0                                       |        |
| 16707  | 3                           | 2      | 2                                       | 3      |
| 16711  | 1                           | 1      | 1                                       | 1      |
| 16712  | 0                           |        | 0                                       |        |
| 16716  | 0                           |        | 0                                       |        |
| 16724  | 1                           | 1      | 1                                       | 1      |
| 16727  | 1                           | 1      | 1                                       | 1      |

| respid | ICS Terminal Dribble: Q28_1 | Q28a_1 | ICS Urgency with fear of leaking: Q29_1 | Q29a_1 |
|--------|-----------------------------|--------|-----------------------------------------|--------|
| 16734  | 1                           | 1      | 0                                       |        |
| 16740  | 0                           |        | 0                                       |        |
| 16748  | 1                           | 1      | 0                                       |        |
| 16759  | 0                           |        | 0                                       |        |
| 16761  | 0                           |        | 0                                       |        |
| 16763  | 4                           | 3      | 0                                       |        |
| 16764  | 4                           | 3      | 3                                       | 4      |
| 16766  | 0                           |        | 0                                       |        |
| 16767  | 0                           |        | 0                                       |        |
| 16776  | 0                           |        | 1                                       | 0      |
| 16781  | 0                           |        | 0                                       |        |
| 16793  | 2                           | 1      | 1                                       | 1      |
| 16796  | 4                           | 3      | 5                                       | 4      |
| 16810  | 2                           | 0      | 0                                       |        |
| 16811  | 1                           | 1      | 0                                       |        |
| 16813  | 0                           |        | 0                                       |        |
| 16814  | 1                           | 2      | 0                                       |        |
| 16831  | 2                           | 2      | 0                                       |        |
| 16833  | 1                           | 1      | 1                                       | 0      |
| 16839  | 3                           | 1      | 1                                       | 1      |
| 16843  | 3                           | 1      | 0                                       |        |
| 16860  | 0                           |        | 0                                       |        |
| 16871  | 0                           |        | 0                                       |        |
| 16881  | 2                           | 2      | 1                                       | 2      |
| 16884  | 2                           | 1      | 1                                       | 1      |
| 16891  | 1                           | 1      | 1                                       | 1      |
| 16909  | 0                           |        | 1                                       | 0      |
| 16911  | 0                           |        | 0                                       |        |
| 16922  | 3                           | 2      | 3                                       | 3      |
| 16935  | 2                           | 3      | 3                                       | 2      |
| 16942  | 0                           |        | 0                                       |        |
| 16950  | 0                           |        | 0                                       |        |

| respid | ICS Terminal Dribble: Q28_1 | Q28a_1 | ICS Urgency with fear of leaking: Q29_1 | Q29a_1 |
|--------|-----------------------------|--------|-----------------------------------------|--------|
| 16952  | 2                           | 3      | 3                                       | 2      |
| 16963  | 0                           |        | 0                                       |        |
| 16967  | 3                           | 3      | 1                                       | 1      |
| 16970  | 3                           | 2      | 1                                       | 2      |
| 16976  | 2                           | 2      | 1                                       | 2      |
| 16982  | 0                           |        | 0                                       |        |
| 16995  | 1                           | 0      | 1                                       | 0      |
| 17004  | 1                           | 1      | 0                                       |        |
| 17006  | 0                           |        | 0                                       |        |
| 17009  | 3                           | 3      | 1                                       | 2      |
| 17021  | 0                           |        | 0                                       |        |
| 17040  | 0                           |        | 0                                       |        |
| 17041  | 0                           |        | 0                                       |        |
| 17044  | 3                           | 1      | 3                                       | 2      |
| 17046  | 1                           | 1      | 1                                       | 1      |
| 17052  | 1                           | 1      | 1                                       | 1      |
| 17055  | 0                           |        | 0                                       |        |
| 17108  | 1                           | 0      | 0                                       |        |
| 17109  | 0                           |        | 1                                       | 1      |
| 17113  | 0                           |        | 0                                       |        |
| 17115  | 4                           | 4      | 0                                       |        |
| 17132  | 0                           |        | 0                                       |        |
| 17135  | 1                           | 1      | 1                                       | 1      |
| 17138  | 1                           | 0      | 0                                       |        |
| 17141  | 0                           |        | 0                                       |        |
| 17143  | 5                           | 0      | 0                                       |        |
| 17148  | 0                           |        | 0                                       |        |
| 17151  | 0                           |        | 1                                       | 1      |
| 17153  | 1                           | 1      | 0                                       |        |
| 17154  | 4                           | 3      | 3                                       | 3      |
| 17157  | 4                           | 3      | 1                                       | 1      |
| 17160  | 1                           | 0      | 0                                       |        |



| respid | ICS Terminal Dribble: Q28_1 | Q28a_1 | ICS Urgency with fear of leaking: Q29_1 | Q29a_1 |
|--------|-----------------------------|--------|-----------------------------------------|--------|
| 17167  | 3                           | 1      | 1                                       | 1      |
| 17169  | 5                           | 2      | 1                                       | 1      |
| 17174  | 0                           |        | 1                                       | 2      |
| 17179  | 0                           |        | 0                                       |        |
| 17180  | 2                           | 1      | 0                                       |        |
| 17182  | 0                           |        | 0                                       |        |
| 17184  | 5                           | 3      | 3                                       | 3      |
| 17186  | 1                           | 1      | 1                                       | 1      |
| 17187  | 0                           |        | 0                                       |        |
| 17192  | 5                           | 1      | 0                                       |        |
| 17197  | 1                           | 1      | 1                                       | 1      |
| 17217  | 0                           |        | 0                                       |        |
| 17226  | 1                           | 1      | 0                                       |        |
| 17228  | 2                           | 1      | 0                                       |        |
| 17245  | 4                           | 3      | 3                                       | 3      |
| 17247  | 0                           |        | 0                                       |        |
| 17258  | 0                           |        | 0                                       |        |
| 17259  | 2                           | 1      | 2                                       | 1      |
| 17262  | 1                           | 0      | 0                                       |        |
| 17265  | 1                           | 1      | 0                                       |        |
| 17281  | 0                           |        | 0                                       |        |
| 17282  | 2                           | 3      | 1                                       | 3      |
| 17293  | 0                           |        | 0                                       |        |
| 17306  | 1                           | 2      | 1                                       | 2      |
| 17312  | 1                           | 0      | 1                                       | 0      |
| 17318  | 1                           | 1      | 1                                       | 1      |
| 17328  | 4                           | 3      | 2                                       | 3      |
| 17343  | 1                           | 1      | 1                                       | 1      |
| 17344  | 0                           |        | 0                                       |        |
| 17348  | 0                           |        | 0                                       |        |
| 17352  | 0                           |        | 0                                       |        |
| 17355  | 0                           |        | 0                                       |        |

| respid | ICS Terminal Dribble: Q28_1 | Q28a_1 | ICS Urgency with fear of leaking: Q29_1 | Q29a_1 |
|--------|-----------------------------|--------|-----------------------------------------|--------|
| 17356  | 1                           | 1      | 0                                       |        |
| 17359  | 1                           | 1      | 0                                       |        |
| 17373  | 3                           | 3      | 3                                       | 3      |
| 17381  | 1                           | 1      | 0                                       |        |
| 17388  | 1                           | 0      | 1                                       | 1      |
| 17394  | 1                           | 1      | 1                                       | 1      |
| 17401  | 0                           |        | 0                                       |        |
| 17403  | 0                           |        | 0                                       |        |
| 17411  | 0                           |        | 0                                       |        |
| 17423  | 1                           | 1      | 1                                       | 1      |
| 17427  | 0                           |        | 0                                       |        |
| 17433  | 0                           |        | 0                                       |        |
| 17441  | 0                           |        | 0                                       |        |
| 17442  | 1                           | 0      | 1                                       | 2      |
| 17447  | 1                           | 1      | 0                                       |        |
| 17458  | 0                           |        | 0                                       |        |
| 17474  | 0                           |        | 0                                       |        |
| 17475  | 2                           | 2      | 3                                       | 2      |
| 17476  | 1                           | 1      | 1                                       | 2      |
| 17480  | 0                           |        | 0                                       |        |
| 17484  | 0                           |        | 0                                       |        |
| 17490  | 0                           |        | 0                                       |        |
| 17491  | 0                           |        | 0                                       |        |
| 17500  | 1                           | 1      | 0                                       |        |
| 17507  | 1                           | 0      | 0                                       |        |
| 17517  | 1                           | 0      | 0                                       |        |
| 17520  | 2                           | 2      | 0                                       |        |
| 17521  | 2                           | 1      | 0                                       |        |
| 17531  | 0                           |        | 0                                       |        |
| 17540  | 0                           |        | 0                                       |        |
| 17550  | 1                           | 0      | 0                                       |        |
| 17551  | 0                           |        | 0                                       |        |

| respid | ICS Terminal Dribble: Q28_1 | Q28a_1 | ICS Urgency with fear of leaking: Q29_1 | Q29a_1 |
|--------|-----------------------------|--------|-----------------------------------------|--------|
| 17555  | 1                           | 1      | 2                                       | 3      |
| 17556  | 1                           | 0      | 1                                       | 1      |
| 17574  | 4                           | 1      | 0                                       |        |
| 17575  | 0                           |        | 0                                       |        |
| 17582  | 0                           |        | 1                                       | 0      |
| 17587  | 0                           |        | 0                                       |        |
| 17601  | 2                           | 2      | 1                                       | 1      |
| 17607  | 3                           | 2      | 1                                       | 1      |
| 17609  | 0                           |        | 0                                       |        |
| 17611  | 0                           |        | 0                                       |        |
| 17613  | 1                           | 1      | 0                                       |        |
| 17615  | 0                           |        | 0                                       |        |
| 17620  | 1                           | 1      | 1                                       | 1      |
| 17624  | 3                           | 1      | 2                                       | 1      |
| 17635  | 2                           | 2      | 0                                       |        |
| 17643  | 1                           | 0      | 1                                       | 1      |
| 17645  | 0                           |        | 1                                       | 0      |
| 17646  | 0                           |        | 0                                       |        |
| 17649  | 1                           | 1      | 0                                       |        |
| 17658  | 1                           | 1      | 0                                       |        |
| 17666  | 0                           |        | 0                                       |        |
| 17670  | 0                           |        | 0                                       |        |
| 17678  | 0                           |        | 0                                       |        |
| 17679  | 0                           |        | 0                                       |        |
| 17695  | 0                           |        | 0                                       |        |
| 17697  | 5                           | 3      | 1                                       | 1      |
| 17698  | 3                           | 2      | 0                                       |        |
| 17723  | 1                           | 1      | 1                                       | 2      |
| 17727  | 0                           |        | 0                                       |        |
| 17734  | 0                           |        | 0                                       |        |
| 17737  | 0                           |        | 0                                       |        |
| 17748  | 1                           | 1      | 0                                       |        |

| respid | ICS Terminal Dribble: Q28_1 | Q28a_1 | ICS Urgency with fear of leaking: Q29_1 | Q29a_1 |
|--------|-----------------------------|--------|-----------------------------------------|--------|
| 17749  | 0                           |        | 0                                       |        |
| 17754  | 3                           | 1      | 2                                       | 2      |
| 17766  | 1                           | 1      | 1                                       | 1      |
| 17777  | 0                           |        | 0                                       |        |
| 17780  | 4                           | 2      | 0                                       |        |
| 17788  | 1                           | 0      | 0                                       |        |
| 17801  | 5                           | 3      | 1                                       | 2      |
| 17803  | 0                           |        | 0                                       |        |
| 17807  | 0                           |        | 0                                       |        |
| 17808  | 0                           |        | 0                                       |        |
| 17809  | 1                           | 1      | 1                                       | 1      |
| 17821  | 0                           |        | 0                                       |        |
| 17827  | 2                           | 2      | 2                                       | 2      |
| 17834  | 3                           | 3      | 2                                       | 3      |
| 17838  | 1                           | 1      | 1                                       | 1      |
| 17842  | 0                           |        | 0                                       |        |
| 17862  | 1                           | 1      | 1                                       | 1      |
| 17863  | 0                           |        | 0                                       |        |
| 17871  | 4                           | 2      | 3                                       | 2      |
| 17872  | 1                           | 0      | 0                                       |        |
| 17903  | 1                           | 0      | 1                                       | 1      |
| 17906  | 1                           | 1      | 1                                       | 1      |
| 17910  | 3                           | 2      | 3                                       | 2      |
| 17922  | 1                           | 1      | 0                                       |        |
| 17923  | 1                           | 1      | 0                                       |        |
| 17925  | 3                           | 2      | 2                                       | 2      |
| 17926  | 0                           |        | 0                                       |        |
| 17937  | 0                           |        | 0                                       |        |
| 17956  | 0                           |        | 0                                       |        |
| 17958  | 2                           | 2      | 1                                       | 1      |
| 17985  | 1                           | 0      | 0                                       |        |
| 17989  | 0                           |        | 3                                       | 3      |

| respid | ICS Terminal Dribble: Q28_1 | Q28a_1 | ICS Urgency with fear of leaking: Q29_1 | Q29a_1 |
|--------|-----------------------------|--------|-----------------------------------------|--------|
| 17995  | 1                           | 0      | 0                                       |        |
| 18000  | 0                           |        | 1                                       | 0      |
| 18010  | 0                           |        | 0                                       |        |
| 18015  | 1                           | 1      | 0                                       |        |
| 18018  | 4                           | 3      | 4                                       | 2      |
| 18031  | 0                           |        | 0                                       |        |
| 18033  | 3                           | 2      | 4                                       | 2      |
| 18036  | 0                           |        | 0                                       |        |
| 18041  | 0                           |        | 0                                       |        |
| 18068  | 0                           |        | 0                                       |        |
| 18080  | 0                           |        | 0                                       |        |
| 18081  | 1                           | 1      | 1                                       | 1      |
| 18083  | 2                           | 2      | 2                                       | 2      |
| 18113  | 1                           | 2      | 1                                       | 2      |
| 18115  | 1                           | 1      | 0                                       |        |
| 18117  | 5                           | 3      | 5                                       | 4      |
| 18129  | 1                           | 1      | 0                                       |        |
| 18132  | 2                           | 2      | 3                                       | 3      |
| 18146  | 0                           |        | 0                                       |        |
| 18147  | 3                           | 2      | 4                                       | 4      |
| 18153  | 0                           |        | 0                                       |        |
| 18154  | 0                           |        | 0                                       |        |
| 18157  | 1                           | 0      | 0                                       |        |
| 18166  | 2                           | 1      | 0                                       |        |
| 18169  | 0                           |        | 1                                       | 1      |
| 18171  | 1                           | 0      | 1                                       | 2      |
| 18173  | 0                           |        | 1                                       | 2      |
| 18204  | 1                           | 0      | 1                                       | 0      |
| 18210  | 4                           | 3      | 2                                       | 2      |
| 18212  | 0                           |        | 0                                       |        |
| 18220  | 3                           | 3      | 2                                       | 2      |
| 18221  | 0                           |        | 0                                       |        |

| respid | ICS Terminal Dribble: Q28_1 | Q28a_1 | ICS Urgency with fear of leaking: Q29_1 | Q29a_1 |
|--------|-----------------------------|--------|-----------------------------------------|--------|
| 18228  | 4                           | 0      | 0                                       |        |
| 18231  | 0                           |        | 0                                       |        |
| 18233  | 1                           | 1      | 1                                       | 1      |
| 18235  | 0                           |        | 1                                       | 0      |
| 18237  | 0                           |        | 0                                       |        |
| 18250  | 0                           |        | 1                                       | 1      |
| 18253  | 0                           |        | 0                                       |        |
| 18264  | 0                           |        | 0                                       |        |
| 18285  | 0                           |        | 0                                       |        |
| 18287  | 0                           |        | 0                                       |        |
| 18296  | 0                           |        | 0                                       |        |
| 18299  | 0                           |        | 0                                       |        |
| 18313  | 0                           |        | 0                                       |        |
| 18321  | 0                           |        | 0                                       |        |
| 18324  | 0                           |        | 0                                       |        |
| 18329  | 0                           |        | 0                                       |        |
| 18332  | 0                           |        | 0                                       |        |
| 18339  | 4                           | 4      | 3                                       | 3      |
| 18340  | 2                           | 1      | 0                                       |        |
| 18348  | 0                           |        | 0                                       |        |
| 18355  | 1                           | 1      | 1                                       | 1      |
| 18360  | 1                           | 0      | 1                                       | 0      |
| 18380  | 2                           | 2      | 0                                       |        |
| 18403  | 3                           | 3      | 4                                       | 3      |
| 18405  | 3                           | 1      | 3                                       | 1      |
| 18409  | 0                           |        | 0                                       |        |
| 18445  | 0                           |        | 0                                       |        |
| 18458  | 0                           |        | 0                                       |        |
| 18477  | 0                           |        | 0                                       |        |
| 18481  | 1                           | 0      | 0                                       |        |
| 18491  | 1                           | 1      | 0                                       |        |
| 18492  | 2                           | 1      | 0                                       |        |

| respid | ICS Terminal Dribble: Q28_1 | Q28a_1 | ICS Urgency with fear of leaking: Q29_1 | Q29a_1 |
|--------|-----------------------------|--------|-----------------------------------------|--------|
| 18494  | 0                           |        | 0                                       |        |
| 18495  | 0                           |        | 0                                       |        |
| 18496  | 0                           |        | 1                                       | 1      |
| 18507  | 3                           | 3      | 2                                       | 1      |
| 18509  | 0                           |        | 0                                       |        |
| 18510  | 0                           |        | 0                                       |        |
| 18513  | 0                           |        | 0                                       |        |
| 18525  | 0                           |        | 0                                       |        |
| 18526  | 3                           | 2      | 2                                       | 2      |
| 18527  | 4                           | 2      | 1                                       | 2      |
| 18536  | 0                           |        | 0                                       |        |
| 18540  | 0                           |        | 0                                       |        |
| 18548  | 1                           | 1      | 0                                       |        |
| 18550  | 0                           |        | 0                                       |        |
| 18556  | 1                           | 0      | 0                                       |        |
| 18561  | 0                           |        | 0                                       |        |
| 18577  | 3                           | 2      | 2                                       | 2      |
| 18580  | 0                           |        | 0                                       |        |
| 18633  | 0                           |        | 1                                       | 1      |
| 18635  | 0                           |        | 0                                       |        |
| 18636  | 0                           |        | 0                                       |        |
| 18645  | 3                           | 3      | 3                                       | 3      |
| 18649  | 2                           | 1      | 0                                       |        |
| 18664  | 0                           |        | 0                                       |        |
| 18668  | 0                           |        | 0                                       |        |
| 18682  | 5                           | 4      | 5                                       | 4      |
| 18685  | 2                           | 2      | 1                                       | 1      |
| 18688  | 1                           | 1      | 1                                       | 1      |
| 18689  | 2                           | 2      | 3                                       | 2      |
| 18693  | 3                           | 3      | 3                                       | 4      |
| 18694  | 0                           |        | 0                                       |        |
| 18705  | 0                           |        | 0                                       |        |

| respid | ICS Terminal Dribble: Q28_1 | Q28a_1 | ICS Urgency with fear of leaking: Q29_1 | Q29a_1 |
|--------|-----------------------------|--------|-----------------------------------------|--------|
| 18710  | 0                           |        | 1                                       | 1      |
| 18715  | 1                           | 1      | 0                                       |        |
| 18718  | 0                           |        | 0                                       |        |
| 18727  | 0                           |        | 0                                       |        |
| 18732  | 0                           |        | 0                                       |        |
| 18735  | 0                           |        | 0                                       |        |
| 18742  | 1                           | 1      | 0                                       |        |
| 18745  | 1                           | 0      | 0                                       |        |
| 18747  | 0                           |        | 0                                       |        |
| 18750  | 0                           |        | 0                                       |        |
| 18751  | 1                           | 1      | 1                                       | 1      |
| 18753  | 0                           |        | 0                                       |        |
| 18754  | 0                           |        | 0                                       |        |
| 18759  | 0                           |        | 1                                       | 0      |
| 18780  | 0                           |        | 0                                       |        |
| 18782  | 0                           |        | 0                                       |        |
| 18807  | 4                           | 4      | 4                                       | 4      |
| 18815  | 0                           |        | 0                                       |        |
| 18818  | 1                           | 1      | 0                                       |        |
| 18820  | 0                           |        | 0                                       |        |
| 18823  | 5                           | 4      | 5                                       | 4      |
| 18825  | 0                           |        | 0                                       |        |
| 18828  | 0                           |        | 0                                       |        |
| 18832  | 1                           | 2      | 1                                       | 1      |
| 18834  | 0                           |        | 1                                       | 1      |
| 18835  | 3                           | 3      | 4                                       | 3      |
| 18837  | 5                           | 2      | 5                                       | 2      |
| 18842  | 0                           |        | 0                                       |        |
| 18846  | 0                           |        | 0                                       |        |
| 18855  | 0                           |        | 0                                       |        |
| 18856  | 4                           | 1      | 1                                       | 1      |
| 18887  | 1                           | 1      | 0                                       |        |



| respid | ICS Terminal Dribble: Q28_1 | Q28a_1 | ICS Urgency with fear of leaking: Q29_1 | Q29a_1 |
|--------|-----------------------------|--------|-----------------------------------------|--------|
| 18903  | 0                           |        | 0                                       |        |
| 18906  | 0                           |        | 0                                       |        |
| 18910  | 0                           |        | 0                                       |        |
| 18919  | 1                           | 1      | 0                                       |        |
| 18928  | 0                           |        | 0                                       |        |
| 18931  | 4                           | 1      | 1                                       | 2      |
| 18939  | 2                           | 1      | 1                                       | 1      |
| 18946  | 0                           |        | 0                                       |        |
| 18952  | 0                           |        | 0                                       |        |
| 18954  | 1                           | 0      | 0                                       |        |
| 18982  | 0                           |        | 0                                       |        |
| 18986  | 0                           |        | 0                                       |        |
| 18989  | 1                           | 4      | 2                                       | 4      |
| 18990  | 0                           |        | 0                                       |        |
| 18996  | 0                           |        | 0                                       |        |
| 18998  | 0                           |        | 0                                       |        |
| 19009  | 2                           | 3      | 2                                       | 2      |
| 19010  | 0                           |        | 0                                       |        |
| 19017  | 0                           |        | 0                                       |        |
| 19018  | 0                           |        | 0                                       |        |
| 19020  | 0                           |        | 0                                       |        |
| 19027  | 2                           | 1      | 0                                       |        |
| 19035  | 1                           | 1      | 0                                       |        |
| 19037  | 0                           |        | 0                                       |        |
| 19048  | 0                           |        | 0                                       |        |
| 19051  | 2                           | 2      | 1                                       | 2      |
| 19054  | 1                           | 1      | 0                                       |        |
| 19057  | 0                           |        | 0                                       |        |
| 19073  | 0                           |        | 0                                       |        |
| 19075  | 0                           |        | 0                                       |        |
| 19079  | 3                           | 2      | 1                                       | 2      |
| 19087  | 0                           |        | 0                                       |        |

| respid | ICS Terminal Dribble: Q28_1 | Q28a_1 | ICS Urgency with fear of leaking: Q29_1 | Q29a_1 |
|--------|-----------------------------|--------|-----------------------------------------|--------|
| 19090  | 0                           |        | 0                                       |        |
| 19093  | 1                           | 1      | 0                                       |        |
| 19099  | 4                           | 2      | 3                                       | 2      |
| 19100  | 0                           |        | 1                                       | 2      |
| 19101  | 0                           |        | 0                                       |        |
| 19105  | 0                           |        | 0                                       |        |
| 19111  | 2                           | 2      | 0                                       |        |
| 19112  | 0                           |        | 0                                       |        |
| 19117  | 3                           | 2      | 2                                       | 1      |
| 19122  | 0                           |        | 0                                       |        |
| 19126  | 1                           | 0      | 0                                       |        |
| 19127  | 1                           | 1      | 0                                       |        |
| 19131  | 0                           |        | 0                                       |        |
| 19134  | 1                           | 0      | 0                                       |        |
| 19149  | 1                           | 1      | 0                                       |        |
| 19151  | 1                           | 1      | 1                                       | 0      |
| 19164  | 0                           |        | 0                                       |        |
| 19166  | 2                           | 2      | 0                                       |        |
| 19172  | 1                           | 1      | 1                                       | 1      |
| 19173  | 1                           | 1      | 1                                       | 1      |
| 19180  | 3                           | 1      | 0                                       |        |
| 19185  | 2                           | 2      | 0                                       |        |
| 19189  | 0                           |        | 0                                       |        |
| 19191  | 0                           |        | 0                                       |        |
| 19198  | 0                           |        | 0                                       |        |
| 19203  | 0                           |        | 0                                       |        |
| 19209  | 0                           |        | 0                                       |        |
| 19210  | 0                           |        | 0                                       |        |
| 19218  | 0                           |        | 0                                       |        |
| 19220  | 0                           |        | 0                                       |        |
| 19225  | 3                           | 2      | 0                                       |        |
| 19227  | 0                           |        | 0                                       |        |

| respid | ICS Terminal Dribble: Q28_1 | Q28a_1 | ICS Urgency with fear of leaking: Q29_1 | Q29a_1 |
|--------|-----------------------------|--------|-----------------------------------------|--------|
| 19228  | 0                           |        | 0                                       |        |
| 19243  | 0                           |        | 0                                       |        |
| 19244  | 1                           | 1      | 0                                       |        |
| 19246  | 0                           |        | 0                                       |        |
| 19248  | 0                           |        | 0                                       |        |
| 19249  | 0                           |        | 0                                       |        |
| 19252  | 0                           |        | 0                                       |        |
| 19255  | 0                           |        | 0                                       |        |
| 19257  | 0                           |        | 0                                       |        |
| 19274  | 0                           |        | 0                                       |        |
| 19279  | 0                           |        | 0                                       |        |
| 19291  | 0                           |        | 0                                       |        |
| 19292  | 0                           |        | 0                                       |        |
| 19308  | 1                           | 1      | 1                                       | 1      |
| 19310  | 0                           |        | 0                                       |        |
| 19311  | 1                           | 3      | 0                                       |        |
| 19326  | 0                           |        | 0                                       |        |
| 19327  | 0                           |        | 0                                       |        |
| 19329  | 0                           |        | 0                                       |        |
| 19330  | 3                           | 2      | 3                                       | 2      |
| 19333  | 2                           | 2      | 2                                       | 2      |
| 19336  | 0                           |        | 1                                       | 0      |
| 19343  | 5                           | 2      | 0                                       |        |
| 19348  | 0                           |        | 0                                       |        |
| 19349  | 1                           | 2      | 3                                       | 1      |
| 19352  | 5                           | 2      | 2                                       | 2      |
| 19356  | 0                           |        | 0                                       |        |
| 19357  | 1                           | 1      | 0                                       |        |
| 19358  | 0                           |        | 0                                       |        |
| 19367  | 1                           | 1      | 1                                       | 1      |
| 19376  | 0                           |        | 0                                       |        |
| 19377  | 0                           |        | 0                                       |        |

| respid | ICS Terminal Dribble: Q28_1 | Q28a_1 | ICS Urgency with fear of leaking: Q29_1 | Q29a_1 |
|--------|-----------------------------|--------|-----------------------------------------|--------|
| 19380  | 1                           | 1      | 0                                       |        |
| 19384  | 0                           |        | 0                                       |        |
| 19391  | 5                           | 4      | 4                                       | 4      |
| 19397  | 0                           |        | 0                                       |        |
| 19398  | 0                           |        | 0                                       |        |
| 19401  | 0                           |        | 0                                       |        |
| 19402  | 0                           |        | 0                                       |        |
| 19403  | 0                           |        | 0                                       |        |
| 19405  | 0                           |        | 0                                       |        |
| 19407  | 2                           | 1      | 0                                       |        |
| 19415  | 0                           |        | 0                                       |        |
| 19420  | 0                           |        | 0                                       |        |
| 19423  | 2                           | 3      | 2                                       | 2      |
| 19424  | 2                           | 3      | 2                                       | 2      |
| 19426  | 0                           |        | 0                                       |        |
| 19429  | 0                           |        | 0                                       |        |
| 19435  | 4                           | 3      | 3                                       | 4      |
| 19441  | 1                           | 1      | 0                                       |        |
| 19450  | 0                           |        | 0                                       |        |
| 19456  | 2                           | 3      | 1                                       | 3      |
| 19457  | 0                           |        | 0                                       |        |
| 19463  | 0                           |        | 0                                       |        |
| 19467  | 5                           | 4      | 0                                       |        |
| 19468  | 0                           |        | 0                                       |        |
| 19471  | 0                           |        | 0                                       |        |
| 19473  | 2                           | 2      | 0                                       |        |
| 19478  | 2                           | 3      | 0                                       |        |
| 19480  | 0                           |        | 0                                       |        |
| 19481  | 0                           |        | 0                                       |        |
| 19484  | 1                           | 0      | 0                                       |        |
| 19487  | 0                           |        | 0                                       |        |
| 19491  | 1                           | 1      | 1                                       | 1      |

| respid | ICS Terminal Dribble: Q28_1 | Q28a_1 | ICS Urgency with fear of leaking: Q29_1 | Q29a_1 |
|--------|-----------------------------|--------|-----------------------------------------|--------|
| 19495  | 1                           | 4      | 1                                       | 4      |
| 19498  | 1                           | 1      | 1                                       | 1      |
| 19500  | 3                           | 2      | 0                                       |        |
| 19501  | 3                           | 3      | 2                                       | 2      |
| 19503  | 0                           |        | 0                                       |        |
| 19506  | 0                           |        | 0                                       |        |
| 19508  | 0                           |        | 0                                       |        |
| 19509  | 0                           |        | 0                                       |        |
| 19518  | 1                           | 1      | 1                                       | 1      |
| 19520  | 2                           | 2      | 2                                       | 1      |
| 19536  | 0                           |        | 0                                       |        |
| 19538  | 2                           | 4      | 0                                       |        |
| 19541  | 2                           | 2      | 0                                       |        |
| 19548  | 1                           | 1      | 0                                       |        |
| 19553  | 0                           |        | 0                                       |        |
| 19556  | 0                           |        | 0                                       |        |
| 19559  | 0                           |        | 0                                       |        |
| 19561  | 2                           | 3      | 0                                       |        |
| 19562  | 0                           |        | 0                                       |        |
| 19564  | 1                           | 1      | 1                                       | 1      |
| 19567  | 4                           | 4      | 5                                       | 4      |
| 19571  | 1                           | 1      | 1                                       | 1      |
| 19576  | 1                           | 1      | 0                                       |        |
| 19578  | 0                           |        | 0                                       |        |
| 19606  | 0                           |        | 0                                       |        |
| 19607  | 0                           |        | 0                                       |        |
| 19608  | 0                           |        | 0                                       |        |
| 19612  | 2                           | 3      | 3                                       | 3      |
| 19618  | 2                           | 3      | 2                                       | 2      |
| 19621  | 0                           |        | 0                                       |        |
| 19624  | 2                           | 3      | 2                                       | 3      |
| 19630  | 0                           |        | 0                                       |        |

| respid | ICS Terminal Dribble: Q28_1 | Q28a_1 | ICS Urgency with fear of leaking: Q29_1 | Q29a_1 |
|--------|-----------------------------|--------|-----------------------------------------|--------|
| 19637  | 5                           | 2      | 0                                       |        |
| 19639  | 0                           |        | 0                                       |        |
| 19647  | 1                           | 1      | 2                                       | 1      |
| 19648  | 2                           | 2      | 3                                       | 3      |
| 19660  | 0                           |        | 0                                       |        |
| 19662  | 3                           | 3      | 4                                       | 3      |
| 19669  | 0                           |        | 0                                       |        |
| 19680  | 2                           | 0      | 0                                       |        |
| 19682  | 1                           | 1      | 0                                       |        |
| 19686  | 0                           |        | 0                                       |        |
| 19700  | 0                           |        | 0                                       |        |
| 19701  | 0                           |        | 0                                       |        |
| 19704  | 0                           |        | 0                                       |        |
| 19706  | 1                           | 0      | 0                                       |        |
| 19707  | 2                           | 1      | 2                                       | 1      |
| 19717  | 3                           | 3      | 2                                       | 2      |
| 19718  | 1                           | 1      | 0                                       |        |
| 19721  | 1                           | 1      | 1                                       | 1      |
| 19722  | 0                           |        | 0                                       |        |
| 19729  | 0                           |        | 0                                       |        |
| 19738  | 2                           | 3      | 2                                       | 3      |
| 19741  | 0                           |        | 0                                       |        |
| 19742  | 1                           | 0      | 0                                       |        |
| 19747  | 1                           | 0      | 0                                       |        |
| 19748  | 0                           |        | 0                                       |        |
| 19749  | 1                           | 0      | 0                                       |        |
| 19756  | 1                           | 1      | 0                                       |        |
| 19771  | 0                           |        | 0                                       |        |
| 19772  | 2                           | 2      | 2                                       | 2      |
| 19775  | 0                           |        | 0                                       |        |
| 19783  | 0                           |        | 0                                       |        |
| 19787  | 1                           | 0      | 0                                       |        |

| respid | ICS Terminal Dribble: Q28_1 | Q28a_1 | ICS Urgency with fear of leaking: Q29_1 | Q29a_1 |
|--------|-----------------------------|--------|-----------------------------------------|--------|
| 19790  | 0                           |        | 0                                       |        |
| 19797  | 0                           |        | 0                                       |        |
| 19802  | 0                           |        | 0                                       |        |
| 19808  | 0                           |        | 0                                       |        |
| 19810  | 0                           |        | 0                                       |        |
| 19811  | 1                           | 1      | 0                                       |        |
| 19812  | 1                           | 0      | 1                                       | 1      |
| 19821  | 2                           | 2      | 2                                       | 2      |
| 19826  | 0                           |        | 0                                       |        |
| 19827  | 0                           |        | 0                                       |        |
| 19830  | 0                           |        | 0                                       |        |
| 19834  | 2                           | 1      | 0                                       |        |
| 19838  | 5                           | 2      | 3                                       | 2      |
| 19843  | 0                           |        | 0                                       |        |
| 19845  | 1                           | 1      | 3                                       | 3      |
| 19846  | 1                           | 0      | 0                                       |        |
| 19852  | 2                           | 3      | 2                                       | 2      |
| 19855  | 0                           |        | 0                                       |        |
| 19858  | 2                           | 1      | 0                                       |        |
| 19861  | 2                           | 2      | 4                                       | 3      |
| 19863  | 0                           |        | 0                                       |        |
| 19868  | 1                           | 1      | 1                                       | 1      |
| 19874  | 0                           |        | 0                                       |        |
| 19876  | 0                           |        | 0                                       |        |
| 19880  | 2                           | 2      | 3                                       | 3      |
| 19885  | 2                           | 1      | 0                                       |        |
| 19890  | 0                           |        | 0                                       |        |
| 19894  | 0                           |        | 0                                       |        |
| 19895  | 0                           |        | 0                                       |        |
| 19897  | 1                           | 0      | 0                                       |        |
| 19906  | 0                           |        | 0                                       |        |
| 19908  | 0                           |        | 0                                       |        |

| respid | ICS Terminal Dribble: Q28_1 | Q28a_1 | ICS Urgency with fear of leaking: Q29_1 | Q29a_1 |
|--------|-----------------------------|--------|-----------------------------------------|--------|
| 19912  | 0                           |        | 0                                       |        |
| 19913  | 3                           | 2      | 1                                       | 1      |
| 19914  | 3                           | 3      | 2                                       | 3      |
| 19918  | 1                           | 1      | 1                                       | 1      |
| 19924  | 3                           | 2      | 2                                       | 1      |
| 19936  | 0                           |        | 0                                       |        |
| 19940  | 0                           |        | 0                                       |        |
| 19945  | 2                           | 1      | 0                                       |        |
| 19948  | 0                           |        | 0                                       |        |
| 19959  | 0                           |        | 0                                       |        |
| 19961  | 1                           | 0      | 0                                       |        |
| 19962  | 4                           | 2      | 0                                       |        |
| 19965  | 0                           |        | 0                                       |        |
| 19966  | 1                           | 1      | 1                                       | 1      |
| 19973  | 1                           | 1      | 0                                       |        |
| 19981  | 2                           | 2      | 0                                       |        |
| 19986  | 0                           |        | 0                                       |        |
| 19989  | 0                           |        | 0                                       |        |
| 19998  | 0                           |        | 0                                       |        |
| 20001  | 0                           |        | 0                                       |        |
| 20005  | 0                           |        | 0                                       |        |
| 20013  | 4                           | 3      | 4                                       | 3      |
| 20015  | 3                           | 1      | 0                                       |        |
| 20017  | 2                           | 2      | 3                                       | 2      |
| 20020  | 0                           |        | 0                                       |        |
| 20021  | 0                           |        | 0                                       |        |
| 20026  | 0                           |        | 1                                       | 1      |
| 20028  | 1                           | 2      | 0                                       |        |
| 20030  | 0                           |        | 1                                       | 2      |
| 20031  | 0                           |        | 0                                       |        |
| 20034  | 0                           |        | 0                                       |        |
| 20035  | 0                           |        | 0                                       |        |



| respid | ICS Terminal Dribble: Q28_1 | Q28a_1 | ICS Urgency with fear of leaking: Q29_1 | Q29a_1 |
|--------|-----------------------------|--------|-----------------------------------------|--------|
| 20040  | 0                           |        | 1                                       | 1      |
| 20045  | 0                           |        | 0                                       |        |
| 20048  | 5                           | 4      | 0                                       |        |
| 20053  | 0                           |        | 1                                       | 1      |
| 20064  | 1                           | 1      | 0                                       |        |
| 20071  | 1                           | 1      | 1                                       | 1      |
| 20072  | 5                           | 4      | 0                                       |        |
| 20076  | 0                           |        | 0                                       |        |
| 20081  | 1                           | 1      | 1                                       | 1      |
| 20082  | 3                           | 3      | 3                                       | 3      |
| 20083  | 0                           |        | 0                                       |        |
| 20088  | 0                           |        | 0                                       |        |
| 20089  | 1                           | 1      | 0                                       |        |
| 20099  | 0                           |        | 0                                       |        |
| 20101  | 0                           |        | 0                                       |        |
| 20102  | 1                           | 1      | 1                                       | 1      |
| 20109  | 1                           | 0      | 0                                       |        |
| 20118  | 0                           |        | 1                                       | 0      |
| 20119  | 0                           |        | 0                                       |        |
| 20124  | 0                           |        | 0                                       |        |
| 20126  | 0                           |        | 0                                       |        |
| 20130  | 0                           |        | 0                                       |        |
| 20131  | 1                           | 1      | 0                                       |        |
| 20134  | 2                           | 2      | 1                                       | 1      |
| 20146  | 0                           |        | 0                                       |        |
| 20152  | 0                           |        | 0                                       |        |
| 20155  | 1                           | 1      | 0                                       |        |
| 20156  | 0                           |        | 0                                       |        |
| 20157  | 0                           |        | 0                                       |        |
| 20164  | 0                           |        | 0                                       |        |
| 20168  | 1                           | 1      | 0                                       |        |
| 20173  | 3                           | 2      | 4                                       | 3      |

| respid | ICS Terminal Dribble: Q28_1 | Q28a_1 | ICS Urgency with fear of leaking: Q29_1 | Q29a_1 |
|--------|-----------------------------|--------|-----------------------------------------|--------|
| 20174  | 0                           |        | 0                                       |        |
| 20175  | 3                           | 4      | 3                                       | 4      |
| 20189  | 0                           |        | 0                                       |        |
| 20190  | 0                           |        | 1                                       | 0      |
| 20201  | 0                           |        | 0                                       |        |
| 20202  | 0                           |        | 0                                       |        |
| 20204  | 0                           |        | 0                                       |        |
| 20206  | 1                           | 1      | 2                                       | 2      |
| 20207  | 0                           |        | 0                                       |        |
| 20212  | 0                           |        | 1                                       | 0      |
| 20213  | 0                           |        | 0                                       |        |
| 20217  | 0                           |        | 0                                       |        |
| 20222  | 3                           | 2      | 1                                       | 1      |
| 20227  | 0                           |        | 0                                       |        |
| 20228  | 0                           |        | 0                                       |        |
| 20238  | 0                           |        | 0                                       |        |
| 20242  | 0                           |        | 0                                       |        |
| 20246  | 0                           |        | 0                                       |        |
| 20255  | 2                           | 2      | 2                                       | 2      |
| 20256  | 3                           | 3      | 0                                       |        |
| 20259  | 3                           | 3      | 2                                       | 2      |
| 20262  | 1                           | 1      | 0                                       |        |
| 20274  | 0                           |        | 0                                       |        |
| 20283  | 2                           | 2      | 2                                       | 2      |
| 20284  | 0                           |        | 0                                       |        |
| 20291  | 0                           |        | 0                                       |        |
| 20292  | 0                           |        | 0                                       |        |
| 20293  | 5                           | 2      | 0                                       |        |
| 20298  | 3                           | 2      | 3                                       | 0      |
| 20301  | 0                           |        | 0                                       |        |
| 20303  | 2                           | 1      | 0                                       |        |
| 20309  | 0                           |        | 0                                       |        |

| respid | ICS Terminal Dribble: Q28_1 | Q28a_1 | ICS Urgency with fear of leaking: Q29_1 | Q29a_1 |
|--------|-----------------------------|--------|-----------------------------------------|--------|
| 20318  | 1                           | 1      | 0                                       |        |
| 20324  | 0                           |        | 0                                       |        |
| 20335  | 0                           |        | 0                                       |        |
| 20336  | 0                           |        | 0                                       |        |
| 20339  | 0                           |        | 0                                       |        |
| 20348  | 0                           |        | 1                                       | 1      |
| 20351  | 1                           | 0      | 0                                       |        |
| 20353  | 0                           |        | 0                                       |        |
| 20356  | 0                           |        | 0                                       |        |
| 20357  | 0                           |        | 0                                       |        |
| 20366  | 0                           |        | 0                                       |        |
| 20369  | 3                           | 3      | 4                                       | 3      |
| 20372  | 0                           |        | 0                                       |        |
| 20375  | 0                           |        | 0                                       |        |
| 20379  | 1                           | 0      | 0                                       |        |
| 20380  | 0                           |        | 0                                       |        |
| 20396  | 1                           | 2      | 1                                       | 2      |
| 20398  | 2                           | 1      | 2                                       | 2      |
| 20412  | 0                           |        | 0                                       |        |
| 20415  | 1                           | 0      | 0                                       |        |
| 20424  | 1                           | 1      | 5                                       | 4      |
| 20434  | 0                           |        | 0                                       |        |
| 20435  | 0                           |        | 0                                       |        |
| 20440  | 0                           |        | 0                                       |        |
| 20441  | 1                           | 0      | 0                                       |        |
| 20445  | 0                           |        | 0                                       |        |
| 20446  | 3                           | 2      | 3                                       | 2      |
| 20450  | 0                           |        | 0                                       |        |
| 20453  | 2                           | 2      | 1                                       | 2      |
| 20458  | 0                           |        | 0                                       |        |
| 20464  | 0                           |        | 0                                       |        |
| 20471  | 0                           |        | 0                                       |        |

| respid | ICS Terminal Dribble: Q28_1 | Q28a_1 | ICS Urgency with fear of leaking: Q29_1 | Q29a_1 |
|--------|-----------------------------|--------|-----------------------------------------|--------|
| 20473  | 0                           |        | 0                                       |        |
| 20474  | 0                           |        | 0                                       |        |
| 20477  | 0                           |        | 0                                       |        |
| 20479  | 1                           | 1      | 5                                       | 4      |
| 20485  | 0                           |        | 0                                       |        |
| 20487  | 0                           |        | 0                                       |        |
| 20488  | 0                           |        | 0                                       |        |
| 20494  | 2                           | 1      | 0                                       |        |
| 20502  | 3                           | 3      | 3                                       | 3      |
| 20503  | 0                           |        | 0                                       |        |
| 20510  | 0                           |        | 0                                       |        |
| 20512  | 0                           |        | 0                                       |        |
| 20516  | 2                           | 2      | 2                                       | 2      |
| 20522  | 5                           | 3      | 3                                       | 3      |
| 20527  | 0                           |        | 0                                       |        |
| 20529  | 1                           | 1      | 1                                       | 1      |
| 20535  | 2                           | 2      | 0                                       |        |
| 20543  | 0                           |        | 0                                       |        |
| 20546  | 1                           | 1      | 0                                       |        |
| 20548  | 0                           |        | 0                                       |        |
| 20552  | 0                           |        | 0                                       |        |
| 20556  | 4                           | 1      | 0                                       |        |
| 20566  | 2                           | 2      | 0                                       |        |
| 20576  | 1                           | 1      | 0                                       |        |
| 20587  | 1                           | 1      | 0                                       |        |
| 20589  | 0                           |        | 0                                       |        |
| 20593  | 0                           |        | 0                                       |        |
| 20594  | 0                           |        | 0                                       |        |
| 20602  | 1                           | 1      | 1                                       | 1      |
| 20607  | 0                           |        | 0                                       |        |
| 20608  | 0                           |        | 0                                       |        |
| 20611  | 0                           |        | 0                                       |        |

| respid | ICS Terminal Dribble: Q28_1 | Q28a_1 | ICS Urgency with fear of leaking: Q29_1 | Q29a_1 |
|--------|-----------------------------|--------|-----------------------------------------|--------|
| 20612  | 0                           |        | 0                                       |        |
| 20615  | 0                           |        | 1                                       | 1      |
| 20625  | 0                           |        | 0                                       |        |
| 20630  | 1                           | 0      | 1                                       | 1      |
| 20639  | 0                           |        | 0                                       |        |
| 20643  | 1                           | 0      | 0                                       |        |
| 20645  | 0                           |        | 0                                       |        |
| 20647  | 1                           | 0      | 0                                       |        |
| 20652  | 4                           | 4      | 3                                       | 3      |
| 20661  | 0                           |        | 0                                       |        |
| 20665  | 0                           |        | 0                                       |        |
| 20679  | 0                           |        | 0                                       |        |
| 20682  | 1                           | 1      | 2                                       | 1      |
| 20683  | 0                           |        | 0                                       |        |
| 20700  | 0                           |        | 0                                       |        |
| 20702  | 1                           | 3      | 3                                       | 4      |
| 20709  | 0                           |        | 0                                       |        |
| 20715  | 3                           | 3      | 4                                       | 2      |
| 20718  | 0                           |        | 0                                       |        |
| 20722  | 0                           |        | 0                                       |        |
| 20729  | 0                           |        | 0                                       |        |
| 20732  | 0                           |        | 0                                       |        |
| 20746  | 1                           | 1      | 1                                       | 1      |
| 20747  | 0                           |        | 0                                       |        |
| 20758  | 0                           |        | 0                                       |        |
| 20767  | 1                           | 2      | 0                                       |        |
| 20777  | 0                           |        | 0                                       |        |
| 20778  | 0                           |        | 0                                       |        |
| 20780  | 0                           |        | 0                                       |        |
| 20800  | 0                           |        | 0                                       |        |
| 20810  | 1                           | 1      | 0                                       |        |
| 20814  | 1                           | 1      | 1                                       | 1      |

| respid | ICS Terminal Dribble: Q28_1 | Q28a_1 | ICS Urgency with fear of leaking: Q29_1 | Q29a_1 |
|--------|-----------------------------|--------|-----------------------------------------|--------|
| 20816  | 0                           |        | 0                                       |        |
| 20832  | 0                           |        | 0                                       |        |
| 20838  | 2                           | 3      | 0                                       |        |
| 20841  | 0                           |        | 0                                       |        |
| 20848  | 2                           | 1      | 0                                       |        |
| 20850  | 0                           |        | 0                                       |        |
| 20851  | 0                           |        | 0                                       |        |
| 20861  | 1                           | 3      | 0                                       |        |
| 20870  | 1                           | 2      | 1                                       | 2      |
| 20880  | 0                           |        | 0                                       |        |
| 20883  | 0                           |        | 0                                       |        |
| 20894  | 0                           |        | 1                                       | 0      |
| 20896  | 2                           | 2      | 0                                       |        |
| 20901  | 4                           | 3      | 2                                       | 2      |
| 20903  | 0                           |        | 0                                       |        |
| 20909  | 0                           |        | 0                                       |        |
| 20919  | 1                           | 0      | 0                                       |        |
| 20925  | 0                           |        | 0                                       |        |
| 20935  | 0                           |        | 0                                       |        |
| 20939  | 0                           |        | 0                                       |        |
| 20956  | 4                           | 3      | 4                                       | 4      |
| 20970  | 0                           |        | 0                                       |        |
| 20974  | 1                           | 2      | 0                                       |        |
| 20975  | 0                           |        | 0                                       |        |
| 20984  | 1                           | 2      | 0                                       |        |
| 20988  | 0                           |        | 0                                       |        |
| 20996  | 0                           |        | 1                                       | 1      |
| 20998  | 0                           |        | 0                                       |        |
| 21007  | 0                           |        | 0                                       |        |
| 21008  | 0                           |        | 0                                       |        |
| 21014  | 0                           |        | 0                                       |        |
| 21020  | 0                           |        | 0                                       |        |

| respid | ICS Terminal Dribble: Q28_1 | Q28a_1 | ICS Urgency with fear of leaking: Q29_1 | Q29a_1 |
|--------|-----------------------------|--------|-----------------------------------------|--------|
| 21022  | 3                           | 2      | 0                                       |        |
| 21024  | 0                           |        | 0                                       |        |
| 21026  | 1                           | 1      | 1                                       | 1      |
| 21027  | 0                           |        | 0                                       |        |
| 21030  | 1                           | 3      | 0                                       |        |
| 21032  | 3                           | 2      | 2                                       | 2      |
| 21040  | 0                           |        | 0                                       |        |
| 21045  | 0                           |        | 0                                       |        |
| 21058  | 1                           | 1      | 0                                       |        |
| 21064  | 0                           |        | 0                                       |        |
| 21073  | 0                           |        | 0                                       |        |
| 21086  | 2                           | 1      | 0                                       |        |
| 21092  | 4                           | 3      | 4                                       | 4      |
| 21096  | 4                           | 3      | 3                                       | 2      |
| 21103  | 2                           | 1      | 1                                       | 2      |
| 21120  | 2                           | 3      | 2                                       | 2      |
| 21125  | 0                           |        | 0                                       |        |
| 21126  | 1                           | 1      | 0                                       |        |
| 21132  | 0                           |        | 0                                       |        |
| 21139  | 3                           | 2      | 2                                       | 2      |
| 21147  | 0                           |        | 0                                       |        |
| 21148  | 1                           | 1      | 0                                       |        |
| 21149  | 1                           | 1      | 0                                       |        |
| 21164  | 2                           | 2      | 1                                       | 1      |
| 21165  | 2                           | 3      | 1                                       | 2      |
| 21171  | 2                           | 1      | 2                                       | 2      |
| 21176  | 0                           |        | 0                                       |        |
| 21187  | 2                           | 1      | 0                                       |        |
| 21192  | 0                           |        | 1                                       | 1      |
| 21198  | 0                           |        | 0                                       |        |
| 21199  | 1                           | 2      | 1                                       | 2      |
| 21206  | 2                           | 2      | 1                                       | 1      |

| respid | ICS Terminal Dribble: Q28_1 | Q28a_1 | ICS Urgency with fear of leaking: Q29_1 | Q29a_1 |
|--------|-----------------------------|--------|-----------------------------------------|--------|
| 21212  | 1                           | 1      | 0                                       |        |
| 21216  | 0                           |        | 0                                       |        |
| 21217  | 3                           | 3      | 3                                       | 3      |
| 21228  | 1                           | 1      | 1                                       | 3      |
| 21229  | 0                           |        | 0                                       |        |
| 21230  | 0                           |        | 0                                       |        |
| 21243  | 3                           | 2      | 3                                       | 2      |
| 21247  | 1                           | 0      | 0                                       |        |
| 21253  | 0                           |        | 0                                       |        |
| 21264  | 4                           | 2      | 2                                       | 2      |
| 21265  | 0                           |        | 0                                       |        |
| 21273  | 2                           | 2      | 3                                       | 2      |
| 21275  | 1                           | 0      | 0                                       |        |
| 21278  | 0                           |        | 0                                       |        |
| 21291  | 4                           | 3      | 3                                       | 2      |
| 21298  | 0                           |        | 0                                       |        |
| 21301  | 1                           | 3      | 0                                       |        |
| 21312  | 5                           | 4      | 2                                       | 2      |
| 21323  | 3                           | 2      | 1                                       | 1      |
| 21325  | 2                           | 1      | 1                                       | 1      |
| 21341  | 0                           |        | 0                                       |        |
| 21349  | 2                           | 2      | 1                                       | 1      |
| 21350  | 1                           | 1      | 1                                       | 1      |
| 21354  | 4                           | 4      | 4                                       | 3      |
| 21372  | 1                           | 1      | 1                                       | 2      |
| 21373  | 2                           | 2      | 2                                       | 2      |
| 21378  | 0                           |        | 1                                       | 2      |
| 21393  | 0                           |        | 0                                       |        |
| 21401  | 1                           | 1      | 0                                       |        |
| 21405  | 0                           |        | 0                                       |        |
| 21406  | 0                           |        | 0                                       |        |
| 21407  | 1                           | 0      | 0                                       |        |



| respid | ICS Terminal Dribble: Q28_1 | Q28a_1 | ICS Urgency with fear of leaking: Q29_1 | Q29a_1 |
|--------|-----------------------------|--------|-----------------------------------------|--------|
| 21418  | 0                           |        | 0                                       |        |
| 21420  | 1                           | 1      | 0                                       |        |
| 21421  | 0                           |        | 0                                       |        |
| 21446  | 2                           | 2      | 2                                       | 1      |
| 21449  | 2                           | 2      | 2                                       | 2      |
| 21452  | 0                           |        | 0                                       |        |
| 21455  | 0                           |        | 0                                       |        |
| 21469  | 0                           |        | 0                                       |        |
| 21471  | 1                           | 0      | 0                                       |        |
| 21472  | 0                           |        | 0                                       |        |
| 21474  | 0                           |        | 0                                       |        |
| 21479  | 3                           | 1      | 1                                       | 1      |
| 21485  | 1                           | 1      | 0                                       |        |
| 21512  | 0                           |        | 0                                       |        |
| 21513  | 0                           |        | 0                                       |        |
| 21514  | 2                           | 2      | 0                                       |        |
| 21520  | 0                           |        | 0                                       |        |
| 21539  | 0                           |        | 0                                       |        |
| 21553  | 0                           |        | 1                                       | 1      |
| 21560  | 0                           |        | 0                                       |        |
| 21561  | 0                           |        | 0                                       |        |
| 21563  | 0                           |        | 2                                       | 2      |
| 21565  | 0                           |        | 0                                       |        |
| 21582  | 1                           | 1      | 1                                       | 1      |
| 21584  | 1                           | 1      | 0                                       |        |
| 21585  | 0                           |        | 2                                       | 2      |
| 21586  | 1                           | 1      | 0                                       |        |
| 21587  | 1                           | 1      | 0                                       |        |
| 21590  | 4                           | 3      | 2                                       | 2      |
| 21601  | 2                           | 1      | 2                                       | 1      |
| 21611  | 1                           | 1      | 0                                       |        |
| 21612  | 0                           |        | 0                                       |        |

| respid | ICS Terminal Dribble: Q28_1 | Q28a_1 | ICS Urgency with fear of leaking: Q29_1 | Q29a_1 |
|--------|-----------------------------|--------|-----------------------------------------|--------|
| 21625  | 2                           | 1      | 3                                       | 2      |
| 21633  | 0                           |        | 0                                       |        |
| 21640  | 1                           | 1      | 0                                       |        |
| 21647  | 0                           |        | 0                                       |        |
| 21648  | 2                           | 4      | 4                                       | 4      |
| 21656  | 0                           |        | 0                                       |        |
| 21657  | 0                           |        | 0                                       |        |
| 21658  | 1                           | 2      | 2                                       | 3      |
| 21665  | 2                           | 2      | 2                                       | 2      |
| 21666  | 3                           | 3      | 2                                       | 3      |
| 21668  | 3                           | 4      | 4                                       | 4      |
| 21673  | 0                           |        | 0                                       |        |
| 21681  | 0                           |        | 2                                       | 2      |
| 21682  | 1                           | 0      | 0                                       |        |
| 21685  | 1                           | 0      | 0                                       |        |
| 21692  | 1                           | 1      | 1                                       | 1      |
| 21697  | 0                           |        | 0                                       |        |
| 21711  | 0                           |        | 0                                       |        |
| 21715  | 1                           | 1      | 0                                       |        |
| 21726  | 0                           |        | 0                                       |        |
| 21748  | 0                           |        | 0                                       |        |
| 21761  | 1                           | 0      | 0                                       |        |
| 21769  | 2                           | 2      | 2                                       | 2      |
| 21774  | 1                           | 1      | 1                                       | 2      |
| 21778  | 0                           |        | 0                                       |        |
| 21785  | 0                           |        | 2                                       | 2      |
| 21799  | 0                           |        | 0                                       |        |
| 21820  | 5                           | 3      | 4                                       | 4      |
| 21837  | 0                           |        | 0                                       |        |
| 21845  | 3                           | 3      | 3                                       | 2      |
| 21846  | 0                           |        | 0                                       |        |
| 21849  | 1                           | 0      | 2                                       | 1      |

| respid | ICS Terminal Dribble: Q28_1 | Q28a_1 | ICS Urgency with fear of leaking: Q29_1 | Q29a_1 |
|--------|-----------------------------|--------|-----------------------------------------|--------|
| 21850  | 1                           | 1      | 1                                       | 1      |
| 21855  | 0                           |        | 0                                       |        |
| 21859  | 1                           | 1      | 0                                       |        |
| 21861  | 4                           | 2      | 3                                       | 2      |
| 21866  | 0                           |        | 0                                       |        |
| 21873  | 0                           |        | 0                                       |        |
| 21876  | 0                           |        | 0                                       |        |
| 21882  | 0                           |        | 0                                       |        |
| 21884  | 1                           | 1      | 1                                       | 2      |
| 21887  | 1                           | 1      | 1                                       | 1      |
| 21892  | 0                           |        | 0                                       |        |
| 21907  | 0                           |        | 2                                       | 1      |
| 21910  | 3                           | 3      | 3                                       | 3      |
| 21912  | 1                           | 1      | 3                                       | 2      |
| 21914  | 1                           | 1      | 1                                       | 1      |
| 21925  | 0                           |        | 0                                       |        |
| 21937  | 0                           |        | 0                                       |        |
| 21938  | 1                           | 1      | 1                                       | 1      |
| 21940  | 2                           | 1      | 0                                       |        |
| 21942  | 0                           |        | 0                                       |        |
| 21947  | 0                           |        | 0                                       |        |
| 21948  | 0                           |        | 0                                       |        |
| 21961  | 0                           |        | 1                                       | 1      |
| 21977  | 2                           | 1      | 2                                       | 2      |
| 21983  | 0                           |        | 0                                       |        |
| 21986  | 3                           | 3      | 2                                       | 2      |
| 21988  | 2                           | 2      | 0                                       |        |
| 21996  | 0                           |        | 0                                       |        |
| 21997  | 0                           |        | 0                                       |        |
| 22005  | 0                           |        | 0                                       |        |
| 22013  | 0                           |        | 0                                       |        |
| 22018  | 0                           |        | 0                                       |        |

| respid | ICS Terminal Dribble: Q28_1 | Q28a_1 | ICS Urgency with fear of leaking: Q29_1 | Q29a_1 |
|--------|-----------------------------|--------|-----------------------------------------|--------|
| 22019  | 2                           | 2      | 1                                       | 2      |
| 22071  | 0                           |        | 0                                       |        |
| 22082  | 0                           |        | 0                                       |        |
| 22085  | 1                           | 0      | 0                                       |        |
| 22092  | 0                           |        | 0                                       |        |
| 22097  | 1                           | 0      | 0                                       |        |
| 22111  | 0                           |        | 0                                       |        |
| 22118  | 3                           | 2      | 0                                       |        |
| 22132  | 0                           |        | 0                                       |        |
| 22133  | 2                           | 0      | 0                                       |        |
| 22139  | 0                           |        | 0                                       |        |
| 22142  | 5                           | 4      | 4                                       | 3      |
| 22146  | 0                           |        | 0                                       |        |
| 22181  | 0                           |        | 0                                       |        |
| 22202  | 1                           | 1      | 0                                       |        |
| 22214  | 0                           |        | 0                                       |        |
| 22223  | 0                           |        | 0                                       |        |
| 22227  | 1                           | 1      | 1                                       | 1      |
| 22229  | 0                           |        | 0                                       |        |
| 22239  | 0                           |        | 0                                       |        |
| 22245  | 4                           | 3      | 4                                       | 3      |
| 22256  | 0                           |        | 0                                       |        |
| 22260  | 1                           | 1      | 0                                       |        |
| 22298  | 2                           | 1      | 2                                       | 1      |
| 22321  | 1                           | 1      | 0                                       |        |
| 22340  | 0                           |        | 0                                       |        |
| 22346  | 2                           | 2      | 2                                       | 2      |
| 22356  | 1                           | 2      | 0                                       |        |
| 22361  | 3                           | 3      | 1                                       | 1      |
| 22364  | 0                           |        | 0                                       |        |
| 22368  | 0                           |        | 0                                       |        |
| 22374  | 2                           | 2      | 2                                       | 2      |

| respid | ICS Terminal Dribble: Q28_1 | Q28a_1 | ICS Urgency with fear of leaking: Q29_1 | Q29a_1 |
|--------|-----------------------------|--------|-----------------------------------------|--------|
| 22375  | 0                           |        | 0                                       |        |
| 22377  | 2                           | 0      | 2                                       | 0      |
| 22383  | 0                           |        | 0                                       |        |
| 22387  | 2                           | 2      | 2                                       | 2      |
| 22392  | 0                           |        | 0                                       |        |
| 22393  | 1                           | 1      | 0                                       |        |
| 22394  | 0                           |        | 0                                       |        |
| 22395  | 0                           |        | 0                                       |        |
| 22401  | 2                           | 1      | 0                                       |        |
| 22407  | 0                           |        | 0                                       |        |
| 22410  | 0                           |        | 0                                       |        |
| 22418  | 0                           |        | 0                                       |        |
| 22421  | 0                           |        | 0                                       |        |
| 22423  | 0                           |        | 0                                       |        |
| 22425  | 0                           |        | 0                                       |        |
| 22427  | 0                           |        | 0                                       |        |
| 22431  | 3                           | 4      | 3                                       | 4      |
| 22435  | 0                           |        | 0                                       |        |
| 22436  | 0                           |        | 0                                       |        |
| 22442  | 0                           |        | 0                                       |        |
| 22444  | 2                           | 2      | 2                                       | 3      |
| 22445  | 1                           | 1      | 4                                       | 2      |
| 22446  | 0                           |        | 0                                       |        |
| 22448  | 2                           | 3      | 1                                       | 1      |
| 22449  | 0                           |        | 0                                       |        |
| 22450  | 1                           | 1      | 1                                       | 1      |
| 22453  | 2                           | 1      | 2                                       | 3      |
| 22465  | 1                           | 1      | 1                                       | 1      |
| 22472  | 1                           | 1      | 1                                       | 0      |
| 22475  | 2                           | 3      | 1                                       | 2      |
| 22478  | 4                           | 3      | 1                                       | 1      |
| 22491  | 0                           |        | 0                                       |        |

| respid | ICS Terminal Dribble: Q28_1 | Q28a_1 | ICS Urgency with fear of leaking: Q29_1 | Q29a_1 |
|--------|-----------------------------|--------|-----------------------------------------|--------|
| 22497  | 2                           | 1      | 2                                       | 1      |
| 22498  | 1                           | 2      | 1                                       | 1      |
| 22499  | 1                           | 2      | 0                                       |        |
| 22503  | 0                           |        | 0                                       |        |
| 22507  | 0                           |        | 0                                       |        |
| 22513  | 0                           |        | 2                                       | 3      |
| 22517  | 1                           | 1      | 2                                       | 2      |
| 22524  | 1                           | 1      | 1                                       | 1      |
| 22528  | 0                           |        | 0                                       |        |
| 22544  | 1                           | 1      | 0                                       |        |
| 22571  | 0                           |        | 0                                       |        |
| 22576  | 0                           |        | 0                                       |        |
| 22579  | 0                           |        | 1                                       | 1      |
| 22583  | 0                           |        | 1                                       | 1      |
| 22591  | 3                           | 2      | 3                                       | 2      |
| 22592  | 0                           |        | 0                                       |        |
| 22612  | 1                           | 0      | 0                                       |        |
| 22613  | 3                           | 2      | 2                                       | 2      |
| 22615  | 1                           | 1      | 0                                       |        |
| 22621  | 0                           |        | 0                                       |        |
| 22625  | 0                           |        | 0                                       |        |
| 22628  | 0                           |        | 0                                       |        |
| 22632  | 0                           |        | 0                                       |        |
| 22639  | 0                           |        | 0                                       |        |
| 22648  | 5                           | 4      | 1                                       | 3      |
| 22649  | 0                           |        | 1                                       | 1      |
| 22655  | 0                           |        | 0                                       |        |
| 22659  | 0                           |        | 0                                       |        |
| 22660  | 0                           |        | 0                                       |        |
| 22666  | 1                           | 1      | 2                                       | 2      |
| 22667  | 0                           |        | 0                                       |        |
| 22670  | 0                           |        | 0                                       |        |

| respid | ICS Terminal Dribble: Q28_1 | Q28a_1 | ICS Urgency with fear of leaking: Q29_1 | Q29a_1 |
|--------|-----------------------------|--------|-----------------------------------------|--------|
| 22681  | 0                           |        | 0                                       |        |
| 22683  | 0                           |        | 0                                       |        |
| 22688  | 0                           |        | 0                                       |        |
| 22695  | 0                           |        | 0                                       |        |
| 22696  | 0                           |        | 0                                       |        |
| 22705  | 3                           | 2      | 1                                       | 1      |
| 22718  | 3                           | 2      | 3                                       | 2      |
| 22720  | 1                           | 1      | 0                                       |        |
| 22724  | 0                           |        | 0                                       |        |
| 22728  | 1                           | 0      | 0                                       |        |
| 22751  | 0                           |        | 0                                       |        |
| 22782  | 5                           | 3      | 4                                       | 4      |
| 22786  | 2                           | 2      | 3                                       | 4      |
| 22788  | 1                           | 1      | 0                                       |        |
| 22810  | 2                           | 1      | 1                                       | 1      |
| 22816  | 0                           |        | 0                                       |        |
| 22818  | 0                           |        | 0                                       |        |
| 22854  | 0                           |        | 0                                       |        |
| 22858  | 0                           |        | 0                                       |        |
| 22862  | 0                           |        | 0                                       |        |
| 22865  | 1                           | 0      | 0                                       |        |
| 22868  | 0                           |        | 0                                       |        |
| 22869  | 4                           | 3      | 3                                       | 2      |
| 22873  | 0                           |        | 0                                       |        |
| 22875  | 0                           |        | 0                                       |        |
| 22876  | 1                           | 1      | 0                                       |        |
| 22882  | 1                           | 1      | 1                                       | 1      |
| 22884  | 0                           |        | 4                                       | 3      |
| 22887  | 0                           |        | 0                                       |        |
| 22888  | 0                           |        | 0                                       |        |
| 22900  | 0                           |        | 0                                       |        |
| 22901  | 0                           |        | 0                                       |        |

| respid | ICS Terminal Dribble: Q28_1 | Q28a_1 | ICS Urgency with fear of leaking: Q29_1 | Q29a_1 |
|--------|-----------------------------|--------|-----------------------------------------|--------|
| 22912  | 4                           | 2      | 0                                       |        |
| 22913  | 1                           | 1      | 0                                       |        |
| 22921  | 0                           |        | 0                                       |        |
| 22925  | 0                           |        | 0                                       |        |
| 22940  | 1                           | 1      | 0                                       |        |
| 22941  | 0                           |        | 0                                       |        |
| 22947  | 1                           | 1      | 1                                       | 1      |
| 22948  | 0                           |        | 0                                       |        |
| 22964  | 1                           | 1      | 1                                       | 2      |
| 22966  | 2                           | 3      | 0                                       |        |
| 22969  | 1                           | 0      | 0                                       |        |
| 22971  | 0                           |        | 0                                       |        |
| 22988  | 0                           |        | 0                                       |        |
| 22990  | 0                           |        | 0                                       |        |
| 23000  | 0                           |        | 0                                       |        |
| 23016  | 0                           |        | 0                                       |        |
| 23026  | 1                           | 0      | 1                                       | 1      |
| 23035  | 0                           |        | 0                                       |        |
| 23037  | 3                           | 4      | 2                                       | 2      |
| 23044  | 1                           | 0      | 0                                       |        |
| 23046  | 1                           | 0      | 0                                       |        |
| 23047  | 0                           |        | 0                                       |        |
| 23049  | 0                           |        | 2                                       | 0      |
| 23055  | 3                           | 2      | 0                                       |        |
| 23066  | 0                           |        | 0                                       |        |
| 23075  | 0                           |        | 0                                       |        |
| 23081  | 1                           | 0      | 0                                       |        |
| 23087  | 5                           | 2      | 0                                       |        |
| 23094  | 0                           |        | 0                                       |        |
| 23099  | 0                           |        | 0                                       |        |
| 23101  | 0                           |        | 0                                       |        |
| 23105  | 0                           |        | 0                                       |        |



| respid | ICS Terminal Dribble: Q28_1 | Q28a_1 | ICS Urgency with fear of leaking: Q29_1 | Q29a_1 |
|--------|-----------------------------|--------|-----------------------------------------|--------|
| 23115  | 2                           |        | 0                                       |        |
| 23121  | 0                           |        | 1                                       | 2      |
| 23127  | 0                           |        | 0                                       |        |
| 23131  | 0                           |        | 0                                       |        |
| 23134  | 0                           |        | 0                                       |        |
| 23145  | 0                           |        | 0                                       |        |
| 23151  | 0                           |        | 0                                       |        |
| 23161  | 0                           |        | 0                                       |        |
| 23169  | 1                           | 1      | 1                                       | 1      |
| 23173  | 0                           |        | 0                                       |        |
| 23174  | 1                           | 2      | 0                                       |        |
| 23186  | 3                           | 3      | 4                                       | 4      |
| 23195  | 0                           |        | 0                                       |        |
| 23197  | 0                           |        | 0                                       |        |
| 23198  | 0                           |        | 0                                       |        |
| 23203  | 0                           |        | 0                                       |        |
| 23204  | 2                           | 2      | 0                                       |        |
| 23212  | 0                           |        | 0                                       |        |
| 23214  | 0                           |        | 0                                       |        |
| 23221  | 0                           |        | 0                                       |        |
| 23237  | 0                           |        | 0                                       |        |
| 23251  | 0                           |        | 0                                       |        |
| 23254  | 0                           |        | 0                                       |        |
| 23262  | 0                           |        | 0                                       |        |
| 23267  | 0                           |        | 0                                       |        |
| 23268  | 0                           |        | 0                                       |        |
| 23273  | 0                           |        | 0                                       |        |
| 23278  | 0                           |        | 0                                       |        |
| 23279  | 0                           |        | 0                                       |        |
| 23281  | 3                           | 2      | 2                                       | 2      |
| 23282  | 4                           | 2      | 2                                       | 2      |
| 23283  | 0                           |        | 3                                       | 3      |

| respid | ICS Terminal Dribble: Q28_1 | Q28a_1 | ICS Urgency with fear of leaking: Q29_1 | Q29a_1 |
|--------|-----------------------------|--------|-----------------------------------------|--------|
| 23285  | 0                           |        | 0                                       |        |
| 23305  | 0                           |        | 0                                       |        |
| 23309  | 0                           |        | 0                                       |        |
| 23310  | 2                           | 2      | 0                                       |        |
| 23311  | 0                           |        | 0                                       |        |
| 23312  | 2                           | 2      | 0                                       |        |
| 23319  | 0                           |        | 0                                       |        |
| 23320  | 0                           |        | 0                                       |        |
| 23322  | 0                           |        | 0                                       |        |
| 23334  | 0                           |        | 0                                       |        |
| 23340  | 1                           | 1      | 1                                       | 0      |
| 23346  | 0                           |        | 0                                       |        |
| 23353  | 0                           |        | 0                                       |        |
| 23363  | 3                           | 2      | 3                                       | 2      |
| 23364  | 3                           | 3      | 3                                       | 2      |
| 23376  | 0                           |        | 0                                       |        |
| 23378  | 0                           |        | 0                                       |        |
| 23382  | 0                           |        | 0                                       |        |
| 23383  | 0                           |        | 0                                       |        |
| 23390  | 1                           | 0      | 0                                       |        |
| 23395  | 0                           |        | 0                                       |        |
| 23398  | 1                           | 1      | 1                                       | 1      |
| 23399  | 0                           |        | 0                                       |        |
| 23406  | 0                           |        | 0                                       |        |
| 23418  | 2                           | 1      | 0                                       |        |
| 23427  | 0                           |        | 0                                       |        |
| 23428  | 0                           |        | 0                                       |        |
| 23435  | 1                           | 1      | 1                                       | 2      |
| 23439  | 0                           |        | 0                                       |        |
| 23440  | 0                           |        | 0                                       |        |
| 23444  | 0                           |        | 1                                       | 2      |
| 23445  | 1                           | 0      | 0                                       |        |

| respid | ICS Terminal Dribble: Q28_1 | Q28a_1 | ICS Urgency with fear of leaking: Q29_1 | Q29a_1 |
|--------|-----------------------------|--------|-----------------------------------------|--------|
| 23455  | 0                           |        | 0                                       |        |
| 23467  | 1                           | 1      | 0                                       |        |
| 23478  | 1                           | 2      | 0                                       |        |
| 23492  | 1                           | 1      | 0                                       |        |
| 23498  | 0                           |        | 0                                       |        |
| 23511  | 0                           |        | 0                                       |        |
| 23514  | 0                           |        | 0                                       |        |
| 23515  | 1                           | 1      | 1                                       | 1      |
| 23522  | 0                           |        | 0                                       |        |
| 23524  | 0                           |        | 0                                       |        |
| 23531  | 4                           | 4      | 0                                       |        |
| 23532  | 0                           |        | 0                                       |        |
| 23533  | 0                           |        | 0                                       |        |
| 23534  | 1                           | 0      | 0                                       |        |
| 23538  | 0                           |        | 0                                       |        |
| 23539  | 2                           | 2      | 0                                       |        |
| 23548  | 0                           |        | 0                                       |        |
| 23553  | 0                           |        | 0                                       |        |
| 23556  | 0                           |        | 0                                       |        |
| 23563  | 0                           |        | 0                                       |        |
| 23572  | 2                           | 2      | 0                                       |        |
| 23575  | 0                           |        | 0                                       |        |
| 23576  | 0                           |        | 0                                       |        |
| 23577  | 0                           |        | 0                                       |        |
| 23578  | 0                           |        | 1                                       | 1      |
| 23587  | 1                           | 1      | 0                                       |        |
| 23597  | 0                           |        | 0                                       |        |
| 23598  | 1                           | 1      | 0                                       |        |
| 23604  | 0                           |        | 0                                       |        |
| 23617  | 0                           |        | 0                                       |        |
| 23620  | 0                           |        | 0                                       |        |
| 23621  | 0                           |        | 0                                       |        |

| respid | ICS Terminal Dribble: Q28_1 | Q28a_1 | ICS Urgency with fear of leaking: Q29_1 | Q29a_1 |
|--------|-----------------------------|--------|-----------------------------------------|--------|
| 23625  | 1                           | 0      | 0                                       |        |
| 23629  | 0                           |        | 0                                       |        |
| 23635  | 0                           |        | 0                                       |        |
| 23636  | 0                           |        | 0                                       |        |
| 23637  | 4                           | 3      | 4                                       | 3      |
| 23638  | 0                           |        | 0                                       |        |
| 23644  | 0                           |        | 0                                       |        |
| 23645  | 1                           | 1      | 0                                       |        |
| 23649  | 0                           |        | 0                                       |        |
| 23654  | 0                           |        | 0                                       |        |
| 23662  | 0                           |        | 0                                       |        |
| 23664  | 0                           |        | 0                                       |        |
| 23665  | 0                           |        | 0                                       |        |
| 23666  | 1                           | 1      | 1                                       | 1      |
| 23671  | 0                           |        | 0                                       |        |
| 23672  | 2                           | 1      | 0                                       |        |
| 23685  | 1                           | 1      | 0                                       |        |
| 23686  | 2                           | 2      | 0                                       |        |
| 23689  | 2                           | 2      | 3                                       | 2      |
| 23690  | 2                           | 1      | 2                                       | 1      |
| 23695  | 2                           | 2      | 2                                       | 3      |
| 23700  | 0                           |        | 0                                       |        |
| 23714  | 0                           |        | 0                                       |        |
| 23719  | 0                           |        | 0                                       |        |
| 23720  | 0                           |        | 0                                       |        |
| 23721  | 0                           |        | 0                                       |        |
| 23729  | 0                           |        | 0                                       |        |
| 23730  | 0                           |        | 0                                       |        |
| 23732  | 0                           |        | 0                                       |        |
| 23736  | 0                           |        | 0                                       |        |
| 23754  | 0                           |        | 0                                       |        |
| 23756  | 0                           |        | 0                                       |        |

| respid | ICS Terminal Dribble: Q28_1 | Q28a_1 | ICS Urgency with fear of leaking: Q29_1 | Q29a_1 |
|--------|-----------------------------|--------|-----------------------------------------|--------|
| 23759  | 1                           | 0      | 0                                       |        |
| 23761  | 1                           | 1      | 1                                       | 1      |
| 23766  | 0                           |        | 0                                       |        |
| 23768  | 3                           | 3      | 3                                       | 3      |
| 23773  | 0                           |        | 0                                       |        |
| 23781  | 0                           |        | 0                                       |        |
| 23782  | 5                           | 2      | 3                                       | 2      |
| 23787  | 1                           | 1      | 1                                       | 1      |
| 23788  | 2                           | 1      | 2                                       | 2      |
| 23790  | 0                           |        | 0                                       |        |
| 23794  | 3                           | 3      | 1                                       | 1      |
| 23795  | 1                           | 2      | 0                                       |        |
| 23801  | 0                           |        | 0                                       |        |
| 23806  | 0                           |        | 0                                       |        |
| 23809  | 1                           | 3      | 1                                       | 2      |
| 23813  | 0                           |        | 0                                       |        |
| 23815  | 0                           |        | 0                                       |        |
| 23821  | 0                           |        | 0                                       |        |
| 23825  | 0                           |        | 0                                       |        |
| 23826  | 0                           |        | 0                                       |        |
| 23830  | 0                           |        | 0                                       |        |
| 23833  | 0                           |        | 0                                       |        |
| 23837  | 0                           |        | 0                                       |        |
| 23848  | 5                           | 4      | 5                                       | 4      |
| 23850  | 0                           |        | 0                                       |        |
| 23870  | 0                           |        | 0                                       |        |
| 23877  | 0                           |        | 0                                       |        |
| 23880  | 0                           |        | 0                                       |        |
| 23882  | 0                           |        | 0                                       |        |
| 23888  | 0                           |        | 0                                       |        |
| 23908  | 1                           | 1      | 0                                       |        |
| 23914  | 0                           |        | 1                                       | 1      |

| respid | ICS Terminal Dribble: Q28_1 | Q28a_1 | ICS Urgency with fear of leaking: Q29_1 | Q29a_1 |
|--------|-----------------------------|--------|-----------------------------------------|--------|
| 23916  | 0                           |        | 0                                       |        |
| 23922  | 0                           |        | 0                                       |        |
| 23932  | 1                           | 1      | 0                                       |        |
| 23934  | 0                           |        | 0                                       |        |
| 23942  | 1                           | 1      | 4                                       | 3      |
| 23945  | 0                           |        | 0                                       |        |
| 23948  | 2                           | 1      | 0                                       |        |
| 23955  | 0                           |        | 0                                       |        |
| 23956  | 1                           | 2      | 1                                       | 2      |
| 23978  | 2                           | 2      | 0                                       |        |
| 23981  | 0                           |        | 0                                       |        |
| 23982  | 0                           |        | 0                                       |        |
| 23991  | 0                           |        | 0                                       |        |
| 23994  | 1                           | 1      | 0                                       |        |
| 23995  | 0                           |        | 0                                       |        |
| 23999  | 0                           |        | 0                                       |        |
| 24005  | 4                           | 4      | 2                                       | 3      |
| 24018  | 0                           |        | 0                                       |        |
| 24021  | 0                           |        | 0                                       |        |
| 24035  | 0                           |        | 0                                       |        |
| 24040  | 3                           | 1      | 0                                       |        |
| 24043  | 0                           |        | 0                                       |        |
| 24046  | 1                           | 1      | 1                                       | 1      |
| 24047  | 0                           |        | 0                                       |        |
| 24048  | 1                           | 0      | 0                                       |        |
| 24062  | 1                           | 1      | 1                                       | 1      |
| 24063  | 0                           |        | 1                                       | 1      |
| 24066  | 0                           |        | 0                                       |        |
| 24069  | 0                           |        | 0                                       |        |
| 24070  | 0                           |        | 0                                       |        |
| 24074  | 0                           |        | 0                                       |        |
| 24080  | 0                           |        | 0                                       |        |

| respid | ICS Terminal Dribble: Q28_1 | Q28a_1 | ICS Urgency with fear of leaking: Q29_1 | Q29a_1 |
|--------|-----------------------------|--------|-----------------------------------------|--------|
| 24082  | 0                           |        | 0                                       |        |
| 24088  | 0                           |        | 0                                       |        |
| 24089  | 0                           |        | 0                                       |        |
| 24091  | 0                           |        | 0                                       |        |
| 24095  | 0                           |        | 0                                       |        |
| 24100  | 0                           |        | 1                                       | 1      |
| 24105  | 0                           |        | 0                                       |        |
| 24107  | 3                           | 2      | 3                                       | 3      |
| 24108  | 0                           |        | 0                                       |        |
| 24113  | 1                           | 0      | 1                                       | 1      |
| 24120  | 0                           |        | 0                                       |        |
| 24122  | 2                           | 1      | 4                                       | 2      |
| 24123  | 1                           | 1      | 1                                       | 1      |
| 24125  | 1                           | 2      | 2                                       | 2      |
| 24132  | 0                           |        | 0                                       |        |
| 24139  | 0                           |        | 0                                       |        |
| 24140  | 1                           | 0      | 0                                       |        |
| 24143  | 1                           | 3      | 1                                       | 2      |
| 24150  | 2                           | 2      | 2                                       | 1      |
| 24153  | 0                           |        | 0                                       |        |
| 24161  | 0                           |        | 0                                       |        |
| 24168  | 0                           |        | 0                                       |        |
| 24179  | 1                           | 1      | 0                                       |        |
| 24182  | 3                           | 2      | 2                                       | 1      |
| 24194  | 0                           |        | 0                                       |        |
| 24206  | 0                           |        | 0                                       |        |
| 24214  | 0                           |        | 0                                       |        |
| 24215  | 1                           | 1      | 0                                       |        |
| 24224  | 0                           |        | 0                                       |        |
| 24225  | 0                           |        | 0                                       |        |
| 24227  | 0                           |        | 0                                       |        |
| 24229  | 0                           |        | 0                                       |        |

| respid | ICS Terminal Dribble: Q28_1 | Q28a_1 | ICS Urgency with fear of leaking: Q29_1 | Q29a_1 |
|--------|-----------------------------|--------|-----------------------------------------|--------|
| 24230  | 0                           |        | 0                                       |        |
| 24232  | 2                           | 2      | 2                                       | 2      |
| 24253  | 0                           |        | 0                                       |        |
| 24267  | 0                           |        | 0                                       |        |
| 24274  | 0                           |        | 0                                       |        |
| 24275  | 0                           |        | 0                                       |        |
| 24277  | 0                           |        | 0                                       |        |
| 24280  | 3                           | 3      | 2                                       | 1      |
| 24285  | 0                           |        | 1                                       | 1      |
| 24293  | 0                           |        | 0                                       |        |
| 24295  | 0                           |        | 0                                       |        |
| 24299  | 0                           |        | 0                                       |        |
| 24303  | 1                           | 1      | 0                                       |        |
| 24308  | 1                           | 1      | 0                                       |        |
| 24322  | 0                           |        | 0                                       |        |
| 24325  | 0                           |        | 0                                       |        |
| 24328  | 0                           |        | 0                                       |        |
| 24334  | 0                           |        | 0                                       |        |
| 24342  | 0                           |        | 0                                       |        |
| 24343  | 3                           | 2      | 2                                       | 2      |
| 24348  | 5                           | 4      | 1                                       | 2      |
| 24352  | 0                           |        | 1                                       | 2      |
| 24354  | 1                           | 1      | 0                                       |        |
| 24357  | 0                           |        | 0                                       |        |
| 24360  | 1                           | 1      | 0                                       |        |
| 24369  | 0                           |        | 0                                       |        |
| 24373  | 0                           |        | 0                                       |        |
| 24398  | 3                           | 4      | 4                                       | 4      |
| 24402  | 0                           |        | 0                                       |        |
| 24405  | 0                           |        | 0                                       |        |
| 24407  | 0                           |        | 0                                       |        |
| 24413  | 0                           |        | 0                                       |        |



| respid | ICS Terminal Dribble: Q28_1 | Q28a_1 | ICS Urgency with fear of leaking: Q29_1 | Q29a_1 |
|--------|-----------------------------|--------|-----------------------------------------|--------|
| 24443  | 2                           | 2      | 2                                       | 2      |
| 24451  | 0                           |        | 0                                       |        |
| 24459  | 2                           | 2      | 3                                       | 2      |
| 24465  | 0                           |        | 0                                       |        |
| 24481  | 0                           |        | 0                                       |        |
| 24482  | 0                           |        | 0                                       |        |
| 24491  | 1                           | 1      | 1                                       | 1      |
| 24495  | 0                           |        | 0                                       |        |
| 24497  | 3                           | 2      | 3                                       | 3      |
| 24511  | 0                           |        | 0                                       |        |
| 24513  | 2                           | 1      | 0                                       |        |
| 24516  | 2                           | 1      | 1                                       | 1      |
| 24518  | 1                           | 1      | 0                                       |        |
| 24524  | 0                           |        | 0                                       |        |
| 24528  | 3                           | 0      | 0                                       |        |
| 24531  | 3                           | 4      | 3                                       | 3      |
| 24533  | 4                           | 3      | 3                                       | 3      |
| 24547  | 0                           |        | 0                                       |        |
| 24557  | 3                           | 2      | 4                                       | 3      |
| 24559  | 1                           | 2      | 5                                       | 4      |
| 24567  | 0                           |        | 0                                       |        |
| 24568  | 0                           |        | 0                                       |        |
| 24577  | 0                           |        | 0                                       |        |
| 24581  | 1                           | 0      | 0                                       |        |
| 24588  | 0                           |        | 0                                       |        |
| 24604  | 2                           | 3      | 4                                       | 3      |
| 24612  | 2                           | 2      | 0                                       |        |
| 24621  | 3                           | 0      | 3                                       | 1      |
| 24625  | 0                           |        | 0                                       |        |
| 24627  | 1                           | 1      | 0                                       |        |
| 24640  | 0                           |        | 0                                       |        |
| 24644  | 1                           | 0      | 0                                       |        |

| respid | ICS Terminal Dribble: Q28_1 | Q28a_1 | ICS Urgency with fear of leaking: Q29_1 | Q29a_1 |
|--------|-----------------------------|--------|-----------------------------------------|--------|
| 24664  | 0                           |        | 0                                       |        |
| 24669  | 0                           |        | 0                                       |        |
| 24685  | 0                           |        | 0                                       |        |
| 24687  | 2                           | 2      | 1                                       | 1      |
| 24688  | 1                           | 1      | 1                                       | 1      |
| 24691  | 2                           | 2      | 3                                       | 2      |
| 24693  | 1                           | 1      | 0                                       |        |
| 24706  | 0                           |        | 0                                       |        |
| 24710  | 0                           |        | 0                                       |        |
| 24717  | 0                           |        | 0                                       |        |
| 24720  | 0                           |        | 0                                       |        |
| 24731  | 4                           | 3      | 2                                       | 2      |
| 24732  | 2                           | 2      | 2                                       | 2      |
| 24733  | 0                           |        | 0                                       |        |
| 24747  | 0                           |        | 0                                       |        |
| 24750  | 0                           |        | 0                                       |        |
| 24758  | 0                           |        | 0                                       |        |
| 24760  | 0                           |        | 0                                       |        |
| 24765  | 0                           |        | 0                                       |        |
| 24772  | 0                           |        | 0                                       |        |
| 24779  | 4                           | 2      | 3                                       | 2      |
| 24794  | 0                           |        | 0                                       |        |
| 24796  | 0                           |        | 3                                       | 3      |
| 24797  | 0                           |        | 0                                       |        |
| 24800  | 1                           | 0      | 0                                       |        |
| 24813  | 3                           | 3      | 3                                       | 3      |
| 24815  | 0                           |        | 0                                       |        |
| 24821  | 0                           |        | 0                                       |        |
| 24822  | 0                           |        | 0                                       |        |
| 24831  | 1                           | 1      | 0                                       |        |
| 24835  | 0                           |        | 0                                       |        |
| 24843  | 4                           | 3      | 4                                       | 4      |

| respid | ICS Terminal Dribble: Q28_1 | Q28a_1 | ICS Urgency with fear of leaking: Q29_1 | Q29a_1 |
|--------|-----------------------------|--------|-----------------------------------------|--------|
| 24844  | 3                           |        | 2                                       | 2      |
| 24860  | 0                           |        | 0                                       |        |
| 24861  | 1                           |        | 2                                       |        |
| 24865  | 3                           |        | 2                                       | 2      |
| 24870  | 1                           |        | 0                                       | 1      |
| 24887  | 0                           |        | 0                                       |        |
| 24897  | 4                           |        | 2                                       | 1      |
| 24902  | 0                           |        | 2                                       | 2      |
| 24914  | 3                           | 1      | 2                                       | 1      |
| 24921  | 0                           |        | 0                                       |        |
| 24922  | 0                           |        | 0                                       |        |
| 24924  | 0                           |        | 0                                       |        |
| 24927  | 0                           |        | 0                                       |        |
| 24936  | 0                           |        | 0                                       |        |
| 24937  | 0                           |        | 0                                       |        |
| 24942  | 3                           | 3      | 2                                       | 1      |
| 24947  | 1                           | 0      | 0                                       |        |
| 24953  | 0                           |        | 0                                       |        |
| 24954  | 2                           | 2      | 2                                       | 2      |
| 24960  | 5                           | 4      | 4                                       | 4      |
| 24965  | 0                           |        | 0                                       |        |
| 24975  | 1                           | 1      | 0                                       |        |
| 24983  | 3                           | 2      | 4                                       | 3      |
| 24985  | 0                           |        | 0                                       |        |
| 24990  | 0                           |        | 0                                       |        |
| 25000  | 0                           |        | 0                                       |        |
| 25007  | 1                           | 1      | 2                                       | 1      |
| 25008  | 0                           |        | 0                                       |        |
| 25010  | 0                           |        | 0                                       |        |
| 25016  | 1                           | 1      | 0                                       |        |
| 25021  | 1                           | 2      | 0                                       |        |
| 25040  | 0                           |        | 0                                       |        |

| respid | ICS Terminal Dribble: Q28_1 | Q28a_1 | ICS Urgency with fear of leaking: Q29_1 | Q29a_1 |
|--------|-----------------------------|--------|-----------------------------------------|--------|
| 25043  | 0                           |        | 0                                       |        |
| 25055  | 0                           |        | 0                                       |        |
| 25057  | 0                           |        | 1                                       | 1      |
| 25060  | 0                           |        | 0                                       |        |
| 25062  | 2                           | 1      | 1                                       | 1      |
| 25064  | 4                           | 3      | 4                                       | 3      |
| 25069  | 0                           |        | 0                                       |        |
| 25077  | 0                           |        | 0                                       |        |
| 25088  | 0                           |        | 0                                       |        |
| 25093  | 1                           | 1      | 2                                       | 1      |
| 25121  | 0                           |        | 0                                       |        |
| 25140  | 3                           | 2      | 4                                       | 3      |
| 25144  | 0                           |        | 0                                       |        |
| 25149  | 0                           |        | 1                                       | 1      |
| 25159  | 5                           | 1      | 0                                       |        |
| 25191  | 4                           | 3      | 1                                       | 1      |
| 25193  | 4                           | 2      | 2                                       | 2      |
| 25202  | 3                           | 2      | 4                                       | 3      |
| 25215  | 1                           | 1      | 1                                       | 1      |
| 25229  | 1                           | 1      | 1                                       | 1      |
| 25231  | 0                           |        | 0                                       |        |
| 25236  | 0                           |        | 0                                       |        |
| 25242  | 0                           |        | 0                                       |        |
| 25252  | 0                           |        | 0                                       |        |
| 25253  | 4                           | 3      | 2                                       | 3      |
| 25256  | 3                           | 2      | 3                                       | 2      |
| 25260  | 1                           | 1      | 0                                       |        |
| 25261  | 0                           |        | 0                                       |        |
| 25280  | 0                           |        | 0                                       |        |
| 25282  | 1                           | 1      | 1                                       | 1      |
| 25289  | 2                           | 2      | 3                                       | 2      |
| 25303  | 0                           |        | 0                                       |        |

| respid | ICS Terminal Dribble: Q28_1 | Q28a_1 | ICS Urgency with fear of leaking: Q29_1 | Q29a_1 |
|--------|-----------------------------|--------|-----------------------------------------|--------|
| 25304  | 0                           |        | 0                                       |        |
| 25309  | 0                           |        | 0                                       |        |
| 25317  | 3                           | 2      | 1                                       | 1      |
| 25318  | 3                           | 2      | 3                                       | 2      |
| 25320  | 0                           |        | 0                                       |        |
| 25324  | 3                           | 2      | 4                                       | 3      |
| 25331  | 0                           |        | 1                                       | 1      |
| 25340  | 0                           |        | 0                                       |        |
| 25342  | 0                           |        | 0                                       |        |
| 25350  | 0                           |        | 0                                       |        |
| 25352  | 0                           |        | 0                                       |        |
| 25358  | 0                           |        | 0                                       |        |
| 25375  | 0                           |        | 0                                       |        |
| 25386  | 0                           |        | 0                                       |        |
| 25388  | 5                           | 1      | 0                                       |        |
| 25390  | 0                           |        | 1                                       | 1      |
| 25391  | 0                           |        | 0                                       |        |
| 25400  | 1                           | 2      | 1                                       | 2      |
| 25413  | 3                           | 2      | 4                                       | 3      |
| 25424  | 1                           | 2      | 0                                       |        |
| 25426  | 2                           | 2      | 2                                       | 2      |
| 25430  | 0                           |        | 0                                       |        |
| 25434  | 1                           | 1      | 0                                       |        |
| 25439  | 3                           | 2      | 0                                       |        |
| 25441  | 0                           |        | 0                                       |        |
| 25445  | 0                           |        | 0                                       |        |
| 25451  | 0                           |        | 0                                       |        |
| 25469  | 3                           | 2      | 4                                       | 3      |
| 25471  | 2                           | 2      | 2                                       | 1      |
| 25476  | 0                           |        | 2                                       | 2      |
| 25480  | 0                           |        | 0                                       |        |
| 25482  | 0                           |        | 0                                       |        |

| respid | ICS Terminal Dribble: Q28_1 | Q28a_1 | ICS Urgency with fear of leaking: Q29_1 | Q29a_1 |
|--------|-----------------------------|--------|-----------------------------------------|--------|
| 25500  | 1                           | 4      | 1                                       | 3      |
| 25516  | 0                           |        | 0                                       |        |
| 25521  | 4                           | 3      | 3                                       | 4      |
| 25525  | 3                           | 2      | 2                                       | 1      |
| 25530  | 3                           | 3      | 3                                       | 2      |
| 25555  | 3                           | 3      | 2                                       | 1      |
| 25558  | 0                           |        | 0                                       |        |
| 25561  | 3                           | 3      | 3                                       | 3      |
| 25566  | 0                           |        | 0                                       |        |
| 25571  | 0                           |        | 0                                       |        |
| 25572  | 1                           | 0      | 0                                       |        |
| 25574  | 0                           |        | 0                                       |        |
| 25588  | 0                           |        | 0                                       |        |
| 25591  | 2                           | 2      | 2                                       | 1      |
| 25599  | 2                           | 2      | 2                                       | 1      |
| 25604  | 5                           | 2      | 0                                       |        |
| 25614  | 0                           |        | 0                                       |        |
| 25634  | 2                           | 2      | 3                                       | 3      |
| 25642  | 1                           | 1      | 0                                       |        |
| 25647  | 0                           |        | 0                                       |        |
| 25653  | 0                           |        | 0                                       |        |
| 25654  | 0                           |        | 1                                       | 1      |
| 25660  | 0                           |        | 0                                       |        |
| 25664  | 0                           |        | 0                                       |        |
| 25665  | 1                           | 2      | 1                                       | 2      |
| 25672  | 2                           | 2      | 3                                       | 2      |
| 25677  | 1                           | 1      | 1                                       | 1      |
| 25685  | 2                           | 3      | 0                                       |        |
| 25699  | 2                           | 1      | 2                                       | 2      |
| 25703  | 0                           |        | 0                                       |        |
| 25704  | 2                           | 2      | 2                                       | 1      |
| 25705  | 1                           | 1      | 1                                       | 1      |

| respid | ICS Terminal Dribble: Q28_1 | Q28a_1 | ICS Urgency with fear of leaking: Q29_1 | Q29a_1 |
|--------|-----------------------------|--------|-----------------------------------------|--------|
| 25711  | 0                           |        | 0                                       |        |
| 25727  | 2                           | 3      | 0                                       |        |
| 25728  | 1                           | 1      | 0                                       |        |
| 25733  | 4                           | 3      | 2                                       | 2      |
| 25735  | 0                           |        | 0                                       |        |
| 25736  | 0                           |        | 0                                       |        |
| 25742  | 0                           |        | 0                                       |        |
| 25750  | 0                           |        | 0                                       |        |
| 25754  | 0                           |        | 0                                       |        |
| 25776  | 3                           | 4      | 2                                       | 3      |
| 25778  | 0                           |        | 0                                       |        |
| 25796  | 0                           |        | 0                                       |        |
| 25852  | 0                           |        | 0                                       |        |
| 25858  | 0                           |        | 0                                       |        |
| 25859  | 0                           |        | 0                                       |        |
| 25886  | 2                           | 2      | 2                                       | 2      |
| 25890  | 2                           | 2      | 0                                       |        |
| 25897  | 0                           |        | 0                                       |        |
| 25903  | 0                           |        | 0                                       |        |
| 25905  | 0                           |        | 0                                       |        |
| 25917  | 0                           |        | 0                                       |        |
| 25918  | 0                           |        | 0                                       |        |
| 25928  | 1                           | 1      | 0                                       |        |
| 25930  | 0                           |        | 0                                       |        |
| 25949  | 0                           |        | 1                                       | 1      |
| 25955  | 0                           |        | 0                                       |        |
| 25959  | 0                           |        | 0                                       |        |
| 25964  | 0                           |        | 0                                       |        |
| 25972  | 0                           |        | 0                                       |        |
| 25999  | 3                           | 2      | 3                                       | 2      |
| 26019  | 0                           |        | 0                                       |        |
| 26025  | 1                           | 1      | 0                                       |        |

| respid | ICS Terminal Dribble: Q28_1 | Q28a_1 | ICS Urgency with fear of leaking: Q29_1 | Q29a_1 |
|--------|-----------------------------|--------|-----------------------------------------|--------|
| 26039  | 1                           | 2      | 1                                       | 2      |
| 26055  | 0                           |        | 0                                       |        |
| 26061  | 2                           | 1      | 1                                       | 0      |
| 26076  | 5                           | 1      | 0                                       |        |
| 26088  | 1                           | 1      | 0                                       |        |
| 26094  | 0                           |        | 0                                       |        |
| 26104  | 4                           | 4      | 4                                       | 4      |
| 26131  | 0                           |        | 0                                       |        |
| 26134  | 2                           | 2      | 2                                       | 2      |
| 26160  | 0                           |        | 0                                       |        |
| 26168  | 0                           |        | 0                                       |        |
| 26170  | 0                           |        | 0                                       |        |
| 26191  | 3                           | 3      | 3                                       | 3      |
| 26192  | 0                           |        | 0                                       |        |
| 26195  | 1                           | 1      | 1                                       | 1      |
| 26198  | 0                           |        | 0                                       |        |
| 26199  | 1                           | 2      | 1                                       | 2      |
| 26201  | 0                           |        | 0                                       |        |
| 26202  | 0                           |        | 0                                       |        |
| 26226  | 2                           | 1      | 0                                       |        |
| 26233  | 3                           | 3      | 3                                       | 2      |
| 26236  | 0                           |        | 0                                       |        |
| 26242  | 0                           |        | 1                                       | 1      |
| 26244  | 0                           |        | 0                                       |        |
| 26250  | 0                           |        | 0                                       |        |
| 26266  | 0                           |        | 0                                       |        |
| 26274  | 1                           | 1      | 0                                       |        |
| 26286  | 2                           | 2      | 2                                       | 1      |
| 26288  | 0                           |        | 1                                       | 1      |
| 26295  | 0                           |        | 0                                       |        |
| 26296  | 2                           | 1      | 0                                       |        |
| 26297  | 0                           |        | 0                                       |        |



| respid | ICS Terminal Dribble: Q28_1 | Q28a_1 | ICS Urgency with fear of leaking: Q29_1 | Q29a_1 |
|--------|-----------------------------|--------|-----------------------------------------|--------|
| 26300  | 0                           |        | 0                                       |        |
| 26317  | 0                           |        | 0                                       |        |
| 26343  | 0                           |        | 0                                       |        |
| 26367  | 5                           | 3      | 0                                       |        |
| 26372  | 0                           |        | 0                                       |        |
| 26403  | 0                           |        | 0                                       |        |
| 26423  | 0                           |        | 0                                       |        |
| 26430  | 1                           | 0      | 0                                       |        |
| 26437  | 0                           |        | 0                                       |        |
| 26457  | 0                           |        | 0                                       |        |
| 26466  | 0                           |        | 0                                       |        |
| 26467  | 0                           |        | 0                                       |        |
| 26469  | 1                           | 1      | 0                                       |        |
| 26494  | 0                           |        | 0                                       |        |
| 26510  | 2                           | 1      | 0                                       |        |
| 26519  | 0                           |        | 0                                       |        |
| 26525  | 1                           | 1      | 0                                       |        |
| 26529  | 0                           |        | 0                                       |        |
| 26533  | 0                           |        | 0                                       |        |
| 26556  | 0                           |        | 1                                       | 1      |
| 26559  | 2                           | 2      | 1                                       | 3      |
| 26565  | 2                           | 2      | 1                                       | 2      |
| 26576  | 4                           | 3      | 4                                       | 3      |
| 26601  | 0                           |        | 0                                       |        |
| 26607  | 0                           |        | 0                                       |        |
| 26611  | 2                           | 1      | 0                                       |        |
| 26619  | 0                           |        | 0                                       |        |
| 26631  | 0                           |        | 0                                       |        |
| 26654  | 0                           |        | 0                                       |        |
| 26656  | 1                           | 1      | 1                                       | 1      |
| 26664  | 0                           |        | 0                                       |        |
| 26667  | 5                           | 3      | 1                                       | 1      |

| respid | ICS Terminal Dribble: Q28_1 | Q28a_1 | ICS Urgency with fear of leaking: Q29_1 | Q29a_1 |
|--------|-----------------------------|--------|-----------------------------------------|--------|
| 26674  | 3                           | 3      | 3                                       | 2      |
| 26678  | 1                           | 1      | 1                                       | 1      |
| 26693  | 0                           |        | 0                                       |        |
| 26696  | 4                           | 3      | 4                                       | 3      |
| 26703  | 4                           | 4      | 3                                       | 4      |
| 26705  | 0                           |        | 0                                       |        |
| 26706  | 2                           | 2      | 2                                       | 2      |
| 26716  | 2                           | 2      | 2                                       | 2      |
| 26721  | 1                           | 1      | 0                                       |        |
| 26730  | 0                           |        | 1                                       | 1      |
| 26752  | 0                           |        | 0                                       |        |
| 26755  | 0                           |        | 0                                       |        |
| 26791  | 0                           |        | 0                                       |        |
| 26804  | 1                           | 1      | 0                                       |        |
| 26810  | 1                           | 1      | 0                                       |        |
| 26813  | 4                           | 2      | 2                                       | 1      |
| 26833  | 1                           | 1      | 1                                       | 1      |
| 26880  | 2                           | 3      | 1                                       | 3      |
| 26884  | 1                           | 1      | 0                                       |        |
| 26885  | 1                           | 1      | 0                                       |        |
| 26890  | 4                           | 3      | 3                                       | 3      |
| 26937  | 1                           | 1      | 1                                       | 1      |
| 26939  | 0                           |        | 2                                       | 1      |
| 26941  | 0                           |        | 0                                       |        |
| 26992  | 4                           | 4      | 0                                       |        |
| 27037  | 0                           |        | 0                                       |        |
| 27045  | 4                           | 2      | 3                                       | 2      |
| 27053  | 3                           | 2      | 4                                       | 1      |
| 27060  | 2                           | 2      | 2                                       | 2      |
| 27076  | 0                           |        | 0                                       |        |
| 27124  | 1                           | 0      | 0                                       |        |
| 27125  | 0                           |        | 0                                       |        |

| respid | ICS Terminal Dribble: Q28_1 | Q28a_1 | ICS Urgency with fear of leaking: Q29_1 | Q29a_1 |
|--------|-----------------------------|--------|-----------------------------------------|--------|
| 27132  | 0                           |        | 0                                       |        |
| 27166  | 0                           |        | 0                                       |        |
| 27190  | 0                           |        | 0                                       |        |
| 27199  | 0                           |        | 0                                       |        |
| 27221  | 2                           | 1      | 2                                       | 1      |
| 27233  | 0                           |        | 2                                       | 2      |
| 27241  | 0                           |        | 0                                       |        |
| 27244  | 1                           | 0      | 0                                       |        |
| 27245  | 3                           | 3      | 3                                       | 3      |
| 27246  | 3                           | 2      | 1                                       | 2      |
| 27253  | 1                           | 1      | 0                                       |        |
| 27255  | 2                           | 3      | 2                                       | 2      |
| 27267  | 1                           | 1      | 0                                       |        |
| 27283  | 1                           | 1      | 3                                       | 2      |
| 27289  | 3                           | 3      | 2                                       | 3      |
| 27302  | 0                           |        | 0                                       |        |
| 27317  | 0                           |        | 0                                       |        |
| 27319  | 0                           |        | 0                                       |        |
| 27331  | 0                           |        | 0                                       |        |
| 27333  | 1                           | 1      | 0                                       |        |
| 27340  | 0                           |        | 0                                       |        |
| 27362  | 2                           | 2      | 2                                       | 3      |
| 27370  | 1                           | 0      | 0                                       |        |
| 27379  | 0                           |        | 0                                       |        |
| 27386  | 0                           |        | 0                                       |        |
| 27398  | 0                           |        | 0                                       |        |
| 27404  | 0                           |        | 0                                       |        |
| 27408  | 0                           |        | 0                                       |        |
| 27412  | 3                           | 3      | 4                                       | 3      |
| 27426  | 1                           | 2      | 1                                       | 2      |
| 27455  | 0                           |        | 0                                       |        |
| 27464  | 4                           | 3      | 3                                       | 3      |

| respid | ICS Terminal Dribble: Q28_1 | Q28a_1 | ICS Urgency with fear of leaking: Q29_1 | Q29a_1 |
|--------|-----------------------------|--------|-----------------------------------------|--------|
| 27484  | 0                           |        | 2                                       | 1      |
| 27493  | 0                           |        | 3                                       | 4      |
| 27512  | 2                           | 2      | 2                                       | 3      |
| 27525  | 1                           | 1      | 1                                       | 1      |
| 27532  | 1                           | 1      | 1                                       | 1      |
| 27539  | 0                           |        | 0                                       |        |
| 27540  | 0                           |        | 0                                       |        |
| 27552  | 3                           | 4      | 2                                       | 4      |
| 27562  | 0                           |        | 0                                       |        |
| 27568  | 0                           |        | 0                                       |        |
| 27574  | 3                           | 3      | 3                                       | 3      |
| 27575  | 0                           |        | 0                                       |        |
| 27577  | 2                           | 1      | 0                                       |        |
| 27589  | 0                           |        | 0                                       |        |
| 27593  | 0                           |        | 0                                       |        |
| 27594  | 5                           | 3      | 5                                       | 3      |
| 27595  | 4                           | 3      | 4                                       | 3      |
| 27598  | 0                           |        | 0                                       |        |
| 27620  | 1                           | 1      | 0                                       |        |
| 27621  | 3                           | 1      | 1                                       | 1      |
| 27628  | 0                           |        | 0                                       |        |
| 27633  | 2                           | 1      | 0                                       |        |
| 27643  | 2                           | 1      | 2                                       | 1      |
| 27644  | 3                           | 3      | 3                                       | 3      |
| 27668  | 0                           |        | 0                                       |        |
| 27681  | 2                           | 1      | 1                                       | 1      |
| 27691  | 0                           |        | 0                                       |        |
| 27693  | 5                           | 4      | 5                                       | 4      |
| 27703  | 1                           | 1      | 1                                       | 1      |
| 27708  | 1                           | 1      | 1                                       | 1      |
| 27719  | 3                           | 2      | 2                                       | 2      |
| 27720  | 0                           |        | 0                                       |        |

| respid | ICS Terminal Dribble: Q28_1 | Q28a_1 | ICS Urgency with fear of leaking: Q29_1 | Q29a_1 |
|--------|-----------------------------|--------|-----------------------------------------|--------|
| 27723  | 1                           | 1      | 1                                       | 1      |
| 27725  | 1                           | 0      | 0                                       |        |
| 27734  | 2                           | 2      | 2                                       | 2      |
| 27744  | 1                           | 1      | 0                                       |        |
| 27749  | 4                           | 3      | 3                                       | 3      |
| 27762  | 1                           | 1      | 2                                       | 1      |
| 27808  | 1                           | 2      | 2                                       | 3      |
| 27810  | 4                           | 3      | 3                                       | 3      |
| 27812  | 0                           |        | 1                                       | 0      |
| 27815  | 0                           |        | 0                                       |        |
| 27818  | 0                           |        | 0                                       |        |
| 27823  | 0                           |        | 0                                       |        |
| 27841  | 4                           | 3      | 2                                       | 1      |
| 27843  | 0                           |        | 0                                       |        |
| 27851  | 1                           | 0      | 1                                       | 1      |
| 27858  | 2                           | 1      | 1                                       | 1      |
| 27859  | 0                           |        | 0                                       |        |
| 27869  | 0                           |        | 0                                       |        |
| 27872  | 0                           |        | 0                                       |        |
| 27873  | 0                           |        | 0                                       |        |
| 27884  | 1                           | 1      | 1                                       | 1      |
| 27904  | 2                           | 2      | 1                                       | 1      |
| 27915  | 1                           | 2      | 0                                       |        |
| 27918  | 1                           | 0      | 1                                       | 1      |
| 27937  | 0                           |        | 0                                       |        |
| 27943  | 2                           | 3      | 3                                       | 2      |
| 27948  | 0                           |        | 0                                       |        |
| 27971  | 1                           | 2      | 0                                       |        |
| 27991  | 0                           |        | 0                                       |        |
| 28000  | 0                           |        | 0                                       |        |
| 28011  | 1                           | 1      | 3                                       | 2      |
| 28022  | 0                           |        | 0                                       |        |

| respid | ICS Terminal Dribble: Q28_1 | Q28a_1 | ICS Urgency with fear of leaking: Q29_1 | Q29a_1 |
|--------|-----------------------------|--------|-----------------------------------------|--------|
| 28025  | 1                           | 0      | 0                                       |        |
| 28041  | 0                           |        | 0                                       |        |
| 28057  | 3                           | 3      | 3                                       | 3      |
| 28080  | 0                           |        | 0                                       |        |
| 28098  | 0                           |        | 0                                       |        |
| 28104  | 1                           | 1      | 0                                       |        |
| 28109  | 0                           |        | 0                                       |        |
| 28129  | 1                           | 3      | 3                                       | 3      |
| 28141  | 0                           |        | 0                                       |        |
| 28143  | 0                           |        | 0                                       |        |
| 28149  | 0                           |        | 0                                       |        |
| 28151  | 0                           |        | 0                                       |        |
| 28161  | 4                           | 4      | 0                                       |        |
| 28169  | 3                           | 1      | 0                                       |        |
| 28194  | 3                           | 3      | 3                                       | 3      |
| 28197  | 0                           |        | 0                                       |        |
| 28206  | 0                           |        | 0                                       |        |
| 28218  | 1                           | 1      | 0                                       |        |
| 28227  | 0                           |        | 0                                       |        |
| 28235  | 1                           | 2      | 0                                       |        |
| 28246  | 1                           | 1      | 1                                       | 1      |
| 28259  | 2                           | 1      | 3                                       | 3      |
| 28263  | 1                           | 1      | 0                                       |        |
| 28267  | 4                           | 4      | 2                                       | 1      |
| 28274  | 3                           | 0      | 0                                       |        |
| 28278  | 0                           |        | 0                                       |        |
| 28288  | 0                           |        | 0                                       |        |
| 28308  | 0                           |        | 0                                       |        |
| 28309  | 2                           | 0      | 2                                       | 1      |
| 28323  | 1                           | 1      | 1                                       | 2      |
| 28335  | 3                           | 3      | 3                                       | 3      |
| 28354  | 4                           | 3      | 3                                       | 3      |

| respid | ICS Terminal Dribble: Q28_1 | Q28a_1 | ICS Urgency with fear of leaking: Q29_1 | Q29a_1 |
|--------|-----------------------------|--------|-----------------------------------------|--------|
| 28355  | 4                           | 3      | 4                                       | 3      |
| 28356  | 2                           | 1      | 1                                       | 1      |
| 28357  | 1                           | 0      | 0                                       |        |
| 28363  | 0                           |        | 0                                       |        |
| 28366  | 0                           |        | 0                                       |        |
| 28372  | 2                           | 2      | 2                                       | 2      |
| 28381  | 1                           | 1      | 1                                       | 1      |
| 28388  | 2                           | 1      | 1                                       | 2      |
| 28413  | 3                           | 3      | 3                                       | 3      |
| 28421  | 0                           |        | 0                                       |        |
| 28430  | 3                           | 3      | 3                                       | 3      |
| 28439  | 2                           | 2      | 3                                       | 3      |
| 28458  | 3                           | 2      | 3                                       | 3      |
| 28461  | 0                           |        | 0                                       |        |
| 28466  | 0                           |        | 0                                       |        |
| 28492  | 0                           |        | 0                                       |        |
| 28534  | 0                           |        | 0                                       |        |
| 28537  | 2                           | 2      | 2                                       | 2      |
| 28560  | 1                           | 0      | 0                                       |        |
| 28566  | 0                           |        | 0                                       |        |
| 28569  | 1                           | 1      | 1                                       | 1      |
| 28584  | 3                           | 3      | 4                                       | 3      |
| 28590  | 4                           | 3      | 0                                       |        |
| 28596  | 0                           |        | 0                                       |        |
| 28608  | 1                           | 1      | 0                                       |        |
| 28631  | 3                           | 3      | 3                                       | 3      |
| 28644  | 2                           | 1      | 2                                       | 1      |
| 28646  | 0                           |        | 0                                       |        |
| 28665  | 0                           |        | 0                                       |        |
| 28686  | 0                           |        | 0                                       |        |
| 28704  | 2                           | 1      | 2                                       | 1      |
| 28719  | 1                           | 1      | 0                                       |        |

| respid | ICS Terminal Dribble: Q28_1 | Q28a_1 | ICS Urgency with fear of leaking: Q29_1 | Q29a_1 |
|--------|-----------------------------|--------|-----------------------------------------|--------|
| 28736  | 3                           | 2      | 0                                       |        |
| 28739  | 2                           | 2      | 1                                       | 1      |
| 28758  | 0                           |        | 0                                       |        |
| 28761  | 1                           | 1      | 4                                       | 3      |
| 28770  | 4                           | 4      | 3                                       | 2      |
| 28774  | 0                           |        | 0                                       |        |
| 28778  | 4                           | 4      | 3                                       | 3      |
| 28783  | 1                           | 1      | 1                                       | 1      |
| 28785  | 0                           |        | 0                                       |        |
| 28797  | 3                           | 3      | 2                                       | 2      |
| 28801  | 0                           |        | 0                                       |        |
| 28821  | 0                           |        | 0                                       |        |
| 28827  | 3                           | 2      | 0                                       |        |
| 28828  | 0                           |        | 0                                       |        |
| 28871  | 1                           | 1      | 1                                       | 1      |
| 28876  | 2                           | 2      | 0                                       |        |
| 28891  | 5                           | 2      | 3                                       | 2      |
| 28898  | 0                           |        | 0                                       |        |
| 28909  | 2                           | 2      | 1                                       | 1      |
| 28930  | 2                           | 0      | 1                                       | 0      |
| 28935  | 2                           | 1      | 0                                       |        |
| 28964  | 1                           | 0      | 0                                       |        |
| 28965  | 0                           |        | 0                                       |        |
| 28967  | 4                           | 4      | 3                                       | 4      |
| 28975  | 0                           |        | 0                                       |        |
| 28982  | 1                           | 1      | 0                                       |        |
| 28989  | 1                           | 1      | 0                                       |        |
| 29003  | 2                           | 2      | 0                                       |        |
| 29004  | 0                           |        | 0                                       |        |
| 29007  | 2                           | 2      | 1                                       | 1      |
| 29008  | 0                           |        | 0                                       |        |
| 29011  | 1                           | 0      | 0                                       |        |



| respid | ICS Terminal Dribble: Q28_1 | Q28a_1 | ICS Urgency with fear of leaking: Q29_1 | Q29a_1 |
|--------|-----------------------------|--------|-----------------------------------------|--------|
| 29012  | 2                           | 1      | 2                                       | 1      |
| 29014  | 0                           |        | 0                                       |        |
| 29016  | 0                           |        | 1                                       | 1      |
| 29018  | 1                           | 1      | 4                                       | 3      |
| 29048  | 0                           |        | 0                                       |        |
| 29184  | 0                           |        | 0                                       |        |
| 29237  | 0                           |        | 0                                       |        |
| 29252  | 1                           | 0      | 0                                       |        |
| 29267  | 1                           | 1      | 0                                       |        |
| 29276  | 0                           |        | 0                                       |        |
| 29281  | 4                           | 3      | 4                                       | 4      |
| 29285  | 0                           |        | 0                                       |        |
| 29291  | 3                           | 3      | 4                                       | 4      |
| 29304  | 2                           | 2      | 2                                       | 2      |
| 29323  | 0                           |        | 0                                       |        |
| 29330  | 4                           | 3      | 1                                       | 1      |
| 29357  | 1                           | 4      | 2                                       | 4      |
| 29416  | 1                           | 0      | 0                                       |        |
| 29432  | 1                           | 1      | 0                                       |        |
| 29482  | 2                           | 1      | 2                                       | 2      |
| 29506  | 0                           |        | 0                                       |        |
| 29509  | 3                           | 2      | 1                                       | 1      |
| 29512  | 2                           | 2      | 1                                       | 2      |
| 29519  | 0                           |        | 0                                       |        |
| 29520  | 1                           | 2      | 0                                       |        |
| 29521  | 2                           | 2      | 2                                       | 2      |
| 29529  | 3                           | 3      | 3                                       | 3      |
| 29532  | 0                           |        | 0                                       |        |
| 29547  | 3                           | 3      | 3                                       | 3      |
| 29551  | 0                           |        | 0                                       |        |
| 29584  | 3                           | 3      | 4                                       | 4      |
| 29591  | 1                           | 0      | 3                                       | 3      |

| respid | ICS Terminal Dribble: Q28_1 | Q28a_1 | ICS Urgency with fear of leaking: Q29_1 | Q29a_1 |
|--------|-----------------------------|--------|-----------------------------------------|--------|
| 29613  | 0                           |        | 0                                       |        |
| 29615  | 0                           |        | 1                                       | 3      |
| 29625  | 4                           | 1      | 1                                       | 0      |
| 29660  | 1                           | 0      | 1                                       | 0      |
| 29677  | 0                           |        | 0                                       |        |
| 29700  | 0                           |        | 2                                       | 2      |
| 29715  | 5                           | 4      | 3                                       | 3      |
| 29720  | 0                           |        | 0                                       |        |
| 29730  | 0                           |        | 0                                       |        |
| 29734  | 0                           |        | 1                                       | 3      |
| 29754  | 0                           |        | 0                                       |        |
| 29771  | 2                           | 1      | 0                                       |        |
| 29774  | 0                           |        | 0                                       |        |
| 29783  | 0                           |        | 0                                       |        |
| 29812  | 1                           | 1      | 1                                       | 1      |
| 29813  | 0                           |        | 1                                       | 1      |
| 29814  | 0                           |        | 0                                       |        |
| 29820  | 1                           | 1      | 1                                       | 1      |
| 29906  | 1                           | 2      | 0                                       |        |
| 29907  | 2                           | 1      | 1                                       | 1      |
| 29928  | 0                           |        | 0                                       |        |
| 29932  | 1                           | 1      | 0                                       |        |
| 29958  | 3                           | 2      | 2                                       | 2      |
| 29982  | 0                           |        | 0                                       |        |
| 29989  | 0                           |        | 1                                       | 1      |
| 29994  | 0                           |        | 1                                       | 1      |
| 30005  | 0                           |        | 1                                       | 0      |
| 30077  | 1                           | 0      | 0                                       |        |
| 30098  | 0                           |        | 0                                       |        |
| 30107  | 0                           |        | 0                                       |        |
| 30154  | 0                           |        | 0                                       |        |
| 30159  | 0                           |        | 0                                       |        |

| respid | ICS Terminal Dribble: Q28_1 | Q28a_1 | ICS Urgency with fear of leaking: Q29_1 | Q29a_1 |
|--------|-----------------------------|--------|-----------------------------------------|--------|
| 30162  | 1                           | 1      | 1                                       | 2      |
| 30163  | 0                           |        | 0                                       |        |
| 30189  | 1                           | 1      | 1                                       | 1      |
| 30230  | 0                           |        | 0                                       |        |
| 30259  | 4                           | 3      | 3                                       | 2      |
| 30284  | 1                           | 2      | 0                                       |        |
| 30296  | 0                           |        | 0                                       |        |
| 30330  | 3                           | 2      | 2                                       | 2      |
| 30341  | 0                           |        | 1                                       | 1      |
| 30352  | 2                           | 2      | 3                                       | 3      |
| 30379  | 0                           |        | 0                                       |        |
| 30424  | 0                           |        | 1                                       | 1      |
| 30447  | 0                           |        | 0                                       |        |
| 30477  | 3                           | 3      | 3                                       | 2      |
| 30503  | 0                           |        | 0                                       |        |
| 30515  | 1                           | 2      | 4                                       | 4      |
| 30516  | 3                           | 2      | 3                                       | 2      |
| 30623  | 2                           | 1      | 2                                       | 2      |
| 30639  | 0                           |        | 0                                       |        |
| 30670  | 0                           |        | 0                                       |        |
| 30697  | 0                           |        | 0                                       |        |
| 30735  | 0                           |        | 0                                       |        |
| 30742  | 1                           | 1      | 0                                       |        |
| 30751  | 5                           | 3      | 2                                       | 2      |
| 30789  | 0                           |        | 0                                       |        |
| 30867  | 4                           | 2      | 3                                       | 2      |
| 30876  | 0                           |        | 0                                       |        |
| 30877  | 3                           | 0      | 0                                       |        |
| 30887  | 0                           |        | 0                                       |        |
| 30891  | 2                           | 2      | 2                                       | 2      |
| 31030  | 0                           |        | 0                                       |        |
| 31059  | 2                           | 2      | 3                                       | 2      |

| respid | ICS Terminal Dribble: Q28_1 | Q28a_1 | ICS Urgency with fear of leaking: Q29_1 | Q29a_1 |
|--------|-----------------------------|--------|-----------------------------------------|--------|
| 31082  | 0                           |        | 0                                       |        |
| 31106  | 1                           | 0      | 0                                       |        |
| 31110  | 0                           |        | 0                                       |        |
| 31265  | 3                           | 4      | 3                                       | 4      |
| 31266  | 3                           | 4      | 3                                       | 4      |
| 31267  | 3                           | 4      | 3                                       | 4      |
| 31310  | 0                           |        | 0                                       |        |
| 31325  | 0                           |        | 0                                       |        |
| 31367  | 0                           |        | 0                                       |        |
| 31389  | 0                           |        | 0                                       |        |
| 31440  | 1                           | 0      | 0                                       |        |
| 31465  | 0                           |        | 0                                       |        |
| 31477  | 0                           |        | 3                                       | 3      |
| 31491  | 0                           |        | 0                                       |        |
| 31494  | 2                           | 2      | 2                                       | 1      |
| 31509  | 5                           | 4      | 0                                       |        |
| 31533  | 1                           | 1      | 0                                       |        |
| 31547  | 1                           | 1      | 0                                       |        |
| 31558  | 0                           |        | 0                                       |        |
| 31579  | 0                           |        | 0                                       |        |
| 31591  | 1                           | 0      | 1                                       | 1      |
| 31596  | 3                           | 2      | 3                                       | 2      |
| 31601  | 4                           | 3      | 3                                       | 2      |
| 31605  | 0                           |        | 0                                       |        |
| 31637  | 1                           | 0      | 1                                       | 2      |
| 31646  | 0                           |        | 0                                       |        |
| 31647  | 1                           | 0      | 5                                       | 4      |
| 31650  | 0                           |        | 0                                       |        |
| 31651  | 0                           |        | 0                                       |        |
| 31657  | 0                           |        | 0                                       |        |
| 31660  | 0                           |        | 0                                       |        |
| 31661  | 1                           | 0      | 0                                       |        |

| respid | ICS Terminal Dribble: Q28_1 | Q28a_1 | ICS Urgency with fear of leaking: Q29_1 | Q29a_1 |
|--------|-----------------------------|--------|-----------------------------------------|--------|
| 31667  | 1                           | 1      | 1                                       | 0      |
| 31674  | 1                           | 1      | 0                                       |        |
| 31686  | 4                           | 3      | 2                                       | 1      |
| 31693  | 0                           |        | 0                                       |        |
| 31716  | 0                           |        | 0                                       |        |
| 31818  | 0                           |        | 0                                       |        |
| 31886  | 1                           | 1      | 1                                       | 1      |
| 31945  | 1                           | 3      | 2                                       | 3      |
| 31957  | 1                           | 1      | 1                                       | 1      |
| 31966  | 1                           | 1      | 1                                       | 1      |
| 31978  | 1                           | 1      | 1                                       | 1      |
| 31999  | 0                           |        | 0                                       |        |
| 32026  | 1                           | 1      | 1                                       | 1      |
| 32033  | 0                           |        | 0                                       |        |
| 32037  | 3                           | 4      | 3                                       | 4      |
| 32038  | 3                           | 4      | 3                                       | 4      |
| 32047  | 1                           | 2      | 1                                       | 2      |
| 32053  | 0                           |        | 0                                       |        |
| 32069  | 0                           |        | 2                                       | 0      |
| 32081  | 2                           | 2      | 2                                       | 1      |
| 32123  | 0                           |        | 1                                       | 2      |
| 32130  | 0                           |        | 1                                       | 1      |
| 32141  | 0                           |        | 0                                       |        |
| 32158  | 0                           |        | 0                                       |        |
| 32165  | 0                           |        | 0                                       |        |
| 32180  | 0                           |        | 0                                       |        |
| 32221  | 0                           |        | 0                                       |        |
| 32292  | 0                           |        | 0                                       |        |
| 32318  | 1                           | 1      | 0                                       |        |
| 32346  | 0                           |        | 1                                       | 1      |
| 32402  | 2                           | 2      | 2                                       | 2      |
| 32422  | 1                           | 1      | 0                                       |        |

| respid | ICS Terminal Dribble: Q28_1 | Q28a_1 | ICS Urgency with fear of leaking: Q29_1 | Q29a_1 |
|--------|-----------------------------|--------|-----------------------------------------|--------|
| 32439  | 0                           |        | 0                                       |        |
| 32507  | 3                           | 2      | 3                                       | 2      |
| 32522  | 0                           |        | 0                                       |        |
| 32535  | 0                           |        | 0                                       |        |
| 32546  | 0                           |        | 0                                       |        |
| 32553  | 0                           |        | 0                                       |        |
| 32570  | 0                           |        | 0                                       |        |
| 32592  | 1                           | 1      | 0                                       |        |
| 32605  | 1                           | 0      | 2                                       | 2      |
| 32630  | 2                           | 3      | 2                                       | 2      |
| 32642  | 3                           | 2      | 1                                       | 2      |
| 32646  | 0                           |        | 0                                       |        |
| 32665  | 3                           | 2      | 1                                       | 0      |
| 32677  | 0                           |        | 0                                       |        |
| 32694  | 0                           |        | 0                                       |        |
| 32698  | 0                           |        | 0                                       |        |
| 32754  | 2                           | 1      | 3                                       | 2      |
| 32799  | 1                           | 1      | 2                                       | 2      |
| 32816  | 0                           |        | 0                                       |        |
| 32819  | 1                           | 1      | 0                                       |        |
| 32840  | 0                           |        | 0                                       |        |
| 32861  | 1                           | 3      | 1                                       | 1      |
| 32866  | 0                           |        | 0                                       |        |
| 32889  | 5                           | 4      | 5                                       | 3      |
| 32960  | 0                           |        | 0                                       |        |
| 32965  | 1                           | 1      | 1                                       | 1      |
| 32986  | 0                           |        | 0                                       |        |
| 33005  | 0                           |        | 1                                       | 1      |
| 33054  | 4                           | 3      | 2                                       | 2      |
| 33072  | 2                           | 2      | 1                                       | 2      |
| 33095  | 0                           |        | 0                                       |        |
| 33099  | 2                           | 1      | 0                                       |        |

| respid | ICS Terminal Dribble: Q28_1 | Q28a_1 | ICS Urgency with fear of leaking: Q29_1 | Q29a_1 |
|--------|-----------------------------|--------|-----------------------------------------|--------|
| 33121  | 1                           | 0      | 0                                       |        |
| 33152  | 2                           | 1      | 2                                       | 1      |
| 33159  | 0                           |        | 0                                       |        |
| 33189  | 0                           |        | 0                                       |        |
| 33198  | 0                           |        | 1                                       | 2      |
| 33202  | 2                           | 3      | 3                                       | 3      |
| 33204  | 0                           |        | 0                                       |        |
| 33224  | 0                           |        | 0                                       |        |
| 33272  | 2                           | 3      | 2                                       | 2      |
| 33294  | 0                           |        | 0                                       |        |
| 33300  | 1                           | 1      | 1                                       | 1      |
| 33314  | 0                           |        | 0                                       |        |
| 33338  | 0                           |        | 0                                       |        |
| 33350  | 4                           | 3      | 4                                       | 3      |
| 33362  | 3                           | 3      | 0                                       |        |
| 33368  | 0                           |        | 0                                       |        |
| 33374  | 2                           | 1      | 2                                       | 1      |
| 33380  | 1                           | 3      | 4                                       | 4      |
| 33385  | 2                           | 2      | 0                                       |        |
| 33402  | 2                           | 1      | 2                                       | 1      |
| 33414  | 1                           | 1      | 0                                       |        |
| 33439  | 2                           | 1      | 2                                       | 1      |
| 33449  | 3                           | 2      | 3                                       | 2      |
| 33533  | 1                           | 0      | 1                                       | 2      |
| 33540  | 0                           |        | 0                                       |        |
| 33556  | 0                           |        | 1                                       | 1      |
| 33615  | 0                           |        | 0                                       |        |
| 33694  | 3                           | 2      | 1                                       | 1      |
| 33717  | 0                           |        | 0                                       |        |
| 33729  | 0                           |        | 0                                       |        |
| 33746  | 3                           | 1      | 0                                       |        |
| 33764  | 2                           | 0      | 0                                       |        |

| respid | ICS Terminal Dribble: Q28_1 | Q28a_1 | ICS Urgency with fear of leaking: Q29_1 | Q29a_1 |
|--------|-----------------------------|--------|-----------------------------------------|--------|
| 33790  | 2                           | 1      | 1                                       | 0      |
| 33868  | 3                           | 2      | 4                                       | 0      |
| 33872  | 3                           | 2      | 3                                       | 3      |
| 33883  | 0                           |        | 0                                       |        |
| 33884  | 0                           |        | 0                                       |        |
| 33900  | 0                           |        | 0                                       |        |
| 33933  | 1                           | 1      | 0                                       |        |
| 33949  | 0                           |        | 0                                       |        |
| 34005  | 0                           |        | 0                                       |        |
| 34016  | 0                           |        | 0                                       |        |
| 34041  | 2                           | 1      | 2                                       | 1      |
| 34053  | 0                           |        | 0                                       |        |
| 34056  | 0                           |        | 0                                       |        |
| 34093  | 0                           |        | 0                                       |        |
| 34112  | 3                           | 2      | 1                                       | 1      |
| 34136  | 3                           | 3      | 4                                       | 3      |
| 34138  | 0                           |        | 0                                       |        |
| 34139  | 1                           | 1      | 0                                       |        |
| 34189  | 4                           | 3      | 0                                       |        |
| 34239  | 0                           |        | 0                                       |        |
| 34240  | 0                           |        | 0                                       |        |
| 34241  | 1                           | 1      | 0                                       |        |
| 34259  | 0                           |        | 0                                       |        |
| 34303  | 4                           | 3      | 2                                       | 2      |
| 34306  | 0                           |        | 0                                       |        |
| 34395  | 2                           | 2      | 1                                       | 0      |
| 34463  | 2                           | 1      | 2                                       | 2      |
| 34466  | 2                           | 1      | 1                                       | 1      |
| 34471  | 0                           |        | 0                                       |        |
| 34489  | 2                           | 2      | 3                                       | 2      |
| 34518  | 5                           | 0      | 0                                       |        |
| 34542  | 2                           | 2      | 0                                       |        |



| respid | ICS Terminal Dribble: Q28_1 | Q28a_1 | ICS Urgency with fear of leaking: Q29_1 | Q29a_1 |
|--------|-----------------------------|--------|-----------------------------------------|--------|
| 34595  | 0                           |        | 0                                       |        |
| 34604  | 0                           |        | 0                                       |        |
| 34631  | 4                           | 4      | 4                                       | 3      |
| 34665  | 1                           | 0      | 0                                       |        |
| 34716  | 0                           |        | 0                                       |        |
| 34729  | 0                           |        | 0                                       |        |
| 34772  | 3                           | 3      | 3                                       | 3      |
| 34800  | 2                           | 1      | 3                                       | 2      |
| 34819  | 0                           |        | 1                                       | 0      |
| 34829  | 2                           | 2      | 3                                       | 3      |
| 34831  | 0                           |        | 1                                       | 1      |
| 34839  | 0                           |        | 0                                       |        |
| 34868  | 1                           | 1      | 0                                       |        |
| 34869  | 0                           |        | 0                                       |        |
| 34882  | 5                           | 4      | 4                                       | 3      |
| 34895  | 2                           | 3      | 2                                       | 4      |
| 34901  | 3                           | 1      | 0                                       |        |
| 34904  | 3                           | 2      | 2                                       | 1      |
| 34907  | 0                           |        | 0                                       |        |
| 34914  | 1                           | 1      | 0                                       |        |
| 34918  | 1                           | 1      | 0                                       |        |
| 34924  | 0                           |        | 0                                       |        |
| 34933  | 2                           | 2      | 2                                       | 2      |
| 34938  | 1                           | 1      | 0                                       |        |
| 34952  | 2                           | 3      | 3                                       | 3      |
| 34959  | 0                           |        | 0                                       |        |
| 34972  | 0                           |        | 0                                       |        |
| 34973  | 1                           | 3      | 1                                       | 3      |
| 34975  | 3                           | 2      | 3                                       | 2      |
| 34977  | 1                           | 2      | 0                                       |        |
| 34978  | 0                           |        | 0                                       |        |
| 34980  | 0                           |        | 0                                       |        |

| respid | ICS Terminal Dribble: Q28_1 | Q28a_1 | ICS Urgency with fear of leaking: Q29_1 | Q29a_1 |
|--------|-----------------------------|--------|-----------------------------------------|--------|
| 34984  | 3                           | 3      | 2                                       | 1      |
| 34986  | 4                           | 3      | 2                                       | 2      |
| 34994  | 0                           |        | 0                                       |        |
| 34996  | 1                           | 2      | 0                                       |        |
| 35003  | 0                           |        | 0                                       |        |
| 35014  | 0                           |        | 0                                       |        |
| 35029  | 2                           | 1      | 2                                       | 1      |
| 35030  | 4                           | 3      | 3                                       | 3      |
| 35037  | 1                           | 1      | 0                                       |        |
| 35043  | 0                           |        | 0                                       |        |
| 35048  | 0                           |        | 0                                       |        |
| 35055  | 0                           |        | 0                                       |        |
| 35067  | 1                           | 1      | 0                                       |        |
| 35072  | 1                           | 1      | 0                                       |        |
| 35078  | 0                           |        | 0                                       |        |
| 35084  | 2                           | 2      | 0                                       |        |
| 35095  | 0                           |        | 0                                       |        |
| 35096  | 0                           |        | 0                                       |        |
| 35097  | 1                           | 1      | 2                                       | 2      |
| 35098  | 2                           | 2      | 2                                       | 2      |
| 35109  | 4                           | 3      | 4                                       | 3      |
| 35114  | 0                           |        | 0                                       |        |
| 35115  | 0                           |        | 0                                       |        |
| 35124  | 2                           | 2      | 2                                       | 2      |
| 35125  | 0                           |        | 0                                       |        |
| 35141  | 0                           |        | 0                                       |        |
| 35142  | 0                           |        | 0                                       |        |
| 35145  | 0                           |        | 0                                       |        |
| 35149  | 2                           | 2      | 3                                       | 3      |
| 35159  | 0                           |        | 0                                       |        |
| 35163  | 1                           | 1      | 2                                       | 1      |
| 35174  | 1                           | 2      | 1                                       | 2      |

| respid | ICS Terminal Dribble: Q28_1 | Q28a_1 | ICS Urgency with fear of leaking: Q29_1 | Q29a_1 |
|--------|-----------------------------|--------|-----------------------------------------|--------|
| 35188  | 0                           |        | 0                                       |        |
| 35189  | 1                           | 1      | 1                                       | 1      |
| 35201  | 3                           | 1      | 1                                       | 4      |
| 35215  | 0                           |        | 0                                       |        |
| 35228  | 0                           |        | 0                                       |        |
| 35235  | 1                           | 1      | 1                                       | 1      |
| 35239  | 2                           | 2      | 3                                       | 3      |
| 35243  | 0                           |        | 0                                       |        |
| 35245  | 5                           | 2      | 1                                       | 1      |
| 35259  | 0                           |        | 0                                       |        |
| 35265  | 0                           |        | 0                                       |        |
| 35272  | 1                           | 1      | 1                                       | 1      |
| 35280  | 0                           |        | 1                                       | 1      |
| 35298  | 1                           | 0      | 0                                       |        |
| 35305  | 1                           | 1      | 0                                       |        |
| 35306  | 1                           | 1      | 0                                       |        |
| 35307  | 0                           |        | 0                                       |        |
| 35311  | 0                           |        | 0                                       |        |
| 35322  | 1                           | 1      | 1                                       | 1      |
| 35323  | 0                           |        | 0                                       |        |
| 35327  | 1                           | 0      | 1                                       | 0      |
| 35366  | 0                           |        | 0                                       |        |
| 35378  | 0                           |        | 1                                       | 1      |
| 35389  | 2                           | 1      | 2                                       | 1      |
| 35390  | 0                           |        | 0                                       |        |
| 35395  | 1                           | 2      | 0                                       |        |
| 35411  | 3                           | 2      | 3                                       | 3      |
| 35423  | 0                           |        | 0                                       |        |
| 35425  | 0                           |        | 0                                       |        |
| 35434  | 0                           |        | 0                                       |        |
| 35462  | 0                           |        | 0                                       |        |
| 35478  | 2                           | 2      | 3                                       | 2      |

| respid | ICS Terminal Dribble: Q28_1 | Q28a_1 | ICS Urgency with fear of leaking: Q29_1 | Q29a_1 |
|--------|-----------------------------|--------|-----------------------------------------|--------|
| 35481  | 5                           | 3      | 4                                       | 3      |
| 35498  | 1                           | 1      | 0                                       |        |
| 35499  | 0                           |        | 0                                       |        |
| 35502  | 3                           | 3      | 3                                       | 1      |
| 35503  | 0                           |        | 0                                       |        |
| 35504  | 0                           |        | 0                                       |        |
| 35508  | 0                           |        | 1                                       | 2      |
| 35513  | 1                           | 1      | 1                                       | 1      |
| 35516  | 1                           | 0      | 1                                       | 1      |
| 35519  | 0                           |        | 1                                       | 2      |
| 35530  | 2                           | 2      | 2                                       | 3      |
| 35533  | 0                           |        | 0                                       |        |
| 35561  | 0                           |        | 1                                       | 1      |
| 35565  | 0                           |        | 0                                       |        |
| 35588  | 0                           |        | 0                                       |        |
| 35598  | 0                           |        | 0                                       |        |
| 35607  | 1                           | 1      | 0                                       |        |
| 35638  | 0                           |        | 0                                       |        |
| 35642  | 0                           |        | 0                                       |        |
| 35643  | 1                           | 2      | 1                                       | 3      |
| 35680  | 0                           |        | 0                                       |        |
| 35697  | 0                           |        | 0                                       |        |
| 35703  | 0                           |        | 0                                       |        |
| 35709  | 0                           |        | 0                                       |        |
| 35710  | 2                           | 3      | 1                                       | 3      |
| 35721  | 5                           | 1      | 5                                       | 4      |
| 35723  | 0                           |        | 0                                       |        |
| 35736  | 1                           | 2      | 1                                       | 1      |
| 35739  | 2                           | 0      | 0                                       |        |
| 35745  | 0                           |        | 2                                       | 3      |
| 35748  | 5                           | 4      | 1                                       | 2      |
| 35750  | 1                           | 1      | 1                                       | 1      |

| respid | ICS Terminal Dribble: Q28_1 | Q28a_1 | ICS Urgency with fear of leaking: Q29_1 | Q29a_1 |
|--------|-----------------------------|--------|-----------------------------------------|--------|
| 35752  | 1                           | 1      | 0                                       |        |
| 35773  | 0                           |        | 0                                       |        |
| 35779  | 0                           |        | 0                                       |        |
| 35791  | 1                           | 0      | 0                                       |        |
| 35801  | 1                           | 1      | 0                                       |        |
| 35802  | 0                           |        | 0                                       |        |
| 35837  | 0                           |        | 0                                       |        |
| 35853  | 0                           |        | 1                                       | 1      |
| 35858  | 1                           | 1      | 0                                       |        |
| 35860  | 1                           | 1      | 1                                       | 1      |
| 35875  | 3                           | 4      | 3                                       | 3      |
| 35883  | 2                           | 2      | 1                                       | 2      |
| 35890  | 0                           |        | 0                                       |        |
| 35898  | 0                           |        | 0                                       |        |
| 35901  | 3                           | 4      | 3                                       | 4      |
| 35914  | 0                           |        | 0                                       |        |
| 35924  | 2                           | 2      | 1                                       | 0      |
| 35950  | 4                           | 3      | 2                                       | 3      |
| 35961  | 1                           | 1      | 0                                       |        |
| 35966  | 1                           | 1      | 1                                       | 1      |
| 35967  | 0                           |        | 0                                       |        |
| 35971  | 1                           | 0      | 0                                       |        |
| 35974  | 0                           |        | 0                                       |        |
| 35983  | 5                           | 4      | 3                                       | 4      |
| 35992  | 3                           | 3      | 4                                       | 4      |
| 36010  | 1                           | 0      | 0                                       |        |
| 36019  | 2                           | 4      | 1                                       | 4      |
| 36029  | 3                           | 1      | 2                                       | 2      |
| 36033  | 0                           |        | 0                                       |        |
| 36042  | 0                           |        | 0                                       |        |
| 36043  | 0                           |        | 0                                       |        |
| 36048  | 4                           | 3      | 0                                       |        |

| respid | ICS Terminal Dribble: Q28_1 | Q28a_1 | ICS Urgency with fear of leaking: Q29_1 | Q29a_1 |
|--------|-----------------------------|--------|-----------------------------------------|--------|
| 36050  | 2                           | 2      | 0                                       |        |
| 36062  | 0                           |        | 1                                       | 1      |
| 36063  | 0                           |        | 0                                       |        |
| 36092  | 1                           | 1      | 0                                       |        |
| 36097  | 1                           | 1      | 1                                       | 1      |
| 36108  | 0                           |        | 0                                       |        |
| 36113  | 4                           | 4      | 3                                       | 4      |
| 36117  | 0                           |        | 0                                       |        |
| 36129  | 2                           | 2      | 0                                       |        |
| 36144  | 0                           |        | 0                                       |        |
| 36152  | 0                           |        | 0                                       |        |
| 36154  | 0                           |        | 1                                       | 1      |
| 36155  | 1                           | 0      | 0                                       |        |
| 36167  | 0                           |        | 0                                       |        |
| 36172  | 1                           | 1      | 0                                       |        |
| 36173  | 0                           |        | 1                                       | 0      |
| 36174  | 1                           | 1      | 0                                       |        |
| 36182  | 0                           |        | 0                                       |        |
| 36192  | 1                           | 2      | 0                                       |        |
| 36195  | 2                           | 2      | 1                                       | 1      |
| 36204  | 0                           |        | 0                                       |        |
| 36205  | 0                           |        | 0                                       |        |
| 36208  | 2                           | 1      | 0                                       |        |
| 36216  | 1                           | 1      | 1                                       | 1      |
| 36221  | 2                           | 2      | 2                                       | 2      |
| 36244  | 0                           |        | 0                                       |        |
| 36255  | 2                           | 1      | 2                                       | 2      |
| 36259  | 1                           | 1      | 0                                       |        |
| 36262  | 2                           | 2      | 2                                       | 2      |
| 36268  | 0                           |        | 0                                       |        |
| 36308  | 3                           | 3      | 1                                       | 1      |
| 36324  | 2                           | 1      | 0                                       |        |

| respid | ICS Terminal Dribble: Q28_1 | Q28a_1 | ICS Urgency with fear of leaking: Q29_1 | Q29a_1 |
|--------|-----------------------------|--------|-----------------------------------------|--------|
| 36330  | 0                           |        | 0                                       |        |
| 36331  | 3                           | 3      | 2                                       | 2      |
| 36336  | 2                           | 1      | 0                                       |        |
| 36337  | 1                           | 1      | 0                                       |        |
| 36364  | 0                           |        | 0                                       |        |
| 36365  | 3                           | 2      | 2                                       | 2      |
| 36396  | 0                           |        | 0                                       |        |
| 36403  | 0                           |        | 0                                       |        |
| 36410  | 0                           |        | 0                                       |        |
| 36413  | 0                           |        | 0                                       |        |
| 36422  | 1                           | 0      | 1                                       | 1      |
| 36424  | 4                           | 4      | 1                                       | 1      |
| 36425  | 4                           | 3      | 4                                       | 3      |
| 36432  | 1                           | 1      | 1                                       | 1      |
| 36435  | 5                           | 4      | 4                                       | 3      |
| 36446  | 4                           | 3      | 3                                       | 3      |
| 36451  | 4                           | 3      | 1                                       | 1      |
| 36453  | 0                           |        | 0                                       |        |
| 36459  | 2                           | 2      | 2                                       | 2      |
| 36464  | 1                           | 2      | 1                                       | 2      |
| 36465  | 1                           | 1      | 1                                       | 1      |
| 36466  | 0                           |        | 0                                       |        |
| 36476  | 1                           | 0      | 1                                       | 0      |
| 36487  | 0                           |        | 0                                       |        |
| 36488  | 1                           | 3      | 1                                       | 2      |
| 36500  | 0                           |        | 0                                       |        |
| 36504  | 0                           |        | 1                                       | 1      |
| 36513  | 0                           |        | 0                                       |        |
| 36515  | 1                           | 1      | 1                                       | 1      |
| 36521  | 3                           | 4      | 1                                       | 2      |
| 36530  | 2                           | 2      | 2                                       | 1      |
| 36556  | 0                           |        | 0                                       |        |

| respid | ICS Terminal Dribble: Q28_1 | Q28a_1 | ICS Urgency with fear of leaking: Q29_1 | Q29a_1 |
|--------|-----------------------------|--------|-----------------------------------------|--------|
| 36564  | 4                           | 0      | 3                                       | 0      |
| 36584  | 0                           |        | 0                                       |        |
| 36585  | 0                           |        | 0                                       |        |
| 36586  | 0                           |        | 0                                       |        |
| 36606  | 5                           | 4      | 5                                       | 4      |
| 36615  | 1                           | 1      | 0                                       |        |
| 36628  | 0                           |        | 2                                       | 0      |
| 36630  | 0                           |        | 0                                       |        |
| 36631  | 4                           | 4      | 1                                       | 2      |
| 36636  | 0                           |        | 0                                       |        |
| 36637  | 0                           |        | 0                                       |        |
| 36651  | 0                           |        | 1                                       | 4      |
| 36661  | 1                           | 0      | 0                                       |        |
| 36670  | 2                           | 2      | 2                                       | 2      |
| 36671  | 2                           | 3      | 0                                       |        |
| 36688  | 0                           |        | 0                                       |        |
| 36694  | 0                           |        | 0                                       |        |
| 36696  | 0                           |        | 0                                       |        |
| 36703  | 0                           |        | 0                                       |        |
| 36719  | 3                           | 4      | 3                                       | 4      |
| 36721  | 3                           | 4      | 3                                       | 4      |
| 36740  | 1                           | 1      | 1                                       | 1      |
| 36755  | 1                           | 1      | 0                                       |        |
| 36765  | 1                           | 2      | 3                                       | 2      |
| 36770  | 0                           |        | 0                                       |        |
| 36773  | 1                           | 1      | 1                                       | 1      |
| 36813  | 0                           |        | 0                                       |        |
| 36819  | 2                           | 2      | 1                                       | 1      |
| 36820  | 0                           |        | 1                                       | 2      |
| 36821  | 0                           |        | 0                                       |        |
| 36827  | 0                           |        | 0                                       |        |
| 36835  | 0                           |        | 0                                       |        |



| respid | ICS Terminal Dribble: Q28_1 | Q28a_1 | ICS Urgency with fear of leaking: Q29_1 | Q29a_1 |
|--------|-----------------------------|--------|-----------------------------------------|--------|
| 36837  | 0                           |        | 1                                       | 1      |
| 36849  | 0                           |        | 0                                       |        |
| 36851  | 0                           |        | 1                                       | 2      |
| 36868  | 3                           | 2      | 3                                       | 2      |
| 36870  | 0                           |        | 0                                       |        |
| 36871  | 0                           |        | 0                                       |        |
| 36874  | 2                           | 2      | 2                                       | 2      |
| 36878  | 2                           | 2      | 3                                       | 2      |
| 36887  | 1                           | 0      | 0                                       |        |
| 36889  | 0                           |        | 0                                       |        |
| 36891  | 0                           |        | 0                                       |        |
| 36903  | 1                           | 2      | 0                                       |        |
| 36905  | 1                           | 0      | 0                                       |        |
| 36913  | 0                           |        | 0                                       |        |
| 36949  | 1                           | 2      | 1                                       | 1      |
| 36954  | 3                           | 2      | 2                                       | 1      |
| 36962  | 1                           | 1      | 1                                       | 1      |
| 36965  | 3                           | 2      | 2                                       | 2      |
| 36970  | 0                           |        | 0                                       |        |
| 36979  | 1                           | 3      | 0                                       |        |
| 36990  | 2                           | 2      | 0                                       |        |
| 36991  | 2                           | 2      | 0                                       |        |
| 36992  | 3                           | 1      | 0                                       |        |
| 37015  | 0                           |        | 0                                       |        |
| 37017  | 0                           |        | 0                                       |        |
| 37020  | 0                           |        | 0                                       |        |
| 37033  | 2                           | 2      | 2                                       | 1      |
| 37041  | 1                           | 1      | 0                                       |        |
| 37048  | 2                           | 1      | 1                                       | 1      |
| 37050  | 0                           |        | 0                                       |        |
| 37054  | 3                           | 3      | 3                                       | 3      |
| 37057  | 2                           | 2      | 4                                       | 2      |

| respid | ICS Terminal Dribble: Q28_1 | Q28a_1 | ICS Urgency with fear of leaking: Q29_1 | Q29a_1 |
|--------|-----------------------------|--------|-----------------------------------------|--------|
| 37067  | 3                           | 2      | 2                                       | 2      |
| 37074  | 5                           | 1      | 0                                       |        |
| 37088  | 0                           |        | 1                                       | 1      |
| 37090  | 3                           | 1      | 1                                       | 2      |
| 37110  | 3                           | 3      | 2                                       | 1      |
| 37122  | 0                           |        | 0                                       |        |
| 37124  | 2                           | 1      | 0                                       |        |
| 37126  | 0                           |        | 0                                       |        |
| 37129  | 2                           | 0      | 0                                       |        |
| 37130  | 0                           |        | 0                                       |        |
| 37142  | 3                           | 4      | 1                                       | 1      |
| 37160  | 2                           | 1      | 1                                       | 1      |
| 37168  | 0                           |        | 0                                       |        |
| 37169  | 5                           | 4      | 2                                       | 1      |
| 37191  | 1                           | 0      | 1                                       | 0      |
| 37197  | 1                           | 2      | 3                                       | 3      |
| 37204  | 0                           |        | 0                                       |        |
| 37213  | 3                           | 2      | 2                                       | 2      |
| 37238  | 1                           | 1      | 0                                       |        |
| 37242  | 1                           | 1      | 1                                       | 1      |
| 37243  | 3                           | 4      | 2                                       | 4      |
| 37275  | 2                           | 2      | 2                                       | 2      |
| 37305  | 0                           |        | 1                                       | 2      |
| 37357  | 2                           | 2      | 2                                       | 2      |
| 37365  | 2                           | 1      | 2                                       | 2      |
| 37370  | 0                           |        | 0                                       |        |
| 37406  | 3                           | 3      | 3                                       | 3      |
| 37410  | 4                           | 3      | 4                                       | 3      |
| 37411  | 4                           | 3      | 4                                       | 3      |
| 37427  | 1                           | 1      | 2                                       | 1      |
| 37437  | 3                           | 3      | 2                                       | 3      |
| 37440  | 3                           | 2      | 0                                       |        |

| respid | ICS Terminal Dribble: Q28_1 | Q28a_1 | ICS Urgency with fear of leaking: Q29_1 | Q29a_1 |
|--------|-----------------------------|--------|-----------------------------------------|--------|
| 37452  | 1                           | 0      | 0                                       |        |
| 37465  | 2                           | 1      | 2                                       | 2      |
| 37468  | 1                           | 2      | 1                                       | 2      |
| 37469  | 0                           |        | 0                                       |        |
| 37477  | 0                           |        | 1                                       | 2      |
| 37509  | 0                           |        | 0                                       |        |
| 37513  | 0                           |        | 0                                       |        |
| 37534  | 2                           | 1      | 0                                       |        |
| 37537  | 0                           |        | 0                                       |        |
| 37560  | 2                           | 2      | 3                                       | 1      |
| 37566  | 2                           | 2      | 2                                       | 2      |
| 37572  | 1                           | 2      | 1                                       | 2      |
| 37574  | 0                           |        | 1                                       | 1      |
| 37575  | 0                           |        | 0                                       |        |
| 37590  | 0                           |        | 2                                       | 1      |
| 37593  | 1                           | 1      | 0                                       |        |
| 37599  | 0                           |        | 0                                       |        |
| 37641  | 0                           |        | 0                                       |        |
| 37651  | 1                           | 1      | 1                                       | 1      |
| 37670  | 0                           |        | 0                                       |        |
| 37680  | 1                           | 2      | 2                                       | 1      |
| 37690  | 1                           | 2      | 0                                       |        |
| 37694  | 0                           |        | 0                                       |        |
| 37705  | 0                           |        | 0                                       |        |
| 37710  | 3                           | 3      | 2                                       | 3      |
| 37719  | 4                           | 3      | 4                                       | 3      |
| 37741  | 2                           | 2      | 2                                       | 2      |
| 37752  | 0                           |        | 0                                       |        |
| 37755  | 5                           | 1      | 3                                       | 3      |
| 37757  | 0                           |        | 0                                       |        |
| 37783  | 0                           |        | 0                                       |        |
| 37793  | 4                           | 3      | 3                                       | 3      |

| respid | ICS Terminal Dribble: Q28_1 | Q28a_1 | ICS Urgency with fear of leaking: Q29_1 | Q29a_1 |
|--------|-----------------------------|--------|-----------------------------------------|--------|
| 37800  | 2                           | 2      | 2                                       | 2      |
| 37801  | 0                           |        | 0                                       |        |
| 37820  | 3                           | 3      | 2                                       | 2      |
| 37826  | 2                           | 2      | 2                                       | 2      |
| 37835  | 2                           | 2      | 1                                       | 2      |
| 37839  | 2                           | 2      | 2                                       | 2      |
| 37871  | 3                           | 3      | 4                                       | 3      |
| 37876  | 2                           | 1      | 0                                       |        |
| 37879  | 1                           | 1      | 2                                       | 2      |
| 37894  | 0                           |        | 0                                       |        |
| 37895  | 2                           | 1      | 0                                       |        |
| 37901  | 1                           | 3      | 2                                       | 2      |
| 37926  | 1                           | 1      | 1                                       | 1      |
| 37937  | 1                           | 1      | 2                                       | 2      |
| 37938  | 0                           |        | 2                                       | 4      |
| 37959  | 1                           | 1      | 0                                       |        |
| 37970  | 0                           |        | 0                                       |        |
| 37972  | 2                           | 3      | 3                                       | 2      |
| 37988  | 2                           | 1      | 1                                       | 0      |
| 37989  | 1                           | 1      | 1                                       | 1      |
| 38000  | 1                           | 0      | 2                                       | 1      |
| 38028  | 4                           | 4      | 5                                       | 4      |
| 38042  | 2                           | 2      | 2                                       | 2      |
| 38052  | 1                           | 1      | 0                                       |        |
| 38056  | 0                           |        | 0                                       |        |
| 38106  | 1                           | 3      | 2                                       | 1      |
| 38114  | 3                           | 3      | 3                                       | 3      |
| 38134  | 0                           |        | 0                                       |        |
| 38135  | 1                           | 2      | 0                                       |        |
| 38139  | 2                           | 3      | 2                                       | 3      |
| 38160  | 2                           | 1      | 0                                       |        |
| 38164  | 1                           | 4      | 2                                       | 2      |

| respid | ICS Terminal Dribble: Q28_1 | Q28a_1 | ICS Urgency with fear of leaking: Q29_1 | Q29a_1 |
|--------|-----------------------------|--------|-----------------------------------------|--------|
| 38168  | 0                           |        | 0                                       |        |
| 38173  | 1                           | 0      | 0                                       |        |
| 38193  | 3                           | 2      | 1                                       | 3      |
| 38204  | 0                           |        | 1                                       | 1      |
| 38206  | 1                           | 1      | 0                                       |        |
| 38233  | 2                           | 4      | 1                                       | 4      |
| 38242  | 3                           | 2      | 3                                       | 2      |
| 38245  | 3                           | 2      | 2                                       | 1      |
| 38261  | 3                           | 2      | 3                                       | 2      |
| 38288  | 0                           |        | 0                                       |        |
| 38296  | 0                           |        | 1                                       | 1      |
| 38299  | 2                           | 2      | 1                                       | 1      |
| 38300  | 2                           | 1      | 0                                       |        |
| 38303  | 1                           | 2      | 0                                       |        |
| 38317  | 0                           |        | 0                                       |        |
| 38328  | 2                           | 2      | 0                                       |        |
| 38333  | 0                           |        | 0                                       |        |
| 38336  | 0                           |        | 0                                       |        |
| 38338  | 0                           |        | 0                                       |        |
| 38342  | 2                           | 1      | 4                                       | 2      |
| 38360  | 2                           | 1      | 0                                       |        |
| 38362  | 2                           | 2      | 2                                       | 1      |
| 38364  | 4                           | 3      | 0                                       |        |
| 38402  | 1                           | 1      | 0                                       |        |
| 38423  | 1                           | 2      | 2                                       | 3      |
| 38424  | 5                           | 4      | 5                                       | 4      |
| 38435  | 4                           | 2      | 4                                       | 2      |
| 38450  | 1                           | 4      | 1                                       | 4      |
| 38455  | 5                           | 1      | 0                                       |        |
| 38467  | 5                           | 4      | 1                                       | 1      |
| 38468  | 2                           | 3      | 2                                       | 3      |
| 38472  | 0                           |        | 0                                       |        |

| respid | ICS Terminal Dribble: Q28_1 | Q28a_1 | ICS Urgency with fear of leaking: Q29_1 | Q29a_1 |
|--------|-----------------------------|--------|-----------------------------------------|--------|
| 38484  | 1                           | 1      | 0                                       |        |
| 38498  | 1                           | 1      | 0                                       |        |
| 38507  | 0                           |        | 0                                       |        |
| 38511  | 1                           | 1      | 1                                       | 1      |
| 38524  | 4                           | 3      | 4                                       | 3      |
| 38526  | 1                           | 0      | 0                                       |        |
| 38534  | 1                           | 2      | 0                                       |        |
| 38536  | 1                           | 0      | 0                                       |        |
| 38539  | 1                           | 1      | 0                                       |        |
| 38547  | 0                           |        | 0                                       |        |
| 38549  | 1                           | 0      | 1                                       | 1      |
| 38575  | 1                           | 1      | 1                                       | 2      |
| 38579  | 0                           |        | 0                                       |        |
| 38585  | 1                           | 1      | 0                                       |        |
| 38589  | 4                           | 4      | 2                                       | 3      |
| 38595  | 4                           | 3      | 3                                       | 2      |
| 38602  | 0                           |        | 0                                       |        |
| 38603  | 1                           | 2      | 1                                       | 2      |
| 38612  | 1                           | 1      | 0                                       |        |
| 38621  | 3                           | 3      | 3                                       | 3      |
| 38624  | 2                           | 2      | 2                                       | 2      |
| 38636  | 0                           |        | 0                                       |        |
| 38656  | 3                           | 1      | 0                                       |        |
| 38668  | 1                           | 1      | 0                                       |        |
| 38675  | 0                           |        | 0                                       |        |
| 38676  | 1                           | 0      | 0                                       |        |
| 38682  | 1                           | 0      | 0                                       |        |
| 38689  | 1                           | 1      | 0                                       |        |
| 38702  | 0                           |        | 0                                       |        |
| 38704  | 3                           | 3      | 3                                       | 3      |
| 38713  | 2                           | 1      | 0                                       |        |
| 38718  | 4                           | 2      | 1                                       | 1      |

| respid | ICS Terminal Dribble: Q28_1 | Q28a_1 | ICS Urgency with fear of leaking: Q29_1 | Q29a_1 |
|--------|-----------------------------|--------|-----------------------------------------|--------|
| 38725  | 0                           |        | 0                                       |        |
| 38730  | 3                           | 2      | 2                                       | 2      |
| 38737  | 0                           |        | 1                                       | 2      |
| 38738  | 1                           | 2      | 2                                       | 2      |
| 38744  | 0                           |        | 2                                       | 4      |
| 38746  | 1                           | 1      | 0                                       |        |
| 38753  | 0                           |        | 0                                       |        |
| 38756  | 2                           | 2      | 2                                       | 2      |
| 38760  | 1                           | 1      | 0                                       |        |
| 38762  | 4                           | 4      | 2                                       | 3      |
| 38765  | 0                           |        | 0                                       |        |
| 38769  | 1                           | 1      | 1                                       | 0      |
| 38781  | 3                           | 2      | 4                                       | 3      |
| 38786  | 0                           |        | 0                                       |        |
| 38790  | 2                           | 2      | 2                                       | 2      |
| 38793  | 1                           | 0      | 0                                       |        |
| 38797  | 1                           | 1      | 0                                       |        |
| 38802  | 0                           |        | 0                                       |        |
| 38815  | 4                           | 3      | 2                                       | 1      |
| 38826  | 3                           | 3      | 3                                       | 4      |
| 38828  | 0                           |        | 0                                       |        |
| 38829  | 3                           | 3      | 3                                       | 3      |
| 38835  | 2                           | 1      | 3                                       | 2      |
| 38842  | 4                           | 3      | 2                                       | 4      |
| 38853  | 1                           | 1      | 0                                       |        |
| 38855  | 3                           | 3      | 3                                       | 3      |
| 38860  | 3                           | 2      | 1                                       | 1      |
| 38869  | 0                           |        | 1                                       | 1      |
| 38882  | 4                           | 3      | 3                                       | 3      |
| 38897  | 0                           |        | 0                                       |        |
| 38903  | 0                           |        | 0                                       |        |
| 38910  | 2                           | 2      | 3                                       | 2      |

| respid | ICS Terminal Dribble: Q28_1 | Q28a_1 | ICS Urgency with fear of leaking: Q29_1 | Q29a_1 |
|--------|-----------------------------|--------|-----------------------------------------|--------|
| 38948  | 2                           | 3      | 2                                       | 3      |
| 38949  | 4                           | 2      | 0                                       |        |
| 38953  | 3                           | 2      | 3                                       | 3      |
| 38989  | 3                           | 2      | 3                                       | 2      |
| 38997  | 1                           | 0      | 0                                       |        |
| 38999  | 0                           |        | 0                                       |        |
| 39002  | 4                           | 4      | 4                                       | 4      |
| 39003  | 5                           | 3      | 3                                       | 3      |
| 39006  | 0                           |        | 0                                       |        |
| 39014  | 0                           |        | 0                                       |        |
| 39017  | 2                           | 2      | 3                                       | 4      |
| 39018  | 4                           | 3      | 4                                       | 3      |
| 39025  | 3                           | 3      | 4                                       | 4      |
| 39031  | 3                           | 2      | 1                                       | 2      |
| 39061  | 2                           | 0      | 2                                       | 2      |
| 39131  | 0                           |        | 0                                       |        |
| 39153  | 3                           | 4      | 3                                       | 4      |
| 39194  | 1                           | 3      | 1                                       | 4      |
| 39204  | 0                           |        | 1                                       | 1      |
| 39208  | 4                           | 2      | 0                                       |        |
| 39213  | 0                           |        | 1                                       | 1      |
| 39231  | 1                           | 1      | 1                                       | 1      |
| 39251  | 2                           | 4      | 3                                       | 4      |
| 39257  | 3                           | 4      | 3                                       | 4      |
| 39262  | 0                           |        | 2                                       | 3      |
| 39269  | 1                           | 3      | 0                                       |        |
| 39272  | 0                           |        | 1                                       | 1      |
| 39280  | 2                           | 2      | 2                                       | 2      |
| 39294  | 0                           |        | 2                                       | 3      |
| 39297  | 2                           | 2      | 2                                       | 2      |
| 39300  | 1                           | 3      | 1                                       | 3      |
| 39307  | 0                           |        | 1                                       | 2      |



| respid | ICS Terminal Dribble: Q28_1 | Q28a_1 | ICS Urgency with fear of leaking: Q29_1 | Q29a_1 |
|--------|-----------------------------|--------|-----------------------------------------|--------|
| 39320  | 2                           | 1      | 3                                       | 4      |
| 39333  | 0                           |        | 0                                       |        |
| 39335  | 4                           | 4      | 2                                       | 4      |
| 39339  | 1                           | 2      | 0                                       |        |
| 39375  | 0                           |        | 0                                       |        |
| 39377  | 0                           |        | 0                                       |        |
| 39380  | 0                           |        | 0                                       |        |
| 39425  | 0                           |        | 0                                       |        |
| 39590  | 0                           |        | 0                                       |        |
| 40529  | 0                           |        | 0                                       |        |
| 40702  | 0                           |        | 0                                       |        |
| 40788  | 1                           | 1      | 0                                       |        |
| 40841  | 0                           |        | 0                                       |        |
| 40965  | 0                           |        | 0                                       |        |
| 41092  | 2                           | 1      | 0                                       |        |
| 41534  | 0                           |        | 0                                       |        |
| 41919  | 0                           |        | 0                                       |        |
| 42110  | 0                           |        | 0                                       |        |
| 42135  | 1                           | 2      | 0                                       |        |
| 42142  | 4                           | 2      | 0                                       |        |
| 42163  | 0                           |        | 0                                       |        |
| 42164  | 0                           |        | 0                                       |        |
| 42172  | 5                           | 2      | 2                                       | 3      |
| 42177  | 1                           | 1      | 0                                       |        |
| 42181  | 0                           |        | 0                                       |        |
| 42193  | 2                           | 2      | 1                                       | 1      |
| 42196  | 2                           | 2      | 1                                       | 2      |
| 42202  | 1                           | 1      | 1                                       | 1      |
| 42248  | 1                           | 1      | 1                                       | 3      |
| 42283  | 3                           | 2      | 0                                       |        |
| 42284  | 1                           | 1      | 1                                       | 1      |
| 42323  | 0                           |        | 0                                       |        |

| respid | ICS Terminal Dribble: Q28_1 | Q28a_1 | ICS Urgency with fear of leaking: Q29_1 | Q29a_1 |
|--------|-----------------------------|--------|-----------------------------------------|--------|
| 42349  | 0                           |        | 0                                       |        |
| 42351  | 0                           |        | 0                                       |        |
| 42357  | 0                           |        | 0                                       |        |
| 42366  | 0                           |        | 0                                       |        |
| 42380  | 1                           | 1      | 0                                       |        |
| 42414  | 3                           | 2      | 3                                       | 4      |
| 42420  | 3                           | 3      | 3                                       | 3      |
| 42454  | 0                           |        | 0                                       |        |
| 42458  | 0                           |        | 0                                       |        |
| 42461  | 0                           |        | 0                                       |        |
| 42488  | 1                           | 1      | 1                                       | 1      |
| 42511  | 0                           |        | 0                                       |        |
| 42512  | 0                           |        | 0                                       |        |
| 42530  | 1                           | 1      | 1                                       | 1      |
| 42531  | 5                           | 4      | 4                                       | 4      |
| 42533  | 0                           |        | 0                                       |        |
| 42549  | 0                           |        | 1                                       | 1      |
| 42550  | 0                           |        | 3                                       | 2      |
| 42553  | 0                           |        | 0                                       |        |
| 42562  | 2                           | 1      | 1                                       | 1      |
| 42567  | 0                           |        | 0                                       |        |
| 42589  | 1                           | 1      | 1                                       | 1      |
| 42604  | 1                           | 0      | 1                                       | 1      |
| 42618  | 0                           |        | 0                                       |        |
| 42621  | 3                           | 3      | 3                                       | 4      |
| 42627  | 0                           |        | 0                                       |        |
| 42641  | 1                           | 1      | 0                                       |        |
| 42655  | 5                           | 3      | 3                                       | 3      |
| 42666  | 0                           |        | 0                                       |        |
| 42667  | 2                           | 0      | 2                                       | 0      |
| 42697  | 1                           | 1      | 2                                       | 3      |
| 42703  | 1                           | 0      | 0                                       |        |

| respid | ICS Terminal Dribble: Q28_1 | Q28a_1 | ICS Urgency with fear of leaking: Q29_1 | Q29a_1 |
|--------|-----------------------------|--------|-----------------------------------------|--------|
| 42712  | 1                           | 1      | 2                                       | 2      |
| 42731  | 1                           | 2      | 1                                       | 2      |
| 42780  | 2                           | 1      | 0                                       |        |
| 42785  | 1                           | 1      | 1                                       | 1      |
| 42788  | 0                           |        | 1                                       | 1      |
| 42802  | 4                           | 4      | 1                                       | 1      |
| 42818  | 0                           |        | 3                                       | 3      |
| 42821  | 1                           | 0      | 0                                       |        |
| 42824  | 0                           |        | 0                                       |        |
| 42831  | 0                           |        | 0                                       |        |
| 42836  | 2                           | 1      | 2                                       | 1      |
| 42864  | 1                           | 0      | 2                                       | 1      |
| 42875  | 1                           | 1      | 1                                       | 1      |
| 42891  | 4                           | 3      | 4                                       | 4      |
| 42897  | 1                           | 0      | 0                                       |        |
| 42900  | 1                           | 1      | 0                                       |        |
| 42902  | 3                           | 1      | 3                                       | 1      |
| 42921  | 1                           | 1      | 0                                       |        |
| 42925  | 0                           |        | 0                                       |        |
| 42944  | 0                           |        | 0                                       |        |
| 42950  | 0                           |        | 0                                       |        |
| 42963  | 0                           |        | 0                                       |        |
| 42967  | 0                           |        | 0                                       |        |
| 42985  | 0                           |        | 0                                       |        |
| 42990  | 2                           | 2      | 1                                       | 3      |
| 42996  | 5                           | 2      | 0                                       |        |
| 43002  | 1                           | 0      | 0                                       |        |
| 43004  | 0                           |        | 0                                       |        |
| 43012  | 0                           |        | 0                                       |        |
| 43027  | 2                           | 2      | 0                                       |        |
| 43028  | 1                           | 1      | 0                                       |        |
| 43029  | 1                           | 1      | 1                                       | 1      |

| respid | ICS Terminal Dribble: Q28_1 | Q28a_1 | ICS Urgency with fear of leaking: Q29_1 | Q29a_1 |
|--------|-----------------------------|--------|-----------------------------------------|--------|
| 43031  | 1                           | 1      | 0                                       |        |
| 43042  | 0                           |        | 0                                       |        |
| 43054  | 0                           |        | 0                                       |        |
| 43058  | 1                           | 1      | 0                                       |        |
| 43064  | 1                           | 1      | 1                                       | 1      |
| 43069  | 1                           | 1      | 1                                       | 1      |
| 43071  | 0                           |        | 0                                       |        |
| 43072  | 0                           |        | 0                                       |        |
| 43077  | 1                           | 1      | 1                                       | 1      |
| 43078  | 3                           | 2      | 3                                       | 2      |
| 43082  | 0                           |        | 0                                       |        |
| 43092  | 0                           |        | 0                                       |        |
| 43096  | 2                           | 1      | 0                                       |        |
| 43109  | 0                           |        | 0                                       |        |
| 43113  | 0                           |        | 0                                       |        |
| 43123  | 0                           |        | 0                                       |        |
| 43127  | 0                           |        | 0                                       |        |
| 43128  | 1                           | 0      | 0                                       |        |
| 43129  | 1                           | 0      | 1                                       | 1      |
| 43133  | 3                           | 2      | 3                                       | 2      |
| 43140  | 0                           |        | 0                                       |        |
| 43143  | 0                           |        | 0                                       |        |
| 43149  | 0                           |        | 0                                       |        |
| 43150  | 2                           | 1      | 1                                       | 1      |
| 43153  | 3                           | 2      | 3                                       | 3      |
| 43170  | 0                           |        | 0                                       |        |
| 43187  | 3                           | 0      | 1                                       | 1      |
| 43188  | 0                           |        | 1                                       | 2      |
| 43198  | 0                           |        | 0                                       |        |
| 43208  | 0                           |        | 0                                       |        |
| 43216  | 1                           | 2      | 0                                       |        |
| 43222  | 2                           | 2      | 2                                       | 2      |

| respid | ICS Terminal Dribble: Q28_1 | Q28a_1 | ICS Urgency with fear of leaking: Q29_1 | Q29a_1 |
|--------|-----------------------------|--------|-----------------------------------------|--------|
| 43224  | 1                           | 1      | 1                                       | 1      |
| 43230  | 1                           | 1      | 0                                       |        |
| 43231  | 1                           | 1      | 2                                       | 3      |
| 43265  | 2                           | 2      | 3                                       | 2      |
| 43270  | 3                           | 1      | 2                                       | 1      |
| 43283  | 2                           | 1      | 0                                       |        |
| 43295  | 1                           | 1      | 1                                       | 0      |
| 43297  | 1                           | 0      | 0                                       |        |
| 43299  | 2                           | 2      | 2                                       | 2      |
| 43307  | 0                           |        | 1                                       | 1      |
| 43316  | 1                           | 2      | 1                                       | 1      |
| 43318  | 1                           | 1      | 1                                       | 1      |
| 43319  | 1                           | 1      | 0                                       |        |
| 43324  | 1                           | 1      | 1                                       | 1      |
| 43325  | 1                           | 1      | 1                                       | 1      |
| 43327  | 1                           | 0      | 0                                       |        |
| 43338  | 2                           | 1      | 0                                       |        |
| 43342  | 1                           | 0      | 0                                       |        |
| 43348  | 0                           |        | 0                                       |        |
| 43395  | 1                           | 1      | 1                                       | 1      |
| 43404  | 2                           | 2      | 2                                       | 1      |
| 43406  | 4                           | 2      | 2                                       | 2      |
| 43407  | 0                           |        | 0                                       |        |
| 43411  | 0                           |        | 0                                       |        |
| 43416  | 1                           | 2      | 3                                       | 2      |
| 43428  | 0                           |        | 0                                       |        |
| 43429  | 2                           | 2      | 3                                       | 2      |
| 43432  | 2                           | 1      | 1                                       | 0      |
| 43443  | 1                           | 1      | 0                                       |        |
| 43455  | 0                           |        | 0                                       |        |
| 43457  | 1                           | 1      | 1                                       | 1      |
| 43458  | 0                           |        | 0                                       |        |

| respid | ICS Terminal Dribble: Q28_1 | Q28a_1 | ICS Urgency with fear of leaking: Q29_1 | Q29a_1 |
|--------|-----------------------------|--------|-----------------------------------------|--------|
| 43477  | 4                           | 2      | 2                                       | 1      |
| 43520  | 1                           | 0      | 0                                       |        |
| 43521  | 0                           |        | 0                                       |        |
| 43550  | 0                           |        | 0                                       |        |
| 43551  | 2                           | 2      | 2                                       | 2      |
| 43554  | 2                           | 2      | 2                                       | 2      |
| 43560  | 1                           | 0      | 1                                       | 1      |
| 43569  | 3                           | 0      | 0                                       |        |
| 43583  | 1                           | 2      | 1                                       | 1      |
| 43590  | 5                           | 2      | 1                                       | 2      |
| 43591  | 0                           |        | 0                                       |        |
| 43595  | 0                           |        | 0                                       |        |
| 43599  | 1                           | 1      | 3                                       | 2      |
| 43606  | 0                           |        | 0                                       |        |
| 43609  | 0                           |        | 0                                       |        |
| 43629  | 0                           |        | 0                                       |        |
| 43636  | 0                           |        | 0                                       |        |
| 43661  | 1                           | 0      | 0                                       |        |
| 43668  | 1                           | 0      | 0                                       |        |
| 43672  | 0                           |        | 0                                       |        |
| 43677  | 3                           | 2      | 2                                       | 2      |
| 43683  | 0                           |        | 0                                       |        |
| 43708  | 2                           | 1      | 2                                       | 1      |
| 43713  | 1                           | 1      | 1                                       | 1      |
| 43718  | 0                           |        | 0                                       |        |
| 43725  | 0                           |        | 0                                       |        |
| 43747  | 1                           | 0      | 1                                       | 1      |
| 43755  | 0                           |        | 0                                       |        |
| 43770  | 1                           | 1      | 0                                       |        |
| 43775  | 2                           | 1      | 3                                       | 2      |
| 43788  | 0                           |        | 0                                       |        |
| 43790  | 2                           | 2      | 3                                       | 1      |

| respid | ICS Terminal Dribble: Q28_1 | Q28a_1 | ICS Urgency with fear of leaking: Q29_1 | Q29a_1 |
|--------|-----------------------------|--------|-----------------------------------------|--------|
| 43797  | 1                           | 1      | 1                                       | 1      |
| 43798  | 2                           | 1      | 2                                       | 2      |
| 43811  | 3                           | 1      | 1                                       | 1      |
| 43819  | 1                           | 1      | 1                                       | 1      |
| 43821  | 1                           | 2      | 1                                       | 2      |
| 43822  | 0                           |        | 0                                       |        |
| 43825  | 3                           | 3      | 3                                       | 2      |
| 43826  | 1                           | 1      | 1                                       | 1      |
| 43831  | 0                           |        | 0                                       |        |
| 43836  | 2                           | 1      | 2                                       | 1      |
| 43852  | 2                           | 1      | 2                                       | 2      |
| 43857  | 0                           |        | 1                                       | 2      |
| 43858  | 0                           |        | 0                                       |        |
| 43859  | 1                           | 1      | 1                                       | 1      |
| 43863  | 0                           |        | 0                                       |        |
| 43868  | 1                           | 1      | 1                                       | 1      |
| 43872  | 1                           | 1      | 1                                       | 1      |
| 43874  | 2                           | 2      | 2                                       | 2      |
| 43882  | 0                           |        | 0                                       |        |
| 43886  | 0                           |        | 0                                       |        |
| 43903  | 0                           |        | 1                                       | 2      |
| 43929  | 1                           | 1      | 1                                       | 1      |
| 43932  | 3                           | 2      | 0                                       |        |
| 43936  | 0                           |        | 0                                       |        |
| 43962  | 3                           | 2      | 3                                       | 2      |
| 43964  | 1                           | 0      | 0                                       |        |
| 43968  | 1                           | 4      | 0                                       |        |
| 43979  | 1                           | 1      | 2                                       | 1      |
| 44006  | 4                           | 3      | 4                                       | 3      |
| 44009  | 3                           | 0      | 0                                       |        |
| 44023  | 0                           |        | 1                                       | 1      |
| 44035  | 1                           | 1      | 1                                       | 1      |

| respid | ICS Terminal Dribble: Q28_1 | Q28a_1 | ICS Urgency with fear of leaking: Q29_1 | Q29a_1 |
|--------|-----------------------------|--------|-----------------------------------------|--------|
| 44038  | 3                           | 4      | 0                                       |        |
| 44039  | 2                           | 2      | 2                                       | 3      |
| 44043  | 2                           | 2      | 1                                       | 1      |
| 44048  | 1                           | 1      | 2                                       | 1      |
| 44050  | 0                           |        | 0                                       |        |
| 44051  | 1                           | 1      | 1                                       | 2      |
| 44061  | 2                           | 1      | 1                                       | 3      |
| 44063  | 1                           | 1      | 1                                       | 1      |
| 44072  | 2                           | 1      | 1                                       | 1      |
| 44075  | 1                           | 2      | 2                                       | 2      |
| 44089  | 1                           | 2      | 2                                       | 2      |
| 44090  | 3                           | 3      | 2                                       | 2      |
| 44091  | 2                           | 1      | 2                                       | 2      |
| 44092  | 0                           |        | 0                                       |        |
| 44110  | 1                           | 1      | 1                                       | 1      |
| 44112  | 1                           | 1      | 1                                       | 1      |
| 44114  | 2                           | 1      | 2                                       | 2      |
| 44143  | 2                           | 2      | 2                                       | 2      |
| 44179  | 1                           | 2      | 0                                       |        |
| 44234  | 1                           | 1      | 1                                       | 1      |
| 44236  | 0                           |        | 0                                       |        |
| 44239  | 1                           | 1      | 1                                       | 1      |
| 44241  | 3                           | 2      | 2                                       | 1      |
| 44253  | 0                           |        | 0                                       |        |
| 44260  | 2                           | 1      | 2                                       | 2      |
| 44261  | 1                           | 1      | 1                                       | 1      |
| 44263  | 1                           | 2      | 0                                       |        |
| 44264  | 0                           |        | 0                                       |        |
| 44265  | 0                           |        | 0                                       |        |
| 44267  | 1                           | 1      | 1                                       | 1      |
| 44306  | 2                           | 1      | 2                                       | 1      |
| 44309  | 3                           | 2      | 3                                       | 3      |



| respid | ICS Terminal Dribble: Q28_1 | Q28a_1 | ICS Urgency with fear of leaking: Q29_1 | Q29a_1 |
|--------|-----------------------------|--------|-----------------------------------------|--------|
| 44310  | 0                           |        | 1                                       | 0      |
| 44361  | 5                           | 0      | 0                                       |        |
| 44380  | 1                           | 0      | 0                                       |        |
| 44386  | 1                           | 1      | 0                                       |        |
| 44419  | 0                           |        | 0                                       |        |
| 44426  | 1                           | 2      | 0                                       |        |
| 44479  | 5                           | 4      | 0                                       |        |
| 44484  | 0                           |        | 0                                       |        |
| 44487  | 1                           | 3      | 1                                       | 3      |
| 44509  | 0                           |        | 0                                       |        |
| 44540  | 0                           |        | 1                                       | 1      |
| 44551  | 1                           | 2      | 1                                       | 0      |
| 44553  | 0                           |        | 0                                       |        |
| 44650  | 0                           |        | 1                                       | 0      |
| 44665  | 2                           | 2      | 2                                       | 2      |
| 44779  | 1                           | 1      | 0                                       |        |
| 44797  | 0                           |        | 1                                       | 1      |
| 44807  | 1                           | 1      | 0                                       |        |
| 44815  | 1                           | 2      | 1                                       | 1      |
| 44836  | 0                           |        | 0                                       |        |
| 44868  | 1                           | 1      | 0                                       |        |
| 44927  | 2                           | 1      | 1                                       | 1      |
| 44983  | 0                           |        | 0                                       |        |
| 45040  | 0                           |        | 1                                       | 1      |
| 45051  | 1                           | 0      | 2                                       | 2      |
| 45067  | 5                           | 2      | 0                                       |        |
| 45074  | 0                           |        | 0                                       |        |
| 45115  | 1                           | 0      | 0                                       |        |
| 45187  | 4                           | 2      | 3                                       | 2      |
| 45221  | 4                           | 3      | 1                                       | 3      |
| 45279  | 1                           | 1      | 1                                       | 2      |
| 45308  | 2                           | 2      | 2                                       | 1      |

| respid | ICS Terminal Dribble: Q28_1 | Q28a_1 | ICS Urgency with fear of leaking: Q29_1 | Q29a_1 |
|--------|-----------------------------|--------|-----------------------------------------|--------|
| 45317  | 1                           | 0      | 1                                       | 1      |
| 45379  | 1                           | 1      | 1                                       | 1      |
| 45451  | 0                           |        | 0                                       |        |
| 45472  | 2                           | 1      | 3                                       | 2      |
| 45474  | 1                           | 3      | 5                                       | 4      |
| 45544  | 4                           | 3      | 1                                       | 1      |
| 45561  | 1                           | 1      | 1                                       | 1      |
| 45596  | 0                           |        | 0                                       |        |

| Instrum   | ICS     | ICS       | ICS     |
|-----------|---------|-----------|---------|
| Symptom   | Storage | Storage   | Storage |
| Type of R | Symptom | Frequency | Bother  |

| Descripti | Urgency incontinence | How often experienced Urgency incontinence | Symptom Bother | SUI: Laughing |
|-----------|----------------------|--------------------------------------------|----------------|---------------|
|-----------|----------------------|--------------------------------------------|----------------|---------------|

| respid | ICS Urgency Incontinence Q30 | ICS Urgency Incontinence - how often Q30a_1 | Q30b_1 | Q31_1 |
|--------|------------------------------|---------------------------------------------|--------|-------|
| 241    | 2                            |                                             |        | 0     |
| 242    | 2                            |                                             |        | 0     |
| 243    | 2                            |                                             |        | 0     |
| 244    | 1                            | 2                                           | 4      | 0     |
| 245    | 2                            |                                             |        | 0     |
| 246    | 2                            |                                             |        | 0     |
| 247    | 2                            |                                             |        | 0     |
| 253    | 2                            |                                             |        | 0     |
| 256    | 2                            |                                             |        | 0     |
| 257    | 1                            | 1                                           | 0      | 0     |
| 258    | 2                            |                                             |        | 0     |
| 259    | 2                            |                                             |        | 0     |
| 263    | 2                            |                                             |        | 0     |
| 264    | 2                            |                                             |        | 0     |
| 265    | 1                            | 3                                           | 2      | 0     |
| 266    | 2                            |                                             |        | 0     |
| 268    | 2                            |                                             |        | 0     |
| 270    | 2                            |                                             |        | 0     |
| 272    | 2                            |                                             |        | 0     |
| 274    | 2                            |                                             |        | 0     |

| respid | ICS Urgency Incontinence Q30 | ICS Urgency Incontinence -<br>how often Q30a_1 | Q30b_1 | Q31_1 |
|--------|------------------------------|------------------------------------------------|--------|-------|
| 275    | 2                            |                                                |        | 0     |
| 276    | 2                            |                                                |        | 0     |
| 277    | 2                            |                                                |        | 0     |
| 279    | 1                            | 1                                              | 1      | 0     |
| 286    | 1                            | 3                                              | 3      | 0     |
| 290    | 2                            |                                                |        | 0     |
| 291    | 1                            | 1                                              | 1      | 0     |
| 295    | 2                            |                                                |        | 0     |
| 297    | 2                            |                                                |        | 0     |
| 299    | 2                            |                                                |        | 0     |
| 300    | 1                            | 1                                              | 2      | 0     |
| 303    | 2                            |                                                |        | 0     |
| 304    | 2                            |                                                |        | 0     |
| 306    | 1                            | 2                                              | 2      | 0     |
| 307    | 2                            |                                                |        | 0     |
| 312    | 1                            | 4                                              | 3      | 0     |
| 315    | 2                            |                                                |        | 0     |
| 317    | 2                            |                                                |        | 0     |
| 322    | 2                            |                                                |        | 1     |
| 335    | 2                            |                                                |        | 0     |
| 374    | 1                            | 3                                              | 2      | 1     |
| 378    | 2                            |                                                |        | 0     |
| 380    | 2                            |                                                |        | 0     |
| 382    | 2                            |                                                |        | 0     |
| 384    | 1                            | 2                                              | 2      | 0     |
| 385    | 1                            | 1                                              | 1      | 0     |
| 395    | 2                            |                                                |        | 0     |
| 396    | 2                            |                                                |        | 0     |
| 398    | 2                            |                                                |        | 0     |
| 402    | 1                            | 5                                              | 3      | 0     |
| 414    | 2                            |                                                |        | 0     |
| 415    | 2                            |                                                |        | 0     |

| respid | ICS Urgency Incontinence Q30 | ICS Urgency Incontinence -<br>how often Q30a_1 | Q30b_1 | Q31_1 |
|--------|------------------------------|------------------------------------------------|--------|-------|
| 416    | 2                            |                                                |        | 0     |
| 420    | 1                            | 2                                              | 3      | 0     |
| 421    | 2                            |                                                |        | 0     |
| 422    | 2                            |                                                |        | 0     |
| 423    | 2                            |                                                |        | 0     |
| 424    | 2                            |                                                |        | 0     |
| 425    | 2                            |                                                |        | 0     |
| 428    | 2                            |                                                |        | 0     |
| 429    | 2                            |                                                |        | 0     |
| 431    | 2                            |                                                |        | 0     |
| 437    | 2                            |                                                |        | 0     |
| 438    | 2                            |                                                |        | 0     |
| 441    | 2                            |                                                |        | 0     |
| 444    | 2                            |                                                |        | 0     |
| 448    | 2                            |                                                |        | 0     |
| 449    | 2                            |                                                |        | 0     |
| 457    | 2                            |                                                |        | 1     |
| 460    | 2                            |                                                |        | 0     |
| 469    | 2                            |                                                |        | 0     |
| 471    | 1                            | 2                                              | 2      | 0     |
| 473    | 2                            |                                                |        | 0     |
| 476    | 2                            |                                                |        | 0     |
| 479    | 2                            |                                                |        | 0     |
| 485    | 2                            |                                                |        | 0     |
| 488    | 2                            |                                                |        | 0     |
| 494    | 2                            |                                                |        | 0     |
| 496    | 2                            |                                                |        | 0     |
| 501    | 2                            |                                                |        | 0     |
| 502    | 1                            | 3                                              | 2      | 0     |
| 503    | 2                            |                                                |        | 0     |
| 506    | 2                            |                                                |        | 0     |
| 514    | 1                            | 1                                              | 1      | 1     |

| respid | ICS Urgency Incontinence Q30 | ICS Urgency Incontinence -<br>how often Q30a_1 | Q30b_1 | Q31_1 |
|--------|------------------------------|------------------------------------------------|--------|-------|
| 515    | 2                            |                                                |        | 0     |
| 516    | 2                            |                                                |        | 0     |
| 519    | 1                            | 3                                              | 3      | 0     |
| 522    | 2                            |                                                |        | 0     |
| 525    | 2                            |                                                |        | 0     |
| 528    | 2                            |                                                |        | 0     |
| 532    | 2                            |                                                |        | 0     |
| 536    | 1                            | 1                                              | 2      | 0     |
| 539    | 2                            |                                                |        | 0     |
| 540    | 2                            |                                                |        | 1     |
| 547    | 2                            |                                                |        | 0     |
| 551    | 2                            |                                                |        | 0     |
| 554    | 2                            |                                                |        | 0     |
| 558    | 2                            |                                                |        | 0     |
| 563    | 1                            | 1                                              | 0      | 0     |
| 564    | 2                            |                                                |        | 0     |
| 565    | 2                            |                                                |        | 0     |
| 567    | 2                            |                                                |        | 0     |
| 569    | 1                            | 1                                              | 1      | 0     |
| 572    | 2                            |                                                |        | 0     |
| 574    | 2                            |                                                |        | 0     |
| 583    | 1                            | 1                                              | 1      | 0     |
| 589    | 2                            |                                                |        | 0     |
| 592    | 2                            |                                                |        | 0     |
| 593    | 2                            |                                                |        | 0     |
| 594    | 2                            |                                                |        | 0     |
| 597    | 2                            |                                                |        | 0     |
| 601    | 2                            |                                                |        | 0     |
| 607    | 2                            |                                                |        | 0     |
| 610    | 2                            |                                                |        | 0     |
| 612    | 1                            | 3                                              | 3      | 0     |
| 627    | 2                            |                                                |        | 0     |

| respid | ICS Urgency Incontinence Q30 | ICS Urgency Incontinence -<br>how often Q30a_1 | Q30b_1 | Q31_1 |
|--------|------------------------------|------------------------------------------------|--------|-------|
| 631    | 2                            |                                                |        | 0     |
| 633    | 1                            | 2                                              | 1      | 0     |
| 636    | 2                            |                                                |        | 0     |
| 656    | 1                            | 1                                              | 1      | 0     |
| 659    | 2                            |                                                |        | 0     |
| 670    | 2                            |                                                |        | 0     |
| 672    | 1                            | 1                                              | 1      | 0     |
| 673    | 1                            | 1                                              | 1      | 0     |
| 675    | 2                            |                                                |        | 0     |
| 676    | 1                            | 2                                              | 2      | 0     |
| 679    | 2                            |                                                |        | 0     |
| 683    | 2                            |                                                |        | 0     |
| 684    | 2                            |                                                |        | 0     |
| 690    | 2                            |                                                |        | 0     |
| 701    | 1                            | 4                                              | 3      | 0     |
| 709    | 2                            |                                                |        | 0     |
| 719    | 2                            |                                                |        | 0     |
| 726    | 2                            |                                                |        | 0     |
| 730    | 2                            |                                                |        | 0     |
| 731    | 2                            |                                                |        | 0     |
| 732    | 2                            |                                                |        | 0     |
| 733    | 2                            |                                                |        | 0     |
| 735    | 2                            |                                                |        | 0     |
| 738    | 2                            |                                                |        | 0     |
| 740    | 2                            |                                                |        | 0     |
| 742    | 2                            |                                                |        | 0     |
| 744    | 2                            |                                                |        | 0     |
| 749    | 2                            |                                                |        | 0     |
| 751    | 2                            |                                                |        | 0     |
| 752    | 2                            |                                                |        | 0     |
| 753    | 2                            |                                                |        | 0     |
| 755    | 2                            |                                                |        | 0     |

| respid | ICS Urgency Incontinence Q30 | ICS Urgency Incontinence -<br>how often Q30a_1 | Q30b_1 | Q31_1 |
|--------|------------------------------|------------------------------------------------|--------|-------|
| 756    | 2                            |                                                |        | 0     |
| 759    | 2                            |                                                |        | 0     |
| 760    | 2                            |                                                |        | 0     |
| 763    | 2                            |                                                |        | 0     |
| 764    | 2                            |                                                |        | 0     |
| 765    | 1                            | 1                                              | 0      | 0     |
| 766    | 2                            |                                                |        | 0     |
| 767    | 2                            |                                                |        | 0     |
| 771    | 2                            |                                                |        | 0     |
| 773    | 2                            |                                                |        | 0     |
| 774    | 2                            |                                                |        | 0     |
| 775    | 2                            |                                                |        | 0     |
| 776    | 2                            |                                                |        | 0     |
| 778    | 1                            | 2                                              | 1      | 0     |
| 780    | 2                            |                                                |        | 0     |
| 781    | 2                            |                                                |        | 0     |
| 782    | 2                            |                                                |        | 0     |
| 783    | 2                            |                                                |        | 0     |
| 786    | 1                            | 4                                              | 3      | 0     |
| 788    | 2                            |                                                |        | 0     |
| 792    | 2                            |                                                |        | 0     |
| 794    | 1                            | 3                                              | 3      | 0     |
| 795    | 2                            |                                                |        | 0     |
| 799    | 2                            |                                                |        | 0     |
| 800    | 2                            |                                                |        | 0     |
| 801    | 1                            | 1                                              | 1      | 0     |
| 804    | 2                            |                                                |        | 0     |
| 806    | 2                            |                                                |        | 0     |
| 807    | 2                            |                                                |        | 0     |
| 808    | 2                            |                                                |        | 0     |
| 809    | 2                            |                                                |        | 0     |
| 811    | 2                            |                                                |        | 0     |



| respid | ICS Urgency Incontinence Q30 | ICS Urgency Incontinence -<br>how often Q30a_1 | Q30b_1 | Q31_1 |
|--------|------------------------------|------------------------------------------------|--------|-------|
| 812    | 2                            |                                                |        | 0     |
| 815    | 2                            |                                                |        | 0     |
| 817    | 2                            |                                                |        | 1     |
| 818    | 2                            |                                                |        | 0     |
| 819    | 2                            |                                                |        | 0     |
| 821    | 1                            | 3                                              | 2      | 0     |
| 824    | 2                            |                                                |        | 0     |
| 825    | 2                            |                                                |        | 0     |
| 828    | 2                            |                                                |        | 0     |
| 832    | 2                            |                                                |        | 0     |
| 834    | 2                            |                                                |        | 0     |
| 835    | 2                            |                                                |        | 0     |
| 836    | 2                            |                                                |        | 0     |
| 837    | 2                            |                                                |        | 0     |
| 840    | 2                            |                                                |        | 0     |
| 841    | 2                            |                                                |        | 0     |
| 845    | 2                            |                                                |        | 0     |
| 846    | 2                            |                                                |        | 0     |
| 849    | 2                            |                                                |        | 0     |
| 852    | 2                            |                                                |        | 0     |
| 854    | 2                            |                                                |        | 0     |
| 856    | 2                            |                                                |        | 0     |
| 858    | 2                            |                                                |        | 0     |
| 859    | 1                            | 1                                              | 1      | 0     |
| 861    | 2                            |                                                |        | 0     |
| 863    | 2                            |                                                |        | 0     |
| 864    | 2                            |                                                |        | 0     |
| 866    | 2                            |                                                |        | 0     |
| 869    | 2                            |                                                |        | 0     |
| 870    | 2                            |                                                |        | 0     |
| 871    | 2                            |                                                |        | 0     |
| 873    | 2                            |                                                |        | 0     |

| respid | ICS Urgency Incontinence Q30 | ICS Urgency Incontinence -<br>how often Q30a_1 | Q30b_1 | Q31_1 |
|--------|------------------------------|------------------------------------------------|--------|-------|
| 879    | 2                            |                                                |        | 0     |
| 880    | 1                            | 1                                              | 1      | 1     |
| 881    | 2                            |                                                |        | 0     |
| 882    | 1                            | 1                                              | 0      | 0     |
| 885    | 2                            |                                                |        | 0     |
| 886    | 2                            |                                                |        | 0     |
| 887    | 1                            | 3                                              | 3      | 0     |
| 888    | 2                            |                                                |        | 0     |
| 889    | 2                            |                                                |        | 0     |
| 890    | 2                            |                                                |        | 0     |
| 900    | 2                            |                                                |        | 0     |
| 901    | 2                            |                                                |        | 0     |
| 902    | 2                            |                                                |        | 0     |
| 903    | 2                            |                                                |        | 0     |
| 906    | 2                            |                                                |        | 0     |
| 907    | 1                            | 2                                              | 2      | 0     |
| 908    | 2                            |                                                |        | 0     |
| 910    | 2                            |                                                |        | 0     |
| 911    | 1                            | 1                                              | 1      | 0     |
| 912    | 2                            |                                                |        | 0     |
| 915    | 2                            |                                                |        | 0     |
| 923    | 2                            |                                                |        | 0     |
| 925    | 2                            |                                                |        | 0     |
| 926    | 2                            |                                                |        | 0     |
| 929    | 2                            |                                                |        | 0     |
| 932    | 2                            |                                                |        | 0     |
| 933    | 1                            | 1                                              | 2      | 0     |
| 934    | 2                            |                                                |        | 0     |
| 938    | 2                            |                                                |        | 0     |
| 941    | 2                            |                                                |        | 0     |
| 942    | 2                            |                                                |        | 0     |
| 943    | 2                            |                                                |        | 0     |

| respid | ICS Urgency Incontinence Q30 | ICS Urgency Incontinence -<br>how often Q30a_1 | Q30b_1 | Q31_1 |
|--------|------------------------------|------------------------------------------------|--------|-------|
| 945    | 2                            |                                                |        | 0     |
| 946    | 2                            |                                                |        | 0     |
| 947    | 2                            |                                                |        | 0     |
| 948    | 2                            |                                                |        | 0     |
| 949    | 2                            |                                                |        | 0     |
| 952    | 2                            |                                                |        | 0     |
| 956    | 2                            |                                                |        | 0     |
| 957    | 2                            |                                                |        | 0     |
| 959    | 2                            |                                                |        | 0     |
| 961    | 2                            |                                                |        | 0     |
| 962    | 1                            | 2                                              | 3      | 1     |
| 965    | 2                            |                                                |        | 0     |
| 967    | 2                            |                                                |        | 0     |
| 969    | 2                            |                                                |        | 0     |
| 970    | 2                            |                                                |        | 0     |
| 973    | 2                            |                                                |        | 0     |
| 974    | 2                            |                                                |        | 0     |
| 975    | 1                            | 1                                              | 1      | 0     |
| 976    | 2                            |                                                |        | 0     |
| 977    | 2                            |                                                |        | 0     |
| 979    | 2                            |                                                |        | 0     |
| 981    | 2                            |                                                |        | 0     |
| 983    | 2                            |                                                |        | 0     |
| 987    | 2                            |                                                |        | 0     |
| 991    | 2                            |                                                |        | 0     |
| 992    | 2                            |                                                |        | 0     |
| 993    | 2                            |                                                |        | 0     |
| 994    | 1                            | 1                                              | 1      | 0     |
| 995    | 2                            |                                                |        | 0     |
| 998    | 1                            | 1                                              | 1      | 0     |
| 1000   | 2                            |                                                |        | 1     |
| 1001   | 2                            |                                                |        | 0     |

| respid | ICS Urgency Incontinence Q30 | ICS Urgency Incontinence -<br>how often Q30a_1 | Q30b_1 | Q31_1 |
|--------|------------------------------|------------------------------------------------|--------|-------|
| 1002   | 2                            |                                                |        | 0     |
| 1004   | 2                            |                                                |        | 0     |
| 1005   | 2                            |                                                |        | 0     |
| 1006   | 2                            |                                                |        | 0     |
| 1007   | 2                            |                                                |        | 0     |
| 1009   | 2                            |                                                |        | 0     |
| 1013   | 2                            |                                                |        | 0     |
| 1015   | 2                            |                                                |        | 0     |
| 1020   | 1                            | 2                                              | 1      | 0     |
| 1022   | 1                            | 1                                              | 0      | 0     |
| 1024   | 2                            |                                                |        | 0     |
| 1025   | 2                            |                                                |        | 0     |
| 1027   | 2                            |                                                |        | 0     |
| 1031   | 2                            |                                                |        | 0     |
| 1037   | 2                            |                                                |        | 0     |
| 1039   | 2                            |                                                |        | 0     |
| 1040   | 2                            |                                                |        | 0     |
| 1056   | 2                            |                                                |        | 0     |
| 1057   | 2                            |                                                |        | 0     |
| 1062   | 2                            |                                                |        | 0     |
| 1069   | 2                            |                                                |        | 0     |
| 1070   | 2                            |                                                |        | 0     |
| 1072   | 2                            |                                                |        | 0     |
| 1076   | 2                            |                                                |        | 0     |
| 1077   | 2                            |                                                |        | 0     |
| 1078   | 2                            |                                                |        | 0     |
| 1080   | 2                            |                                                |        | 0     |
| 1094   | 2                            |                                                |        | 1     |
| 1098   | 2                            |                                                |        | 0     |
| 1099   | 2                            |                                                |        | 0     |
| 1102   | 2                            |                                                |        | 0     |
| 1110   | 2                            |                                                |        | 0     |

| respid | ICS Urgency Incontinence Q30 | ICS Urgency Incontinence -<br>how often Q30a_1 | Q30b_1 | Q31_1 |
|--------|------------------------------|------------------------------------------------|--------|-------|
| 1117   | 1                            | 2                                              | 2      | 0     |
| 1119   | 2                            |                                                |        | 0     |
| 1126   | 2                            |                                                |        | 0     |
| 1127   | 2                            |                                                |        | 0     |
| 1130   | 2                            |                                                |        | 0     |
| 1131   | 2                            |                                                |        | 0     |
| 1135   | 1                            | 2                                              | 3      | 0     |
| 1138   | 2                            |                                                |        | 0     |
| 1139   | 2                            |                                                |        | 0     |
| 1140   | 2                            |                                                |        | 0     |
| 1142   | 2                            |                                                |        | 0     |
| 1143   | 2                            |                                                |        | 0     |
| 1145   | 2                            |                                                |        | 0     |
| 1149   | 2                            |                                                |        | 0     |
| 1152   | 2                            |                                                |        | 0     |
| 1160   | 2                            |                                                |        | 0     |
| 1164   | 2                            |                                                |        | 0     |
| 1165   | 2                            |                                                |        | 0     |
| 1169   | 1                            | 2                                              | 3      | 0     |
| 1170   | 2                            |                                                |        | 0     |
| 1179   | 2                            |                                                |        | 0     |
| 1180   | 2                            |                                                |        | 0     |
| 1183   | 2                            |                                                |        | 0     |
| 1187   | 2                            |                                                |        | 0     |
| 1188   | 2                            |                                                |        | 0     |
| 1193   | 2                            |                                                |        | 0     |
| 1194   | 2                            |                                                |        | 0     |
| 1197   | 2                            |                                                |        | 0     |
| 1202   | 2                            |                                                |        | 0     |
| 1204   | 1                            | 4                                              | 4      | 1     |
| 1211   | 2                            |                                                |        | 0     |
| 1224   | 2                            |                                                |        | 0     |

| respid | ICS Urgency Incontinence Q30 | ICS Urgency Incontinence -<br>how often Q30a_1 | Q30b_1 | Q31_1 |
|--------|------------------------------|------------------------------------------------|--------|-------|
| 1225   | 2                            |                                                |        | 0     |
| 1230   | 2                            |                                                |        | 0     |
| 1232   | 2                            |                                                |        | 0     |
| 1233   | 1                            | 1                                              | 2      | 0     |
| 1234   | 2                            |                                                |        | 0     |
| 1235   | 2                            |                                                |        | 0     |
| 1236   | 2                            |                                                |        | 0     |
| 1237   | 2                            |                                                |        | 0     |
| 1238   | 2                            |                                                |        | 0     |
| 1239   | 2                            |                                                |        | 0     |
| 1241   | 2                            |                                                |        | 0     |
| 1242   | 2                            |                                                |        | 0     |
| 1244   | 2                            |                                                |        | 0     |
| 1245   | 2                            |                                                |        | 0     |
| 1247   | 2                            |                                                |        | 0     |
| 1248   | 2                            |                                                |        | 0     |
| 1249   | 2                            |                                                |        | 0     |
| 1250   | 2                            |                                                |        | 0     |
| 1251   | 2                            |                                                |        | 0     |
| 1252   | 2                            |                                                |        | 0     |
| 1253   | 2                            |                                                |        | 0     |
| 1254   | 2                            |                                                |        | 0     |
| 1258   | 2                            |                                                |        | 0     |
| 1260   | 2                            |                                                |        | 0     |
| 1261   | 2                            |                                                |        | 0     |
| 1262   | 2                            |                                                |        | 0     |
| 1263   | 1                            | 2                                              | 3      | 0     |
| 1264   | 2                            |                                                |        | 1     |
| 1265   | 1                            | 1                                              | 1      | 0     |
| 1266   | 2                            |                                                |        | 0     |
| 1270   | 2                            |                                                |        | 0     |
| 1272   | 1                            | 2                                              | 2      | 0     |

| respid | ICS Urgency Incontinence Q30 | ICS Urgency Incontinence -<br>how often Q30a_1 | Q30b_1 | Q31_1 |
|--------|------------------------------|------------------------------------------------|--------|-------|
| 1273   | 1                            | 1                                              | 1      | 0     |
| 1276   | 2                            |                                                |        | 0     |
| 1277   | 2                            |                                                |        | 0     |
| 1278   | 2                            |                                                |        | 0     |
| 1280   | 2                            |                                                |        | 0     |
| 1281   | 2                            |                                                |        | 0     |
| 1282   | 2                            |                                                |        | 0     |
| 1283   | 2                            |                                                |        | 0     |
| 1288   | 2                            |                                                |        | 0     |
| 1289   | 2                            |                                                |        | 0     |
| 1290   | 2                            |                                                |        | 0     |
| 1291   | 2                            |                                                |        | 0     |
| 1293   | 1                            | 2                                              | 2      | 1     |
| 1294   | 2                            |                                                |        | 0     |
| 1295   | 2                            |                                                |        | 0     |
| 1296   | 2                            |                                                |        | 0     |
| 1297   | 2                            |                                                |        | 0     |
| 1298   | 1                            | 2                                              | 2      | 0     |
| 1300   | 1                            | 2                                              | 1      | 0     |
| 1302   | 2                            |                                                |        | 0     |
| 1303   | 2                            |                                                |        | 0     |
| 1304   | 1                            | 1                                              | 2      | 0     |
| 1305   | 2                            |                                                |        | 0     |
| 1307   | 2                            |                                                |        | 0     |
| 1312   | 2                            |                                                |        | 0     |
| 1313   | 2                            |                                                |        | 0     |
| 1314   | 2                            |                                                |        | 0     |
| 1317   | 2                            |                                                |        | 1     |
| 1318   | 2                            |                                                |        | 0     |
| 1319   | 2                            |                                                |        | 0     |
| 1321   | 2                            |                                                |        | 0     |
| 1324   | 2                            |                                                |        | 0     |

| respid | ICS Urgency Incontinence Q30 | ICS Urgency Incontinence -<br>how often Q30a_1 | Q30b_1 | Q31_1 |
|--------|------------------------------|------------------------------------------------|--------|-------|
| 1325   | 2                            |                                                |        | 0     |
| 1326   | 2                            |                                                |        | 0     |
| 1327   | 2                            |                                                |        | 0     |
| 1329   | 2                            |                                                |        | 0     |
| 1330   | 2                            |                                                |        | 1     |
| 1331   | 2                            |                                                |        | 0     |
| 1335   | 2                            |                                                |        | 0     |
| 1337   | 2                            |                                                |        | 0     |
| 1341   | 2                            |                                                |        | 0     |
| 1342   | 2                            |                                                |        | 0     |
| 1344   | 1                            | 1                                              | 3      | 0     |
| 1345   | 2                            |                                                |        | 0     |
| 1346   | 2                            |                                                |        | 0     |
| 1350   | 1                            | 2                                              | 2      | 0     |
| 1352   | 2                            |                                                |        | 0     |
| 1353   | 2                            |                                                |        | 0     |
| 1354   | 2                            |                                                |        | 0     |
| 1355   | 2                            |                                                |        | 0     |
| 1357   | 1                            | 1                                              | 3      | 0     |
| 1360   | 2                            |                                                |        | 0     |
| 1362   | 2                            |                                                |        | 0     |
| 1363   | 1                            | 2                                              | 1      | 0     |
| 1367   | 1                            | 1                                              | 0      | 0     |
| 1369   | 2                            |                                                |        | 0     |
| 1371   | 2                            |                                                |        | 0     |
| 1372   | 2                            |                                                |        | 0     |
| 1375   | 2                            |                                                |        | 0     |
| 1377   | 2                            |                                                |        | 0     |
| 1379   | 1                            | 3                                              | 1      | 0     |
| 1380   | 2                            |                                                |        | 0     |
| 1382   | 2                            |                                                |        | 0     |
| 1383   | 2                            |                                                |        | 0     |



| respid | ICS Urgency Incontinence Q30 | ICS Urgency Incontinence -<br>how often Q30a_1 | Q30b_1 | Q31_1 |
|--------|------------------------------|------------------------------------------------|--------|-------|
| 1384   | 2                            |                                                |        | 0     |
| 1385   | 2                            |                                                |        | 0     |
| 1387   | 2                            |                                                |        | 0     |
| 1388   | 2                            |                                                |        | 0     |
| 1389   | 1                            | 1                                              | 1      | 0     |
| 1390   | 2                            |                                                |        | 0     |
| 1395   | 2                            |                                                |        | 0     |
| 1396   | 2                            |                                                |        | 0     |
| 1397   | 1                            | 2                                              | 1      | 0     |
| 1398   | 2                            |                                                |        | 0     |
| 1399   | 2                            |                                                |        | 0     |
| 1403   | 2                            |                                                |        | 0     |
| 1405   | 1                            | 1                                              | 0      | 0     |
| 1406   | 1                            | 2                                              | 1      | 0     |
| 1407   | 1                            | 2                                              | 1      | 1     |
| 1408   | 2                            |                                                |        | 0     |
| 1409   | 2                            |                                                |        | 0     |
| 1410   | 1                            | 5                                              | 4      | 0     |
| 1411   | 2                            |                                                |        | 0     |
| 1412   | 2                            |                                                |        | 0     |
| 1413   | 2                            |                                                |        | 0     |
| 1414   | 2                            |                                                |        | 0     |
| 1415   | 2                            |                                                |        | 0     |
| 1416   | 2                            |                                                |        | 0     |
| 1417   | 2                            |                                                |        | 0     |
| 1418   | 2                            |                                                |        | 0     |
| 1419   | 2                            |                                                |        | 0     |
| 1420   | 1                            | 1                                              | 0      | 0     |
| 1421   | 2                            |                                                |        | 0     |
| 1422   | 2                            |                                                |        | 0     |
| 1423   | 2                            |                                                |        | 0     |
| 1424   | 2                            |                                                |        | 0     |

| respid | ICS Urgency Incontinence Q30 | ICS Urgency Incontinence -<br>how often Q30a_1 | Q30b_1 | Q31_1 |
|--------|------------------------------|------------------------------------------------|--------|-------|
| 1429   | 2                            |                                                |        | 0     |
| 1430   | 2                            |                                                |        | 0     |
| 1431   | 1                            | 3                                              | 2      | 0     |
| 1433   | 2                            |                                                |        | 0     |
| 1435   | 2                            |                                                |        | 0     |
| 1436   | 2                            |                                                |        | 0     |
| 1438   | 2                            |                                                |        | 0     |
| 1439   | 2                            |                                                |        | 0     |
| 1441   | 1                            | 1                                              | 0      | 0     |
| 1442   | 2                            |                                                |        | 0     |
| 1443   | 2                            |                                                |        | 0     |
| 1444   | 2                            |                                                |        | 0     |
| 1445   | 1                            | 3                                              | 3      | 0     |
| 1446   | 1                            | 2                                              | 2      | 0     |
| 1447   | 2                            |                                                |        | 0     |
| 1449   | 2                            |                                                |        | 1     |
| 1450   | 2                            |                                                |        | 0     |
| 1451   | 2                            |                                                |        | 0     |
| 1452   | 2                            |                                                |        | 0     |
| 1453   | 1                            | 3                                              | 2      | 0     |
| 1454   | 1                            | 1                                              | 1      | 0     |
| 1456   | 2                            |                                                |        | 0     |
| 1457   | 1                            | 2                                              | 1      | 0     |
| 1459   | 2                            |                                                |        | 0     |
| 1460   | 2                            |                                                |        | 0     |
| 1463   | 2                            |                                                |        | 0     |
| 1465   | 2                            |                                                |        | 0     |
| 1467   | 2                            |                                                |        | 0     |
| 1470   | 2                            |                                                |        | 0     |
| 1471   | 2                            |                                                |        | 0     |
| 1472   | 2                            |                                                |        | 0     |
| 1474   | 2                            |                                                |        | 0     |

| respid | ICS Urgency Incontinence Q30 | ICS Urgency Incontinence -<br>how often Q30a_1 | Q30b_1 | Q31_1 |
|--------|------------------------------|------------------------------------------------|--------|-------|
| 1475   | 2                            |                                                |        | 0     |
| 1477   | 2                            |                                                |        | 0     |
| 1478   | 2                            |                                                |        | 0     |
| 1480   | 2                            |                                                |        | 0     |
| 1481   | 1                            | 2                                              | 2      | 0     |
| 1483   | 2                            |                                                |        | 0     |
| 1484   | 2                            |                                                |        | 0     |
| 1485   | 2                            |                                                |        | 0     |
| 1486   | 2                            |                                                |        | 0     |
| 1487   | 2                            |                                                |        | 0     |
| 1488   | 1                            | 1                                              | 0      | 0     |
| 1489   | 1                            | 3                                              | 3      | 0     |
| 1490   | 2                            |                                                |        | 0     |
| 1491   | 1                            | 3                                              | 2      | 0     |
| 1492   | 2                            |                                                |        | 0     |
| 1494   | 2                            |                                                |        | 0     |
| 1495   | 2                            |                                                |        | 0     |
| 1496   | 1                            | 2                                              | 1      | 0     |
| 1498   | 2                            |                                                |        | 0     |
| 1499   | 1                            | 1                                              | 1      | 0     |
| 1500   | 1                            | 2                                              | 1      | 0     |
| 1501   | 2                            |                                                |        | 0     |
| 1503   | 2                            |                                                |        | 0     |
| 1504   | 2                            |                                                |        | 0     |
| 1508   | 2                            |                                                |        | 0     |
| 1509   | 2                            |                                                |        | 0     |
| 1511   | 1                            | 2                                              | 2      | 0     |
| 1512   | 2                            |                                                |        | 0     |
| 1513   | 2                            |                                                |        | 0     |
| 1515   | 1                            | 2                                              | 1      | 0     |
| 1517   | 1                            | 2                                              | 1      | 0     |
| 1518   | 2                            |                                                |        | 0     |

| respid | ICS Urgency Incontinence Q30 | ICS Urgency Incontinence -<br>how often Q30a_1 | Q30b_1 | Q31_1 |
|--------|------------------------------|------------------------------------------------|--------|-------|
| 1519   | 1                            | 1                                              | 2      | 0     |
| 1520   | 2                            |                                                |        | 0     |
| 1521   | 2                            |                                                |        | 0     |
| 1522   | 2                            |                                                |        | 0     |
| 1523   | 1                            | 4                                              | 4      | 0     |
| 1524   | 2                            |                                                |        | 0     |
| 1525   | 2                            |                                                |        | 1     |
| 1526   | 2                            |                                                |        | 0     |
| 1527   | 2                            |                                                |        | 0     |
| 1534   | 2                            |                                                |        | 0     |
| 1535   | 2                            |                                                |        | 0     |
| 1536   | 2                            |                                                |        | 0     |
| 1538   | 2                            |                                                |        | 0     |
| 1539   | 2                            |                                                |        | 0     |
| 1540   | 2                            |                                                |        | 0     |
| 1541   | 2                            |                                                |        | 0     |
| 1542   | 1                            | 1                                              | 0      | 0     |
| 1543   | 2                            |                                                |        | 0     |
| 1545   | 1                            | 2                                              | 1      | 0     |
| 1546   | 2                            |                                                |        | 0     |
| 1548   | 2                            |                                                |        | 0     |
| 1549   | 2                            |                                                |        | 0     |
| 1551   | 2                            |                                                |        | 0     |
| 1552   | 2                            |                                                |        | 0     |
| 1556   | 1                            | 1                                              | 0      | 0     |
| 1557   | 2                            |                                                |        | 0     |
| 1558   | 2                            |                                                |        | 0     |
| 1561   | 2                            |                                                |        | 0     |
| 1562   | 2                            |                                                |        | 0     |
| 1563   | 2                            |                                                |        | 0     |
| 1564   | 1                            | 2                                              | 4      | 0     |
| 1565   | 2                            |                                                |        | 0     |

| respid | ICS Urgency Incontinence Q30 | ICS Urgency Incontinence -<br>how often Q30a_1 | Q30b_1 | Q31_1 |
|--------|------------------------------|------------------------------------------------|--------|-------|
| 1566   | 2                            |                                                |        | 0     |
| 1567   | 2                            |                                                |        | 0     |
| 1569   | 2                            |                                                |        | 0     |
| 1570   | 2                            |                                                |        | 0     |
| 1574   | 2                            |                                                |        | 0     |
| 1575   | 2                            |                                                |        | 0     |
| 1576   | 2                            |                                                |        | 0     |
| 1577   | 2                            |                                                |        | 0     |
| 1581   | 2                            |                                                |        | 0     |
| 1583   | 2                            |                                                |        | 0     |
| 1585   | 2                            |                                                |        | 0     |
| 1586   | 2                            |                                                |        | 0     |
| 1588   | 2                            |                                                |        | 0     |
| 1590   | 2                            |                                                |        | 0     |
| 1592   | 2                            |                                                |        | 0     |
| 1594   | 2                            |                                                |        | 0     |
| 1598   | 2                            |                                                |        | 0     |
| 1599   | 2                            |                                                |        | 0     |
| 1600   | 1                            | 1                                              | 2      | 0     |
| 1602   | 2                            |                                                |        | 0     |
| 1603   | 2                            |                                                |        | 0     |
| 1604   | 2                            |                                                |        | 0     |
| 1605   | 2                            |                                                |        | 0     |
| 1606   | 2                            |                                                |        | 0     |
| 1610   | 2                            |                                                |        | 0     |
| 1611   | 2                            |                                                |        | 0     |
| 1612   | 2                            |                                                |        | 0     |
| 1613   | 1                            | 4                                              | 3      | 0     |
| 1615   | 1                            | 1                                              | 1      | 0     |
| 1616   | 2                            |                                                |        | 0     |
| 1617   | 2                            |                                                |        | 0     |
| 1618   | 2                            |                                                |        | 0     |

| respid | ICS Urgency Incontinence Q30 | ICS Urgency Incontinence -<br>how often Q30a_1 | Q30b_1 | Q31_1 |
|--------|------------------------------|------------------------------------------------|--------|-------|
| 1620   | 2                            |                                                |        | 0     |
| 1621   | 1                            | 2                                              | 3      | 0     |
| 1622   | 2                            |                                                |        | 0     |
| 1623   | 2                            |                                                |        | 0     |
| 1624   | 2                            |                                                |        | 0     |
| 1625   | 2                            |                                                |        | 0     |
| 1626   | 2                            |                                                |        | 0     |
| 1627   | 2                            |                                                |        | 0     |
| 1629   | 2                            |                                                |        | 0     |
| 1630   | 2                            |                                                |        | 0     |
| 1631   | 2                            |                                                |        | 0     |
| 1634   | 1                            | 1                                              | 1      | 1     |
| 1635   | 2                            |                                                |        | 0     |
| 1636   | 2                            |                                                |        | 0     |
| 1637   | 2                            |                                                |        | 0     |
| 1640   | 2                            |                                                |        | 0     |
| 1642   | 2                            |                                                |        | 0     |
| 1643   | 1                            | 2                                              | 2      | 1     |
| 1644   | 2                            |                                                |        | 0     |
| 1645   | 2                            |                                                |        | 0     |
| 1646   | 2                            |                                                |        | 0     |
| 1647   | 2                            |                                                |        | 0     |
| 1650   | 2                            |                                                |        | 0     |
| 1654   | 2                            |                                                |        | 0     |
| 1656   | 2                            |                                                |        | 0     |
| 1657   | 1                            | 3                                              | 4      | 0     |
| 1659   | 2                            |                                                |        | 0     |
| 1662   | 1                            | 2                                              | 1      | 0     |
| 1663   | 2                            |                                                |        | 0     |
| 1664   | 1                            | 1                                              | 0      | 0     |
| 1665   | 2                            |                                                |        | 0     |
| 1667   | 2                            |                                                |        | 0     |

| respid | ICS Urgency Incontinence Q30 | ICS Urgency Incontinence -<br>how often Q30a_1 | Q30b_1 | Q31_1 |
|--------|------------------------------|------------------------------------------------|--------|-------|
| 1668   | 2                            |                                                |        | 0     |
| 1670   | 2                            |                                                |        | 0     |
| 1671   | 2                            |                                                |        | 0     |
| 1673   | 2                            |                                                |        | 0     |
| 1674   | 2                            |                                                |        | 0     |
| 1676   | 2                            |                                                |        | 0     |
| 1677   | 2                            |                                                |        | 0     |
| 1678   | 2                            |                                                |        | 0     |
| 1680   | 2                            |                                                |        | 0     |
| 1681   | 2                            |                                                |        | 0     |
| 1683   | 2                            |                                                |        | 0     |
| 1685   | 1                            | 1                                              | 1      | 0     |
| 1686   | 1                            | 1                                              | 1      | 0     |
| 1690   | 2                            |                                                |        | 0     |
| 1691   | 2                            |                                                |        | 0     |
| 1692   | 2                            |                                                |        | 0     |
| 1693   | 2                            |                                                |        | 0     |
| 1695   | 2                            |                                                |        | 0     |
| 1696   | 2                            |                                                |        | 0     |
| 1698   | 2                            |                                                |        | 0     |
| 1699   | 2                            |                                                |        | 0     |
| 1701   | 2                            |                                                |        | 0     |
| 1702   | 2                            |                                                |        | 0     |
| 1703   | 2                            |                                                |        | 0     |
| 1705   | 2                            |                                                |        | 0     |
| 1706   | 2                            |                                                |        | 0     |
| 1708   | 2                            |                                                |        | 0     |
| 1711   | 2                            |                                                |        | 0     |
| 1712   | 1                            | 2                                              | 1      | 0     |
| 1713   | 2                            |                                                |        | 0     |
| 1715   | 2                            |                                                |        | 0     |
| 1717   | 2                            |                                                |        | 0     |

| respid | ICS Urgency Incontinence Q30 | ICS Urgency Incontinence -<br>how often Q30a_1 | Q30b_1 | Q31_1 |
|--------|------------------------------|------------------------------------------------|--------|-------|
| 1718   | 1                            | 5                                              | 4      | 1     |
| 1719   | 2                            |                                                |        | 0     |
| 1721   | 2                            |                                                |        | 0     |
| 1722   | 1                            | 1                                              | 1      | 1     |
| 1724   | 2                            |                                                |        | 0     |
| 1725   | 2                            |                                                |        | 0     |
| 1726   | 2                            |                                                |        | 0     |
| 1727   | 2                            |                                                |        | 0     |
| 1728   | 2                            |                                                |        | 0     |
| 1731   | 2                            |                                                |        | 0     |
| 1733   | 2                            |                                                |        | 0     |
| 1734   | 2                            |                                                |        | 0     |
| 1735   | 2                            |                                                |        | 0     |
| 1736   | 2                            |                                                |        | 0     |
| 1737   | 2                            |                                                |        | 0     |
| 1738   | 1                            | 3                                              | 2      | 0     |
| 1743   | 2                            |                                                |        | 0     |
| 1755   | 1                            | 1                                              | 3      | 0     |
| 1756   | 2                            |                                                |        | 0     |
| 1757   | 2                            |                                                |        | 0     |
| 1758   | 1                            | 1                                              | 1      | 1     |
| 1759   | 1                            | 2                                              | 1      | 0     |
| 1761   | 2                            |                                                |        | 0     |
| 1762   | 2                            |                                                |        | 0     |
| 1764   | 2                            |                                                |        | 0     |
| 1767   | 2                            |                                                |        | 0     |
| 1768   | 2                            |                                                |        | 0     |
| 1769   | 2                            |                                                |        | 0     |
| 1770   | 2                            |                                                |        | 0     |
| 1771   | 2                            |                                                |        | 0     |
| 1776   | 2                            |                                                |        | 0     |
| 1777   | 2                            |                                                |        | 0     |



| respid | ICS Urgency Incontinence Q30 | ICS Urgency Incontinence -<br>how often Q30a_1 | Q30b_1 | Q31_1 |
|--------|------------------------------|------------------------------------------------|--------|-------|
| 1778   | 2                            |                                                |        | 0     |
| 1779   | 2                            |                                                |        | 0     |
| 1780   | 2                            |                                                |        | 0     |
| 1781   | 2                            |                                                |        | 0     |
| 1783   | 2                            |                                                |        | 0     |
| 1784   | 2                            |                                                |        | 0     |
| 1785   | 2                            |                                                |        | 0     |
| 1788   | 2                            |                                                |        | 0     |
| 1792   | 2                            |                                                |        | 0     |
| 1794   | 2                            |                                                |        | 0     |
| 1798   | 1                            | 4                                              | 3      | 0     |
| 1799   | 2                            |                                                |        | 0     |
| 1800   | 2                            |                                                |        | 0     |
| 1804   | 2                            |                                                |        | 0     |
| 1806   | 2                            |                                                |        | 0     |
| 1807   | 2                            |                                                |        | 0     |
| 1808   | 2                            |                                                |        | 0     |
| 1809   | 1                            | 1                                              | 1      | 0     |
| 1811   | 2                            |                                                |        | 0     |
| 1812   | 2                            |                                                |        | 0     |
| 1813   | 2                            |                                                |        | 0     |
| 1814   | 1                            | 2                                              | 2      | 0     |
| 1815   | 2                            |                                                |        | 0     |
| 1817   | 1                            | 1                                              | 1      | 0     |
| 1820   | 2                            |                                                |        | 0     |
| 1821   | 2                            |                                                |        | 0     |
| 1822   | 1                            | 1                                              | 0      | 0     |
| 1823   | 2                            |                                                |        | 0     |
| 1824   | 2                            |                                                |        | 0     |
| 1826   | 2                            |                                                |        | 0     |
| 1828   | 2                            |                                                |        | 0     |
| 1829   | 2                            |                                                |        | 0     |

| respid | ICS Urgency Incontinence Q30 | ICS Urgency Incontinence -<br>how often Q30a_1 | Q30b_1 | Q31_1 |
|--------|------------------------------|------------------------------------------------|--------|-------|
| 1830   | 2                            |                                                |        | 0     |
| 1831   | 2                            |                                                |        | 0     |
| 1832   | 2                            |                                                |        | 0     |
| 1836   | 1                            | 2                                              | 1      | 0     |
| 1838   | 2                            |                                                |        | 0     |
| 1839   | 2                            |                                                |        | 0     |
| 1840   | 2                            |                                                |        | 0     |
| 1841   | 2                            |                                                |        | 0     |
| 1842   | 2                            |                                                |        | 0     |
| 1843   | 2                            |                                                |        | 0     |
| 1844   | 1                            | 1                                              | 1      | 0     |
| 1845   | 2                            |                                                |        | 0     |
| 1849   | 2                            |                                                |        | 0     |
| 1850   | 1                            | 1                                              | 1      | 0     |
| 1851   | 2                            |                                                |        | 0     |
| 1852   | 2                            |                                                |        | 0     |
| 1857   | 2                            |                                                |        | 0     |
| 1858   | 2                            |                                                |        | 0     |
| 1861   | 1                            | 1                                              | 0      | 0     |
| 1862   | 2                            |                                                |        | 0     |
| 1863   | 2                            |                                                |        | 0     |
| 1864   | 2                            |                                                |        | 0     |
| 1865   | 2                            |                                                |        | 0     |
| 1867   | 2                            |                                                |        | 0     |
| 1868   | 1                            | 1                                              | 2      | 0     |
| 1869   | 2                            |                                                |        | 0     |
| 1870   | 2                            |                                                |        | 0     |
| 1871   | 2                            |                                                |        | 0     |
| 1872   | 2                            |                                                |        | 0     |
| 1873   | 2                            |                                                |        | 0     |
| 1876   | 2                            |                                                |        | 0     |
| 1877   | 2                            |                                                |        | 0     |

| respid | ICS Urgency Incontinence Q30 | ICS Urgency Incontinence -<br>how often Q30a_1 | Q30b_1 | Q31_1 |
|--------|------------------------------|------------------------------------------------|--------|-------|
| 1878   | 2                            |                                                |        | 0     |
| 1879   | 2                            |                                                |        | 0     |
| 1880   | 2                            |                                                |        | 0     |
| 1881   | 1                            | 2                                              | 1      | 0     |
| 1883   | 2                            |                                                |        | 0     |
| 1886   | 2                            |                                                |        | 0     |
| 1888   | 2                            |                                                |        | 0     |
| 1889   | 1                            | 2                                              | 3      | 1     |
| 1890   | 2                            |                                                |        | 0     |
| 1891   | 2                            |                                                |        | 0     |
| 1893   | 2                            |                                                |        | 0     |
| 1894   | 2                            |                                                |        | 0     |
| 1895   | 1                            | 2                                              | 1      | 0     |
| 1896   | 2                            |                                                |        | 0     |
| 1897   | 2                            |                                                |        | 0     |
| 1898   | 1                            | 3                                              | 3      | 1     |
| 1899   | 2                            |                                                |        | 0     |
| 1900   | 2                            |                                                |        | 0     |
| 1903   | 2                            |                                                |        | 0     |
| 1906   | 1                            | 1                                              | 0      | 0     |
| 1907   | 1                            | 3                                              | 2      | 0     |
| 1908   | 2                            |                                                |        | 0     |
| 1909   | 1                            | 2                                              | 2      | 0     |
| 1910   | 2                            |                                                |        | 0     |
| 1911   | 2                            |                                                |        | 0     |
| 1912   | 2                            |                                                |        | 0     |
| 1917   | 1                            | 1                                              | 1      | 1     |
| 1918   | 2                            |                                                |        | 0     |
| 1919   | 2                            |                                                |        | 0     |
| 1922   | 2                            |                                                |        | 0     |
| 1925   | 2                            |                                                |        | 0     |
| 1926   | 2                            |                                                |        | 0     |

| respid | ICS Urgency Incontinence Q30 | ICS Urgency Incontinence -<br>how often Q30a_1 | Q30b_1 | Q31_1 |
|--------|------------------------------|------------------------------------------------|--------|-------|
| 1927   | 2                            |                                                |        | 0     |
| 1928   | 2                            |                                                |        | 0     |
| 1929   | 2                            |                                                |        | 0     |
| 1934   | 2                            |                                                |        | 0     |
| 1935   | 2                            |                                                |        | 0     |
| 1936   | 2                            |                                                |        | 0     |
| 1937   | 2                            |                                                |        | 0     |
| 1938   | 2                            |                                                |        | 0     |
| 1939   | 2                            |                                                |        | 0     |
| 1940   | 2                            |                                                |        | 0     |
| 1941   | 2                            |                                                |        | 0     |
| 1948   | 2                            |                                                |        | 0     |
| 1950   | 1                            | 1                                              | 3      | 0     |
| 1955   | 1                            | 3                                              | 3      | 0     |
| 1958   | 2                            |                                                |        | 0     |
| 1960   | 2                            |                                                |        | 0     |
| 1961   | 2                            |                                                |        | 0     |
| 1962   | 2                            |                                                |        | 0     |
| 1965   | 2                            |                                                |        | 0     |
| 1966   | 2                            |                                                |        | 0     |
| 1967   | 2                            |                                                |        | 0     |
| 1968   | 2                            |                                                |        | 0     |
| 1973   | 2                            |                                                |        | 0     |
| 1974   | 1                            | 4                                              | 4      | 0     |
| 1975   | 2                            |                                                |        | 0     |
| 1977   | 2                            |                                                |        | 0     |
| 1978   | 2                            |                                                |        | 0     |
| 1979   | 1                            | 4                                              | 3      | 0     |
| 1982   | 2                            |                                                |        | 0     |
| 1983   | 2                            |                                                |        | 0     |
| 1987   | 2                            |                                                |        | 0     |
| 1988   | 2                            |                                                |        | 0     |

| respid | ICS Urgency Incontinence Q30 | ICS Urgency Incontinence -<br>how often Q30a_1 | Q30b_1 | Q31_1 |
|--------|------------------------------|------------------------------------------------|--------|-------|
| 1991   | 2                            |                                                |        | 0     |
| 1992   | 2                            |                                                |        | 0     |
| 1993   | 2                            |                                                |        | 0     |
| 1994   | 1                            | 1                                              | 1      | 0     |
| 1995   | 2                            |                                                |        | 0     |
| 1996   | 2                            |                                                |        | 0     |
| 1997   | 2                            |                                                |        | 0     |
| 1998   | 2                            |                                                |        | 0     |
| 1999   | 1                            | 2                                              | 2      | 0     |
| 2000   | 1                            | 1                                              | 1      | 0     |
| 2001   | 1                            | 1                                              | 2      | 0     |
| 2002   | 2                            |                                                |        | 0     |
| 2003   | 2                            |                                                |        | 0     |
| 2004   | 2                            |                                                |        | 0     |
| 2005   | 2                            |                                                |        | 0     |
| 2007   | 1                            | 2                                              | 1      | 1     |
| 2009   | 2                            |                                                |        | 0     |
| 2010   | 2                            |                                                |        | 0     |
| 2011   | 1                            | 1                                              | 0      | 0     |
| 2013   | 2                            |                                                |        | 0     |
| 2014   | 2                            |                                                |        | 0     |
| 2017   | 1                            | 1                                              | 1      | 0     |
| 2020   | 2                            |                                                |        | 0     |
| 2023   | 2                            |                                                |        | 0     |
| 2024   | 2                            |                                                |        | 0     |
| 2029   | 2                            |                                                |        | 0     |
| 2030   | 2                            |                                                |        | 0     |
| 2031   | 2                            |                                                |        | 0     |
| 2032   | 2                            |                                                |        | 0     |
| 2033   | 2                            |                                                |        | 0     |
| 2034   | 2                            |                                                |        | 0     |
| 2036   | 1                            | 2                                              | 2      | 1     |

| respid | ICS Urgency Incontinence Q30 | ICS Urgency Incontinence -<br>how often Q30a_1 | Q30b_1 | Q31_1 |
|--------|------------------------------|------------------------------------------------|--------|-------|
| 2037   | 1                            | 1                                              | 2      | 0     |
| 2038   | 2                            |                                                |        | 0     |
| 2039   | 2                            |                                                |        | 0     |
| 2040   | 2                            |                                                |        | 0     |
| 2041   | 2                            |                                                |        | 0     |
| 2042   | 2                            |                                                |        | 0     |
| 2043   | 2                            |                                                |        | 0     |
| 2051   | 2                            |                                                |        | 0     |
| 2052   | 2                            |                                                |        | 0     |
| 2053   | 2                            |                                                |        | 1     |
| 2054   | 2                            |                                                |        | 0     |
| 2055   | 2                            |                                                |        | 1     |
| 2056   | 2                            |                                                |        | 0     |
| 2057   | 2                            |                                                |        | 0     |
| 2059   | 2                            |                                                |        | 0     |
| 2063   | 2                            |                                                |        | 0     |
| 2066   | 2                            |                                                |        | 0     |
| 2068   | 2                            |                                                |        | 0     |
| 2069   | 1                            | 1                                              | 1      | 0     |
| 2070   | 2                            |                                                |        | 0     |
| 2071   | 2                            |                                                |        | 0     |
| 2073   | 2                            |                                                |        | 0     |
| 2077   | 2                            |                                                |        | 0     |
| 2079   | 2                            |                                                |        | 0     |
| 2080   | 1                            | 1                                              | 4      | 1     |
| 2081   | 2                            |                                                |        | 0     |
| 2084   | 2                            |                                                |        | 0     |
| 2085   | 2                            |                                                |        | 0     |
| 2087   | 2                            |                                                |        | 0     |
| 2089   | 1                            | 2                                              | 1      | 0     |
| 2093   | 2                            |                                                |        | 0     |
| 2094   | 2                            |                                                |        | 0     |

| respid | ICS Urgency Incontinence Q30 | ICS Urgency Incontinence -<br>how often Q30a_1 | Q30b_1 | Q31_1 |
|--------|------------------------------|------------------------------------------------|--------|-------|
| 2095   | 2                            |                                                |        | 0     |
| 2097   | 2                            |                                                |        | 0     |
| 2099   | 2                            |                                                |        | 0     |
| 2100   | 2                            |                                                |        | 0     |
| 2101   | 2                            |                                                |        | 0     |
| 2103   | 2                            |                                                |        | 0     |
| 2104   | 2                            |                                                |        | 0     |
| 2106   | 2                            |                                                |        | 0     |
| 2111   | 2                            |                                                |        | 0     |
| 2113   | 2                            |                                                |        | 0     |
| 2115   | 2                            |                                                |        | 0     |
| 2119   | 2                            |                                                |        | 0     |
| 2120   | 2                            |                                                |        | 0     |
| 2123   | 2                            |                                                |        | 0     |
| 2124   | 2                            |                                                |        | 0     |
| 2130   | 2                            |                                                |        | 0     |
| 2131   | 2                            |                                                |        | 0     |
| 2133   | 2                            |                                                |        | 1     |
| 2139   | 2                            |                                                |        | 1     |
| 2141   | 2                            |                                                |        | 0     |
| 2143   | 2                            |                                                |        | 0     |
| 2144   | 2                            |                                                |        | 0     |
| 2147   | 2                            |                                                |        | 0     |
| 2151   | 2                            |                                                |        | 0     |
| 2153   | 2                            |                                                |        | 0     |
| 2154   | 2                            |                                                |        | 0     |
| 2155   | 2                            |                                                |        | 0     |
| 2159   | 2                            |                                                |        | 0     |
| 2160   | 1                            | 2                                              | 2      | 0     |
| 2161   | 2                            |                                                |        | 0     |
| 2163   | 2                            |                                                |        | 0     |
| 2164   | 2                            |                                                |        | 0     |

| respid | ICS Urgency Incontinence Q30 | ICS Urgency Incontinence -<br>how often Q30a_1 | Q30b_1 | Q31_1 |
|--------|------------------------------|------------------------------------------------|--------|-------|
| 2168   | 2                            |                                                |        | 0     |
| 2169   | 2                            |                                                |        | 0     |
| 2170   | 2                            |                                                |        | 0     |
| 2171   | 2                            |                                                |        | 0     |
| 2172   | 2                            |                                                |        | 0     |
| 2173   | 2                            |                                                |        | 0     |
| 2174   | 2                            |                                                |        | 0     |
| 2175   | 1                            | 2                                              | 3      | 0     |
| 2176   | 2                            |                                                |        | 0     |
| 2177   | 1                            | 3                                              | 2      | 1     |
| 2179   | 2                            |                                                |        | 0     |
| 2181   | 2                            |                                                |        | 0     |
| 2182   | 2                            |                                                |        | 0     |
| 2183   | 1                            | 2                                              | 1      | 0     |
| 2184   | 1                            | 2                                              | 1      | 0     |
| 2185   | 2                            |                                                |        | 0     |
| 2186   | 2                            |                                                |        | 0     |
| 2187   | 2                            |                                                |        | 0     |
| 2188   | 2                            |                                                |        | 0     |
| 2189   | 2                            |                                                |        | 0     |
| 2190   | 2                            |                                                |        | 0     |
| 2193   | 1                            | 1                                              | 0      | 0     |
| 2195   | 2                            |                                                |        | 0     |
| 2198   | 2                            |                                                |        | 0     |
| 2200   | 2                            |                                                |        | 0     |
| 2205   | 2                            |                                                |        | 0     |
| 2208   | 2                            |                                                |        | 0     |
| 2209   | 2                            |                                                |        | 0     |
| 2210   | 1                            | 1                                              | 0      | 0     |
| 2211   | 2                            |                                                |        | 0     |
| 2213   | 1                            | 1                                              | 0      | 0     |
| 2214   | 2                            |                                                |        | 0     |



| respid | ICS Urgency Incontinence Q30 | ICS Urgency Incontinence -<br>how often Q30a_1 | Q30b_1 | Q31_1 |
|--------|------------------------------|------------------------------------------------|--------|-------|
| 2216   | 2                            |                                                |        | 0     |
| 2220   | 2                            |                                                |        | 0     |
| 2225   | 2                            |                                                |        | 0     |
| 2227   | 2                            |                                                |        | 0     |
| 2228   | 1                            | 2                                              | 2      | 0     |
| 2229   | 2                            |                                                |        | 0     |
| 2230   | 2                            |                                                |        | 0     |
| 2236   | 2                            |                                                |        | 0     |
| 2238   | 1                            | 3                                              | 3      | 0     |
| 2239   | 2                            |                                                |        | 0     |
| 2240   | 2                            |                                                |        | 0     |
| 2241   | 2                            |                                                |        | 0     |
| 2243   | 2                            |                                                |        | 0     |
| 2245   | 2                            |                                                |        | 0     |
| 2247   | 1                            | 1                                              | 1      | 0     |
| 2248   | 2                            |                                                |        | 0     |
| 2249   | 2                            |                                                |        | 0     |
| 2254   | 2                            |                                                |        | 0     |
| 2256   | 2                            |                                                |        | 0     |
| 2259   | 2                            |                                                |        | 0     |
| 2261   | 2                            |                                                |        | 0     |
| 2262   | 2                            |                                                |        | 0     |
| 2263   | 1                            | 1                                              | 1      | 0     |
| 2264   | 2                            |                                                |        | 0     |
| 2265   | 2                            |                                                |        | 0     |
| 2270   | 2                            |                                                |        | 0     |
| 2271   | 2                            |                                                |        | 0     |
| 2272   | 2                            |                                                |        | 0     |
| 2273   | 2                            |                                                |        | 0     |
| 2274   | 2                            |                                                |        | 0     |
| 2276   | 1                            | 1                                              | 1      | 0     |
| 2277   | 2                            |                                                |        | 0     |

| respid | ICS Urgency Incontinence Q30 | ICS Urgency Incontinence -<br>how often Q30a_1 | Q30b_1 | Q31_1 |
|--------|------------------------------|------------------------------------------------|--------|-------|
| 2281   | 2                            |                                                |        | 0     |
| 2288   | 2                            |                                                |        | 0     |
| 2290   | 2                            |                                                |        | 0     |
| 2294   | 1                            | 1                                              | 1      | 1     |
| 2295   | 2                            |                                                |        | 0     |
| 2296   | 2                            |                                                |        | 0     |
| 2297   | 2                            |                                                |        | 0     |
| 2298   | 2                            |                                                |        | 0     |
| 2301   | 2                            |                                                |        | 0     |
| 2302   | 1                            | 1                                              | 1      | 0     |
| 2303   | 2                            |                                                |        | 0     |
| 2305   | 2                            |                                                |        | 0     |
| 2309   | 2                            |                                                |        | 0     |
| 2310   | 2                            |                                                |        | 0     |
| 2311   | 1                            | 2                                              | 2      | 0     |
| 2313   | 1                            | 2                                              | 2      | 0     |
| 2316   | 2                            |                                                |        | 0     |
| 2317   | 2                            |                                                |        | 0     |
| 2318   | 2                            |                                                |        | 0     |
| 2319   | 2                            |                                                |        | 0     |
| 2321   | 1                            | 3                                              | 2      | 0     |
| 2324   | 2                            |                                                |        | 0     |
| 2328   | 2                            |                                                |        | 0     |
| 2329   | 2                            |                                                |        | 0     |
| 2330   | 2                            |                                                |        | 0     |
| 2333   | 2                            |                                                |        | 0     |
| 2334   | 2                            |                                                |        | 0     |
| 2338   | 2                            |                                                |        | 0     |
| 2341   | 2                            |                                                |        | 1     |
| 2342   | 2                            |                                                |        | 0     |
| 2343   | 2                            |                                                |        | 1     |
| 2346   | 2                            |                                                |        | 1     |

| respid | ICS Urgency Incontinence Q30 | ICS Urgency Incontinence -<br>how often Q30a_1 | Q30b_1 | Q31_1 |
|--------|------------------------------|------------------------------------------------|--------|-------|
| 2347   | 2                            |                                                |        | 0     |
| 2348   | 2                            |                                                |        | 0     |
| 2349   | 2                            |                                                |        | 0     |
| 2350   | 2                            |                                                |        | 0     |
| 2351   | 1                            | 2                                              | 0      | 0     |
| 2352   | 2                            |                                                |        | 0     |
| 2359   | 2                            |                                                |        | 0     |
| 2362   | 2                            |                                                |        | 0     |
| 2363   | 2                            |                                                |        | 0     |
| 2365   | 2                            |                                                |        | 0     |
| 2367   | 2                            |                                                |        | 0     |
| 2368   | 2                            |                                                |        | 0     |
| 2369   | 2                            |                                                |        | 0     |
| 2372   | 2                            |                                                |        | 0     |
| 2374   | 1                            | 2                                              | 2      | 0     |
| 2376   | 2                            |                                                |        | 0     |
| 2379   | 2                            |                                                |        | 0     |
| 2380   | 2                            |                                                |        | 0     |
| 2381   | 2                            |                                                |        | 0     |
| 2382   | 2                            |                                                |        | 0     |
| 2385   | 2                            |                                                |        | 0     |
| 2387   | 2                            |                                                |        | 0     |
| 2388   | 2                            |                                                |        | 0     |
| 2389   | 1                            | 1                                              | 1      | 0     |
| 2391   | 2                            |                                                |        | 0     |
| 2392   | 2                            |                                                |        | 0     |
| 2393   | 2                            |                                                |        | 0     |
| 2394   | 1                            | 3                                              | 3      | 1     |
| 2397   | 2                            |                                                |        | 0     |
| 2398   | 2                            |                                                |        | 0     |
| 2400   | 2                            |                                                |        | 0     |
| 2402   | 2                            |                                                |        | 0     |

| respid | ICS Urgency Incontinence Q30 | ICS Urgency Incontinence -<br>how often Q30a_1 | Q30b_1 | Q31_1 |
|--------|------------------------------|------------------------------------------------|--------|-------|
| 2406   | 2                            |                                                |        | 0     |
| 2408   | 2                            |                                                |        | 1     |
| 2410   | 2                            |                                                |        | 0     |
| 2411   | 2                            |                                                |        | 0     |
| 2412   | 2                            |                                                |        | 0     |
| 2414   | 1                            | 3                                              | 2      | 0     |
| 2421   | 2                            |                                                |        | 0     |
| 2423   | 2                            |                                                |        | 0     |
| 2424   | 1                            | 1                                              | 1      | 0     |
| 2425   | 1                            | 1                                              | 1      | 0     |
| 2426   | 2                            |                                                |        | 0     |
| 2429   | 1                            | 5                                              | 4      | 0     |
| 2430   | 2                            |                                                |        | 0     |
| 2432   | 2                            |                                                |        | 0     |
| 2433   | 2                            |                                                |        | 0     |
| 2434   | 2                            |                                                |        | 0     |
| 2435   | 1                            | 1                                              | 1      | 0     |
| 2436   | 2                            |                                                |        | 0     |
| 2439   | 2                            |                                                |        | 1     |
| 2440   | 2                            |                                                |        | 0     |
| 2441   | 2                            |                                                |        | 0     |
| 2446   | 2                            |                                                |        | 0     |
| 2448   | 1                            | 2                                              | 3      | 1     |
| 2449   | 2                            |                                                |        | 0     |
| 2451   | 2                            |                                                |        | 0     |
| 2452   | 2                            |                                                |        | 0     |
| 2455   | 2                            |                                                |        | 0     |
| 2457   | 1                            | 2                                              | 3      | 0     |
| 2458   | 2                            |                                                |        | 0     |
| 2459   | 1                            | 1                                              | 0      | 0     |
| 2460   | 2                            |                                                |        | 0     |
| 2462   | 1                            | 3                                              | 3      | 1     |

| respid | ICS Urgency Incontinence Q30 | ICS Urgency Incontinence -<br>how often Q30a_1 | Q30b_1 | Q31_1 |
|--------|------------------------------|------------------------------------------------|--------|-------|
| 2464   | 1                            | 4                                              | 3      | 0     |
| 2465   | 1                            | 1                                              | 1      | 0     |
| 2468   | 2                            |                                                |        | 0     |
| 2469   | 2                            |                                                |        | 0     |
| 2470   | 1                            | 1                                              | 1      | 0     |
| 2471   | 1                            | 2                                              | 2      | 0     |
| 2472   | 2                            |                                                |        | 0     |
| 2474   | 2                            |                                                |        | 0     |
| 2476   | 2                            |                                                |        | 0     |
| 2478   | 1                            | 1                                              | 1      | 0     |
| 2479   | 2                            |                                                |        | 0     |
| 2480   | 2                            |                                                |        | 0     |
| 2482   | 2                            |                                                |        | 0     |
| 2486   | 2                            |                                                |        | 0     |
| 2488   | 1                            | 2                                              | 3      | 0     |
| 2489   | 2                            |                                                |        | 0     |
| 2491   | 2                            |                                                |        | 0     |
| 2495   | 2                            |                                                |        | 0     |
| 2496   | 2                            |                                                |        | 0     |
| 2498   | 1                            | 2                                              | 1      | 0     |
| 2501   | 2                            |                                                |        | 0     |
| 2502   | 2                            |                                                |        | 0     |
| 2503   | 2                            |                                                |        | 0     |
| 2504   | 2                            |                                                |        | 0     |
| 2507   | 1                            | 2                                              | 0      | 0     |
| 2509   | 2                            |                                                |        | 0     |
| 2512   | 2                            |                                                |        | 0     |
| 2514   | 2                            |                                                |        | 0     |
| 2516   | 2                            |                                                |        | 0     |
| 2517   | 2                            |                                                |        | 0     |
| 2521   | 2                            |                                                |        | 0     |
| 2522   | 2                            |                                                |        | 0     |

| respid | ICS Urgency Incontinence Q30 | ICS Urgency Incontinence -<br>how often Q30a_1 | Q30b_1 | Q31_1 |
|--------|------------------------------|------------------------------------------------|--------|-------|
| 2524   | 2                            |                                                |        | 0     |
| 2525   | 2                            |                                                |        | 0     |
| 2526   | 2                            |                                                |        | 0     |
| 2527   | 2                            |                                                |        | 1     |
| 2528   | 2                            |                                                |        | 1     |
| 2531   | 2                            |                                                |        | 0     |
| 2533   | 2                            |                                                |        | 0     |
| 2535   | 2                            |                                                |        | 0     |
| 2536   | 1                            | 1                                              | 1      | 0     |
| 2539   | 2                            |                                                |        | 0     |
| 2540   | 2                            |                                                |        | 0     |
| 2543   | 2                            |                                                |        | 0     |
| 2546   | 2                            |                                                |        | 0     |
| 2547   | 2                            |                                                |        | 0     |
| 2549   | 2                            |                                                |        | 0     |
| 2553   | 2                            |                                                |        | 0     |
| 2554   | 2                            |                                                |        | 0     |
| 2555   | 2                            |                                                |        | 0     |
| 2556   | 2                            |                                                |        | 0     |
| 2557   | 2                            |                                                |        | 0     |
| 2559   | 2                            |                                                |        | 0     |
| 2560   | 1                            | 3                                              | 2      | 1     |
| 2561   | 2                            |                                                |        | 0     |
| 2566   | 2                            |                                                |        | 0     |
| 2567   | 2                            |                                                |        | 0     |
| 2570   | 2                            |                                                |        | 0     |
| 2574   | 2                            |                                                |        | 0     |
| 2578   | 2                            |                                                |        | 0     |
| 2580   | 2                            |                                                |        | 0     |
| 2590   | 2                            |                                                |        | 0     |
| 2593   | 2                            |                                                |        | 0     |
| 2594   | 2                            |                                                |        | 0     |

| respid | ICS Urgency Incontinence Q30 | ICS Urgency Incontinence -<br>how often Q30a_1 | Q30b_1 | Q31_1 |
|--------|------------------------------|------------------------------------------------|--------|-------|
| 2595   | 2                            |                                                |        | 0     |
| 2596   | 2                            |                                                |        | 0     |
| 2597   | 2                            |                                                |        | 0     |
| 2598   | 2                            |                                                |        | 0     |
| 2602   | 2                            |                                                |        | 0     |
| 2605   | 1                            | 3                                              | 2      | 0     |
| 2606   | 2                            |                                                |        | 0     |
| 2607   | 2                            |                                                |        | 0     |
| 2608   | 2                            |                                                |        | 0     |
| 2609   | 2                            |                                                |        | 0     |
| 2610   | 2                            |                                                |        | 0     |
| 2614   | 2                            |                                                |        | 0     |
| 2615   | 2                            |                                                |        | 0     |
| 2616   | 2                            |                                                |        | 0     |
| 2618   | 2                            |                                                |        | 0     |
| 2630   | 2                            |                                                |        | 0     |
| 2633   | 2                            |                                                |        | 0     |
| 2637   | 2                            |                                                |        | 0     |
| 2638   | 2                            |                                                |        | 0     |
| 2641   | 2                            |                                                |        | 0     |
| 2644   | 2                            |                                                |        | 0     |
| 2645   | 2                            |                                                |        | 0     |
| 2646   | 2                            |                                                |        | 0     |
| 2648   | 2                            |                                                |        | 0     |
| 2651   | 2                            |                                                |        | 0     |
| 2652   | 2                            |                                                |        | 0     |
| 2653   | 2                            |                                                |        | 0     |
| 2656   | 2                            |                                                |        | 0     |
| 2657   | 2                            |                                                |        | 0     |
| 2658   | 2                            |                                                |        | 0     |
| 2661   | 2                            |                                                |        | 1     |
| 2663   | 2                            |                                                |        | 0     |

| respid | ICS Urgency Incontinence Q30 | ICS Urgency Incontinence -<br>how often Q30a_1 | Q30b_1 | Q31_1 |
|--------|------------------------------|------------------------------------------------|--------|-------|
| 2665   | 2                            |                                                |        | 0     |
| 2670   | 2                            |                                                |        | 0     |
| 2672   | 2                            |                                                |        | 0     |
| 2673   | 2                            |                                                |        | 0     |
| 2677   | 2                            |                                                |        | 0     |
| 2686   | 1                            | 3                                              | 4      | 1     |
| 2688   | 1                            | 1                                              | 2      | 0     |
| 2689   | 2                            |                                                |        | 0     |
| 2691   | 2                            |                                                |        | 0     |
| 2695   | 2                            |                                                |        | 0     |
| 2696   | 2                            |                                                |        | 0     |
| 2697   | 2                            |                                                |        | 0     |
| 2698   | 2                            |                                                |        | 0     |
| 2703   | 1                            | 2                                              | 2      | 0     |
| 2704   | 2                            |                                                |        | 0     |
| 2706   | 2                            |                                                |        | 0     |
| 2707   | 2                            |                                                |        | 0     |
| 2710   | 2                            |                                                |        | 0     |
| 2711   | 2                            |                                                |        | 0     |
| 2712   | 2                            |                                                |        | 0     |
| 2713   | 2                            |                                                |        | 0     |
| 2721   | 2                            |                                                |        | 0     |
| 2730   | 2                            |                                                |        | 0     |
| 2731   | 2                            |                                                |        | 0     |
| 2732   | 2                            |                                                |        | 0     |
| 2733   | 2                            |                                                |        | 0     |
| 2735   | 2                            |                                                |        | 0     |
| 2736   | 1                            | 1                                              | 1      | 0     |
| 2740   | 2                            |                                                |        | 0     |
| 2741   | 2                            |                                                |        | 0     |
| 2742   | 2                            |                                                |        | 0     |
| 2743   | 2                            |                                                |        | 0     |



| respid | ICS Urgency Incontinence Q30 | ICS Urgency Incontinence -<br>how often Q30a_1 | Q30b_1 | Q31_1 |
|--------|------------------------------|------------------------------------------------|--------|-------|
| 2744   | 2                            |                                                |        | 0     |
| 2745   | 2                            |                                                |        | 0     |
| 2749   | 1                            | 1                                              | 0      | 0     |
| 2751   | 2                            |                                                |        | 0     |
| 2754   | 2                            |                                                |        | 0     |
| 2755   | 2                            |                                                |        | 0     |
| 2757   | 2                            |                                                |        | 0     |
| 2758   | 2                            |                                                |        | 0     |
| 2759   | 2                            |                                                |        | 0     |
| 2761   | 2                            |                                                |        | 0     |
| 2762   | 2                            |                                                |        | 0     |
| 2763   | 2                            |                                                |        | 0     |
| 2764   | 1                            | 1                                              | 2      | 0     |
| 2765   | 2                            |                                                |        | 0     |
| 2766   | 1                            | 2                                              | 0      | 0     |
| 2767   | 1                            | 1                                              | 1      | 0     |
| 2769   | 2                            |                                                |        | 0     |
| 2770   | 1                            | 1                                              | 1      | 1     |
| 2771   | 2                            |                                                |        | 1     |
| 2774   | 2                            |                                                |        | 0     |
| 2777   | 1                            | 2                                              | 2      | 1     |
| 2778   | 1                            | 2                                              | 2      | 0     |
| 2781   | 2                            |                                                |        | 0     |
| 2782   | 1                            | 1                                              | 1      | 0     |
| 2784   | 1                            | 1                                              | 1      | 0     |
| 2785   | 2                            |                                                |        | 0     |
| 2786   | 2                            |                                                |        | 0     |
| 2787   | 2                            |                                                |        | 0     |
| 2789   | 1                            | 2                                              | 1      | 0     |
| 2790   | 2                            |                                                |        | 0     |
| 2791   | 2                            |                                                |        | 0     |
| 2793   | 2                            |                                                |        | 0     |

| respid | ICS Urgency Incontinence Q30 | ICS Urgency Incontinence -<br>how often Q30a_1 | Q30b_1 | Q31_1 |
|--------|------------------------------|------------------------------------------------|--------|-------|
| 2797   | 2                            |                                                |        | 0     |
| 2798   | 2                            |                                                |        | 0     |
| 2799   | 1                            | 1                                              | 1      | 0     |
| 2801   | 2                            |                                                |        | 0     |
| 2802   | 1                            | 1                                              | 4      | 0     |
| 2803   | 1                            | 2                                              | 3      | 0     |
| 2804   | 1                            | 2                                              | 1      | 0     |
| 2807   | 2                            |                                                |        | 0     |
| 2809   | 1                            | 1                                              | 0      | 0     |
| 2810   | 1                            | 2                                              | 1      | 1     |
| 2812   | 2                            |                                                |        | 0     |
| 2814   | 2                            |                                                |        | 0     |
| 2815   | 2                            |                                                |        | 0     |
| 2816   | 2                            |                                                |        | 0     |
| 2817   | 2                            |                                                |        | 0     |
| 2819   | 2                            |                                                |        | 0     |
| 2820   | 2                            |                                                |        | 0     |
| 2821   | 2                            |                                                |        | 0     |
| 2822   | 2                            |                                                |        | 1     |
| 2823   | 2                            |                                                |        | 0     |
| 2824   | 2                            |                                                |        | 0     |
| 2825   | 2                            |                                                |        | 0     |
| 2826   | 1                            | 1                                              | 0      | 0     |
| 2827   | 2                            |                                                |        | 0     |
| 2828   | 2                            |                                                |        | 0     |
| 2829   | 2                            |                                                |        | 0     |
| 2830   | 1                            | 2                                              | 1      | 0     |
| 2831   | 2                            |                                                |        | 0     |
| 2832   | 1                            | 3                                              | 2      | 1     |
| 2833   | 2                            |                                                |        | 0     |
| 2834   | 2                            |                                                |        | 0     |
| 2835   | 1                            | 4                                              | 4      | 0     |

| respid | ICS Urgency Incontinence Q30 | ICS Urgency Incontinence -<br>how often Q30a_1 | Q30b_1 | Q31_1 |
|--------|------------------------------|------------------------------------------------|--------|-------|
| 2836   | 2                            |                                                |        | 0     |
| 2837   | 2                            |                                                |        | 0     |
| 2838   | 2                            |                                                |        | 0     |
| 2844   | 2                            |                                                |        | 0     |
| 2845   | 2                            |                                                |        | 0     |
| 2847   | 2                            |                                                |        | 0     |
| 2848   | 2                            |                                                |        | 0     |
| 2849   | 2                            |                                                |        | 0     |
| 2851   | 2                            |                                                |        | 0     |
| 2852   | 1                            | 2                                              | 1      | 1     |
| 2853   | 1                            | 1                                              | 0      | 0     |
| 2854   | 2                            |                                                |        | 0     |
| 2856   | 2                            |                                                |        | 0     |
| 2857   | 2                            |                                                |        | 0     |
| 2858   | 2                            |                                                |        | 0     |
| 2859   | 2                            |                                                |        | 0     |
| 2860   | 1                            | 2                                              | 2      | 0     |
| 2861   | 1                            | 3                                              | 2      | 0     |
| 2863   | 2                            |                                                |        | 0     |
| 2864   | 2                            |                                                |        | 1     |
| 2866   | 2                            |                                                |        | 0     |
| 2872   | 2                            |                                                |        | 0     |
| 2875   | 2                            |                                                |        | 0     |
| 2879   | 2                            |                                                |        | 0     |
| 2881   | 2                            |                                                |        | 0     |
| 2882   | 1                            | 1                                              | 1      | 0     |
| 2883   | 2                            |                                                |        | 0     |
| 2884   | 1                            | 3                                              | 2      | 0     |
| 2885   | 2                            |                                                |        | 0     |
| 2887   | 2                            |                                                |        | 0     |
| 2888   | 2                            |                                                |        | 0     |
| 2890   | 2                            |                                                |        | 0     |

| respid | ICS Urgency Incontinence Q30 | ICS Urgency Incontinence -<br>how often Q30a_1 | Q30b_1 | Q31_1 |
|--------|------------------------------|------------------------------------------------|--------|-------|
| 2891   | 2                            |                                                |        | 0     |
| 2892   | 2                            |                                                |        | 0     |
| 2895   | 2                            |                                                |        | 0     |
| 2899   | 2                            |                                                |        | 0     |
| 2900   | 2                            |                                                |        | 0     |
| 2902   | 2                            |                                                |        | 0     |
| 2903   | 2                            |                                                |        | 0     |
| 2904   | 2                            |                                                |        | 0     |
| 2906   | 2                            |                                                |        | 0     |
| 2908   | 1                            | 1                                              | 0      | 0     |
| 2910   | 2                            |                                                |        | 0     |
| 2917   | 2                            |                                                |        | 0     |
| 2918   | 2                            |                                                |        | 0     |
| 2919   | 2                            |                                                |        | 0     |
| 2920   | 2                            |                                                |        | 0     |
| 2921   | 1                            | 3                                              | 2      | 0     |
| 2922   | 2                            |                                                |        | 0     |
| 2923   | 2                            |                                                |        | 0     |
| 2924   | 1                            | 3                                              | 2      | 0     |
| 2926   | 2                            |                                                |        | 0     |
| 2928   | 2                            |                                                |        | 0     |
| 2930   | 2                            |                                                |        | 0     |
| 2931   | 1                            | 2                                              | 2      | 0     |
| 2933   | 2                            |                                                |        | 0     |
| 2935   | 2                            |                                                |        | 0     |
| 2936   | 2                            |                                                |        | 0     |
| 2937   | 2                            |                                                |        | 0     |
| 2938   | 2                            |                                                |        | 0     |
| 2944   | 2                            |                                                |        | 0     |
| 2945   | 1                            | 1                                              | 1      | 0     |
| 2947   | 2                            |                                                |        | 0     |
| 2949   | 2                            |                                                |        | 0     |

| respid | ICS Urgency Incontinence Q30 | ICS Urgency Incontinence -<br>how often Q30a_1 | Q30b_1 | Q31_1 |
|--------|------------------------------|------------------------------------------------|--------|-------|
| 2951   | 2                            |                                                |        | 0     |
| 2952   | 2                            |                                                |        | 0     |
| 2953   | 2                            |                                                |        | 0     |
| 2955   | 2                            |                                                |        | 0     |
| 2957   | 2                            |                                                |        | 0     |
| 2958   | 2                            |                                                |        | 0     |
| 2960   | 2                            |                                                |        | 0     |
| 2963   | 2                            |                                                |        | 0     |
| 2964   | 2                            |                                                |        | 0     |
| 2967   | 2                            |                                                |        | 0     |
| 2968   | 2                            |                                                |        | 0     |
| 2971   | 1                            | 3                                              | 2      | 1     |
| 2974   | 2                            |                                                |        | 0     |
| 2975   | 2                            |                                                |        | 0     |
| 2982   | 2                            |                                                |        | 0     |
| 2983   | 2                            |                                                |        | 0     |
| 2985   | 2                            |                                                |        | 0     |
| 2986   | 1                            | 2                                              | 1      | 1     |
| 2987   | 1                            | 1                                              | 1      | 0     |
| 2988   | 1                            | 2                                              | 2      | 0     |
| 2993   | 2                            |                                                |        | 0     |
| 2996   | 2                            |                                                |        | 0     |
| 2997   | 2                            |                                                |        | 0     |
| 2998   | 2                            |                                                |        | 0     |
| 3004   | 2                            |                                                |        | 0     |
| 3007   | 2                            |                                                |        | 0     |
| 3011   | 1                            | 3                                              | 1      | 0     |
| 3012   | 2                            |                                                |        | 0     |
| 3013   | 2                            |                                                |        | 0     |
| 3014   | 2                            |                                                |        | 0     |
| 3015   | 2                            |                                                |        | 0     |
| 3016   | 2                            |                                                |        | 0     |

| respid | ICS Urgency Incontinence Q30 | ICS Urgency Incontinence -<br>how often Q30a_1 | Q30b_1 | Q31_1 |
|--------|------------------------------|------------------------------------------------|--------|-------|
| 3017   | 2                            |                                                |        | 0     |
| 3020   | 2                            |                                                |        | 0     |
| 3022   | 2                            |                                                |        | 0     |
| 3023   | 2                            |                                                |        | 0     |
| 3026   | 2                            |                                                |        | 0     |
| 3038   | 2                            |                                                |        | 0     |
| 3039   | 2                            |                                                |        | 0     |
| 3040   | 2                            |                                                |        | 0     |
| 3041   | 2                            |                                                |        | 0     |
| 3042   | 1                            | 1                                              | 0      | 0     |
| 3044   | 2                            |                                                |        | 0     |
| 3050   | 2                            |                                                |        | 0     |
| 3052   | 2                            |                                                |        | 0     |
| 3056   | 1                            | 1                                              | 2      | 1     |
| 3059   | 2                            |                                                |        | 0     |
| 3060   | 2                            |                                                |        | 0     |
| 3063   | 2                            |                                                |        | 0     |
| 3065   | 2                            |                                                |        | 0     |
| 3067   | 2                            |                                                |        | 0     |
| 3068   | 2                            |                                                |        | 0     |
| 3072   | 2                            |                                                |        | 0     |
| 3074   | 2                            |                                                |        | 0     |
| 3075   | 1                            | 2                                              | 2      | 0     |
| 3076   | 2                            |                                                |        | 0     |
| 3079   | 2                            |                                                |        | 0     |
| 3082   | 1                            | 2                                              | 2      | 0     |
| 3083   | 2                            |                                                |        | 0     |
| 3084   | 2                            |                                                |        | 0     |
| 3085   | 2                            |                                                |        | 0     |
| 3090   | 2                            |                                                |        | 0     |
| 3091   | 2                            |                                                |        | 0     |
| 3092   | 2                            |                                                |        | 0     |

| respid | ICS Urgency Incontinence Q30 | ICS Urgency Incontinence -<br>how often Q30a_1 | Q30b_1 | Q31_1 |
|--------|------------------------------|------------------------------------------------|--------|-------|
| 3095   | 2                            |                                                |        | 0     |
| 3096   | 1                            | 4                                              | 3      | 0     |
| 3097   | 2                            |                                                |        | 1     |
| 3099   | 1                            | 4                                              | 3      | 0     |
| 3101   | 1                            | 2                                              | 2      | 0     |
| 3103   | 2                            |                                                |        | 0     |
| 3104   | 2                            |                                                |        | 0     |
| 3105   | 2                            |                                                |        | 0     |
| 3107   | 2                            |                                                |        | 0     |
| 3108   | 2                            |                                                |        | 0     |
| 3109   | 2                            |                                                |        | 0     |
| 3116   | 2                            |                                                |        | 0     |
| 3117   | 2                            |                                                |        | 0     |
| 3119   | 2                            |                                                |        | 0     |
| 3120   | 2                            |                                                |        | 0     |
| 3130   | 1                            | 1                                              | 2      | 0     |
| 3131   | 1                            | 2                                              | 3      | 1     |
| 3133   | 2                            |                                                |        | 0     |
| 3134   | 2                            |                                                |        | 0     |
| 3135   | 2                            |                                                |        | 0     |
| 3145   | 2                            |                                                |        | 0     |
| 3147   | 2                            |                                                |        | 0     |
| 3152   | 2                            |                                                |        | 0     |
| 3155   | 1                            | 3                                              | 3      | 0     |
| 3156   | 2                            |                                                |        | 0     |
| 3157   | 2                            |                                                |        | 0     |
| 3166   | 1                            | 1                                              | 1      | 0     |
| 3169   | 1                            | 1                                              | 0      | 0     |
| 3179   | 2                            |                                                |        | 0     |
| 3181   | 2                            |                                                |        | 0     |
| 3185   | 2                            |                                                |        | 0     |
| 3190   | 2                            |                                                |        | 0     |

| respid | ICS Urgency Incontinence Q30 | ICS Urgency Incontinence -<br>how often Q30a_1 | Q30b_1 | Q31_1 |
|--------|------------------------------|------------------------------------------------|--------|-------|
| 3191   | 2                            |                                                |        | 0     |
| 3192   | 1                            | 1                                              | 0      | 0     |
| 3193   | 2                            |                                                |        | 0     |
| 3195   | 2                            |                                                |        | 0     |
| 3202   | 2                            |                                                |        | 0     |
| 3204   | 2                            |                                                |        | 0     |
| 3208   | 2                            |                                                |        | 1     |
| 3212   | 2                            |                                                |        | 0     |
| 3218   | 2                            |                                                |        | 0     |
| 3219   | 2                            |                                                |        | 0     |
| 3220   | 2                            |                                                |        | 0     |
| 3221   | 1                            | 2                                              | 3      | 0     |
| 3223   | 2                            |                                                |        | 0     |
| 3231   | 2                            |                                                |        | 0     |
| 3232   | 2                            |                                                |        | 0     |
| 3234   | 2                            |                                                |        | 0     |
| 3235   | 1                            | 1                                              | 0      | 0     |
| 3237   | 2                            |                                                |        | 0     |
| 3238   | 2                            |                                                |        | 0     |
| 3240   | 2                            |                                                |        | 0     |
| 3241   | 2                            |                                                |        | 0     |
| 3243   | 2                            |                                                |        | 0     |
| 3244   | 2                            |                                                |        | 0     |
| 3247   | 2                            |                                                |        | 0     |
| 3250   | 2                            |                                                |        | 0     |
| 3251   | 1                            | 2                                              | 2      | 1     |
| 3255   | 2                            |                                                |        | 0     |
| 3256   | 2                            |                                                |        | 0     |
| 3257   | 2                            |                                                |        | 0     |
| 3258   | 2                            |                                                |        | 0     |
| 3259   | 1                            | 2                                              | 2      | 1     |
| 3260   | 2                            |                                                |        | 0     |



| respid | ICS Urgency Incontinence Q30 | ICS Urgency Incontinence -<br>how often Q30a_1 | Q30b_1 | Q31_1 |
|--------|------------------------------|------------------------------------------------|--------|-------|
| 3261   | 2                            |                                                |        | 0     |
| 3262   | 1                            | 1                                              | 1      | 0     |
| 3264   | 1                            | 2                                              | 3      | 0     |
| 3265   | 2                            |                                                |        | 0     |
| 3267   | 2                            |                                                |        | 0     |
| 3268   | 2                            |                                                |        | 0     |
| 3270   | 2                            |                                                |        | 0     |
| 3271   | 2                            |                                                |        | 0     |
| 3274   | 2                            |                                                |        | 0     |
| 3276   | 2                            |                                                |        | 0     |
| 3277   | 2                            |                                                |        | 0     |
| 3279   | 2                            |                                                |        | 0     |
| 3281   | 2                            |                                                |        | 0     |
| 3283   | 1                            | 2                                              | 1      | 0     |
| 3285   | 2                            |                                                |        | 0     |
| 3286   | 2                            |                                                |        | 0     |
| 3287   | 2                            |                                                |        | 0     |
| 3289   | 2                            |                                                |        | 0     |
| 3290   | 2                            |                                                |        | 0     |
| 3291   | 2                            |                                                |        | 0     |
| 3292   | 1                            | 2                                              | 2      | 0     |
| 3293   | 1                            | 3                                              | 2      | 0     |
| 3294   | 2                            |                                                |        | 0     |
| 3296   | 2                            |                                                |        | 0     |
| 3306   | 2                            |                                                |        | 0     |
| 3307   | 1                            | 2                                              | 2      | 1     |
| 3308   | 1                            | 3                                              | 2      | 0     |
| 3312   | 2                            |                                                |        | 0     |
| 3313   | 2                            |                                                |        | 0     |
| 3316   | 2                            |                                                |        | 0     |
| 3317   | 2                            |                                                |        | 0     |
| 3320   | 2                            |                                                |        | 0     |

| respid | ICS Urgency Incontinence Q30 | ICS Urgency Incontinence -<br>how often Q30a_1 | Q30b_1 | Q31_1 |
|--------|------------------------------|------------------------------------------------|--------|-------|
| 3321   | 2                            |                                                |        | 0     |
| 3322   | 2                            |                                                |        | 0     |
| 3323   | 2                            |                                                |        | 0     |
| 3325   | 2                            |                                                |        | 0     |
| 3332   | 2                            |                                                |        | 0     |
| 3334   | 2                            |                                                |        | 0     |
| 3335   | 1                            | 1                                              | 2      | 0     |
| 3341   | 2                            |                                                |        | 1     |
| 3345   | 2                            |                                                |        | 0     |
| 3346   | 2                            |                                                |        | 0     |
| 3349   | 2                            |                                                |        | 0     |
| 3351   | 2                            |                                                |        | 0     |
| 3353   | 2                            |                                                |        | 0     |
| 3354   | 1                            | 2                                              | 1      | 0     |
| 3356   | 2                            |                                                |        | 0     |
| 3357   | 2                            |                                                |        | 0     |
| 3360   | 2                            |                                                |        | 0     |
| 3361   | 2                            |                                                |        | 0     |
| 3362   | 2                            |                                                |        | 0     |
| 3363   | 2                            |                                                |        | 0     |
| 3364   | 1                            | 3                                              | 3      | 0     |
| 3368   | 2                            |                                                |        | 0     |
| 3370   | 2                            |                                                |        | 0     |
| 3371   | 2                            |                                                |        | 0     |
| 3379   | 2                            |                                                |        | 0     |
| 3380   | 2                            |                                                |        | 0     |
| 3382   | 2                            |                                                |        | 0     |
| 3384   | 2                            |                                                |        | 0     |
| 3385   | 2                            |                                                |        | 0     |
| 3388   | 2                            |                                                |        | 0     |
| 3392   | 1                            | 1                                              | 0      | 0     |
| 3393   | 1                            | 1                                              | 0      | 0     |

| respid | ICS Urgency Incontinence Q30 | ICS Urgency Incontinence -<br>how often Q30a_1 | Q30b_1 | Q31_1 |
|--------|------------------------------|------------------------------------------------|--------|-------|
| 3394   | 1                            | 2                                              | 2      | 0     |
| 3395   | 2                            |                                                |        | 0     |
| 3396   | 2                            |                                                |        | 0     |
| 3397   | 2                            |                                                |        | 0     |
| 3398   | 2                            |                                                |        | 0     |
| 3399   | 2                            |                                                |        | 0     |
| 3400   | 2                            |                                                |        | 0     |
| 3401   | 1                            | 3                                              | 3      | 0     |
| 3402   | 2                            |                                                |        | 0     |
| 3403   | 2                            |                                                |        | 0     |
| 3405   | 1                            | 3                                              | 2      | 1     |
| 3407   | 1                            | 2                                              | 1      | 0     |
| 3410   | 2                            |                                                |        | 0     |
| 3411   | 2                            |                                                |        | 0     |
| 3413   | 2                            |                                                |        | 0     |
| 3414   | 2                            |                                                |        | 0     |
| 3420   | 2                            |                                                |        | 0     |
| 3421   | 1                            | 3                                              | 3      | 1     |
| 3425   | 2                            |                                                |        | 0     |
| 3426   | 2                            |                                                |        | 0     |
| 3429   | 1                            | 2                                              | 1      | 0     |
| 3430   | 1                            | 2                                              | 3      | 1     |
| 3433   | 1                            | 1                                              | 0      | 0     |
| 3434   | 1                            | 3                                              | 3      | 1     |
| 3437   | 2                            |                                                |        | 0     |
| 3439   | 2                            |                                                |        | 0     |
| 3441   | 1                            | 3                                              | 1      | 0     |
| 3442   | 2                            |                                                |        | 0     |
| 3444   | 1                            | 1                                              | 0      | 0     |
| 3445   | 2                            |                                                |        | 0     |
| 3450   | 2                            |                                                |        | 0     |
| 3452   | 1                            | 1                                              | 3      | 0     |

| respid | ICS Urgency Incontinence Q30 | ICS Urgency Incontinence -<br>how often Q30a_1 | Q30b_1 | Q31_1 |
|--------|------------------------------|------------------------------------------------|--------|-------|
| 3456   | 1                            | 1                                              | 0      | 0     |
| 3459   | 2                            |                                                |        | 0     |
| 3460   | 2                            |                                                |        | 0     |
| 3461   | 2                            |                                                |        | 0     |
| 3466   | 2                            |                                                |        | 0     |
| 3471   | 2                            |                                                |        | 0     |
| 3473   | 2                            |                                                |        | 0     |
| 3475   | 1                            | 3                                              | 2      | 0     |
| 3476   | 2                            |                                                |        | 0     |
| 3477   | 2                            |                                                |        | 0     |
| 3478   | 2                            |                                                |        | 0     |
| 3479   | 2                            |                                                |        | 0     |
| 3482   | 1                            | 2                                              | 2      | 0     |
| 3483   | 2                            |                                                |        | 0     |
| 3485   | 2                            |                                                |        | 0     |
| 3489   | 2                            |                                                |        | 0     |
| 3490   | 2                            |                                                |        | 0     |
| 3491   | 1                            | 1                                              | 2      | 1     |
| 3494   | 2                            |                                                |        | 0     |
| 3495   | 2                            |                                                |        | 0     |
| 3501   | 2                            |                                                |        | 0     |
| 3506   | 2                            |                                                |        | 0     |
| 3507   | 2                            |                                                |        | 0     |
| 3517   | 2                            |                                                |        | 0     |
| 3520   | 2                            |                                                |        | 0     |
| 3521   | 2                            |                                                |        | 0     |
| 3522   | 2                            |                                                |        | 0     |
| 3524   | 1                            | 1                                              | 0      | 0     |
| 3527   | 2                            |                                                |        | 0     |
| 3528   | 2                            |                                                |        | 0     |
| 3529   | 2                            |                                                |        | 0     |
| 3536   | 2                            |                                                |        | 0     |

| respid | ICS Urgency Incontinence Q30 | ICS Urgency Incontinence -<br>how often Q30a_1 | Q30b_1 | Q31_1 |
|--------|------------------------------|------------------------------------------------|--------|-------|
| 3537   | 2                            |                                                |        | 0     |
| 3538   | 2                            |                                                |        | 0     |
| 3540   | 1                            | 1                                              | 1      | 0     |
| 3545   | 2                            |                                                |        | 0     |
| 3547   | 2                            |                                                |        | 0     |
| 3554   | 2                            |                                                |        | 0     |
| 3556   | 2                            |                                                |        | 0     |
| 3557   | 2                            |                                                |        | 0     |
| 3559   | 2                            |                                                |        | 0     |
| 3560   | 2                            |                                                |        | 0     |
| 3562   | 2                            |                                                |        | 0     |
| 3564   | 1                            | 2                                              | 2      | 1     |
| 3565   | 2                            |                                                |        | 0     |
| 3568   | 1                            | 2                                              | 2      | 0     |
| 3572   | 2                            |                                                |        | 0     |
| 3578   | 2                            |                                                |        | 0     |
| 3581   | 2                            |                                                |        | 0     |
| 3583   | 1                            | 1                                              | 0      | 1     |
| 3588   | 2                            |                                                |        | 0     |
| 3591   | 2                            |                                                |        | 0     |
| 3594   | 2                            |                                                |        | 0     |
| 3595   | 1                            | 2                                              | 1      | 0     |
| 3596   | 2                            |                                                |        | 0     |
| 3597   | 2                            |                                                |        | 0     |
| 3598   | 2                            |                                                |        | 0     |
| 3600   | 1                            | 1                                              | 1      | 0     |
| 3602   | 2                            |                                                |        | 0     |
| 3604   | 2                            |                                                |        | 0     |
| 3605   | 1                            | 1                                              | 0      | 0     |
| 3606   | 2                            |                                                |        | 0     |
| 3607   | 2                            |                                                |        | 0     |
| 3610   | 2                            |                                                |        | 0     |

| respid | ICS Urgency Incontinence Q30 | ICS Urgency Incontinence -<br>how often Q30a_1 | Q30b_1 | Q31_1 |
|--------|------------------------------|------------------------------------------------|--------|-------|
| 3611   | 2                            |                                                |        | 0     |
| 3612   | 2                            |                                                |        | 0     |
| 3614   | 2                            |                                                |        | 0     |
| 3616   | 2                            |                                                |        | 0     |
| 3617   | 2                            |                                                |        | 0     |
| 3618   | 2                            |                                                |        | 0     |
| 3619   | 2                            |                                                |        | 0     |
| 3621   | 2                            |                                                |        | 0     |
| 3622   | 1                            | 2                                              | 2      | 0     |
| 3624   | 2                            |                                                |        | 0     |
| 3626   | 2                            |                                                |        | 0     |
| 3629   | 2                            |                                                |        | 0     |
| 3631   | 2                            |                                                |        | 0     |
| 3632   | 2                            |                                                |        | 0     |
| 3638   | 2                            |                                                |        | 0     |
| 3640   | 1                            | 1                                              | 0      | 0     |
| 3641   | 2                            |                                                |        | 0     |
| 3645   | 1                            | 2                                              | 1      | 0     |
| 3650   | 2                            |                                                |        | 0     |
| 3653   | 2                            |                                                |        | 0     |
| 3655   | 1                            | 3                                              | 1      | 0     |
| 3657   | 1                            | 1                                              | 2      | 0     |
| 3658   | 2                            |                                                |        | 0     |
| 3659   | 2                            |                                                |        | 0     |
| 3664   | 1                            | 3                                              | 2      | 0     |
| 3665   | 2                            |                                                |        | 0     |
| 3667   | 2                            |                                                |        | 0     |
| 3668   | 1                            | 3                                              | 2      | 0     |
| 3675   | 2                            |                                                |        | 0     |
| 3678   | 2                            |                                                |        | 0     |
| 3680   | 2                            |                                                |        | 0     |
| 3684   | 2                            |                                                |        | 0     |

| respid | ICS Urgency Incontinence Q30 | ICS Urgency Incontinence -<br>how often Q30a_1 | Q30b_1 | Q31_1 |
|--------|------------------------------|------------------------------------------------|--------|-------|
| 3685   | 2                            |                                                |        | 0     |
| 3687   | 2                            |                                                |        | 0     |
| 3689   | 1                            | 2                                              | 3      | 0     |
| 3690   | 2                            |                                                |        | 0     |
| 3693   | 2                            |                                                |        | 0     |
| 3694   | 2                            |                                                |        | 0     |
| 3695   | 2                            |                                                |        | 0     |
| 3700   | 2                            |                                                |        | 0     |
| 3701   | 2                            |                                                |        | 0     |
| 3703   | 2                            |                                                |        | 0     |
| 3704   | 1                            | 3                                              | 3      | 0     |
| 3705   | 2                            |                                                |        | 0     |
| 3709   | 2                            |                                                |        | 0     |
| 3710   | 2                            |                                                |        | 0     |
| 3722   | 2                            |                                                |        | 0     |
| 3725   | 2                            |                                                |        | 0     |
| 3726   | 2                            |                                                |        | 0     |
| 3727   | 2                            |                                                |        | 0     |
| 3728   | 2                            |                                                |        | 0     |
| 3729   | 2                            |                                                |        | 0     |
| 3731   | 2                            |                                                |        | 0     |
| 3738   | 2                            |                                                |        | 0     |
| 3739   | 2                            |                                                |        | 0     |
| 3740   | 2                            |                                                |        | 0     |
| 3749   | 2                            |                                                |        | 0     |
| 3758   | 2                            |                                                |        | 0     |
| 3762   | 2                            |                                                |        | 0     |
| 3765   | 1                            | 2                                              | 1      | 0     |
| 3770   | 2                            |                                                |        | 0     |
| 3771   | 2                            |                                                |        | 0     |
| 3778   | 2                            |                                                |        | 0     |
| 3779   | 2                            |                                                |        | 0     |

| respid | ICS Urgency Incontinence Q30 | ICS Urgency Incontinence -<br>how often Q30a_1 | Q30b_1 | Q31_1 |
|--------|------------------------------|------------------------------------------------|--------|-------|
| 3780   | 2                            |                                                |        | 0     |
| 3782   | 2                            |                                                |        | 0     |
| 3784   | 2                            |                                                |        | 0     |
| 3787   | 2                            |                                                |        | 0     |
| 3790   | 2                            |                                                |        | 0     |
| 3791   | 2                            |                                                |        | 0     |
| 3793   | 1                            | 5                                              | 4      | 0     |
| 3795   | 2                            |                                                |        | 0     |
| 3799   | 2                            |                                                |        | 0     |
| 3801   | 2                            |                                                |        | 0     |
| 3804   | 2                            |                                                |        | 0     |
| 3809   | 2                            |                                                |        | 0     |
| 3810   | 2                            |                                                |        | 0     |
| 3813   | 2                            |                                                |        | 0     |
| 3816   | 2                            |                                                |        | 1     |
| 3820   | 2                            |                                                |        | 0     |
| 3821   | 2                            |                                                |        | 0     |
| 3823   | 2                            |                                                |        | 0     |
| 3828   | 2                            |                                                |        | 0     |
| 3829   | 2                            |                                                |        | 0     |
| 3832   | 2                            |                                                |        | 0     |
| 3835   | 1                            | 1                                              | 0      | 0     |
| 3837   | 2                            |                                                |        | 0     |
| 3838   | 2                            |                                                |        | 0     |
| 3839   | 1                            | 3                                              | 4      | 1     |
| 3840   | 2                            |                                                |        | 0     |
| 3842   | 2                            |                                                |        | 0     |
| 3843   | 2                            |                                                |        | 0     |
| 3844   | 2                            |                                                |        | 0     |
| 3850   | 2                            |                                                |        | 0     |
| 3851   | 2                            |                                                |        | 0     |
| 3856   | 2                            |                                                |        | 0     |



| respid | ICS Urgency Incontinence Q30 | ICS Urgency Incontinence -<br>how often Q30a_1 | Q30b_1 | Q31_1 |
|--------|------------------------------|------------------------------------------------|--------|-------|
| 3859   | 2                            |                                                |        | 0     |
| 3860   | 2                            |                                                |        | 0     |
| 3863   | 2                            |                                                |        | 0     |
| 3866   | 2                            |                                                |        | 0     |
| 3867   | 2                            |                                                |        | 0     |
| 3870   | 2                            |                                                |        | 0     |
| 3873   | 2                            |                                                |        | 0     |
| 3875   | 2                            |                                                |        | 0     |
| 3878   | 1                            | 1                                              | 1      | 0     |
| 3881   | 2                            |                                                |        | 1     |
| 3883   | 1                            | 3                                              | 3      | 0     |
| 3884   | 2                            |                                                |        | 0     |
| 3885   | 1                            | 3                                              | 3      | 0     |
| 3886   | 2                            |                                                |        | 0     |
| 3887   | 2                            |                                                |        | 0     |
| 3888   | 2                            |                                                |        | 0     |
| 3889   | 1                            | 2                                              | 2      | 1     |
| 3890   | 2                            |                                                |        | 0     |
| 3896   | 2                            |                                                |        | 0     |
| 3902   | 1                            | 3                                              | 3      | 1     |
| 3909   | 2                            |                                                |        | 0     |
| 3912   | 2                            |                                                |        | 0     |
| 3922   | 1                            | 1                                              | 1      | 0     |
| 3928   | 2                            |                                                |        | 0     |
| 3930   | 2                            |                                                |        | 0     |
| 3931   | 2                            |                                                |        | 1     |
| 3933   | 1                            | 1                                              | 1      | 0     |
| 3935   | 2                            |                                                |        | 0     |
| 3937   | 2                            |                                                |        | 0     |
| 3939   | 2                            |                                                |        | 0     |
| 3942   | 2                            |                                                |        | 0     |
| 3943   | 2                            |                                                |        | 0     |

| respid | ICS Urgency Incontinence Q30 | ICS Urgency Incontinence -<br>how often Q30a_1 | Q30b_1 | Q31_1 |
|--------|------------------------------|------------------------------------------------|--------|-------|
| 3944   | 2                            |                                                |        | 0     |
| 3945   | 2                            |                                                |        | 0     |
| 3947   | 2                            |                                                |        | 0     |
| 3948   | 2                            |                                                |        | 0     |
| 3951   | 2                            |                                                |        | 0     |
| 3959   | 2                            |                                                |        | 0     |
| 3969   | 2                            |                                                |        | 0     |
| 3973   | 2                            |                                                |        | 0     |
| 3975   | 1                            | 2                                              | 2      | 0     |
| 3976   | 2                            |                                                |        | 0     |
| 3977   | 2                            |                                                |        | 0     |
| 3978   | 2                            |                                                |        | 0     |
| 3994   | 2                            |                                                |        | 0     |
| 3995   | 2                            |                                                |        | 0     |
| 3997   | 2                            |                                                |        | 0     |
| 3998   | 2                            |                                                |        | 0     |
| 3999   | 1                            | 1                                              | 1      | 0     |
| 4002   | 1                            | 2                                              | 2      | 0     |
| 4004   | 1                            | 2                                              | 1      | 0     |
| 4005   | 2                            |                                                |        | 0     |
| 4006   | 2                            |                                                |        | 0     |
| 4008   | 2                            |                                                |        | 0     |
| 4010   | 2                            |                                                |        | 0     |
| 4011   | 1                            | 1                                              | 1      | 0     |
| 4013   | 2                            |                                                |        | 0     |
| 4014   | 2                            |                                                |        | 0     |
| 4016   | 2                            |                                                |        | 0     |
| 4017   | 2                            |                                                |        | 0     |
| 4019   | 1                            | 2                                              | 1      | 0     |
| 4021   | 2                            |                                                |        | 0     |
| 4023   | 2                            |                                                |        | 0     |
| 4024   | 2                            |                                                |        | 0     |

| respid | ICS Urgency Incontinence Q30 | ICS Urgency Incontinence -<br>how often Q30a_1 | Q30b_1 | Q31_1 |
|--------|------------------------------|------------------------------------------------|--------|-------|
| 4025   | 2                            |                                                |        | 0     |
| 4027   | 2                            |                                                |        | 0     |
| 4032   | 2                            |                                                |        | 0     |
| 4034   | 2                            |                                                |        | 0     |
| 4035   | 1                            | 3                                              | 3      | 0     |
| 4037   | 1                            | 2                                              | 1      | 0     |
| 4040   | 2                            |                                                |        | 0     |
| 4041   | 2                            |                                                |        | 0     |
| 4042   | 2                            |                                                |        | 0     |
| 4043   | 2                            |                                                |        | 1     |
| 4045   | 1                            | 1                                              | 2      | 0     |
| 4046   | 2                            |                                                |        | 0     |
| 4048   | 2                            |                                                |        | 0     |
| 4049   | 2                            |                                                |        | 0     |
| 4050   | 1                            | 1                                              | 2      | 0     |
| 4052   | 2                            |                                                |        | 0     |
| 4053   | 2                            |                                                |        | 0     |
| 4060   | 2                            |                                                |        | 0     |
| 4065   | 2                            |                                                |        | 0     |
| 4066   | 2                            |                                                |        | 0     |
| 4067   | 2                            |                                                |        | 0     |
| 4068   | 2                            |                                                |        | 0     |
| 4069   | 2                            |                                                |        | 0     |
| 4070   | 2                            |                                                |        | 0     |
| 4071   | 2                            |                                                |        | 0     |
| 4072   | 2                            |                                                |        | 0     |
| 4073   | 2                            |                                                |        | 0     |
| 4074   | 2                            |                                                |        | 0     |
| 4075   | 2                            |                                                |        | 0     |
| 4078   | 2                            |                                                |        | 0     |
| 4080   | 2                            |                                                |        | 0     |
| 4081   | 2                            |                                                |        | 0     |

| respid | ICS Urgency Incontinence Q30 | ICS Urgency Incontinence -<br>how often Q30a_1 | Q30b_1 | Q31_1 |
|--------|------------------------------|------------------------------------------------|--------|-------|
| 4082   | 2                            |                                                |        | 0     |
| 4083   | 2                            |                                                |        | 0     |
| 4084   | 2                            |                                                |        | 0     |
| 4086   | 2                            |                                                |        | 0     |
| 4087   | 2                            |                                                |        | 0     |
| 4088   | 2                            |                                                |        | 0     |
| 4089   | 2                            |                                                |        | 0     |
| 4090   | 2                            |                                                |        | 0     |
| 4093   | 2                            |                                                |        | 0     |
| 4094   | 2                            |                                                |        | 0     |
| 4095   | 2                            |                                                |        | 0     |
| 4096   | 2                            |                                                |        | 0     |
| 4098   | 2                            |                                                |        | 0     |
| 4103   | 2                            |                                                |        | 0     |
| 4104   | 2                            |                                                |        | 1     |
| 4107   | 2                            |                                                |        | 0     |
| 4109   | 2                            |                                                |        | 0     |
| 4110   | 1                            | 1                                              | 3      | 0     |
| 4113   | 1                            | 1                                              | 1      | 0     |
| 4114   | 2                            |                                                |        | 0     |
| 4116   | 2                            |                                                |        | 0     |
| 4119   | 2                            |                                                |        | 0     |
| 4120   | 2                            |                                                |        | 0     |
| 4121   | 2                            |                                                |        | 0     |
| 4122   | 2                            |                                                |        | 0     |
| 4124   | 1                            | 1                                              | 1      | 0     |
| 4126   | 2                            |                                                |        | 0     |
| 4127   | 2                            |                                                |        | 0     |
| 4131   | 2                            |                                                |        | 0     |
| 4134   | 2                            |                                                |        | 0     |
| 4144   | 2                            |                                                |        | 0     |
| 4145   | 2                            |                                                |        | 0     |

| respid | ICS Urgency Incontinence Q30 | ICS Urgency Incontinence -<br>how often Q30a_1 | Q30b_1 | Q31_1 |
|--------|------------------------------|------------------------------------------------|--------|-------|
| 4146   | 2                            |                                                |        | 0     |
| 4147   | 2                            |                                                |        | 0     |
| 4149   | 2                            |                                                |        | 0     |
| 4150   | 2                            |                                                |        | 0     |
| 4151   | 2                            |                                                |        | 0     |
| 4153   | 1                            | 2                                              | 1      | 0     |
| 4155   | 2                            |                                                |        | 0     |
| 4157   | 2                            |                                                |        | 0     |
| 4159   | 2                            |                                                |        | 1     |
| 4160   | 2                            |                                                |        | 0     |
| 4161   | 1                            | 1                                              | 0      | 0     |
| 4163   | 2                            |                                                |        | 0     |
| 4164   | 2                            |                                                |        | 0     |
| 4165   | 1                            | 3                                              | 1      | 0     |
| 4166   | 2                            |                                                |        | 0     |
| 4167   | 2                            |                                                |        | 0     |
| 4170   | 2                            |                                                |        | 0     |
| 4172   | 2                            |                                                |        | 0     |
| 4173   | 2                            |                                                |        | 0     |
| 4180   | 1                            | 1                                              | 0      | 0     |
| 4185   | 2                            |                                                |        | 0     |
| 4187   | 2                            |                                                |        | 0     |
| 4190   | 2                            |                                                |        | 0     |
| 4191   | 2                            |                                                |        | 0     |
| 4193   | 2                            |                                                |        | 0     |
| 4194   | 2                            |                                                |        | 0     |
| 4195   | 2                            |                                                |        | 0     |
| 4196   | 2                            |                                                |        | 0     |
| 4197   | 2                            |                                                |        | 0     |
| 4198   | 1                            | 1                                              | 0      | 0     |
| 4199   | 2                            |                                                |        | 0     |
| 4205   | 2                            |                                                |        | 0     |

| respid | ICS Urgency Incontinence Q30 | ICS Urgency Incontinence -<br>how often Q30a_1 | Q30b_1 | Q31_1 |
|--------|------------------------------|------------------------------------------------|--------|-------|
| 4206   | 2                            |                                                |        | 0     |
| 4207   | 2                            |                                                |        | 0     |
| 4214   | 1                            | 1                                              | 0      | 0     |
| 4215   | 2                            |                                                |        | 0     |
| 4217   | 2                            |                                                |        | 0     |
| 4219   | 2                            |                                                |        | 0     |
| 4223   | 2                            |                                                |        | 1     |
| 4226   | 2                            |                                                |        | 0     |
| 4229   | 2                            |                                                |        | 0     |
| 4230   | 2                            |                                                |        | 0     |
| 4232   | 2                            |                                                |        | 1     |
| 4233   | 2                            |                                                |        | 0     |
| 4234   | 2                            |                                                |        | 0     |
| 4235   | 2                            |                                                |        | 0     |
| 4236   | 2                            |                                                |        | 0     |
| 4237   | 2                            |                                                |        | 0     |
| 4238   | 2                            |                                                |        | 0     |
| 4240   | 2                            |                                                |        | 0     |
| 4241   | 2                            |                                                |        | 0     |
| 4247   | 2                            |                                                |        | 0     |
| 4250   | 2                            |                                                |        | 0     |
| 4251   | 2                            |                                                |        | 0     |
| 4253   | 1                            | 2                                              | 2      | 0     |
| 4254   | 2                            |                                                |        | 0     |
| 4258   | 1                            | 3                                              | 1      | 0     |
| 4260   | 2                            |                                                |        | 0     |
| 4263   | 2                            |                                                |        | 0     |
| 4265   | 2                            |                                                |        | 0     |
| 4266   | 2                            |                                                |        | 0     |
| 4267   | 2                            |                                                |        | 0     |
| 4270   | 2                            |                                                |        | 0     |
| 4273   | 2                            |                                                |        | 0     |

| respid | ICS Urgency Incontinence Q30 | ICS Urgency Incontinence -<br>how often Q30a_1 | Q30b_1 | Q31_1 |
|--------|------------------------------|------------------------------------------------|--------|-------|
| 4280   | 2                            |                                                |        | 0     |
| 4281   | 2                            |                                                |        | 0     |
| 4282   | 2                            |                                                |        | 0     |
| 4283   | 2                            |                                                |        | 0     |
| 4286   | 2                            |                                                |        | 0     |
| 4287   | 2                            |                                                |        | 0     |
| 4289   | 2                            |                                                |        | 0     |
| 4290   | 1                            | 2                                              | 2      | 0     |
| 4291   | 2                            |                                                |        | 0     |
| 4292   | 2                            |                                                |        | 0     |
| 4293   | 2                            |                                                |        | 0     |
| 4294   | 1                            | 1                                              | 1      | 0     |
| 4295   | 2                            |                                                |        | 0     |
| 4296   | 1                            | 2                                              | 2      | 0     |
| 4297   | 2                            |                                                |        | 0     |
| 4298   | 2                            |                                                |        | 0     |
| 4299   | 1                            | 1                                              | 1      | 0     |
| 4300   | 2                            |                                                |        | 0     |
| 4301   | 2                            |                                                |        | 0     |
| 4302   | 2                            |                                                |        | 0     |
| 4304   | 2                            |                                                |        | 0     |
| 4305   | 2                            |                                                |        | 0     |
| 4307   | 2                            |                                                |        | 0     |
| 4308   | 2                            |                                                |        | 0     |
| 4312   | 2                            |                                                |        | 0     |
| 4314   | 2                            |                                                |        | 0     |
| 4316   | 2                            |                                                |        | 0     |
| 4317   | 2                            |                                                |        | 0     |
| 4319   | 1                            | 1                                              | 2      | 0     |
| 4323   | 1                            | 2                                              | 2      | 0     |
| 4337   | 2                            |                                                |        | 0     |
| 4341   | 2                            |                                                |        | 0     |

| respid | ICS Urgency Incontinence Q30 | ICS Urgency Incontinence -<br>how often Q30a_1 | Q30b_1 | Q31_1 |
|--------|------------------------------|------------------------------------------------|--------|-------|
| 4342   | 2                            |                                                |        | 0     |
| 4344   | 2                            |                                                |        | 0     |
| 4345   | 2                            |                                                |        | 1     |
| 4346   | 1                            | 3                                              | 1      | 0     |
| 4347   | 2                            |                                                |        | 0     |
| 4350   | 2                            |                                                |        | 0     |
| 4352   | 2                            |                                                |        | 0     |
| 4353   | 2                            |                                                |        | 0     |
| 4355   | 2                            |                                                |        | 0     |
| 4356   | 2                            |                                                |        | 0     |
| 4358   | 2                            |                                                |        | 0     |
| 4359   | 2                            |                                                |        | 0     |
| 4360   | 2                            |                                                |        | 0     |
| 4361   | 1                            | 3                                              | 2      | 0     |
| 4363   | 2                            |                                                |        | 0     |
| 4364   | 2                            |                                                |        | 0     |
| 4365   | 2                            |                                                |        | 0     |
| 4367   | 2                            |                                                |        | 0     |
| 4369   | 2                            |                                                |        | 0     |
| 4373   | 2                            |                                                |        | 0     |
| 4374   | 2                            |                                                |        | 0     |
| 4375   | 2                            |                                                |        | 0     |
| 4378   | 1                            | 1                                              | 0      | 0     |
| 4379   | 1                            | 1                                              | 1      | 0     |
| 4382   | 2                            |                                                |        | 0     |
| 4383   | 2                            |                                                |        | 0     |
| 4384   | 1                            | 1                                              | 2      | 0     |
| 4385   | 2                            |                                                |        | 0     |
| 4388   | 2                            |                                                |        | 0     |
| 4389   | 1                            | 1                                              | 1      | 0     |
| 4391   | 2                            |                                                |        | 0     |
| 4392   | 1                            | 2                                              | 2      | 0     |



| respid | ICS Urgency Incontinence Q30 | ICS Urgency Incontinence -<br>how often Q30a_1 | Q30b_1 | Q31_1 |
|--------|------------------------------|------------------------------------------------|--------|-------|
| 4393   | 2                            |                                                |        | 0     |
| 4395   | 2                            |                                                |        | 0     |
| 4397   | 2                            |                                                |        | 0     |
| 4398   | 2                            |                                                |        | 1     |
| 4399   | 2                            |                                                |        | 0     |
| 4400   | 2                            |                                                |        | 0     |
| 4401   | 2                            |                                                |        | 0     |
| 4402   | 2                            |                                                |        | 0     |
| 4404   | 2                            |                                                |        | 0     |
| 4405   | 2                            |                                                |        | 0     |
| 4407   | 2                            |                                                |        | 0     |
| 4408   | 2                            |                                                |        | 0     |
| 4411   | 2                            |                                                |        | 0     |
| 4420   | 2                            |                                                |        | 0     |
| 4421   | 2                            |                                                |        | 0     |
| 4424   | 1                            | 3                                              | 3      | 0     |
| 4425   | 2                            |                                                |        | 0     |
| 4427   | 1                            | 2                                              | 1      | 0     |
| 4430   | 1                            | 2                                              | 1      | 0     |
| 4431   | 2                            |                                                |        | 1     |
| 4432   | 2                            |                                                |        | 0     |
| 4436   | 2                            |                                                |        | 0     |
| 4439   | 2                            |                                                |        | 0     |
| 4451   | 2                            |                                                |        | 0     |
| 4452   | 1                            | 2                                              | 3      | 1     |
| 4458   | 2                            |                                                |        | 0     |
| 4464   | 2                            |                                                |        | 0     |
| 4465   | 1                            | 2                                              | 2      | 0     |
| 4467   | 2                            |                                                |        | 0     |
| 4470   | 2                            |                                                |        | 0     |
| 4471   | 2                            |                                                |        | 0     |
| 4472   | 2                            |                                                |        | 0     |

| respid | ICS Urgency Incontinence Q30 | ICS Urgency Incontinence -<br>how often Q30a_1 | Q30b_1 | Q31_1 |
|--------|------------------------------|------------------------------------------------|--------|-------|
| 4473   | 2                            |                                                |        | 0     |
| 4475   | 2                            |                                                |        | 0     |
| 4476   | 1                            | 1                                              | 2      | 0     |
| 4478   | 2                            |                                                |        | 0     |
| 4485   | 2                            |                                                |        | 1     |
| 4486   | 2                            |                                                |        | 1     |
| 4490   | 2                            |                                                |        | 0     |
| 4502   | 2                            |                                                |        | 0     |
| 4503   | 2                            |                                                |        | 0     |
| 4504   | 2                            |                                                |        | 0     |
| 4506   | 2                            |                                                |        | 0     |
| 4508   | 2                            |                                                |        | 0     |
| 4515   | 2                            |                                                |        | 0     |
| 4516   | 1                            | 3                                              | 2      | 0     |
| 4519   | 2                            |                                                |        | 0     |
| 4523   | 2                            |                                                |        | 0     |
| 4525   | 2                            |                                                |        | 0     |
| 4526   | 2                            |                                                |        | 0     |
| 4528   | 2                            |                                                |        | 0     |
| 4530   | 2                            |                                                |        | 0     |
| 4531   | 1                            | 1                                              | 1      | 1     |
| 4532   | 2                            |                                                |        | 0     |
| 4537   | 2                            |                                                |        | 0     |
| 4538   | 2                            |                                                |        | 0     |
| 4539   | 1                            | 1                                              | 1      | 1     |
| 4541   | 2                            |                                                |        | 0     |
| 4543   | 2                            |                                                |        | 0     |
| 4544   | 2                            |                                                |        | 0     |
| 4546   | 2                            |                                                |        | 0     |
| 4547   | 2                            |                                                |        | 0     |
| 4549   | 2                            |                                                |        | 0     |
| 4550   | 2                            |                                                |        | 0     |

| respid | ICS Urgency Incontinence Q30 | ICS Urgency Incontinence -<br>how often Q30a_1 | Q30b_1 | Q31_1 |
|--------|------------------------------|------------------------------------------------|--------|-------|
| 4551   | 2                            |                                                |        | 0     |
| 4554   | 2                            |                                                |        | 0     |
| 4557   | 2                            |                                                |        | 0     |
| 4565   | 2                            |                                                |        | 0     |
| 4568   | 2                            |                                                |        | 0     |
| 4569   | 1                            | 1                                              | 1      | 0     |
| 4570   | 2                            |                                                |        | 0     |
| 4572   | 2                            |                                                |        | 0     |
| 4574   | 2                            |                                                |        | 0     |
| 4576   | 2                            |                                                |        | 0     |
| 4578   | 2                            |                                                |        | 0     |
| 4579   | 2                            |                                                |        | 0     |
| 4580   | 2                            |                                                |        | 0     |
| 4581   | 2                            |                                                |        | 0     |
| 4584   | 2                            |                                                |        | 0     |
| 4586   | 2                            |                                                |        | 0     |
| 4587   | 1                            | 2                                              | 3      | 0     |
| 4590   | 2                            |                                                |        | 0     |
| 4592   | 2                            |                                                |        | 0     |
| 4593   | 1                            | 1                                              | 0      | 0     |
| 4595   | 2                            |                                                |        | 0     |
| 4597   | 2                            |                                                |        | 0     |
| 4598   | 2                            |                                                |        | 0     |
| 4599   | 2                            |                                                |        | 0     |
| 4600   | 2                            |                                                |        | 0     |
| 4601   | 1                            | 1                                              | 1      | 0     |
| 4608   | 2                            |                                                |        | 0     |
| 4609   | 2                            |                                                |        | 0     |
| 4611   | 2                            |                                                |        | 0     |
| 4612   | 2                            |                                                |        | 0     |
| 4613   | 2                            |                                                |        | 0     |
| 4616   | 2                            |                                                |        | 0     |

| respid | ICS Urgency Incontinence Q30 | ICS Urgency Incontinence -<br>how often Q30a_1 | Q30b_1 | Q31_1 |
|--------|------------------------------|------------------------------------------------|--------|-------|
| 4617   | 2                            |                                                |        | 0     |
| 4620   | 2                            |                                                |        | 0     |
| 4621   | 2                            |                                                |        | 0     |
| 4622   | 2                            |                                                |        | 0     |
| 4624   | 2                            |                                                |        | 0     |
| 4625   | 1                            | 2                                              | 1      | 0     |
| 4627   | 2                            |                                                |        | 0     |
| 4628   | 1                            | 3                                              | 2      | 0     |
| 4629   | 2                            |                                                |        | 0     |
| 4630   | 1                            | 2                                              | 1      | 0     |
| 4632   | 2                            |                                                |        | 0     |
| 4634   | 2                            |                                                |        | 0     |
| 4635   | 2                            |                                                |        | 0     |
| 4636   | 2                            |                                                |        | 0     |
| 4637   | 2                            |                                                |        | 0     |
| 4638   | 2                            |                                                |        | 0     |
| 4639   | 1                            | 2                                              | 2      | 0     |
| 4641   | 2                            |                                                |        | 0     |
| 4643   | 2                            |                                                |        | 0     |
| 4645   | 2                            |                                                |        | 0     |
| 4646   | 1                            | 1                                              | 1      | 0     |
| 4647   | 2                            |                                                |        | 0     |
| 4648   | 2                            |                                                |        | 0     |
| 4649   | 2                            |                                                |        | 0     |
| 4650   | 2                            |                                                |        | 0     |
| 4651   | 2                            |                                                |        | 0     |
| 4652   | 2                            |                                                |        | 0     |
| 4653   | 2                            |                                                |        | 0     |
| 4657   | 2                            |                                                |        | 0     |
| 4660   | 2                            |                                                |        | 0     |
| 4661   | 2                            |                                                |        | 0     |
| 4662   | 1                            | 1                                              | 1      | 0     |

| respid | ICS Urgency Incontinence Q30 | ICS Urgency Incontinence -<br>how often Q30a_1 | Q30b_1 | Q31_1 |
|--------|------------------------------|------------------------------------------------|--------|-------|
| 4667   | 1                            | 1                                              | 1      | 0     |
| 4669   | 2                            |                                                |        | 0     |
| 4671   | 2                            |                                                |        | 0     |
| 4672   | 1                            | 2                                              | 2      | 0     |
| 4673   | 2                            |                                                |        | 0     |
| 4677   | 2                            |                                                |        | 0     |
| 4679   | 2                            |                                                |        | 0     |
| 4683   | 2                            |                                                |        | 0     |
| 4684   | 2                            |                                                |        | 0     |
| 4685   | 2                            |                                                |        | 0     |
| 4686   | 2                            |                                                |        | 0     |
| 4687   | 2                            |                                                |        | 0     |
| 4688   | 2                            |                                                |        | 0     |
| 4691   | 2                            |                                                |        | 0     |
| 4692   | 2                            |                                                |        | 0     |
| 4694   | 2                            |                                                |        | 0     |
| 4695   | 2                            |                                                |        | 0     |
| 4696   | 2                            |                                                |        | 0     |
| 4697   | 2                            |                                                |        | 0     |
| 4698   | 1                            | 3                                              | 1      | 0     |
| 4699   | 2                            |                                                |        | 0     |
| 4701   | 2                            |                                                |        | 0     |
| 4703   | 1                            | 4                                              | 1      | 0     |
| 4704   | 2                            |                                                |        | 1     |
| 4705   | 2                            |                                                |        | 0     |
| 4706   | 2                            |                                                |        | 0     |
| 4707   | 2                            |                                                |        | 0     |
| 4708   | 2                            |                                                |        | 0     |
| 4710   | 2                            |                                                |        | 0     |
| 4711   | 1                            | 2                                              | 2      | 0     |
| 4715   | 2                            |                                                |        | 0     |
| 4716   | 2                            |                                                |        | 0     |

| respid | ICS Urgency Incontinence Q30 | ICS Urgency Incontinence -<br>how often Q30a_1 | Q30b_1 | Q31_1 |
|--------|------------------------------|------------------------------------------------|--------|-------|
| 4717   | 2                            |                                                |        | 0     |
| 4718   | 2                            |                                                |        | 0     |
| 4722   | 1                            | 1                                              | 1      | 0     |
| 4727   | 2                            |                                                |        | 0     |
| 4728   | 2                            |                                                |        | 0     |
| 4729   | 2                            |                                                |        | 0     |
| 4732   | 2                            |                                                |        | 0     |
| 4733   | 2                            |                                                |        | 0     |
| 4734   | 2                            |                                                |        | 0     |
| 4735   | 2                            |                                                |        | 0     |
| 4737   | 1                            | 2                                              | 1      | 0     |
| 4738   | 2                            |                                                |        | 0     |
| 4740   | 2                            |                                                |        | 0     |
| 4741   | 1                            | 2                                              | 2      | 0     |
| 4743   | 2                            |                                                |        | 0     |
| 4746   | 2                            |                                                |        | 0     |
| 4750   | 2                            |                                                |        | 0     |
| 4752   | 2                            |                                                |        | 0     |
| 4753   | 1                            | 1                                              | 1      | 0     |
| 4754   | 2                            |                                                |        | 0     |
| 4755   | 1                            | 2                                              | 1      | 0     |
| 4758   | 2                            |                                                |        | 0     |
| 4766   | 2                            |                                                |        | 0     |
| 4767   | 2                            |                                                |        | 0     |
| 4768   | 2                            |                                                |        | 0     |
| 4769   | 2                            |                                                |        | 0     |
| 4771   | 2                            |                                                |        | 0     |
| 4772   | 2                            |                                                |        | 0     |
| 4773   | 2                            |                                                |        | 0     |
| 4774   | 2                            |                                                |        | 0     |
| 4776   | 2                            |                                                |        | 0     |
| 4777   | 2                            |                                                |        | 0     |

| respid | ICS Urgency Incontinence Q30 | ICS Urgency Incontinence -<br>how often Q30a_1 | Q30b_1 | Q31_1 |
|--------|------------------------------|------------------------------------------------|--------|-------|
| 4779   | 2                            |                                                |        | 0     |
| 4780   | 1                            | 3                                              | 1      | 1     |
| 4781   | 2                            |                                                |        | 0     |
| 4783   | 1                            | 2                                              | 4      | 1     |
| 4784   | 2                            |                                                |        | 0     |
| 4785   | 2                            |                                                |        | 0     |
| 4788   | 2                            |                                                |        | 0     |
| 4789   | 1                            | 3                                              | 3      | 0     |
| 4790   | 2                            |                                                |        | 0     |
| 4791   | 2                            |                                                |        | 0     |
| 4794   | 2                            |                                                |        | 0     |
| 4795   | 2                            |                                                |        | 0     |
| 4797   | 2                            |                                                |        | 0     |
| 4802   | 1                            | 3                                              | 2      | 0     |
| 4803   | 1                            | 2                                              | 2      | 0     |
| 4804   | 2                            |                                                |        | 0     |
| 4805   | 1                            | 1                                              | 0      | 0     |
| 4807   | 2                            |                                                |        | 0     |
| 4808   | 1                            | 1                                              | 2      | 0     |
| 4809   | 1                            | 4                                              | 3      | 0     |
| 4811   | 2                            |                                                |        | 0     |
| 4817   | 2                            |                                                |        | 0     |
| 4819   | 2                            |                                                |        | 0     |
| 4820   | 2                            |                                                |        | 0     |
| 4821   | 2                            |                                                |        | 0     |
| 4822   | 2                            |                                                |        | 0     |
| 4823   | 2                            |                                                |        | 0     |
| 4825   | 2                            |                                                |        | 0     |
| 4826   | 2                            |                                                |        | 0     |
| 4830   | 2                            |                                                |        | 0     |
| 4832   | 2                            |                                                |        | 0     |
| 4838   | 1                            | 3                                              | 2      | 1     |

| respid | ICS Urgency Incontinence Q30 | ICS Urgency Incontinence -<br>how often Q30a_1 | Q30b_1 | Q31_1 |
|--------|------------------------------|------------------------------------------------|--------|-------|
| 4840   | 2                            |                                                |        | 0     |
| 4841   | 2                            |                                                |        | 0     |
| 4843   | 2                            |                                                |        | 0     |
| 4845   | 2                            |                                                |        | 0     |
| 4846   | 1                            | 3                                              | 1      | 0     |
| 4848   | 2                            |                                                |        | 0     |
| 4853   | 2                            |                                                |        | 0     |
| 4854   | 2                            |                                                |        | 0     |
| 4859   | 2                            |                                                |        | 0     |
| 4861   | 2                            |                                                |        | 0     |
| 4864   | 2                            |                                                |        | 0     |
| 4867   | 2                            |                                                |        | 0     |
| 4870   | 2                            |                                                |        | 0     |
| 4872   | 2                            |                                                |        | 0     |
| 4873   | 2                            |                                                |        | 0     |
| 4874   | 2                            |                                                |        | 0     |
| 4878   | 2                            |                                                |        | 0     |
| 4880   | 2                            |                                                |        | 0     |
| 4881   | 2                            |                                                |        | 0     |
| 4882   | 1                            | 2                                              | 3      | 0     |
| 4883   | 2                            |                                                |        | 0     |
| 4885   | 2                            |                                                |        | 0     |
| 4889   | 2                            |                                                |        | 0     |
| 4890   | 2                            |                                                |        | 0     |
| 4891   | 2                            |                                                |        | 0     |
| 4894   | 2                            |                                                |        | 0     |
| 4895   | 1                            | 5                                              | 4      | 0     |
| 4896   | 2                            |                                                |        | 0     |
| 4897   | 2                            |                                                |        | 0     |
| 4898   | 1                            | 2                                              | 1      | 0     |
| 4899   | 2                            |                                                |        | 0     |
| 4900   | 2                            |                                                |        | 0     |



| respid | ICS Urgency Incontinence Q30 | ICS Urgency Incontinence -<br>how often Q30a_1 | Q30b_1 | Q31_1 |
|--------|------------------------------|------------------------------------------------|--------|-------|
| 4901   | 2                            |                                                |        | 0     |
| 4903   | 2                            |                                                |        | 1     |
| 4904   | 2                            |                                                |        | 0     |
| 4908   | 2                            |                                                |        | 0     |
| 4909   | 2                            |                                                |        | 0     |
| 4913   | 2                            |                                                |        | 0     |
| 4917   | 2                            |                                                |        | 0     |
| 4918   | 2                            |                                                |        | 0     |
| 4920   | 2                            |                                                |        | 0     |
| 4921   | 2                            |                                                |        | 0     |
| 4925   | 2                            |                                                |        | 0     |
| 4926   | 2                            |                                                |        | 0     |
| 4927   | 2                            |                                                |        | 0     |
| 4928   | 1                            | 1                                              | 0      | 0     |
| 4929   | 2                            |                                                |        | 0     |
| 4930   | 1                            | 2                                              | 3      | 0     |
| 4931   | 2                            |                                                |        | 0     |
| 4932   | 1                            | 2                                              | 2      | 1     |
| 4933   | 2                            |                                                |        | 0     |
| 4934   | 2                            |                                                |        | 0     |
| 5934   | 2                            |                                                |        | 0     |
| 5935   | 2                            |                                                |        | 0     |
| 5936   | 2                            |                                                |        | 0     |
| 5938   | 2                            |                                                |        | 0     |
| 5939   | 2                            |                                                |        | 0     |
| 5940   | 1                            | 1                                              | 1      | 0     |
| 5942   | 2                            |                                                |        | 0     |
| 5944   | 2                            |                                                |        | 0     |
| 5951   | 2                            |                                                |        | 0     |
| 5952   | 2                            |                                                |        | 0     |
| 5954   | 2                            |                                                |        | 0     |
| 5956   | 2                            |                                                |        | 0     |

| respid | ICS Urgency Incontinence Q30 | ICS Urgency Incontinence -<br>how often Q30a_1 | Q30b_1 | Q31_1 |
|--------|------------------------------|------------------------------------------------|--------|-------|
| 5957   | 2                            |                                                |        | 0     |
| 5958   | 2                            |                                                |        | 0     |
| 5959   | 1                            | 2                                              | 1      | 0     |
| 5960   | 2                            |                                                |        | 0     |
| 5963   | 2                            |                                                |        | 0     |
| 5966   | 2                            |                                                |        | 0     |
| 5968   | 2                            |                                                |        | 0     |
| 5974   | 2                            |                                                |        | 0     |
| 5975   | 2                            |                                                |        | 0     |
| 5976   | 2                            |                                                |        | 0     |
| 5977   | 2                            |                                                |        | 0     |
| 5978   | 2                            |                                                |        | 0     |
| 5979   | 2                            |                                                |        | 0     |
| 5983   | 2                            |                                                |        | 0     |
| 5984   | 2                            |                                                |        | 0     |
| 5990   | 2                            |                                                |        | 0     |
| 5991   | 2                            |                                                |        | 0     |
| 5992   | 2                            |                                                |        | 0     |
| 5993   | 2                            |                                                |        | 0     |
| 5994   | 2                            |                                                |        | 1     |
| 5996   | 2                            |                                                |        | 0     |
| 6001   | 1                            | 3                                              | 2      | 0     |
| 6003   | 2                            |                                                |        | 0     |
| 6004   | 1                            | 1                                              | 1      | 0     |
| 6005   | 2                            |                                                |        | 0     |
| 6006   | 2                            |                                                |        | 0     |
| 6008   | 2                            |                                                |        | 0     |
| 6009   | 2                            |                                                |        | 0     |
| 6014   | 2                            |                                                |        | 0     |
| 6016   | 2                            |                                                |        | 0     |
| 6017   | 1                            | 1                                              | 2      | 0     |
| 6018   | 2                            |                                                |        | 0     |

| respid | ICS Urgency Incontinence Q30 | ICS Urgency Incontinence -<br>how often Q30a_1 | Q30b_1 | Q31_1 |
|--------|------------------------------|------------------------------------------------|--------|-------|
| 6020   | 2                            |                                                |        | 0     |
| 6021   | 2                            |                                                |        | 0     |
| 6024   | 2                            |                                                |        | 0     |
| 6025   | 2                            |                                                |        | 0     |
| 6026   | 2                            |                                                |        | 0     |
| 6032   | 2                            |                                                |        | 0     |
| 6035   | 2                            |                                                |        | 0     |
| 6038   | 1                            | 2                                              | 1      | 0     |
| 6043   | 1                            | 1                                              | 1      | 0     |
| 6044   | 2                            |                                                |        | 0     |
| 6046   | 1                            | 2                                              | 1      | 0     |
| 6047   | 2                            |                                                |        | 0     |
| 6048   | 2                            |                                                |        | 0     |
| 6050   | 1                            | 2                                              | 2      | 0     |
| 6051   | 2                            |                                                |        | 0     |
| 6053   | 2                            |                                                |        | 0     |
| 6054   | 1                            | 1                                              | 1      | 0     |
| 6056   | 2                            |                                                |        | 0     |
| 6058   | 2                            |                                                |        | 0     |
| 6060   | 2                            |                                                |        | 0     |
| 6061   | 2                            |                                                |        | 0     |
| 6062   | 2                            |                                                |        | 0     |
| 6067   | 2                            |                                                |        | 0     |
| 6070   | 2                            |                                                |        | 0     |
| 6074   | 2                            |                                                |        | 0     |
| 6076   | 2                            |                                                |        | 0     |
| 6078   | 2                            |                                                |        | 0     |
| 6081   | 2                            |                                                |        | 0     |
| 6085   | 2                            |                                                |        | 0     |
| 6088   | 2                            |                                                |        | 0     |
| 6092   | 2                            |                                                |        | 0     |
| 6095   | 2                            |                                                |        | 0     |

| respid | ICS Urgency Incontinence Q30 | ICS Urgency Incontinence -<br>how often Q30a_1 | Q30b_1 | Q31_1 |
|--------|------------------------------|------------------------------------------------|--------|-------|
| 6098   | 2                            |                                                |        | 0     |
| 6101   | 2                            |                                                |        | 0     |
| 6102   | 2                            |                                                |        | 0     |
| 6105   | 2                            |                                                |        | 0     |
| 6106   | 2                            |                                                |        | 0     |
| 6107   | 1                            | 1                                              | 0      | 0     |
| 6111   | 2                            |                                                |        | 0     |
| 6112   | 1                            | 1                                              | 0      | 0     |
| 6113   | 2                            |                                                |        | 0     |
| 6115   | 2                            |                                                |        | 0     |
| 6116   | 2                            |                                                |        | 0     |
| 6117   | 2                            |                                                |        | 0     |
| 6124   | 2                            |                                                |        | 0     |
| 6125   | 2                            |                                                |        | 0     |
| 6128   | 2                            |                                                |        | 0     |
| 6133   | 2                            |                                                |        | 0     |
| 6134   | 2                            |                                                |        | 0     |
| 6135   | 2                            |                                                |        | 0     |
| 6138   | 1                            | 2                                              | 3      | 0     |
| 6140   | 2                            |                                                |        | 0     |
| 6143   | 2                            |                                                |        | 0     |
| 6147   | 2                            |                                                |        | 0     |
| 6154   | 2                            |                                                |        | 0     |
| 6162   | 2                            |                                                |        | 0     |
| 6165   | 2                            |                                                |        | 0     |
| 6166   | 2                            |                                                |        | 0     |
| 6173   | 2                            |                                                |        | 0     |
| 6180   | 2                            |                                                |        | 0     |
| 6184   | 1                            | 2                                              | 3      | 1     |
| 6185   | 2                            |                                                |        | 0     |
| 6186   | 2                            |                                                |        | 0     |
| 6188   | 2                            |                                                |        | 0     |

| respid | ICS Urgency Incontinence Q30 | ICS Urgency Incontinence -<br>how often Q30a_1 | Q30b_1 | Q31_1 |
|--------|------------------------------|------------------------------------------------|--------|-------|
| 6192   | 1                            | 2                                              | 2      | 0     |
| 6194   | 2                            |                                                |        | 0     |
| 6195   | 2                            |                                                |        | 0     |
| 6196   | 2                            |                                                |        | 0     |
| 6199   | 2                            |                                                |        | 0     |
| 6200   | 2                            |                                                |        | 0     |
| 6201   | 2                            |                                                |        | 0     |
| 6202   | 2                            |                                                |        | 0     |
| 6203   | 2                            |                                                |        | 0     |
| 6205   | 2                            |                                                |        | 0     |
| 6210   | 2                            |                                                |        | 0     |
| 6212   | 2                            |                                                |        | 0     |
| 6216   | 2                            |                                                |        | 0     |
| 6218   | 2                            |                                                |        | 0     |
| 6221   | 2                            |                                                |        | 0     |
| 6224   | 2                            |                                                |        | 0     |
| 6225   | 2                            |                                                |        | 0     |
| 6227   | 2                            |                                                |        | 0     |
| 6230   | 2                            |                                                |        | 0     |
| 6231   | 2                            |                                                |        | 0     |
| 6233   | 2                            |                                                |        | 0     |
| 6234   | 2                            |                                                |        | 0     |
| 6235   | 2                            |                                                |        | 0     |
| 6237   | 2                            |                                                |        | 0     |
| 6240   | 2                            |                                                |        | 0     |
| 6248   | 2                            |                                                |        | 0     |
| 6249   | 2                            |                                                |        | 0     |
| 6252   | 1                            | 2                                              | 3      | 0     |
| 6254   | 2                            |                                                |        | 0     |
| 6269   | 2                            |                                                |        | 0     |
| 6304   | 2                            |                                                |        | 0     |
| 6334   | 2                            |                                                |        | 0     |

| respid | ICS Urgency Incontinence Q30 | ICS Urgency Incontinence -<br>how often Q30a_1 | Q30b_1 | Q31_1 |
|--------|------------------------------|------------------------------------------------|--------|-------|
| 6341   | 2                            |                                                |        | 0     |
| 6350   | 1                            | 2                                              | 2      | 0     |
| 6370   | 2                            |                                                |        | 0     |
| 6384   | 1                            | 1                                              | 1      | 0     |
| 6400   | 2                            |                                                |        | 0     |
| 6418   | 2                            |                                                |        | 0     |
| 6467   | 2                            |                                                |        | 0     |
| 6469   | 2                            |                                                |        | 0     |
| 6474   | 2                            |                                                |        | 0     |
| 6475   | 2                            |                                                |        | 0     |
| 6476   | 2                            |                                                |        | 0     |
| 6477   | 2                            |                                                |        | 0     |
| 6480   | 2                            |                                                |        | 0     |
| 6481   | 2                            |                                                |        | 0     |
| 6485   | 2                            |                                                |        | 0     |
| 6488   | 1                            | 2                                              | 1      | 0     |
| 6495   | 2                            |                                                |        | 0     |
| 6499   | 2                            |                                                |        | 0     |
| 6500   | 2                            |                                                |        | 0     |
| 6504   | 2                            |                                                |        | 0     |
| 6507   | 1                            | 1                                              | 1      | 0     |
| 6512   | 2                            |                                                |        | 0     |
| 6525   | 2                            |                                                |        | 0     |
| 6532   | 2                            |                                                |        | 0     |
| 6535   | 2                            |                                                |        | 0     |
| 6546   | 2                            |                                                |        | 0     |
| 6551   | 2                            |                                                |        | 0     |
| 6556   | 2                            |                                                |        | 0     |
| 6566   | 2                            |                                                |        | 0     |
| 6569   | 2                            |                                                |        | 0     |
| 6574   | 2                            |                                                |        | 0     |
| 6576   | 2                            |                                                |        | 0     |

| respid | ICS Urgency Incontinence Q30 | ICS Urgency Incontinence -<br>how often Q30a_1 | Q30b_1 | Q31_1 |
|--------|------------------------------|------------------------------------------------|--------|-------|
| 6580   | 2                            |                                                |        | 0     |
| 6584   | 2                            |                                                |        | 0     |
| 6585   | 2                            |                                                |        | 0     |
| 6589   | 2                            |                                                |        | 0     |
| 6590   | 2                            |                                                |        | 0     |
| 6598   | 2                            |                                                |        | 0     |
| 6603   | 1                            | 2                                              | 2      | 0     |
| 6618   | 2                            |                                                |        | 0     |
| 6630   | 2                            |                                                |        | 0     |
| 6636   | 2                            |                                                |        | 0     |
| 6649   | 2                            |                                                |        | 0     |
| 6675   | 2                            |                                                |        | 0     |
| 6678   | 2                            |                                                |        | 0     |
| 6681   | 2                            |                                                |        | 0     |
| 6684   | 2                            |                                                |        | 0     |
| 6688   | 2                            |                                                |        | 0     |
| 6691   | 2                            |                                                |        | 0     |
| 6694   | 1                            | 1                                              | 1      | 0     |
| 6696   | 2                            |                                                |        | 0     |
| 6720   | 1                            | 2                                              | 3      | 1     |
| 6722   | 1                            | 3                                              | 3      | 1     |
| 6724   | 2                            |                                                |        | 0     |
| 6725   | 2                            |                                                |        | 0     |
| 6727   | 2                            |                                                |        | 0     |
| 6734   | 2                            |                                                |        | 0     |
| 6739   | 2                            |                                                |        | 0     |
| 6743   | 2                            |                                                |        | 0     |
| 6749   | 2                            |                                                |        | 0     |
| 6756   | 2                            |                                                |        | 0     |
| 6764   | 2                            |                                                |        | 0     |
| 6765   | 2                            |                                                |        | 0     |
| 6768   | 2                            |                                                |        | 0     |

| respid | ICS Urgency Incontinence Q30 | ICS Urgency Incontinence -<br>how often Q30a_1 | Q30b_1 | Q31_1 |
|--------|------------------------------|------------------------------------------------|--------|-------|
| 6773   | 2                            |                                                |        | 0     |
| 6775   | 2                            |                                                |        | 0     |
| 6777   | 2                            |                                                |        | 0     |
| 6779   | 2                            |                                                |        | 0     |
| 6790   | 2                            |                                                |        | 0     |
| 6797   | 2                            |                                                |        | 0     |
| 6798   | 2                            |                                                |        | 1     |
| 6808   | 2                            |                                                |        | 0     |
| 6810   | 2                            |                                                |        | 0     |
| 6811   | 2                            |                                                |        | 0     |
| 6812   | 2                            |                                                |        | 0     |
| 6814   | 2                            |                                                |        | 0     |
| 6819   | 2                            |                                                |        | 0     |
| 6820   | 2                            |                                                |        | 0     |
| 6832   | 2                            |                                                |        | 0     |
| 6854   | 2                            |                                                |        | 0     |
| 6855   | 2                            |                                                |        | 0     |
| 6857   | 2                            |                                                |        | 0     |
| 6858   | 2                            |                                                |        | 0     |
| 6859   | 2                            |                                                |        | 0     |
| 6860   | 2                            |                                                |        | 0     |
| 6862   | 2                            |                                                |        | 1     |
| 6879   | 2                            |                                                |        | 0     |
| 6893   | 2                            |                                                |        | 0     |
| 6898   | 2                            |                                                |        | 0     |
| 6902   | 1                            | 1                                              | 1      | 1     |
| 6903   | 2                            |                                                |        | 0     |
| 6907   | 2                            |                                                |        | 0     |
| 6908   | 2                            |                                                |        | 0     |
| 6912   | 2                            |                                                |        | 0     |
| 6915   | 2                            |                                                |        | 0     |
| 6916   | 1                            | 1                                              | 2      | 1     |



| respid | ICS Urgency Incontinence Q30 | ICS Urgency Incontinence -<br>how often Q30a_1 | Q30b_1 | Q31_1 |
|--------|------------------------------|------------------------------------------------|--------|-------|
| 6917   | 2                            |                                                |        | 0     |
| 6923   | 2                            |                                                |        | 0     |
| 6934   | 2                            |                                                |        | 0     |
| 6937   | 2                            |                                                |        | 0     |
| 6945   | 2                            |                                                |        | 0     |
| 6954   | 2                            |                                                |        | 0     |
| 6956   | 2                            |                                                |        | 0     |
| 6958   | 2                            |                                                |        | 0     |
| 6961   | 1                            | 1                                              | 0      | 0     |
| 6963   | 2                            |                                                |        | 0     |
| 6964   | 2                            |                                                |        | 0     |
| 6976   | 2                            |                                                |        | 0     |
| 6977   | 2                            |                                                |        | 0     |
| 7000   | 1                            | 2                                              | 1      | 0     |
| 7001   | 2                            |                                                |        | 0     |
| 7005   | 2                            |                                                |        | 0     |
| 7006   | 2                            |                                                |        | 0     |
| 7008   | 1                            | 2                                              | 3      | 0     |
| 7009   | 2                            |                                                |        | 0     |
| 7019   | 2                            |                                                |        | 0     |
| 7021   | 2                            |                                                |        | 0     |
| 7026   | 2                            |                                                |        | 0     |
| 7030   | 1                            | 2                                              | 2      | 0     |
| 7034   | 2                            |                                                |        | 0     |
| 7039   | 1                            | 2                                              | 2      | 0     |
| 7041   | 2                            |                                                |        | 0     |
| 7047   | 2                            |                                                |        | 0     |
| 7051   | 2                            |                                                |        | 0     |
| 7052   | 1                            | 1                                              | 1      | 0     |
| 7059   | 2                            |                                                |        | 0     |
| 7062   | 1                            | 1                                              | 1      | 0     |
| 7065   | 1                            | 1                                              | 1      | 0     |

| respid | ICS Urgency Incontinence Q30 | ICS Urgency Incontinence -<br>how often Q30a_1 | Q30b_1 | Q31_1 |
|--------|------------------------------|------------------------------------------------|--------|-------|
| 7066   | 2                            |                                                |        | 0     |
| 7069   | 2                            |                                                |        | 0     |
| 7070   | 2                            |                                                |        | 0     |
| 7073   | 2                            |                                                |        | 0     |
| 7078   | 2                            |                                                |        | 0     |
| 7083   | 1                            | 3                                              | 4      | 0     |
| 7084   | 1                            | 3                                              | 3      | 0     |
| 7085   | 2                            |                                                |        | 0     |
| 7088   | 1                            | 3                                              | 2      | 0     |
| 7090   | 2                            |                                                |        | 0     |
| 7095   | 2                            |                                                |        | 0     |
| 7100   | 2                            |                                                |        | 0     |
| 7102   | 2                            |                                                |        | 0     |
| 7103   | 2                            |                                                |        | 0     |
| 7108   | 2                            |                                                |        | 0     |
| 7109   | 2                            |                                                |        | 0     |
| 7110   | 2                            |                                                |        | 0     |
| 7112   | 2                            |                                                |        | 0     |
| 7114   | 2                            |                                                |        | 0     |
| 7116   | 2                            |                                                |        | 0     |
| 7117   | 2                            |                                                |        | 0     |
| 7118   | 2                            |                                                |        | 0     |
| 7120   | 1                            | 2                                              | 3      | 1     |
| 7124   | 2                            |                                                |        | 0     |
| 7130   | 2                            |                                                |        | 0     |
| 7135   | 2                            |                                                |        | 0     |
| 7137   | 2                            |                                                |        | 1     |
| 7140   | 2                            |                                                |        | 0     |
| 7141   | 2                            |                                                |        | 0     |
| 7148   | 2                            |                                                |        | 0     |
| 7152   | 2                            |                                                |        | 0     |
| 7154   | 2                            |                                                |        | 0     |

| respid | ICS Urgency Incontinence Q30 | ICS Urgency Incontinence -<br>how often Q30a_1 | Q30b_1 | Q31_1 |
|--------|------------------------------|------------------------------------------------|--------|-------|
| 7156   | 2                            |                                                |        | 0     |
| 7158   | 2                            |                                                |        | 0     |
| 7159   | 2                            |                                                |        | 0     |
| 7161   | 2                            |                                                |        | 0     |
| 7164   | 2                            |                                                |        | 0     |
| 7166   | 2                            |                                                |        | 0     |
| 7167   | 2                            |                                                |        | 0     |
| 7168   | 2                            |                                                |        | 0     |
| 7170   | 2                            |                                                |        | 0     |
| 7171   | 2                            |                                                |        | 0     |
| 7172   | 2                            |                                                |        | 0     |
| 7173   | 2                            |                                                |        | 0     |
| 7175   | 2                            |                                                |        | 0     |
| 7176   | 2                            |                                                |        | 0     |
| 7180   | 2                            |                                                |        | 0     |
| 7183   | 2                            |                                                |        | 0     |
| 7189   | 2                            |                                                |        | 0     |
| 7193   | 2                            |                                                |        | 0     |
| 7194   | 2                            |                                                |        | 0     |
| 7195   | 2                            |                                                |        | 0     |
| 7200   | 2                            |                                                |        | 0     |
| 7201   | 2                            |                                                |        | 1     |
| 7205   | 1                            | 2                                              | 2      | 1     |
| 7207   | 2                            |                                                |        | 0     |
| 7208   | 2                            |                                                |        | 0     |
| 7210   | 2                            |                                                |        | 0     |
| 7211   | 2                            |                                                |        | 0     |
| 7217   | 1                            | 1                                              | 1      | 0     |
| 7218   | 2                            |                                                |        | 0     |
| 7220   | 2                            |                                                |        | 0     |
| 7225   | 2                            |                                                |        | 0     |
| 7228   | 2                            |                                                |        | 0     |

| respid | ICS Urgency Incontinence Q30 | ICS Urgency Incontinence -<br>how often Q30a_1 | Q30b_1 | Q31_1 |
|--------|------------------------------|------------------------------------------------|--------|-------|
| 7230   | 2                            |                                                |        | 0     |
| 7233   | 2                            |                                                |        | 0     |
| 7234   | 2                            |                                                |        | 0     |
| 7235   | 2                            |                                                |        | 0     |
| 7236   | 2                            |                                                |        | 0     |
| 7241   | 2                            |                                                |        | 0     |
| 7251   | 2                            |                                                |        | 0     |
| 7253   | 2                            |                                                |        | 0     |
| 7259   | 2                            |                                                |        | 0     |
| 7260   | 2                            |                                                |        | 0     |
| 7261   | 2                            |                                                |        | 0     |
| 7263   | 2                            |                                                |        | 0     |
| 7265   | 2                            |                                                |        | 0     |
| 7268   | 2                            |                                                |        | 0     |
| 7269   | 2                            |                                                |        | 0     |
| 7271   | 1                            | 3                                              | 2      | 0     |
| 7276   | 1                            | 3                                              | 3      | 1     |
| 7280   | 2                            |                                                |        | 0     |
| 7283   | 2                            |                                                |        | 0     |
| 7284   | 2                            |                                                |        | 0     |
| 7286   | 2                            |                                                |        | 0     |
| 7287   | 2                            |                                                |        | 0     |
| 7288   | 1                            | 2                                              | 1      | 0     |
| 7294   | 2                            |                                                |        | 0     |
| 7295   | 2                            |                                                |        | 0     |
| 7296   | 2                            |                                                |        | 0     |
| 7297   | 2                            |                                                |        | 0     |
| 7299   | 1                            | 1                                              | 1      | 0     |
| 7300   | 1                            | 1                                              | 1      | 0     |
| 7301   | 2                            |                                                |        | 0     |
| 7302   | 2                            |                                                |        | 0     |
| 7306   | 2                            |                                                |        | 0     |

| respid | ICS Urgency Incontinence Q30 | ICS Urgency Incontinence -<br>how often Q30a_1 | Q30b_1 | Q31_1 |
|--------|------------------------------|------------------------------------------------|--------|-------|
| 7313   | 1                            | 3                                              | 4      | 1     |
| 7315   | 1                            | 2                                              | 2      | 0     |
| 7317   | 2                            |                                                |        | 0     |
| 7321   | 2                            |                                                |        | 0     |
| 7322   | 2                            |                                                |        | 0     |
| 7323   | 1                            | 1                                              | 1      | 1     |
| 7333   | 1                            | 4                                              | 3      | 0     |
| 7335   | 1                            | 3                                              | 3      | 1     |
| 7336   | 2                            |                                                |        | 0     |
| 7337   | 2                            |                                                |        | 0     |
| 7338   | 2                            |                                                |        | 0     |
| 7340   | 2                            |                                                |        | 0     |
| 7341   | 2                            |                                                |        | 0     |
| 7342   | 2                            |                                                |        | 0     |
| 7344   | 2                            |                                                |        | 0     |
| 7346   | 1                            | 2                                              | 2      | 0     |
| 7347   | 2                            |                                                |        | 0     |
| 7349   | 2                            |                                                |        | 0     |
| 7352   | 2                            |                                                |        | 0     |
| 7353   | 2                            |                                                |        | 0     |
| 7355   | 2                            |                                                |        | 0     |
| 7356   | 2                            |                                                |        | 0     |
| 7360   | 1                            | 3                                              | 3      | 0     |
| 7371   | 2                            |                                                |        | 0     |
| 7376   | 2                            |                                                |        | 0     |
| 7379   | 2                            |                                                |        | 0     |
| 7381   | 2                            |                                                |        | 0     |
| 7386   | 2                            |                                                |        | 0     |
| 7389   | 2                            |                                                |        | 0     |
| 7390   | 1                            | 2                                              | 3      | 0     |
| 7393   | 2                            |                                                |        | 0     |
| 7394   | 2                            |                                                |        | 0     |

| respid | ICS Urgency Incontinence Q30 | ICS Urgency Incontinence -<br>how often Q30a_1 | Q30b_1 | Q31_1 |
|--------|------------------------------|------------------------------------------------|--------|-------|
| 7396   | 1                            | 1                                              | 1      | 1     |
| 7400   | 1                            | 1                                              | 1      | 1     |
| 7401   | 2                            |                                                |        | 0     |
| 7403   | 2                            |                                                |        | 0     |
| 7406   | 1                            | 2                                              | 4      | 0     |
| 7409   | 2                            |                                                |        | 0     |
| 7410   | 1                            | 2                                              | 3      | 0     |
| 7412   | 2                            |                                                |        | 0     |
| 7414   | 2                            |                                                |        | 0     |
| 7415   | 2                            |                                                |        | 0     |
| 7417   | 1                            | 1                                              | 1      | 0     |
| 7421   | 1                            | 3                                              | 3      | 0     |
| 7425   | 2                            |                                                |        | 0     |
| 7430   | 2                            |                                                |        | 0     |
| 7432   | 2                            |                                                |        | 0     |
| 7433   | 2                            |                                                |        | 1     |
| 7442   | 2                            |                                                |        | 0     |
| 7445   | 2                            |                                                |        | 0     |
| 7446   | 2                            |                                                |        | 0     |
| 7449   | 2                            |                                                |        | 0     |
| 7450   | 2                            |                                                |        | 0     |
| 7451   | 2                            |                                                |        | 0     |
| 7459   | 2                            |                                                |        | 0     |
| 7462   | 2                            |                                                |        | 0     |
| 7463   | 2                            |                                                |        | 0     |
| 7469   | 2                            |                                                |        | 0     |
| 7482   | 2                            |                                                |        | 0     |
| 7484   | 1                            | 1                                              | 1      | 0     |
| 7486   | 2                            |                                                |        | 0     |
| 7496   | 2                            |                                                |        | 0     |
| 7502   | 2                            |                                                |        | 0     |
| 7504   | 2                            |                                                |        | 0     |

| respid | ICS Urgency Incontinence Q30 | ICS Urgency Incontinence -<br>how often Q30a_1 | Q30b_1 | Q31_1 |
|--------|------------------------------|------------------------------------------------|--------|-------|
| 7509   | 2                            |                                                |        | 0     |
| 7513   | 1                            | 2                                              | 3      | 1     |
| 7514   | 2                            |                                                |        | 0     |
| 7520   | 2                            |                                                |        | 0     |
| 7523   | 2                            |                                                |        | 0     |
| 7526   | 1                            | 1                                              | 1      | 0     |
| 7529   | 2                            |                                                |        | 0     |
| 7534   | 2                            |                                                |        | 0     |
| 7536   | 2                            |                                                |        | 0     |
| 7540   | 2                            |                                                |        | 0     |
| 7541   | 2                            |                                                |        | 0     |
| 7542   | 2                            |                                                |        | 0     |
| 7555   | 2                            |                                                |        | 0     |
| 7566   | 2                            |                                                |        | 0     |
| 7568   | 2                            |                                                |        | 0     |
| 7570   | 1                            | 3                                              | 2      | 0     |
| 7572   | 2                            |                                                |        | 0     |
| 7573   | 2                            |                                                |        | 1     |
| 7576   | 2                            |                                                |        | 0     |
| 7577   | 2                            |                                                |        | 0     |
| 7583   | 2                            |                                                |        | 0     |
| 7584   | 1                            | 1                                              | 0      | 0     |
| 7585   | 1                            | 3                                              | 3      | 1     |
| 7586   | 1                            | 2                                              | 1      | 0     |
| 7587   | 2                            |                                                |        | 0     |
| 7588   | 2                            |                                                |        | 0     |
| 7596   | 2                            |                                                |        | 0     |
| 7599   | 2                            |                                                |        | 0     |
| 7600   | 1                            | 2                                              | 3      | 1     |
| 7602   | 2                            |                                                |        | 1     |
| 7613   | 2                            |                                                |        | 0     |
| 7620   | 2                            |                                                |        | 0     |

| respid | ICS Urgency Incontinence Q30 | ICS Urgency Incontinence -<br>how often Q30a_1 | Q30b_1 | Q31_1 |
|--------|------------------------------|------------------------------------------------|--------|-------|
| 7623   | 2                            |                                                |        | 0     |
| 7635   | 2                            |                                                |        | 0     |
| 7636   | 1                            | 1                                              | 1      | 0     |
| 7643   | 1                            | 2                                              | 1      | 0     |
| 7645   | 1                            | 1                                              | 3      | 0     |
| 7649   | 1                            | 4                                              | 3      | 0     |
| 7651   | 2                            |                                                |        | 0     |
| 7652   | 1                            | 2                                              | 3      | 0     |
| 7655   | 2                            |                                                |        | 0     |
| 7657   | 2                            |                                                |        | 0     |
| 7675   | 2                            |                                                |        | 0     |
| 7676   | 2                            |                                                |        | 0     |
| 7684   | 2                            |                                                |        | 1     |
| 7693   | 2                            |                                                |        | 0     |
| 7694   | 1                            | 3                                              | 4      | 0     |
| 7695   | 2                            |                                                |        | 0     |
| 7696   | 1                            | 3                                              | 4      | 0     |
| 7698   | 2                            |                                                |        | 0     |
| 7700   | 2                            |                                                |        | 1     |
| 7701   | 2                            |                                                |        | 0     |
| 7704   | 2                            |                                                |        | 0     |
| 7709   | 2                            |                                                |        | 0     |
| 7713   | 2                            |                                                |        | 0     |
| 7714   | 2                            |                                                |        | 0     |
| 7718   | 1                            | 3                                              | 4      | 0     |
| 7720   | 2                            |                                                |        | 0     |
| 7721   | 2                            |                                                |        | 0     |
| 7722   | 2                            |                                                |        | 0     |
| 7724   | 2                            |                                                |        | 0     |
| 7728   | 2                            |                                                |        | 0     |
| 7731   | 2                            |                                                |        | 0     |
| 7735   | 2                            |                                                |        | 0     |



| respid | ICS Urgency Incontinence Q30 | ICS Urgency Incontinence -<br>how often Q30a_1 | Q30b_1 | Q31_1 |
|--------|------------------------------|------------------------------------------------|--------|-------|
| 7737   | 2                            |                                                |        | 0     |
| 7741   | 2                            |                                                |        | 0     |
| 7746   | 2                            |                                                |        | 0     |
| 7747   | 2                            |                                                |        | 0     |
| 7748   | 2                            |                                                |        | 0     |
| 7750   | 2                            |                                                |        | 1     |
| 7754   | 2                            |                                                |        | 0     |
| 7755   | 1                            | 1                                              | 0      | 0     |
| 7762   | 2                            |                                                |        | 0     |
| 7764   | 2                            |                                                |        | 0     |
| 7766   | 2                            |                                                |        | 0     |
| 7768   | 2                            |                                                |        | 0     |
| 7770   | 2                            |                                                |        | 0     |
| 7771   | 1                            | 1                                              | 0      | 0     |
| 7777   | 2                            |                                                |        | 0     |
| 7778   | 2                            |                                                |        | 0     |
| 7783   | 1                            | 3                                              | 3      | 1     |
| 7789   | 2                            |                                                |        | 0     |
| 7790   | 2                            |                                                |        | 0     |
| 7795   | 1                            | 1                                              | 1      | 0     |
| 7807   | 2                            |                                                |        | 0     |
| 7808   | 1                            | 2                                              | 3      | 0     |
| 7818   | 1                            | 2                                              | 3      | 0     |
| 7820   | 2                            |                                                |        | 0     |
| 7831   | 2                            |                                                |        | 0     |
| 7832   | 1                            | 1                                              | 0      | 0     |
| 7837   | 2                            |                                                |        | 0     |
| 7841   | 1                            | 2                                              | 2      | 1     |
| 7845   | 1                            | 2                                              | 3      | 0     |
| 7853   | 2                            |                                                |        | 0     |
| 7854   | 1                            | 1                                              | 0      | 0     |
| 7862   | 1                            | 1                                              | 2      | 0     |

| respid | ICS Urgency Incontinence Q30 | ICS Urgency Incontinence -<br>how often Q30a_1 | Q30b_1 | Q31_1 |
|--------|------------------------------|------------------------------------------------|--------|-------|
| 7871   | 2                            |                                                |        | 0     |
| 7875   | 2                            |                                                |        | 0     |
| 7880   | 2                            |                                                |        | 0     |
| 7881   | 2                            |                                                |        | 1     |
| 7883   | 2                            |                                                |        | 0     |
| 7896   | 2                            |                                                |        | 0     |
| 7905   | 2                            |                                                |        | 0     |
| 7919   | 2                            |                                                |        | 0     |
| 7928   | 1                            | 2                                              | 3      | 0     |
| 7929   | 2                            |                                                |        | 0     |
| 7938   | 2                            |                                                |        | 0     |
| 7940   | 2                            |                                                |        | 0     |
| 7941   | 2                            |                                                |        | 0     |
| 7952   | 2                            |                                                |        | 0     |
| 7962   | 2                            |                                                |        | 0     |
| 7968   | 2                            |                                                |        | 0     |
| 7972   | 2                            |                                                |        | 0     |
| 7983   | 1                            | 1                                              | 1      | 0     |
| 7990   | 2                            |                                                |        | 0     |
| 7993   | 1                            | 1                                              | 0      | 0     |
| 8005   | 2                            |                                                |        | 0     |
| 8008   | 2                            |                                                |        | 0     |
| 8012   | 2                            |                                                |        | 0     |
| 8021   | 2                            |                                                |        | 1     |
| 8024   | 2                            |                                                |        | 0     |
| 8043   | 2                            |                                                |        | 0     |
| 8051   | 2                            |                                                |        | 0     |
| 8056   | 2                            |                                                |        | 0     |
| 8061   | 2                            |                                                |        | 0     |
| 8066   | 2                            |                                                |        | 0     |
| 8069   | 2                            |                                                |        | 0     |
| 8071   | 2                            |                                                |        | 0     |

| respid | ICS Urgency Incontinence Q30 | ICS Urgency Incontinence -<br>how often Q30a_1 | Q30b_1 | Q31_1 |
|--------|------------------------------|------------------------------------------------|--------|-------|
| 8072   | 1                            | 1                                              | 0      | 0     |
| 8076   | 2                            |                                                |        | 0     |
| 8080   | 2                            |                                                |        | 0     |
| 8083   | 2                            |                                                |        | 0     |
| 8093   | 2                            |                                                |        | 1     |
| 8095   | 1                            | 1                                              | 2      | 0     |
| 8099   | 2                            |                                                |        | 0     |
| 8100   | 2                            |                                                |        | 0     |
| 8103   | 2                            |                                                |        | 0     |
| 8104   | 2                            |                                                |        | 0     |
| 8115   | 1                            | 3                                              | 1      | 0     |
| 8121   | 2                            |                                                |        | 0     |
| 8128   | 2                            |                                                |        | 0     |
| 8130   | 2                            |                                                |        | 0     |
| 8131   | 2                            |                                                |        | 0     |
| 8133   | 2                            |                                                |        | 0     |
| 8143   | 2                            |                                                |        | 0     |
| 8144   | 2                            |                                                |        | 1     |
| 8146   | 2                            |                                                |        | 0     |
| 8148   | 2                            |                                                |        | 0     |
| 8157   | 2                            |                                                |        | 0     |
| 8164   | 2                            |                                                |        | 0     |
| 8173   | 2                            |                                                |        | 0     |
| 8176   | 2                            |                                                |        | 1     |
| 8179   | 2                            |                                                |        | 0     |
| 8181   | 2                            |                                                |        | 0     |
| 8182   | 2                            |                                                |        | 0     |
| 8196   | 2                            |                                                |        | 0     |
| 8200   | 2                            |                                                |        | 0     |
| 8203   | 2                            |                                                |        | 0     |
| 8204   | 1                            | 2                                              | 4      | 1     |
| 8206   | 2                            |                                                |        | 0     |

| respid | ICS Urgency Incontinence Q30 | ICS Urgency Incontinence -<br>how often Q30a_1 | Q30b_1 | Q31_1 |
|--------|------------------------------|------------------------------------------------|--------|-------|
| 8208   | 2                            |                                                |        | 0     |
| 8212   | 2                            |                                                |        | 0     |
| 8222   | 2                            |                                                |        | 0     |
| 8223   | 2                            |                                                |        | 0     |
| 8225   | 2                            |                                                |        | 0     |
| 8226   | 1                            | 1                                              | 0      | 0     |
| 8228   | 2                            |                                                |        | 0     |
| 8229   | 2                            |                                                |        | 0     |
| 8239   | 2                            |                                                |        | 0     |
| 8246   | 1                            | 2                                              | 3      | 0     |
| 8258   | 1                            | 2                                              | 2      | 0     |
| 8260   | 2                            |                                                |        | 0     |
| 8262   | 2                            |                                                |        | 0     |
| 8263   | 2                            |                                                |        | 0     |
| 8267   | 2                            |                                                |        | 0     |
| 8271   | 1                            | 3                                              | 3      | 1     |
| 8274   | 2                            |                                                |        | 0     |
| 8275   | 1                            | 2                                              | 2      | 0     |
| 8279   | 2                            |                                                |        | 0     |
| 8285   | 1                            | 2                                              | 3      | 1     |
| 8287   | 1                            | 3                                              | 4      | 0     |
| 8289   | 2                            |                                                |        | 0     |
| 8291   | 2                            |                                                |        | 0     |
| 8299   | 1                            | 2                                              | 3      | 0     |
| 8301   | 2                            |                                                |        | 0     |
| 8302   | 2                            |                                                |        | 0     |
| 8308   | 1                            | 1                                              | 1      | 1     |
| 8313   | 2                            |                                                |        | 0     |
| 8316   | 2                            |                                                |        | 0     |
| 8317   | 2                            |                                                |        | 0     |
| 8319   | 2                            |                                                |        | 0     |
| 8323   | 2                            |                                                |        | 0     |

| respid | ICS Urgency Incontinence Q30 | ICS Urgency Incontinence -<br>how often Q30a_1 | Q30b_1 | Q31_1 |
|--------|------------------------------|------------------------------------------------|--------|-------|
| 8324   | 2                            |                                                |        | 0     |
| 8327   | 2                            |                                                |        | 0     |
| 8328   | 1                            | 2                                              | 2      | 0     |
| 8342   | 2                            |                                                |        | 0     |
| 8350   | 2                            |                                                |        | 0     |
| 8352   | 2                            |                                                |        | 0     |
| 8353   | 2                            |                                                |        | 0     |
| 8356   | 2                            |                                                |        | 1     |
| 8367   | 2                            |                                                |        | 0     |
| 8373   | 2                            |                                                |        | 0     |
| 8379   | 2                            |                                                |        | 0     |
| 8382   | 2                            |                                                |        | 0     |
| 8387   | 2                            |                                                |        | 0     |
| 8409   | 2                            |                                                |        | 0     |
| 8410   | 2                            |                                                |        | 0     |
| 8412   | 2                            |                                                |        | 0     |
| 8415   | 2                            |                                                |        | 0     |
| 8417   | 2                            |                                                |        | 0     |
| 8422   | 2                            |                                                |        | 0     |
| 8430   | 1                            | 1                                              | 2      | 0     |
| 8434   | 1                            | 1                                              | 1      | 0     |
| 8436   | 2                            |                                                |        | 0     |
| 8446   | 2                            |                                                |        | 0     |
| 8447   | 2                            |                                                |        | 0     |
| 8448   | 2                            |                                                |        | 0     |
| 8455   | 2                            |                                                |        | 0     |
| 8456   | 2                            |                                                |        | 0     |
| 8459   | 2                            |                                                |        | 0     |
| 8460   | 2                            |                                                |        | 0     |
| 8464   | 1                            | 1                                              | 1      | 0     |
| 8470   | 1                            | 2                                              | 2      | 0     |
| 8473   | 2                            |                                                |        | 0     |

| respid | ICS Urgency Incontinence Q30 | ICS Urgency Incontinence -<br>how often Q30a_1 | Q30b_1 | Q31_1 |
|--------|------------------------------|------------------------------------------------|--------|-------|
| 8486   | 2                            |                                                |        | 0     |
| 8487   | 2                            |                                                |        | 0     |
| 8489   | 2                            |                                                |        | 0     |
| 8494   | 2                            |                                                |        | 0     |
| 8495   | 1                            | 5                                              | 4      | 0     |
| 8497   | 2                            |                                                |        | 1     |
| 8510   | 1                            | 1                                              | 1      | 0     |
| 8515   | 2                            |                                                |        | 0     |
| 8526   | 2                            |                                                |        | 0     |
| 8530   | 2                            |                                                |        | 0     |
| 8532   | 2                            |                                                |        | 0     |
| 8533   | 2                            |                                                |        | 0     |
| 8534   | 2                            |                                                |        | 1     |
| 8572   | 2                            |                                                |        | 0     |
| 8582   | 2                            |                                                |        | 0     |
| 8584   | 2                            |                                                |        | 0     |
| 8585   | 2                            |                                                |        | 0     |
| 8586   | 2                            |                                                |        | 0     |
| 8589   | 2                            |                                                |        | 0     |
| 8593   | 2                            |                                                |        | 0     |
| 8594   | 2                            |                                                |        | 0     |
| 8601   | 2                            |                                                |        | 0     |
| 8603   | 2                            |                                                |        | 0     |
| 8604   | 2                            |                                                |        | 0     |
| 8605   | 2                            |                                                |        | 0     |
| 8607   | 2                            |                                                |        | 0     |
| 8623   | 2                            |                                                |        | 0     |
| 8626   | 1                            | 2                                              | 1      | 1     |
| 8638   | 2                            |                                                |        | 1     |
| 8640   | 2                            |                                                |        | 0     |
| 8641   | 2                            |                                                |        | 0     |
| 8643   | 2                            |                                                |        | 0     |

| respid | ICS Urgency Incontinence Q30 | ICS Urgency Incontinence -<br>how often Q30a_1 | Q30b_1 | Q31_1 |
|--------|------------------------------|------------------------------------------------|--------|-------|
| 8644   | 2                            |                                                |        | 0     |
| 8646   | 2                            |                                                |        | 0     |
| 8647   | 2                            |                                                |        | 0     |
| 8649   | 2                            |                                                |        | 0     |
| 8650   | 1                            | 1                                              | 1      | 1     |
| 8658   | 2                            |                                                |        | 0     |
| 8659   | 2                            |                                                |        | 0     |
| 8669   | 2                            |                                                |        | 0     |
| 8672   | 2                            |                                                |        | 0     |
| 8673   | 2                            |                                                |        | 0     |
| 8676   | 2                            |                                                |        | 0     |
| 8677   | 2                            |                                                |        | 0     |
| 8681   | 2                            |                                                |        | 1     |
| 8688   | 2                            |                                                |        | 0     |
| 8689   | 1                            | 1                                              | 2      | 0     |
| 8690   | 2                            |                                                |        | 0     |
| 8693   | 1                            | 1                                              | 0      | 0     |
| 8694   | 2                            |                                                |        | 0     |
| 8699   | 2                            |                                                |        | 0     |
| 8700   | 2                            |                                                |        | 0     |
| 8703   | 2                            |                                                |        | 0     |
| 8704   | 2                            |                                                |        | 0     |
| 8706   | 1                            | 2                                              | 2      | 0     |
| 8709   | 2                            |                                                |        | 0     |
| 8715   | 2                            |                                                |        | 0     |
| 8728   | 2                            |                                                |        | 0     |
| 8729   | 2                            |                                                |        | 0     |
| 8730   | 2                            |                                                |        | 0     |
| 8742   | 2                            |                                                |        | 0     |
| 8748   | 2                            |                                                |        | 1     |
| 8749   | 2                            |                                                |        | 0     |
| 8750   | 2                            |                                                |        | 0     |

| respid | ICS Urgency Incontinence Q30 | ICS Urgency Incontinence -<br>how often Q30a_1 | Q30b_1 | Q31_1 |
|--------|------------------------------|------------------------------------------------|--------|-------|
| 8751   | 2                            |                                                |        | 0     |
| 8752   | 2                            |                                                |        | 0     |
| 8754   | 2                            |                                                |        | 0     |
| 8757   | 2                            |                                                |        | 0     |
| 8760   | 2                            |                                                |        | 0     |
| 8761   | 2                            |                                                |        | 0     |
| 8762   | 1                            | 1                                              | 1      | 0     |
| 8763   | 2                            |                                                |        | 0     |
| 8764   | 2                            |                                                |        | 0     |
| 8765   | 2                            |                                                |        | 0     |
| 8766   | 2                            |                                                |        | 0     |
| 8767   | 1                            | 2                                              | 2      | 1     |
| 8768   | 2                            |                                                |        | 0     |
| 8770   | 2                            |                                                |        | 0     |
| 8771   | 2                            |                                                |        | 0     |
| 8773   | 2                            |                                                |        | 0     |
| 8774   | 2                            |                                                |        | 0     |
| 8776   | 2                            |                                                |        | 1     |
| 8777   | 2                            |                                                |        | 0     |
| 8778   | 2                            |                                                |        | 0     |
| 8779   | 2                            |                                                |        | 0     |
| 8784   | 2                            |                                                |        | 0     |
| 8786   | 2                            |                                                |        | 0     |
| 8787   | 2                            |                                                |        | 0     |
| 8790   | 2                            |                                                |        | 0     |
| 8791   | 1                            | 2                                              | 3      | 1     |
| 8793   | 2                            |                                                |        | 0     |
| 8795   | 1                            | 1                                              | 1      | 0     |
| 8797   | 2                            |                                                |        | 0     |
| 8801   | 2                            |                                                |        | 0     |
| 8802   | 2                            |                                                |        | 0     |
| 8807   | 2                            |                                                |        | 0     |



| respid | ICS Urgency Incontinence Q30 | ICS Urgency Incontinence -<br>how often Q30a_1 | Q30b_1 | Q31_1 |
|--------|------------------------------|------------------------------------------------|--------|-------|
| 8813   | 2                            |                                                |        | 0     |
| 8817   | 2                            |                                                |        | 0     |
| 8818   | 2                            |                                                |        | 0     |
| 8821   | 2                            |                                                |        | 0     |
| 8822   | 2                            |                                                |        | 0     |
| 8823   | 2                            |                                                |        | 0     |
| 8824   | 2                            |                                                |        | 0     |
| 8825   | 2                            |                                                |        | 0     |
| 8834   | 1                            | 3                                              | 3      | 0     |
| 8840   | 1                            | 2                                              | 4      | 1     |
| 8843   | 1                            | 5                                              | 4      | 1     |
| 8846   | 2                            |                                                |        | 0     |
| 8862   | 2                            |                                                |        | 0     |
| 8866   | 2                            |                                                |        | 0     |
| 8869   | 2                            |                                                |        | 0     |
| 8872   | 2                            |                                                |        | 1     |
| 8903   | 2                            |                                                |        | 0     |
| 8909   | 2                            |                                                |        | 0     |
| 8926   | 2                            |                                                |        | 0     |
| 8936   | 2                            |                                                |        | 0     |
| 8945   | 2                            |                                                |        | 0     |
| 8954   | 2                            |                                                |        | 0     |
| 8955   | 2                            |                                                |        | 1     |
| 8958   | 2                            |                                                |        | 0     |
| 8959   | 2                            |                                                |        | 0     |
| 8960   | 2                            |                                                |        | 0     |
| 8976   | 2                            |                                                |        | 0     |
| 8977   | 2                            |                                                |        | 0     |
| 8979   | 2                            |                                                |        | 0     |
| 8985   | 2                            |                                                |        | 0     |
| 8994   | 2                            |                                                |        | 0     |
| 8997   | 2                            |                                                |        | 0     |

| respid | ICS Urgency Incontinence Q30 | ICS Urgency Incontinence -<br>how often Q30a_1 | Q30b_1 | Q31_1 |
|--------|------------------------------|------------------------------------------------|--------|-------|
| 9002   | 2                            |                                                |        | 0     |
| 9005   | 2                            |                                                |        | 0     |
| 9017   | 2                            |                                                |        | 0     |
| 9018   | 2                            |                                                |        | 0     |
| 9021   | 2                            |                                                |        | 0     |
| 9029   | 1                            | 4                                              | 3      | 1     |
| 9035   | 2                            |                                                |        | 0     |
| 9038   | 2                            |                                                |        | 0     |
| 9039   | 2                            |                                                |        | 0     |
| 9040   | 2                            |                                                |        | 0     |
| 9042   | 2                            |                                                |        | 0     |
| 9043   | 2                            |                                                |        | 0     |
| 9045   | 2                            |                                                |        | 0     |
| 9051   | 2                            |                                                |        | 0     |
| 9067   | 2                            |                                                |        | 0     |
| 9069   | 2                            |                                                |        | 0     |
| 9073   | 1                            | 2                                              | 1      | 0     |
| 9084   | 2                            |                                                |        | 0     |
| 9096   | 2                            |                                                |        | 0     |
| 9100   | 2                            |                                                |        | 0     |
| 9107   | 2                            |                                                |        | 0     |
| 9110   | 2                            |                                                |        | 0     |
| 9120   | 1                            | 1                                              | 0      | 0     |
| 9122   | 2                            |                                                |        | 1     |
| 9130   | 2                            |                                                |        | 0     |
| 9134   | 2                            |                                                |        | 0     |
| 9137   | 2                            |                                                |        | 0     |
| 9139   | 2                            |                                                |        | 0     |
| 9144   | 2                            |                                                |        | 0     |
| 9157   | 2                            |                                                |        | 0     |
| 9166   | 2                            |                                                |        | 0     |
| 9177   | 2                            |                                                |        | 0     |

| respid | ICS Urgency Incontinence Q30 | ICS Urgency Incontinence -<br>how often Q30a_1 | Q30b_1 | Q31_1 |
|--------|------------------------------|------------------------------------------------|--------|-------|
| 9181   | 2                            |                                                |        | 0     |
| 9183   | 2                            |                                                |        | 0     |
| 9184   | 1                            | 2                                              | 3      | 0     |
| 9188   | 2                            |                                                |        | 0     |
| 9197   | 2                            |                                                |        | 0     |
| 9200   | 1                            | 2                                              | 3      | 1     |
| 9205   | 2                            |                                                |        | 0     |
| 9207   | 2                            |                                                |        | 0     |
| 9213   | 2                            |                                                |        | 0     |
| 9216   | 2                            |                                                |        | 1     |
| 9217   | 2                            |                                                |        | 0     |
| 9218   | 2                            |                                                |        | 0     |
| 9219   | 1                            | 2                                              | 3      | 0     |
| 9220   | 2                            |                                                |        | 0     |
| 9221   | 2                            |                                                |        | 0     |
| 9223   | 1                            | 4                                              | 4      | 1     |
| 9228   | 2                            |                                                |        | 0     |
| 9230   | 2                            |                                                |        | 0     |
| 9231   | 2                            |                                                |        | 0     |
| 9233   | 2                            |                                                |        | 0     |
| 9235   | 2                            |                                                |        | 1     |
| 9237   | 1                            | 1                                              | 1      | 0     |
| 9242   | 2                            |                                                |        | 1     |
| 9250   | 2                            |                                                |        | 0     |
| 9253   | 2                            |                                                |        | 0     |
| 9257   | 2                            |                                                |        | 0     |
| 9263   | 2                            |                                                |        | 0     |
| 9267   | 2                            |                                                |        | 0     |
| 9272   | 2                            |                                                |        | 0     |
| 9279   | 2                            |                                                |        | 0     |
| 9281   | 2                            |                                                |        | 0     |
| 9285   | 2                            |                                                |        | 0     |

| respid | ICS Urgency Incontinence Q30 | ICS Urgency Incontinence -<br>how often Q30a_1 | Q30b_1 | Q31_1 |
|--------|------------------------------|------------------------------------------------|--------|-------|
| 9286   | 2                            |                                                |        | 0     |
| 9294   | 1                            | 1                                              | 1      | 0     |
| 9295   | 2                            |                                                |        | 0     |
| 9297   | 2                            |                                                |        | 0     |
| 9299   | 2                            |                                                |        | 0     |
| 9309   | 1                            | 1                                              | 0      | 0     |
| 9315   | 2                            |                                                |        | 0     |
| 9320   | 2                            |                                                |        | 0     |
| 9324   | 2                            |                                                |        | 0     |
| 9326   | 2                            |                                                |        | 0     |
| 9333   | 2                            |                                                |        | 0     |
| 9334   | 2                            |                                                |        | 0     |
| 9336   | 2                            |                                                |        | 0     |
| 9337   | 2                            |                                                |        | 0     |
| 9342   | 2                            |                                                |        | 0     |
| 9347   | 2                            |                                                |        | 0     |
| 9352   | 2                            |                                                |        | 0     |
| 9355   | 2                            |                                                |        | 0     |
| 9356   | 2                            |                                                |        | 0     |
| 9359   | 2                            |                                                |        | 0     |
| 9368   | 2                            |                                                |        | 0     |
| 9375   | 2                            |                                                |        | 0     |
| 9384   | 2                            |                                                |        | 0     |
| 9388   | 2                            |                                                |        | 0     |
| 9397   | 1                            | 2                                              | 3      | 0     |
| 9400   | 2                            |                                                |        | 0     |
| 9401   | 2                            |                                                |        | 0     |
| 9402   | 2                            |                                                |        | 0     |
| 9417   | 2                            |                                                |        | 0     |
| 9424   | 2                            |                                                |        | 0     |
| 9427   | 2                            |                                                |        | 0     |
| 9429   | 2                            |                                                |        | 0     |

| respid | ICS Urgency Incontinence Q30 | ICS Urgency Incontinence -<br>how often Q30a_1 | Q30b_1 | Q31_1 |
|--------|------------------------------|------------------------------------------------|--------|-------|
| 9437   | 2                            |                                                |        | 0     |
| 9442   | 2                            |                                                |        | 0     |
| 9446   | 2                            |                                                |        | 0     |
| 9447   | 2                            |                                                |        | 0     |
| 9448   | 1                            | 1                                              | 1      | 0     |
| 9449   | 2                            |                                                |        | 0     |
| 9455   | 2                            |                                                |        | 0     |
| 9459   | 2                            |                                                |        | 0     |
| 9460   | 2                            |                                                |        | 0     |
| 9461   | 2                            |                                                |        | 0     |
| 9463   | 2                            |                                                |        | 0     |
| 9464   | 2                            |                                                |        | 0     |
| 9466   | 2                            |                                                |        | 0     |
| 9477   | 2                            |                                                |        | 0     |
| 9482   | 1                            | 3                                              | 3      | 0     |
| 9486   | 1                            | 2                                              | 1      | 0     |
| 9488   | 1                            | 1                                              | 2      | 1     |
| 9489   | 2                            |                                                |        | 0     |
| 9496   | 2                            |                                                |        | 0     |
| 9499   | 2                            |                                                |        | 0     |
| 9512   | 2                            |                                                |        | 0     |
| 9514   | 2                            |                                                |        | 0     |
| 9516   | 2                            |                                                |        | 0     |
| 9517   | 2                            |                                                |        | 1     |
| 9520   | 2                            |                                                |        | 0     |
| 9527   | 2                            |                                                |        | 0     |
| 9532   | 2                            |                                                |        | 0     |
| 9533   | 2                            |                                                |        | 0     |
| 9543   | 2                            |                                                |        | 0     |
| 9550   | 2                            |                                                |        | 0     |
| 9553   | 2                            |                                                |        | 0     |
| 9555   | 1                            | 3                                              | 2      | 0     |

| respid | ICS Urgency Incontinence Q30 | ICS Urgency Incontinence -<br>how often Q30a_1 | Q30b_1 | Q31_1 |
|--------|------------------------------|------------------------------------------------|--------|-------|
| 9565   | 2                            |                                                |        | 0     |
| 9583   | 1                            | 3                                              | 3      | 0     |
| 9594   | 2                            |                                                |        | 1     |
| 9596   | 2                            |                                                |        | 0     |
| 9600   | 2                            |                                                |        | 0     |
| 9602   | 2                            |                                                |        | 0     |
| 9606   | 2                            |                                                |        | 0     |
| 9608   | 2                            |                                                |        | 0     |
| 9610   | 1                            | 2                                              | 1      | 0     |
| 9612   | 1                            | 1                                              | 2      | 1     |
| 9613   | 2                            |                                                |        | 0     |
| 9614   | 2                            |                                                |        | 0     |
| 9620   | 2                            |                                                |        | 0     |
| 9628   | 2                            |                                                |        | 0     |
| 9631   | 2                            |                                                |        | 0     |
| 9632   | 2                            |                                                |        | 0     |
| 9633   | 1                            | 1                                              | 2      | 0     |
| 9639   | 2                            |                                                |        | 0     |
| 9640   | 2                            |                                                |        | 1     |
| 9642   | 2                            |                                                |        | 0     |
| 9653   | 2                            |                                                |        | 0     |
| 9658   | 2                            |                                                |        | 0     |
| 9659   | 2                            |                                                |        | 1     |
| 9661   | 2                            |                                                |        | 0     |
| 9664   | 2                            |                                                |        | 0     |
| 9665   | 1                            | 1                                              | 1      | 0     |
| 9666   | 2                            |                                                |        | 0     |
| 9667   | 2                            |                                                |        | 0     |
| 9668   | 2                            |                                                |        | 0     |
| 9670   | 2                            |                                                |        | 0     |
| 9671   | 2                            |                                                |        | 0     |
| 9681   | 2                            |                                                |        | 0     |

| respid | ICS Urgency Incontinence Q30 | ICS Urgency Incontinence -<br>how often Q30a_1 | Q30b_1 | Q31_1 |
|--------|------------------------------|------------------------------------------------|--------|-------|
| 9684   | 2                            |                                                |        | 0     |
| 9685   | 2                            |                                                |        | 0     |
| 9686   | 2                            |                                                |        | 0     |
| 9688   | 1                            | 1                                              | 1      | 0     |
| 9692   | 2                            |                                                |        | 0     |
| 9693   | 1                            | 5                                              | 4      | 1     |
| 9698   | 2                            |                                                |        | 0     |
| 9699   | 1                            | 2                                              | 2      | 1     |
| 9701   | 2                            |                                                |        | 0     |
| 9702   | 2                            |                                                |        | 0     |
| 9709   | 2                            |                                                |        | 0     |
| 9713   | 2                            |                                                |        | 0     |
| 9715   | 2                            |                                                |        | 0     |
| 9721   | 2                            |                                                |        | 0     |
| 9725   | 2                            |                                                |        | 0     |
| 9729   | 2                            |                                                |        | 0     |
| 9731   | 2                            |                                                |        | 0     |
| 9736   | 2                            |                                                |        | 0     |
| 9740   | 2                            |                                                |        | 0     |
| 9741   | 2                            |                                                |        | 0     |
| 9749   | 2                            |                                                |        | 0     |
| 9750   | 2                            |                                                |        | 0     |
| 9751   | 1                            | 2                                              | 3      | 1     |
| 9753   | 2                            |                                                |        | 0     |
| 9754   | 1                            | 2                                              | 4      | 0     |
| 9756   | 1                            | 2                                              | 2      | 0     |
| 9758   | 1                            | 2                                              | 3      | 0     |
| 9759   | 2                            |                                                |        | 0     |
| 9760   | 2                            |                                                |        | 0     |
| 9761   | 2                            |                                                |        | 0     |
| 9762   | 2                            |                                                |        | 0     |
| 9764   | 2                            |                                                |        | 0     |

| respid | ICS Urgency Incontinence Q30 | ICS Urgency Incontinence -<br>how often Q30a_1 | Q30b_1 | Q31_1 |
|--------|------------------------------|------------------------------------------------|--------|-------|
| 9768   | 2                            |                                                |        | 0     |
| 9769   | 2                            |                                                |        | 0     |
| 9770   | 2                            |                                                |        | 0     |
| 9771   | 2                            |                                                |        | 0     |
| 9772   | 2                            |                                                |        | 0     |
| 9773   | 2                            |                                                |        | 0     |
| 9776   | 2                            |                                                |        | 0     |
| 9786   | 1                            | 2                                              | 1      | 0     |
| 9790   | 2                            |                                                |        | 0     |
| 9791   | 2                            |                                                |        | 0     |
| 9794   | 2                            |                                                |        | 0     |
| 9797   | 2                            |                                                |        | 0     |
| 9799   | 2                            |                                                |        | 0     |
| 9804   | 2                            |                                                |        | 0     |
| 9805   | 2                            |                                                |        | 0     |
| 9806   | 2                            |                                                |        | 0     |
| 9807   | 2                            |                                                |        | 0     |
| 9813   | 2                            |                                                |        | 0     |
| 9817   | 2                            |                                                |        | 0     |
| 9823   | 2                            |                                                |        | 0     |
| 9826   | 2                            |                                                |        | 0     |
| 9830   | 1                            | 1                                              | 1      | 0     |
| 9835   | 2                            |                                                |        | 0     |
| 9836   | 2                            |                                                |        | 0     |
| 9841   | 2                            |                                                |        | 0     |
| 9842   | 2                            |                                                |        | 0     |
| 9844   | 2                            |                                                |        | 0     |
| 9847   | 2                            |                                                |        | 0     |
| 9851   | 2                            |                                                |        | 0     |
| 9852   | 1                            | 1                                              | 1      | 0     |
| 9854   | 2                            |                                                |        | 0     |
| 9855   | 2                            |                                                |        | 0     |



| respid | ICS Urgency Incontinence Q30 | ICS Urgency Incontinence -<br>how often Q30a_1 | Q30b_1 | Q31_1 |
|--------|------------------------------|------------------------------------------------|--------|-------|
| 9856   | 2                            |                                                |        | 1     |
| 9862   | 2                            |                                                |        | 0     |
| 9863   | 2                            |                                                |        | 0     |
| 9866   | 2                            |                                                |        | 0     |
| 9867   | 2                            |                                                |        | 0     |
| 9868   | 1                            | 2                                              | 3      | 0     |
| 9869   | 2                            |                                                |        | 0     |
| 9878   | 2                            |                                                |        | 0     |
| 9879   | 2                            |                                                |        | 0     |
| 9881   | 2                            |                                                |        | 0     |
| 9882   | 2                            |                                                |        | 0     |
| 9884   | 2                            |                                                |        | 0     |
| 9885   | 2                            |                                                |        | 0     |
| 9888   | 2                            |                                                |        | 0     |
| 9889   | 2                            |                                                |        | 0     |
| 9894   | 1                            | 2                                              | 2      | 0     |
| 9895   | 2                            |                                                |        | 0     |
| 9896   | 1                            | 5                                              | 4      | 0     |
| 9897   | 2                            |                                                |        | 0     |
| 9905   | 2                            |                                                |        | 0     |
| 9907   | 2                            |                                                |        | 0     |
| 9908   | 2                            |                                                |        | 0     |
| 9909   | 2                            |                                                |        | 0     |
| 9910   | 1                            | 2                                              | 4      | 0     |
| 9913   | 1                            | 3                                              | 1      | 0     |
| 9914   | 2                            |                                                |        | 0     |
| 9915   | 2                            |                                                |        | 0     |
| 9916   | 1                            | 1                                              | 0      | 0     |
| 9918   | 2                            |                                                |        | 0     |
| 9919   | 1                            | 2                                              | 1      | 0     |
| 9922   | 2                            |                                                |        | 0     |
| 9930   | 2                            |                                                |        | 0     |

| respid | ICS Urgency Incontinence Q30 | ICS Urgency Incontinence -<br>how often Q30a_1 | Q30b_1 | Q31_1 |
|--------|------------------------------|------------------------------------------------|--------|-------|
| 9934   | 2                            |                                                |        | 0     |
| 9936   | 2                            |                                                |        | 0     |
| 9938   | 2                            |                                                |        | 0     |
| 9940   | 2                            |                                                |        | 0     |
| 9944   | 1                            | 1                                              | 1      | 1     |
| 9945   | 2                            |                                                |        | 0     |
| 9948   | 1                            | 4                                              | 3      | 0     |
| 9949   | 1                            | 2                                              | 2      | 0     |
| 9951   | 2                            |                                                |        | 0     |
| 9952   | 2                            |                                                |        | 0     |
| 9954   | 2                            |                                                |        | 0     |
| 9955   | 2                            |                                                |        | 0     |
| 9956   | 2                            |                                                |        | 0     |
| 9957   | 2                            |                                                |        | 0     |
| 9958   | 2                            |                                                |        | 0     |
| 9959   | 2                            |                                                |        | 0     |
| 9960   | 2                            |                                                |        | 0     |
| 9961   | 2                            |                                                |        | 0     |
| 9962   | 2                            |                                                |        | 0     |
| 9969   | 2                            |                                                |        | 0     |
| 9982   | 2                            |                                                |        | 0     |
| 9984   | 2                            |                                                |        | 0     |
| 9990   | 2                            |                                                |        | 0     |
| 9992   | 2                            |                                                |        | 1     |
| 9993   | 1                            | 2                                              | 3      | 0     |
| 9997   | 2                            |                                                |        | 0     |
| 9999   | 2                            |                                                |        | 0     |
| 10000  | 2                            |                                                |        | 0     |
| 10005  | 2                            |                                                |        | 0     |
| 10014  | 2                            |                                                |        | 0     |
| 10016  | 2                            |                                                |        | 0     |
| 10017  | 2                            |                                                |        | 0     |

| respid | ICS Urgency Incontinence Q30 | ICS Urgency Incontinence -<br>how often Q30a_1 | Q30b_1 | Q31_1 |
|--------|------------------------------|------------------------------------------------|--------|-------|
| 10018  | 1                            | 2                                              | 2      | 0     |
| 10021  | 2                            |                                                |        | 0     |
| 10025  | 2                            |                                                |        | 0     |
| 10027  | 2                            |                                                |        | 0     |
| 10028  | 2                            |                                                |        | 0     |
| 10031  | 1                            | 1                                              | 2      | 0     |
| 10036  | 2                            |                                                |        | 0     |
| 10037  | 2                            |                                                |        | 0     |
| 10038  | 1                            | 2                                              | 2      | 0     |
| 10039  | 2                            |                                                |        | 0     |
| 10041  | 2                            |                                                |        | 0     |
| 10045  | 2                            |                                                |        | 0     |
| 10046  | 2                            |                                                |        | 0     |
| 10047  | 1                            | 1                                              | 1      | 0     |
| 10048  | 2                            |                                                |        | 0     |
| 10049  | 2                            |                                                |        | 0     |
| 10051  | 2                            |                                                |        | 0     |
| 10052  | 2                            |                                                |        | 0     |
| 10056  | 2                            |                                                |        | 0     |
| 10061  | 2                            |                                                |        | 0     |
| 10064  | 2                            |                                                |        | 0     |
| 10066  | 2                            |                                                |        | 0     |
| 10069  | 2                            |                                                |        | 0     |
| 10071  | 1                            | 1                                              | 2      | 0     |
| 10074  | 2                            |                                                |        | 0     |
| 10079  | 2                            |                                                |        | 0     |
| 10087  | 2                            |                                                |        | 0     |
| 10095  | 2                            |                                                |        | 0     |
| 10097  | 1                            | 1                                              | 0      | 0     |
| 10100  | 2                            |                                                |        | 0     |
| 10105  | 2                            |                                                |        | 0     |
| 10107  | 1                            | 2                                              | 2      | 0     |

| respid | ICS Urgency Incontinence Q30 | ICS Urgency Incontinence -<br>how often Q30a_1 | Q30b_1 | Q31_1 |
|--------|------------------------------|------------------------------------------------|--------|-------|
| 10111  | 2                            |                                                |        | 0     |
| 10116  | 2                            |                                                |        | 0     |
| 10118  | 2                            |                                                |        | 0     |
| 10123  | 2                            |                                                |        | 0     |
| 10124  | 2                            |                                                |        | 0     |
| 10130  | 2                            |                                                |        | 0     |
| 10134  | 2                            |                                                |        | 0     |
| 10135  | 2                            |                                                |        | 0     |
| 10136  | 2                            |                                                |        | 0     |
| 10141  | 2                            |                                                |        | 0     |
| 10142  | 2                            |                                                |        | 0     |
| 10143  | 2                            |                                                |        | 0     |
| 10145  | 2                            |                                                |        | 0     |
| 10149  | 1                            | 1                                              | 1      | 0     |
| 10150  | 2                            |                                                |        | 0     |
| 10151  | 2                            |                                                |        | 0     |
| 10152  | 1                            | 3                                              | 2      | 0     |
| 10153  | 2                            |                                                |        | 0     |
| 10156  | 2                            |                                                |        | 0     |
| 10160  | 2                            |                                                |        | 0     |
| 10161  | 2                            |                                                |        | 0     |
| 10167  | 1                            | 2                                              | 1      | 1     |
| 10171  | 2                            |                                                |        | 0     |
| 10172  | 2                            |                                                |        | 0     |
| 10176  | 2                            |                                                |        | 0     |
| 10177  | 2                            |                                                |        | 0     |
| 10182  | 2                            |                                                |        | 0     |
| 10184  | 2                            |                                                |        | 0     |
| 10186  | 1                            | 2                                              | 3      | 0     |
| 10189  | 2                            |                                                |        | 0     |
| 10191  | 1                            | 1                                              | 0      | 0     |
| 10192  | 2                            |                                                |        | 0     |

| respid | ICS Urgency Incontinence Q30 | ICS Urgency Incontinence -<br>how often Q30a_1 | Q30b_1 | Q31_1 |
|--------|------------------------------|------------------------------------------------|--------|-------|
| 10195  | 1                            | 1                                              | 0      | 0     |
| 10199  | 2                            |                                                |        | 0     |
| 10201  | 2                            |                                                |        | 0     |
| 10213  | 1                            | 1                                              | 0      | 0     |
| 10222  | 1                            | 3                                              | 3      | 0     |
| 10224  | 2                            |                                                |        | 0     |
| 10245  | 2                            |                                                |        | 0     |
| 10254  | 2                            |                                                |        | 0     |
| 10255  | 1                            | 3                                              | 4      | 0     |
| 10257  | 2                            |                                                |        | 0     |
| 10260  | 2                            |                                                |        | 0     |
| 10261  | 2                            |                                                |        | 0     |
| 10263  | 1                            | 3                                              | 4      | 0     |
| 10264  | 2                            |                                                |        | 0     |
| 10268  | 1                            | 2                                              | 1      | 0     |
| 10269  | 2                            |                                                |        | 0     |
| 10270  | 2                            |                                                |        | 0     |
| 10282  | 2                            |                                                |        | 0     |
| 10285  | 2                            |                                                |        | 0     |
| 10288  | 2                            |                                                |        | 0     |
| 10291  | 2                            |                                                |        | 0     |
| 10292  | 2                            |                                                |        | 0     |
| 10304  | 2                            |                                                |        | 0     |
| 10305  | 2                            |                                                |        | 0     |
| 10310  | 2                            |                                                |        | 0     |
| 10324  | 2                            |                                                |        | 0     |
| 10325  | 2                            |                                                |        | 0     |
| 10326  | 2                            |                                                |        | 0     |
| 10329  | 2                            |                                                |        | 0     |
| 10332  | 2                            |                                                |        | 0     |
| 10337  | 2                            |                                                |        | 0     |
| 10341  | 2                            |                                                |        | 0     |

| respid | ICS Urgency Incontinence Q30 | ICS Urgency Incontinence -<br>how often Q30a_1 | Q30b_1 | Q31_1 |
|--------|------------------------------|------------------------------------------------|--------|-------|
| 10353  | 2                            |                                                |        | 0     |
| 10354  | 2                            |                                                |        | 0     |
| 10359  | 1                            | 2                                              | 1      | 0     |
| 10360  | 2                            |                                                |        | 0     |
| 10362  | 2                            |                                                |        | 0     |
| 10364  | 2                            |                                                |        | 0     |
| 10366  | 2                            |                                                |        | 0     |
| 10367  | 2                            |                                                |        | 0     |
| 10371  | 2                            |                                                |        | 0     |
| 10374  | 1                            | 1                                              | 0      | 0     |
| 10375  | 2                            |                                                |        | 0     |
| 10376  | 2                            |                                                |        | 0     |
| 10377  | 2                            |                                                |        | 0     |
| 10378  | 1                            | 1                                              | 1      | 0     |
| 10387  | 2                            |                                                |        | 0     |
| 10396  | 2                            |                                                |        | 0     |
| 10397  | 2                            |                                                |        | 0     |
| 10399  | 1                            | 4                                              | 3      | 0     |
| 10405  | 2                            |                                                |        | 0     |
| 10406  | 2                            |                                                |        | 0     |
| 10408  | 2                            |                                                |        | 0     |
| 10409  | 2                            |                                                |        | 0     |
| 10412  | 2                            |                                                |        | 0     |
| 10413  | 2                            |                                                |        | 0     |
| 10419  | 2                            |                                                |        | 0     |
| 10423  | 1                            | 3                                              | 3      | 1     |
| 10426  | 1                            | 2                                              | 0      | 0     |
| 10446  | 2                            |                                                |        | 0     |
| 10448  | 2                            |                                                |        | 0     |
| 10450  | 2                            |                                                |        | 0     |
| 10455  | 1                            | 1                                              | 1      | 0     |
| 10460  | 2                            |                                                |        | 0     |

| respid | ICS Urgency Incontinence Q30 | ICS Urgency Incontinence -<br>how often Q30a_1 | Q30b_1 | Q31_1 |
|--------|------------------------------|------------------------------------------------|--------|-------|
| 10461  | 2                            |                                                |        | 0     |
| 10471  | 2                            |                                                |        | 0     |
| 10472  | 2                            |                                                |        | 0     |
| 10491  | 1                            | 2                                              | 3      | 1     |
| 10493  | 2                            |                                                |        | 0     |
| 10498  | 2                            |                                                |        | 0     |
| 10533  | 2                            |                                                |        | 0     |
| 10539  | 2                            |                                                |        | 0     |
| 10540  | 2                            |                                                |        | 0     |
| 10557  | 2                            |                                                |        | 0     |
| 10558  | 1                            | 2                                              | 3      | 1     |
| 10559  | 1                            | 2                                              | 1      | 0     |
| 10564  | 2                            |                                                |        | 0     |
| 10570  | 2                            |                                                |        | 0     |
| 10572  | 2                            |                                                |        | 0     |
| 10576  | 2                            |                                                |        | 0     |
| 10582  | 1                            | 1                                              | 0      | 1     |
| 10593  | 2                            |                                                |        | 0     |
| 10596  | 2                            |                                                |        | 0     |
| 10615  | 2                            |                                                |        | 0     |
| 10616  | 2                            |                                                |        | 0     |
| 10623  | 2                            |                                                |        | 0     |
| 10626  | 2                            |                                                |        | 0     |
| 10627  | 2                            |                                                |        | 1     |
| 10629  | 2                            |                                                |        | 0     |
| 10632  | 2                            |                                                |        | 1     |
| 10641  | 2                            |                                                |        | 0     |
| 10648  | 2                            |                                                |        | 0     |
| 10651  | 2                            |                                                |        | 1     |
| 10654  | 2                            |                                                |        | 0     |
| 10673  | 2                            |                                                |        | 0     |
| 10675  | 2                            |                                                |        | 0     |

| respid | ICS Urgency Incontinence Q30 | ICS Urgency Incontinence -<br>how often Q30a_1 | Q30b_1 | Q31_1 |
|--------|------------------------------|------------------------------------------------|--------|-------|
| 10689  | 1                            | 2                                              | 1      | 0     |
| 10692  | 2                            |                                                |        | 0     |
| 10694  | 2                            |                                                |        | 0     |
| 10695  | 2                            |                                                |        | 0     |
| 10702  | 2                            |                                                |        | 0     |
| 10703  | 1                            | 1                                              | 0      | 0     |
| 10708  | 2                            |                                                |        | 0     |
| 10719  | 2                            |                                                |        | 0     |
| 10722  | 2                            |                                                |        | 0     |
| 10723  | 2                            |                                                |        | 0     |
| 10726  | 2                            |                                                |        | 0     |
| 10727  | 2                            |                                                |        | 0     |
| 10730  | 2                            |                                                |        | 0     |
| 10731  | 2                            |                                                |        | 0     |
| 10737  | 2                            |                                                |        | 0     |
| 10743  | 2                            |                                                |        | 0     |
| 10763  | 2                            |                                                |        | 0     |
| 10777  | 2                            |                                                |        | 0     |
| 10787  | 1                            | 2                                              | 1      | 0     |
| 10798  | 2                            |                                                |        | 0     |
| 10800  | 2                            |                                                |        | 0     |
| 10802  | 2                            |                                                |        | 1     |
| 10803  | 1                            | 3                                              | 2      | 0     |
| 10808  | 2                            |                                                |        | 0     |
| 10810  | 2                            |                                                |        | 0     |
| 10819  | 2                            |                                                |        | 0     |
| 10825  | 2                            |                                                |        | 0     |
| 10827  | 2                            |                                                |        | 0     |
| 10830  | 2                            |                                                |        | 1     |
| 10847  | 2                            |                                                |        | 0     |
| 10849  | 2                            |                                                |        | 0     |
| 10852  | 2                            |                                                |        | 0     |



| respid | ICS Urgency Incontinence Q30 | ICS Urgency Incontinence -<br>how often Q30a_1 | Q30b_1 | Q31_1 |
|--------|------------------------------|------------------------------------------------|--------|-------|
| 10854  | 1                            | 3                                              | 3      | 0     |
| 10857  | 2                            |                                                |        | 0     |
| 10861  | 1                            | 2                                              | 3      | 0     |
| 10862  | 2                            |                                                |        | 0     |
| 10870  | 2                            |                                                |        | 0     |
| 10873  | 2                            |                                                |        | 0     |
| 10881  | 2                            |                                                |        | 0     |
| 10893  | 2                            |                                                |        | 0     |
| 10898  | 2                            |                                                |        | 0     |
| 10899  | 1                            | 1                                              | 1      | 1     |
| 10905  | 1                            | 1                                              | 0      | 0     |
| 10910  | 2                            |                                                |        | 0     |
| 10911  | 2                            |                                                |        | 0     |
| 10912  | 2                            |                                                |        | 0     |
| 10913  | 2                            |                                                |        | 0     |
| 10918  | 2                            |                                                |        | 0     |
| 10995  | 2                            |                                                |        | 0     |
| 11002  | 2                            |                                                |        | 0     |
| 11003  | 2                            |                                                |        | 0     |
| 11005  | 2                            |                                                |        | 0     |
| 11015  | 2                            |                                                |        | 0     |
| 11016  | 2                            |                                                |        | 0     |
| 11017  | 2                            |                                                |        | 0     |
| 11020  | 2                            |                                                |        | 0     |
| 11024  | 2                            |                                                |        | 0     |
| 11026  | 1                            | 2                                              | 1      | 1     |
| 11028  | 2                            |                                                |        | 0     |
| 11029  | 2                            |                                                |        | 0     |
| 11030  | 2                            |                                                |        | 0     |
| 11031  | 2                            |                                                |        | 0     |
| 11038  | 2                            |                                                |        | 0     |
| 11051  | 2                            |                                                |        | 0     |

| respid | ICS Urgency Incontinence Q30 | ICS Urgency Incontinence -<br>how often Q30a_1 | Q30b_1 | Q31_1 |
|--------|------------------------------|------------------------------------------------|--------|-------|
| 11052  | 2                            |                                                |        | 0     |
| 11053  | 2                            |                                                |        | 0     |
| 11054  | 2                            |                                                |        | 0     |
| 11063  | 2                            |                                                |        | 0     |
| 11075  | 1                            | 2                                              | 1      | 1     |
| 11083  | 2                            |                                                |        | 0     |
| 11092  | 2                            |                                                |        | 0     |
| 11118  | 2                            |                                                |        | 1     |
| 11119  | 2                            |                                                |        | 0     |
| 11134  | 2                            |                                                |        | 0     |
| 11139  | 2                            |                                                |        | 1     |
| 11154  | 2                            |                                                |        | 0     |
| 11166  | 2                            |                                                |        | 0     |
| 11168  | 2                            |                                                |        | 0     |
| 11176  | 2                            |                                                |        | 0     |
| 11183  | 1                            | 2                                              | 3      | 0     |
| 11189  | 2                            |                                                |        | 0     |
| 11196  | 1                            | 2                                              | 2      | 1     |
| 11200  | 2                            |                                                |        | 0     |
| 11201  | 2                            |                                                |        | 0     |
| 11211  | 1                            | 3                                              | 3      | 1     |
| 11218  | 2                            |                                                |        | 0     |
| 11219  | 2                            |                                                |        | 0     |
| 11221  | 1                            | 2                                              | 1      | 0     |
| 11222  | 2                            |                                                |        | 0     |
| 11230  | 1                            | 3                                              | 2      | 1     |
| 11236  | 1                            | 3                                              | 2      | 1     |
| 11237  | 2                            |                                                |        | 0     |
| 11240  | 1                            | 2                                              | 2      | 0     |
| 11244  | 1                            | 3                                              | 2      | 1     |
| 11249  | 2                            |                                                |        | 0     |
| 11252  | 1                            | 3                                              | 2      | 1     |

| respid | ICS Urgency Incontinence Q30 | ICS Urgency Incontinence -<br>how often Q30a_1 | Q30b_1 | Q31_1 |
|--------|------------------------------|------------------------------------------------|--------|-------|
| 11254  | 2                            |                                                |        | 0     |
| 11255  | 1                            | 2                                              | 2      | 0     |
| 11258  | 1                            | 3                                              | 2      | 1     |
| 11260  | 2                            |                                                |        | 0     |
| 11264  | 1                            | 3                                              | 2      | 0     |
| 11266  | 2                            |                                                |        | 0     |
| 11268  | 2                            |                                                |        | 0     |
| 11269  | 2                            |                                                |        | 0     |
| 11272  | 2                            |                                                |        | 0     |
| 11273  | 2                            |                                                |        | 0     |
| 11275  | 2                            |                                                |        | 0     |
| 11276  | 2                            |                                                |        | 0     |
| 11278  | 1                            | 2                                              | 2      | 1     |
| 11288  | 2                            |                                                |        | 0     |
| 11289  | 2                            |                                                |        | 0     |
| 11291  | 2                            |                                                |        | 0     |
| 11295  | 2                            |                                                |        | 0     |
| 11297  | 2                            |                                                |        | 0     |
| 11304  | 1                            | 2                                              | 4      | 0     |
| 11305  | 2                            |                                                |        | 0     |
| 11311  | 2                            |                                                |        | 0     |
| 11313  | 2                            |                                                |        | 0     |
| 11315  | 1                            | 3                                              | 4      | 0     |
| 11316  | 1                            | 3                                              | 4      | 0     |
| 11318  | 1                            | 3                                              | 2      | 1     |
| 11323  | 2                            |                                                |        | 0     |
| 11331  | 2                            |                                                |        | 0     |
| 11333  | 2                            |                                                |        | 0     |
| 11334  | 2                            |                                                |        | 0     |
| 11340  | 2                            |                                                |        | 0     |
| 11345  | 2                            |                                                |        | 0     |
| 11354  | 2                            |                                                |        | 0     |

| respid | ICS Urgency Incontinence Q30 | ICS Urgency Incontinence -<br>how often Q30a_1 | Q30b_1 | Q31_1 |
|--------|------------------------------|------------------------------------------------|--------|-------|
| 11360  | 2                            |                                                |        | 0     |
| 11361  | 2                            |                                                |        | 1     |
| 11367  | 2                            |                                                |        | 0     |
| 11370  | 2                            |                                                |        | 0     |
| 11371  | 1                            | 3                                              | 3      | 0     |
| 11372  | 1                            | 3                                              | 3      | 0     |
| 11373  | 2                            |                                                |        | 0     |
| 11382  | 2                            |                                                |        | 0     |
| 11394  | 2                            |                                                |        | 0     |
| 11395  | 1                            | 1                                              | 0      | 0     |
| 11397  | 2                            |                                                |        | 0     |
| 11402  | 2                            |                                                |        | 0     |
| 11409  | 2                            |                                                |        | 0     |
| 11410  | 1                            | 1                                              | 1      | 0     |
| 11411  | 2                            |                                                |        | 0     |
| 11418  | 2                            |                                                |        | 0     |
| 11425  | 2                            |                                                |        | 0     |
| 11429  | 2                            |                                                |        | 0     |
| 11430  | 1                            | 3                                              | 3      | 0     |
| 11431  | 2                            |                                                |        | 0     |
| 11432  | 2                            |                                                |        | 0     |
| 11433  | 2                            |                                                |        | 0     |
| 11435  | 1                            | 3                                              | 2      | 0     |
| 11436  | 1                            | 2                                              | 1      | 1     |
| 11437  | 1                            | 2                                              | 1      | 1     |
| 11439  | 2                            |                                                |        | 0     |
| 11440  | 2                            |                                                |        | 0     |
| 11447  | 2                            |                                                |        | 0     |
| 11455  | 2                            |                                                |        | 0     |
| 11456  | 2                            |                                                |        | 0     |
| 11461  | 1                            | 1                                              | 1      | 0     |
| 11463  | 1                            | 1                                              | 3      | 0     |

| respid | ICS Urgency Incontinence Q30 | ICS Urgency Incontinence -<br>how often Q30a_1 | Q30b_1 | Q31_1 |
|--------|------------------------------|------------------------------------------------|--------|-------|
| 11470  | 1                            | 4                                              | 1      | 0     |
| 11472  | 2                            |                                                |        | 0     |
| 11475  | 2                            |                                                |        | 0     |
| 11476  | 2                            |                                                |        | 0     |
| 11482  | 2                            |                                                |        | 0     |
| 11501  | 1                            | 2                                              | 3      | 0     |
| 11503  | 2                            |                                                |        | 0     |
| 11505  | 2                            |                                                |        | 0     |
| 11510  | 2                            |                                                |        | 0     |
| 11519  | 2                            |                                                |        | 0     |
| 11527  | 1                            | 3                                              | 4      | 1     |
| 11529  | 1                            | 2                                              | 2      | 1     |
| 11530  | 1                            | 1                                              | 1      | 0     |
| 11536  | 2                            |                                                |        | 0     |
| 11543  | 2                            |                                                |        | 0     |
| 11548  | 2                            |                                                |        | 1     |
| 11566  | 2                            |                                                |        | 0     |
| 11570  | 1                            | 3                                              | 3      | 0     |
| 11571  | 1                            | 1                                              | 2      | 0     |
| 11578  | 2                            |                                                |        | 0     |
| 11579  | 2                            |                                                |        | 0     |
| 11581  | 1                            | 2                                              | 4      | 1     |
| 11582  | 2                            |                                                |        | 0     |
| 11583  | 2                            |                                                |        | 0     |
| 11589  | 2                            |                                                |        | 1     |
| 11590  | 2                            |                                                |        | 0     |
| 11592  | 2                            |                                                |        | 0     |
| 11596  | 2                            |                                                |        | 0     |
| 11598  | 1                            | 3                                              | 2      | 0     |
| 11602  | 2                            |                                                |        | 0     |
| 11605  | 2                            |                                                |        | 0     |
| 11618  | 2                            |                                                |        | 0     |

| respid | ICS Urgency Incontinence Q30 | ICS Urgency Incontinence -<br>how often Q30a_1 | Q30b_1 | Q31_1 |
|--------|------------------------------|------------------------------------------------|--------|-------|
| 11621  | 2                            |                                                |        | 0     |
| 11630  | 2                            |                                                |        | 0     |
| 11636  | 2                            |                                                |        | 0     |
| 11640  | 1                            | 3                                              | 4      | 1     |
| 11658  | 2                            |                                                |        | 0     |
| 11665  | 2                            |                                                |        | 0     |
| 11666  | 2                            |                                                |        | 0     |
| 11667  | 1                            | 3                                              | 3      | 0     |
| 11674  | 1                            | 1                                              | 1      | 0     |
| 11680  | 2                            |                                                |        | 0     |
| 11683  | 2                            |                                                |        | 0     |
| 11688  | 2                            |                                                |        | 0     |
| 11690  | 2                            |                                                |        | 0     |
| 11694  | 2                            |                                                |        | 0     |
| 11705  | 2                            |                                                |        | 0     |
| 11720  | 1                            | 2                                              | 2      | 0     |
| 11724  | 2                            |                                                |        | 0     |
| 11738  | 1                            | 2                                              | 1      | 1     |
| 11744  | 1                            | 1                                              | 3      | 0     |
| 11745  | 2                            |                                                |        | 0     |
| 11747  | 2                            |                                                |        | 0     |
| 11755  | 2                            |                                                |        | 0     |
| 11756  | 1                            | 1                                              | 3      | 0     |
| 11772  | 2                            |                                                |        | 0     |
| 11773  | 2                            |                                                |        | 0     |
| 11778  | 1                            | 3                                              | 3      | 0     |
| 11790  | 2                            |                                                |        | 0     |
| 11794  | 2                            |                                                |        | 0     |
| 11795  | 2                            |                                                |        | 0     |
| 11799  | 1                            | 4                                              | 3      | 0     |
| 11803  | 2                            |                                                |        | 0     |
| 11806  | 1                            | 4                                              | 3      | 1     |

| respid | ICS Urgency Incontinence Q30 | ICS Urgency Incontinence -<br>how often Q30a_1 | Q30b_1 | Q31_1 |
|--------|------------------------------|------------------------------------------------|--------|-------|
| 11808  | 2                            |                                                |        | 0     |
| 11810  | 2                            |                                                |        | 0     |
| 11811  | 2                            |                                                |        | 0     |
| 11812  | 1                            | 3                                              | 2      | 0     |
| 11813  | 1                            | 2                                              | 1      | 0     |
| 11821  | 2                            |                                                |        | 0     |
| 11827  | 2                            |                                                |        | 0     |
| 11831  | 2                            |                                                |        | 0     |
| 11841  | 2                            |                                                |        | 0     |
| 11872  | 2                            |                                                |        | 0     |
| 11898  | 2                            |                                                |        | 0     |
| 11902  | 2                            |                                                |        | 0     |
| 11912  | 2                            |                                                |        | 0     |
| 11926  | 2                            |                                                |        | 0     |
| 11928  | 2                            |                                                |        | 0     |
| 11932  | 1                            | 1                                              | 1      | 0     |
| 11934  | 2                            |                                                |        | 0     |
| 11941  | 1                            | 2                                              | 3      | 0     |
| 11942  | 2                            |                                                |        | 0     |
| 11943  | 2                            |                                                |        | 0     |
| 11944  | 2                            |                                                |        | 0     |
| 11955  | 2                            |                                                |        | 0     |
| 11958  | 2                            |                                                |        | 0     |
| 11968  | 2                            |                                                |        | 0     |
| 11979  | 1                            | 3                                              | 1      | 0     |
| 11988  | 2                            |                                                |        | 0     |
| 11999  | 2                            |                                                |        | 0     |
| 12002  | 2                            |                                                |        | 0     |
| 12004  | 2                            |                                                |        | 0     |
| 12008  | 2                            |                                                |        | 0     |
| 12013  | 2                            |                                                |        | 0     |
| 12018  | 2                            |                                                |        | 0     |

| respid | ICS Urgency Incontinence Q30 | ICS Urgency Incontinence -<br>how often Q30a_1 | Q30b_1 | Q31_1 |
|--------|------------------------------|------------------------------------------------|--------|-------|
| 12023  | 2                            |                                                |        | 0     |
| 12027  | 1                            | 2                                              | 2      | 1     |
| 12030  | 1                            | 1                                              | 0      | 0     |
| 12031  | 2                            |                                                |        | 1     |
| 12036  | 1                            | 1                                              | 3      | 0     |
| 12037  | 1                            | 4                                              | 4      | 0     |
| 12038  | 1                            | 3                                              | 4      | 0     |
| 12039  | 2                            |                                                |        | 0     |
| 12045  | 2                            |                                                |        | 0     |
| 12046  | 2                            |                                                |        | 1     |
| 12054  | 2                            |                                                |        | 1     |
| 12055  | 1                            | 2                                              | 1      | 1     |
| 12069  | 2                            |                                                |        | 1     |
| 12070  | 1                            | 2                                              | 3      | 0     |
| 12074  | 2                            |                                                |        | 0     |
| 12075  | 2                            |                                                |        | 0     |
| 12078  | 2                            |                                                |        | 1     |
| 12089  | 2                            |                                                |        | 1     |
| 12091  | 2                            |                                                |        | 0     |
| 12092  | 1                            | 2                                              | 2      | 0     |
| 12108  | 1                            | 1                                              | 0      | 0     |
| 12111  | 1                            | 3                                              | 3      | 0     |
| 12112  | 2                            |                                                |        | 0     |
| 12126  | 2                            |                                                |        | 0     |
| 12132  | 2                            |                                                |        | 0     |
| 12150  | 1                            | 3                                              | 3      | 0     |
| 12152  | 2                            |                                                |        | 0     |
| 12154  | 2                            |                                                |        | 0     |
| 12157  | 2                            |                                                |        | 0     |
| 12165  | 2                            |                                                |        | 0     |
| 12169  | 1                            | 2                                              | 4      | 1     |
| 12182  | 1                            | 4                                              | 3      | 0     |



| respid | ICS Urgency Incontinence Q30 | ICS Urgency Incontinence -<br>how often Q30a_1 | Q30b_1 | Q31_1 |
|--------|------------------------------|------------------------------------------------|--------|-------|
| 12198  | 2                            |                                                |        | 0     |
| 12199  | 2                            |                                                |        | 0     |
| 12202  | 2                            |                                                |        | 0     |
| 12207  | 2                            |                                                |        | 0     |
| 12208  | 2                            |                                                |        | 0     |
| 12210  | 2                            |                                                |        | 0     |
| 12219  | 1                            | 4                                              | 3      | 0     |
| 12224  | 2                            |                                                |        | 0     |
| 12230  | 2                            |                                                |        | 0     |
| 12238  | 2                            |                                                |        | 0     |
| 12239  | 1                            | 1                                              | 0      | 0     |
| 12243  | 1                            | 1                                              | 0      | 0     |
| 12245  | 2                            |                                                |        | 0     |
| 12246  | 1                            | 3                                              | 2      | 0     |
| 12247  | 2                            |                                                |        | 0     |
| 12248  | 2                            |                                                |        | 0     |
| 12249  | 2                            |                                                |        | 0     |
| 12258  | 1                            | 1                                              | 3      | 0     |
| 12265  | 2                            |                                                |        | 0     |
| 12269  | 2                            |                                                |        | 0     |
| 12270  | 2                            |                                                |        | 0     |
| 12279  | 2                            |                                                |        | 0     |
| 12280  | 2                            |                                                |        | 0     |
| 12282  | 1                            | 1                                              | 1      | 0     |
| 12283  | 2                            |                                                |        | 0     |
| 12287  | 2                            |                                                |        | 0     |
| 12288  | 2                            |                                                |        | 1     |
| 12290  | 2                            |                                                |        | 0     |
| 12292  | 2                            |                                                |        | 1     |
| 12294  | 2                            |                                                |        | 0     |
| 12296  | 2                            |                                                |        | 0     |
| 12307  | 2                            |                                                |        | 0     |

| respid | ICS Urgency Incontinence Q30 | ICS Urgency Incontinence -<br>how often Q30a_1 | Q30b_1 | Q31_1 |
|--------|------------------------------|------------------------------------------------|--------|-------|
| 12309  | 2                            |                                                |        | 0     |
| 12312  | 1                            | 2                                              | 1      | 0     |
| 12317  | 2                            |                                                |        | 0     |
| 12319  | 2                            |                                                |        | 0     |
| 12320  | 2                            |                                                |        | 0     |
| 12322  | 2                            |                                                |        | 0     |
| 12328  | 2                            |                                                |        | 0     |
| 12331  | 1                            | 4                                              | 3      | 1     |
| 12332  | 2                            |                                                |        | 0     |
| 12334  | 1                            | 1                                              | 0      | 0     |
| 12337  | 2                            |                                                |        | 0     |
| 12338  | 2                            |                                                |        | 0     |
| 12342  | 2                            |                                                |        | 0     |
| 12349  | 2                            |                                                |        | 0     |
| 12352  | 1                            | 2                                              | 2      | 0     |
| 12355  | 2                            |                                                |        | 0     |
| 12357  | 2                            |                                                |        | 0     |
| 12358  | 2                            |                                                |        | 0     |
| 12371  | 2                            |                                                |        | 0     |
| 12372  | 2                            |                                                |        | 0     |
| 12373  | 2                            |                                                |        | 0     |
| 12379  | 2                            |                                                |        | 0     |
| 12381  | 1                            | 2                                              | 2      | 1     |
| 12383  | 2                            |                                                |        | 0     |
| 12384  | 2                            |                                                |        | 1     |
| 12386  | 2                            |                                                |        | 0     |
| 12389  | 2                            |                                                |        | 0     |
| 12392  | 2                            |                                                |        | 0     |
| 12396  | 2                            |                                                |        | 0     |
| 12397  | 2                            |                                                |        | 0     |
| 12399  | 1                            | 1                                              | 3      | 0     |
| 12400  | 2                            |                                                |        | 0     |

| respid | ICS Urgency Incontinence Q30 | ICS Urgency Incontinence -<br>how often Q30a_1 | Q30b_1 | Q31_1 |
|--------|------------------------------|------------------------------------------------|--------|-------|
| 12406  | 2                            |                                                |        | 0     |
| 12407  | 2                            |                                                |        | 0     |
| 12410  | 2                            |                                                |        | 0     |
| 12413  | 2                            |                                                |        | 0     |
| 12416  | 2                            |                                                |        | 0     |
| 12419  | 1                            | 2                                              | 2      | 0     |
| 12422  | 1                            | 1                                              | 3      | 1     |
| 12423  | 2                            |                                                |        | 0     |
| 12429  | 2                            |                                                |        | 0     |
| 12434  | 1                            | 3                                              | 3      | 0     |
| 12435  | 2                            |                                                |        | 0     |
| 12436  | 2                            |                                                |        | 0     |
| 12442  | 2                            |                                                |        | 0     |
| 12449  | 2                            |                                                |        | 0     |
| 12451  | 2                            |                                                |        | 0     |
| 12456  | 2                            |                                                |        | 0     |
| 12457  | 2                            |                                                |        | 0     |
| 12458  | 2                            |                                                |        | 0     |
| 12461  | 2                            |                                                |        | 0     |
| 12462  | 2                            |                                                |        | 0     |
| 12463  | 2                            |                                                |        | 0     |
| 12466  | 2                            |                                                |        | 0     |
| 12470  | 2                            |                                                |        | 0     |
| 12471  | 2                            |                                                |        | 0     |
| 12472  | 2                            |                                                |        | 0     |
| 12478  | 1                            | 2                                              | 1      | 0     |
| 12479  | 2                            |                                                |        | 1     |
| 12481  | 2                            |                                                |        | 0     |
| 12482  | 2                            |                                                |        | 1     |
| 12483  | 2                            |                                                |        | 0     |
| 12496  | 2                            |                                                |        | 0     |
| 12497  | 2                            |                                                |        | 0     |

| respid | ICS Urgency Incontinence Q30 | ICS Urgency Incontinence -<br>how often Q30a_1 | Q30b_1 | Q31_1 |
|--------|------------------------------|------------------------------------------------|--------|-------|
| 12498  | 1                            | 2                                              | 2      | 0     |
| 12500  | 2                            |                                                |        | 0     |
| 12501  | 2                            |                                                |        | 0     |
| 12502  | 1                            | 2                                              | 1      | 0     |
| 12503  | 2                            |                                                |        | 0     |
| 12505  | 1                            | 1                                              | 1      | 0     |
| 12508  | 1                            | 2                                              | 2      | 1     |
| 12509  | 2                            |                                                |        | 0     |
| 12510  | 2                            |                                                |        | 0     |
| 12512  | 2                            |                                                |        | 0     |
| 12514  | 1                            | 2                                              | 2      | 0     |
| 12515  | 1                            | 2                                              | 4      | 0     |
| 12520  | 2                            |                                                |        | 0     |
| 12522  | 2                            |                                                |        | 0     |
| 12526  | 2                            |                                                |        | 0     |
| 12527  | 2                            |                                                |        | 0     |
| 12528  | 2                            |                                                |        | 0     |
| 12530  | 1                            | 2                                              | 1      | 0     |
| 12535  | 2                            |                                                |        | 0     |
| 12539  | 2                            |                                                |        | 0     |
| 12541  | 2                            |                                                |        | 0     |
| 12542  | 2                            |                                                |        | 0     |
| 12545  | 2                            |                                                |        | 0     |
| 12547  | 2                            |                                                |        | 0     |
| 12549  | 2                            |                                                |        | 0     |
| 12550  | 2                            |                                                |        | 0     |
| 12555  | 2                            |                                                |        | 0     |
| 12557  | 2                            |                                                |        | 0     |
| 12559  | 2                            |                                                |        | 0     |
| 12561  | 2                            |                                                |        | 0     |
| 12562  | 2                            |                                                |        | 0     |
| 12563  | 2                            |                                                |        | 0     |

| respid | ICS Urgency Incontinence Q30 | ICS Urgency Incontinence -<br>how often Q30a_1 | Q30b_1 | Q31_1 |
|--------|------------------------------|------------------------------------------------|--------|-------|
| 12565  | 2                            |                                                |        | 1     |
| 12566  | 2                            |                                                |        | 0     |
| 12570  | 2                            |                                                |        | 0     |
| 12571  | 2                            |                                                |        | 0     |
| 12572  | 2                            |                                                |        | 0     |
| 12578  | 2                            |                                                |        | 0     |
| 12579  | 1                            | 1                                              | 0      | 0     |
| 12581  | 2                            |                                                |        | 0     |
| 12582  | 2                            |                                                |        | 0     |
| 12585  | 2                            |                                                |        | 0     |
| 12586  | 2                            |                                                |        | 1     |
| 12588  | 1                            | 2                                              | 2      | 0     |
| 12589  | 2                            |                                                |        | 0     |
| 12590  | 2                            |                                                |        | 0     |
| 12591  | 2                            |                                                |        | 0     |
| 12593  | 2                            |                                                |        | 0     |
| 12594  | 2                            |                                                |        | 0     |
| 12599  | 2                            |                                                |        | 0     |
| 12600  | 2                            |                                                |        | 0     |
| 12602  | 1                            | 3                                              | 3      | 0     |
| 12606  | 1                            | 3                                              | 3      | 0     |
| 12607  | 2                            |                                                |        | 0     |
| 12608  | 2                            |                                                |        | 0     |
| 12610  | 1                            | 1                                              | 1      | 0     |
| 12611  | 2                            |                                                |        | 0     |
| 12613  | 1                            | 5                                              | 4      | 0     |
| 12616  | 2                            |                                                |        | 0     |
| 12617  | 1                            | 2                                              | 1      | 0     |
| 12619  | 2                            |                                                |        | 0     |
| 12622  | 2                            |                                                |        | 0     |
| 12628  | 2                            |                                                |        | 0     |
| 12631  | 2                            |                                                |        | 0     |

| respid | ICS Urgency Incontinence Q30 | ICS Urgency Incontinence -<br>how often Q30a_1 | Q30b_1 | Q31_1 |
|--------|------------------------------|------------------------------------------------|--------|-------|
| 12635  | 2                            |                                                |        | 0     |
| 12638  | 1                            | 1                                              | 0      | 0     |
| 12639  | 2                            |                                                |        | 0     |
| 12640  | 2                            |                                                |        | 0     |
| 12643  | 2                            |                                                |        | 0     |
| 12646  | 1                            | 2                                              | 4      | 0     |
| 12648  | 2                            |                                                |        | 0     |
| 12650  | 1                            | 4                                              | 3      | 0     |
| 12651  | 1                            | 1                                              | 1      | 1     |
| 12658  | 1                            | 2                                              | 1      | 1     |
| 12662  | 1                            | 1                                              | 1      | 0     |
| 12663  | 2                            |                                                |        | 0     |
| 12664  | 2                            |                                                |        | 0     |
| 12669  | 1                            | 3                                              | 3      | 1     |
| 12670  | 2                            |                                                |        | 0     |
| 12673  | 2                            |                                                |        | 0     |
| 12675  | 2                            |                                                |        | 0     |
| 12677  | 2                            |                                                |        | 0     |
| 12679  | 2                            |                                                |        | 0     |
| 12682  | 1                            | 2                                              | 4      | 0     |
| 12696  | 2                            |                                                |        | 0     |
| 12697  | 2                            |                                                |        | 0     |
| 12699  | 2                            |                                                |        | 0     |
| 12700  | 1                            | 1                                              | 1      | 1     |
| 12701  | 2                            |                                                |        | 0     |
| 12702  | 2                            |                                                |        | 0     |
| 12704  | 1                            | 3                                              | 3      | 0     |
| 12705  | 2                            |                                                |        | 0     |
| 12709  | 2                            |                                                |        | 0     |
| 12710  | 2                            |                                                |        | 0     |
| 12713  | 1                            | 1                                              | 0      | 1     |
| 12716  | 2                            |                                                |        | 0     |

| respid | ICS Urgency Incontinence Q30 | ICS Urgency Incontinence -<br>how often Q30a_1 | Q30b_1 | Q31_1 |
|--------|------------------------------|------------------------------------------------|--------|-------|
| 12719  | 1                            | 2                                              | 2      | 0     |
| 12720  | 2                            |                                                |        | 0     |
| 12723  | 2                            |                                                |        | 0     |
| 12726  | 2                            |                                                |        | 0     |
| 12728  | 2                            |                                                |        | 0     |
| 12729  | 2                            |                                                |        | 0     |
| 12731  | 2                            |                                                |        | 0     |
| 12732  | 1                            | 2                                              | 1      | 0     |
| 12733  | 1                            | 2                                              | 3      | 0     |
| 12736  | 2                            |                                                |        | 0     |
| 12737  | 2                            |                                                |        | 0     |
| 12739  | 2                            |                                                |        | 0     |
| 12742  | 2                            |                                                |        | 0     |
| 12743  | 1                            | 4                                              | 4      | 1     |
| 12744  | 2                            |                                                |        | 0     |
| 12747  | 2                            |                                                |        | 0     |
| 12751  | 2                            |                                                |        | 0     |
| 12754  | 2                            |                                                |        | 0     |
| 12756  | 2                            |                                                |        | 0     |
| 12757  | 2                            |                                                |        | 0     |
| 12760  | 2                            |                                                |        | 0     |
| 12761  | 2                            |                                                |        | 0     |
| 12762  | 1                            | 3                                              | 2      | 0     |
| 12766  | 1                            | 1                                              | 0      | 0     |
| 12769  | 2                            |                                                |        | 0     |
| 12770  | 2                            |                                                |        | 0     |
| 12773  | 2                            |                                                |        | 0     |
| 12780  | 2                            |                                                |        | 0     |
| 12789  | 2                            |                                                |        | 0     |
| 12792  | 1                            | 2                                              | 3      | 1     |
| 12795  | 2                            |                                                |        | 1     |
| 12804  | 2                            |                                                |        | 0     |

| respid | ICS Urgency Incontinence Q30 | ICS Urgency Incontinence -<br>how often Q30a_1 | Q30b_1 | Q31_1 |
|--------|------------------------------|------------------------------------------------|--------|-------|
| 12811  | 2                            |                                                |        | 0     |
| 12813  | 1                            | 2                                              | 1      | 0     |
| 12814  | 1                            | 3                                              | 3      | 0     |
| 12815  | 2                            |                                                |        | 0     |
| 12816  | 2                            |                                                |        | 0     |
| 12817  | 2                            |                                                |        | 0     |
| 12818  | 2                            |                                                |        | 0     |
| 12819  | 1                            | 1                                              | 2      | 0     |
| 12820  | 2                            |                                                |        | 0     |
| 12821  | 2                            |                                                |        | 0     |
| 12824  | 2                            |                                                |        | 1     |
| 12827  | 2                            |                                                |        | 0     |
| 12836  | 1                            | 3                                              | 2      | 0     |
| 12837  | 1                            | 1                                              | 1      | 0     |
| 12838  | 1                            | 2                                              | 1      | 0     |
| 12845  | 1                            | 1                                              | 0      | 1     |
| 12847  | 2                            |                                                |        | 0     |
| 12849  | 2                            |                                                |        | 0     |
| 12850  | 2                            |                                                |        | 0     |
| 12852  | 2                            |                                                |        | 0     |
| 12853  | 2                            |                                                |        | 0     |
| 12854  | 2                            |                                                |        | 0     |
| 12860  | 2                            |                                                |        | 0     |
| 12861  | 2                            |                                                |        | 0     |
| 12863  | 2                            |                                                |        | 0     |
| 12865  | 2                            |                                                |        | 0     |
| 12870  | 2                            |                                                |        | 1     |
| 12871  | 2                            |                                                |        | 0     |
| 12873  | 2                            |                                                |        | 0     |
| 12877  | 2                            |                                                |        | 0     |
| 12880  | 2                            |                                                |        | 0     |
| 12881  | 2                            |                                                |        | 0     |



| respid | ICS Urgency Incontinence Q30 | ICS Urgency Incontinence -<br>how often Q30a_1 | Q30b_1 | Q31_1 |
|--------|------------------------------|------------------------------------------------|--------|-------|
| 12882  | 2                            |                                                |        | 0     |
| 12883  | 1                            | 2                                              | 1      | 1     |
| 12885  | 1                            | 2                                              | 2      | 0     |
| 12887  | 1                            | 1                                              | 1      | 0     |
| 12889  | 2                            |                                                |        | 0     |
| 12890  | 2                            |                                                |        | 0     |
| 12891  | 1                            | 2                                              | 1      | 0     |
| 12892  | 2                            |                                                |        | 0     |
| 12893  | 2                            |                                                |        | 0     |
| 12895  | 1                            | 1                                              | 1      | 0     |
| 12898  | 2                            |                                                |        | 0     |
| 12907  | 1                            | 2                                              | 2      | 0     |
| 12908  | 2                            |                                                |        | 0     |
| 12909  | 2                            |                                                |        | 0     |
| 12914  | 2                            |                                                |        | 0     |
| 12915  | 2                            |                                                |        | 1     |
| 12916  | 2                            |                                                |        | 0     |
| 12921  | 2                            |                                                |        | 0     |
| 12922  | 2                            |                                                |        | 0     |
| 12923  | 2                            |                                                |        | 0     |
| 12926  | 2                            |                                                |        | 0     |
| 12927  | 1                            | 1                                              | 1      | 0     |
| 12932  | 2                            |                                                |        | 0     |
| 12936  | 2                            |                                                |        | 0     |
| 12937  | 2                            |                                                |        | 0     |
| 12938  | 1                            | 3                                              | 4      | 1     |
| 12939  | 2                            |                                                |        | 0     |
| 12940  | 1                            | 2                                              | 2      | 0     |
| 12945  | 2                            |                                                |        | 0     |
| 12946  | 2                            |                                                |        | 0     |
| 12947  | 2                            |                                                |        | 0     |
| 12948  | 1                            | 3                                              | 3      | 0     |

| respid | ICS Urgency Incontinence Q30 | ICS Urgency Incontinence -<br>how often Q30a_1 | Q30b_1 | Q31_1 |
|--------|------------------------------|------------------------------------------------|--------|-------|
| 12951  | 2                            |                                                |        | 0     |
| 12952  | 2                            |                                                |        | 0     |
| 12954  | 1                            | 3                                              | 4      | 1     |
| 12960  | 2                            |                                                |        | 0     |
| 12961  | 1                            | 1                                              | 0      | 1     |
| 12962  | 2                            |                                                |        | 0     |
| 12963  | 2                            |                                                |        | 0     |
| 12964  | 1                            | 1                                              | 1      | 0     |
| 12966  | 2                            |                                                |        | 0     |
| 12967  | 2                            |                                                |        | 0     |
| 12969  | 2                            |                                                |        | 0     |
| 12970  | 2                            |                                                |        | 0     |
| 12974  | 1                            | 3                                              | 2      | 0     |
| 12979  | 2                            |                                                |        | 0     |
| 12980  | 2                            |                                                |        | 0     |
| 12983  | 2                            |                                                |        | 0     |
| 12988  | 2                            |                                                |        | 0     |
| 12994  | 2                            |                                                |        | 1     |
| 12995  | 2                            |                                                |        | 0     |
| 12996  | 2                            |                                                |        | 0     |
| 12998  | 2                            |                                                |        | 0     |
| 12999  | 2                            |                                                |        | 0     |
| 13001  | 2                            |                                                |        | 0     |
| 13005  | 2                            |                                                |        | 0     |
| 13006  | 1                            | 2                                              | 3      | 0     |
| 13007  | 2                            |                                                |        | 0     |
| 13011  | 1                            | 2                                              | 1      | 0     |
| 13012  | 2                            |                                                |        | 0     |
| 13013  | 1                            | 3                                              | 3      | 1     |
| 13016  | 2                            |                                                |        | 0     |
| 13018  | 2                            |                                                |        | 0     |
| 13020  | 2                            |                                                |        | 0     |

| respid | ICS Urgency Incontinence Q30 | ICS Urgency Incontinence -<br>how often Q30a_1 | Q30b_1 | Q31_1 |
|--------|------------------------------|------------------------------------------------|--------|-------|
| 13024  | 2                            |                                                |        | 0     |
| 13025  | 2                            |                                                |        | 1     |
| 13027  | 1                            | 1                                              | 1      | 1     |
| 13031  | 1                            | 2                                              | 2      | 0     |
| 13032  | 2                            |                                                |        | 0     |
| 13034  | 2                            |                                                |        | 0     |
| 13036  | 2                            |                                                |        | 0     |
| 13037  | 2                            |                                                |        | 0     |
| 13038  | 2                            |                                                |        | 0     |
| 13039  | 2                            |                                                |        | 1     |
| 13040  | 2                            |                                                |        | 0     |
| 13041  | 2                            |                                                |        | 0     |
| 13045  | 2                            |                                                |        | 0     |
| 13046  | 2                            |                                                |        | 0     |
| 13048  | 2                            |                                                |        | 0     |
| 13051  | 2                            |                                                |        | 0     |
| 13053  | 2                            |                                                |        | 0     |
| 13055  | 1                            | 3                                              | 3      | 0     |
| 13059  | 1                            | 1                                              | 1      | 0     |
| 13068  | 2                            |                                                |        | 0     |
| 13069  | 2                            |                                                |        | 0     |
| 13076  | 2                            |                                                |        | 0     |
| 13081  | 2                            |                                                |        | 0     |
| 13082  | 2                            |                                                |        | 0     |
| 13084  | 1                            | 3                                              | 3      | 0     |
| 13085  | 1                            | 1                                              | 2      | 0     |
| 13086  | 1                            | 1                                              | 1      | 1     |
| 13093  | 2                            |                                                |        | 0     |
| 13094  | 1                            | 3                                              | 2      | 0     |
| 13097  | 2                            |                                                |        | 0     |
| 13098  | 1                            | 1                                              | 0      | 0     |
| 13099  | 2                            |                                                |        | 0     |

| respid | ICS Urgency Incontinence Q30 | ICS Urgency Incontinence -<br>how often Q30a_1 | Q30b_1 | Q31_1 |
|--------|------------------------------|------------------------------------------------|--------|-------|
| 13100  | 2                            |                                                |        | 0     |
| 13101  | 2                            |                                                |        | 0     |
| 13103  | 2                            |                                                |        | 0     |
| 13105  | 2                            |                                                |        | 0     |
| 13106  | 2                            |                                                |        | 0     |
| 13107  | 2                            |                                                |        | 0     |
| 13110  | 2                            |                                                |        | 0     |
| 13118  | 2                            |                                                |        | 0     |
| 13120  | 2                            |                                                |        | 1     |
| 13130  | 2                            |                                                |        | 0     |
| 13133  | 2                            |                                                |        | 0     |
| 13134  | 2                            |                                                |        | 0     |
| 13139  | 2                            |                                                |        | 0     |
| 13142  | 2                            |                                                |        | 0     |
| 13143  | 2                            |                                                |        | 0     |
| 13145  | 2                            |                                                |        | 0     |
| 13148  | 2                            |                                                |        | 0     |
| 13149  | 2                            |                                                |        | 0     |
| 13151  | 2                            |                                                |        | 1     |
| 13153  | 2                            |                                                |        | 0     |
| 13158  | 2                            |                                                |        | 0     |
| 13160  | 2                            |                                                |        | 0     |
| 13162  | 1                            | 3                                              | 3      | 1     |
| 13169  | 2                            |                                                |        | 0     |
| 13172  | 1                            | 3                                              | 2      | 1     |
| 13173  | 2                            |                                                |        | 0     |
| 13176  | 2                            |                                                |        | 1     |
| 13179  | 2                            |                                                |        | 0     |
| 13184  | 2                            |                                                |        | 0     |
| 13185  | 2                            |                                                |        | 0     |
| 13186  | 1                            | 1                                              | 0      | 0     |
| 13188  | 1                            | 2                                              | 1      | 0     |

| respid | ICS Urgency Incontinence Q30 | ICS Urgency Incontinence -<br>how often Q30a_1 | Q30b_1 | Q31_1 |
|--------|------------------------------|------------------------------------------------|--------|-------|
| 13190  | 2                            |                                                |        | 0     |
| 13192  | 2                            |                                                |        | 1     |
| 13193  | 2                            |                                                |        | 0     |
| 13201  | 2                            |                                                |        | 0     |
| 13207  | 2                            |                                                |        | 0     |
| 13208  | 2                            |                                                |        | 0     |
| 13209  | 1                            | 2                                              | 2      | 1     |
| 13212  | 2                            |                                                |        | 0     |
| 13215  | 2                            |                                                |        | 0     |
| 13218  | 2                            |                                                |        | 0     |
| 13219  | 2                            |                                                |        | 0     |
| 13224  | 2                            |                                                |        | 0     |
| 13225  | 2                            |                                                |        | 0     |
| 13226  | 2                            |                                                |        | 0     |
| 13232  | 2                            |                                                |        | 0     |
| 13237  | 2                            |                                                |        | 1     |
| 13239  | 2                            |                                                |        | 0     |
| 13241  | 2                            |                                                |        | 0     |
| 13243  | 2                            |                                                |        | 0     |
| 13247  | 2                            |                                                |        | 0     |
| 13248  | 2                            |                                                |        | 0     |
| 13251  | 2                            |                                                |        | 0     |
| 13256  | 2                            |                                                |        | 0     |
| 13260  | 1                            | 1                                              | 1      | 0     |
| 13261  | 2                            |                                                |        | 0     |
| 13264  | 2                            |                                                |        | 0     |
| 13273  | 2                            |                                                |        | 0     |
| 13274  | 2                            |                                                |        | 0     |
| 13276  | 1                            | 1                                              | 1      | 0     |
| 13278  | 2                            |                                                |        | 0     |
| 13279  | 2                            |                                                |        | 0     |
| 13282  | 2                            |                                                |        | 0     |

| respid | ICS Urgency Incontinence Q30 | ICS Urgency Incontinence -<br>how often Q30a_1 | Q30b_1 | Q31_1 |
|--------|------------------------------|------------------------------------------------|--------|-------|
| 13283  | 2                            |                                                |        | 0     |
| 13285  | 2                            |                                                |        | 0     |
| 13286  | 2                            |                                                |        | 0     |
| 13299  | 2                            |                                                |        | 0     |
| 13300  | 2                            |                                                |        | 0     |
| 13301  | 2                            |                                                |        | 0     |
| 13303  | 2                            |                                                |        | 0     |
| 13304  | 2                            |                                                |        | 0     |
| 13307  | 1                            | 2                                              | 1      | 0     |
| 13308  | 2                            |                                                |        | 0     |
| 13312  | 2                            |                                                |        | 0     |
| 13313  | 2                            |                                                |        | 0     |
| 13314  | 2                            |                                                |        | 0     |
| 13318  | 1                            | 2                                              | 2      | 0     |
| 13320  | 1                            | 2                                              | 1      | 0     |
| 13322  | 2                            |                                                |        | 0     |
| 13324  | 2                            |                                                |        | 0     |
| 13325  | 2                            |                                                |        | 0     |
| 13327  | 2                            |                                                |        | 0     |
| 13330  | 2                            |                                                |        | 0     |
| 13332  | 2                            |                                                |        | 0     |
| 13333  | 2                            |                                                |        | 0     |
| 13334  | 2                            |                                                |        | 0     |
| 13351  | 2                            |                                                |        | 0     |
| 13353  | 1                            | 1                                              | 1      | 0     |
| 13354  | 2                            |                                                |        | 0     |
| 13355  | 1                            | 2                                              | 2      | 0     |
| 13358  | 2                            |                                                |        | 1     |
| 13359  | 2                            |                                                |        | 0     |
| 13360  | 1                            | 2                                              | 1      | 1     |
| 13364  | 2                            |                                                |        | 1     |
| 13365  | 1                            | 2                                              | 2      | 0     |

| respid | ICS Urgency Incontinence Q30 | ICS Urgency Incontinence -<br>how often Q30a_1 | Q30b_1 | Q31_1 |
|--------|------------------------------|------------------------------------------------|--------|-------|
| 13368  | 2                            |                                                |        | 0     |
| 13370  | 2                            |                                                |        | 0     |
| 13375  | 2                            |                                                |        | 0     |
| 13384  | 2                            |                                                |        | 0     |
| 13387  | 2                            |                                                |        | 0     |
| 13395  | 1                            | 3                                              | 2      | 0     |
| 13398  | 2                            |                                                |        | 0     |
| 13404  | 2                            |                                                |        | 0     |
| 13405  | 2                            |                                                |        | 0     |
| 13408  | 2                            |                                                |        | 0     |
| 13411  | 2                            |                                                |        | 0     |
| 13413  | 2                            |                                                |        | 0     |
| 13419  | 2                            |                                                |        | 0     |
| 13420  | 2                            |                                                |        | 0     |
| 13427  | 2                            |                                                |        | 0     |
| 13441  | 2                            |                                                |        | 0     |
| 13444  | 2                            |                                                |        | 0     |
| 13456  | 2                            |                                                |        | 0     |
| 13466  | 2                            |                                                |        | 0     |
| 13468  | 2                            |                                                |        | 0     |
| 13475  | 2                            |                                                |        | 0     |
| 13484  | 2                            |                                                |        | 0     |
| 13486  | 2                            |                                                |        | 0     |
| 13487  | 2                            |                                                |        | 0     |
| 13491  | 2                            |                                                |        | 0     |
| 13496  | 2                            |                                                |        | 0     |
| 13497  | 2                            |                                                |        | 0     |
| 13498  | 2                            |                                                |        | 0     |
| 13502  | 2                            |                                                |        | 0     |
| 13503  | 1                            | 4                                              | 2      | 0     |
| 13505  | 2                            |                                                |        | 0     |
| 13509  | 2                            |                                                |        | 0     |

| respid | ICS Urgency Incontinence Q30 | ICS Urgency Incontinence -<br>how often Q30a_1 | Q30b_1 | Q31_1 |
|--------|------------------------------|------------------------------------------------|--------|-------|
| 13510  | 2                            |                                                |        | 0     |
| 13518  | 1                            | 2                                              | 1      | 0     |
| 13521  | 2                            |                                                |        | 0     |
| 13523  | 2                            |                                                |        | 0     |
| 13528  | 2                            |                                                |        | 0     |
| 13531  | 2                            |                                                |        | 0     |
| 13532  | 2                            |                                                |        | 0     |
| 13533  | 2                            |                                                |        | 0     |
| 13534  | 2                            |                                                |        | 0     |
| 13535  | 2                            |                                                |        | 0     |
| 13538  | 1                            | 3                                              | 2      | 0     |
| 13540  | 2                            |                                                |        | 0     |
| 13541  | 2                            |                                                |        | 0     |
| 13542  | 2                            |                                                |        | 0     |
| 13550  | 2                            |                                                |        | 0     |
| 13553  | 2                            |                                                |        | 0     |
| 13554  | 2                            |                                                |        | 0     |
| 13555  | 1                            | 1                                              | 2      | 0     |
| 13556  | 2                            |                                                |        | 0     |
| 13563  | 2                            |                                                |        | 0     |
| 13564  | 2                            |                                                |        | 0     |
| 13567  | 2                            |                                                |        | 0     |
| 13568  | 2                            |                                                |        | 0     |
| 13570  | 2                            |                                                |        | 0     |
| 13573  | 2                            |                                                |        | 0     |
| 13575  | 1                            | 2                                              | 3      | 0     |
| 13577  | 1                            | 3                                              | 3      | 0     |
| 13580  | 1                            | 2                                              | 1      | 0     |
| 13582  | 2                            |                                                |        | 0     |
| 13584  | 2                            |                                                |        | 0     |
| 13585  | 2                            |                                                |        | 0     |
| 13586  | 2                            |                                                |        | 0     |



| respid | ICS Urgency Incontinence Q30 | ICS Urgency Incontinence -<br>how often Q30a_1 | Q30b_1 | Q31_1 |
|--------|------------------------------|------------------------------------------------|--------|-------|
| 13587  | 1                            | 2                                              | 1      | 0     |
| 13592  | 2                            |                                                |        | 0     |
| 13596  | 2                            |                                                |        | 0     |
| 13597  | 2                            |                                                |        | 0     |
| 13599  | 2                            |                                                |        | 0     |
| 13601  | 2                            |                                                |        | 0     |
| 13604  | 2                            |                                                |        | 0     |
| 13608  | 2                            |                                                |        | 0     |
| 13616  | 2                            |                                                |        | 0     |
| 13618  | 2                            |                                                |        | 1     |
| 13619  | 1                            | 1                                              | 1      | 0     |
| 13626  | 2                            |                                                |        | 0     |
| 13628  | 1                            | 2                                              | 1      | 0     |
| 13640  | 2                            |                                                |        | 0     |
| 13645  | 2                            |                                                |        | 0     |
| 13648  | 2                            |                                                |        | 0     |
| 13653  | 2                            |                                                |        | 1     |
| 13655  | 2                            |                                                |        | 0     |
| 13662  | 2                            |                                                |        | 0     |
| 13670  | 2                            |                                                |        | 0     |
| 13673  | 1                            | 3                                              | 2      | 0     |
| 13674  | 1                            | 1                                              | 1      | 0     |
| 13675  | 2                            |                                                |        | 1     |
| 13678  | 2                            |                                                |        | 0     |
| 13680  | 2                            |                                                |        | 0     |
| 13681  | 2                            |                                                |        | 0     |
| 13683  | 2                            |                                                |        | 0     |
| 13684  | 2                            |                                                |        | 0     |
| 13685  | 2                            |                                                |        | 0     |
| 13687  | 2                            |                                                |        | 0     |
| 13690  | 2                            |                                                |        | 0     |
| 13700  | 1                            | 2                                              | 2      | 0     |

| respid | ICS Urgency Incontinence Q30 | ICS Urgency Incontinence -<br>how often Q30a_1 | Q30b_1 | Q31_1 |
|--------|------------------------------|------------------------------------------------|--------|-------|
| 13705  | 1                            | 1                                              | 1      | 0     |
| 13710  | 2                            |                                                |        | 0     |
| 13711  | 2                            |                                                |        | 0     |
| 13713  | 2                            |                                                |        | 0     |
| 13716  | 2                            |                                                |        | 0     |
| 13721  | 2                            |                                                |        | 0     |
| 13722  | 2                            |                                                |        | 0     |
| 13723  | 1                            | 2                                              | 4      | 0     |
| 13726  | 1                            | 2                                              | 2      | 0     |
| 13728  | 2                            |                                                |        | 0     |
| 13730  | 1                            | 2                                              | 1      | 0     |
| 13734  | 2                            |                                                |        | 0     |
| 13736  | 1                            | 3                                              | 4      | 1     |
| 13737  | 2                            |                                                |        | 0     |
| 13739  | 2                            |                                                |        | 0     |
| 13742  | 2                            |                                                |        | 0     |
| 13746  | 2                            |                                                |        | 1     |
| 13747  | 2                            |                                                |        | 0     |
| 13749  | 2                            |                                                |        | 0     |
| 13751  | 2                            |                                                |        | 0     |
| 13752  | 2                            |                                                |        | 0     |
| 13756  | 1                            | 1                                              | 1      | 1     |
| 13757  | 2                            |                                                |        | 0     |
| 13767  | 2                            |                                                |        | 0     |
| 13771  | 2                            |                                                |        | 0     |
| 13772  | 1                            | 2                                              | 2      | 0     |
| 13779  | 2                            |                                                |        | 0     |
| 13782  | 2                            |                                                |        | 0     |
| 13783  | 2                            |                                                |        | 0     |
| 13785  | 2                            |                                                |        | 0     |
| 13786  | 1                            | 1                                              | 1      | 0     |
| 13792  | 1                            | 2                                              | 4      | 1     |

| respid | ICS Urgency Incontinence Q30 | ICS Urgency Incontinence -<br>how often Q30a_1 | Q30b_1 | Q31_1 |
|--------|------------------------------|------------------------------------------------|--------|-------|
| 13796  | 2                            |                                                |        | 0     |
| 13798  | 2                            |                                                |        | 0     |
| 13799  | 2                            |                                                |        | 0     |
| 13804  | 2                            |                                                |        | 0     |
| 13805  | 2                            |                                                |        | 0     |
| 13810  | 1                            | 2                                              | 2      | 1     |
| 13811  | 2                            |                                                |        | 0     |
| 13819  | 2                            |                                                |        | 1     |
| 13821  | 1                            | 4                                              | 3      | 0     |
| 13824  | 1                            | 2                                              | 2      | 0     |
| 13828  | 2                            |                                                |        | 1     |
| 13829  | 1                            | 2                                              | 2      | 0     |
| 13831  | 2                            |                                                |        | 0     |
| 13833  | 2                            |                                                |        | 0     |
| 13835  | 1                            | 3                                              | 3      | 1     |
| 13838  | 2                            |                                                |        | 0     |
| 13839  | 1                            | 4                                              | 3      | 0     |
| 13845  | 2                            |                                                |        | 0     |
| 13846  | 2                            |                                                |        | 0     |
| 13853  | 1                            | 1                                              | 1      | 0     |
| 13855  | 1                            | 2                                              | 1      | 0     |
| 13858  | 2                            |                                                |        | 0     |
| 13860  | 2                            |                                                |        | 0     |
| 13865  | 1                            | 4                                              | 3      | 0     |
| 13870  | 2                            |                                                |        | 0     |
| 13872  | 1                            | 2                                              | 4      | 0     |
| 13873  | 2                            |                                                |        | 0     |
| 13874  | 2                            |                                                |        | 0     |
| 13875  | 1                            | 1                                              | 1      | 0     |
| 13881  | 2                            |                                                |        | 0     |
| 13887  | 2                            |                                                |        | 0     |
| 13888  | 2                            |                                                |        | 0     |

| respid | ICS Urgency Incontinence Q30 | ICS Urgency Incontinence -<br>how often Q30a_1 | Q30b_1 | Q31_1 |
|--------|------------------------------|------------------------------------------------|--------|-------|
| 13889  | 1                            | 2                                              | 3      | 0     |
| 13895  | 1                            | 2                                              | 2      | 0     |
| 13897  | 2                            |                                                |        | 0     |
| 13898  | 2                            |                                                |        | 0     |
| 13901  | 2                            |                                                |        | 0     |
| 13902  | 1                            | 4                                              | 3      | 0     |
| 13903  | 2                            |                                                |        | 0     |
| 13905  | 1                            | 1                                              | 1      | 0     |
| 13908  | 1                            | 2                                              | 2      | 0     |
| 13909  | 2                            |                                                |        | 0     |
| 13910  | 1                            | 5                                              | 4      | 0     |
| 13911  | 2                            |                                                |        | 0     |
| 13914  | 1                            | 3                                              | 2      | 1     |
| 13920  | 1                            | 3                                              | 3      | 0     |
| 13926  | 2                            |                                                |        | 0     |
| 13929  | 1                            | 1                                              | 0      | 0     |
| 13930  | 1                            | 2                                              | 2      | 0     |
| 13931  | 2                            |                                                |        | 0     |
| 13932  | 1                            | 2                                              | 2      | 0     |
| 13934  | 1                            | 2                                              | 1      | 0     |
| 13938  | 2                            |                                                |        | 0     |
| 13942  | 2                            |                                                |        | 0     |
| 13945  | 2                            |                                                |        | 0     |
| 13947  | 1                            | 5                                              | 3      | 0     |
| 13948  | 2                            |                                                |        | 0     |
| 13959  | 2                            |                                                |        | 0     |
| 13962  | 2                            |                                                |        | 0     |
| 13963  | 2                            |                                                |        | 0     |
| 13964  | 1                            | 1                                              | 1      | 0     |
| 13966  | 1                            | 2                                              | 1      | 0     |
| 13968  | 2                            |                                                |        | 0     |
| 13971  | 1                            | 2                                              | 1      | 0     |

| respid | ICS Urgency Incontinence Q30 | ICS Urgency Incontinence -<br>how often Q30a_1 | Q30b_1 | Q31_1 |
|--------|------------------------------|------------------------------------------------|--------|-------|
| 13979  | 1                            | 2                                              | 2      | 0     |
| 13980  | 1                            | 2                                              | 1      | 0     |
| 13981  | 2                            |                                                |        | 0     |
| 13982  | 2                            |                                                |        | 0     |
| 13984  | 1                            | 1                                              | 3      | 0     |
| 13989  | 2                            |                                                |        | 0     |
| 13990  | 2                            |                                                |        | 0     |
| 13992  | 1                            | 2                                              | 2      | 0     |
| 13998  | 2                            |                                                |        | 0     |
| 13999  | 1                            | 2                                              | 1      | 0     |
| 14000  | 2                            |                                                |        | 0     |
| 14003  | 2                            |                                                |        | 0     |
| 14004  | 2                            |                                                |        | 0     |
| 14006  | 2                            |                                                |        | 0     |
| 14007  | 2                            |                                                |        | 0     |
| 14008  | 2                            |                                                |        | 0     |
| 14013  | 2                            |                                                |        | 0     |
| 14015  | 2                            |                                                |        | 0     |
| 14018  | 2                            |                                                |        | 0     |
| 14021  | 2                            |                                                |        | 0     |
| 14023  | 2                            |                                                |        | 0     |
| 14024  | 2                            |                                                |        | 0     |
| 14026  | 2                            |                                                |        | 0     |
| 14030  | 2                            |                                                |        | 0     |
| 14032  | 1                            | 2                                              | 1      | 0     |
| 14040  | 2                            |                                                |        | 0     |
| 14045  | 2                            |                                                |        | 0     |
| 14048  | 1                            | 2                                              | 1      | 0     |
| 14049  | 1                            | 1                                              | 3      | 0     |
| 14050  | 2                            |                                                |        | 0     |
| 14051  | 1                            | 2                                              | 2      | 0     |
| 14052  | 2                            |                                                |        | 0     |

| respid | ICS Urgency Incontinence Q30 | ICS Urgency Incontinence -<br>how often Q30a_1 | Q30b_1 | Q31_1 |
|--------|------------------------------|------------------------------------------------|--------|-------|
| 14054  | 2                            |                                                |        | 0     |
| 14055  | 2                            |                                                |        | 0     |
| 14057  | 2                            |                                                |        | 0     |
| 14058  | 2                            |                                                |        | 0     |
| 14059  | 2                            |                                                |        | 0     |
| 14060  | 2                            |                                                |        | 0     |
| 14061  | 1                            | 3                                              | 3      | 0     |
| 14071  | 2                            |                                                |        | 0     |
| 14073  | 2                            |                                                |        | 1     |
| 14074  | 2                            |                                                |        | 0     |
| 14076  | 1                            | 2                                              | 2      | 0     |
| 14080  | 2                            |                                                |        | 0     |
| 14082  | 2                            |                                                |        | 0     |
| 14083  | 2                            |                                                |        | 0     |
| 14084  | 2                            |                                                |        | 0     |
| 14085  | 2                            |                                                |        | 0     |
| 14086  | 2                            |                                                |        | 0     |
| 14088  | 1                            | 1                                              | 1      | 0     |
| 14090  | 2                            |                                                |        | 0     |
| 14092  | 2                            |                                                |        | 0     |
| 14093  | 2                            |                                                |        | 0     |
| 14096  | 2                            |                                                |        | 0     |
| 14103  | 1                            | 2                                              | 1      | 0     |
| 14105  | 2                            |                                                |        | 0     |
| 14106  | 2                            |                                                |        | 0     |
| 14107  | 1                            | 2                                              | 2      | 0     |
| 14108  | 1                            | 2                                              | 4      | 0     |
| 14112  | 2                            |                                                |        | 0     |
| 14114  | 2                            |                                                |        | 0     |
| 14115  | 2                            |                                                |        | 0     |
| 14116  | 2                            |                                                |        | 0     |
| 14117  | 2                            |                                                |        | 0     |

| respid | ICS Urgency Incontinence Q30 | ICS Urgency Incontinence -<br>how often Q30a_1 | Q30b_1 | Q31_1 |
|--------|------------------------------|------------------------------------------------|--------|-------|
| 14118  | 1                            | 2                                              | 1      | 0     |
| 14119  | 2                            |                                                |        | 0     |
| 14127  | 2                            |                                                |        | 0     |
| 14129  | 2                            |                                                |        | 0     |
| 14131  | 1                            | 1                                              | 1      | 0     |
| 14132  | 2                            |                                                |        | 0     |
| 14133  | 1                            | 2                                              | 4      | 0     |
| 14134  | 2                            |                                                |        | 0     |
| 14135  | 2                            |                                                |        | 0     |
| 14136  | 2                            |                                                |        | 0     |
| 14138  | 2                            |                                                |        | 0     |
| 14139  | 2                            |                                                |        | 0     |
| 14140  | 2                            |                                                |        | 0     |
| 14141  | 2                            |                                                |        | 0     |
| 14143  | 2                            |                                                |        | 0     |
| 14146  | 2                            |                                                |        | 0     |
| 14147  | 1                            | 3                                              | 4      | 1     |
| 14148  | 1                            | 1                                              | 0      | 0     |
| 14151  | 1                            | 2                                              | 2      | 1     |
| 14152  | 1                            | 2                                              | 1      | 0     |
| 14153  | 2                            |                                                |        | 0     |
| 14154  | 2                            |                                                |        | 0     |
| 14158  | 2                            |                                                |        | 0     |
| 14159  | 1                            | 3                                              | 1      | 0     |
| 14160  | 1                            | 2                                              | 3      | 0     |
| 14161  | 1                            | 1                                              | 0      | 0     |
| 14162  | 2                            |                                                |        | 0     |
| 14165  | 2                            |                                                |        | 0     |
| 14166  | 1                            | 2                                              | 2      | 0     |
| 14167  | 2                            |                                                |        | 0     |
| 14169  | 2                            |                                                |        | 0     |
| 14170  | 2                            |                                                |        | 1     |

| respid | ICS Urgency Incontinence Q30 | ICS Urgency Incontinence -<br>how often Q30a_1 | Q30b_1 | Q31_1 |
|--------|------------------------------|------------------------------------------------|--------|-------|
| 14172  | 2                            |                                                |        | 0     |
| 14173  | 2                            |                                                |        | 0     |
| 14174  | 1                            | 2                                              | 2      | 0     |
| 14175  | 2                            |                                                |        | 0     |
| 14176  | 1                            | 1                                              | 1      | 0     |
| 14178  | 2                            |                                                |        | 0     |
| 14179  | 2                            |                                                |        | 0     |
| 14180  | 1                            | 2                                              | 2      | 0     |
| 14183  | 1                            | 2                                              | 4      | 0     |
| 14185  | 2                            |                                                |        | 0     |
| 14187  | 2                            |                                                |        | 0     |
| 14189  | 2                            |                                                |        | 0     |
| 14191  | 2                            |                                                |        | 0     |
| 14192  | 2                            |                                                |        | 0     |
| 14195  | 1                            | 2                                              | 3      | 0     |
| 14197  | 2                            |                                                |        | 0     |
| 14203  | 2                            |                                                |        | 0     |
| 14204  | 1                            | 1                                              | 1      | 0     |
| 14205  | 2                            |                                                |        | 1     |
| 14208  | 2                            |                                                |        | 0     |
| 14211  | 1                            | 3                                              | 4      | 1     |
| 14214  | 2                            |                                                |        | 0     |
| 14215  | 2                            |                                                |        | 0     |
| 14216  | 2                            |                                                |        | 0     |
| 14218  | 2                            |                                                |        | 0     |
| 14220  | 2                            |                                                |        | 0     |
| 14223  | 2                            |                                                |        | 0     |
| 14225  | 1                            | 2                                              | 2      | 0     |
| 14226  | 2                            |                                                |        | 0     |
| 14228  | 1                            | 1                                              | 0      | 0     |
| 14231  | 2                            |                                                |        | 0     |
| 14233  | 1                            | 1                                              | 1      | 0     |



| respid | ICS Urgency Incontinence Q30 | ICS Urgency Incontinence -<br>how often Q30a_1 | Q30b_1 | Q31_1 |
|--------|------------------------------|------------------------------------------------|--------|-------|
| 14237  | 2                            |                                                |        | 0     |
| 14238  | 2                            |                                                |        | 0     |
| 14243  | 1                            | 1                                              | 1      | 0     |
| 14245  | 2                            |                                                |        | 0     |
| 14246  | 1                            | 1                                              | 1      | 0     |
| 14248  | 2                            |                                                |        | 0     |
| 14250  | 2                            |                                                |        | 0     |
| 14253  | 2                            |                                                |        | 0     |
| 14254  | 1                            | 2                                              | 1      | 0     |
| 14255  | 2                            |                                                |        | 0     |
| 14257  | 2                            |                                                |        | 0     |
| 14258  | 2                            |                                                |        | 0     |
| 14259  | 2                            |                                                |        | 0     |
| 14260  | 2                            |                                                |        | 0     |
| 14261  | 1                            | 3                                              | 4      | 0     |
| 14263  | 1                            | 3                                              | 3      | 0     |
| 14264  | 2                            |                                                |        | 0     |
| 14266  | 2                            |                                                |        | 0     |
| 14267  | 1                            | 2                                              | 0      | 0     |
| 14268  | 2                            |                                                |        | 0     |
| 14275  | 2                            |                                                |        | 0     |
| 14278  | 2                            |                                                |        | 1     |
| 14279  | 2                            |                                                |        | 0     |
| 14280  | 2                            |                                                |        | 0     |
| 14281  | 2                            |                                                |        | 0     |
| 14282  | 1                            | 1                                              | 1      | 0     |
| 14283  | 1                            | 2                                              | 2      | 0     |
| 14286  | 2                            |                                                |        | 0     |
| 14287  | 2                            |                                                |        | 0     |
| 14288  | 1                            | 2                                              | 2      | 1     |
| 14291  | 2                            |                                                |        | 0     |
| 14292  | 2                            |                                                |        | 0     |

| respid | ICS Urgency Incontinence Q30 | ICS Urgency Incontinence -<br>how often Q30a_1 | Q30b_1 | Q31_1 |
|--------|------------------------------|------------------------------------------------|--------|-------|
| 14293  | 2                            |                                                |        | 0     |
| 14304  | 1                            | 4                                              | 3      | 0     |
| 14308  | 2                            |                                                |        | 0     |
| 14313  | 2                            |                                                |        | 0     |
| 14314  | 1                            | 1                                              | 1      | 0     |
| 14316  | 2                            |                                                |        | 0     |
| 14317  | 2                            |                                                |        | 0     |
| 14318  | 2                            |                                                |        | 0     |
| 14319  | 1                            | 2                                              | 1      | 0     |
| 14320  | 1                            | 4                                              | 2      | 0     |
| 14321  | 2                            |                                                |        | 1     |
| 14322  | 1                            | 2                                              | 2      | 0     |
| 14326  | 2                            |                                                |        | 0     |
| 14327  | 1                            | 4                                              | 4      | 0     |
| 14328  | 2                            |                                                |        | 0     |
| 14330  | 2                            |                                                |        | 0     |
| 14332  | 2                            |                                                |        | 0     |
| 14334  | 2                            |                                                |        | 0     |
| 14336  | 2                            |                                                |        | 0     |
| 14337  | 2                            |                                                |        | 0     |
| 14339  | 2                            |                                                |        | 0     |
| 14340  | 2                            |                                                |        | 1     |
| 14341  | 2                            |                                                |        | 1     |
| 14344  | 2                            |                                                |        | 0     |
| 14345  | 1                            | 1                                              | 1      | 0     |
| 14346  | 2                            |                                                |        | 0     |
| 14348  | 2                            |                                                |        | 0     |
| 14349  | 1                            | 1                                              | 1      | 0     |
| 14358  | 1                            | 2                                              | 2      | 0     |
| 14360  | 2                            |                                                |        | 0     |
| 14362  | 2                            |                                                |        | 0     |
| 14366  | 2                            |                                                |        | 0     |

| respid | ICS Urgency Incontinence Q30 | ICS Urgency Incontinence -<br>how often Q30a_1 | Q30b_1 | Q31_1 |
|--------|------------------------------|------------------------------------------------|--------|-------|
| 14367  | 2                            |                                                |        | 0     |
| 14369  | 2                            |                                                |        | 0     |
| 14371  | 2                            |                                                |        | 0     |
| 14372  | 2                            |                                                |        | 0     |
| 14374  | 2                            |                                                |        | 0     |
| 14376  | 2                            |                                                |        | 0     |
| 14377  | 2                            |                                                |        | 0     |
| 14378  | 2                            |                                                |        | 0     |
| 14379  | 2                            |                                                |        | 0     |
| 14381  | 2                            |                                                |        | 0     |
| 14383  | 2                            |                                                |        | 0     |
| 14384  | 2                            |                                                |        | 0     |
| 14385  | 1                            | 3                                              | 2      | 0     |
| 14386  | 1                            | 3                                              | 3      | 0     |
| 14390  | 2                            |                                                |        | 0     |
| 14391  | 2                            |                                                |        | 0     |
| 14392  | 2                            |                                                |        | 0     |
| 14393  | 1                            | 2                                              | 3      | 0     |
| 14394  | 1                            | 2                                              | 1      | 1     |
| 14395  | 2                            |                                                |        | 0     |
| 14396  | 2                            |                                                |        | 0     |
| 14397  | 2                            |                                                |        | 0     |
| 14398  | 2                            |                                                |        | 0     |
| 14399  | 2                            |                                                |        | 0     |
| 14400  | 2                            |                                                |        | 0     |
| 14403  | 2                            |                                                |        | 0     |
| 14404  | 2                            |                                                |        | 0     |
| 14405  | 2                            |                                                |        | 0     |
| 14407  | 2                            |                                                |        | 0     |
| 14408  | 1                            | 3                                              | 2      | 0     |
| 14410  | 1                            | 2                                              | 4      | 0     |
| 14415  | 2                            |                                                |        | 0     |

| respid | ICS Urgency Incontinence Q30 | ICS Urgency Incontinence -<br>how often Q30a_1 | Q30b_1 | Q31_1 |
|--------|------------------------------|------------------------------------------------|--------|-------|
| 14419  | 1                            | 3                                              | 2      | 0     |
| 14420  | 2                            |                                                |        | 0     |
| 14421  | 2                            |                                                |        | 0     |
| 14423  | 2                            |                                                |        | 0     |
| 14424  | 2                            |                                                |        | 0     |
| 14425  | 2                            |                                                |        | 0     |
| 14426  | 2                            |                                                |        | 0     |
| 14427  | 1                            | 1                                              | 0      | 0     |
| 14428  | 1                            | 3                                              | 3      | 0     |
| 14431  | 1                            | 2                                              | 1      | 1     |
| 14433  | 2                            |                                                |        | 0     |
| 14434  | 2                            |                                                |        | 0     |
| 14435  | 1                            | 1                                              | 1      | 0     |
| 14436  | 2                            |                                                |        | 0     |
| 14438  | 2                            |                                                |        | 0     |
| 14442  | 1                            | 3                                              | 2      | 0     |
| 14447  | 2                            |                                                |        | 0     |
| 14448  | 2                            |                                                |        | 0     |
| 14450  | 2                            |                                                |        | 0     |
| 14451  | 2                            |                                                |        | 0     |
| 14454  | 1                            | 2                                              | 1      | 0     |
| 14455  | 1                            | 2                                              | 3      | 1     |
| 14456  | 2                            |                                                |        | 0     |
| 14457  | 1                            | 4                                              | 1      | 0     |
| 14458  | 1                            | 4                                              | 3      | 0     |
| 14459  | 2                            |                                                |        | 0     |
| 14460  | 2                            |                                                |        | 0     |
| 14464  | 1                            | 2                                              | 1      | 0     |
| 14465  | 2                            |                                                |        | 0     |
| 14466  | 1                            | 1                                              | 0      | 0     |
| 14467  | 2                            |                                                |        | 0     |
| 14470  | 2                            |                                                |        | 1     |

| respid | ICS Urgency Incontinence Q30 | ICS Urgency Incontinence -<br>how often Q30a_1 | Q30b_1 | Q31_1 |
|--------|------------------------------|------------------------------------------------|--------|-------|
| 14472  | 2                            |                                                |        | 0     |
| 14473  | 2                            |                                                |        | 0     |
| 14474  | 2                            |                                                |        | 0     |
| 14477  | 2                            |                                                |        | 0     |
| 14478  | 2                            |                                                |        | 0     |
| 14479  | 2                            |                                                |        | 0     |
| 14484  | 2                            |                                                |        | 0     |
| 14485  | 2                            |                                                |        | 0     |
| 14486  | 2                            |                                                |        | 0     |
| 14487  | 2                            |                                                |        | 0     |
| 14488  | 1                            | 3                                              | 2      | 0     |
| 14491  | 1                            | 2                                              | 2      | 0     |
| 14495  | 2                            |                                                |        | 0     |
| 14500  | 2                            |                                                |        | 1     |
| 14502  | 2                            |                                                |        | 0     |
| 14504  | 1                            | 2                                              | 2      | 0     |
| 14505  | 1                            | 2                                              | 2      | 0     |
| 14507  | 2                            |                                                |        | 0     |
| 14517  | 2                            |                                                |        | 0     |
| 14518  | 2                            |                                                |        | 0     |
| 14519  | 1                            | 1                                              | 1      | 0     |
| 14521  | 1                            | 3                                              | 2      | 0     |
| 14522  | 2                            |                                                |        | 0     |
| 14526  | 2                            |                                                |        | 0     |
| 14528  | 1                            | 3                                              | 2      | 0     |
| 14529  | 2                            |                                                |        | 0     |
| 14530  | 2                            |                                                |        | 0     |
| 14531  | 1                            | 3                                              | 4      | 1     |
| 14534  | 1                            | 2                                              | 1      | 0     |
| 14538  | 2                            |                                                |        | 0     |
| 14539  | 2                            |                                                |        | 0     |
| 14545  | 2                            |                                                |        | 0     |

| respid | ICS Urgency Incontinence Q30 | ICS Urgency Incontinence -<br>how often Q30a_1 | Q30b_1 | Q31_1 |
|--------|------------------------------|------------------------------------------------|--------|-------|
| 14546  | 2                            |                                                |        | 0     |
| 14551  | 2                            |                                                |        | 0     |
| 14553  | 1                            | 2                                              | 4      | 0     |
| 14557  | 2                            |                                                |        | 0     |
| 14558  | 2                            |                                                |        | 0     |
| 14559  | 1                            | 1                                              | 1      | 0     |
| 14560  | 2                            |                                                |        | 0     |
| 14563  | 1                            | 2                                              | 1      | 0     |
| 14565  | 2                            |                                                |        | 0     |
| 14571  | 1                            | 2                                              | 2      | 0     |
| 14572  | 2                            |                                                |        | 0     |
| 14573  | 1                            | 1                                              | 2      | 0     |
| 14575  | 2                            |                                                |        | 0     |
| 14576  | 2                            |                                                |        | 0     |
| 14578  | 2                            |                                                |        | 0     |
| 14579  | 2                            |                                                |        | 0     |
| 14580  | 2                            |                                                |        | 1     |
| 14582  | 2                            |                                                |        | 0     |
| 14585  | 1                            | 2                                              | 1      | 0     |
| 14588  | 2                            |                                                |        | 0     |
| 14590  | 1                            | 3                                              | 1      | 0     |
| 14592  | 1                            | 1                                              | 2      | 0     |
| 14593  | 2                            |                                                |        | 0     |
| 14595  | 2                            |                                                |        | 0     |
| 14597  | 1                            | 1                                              | 1      | 0     |
| 14600  | 2                            |                                                |        | 0     |
| 14602  | 1                            | 2                                              | 4      | 1     |
| 14604  | 2                            |                                                |        | 0     |
| 14605  | 2                            |                                                |        | 0     |
| 14609  | 2                            |                                                |        | 0     |
| 14610  | 2                            |                                                |        | 0     |
| 14611  | 2                            |                                                |        | 0     |

| respid | ICS Urgency Incontinence Q30 | ICS Urgency Incontinence -<br>how often Q30a_1 | Q30b_1 | Q31_1 |
|--------|------------------------------|------------------------------------------------|--------|-------|
| 14612  | 2                            |                                                |        | 0     |
| 14614  | 1                            | 2                                              | 1      | 0     |
| 14615  | 2                            |                                                |        | 0     |
| 14618  | 1                            | 3                                              | 1      | 1     |
| 14621  | 2                            |                                                |        | 0     |
| 14624  | 2                            |                                                |        | 0     |
| 14626  | 2                            |                                                |        | 0     |
| 14627  | 1                            | 2                                              | 3      | 1     |
| 14628  | 1                            | 4                                              | 3      | 0     |
| 14631  | 2                            |                                                |        | 0     |
| 14633  | 2                            |                                                |        | 0     |
| 14642  | 2                            |                                                |        | 0     |
| 14647  | 2                            |                                                |        | 0     |
| 14658  | 2                            |                                                |        | 0     |
| 14659  | 1                            | 3                                              | 1      | 0     |
| 14660  | 2                            |                                                |        | 0     |
| 14661  | 2                            |                                                |        | 0     |
| 14662  | 1                            | 2                                              | 3      | 0     |
| 14663  | 2                            |                                                |        | 0     |
| 14670  | 2                            |                                                |        | 0     |
| 14671  | 2                            |                                                |        | 0     |
| 14672  | 1                            | 2                                              | 1      | 0     |
| 14675  | 2                            |                                                |        | 0     |
| 14676  | 2                            |                                                |        | 0     |
| 14677  | 1                            | 3                                              | 4      | 0     |
| 14678  | 2                            |                                                |        | 0     |
| 14681  | 2                            |                                                |        | 0     |
| 14684  | 2                            |                                                |        | 0     |
| 14688  | 2                            |                                                |        | 0     |
| 14690  | 2                            |                                                |        | 0     |
| 14694  | 1                            | 3                                              | 1      | 0     |
| 14696  | 2                            |                                                |        | 0     |

| respid | ICS Urgency Incontinence Q30 | ICS Urgency Incontinence -<br>how often Q30a_1 | Q30b_1 | Q31_1 |
|--------|------------------------------|------------------------------------------------|--------|-------|
| 14700  | 2                            |                                                |        | 0     |
| 14701  | 2                            |                                                |        | 0     |
| 14703  | 1                            | 1                                              | 2      | 0     |
| 14707  | 2                            |                                                |        | 0     |
| 14711  | 1                            | 3                                              | 1      | 0     |
| 14714  | 2                            |                                                |        | 0     |
| 14715  | 1                            | 5                                              | 4      | 0     |
| 14716  | 2                            |                                                |        | 0     |
| 14720  | 2                            |                                                |        | 0     |
| 14725  | 2                            |                                                |        | 0     |
| 14726  | 2                            |                                                |        | 0     |
| 14734  | 2                            |                                                |        | 0     |
| 14735  | 2                            |                                                |        | 0     |
| 14736  | 2                            |                                                |        | 0     |
| 14740  | 2                            |                                                |        | 0     |
| 14745  | 2                            |                                                |        | 0     |
| 14747  | 2                            |                                                |        | 0     |
| 14750  | 1                            | 3                                              | 3      | 0     |
| 14751  | 2                            |                                                |        | 0     |
| 14753  | 2                            |                                                |        | 0     |
| 14756  | 1                            | 4                                              | 4      | 1     |
| 14780  | 2                            |                                                |        | 0     |
| 14782  | 2                            |                                                |        | 0     |
| 14800  | 1                            | 4                                              | 3      | 0     |
| 14801  | 2                            |                                                |        | 0     |
| 14802  | 1                            | 4                                              | 2      | 0     |
| 14805  | 1                            | 2                                              | 3      | 1     |
| 14811  | 1                            | 2                                              | 2      | 1     |
| 14814  | 1                            | 3                                              | 2      | 0     |
| 14822  | 1                            | 2                                              | 1      | 0     |
| 14827  | 1                            | 1                                              | 3      | 0     |
| 14828  | 2                            |                                                |        | 0     |



| respid | ICS Urgency Incontinence Q30 | ICS Urgency Incontinence -<br>how often Q30a_1 | Q30b_1 | Q31_1 |
|--------|------------------------------|------------------------------------------------|--------|-------|
| 14830  | 2                            |                                                |        | 0     |
| 14832  | 1                            | 4                                              | 3      | 0     |
| 14835  | 2                            |                                                |        | 0     |
| 14841  | 2                            |                                                |        | 0     |
| 14849  | 2                            |                                                |        | 0     |
| 14850  | 2                            |                                                |        | 0     |
| 14851  | 2                            |                                                |        | 0     |
| 14856  | 1                            | 4                                              | 3      | 0     |
| 14862  | 1                            | 2                                              | 2      | 0     |
| 14863  | 2                            |                                                |        | 0     |
| 14864  | 2                            |                                                |        | 0     |
| 14866  | 2                            |                                                |        | 0     |
| 14867  | 1                            | 4                                              | 3      | 0     |
| 14868  | 1                            | 2                                              | 1      | 0     |
| 14870  | 2                            |                                                |        | 0     |
| 14873  | 2                            |                                                |        | 0     |
| 14878  | 2                            |                                                |        | 1     |
| 14879  | 2                            |                                                |        | 0     |
| 14881  | 2                            |                                                |        | 0     |
| 14888  | 1                            | 4                                              | 3      | 1     |
| 14895  | 2                            |                                                |        | 0     |
| 14900  | 1                            | 3                                              | 3      | 0     |
| 14912  | 2                            |                                                |        | 0     |
| 14922  | 1                            | 2                                              | 1      | 0     |
| 14923  | 1                            | 4                                              | 3      | 0     |
| 14924  | 1                            | 3                                              | 4      | 0     |
| 14925  | 1                            | 1                                              | 3      | 0     |
| 14926  | 2                            |                                                |        | 0     |
| 14927  | 1                            | 4                                              | 2      | 0     |
| 14930  | 2                            |                                                |        | 0     |
| 14937  | 1                            | 3                                              | 3      | 1     |
| 14938  | 1                            | 3                                              | 3      | 0     |

| respid | ICS Urgency Incontinence Q30 | ICS Urgency Incontinence -<br>how often Q30a_1 | Q30b_1 | Q31_1 |
|--------|------------------------------|------------------------------------------------|--------|-------|
| 14939  | 1                            | 4                                              | 3      | 0     |
| 14942  | 2                            |                                                |        | 0     |
| 14943  | 2                            |                                                |        | 0     |
| 14953  | 2                            |                                                |        | 0     |
| 14954  | 2                            |                                                |        | 0     |
| 14955  | 1                            | 1                                              | 1      | 1     |
| 14957  | 2                            |                                                |        | 1     |
| 14958  | 1                            | 4                                              | 3      | 0     |
| 14959  | 1                            | 3                                              | 2      | 0     |
| 14961  | 2                            |                                                |        | 0     |
| 14963  | 2                            |                                                |        | 0     |
| 14964  | 2                            |                                                |        | 0     |
| 14965  | 2                            |                                                |        | 0     |
| 14967  | 1                            | 5                                              | 3      | 0     |
| 14970  | 1                            | 4                                              | 3      | 0     |
| 14972  | 2                            |                                                |        | 1     |
| 14975  | 1                            | 4                                              | 3      | 0     |
| 14977  | 2                            |                                                |        | 0     |
| 14982  | 1                            | 1                                              | 1      | 0     |
| 14985  | 1                            | 2                                              | 1      | 0     |
| 14986  | 2                            |                                                |        | 0     |
| 14987  | 2                            |                                                |        | 0     |
| 14988  | 1                            | 4                                              | 3      | 1     |
| 14989  | 1                            | 1                                              | 2      | 1     |
| 14993  | 2                            |                                                |        | 0     |
| 15001  | 2                            |                                                |        | 0     |
| 15002  | 1                            | 5                                              | 3      | 0     |
| 15006  | 2                            |                                                |        | 0     |
| 15007  | 2                            |                                                |        | 0     |
| 15014  | 1                            | 4                                              | 3      | 0     |
| 15020  | 1                            | 2                                              | 1      | 0     |
| 15021  | 2                            |                                                |        | 0     |

| respid | ICS Urgency Incontinence Q30 | ICS Urgency Incontinence -<br>how often Q30a_1 | Q30b_1 | Q31_1 |
|--------|------------------------------|------------------------------------------------|--------|-------|
| 15023  | 1                            | 4                                              | 3      | 0     |
| 15030  | 2                            |                                                |        | 0     |
| 15032  | 2                            |                                                |        | 0     |
| 15033  | 2                            |                                                |        | 0     |
| 15034  | 1                            | 2                                              | 2      | 0     |
| 15035  | 2                            |                                                |        | 0     |
| 15037  | 2                            |                                                |        | 0     |
| 15039  | 2                            |                                                |        | 0     |
| 15040  | 2                            |                                                |        | 0     |
| 15042  | 2                            |                                                |        | 0     |
| 15044  | 2                            |                                                |        | 0     |
| 15045  | 2                            |                                                |        | 0     |
| 15046  | 2                            |                                                |        | 0     |
| 15052  | 1                            | 4                                              | 2      | 0     |
| 15058  | 2                            |                                                |        | 0     |
| 15063  | 2                            |                                                |        | 0     |
| 15066  | 2                            |                                                |        | 0     |
| 15069  | 2                            |                                                |        | 0     |
| 15071  | 2                            |                                                |        | 1     |
| 15076  | 2                            |                                                |        | 0     |
| 15078  | 1                            | 1                                              | 0      | 0     |
| 15087  | 2                            |                                                |        | 0     |
| 15090  | 2                            |                                                |        | 0     |
| 15091  | 1                            | 3                                              | 3      | 0     |
| 15092  | 2                            |                                                |        | 0     |
| 15096  | 2                            |                                                |        | 0     |
| 15106  | 2                            |                                                |        | 0     |
| 15108  | 2                            |                                                |        | 0     |
| 15113  | 2                            |                                                |        | 0     |
| 15116  | 2                            |                                                |        | 0     |
| 15119  | 2                            |                                                |        | 0     |
| 15120  | 2                            |                                                |        | 0     |

| respid | ICS Urgency Incontinence Q30 | ICS Urgency Incontinence -<br>how often Q30a_1 | Q30b_1 | Q31_1 |
|--------|------------------------------|------------------------------------------------|--------|-------|
| 15121  | 2                            |                                                |        | 0     |
| 15123  | 2                            |                                                |        | 0     |
| 15124  | 2                            |                                                |        | 0     |
| 15128  | 2                            |                                                |        | 0     |
| 15131  | 2                            |                                                |        | 0     |
| 15136  | 2                            |                                                |        | 0     |
| 15137  | 1                            | 2                                              | 3      | 0     |
| 15141  | 2                            |                                                |        | 0     |
| 15144  | 2                            |                                                |        | 0     |
| 15147  | 1                            | 2                                              | 2      | 0     |
| 15151  | 2                            |                                                |        | 0     |
| 15154  | 2                            |                                                |        | 0     |
| 15157  | 2                            |                                                |        | 0     |
| 15164  | 1                            | 4                                              | 3      | 1     |
| 15168  | 1                            | 1                                              | 4      | 0     |
| 15169  | 2                            |                                                |        | 0     |
| 15172  | 1                            | 3                                              | 3      | 0     |
| 15177  | 1                            | 3                                              | 3      | 0     |
| 15178  | 2                            |                                                |        | 0     |
| 15180  | 1                            | 2                                              | 1      | 0     |
| 15181  | 2                            |                                                |        | 0     |
| 15182  | 2                            |                                                |        | 0     |
| 15183  | 2                            |                                                |        | 0     |
| 15188  | 2                            |                                                |        | 0     |
| 15190  | 1                            | 4                                              | 2      | 0     |
| 15195  | 2                            |                                                |        | 0     |
| 15201  | 1                            | 2                                              | 1      | 1     |
| 15203  | 2                            |                                                |        | 0     |
| 15204  | 2                            |                                                |        | 0     |
| 15207  | 2                            |                                                |        | 0     |
| 15208  | 1                            | 4                                              | 2      | 0     |
| 15209  | 2                            |                                                |        | 0     |

| respid | ICS Urgency Incontinence Q30 | ICS Urgency Incontinence -<br>how often Q30a_1 | Q30b_1 | Q31_1 |
|--------|------------------------------|------------------------------------------------|--------|-------|
| 15212  | 2                            |                                                |        | 0     |
| 15213  | 1                            | 2                                              | 2      | 0     |
| 15219  | 2                            |                                                |        | 0     |
| 15220  | 2                            |                                                |        | 0     |
| 15221  | 2                            |                                                |        | 0     |
| 15223  | 2                            |                                                |        | 0     |
| 15224  | 2                            |                                                |        | 0     |
| 15225  | 2                            |                                                |        | 0     |
| 15226  | 2                            |                                                |        | 0     |
| 15230  | 2                            |                                                |        | 0     |
| 15231  | 1                            | 3                                              | 3      | 0     |
| 15232  | 2                            |                                                |        | 0     |
| 15237  | 2                            |                                                |        | 0     |
| 15239  | 2                            |                                                |        | 0     |
| 15241  | 2                            |                                                |        | 0     |
| 15242  | 2                            |                                                |        | 0     |
| 15247  | 2                            |                                                |        | 0     |
| 15248  | 2                            |                                                |        | 0     |
| 15251  | 2                            |                                                |        | 0     |
| 15257  | 2                            |                                                |        | 0     |
| 15260  | 2                            |                                                |        | 0     |
| 15261  | 1                            | 4                                              | 3      | 0     |
| 15262  | 2                            |                                                |        | 0     |
| 15263  | 2                            |                                                |        | 0     |
| 15265  | 2                            |                                                |        | 0     |
| 15266  | 2                            |                                                |        | 0     |
| 15268  | 2                            |                                                |        | 0     |
| 15269  | 1                            | 3                                              | 2      | 0     |
| 15270  | 1                            | 3                                              | 4      | 0     |
| 15273  | 1                            | 2                                              | 1      | 0     |
| 15276  | 1                            | 4                                              | 2      | 0     |
| 15277  | 2                            |                                                |        | 0     |

| respid | ICS Urgency Incontinence Q30 | ICS Urgency Incontinence -<br>how often Q30a_1 | Q30b_1 | Q31_1 |
|--------|------------------------------|------------------------------------------------|--------|-------|
| 15282  | 2                            |                                                |        | 0     |
| 15284  | 2                            |                                                |        | 0     |
| 15285  | 2                            |                                                |        | 0     |
| 15286  | 1                            | 2                                              | 3      | 1     |
| 15288  | 1                            | 3                                              | 2      | 0     |
| 15292  | 1                            | 4                                              | 3      | 0     |
| 15296  | 2                            |                                                |        | 0     |
| 15297  | 2                            |                                                |        | 1     |
| 15298  | 2                            |                                                |        | 0     |
| 15301  | 2                            |                                                |        | 0     |
| 15302  | 2                            |                                                |        | 0     |
| 15305  | 2                            |                                                |        | 0     |
| 15307  | 2                            |                                                |        | 0     |
| 15308  | 1                            | 1                                              | 0      | 1     |
| 15309  | 2                            |                                                |        | 0     |
| 15311  | 2                            |                                                |        | 0     |
| 15315  | 2                            |                                                |        | 0     |
| 15316  | 1                            | 1                                              | 1      | 0     |
| 15318  | 2                            |                                                |        | 0     |
| 15321  | 1                            | 2                                              | 2      | 0     |
| 15322  | 2                            |                                                |        | 0     |
| 15324  | 1                            | 2                                              | 0      | 1     |
| 15326  | 2                            |                                                |        | 0     |
| 15327  | 2                            |                                                |        | 0     |
| 15328  | 2                            |                                                |        | 0     |
| 15330  | 2                            |                                                |        | 0     |
| 15332  | 2                            |                                                |        | 0     |
| 15333  | 2                            |                                                |        | 0     |
| 15334  | 2                            |                                                |        | 0     |
| 15336  | 1                            | 4                                              | 3      | 0     |
| 15337  | 2                            |                                                |        | 0     |
| 15338  | 2                            |                                                |        | 0     |

| respid | ICS Urgency Incontinence Q30 | ICS Urgency Incontinence -<br>how often Q30a_1 | Q30b_1 | Q31_1 |
|--------|------------------------------|------------------------------------------------|--------|-------|
| 15339  | 1                            | 3                                              | 4      | 1     |
| 15341  | 2                            |                                                |        | 0     |
| 15344  | 2                            |                                                |        | 0     |
| 15345  | 2                            |                                                |        | 0     |
| 15350  | 2                            |                                                |        | 0     |
| 15351  | 2                            |                                                |        | 0     |
| 15352  | 2                            |                                                |        | 0     |
| 15372  | 2                            |                                                |        | 0     |
| 15373  | 1                            | 3                                              | 0      | 0     |
| 15376  | 2                            |                                                |        | 0     |
| 15377  | 2                            |                                                |        | 0     |
| 15382  | 2                            |                                                |        | 0     |
| 15383  | 2                            |                                                |        | 0     |
| 15385  | 1                            | 3                                              | 3      | 0     |
| 15390  | 2                            |                                                |        | 0     |
| 15399  | 2                            |                                                |        | 0     |
| 15404  | 2                            |                                                |        | 0     |
| 15410  | 2                            |                                                |        | 1     |
| 15411  | 2                            |                                                |        | 0     |
| 15412  | 1                            | 2                                              | 2      | 0     |
| 15413  | 2                            |                                                |        | 0     |
| 15414  | 2                            |                                                |        | 0     |
| 15417  | 2                            |                                                |        | 1     |
| 15418  | 2                            |                                                |        | 0     |
| 15421  | 2                            |                                                |        | 0     |
| 15423  | 2                            |                                                |        | 0     |
| 15425  | 2                            |                                                |        | 0     |
| 15426  | 1                            | 4                                              | 2      | 0     |
| 15430  | 2                            |                                                |        | 0     |
| 15431  | 1                            | 4                                              | 3      | 0     |
| 15435  | 2                            |                                                |        | 0     |
| 15436  | 2                            |                                                |        | 0     |

| respid | ICS Urgency Incontinence Q30 | ICS Urgency Incontinence -<br>how often Q30a_1 | Q30b_1 | Q31_1 |
|--------|------------------------------|------------------------------------------------|--------|-------|
| 15437  | 2                            |                                                |        | 0     |
| 15438  | 2                            |                                                |        | 0     |
| 15439  | 2                            |                                                |        | 0     |
| 15441  | 1                            | 4                                              | 3      | 0     |
| 15443  | 2                            |                                                |        | 0     |
| 15446  | 2                            |                                                |        | 0     |
| 15449  | 2                            |                                                |        | 0     |
| 15451  | 1                            | 2                                              | 3      | 0     |
| 15452  | 1                            | 4                                              | 3      | 0     |
| 15454  | 2                            |                                                |        | 0     |
| 15456  | 2                            |                                                |        | 0     |
| 15457  | 2                            |                                                |        | 0     |
| 15458  | 2                            |                                                |        | 0     |
| 15462  | 1                            | 2                                              | 1      | 0     |
| 15467  | 1                            | 1                                              | 1      | 1     |
| 15470  | 1                            | 2                                              | 3      | 0     |
| 15472  | 1                            | 2                                              | 1      | 0     |
| 15476  | 2                            |                                                |        | 0     |
| 15477  | 2                            |                                                |        | 0     |
| 15488  | 2                            |                                                |        | 0     |
| 15489  | 2                            |                                                |        | 0     |
| 15490  | 2                            |                                                |        | 0     |
| 15496  | 2                            |                                                |        | 0     |
| 15497  | 2                            |                                                |        | 0     |
| 15498  | 2                            |                                                |        | 0     |
| 15509  | 2                            |                                                |        | 0     |
| 15510  | 2                            |                                                |        | 0     |
| 15516  | 2                            |                                                |        | 1     |
| 15519  | 2                            |                                                |        | 0     |
| 15520  | 2                            |                                                |        | 0     |
| 15524  | 1                            | 1                                              | 1      | 0     |
| 15525  | 1                            | 1                                              | 0      | 0     |



| respid | ICS Urgency Incontinence Q30 | ICS Urgency Incontinence -<br>how often Q30a_1 | Q30b_1 | Q31_1 |
|--------|------------------------------|------------------------------------------------|--------|-------|
| 15526  | 2                            |                                                |        | 0     |
| 15531  | 2                            |                                                |        | 0     |
| 15532  | 2                            |                                                |        | 0     |
| 15534  | 1                            | 3                                              | 3      | 0     |
| 15535  | 2                            |                                                |        | 1     |
| 15539  | 2                            |                                                |        | 0     |
| 15550  | 2                            |                                                |        | 0     |
| 15556  | 2                            |                                                |        | 0     |
| 15558  | 1                            | 4                                              | 3      | 0     |
| 15565  | 2                            |                                                |        | 0     |
| 15567  | 2                            |                                                |        | 0     |
| 15568  | 1                            | 3                                              | 3      | 1     |
| 15571  | 2                            |                                                |        | 0     |
| 15573  | 1                            | 1                                              | 1      | 0     |
| 15574  | 1                            | 4                                              | 3      | 1     |
| 15576  | 2                            |                                                |        | 1     |
| 15587  | 1                            | 2                                              | 2      | 0     |
| 15588  | 2                            |                                                |        | 0     |
| 15593  | 1                            | 2                                              | 3      | 0     |
| 15597  | 2                            |                                                |        | 0     |
| 15598  | 2                            |                                                |        | 0     |
| 15599  | 1                            | 3                                              | 2      | 0     |
| 15601  | 2                            |                                                |        | 0     |
| 15604  | 2                            |                                                |        | 0     |
| 15611  | 2                            |                                                |        | 0     |
| 15613  | 2                            |                                                |        | 0     |
| 15614  | 2                            |                                                |        | 0     |
| 15617  | 1                            | 2                                              | 1      | 0     |
| 15622  | 2                            |                                                |        | 0     |
| 15623  | 2                            |                                                |        | 0     |
| 15625  | 2                            |                                                |        | 0     |
| 15627  | 2                            |                                                |        | 0     |

| respid | ICS Urgency Incontinence Q30 | ICS Urgency Incontinence -<br>how often Q30a_1 | Q30b_1 | Q31_1 |
|--------|------------------------------|------------------------------------------------|--------|-------|
| 15628  | 2                            |                                                |        | 0     |
| 15633  | 2                            |                                                |        | 0     |
| 15634  | 2                            |                                                |        | 0     |
| 15637  | 2                            |                                                |        | 0     |
| 15644  | 2                            |                                                |        | 0     |
| 15645  | 2                            |                                                |        | 0     |
| 15649  | 2                            |                                                |        | 0     |
| 15650  | 2                            |                                                |        | 0     |
| 15651  | 2                            |                                                |        | 0     |
| 15657  | 1                            | 2                                              | 4      | 1     |
| 15658  | 2                            |                                                |        | 0     |
| 15660  | 1                            | 2                                              | 1      | 0     |
| 15667  | 2                            |                                                |        | 0     |
| 15671  | 2                            |                                                |        | 0     |
| 15679  | 2                            |                                                |        | 0     |
| 15712  | 2                            |                                                |        | 0     |
| 15715  | 2                            |                                                |        | 0     |
| 15749  | 1                            | 1                                              | 2      | 1     |
| 15754  | 2                            |                                                |        | 0     |
| 15756  | 2                            |                                                |        | 0     |
| 15773  | 2                            |                                                |        | 0     |
| 15774  | 2                            |                                                |        | 0     |
| 15776  | 2                            |                                                |        | 0     |
| 15777  | 2                            |                                                |        | 0     |
| 15779  | 2                            |                                                |        | 0     |
| 15780  | 2                            |                                                |        | 0     |
| 15792  | 2                            |                                                |        | 0     |
| 15793  | 2                            |                                                |        | 0     |
| 15796  | 2                            |                                                |        | 0     |
| 15798  | 2                            |                                                |        | 0     |
| 15809  | 2                            |                                                |        | 0     |
| 15810  | 2                            |                                                |        | 0     |

| respid | ICS Urgency Incontinence Q30 | ICS Urgency Incontinence -<br>how often Q30a_1 | Q30b_1 | Q31_1 |
|--------|------------------------------|------------------------------------------------|--------|-------|
| 15815  | 1                            | 1                                              | 1      | 0     |
| 15816  | 2                            |                                                |        | 0     |
| 15817  | 2                            |                                                |        | 0     |
| 15821  | 2                            |                                                |        | 0     |
| 15823  | 2                            |                                                |        | 1     |
| 15834  | 2                            |                                                |        | 0     |
| 15835  | 2                            |                                                |        | 0     |
| 15836  | 2                            |                                                |        | 0     |
| 15837  | 2                            |                                                |        | 0     |
| 15839  | 2                            |                                                |        | 0     |
| 15840  | 2                            |                                                |        | 0     |
| 15844  | 2                            |                                                |        | 0     |
| 15845  | 2                            |                                                |        | 0     |
| 15847  | 1                            | 3                                              | 2      | 0     |
| 15848  | 2                            |                                                |        | 0     |
| 15849  | 2                            |                                                |        | 0     |
| 15857  | 2                            |                                                |        | 1     |
| 15858  | 2                            |                                                |        | 0     |
| 15862  | 1                            | 4                                              | 3      | 0     |
| 15866  | 2                            |                                                |        | 0     |
| 15870  | 2                            |                                                |        | 0     |
| 15871  | 2                            |                                                |        | 0     |
| 15872  | 2                            |                                                |        | 0     |
| 15873  | 2                            |                                                |        | 0     |
| 15874  | 2                            |                                                |        | 0     |
| 15875  | 2                            |                                                |        | 0     |
| 15876  | 1                            | 3                                              | 1      | 0     |
| 15882  | 1                            | 2                                              | 4      | 0     |
| 15884  | 2                            |                                                |        | 0     |
| 15890  | 2                            |                                                |        | 0     |
| 15892  | 1                            | 1                                              | 3      | 1     |
| 15908  | 2                            |                                                |        | 0     |

| respid | ICS Urgency Incontinence Q30 | ICS Urgency Incontinence -<br>how often Q30a_1 | Q30b_1 | Q31_1 |
|--------|------------------------------|------------------------------------------------|--------|-------|
| 15914  | 2                            |                                                |        | 0     |
| 15932  | 2                            |                                                |        | 0     |
| 15933  | 2                            |                                                |        | 0     |
| 15938  | 2                            |                                                |        | 0     |
| 15940  | 1                            | 3                                              | 4      | 0     |
| 15945  | 2                            |                                                |        | 0     |
| 15947  | 2                            |                                                |        | 0     |
| 15950  | 2                            |                                                |        | 0     |
| 15951  | 2                            |                                                |        | 1     |
| 15952  | 2                            |                                                |        | 0     |
| 15953  | 1                            | 2                                              | 2      | 0     |
| 15954  | 1                            | 3                                              | 3      | 0     |
| 15957  | 1                            | 3                                              | 3      | 0     |
| 15965  | 1                            | 4                                              | 3      | 0     |
| 15966  | 2                            |                                                |        | 0     |
| 15967  | 2                            |                                                |        | 0     |
| 15968  | 2                            |                                                |        | 0     |
| 15970  | 1                            | 1                                              | 0      | 0     |
| 15973  | 2                            |                                                |        | 0     |
| 15974  | 2                            |                                                |        | 0     |
| 15975  | 2                            |                                                |        | 0     |
| 15980  | 1                            | 4                                              | 3      | 0     |
| 15984  | 2                            |                                                |        | 0     |
| 15985  | 1                            | 2                                              | 2      | 0     |
| 15994  | 2                            |                                                |        | 0     |
| 15995  | 2                            |                                                |        | 0     |
| 16000  | 2                            |                                                |        | 0     |
| 16004  | 2                            |                                                |        | 0     |
| 16005  | 2                            |                                                |        | 0     |
| 16006  | 2                            |                                                |        | 0     |
| 16009  | 1                            | 1                                              | 2      | 0     |
| 16017  | 2                            |                                                |        | 0     |

| respid | ICS Urgency Incontinence Q30 | ICS Urgency Incontinence -<br>how often Q30a_1 | Q30b_1 | Q31_1 |
|--------|------------------------------|------------------------------------------------|--------|-------|
| 16019  | 2                            |                                                |        | 0     |
| 16021  | 2                            |                                                |        | 0     |
| 16024  | 2                            |                                                |        | 0     |
| 16026  | 1                            | 1                                              | 1      | 0     |
| 16029  | 2                            |                                                |        | 0     |
| 16031  | 2                            |                                                |        | 0     |
| 16037  | 2                            |                                                |        | 0     |
| 16043  | 2                            |                                                |        | 0     |
| 16044  | 2                            |                                                |        | 0     |
| 16047  | 2                            |                                                |        | 0     |
| 16048  | 2                            |                                                |        | 0     |
| 16049  | 2                            |                                                |        | 0     |
| 16051  | 2                            |                                                |        | 0     |
| 16053  | 1                            | 2                                              | 2      | 0     |
| 16054  | 2                            |                                                |        | 0     |
| 16069  | 2                            |                                                |        | 0     |
| 16070  | 2                            |                                                |        | 0     |
| 16074  | 2                            |                                                |        | 0     |
| 16076  | 2                            |                                                |        | 0     |
| 16078  | 2                            |                                                |        | 0     |
| 16081  | 2                            |                                                |        | 0     |
| 16085  | 2                            |                                                |        | 0     |
| 16088  | 2                            |                                                |        | 0     |
| 16091  | 1                            | 2                                              | 1      | 0     |
| 16092  | 2                            |                                                |        | 0     |
| 16093  | 2                            |                                                |        | 0     |
| 16097  | 1                            | 1                                              | 1      | 0     |
| 16100  | 1                            | 1                                              | 0      | 0     |
| 16101  | 2                            |                                                |        | 0     |
| 16105  | 2                            |                                                |        | 0     |
| 16118  | 1                            | 2                                              | 2      | 1     |
| 16129  | 2                            |                                                |        | 0     |

| respid | ICS Urgency Incontinence Q30 | ICS Urgency Incontinence -<br>how often Q30a_1 | Q30b_1 | Q31_1 |
|--------|------------------------------|------------------------------------------------|--------|-------|
| 16130  | 1                            | 2                                              | 3      | 0     |
| 16131  | 1                            | 2                                              | 4      | 1     |
| 16136  | 2                            |                                                |        | 0     |
| 16137  | 2                            |                                                |        | 0     |
| 16138  | 2                            |                                                |        | 0     |
| 16139  | 2                            |                                                |        | 1     |
| 16140  | 2                            |                                                |        | 0     |
| 16145  | 2                            |                                                |        | 0     |
| 16150  | 1                            | 1                                              | 4      | 1     |
| 16151  | 2                            |                                                |        | 0     |
| 16153  | 2                            |                                                |        | 0     |
| 16164  | 2                            |                                                |        | 0     |
| 16168  | 2                            |                                                |        | 0     |
| 16173  | 2                            |                                                |        | 0     |
| 16174  | 2                            |                                                |        | 0     |
| 16177  | 1                            | 3                                              | 1      | 0     |
| 16185  | 1                            | 1                                              | 1      | 0     |
| 16189  | 1                            | 1                                              | 3      | 0     |
| 16192  | 2                            |                                                |        | 0     |
| 16193  | 2                            |                                                |        | 0     |
| 16194  | 2                            |                                                |        | 1     |
| 16196  | 2                            |                                                |        | 0     |
| 16202  | 2                            |                                                |        | 0     |
| 16205  | 1                            | 2                                              | 2      | 0     |
| 16206  | 1                            | 5                                              | 1      | 0     |
| 16208  | 2                            |                                                |        | 0     |
| 16211  | 1                            | 2                                              | 1      | 1     |
| 16212  | 2                            |                                                |        | 0     |
| 16215  | 2                            |                                                |        | 0     |
| 16217  | 2                            |                                                |        | 0     |
| 16221  | 2                            |                                                |        | 0     |
| 16226  | 1                            | 1                                              | 3      | 0     |

| respid | ICS Urgency Incontinence Q30 | ICS Urgency Incontinence -<br>how often Q30a_1 | Q30b_1 | Q31_1 |
|--------|------------------------------|------------------------------------------------|--------|-------|
| 16228  | 1                            | 2                                              | 2      | 0     |
| 16229  | 2                            |                                                |        | 0     |
| 16230  | 2                            |                                                |        | 0     |
| 16231  | 1                            | 3                                              | 4      | 0     |
| 16232  | 1                            | 1                                              | 3      | 0     |
| 16234  | 2                            |                                                |        | 0     |
| 16235  | 1                            | 3                                              | 2      | 0     |
| 16236  | 2                            |                                                |        | 0     |
| 16237  | 2                            |                                                |        | 0     |
| 16238  | 1                            | 1                                              | 1      | 0     |
| 16239  | 2                            |                                                |        | 0     |
| 16243  | 2                            |                                                |        | 0     |
| 16248  | 2                            |                                                |        | 0     |
| 16249  | 2                            |                                                |        | 0     |
| 16251  | 2                            |                                                |        | 0     |
| 16263  | 2                            |                                                |        | 0     |
| 16265  | 1                            | 1                                              | 0      | 1     |
| 16269  | 2                            |                                                |        | 0     |
| 16272  | 2                            |                                                |        | 0     |
| 16273  | 2                            |                                                |        | 0     |
| 16281  | 2                            |                                                |        | 0     |
| 16282  | 2                            |                                                |        | 0     |
| 16287  | 2                            |                                                |        | 0     |
| 16290  | 1                            | 1                                              | 0      | 0     |
| 16294  | 2                            |                                                |        | 0     |
| 16295  | 2                            |                                                |        | 0     |
| 16296  | 2                            |                                                |        | 0     |
| 16299  | 1                            | 3                                              | 2      | 0     |
| 16302  | 2                            |                                                |        | 0     |
| 16303  | 2                            |                                                |        | 0     |
| 16304  | 2                            |                                                |        | 0     |
| 16306  | 1                            | 2                                              | 1      | 0     |

| respid | ICS Urgency Incontinence Q30 | ICS Urgency Incontinence -<br>how often Q30a_1 | Q30b_1 | Q31_1 |
|--------|------------------------------|------------------------------------------------|--------|-------|
| 16318  | 2                            |                                                |        | 0     |
| 16320  | 2                            |                                                |        | 0     |
| 16321  | 1                            | 2                                              | 2      | 0     |
| 16322  | 2                            |                                                |        | 0     |
| 16324  | 2                            |                                                |        | 0     |
| 16326  | 2                            |                                                |        | 0     |
| 16328  | 2                            |                                                |        | 1     |
| 16336  | 2                            |                                                |        | 0     |
| 16341  | 2                            |                                                |        | 0     |
| 16342  | 2                            |                                                |        | 0     |
| 16343  | 2                            |                                                |        | 0     |
| 16345  | 1                            | 2                                              | 2      | 0     |
| 16349  | 2                            |                                                |        | 0     |
| 16355  | 2                            |                                                |        | 0     |
| 16364  | 2                            |                                                |        | 0     |
| 16374  | 1                            | 1                                              | 0      | 0     |
| 16375  | 2                            |                                                |        | 0     |
| 16376  | 2                            |                                                |        | 0     |
| 16393  | 2                            |                                                |        | 0     |
| 16394  | 2                            |                                                |        | 0     |
| 16395  | 2                            |                                                |        | 0     |
| 16397  | 2                            |                                                |        | 0     |
| 16398  | 1                            | 2                                              | 2      | 0     |
| 16402  | 2                            |                                                |        | 0     |
| 16405  | 2                            |                                                |        | 0     |
| 16416  | 1                            | 2                                              | 1      | 0     |
| 16422  | 1                            | 1                                              | 1      | 0     |
| 16429  | 2                            |                                                |        | 0     |
| 16430  | 2                            |                                                |        | 0     |
| 16432  | 1                            | 2                                              | 2      | 0     |
| 16433  | 2                            |                                                |        | 0     |
| 16434  | 2                            |                                                |        | 0     |



| respid | ICS Urgency Incontinence Q30 | ICS Urgency Incontinence -<br>how often Q30a_1 | Q30b_1 | Q31_1 |
|--------|------------------------------|------------------------------------------------|--------|-------|
| 16437  | 2                            |                                                |        | 0     |
| 16439  | 2                            |                                                |        | 0     |
| 16440  | 2                            |                                                |        | 0     |
| 16441  | 2                            |                                                |        | 0     |
| 16442  | 2                            |                                                |        | 0     |
| 16450  | 1                            | 1                                              | 0      | 0     |
| 16451  | 2                            |                                                |        | 0     |
| 16452  | 1                            | 1                                              | 0      | 1     |
| 16467  | 2                            |                                                |        | 0     |
| 16468  | 2                            |                                                |        | 0     |
| 16469  | 2                            |                                                |        | 0     |
| 16470  | 2                            |                                                |        | 0     |
| 16471  | 1                            | 2                                              | 1      | 1     |
| 16473  | 2                            |                                                |        | 0     |
| 16476  | 1                            | 1                                              | 1      | 0     |
| 16478  | 2                            |                                                |        | 0     |
| 16484  | 2                            |                                                |        | 0     |
| 16499  | 2                            |                                                |        | 0     |
| 16502  | 2                            |                                                |        | 0     |
| 16505  | 2                            |                                                |        | 0     |
| 16514  | 2                            |                                                |        | 0     |
| 16515  | 2                            |                                                |        | 0     |
| 16517  | 2                            |                                                |        | 0     |
| 16518  | 2                            |                                                |        | 0     |
| 16519  | 2                            |                                                |        | 0     |
| 16525  | 2                            |                                                |        | 0     |
| 16526  | 2                            |                                                |        | 0     |
| 16530  | 2                            |                                                |        | 0     |
| 16532  | 2                            |                                                |        | 0     |
| 16536  | 2                            |                                                |        | 0     |
| 16537  | 1                            | 2                                              | 1      | 0     |
| 16541  | 2                            |                                                |        | 0     |

| respid | ICS Urgency Incontinence Q30 | ICS Urgency Incontinence -<br>how often Q30a_1 | Q30b_1 | Q31_1 |
|--------|------------------------------|------------------------------------------------|--------|-------|
| 16543  | 2                            |                                                |        | 0     |
| 16544  | 2                            |                                                |        | 0     |
| 16545  | 2                            |                                                |        | 0     |
| 16546  | 2                            |                                                |        | 0     |
| 16548  | 2                            |                                                |        | 0     |
| 16552  | 2                            |                                                |        | 0     |
| 16559  | 2                            |                                                |        | 0     |
| 16564  | 1                            | 5                                              | 4      | 0     |
| 16565  | 1                            | 2                                              | 1      | 0     |
| 16567  | 2                            |                                                |        | 0     |
| 16571  | 2                            |                                                |        | 0     |
| 16572  | 1                            | 1                                              | 1      | 0     |
| 16579  | 2                            |                                                |        | 0     |
| 16588  | 1                            | 4                                              | 4      | 0     |
| 16599  | 2                            |                                                |        | 0     |
| 16605  | 2                            |                                                |        | 0     |
| 16622  | 2                            |                                                |        | 0     |
| 16635  | 1                            | 1                                              | 0      | 0     |
| 16638  | 2                            |                                                |        | 0     |
| 16652  | 2                            |                                                |        | 0     |
| 16656  | 2                            |                                                |        | 0     |
| 16671  | 2                            |                                                |        | 0     |
| 16676  | 2                            |                                                |        | 0     |
| 16678  | 2                            |                                                |        | 0     |
| 16702  | 2                            |                                                |        | 0     |
| 16705  | 2                            |                                                |        | 0     |
| 16707  | 1                            | 3                                              | 2      | 0     |
| 16711  | 1                            | 1                                              | 1      | 0     |
| 16712  | 2                            |                                                |        | 0     |
| 16716  | 2                            |                                                |        | 0     |
| 16724  | 2                            |                                                |        | 0     |
| 16727  | 1                            | 2                                              | 1      | 0     |

| respid | ICS Urgency Incontinence Q30 | ICS Urgency Incontinence -<br>how often Q30a_1 | Q30b_1 | Q31_1 |
|--------|------------------------------|------------------------------------------------|--------|-------|
| 16734  | 2                            |                                                |        | 0     |
| 16740  | 2                            |                                                |        | 0     |
| 16748  | 2                            |                                                |        | 0     |
| 16759  | 2                            |                                                |        | 0     |
| 16761  | 2                            |                                                |        | 0     |
| 16763  | 2                            |                                                |        | 0     |
| 16764  | 1                            | 2                                              | 2      | 1     |
| 16766  | 2                            |                                                |        | 0     |
| 16767  | 2                            |                                                |        | 0     |
| 16776  | 1                            | 1                                              | 1      | 0     |
| 16781  | 2                            |                                                |        | 0     |
| 16793  | 2                            |                                                |        | 0     |
| 16796  | 1                            | 4                                              | 3      | 1     |
| 16810  | 2                            |                                                |        | 0     |
| 16811  | 2                            |                                                |        | 0     |
| 16813  | 2                            |                                                |        | 0     |
| 16814  | 2                            |                                                |        | 0     |
| 16831  | 2                            |                                                |        | 0     |
| 16833  | 2                            |                                                |        | 1     |
| 16839  | 1                            | 2                                              | 2      | 0     |
| 16843  | 2                            |                                                |        | 0     |
| 16860  | 2                            |                                                |        | 0     |
| 16871  | 2                            |                                                |        | 0     |
| 16881  | 2                            |                                                |        | 1     |
| 16884  | 2                            |                                                |        | 1     |
| 16891  | 2                            |                                                |        | 0     |
| 16909  | 1                            | 1                                              | 0      | 0     |
| 16911  | 2                            |                                                |        | 0     |
| 16922  | 2                            |                                                |        | 0     |
| 16935  | 2                            |                                                |        | 0     |
| 16942  | 2                            |                                                |        | 0     |
| 16950  | 2                            |                                                |        | 0     |

| respid | ICS Urgency Incontinence Q30 | ICS Urgency Incontinence -<br>how often Q30a_1 | Q30b_1 | Q31_1 |
|--------|------------------------------|------------------------------------------------|--------|-------|
| 16952  | 1                            | 2                                              | 2      | 0     |
| 16963  | 2                            |                                                |        | 0     |
| 16967  | 2                            |                                                |        | 0     |
| 16970  | 2                            |                                                |        | 0     |
| 16976  | 1                            | 2                                              | 2      | 1     |
| 16982  | 2                            |                                                |        | 0     |
| 16995  | 2                            |                                                |        | 0     |
| 17004  | 2                            |                                                |        | 0     |
| 17006  | 2                            |                                                |        | 0     |
| 17009  | 2                            |                                                |        | 0     |
| 17021  | 2                            |                                                |        | 0     |
| 17040  | 2                            |                                                |        | 0     |
| 17041  | 2                            |                                                |        | 0     |
| 17044  | 1                            | 1                                              | 1      | 0     |
| 17046  | 1                            | 2                                              | 1      | 0     |
| 17052  | 2                            |                                                |        | 0     |
| 17055  | 2                            |                                                |        | 0     |
| 17108  | 1                            | 3                                              | 0      | 0     |
| 17109  | 2                            |                                                |        | 0     |
| 17113  | 2                            |                                                |        | 0     |
| 17115  | 2                            |                                                |        | 0     |
| 17132  | 2                            |                                                |        | 0     |
| 17135  | 2                            |                                                |        | 0     |
| 17138  | 2                            |                                                |        | 0     |
| 17141  | 2                            |                                                |        | 0     |
| 17143  | 2                            |                                                |        | 0     |
| 17148  | 2                            |                                                |        | 0     |
| 17151  | 2                            |                                                |        | 0     |
| 17153  | 2                            |                                                |        | 0     |
| 17154  | 1                            | 3                                              | 3      | 0     |
| 17157  | 2                            |                                                |        | 0     |
| 17160  | 2                            |                                                |        | 0     |

| respid | ICS Urgency Incontinence Q30 | ICS Urgency Incontinence -<br>how often Q30a_1 | Q30b_1 | Q31_1 |
|--------|------------------------------|------------------------------------------------|--------|-------|
| 17167  | 1                            | 2                                              | 2      | 0     |
| 17169  | 2                            |                                                |        | 0     |
| 17174  | 2                            |                                                |        | 0     |
| 17179  | 2                            |                                                |        | 0     |
| 17180  | 2                            |                                                |        | 0     |
| 17182  | 2                            |                                                |        | 0     |
| 17184  | 1                            | 1                                              | 1      | 0     |
| 17186  | 2                            |                                                |        | 0     |
| 17187  | 2                            |                                                |        | 0     |
| 17192  | 2                            |                                                |        | 1     |
| 17197  | 2                            |                                                |        | 0     |
| 17217  | 2                            |                                                |        | 0     |
| 17226  | 2                            |                                                |        | 0     |
| 17228  | 2                            |                                                |        | 0     |
| 17245  | 2                            |                                                |        | 0     |
| 17247  | 2                            |                                                |        | 0     |
| 17258  | 2                            |                                                |        | 0     |
| 17259  | 2                            |                                                |        | 0     |
| 17262  | 2                            |                                                |        | 0     |
| 17265  | 2                            |                                                |        | 0     |
| 17281  | 2                            |                                                |        | 0     |
| 17282  | 2                            |                                                |        | 0     |
| 17293  | 2                            |                                                |        | 0     |
| 17306  | 2                            |                                                |        | 0     |
| 17312  | 1                            | 1                                              | 0      | 0     |
| 17318  | 2                            |                                                |        | 0     |
| 17328  | 1                            | 2                                              | 2      | 0     |
| 17343  | 2                            |                                                |        | 0     |
| 17344  | 2                            |                                                |        | 0     |
| 17348  | 2                            |                                                |        | 0     |
| 17352  | 2                            |                                                |        | 0     |
| 17355  | 2                            |                                                |        | 0     |

| respid | ICS Urgency Incontinence Q30 | ICS Urgency Incontinence -<br>how often Q30a_1 | Q30b_1 | Q31_1 |
|--------|------------------------------|------------------------------------------------|--------|-------|
| 17356  | 2                            |                                                |        | 0     |
| 17359  | 2                            |                                                |        | 0     |
| 17373  | 1                            | 3                                              | 3      | 0     |
| 17381  | 2                            |                                                |        | 0     |
| 17388  | 2                            |                                                |        | 0     |
| 17394  | 2                            |                                                |        | 0     |
| 17401  | 2                            |                                                |        | 0     |
| 17403  | 2                            |                                                |        | 0     |
| 17411  | 2                            |                                                |        | 0     |
| 17423  | 2                            |                                                |        | 0     |
| 17427  | 2                            |                                                |        | 0     |
| 17433  | 2                            |                                                |        | 0     |
| 17441  | 2                            |                                                |        | 0     |
| 17442  | 2                            |                                                |        | 0     |
| 17447  | 2                            |                                                |        | 0     |
| 17458  | 2                            |                                                |        | 0     |
| 17474  | 2                            |                                                |        | 0     |
| 17475  | 2                            |                                                |        | 1     |
| 17476  | 2                            |                                                |        | 1     |
| 17480  | 2                            |                                                |        | 0     |
| 17484  | 2                            |                                                |        | 0     |
| 17490  | 2                            |                                                |        | 0     |
| 17491  | 2                            |                                                |        | 0     |
| 17500  | 2                            |                                                |        | 0     |
| 17507  | 2                            |                                                |        | 0     |
| 17517  | 2                            |                                                |        | 0     |
| 17520  | 2                            |                                                |        | 0     |
| 17521  | 2                            |                                                |        | 0     |
| 17531  | 2                            |                                                |        | 0     |
| 17540  | 2                            |                                                |        | 0     |
| 17550  | 1                            | 1                                              | 0      | 0     |
| 17551  | 2                            |                                                |        | 0     |

| respid | ICS Urgency Incontinence Q30 | ICS Urgency Incontinence -<br>how often Q30a_1 | Q30b_1 | Q31_1 |
|--------|------------------------------|------------------------------------------------|--------|-------|
| 17555  | 1                            | 2                                              | 1      | 0     |
| 17556  | 1                            | 1                                              | 1      | 1     |
| 17574  | 2                            |                                                |        | 0     |
| 17575  | 2                            |                                                |        | 0     |
| 17582  | 2                            |                                                |        | 0     |
| 17587  | 2                            |                                                |        | 0     |
| 17601  | 2                            |                                                |        | 0     |
| 17607  | 2                            |                                                |        | 0     |
| 17609  | 2                            |                                                |        | 0     |
| 17611  | 2                            |                                                |        | 0     |
| 17613  | 2                            |                                                |        | 0     |
| 17615  | 2                            |                                                |        | 0     |
| 17620  | 2                            |                                                |        | 0     |
| 17624  | 1                            | 2                                              | 2      | 0     |
| 17635  | 2                            |                                                |        | 0     |
| 17643  | 2                            |                                                |        | 0     |
| 17645  | 1                            | 1                                              | 1      | 0     |
| 17646  | 2                            |                                                |        | 0     |
| 17649  | 2                            |                                                |        | 0     |
| 17658  | 2                            |                                                |        | 0     |
| 17666  | 2                            |                                                |        | 0     |
| 17670  | 2                            |                                                |        | 0     |
| 17678  | 2                            |                                                |        | 0     |
| 17679  | 2                            |                                                |        | 0     |
| 17695  | 2                            |                                                |        | 1     |
| 17697  | 2                            |                                                |        | 0     |
| 17698  | 2                            |                                                |        | 0     |
| 17723  | 1                            | 1                                              | 2      | 0     |
| 17727  | 2                            |                                                |        | 0     |
| 17734  | 1                            | 1                                              | 0      | 0     |
| 17737  | 2                            |                                                |        | 0     |
| 17748  | 2                            |                                                |        | 0     |

| respid | ICS Urgency Incontinence Q30 | ICS Urgency Incontinence -<br>how often Q30a_1 | Q30b_1 | Q31_1 |
|--------|------------------------------|------------------------------------------------|--------|-------|
| 17749  | 2                            |                                                |        | 0     |
| 17754  | 2                            |                                                |        | 1     |
| 17766  | 2                            |                                                |        | 0     |
| 17777  | 2                            |                                                |        | 0     |
| 17780  | 2                            |                                                |        | 0     |
| 17788  | 2                            |                                                |        | 0     |
| 17801  | 1                            | 2                                              | 2      | 0     |
| 17803  | 2                            |                                                |        | 0     |
| 17807  | 2                            |                                                |        | 0     |
| 17808  | 2                            |                                                |        | 0     |
| 17809  | 2                            |                                                |        | 0     |
| 17821  | 2                            |                                                |        | 0     |
| 17827  | 2                            |                                                |        | 0     |
| 17834  | 2                            |                                                |        | 0     |
| 17838  | 2                            |                                                |        | 0     |
| 17842  | 2                            |                                                |        | 0     |
| 17862  | 2                            |                                                |        | 0     |
| 17863  | 2                            |                                                |        | 0     |
| 17871  | 2                            |                                                |        | 0     |
| 17872  | 2                            |                                                |        | 0     |
| 17903  | 1                            | 2                                              | 1      | 0     |
| 17906  | 2                            |                                                |        | 0     |
| 17910  | 1                            | 3                                              | 2      | 1     |
| 17922  | 2                            |                                                |        | 0     |
| 17923  | 2                            |                                                |        | 0     |
| 17925  | 2                            |                                                |        | 0     |
| 17926  | 1                            | 1                                              | 0      | 0     |
| 17937  | 2                            |                                                |        | 0     |
| 17956  | 2                            |                                                |        | 0     |
| 17958  | 2                            |                                                |        | 0     |
| 17985  | 2                            |                                                |        | 0     |
| 17989  | 2                            |                                                |        | 0     |



| respid | ICS Urgency Incontinence Q30 | ICS Urgency Incontinence -<br>how often Q30a_1 | Q30b_1 | Q31_1 |
|--------|------------------------------|------------------------------------------------|--------|-------|
| 17995  | 2                            |                                                |        | 1     |
| 18000  | 1                            | 1                                              | 0      | 0     |
| 18010  | 2                            |                                                |        | 0     |
| 18015  | 2                            |                                                |        | 0     |
| 18018  | 2                            |                                                |        | 0     |
| 18031  | 2                            |                                                |        | 0     |
| 18033  | 1                            | 2                                              | 2      | 1     |
| 18036  | 2                            |                                                |        | 0     |
| 18041  | 2                            |                                                |        | 0     |
| 18068  | 2                            |                                                |        | 0     |
| 18080  | 2                            |                                                |        | 0     |
| 18081  | 2                            |                                                |        | 0     |
| 18083  | 2                            |                                                |        | 0     |
| 18113  | 1                            | 3                                              | 2      | 0     |
| 18115  | 2                            |                                                |        | 0     |
| 18117  | 1                            | 4                                              | 4      | 1     |
| 18129  | 2                            |                                                |        | 0     |
| 18132  | 1                            | 3                                              | 2      | 0     |
| 18146  | 2                            |                                                |        | 0     |
| 18147  | 1                            | 2                                              | 4      | 0     |
| 18153  | 2                            |                                                |        | 0     |
| 18154  | 2                            |                                                |        | 0     |
| 18157  | 2                            |                                                |        | 0     |
| 18166  | 2                            |                                                |        | 0     |
| 18169  | 2                            |                                                |        | 0     |
| 18171  | 2                            |                                                |        | 0     |
| 18173  | 1                            | 1                                              | 2      | 1     |
| 18204  | 2                            |                                                |        | 0     |
| 18210  | 2                            |                                                |        | 0     |
| 18212  | 2                            |                                                |        | 0     |
| 18220  | 1                            | 3                                              | 2      | 0     |
| 18221  | 2                            |                                                |        | 0     |

| respid | ICS Urgency Incontinence Q30 | ICS Urgency Incontinence -<br>how often Q30a_1 | Q30b_1 | Q31_1 |
|--------|------------------------------|------------------------------------------------|--------|-------|
| 18228  | 2                            |                                                |        | 0     |
| 18231  | 2                            |                                                |        | 0     |
| 18233  | 1                            | 2                                              | 1      | 0     |
| 18235  | 2                            |                                                |        | 0     |
| 18237  | 2                            |                                                |        | 0     |
| 18250  | 2                            |                                                |        | 0     |
| 18253  | 2                            |                                                |        | 0     |
| 18264  | 2                            |                                                |        | 0     |
| 18285  | 2                            |                                                |        | 0     |
| 18287  | 2                            |                                                |        | 0     |
| 18296  | 2                            |                                                |        | 0     |
| 18299  | 2                            |                                                |        | 0     |
| 18313  | 2                            |                                                |        | 0     |
| 18321  | 2                            |                                                |        | 1     |
| 18324  | 2                            |                                                |        | 0     |
| 18329  | 2                            |                                                |        | 0     |
| 18332  | 2                            |                                                |        | 0     |
| 18339  | 1                            | 3                                              | 3      | 0     |
| 18340  | 2                            |                                                |        | 0     |
| 18348  | 2                            |                                                |        | 0     |
| 18355  | 2                            |                                                |        | 0     |
| 18360  | 2                            |                                                |        | 0     |
| 18380  | 2                            |                                                |        | 1     |
| 18403  | 2                            |                                                |        | 0     |
| 18405  | 2                            |                                                |        | 0     |
| 18409  | 2                            |                                                |        | 0     |
| 18445  | 2                            |                                                |        | 0     |
| 18458  | 2                            |                                                |        | 0     |
| 18477  | 2                            |                                                |        | 0     |
| 18481  | 2                            |                                                |        | 0     |
| 18491  | 2                            |                                                |        | 0     |
| 18492  | 2                            |                                                |        | 0     |

| respid | ICS Urgency Incontinence Q30 | ICS Urgency Incontinence -<br>how often Q30a_1 | Q30b_1 | Q31_1 |
|--------|------------------------------|------------------------------------------------|--------|-------|
| 18494  | 2                            |                                                |        | 0     |
| 18495  | 2                            |                                                |        | 0     |
| 18496  | 2                            |                                                |        | 0     |
| 18507  | 2                            |                                                |        | 0     |
| 18509  | 2                            |                                                |        | 0     |
| 18510  | 2                            |                                                |        | 0     |
| 18513  | 2                            |                                                |        | 0     |
| 18525  | 2                            |                                                |        | 0     |
| 18526  | 1                            | 3                                              | 2      | 0     |
| 18527  | 2                            |                                                |        | 0     |
| 18536  | 2                            |                                                |        | 0     |
| 18540  | 2                            |                                                |        | 0     |
| 18548  | 2                            |                                                |        | 0     |
| 18550  | 2                            |                                                |        | 0     |
| 18556  | 2                            |                                                |        | 0     |
| 18561  | 2                            |                                                |        | 0     |
| 18577  | 2                            |                                                |        | 0     |
| 18580  | 2                            |                                                |        | 0     |
| 18633  | 2                            |                                                |        | 0     |
| 18635  | 2                            |                                                |        | 0     |
| 18636  | 2                            |                                                |        | 0     |
| 18645  | 1                            | 3                                              | 3      | 0     |
| 18649  | 2                            |                                                |        | 0     |
| 18664  | 2                            |                                                |        | 0     |
| 18668  | 2                            |                                                |        | 0     |
| 18682  | 1                            | 3                                              | 4      | 0     |
| 18685  | 1                            | 2                                              | 1      | 0     |
| 18688  | 2                            |                                                |        | 0     |
| 18689  | 1                            | 2                                              | 3      | 0     |
| 18693  | 2                            |                                                |        | 0     |
| 18694  | 2                            |                                                |        | 0     |
| 18705  | 2                            |                                                |        | 0     |

| respid | ICS Urgency Incontinence Q30 | ICS Urgency Incontinence -<br>how often Q30a_1 | Q30b_1 | Q31_1 |
|--------|------------------------------|------------------------------------------------|--------|-------|
| 18710  | 2                            |                                                |        | 0     |
| 18715  | 2                            |                                                |        | 1     |
| 18718  | 2                            |                                                |        | 0     |
| 18727  | 2                            |                                                |        | 0     |
| 18732  | 2                            |                                                |        | 0     |
| 18735  | 2                            |                                                |        | 0     |
| 18742  | 2                            |                                                |        | 0     |
| 18745  | 2                            |                                                |        | 0     |
| 18747  | 2                            |                                                |        | 0     |
| 18750  | 2                            |                                                |        | 0     |
| 18751  | 1                            | 1                                              | 1      | 0     |
| 18753  | 2                            |                                                |        | 0     |
| 18754  | 2                            |                                                |        | 0     |
| 18759  | 2                            |                                                |        | 0     |
| 18780  | 2                            |                                                |        | 0     |
| 18782  | 2                            |                                                |        | 0     |
| 18807  | 1                            | 5                                              | 4      | 0     |
| 18815  | 2                            |                                                |        | 0     |
| 18818  | 2                            |                                                |        | 0     |
| 18820  | 2                            |                                                |        | 0     |
| 18823  | 1                            | 4                                              | 4      | 1     |
| 18825  | 2                            |                                                |        | 0     |
| 18828  | 2                            |                                                |        | 0     |
| 18832  | 1                            | 1                                              | 1      | 1     |
| 18834  | 1                            | 1                                              | 3      | 0     |
| 18835  | 1                            | 4                                              | 3      | 0     |
| 18837  | 1                            | 3                                              | 2      | 0     |
| 18842  | 2                            |                                                |        | 0     |
| 18846  | 2                            |                                                |        | 0     |
| 18855  | 2                            |                                                |        | 0     |
| 18856  | 1                            | 1                                              | 1      | 0     |
| 18887  | 2                            |                                                |        | 0     |

| respid | ICS Urgency Incontinence Q30 | ICS Urgency Incontinence -<br>how often Q30a_1 | Q30b_1 | Q31_1 |
|--------|------------------------------|------------------------------------------------|--------|-------|
| 18903  | 2                            |                                                |        | 0     |
| 18906  | 2                            |                                                |        | 0     |
| 18910  | 2                            |                                                |        | 0     |
| 18919  | 2                            |                                                |        | 0     |
| 18928  | 2                            |                                                |        | 0     |
| 18931  | 1                            | 1                                              | 2      | 0     |
| 18939  | 2                            |                                                |        | 0     |
| 18946  | 2                            |                                                |        | 0     |
| 18952  | 2                            |                                                |        | 0     |
| 18954  | 2                            |                                                |        | 0     |
| 18982  | 2                            |                                                |        | 0     |
| 18986  | 2                            |                                                |        | 0     |
| 18989  | 1                            | 2                                              | 4      | 1     |
| 18990  | 2                            |                                                |        | 0     |
| 18996  | 2                            |                                                |        | 0     |
| 18998  | 2                            |                                                |        | 0     |
| 19009  | 1                            | 2                                              | 2      | 0     |
| 19010  | 2                            |                                                |        | 0     |
| 19017  | 2                            |                                                |        | 0     |
| 19018  | 2                            |                                                |        | 0     |
| 19020  | 2                            |                                                |        | 0     |
| 19027  | 2                            |                                                |        | 0     |
| 19035  | 2                            |                                                |        | 1     |
| 19037  | 2                            |                                                |        | 0     |
| 19048  | 2                            |                                                |        | 0     |
| 19051  | 2                            |                                                |        | 0     |
| 19054  | 2                            |                                                |        | 0     |
| 19057  | 2                            |                                                |        | 0     |
| 19073  | 2                            |                                                |        | 0     |
| 19075  | 2                            |                                                |        | 0     |
| 19079  | 2                            |                                                |        | 0     |
| 19087  | 1                            | 1                                              | 1      | 0     |

| respid | ICS Urgency Incontinence Q30 | ICS Urgency Incontinence -<br>how often Q30a_1 | Q30b_1 | Q31_1 |
|--------|------------------------------|------------------------------------------------|--------|-------|
| 19090  | 2                            |                                                |        | 0     |
| 19093  | 2                            |                                                |        | 0     |
| 19099  | 2                            |                                                |        | 0     |
| 19100  | 1                            | 2                                              | 2      | 0     |
| 19101  | 2                            |                                                |        | 0     |
| 19105  | 2                            |                                                |        | 0     |
| 19111  | 2                            |                                                |        | 0     |
| 19112  | 2                            |                                                |        | 0     |
| 19117  | 2                            |                                                |        | 0     |
| 19122  | 2                            |                                                |        | 0     |
| 19126  | 2                            |                                                |        | 0     |
| 19127  | 2                            |                                                |        | 0     |
| 19131  | 2                            |                                                |        | 0     |
| 19134  | 2                            |                                                |        | 0     |
| 19149  | 2                            |                                                |        | 0     |
| 19151  | 2                            |                                                |        | 0     |
| 19164  | 2                            |                                                |        | 0     |
| 19166  | 2                            |                                                |        | 0     |
| 19172  | 2                            |                                                |        | 0     |
| 19173  | 2                            |                                                |        | 0     |
| 19180  | 2                            |                                                |        | 0     |
| 19185  | 1                            | 1                                              | 1      | 0     |
| 19189  | 2                            |                                                |        | 0     |
| 19191  | 2                            |                                                |        | 0     |
| 19198  | 2                            |                                                |        | 0     |
| 19203  | 2                            |                                                |        | 0     |
| 19209  | 2                            |                                                |        | 0     |
| 19210  | 2                            |                                                |        | 0     |
| 19218  | 2                            |                                                |        | 0     |
| 19220  | 2                            |                                                |        | 0     |
| 19225  | 2                            |                                                |        | 0     |
| 19227  | 2                            |                                                |        | 0     |

| respid | ICS Urgency Incontinence Q30 | ICS Urgency Incontinence -<br>how often Q30a_1 | Q30b_1 | Q31_1 |
|--------|------------------------------|------------------------------------------------|--------|-------|
| 19228  | 2                            |                                                |        | 0     |
| 19243  | 2                            |                                                |        | 0     |
| 19244  | 2                            |                                                |        | 0     |
| 19246  | 2                            |                                                |        | 0     |
| 19248  | 2                            |                                                |        | 0     |
| 19249  | 2                            |                                                |        | 0     |
| 19252  | 2                            |                                                |        | 0     |
| 19255  | 2                            |                                                |        | 0     |
| 19257  | 2                            |                                                |        | 0     |
| 19274  | 2                            |                                                |        | 0     |
| 19279  | 2                            |                                                |        | 0     |
| 19291  | 2                            |                                                |        | 0     |
| 19292  | 2                            |                                                |        | 0     |
| 19308  | 2                            |                                                |        | 0     |
| 19310  | 2                            |                                                |        | 0     |
| 19311  | 2                            |                                                |        | 0     |
| 19326  | 2                            |                                                |        | 0     |
| 19327  | 2                            |                                                |        | 0     |
| 19329  | 2                            |                                                |        | 0     |
| 19330  | 1                            | 3                                              | 2      | 0     |
| 19333  | 1                            | 2                                              | 2      | 1     |
| 19336  | 2                            |                                                |        | 0     |
| 19343  | 1                            | 1                                              | 1      | 0     |
| 19348  | 2                            |                                                |        | 0     |
| 19349  | 2                            |                                                |        | 0     |
| 19352  | 1                            | 2                                              | 2      | 0     |
| 19356  | 2                            |                                                |        | 0     |
| 19357  | 2                            |                                                |        | 0     |
| 19358  | 2                            |                                                |        | 1     |
| 19367  | 2                            |                                                |        | 0     |
| 19376  | 2                            |                                                |        | 0     |
| 19377  | 2                            |                                                |        | 0     |

| respid | ICS Urgency Incontinence Q30 | ICS Urgency Incontinence -<br>how often Q30a_1 | Q30b_1 | Q31_1 |
|--------|------------------------------|------------------------------------------------|--------|-------|
| 19380  | 2                            |                                                |        | 0     |
| 19384  | 2                            |                                                |        | 0     |
| 19391  | 2                            |                                                |        | 0     |
| 19397  | 2                            |                                                |        | 0     |
| 19398  | 2                            |                                                |        | 0     |
| 19401  | 2                            |                                                |        | 0     |
| 19402  | 2                            |                                                |        | 0     |
| 19403  | 2                            |                                                |        | 0     |
| 19405  | 2                            |                                                |        | 0     |
| 19407  | 2                            |                                                |        | 0     |
| 19415  | 2                            |                                                |        | 0     |
| 19420  | 2                            |                                                |        | 0     |
| 19423  | 1                            | 2                                              | 1      | 0     |
| 19424  | 2                            |                                                |        | 0     |
| 19426  | 1                            | 2                                              | 2      | 1     |
| 19429  | 2                            |                                                |        | 0     |
| 19435  | 1                            | 3                                              | 3      | 0     |
| 19441  | 2                            |                                                |        | 0     |
| 19450  | 2                            |                                                |        | 0     |
| 19456  | 1                            | 2                                              | 3      | 0     |
| 19457  | 2                            |                                                |        | 0     |
| 19463  | 2                            |                                                |        | 0     |
| 19467  | 2                            |                                                |        | 0     |
| 19468  | 2                            |                                                |        | 0     |
| 19471  | 2                            |                                                |        | 0     |
| 19473  | 2                            |                                                |        | 0     |
| 19478  | 2                            |                                                |        | 0     |
| 19480  | 2                            |                                                |        | 0     |
| 19481  | 2                            |                                                |        | 0     |
| 19484  | 2                            |                                                |        | 0     |
| 19487  | 2                            |                                                |        | 0     |
| 19491  | 1                            | 2                                              | 3      | 0     |



| respid | ICS Urgency Incontinence Q30 | ICS Urgency Incontinence -<br>how often Q30a_1 | Q30b_1 | Q31_1 |
|--------|------------------------------|------------------------------------------------|--------|-------|
| 19495  | 1                            | 2                                              | 4      | 0     |
| 19498  | 1                            | 1                                              | 1      | 1     |
| 19500  | 2                            |                                                |        | 0     |
| 19501  | 1                            | 2                                              | 3      | 0     |
| 19503  | 2                            |                                                |        | 0     |
| 19506  | 2                            |                                                |        | 0     |
| 19508  | 2                            |                                                |        | 0     |
| 19509  | 2                            |                                                |        | 0     |
| 19518  | 1                            | 1                                              | 1      | 1     |
| 19520  | 2                            |                                                |        | 0     |
| 19536  | 2                            |                                                |        | 0     |
| 19538  | 1                            | 1                                              | 4      | 0     |
| 19541  | 1                            | 1                                              | 1      | 0     |
| 19548  | 2                            |                                                |        | 0     |
| 19553  | 2                            |                                                |        | 0     |
| 19556  | 2                            |                                                |        | 0     |
| 19559  | 2                            |                                                |        | 0     |
| 19561  | 2                            |                                                |        | 0     |
| 19562  | 2                            |                                                |        | 0     |
| 19564  | 2                            |                                                |        | 0     |
| 19567  | 1                            | 4                                              | 4      | 0     |
| 19571  | 1                            | 1                                              | 1      | 0     |
| 19576  | 2                            |                                                |        | 0     |
| 19578  | 2                            |                                                |        | 0     |
| 19606  | 2                            |                                                |        | 0     |
| 19607  | 2                            |                                                |        | 0     |
| 19608  | 2                            |                                                |        | 0     |
| 19612  | 1                            | 2                                              | 2      | 0     |
| 19618  | 1                            | 2                                              | 2      | 0     |
| 19621  | 2                            |                                                |        | 0     |
| 19624  | 1                            | 1                                              | 2      | 0     |
| 19630  | 2                            |                                                |        | 0     |

| respid | ICS Urgency Incontinence Q30 | ICS Urgency Incontinence -<br>how often Q30a_1 | Q30b_1 | Q31_1 |
|--------|------------------------------|------------------------------------------------|--------|-------|
| 19637  | 2                            |                                                |        | 0     |
| 19639  | 2                            |                                                |        | 0     |
| 19647  | 2                            |                                                |        | 0     |
| 19648  | 2                            |                                                |        | 0     |
| 19660  | 2                            |                                                |        | 0     |
| 19662  | 1                            | 3                                              | 4      | 1     |
| 19669  | 2                            |                                                |        | 0     |
| 19680  | 2                            |                                                |        | 0     |
| 19682  | 2                            |                                                |        | 0     |
| 19686  | 2                            |                                                |        | 0     |
| 19700  | 2                            |                                                |        | 0     |
| 19701  | 2                            |                                                |        | 0     |
| 19704  | 2                            |                                                |        | 0     |
| 19706  | 2                            |                                                |        | 0     |
| 19707  | 2                            |                                                |        | 0     |
| 19717  | 1                            | 2                                              | 2      | 0     |
| 19718  | 2                            |                                                |        | 0     |
| 19721  | 1                            | 2                                              | 1      | 0     |
| 19722  | 2                            |                                                |        | 0     |
| 19729  | 2                            |                                                |        | 0     |
| 19738  | 1                            | 2                                              | 2      | 0     |
| 19741  | 2                            |                                                |        | 0     |
| 19742  | 2                            |                                                |        | 0     |
| 19747  | 2                            |                                                |        | 0     |
| 19748  | 2                            |                                                |        | 0     |
| 19749  | 2                            |                                                |        | 0     |
| 19756  | 2                            |                                                |        | 0     |
| 19771  | 2                            |                                                |        | 0     |
| 19772  | 1                            | 3                                              | 2      | 0     |
| 19775  | 2                            |                                                |        | 0     |
| 19783  | 2                            |                                                |        | 0     |
| 19787  | 2                            |                                                |        | 0     |

| respid | ICS Urgency Incontinence Q30 | ICS Urgency Incontinence -<br>how often Q30a_1 | Q30b_1 | Q31_1 |
|--------|------------------------------|------------------------------------------------|--------|-------|
| 19790  | 2                            |                                                |        | 0     |
| 19797  | 2                            |                                                |        | 0     |
| 19802  | 2                            |                                                |        | 0     |
| 19808  | 2                            |                                                |        | 0     |
| 19810  | 2                            |                                                |        | 0     |
| 19811  | 2                            |                                                |        | 0     |
| 19812  | 2                            |                                                |        | 0     |
| 19821  | 2                            |                                                |        | 0     |
| 19826  | 2                            |                                                |        | 0     |
| 19827  | 2                            |                                                |        | 0     |
| 19830  | 2                            |                                                |        | 0     |
| 19834  | 2                            |                                                |        | 0     |
| 19838  | 1                            | 1                                              | 2      | 0     |
| 19843  | 2                            |                                                |        | 0     |
| 19845  | 2                            |                                                |        | 0     |
| 19846  | 2                            |                                                |        | 0     |
| 19852  | 1                            | 3                                              | 3      | 0     |
| 19855  | 2                            |                                                |        | 0     |
| 19858  | 2                            |                                                |        | 0     |
| 19861  | 1                            | 4                                              | 3      | 0     |
| 19863  | 2                            |                                                |        | 0     |
| 19868  | 2                            |                                                |        | 0     |
| 19874  | 2                            |                                                |        | 0     |
| 19876  | 2                            |                                                |        | 0     |
| 19880  | 1                            | 2                                              | 2      | 0     |
| 19885  | 2                            |                                                |        | 0     |
| 19890  | 2                            |                                                |        | 0     |
| 19894  | 2                            |                                                |        | 0     |
| 19895  | 2                            |                                                |        | 0     |
| 19897  | 2                            |                                                |        | 0     |
| 19906  | 2                            |                                                |        | 1     |
| 19908  | 2                            |                                                |        | 0     |

| respid | ICS Urgency Incontinence Q30 | ICS Urgency Incontinence -<br>how often Q30a_1 | Q30b_1 | Q31_1 |
|--------|------------------------------|------------------------------------------------|--------|-------|
| 19912  | 2                            |                                                |        | 0     |
| 19913  | 2                            |                                                |        | 0     |
| 19914  | 1                            | 2                                              | 3      | 1     |
| 19918  | 2                            |                                                |        | 0     |
| 19924  | 1                            | 1                                              | 2      | 1     |
| 19936  | 2                            |                                                |        | 0     |
| 19940  | 2                            |                                                |        | 0     |
| 19945  | 2                            |                                                |        | 0     |
| 19948  | 2                            |                                                |        | 0     |
| 19959  | 2                            |                                                |        | 0     |
| 19961  | 2                            |                                                |        | 0     |
| 19962  | 2                            |                                                |        | 0     |
| 19965  | 2                            |                                                |        | 0     |
| 19966  | 2                            |                                                |        | 0     |
| 19973  | 2                            |                                                |        | 0     |
| 19981  | 2                            |                                                |        | 0     |
| 19986  | 2                            |                                                |        | 0     |
| 19989  | 2                            |                                                |        | 0     |
| 19998  | 1                            | 1                                              | 0      | 0     |
| 20001  | 2                            |                                                |        | 0     |
| 20005  | 2                            |                                                |        | 0     |
| 20013  | 1                            | 4                                              | 3      | 1     |
| 20015  | 2                            |                                                |        | 0     |
| 20017  | 1                            | 3                                              | 3      | 0     |
| 20020  | 2                            |                                                |        | 0     |
| 20021  | 2                            |                                                |        | 0     |
| 20026  | 2                            |                                                |        | 0     |
| 20028  | 2                            |                                                |        | 0     |
| 20030  | 1                            | 2                                              | 2      | 1     |
| 20031  | 2                            |                                                |        | 0     |
| 20034  | 2                            |                                                |        | 0     |
| 20035  | 2                            |                                                |        | 0     |

| respid | ICS Urgency Incontinence Q30 | ICS Urgency Incontinence -<br>how often Q30a_1 | Q30b_1 | Q31_1 |
|--------|------------------------------|------------------------------------------------|--------|-------|
| 20040  | 2                            |                                                |        | 1     |
| 20045  | 2                            |                                                |        | 0     |
| 20048  | 1                            | 5                                              | 4      | 0     |
| 20053  | 2                            |                                                |        | 0     |
| 20064  | 2                            |                                                |        | 0     |
| 20071  | 2                            |                                                |        | 0     |
| 20072  | 2                            |                                                |        | 0     |
| 20076  | 2                            |                                                |        | 1     |
| 20081  | 2                            |                                                |        | 0     |
| 20082  | 1                            | 2                                              | 3      | 1     |
| 20083  | 2                            |                                                |        | 0     |
| 20088  | 2                            |                                                |        | 0     |
| 20089  | 2                            |                                                |        | 0     |
| 20099  | 2                            |                                                |        | 0     |
| 20101  | 2                            |                                                |        | 0     |
| 20102  | 1                            | 1                                              | 1      | 0     |
| 20109  | 2                            |                                                |        | 0     |
| 20118  | 2                            |                                                |        | 1     |
| 20119  | 2                            |                                                |        | 0     |
| 20124  | 2                            |                                                |        | 0     |
| 20126  | 2                            |                                                |        | 0     |
| 20130  | 2                            |                                                |        | 0     |
| 20131  | 1                            | 1                                              | 1      | 1     |
| 20134  | 2                            |                                                |        | 0     |
| 20146  | 2                            |                                                |        | 0     |
| 20152  | 2                            |                                                |        | 0     |
| 20155  | 2                            |                                                |        | 0     |
| 20156  | 2                            |                                                |        | 0     |
| 20157  | 2                            |                                                |        | 0     |
| 20164  | 2                            |                                                |        | 1     |
| 20168  | 2                            |                                                |        | 0     |
| 20173  | 2                            |                                                |        | 0     |

| respid | ICS Urgency Incontinence Q30 | ICS Urgency Incontinence -<br>how often Q30a_1 | Q30b_1 | Q31_1 |
|--------|------------------------------|------------------------------------------------|--------|-------|
| 20174  | 2                            |                                                |        | 0     |
| 20175  | 1                            | 3                                              | 4      | 1     |
| 20189  | 2                            |                                                |        | 0     |
| 20190  | 1                            | 1                                              | 1      | 0     |
| 20201  | 2                            |                                                |        | 0     |
| 20202  | 2                            |                                                |        | 0     |
| 20204  | 2                            |                                                |        | 0     |
| 20206  | 2                            |                                                |        | 0     |
| 20207  | 2                            |                                                |        | 0     |
| 20212  | 2                            |                                                |        | 1     |
| 20213  | 2                            |                                                |        | 0     |
| 20217  | 2                            |                                                |        | 0     |
| 20222  | 2                            |                                                |        | 0     |
| 20227  | 2                            |                                                |        | 0     |
| 20228  | 2                            |                                                |        | 0     |
| 20238  | 2                            |                                                |        | 0     |
| 20242  | 2                            |                                                |        | 0     |
| 20246  | 2                            |                                                |        | 1     |
| 20255  | 2                            |                                                |        | 0     |
| 20256  | 2                            |                                                |        | 0     |
| 20259  | 1                            | 3                                              | 2      | 0     |
| 20262  | 2                            |                                                |        | 0     |
| 20274  | 2                            |                                                |        | 0     |
| 20283  | 2                            |                                                |        | 1     |
| 20284  | 2                            |                                                |        | 0     |
| 20291  | 2                            |                                                |        | 0     |
| 20292  | 1                            | 1                                              | 1      | 0     |
| 20293  | 2                            |                                                |        | 0     |
| 20298  | 2                            |                                                |        | 0     |
| 20301  | 2                            |                                                |        | 0     |
| 20303  | 2                            |                                                |        | 0     |
| 20309  | 2                            |                                                |        | 0     |

| respid | ICS Urgency Incontinence Q30 | ICS Urgency Incontinence -<br>how often Q30a_1 | Q30b_1 | Q31_1 |
|--------|------------------------------|------------------------------------------------|--------|-------|
| 20318  | 2                            |                                                |        | 0     |
| 20324  | 2                            |                                                |        | 0     |
| 20335  | 2                            |                                                |        | 0     |
| 20336  | 2                            |                                                |        | 0     |
| 20339  | 2                            |                                                |        | 0     |
| 20348  | 1                            | 2                                              | 1      | 0     |
| 20351  | 2                            |                                                |        | 0     |
| 20353  | 2                            |                                                |        | 0     |
| 20356  | 2                            |                                                |        | 0     |
| 20357  | 2                            |                                                |        | 0     |
| 20366  | 2                            |                                                |        | 0     |
| 20369  | 1                            | 3                                              | 4      | 0     |
| 20372  | 2                            |                                                |        | 0     |
| 20375  | 2                            |                                                |        | 0     |
| 20379  | 2                            |                                                |        | 0     |
| 20380  | 2                            |                                                |        | 0     |
| 20396  | 2                            |                                                |        | 0     |
| 20398  | 2                            |                                                |        | 0     |
| 20412  | 2                            |                                                |        | 0     |
| 20415  | 2                            |                                                |        | 0     |
| 20424  | 1                            | 3                                              | 4      | 0     |
| 20434  | 2                            |                                                |        | 0     |
| 20435  | 2                            |                                                |        | 0     |
| 20440  | 2                            |                                                |        | 0     |
| 20441  | 2                            |                                                |        | 0     |
| 20445  | 2                            |                                                |        | 0     |
| 20446  | 1                            | 3                                              | 2      | 0     |
| 20450  | 2                            |                                                |        | 0     |
| 20453  | 2                            |                                                |        | 0     |
| 20458  | 2                            |                                                |        | 0     |
| 20464  | 2                            |                                                |        | 0     |
| 20471  | 2                            |                                                |        | 0     |

| respid | ICS Urgency Incontinence Q30 | ICS Urgency Incontinence -<br>how often Q30a_1 | Q30b_1 | Q31_1 |
|--------|------------------------------|------------------------------------------------|--------|-------|
| 20473  | 2                            |                                                |        | 0     |
| 20474  | 2                            |                                                |        | 0     |
| 20477  | 2                            |                                                |        | 0     |
| 20479  | 1                            | 5                                              | 4      | 1     |
| 20485  | 2                            |                                                |        | 0     |
| 20487  | 2                            |                                                |        | 0     |
| 20488  | 2                            |                                                |        | 0     |
| 20494  | 2                            |                                                |        | 0     |
| 20502  | 1                            | 3                                              | 3      | 0     |
| 20503  | 2                            |                                                |        | 0     |
| 20510  | 2                            |                                                |        | 0     |
| 20512  | 2                            |                                                |        | 0     |
| 20516  | 2                            |                                                |        | 0     |
| 20522  | 2                            |                                                |        | 0     |
| 20527  | 2                            |                                                |        | 0     |
| 20529  | 2                            |                                                |        | 1     |
| 20535  | 2                            |                                                |        | 1     |
| 20543  | 2                            |                                                |        | 0     |
| 20546  | 1                            | 1                                              | 1      | 1     |
| 20548  | 2                            |                                                |        | 0     |
| 20552  | 2                            |                                                |        | 0     |
| 20556  | 2                            |                                                |        | 0     |
| 20566  | 2                            |                                                |        | 0     |
| 20576  | 2                            |                                                |        | 0     |
| 20587  | 2                            |                                                |        | 0     |
| 20589  | 2                            |                                                |        | 0     |
| 20593  | 2                            |                                                |        | 0     |
| 20594  | 2                            |                                                |        | 0     |
| 20602  | 1                            | 1                                              | 1      | 0     |
| 20607  | 2                            |                                                |        | 0     |
| 20608  | 2                            |                                                |        | 0     |
| 20611  | 2                            |                                                |        | 0     |



| respid | ICS Urgency Incontinence Q30 | ICS Urgency Incontinence -<br>how often Q30a_1 | Q30b_1 | Q31_1 |
|--------|------------------------------|------------------------------------------------|--------|-------|
| 20612  | 2                            |                                                |        | 0     |
| 20615  | 2                            |                                                |        | 0     |
| 20625  | 2                            |                                                |        | 0     |
| 20630  | 2                            |                                                |        | 0     |
| 20639  | 2                            |                                                |        | 0     |
| 20643  | 2                            |                                                |        | 0     |
| 20645  | 2                            |                                                |        | 0     |
| 20647  | 2                            |                                                |        | 0     |
| 20652  | 1                            | 2                                              | 4      | 1     |
| 20661  | 2                            |                                                |        | 0     |
| 20665  | 2                            |                                                |        | 0     |
| 20679  | 2                            |                                                |        | 0     |
| 20682  | 1                            | 2                                              | 2      | 0     |
| 20683  | 2                            |                                                |        | 0     |
| 20700  | 2                            |                                                |        | 0     |
| 20702  | 2                            |                                                |        | 0     |
| 20709  | 2                            |                                                |        | 0     |
| 20715  | 2                            |                                                |        | 0     |
| 20718  | 2                            |                                                |        | 0     |
| 20722  | 2                            |                                                |        | 0     |
| 20729  | 2                            |                                                |        | 0     |
| 20732  | 2                            |                                                |        | 0     |
| 20746  | 1                            | 2                                              | 2      | 0     |
| 20747  | 2                            |                                                |        | 0     |
| 20758  | 2                            |                                                |        | 0     |
| 20767  | 2                            |                                                |        | 0     |
| 20777  | 2                            |                                                |        | 0     |
| 20778  | 2                            |                                                |        | 0     |
| 20780  | 2                            |                                                |        | 0     |
| 20800  | 2                            |                                                |        | 0     |
| 20810  | 2                            |                                                |        | 0     |
| 20814  | 2                            |                                                |        | 0     |

| respid | ICS Urgency Incontinence Q30 | ICS Urgency Incontinence -<br>how often Q30a_1 | Q30b_1 | Q31_1 |
|--------|------------------------------|------------------------------------------------|--------|-------|
| 20816  | 2                            |                                                |        | 0     |
| 20832  | 2                            |                                                |        | 0     |
| 20838  | 2                            |                                                |        | 1     |
| 20841  | 1                            | 2                                              | 1      | 0     |
| 20848  | 2                            |                                                |        | 0     |
| 20850  | 2                            |                                                |        | 0     |
| 20851  | 2                            |                                                |        | 0     |
| 20861  | 2                            |                                                |        | 0     |
| 20870  | 2                            |                                                |        | 0     |
| 20880  | 2                            |                                                |        | 0     |
| 20883  | 2                            |                                                |        | 0     |
| 20894  | 2                            |                                                |        | 1     |
| 20896  | 2                            |                                                |        | 1     |
| 20901  | 1                            | 3                                              | 2      | 0     |
| 20903  | 2                            |                                                |        | 0     |
| 20909  | 2                            |                                                |        | 0     |
| 20919  | 2                            |                                                |        | 0     |
| 20925  | 2                            |                                                |        | 0     |
| 20935  | 2                            |                                                |        | 0     |
| 20939  | 1                            | 2                                              | 2      | 0     |
| 20956  | 1                            | 3                                              | 4      | 0     |
| 20970  | 2                            |                                                |        | 0     |
| 20974  | 2                            |                                                |        | 0     |
| 20975  | 2                            |                                                |        | 0     |
| 20984  | 2                            |                                                |        | 0     |
| 20988  | 2                            |                                                |        | 0     |
| 20996  | 2                            |                                                |        | 1     |
| 20998  | 2                            |                                                |        | 0     |
| 21007  | 2                            |                                                |        | 0     |
| 21008  | 2                            |                                                |        | 0     |
| 21014  | 2                            |                                                |        | 0     |
| 21020  | 2                            |                                                |        | 0     |

| respid | ICS Urgency Incontinence Q30 | ICS Urgency Incontinence -<br>how often Q30a_1 | Q30b_1 | Q31_1 |
|--------|------------------------------|------------------------------------------------|--------|-------|
| 21022  | 2                            |                                                |        | 1     |
| 21024  | 2                            |                                                |        | 0     |
| 21026  | 2                            |                                                |        | 0     |
| 21027  | 2                            |                                                |        | 0     |
| 21030  | 2                            |                                                |        | 0     |
| 21032  | 2                            |                                                |        | 0     |
| 21040  | 2                            |                                                |        | 0     |
| 21045  | 2                            |                                                |        | 0     |
| 21058  | 2                            |                                                |        | 0     |
| 21064  | 2                            |                                                |        | 0     |
| 21073  | 2                            |                                                |        | 0     |
| 21086  | 2                            |                                                |        | 0     |
| 21092  | 1                            | 3                                              | 4      | 1     |
| 21096  | 1                            | 2                                              | 3      | 0     |
| 21103  | 1                            | 1                                              | 2      | 0     |
| 21120  | 1                            | 1                                              | 1      | 1     |
| 21125  | 2                            |                                                |        | 0     |
| 21126  | 2                            |                                                |        | 0     |
| 21132  | 2                            |                                                |        | 0     |
| 21139  | 1                            | 2                                              | 1      | 0     |
| 21147  | 2                            |                                                |        | 0     |
| 21148  | 2                            |                                                |        | 0     |
| 21149  | 2                            |                                                |        | 0     |
| 21164  | 2                            |                                                |        | 0     |
| 21165  | 2                            |                                                |        | 0     |
| 21171  | 1                            | 2                                              | 2      | 0     |
| 21176  | 2                            |                                                |        | 0     |
| 21187  | 2                            |                                                |        | 1     |
| 21192  | 1                            | 1                                              | 1      | 1     |
| 21198  | 2                            |                                                |        | 0     |
| 21199  | 2                            |                                                |        | 0     |
| 21206  | 1                            | 2                                              | 2      | 0     |

| respid | ICS Urgency Incontinence Q30 | ICS Urgency Incontinence -<br>how often Q30a_1 | Q30b_1 | Q31_1 |
|--------|------------------------------|------------------------------------------------|--------|-------|
| 21212  | 2                            |                                                |        | 0     |
| 21216  | 2                            |                                                |        | 0     |
| 21217  | 1                            | 2                                              | 3      | 0     |
| 21228  | 2                            |                                                |        | 0     |
| 21229  | 2                            |                                                |        | 0     |
| 21230  | 2                            |                                                |        | 1     |
| 21243  | 1                            | 2                                              | 1      | 0     |
| 21247  | 2                            |                                                |        | 0     |
| 21253  | 1                            | 2                                              | 1      | 0     |
| 21264  | 2                            |                                                |        | 0     |
| 21265  | 2                            |                                                |        | 0     |
| 21273  | 2                            |                                                |        | 0     |
| 21275  | 2                            |                                                |        | 0     |
| 21278  | 2                            |                                                |        | 0     |
| 21291  | 1                            | 2                                              | 2      | 0     |
| 21298  | 1                            | 1                                              | 0      | 0     |
| 21301  | 2                            |                                                |        | 0     |
| 21312  | 2                            |                                                |        | 0     |
| 21323  | 2                            |                                                |        | 0     |
| 21325  | 2                            |                                                |        | 0     |
| 21341  | 2                            |                                                |        | 0     |
| 21349  | 2                            |                                                |        | 0     |
| 21350  | 2                            |                                                |        | 1     |
| 21354  | 1                            | 2                                              | 4      | 0     |
| 21372  | 2                            |                                                |        | 0     |
| 21373  | 1                            | 1                                              | 1      | 0     |
| 21378  | 1                            | 1                                              | 2      | 0     |
| 21393  | 2                            |                                                |        | 0     |
| 21401  | 2                            |                                                |        | 0     |
| 21405  | 2                            |                                                |        | 0     |
| 21406  | 2                            |                                                |        | 0     |
| 21407  | 2                            |                                                |        | 0     |

| respid | ICS Urgency Incontinence Q30 | ICS Urgency Incontinence -<br>how often Q30a_1 | Q30b_1 | Q31_1 |
|--------|------------------------------|------------------------------------------------|--------|-------|
| 21418  | 2                            |                                                |        | 0     |
| 21420  | 2                            |                                                |        | 0     |
| 21421  | 2                            |                                                |        | 0     |
| 21446  | 2                            |                                                |        | 0     |
| 21449  | 2                            |                                                |        | 1     |
| 21452  | 2                            |                                                |        | 0     |
| 21455  | 1                            | 2                                              | 1      | 0     |
| 21469  | 2                            |                                                |        | 0     |
| 21471  | 2                            |                                                |        | 0     |
| 21472  | 2                            |                                                |        | 0     |
| 21474  | 2                            |                                                |        | 0     |
| 21479  | 2                            |                                                |        | 0     |
| 21485  | 2                            |                                                |        | 0     |
| 21512  | 2                            |                                                |        | 0     |
| 21513  | 2                            |                                                |        | 0     |
| 21514  | 2                            |                                                |        | 0     |
| 21520  | 2                            |                                                |        | 0     |
| 21539  | 2                            |                                                |        | 0     |
| 21553  | 1                            | 1                                              | 1      | 0     |
| 21560  | 2                            |                                                |        | 0     |
| 21561  | 2                            |                                                |        | 0     |
| 21563  | 1                            | 1                                              | 3      | 0     |
| 21565  | 2                            |                                                |        | 0     |
| 21582  | 2                            |                                                |        | 0     |
| 21584  | 2                            |                                                |        | 0     |
| 21585  | 2                            |                                                |        | 0     |
| 21586  | 2                            |                                                |        | 0     |
| 21587  | 2                            |                                                |        | 0     |
| 21590  | 1                            | 2                                              | 4      | 0     |
| 21601  | 1                            | 1                                              | 1      | 0     |
| 21611  | 1                            | 1                                              | 2      | 0     |
| 21612  | 2                            |                                                |        | 0     |

| respid | ICS Urgency Incontinence Q30 | ICS Urgency Incontinence -<br>how often Q30a_1 | Q30b_1 | Q31_1 |
|--------|------------------------------|------------------------------------------------|--------|-------|
| 21625  | 2                            |                                                |        | 1     |
| 21633  | 2                            |                                                |        | 0     |
| 21640  | 2                            |                                                |        | 0     |
| 21647  | 2                            |                                                |        | 0     |
| 21648  | 1                            | 2                                              | 4      | 1     |
| 21656  | 2                            |                                                |        | 0     |
| 21657  | 2                            |                                                |        | 0     |
| 21658  | 1                            | 3                                              | 3      | 0     |
| 21665  | 1                            | 2                                              | 3      | 0     |
| 21666  | 1                            | 4                                              | 3      | 0     |
| 21668  | 1                            | 2                                              | 3      | 0     |
| 21673  | 1                            | 1                                              | 1      | 0     |
| 21681  | 2                            |                                                |        | 0     |
| 21682  | 1                            | 2                                              | 1      | 0     |
| 21685  | 2                            |                                                |        | 0     |
| 21692  | 1                            | 1                                              | 1      | 0     |
| 21697  | 2                            |                                                |        | 0     |
| 21711  | 2                            |                                                |        | 0     |
| 21715  | 1                            | 4                                              | 3      | 0     |
| 21726  | 2                            |                                                |        | 0     |
| 21748  | 2                            |                                                |        | 0     |
| 21761  | 2                            |                                                |        | 0     |
| 21769  | 1                            | 3                                              | 2      | 1     |
| 21774  | 1                            | 2                                              | 1      | 0     |
| 21778  | 2                            |                                                |        | 0     |
| 21785  | 2                            |                                                |        | 0     |
| 21799  | 2                            |                                                |        | 0     |
| 21820  | 1                            | 4                                              | 4      | 1     |
| 21837  | 2                            |                                                |        | 0     |
| 21845  | 1                            | 3                                              | 4      | 1     |
| 21846  | 2                            |                                                |        | 0     |
| 21849  | 1                            | 2                                              | 2      | 0     |

| respid | ICS Urgency Incontinence Q30 | ICS Urgency Incontinence -<br>how often Q30a_1 | Q30b_1 | Q31_1 |
|--------|------------------------------|------------------------------------------------|--------|-------|
| 21850  | 2                            |                                                |        | 0     |
| 21855  | 2                            |                                                |        | 0     |
| 21859  | 2                            |                                                |        | 0     |
| 21861  | 2                            |                                                |        | 1     |
| 21866  | 2                            |                                                |        | 0     |
| 21873  | 2                            |                                                |        | 0     |
| 21876  | 2                            |                                                |        | 0     |
| 21882  | 2                            |                                                |        | 0     |
| 21884  | 2                            |                                                |        | 0     |
| 21887  | 2                            |                                                |        | 0     |
| 21892  | 2                            |                                                |        | 0     |
| 21907  | 2                            |                                                |        | 0     |
| 21910  | 1                            | 4                                              | 4      | 1     |
| 21912  | 1                            | 2                                              | 2      | 0     |
| 21914  | 2                            |                                                |        | 0     |
| 21925  | 2                            |                                                |        | 0     |
| 21937  | 2                            |                                                |        | 0     |
| 21938  | 1                            | 1                                              | 1      | 0     |
| 21940  | 2                            |                                                |        | 0     |
| 21942  | 2                            |                                                |        | 0     |
| 21947  | 2                            |                                                |        | 0     |
| 21948  | 2                            |                                                |        | 0     |
| 21961  | 1                            | 2                                              | 1      | 1     |
| 21977  | 1                            | 2                                              | 2      | 0     |
| 21983  | 2                            |                                                |        | 0     |
| 21986  | 1                            | 2                                              | 2      | 1     |
| 21988  | 2                            |                                                |        | 0     |
| 21996  | 2                            |                                                |        | 0     |
| 21997  | 2                            |                                                |        | 0     |
| 22005  | 2                            |                                                |        | 0     |
| 22013  | 2                            |                                                |        | 0     |
| 22018  | 2                            |                                                |        | 0     |

| respid | ICS Urgency Incontinence Q30 | ICS Urgency Incontinence -<br>how often Q30a_1 | Q30b_1 | Q31_1 |
|--------|------------------------------|------------------------------------------------|--------|-------|
| 22019  | 2                            |                                                |        | 0     |
| 22071  | 2                            |                                                |        | 0     |
| 22082  | 2                            |                                                |        | 0     |
| 22085  | 2                            |                                                |        | 0     |
| 22092  | 2                            |                                                |        | 0     |
| 22097  | 2                            |                                                |        | 0     |
| 22111  | 2                            |                                                |        | 0     |
| 22118  | 2                            |                                                |        | 0     |
| 22132  | 2                            |                                                |        | 0     |
| 22133  | 2                            |                                                |        | 0     |
| 22139  | 2                            |                                                |        | 0     |
| 22142  | 1                            | 3                                              | 3      | 0     |
| 22146  | 2                            |                                                |        | 0     |
| 22181  | 2                            |                                                |        | 0     |
| 22202  | 2                            |                                                |        | 0     |
| 22214  | 2                            |                                                |        | 0     |
| 22223  | 2                            |                                                |        | 0     |
| 22227  | 2                            |                                                |        | 0     |
| 22229  | 2                            |                                                |        | 0     |
| 22239  | 2                            |                                                |        | 0     |
| 22245  | 1                            | 4                                              | 3      | 1     |
| 22256  | 2                            |                                                |        | 0     |
| 22260  | 2                            |                                                |        | 0     |
| 22298  | 2                            |                                                |        | 0     |
| 22321  | 1                            | 1                                              | 1      | 0     |
| 22340  | 2                            |                                                |        | 0     |
| 22346  | 1                            | 3                                              | 3      | 1     |
| 22356  | 1                            | 1                                              | 1      | 0     |
| 22361  | 2                            |                                                |        | 0     |
| 22364  | 2                            |                                                |        | 0     |
| 22368  | 2                            |                                                |        | 0     |
| 22374  | 1                            | 3                                              | 2      | 0     |



| respid | ICS Urgency Incontinence Q30 | ICS Urgency Incontinence -<br>how often Q30a_1 | Q30b_1 | Q31_1 |
|--------|------------------------------|------------------------------------------------|--------|-------|
| 22375  | 2                            |                                                |        | 0     |
| 22377  | 2                            |                                                |        | 0     |
| 22383  | 2                            |                                                |        | 0     |
| 22387  | 2                            |                                                |        | 1     |
| 22392  | 2                            |                                                |        | 0     |
| 22393  | 2                            |                                                |        | 0     |
| 22394  | 2                            |                                                |        | 0     |
| 22395  | 2                            |                                                |        | 0     |
| 22401  | 2                            |                                                |        | 0     |
| 22407  | 2                            |                                                |        | 0     |
| 22410  | 2                            |                                                |        | 0     |
| 22418  | 2                            |                                                |        | 0     |
| 22421  | 2                            |                                                |        | 0     |
| 22423  | 2                            |                                                |        | 0     |
| 22425  | 2                            |                                                |        | 0     |
| 22427  | 2                            |                                                |        | 0     |
| 22431  | 1                            | 3                                              | 4      | 0     |
| 22435  | 1                            | 1                                              | 1      | 0     |
| 22436  | 2                            |                                                |        | 0     |
| 22442  | 2                            |                                                |        | 0     |
| 22444  | 1                            | 1                                              | 2      | 0     |
| 22445  | 1                            | 2                                              | 3      | 0     |
| 22446  | 2                            |                                                |        | 0     |
| 22448  | 2                            |                                                |        | 0     |
| 22449  | 2                            |                                                |        | 0     |
| 22450  | 1                            | 2                                              | 1      | 0     |
| 22453  | 1                            | 2                                              | 3      | 1     |
| 22465  | 1                            | 2                                              | 2      | 1     |
| 22472  | 2                            |                                                |        | 0     |
| 22475  | 2                            |                                                |        | 1     |
| 22478  | 2                            |                                                |        | 0     |
| 22491  | 2                            |                                                |        | 0     |

| respid | ICS Urgency Incontinence Q30 | ICS Urgency Incontinence -<br>how often Q30a_1 | Q30b_1 | Q31_1 |
|--------|------------------------------|------------------------------------------------|--------|-------|
| 22497  | 2                            |                                                |        | 0     |
| 22498  | 1                            | 1                                              | 1      | 1     |
| 22499  | 1                            | 1                                              | 3      | 0     |
| 22503  | 2                            |                                                |        | 0     |
| 22507  | 2                            |                                                |        | 0     |
| 22513  | 1                            | 3                                              | 4      | 0     |
| 22517  | 2                            |                                                |        | 0     |
| 22524  | 2                            |                                                |        | 0     |
| 22528  | 2                            |                                                |        | 0     |
| 22544  | 1                            | 1                                              | 1      | 0     |
| 22571  | 2                            |                                                |        | 0     |
| 22576  | 2                            |                                                |        | 0     |
| 22579  | 2                            |                                                |        | 0     |
| 22583  | 2                            |                                                |        | 0     |
| 22591  | 2                            |                                                |        | 0     |
| 22592  | 2                            |                                                |        | 0     |
| 22612  | 1                            | 1                                              | 0      | 0     |
| 22613  | 2                            |                                                |        | 0     |
| 22615  | 2                            |                                                |        | 0     |
| 22621  | 2                            |                                                |        | 0     |
| 22625  | 2                            |                                                |        | 0     |
| 22628  | 2                            |                                                |        | 0     |
| 22632  | 2                            |                                                |        | 0     |
| 22639  | 2                            |                                                |        | 0     |
| 22648  | 2                            |                                                |        | 0     |
| 22649  | 2                            |                                                |        | 0     |
| 22655  | 2                            |                                                |        | 0     |
| 22659  | 2                            |                                                |        | 0     |
| 22660  | 2                            |                                                |        | 0     |
| 22666  | 2                            |                                                |        | 0     |
| 22667  | 2                            |                                                |        | 0     |
| 22670  | 2                            |                                                |        | 0     |

| respid | ICS Urgency Incontinence Q30 | ICS Urgency Incontinence -<br>how often Q30a_1 | Q30b_1 | Q31_1 |
|--------|------------------------------|------------------------------------------------|--------|-------|
| 22681  | 2                            |                                                |        | 0     |
| 22683  | 2                            |                                                |        | 0     |
| 22688  | 2                            |                                                |        | 0     |
| 22695  | 2                            |                                                |        | 0     |
| 22696  | 2                            |                                                |        | 0     |
| 22705  | 2                            |                                                |        | 0     |
| 22718  | 1                            | 2                                              | 1      | 0     |
| 22720  | 2                            |                                                |        | 0     |
| 22724  | 2                            |                                                |        | 0     |
| 22728  | 2                            |                                                |        | 0     |
| 22751  | 2                            |                                                |        | 0     |
| 22782  | 1                            | 3                                              | 4      | 0     |
| 22786  | 1                            | 1                                              | 3      | 0     |
| 22788  | 2                            |                                                |        | 0     |
| 22810  | 1                            | 2                                              | 1      | 1     |
| 22816  | 2                            |                                                |        | 0     |
| 22818  | 2                            |                                                |        | 0     |
| 22854  | 2                            |                                                |        | 0     |
| 22858  | 2                            |                                                |        | 0     |
| 22862  | 2                            |                                                |        | 0     |
| 22865  | 2                            |                                                |        | 0     |
| 22868  | 2                            |                                                |        | 0     |
| 22869  | 2                            |                                                |        | 0     |
| 22873  | 2                            |                                                |        | 0     |
| 22875  | 2                            |                                                |        | 0     |
| 22876  | 2                            |                                                |        | 0     |
| 22882  | 2                            |                                                |        | 0     |
| 22884  | 1                            | 2                                              | 3      | 0     |
| 22887  | 2                            |                                                |        | 1     |
| 22888  | 2                            |                                                |        | 0     |
| 22900  | 2                            |                                                |        | 0     |
| 22901  | 2                            |                                                |        | 0     |

| respid | ICS Urgency Incontinence Q30 | ICS Urgency Incontinence -<br>how often Q30a_1 | Q30b_1 | Q31_1 |
|--------|------------------------------|------------------------------------------------|--------|-------|
| 22912  | 2                            |                                                |        | 0     |
| 22913  | 2                            |                                                |        | 0     |
| 22921  | 2                            |                                                |        | 0     |
| 22925  | 2                            |                                                |        | 0     |
| 22940  | 2                            |                                                |        | 0     |
| 22941  | 2                            |                                                |        | 0     |
| 22947  | 2                            |                                                |        | 0     |
| 22948  | 2                            |                                                |        | 0     |
| 22964  | 1                            | 2                                              | 2      | 1     |
| 22966  | 2                            |                                                |        | 0     |
| 22969  | 2                            |                                                |        | 0     |
| 22971  | 2                            |                                                |        | 0     |
| 22988  | 2                            |                                                |        | 0     |
| 22990  | 2                            |                                                |        | 0     |
| 23000  | 2                            |                                                |        | 0     |
| 23016  | 2                            |                                                |        | 0     |
| 23026  | 2                            |                                                |        | 0     |
| 23035  | 2                            |                                                |        | 0     |
| 23037  | 1                            | 2                                              | 3      | 0     |
| 23044  | 2                            |                                                |        | 0     |
| 23046  | 2                            |                                                |        | 0     |
| 23047  | 1                            | 2                                              | 1      | 0     |
| 23049  | 2                            |                                                |        | 0     |
| 23055  | 2                            |                                                |        | 0     |
| 23066  | 2                            |                                                |        | 0     |
| 23075  | 2                            |                                                |        | 0     |
| 23081  | 2                            |                                                |        | 0     |
| 23087  | 2                            |                                                |        | 0     |
| 23094  | 2                            |                                                |        | 0     |
| 23099  | 2                            |                                                |        | 0     |
| 23101  | 2                            |                                                |        | 0     |
| 23105  | 2                            |                                                |        | 0     |

| respid | ICS Urgency Incontinence Q30 | ICS Urgency Incontinence -<br>how often Q30a_1 | Q30b_1 | Q31_1 |
|--------|------------------------------|------------------------------------------------|--------|-------|
| 23115  | 2                            |                                                |        | 0     |
| 23121  | 2                            |                                                |        | 0     |
| 23127  | 2                            |                                                |        | 0     |
| 23131  | 2                            |                                                |        | 0     |
| 23134  | 2                            |                                                |        | 0     |
| 23145  | 2                            |                                                |        | 0     |
| 23151  | 2                            |                                                |        | 0     |
| 23161  | 2                            |                                                |        | 0     |
| 23169  | 2                            |                                                |        | 0     |
| 23173  | 1                            | 1                                              | 0      | 0     |
| 23174  | 2                            |                                                |        | 0     |
| 23186  | 1                            | 3                                              | 4      | 0     |
| 23195  | 2                            |                                                |        | 0     |
| 23197  | 2                            |                                                |        | 0     |
| 23198  | 2                            |                                                |        | 0     |
| 23203  | 2                            |                                                |        | 0     |
| 23204  | 2                            |                                                |        | 0     |
| 23212  | 2                            |                                                |        | 0     |
| 23214  | 2                            |                                                |        | 0     |
| 23221  | 2                            |                                                |        | 0     |
| 23237  | 2                            |                                                |        | 0     |
| 23251  | 2                            |                                                |        | 0     |
| 23254  | 2                            |                                                |        | 0     |
| 23262  | 2                            |                                                |        | 0     |
| 23267  | 2                            |                                                |        | 0     |
| 23268  | 2                            |                                                |        | 0     |
| 23273  | 2                            |                                                |        | 0     |
| 23278  | 2                            |                                                |        | 0     |
| 23279  | 2                            |                                                |        | 0     |
| 23281  | 1                            | 3                                              | 2      | 0     |
| 23282  | 2                            |                                                |        | 0     |
| 23283  | 1                            | 2                                              | 3      | 0     |

| respid | ICS Urgency Incontinence Q30 | ICS Urgency Incontinence -<br>how often Q30a_1 | Q30b_1 | Q31_1 |
|--------|------------------------------|------------------------------------------------|--------|-------|
| 23285  | 2                            |                                                |        | 0     |
| 23305  | 2                            |                                                |        | 0     |
| 23309  | 2                            |                                                |        | 0     |
| 23310  | 2                            |                                                |        | 0     |
| 23311  | 2                            |                                                |        | 0     |
| 23312  | 2                            |                                                |        | 0     |
| 23319  | 2                            |                                                |        | 0     |
| 23320  | 2                            |                                                |        | 0     |
| 23322  | 2                            |                                                |        | 0     |
| 23334  | 2                            |                                                |        | 1     |
| 23340  | 2                            |                                                |        | 0     |
| 23346  | 2                            |                                                |        | 0     |
| 23353  | 2                            |                                                |        | 0     |
| 23363  | 1                            | 2                                              | 2      | 1     |
| 23364  | 1                            | 2                                              | 2      | 0     |
| 23376  | 2                            |                                                |        | 0     |
| 23378  | 2                            |                                                |        | 0     |
| 23382  | 2                            |                                                |        | 0     |
| 23383  | 2                            |                                                |        | 0     |
| 23390  | 2                            |                                                |        | 0     |
| 23395  | 1                            | 1                                              | 0      | 0     |
| 23398  | 1                            | 2                                              | 2      | 0     |
| 23399  | 2                            |                                                |        | 0     |
| 23406  | 2                            |                                                |        | 0     |
| 23418  | 2                            |                                                |        | 0     |
| 23427  | 2                            |                                                |        | 0     |
| 23428  | 2                            |                                                |        | 0     |
| 23435  | 1                            | 2                                              | 2      | 0     |
| 23439  | 2                            |                                                |        | 0     |
| 23440  | 2                            |                                                |        | 0     |
| 23444  | 2                            |                                                |        | 1     |
| 23445  | 2                            |                                                |        | 0     |

| respid | ICS Urgency Incontinence Q30 | ICS Urgency Incontinence -<br>how often Q30a_1 | Q30b_1 | Q31_1 |
|--------|------------------------------|------------------------------------------------|--------|-------|
| 23455  | 2                            |                                                |        | 0     |
| 23467  | 2                            |                                                |        | 0     |
| 23478  | 2                            |                                                |        | 0     |
| 23492  | 2                            |                                                |        | 0     |
| 23498  | 2                            |                                                |        | 0     |
| 23511  | 2                            |                                                |        | 0     |
| 23514  | 2                            |                                                |        | 0     |
| 23515  | 2                            |                                                |        | 0     |
| 23522  | 2                            |                                                |        | 0     |
| 23524  | 2                            |                                                |        | 0     |
| 23531  | 2                            |                                                |        | 0     |
| 23532  | 2                            |                                                |        | 0     |
| 23533  | 2                            |                                                |        | 0     |
| 23534  | 2                            |                                                |        | 0     |
| 23538  | 2                            |                                                |        | 0     |
| 23539  | 2                            |                                                |        | 0     |
| 23548  | 2                            |                                                |        | 0     |
| 23553  | 2                            |                                                |        | 0     |
| 23556  | 2                            |                                                |        | 0     |
| 23563  | 2                            |                                                |        | 0     |
| 23572  | 2                            |                                                |        | 0     |
| 23575  | 2                            |                                                |        | 0     |
| 23576  | 2                            |                                                |        | 0     |
| 23577  | 2                            |                                                |        | 0     |
| 23578  | 1                            | 1                                              | 1      | 0     |
| 23587  | 1                            | 2                                              | 1      | 0     |
| 23597  | 2                            |                                                |        | 0     |
| 23598  | 2                            |                                                |        | 0     |
| 23604  | 2                            |                                                |        | 0     |
| 23617  | 2                            |                                                |        | 0     |
| 23620  | 2                            |                                                |        | 0     |
| 23621  | 2                            |                                                |        | 0     |

| respid | ICS Urgency Incontinence Q30 | ICS Urgency Incontinence -<br>how often Q30a_1 | Q30b_1 | Q31_1 |
|--------|------------------------------|------------------------------------------------|--------|-------|
| 23625  | 2                            |                                                |        | 0     |
| 23629  | 2                            |                                                |        | 0     |
| 23635  | 2                            |                                                |        | 0     |
| 23636  | 2                            |                                                |        | 0     |
| 23637  | 1                            | 3                                              | 4      | 0     |
| 23638  | 2                            |                                                |        | 0     |
| 23644  | 2                            |                                                |        | 0     |
| 23645  | 1                            | 1                                              | 1      | 1     |
| 23649  | 1                            | 1                                              | 0      | 0     |
| 23654  | 2                            |                                                |        | 0     |
| 23662  | 2                            |                                                |        | 0     |
| 23664  | 2                            |                                                |        | 0     |
| 23665  | 2                            |                                                |        | 0     |
| 23666  | 2                            |                                                |        | 0     |
| 23671  | 2                            |                                                |        | 0     |
| 23672  | 2                            |                                                |        | 0     |
| 23685  | 2                            |                                                |        | 0     |
| 23686  | 2                            |                                                |        | 0     |
| 23689  | 1                            | 3                                              | 3      | 0     |
| 23690  | 2                            |                                                |        | 0     |
| 23695  | 1                            | 2                                              | 2      | 1     |
| 23700  | 2                            |                                                |        | 0     |
| 23714  | 2                            |                                                |        | 0     |
| 23719  | 2                            |                                                |        | 1     |
| 23720  | 2                            |                                                |        | 0     |
| 23721  | 2                            |                                                |        | 0     |
| 23729  | 2                            |                                                |        | 0     |
| 23730  | 2                            |                                                |        | 0     |
| 23732  | 2                            |                                                |        | 0     |
| 23736  | 2                            |                                                |        | 0     |
| 23754  | 2                            |                                                |        | 0     |
| 23756  | 2                            |                                                |        | 0     |



| respid | ICS Urgency Incontinence Q30 | ICS Urgency Incontinence -<br>how often Q30a_1 | Q30b_1 | Q31_1 |
|--------|------------------------------|------------------------------------------------|--------|-------|
| 23759  | 2                            |                                                |        | 0     |
| 23761  | 2                            |                                                |        | 0     |
| 23766  | 2                            |                                                |        | 0     |
| 23768  | 2                            |                                                |        | 0     |
| 23773  | 2                            |                                                |        | 0     |
| 23781  | 2                            |                                                |        | 0     |
| 23782  | 2                            |                                                |        | 0     |
| 23787  | 2                            |                                                |        | 0     |
| 23788  | 1                            | 4                                              | 2      | 0     |
| 23790  | 2                            |                                                |        | 0     |
| 23794  | 2                            |                                                |        | 0     |
| 23795  | 2                            |                                                |        | 0     |
| 23801  | 2                            |                                                |        | 0     |
| 23806  | 2                            |                                                |        | 0     |
| 23809  | 2                            |                                                |        | 0     |
| 23813  | 2                            |                                                |        | 0     |
| 23815  | 2                            |                                                |        | 0     |
| 23821  | 2                            |                                                |        | 0     |
| 23825  | 2                            |                                                |        | 0     |
| 23826  | 2                            |                                                |        | 0     |
| 23830  | 2                            |                                                |        | 0     |
| 23833  | 2                            |                                                |        | 0     |
| 23837  | 2                            |                                                |        | 0     |
| 23848  | 2                            |                                                |        | 0     |
| 23850  | 2                            |                                                |        | 0     |
| 23870  | 2                            |                                                |        | 0     |
| 23877  | 2                            |                                                |        | 0     |
| 23880  | 2                            |                                                |        | 0     |
| 23882  | 2                            |                                                |        | 0     |
| 23888  | 2                            |                                                |        | 0     |
| 23908  | 2                            |                                                |        | 0     |
| 23914  | 1                            | 1                                              | 1      | 0     |

| respid | ICS Urgency Incontinence Q30 | ICS Urgency Incontinence -<br>how often Q30a_1 | Q30b_1 | Q31_1 |
|--------|------------------------------|------------------------------------------------|--------|-------|
| 23916  | 2                            |                                                |        | 0     |
| 23922  | 2                            |                                                |        | 0     |
| 23932  | 2                            |                                                |        | 0     |
| 23934  | 2                            |                                                |        | 0     |
| 23942  | 2                            |                                                |        | 1     |
| 23945  | 1                            | 1                                              | 0      | 0     |
| 23948  | 2                            |                                                |        | 0     |
| 23955  | 2                            |                                                |        | 0     |
| 23956  | 2                            |                                                |        | 0     |
| 23978  | 2                            |                                                |        | 0     |
| 23981  | 2                            |                                                |        | 0     |
| 23982  | 2                            |                                                |        | 0     |
| 23991  | 2                            |                                                |        | 0     |
| 23994  | 2                            |                                                |        | 0     |
| 23995  | 2                            |                                                |        | 0     |
| 23999  | 1                            | 1                                              | 0      | 0     |
| 24005  | 1                            | 2                                              | 3      | 0     |
| 24018  | 2                            |                                                |        | 0     |
| 24021  | 2                            |                                                |        | 0     |
| 24035  | 2                            |                                                |        | 0     |
| 24040  | 2                            |                                                |        | 0     |
| 24043  | 2                            |                                                |        | 0     |
| 24046  | 2                            |                                                |        | 0     |
| 24047  | 2                            |                                                |        | 0     |
| 24048  | 2                            |                                                |        | 0     |
| 24062  | 2                            |                                                |        | 0     |
| 24063  | 2                            |                                                |        | 0     |
| 24066  | 2                            |                                                |        | 0     |
| 24069  | 2                            |                                                |        | 1     |
| 24070  | 2                            |                                                |        | 0     |
| 24074  | 2                            |                                                |        | 0     |
| 24080  | 2                            |                                                |        | 0     |

| respid | ICS Urgency Incontinence Q30 | ICS Urgency Incontinence -<br>how often Q30a_1 | Q30b_1 | Q31_1 |
|--------|------------------------------|------------------------------------------------|--------|-------|
| 24082  | 2                            |                                                |        | 0     |
| 24088  | 2                            |                                                |        | 0     |
| 24089  | 2                            |                                                |        | 0     |
| 24091  | 2                            |                                                |        | 0     |
| 24095  | 2                            |                                                |        | 0     |
| 24100  | 1                            | 2                                              | 2      | 1     |
| 24105  | 2                            |                                                |        | 0     |
| 24107  | 1                            | 3                                              | 3      | 0     |
| 24108  | 2                            |                                                |        | 0     |
| 24113  | 1                            | 2                                              | 1      | 0     |
| 24120  | 2                            |                                                |        | 0     |
| 24122  | 1                            | 3                                              | 2      | 0     |
| 24123  | 2                            |                                                |        | 0     |
| 24125  | 2                            |                                                |        | 1     |
| 24132  | 2                            |                                                |        | 0     |
| 24139  | 2                            |                                                |        | 0     |
| 24140  | 2                            |                                                |        | 0     |
| 24143  | 2                            |                                                |        | 0     |
| 24150  | 2                            |                                                |        | 0     |
| 24153  | 2                            |                                                |        | 0     |
| 24161  | 2                            |                                                |        | 0     |
| 24168  | 2                            |                                                |        | 0     |
| 24179  | 2                            |                                                |        | 0     |
| 24182  | 2                            |                                                |        | 0     |
| 24194  | 2                            |                                                |        | 0     |
| 24206  | 2                            |                                                |        | 0     |
| 24214  | 2                            |                                                |        | 0     |
| 24215  | 2                            |                                                |        | 0     |
| 24224  | 2                            |                                                |        | 0     |
| 24225  | 2                            |                                                |        | 0     |
| 24227  | 2                            |                                                |        | 0     |
| 24229  | 2                            |                                                |        | 0     |

| respid | ICS Urgency Incontinence Q30 | ICS Urgency Incontinence -<br>how often Q30a_1 | Q30b_1 | Q31_1 |
|--------|------------------------------|------------------------------------------------|--------|-------|
| 24230  | 2                            |                                                |        | 0     |
| 24232  | 2                            |                                                |        | 0     |
| 24253  | 2                            |                                                |        | 0     |
| 24267  | 2                            |                                                |        | 0     |
| 24274  | 2                            |                                                |        | 0     |
| 24275  | 2                            |                                                |        | 0     |
| 24277  | 1                            | 1                                              | 0      | 0     |
| 24280  | 2                            |                                                |        | 0     |
| 24285  | 2                            |                                                |        | 0     |
| 24293  | 2                            |                                                |        | 0     |
| 24295  | 1                            | 1                                              | 3      | 0     |
| 24299  | 2                            |                                                |        | 0     |
| 24303  | 2                            |                                                |        | 0     |
| 24308  | 2                            |                                                |        | 0     |
| 24322  | 2                            |                                                |        | 0     |
| 24325  | 2                            |                                                |        | 0     |
| 24328  | 2                            |                                                |        | 0     |
| 24334  | 2                            |                                                |        | 0     |
| 24342  | 2                            |                                                |        | 0     |
| 24343  | 1                            | 2                                              | 1      | 0     |
| 24348  | 2                            |                                                |        | 0     |
| 24352  | 1                            | 2                                              | 2      | 0     |
| 24354  | 1                            | 1                                              | 1      | 0     |
| 24357  | 2                            |                                                |        | 0     |
| 24360  | 2                            |                                                |        | 0     |
| 24369  | 2                            |                                                |        | 0     |
| 24373  | 1                            | 1                                              | 1      | 0     |
| 24398  | 1                            | 4                                              | 4      | 0     |
| 24402  | 2                            |                                                |        | 1     |
| 24405  | 2                            |                                                |        | 0     |
| 24407  | 2                            |                                                |        | 0     |
| 24413  | 2                            |                                                |        | 0     |

| respid | ICS Urgency Incontinence Q30 | ICS Urgency Incontinence -<br>how often Q30a_1 | Q30b_1 | Q31_1 |
|--------|------------------------------|------------------------------------------------|--------|-------|
| 24443  | 2                            |                                                |        | 0     |
| 24451  | 2                            |                                                |        | 0     |
| 24459  | 1                            | 2                                              | 3      | 0     |
| 24465  | 2                            |                                                |        | 0     |
| 24481  | 2                            |                                                |        | 0     |
| 24482  | 2                            |                                                |        | 0     |
| 24491  | 2                            |                                                |        | 0     |
| 24495  | 2                            |                                                |        | 0     |
| 24497  | 1                            | 3                                              | 2      | 0     |
| 24511  | 2                            |                                                |        | 1     |
| 24513  | 2                            |                                                |        | 0     |
| 24516  | 1                            | 3                                              | 2      | 0     |
| 24518  | 2                            |                                                |        | 0     |
| 24524  | 2                            |                                                |        | 0     |
| 24528  | 2                            |                                                |        | 0     |
| 24531  | 1                            | 3                                              | 4      | 1     |
| 24533  | 1                            | 3                                              | 3      | 0     |
| 24547  | 2                            |                                                |        | 0     |
| 24557  | 1                            | 3                                              | 2      | 0     |
| 24559  | 1                            | 4                                              | 4      | 0     |
| 24567  | 2                            |                                                |        | 0     |
| 24568  | 2                            |                                                |        | 0     |
| 24577  | 2                            |                                                |        | 0     |
| 24581  | 2                            |                                                |        | 0     |
| 24588  | 2                            |                                                |        | 0     |
| 24604  | 1                            | 2                                              | 4      | 0     |
| 24612  | 2                            |                                                |        | 0     |
| 24621  | 1                            | 2                                              | 3      | 0     |
| 24625  | 2                            |                                                |        | 0     |
| 24627  | 2                            |                                                |        | 0     |
| 24640  | 2                            |                                                |        | 0     |
| 24644  | 2                            |                                                |        | 0     |

| respid | ICS Urgency Incontinence Q30 | ICS Urgency Incontinence -<br>how often Q30a_1 | Q30b_1 | Q31_1 |
|--------|------------------------------|------------------------------------------------|--------|-------|
| 24664  | 2                            |                                                |        | 0     |
| 24669  | 2                            |                                                |        | 0     |
| 24685  | 2                            |                                                |        | 0     |
| 24687  | 1                            | 2                                              | 2      | 0     |
| 24688  | 2                            |                                                |        | 0     |
| 24691  | 1                            | 2                                              | 2      | 0     |
| 24693  | 2                            |                                                |        | 0     |
| 24706  | 2                            |                                                |        | 0     |
| 24710  | 2                            |                                                |        | 0     |
| 24717  | 2                            |                                                |        | 0     |
| 24720  | 2                            |                                                |        | 0     |
| 24731  | 1                            | 2                                              | 1      | 0     |
| 24732  | 2                            |                                                |        | 0     |
| 24733  | 2                            |                                                |        | 0     |
| 24747  | 2                            |                                                |        | 0     |
| 24750  | 1                            | 2                                              | 4      | 0     |
| 24758  | 2                            |                                                |        | 0     |
| 24760  | 2                            |                                                |        | 0     |
| 24765  | 2                            |                                                |        | 0     |
| 24772  | 2                            |                                                |        | 0     |
| 24779  | 2                            |                                                |        | 0     |
| 24794  | 2                            |                                                |        | 0     |
| 24796  | 1                            | 3                                              | 3      | 1     |
| 24797  | 2                            |                                                |        | 0     |
| 24800  | 2                            |                                                |        | 0     |
| 24813  | 1                            | 3                                              | 3      | 0     |
| 24815  | 2                            |                                                |        | 0     |
| 24821  | 2                            |                                                |        | 0     |
| 24822  | 2                            |                                                |        | 0     |
| 24831  | 2                            |                                                |        | 0     |
| 24835  | 2                            |                                                |        | 0     |
| 24843  | 1                            | 3                                              | 2      | 0     |

| respid | ICS Urgency Incontinence Q30 | ICS Urgency Incontinence -<br>how often Q30a_1 | Q30b_1 | Q31_1 |
|--------|------------------------------|------------------------------------------------|--------|-------|
| 24844  | 1                            | 3                                              | 2      | 0     |
| 24860  | 2                            |                                                |        | 0     |
| 24861  | 2                            |                                                |        | 0     |
| 24865  | 1                            | 2                                              | 2      | 0     |
| 24870  | 2                            |                                                |        | 0     |
| 24887  | 2                            |                                                |        | 0     |
| 24897  | 2                            |                                                |        | 0     |
| 24902  | 2                            |                                                |        | 0     |
| 24914  | 2                            |                                                |        | 0     |
| 24921  | 2                            |                                                |        | 0     |
| 24922  | 2                            |                                                |        | 0     |
| 24924  | 2                            |                                                |        | 0     |
| 24927  | 2                            |                                                |        | 0     |
| 24936  | 2                            |                                                |        | 0     |
| 24937  | 2                            |                                                |        | 0     |
| 24942  | 2                            |                                                |        | 0     |
| 24947  | 2                            |                                                |        | 0     |
| 24953  | 2                            |                                                |        | 0     |
| 24954  | 1                            | 2                                              | 1      | 0     |
| 24960  | 1                            | 3                                              | 4      | 0     |
| 24965  | 2                            |                                                |        | 0     |
| 24975  | 2                            |                                                |        | 0     |
| 24983  | 1                            | 2                                              | 2      | 0     |
| 24985  | 2                            |                                                |        | 0     |
| 24990  | 2                            |                                                |        | 0     |
| 25000  | 2                            |                                                |        | 0     |
| 25007  | 2                            |                                                |        | 0     |
| 25008  | 2                            |                                                |        | 0     |
| 25010  | 2                            |                                                |        | 0     |
| 25016  | 2                            |                                                |        | 0     |
| 25021  | 2                            |                                                |        | 0     |
| 25040  | 2                            |                                                |        | 0     |

| respid | ICS Urgency Incontinence Q30 | ICS Urgency Incontinence -<br>how often Q30a_1 | Q30b_1 | Q31_1 |
|--------|------------------------------|------------------------------------------------|--------|-------|
| 25043  | 2                            |                                                |        | 0     |
| 25055  | 2                            |                                                |        | 0     |
| 25057  | 2                            |                                                |        | 0     |
| 25060  | 2                            |                                                |        | 0     |
| 25062  | 2                            |                                                |        | 0     |
| 25064  | 1                            | 2                                              | 2      | 0     |
| 25069  | 2                            |                                                |        | 0     |
| 25077  | 2                            |                                                |        | 0     |
| 25088  | 2                            |                                                |        | 0     |
| 25093  | 2                            |                                                |        | 1     |
| 25121  | 2                            |                                                |        | 0     |
| 25140  | 1                            | 2                                              | 2      | 0     |
| 25144  | 2                            |                                                |        | 0     |
| 25149  | 2                            |                                                |        | 0     |
| 25159  | 2                            |                                                |        | 0     |
| 25191  | 2                            |                                                |        | 0     |
| 25193  | 1                            | 2                                              | 2      | 0     |
| 25202  | 1                            | 2                                              | 2      | 0     |
| 25215  | 1                            | 1                                              | 1      | 0     |
| 25229  | 2                            |                                                |        | 1     |
| 25231  | 2                            |                                                |        | 0     |
| 25236  | 2                            |                                                |        | 0     |
| 25242  | 2                            |                                                |        | 0     |
| 25252  | 2                            |                                                |        | 0     |
| 25253  | 1                            | 3                                              | 4      | 0     |
| 25256  | 1                            | 2                                              | 2      | 0     |
| 25260  | 2                            |                                                |        | 0     |
| 25261  | 2                            |                                                |        | 0     |
| 25280  | 2                            |                                                |        | 1     |
| 25282  | 2                            |                                                |        | 0     |
| 25289  | 2                            |                                                |        | 0     |
| 25303  | 2                            |                                                |        | 0     |



| respid | ICS Urgency Incontinence Q30 | ICS Urgency Incontinence -<br>how often Q30a_1 | Q30b_1 | Q31_1 |
|--------|------------------------------|------------------------------------------------|--------|-------|
| 25304  | 2                            |                                                |        | 0     |
| 25309  | 2                            |                                                |        | 0     |
| 25317  | 2                            |                                                |        | 0     |
| 25318  | 1                            | 2                                              | 2      | 1     |
| 25320  | 2                            |                                                |        | 0     |
| 25324  | 1                            | 2                                              | 2      | 0     |
| 25331  | 2                            |                                                |        | 0     |
| 25340  | 2                            |                                                |        | 0     |
| 25342  | 2                            |                                                |        | 0     |
| 25350  | 2                            |                                                |        | 0     |
| 25352  | 2                            |                                                |        | 0     |
| 25358  | 2                            |                                                |        | 0     |
| 25375  | 2                            |                                                |        | 0     |
| 25386  | 2                            |                                                |        | 0     |
| 25388  | 2                            |                                                |        | 0     |
| 25390  | 1                            | 2                                              | 2      | 0     |
| 25391  | 2                            |                                                |        | 0     |
| 25400  | 2                            |                                                |        | 0     |
| 25413  | 1                            | 2                                              | 2      | 0     |
| 25424  | 2                            |                                                |        | 0     |
| 25426  | 2                            |                                                |        | 0     |
| 25430  | 2                            |                                                |        | 0     |
| 25434  | 1                            | 2                                              | 1      | 0     |
| 25439  | 2                            |                                                |        | 0     |
| 25441  | 2                            |                                                |        | 0     |
| 25445  | 2                            |                                                |        | 0     |
| 25451  | 2                            |                                                |        | 0     |
| 25469  | 1                            | 2                                              | 2      | 0     |
| 25471  | 1                            | 2                                              | 1      | 1     |
| 25476  | 2                            |                                                |        | 0     |
| 25480  | 2                            |                                                |        | 0     |
| 25482  | 2                            |                                                |        | 0     |

| respid | ICS Urgency Incontinence Q30 | ICS Urgency Incontinence -<br>how often Q30a_1 | Q30b_1 | Q31_1 |
|--------|------------------------------|------------------------------------------------|--------|-------|
| 25500  | 2                            |                                                |        | 0     |
| 25516  | 2                            |                                                |        | 0     |
| 25521  | 1                            | 3                                              | 3      | 0     |
| 25525  | 2                            |                                                |        | 0     |
| 25530  | 1                            | 1                                              | 1      | 0     |
| 25555  | 2                            |                                                |        | 0     |
| 25558  | 2                            |                                                |        | 1     |
| 25561  | 2                            |                                                |        | 0     |
| 25566  | 2                            |                                                |        | 0     |
| 25571  | 2                            |                                                |        | 1     |
| 25572  | 2                            |                                                |        | 0     |
| 25574  | 2                            |                                                |        | 0     |
| 25588  | 1                            | 1                                              | 0      | 0     |
| 25591  | 2                            |                                                |        | 1     |
| 25599  | 1                            | 2                                              | 1      | 1     |
| 25604  | 2                            |                                                |        | 0     |
| 25614  | 2                            |                                                |        | 0     |
| 25634  | 1                            | 2                                              | 2      | 1     |
| 25642  | 2                            |                                                |        | 0     |
| 25647  | 2                            |                                                |        | 0     |
| 25653  | 2                            |                                                |        | 0     |
| 25654  | 2                            |                                                |        | 0     |
| 25660  | 2                            |                                                |        | 0     |
| 25664  | 1                            | 1                                              | 0      | 0     |
| 25665  | 2                            |                                                |        | 1     |
| 25672  | 1                            | 2                                              | 2      | 0     |
| 25677  | 1                            | 2                                              | 2      | 0     |
| 25685  | 2                            |                                                |        | 0     |
| 25699  | 1                            | 3                                              | 2      | 0     |
| 25703  | 2                            |                                                |        | 0     |
| 25704  | 1                            | 2                                              | 2      | 0     |
| 25705  | 1                            | 2                                              | 3      | 0     |

| respid | ICS Urgency Incontinence Q30 | ICS Urgency Incontinence -<br>how often Q30a_1 | Q30b_1 | Q31_1 |
|--------|------------------------------|------------------------------------------------|--------|-------|
| 25711  | 2                            |                                                |        | 0     |
| 25727  | 2                            |                                                |        | 0     |
| 25728  | 2                            |                                                |        | 0     |
| 25733  | 2                            |                                                |        | 0     |
| 25735  | 1                            | 1                                              | 1      | 0     |
| 25736  | 2                            |                                                |        | 0     |
| 25742  | 2                            |                                                |        | 0     |
| 25750  | 2                            |                                                |        | 0     |
| 25754  | 2                            |                                                |        | 0     |
| 25776  | 1                            | 1                                              | 1      | 0     |
| 25778  | 2                            |                                                |        | 0     |
| 25796  | 2                            |                                                |        | 1     |
| 25852  | 1                            | 1                                              | 1      | 1     |
| 25858  | 2                            |                                                |        | 0     |
| 25859  | 2                            |                                                |        | 0     |
| 25886  | 2                            |                                                |        | 0     |
| 25890  | 2                            |                                                |        | 0     |
| 25897  | 2                            |                                                |        | 1     |
| 25903  | 2                            |                                                |        | 0     |
| 25905  | 2                            |                                                |        | 0     |
| 25917  | 2                            |                                                |        | 0     |
| 25918  | 2                            |                                                |        | 0     |
| 25928  | 2                            |                                                |        | 0     |
| 25930  | 2                            |                                                |        | 0     |
| 25949  | 2                            |                                                |        | 0     |
| 25955  | 2                            |                                                |        | 0     |
| 25959  | 1                            | 1                                              | 1      | 0     |
| 25964  | 2                            |                                                |        | 0     |
| 25972  | 2                            |                                                |        | 0     |
| 25999  | 1                            | 3                                              | 3      | 0     |
| 26019  | 2                            |                                                |        | 0     |
| 26025  | 2                            |                                                |        | 0     |

| respid | ICS Urgency Incontinence Q30 | ICS Urgency Incontinence -<br>how often Q30a_1 | Q30b_1 | Q31_1 |
|--------|------------------------------|------------------------------------------------|--------|-------|
| 26039  | 1                            | 1                                              | 3      | 0     |
| 26055  | 2                            |                                                |        | 0     |
| 26061  | 1                            | 1                                              | 1      | 0     |
| 26076  | 2                            |                                                |        | 0     |
| 26088  | 2                            |                                                |        | 0     |
| 26094  | 2                            |                                                |        | 0     |
| 26104  | 2                            |                                                |        | 0     |
| 26131  | 2                            |                                                |        | 0     |
| 26134  | 2                            |                                                |        | 0     |
| 26160  | 2                            |                                                |        | 0     |
| 26168  | 2                            |                                                |        | 0     |
| 26170  | 2                            |                                                |        | 0     |
| 26191  | 2                            |                                                |        | 0     |
| 26192  | 2                            |                                                |        | 0     |
| 26195  | 2                            |                                                |        | 0     |
| 26198  | 2                            |                                                |        | 0     |
| 26199  | 1                            | 2                                              | 2      | 1     |
| 26201  | 2                            |                                                |        | 0     |
| 26202  | 2                            |                                                |        | 0     |
| 26226  | 2                            |                                                |        | 0     |
| 26233  | 2                            |                                                |        | 1     |
| 26236  | 2                            |                                                |        | 0     |
| 26242  | 2                            |                                                |        | 0     |
| 26244  | 2                            |                                                |        | 0     |
| 26250  | 2                            |                                                |        | 0     |
| 26266  | 2                            |                                                |        | 0     |
| 26274  | 2                            |                                                |        | 0     |
| 26286  | 1                            | 1                                              | 1      | 1     |
| 26288  | 2                            |                                                |        | 0     |
| 26295  | 2                            |                                                |        | 0     |
| 26296  | 2                            |                                                |        | 0     |
| 26297  | 2                            |                                                |        | 0     |

| respid | ICS Urgency Incontinence Q30 | ICS Urgency Incontinence -<br>how often Q30a_1 | Q30b_1 | Q31_1 |
|--------|------------------------------|------------------------------------------------|--------|-------|
| 26300  | 2                            |                                                |        | 0     |
| 26317  | 2                            |                                                |        | 0     |
| 26343  | 2                            |                                                |        | 0     |
| 26367  | 2                            |                                                |        | 0     |
| 26372  | 2                            |                                                |        | 0     |
| 26403  | 2                            |                                                |        | 0     |
| 26423  | 2                            |                                                |        | 0     |
| 26430  | 2                            |                                                |        | 0     |
| 26437  | 2                            |                                                |        | 0     |
| 26457  | 2                            |                                                |        | 0     |
| 26466  | 2                            |                                                |        | 0     |
| 26467  | 2                            |                                                |        | 0     |
| 26469  | 1                            | 2                                              | 1      | 1     |
| 26494  | 2                            |                                                |        | 0     |
| 26510  | 2                            |                                                |        | 0     |
| 26519  | 2                            |                                                |        | 0     |
| 26525  | 2                            |                                                |        | 0     |
| 26529  | 2                            |                                                |        | 0     |
| 26533  | 1                            | 1                                              | 0      | 0     |
| 26556  | 2                            |                                                |        | 0     |
| 26559  | 2                            |                                                |        | 0     |
| 26565  | 2                            |                                                |        | 0     |
| 26576  | 2                            |                                                |        | 0     |
| 26601  | 2                            |                                                |        | 0     |
| 26607  | 1                            | 2                                              | 2      | 0     |
| 26611  | 2                            |                                                |        | 0     |
| 26619  | 1                            | 1                                              | 1      | 0     |
| 26631  | 2                            |                                                |        | 0     |
| 26654  | 2                            |                                                |        | 0     |
| 26656  | 2                            |                                                |        | 0     |
| 26664  | 2                            |                                                |        | 0     |
| 26667  | 2                            |                                                |        | 0     |

| respid | ICS Urgency Incontinence Q30 | ICS Urgency Incontinence -<br>how often Q30a_1 | Q30b_1 | Q31_1 |
|--------|------------------------------|------------------------------------------------|--------|-------|
| 26674  | 1                            | 3                                              | 2      | 0     |
| 26678  | 1                            | 1                                              | 1      | 1     |
| 26693  | 2                            |                                                |        | 0     |
| 26696  | 1                            | 2                                              | 3      | 0     |
| 26703  | 1                            | 3                                              | 3      | 1     |
| 26705  | 2                            |                                                |        | 0     |
| 26706  | 1                            | 1                                              | 1      | 0     |
| 26716  | 2                            |                                                |        | 0     |
| 26721  | 2                            |                                                |        | 0     |
| 26730  | 2                            |                                                |        | 0     |
| 26752  | 2                            |                                                |        | 0     |
| 26755  | 2                            |                                                |        | 0     |
| 26791  | 2                            |                                                |        | 0     |
| 26804  | 2                            |                                                |        | 0     |
| 26810  | 2                            |                                                |        | 0     |
| 26813  | 2                            |                                                |        | 0     |
| 26833  | 2                            |                                                |        | 0     |
| 26880  | 2                            |                                                |        | 0     |
| 26884  | 2                            |                                                |        | 0     |
| 26885  | 2                            |                                                |        | 0     |
| 26890  | 1                            | 2                                              | 2      | 0     |
| 26937  | 2                            |                                                |        | 0     |
| 26939  | 2                            |                                                |        | 0     |
| 26941  | 2                            |                                                |        | 0     |
| 26992  | 2                            |                                                |        | 0     |
| 27037  | 2                            |                                                |        | 0     |
| 27045  | 1                            | 2                                              | 2      | 0     |
| 27053  | 1                            | 1                                              | 3      | 0     |
| 27060  | 1                            | 2                                              | 2      | 0     |
| 27076  | 1                            | 1                                              | 1      | 0     |
| 27124  | 2                            |                                                |        | 0     |
| 27125  | 2                            |                                                |        | 0     |

| respid | ICS Urgency Incontinence Q30 | ICS Urgency Incontinence -<br>how often Q30a_1 | Q30b_1 | Q31_1 |
|--------|------------------------------|------------------------------------------------|--------|-------|
| 27132  | 2                            |                                                |        | 0     |
| 27166  | 2                            |                                                |        | 0     |
| 27190  | 1                            | 1                                              | 1      | 0     |
| 27199  | 2                            |                                                |        | 0     |
| 27221  | 1                            | 2                                              | 1      | 0     |
| 27233  | 2                            |                                                |        | 0     |
| 27241  | 2                            |                                                |        | 0     |
| 27244  | 2                            |                                                |        | 0     |
| 27245  | 1                            | 3                                              | 3      | 1     |
| 27246  | 2                            |                                                |        | 0     |
| 27253  | 2                            |                                                |        | 0     |
| 27255  | 2                            |                                                |        | 0     |
| 27267  | 2                            |                                                |        | 0     |
| 27283  | 1                            | 2                                              | 3      | 0     |
| 27289  | 2                            |                                                |        | 0     |
| 27302  | 2                            |                                                |        | 0     |
| 27317  | 2                            |                                                |        | 0     |
| 27319  | 2                            |                                                |        | 0     |
| 27331  | 2                            |                                                |        | 0     |
| 27333  | 2                            |                                                |        | 0     |
| 27340  | 2                            |                                                |        | 0     |
| 27362  | 1                            | 3                                              | 2      | 0     |
| 27370  | 2                            |                                                |        | 0     |
| 27379  | 1                            | 1                                              | 2      | 0     |
| 27386  | 2                            |                                                |        | 0     |
| 27398  | 2                            |                                                |        | 0     |
| 27404  | 2                            |                                                |        | 0     |
| 27408  | 2                            |                                                |        | 1     |
| 27412  | 1                            | 4                                              | 3      | 0     |
| 27426  | 2                            |                                                |        | 0     |
| 27455  | 2                            |                                                |        | 0     |
| 27464  | 2                            |                                                |        | 0     |

| respid | ICS Urgency Incontinence Q30 | ICS Urgency Incontinence -<br>how often Q30a_1 | Q30b_1 | Q31_1 |
|--------|------------------------------|------------------------------------------------|--------|-------|
| 27484  | 2                            |                                                |        | 0     |
| 27493  | 1                            | 2                                              | 3      | 0     |
| 27512  | 1                            | 2                                              | 3      | 0     |
| 27525  | 2                            |                                                |        | 0     |
| 27532  | 2                            |                                                |        | 1     |
| 27539  | 2                            |                                                |        | 0     |
| 27540  | 2                            |                                                |        | 0     |
| 27552  | 1                            | 2                                              | 4      | 0     |
| 27562  | 2                            |                                                |        | 0     |
| 27568  | 2                            |                                                |        | 0     |
| 27574  | 1                            | 3                                              | 3      | 0     |
| 27575  | 2                            |                                                |        | 0     |
| 27577  | 2                            |                                                |        | 0     |
| 27589  | 2                            |                                                |        | 0     |
| 27593  | 2                            |                                                |        | 0     |
| 27594  | 2                            |                                                |        | 0     |
| 27595  | 1                            | 3                                              | 2      | 1     |
| 27598  | 2                            |                                                |        | 0     |
| 27620  | 2                            |                                                |        | 1     |
| 27621  | 1                            | 1                                              | 1      | 0     |
| 27628  | 2                            |                                                |        | 0     |
| 27633  | 2                            |                                                |        | 0     |
| 27643  | 2                            |                                                |        | 0     |
| 27644  | 2                            |                                                |        | 0     |
| 27668  | 2                            |                                                |        | 0     |
| 27681  | 2                            |                                                |        | 0     |
| 27691  | 2                            |                                                |        | 0     |
| 27693  | 1                            | 4                                              | 3      | 0     |
| 27703  | 2                            |                                                |        | 0     |
| 27708  | 2                            |                                                |        | 1     |
| 27719  | 2                            |                                                |        | 0     |
| 27720  | 2                            |                                                |        | 0     |



| respid | ICS Urgency Incontinence Q30 | ICS Urgency Incontinence -<br>how often Q30a_1 | Q30b_1 | Q31_1 |
|--------|------------------------------|------------------------------------------------|--------|-------|
| 27723  | 2                            |                                                |        | 1     |
| 27725  | 2                            |                                                |        | 0     |
| 27734  | 2                            |                                                |        | 0     |
| 27744  | 2                            |                                                |        | 0     |
| 27749  | 1                            | 3                                              | 3      | 0     |
| 27762  | 1                            | 2                                              | 3      | 0     |
| 27808  | 2                            |                                                |        | 0     |
| 27810  | 1                            | 3                                              | 3      | 0     |
| 27812  | 2                            |                                                |        | 0     |
| 27815  | 2                            |                                                |        | 0     |
| 27818  | 2                            |                                                |        | 0     |
| 27823  | 2                            |                                                |        | 0     |
| 27841  | 2                            |                                                |        | 0     |
| 27843  | 2                            |                                                |        | 0     |
| 27851  | 2                            |                                                |        | 0     |
| 27858  | 2                            |                                                |        | 0     |
| 27859  | 2                            |                                                |        | 0     |
| 27869  | 2                            |                                                |        | 0     |
| 27872  | 2                            |                                                |        | 0     |
| 27873  | 2                            |                                                |        | 0     |
| 27884  | 1                            | 2                                              | 1      | 0     |
| 27904  | 2                            |                                                |        | 0     |
| 27915  | 2                            |                                                |        | 0     |
| 27918  | 2                            |                                                |        | 0     |
| 27937  | 2                            |                                                |        | 0     |
| 27943  | 2                            |                                                |        | 0     |
| 27948  | 2                            |                                                |        | 0     |
| 27971  | 2                            |                                                |        | 0     |
| 27991  | 2                            |                                                |        | 0     |
| 28000  | 2                            |                                                |        | 0     |
| 28011  | 2                            |                                                |        | 0     |
| 28022  | 2                            |                                                |        | 0     |

| respid | ICS Urgency Incontinence Q30 | ICS Urgency Incontinence -<br>how often Q30a_1 | Q30b_1 | Q31_1 |
|--------|------------------------------|------------------------------------------------|--------|-------|
| 28025  | 2                            |                                                |        | 0     |
| 28041  | 2                            |                                                |        | 0     |
| 28057  | 1                            | 3                                              | 3      | 1     |
| 28080  | 2                            |                                                |        | 0     |
| 28098  | 2                            |                                                |        | 0     |
| 28104  | 2                            |                                                |        | 0     |
| 28109  | 2                            |                                                |        | 0     |
| 28129  | 2                            |                                                |        | 1     |
| 28141  | 2                            |                                                |        | 0     |
| 28143  | 2                            |                                                |        | 0     |
| 28149  | 2                            |                                                |        | 1     |
| 28151  | 2                            |                                                |        | 0     |
| 28161  | 2                            |                                                |        | 0     |
| 28169  | 2                            |                                                |        | 0     |
| 28194  | 1                            | 2                                              | 3      | 0     |
| 28197  | 2                            |                                                |        | 0     |
| 28206  | 2                            |                                                |        | 0     |
| 28218  | 2                            |                                                |        | 0     |
| 28227  | 2                            |                                                |        | 0     |
| 28235  | 2                            |                                                |        | 0     |
| 28246  | 2                            |                                                |        | 0     |
| 28259  | 1                            | 3                                              | 3      | 0     |
| 28263  | 2                            |                                                |        | 1     |
| 28267  | 2                            |                                                |        | 0     |
| 28274  | 2                            |                                                |        | 0     |
| 28278  | 2                            |                                                |        | 0     |
| 28288  | 2                            |                                                |        | 1     |
| 28308  | 2                            |                                                |        | 0     |
| 28309  | 2                            |                                                |        | 0     |
| 28323  | 1                            | 1                                              | 2      | 1     |
| 28335  | 1                            | 2                                              | 2      | 0     |
| 28354  | 2                            |                                                |        | 0     |

| respid | ICS Urgency Incontinence Q30 | ICS Urgency Incontinence -<br>how often Q30a_1 | Q30b_1 | Q31_1 |
|--------|------------------------------|------------------------------------------------|--------|-------|
| 28355  | 1                            | 3                                              | 2      | 0     |
| 28356  | 2                            |                                                |        | 0     |
| 28357  | 2                            |                                                |        | 0     |
| 28363  | 2                            |                                                |        | 0     |
| 28366  | 2                            |                                                |        | 0     |
| 28372  | 1                            | 2                                              | 2      | 0     |
| 28381  | 1                            | 2                                              | 1      | 0     |
| 28388  | 1                            | 2                                              | 1      | 0     |
| 28413  | 2                            |                                                |        | 0     |
| 28421  | 2                            |                                                |        | 0     |
| 28430  | 2                            |                                                |        | 0     |
| 28439  | 2                            |                                                |        | 0     |
| 28458  | 1                            | 3                                              | 2      | 0     |
| 28461  | 2                            |                                                |        | 0     |
| 28466  | 2                            |                                                |        | 0     |
| 28492  | 2                            |                                                |        | 0     |
| 28534  | 2                            |                                                |        | 0     |
| 28537  | 2                            |                                                |        | 1     |
| 28560  | 2                            |                                                |        | 0     |
| 28566  | 2                            |                                                |        | 0     |
| 28569  | 2                            |                                                |        | 0     |
| 28584  | 2                            |                                                |        | 0     |
| 28590  | 2                            |                                                |        | 0     |
| 28596  | 2                            |                                                |        | 0     |
| 28608  | 2                            |                                                |        | 0     |
| 28631  | 1                            | 3                                              | 2      | 0     |
| 28644  | 1                            | 1                                              | 1      | 0     |
| 28646  | 2                            |                                                |        | 0     |
| 28665  | 2                            |                                                |        | 0     |
| 28686  | 2                            |                                                |        | 0     |
| 28704  | 2                            |                                                |        | 0     |
| 28719  | 2                            |                                                |        | 0     |

| respid | ICS Urgency Incontinence Q30 | ICS Urgency Incontinence -<br>how often Q30a_1 | Q30b_1 | Q31_1 |
|--------|------------------------------|------------------------------------------------|--------|-------|
| 28736  | 2                            |                                                |        | 0     |
| 28739  | 1                            | 2                                              | 2      | 0     |
| 28758  | 1                            | 2                                              | 3      | 0     |
| 28761  | 1                            | 3                                              | 3      | 1     |
| 28770  | 1                            | 3                                              | 2      | 0     |
| 28774  | 2                            |                                                |        | 0     |
| 28778  | 1                            | 4                                              | 4      | 0     |
| 28783  | 2                            |                                                |        | 0     |
| 28785  | 2                            |                                                |        | 0     |
| 28797  | 1                            | 2                                              | 2      | 0     |
| 28801  | 2                            |                                                |        | 0     |
| 28821  | 2                            |                                                |        | 0     |
| 28827  | 2                            |                                                |        | 0     |
| 28828  | 2                            |                                                |        | 0     |
| 28871  | 2                            |                                                |        | 0     |
| 28876  | 2                            |                                                |        | 0     |
| 28891  | 1                            | 3                                              | 3      | 1     |
| 28898  | 2                            |                                                |        | 0     |
| 28909  | 1                            | 1                                              | 0      | 0     |
| 28930  | 2                            |                                                |        | 0     |
| 28935  | 2                            |                                                |        | 1     |
| 28964  | 2                            |                                                |        | 0     |
| 28965  | 2                            |                                                |        | 0     |
| 28967  | 1                            | 3                                              | 3      | 0     |
| 28975  | 2                            |                                                |        | 0     |
| 28982  | 2                            |                                                |        | 0     |
| 28989  | 2                            |                                                |        | 0     |
| 29003  | 2                            |                                                |        | 0     |
| 29004  | 2                            |                                                |        | 0     |
| 29007  | 2                            |                                                |        | 0     |
| 29008  | 2                            |                                                |        | 0     |
| 29011  | 2                            |                                                |        | 1     |

| respid | ICS Urgency Incontinence Q30 | ICS Urgency Incontinence -<br>how often Q30a_1 | Q30b_1 | Q31_1 |
|--------|------------------------------|------------------------------------------------|--------|-------|
| 29012  | 2                            |                                                |        | 0     |
| 29014  | 2                            |                                                |        | 0     |
| 29016  | 2                            |                                                |        | 0     |
| 29018  | 2                            |                                                |        | 0     |
| 29048  | 2                            |                                                |        | 0     |
| 29184  | 2                            |                                                |        | 0     |
| 29237  | 2                            |                                                |        | 1     |
| 29252  | 2                            |                                                |        | 0     |
| 29267  | 2                            |                                                |        | 0     |
| 29276  | 2                            |                                                |        | 0     |
| 29281  | 1                            | 3                                              | 3      | 0     |
| 29285  | 1                            | 1                                              | 0      | 0     |
| 29291  | 1                            | 3                                              | 4      | 1     |
| 29304  | 1                            | 2                                              | 2      | 0     |
| 29323  | 2                            |                                                |        | 0     |
| 29330  | 2                            |                                                |        | 0     |
| 29357  | 1                            | 2                                              | 4      | 0     |
| 29416  | 2                            |                                                |        | 0     |
| 29432  | 2                            |                                                |        | 0     |
| 29482  | 2                            |                                                |        | 0     |
| 29506  | 2                            |                                                |        | 0     |
| 29509  | 2                            |                                                |        | 0     |
| 29512  | 2                            |                                                |        | 0     |
| 29519  | 2                            |                                                |        | 0     |
| 29520  | 2                            |                                                |        | 0     |
| 29521  | 2                            |                                                |        | 0     |
| 29529  | 1                            | 3                                              | 3      | 1     |
| 29532  | 2                            |                                                |        | 0     |
| 29547  | 1                            | 2                                              | 3      | 0     |
| 29551  | 2                            |                                                |        | 0     |
| 29584  | 1                            | 2                                              | 3      | 0     |
| 29591  | 1                            | 2                                              | 3      | 1     |

| respid | ICS Urgency Incontinence Q30 | ICS Urgency Incontinence -<br>how often Q30a_1 | Q30b_1 | Q31_1 |
|--------|------------------------------|------------------------------------------------|--------|-------|
| 29613  | 2                            |                                                |        | 0     |
| 29615  | 1                            | 2                                              | 2      | 1     |
| 29625  | 2                            |                                                |        | 0     |
| 29660  | 2                            |                                                |        | 0     |
| 29677  | 2                            |                                                |        | 0     |
| 29700  | 2                            |                                                |        | 1     |
| 29715  | 1                            | 3                                              | 4      | 0     |
| 29720  | 2                            |                                                |        | 0     |
| 29730  | 2                            |                                                |        | 0     |
| 29734  | 1                            | 2                                              | 3      | 1     |
| 29754  | 2                            |                                                |        | 0     |
| 29771  | 2                            |                                                |        | 0     |
| 29774  | 2                            |                                                |        | 0     |
| 29783  | 2                            |                                                |        | 0     |
| 29812  | 2                            |                                                |        | 0     |
| 29813  | 2                            |                                                |        | 0     |
| 29814  | 1                            | 2                                              | 1      | 1     |
| 29820  | 2                            |                                                |        | 0     |
| 29906  | 2                            |                                                |        | 0     |
| 29907  | 1                            | 1                                              | 2      | 0     |
| 29928  | 2                            |                                                |        | 0     |
| 29932  | 2                            |                                                |        | 0     |
| 29958  | 2                            |                                                |        | 0     |
| 29982  | 2                            |                                                |        | 0     |
| 29989  | 2                            |                                                |        | 0     |
| 29994  | 2                            |                                                |        | 1     |
| 30005  | 2                            |                                                |        | 0     |
| 30077  | 2                            |                                                |        | 0     |
| 30098  | 2                            |                                                |        | 0     |
| 30107  | 2                            |                                                |        | 0     |
| 30154  | 2                            |                                                |        | 0     |
| 30159  | 2                            |                                                |        | 0     |

| respid | ICS Urgency Incontinence Q30 | ICS Urgency Incontinence -<br>how often Q30a_1 | Q30b_1 | Q31_1 |
|--------|------------------------------|------------------------------------------------|--------|-------|
| 30162  | 2                            |                                                |        | 0     |
| 30163  | 2                            |                                                |        | 0     |
| 30189  | 1                            | 2                                              | 2      | 0     |
| 30230  | 2                            |                                                |        | 0     |
| 30259  | 2                            |                                                |        | 0     |
| 30284  | 2                            |                                                |        | 0     |
| 30296  | 2                            |                                                |        | 0     |
| 30330  | 2                            |                                                |        | 0     |
| 30341  | 1                            | 1                                              | 2      | 0     |
| 30352  | 1                            | 1                                              | 1      | 0     |
| 30379  | 2                            |                                                |        | 0     |
| 30424  | 2                            |                                                |        | 0     |
| 30447  | 2                            |                                                |        | 0     |
| 30477  | 1                            | 3                                              | 2      | 0     |
| 30503  | 2                            |                                                |        | 0     |
| 30515  | 2                            |                                                |        | 0     |
| 30516  | 2                            |                                                |        | 0     |
| 30623  | 1                            | 3                                              | 1      | 0     |
| 30639  | 2                            |                                                |        | 0     |
| 30670  | 2                            |                                                |        | 0     |
| 30697  | 2                            |                                                |        | 0     |
| 30735  | 2                            |                                                |        | 0     |
| 30742  | 2                            |                                                |        | 0     |
| 30751  | 2                            |                                                |        | 0     |
| 30789  | 2                            |                                                |        | 0     |
| 30867  | 2                            |                                                |        | 0     |
| 30876  | 2                            |                                                |        | 0     |
| 30877  | 2                            |                                                |        | 0     |
| 30887  | 2                            |                                                |        | 0     |
| 30891  | 1                            | 3                                              | 2      | 0     |
| 31030  | 2                            |                                                |        | 0     |
| 31059  | 2                            |                                                |        | 0     |

| respid | ICS Urgency Incontinence Q30 | ICS Urgency Incontinence -<br>how often Q30a_1 | Q30b_1 | Q31_1 |
|--------|------------------------------|------------------------------------------------|--------|-------|
| 31082  | 2                            |                                                |        | 0     |
| 31106  | 2                            |                                                |        | 0     |
| 31110  | 2                            |                                                |        | 0     |
| 31265  | 1                            | 3                                              | 4      | 0     |
| 31266  | 1                            | 3                                              | 4      | 0     |
| 31267  | 1                            | 3                                              | 4      | 0     |
| 31310  | 2                            |                                                |        | 0     |
| 31325  | 2                            |                                                |        | 0     |
| 31367  | 2                            |                                                |        | 1     |
| 31389  | 2                            |                                                |        | 0     |
| 31440  | 2                            |                                                |        | 0     |
| 31465  | 2                            |                                                |        | 0     |
| 31477  | 2                            |                                                |        | 0     |
| 31491  | 2                            |                                                |        | 0     |
| 31494  | 2                            |                                                |        | 0     |
| 31509  | 1                            | 2                                              | 4      | 0     |
| 31533  | 2                            |                                                |        | 0     |
| 31547  | 2                            |                                                |        | 0     |
| 31558  | 2                            |                                                |        | 0     |
| 31579  | 2                            |                                                |        | 0     |
| 31591  | 2                            |                                                |        | 0     |
| 31596  | 2                            |                                                |        | 0     |
| 31601  | 1                            | 3                                              | 3      | 0     |
| 31605  | 2                            |                                                |        | 0     |
| 31637  | 2                            |                                                |        | 0     |
| 31646  | 2                            |                                                |        | 0     |
| 31647  | 1                            | 2                                              | 4      | 1     |
| 31650  | 2                            |                                                |        | 0     |
| 31651  | 2                            |                                                |        | 1     |
| 31657  | 2                            |                                                |        | 0     |
| 31660  | 2                            |                                                |        | 0     |
| 31661  | 2                            |                                                |        | 1     |



| respid | ICS Urgency Incontinence Q30 | ICS Urgency Incontinence -<br>how often Q30a_1 | Q30b_1 | Q31_1 |
|--------|------------------------------|------------------------------------------------|--------|-------|
| 31667  | 2                            |                                                |        | 0     |
| 31674  | 2                            |                                                |        | 0     |
| 31686  | 1                            | 2                                              | 2      | 0     |
| 31693  | 2                            |                                                |        | 0     |
| 31716  | 2                            |                                                |        | 0     |
| 31818  | 2                            |                                                |        | 0     |
| 31886  | 2                            |                                                |        | 0     |
| 31945  | 2                            |                                                |        | 0     |
| 31957  | 2                            |                                                |        | 0     |
| 31966  | 2                            |                                                |        | 0     |
| 31978  | 2                            |                                                |        | 0     |
| 31999  | 2                            |                                                |        | 0     |
| 32026  | 2                            |                                                |        | 0     |
| 32033  | 2                            |                                                |        | 0     |
| 32037  | 1                            | 3                                              | 4      | 0     |
| 32038  | 1                            | 3                                              | 4      | 0     |
| 32047  | 1                            | 2                                              | 3      | 0     |
| 32053  | 2                            |                                                |        | 0     |
| 32069  | 2                            |                                                |        | 0     |
| 32081  | 1                            | 2                                              | 1      | 0     |
| 32123  | 2                            |                                                |        | 0     |
| 32130  | 2                            |                                                |        | 0     |
| 32141  | 2                            |                                                |        | 0     |
| 32158  | 2                            |                                                |        | 0     |
| 32165  | 2                            |                                                |        | 0     |
| 32180  | 2                            |                                                |        | 0     |
| 32221  | 2                            |                                                |        | 1     |
| 32292  | 2                            |                                                |        | 0     |
| 32318  | 2                            |                                                |        | 1     |
| 32346  | 2                            |                                                |        | 0     |
| 32402  | 1                            | 2                                              | 1      | 0     |
| 32422  | 2                            |                                                |        | 0     |

| respid | ICS Urgency Incontinence Q30 | ICS Urgency Incontinence -<br>how often Q30a_1 | Q30b_1 | Q31_1 |
|--------|------------------------------|------------------------------------------------|--------|-------|
| 32439  | 2                            |                                                |        | 0     |
| 32507  | 2                            |                                                |        | 0     |
| 32522  | 2                            |                                                |        | 0     |
| 32535  | 2                            |                                                |        | 0     |
| 32546  | 2                            |                                                |        | 0     |
| 32553  | 2                            |                                                |        | 0     |
| 32570  | 2                            |                                                |        | 0     |
| 32592  | 2                            |                                                |        | 0     |
| 32605  | 1                            | 2                                              | 2      | 1     |
| 32630  | 1                            | 3                                              | 3      | 0     |
| 32642  | 2                            |                                                |        | 0     |
| 32646  | 2                            |                                                |        | 0     |
| 32665  | 2                            |                                                |        | 0     |
| 32677  | 2                            |                                                |        | 0     |
| 32694  | 2                            |                                                |        | 0     |
| 32698  | 2                            |                                                |        | 0     |
| 32754  | 1                            | 2                                              | 3      | 0     |
| 32799  | 2                            |                                                |        | 0     |
| 32816  | 2                            |                                                |        | 0     |
| 32819  | 2                            |                                                |        | 0     |
| 32840  | 2                            |                                                |        | 0     |
| 32861  | 2                            |                                                |        | 0     |
| 32866  | 1                            | 1                                              | 1      | 0     |
| 32889  | 2                            |                                                |        | 1     |
| 32960  | 2                            |                                                |        | 0     |
| 32965  | 2                            |                                                |        | 0     |
| 32986  | 2                            |                                                |        | 0     |
| 33005  | 2                            |                                                |        | 0     |
| 33054  | 1                            | 2                                              | 2      | 0     |
| 33072  | 1                            | 1                                              | 1      | 0     |
| 33095  | 2                            |                                                |        | 0     |
| 33099  | 1                            | 1                                              | 1      | 0     |

| respid | ICS Urgency Incontinence Q30 | ICS Urgency Incontinence -<br>how often Q30a_1 | Q30b_1 | Q31_1 |
|--------|------------------------------|------------------------------------------------|--------|-------|
| 33121  | 2                            |                                                |        | 0     |
| 33152  | 1                            | 2                                              | 1      | 1     |
| 33159  | 2                            |                                                |        | 0     |
| 33189  | 2                            |                                                |        | 0     |
| 33198  | 1                            | 2                                              | 2      | 0     |
| 33202  | 1                            | 2                                              | 1      | 0     |
| 33204  | 2                            |                                                |        | 0     |
| 33224  | 2                            |                                                |        | 0     |
| 33272  | 1                            | 1                                              | 2      | 0     |
| 33294  | 2                            |                                                |        | 0     |
| 33300  | 2                            |                                                |        | 0     |
| 33314  | 2                            |                                                |        | 1     |
| 33338  | 2                            |                                                |        | 0     |
| 33350  | 1                            | 3                                              | 3      | 0     |
| 33362  | 2                            |                                                |        | 0     |
| 33368  | 2                            |                                                |        | 0     |
| 33374  | 1                            | 2                                              | 1      | 0     |
| 33380  | 1                            | 2                                              | 3      | 1     |
| 33385  | 2                            |                                                |        | 0     |
| 33402  | 1                            | 2                                              | 1      | 0     |
| 33414  | 2                            |                                                |        | 0     |
| 33439  | 2                            |                                                |        | 0     |
| 33449  | 2                            |                                                |        | 0     |
| 33533  | 2                            |                                                |        | 0     |
| 33540  | 2                            |                                                |        | 0     |
| 33556  | 2                            |                                                |        | 0     |
| 33615  | 2                            |                                                |        | 1     |
| 33694  | 2                            |                                                |        | 0     |
| 33717  | 2                            |                                                |        | 0     |
| 33729  | 2                            |                                                |        | 0     |
| 33746  | 2                            |                                                |        | 0     |
| 33764  | 2                            |                                                |        | 0     |

| respid | ICS Urgency Incontinence Q30 | ICS Urgency Incontinence -<br>how often Q30a_1 | Q30b_1 | Q31_1 |
|--------|------------------------------|------------------------------------------------|--------|-------|
| 33790  | 1                            | 2                                              | 1      | 0     |
| 33868  | 2                            |                                                |        | 0     |
| 33872  | 1                            | 3                                              | 1      | 0     |
| 33883  | 2                            |                                                |        | 0     |
| 33884  | 2                            |                                                |        | 0     |
| 33900  | 2                            |                                                |        | 0     |
| 33933  | 2                            |                                                |        | 0     |
| 33949  | 2                            |                                                |        | 0     |
| 34005  | 2                            |                                                |        | 0     |
| 34016  | 2                            |                                                |        | 0     |
| 34041  | 2                            |                                                |        | 0     |
| 34053  | 2                            |                                                |        | 0     |
| 34056  | 2                            |                                                |        | 0     |
| 34093  | 2                            |                                                |        | 0     |
| 34112  | 1                            | 2                                              | 2      | 0     |
| 34136  | 1                            | 3                                              | 3      | 1     |
| 34138  | 2                            |                                                |        | 0     |
| 34139  | 2                            |                                                |        | 0     |
| 34189  | 1                            | 3                                              | 4      | 0     |
| 34239  | 1                            | 1                                              | 1      | 0     |
| 34240  | 2                            |                                                |        | 1     |
| 34241  | 2                            |                                                |        | 0     |
| 34259  | 2                            |                                                |        | 0     |
| 34303  | 1                            | 3                                              | 2      | 0     |
| 34306  | 2                            |                                                |        | 0     |
| 34395  | 2                            |                                                |        | 0     |
| 34463  | 1                            | 2                                              | 2      | 0     |
| 34466  | 1                            | 2                                              | 0      | 1     |
| 34471  | 2                            |                                                |        | 0     |
| 34489  | 1                            | 2                                              | 2      | 0     |
| 34518  | 2                            |                                                |        | 0     |
| 34542  | 2                            |                                                |        | 1     |

| respid | ICS Urgency Incontinence Q30 | ICS Urgency Incontinence -<br>how often Q30a_1 | Q30b_1 | Q31_1 |
|--------|------------------------------|------------------------------------------------|--------|-------|
| 34595  | 2                            |                                                |        | 0     |
| 34604  | 2                            |                                                |        | 0     |
| 34631  | 1                            | 3                                              | 3      | 0     |
| 34665  | 2                            |                                                |        | 0     |
| 34716  | 2                            |                                                |        | 0     |
| 34729  | 2                            |                                                |        | 0     |
| 34772  | 1                            | 2                                              | 3      | 0     |
| 34800  | 1                            | 1                                              | 1      | 0     |
| 34819  | 2                            |                                                |        | 0     |
| 34829  | 2                            |                                                |        | 0     |
| 34831  | 2                            |                                                |        | 0     |
| 34839  | 2                            |                                                |        | 0     |
| 34868  | 2                            |                                                |        | 0     |
| 34869  | 2                            |                                                |        | 0     |
| 34882  | 1                            | 4                                              | 3      | 0     |
| 34895  | 1                            | 2                                              | 4      | 0     |
| 34901  | 2                            |                                                |        | 0     |
| 34904  | 1                            | 2                                              | 2      | 0     |
| 34907  | 2                            |                                                |        | 0     |
| 34914  | 2                            |                                                |        | 0     |
| 34918  | 2                            |                                                |        | 0     |
| 34924  | 2                            |                                                |        | 0     |
| 34933  | 1                            | 2                                              | 2      | 1     |
| 34938  | 1                            | 1                                              | 1      | 0     |
| 34952  | 2                            |                                                |        | 0     |
| 34959  | 2                            |                                                |        | 0     |
| 34972  | 2                            |                                                |        | 1     |
| 34973  | 2                            |                                                |        | 1     |
| 34975  | 1                            | 2                                              | 3      | 0     |
| 34977  | 2                            |                                                |        | 0     |
| 34978  | 2                            |                                                |        | 0     |
| 34980  | 2                            |                                                |        | 0     |

| respid | ICS Urgency Incontinence Q30 | ICS Urgency Incontinence -<br>how often Q30a_1 | Q30b_1 | Q31_1 |
|--------|------------------------------|------------------------------------------------|--------|-------|
| 34984  | 1                            | 2                                              | 1      | 1     |
| 34986  | 2                            |                                                |        | 0     |
| 34994  | 2                            |                                                |        | 0     |
| 34996  | 2                            |                                                |        | 0     |
| 35003  | 2                            |                                                |        | 0     |
| 35014  | 2                            |                                                |        | 0     |
| 35029  | 2                            |                                                |        | 0     |
| 35030  | 1                            | 2                                              | 3      | 0     |
| 35037  | 2                            |                                                |        | 0     |
| 35043  | 2                            |                                                |        | 0     |
| 35048  | 2                            |                                                |        | 0     |
| 35055  | 2                            |                                                |        | 0     |
| 35067  | 2                            |                                                |        | 0     |
| 35072  | 2                            |                                                |        | 0     |
| 35078  | 2                            |                                                |        | 0     |
| 35084  | 2                            |                                                |        | 0     |
| 35095  | 2                            |                                                |        | 0     |
| 35096  | 2                            |                                                |        | 0     |
| 35097  | 1                            | 2                                              | 2      | 0     |
| 35098  | 2                            |                                                |        | 0     |
| 35109  | 1                            | 4                                              | 3      | 0     |
| 35114  | 2                            |                                                |        | 0     |
| 35115  | 2                            |                                                |        | 0     |
| 35124  | 1                            | 3                                              | 2      | 0     |
| 35125  | 2                            |                                                |        | 0     |
| 35141  | 2                            |                                                |        | 0     |
| 35142  | 2                            |                                                |        | 0     |
| 35145  | 2                            |                                                |        | 0     |
| 35149  | 1                            | 3                                              | 3      | 0     |
| 35159  | 2                            |                                                |        | 0     |
| 35163  | 1                            | 2                                              | 2      | 0     |
| 35174  | 1                            | 1                                              | 2      | 0     |

| respid | ICS Urgency Incontinence Q30 | ICS Urgency Incontinence -<br>how often Q30a_1 | Q30b_1 | Q31_1 |
|--------|------------------------------|------------------------------------------------|--------|-------|
| 35188  | 2                            |                                                |        | 0     |
| 35189  | 1                            | 2                                              | 2      | 1     |
| 35201  | 1                            | 2                                              | 3      | 0     |
| 35215  | 2                            |                                                |        | 0     |
| 35228  | 2                            |                                                |        | 0     |
| 35235  | 2                            |                                                |        | 0     |
| 35239  | 1                            | 2                                              | 3      | 0     |
| 35243  | 2                            |                                                |        | 0     |
| 35245  | 1                            | 3                                              | 3      | 1     |
| 35259  | 2                            |                                                |        | 0     |
| 35265  | 2                            |                                                |        | 0     |
| 35272  | 2                            |                                                |        | 0     |
| 35280  | 2                            |                                                |        | 0     |
| 35298  | 1                            | 1                                              | 0      | 0     |
| 35305  | 2                            |                                                |        | 0     |
| 35306  | 1                            | 2                                              | 3      | 0     |
| 35307  | 2                            |                                                |        | 0     |
| 35311  | 2                            |                                                |        | 0     |
| 35322  | 2                            |                                                |        | 0     |
| 35323  | 2                            |                                                |        | 0     |
| 35327  | 2                            |                                                |        | 1     |
| 35366  | 2                            |                                                |        | 0     |
| 35378  | 2                            |                                                |        | 0     |
| 35389  | 2                            |                                                |        | 0     |
| 35390  | 2                            |                                                |        | 0     |
| 35395  | 2                            |                                                |        | 0     |
| 35411  | 2                            |                                                |        | 0     |
| 35423  | 2                            |                                                |        | 0     |
| 35425  | 2                            |                                                |        | 0     |
| 35434  | 1                            | 1                                              | 0      | 0     |
| 35462  | 2                            |                                                |        | 0     |
| 35478  | 1                            | 3                                              | 2      | 1     |

| respid | ICS Urgency Incontinence Q30 | ICS Urgency Incontinence -<br>how often Q30a_1 | Q30b_1 | Q31_1 |
|--------|------------------------------|------------------------------------------------|--------|-------|
| 35481  | 1                            | 3                                              | 3      | 1     |
| 35498  | 2                            |                                                |        | 0     |
| 35499  | 2                            |                                                |        | 0     |
| 35502  | 2                            |                                                |        | 0     |
| 35503  | 2                            |                                                |        | 0     |
| 35504  | 2                            |                                                |        | 0     |
| 35508  | 1                            | 2                                              | 2      | 0     |
| 35513  | 2                            |                                                |        | 0     |
| 35516  | 1                            | 1                                              | 0      | 0     |
| 35519  | 1                            | 2                                              | 3      | 0     |
| 35530  | 1                            | 2                                              | 3      | 0     |
| 35533  | 2                            |                                                |        | 0     |
| 35561  | 2                            |                                                |        | 0     |
| 35565  | 2                            |                                                |        | 0     |
| 35588  | 2                            |                                                |        | 0     |
| 35598  | 2                            |                                                |        | 0     |
| 35607  | 2                            |                                                |        | 0     |
| 35638  | 2                            |                                                |        | 0     |
| 35642  | 2                            |                                                |        | 0     |
| 35643  | 1                            | 2                                              | 3      | 1     |
| 35680  | 2                            |                                                |        | 0     |
| 35697  | 2                            |                                                |        | 0     |
| 35703  | 2                            |                                                |        | 0     |
| 35709  | 1                            | 1                                              | 2      | 0     |
| 35710  | 2                            |                                                |        | 1     |
| 35721  | 1                            | 4                                              | 2      | 1     |
| 35723  | 2                            |                                                |        | 0     |
| 35736  | 2                            |                                                |        | 0     |
| 35739  | 2                            |                                                |        | 0     |
| 35745  | 1                            | 1                                              | 3      | 0     |
| 35748  | 1                            | 3                                              | 4      | 0     |
| 35750  | 1                            | 3                                              | 2      | 0     |



| respid | ICS Urgency Incontinence Q30 | ICS Urgency Incontinence -<br>how often Q30a_1 | Q30b_1 | Q31_1 |
|--------|------------------------------|------------------------------------------------|--------|-------|
| 35752  | 1                            | 1                                              | 1      | 0     |
| 35773  | 2                            |                                                |        | 0     |
| 35779  | 2                            |                                                |        | 0     |
| 35791  | 2                            |                                                |        | 0     |
| 35801  | 2                            |                                                |        | 0     |
| 35802  | 2                            |                                                |        | 0     |
| 35837  | 2                            |                                                |        | 0     |
| 35853  | 2                            |                                                |        | 0     |
| 35858  | 2                            |                                                |        | 0     |
| 35860  | 1                            | 1                                              | 1      | 0     |
| 35875  | 1                            | 3                                              | 4      | 1     |
| 35883  | 1                            | 2                                              | 2      | 0     |
| 35890  | 2                            |                                                |        | 0     |
| 35898  | 2                            |                                                |        | 0     |
| 35901  | 1                            | 2                                              | 4      | 0     |
| 35914  | 2                            |                                                |        | 0     |
| 35924  | 2                            |                                                |        | 0     |
| 35950  | 2                            |                                                |        | 0     |
| 35961  | 2                            |                                                |        | 0     |
| 35966  | 1                            | 1                                              | 1      | 0     |
| 35967  | 2                            |                                                |        | 0     |
| 35971  | 2                            |                                                |        | 0     |
| 35974  | 2                            |                                                |        | 0     |
| 35983  | 1                            | 3                                              | 3      | 1     |
| 35992  | 1                            | 3                                              | 4      | 1     |
| 36010  | 2                            |                                                |        | 0     |
| 36019  | 2                            |                                                |        | 0     |
| 36029  | 2                            |                                                |        | 0     |
| 36033  | 2                            |                                                |        | 0     |
| 36042  | 2                            |                                                |        | 0     |
| 36043  | 1                            | 1                                              | 1      | 0     |
| 36048  | 1                            | 3                                              | 2      | 0     |

| respid | ICS Urgency Incontinence Q30 | ICS Urgency Incontinence -<br>how often Q30a_1 | Q30b_1 | Q31_1 |
|--------|------------------------------|------------------------------------------------|--------|-------|
| 36050  | 2                            |                                                |        | 0     |
| 36062  | 2                            |                                                |        | 0     |
| 36063  | 2                            |                                                |        | 0     |
| 36092  | 2                            |                                                |        | 0     |
| 36097  | 2                            |                                                |        | 0     |
| 36108  | 2                            |                                                |        | 0     |
| 36113  | 1                            | 3                                              | 4      | 0     |
| 36117  | 2                            |                                                |        | 0     |
| 36129  | 2                            |                                                |        | 1     |
| 36144  | 2                            |                                                |        | 0     |
| 36152  | 2                            |                                                |        | 0     |
| 36154  | 2                            |                                                |        | 0     |
| 36155  | 2                            |                                                |        | 0     |
| 36167  | 2                            |                                                |        | 0     |
| 36172  | 2                            |                                                |        | 0     |
| 36173  | 2                            |                                                |        | 0     |
| 36174  | 2                            |                                                |        | 0     |
| 36182  | 2                            |                                                |        | 0     |
| 36192  | 2                            |                                                |        | 0     |
| 36195  | 2                            |                                                |        | 0     |
| 36204  | 2                            |                                                |        | 0     |
| 36205  | 2                            |                                                |        | 0     |
| 36208  | 2                            |                                                |        | 0     |
| 36216  | 1                            | 2                                              | 2      | 0     |
| 36221  | 2                            |                                                |        | 0     |
| 36244  | 2                            |                                                |        | 0     |
| 36255  | 2                            |                                                |        | 0     |
| 36259  | 2                            |                                                |        | 0     |
| 36262  | 1                            | 3                                              | 2      | 0     |
| 36268  | 2                            |                                                |        | 0     |
| 36308  | 2                            |                                                |        | 0     |
| 36324  | 2                            |                                                |        | 0     |

| respid | ICS Urgency Incontinence Q30 | ICS Urgency Incontinence -<br>how often Q30a_1 | Q30b_1 | Q31_1 |
|--------|------------------------------|------------------------------------------------|--------|-------|
| 36330  | 2                            |                                                |        | 0     |
| 36331  | 2                            |                                                |        | 0     |
| 36336  | 2                            |                                                |        | 0     |
| 36337  | 2                            |                                                |        | 0     |
| 36364  | 2                            |                                                |        | 0     |
| 36365  | 1                            | 2                                              | 3      | 0     |
| 36396  | 1                            | 1                                              | 2      | 0     |
| 36403  | 2                            |                                                |        | 0     |
| 36410  | 2                            |                                                |        | 0     |
| 36413  | 2                            |                                                |        | 0     |
| 36422  | 1                            | 1                                              | 1      | 0     |
| 36424  | 1                            | 1                                              | 1      | 1     |
| 36425  | 1                            | 4                                              | 3      | 1     |
| 36432  | 2                            |                                                |        | 0     |
| 36435  | 1                            | 3                                              | 3      | 0     |
| 36446  | 1                            | 4                                              | 3      | 0     |
| 36451  | 2                            |                                                |        | 0     |
| 36453  | 2                            |                                                |        | 0     |
| 36459  | 2                            |                                                |        | 0     |
| 36464  | 1                            | 2                                              | 2      | 0     |
| 36465  | 1                            | 1                                              | 1      | 0     |
| 36466  | 2                            |                                                |        | 0     |
| 36476  | 1                            | 1                                              | 1      | 0     |
| 36487  | 2                            |                                                |        | 0     |
| 36488  | 2                            |                                                |        | 0     |
| 36500  | 2                            |                                                |        | 0     |
| 36504  | 2                            |                                                |        | 0     |
| 36513  | 2                            |                                                |        | 0     |
| 36515  | 2                            |                                                |        | 0     |
| 36521  | 1                            | 3                                              | 3      | 0     |
| 36530  | 1                            | 2                                              | 2      | 0     |
| 36556  | 2                            |                                                |        | 0     |

| respid | ICS Urgency Incontinence Q30 | ICS Urgency Incontinence -<br>how often Q30a_1 | Q30b_1 | Q31_1 |
|--------|------------------------------|------------------------------------------------|--------|-------|
| 36564  | 1                            | 3                                              | 3      | 0     |
| 36584  | 2                            |                                                |        | 0     |
| 36585  | 2                            |                                                |        | 0     |
| 36586  | 2                            |                                                |        | 0     |
| 36606  | 1                            | 4                                              | 4      | 0     |
| 36615  | 2                            |                                                |        | 1     |
| 36628  | 2                            |                                                |        | 0     |
| 36630  | 2                            |                                                |        | 0     |
| 36631  | 2                            |                                                |        | 0     |
| 36636  | 2                            |                                                |        | 0     |
| 36637  | 2                            |                                                |        | 0     |
| 36651  | 1                            | 1                                              | 3      | 0     |
| 36661  | 2                            |                                                |        | 0     |
| 36670  | 2                            |                                                |        | 1     |
| 36671  | 2                            |                                                |        | 0     |
| 36688  | 2                            |                                                |        | 0     |
| 36694  | 2                            |                                                |        | 0     |
| 36696  | 2                            |                                                |        | 0     |
| 36703  | 2                            |                                                |        | 0     |
| 36719  | 2                            |                                                |        | 1     |
| 36721  | 2                            |                                                |        | 1     |
| 36740  | 2                            |                                                |        | 0     |
| 36755  | 2                            |                                                |        | 0     |
| 36765  | 1                            | 2                                              | 3      | 1     |
| 36770  | 2                            |                                                |        | 0     |
| 36773  | 2                            |                                                |        | 0     |
| 36813  | 2                            |                                                |        | 0     |
| 36819  | 2                            |                                                |        | 0     |
| 36820  | 1                            | 1                                              | 2      | 1     |
| 36821  | 2                            |                                                |        | 0     |
| 36827  | 1                            | 1                                              | 1      | 1     |
| 36835  | 2                            |                                                |        | 0     |

| respid | ICS Urgency Incontinence Q30 | ICS Urgency Incontinence -<br>how often Q30a_1 | Q30b_1 | Q31_1 |
|--------|------------------------------|------------------------------------------------|--------|-------|
| 36837  | 2                            |                                                |        | 0     |
| 36849  | 2                            |                                                |        | 1     |
| 36851  | 2                            |                                                |        | 0     |
| 36868  | 2                            |                                                |        | 0     |
| 36870  | 2                            |                                                |        | 0     |
| 36871  | 2                            |                                                |        | 0     |
| 36874  | 1                            | 2                                              | 2      | 0     |
| 36878  | 2                            |                                                |        | 0     |
| 36887  | 2                            |                                                |        | 0     |
| 36889  | 2                            |                                                |        | 0     |
| 36891  | 2                            |                                                |        | 0     |
| 36903  | 2                            |                                                |        | 0     |
| 36905  | 2                            |                                                |        | 0     |
| 36913  | 2                            |                                                |        | 0     |
| 36949  | 2                            |                                                |        | 0     |
| 36954  | 1                            | 1                                              | 2      | 0     |
| 36962  | 2                            |                                                |        | 0     |
| 36965  | 2                            |                                                |        | 0     |
| 36970  | 2                            |                                                |        | 0     |
| 36979  | 2                            |                                                |        | 0     |
| 36990  | 2                            |                                                |        | 0     |
| 36991  | 1                            | 2                                              | 2      | 0     |
| 36992  | 2                            |                                                |        | 0     |
| 37015  | 2                            |                                                |        | 0     |
| 37017  | 2                            |                                                |        | 0     |
| 37020  | 2                            |                                                |        | 0     |
| 37033  | 2                            |                                                |        | 0     |
| 37041  | 2                            |                                                |        | 0     |
| 37048  | 1                            | 1                                              | 1      | 0     |
| 37050  | 2                            |                                                |        | 0     |
| 37054  | 1                            | 2                                              | 2      | 1     |
| 37057  | 1                            | 1                                              | 2      | 1     |

| respid | ICS Urgency Incontinence Q30 | ICS Urgency Incontinence -<br>how often Q30a_1 | Q30b_1 | Q31_1 |
|--------|------------------------------|------------------------------------------------|--------|-------|
| 37067  | 2                            |                                                |        | 0     |
| 37074  | 2                            |                                                |        | 0     |
| 37088  | 1                            | 1                                              | 0      | 0     |
| 37090  | 1                            | 2                                              | 1      | 1     |
| 37110  | 1                            | 3                                              | 2      | 1     |
| 37122  | 2                            |                                                |        | 0     |
| 37124  | 2                            |                                                |        | 0     |
| 37126  | 2                            |                                                |        | 0     |
| 37129  | 1                            | 2                                              | 1      | 0     |
| 37130  | 2                            |                                                |        | 0     |
| 37142  | 2                            |                                                |        | 0     |
| 37160  | 2                            |                                                |        | 0     |
| 37168  | 2                            |                                                |        | 0     |
| 37169  | 2                            |                                                |        | 0     |
| 37191  | 2                            |                                                |        | 0     |
| 37197  | 1                            | 3                                              | 2      | 0     |
| 37204  | 2                            |                                                |        | 0     |
| 37213  | 2                            |                                                |        | 0     |
| 37238  | 2                            |                                                |        | 0     |
| 37242  | 1                            | 1                                              | 0      | 0     |
| 37243  | 2                            |                                                |        | 0     |
| 37275  | 1                            | 1                                              | 2      | 0     |
| 37305  | 1                            | 2                                              | 2      | 1     |
| 37357  | 1                            | 2                                              | 1      | 0     |
| 37365  | 1                            | 2                                              | 1      | 0     |
| 37370  | 2                            |                                                |        | 0     |
| 37406  | 1                            | 4                                              | 3      | 0     |
| 37410  | 1                            | 2                                              | 2      | 0     |
| 37411  | 1                            | 3                                              | 3      | 0     |
| 37427  | 1                            | 2                                              | 3      | 0     |
| 37437  | 2                            |                                                |        | 0     |
| 37440  | 2                            |                                                |        | 0     |

| respid | ICS Urgency Incontinence Q30 | ICS Urgency Incontinence -<br>how often Q30a_1 | Q30b_1 | Q31_1 |
|--------|------------------------------|------------------------------------------------|--------|-------|
| 37452  | 2                            |                                                |        | 0     |
| 37465  | 1                            | 1                                              | 1      | 0     |
| 37468  | 1                            | 1                                              | 1      | 1     |
| 37469  | 2                            |                                                |        | 0     |
| 37477  | 1                            | 1                                              | 1      | 0     |
| 37509  | 2                            |                                                |        | 0     |
| 37513  | 2                            |                                                |        | 0     |
| 37534  | 2                            |                                                |        | 0     |
| 37537  | 2                            |                                                |        | 0     |
| 37560  | 1                            | 2                                              | 1      | 0     |
| 37566  | 2                            |                                                |        | 0     |
| 37572  | 1                            | 3                                              | 2      | 1     |
| 37574  | 1                            | 2                                              | 1      | 0     |
| 37575  | 2                            |                                                |        | 0     |
| 37590  | 2                            |                                                |        | 0     |
| 37593  | 2                            |                                                |        | 0     |
| 37599  | 2                            |                                                |        | 0     |
| 37641  | 2                            |                                                |        | 0     |
| 37651  | 2                            |                                                |        | 0     |
| 37670  | 2                            |                                                |        | 0     |
| 37680  | 2                            |                                                |        | 1     |
| 37690  | 2                            |                                                |        | 0     |
| 37694  | 2                            |                                                |        | 0     |
| 37705  | 2                            |                                                |        | 0     |
| 37710  | 2                            |                                                |        | 1     |
| 37719  | 2                            |                                                |        | 0     |
| 37741  | 1                            | 2                                              | 1      | 1     |
| 37752  | 2                            |                                                |        | 0     |
| 37755  | 1                            | 2                                              | 1      | 1     |
| 37757  | 2                            |                                                |        | 0     |
| 37783  | 2                            |                                                |        | 1     |
| 37793  | 1                            | 4                                              | 3      | 0     |

| respid | ICS Urgency Incontinence Q30 | ICS Urgency Incontinence -<br>how often Q30a_1 | Q30b_1 | Q31_1 |
|--------|------------------------------|------------------------------------------------|--------|-------|
| 37800  | 1                            | 2                                              | 3      | 0     |
| 37801  | 2                            |                                                |        | 0     |
| 37820  | 1                            | 3                                              | 2      | 0     |
| 37826  | 1                            | 2                                              | 2      | 0     |
| 37835  | 1                            | 2                                              | 2      | 0     |
| 37839  | 2                            |                                                |        | 0     |
| 37871  | 1                            | 5                                              | 4      | 0     |
| 37876  | 1                            | 1                                              | 2      | 1     |
| 37879  | 1                            | 1                                              | 2      | 0     |
| 37894  | 2                            |                                                |        | 0     |
| 37895  | 2                            |                                                |        | 1     |
| 37901  | 1                            | 2                                              | 2      | 1     |
| 37926  | 2                            |                                                |        | 0     |
| 37937  | 1                            | 2                                              | 2      | 0     |
| 37938  | 1                            | 4                                              | 4      | 1     |
| 37959  | 2                            |                                                |        | 0     |
| 37970  | 2                            |                                                |        | 0     |
| 37972  | 2                            |                                                |        | 0     |
| 37988  | 2                            |                                                |        | 0     |
| 37989  | 1                            | 2                                              | 1      | 0     |
| 38000  | 1                            | 1                                              | 1      | 0     |
| 38028  | 1                            | 4                                              | 3      | 0     |
| 38042  | 2                            |                                                |        | 0     |
| 38052  | 2                            |                                                |        | 0     |
| 38056  | 2                            |                                                |        | 0     |
| 38106  | 2                            |                                                |        | 0     |
| 38114  | 1                            | 3                                              | 4      | 0     |
| 38134  | 2                            |                                                |        | 0     |
| 38135  | 2                            |                                                |        | 0     |
| 38139  | 1                            | 3                                              | 2      | 0     |
| 38160  | 2                            |                                                |        | 0     |
| 38164  | 2                            |                                                |        | 0     |



| respid | ICS Urgency Incontinence Q30 | ICS Urgency Incontinence -<br>how often Q30a_1 | Q30b_1 | Q31_1 |
|--------|------------------------------|------------------------------------------------|--------|-------|
| 38168  | 2                            |                                                |        | 0     |
| 38173  | 2                            |                                                |        | 0     |
| 38193  | 1                            | 2                                              | 2      | 1     |
| 38204  | 1                            | 1                                              | 1      | 0     |
| 38206  | 2                            |                                                |        | 0     |
| 38233  | 1                            | 1                                              | 3      | 0     |
| 38242  | 1                            | 3                                              | 2      | 0     |
| 38245  | 2                            |                                                |        | 0     |
| 38261  | 2                            |                                                |        | 0     |
| 38288  | 2                            |                                                |        | 0     |
| 38296  | 1                            | 1                                              | 1      | 0     |
| 38299  | 1                            | 2                                              | 1      | 0     |
| 38300  | 2                            |                                                |        | 0     |
| 38303  | 2                            |                                                |        | 0     |
| 38317  | 2                            |                                                |        | 0     |
| 38328  | 2                            |                                                |        | 0     |
| 38333  | 2                            |                                                |        | 0     |
| 38336  | 2                            |                                                |        | 0     |
| 38338  | 2                            |                                                |        | 0     |
| 38342  | 1                            | 2                                              | 1      | 0     |
| 38360  | 2                            |                                                |        | 0     |
| 38362  | 2                            |                                                |        | 0     |
| 38364  | 2                            |                                                |        | 1     |
| 38402  | 2                            |                                                |        | 0     |
| 38423  | 2                            |                                                |        | 0     |
| 38424  | 1                            | 2                                              | 4      | 0     |
| 38435  | 1                            | 4                                              | 3      | 0     |
| 38450  | 2                            |                                                |        | 0     |
| 38455  | 2                            |                                                |        | 0     |
| 38467  | 2                            |                                                |        | 0     |
| 38468  | 2                            |                                                |        | 0     |
| 38472  | 2                            |                                                |        | 1     |

| respid | ICS Urgency Incontinence Q30 | ICS Urgency Incontinence -<br>how often Q30a_1 | Q30b_1 | Q31_1 |
|--------|------------------------------|------------------------------------------------|--------|-------|
| 38484  | 2                            |                                                |        | 0     |
| 38498  | 2                            |                                                |        | 0     |
| 38507  | 2                            |                                                |        | 0     |
| 38511  | 2                            |                                                |        | 0     |
| 38524  | 1                            | 4                                              | 3      | 0     |
| 38526  | 2                            |                                                |        | 0     |
| 38534  | 2                            |                                                |        | 0     |
| 38536  | 2                            |                                                |        | 0     |
| 38539  | 2                            |                                                |        | 0     |
| 38547  | 2                            |                                                |        | 0     |
| 38549  | 2                            |                                                |        | 0     |
| 38575  | 2                            |                                                |        | 0     |
| 38579  | 2                            |                                                |        | 0     |
| 38585  | 2                            |                                                |        | 0     |
| 38589  | 2                            |                                                |        | 0     |
| 38595  | 1                            | 4                                              | 4      | 0     |
| 38602  | 2                            |                                                |        | 0     |
| 38603  | 2                            |                                                |        | 0     |
| 38612  | 2                            |                                                |        | 0     |
| 38621  | 1                            | 3                                              | 3      | 0     |
| 38624  | 2                            |                                                |        | 0     |
| 38636  | 2                            |                                                |        | 0     |
| 38656  | 2                            |                                                |        | 0     |
| 38668  | 2                            |                                                |        | 0     |
| 38675  | 1                            | 2                                              | 1      | 0     |
| 38676  | 2                            |                                                |        | 0     |
| 38682  | 2                            |                                                |        | 0     |
| 38689  | 2                            |                                                |        | 0     |
| 38702  | 2                            |                                                |        | 0     |
| 38704  | 1                            | 3                                              | 2      | 0     |
| 38713  | 2                            |                                                |        | 0     |
| 38718  | 1                            | 2                                              | 1      | 0     |

| respid | ICS Urgency Incontinence Q30 | ICS Urgency Incontinence -<br>how often Q30a_1 | Q30b_1 | Q31_1 |
|--------|------------------------------|------------------------------------------------|--------|-------|
| 38725  | 2                            |                                                |        | 1     |
| 38730  | 1                            | 1                                              | 2      | 0     |
| 38737  | 2                            |                                                |        | 0     |
| 38738  | 1                            | 2                                              | 1      | 0     |
| 38744  | 2                            |                                                |        | 1     |
| 38746  | 2                            |                                                |        | 0     |
| 38753  | 2                            |                                                |        | 0     |
| 38756  | 1                            | 3                                              | 2      | 0     |
| 38760  | 2                            |                                                |        | 1     |
| 38762  | 2                            |                                                |        | 0     |
| 38765  | 2                            |                                                |        | 0     |
| 38769  | 1                            | 1                                              | 0      | 0     |
| 38781  | 1                            | 3                                              | 3      | 0     |
| 38786  | 2                            |                                                |        | 0     |
| 38790  | 2                            |                                                |        | 0     |
| 38793  | 2                            |                                                |        | 0     |
| 38797  | 2                            |                                                |        | 0     |
| 38802  | 2                            |                                                |        | 0     |
| 38815  | 2                            |                                                |        | 0     |
| 38826  | 1                            | 2                                              | 4      | 0     |
| 38828  | 2                            |                                                |        | 0     |
| 38829  | 1                            | 2                                              | 3      | 0     |
| 38835  | 2                            |                                                |        | 0     |
| 38842  | 1                            | 2                                              | 3      | 0     |
| 38853  | 2                            |                                                |        | 0     |
| 38855  | 1                            | 4                                              | 3      | 0     |
| 38860  | 1                            | 2                                              | 3      | 1     |
| 38869  | 2                            |                                                |        | 0     |
| 38882  | 1                            | 3                                              | 3      | 1     |
| 38897  | 1                            | 1                                              | 1      | 0     |
| 38903  | 2                            |                                                |        | 0     |
| 38910  | 1                            | 2                                              | 3      | 0     |

| respid | ICS Urgency Incontinence Q30 | ICS Urgency Incontinence -<br>how often Q30a_1 | Q30b_1 | Q31_1 |
|--------|------------------------------|------------------------------------------------|--------|-------|
| 38948  | 1                            | 4                                              | 2      | 0     |
| 38949  | 2                            |                                                |        | 0     |
| 38953  | 1                            | 3                                              | 3      | 0     |
| 38989  | 1                            | 3                                              | 3      | 0     |
| 38997  | 1                            | 1                                              | 0      | 0     |
| 38999  | 2                            |                                                |        | 0     |
| 39002  | 1                            | 3                                              | 3      | 0     |
| 39003  | 1                            | 3                                              | 1      | 0     |
| 39006  | 2                            |                                                |        | 0     |
| 39014  | 2                            |                                                |        | 0     |
| 39017  | 1                            | 5                                              | 2      | 1     |
| 39018  | 1                            | 4                                              | 3      | 1     |
| 39025  | 1                            | 3                                              | 4      | 0     |
| 39031  | 2                            |                                                |        | 0     |
| 39061  | 1                            | 3                                              | 1      | 0     |
| 39131  | 2                            |                                                |        | 0     |
| 39153  | 2                            |                                                |        | 0     |
| 39194  | 1                            | 4                                              | 4      | 1     |
| 39204  | 2                            |                                                |        | 0     |
| 39208  | 1                            | 1                                              | 2      | 0     |
| 39213  | 2                            |                                                |        | 0     |
| 39231  | 2                            |                                                |        | 0     |
| 39251  | 2                            |                                                |        | 0     |
| 39257  | 1                            | 3                                              | 4      | 0     |
| 39262  | 1                            | 2                                              | 3      | 0     |
| 39269  | 1                            | 3                                              | 2      | 0     |
| 39272  | 2                            |                                                |        | 0     |
| 39280  | 2                            |                                                |        | 0     |
| 39294  | 1                            | 3                                              | 2      | 1     |
| 39297  | 1                            | 2                                              | 1      | 0     |
| 39300  | 1                            | 3                                              | 3      | 0     |
| 39307  | 1                            | 2                                              | 2      | 0     |

| respid | ICS Urgency Incontinence Q30 | ICS Urgency Incontinence -<br>how often Q30a_1 | Q30b_1 | Q31_1 |
|--------|------------------------------|------------------------------------------------|--------|-------|
| 39320  | 1                            | 2                                              | 3      | 0     |
| 39333  | 2                            |                                                |        | 0     |
| 39335  | 1                            | 2                                              | 4      | 0     |
| 39339  | 2                            |                                                |        | 0     |
| 39375  | 2                            |                                                |        | 0     |
| 39377  | 2                            |                                                |        | 0     |
| 39380  | 2                            |                                                |        | 0     |
| 39425  | 2                            |                                                |        | 0     |
| 39590  | 2                            |                                                |        | 0     |
| 40529  | 2                            |                                                |        | 0     |
| 40702  | 2                            |                                                |        | 0     |
| 40788  | 2                            |                                                |        | 0     |
| 40841  | 2                            |                                                |        | 0     |
| 40965  | 2                            |                                                |        | 0     |
| 41092  | 2                            |                                                |        | 0     |
| 41534  | 2                            |                                                |        | 0     |
| 41919  | 2                            |                                                |        | 0     |
| 42110  | 2                            |                                                |        | 0     |
| 42135  | 2                            |                                                |        | 0     |
| 42142  | 2                            |                                                |        | 0     |
| 42163  | 2                            |                                                |        | 0     |
| 42164  | 2                            |                                                |        | 0     |
| 42172  | 1                            | 1                                              | 4      | 0     |
| 42177  | 2                            |                                                |        | 0     |
| 42181  | 2                            |                                                |        | 0     |
| 42193  | 2                            |                                                |        | 0     |
| 42196  | 2                            |                                                |        | 0     |
| 42202  | 2                            |                                                |        | 0     |
| 42248  | 1                            | 1                                              | 1      | 0     |
| 42283  | 2                            |                                                |        | 0     |
| 42284  | 2                            |                                                |        | 0     |
| 42323  | 2                            |                                                |        | 0     |

| respid | ICS Urgency Incontinence Q30 | ICS Urgency Incontinence -<br>how often Q30a_1 | Q30b_1 | Q31_1 |
|--------|------------------------------|------------------------------------------------|--------|-------|
| 42349  | 2                            |                                                |        | 0     |
| 42351  | 2                            |                                                |        | 0     |
| 42357  | 2                            |                                                |        | 0     |
| 42366  | 2                            |                                                |        | 0     |
| 42380  | 2                            |                                                |        | 0     |
| 42414  | 1                            | 4                                              | 3      | 0     |
| 42420  | 1                            | 3                                              | 3      | 1     |
| 42454  | 2                            |                                                |        | 0     |
| 42458  | 2                            |                                                |        | 0     |
| 42461  | 2                            |                                                |        | 0     |
| 42488  | 2                            |                                                |        | 0     |
| 42511  | 2                            |                                                |        | 0     |
| 42512  | 2                            |                                                |        | 0     |
| 42530  | 1                            | 2                                              | 2      | 0     |
| 42531  | 1                            | 2                                              | 3      | 0     |
| 42533  | 2                            |                                                |        | 0     |
| 42549  | 2                            |                                                |        | 0     |
| 42550  | 1                            | 5                                              | 3      | 1     |
| 42553  | 2                            |                                                |        | 0     |
| 42562  | 1                            | 2                                              | 2      | 0     |
| 42567  | 2                            |                                                |        | 0     |
| 42589  | 2                            |                                                |        | 0     |
| 42604  | 2                            |                                                |        | 0     |
| 42618  | 1                            | 1                                              | 1      | 1     |
| 42621  | 2                            |                                                |        | 0     |
| 42627  | 2                            |                                                |        | 0     |
| 42641  | 2                            |                                                |        | 0     |
| 42655  | 1                            | 2                                              | 3      | 0     |
| 42666  | 2                            |                                                |        | 0     |
| 42667  | 2                            |                                                |        | 0     |
| 42697  | 1                            | 1                                              | 2      | 0     |
| 42703  | 2                            |                                                |        | 0     |

| respid | ICS Urgency Incontinence Q30 | ICS Urgency Incontinence -<br>how often Q30a_1 | Q30b_1 | Q31_1 |
|--------|------------------------------|------------------------------------------------|--------|-------|
| 42712  | 2                            |                                                |        | 0     |
| 42731  | 1                            | 2                                              | 2      | 0     |
| 42780  | 2                            |                                                |        | 0     |
| 42785  | 1                            | 1                                              | 1      | 0     |
| 42788  | 2                            |                                                |        | 0     |
| 42802  | 1                            | 1                                              | 1      | 0     |
| 42818  | 1                            | 3                                              | 4      | 1     |
| 42821  | 2                            |                                                |        | 0     |
| 42824  | 2                            |                                                |        | 0     |
| 42831  | 2                            |                                                |        | 0     |
| 42836  | 2                            |                                                |        | 0     |
| 42864  | 2                            |                                                |        | 0     |
| 42875  | 1                            | 1                                              | 0      | 0     |
| 42891  | 1                            | 4                                              | 4      | 1     |
| 42897  | 1                            | 1                                              | 0      | 0     |
| 42900  | 2                            |                                                |        | 0     |
| 42902  | 1                            | 2                                              | 1      | 0     |
| 42921  | 2                            |                                                |        | 0     |
| 42925  | 2                            |                                                |        | 1     |
| 42944  | 2                            |                                                |        | 0     |
| 42950  | 2                            |                                                |        | 0     |
| 42963  | 2                            |                                                |        | 0     |
| 42967  | 2                            |                                                |        | 0     |
| 42985  | 2                            |                                                |        | 0     |
| 42990  | 2                            |                                                |        | 0     |
| 42996  | 2                            |                                                |        | 0     |
| 43002  | 2                            |                                                |        | 0     |
| 43004  | 2                            |                                                |        | 0     |
| 43012  | 2                            |                                                |        | 0     |
| 43027  | 1                            | 4                                              | 1      | 0     |
| 43028  | 2                            |                                                |        | 0     |
| 43029  | 2                            |                                                |        | 0     |

| respid | ICS Urgency Incontinence Q30 | ICS Urgency Incontinence -<br>how often Q30a_1 | Q30b_1 | Q31_1 |
|--------|------------------------------|------------------------------------------------|--------|-------|
| 43031  | 2                            |                                                |        | 0     |
| 43042  | 1                            | 1                                              | 0      | 0     |
| 43054  | 1                            | 2                                              | 2      | 0     |
| 43058  | 2                            |                                                |        | 0     |
| 43064  | 1                            | 1                                              | 1      | 0     |
| 43069  | 2                            |                                                |        | 0     |
| 43071  | 2                            |                                                |        | 0     |
| 43072  | 2                            |                                                |        | 0     |
| 43077  | 2                            |                                                |        | 0     |
| 43078  | 1                            | 4                                              | 2      | 0     |
| 43082  | 2                            |                                                |        | 0     |
| 43092  | 2                            |                                                |        | 0     |
| 43096  | 2                            |                                                |        | 0     |
| 43109  | 2                            |                                                |        | 0     |
| 43113  | 2                            |                                                |        | 0     |
| 43123  | 1                            | 2                                              | 1      | 0     |
| 43127  | 2                            |                                                |        | 0     |
| 43128  | 1                            | 1                                              | 1      | 0     |
| 43129  | 2                            |                                                |        | 0     |
| 43133  | 1                            | 3                                              | 2      | 0     |
| 43140  | 2                            |                                                |        | 0     |
| 43143  | 1                            | 1                                              | 2      | 0     |
| 43149  | 1                            | 4                                              | 1      | 0     |
| 43150  | 1                            | 2                                              | 1      | 0     |
| 43153  | 1                            | 3                                              | 1      | 0     |
| 43170  | 2                            |                                                |        | 0     |
| 43187  | 1                            | 2                                              | 1      | 1     |
| 43188  | 1                            | 3                                              | 3      | 0     |
| 43198  | 2                            |                                                |        | 0     |
| 43208  | 2                            |                                                |        | 0     |
| 43216  | 2                            |                                                |        | 0     |
| 43222  | 1                            | 4                                              | 1      | 0     |



| respid | ICS Urgency Incontinence Q30 | ICS Urgency Incontinence -<br>how often Q30a_1 | Q30b_1 | Q31_1 |
|--------|------------------------------|------------------------------------------------|--------|-------|
| 43224  | 2                            |                                                |        | 0     |
| 43230  | 1                            | 2                                              | 3      | 0     |
| 43231  | 1                            | 2                                              | 1      | 0     |
| 43265  | 1                            | 2                                              | 2      | 0     |
| 43270  | 1                            | 3                                              | 1      | 0     |
| 43283  | 1                            | 2                                              | 1      | 0     |
| 43295  | 1                            | 1                                              | 1      | 0     |
| 43297  | 2                            |                                                |        | 0     |
| 43299  | 2                            |                                                |        | 0     |
| 43307  | 2                            |                                                |        | 0     |
| 43316  | 1                            | 2                                              | 2      | 0     |
| 43318  | 2                            |                                                |        | 0     |
| 43319  | 2                            |                                                |        | 0     |
| 43324  | 1                            | 1                                              | 2      | 0     |
| 43325  | 1                            | 1                                              | 1      | 0     |
| 43327  | 2                            |                                                |        | 0     |
| 43338  | 2                            |                                                |        | 0     |
| 43342  | 2                            |                                                |        | 0     |
| 43348  | 2                            |                                                |        | 0     |
| 43395  | 1                            | 1                                              | 1      | 0     |
| 43404  | 2                            |                                                |        | 1     |
| 43406  | 2                            |                                                |        | 1     |
| 43407  | 2                            |                                                |        | 0     |
| 43411  | 2                            |                                                |        | 0     |
| 43416  | 1                            | 2                                              | 1      | 0     |
| 43428  | 2                            |                                                |        | 0     |
| 43429  | 1                            | 3                                              | 2      | 1     |
| 43432  | 2                            |                                                |        | 0     |
| 43443  | 2                            |                                                |        | 0     |
| 43455  | 2                            |                                                |        | 0     |
| 43457  | 1                            | 1                                              | 1      | 0     |
| 43458  | 2                            |                                                |        | 0     |

| respid | ICS Urgency Incontinence Q30 | ICS Urgency Incontinence -<br>how often Q30a_1 | Q30b_1 | Q31_1 |
|--------|------------------------------|------------------------------------------------|--------|-------|
| 43477  | 1                            | 2                                              | 2      | 0     |
| 43520  | 1                            | 1                                              | 1      | 0     |
| 43521  | 2                            |                                                |        | 0     |
| 43550  | 2                            |                                                |        | 0     |
| 43551  | 1                            | 2                                              | 2      | 0     |
| 43554  | 1                            | 2                                              | 1      | 0     |
| 43560  | 1                            | 1                                              | 1      | 0     |
| 43569  | 2                            |                                                |        | 0     |
| 43583  | 1                            | 2                                              | 1      | 0     |
| 43590  | 2                            |                                                |        | 0     |
| 43591  | 2                            |                                                |        | 0     |
| 43595  | 2                            |                                                |        | 0     |
| 43599  | 2                            |                                                |        | 0     |
| 43606  | 2                            |                                                |        | 0     |
| 43609  | 2                            |                                                |        | 0     |
| 43629  | 2                            |                                                |        | 0     |
| 43636  | 2                            |                                                |        | 0     |
| 43661  | 2                            |                                                |        | 0     |
| 43668  | 2                            |                                                |        | 0     |
| 43672  | 2                            |                                                |        | 0     |
| 43677  | 2                            |                                                |        | 0     |
| 43683  | 2                            |                                                |        | 0     |
| 43708  | 1                            | 2                                              | 2      | 1     |
| 43713  | 1                            | 1                                              | 1      | 0     |
| 43718  | 2                            |                                                |        | 0     |
| 43725  | 2                            |                                                |        | 0     |
| 43747  | 1                            | 1                                              | 1      | 0     |
| 43755  | 2                            |                                                |        | 0     |
| 43770  | 2                            |                                                |        | 0     |
| 43775  | 2                            |                                                |        | 0     |
| 43788  | 2                            |                                                |        | 0     |
| 43790  | 1                            | 2                                              | 2      | 1     |

| respid | ICS Urgency Incontinence Q30 | ICS Urgency Incontinence -<br>how often Q30a_1 | Q30b_1 | Q31_1 |
|--------|------------------------------|------------------------------------------------|--------|-------|
| 43797  | 1                            | 2                                              | 1      | 0     |
| 43798  | 2                            |                                                |        | 0     |
| 43811  | 1                            | 1                                              | 1      | 0     |
| 43819  | 2                            |                                                |        | 0     |
| 43821  | 1                            | 3                                              | 3      | 0     |
| 43822  | 2                            |                                                |        | 0     |
| 43825  | 1                            | 2                                              | 2      | 0     |
| 43826  | 1                            | 1                                              | 1      | 0     |
| 43831  | 2                            |                                                |        | 0     |
| 43836  | 2                            |                                                |        | 1     |
| 43852  | 1                            | 2                                              | 2      | 0     |
| 43857  | 2                            |                                                |        | 0     |
| 43858  | 2                            |                                                |        | 0     |
| 43859  | 2                            |                                                |        | 0     |
| 43863  | 2                            |                                                |        | 0     |
| 43868  | 2                            |                                                |        | 0     |
| 43872  | 2                            |                                                |        | 0     |
| 43874  | 2                            |                                                |        | 0     |
| 43882  | 2                            |                                                |        | 0     |
| 43886  | 2                            |                                                |        | 0     |
| 43903  | 2                            |                                                |        | 0     |
| 43929  | 2                            |                                                |        | 0     |
| 43932  | 2                            |                                                |        | 0     |
| 43936  | 1                            | 1                                              | 0      | 0     |
| 43962  | 2                            |                                                |        | 0     |
| 43964  | 2                            |                                                |        | 0     |
| 43968  | 2                            |                                                |        | 0     |
| 43979  | 2                            |                                                |        | 0     |
| 44006  | 1                            | 2                                              | 2      | 1     |
| 44009  | 2                            |                                                |        | 0     |
| 44023  | 2                            |                                                |        | 0     |
| 44035  | 2                            |                                                |        | 0     |

| respid | ICS Urgency Incontinence Q30 | ICS Urgency Incontinence -<br>how often Q30a_1 | Q30b_1 | Q31_1 |
|--------|------------------------------|------------------------------------------------|--------|-------|
| 44038  | 2                            |                                                |        | 0     |
| 44039  | 1                            | 4                                              | 2      | 0     |
| 44043  | 2                            |                                                |        | 0     |
| 44048  | 2                            |                                                |        | 0     |
| 44050  | 2                            |                                                |        | 0     |
| 44051  | 2                            |                                                |        | 1     |
| 44061  | 2                            |                                                |        | 0     |
| 44063  | 1                            | 2                                              | 1      | 0     |
| 44072  | 1                            | 1                                              | 0      | 0     |
| 44075  | 2                            |                                                |        | 1     |
| 44089  | 2                            |                                                |        | 0     |
| 44090  | 2                            |                                                |        | 0     |
| 44091  | 2                            |                                                |        | 0     |
| 44092  | 2                            |                                                |        | 0     |
| 44110  | 2                            |                                                |        | 0     |
| 44112  | 1                            | 2                                              | 1      | 0     |
| 44114  | 2                            |                                                |        | 0     |
| 44143  | 2                            |                                                |        | 0     |
| 44179  | 2                            |                                                |        | 0     |
| 44234  | 2                            |                                                |        | 0     |
| 44236  | 2                            |                                                |        | 0     |
| 44239  | 2                            |                                                |        | 0     |
| 44241  | 2                            |                                                |        | 0     |
| 44253  | 2                            |                                                |        | 0     |
| 44260  | 1                            | 1                                              | 2      | 0     |
| 44261  | 2                            |                                                |        | 0     |
| 44263  | 2                            |                                                |        | 1     |
| 44264  | 2                            |                                                |        | 0     |
| 44265  | 2                            |                                                |        | 0     |
| 44267  | 2                            |                                                |        | 0     |
| 44306  | 2                            |                                                |        | 0     |
| 44309  | 1                            | 3                                              | 3      | 1     |

| respid | ICS Urgency Incontinence Q30 | ICS Urgency Incontinence -<br>how often Q30a_1 | Q30b_1 | Q31_1 |
|--------|------------------------------|------------------------------------------------|--------|-------|
| 44310  | 2                            |                                                |        | 0     |
| 44361  | 2                            |                                                |        | 0     |
| 44380  | 2                            |                                                |        | 1     |
| 44386  | 2                            |                                                |        | 0     |
| 44419  | 2                            |                                                |        | 0     |
| 44426  | 2                            |                                                |        | 0     |
| 44479  | 2                            |                                                |        | 0     |
| 44484  | 2                            |                                                |        | 0     |
| 44487  | 2                            |                                                |        | 0     |
| 44509  | 2                            |                                                |        | 0     |
| 44540  | 2                            |                                                |        | 0     |
| 44551  | 2                            |                                                |        | 0     |
| 44553  | 2                            |                                                |        | 0     |
| 44650  | 2                            |                                                |        | 0     |
| 44665  | 1                            | 2                                              | 3      | 0     |
| 44779  | 2                            |                                                |        | 0     |
| 44797  | 2                            |                                                |        | 0     |
| 44807  | 2                            |                                                |        | 0     |
| 44815  | 2                            |                                                |        | 0     |
| 44836  | 2                            |                                                |        | 0     |
| 44868  | 2                            |                                                |        | 0     |
| 44927  | 1                            | 2                                              | 2      | 0     |
| 44983  | 2                            |                                                |        | 0     |
| 45040  | 2                            |                                                |        | 0     |
| 45051  | 2                            |                                                |        | 1     |
| 45067  | 2                            |                                                |        | 0     |
| 45074  | 2                            |                                                |        | 0     |
| 45115  | 2                            |                                                |        | 0     |
| 45187  | 1                            | 3                                              | 3      | 1     |
| 45221  | 2                            |                                                |        | 0     |
| 45279  | 1                            | 1                                              | 1      | 0     |
| 45308  | 2                            |                                                |        | 0     |

| respid | ICS Urgency Incontinence Q30 | ICS Urgency Incontinence -<br>how often Q30a_1 | Q30b_1 | Q31_1 |
|--------|------------------------------|------------------------------------------------|--------|-------|
| 45317  | 1                            | 1                                              | 1      | 0     |
| 45379  | 2                            |                                                |        | 0     |
| 45451  | 2                            |                                                |        | 0     |
| 45472  | 1                            | 2                                              | 3      | 0     |
| 45474  | 1                            | 3                                              | 3      | 0     |
| 45544  | 1                            | 1                                              | 4      | 1     |
| 45561  | 2                            |                                                |        | 0     |
| 45596  | 2                            |                                                |        | 0     |

SUI: Sneezing: Q31\_2

SUI: Coughing: Q31\_3

SUI: Exercizing: Q31\_4

SUI: Lifting heavy objects :

**Instrum**

**Symptom** Storage

Storage

Storage

Storage

**Type of R**Symptom

Symptom

Symptom

Symptom

**Descripti**SUI: Sneezing

SUI: Coughing

SUI: Exercizing

SUI: Lifting heavy objects

respid Q31\_2

Q31\_3

Q31\_4

Q31\_5

|     |   |   |   |   |
|-----|---|---|---|---|
| 241 | 0 | 0 | 0 | 0 |
| 242 | 0 | 0 | 0 | 0 |
| 243 | 0 | 0 | 0 | 0 |
| 244 | 0 | 0 | 0 | 0 |
| 245 | 0 | 0 | 0 | 0 |
| 246 | 0 | 0 | 0 | 0 |
| 247 | 0 | 0 | 0 | 0 |
| 253 | 1 | 0 | 0 | 0 |
| 256 | 0 | 0 | 0 | 0 |
| 257 | 1 | 0 | 0 | 0 |
| 258 | 0 | 0 | 0 | 0 |
| 259 | 1 | 1 | 0 | 0 |
| 263 | 0 | 0 | 0 | 0 |
| 264 | 0 | 0 | 0 | 0 |
| 265 | 0 | 0 | 0 | 0 |
| 266 | 0 | 0 | 0 | 0 |
| 268 | 0 | 0 | 0 | 0 |
| 270 | 0 | 0 | 0 | 0 |
| 272 | 1 | 0 | 0 | 1 |
| 274 | 0 | 0 | 0 | 0 |

| respid | Q31_2 | Q31_3 | Q31_4 | Q31_5 |
|--------|-------|-------|-------|-------|
| 275    | 0     | 0     | 0     | 0     |
| 276    | 0     | 0     | 0     | 0     |
| 277    | 0     | 0     | 0     | 0     |
| 279    | 0     | 1     | 0     | 0     |
| 286    | 0     | 0     | 1     | 0     |
| 290    | 0     | 0     | 0     | 0     |
| 291    | 1     | 0     | 0     | 0     |
| 295    | 0     | 0     | 0     | 0     |
| 297    | 0     | 0     | 0     | 0     |
| 299    | 0     | 0     | 0     | 0     |
| 300    | 0     | 0     | 0     | 0     |
| 303    | 0     | 0     | 0     | 0     |
| 304    | 0     | 0     | 0     | 0     |
| 306    | 0     | 0     | 0     | 0     |
| 307    | 0     | 0     | 0     | 0     |
| 312    | 0     | 1     | 1     | 0     |
| 315    | 0     | 0     | 0     | 0     |
| 317    | 0     | 0     | 0     | 0     |
| 322    | 1     | 1     | 0     | 1     |
| 335    | 1     | 0     | 0     | 0     |
| 374    | 1     | 0     | 1     | 1     |
| 378    | 0     | 0     | 0     | 0     |
| 380    | 1     | 0     | 0     | 0     |
| 382    | 0     | 0     | 0     | 0     |
| 384    | 0     | 0     | 0     | 0     |
| 385    | 1     | 1     | 0     | 0     |
| 395    | 0     | 0     | 0     | 0     |
| 396    | 0     | 0     | 0     | 0     |
| 398    | 0     | 0     | 0     | 0     |
| 402    | 1     | 1     | 1     | 0     |
| 414    | 0     | 0     | 0     | 0     |
| 415    | 0     | 0     | 0     | 0     |



| respid | Q31_2 | Q31_3 | Q31_4 | Q31_5 |
|--------|-------|-------|-------|-------|
| 416    | 0     | 0     | 0     | 0     |
| 420    | 1     | 1     | 0     | 0     |
| 421    | 0     | 0     | 0     | 0     |
| 422    | 1     | 0     | 0     | 0     |
| 423    | 0     | 0     | 0     | 0     |
| 424    | 0     | 0     | 0     | 0     |
| 425    | 0     | 0     | 0     | 0     |
| 428    | 0     | 0     | 0     | 0     |
| 429    | 1     | 1     | 1     | 0     |
| 431    | 0     | 0     | 0     | 0     |
| 437    | 0     | 0     | 0     | 0     |
| 438    | 0     | 0     | 0     | 0     |
| 441    | 1     | 0     | 0     | 0     |
| 444    | 0     | 0     | 0     | 0     |
| 448    | 0     | 0     | 0     | 0     |
| 449    | 1     | 0     | 0     | 0     |
| 457    | 0     | 1     | 1     | 0     |
| 460    | 0     | 0     | 0     | 0     |
| 469    | 0     | 0     | 0     | 0     |
| 471    | 1     | 0     | 0     | 0     |
| 473    | 1     | 0     | 0     | 0     |
| 476    | 0     | 0     | 0     | 0     |
| 479    | 0     | 0     | 0     | 0     |
| 485    | 0     | 0     | 0     | 0     |
| 488    | 1     | 1     | 0     | 1     |
| 494    | 1     | 0     | 0     | 0     |
| 496    | 0     | 0     | 0     | 0     |
| 501    | 0     | 0     | 0     | 0     |
| 502    | 0     | 0     | 0     | 1     |
| 503    | 0     | 0     | 0     | 0     |
| 506    | 0     | 0     | 0     | 0     |
| 514    | 0     | 1     | 0     | 0     |

| respid | Q31_2 | Q31_3 | Q31_4 | Q31_5 |
|--------|-------|-------|-------|-------|
| 515    | 0     | 0     | 0     | 0     |
| 516    | 1     | 0     | 0     | 0     |
| 519    | 0     | 0     | 0     | 0     |
| 522    | 0     | 0     | 0     | 0     |
| 525    | 0     | 1     | 0     | 0     |
| 528    | 0     | 0     | 0     | 0     |
| 532    | 0     | 0     | 0     | 0     |
| 536    | 1     | 1     | 0     | 0     |
| 539    | 0     | 0     | 0     | 1     |
| 540    | 1     | 0     | 0     | 0     |
| 547    | 0     | 0     | 0     | 0     |
| 551    | 0     | 0     | 0     | 0     |
| 554    | 0     | 0     | 0     | 0     |
| 558    | 0     | 0     | 0     | 0     |
| 563    | 0     | 0     | 0     | 0     |
| 564    | 0     | 0     | 0     | 0     |
| 565    | 0     | 0     | 0     | 0     |
| 567    | 0     | 0     | 0     | 0     |
| 569    | 0     | 1     | 0     | 0     |
| 572    | 0     | 0     | 0     | 0     |
| 574    | 0     | 0     | 0     | 0     |
| 583    | 0     | 0     | 0     | 0     |
| 589    | 0     | 0     | 0     | 0     |
| 592    | 0     | 0     | 0     | 0     |
| 593    | 0     | 0     | 0     | 0     |
| 594    | 0     | 0     | 0     | 0     |
| 597    | 0     | 0     | 0     | 0     |
| 601    | 0     | 0     | 0     | 0     |
| 607    | 0     | 0     | 0     | 0     |
| 610    | 0     | 0     | 0     | 0     |
| 612    | 0     | 0     | 0     | 0     |
| 627    | 0     | 0     | 0     | 0     |

| respid | Q31_2 | Q31_3 | Q31_4 | Q31_5 |
|--------|-------|-------|-------|-------|
| 631    | 0     | 0     | 0     | 0     |
| 633    | 1     | 1     | 0     | 0     |
| 636    | 0     | 0     | 0     | 0     |
| 656    | 0     | 0     | 0     | 0     |
| 659    | 0     | 0     | 0     | 0     |
| 670    | 0     | 0     | 0     | 0     |
| 672    | 1     | 0     | 0     | 0     |
| 673    | 1     | 1     | 0     | 0     |
| 675    | 0     | 0     | 0     | 0     |
| 676    | 0     | 0     | 1     | 0     |
| 679    | 0     | 1     | 0     | 0     |
| 683    | 0     | 0     | 0     | 0     |
| 684    | 0     | 0     | 0     | 0     |
| 690    | 1     | 1     | 1     | 0     |
| 701    | 0     | 0     | 0     | 0     |
| 709    | 0     | 0     | 0     | 0     |
| 719    | 0     | 0     | 0     | 0     |
| 726    | 1     | 1     | 0     | 0     |
| 730    | 0     | 0     | 0     | 0     |
| 731    | 0     | 0     | 0     | 0     |
| 732    | 0     | 0     | 0     | 0     |
| 733    | 0     | 0     | 0     | 0     |
| 735    | 0     | 0     | 0     | 0     |
| 738    | 0     | 0     | 0     | 0     |
| 740    | 0     | 0     | 0     | 0     |
| 742    | 0     | 0     | 0     | 0     |
| 744    | 0     | 0     | 0     | 0     |
| 749    | 1     | 0     | 0     | 0     |
| 751    | 0     | 0     | 0     | 0     |
| 752    | 0     | 0     | 0     | 0     |
| 753    | 0     | 0     | 0     | 0     |
| 755    | 0     | 0     | 0     | 0     |

| respid | Q31_2 | Q31_3 | Q31_4 | Q31_5 |
|--------|-------|-------|-------|-------|
| 756    | 0     | 0     | 0     | 0     |
| 759    | 1     | 0     | 0     | 0     |
| 760    | 0     | 0     | 0     | 0     |
| 763    | 0     | 0     | 0     | 0     |
| 764    | 0     | 0     | 0     | 0     |
| 765    | 0     | 1     | 0     | 0     |
| 766    | 0     | 0     | 0     | 0     |
| 767    | 0     | 0     | 0     | 0     |
| 771    | 0     | 0     | 0     | 0     |
| 773    | 0     | 0     | 0     | 0     |
| 774    | 1     | 0     | 0     | 0     |
| 775    | 0     | 0     | 0     | 0     |
| 776    | 0     | 0     | 0     | 0     |
| 778    | 0     | 0     | 0     | 0     |
| 780    | 0     | 0     | 0     | 0     |
| 781    | 0     | 0     | 0     | 0     |
| 782    | 0     | 1     | 0     | 0     |
| 783    | 0     | 0     | 0     | 0     |
| 786    | 0     | 0     | 0     | 0     |
| 788    | 0     | 0     | 0     | 0     |
| 792    | 0     | 0     | 0     | 0     |
| 794    | 0     | 0     | 0     | 0     |
| 795    | 0     | 0     | 0     | 0     |
| 799    | 1     | 0     | 0     | 0     |
| 800    | 0     | 0     | 0     | 0     |
| 801    | 0     | 0     | 0     | 0     |
| 804    | 0     | 0     | 0     | 0     |
| 806    | 0     | 0     | 0     | 0     |
| 807    | 0     | 0     | 0     | 0     |
| 808    | 0     | 0     | 0     | 0     |
| 809    | 0     | 0     | 0     | 0     |
| 811    | 0     | 0     | 0     | 0     |

| respid | Q31_2 | Q31_3 | Q31_4 | Q31_5 |
|--------|-------|-------|-------|-------|
| 812    | 0     | 0     | 0     | 0     |
| 815    | 0     | 0     | 0     | 0     |
| 817    | 1     | 1     | 0     | 1     |
| 818    | 1     | 1     | 0     | 0     |
| 819    | 0     | 0     | 0     | 0     |
| 821    | 1     | 1     | 0     | 0     |
| 824    | 0     | 0     | 0     | 0     |
| 825    | 0     | 0     | 0     | 0     |
| 828    | 0     | 1     | 0     | 0     |
| 832    | 0     | 0     | 0     | 0     |
| 834    | 0     | 0     | 0     | 0     |
| 835    | 0     | 0     | 0     | 0     |
| 836    | 0     | 0     | 0     | 0     |
| 837    | 0     | 0     | 0     | 0     |
| 840    | 0     | 0     | 0     | 0     |
| 841    | 0     | 0     | 0     | 0     |
| 845    | 0     | 0     | 0     | 0     |
| 846    | 0     | 0     | 0     | 0     |
| 849    | 0     | 0     | 0     | 0     |
| 852    | 0     | 1     | 0     | 0     |
| 854    | 0     | 0     | 0     | 0     |
| 856    | 0     | 0     | 0     | 0     |
| 858    | 0     | 0     | 0     | 0     |
| 859    | 0     | 1     | 0     | 0     |
| 861    | 1     | 0     | 0     | 0     |
| 863    | 0     | 0     | 0     | 0     |
| 864    | 0     | 0     | 0     | 0     |
| 866    | 0     | 0     | 0     | 0     |
| 869    | 0     | 0     | 0     | 0     |
| 870    | 0     | 0     | 0     | 0     |
| 871    | 0     | 0     | 0     | 0     |
| 873    | 0     | 0     | 0     | 0     |

| respid | Q31_2 | Q31_3 | Q31_4 | Q31_5 |
|--------|-------|-------|-------|-------|
| 879    | 0     | 0     | 0     | 0     |
| 880    | 1     | 1     | 0     | 0     |
| 881    | 0     | 0     | 0     | 0     |
| 882    | 0     | 0     | 0     | 0     |
| 885    | 0     | 0     | 0     | 0     |
| 886    | 0     | 0     | 0     | 0     |
| 887    | 1     | 1     | 0     | 0     |
| 888    | 0     | 0     | 0     | 0     |
| 889    | 0     | 0     | 0     | 0     |
| 890    | 0     | 0     | 0     | 0     |
| 900    | 0     | 0     | 0     | 0     |
| 901    | 0     | 0     | 0     | 0     |
| 902    | 0     | 0     | 0     | 0     |
| 903    | 0     | 0     | 0     | 0     |
| 906    | 0     | 0     | 0     | 0     |
| 907    | 0     | 0     | 0     | 0     |
| 908    | 0     | 0     | 0     | 0     |
| 910    | 1     | 0     | 0     | 0     |
| 911    | 0     | 0     | 0     | 0     |
| 912    | 0     | 0     | 0     | 0     |
| 915    | 0     | 0     | 0     | 0     |
| 923    | 1     | 1     | 0     | 0     |
| 925    | 0     | 0     | 0     | 0     |
| 926    | 0     | 0     | 0     | 0     |
| 929    | 0     | 0     | 0     | 0     |
| 932    | 0     | 0     | 0     | 0     |
| 933    | 0     | 0     | 0     | 0     |
| 934    | 0     | 0     | 0     | 0     |
| 938    | 0     | 0     | 0     | 0     |
| 941    | 0     | 0     | 0     | 0     |
| 942    | 0     | 0     | 0     | 0     |
| 943    | 0     | 0     | 0     | 0     |

| respid | Q31_2 | Q31_3 | Q31_4 | Q31_5 |
|--------|-------|-------|-------|-------|
| 945    | 0     | 0     | 0     | 0     |
| 946    | 0     | 0     | 0     | 0     |
| 947    | 0     | 0     | 0     | 0     |
| 948    | 0     | 0     | 0     | 0     |
| 949    | 0     | 0     | 0     | 0     |
| 952    | 0     | 0     | 0     | 0     |
| 956    | 0     | 0     | 0     | 0     |
| 957    | 0     | 0     | 0     | 0     |
| 959    | 0     | 0     | 0     | 0     |
| 961    | 0     | 0     | 0     | 0     |
| 962    | 1     | 1     | 1     | 0     |
| 965    | 0     | 0     | 0     | 0     |
| 967    | 0     | 0     | 0     | 0     |
| 969    | 1     | 0     | 0     | 0     |
| 970    | 0     | 0     | 0     | 0     |
| 973    | 0     | 0     | 0     | 0     |
| 974    | 0     | 0     | 0     | 0     |
| 975    | 0     | 0     | 0     | 0     |
| 976    | 0     | 0     | 0     | 0     |
| 977    | 0     | 0     | 0     | 0     |
| 979    | 0     | 0     | 0     | 0     |
| 981    | 1     | 1     | 0     | 0     |
| 983    | 0     | 1     | 0     | 0     |
| 987    | 0     | 0     | 0     | 0     |
| 991    | 0     | 0     | 0     | 0     |
| 992    | 0     | 0     | 0     | 0     |
| 993    | 0     | 1     | 0     | 0     |
| 994    | 1     | 0     | 0     | 1     |
| 995    | 0     | 0     | 0     | 0     |
| 998    | 1     | 1     | 0     | 0     |
| 1000   | 0     | 0     | 1     | 1     |
| 1001   | 0     | 0     | 0     | 0     |

| respid | Q31_2 | Q31_3 | Q31_4 | Q31_5 |
|--------|-------|-------|-------|-------|
| 1002   | 0     | 0     | 0     | 0     |
| 1004   | 0     | 0     | 0     | 0     |
| 1005   | 0     | 0     | 0     | 0     |
| 1006   | 0     | 0     | 0     | 0     |
| 1007   | 1     | 0     | 0     | 0     |
| 1009   | 0     | 0     | 0     | 0     |
| 1013   | 0     | 0     | 0     | 0     |
| 1015   | 0     | 0     | 0     | 0     |
| 1020   | 0     | 0     | 0     | 0     |
| 1022   | 0     | 0     | 0     | 0     |
| 1024   | 0     | 0     | 0     | 0     |
| 1025   | 0     | 0     | 0     | 0     |
| 1027   | 0     | 0     | 0     | 0     |
| 1031   | 0     | 0     | 0     | 0     |
| 1037   | 0     | 0     | 0     | 0     |
| 1039   | 0     | 0     | 0     | 0     |
| 1040   | 0     | 0     | 0     | 0     |
| 1056   | 0     | 0     | 0     | 0     |
| 1057   | 0     | 0     | 0     | 0     |
| 1062   | 0     | 0     | 0     | 0     |
| 1069   | 0     | 0     | 0     | 0     |
| 1070   | 0     | 0     | 0     | 0     |
| 1072   | 0     | 0     | 0     | 0     |
| 1076   | 0     | 0     | 0     | 0     |
| 1077   | 0     | 0     | 0     | 0     |
| 1078   | 0     | 0     | 0     | 0     |
| 1080   | 0     | 0     | 0     | 0     |
| 1094   | 0     | 1     | 0     | 0     |
| 1098   | 0     | 0     | 0     | 0     |
| 1099   | 1     | 0     | 0     | 0     |
| 1102   | 0     | 0     | 0     | 0     |
| 1110   | 0     | 0     | 0     | 0     |



| respid | Q31_2 | Q31_3 | Q31_4 | Q31_5 |
|--------|-------|-------|-------|-------|
| 1117   | 1     | 1     | 0     | 0     |
| 1119   | 0     | 0     | 0     | 0     |
| 1126   | 0     | 0     | 0     | 0     |
| 1127   | 0     | 0     | 0     | 0     |
| 1130   | 0     | 0     | 0     | 0     |
| 1131   | 0     | 0     | 0     | 0     |
| 1135   | 0     | 0     | 1     | 1     |
| 1138   | 1     | 1     | 0     | 0     |
| 1139   | 0     | 0     | 0     | 0     |
| 1140   | 0     | 0     | 0     | 0     |
| 1142   | 0     | 0     | 0     | 0     |
| 1143   | 0     | 0     | 0     | 0     |
| 1145   | 0     | 0     | 0     | 0     |
| 1149   | 0     | 0     | 0     | 0     |
| 1152   | 0     | 0     | 0     | 0     |
| 1160   | 0     | 0     | 0     | 0     |
| 1164   | 0     | 0     | 0     | 0     |
| 1165   | 0     | 0     | 0     | 0     |
| 1169   | 0     | 0     | 0     | 0     |
| 1170   | 0     | 0     | 0     | 0     |
| 1179   | 0     | 0     | 0     | 0     |
| 1180   | 0     | 0     | 0     | 0     |
| 1183   | 0     | 0     | 0     | 0     |
| 1187   | 0     | 0     | 0     | 0     |
| 1188   | 0     | 0     | 0     | 0     |
| 1193   | 0     | 0     | 0     | 0     |
| 1194   | 0     | 0     | 0     | 0     |
| 1197   | 0     | 0     | 0     | 0     |
| 1202   | 0     | 0     | 0     | 0     |
| 1204   | 1     | 0     | 0     | 1     |
| 1211   | 0     | 0     | 0     | 0     |
| 1224   | 0     | 0     | 0     | 0     |

| respid | Q31_2 | Q31_3 | Q31_4 | Q31_5 |
|--------|-------|-------|-------|-------|
| 1225   | 0     | 0     | 0     | 0     |
| 1230   | 1     | 0     | 0     | 0     |
| 1232   | 0     | 0     | 0     | 0     |
| 1233   | 0     | 0     | 0     | 0     |
| 1234   | 0     | 0     | 0     | 0     |
| 1235   | 0     | 0     | 0     | 0     |
| 1236   | 0     | 0     | 0     | 0     |
| 1237   | 0     | 1     | 0     | 0     |
| 1238   | 0     | 0     | 0     | 0     |
| 1239   | 0     | 0     | 0     | 0     |
| 1241   | 0     | 0     | 0     | 0     |
| 1242   | 0     | 0     | 0     | 0     |
| 1244   | 0     | 0     | 0     | 0     |
| 1245   | 0     | 0     | 0     | 0     |
| 1247   | 0     | 0     | 0     | 0     |
| 1248   | 1     | 0     | 0     | 0     |
| 1249   | 0     | 0     | 0     | 0     |
| 1250   | 0     | 0     | 0     | 0     |
| 1251   | 0     | 0     | 0     | 0     |
| 1252   | 0     | 0     | 0     | 0     |
| 1253   | 0     | 0     | 0     | 0     |
| 1254   | 0     | 0     | 0     | 0     |
| 1258   | 0     | 0     | 0     | 0     |
| 1260   | 0     | 0     | 0     | 0     |
| 1261   | 0     | 0     | 0     | 0     |
| 1262   | 0     | 0     | 0     | 0     |
| 1263   | 0     | 0     | 0     | 0     |
| 1264   | 0     | 1     | 0     | 0     |
| 1265   | 0     | 0     | 0     | 0     |
| 1266   | 0     | 0     | 0     | 0     |
| 1270   | 0     | 0     | 0     | 0     |
| 1272   | 1     | 1     | 0     | 0     |

| respid | Q31_2 | Q31_3 | Q31_4 | Q31_5 |
|--------|-------|-------|-------|-------|
| 1273   | 1     | 0     | 0     | 0     |
| 1276   | 0     | 0     | 0     | 0     |
| 1277   | 0     | 0     | 0     | 0     |
| 1278   | 0     | 0     | 0     | 0     |
| 1280   | 0     | 0     | 0     | 0     |
| 1281   | 1     | 1     | 0     | 0     |
| 1282   | 0     | 0     | 0     | 0     |
| 1283   | 0     | 0     | 0     | 0     |
| 1288   | 1     | 0     | 0     | 0     |
| 1289   | 0     | 1     | 0     | 0     |
| 1290   | 0     | 0     | 0     | 0     |
| 1291   | 0     | 0     | 0     | 0     |
| 1293   | 1     | 1     | 0     | 0     |
| 1294   | 0     | 0     | 0     | 0     |
| 1295   | 0     | 0     | 0     | 0     |
| 1296   | 0     | 0     | 0     | 0     |
| 1297   | 1     | 0     | 0     | 0     |
| 1298   | 0     | 0     | 0     | 1     |
| 1300   | 0     | 0     | 1     | 0     |
| 1302   | 0     | 0     | 0     | 0     |
| 1303   | 0     | 0     | 0     | 0     |
| 1304   | 1     | 0     | 0     | 1     |
| 1305   | 0     | 0     | 0     | 0     |
| 1307   | 0     | 0     | 0     | 0     |
| 1312   | 1     | 0     | 0     | 0     |
| 1313   | 1     | 0     | 0     | 0     |
| 1314   | 0     | 0     | 0     | 0     |
| 1317   | 0     | 0     | 0     | 0     |
| 1318   | 0     | 0     | 0     | 0     |
| 1319   | 0     | 0     | 0     | 0     |
| 1321   | 0     | 0     | 0     | 0     |
| 1324   | 1     | 1     | 1     | 1     |

| respid | Q31_2 | Q31_3 | Q31_4 | Q31_5 |
|--------|-------|-------|-------|-------|
| 1325   | 0     | 0     | 0     | 0     |
| 1326   | 0     | 0     | 0     | 0     |
| 1327   | 0     | 0     | 0     | 0     |
| 1329   | 0     | 0     | 0     | 0     |
| 1330   | 1     | 1     | 1     | 1     |
| 1331   | 1     | 0     | 0     | 0     |
| 1335   | 0     | 0     | 0     | 0     |
| 1337   | 0     | 0     | 0     | 0     |
| 1341   | 0     | 0     | 0     | 0     |
| 1342   | 0     | 0     | 0     | 0     |
| 1344   | 0     | 0     | 0     | 0     |
| 1345   | 0     | 0     | 0     | 0     |
| 1346   | 0     | 0     | 0     | 0     |
| 1350   | 1     | 1     | 0     | 0     |
| 1352   | 0     | 0     | 0     | 0     |
| 1353   | 0     | 0     | 0     | 0     |
| 1354   | 0     | 0     | 0     | 0     |
| 1355   | 0     | 0     | 0     | 0     |
| 1357   | 0     | 0     | 0     | 0     |
| 1360   | 0     | 0     | 0     | 0     |
| 1362   | 0     | 0     | 0     | 1     |
| 1363   | 0     | 0     | 0     | 0     |
| 1367   | 0     | 0     | 0     | 0     |
| 1369   | 0     | 0     | 0     | 0     |
| 1371   | 0     | 0     | 0     | 0     |
| 1372   | 0     | 0     | 0     | 0     |
| 1375   | 0     | 0     | 0     | 0     |
| 1377   | 0     | 0     | 0     | 0     |
| 1379   | 0     | 0     | 0     | 0     |
| 1380   | 0     | 0     | 0     | 0     |
| 1382   | 0     | 0     | 0     | 0     |
| 1383   | 0     | 1     | 0     | 0     |

| respid | Q31_2 | Q31_3 | Q31_4 | Q31_5 |
|--------|-------|-------|-------|-------|
| 1384   | 1     | 0     | 0     | 0     |
| 1385   | 0     | 0     | 0     | 0     |
| 1387   | 0     | 0     | 0     | 0     |
| 1388   | 0     | 0     | 0     | 0     |
| 1389   | 1     | 1     | 0     | 0     |
| 1390   | 1     | 1     | 0     | 0     |
| 1395   | 0     | 0     | 0     | 0     |
| 1396   | 0     | 0     | 0     | 0     |
| 1397   | 1     | 0     | 0     | 0     |
| 1398   | 0     | 0     | 0     | 0     |
| 1399   | 0     | 0     | 0     | 0     |
| 1403   | 0     | 0     | 0     | 0     |
| 1405   | 0     | 0     | 0     | 0     |
| 1406   | 1     | 1     | 1     | 0     |
| 1407   | 1     | 1     | 1     | 1     |
| 1408   | 0     | 0     | 0     | 0     |
| 1409   | 0     | 0     | 0     | 0     |
| 1410   | 0     | 0     | 0     | 0     |
| 1411   | 0     | 0     | 0     | 0     |
| 1412   | 0     | 0     | 0     | 0     |
| 1413   | 1     | 0     | 0     | 0     |
| 1414   | 0     | 0     | 0     | 0     |
| 1415   | 0     | 0     | 0     | 0     |
| 1416   | 0     | 0     | 0     | 0     |
| 1417   | 0     | 0     | 0     | 0     |
| 1418   | 0     | 0     | 0     | 0     |
| 1419   | 1     | 0     | 0     | 0     |
| 1420   | 0     | 0     | 0     | 0     |
| 1421   | 0     | 0     | 1     | 0     |
| 1422   | 1     | 0     | 0     | 0     |
| 1423   | 0     | 0     | 0     | 0     |
| 1424   | 0     | 0     | 0     | 0     |

| respid | Q31_2 | Q31_3 | Q31_4 | Q31_5 |
|--------|-------|-------|-------|-------|
| 1429   | 0     | 0     | 0     | 0     |
| 1430   | 0     | 0     | 0     | 0     |
| 1431   | 0     | 0     | 0     | 0     |
| 1433   | 0     | 0     | 0     | 0     |
| 1435   | 0     | 0     | 0     | 0     |
| 1436   | 0     | 0     | 0     | 0     |
| 1438   | 0     | 0     | 0     | 0     |
| 1439   | 0     | 0     | 0     | 0     |
| 1441   | 0     | 0     | 0     | 0     |
| 1442   | 0     | 0     | 0     | 0     |
| 1443   | 0     | 0     | 0     | 0     |
| 1444   | 0     | 0     | 0     | 0     |
| 1445   | 0     | 0     | 0     | 0     |
| 1446   | 1     | 0     | 0     | 0     |
| 1447   | 0     | 0     | 0     | 0     |
| 1449   | 0     | 0     | 0     | 0     |
| 1450   | 0     | 0     | 0     | 0     |
| 1451   | 0     | 0     | 0     | 0     |
| 1452   | 0     | 0     | 0     | 0     |
| 1453   | 0     | 0     | 1     | 1     |
| 1454   | 1     | 0     | 0     | 0     |
| 1456   | 0     | 0     | 0     | 0     |
| 1457   | 0     | 0     | 0     | 0     |
| 1459   | 0     | 0     | 0     | 0     |
| 1460   | 0     | 0     | 0     | 0     |
| 1463   | 0     | 0     | 0     | 0     |
| 1465   | 0     | 0     | 0     | 0     |
| 1467   | 0     | 0     | 0     | 0     |
| 1470   | 0     | 0     | 0     | 0     |
| 1471   | 0     | 0     | 0     | 0     |
| 1472   | 0     | 0     | 0     | 0     |
| 1474   | 0     | 0     | 1     | 0     |

| respid | Q31_2 | Q31_3 | Q31_4 | Q31_5 |
|--------|-------|-------|-------|-------|
| 1475   | 0     | 0     | 0     | 0     |
| 1477   | 0     | 0     | 0     | 0     |
| 1478   | 0     | 0     | 0     | 0     |
| 1480   | 0     | 0     | 0     | 0     |
| 1481   | 1     | 1     | 0     | 1     |
| 1483   | 0     | 0     | 0     | 0     |
| 1484   | 0     | 0     | 0     | 0     |
| 1485   | 0     | 0     | 0     | 0     |
| 1486   | 0     | 0     | 0     | 0     |
| 1487   | 0     | 0     | 0     | 0     |
| 1488   | 0     | 0     | 0     | 0     |
| 1489   | 0     | 0     | 0     | 0     |
| 1490   | 0     | 0     | 0     | 0     |
| 1491   | 1     | 1     | 0     | 0     |
| 1492   | 0     | 0     | 0     | 0     |
| 1494   | 0     | 0     | 0     | 0     |
| 1495   | 0     | 0     | 0     | 0     |
| 1496   | 0     | 0     | 0     | 0     |
| 1498   | 0     | 0     | 0     | 0     |
| 1499   | 1     | 0     | 0     | 0     |
| 1500   | 0     | 0     | 0     | 0     |
| 1501   | 0     | 0     | 0     | 0     |
| 1503   | 0     | 0     | 0     | 0     |
| 1504   | 0     | 0     | 0     | 0     |
| 1508   | 0     | 0     | 0     | 0     |
| 1509   | 0     | 0     | 0     | 0     |
| 1511   | 0     | 0     | 0     | 0     |
| 1512   | 1     | 0     | 0     | 0     |
| 1513   | 0     | 0     | 0     | 0     |
| 1515   | 0     | 0     | 0     | 0     |
| 1517   | 0     | 0     | 0     | 0     |
| 1518   | 1     | 1     | 0     | 0     |

| respid | Q31_2 | Q31_3 | Q31_4 | Q31_5 |
|--------|-------|-------|-------|-------|
| 1519   | 0     | 0     | 1     | 0     |
| 1520   | 0     | 0     | 0     | 0     |
| 1521   | 0     | 1     | 0     | 1     |
| 1522   | 0     | 0     | 0     | 0     |
| 1523   | 0     | 0     | 0     | 0     |
| 1524   | 1     | 1     | 0     | 0     |
| 1525   | 1     | 1     | 0     | 0     |
| 1526   | 0     | 0     | 0     | 0     |
| 1527   | 0     | 0     | 0     | 0     |
| 1534   | 1     | 0     | 0     | 0     |
| 1535   | 0     | 0     | 0     | 0     |
| 1536   | 0     | 0     | 0     | 0     |
| 1538   | 0     | 0     | 0     | 0     |
| 1539   | 0     | 0     | 0     | 0     |
| 1540   | 0     | 0     | 0     | 0     |
| 1541   | 0     | 0     | 0     | 0     |
| 1542   | 0     | 0     | 0     | 0     |
| 1543   | 0     | 0     | 0     | 0     |
| 1545   | 0     | 0     | 0     | 0     |
| 1546   | 0     | 0     | 0     | 0     |
| 1548   | 0     | 0     | 0     | 0     |
| 1549   | 0     | 0     | 0     | 0     |
| 1551   | 0     | 0     | 0     | 0     |
| 1552   | 0     | 0     | 0     | 0     |
| 1556   | 0     | 0     | 0     | 0     |
| 1557   | 0     | 0     | 0     | 0     |
| 1558   | 0     | 0     | 0     | 0     |
| 1561   | 0     | 0     | 0     | 0     |
| 1562   | 0     | 0     | 0     | 0     |
| 1563   | 0     | 0     | 0     | 0     |
| 1564   | 0     | 1     | 0     | 0     |
| 1565   | 0     | 0     | 0     | 0     |



| respid | Q31_2 | Q31_3 | Q31_4 | Q31_5 |
|--------|-------|-------|-------|-------|
| 1566   | 0     | 0     | 0     | 0     |
| 1567   | 0     | 0     | 0     | 0     |
| 1569   | 0     | 0     | 0     | 0     |
| 1570   | 0     | 0     | 0     | 0     |
| 1574   | 0     | 0     | 0     | 0     |
| 1575   | 0     | 0     | 0     | 0     |
| 1576   | 0     | 1     | 0     | 0     |
| 1577   | 0     | 0     | 0     | 0     |
| 1581   | 0     | 0     | 0     | 0     |
| 1583   | 0     | 0     | 0     | 0     |
| 1585   | 0     | 0     | 0     | 0     |
| 1586   | 0     | 0     | 0     | 0     |
| 1588   | 0     | 0     | 0     | 0     |
| 1590   | 0     | 0     | 0     | 0     |
| 1592   | 1     | 0     | 0     | 0     |
| 1594   | 0     | 0     | 0     | 0     |
| 1598   | 0     | 0     | 0     | 0     |
| 1599   | 0     | 0     | 0     | 0     |
| 1600   | 0     | 0     | 0     | 0     |
| 1602   | 0     | 0     | 0     | 0     |
| 1603   | 1     | 0     | 0     | 0     |
| 1604   | 0     | 1     | 0     | 0     |
| 1605   | 0     | 0     | 0     | 0     |
| 1606   | 0     | 0     | 0     | 0     |
| 1610   | 0     | 0     | 0     | 0     |
| 1611   | 0     | 0     | 0     | 0     |
| 1612   | 1     | 0     | 0     | 0     |
| 1613   | 0     | 0     | 1     | 0     |
| 1615   | 1     | 1     | 0     | 0     |
| 1616   | 0     | 0     | 0     | 0     |
| 1617   | 0     | 0     | 0     | 0     |
| 1618   | 0     | 0     | 0     | 0     |

| respid | Q31_2 | Q31_3 | Q31_4 | Q31_5 |
|--------|-------|-------|-------|-------|
| 1620   | 0     | 0     | 0     | 0     |
| 1621   | 0     | 0     | 0     | 0     |
| 1622   | 0     | 0     | 0     | 0     |
| 1623   | 0     | 0     | 0     | 0     |
| 1624   | 0     | 1     | 0     | 0     |
| 1625   | 0     | 0     | 0     | 0     |
| 1626   | 0     | 0     | 0     | 0     |
| 1627   | 0     | 0     | 0     | 0     |
| 1629   | 0     | 0     | 0     | 0     |
| 1630   | 0     | 0     | 0     | 0     |
| 1631   | 0     | 0     | 0     | 0     |
| 1634   | 1     | 1     | 0     | 0     |
| 1635   | 0     | 0     | 0     | 0     |
| 1636   | 0     | 0     | 0     | 0     |
| 1637   | 0     | 0     | 0     | 0     |
| 1640   | 0     | 0     | 0     | 0     |
| 1642   | 1     | 0     | 0     | 0     |
| 1643   | 0     | 1     | 0     | 0     |
| 1644   | 0     | 0     | 0     | 0     |
| 1645   | 0     | 0     | 0     | 0     |
| 1646   | 1     | 0     | 0     | 0     |
| 1647   | 0     | 0     | 0     | 0     |
| 1650   | 0     | 0     | 0     | 0     |
| 1654   | 0     | 0     | 0     | 0     |
| 1656   | 0     | 0     | 0     | 0     |
| 1657   | 0     | 1     | 0     | 0     |
| 1659   | 0     | 0     | 1     | 0     |
| 1662   | 0     | 1     | 0     | 0     |
| 1663   | 0     | 0     | 0     | 0     |
| 1664   | 0     | 0     | 0     | 0     |
| 1665   | 0     | 0     | 0     | 0     |
| 1667   | 0     | 0     | 0     | 0     |

| respid | Q31_2 | Q31_3 | Q31_4 | Q31_5 |
|--------|-------|-------|-------|-------|
| 1668   | 0     | 0     | 0     | 0     |
| 1670   | 0     | 0     | 0     | 0     |
| 1671   | 0     | 0     | 0     | 0     |
| 1673   | 0     | 0     | 0     | 0     |
| 1674   | 0     | 0     | 0     | 0     |
| 1676   | 0     | 0     | 0     | 0     |
| 1677   | 0     | 0     | 0     | 0     |
| 1678   | 0     | 0     | 0     | 0     |
| 1680   | 1     | 0     | 0     | 0     |
| 1681   | 0     | 0     | 0     | 0     |
| 1683   | 0     | 0     | 0     | 0     |
| 1685   | 0     | 0     | 0     | 0     |
| 1686   | 1     | 1     | 0     | 0     |
| 1690   | 0     | 0     | 0     | 0     |
| 1691   | 1     | 1     | 0     | 0     |
| 1692   | 0     | 0     | 0     | 0     |
| 1693   | 0     | 0     | 0     | 0     |
| 1695   | 0     | 0     | 0     | 0     |
| 1696   | 0     | 0     | 0     | 0     |
| 1698   | 0     | 0     | 0     | 0     |
| 1699   | 1     | 1     | 0     | 0     |
| 1701   | 0     | 0     | 0     | 0     |
| 1702   | 0     | 0     | 0     | 0     |
| 1703   | 0     | 0     | 0     | 0     |
| 1705   | 1     | 0     | 0     | 0     |
| 1706   | 0     | 0     | 0     | 0     |
| 1708   | 0     | 0     | 0     | 0     |
| 1711   | 1     | 1     | 0     | 0     |
| 1712   | 0     | 0     | 0     | 0     |
| 1713   | 0     | 1     | 0     | 0     |
| 1715   | 0     | 0     | 0     | 0     |
| 1717   | 0     | 0     | 0     | 0     |

| respid | Q31_2 | Q31_3 | Q31_4 | Q31_5 |
|--------|-------|-------|-------|-------|
| 1718   | 1     | 1     | 1     | 1     |
| 1719   | 0     | 0     | 0     | 0     |
| 1721   | 0     | 0     | 0     | 0     |
| 1722   | 1     | 0     | 0     | 0     |
| 1724   | 0     | 0     | 0     | 0     |
| 1725   | 0     | 0     | 0     | 0     |
| 1726   | 0     | 0     | 0     | 0     |
| 1727   | 0     | 0     | 0     | 0     |
| 1728   | 0     | 0     | 0     | 0     |
| 1731   | 0     | 0     | 0     | 0     |
| 1733   | 0     | 0     | 0     | 0     |
| 1734   | 0     | 0     | 0     | 0     |
| 1735   | 0     | 0     | 0     | 0     |
| 1736   | 1     | 0     | 0     | 0     |
| 1737   | 0     | 0     | 0     | 0     |
| 1738   | 1     | 1     | 0     | 1     |
| 1743   | 0     | 0     | 0     | 0     |
| 1755   | 1     | 0     | 1     | 0     |
| 1756   | 0     | 0     | 0     | 0     |
| 1757   | 0     | 0     | 0     | 0     |
| 1758   | 1     | 1     | 1     | 0     |
| 1759   | 0     | 0     | 1     | 0     |
| 1761   | 0     | 0     | 0     | 0     |
| 1762   | 1     | 0     | 1     | 0     |
| 1764   | 0     | 0     | 0     | 0     |
| 1767   | 0     | 0     | 0     | 0     |
| 1768   | 0     | 0     | 0     | 0     |
| 1769   | 0     | 0     | 0     | 0     |
| 1770   | 0     | 0     | 0     | 0     |
| 1771   | 1     | 0     | 0     | 1     |
| 1776   | 0     | 0     | 0     | 0     |
| 1777   | 0     | 0     | 0     | 0     |

| respid | Q31_2 | Q31_3 | Q31_4 | Q31_5 |
|--------|-------|-------|-------|-------|
| 1778   | 0     | 0     | 0     | 0     |
| 1779   | 0     | 0     | 0     | 0     |
| 1780   | 0     | 0     | 0     | 0     |
| 1781   | 0     | 0     | 0     | 0     |
| 1783   | 0     | 0     | 0     | 0     |
| 1784   | 0     | 0     | 0     | 0     |
| 1785   | 0     | 0     | 0     | 0     |
| 1788   | 1     | 1     | 0     | 0     |
| 1792   | 0     | 0     | 0     | 0     |
| 1794   | 1     | 0     | 0     | 0     |
| 1798   | 0     | 1     | 0     | 0     |
| 1799   | 0     | 0     | 0     | 0     |
| 1800   | 0     | 0     | 0     | 0     |
| 1804   | 0     | 0     | 0     | 0     |
| 1806   | 1     | 0     | 0     | 0     |
| 1807   | 0     | 0     | 0     | 0     |
| 1808   | 0     | 0     | 0     | 0     |
| 1809   | 1     | 0     | 0     | 0     |
| 1811   | 0     | 0     | 0     | 0     |
| 1812   | 0     | 0     | 0     | 0     |
| 1813   | 0     | 0     | 0     | 0     |
| 1814   | 1     | 0     | 0     | 0     |
| 1815   | 0     | 0     | 0     | 0     |
| 1817   | 0     | 0     | 0     | 0     |
| 1820   | 0     | 0     | 0     | 0     |
| 1821   | 0     | 0     | 0     | 0     |
| 1822   | 0     | 0     | 0     | 0     |
| 1823   | 0     | 0     | 0     | 0     |
| 1824   | 0     | 0     | 0     | 0     |
| 1826   | 0     | 0     | 0     | 0     |
| 1828   | 0     | 0     | 0     | 0     |
| 1829   | 0     | 0     | 0     | 0     |

| respid | Q31_2 | Q31_3 | Q31_4 | Q31_5 |
|--------|-------|-------|-------|-------|
| 1830   | 0     | 0     | 0     | 0     |
| 1831   | 0     | 0     | 0     | 0     |
| 1832   | 0     | 0     | 0     | 0     |
| 1836   | 0     | 0     | 0     | 0     |
| 1838   | 0     | 0     | 0     | 0     |
| 1839   | 0     | 0     | 0     | 0     |
| 1840   | 0     | 0     | 0     | 0     |
| 1841   | 0     | 0     | 0     | 0     |
| 1842   | 1     | 0     | 0     | 0     |
| 1843   | 0     | 0     | 0     | 0     |
| 1844   | 1     | 0     | 1     | 0     |
| 1845   | 0     | 0     | 0     | 0     |
| 1849   | 0     | 0     | 0     | 0     |
| 1850   | 0     | 0     | 0     | 0     |
| 1851   | 0     | 0     | 0     | 0     |
| 1852   | 0     | 0     | 0     | 0     |
| 1857   | 1     | 1     | 0     | 1     |
| 1858   | 0     | 0     | 0     | 0     |
| 1861   | 0     | 0     | 0     | 0     |
| 1862   | 0     | 0     | 0     | 0     |
| 1863   | 0     | 0     | 0     | 0     |
| 1864   | 0     | 0     | 0     | 0     |
| 1865   | 0     | 0     | 0     | 0     |
| 1867   | 0     | 0     | 0     | 0     |
| 1868   | 0     | 0     | 0     | 0     |
| 1869   | 0     | 0     | 0     | 0     |
| 1870   | 0     | 0     | 0     | 0     |
| 1871   | 0     | 0     | 0     | 0     |
| 1872   | 0     | 0     | 0     | 0     |
| 1873   | 0     | 0     | 0     | 0     |
| 1876   | 0     | 0     | 0     | 0     |
| 1877   | 0     | 0     | 0     | 0     |

| respid | Q31_2 | Q31_3 | Q31_4 | Q31_5 |
|--------|-------|-------|-------|-------|
| 1878   | 1     | 0     | 0     | 0     |
| 1879   | 0     | 0     | 0     | 0     |
| 1880   | 0     | 0     | 0     | 0     |
| 1881   | 1     | 1     | 0     | 0     |
| 1883   | 0     | 0     | 0     | 0     |
| 1886   | 0     | 0     | 0     | 0     |
| 1888   | 0     | 1     | 1     | 0     |
| 1889   | 1     | 1     | 1     | 1     |
| 1890   | 0     | 0     | 0     | 0     |
| 1891   | 0     | 0     | 0     | 0     |
| 1893   | 0     | 0     | 0     | 0     |
| 1894   | 0     | 0     | 0     | 0     |
| 1895   | 0     | 0     | 0     | 0     |
| 1896   | 0     | 0     | 0     | 0     |
| 1897   | 0     | 0     | 0     | 0     |
| 1898   | 1     | 1     | 1     | 1     |
| 1899   | 0     | 0     | 0     | 0     |
| 1900   | 0     | 0     | 0     | 0     |
| 1903   | 0     | 0     | 0     | 0     |
| 1906   | 0     | 0     | 0     | 0     |
| 1907   | 1     | 1     | 0     | 0     |
| 1908   | 0     | 0     | 0     | 0     |
| 1909   | 1     | 1     | 1     | 0     |
| 1910   | 0     | 0     | 0     | 0     |
| 1911   | 0     | 0     | 0     | 0     |
| 1912   | 0     | 0     | 0     | 0     |
| 1917   | 1     | 1     | 0     | 0     |
| 1918   | 0     | 0     | 0     | 0     |
| 1919   | 0     | 0     | 0     | 0     |
| 1922   | 0     | 0     | 0     | 0     |
| 1925   | 0     | 0     | 0     | 0     |
| 1926   | 0     | 0     | 0     | 0     |

| respid | Q31_2 | Q31_3 | Q31_4 | Q31_5 |
|--------|-------|-------|-------|-------|
| 1927   | 0     | 0     | 0     | 0     |
| 1928   | 0     | 0     | 0     | 0     |
| 1929   | 0     | 0     | 0     | 0     |
| 1934   | 0     | 0     | 0     | 0     |
| 1935   | 0     | 0     | 0     | 0     |
| 1936   | 1     | 0     | 0     | 0     |
| 1937   | 0     | 0     | 0     | 0     |
| 1938   | 0     | 0     | 0     | 0     |
| 1939   | 0     | 1     | 0     | 0     |
| 1940   | 0     | 0     | 0     | 0     |
| 1941   | 0     | 0     | 0     | 0     |
| 1948   | 0     | 0     | 0     | 0     |
| 1950   | 0     | 0     | 0     | 0     |
| 1955   | 1     | 1     | 0     | 0     |
| 1958   | 1     | 0     | 0     | 0     |
| 1960   | 0     | 0     | 0     | 0     |
| 1961   | 0     | 0     | 0     | 0     |
| 1962   | 0     | 0     | 0     | 0     |
| 1965   | 0     | 0     | 0     | 0     |
| 1966   | 0     | 0     | 0     | 0     |
| 1967   | 0     | 0     | 0     | 0     |
| 1968   | 1     | 0     | 0     | 0     |
| 1973   | 0     | 0     | 0     | 0     |
| 1974   | 0     | 0     | 0     | 0     |
| 1975   | 0     | 0     | 0     | 0     |
| 1977   | 0     | 0     | 0     | 0     |
| 1978   | 0     | 0     | 0     | 0     |
| 1979   | 0     | 1     | 0     | 0     |
| 1982   | 0     | 0     | 0     | 0     |
| 1983   | 0     | 0     | 0     | 0     |
| 1987   | 0     | 0     | 0     | 0     |
| 1988   | 0     | 0     | 0     | 0     |



| respid | Q31_2 | Q31_3 | Q31_4 | Q31_5 |
|--------|-------|-------|-------|-------|
| 1991   | 0     | 0     | 0     | 0     |
| 1992   | 0     | 0     | 0     | 0     |
| 1993   | 1     | 0     | 0     | 0     |
| 1994   | 0     | 0     | 1     | 0     |
| 1995   | 0     | 0     | 0     | 0     |
| 1996   | 0     | 1     | 1     | 0     |
| 1997   | 1     | 0     | 0     | 0     |
| 1998   | 0     | 0     | 0     | 0     |
| 1999   | 1     | 1     | 0     | 1     |
| 2000   | 0     | 0     | 0     | 0     |
| 2001   | 0     | 0     | 0     | 0     |
| 2002   | 0     | 0     | 0     | 1     |
| 2003   | 0     | 0     | 0     | 0     |
| 2004   | 0     | 1     | 0     | 0     |
| 2005   | 1     | 0     | 0     | 0     |
| 2007   | 0     | 1     | 1     | 0     |
| 2009   | 0     | 1     | 0     | 0     |
| 2010   | 0     | 0     | 0     | 0     |
| 2011   | 0     | 0     | 0     | 0     |
| 2013   | 0     | 0     | 0     | 0     |
| 2014   | 0     | 0     | 0     | 0     |
| 2017   | 0     | 0     | 0     | 0     |
| 2020   | 0     | 0     | 0     | 0     |
| 2023   | 1     | 1     | 0     | 0     |
| 2024   | 0     | 0     | 0     | 0     |
| 2029   | 0     | 0     | 0     | 0     |
| 2030   | 0     | 0     | 0     | 0     |
| 2031   | 0     | 0     | 0     | 0     |
| 2032   | 0     | 0     | 0     | 0     |
| 2033   | 0     | 0     | 0     | 0     |
| 2034   | 0     | 0     | 0     | 0     |
| 2036   | 1     | 1     | 0     | 0     |

| respid | Q31_2 | Q31_3 | Q31_4 | Q31_5 |
|--------|-------|-------|-------|-------|
| 2037   | 0     | 0     | 0     | 0     |
| 2038   | 0     | 0     | 0     | 0     |
| 2039   | 1     | 0     | 0     | 0     |
| 2040   | 0     | 0     | 0     | 0     |
| 2041   | 0     | 0     | 0     | 0     |
| 2042   | 0     | 0     | 0     | 0     |
| 2043   | 1     | 0     | 0     | 0     |
| 2051   | 0     | 0     | 0     | 0     |
| 2052   | 0     | 0     | 0     | 0     |
| 2053   | 0     | 0     | 0     | 0     |
| 2054   | 0     | 0     | 0     | 0     |
| 2055   | 0     | 0     | 0     | 1     |
| 2056   | 0     | 0     | 0     | 0     |
| 2057   | 0     | 0     | 0     | 0     |
| 2059   | 0     | 0     | 0     | 0     |
| 2063   | 0     | 0     | 0     | 0     |
| 2066   | 1     | 0     | 0     | 0     |
| 2068   | 0     | 0     | 0     | 0     |
| 2069   | 1     | 0     | 0     | 0     |
| 2070   | 0     | 0     | 0     | 0     |
| 2071   | 0     | 0     | 0     | 0     |
| 2073   | 0     | 0     | 0     | 0     |
| 2077   | 1     | 1     | 0     | 0     |
| 2079   | 0     | 0     | 0     | 0     |
| 2080   | 1     | 1     | 0     | 0     |
| 2081   | 0     | 0     | 0     | 0     |
| 2084   | 0     | 0     | 0     | 0     |
| 2085   | 0     | 0     | 0     | 0     |
| 2087   | 1     | 1     | 1     | 0     |
| 2089   | 0     | 0     | 0     | 1     |
| 2093   | 0     | 0     | 0     | 0     |
| 2094   | 0     | 0     | 0     | 0     |

| respid | Q31_2 | Q31_3 | Q31_4 | Q31_5 |
|--------|-------|-------|-------|-------|
| 2095   | 0     | 0     | 0     | 0     |
| 2097   | 0     | 0     | 0     | 0     |
| 2099   | 0     | 0     | 0     | 0     |
| 2100   | 1     | 1     | 0     | 0     |
| 2101   | 0     | 0     | 0     | 0     |
| 2103   | 0     | 0     | 0     | 0     |
| 2104   | 1     | 1     | 0     | 0     |
| 2106   | 0     | 0     | 0     | 0     |
| 2111   | 0     | 0     | 0     | 0     |
| 2113   | 0     | 0     | 0     | 0     |
| 2115   | 0     | 0     | 0     | 0     |
| 2119   | 0     | 0     | 0     | 0     |
| 2120   | 0     | 0     | 0     | 0     |
| 2123   | 0     | 0     | 0     | 0     |
| 2124   | 1     | 1     | 0     | 0     |
| 2130   | 0     | 0     | 0     | 0     |
| 2131   | 1     | 0     | 0     | 1     |
| 2133   | 1     | 1     | 0     | 0     |
| 2139   | 0     | 0     | 0     | 0     |
| 2141   | 0     | 0     | 0     | 0     |
| 2143   | 0     | 0     | 0     | 0     |
| 2144   | 0     | 0     | 0     | 0     |
| 2147   | 0     | 0     | 0     | 0     |
| 2151   | 0     | 0     | 0     | 0     |
| 2153   | 0     | 0     | 0     | 0     |
| 2154   | 0     | 0     | 0     | 0     |
| 2155   | 0     | 0     | 0     | 0     |
| 2159   | 1     | 0     | 0     | 0     |
| 2160   | 0     | 1     | 0     | 1     |
| 2161   | 0     | 0     | 0     | 0     |
| 2163   | 0     | 0     | 0     | 0     |
| 2164   | 0     | 0     | 0     | 0     |

| respid | Q31_2 | Q31_3 | Q31_4 | Q31_5 |
|--------|-------|-------|-------|-------|
| 2168   | 0     | 0     | 0     | 0     |
| 2169   | 0     | 0     | 0     | 0     |
| 2170   | 0     | 0     | 0     | 0     |
| 2171   | 0     | 0     | 0     | 0     |
| 2172   | 0     | 0     | 0     | 0     |
| 2173   | 0     | 0     | 0     | 0     |
| 2174   | 0     | 1     | 0     | 0     |
| 2175   | 0     | 0     | 0     | 0     |
| 2176   | 0     | 0     | 0     | 0     |
| 2177   | 1     | 1     | 0     | 0     |
| 2179   | 1     | 0     | 0     | 0     |
| 2181   | 0     | 0     | 0     | 0     |
| 2182   | 0     | 0     | 0     | 0     |
| 2183   | 0     | 0     | 1     | 0     |
| 2184   | 1     | 0     | 1     | 0     |
| 2185   | 0     | 0     | 0     | 0     |
| 2186   | 0     | 0     | 0     | 0     |
| 2187   | 0     | 0     | 0     | 0     |
| 2188   | 0     | 0     | 0     | 0     |
| 2189   | 0     | 0     | 0     | 0     |
| 2190   | 0     | 0     | 0     | 0     |
| 2193   | 0     | 0     | 0     | 0     |
| 2195   | 0     | 0     | 0     | 0     |
| 2198   | 0     | 0     | 0     | 0     |
| 2200   | 0     | 1     | 0     | 0     |
| 2205   | 0     | 0     | 0     | 0     |
| 2208   | 0     | 0     | 0     | 0     |
| 2209   | 0     | 0     | 0     | 0     |
| 2210   | 0     | 0     | 0     | 0     |
| 2211   | 0     | 0     | 0     | 0     |
| 2213   | 0     | 0     | 0     | 0     |
| 2214   | 1     | 0     | 0     | 0     |

| respid | Q31_2 | Q31_3 | Q31_4 | Q31_5 |
|--------|-------|-------|-------|-------|
| 2216   | 0     | 0     | 0     | 0     |
| 2220   | 0     | 1     | 0     | 0     |
| 2225   | 0     | 0     | 0     | 0     |
| 2227   | 0     | 0     | 0     | 0     |
| 2228   | 0     | 0     | 0     | 0     |
| 2229   | 0     | 0     | 0     | 0     |
| 2230   | 0     | 0     | 0     | 0     |
| 2236   | 0     | 0     | 0     | 0     |
| 2238   | 1     | 1     | 0     | 1     |
| 2239   | 0     | 0     | 0     | 0     |
| 2240   | 0     | 0     | 0     | 0     |
| 2241   | 1     | 0     | 0     | 0     |
| 2243   | 0     | 0     | 0     | 0     |
| 2245   | 0     | 0     | 0     | 0     |
| 2247   | 1     | 0     | 0     | 0     |
| 2248   | 0     | 0     | 0     | 0     |
| 2249   | 0     | 0     | 0     | 0     |
| 2254   | 0     | 0     | 0     | 0     |
| 2256   | 0     | 0     | 0     | 0     |
| 2259   | 0     | 0     | 0     | 0     |
| 2261   | 1     | 0     | 0     | 0     |
| 2262   | 0     | 0     | 0     | 0     |
| 2263   | 1     | 1     | 0     | 0     |
| 2264   | 0     | 0     | 0     | 0     |
| 2265   | 0     | 0     | 0     | 0     |
| 2270   | 0     | 0     | 0     | 0     |
| 2271   | 0     | 0     | 0     | 0     |
| 2272   | 0     | 0     | 0     | 0     |
| 2273   | 0     | 0     | 0     | 0     |
| 2274   | 0     | 0     | 0     | 0     |
| 2276   | 1     | 1     | 0     | 0     |
| 2277   | 1     | 0     | 0     | 0     |

| respid | Q31_2 | Q31_3 | Q31_4 | Q31_5 |
|--------|-------|-------|-------|-------|
| 2281   | 0     | 0     | 0     | 0     |
| 2288   | 0     | 0     | 0     | 0     |
| 2290   | 0     | 0     | 0     | 0     |
| 2294   | 0     | 1     | 0     | 0     |
| 2295   | 1     | 0     | 0     | 0     |
| 2296   | 0     | 0     | 0     | 0     |
| 2297   | 0     | 0     | 0     | 0     |
| 2298   | 0     | 0     | 0     | 0     |
| 2301   | 0     | 0     | 0     | 0     |
| 2302   | 0     | 0     | 0     | 0     |
| 2303   | 0     | 0     | 0     | 0     |
| 2305   | 0     | 0     | 0     | 0     |
| 2309   | 1     | 0     | 0     | 0     |
| 2310   | 0     | 0     | 0     | 0     |
| 2311   | 1     | 1     | 0     | 0     |
| 2313   | 1     | 0     | 0     | 0     |
| 2316   | 0     | 0     | 0     | 0     |
| 2317   | 0     | 0     | 0     | 0     |
| 2318   | 0     | 0     | 0     | 0     |
| 2319   | 1     | 1     | 0     | 0     |
| 2321   | 0     | 0     | 0     | 0     |
| 2324   | 0     | 0     | 0     | 0     |
| 2328   | 1     | 0     | 0     | 0     |
| 2329   | 0     | 0     | 0     | 0     |
| 2330   | 0     | 0     | 0     | 0     |
| 2333   | 0     | 0     | 0     | 0     |
| 2334   | 0     | 0     | 0     | 0     |
| 2338   | 0     | 0     | 0     | 0     |
| 2341   | 1     | 1     | 1     | 0     |
| 2342   | 0     | 0     | 0     | 0     |
| 2343   | 1     | 0     | 0     | 0     |
| 2346   | 1     | 1     | 0     | 0     |

| respid | Q31_2 | Q31_3 | Q31_4 | Q31_5 |
|--------|-------|-------|-------|-------|
| 2347   | 1     | 0     | 0     | 0     |
| 2348   | 0     | 0     | 0     | 0     |
| 2349   | 0     | 1     | 0     | 0     |
| 2350   | 1     | 0     | 0     | 0     |
| 2351   | 0     | 0     | 0     | 0     |
| 2352   | 0     | 0     | 0     | 0     |
| 2359   | 0     | 1     | 0     | 0     |
| 2362   | 0     | 0     | 0     | 0     |
| 2363   | 0     | 0     | 0     | 0     |
| 2365   | 0     | 0     | 0     | 0     |
| 2367   | 0     | 0     | 0     | 0     |
| 2368   | 0     | 0     | 0     | 0     |
| 2369   | 0     | 0     | 0     | 0     |
| 2372   | 0     | 0     | 0     | 0     |
| 2374   | 1     | 0     | 0     | 0     |
| 2376   | 0     | 0     | 0     | 0     |
| 2379   | 1     | 0     | 0     | 0     |
| 2380   | 0     | 0     | 0     | 0     |
| 2381   | 1     | 0     | 0     | 0     |
| 2382   | 0     | 0     | 0     | 0     |
| 2385   | 1     | 1     | 0     | 0     |
| 2387   | 0     | 0     | 0     | 0     |
| 2388   | 0     | 0     | 0     | 0     |
| 2389   | 0     | 1     | 0     | 0     |
| 2391   | 0     | 1     | 0     | 0     |
| 2392   | 0     | 0     | 0     | 0     |
| 2393   | 0     | 0     | 0     | 0     |
| 2394   | 0     | 0     | 0     | 0     |
| 2397   | 0     | 0     | 0     | 0     |
| 2398   | 1     | 0     | 0     | 0     |
| 2400   | 0     | 0     | 0     | 0     |
| 2402   | 0     | 0     | 0     | 0     |

| respid | Q31_2 | Q31_3 | Q31_4 | Q31_5 |
|--------|-------|-------|-------|-------|
| 2406   | 0     | 0     | 0     | 0     |
| 2408   | 1     | 0     | 0     | 0     |
| 2410   | 0     | 0     | 0     | 0     |
| 2411   | 1     | 0     | 0     | 0     |
| 2412   | 0     | 0     | 0     | 0     |
| 2414   | 1     | 0     | 0     | 0     |
| 2421   | 1     | 0     | 0     | 0     |
| 2423   | 0     | 0     | 0     | 0     |
| 2424   | 1     | 0     | 0     | 0     |
| 2425   | 0     | 1     | 0     | 0     |
| 2426   | 0     | 0     | 0     | 0     |
| 2429   | 1     | 1     | 1     | 1     |
| 2430   | 0     | 0     | 0     | 0     |
| 2432   | 0     | 0     | 0     | 0     |
| 2433   | 0     | 0     | 0     | 0     |
| 2434   | 1     | 0     | 0     | 0     |
| 2435   | 0     | 0     | 0     | 0     |
| 2436   | 1     | 1     | 0     | 0     |
| 2439   | 1     | 1     | 0     | 0     |
| 2440   | 0     | 0     | 0     | 0     |
| 2441   | 0     | 0     | 0     | 0     |
| 2446   | 1     | 0     | 0     | 0     |
| 2448   | 1     | 1     | 0     | 0     |
| 2449   | 0     | 0     | 0     | 0     |
| 2451   | 0     | 0     | 0     | 0     |
| 2452   | 0     | 0     | 0     | 0     |
| 2455   | 0     | 0     | 0     | 0     |
| 2457   | 1     | 0     | 0     | 0     |
| 2458   | 0     | 0     | 0     | 0     |
| 2459   | 1     | 0     | 0     | 0     |
| 2460   | 0     | 0     | 0     | 0     |
| 2462   | 0     | 0     | 1     | 0     |



| respid | Q31_2 | Q31_3 | Q31_4 | Q31_5 |
|--------|-------|-------|-------|-------|
| 2464   | 0     | 0     | 0     | 0     |
| 2465   | 1     | 1     | 0     | 0     |
| 2468   | 0     | 0     | 0     | 0     |
| 2469   | 0     | 0     | 0     | 0     |
| 2470   | 0     | 0     | 0     | 0     |
| 2471   | 0     | 0     | 0     | 0     |
| 2472   | 0     | 0     | 0     | 0     |
| 2474   | 0     | 0     | 0     | 0     |
| 2476   | 0     | 0     | 0     | 0     |
| 2478   | 0     | 0     | 0     | 0     |
| 2479   | 0     | 0     | 0     | 0     |
| 2480   | 0     | 0     | 0     | 0     |
| 2482   | 0     | 0     | 0     | 0     |
| 2486   | 0     | 0     | 0     | 0     |
| 2488   | 0     | 1     | 1     | 0     |
| 2489   | 0     | 0     | 0     | 0     |
| 2491   | 0     | 0     | 0     | 0     |
| 2495   | 0     | 0     | 0     | 0     |
| 2496   | 0     | 0     | 0     | 0     |
| 2498   | 1     | 1     | 0     | 0     |
| 2501   | 0     | 0     | 0     | 0     |
| 2502   | 0     | 0     | 0     | 0     |
| 2503   | 0     | 0     | 0     | 0     |
| 2504   | 0     | 0     | 0     | 0     |
| 2507   | 1     | 0     | 0     | 0     |
| 2509   | 1     | 0     | 1     | 0     |
| 2512   | 0     | 0     | 0     | 0     |
| 2514   | 0     | 0     | 0     | 0     |
| 2516   | 0     | 0     | 0     | 0     |
| 2517   | 1     | 0     | 0     | 0     |
| 2521   | 0     | 0     | 0     | 0     |
| 2522   | 0     | 0     | 0     | 0     |

| respid | Q31_2 | Q31_3 | Q31_4 | Q31_5 |
|--------|-------|-------|-------|-------|
| 2524   | 0     | 0     | 0     | 0     |
| 2525   | 0     | 0     | 0     | 0     |
| 2526   | 0     | 0     | 0     | 0     |
| 2527   | 0     | 0     | 0     | 0     |
| 2528   | 0     | 0     | 1     | 0     |
| 2531   | 0     | 0     | 0     | 0     |
| 2533   | 0     | 1     | 0     | 0     |
| 2535   | 0     | 0     | 0     | 0     |
| 2536   | 1     | 0     | 0     | 0     |
| 2539   | 0     | 0     | 0     | 0     |
| 2540   | 0     | 0     | 0     | 0     |
| 2543   | 0     | 0     | 0     | 0     |
| 2546   | 1     | 1     | 0     | 0     |
| 2547   | 1     | 0     | 0     | 0     |
| 2549   | 0     | 0     | 0     | 0     |
| 2553   | 0     | 0     | 0     | 0     |
| 2554   | 0     | 0     | 0     | 0     |
| 2555   | 0     | 0     | 0     | 0     |
| 2556   | 0     | 0     | 0     | 0     |
| 2557   | 0     | 0     | 0     | 0     |
| 2559   | 0     | 0     | 0     | 0     |
| 2560   | 1     | 1     | 0     | 1     |
| 2561   | 0     | 0     | 0     | 0     |
| 2566   | 0     | 0     | 0     | 0     |
| 2567   | 0     | 0     | 0     | 0     |
| 2570   | 0     | 0     | 0     | 0     |
| 2574   | 0     | 0     | 0     | 0     |
| 2578   | 0     | 0     | 0     | 0     |
| 2580   | 0     | 0     | 0     | 0     |
| 2590   | 0     | 0     | 0     | 0     |
| 2593   | 0     | 0     | 0     | 0     |
| 2594   | 0     | 0     | 0     | 0     |

| respid | Q31_2 | Q31_3 | Q31_4 | Q31_5 |
|--------|-------|-------|-------|-------|
| 2595   | 0     | 0     | 0     | 0     |
| 2596   | 0     | 0     | 0     | 0     |
| 2597   | 0     | 0     | 0     | 0     |
| 2598   | 0     | 0     | 0     | 0     |
| 2602   | 0     | 0     | 0     | 1     |
| 2605   | 0     | 0     | 0     | 0     |
| 2606   | 0     | 0     | 0     | 0     |
| 2607   | 0     | 0     | 0     | 0     |
| 2608   | 0     | 0     | 0     | 0     |
| 2609   | 1     | 0     | 0     | 0     |
| 2610   | 0     | 0     | 0     | 0     |
| 2614   | 0     | 0     | 0     | 0     |
| 2615   | 0     | 0     | 0     | 0     |
| 2616   | 0     | 0     | 0     | 0     |
| 2618   | 0     | 0     | 0     | 0     |
| 2630   | 0     | 0     | 0     | 0     |
| 2633   | 0     | 0     | 0     | 0     |
| 2637   | 0     | 0     | 0     | 0     |
| 2638   | 1     | 0     | 0     | 0     |
| 2641   | 0     | 0     | 0     | 0     |
| 2644   | 0     | 0     | 0     | 0     |
| 2645   | 1     | 0     | 0     | 0     |
| 2646   | 0     | 0     | 0     | 0     |
| 2648   | 0     | 0     | 0     | 0     |
| 2651   | 0     | 0     | 0     | 0     |
| 2652   | 1     | 1     | 0     | 0     |
| 2653   | 0     | 0     | 0     | 0     |
| 2656   | 0     | 0     | 0     | 0     |
| 2657   | 0     | 0     | 0     | 0     |
| 2658   | 0     | 0     | 0     | 0     |
| 2661   | 1     | 1     | 1     | 0     |
| 2663   | 0     | 0     | 0     | 0     |

| respid | Q31_2 | Q31_3 | Q31_4 | Q31_5 |
|--------|-------|-------|-------|-------|
| 2665   | 0     | 0     | 0     | 0     |
| 2670   | 0     | 0     | 0     | 0     |
| 2672   | 0     | 0     | 0     | 0     |
| 2673   | 0     | 0     | 0     | 0     |
| 2677   | 0     | 0     | 0     | 0     |
| 2686   | 1     | 1     | 1     | 1     |
| 2688   | 0     | 0     | 0     | 0     |
| 2689   | 0     | 0     | 0     | 0     |
| 2691   | 0     | 0     | 0     | 0     |
| 2695   | 0     | 0     | 0     | 0     |
| 2696   | 0     | 0     | 0     | 0     |
| 2697   | 0     | 0     | 0     | 0     |
| 2698   | 0     | 0     | 0     | 0     |
| 2703   | 1     | 1     | 0     | 0     |
| 2704   | 0     | 0     | 0     | 0     |
| 2706   | 0     | 0     | 0     | 0     |
| 2707   | 0     | 0     | 0     | 0     |
| 2710   | 0     | 0     | 0     | 0     |
| 2711   | 0     | 0     | 0     | 0     |
| 2712   | 0     | 0     | 0     | 0     |
| 2713   | 0     | 0     | 0     | 0     |
| 2721   | 0     | 0     | 0     | 0     |
| 2730   | 0     | 0     | 0     | 0     |
| 2731   | 0     | 0     | 0     | 0     |
| 2732   | 0     | 0     | 0     | 0     |
| 2733   | 0     | 0     | 0     | 0     |
| 2735   | 0     | 0     | 0     | 0     |
| 2736   | 0     | 0     | 0     | 0     |
| 2740   | 0     | 0     | 0     | 0     |
| 2741   | 0     | 0     | 0     | 0     |
| 2742   | 1     | 0     | 0     | 0     |
| 2743   | 0     | 0     | 0     | 0     |

| respid | Q31_2 | Q31_3 | Q31_4 | Q31_5 |
|--------|-------|-------|-------|-------|
| 2744   | 0     | 0     | 0     | 0     |
| 2745   | 0     | 0     | 0     | 0     |
| 2749   | 1     | 0     | 0     | 0     |
| 2751   | 0     | 0     | 0     | 0     |
| 2754   | 0     | 0     | 0     | 0     |
| 2755   | 0     | 0     | 0     | 0     |
| 2757   | 0     | 0     | 0     | 0     |
| 2758   | 1     | 0     | 0     | 1     |
| 2759   | 0     | 0     | 0     | 0     |
| 2761   | 1     | 1     | 0     | 0     |
| 2762   | 0     | 0     | 0     | 0     |
| 2763   | 0     | 0     | 0     | 0     |
| 2764   | 1     | 1     | 0     | 1     |
| 2765   | 0     | 0     | 0     | 0     |
| 2766   | 0     | 0     | 0     | 0     |
| 2767   | 0     | 0     | 0     | 0     |
| 2769   | 1     | 1     | 0     | 1     |
| 2770   | 1     | 0     | 0     | 0     |
| 2771   | 1     | 0     | 1     | 0     |
| 2774   | 0     | 0     | 0     | 1     |
| 2777   | 1     | 1     | 1     | 1     |
| 2778   | 1     | 0     | 0     | 0     |
| 2781   | 0     | 0     | 0     | 0     |
| 2782   | 1     | 0     | 0     | 0     |
| 2784   | 0     | 0     | 0     | 0     |
| 2785   | 0     | 0     | 0     | 0     |
| 2786   | 0     | 0     | 0     | 0     |
| 2787   | 0     | 0     | 0     | 0     |
| 2789   | 1     | 1     | 0     | 0     |
| 2790   | 0     | 0     | 0     | 0     |
| 2791   | 0     | 0     | 0     | 0     |
| 2793   | 0     | 0     | 0     | 0     |

| respid | Q31_2 | Q31_3 | Q31_4 | Q31_5 |
|--------|-------|-------|-------|-------|
| 2797   | 0     | 0     | 0     | 0     |
| 2798   | 0     | 0     | 0     | 0     |
| 2799   | 0     | 1     | 0     | 0     |
| 2801   | 0     | 0     | 0     | 0     |
| 2802   | 0     | 0     | 0     | 0     |
| 2803   | 1     | 0     | 0     | 0     |
| 2804   | 0     | 0     | 1     | 0     |
| 2807   | 0     | 0     | 0     | 0     |
| 2809   | 0     | 0     | 0     | 0     |
| 2810   | 0     | 0     | 0     | 0     |
| 2812   | 0     | 0     | 0     | 0     |
| 2814   | 0     | 0     | 0     | 0     |
| 2815   | 0     | 0     | 0     | 0     |
| 2816   | 0     | 0     | 0     | 0     |
| 2817   | 0     | 0     | 0     | 0     |
| 2819   | 0     | 0     | 0     | 0     |
| 2820   | 0     | 0     | 0     | 0     |
| 2821   | 0     | 0     | 0     | 0     |
| 2822   | 1     | 1     | 1     | 1     |
| 2823   | 1     | 1     | 0     | 0     |
| 2824   | 1     | 0     | 0     | 0     |
| 2825   | 0     | 0     | 0     | 0     |
| 2826   | 1     | 0     | 0     | 0     |
| 2827   | 0     | 0     | 0     | 0     |
| 2828   | 0     | 0     | 0     | 0     |
| 2829   | 0     | 0     | 0     | 0     |
| 2830   | 1     | 0     | 1     | 0     |
| 2831   | 0     | 0     | 0     | 0     |
| 2832   | 1     | 1     | 0     | 1     |
| 2833   | 0     | 0     | 0     | 0     |
| 2834   | 0     | 0     | 0     | 0     |
| 2835   | 0     | 1     | 0     | 0     |

| respid | Q31_2 | Q31_3 | Q31_4 | Q31_5 |
|--------|-------|-------|-------|-------|
| 2836   | 0     | 0     | 0     | 0     |
| 2837   | 0     | 0     | 0     | 0     |
| 2838   | 0     | 1     | 0     | 0     |
| 2844   | 1     | 0     | 1     | 0     |
| 2845   | 0     | 0     | 0     | 0     |
| 2847   | 0     | 0     | 0     | 0     |
| 2848   | 0     | 0     | 0     | 0     |
| 2849   | 0     | 0     | 0     | 0     |
| 2851   | 0     | 0     | 0     | 0     |
| 2852   | 1     | 1     | 0     | 0     |
| 2853   | 0     | 0     | 0     | 0     |
| 2854   | 0     | 0     | 0     | 0     |
| 2856   | 0     | 0     | 0     | 0     |
| 2857   | 0     | 0     | 0     | 0     |
| 2858   | 0     | 0     | 0     | 0     |
| 2859   | 0     | 0     | 0     | 0     |
| 2860   | 1     | 0     | 0     | 0     |
| 2861   | 1     | 0     | 0     | 1     |
| 2863   | 0     | 0     | 0     | 0     |
| 2864   | 1     | 0     | 0     | 0     |
| 2866   | 1     | 1     | 0     | 0     |
| 2872   | 0     | 0     | 0     | 0     |
| 2875   | 0     | 0     | 0     | 0     |
| 2879   | 0     | 0     | 0     | 0     |
| 2881   | 0     | 0     | 0     | 0     |
| 2882   | 0     | 0     | 0     | 0     |
| 2883   | 0     | 0     | 0     | 0     |
| 2884   | 0     | 0     | 0     | 0     |
| 2885   | 0     | 1     | 0     | 0     |
| 2887   | 0     | 0     | 0     | 0     |
| 2888   | 0     | 0     | 0     | 0     |
| 2890   | 0     | 0     | 0     | 0     |

| respid | Q31_2 | Q31_3 | Q31_4 | Q31_5 |
|--------|-------|-------|-------|-------|
| 2891   | 0     | 0     | 0     | 0     |
| 2892   | 0     | 0     | 0     | 0     |
| 2895   | 0     | 0     | 0     | 0     |
| 2899   | 0     | 0     | 0     | 0     |
| 2900   | 0     | 0     | 0     | 0     |
| 2902   | 0     | 0     | 0     | 0     |
| 2903   | 0     | 0     | 0     | 0     |
| 2904   | 0     | 0     | 0     | 0     |
| 2906   | 1     | 1     | 0     | 0     |
| 2908   | 0     | 0     | 0     | 0     |
| 2910   | 0     | 0     | 0     | 0     |
| 2917   | 0     | 0     | 0     | 0     |
| 2918   | 0     | 0     | 0     | 0     |
| 2919   | 0     | 0     | 0     | 0     |
| 2920   | 0     | 0     | 0     | 0     |
| 2921   | 0     | 0     | 0     | 0     |
| 2922   | 0     | 0     | 0     | 0     |
| 2923   | 0     | 0     | 0     | 0     |
| 2924   | 0     | 1     | 1     | 0     |
| 2926   | 1     | 1     | 0     | 0     |
| 2928   | 0     | 0     | 0     | 0     |
| 2930   | 0     | 0     | 0     | 0     |
| 2931   | 0     | 0     | 0     | 0     |
| 2933   | 0     | 0     | 0     | 0     |
| 2935   | 0     | 0     | 0     | 0     |
| 2936   | 0     | 0     | 0     | 0     |
| 2937   | 0     | 0     | 0     | 0     |
| 2938   | 0     | 0     | 0     | 0     |
| 2944   | 0     | 0     | 0     | 0     |
| 2945   | 0     | 0     | 0     | 0     |
| 2947   | 0     | 0     | 0     | 0     |
| 2949   | 0     | 0     | 0     | 0     |



| respid | Q31_2 | Q31_3 | Q31_4 | Q31_5 |
|--------|-------|-------|-------|-------|
| 2951   | 0     | 1     | 0     | 0     |
| 2952   | 0     | 0     | 0     | 0     |
| 2953   | 0     | 0     | 0     | 0     |
| 2955   | 0     | 0     | 0     | 0     |
| 2957   | 0     | 0     | 0     | 0     |
| 2958   | 0     | 0     | 0     | 0     |
| 2960   | 0     | 0     | 0     | 0     |
| 2963   | 0     | 0     | 0     | 0     |
| 2964   | 0     | 0     | 0     | 0     |
| 2967   | 0     | 0     | 0     | 0     |
| 2968   | 0     | 0     | 0     | 0     |
| 2971   | 1     | 0     | 0     | 0     |
| 2974   | 0     | 0     | 0     | 0     |
| 2975   | 0     | 0     | 0     | 0     |
| 2982   | 0     | 0     | 0     | 0     |
| 2983   | 0     | 0     | 0     | 0     |
| 2985   | 0     | 0     | 0     | 0     |
| 2986   | 1     | 1     | 0     | 1     |
| 2987   | 1     | 0     | 0     | 0     |
| 2988   | 1     | 1     | 0     | 0     |
| 2993   | 0     | 0     | 0     | 0     |
| 2996   | 0     | 0     | 0     | 0     |
| 2997   | 0     | 0     | 0     | 0     |
| 2998   | 0     | 0     | 0     | 0     |
| 3004   | 0     | 0     | 0     | 0     |
| 3007   | 0     | 0     | 0     | 0     |
| 3011   | 0     | 0     | 0     | 0     |
| 3012   | 0     | 0     | 0     | 0     |
| 3013   | 0     | 0     | 0     | 0     |
| 3014   | 0     | 0     | 0     | 0     |
| 3015   | 0     | 0     | 0     | 0     |
| 3016   | 0     | 0     | 0     | 0     |

| respid | Q31_2 | Q31_3 | Q31_4 | Q31_5 |
|--------|-------|-------|-------|-------|
| 3017   | 0     | 0     | 0     | 0     |
| 3020   | 0     | 0     | 0     | 0     |
| 3022   | 0     | 0     | 0     | 0     |
| 3023   | 0     | 0     | 0     | 0     |
| 3026   | 1     | 1     | 0     | 0     |
| 3038   | 1     | 0     | 0     | 0     |
| 3039   | 0     | 0     | 0     | 0     |
| 3040   | 0     | 0     | 0     | 0     |
| 3041   | 0     | 0     | 0     | 0     |
| 3042   | 0     | 0     | 0     | 0     |
| 3044   | 0     | 0     | 0     | 0     |
| 3050   | 0     | 0     | 0     | 0     |
| 3052   | 0     | 0     | 0     | 0     |
| 3056   | 1     | 1     | 0     | 0     |
| 3059   | 0     | 0     | 0     | 0     |
| 3060   | 0     | 0     | 0     | 0     |
| 3063   | 0     | 0     | 0     | 0     |
| 3065   | 0     | 0     | 0     | 0     |
| 3067   | 0     | 0     | 0     | 0     |
| 3068   | 0     | 0     | 0     | 0     |
| 3072   | 0     | 0     | 0     | 0     |
| 3074   | 0     | 0     | 0     | 0     |
| 3075   | 0     | 0     | 0     | 0     |
| 3076   | 1     | 0     | 0     | 0     |
| 3079   | 0     | 0     | 0     | 0     |
| 3082   | 0     | 1     | 0     | 0     |
| 3083   | 0     | 0     | 0     | 0     |
| 3084   | 0     | 0     | 0     | 0     |
| 3085   | 0     | 0     | 0     | 0     |
| 3090   | 1     | 0     | 0     | 0     |
| 3091   | 1     | 1     | 0     | 0     |
| 3092   | 0     | 0     | 0     | 0     |

| respid | Q31_2 | Q31_3 | Q31_4 | Q31_5 |
|--------|-------|-------|-------|-------|
| 3095   | 0     | 0     | 0     | 0     |
| 3096   | 0     | 0     | 1     | 0     |
| 3097   | 0     | 0     | 0     | 0     |
| 3099   | 0     | 0     | 0     | 1     |
| 3101   | 1     | 1     | 0     | 0     |
| 3103   | 0     | 0     | 0     | 0     |
| 3104   | 0     | 0     | 0     | 0     |
| 3105   | 0     | 0     | 0     | 0     |
| 3107   | 0     | 0     | 0     | 0     |
| 3108   | 0     | 0     | 0     | 0     |
| 3109   | 0     | 0     | 0     | 0     |
| 3116   | 0     | 0     | 0     | 0     |
| 3117   | 1     | 1     | 0     | 0     |
| 3119   | 0     | 0     | 0     | 0     |
| 3120   | 0     | 0     | 0     | 0     |
| 3130   | 0     | 1     | 0     | 0     |
| 3131   | 0     | 0     | 0     | 0     |
| 3133   | 0     | 0     | 0     | 0     |
| 3134   | 0     | 0     | 0     | 0     |
| 3135   | 0     | 0     | 0     | 0     |
| 3145   | 0     | 0     | 0     | 0     |
| 3147   | 0     | 0     | 0     | 0     |
| 3152   | 0     | 0     | 0     | 0     |
| 3155   | 1     | 0     | 0     | 1     |
| 3156   | 0     | 0     | 0     | 0     |
| 3157   | 0     | 0     | 0     | 1     |
| 3166   | 0     | 0     | 0     | 0     |
| 3169   | 0     | 0     | 0     | 1     |
| 3179   | 1     | 0     | 0     | 0     |
| 3181   | 0     | 0     | 0     | 0     |
| 3185   | 0     | 0     | 0     | 0     |
| 3190   | 0     | 0     | 0     | 0     |

| respid | Q31_2 | Q31_3 | Q31_4 | Q31_5 |
|--------|-------|-------|-------|-------|
| 3191   | 0     | 0     | 0     | 0     |
| 3192   | 0     | 0     | 0     | 0     |
| 3193   | 0     | 0     | 0     | 0     |
| 3195   | 0     | 0     | 0     | 0     |
| 3202   | 0     | 0     | 0     | 1     |
| 3204   | 0     | 0     | 0     | 0     |
| 3208   | 0     | 0     | 0     | 0     |
| 3212   | 0     | 0     | 0     | 0     |
| 3218   | 0     | 0     | 0     | 0     |
| 3219   | 1     | 0     | 0     | 0     |
| 3220   | 1     | 1     | 0     | 0     |
| 3221   | 0     | 0     | 0     | 0     |
| 3223   | 1     | 0     | 0     | 0     |
| 3231   | 1     | 0     | 0     | 1     |
| 3232   | 0     | 0     | 1     | 0     |
| 3234   | 0     | 0     | 0     | 0     |
| 3235   | 0     | 0     | 0     | 0     |
| 3237   | 0     | 0     | 0     | 0     |
| 3238   | 0     | 0     | 0     | 0     |
| 3240   | 0     | 0     | 0     | 0     |
| 3241   | 0     | 0     | 0     | 0     |
| 3243   | 1     | 0     | 0     | 0     |
| 3244   | 1     | 0     | 0     | 0     |
| 3247   | 0     | 0     | 0     | 0     |
| 3250   | 0     | 0     | 0     | 0     |
| 3251   | 1     | 1     | 1     | 0     |
| 3255   | 1     | 0     | 0     | 0     |
| 3256   | 0     | 0     | 0     | 0     |
| 3257   | 0     | 1     | 0     | 0     |
| 3258   | 0     | 0     | 0     | 0     |
| 3259   | 1     | 1     | 1     | 0     |
| 3260   | 0     | 0     | 0     | 0     |

| respid | Q31_2 | Q31_3 | Q31_4 | Q31_5 |
|--------|-------|-------|-------|-------|
| 3261   | 0     | 0     | 0     | 0     |
| 3262   | 0     | 0     | 0     | 0     |
| 3264   | 1     | 1     | 1     | 1     |
| 3265   | 0     | 0     | 0     | 0     |
| 3267   | 0     | 0     | 0     | 0     |
| 3268   | 1     | 0     | 0     | 0     |
| 3270   | 0     | 0     | 0     | 0     |
| 3271   | 0     | 0     | 0     | 0     |
| 3274   | 0     | 0     | 0     | 0     |
| 3276   | 0     | 0     | 0     | 0     |
| 3277   | 0     | 0     | 0     | 0     |
| 3279   | 0     | 0     | 0     | 0     |
| 3281   | 0     | 0     | 0     | 0     |
| 3283   | 0     | 0     | 0     | 0     |
| 3285   | 0     | 0     | 0     | 0     |
| 3286   | 0     | 0     | 0     | 0     |
| 3287   | 0     | 0     | 0     | 0     |
| 3289   | 0     | 0     | 0     | 0     |
| 3290   | 0     | 0     | 0     | 0     |
| 3291   | 1     | 0     | 0     | 0     |
| 3292   | 1     | 1     | 1     | 0     |
| 3293   | 1     | 1     | 0     | 0     |
| 3294   | 0     | 0     | 0     | 0     |
| 3296   | 0     | 0     | 1     | 0     |
| 3306   | 0     | 1     | 0     | 0     |
| 3307   | 1     | 1     | 1     | 0     |
| 3308   | 0     | 0     | 0     | 0     |
| 3312   | 0     | 0     | 0     | 0     |
| 3313   | 0     | 0     | 0     | 0     |
| 3316   | 0     | 0     | 0     | 0     |
| 3317   | 0     | 0     | 0     | 0     |
| 3320   | 0     | 0     | 0     | 0     |

| respid | Q31_2 | Q31_3 | Q31_4 | Q31_5 |
|--------|-------|-------|-------|-------|
| 3321   | 0     | 0     | 0     | 0     |
| 3322   | 0     | 0     | 0     | 0     |
| 3323   | 0     | 0     | 0     | 0     |
| 3325   | 0     | 0     | 0     | 0     |
| 3332   | 0     | 0     | 0     | 0     |
| 3334   | 0     | 0     | 0     | 0     |
| 3335   | 0     | 0     | 0     | 0     |
| 3341   | 0     | 0     | 0     | 0     |
| 3345   | 0     | 0     | 0     | 0     |
| 3346   | 0     | 0     | 0     | 0     |
| 3349   | 0     | 0     | 0     | 0     |
| 3351   | 0     | 0     | 0     | 0     |
| 3353   | 0     | 0     | 0     | 0     |
| 3354   | 0     | 0     | 0     | 0     |
| 3356   | 0     | 0     | 0     | 0     |
| 3357   | 0     | 0     | 0     | 0     |
| 3360   | 1     | 1     | 0     | 0     |
| 3361   | 0     | 0     | 0     | 0     |
| 3362   | 0     | 0     | 0     | 0     |
| 3363   | 0     | 0     | 0     | 0     |
| 3364   | 1     | 1     | 1     | 1     |
| 3368   | 0     | 0     | 0     | 0     |
| 3370   | 0     | 0     | 0     | 0     |
| 3371   | 0     | 0     | 0     | 0     |
| 3379   | 0     | 0     | 0     | 0     |
| 3380   | 0     | 0     | 1     | 1     |
| 3382   | 0     | 0     | 0     | 0     |
| 3384   | 0     | 0     | 0     | 0     |
| 3385   | 0     | 0     | 0     | 0     |
| 3388   | 0     | 0     | 0     | 0     |
| 3392   | 0     | 0     | 0     | 1     |
| 3393   | 0     | 0     | 0     | 0     |

| respid | Q31_2 | Q31_3 | Q31_4 | Q31_5 |
|--------|-------|-------|-------|-------|
| 3394   | 0     | 0     | 1     | 1     |
| 3395   | 0     | 0     | 0     | 0     |
| 3396   | 0     | 0     | 0     | 0     |
| 3397   | 0     | 0     | 0     | 0     |
| 3398   | 0     | 0     | 0     | 0     |
| 3399   | 0     | 0     | 0     | 0     |
| 3400   | 0     | 0     | 0     | 0     |
| 3401   | 0     | 1     | 1     | 0     |
| 3402   | 0     | 0     | 0     | 0     |
| 3403   | 0     | 0     | 0     | 0     |
| 3405   | 0     | 1     | 0     | 1     |
| 3407   | 0     | 0     | 0     | 0     |
| 3410   | 0     | 0     | 0     | 0     |
| 3411   | 0     | 0     | 0     | 0     |
| 3413   | 0     | 0     | 0     | 0     |
| 3414   | 1     | 1     | 0     | 0     |
| 3420   | 0     | 0     | 0     | 0     |
| 3421   | 1     | 1     | 1     | 0     |
| 3425   | 0     | 0     | 0     | 0     |
| 3426   | 0     | 0     | 0     | 0     |
| 3429   | 0     | 0     | 0     | 0     |
| 3430   | 1     | 1     | 1     | 1     |
| 3433   | 0     | 0     | 0     | 0     |
| 3434   | 1     | 1     | 0     | 0     |
| 3437   | 0     | 0     | 0     | 0     |
| 3439   | 0     | 0     | 0     | 0     |
| 3441   | 0     | 0     | 0     | 0     |
| 3442   | 1     | 0     | 0     | 0     |
| 3444   | 0     | 0     | 0     | 0     |
| 3445   | 0     | 0     | 0     | 0     |
| 3450   | 0     | 0     | 0     | 0     |
| 3452   | 0     | 0     | 0     | 0     |

| respid | Q31_2 | Q31_3 | Q31_4 | Q31_5 |
|--------|-------|-------|-------|-------|
| 3456   | 0     | 0     | 0     | 0     |
| 3459   | 0     | 0     | 0     | 0     |
| 3460   | 0     | 0     | 0     | 0     |
| 3461   | 0     | 0     | 0     | 0     |
| 3466   | 0     | 0     | 0     | 0     |
| 3471   | 0     | 0     | 0     | 0     |
| 3473   | 0     | 0     | 0     | 0     |
| 3475   | 1     | 0     | 0     | 0     |
| 3476   | 0     | 0     | 0     | 0     |
| 3477   | 0     | 0     | 0     | 0     |
| 3478   | 0     | 0     | 0     | 0     |
| 3479   | 0     | 1     | 0     | 0     |
| 3482   | 1     | 0     | 0     | 0     |
| 3483   | 0     | 0     | 0     | 0     |
| 3485   | 0     | 0     | 1     | 0     |
| 3489   | 0     | 0     | 0     | 0     |
| 3490   | 1     | 1     | 0     | 0     |
| 3491   | 1     | 1     | 0     | 0     |
| 3494   | 0     | 0     | 0     | 0     |
| 3495   | 0     | 0     | 0     | 0     |
| 3501   | 0     | 0     | 0     | 0     |
| 3506   | 0     | 0     | 0     | 0     |
| 3507   | 0     | 0     | 0     | 0     |
| 3517   | 0     | 1     | 0     | 0     |
| 3520   | 0     | 0     | 0     | 0     |
| 3521   | 0     | 0     | 0     | 0     |
| 3522   | 1     | 0     | 1     | 0     |
| 3524   | 0     | 0     | 0     | 0     |
| 3527   | 0     | 0     | 0     | 0     |
| 3528   | 0     | 0     | 0     | 0     |
| 3529   | 0     | 0     | 0     | 0     |
| 3536   | 0     | 1     | 0     | 0     |



| respid | Q31_2 | Q31_3 | Q31_4 | Q31_5 |
|--------|-------|-------|-------|-------|
| 3537   | 0     | 0     | 0     | 0     |
| 3538   | 0     | 0     | 0     | 0     |
| 3540   | 0     | 1     | 0     | 1     |
| 3545   | 0     | 0     | 0     | 0     |
| 3547   | 0     | 0     | 0     | 0     |
| 3554   | 0     | 0     | 0     | 0     |
| 3556   | 0     | 0     | 0     | 0     |
| 3557   | 0     | 0     | 0     | 0     |
| 3559   | 1     | 0     | 0     | 0     |
| 3560   | 0     | 0     | 0     | 0     |
| 3562   | 0     | 0     | 0     | 0     |
| 3564   | 1     | 1     | 0     | 0     |
| 3565   | 0     | 0     | 0     | 0     |
| 3568   | 0     | 0     | 0     | 0     |
| 3572   | 0     | 0     | 0     | 0     |
| 3578   | 0     | 0     | 0     | 0     |
| 3581   | 0     | 0     | 0     | 0     |
| 3583   | 1     | 1     | 1     | 0     |
| 3588   | 0     | 0     | 0     | 0     |
| 3591   | 0     | 0     | 0     | 0     |
| 3594   | 0     | 0     | 0     | 0     |
| 3595   | 0     | 0     | 0     | 0     |
| 3596   | 0     | 1     | 0     | 0     |
| 3597   | 0     | 0     | 0     | 0     |
| 3598   | 0     | 0     | 0     | 0     |
| 3600   | 0     | 0     | 0     | 0     |
| 3602   | 0     | 0     | 0     | 0     |
| 3604   | 0     | 0     | 0     | 0     |
| 3605   | 0     | 0     | 0     | 0     |
| 3606   | 0     | 0     | 0     | 0     |
| 3607   | 0     | 0     | 0     | 0     |
| 3610   | 0     | 0     | 0     | 0     |

| respid | Q31_2 | Q31_3 | Q31_4 | Q31_5 |
|--------|-------|-------|-------|-------|
| 3611   | 0     | 0     | 0     | 0     |
| 3612   | 0     | 0     | 0     | 0     |
| 3614   | 0     | 1     | 0     | 1     |
| 3616   | 0     | 0     | 0     | 0     |
| 3617   | 0     | 0     | 0     | 1     |
| 3618   | 0     | 0     | 0     | 0     |
| 3619   | 0     | 0     | 0     | 0     |
| 3621   | 0     | 0     | 0     | 0     |
| 3622   | 1     | 1     | 0     | 0     |
| 3624   | 0     | 0     | 0     | 0     |
| 3626   | 0     | 0     | 0     | 0     |
| 3629   | 0     | 0     | 0     | 0     |
| 3631   | 0     | 0     | 0     | 0     |
| 3632   | 0     | 0     | 0     | 0     |
| 3638   | 0     | 0     | 0     | 0     |
| 3640   | 1     | 0     | 0     | 0     |
| 3641   | 0     | 0     | 1     | 0     |
| 3645   | 0     | 1     | 0     | 0     |
| 3650   | 0     | 0     | 0     | 0     |
| 3653   | 0     | 0     | 1     | 0     |
| 3655   | 0     | 0     | 0     | 0     |
| 3657   | 1     | 1     | 1     | 1     |
| 3658   | 0     | 0     | 0     | 0     |
| 3659   | 0     | 0     | 0     | 0     |
| 3664   | 0     | 1     | 1     | 1     |
| 3665   | 0     | 0     | 0     | 0     |
| 3667   | 0     | 0     | 0     | 0     |
| 3668   | 0     | 0     | 1     | 0     |
| 3675   | 0     | 0     | 0     | 0     |
| 3678   | 0     | 0     | 0     | 0     |
| 3680   | 0     | 0     | 0     | 0     |
| 3684   | 1     | 0     | 0     | 0     |

| respid | Q31_2 | Q31_3 | Q31_4 | Q31_5 |
|--------|-------|-------|-------|-------|
| 3685   | 0     | 0     | 0     | 0     |
| 3687   | 0     | 0     | 0     | 0     |
| 3689   | 0     | 0     | 1     | 0     |
| 3690   | 0     | 0     | 0     | 0     |
| 3693   | 0     | 0     | 0     | 0     |
| 3694   | 0     | 0     | 0     | 0     |
| 3695   | 0     | 0     | 0     | 0     |
| 3700   | 1     | 0     | 0     | 0     |
| 3701   | 0     | 0     | 0     | 0     |
| 3703   | 1     | 1     | 0     | 0     |
| 3704   | 1     | 1     | 0     | 0     |
| 3705   | 0     | 0     | 0     | 0     |
| 3709   | 0     | 0     | 0     | 0     |
| 3710   | 1     | 1     | 0     | 0     |
| 3722   | 0     | 0     | 0     | 0     |
| 3725   | 0     | 0     | 0     | 0     |
| 3726   | 0     | 0     | 0     | 0     |
| 3727   | 0     | 0     | 0     | 0     |
| 3728   | 0     | 0     | 0     | 0     |
| 3729   | 0     | 0     | 0     | 0     |
| 3731   | 0     | 0     | 0     | 0     |
| 3738   | 0     | 0     | 0     | 0     |
| 3739   | 0     | 0     | 0     | 0     |
| 3740   | 0     | 0     | 0     | 0     |
| 3749   | 0     | 0     | 0     | 0     |
| 3758   | 0     | 0     | 0     | 0     |
| 3762   | 0     | 0     | 0     | 0     |
| 3765   | 0     | 0     | 0     | 0     |
| 3770   | 0     | 0     | 0     | 0     |
| 3771   | 0     | 0     | 0     | 0     |
| 3778   | 0     | 0     | 0     | 0     |
| 3779   | 0     | 0     | 0     | 0     |

| respid | Q31_2 | Q31_3 | Q31_4 | Q31_5 |
|--------|-------|-------|-------|-------|
| 3780   | 0     | 0     | 0     | 0     |
| 3782   | 1     | 0     | 0     | 0     |
| 3784   | 1     | 0     | 0     | 0     |
| 3787   | 0     | 0     | 0     | 0     |
| 3790   | 0     | 0     | 0     | 0     |
| 3791   | 0     | 0     | 0     | 0     |
| 3793   | 0     | 0     | 0     | 0     |
| 3795   | 0     | 0     | 0     | 0     |
| 3799   | 0     | 0     | 0     | 0     |
| 3801   | 0     | 0     | 0     | 0     |
| 3804   | 0     | 0     | 0     | 0     |
| 3809   | 0     | 0     | 0     | 0     |
| 3810   | 1     | 1     | 0     | 0     |
| 3813   | 0     | 1     | 0     | 0     |
| 3816   | 1     | 0     | 0     | 0     |
| 3820   | 0     | 0     | 0     | 0     |
| 3821   | 0     | 0     | 0     | 0     |
| 3823   | 0     | 0     | 0     | 0     |
| 3828   | 0     | 0     | 0     | 0     |
| 3829   | 0     | 0     | 0     | 0     |
| 3832   | 0     | 0     | 0     | 0     |
| 3835   | 0     | 1     | 1     | 0     |
| 3837   | 0     | 0     | 0     | 0     |
| 3838   | 0     | 0     | 0     | 0     |
| 3839   | 0     | 1     | 0     | 1     |
| 3840   | 0     | 0     | 0     | 0     |
| 3842   | 0     | 0     | 0     | 0     |
| 3843   | 0     | 0     | 0     | 0     |
| 3844   | 0     | 1     | 0     | 0     |
| 3850   | 0     | 0     | 0     | 0     |
| 3851   | 0     | 0     | 0     | 0     |
| 3856   | 0     | 0     | 0     | 0     |

| respid | Q31_2 | Q31_3 | Q31_4 | Q31_5 |
|--------|-------|-------|-------|-------|
| 3859   | 0     | 0     | 0     | 0     |
| 3860   | 0     | 0     | 0     | 0     |
| 3863   | 1     | 0     | 0     | 0     |
| 3866   | 0     | 0     | 0     | 0     |
| 3867   | 0     | 0     | 0     | 0     |
| 3870   | 0     | 0     | 0     | 0     |
| 3873   | 0     | 0     | 0     | 0     |
| 3875   | 0     | 0     | 0     | 0     |
| 3878   | 0     | 0     | 0     | 0     |
| 3881   | 1     | 1     | 0     | 0     |
| 3883   | 1     | 1     | 0     | 0     |
| 3884   | 0     | 0     | 0     | 0     |
| 3885   | 1     | 1     | 1     | 1     |
| 3886   | 0     | 0     | 0     | 0     |
| 3887   | 0     | 0     | 0     | 0     |
| 3888   | 0     | 0     | 0     | 0     |
| 3889   | 1     | 1     | 0     | 0     |
| 3890   | 0     | 0     | 0     | 0     |
| 3896   | 0     | 1     | 0     | 0     |
| 3902   | 1     | 1     | 1     | 1     |
| 3909   | 0     | 0     | 0     | 0     |
| 3912   | 0     | 0     | 0     | 0     |
| 3922   | 0     | 1     | 0     | 1     |
| 3928   | 0     | 1     | 0     | 0     |
| 3930   | 0     | 0     | 0     | 0     |
| 3931   | 0     | 0     | 0     | 0     |
| 3933   | 1     | 0     | 0     | 1     |
| 3935   | 0     | 1     | 0     | 0     |
| 3937   | 0     | 0     | 0     | 0     |
| 3939   | 0     | 0     | 0     | 0     |
| 3942   | 0     | 0     | 0     | 0     |
| 3943   | 0     | 0     | 1     | 0     |

| respid | Q31_2 | Q31_3 | Q31_4 | Q31_5 |
|--------|-------|-------|-------|-------|
| 3944   | 0     | 0     | 0     | 0     |
| 3945   | 0     | 0     | 0     | 0     |
| 3947   | 0     | 0     | 0     | 0     |
| 3948   | 1     | 0     | 0     | 0     |
| 3951   | 0     | 0     | 0     | 0     |
| 3959   | 0     | 0     | 0     | 0     |
| 3969   | 0     | 0     | 0     | 0     |
| 3973   | 0     | 0     | 0     | 0     |
| 3975   | 0     | 0     | 0     | 0     |
| 3976   | 0     | 0     | 0     | 0     |
| 3977   | 0     | 0     | 0     | 0     |
| 3978   | 0     | 1     | 0     | 0     |
| 3994   | 0     | 0     | 0     | 0     |
| 3995   | 0     | 0     | 0     | 0     |
| 3997   | 0     | 0     | 0     | 0     |
| 3998   | 0     | 0     | 0     | 0     |
| 3999   | 1     | 1     | 0     | 0     |
| 4002   | 0     | 0     | 1     | 0     |
| 4004   | 0     | 0     | 0     | 0     |
| 4005   | 0     | 0     | 0     | 0     |
| 4006   | 0     | 0     | 0     | 0     |
| 4008   | 0     | 0     | 0     | 0     |
| 4010   | 0     | 0     | 0     | 0     |
| 4011   | 0     | 0     | 0     | 0     |
| 4013   | 0     | 0     | 0     | 0     |
| 4014   | 0     | 0     | 0     | 0     |
| 4016   | 0     | 1     | 0     | 0     |
| 4017   | 0     | 0     | 0     | 0     |
| 4019   | 0     | 0     | 1     | 0     |
| 4021   | 0     | 0     | 0     | 0     |
| 4023   | 0     | 0     | 0     | 0     |
| 4024   | 0     | 0     | 0     | 0     |

| respid | Q31_2 | Q31_3 | Q31_4 | Q31_5 |
|--------|-------|-------|-------|-------|
| 4025   | 1     | 0     | 1     | 0     |
| 4027   | 0     | 0     | 0     | 0     |
| 4032   | 0     | 0     | 0     | 0     |
| 4034   | 0     | 0     | 0     | 0     |
| 4035   | 0     | 0     | 0     | 0     |
| 4037   | 0     | 0     | 0     | 0     |
| 4040   | 0     | 0     | 0     | 0     |
| 4041   | 0     | 0     | 0     | 0     |
| 4042   | 1     | 1     | 0     | 0     |
| 4043   | 1     | 1     | 0     | 0     |
| 4045   | 1     | 1     | 1     | 1     |
| 4046   | 1     | 1     | 0     | 0     |
| 4048   | 1     | 1     | 0     | 0     |
| 4049   | 0     | 0     | 0     | 0     |
| 4050   | 0     | 0     | 0     | 0     |
| 4052   | 0     | 0     | 0     | 0     |
| 4053   | 0     | 0     | 0     | 0     |
| 4060   | 0     | 0     | 0     | 0     |
| 4065   | 0     | 0     | 0     | 0     |
| 4066   | 0     | 0     | 0     | 0     |
| 4067   | 0     | 0     | 0     | 0     |
| 4068   | 0     | 0     | 0     | 0     |
| 4069   | 0     | 0     | 0     | 0     |
| 4070   | 0     | 0     | 0     | 0     |
| 4071   | 1     | 0     | 0     | 0     |
| 4072   | 0     | 0     | 0     | 0     |
| 4073   | 0     | 0     | 0     | 0     |
| 4074   | 0     | 0     | 0     | 0     |
| 4075   | 0     | 0     | 0     | 0     |
| 4078   | 0     | 0     | 0     | 0     |
| 4080   | 0     | 0     | 0     | 0     |
| 4081   | 0     | 0     | 0     | 0     |

| respid | Q31_2 | Q31_3 | Q31_4 | Q31_5 |
|--------|-------|-------|-------|-------|
| 4082   | 0     | 0     | 1     | 0     |
| 4083   | 0     | 0     | 0     | 0     |
| 4084   | 0     | 0     | 0     | 0     |
| 4086   | 0     | 0     | 0     | 0     |
| 4087   | 0     | 0     | 0     | 0     |
| 4088   | 0     | 0     | 0     | 0     |
| 4089   | 1     | 0     | 0     | 0     |
| 4090   | 0     | 0     | 0     | 0     |
| 4093   | 0     | 0     | 0     | 0     |
| 4094   | 0     | 0     | 0     | 0     |
| 4095   | 0     | 0     | 0     | 0     |
| 4096   | 0     | 0     | 0     | 0     |
| 4098   | 0     | 0     | 0     | 0     |
| 4103   | 0     | 0     | 0     | 0     |
| 4104   | 1     | 1     | 1     | 0     |
| 4107   | 0     | 0     | 0     | 0     |
| 4109   | 0     | 0     | 0     | 0     |
| 4110   | 0     | 1     | 0     | 0     |
| 4113   | 0     | 0     | 0     | 0     |
| 4114   | 0     | 0     | 0     | 0     |
| 4116   | 0     | 0     | 0     | 0     |
| 4119   | 0     | 0     | 0     | 0     |
| 4120   | 0     | 0     | 0     | 0     |
| 4121   | 0     | 0     | 0     | 0     |
| 4122   | 0     | 0     | 1     | 0     |
| 4124   | 1     | 0     | 0     | 0     |
| 4126   | 0     | 0     | 0     | 0     |
| 4127   | 0     | 0     | 0     | 0     |
| 4131   | 0     | 0     | 0     | 0     |
| 4134   | 1     | 0     | 0     | 0     |
| 4144   | 0     | 0     | 0     | 0     |
| 4145   | 0     | 0     | 0     | 0     |



| respid | Q31_2 | Q31_3 | Q31_4 | Q31_5 |
|--------|-------|-------|-------|-------|
| 4146   | 0     | 0     | 0     | 0     |
| 4147   | 0     | 0     | 0     | 0     |
| 4149   | 0     | 0     | 0     | 1     |
| 4150   | 0     | 0     | 0     | 0     |
| 4151   | 1     | 0     | 0     | 0     |
| 4153   | 1     | 0     | 0     | 0     |
| 4155   | 0     | 1     | 0     | 0     |
| 4157   | 0     | 0     | 0     | 0     |
| 4159   | 1     | 0     | 0     | 0     |
| 4160   | 0     | 0     | 0     | 0     |
| 4161   | 0     | 0     | 0     | 0     |
| 4163   | 0     | 0     | 0     | 0     |
| 4164   | 0     | 0     | 0     | 0     |
| 4165   | 0     | 0     | 0     | 0     |
| 4166   | 0     | 0     | 0     | 0     |
| 4167   | 0     | 0     | 0     | 0     |
| 4170   | 1     | 0     | 0     | 0     |
| 4172   | 0     | 0     | 0     | 0     |
| 4173   | 0     | 0     | 0     | 0     |
| 4180   | 0     | 0     | 1     | 0     |
| 4185   | 0     | 0     | 0     | 0     |
| 4187   | 0     | 0     | 0     | 0     |
| 4190   | 0     | 0     | 0     | 0     |
| 4191   | 0     | 0     | 0     | 0     |
| 4193   | 0     | 0     | 0     | 0     |
| 4194   | 0     | 0     | 0     | 0     |
| 4195   | 0     | 0     | 0     | 0     |
| 4196   | 0     | 0     | 0     | 0     |
| 4197   | 1     | 0     | 0     | 0     |
| 4198   | 0     | 1     | 0     | 0     |
| 4199   | 1     | 1     | 1     | 0     |
| 4205   | 0     | 0     | 0     | 0     |

| respid | Q31_2 | Q31_3 | Q31_4 | Q31_5 |
|--------|-------|-------|-------|-------|
| 4206   | 0     | 0     | 0     | 0     |
| 4207   | 0     | 0     | 0     | 0     |
| 4214   | 0     | 0     | 0     | 0     |
| 4215   | 0     | 0     | 0     | 0     |
| 4217   | 0     | 0     | 0     | 0     |
| 4219   | 0     | 0     | 0     | 0     |
| 4223   | 1     | 0     | 0     | 0     |
| 4226   | 0     | 0     | 0     | 0     |
| 4229   | 1     | 0     | 0     | 0     |
| 4230   | 0     | 0     | 0     | 0     |
| 4232   | 0     | 1     | 1     | 0     |
| 4233   | 0     | 0     | 0     | 0     |
| 4234   | 0     | 0     | 0     | 0     |
| 4235   | 0     | 0     | 0     | 0     |
| 4236   | 0     | 1     | 0     | 0     |
| 4237   | 1     | 0     | 0     | 0     |
| 4238   | 0     | 0     | 0     | 0     |
| 4240   | 0     | 1     | 0     | 0     |
| 4241   | 0     | 0     | 0     | 0     |
| 4247   | 0     | 0     | 0     | 0     |
| 4250   | 0     | 0     | 0     | 0     |
| 4251   | 1     | 0     | 0     | 0     |
| 4253   | 1     | 0     | 0     | 0     |
| 4254   | 0     | 0     | 0     | 0     |
| 4258   | 1     | 0     | 0     | 0     |
| 4260   | 0     | 0     | 0     | 0     |
| 4263   | 1     | 0     | 0     | 0     |
| 4265   | 0     | 0     | 0     | 0     |
| 4266   | 0     | 0     | 0     | 0     |
| 4267   | 0     | 0     | 0     | 0     |
| 4270   | 0     | 0     | 0     | 0     |
| 4273   | 0     | 0     | 0     | 0     |

| respid | Q31_2 | Q31_3 | Q31_4 | Q31_5 |
|--------|-------|-------|-------|-------|
| 4280   | 0     | 0     | 0     | 0     |
| 4281   | 0     | 0     | 0     | 0     |
| 4282   | 0     | 0     | 0     | 0     |
| 4283   | 0     | 0     | 0     | 0     |
| 4286   | 0     | 0     | 0     | 0     |
| 4287   | 0     | 0     | 0     | 0     |
| 4289   | 1     | 0     | 0     | 0     |
| 4290   | 0     | 0     | 1     | 0     |
| 4291   | 1     | 1     | 0     | 0     |
| 4292   | 0     | 0     | 0     | 0     |
| 4293   | 0     | 0     | 0     | 0     |
| 4294   | 1     | 0     | 0     | 0     |
| 4295   | 0     | 0     | 0     | 0     |
| 4296   | 0     | 1     | 0     | 0     |
| 4297   | 0     | 0     | 0     | 0     |
| 4298   | 0     | 1     | 0     | 0     |
| 4299   | 0     | 1     | 0     | 0     |
| 4300   | 0     | 0     | 0     | 0     |
| 4301   | 0     | 0     | 0     | 0     |
| 4302   | 0     | 0     | 0     | 0     |
| 4304   | 0     | 0     | 0     | 0     |
| 4305   | 0     | 0     | 0     | 0     |
| 4307   | 0     | 0     | 0     | 0     |
| 4308   | 0     | 0     | 0     | 0     |
| 4312   | 0     | 0     | 0     | 0     |
| 4314   | 0     | 1     | 0     | 0     |
| 4316   | 0     | 0     | 0     | 0     |
| 4317   | 1     | 0     | 0     | 0     |
| 4319   | 0     | 0     | 0     | 0     |
| 4323   | 1     | 0     | 0     | 0     |
| 4337   | 0     | 0     | 0     | 0     |
| 4341   | 1     | 0     | 0     | 0     |

| respid | Q31_2 | Q31_3 | Q31_4 | Q31_5 |
|--------|-------|-------|-------|-------|
| 4342   | 0     | 0     | 0     | 0     |
| 4344   | 0     | 0     | 0     | 0     |
| 4345   | 1     | 1     | 0     | 0     |
| 4346   | 1     | 0     | 0     | 0     |
| 4347   | 0     | 0     | 0     | 0     |
| 4350   | 0     | 0     | 0     | 0     |
| 4352   | 0     | 0     | 0     | 0     |
| 4353   | 0     | 0     | 0     | 0     |
| 4355   | 0     | 0     | 0     | 0     |
| 4356   | 0     | 0     | 0     | 0     |
| 4358   | 0     | 0     | 0     | 0     |
| 4359   | 0     | 0     | 0     | 0     |
| 4360   | 0     | 0     | 0     | 0     |
| 4361   | 1     | 0     | 0     | 0     |
| 4363   | 0     | 0     | 0     | 0     |
| 4364   | 0     | 0     | 0     | 0     |
| 4365   | 0     | 0     | 0     | 0     |
| 4367   | 0     | 0     | 0     | 0     |
| 4369   | 0     | 0     | 0     | 0     |
| 4373   | 0     | 0     | 0     | 0     |
| 4374   | 0     | 0     | 1     | 0     |
| 4375   | 0     | 0     | 0     | 0     |
| 4378   | 0     | 1     | 0     | 0     |
| 4379   | 1     | 0     | 0     | 0     |
| 4382   | 0     | 0     | 0     | 0     |
| 4383   | 0     | 0     | 0     | 0     |
| 4384   | 0     | 0     | 0     | 0     |
| 4385   | 0     | 0     | 0     | 0     |
| 4388   | 0     | 0     | 0     | 0     |
| 4389   | 0     | 0     | 0     | 0     |
| 4391   | 1     | 0     | 0     | 0     |
| 4392   | 0     | 0     | 0     | 0     |

| respid | Q31_2 | Q31_3 | Q31_4 | Q31_5 |
|--------|-------|-------|-------|-------|
| 4393   | 0     | 0     | 0     | 0     |
| 4395   | 0     | 0     | 0     | 0     |
| 4397   | 1     | 0     | 0     | 0     |
| 4398   | 1     | 0     | 0     | 0     |
| 4399   | 0     | 0     | 0     | 0     |
| 4400   | 0     | 0     | 0     | 0     |
| 4401   | 0     | 0     | 0     | 0     |
| 4402   | 0     | 1     | 0     | 0     |
| 4404   | 0     | 0     | 0     | 0     |
| 4405   | 0     | 0     | 0     | 0     |
| 4407   | 0     | 0     | 0     | 0     |
| 4408   | 0     | 0     | 0     | 0     |
| 4411   | 0     | 0     | 0     | 0     |
| 4420   | 0     | 1     | 1     | 0     |
| 4421   | 0     | 0     | 0     | 0     |
| 4424   | 0     | 1     | 1     | 0     |
| 4425   | 0     | 0     | 0     | 0     |
| 4427   | 1     | 0     | 0     | 0     |
| 4430   | 0     | 0     | 0     | 0     |
| 4431   | 0     | 0     | 0     | 0     |
| 4432   | 0     | 0     | 0     | 0     |
| 4436   | 0     | 0     | 0     | 0     |
| 4439   | 0     | 0     | 0     | 0     |
| 4451   | 0     | 0     | 0     | 0     |
| 4452   | 0     | 1     | 0     | 0     |
| 4458   | 0     | 0     | 0     | 0     |
| 4464   | 0     | 0     | 0     | 0     |
| 4465   | 0     | 0     | 0     | 0     |
| 4467   | 0     | 0     | 0     | 0     |
| 4470   | 0     | 0     | 0     | 0     |
| 4471   | 0     | 0     | 0     | 0     |
| 4472   | 0     | 0     | 0     | 0     |

| respid | Q31_2 | Q31_3 | Q31_4 | Q31_5 |
|--------|-------|-------|-------|-------|
| 4473   | 0     | 0     | 0     | 0     |
| 4475   | 0     | 1     | 0     | 0     |
| 4476   | 0     | 1     | 0     | 0     |
| 4478   | 0     | 0     | 0     | 0     |
| 4485   | 1     | 1     | 1     | 0     |
| 4486   | 0     | 1     | 0     | 0     |
| 4490   | 0     | 0     | 0     | 0     |
| 4502   | 0     | 0     | 0     | 0     |
| 4503   | 0     | 0     | 0     | 0     |
| 4504   | 0     | 0     | 0     | 0     |
| 4506   | 0     | 1     | 0     | 0     |
| 4508   | 0     | 0     | 0     | 0     |
| 4515   | 0     | 0     | 0     | 0     |
| 4516   | 1     | 0     | 0     | 0     |
| 4519   | 0     | 0     | 0     | 0     |
| 4523   | 0     | 0     | 0     | 0     |
| 4525   | 0     | 0     | 0     | 0     |
| 4526   | 0     | 0     | 0     | 0     |
| 4528   | 0     | 0     | 0     | 0     |
| 4530   | 0     | 0     | 0     | 0     |
| 4531   | 1     | 1     | 0     | 0     |
| 4532   | 0     | 0     | 0     | 0     |
| 4537   | 0     | 0     | 0     | 0     |
| 4538   | 0     | 0     | 0     | 0     |
| 4539   | 0     | 0     | 0     | 0     |
| 4541   | 0     | 0     | 0     | 0     |
| 4543   | 0     | 0     | 0     | 0     |
| 4544   | 0     | 0     | 0     | 0     |
| 4546   | 0     | 0     | 0     | 0     |
| 4547   | 0     | 0     | 0     | 0     |
| 4549   | 0     | 0     | 0     | 0     |
| 4550   | 0     | 0     | 0     | 0     |

| respid | Q31_2 | Q31_3 | Q31_4 | Q31_5 |
|--------|-------|-------|-------|-------|
| 4551   | 0     | 0     | 0     | 0     |
| 4554   | 0     | 0     | 0     | 0     |
| 4557   | 0     | 0     | 0     | 0     |
| 4565   | 0     | 0     | 0     | 0     |
| 4568   | 0     | 0     | 0     | 0     |
| 4569   | 0     | 1     | 0     | 0     |
| 4570   | 0     | 0     | 0     | 0     |
| 4572   | 0     | 0     | 0     | 0     |
| 4574   | 0     | 0     | 0     | 0     |
| 4576   | 0     | 0     | 0     | 0     |
| 4578   | 0     | 0     | 0     | 0     |
| 4579   | 0     | 0     | 0     | 0     |
| 4580   | 0     | 1     | 0     | 0     |
| 4581   | 0     | 0     | 0     | 0     |
| 4584   | 0     | 0     | 0     | 0     |
| 4586   | 0     | 0     | 0     | 0     |
| 4587   | 0     | 0     | 0     | 1     |
| 4590   | 0     | 0     | 0     | 0     |
| 4592   | 0     | 0     | 0     | 0     |
| 4593   | 1     | 1     | 0     | 0     |
| 4595   | 0     | 0     | 0     | 0     |
| 4597   | 0     | 0     | 0     | 0     |
| 4598   | 0     | 0     | 0     | 0     |
| 4599   | 0     | 0     | 0     | 0     |
| 4600   | 0     | 0     | 0     | 0     |
| 4601   | 1     | 0     | 0     | 0     |
| 4608   | 0     | 0     | 0     | 0     |
| 4609   | 0     | 0     | 0     | 0     |
| 4611   | 0     | 0     | 0     | 0     |
| 4612   | 1     | 0     | 0     | 0     |
| 4613   | 0     | 0     | 0     | 0     |
| 4616   | 1     | 1     | 0     | 0     |

| respid | Q31_2 | Q31_3 | Q31_4 | Q31_5 |
|--------|-------|-------|-------|-------|
| 4617   | 0     | 0     | 0     | 0     |
| 4620   | 0     | 0     | 0     | 0     |
| 4621   | 0     | 0     | 0     | 0     |
| 4622   | 0     | 0     | 0     | 0     |
| 4624   | 1     | 1     | 0     | 0     |
| 4625   | 0     | 0     | 0     | 1     |
| 4627   | 0     | 0     | 0     | 0     |
| 4628   | 0     | 0     | 0     | 0     |
| 4629   | 0     | 0     | 0     | 0     |
| 4630   | 1     | 0     | 0     | 0     |
| 4632   | 0     | 0     | 0     | 0     |
| 4634   | 1     | 0     | 0     | 0     |
| 4635   | 0     | 0     | 0     | 0     |
| 4636   | 0     | 0     | 0     | 0     |
| 4637   | 0     | 0     | 0     | 0     |
| 4638   | 0     | 0     | 0     | 0     |
| 4639   | 1     | 0     | 0     | 0     |
| 4641   | 0     | 1     | 0     | 0     |
| 4643   | 0     | 0     | 0     | 0     |
| 4645   | 0     | 0     | 0     | 0     |
| 4646   | 1     | 0     | 0     | 1     |
| 4647   | 0     | 0     | 0     | 0     |
| 4648   | 0     | 0     | 0     | 0     |
| 4649   | 0     | 1     | 0     | 0     |
| 4650   | 0     | 0     | 0     | 0     |
| 4651   | 0     | 0     | 0     | 0     |
| 4652   | 1     | 0     | 0     | 0     |
| 4653   | 0     | 0     | 0     | 0     |
| 4657   | 0     | 0     | 0     | 0     |
| 4660   | 0     | 0     | 0     | 0     |
| 4661   | 0     | 1     | 0     | 0     |
| 4662   | 0     | 1     | 0     | 0     |



| respid | Q31_2 | Q31_3 | Q31_4 | Q31_5 |
|--------|-------|-------|-------|-------|
| 4667   | 0     | 0     | 0     | 0     |
| 4669   | 0     | 0     | 0     | 0     |
| 4671   | 0     | 0     | 0     | 0     |
| 4672   | 0     | 0     | 0     | 0     |
| 4673   | 0     | 1     | 0     | 0     |
| 4677   | 0     | 0     | 0     | 0     |
| 4679   | 0     | 0     | 0     | 0     |
| 4683   | 0     | 0     | 0     | 0     |
| 4684   | 1     | 0     | 0     | 0     |
| 4685   | 0     | 0     | 0     | 0     |
| 4686   | 1     | 0     | 0     | 0     |
| 4687   | 0     | 0     | 0     | 0     |
| 4688   | 0     | 0     | 0     | 0     |
| 4691   | 0     | 0     | 0     | 0     |
| 4692   | 0     | 0     | 0     | 0     |
| 4694   | 0     | 0     | 0     | 0     |
| 4695   | 0     | 0     | 0     | 0     |
| 4696   | 0     | 0     | 0     | 0     |
| 4697   | 0     | 0     | 0     | 0     |
| 4698   | 0     | 0     | 1     | 0     |
| 4699   | 0     | 0     | 0     | 0     |
| 4701   | 0     | 0     | 0     | 0     |
| 4703   | 0     | 0     | 0     | 0     |
| 4704   | 1     | 0     | 1     | 0     |
| 4705   | 0     | 0     | 0     | 0     |
| 4706   | 0     | 0     | 0     | 0     |
| 4707   | 1     | 0     | 0     | 0     |
| 4708   | 0     | 0     | 0     | 0     |
| 4710   | 0     | 0     | 0     | 0     |
| 4711   | 1     | 0     | 0     | 0     |
| 4715   | 0     | 0     | 0     | 0     |
| 4716   | 1     | 0     | 0     | 0     |

| respid | Q31_2 | Q31_3 | Q31_4 | Q31_5 |
|--------|-------|-------|-------|-------|
| 4717   | 0     | 0     | 0     | 0     |
| 4718   | 0     | 0     | 0     | 0     |
| 4722   | 0     | 0     | 0     | 0     |
| 4727   | 0     | 0     | 0     | 0     |
| 4728   | 0     | 0     | 0     | 0     |
| 4729   | 0     | 0     | 0     | 0     |
| 4732   | 0     | 0     | 0     | 0     |
| 4733   | 0     | 0     | 0     | 0     |
| 4734   | 0     | 0     | 0     | 0     |
| 4735   | 0     | 0     | 0     | 0     |
| 4737   | 0     | 0     | 0     | 0     |
| 4738   | 0     | 0     | 0     | 0     |
| 4740   | 0     | 0     | 0     | 0     |
| 4741   | 0     | 0     | 1     | 0     |
| 4743   | 1     | 0     | 0     | 0     |
| 4746   | 0     | 0     | 0     | 0     |
| 4750   | 0     | 0     | 0     | 0     |
| 4752   | 0     | 0     | 0     | 0     |
| 4753   | 0     | 1     | 1     | 0     |
| 4754   | 0     | 0     | 0     | 0     |
| 4755   | 0     | 0     | 0     | 0     |
| 4758   | 0     | 0     | 0     | 0     |
| 4766   | 0     | 0     | 0     | 0     |
| 4767   | 0     | 1     | 1     | 0     |
| 4768   | 0     | 0     | 0     | 0     |
| 4769   | 0     | 0     | 0     | 0     |
| 4771   | 0     | 0     | 0     | 0     |
| 4772   | 0     | 0     | 0     | 0     |
| 4773   | 0     | 0     | 0     | 0     |
| 4774   | 0     | 0     | 1     | 0     |
| 4776   | 0     | 0     | 0     | 0     |
| 4777   | 0     | 1     | 0     | 0     |

| respid | Q31_2 | Q31_3 | Q31_4 | Q31_5 |
|--------|-------|-------|-------|-------|
| 4779   | 0     | 0     | 0     | 0     |
| 4780   | 1     | 1     | 0     | 0     |
| 4781   | 0     | 0     | 0     | 0     |
| 4783   | 1     | 1     | 0     | 1     |
| 4784   | 0     | 0     | 0     | 0     |
| 4785   | 0     | 0     | 0     | 0     |
| 4788   | 0     | 0     | 0     | 0     |
| 4789   | 0     | 0     | 0     | 0     |
| 4790   | 0     | 0     | 0     | 0     |
| 4791   | 0     | 0     | 0     | 0     |
| 4794   | 0     | 0     | 0     | 0     |
| 4795   | 0     | 0     | 0     | 0     |
| 4797   | 0     | 0     | 0     | 0     |
| 4802   | 0     | 0     | 0     | 0     |
| 4803   | 0     | 0     | 0     | 0     |
| 4804   | 0     | 0     | 0     | 0     |
| 4805   | 0     | 0     | 0     | 0     |
| 4807   | 0     | 0     | 0     | 0     |
| 4808   | 1     | 1     | 0     | 0     |
| 4809   | 0     | 0     | 0     | 0     |
| 4811   | 0     | 0     | 0     | 0     |
| 4817   | 0     | 0     | 0     | 0     |
| 4819   | 0     | 0     | 0     | 0     |
| 4820   | 0     | 0     | 0     | 0     |
| 4821   | 1     | 1     | 0     | 0     |
| 4822   | 0     | 0     | 0     | 0     |
| 4823   | 1     | 0     | 0     | 0     |
| 4825   | 0     | 0     | 0     | 0     |
| 4826   | 0     | 0     | 0     | 0     |
| 4830   | 0     | 0     | 0     | 0     |
| 4832   | 0     | 0     | 0     | 0     |
| 4838   | 1     | 1     | 0     | 0     |

| respid | Q31_2 | Q31_3 | Q31_4 | Q31_5 |
|--------|-------|-------|-------|-------|
| 4840   | 1     | 0     | 0     | 0     |
| 4841   | 0     | 0     | 0     | 0     |
| 4843   | 0     | 0     | 0     | 0     |
| 4845   | 0     | 0     | 0     | 0     |
| 4846   | 0     | 0     | 0     | 0     |
| 4848   | 0     | 0     | 0     | 0     |
| 4853   | 0     | 0     | 0     | 0     |
| 4854   | 0     | 0     | 0     | 0     |
| 4859   | 0     | 0     | 0     | 0     |
| 4861   | 0     | 0     | 0     | 0     |
| 4864   | 0     | 0     | 0     | 0     |
| 4867   | 0     | 0     | 0     | 0     |
| 4870   | 0     | 0     | 1     | 0     |
| 4872   | 0     | 1     | 0     | 0     |
| 4873   | 0     | 0     | 0     | 0     |
| 4874   | 0     | 0     | 0     | 0     |
| 4878   | 0     | 0     | 0     | 0     |
| 4880   | 0     | 0     | 0     | 0     |
| 4881   | 0     | 0     | 0     | 0     |
| 4882   | 0     | 1     | 0     | 0     |
| 4883   | 0     | 0     | 0     | 0     |
| 4885   | 0     | 0     | 0     | 0     |
| 4889   | 0     | 0     | 0     | 0     |
| 4890   | 0     | 0     | 0     | 0     |
| 4891   | 0     | 0     | 0     | 0     |
| 4894   | 0     | 0     | 0     | 0     |
| 4895   | 1     | 1     | 0     | 0     |
| 4896   | 0     | 0     | 0     | 0     |
| 4897   | 0     | 0     | 0     | 0     |
| 4898   | 0     | 0     | 0     | 0     |
| 4899   | 0     | 0     | 0     | 0     |
| 4900   | 0     | 0     | 1     | 0     |

| respid | Q31_2 | Q31_3 | Q31_4 | Q31_5 |
|--------|-------|-------|-------|-------|
| 4901   | 0     | 0     | 0     | 0     |
| 4903   | 0     | 0     | 0     | 0     |
| 4904   | 0     | 0     | 0     | 0     |
| 4908   | 0     | 0     | 0     | 0     |
| 4909   | 0     | 0     | 1     | 0     |
| 4913   | 0     | 0     | 0     | 0     |
| 4917   | 0     | 0     | 0     | 0     |
| 4918   | 0     | 0     | 0     | 0     |
| 4920   | 0     | 0     | 0     | 0     |
| 4921   | 0     | 0     | 0     | 0     |
| 4925   | 1     | 0     | 0     | 0     |
| 4926   | 0     | 0     | 0     | 0     |
| 4927   | 0     | 0     | 0     | 0     |
| 4928   | 0     | 0     | 0     | 0     |
| 4929   | 0     | 0     | 0     | 0     |
| 4930   | 1     | 1     | 1     | 0     |
| 4931   | 0     | 0     | 0     | 0     |
| 4932   | 1     | 1     | 1     | 0     |
| 4933   | 0     | 0     | 0     | 0     |
| 4934   | 0     | 0     | 0     | 0     |
| 5934   | 0     | 0     | 0     | 0     |
| 5935   | 0     | 0     | 0     | 0     |
| 5936   | 0     | 0     | 0     | 0     |
| 5938   | 0     | 0     | 0     | 0     |
| 5939   | 0     | 1     | 0     | 0     |
| 5940   | 0     | 1     | 0     | 0     |
| 5942   | 0     | 0     | 0     | 0     |
| 5944   | 0     | 0     | 0     | 0     |
| 5951   | 0     | 0     | 0     | 0     |
| 5952   | 1     | 0     | 0     | 0     |
| 5954   | 0     | 0     | 0     | 0     |
| 5956   | 0     | 0     | 0     | 0     |

| respid | Q31_2 | Q31_3 | Q31_4 | Q31_5 |
|--------|-------|-------|-------|-------|
| 5957   | 0     | 0     | 0     | 0     |
| 5958   | 0     | 0     | 0     | 0     |
| 5959   | 1     | 1     | 1     | 0     |
| 5960   | 0     | 0     | 0     | 0     |
| 5963   | 0     | 0     | 0     | 0     |
| 5966   | 0     | 0     | 0     | 0     |
| 5968   | 0     | 1     | 0     | 0     |
| 5974   | 0     | 1     | 0     | 0     |
| 5975   | 0     | 1     | 0     | 0     |
| 5976   | 0     | 0     | 1     | 0     |
| 5977   | 0     | 0     | 0     | 0     |
| 5978   | 0     | 1     | 1     | 0     |
| 5979   | 0     | 0     | 0     | 0     |
| 5983   | 0     | 1     | 0     | 0     |
| 5984   | 0     | 0     | 0     | 0     |
| 5990   | 0     | 0     | 0     | 0     |
| 5991   | 1     | 0     | 0     | 0     |
| 5992   | 0     | 0     | 0     | 0     |
| 5993   | 0     | 1     | 0     | 0     |
| 5994   | 1     | 0     | 0     | 0     |
| 5996   | 0     | 1     | 0     | 0     |
| 6001   | 0     | 0     | 0     | 0     |
| 6003   | 0     | 0     | 0     | 0     |
| 6004   | 0     | 0     | 0     | 0     |
| 6005   | 0     | 0     | 0     | 0     |
| 6006   | 0     | 0     | 0     | 0     |
| 6008   | 0     | 0     | 0     | 0     |
| 6009   | 0     | 0     | 0     | 0     |
| 6014   | 0     | 0     | 0     | 0     |
| 6016   | 1     | 0     | 0     | 0     |
| 6017   | 0     | 0     | 0     | 0     |
| 6018   | 0     | 0     | 0     | 0     |

| respid | Q31_2 | Q31_3 | Q31_4 | Q31_5 |
|--------|-------|-------|-------|-------|
| 6020   | 0     | 0     | 0     | 0     |
| 6021   | 0     | 0     | 0     | 0     |
| 6024   | 0     | 0     | 0     | 0     |
| 6025   | 0     | 0     | 0     | 0     |
| 6026   | 0     | 1     | 0     | 0     |
| 6032   | 1     | 0     | 0     | 0     |
| 6035   | 1     | 0     | 1     | 0     |
| 6038   | 0     | 0     | 0     | 0     |
| 6043   | 0     | 0     | 0     | 0     |
| 6044   | 0     | 0     | 0     | 0     |
| 6046   | 0     | 0     | 0     | 0     |
| 6047   | 0     | 0     | 0     | 0     |
| 6048   | 0     | 0     | 0     | 0     |
| 6050   | 0     | 0     | 0     | 0     |
| 6051   | 0     | 0     | 0     | 0     |
| 6053   | 0     | 0     | 0     | 0     |
| 6054   | 0     | 0     | 0     | 0     |
| 6056   | 0     | 0     | 0     | 0     |
| 6058   | 1     | 0     | 0     | 0     |
| 6060   | 0     | 0     | 0     | 0     |
| 6061   | 1     | 0     | 0     | 0     |
| 6062   | 0     | 0     | 0     | 0     |
| 6067   | 0     | 0     | 0     | 0     |
| 6070   | 0     | 0     | 0     | 0     |
| 6074   | 1     | 1     | 1     | 0     |
| 6076   | 0     | 0     | 0     | 0     |
| 6078   | 0     | 0     | 0     | 0     |
| 6081   | 0     | 0     | 0     | 0     |
| 6085   | 0     | 0     | 0     | 0     |
| 6088   | 0     | 0     | 0     | 0     |
| 6092   | 0     | 0     | 0     | 0     |
| 6095   | 0     | 1     | 0     | 0     |

| respid | Q31_2 | Q31_3 | Q31_4 | Q31_5 |
|--------|-------|-------|-------|-------|
| 6098   | 0     | 0     | 0     | 0     |
| 6101   | 0     | 0     | 0     | 0     |
| 6102   | 0     | 0     | 0     | 1     |
| 6105   | 0     | 0     | 0     | 0     |
| 6106   | 0     | 0     | 0     | 0     |
| 6107   | 0     | 0     | 0     | 0     |
| 6111   | 0     | 0     | 0     | 0     |
| 6112   | 0     | 0     | 0     | 0     |
| 6113   | 0     | 0     | 0     | 0     |
| 6115   | 0     | 0     | 0     | 0     |
| 6116   | 0     | 0     | 0     | 0     |
| 6117   | 0     | 0     | 0     | 0     |
| 6124   | 0     | 0     | 0     | 0     |
| 6125   | 0     | 0     | 0     | 0     |
| 6128   | 0     | 0     | 0     | 0     |
| 6133   | 0     | 0     | 0     | 0     |
| 6134   | 1     | 0     | 0     | 0     |
| 6135   | 0     | 0     | 0     | 0     |
| 6138   | 1     | 1     | 0     | 0     |
| 6140   | 0     | 0     | 0     | 0     |
| 6143   | 0     | 0     | 0     | 0     |
| 6147   | 0     | 0     | 0     | 0     |
| 6154   | 0     | 0     | 0     | 0     |
| 6162   | 0     | 0     | 0     | 0     |
| 6165   | 1     | 0     | 0     | 0     |
| 6166   | 1     | 0     | 1     | 0     |
| 6173   | 0     | 0     | 0     | 0     |
| 6180   | 0     | 1     | 0     | 0     |
| 6184   | 1     | 1     | 0     | 0     |
| 6185   | 0     | 0     | 0     | 0     |
| 6186   | 0     | 0     | 0     | 0     |
| 6188   | 0     | 0     | 0     | 0     |



| respid | Q31_2 | Q31_3 | Q31_4 | Q31_5 |
|--------|-------|-------|-------|-------|
| 6192   | 0     | 1     | 0     | 0     |
| 6194   | 0     | 0     | 0     | 0     |
| 6195   | 0     | 0     | 0     | 0     |
| 6196   | 1     | 0     | 0     | 0     |
| 6199   | 1     | 0     | 0     | 0     |
| 6200   | 0     | 0     | 0     | 0     |
| 6201   | 0     | 0     | 0     | 0     |
| 6202   | 1     | 0     | 0     | 0     |
| 6203   | 0     | 0     | 0     | 0     |
| 6205   | 0     | 0     | 0     | 0     |
| 6210   | 0     | 0     | 0     | 0     |
| 6212   | 0     | 0     | 0     | 0     |
| 6216   | 0     | 1     | 0     | 0     |
| 6218   | 0     | 0     | 0     | 0     |
| 6221   | 0     | 0     | 0     | 0     |
| 6224   | 0     | 0     | 0     | 0     |
| 6225   | 0     | 0     | 0     | 0     |
| 6227   | 0     | 0     | 0     | 0     |
| 6230   | 0     | 0     | 0     | 0     |
| 6231   | 0     | 0     | 0     | 0     |
| 6233   | 0     | 0     | 0     | 0     |
| 6234   | 0     | 0     | 0     | 0     |
| 6235   | 0     | 0     | 0     | 0     |
| 6237   | 0     | 0     | 0     | 0     |
| 6240   | 0     | 0     | 0     | 0     |
| 6248   | 0     | 0     | 0     | 0     |
| 6249   | 0     | 0     | 0     | 0     |
| 6252   | 0     | 0     | 0     | 0     |
| 6254   | 0     | 0     | 0     | 0     |
| 6269   | 1     | 0     | 0     | 0     |
| 6304   | 0     | 0     | 0     | 0     |
| 6334   | 0     | 0     | 0     | 0     |

| respid | Q31_2 | Q31_3 | Q31_4 | Q31_5 |
|--------|-------|-------|-------|-------|
| 6341   | 0     | 0     | 0     | 0     |
| 6350   | 0     | 1     | 1     | 0     |
| 6370   | 0     | 0     | 0     | 0     |
| 6384   | 1     | 1     | 0     | 0     |
| 6400   | 0     | 0     | 0     | 0     |
| 6418   | 0     | 0     | 0     | 0     |
| 6467   | 0     | 0     | 0     | 0     |
| 6469   | 0     | 0     | 0     | 0     |
| 6474   | 0     | 0     | 0     | 0     |
| 6475   | 0     | 0     | 0     | 0     |
| 6476   | 0     | 0     | 0     | 0     |
| 6477   | 0     | 0     | 0     | 0     |
| 6480   | 0     | 0     | 0     | 0     |
| 6481   | 0     | 1     | 0     | 0     |
| 6485   | 0     | 0     | 0     | 0     |
| 6488   | 0     | 0     | 0     | 0     |
| 6495   | 0     | 0     | 0     | 0     |
| 6499   | 1     | 0     | 0     | 0     |
| 6500   | 0     | 0     | 0     | 0     |
| 6504   | 0     | 0     | 0     | 0     |
| 6507   | 0     | 0     | 0     | 0     |
| 6512   | 1     | 1     | 0     | 0     |
| 6525   | 1     | 0     | 0     | 0     |
| 6532   | 0     | 0     | 0     | 0     |
| 6535   | 0     | 0     | 0     | 0     |
| 6546   | 0     | 0     | 0     | 0     |
| 6551   | 1     | 0     | 0     | 0     |
| 6556   | 0     | 0     | 0     | 0     |
| 6566   | 0     | 0     | 0     | 0     |
| 6569   | 0     | 0     | 0     | 0     |
| 6574   | 0     | 0     | 0     | 0     |
| 6576   | 1     | 1     | 0     | 0     |

| respid | Q31_2 | Q31_3 | Q31_4 | Q31_5 |
|--------|-------|-------|-------|-------|
| 6580   | 0     | 0     | 0     | 0     |
| 6584   | 0     | 0     | 0     | 0     |
| 6585   | 1     | 0     | 0     | 0     |
| 6589   | 0     | 1     | 0     | 0     |
| 6590   | 1     | 0     | 0     | 0     |
| 6598   | 0     | 0     | 0     | 0     |
| 6603   | 0     | 0     | 0     | 0     |
| 6618   | 0     | 0     | 0     | 0     |
| 6630   | 0     | 0     | 0     | 0     |
| 6636   | 0     | 0     | 0     | 0     |
| 6649   | 0     | 0     | 0     | 0     |
| 6675   | 0     | 1     | 0     | 0     |
| 6678   | 0     | 0     | 0     | 0     |
| 6681   | 0     | 0     | 0     | 0     |
| 6684   | 0     | 0     | 0     | 0     |
| 6688   | 0     | 0     | 0     | 0     |
| 6691   | 0     | 0     | 0     | 0     |
| 6694   | 1     | 0     | 0     | 0     |
| 6696   | 0     | 0     | 0     | 0     |
| 6720   | 1     | 1     | 1     | 1     |
| 6722   | 1     | 1     | 1     | 1     |
| 6724   | 0     | 0     | 0     | 0     |
| 6725   | 0     | 0     | 0     | 0     |
| 6727   | 0     | 0     | 0     | 0     |
| 6734   | 1     | 0     | 0     | 0     |
| 6739   | 0     | 0     | 0     | 0     |
| 6743   | 0     | 0     | 0     | 0     |
| 6749   | 0     | 0     | 0     | 0     |
| 6756   | 0     | 0     | 0     | 0     |
| 6764   | 0     | 0     | 0     | 0     |
| 6765   | 0     | 0     | 0     | 0     |
| 6768   | 0     | 0     | 0     | 0     |

| respid | Q31_2 | Q31_3 | Q31_4 | Q31_5 |
|--------|-------|-------|-------|-------|
| 6773   | 0     | 1     | 0     | 0     |
| 6775   | 0     | 0     | 0     | 0     |
| 6777   | 0     | 0     | 0     | 0     |
| 6779   | 0     | 0     | 0     | 0     |
| 6790   | 0     | 0     | 0     | 0     |
| 6797   | 0     | 0     | 0     | 0     |
| 6798   | 1     | 0     | 0     | 0     |
| 6808   | 0     | 0     | 0     | 0     |
| 6810   | 1     | 0     | 0     | 0     |
| 6811   | 0     | 0     | 0     | 0     |
| 6812   | 0     | 0     | 0     | 0     |
| 6814   | 1     | 0     | 0     | 0     |
| 6819   | 0     | 0     | 0     | 0     |
| 6820   | 0     | 0     | 0     | 0     |
| 6832   | 0     | 0     | 0     | 0     |
| 6854   | 0     | 0     | 0     | 0     |
| 6855   | 0     | 0     | 0     | 0     |
| 6857   | 0     | 0     | 0     | 0     |
| 6858   | 0     | 0     | 0     | 0     |
| 6859   | 0     | 0     | 0     | 0     |
| 6860   | 0     | 0     | 0     | 0     |
| 6862   | 1     | 0     | 0     | 0     |
| 6879   | 0     | 0     | 0     | 0     |
| 6893   | 0     | 0     | 0     | 0     |
| 6898   | 1     | 0     | 0     | 0     |
| 6902   | 1     | 1     | 0     | 0     |
| 6903   | 1     | 0     | 0     | 0     |
| 6907   | 0     | 0     | 1     | 0     |
| 6908   | 0     | 0     | 0     | 0     |
| 6912   | 0     | 0     | 0     | 0     |
| 6915   | 0     | 0     | 0     | 0     |
| 6916   | 0     | 0     | 0     | 0     |

| respid | Q31_2 | Q31_3 | Q31_4 | Q31_5 |
|--------|-------|-------|-------|-------|
| 6917   | 1     | 1     | 0     | 0     |
| 6923   | 0     | 0     | 0     | 0     |
| 6934   | 0     | 0     | 0     | 0     |
| 6937   | 0     | 0     | 0     | 0     |
| 6945   | 0     | 0     | 0     | 0     |
| 6954   | 0     | 0     | 0     | 0     |
| 6956   | 1     | 0     | 0     | 0     |
| 6958   | 0     | 0     | 0     | 0     |
| 6961   | 1     | 1     | 0     | 0     |
| 6963   | 0     | 0     | 0     | 0     |
| 6964   | 0     | 0     | 0     | 0     |
| 6976   | 0     | 0     | 0     | 0     |
| 6977   | 0     | 0     | 1     | 0     |
| 7000   | 0     | 0     | 1     | 0     |
| 7001   | 0     | 0     | 0     | 0     |
| 7005   | 0     | 0     | 0     | 0     |
| 7006   | 0     | 0     | 0     | 0     |
| 7008   | 1     | 1     | 0     | 0     |
| 7009   | 0     | 0     | 0     | 0     |
| 7019   | 0     | 0     | 0     | 0     |
| 7021   | 0     | 0     | 0     | 0     |
| 7026   | 0     | 0     | 0     | 0     |
| 7030   | 0     | 0     | 1     | 1     |
| 7034   | 0     | 0     | 0     | 0     |
| 7039   | 1     | 0     | 0     | 0     |
| 7041   | 0     | 0     | 0     | 0     |
| 7047   | 1     | 0     | 0     | 0     |
| 7051   | 0     | 0     | 0     | 0     |
| 7052   | 1     | 0     | 0     | 0     |
| 7059   | 0     | 0     | 0     | 0     |
| 7062   | 1     | 1     | 0     | 0     |
| 7065   | 0     | 1     | 0     | 0     |

| respid | Q31_2 | Q31_3 | Q31_4 | Q31_5 |
|--------|-------|-------|-------|-------|
| 7066   | 0     | 0     | 0     | 0     |
| 7069   | 0     | 0     | 0     | 0     |
| 7070   | 0     | 0     | 0     | 0     |
| 7073   | 0     | 0     | 0     | 0     |
| 7078   | 0     | 0     | 0     | 0     |
| 7083   | 0     | 0     | 0     | 0     |
| 7084   | 1     | 1     | 0     | 0     |
| 7085   | 0     | 0     | 0     | 0     |
| 7088   | 0     | 1     | 0     | 0     |
| 7090   | 0     | 0     | 0     | 0     |
| 7095   | 0     | 1     | 0     | 0     |
| 7100   | 0     | 0     | 0     | 0     |
| 7102   | 0     | 0     | 0     | 0     |
| 7103   | 0     | 1     | 0     | 0     |
| 7108   | 1     | 0     | 0     | 0     |
| 7109   | 0     | 1     | 0     | 0     |
| 7110   | 0     | 0     | 0     | 0     |
| 7112   | 0     | 0     | 0     | 0     |
| 7114   | 0     | 0     | 0     | 0     |
| 7116   | 0     | 0     | 0     | 0     |
| 7117   | 0     | 0     | 0     | 1     |
| 7118   | 1     | 1     | 0     | 0     |
| 7120   | 1     | 1     | 0     | 0     |
| 7124   | 0     | 0     | 0     | 0     |
| 7130   | 0     | 0     | 0     | 0     |
| 7135   | 0     | 0     | 0     | 0     |
| 7137   | 0     | 1     | 1     | 0     |
| 7140   | 0     | 0     | 0     | 0     |
| 7141   | 0     | 0     | 0     | 0     |
| 7148   | 0     | 0     | 0     | 0     |
| 7152   | 0     | 0     | 0     | 0     |
| 7154   | 0     | 0     | 0     | 0     |

| respid | Q31_2 | Q31_3 | Q31_4 | Q31_5 |
|--------|-------|-------|-------|-------|
| 7156   | 0     | 0     | 0     | 0     |
| 7158   | 0     | 0     | 0     | 0     |
| 7159   | 0     | 0     | 0     | 0     |
| 7161   | 0     | 0     | 0     | 0     |
| 7164   | 0     | 0     | 0     | 0     |
| 7166   | 0     | 0     | 0     | 0     |
| 7167   | 0     | 0     | 0     | 0     |
| 7168   | 0     | 0     | 0     | 0     |
| 7170   | 0     | 0     | 0     | 0     |
| 7171   | 0     | 0     | 0     | 0     |
| 7172   | 0     | 1     | 0     | 0     |
| 7173   | 0     | 0     | 0     | 0     |
| 7175   | 0     | 0     | 0     | 0     |
| 7176   | 0     | 0     | 0     | 0     |
| 7180   | 0     | 0     | 0     | 0     |
| 7183   | 0     | 0     | 0     | 0     |
| 7189   | 0     | 0     | 0     | 0     |
| 7193   | 0     | 0     | 0     | 0     |
| 7194   | 0     | 0     | 0     | 0     |
| 7195   | 0     | 0     | 0     | 0     |
| 7200   | 0     | 0     | 0     | 0     |
| 7201   | 1     | 1     | 0     | 0     |
| 7205   | 0     | 0     | 0     | 0     |
| 7207   | 0     | 0     | 0     | 0     |
| 7208   | 0     | 0     | 0     | 0     |
| 7210   | 0     | 0     | 0     | 0     |
| 7211   | 0     | 0     | 0     | 0     |
| 7217   | 0     | 0     | 0     | 0     |
| 7218   | 0     | 0     | 0     | 0     |
| 7220   | 0     | 0     | 0     | 0     |
| 7225   | 0     | 0     | 0     | 0     |
| 7228   | 0     | 0     | 0     | 0     |

| respid | Q31_2 | Q31_3 | Q31_4 | Q31_5 |
|--------|-------|-------|-------|-------|
| 7230   | 0     | 0     | 0     | 0     |
| 7233   | 0     | 0     | 0     | 0     |
| 7234   | 0     | 0     | 0     | 0     |
| 7235   | 0     | 0     | 0     | 0     |
| 7236   | 0     | 0     | 0     | 0     |
| 7241   | 0     | 0     | 0     | 0     |
| 7251   | 0     | 0     | 0     | 0     |
| 7253   | 0     | 0     | 0     | 0     |
| 7259   | 0     | 0     | 0     | 0     |
| 7260   | 1     | 0     | 0     | 0     |
| 7261   | 0     | 0     | 0     | 0     |
| 7263   | 0     | 0     | 0     | 0     |
| 7265   | 0     | 0     | 0     | 0     |
| 7268   | 1     | 0     | 0     | 0     |
| 7269   | 0     | 0     | 0     | 0     |
| 7271   | 0     | 1     | 1     | 0     |
| 7276   | 0     | 0     | 1     | 0     |
| 7280   | 0     | 0     | 0     | 0     |
| 7283   | 0     | 0     | 0     | 0     |
| 7284   | 1     | 0     | 0     | 0     |
| 7286   | 0     | 1     | 0     | 0     |
| 7287   | 0     | 0     | 0     | 0     |
| 7288   | 0     | 1     | 0     | 0     |
| 7294   | 1     | 0     | 0     | 0     |
| 7295   | 0     | 0     | 0     | 0     |
| 7296   | 0     | 0     | 0     | 0     |
| 7297   | 0     | 0     | 0     | 0     |
| 7299   | 0     | 0     | 0     | 0     |
| 7300   | 1     | 0     | 0     | 0     |
| 7301   | 1     | 0     | 0     | 0     |
| 7302   | 0     | 0     | 0     | 0     |
| 7306   | 0     | 1     | 0     | 0     |



| respid | Q31_2 | Q31_3 | Q31_4 | Q31_5 |
|--------|-------|-------|-------|-------|
| 7313   | 1     | 1     | 1     | 1     |
| 7315   | 1     | 0     | 0     | 0     |
| 7317   | 0     | 0     | 0     | 0     |
| 7321   | 0     | 0     | 0     | 0     |
| 7322   | 0     | 0     | 0     | 0     |
| 7323   | 1     | 0     | 0     | 0     |
| 7333   | 0     | 0     | 0     | 0     |
| 7335   | 0     | 1     | 1     | 0     |
| 7336   | 0     | 0     | 0     | 0     |
| 7337   | 0     | 0     | 0     | 0     |
| 7338   | 0     | 0     | 0     | 0     |
| 7340   | 0     | 0     | 0     | 0     |
| 7341   | 1     | 0     | 0     | 0     |
| 7342   | 1     | 1     | 0     | 0     |
| 7344   | 0     | 0     | 0     | 0     |
| 7346   | 1     | 1     | 0     | 0     |
| 7347   | 0     | 1     | 0     | 0     |
| 7349   | 1     | 1     | 0     | 0     |
| 7352   | 0     | 0     | 0     | 0     |
| 7353   | 0     | 0     | 0     | 0     |
| 7355   | 0     | 0     | 0     | 0     |
| 7356   | 0     | 0     | 0     | 0     |
| 7360   | 1     | 1     | 1     | 1     |
| 7371   | 0     | 0     | 0     | 0     |
| 7376   | 0     | 0     | 0     | 0     |
| 7379   | 0     | 0     | 0     | 0     |
| 7381   | 0     | 0     | 0     | 0     |
| 7386   | 1     | 1     | 0     | 0     |
| 7389   | 0     | 0     | 0     | 0     |
| 7390   | 0     | 0     | 0     | 0     |
| 7393   | 0     | 0     | 0     | 0     |
| 7394   | 0     | 0     | 0     | 0     |

| respid | Q31_2 | Q31_3 | Q31_4 | Q31_5 |
|--------|-------|-------|-------|-------|
| 7396   | 1     | 1     | 0     | 0     |
| 7400   | 0     | 1     | 0     | 0     |
| 7401   | 0     | 0     | 0     | 0     |
| 7403   | 0     | 0     | 0     | 0     |
| 7406   | 1     | 0     | 0     | 0     |
| 7409   | 1     | 1     | 0     | 0     |
| 7410   | 1     | 1     | 0     | 1     |
| 7412   | 0     | 0     | 0     | 0     |
| 7414   | 0     | 1     | 0     | 0     |
| 7415   | 0     | 0     | 0     | 0     |
| 7417   | 0     | 0     | 0     | 0     |
| 7421   | 0     | 1     | 1     | 1     |
| 7425   | 0     | 0     | 0     | 0     |
| 7430   | 0     | 0     | 0     | 0     |
| 7432   | 0     | 0     | 0     | 0     |
| 7433   | 1     | 1     | 0     | 0     |
| 7442   | 0     | 0     | 0     | 0     |
| 7445   | 0     | 0     | 0     | 0     |
| 7446   | 0     | 0     | 0     | 0     |
| 7449   | 0     | 0     | 0     | 0     |
| 7450   | 0     | 0     | 0     | 0     |
| 7451   | 0     | 0     | 0     | 0     |
| 7459   | 0     | 0     | 0     | 0     |
| 7462   | 1     | 0     | 0     | 0     |
| 7463   | 0     | 0     | 0     | 0     |
| 7469   | 0     | 0     | 0     | 0     |
| 7482   | 0     | 0     | 0     | 0     |
| 7484   | 0     | 0     | 0     | 0     |
| 7486   | 0     | 0     | 0     | 0     |
| 7496   | 0     | 0     | 0     | 0     |
| 7502   | 0     | 0     | 0     | 0     |
| 7504   | 0     | 0     | 0     | 0     |

| respid | Q31_2 | Q31_3 | Q31_4 | Q31_5 |
|--------|-------|-------|-------|-------|
| 7509   | 0     | 0     | 0     | 0     |
| 7513   | 1     | 0     | 1     | 0     |
| 7514   | 0     | 0     | 0     | 0     |
| 7520   | 0     | 0     | 0     | 0     |
| 7523   | 0     | 0     | 0     | 0     |
| 7526   | 1     | 0     | 0     | 0     |
| 7529   | 0     | 0     | 0     | 0     |
| 7534   | 0     | 0     | 0     | 0     |
| 7536   | 0     | 0     | 0     | 1     |
| 7540   | 0     | 0     | 0     | 0     |
| 7541   | 0     | 0     | 0     | 0     |
| 7542   | 0     | 0     | 0     | 0     |
| 7555   | 0     | 0     | 0     | 0     |
| 7566   | 0     | 0     | 0     | 0     |
| 7568   | 1     | 0     | 0     | 0     |
| 7570   | 1     | 1     | 1     | 0     |
| 7572   | 0     | 0     | 0     | 0     |
| 7573   | 1     | 1     | 1     | 0     |
| 7576   | 0     | 0     | 0     | 0     |
| 7577   | 0     | 0     | 0     | 0     |
| 7583   | 0     | 0     | 0     | 0     |
| 7584   | 0     | 0     | 0     | 0     |
| 7585   | 1     | 1     | 1     | 1     |
| 7586   | 0     | 0     | 0     | 0     |
| 7587   | 0     | 0     | 0     | 0     |
| 7588   | 0     | 0     | 0     | 0     |
| 7596   | 0     | 0     | 0     | 0     |
| 7599   | 1     | 0     | 0     | 0     |
| 7600   | 0     | 0     | 0     | 0     |
| 7602   | 1     | 1     | 0     | 0     |
| 7613   | 0     | 0     | 0     | 0     |
| 7620   | 1     | 0     | 0     | 0     |

| respid | Q31_2 | Q31_3 | Q31_4 | Q31_5 |
|--------|-------|-------|-------|-------|
| 7623   | 0     | 0     | 0     | 0     |
| 7635   | 0     | 0     | 0     | 0     |
| 7636   | 0     | 0     | 0     | 0     |
| 7643   | 1     | 1     | 0     | 1     |
| 7645   | 1     | 0     | 0     | 0     |
| 7649   | 1     | 0     | 0     | 1     |
| 7651   | 0     | 0     | 0     | 0     |
| 7652   | 0     | 0     | 1     | 0     |
| 7655   | 0     | 0     | 0     | 0     |
| 7657   | 0     | 0     | 0     | 0     |
| 7675   | 0     | 0     | 0     | 0     |
| 7676   | 0     | 0     | 0     | 0     |
| 7684   | 1     | 0     | 0     | 0     |
| 7693   | 0     | 0     | 0     | 0     |
| 7694   | 1     | 1     | 1     | 1     |
| 7695   | 0     | 0     | 0     | 0     |
| 7696   | 0     | 0     | 0     | 0     |
| 7698   | 1     | 1     | 0     | 0     |
| 7700   | 0     | 0     | 0     | 0     |
| 7701   | 0     | 0     | 0     | 0     |
| 7704   | 1     | 1     | 0     | 0     |
| 7709   | 0     | 0     | 0     | 0     |
| 7713   | 0     | 0     | 0     | 0     |
| 7714   | 0     | 0     | 0     | 0     |
| 7718   | 1     | 0     | 0     | 0     |
| 7720   | 0     | 0     | 0     | 0     |
| 7721   | 0     | 1     | 0     | 0     |
| 7722   | 0     | 0     | 0     | 0     |
| 7724   | 0     | 0     | 0     | 0     |
| 7728   | 0     | 0     | 0     | 0     |
| 7731   | 0     | 0     | 0     | 0     |
| 7735   | 0     | 0     | 0     | 0     |

| respid | Q31_2 | Q31_3 | Q31_4 | Q31_5 |
|--------|-------|-------|-------|-------|
| 7737   | 0     | 0     | 0     | 0     |
| 7741   | 0     | 0     | 0     | 0     |
| 7746   | 0     | 0     | 0     | 0     |
| 7747   | 0     | 0     | 0     | 0     |
| 7748   | 0     | 0     | 0     | 0     |
| 7750   | 0     | 0     | 0     | 0     |
| 7754   | 1     | 0     | 0     | 0     |
| 7755   | 0     | 1     | 0     | 0     |
| 7762   | 0     | 0     | 0     | 0     |
| 7764   | 0     | 0     | 0     | 0     |
| 7766   | 0     | 0     | 0     | 0     |
| 7768   | 0     | 1     | 0     | 0     |
| 7770   | 0     | 0     | 0     | 0     |
| 7771   | 0     | 0     | 0     | 0     |
| 7777   | 0     | 0     | 0     | 0     |
| 7778   | 0     | 0     | 0     | 0     |
| 7783   | 0     | 0     | 1     | 1     |
| 7789   | 0     | 0     | 0     | 0     |
| 7790   | 0     | 0     | 0     | 0     |
| 7795   | 0     | 0     | 0     | 0     |
| 7807   | 0     | 0     | 0     | 0     |
| 7808   | 1     | 1     | 0     | 0     |
| 7818   | 1     | 1     | 0     | 1     |
| 7820   | 0     | 0     | 0     | 0     |
| 7831   | 1     | 1     | 0     | 0     |
| 7832   | 0     | 0     | 0     | 0     |
| 7837   | 0     | 0     | 0     | 0     |
| 7841   | 1     | 1     | 0     | 0     |
| 7845   | 1     | 1     | 1     | 0     |
| 7853   | 0     | 0     | 0     | 0     |
| 7854   | 0     | 0     | 0     | 0     |
| 7862   | 0     | 0     | 1     | 0     |

| respid | Q31_2 | Q31_3 | Q31_4 | Q31_5 |
|--------|-------|-------|-------|-------|
| 7871   | 0     | 0     | 0     | 0     |
| 7875   | 1     | 1     | 0     | 0     |
| 7880   | 0     | 0     | 0     | 0     |
| 7881   | 1     | 0     | 0     | 0     |
| 7883   | 0     | 0     | 0     | 0     |
| 7896   | 0     | 0     | 0     | 0     |
| 7905   | 0     | 0     | 0     | 0     |
| 7919   | 0     | 0     | 0     | 0     |
| 7928   | 1     | 0     | 0     | 0     |
| 7929   | 0     | 1     | 0     | 0     |
| 7938   | 1     | 1     | 0     | 0     |
| 7940   | 0     | 0     | 0     | 0     |
| 7941   | 0     | 0     | 0     | 0     |
| 7952   | 0     | 0     | 0     | 0     |
| 7962   | 0     | 0     | 0     | 0     |
| 7968   | 0     | 0     | 0     | 0     |
| 7972   | 0     | 0     | 0     | 0     |
| 7983   | 1     | 0     | 0     | 0     |
| 7990   | 0     | 1     | 0     | 0     |
| 7993   | 1     | 0     | 0     | 1     |
| 8005   | 0     | 1     | 0     | 0     |
| 8008   | 0     | 0     | 0     | 0     |
| 8012   | 0     | 1     | 0     | 0     |
| 8021   | 1     | 0     | 0     | 0     |
| 8024   | 0     | 0     | 0     | 0     |
| 8043   | 0     | 0     | 0     | 0     |
| 8051   | 1     | 1     | 0     | 0     |
| 8056   | 0     | 0     | 0     | 0     |
| 8061   | 0     | 0     | 0     | 0     |
| 8066   | 0     | 0     | 0     | 0     |
| 8069   | 1     | 1     | 0     | 0     |
| 8071   | 0     | 0     | 0     | 0     |

| respid | Q31_2 | Q31_3 | Q31_4 | Q31_5 |
|--------|-------|-------|-------|-------|
| 8072   | 1     | 1     | 0     | 0     |
| 8076   | 0     | 0     | 0     | 0     |
| 8080   | 0     | 0     | 0     | 0     |
| 8083   | 0     | 0     | 0     | 0     |
| 8093   | 0     | 1     | 0     | 0     |
| 8095   | 0     | 0     | 0     | 0     |
| 8099   | 0     | 0     | 0     | 0     |
| 8100   | 0     | 0     | 0     | 0     |
| 8103   | 0     | 0     | 0     | 0     |
| 8104   | 0     | 0     | 0     | 0     |
| 8115   | 0     | 0     | 0     | 0     |
| 8121   | 0     | 0     | 0     | 0     |
| 8128   | 0     | 0     | 0     | 0     |
| 8130   | 0     | 1     | 0     | 0     |
| 8131   | 0     | 0     | 0     | 0     |
| 8133   | 0     | 0     | 0     | 0     |
| 8143   | 0     | 0     | 0     | 0     |
| 8144   | 0     | 0     | 0     | 0     |
| 8146   | 0     | 0     | 0     | 0     |
| 8148   | 0     | 0     | 0     | 0     |
| 8157   | 0     | 0     | 0     | 0     |
| 8164   | 0     | 0     | 0     | 0     |
| 8173   | 0     | 0     | 0     | 0     |
| 8176   | 0     | 0     | 0     | 0     |
| 8179   | 0     | 0     | 0     | 0     |
| 8181   | 0     | 0     | 0     | 0     |
| 8182   | 0     | 0     | 0     | 0     |
| 8196   | 0     | 0     | 0     | 0     |
| 8200   | 0     | 1     | 0     | 0     |
| 8203   | 0     | 1     | 0     | 0     |
| 8204   | 1     | 0     | 0     | 0     |
| 8206   | 0     | 1     | 0     | 0     |

| respid | Q31_2 | Q31_3 | Q31_4 | Q31_5 |
|--------|-------|-------|-------|-------|
| 8208   | 0     | 0     | 0     | 0     |
| 8212   | 0     | 0     | 0     | 0     |
| 8222   | 1     | 0     | 0     | 0     |
| 8223   | 0     | 0     | 0     | 0     |
| 8225   | 0     | 0     | 0     | 0     |
| 8226   | 0     | 0     | 0     | 0     |
| 8228   | 0     | 0     | 0     | 0     |
| 8229   | 0     | 0     | 0     | 0     |
| 8239   | 0     | 0     | 0     | 0     |
| 8246   | 0     | 0     | 0     | 0     |
| 8258   | 0     | 0     | 1     | 0     |
| 8260   | 0     | 0     | 0     | 0     |
| 8262   | 0     | 0     | 0     | 0     |
| 8263   | 0     | 0     | 0     | 0     |
| 8267   | 0     | 0     | 0     | 0     |
| 8271   | 1     | 1     | 1     | 1     |
| 8274   | 0     | 0     | 0     | 0     |
| 8275   | 0     | 0     | 1     | 0     |
| 8279   | 0     | 1     | 0     | 0     |
| 8285   | 1     | 1     | 0     | 0     |
| 8287   | 0     | 0     | 0     | 0     |
| 8289   | 1     | 0     | 0     | 0     |
| 8291   | 0     | 0     | 0     | 0     |
| 8299   | 0     | 0     | 0     | 0     |
| 8301   | 0     | 0     | 0     | 0     |
| 8302   | 1     | 1     | 0     | 0     |
| 8308   | 1     | 1     | 0     | 0     |
| 8313   | 0     | 0     | 0     | 0     |
| 8316   | 0     | 1     | 0     | 0     |
| 8317   | 0     | 0     | 0     | 0     |
| 8319   | 0     | 0     | 0     | 0     |
| 8323   | 0     | 0     | 0     | 0     |



| respid | Q31_2 | Q31_3 | Q31_4 | Q31_5 |
|--------|-------|-------|-------|-------|
| 8324   | 0     | 0     | 0     | 0     |
| 8327   | 0     | 0     | 1     | 0     |
| 8328   | 0     | 1     | 0     | 1     |
| 8342   | 0     | 0     | 0     | 0     |
| 8350   | 0     | 1     | 0     | 0     |
| 8352   | 0     | 0     | 1     | 0     |
| 8353   | 0     | 0     | 0     | 0     |
| 8356   | 1     | 1     | 0     | 0     |
| 8367   | 1     | 0     | 0     | 0     |
| 8373   | 0     | 0     | 0     | 0     |
| 8379   | 0     | 0     | 0     | 0     |
| 8382   | 0     | 0     | 0     | 0     |
| 8387   | 0     | 0     | 0     | 0     |
| 8409   | 1     | 0     | 0     | 0     |
| 8410   | 0     | 0     | 0     | 0     |
| 8412   | 0     | 0     | 0     | 0     |
| 8415   | 0     | 0     | 0     | 0     |
| 8417   | 0     | 0     | 0     | 0     |
| 8422   | 1     | 0     | 0     | 0     |
| 8430   | 1     | 1     | 0     | 0     |
| 8434   | 0     | 0     | 0     | 0     |
| 8436   | 0     | 0     | 0     | 0     |
| 8446   | 0     | 0     | 0     | 0     |
| 8447   | 0     | 0     | 0     | 0     |
| 8448   | 0     | 0     | 0     | 0     |
| 8455   | 0     | 0     | 0     | 0     |
| 8456   | 0     | 0     | 0     | 0     |
| 8459   | 1     | 1     | 0     | 0     |
| 8460   | 0     | 0     | 0     | 0     |
| 8464   | 1     | 1     | 0     | 0     |
| 8470   | 0     | 1     | 0     | 0     |
| 8473   | 1     | 0     | 0     | 0     |

| respid | Q31_2 | Q31_3 | Q31_4 | Q31_5 |
|--------|-------|-------|-------|-------|
| 8486   | 0     | 0     | 0     | 0     |
| 8487   | 0     | 0     | 0     | 0     |
| 8489   | 1     | 1     | 0     | 0     |
| 8494   | 0     | 0     | 0     | 0     |
| 8495   | 1     | 1     | 0     | 1     |
| 8497   | 0     | 0     | 0     | 0     |
| 8510   | 0     | 1     | 0     | 0     |
| 8515   | 0     | 0     | 0     | 0     |
| 8526   | 0     | 0     | 0     | 0     |
| 8530   | 0     | 0     | 0     | 0     |
| 8532   | 0     | 0     | 0     | 0     |
| 8533   | 0     | 0     | 0     | 0     |
| 8534   | 1     | 0     | 0     | 0     |
| 8572   | 0     | 0     | 0     | 0     |
| 8582   | 0     | 0     | 0     | 0     |
| 8584   | 0     | 0     | 0     | 0     |
| 8585   | 0     | 0     | 0     | 0     |
| 8586   | 0     | 0     | 0     | 0     |
| 8589   | 0     | 0     | 1     | 0     |
| 8593   | 0     | 0     | 0     | 0     |
| 8594   | 0     | 1     | 0     | 0     |
| 8601   | 0     | 1     | 0     | 0     |
| 8603   | 0     | 0     | 0     | 0     |
| 8604   | 0     | 0     | 0     | 0     |
| 8605   | 0     | 0     | 0     | 0     |
| 8607   | 0     | 0     | 0     | 0     |
| 8623   | 0     | 0     | 0     | 0     |
| 8626   | 1     | 0     | 0     | 0     |
| 8638   | 1     | 1     | 0     | 0     |
| 8640   | 1     | 1     | 0     | 0     |
| 8641   | 0     | 0     | 0     | 0     |
| 8643   | 0     | 0     | 0     | 0     |

| respid | Q31_2 | Q31_3 | Q31_4 | Q31_5 |
|--------|-------|-------|-------|-------|
| 8644   | 1     | 1     | 0     | 0     |
| 8646   | 0     | 0     | 0     | 0     |
| 8647   | 0     | 0     | 0     | 0     |
| 8649   | 0     | 0     | 0     | 0     |
| 8650   | 1     | 0     | 0     | 0     |
| 8658   | 0     | 0     | 0     | 0     |
| 8659   | 0     | 0     | 0     | 0     |
| 8669   | 0     | 0     | 0     | 0     |
| 8672   | 0     | 1     | 0     | 0     |
| 8673   | 0     | 0     | 0     | 0     |
| 8676   | 0     | 0     | 0     | 0     |
| 8677   | 0     | 0     | 0     | 0     |
| 8681   | 0     | 0     | 0     | 0     |
| 8688   | 0     | 0     | 0     | 0     |
| 8689   | 1     | 0     | 0     | 0     |
| 8690   | 0     | 0     | 0     | 0     |
| 8693   | 0     | 0     | 0     | 0     |
| 8694   | 0     | 0     | 0     | 0     |
| 8699   | 0     | 0     | 0     | 0     |
| 8700   | 0     | 0     | 0     | 0     |
| 8703   | 0     | 0     | 0     | 0     |
| 8704   | 0     | 0     | 0     | 0     |
| 8706   | 0     | 0     | 0     | 0     |
| 8709   | 0     | 0     | 0     | 0     |
| 8715   | 0     | 0     | 0     | 0     |
| 8728   | 0     | 0     | 0     | 0     |
| 8729   | 0     | 0     | 0     | 0     |
| 8730   | 0     | 0     | 0     | 0     |
| 8742   | 0     | 1     | 0     | 0     |
| 8748   | 1     | 1     | 0     | 0     |
| 8749   | 0     | 0     | 0     | 0     |
| 8750   | 0     | 1     | 0     | 0     |

| respid | Q31_2 | Q31_3 | Q31_4 | Q31_5 |
|--------|-------|-------|-------|-------|
| 8751   | 0     | 0     | 0     | 0     |
| 8752   | 0     | 0     | 0     | 0     |
| 8754   | 0     | 0     | 0     | 0     |
| 8757   | 0     | 0     | 0     | 0     |
| 8760   | 0     | 0     | 0     | 0     |
| 8761   | 0     | 0     | 0     | 0     |
| 8762   | 0     | 0     | 0     | 0     |
| 8763   | 0     | 0     | 0     | 0     |
| 8764   | 0     | 0     | 0     | 0     |
| 8765   | 0     | 0     | 0     | 0     |
| 8766   | 1     | 1     | 0     | 0     |
| 8767   | 1     | 0     | 0     | 0     |
| 8768   | 0     | 1     | 0     | 0     |
| 8770   | 0     | 0     | 0     | 0     |
| 8771   | 0     | 0     | 0     | 0     |
| 8773   | 0     | 0     | 0     | 0     |
| 8774   | 0     | 0     | 0     | 0     |
| 8776   | 0     | 0     | 0     | 0     |
| 8777   | 0     | 0     | 0     | 0     |
| 8778   | 1     | 1     | 0     | 0     |
| 8779   | 0     | 0     | 0     | 0     |
| 8784   | 0     | 1     | 0     | 0     |
| 8786   | 0     | 0     | 0     | 0     |
| 8787   | 0     | 0     | 0     | 0     |
| 8790   | 0     | 0     | 0     | 0     |
| 8791   | 1     | 1     | 0     | 1     |
| 8793   | 0     | 0     | 0     | 0     |
| 8795   | 1     | 0     | 0     | 0     |
| 8797   | 0     | 0     | 0     | 0     |
| 8801   | 0     | 0     | 0     | 0     |
| 8802   | 0     | 0     | 0     | 0     |
| 8807   | 0     | 0     | 0     | 0     |

| respid | Q31_2 | Q31_3 | Q31_4 | Q31_5 |
|--------|-------|-------|-------|-------|
| 8813   | 0     | 0     | 0     | 0     |
| 8817   | 0     | 0     | 0     | 0     |
| 8818   | 0     | 0     | 1     | 0     |
| 8821   | 0     | 0     | 0     | 0     |
| 8822   | 0     | 0     | 0     | 0     |
| 8823   | 0     | 0     | 0     | 0     |
| 8824   | 0     | 0     | 0     | 0     |
| 8825   | 0     | 0     | 0     | 0     |
| 8834   | 0     | 0     | 1     | 0     |
| 8840   | 1     | 1     | 0     | 0     |
| 8843   | 0     | 1     | 0     | 0     |
| 8846   | 0     | 0     | 0     | 0     |
| 8862   | 0     | 0     | 0     | 0     |
| 8866   | 0     | 0     | 0     | 0     |
| 8869   | 0     | 0     | 0     | 0     |
| 8872   | 0     | 0     | 0     | 0     |
| 8903   | 0     | 0     | 0     | 0     |
| 8909   | 0     | 0     | 0     | 0     |
| 8926   | 0     | 0     | 0     | 0     |
| 8936   | 1     | 0     | 0     | 0     |
| 8945   | 0     | 0     | 0     | 0     |
| 8954   | 0     | 0     | 0     | 0     |
| 8955   | 1     | 1     | 1     | 1     |
| 8958   | 0     | 0     | 0     | 0     |
| 8959   | 1     | 0     | 0     | 0     |
| 8960   | 0     | 0     | 0     | 0     |
| 8976   | 1     | 1     | 0     | 0     |
| 8977   | 0     | 0     | 0     | 1     |
| 8979   | 0     | 0     | 0     | 0     |
| 8985   | 0     | 0     | 0     | 0     |
| 8994   | 0     | 0     | 0     | 0     |
| 8997   | 0     | 0     | 0     | 0     |

| respid | Q31_2 | Q31_3 | Q31_4 | Q31_5 |
|--------|-------|-------|-------|-------|
| 9002   | 0     | 0     | 0     | 0     |
| 9005   | 1     | 1     | 0     | 0     |
| 9017   | 0     | 0     | 0     | 0     |
| 9018   | 0     | 0     | 0     | 0     |
| 9021   | 1     | 0     | 0     | 0     |
| 9029   | 1     | 0     | 0     | 0     |
| 9035   | 0     | 0     | 0     | 0     |
| 9038   | 0     | 0     | 0     | 0     |
| 9039   | 0     | 0     | 0     | 0     |
| 9040   | 0     | 1     | 0     | 0     |
| 9042   | 0     | 0     | 0     | 0     |
| 9043   | 0     | 0     | 0     | 0     |
| 9045   | 0     | 0     | 0     | 1     |
| 9051   | 0     | 0     | 0     | 0     |
| 9067   | 0     | 0     | 0     | 0     |
| 9069   | 0     | 0     | 0     | 0     |
| 9073   | 0     | 0     | 0     | 0     |
| 9084   | 0     | 0     | 0     | 0     |
| 9096   | 0     | 0     | 0     | 0     |
| 9100   | 0     | 0     | 0     | 0     |
| 9107   | 0     | 0     | 0     | 0     |
| 9110   | 0     | 0     | 0     | 0     |
| 9120   | 0     | 0     | 0     | 0     |
| 9122   | 0     | 0     | 0     | 0     |
| 9130   | 1     | 0     | 0     | 0     |
| 9134   | 0     | 0     | 0     | 0     |
| 9137   | 0     | 0     | 0     | 0     |
| 9139   | 0     | 0     | 0     | 0     |
| 9144   | 0     | 0     | 0     | 0     |
| 9157   | 0     | 1     | 0     | 0     |
| 9166   | 0     | 0     | 0     | 0     |
| 9177   | 0     | 0     | 0     | 0     |

| respid | Q31_2 | Q31_3 | Q31_4 | Q31_5 |
|--------|-------|-------|-------|-------|
| 9181   | 0     | 0     | 1     | 0     |
| 9183   | 0     | 0     | 0     | 0     |
| 9184   | 0     | 1     | 1     | 0     |
| 9188   | 0     | 0     | 0     | 0     |
| 9197   | 0     | 0     | 0     | 0     |
| 9200   | 0     | 1     | 0     | 0     |
| 9205   | 1     | 1     | 1     | 0     |
| 9207   | 0     | 1     | 0     | 0     |
| 9213   | 0     | 0     | 0     | 0     |
| 9216   | 0     | 0     | 1     | 0     |
| 9217   | 0     | 0     | 0     | 0     |
| 9218   | 1     | 1     | 0     | 0     |
| 9219   | 1     | 1     | 0     | 0     |
| 9220   | 0     | 0     | 0     | 0     |
| 9221   | 0     | 0     | 0     | 0     |
| 9223   | 1     | 1     | 1     | 1     |
| 9228   | 0     | 0     | 0     | 0     |
| 9230   | 0     | 0     | 0     | 0     |
| 9231   | 0     | 1     | 0     | 0     |
| 9233   | 1     | 0     | 0     | 0     |
| 9235   | 0     | 0     | 0     | 0     |
| 9237   | 0     | 0     | 0     | 0     |
| 9242   | 1     | 0     | 0     | 0     |
| 9250   | 0     | 0     | 0     | 0     |
| 9253   | 1     | 1     | 0     | 0     |
| 9257   | 0     | 0     | 0     | 0     |
| 9263   | 0     | 0     | 0     | 0     |
| 9267   | 0     | 0     | 0     | 0     |
| 9272   | 1     | 1     | 0     | 0     |
| 9279   | 0     | 0     | 0     | 0     |
| 9281   | 0     | 0     | 0     | 0     |
| 9285   | 0     | 0     | 0     | 0     |

| respid | Q31_2 | Q31_3 | Q31_4 | Q31_5 |
|--------|-------|-------|-------|-------|
| 9286   | 0     | 0     | 0     | 0     |
| 9294   | 0     | 1     | 1     | 0     |
| 9295   | 0     | 0     | 0     | 0     |
| 9297   | 0     | 0     | 0     | 0     |
| 9299   | 0     | 0     | 0     | 0     |
| 9309   | 0     | 0     | 0     | 0     |
| 9315   | 0     | 0     | 0     | 0     |
| 9320   | 0     | 0     | 0     | 0     |
| 9324   | 0     | 0     | 0     | 0     |
| 9326   | 0     | 0     | 0     | 0     |
| 9333   | 0     | 0     | 0     | 0     |
| 9334   | 1     | 0     | 0     | 0     |
| 9336   | 0     | 1     | 1     | 0     |
| 9337   | 0     | 0     | 0     | 0     |
| 9342   | 0     | 0     | 0     | 0     |
| 9347   | 0     | 0     | 0     | 0     |
| 9352   | 0     | 0     | 0     | 0     |
| 9355   | 0     | 0     | 0     | 0     |
| 9356   | 0     | 0     | 0     | 0     |
| 9359   | 0     | 0     | 0     | 0     |
| 9368   | 0     | 1     | 0     | 0     |
| 9375   | 0     | 0     | 0     | 0     |
| 9384   | 0     | 0     | 0     | 0     |
| 9388   | 0     | 0     | 0     | 0     |
| 9397   | 0     | 0     | 0     | 0     |
| 9400   | 0     | 0     | 0     | 0     |
| 9401   | 0     | 0     | 0     | 0     |
| 9402   | 0     | 0     | 0     | 0     |
| 9417   | 0     | 1     | 0     | 0     |
| 9424   | 0     | 0     | 0     | 0     |
| 9427   | 0     | 0     | 0     | 0     |
| 9429   | 0     | 0     | 0     | 0     |



| respid | Q31_2 | Q31_3 | Q31_4 | Q31_5 |
|--------|-------|-------|-------|-------|
| 9437   | 0     | 1     | 0     | 0     |
| 9442   | 0     | 0     | 0     | 0     |
| 9446   | 1     | 0     | 0     | 0     |
| 9447   | 0     | 0     | 0     | 0     |
| 9448   | 1     | 1     | 0     | 0     |
| 9449   | 0     | 0     | 0     | 0     |
| 9455   | 0     | 0     | 0     | 0     |
| 9459   | 0     | 0     | 0     | 0     |
| 9460   | 0     | 0     | 0     | 0     |
| 9461   | 0     | 0     | 0     | 0     |
| 9463   | 1     | 0     | 0     | 0     |
| 9464   | 0     | 0     | 0     | 0     |
| 9466   | 0     | 0     | 0     | 0     |
| 9477   | 1     | 0     | 0     | 0     |
| 9482   | 0     | 0     | 1     | 0     |
| 9486   | 0     | 0     | 0     | 0     |
| 9488   | 1     | 0     | 0     | 0     |
| 9489   | 0     | 0     | 0     | 0     |
| 9496   | 0     | 0     | 0     | 0     |
| 9499   | 0     | 0     | 0     | 0     |
| 9512   | 0     | 0     | 0     | 0     |
| 9514   | 0     | 0     | 0     | 0     |
| 9516   | 0     | 0     | 0     | 0     |
| 9517   | 1     | 0     | 0     | 0     |
| 9520   | 0     | 0     | 0     | 0     |
| 9527   | 0     | 0     | 0     | 0     |
| 9532   | 0     | 0     | 0     | 0     |
| 9533   | 0     | 0     | 0     | 0     |
| 9543   | 0     | 0     | 0     | 0     |
| 9550   | 0     | 0     | 0     | 0     |
| 9553   | 0     | 0     | 0     | 0     |
| 9555   | 0     | 0     | 0     | 0     |

| respid | Q31_2 | Q31_3 | Q31_4 | Q31_5 |
|--------|-------|-------|-------|-------|
| 9565   | 0     | 0     | 0     | 0     |
| 9583   | 0     | 0     | 0     | 0     |
| 9594   | 1     | 0     | 0     | 0     |
| 9596   | 0     | 0     | 0     | 0     |
| 9600   | 0     | 0     | 0     | 0     |
| 9602   | 0     | 0     | 1     | 1     |
| 9606   | 0     | 0     | 0     | 0     |
| 9608   | 0     | 0     | 0     | 0     |
| 9610   | 0     | 1     | 0     | 0     |
| 9612   | 1     | 1     | 1     | 0     |
| 9613   | 0     | 0     | 0     | 0     |
| 9614   | 0     | 0     | 0     | 0     |
| 9620   | 0     | 0     | 0     | 0     |
| 9628   | 0     | 0     | 0     | 0     |
| 9631   | 0     | 0     | 0     | 0     |
| 9632   | 0     | 0     | 0     | 0     |
| 9633   | 0     | 0     | 0     | 0     |
| 9639   | 0     | 0     | 0     | 0     |
| 9640   | 1     | 1     | 0     | 0     |
| 9642   | 0     | 0     | 0     | 0     |
| 9653   | 0     | 0     | 0     | 0     |
| 9658   | 1     | 0     | 0     | 0     |
| 9659   | 0     | 0     | 0     | 0     |
| 9661   | 0     | 0     | 0     | 0     |
| 9664   | 0     | 0     | 0     | 0     |
| 9665   | 0     | 0     | 0     | 0     |
| 9666   | 1     | 0     | 0     | 0     |
| 9667   | 0     | 1     | 0     | 0     |
| 9668   | 0     | 0     | 0     | 0     |
| 9670   | 0     | 0     | 0     | 0     |
| 9671   | 1     | 1     | 0     | 0     |
| 9681   | 0     | 0     | 0     | 0     |

| respid | Q31_2 | Q31_3 | Q31_4 | Q31_5 |
|--------|-------|-------|-------|-------|
| 9684   | 0     | 0     | 0     | 0     |
| 9685   | 0     | 0     | 0     | 0     |
| 9686   | 0     | 0     | 0     | 0     |
| 9688   | 0     | 0     | 0     | 0     |
| 9692   | 0     | 0     | 0     | 0     |
| 9693   | 1     | 1     | 1     | 0     |
| 9698   | 0     | 1     | 0     | 0     |
| 9699   | 1     | 1     | 1     | 1     |
| 9701   | 0     | 0     | 0     | 0     |
| 9702   | 1     | 1     | 0     | 0     |
| 9709   | 0     | 0     | 0     | 0     |
| 9713   | 0     | 0     | 0     | 0     |
| 9715   | 0     | 0     | 0     | 0     |
| 9721   | 0     | 0     | 0     | 0     |
| 9725   | 0     | 0     | 0     | 0     |
| 9729   | 0     | 0     | 0     | 0     |
| 9731   | 1     | 1     | 0     | 0     |
| 9736   | 0     | 0     | 0     | 0     |
| 9740   | 0     | 0     | 0     | 0     |
| 9741   | 0     | 0     | 0     | 0     |
| 9749   | 0     | 0     | 0     | 0     |
| 9750   | 0     | 0     | 0     | 0     |
| 9751   | 1     | 1     | 1     | 0     |
| 9753   | 0     | 1     | 0     | 0     |
| 9754   | 0     | 0     | 0     | 0     |
| 9756   | 0     | 0     | 0     | 0     |
| 9758   | 1     | 0     | 1     | 1     |
| 9759   | 0     | 0     | 0     | 1     |
| 9760   | 1     | 0     | 0     | 0     |
| 9761   | 0     | 0     | 0     | 0     |
| 9762   | 0     | 0     | 0     | 0     |
| 9764   | 0     | 0     | 0     | 0     |

| respid | Q31_2 | Q31_3 | Q31_4 | Q31_5 |
|--------|-------|-------|-------|-------|
| 9768   | 0     | 0     | 0     | 0     |
| 9769   | 1     | 0     | 0     | 0     |
| 9770   | 0     | 0     | 0     | 0     |
| 9771   | 0     | 0     | 0     | 0     |
| 9772   | 0     | 0     | 0     | 0     |
| 9773   | 0     | 0     | 0     | 0     |
| 9776   | 1     | 1     | 0     | 0     |
| 9786   | 0     | 0     | 0     | 0     |
| 9790   | 0     | 0     | 0     | 0     |
| 9791   | 0     | 0     | 0     | 0     |
| 9794   | 0     | 0     | 0     | 0     |
| 9797   | 1     | 1     | 0     | 0     |
| 9799   | 1     | 0     | 0     | 0     |
| 9804   | 0     | 0     | 0     | 0     |
| 9805   | 0     | 0     | 0     | 1     |
| 9806   | 0     | 0     | 0     | 0     |
| 9807   | 0     | 0     | 0     | 0     |
| 9813   | 1     | 0     | 0     | 0     |
| 9817   | 1     | 0     | 0     | 0     |
| 9823   | 1     | 0     | 0     | 0     |
| 9826   | 0     | 1     | 0     | 0     |
| 9830   | 0     | 0     | 0     | 0     |
| 9835   | 0     | 0     | 1     | 0     |
| 9836   | 0     | 0     | 0     | 0     |
| 9841   | 0     | 0     | 0     | 0     |
| 9842   | 0     | 0     | 0     | 0     |
| 9844   | 0     | 0     | 0     | 0     |
| 9847   | 0     | 0     | 0     | 0     |
| 9851   | 0     | 0     | 0     | 0     |
| 9852   | 0     | 0     | 0     | 0     |
| 9854   | 1     | 0     | 0     | 0     |
| 9855   | 0     | 0     | 0     | 0     |

| respid | Q31_2 | Q31_3 | Q31_4 | Q31_5 |
|--------|-------|-------|-------|-------|
| 9856   | 1     | 1     | 0     | 0     |
| 9862   | 0     | 0     | 0     | 0     |
| 9863   | 0     | 0     | 0     | 0     |
| 9866   | 0     | 0     | 0     | 0     |
| 9867   | 0     | 0     | 0     | 0     |
| 9868   | 1     | 0     | 0     | 1     |
| 9869   | 0     | 0     | 0     | 0     |
| 9878   | 0     | 0     | 0     | 0     |
| 9879   | 0     | 0     | 0     | 0     |
| 9881   | 0     | 0     | 0     | 0     |
| 9882   | 0     | 0     | 0     | 0     |
| 9884   | 0     | 0     | 0     | 0     |
| 9885   | 0     | 0     | 0     | 0     |
| 9888   | 0     | 0     | 0     | 0     |
| 9889   | 0     | 0     | 0     | 0     |
| 9894   | 0     | 1     | 0     | 0     |
| 9895   | 0     | 0     | 0     | 0     |
| 9896   | 1     | 1     | 0     | 0     |
| 9897   | 0     | 0     | 0     | 0     |
| 9905   | 0     | 0     | 0     | 0     |
| 9907   | 1     | 0     | 0     | 0     |
| 9908   | 0     | 0     | 0     | 0     |
| 9909   | 0     | 0     | 0     | 0     |
| 9910   | 0     | 0     | 0     | 0     |
| 9913   | 0     | 0     | 0     | 0     |
| 9914   | 0     | 0     | 0     | 0     |
| 9915   | 1     | 1     | 0     | 0     |
| 9916   | 0     | 0     | 0     | 0     |
| 9918   | 0     | 0     | 0     | 0     |
| 9919   | 0     | 0     | 1     | 1     |
| 9922   | 0     | 0     | 0     | 0     |
| 9930   | 0     | 0     | 0     | 0     |

| respid | Q31_2 | Q31_3 | Q31_4 | Q31_5 |
|--------|-------|-------|-------|-------|
| 9934   | 0     | 0     | 0     | 0     |
| 9936   | 0     | 0     | 0     | 0     |
| 9938   | 0     | 0     | 0     | 0     |
| 9940   | 0     | 0     | 0     | 0     |
| 9944   | 1     | 1     | 0     | 0     |
| 9945   | 0     | 0     | 0     | 0     |
| 9948   | 1     | 1     | 0     | 0     |
| 9949   | 0     | 1     | 0     | 1     |
| 9951   | 1     | 0     | 0     | 0     |
| 9952   | 0     | 0     | 0     | 1     |
| 9954   | 0     | 0     | 0     | 0     |
| 9955   | 1     | 0     | 0     | 0     |
| 9956   | 0     | 1     | 0     | 0     |
| 9957   | 0     | 0     | 0     | 0     |
| 9958   | 0     | 0     | 0     | 0     |
| 9959   | 1     | 0     | 0     | 0     |
| 9960   | 0     | 0     | 0     | 0     |
| 9961   | 0     | 0     | 0     | 0     |
| 9962   | 0     | 0     | 0     | 0     |
| 9969   | 0     | 0     | 0     | 0     |
| 9982   | 0     | 0     | 0     | 0     |
| 9984   | 0     | 0     | 0     | 0     |
| 9990   | 0     | 0     | 0     | 0     |
| 9992   | 0     | 1     | 0     | 0     |
| 9993   | 0     | 0     | 0     | 0     |
| 9997   | 0     | 0     | 0     | 0     |
| 9999   | 0     | 0     | 0     | 0     |
| 10000  | 0     | 0     | 0     | 0     |
| 10005  | 0     | 1     | 0     | 0     |
| 10014  | 0     | 0     | 0     | 0     |
| 10016  | 0     | 1     | 0     | 0     |
| 10017  | 0     | 0     | 0     | 0     |

| respid | Q31_2 | Q31_3 | Q31_4 | Q31_5 |
|--------|-------|-------|-------|-------|
| 10018  | 0     | 0     | 0     | 0     |
| 10021  | 0     | 0     | 0     | 0     |
| 10025  | 0     | 0     | 0     | 0     |
| 10027  | 0     | 0     | 0     | 0     |
| 10028  | 0     | 0     | 0     | 0     |
| 10031  | 0     | 0     | 0     | 0     |
| 10036  | 1     | 0     | 0     | 0     |
| 10037  | 0     | 0     | 0     | 0     |
| 10038  | 1     | 0     | 0     | 0     |
| 10039  | 0     | 0     | 0     | 0     |
| 10041  | 0     | 0     | 0     | 0     |
| 10045  | 0     | 0     | 0     | 0     |
| 10046  | 0     | 0     | 0     | 0     |
| 10047  | 0     | 0     | 0     | 0     |
| 10048  | 0     | 0     | 0     | 0     |
| 10049  | 0     | 0     | 0     | 0     |
| 10051  | 0     | 0     | 0     | 0     |
| 10052  | 0     | 0     | 0     | 0     |
| 10056  | 0     | 0     | 0     | 0     |
| 10061  | 0     | 0     | 0     | 0     |
| 10064  | 0     | 0     | 0     | 0     |
| 10066  | 0     | 0     | 0     | 0     |
| 10069  | 0     | 0     | 0     | 0     |
| 10071  | 0     | 0     | 0     | 0     |
| 10074  | 0     | 0     | 0     | 0     |
| 10079  | 0     | 0     | 0     | 0     |
| 10087  | 0     | 0     | 0     | 0     |
| 10095  | 0     | 0     | 0     | 0     |
| 10097  | 0     | 0     | 0     | 0     |
| 10100  | 0     | 0     | 0     | 0     |
| 10105  | 0     | 0     | 0     | 0     |
| 10107  | 0     | 0     | 0     | 0     |

| respid | Q31_2 | Q31_3 | Q31_4 | Q31_5 |
|--------|-------|-------|-------|-------|
| 10111  | 1     | 0     | 0     | 0     |
| 10116  | 0     | 0     | 0     | 0     |
| 10118  | 0     | 0     | 0     | 0     |
| 10123  | 0     | 0     | 0     | 0     |
| 10124  | 1     | 0     | 0     | 0     |
| 10130  | 0     | 0     | 0     | 0     |
| 10134  | 0     | 0     | 0     | 0     |
| 10135  | 0     | 0     | 0     | 0     |
| 10136  | 0     | 0     | 0     | 0     |
| 10141  | 0     | 0     | 0     | 0     |
| 10142  | 1     | 0     | 0     | 0     |
| 10143  | 0     | 0     | 0     | 0     |
| 10145  | 0     | 0     | 0     | 0     |
| 10149  | 0     | 0     | 0     | 0     |
| 10150  | 0     | 0     | 0     | 0     |
| 10151  | 0     | 0     | 0     | 0     |
| 10152  | 0     | 0     | 0     | 0     |
| 10153  | 0     | 0     | 0     | 0     |
| 10156  | 0     | 0     | 0     | 0     |
| 10160  | 0     | 0     | 0     | 0     |
| 10161  | 0     | 0     | 0     | 0     |
| 10167  | 1     | 1     | 0     | 0     |
| 10171  | 0     | 0     | 0     | 0     |
| 10172  | 0     | 0     | 0     | 0     |
| 10176  | 0     | 0     | 0     | 0     |
| 10177  | 0     | 0     | 0     | 0     |
| 10182  | 0     | 0     | 0     | 0     |
| 10184  | 0     | 0     | 0     | 0     |
| 10186  | 1     | 0     | 0     | 1     |
| 10189  | 0     | 0     | 0     | 0     |
| 10191  | 0     | 0     | 0     | 0     |
| 10192  | 0     | 0     | 0     | 0     |



| respid | Q31_2 | Q31_3 | Q31_4 | Q31_5 |
|--------|-------|-------|-------|-------|
| 10195  | 0     | 0     | 0     | 0     |
| 10199  | 0     | 0     | 0     | 0     |
| 10201  | 0     | 0     | 0     | 0     |
| 10213  | 0     | 0     | 0     | 0     |
| 10222  | 1     | 0     | 0     | 0     |
| 10224  | 0     | 0     | 0     | 0     |
| 10245  | 0     | 0     | 0     | 0     |
| 10254  | 0     | 0     | 0     | 0     |
| 10255  | 1     | 1     | 0     | 1     |
| 10257  | 0     | 0     | 0     | 0     |
| 10260  | 0     | 0     | 0     | 0     |
| 10261  | 0     | 0     | 0     | 0     |
| 10263  | 0     | 0     | 0     | 0     |
| 10264  | 0     | 0     | 0     | 0     |
| 10268  | 0     | 1     | 1     | 0     |
| 10269  | 0     | 0     | 0     | 0     |
| 10270  | 0     | 0     | 0     | 0     |
| 10282  | 0     | 0     | 0     | 0     |
| 10285  | 0     | 0     | 0     | 0     |
| 10288  | 0     | 0     | 0     | 0     |
| 10291  | 0     | 0     | 0     | 0     |
| 10292  | 0     | 0     | 0     | 0     |
| 10304  | 0     | 0     | 0     | 0     |
| 10305  | 1     | 0     | 0     | 0     |
| 10310  | 0     | 0     | 0     | 0     |
| 10324  | 0     | 0     | 0     | 0     |
| 10325  | 1     | 0     | 0     | 0     |
| 10326  | 0     | 0     | 0     | 0     |
| 10329  | 0     | 0     | 0     | 0     |
| 10332  | 0     | 0     | 0     | 0     |
| 10337  | 0     | 0     | 0     | 0     |
| 10341  | 0     | 1     | 0     | 0     |

| respid | Q31_2 | Q31_3 | Q31_4 | Q31_5 |
|--------|-------|-------|-------|-------|
| 10353  | 0     | 0     | 0     | 0     |
| 10354  | 0     | 0     | 0     | 0     |
| 10359  | 1     | 1     | 0     | 0     |
| 10360  | 0     | 0     | 0     | 0     |
| 10362  | 0     | 0     | 0     | 0     |
| 10364  | 0     | 0     | 0     | 0     |
| 10366  | 0     | 0     | 1     | 0     |
| 10367  | 0     | 0     | 0     | 0     |
| 10371  | 0     | 0     | 0     | 0     |
| 10374  | 1     | 0     | 0     | 0     |
| 10375  | 1     | 1     | 0     | 0     |
| 10376  | 0     | 0     | 0     | 0     |
| 10377  | 0     | 0     | 0     | 0     |
| 10378  | 0     | 0     | 0     | 0     |
| 10387  | 0     | 0     | 0     | 0     |
| 10396  | 0     | 0     | 0     | 0     |
| 10397  | 0     | 0     | 0     | 0     |
| 10399  | 0     | 0     | 0     | 0     |
| 10405  | 0     | 0     | 0     | 0     |
| 10406  | 0     | 0     | 0     | 0     |
| 10408  | 0     | 0     | 0     | 0     |
| 10409  | 0     | 0     | 0     | 0     |
| 10412  | 0     | 0     | 0     | 0     |
| 10413  | 0     | 0     | 0     | 0     |
| 10419  | 0     | 0     | 0     | 0     |
| 10423  | 0     | 0     | 0     | 0     |
| 10426  | 0     | 0     | 0     | 0     |
| 10446  | 0     | 0     | 0     | 0     |
| 10448  | 0     | 0     | 0     | 0     |
| 10450  | 0     | 0     | 0     | 0     |
| 10455  | 0     | 0     | 0     | 0     |
| 10460  | 0     | 0     | 0     | 0     |

| respid | Q31_2 | Q31_3 | Q31_4 | Q31_5 |
|--------|-------|-------|-------|-------|
| 10461  | 0     | 0     | 0     | 0     |
| 10471  | 0     | 0     | 0     | 0     |
| 10472  | 0     | 0     | 0     | 0     |
| 10491  | 1     | 1     | 0     | 1     |
| 10493  | 0     | 0     | 0     | 0     |
| 10498  | 1     | 1     | 0     | 0     |
| 10533  | 1     | 0     | 0     | 0     |
| 10539  | 0     | 0     | 0     | 0     |
| 10540  | 0     | 0     | 0     | 0     |
| 10557  | 0     | 0     | 0     | 0     |
| 10558  | 1     | 1     | 0     | 0     |
| 10559  | 0     | 0     | 0     | 0     |
| 10564  | 0     | 0     | 0     | 0     |
| 10570  | 0     | 0     | 0     | 0     |
| 10572  | 0     | 0     | 0     | 0     |
| 10576  | 0     | 0     | 0     | 0     |
| 10582  | 0     | 0     | 0     | 0     |
| 10593  | 0     | 0     | 0     | 0     |
| 10596  | 0     | 0     | 0     | 0     |
| 10615  | 0     | 0     | 0     | 0     |
| 10616  | 0     | 0     | 0     | 0     |
| 10623  | 0     | 0     | 0     | 0     |
| 10626  | 0     | 0     | 0     | 0     |
| 10627  | 1     | 1     | 1     | 1     |
| 10629  | 0     | 1     | 0     | 0     |
| 10632  | 1     | 1     | 1     | 1     |
| 10641  | 0     | 0     | 0     | 0     |
| 10648  | 0     | 0     | 0     | 0     |
| 10651  | 0     | 0     | 0     | 0     |
| 10654  | 0     | 0     | 0     | 0     |
| 10673  | 0     | 0     | 0     | 0     |
| 10675  | 0     | 0     | 0     | 0     |

| respid | Q31_2 | Q31_3 | Q31_4 | Q31_5 |
|--------|-------|-------|-------|-------|
| 10689  | 0     | 0     | 0     | 0     |
| 10692  | 1     | 1     | 0     | 0     |
| 10694  | 0     | 0     | 0     | 0     |
| 10695  | 0     | 0     | 0     | 0     |
| 10702  | 0     | 0     | 0     | 0     |
| 10703  | 0     | 1     | 0     | 0     |
| 10708  | 0     | 0     | 0     | 0     |
| 10719  | 0     | 0     | 0     | 0     |
| 10722  | 0     | 0     | 0     | 0     |
| 10723  | 1     | 0     | 0     | 0     |
| 10726  | 0     | 0     | 0     | 0     |
| 10727  | 0     | 0     | 0     | 0     |
| 10730  | 0     | 0     | 0     | 0     |
| 10731  | 0     | 0     | 0     | 0     |
| 10737  | 0     | 0     | 0     | 0     |
| 10743  | 0     | 0     | 0     | 0     |
| 10763  | 0     | 0     | 0     | 0     |
| 10777  | 0     | 0     | 0     | 0     |
| 10787  | 0     | 0     | 0     | 0     |
| 10798  | 1     | 0     | 0     | 0     |
| 10800  | 0     | 0     | 0     | 0     |
| 10802  | 1     | 1     | 0     | 0     |
| 10803  | 0     | 1     | 0     | 0     |
| 10808  | 0     | 0     | 1     | 0     |
| 10810  | 0     | 0     | 0     | 0     |
| 10819  | 0     | 0     | 0     | 0     |
| 10825  | 0     | 0     | 0     | 0     |
| 10827  | 0     | 1     | 0     | 0     |
| 10830  | 1     | 1     | 0     | 1     |
| 10847  | 0     | 0     | 0     | 0     |
| 10849  | 0     | 0     | 0     | 0     |
| 10852  | 0     | 0     | 0     | 0     |

| respid | Q31_2 | Q31_3 | Q31_4 | Q31_5 |
|--------|-------|-------|-------|-------|
| 10854  | 1     | 1     | 0     | 0     |
| 10857  | 0     | 1     | 0     | 0     |
| 10861  | 1     | 1     | 0     | 0     |
| 10862  | 0     | 0     | 0     | 0     |
| 10870  | 0     | 0     | 0     | 0     |
| 10873  | 0     | 0     | 0     | 0     |
| 10881  | 1     | 1     | 0     | 0     |
| 10893  | 0     | 0     | 0     | 0     |
| 10898  | 0     | 0     | 0     | 0     |
| 10899  | 0     | 0     | 0     | 0     |
| 10905  | 0     | 0     | 0     | 0     |
| 10910  | 0     | 0     | 0     | 0     |
| 10911  | 0     | 0     | 1     | 0     |
| 10912  | 0     | 0     | 0     | 0     |
| 10913  | 0     | 0     | 0     | 0     |
| 10918  | 0     | 0     | 0     | 0     |
| 10995  | 0     | 0     | 0     | 0     |
| 11002  | 0     | 0     | 0     | 0     |
| 11003  | 0     | 0     | 0     | 0     |
| 11005  | 1     | 0     | 1     | 0     |
| 11015  | 0     | 0     | 0     | 0     |
| 11016  | 0     | 0     | 0     | 0     |
| 11017  | 0     | 0     | 0     | 0     |
| 11020  | 0     | 0     | 1     | 1     |
| 11024  | 0     | 0     | 0     | 0     |
| 11026  | 1     | 1     | 0     | 0     |
| 11028  | 0     | 0     | 0     | 0     |
| 11029  | 0     | 1     | 1     | 0     |
| 11030  | 1     | 0     | 0     | 0     |
| 11031  | 0     | 0     | 0     | 0     |
| 11038  | 0     | 1     | 0     | 0     |
| 11051  | 0     | 0     | 0     | 0     |

| respid | Q31_2 | Q31_3 | Q31_4 | Q31_5 |
|--------|-------|-------|-------|-------|
| 11052  | 0     | 0     | 1     | 0     |
| 11053  | 1     | 1     | 0     | 0     |
| 11054  | 0     | 0     | 1     | 0     |
| 11063  | 0     | 0     | 0     | 0     |
| 11075  | 1     | 0     | 1     | 0     |
| 11083  | 0     | 0     | 0     | 0     |
| 11092  | 0     | 0     | 0     | 0     |
| 11118  | 0     | 0     | 0     | 0     |
| 11119  | 0     | 1     | 0     | 0     |
| 11134  | 0     | 0     | 0     | 0     |
| 11139  | 0     | 0     | 0     | 0     |
| 11154  | 0     | 0     | 0     | 0     |
| 11166  | 0     | 0     | 0     | 0     |
| 11168  | 0     | 0     | 0     | 0     |
| 11176  | 0     | 0     | 0     | 0     |
| 11183  | 0     | 0     | 1     | 1     |
| 11189  | 0     | 0     | 0     | 0     |
| 11196  | 0     | 1     | 1     | 0     |
| 11200  | 0     | 0     | 0     | 0     |
| 11201  | 0     | 0     | 0     | 0     |
| 11211  | 0     | 1     | 1     | 0     |
| 11218  | 0     | 0     | 0     | 0     |
| 11219  | 0     | 0     | 0     | 0     |
| 11221  | 1     | 0     | 0     | 0     |
| 11222  | 0     | 0     | 0     | 0     |
| 11230  | 0     | 1     | 1     | 0     |
| 11236  | 0     | 1     | 1     | 0     |
| 11237  | 0     | 0     | 0     | 0     |
| 11240  | 0     | 0     | 0     | 0     |
| 11244  | 0     | 1     | 1     | 0     |
| 11249  | 0     | 0     | 1     | 0     |
| 11252  | 0     | 1     | 1     | 0     |

| respid | Q31_2 | Q31_3 | Q31_4 | Q31_5 |
|--------|-------|-------|-------|-------|
| 11254  | 0     | 0     | 1     | 0     |
| 11255  | 1     | 1     | 0     | 0     |
| 11258  | 1     | 0     | 1     | 0     |
| 11260  | 0     | 0     | 0     | 0     |
| 11264  | 1     | 1     | 0     | 1     |
| 11266  | 1     | 0     | 0     | 0     |
| 11268  | 0     | 0     | 0     | 1     |
| 11269  | 0     | 0     | 0     | 0     |
| 11272  | 1     | 0     | 0     | 0     |
| 11273  | 0     | 1     | 0     | 0     |
| 11275  | 1     | 1     | 0     | 0     |
| 11276  | 1     | 1     | 1     | 0     |
| 11278  | 1     | 0     | 1     | 0     |
| 11288  | 0     | 0     | 0     | 0     |
| 11289  | 0     | 0     | 0     | 0     |
| 11291  | 0     | 0     | 0     | 0     |
| 11295  | 0     | 0     | 0     | 0     |
| 11297  | 0     | 0     | 0     | 0     |
| 11304  | 0     | 0     | 0     | 0     |
| 11305  | 0     | 0     | 0     | 0     |
| 11311  | 0     | 0     | 0     | 0     |
| 11313  | 0     | 1     | 1     | 0     |
| 11315  | 1     | 1     | 1     | 1     |
| 11316  | 1     | 1     | 1     | 0     |
| 11318  | 1     | 0     | 1     | 1     |
| 11323  | 0     | 0     | 0     | 0     |
| 11331  | 0     | 0     | 0     | 0     |
| 11333  | 0     | 0     | 0     | 0     |
| 11334  | 0     | 1     | 0     | 0     |
| 11340  | 0     | 0     | 1     | 0     |
| 11345  | 0     | 0     | 0     | 0     |
| 11354  | 0     | 0     | 0     | 0     |

| respid | Q31_2 | Q31_3 | Q31_4 | Q31_5 |
|--------|-------|-------|-------|-------|
| 11360  | 0     | 0     | 0     | 0     |
| 11361  | 0     | 0     | 0     | 0     |
| 11367  | 0     | 0     | 0     | 0     |
| 11370  | 0     | 0     | 0     | 0     |
| 11371  | 0     | 1     | 0     | 1     |
| 11372  | 0     | 0     | 0     | 1     |
| 11373  | 0     | 0     | 0     | 0     |
| 11382  | 0     | 0     | 0     | 0     |
| 11394  | 0     | 0     | 0     | 0     |
| 11395  | 1     | 0     | 0     | 0     |
| 11397  | 0     | 0     | 0     | 0     |
| 11402  | 0     | 0     | 0     | 0     |
| 11409  | 0     | 0     | 0     | 0     |
| 11410  | 0     | 0     | 0     | 0     |
| 11411  | 0     | 0     | 0     | 0     |
| 11418  | 0     | 0     | 0     | 0     |
| 11425  | 0     | 0     | 0     | 1     |
| 11429  | 0     | 0     | 0     | 0     |
| 11430  | 0     | 0     | 0     | 0     |
| 11431  | 0     | 0     | 0     | 0     |
| 11432  | 0     | 0     | 0     | 0     |
| 11433  | 0     | 0     | 0     | 0     |
| 11435  | 0     | 0     | 0     | 0     |
| 11436  | 1     | 0     | 0     | 1     |
| 11437  | 0     | 0     | 0     | 1     |
| 11439  | 0     | 0     | 0     | 0     |
| 11440  | 1     | 0     | 0     | 0     |
| 11447  | 0     | 0     | 0     | 0     |
| 11455  | 0     | 0     | 0     | 0     |
| 11456  | 0     | 0     | 0     | 1     |
| 11461  | 0     | 0     | 0     | 0     |
| 11463  | 1     | 1     | 0     | 0     |



| respid | Q31_2 | Q31_3 | Q31_4 | Q31_5 |
|--------|-------|-------|-------|-------|
| 11470  | 0     | 0     | 1     | 0     |
| 11472  | 0     | 0     | 0     | 0     |
| 11475  | 0     | 0     | 0     | 0     |
| 11476  | 0     | 0     | 0     | 0     |
| 11482  | 0     | 0     | 0     | 1     |
| 11501  | 1     | 0     | 0     | 1     |
| 11503  | 0     | 0     | 0     | 0     |
| 11505  | 0     | 0     | 0     | 0     |
| 11510  | 1     | 1     | 0     | 0     |
| 11519  | 0     | 0     | 0     | 0     |
| 11527  | 1     | 0     | 0     | 0     |
| 11529  | 1     | 1     | 1     | 1     |
| 11530  | 1     | 0     | 0     | 0     |
| 11536  | 0     | 0     | 0     | 0     |
| 11543  | 0     | 1     | 0     | 0     |
| 11548  | 0     | 0     | 0     | 0     |
| 11566  | 0     | 0     | 0     | 0     |
| 11570  | 1     | 1     | 0     | 1     |
| 11571  | 0     | 0     | 0     | 0     |
| 11578  | 0     | 0     | 0     | 0     |
| 11579  | 0     | 0     | 0     | 0     |
| 11581  | 1     | 1     | 0     | 0     |
| 11582  | 0     | 0     | 0     | 0     |
| 11583  | 0     | 0     | 0     | 0     |
| 11589  | 0     | 1     | 0     | 1     |
| 11590  | 0     | 0     | 0     | 0     |
| 11592  | 0     | 0     | 0     | 0     |
| 11596  | 0     | 0     | 0     | 0     |
| 11598  | 0     | 0     | 0     | 1     |
| 11602  | 1     | 0     | 0     | 0     |
| 11605  | 0     | 0     | 0     | 1     |
| 11618  | 0     | 0     | 1     | 1     |

| respid | Q31_2 | Q31_3 | Q31_4 | Q31_5 |
|--------|-------|-------|-------|-------|
| 11621  | 0     | 0     | 0     | 0     |
| 11630  | 0     | 0     | 0     | 0     |
| 11636  | 0     | 0     | 0     | 0     |
| 11640  | 1     | 0     | 0     | 0     |
| 11658  | 0     | 0     | 0     | 0     |
| 11665  | 0     | 0     | 0     | 0     |
| 11666  | 1     | 0     | 0     | 0     |
| 11667  | 0     | 0     | 0     | 0     |
| 11674  | 0     | 0     | 0     | 0     |
| 11680  | 0     | 0     | 0     | 0     |
| 11683  | 0     | 0     | 1     | 0     |
| 11688  | 1     | 0     | 0     | 0     |
| 11690  | 0     | 0     | 0     | 0     |
| 11694  | 0     | 0     | 0     | 0     |
| 11705  | 1     | 0     | 0     | 0     |
| 11720  | 0     | 0     | 1     | 0     |
| 11724  | 0     | 0     | 0     | 0     |
| 11738  | 1     | 0     | 0     | 0     |
| 11744  | 1     | 0     | 0     | 0     |
| 11745  | 0     | 0     | 0     | 0     |
| 11747  | 0     | 0     | 0     | 0     |
| 11755  | 0     | 0     | 0     | 0     |
| 11756  | 0     | 1     | 0     | 0     |
| 11772  | 0     | 1     | 0     | 0     |
| 11773  | 0     | 0     | 0     | 0     |
| 11778  | 1     | 1     | 0     | 1     |
| 11790  | 0     | 0     | 0     | 0     |
| 11794  | 0     | 0     | 0     | 0     |
| 11795  | 0     | 0     | 0     | 0     |
| 11799  | 0     | 0     | 0     | 1     |
| 11803  | 1     | 1     | 0     | 0     |
| 11806  | 1     | 1     | 0     | 0     |

| respid | Q31_2 | Q31_3 | Q31_4 | Q31_5 |
|--------|-------|-------|-------|-------|
| 11808  | 0     | 0     | 0     | 0     |
| 11810  | 0     | 0     | 0     | 0     |
| 11811  | 0     | 0     | 0     | 0     |
| 11812  | 0     | 0     | 1     | 0     |
| 11813  | 1     | 0     | 0     | 0     |
| 11821  | 1     | 1     | 0     | 0     |
| 11827  | 0     | 0     | 0     | 0     |
| 11831  | 1     | 0     | 1     | 0     |
| 11841  | 0     | 0     | 0     | 0     |
| 11872  | 1     | 0     | 0     | 0     |
| 11898  | 0     | 0     | 0     | 0     |
| 11902  | 0     | 0     | 0     | 0     |
| 11912  | 0     | 0     | 0     | 0     |
| 11926  | 0     | 0     | 0     | 0     |
| 11928  | 1     | 1     | 0     | 0     |
| 11932  | 1     | 0     | 0     | 0     |
| 11934  | 0     | 0     | 0     | 0     |
| 11941  | 0     | 1     | 0     | 0     |
| 11942  | 0     | 0     | 0     | 0     |
| 11943  | 0     | 0     | 0     | 0     |
| 11944  | 0     | 0     | 0     | 0     |
| 11955  | 0     | 0     | 0     | 0     |
| 11958  | 0     | 0     | 0     | 0     |
| 11968  | 0     | 0     | 0     | 0     |
| 11979  | 1     | 0     | 0     | 1     |
| 11988  | 0     | 0     | 0     | 0     |
| 11999  | 0     | 0     | 1     | 0     |
| 12002  | 0     | 0     | 0     | 0     |
| 12004  | 0     | 0     | 0     | 0     |
| 12008  | 0     | 0     | 0     | 0     |
| 12013  | 0     | 0     | 0     | 0     |
| 12018  | 0     | 0     | 0     | 0     |

| respid | Q31_2 | Q31_3 | Q31_4 | Q31_5 |
|--------|-------|-------|-------|-------|
| 12023  | 0     | 0     | 0     | 0     |
| 12027  | 1     | 1     | 1     | 0     |
| 12030  | 0     | 0     | 0     | 0     |
| 12031  | 0     | 1     | 0     | 0     |
| 12036  | 0     | 0     | 0     | 0     |
| 12037  | 0     | 0     | 1     | 0     |
| 12038  | 0     | 0     | 0     | 0     |
| 12039  | 0     | 0     | 0     | 0     |
| 12045  | 1     | 0     | 0     | 0     |
| 12046  | 0     | 0     | 0     | 0     |
| 12054  | 1     | 1     | 0     | 0     |
| 12055  | 1     | 1     | 0     | 1     |
| 12069  | 1     | 1     | 0     | 0     |
| 12070  | 1     | 1     | 0     | 1     |
| 12074  | 0     | 0     | 0     | 0     |
| 12075  | 1     | 0     | 0     | 0     |
| 12078  | 1     | 0     | 0     | 0     |
| 12089  | 1     | 0     | 0     | 0     |
| 12091  | 0     | 0     | 1     | 0     |
| 12092  | 1     | 1     | 1     | 0     |
| 12108  | 0     | 1     | 0     | 0     |
| 12111  | 1     | 0     | 0     | 1     |
| 12112  | 1     | 0     | 0     | 0     |
| 12126  | 0     | 0     | 0     | 0     |
| 12132  | 0     | 0     | 0     | 0     |
| 12150  | 0     | 0     | 1     | 0     |
| 12152  | 1     | 1     | 0     | 0     |
| 12154  | 0     | 0     | 0     | 0     |
| 12157  | 0     | 0     | 0     | 0     |
| 12165  | 0     | 0     | 0     | 0     |
| 12169  | 1     | 1     | 0     | 0     |
| 12182  | 1     | 1     | 0     | 0     |

| respid | Q31_2 | Q31_3 | Q31_4 | Q31_5 |
|--------|-------|-------|-------|-------|
| 12198  | 1     | 0     | 0     | 0     |
| 12199  | 0     | 0     | 0     | 0     |
| 12202  | 0     | 0     | 0     | 0     |
| 12207  | 0     | 0     | 0     | 0     |
| 12208  | 0     | 0     | 0     | 0     |
| 12210  | 0     | 0     | 0     | 0     |
| 12219  | 0     | 1     | 1     | 0     |
| 12224  | 0     | 0     | 0     | 0     |
| 12230  | 1     | 0     | 0     | 0     |
| 12238  | 0     | 1     | 0     | 0     |
| 12239  | 0     | 0     | 0     | 0     |
| 12243  | 1     | 0     | 0     | 0     |
| 12245  | 0     | 0     | 0     | 0     |
| 12246  | 1     | 1     | 1     | 0     |
| 12247  | 0     | 0     | 0     | 0     |
| 12248  | 0     | 0     | 0     | 0     |
| 12249  | 1     | 0     | 1     | 0     |
| 12258  | 0     | 1     | 0     | 1     |
| 12265  | 0     | 0     | 0     | 0     |
| 12269  | 0     | 0     | 0     | 0     |
| 12270  | 0     | 0     | 0     | 0     |
| 12279  | 0     | 0     | 0     | 0     |
| 12280  | 0     | 0     | 0     | 0     |
| 12282  | 1     | 1     | 0     | 1     |
| 12283  | 0     | 1     | 0     | 0     |
| 12287  | 0     | 0     | 0     | 0     |
| 12288  | 1     | 0     | 0     | 0     |
| 12290  | 0     | 0     | 0     | 0     |
| 12292  | 1     | 0     | 0     | 0     |
| 12294  | 0     | 0     | 0     | 0     |
| 12296  | 0     | 0     | 0     | 0     |
| 12307  | 0     | 0     | 0     | 0     |

| respid | Q31_2 | Q31_3 | Q31_4 | Q31_5 |
|--------|-------|-------|-------|-------|
| 12309  | 0     | 0     | 0     | 0     |
| 12312  | 0     | 0     | 0     | 0     |
| 12317  | 0     | 0     | 0     | 0     |
| 12319  | 0     | 0     | 0     | 0     |
| 12320  | 0     | 0     | 0     | 0     |
| 12322  | 0     | 0     | 0     | 0     |
| 12328  | 1     | 0     | 0     | 0     |
| 12331  | 1     | 0     | 1     | 0     |
| 12332  | 0     | 0     | 0     | 0     |
| 12334  | 1     | 1     | 1     | 0     |
| 12337  | 0     | 0     | 0     | 0     |
| 12338  | 0     | 0     | 0     | 0     |
| 12342  | 0     | 0     | 0     | 0     |
| 12349  | 0     | 0     | 0     | 0     |
| 12352  | 0     | 0     | 0     | 0     |
| 12355  | 0     | 0     | 0     | 0     |
| 12357  | 0     | 0     | 1     | 0     |
| 12358  | 0     | 0     | 0     | 0     |
| 12371  | 0     | 0     | 1     | 0     |
| 12372  | 0     | 0     | 0     | 0     |
| 12373  | 0     | 0     | 0     | 0     |
| 12379  | 0     | 0     | 0     | 0     |
| 12381  | 1     | 1     | 1     | 0     |
| 12383  | 0     | 0     | 0     | 0     |
| 12384  | 0     | 0     | 0     | 0     |
| 12386  | 0     | 0     | 0     | 0     |
| 12389  | 0     | 0     | 0     | 0     |
| 12392  | 0     | 0     | 0     | 0     |
| 12396  | 0     | 0     | 0     | 1     |
| 12397  | 0     | 0     | 0     | 0     |
| 12399  | 0     | 0     | 0     | 0     |
| 12400  | 0     | 0     | 0     | 0     |

| respid | Q31_2 | Q31_3 | Q31_4 | Q31_5 |
|--------|-------|-------|-------|-------|
| 12406  | 1     | 0     | 0     | 0     |
| 12407  | 0     | 0     | 0     | 0     |
| 12410  | 0     | 0     | 0     | 0     |
| 12413  | 0     | 0     | 1     | 0     |
| 12416  | 1     | 0     | 1     | 1     |
| 12419  | 0     | 0     | 0     | 0     |
| 12422  | 1     | 0     | 0     | 0     |
| 12423  | 0     | 1     | 0     | 0     |
| 12429  | 0     | 0     | 0     | 0     |
| 12434  | 0     | 1     | 0     | 1     |
| 12435  | 0     | 0     | 0     | 0     |
| 12436  | 0     | 0     | 0     | 0     |
| 12442  | 0     | 0     | 0     | 0     |
| 12449  | 0     | 0     | 0     | 0     |
| 12451  | 0     | 0     | 0     | 0     |
| 12456  | 0     | 0     | 0     | 0     |
| 12457  | 0     | 0     | 0     | 0     |
| 12458  | 0     | 0     | 0     | 0     |
| 12461  | 0     | 1     | 0     | 0     |
| 12462  | 0     | 0     | 0     | 0     |
| 12463  | 1     | 1     | 1     | 1     |
| 12466  | 0     | 0     | 0     | 0     |
| 12470  | 0     | 0     | 1     | 0     |
| 12471  | 0     | 0     | 0     | 0     |
| 12472  | 0     | 0     | 0     | 0     |
| 12478  | 0     | 0     | 0     | 0     |
| 12479  | 1     | 1     | 0     | 0     |
| 12481  | 0     | 0     | 0     | 0     |
| 12482  | 0     | 0     | 0     | 0     |
| 12483  | 0     | 0     | 0     | 0     |
| 12496  | 0     | 0     | 0     | 0     |
| 12497  | 0     | 0     | 0     | 0     |

| respid | Q31_2 | Q31_3 | Q31_4 | Q31_5 |
|--------|-------|-------|-------|-------|
| 12498  | 1     | 1     | 1     | 0     |
| 12500  | 0     | 0     | 0     | 0     |
| 12501  | 0     | 0     | 0     | 0     |
| 12502  | 0     | 1     | 0     | 0     |
| 12503  | 1     | 0     | 0     | 0     |
| 12505  | 0     | 0     | 0     | 0     |
| 12508  | 1     | 1     | 0     | 0     |
| 12509  | 0     | 0     | 0     | 0     |
| 12510  | 0     | 0     | 0     | 0     |
| 12512  | 0     | 0     | 0     | 0     |
| 12514  | 1     | 1     | 0     | 0     |
| 12515  | 0     | 0     | 0     | 0     |
| 12520  | 0     | 0     | 0     | 0     |
| 12522  | 0     | 0     | 0     | 0     |
| 12526  | 0     | 0     | 0     | 1     |
| 12527  | 0     | 0     | 0     | 0     |
| 12528  | 0     | 0     | 0     | 0     |
| 12530  | 1     | 1     | 0     | 0     |
| 12535  | 0     | 1     | 0     | 0     |
| 12539  | 0     | 0     | 0     | 0     |
| 12541  | 0     | 1     | 1     | 0     |
| 12542  | 0     | 1     | 0     | 0     |
| 12545  | 0     | 0     | 0     | 0     |
| 12547  | 0     | 0     | 0     | 0     |
| 12549  | 0     | 0     | 0     | 0     |
| 12550  | 1     | 0     | 0     | 0     |
| 12555  | 0     | 0     | 0     | 0     |
| 12557  | 1     | 0     | 0     | 0     |
| 12559  | 0     | 0     | 0     | 0     |
| 12561  | 0     | 0     | 0     | 0     |
| 12562  | 0     | 0     | 0     | 1     |
| 12563  | 0     | 1     | 0     | 0     |



| respid | Q31_2 | Q31_3 | Q31_4 | Q31_5 |
|--------|-------|-------|-------|-------|
| 12565  | 1     | 1     | 0     | 1     |
| 12566  | 0     | 0     | 0     | 0     |
| 12570  | 0     | 0     | 0     | 0     |
| 12571  | 0     | 0     | 0     | 0     |
| 12572  | 1     | 0     | 0     | 0     |
| 12578  | 0     | 0     | 0     | 0     |
| 12579  | 0     | 0     | 0     | 0     |
| 12581  | 0     | 0     | 0     | 0     |
| 12582  | 0     | 0     | 0     | 0     |
| 12585  | 0     | 0     | 0     | 0     |
| 12586  | 1     | 1     | 1     | 0     |
| 12588  | 1     | 1     | 0     | 0     |
| 12589  | 1     | 1     | 0     | 0     |
| 12590  | 0     | 0     | 0     | 0     |
| 12591  | 0     | 0     | 0     | 1     |
| 12593  | 1     | 0     | 1     | 0     |
| 12594  | 0     | 0     | 0     | 0     |
| 12599  | 0     | 0     | 0     | 0     |
| 12600  | 1     | 0     | 0     | 0     |
| 12602  | 1     | 0     | 0     | 1     |
| 12606  | 0     | 0     | 0     | 0     |
| 12607  | 0     | 0     | 0     | 0     |
| 12608  | 0     | 0     | 0     | 0     |
| 12610  | 0     | 1     | 1     | 0     |
| 12611  | 0     | 0     | 0     | 0     |
| 12613  | 1     | 1     | 1     | 1     |
| 12616  | 0     | 0     | 0     | 0     |
| 12617  | 0     | 0     | 0     | 0     |
| 12619  | 0     | 0     | 0     | 0     |
| 12622  | 0     | 0     | 0     | 0     |
| 12628  | 0     | 0     | 0     | 0     |
| 12631  | 1     | 0     | 0     | 0     |

| respid | Q31_2 | Q31_3 | Q31_4 | Q31_5 |
|--------|-------|-------|-------|-------|
| 12635  | 0     | 0     | 0     | 0     |
| 12638  | 0     | 0     | 0     | 0     |
| 12639  | 0     | 0     | 0     | 0     |
| 12640  | 0     | 0     | 0     | 0     |
| 12643  | 0     | 0     | 0     | 0     |
| 12646  | 0     | 0     | 0     | 0     |
| 12648  | 0     | 1     | 0     | 1     |
| 12650  | 0     | 0     | 0     | 0     |
| 12651  | 0     | 0     | 0     | 0     |
| 12658  | 1     | 1     | 0     | 1     |
| 12662  | 1     | 0     | 0     | 0     |
| 12663  | 0     | 0     | 0     | 0     |
| 12664  | 0     | 0     | 0     | 0     |
| 12669  | 1     | 1     | 1     | 1     |
| 12670  | 0     | 0     | 0     | 0     |
| 12673  | 0     | 0     | 0     | 0     |
| 12675  | 0     | 0     | 0     | 0     |
| 12677  | 0     | 0     | 0     | 0     |
| 12679  | 0     | 0     | 0     | 0     |
| 12682  | 0     | 0     | 1     | 0     |
| 12696  | 0     | 1     | 0     | 0     |
| 12697  | 0     | 0     | 0     | 0     |
| 12699  | 0     | 0     | 0     | 0     |
| 12700  | 1     | 1     | 1     | 0     |
| 12701  | 0     | 0     | 0     | 0     |
| 12702  | 0     | 0     | 0     | 0     |
| 12704  | 1     | 1     | 1     | 0     |
| 12705  | 0     | 0     | 0     | 0     |
| 12709  | 0     | 0     | 0     | 0     |
| 12710  | 0     | 0     | 0     | 0     |
| 12713  | 1     | 1     | 1     | 0     |
| 12716  | 0     | 0     | 0     | 0     |

| respid | Q31_2 | Q31_3 | Q31_4 | Q31_5 |
|--------|-------|-------|-------|-------|
| 12719  | 0     | 0     | 0     | 0     |
| 12720  | 0     | 0     | 0     | 0     |
| 12723  | 0     | 0     | 0     | 0     |
| 12726  | 0     | 0     | 0     | 0     |
| 12728  | 0     | 0     | 0     | 0     |
| 12729  | 0     | 0     | 0     | 0     |
| 12731  | 0     | 0     | 0     | 0     |
| 12732  | 0     | 0     | 1     | 0     |
| 12733  | 0     | 0     | 0     | 0     |
| 12736  | 0     | 0     | 0     | 0     |
| 12737  | 0     | 0     | 0     | 0     |
| 12739  | 0     | 0     | 0     | 0     |
| 12742  | 0     | 0     | 0     | 0     |
| 12743  | 1     | 1     | 0     | 1     |
| 12744  | 1     | 0     | 0     | 0     |
| 12747  | 0     | 0     | 0     | 0     |
| 12751  | 0     | 0     | 0     | 0     |
| 12754  | 0     | 0     | 0     | 0     |
| 12756  | 0     | 0     | 0     | 0     |
| 12757  | 0     | 0     | 0     | 0     |
| 12760  | 0     | 0     | 0     | 0     |
| 12761  | 0     | 0     | 0     | 0     |
| 12762  | 0     | 0     | 0     | 0     |
| 12766  | 0     | 0     | 0     | 0     |
| 12769  | 0     | 0     | 0     | 0     |
| 12770  | 0     | 0     | 0     | 0     |
| 12773  | 0     | 0     | 0     | 0     |
| 12780  | 0     | 0     | 0     | 0     |
| 12789  | 0     | 0     | 0     | 0     |
| 12792  | 1     | 1     | 1     | 1     |
| 12795  | 0     | 0     | 0     | 0     |
| 12804  | 0     | 0     | 0     | 0     |

| respid | Q31_2 | Q31_3 | Q31_4 | Q31_5 |
|--------|-------|-------|-------|-------|
| 12811  | 0     | 0     | 0     | 1     |
| 12813  | 1     | 1     | 0     | 0     |
| 12814  | 0     | 0     | 0     | 0     |
| 12815  | 0     | 0     | 0     | 0     |
| 12816  | 0     | 0     | 0     | 0     |
| 12817  | 0     | 0     | 1     | 0     |
| 12818  | 1     | 0     | 0     | 0     |
| 12819  | 0     | 0     | 0     | 0     |
| 12820  | 1     | 1     | 0     | 0     |
| 12821  | 0     | 0     | 0     | 0     |
| 12824  | 1     | 1     | 1     | 0     |
| 12827  | 0     | 0     | 0     | 0     |
| 12836  | 1     | 0     | 0     | 1     |
| 12837  | 0     | 0     | 0     | 0     |
| 12838  | 1     | 1     | 0     | 0     |
| 12845  | 1     | 0     | 0     | 0     |
| 12847  | 0     | 0     | 0     | 0     |
| 12849  | 0     | 0     | 0     | 1     |
| 12850  | 0     | 0     | 0     | 0     |
| 12852  | 0     | 0     | 0     | 0     |
| 12853  | 1     | 0     | 0     | 0     |
| 12854  | 0     | 0     | 0     | 0     |
| 12860  | 0     | 0     | 0     | 0     |
| 12861  | 0     | 0     | 0     | 0     |
| 12863  | 0     | 1     | 0     | 0     |
| 12865  | 0     | 0     | 0     | 0     |
| 12870  | 1     | 1     | 0     | 0     |
| 12871  | 0     | 0     | 0     | 0     |
| 12873  | 0     | 0     | 0     | 0     |
| 12877  | 0     | 0     | 0     | 0     |
| 12880  | 1     | 0     | 0     | 0     |
| 12881  | 1     | 0     | 0     | 0     |

| respid | Q31_2 | Q31_3 | Q31_4 | Q31_5 |
|--------|-------|-------|-------|-------|
| 12882  | 0     | 0     | 0     | 0     |
| 12883  | 1     | 0     | 0     | 0     |
| 12885  | 0     | 0     | 0     | 0     |
| 12887  | 1     | 0     | 0     | 0     |
| 12889  | 0     | 0     | 1     | 0     |
| 12890  | 0     | 0     | 0     | 0     |
| 12891  | 0     | 1     | 0     | 0     |
| 12892  | 0     | 0     | 0     | 0     |
| 12893  | 0     | 0     | 0     | 0     |
| 12895  | 0     | 1     | 0     | 0     |
| 12898  | 0     | 0     | 0     | 0     |
| 12907  | 0     | 1     | 0     | 0     |
| 12908  | 0     | 0     | 0     | 0     |
| 12909  | 0     | 0     | 0     | 0     |
| 12914  | 0     | 0     | 0     | 0     |
| 12915  | 1     | 1     | 0     | 0     |
| 12916  | 0     | 0     | 0     | 0     |
| 12921  | 0     | 0     | 0     | 0     |
| 12922  | 1     | 1     | 0     | 0     |
| 12923  | 0     | 0     | 0     | 0     |
| 12926  | 0     | 0     | 0     | 0     |
| 12927  | 1     | 1     | 0     | 1     |
| 12932  | 0     | 0     | 0     | 0     |
| 12936  | 0     | 0     | 0     | 0     |
| 12937  | 0     | 0     | 0     | 0     |
| 12938  | 1     | 1     | 0     | 1     |
| 12939  | 0     | 0     | 0     | 0     |
| 12940  | 0     | 0     | 0     | 0     |
| 12945  | 1     | 1     | 0     | 0     |
| 12946  | 0     | 0     | 0     | 0     |
| 12947  | 0     | 0     | 1     | 0     |
| 12948  | 0     | 0     | 0     | 0     |

| respid | Q31_2 | Q31_3 | Q31_4 | Q31_5 |
|--------|-------|-------|-------|-------|
| 12951  | 1     | 0     | 0     | 0     |
| 12952  | 1     | 1     | 0     | 1     |
| 12954  | 1     | 0     | 1     | 0     |
| 12960  | 0     | 0     | 0     | 0     |
| 12961  | 0     | 1     | 1     | 0     |
| 12962  | 0     | 0     | 0     | 0     |
| 12963  | 0     | 0     | 0     | 0     |
| 12964  | 0     | 1     | 0     | 0     |
| 12966  | 0     | 0     | 0     | 0     |
| 12967  | 0     | 0     | 0     | 0     |
| 12969  | 0     | 0     | 0     | 0     |
| 12970  | 0     | 0     | 0     | 0     |
| 12974  | 0     | 0     | 0     | 0     |
| 12979  | 0     | 0     | 0     | 0     |
| 12980  | 0     | 0     | 0     | 0     |
| 12983  | 0     | 0     | 0     | 0     |
| 12988  | 1     | 1     | 0     | 0     |
| 12994  | 1     | 1     | 0     | 0     |
| 12995  | 0     | 0     | 0     | 0     |
| 12996  | 0     | 0     | 0     | 0     |
| 12998  | 1     | 0     | 1     | 0     |
| 12999  | 0     | 0     | 0     | 0     |
| 13001  | 0     | 1     | 0     | 0     |
| 13005  | 0     | 0     | 0     | 0     |
| 13006  | 0     | 0     | 0     | 1     |
| 13007  | 0     | 0     | 0     | 0     |
| 13011  | 1     | 0     | 0     | 0     |
| 13012  | 0     | 0     | 0     | 0     |
| 13013  | 0     | 1     | 1     | 0     |
| 13016  | 0     | 0     | 0     | 0     |
| 13018  | 0     | 0     | 0     | 0     |
| 13020  | 0     | 0     | 0     | 0     |

| respid | Q31_2 | Q31_3 | Q31_4 | Q31_5 |
|--------|-------|-------|-------|-------|
| 13024  | 0     | 0     | 0     | 0     |
| 13025  | 1     | 1     | 1     | 1     |
| 13027  | 1     | 0     | 1     | 0     |
| 13031  | 0     | 0     | 0     | 1     |
| 13032  | 0     | 0     | 1     | 0     |
| 13034  | 0     | 0     | 0     | 0     |
| 13036  | 1     | 1     | 0     | 0     |
| 13037  | 0     | 0     | 0     | 0     |
| 13038  | 0     | 1     | 1     | 0     |
| 13039  | 0     | 0     | 0     | 0     |
| 13040  | 1     | 1     | 0     | 1     |
| 13041  | 0     | 0     | 0     | 0     |
| 13045  | 0     | 0     | 1     | 0     |
| 13046  | 0     | 0     | 0     | 0     |
| 13048  | 0     | 0     | 0     | 0     |
| 13051  | 0     | 0     | 0     | 0     |
| 13053  | 0     | 0     | 0     | 0     |
| 13055  | 0     | 1     | 0     | 0     |
| 13059  | 1     | 0     | 0     | 0     |
| 13068  | 0     | 0     | 0     | 0     |
| 13069  | 0     | 0     | 0     | 0     |
| 13076  | 1     | 1     | 0     | 0     |
| 13081  | 0     | 0     | 0     | 0     |
| 13082  | 0     | 0     | 0     | 0     |
| 13084  | 1     | 0     | 1     | 0     |
| 13085  | 0     | 0     | 0     | 0     |
| 13086  | 0     | 0     | 0     | 0     |
| 13093  | 0     | 0     | 0     | 0     |
| 13094  | 0     | 1     | 0     | 0     |
| 13097  | 1     | 0     | 0     | 0     |
| 13098  | 0     | 0     | 0     | 0     |
| 13099  | 0     | 0     | 0     | 0     |

| respid | Q31_2 | Q31_3 | Q31_4 | Q31_5 |
|--------|-------|-------|-------|-------|
| 13100  | 0     | 0     | 0     | 0     |
| 13101  | 0     | 0     | 0     | 0     |
| 13103  | 0     | 0     | 0     | 0     |
| 13105  | 0     | 1     | 0     | 0     |
| 13106  | 0     | 0     | 0     | 0     |
| 13107  | 1     | 0     | 0     | 0     |
| 13110  | 0     | 0     | 0     | 1     |
| 13118  | 0     | 0     | 0     | 0     |
| 13120  | 1     | 1     | 0     | 0     |
| 13130  | 0     | 0     | 0     | 0     |
| 13133  | 0     | 0     | 0     | 0     |
| 13134  | 0     | 0     | 0     | 0     |
| 13139  | 1     | 1     | 0     | 0     |
| 13142  | 0     | 0     | 0     | 0     |
| 13143  | 0     | 0     | 0     | 0     |
| 13145  | 0     | 0     | 0     | 0     |
| 13148  | 0     | 0     | 0     | 0     |
| 13149  | 0     | 0     | 0     | 0     |
| 13151  | 0     | 1     | 0     | 0     |
| 13153  | 0     | 0     | 0     | 0     |
| 13158  | 0     | 0     | 0     | 0     |
| 13160  | 1     | 1     | 0     | 0     |
| 13162  | 1     | 0     | 1     | 1     |
| 13169  | 0     | 0     | 0     | 0     |
| 13172  | 1     | 0     | 0     | 0     |
| 13173  | 0     | 0     | 0     | 0     |
| 13176  | 0     | 0     | 0     | 0     |
| 13179  | 1     | 0     | 0     | 0     |
| 13184  | 0     | 0     | 0     | 0     |
| 13185  | 0     | 0     | 0     | 0     |
| 13186  | 0     | 0     | 0     | 0     |
| 13188  | 0     | 1     | 0     | 0     |



| respid | Q31_2 | Q31_3 | Q31_4 | Q31_5 |
|--------|-------|-------|-------|-------|
| 13190  | 0     | 0     | 0     | 1     |
| 13192  | 1     | 1     | 0     | 0     |
| 13193  | 0     | 0     | 0     | 0     |
| 13201  | 0     | 0     | 0     | 0     |
| 13207  | 0     | 0     | 0     | 0     |
| 13208  | 0     | 0     | 0     | 0     |
| 13209  | 0     | 0     | 0     | 0     |
| 13212  | 0     | 1     | 0     | 0     |
| 13215  | 0     | 1     | 0     | 0     |
| 13218  | 0     | 0     | 0     | 0     |
| 13219  | 0     | 0     | 0     | 0     |
| 13224  | 0     | 0     | 0     | 0     |
| 13225  | 0     | 0     | 0     | 0     |
| 13226  | 0     | 0     | 0     | 0     |
| 13232  | 1     | 0     | 0     | 0     |
| 13237  | 1     | 0     | 1     | 0     |
| 13239  | 0     | 1     | 0     | 0     |
| 13241  | 1     | 1     | 1     | 1     |
| 13243  | 0     | 0     | 0     | 0     |
| 13247  | 0     | 0     | 0     | 0     |
| 13248  | 0     | 0     | 0     | 0     |
| 13251  | 0     | 1     | 0     | 0     |
| 13256  | 0     | 0     | 0     | 0     |
| 13260  | 0     | 0     | 0     | 0     |
| 13261  | 0     | 0     | 0     | 0     |
| 13264  | 0     | 0     | 1     | 0     |
| 13273  | 1     | 0     | 0     | 0     |
| 13274  | 1     | 0     | 0     | 0     |
| 13276  | 0     | 0     | 0     | 0     |
| 13278  | 0     | 0     | 0     | 0     |
| 13279  | 1     | 0     | 0     | 0     |
| 13282  | 0     | 0     | 0     | 0     |

| respid | Q31_2 | Q31_3 | Q31_4 | Q31_5 |
|--------|-------|-------|-------|-------|
| 13283  | 0     | 1     | 0     | 0     |
| 13285  | 0     | 0     | 0     | 0     |
| 13286  | 1     | 0     | 0     | 0     |
| 13299  | 0     | 1     | 0     | 0     |
| 13300  | 1     | 1     | 0     | 0     |
| 13301  | 0     | 0     | 0     | 0     |
| 13303  | 1     | 0     | 0     | 0     |
| 13304  | 0     | 0     | 0     | 0     |
| 13307  | 1     | 0     | 0     | 0     |
| 13308  | 0     | 0     | 0     | 0     |
| 13312  | 1     | 0     | 0     | 0     |
| 13313  | 0     | 0     | 0     | 0     |
| 13314  | 0     | 0     | 0     | 0     |
| 13318  | 0     | 1     | 0     | 0     |
| 13320  | 1     | 1     | 0     | 1     |
| 13322  | 0     | 0     | 0     | 0     |
| 13324  | 0     | 0     | 0     | 0     |
| 13325  | 0     | 1     | 1     | 0     |
| 13327  | 0     | 0     | 0     | 0     |
| 13330  | 1     | 1     | 0     | 0     |
| 13332  | 1     | 0     | 0     | 0     |
| 13333  | 0     | 0     | 0     | 0     |
| 13334  | 1     | 0     | 0     | 0     |
| 13351  | 0     | 1     | 0     | 0     |
| 13353  | 0     | 0     | 0     | 0     |
| 13354  | 0     | 0     | 0     | 0     |
| 13355  | 1     | 0     | 0     | 0     |
| 13358  | 1     | 1     | 0     | 0     |
| 13359  | 0     | 0     | 0     | 0     |
| 13360  | 0     | 1     | 0     | 0     |
| 13364  | 1     | 1     | 1     | 1     |
| 13365  | 0     | 0     | 0     | 0     |

| respid | Q31_2 | Q31_3 | Q31_4 | Q31_5 |
|--------|-------|-------|-------|-------|
| 13368  | 0     | 0     | 0     | 0     |
| 13370  | 0     | 0     | 0     | 0     |
| 13375  | 0     | 0     | 0     | 0     |
| 13384  | 0     | 0     | 0     | 0     |
| 13387  | 0     | 0     | 0     | 0     |
| 13395  | 0     | 0     | 0     | 0     |
| 13398  | 0     | 0     | 0     | 0     |
| 13404  | 0     | 0     | 0     | 0     |
| 13405  | 0     | 0     | 0     | 0     |
| 13408  | 0     | 0     | 0     | 0     |
| 13411  | 1     | 0     | 0     | 0     |
| 13413  | 0     | 0     | 0     | 0     |
| 13419  | 0     | 0     | 0     | 0     |
| 13420  | 0     | 0     | 0     | 0     |
| 13427  | 0     | 0     | 0     | 0     |
| 13441  | 0     | 1     | 0     | 0     |
| 13444  | 1     | 0     | 0     | 0     |
| 13456  | 0     | 0     | 0     | 0     |
| 13466  | 0     | 0     | 0     | 0     |
| 13468  | 1     | 0     | 0     | 0     |
| 13475  | 0     | 0     | 0     | 0     |
| 13484  | 0     | 1     | 0     | 0     |
| 13486  | 0     | 0     | 0     | 0     |
| 13487  | 0     | 0     | 0     | 0     |
| 13491  | 0     | 0     | 0     | 0     |
| 13496  | 0     | 0     | 0     | 0     |
| 13497  | 0     | 0     | 0     | 0     |
| 13498  | 1     | 0     | 0     | 0     |
| 13502  | 0     | 0     | 0     | 0     |
| 13503  | 0     | 0     | 0     | 0     |
| 13505  | 0     | 0     | 0     | 0     |
| 13509  | 0     | 0     | 0     | 0     |

| respid | Q31_2 | Q31_3 | Q31_4 | Q31_5 |
|--------|-------|-------|-------|-------|
| 13510  | 1     | 1     | 0     | 0     |
| 13518  | 0     | 0     | 0     | 0     |
| 13521  | 0     | 0     | 0     | 0     |
| 13523  | 1     | 0     | 0     | 0     |
| 13528  | 0     | 0     | 0     | 0     |
| 13531  | 1     | 0     | 1     | 0     |
| 13532  | 0     | 1     | 0     | 0     |
| 13533  | 1     | 1     | 0     | 0     |
| 13534  | 0     | 0     | 0     | 0     |
| 13535  | 0     | 0     | 0     | 0     |
| 13538  | 0     | 1     | 1     | 0     |
| 13540  | 0     | 0     | 0     | 0     |
| 13541  | 0     | 0     | 0     | 0     |
| 13542  | 0     | 0     | 0     | 0     |
| 13550  | 1     | 0     | 1     | 0     |
| 13553  | 0     | 0     | 0     | 0     |
| 13554  | 0     | 0     | 0     | 0     |
| 13555  | 0     | 1     | 0     | 1     |
| 13556  | 1     | 1     | 0     | 0     |
| 13563  | 1     | 1     | 0     | 1     |
| 13564  | 1     | 0     | 0     | 0     |
| 13567  | 0     | 0     | 0     | 0     |
| 13568  | 0     | 1     | 0     | 0     |
| 13570  | 0     | 0     | 0     | 0     |
| 13573  | 0     | 0     | 0     | 0     |
| 13575  | 0     | 0     | 0     | 0     |
| 13577  | 0     | 1     | 1     | 0     |
| 13580  | 0     | 0     | 1     | 1     |
| 13582  | 0     | 0     | 0     | 0     |
| 13584  | 1     | 1     | 0     | 0     |
| 13585  | 0     | 0     | 0     | 0     |
| 13586  | 1     | 0     | 0     | 0     |

| respid | Q31_2 | Q31_3 | Q31_4 | Q31_5 |
|--------|-------|-------|-------|-------|
| 13587  | 1     | 1     | 0     | 0     |
| 13592  | 0     | 0     | 1     | 1     |
| 13596  | 0     | 0     | 1     | 0     |
| 13597  | 1     | 0     | 0     | 0     |
| 13599  | 1     | 1     | 0     | 0     |
| 13601  | 1     | 1     | 1     | 0     |
| 13604  | 0     | 0     | 0     | 0     |
| 13608  | 0     | 0     | 0     | 0     |
| 13616  | 0     | 0     | 0     | 0     |
| 13618  | 0     | 0     | 0     | 0     |
| 13619  | 0     | 0     | 0     | 0     |
| 13626  | 0     | 0     | 0     | 0     |
| 13628  | 1     | 0     | 1     | 0     |
| 13640  | 0     | 0     | 0     | 0     |
| 13645  | 0     | 0     | 0     | 0     |
| 13648  | 0     | 0     | 0     | 0     |
| 13653  | 0     | 0     | 0     | 0     |
| 13655  | 0     | 0     | 0     | 0     |
| 13662  | 0     | 0     | 0     | 0     |
| 13670  | 0     | 0     | 0     | 0     |
| 13673  | 1     | 0     | 0     | 0     |
| 13674  | 0     | 0     | 0     | 0     |
| 13675  | 0     | 0     | 0     | 0     |
| 13678  | 1     | 0     | 0     | 0     |
| 13680  | 1     | 1     | 1     | 0     |
| 13681  | 0     | 0     | 0     | 0     |
| 13683  | 1     | 0     | 0     | 0     |
| 13684  | 0     | 0     | 0     | 0     |
| 13685  | 0     | 0     | 0     | 0     |
| 13687  | 0     | 0     | 0     | 0     |
| 13690  | 0     | 0     | 0     | 0     |
| 13700  | 0     | 1     | 1     | 0     |

| respid | Q31_2 | Q31_3 | Q31_4 | Q31_5 |
|--------|-------|-------|-------|-------|
| 13705  | 0     | 1     | 0     | 0     |
| 13710  | 0     | 0     | 0     | 0     |
| 13711  | 0     | 0     | 0     | 0     |
| 13713  | 0     | 0     | 0     | 0     |
| 13716  | 0     | 0     | 0     | 0     |
| 13721  | 1     | 1     | 0     | 0     |
| 13722  | 0     | 0     | 0     | 0     |
| 13723  | 0     | 0     | 1     | 0     |
| 13726  | 1     | 1     | 0     | 0     |
| 13728  | 0     | 0     | 0     | 0     |
| 13730  | 0     | 0     | 0     | 0     |
| 13734  | 0     | 0     | 0     | 0     |
| 13736  | 1     | 0     | 0     | 0     |
| 13737  | 0     | 0     | 0     | 0     |
| 13739  | 0     | 0     | 0     | 0     |
| 13742  | 0     | 0     | 0     | 0     |
| 13746  | 1     | 0     | 0     | 0     |
| 13747  | 0     | 0     | 0     | 0     |
| 13749  | 0     | 1     | 0     | 0     |
| 13751  | 0     | 0     | 0     | 0     |
| 13752  | 0     | 0     | 0     | 0     |
| 13756  | 0     | 0     | 0     | 0     |
| 13757  | 0     | 0     | 0     | 0     |
| 13767  | 0     | 1     | 0     | 0     |
| 13771  | 0     | 0     | 0     | 0     |
| 13772  | 0     | 0     | 0     | 0     |
| 13779  | 0     | 0     | 0     | 0     |
| 13782  | 0     | 0     | 0     | 0     |
| 13783  | 0     | 0     | 1     | 0     |
| 13785  | 0     | 0     | 0     | 0     |
| 13786  | 1     | 0     | 0     | 0     |
| 13792  | 1     | 0     | 0     | 0     |

| respid | Q31_2 | Q31_3 | Q31_4 | Q31_5 |
|--------|-------|-------|-------|-------|
| 13796  | 0     | 0     | 0     | 0     |
| 13798  | 0     | 0     | 0     | 0     |
| 13799  | 0     | 0     | 0     | 0     |
| 13804  | 0     | 0     | 0     | 0     |
| 13805  | 1     | 0     | 0     | 0     |
| 13810  | 1     | 1     | 0     | 0     |
| 13811  | 0     | 0     | 0     | 0     |
| 13819  | 1     | 0     | 0     | 0     |
| 13821  | 1     | 0     | 1     | 1     |
| 13824  | 0     | 0     | 1     | 1     |
| 13828  | 0     | 1     | 0     | 0     |
| 13829  | 0     | 1     | 1     | 0     |
| 13831  | 0     | 0     | 0     | 0     |
| 13833  | 0     | 0     | 0     | 0     |
| 13835  | 0     | 0     | 0     | 1     |
| 13838  | 0     | 0     | 0     | 0     |
| 13839  | 0     | 0     | 0     | 1     |
| 13845  | 0     | 0     | 0     | 0     |
| 13846  | 0     | 0     | 0     | 0     |
| 13853  | 0     | 0     | 0     | 0     |
| 13855  | 0     | 0     | 1     | 0     |
| 13858  | 0     | 0     | 0     | 0     |
| 13860  | 0     | 0     | 0     | 0     |
| 13865  | 0     | 0     | 1     | 0     |
| 13870  | 0     | 0     | 0     | 0     |
| 13872  | 1     | 1     | 0     | 1     |
| 13873  | 0     | 0     | 0     | 0     |
| 13874  | 0     | 0     | 0     | 0     |
| 13875  | 0     | 1     | 0     | 0     |
| 13881  | 0     | 0     | 0     | 0     |
| 13887  | 0     | 0     | 0     | 0     |
| 13888  | 0     | 0     | 0     | 0     |

| respid | Q31_2 | Q31_3 | Q31_4 | Q31_5 |
|--------|-------|-------|-------|-------|
| 13889  | 1     | 1     | 0     | 0     |
| 13895  | 0     | 0     | 0     | 0     |
| 13897  | 0     | 0     | 0     | 0     |
| 13898  | 0     | 0     | 0     | 0     |
| 13901  | 0     | 0     | 0     | 0     |
| 13902  | 0     | 0     | 0     | 1     |
| 13903  | 1     | 0     | 0     | 0     |
| 13905  | 0     | 1     | 0     | 0     |
| 13908  | 0     | 1     | 0     | 1     |
| 13909  | 0     | 0     | 0     | 0     |
| 13910  | 0     | 0     | 1     | 1     |
| 13911  | 0     | 0     | 0     | 0     |
| 13914  | 0     | 1     | 0     | 0     |
| 13920  | 1     | 0     | 0     | 0     |
| 13926  | 1     | 0     | 0     | 0     |
| 13929  | 0     | 1     | 0     | 0     |
| 13930  | 0     | 0     | 0     | 1     |
| 13931  | 0     | 0     | 0     | 0     |
| 13932  | 0     | 0     | 1     | 0     |
| 13934  | 0     | 1     | 0     | 0     |
| 13938  | 0     | 0     | 0     | 0     |
| 13942  | 0     | 0     | 0     | 0     |
| 13945  | 0     | 1     | 0     | 0     |
| 13947  | 0     | 0     | 0     | 0     |
| 13948  | 0     | 0     | 0     | 0     |
| 13959  | 0     | 0     | 0     | 0     |
| 13962  | 0     | 0     | 0     | 0     |
| 13963  | 0     | 0     | 0     | 0     |
| 13964  | 0     | 0     | 0     | 0     |
| 13966  | 0     | 0     | 1     | 0     |
| 13968  | 0     | 0     | 0     | 0     |
| 13971  | 0     | 0     | 0     | 0     |



| respid | Q31_2 | Q31_3 | Q31_4 | Q31_5 |
|--------|-------|-------|-------|-------|
| 13979  | 0     | 0     | 0     | 0     |
| 13980  | 0     | 0     | 1     | 0     |
| 13981  | 0     | 0     | 0     | 0     |
| 13982  | 0     | 0     | 0     | 0     |
| 13984  | 0     | 0     | 0     | 0     |
| 13989  | 0     | 0     | 0     | 0     |
| 13990  | 0     | 0     | 0     | 0     |
| 13992  | 1     | 1     | 0     | 1     |
| 13998  | 0     | 1     | 0     | 0     |
| 13999  | 1     | 0     | 0     | 0     |
| 14000  | 0     | 0     | 0     | 0     |
| 14003  | 0     | 0     | 0     | 0     |
| 14004  | 1     | 0     | 0     | 0     |
| 14006  | 0     | 0     | 0     | 0     |
| 14007  | 0     | 0     | 0     | 0     |
| 14008  | 0     | 0     | 0     | 0     |
| 14013  | 0     | 1     | 0     | 0     |
| 14015  | 0     | 1     | 0     | 0     |
| 14018  | 0     | 1     | 0     | 0     |
| 14021  | 0     | 0     | 0     | 0     |
| 14023  | 0     | 0     | 0     | 0     |
| 14024  | 0     | 0     | 0     | 0     |
| 14026  | 0     | 0     | 0     | 0     |
| 14030  | 0     | 0     | 0     | 0     |
| 14032  | 1     | 0     | 0     | 0     |
| 14040  | 0     | 0     | 0     | 0     |
| 14045  | 0     | 0     | 0     | 0     |
| 14048  | 0     | 0     | 1     | 0     |
| 14049  | 0     | 0     | 0     | 0     |
| 14050  | 1     | 0     | 0     | 1     |
| 14051  | 0     | 0     | 0     | 1     |
| 14052  | 0     | 0     | 0     | 0     |

| respid | Q31_2 | Q31_3 | Q31_4 | Q31_5 |
|--------|-------|-------|-------|-------|
| 14054  | 0     | 1     | 0     | 0     |
| 14055  | 0     | 0     | 0     | 0     |
| 14057  | 1     | 1     | 0     | 0     |
| 14058  | 0     | 0     | 0     | 0     |
| 14059  | 0     | 0     | 0     | 0     |
| 14060  | 1     | 1     | 0     | 0     |
| 14061  | 0     | 0     | 0     | 1     |
| 14071  | 0     | 0     | 0     | 0     |
| 14073  | 0     | 0     | 0     | 0     |
| 14074  | 0     | 0     | 0     | 0     |
| 14076  | 1     | 1     | 0     | 0     |
| 14080  | 0     | 0     | 0     | 0     |
| 14082  | 0     | 0     | 0     | 0     |
| 14083  | 0     | 0     | 0     | 0     |
| 14084  | 0     | 0     | 0     | 0     |
| 14085  | 0     | 0     | 0     | 0     |
| 14086  | 1     | 0     | 0     | 0     |
| 14088  | 1     | 0     | 0     | 0     |
| 14090  | 0     | 0     | 0     | 0     |
| 14092  | 0     | 0     | 0     | 0     |
| 14093  | 0     | 0     | 1     | 0     |
| 14096  | 1     | 1     | 0     | 0     |
| 14103  | 0     | 0     | 0     | 0     |
| 14105  | 0     | 1     | 0     | 0     |
| 14106  | 0     | 0     | 0     | 0     |
| 14107  | 0     | 0     | 1     | 0     |
| 14108  | 1     | 1     | 0     | 0     |
| 14112  | 1     | 1     | 0     | 0     |
| 14114  | 0     | 0     | 0     | 0     |
| 14115  | 0     | 0     | 0     | 0     |
| 14116  | 0     | 0     | 0     | 0     |
| 14117  | 0     | 0     | 0     | 0     |

| respid | Q31_2 | Q31_3 | Q31_4 | Q31_5 |
|--------|-------|-------|-------|-------|
| 14118  | 1     | 0     | 1     | 0     |
| 14119  | 1     | 0     | 0     | 0     |
| 14127  | 0     | 0     | 0     | 0     |
| 14129  | 0     | 0     | 0     | 0     |
| 14131  | 0     | 0     | 0     | 0     |
| 14132  | 0     | 0     | 0     | 0     |
| 14133  | 1     | 1     | 0     | 1     |
| 14134  | 0     | 0     | 0     | 0     |
| 14135  | 1     | 0     | 0     | 0     |
| 14136  | 0     | 0     | 0     | 0     |
| 14138  | 0     | 0     | 0     | 0     |
| 14139  | 0     | 0     | 0     | 0     |
| 14140  | 0     | 1     | 0     | 0     |
| 14141  | 0     | 0     | 0     | 0     |
| 14143  | 0     | 0     | 0     | 0     |
| 14146  | 0     | 0     | 0     | 0     |
| 14147  | 1     | 1     | 1     | 1     |
| 14148  | 1     | 1     | 0     | 0     |
| 14151  | 1     | 1     | 0     | 1     |
| 14152  | 1     | 0     | 0     | 0     |
| 14153  | 0     | 0     | 0     | 0     |
| 14154  | 0     | 0     | 0     | 0     |
| 14158  | 1     | 0     | 0     | 0     |
| 14159  | 0     | 0     | 1     | 0     |
| 14160  | 0     | 0     | 0     | 0     |
| 14161  | 0     | 0     | 0     | 0     |
| 14162  | 0     | 0     | 0     | 0     |
| 14165  | 0     | 0     | 0     | 0     |
| 14166  | 0     | 0     | 1     | 0     |
| 14167  | 0     | 0     | 0     | 0     |
| 14169  | 0     | 0     | 0     | 0     |
| 14170  | 1     | 1     | 0     | 0     |

| respid | Q31_2 | Q31_3 | Q31_4 | Q31_5 |
|--------|-------|-------|-------|-------|
| 14172  | 0     | 0     | 0     | 0     |
| 14173  | 0     | 0     | 0     | 0     |
| 14174  | 1     | 1     | 0     | 0     |
| 14175  | 0     | 0     | 0     | 0     |
| 14176  | 1     | 0     | 0     | 0     |
| 14178  | 0     | 0     | 0     | 0     |
| 14179  | 0     | 0     | 0     | 0     |
| 14180  | 1     | 0     | 0     | 1     |
| 14183  | 0     | 0     | 1     | 0     |
| 14185  | 0     | 0     | 0     | 0     |
| 14187  | 0     | 0     | 0     | 0     |
| 14189  | 0     | 0     | 0     | 0     |
| 14191  | 0     | 0     | 0     | 0     |
| 14192  | 0     | 0     | 0     | 0     |
| 14195  | 0     | 0     | 0     | 1     |
| 14197  | 0     | 1     | 0     | 0     |
| 14203  | 0     | 0     | 0     | 1     |
| 14204  | 1     | 0     | 0     | 0     |
| 14205  | 0     | 0     | 0     | 0     |
| 14208  | 0     | 0     | 0     | 0     |
| 14211  | 1     | 1     | 1     | 0     |
| 14214  | 0     | 1     | 0     | 1     |
| 14215  | 0     | 0     | 0     | 0     |
| 14216  | 0     | 0     | 0     | 0     |
| 14218  | 0     | 0     | 0     | 0     |
| 14220  | 0     | 0     | 0     | 0     |
| 14223  | 0     | 0     | 0     | 0     |
| 14225  | 0     | 0     | 0     | 0     |
| 14226  | 0     | 0     | 0     | 0     |
| 14228  | 0     | 0     | 1     | 0     |
| 14231  | 1     | 0     | 0     | 0     |
| 14233  | 0     | 1     | 0     | 0     |

| respid | Q31_2 | Q31_3 | Q31_4 | Q31_5 |
|--------|-------|-------|-------|-------|
| 14237  | 0     | 0     | 0     | 0     |
| 14238  | 1     | 0     | 0     | 0     |
| 14243  | 1     | 0     | 0     | 0     |
| 14245  | 0     | 0     | 0     | 0     |
| 14246  | 0     | 0     | 0     | 1     |
| 14248  | 0     | 0     | 0     | 0     |
| 14250  | 0     | 0     | 0     | 0     |
| 14253  | 1     | 0     | 0     | 0     |
| 14254  | 0     | 0     | 0     | 0     |
| 14255  | 0     | 0     | 0     | 0     |
| 14257  | 0     | 0     | 0     | 0     |
| 14258  | 0     | 0     | 0     | 0     |
| 14259  | 0     | 0     | 0     | 0     |
| 14260  | 0     | 0     | 0     | 0     |
| 14261  | 0     | 1     | 0     | 0     |
| 14263  | 1     | 1     | 0     | 0     |
| 14264  | 0     | 0     | 1     | 1     |
| 14266  | 0     | 0     | 0     | 1     |
| 14267  | 0     | 0     | 1     | 0     |
| 14268  | 0     | 0     | 0     | 0     |
| 14275  | 0     | 0     | 0     | 0     |
| 14278  | 0     | 0     | 0     | 0     |
| 14279  | 0     | 0     | 0     | 0     |
| 14280  | 0     | 0     | 0     | 0     |
| 14281  | 1     | 1     | 0     | 0     |
| 14282  | 0     | 0     | 1     | 0     |
| 14283  | 0     | 0     | 0     | 0     |
| 14286  | 0     | 1     | 0     | 0     |
| 14287  | 0     | 0     | 0     | 0     |
| 14288  | 1     | 1     | 0     | 0     |
| 14291  | 0     | 0     | 0     | 0     |
| 14292  | 0     | 0     | 0     | 0     |

| respid | Q31_2 | Q31_3 | Q31_4 | Q31_5 |
|--------|-------|-------|-------|-------|
| 14293  | 0     | 0     | 0     | 0     |
| 14304  | 0     | 0     | 1     | 1     |
| 14308  | 0     | 0     | 0     | 0     |
| 14313  | 0     | 0     | 0     | 0     |
| 14314  | 0     | 0     | 0     | 0     |
| 14316  | 0     | 0     | 1     | 0     |
| 14317  | 0     | 0     | 0     | 0     |
| 14318  | 1     | 0     | 1     | 0     |
| 14319  | 0     | 0     | 0     | 0     |
| 14320  | 0     | 0     | 1     | 0     |
| 14321  | 1     | 1     | 0     | 0     |
| 14322  | 1     | 0     | 1     | 0     |
| 14326  | 0     | 0     | 0     | 0     |
| 14327  | 0     | 0     | 1     | 1     |
| 14328  | 0     | 0     | 0     | 0     |
| 14330  | 0     | 0     | 0     | 0     |
| 14332  | 0     | 0     | 0     | 0     |
| 14334  | 0     | 0     | 0     | 0     |
| 14336  | 0     | 1     | 0     | 0     |
| 14337  | 0     | 0     | 0     | 0     |
| 14339  | 0     | 0     | 0     | 0     |
| 14340  | 0     | 0     | 0     | 0     |
| 14341  | 0     | 0     | 0     | 0     |
| 14344  | 0     | 0     | 0     | 0     |
| 14345  | 0     | 0     | 0     | 0     |
| 14346  | 0     | 0     | 0     | 0     |
| 14348  | 0     | 0     | 0     | 0     |
| 14349  | 0     | 0     | 0     | 0     |
| 14358  | 1     | 1     | 1     | 0     |
| 14360  | 0     | 0     | 0     | 0     |
| 14362  | 0     | 0     | 0     | 0     |
| 14366  | 0     | 0     | 0     | 0     |

| respid | Q31_2 | Q31_3 | Q31_4 | Q31_5 |
|--------|-------|-------|-------|-------|
| 14367  | 0     | 0     | 0     | 0     |
| 14369  | 0     | 0     | 0     | 0     |
| 14371  | 0     | 0     | 0     | 0     |
| 14372  | 0     | 0     | 0     | 0     |
| 14374  | 1     | 0     | 0     | 0     |
| 14376  | 0     | 0     | 0     | 0     |
| 14377  | 0     | 0     | 0     | 0     |
| 14378  | 0     | 1     | 0     | 0     |
| 14379  | 0     | 0     | 0     | 0     |
| 14381  | 1     | 0     | 0     | 0     |
| 14383  | 0     | 0     | 0     | 0     |
| 14384  | 0     | 0     | 0     | 0     |
| 14385  | 0     | 0     | 1     | 1     |
| 14386  | 0     | 0     | 0     | 0     |
| 14390  | 0     | 0     | 0     | 0     |
| 14391  | 0     | 0     | 0     | 0     |
| 14392  | 0     | 0     | 0     | 0     |
| 14393  | 1     | 0     | 0     | 0     |
| 14394  | 1     | 1     | 0     | 0     |
| 14395  | 0     | 0     | 0     | 0     |
| 14396  | 0     | 0     | 0     | 0     |
| 14397  | 0     | 0     | 0     | 0     |
| 14398  | 0     | 0     | 0     | 0     |
| 14399  | 0     | 0     | 0     | 0     |
| 14400  | 1     | 0     | 0     | 0     |
| 14403  | 0     | 0     | 0     | 0     |
| 14404  | 1     | 0     | 0     | 0     |
| 14405  | 0     | 0     | 0     | 0     |
| 14407  | 0     | 0     | 0     | 0     |
| 14408  | 0     | 1     | 0     | 0     |
| 14410  | 0     | 0     | 1     | 0     |
| 14415  | 0     | 0     | 0     | 0     |

| respid | Q31_2 | Q31_3 | Q31_4 | Q31_5 |
|--------|-------|-------|-------|-------|
| 14419  | 0     | 0     | 0     | 0     |
| 14420  | 0     | 0     | 0     | 0     |
| 14421  | 0     | 0     | 0     | 0     |
| 14423  | 0     | 0     | 0     | 0     |
| 14424  | 0     | 0     | 0     | 0     |
| 14425  | 0     | 0     | 0     | 0     |
| 14426  | 0     | 0     | 0     | 0     |
| 14427  | 0     | 0     | 0     | 0     |
| 14428  | 0     | 0     | 0     | 0     |
| 14431  | 1     | 1     | 0     | 0     |
| 14433  | 0     | 0     | 0     | 0     |
| 14434  | 0     | 0     | 0     | 0     |
| 14435  | 1     | 1     | 0     | 0     |
| 14436  | 1     | 1     | 0     | 0     |
| 14438  | 0     | 0     | 0     | 0     |
| 14442  | 1     | 1     | 0     | 0     |
| 14447  | 0     | 0     | 0     | 0     |
| 14448  | 0     | 0     | 0     | 0     |
| 14450  | 0     | 0     | 0     | 1     |
| 14451  | 0     | 0     | 0     | 0     |
| 14454  | 0     | 0     | 0     | 1     |
| 14455  | 0     | 0     | 0     | 0     |
| 14456  | 0     | 0     | 0     | 0     |
| 14457  | 0     | 1     | 0     | 1     |
| 14458  | 0     | 0     | 1     | 0     |
| 14459  | 0     | 0     | 0     | 0     |
| 14460  | 1     | 1     | 0     | 0     |
| 14464  | 1     | 0     | 0     | 0     |
| 14465  | 0     | 0     | 0     | 0     |
| 14466  | 0     | 0     | 0     | 0     |
| 14467  | 0     | 0     | 0     | 0     |
| 14470  | 0     | 0     | 0     | 0     |



| respid | Q31_2 | Q31_3 | Q31_4 | Q31_5 |
|--------|-------|-------|-------|-------|
| 14472  | 0     | 0     | 0     | 0     |
| 14473  | 0     | 0     | 0     | 0     |
| 14474  | 0     | 0     | 0     | 0     |
| 14477  | 1     | 0     | 0     | 0     |
| 14478  | 0     | 0     | 0     | 0     |
| 14479  | 0     | 0     | 0     | 0     |
| 14484  | 0     | 0     | 0     | 0     |
| 14485  | 0     | 0     | 0     | 0     |
| 14486  | 0     | 1     | 0     | 0     |
| 14487  | 0     | 0     | 0     | 0     |
| 14488  | 1     | 1     | 0     | 0     |
| 14491  | 0     | 1     | 0     | 0     |
| 14495  | 0     | 0     | 0     | 0     |
| 14500  | 0     | 0     | 0     | 0     |
| 14502  | 0     | 0     | 0     | 0     |
| 14504  | 0     | 0     | 0     | 1     |
| 14505  | 0     | 0     | 1     | 1     |
| 14507  | 0     | 0     | 0     | 0     |
| 14517  | 0     | 0     | 0     | 0     |
| 14518  | 0     | 0     | 0     | 0     |
| 14519  | 1     | 0     | 0     | 0     |
| 14521  | 0     | 1     | 0     | 0     |
| 14522  | 0     | 0     | 0     | 0     |
| 14526  | 0     | 0     | 0     | 0     |
| 14528  | 1     | 1     | 0     | 0     |
| 14529  | 0     | 0     | 0     | 0     |
| 14530  | 0     | 0     | 0     | 0     |
| 14531  | 1     | 1     | 1     | 1     |
| 14534  | 0     | 0     | 1     | 0     |
| 14538  | 0     | 0     | 0     | 0     |
| 14539  | 0     | 0     | 0     | 0     |
| 14545  | 1     | 0     | 0     | 0     |

| respid | Q31_2 | Q31_3 | Q31_4 | Q31_5 |
|--------|-------|-------|-------|-------|
| 14546  | 0     | 0     | 0     | 0     |
| 14551  | 0     | 0     | 0     | 0     |
| 14553  | 1     | 0     | 1     | 0     |
| 14557  | 0     | 0     | 0     | 0     |
| 14558  | 0     | 0     | 0     | 0     |
| 14559  | 1     | 0     | 0     | 0     |
| 14560  | 0     | 0     | 0     | 0     |
| 14563  | 1     | 0     | 0     | 0     |
| 14565  | 0     | 0     | 0     | 0     |
| 14571  | 0     | 0     | 0     | 1     |
| 14572  | 0     | 0     | 0     | 0     |
| 14573  | 1     | 1     | 0     | 0     |
| 14575  | 0     | 0     | 0     | 0     |
| 14576  | 1     | 0     | 0     | 1     |
| 14578  | 0     | 0     | 0     | 0     |
| 14579  | 0     | 0     | 0     | 0     |
| 14580  | 1     | 0     | 1     | 0     |
| 14582  | 0     | 0     | 0     | 0     |
| 14585  | 0     | 0     | 1     | 0     |
| 14588  | 0     | 0     | 0     | 0     |
| 14590  | 0     | 0     | 0     | 0     |
| 14592  | 0     | 1     | 1     | 0     |
| 14593  | 0     | 0     | 0     | 0     |
| 14595  | 0     | 0     | 0     | 0     |
| 14597  | 1     | 1     | 0     | 0     |
| 14600  | 0     | 0     | 0     | 0     |
| 14602  | 0     | 1     | 0     | 0     |
| 14604  | 0     | 0     | 0     | 0     |
| 14605  | 0     | 0     | 0     | 0     |
| 14609  | 1     | 0     | 0     | 0     |
| 14610  | 0     | 0     | 0     | 0     |
| 14611  | 0     | 0     | 0     | 0     |

| respid | Q31_2 | Q31_3 | Q31_4 | Q31_5 |
|--------|-------|-------|-------|-------|
| 14612  | 0     | 1     | 0     | 0     |
| 14614  | 0     | 0     | 0     | 1     |
| 14615  | 1     | 1     | 0     | 0     |
| 14618  | 1     | 1     | 0     | 0     |
| 14621  | 0     | 0     | 0     | 0     |
| 14624  | 1     | 0     | 0     | 0     |
| 14626  | 1     | 0     | 0     | 0     |
| 14627  | 1     | 1     | 0     | 0     |
| 14628  | 0     | 0     | 0     | 1     |
| 14631  | 0     | 0     | 0     | 0     |
| 14633  | 1     | 0     | 0     | 0     |
| 14642  | 0     | 0     | 0     | 0     |
| 14647  | 0     | 0     | 0     | 0     |
| 14658  | 0     | 0     | 0     | 0     |
| 14659  | 0     | 1     | 0     | 0     |
| 14660  | 0     | 0     | 0     | 0     |
| 14661  | 0     | 0     | 0     | 0     |
| 14662  | 0     | 1     | 1     | 0     |
| 14663  | 0     | 0     | 0     | 0     |
| 14670  | 0     | 1     | 0     | 0     |
| 14671  | 0     | 0     | 0     | 0     |
| 14672  | 0     | 0     | 0     | 0     |
| 14675  | 0     | 0     | 0     | 0     |
| 14676  | 1     | 0     | 0     | 0     |
| 14677  | 0     | 1     | 0     | 1     |
| 14678  | 0     | 0     | 1     | 0     |
| 14681  | 0     | 1     | 0     | 0     |
| 14684  | 0     | 0     | 0     | 0     |
| 14688  | 0     | 0     | 0     | 0     |
| 14690  | 0     | 0     | 0     | 0     |
| 14694  | 0     | 0     | 0     | 1     |
| 14696  | 0     | 0     | 0     | 0     |

| respid | Q31_2 | Q31_3 | Q31_4 | Q31_5 |
|--------|-------|-------|-------|-------|
| 14700  | 0     | 0     | 0     | 0     |
| 14701  | 0     | 0     | 0     | 0     |
| 14703  | 0     | 0     | 0     | 1     |
| 14707  | 0     | 0     | 0     | 0     |
| 14711  | 0     | 0     | 1     | 0     |
| 14714  | 0     | 0     | 0     | 0     |
| 14715  | 0     | 0     | 1     | 0     |
| 14716  | 1     | 0     | 0     | 0     |
| 14720  | 0     | 0     | 1     | 0     |
| 14725  | 0     | 0     | 0     | 0     |
| 14726  | 0     | 0     | 1     | 0     |
| 14734  | 0     | 0     | 0     | 0     |
| 14735  | 0     | 0     | 0     | 0     |
| 14736  | 1     | 0     | 0     | 0     |
| 14740  | 0     | 0     | 0     | 0     |
| 14745  | 0     | 1     | 1     | 0     |
| 14747  | 0     | 0     | 0     | 0     |
| 14750  | 0     | 0     | 1     | 0     |
| 14751  | 0     | 0     | 0     | 0     |
| 14753  | 0     | 0     | 0     | 0     |
| 14756  | 1     | 1     | 1     | 1     |
| 14780  | 0     | 0     | 0     | 0     |
| 14782  | 0     | 0     | 0     | 0     |
| 14800  | 1     | 1     | 0     | 0     |
| 14801  | 0     | 0     | 0     | 0     |
| 14802  | 0     | 0     | 0     | 1     |
| 14805  | 0     | 0     | 0     | 0     |
| 14811  | 0     | 0     | 1     | 1     |
| 14814  | 0     | 0     | 1     | 1     |
| 14822  | 0     | 1     | 1     | 0     |
| 14827  | 0     | 1     | 1     | 1     |
| 14828  | 0     | 0     | 0     | 0     |

| respid | Q31_2 | Q31_3 | Q31_4 | Q31_5 |
|--------|-------|-------|-------|-------|
| 14830  | 0     | 0     | 0     | 0     |
| 14832  | 1     | 1     | 0     | 0     |
| 14835  | 1     | 0     | 0     | 0     |
| 14841  | 0     | 0     | 0     | 0     |
| 14849  | 0     | 0     | 0     | 0     |
| 14850  | 0     | 0     | 0     | 0     |
| 14851  | 0     | 0     | 0     | 0     |
| 14856  | 0     | 0     | 1     | 1     |
| 14862  | 0     | 1     | 1     | 0     |
| 14863  | 0     | 0     | 0     | 0     |
| 14864  | 0     | 0     | 0     | 0     |
| 14866  | 0     | 0     | 0     | 0     |
| 14867  | 1     | 1     | 1     | 0     |
| 14868  | 0     | 0     | 0     | 0     |
| 14870  | 0     | 0     | 0     | 0     |
| 14873  | 0     | 0     | 0     | 0     |
| 14878  | 1     | 1     | 0     | 0     |
| 14879  | 0     | 0     | 0     | 0     |
| 14881  | 0     | 0     | 0     | 0     |
| 14888  | 0     | 1     | 0     | 1     |
| 14895  | 0     | 0     | 0     | 0     |
| 14900  | 0     | 0     | 1     | 0     |
| 14912  | 0     | 0     | 0     | 0     |
| 14922  | 0     | 0     | 1     | 0     |
| 14923  | 1     | 0     | 0     | 0     |
| 14924  | 0     | 0     | 0     | 0     |
| 14925  | 0     | 1     | 0     | 1     |
| 14926  | 0     | 0     | 0     | 0     |
| 14927  | 0     | 0     | 1     | 1     |
| 14930  | 0     | 0     | 0     | 0     |
| 14937  | 0     | 1     | 0     | 0     |
| 14938  | 0     | 0     | 1     | 1     |

| respid | Q31_2 | Q31_3 | Q31_4 | Q31_5 |
|--------|-------|-------|-------|-------|
| 14939  | 1     | 1     | 0     | 0     |
| 14942  | 0     | 0     | 0     | 0     |
| 14943  | 0     | 0     | 0     | 0     |
| 14953  | 0     | 0     | 0     | 0     |
| 14954  | 0     | 0     | 0     | 0     |
| 14955  | 1     | 1     | 0     | 0     |
| 14957  | 0     | 0     | 0     | 0     |
| 14958  | 1     | 0     | 1     | 0     |
| 14959  | 0     | 0     | 1     | 0     |
| 14961  | 0     | 0     | 0     | 0     |
| 14963  | 0     | 1     | 1     | 0     |
| 14964  | 0     | 0     | 0     | 0     |
| 14965  | 0     | 0     | 0     | 0     |
| 14967  | 0     | 0     | 1     | 0     |
| 14970  | 1     | 0     | 0     | 1     |
| 14972  | 0     | 0     | 0     | 0     |
| 14975  | 0     | 1     | 1     | 0     |
| 14977  | 0     | 0     | 0     | 0     |
| 14982  | 0     | 0     | 0     | 0     |
| 14985  | 0     | 1     | 1     | 0     |
| 14986  | 0     | 0     | 0     | 0     |
| 14987  | 0     | 0     | 0     | 0     |
| 14988  | 0     | 1     | 0     | 0     |
| 14989  | 1     | 1     | 0     | 0     |
| 14993  | 0     | 0     | 0     | 0     |
| 15001  | 0     | 0     | 0     | 0     |
| 15002  | 0     | 1     | 1     | 0     |
| 15006  | 0     | 0     | 0     | 0     |
| 15007  | 0     | 0     | 0     | 0     |
| 15014  | 1     | 1     | 0     | 0     |
| 15020  | 0     | 0     | 0     | 0     |
| 15021  | 0     | 0     | 0     | 1     |

| respid | Q31_2 | Q31_3 | Q31_4 | Q31_5 |
|--------|-------|-------|-------|-------|
| 15023  | 0     | 1     | 0     | 1     |
| 15030  | 0     | 0     | 0     | 0     |
| 15032  | 0     | 0     | 0     | 0     |
| 15033  | 0     | 1     | 0     | 0     |
| 15034  | 0     | 0     | 0     | 0     |
| 15035  | 0     | 0     | 0     | 0     |
| 15037  | 0     | 0     | 0     | 0     |
| 15039  | 0     | 1     | 1     | 0     |
| 15040  | 0     | 0     | 0     | 0     |
| 15042  | 0     | 0     | 0     | 0     |
| 15044  | 0     | 0     | 0     | 0     |
| 15045  | 1     | 0     | 0     | 0     |
| 15046  | 0     | 0     | 0     | 0     |
| 15052  | 0     | 1     | 0     | 0     |
| 15058  | 1     | 0     | 0     | 0     |
| 15063  | 0     | 1     | 1     | 0     |
| 15066  | 0     | 0     | 0     | 0     |
| 15069  | 0     | 1     | 0     | 0     |
| 15071  | 1     | 1     | 1     | 0     |
| 15076  | 0     | 1     | 1     | 0     |
| 15078  | 0     | 0     | 0     | 0     |
| 15087  | 0     | 0     | 0     | 0     |
| 15090  | 0     | 0     | 0     | 0     |
| 15091  | 0     | 0     | 1     | 0     |
| 15092  | 0     | 0     | 0     | 0     |
| 15096  | 0     | 0     | 0     | 0     |
| 15106  | 0     | 1     | 1     | 1     |
| 15108  | 0     | 0     | 0     | 0     |
| 15113  | 0     | 0     | 0     | 0     |
| 15116  | 0     | 0     | 0     | 0     |
| 15119  | 0     | 0     | 0     | 1     |
| 15120  | 0     | 0     | 0     | 0     |

| respid | Q31_2 | Q31_3 | Q31_4 | Q31_5 |
|--------|-------|-------|-------|-------|
| 15121  | 0     | 0     | 0     | 0     |
| 15123  | 0     | 0     | 0     | 0     |
| 15124  | 0     | 0     | 0     | 0     |
| 15128  | 0     | 1     | 0     | 0     |
| 15131  | 0     | 0     | 0     | 0     |
| 15136  | 0     | 1     | 0     | 0     |
| 15137  | 0     | 0     | 0     | 0     |
| 15141  | 0     | 0     | 0     | 0     |
| 15144  | 0     | 0     | 0     | 0     |
| 15147  | 0     | 0     | 0     | 0     |
| 15151  | 0     | 0     | 0     | 0     |
| 15154  | 1     | 0     | 0     | 0     |
| 15157  | 0     | 0     | 0     | 0     |
| 15164  | 1     | 0     | 1     | 0     |
| 15168  | 0     | 0     | 0     | 0     |
| 15169  | 0     | 0     | 0     | 0     |
| 15172  | 0     | 1     | 0     | 0     |
| 15177  | 1     | 0     | 0     | 0     |
| 15178  | 0     | 0     | 0     | 0     |
| 15180  | 0     | 0     | 1     | 0     |
| 15181  | 0     | 0     | 0     | 0     |
| 15182  | 0     | 0     | 0     | 0     |
| 15183  | 0     | 0     | 0     | 0     |
| 15188  | 0     | 0     | 0     | 0     |
| 15190  | 0     | 1     | 0     | 0     |
| 15195  | 0     | 0     | 0     | 0     |
| 15201  | 0     | 0     | 0     | 0     |
| 15203  | 0     | 0     | 0     | 0     |
| 15204  | 0     | 0     | 0     | 0     |
| 15207  | 0     | 0     | 0     | 0     |
| 15208  | 0     | 1     | 1     | 0     |
| 15209  | 0     | 0     | 0     | 0     |



| respid | Q31_2 | Q31_3 | Q31_4 | Q31_5 |
|--------|-------|-------|-------|-------|
| 15212  | 0     | 0     | 0     | 0     |
| 15213  | 0     | 0     | 0     | 0     |
| 15219  | 0     | 0     | 0     | 0     |
| 15220  | 0     | 0     | 0     | 0     |
| 15221  | 0     | 0     | 0     | 0     |
| 15223  | 0     | 0     | 0     | 1     |
| 15224  | 0     | 0     | 0     | 0     |
| 15225  | 0     | 0     | 0     | 0     |
| 15226  | 0     | 0     | 0     | 0     |
| 15230  | 0     | 0     | 0     | 0     |
| 15231  | 1     | 1     | 0     | 0     |
| 15232  | 0     | 0     | 0     | 0     |
| 15237  | 0     | 0     | 0     | 0     |
| 15239  | 0     | 0     | 0     | 0     |
| 15241  | 0     | 0     | 0     | 0     |
| 15242  | 0     | 0     | 0     | 1     |
| 15247  | 0     | 0     | 0     | 0     |
| 15248  | 0     | 0     | 0     | 0     |
| 15251  | 0     | 0     | 0     | 0     |
| 15257  | 0     | 0     | 0     | 0     |
| 15260  | 0     | 0     | 0     | 0     |
| 15261  | 0     | 0     | 1     | 0     |
| 15262  | 0     | 0     | 0     | 0     |
| 15263  | 0     | 0     | 0     | 0     |
| 15265  | 0     | 0     | 0     | 0     |
| 15266  | 0     | 0     | 0     | 0     |
| 15268  | 0     | 0     | 0     | 0     |
| 15269  | 0     | 0     | 0     | 0     |
| 15270  | 0     | 1     | 0     | 0     |
| 15273  | 0     | 0     | 1     | 1     |
| 15276  | 1     | 0     | 0     | 0     |
| 15277  | 0     | 0     | 0     | 0     |

| respid | Q31_2 | Q31_3 | Q31_4 | Q31_5 |
|--------|-------|-------|-------|-------|
| 15282  | 0     | 0     | 0     | 0     |
| 15284  | 0     | 0     | 0     | 0     |
| 15285  | 0     | 0     | 0     | 0     |
| 15286  | 0     | 0     | 1     | 0     |
| 15288  | 0     | 0     | 0     | 0     |
| 15292  | 0     | 1     | 1     | 0     |
| 15296  | 0     | 0     | 0     | 1     |
| 15297  | 0     | 0     | 0     | 0     |
| 15298  | 0     | 0     | 0     | 0     |
| 15301  | 0     | 0     | 0     | 0     |
| 15302  | 1     | 0     | 0     | 1     |
| 15305  | 0     | 0     | 0     | 0     |
| 15307  | 0     | 0     | 0     | 0     |
| 15308  | 0     | 0     | 0     | 0     |
| 15309  | 0     | 0     | 0     | 0     |
| 15311  | 0     | 0     | 0     | 0     |
| 15315  | 0     | 0     | 0     | 0     |
| 15316  | 1     | 0     | 0     | 0     |
| 15318  | 0     | 0     | 0     | 0     |
| 15321  | 0     | 0     | 0     | 1     |
| 15322  | 0     | 0     | 0     | 0     |
| 15324  | 1     | 0     | 0     | 0     |
| 15326  | 0     | 0     | 0     | 0     |
| 15327  | 0     | 0     | 0     | 0     |
| 15328  | 0     | 0     | 0     | 0     |
| 15330  | 0     | 0     | 0     | 0     |
| 15332  | 0     | 0     | 0     | 0     |
| 15333  | 0     | 0     | 0     | 0     |
| 15334  | 0     | 0     | 0     | 0     |
| 15336  | 0     | 0     | 0     | 0     |
| 15337  | 0     | 1     | 1     | 0     |
| 15338  | 0     | 0     | 0     | 0     |

| respid | Q31_2 | Q31_3 | Q31_4 | Q31_5 |
|--------|-------|-------|-------|-------|
| 15339  | 1     | 1     | 0     | 0     |
| 15341  | 0     | 0     | 0     | 0     |
| 15344  | 0     | 0     | 0     | 0     |
| 15345  | 0     | 1     | 0     | 0     |
| 15350  | 0     | 0     | 0     | 0     |
| 15351  | 0     | 0     | 0     | 1     |
| 15352  | 0     | 0     | 0     | 0     |
| 15372  | 0     | 0     | 0     | 0     |
| 15373  | 0     | 1     | 1     | 0     |
| 15376  | 0     | 0     | 0     | 0     |
| 15377  | 0     | 0     | 0     | 0     |
| 15382  | 0     | 0     | 0     | 0     |
| 15383  | 0     | 0     | 0     | 0     |
| 15385  | 0     | 0     | 1     | 1     |
| 15390  | 0     | 0     | 0     | 0     |
| 15399  | 0     | 0     | 0     | 0     |
| 15404  | 1     | 1     | 0     | 0     |
| 15410  | 1     | 0     | 0     | 0     |
| 15411  | 0     | 0     | 1     | 0     |
| 15412  | 0     | 0     | 0     | 0     |
| 15413  | 0     | 0     | 0     | 0     |
| 15414  | 0     | 0     | 0     | 0     |
| 15417  | 0     | 0     | 0     | 0     |
| 15418  | 1     | 0     | 0     | 0     |
| 15421  | 0     | 0     | 0     | 0     |
| 15423  | 0     | 0     | 0     | 0     |
| 15425  | 0     | 0     | 0     | 0     |
| 15426  | 0     | 1     | 0     | 1     |
| 15430  | 0     | 0     | 0     | 0     |
| 15431  | 1     | 1     | 0     | 0     |
| 15435  | 0     | 0     | 0     | 0     |
| 15436  | 0     | 0     | 0     | 0     |

| respid | Q31_2 | Q31_3 | Q31_4 | Q31_5 |
|--------|-------|-------|-------|-------|
| 15437  | 0     | 0     | 0     | 0     |
| 15438  | 0     | 0     | 0     | 0     |
| 15439  | 0     | 0     | 0     | 0     |
| 15441  | 0     | 0     | 1     | 1     |
| 15443  | 0     | 0     | 0     | 0     |
| 15446  | 0     | 0     | 0     | 0     |
| 15449  | 0     | 0     | 1     | 0     |
| 15451  | 1     | 1     | 0     | 1     |
| 15452  | 0     | 0     | 1     | 1     |
| 15454  | 0     | 0     | 0     | 0     |
| 15456  | 1     | 0     | 0     | 0     |
| 15457  | 0     | 0     | 0     | 0     |
| 15458  | 0     | 0     | 0     | 1     |
| 15462  | 1     | 0     | 0     | 1     |
| 15467  | 0     | 1     | 0     | 0     |
| 15470  | 0     | 0     | 0     | 0     |
| 15472  | 0     | 0     | 0     | 0     |
| 15476  | 0     | 0     | 0     | 0     |
| 15477  | 0     | 0     | 0     | 0     |
| 15488  | 0     | 0     | 0     | 0     |
| 15489  | 0     | 0     | 0     | 0     |
| 15490  | 0     | 0     | 0     | 0     |
| 15496  | 0     | 0     | 0     | 0     |
| 15497  | 0     | 0     | 0     | 0     |
| 15498  | 0     | 0     | 0     | 0     |
| 15509  | 0     | 0     | 1     | 0     |
| 15510  | 0     | 0     | 0     | 0     |
| 15516  | 1     | 1     | 0     | 0     |
| 15519  | 0     | 1     | 0     | 0     |
| 15520  | 0     | 0     | 0     | 0     |
| 15524  | 0     | 0     | 0     | 1     |
| 15525  | 0     | 0     | 0     | 0     |

| respid | Q31_2 | Q31_3 | Q31_4 | Q31_5 |
|--------|-------|-------|-------|-------|
| 15526  | 0     | 0     | 0     | 0     |
| 15531  | 1     | 0     | 1     | 0     |
| 15532  | 0     | 0     | 0     | 0     |
| 15534  | 1     | 0     | 0     | 1     |
| 15535  | 1     | 1     | 0     | 0     |
| 15539  | 0     | 0     | 0     | 0     |
| 15550  | 0     | 0     | 0     | 0     |
| 15556  | 0     | 0     | 0     | 0     |
| 15558  | 1     | 1     | 1     | 0     |
| 15565  | 0     | 0     | 0     | 0     |
| 15567  | 0     | 0     | 1     | 0     |
| 15568  | 1     | 1     | 0     | 0     |
| 15571  | 0     | 0     | 0     | 0     |
| 15573  | 0     | 0     | 0     | 0     |
| 15574  | 1     | 1     | 0     | 0     |
| 15576  | 0     | 0     | 0     | 0     |
| 15587  | 1     | 1     | 1     | 0     |
| 15588  | 1     | 1     | 0     | 0     |
| 15593  | 1     | 1     | 0     | 0     |
| 15597  | 0     | 0     | 0     | 0     |
| 15598  | 0     | 0     | 0     | 0     |
| 15599  | 0     | 0     | 0     | 0     |
| 15601  | 0     | 0     | 0     | 0     |
| 15604  | 0     | 0     | 0     | 0     |
| 15611  | 0     | 0     | 0     | 0     |
| 15613  | 0     | 0     | 0     | 0     |
| 15614  | 0     | 0     | 0     | 0     |
| 15617  | 1     | 1     | 0     | 0     |
| 15622  | 0     | 0     | 0     | 0     |
| 15623  | 0     | 0     | 0     | 0     |
| 15625  | 0     | 0     | 0     | 0     |
| 15627  | 0     | 0     | 0     | 0     |

| respid | Q31_2 | Q31_3 | Q31_4 | Q31_5 |
|--------|-------|-------|-------|-------|
| 15628  | 0     | 0     | 0     | 0     |
| 15633  | 0     | 0     | 0     | 0     |
| 15634  | 0     | 0     | 0     | 0     |
| 15637  | 0     | 0     | 0     | 0     |
| 15644  | 0     | 0     | 0     | 0     |
| 15645  | 0     | 0     | 0     | 0     |
| 15649  | 0     | 0     | 0     | 0     |
| 15650  | 0     | 0     | 0     | 0     |
| 15651  | 1     | 0     | 0     | 0     |
| 15657  | 1     | 1     | 0     | 0     |
| 15658  | 0     | 0     | 0     | 0     |
| 15660  | 0     | 0     | 0     | 0     |
| 15667  | 0     | 0     | 0     | 0     |
| 15671  | 0     | 0     | 0     | 0     |
| 15679  | 0     | 0     | 0     | 0     |
| 15712  | 0     | 0     | 0     | 0     |
| 15715  | 0     | 0     | 0     | 0     |
| 15749  | 1     | 1     | 1     | 0     |
| 15754  | 0     | 0     | 0     | 0     |
| 15756  | 0     | 0     | 0     | 0     |
| 15773  | 0     | 0     | 0     | 0     |
| 15774  | 0     | 0     | 0     | 0     |
| 15776  | 0     | 0     | 0     | 0     |
| 15777  | 1     | 1     | 0     | 1     |
| 15779  | 0     | 0     | 0     | 0     |
| 15780  | 0     | 0     | 0     | 0     |
| 15792  | 0     | 0     | 0     | 0     |
| 15793  | 0     | 0     | 1     | 0     |
| 15796  | 0     | 0     | 0     | 0     |
| 15798  | 0     | 0     | 0     | 0     |
| 15809  | 0     | 0     | 0     | 0     |
| 15810  | 0     | 0     | 0     | 0     |

| respid | Q31_2 | Q31_3 | Q31_4 | Q31_5 |
|--------|-------|-------|-------|-------|
| 15815  | 1     | 1     | 1     | 0     |
| 15816  | 0     | 0     | 0     | 0     |
| 15817  | 0     | 0     | 0     | 0     |
| 15821  | 0     | 0     | 1     | 0     |
| 15823  | 1     | 0     | 0     | 0     |
| 15834  | 0     | 0     | 0     | 0     |
| 15835  | 0     | 0     | 0     | 0     |
| 15836  | 0     | 0     | 0     | 0     |
| 15837  | 0     | 0     | 0     | 0     |
| 15839  | 0     | 0     | 0     | 0     |
| 15840  | 0     | 0     | 0     | 0     |
| 15844  | 0     | 0     | 0     | 0     |
| 15845  | 0     | 0     | 0     | 0     |
| 15847  | 0     | 1     | 0     | 1     |
| 15848  | 0     | 0     | 0     | 0     |
| 15849  | 0     | 0     | 0     | 0     |
| 15857  | 1     | 0     | 0     | 0     |
| 15858  | 0     | 0     | 0     | 0     |
| 15862  | 0     | 0     | 0     | 1     |
| 15866  | 0     | 0     | 0     | 0     |
| 15870  | 0     | 0     | 0     | 0     |
| 15871  | 0     | 0     | 0     | 0     |
| 15872  | 0     | 0     | 0     | 0     |
| 15873  | 0     | 0     | 0     | 0     |
| 15874  | 0     | 0     | 0     | 0     |
| 15875  | 0     | 1     | 1     | 1     |
| 15876  | 0     | 1     | 0     | 0     |
| 15882  | 0     | 0     | 0     | 0     |
| 15884  | 1     | 0     | 0     | 0     |
| 15890  | 0     | 0     | 0     | 0     |
| 15892  | 1     | 1     | 1     | 0     |
| 15908  | 0     | 0     | 0     | 0     |

| respid | Q31_2 | Q31_3 | Q31_4 | Q31_5 |
|--------|-------|-------|-------|-------|
| 15914  | 0     | 0     | 0     | 0     |
| 15932  | 0     | 0     | 0     | 0     |
| 15933  | 0     | 0     | 0     | 0     |
| 15938  | 0     | 0     | 0     | 0     |
| 15940  | 0     | 1     | 0     | 0     |
| 15945  | 0     | 0     | 0     | 0     |
| 15947  | 0     | 0     | 0     | 0     |
| 15950  | 0     | 0     | 0     | 0     |
| 15951  | 1     | 0     | 0     | 0     |
| 15952  | 0     | 0     | 1     | 0     |
| 15953  | 1     | 0     | 0     | 0     |
| 15954  | 0     | 0     | 0     | 0     |
| 15957  | 0     | 0     | 0     | 0     |
| 15965  | 1     | 1     | 1     | 0     |
| 15966  | 0     | 0     | 0     | 0     |
| 15967  | 0     | 0     | 0     | 0     |
| 15968  | 0     | 0     | 0     | 0     |
| 15970  | 1     | 0     | 0     | 0     |
| 15973  | 0     | 0     | 0     | 0     |
| 15974  | 0     | 0     | 0     | 0     |
| 15975  | 0     | 0     | 0     | 0     |
| 15980  | 0     | 1     | 1     | 0     |
| 15984  | 0     | 0     | 0     | 0     |
| 15985  | 0     | 0     | 1     | 0     |
| 15994  | 0     | 0     | 0     | 0     |
| 15995  | 0     | 1     | 0     | 0     |
| 16000  | 0     | 0     | 0     | 0     |
| 16004  | 0     | 0     | 0     | 0     |
| 16005  | 0     | 0     | 0     | 0     |
| 16006  | 0     | 0     | 0     | 0     |
| 16009  | 0     | 0     | 0     | 0     |
| 16017  | 0     | 0     | 0     | 0     |



| respid | Q31_2 | Q31_3 | Q31_4 | Q31_5 |
|--------|-------|-------|-------|-------|
| 16019  | 0     | 0     | 0     | 0     |
| 16021  | 0     | 0     | 0     | 0     |
| 16024  | 0     | 0     | 0     | 0     |
| 16026  | 0     | 0     | 0     | 0     |
| 16029  | 0     | 0     | 0     | 0     |
| 16031  | 0     | 0     | 0     | 0     |
| 16037  | 0     | 0     | 0     | 0     |
| 16043  | 0     | 0     | 0     | 0     |
| 16044  | 0     | 1     | 0     | 0     |
| 16047  | 0     | 0     | 0     | 0     |
| 16048  | 0     | 0     | 0     | 0     |
| 16049  | 0     | 0     | 0     | 0     |
| 16051  | 1     | 0     | 0     | 0     |
| 16053  | 0     | 0     | 0     | 0     |
| 16054  | 1     | 1     | 0     | 1     |
| 16069  | 0     | 0     | 0     | 0     |
| 16070  | 0     | 0     | 0     | 0     |
| 16074  | 0     | 0     | 0     | 0     |
| 16076  | 0     | 0     | 0     | 0     |
| 16078  | 0     | 0     | 0     | 0     |
| 16081  | 1     | 1     | 0     | 0     |
| 16085  | 0     | 0     | 0     | 0     |
| 16088  | 1     | 0     | 0     | 0     |
| 16091  | 1     | 0     | 0     | 0     |
| 16092  | 0     | 0     | 0     | 0     |
| 16093  | 0     | 0     | 0     | 0     |
| 16097  | 0     | 0     | 0     | 0     |
| 16100  | 1     | 1     | 0     | 0     |
| 16101  | 0     | 0     | 0     | 0     |
| 16105  | 0     | 0     | 0     | 0     |
| 16118  | 0     | 1     | 0     | 0     |
| 16129  | 0     | 0     | 0     | 0     |

| respid | Q31_2 | Q31_3 | Q31_4 | Q31_5 |
|--------|-------|-------|-------|-------|
| 16130  | 0     | 0     | 0     | 0     |
| 16131  | 1     | 0     | 0     | 0     |
| 16136  | 0     | 0     | 1     | 0     |
| 16137  | 0     | 0     | 0     | 0     |
| 16138  | 1     | 1     | 1     | 0     |
| 16139  | 1     | 0     | 0     | 0     |
| 16140  | 0     | 0     | 0     | 0     |
| 16145  | 0     | 0     | 0     | 0     |
| 16150  | 1     | 0     | 0     | 0     |
| 16151  | 0     | 1     | 0     | 0     |
| 16153  | 0     | 0     | 0     | 0     |
| 16164  | 0     | 0     | 0     | 0     |
| 16168  | 0     | 1     | 1     | 0     |
| 16173  | 0     | 0     | 0     | 0     |
| 16174  | 0     | 0     | 0     | 0     |
| 16177  | 0     | 0     | 0     | 0     |
| 16185  | 0     | 0     | 0     | 0     |
| 16189  | 1     | 0     | 1     | 0     |
| 16192  | 0     | 0     | 0     | 0     |
| 16193  | 1     | 1     | 0     | 0     |
| 16194  | 1     | 1     | 0     | 0     |
| 16196  | 0     | 0     | 0     | 0     |
| 16202  | 0     | 0     | 1     | 1     |
| 16205  | 0     | 0     | 0     | 0     |
| 16206  | 0     | 0     | 0     | 0     |
| 16208  | 0     | 0     | 0     | 0     |
| 16211  | 1     | 1     | 0     | 1     |
| 16212  | 0     | 0     | 0     | 0     |
| 16215  | 0     | 0     | 0     | 0     |
| 16217  | 0     | 0     | 0     | 0     |
| 16221  | 0     | 0     | 0     | 0     |
| 16226  | 1     | 0     | 0     | 0     |

| respid | Q31_2 | Q31_3 | Q31_4 | Q31_5 |
|--------|-------|-------|-------|-------|
| 16228  | 0     | 1     | 0     | 0     |
| 16229  | 0     | 0     | 0     | 0     |
| 16230  | 0     | 0     | 0     | 0     |
| 16231  | 0     | 0     | 0     | 1     |
| 16232  | 0     | 0     | 0     | 0     |
| 16234  | 1     | 0     | 0     | 0     |
| 16235  | 0     | 1     | 1     | 1     |
| 16236  | 0     | 0     | 0     | 0     |
| 16237  | 1     | 0     | 0     | 0     |
| 16238  | 0     | 0     | 0     | 0     |
| 16239  | 0     | 0     | 0     | 0     |
| 16243  | 0     | 0     | 0     | 0     |
| 16248  | 0     | 0     | 0     | 0     |
| 16249  | 1     | 0     | 0     | 0     |
| 16251  | 0     | 0     | 0     | 0     |
| 16263  | 0     | 0     | 0     | 0     |
| 16265  | 1     | 1     | 1     | 0     |
| 16269  | 0     | 0     | 0     | 0     |
| 16272  | 1     | 0     | 0     | 0     |
| 16273  | 0     | 0     | 0     | 0     |
| 16281  | 0     | 0     | 0     | 0     |
| 16282  | 0     | 1     | 0     | 0     |
| 16287  | 0     | 0     | 0     | 0     |
| 16290  | 0     | 0     | 1     | 0     |
| 16294  | 0     | 0     | 0     | 0     |
| 16295  | 0     | 0     | 0     | 0     |
| 16296  | 0     | 0     | 0     | 0     |
| 16299  | 0     | 0     | 0     | 0     |
| 16302  | 0     | 0     | 0     | 0     |
| 16303  | 0     | 0     | 0     | 0     |
| 16304  | 0     | 0     | 0     | 0     |
| 16306  | 1     | 0     | 0     | 0     |

| respid | Q31_2 | Q31_3 | Q31_4 | Q31_5 |
|--------|-------|-------|-------|-------|
| 16318  | 0     | 0     | 0     | 0     |
| 16320  | 1     | 0     | 0     | 0     |
| 16321  | 0     | 0     | 0     | 0     |
| 16322  | 0     | 0     | 0     | 0     |
| 16324  | 0     | 1     | 0     | 0     |
| 16326  | 0     | 0     | 0     | 0     |
| 16328  | 0     | 0     | 0     | 0     |
| 16336  | 1     | 0     | 0     | 0     |
| 16341  | 0     | 0     | 0     | 0     |
| 16342  | 1     | 0     | 0     | 0     |
| 16343  | 0     | 1     | 0     | 0     |
| 16345  | 0     | 0     | 1     | 0     |
| 16349  | 0     | 0     | 0     | 0     |
| 16355  | 0     | 0     | 0     | 0     |
| 16364  | 0     | 0     | 0     | 0     |
| 16374  | 1     | 1     | 0     | 0     |
| 16375  | 0     | 0     | 0     | 0     |
| 16376  | 0     | 0     | 0     | 0     |
| 16393  | 0     | 0     | 0     | 0     |
| 16394  | 0     | 0     | 0     | 0     |
| 16395  | 0     | 0     | 0     | 0     |
| 16397  | 0     | 1     | 0     | 0     |
| 16398  | 0     | 0     | 1     | 0     |
| 16402  | 1     | 1     | 0     | 0     |
| 16405  | 0     | 0     | 0     | 0     |
| 16416  | 0     | 0     | 0     | 0     |
| 16422  | 0     | 0     | 0     | 1     |
| 16429  | 0     | 0     | 0     | 0     |
| 16430  | 0     | 0     | 0     | 0     |
| 16432  | 0     | 0     | 1     | 0     |
| 16433  | 0     | 0     | 0     | 0     |
| 16434  | 0     | 0     | 0     | 0     |

| respid | Q31_2 | Q31_3 | Q31_4 | Q31_5 |
|--------|-------|-------|-------|-------|
| 16437  | 0     | 0     | 0     | 0     |
| 16439  | 0     | 0     | 0     | 0     |
| 16440  | 0     | 0     | 0     | 0     |
| 16441  | 0     | 0     | 0     | 0     |
| 16442  | 1     | 0     | 0     | 0     |
| 16450  | 0     | 0     | 0     | 0     |
| 16451  | 0     | 0     | 0     | 0     |
| 16452  | 1     | 1     | 0     | 1     |
| 16467  | 0     | 0     | 0     | 0     |
| 16468  | 0     | 0     | 0     | 0     |
| 16469  | 0     | 0     | 0     | 1     |
| 16470  | 0     | 0     | 0     | 0     |
| 16471  | 1     | 0     | 0     | 0     |
| 16473  | 0     | 0     | 0     | 0     |
| 16476  | 0     | 0     | 0     | 0     |
| 16478  | 1     | 1     | 0     | 0     |
| 16484  | 0     | 0     | 1     | 0     |
| 16499  | 0     | 0     | 0     | 0     |
| 16502  | 0     | 0     | 0     | 0     |
| 16505  | 1     | 0     | 0     | 0     |
| 16514  | 0     | 0     | 0     | 0     |
| 16515  | 0     | 0     | 0     | 0     |
| 16517  | 0     | 0     | 0     | 0     |
| 16518  | 0     | 0     | 0     | 0     |
| 16519  | 0     | 0     | 0     | 0     |
| 16525  | 0     | 0     | 0     | 0     |
| 16526  | 0     | 0     | 0     | 0     |
| 16530  | 0     | 0     | 0     | 0     |
| 16532  | 0     | 0     | 0     | 0     |
| 16536  | 0     | 0     | 0     | 0     |
| 16537  | 1     | 0     | 0     | 1     |
| 16541  | 0     | 1     | 0     | 0     |

| respid | Q31_2 | Q31_3 | Q31_4 | Q31_5 |
|--------|-------|-------|-------|-------|
| 16543  | 0     | 0     | 0     | 1     |
| 16544  | 0     | 0     | 0     | 0     |
| 16545  | 0     | 0     | 0     | 0     |
| 16546  | 0     | 1     | 0     | 0     |
| 16548  | 0     | 0     | 0     | 0     |
| 16552  | 0     | 0     | 0     | 0     |
| 16559  | 1     | 0     | 0     | 0     |
| 16564  | 1     | 0     | 0     | 0     |
| 16565  | 0     | 1     | 0     | 0     |
| 16567  | 0     | 1     | 0     | 0     |
| 16571  | 0     | 0     | 0     | 0     |
| 16572  | 1     | 1     | 0     | 0     |
| 16579  | 0     | 0     | 0     | 0     |
| 16588  | 0     | 1     | 1     | 0     |
| 16599  | 1     | 0     | 0     | 0     |
| 16605  | 0     | 0     | 0     | 0     |
| 16622  | 0     | 0     | 0     | 0     |
| 16635  | 1     | 0     | 0     | 0     |
| 16638  | 0     | 0     | 0     | 0     |
| 16652  | 0     | 0     | 0     | 0     |
| 16656  | 0     | 0     | 0     | 0     |
| 16671  | 0     | 0     | 0     | 0     |
| 16676  | 0     | 0     | 0     | 0     |
| 16678  | 0     | 0     | 0     | 0     |
| 16702  | 0     | 0     | 0     | 1     |
| 16705  | 0     | 0     | 0     | 1     |
| 16707  | 0     | 1     | 0     | 1     |
| 16711  | 0     | 0     | 0     | 0     |
| 16712  | 0     | 0     | 0     | 0     |
| 16716  | 0     | 0     | 0     | 0     |
| 16724  | 1     | 1     | 0     | 0     |
| 16727  | 0     | 1     | 0     | 1     |

| respid | Q31_2 | Q31_3 | Q31_4 | Q31_5 |
|--------|-------|-------|-------|-------|
| 16734  | 0     | 0     | 0     | 0     |
| 16740  | 0     | 0     | 0     | 0     |
| 16748  | 0     | 0     | 0     | 0     |
| 16759  | 0     | 0     | 0     | 0     |
| 16761  | 0     | 0     | 0     | 0     |
| 16763  | 0     | 0     | 0     | 0     |
| 16764  | 1     | 1     | 1     | 1     |
| 16766  | 0     | 0     | 0     | 0     |
| 16767  | 0     | 0     | 0     | 0     |
| 16776  | 0     | 1     | 0     | 0     |
| 16781  | 0     | 0     | 0     | 0     |
| 16793  | 0     | 0     | 0     | 0     |
| 16796  | 1     | 0     | 0     | 1     |
| 16810  | 0     | 0     | 1     | 0     |
| 16811  | 0     | 0     | 0     | 0     |
| 16813  | 0     | 0     | 0     | 0     |
| 16814  | 0     | 0     | 0     | 1     |
| 16831  | 0     | 0     | 0     | 0     |
| 16833  | 1     | 1     | 1     | 1     |
| 16839  | 1     | 1     | 0     | 0     |
| 16843  | 0     | 0     | 0     | 0     |
| 16860  | 0     | 0     | 0     | 0     |
| 16871  | 0     | 0     | 0     | 0     |
| 16881  | 1     | 0     | 0     | 0     |
| 16884  | 1     | 0     | 0     | 0     |
| 16891  | 0     | 0     | 0     | 0     |
| 16909  | 0     | 0     | 0     | 0     |
| 16911  | 0     | 0     | 0     | 0     |
| 16922  | 0     | 0     | 0     | 0     |
| 16935  | 1     | 0     | 1     | 0     |
| 16942  | 0     | 0     | 0     | 0     |
| 16950  | 0     | 0     | 0     | 0     |

| respid | Q31_2 | Q31_3 | Q31_4 | Q31_5 |
|--------|-------|-------|-------|-------|
| 16952  | 1     | 1     | 0     | 1     |
| 16963  | 0     | 0     | 0     | 0     |
| 16967  | 0     | 0     | 1     | 1     |
| 16970  | 1     | 1     | 1     | 0     |
| 16976  | 1     | 1     | 0     | 0     |
| 16982  | 0     | 0     | 0     | 0     |
| 16995  | 0     | 0     | 0     | 0     |
| 17004  | 0     | 0     | 0     | 0     |
| 17006  | 0     | 0     | 0     | 0     |
| 17009  | 0     | 0     | 0     | 0     |
| 17021  | 0     | 0     | 0     | 0     |
| 17040  | 0     | 0     | 0     | 0     |
| 17041  | 0     | 0     | 0     | 0     |
| 17044  | 1     | 0     | 0     | 0     |
| 17046  | 1     | 0     | 0     | 0     |
| 17052  | 0     | 0     | 0     | 0     |
| 17055  | 0     | 0     | 0     | 0     |
| 17108  | 0     | 0     | 0     | 0     |
| 17109  | 0     | 0     | 0     | 0     |
| 17113  | 0     | 0     | 0     | 0     |
| 17115  | 0     | 0     | 0     | 0     |
| 17132  | 0     | 0     | 0     | 0     |
| 17135  | 1     | 0     | 0     | 0     |
| 17138  | 0     | 0     | 0     | 1     |
| 17141  | 0     | 0     | 0     | 0     |
| 17143  | 0     | 0     | 0     | 1     |
| 17148  | 0     | 0     | 0     | 0     |
| 17151  | 0     | 0     | 0     | 0     |
| 17153  | 0     | 0     | 0     | 0     |
| 17154  | 0     | 0     | 0     | 0     |
| 17157  | 0     | 0     | 0     | 0     |
| 17160  | 0     | 0     | 0     | 0     |



| respid | Q31_2 | Q31_3 | Q31_4 | Q31_5 |
|--------|-------|-------|-------|-------|
| 17167  | 1     | 1     | 0     | 0     |
| 17169  | 0     | 0     | 0     | 0     |
| 17174  | 0     | 0     | 0     | 1     |
| 17179  | 0     | 0     | 0     | 0     |
| 17180  | 0     | 0     | 0     | 0     |
| 17182  | 0     | 0     | 0     | 0     |
| 17184  | 1     | 1     | 0     | 0     |
| 17186  | 0     | 0     | 0     | 0     |
| 17187  | 0     | 0     | 0     | 0     |
| 17192  | 1     | 1     | 0     | 0     |
| 17197  | 0     | 0     | 0     | 0     |
| 17217  | 0     | 0     | 0     | 0     |
| 17226  | 0     | 0     | 0     | 0     |
| 17228  | 0     | 0     | 0     | 0     |
| 17245  | 0     | 0     | 0     | 0     |
| 17247  | 0     | 0     | 0     | 0     |
| 17258  | 0     | 0     | 0     | 0     |
| 17259  | 0     | 0     | 0     | 0     |
| 17262  | 0     | 0     | 0     | 0     |
| 17265  | 1     | 0     | 0     | 0     |
| 17281  | 0     | 0     | 0     | 0     |
| 17282  | 0     | 0     | 0     | 0     |
| 17293  | 0     | 0     | 0     | 0     |
| 17306  | 0     | 1     | 0     | 0     |
| 17312  | 0     | 0     | 0     | 0     |
| 17318  | 0     | 0     | 0     | 0     |
| 17328  | 1     | 0     | 0     | 0     |
| 17343  | 0     | 0     | 0     | 0     |
| 17344  | 0     | 0     | 0     | 0     |
| 17348  | 0     | 0     | 0     | 0     |
| 17352  | 0     | 0     | 0     | 0     |
| 17355  | 0     | 0     | 0     | 0     |

| respid | Q31_2 | Q31_3 | Q31_4 | Q31_5 |
|--------|-------|-------|-------|-------|
| 17356  | 0     | 0     | 0     | 0     |
| 17359  | 0     | 0     | 0     | 0     |
| 17373  | 0     | 1     | 1     | 0     |
| 17381  | 0     | 0     | 1     | 0     |
| 17388  | 0     | 0     | 0     | 0     |
| 17394  | 0     | 0     | 0     | 1     |
| 17401  | 0     | 0     | 0     | 0     |
| 17403  | 0     | 0     | 0     | 0     |
| 17411  | 0     | 0     | 0     | 0     |
| 17423  | 0     | 0     | 0     | 0     |
| 17427  | 0     | 0     | 0     | 0     |
| 17433  | 0     | 0     | 0     | 0     |
| 17441  | 0     | 0     | 0     | 0     |
| 17442  | 0     | 0     | 0     | 0     |
| 17447  | 0     | 0     | 0     | 0     |
| 17458  | 0     | 0     | 0     | 0     |
| 17474  | 0     | 0     | 0     | 0     |
| 17475  | 0     | 0     | 0     | 0     |
| 17476  | 1     | 0     | 0     | 0     |
| 17480  | 1     | 0     | 0     | 0     |
| 17484  | 0     | 0     | 0     | 0     |
| 17490  | 1     | 0     | 0     | 0     |
| 17491  | 1     | 0     | 0     | 0     |
| 17500  | 0     | 0     | 0     | 0     |
| 17507  | 0     | 0     | 0     | 0     |
| 17517  | 0     | 0     | 0     | 0     |
| 17520  | 0     | 0     | 0     | 0     |
| 17521  | 1     | 0     | 0     | 0     |
| 17531  | 0     | 0     | 0     | 0     |
| 17540  | 1     | 0     | 0     | 0     |
| 17550  | 0     | 0     | 0     | 0     |
| 17551  | 0     | 0     | 0     | 0     |

| respid | Q31_2 | Q31_3 | Q31_4 | Q31_5 |
|--------|-------|-------|-------|-------|
| 17555  | 1     | 1     | 0     | 0     |
| 17556  | 1     | 1     | 1     | 0     |
| 17574  | 0     | 0     | 0     | 0     |
| 17575  | 0     | 0     | 0     | 0     |
| 17582  | 0     | 0     | 0     | 0     |
| 17587  | 0     | 0     | 0     | 0     |
| 17601  | 1     | 0     | 0     | 0     |
| 17607  | 0     | 0     | 0     | 0     |
| 17609  | 0     | 0     | 0     | 0     |
| 17611  | 1     | 1     | 0     | 0     |
| 17613  | 0     | 0     | 0     | 0     |
| 17615  | 1     | 0     | 0     | 0     |
| 17620  | 0     | 0     | 0     | 0     |
| 17624  | 1     | 1     | 0     | 0     |
| 17635  | 0     | 0     | 0     | 0     |
| 17643  | 0     | 0     | 0     | 0     |
| 17645  | 0     | 0     | 0     | 0     |
| 17646  | 0     | 1     | 0     | 0     |
| 17649  | 0     | 0     | 0     | 0     |
| 17658  | 0     | 0     | 0     | 0     |
| 17666  | 0     | 0     | 0     | 0     |
| 17670  | 0     | 1     | 0     | 0     |
| 17678  | 0     | 0     | 0     | 0     |
| 17679  | 0     | 0     | 0     | 0     |
| 17695  | 1     | 1     | 1     | 0     |
| 17697  | 0     | 0     | 0     | 0     |
| 17698  | 0     | 0     | 0     | 0     |
| 17723  | 1     | 0     | 0     | 0     |
| 17727  | 0     | 0     | 0     | 0     |
| 17734  | 0     | 0     | 0     | 0     |
| 17737  | 0     | 0     | 0     | 0     |
| 17748  | 0     | 0     | 0     | 0     |

| respid | Q31_2 | Q31_3 | Q31_4 | Q31_5 |
|--------|-------|-------|-------|-------|
| 17749  | 0     | 0     | 0     | 0     |
| 17754  | 0     | 0     | 0     | 0     |
| 17766  | 0     | 0     | 0     | 0     |
| 17777  | 0     | 0     | 0     | 0     |
| 17780  | 0     | 0     | 0     | 0     |
| 17788  | 0     | 0     | 0     | 0     |
| 17801  | 0     | 0     | 0     | 0     |
| 17803  | 0     | 0     | 0     | 0     |
| 17807  | 0     | 0     | 0     | 0     |
| 17808  | 0     | 0     | 0     | 0     |
| 17809  | 0     | 0     | 0     | 0     |
| 17821  | 0     | 0     | 0     | 0     |
| 17827  | 0     | 0     | 0     | 0     |
| 17834  | 0     | 0     | 0     | 0     |
| 17838  | 0     | 0     | 1     | 1     |
| 17842  | 0     | 0     | 0     | 0     |
| 17862  | 0     | 0     | 0     | 0     |
| 17863  | 0     | 0     | 0     | 0     |
| 17871  | 0     | 0     | 0     | 0     |
| 17872  | 0     | 0     | 0     | 0     |
| 17903  | 1     | 1     | 0     | 0     |
| 17906  | 0     | 0     | 0     | 0     |
| 17910  | 1     | 1     | 0     | 0     |
| 17922  | 0     | 0     | 0     | 0     |
| 17923  | 0     | 0     | 1     | 1     |
| 17925  | 0     | 0     | 0     | 1     |
| 17926  | 0     | 0     | 0     | 0     |
| 17937  | 0     | 0     | 0     | 0     |
| 17956  | 0     | 0     | 0     | 0     |
| 17958  | 0     | 0     | 0     | 1     |
| 17985  | 0     | 0     | 0     | 0     |
| 17989  | 0     | 0     | 0     | 0     |

| respid | Q31_2 | Q31_3 | Q31_4 | Q31_5 |
|--------|-------|-------|-------|-------|
| 17995  | 1     | 0     | 0     | 0     |
| 18000  | 1     | 0     | 0     | 0     |
| 18010  | 0     | 0     | 0     | 0     |
| 18015  | 0     | 0     | 0     | 0     |
| 18018  | 0     | 0     | 0     | 0     |
| 18031  | 1     | 0     | 0     | 0     |
| 18033  | 1     | 1     | 0     | 0     |
| 18036  | 1     | 1     | 0     | 0     |
| 18041  | 0     | 0     | 0     | 0     |
| 18068  | 0     | 0     | 0     | 0     |
| 18080  | 0     | 0     | 0     | 0     |
| 18081  | 0     | 0     | 0     | 0     |
| 18083  | 0     | 0     | 0     | 0     |
| 18113  | 1     | 1     | 0     | 0     |
| 18115  | 0     | 0     | 0     | 0     |
| 18117  | 1     | 1     | 1     | 1     |
| 18129  | 0     | 0     | 0     | 1     |
| 18132  | 0     | 0     | 0     | 0     |
| 18146  | 0     | 0     | 0     | 0     |
| 18147  | 0     | 0     | 0     | 0     |
| 18153  | 0     | 0     | 0     | 0     |
| 18154  | 0     | 0     | 0     | 0     |
| 18157  | 0     | 0     | 0     | 0     |
| 18166  | 0     | 0     | 0     | 0     |
| 18169  | 0     | 0     | 0     | 0     |
| 18171  | 0     | 0     | 1     | 0     |
| 18173  | 1     | 1     | 0     | 0     |
| 18204  | 0     | 0     | 0     | 0     |
| 18210  | 0     | 0     | 0     | 0     |
| 18212  | 0     | 0     | 0     | 0     |
| 18220  | 1     | 1     | 1     | 0     |
| 18221  | 0     | 0     | 0     | 0     |

| respid | Q31_2 | Q31_3 | Q31_4 | Q31_5 |
|--------|-------|-------|-------|-------|
| 18228  | 0     | 0     | 0     | 0     |
| 18231  | 0     | 0     | 0     | 0     |
| 18233  | 0     | 0     | 0     | 0     |
| 18235  | 0     | 0     | 0     | 0     |
| 18237  | 0     | 0     | 0     | 0     |
| 18250  | 1     | 1     | 0     | 0     |
| 18253  | 0     | 0     | 0     | 0     |
| 18264  | 0     | 0     | 0     | 0     |
| 18285  | 0     | 0     | 0     | 0     |
| 18287  | 0     | 0     | 0     | 0     |
| 18296  | 0     | 1     | 0     | 0     |
| 18299  | 0     | 0     | 0     | 0     |
| 18313  | 1     | 0     | 0     | 0     |
| 18321  | 0     | 0     | 0     | 0     |
| 18324  | 0     | 0     | 0     | 0     |
| 18329  | 0     | 0     | 0     | 0     |
| 18332  | 0     | 0     | 0     | 0     |
| 18339  | 0     | 0     | 0     | 0     |
| 18340  | 0     | 0     | 0     | 0     |
| 18348  | 0     | 0     | 0     | 0     |
| 18355  | 0     | 0     | 0     | 0     |
| 18360  | 0     | 0     | 0     | 0     |
| 18380  | 1     | 1     | 1     | 0     |
| 18403  | 0     | 0     | 0     | 0     |
| 18405  | 0     | 0     | 0     | 0     |
| 18409  | 0     | 0     | 0     | 0     |
| 18445  | 0     | 0     | 0     | 0     |
| 18458  | 0     | 0     | 0     | 0     |
| 18477  | 1     | 0     | 0     | 0     |
| 18481  | 0     | 0     | 0     | 0     |
| 18491  | 0     | 0     | 0     | 0     |
| 18492  | 0     | 0     | 0     | 0     |

| respid | Q31_2 | Q31_3 | Q31_4 | Q31_5 |
|--------|-------|-------|-------|-------|
| 18494  | 0     | 0     | 0     | 0     |
| 18495  | 0     | 0     | 0     | 0     |
| 18496  | 0     | 0     | 0     | 0     |
| 18507  | 0     | 0     | 1     | 0     |
| 18509  | 0     | 0     | 0     | 0     |
| 18510  | 0     | 0     | 0     | 0     |
| 18513  | 1     | 0     | 0     | 0     |
| 18525  | 0     | 0     | 0     | 0     |
| 18526  | 0     | 1     | 0     | 0     |
| 18527  | 0     | 0     | 0     | 0     |
| 18536  | 0     | 0     | 0     | 0     |
| 18540  | 0     | 0     | 0     | 0     |
| 18548  | 0     | 0     | 0     | 0     |
| 18550  | 0     | 0     | 0     | 0     |
| 18556  | 0     | 0     | 0     | 0     |
| 18561  | 0     | 0     | 0     | 0     |
| 18577  | 0     | 0     | 0     | 0     |
| 18580  | 0     | 1     | 0     | 0     |
| 18633  | 1     | 0     | 0     | 0     |
| 18635  | 0     | 0     | 0     | 0     |
| 18636  | 0     | 0     | 0     | 0     |
| 18645  | 1     | 0     | 1     | 1     |
| 18649  | 1     | 1     | 0     | 0     |
| 18664  | 0     | 0     | 0     | 0     |
| 18668  | 0     | 0     | 0     | 0     |
| 18682  | 0     | 1     | 0     | 0     |
| 18685  | 1     | 1     | 0     | 1     |
| 18688  | 0     | 1     | 0     | 0     |
| 18689  | 1     | 1     | 1     | 0     |
| 18693  | 0     | 0     | 0     | 0     |
| 18694  | 0     | 0     | 0     | 0     |
| 18705  | 0     | 0     | 0     | 0     |

| respid | Q31_2 | Q31_3 | Q31_4 | Q31_5 |
|--------|-------|-------|-------|-------|
| 18710  | 0     | 0     | 0     | 0     |
| 18715  | 1     | 0     | 0     | 1     |
| 18718  | 0     | 0     | 0     | 0     |
| 18727  | 1     | 0     | 0     | 0     |
| 18732  | 0     | 0     | 0     | 0     |
| 18735  | 0     | 1     | 0     | 0     |
| 18742  | 0     | 0     | 0     | 0     |
| 18745  | 0     | 0     | 0     | 0     |
| 18747  | 0     | 0     | 0     | 0     |
| 18750  | 0     | 0     | 0     | 0     |
| 18751  | 0     | 0     | 0     | 0     |
| 18753  | 1     | 0     | 0     | 0     |
| 18754  | 0     | 0     | 0     | 0     |
| 18759  | 0     | 0     | 0     | 0     |
| 18780  | 0     | 0     | 0     | 0     |
| 18782  | 0     | 0     | 0     | 0     |
| 18807  | 0     | 0     | 1     | 0     |
| 18815  | 0     | 0     | 0     | 0     |
| 18818  | 1     | 1     | 0     | 0     |
| 18820  | 0     | 1     | 0     | 0     |
| 18823  | 1     | 1     | 0     | 1     |
| 18825  | 0     | 0     | 0     | 0     |
| 18828  | 0     | 0     | 0     | 0     |
| 18832  | 1     | 0     | 0     | 1     |
| 18834  | 1     | 0     | 0     | 0     |
| 18835  | 1     | 1     | 1     | 1     |
| 18837  | 0     | 0     | 1     | 1     |
| 18842  | 0     | 0     | 0     | 0     |
| 18846  | 0     | 0     | 0     | 0     |
| 18855  | 0     | 0     | 1     | 0     |
| 18856  | 0     | 0     | 0     | 0     |
| 18887  | 0     | 0     | 0     | 0     |



| respid | Q31_2 | Q31_3 | Q31_4 | Q31_5 |
|--------|-------|-------|-------|-------|
| 18903  | 0     | 0     | 0     | 0     |
| 18906  | 0     | 1     | 0     | 0     |
| 18910  | 0     | 0     | 0     | 0     |
| 18919  | 1     | 0     | 0     | 0     |
| 18928  | 0     | 0     | 0     | 0     |
| 18931  | 1     | 1     | 0     | 0     |
| 18939  | 0     | 0     | 0     | 0     |
| 18946  | 1     | 0     | 0     | 0     |
| 18952  | 0     | 1     | 0     | 0     |
| 18954  | 0     | 0     | 0     | 0     |
| 18982  | 0     | 0     | 0     | 0     |
| 18986  | 0     | 0     | 0     | 0     |
| 18989  | 1     | 0     | 0     | 0     |
| 18990  | 0     | 0     | 0     | 0     |
| 18996  | 0     | 0     | 0     | 0     |
| 18998  | 0     | 0     | 0     | 0     |
| 19009  | 0     | 0     | 0     | 1     |
| 19010  | 0     | 0     | 0     | 0     |
| 19017  | 0     | 0     | 0     | 0     |
| 19018  | 0     | 0     | 0     | 0     |
| 19020  | 0     | 0     | 0     | 0     |
| 19027  | 0     | 0     | 0     | 0     |
| 19035  | 0     | 0     | 0     | 0     |
| 19037  | 1     | 1     | 0     | 0     |
| 19048  | 0     | 0     | 0     | 0     |
| 19051  | 1     | 0     | 0     | 0     |
| 19054  | 0     | 0     | 0     | 0     |
| 19057  | 0     | 1     | 0     | 0     |
| 19073  | 0     | 0     | 0     | 0     |
| 19075  | 0     | 0     | 0     | 0     |
| 19079  | 0     | 0     | 0     | 0     |
| 19087  | 1     | 0     | 0     | 0     |

| respid | Q31_2 | Q31_3 | Q31_4 | Q31_5 |
|--------|-------|-------|-------|-------|
| 19090  | 0     | 0     | 0     | 0     |
| 19093  | 0     | 0     | 0     | 0     |
| 19099  | 0     | 0     | 0     | 0     |
| 19100  | 0     | 0     | 1     | 0     |
| 19101  | 0     | 0     | 0     | 0     |
| 19105  | 1     | 0     | 0     | 0     |
| 19111  | 0     | 0     | 0     | 0     |
| 19112  | 0     | 0     | 0     | 0     |
| 19117  | 1     | 0     | 1     | 1     |
| 19122  | 0     | 0     | 0     | 0     |
| 19126  | 0     | 0     | 0     | 0     |
| 19127  | 0     | 0     | 0     | 0     |
| 19131  | 0     | 0     | 0     | 0     |
| 19134  | 0     | 0     | 0     | 0     |
| 19149  | 1     | 1     | 0     | 0     |
| 19151  | 0     | 0     | 1     | 0     |
| 19164  | 0     | 0     | 0     | 0     |
| 19166  | 1     | 0     | 0     | 0     |
| 19172  | 1     | 0     | 0     | 0     |
| 19173  | 0     | 0     | 0     | 0     |
| 19180  | 0     | 0     | 0     | 0     |
| 19185  | 0     | 0     | 0     | 0     |
| 19189  | 0     | 0     | 0     | 0     |
| 19191  | 0     | 0     | 0     | 0     |
| 19198  | 0     | 1     | 0     | 0     |
| 19203  | 0     | 0     | 0     | 0     |
| 19209  | 1     | 0     | 0     | 0     |
| 19210  | 0     | 0     | 0     | 0     |
| 19218  | 0     | 0     | 0     | 0     |
| 19220  | 0     | 0     | 0     | 0     |
| 19225  | 0     | 0     | 0     | 0     |
| 19227  | 0     | 0     | 0     | 0     |

| respid | Q31_2 | Q31_3 | Q31_4 | Q31_5 |
|--------|-------|-------|-------|-------|
| 19228  | 0     | 0     | 0     | 0     |
| 19243  | 1     | 0     | 0     | 0     |
| 19244  | 0     | 0     | 0     | 0     |
| 19246  | 0     | 0     | 0     | 0     |
| 19248  | 0     | 0     | 0     | 0     |
| 19249  | 0     | 0     | 0     | 0     |
| 19252  | 0     | 0     | 1     | 0     |
| 19255  | 0     | 0     | 0     | 0     |
| 19257  | 0     | 0     | 0     | 0     |
| 19274  | 0     | 0     | 0     | 0     |
| 19279  | 0     | 0     | 0     | 0     |
| 19291  | 0     | 0     | 0     | 0     |
| 19292  | 0     | 1     | 0     | 0     |
| 19308  | 0     | 0     | 0     | 0     |
| 19310  | 0     | 0     | 0     | 0     |
| 19311  | 0     | 0     | 0     | 0     |
| 19326  | 0     | 1     | 0     | 0     |
| 19327  | 0     | 0     | 0     | 0     |
| 19329  | 0     | 0     | 0     | 0     |
| 19330  | 1     | 0     | 0     | 0     |
| 19333  | 1     | 1     | 0     | 0     |
| 19336  | 0     | 0     | 0     | 0     |
| 19343  | 0     | 1     | 1     | 0     |
| 19348  | 0     | 0     | 0     | 0     |
| 19349  | 1     | 0     | 0     | 0     |
| 19352  | 1     | 1     | 0     | 0     |
| 19356  | 0     | 0     | 0     | 0     |
| 19357  | 1     | 0     | 0     | 0     |
| 19358  | 1     | 0     | 0     | 0     |
| 19367  | 0     | 0     | 0     | 0     |
| 19376  | 0     | 0     | 0     | 0     |
| 19377  | 0     | 0     | 0     | 0     |

| respid | Q31_2 | Q31_3 | Q31_4 | Q31_5 |
|--------|-------|-------|-------|-------|
| 19380  | 0     | 0     | 0     | 0     |
| 19384  | 0     | 0     | 0     | 0     |
| 19391  | 0     | 0     | 0     | 0     |
| 19397  | 0     | 0     | 0     | 0     |
| 19398  | 0     | 0     | 0     | 0     |
| 19401  | 0     | 0     | 0     | 0     |
| 19402  | 0     | 0     | 0     | 0     |
| 19403  | 0     | 0     | 0     | 0     |
| 19405  | 0     | 0     | 0     | 0     |
| 19407  | 0     | 0     | 0     | 0     |
| 19415  | 0     | 1     | 0     | 0     |
| 19420  | 0     | 0     | 0     | 0     |
| 19423  | 1     | 0     | 0     | 1     |
| 19424  | 1     | 0     | 0     | 0     |
| 19426  | 0     | 1     | 0     | 0     |
| 19429  | 0     | 0     | 0     | 0     |
| 19435  | 1     | 1     | 0     | 1     |
| 19441  | 1     | 1     | 0     | 0     |
| 19450  | 0     | 0     | 0     | 0     |
| 19456  | 0     | 0     | 0     | 0     |
| 19457  | 0     | 0     | 0     | 0     |
| 19463  | 1     | 0     | 0     | 0     |
| 19467  | 0     | 1     | 0     | 0     |
| 19468  | 0     | 0     | 0     | 0     |
| 19471  | 0     | 1     | 0     | 0     |
| 19473  | 0     | 0     | 0     | 0     |
| 19478  | 0     | 0     | 0     | 0     |
| 19480  | 0     | 0     | 0     | 0     |
| 19481  | 1     | 1     | 0     | 0     |
| 19484  | 0     | 0     | 0     | 0     |
| 19487  | 0     | 0     | 0     | 0     |
| 19491  | 1     | 0     | 0     | 0     |

| respid | Q31_2 | Q31_3 | Q31_4 | Q31_5 |
|--------|-------|-------|-------|-------|
| 19495  | 0     | 0     | 1     | 0     |
| 19498  | 0     | 0     | 0     | 0     |
| 19500  | 0     | 0     | 0     | 0     |
| 19501  | 1     | 1     | 0     | 0     |
| 19503  | 0     | 0     | 0     | 0     |
| 19506  | 0     | 0     | 0     | 0     |
| 19508  | 0     | 0     | 0     | 0     |
| 19509  | 0     | 0     | 0     | 0     |
| 19518  | 1     | 1     | 0     | 0     |
| 19520  | 0     | 0     | 0     | 0     |
| 19536  | 0     | 1     | 0     | 0     |
| 19538  | 0     | 1     | 0     | 0     |
| 19541  | 1     | 1     | 0     | 0     |
| 19548  | 0     | 0     | 0     | 0     |
| 19553  | 0     | 0     | 0     | 0     |
| 19556  | 0     | 0     | 0     | 0     |
| 19559  | 0     | 0     | 0     | 0     |
| 19561  | 0     | 0     | 0     | 0     |
| 19562  | 0     | 0     | 0     | 0     |
| 19564  | 0     | 0     | 0     | 0     |
| 19567  | 1     | 1     | 0     | 0     |
| 19571  | 0     | 0     | 1     | 0     |
| 19576  | 0     | 0     | 0     | 0     |
| 19578  | 0     | 1     | 0     | 0     |
| 19606  | 0     | 0     | 0     | 0     |
| 19607  | 0     | 0     | 0     | 0     |
| 19608  | 0     | 0     | 0     | 0     |
| 19612  | 1     | 1     | 1     | 0     |
| 19618  | 1     | 1     | 0     | 0     |
| 19621  | 0     | 0     | 0     | 0     |
| 19624  | 0     | 0     | 1     | 0     |
| 19630  | 0     | 0     | 0     | 0     |

| respid | Q31_2 | Q31_3 | Q31_4 | Q31_5 |
|--------|-------|-------|-------|-------|
| 19637  | 0     | 0     | 0     | 0     |
| 19639  | 0     | 0     | 0     | 0     |
| 19647  | 0     | 0     | 0     | 0     |
| 19648  | 0     | 0     | 0     | 0     |
| 19660  | 0     | 0     | 0     | 0     |
| 19662  | 1     | 1     | 0     | 1     |
| 19669  | 0     | 0     | 0     | 0     |
| 19680  | 0     | 0     | 0     | 0     |
| 19682  | 0     | 1     | 0     | 0     |
| 19686  | 1     | 0     | 0     | 0     |
| 19700  | 0     | 0     | 0     | 0     |
| 19701  | 0     | 0     | 0     | 0     |
| 19704  | 0     | 0     | 0     | 0     |
| 19706  | 1     | 0     | 0     | 0     |
| 19707  | 0     | 0     | 0     | 0     |
| 19717  | 1     | 1     | 0     | 0     |
| 19718  | 0     | 0     | 0     | 0     |
| 19721  | 1     | 0     | 0     | 1     |
| 19722  | 0     | 0     | 0     | 0     |
| 19729  | 0     | 0     | 0     | 0     |
| 19738  | 1     | 0     | 0     | 0     |
| 19741  | 0     | 0     | 0     | 0     |
| 19742  | 0     | 0     | 1     | 1     |
| 19747  | 0     | 0     | 0     | 0     |
| 19748  | 0     | 1     | 0     | 0     |
| 19749  | 1     | 0     | 0     | 0     |
| 19756  | 0     | 0     | 0     | 0     |
| 19771  | 1     | 0     | 0     | 0     |
| 19772  | 1     | 1     | 0     | 1     |
| 19775  | 0     | 0     | 0     | 0     |
| 19783  | 0     | 0     | 0     | 0     |
| 19787  | 0     | 0     | 0     | 0     |

| respid | Q31_2 | Q31_3 | Q31_4 | Q31_5 |
|--------|-------|-------|-------|-------|
| 19790  | 0     | 0     | 0     | 0     |
| 19797  | 0     | 0     | 0     | 0     |
| 19802  | 0     | 0     | 0     | 0     |
| 19808  | 0     | 0     | 0     | 0     |
| 19810  | 0     | 0     | 0     | 0     |
| 19811  | 0     | 0     | 0     | 0     |
| 19812  | 1     | 0     | 0     | 0     |
| 19821  | 0     | 0     | 0     | 0     |
| 19826  | 0     | 0     | 0     | 0     |
| 19827  | 0     | 0     | 0     | 0     |
| 19830  | 0     | 0     | 0     | 0     |
| 19834  | 0     | 0     | 0     | 0     |
| 19838  | 1     | 1     | 1     | 0     |
| 19843  | 0     | 0     | 0     | 0     |
| 19845  | 0     | 1     | 1     | 0     |
| 19846  | 0     | 0     | 0     | 0     |
| 19852  | 1     | 0     | 0     | 1     |
| 19855  | 0     | 0     | 0     | 0     |
| 19858  | 0     | 0     | 0     | 0     |
| 19861  | 0     | 0     | 0     | 0     |
| 19863  | 0     | 0     | 0     | 0     |
| 19868  | 0     | 0     | 0     | 0     |
| 19874  | 0     | 0     | 0     | 0     |
| 19876  | 0     | 0     | 0     | 0     |
| 19880  | 1     | 1     | 0     | 1     |
| 19885  | 0     | 0     | 0     | 0     |
| 19890  | 0     | 0     | 0     | 0     |
| 19894  | 0     | 0     | 0     | 0     |
| 19895  | 0     | 0     | 0     | 0     |
| 19897  | 1     | 0     | 1     | 0     |
| 19906  | 0     | 0     | 0     | 0     |
| 19908  | 0     | 0     | 0     | 0     |

| respid | Q31_2 | Q31_3 | Q31_4 | Q31_5 |
|--------|-------|-------|-------|-------|
| 19912  | 1     | 0     | 0     | 0     |
| 19913  | 0     | 0     | 0     | 0     |
| 19914  | 1     | 1     | 1     | 1     |
| 19918  | 1     | 0     | 0     | 0     |
| 19924  | 1     | 0     | 0     | 0     |
| 19936  | 0     | 0     | 0     | 0     |
| 19940  | 0     | 0     | 0     | 0     |
| 19945  | 0     | 0     | 0     | 0     |
| 19948  | 0     | 0     | 0     | 0     |
| 19959  | 0     | 0     | 0     | 0     |
| 19961  | 0     | 0     | 0     | 0     |
| 19962  | 0     | 0     | 0     | 0     |
| 19965  | 0     | 0     | 0     | 0     |
| 19966  | 0     | 1     | 0     | 0     |
| 19973  | 0     | 0     | 1     | 0     |
| 19981  | 0     | 0     | 0     | 0     |
| 19986  | 0     | 0     | 0     | 0     |
| 19989  | 0     | 0     | 0     | 0     |
| 19998  | 0     | 0     | 0     | 0     |
| 20001  | 0     | 0     | 0     | 0     |
| 20005  | 0     | 0     | 0     | 0     |
| 20013  | 1     | 1     | 0     | 0     |
| 20015  | 0     | 0     | 0     | 0     |
| 20017  | 0     | 0     | 0     | 0     |
| 20020  | 1     | 0     | 0     | 0     |
| 20021  | 0     | 0     | 0     | 0     |
| 20026  | 0     | 0     | 0     | 0     |
| 20028  | 0     | 0     | 0     | 0     |
| 20030  | 1     | 1     | 0     | 0     |
| 20031  | 0     | 0     | 0     | 0     |
| 20034  | 0     | 0     | 0     | 0     |
| 20035  | 0     | 0     | 0     | 0     |



| respid | Q31_2 | Q31_3 | Q31_4 | Q31_5 |
|--------|-------|-------|-------|-------|
| 20040  | 1     | 1     | 1     | 1     |
| 20045  | 0     | 0     | 0     | 0     |
| 20048  | 0     | 0     | 0     | 0     |
| 20053  | 1     | 1     | 0     | 0     |
| 20064  | 0     | 0     | 0     | 0     |
| 20071  | 0     | 0     | 0     | 0     |
| 20072  | 0     | 0     | 0     | 0     |
| 20076  | 1     | 1     | 0     | 0     |
| 20081  | 0     | 0     | 0     | 0     |
| 20082  | 0     | 1     | 0     | 1     |
| 20083  | 0     | 0     | 0     | 0     |
| 20088  | 0     | 0     | 0     | 0     |
| 20089  | 0     | 0     | 0     | 0     |
| 20099  | 0     | 0     | 0     | 0     |
| 20101  | 0     | 0     | 0     | 0     |
| 20102  | 0     | 0     | 0     | 0     |
| 20109  | 0     | 0     | 0     | 0     |
| 20118  | 1     | 0     | 0     | 0     |
| 20119  | 0     | 0     | 0     | 0     |
| 20124  | 0     | 0     | 0     | 0     |
| 20126  | 0     | 0     | 0     | 0     |
| 20130  | 0     | 0     | 0     | 0     |
| 20131  | 0     | 0     | 0     | 0     |
| 20134  | 1     | 0     | 0     | 0     |
| 20146  | 1     | 0     | 0     | 0     |
| 20152  | 0     | 0     | 0     | 0     |
| 20155  | 0     | 0     | 0     | 0     |
| 20156  | 0     | 0     | 0     | 0     |
| 20157  | 0     | 0     | 0     | 0     |
| 20164  | 0     | 0     | 0     | 0     |
| 20168  | 0     | 0     | 0     | 0     |
| 20173  | 0     | 0     | 1     | 1     |

| respid | Q31_2 | Q31_3 | Q31_4 | Q31_5 |
|--------|-------|-------|-------|-------|
| 20174  | 0     | 0     | 0     | 0     |
| 20175  | 0     | 0     | 0     | 0     |
| 20189  | 0     | 0     | 0     | 0     |
| 20190  | 1     | 0     | 0     | 0     |
| 20201  | 0     | 0     | 0     | 0     |
| 20202  | 0     | 0     | 0     | 0     |
| 20204  | 0     | 0     | 0     | 0     |
| 20206  | 0     | 0     | 0     | 0     |
| 20207  | 0     | 0     | 0     | 0     |
| 20212  | 1     | 1     | 0     | 0     |
| 20213  | 1     | 0     | 0     | 0     |
| 20217  | 0     | 0     | 0     | 0     |
| 20222  | 0     | 0     | 0     | 0     |
| 20227  | 0     | 0     | 0     | 0     |
| 20228  | 1     | 1     | 0     | 0     |
| 20238  | 0     | 0     | 0     | 0     |
| 20242  | 0     | 0     | 0     | 0     |
| 20246  | 0     | 0     | 0     | 0     |
| 20255  | 0     | 0     | 0     | 0     |
| 20256  | 0     | 0     | 0     | 1     |
| 20259  | 1     | 0     | 0     | 1     |
| 20262  | 0     | 0     | 0     | 0     |
| 20274  | 0     | 0     | 0     | 0     |
| 20283  | 1     | 1     | 0     | 1     |
| 20284  | 0     | 0     | 0     | 0     |
| 20291  | 0     | 0     | 0     | 0     |
| 20292  | 1     | 0     | 0     | 0     |
| 20293  | 0     | 1     | 0     | 0     |
| 20298  | 0     | 0     | 0     | 0     |
| 20301  | 0     | 0     | 0     | 0     |
| 20303  | 0     | 0     | 0     | 0     |
| 20309  | 0     | 0     | 0     | 0     |

| respid | Q31_2 | Q31_3 | Q31_4 | Q31_5 |
|--------|-------|-------|-------|-------|
| 20318  | 0     | 0     | 0     | 0     |
| 20324  | 0     | 0     | 0     | 0     |
| 20335  | 0     | 0     | 0     | 0     |
| 20336  | 1     | 0     | 0     | 0     |
| 20339  | 0     | 0     | 0     | 0     |
| 20348  | 0     | 0     | 0     | 0     |
| 20351  | 0     | 0     | 0     | 0     |
| 20353  | 0     | 1     | 0     | 0     |
| 20356  | 0     | 0     | 0     | 0     |
| 20357  | 0     | 0     | 0     | 0     |
| 20366  | 0     | 0     | 0     | 0     |
| 20369  | 1     | 1     | 1     | 0     |
| 20372  | 0     | 0     | 0     | 0     |
| 20375  | 0     | 0     | 0     | 0     |
| 20379  | 0     | 0     | 0     | 0     |
| 20380  | 0     | 0     | 0     | 0     |
| 20396  | 1     | 1     | 1     | 0     |
| 20398  | 0     | 0     | 1     | 1     |
| 20412  | 0     | 0     | 0     | 0     |
| 20415  | 0     | 0     | 0     | 0     |
| 20424  | 1     | 1     | 0     | 0     |
| 20434  | 0     | 0     | 0     | 0     |
| 20435  | 0     | 0     | 0     | 0     |
| 20440  | 0     | 0     | 0     | 0     |
| 20441  | 0     | 0     | 0     | 0     |
| 20445  | 0     | 0     | 0     | 0     |
| 20446  | 1     | 0     | 0     | 1     |
| 20450  | 1     | 0     | 0     | 0     |
| 20453  | 0     | 1     | 0     | 0     |
| 20458  | 0     | 0     | 0     | 0     |
| 20464  | 0     | 0     | 0     | 0     |
| 20471  | 1     | 0     | 0     | 0     |

| respid | Q31_2 | Q31_3 | Q31_4 | Q31_5 |
|--------|-------|-------|-------|-------|
| 20473  | 0     | 0     | 0     | 0     |
| 20474  | 0     | 1     | 0     | 0     |
| 20477  | 0     | 0     | 0     | 0     |
| 20479  | 1     | 0     | 0     | 0     |
| 20485  | 1     | 0     | 0     | 0     |
| 20487  | 0     | 0     | 0     | 0     |
| 20488  | 0     | 0     | 0     | 0     |
| 20494  | 1     | 0     | 0     | 0     |
| 20502  | 1     | 1     | 1     | 1     |
| 20503  | 0     | 0     | 0     | 0     |
| 20510  | 0     | 0     | 0     | 0     |
| 20512  | 0     | 0     | 0     | 0     |
| 20516  | 0     | 0     | 0     | 0     |
| 20522  | 1     | 0     | 0     | 0     |
| 20527  | 1     | 0     | 0     | 0     |
| 20529  | 1     | 1     | 1     | 0     |
| 20535  | 1     | 0     | 0     | 0     |
| 20543  | 0     | 0     | 0     | 0     |
| 20546  | 0     | 0     | 0     | 0     |
| 20548  | 0     | 0     | 0     | 0     |
| 20552  | 0     | 0     | 0     | 0     |
| 20556  | 0     | 0     | 0     | 0     |
| 20566  | 0     | 0     | 0     | 0     |
| 20576  | 0     | 0     | 0     | 0     |
| 20587  | 0     | 0     | 0     | 0     |
| 20589  | 0     | 0     | 0     | 0     |
| 20593  | 0     | 0     | 0     | 0     |
| 20594  | 1     | 0     | 0     | 0     |
| 20602  | 1     | 0     | 0     | 0     |
| 20607  | 0     | 0     | 0     | 0     |
| 20608  | 0     | 0     | 0     | 0     |
| 20611  | 0     | 0     | 0     | 0     |

| respid | Q31_2 | Q31_3 | Q31_4 | Q31_5 |
|--------|-------|-------|-------|-------|
| 20612  | 1     | 0     | 0     | 0     |
| 20615  | 1     | 0     | 0     | 0     |
| 20625  | 1     | 0     | 0     | 0     |
| 20630  | 0     | 0     | 0     | 1     |
| 20639  | 0     | 0     | 0     | 0     |
| 20643  | 0     | 0     | 0     | 0     |
| 20645  | 0     | 0     | 0     | 0     |
| 20647  | 0     | 1     | 0     | 1     |
| 20652  | 1     | 1     | 0     | 0     |
| 20661  | 0     | 0     | 0     | 0     |
| 20665  | 0     | 0     | 0     | 0     |
| 20679  | 0     | 0     | 0     | 0     |
| 20682  | 1     | 0     | 0     | 1     |
| 20683  | 0     | 0     | 0     | 0     |
| 20700  | 0     | 0     | 0     | 0     |
| 20702  | 0     | 0     | 0     | 0     |
| 20709  | 0     | 1     | 0     | 0     |
| 20715  | 1     | 0     | 0     | 0     |
| 20718  | 0     | 1     | 0     | 0     |
| 20722  | 0     | 0     | 0     | 0     |
| 20729  | 0     | 0     | 0     | 0     |
| 20732  | 0     | 0     | 0     | 0     |
| 20746  | 1     | 1     | 0     | 1     |
| 20747  | 0     | 0     | 0     | 0     |
| 20758  | 0     | 0     | 0     | 0     |
| 20767  | 0     | 0     | 0     | 0     |
| 20777  | 0     | 0     | 0     | 0     |
| 20778  | 0     | 0     | 0     | 0     |
| 20780  | 0     | 0     | 0     | 0     |
| 20800  | 0     | 0     | 0     | 0     |
| 20810  | 0     | 0     | 0     | 0     |
| 20814  | 0     | 0     | 0     | 0     |

| respid | Q31_2 | Q31_3 | Q31_4 | Q31_5 |
|--------|-------|-------|-------|-------|
| 20816  | 0     | 0     | 0     | 0     |
| 20832  | 1     | 1     | 0     | 0     |
| 20838  | 1     | 0     | 0     | 0     |
| 20841  | 1     | 0     | 0     | 0     |
| 20848  | 0     | 0     | 0     | 0     |
| 20850  | 0     | 0     | 0     | 0     |
| 20851  | 0     | 0     | 0     | 0     |
| 20861  | 0     | 0     | 0     | 0     |
| 20870  | 0     | 0     | 0     | 0     |
| 20880  | 0     | 0     | 0     | 0     |
| 20883  | 0     | 0     | 0     | 0     |
| 20894  | 1     | 1     | 0     | 1     |
| 20896  | 1     | 0     | 0     | 0     |
| 20901  | 0     | 0     | 0     | 0     |
| 20903  | 1     | 0     | 0     | 0     |
| 20909  | 0     | 0     | 0     | 0     |
| 20919  | 0     | 0     | 0     | 0     |
| 20925  | 0     | 0     | 0     | 0     |
| 20935  | 0     | 0     | 0     | 0     |
| 20939  | 0     | 1     | 0     | 0     |
| 20956  | 1     | 0     | 1     | 0     |
| 20970  | 0     | 0     | 0     | 0     |
| 20974  | 0     | 0     | 0     | 0     |
| 20975  | 0     | 0     | 0     | 0     |
| 20984  | 1     | 1     | 0     | 1     |
| 20988  | 0     | 0     | 0     | 0     |
| 20996  | 0     | 1     | 0     | 0     |
| 20998  | 0     | 0     | 0     | 0     |
| 21007  | 0     | 0     | 0     | 0     |
| 21008  | 0     | 0     | 0     | 0     |
| 21014  | 0     | 0     | 0     | 0     |
| 21020  | 0     | 0     | 0     | 0     |

| respid | Q31_2 | Q31_3 | Q31_4 | Q31_5 |
|--------|-------|-------|-------|-------|
| 21022  | 1     | 1     | 0     | 0     |
| 21024  | 0     | 0     | 0     | 0     |
| 21026  | 0     | 0     | 0     | 0     |
| 21027  | 0     | 0     | 0     | 0     |
| 21030  | 0     | 0     | 0     | 0     |
| 21032  | 0     | 0     | 1     | 1     |
| 21040  | 0     | 0     | 0     | 0     |
| 21045  | 0     | 0     | 0     | 0     |
| 21058  | 0     | 0     | 0     | 0     |
| 21064  | 1     | 0     | 0     | 0     |
| 21073  | 0     | 0     | 0     | 0     |
| 21086  | 1     | 1     | 0     | 0     |
| 21092  | 0     | 1     | 1     | 0     |
| 21096  | 1     | 0     | 0     | 1     |
| 21103  | 1     | 0     | 0     | 0     |
| 21120  | 1     | 1     | 0     | 0     |
| 21125  | 0     | 0     | 0     | 0     |
| 21126  | 0     | 0     | 0     | 0     |
| 21132  | 0     | 0     | 0     | 0     |
| 21139  | 0     | 0     | 0     | 0     |
| 21147  | 0     | 0     | 0     | 0     |
| 21148  | 0     | 1     | 0     | 1     |
| 21149  | 1     | 0     | 0     | 0     |
| 21164  | 0     | 0     | 0     | 0     |
| 21165  | 0     | 0     | 0     | 0     |
| 21171  | 0     | 0     | 1     | 1     |
| 21176  | 0     | 0     | 0     | 0     |
| 21187  | 1     | 0     | 0     | 0     |
| 21192  | 1     | 0     | 0     | 0     |
| 21198  | 0     | 0     | 0     | 0     |
| 21199  | 0     | 1     | 0     | 0     |
| 21206  | 1     | 1     | 0     | 0     |

| respid | Q31_2 | Q31_3 | Q31_4 | Q31_5 |
|--------|-------|-------|-------|-------|
| 21212  | 0     | 0     | 0     | 0     |
| 21216  | 0     | 0     | 0     | 0     |
| 21217  | 0     | 0     | 0     | 1     |
| 21228  | 0     | 0     | 0     | 0     |
| 21229  | 1     | 0     | 0     | 0     |
| 21230  | 0     | 1     | 0     | 0     |
| 21243  | 1     | 0     | 0     | 0     |
| 21247  | 0     | 0     | 0     | 0     |
| 21253  | 0     | 0     | 1     | 0     |
| 21264  | 0     | 0     | 0     | 0     |
| 21265  | 0     | 0     | 0     | 0     |
| 21273  | 0     | 0     | 0     | 0     |
| 21275  | 0     | 0     | 0     | 0     |
| 21278  | 0     | 1     | 0     | 0     |
| 21291  | 1     | 1     | 0     | 0     |
| 21298  | 0     | 0     | 0     | 0     |
| 21301  | 0     | 0     | 0     | 0     |
| 21312  | 0     | 0     | 0     | 0     |
| 21323  | 0     | 0     | 0     | 0     |
| 21325  | 0     | 0     | 0     | 0     |
| 21341  | 0     | 0     | 0     | 0     |
| 21349  | 1     | 1     | 0     | 0     |
| 21350  | 1     | 0     | 0     | 0     |
| 21354  | 1     | 1     | 0     | 0     |
| 21372  | 1     | 1     | 0     | 0     |
| 21373  | 0     | 0     | 0     | 1     |
| 21378  | 1     | 0     | 0     | 0     |
| 21393  | 0     | 0     | 0     | 0     |
| 21401  | 1     | 1     | 0     | 0     |
| 21405  | 0     | 0     | 0     | 0     |
| 21406  | 0     | 0     | 0     | 0     |
| 21407  | 1     | 0     | 0     | 0     |



| respid | Q31_2 | Q31_3 | Q31_4 | Q31_5 |
|--------|-------|-------|-------|-------|
| 21418  | 0     | 0     | 0     | 0     |
| 21420  | 0     | 0     | 0     | 0     |
| 21421  | 0     | 0     | 0     | 0     |
| 21446  | 0     | 0     | 0     | 0     |
| 21449  | 0     | 0     | 0     | 0     |
| 21452  | 0     | 0     | 0     | 0     |
| 21455  | 0     | 1     | 1     | 0     |
| 21469  | 0     | 1     | 0     | 0     |
| 21471  | 0     | 0     | 0     | 0     |
| 21472  | 1     | 0     | 0     | 1     |
| 21474  | 0     | 0     | 0     | 0     |
| 21479  | 0     | 0     | 0     | 0     |
| 21485  | 0     | 0     | 0     | 0     |
| 21512  | 0     | 0     | 0     | 0     |
| 21513  | 0     | 0     | 0     | 0     |
| 21514  | 0     | 0     | 0     | 0     |
| 21520  | 1     | 0     | 0     | 0     |
| 21539  | 0     | 0     | 0     | 0     |
| 21553  | 0     | 0     | 0     | 0     |
| 21560  | 0     | 0     | 0     | 0     |
| 21561  | 0     | 0     | 0     | 0     |
| 21563  | 1     | 0     | 0     | 1     |
| 21565  | 0     | 0     | 0     | 0     |
| 21582  | 1     | 1     | 0     | 0     |
| 21584  | 0     | 0     | 0     | 0     |
| 21585  | 0     | 0     | 0     | 0     |
| 21586  | 0     | 0     | 0     | 0     |
| 21587  | 1     | 0     | 0     | 0     |
| 21590  | 0     | 0     | 1     | 1     |
| 21601  | 1     | 0     | 0     | 0     |
| 21611  | 0     | 0     | 1     | 0     |
| 21612  | 1     | 0     | 0     | 0     |

| respid | Q31_2 | Q31_3 | Q31_4 | Q31_5 |
|--------|-------|-------|-------|-------|
| 21625  | 1     | 1     | 0     | 0     |
| 21633  | 0     | 0     | 0     | 0     |
| 21640  | 0     | 0     | 0     | 0     |
| 21647  | 0     | 0     | 0     | 0     |
| 21648  | 1     | 1     | 1     | 1     |
| 21656  | 0     | 0     | 0     | 0     |
| 21657  | 0     | 0     | 0     | 0     |
| 21658  | 1     | 0     | 0     | 1     |
| 21665  | 0     | 0     | 1     | 1     |
| 21666  | 1     | 0     | 0     | 1     |
| 21668  | 1     | 0     | 1     | 0     |
| 21673  | 1     | 1     | 0     | 0     |
| 21681  | 0     | 0     | 0     | 0     |
| 21682  | 0     | 0     | 0     | 0     |
| 21685  | 0     | 0     | 0     | 0     |
| 21692  | 0     | 0     | 0     | 1     |
| 21697  | 1     | 0     | 0     | 0     |
| 21711  | 1     | 0     | 0     | 0     |
| 21715  | 0     | 0     | 0     | 0     |
| 21726  | 0     | 0     | 0     | 0     |
| 21748  | 0     | 0     | 0     | 0     |
| 21761  | 0     | 1     | 0     | 0     |
| 21769  | 1     | 0     | 0     | 0     |
| 21774  | 0     | 1     | 0     | 0     |
| 21778  | 0     | 0     | 0     | 0     |
| 21785  | 0     | 0     | 0     | 0     |
| 21799  | 0     | 0     | 0     | 0     |
| 21820  | 0     | 0     | 0     | 1     |
| 21837  | 1     | 0     | 0     | 0     |
| 21845  | 1     | 1     | 1     | 0     |
| 21846  | 0     | 0     | 0     | 0     |
| 21849  | 0     | 0     | 0     | 0     |

| respid | Q31_2 | Q31_3 | Q31_4 | Q31_5 |
|--------|-------|-------|-------|-------|
| 21850  | 0     | 0     | 0     | 0     |
| 21855  | 0     | 0     | 0     | 0     |
| 21859  | 0     | 0     | 0     | 0     |
| 21861  | 1     | 0     | 0     | 0     |
| 21866  | 0     | 0     | 0     | 0     |
| 21873  | 0     | 0     | 0     | 0     |
| 21876  | 0     | 0     | 0     | 0     |
| 21882  | 0     | 0     | 0     | 0     |
| 21884  | 0     | 1     | 0     | 1     |
| 21887  | 0     | 0     | 0     | 0     |
| 21892  | 0     | 0     | 0     | 0     |
| 21907  | 0     | 0     | 0     | 1     |
| 21910  | 1     | 1     | 0     | 1     |
| 21912  | 1     | 0     | 0     | 0     |
| 21914  | 0     | 0     | 0     | 0     |
| 21925  | 0     | 0     | 0     | 0     |
| 21937  | 0     | 0     | 0     | 0     |
| 21938  | 0     | 0     | 0     | 0     |
| 21940  | 0     | 0     | 0     | 0     |
| 21942  | 0     | 0     | 0     | 0     |
| 21947  | 0     | 0     | 0     | 0     |
| 21948  | 0     | 0     | 0     | 0     |
| 21961  | 1     | 1     | 0     | 0     |
| 21977  | 0     | 0     | 0     | 0     |
| 21983  | 0     | 0     | 0     | 0     |
| 21986  | 1     | 0     | 0     | 1     |
| 21988  | 0     | 0     | 0     | 0     |
| 21996  | 0     | 0     | 0     | 0     |
| 21997  | 0     | 0     | 0     | 0     |
| 22005  | 0     | 0     | 0     | 0     |
| 22013  | 0     | 0     | 0     | 0     |
| 22018  | 0     | 0     | 0     | 0     |

| respid | Q31_2 | Q31_3 | Q31_4 | Q31_5 |
|--------|-------|-------|-------|-------|
| 22019  | 0     | 1     | 0     | 0     |
| 22071  | 0     | 1     | 0     | 0     |
| 22082  | 0     | 0     | 0     | 0     |
| 22085  | 0     | 0     | 0     | 0     |
| 22092  | 0     | 0     | 0     | 0     |
| 22097  | 0     | 0     | 0     | 0     |
| 22111  | 0     | 0     | 0     | 0     |
| 22118  | 0     | 0     | 0     | 0     |
| 22132  | 0     | 0     | 0     | 0     |
| 22133  | 0     | 0     | 0     | 0     |
| 22139  | 0     | 0     | 0     | 0     |
| 22142  | 0     | 0     | 0     | 0     |
| 22146  | 0     | 0     | 0     | 0     |
| 22181  | 0     | 0     | 0     | 0     |
| 22202  | 0     | 0     | 0     | 0     |
| 22214  | 0     | 0     | 0     | 0     |
| 22223  | 0     | 0     | 0     | 0     |
| 22227  | 1     | 1     | 0     | 1     |
| 22229  | 0     | 1     | 0     | 0     |
| 22239  | 0     | 0     | 0     | 0     |
| 22245  | 1     | 1     | 1     | 0     |
| 22256  | 0     | 0     | 0     | 0     |
| 22260  | 0     | 0     | 0     | 0     |
| 22298  | 0     | 0     | 0     | 0     |
| 22321  | 0     | 1     | 0     | 0     |
| 22340  | 0     | 0     | 0     | 0     |
| 22346  | 1     | 0     | 0     | 0     |
| 22356  | 0     | 0     | 0     | 0     |
| 22361  | 0     | 0     | 0     | 0     |
| 22364  | 0     | 0     | 0     | 0     |
| 22368  | 0     | 0     | 0     | 0     |
| 22374  | 0     | 1     | 0     | 0     |

| respid | Q31_2 | Q31_3 | Q31_4 | Q31_5 |
|--------|-------|-------|-------|-------|
| 22375  | 0     | 0     | 0     | 0     |
| 22377  | 0     | 0     | 0     | 0     |
| 22383  | 0     | 0     | 0     | 0     |
| 22387  | 1     | 0     | 0     | 0     |
| 22392  | 0     | 0     | 0     | 0     |
| 22393  | 0     | 0     | 0     | 0     |
| 22394  | 0     | 0     | 0     | 0     |
| 22395  | 0     | 0     | 0     | 0     |
| 22401  | 0     | 0     | 0     | 0     |
| 22407  | 0     | 0     | 0     | 0     |
| 22410  | 0     | 0     | 0     | 1     |
| 22418  | 1     | 0     | 0     | 0     |
| 22421  | 0     | 0     | 0     | 0     |
| 22423  | 0     | 0     | 0     | 0     |
| 22425  | 0     | 0     | 0     | 0     |
| 22427  | 0     | 0     | 0     | 0     |
| 22431  | 1     | 1     | 0     | 0     |
| 22435  | 0     | 0     | 0     | 0     |
| 22436  | 1     | 0     | 0     | 0     |
| 22442  | 0     | 0     | 0     | 0     |
| 22444  | 0     | 0     | 0     | 0     |
| 22445  | 1     | 1     | 0     | 0     |
| 22446  | 0     | 0     | 0     | 0     |
| 22448  | 1     | 1     | 0     | 0     |
| 22449  | 0     | 0     | 0     | 0     |
| 22450  | 1     | 0     | 0     | 0     |
| 22453  | 1     | 1     | 0     | 1     |
| 22465  | 1     | 0     | 0     | 1     |
| 22472  | 0     | 0     | 0     | 0     |
| 22475  | 1     | 0     | 0     | 1     |
| 22478  | 0     | 0     | 0     | 0     |
| 22491  | 0     | 0     | 0     | 0     |

| respid | Q31_2 | Q31_3 | Q31_4 | Q31_5 |
|--------|-------|-------|-------|-------|
| 22497  | 0     | 0     | 0     | 0     |
| 22498  | 0     | 1     | 0     | 0     |
| 22499  | 0     | 0     | 0     | 0     |
| 22503  | 0     | 0     | 0     | 0     |
| 22507  | 0     | 0     | 0     | 0     |
| 22513  | 0     | 1     | 0     | 1     |
| 22517  | 0     | 0     | 0     | 0     |
| 22524  | 0     | 0     | 0     | 0     |
| 22528  | 0     | 0     | 0     | 0     |
| 22544  | 0     | 0     | 0     | 0     |
| 22571  | 0     | 0     | 0     | 0     |
| 22576  | 0     | 0     | 1     | 0     |
| 22579  | 0     | 0     | 0     | 0     |
| 22583  | 0     | 0     | 0     | 0     |
| 22591  | 1     | 0     | 0     | 0     |
| 22592  | 0     | 0     | 0     | 0     |
| 22612  | 1     | 0     | 0     | 0     |
| 22613  | 0     | 1     | 0     | 0     |
| 22615  | 1     | 0     | 0     | 0     |
| 22621  | 0     | 0     | 0     | 0     |
| 22625  | 0     | 0     | 0     | 0     |
| 22628  | 0     | 0     | 0     | 0     |
| 22632  | 0     | 0     | 0     | 0     |
| 22639  | 0     | 0     | 0     | 0     |
| 22648  | 0     | 0     | 0     | 0     |
| 22649  | 0     | 0     | 0     | 0     |
| 22655  | 0     | 0     | 0     | 0     |
| 22659  | 0     | 0     | 0     | 0     |
| 22660  | 0     | 0     | 0     | 0     |
| 22666  | 0     | 0     | 0     | 0     |
| 22667  | 0     | 0     | 0     | 0     |
| 22670  | 0     | 0     | 0     | 0     |

| respid | Q31_2 | Q31_3 | Q31_4 | Q31_5 |
|--------|-------|-------|-------|-------|
| 22681  | 0     | 0     | 0     | 0     |
| 22683  | 0     | 1     | 0     | 0     |
| 22688  | 0     | 0     | 0     | 0     |
| 22695  | 0     | 0     | 0     | 0     |
| 22696  | 0     | 0     | 0     | 0     |
| 22705  | 1     | 1     | 0     | 0     |
| 22718  | 1     | 1     | 0     | 0     |
| 22720  | 0     | 0     | 0     | 0     |
| 22724  | 1     | 0     | 0     | 0     |
| 22728  | 0     | 0     | 0     | 0     |
| 22751  | 0     | 0     | 0     | 0     |
| 22782  | 0     | 0     | 0     | 0     |
| 22786  | 0     | 0     | 0     | 0     |
| 22788  | 0     | 0     | 0     | 0     |
| 22810  | 1     | 1     | 0     | 0     |
| 22816  | 0     | 0     | 0     | 0     |
| 22818  | 1     | 0     | 0     | 0     |
| 22854  | 0     | 0     | 0     | 0     |
| 22858  | 1     | 1     | 0     | 0     |
| 22862  | 0     | 0     | 0     | 0     |
| 22865  | 0     | 0     | 0     | 0     |
| 22868  | 0     | 1     | 0     | 0     |
| 22869  | 0     | 0     | 0     | 1     |
| 22873  | 0     | 0     | 0     | 0     |
| 22875  | 0     | 0     | 0     | 0     |
| 22876  | 0     | 0     | 0     | 0     |
| 22882  | 0     | 0     | 0     | 0     |
| 22884  | 0     | 0     | 0     | 0     |
| 22887  | 1     | 1     | 0     | 0     |
| 22888  | 0     | 0     | 0     | 0     |
| 22900  | 0     | 0     | 0     | 0     |
| 22901  | 0     | 0     | 0     | 0     |

| respid | Q31_2 | Q31_3 | Q31_4 | Q31_5 |
|--------|-------|-------|-------|-------|
| 22912  | 0     | 0     | 0     | 0     |
| 22913  | 0     | 0     | 0     | 0     |
| 22921  | 0     | 0     | 0     | 0     |
| 22925  | 0     | 0     | 0     | 0     |
| 22940  | 0     | 0     | 0     | 0     |
| 22941  | 0     | 0     | 0     | 0     |
| 22947  | 0     | 0     | 0     | 0     |
| 22948  | 0     | 0     | 0     | 0     |
| 22964  | 1     | 1     | 0     | 0     |
| 22966  | 0     | 0     | 0     | 0     |
| 22969  | 0     | 0     | 0     | 0     |
| 22971  | 0     | 0     | 0     | 0     |
| 22988  | 0     | 0     | 0     | 0     |
| 22990  | 0     | 0     | 0     | 0     |
| 23000  | 0     | 0     | 0     | 0     |
| 23016  | 0     | 0     | 0     | 0     |
| 23026  | 0     | 0     | 0     | 0     |
| 23035  | 0     | 0     | 0     | 0     |
| 23037  | 0     | 1     | 0     | 0     |
| 23044  | 0     | 0     | 0     | 0     |
| 23046  | 0     | 0     | 0     | 0     |
| 23047  | 0     | 1     | 0     | 0     |
| 23049  | 0     | 0     | 0     | 0     |
| 23055  | 0     | 0     | 0     | 0     |
| 23066  | 0     | 0     | 0     | 0     |
| 23075  | 0     | 0     | 0     | 0     |
| 23081  | 0     | 0     | 0     | 0     |
| 23087  | 0     | 0     | 0     | 0     |
| 23094  | 0     | 0     | 0     | 0     |
| 23099  | 0     | 0     | 0     | 0     |
| 23101  | 0     | 0     | 0     | 0     |
| 23105  | 0     | 0     | 0     | 0     |



| respid | Q31_2 | Q31_3 | Q31_4 | Q31_5 |
|--------|-------|-------|-------|-------|
| 23115  | 0     | 0     | 0     | 1     |
| 23121  | 0     | 1     | 0     | 0     |
| 23127  | 1     | 0     | 0     | 0     |
| 23131  | 0     | 0     | 0     | 0     |
| 23134  | 0     | 0     | 0     | 0     |
| 23145  | 0     | 0     | 0     | 0     |
| 23151  | 0     | 0     | 0     | 0     |
| 23161  | 0     | 1     | 1     | 0     |
| 23169  | 1     | 1     | 0     | 0     |
| 23173  | 0     | 0     | 0     | 0     |
| 23174  | 0     | 0     | 0     | 0     |
| 23186  | 1     | 1     | 0     | 1     |
| 23195  | 0     | 0     | 0     | 0     |
| 23197  | 0     | 0     | 0     | 0     |
| 23198  | 0     | 0     | 0     | 0     |
| 23203  | 0     | 0     | 0     | 0     |
| 23204  | 0     | 0     | 0     | 0     |
| 23212  | 0     | 0     | 0     | 0     |
| 23214  | 0     | 0     | 0     | 0     |
| 23221  | 0     | 0     | 0     | 0     |
| 23237  | 0     | 0     | 0     | 0     |
| 23251  | 1     | 0     | 0     | 0     |
| 23254  | 0     | 0     | 0     | 0     |
| 23262  | 0     | 0     | 0     | 0     |
| 23267  | 0     | 0     | 0     | 0     |
| 23268  | 1     | 1     | 0     | 0     |
| 23273  | 1     | 0     | 0     | 0     |
| 23278  | 0     | 0     | 0     | 0     |
| 23279  | 0     | 0     | 0     | 0     |
| 23281  | 0     | 0     | 0     | 0     |
| 23282  | 0     | 0     | 0     | 0     |
| 23283  | 1     | 0     | 1     | 0     |

| respid | Q31_2 | Q31_3 | Q31_4 | Q31_5 |
|--------|-------|-------|-------|-------|
| 23285  | 0     | 0     | 0     | 1     |
| 23305  | 1     | 0     | 1     | 0     |
| 23309  | 0     | 0     | 1     | 0     |
| 23310  | 0     | 0     | 0     | 1     |
| 23311  | 0     | 0     | 0     | 0     |
| 23312  | 0     | 0     | 0     | 0     |
| 23319  | 0     | 0     | 0     | 0     |
| 23320  | 0     | 0     | 0     | 0     |
| 23322  | 0     | 0     | 0     | 0     |
| 23334  | 0     | 0     | 0     | 0     |
| 23340  | 0     | 1     | 0     | 0     |
| 23346  | 0     | 0     | 0     | 0     |
| 23353  | 0     | 0     | 0     | 0     |
| 23363  | 1     | 0     | 1     | 1     |
| 23364  | 0     | 0     | 0     | 1     |
| 23376  | 0     | 0     | 0     | 0     |
| 23378  | 0     | 0     | 0     | 0     |
| 23382  | 0     | 0     | 0     | 0     |
| 23383  | 0     | 0     | 0     | 0     |
| 23390  | 0     | 0     | 0     | 0     |
| 23395  | 0     | 0     | 0     | 0     |
| 23398  | 0     | 1     | 0     | 0     |
| 23399  | 0     | 0     | 0     | 0     |
| 23406  | 0     | 0     | 0     | 0     |
| 23418  | 0     | 0     | 0     | 0     |
| 23427  | 0     | 0     | 0     | 0     |
| 23428  | 0     | 0     | 0     | 0     |
| 23435  | 1     | 0     | 0     | 0     |
| 23439  | 0     | 0     | 0     | 0     |
| 23440  | 0     | 0     | 0     | 0     |
| 23444  | 0     | 1     | 0     | 0     |
| 23445  | 0     | 0     | 0     | 0     |

| respid | Q31_2 | Q31_3 | Q31_4 | Q31_5 |
|--------|-------|-------|-------|-------|
| 23455  | 0     | 0     | 0     | 0     |
| 23467  | 0     | 0     | 0     | 0     |
| 23478  | 0     | 0     | 0     | 0     |
| 23492  | 0     | 0     | 0     | 0     |
| 23498  | 0     | 0     | 0     | 0     |
| 23511  | 1     | 0     | 0     | 0     |
| 23514  | 0     | 0     | 0     | 0     |
| 23515  | 0     | 0     | 0     | 0     |
| 23522  | 0     | 0     | 0     | 0     |
| 23524  | 0     | 0     | 0     | 0     |
| 23531  | 0     | 0     | 0     | 0     |
| 23532  | 0     | 0     | 0     | 0     |
| 23533  | 1     | 0     | 0     | 0     |
| 23534  | 0     | 0     | 0     | 0     |
| 23538  | 0     | 0     | 0     | 0     |
| 23539  | 0     | 0     | 0     | 0     |
| 23548  | 0     | 0     | 0     | 0     |
| 23553  | 0     | 0     | 0     | 0     |
| 23556  | 0     | 0     | 0     | 0     |
| 23563  | 0     | 0     | 0     | 0     |
| 23572  | 0     | 0     | 0     | 0     |
| 23575  | 0     | 0     | 0     | 0     |
| 23576  | 0     | 0     | 0     | 0     |
| 23577  | 0     | 0     | 0     | 0     |
| 23578  | 1     | 1     | 1     | 1     |
| 23587  | 0     | 1     | 0     | 0     |
| 23597  | 0     | 1     | 0     | 0     |
| 23598  | 0     | 0     | 0     | 0     |
| 23604  | 0     | 0     | 0     | 0     |
| 23617  | 0     | 0     | 1     | 0     |
| 23620  | 0     | 1     | 0     | 0     |
| 23621  | 0     | 0     | 0     | 0     |

| respid | Q31_2 | Q31_3 | Q31_4 | Q31_5 |
|--------|-------|-------|-------|-------|
| 23625  | 0     | 0     | 0     | 0     |
| 23629  | 1     | 1     | 0     | 0     |
| 23635  | 0     | 0     | 0     | 0     |
| 23636  | 0     | 0     | 0     | 0     |
| 23637  | 0     | 0     | 0     | 0     |
| 23638  | 0     | 0     | 0     | 0     |
| 23644  | 0     | 0     | 0     | 0     |
| 23645  | 1     | 0     | 0     | 0     |
| 23649  | 0     | 0     | 0     | 0     |
| 23654  | 0     | 0     | 0     | 0     |
| 23662  | 0     | 0     | 0     | 0     |
| 23664  | 1     | 0     | 0     | 0     |
| 23665  | 0     | 0     | 0     | 0     |
| 23666  | 1     | 1     | 0     | 0     |
| 23671  | 0     | 0     | 0     | 0     |
| 23672  | 0     | 0     | 0     | 0     |
| 23685  | 0     | 0     | 0     | 0     |
| 23686  | 0     | 0     | 0     | 0     |
| 23689  | 0     | 0     | 0     | 0     |
| 23690  | 0     | 0     | 0     | 0     |
| 23695  | 1     | 1     | 0     | 1     |
| 23700  | 0     | 0     | 0     | 0     |
| 23714  | 0     | 0     | 0     | 0     |
| 23719  | 0     | 0     | 0     | 0     |
| 23720  | 1     | 0     | 0     | 0     |
| 23721  | 0     | 0     | 0     | 0     |
| 23729  | 0     | 0     | 0     | 0     |
| 23730  | 0     | 0     | 0     | 0     |
| 23732  | 0     | 0     | 0     | 0     |
| 23736  | 0     | 0     | 0     | 0     |
| 23754  | 0     | 0     | 0     | 0     |
| 23756  | 0     | 1     | 0     | 0     |

| respid | Q31_2 | Q31_3 | Q31_4 | Q31_5 |
|--------|-------|-------|-------|-------|
| 23759  | 0     | 1     | 0     | 0     |
| 23761  | 0     | 0     | 0     | 0     |
| 23766  | 0     | 0     | 0     | 0     |
| 23768  | 0     | 0     | 0     | 0     |
| 23773  | 0     | 0     | 0     | 0     |
| 23781  | 0     | 0     | 0     | 0     |
| 23782  | 0     | 0     | 0     | 0     |
| 23787  | 0     | 0     | 0     | 0     |
| 23788  | 0     | 0     | 1     | 1     |
| 23790  | 0     | 0     | 0     | 0     |
| 23794  | 0     | 0     | 0     | 0     |
| 23795  | 0     | 0     | 0     | 0     |
| 23801  | 0     | 0     | 0     | 0     |
| 23806  | 0     | 1     | 0     | 0     |
| 23809  | 0     | 0     | 0     | 0     |
| 23813  | 0     | 0     | 0     | 0     |
| 23815  | 0     | 0     | 0     | 0     |
| 23821  | 0     | 0     | 0     | 0     |
| 23825  | 0     | 0     | 0     | 0     |
| 23826  | 0     | 0     | 0     | 0     |
| 23830  | 0     | 0     | 0     | 0     |
| 23833  | 1     | 0     | 0     | 0     |
| 23837  | 0     | 0     | 0     | 0     |
| 23848  | 0     | 0     | 0     | 0     |
| 23850  | 0     | 0     | 0     | 0     |
| 23870  | 0     | 0     | 0     | 0     |
| 23877  | 0     | 0     | 0     | 0     |
| 23880  | 0     | 0     | 0     | 0     |
| 23882  | 1     | 0     | 0     | 0     |
| 23888  | 0     | 0     | 0     | 0     |
| 23908  | 1     | 0     | 0     | 0     |
| 23914  | 1     | 0     | 0     | 0     |

| respid | Q31_2 | Q31_3 | Q31_4 | Q31_5 |
|--------|-------|-------|-------|-------|
| 23916  | 0     | 1     | 0     | 0     |
| 23922  | 0     | 0     | 0     | 0     |
| 23932  | 0     | 0     | 0     | 0     |
| 23934  | 0     | 0     | 0     | 0     |
| 23942  | 1     | 1     | 1     | 0     |
| 23945  | 1     | 0     | 0     | 0     |
| 23948  | 0     | 0     | 0     | 0     |
| 23955  | 0     | 0     | 0     | 0     |
| 23956  | 0     | 1     | 0     | 0     |
| 23978  | 0     | 0     | 0     | 0     |
| 23981  | 0     | 0     | 0     | 0     |
| 23982  | 0     | 0     | 0     | 0     |
| 23991  | 0     | 0     | 0     | 0     |
| 23994  | 1     | 1     | 0     | 1     |
| 23995  | 0     | 0     | 0     | 0     |
| 23999  | 0     | 0     | 0     | 0     |
| 24005  | 1     | 1     | 0     | 0     |
| 24018  | 0     | 0     | 0     | 0     |
| 24021  | 0     | 0     | 0     | 0     |
| 24035  | 0     | 0     | 0     | 0     |
| 24040  | 0     | 0     | 0     | 0     |
| 24043  | 0     | 0     | 0     | 0     |
| 24046  | 1     | 1     | 0     | 0     |
| 24047  | 1     | 0     | 0     | 0     |
| 24048  | 0     | 0     | 0     | 0     |
| 24062  | 0     | 0     | 0     | 0     |
| 24063  | 0     | 0     | 0     | 0     |
| 24066  | 0     | 0     | 0     | 0     |
| 24069  | 0     | 0     | 0     | 0     |
| 24070  | 0     | 0     | 0     | 0     |
| 24074  | 0     | 0     | 0     | 0     |
| 24080  | 0     | 1     | 0     | 0     |

| respid | Q31_2 | Q31_3 | Q31_4 | Q31_5 |
|--------|-------|-------|-------|-------|
| 24082  | 0     | 0     | 0     | 0     |
| 24088  | 0     | 0     | 0     | 0     |
| 24089  | 0     | 0     | 0     | 0     |
| 24091  | 0     | 0     | 0     | 0     |
| 24095  | 0     | 0     | 0     | 0     |
| 24100  | 1     | 1     | 0     | 0     |
| 24105  | 0     | 0     | 0     | 0     |
| 24107  | 1     | 0     | 1     | 1     |
| 24108  | 0     | 0     | 0     | 0     |
| 24113  | 0     | 0     | 0     | 0     |
| 24120  | 0     | 0     | 0     | 0     |
| 24122  | 1     | 1     | 0     | 1     |
| 24123  | 0     | 0     | 0     | 0     |
| 24125  | 1     | 1     | 1     | 0     |
| 24132  | 0     | 0     | 0     | 0     |
| 24139  | 0     | 0     | 0     | 0     |
| 24140  | 0     | 0     | 0     | 0     |
| 24143  | 0     | 0     | 1     | 0     |
| 24150  | 1     | 1     | 0     | 0     |
| 24153  | 0     | 0     | 0     | 0     |
| 24161  | 0     | 0     | 0     | 0     |
| 24168  | 0     | 0     | 0     | 0     |
| 24179  | 0     | 0     | 0     | 0     |
| 24182  | 0     | 0     | 0     | 0     |
| 24194  | 0     | 0     | 0     | 0     |
| 24206  | 0     | 0     | 0     | 0     |
| 24214  | 0     | 0     | 0     | 0     |
| 24215  | 0     | 0     | 0     | 0     |
| 24224  | 0     | 0     | 0     | 0     |
| 24225  | 0     | 0     | 0     | 0     |
| 24227  | 0     | 0     | 0     | 0     |
| 24229  | 0     | 0     | 0     | 0     |

| respid | Q31_2 | Q31_3 | Q31_4 | Q31_5 |
|--------|-------|-------|-------|-------|
| 24230  | 0     | 0     | 0     | 0     |
| 24232  | 0     | 1     | 0     | 0     |
| 24253  | 1     | 0     | 0     | 0     |
| 24267  | 0     | 0     | 1     | 0     |
| 24274  | 0     | 0     | 0     | 0     |
| 24275  | 0     | 0     | 0     | 0     |
| 24277  | 0     | 0     | 0     | 0     |
| 24280  | 1     | 0     | 0     | 0     |
| 24285  | 0     | 0     | 0     | 0     |
| 24293  | 0     | 0     | 0     | 0     |
| 24295  | 1     | 1     | 0     | 0     |
| 24299  | 0     | 0     | 0     | 0     |
| 24303  | 0     | 0     | 0     | 0     |
| 24308  | 0     | 0     | 0     | 0     |
| 24322  | 0     | 0     | 0     | 0     |
| 24325  | 0     | 0     | 0     | 0     |
| 24328  | 0     | 0     | 1     | 0     |
| 24334  | 0     | 0     | 0     | 0     |
| 24342  | 1     | 1     | 0     | 1     |
| 24343  | 0     | 0     | 0     | 0     |
| 24348  | 1     | 0     | 0     | 0     |
| 24352  | 0     | 0     | 0     | 0     |
| 24354  | 1     | 1     | 0     | 0     |
| 24357  | 0     | 0     | 0     | 0     |
| 24360  | 1     | 0     | 0     | 0     |
| 24369  | 0     | 1     | 0     | 0     |
| 24373  | 0     | 1     | 0     | 0     |
| 24398  | 0     | 0     | 1     | 0     |
| 24402  | 1     | 1     | 0     | 0     |
| 24405  | 0     | 0     | 0     | 0     |
| 24407  | 0     | 0     | 0     | 0     |
| 24413  | 1     | 1     | 0     | 0     |



| respid | Q31_2 | Q31_3 | Q31_4 | Q31_5 |
|--------|-------|-------|-------|-------|
| 24443  | 0     | 0     | 0     | 1     |
| 24451  | 0     | 0     | 0     | 0     |
| 24459  | 0     | 0     | 0     | 1     |
| 24465  | 0     | 0     | 0     | 0     |
| 24481  | 0     | 0     | 0     | 0     |
| 24482  | 0     | 0     | 0     | 0     |
| 24491  | 1     | 0     | 0     | 1     |
| 24495  | 0     | 0     | 0     | 0     |
| 24497  | 1     | 1     | 0     | 0     |
| 24511  | 0     | 0     | 0     | 0     |
| 24513  | 1     | 0     | 0     | 0     |
| 24516  | 0     | 0     | 0     | 0     |
| 24518  | 0     | 0     | 0     | 0     |
| 24524  | 0     | 0     | 0     | 0     |
| 24528  | 0     | 0     | 0     | 0     |
| 24531  | 0     | 0     | 0     | 0     |
| 24533  | 1     | 1     | 1     | 1     |
| 24547  | 1     | 0     | 0     | 0     |
| 24557  | 1     | 0     | 1     | 0     |
| 24559  | 0     | 1     | 1     | 0     |
| 24567  | 0     | 0     | 0     | 0     |
| 24568  | 0     | 0     | 0     | 0     |
| 24577  | 0     | 0     | 0     | 0     |
| 24581  | 0     | 0     | 0     | 0     |
| 24588  | 0     | 0     | 0     | 0     |
| 24604  | 0     | 0     | 0     | 0     |
| 24612  | 0     | 0     | 0     | 0     |
| 24621  | 1     | 0     | 0     | 1     |
| 24625  | 0     | 1     | 0     | 0     |
| 24627  | 0     | 0     | 0     | 0     |
| 24640  | 0     | 0     | 0     | 0     |
| 24644  | 0     | 0     | 0     | 0     |

| respid | Q31_2 | Q31_3 | Q31_4 | Q31_5 |
|--------|-------|-------|-------|-------|
| 24664  | 0     | 0     | 0     | 0     |
| 24669  | 0     | 0     | 0     | 0     |
| 24685  | 0     | 0     | 0     | 0     |
| 24687  | 0     | 1     | 0     | 0     |
| 24688  | 0     | 0     | 0     | 0     |
| 24691  | 1     | 0     | 1     | 0     |
| 24693  | 0     | 0     | 0     | 0     |
| 24706  | 0     | 0     | 0     | 0     |
| 24710  | 0     | 0     | 0     | 0     |
| 24717  | 0     | 0     | 0     | 0     |
| 24720  | 1     | 0     | 0     | 0     |
| 24731  | 1     | 1     | 0     | 0     |
| 24732  | 0     | 0     | 0     | 0     |
| 24733  | 0     | 0     | 0     | 0     |
| 24747  | 0     | 0     | 0     | 0     |
| 24750  | 1     | 1     | 0     | 0     |
| 24758  | 1     | 1     | 0     | 0     |
| 24760  | 0     | 0     | 0     | 0     |
| 24765  | 0     | 0     | 0     | 0     |
| 24772  | 0     | 0     | 0     | 0     |
| 24779  | 0     | 0     | 0     | 0     |
| 24794  | 0     | 0     | 0     | 0     |
| 24796  | 1     | 0     | 1     | 0     |
| 24797  | 0     | 0     | 0     | 0     |
| 24800  | 0     | 0     | 0     | 0     |
| 24813  | 1     | 0     | 0     | 0     |
| 24815  | 0     | 0     | 0     | 0     |
| 24821  | 0     | 0     | 0     | 0     |
| 24822  | 0     | 0     | 0     | 0     |
| 24831  | 0     | 0     | 0     | 0     |
| 24835  | 0     | 0     | 0     | 0     |
| 24843  | 1     | 1     | 0     | 0     |

| respid | Q31_2 | Q31_3 | Q31_4 | Q31_5 |
|--------|-------|-------|-------|-------|
| 24844  | 0     | 1     | 0     | 0     |
| 24860  | 0     | 0     | 0     | 0     |
| 24861  | 0     | 0     | 0     | 0     |
| 24865  | 1     | 0     | 1     | 0     |
| 24870  | 0     | 0     | 1     | 0     |
| 24887  | 0     | 0     | 0     | 0     |
| 24897  | 0     | 0     | 1     | 0     |
| 24902  | 0     | 0     | 0     | 0     |
| 24914  | 0     | 0     | 0     | 0     |
| 24921  | 0     | 0     | 0     | 0     |
| 24922  | 0     | 0     | 0     | 0     |
| 24924  | 0     | 0     | 0     | 0     |
| 24927  | 1     | 0     | 0     | 0     |
| 24936  | 0     | 0     | 0     | 0     |
| 24937  | 0     | 1     | 0     | 0     |
| 24942  | 1     | 0     | 0     | 0     |
| 24947  | 0     | 0     | 0     | 0     |
| 24953  | 0     | 0     | 0     | 0     |
| 24954  | 0     | 0     | 1     | 0     |
| 24960  | 1     | 1     | 0     | 1     |
| 24965  | 0     | 0     | 0     | 0     |
| 24975  | 1     | 0     | 0     | 1     |
| 24983  | 1     | 0     | 1     | 0     |
| 24985  | 0     | 0     | 0     | 0     |
| 24990  | 0     | 0     | 0     | 0     |
| 25000  | 0     | 0     | 0     | 0     |
| 25007  | 0     | 0     | 0     | 0     |
| 25008  | 0     | 0     | 0     | 0     |
| 25010  | 0     | 0     | 0     | 0     |
| 25016  | 0     | 0     | 0     | 0     |
| 25021  | 1     | 1     | 0     | 1     |
| 25040  | 0     | 0     | 0     | 0     |

| respid | Q31_2 | Q31_3 | Q31_4 | Q31_5 |
|--------|-------|-------|-------|-------|
| 25043  | 0     | 0     | 0     | 0     |
| 25055  | 0     | 0     | 0     | 0     |
| 25057  | 0     | 0     | 0     | 0     |
| 25060  | 0     | 0     | 1     | 0     |
| 25062  | 0     | 0     | 0     | 0     |
| 25064  | 1     | 1     | 0     | 0     |
| 25069  | 0     | 0     | 0     | 0     |
| 25077  | 0     | 0     | 0     | 0     |
| 25088  | 0     | 0     | 0     | 0     |
| 25093  | 1     | 0     | 0     | 0     |
| 25121  | 0     | 0     | 0     | 0     |
| 25140  | 1     | 0     | 1     | 0     |
| 25144  | 0     | 0     | 0     | 0     |
| 25149  | 0     | 0     | 0     | 0     |
| 25159  | 0     | 0     | 0     | 0     |
| 25191  | 0     | 0     | 0     | 0     |
| 25193  | 1     | 0     | 0     | 1     |
| 25202  | 1     | 0     | 1     | 0     |
| 25215  | 0     | 0     | 1     | 0     |
| 25229  | 1     | 0     | 0     | 0     |
| 25231  | 1     | 1     | 0     | 0     |
| 25236  | 0     | 0     | 0     | 0     |
| 25242  | 0     | 0     | 0     | 0     |
| 25252  | 0     | 0     | 0     | 0     |
| 25253  | 1     | 1     | 0     | 0     |
| 25256  | 1     | 0     | 1     | 0     |
| 25260  | 0     | 0     | 0     | 0     |
| 25261  | 0     | 0     | 0     | 0     |
| 25280  | 0     | 0     | 0     | 0     |
| 25282  | 1     | 0     | 0     | 0     |
| 25289  | 0     | 0     | 0     | 0     |
| 25303  | 0     | 0     | 0     | 0     |

| respid | Q31_2 | Q31_3 | Q31_4 | Q31_5 |
|--------|-------|-------|-------|-------|
| 25304  | 0     | 0     | 1     | 0     |
| 25309  | 0     | 0     | 0     | 0     |
| 25317  | 0     | 0     | 0     | 0     |
| 25318  | 1     | 1     | 1     | 0     |
| 25320  | 0     | 0     | 0     | 0     |
| 25324  | 1     | 0     | 1     | 0     |
| 25331  | 0     | 0     | 0     | 0     |
| 25340  | 0     | 0     | 0     | 0     |
| 25342  | 1     | 0     | 0     | 0     |
| 25350  | 0     | 0     | 0     | 0     |
| 25352  | 0     | 0     | 0     | 0     |
| 25358  | 0     | 0     | 0     | 0     |
| 25375  | 1     | 1     | 0     | 0     |
| 25386  | 0     | 0     | 0     | 0     |
| 25388  | 0     | 0     | 0     | 0     |
| 25390  | 1     | 1     | 0     | 0     |
| 25391  | 0     | 0     | 0     | 0     |
| 25400  | 0     | 1     | 0     | 0     |
| 25413  | 1     | 0     | 1     | 0     |
| 25424  | 0     | 0     | 0     | 0     |
| 25426  | 1     | 0     | 0     | 0     |
| 25430  | 0     | 0     | 0     | 0     |
| 25434  | 1     | 1     | 0     | 0     |
| 25439  | 0     | 0     | 0     | 0     |
| 25441  | 0     | 0     | 0     | 0     |
| 25445  | 0     | 0     | 0     | 0     |
| 25451  | 0     | 0     | 0     | 0     |
| 25469  | 1     | 0     | 1     | 0     |
| 25471  | 0     | 1     | 1     | 0     |
| 25476  | 0     | 0     | 0     | 0     |
| 25480  | 0     | 0     | 0     | 0     |
| 25482  | 0     | 1     | 0     | 0     |

| respid | Q31_2 | Q31_3 | Q31_4 | Q31_5 |
|--------|-------|-------|-------|-------|
| 25500  | 0     | 1     | 0     | 0     |
| 25516  | 0     | 0     | 0     | 0     |
| 25521  | 1     | 1     | 1     | 1     |
| 25525  | 0     | 0     | 0     | 0     |
| 25530  | 1     | 0     | 0     | 0     |
| 25555  | 0     | 0     | 0     | 1     |
| 25558  | 0     | 0     | 0     | 0     |
| 25561  | 0     | 1     | 0     | 0     |
| 25566  | 0     | 0     | 0     | 0     |
| 25571  | 1     | 0     | 0     | 0     |
| 25572  | 0     | 0     | 0     | 0     |
| 25574  | 0     | 0     | 0     | 0     |
| 25588  | 0     | 0     | 0     | 0     |
| 25591  | 0     | 1     | 0     | 0     |
| 25599  | 1     | 1     | 1     | 0     |
| 25604  | 1     | 0     | 0     | 0     |
| 25614  | 0     | 0     | 0     | 0     |
| 25634  | 0     | 1     | 0     | 0     |
| 25642  | 0     | 0     | 0     | 0     |
| 25647  | 0     | 0     | 0     | 0     |
| 25653  | 1     | 0     | 0     | 0     |
| 25654  | 1     | 0     | 0     | 0     |
| 25660  | 0     | 0     | 0     | 0     |
| 25664  | 0     | 0     | 0     | 0     |
| 25665  | 0     | 1     | 0     | 0     |
| 25672  | 0     | 0     | 0     | 1     |
| 25677  | 0     | 0     | 0     | 0     |
| 25685  | 0     | 0     | 0     | 0     |
| 25699  | 1     | 0     | 0     | 1     |
| 25703  | 0     | 0     | 0     | 0     |
| 25704  | 0     | 1     | 0     | 0     |
| 25705  | 0     | 0     | 0     | 0     |

| respid | Q31_2 | Q31_3 | Q31_4 | Q31_5 |
|--------|-------|-------|-------|-------|
| 25711  | 0     | 0     | 0     | 0     |
| 25727  | 0     | 0     | 0     | 0     |
| 25728  | 0     | 0     | 0     | 0     |
| 25733  | 0     | 0     | 0     | 0     |
| 25735  | 0     | 0     | 0     | 0     |
| 25736  | 0     | 0     | 0     | 0     |
| 25742  | 0     | 0     | 0     | 0     |
| 25750  | 0     | 0     | 0     | 0     |
| 25754  | 0     | 0     | 0     | 0     |
| 25776  | 1     | 1     | 0     | 1     |
| 25778  | 0     | 0     | 0     | 0     |
| 25796  | 0     | 0     | 0     | 0     |
| 25852  | 1     | 1     | 0     | 0     |
| 25858  | 0     | 0     | 0     | 0     |
| 25859  | 0     | 0     | 0     | 0     |
| 25886  | 0     | 0     | 0     | 0     |
| 25890  | 0     | 0     | 0     | 0     |
| 25897  | 0     | 0     | 0     | 0     |
| 25903  | 0     | 0     | 0     | 0     |
| 25905  | 0     | 0     | 0     | 0     |
| 25917  | 0     | 0     | 0     | 0     |
| 25918  | 1     | 0     | 0     | 0     |
| 25928  | 0     | 0     | 0     | 0     |
| 25930  | 0     | 0     | 0     | 0     |
| 25949  | 1     | 1     | 0     | 0     |
| 25955  | 0     | 0     | 0     | 0     |
| 25959  | 0     | 0     | 0     | 1     |
| 25964  | 0     | 0     | 0     | 0     |
| 25972  | 0     | 0     | 0     | 0     |
| 25999  | 1     | 1     | 1     | 0     |
| 26019  | 0     | 0     | 0     | 0     |
| 26025  | 0     | 0     | 0     | 1     |

| respid | Q31_2 | Q31_3 | Q31_4 | Q31_5 |
|--------|-------|-------|-------|-------|
| 26039  | 1     | 1     | 0     | 0     |
| 26055  | 0     | 0     | 0     | 0     |
| 26061  | 1     | 1     | 0     | 0     |
| 26076  | 0     | 0     | 0     | 0     |
| 26088  | 0     | 0     | 0     | 0     |
| 26094  | 0     | 0     | 0     | 0     |
| 26104  | 0     | 0     | 0     | 0     |
| 26131  | 0     | 0     | 0     | 0     |
| 26134  | 0     | 0     | 0     | 0     |
| 26160  | 0     | 0     | 0     | 0     |
| 26168  | 0     | 0     | 0     | 0     |
| 26170  | 0     | 0     | 0     | 0     |
| 26191  | 0     | 0     | 0     | 0     |
| 26192  | 0     | 0     | 0     | 0     |
| 26195  | 0     | 0     | 1     | 0     |
| 26198  | 0     | 0     | 0     | 0     |
| 26199  | 1     | 1     | 0     | 0     |
| 26201  | 0     | 0     | 0     | 0     |
| 26202  | 0     | 0     | 0     | 0     |
| 26226  | 1     | 0     | 0     | 0     |
| 26233  | 1     | 1     | 0     | 0     |
| 26236  | 0     | 0     | 0     | 0     |
| 26242  | 1     | 1     | 0     | 0     |
| 26244  | 1     | 1     | 0     | 0     |
| 26250  | 0     | 0     | 0     | 0     |
| 26266  | 0     | 0     | 0     | 0     |
| 26274  | 0     | 0     | 0     | 0     |
| 26286  | 1     | 1     | 0     | 0     |
| 26288  | 1     | 0     | 0     | 0     |
| 26295  | 0     | 0     | 0     | 0     |
| 26296  | 0     | 0     | 0     | 0     |
| 26297  | 0     | 0     | 0     | 0     |



| respid | Q31_2 | Q31_3 | Q31_4 | Q31_5 |
|--------|-------|-------|-------|-------|
| 26300  | 1     | 0     | 0     | 0     |
| 26317  | 0     | 0     | 0     | 0     |
| 26343  | 0     | 0     | 0     | 0     |
| 26367  | 0     | 0     | 0     | 0     |
| 26372  | 0     | 0     | 1     | 1     |
| 26403  | 1     | 0     | 0     | 0     |
| 26423  | 0     | 0     | 0     | 0     |
| 26430  | 0     | 0     | 0     | 0     |
| 26437  | 1     | 0     | 0     | 1     |
| 26457  | 0     | 0     | 0     | 0     |
| 26466  | 0     | 0     | 0     | 0     |
| 26467  | 0     | 0     | 0     | 0     |
| 26469  | 1     | 1     | 1     | 0     |
| 26494  | 0     | 0     | 0     | 0     |
| 26510  | 0     | 0     | 0     | 0     |
| 26519  | 1     | 0     | 0     | 0     |
| 26525  | 0     | 0     | 0     | 0     |
| 26529  | 0     | 0     | 0     | 0     |
| 26533  | 1     | 0     | 0     | 0     |
| 26556  | 0     | 0     | 0     | 0     |
| 26559  | 1     | 1     | 0     | 0     |
| 26565  | 0     | 0     | 0     | 0     |
| 26576  | 0     | 0     | 1     | 1     |
| 26601  | 0     | 0     | 0     | 0     |
| 26607  | 1     | 0     | 0     | 1     |
| 26611  | 0     | 0     | 0     | 0     |
| 26619  | 0     | 1     | 1     | 0     |
| 26631  | 0     | 0     | 0     | 0     |
| 26654  | 0     | 0     | 0     | 0     |
| 26656  | 1     | 1     | 0     | 0     |
| 26664  | 0     | 0     | 0     | 0     |
| 26667  | 0     | 0     | 0     | 0     |

| respid | Q31_2 | Q31_3 | Q31_4 | Q31_5 |
|--------|-------|-------|-------|-------|
| 26674  | 1     | 0     | 0     | 1     |
| 26678  | 0     | 0     | 0     | 1     |
| 26693  | 0     | 0     | 0     | 0     |
| 26696  | 0     | 0     | 1     | 0     |
| 26703  | 1     | 1     | 1     | 1     |
| 26705  | 0     | 0     | 0     | 0     |
| 26706  | 1     | 1     | 0     | 0     |
| 26716  | 0     | 0     | 0     | 0     |
| 26721  | 0     | 0     | 0     | 0     |
| 26730  | 0     | 0     | 1     | 0     |
| 26752  | 0     | 0     | 0     | 0     |
| 26755  | 0     | 0     | 0     | 0     |
| 26791  | 0     | 0     | 0     | 0     |
| 26804  | 0     | 0     | 0     | 0     |
| 26810  | 1     | 1     | 1     | 0     |
| 26813  | 0     | 0     | 0     | 0     |
| 26833  | 1     | 0     | 0     | 0     |
| 26880  | 0     | 0     | 0     | 0     |
| 26884  | 0     | 0     | 0     | 0     |
| 26885  | 0     | 0     | 0     | 0     |
| 26890  | 1     | 1     | 0     | 0     |
| 26937  | 0     | 0     | 0     | 0     |
| 26939  | 0     | 0     | 0     | 0     |
| 26941  | 0     | 0     | 0     | 0     |
| 26992  | 1     | 1     | 0     | 0     |
| 27037  | 0     | 0     | 0     | 0     |
| 27045  | 0     | 0     | 0     | 0     |
| 27053  | 1     | 1     | 0     | 0     |
| 27060  | 0     | 0     | 0     | 0     |
| 27076  | 0     | 0     | 0     | 1     |
| 27124  | 0     | 0     | 0     | 0     |
| 27125  | 0     | 0     | 0     | 0     |

| respid | Q31_2 | Q31_3 | Q31_4 | Q31_5 |
|--------|-------|-------|-------|-------|
| 27132  | 0     | 0     | 0     | 0     |
| 27166  | 0     | 0     | 0     | 0     |
| 27190  | 0     | 0     | 0     | 0     |
| 27199  | 0     | 0     | 0     | 0     |
| 27221  | 0     | 0     | 0     | 0     |
| 27233  | 1     | 0     | 0     | 1     |
| 27241  | 0     | 0     | 0     | 0     |
| 27244  | 0     | 0     | 0     | 0     |
| 27245  | 1     | 1     | 1     | 1     |
| 27246  | 0     | 0     | 0     | 0     |
| 27253  | 0     | 0     | 0     | 0     |
| 27255  | 0     | 0     | 1     | 0     |
| 27267  | 0     | 0     | 0     | 0     |
| 27283  | 1     | 1     | 0     | 0     |
| 27289  | 0     | 0     | 0     | 0     |
| 27302  | 0     | 0     | 0     | 0     |
| 27317  | 0     | 0     | 0     | 0     |
| 27319  | 1     | 0     | 0     | 0     |
| 27331  | 0     | 0     | 0     | 0     |
| 27333  | 0     | 0     | 0     | 0     |
| 27340  | 0     | 0     | 0     | 0     |
| 27362  | 0     | 0     | 1     | 0     |
| 27370  | 0     | 0     | 0     | 0     |
| 27379  | 1     | 0     | 0     | 0     |
| 27386  | 0     | 0     | 0     | 0     |
| 27398  | 0     | 0     | 0     | 0     |
| 27404  | 0     | 0     | 0     | 0     |
| 27408  | 1     | 1     | 0     | 0     |
| 27412  | 0     | 0     | 0     | 0     |
| 27426  | 0     | 1     | 0     | 0     |
| 27455  | 0     | 0     | 0     | 0     |
| 27464  | 0     | 0     | 0     | 0     |

| respid | Q31_2 | Q31_3 | Q31_4 | Q31_5 |
|--------|-------|-------|-------|-------|
| 27484  | 1     | 0     | 0     | 0     |
| 27493  | 1     | 1     | 0     | 0     |
| 27512  | 0     | 0     | 0     | 1     |
| 27525  | 0     | 0     | 0     | 0     |
| 27532  | 1     | 1     | 0     | 0     |
| 27539  | 0     | 0     | 0     | 0     |
| 27540  | 0     | 1     | 0     | 0     |
| 27552  | 1     | 0     | 0     | 1     |
| 27562  | 1     | 0     | 0     | 0     |
| 27568  | 0     | 0     | 0     | 0     |
| 27574  | 1     | 1     | 1     | 1     |
| 27575  | 1     | 0     | 0     | 0     |
| 27577  | 0     | 0     | 0     | 0     |
| 27589  | 0     | 0     | 0     | 0     |
| 27593  | 0     | 0     | 0     | 0     |
| 27594  | 1     | 1     | 0     | 0     |
| 27595  | 1     | 1     | 1     | 1     |
| 27598  | 0     | 0     | 1     | 0     |
| 27620  | 0     | 0     | 0     | 0     |
| 27621  | 0     | 0     | 0     | 0     |
| 27628  | 1     | 0     | 0     | 0     |
| 27633  | 1     | 0     | 0     | 0     |
| 27643  | 0     | 0     | 0     | 0     |
| 27644  | 0     | 0     | 0     | 0     |
| 27668  | 0     | 0     | 0     | 0     |
| 27681  | 0     | 0     | 0     | 0     |
| 27691  | 0     | 0     | 0     | 0     |
| 27693  | 0     | 0     | 0     | 0     |
| 27703  | 1     | 1     | 0     | 0     |
| 27708  | 0     | 0     | 0     | 0     |
| 27719  | 0     | 0     | 0     | 0     |
| 27720  | 0     | 0     | 0     | 0     |

| respid | Q31_2 | Q31_3 | Q31_4 | Q31_5 |
|--------|-------|-------|-------|-------|
| 27723  | 1     | 0     | 0     | 0     |
| 27725  | 0     | 0     | 0     | 0     |
| 27734  | 0     | 0     | 0     | 0     |
| 27744  | 0     | 0     | 0     | 0     |
| 27749  | 0     | 0     | 0     | 0     |
| 27762  | 0     | 1     | 0     | 1     |
| 27808  | 1     | 1     | 0     | 0     |
| 27810  | 1     | 0     | 1     | 0     |
| 27812  | 1     | 0     | 0     | 0     |
| 27815  | 0     | 0     | 0     | 0     |
| 27818  | 0     | 0     | 0     | 0     |
| 27823  | 0     | 0     | 0     | 0     |
| 27841  | 0     | 0     | 0     | 0     |
| 27843  | 0     | 0     | 0     | 0     |
| 27851  | 1     | 1     | 0     | 0     |
| 27858  | 1     | 0     | 0     | 0     |
| 27859  | 0     | 0     | 0     | 0     |
| 27869  | 0     | 0     | 0     | 0     |
| 27872  | 0     | 0     | 0     | 0     |
| 27873  | 0     | 0     | 0     | 0     |
| 27884  | 1     | 0     | 0     | 0     |
| 27904  | 0     | 0     | 0     | 0     |
| 27915  | 0     | 0     | 0     | 0     |
| 27918  | 1     | 0     | 0     | 1     |
| 27937  | 0     | 0     | 0     | 0     |
| 27943  | 0     | 0     | 0     | 0     |
| 27948  | 1     | 0     | 0     | 0     |
| 27971  | 0     | 0     | 0     | 0     |
| 27991  | 0     | 0     | 0     | 0     |
| 28000  | 0     | 0     | 0     | 0     |
| 28011  | 1     | 1     | 0     | 0     |
| 28022  | 0     | 0     | 0     | 0     |

| respid | Q31_2 | Q31_3 | Q31_4 | Q31_5 |
|--------|-------|-------|-------|-------|
| 28025  | 0     | 0     | 0     | 0     |
| 28041  | 0     | 0     | 0     | 0     |
| 28057  | 1     | 1     | 1     | 1     |
| 28080  | 0     | 0     | 0     | 0     |
| 28098  | 0     | 0     | 0     | 0     |
| 28104  | 0     | 0     | 0     | 0     |
| 28109  | 0     | 0     | 0     | 0     |
| 28129  | 0     | 0     | 0     | 0     |
| 28141  | 0     | 0     | 0     | 0     |
| 28143  | 0     | 0     | 0     | 0     |
| 28149  | 0     | 1     | 0     | 0     |
| 28151  | 0     | 0     | 0     | 1     |
| 28161  | 0     | 0     | 0     | 0     |
| 28169  | 0     | 0     | 0     | 0     |
| 28194  | 0     | 0     | 1     | 0     |
| 28197  | 0     | 0     | 0     | 0     |
| 28206  | 0     | 0     | 0     | 0     |
| 28218  | 0     | 0     | 0     | 0     |
| 28227  | 0     | 0     | 0     | 0     |
| 28235  | 0     | 0     | 0     | 0     |
| 28246  | 0     | 0     | 0     | 0     |
| 28259  | 1     | 0     | 1     | 1     |
| 28263  | 0     | 0     | 0     | 0     |
| 28267  | 1     | 0     | 1     | 0     |
| 28274  | 0     | 0     | 0     | 0     |
| 28278  | 0     | 1     | 0     | 0     |
| 28288  | 1     | 1     | 0     | 0     |
| 28308  | 0     | 0     | 0     | 0     |
| 28309  | 0     | 0     | 1     | 1     |
| 28323  | 0     | 1     | 0     | 0     |
| 28335  | 0     | 0     | 0     | 1     |
| 28354  | 0     | 0     | 0     | 1     |

| respid | Q31_2 | Q31_3 | Q31_4 | Q31_5 |
|--------|-------|-------|-------|-------|
| 28355  | 0     | 1     | 0     | 1     |
| 28356  | 0     | 0     | 0     | 0     |
| 28357  | 0     | 0     | 0     | 0     |
| 28363  | 0     | 0     | 0     | 0     |
| 28366  | 0     | 0     | 0     | 0     |
| 28372  | 1     | 1     | 1     | 0     |
| 28381  | 1     | 1     | 0     | 0     |
| 28388  | 0     | 0     | 0     | 0     |
| 28413  | 0     | 0     | 1     | 0     |
| 28421  | 0     | 0     | 0     | 0     |
| 28430  | 0     | 0     | 0     | 0     |
| 28439  | 0     | 0     | 0     | 1     |
| 28458  | 1     | 0     | 1     | 0     |
| 28461  | 0     | 0     | 0     | 0     |
| 28466  | 0     | 0     | 0     | 0     |
| 28492  | 0     | 0     | 0     | 0     |
| 28534  | 0     | 0     | 0     | 0     |
| 28537  | 1     | 0     | 0     | 0     |
| 28560  | 0     | 0     | 0     | 0     |
| 28566  | 0     | 0     | 0     | 0     |
| 28569  | 0     | 0     | 0     | 0     |
| 28584  | 0     | 1     | 0     | 0     |
| 28590  | 0     | 0     | 0     | 0     |
| 28596  | 0     | 0     | 0     | 0     |
| 28608  | 0     | 0     | 0     | 0     |
| 28631  | 0     | 1     | 0     | 0     |
| 28644  | 0     | 1     | 0     | 0     |
| 28646  | 0     | 1     | 0     | 0     |
| 28665  | 0     | 0     | 0     | 0     |
| 28686  | 0     | 0     | 0     | 0     |
| 28704  | 0     | 0     | 0     | 0     |
| 28719  | 0     | 0     | 0     | 0     |

| respid | Q31_2 | Q31_3 | Q31_4 | Q31_5 |
|--------|-------|-------|-------|-------|
| 28736  | 0     | 0     | 0     | 0     |
| 28739  | 1     | 0     | 1     | 0     |
| 28758  | 1     | 1     | 0     | 0     |
| 28761  | 0     | 1     | 0     | 0     |
| 28770  | 1     | 1     | 1     | 0     |
| 28774  | 1     | 1     | 0     | 0     |
| 28778  | 0     | 1     | 1     | 0     |
| 28783  | 0     | 0     | 0     | 0     |
| 28785  | 0     | 0     | 0     | 0     |
| 28797  | 1     | 1     | 1     | 0     |
| 28801  | 0     | 0     | 0     | 0     |
| 28821  | 0     | 0     | 0     | 0     |
| 28827  | 0     | 0     | 0     | 0     |
| 28828  | 0     | 0     | 0     | 0     |
| 28871  | 0     | 0     | 0     | 0     |
| 28876  | 0     | 0     | 0     | 0     |
| 28891  | 1     | 0     | 1     | 0     |
| 28898  | 0     | 0     | 0     | 0     |
| 28909  | 0     | 0     | 0     | 0     |
| 28930  | 0     | 0     | 0     | 0     |
| 28935  | 0     | 1     | 0     | 0     |
| 28964  | 0     | 0     | 0     | 0     |
| 28965  | 0     | 0     | 0     | 0     |
| 28967  | 0     | 1     | 0     | 1     |
| 28975  | 0     | 0     | 0     | 0     |
| 28982  | 0     | 0     | 0     | 0     |
| 28989  | 0     | 0     | 0     | 0     |
| 29003  | 0     | 0     | 0     | 0     |
| 29004  | 0     | 0     | 0     | 0     |
| 29007  | 0     | 0     | 0     | 0     |
| 29008  | 0     | 0     | 0     | 0     |
| 29011  | 0     | 0     | 0     | 0     |



| respid | Q31_2 | Q31_3 | Q31_4 | Q31_5 |
|--------|-------|-------|-------|-------|
| 29012  | 0     | 0     | 0     | 0     |
| 29014  | 0     | 0     | 0     | 0     |
| 29016  | 1     | 0     | 0     | 0     |
| 29018  | 0     | 0     | 0     | 0     |
| 29048  | 0     | 0     | 0     | 0     |
| 29184  | 0     | 0     | 0     | 0     |
| 29237  | 0     | 0     | 0     | 0     |
| 29252  | 0     | 0     | 0     | 0     |
| 29267  | 0     | 0     | 0     | 0     |
| 29276  | 0     | 0     | 0     | 0     |
| 29281  | 1     | 1     | 0     | 1     |
| 29285  | 1     | 0     | 0     | 0     |
| 29291  | 0     | 1     | 1     | 1     |
| 29304  | 0     | 0     | 0     | 0     |
| 29323  | 1     | 0     | 0     | 0     |
| 29330  | 0     | 0     | 0     | 0     |
| 29357  | 1     | 1     | 0     | 0     |
| 29416  | 0     | 1     | 0     | 0     |
| 29432  | 0     | 0     | 0     | 0     |
| 29482  | 0     | 1     | 0     | 0     |
| 29506  | 0     | 0     | 0     | 0     |
| 29509  | 0     | 0     | 0     | 0     |
| 29512  | 0     | 1     | 0     | 0     |
| 29519  | 0     | 0     | 0     | 0     |
| 29520  | 0     | 0     | 0     | 0     |
| 29521  | 0     | 0     | 0     | 0     |
| 29529  | 1     | 1     | 1     | 1     |
| 29532  | 0     | 0     | 0     | 0     |
| 29547  | 1     | 1     | 1     | 0     |
| 29551  | 1     | 0     | 0     | 0     |
| 29584  | 1     | 1     | 0     | 1     |
| 29591  | 1     | 0     | 0     | 0     |

| respid | Q31_2 | Q31_3 | Q31_4 | Q31_5 |
|--------|-------|-------|-------|-------|
| 29613  | 0     | 0     | 0     | 0     |
| 29615  | 0     | 0     | 0     | 0     |
| 29625  | 0     | 0     | 0     | 0     |
| 29660  | 0     | 0     | 0     | 0     |
| 29677  | 0     | 0     | 0     | 0     |
| 29700  | 1     | 0     | 0     | 0     |
| 29715  | 0     | 0     | 0     | 0     |
| 29720  | 0     | 0     | 0     | 0     |
| 29730  | 1     | 1     | 0     | 0     |
| 29734  | 1     | 1     | 0     | 0     |
| 29754  | 0     | 0     | 0     | 0     |
| 29771  | 0     | 0     | 0     | 0     |
| 29774  | 0     | 0     | 0     | 0     |
| 29783  | 0     | 0     | 0     | 0     |
| 29812  | 0     | 1     | 0     | 1     |
| 29813  | 0     | 0     | 0     | 0     |
| 29814  | 1     | 0     | 1     | 1     |
| 29820  | 1     | 1     | 0     | 0     |
| 29906  | 0     | 0     | 0     | 0     |
| 29907  | 1     | 0     | 1     | 0     |
| 29928  | 0     | 0     | 0     | 0     |
| 29932  | 0     | 0     | 0     | 0     |
| 29958  | 1     | 0     | 1     | 0     |
| 29982  | 0     | 0     | 0     | 0     |
| 29989  | 0     | 0     | 0     | 0     |
| 29994  | 1     | 0     | 0     | 0     |
| 30005  | 1     | 0     | 0     | 0     |
| 30077  | 0     | 0     | 0     | 0     |
| 30098  | 0     | 0     | 0     | 0     |
| 30107  | 0     | 0     | 0     | 0     |
| 30154  | 0     | 0     | 0     | 0     |
| 30159  | 0     | 0     | 0     | 0     |

| respid | Q31_2 | Q31_3 | Q31_4 | Q31_5 |
|--------|-------|-------|-------|-------|
| 30162  | 0     | 0     | 0     | 0     |
| 30163  | 0     | 0     | 0     | 0     |
| 30189  | 0     | 0     | 0     | 0     |
| 30230  | 0     | 0     | 0     | 0     |
| 30259  | 0     | 0     | 1     | 0     |
| 30284  | 0     | 0     | 0     | 0     |
| 30296  | 0     | 0     | 0     | 0     |
| 30330  | 0     | 0     | 0     | 0     |
| 30341  | 1     | 1     | 0     | 0     |
| 30352  | 0     | 1     | 0     | 0     |
| 30379  | 0     | 0     | 0     | 0     |
| 30424  | 1     | 0     | 0     | 0     |
| 30447  | 0     | 0     | 0     | 0     |
| 30477  | 1     | 1     | 1     | 1     |
| 30503  | 0     | 0     | 0     | 0     |
| 30515  | 1     | 0     | 0     | 0     |
| 30516  | 0     | 0     | 0     | 0     |
| 30623  | 0     | 1     | 0     | 1     |
| 30639  | 0     | 0     | 0     | 0     |
| 30670  | 0     | 0     | 0     | 0     |
| 30697  | 0     | 0     | 0     | 0     |
| 30735  | 1     | 0     | 0     | 0     |
| 30742  | 0     | 0     | 0     | 0     |
| 30751  | 1     | 1     | 0     | 0     |
| 30789  | 0     | 0     | 0     | 0     |
| 30867  | 0     | 0     | 0     | 0     |
| 30876  | 0     | 0     | 0     | 0     |
| 30877  | 0     | 0     | 0     | 0     |
| 30887  | 0     | 0     | 0     | 0     |
| 30891  | 0     | 1     | 0     | 0     |
| 31030  | 0     | 0     | 0     | 0     |
| 31059  | 0     | 0     | 0     | 0     |

| respid | Q31_2 | Q31_3 | Q31_4 | Q31_5 |
|--------|-------|-------|-------|-------|
| 31082  | 0     | 0     | 0     | 0     |
| 31106  | 0     | 0     | 0     | 0     |
| 31110  | 0     | 0     | 0     | 0     |
| 31265  | 1     | 1     | 1     | 0     |
| 31266  | 0     | 0     | 0     | 0     |
| 31267  | 0     | 0     | 0     | 1     |
| 31310  | 0     | 0     | 0     | 0     |
| 31325  | 0     | 0     | 0     | 0     |
| 31367  | 0     | 0     | 0     | 0     |
| 31389  | 0     | 0     | 0     | 0     |
| 31440  | 0     | 0     | 0     | 0     |
| 31465  | 0     | 0     | 0     | 0     |
| 31477  | 0     | 0     | 0     | 0     |
| 31491  | 0     | 0     | 0     | 0     |
| 31494  | 0     | 0     | 1     | 1     |
| 31509  | 0     | 1     | 0     | 0     |
| 31533  | 0     | 0     | 0     | 0     |
| 31547  | 1     | 0     | 0     | 0     |
| 31558  | 0     | 0     | 0     | 0     |
| 31579  | 1     | 1     | 0     | 0     |
| 31591  | 0     | 0     | 0     | 0     |
| 31596  | 0     | 0     | 0     | 1     |
| 31601  | 1     | 0     | 0     | 1     |
| 31605  | 0     | 0     | 0     | 0     |
| 31637  | 0     | 0     | 0     | 0     |
| 31646  | 0     | 0     | 0     | 0     |
| 31647  | 1     | 1     | 0     | 1     |
| 31650  | 0     | 0     | 0     | 0     |
| 31651  | 1     | 0     | 0     | 0     |
| 31657  | 0     | 0     | 0     | 0     |
| 31660  | 0     | 0     | 0     | 0     |
| 31661  | 1     | 0     | 0     | 0     |

| respid | Q31_2 | Q31_3 | Q31_4 | Q31_5 |
|--------|-------|-------|-------|-------|
| 31667  | 0     | 0     | 0     | 0     |
| 31674  | 1     | 0     | 0     | 0     |
| 31686  | 1     | 1     | 0     | 0     |
| 31693  | 0     | 0     | 0     | 0     |
| 31716  | 0     | 0     | 0     | 0     |
| 31818  | 0     | 0     | 0     | 0     |
| 31886  | 0     | 0     | 0     | 0     |
| 31945  | 0     | 0     | 0     | 1     |
| 31957  | 0     | 0     | 0     | 0     |
| 31966  | 0     | 1     | 0     | 0     |
| 31978  | 0     | 0     | 0     | 0     |
| 31999  | 0     | 1     | 0     | 0     |
| 32026  | 1     | 1     | 0     | 0     |
| 32033  | 0     | 0     | 0     | 0     |
| 32037  | 0     | 0     | 0     | 1     |
| 32038  | 1     | 0     | 0     | 0     |
| 32047  | 1     | 1     | 0     | 0     |
| 32053  | 0     | 0     | 0     | 0     |
| 32069  | 0     | 0     | 0     | 0     |
| 32081  | 0     | 1     | 0     | 1     |
| 32123  | 1     | 1     | 0     | 0     |
| 32130  | 0     | 0     | 0     | 0     |
| 32141  | 0     | 0     | 0     | 0     |
| 32158  | 0     | 0     | 0     | 0     |
| 32165  | 0     | 0     | 0     | 0     |
| 32180  | 1     | 0     | 0     | 0     |
| 32221  | 0     | 0     | 1     | 1     |
| 32292  | 0     | 0     | 0     | 0     |
| 32318  | 0     | 1     | 0     | 0     |
| 32346  | 0     | 0     | 0     | 0     |
| 32402  | 1     | 1     | 0     | 0     |
| 32422  | 0     | 0     | 0     | 0     |

| respid | Q31_2 | Q31_3 | Q31_4 | Q31_5 |
|--------|-------|-------|-------|-------|
| 32439  | 0     | 0     | 0     | 0     |
| 32507  | 0     | 0     | 0     | 0     |
| 32522  | 0     | 0     | 0     | 0     |
| 32535  | 0     | 0     | 0     | 0     |
| 32546  | 0     | 0     | 0     | 0     |
| 32553  | 0     | 0     | 0     | 0     |
| 32570  | 0     | 0     | 0     | 0     |
| 32592  | 0     | 1     | 0     | 0     |
| 32605  | 1     | 1     | 0     | 1     |
| 32630  | 0     | 0     | 0     | 0     |
| 32642  | 0     | 0     | 0     | 0     |
| 32646  | 0     | 0     | 0     | 0     |
| 32665  | 0     | 0     | 0     | 0     |
| 32677  | 0     | 0     | 0     | 0     |
| 32694  | 0     | 0     | 0     | 0     |
| 32698  | 0     | 0     | 0     | 0     |
| 32754  | 1     | 0     | 0     | 0     |
| 32799  | 0     | 0     | 0     | 0     |
| 32816  | 0     | 0     | 0     | 0     |
| 32819  | 0     | 0     | 0     | 0     |
| 32840  | 0     | 1     | 0     | 0     |
| 32861  | 0     | 0     | 0     | 0     |
| 32866  | 0     | 0     | 0     | 0     |
| 32889  | 1     | 1     | 0     | 1     |
| 32960  | 0     | 0     | 0     | 0     |
| 32965  | 0     | 0     | 0     | 0     |
| 32986  | 0     | 0     | 0     | 1     |
| 33005  | 1     | 0     | 0     | 0     |
| 33054  | 0     | 0     | 0     | 0     |
| 33072  | 0     | 0     | 1     | 0     |
| 33095  | 0     | 0     | 0     | 0     |
| 33099  | 0     | 0     | 0     | 0     |

| respid | Q31_2 | Q31_3 | Q31_4 | Q31_5 |
|--------|-------|-------|-------|-------|
| 33121  | 0     | 0     | 0     | 0     |
| 33152  | 1     | 0     | 0     | 0     |
| 33159  | 0     | 1     | 0     | 0     |
| 33189  | 0     | 0     | 0     | 0     |
| 33198  | 1     | 0     | 0     | 0     |
| 33202  | 0     | 1     | 0     | 0     |
| 33204  | 0     | 1     | 0     | 0     |
| 33224  | 0     | 0     | 0     | 0     |
| 33272  | 1     | 1     | 0     | 0     |
| 33294  | 0     | 0     | 0     | 0     |
| 33300  | 0     | 0     | 1     | 0     |
| 33314  | 0     | 1     | 0     | 0     |
| 33338  | 0     | 0     | 0     | 0     |
| 33350  | 0     | 0     | 0     | 0     |
| 33362  | 0     | 0     | 0     | 0     |
| 33368  | 0     | 0     | 0     | 0     |
| 33374  | 1     | 0     | 0     | 0     |
| 33380  | 1     | 0     | 1     | 0     |
| 33385  | 0     | 0     | 0     | 0     |
| 33402  | 1     | 1     | 1     | 0     |
| 33414  | 0     | 0     | 0     | 0     |
| 33439  | 1     | 0     | 1     | 0     |
| 33449  | 0     | 0     | 0     | 0     |
| 33533  | 0     | 0     | 0     | 0     |
| 33540  | 0     | 0     | 0     | 0     |
| 33556  | 0     | 0     | 0     | 0     |
| 33615  | 0     | 0     | 0     | 0     |
| 33694  | 0     | 0     | 0     | 0     |
| 33717  | 0     | 0     | 0     | 0     |
| 33729  | 0     | 0     | 0     | 0     |
| 33746  | 0     | 0     | 0     | 0     |
| 33764  | 1     | 0     | 0     | 0     |

| respid | Q31_2 | Q31_3 | Q31_4 | Q31_5 |
|--------|-------|-------|-------|-------|
| 33790  | 1     | 1     | 0     | 0     |
| 33868  | 1     | 0     | 0     | 0     |
| 33872  | 0     | 0     | 1     | 0     |
| 33883  | 0     | 0     | 0     | 0     |
| 33884  | 0     | 0     | 0     | 0     |
| 33900  | 0     | 0     | 0     | 0     |
| 33933  | 0     | 0     | 0     | 0     |
| 33949  | 0     | 0     | 0     | 0     |
| 34005  | 0     | 0     | 0     | 0     |
| 34016  | 0     | 0     | 0     | 0     |
| 34041  | 0     | 1     | 0     | 0     |
| 34053  | 0     | 0     | 0     | 0     |
| 34056  | 0     | 0     | 0     | 0     |
| 34093  | 0     | 0     | 0     | 0     |
| 34112  | 1     | 1     | 0     | 0     |
| 34136  | 1     | 0     | 1     | 1     |
| 34138  | 0     | 0     | 0     | 0     |
| 34139  | 0     | 0     | 0     | 0     |
| 34189  | 0     | 0     | 0     | 0     |
| 34239  | 1     | 0     | 0     | 0     |
| 34240  | 1     | 0     | 0     | 0     |
| 34241  | 0     | 0     | 0     | 0     |
| 34259  | 0     | 0     | 0     | 0     |
| 34303  | 0     | 1     | 0     | 0     |
| 34306  | 0     | 0     | 0     | 0     |
| 34395  | 0     | 0     | 0     | 0     |
| 34463  | 1     | 1     | 0     | 0     |
| 34466  | 0     | 0     | 0     | 0     |
| 34471  | 1     | 0     | 0     | 0     |
| 34489  | 0     | 0     | 0     | 0     |
| 34518  | 1     | 1     | 1     | 1     |
| 34542  | 0     | 0     | 0     | 0     |



| respid | Q31_2 | Q31_3 | Q31_4 | Q31_5 |
|--------|-------|-------|-------|-------|
| 34595  | 0     | 0     | 0     | 0     |
| 34604  | 0     | 0     | 0     | 0     |
| 34631  | 1     | 1     | 0     | 0     |
| 34665  | 1     | 0     | 0     | 0     |
| 34716  | 0     | 0     | 0     | 0     |
| 34729  | 0     | 0     | 0     | 0     |
| 34772  | 1     | 0     | 0     | 1     |
| 34800  | 0     | 0     | 0     | 0     |
| 34819  | 0     | 0     | 0     | 0     |
| 34829  | 1     | 0     | 0     | 0     |
| 34831  | 1     | 0     | 0     | 0     |
| 34839  | 0     | 0     | 0     | 1     |
| 34868  | 0     | 0     | 0     | 0     |
| 34869  | 0     | 0     | 0     | 0     |
| 34882  | 0     | 0     | 0     | 0     |
| 34895  | 1     | 1     | 0     | 0     |
| 34901  | 0     | 1     | 0     | 0     |
| 34904  | 0     | 0     | 1     | 0     |
| 34907  | 0     | 0     | 0     | 0     |
| 34914  | 0     | 0     | 0     | 0     |
| 34918  | 1     | 1     | 1     | 0     |
| 34924  | 0     | 0     | 0     | 0     |
| 34933  | 1     | 0     | 0     | 0     |
| 34938  | 1     | 1     | 0     | 0     |
| 34952  | 0     | 0     | 0     | 0     |
| 34959  | 0     | 0     | 0     | 0     |
| 34972  | 0     | 0     | 0     | 0     |
| 34973  | 1     | 1     | 0     | 0     |
| 34975  | 0     | 1     | 1     | 1     |
| 34977  | 1     | 0     | 0     | 0     |
| 34978  | 0     | 0     | 0     | 0     |
| 34980  | 0     | 0     | 0     | 0     |

| respid | Q31_2 | Q31_3 | Q31_4 | Q31_5 |
|--------|-------|-------|-------|-------|
| 34984  | 0     | 1     | 0     | 0     |
| 34986  | 0     | 0     | 0     | 0     |
| 34994  | 0     | 0     | 0     | 0     |
| 34996  | 0     | 0     | 0     | 0     |
| 35003  | 0     | 0     | 0     | 0     |
| 35014  | 0     | 0     | 0     | 0     |
| 35029  | 0     | 0     | 0     | 0     |
| 35030  | 0     | 0     | 0     | 0     |
| 35037  | 0     | 0     | 1     | 0     |
| 35043  | 0     | 0     | 0     | 0     |
| 35048  | 0     | 0     | 0     | 0     |
| 35055  | 0     | 0     | 0     | 0     |
| 35067  | 0     | 0     | 0     | 0     |
| 35072  | 1     | 0     | 0     | 0     |
| 35078  | 0     | 0     | 0     | 0     |
| 35084  | 0     | 0     | 0     | 0     |
| 35095  | 0     | 0     | 0     | 0     |
| 35096  | 0     | 0     | 0     | 0     |
| 35097  | 0     | 0     | 1     | 1     |
| 35098  | 1     | 0     | 0     | 1     |
| 35109  | 0     | 1     | 0     | 0     |
| 35114  | 0     | 0     | 0     | 0     |
| 35115  | 0     | 0     | 0     | 0     |
| 35124  | 1     | 1     | 0     | 0     |
| 35125  | 0     | 0     | 0     | 0     |
| 35141  | 0     | 0     | 0     | 0     |
| 35142  | 0     | 0     | 0     | 0     |
| 35145  | 0     | 0     | 0     | 0     |
| 35149  | 1     | 1     | 0     | 0     |
| 35159  | 0     | 0     | 0     | 0     |
| 35163  | 1     | 1     | 0     | 0     |
| 35174  | 1     | 0     | 0     | 0     |

| respid | Q31_2 | Q31_3 | Q31_4 | Q31_5 |
|--------|-------|-------|-------|-------|
| 35188  | 0     | 0     | 0     | 0     |
| 35189  | 1     | 1     | 1     | 0     |
| 35201  | 0     | 1     | 0     | 1     |
| 35215  | 0     | 0     | 0     | 0     |
| 35228  | 0     | 0     | 0     | 0     |
| 35235  | 0     | 0     | 0     | 1     |
| 35239  | 1     | 1     | 1     | 1     |
| 35243  | 0     | 0     | 0     | 0     |
| 35245  | 1     | 1     | 0     | 0     |
| 35259  | 0     | 0     | 0     | 0     |
| 35265  | 0     | 0     | 0     | 0     |
| 35272  | 0     | 1     | 0     | 0     |
| 35280  | 0     | 1     | 0     | 0     |
| 35298  | 0     | 0     | 0     | 0     |
| 35305  | 0     | 1     | 0     | 0     |
| 35306  | 1     | 0     | 1     | 0     |
| 35307  | 0     | 0     | 0     | 0     |
| 35311  | 0     | 0     | 0     | 0     |
| 35322  | 0     | 0     | 0     | 0     |
| 35323  | 0     | 0     | 0     | 0     |
| 35327  | 1     | 1     | 0     | 0     |
| 35366  | 0     | 0     | 0     | 0     |
| 35378  | 0     | 0     | 0     | 0     |
| 35389  | 0     | 0     | 0     | 0     |
| 35390  | 0     | 1     | 0     | 0     |
| 35395  | 0     | 0     | 0     | 0     |
| 35411  | 1     | 0     | 0     | 1     |
| 35423  | 0     | 0     | 0     | 0     |
| 35425  | 1     | 1     | 0     | 0     |
| 35434  | 1     | 0     | 0     | 0     |
| 35462  | 0     | 0     | 0     | 0     |
| 35478  | 1     | 1     | 0     | 0     |

| respid | Q31_2 | Q31_3 | Q31_4 | Q31_5 |
|--------|-------|-------|-------|-------|
| 35481  | 1     | 1     | 0     | 0     |
| 35498  | 0     | 0     | 0     | 0     |
| 35499  | 0     | 0     | 0     | 0     |
| 35502  | 0     | 1     | 0     | 1     |
| 35503  | 0     | 0     | 0     | 0     |
| 35504  | 0     | 0     | 0     | 0     |
| 35508  | 1     | 1     | 0     | 0     |
| 35513  | 0     | 1     | 0     | 0     |
| 35516  | 0     | 0     | 1     | 0     |
| 35519  | 1     | 0     | 0     | 0     |
| 35530  | 1     | 1     | 0     | 1     |
| 35533  | 0     | 0     | 0     | 0     |
| 35561  | 1     | 0     | 0     | 0     |
| 35565  | 0     | 0     | 0     | 0     |
| 35588  | 0     | 0     | 0     | 0     |
| 35598  | 0     | 0     | 0     | 0     |
| 35607  | 1     | 0     | 0     | 0     |
| 35638  | 0     | 0     | 0     | 0     |
| 35642  | 0     | 0     | 0     | 0     |
| 35643  | 0     | 0     | 1     | 0     |
| 35680  | 0     | 0     | 0     | 0     |
| 35697  | 0     | 1     | 0     | 1     |
| 35703  | 0     | 0     | 0     | 0     |
| 35709  | 0     | 0     | 0     | 0     |
| 35710  | 0     | 0     | 0     | 0     |
| 35721  | 1     | 1     | 0     | 1     |
| 35723  | 0     | 0     | 0     | 0     |
| 35736  | 0     | 1     | 0     | 0     |
| 35739  | 0     | 1     | 0     | 0     |
| 35745  | 0     | 0     | 0     | 0     |
| 35748  | 0     | 1     | 0     | 0     |
| 35750  | 0     | 0     | 0     | 0     |

| respid | Q31_2 | Q31_3 | Q31_4 | Q31_5 |
|--------|-------|-------|-------|-------|
| 35752  | 0     | 1     | 0     | 0     |
| 35773  | 0     | 0     | 0     | 0     |
| 35779  | 0     | 0     | 0     | 0     |
| 35791  | 0     | 0     | 0     | 0     |
| 35801  | 1     | 0     | 0     | 0     |
| 35802  | 0     | 0     | 0     | 0     |
| 35837  | 0     | 0     | 0     | 0     |
| 35853  | 1     | 0     | 0     | 0     |
| 35858  | 0     | 1     | 1     | 0     |
| 35860  | 0     | 0     | 0     | 0     |
| 35875  | 1     | 0     | 0     | 0     |
| 35883  | 1     | 0     | 0     | 0     |
| 35890  | 0     | 1     | 0     | 0     |
| 35898  | 0     | 0     | 0     | 0     |
| 35901  | 0     | 1     | 0     | 0     |
| 35914  | 0     | 0     | 0     | 0     |
| 35924  | 1     | 0     | 0     | 0     |
| 35950  | 1     | 0     | 0     | 1     |
| 35961  | 0     | 0     | 0     | 0     |
| 35966  | 1     | 0     | 0     | 1     |
| 35967  | 0     | 0     | 0     | 0     |
| 35971  | 0     | 0     | 0     | 0     |
| 35974  | 0     | 0     | 0     | 1     |
| 35983  | 0     | 1     | 0     | 0     |
| 35992  | 1     | 0     | 0     | 1     |
| 36010  | 0     | 0     | 0     | 0     |
| 36019  | 0     | 0     | 0     | 0     |
| 36029  | 1     | 0     | 0     | 0     |
| 36033  | 0     | 0     | 0     | 0     |
| 36042  | 0     | 0     | 0     | 0     |
| 36043  | 0     | 0     | 0     | 0     |
| 36048  | 0     | 0     | 0     | 0     |

| respid | Q31_2 | Q31_3 | Q31_4 | Q31_5 |
|--------|-------|-------|-------|-------|
| 36050  | 0     | 0     | 0     | 0     |
| 36062  | 1     | 1     | 0     | 0     |
| 36063  | 0     | 0     | 0     | 0     |
| 36092  | 0     | 0     | 0     | 0     |
| 36097  | 0     | 1     | 0     | 0     |
| 36108  | 0     | 0     | 0     | 0     |
| 36113  | 1     | 0     | 0     | 1     |
| 36117  | 0     | 0     | 0     | 0     |
| 36129  | 1     | 1     | 1     | 1     |
| 36144  | 0     | 0     | 0     | 0     |
| 36152  | 0     | 0     | 0     | 0     |
| 36154  | 0     | 0     | 0     | 0     |
| 36155  | 0     | 1     | 0     | 0     |
| 36167  | 0     | 0     | 0     | 0     |
| 36172  | 0     | 0     | 0     | 0     |
| 36173  | 0     | 0     | 0     | 0     |
| 36174  | 0     | 0     | 1     | 1     |
| 36182  | 1     | 1     | 0     | 0     |
| 36192  | 0     | 0     | 0     | 0     |
| 36195  | 0     | 0     | 0     | 0     |
| 36204  | 0     | 0     | 0     | 0     |
| 36205  | 0     | 0     | 0     | 0     |
| 36208  | 0     | 0     | 0     | 0     |
| 36216  | 1     | 0     | 0     | 1     |
| 36221  | 0     | 0     | 0     | 0     |
| 36244  | 0     | 0     | 0     | 0     |
| 36255  | 1     | 1     | 0     | 0     |
| 36259  | 0     | 0     | 0     | 0     |
| 36262  | 1     | 0     | 0     | 0     |
| 36268  | 0     | 0     | 0     | 0     |
| 36308  | 0     | 0     | 0     | 0     |
| 36324  | 0     | 0     | 0     | 0     |

| respid | Q31_2 | Q31_3 | Q31_4 | Q31_5 |
|--------|-------|-------|-------|-------|
| 36330  | 0     | 0     | 0     | 0     |
| 36331  | 0     | 0     | 0     | 0     |
| 36336  | 0     | 0     | 0     | 0     |
| 36337  | 1     | 0     | 0     | 0     |
| 36364  | 0     | 0     | 0     | 0     |
| 36365  | 0     | 0     | 0     | 0     |
| 36396  | 0     | 0     | 0     | 0     |
| 36403  | 1     | 0     | 0     | 0     |
| 36410  | 0     | 0     | 0     | 0     |
| 36413  | 0     | 0     | 0     | 0     |
| 36422  | 1     | 0     | 0     | 0     |
| 36424  | 0     | 1     | 0     | 0     |
| 36425  | 0     | 1     | 0     | 1     |
| 36432  | 0     | 0     | 0     | 0     |
| 36435  | 0     | 1     | 0     | 0     |
| 36446  | 0     | 0     | 0     | 0     |
| 36451  | 1     | 0     | 0     | 0     |
| 36453  | 0     | 0     | 0     | 0     |
| 36459  | 0     | 0     | 1     | 0     |
| 36464  | 0     | 0     | 0     | 0     |
| 36465  | 0     | 0     | 0     | 0     |
| 36466  | 0     | 0     | 0     | 0     |
| 36476  | 0     | 0     | 0     | 0     |
| 36487  | 0     | 0     | 0     | 0     |
| 36488  | 0     | 0     | 0     | 0     |
| 36500  | 0     | 0     | 0     | 0     |
| 36504  | 0     | 1     | 0     | 0     |
| 36513  | 1     | 1     | 0     | 0     |
| 36515  | 1     | 0     | 1     | 0     |
| 36521  | 0     | 0     | 0     | 0     |
| 36530  | 0     | 1     | 0     | 0     |
| 36556  | 0     | 0     | 0     | 0     |

| respid | Q31_2 | Q31_3 | Q31_4 | Q31_5 |
|--------|-------|-------|-------|-------|
| 36564  | 1     | 0     | 1     | 1     |
| 36584  | 0     | 0     | 0     | 0     |
| 36585  | 0     | 0     | 0     | 0     |
| 36586  | 0     | 0     | 0     | 0     |
| 36606  | 1     | 0     | 0     | 1     |
| 36615  | 0     | 1     | 0     | 0     |
| 36628  | 0     | 0     | 0     | 0     |
| 36630  | 1     | 1     | 0     | 0     |
| 36631  | 1     | 0     | 0     | 0     |
| 36636  | 1     | 0     | 0     | 0     |
| 36637  | 0     | 0     | 0     | 0     |
| 36651  | 1     | 0     | 1     | 0     |
| 36661  | 0     | 0     | 0     | 0     |
| 36670  | 1     | 1     | 0     | 0     |
| 36671  | 0     | 0     | 0     | 0     |
| 36688  | 0     | 0     | 0     | 0     |
| 36694  | 0     | 0     | 0     | 0     |
| 36696  | 0     | 0     | 0     | 0     |
| 36703  | 0     | 0     | 0     | 0     |
| 36719  | 0     | 0     | 0     | 0     |
| 36721  | 0     | 0     | 0     | 0     |
| 36740  | 0     | 0     | 0     | 0     |
| 36755  | 0     | 0     | 0     | 0     |
| 36765  | 1     | 0     | 0     | 1     |
| 36770  | 0     | 0     | 0     | 0     |
| 36773  | 1     | 0     | 0     | 0     |
| 36813  | 1     | 0     | 0     | 0     |
| 36819  | 0     | 0     | 1     | 1     |
| 36820  | 1     | 1     | 0     | 0     |
| 36821  | 0     | 0     | 0     | 0     |
| 36827  | 1     | 1     | 0     | 0     |
| 36835  | 0     | 0     | 0     | 0     |



| respid | Q31_2 | Q31_3 | Q31_4 | Q31_5 |
|--------|-------|-------|-------|-------|
| 36837  | 0     | 0     | 0     | 0     |
| 36849  | 0     | 1     | 0     | 0     |
| 36851  | 1     | 0     | 0     | 0     |
| 36868  | 0     | 0     | 1     | 1     |
| 36870  | 0     | 0     | 0     | 0     |
| 36871  | 0     | 0     | 0     | 0     |
| 36874  | 0     | 0     | 0     | 0     |
| 36878  | 0     | 0     | 0     | 1     |
| 36887  | 0     | 0     | 0     | 0     |
| 36889  | 0     | 0     | 0     | 0     |
| 36891  | 0     | 0     | 0     | 0     |
| 36903  | 0     | 0     | 0     | 0     |
| 36905  | 0     | 0     | 0     | 0     |
| 36913  | 0     | 0     | 0     | 0     |
| 36949  | 1     | 0     | 0     | 0     |
| 36954  | 0     | 0     | 0     | 0     |
| 36962  | 1     | 0     | 1     | 0     |
| 36965  | 0     | 0     | 0     | 0     |
| 36970  | 0     | 0     | 0     | 0     |
| 36979  | 1     | 0     | 0     | 0     |
| 36990  | 1     | 1     | 0     | 0     |
| 36991  | 1     | 1     | 0     | 0     |
| 36992  | 0     | 0     | 0     | 0     |
| 37015  | 0     | 0     | 0     | 0     |
| 37017  | 0     | 0     | 0     | 0     |
| 37020  | 0     | 0     | 0     | 0     |
| 37033  | 0     | 0     | 0     | 0     |
| 37041  | 0     | 0     | 0     | 0     |
| 37048  | 1     | 1     | 0     | 0     |
| 37050  | 0     | 0     | 0     | 0     |
| 37054  | 1     | 1     | 0     | 0     |
| 37057  | 1     | 1     | 0     | 0     |

| respid | Q31_2 | Q31_3 | Q31_4 | Q31_5 |
|--------|-------|-------|-------|-------|
| 37067  | 0     | 0     | 0     | 0     |
| 37074  | 0     | 0     | 0     | 0     |
| 37088  | 0     | 0     | 1     | 0     |
| 37090  | 1     | 1     | 0     | 1     |
| 37110  | 1     | 1     | 1     | 0     |
| 37122  | 0     | 0     | 0     | 0     |
| 37124  | 0     | 0     | 0     | 1     |
| 37126  | 0     | 0     | 0     | 0     |
| 37129  | 0     | 0     | 0     | 0     |
| 37130  | 0     | 0     | 0     | 0     |
| 37142  | 0     | 0     | 0     | 0     |
| 37160  | 1     | 0     | 0     | 0     |
| 37168  | 0     | 0     | 0     | 0     |
| 37169  | 0     | 0     | 0     | 0     |
| 37191  | 0     | 0     | 0     | 1     |
| 37197  | 0     | 0     | 1     | 1     |
| 37204  | 0     | 0     | 0     | 0     |
| 37213  | 0     | 0     | 0     | 0     |
| 37238  | 0     | 0     | 0     | 0     |
| 37242  | 0     | 0     | 0     | 0     |
| 37243  | 0     | 0     | 0     | 0     |
| 37275  | 0     | 0     | 1     | 0     |
| 37305  | 1     | 0     | 0     | 1     |
| 37357  | 0     | 1     | 0     | 0     |
| 37365  | 0     | 0     | 1     | 1     |
| 37370  | 0     | 0     | 0     | 0     |
| 37406  | 1     | 1     | 0     | 0     |
| 37410  | 0     | 1     | 0     | 0     |
| 37411  | 1     | 1     | 1     | 0     |
| 37427  | 1     | 1     | 0     | 1     |
| 37437  | 1     | 0     | 0     | 1     |
| 37440  | 0     | 0     | 0     | 0     |

| respid | Q31_2 | Q31_3 | Q31_4 | Q31_5 |
|--------|-------|-------|-------|-------|
| 37452  | 0     | 0     | 0     | 0     |
| 37465  | 0     | 0     | 0     | 0     |
| 37468  | 1     | 1     | 0     | 0     |
| 37469  | 0     | 0     | 0     | 0     |
| 37477  | 1     | 1     | 0     | 1     |
| 37509  | 0     | 0     | 0     | 0     |
| 37513  | 0     | 0     | 0     | 0     |
| 37534  | 0     | 0     | 0     | 1     |
| 37537  | 0     | 0     | 0     | 0     |
| 37560  | 1     | 1     | 0     | 0     |
| 37566  | 0     | 0     | 0     | 0     |
| 37572  | 1     | 0     | 0     | 0     |
| 37574  | 1     | 0     | 1     | 0     |
| 37575  | 0     | 0     | 0     | 0     |
| 37590  | 0     | 1     | 1     | 0     |
| 37593  | 0     | 0     | 0     | 0     |
| 37599  | 0     | 0     | 0     | 0     |
| 37641  | 0     | 0     | 0     | 0     |
| 37651  | 0     | 0     | 1     | 0     |
| 37670  | 0     | 0     | 0     | 0     |
| 37680  | 0     | 0     | 1     | 0     |
| 37690  | 0     | 0     | 0     | 0     |
| 37694  | 0     | 0     | 0     | 0     |
| 37705  | 0     | 1     | 0     | 0     |
| 37710  | 1     | 0     | 0     | 0     |
| 37719  | 0     | 1     | 0     | 0     |
| 37741  | 0     | 0     | 0     | 0     |
| 37752  | 0     | 0     | 0     | 0     |
| 37755  | 0     | 1     | 0     | 0     |
| 37757  | 0     | 0     | 0     | 0     |
| 37783  | 0     | 0     | 0     | 0     |
| 37793  | 0     | 0     | 1     | 1     |

| respid | Q31_2 | Q31_3 | Q31_4 | Q31_5 |
|--------|-------|-------|-------|-------|
| 37800  | 1     | 0     | 0     | 1     |
| 37801  | 0     | 0     | 0     | 0     |
| 37820  | 1     | 1     | 1     | 0     |
| 37826  | 0     | 1     | 0     | 0     |
| 37835  | 0     | 1     | 0     | 1     |
| 37839  | 0     | 0     | 0     | 0     |
| 37871  | 1     | 1     | 1     | 0     |
| 37876  | 1     | 1     | 0     | 1     |
| 37879  | 0     | 0     | 0     | 0     |
| 37894  | 0     | 0     | 0     | 0     |
| 37895  | 1     | 1     | 0     | 0     |
| 37901  | 0     | 1     | 0     | 0     |
| 37926  | 0     | 0     | 0     | 0     |
| 37937  | 0     | 1     | 0     | 0     |
| 37938  | 0     | 0     | 0     | 0     |
| 37959  | 0     | 0     | 0     | 0     |
| 37970  | 0     | 0     | 0     | 0     |
| 37972  | 0     | 0     | 0     | 0     |
| 37988  | 0     | 0     | 0     | 0     |
| 37989  | 0     | 1     | 1     | 1     |
| 38000  | 0     | 0     | 1     | 1     |
| 38028  | 0     | 1     | 0     | 1     |
| 38042  | 0     | 0     | 0     | 0     |
| 38052  | 0     | 0     | 0     | 0     |
| 38056  | 0     | 0     | 0     | 0     |
| 38106  | 0     | 1     | 1     | 1     |
| 38114  | 0     | 1     | 0     | 0     |
| 38134  | 0     | 0     | 0     | 0     |
| 38135  | 0     | 0     | 0     | 0     |
| 38139  | 0     | 1     | 1     | 1     |
| 38160  | 0     | 0     | 0     | 0     |
| 38164  | 0     | 0     | 0     | 0     |

| respid | Q31_2 | Q31_3 | Q31_4 | Q31_5 |
|--------|-------|-------|-------|-------|
| 38168  | 0     | 0     | 0     | 0     |
| 38173  | 0     | 0     | 0     | 0     |
| 38193  | 1     | 1     | 0     | 1     |
| 38204  | 0     | 0     | 0     | 0     |
| 38206  | 0     | 0     | 0     | 0     |
| 38233  | 1     | 1     | 0     | 0     |
| 38242  | 1     | 1     | 0     | 0     |
| 38245  | 0     | 0     | 0     | 0     |
| 38261  | 0     | 0     | 0     | 0     |
| 38288  | 0     | 1     | 0     | 0     |
| 38296  | 1     | 0     | 0     | 1     |
| 38299  | 1     | 0     | 1     | 0     |
| 38300  | 0     | 1     | 0     | 0     |
| 38303  | 0     | 0     | 0     | 0     |
| 38317  | 0     | 0     | 0     | 0     |
| 38328  | 1     | 0     | 0     | 0     |
| 38333  | 0     | 1     | 0     | 0     |
| 38336  | 0     | 0     | 0     | 0     |
| 38338  | 1     | 0     | 0     | 0     |
| 38342  | 0     | 1     | 0     | 0     |
| 38360  | 0     | 0     | 0     | 0     |
| 38362  | 0     | 0     | 0     | 0     |
| 38364  | 1     | 1     | 0     | 0     |
| 38402  | 0     | 1     | 0     | 0     |
| 38423  | 0     | 1     | 1     | 0     |
| 38424  | 0     | 0     | 0     | 0     |
| 38435  | 0     | 0     | 1     | 0     |
| 38450  | 0     | 0     | 0     | 0     |
| 38455  | 0     | 0     | 0     | 0     |
| 38467  | 0     | 0     | 0     | 0     |
| 38468  | 0     | 0     | 0     | 0     |
| 38472  | 0     | 0     | 0     | 0     |

| respid | Q31_2 | Q31_3 | Q31_4 | Q31_5 |
|--------|-------|-------|-------|-------|
| 38484  | 0     | 0     | 0     | 0     |
| 38498  | 0     | 0     | 0     | 0     |
| 38507  | 0     | 0     | 0     | 0     |
| 38511  | 1     | 1     | 0     | 0     |
| 38524  | 1     | 1     | 0     | 1     |
| 38526  | 0     | 0     | 0     | 0     |
| 38534  | 0     | 0     | 0     | 0     |
| 38536  | 0     | 0     | 0     | 0     |
| 38539  | 0     | 0     | 0     | 0     |
| 38547  | 0     | 0     | 0     | 0     |
| 38549  | 0     | 0     | 0     | 0     |
| 38575  | 0     | 0     | 0     | 0     |
| 38579  | 0     | 1     | 0     | 0     |
| 38585  | 0     | 0     | 0     | 0     |
| 38589  | 0     | 0     | 0     | 0     |
| 38595  | 0     | 1     | 0     | 1     |
| 38602  | 0     | 0     | 0     | 0     |
| 38603  | 0     | 0     | 0     | 0     |
| 38612  | 0     | 0     | 0     | 0     |
| 38621  | 0     | 1     | 1     | 0     |
| 38624  | 0     | 0     | 0     | 0     |
| 38636  | 0     | 0     | 0     | 0     |
| 38656  | 0     | 0     | 0     | 0     |
| 38668  | 0     | 0     | 0     | 0     |
| 38675  | 0     | 1     | 0     | 0     |
| 38676  | 0     | 0     | 0     | 0     |
| 38682  | 1     | 0     | 0     | 0     |
| 38689  | 0     | 0     | 0     | 0     |
| 38702  | 0     | 0     | 0     | 0     |
| 38704  | 0     | 0     | 0     | 0     |
| 38713  | 0     | 0     | 0     | 0     |
| 38718  | 1     | 1     | 0     | 0     |

| respid | Q31_2 | Q31_3 | Q31_4 | Q31_5 |
|--------|-------|-------|-------|-------|
| 38725  | 0     | 0     | 0     | 0     |
| 38730  | 0     | 0     | 0     | 0     |
| 38737  | 0     | 0     | 0     | 1     |
| 38738  | 1     | 0     | 0     | 1     |
| 38744  | 0     | 0     | 0     | 0     |
| 38746  | 0     | 0     | 1     | 0     |
| 38753  | 0     | 0     | 0     | 0     |
| 38756  | 0     | 0     | 0     | 1     |
| 38760  | 0     | 0     | 0     | 0     |
| 38762  | 0     | 1     | 1     | 1     |
| 38765  | 0     | 0     | 0     | 0     |
| 38769  | 0     | 0     | 0     | 0     |
| 38781  | 0     | 0     | 0     | 1     |
| 38786  | 0     | 0     | 0     | 0     |
| 38790  | 0     | 1     | 0     | 0     |
| 38793  | 0     | 1     | 0     | 0     |
| 38797  | 0     | 0     | 0     | 0     |
| 38802  | 0     | 0     | 0     | 0     |
| 38815  | 0     | 0     | 0     | 0     |
| 38826  | 0     | 1     | 0     | 0     |
| 38828  | 0     | 0     | 0     | 0     |
| 38829  | 0     | 0     | 0     | 0     |
| 38835  | 1     | 0     | 0     | 0     |
| 38842  | 1     | 0     | 1     | 0     |
| 38853  | 0     | 0     | 0     | 0     |
| 38855  | 0     | 0     | 1     | 1     |
| 38860  | 1     | 1     | 0     | 0     |
| 38869  | 1     | 0     | 0     | 0     |
| 38882  | 0     | 0     | 0     | 0     |
| 38897  | 0     | 0     | 0     | 0     |
| 38903  | 0     | 0     | 0     | 0     |
| 38910  | 0     | 0     | 1     | 0     |

| respid | Q31_2 | Q31_3 | Q31_4 | Q31_5 |
|--------|-------|-------|-------|-------|
| 38948  | 0     | 0     | 1     | 0     |
| 38949  | 0     | 0     | 0     | 0     |
| 38953  | 0     | 0     | 0     | 1     |
| 38989  | 1     | 1     | 0     | 0     |
| 38997  | 1     | 0     | 0     | 0     |
| 38999  | 0     | 0     | 0     | 0     |
| 39002  | 0     | 0     | 1     | 1     |
| 39003  | 0     | 0     | 1     | 0     |
| 39006  | 1     | 0     | 0     | 0     |
| 39014  | 0     | 0     | 0     | 0     |
| 39017  | 1     | 0     | 0     | 0     |
| 39018  | 1     | 1     | 0     | 0     |
| 39025  | 1     | 1     | 0     | 0     |
| 39031  | 1     | 0     | 0     | 1     |
| 39061  | 0     | 0     | 0     | 0     |
| 39131  | 0     | 0     | 0     | 0     |
| 39153  | 0     | 1     | 1     | 0     |
| 39194  | 1     | 0     | 0     | 0     |
| 39204  | 0     | 0     | 0     | 0     |
| 39208  | 0     | 1     | 0     | 0     |
| 39213  | 0     | 0     | 0     | 0     |
| 39231  | 0     | 0     | 0     | 0     |
| 39251  | 0     | 0     | 0     | 0     |
| 39257  | 1     | 0     | 1     | 1     |
| 39262  | 0     | 0     | 0     | 0     |
| 39269  | 0     | 0     | 1     | 0     |
| 39272  | 1     | 0     | 0     | 0     |
| 39280  | 0     | 0     | 0     | 0     |
| 39294  | 0     | 0     | 0     | 0     |
| 39297  | 0     | 0     | 0     | 1     |
| 39300  | 1     | 1     | 1     | 0     |
| 39307  | 1     | 0     | 0     | 0     |



| respid | Q31_2 | Q31_3 | Q31_4 | Q31_5 |
|--------|-------|-------|-------|-------|
| 39320  | 0     | 0     | 0     | 0     |
| 39333  | 0     | 0     | 0     | 0     |
| 39335  | 0     | 1     | 0     | 1     |
| 39339  | 0     | 0     | 0     | 0     |
| 39375  | 0     | 1     | 0     | 0     |
| 39377  | 0     | 0     | 0     | 0     |
| 39380  | 0     | 0     | 0     | 0     |
| 39425  | 0     | 1     | 0     | 0     |
| 39590  | 0     | 0     | 0     | 0     |
| 40529  | 1     | 1     | 0     | 0     |
| 40702  | 0     | 0     | 0     | 0     |
| 40788  | 0     | 0     | 0     | 0     |
| 40841  | 0     | 0     | 0     | 0     |
| 40965  | 0     | 0     | 0     | 0     |
| 41092  | 0     | 0     | 0     | 0     |
| 41534  | 0     | 0     | 0     | 0     |
| 41919  | 0     | 1     | 0     | 0     |
| 42110  | 0     | 0     | 0     | 0     |
| 42135  | 0     | 0     | 0     | 0     |
| 42142  | 0     | 0     | 0     | 0     |
| 42163  | 1     | 1     | 0     | 1     |
| 42164  | 0     | 0     | 0     | 0     |
| 42172  | 1     | 0     | 1     | 0     |
| 42177  | 0     | 0     | 0     | 0     |
| 42181  | 0     | 0     | 0     | 0     |
| 42193  | 1     | 0     | 0     | 0     |
| 42196  | 0     | 0     | 0     | 0     |
| 42202  | 0     | 0     | 0     | 0     |
| 42248  | 0     | 0     | 0     | 1     |
| 42283  | 0     | 0     | 0     | 0     |
| 42284  | 0     | 0     | 0     | 0     |
| 42323  | 0     | 0     | 0     | 0     |

| respid | Q31_2 | Q31_3 | Q31_4 | Q31_5 |
|--------|-------|-------|-------|-------|
| 42349  | 0     | 0     | 0     | 0     |
| 42351  | 0     | 0     | 0     | 0     |
| 42357  | 0     | 0     | 0     | 0     |
| 42366  | 0     | 0     | 0     | 0     |
| 42380  | 0     | 0     | 0     | 0     |
| 42414  | 1     | 0     | 0     | 1     |
| 42420  | 1     | 1     | 0     | 0     |
| 42454  | 0     | 0     | 0     | 0     |
| 42458  | 1     | 1     | 0     | 0     |
| 42461  | 0     | 0     | 0     | 0     |
| 42488  | 0     | 1     | 0     | 0     |
| 42511  | 0     | 0     | 0     | 0     |
| 42512  | 0     | 0     | 0     | 0     |
| 42530  | 0     | 1     | 0     | 1     |
| 42531  | 0     | 0     | 1     | 1     |
| 42533  | 0     | 0     | 0     | 0     |
| 42549  | 0     | 0     | 0     | 0     |
| 42550  | 1     | 0     | 1     | 0     |
| 42553  | 0     | 0     | 0     | 0     |
| 42562  | 0     | 1     | 0     | 1     |
| 42567  | 0     | 0     | 0     | 0     |
| 42589  | 1     | 0     | 0     | 0     |
| 42604  | 1     | 0     | 0     | 0     |
| 42618  | 0     | 0     | 0     | 0     |
| 42621  | 1     | 0     | 0     | 1     |
| 42627  | 0     | 0     | 0     | 0     |
| 42641  | 0     | 0     | 0     | 0     |
| 42655  | 0     | 1     | 0     | 0     |
| 42666  | 0     | 0     | 0     | 0     |
| 42667  | 0     | 0     | 0     | 0     |
| 42697  | 1     | 0     | 0     | 0     |
| 42703  | 0     | 0     | 0     | 0     |

| respid | Q31_2 | Q31_3 | Q31_4 | Q31_5 |
|--------|-------|-------|-------|-------|
| 42712  | 1     | 0     | 0     | 0     |
| 42731  | 0     | 1     | 0     | 0     |
| 42780  | 0     | 0     | 0     | 0     |
| 42785  | 0     | 0     | 0     | 0     |
| 42788  | 0     | 0     | 0     | 0     |
| 42802  | 0     | 0     | 0     | 1     |
| 42818  | 0     | 0     | 1     | 1     |
| 42821  | 0     | 0     | 0     | 0     |
| 42824  | 0     | 0     | 0     | 0     |
| 42831  | 1     | 0     | 0     | 0     |
| 42836  | 0     | 0     | 0     | 0     |
| 42864  | 0     | 0     | 0     | 0     |
| 42875  | 0     | 0     | 0     | 0     |
| 42891  | 1     | 1     | 1     | 1     |
| 42897  | 0     | 0     | 0     | 1     |
| 42900  | 0     | 0     | 0     | 0     |
| 42902  | 0     | 0     | 1     | 0     |
| 42921  | 1     | 0     | 0     | 0     |
| 42925  | 0     | 0     | 0     | 0     |
| 42944  | 0     | 0     | 0     | 0     |
| 42950  | 0     | 0     | 0     | 0     |
| 42963  | 0     | 0     | 0     | 0     |
| 42967  | 0     | 0     | 0     | 1     |
| 42985  | 1     | 0     | 0     | 0     |
| 42990  | 0     | 0     | 0     | 1     |
| 42996  | 0     | 0     | 0     | 0     |
| 43002  | 1     | 1     | 0     | 1     |
| 43004  | 0     | 0     | 0     | 0     |
| 43012  | 0     | 0     | 0     | 0     |
| 43027  | 0     | 0     | 0     | 0     |
| 43028  | 0     | 0     | 0     | 0     |
| 43029  | 0     | 0     | 1     | 0     |

| respid | Q31_2 | Q31_3 | Q31_4 | Q31_5 |
|--------|-------|-------|-------|-------|
| 43031  | 0     | 0     | 0     | 0     |
| 43042  | 0     | 0     | 0     | 0     |
| 43054  | 1     | 0     | 0     | 0     |
| 43058  | 0     | 0     | 0     | 0     |
| 43064  | 1     | 1     | 0     | 0     |
| 43069  | 0     | 0     | 0     | 0     |
| 43071  | 0     | 0     | 0     | 0     |
| 43072  | 0     | 0     | 0     | 0     |
| 43077  | 0     | 0     | 0     | 0     |
| 43078  | 0     | 1     | 0     | 1     |
| 43082  | 0     | 0     | 0     | 0     |
| 43092  | 0     | 0     | 0     | 0     |
| 43096  | 0     | 0     | 0     | 0     |
| 43109  | 0     | 0     | 0     | 0     |
| 43113  | 0     | 0     | 0     | 0     |
| 43123  | 1     | 0     | 1     | 1     |
| 43127  | 0     | 0     | 0     | 0     |
| 43128  | 1     | 0     | 1     | 0     |
| 43129  | 0     | 0     | 0     | 0     |
| 43133  | 0     | 0     | 0     | 0     |
| 43140  | 0     | 0     | 0     | 0     |
| 43143  | 0     | 0     | 0     | 1     |
| 43149  | 0     | 0     | 0     | 0     |
| 43150  | 0     | 1     | 0     | 1     |
| 43153  | 1     | 1     | 0     | 1     |
| 43170  | 0     | 0     | 0     | 0     |
| 43187  | 1     | 0     | 1     | 1     |
| 43188  | 0     | 0     | 1     | 1     |
| 43198  | 1     | 0     | 0     | 0     |
| 43208  | 0     | 0     | 0     | 0     |
| 43216  | 0     | 0     | 0     | 0     |
| 43222  | 0     | 1     | 0     | 0     |

| respid | Q31_2 | Q31_3 | Q31_4 | Q31_5 |
|--------|-------|-------|-------|-------|
| 43224  | 0     | 0     | 0     | 0     |
| 43230  | 0     | 0     | 0     | 1     |
| 43231  | 0     | 0     | 1     | 0     |
| 43265  | 0     | 0     | 0     | 1     |
| 43270  | 0     | 0     | 1     | 0     |
| 43283  | 0     | 0     | 0     | 1     |
| 43295  | 0     | 1     | 0     | 0     |
| 43297  | 0     | 0     | 0     | 0     |
| 43299  | 0     | 0     | 0     | 0     |
| 43307  | 0     | 0     | 0     | 0     |
| 43316  | 0     | 1     | 0     | 0     |
| 43318  | 0     | 1     | 0     | 0     |
| 43319  | 0     | 0     | 0     | 0     |
| 43324  | 0     | 0     | 0     | 1     |
| 43325  | 0     | 1     | 0     | 1     |
| 43327  | 1     | 1     | 0     | 0     |
| 43338  | 0     | 0     | 0     | 0     |
| 43342  | 1     | 1     | 0     | 0     |
| 43348  | 0     | 0     | 0     | 0     |
| 43395  | 1     | 0     | 1     | 0     |
| 43404  | 1     | 1     | 0     | 0     |
| 43406  | 0     | 0     | 0     | 0     |
| 43407  | 0     | 0     | 0     | 0     |
| 43411  | 1     | 0     | 0     | 0     |
| 43416  | 1     | 1     | 0     | 0     |
| 43428  | 0     | 0     | 0     | 0     |
| 43429  | 1     | 1     | 0     | 0     |
| 43432  | 0     | 0     | 0     | 0     |
| 43443  | 0     | 0     | 0     | 0     |
| 43455  | 0     | 0     | 0     | 0     |
| 43457  | 0     | 0     | 0     | 0     |
| 43458  | 1     | 1     | 0     | 0     |

| respid | Q31_2 | Q31_3 | Q31_4 | Q31_5 |
|--------|-------|-------|-------|-------|
| 43477  | 0     | 1     | 1     | 0     |
| 43520  | 0     | 0     | 0     | 0     |
| 43521  | 0     | 0     | 0     | 0     |
| 43550  | 0     | 0     | 0     | 0     |
| 43551  | 0     | 1     | 0     | 0     |
| 43554  | 0     | 1     | 0     | 0     |
| 43560  | 1     | 1     | 0     | 0     |
| 43569  | 0     | 0     | 0     | 0     |
| 43583  | 1     | 1     | 0     | 0     |
| 43590  | 0     | 0     | 0     | 0     |
| 43591  | 0     | 0     | 0     | 0     |
| 43595  | 0     | 0     | 0     | 0     |
| 43599  | 0     | 0     | 0     | 0     |
| 43606  | 1     | 1     | 0     | 0     |
| 43609  | 0     | 0     | 0     | 0     |
| 43629  | 0     | 0     | 0     | 0     |
| 43636  | 0     | 1     | 0     | 0     |
| 43661  | 1     | 0     | 0     | 0     |
| 43668  | 0     | 0     | 0     | 0     |
| 43672  | 0     | 0     | 0     | 0     |
| 43677  | 0     | 0     | 1     | 0     |
| 43683  | 0     | 0     | 0     | 0     |
| 43708  | 0     | 0     | 0     | 0     |
| 43713  | 1     | 0     | 0     | 0     |
| 43718  | 0     | 0     | 0     | 0     |
| 43725  | 0     | 0     | 0     | 0     |
| 43747  | 1     | 0     | 0     | 0     |
| 43755  | 0     | 0     | 0     | 0     |
| 43770  | 0     | 0     | 0     | 0     |
| 43775  | 1     | 1     | 0     | 1     |
| 43788  | 0     | 0     | 0     | 0     |
| 43790  | 1     | 1     | 0     | 0     |

| respid | Q31_2 | Q31_3 | Q31_4 | Q31_5 |
|--------|-------|-------|-------|-------|
| 43797  | 1     | 1     | 1     | 0     |
| 43798  | 1     | 1     | 0     | 0     |
| 43811  | 1     | 1     | 1     | 0     |
| 43819  | 1     | 1     | 1     | 0     |
| 43821  | 1     | 0     | 0     | 0     |
| 43822  | 0     | 0     | 0     | 0     |
| 43825  | 1     | 1     | 0     | 1     |
| 43826  | 0     | 0     | 0     | 0     |
| 43831  | 0     | 0     | 0     | 0     |
| 43836  | 1     | 1     | 0     | 0     |
| 43852  | 0     | 0     | 0     | 0     |
| 43857  | 1     | 1     | 0     | 0     |
| 43858  | 0     | 0     | 0     | 0     |
| 43859  | 0     | 0     | 1     | 0     |
| 43863  | 0     | 0     | 0     | 0     |
| 43868  | 0     | 0     | 1     | 0     |
| 43872  | 0     | 1     | 0     | 0     |
| 43874  | 0     | 0     | 1     | 0     |
| 43882  | 0     | 0     | 0     | 0     |
| 43886  | 0     | 0     | 0     | 0     |
| 43903  | 0     | 0     | 0     | 0     |
| 43929  | 0     | 0     | 0     | 0     |
| 43932  | 1     | 1     | 0     | 0     |
| 43936  | 0     | 0     | 0     | 0     |
| 43962  | 0     | 0     | 0     | 0     |
| 43964  | 0     | 0     | 0     | 0     |
| 43968  | 0     | 0     | 0     | 0     |
| 43979  | 0     | 0     | 0     | 0     |
| 44006  | 1     | 1     | 0     | 1     |
| 44009  | 0     | 0     | 0     | 0     |
| 44023  | 1     | 0     | 0     | 0     |
| 44035  | 0     | 1     | 0     | 0     |

| respid | Q31_2 | Q31_3 | Q31_4 | Q31_5 |
|--------|-------|-------|-------|-------|
| 44038  | 0     | 0     | 0     | 0     |
| 44039  | 0     | 1     | 0     | 0     |
| 44043  | 0     | 0     | 0     | 0     |
| 44048  | 0     | 0     | 1     | 1     |
| 44050  | 0     | 0     | 0     | 0     |
| 44051  | 0     | 1     | 0     | 1     |
| 44061  | 0     | 1     | 1     | 1     |
| 44063  | 1     | 1     | 1     | 0     |
| 44072  | 0     | 0     | 1     | 1     |
| 44075  | 1     | 0     | 0     | 0     |
| 44089  | 0     | 1     | 0     | 1     |
| 44090  | 1     | 1     | 0     | 0     |
| 44091  | 1     | 1     | 0     | 0     |
| 44092  | 0     | 0     | 0     | 0     |
| 44110  | 1     | 1     | 1     | 0     |
| 44112  | 1     | 1     | 1     | 0     |
| 44114  | 1     | 1     | 1     | 0     |
| 44143  | 0     | 0     | 0     | 0     |
| 44179  | 0     | 0     | 0     | 0     |
| 44234  | 0     | 0     | 0     | 0     |
| 44236  | 0     | 0     | 0     | 0     |
| 44239  | 0     | 1     | 1     | 1     |
| 44241  | 1     | 1     | 1     | 0     |
| 44253  | 0     | 0     | 0     | 0     |
| 44260  | 0     | 1     | 1     | 1     |
| 44261  | 0     | 1     | 1     | 0     |
| 44263  | 1     | 1     | 0     | 0     |
| 44264  | 0     | 0     | 0     | 0     |
| 44265  | 0     | 0     | 0     | 0     |
| 44267  | 1     | 1     | 1     | 0     |
| 44306  | 0     | 0     | 0     | 0     |
| 44309  | 1     | 1     | 1     | 0     |



| respid | Q31_2 | Q31_3 | Q31_4 | Q31_5 |
|--------|-------|-------|-------|-------|
| 44310  | 0     | 0     | 0     | 0     |
| 44361  | 1     | 1     | 0     | 0     |
| 44380  | 1     | 1     | 0     | 0     |
| 44386  | 0     | 0     | 0     | 0     |
| 44419  | 0     | 0     | 0     | 0     |
| 44426  | 0     | 0     | 0     | 0     |
| 44479  | 0     | 0     | 0     | 0     |
| 44484  | 0     | 0     | 0     | 0     |
| 44487  | 0     | 0     | 0     | 0     |
| 44509  | 1     | 0     | 0     | 0     |
| 44540  | 0     | 0     | 0     | 0     |
| 44551  | 1     | 0     | 0     | 0     |
| 44553  | 0     | 0     | 0     | 0     |
| 44650  | 1     | 0     | 0     | 0     |
| 44665  | 0     | 0     | 1     | 1     |
| 44779  | 0     | 0     | 0     | 0     |
| 44797  | 0     | 0     | 0     | 0     |
| 44807  | 0     | 0     | 0     | 0     |
| 44815  | 0     | 0     | 0     | 0     |
| 44836  | 0     | 0     | 0     | 0     |
| 44868  | 0     | 0     | 0     | 0     |
| 44927  | 0     | 1     | 0     | 0     |
| 44983  | 0     | 0     | 0     | 0     |
| 45040  | 0     | 0     | 0     | 0     |
| 45051  | 1     | 1     | 0     | 0     |
| 45067  | 0     | 1     | 0     | 0     |
| 45074  | 0     | 0     | 0     | 0     |
| 45115  | 0     | 0     | 0     | 0     |
| 45187  | 1     | 1     | 1     | 0     |
| 45221  | 0     | 0     | 0     | 0     |
| 45279  | 1     | 0     | 0     | 0     |
| 45308  | 1     | 1     | 0     | 0     |

| respid | Q31_2 | Q31_3 | Q31_4 | Q31_5 |
|--------|-------|-------|-------|-------|
| 45317  | 0     | 0     | 0     | 0     |
| 45379  | 0     | 0     | 0     | 0     |
| 45451  | 0     | 0     | 0     | 0     |
| 45472  | 1     | 1     | 0     | 1     |
| 45474  | 1     | 0     | 0     | 0     |
| 45544  | 0     | 0     | 0     | 0     |
| 45561  | 0     | 0     | 0     | 0     |
| 45596  | 0     | 1     | 0     | 1     |

Incont. While sleeping : Q31\_6 Incont. For no reason : Q31\_7 Incont. During sexual activity : Just after you have finished

**Instrum**

| Symptom   | Storage | Storage | Storage | Postmicturition |
|-----------|---------|---------|---------|-----------------|
| Type of R | Symptom | Symptom | Symptom | Symptom         |

**Descripti** Incont. While sleeping      Incont. For no reason      Incont. During sexual activity      Just after you have finished urinating

| respid | Q31_6 | Q31_7 | Q31_8 | Q31_9 |
|--------|-------|-------|-------|-------|
| 241    | 0     | 0     | 0     | 0     |
| 242    | 0     | 0     | 0     | 0     |
| 243    | 0     | 0     | 0     | 0     |
| 244    | 1     | 0     | 0     | 0     |
| 245    | 0     | 0     | 0     | 0     |
| 246    | 0     | 0     | 0     | 1     |
| 247    | 0     | 0     | 0     | 0     |
| 253    | 0     | 0     | 0     | 0     |
| 256    | 0     | 0     | 0     | 0     |
| 257    | 0     | 0     | 0     | 0     |
| 258    | 0     | 0     | 0     | 0     |
| 259    | 0     | 0     | 0     | 0     |
| 263    | 0     | 0     | 0     | 0     |
| 264    | 0     | 0     | 0     | 0     |
| 265    | 0     | 1     | 0     | 1     |
| 266    | 0     | 0     | 0     | 0     |
| 268    | 0     | 0     | 0     | 1     |
| 270    | 0     | 0     | 0     | 0     |
| 272    | 0     | 0     | 0     | 1     |
| 274    | 0     | 0     | 0     | 0     |

| respid | Q31_6 | Q31_7 | Q31_8 | Q31_9 |
|--------|-------|-------|-------|-------|
| 275    | 0     | 0     | 0     | 0     |
| 276    | 0     | 0     | 0     | 0     |
| 277    | 0     | 0     | 0     | 0     |
| 279    | 0     | 0     | 0     | 0     |
| 286    | 0     | 0     | 0     | 0     |
| 290    | 0     | 0     | 0     | 0     |
| 291    | 0     | 0     | 0     | 0     |
| 295    | 0     | 0     | 0     | 0     |
| 297    | 0     | 0     | 0     | 1     |
| 299    | 0     | 0     | 0     | 0     |
| 300    | 0     | 0     | 0     | 1     |
| 303    | 0     | 0     | 0     | 0     |
| 304    | 0     | 0     | 0     | 0     |
| 306    | 0     | 0     | 0     | 0     |
| 307    | 0     | 0     | 0     | 0     |
| 312    | 0     | 1     | 0     | 0     |
| 315    | 0     | 0     | 0     | 0     |
| 317    | 0     | 0     | 0     | 0     |
| 322    | 0     | 0     | 0     | 0     |
| 335    | 0     | 0     | 0     | 0     |
| 374    | 0     | 0     | 0     | 0     |
| 378    | 0     | 0     | 0     | 0     |
| 380    | 0     | 1     | 0     | 0     |
| 382    | 0     | 0     | 0     | 1     |
| 384    | 0     | 1     | 0     | 0     |
| 385    | 0     | 0     | 0     | 0     |
| 395    | 0     | 0     | 0     | 0     |
| 396    | 0     | 0     | 0     | 0     |
| 398    | 0     | 0     | 0     | 0     |
| 402    | 0     | 1     | 0     | 0     |
| 414    | 0     | 1     | 1     | 1     |
| 415    | 0     | 0     | 0     | 0     |

| respid | Q31_6 | Q31_7 | Q31_8 | Q31_9 |
|--------|-------|-------|-------|-------|
| 416    | 0     | 0     | 0     | 0     |
| 420    | 0     | 0     | 0     | 0     |
| 421    | 0     | 0     | 0     | 0     |
| 422    | 0     | 0     | 0     | 0     |
| 423    | 0     | 0     | 0     | 0     |
| 424    | 0     | 0     | 0     | 0     |
| 425    | 0     | 0     | 0     | 0     |
| 428    | 0     | 0     | 0     | 0     |
| 429    | 0     | 0     | 0     | 0     |
| 431    | 0     | 0     | 0     | 0     |
| 437    | 0     | 0     | 0     | 0     |
| 438    | 0     | 0     | 0     | 0     |
| 441    | 0     | 0     | 0     | 0     |
| 444    | 0     | 0     | 0     | 0     |
| 448    | 0     | 0     | 0     | 1     |
| 449    | 0     | 0     | 0     | 0     |
| 457    | 0     | 0     | 0     | 0     |
| 460    | 0     | 0     | 0     | 0     |
| 469    | 0     | 0     | 0     | 0     |
| 471    | 0     | 0     | 0     | 0     |
| 473    | 0     | 0     | 0     | 1     |
| 476    | 0     | 0     | 0     | 0     |
| 479    | 0     | 0     | 0     | 0     |
| 485    | 0     | 0     | 0     | 0     |
| 488    | 0     | 0     | 0     | 0     |
| 494    | 0     | 0     | 0     | 0     |
| 496    | 0     | 0     | 0     | 0     |
| 501    | 0     | 0     | 0     | 0     |
| 502    | 0     | 0     | 0     | 0     |
| 503    | 0     | 0     | 0     | 1     |
| 506    | 0     | 0     | 0     | 1     |
| 514    | 0     | 0     | 0     | 0     |

| respid | Q31_6 | Q31_7 | Q31_8 | Q31_9 |
|--------|-------|-------|-------|-------|
| 515    | 0     | 0     | 0     | 1     |
| 516    | 0     | 0     | 0     | 0     |
| 519    | 0     | 0     | 1     | 0     |
| 522    | 0     | 0     | 0     | 0     |
| 525    | 0     | 0     | 0     | 0     |
| 528    | 0     | 0     | 0     | 0     |
| 532    | 0     | 0     | 0     | 0     |
| 536    | 0     | 0     | 0     | 0     |
| 539    | 0     | 0     | 0     | 0     |
| 540    | 0     | 0     | 0     | 0     |
| 547    | 0     | 0     | 0     | 0     |
| 551    | 0     | 0     | 0     | 0     |
| 554    | 0     | 0     | 0     | 1     |
| 558    | 0     | 0     | 0     | 1     |
| 563    | 0     | 0     | 0     | 0     |
| 564    | 0     | 0     | 0     | 1     |
| 565    | 0     | 0     | 0     | 0     |
| 567    | 0     | 0     | 0     | 0     |
| 569    | 0     | 0     | 0     | 0     |
| 572    | 0     | 0     | 0     | 0     |
| 574    | 0     | 0     | 0     | 0     |
| 583    | 0     | 0     | 0     | 1     |
| 589    | 0     | 0     | 0     | 0     |
| 592    | 0     | 0     | 0     | 1     |
| 593    | 0     | 0     | 0     | 0     |
| 594    | 0     | 0     | 0     | 1     |
| 597    | 0     | 0     | 0     | 0     |
| 601    | 0     | 0     | 0     | 0     |
| 607    | 0     | 0     | 0     | 0     |
| 610    | 0     | 0     | 0     | 0     |
| 612    | 0     | 1     | 0     | 0     |
| 627    | 0     | 0     | 0     | 0     |

| respid | Q31_6 | Q31_7 | Q31_8 | Q31_9 |
|--------|-------|-------|-------|-------|
| 631    | 0     | 0     | 0     | 0     |
| 633    | 0     | 0     | 0     | 1     |
| 636    | 0     | 0     | 1     | 0     |
| 656    | 0     | 0     | 0     | 0     |
| 659    | 0     | 0     | 0     | 0     |
| 670    | 0     | 0     | 0     | 0     |
| 672    | 0     | 0     | 0     | 1     |
| 673    | 0     | 0     | 0     | 0     |
| 675    | 0     | 0     | 0     | 0     |
| 676    | 0     | 0     | 0     | 0     |
| 679    | 0     | 0     | 0     | 0     |
| 683    | 0     | 0     | 0     | 0     |
| 684    | 0     | 0     | 0     | 1     |
| 690    | 0     | 0     | 0     | 0     |
| 701    | 0     | 1     | 0     | 0     |
| 709    | 0     | 0     | 0     | 1     |
| 719    | 0     | 0     | 0     | 0     |
| 726    | 0     | 0     | 0     | 0     |
| 730    | 0     | 0     | 0     | 0     |
| 731    | 0     | 1     | 0     | 0     |
| 732    | 0     | 0     | 0     | 0     |
| 733    | 0     | 0     | 0     | 0     |
| 735    | 0     | 0     | 0     | 0     |
| 738    | 0     | 0     | 0     | 0     |
| 740    | 0     | 0     | 0     | 0     |
| 742    | 0     | 0     | 0     | 0     |
| 744    | 0     | 0     | 0     | 0     |
| 749    | 0     | 0     | 0     | 0     |
| 751    | 0     | 0     | 0     | 0     |
| 752    | 0     | 0     | 0     | 0     |
| 753    | 0     | 0     | 0     | 1     |
| 755    | 0     | 0     | 0     | 0     |

| respid | Q31_6 | Q31_7 | Q31_8 | Q31_9 |
|--------|-------|-------|-------|-------|
| 756    | 0     | 0     | 0     | 0     |
| 759    | 0     | 0     | 0     | 0     |
| 760    | 0     | 0     | 0     | 0     |
| 763    | 0     | 0     | 0     | 0     |
| 764    | 1     | 0     | 0     | 0     |
| 765    | 0     | 0     | 0     | 0     |
| 766    | 0     | 0     | 0     | 0     |
| 767    | 0     | 0     | 1     | 0     |
| 771    | 0     | 0     | 0     | 0     |
| 773    | 0     | 0     | 0     | 0     |
| 774    | 0     | 0     | 0     | 0     |
| 775    | 0     | 0     | 0     | 0     |
| 776    | 0     | 0     | 0     | 0     |
| 778    | 0     | 0     | 0     | 0     |
| 780    | 0     | 0     | 0     | 1     |
| 781    | 0     | 0     | 0     | 0     |
| 782    | 0     | 0     | 0     | 0     |
| 783    | 0     | 0     | 0     | 0     |
| 786    | 0     | 0     | 0     | 0     |
| 788    | 0     | 0     | 0     | 0     |
| 792    | 0     | 0     | 0     | 0     |
| 794    | 0     | 0     | 0     | 1     |
| 795    | 0     | 0     | 0     | 0     |
| 799    | 0     | 0     | 0     | 1     |
| 800    | 0     | 0     | 0     | 0     |
| 801    | 1     | 0     | 0     | 0     |
| 804    | 0     | 0     | 0     | 0     |
| 806    | 0     | 0     | 0     | 0     |
| 807    | 0     | 0     | 0     | 0     |
| 808    | 0     | 0     | 0     | 0     |
| 809    | 0     | 0     | 0     | 0     |
| 811    | 0     | 0     | 0     | 0     |



| respid | Q31_6 | Q31_7 | Q31_8 | Q31_9 |
|--------|-------|-------|-------|-------|
| 812    | 0     | 0     | 0     | 0     |
| 815    | 0     | 0     | 0     | 0     |
| 817    | 0     | 0     | 0     | 1     |
| 818    | 0     | 0     | 0     | 0     |
| 819    | 0     | 0     | 0     | 1     |
| 821    | 0     | 0     | 0     | 0     |
| 824    | 0     | 0     | 0     | 0     |
| 825    | 0     | 0     | 0     | 0     |
| 828    | 0     | 0     | 0     | 0     |
| 832    | 0     | 0     | 0     | 0     |
| 834    | 0     | 0     | 0     | 0     |
| 835    | 0     | 0     | 0     | 0     |
| 836    | 0     | 0     | 0     | 0     |
| 837    | 0     | 0     | 0     | 0     |
| 840    | 0     | 0     | 0     | 0     |
| 841    | 0     | 0     | 0     | 0     |
| 845    | 0     | 0     | 0     | 0     |
| 846    | 0     | 0     | 0     | 0     |
| 849    | 0     | 0     | 0     | 0     |
| 852    | 0     | 0     | 0     | 0     |
| 854    | 0     | 0     | 0     | 0     |
| 856    | 0     | 0     | 0     | 0     |
| 858    | 0     | 0     | 0     | 0     |
| 859    | 0     | 0     | 0     | 0     |
| 861    | 0     | 0     | 0     | 0     |
| 863    | 0     | 0     | 0     | 0     |
| 864    | 1     | 0     | 0     | 0     |
| 866    | 0     | 0     | 0     | 0     |
| 869    | 0     | 0     | 0     | 0     |
| 870    | 0     | 0     | 0     | 0     |
| 871    | 0     | 0     | 0     | 0     |
| 873    | 0     | 0     | 0     | 1     |

| respid | Q31_6 | Q31_7 | Q31_8 | Q31_9 |
|--------|-------|-------|-------|-------|
| 879    | 1     | 0     | 0     | 0     |
| 880    | 0     | 0     | 0     | 0     |
| 881    | 0     | 0     | 0     | 0     |
| 882    | 0     | 0     | 0     | 0     |
| 885    | 0     | 0     | 0     | 0     |
| 886    | 0     | 0     | 0     | 0     |
| 887    | 0     | 0     | 1     | 1     |
| 888    | 0     | 0     | 0     | 0     |
| 889    | 0     | 0     | 0     | 0     |
| 890    | 0     | 0     | 0     | 0     |
| 900    | 0     | 0     | 0     | 0     |
| 901    | 0     | 0     | 0     | 0     |
| 902    | 0     | 0     | 0     | 0     |
| 903    | 0     | 0     | 0     | 0     |
| 906    | 0     | 0     | 0     | 0     |
| 907    | 0     | 1     | 0     | 1     |
| 908    | 1     | 0     | 0     | 0     |
| 910    | 0     | 0     | 0     | 0     |
| 911    | 0     | 1     | 0     | 0     |
| 912    | 0     | 0     | 0     | 0     |
| 915    | 0     | 0     | 0     | 0     |
| 923    | 0     | 0     | 0     | 1     |
| 925    | 0     | 0     | 0     | 0     |
| 926    | 0     | 0     | 0     | 0     |
| 929    | 0     | 0     | 0     | 0     |
| 932    | 0     | 0     | 0     | 0     |
| 933    | 1     | 0     | 0     | 0     |
| 934    | 0     | 0     | 0     | 0     |
| 938    | 0     | 0     | 0     | 1     |
| 941    | 0     | 0     | 0     | 0     |
| 942    | 0     | 0     | 0     | 0     |
| 943    | 0     | 0     | 0     | 0     |

| respid | Q31_6 | Q31_7 | Q31_8 | Q31_9 |
|--------|-------|-------|-------|-------|
| 945    | 0     | 0     | 0     | 0     |
| 946    | 0     | 0     | 0     | 0     |
| 947    | 0     | 0     | 0     | 0     |
| 948    | 0     | 0     | 0     | 0     |
| 949    | 0     | 0     | 0     | 0     |
| 952    | 0     | 0     | 0     | 0     |
| 956    | 0     | 0     | 0     | 0     |
| 957    | 0     | 0     | 0     | 0     |
| 959    | 0     | 0     | 0     | 0     |
| 961    | 0     | 0     | 0     | 0     |
| 962    | 0     | 0     | 0     | 0     |
| 965    | 0     | 0     | 0     | 0     |
| 967    | 0     | 0     | 0     | 0     |
| 969    | 0     | 0     | 0     | 0     |
| 970    | 0     | 0     | 0     | 0     |
| 973    | 0     | 0     | 0     | 0     |
| 974    | 0     | 0     | 0     | 0     |
| 975    | 0     | 1     | 0     | 1     |
| 976    | 0     | 0     | 0     | 0     |
| 977    | 0     | 0     | 0     | 0     |
| 979    | 0     | 0     | 0     | 0     |
| 981    | 0     | 0     | 0     | 0     |
| 983    | 0     | 0     | 0     | 0     |
| 987    | 0     | 0     | 0     | 1     |
| 991    | 0     | 0     | 0     | 0     |
| 992    | 0     | 0     | 0     | 0     |
| 993    | 0     | 0     | 0     | 0     |
| 994    | 0     | 0     | 0     | 0     |
| 995    | 0     | 0     | 0     | 1     |
| 998    | 0     | 0     | 0     | 0     |
| 1000   | 1     | 1     | 1     | 1     |
| 1001   | 0     | 0     | 0     | 0     |

| respid | Q31_6 | Q31_7 | Q31_8 | Q31_9 |
|--------|-------|-------|-------|-------|
| 1002   | 0     | 0     | 0     | 0     |
| 1004   | 0     | 0     | 0     | 0     |
| 1005   | 0     | 0     | 0     | 0     |
| 1006   | 0     | 0     | 0     | 0     |
| 1007   | 0     | 0     | 0     | 0     |
| 1009   | 0     | 0     | 0     | 0     |
| 1013   | 0     | 0     | 0     | 0     |
| 1015   | 0     | 0     | 0     | 0     |
| 1020   | 1     | 0     | 0     | 0     |
| 1022   | 1     | 0     | 0     | 0     |
| 1024   | 0     | 0     | 0     | 0     |
| 1025   | 0     | 0     | 0     | 0     |
| 1027   | 0     | 0     | 0     | 0     |
| 1031   | 0     | 0     | 0     | 0     |
| 1037   | 0     | 0     | 0     | 0     |
| 1039   | 0     | 0     | 0     | 0     |
| 1040   | 0     | 0     | 0     | 0     |
| 1056   | 0     | 0     | 0     | 1     |
| 1057   | 0     | 0     | 0     | 0     |
| 1062   | 0     | 0     | 0     | 0     |
| 1069   | 0     | 0     | 0     | 0     |
| 1070   | 0     | 0     | 0     | 0     |
| 1072   | 0     | 0     | 0     | 0     |
| 1076   | 0     | 0     | 0     | 0     |
| 1077   | 0     | 0     | 0     | 1     |
| 1078   | 0     | 0     | 0     | 0     |
| 1080   | 0     | 0     | 0     | 0     |
| 1094   | 0     | 0     | 0     | 0     |
| 1098   | 0     | 0     | 0     | 1     |
| 1099   | 0     | 0     | 0     | 0     |
| 1102   | 0     | 0     | 0     | 0     |
| 1110   | 0     | 0     | 0     | 0     |

| respid | Q31_6 | Q31_7 | Q31_8 | Q31_9 |
|--------|-------|-------|-------|-------|
| 1117   | 0     | 0     | 0     | 0     |
| 1119   | 0     | 0     | 0     | 0     |
| 1126   | 0     | 0     | 0     | 0     |
| 1127   | 0     | 0     | 0     | 0     |
| 1130   | 0     | 0     | 0     | 0     |
| 1131   | 0     | 0     | 0     | 0     |
| 1135   | 0     | 0     | 0     | 1     |
| 1138   | 0     | 0     | 0     | 0     |
| 1139   | 0     | 0     | 0     | 0     |
| 1140   | 0     | 0     | 0     | 0     |
| 1142   | 0     | 0     | 0     | 0     |
| 1143   | 0     | 0     | 0     | 0     |
| 1145   | 0     | 0     | 0     | 0     |
| 1149   | 0     | 0     | 0     | 0     |
| 1152   | 0     | 0     | 0     | 0     |
| 1160   | 0     | 0     | 0     | 0     |
| 1164   | 0     | 0     | 0     | 0     |
| 1165   | 0     | 0     | 0     | 1     |
| 1169   | 0     | 1     | 0     | 0     |
| 1170   | 0     | 0     | 0     | 0     |
| 1179   | 0     | 0     | 0     | 0     |
| 1180   | 0     | 0     | 0     | 0     |
| 1183   | 0     | 0     | 0     | 0     |
| 1187   | 0     | 0     | 0     | 0     |
| 1188   | 0     | 0     | 0     | 0     |
| 1193   | 0     | 0     | 0     | 0     |
| 1194   | 0     | 0     | 0     | 0     |
| 1197   | 0     | 0     | 0     | 0     |
| 1202   | 0     | 0     | 0     | 0     |
| 1204   | 0     | 0     | 0     | 0     |
| 1211   | 0     | 0     | 0     | 0     |
| 1224   | 0     | 0     | 0     | 0     |

| respid | Q31_6 | Q31_7 | Q31_8 | Q31_9 |
|--------|-------|-------|-------|-------|
| 1225   | 0     | 0     | 0     | 0     |
| 1230   | 0     | 0     | 0     | 0     |
| 1232   | 0     | 0     | 0     | 0     |
| 1233   | 0     | 0     | 0     | 1     |
| 1234   | 0     | 0     | 0     | 0     |
| 1235   | 0     | 0     | 0     | 1     |
| 1236   | 0     | 0     | 0     | 0     |
| 1237   | 0     | 0     | 0     | 0     |
| 1238   | 0     | 0     | 0     | 0     |
| 1239   | 0     | 0     | 0     | 0     |
| 1241   | 0     | 0     | 0     | 0     |
| 1242   | 0     | 0     | 0     | 0     |
| 1244   | 0     | 0     | 0     | 0     |
| 1245   | 0     | 0     | 0     | 0     |
| 1247   | 0     | 0     | 0     | 1     |
| 1248   | 0     | 0     | 0     | 0     |
| 1249   | 0     | 0     | 0     | 1     |
| 1250   | 0     | 0     | 0     | 0     |
| 1251   | 0     | 0     | 0     | 0     |
| 1252   | 0     | 0     | 0     | 0     |
| 1253   | 0     | 0     | 0     | 0     |
| 1254   | 0     | 0     | 0     | 1     |
| 1258   | 0     | 0     | 0     | 0     |
| 1260   | 0     | 0     | 0     | 0     |
| 1261   | 0     | 0     | 0     | 0     |
| 1262   | 0     | 0     | 0     | 0     |
| 1263   | 0     | 0     | 0     | 0     |
| 1264   | 0     | 0     | 0     | 0     |
| 1265   | 0     | 0     | 0     | 0     |
| 1266   | 0     | 0     | 0     | 0     |
| 1270   | 0     | 0     | 0     | 0     |
| 1272   | 0     | 0     | 0     | 0     |

| respid | Q31_6 | Q31_7 | Q31_8 | Q31_9 |
|--------|-------|-------|-------|-------|
| 1273   | 0     | 0     | 0     | 0     |
| 1276   | 0     | 0     | 0     | 0     |
| 1277   | 0     | 0     | 0     | 0     |
| 1278   | 1     | 0     | 0     | 0     |
| 1280   | 0     | 0     | 0     | 0     |
| 1281   | 0     | 0     | 0     | 0     |
| 1282   | 0     | 0     | 0     | 1     |
| 1283   | 0     | 0     | 0     | 0     |
| 1288   | 0     | 0     | 0     | 0     |
| 1289   | 0     | 0     | 0     | 0     |
| 1290   | 0     | 0     | 0     | 0     |
| 1291   | 0     | 0     | 0     | 0     |
| 1293   | 0     | 0     | 0     | 0     |
| 1294   | 0     | 0     | 0     | 0     |
| 1295   | 0     | 0     | 0     | 0     |
| 1296   | 0     | 0     | 0     | 0     |
| 1297   | 0     | 0     | 0     | 0     |
| 1298   | 0     | 0     | 0     | 0     |
| 1300   | 0     | 0     | 0     | 1     |
| 1302   | 0     | 0     | 0     | 0     |
| 1303   | 0     | 1     | 0     | 0     |
| 1304   | 0     | 0     | 0     | 0     |
| 1305   | 0     | 0     | 0     | 1     |
| 1307   | 0     | 0     | 0     | 0     |
| 1312   | 0     | 0     | 0     | 0     |
| 1313   | 0     | 0     | 0     | 0     |
| 1314   | 0     | 0     | 0     | 0     |
| 1317   | 0     | 0     | 0     | 0     |
| 1318   | 0     | 0     | 0     | 0     |
| 1319   | 0     | 0     | 0     | 0     |
| 1321   | 0     | 0     | 0     | 0     |
| 1324   | 0     | 0     | 0     | 0     |

| respid | Q31_6 | Q31_7 | Q31_8 | Q31_9 |
|--------|-------|-------|-------|-------|
| 1325   | 0     | 0     | 0     | 0     |
| 1326   | 0     | 0     | 0     | 0     |
| 1327   | 0     | 0     | 0     | 0     |
| 1329   | 0     | 0     | 0     | 1     |
| 1330   | 0     | 0     | 0     | 0     |
| 1331   | 0     | 0     | 0     | 0     |
| 1335   | 0     | 0     | 0     | 1     |
| 1337   | 0     | 0     | 0     | 0     |
| 1341   | 0     | 0     | 0     | 0     |
| 1342   | 0     | 0     | 0     | 0     |
| 1344   | 0     | 1     | 0     | 1     |
| 1345   | 0     | 0     | 0     | 0     |
| 1346   | 0     | 0     | 0     | 1     |
| 1350   | 0     | 0     | 0     | 0     |
| 1352   | 0     | 0     | 0     | 0     |
| 1353   | 0     | 0     | 0     | 1     |
| 1354   | 0     | 0     | 0     | 0     |
| 1355   | 0     | 0     | 0     | 0     |
| 1357   | 0     | 0     | 0     | 1     |
| 1360   | 0     | 0     | 0     | 0     |
| 1362   | 0     | 0     | 0     | 0     |
| 1363   | 0     | 1     | 0     | 0     |
| 1367   | 0     | 0     | 0     | 1     |
| 1369   | 0     | 0     | 0     | 0     |
| 1371   | 0     | 0     | 0     | 0     |
| 1372   | 0     | 0     | 0     | 0     |
| 1375   | 0     | 0     | 0     | 0     |
| 1377   | 0     | 0     | 1     | 0     |
| 1379   | 0     | 0     | 0     | 0     |
| 1380   | 0     | 0     | 0     | 0     |
| 1382   | 0     | 0     | 0     | 0     |
| 1383   | 0     | 0     | 0     | 0     |



| respid | Q31_6 | Q31_7 | Q31_8 | Q31_9 |
|--------|-------|-------|-------|-------|
| 1384   | 0     | 0     | 0     | 0     |
| 1385   | 0     | 0     | 0     | 0     |
| 1387   | 0     | 0     | 0     | 0     |
| 1388   | 0     | 0     | 0     | 0     |
| 1389   | 0     | 0     | 0     | 0     |
| 1390   | 0     | 0     | 0     | 0     |
| 1395   | 0     | 0     | 0     | 0     |
| 1396   | 0     | 0     | 0     | 0     |
| 1397   | 0     | 1     | 0     | 0     |
| 1398   | 0     | 0     | 0     | 0     |
| 1399   | 0     | 0     | 0     | 0     |
| 1403   | 0     | 0     | 0     | 0     |
| 1405   | 0     | 0     | 0     | 0     |
| 1406   | 0     | 0     | 0     | 0     |
| 1407   | 0     | 1     | 0     | 1     |
| 1408   | 0     | 0     | 0     | 0     |
| 1409   | 0     | 0     | 0     | 0     |
| 1410   | 0     | 0     | 0     | 1     |
| 1411   | 0     | 0     | 0     | 0     |
| 1412   | 0     | 0     | 0     | 0     |
| 1413   | 0     | 0     | 0     | 0     |
| 1414   | 0     | 0     | 0     | 0     |
| 1415   | 0     | 0     | 0     | 0     |
| 1416   | 0     | 0     | 0     | 0     |
| 1417   | 0     | 0     | 0     | 0     |
| 1418   | 0     | 0     | 0     | 0     |
| 1419   | 0     | 0     | 0     | 0     |
| 1420   | 0     | 0     | 0     | 0     |
| 1421   | 0     | 0     | 0     | 0     |
| 1422   | 0     | 0     | 0     | 0     |
| 1423   | 0     | 0     | 0     | 0     |
| 1424   | 0     | 0     | 0     | 0     |

| respid | Q31_6 | Q31_7 | Q31_8 | Q31_9 |
|--------|-------|-------|-------|-------|
| 1429   | 0     | 0     | 0     | 0     |
| 1430   | 0     | 0     | 0     | 0     |
| 1431   | 1     | 0     | 0     | 0     |
| 1433   | 0     | 0     | 0     | 0     |
| 1435   | 0     | 0     | 0     | 0     |
| 1436   | 0     | 0     | 0     | 0     |
| 1438   | 0     | 0     | 0     | 0     |
| 1439   | 0     | 0     | 0     | 0     |
| 1441   | 0     | 0     | 0     | 0     |
| 1442   | 0     | 0     | 0     | 0     |
| 1443   | 0     | 0     | 0     | 0     |
| 1444   | 0     | 0     | 0     | 0     |
| 1445   | 0     | 1     | 0     | 0     |
| 1446   | 0     | 0     | 0     | 0     |
| 1447   | 0     | 0     | 0     | 0     |
| 1449   | 0     | 0     | 0     | 0     |
| 1450   | 0     | 0     | 0     | 0     |
| 1451   | 0     | 0     | 0     | 1     |
| 1452   | 0     | 0     | 0     | 0     |
| 1453   | 0     | 0     | 0     | 0     |
| 1454   | 0     | 0     | 1     | 0     |
| 1456   | 0     | 0     | 0     | 0     |
| 1457   | 0     | 0     | 0     | 0     |
| 1459   | 0     | 0     | 0     | 0     |
| 1460   | 0     | 0     | 0     | 0     |
| 1463   | 0     | 0     | 0     | 0     |
| 1465   | 0     | 0     | 0     | 0     |
| 1467   | 0     | 0     | 0     | 0     |
| 1470   | 0     | 0     | 0     | 0     |
| 1471   | 0     | 0     | 0     | 0     |
| 1472   | 0     | 0     | 0     | 0     |
| 1474   | 0     | 0     | 0     | 0     |

| respid | Q31_6 | Q31_7 | Q31_8 | Q31_9 |
|--------|-------|-------|-------|-------|
| 1475   | 0     | 0     | 0     | 0     |
| 1477   | 0     | 0     | 0     | 0     |
| 1478   | 0     | 0     | 0     | 0     |
| 1480   | 0     | 0     | 0     | 0     |
| 1481   | 0     | 0     | 0     | 0     |
| 1483   | 0     | 0     | 0     | 0     |
| 1484   | 0     | 0     | 0     | 0     |
| 1485   | 0     | 0     | 0     | 0     |
| 1486   | 0     | 0     | 0     | 0     |
| 1487   | 0     | 0     | 0     | 1     |
| 1488   | 0     | 0     | 0     | 0     |
| 1489   | 0     | 0     | 0     | 1     |
| 1490   | 0     | 0     | 0     | 0     |
| 1491   | 0     | 0     | 0     | 0     |
| 1492   | 0     | 0     | 0     | 0     |
| 1494   | 0     | 0     | 0     | 0     |
| 1495   | 0     | 0     | 0     | 0     |
| 1496   | 0     | 0     | 0     | 0     |
| 1498   | 0     | 0     | 0     | 0     |
| 1499   | 0     | 0     | 0     | 0     |
| 1500   | 0     | 1     | 0     | 0     |
| 1501   | 0     | 0     | 0     | 0     |
| 1503   | 0     | 0     | 0     | 0     |
| 1504   | 0     | 0     | 0     | 0     |
| 1508   | 0     | 0     | 0     | 0     |
| 1509   | 0     | 0     | 0     | 1     |
| 1511   | 1     | 0     | 0     | 1     |
| 1512   | 0     | 0     | 0     | 0     |
| 1513   | 0     | 0     | 0     | 0     |
| 1515   | 0     | 0     | 0     | 1     |
| 1517   | 0     | 0     | 0     | 0     |
| 1518   | 0     | 0     | 0     | 0     |

| respid | Q31_6 | Q31_7 | Q31_8 | Q31_9 |
|--------|-------|-------|-------|-------|
| 1519   | 0     | 1     | 0     | 0     |
| 1520   | 0     | 0     | 0     | 0     |
| 1521   | 0     | 0     | 0     | 0     |
| 1522   | 0     | 0     | 0     | 0     |
| 1523   | 0     | 1     | 0     | 0     |
| 1524   | 0     | 0     | 0     | 0     |
| 1525   | 0     | 0     | 0     | 0     |
| 1526   | 1     | 0     | 0     | 1     |
| 1527   | 0     | 0     | 0     | 0     |
| 1534   | 0     | 0     | 0     | 0     |
| 1535   | 0     | 0     | 0     | 0     |
| 1536   | 0     | 0     | 0     | 1     |
| 1538   | 0     | 0     | 0     | 0     |
| 1539   | 0     | 0     | 0     | 0     |
| 1540   | 0     | 0     | 0     | 0     |
| 1541   | 0     | 0     | 0     | 0     |
| 1542   | 0     | 0     | 0     | 0     |
| 1543   | 0     | 0     | 0     | 0     |
| 1545   | 0     | 0     | 0     | 0     |
| 1546   | 0     | 0     | 0     | 0     |
| 1548   | 0     | 0     | 0     | 1     |
| 1549   | 0     | 0     | 0     | 0     |
| 1551   | 0     | 0     | 0     | 0     |
| 1552   | 0     | 0     | 0     | 0     |
| 1556   | 0     | 0     | 0     | 0     |
| 1557   | 0     | 0     | 0     | 0     |
| 1558   | 0     | 0     | 0     | 0     |
| 1561   | 0     | 0     | 0     | 0     |
| 1562   | 0     | 0     | 0     | 0     |
| 1563   | 0     | 0     | 0     | 0     |
| 1564   | 0     | 1     | 1     | 1     |
| 1565   | 0     | 0     | 0     | 0     |

| respid | Q31_6 | Q31_7 | Q31_8 | Q31_9 |
|--------|-------|-------|-------|-------|
| 1566   | 0     | 0     | 0     | 0     |
| 1567   | 0     | 0     | 0     | 0     |
| 1569   | 0     | 0     | 0     | 0     |
| 1570   | 0     | 0     | 0     | 0     |
| 1574   | 0     | 0     | 0     | 0     |
| 1575   | 0     | 0     | 0     | 0     |
| 1576   | 0     | 0     | 0     | 0     |
| 1577   | 0     | 0     | 0     | 0     |
| 1581   | 0     | 0     | 0     | 0     |
| 1583   | 0     | 0     | 0     | 1     |
| 1585   | 0     | 0     | 0     | 0     |
| 1586   | 0     | 0     | 0     | 0     |
| 1588   | 0     | 0     | 0     | 0     |
| 1590   | 0     | 0     | 0     | 0     |
| 1592   | 0     | 0     | 0     | 0     |
| 1594   | 0     | 0     | 0     | 0     |
| 1598   | 0     | 0     | 0     | 0     |
| 1599   | 0     | 0     | 0     | 0     |
| 1600   | 0     | 1     | 0     | 0     |
| 1602   | 0     | 0     | 0     | 0     |
| 1603   | 0     | 0     | 0     | 0     |
| 1604   | 0     | 0     | 0     | 0     |
| 1605   | 0     | 0     | 0     | 1     |
| 1606   | 0     | 0     | 0     | 0     |
| 1610   | 0     | 0     | 0     | 0     |
| 1611   | 0     | 0     | 0     | 0     |
| 1612   | 0     | 0     | 0     | 0     |
| 1613   | 1     | 0     | 0     | 0     |
| 1615   | 0     | 0     | 0     | 0     |
| 1616   | 0     | 0     | 0     | 0     |
| 1617   | 0     | 0     | 0     | 0     |
| 1618   | 0     | 0     | 0     | 0     |

| respid | Q31_6 | Q31_7 | Q31_8 | Q31_9 |
|--------|-------|-------|-------|-------|
| 1620   | 0     | 0     | 0     | 0     |
| 1621   | 0     | 1     | 0     | 0     |
| 1622   | 0     | 0     | 0     | 0     |
| 1623   | 0     | 0     | 0     | 0     |
| 1624   | 0     | 0     | 0     | 0     |
| 1625   | 0     | 0     | 0     | 0     |
| 1626   | 0     | 0     | 0     | 0     |
| 1627   | 0     | 0     | 0     | 0     |
| 1629   | 0     | 0     | 0     | 0     |
| 1630   | 0     | 0     | 0     | 0     |
| 1631   | 0     | 0     | 0     | 0     |
| 1634   | 0     | 0     | 0     | 0     |
| 1635   | 0     | 0     | 0     | 0     |
| 1636   | 0     | 0     | 0     | 0     |
| 1637   | 0     | 0     | 0     | 0     |
| 1640   | 0     | 0     | 0     | 0     |
| 1642   | 0     | 0     | 0     | 0     |
| 1643   | 0     | 0     | 0     | 0     |
| 1644   | 0     | 0     | 0     | 1     |
| 1645   | 0     | 0     | 0     | 0     |
| 1646   | 0     | 0     | 0     | 0     |
| 1647   | 0     | 0     | 0     | 0     |
| 1650   | 0     | 0     | 0     | 1     |
| 1654   | 0     | 0     | 0     | 0     |
| 1656   | 0     | 0     | 0     | 0     |
| 1657   | 0     | 0     | 0     | 0     |
| 1659   | 0     | 0     | 0     | 0     |
| 1662   | 0     | 0     | 0     | 0     |
| 1663   | 0     | 0     | 0     | 0     |
| 1664   | 0     | 0     | 0     | 0     |
| 1665   | 0     | 0     | 0     | 0     |
| 1667   | 0     | 0     | 0     | 0     |

| respid | Q31_6 | Q31_7 | Q31_8 | Q31_9 |
|--------|-------|-------|-------|-------|
| 1668   | 0     | 0     | 0     | 0     |
| 1670   | 0     | 0     | 0     | 0     |
| 1671   | 0     | 0     | 0     | 0     |
| 1673   | 0     | 0     | 0     | 0     |
| 1674   | 0     | 0     | 0     | 0     |
| 1676   | 0     | 0     | 0     | 0     |
| 1677   | 0     | 0     | 0     | 0     |
| 1678   | 0     | 0     | 0     | 0     |
| 1680   | 0     | 0     | 0     | 0     |
| 1681   | 0     | 0     | 0     | 0     |
| 1683   | 0     | 0     | 0     | 0     |
| 1685   | 0     | 0     | 0     | 0     |
| 1686   | 0     | 0     | 0     | 0     |
| 1690   | 0     | 0     | 0     | 0     |
| 1691   | 0     | 0     | 0     | 0     |
| 1692   | 0     | 1     | 0     | 0     |
| 1693   | 0     | 0     | 0     | 0     |
| 1695   | 0     | 0     | 0     | 0     |
| 1696   | 0     | 0     | 0     | 0     |
| 1698   | 0     | 0     | 0     | 0     |
| 1699   | 0     | 0     | 0     | 0     |
| 1701   | 0     | 0     | 0     | 0     |
| 1702   | 0     | 0     | 0     | 0     |
| 1703   | 0     | 0     | 0     | 0     |
| 1705   | 0     | 0     | 0     | 0     |
| 1706   | 0     | 0     | 0     | 0     |
| 1708   | 0     | 0     | 0     | 0     |
| 1711   | 0     | 0     | 0     | 0     |
| 1712   | 0     | 0     | 0     | 0     |
| 1713   | 0     | 0     | 0     | 0     |
| 1715   | 0     | 0     | 0     | 0     |
| 1717   | 0     | 0     | 0     | 0     |

| respid | Q31_6 | Q31_7 | Q31_8 | Q31_9 |
|--------|-------|-------|-------|-------|
| 1718   | 0     | 1     | 0     | 0     |
| 1719   | 0     | 0     | 0     | 0     |
| 1721   | 0     | 0     | 0     | 0     |
| 1722   | 0     | 0     | 0     | 0     |
| 1724   | 0     | 0     | 0     | 0     |
| 1725   | 0     | 0     | 0     | 0     |
| 1726   | 0     | 0     | 0     | 1     |
| 1727   | 0     | 0     | 0     | 0     |
| 1728   | 0     | 0     | 0     | 1     |
| 1731   | 0     | 0     | 0     | 0     |
| 1733   | 0     | 0     | 0     | 0     |
| 1734   | 0     | 0     | 0     | 0     |
| 1735   | 0     | 0     | 0     | 0     |
| 1736   | 0     | 0     | 0     | 0     |
| 1737   | 0     | 0     | 0     | 0     |
| 1738   | 0     | 0     | 0     | 0     |
| 1743   | 0     | 0     | 0     | 0     |
| 1755   | 0     | 1     | 0     | 0     |
| 1756   | 0     | 0     | 0     | 0     |
| 1757   | 0     | 0     | 0     | 0     |
| 1758   | 0     | 1     | 0     | 0     |
| 1759   | 0     | 0     | 0     | 0     |
| 1761   | 0     | 0     | 0     | 0     |
| 1762   | 0     | 0     | 0     | 0     |
| 1764   | 0     | 0     | 0     | 0     |
| 1767   | 0     | 0     | 0     | 0     |
| 1768   | 0     | 0     | 0     | 1     |
| 1769   | 0     | 0     | 0     | 0     |
| 1770   | 0     | 0     | 0     | 0     |
| 1771   | 0     | 0     | 0     | 0     |
| 1776   | 0     | 0     | 0     | 0     |
| 1777   | 0     | 0     | 0     | 0     |



| respid | Q31_6 | Q31_7 | Q31_8 | Q31_9 |
|--------|-------|-------|-------|-------|
| 1778   | 1     | 0     | 0     | 0     |
| 1779   | 0     | 0     | 0     | 1     |
| 1780   | 0     | 0     | 0     | 1     |
| 1781   | 0     | 0     | 0     | 0     |
| 1783   | 0     | 0     | 0     | 0     |
| 1784   | 0     | 0     | 0     | 0     |
| 1785   | 0     | 0     | 0     | 0     |
| 1788   | 0     | 0     | 0     | 0     |
| 1792   | 0     | 0     | 0     | 0     |
| 1794   | 0     | 0     | 0     | 0     |
| 1798   | 1     | 1     | 0     | 0     |
| 1799   | 0     | 0     | 0     | 0     |
| 1800   | 0     | 0     | 0     | 0     |
| 1804   | 0     | 0     | 0     | 0     |
| 1806   | 0     | 0     | 0     | 0     |
| 1807   | 0     | 0     | 0     | 0     |
| 1808   | 0     | 0     | 0     | 0     |
| 1809   | 0     | 0     | 0     | 0     |
| 1811   | 0     | 0     | 0     | 0     |
| 1812   | 0     | 0     | 0     | 0     |
| 1813   | 0     | 0     | 0     | 0     |
| 1814   | 0     | 0     | 0     | 0     |
| 1815   | 0     | 0     | 0     | 0     |
| 1817   | 0     | 0     | 0     | 0     |
| 1820   | 0     | 0     | 0     | 0     |
| 1821   | 0     | 0     | 0     | 0     |
| 1822   | 0     | 0     | 0     | 1     |
| 1823   | 0     | 0     | 0     | 0     |
| 1824   | 0     | 0     | 0     | 0     |
| 1826   | 0     | 0     | 0     | 0     |
| 1828   | 0     | 0     | 0     | 1     |
| 1829   | 0     | 0     | 0     | 0     |

| respid | Q31_6 | Q31_7 | Q31_8 | Q31_9 |
|--------|-------|-------|-------|-------|
| 1830   | 0     | 0     | 0     | 1     |
| 1831   | 0     | 0     | 0     | 0     |
| 1832   | 0     | 0     | 0     | 0     |
| 1836   | 0     | 1     | 0     | 0     |
| 1838   | 0     | 0     | 0     | 1     |
| 1839   | 0     | 0     | 0     | 0     |
| 1840   | 0     | 0     | 0     | 0     |
| 1841   | 0     | 0     | 0     | 0     |
| 1842   | 0     | 0     | 0     | 1     |
| 1843   | 0     | 0     | 0     | 0     |
| 1844   | 0     | 0     | 0     | 0     |
| 1845   | 0     | 0     | 0     | 0     |
| 1849   | 0     | 0     | 0     | 0     |
| 1850   | 0     | 0     | 0     | 1     |
| 1851   | 0     | 0     | 0     | 0     |
| 1852   | 0     | 0     | 0     | 0     |
| 1857   | 0     | 0     | 0     | 0     |
| 1858   | 0     | 0     | 0     | 0     |
| 1861   | 0     | 0     | 0     | 0     |
| 1862   | 0     | 0     | 0     | 0     |
| 1863   | 0     | 0     | 0     | 0     |
| 1864   | 0     | 0     | 0     | 0     |
| 1865   | 0     | 0     | 0     | 0     |
| 1867   | 0     | 0     | 0     | 0     |
| 1868   | 0     | 0     | 0     | 0     |
| 1869   | 0     | 0     | 0     | 0     |
| 1870   | 0     | 0     | 0     | 0     |
| 1871   | 0     | 0     | 0     | 1     |
| 1872   | 0     | 0     | 0     | 0     |
| 1873   | 0     | 0     | 0     | 0     |
| 1876   | 0     | 0     | 0     | 0     |
| 1877   | 0     | 0     | 0     | 0     |

| respid | Q31_6 | Q31_7 | Q31_8 | Q31_9 |
|--------|-------|-------|-------|-------|
| 1878   | 0     | 0     | 0     | 1     |
| 1879   | 0     | 0     | 0     | 0     |
| 1880   | 0     | 0     | 0     | 0     |
| 1881   | 0     | 0     | 0     | 0     |
| 1883   | 0     | 0     | 0     | 1     |
| 1886   | 0     | 0     | 0     | 0     |
| 1888   | 0     | 0     | 0     | 0     |
| 1889   | 0     | 0     | 0     | 0     |
| 1890   | 0     | 0     | 0     | 0     |
| 1891   | 0     | 0     | 0     | 0     |
| 1893   | 0     | 0     | 0     | 0     |
| 1894   | 0     | 0     | 0     | 0     |
| 1895   | 0     | 0     | 0     | 1     |
| 1896   | 0     | 0     | 0     | 0     |
| 1897   | 0     | 0     | 0     | 0     |
| 1898   | 0     | 1     | 1     | 0     |
| 1899   | 0     | 0     | 0     | 0     |
| 1900   | 0     | 0     | 0     | 0     |
| 1903   | 0     | 0     | 0     | 0     |
| 1906   | 0     | 0     | 0     | 0     |
| 1907   | 0     | 0     | 0     | 0     |
| 1908   | 0     | 0     | 0     | 0     |
| 1909   | 0     | 0     | 0     | 0     |
| 1910   | 0     | 0     | 0     | 0     |
| 1911   | 0     | 0     | 0     | 1     |
| 1912   | 0     | 0     | 0     | 0     |
| 1917   | 0     | 0     | 0     | 0     |
| 1918   | 0     | 0     | 0     | 0     |
| 1919   | 0     | 0     | 0     | 0     |
| 1922   | 0     | 0     | 0     | 0     |
| 1925   | 0     | 0     | 0     | 0     |
| 1926   | 0     | 0     | 1     | 0     |

| respid | Q31_6 | Q31_7 | Q31_8 | Q31_9 |
|--------|-------|-------|-------|-------|
| 1927   | 0     | 0     | 0     | 0     |
| 1928   | 0     | 0     | 0     | 0     |
| 1929   | 0     | 0     | 0     | 0     |
| 1934   | 0     | 0     | 0     | 0     |
| 1935   | 0     | 0     | 0     | 0     |
| 1936   | 0     | 1     | 0     | 1     |
| 1937   | 0     | 0     | 0     | 0     |
| 1938   | 0     | 0     | 0     | 0     |
| 1939   | 0     | 0     | 0     | 0     |
| 1940   | 0     | 0     | 0     | 0     |
| 1941   | 0     | 0     | 0     | 0     |
| 1948   | 0     | 0     | 0     | 0     |
| 1950   | 0     | 0     | 0     | 1     |
| 1955   | 0     | 0     | 0     | 0     |
| 1958   | 0     | 0     | 0     | 0     |
| 1960   | 0     | 0     | 0     | 0     |
| 1961   | 0     | 0     | 0     | 0     |
| 1962   | 0     | 0     | 0     | 0     |
| 1965   | 0     | 0     | 0     | 0     |
| 1966   | 0     | 0     | 0     | 0     |
| 1967   | 0     | 0     | 0     | 0     |
| 1968   | 0     | 0     | 0     | 0     |
| 1973   | 0     | 0     | 0     | 0     |
| 1974   | 1     | 1     | 0     | 1     |
| 1975   | 0     | 0     | 0     | 0     |
| 1977   | 0     | 0     | 0     | 0     |
| 1978   | 0     | 0     | 0     | 0     |
| 1979   | 0     | 0     | 0     | 0     |
| 1982   | 0     | 0     | 0     | 0     |
| 1983   | 0     | 0     | 0     | 0     |
| 1987   | 0     | 0     | 0     | 0     |
| 1988   | 0     | 0     | 0     | 0     |

| respid | Q31_6 | Q31_7 | Q31_8 | Q31_9 |
|--------|-------|-------|-------|-------|
| 1991   | 0     | 0     | 0     | 1     |
| 1992   | 0     | 0     | 0     | 0     |
| 1993   | 0     | 0     | 0     | 0     |
| 1994   | 0     | 1     | 0     | 0     |
| 1995   | 0     | 0     | 0     | 0     |
| 1996   | 0     | 0     | 0     | 0     |
| 1997   | 0     | 0     | 0     | 0     |
| 1998   | 0     | 0     | 0     | 0     |
| 1999   | 1     | 1     | 0     | 0     |
| 2000   | 1     | 0     | 0     | 1     |
| 2001   | 0     | 1     | 0     | 0     |
| 2002   | 0     | 0     | 0     | 0     |
| 2003   | 0     | 0     | 0     | 0     |
| 2004   | 0     | 0     | 0     | 0     |
| 2005   | 0     | 0     | 0     | 0     |
| 2007   | 0     | 0     | 0     | 1     |
| 2009   | 0     | 0     | 0     | 0     |
| 2010   | 0     | 0     | 0     | 0     |
| 2011   | 0     | 0     | 0     | 0     |
| 2013   | 0     | 0     | 0     | 0     |
| 2014   | 0     | 0     | 0     | 0     |
| 2017   | 1     | 0     | 0     | 1     |
| 2020   | 0     | 0     | 0     | 0     |
| 2023   | 1     | 0     | 0     | 0     |
| 2024   | 0     | 0     | 0     | 0     |
| 2029   | 0     | 0     | 0     | 0     |
| 2030   | 0     | 0     | 0     | 0     |
| 2031   | 0     | 0     | 0     | 0     |
| 2032   | 0     | 0     | 0     | 1     |
| 2033   | 0     | 0     | 0     | 0     |
| 2034   | 0     | 0     | 0     | 0     |
| 2036   | 0     | 0     | 0     | 0     |

| respid | Q31_6 | Q31_7 | Q31_8 | Q31_9 |
|--------|-------|-------|-------|-------|
| 2037   | 0     | 0     | 0     | 1     |
| 2038   | 0     | 0     | 0     | 0     |
| 2039   | 0     | 0     | 0     | 0     |
| 2040   | 0     | 0     | 0     | 0     |
| 2041   | 0     | 0     | 0     | 0     |
| 2042   | 0     | 0     | 0     | 0     |
| 2043   | 0     | 0     | 0     | 0     |
| 2051   | 0     | 0     | 0     | 0     |
| 2052   | 0     | 0     | 0     | 1     |
| 2053   | 0     | 0     | 0     | 0     |
| 2054   | 0     | 0     | 0     | 0     |
| 2055   | 0     | 0     | 0     | 0     |
| 2056   | 0     | 0     | 0     | 0     |
| 2057   | 0     | 0     | 0     | 0     |
| 2059   | 0     | 0     | 0     | 0     |
| 2063   | 0     | 0     | 0     | 0     |
| 2066   | 0     | 0     | 0     | 0     |
| 2068   | 0     | 0     | 0     | 0     |
| 2069   | 0     | 1     | 0     | 1     |
| 2070   | 0     | 0     | 0     | 0     |
| 2071   | 0     | 0     | 0     | 1     |
| 2073   | 0     | 0     | 0     | 0     |
| 2077   | 0     | 0     | 0     | 0     |
| 2079   | 0     | 0     | 0     | 0     |
| 2080   | 1     | 1     | 0     | 0     |
| 2081   | 0     | 0     | 1     | 1     |
| 2084   | 0     | 0     | 0     | 0     |
| 2085   | 0     | 0     | 0     | 0     |
| 2087   | 0     | 0     | 0     | 0     |
| 2089   | 0     | 0     | 0     | 0     |
| 2093   | 0     | 0     | 0     | 0     |
| 2094   | 0     | 0     | 0     | 0     |

| respid | Q31_6 | Q31_7 | Q31_8 | Q31_9 |
|--------|-------|-------|-------|-------|
| 2095   | 0     | 0     | 0     | 0     |
| 2097   | 0     | 0     | 0     | 0     |
| 2099   | 0     | 0     | 0     | 0     |
| 2100   | 0     | 0     | 0     | 0     |
| 2101   | 0     | 0     | 0     | 0     |
| 2103   | 0     | 0     | 0     | 0     |
| 2104   | 0     | 0     | 0     | 0     |
| 2106   | 0     | 0     | 0     | 0     |
| 2111   | 0     | 0     | 0     | 1     |
| 2113   | 0     | 0     | 0     | 0     |
| 2115   | 0     | 0     | 0     | 0     |
| 2119   | 0     | 0     | 0     | 1     |
| 2120   | 0     | 0     | 0     | 0     |
| 2123   | 0     | 0     | 0     | 0     |
| 2124   | 0     | 0     | 0     | 1     |
| 2130   | 0     | 0     | 0     | 0     |
| 2131   | 0     | 0     | 0     | 0     |
| 2133   | 0     | 0     | 0     | 0     |
| 2139   | 0     | 0     | 0     | 0     |
| 2141   | 0     | 0     | 0     | 0     |
| 2143   | 0     | 0     | 0     | 0     |
| 2144   | 0     | 0     | 0     | 0     |
| 2147   | 0     | 0     | 0     | 0     |
| 2151   | 0     | 0     | 0     | 0     |
| 2153   | 0     | 0     | 0     | 0     |
| 2154   | 0     | 0     | 0     | 0     |
| 2155   | 0     | 0     | 0     | 0     |
| 2159   | 0     | 0     | 0     | 0     |
| 2160   | 1     | 0     | 1     | 0     |
| 2161   | 0     | 0     | 0     | 0     |
| 2163   | 0     | 0     | 0     | 0     |
| 2164   | 0     | 0     | 0     | 0     |

| respid | Q31_6 | Q31_7 | Q31_8 | Q31_9 |
|--------|-------|-------|-------|-------|
| 2168   | 0     | 0     | 0     | 1     |
| 2169   | 0     | 0     | 0     | 0     |
| 2170   | 0     | 0     | 0     | 1     |
| 2171   | 0     | 0     | 0     | 1     |
| 2172   | 0     | 0     | 1     | 1     |
| 2173   | 0     | 0     | 0     | 0     |
| 2174   | 0     | 0     | 0     | 0     |
| 2175   | 0     | 1     | 0     | 0     |
| 2176   | 0     | 0     | 0     | 1     |
| 2177   | 0     | 0     | 0     | 0     |
| 2179   | 0     | 0     | 0     | 0     |
| 2181   | 0     | 0     | 0     | 0     |
| 2182   | 0     | 0     | 0     | 0     |
| 2183   | 0     | 0     | 0     | 0     |
| 2184   | 0     | 0     | 0     | 0     |
| 2185   | 0     | 0     | 0     | 0     |
| 2186   | 0     | 0     | 0     | 0     |
| 2187   | 0     | 0     | 0     | 0     |
| 2188   | 0     | 0     | 0     | 0     |
| 2189   | 0     | 0     | 0     | 0     |
| 2190   | 0     | 0     | 0     | 0     |
| 2193   | 0     | 0     | 0     | 0     |
| 2195   | 0     | 0     | 0     | 0     |
| 2198   | 0     | 0     | 0     | 0     |
| 2200   | 0     | 0     | 0     | 0     |
| 2205   | 0     | 0     | 0     | 0     |
| 2208   | 0     | 0     | 0     | 0     |
| 2209   | 0     | 0     | 0     | 0     |
| 2210   | 0     | 0     | 0     | 0     |
| 2211   | 0     | 0     | 0     | 0     |
| 2213   | 0     | 0     | 0     | 0     |
| 2214   | 0     | 0     | 0     | 0     |



| respid | Q31_6 | Q31_7 | Q31_8 | Q31_9 |
|--------|-------|-------|-------|-------|
| 2216   | 0     | 0     | 0     | 1     |
| 2220   | 0     | 0     | 0     | 0     |
| 2225   | 0     | 0     | 0     | 0     |
| 2227   | 0     | 0     | 0     | 0     |
| 2228   | 0     | 1     | 0     | 0     |
| 2229   | 0     | 0     | 0     | 0     |
| 2230   | 0     | 0     | 0     | 0     |
| 2236   | 0     | 0     | 0     | 0     |
| 2238   | 0     | 1     | 1     | 0     |
| 2239   | 0     | 0     | 0     | 0     |
| 2240   | 0     | 0     | 0     | 0     |
| 2241   | 0     | 0     | 0     | 0     |
| 2243   | 0     | 0     | 0     | 0     |
| 2245   | 0     | 0     | 0     | 0     |
| 2247   | 0     | 0     | 0     | 0     |
| 2248   | 0     | 0     | 0     | 0     |
| 2249   | 0     | 0     | 0     | 0     |
| 2254   | 0     | 0     | 0     | 0     |
| 2256   | 0     | 0     | 0     | 0     |
| 2259   | 0     | 0     | 0     | 0     |
| 2261   | 0     | 0     | 0     | 0     |
| 2262   | 0     | 0     | 0     | 0     |
| 2263   | 0     | 0     | 0     | 0     |
| 2264   | 0     | 0     | 0     | 0     |
| 2265   | 0     | 0     | 0     | 0     |
| 2270   | 0     | 0     | 0     | 0     |
| 2271   | 0     | 0     | 0     | 0     |
| 2272   | 0     | 0     | 0     | 0     |
| 2273   | 0     | 0     | 0     | 0     |
| 2274   | 0     | 0     | 0     | 0     |
| 2276   | 0     | 0     | 0     | 0     |
| 2277   | 0     | 0     | 0     | 0     |

| respid | Q31_6 | Q31_7 | Q31_8 | Q31_9 |
|--------|-------|-------|-------|-------|
| 2281   | 0     | 0     | 0     | 0     |
| 2288   | 0     | 0     | 0     | 0     |
| 2290   | 0     | 0     | 0     | 0     |
| 2294   | 0     | 0     | 0     | 0     |
| 2295   | 0     | 0     | 0     | 0     |
| 2296   | 0     | 0     | 0     | 0     |
| 2297   | 0     | 0     | 0     | 0     |
| 2298   | 0     | 0     | 0     | 0     |
| 2301   | 0     | 0     | 0     | 0     |
| 2302   | 1     | 0     | 1     | 1     |
| 2303   | 0     | 0     | 0     | 0     |
| 2305   | 0     | 0     | 0     | 0     |
| 2309   | 0     | 0     | 0     | 0     |
| 2310   | 0     | 0     | 0     | 0     |
| 2311   | 0     | 0     | 0     | 1     |
| 2313   | 0     | 1     | 0     | 1     |
| 2316   | 0     | 0     | 0     | 0     |
| 2317   | 0     | 0     | 0     | 0     |
| 2318   | 0     | 1     | 0     | 0     |
| 2319   | 0     | 0     | 0     | 0     |
| 2321   | 0     | 0     | 0     | 1     |
| 2324   | 0     | 0     | 0     | 0     |
| 2328   | 0     | 0     | 0     | 0     |
| 2329   | 0     | 0     | 0     | 0     |
| 2330   | 0     | 0     | 0     | 0     |
| 2333   | 0     | 0     | 0     | 0     |
| 2334   | 0     | 0     | 0     | 0     |
| 2338   | 0     | 0     | 0     | 0     |
| 2341   | 1     | 0     | 0     | 0     |
| 2342   | 0     | 0     | 0     | 0     |
| 2343   | 0     | 0     | 0     | 1     |
| 2346   | 0     | 0     | 0     | 0     |

| respid | Q31_6 | Q31_7 | Q31_8 | Q31_9 |
|--------|-------|-------|-------|-------|
| 2347   | 0     | 0     | 0     | 0     |
| 2348   | 0     | 0     | 0     | 0     |
| 2349   | 0     | 0     | 0     | 0     |
| 2350   | 0     | 0     | 0     | 0     |
| 2351   | 0     | 0     | 0     | 0     |
| 2352   | 0     | 0     | 0     | 0     |
| 2359   | 0     | 0     | 0     | 0     |
| 2362   | 0     | 0     | 0     | 0     |
| 2363   | 0     | 0     | 0     | 0     |
| 2365   | 0     | 1     | 0     | 0     |
| 2367   | 0     | 0     | 0     | 0     |
| 2368   | 0     | 0     | 0     | 0     |
| 2369   | 0     | 0     | 0     | 0     |
| 2372   | 0     | 0     | 0     | 0     |
| 2374   | 0     | 1     | 0     | 0     |
| 2376   | 0     | 0     | 0     | 0     |
| 2379   | 0     | 0     | 0     | 1     |
| 2380   | 0     | 0     | 0     | 0     |
| 2381   | 0     | 0     | 0     | 0     |
| 2382   | 0     | 0     | 0     | 0     |
| 2385   | 0     | 0     | 0     | 0     |
| 2387   | 0     | 0     | 0     | 0     |
| 2388   | 0     | 0     | 0     | 0     |
| 2389   | 0     | 0     | 0     | 0     |
| 2391   | 0     | 0     | 0     | 0     |
| 2392   | 0     | 0     | 0     | 0     |
| 2393   | 0     | 0     | 0     | 0     |
| 2394   | 0     | 1     | 0     | 0     |
| 2397   | 0     | 0     | 0     | 0     |
| 2398   | 0     | 0     | 0     | 0     |
| 2400   | 0     | 0     | 0     | 0     |
| 2402   | 0     | 0     | 0     | 0     |

| respid | Q31_6 | Q31_7 | Q31_8 | Q31_9 |
|--------|-------|-------|-------|-------|
| 2406   | 0     | 0     | 0     | 0     |
| 2408   | 0     | 0     | 0     | 0     |
| 2410   | 0     | 0     | 0     | 0     |
| 2411   | 0     | 0     | 0     | 1     |
| 2412   | 0     | 0     | 0     | 0     |
| 2414   | 0     | 0     | 0     | 0     |
| 2421   | 0     | 0     | 0     | 0     |
| 2423   | 0     | 0     | 0     | 0     |
| 2424   | 0     | 0     | 0     | 1     |
| 2425   | 0     | 0     | 0     | 0     |
| 2426   | 0     | 0     | 0     | 0     |
| 2429   | 0     | 0     | 0     | 0     |
| 2430   | 0     | 0     | 0     | 1     |
| 2432   | 0     | 0     | 0     | 0     |
| 2433   | 0     | 0     | 0     | 0     |
| 2434   | 0     | 0     | 0     | 0     |
| 2435   | 0     | 0     | 0     | 0     |
| 2436   | 0     | 0     | 0     | 0     |
| 2439   | 0     | 0     | 0     | 0     |
| 2440   | 0     | 0     | 0     | 0     |
| 2441   | 0     | 0     | 0     | 0     |
| 2446   | 0     | 0     | 0     | 0     |
| 2448   | 0     | 0     | 0     | 1     |
| 2449   | 0     | 0     | 0     | 0     |
| 2451   | 0     | 0     | 0     | 0     |
| 2452   | 0     | 0     | 0     | 0     |
| 2455   | 0     | 0     | 0     | 0     |
| 2457   | 0     | 0     | 0     | 0     |
| 2458   | 0     | 0     | 0     | 0     |
| 2459   | 0     | 0     | 0     | 0     |
| 2460   | 0     | 0     | 0     | 0     |
| 2462   | 0     | 1     | 0     | 1     |

| respid | Q31_6 | Q31_7 | Q31_8 | Q31_9 |
|--------|-------|-------|-------|-------|
| 2464   | 0     | 0     | 0     | 1     |
| 2465   | 0     | 0     | 0     | 0     |
| 2468   | 0     | 0     | 1     | 1     |
| 2469   | 0     | 0     | 0     | 0     |
| 2470   | 0     | 0     | 0     | 0     |
| 2471   | 0     | 1     | 0     | 0     |
| 2472   | 0     | 0     | 0     | 0     |
| 2474   | 0     | 0     | 0     | 0     |
| 2476   | 0     | 0     | 0     | 1     |
| 2478   | 0     | 0     | 0     | 0     |
| 2479   | 0     | 0     | 0     | 0     |
| 2480   | 0     | 0     | 0     | 1     |
| 2482   | 0     | 0     | 0     | 0     |
| 2486   | 0     | 0     | 0     | 0     |
| 2488   | 0     | 0     | 0     | 0     |
| 2489   | 0     | 0     | 0     | 0     |
| 2491   | 0     | 0     | 0     | 0     |
| 2495   | 0     | 0     | 0     | 0     |
| 2496   | 0     | 0     | 0     | 0     |
| 2498   | 0     | 0     | 0     | 0     |
| 2501   | 0     | 0     | 0     | 1     |
| 2502   | 0     | 0     | 0     | 0     |
| 2503   | 0     | 0     | 0     | 1     |
| 2504   | 0     | 0     | 0     | 0     |
| 2507   | 0     | 0     | 0     | 0     |
| 2509   | 0     | 0     | 0     | 0     |
| 2512   | 0     | 0     | 0     | 0     |
| 2514   | 0     | 0     | 0     | 0     |
| 2516   | 0     | 0     | 0     | 0     |
| 2517   | 0     | 0     | 0     | 1     |
| 2521   | 0     | 0     | 0     | 0     |
| 2522   | 0     | 0     | 0     | 0     |

| respid | Q31_6 | Q31_7 | Q31_8 | Q31_9 |
|--------|-------|-------|-------|-------|
| 2524   | 0     | 0     | 0     | 0     |
| 2525   | 0     | 0     | 0     | 0     |
| 2526   | 0     | 0     | 0     | 1     |
| 2527   | 0     | 0     | 0     | 0     |
| 2528   | 0     | 0     | 0     | 0     |
| 2531   | 0     | 0     | 0     | 0     |
| 2533   | 0     | 0     | 0     | 0     |
| 2535   | 0     | 0     | 0     | 0     |
| 2536   | 0     | 0     | 0     | 1     |
| 2539   | 0     | 0     | 0     | 0     |
| 2540   | 0     | 0     | 0     | 0     |
| 2543   | 0     | 0     | 0     | 0     |
| 2546   | 0     | 0     | 0     | 0     |
| 2547   | 0     | 0     | 0     | 1     |
| 2549   | 0     | 0     | 0     | 0     |
| 2553   | 0     | 0     | 0     | 0     |
| 2554   | 0     | 0     | 0     | 0     |
| 2555   | 0     | 0     | 0     | 0     |
| 2556   | 0     | 0     | 0     | 0     |
| 2557   | 0     | 0     | 0     | 0     |
| 2559   | 0     | 0     | 0     | 0     |
| 2560   | 0     | 0     | 0     | 0     |
| 2561   | 0     | 0     | 0     | 0     |
| 2566   | 0     | 0     | 0     | 0     |
| 2567   | 0     | 0     | 0     | 0     |
| 2570   | 0     | 0     | 0     | 1     |
| 2574   | 0     | 1     | 0     | 1     |
| 2578   | 0     | 0     | 0     | 0     |
| 2580   | 0     | 0     | 0     | 0     |
| 2590   | 0     | 0     | 0     | 0     |
| 2593   | 0     | 0     | 0     | 0     |
| 2594   | 0     | 0     | 0     | 0     |

| respid | Q31_6 | Q31_7 | Q31_8 | Q31_9 |
|--------|-------|-------|-------|-------|
| 2595   | 0     | 0     | 0     | 0     |
| 2596   | 0     | 0     | 0     | 0     |
| 2597   | 1     | 0     | 0     | 0     |
| 2598   | 0     | 0     | 0     | 0     |
| 2602   | 0     | 0     | 0     | 0     |
| 2605   | 0     | 0     | 1     | 1     |
| 2606   | 0     | 0     | 0     | 0     |
| 2607   | 0     | 0     | 0     | 0     |
| 2608   | 0     | 0     | 0     | 0     |
| 2609   | 0     | 0     | 0     | 0     |
| 2610   | 0     | 0     | 0     | 0     |
| 2614   | 0     | 0     | 0     | 0     |
| 2615   | 0     | 0     | 0     | 0     |
| 2616   | 0     | 0     | 0     | 0     |
| 2618   | 0     | 0     | 0     | 0     |
| 2630   | 0     | 0     | 0     | 0     |
| 2633   | 0     | 0     | 0     | 0     |
| 2637   | 0     | 0     | 0     | 0     |
| 2638   | 0     | 0     | 0     | 0     |
| 2641   | 0     | 1     | 0     | 0     |
| 2644   | 0     | 0     | 0     | 0     |
| 2645   | 0     | 0     | 0     | 0     |
| 2646   | 0     | 0     | 0     | 0     |
| 2648   | 0     | 0     | 0     | 0     |
| 2651   | 0     | 0     | 0     | 0     |
| 2652   | 0     | 0     | 0     | 0     |
| 2653   | 0     | 0     | 0     | 1     |
| 2656   | 0     | 0     | 0     | 0     |
| 2657   | 0     | 0     | 0     | 0     |
| 2658   | 0     | 0     | 0     | 0     |
| 2661   | 0     | 0     | 0     | 0     |
| 2663   | 0     | 0     | 0     | 0     |

| respid | Q31_6 | Q31_7 | Q31_8 | Q31_9 |
|--------|-------|-------|-------|-------|
| 2665   | 0     | 0     | 0     | 0     |
| 2670   | 0     | 0     | 0     | 0     |
| 2672   | 0     | 0     | 0     | 0     |
| 2673   | 0     | 0     | 0     | 0     |
| 2677   | 0     | 0     | 0     | 0     |
| 2686   | 0     | 0     | 0     | 0     |
| 2688   | 0     | 0     | 0     | 0     |
| 2689   | 0     | 0     | 0     | 0     |
| 2691   | 0     | 0     | 0     | 0     |
| 2695   | 0     | 0     | 0     | 0     |
| 2696   | 0     | 0     | 0     | 0     |
| 2697   | 0     | 0     | 0     | 0     |
| 2698   | 0     | 0     | 0     | 0     |
| 2703   | 0     | 0     | 0     | 0     |
| 2704   | 0     | 0     | 0     | 0     |
| 2706   | 0     | 0     | 0     | 0     |
| 2707   | 0     | 0     | 0     | 0     |
| 2710   | 0     | 0     | 0     | 0     |
| 2711   | 0     | 0     | 0     | 0     |
| 2712   | 0     | 0     | 0     | 0     |
| 2713   | 0     | 0     | 0     | 0     |
| 2721   | 0     | 0     | 0     | 0     |
| 2730   | 0     | 0     | 0     | 0     |
| 2731   | 0     | 0     | 0     | 0     |
| 2732   | 0     | 0     | 0     | 0     |
| 2733   | 0     | 0     | 0     | 0     |
| 2735   | 0     | 0     | 0     | 0     |
| 2736   | 0     | 0     | 0     | 0     |
| 2740   | 0     | 0     | 0     | 0     |
| 2741   | 0     | 0     | 0     | 0     |
| 2742   | 0     | 0     | 0     | 0     |
| 2743   | 0     | 0     | 0     | 0     |



| respid | Q31_6 | Q31_7 | Q31_8 | Q31_9 |
|--------|-------|-------|-------|-------|
| 2744   | 0     | 0     | 0     | 0     |
| 2745   | 0     | 0     | 0     | 1     |
| 2749   | 0     | 0     | 0     | 0     |
| 2751   | 0     | 0     | 0     | 0     |
| 2754   | 0     | 0     | 0     | 0     |
| 2755   | 0     | 0     | 0     | 0     |
| 2757   | 0     | 0     | 0     | 0     |
| 2758   | 0     | 1     | 0     | 0     |
| 2759   | 0     | 0     | 0     | 0     |
| 2761   | 0     | 0     | 0     | 0     |
| 2762   | 0     | 0     | 0     | 0     |
| 2763   | 0     | 0     | 0     | 0     |
| 2764   | 0     | 0     | 0     | 1     |
| 2765   | 1     | 0     | 0     | 0     |
| 2766   | 0     | 0     | 0     | 1     |
| 2767   | 0     | 1     | 0     | 0     |
| 2769   | 0     | 0     | 0     | 0     |
| 2770   | 0     | 0     | 0     | 1     |
| 2771   | 0     | 0     | 0     | 0     |
| 2774   | 0     | 0     | 0     | 1     |
| 2777   | 0     | 0     | 1     | 1     |
| 2778   | 0     | 0     | 0     | 1     |
| 2781   | 0     | 0     | 1     | 0     |
| 2782   | 0     | 0     | 0     | 1     |
| 2784   | 0     | 1     | 0     | 0     |
| 2785   | 0     | 0     | 0     | 1     |
| 2786   | 0     | 0     | 0     | 0     |
| 2787   | 0     | 0     | 0     | 0     |
| 2789   | 0     | 0     | 0     | 0     |
| 2790   | 0     | 0     | 0     | 0     |
| 2791   | 0     | 0     | 0     | 0     |
| 2793   | 0     | 0     | 0     | 0     |

| respid | Q31_6 | Q31_7 | Q31_8 | Q31_9 |
|--------|-------|-------|-------|-------|
| 2797   | 0     | 0     | 0     | 0     |
| 2798   | 0     | 0     | 0     | 0     |
| 2799   | 0     | 0     | 0     | 0     |
| 2801   | 0     | 0     | 0     | 0     |
| 2802   | 1     | 0     | 0     | 0     |
| 2803   | 0     | 0     | 0     | 0     |
| 2804   | 0     | 0     | 0     | 1     |
| 2807   | 0     | 0     | 0     | 0     |
| 2809   | 0     | 0     | 0     | 0     |
| 2810   | 0     | 0     | 0     | 0     |
| 2812   | 0     | 0     | 0     | 1     |
| 2814   | 0     | 0     | 0     | 0     |
| 2815   | 0     | 0     | 0     | 1     |
| 2816   | 0     | 0     | 0     | 0     |
| 2817   | 0     | 0     | 0     | 0     |
| 2819   | 0     | 0     | 0     | 0     |
| 2820   | 0     | 0     | 0     | 0     |
| 2821   | 0     | 0     | 0     | 0     |
| 2822   | 0     | 0     | 0     | 1     |
| 2823   | 0     | 0     | 0     | 0     |
| 2824   | 0     | 0     | 0     | 0     |
| 2825   | 0     | 0     | 0     | 0     |
| 2826   | 0     | 0     | 0     | 0     |
| 2827   | 0     | 0     | 0     | 0     |
| 2828   | 0     | 0     | 0     | 0     |
| 2829   | 0     | 0     | 0     | 0     |
| 2830   | 0     | 0     | 0     | 0     |
| 2831   | 0     | 0     | 0     | 0     |
| 2832   | 0     | 0     | 0     | 1     |
| 2833   | 0     | 0     | 0     | 0     |
| 2834   | 0     | 0     | 0     | 1     |
| 2835   | 1     | 0     | 0     | 0     |

| respid | Q31_6 | Q31_7 | Q31_8 | Q31_9 |
|--------|-------|-------|-------|-------|
| 2836   | 0     | 0     | 0     | 0     |
| 2837   | 0     | 0     | 0     | 0     |
| 2838   | 0     | 0     | 1     | 1     |
| 2844   | 0     | 0     | 0     | 0     |
| 2845   | 0     | 0     | 0     | 0     |
| 2847   | 0     | 0     | 0     | 0     |
| 2848   | 0     | 0     | 0     | 0     |
| 2849   | 0     | 0     | 0     | 0     |
| 2851   | 0     | 0     | 0     | 0     |
| 2852   | 0     | 0     | 0     | 0     |
| 2853   | 0     | 0     | 0     | 0     |
| 2854   | 0     | 0     | 0     | 0     |
| 2856   | 0     | 0     | 0     | 1     |
| 2857   | 0     | 0     | 0     | 0     |
| 2858   | 0     | 0     | 0     | 0     |
| 2859   | 1     | 0     | 0     | 1     |
| 2860   | 0     | 0     | 0     | 0     |
| 2861   | 0     | 0     | 0     | 1     |
| 2863   | 0     | 0     | 0     | 0     |
| 2864   | 0     | 0     | 0     | 0     |
| 2866   | 0     | 0     | 0     | 0     |
| 2872   | 0     | 0     | 0     | 0     |
| 2875   | 0     | 0     | 0     | 0     |
| 2879   | 0     | 0     | 0     | 0     |
| 2881   | 0     | 0     | 0     | 0     |
| 2882   | 0     | 0     | 0     | 0     |
| 2883   | 0     | 0     | 0     | 0     |
| 2884   | 0     | 0     | 0     | 1     |
| 2885   | 0     | 0     | 0     | 0     |
| 2887   | 0     | 0     | 0     | 1     |
| 2888   | 0     | 0     | 0     | 0     |
| 2890   | 0     | 0     | 0     | 0     |

| respid | Q31_6 | Q31_7 | Q31_8 | Q31_9 |
|--------|-------|-------|-------|-------|
| 2891   | 0     | 0     | 0     | 0     |
| 2892   | 0     | 0     | 0     | 0     |
| 2895   | 0     | 0     | 0     | 0     |
| 2899   | 0     | 0     | 0     | 0     |
| 2900   | 0     | 0     | 0     | 0     |
| 2902   | 0     | 0     | 0     | 1     |
| 2903   | 0     | 0     | 0     | 0     |
| 2904   | 0     | 0     | 0     | 0     |
| 2906   | 0     | 0     | 0     | 0     |
| 2908   | 0     | 0     | 0     | 0     |
| 2910   | 0     | 0     | 0     | 0     |
| 2917   | 0     | 0     | 0     | 1     |
| 2918   | 0     | 0     | 0     | 0     |
| 2919   | 0     | 0     | 0     | 0     |
| 2920   | 0     | 0     | 0     | 0     |
| 2921   | 0     | 0     | 0     | 1     |
| 2922   | 0     | 0     | 0     | 0     |
| 2923   | 0     | 0     | 0     | 0     |
| 2924   | 1     | 0     | 0     | 0     |
| 2926   | 0     | 0     | 0     | 0     |
| 2928   | 0     | 0     | 0     | 0     |
| 2930   | 0     | 0     | 0     | 0     |
| 2931   | 0     | 0     | 0     | 1     |
| 2933   | 0     | 0     | 0     | 0     |
| 2935   | 0     | 0     | 0     | 0     |
| 2936   | 0     | 0     | 0     | 0     |
| 2937   | 0     | 0     | 0     | 0     |
| 2938   | 0     | 0     | 0     | 0     |
| 2944   | 0     | 0     | 0     | 0     |
| 2945   | 0     | 0     | 0     | 1     |
| 2947   | 0     | 0     | 0     | 0     |
| 2949   | 0     | 0     | 0     | 0     |

| respid | Q31_6 | Q31_7 | Q31_8 | Q31_9 |
|--------|-------|-------|-------|-------|
| 2951   | 0     | 0     | 0     | 0     |
| 2952   | 0     | 0     | 0     | 1     |
| 2953   | 0     | 0     | 0     | 0     |
| 2955   | 0     | 0     | 0     | 0     |
| 2957   | 0     | 0     | 0     | 0     |
| 2958   | 0     | 0     | 0     | 0     |
| 2960   | 0     | 0     | 0     | 0     |
| 2963   | 0     | 0     | 0     | 0     |
| 2964   | 0     | 0     | 0     | 0     |
| 2967   | 0     | 0     | 0     | 0     |
| 2968   | 0     | 0     | 0     | 0     |
| 2971   | 0     | 0     | 0     | 0     |
| 2974   | 0     | 0     | 0     | 0     |
| 2975   | 0     | 0     | 0     | 0     |
| 2982   | 0     | 0     | 0     | 0     |
| 2983   | 0     | 0     | 0     | 0     |
| 2985   | 0     | 0     | 0     | 0     |
| 2986   | 0     | 0     | 0     | 1     |
| 2987   | 0     | 0     | 0     | 0     |
| 2988   | 0     | 0     | 0     | 0     |
| 2993   | 0     | 0     | 0     | 0     |
| 2996   | 0     | 0     | 0     | 0     |
| 2997   | 0     | 0     | 0     | 1     |
| 2998   | 0     | 0     | 0     | 0     |
| 3004   | 0     | 0     | 0     | 0     |
| 3007   | 0     | 0     | 0     | 0     |
| 3011   | 0     | 0     | 0     | 0     |
| 3012   | 0     | 0     | 0     | 0     |
| 3013   | 0     | 0     | 0     | 0     |
| 3014   | 0     | 0     | 0     | 0     |
| 3015   | 0     | 0     | 0     | 0     |
| 3016   | 0     | 0     | 0     | 0     |

| respid | Q31_6 | Q31_7 | Q31_8 | Q31_9 |
|--------|-------|-------|-------|-------|
| 3017   | 0     | 0     | 0     | 0     |
| 3020   | 0     | 0     | 0     | 0     |
| 3022   | 0     | 0     | 0     | 0     |
| 3023   | 0     | 0     | 0     | 0     |
| 3026   | 0     | 0     | 0     | 0     |
| 3038   | 0     | 0     | 0     | 0     |
| 3039   | 0     | 0     | 0     | 0     |
| 3040   | 0     | 0     | 0     | 0     |
| 3041   | 0     | 0     | 0     | 0     |
| 3042   | 0     | 0     | 0     | 0     |
| 3044   | 0     | 0     | 0     | 0     |
| 3050   | 0     | 0     | 0     | 0     |
| 3052   | 0     | 0     | 0     | 0     |
| 3056   | 0     | 0     | 1     | 0     |
| 3059   | 0     | 0     | 0     | 0     |
| 3060   | 0     | 0     | 0     | 0     |
| 3063   | 0     | 0     | 0     | 0     |
| 3065   | 0     | 0     | 0     | 0     |
| 3067   | 0     | 0     | 0     | 1     |
| 3068   | 0     | 0     | 0     | 0     |
| 3072   | 0     | 0     | 0     | 0     |
| 3074   | 0     | 0     | 0     | 0     |
| 3075   | 0     | 0     | 0     | 0     |
| 3076   | 0     | 0     | 0     | 0     |
| 3079   | 0     | 0     | 0     | 0     |
| 3082   | 0     | 0     | 0     | 1     |
| 3083   | 0     | 0     | 0     | 0     |
| 3084   | 1     | 0     | 0     | 0     |
| 3085   | 0     | 0     | 0     | 0     |
| 3090   | 0     | 0     | 0     | 0     |
| 3091   | 0     | 0     | 0     | 0     |
| 3092   | 0     | 0     | 0     | 0     |

| respid | Q31_6 | Q31_7 | Q31_8 | Q31_9 |
|--------|-------|-------|-------|-------|
| 3095   | 0     | 0     | 0     | 0     |
| 3096   | 1     | 1     | 1     | 0     |
| 3097   | 0     | 0     | 0     | 0     |
| 3099   | 1     | 1     | 0     | 0     |
| 3101   | 0     | 0     | 0     | 0     |
| 3103   | 0     | 0     | 0     | 0     |
| 3104   | 0     | 0     | 0     | 0     |
| 3105   | 0     | 0     | 0     | 0     |
| 3107   | 0     | 0     | 0     | 0     |
| 3108   | 0     | 0     | 0     | 0     |
| 3109   | 0     | 0     | 0     | 0     |
| 3116   | 0     | 0     | 0     | 0     |
| 3117   | 0     | 0     | 0     | 0     |
| 3119   | 0     | 0     | 0     | 0     |
| 3120   | 0     | 0     | 0     | 0     |
| 3130   | 0     | 0     | 0     | 0     |
| 3131   | 0     | 1     | 0     | 0     |
| 3133   | 0     | 0     | 0     | 0     |
| 3134   | 0     | 0     | 0     | 0     |
| 3135   | 0     | 0     | 0     | 0     |
| 3145   | 0     | 0     | 0     | 0     |
| 3147   | 0     | 0     | 0     | 0     |
| 3152   | 0     | 0     | 0     | 0     |
| 3155   | 0     | 1     | 0     | 1     |
| 3156   | 0     | 0     | 0     | 0     |
| 3157   | 0     | 0     | 0     | 1     |
| 3166   | 0     | 0     | 0     | 1     |
| 3169   | 0     | 0     | 0     | 0     |
| 3179   | 0     | 0     | 0     | 0     |
| 3181   | 0     | 0     | 0     | 0     |
| 3185   | 0     | 0     | 0     | 0     |
| 3190   | 0     | 0     | 0     | 0     |

| respid | Q31_6 | Q31_7 | Q31_8 | Q31_9 |
|--------|-------|-------|-------|-------|
| 3191   | 0     | 0     | 0     | 0     |
| 3192   | 0     | 0     | 0     | 0     |
| 3193   | 0     | 0     | 0     | 0     |
| 3195   | 0     | 0     | 0     | 0     |
| 3202   | 1     | 0     | 0     | 1     |
| 3204   | 0     | 0     | 0     | 0     |
| 3208   | 0     | 0     | 0     | 0     |
| 3212   | 0     | 0     | 0     | 0     |
| 3218   | 0     | 0     | 0     | 0     |
| 3219   | 0     | 0     | 0     | 0     |
| 3220   | 0     | 0     | 0     | 0     |
| 3221   | 0     | 1     | 0     | 0     |
| 3223   | 0     | 0     | 0     | 0     |
| 3231   | 0     | 0     | 0     | 0     |
| 3232   | 0     | 1     | 0     | 0     |
| 3234   | 0     | 1     | 0     | 0     |
| 3235   | 0     | 0     | 0     | 0     |
| 3237   | 0     | 0     | 0     | 0     |
| 3238   | 0     | 0     | 0     | 0     |
| 3240   | 0     | 0     | 0     | 0     |
| 3241   | 0     | 0     | 0     | 0     |
| 3243   | 0     | 0     | 0     | 0     |
| 3244   | 0     | 0     | 1     | 0     |
| 3247   | 0     | 0     | 0     | 0     |
| 3250   | 0     | 0     | 0     | 0     |
| 3251   | 0     | 0     | 0     | 1     |
| 3255   | 0     | 0     | 0     | 0     |
| 3256   | 0     | 0     | 0     | 0     |
| 3257   | 0     | 0     | 0     | 0     |
| 3258   | 0     | 0     | 0     | 0     |
| 3259   | 0     | 1     | 0     | 0     |
| 3260   | 0     | 0     | 0     | 0     |



| respid | Q31_6 | Q31_7 | Q31_8 | Q31_9 |
|--------|-------|-------|-------|-------|
| 3261   | 0     | 0     | 0     | 0     |
| 3262   | 0     | 0     | 0     | 1     |
| 3264   | 0     | 0     | 0     | 0     |
| 3265   | 0     | 0     | 0     | 0     |
| 3267   | 0     | 0     | 0     | 0     |
| 3268   | 0     | 0     | 0     | 1     |
| 3270   | 0     | 0     | 0     | 0     |
| 3271   | 0     | 0     | 0     | 0     |
| 3274   | 0     | 0     | 0     | 0     |
| 3276   | 0     | 0     | 0     | 0     |
| 3277   | 0     | 0     | 0     | 0     |
| 3279   | 0     | 0     | 0     | 0     |
| 3281   | 0     | 0     | 0     | 0     |
| 3283   | 0     | 0     | 0     | 1     |
| 3285   | 0     | 0     | 0     | 0     |
| 3286   | 0     | 0     | 0     | 0     |
| 3287   | 0     | 0     | 0     | 0     |
| 3289   | 0     | 0     | 0     | 0     |
| 3290   | 0     | 0     | 0     | 0     |
| 3291   | 0     | 0     | 0     | 0     |
| 3292   | 0     | 0     | 0     | 0     |
| 3293   | 0     | 0     | 0     | 0     |
| 3294   | 0     | 0     | 0     | 1     |
| 3296   | 0     | 0     | 0     | 0     |
| 3306   | 0     | 0     | 0     | 0     |
| 3307   | 1     | 0     | 0     | 0     |
| 3308   | 0     | 0     | 0     | 0     |
| 3312   | 0     | 0     | 0     | 0     |
| 3313   | 0     | 0     | 0     | 0     |
| 3316   | 0     | 0     | 0     | 0     |
| 3317   | 0     | 0     | 0     | 0     |
| 3320   | 0     | 0     | 0     | 0     |

| respid | Q31_6 | Q31_7 | Q31_8 | Q31_9 |
|--------|-------|-------|-------|-------|
| 3321   | 0     | 0     | 0     | 0     |
| 3322   | 0     | 0     | 0     | 0     |
| 3323   | 0     | 0     | 0     | 0     |
| 3325   | 0     | 0     | 0     | 0     |
| 3332   | 0     | 0     | 0     | 0     |
| 3334   | 0     | 0     | 0     | 1     |
| 3335   | 0     | 0     | 0     | 0     |
| 3341   | 0     | 0     | 0     | 0     |
| 3345   | 0     | 0     | 0     | 0     |
| 3346   | 0     | 0     | 0     | 0     |
| 3349   | 0     | 0     | 0     | 0     |
| 3351   | 0     | 0     | 0     | 0     |
| 3353   | 0     | 0     | 0     | 0     |
| 3354   | 0     | 1     | 0     | 0     |
| 3356   | 0     | 0     | 0     | 0     |
| 3357   | 0     | 0     | 0     | 0     |
| 3360   | 0     | 0     | 0     | 0     |
| 3361   | 0     | 0     | 0     | 0     |
| 3362   | 0     | 0     | 0     | 0     |
| 3363   | 0     | 0     | 0     | 0     |
| 3364   | 0     | 0     | 0     | 0     |
| 3368   | 0     | 0     | 0     | 0     |
| 3370   | 0     | 1     | 0     | 0     |
| 3371   | 0     | 0     | 0     | 0     |
| 3379   | 0     | 0     | 0     | 0     |
| 3380   | 0     | 0     | 0     | 0     |
| 3382   | 0     | 0     | 0     | 0     |
| 3384   | 1     | 0     | 0     | 0     |
| 3385   | 0     | 0     | 0     | 0     |
| 3388   | 0     | 0     | 0     | 0     |
| 3392   | 0     | 0     | 0     | 0     |
| 3393   | 0     | 0     | 0     | 0     |

| respid | Q31_6 | Q31_7 | Q31_8 | Q31_9 |
|--------|-------|-------|-------|-------|
| 3394   | 0     | 0     | 0     | 1     |
| 3395   | 0     | 0     | 0     | 0     |
| 3396   | 0     | 0     | 0     | 0     |
| 3397   | 0     | 0     | 0     | 0     |
| 3398   | 0     | 0     | 0     | 0     |
| 3399   | 0     | 0     | 0     | 0     |
| 3400   | 0     | 0     | 0     | 1     |
| 3401   | 1     | 0     | 0     | 0     |
| 3402   | 0     | 0     | 0     | 0     |
| 3403   | 1     | 0     | 0     | 1     |
| 3405   | 0     | 1     | 0     | 1     |
| 3407   | 0     | 1     | 0     | 0     |
| 3410   | 0     | 0     | 0     | 0     |
| 3411   | 0     | 0     | 0     | 0     |
| 3413   | 0     | 0     | 0     | 0     |
| 3414   | 0     | 0     | 0     | 0     |
| 3420   | 0     | 0     | 0     | 0     |
| 3421   | 0     | 0     | 0     | 1     |
| 3425   | 0     | 0     | 0     | 0     |
| 3426   | 0     | 1     | 0     | 0     |
| 3429   | 0     | 1     | 0     | 0     |
| 3430   | 1     | 0     | 1     | 0     |
| 3433   | 0     | 0     | 0     | 0     |
| 3434   | 0     | 0     | 0     | 1     |
| 3437   | 0     | 0     | 0     | 0     |
| 3439   | 0     | 0     | 0     | 0     |
| 3441   | 0     | 0     | 0     | 1     |
| 3442   | 0     | 0     | 0     | 0     |
| 3444   | 0     | 0     | 0     | 0     |
| 3445   | 0     | 0     | 0     | 0     |
| 3450   | 0     | 0     | 0     | 0     |
| 3452   | 0     | 0     | 0     | 0     |

| respid | Q31_6 | Q31_7 | Q31_8 | Q31_9 |
|--------|-------|-------|-------|-------|
| 3456   | 0     | 0     | 0     | 0     |
| 3459   | 0     | 0     | 0     | 0     |
| 3460   | 0     | 0     | 0     | 1     |
| 3461   | 0     | 0     | 0     | 0     |
| 3466   | 0     | 0     | 0     | 1     |
| 3471   | 0     | 0     | 0     | 0     |
| 3473   | 0     | 0     | 0     | 0     |
| 3475   | 0     | 0     | 0     | 1     |
| 3476   | 0     | 0     | 0     | 0     |
| 3477   | 1     | 0     | 0     | 0     |
| 3478   | 0     | 0     | 0     | 0     |
| 3479   | 0     | 0     | 0     | 0     |
| 3482   | 0     | 0     | 0     | 0     |
| 3483   | 0     | 0     | 0     | 0     |
| 3485   | 0     | 0     | 0     | 0     |
| 3489   | 0     | 0     | 0     | 0     |
| 3490   | 0     | 0     | 0     | 0     |
| 3491   | 0     | 0     | 0     | 1     |
| 3494   | 0     | 0     | 0     | 0     |
| 3495   | 0     | 0     | 0     | 0     |
| 3501   | 0     | 0     | 0     | 0     |
| 3506   | 0     | 0     | 0     | 0     |
| 3507   | 0     | 0     | 0     | 0     |
| 3517   | 0     | 0     | 0     | 0     |
| 3520   | 0     | 0     | 0     | 1     |
| 3521   | 0     | 0     | 0     | 0     |
| 3522   | 0     | 0     | 0     | 0     |
| 3524   | 0     | 0     | 0     | 0     |
| 3527   | 0     | 0     | 0     | 0     |
| 3528   | 0     | 0     | 0     | 0     |
| 3529   | 0     | 0     | 0     | 0     |
| 3536   | 0     | 0     | 0     | 0     |

| respid | Q31_6 | Q31_7 | Q31_8 | Q31_9 |
|--------|-------|-------|-------|-------|
| 3537   | 0     | 0     | 0     | 0     |
| 3538   | 0     | 0     | 0     | 1     |
| 3540   | 0     | 0     | 0     | 0     |
| 3545   | 0     | 0     | 0     | 0     |
| 3547   | 0     | 0     | 0     | 0     |
| 3554   | 0     | 0     | 0     | 0     |
| 3556   | 0     | 0     | 0     | 0     |
| 3557   | 0     | 0     | 0     | 0     |
| 3559   | 0     | 0     | 0     | 0     |
| 3560   | 0     | 0     | 0     | 1     |
| 3562   | 0     | 0     | 0     | 0     |
| 3564   | 0     | 0     | 1     | 0     |
| 3565   | 0     | 0     | 0     | 1     |
| 3568   | 0     | 0     | 0     | 1     |
| 3572   | 0     | 0     | 0     | 0     |
| 3578   | 0     | 0     | 0     | 0     |
| 3581   | 0     | 0     | 0     | 0     |
| 3583   | 0     | 0     | 0     | 0     |
| 3588   | 0     | 0     | 0     | 0     |
| 3591   | 0     | 0     | 0     | 0     |
| 3594   | 0     | 0     | 0     | 0     |
| 3595   | 0     | 0     | 0     | 1     |
| 3596   | 0     | 0     | 0     | 0     |
| 3597   | 0     | 0     | 0     | 0     |
| 3598   | 0     | 0     | 0     | 0     |
| 3600   | 1     | 0     | 0     | 0     |
| 3602   | 0     | 0     | 0     | 0     |
| 3604   | 0     | 0     | 0     | 0     |
| 3605   | 0     | 1     | 0     | 0     |
| 3606   | 0     | 0     | 0     | 0     |
| 3607   | 0     | 0     | 0     | 0     |
| 3610   | 0     | 0     | 0     | 0     |

| respid | Q31_6 | Q31_7 | Q31_8 | Q31_9 |
|--------|-------|-------|-------|-------|
| 3611   | 0     | 0     | 0     | 0     |
| 3612   | 0     | 0     | 0     | 0     |
| 3614   | 0     | 0     | 0     | 0     |
| 3616   | 0     | 0     | 0     | 0     |
| 3617   | 0     | 0     | 0     | 0     |
| 3618   | 0     | 0     | 0     | 0     |
| 3619   | 0     | 0     | 0     | 1     |
| 3621   | 0     | 0     | 0     | 0     |
| 3622   | 0     | 0     | 0     | 0     |
| 3624   | 0     | 0     | 0     | 0     |
| 3626   | 0     | 0     | 0     | 0     |
| 3629   | 0     | 0     | 0     | 0     |
| 3631   | 0     | 0     | 0     | 0     |
| 3632   | 0     | 0     | 0     | 0     |
| 3638   | 0     | 0     | 0     | 1     |
| 3640   | 0     | 0     | 0     | 0     |
| 3641   | 0     | 0     | 0     | 0     |
| 3645   | 0     | 1     | 0     | 1     |
| 3650   | 0     | 0     | 0     | 0     |
| 3653   | 0     | 0     | 0     | 1     |
| 3655   | 0     | 0     | 0     | 1     |
| 3657   | 0     | 0     | 0     | 1     |
| 3658   | 0     | 0     | 0     | 0     |
| 3659   | 0     | 0     | 0     | 0     |
| 3664   | 0     | 0     | 1     | 1     |
| 3665   | 0     | 0     | 0     | 0     |
| 3667   | 0     | 0     | 0     | 0     |
| 3668   | 1     | 0     | 0     | 0     |
| 3675   | 0     | 0     | 0     | 0     |
| 3678   | 0     | 0     | 0     | 0     |
| 3680   | 0     | 0     | 0     | 0     |
| 3684   | 0     | 0     | 1     | 1     |

| respid | Q31_6 | Q31_7 | Q31_8 | Q31_9 |
|--------|-------|-------|-------|-------|
| 3685   | 0     | 0     | 0     | 0     |
| 3687   | 0     | 0     | 0     | 1     |
| 3689   | 0     | 0     | 1     | 0     |
| 3690   | 0     | 0     | 0     | 0     |
| 3693   | 0     | 0     | 0     | 0     |
| 3694   | 0     | 0     | 0     | 0     |
| 3695   | 0     | 0     | 0     | 0     |
| 3700   | 0     | 0     | 0     | 0     |
| 3701   | 0     | 0     | 0     | 0     |
| 3703   | 0     | 0     | 0     | 1     |
| 3704   | 0     | 0     | 0     | 1     |
| 3705   | 0     | 0     | 0     | 0     |
| 3709   | 0     | 0     | 0     | 0     |
| 3710   | 0     | 0     | 0     | 1     |
| 3722   | 0     | 0     | 0     | 0     |
| 3725   | 0     | 0     | 0     | 0     |
| 3726   | 0     | 0     | 0     | 1     |
| 3727   | 0     | 0     | 0     | 0     |
| 3728   | 0     | 0     | 0     | 0     |
| 3729   | 0     | 0     | 0     | 0     |
| 3731   | 0     | 0     | 0     | 0     |
| 3738   | 0     | 0     | 0     | 0     |
| 3739   | 0     | 0     | 0     | 0     |
| 3740   | 0     | 0     | 0     | 0     |
| 3749   | 0     | 0     | 0     | 0     |
| 3758   | 0     | 0     | 0     | 0     |
| 3762   | 0     | 0     | 0     | 0     |
| 3765   | 0     | 0     | 0     | 0     |
| 3770   | 0     | 0     | 0     | 0     |
| 3771   | 0     | 0     | 0     | 0     |
| 3778   | 0     | 0     | 1     | 0     |
| 3779   | 0     | 0     | 0     | 0     |

| respid | Q31_6 | Q31_7 | Q31_8 | Q31_9 |
|--------|-------|-------|-------|-------|
| 3780   | 0     | 0     | 0     | 0     |
| 3782   | 0     | 0     | 0     | 0     |
| 3784   | 0     | 0     | 0     | 1     |
| 3787   | 0     | 0     | 0     | 0     |
| 3790   | 0     | 0     | 0     | 0     |
| 3791   | 0     | 0     | 0     | 0     |
| 3793   | 0     | 0     | 0     | 1     |
| 3795   | 0     | 0     | 0     | 0     |
| 3799   | 0     | 0     | 0     | 0     |
| 3801   | 0     | 0     | 0     | 0     |
| 3804   | 0     | 0     | 0     | 0     |
| 3809   | 0     | 0     | 0     | 0     |
| 3810   | 0     | 0     | 0     | 0     |
| 3813   | 0     | 0     | 0     | 1     |
| 3816   | 0     | 0     | 0     | 0     |
| 3820   | 0     | 0     | 0     | 0     |
| 3821   | 0     | 0     | 0     | 1     |
| 3823   | 0     | 0     | 0     | 1     |
| 3828   | 0     | 0     | 0     | 0     |
| 3829   | 0     | 0     | 0     | 0     |
| 3832   | 0     | 0     | 0     | 0     |
| 3835   | 0     | 0     | 0     | 0     |
| 3837   | 0     | 0     | 0     | 0     |
| 3838   | 0     | 0     | 0     | 0     |
| 3839   | 0     | 0     | 0     | 1     |
| 3840   | 0     | 0     | 0     | 0     |
| 3842   | 0     | 0     | 0     | 0     |
| 3843   | 0     | 0     | 0     | 0     |
| 3844   | 0     | 0     | 0     | 0     |
| 3850   | 0     | 0     | 0     | 0     |
| 3851   | 0     | 0     | 0     | 0     |
| 3856   | 0     | 0     | 0     | 0     |



| respid | Q31_6 | Q31_7 | Q31_8 | Q31_9 |
|--------|-------|-------|-------|-------|
| 3859   | 0     | 1     | 0     | 0     |
| 3860   | 0     | 0     | 0     | 0     |
| 3863   | 0     | 0     | 0     | 0     |
| 3866   | 0     | 0     | 0     | 0     |
| 3867   | 0     | 0     | 0     | 0     |
| 3870   | 0     | 0     | 0     | 0     |
| 3873   | 0     | 1     | 0     | 0     |
| 3875   | 0     | 0     | 0     | 0     |
| 3878   | 0     | 0     | 0     | 0     |
| 3881   | 0     | 0     | 0     | 0     |
| 3883   | 1     | 0     | 0     | 0     |
| 3884   | 0     | 0     | 0     | 0     |
| 3885   | 1     | 0     | 1     | 1     |
| 3886   | 0     | 0     | 0     | 0     |
| 3887   | 0     | 0     | 0     | 0     |
| 3888   | 0     | 0     | 0     | 0     |
| 3889   | 0     | 0     | 0     | 1     |
| 3890   | 0     | 0     | 0     | 0     |
| 3896   | 0     | 0     | 0     | 0     |
| 3902   | 0     | 0     | 0     | 1     |
| 3909   | 0     | 0     | 0     | 0     |
| 3912   | 0     | 0     | 0     | 0     |
| 3922   | 0     | 0     | 0     | 0     |
| 3928   | 0     | 0     | 0     | 0     |
| 3930   | 0     | 0     | 0     | 0     |
| 3931   | 0     | 0     | 0     | 0     |
| 3933   | 0     | 0     | 0     | 0     |
| 3935   | 0     | 0     | 0     | 0     |
| 3937   | 0     | 0     | 1     | 0     |
| 3939   | 0     | 0     | 0     | 0     |
| 3942   | 0     | 0     | 0     | 0     |
| 3943   | 0     | 0     | 0     | 0     |

| respid | Q31_6 | Q31_7 | Q31_8 | Q31_9 |
|--------|-------|-------|-------|-------|
| 3944   | 0     | 0     | 0     | 0     |
| 3945   | 0     | 0     | 0     | 0     |
| 3947   | 0     | 0     | 0     | 1     |
| 3948   | 0     | 0     | 0     | 0     |
| 3951   | 0     | 0     | 0     | 0     |
| 3959   | 0     | 0     | 0     | 0     |
| 3969   | 0     | 0     | 0     | 1     |
| 3973   | 0     | 0     | 0     | 1     |
| 3975   | 0     | 0     | 0     | 1     |
| 3976   | 0     | 0     | 0     | 0     |
| 3977   | 1     | 0     | 0     | 0     |
| 3978   | 0     | 0     | 0     | 0     |
| 3994   | 0     | 0     | 0     | 0     |
| 3995   | 0     | 0     | 0     | 0     |
| 3997   | 0     | 0     | 0     | 0     |
| 3998   | 0     | 0     | 0     | 0     |
| 3999   | 0     | 0     | 0     | 1     |
| 4002   | 0     | 0     | 0     | 1     |
| 4004   | 1     | 0     | 0     | 0     |
| 4005   | 0     | 0     | 0     | 0     |
| 4006   | 0     | 1     | 0     | 0     |
| 4008   | 0     | 0     | 0     | 0     |
| 4010   | 0     | 0     | 0     | 0     |
| 4011   | 0     | 0     | 0     | 1     |
| 4013   | 0     | 0     | 0     | 0     |
| 4014   | 0     | 0     | 0     | 0     |
| 4016   | 0     | 0     | 0     | 0     |
| 4017   | 0     | 0     | 0     | 0     |
| 4019   | 0     | 0     | 0     | 0     |
| 4021   | 0     | 0     | 0     | 0     |
| 4023   | 0     | 0     | 0     | 0     |
| 4024   | 0     | 0     | 0     | 0     |

| respid | Q31_6 | Q31_7 | Q31_8 | Q31_9 |
|--------|-------|-------|-------|-------|
| 4025   | 0     | 0     | 0     | 0     |
| 4027   | 0     | 0     | 0     | 0     |
| 4032   | 0     | 0     | 0     | 0     |
| 4034   | 0     | 0     | 0     | 0     |
| 4035   | 0     | 0     | 0     | 0     |
| 4037   | 0     | 0     | 0     | 1     |
| 4040   | 0     | 0     | 0     | 0     |
| 4041   | 0     | 0     | 0     | 0     |
| 4042   | 0     | 0     | 0     | 0     |
| 4043   | 0     | 0     | 0     | 0     |
| 4045   | 0     | 0     | 0     | 0     |
| 4046   | 0     | 0     | 0     | 0     |
| 4048   | 0     | 0     | 0     | 0     |
| 4049   | 0     | 0     | 0     | 0     |
| 4050   | 0     | 1     | 0     | 0     |
| 4052   | 0     | 0     | 0     | 0     |
| 4053   | 0     | 0     | 0     | 0     |
| 4060   | 0     | 0     | 0     | 0     |
| 4065   | 1     | 1     | 0     | 0     |
| 4066   | 0     | 0     | 0     | 1     |
| 4067   | 0     | 0     | 0     | 0     |
| 4068   | 0     | 0     | 0     | 0     |
| 4069   | 0     | 0     | 0     | 0     |
| 4070   | 0     | 0     | 0     | 0     |
| 4071   | 0     | 0     | 0     | 0     |
| 4072   | 0     | 0     | 0     | 0     |
| 4073   | 0     | 0     | 0     | 0     |
| 4074   | 0     | 0     | 0     | 0     |
| 4075   | 0     | 0     | 0     | 0     |
| 4078   | 0     | 0     | 0     | 0     |
| 4080   | 0     | 0     | 0     | 0     |
| 4081   | 0     | 0     | 0     | 0     |

| respid | Q31_6 | Q31_7 | Q31_8 | Q31_9 |
|--------|-------|-------|-------|-------|
| 4082   | 0     | 0     | 0     | 0     |
| 4083   | 0     | 0     | 0     | 1     |
| 4084   | 0     | 0     | 0     | 0     |
| 4086   | 0     | 0     | 0     | 0     |
| 4087   | 0     | 0     | 0     | 0     |
| 4088   | 0     | 0     | 0     | 0     |
| 4089   | 0     | 0     | 0     | 0     |
| 4090   | 0     | 0     | 0     | 0     |
| 4093   | 0     | 0     | 0     | 0     |
| 4094   | 0     | 0     | 0     | 0     |
| 4095   | 0     | 0     | 0     | 0     |
| 4096   | 0     | 0     | 0     | 0     |
| 4098   | 0     | 0     | 0     | 0     |
| 4103   | 1     | 0     | 1     | 1     |
| 4104   | 0     | 0     | 0     | 0     |
| 4107   | 0     | 0     | 0     | 0     |
| 4109   | 0     | 0     | 0     | 0     |
| 4110   | 0     | 0     | 0     | 0     |
| 4113   | 0     | 0     | 0     | 0     |
| 4114   | 0     | 0     | 0     | 0     |
| 4116   | 0     | 0     | 1     | 0     |
| 4119   | 0     | 0     | 0     | 1     |
| 4120   | 0     | 1     | 0     | 0     |
| 4121   | 0     | 0     | 0     | 0     |
| 4122   | 0     | 0     | 0     | 0     |
| 4124   | 0     | 0     | 0     | 0     |
| 4126   | 0     | 0     | 0     | 0     |
| 4127   | 0     | 0     | 0     | 0     |
| 4131   | 0     | 0     | 0     | 0     |
| 4134   | 0     | 0     | 0     | 0     |
| 4144   | 0     | 0     | 0     | 0     |
| 4145   | 0     | 0     | 0     | 0     |

| respid | Q31_6 | Q31_7 | Q31_8 | Q31_9 |
|--------|-------|-------|-------|-------|
| 4146   | 0     | 0     | 0     | 0     |
| 4147   | 0     | 0     | 0     | 0     |
| 4149   | 0     | 0     | 0     | 0     |
| 4150   | 0     | 0     | 0     | 0     |
| 4151   | 0     | 0     | 0     | 0     |
| 4153   | 0     | 0     | 0     | 0     |
| 4155   | 0     | 0     | 0     | 0     |
| 4157   | 0     | 0     | 0     | 0     |
| 4159   | 0     | 0     | 0     | 0     |
| 4160   | 0     | 0     | 0     | 1     |
| 4161   | 0     | 0     | 0     | 1     |
| 4163   | 0     | 0     | 0     | 0     |
| 4164   | 0     | 0     | 0     | 0     |
| 4165   | 0     | 1     | 0     | 0     |
| 4166   | 0     | 0     | 0     | 0     |
| 4167   | 0     | 0     | 0     | 0     |
| 4170   | 0     | 0     | 0     | 0     |
| 4172   | 0     | 0     | 0     | 0     |
| 4173   | 0     | 0     | 0     | 0     |
| 4180   | 0     | 0     | 0     | 1     |
| 4185   | 0     | 0     | 0     | 1     |
| 4187   | 0     | 0     | 0     | 0     |
| 4190   | 0     | 0     | 0     | 0     |
| 4191   | 0     | 0     | 0     | 1     |
| 4193   | 0     | 0     | 0     | 0     |
| 4194   | 0     | 0     | 0     | 0     |
| 4195   | 0     | 0     | 0     | 0     |
| 4196   | 0     | 0     | 0     | 0     |
| 4197   | 0     | 0     | 0     | 0     |
| 4198   | 0     | 0     | 0     | 0     |
| 4199   | 0     | 0     | 0     | 0     |
| 4205   | 0     | 0     | 0     | 0     |

| respid | Q31_6 | Q31_7 | Q31_8 | Q31_9 |
|--------|-------|-------|-------|-------|
| 4206   | 0     | 0     | 0     | 0     |
| 4207   | 0     | 0     | 0     | 0     |
| 4214   | 0     | 0     | 0     | 0     |
| 4215   | 0     | 0     | 0     | 0     |
| 4217   | 0     | 0     | 0     | 0     |
| 4219   | 0     | 0     | 0     | 0     |
| 4223   | 0     | 0     | 0     | 0     |
| 4226   | 0     | 0     | 0     | 1     |
| 4229   | 0     | 0     | 0     | 0     |
| 4230   | 0     | 0     | 0     | 0     |
| 4232   | 0     | 0     | 0     | 0     |
| 4233   | 0     | 0     | 0     | 0     |
| 4234   | 0     | 0     | 0     | 0     |
| 4235   | 0     | 0     | 0     | 0     |
| 4236   | 0     | 0     | 0     | 0     |
| 4237   | 0     | 0     | 0     | 0     |
| 4238   | 0     | 0     | 0     | 0     |
| 4240   | 0     | 0     | 0     | 0     |
| 4241   | 0     | 0     | 0     | 0     |
| 4247   | 0     | 0     | 0     | 0     |
| 4250   | 0     | 0     | 0     | 0     |
| 4251   | 0     | 0     | 0     | 0     |
| 4253   | 1     | 0     | 0     | 1     |
| 4254   | 0     | 0     | 0     | 0     |
| 4258   | 0     | 0     | 0     | 0     |
| 4260   | 0     | 0     | 0     | 0     |
| 4263   | 0     | 0     | 0     | 0     |
| 4265   | 0     | 0     | 0     | 0     |
| 4266   | 0     | 0     | 0     | 1     |
| 4267   | 0     | 0     | 0     | 0     |
| 4270   | 0     | 0     | 0     | 0     |
| 4273   | 0     | 0     | 0     | 0     |

| respid | Q31_6 | Q31_7 | Q31_8 | Q31_9 |
|--------|-------|-------|-------|-------|
| 4280   | 0     | 0     | 0     | 0     |
| 4281   | 0     | 0     | 0     | 0     |
| 4282   | 0     | 0     | 0     | 0     |
| 4283   | 0     | 0     | 0     | 0     |
| 4286   | 0     | 0     | 0     | 0     |
| 4287   | 0     | 0     | 0     | 0     |
| 4289   | 0     | 0     | 0     | 0     |
| 4290   | 0     | 1     | 0     | 0     |
| 4291   | 0     | 0     | 0     | 0     |
| 4292   | 0     | 0     | 0     | 0     |
| 4293   | 0     | 0     | 0     | 0     |
| 4294   | 0     | 0     | 0     | 0     |
| 4295   | 0     | 0     | 0     | 0     |
| 4296   | 0     | 0     | 0     | 0     |
| 4297   | 0     | 0     | 0     | 1     |
| 4298   | 0     | 0     | 0     | 0     |
| 4299   | 0     | 0     | 0     | 0     |
| 4300   | 0     | 0     | 0     | 0     |
| 4301   | 0     | 0     | 0     | 0     |
| 4302   | 0     | 0     | 0     | 0     |
| 4304   | 0     | 0     | 0     | 0     |
| 4305   | 0     | 0     | 0     | 0     |
| 4307   | 0     | 0     | 0     | 1     |
| 4308   | 0     | 0     | 0     | 0     |
| 4312   | 0     | 0     | 0     | 0     |
| 4314   | 0     | 0     | 0     | 1     |
| 4316   | 0     | 0     | 0     | 0     |
| 4317   | 0     | 1     | 1     | 0     |
| 4319   | 0     | 1     | 0     | 0     |
| 4323   | 0     | 0     | 0     | 0     |
| 4337   | 0     | 0     | 0     | 0     |
| 4341   | 0     | 0     | 0     | 0     |

| respid | Q31_6 | Q31_7 | Q31_8 | Q31_9 |
|--------|-------|-------|-------|-------|
| 4342   | 0     | 0     | 0     | 0     |
| 4344   | 0     | 0     | 0     | 0     |
| 4345   | 0     | 1     | 0     | 0     |
| 4346   | 0     | 0     | 0     | 0     |
| 4347   | 0     | 0     | 0     | 0     |
| 4350   | 0     | 0     | 0     | 0     |
| 4352   | 0     | 0     | 0     | 0     |
| 4353   | 0     | 0     | 0     | 0     |
| 4355   | 0     | 0     | 0     | 0     |
| 4356   | 0     | 0     | 0     | 0     |
| 4358   | 0     | 0     | 0     | 0     |
| 4359   | 0     | 0     | 0     | 1     |
| 4360   | 0     | 0     | 0     | 0     |
| 4361   | 1     | 0     | 1     | 1     |
| 4363   | 0     | 0     | 0     | 0     |
| 4364   | 0     | 1     | 0     | 0     |
| 4365   | 0     | 0     | 0     | 0     |
| 4367   | 0     | 0     | 0     | 0     |
| 4369   | 1     | 0     | 0     | 1     |
| 4373   | 0     | 0     | 0     | 1     |
| 4374   | 0     | 0     | 0     | 0     |
| 4375   | 0     | 0     | 0     | 0     |
| 4378   | 0     | 0     | 0     | 0     |
| 4379   | 0     | 0     | 0     | 0     |
| 4382   | 0     | 0     | 0     | 1     |
| 4383   | 0     | 0     | 0     | 0     |
| 4384   | 0     | 0     | 0     | 0     |
| 4385   | 1     | 0     | 0     | 0     |
| 4388   | 0     | 0     | 0     | 1     |
| 4389   | 0     | 0     | 0     | 0     |
| 4391   | 0     | 0     | 0     | 0     |
| 4392   | 0     | 1     | 0     | 0     |



| respid | Q31_6 | Q31_7 | Q31_8 | Q31_9 |
|--------|-------|-------|-------|-------|
| 4393   | 0     | 0     | 0     | 0     |
| 4395   | 0     | 0     | 0     | 0     |
| 4397   | 0     | 0     | 0     | 0     |
| 4398   | 0     | 0     | 0     | 0     |
| 4399   | 0     | 0     | 0     | 0     |
| 4400   | 0     | 0     | 0     | 0     |
| 4401   | 0     | 0     | 0     | 0     |
| 4402   | 0     | 0     | 0     | 0     |
| 4404   | 0     | 0     | 0     | 0     |
| 4405   | 0     | 0     | 0     | 0     |
| 4407   | 0     | 0     | 0     | 0     |
| 4408   | 0     | 0     | 0     | 0     |
| 4411   | 0     | 0     | 0     | 0     |
| 4420   | 0     | 0     | 0     | 0     |
| 4421   | 0     | 0     | 0     | 0     |
| 4424   | 1     | 1     | 0     | 0     |
| 4425   | 0     | 0     | 0     | 0     |
| 4427   | 0     | 0     | 0     | 0     |
| 4430   | 0     | 0     | 0     | 1     |
| 4431   | 0     | 0     | 0     | 0     |
| 4432   | 0     | 0     | 0     | 0     |
| 4436   | 0     | 0     | 0     | 0     |
| 4439   | 0     | 0     | 0     | 0     |
| 4451   | 0     | 0     | 0     | 1     |
| 4452   | 0     | 0     | 0     | 0     |
| 4458   | 0     | 0     | 0     | 0     |
| 4464   | 0     | 0     | 0     | 0     |
| 4465   | 0     | 1     | 0     | 0     |
| 4467   | 0     | 0     | 0     | 0     |
| 4470   | 0     | 0     | 0     | 0     |
| 4471   | 0     | 0     | 0     | 0     |
| 4472   | 0     | 0     | 0     | 0     |

| respid | Q31_6 | Q31_7 | Q31_8 | Q31_9 |
|--------|-------|-------|-------|-------|
| 4473   | 0     | 0     | 0     | 0     |
| 4475   | 0     | 0     | 0     | 0     |
| 4476   | 0     | 0     | 0     | 0     |
| 4478   | 0     | 0     | 0     | 0     |
| 4485   | 0     | 0     | 0     | 0     |
| 4486   | 0     | 0     | 0     | 0     |
| 4490   | 0     | 0     | 0     | 0     |
| 4502   | 0     | 0     | 0     | 0     |
| 4503   | 0     | 0     | 0     | 0     |
| 4504   | 0     | 0     | 0     | 0     |
| 4506   | 0     | 0     | 0     | 0     |
| 4508   | 0     | 0     | 0     | 0     |
| 4515   | 0     | 0     | 0     | 0     |
| 4516   | 1     | 0     | 0     | 0     |
| 4519   | 0     | 0     | 0     | 1     |
| 4523   | 0     | 0     | 0     | 0     |
| 4525   | 0     | 0     | 0     | 1     |
| 4526   | 0     | 0     | 0     | 0     |
| 4528   | 0     | 0     | 0     | 0     |
| 4530   | 0     | 0     | 0     | 0     |
| 4531   | 0     | 0     | 1     | 0     |
| 4532   | 0     | 0     | 0     | 0     |
| 4537   | 0     | 0     | 0     | 0     |
| 4538   | 0     | 0     | 0     | 0     |
| 4539   | 0     | 0     | 0     | 0     |
| 4541   | 0     | 0     | 0     | 0     |
| 4543   | 0     | 0     | 0     | 0     |
| 4544   | 0     | 0     | 0     | 0     |
| 4546   | 0     | 0     | 0     | 0     |
| 4547   | 0     | 0     | 0     | 0     |
| 4549   | 0     | 0     | 0     | 0     |
| 4550   | 0     | 0     | 0     | 0     |

| respid | Q31_6 | Q31_7 | Q31_8 | Q31_9 |
|--------|-------|-------|-------|-------|
| 4551   | 0     | 0     | 0     | 0     |
| 4554   | 0     | 0     | 0     | 0     |
| 4557   | 0     | 0     | 0     | 0     |
| 4565   | 0     | 0     | 0     | 0     |
| 4568   | 0     | 0     | 0     | 0     |
| 4569   | 0     | 0     | 0     | 0     |
| 4570   | 0     | 0     | 0     | 0     |
| 4572   | 0     | 0     | 0     | 0     |
| 4574   | 0     | 0     | 0     | 0     |
| 4576   | 0     | 0     | 0     | 0     |
| 4578   | 0     | 0     | 0     | 0     |
| 4579   | 0     | 0     | 0     | 0     |
| 4580   | 0     | 1     | 0     | 1     |
| 4581   | 0     | 0     | 0     | 0     |
| 4584   | 0     | 0     | 0     | 0     |
| 4586   | 0     | 0     | 1     | 0     |
| 4587   | 0     | 0     | 0     | 0     |
| 4590   | 0     | 0     | 0     | 0     |
| 4592   | 0     | 0     | 0     | 0     |
| 4593   | 0     | 0     | 0     | 0     |
| 4595   | 0     | 0     | 0     | 0     |
| 4597   | 0     | 0     | 0     | 0     |
| 4598   | 0     | 0     | 0     | 0     |
| 4599   | 0     | 0     | 0     | 0     |
| 4600   | 0     | 0     | 0     | 0     |
| 4601   | 0     | 0     | 0     | 0     |
| 4608   | 0     | 0     | 0     | 0     |
| 4609   | 0     | 0     | 0     | 0     |
| 4611   | 0     | 0     | 0     | 0     |
| 4612   | 0     | 0     | 0     | 0     |
| 4613   | 0     | 0     | 0     | 0     |
| 4616   | 0     | 0     | 0     | 0     |

| respid | Q31_6 | Q31_7 | Q31_8 | Q31_9 |
|--------|-------|-------|-------|-------|
| 4617   | 0     | 0     | 0     | 0     |
| 4620   | 0     | 0     | 0     | 0     |
| 4621   | 0     | 0     | 0     | 0     |
| 4622   | 0     | 0     | 0     | 1     |
| 4624   | 0     | 0     | 0     | 0     |
| 4625   | 0     | 0     | 0     | 0     |
| 4627   | 0     | 0     | 0     | 0     |
| 4628   | 0     | 1     | 0     | 0     |
| 4629   | 0     | 0     | 0     | 0     |
| 4630   | 0     | 0     | 0     | 0     |
| 4632   | 0     | 0     | 0     | 0     |
| 4634   | 0     | 0     | 0     | 0     |
| 4635   | 0     | 0     | 0     | 1     |
| 4636   | 0     | 0     | 0     | 0     |
| 4637   | 0     | 0     | 0     | 0     |
| 4638   | 0     | 0     | 0     | 0     |
| 4639   | 0     | 0     | 0     | 1     |
| 4641   | 0     | 0     | 0     | 0     |
| 4643   | 0     | 0     | 0     | 0     |
| 4645   | 0     | 0     | 0     | 0     |
| 4646   | 0     | 0     | 0     | 0     |
| 4647   | 0     | 0     | 0     | 0     |
| 4648   | 0     | 0     | 0     | 0     |
| 4649   | 0     | 0     | 0     | 0     |
| 4650   | 0     | 0     | 0     | 1     |
| 4651   | 0     | 0     | 0     | 0     |
| 4652   | 0     | 0     | 0     | 0     |
| 4653   | 0     | 0     | 0     | 0     |
| 4657   | 0     | 0     | 0     | 0     |
| 4660   | 0     | 0     | 0     | 0     |
| 4661   | 0     | 0     | 0     | 0     |
| 4662   | 0     | 0     | 0     | 0     |

| respid | Q31_6 | Q31_7 | Q31_8 | Q31_9 |
|--------|-------|-------|-------|-------|
| 4667   | 0     | 0     | 0     | 0     |
| 4669   | 0     | 0     | 0     | 0     |
| 4671   | 0     | 0     | 0     | 0     |
| 4672   | 1     | 1     | 0     | 0     |
| 4673   | 0     | 0     | 0     | 0     |
| 4677   | 0     | 0     | 0     | 0     |
| 4679   | 0     | 0     | 0     | 0     |
| 4683   | 0     | 0     | 0     | 0     |
| 4684   | 0     | 0     | 0     | 1     |
| 4685   | 0     | 0     | 1     | 0     |
| 4686   | 0     | 0     | 0     | 0     |
| 4687   | 0     | 0     | 0     | 0     |
| 4688   | 0     | 0     | 0     | 0     |
| 4691   | 0     | 0     | 0     | 0     |
| 4692   | 0     | 0     | 0     | 0     |
| 4694   | 0     | 0     | 0     | 0     |
| 4695   | 0     | 0     | 0     | 0     |
| 4696   | 0     | 0     | 0     | 0     |
| 4697   | 0     | 0     | 0     | 0     |
| 4698   | 0     | 0     | 0     | 0     |
| 4699   | 0     | 0     | 0     | 0     |
| 4701   | 0     | 0     | 0     | 0     |
| 4703   | 0     | 0     | 0     | 1     |
| 4704   | 1     | 0     | 0     | 0     |
| 4705   | 0     | 0     | 0     | 0     |
| 4706   | 0     | 0     | 0     | 0     |
| 4707   | 0     | 0     | 0     | 0     |
| 4708   | 1     | 0     | 0     | 0     |
| 4710   | 0     | 0     | 0     | 0     |
| 4711   | 0     | 0     | 0     | 1     |
| 4715   | 0     | 0     | 0     | 0     |
| 4716   | 0     | 0     | 0     | 0     |

| respid | Q31_6 | Q31_7 | Q31_8 | Q31_9 |
|--------|-------|-------|-------|-------|
| 4717   | 0     | 0     | 0     | 0     |
| 4718   | 0     | 0     | 0     | 0     |
| 4722   | 1     | 0     | 0     | 0     |
| 4727   | 0     | 0     | 0     | 0     |
| 4728   | 0     | 0     | 0     | 1     |
| 4729   | 0     | 0     | 0     | 0     |
| 4732   | 0     | 0     | 0     | 0     |
| 4733   | 0     | 0     | 0     | 0     |
| 4734   | 0     | 0     | 0     | 0     |
| 4735   | 0     | 0     | 0     | 0     |
| 4737   | 0     | 0     | 0     | 1     |
| 4738   | 0     | 0     | 0     | 0     |
| 4740   | 0     | 0     | 0     | 0     |
| 4741   | 1     | 0     | 0     | 0     |
| 4743   | 0     | 0     | 0     | 0     |
| 4746   | 0     | 0     | 0     | 0     |
| 4750   | 0     | 0     | 0     | 0     |
| 4752   | 0     | 0     | 0     | 0     |
| 4753   | 0     | 0     | 0     | 1     |
| 4754   | 0     | 0     | 0     | 0     |
| 4755   | 0     | 1     | 0     | 1     |
| 4758   | 0     | 0     | 0     | 0     |
| 4766   | 0     | 0     | 0     | 0     |
| 4767   | 0     | 0     | 0     | 0     |
| 4768   | 0     | 0     | 0     | 1     |
| 4769   | 0     | 0     | 0     | 0     |
| 4771   | 0     | 0     | 0     | 0     |
| 4772   | 0     | 0     | 0     | 0     |
| 4773   | 0     | 0     | 0     | 0     |
| 4774   | 0     | 0     | 0     | 0     |
| 4776   | 0     | 0     | 0     | 0     |
| 4777   | 0     | 0     | 0     | 0     |

| respid | Q31_6 | Q31_7 | Q31_8 | Q31_9 |
|--------|-------|-------|-------|-------|
| 4779   | 0     | 0     | 0     | 0     |
| 4780   | 0     | 0     | 0     | 0     |
| 4781   | 0     | 0     | 0     | 1     |
| 4783   | 0     | 0     | 0     | 0     |
| 4784   | 0     | 0     | 0     | 0     |
| 4785   | 0     | 0     | 0     | 1     |
| 4788   | 0     | 0     | 0     | 0     |
| 4789   | 0     | 0     | 0     | 0     |
| 4790   | 0     | 0     | 0     | 0     |
| 4791   | 0     | 0     | 0     | 0     |
| 4794   | 0     | 0     | 0     | 0     |
| 4795   | 0     | 0     | 0     | 0     |
| 4797   | 0     | 0     | 0     | 0     |
| 4802   | 0     | 1     | 0     | 0     |
| 4803   | 0     | 1     | 0     | 0     |
| 4804   | 0     | 0     | 0     | 0     |
| 4805   | 0     | 0     | 0     | 0     |
| 4807   | 0     | 0     | 0     | 0     |
| 4808   | 0     | 0     | 0     | 0     |
| 4809   | 0     | 0     | 0     | 1     |
| 4811   | 0     | 0     | 0     | 0     |
| 4817   | 0     | 0     | 0     | 0     |
| 4819   | 0     | 0     | 0     | 0     |
| 4820   | 0     | 0     | 0     | 0     |
| 4821   | 0     | 0     | 1     | 0     |
| 4822   | 0     | 0     | 0     | 0     |
| 4823   | 0     | 0     | 0     | 0     |
| 4825   | 0     | 0     | 0     | 0     |
| 4826   | 0     | 0     | 0     | 0     |
| 4830   | 0     | 0     | 0     | 0     |
| 4832   | 0     | 0     | 0     | 0     |
| 4838   | 0     | 0     | 0     | 0     |

| respid | Q31_6 | Q31_7 | Q31_8 | Q31_9 |
|--------|-------|-------|-------|-------|
| 4840   | 0     | 0     | 0     | 0     |
| 4841   | 0     | 0     | 0     | 0     |
| 4843   | 0     | 0     | 0     | 0     |
| 4845   | 0     | 0     | 0     | 0     |
| 4846   | 0     | 0     | 0     | 1     |
| 4848   | 0     | 0     | 0     | 0     |
| 4853   | 0     | 0     | 0     | 0     |
| 4854   | 0     | 0     | 0     | 0     |
| 4859   | 0     | 0     | 0     | 0     |
| 4861   | 0     | 0     | 0     | 0     |
| 4864   | 0     | 0     | 0     | 0     |
| 4867   | 0     | 0     | 0     | 0     |
| 4870   | 0     | 0     | 0     | 0     |
| 4872   | 0     | 0     | 0     | 0     |
| 4873   | 0     | 0     | 0     | 0     |
| 4874   | 0     | 1     | 0     | 0     |
| 4878   | 0     | 0     | 0     | 0     |
| 4880   | 0     | 0     | 0     | 0     |
| 4881   | 0     | 0     | 0     | 0     |
| 4882   | 0     | 0     | 0     | 0     |
| 4883   | 0     | 0     | 0     | 0     |
| 4885   | 0     | 0     | 0     | 0     |
| 4889   | 0     | 0     | 0     | 0     |
| 4890   | 0     | 0     | 0     | 0     |
| 4891   | 0     | 0     | 0     | 1     |
| 4894   | 0     | 0     | 0     | 0     |
| 4895   | 1     | 1     | 0     | 1     |
| 4896   | 0     | 0     | 0     | 0     |
| 4897   | 0     | 0     | 0     | 0     |
| 4898   | 1     | 0     | 0     | 0     |
| 4899   | 0     | 0     | 0     | 0     |
| 4900   | 1     | 0     | 0     | 1     |



| respid | Q31_6 | Q31_7 | Q31_8 | Q31_9 |
|--------|-------|-------|-------|-------|
| 4901   | 0     | 0     | 0     | 0     |
| 4903   | 0     | 0     | 0     | 0     |
| 4904   | 0     | 0     | 0     | 0     |
| 4908   | 0     | 0     | 0     | 0     |
| 4909   | 0     | 0     | 0     | 0     |
| 4913   | 0     | 0     | 0     | 0     |
| 4917   | 0     | 0     | 0     | 0     |
| 4918   | 0     | 0     | 0     | 0     |
| 4920   | 0     | 0     | 0     | 0     |
| 4921   | 0     | 0     | 0     | 0     |
| 4925   | 0     | 0     | 0     | 0     |
| 4926   | 0     | 0     | 0     | 0     |
| 4927   | 0     | 0     | 0     | 1     |
| 4928   | 0     | 0     | 0     | 0     |
| 4929   | 0     | 0     | 0     | 0     |
| 4930   | 0     | 0     | 0     | 0     |
| 4931   | 0     | 0     | 0     | 0     |
| 4932   | 0     | 0     | 0     | 0     |
| 4933   | 0     | 0     | 0     | 0     |
| 4934   | 0     | 0     | 0     | 0     |
| 5934   | 0     | 0     | 0     | 0     |
| 5935   | 0     | 0     | 0     | 0     |
| 5936   | 0     | 0     | 0     | 0     |
| 5938   | 0     | 0     | 0     | 0     |
| 5939   | 0     | 0     | 0     | 0     |
| 5940   | 0     | 0     | 0     | 0     |
| 5942   | 0     | 0     | 0     | 0     |
| 5944   | 0     | 0     | 0     | 1     |
| 5951   | 0     | 0     | 0     | 0     |
| 5952   | 0     | 0     | 0     | 0     |
| 5954   | 0     | 0     | 0     | 0     |
| 5956   | 0     | 0     | 0     | 0     |

| respid | Q31_6 | Q31_7 | Q31_8 | Q31_9 |
|--------|-------|-------|-------|-------|
| 5957   | 0     | 0     | 0     | 0     |
| 5958   | 0     | 0     | 0     | 1     |
| 5959   | 0     | 0     | 0     | 1     |
| 5960   | 0     | 0     | 0     | 0     |
| 5963   | 0     | 0     | 0     | 0     |
| 5966   | 0     | 0     | 0     | 0     |
| 5968   | 0     | 0     | 0     | 1     |
| 5974   | 0     | 0     | 0     | 0     |
| 5975   | 0     | 0     | 0     | 0     |
| 5976   | 0     | 0     | 0     | 0     |
| 5977   | 0     | 0     | 0     | 0     |
| 5978   | 0     | 0     | 0     | 0     |
| 5979   | 0     | 0     | 0     | 0     |
| 5983   | 0     | 0     | 0     | 0     |
| 5984   | 0     | 0     | 0     | 0     |
| 5990   | 0     | 0     | 0     | 0     |
| 5991   | 0     | 0     | 0     | 0     |
| 5992   | 0     | 0     | 0     | 0     |
| 5993   | 0     | 0     | 0     | 0     |
| 5994   | 0     | 0     | 0     | 0     |
| 5996   | 0     | 0     | 0     | 0     |
| 6001   | 1     | 0     | 0     | 0     |
| 6003   | 0     | 0     | 0     | 0     |
| 6004   | 0     | 0     | 0     | 0     |
| 6005   | 1     | 0     | 0     | 0     |
| 6006   | 0     | 0     | 0     | 0     |
| 6008   | 0     | 0     | 0     | 0     |
| 6009   | 0     | 0     | 0     | 0     |
| 6014   | 0     | 0     | 0     | 0     |
| 6016   | 0     | 0     | 0     | 0     |
| 6017   | 0     | 0     | 0     | 1     |
| 6018   | 0     | 0     | 0     | 0     |

| respid | Q31_6 | Q31_7 | Q31_8 | Q31_9 |
|--------|-------|-------|-------|-------|
| 6020   | 0     | 0     | 0     | 0     |
| 6021   | 0     | 0     | 0     | 0     |
| 6024   | 0     | 0     | 0     | 0     |
| 6025   | 0     | 0     | 0     | 0     |
| 6026   | 0     | 0     | 0     | 0     |
| 6032   | 0     | 0     | 0     | 0     |
| 6035   | 0     | 0     | 0     | 0     |
| 6038   | 0     | 0     | 0     | 0     |
| 6043   | 0     | 0     | 0     | 1     |
| 6044   | 0     | 0     | 0     | 0     |
| 6046   | 0     | 0     | 0     | 1     |
| 6047   | 0     | 0     | 0     | 0     |
| 6048   | 0     | 0     | 0     | 0     |
| 6050   | 1     | 0     | 0     | 0     |
| 6051   | 0     | 0     | 0     | 0     |
| 6053   | 0     | 0     | 0     | 0     |
| 6054   | 0     | 0     | 0     | 1     |
| 6056   | 0     | 0     | 0     | 0     |
| 6058   | 0     | 0     | 0     | 0     |
| 6060   | 0     | 0     | 0     | 0     |
| 6061   | 0     | 0     | 0     | 0     |
| 6062   | 0     | 0     | 0     | 0     |
| 6067   | 0     | 0     | 0     | 0     |
| 6070   | 0     | 0     | 0     | 0     |
| 6074   | 0     | 0     | 0     | 0     |
| 6076   | 0     | 0     | 0     | 0     |
| 6078   | 0     | 0     | 0     | 0     |
| 6081   | 0     | 0     | 0     | 0     |
| 6085   | 0     | 0     | 0     | 1     |
| 6088   | 0     | 0     | 0     | 0     |
| 6092   | 0     | 0     | 0     | 1     |
| 6095   | 0     | 0     | 0     | 0     |

| respid | Q31_6 | Q31_7 | Q31_8 | Q31_9 |
|--------|-------|-------|-------|-------|
| 6098   | 0     | 0     | 0     | 0     |
| 6101   | 0     | 0     | 0     | 0     |
| 6102   | 0     | 0     | 0     | 0     |
| 6105   | 0     | 0     | 0     | 0     |
| 6106   | 0     | 0     | 0     | 1     |
| 6107   | 1     | 0     | 0     | 0     |
| 6111   | 0     | 0     | 0     | 0     |
| 6112   | 0     | 0     | 0     | 0     |
| 6113   | 0     | 1     | 0     | 0     |
| 6115   | 0     | 0     | 0     | 0     |
| 6116   | 0     | 0     | 0     | 0     |
| 6117   | 0     | 0     | 0     | 0     |
| 6124   | 0     | 0     | 0     | 1     |
| 6125   | 0     | 0     | 0     | 0     |
| 6128   | 0     | 0     | 0     | 0     |
| 6133   | 0     | 0     | 0     | 0     |
| 6134   | 0     | 0     | 0     | 0     |
| 6135   | 0     | 0     | 0     | 1     |
| 6138   | 0     | 0     | 0     | 0     |
| 6140   | 0     | 0     | 0     | 0     |
| 6143   | 0     | 0     | 0     | 0     |
| 6147   | 0     | 0     | 0     | 0     |
| 6154   | 0     | 0     | 0     | 0     |
| 6162   | 0     | 0     | 0     | 0     |
| 6165   | 0     | 0     | 0     | 0     |
| 6166   | 0     | 0     | 0     | 1     |
| 6173   | 0     | 0     | 0     | 1     |
| 6180   | 0     | 0     | 0     | 1     |
| 6184   | 0     | 0     | 0     | 1     |
| 6185   | 0     | 0     | 0     | 0     |
| 6186   | 0     | 0     | 0     | 0     |
| 6188   | 0     | 0     | 0     | 0     |

| respid | Q31_6 | Q31_7 | Q31_8 | Q31_9 |
|--------|-------|-------|-------|-------|
| 6192   | 0     | 0     | 0     | 0     |
| 6194   | 0     | 0     | 0     | 0     |
| 6195   | 0     | 0     | 0     | 0     |
| 6196   | 0     | 0     | 0     | 0     |
| 6199   | 0     | 0     | 0     | 1     |
| 6200   | 0     | 0     | 0     | 0     |
| 6201   | 0     | 0     | 0     | 0     |
| 6202   | 0     | 0     | 0     | 0     |
| 6203   | 0     | 0     | 0     | 0     |
| 6205   | 0     | 0     | 0     | 0     |
| 6210   | 0     | 0     | 0     | 1     |
| 6212   | 0     | 0     | 0     | 1     |
| 6216   | 0     | 0     | 0     | 0     |
| 6218   | 0     | 0     | 0     | 0     |
| 6221   | 0     | 0     | 0     | 1     |
| 6224   | 0     | 0     | 0     | 0     |
| 6225   | 0     | 0     | 0     | 0     |
| 6227   | 0     | 0     | 0     | 0     |
| 6230   | 0     | 0     | 0     | 0     |
| 6231   | 0     | 0     | 0     | 0     |
| 6233   | 0     | 0     | 0     | 0     |
| 6234   | 0     | 0     | 0     | 0     |
| 6235   | 0     | 0     | 0     | 0     |
| 6237   | 0     | 0     | 0     | 0     |
| 6240   | 0     | 0     | 0     | 0     |
| 6248   | 0     | 0     | 0     | 0     |
| 6249   | 0     | 0     | 0     | 0     |
| 6252   | 0     | 0     | 0     | 0     |
| 6254   | 0     | 0     | 0     | 0     |
| 6269   | 0     | 1     | 0     | 0     |
| 6304   | 0     | 0     | 0     | 0     |
| 6334   | 0     | 0     | 0     | 1     |

| respid | Q31_6 | Q31_7 | Q31_8 | Q31_9 |
|--------|-------|-------|-------|-------|
| 6341   | 0     | 0     | 0     | 0     |
| 6350   | 0     | 0     | 0     | 0     |
| 6370   | 0     | 0     | 0     | 0     |
| 6384   | 0     | 0     | 0     | 0     |
| 6400   | 0     | 0     | 0     | 0     |
| 6418   | 0     | 0     | 0     | 0     |
| 6467   | 0     | 0     | 0     | 0     |
| 6469   | 0     | 0     | 0     | 0     |
| 6474   | 0     | 0     | 0     | 0     |
| 6475   | 0     | 0     | 0     | 0     |
| 6476   | 0     | 0     | 0     | 0     |
| 6477   | 0     | 0     | 0     | 0     |
| 6480   | 0     | 0     | 0     | 0     |
| 6481   | 0     | 0     | 0     | 0     |
| 6485   | 0     | 0     | 0     | 0     |
| 6488   | 0     | 0     | 0     | 1     |
| 6495   | 0     | 0     | 0     | 0     |
| 6499   | 0     | 0     | 0     | 0     |
| 6500   | 0     | 0     | 0     | 0     |
| 6504   | 0     | 0     | 0     | 0     |
| 6507   | 0     | 0     | 0     | 0     |
| 6512   | 0     | 0     | 0     | 0     |
| 6525   | 0     | 0     | 0     | 0     |
| 6532   | 0     | 0     | 0     | 0     |
| 6535   | 0     | 0     | 0     | 0     |
| 6546   | 0     | 0     | 0     | 0     |
| 6551   | 0     | 0     | 0     | 1     |
| 6556   | 0     | 0     | 0     | 0     |
| 6566   | 0     | 0     | 0     | 0     |
| 6569   | 0     | 0     | 0     | 0     |
| 6574   | 0     | 0     | 0     | 0     |
| 6576   | 0     | 0     | 0     | 0     |

| respid | Q31_6 | Q31_7 | Q31_8 | Q31_9 |
|--------|-------|-------|-------|-------|
| 6580   | 0     | 0     | 0     | 0     |
| 6584   | 0     | 0     | 0     | 0     |
| 6585   | 0     | 0     | 0     | 1     |
| 6589   | 0     | 0     | 0     | 0     |
| 6590   | 0     | 0     | 0     | 0     |
| 6598   | 0     | 0     | 0     | 0     |
| 6603   | 1     | 0     | 0     | 0     |
| 6618   | 0     | 0     | 0     | 0     |
| 6630   | 0     | 0     | 0     | 0     |
| 6636   | 0     | 0     | 0     | 0     |
| 6649   | 0     | 0     | 0     | 0     |
| 6675   | 0     | 0     | 0     | 0     |
| 6678   | 0     | 0     | 0     | 0     |
| 6681   | 0     | 0     | 0     | 0     |
| 6684   | 1     | 0     | 0     | 0     |
| 6688   | 0     | 0     | 0     | 0     |
| 6691   | 0     | 0     | 0     | 0     |
| 6694   | 0     | 0     | 0     | 0     |
| 6696   | 0     | 0     | 0     | 0     |
| 6720   | 0     | 0     | 1     | 1     |
| 6722   | 0     | 0     | 0     | 1     |
| 6724   | 0     | 0     | 0     | 0     |
| 6725   | 0     | 0     | 0     | 0     |
| 6727   | 0     | 0     | 0     | 0     |
| 6734   | 0     | 0     | 0     | 0     |
| 6739   | 0     | 0     | 0     | 0     |
| 6743   | 0     | 1     | 0     | 0     |
| 6749   | 0     | 0     | 0     | 0     |
| 6756   | 0     | 0     | 0     | 0     |
| 6764   | 0     | 0     | 0     | 1     |
| 6765   | 0     | 0     | 0     | 0     |
| 6768   | 0     | 0     | 0     | 0     |

| respid | Q31_6 | Q31_7 | Q31_8 | Q31_9 |
|--------|-------|-------|-------|-------|
| 6773   | 0     | 0     | 0     | 0     |
| 6775   | 0     | 0     | 0     | 0     |
| 6777   | 0     | 0     | 0     | 0     |
| 6779   | 0     | 0     | 0     | 0     |
| 6790   | 0     | 0     | 0     | 0     |
| 6797   | 0     | 0     | 0     | 0     |
| 6798   | 0     | 0     | 0     | 0     |
| 6808   | 0     | 0     | 0     | 0     |
| 6810   | 0     | 0     | 0     | 0     |
| 6811   | 0     | 0     | 0     | 1     |
| 6812   | 0     | 0     | 0     | 0     |
| 6814   | 0     | 0     | 0     | 0     |
| 6819   | 0     | 0     | 0     | 0     |
| 6820   | 0     | 0     | 0     | 1     |
| 6832   | 0     | 0     | 0     | 0     |
| 6854   | 0     | 0     | 0     | 0     |
| 6855   | 0     | 0     | 0     | 0     |
| 6857   | 0     | 0     | 0     | 0     |
| 6858   | 0     | 0     | 0     | 0     |
| 6859   | 0     | 0     | 0     | 0     |
| 6860   | 0     | 0     | 0     | 1     |
| 6862   | 0     | 0     | 0     | 0     |
| 6879   | 0     | 0     | 0     | 0     |
| 6893   | 0     | 0     | 0     | 0     |
| 6898   | 0     | 0     | 0     | 0     |
| 6902   | 0     | 0     | 0     | 1     |
| 6903   | 1     | 0     | 0     | 0     |
| 6907   | 0     | 0     | 0     | 0     |
| 6908   | 0     | 0     | 0     | 0     |
| 6912   | 0     | 0     | 0     | 0     |
| 6915   | 0     | 0     | 0     | 1     |
| 6916   | 0     | 0     | 0     | 0     |



| respid | Q31_6 | Q31_7 | Q31_8 | Q31_9 |
|--------|-------|-------|-------|-------|
| 6917   | 0     | 0     | 0     | 0     |
| 6923   | 0     | 0     | 0     | 0     |
| 6934   | 0     | 0     | 0     | 0     |
| 6937   | 0     | 0     | 0     | 0     |
| 6945   | 0     | 0     | 0     | 0     |
| 6954   | 0     | 0     | 0     | 1     |
| 6956   | 0     | 0     | 0     | 1     |
| 6958   | 0     | 0     | 0     | 0     |
| 6961   | 0     | 0     | 0     | 0     |
| 6963   | 0     | 0     | 0     | 0     |
| 6964   | 0     | 0     | 0     | 0     |
| 6976   | 0     | 0     | 0     | 0     |
| 6977   | 0     | 0     | 0     | 0     |
| 7000   | 0     | 0     | 1     | 0     |
| 7001   | 0     | 0     | 0     | 0     |
| 7005   | 0     | 0     | 0     | 0     |
| 7006   | 0     | 0     | 0     | 0     |
| 7008   | 0     | 0     | 0     | 0     |
| 7009   | 0     | 0     | 1     | 0     |
| 7019   | 0     | 0     | 0     | 0     |
| 7021   | 0     | 0     | 0     | 0     |
| 7026   | 0     | 0     | 0     | 1     |
| 7030   | 0     | 0     | 0     | 0     |
| 7034   | 0     | 0     | 0     | 0     |
| 7039   | 0     | 0     | 0     | 0     |
| 7041   | 0     | 0     | 0     | 0     |
| 7047   | 0     | 0     | 0     | 0     |
| 7051   | 0     | 0     | 0     | 0     |
| 7052   | 0     | 0     | 0     | 0     |
| 7059   | 0     | 0     | 0     | 0     |
| 7062   | 0     | 0     | 0     | 0     |
| 7065   | 0     | 0     | 0     | 1     |

| respid | Q31_6 | Q31_7 | Q31_8 | Q31_9 |
|--------|-------|-------|-------|-------|
| 7066   | 0     | 0     | 0     | 0     |
| 7069   | 0     | 0     | 0     | 0     |
| 7070   | 0     | 0     | 0     | 0     |
| 7073   | 0     | 0     | 0     | 0     |
| 7078   | 0     | 0     | 0     | 0     |
| 7083   | 0     | 0     | 0     | 0     |
| 7084   | 0     | 0     | 0     | 0     |
| 7085   | 0     | 0     | 0     | 0     |
| 7088   | 0     | 0     | 0     | 0     |
| 7090   | 0     | 0     | 0     | 0     |
| 7095   | 0     | 0     | 0     | 0     |
| 7100   | 0     | 0     | 0     | 0     |
| 7102   | 0     | 0     | 0     | 0     |
| 7103   | 0     | 0     | 0     | 0     |
| 7108   | 0     | 0     | 0     | 0     |
| 7109   | 0     | 0     | 0     | 0     |
| 7110   | 0     | 0     | 0     | 0     |
| 7112   | 0     | 0     | 0     | 0     |
| 7114   | 0     | 0     | 0     | 0     |
| 7116   | 0     | 0     | 0     | 0     |
| 7117   | 0     | 0     | 0     | 0     |
| 7118   | 0     | 1     | 0     | 0     |
| 7120   | 1     | 0     | 0     | 0     |
| 7124   | 0     | 0     | 0     | 0     |
| 7130   | 0     | 0     | 0     | 0     |
| 7135   | 0     | 0     | 0     | 0     |
| 7137   | 0     | 0     | 0     | 1     |
| 7140   | 0     | 0     | 0     | 0     |
| 7141   | 0     | 0     | 0     | 0     |
| 7148   | 0     | 0     | 0     | 0     |
| 7152   | 0     | 0     | 0     | 0     |
| 7154   | 0     | 0     | 0     | 0     |

| respid | Q31_6 | Q31_7 | Q31_8 | Q31_9 |
|--------|-------|-------|-------|-------|
| 7156   | 0     | 0     | 0     | 0     |
| 7158   | 0     | 0     | 0     | 0     |
| 7159   | 0     | 0     | 0     | 0     |
| 7161   | 0     | 0     | 0     | 0     |
| 7164   | 0     | 0     | 0     | 0     |
| 7166   | 0     | 0     | 0     | 0     |
| 7167   | 0     | 0     | 0     | 0     |
| 7168   | 0     | 0     | 0     | 0     |
| 7170   | 0     | 0     | 0     | 0     |
| 7171   | 0     | 0     | 0     | 0     |
| 7172   | 0     | 0     | 0     | 0     |
| 7173   | 0     | 0     | 0     | 1     |
| 7175   | 0     | 0     | 0     | 1     |
| 7176   | 0     | 0     | 0     | 0     |
| 7180   | 0     | 0     | 0     | 0     |
| 7183   | 0     | 0     | 0     | 1     |
| 7189   | 0     | 0     | 0     | 0     |
| 7193   | 0     | 0     | 0     | 0     |
| 7194   | 0     | 0     | 1     | 0     |
| 7195   | 0     | 0     | 0     | 0     |
| 7200   | 0     | 0     | 0     | 0     |
| 7201   | 0     | 0     | 0     | 0     |
| 7205   | 1     | 1     | 0     | 1     |
| 7207   | 0     | 0     | 0     | 0     |
| 7208   | 0     | 0     | 0     | 0     |
| 7210   | 0     | 0     | 0     | 0     |
| 7211   | 0     | 0     | 0     | 0     |
| 7217   | 0     | 0     | 0     | 0     |
| 7218   | 0     | 0     | 0     | 0     |
| 7220   | 0     | 0     | 0     | 0     |
| 7225   | 0     | 0     | 0     | 0     |
| 7228   | 0     | 0     | 0     | 0     |

| respid | Q31_6 | Q31_7 | Q31_8 | Q31_9 |
|--------|-------|-------|-------|-------|
| 7230   | 0     | 0     | 0     | 0     |
| 7233   | 0     | 0     | 0     | 0     |
| 7234   | 0     | 0     | 0     | 0     |
| 7235   | 0     | 0     | 0     | 0     |
| 7236   | 0     | 0     | 0     | 0     |
| 7241   | 0     | 0     | 0     | 0     |
| 7251   | 0     | 0     | 0     | 0     |
| 7253   | 0     | 0     | 0     | 0     |
| 7259   | 0     | 0     | 0     | 0     |
| 7260   | 0     | 0     | 0     | 0     |
| 7261   | 0     | 0     | 0     | 1     |
| 7263   | 0     | 0     | 0     | 0     |
| 7265   | 0     | 0     | 0     | 0     |
| 7268   | 0     | 0     | 0     | 0     |
| 7269   | 0     | 0     | 0     | 0     |
| 7271   | 0     | 0     | 0     | 0     |
| 7276   | 1     | 1     | 0     | 1     |
| 7280   | 0     | 0     | 0     | 1     |
| 7283   | 0     | 0     | 0     | 0     |
| 7284   | 0     | 0     | 0     | 0     |
| 7286   | 0     | 0     | 0     | 0     |
| 7287   | 0     | 0     | 0     | 0     |
| 7288   | 0     | 0     | 0     | 0     |
| 7294   | 0     | 0     | 0     | 0     |
| 7295   | 0     | 0     | 0     | 0     |
| 7296   | 0     | 0     | 0     | 0     |
| 7297   | 0     | 0     | 1     | 0     |
| 7299   | 0     | 0     | 0     | 0     |
| 7300   | 0     | 0     | 0     | 0     |
| 7301   | 0     | 0     | 0     | 0     |
| 7302   | 0     | 0     | 0     | 0     |
| 7306   | 0     | 0     | 0     | 0     |

| respid | Q31_6 | Q31_7 | Q31_8 | Q31_9 |
|--------|-------|-------|-------|-------|
| 7313   | 0     | 0     | 0     | 1     |
| 7315   | 0     | 0     | 0     | 0     |
| 7317   | 0     | 0     | 0     | 0     |
| 7321   | 0     | 0     | 0     | 0     |
| 7322   | 0     | 0     | 0     | 0     |
| 7323   | 0     | 0     | 0     | 0     |
| 7333   | 0     | 0     | 0     | 1     |
| 7335   | 0     | 0     | 0     | 1     |
| 7336   | 0     | 0     | 0     | 0     |
| 7337   | 0     | 0     | 0     | 0     |
| 7338   | 0     | 0     | 0     | 0     |
| 7340   | 0     | 0     | 0     | 1     |
| 7341   | 0     | 0     | 0     | 0     |
| 7342   | 0     | 0     | 0     | 0     |
| 7344   | 0     | 0     | 0     | 1     |
| 7346   | 0     | 0     | 0     | 0     |
| 7347   | 0     | 0     | 0     | 0     |
| 7349   | 0     | 0     | 0     | 0     |
| 7352   | 0     | 0     | 0     | 0     |
| 7353   | 0     | 0     | 0     | 1     |
| 7355   | 0     | 0     | 0     | 0     |
| 7356   | 0     | 0     | 0     | 0     |
| 7360   | 1     | 0     | 0     | 0     |
| 7371   | 0     | 0     | 0     | 0     |
| 7376   | 0     | 0     | 1     | 0     |
| 7379   | 0     | 0     | 0     | 0     |
| 7381   | 0     | 0     | 0     | 0     |
| 7386   | 0     | 0     | 0     | 0     |
| 7389   | 0     | 0     | 0     | 0     |
| 7390   | 0     | 0     | 0     | 1     |
| 7393   | 0     | 0     | 0     | 0     |
| 7394   | 0     | 0     | 0     | 0     |

| respid | Q31_6 | Q31_7 | Q31_8 | Q31_9 |
|--------|-------|-------|-------|-------|
| 7396   | 0     | 0     | 0     | 0     |
| 7400   | 0     | 0     | 0     | 0     |
| 7401   | 0     | 0     | 0     | 0     |
| 7403   | 0     | 0     | 0     | 0     |
| 7406   | 1     | 0     | 0     | 1     |
| 7409   | 0     | 0     | 0     | 0     |
| 7410   | 0     | 0     | 0     | 0     |
| 7412   | 1     | 0     | 0     | 0     |
| 7414   | 0     | 0     | 0     | 0     |
| 7415   | 0     | 0     | 0     | 0     |
| 7417   | 0     | 0     | 0     | 1     |
| 7421   | 0     | 0     | 1     | 1     |
| 7425   | 0     | 0     | 0     | 0     |
| 7430   | 0     | 0     | 0     | 0     |
| 7432   | 0     | 0     | 0     | 0     |
| 7433   | 0     | 0     | 0     | 0     |
| 7442   | 0     | 0     | 1     | 1     |
| 7445   | 0     | 0     | 0     | 0     |
| 7446   | 0     | 0     | 0     | 0     |
| 7449   | 0     | 0     | 0     | 0     |
| 7450   | 0     | 0     | 0     | 0     |
| 7451   | 0     | 0     | 0     | 0     |
| 7459   | 0     | 0     | 0     | 0     |
| 7462   | 0     | 0     | 0     | 0     |
| 7463   | 0     | 0     | 0     | 0     |
| 7469   | 0     | 0     | 0     | 0     |
| 7482   | 0     | 0     | 0     | 0     |
| 7484   | 0     | 0     | 0     | 1     |
| 7486   | 0     | 0     | 0     | 0     |
| 7496   | 0     | 0     | 0     | 0     |
| 7502   | 0     | 0     | 0     | 0     |
| 7504   | 0     | 0     | 0     | 1     |

| respid | Q31_6 | Q31_7 | Q31_8 | Q31_9 |
|--------|-------|-------|-------|-------|
| 7509   | 0     | 0     | 0     | 0     |
| 7513   | 0     | 0     | 0     | 0     |
| 7514   | 0     | 0     | 0     | 0     |
| 7520   | 0     | 0     | 0     | 0     |
| 7523   | 0     | 0     | 0     | 0     |
| 7526   | 0     | 0     | 0     | 0     |
| 7529   | 0     | 0     | 0     | 0     |
| 7534   | 0     | 0     | 0     | 0     |
| 7536   | 1     | 0     | 1     | 0     |
| 7540   | 0     | 0     | 0     | 1     |
| 7541   | 1     | 0     | 0     | 0     |
| 7542   | 0     | 0     | 0     | 0     |
| 7555   | 0     | 0     | 0     | 0     |
| 7566   | 0     | 0     | 0     | 0     |
| 7568   | 0     | 0     | 0     | 0     |
| 7570   | 0     | 0     | 0     | 0     |
| 7572   | 0     | 0     | 1     | 0     |
| 7573   | 0     | 0     | 0     | 0     |
| 7576   | 0     | 0     | 0     | 0     |
| 7577   | 0     | 0     | 0     | 0     |
| 7583   | 0     | 0     | 0     | 0     |
| 7584   | 0     | 1     | 0     | 0     |
| 7585   | 0     | 1     | 0     | 1     |
| 7586   | 0     | 0     | 0     | 1     |
| 7587   | 0     | 0     | 0     | 0     |
| 7588   | 0     | 0     | 0     | 0     |
| 7596   | 0     | 0     | 0     | 0     |
| 7599   | 0     | 0     | 0     | 0     |
| 7600   | 0     | 0     | 0     | 0     |
| 7602   | 0     | 0     | 0     | 0     |
| 7613   | 0     | 0     | 0     | 0     |
| 7620   | 0     | 0     | 0     | 0     |

| respid | Q31_6 | Q31_7 | Q31_8 | Q31_9 |
|--------|-------|-------|-------|-------|
| 7623   | 0     | 0     | 1     | 0     |
| 7635   | 0     | 0     | 0     | 0     |
| 7636   | 0     | 0     | 0     | 1     |
| 7643   | 0     | 0     | 0     | 0     |
| 7645   | 0     | 0     | 0     | 0     |
| 7649   | 1     | 0     | 0     | 0     |
| 7651   | 0     | 0     | 0     | 0     |
| 7652   | 0     | 0     | 0     | 1     |
| 7655   | 0     | 0     | 0     | 0     |
| 7657   | 0     | 0     | 0     | 0     |
| 7675   | 0     | 0     | 0     | 0     |
| 7676   | 0     | 0     | 0     | 0     |
| 7684   | 0     | 0     | 0     | 0     |
| 7693   | 0     | 0     | 0     | 0     |
| 7694   | 0     | 0     | 0     | 0     |
| 7695   | 0     | 0     | 0     | 0     |
| 7696   | 1     | 1     | 1     | 0     |
| 7698   | 0     | 0     | 0     | 0     |
| 7700   | 0     | 0     | 0     | 0     |
| 7701   | 0     | 0     | 0     | 0     |
| 7704   | 0     | 0     | 0     | 0     |
| 7709   | 0     | 0     | 0     | 0     |
| 7713   | 0     | 0     | 0     | 0     |
| 7714   | 0     | 0     | 0     | 0     |
| 7718   | 0     | 1     | 0     | 1     |
| 7720   | 0     | 0     | 1     | 0     |
| 7721   | 0     | 0     | 0     | 0     |
| 7722   | 0     | 0     | 0     | 0     |
| 7724   | 0     | 0     | 0     | 0     |
| 7728   | 0     | 0     | 0     | 0     |
| 7731   | 1     | 0     | 0     | 0     |
| 7735   | 0     | 0     | 0     | 0     |



| respid | Q31_6 | Q31_7 | Q31_8 | Q31_9 |
|--------|-------|-------|-------|-------|
| 7737   | 0     | 0     | 0     | 0     |
| 7741   | 0     | 0     | 0     | 0     |
| 7746   | 0     | 0     | 0     | 0     |
| 7747   | 0     | 0     | 0     | 0     |
| 7748   | 0     | 0     | 0     | 0     |
| 7750   | 0     | 0     | 0     | 0     |
| 7754   | 0     | 0     | 0     | 0     |
| 7755   | 0     | 0     | 0     | 0     |
| 7762   | 0     | 0     | 0     | 0     |
| 7764   | 0     | 0     | 0     | 0     |
| 7766   | 0     | 0     | 0     | 0     |
| 7768   | 0     | 0     | 0     | 0     |
| 7770   | 0     | 0     | 1     | 0     |
| 7771   | 0     | 0     | 0     | 0     |
| 7777   | 0     | 0     | 0     | 0     |
| 7778   | 0     | 0     | 0     | 0     |
| 7783   | 0     | 0     | 1     | 1     |
| 7789   | 0     | 0     | 0     | 0     |
| 7790   | 0     | 0     | 0     | 0     |
| 7795   | 0     | 0     | 0     | 0     |
| 7807   | 0     | 0     | 0     | 0     |
| 7808   | 0     | 0     | 0     | 1     |
| 7818   | 0     | 0     | 0     | 0     |
| 7820   | 0     | 0     | 0     | 0     |
| 7831   | 0     | 0     | 0     | 0     |
| 7832   | 0     | 0     | 0     | 0     |
| 7837   | 0     | 0     | 0     | 0     |
| 7841   | 0     | 0     | 0     | 1     |
| 7845   | 0     | 0     | 0     | 0     |
| 7853   | 0     | 0     | 0     | 0     |
| 7854   | 0     | 0     | 0     | 0     |
| 7862   | 0     | 1     | 0     | 1     |

| respid | Q31_6 | Q31_7 | Q31_8 | Q31_9 |
|--------|-------|-------|-------|-------|
| 7871   | 0     | 0     | 0     | 0     |
| 7875   | 0     | 0     | 0     | 0     |
| 7880   | 0     | 0     | 0     | 1     |
| 7881   | 0     | 0     | 0     | 0     |
| 7883   | 0     | 0     | 0     | 0     |
| 7896   | 0     | 0     | 0     | 0     |
| 7905   | 0     | 0     | 0     | 0     |
| 7919   | 0     | 0     | 0     | 0     |
| 7928   | 0     | 1     | 0     | 0     |
| 7929   | 0     | 0     | 0     | 0     |
| 7938   | 0     | 0     | 0     | 0     |
| 7940   | 0     | 0     | 0     | 0     |
| 7941   | 0     | 0     | 0     | 0     |
| 7952   | 0     | 0     | 0     | 0     |
| 7962   | 0     | 0     | 0     | 0     |
| 7968   | 0     | 0     | 0     | 0     |
| 7972   | 0     | 0     | 0     | 0     |
| 7983   | 0     | 0     | 0     | 0     |
| 7990   | 0     | 0     | 0     | 0     |
| 7993   | 0     | 0     | 0     | 0     |
| 8005   | 0     | 0     | 0     | 0     |
| 8008   | 0     | 0     | 0     | 0     |
| 8012   | 0     | 0     | 0     | 0     |
| 8021   | 0     | 0     | 0     | 0     |
| 8024   | 0     | 0     | 0     | 0     |
| 8043   | 0     | 0     | 0     | 0     |
| 8051   | 0     | 0     | 0     | 0     |
| 8056   | 0     | 0     | 0     | 0     |
| 8061   | 0     | 0     | 0     | 0     |
| 8066   | 0     | 0     | 0     | 0     |
| 8069   | 0     | 0     | 0     | 0     |
| 8071   | 0     | 0     | 0     | 0     |

| respid | Q31_6 | Q31_7 | Q31_8 | Q31_9 |
|--------|-------|-------|-------|-------|
| 8072   | 0     | 0     | 0     | 0     |
| 8076   | 0     | 0     | 0     | 0     |
| 8080   | 1     | 0     | 0     | 0     |
| 8083   | 0     | 0     | 0     | 0     |
| 8093   | 1     | 1     | 0     | 0     |
| 8095   | 0     | 0     | 0     | 1     |
| 8099   | 0     | 0     | 0     | 0     |
| 8100   | 0     | 0     | 0     | 0     |
| 8103   | 0     | 0     | 0     | 0     |
| 8104   | 0     | 0     | 0     | 1     |
| 8115   | 0     | 1     | 0     | 1     |
| 8121   | 0     | 0     | 0     | 0     |
| 8128   | 0     | 0     | 0     | 0     |
| 8130   | 0     | 0     | 0     | 0     |
| 8131   | 0     | 0     | 0     | 1     |
| 8133   | 0     | 0     | 0     | 0     |
| 8143   | 0     | 0     | 0     | 0     |
| 8144   | 0     | 0     | 0     | 0     |
| 8146   | 0     | 0     | 0     | 0     |
| 8148   | 0     | 0     | 0     | 0     |
| 8157   | 0     | 0     | 0     | 0     |
| 8164   | 0     | 0     | 0     | 0     |
| 8173   | 0     | 0     | 0     | 0     |
| 8176   | 0     | 0     | 0     | 0     |
| 8179   | 0     | 0     | 0     | 0     |
| 8181   | 0     | 0     | 0     | 0     |
| 8182   | 0     | 0     | 0     | 0     |
| 8196   | 0     | 0     | 0     | 0     |
| 8200   | 0     | 0     | 0     | 1     |
| 8203   | 0     | 0     | 0     | 0     |
| 8204   | 0     | 0     | 0     | 0     |
| 8206   | 0     | 0     | 0     | 0     |

| respid | Q31_6 | Q31_7 | Q31_8 | Q31_9 |
|--------|-------|-------|-------|-------|
| 8208   | 0     | 0     | 0     | 0     |
| 8212   | 0     | 0     | 0     | 0     |
| 8222   | 0     | 0     | 0     | 0     |
| 8223   | 0     | 0     | 0     | 0     |
| 8225   | 0     | 0     | 0     | 0     |
| 8226   | 0     | 0     | 0     | 0     |
| 8228   | 0     | 0     | 0     | 0     |
| 8229   | 0     | 0     | 0     | 0     |
| 8239   | 0     | 0     | 0     | 0     |
| 8246   | 0     | 0     | 0     | 1     |
| 8258   | 0     | 0     | 0     | 0     |
| 8260   | 0     | 0     | 0     | 0     |
| 8262   | 0     | 0     | 0     | 1     |
| 8263   | 0     | 0     | 0     | 0     |
| 8267   | 0     | 0     | 1     | 0     |
| 8271   | 0     | 0     | 0     | 1     |
| 8274   | 0     | 0     | 0     | 0     |
| 8275   | 0     | 0     | 0     | 0     |
| 8279   | 0     | 0     | 0     | 0     |
| 8285   | 0     | 0     | 0     | 1     |
| 8287   | 1     | 0     | 0     | 0     |
| 8289   | 0     | 0     | 0     | 0     |
| 8291   | 0     | 0     | 0     | 0     |
| 8299   | 1     | 0     | 0     | 0     |
| 8301   | 0     | 0     | 0     | 1     |
| 8302   | 0     | 0     | 0     | 0     |
| 8308   | 0     | 0     | 0     | 0     |
| 8313   | 0     | 0     | 0     | 0     |
| 8316   | 0     | 0     | 0     | 0     |
| 8317   | 0     | 0     | 0     | 0     |
| 8319   | 0     | 0     | 0     | 0     |
| 8323   | 0     | 0     | 1     | 1     |

| respid | Q31_6 | Q31_7 | Q31_8 | Q31_9 |
|--------|-------|-------|-------|-------|
| 8324   | 0     | 0     | 0     | 0     |
| 8327   | 0     | 0     | 0     | 0     |
| 8328   | 0     | 0     | 0     | 0     |
| 8342   | 0     | 0     | 0     | 0     |
| 8350   | 0     | 0     | 0     | 0     |
| 8352   | 0     | 0     | 0     | 0     |
| 8353   | 0     | 0     | 0     | 0     |
| 8356   | 0     | 0     | 0     | 0     |
| 8367   | 0     | 0     | 0     | 0     |
| 8373   | 0     | 0     | 0     | 0     |
| 8379   | 0     | 0     | 0     | 0     |
| 8382   | 0     | 0     | 0     | 0     |
| 8387   | 0     | 0     | 0     | 0     |
| 8409   | 0     | 0     | 0     | 0     |
| 8410   | 0     | 0     | 0     | 0     |
| 8412   | 0     | 0     | 0     | 0     |
| 8415   | 0     | 0     | 0     | 0     |
| 8417   | 0     | 0     | 0     | 1     |
| 8422   | 0     | 0     | 0     | 0     |
| 8430   | 0     | 0     | 0     | 0     |
| 8434   | 0     | 0     | 0     | 0     |
| 8436   | 0     | 0     | 0     | 0     |
| 8446   | 0     | 0     | 0     | 0     |
| 8447   | 0     | 0     | 0     | 0     |
| 8448   | 0     | 0     | 0     | 0     |
| 8455   | 0     | 0     | 0     | 0     |
| 8456   | 0     | 0     | 0     | 0     |
| 8459   | 0     | 0     | 0     | 0     |
| 8460   | 0     | 0     | 0     | 0     |
| 8464   | 0     | 0     | 0     | 1     |
| 8470   | 0     | 0     | 0     | 0     |
| 8473   | 0     | 0     | 0     | 0     |

| respid | Q31_6 | Q31_7 | Q31_8 | Q31_9 |
|--------|-------|-------|-------|-------|
| 8486   | 0     | 0     | 0     | 0     |
| 8487   | 0     | 0     | 0     | 0     |
| 8489   | 0     | 0     | 0     | 0     |
| 8494   | 0     | 0     | 0     | 0     |
| 8495   | 1     | 0     | 1     | 1     |
| 8497   | 0     | 0     | 0     | 0     |
| 8510   | 0     | 0     | 0     | 0     |
| 8515   | 1     | 0     | 0     | 1     |
| 8526   | 0     | 0     | 0     | 0     |
| 8530   | 0     | 0     | 0     | 0     |
| 8532   | 0     | 0     | 0     | 0     |
| 8533   | 0     | 0     | 0     | 0     |
| 8534   | 0     | 0     | 0     | 0     |
| 8572   | 0     | 0     | 0     | 1     |
| 8582   | 0     | 0     | 0     | 1     |
| 8584   | 0     | 0     | 0     | 0     |
| 8585   | 0     | 0     | 0     | 0     |
| 8586   | 0     | 0     | 0     | 0     |
| 8589   | 0     | 0     | 0     | 0     |
| 8593   | 0     | 0     | 0     | 0     |
| 8594   | 0     | 0     | 0     | 0     |
| 8601   | 0     | 0     | 0     | 0     |
| 8603   | 0     | 0     | 0     | 0     |
| 8604   | 0     | 0     | 0     | 0     |
| 8605   | 0     | 0     | 0     | 0     |
| 8607   | 0     | 0     | 0     | 0     |
| 8623   | 0     | 0     | 0     | 0     |
| 8626   | 0     | 0     | 0     | 1     |
| 8638   | 0     | 0     | 0     | 0     |
| 8640   | 0     | 0     | 0     | 0     |
| 8641   | 0     | 0     | 0     | 1     |
| 8643   | 0     | 0     | 0     | 0     |

| respid | Q31_6 | Q31_7 | Q31_8 | Q31_9 |
|--------|-------|-------|-------|-------|
| 8644   | 0     | 0     | 0     | 0     |
| 8646   | 0     | 0     | 0     | 0     |
| 8647   | 0     | 0     | 0     | 0     |
| 8649   | 0     | 0     | 0     | 0     |
| 8650   | 0     | 0     | 0     | 0     |
| 8658   | 0     | 0     | 0     | 0     |
| 8659   | 0     | 0     | 0     | 0     |
| 8669   | 0     | 0     | 0     | 0     |
| 8672   | 0     | 0     | 0     | 0     |
| 8673   | 0     | 0     | 0     | 0     |
| 8676   | 0     | 0     | 0     | 0     |
| 8677   | 0     | 0     | 0     | 0     |
| 8681   | 0     | 0     | 0     | 0     |
| 8688   | 0     | 0     | 0     | 0     |
| 8689   | 0     | 0     | 0     | 0     |
| 8690   | 0     | 0     | 0     | 0     |
| 8693   | 0     | 1     | 0     | 0     |
| 8694   | 0     | 0     | 0     | 0     |
| 8699   | 0     | 0     | 0     | 0     |
| 8700   | 0     | 0     | 0     | 0     |
| 8703   | 0     | 0     | 0     | 0     |
| 8704   | 0     | 0     | 0     | 0     |
| 8706   | 1     | 0     | 0     | 1     |
| 8709   | 0     | 0     | 0     | 0     |
| 8715   | 0     | 0     | 0     | 0     |
| 8728   | 0     | 0     | 0     | 0     |
| 8729   | 0     | 0     | 0     | 0     |
| 8730   | 0     | 0     | 0     | 0     |
| 8742   | 0     | 0     | 0     | 1     |
| 8748   | 0     | 1     | 0     | 0     |
| 8749   | 0     | 0     | 0     | 0     |
| 8750   | 0     | 0     | 0     | 0     |

| respid | Q31_6 | Q31_7 | Q31_8 | Q31_9 |
|--------|-------|-------|-------|-------|
| 8751   | 0     | 0     | 0     | 0     |
| 8752   | 0     | 0     | 0     | 0     |
| 8754   | 0     | 0     | 0     | 0     |
| 8757   | 0     | 0     | 0     | 0     |
| 8760   | 0     | 0     | 0     | 0     |
| 8761   | 0     | 0     | 0     | 0     |
| 8762   | 0     | 0     | 1     | 0     |
| 8763   | 0     | 0     | 0     | 0     |
| 8764   | 0     | 0     | 0     | 0     |
| 8765   | 0     | 0     | 0     | 0     |
| 8766   | 0     | 0     | 1     | 0     |
| 8767   | 0     | 0     | 0     | 0     |
| 8768   | 0     | 0     | 0     | 0     |
| 8770   | 0     | 0     | 0     | 0     |
| 8771   | 0     | 0     | 0     | 0     |
| 8773   | 0     | 0     | 0     | 0     |
| 8774   | 0     | 0     | 0     | 0     |
| 8776   | 0     | 0     | 0     | 0     |
| 8777   | 0     | 0     | 0     | 0     |
| 8778   | 0     | 0     | 0     | 0     |
| 8779   | 0     | 0     | 0     | 0     |
| 8784   | 0     | 0     | 0     | 0     |
| 8786   | 0     | 0     | 0     | 0     |
| 8787   | 0     | 0     | 0     | 0     |
| 8790   | 0     | 0     | 0     | 0     |
| 8791   | 0     | 0     | 0     | 1     |
| 8793   | 0     | 0     | 0     | 0     |
| 8795   | 0     | 0     | 0     | 0     |
| 8797   | 0     | 0     | 0     | 0     |
| 8801   | 0     | 0     | 0     | 0     |
| 8802   | 0     | 0     | 0     | 0     |
| 8807   | 0     | 0     | 0     | 0     |



| respid | Q31_6 | Q31_7 | Q31_8 | Q31_9 |
|--------|-------|-------|-------|-------|
| 8813   | 0     | 0     | 0     | 0     |
| 8817   | 0     | 0     | 0     | 0     |
| 8818   | 0     | 0     | 0     | 1     |
| 8821   | 0     | 0     | 0     | 0     |
| 8822   | 0     | 0     | 0     | 0     |
| 8823   | 0     | 0     | 0     | 0     |
| 8824   | 0     | 1     | 0     | 0     |
| 8825   | 0     | 0     | 0     | 0     |
| 8834   | 0     | 0     | 0     | 0     |
| 8840   | 0     | 0     | 0     | 0     |
| 8843   | 0     | 0     | 0     | 0     |
| 8846   | 0     | 0     | 0     | 0     |
| 8862   | 0     | 0     | 0     | 0     |
| 8866   | 0     | 0     | 0     | 0     |
| 8869   | 0     | 0     | 0     | 0     |
| 8872   | 0     | 0     | 0     | 0     |
| 8903   | 0     | 0     | 0     | 0     |
| 8909   | 0     | 0     | 0     | 0     |
| 8926   | 0     | 0     | 0     | 0     |
| 8936   | 0     | 0     | 0     | 0     |
| 8945   | 0     | 0     | 0     | 0     |
| 8954   | 0     | 0     | 0     | 0     |
| 8955   | 0     | 0     | 0     | 0     |
| 8958   | 0     | 0     | 0     | 0     |
| 8959   | 0     | 0     | 0     | 0     |
| 8960   | 0     | 0     | 0     | 0     |
| 8976   | 0     | 0     | 0     | 0     |
| 8977   | 0     | 0     | 0     | 0     |
| 8979   | 0     | 0     | 0     | 0     |
| 8985   | 0     | 0     | 0     | 0     |
| 8994   | 0     | 0     | 0     | 0     |
| 8997   | 0     | 0     | 0     | 0     |

| respid | Q31_6 | Q31_7 | Q31_8 | Q31_9 |
|--------|-------|-------|-------|-------|
| 9002   | 0     | 0     | 0     | 0     |
| 9005   | 0     | 0     | 0     | 0     |
| 9017   | 0     | 0     | 0     | 0     |
| 9018   | 0     | 0     | 0     | 0     |
| 9021   | 0     | 0     | 0     | 0     |
| 9029   | 0     | 0     | 0     | 0     |
| 9035   | 0     | 0     | 0     | 0     |
| 9038   | 0     | 0     | 0     | 0     |
| 9039   | 0     | 0     | 0     | 0     |
| 9040   | 0     | 0     | 0     | 0     |
| 9042   | 0     | 0     | 0     | 0     |
| 9043   | 0     | 0     | 0     | 0     |
| 9045   | 0     | 0     | 0     | 0     |
| 9051   | 0     | 0     | 0     | 0     |
| 9067   | 0     | 0     | 0     | 0     |
| 9069   | 0     | 0     | 0     | 0     |
| 9073   | 0     | 0     | 0     | 1     |
| 9084   | 0     | 0     | 0     | 0     |
| 9096   | 0     | 0     | 0     | 0     |
| 9100   | 0     | 0     | 0     | 0     |
| 9107   | 0     | 0     | 0     | 0     |
| 9110   | 0     | 0     | 0     | 0     |
| 9120   | 0     | 0     | 0     | 0     |
| 9122   | 0     | 0     | 0     | 0     |
| 9130   | 0     | 0     | 0     | 0     |
| 9134   | 0     | 0     | 0     | 0     |
| 9137   | 0     | 0     | 0     | 0     |
| 9139   | 0     | 0     | 0     | 0     |
| 9144   | 0     | 0     | 0     | 0     |
| 9157   | 0     | 0     | 0     | 0     |
| 9166   | 0     | 0     | 0     | 0     |
| 9177   | 0     | 0     | 1     | 1     |

| respid | Q31_6 | Q31_7 | Q31_8 | Q31_9 |
|--------|-------|-------|-------|-------|
| 9181   | 0     | 0     | 0     | 0     |
| 9183   | 0     | 0     | 0     | 0     |
| 9184   | 0     | 0     | 0     | 0     |
| 9188   | 0     | 0     | 0     | 0     |
| 9197   | 0     | 0     | 0     | 0     |
| 9200   | 0     | 0     | 0     | 0     |
| 9205   | 0     | 0     | 0     | 0     |
| 9207   | 0     | 0     | 0     | 0     |
| 9213   | 0     | 0     | 0     | 0     |
| 9216   | 1     | 0     | 0     | 0     |
| 9217   | 0     | 0     | 0     | 0     |
| 9218   | 0     | 0     | 0     | 0     |
| 9219   | 0     | 0     | 0     | 1     |
| 9220   | 0     | 0     | 0     | 0     |
| 9221   | 0     | 0     | 0     | 0     |
| 9223   | 1     | 0     | 0     | 0     |
| 9228   | 0     | 0     | 0     | 0     |
| 9230   | 0     | 0     | 0     | 0     |
| 9231   | 0     | 0     | 0     | 0     |
| 9233   | 0     | 0     | 0     | 0     |
| 9235   | 0     | 0     | 0     | 0     |
| 9237   | 0     | 0     | 0     | 0     |
| 9242   | 0     | 0     | 0     | 0     |
| 9250   | 0     | 0     | 0     | 0     |
| 9253   | 0     | 1     | 0     | 0     |
| 9257   | 0     | 0     | 0     | 0     |
| 9263   | 0     | 0     | 0     | 0     |
| 9267   | 0     | 0     | 0     | 0     |
| 9272   | 0     | 0     | 0     | 0     |
| 9279   | 0     | 0     | 0     | 0     |
| 9281   | 0     | 0     | 0     | 0     |
| 9285   | 0     | 0     | 0     | 0     |

| respid | Q31_6 | Q31_7 | Q31_8 | Q31_9 |
|--------|-------|-------|-------|-------|
| 9286   | 0     | 0     | 0     | 0     |
| 9294   | 0     | 0     | 0     | 0     |
| 9295   | 0     | 0     | 0     | 0     |
| 9297   | 0     | 0     | 0     | 0     |
| 9299   | 0     | 0     | 0     | 0     |
| 9309   | 0     | 0     | 0     | 1     |
| 9315   | 0     | 0     | 0     | 0     |
| 9320   | 0     | 0     | 0     | 0     |
| 9324   | 0     | 0     | 0     | 0     |
| 9326   | 0     | 0     | 0     | 0     |
| 9333   | 0     | 0     | 0     | 0     |
| 9334   | 0     | 0     | 0     | 1     |
| 9336   | 1     | 0     | 0     | 0     |
| 9337   | 0     | 0     | 0     | 0     |
| 9342   | 0     | 0     | 0     | 0     |
| 9347   | 0     | 0     | 0     | 0     |
| 9352   | 0     | 0     | 0     | 1     |
| 9355   | 0     | 0     | 0     | 0     |
| 9356   | 0     | 0     | 0     | 0     |
| 9359   | 0     | 0     | 0     | 0     |
| 9368   | 0     | 0     | 0     | 0     |
| 9375   | 1     | 0     | 0     | 0     |
| 9384   | 0     | 0     | 0     | 0     |
| 9388   | 0     | 0     | 0     | 0     |
| 9397   | 0     | 0     | 0     | 1     |
| 9400   | 0     | 0     | 0     | 0     |
| 9401   | 0     | 0     | 0     | 0     |
| 9402   | 0     | 0     | 0     | 0     |
| 9417   | 0     | 0     | 0     | 1     |
| 9424   | 0     | 0     | 0     | 0     |
| 9427   | 0     | 0     | 0     | 0     |
| 9429   | 0     | 0     | 0     | 0     |

| respid | Q31_6 | Q31_7 | Q31_8 | Q31_9 |
|--------|-------|-------|-------|-------|
| 9437   | 0     | 0     | 0     | 0     |
| 9442   | 0     | 0     | 0     | 0     |
| 9446   | 0     | 0     | 0     | 0     |
| 9447   | 0     | 0     | 0     | 0     |
| 9448   | 0     | 0     | 0     | 0     |
| 9449   | 0     | 0     | 0     | 0     |
| 9455   | 0     | 0     | 0     | 0     |
| 9459   | 0     | 0     | 0     | 1     |
| 9460   | 0     | 0     | 0     | 0     |
| 9461   | 0     | 0     | 0     | 1     |
| 9463   | 0     | 0     | 0     | 0     |
| 9464   | 1     | 0     | 0     | 0     |
| 9466   | 0     | 0     | 0     | 0     |
| 9477   | 0     | 0     | 0     | 0     |
| 9482   | 1     | 0     | 0     | 0     |
| 9486   | 0     | 0     | 0     | 0     |
| 9488   | 1     | 0     | 0     | 0     |
| 9489   | 0     | 0     | 0     | 0     |
| 9496   | 0     | 0     | 1     | 1     |
| 9499   | 0     | 0     | 0     | 0     |
| 9512   | 0     | 0     | 0     | 0     |
| 9514   | 0     | 0     | 0     | 1     |
| 9516   | 0     | 0     | 0     | 0     |
| 9517   | 0     | 0     | 0     | 0     |
| 9520   | 0     | 0     | 0     | 0     |
| 9527   | 0     | 0     | 0     | 0     |
| 9532   | 0     | 0     | 0     | 1     |
| 9533   | 0     | 0     | 0     | 0     |
| 9543   | 0     | 0     | 0     | 0     |
| 9550   | 0     | 0     | 0     | 0     |
| 9553   | 0     | 0     | 0     | 0     |
| 9555   | 0     | 1     | 0     | 0     |

| respid | Q31_6 | Q31_7 | Q31_8 | Q31_9 |
|--------|-------|-------|-------|-------|
| 9565   | 1     | 0     | 0     | 0     |
| 9583   | 0     | 0     | 0     | 1     |
| 9594   | 0     | 0     | 0     | 0     |
| 9596   | 0     | 0     | 0     | 0     |
| 9600   | 0     | 0     | 0     | 0     |
| 9602   | 0     | 0     | 0     | 0     |
| 9606   | 0     | 0     | 0     | 0     |
| 9608   | 0     | 0     | 0     | 0     |
| 9610   | 0     | 0     | 0     | 0     |
| 9612   | 0     | 0     | 0     | 0     |
| 9613   | 0     | 0     | 0     | 0     |
| 9614   | 0     | 0     | 0     | 1     |
| 9620   | 0     | 0     | 0     | 0     |
| 9628   | 0     | 0     | 0     | 0     |
| 9631   | 0     | 0     | 0     | 0     |
| 9632   | 0     | 0     | 0     | 0     |
| 9633   | 0     | 1     | 0     | 0     |
| 9639   | 0     | 0     | 0     | 0     |
| 9640   | 0     | 0     | 0     | 0     |
| 9642   | 0     | 0     | 0     | 0     |
| 9653   | 0     | 0     | 0     | 0     |
| 9658   | 0     | 0     | 0     | 0     |
| 9659   | 0     | 0     | 0     | 0     |
| 9661   | 0     | 0     | 0     | 0     |
| 9664   | 0     | 0     | 0     | 0     |
| 9665   | 1     | 0     | 0     | 0     |
| 9666   | 0     | 0     | 0     | 0     |
| 9667   | 0     | 0     | 0     | 0     |
| 9668   | 0     | 0     | 0     | 0     |
| 9670   | 0     | 0     | 0     | 0     |
| 9671   | 0     | 0     | 0     | 0     |
| 9681   | 0     | 0     | 0     | 0     |

| respid | Q31_6 | Q31_7 | Q31_8 | Q31_9 |
|--------|-------|-------|-------|-------|
| 9684   | 0     | 0     | 0     | 0     |
| 9685   | 0     | 0     | 0     | 0     |
| 9686   | 0     | 0     | 0     | 0     |
| 9688   | 0     | 0     | 0     | 1     |
| 9692   | 0     | 0     | 0     | 0     |
| 9693   | 0     | 0     | 0     | 0     |
| 9698   | 0     | 0     | 0     | 0     |
| 9699   | 0     | 0     | 0     | 0     |
| 9701   | 0     | 0     | 0     | 0     |
| 9702   | 0     | 0     | 0     | 0     |
| 9709   | 0     | 0     | 0     | 0     |
| 9713   | 0     | 0     | 0     | 0     |
| 9715   | 0     | 0     | 0     | 0     |
| 9721   | 0     | 0     | 0     | 0     |
| 9725   | 0     | 0     | 0     | 0     |
| 9729   | 0     | 0     | 0     | 1     |
| 9731   | 0     | 0     | 0     | 0     |
| 9736   | 0     | 0     | 0     | 0     |
| 9740   | 0     | 0     | 0     | 0     |
| 9741   | 0     | 0     | 0     | 0     |
| 9749   | 0     | 0     | 0     | 0     |
| 9750   | 0     | 0     | 0     | 0     |
| 9751   | 0     | 0     | 0     | 1     |
| 9753   | 0     | 0     | 0     | 0     |
| 9754   | 0     | 0     | 0     | 0     |
| 9756   | 0     | 0     | 0     | 1     |
| 9758   | 0     | 0     | 0     | 0     |
| 9759   | 0     | 0     | 0     | 1     |
| 9760   | 0     | 0     | 0     | 0     |
| 9761   | 0     | 0     | 0     | 0     |
| 9762   | 0     | 0     | 0     | 0     |
| 9764   | 0     | 0     | 0     | 0     |

| respid | Q31_6 | Q31_7 | Q31_8 | Q31_9 |
|--------|-------|-------|-------|-------|
| 9768   | 0     | 0     | 0     | 0     |
| 9769   | 0     | 0     | 0     | 0     |
| 9770   | 0     | 0     | 0     | 0     |
| 9771   | 0     | 0     | 0     | 0     |
| 9772   | 0     | 0     | 0     | 0     |
| 9773   | 0     | 0     | 0     | 1     |
| 9776   | 0     | 0     | 0     | 0     |
| 9786   | 0     | 1     | 0     | 0     |
| 9790   | 0     | 0     | 0     | 0     |
| 9791   | 0     | 0     | 0     | 0     |
| 9794   | 0     | 0     | 0     | 1     |
| 9797   | 0     | 0     | 0     | 0     |
| 9799   | 0     | 0     | 0     | 0     |
| 9804   | 0     | 0     | 0     | 0     |
| 9805   | 0     | 0     | 0     | 0     |
| 9806   | 0     | 0     | 0     | 0     |
| 9807   | 0     | 0     | 0     | 0     |
| 9813   | 0     | 0     | 0     | 0     |
| 9817   | 0     | 0     | 0     | 0     |
| 9823   | 0     | 0     | 0     | 0     |
| 9826   | 0     | 0     | 0     | 0     |
| 9830   | 0     | 1     | 0     | 0     |
| 9835   | 0     | 0     | 0     | 0     |
| 9836   | 0     | 0     | 0     | 0     |
| 9841   | 0     | 0     | 0     | 0     |
| 9842   | 0     | 0     | 0     | 0     |
| 9844   | 0     | 0     | 0     | 0     |
| 9847   | 0     | 0     | 0     | 1     |
| 9851   | 0     | 0     | 0     | 0     |
| 9852   | 0     | 0     | 0     | 0     |
| 9854   | 0     | 0     | 0     | 0     |
| 9855   | 0     | 0     | 0     | 1     |



| respid | Q31_6 | Q31_7 | Q31_8 | Q31_9 |
|--------|-------|-------|-------|-------|
| 9856   | 0     | 1     | 0     | 1     |
| 9862   | 0     | 0     | 0     | 0     |
| 9863   | 0     | 0     | 0     | 0     |
| 9866   | 0     | 1     | 0     | 0     |
| 9867   | 0     | 0     | 0     | 0     |
| 9868   | 0     | 0     | 0     | 1     |
| 9869   | 0     | 0     | 0     | 1     |
| 9878   | 0     | 0     | 0     | 0     |
| 9879   | 0     | 0     | 0     | 0     |
| 9881   | 1     | 1     | 0     | 0     |
| 9882   | 0     | 0     | 0     | 0     |
| 9884   | 0     | 0     | 0     | 0     |
| 9885   | 0     | 0     | 0     | 0     |
| 9888   | 0     | 0     | 0     | 0     |
| 9889   | 0     | 0     | 0     | 0     |
| 9894   | 0     | 0     | 0     | 0     |
| 9895   | 0     | 0     | 0     | 0     |
| 9896   | 0     | 0     | 0     | 0     |
| 9897   | 0     | 0     | 0     | 1     |
| 9905   | 0     | 0     | 0     | 0     |
| 9907   | 0     | 0     | 0     | 0     |
| 9908   | 0     | 0     | 0     | 0     |
| 9909   | 0     | 0     | 0     | 1     |
| 9910   | 0     | 1     | 0     | 0     |
| 9913   | 0     | 0     | 0     | 0     |
| 9914   | 0     | 0     | 0     | 0     |
| 9915   | 0     | 0     | 0     | 0     |
| 9916   | 0     | 0     | 0     | 0     |
| 9918   | 0     | 0     | 0     | 0     |
| 9919   | 0     | 0     | 0     | 0     |
| 9922   | 0     | 0     | 0     | 0     |
| 9930   | 0     | 0     | 0     | 0     |

| respid | Q31_6 | Q31_7 | Q31_8 | Q31_9 |
|--------|-------|-------|-------|-------|
| 9934   | 0     | 0     | 0     | 0     |
| 9936   | 0     | 0     | 0     | 0     |
| 9938   | 0     | 0     | 0     | 0     |
| 9940   | 0     | 0     | 0     | 0     |
| 9944   | 0     | 0     | 0     | 0     |
| 9945   | 0     | 0     | 0     | 0     |
| 9948   | 0     | 0     | 0     | 0     |
| 9949   | 0     | 0     | 0     | 0     |
| 9951   | 0     | 0     | 0     | 0     |
| 9952   | 0     | 0     | 0     | 0     |
| 9954   | 0     | 0     | 0     | 0     |
| 9955   | 0     | 0     | 0     | 0     |
| 9956   | 1     | 0     | 0     | 1     |
| 9957   | 0     | 0     | 0     | 0     |
| 9958   | 0     | 0     | 0     | 0     |
| 9959   | 0     | 0     | 0     | 0     |
| 9960   | 0     | 0     | 0     | 0     |
| 9961   | 0     | 0     | 0     | 0     |
| 9962   | 0     | 0     | 0     | 0     |
| 9969   | 0     | 0     | 0     | 0     |
| 9982   | 0     | 0     | 0     | 1     |
| 9984   | 0     | 0     | 0     | 1     |
| 9990   | 0     | 0     | 0     | 0     |
| 9992   | 0     | 0     | 0     | 0     |
| 9993   | 1     | 0     | 0     | 0     |
| 9997   | 0     | 0     | 0     | 0     |
| 9999   | 0     | 0     | 0     | 0     |
| 10000  | 0     | 0     | 0     | 1     |
| 10005  | 1     | 0     | 0     | 0     |
| 10014  | 0     | 0     | 0     | 1     |
| 10016  | 0     | 1     | 0     | 0     |
| 10017  | 0     | 0     | 0     | 0     |

| respid | Q31_6 | Q31_7 | Q31_8 | Q31_9 |
|--------|-------|-------|-------|-------|
| 10018  | 0     | 0     | 0     | 0     |
| 10021  | 0     | 0     | 0     | 0     |
| 10025  | 0     | 0     | 0     | 0     |
| 10027  | 0     | 0     | 0     | 0     |
| 10028  | 0     | 0     | 0     | 0     |
| 10031  | 1     | 0     | 0     | 0     |
| 10036  | 0     | 0     | 0     | 1     |
| 10037  | 0     | 0     | 0     | 0     |
| 10038  | 0     | 0     | 0     | 0     |
| 10039  | 0     | 0     | 0     | 0     |
| 10041  | 0     | 0     | 0     | 0     |
| 10045  | 0     | 0     | 0     | 1     |
| 10046  | 0     | 0     | 0     | 1     |
| 10047  | 1     | 1     | 1     | 0     |
| 10048  | 0     | 0     | 0     | 0     |
| 10049  | 0     | 0     | 0     | 1     |
| 10051  | 0     | 0     | 0     | 0     |
| 10052  | 0     | 0     | 0     | 1     |
| 10056  | 0     | 0     | 0     | 0     |
| 10061  | 0     | 0     | 0     | 0     |
| 10064  | 0     | 0     | 0     | 0     |
| 10066  | 0     | 0     | 0     | 0     |
| 10069  | 0     | 0     | 0     | 0     |
| 10071  | 0     | 0     | 0     | 0     |
| 10074  | 0     | 0     | 0     | 0     |
| 10079  | 0     | 0     | 0     | 0     |
| 10087  | 0     | 0     | 0     | 1     |
| 10095  | 0     | 0     | 0     | 0     |
| 10097  | 0     | 0     | 0     | 0     |
| 10100  | 0     | 0     | 0     | 0     |
| 10105  | 0     | 0     | 0     | 0     |
| 10107  | 0     | 1     | 0     | 0     |

| respid | Q31_6 | Q31_7 | Q31_8 | Q31_9 |
|--------|-------|-------|-------|-------|
| 10111  | 0     | 0     | 0     | 0     |
| 10116  | 0     | 0     | 1     | 0     |
| 10118  | 0     | 0     | 0     | 0     |
| 10123  | 0     | 0     | 0     | 0     |
| 10124  | 0     | 0     | 0     | 0     |
| 10130  | 0     | 0     | 0     | 1     |
| 10134  | 0     | 0     | 0     | 0     |
| 10135  | 0     | 0     | 0     | 0     |
| 10136  | 0     | 0     | 0     | 0     |
| 10141  | 0     | 0     | 0     | 1     |
| 10142  | 0     | 0     | 0     | 0     |
| 10143  | 0     | 0     | 0     | 0     |
| 10145  | 0     | 0     | 0     | 0     |
| 10149  | 1     | 0     | 0     | 0     |
| 10150  | 0     | 0     | 0     | 0     |
| 10151  | 0     | 0     | 0     | 0     |
| 10152  | 0     | 0     | 0     | 1     |
| 10153  | 0     | 0     | 0     | 0     |
| 10156  | 0     | 0     | 0     | 0     |
| 10160  | 0     | 0     | 0     | 0     |
| 10161  | 0     | 0     | 0     | 0     |
| 10167  | 0     | 0     | 0     | 0     |
| 10171  | 0     | 0     | 0     | 0     |
| 10172  | 0     | 0     | 0     | 0     |
| 10176  | 0     | 0     | 0     | 0     |
| 10177  | 0     | 0     | 0     | 1     |
| 10182  | 0     | 0     | 0     | 1     |
| 10184  | 0     | 0     | 0     | 0     |
| 10186  | 1     | 0     | 0     | 0     |
| 10189  | 0     | 0     | 0     | 0     |
| 10191  | 0     | 0     | 0     | 0     |
| 10192  | 0     | 0     | 0     | 0     |

| respid | Q31_6 | Q31_7 | Q31_8 | Q31_9 |
|--------|-------|-------|-------|-------|
| 10195  | 0     | 0     | 0     | 0     |
| 10199  | 0     | 0     | 0     | 0     |
| 10201  | 0     | 0     | 0     | 0     |
| 10213  | 0     | 0     | 0     | 0     |
| 10222  | 0     | 0     | 1     | 0     |
| 10224  | 0     | 0     | 0     | 0     |
| 10245  | 0     | 0     | 0     | 0     |
| 10254  | 0     | 0     | 0     | 0     |
| 10255  | 0     | 0     | 0     | 1     |
| 10257  | 0     | 0     | 0     | 0     |
| 10260  | 0     | 0     | 0     | 1     |
| 10261  | 0     | 0     | 0     | 0     |
| 10263  | 1     | 0     | 0     | 1     |
| 10264  | 0     | 0     | 0     | 0     |
| 10268  | 0     | 0     | 0     | 1     |
| 10269  | 0     | 0     | 0     | 0     |
| 10270  | 0     | 0     | 0     | 0     |
| 10282  | 0     | 0     | 0     | 0     |
| 10285  | 0     | 0     | 0     | 0     |
| 10288  | 0     | 0     | 0     | 0     |
| 10291  | 0     | 0     | 0     | 0     |
| 10292  | 0     | 0     | 0     | 0     |
| 10304  | 0     | 0     | 0     | 0     |
| 10305  | 0     | 0     | 0     | 0     |
| 10310  | 0     | 0     | 0     | 0     |
| 10324  | 0     | 0     | 0     | 0     |
| 10325  | 0     | 0     | 0     | 0     |
| 10326  | 0     | 0     | 0     | 1     |
| 10329  | 0     | 0     | 0     | 0     |
| 10332  | 0     | 0     | 0     | 0     |
| 10337  | 0     | 0     | 0     | 0     |
| 10341  | 0     | 0     | 0     | 0     |

| respid | Q31_6 | Q31_7 | Q31_8 | Q31_9 |
|--------|-------|-------|-------|-------|
| 10353  | 0     | 0     | 0     | 1     |
| 10354  | 0     | 0     | 0     | 0     |
| 10359  | 0     | 1     | 0     | 0     |
| 10360  | 0     | 0     | 0     | 0     |
| 10362  | 0     | 0     | 0     | 0     |
| 10364  | 0     | 0     | 0     | 0     |
| 10366  | 1     | 1     | 0     | 0     |
| 10367  | 0     | 0     | 0     | 0     |
| 10371  | 0     | 0     | 0     | 0     |
| 10374  | 0     | 0     | 0     | 0     |
| 10375  | 0     | 0     | 1     | 0     |
| 10376  | 0     | 0     | 0     | 0     |
| 10377  | 0     | 0     | 0     | 0     |
| 10378  | 0     | 0     | 0     | 0     |
| 10387  | 0     | 0     | 0     | 0     |
| 10396  | 0     | 0     | 0     | 0     |
| 10397  | 0     | 0     | 0     | 0     |
| 10399  | 0     | 0     | 1     | 0     |
| 10405  | 0     | 0     | 0     | 0     |
| 10406  | 0     | 0     | 0     | 0     |
| 10408  | 0     | 0     | 0     | 0     |
| 10409  | 0     | 0     | 0     | 0     |
| 10412  | 0     | 0     | 0     | 0     |
| 10413  | 0     | 0     | 0     | 0     |
| 10419  | 0     | 0     | 0     | 0     |
| 10423  | 0     | 0     | 0     | 0     |
| 10426  | 0     | 0     | 0     | 0     |
| 10446  | 0     | 0     | 0     | 0     |
| 10448  | 0     | 0     | 0     | 0     |
| 10450  | 0     | 0     | 0     | 0     |
| 10455  | 0     | 0     | 0     | 0     |
| 10460  | 0     | 0     | 0     | 0     |

| respid | Q31_6 | Q31_7 | Q31_8 | Q31_9 |
|--------|-------|-------|-------|-------|
| 10461  | 0     | 0     | 0     | 0     |
| 10471  | 0     | 0     | 0     | 0     |
| 10472  | 0     | 0     | 0     | 0     |
| 10491  | 0     | 1     | 0     | 0     |
| 10493  | 0     | 0     | 0     | 0     |
| 10498  | 0     | 0     | 0     | 0     |
| 10533  | 0     | 0     | 0     | 0     |
| 10539  | 0     | 0     | 0     | 0     |
| 10540  | 0     | 0     | 0     | 0     |
| 10557  | 0     | 0     | 0     | 1     |
| 10558  | 0     | 0     | 0     | 0     |
| 10559  | 1     | 0     | 0     | 1     |
| 10564  | 0     | 0     | 0     | 1     |
| 10570  | 0     | 0     | 0     | 0     |
| 10572  | 0     | 0     | 0     | 0     |
| 10576  | 0     | 0     | 0     | 0     |
| 10582  | 0     | 0     | 0     | 0     |
| 10593  | 0     | 0     | 0     | 0     |
| 10596  | 0     | 0     | 0     | 0     |
| 10615  | 0     | 0     | 0     | 0     |
| 10616  | 0     | 0     | 0     | 0     |
| 10623  | 0     | 0     | 0     | 0     |
| 10626  | 0     | 0     | 0     | 0     |
| 10627  | 1     | 0     | 0     | 0     |
| 10629  | 0     | 0     | 0     | 0     |
| 10632  | 1     | 1     | 1     | 1     |
| 10641  | 0     | 0     | 0     | 0     |
| 10648  | 0     | 0     | 1     | 0     |
| 10651  | 0     | 0     | 0     | 0     |
| 10654  | 0     | 0     | 0     | 0     |
| 10673  | 0     | 0     | 0     | 0     |
| 10675  | 0     | 0     | 0     | 0     |

| respid | Q31_6 | Q31_7 | Q31_8 | Q31_9 |
|--------|-------|-------|-------|-------|
| 10689  | 1     | 0     | 0     | 0     |
| 10692  | 0     | 0     | 0     | 0     |
| 10694  | 0     | 0     | 0     | 0     |
| 10695  | 0     | 0     | 0     | 0     |
| 10702  | 0     | 0     | 0     | 0     |
| 10703  | 0     | 0     | 0     | 0     |
| 10708  | 0     | 0     | 0     | 0     |
| 10719  | 0     | 0     | 0     | 0     |
| 10722  | 0     | 0     | 0     | 0     |
| 10723  | 0     | 0     | 0     | 1     |
| 10726  | 0     | 0     | 0     | 0     |
| 10727  | 0     | 0     | 0     | 0     |
| 10730  | 0     | 0     | 0     | 1     |
| 10731  | 0     | 0     | 0     | 0     |
| 10737  | 0     | 0     | 0     | 0     |
| 10743  | 0     | 0     | 0     | 0     |
| 10763  | 0     | 0     | 0     | 0     |
| 10777  | 0     | 0     | 0     | 0     |
| 10787  | 0     | 1     | 0     | 1     |
| 10798  | 0     | 0     | 0     | 0     |
| 10800  | 0     | 0     | 0     | 0     |
| 10802  | 0     | 0     | 0     | 0     |
| 10803  | 0     | 0     | 0     | 0     |
| 10808  | 0     | 0     | 0     | 0     |
| 10810  | 0     | 0     | 0     | 0     |
| 10819  | 0     | 0     | 0     | 0     |
| 10825  | 0     | 0     | 0     | 0     |
| 10827  | 0     | 0     | 0     | 0     |
| 10830  | 0     | 0     | 0     | 0     |
| 10847  | 0     | 0     | 0     | 0     |
| 10849  | 0     | 0     | 0     | 0     |
| 10852  | 0     | 0     | 0     | 0     |



| respid | Q31_6 | Q31_7 | Q31_8 | Q31_9 |
|--------|-------|-------|-------|-------|
| 10854  | 0     | 1     | 0     | 0     |
| 10857  | 0     | 0     | 0     | 0     |
| 10861  | 0     | 0     | 0     | 1     |
| 10862  | 0     | 0     | 0     | 0     |
| 10870  | 0     | 0     | 0     | 1     |
| 10873  | 0     | 0     | 0     | 0     |
| 10881  | 0     | 0     | 0     | 0     |
| 10893  | 0     | 0     | 0     | 0     |
| 10898  | 0     | 0     | 0     | 0     |
| 10899  | 0     | 0     | 0     | 0     |
| 10905  | 0     | 0     | 0     | 0     |
| 10910  | 0     | 0     | 0     | 0     |
| 10911  | 0     | 0     | 0     | 1     |
| 10912  | 0     | 0     | 0     | 0     |
| 10913  | 0     | 0     | 0     | 0     |
| 10918  | 0     | 0     | 0     | 0     |
| 10995  | 0     | 0     | 0     | 0     |
| 11002  | 0     | 0     | 0     | 0     |
| 11003  | 0     | 0     | 0     | 0     |
| 11005  | 0     | 0     | 0     | 0     |
| 11015  | 0     | 0     | 1     | 0     |
| 11016  | 0     | 0     | 0     | 0     |
| 11017  | 0     | 0     | 0     | 0     |
| 11020  | 0     | 0     | 0     | 0     |
| 11024  | 0     | 0     | 0     | 1     |
| 11026  | 0     | 0     | 0     | 0     |
| 11028  | 0     | 0     | 0     | 0     |
| 11029  | 0     | 0     | 0     | 0     |
| 11030  | 0     | 0     | 0     | 1     |
| 11031  | 0     | 0     | 0     | 0     |
| 11038  | 0     | 0     | 0     | 0     |
| 11051  | 0     | 1     | 0     | 0     |

| respid | Q31_6 | Q31_7 | Q31_8 | Q31_9 |
|--------|-------|-------|-------|-------|
| 11052  | 0     | 0     | 0     | 0     |
| 11053  | 0     | 0     | 0     | 0     |
| 11054  | 0     | 0     | 0     | 0     |
| 11063  | 0     | 0     | 0     | 0     |
| 11075  | 0     | 0     | 0     | 0     |
| 11083  | 1     | 0     | 0     | 0     |
| 11092  | 0     | 0     | 0     | 0     |
| 11118  | 0     | 0     | 0     | 0     |
| 11119  | 0     | 0     | 0     | 0     |
| 11134  | 0     | 0     | 0     | 0     |
| 11139  | 0     | 0     | 0     | 0     |
| 11154  | 0     | 0     | 0     | 0     |
| 11166  | 0     | 0     | 0     | 0     |
| 11168  | 0     | 0     | 0     | 0     |
| 11176  | 0     | 0     | 0     | 0     |
| 11183  | 0     | 0     | 0     | 0     |
| 11189  | 0     | 0     | 0     | 0     |
| 11196  | 0     | 0     | 0     | 0     |
| 11200  | 0     | 0     | 0     | 1     |
| 11201  | 0     | 0     | 0     | 0     |
| 11211  | 0     | 0     | 0     | 0     |
| 11218  | 0     | 0     | 0     | 0     |
| 11219  | 0     | 0     | 0     | 0     |
| 11221  | 0     | 0     | 0     | 0     |
| 11222  | 0     | 0     | 0     | 0     |
| 11230  | 0     | 0     | 0     | 0     |
| 11236  | 0     | 0     | 0     | 0     |
| 11237  | 0     | 0     | 0     | 0     |
| 11240  | 0     | 0     | 0     | 1     |
| 11244  | 0     | 0     | 0     | 0     |
| 11249  | 1     | 0     | 0     | 1     |
| 11252  | 0     | 0     | 0     | 0     |

| respid | Q31_6 | Q31_7 | Q31_8 | Q31_9 |
|--------|-------|-------|-------|-------|
| 11254  | 0     | 0     | 0     | 0     |
| 11255  | 0     | 0     | 0     | 0     |
| 11258  | 0     | 0     | 0     | 0     |
| 11260  | 0     | 0     | 0     | 0     |
| 11264  | 0     | 0     | 0     | 1     |
| 11266  | 0     | 0     | 0     | 0     |
| 11268  | 0     | 0     | 0     | 0     |
| 11269  | 0     | 0     | 0     | 1     |
| 11272  | 0     | 0     | 0     | 0     |
| 11273  | 0     | 0     | 0     | 0     |
| 11275  | 0     | 0     | 0     | 0     |
| 11276  | 0     | 0     | 0     | 0     |
| 11278  | 0     | 0     | 0     | 0     |
| 11288  | 0     | 0     | 0     | 0     |
| 11289  | 0     | 0     | 0     | 0     |
| 11291  | 0     | 0     | 0     | 0     |
| 11295  | 0     | 0     | 0     | 0     |
| 11297  | 0     | 0     | 0     | 0     |
| 11304  | 0     | 1     | 0     | 0     |
| 11305  | 0     | 0     | 0     | 0     |
| 11311  | 0     | 0     | 0     | 0     |
| 11313  | 0     | 0     | 0     | 0     |
| 11315  | 1     | 0     | 0     | 0     |
| 11316  | 1     | 0     | 1     | 0     |
| 11318  | 1     | 0     | 0     | 0     |
| 11323  | 0     | 0     | 0     | 0     |
| 11331  | 0     | 0     | 0     | 0     |
| 11333  | 0     | 0     | 0     | 0     |
| 11334  | 0     | 0     | 0     | 0     |
| 11340  | 0     | 0     | 0     | 0     |
| 11345  | 0     | 0     | 0     | 0     |
| 11354  | 0     | 0     | 0     | 0     |

| respid | Q31_6 | Q31_7 | Q31_8 | Q31_9 |
|--------|-------|-------|-------|-------|
| 11360  | 0     | 0     | 0     | 0     |
| 11361  | 1     | 0     | 0     | 0     |
| 11367  | 0     | 0     | 0     | 0     |
| 11370  | 0     | 0     | 0     | 0     |
| 11371  | 0     | 1     | 0     | 0     |
| 11372  | 0     | 0     | 0     | 0     |
| 11373  | 0     | 1     | 0     | 0     |
| 11382  | 0     | 0     | 0     | 0     |
| 11394  | 0     | 0     | 0     | 0     |
| 11395  | 0     | 0     | 0     | 1     |
| 11397  | 0     | 0     | 0     | 0     |
| 11402  | 0     | 1     | 0     | 0     |
| 11409  | 0     | 0     | 0     | 0     |
| 11410  | 0     | 0     | 0     | 0     |
| 11411  | 0     | 0     | 0     | 0     |
| 11418  | 0     | 0     | 0     | 1     |
| 11425  | 0     | 0     | 0     | 0     |
| 11429  | 0     | 0     | 0     | 0     |
| 11430  | 0     | 0     | 1     | 0     |
| 11431  | 0     | 0     | 0     | 1     |
| 11432  | 0     | 0     | 0     | 0     |
| 11433  | 0     | 0     | 0     | 0     |
| 11435  | 0     | 1     | 1     | 0     |
| 11436  | 0     | 0     | 0     | 0     |
| 11437  | 1     | 0     | 0     | 0     |
| 11439  | 0     | 0     | 0     | 0     |
| 11440  | 0     | 0     | 0     | 0     |
| 11447  | 0     | 0     | 0     | 0     |
| 11455  | 0     | 0     | 0     | 0     |
| 11456  | 0     | 0     | 0     | 0     |
| 11461  | 0     | 0     | 0     | 1     |
| 11463  | 0     | 0     | 0     | 0     |

| respid | Q31_6 | Q31_7 | Q31_8 | Q31_9 |
|--------|-------|-------|-------|-------|
| 11470  | 0     | 0     | 1     | 0     |
| 11472  | 0     | 0     | 0     | 0     |
| 11475  | 0     | 0     | 0     | 0     |
| 11476  | 0     | 0     | 0     | 0     |
| 11482  | 0     | 0     | 0     | 0     |
| 11501  | 0     | 0     | 0     | 1     |
| 11503  | 0     | 0     | 0     | 0     |
| 11505  | 0     | 0     | 0     | 0     |
| 11510  | 0     | 0     | 1     | 0     |
| 11519  | 0     | 0     | 0     | 0     |
| 11527  | 1     | 0     | 0     | 1     |
| 11529  | 0     | 0     | 0     | 1     |
| 11530  | 0     | 0     | 0     | 0     |
| 11536  | 0     | 0     | 0     | 0     |
| 11543  | 0     | 0     | 0     | 0     |
| 11548  | 0     | 0     | 0     | 0     |
| 11566  | 0     | 0     | 0     | 0     |
| 11570  | 0     | 0     | 0     | 0     |
| 11571  | 0     | 0     | 0     | 1     |
| 11578  | 0     | 0     | 0     | 0     |
| 11579  | 0     | 0     | 0     | 0     |
| 11581  | 0     | 0     | 0     | 0     |
| 11582  | 0     | 0     | 0     | 0     |
| 11583  | 0     | 0     | 0     | 0     |
| 11589  | 0     | 0     | 0     | 0     |
| 11590  | 0     | 0     | 0     | 0     |
| 11592  | 0     | 0     | 0     | 0     |
| 11596  | 0     | 0     | 0     | 0     |
| 11598  | 0     | 1     | 0     | 1     |
| 11602  | 0     | 0     | 0     | 0     |
| 11605  | 0     | 0     | 0     | 1     |
| 11618  | 1     | 0     | 0     | 0     |

| respid | Q31_6 | Q31_7 | Q31_8 | Q31_9 |
|--------|-------|-------|-------|-------|
| 11621  | 0     | 0     | 0     | 1     |
| 11630  | 1     | 0     | 1     | 0     |
| 11636  | 0     | 0     | 0     | 0     |
| 11640  | 0     | 0     | 1     | 1     |
| 11658  | 0     | 0     | 0     | 0     |
| 11665  | 0     | 0     | 0     | 0     |
| 11666  | 0     | 0     | 0     | 0     |
| 11667  | 1     | 0     | 0     | 0     |
| 11674  | 0     | 0     | 0     | 0     |
| 11680  | 0     | 0     | 0     | 0     |
| 11683  | 0     | 0     | 0     | 0     |
| 11688  | 0     | 0     | 0     | 0     |
| 11690  | 0     | 0     | 0     | 0     |
| 11694  | 0     | 0     | 0     | 0     |
| 11705  | 0     | 0     | 0     | 0     |
| 11720  | 0     | 0     | 0     | 0     |
| 11724  | 0     | 0     | 0     | 0     |
| 11738  | 0     | 0     | 0     | 0     |
| 11744  | 0     | 0     | 1     | 0     |
| 11745  | 0     | 0     | 0     | 0     |
| 11747  | 0     | 0     | 0     | 0     |
| 11755  | 0     | 0     | 0     | 0     |
| 11756  | 0     | 0     | 0     | 1     |
| 11772  | 0     | 0     | 0     | 0     |
| 11773  | 0     | 0     | 0     | 0     |
| 11778  | 0     | 0     | 0     | 1     |
| 11790  | 0     | 0     | 0     | 0     |
| 11794  | 0     | 0     | 0     | 0     |
| 11795  | 1     | 0     | 0     | 0     |
| 11799  | 0     | 0     | 0     | 0     |
| 11803  | 0     | 0     | 0     | 0     |
| 11806  | 0     | 0     | 1     | 0     |

| respid | Q31_6 | Q31_7 | Q31_8 | Q31_9 |
|--------|-------|-------|-------|-------|
| 11808  | 0     | 0     | 0     | 0     |
| 11810  | 0     | 0     | 0     | 0     |
| 11811  | 0     | 0     | 0     | 0     |
| 11812  | 0     | 0     | 0     | 1     |
| 11813  | 0     | 0     | 0     | 1     |
| 11821  | 0     | 0     | 0     | 0     |
| 11827  | 0     | 0     | 0     | 0     |
| 11831  | 0     | 0     | 0     | 0     |
| 11841  | 0     | 0     | 0     | 0     |
| 11872  | 0     | 0     | 0     | 0     |
| 11898  | 0     | 0     | 0     | 0     |
| 11902  | 1     | 0     | 0     | 1     |
| 11912  | 0     | 0     | 0     | 0     |
| 11926  | 0     | 0     | 0     | 0     |
| 11928  | 0     | 0     | 0     | 0     |
| 11932  | 0     | 0     | 0     | 0     |
| 11934  | 0     | 0     | 0     | 0     |
| 11941  | 0     | 0     | 0     | 1     |
| 11942  | 0     | 0     | 0     | 0     |
| 11943  | 0     | 0     | 0     | 0     |
| 11944  | 0     | 0     | 0     | 0     |
| 11955  | 0     | 0     | 0     | 0     |
| 11958  | 0     | 0     | 0     | 1     |
| 11968  | 0     | 0     | 0     | 1     |
| 11979  | 0     | 0     | 0     | 1     |
| 11988  | 0     | 0     | 0     | 0     |
| 11999  | 0     | 0     | 0     | 0     |
| 12002  | 0     | 0     | 1     | 0     |
| 12004  | 0     | 0     | 0     | 0     |
| 12008  | 0     | 0     | 0     | 0     |
| 12013  | 0     | 0     | 0     | 0     |
| 12018  | 0     | 0     | 0     | 0     |

| respid | Q31_6 | Q31_7 | Q31_8 | Q31_9 |
|--------|-------|-------|-------|-------|
| 12023  | 0     | 0     | 0     | 0     |
| 12027  | 0     | 0     | 0     | 0     |
| 12030  | 0     | 0     | 0     | 0     |
| 12031  | 0     | 0     | 0     | 0     |
| 12036  | 0     | 1     | 0     | 1     |
| 12037  | 0     | 0     | 0     | 1     |
| 12038  | 0     | 0     | 0     | 0     |
| 12039  | 0     | 0     | 0     | 0     |
| 12045  | 0     | 0     | 0     | 1     |
| 12046  | 0     | 0     | 0     | 0     |
| 12054  | 1     | 0     | 0     | 0     |
| 12055  | 0     | 0     | 0     | 0     |
| 12069  | 0     | 0     | 0     | 0     |
| 12070  | 0     | 0     | 0     | 0     |
| 12074  | 0     | 0     | 0     | 0     |
| 12075  | 0     | 0     | 0     | 0     |
| 12078  | 0     | 0     | 0     | 0     |
| 12089  | 0     | 0     | 0     | 0     |
| 12091  | 0     | 0     | 0     | 0     |
| 12092  | 0     | 1     | 0     | 0     |
| 12108  | 0     | 0     | 0     | 0     |
| 12111  | 1     | 0     | 1     | 1     |
| 12112  | 1     | 1     | 0     | 0     |
| 12126  | 0     | 0     | 0     | 0     |
| 12132  | 0     | 0     | 0     | 1     |
| 12150  | 1     | 0     | 0     | 0     |
| 12152  | 0     | 0     | 0     | 0     |
| 12154  | 0     | 0     | 0     | 0     |
| 12157  | 0     | 0     | 0     | 0     |
| 12165  | 0     | 0     | 0     | 0     |
| 12169  | 1     | 0     | 0     | 1     |
| 12182  | 0     | 0     | 0     | 0     |



| respid | Q31_6 | Q31_7 | Q31_8 | Q31_9 |
|--------|-------|-------|-------|-------|
| 12198  | 0     | 0     | 0     | 0     |
| 12199  | 0     | 0     | 0     | 0     |
| 12202  | 0     | 0     | 0     | 0     |
| 12207  | 0     | 0     | 0     | 1     |
| 12208  | 0     | 1     | 1     | 0     |
| 12210  | 0     | 0     | 0     | 0     |
| 12219  | 0     | 0     | 0     | 0     |
| 12224  | 0     | 0     | 0     | 0     |
| 12230  | 0     | 0     | 0     | 0     |
| 12238  | 0     | 0     | 0     | 0     |
| 12239  | 0     | 0     | 0     | 0     |
| 12243  | 0     | 0     | 0     | 0     |
| 12245  | 0     | 0     | 0     | 0     |
| 12246  | 0     | 0     | 0     | 0     |
| 12247  | 0     | 0     | 0     | 0     |
| 12248  | 0     | 0     | 0     | 0     |
| 12249  | 0     | 0     | 1     | 0     |
| 12258  | 0     | 0     | 0     | 0     |
| 12265  | 0     | 0     | 0     | 0     |
| 12269  | 0     | 0     | 1     | 0     |
| 12270  | 0     | 0     | 0     | 0     |
| 12279  | 0     | 0     | 0     | 0     |
| 12280  | 0     | 0     | 1     | 0     |
| 12282  | 0     | 0     | 0     | 0     |
| 12283  | 0     | 0     | 0     | 0     |
| 12287  | 0     | 0     | 0     | 0     |
| 12288  | 0     | 0     | 0     | 0     |
| 12290  | 0     | 0     | 0     | 0     |
| 12292  | 0     | 0     | 0     | 1     |
| 12294  | 0     | 0     | 0     | 0     |
| 12296  | 0     | 0     | 0     | 0     |
| 12307  | 0     | 0     | 0     | 0     |

| respid | Q31_6 | Q31_7 | Q31_8 | Q31_9 |
|--------|-------|-------|-------|-------|
| 12309  | 0     | 0     | 0     | 0     |
| 12312  | 0     | 0     | 0     | 1     |
| 12317  | 0     | 0     | 0     | 0     |
| 12319  | 0     | 1     | 0     | 0     |
| 12320  | 0     | 0     | 0     | 0     |
| 12322  | 0     | 0     | 0     | 1     |
| 12328  | 0     | 0     | 0     | 0     |
| 12331  | 1     | 0     | 0     | 0     |
| 12332  | 0     | 0     | 0     | 0     |
| 12334  | 0     | 0     | 0     | 0     |
| 12337  | 0     | 0     | 0     | 1     |
| 12338  | 0     | 0     | 0     | 0     |
| 12342  | 0     | 0     | 0     | 0     |
| 12349  | 0     | 0     | 0     | 0     |
| 12352  | 0     | 0     | 0     | 1     |
| 12355  | 0     | 0     | 0     | 0     |
| 12357  | 0     | 0     | 0     | 0     |
| 12358  | 0     | 0     | 0     | 0     |
| 12371  | 0     | 0     | 0     | 0     |
| 12372  | 0     | 0     | 0     | 0     |
| 12373  | 0     | 0     | 0     | 0     |
| 12379  | 0     | 0     | 0     | 0     |
| 12381  | 0     | 0     | 0     | 0     |
| 12383  | 0     | 0     | 0     | 1     |
| 12384  | 0     | 0     | 0     | 0     |
| 12386  | 0     | 0     | 0     | 0     |
| 12389  | 0     | 0     | 0     | 0     |
| 12392  | 0     | 0     | 0     | 0     |
| 12396  | 0     | 0     | 0     | 0     |
| 12397  | 0     | 0     | 0     | 0     |
| 12399  | 0     | 0     | 0     | 0     |
| 12400  | 0     | 0     | 0     | 1     |

| respid | Q31_6 | Q31_7 | Q31_8 | Q31_9 |
|--------|-------|-------|-------|-------|
| 12406  | 0     | 0     | 0     | 0     |
| 12407  | 0     | 0     | 0     | 0     |
| 12410  | 0     | 0     | 0     | 0     |
| 12413  | 0     | 0     | 0     | 0     |
| 12416  | 0     | 0     | 0     | 0     |
| 12419  | 0     | 0     | 0     | 1     |
| 12422  | 0     | 0     | 0     | 0     |
| 12423  | 0     | 0     | 0     | 0     |
| 12429  | 0     | 0     | 0     | 0     |
| 12434  | 0     | 0     | 0     | 1     |
| 12435  | 0     | 0     | 0     | 0     |
| 12436  | 0     | 0     | 0     | 0     |
| 12442  | 0     | 0     | 0     | 0     |
| 12449  | 0     | 0     | 0     | 0     |
| 12451  | 0     | 0     | 0     | 0     |
| 12456  | 0     | 1     | 0     | 0     |
| 12457  | 0     | 0     | 0     | 0     |
| 12458  | 0     | 0     | 0     | 0     |
| 12461  | 0     | 0     | 0     | 0     |
| 12462  | 0     | 0     | 0     | 0     |
| 12463  | 0     | 0     | 0     | 0     |
| 12466  | 0     | 0     | 0     | 0     |
| 12470  | 0     | 0     | 0     | 0     |
| 12471  | 0     | 0     | 0     | 0     |
| 12472  | 0     | 0     | 0     | 0     |
| 12478  | 1     | 1     | 0     | 0     |
| 12479  | 0     | 0     | 0     | 0     |
| 12481  | 0     | 0     | 0     | 0     |
| 12482  | 0     | 0     | 0     | 0     |
| 12483  | 0     | 0     | 0     | 0     |
| 12496  | 0     | 0     | 0     | 0     |
| 12497  | 0     | 0     | 0     | 0     |

| respid | Q31_6 | Q31_7 | Q31_8 | Q31_9 |
|--------|-------|-------|-------|-------|
| 12498  | 0     | 1     | 1     | 0     |
| 12500  | 0     | 0     | 0     | 0     |
| 12501  | 0     | 0     | 0     | 0     |
| 12502  | 0     | 0     | 0     | 0     |
| 12503  | 0     | 0     | 0     | 0     |
| 12505  | 0     | 0     | 0     | 0     |
| 12508  | 0     | 0     | 0     | 0     |
| 12509  | 0     | 0     | 0     | 1     |
| 12510  | 0     | 0     | 0     | 0     |
| 12512  | 0     | 0     | 0     | 0     |
| 12514  | 0     | 0     | 1     | 0     |
| 12515  | 1     | 0     | 0     | 0     |
| 12520  | 0     | 0     | 0     | 0     |
| 12522  | 0     | 0     | 0     | 0     |
| 12526  | 0     | 0     | 0     | 0     |
| 12527  | 0     | 0     | 0     | 0     |
| 12528  | 0     | 0     | 0     | 0     |
| 12530  | 0     | 0     | 0     | 0     |
| 12535  | 0     | 0     | 0     | 0     |
| 12539  | 0     | 0     | 0     | 0     |
| 12541  | 0     | 0     | 0     | 0     |
| 12542  | 0     | 0     | 0     | 0     |
| 12545  | 0     | 0     | 0     | 0     |
| 12547  | 0     | 0     | 0     | 0     |
| 12549  | 0     | 0     | 0     | 0     |
| 12550  | 0     | 0     | 0     | 0     |
| 12555  | 0     | 0     | 0     | 0     |
| 12557  | 0     | 0     | 0     | 0     |
| 12559  | 0     | 0     | 0     | 0     |
| 12561  | 0     | 0     | 0     | 0     |
| 12562  | 0     | 0     | 0     | 0     |
| 12563  | 0     | 0     | 0     | 0     |

| respid | Q31_6 | Q31_7 | Q31_8 | Q31_9 |
|--------|-------|-------|-------|-------|
| 12565  | 0     | 0     | 0     | 1     |
| 12566  | 0     | 0     | 0     | 0     |
| 12570  | 0     | 0     | 0     | 0     |
| 12571  | 0     | 0     | 0     | 0     |
| 12572  | 0     | 0     | 0     | 0     |
| 12578  | 0     | 0     | 0     | 0     |
| 12579  | 0     | 0     | 0     | 1     |
| 12581  | 0     | 0     | 0     | 0     |
| 12582  | 0     | 0     | 0     | 0     |
| 12585  | 0     | 0     | 0     | 0     |
| 12586  | 0     | 0     | 0     | 0     |
| 12588  | 0     | 0     | 0     | 1     |
| 12589  | 0     | 0     | 0     | 0     |
| 12590  | 0     | 0     | 0     | 0     |
| 12591  | 0     | 0     | 0     | 0     |
| 12593  | 0     | 0     | 0     | 0     |
| 12594  | 1     | 0     | 0     | 0     |
| 12599  | 0     | 0     | 0     | 0     |
| 12600  | 0     | 0     | 0     | 0     |
| 12602  | 1     | 0     | 1     | 0     |
| 12606  | 0     | 0     | 0     | 1     |
| 12607  | 0     | 0     | 0     | 0     |
| 12608  | 0     | 0     | 0     | 0     |
| 12610  | 0     | 0     | 0     | 0     |
| 12611  | 0     | 0     | 0     | 0     |
| 12613  | 0     | 1     | 0     | 1     |
| 12616  | 0     | 0     | 0     | 0     |
| 12617  | 0     | 0     | 0     | 0     |
| 12619  | 0     | 0     | 0     | 0     |
| 12622  | 0     | 0     | 0     | 0     |
| 12628  | 0     | 0     | 0     | 0     |
| 12631  | 0     | 0     | 0     | 0     |

| respid | Q31_6 | Q31_7 | Q31_8 | Q31_9 |
|--------|-------|-------|-------|-------|
| 12635  | 0     | 0     | 0     | 0     |
| 12638  | 0     | 0     | 0     | 0     |
| 12639  | 0     | 0     | 0     | 0     |
| 12640  | 0     | 0     | 0     | 0     |
| 12643  | 0     | 0     | 0     | 0     |
| 12646  | 0     | 0     | 0     | 1     |
| 12648  | 0     | 0     | 1     | 0     |
| 12650  | 0     | 0     | 0     | 0     |
| 12651  | 0     | 0     | 0     | 0     |
| 12658  | 0     | 0     | 0     | 0     |
| 12662  | 0     | 0     | 0     | 0     |
| 12663  | 0     | 0     | 0     | 0     |
| 12664  | 0     | 0     | 0     | 1     |
| 12669  | 0     | 0     | 0     | 1     |
| 12670  | 0     | 0     | 0     | 0     |
| 12673  | 0     | 0     | 0     | 0     |
| 12675  | 0     | 0     | 0     | 0     |
| 12677  | 0     | 0     | 0     | 0     |
| 12679  | 0     | 0     | 0     | 0     |
| 12682  | 0     | 0     | 0     | 0     |
| 12696  | 0     | 0     | 0     | 0     |
| 12697  | 0     | 0     | 0     | 0     |
| 12699  | 0     | 0     | 0     | 0     |
| 12700  | 0     | 0     | 0     | 0     |
| 12701  | 0     | 0     | 0     | 0     |
| 12702  | 0     | 0     | 0     | 0     |
| 12704  | 0     | 0     | 0     | 0     |
| 12705  | 0     | 0     | 0     | 0     |
| 12709  | 0     | 0     | 0     | 0     |
| 12710  | 0     | 0     | 0     | 0     |
| 12713  | 0     | 0     | 0     | 0     |
| 12716  | 1     | 0     | 0     | 0     |

| respid | Q31_6 | Q31_7 | Q31_8 | Q31_9 |
|--------|-------|-------|-------|-------|
| 12719  | 0     | 0     | 0     | 1     |
| 12720  | 0     | 0     | 0     | 0     |
| 12723  | 0     | 0     | 0     | 0     |
| 12726  | 0     | 0     | 0     | 0     |
| 12728  | 0     | 0     | 0     | 0     |
| 12729  | 0     | 0     | 0     | 0     |
| 12731  | 0     | 0     | 0     | 0     |
| 12732  | 0     | 0     | 0     | 0     |
| 12733  | 0     | 1     | 0     | 0     |
| 12736  | 0     | 0     | 0     | 0     |
| 12737  | 0     | 0     | 0     | 0     |
| 12739  | 0     | 0     | 0     | 0     |
| 12742  | 0     | 0     | 0     | 0     |
| 12743  | 0     | 0     | 0     | 1     |
| 12744  | 0     | 0     | 0     | 0     |
| 12747  | 0     | 0     | 0     | 0     |
| 12751  | 0     | 0     | 0     | 0     |
| 12754  | 0     | 0     | 0     | 0     |
| 12756  | 0     | 0     | 0     | 0     |
| 12757  | 0     | 0     | 0     | 0     |
| 12760  | 0     | 0     | 0     | 0     |
| 12761  | 0     | 0     | 0     | 0     |
| 12762  | 0     | 1     | 0     | 1     |
| 12766  | 0     | 0     | 0     | 0     |
| 12769  | 0     | 0     | 0     | 1     |
| 12770  | 0     | 0     | 0     | 0     |
| 12773  | 0     | 0     | 0     | 0     |
| 12780  | 0     | 0     | 0     | 0     |
| 12789  | 0     | 0     | 0     | 0     |
| 12792  | 1     | 1     | 1     | 1     |
| 12795  | 0     | 0     | 0     | 0     |
| 12804  | 0     | 0     | 0     | 1     |

| respid | Q31_6 | Q31_7 | Q31_8 | Q31_9 |
|--------|-------|-------|-------|-------|
| 12811  | 0     | 0     | 0     | 0     |
| 12813  | 0     | 0     | 0     | 0     |
| 12814  | 0     | 0     | 0     | 0     |
| 12815  | 0     | 0     | 0     | 0     |
| 12816  | 0     | 0     | 0     | 0     |
| 12817  | 0     | 0     | 0     | 0     |
| 12818  | 0     | 0     | 0     | 1     |
| 12819  | 0     | 0     | 0     | 0     |
| 12820  | 0     | 0     | 0     | 0     |
| 12821  | 0     | 0     | 0     | 0     |
| 12824  | 0     | 0     | 0     | 0     |
| 12827  | 0     | 0     | 0     | 0     |
| 12836  | 0     | 0     | 1     | 0     |
| 12837  | 0     | 0     | 0     | 0     |
| 12838  | 0     | 0     | 0     | 0     |
| 12845  | 0     | 0     | 0     | 0     |
| 12847  | 0     | 0     | 0     | 1     |
| 12849  | 0     | 0     | 0     | 0     |
| 12850  | 0     | 0     | 0     | 0     |
| 12852  | 0     | 0     | 0     | 0     |
| 12853  | 0     | 0     | 0     | 0     |
| 12854  | 0     | 0     | 0     | 0     |
| 12860  | 0     | 0     | 0     | 0     |
| 12861  | 0     | 0     | 0     | 0     |
| 12863  | 0     | 0     | 0     | 0     |
| 12865  | 0     | 0     | 0     | 0     |
| 12870  | 0     | 0     | 0     | 0     |
| 12871  | 0     | 0     | 0     | 0     |
| 12873  | 0     | 0     | 0     | 0     |
| 12877  | 0     | 0     | 0     | 0     |
| 12880  | 0     | 0     | 0     | 0     |
| 12881  | 0     | 1     | 0     | 0     |



| respid | Q31_6 | Q31_7 | Q31_8 | Q31_9 |
|--------|-------|-------|-------|-------|
| 12882  | 0     | 0     | 0     | 0     |
| 12883  | 0     | 0     | 0     | 0     |
| 12885  | 0     | 1     | 0     | 0     |
| 12887  | 0     | 0     | 0     | 0     |
| 12889  | 0     | 0     | 0     | 0     |
| 12890  | 0     | 0     | 0     | 0     |
| 12891  | 0     | 0     | 0     | 1     |
| 12892  | 0     | 0     | 0     | 0     |
| 12893  | 0     | 0     | 0     | 0     |
| 12895  | 0     | 0     | 0     | 0     |
| 12898  | 0     | 0     | 0     | 0     |
| 12907  | 0     | 1     | 0     | 0     |
| 12908  | 0     | 0     | 0     | 0     |
| 12909  | 0     | 0     | 0     | 0     |
| 12914  | 0     | 0     | 0     | 0     |
| 12915  | 0     | 0     | 0     | 0     |
| 12916  | 0     | 0     | 0     | 0     |
| 12921  | 0     | 0     | 0     | 0     |
| 12922  | 0     | 0     | 0     | 0     |
| 12923  | 0     | 0     | 0     | 0     |
| 12926  | 0     | 0     | 0     | 1     |
| 12927  | 0     | 0     | 0     | 1     |
| 12932  | 0     | 0     | 0     | 0     |
| 12936  | 0     | 0     | 0     | 0     |
| 12937  | 0     | 0     | 0     | 0     |
| 12938  | 0     | 0     | 0     | 0     |
| 12939  | 0     | 0     | 0     | 0     |
| 12940  | 0     | 0     | 1     | 0     |
| 12945  | 0     | 0     | 0     | 0     |
| 12946  | 0     | 0     | 0     | 1     |
| 12947  | 0     | 0     | 0     | 0     |
| 12948  | 1     | 1     | 0     | 0     |

| respid | Q31_6 | Q31_7 | Q31_8 | Q31_9 |
|--------|-------|-------|-------|-------|
| 12951  | 0     | 0     | 0     | 0     |
| 12952  | 0     | 0     | 0     | 0     |
| 12954  | 0     | 1     | 0     | 1     |
| 12960  | 0     | 0     | 0     | 0     |
| 12961  | 0     | 0     | 0     | 0     |
| 12962  | 0     | 0     | 0     | 0     |
| 12963  | 0     | 0     | 0     | 0     |
| 12964  | 0     | 0     | 0     | 0     |
| 12966  | 0     | 0     | 0     | 0     |
| 12967  | 0     | 0     | 0     | 1     |
| 12969  | 0     | 0     | 0     | 0     |
| 12970  | 0     | 0     | 0     | 0     |
| 12974  | 1     | 1     | 1     | 0     |
| 12979  | 0     | 0     | 0     | 0     |
| 12980  | 0     | 0     | 0     | 0     |
| 12983  | 0     | 0     | 0     | 0     |
| 12988  | 0     | 0     | 0     | 0     |
| 12994  | 0     | 0     | 0     | 1     |
| 12995  | 0     | 0     | 0     | 0     |
| 12996  | 0     | 0     | 0     | 0     |
| 12998  | 0     | 0     | 0     | 0     |
| 12999  | 0     | 0     | 0     | 0     |
| 13001  | 0     | 0     | 0     | 0     |
| 13005  | 0     | 0     | 0     | 0     |
| 13006  | 1     | 0     | 0     | 0     |
| 13007  | 0     | 0     | 0     | 0     |
| 13011  | 0     | 0     | 0     | 0     |
| 13012  | 0     | 0     | 0     | 0     |
| 13013  | 0     | 0     | 0     | 0     |
| 13016  | 0     | 0     | 0     | 0     |
| 13018  | 0     | 0     | 0     | 0     |
| 13020  | 0     | 0     | 0     | 0     |

| respid | Q31_6 | Q31_7 | Q31_8 | Q31_9 |
|--------|-------|-------|-------|-------|
| 13024  | 0     | 0     | 0     | 0     |
| 13025  | 0     | 0     | 0     | 0     |
| 13027  | 0     | 0     | 0     | 0     |
| 13031  | 0     | 0     | 0     | 1     |
| 13032  | 0     | 0     | 0     | 0     |
| 13034  | 0     | 0     | 0     | 0     |
| 13036  | 0     | 0     | 0     | 1     |
| 13037  | 0     | 0     | 0     | 0     |
| 13038  | 0     | 0     | 0     | 1     |
| 13039  | 0     | 0     | 0     | 0     |
| 13040  | 0     | 0     | 0     | 0     |
| 13041  | 0     | 0     | 1     | 0     |
| 13045  | 0     | 0     | 0     | 0     |
| 13046  | 0     | 0     | 0     | 0     |
| 13048  | 0     | 0     | 0     | 0     |
| 13051  | 0     | 0     | 0     | 0     |
| 13053  | 0     | 0     | 0     | 0     |
| 13055  | 1     | 0     | 0     | 0     |
| 13059  | 0     | 0     | 0     | 0     |
| 13068  | 0     | 0     | 0     | 0     |
| 13069  | 0     | 0     | 0     | 0     |
| 13076  | 0     | 0     | 0     | 0     |
| 13081  | 0     | 0     | 0     | 0     |
| 13082  | 0     | 0     | 0     | 0     |
| 13084  | 0     | 0     | 0     | 0     |
| 13085  | 0     | 1     | 0     | 0     |
| 13086  | 0     | 0     | 0     | 0     |
| 13093  | 0     | 0     | 1     | 0     |
| 13094  | 0     | 0     | 0     | 1     |
| 13097  | 0     | 0     | 0     | 0     |
| 13098  | 0     | 0     | 0     | 0     |
| 13099  | 0     | 0     | 0     | 0     |

| respid | Q31_6 | Q31_7 | Q31_8 | Q31_9 |
|--------|-------|-------|-------|-------|
| 13100  | 0     | 0     | 0     | 0     |
| 13101  | 0     | 0     | 0     | 0     |
| 13103  | 0     | 0     | 0     | 0     |
| 13105  | 0     | 0     | 0     | 0     |
| 13106  | 0     | 0     | 0     | 1     |
| 13107  | 0     | 0     | 0     | 0     |
| 13110  | 0     | 0     | 0     | 0     |
| 13118  | 0     | 0     | 0     | 0     |
| 13120  | 0     | 0     | 0     | 0     |
| 13130  | 0     | 0     | 0     | 0     |
| 13133  | 0     | 0     | 0     | 0     |
| 13134  | 0     | 0     | 0     | 0     |
| 13139  | 0     | 0     | 0     | 0     |
| 13142  | 0     | 0     | 0     | 0     |
| 13143  | 0     | 0     | 0     | 0     |
| 13145  | 0     | 0     | 0     | 0     |
| 13148  | 0     | 0     | 0     | 0     |
| 13149  | 0     | 0     | 0     | 0     |
| 13151  | 0     | 0     | 0     | 1     |
| 13153  | 0     | 0     | 0     | 0     |
| 13158  | 0     | 0     | 0     | 0     |
| 13160  | 0     | 0     | 0     | 1     |
| 13162  | 0     | 0     | 0     | 0     |
| 13169  | 0     | 0     | 0     | 0     |
| 13172  | 0     | 0     | 1     | 0     |
| 13173  | 0     | 0     | 0     | 0     |
| 13176  | 0     | 0     | 0     | 0     |
| 13179  | 0     | 0     | 0     | 0     |
| 13184  | 0     | 0     | 0     | 0     |
| 13185  | 0     | 0     | 0     | 0     |
| 13186  | 0     | 0     | 0     | 0     |
| 13188  | 0     | 0     | 0     | 1     |

| respid | Q31_6 | Q31_7 | Q31_8 | Q31_9 |
|--------|-------|-------|-------|-------|
| 13190  | 0     | 0     | 0     | 0     |
| 13192  | 0     | 0     | 0     | 0     |
| 13193  | 0     | 0     | 0     | 0     |
| 13201  | 0     | 0     | 0     | 0     |
| 13207  | 0     | 0     | 0     | 0     |
| 13208  | 0     | 0     | 0     | 0     |
| 13209  | 0     | 0     | 0     | 0     |
| 13212  | 0     | 0     | 0     | 0     |
| 13215  | 0     | 0     | 0     | 0     |
| 13218  | 0     | 0     | 0     | 0     |
| 13219  | 0     | 0     | 0     | 0     |
| 13224  | 0     | 0     | 0     | 0     |
| 13225  | 0     | 0     | 0     | 0     |
| 13226  | 0     | 0     | 0     | 0     |
| 13232  | 0     | 0     | 0     | 0     |
| 13237  | 0     | 0     | 0     | 0     |
| 13239  | 0     | 0     | 0     | 0     |
| 13241  | 0     | 0     | 0     | 0     |
| 13243  | 0     | 0     | 0     | 0     |
| 13247  | 1     | 0     | 0     | 0     |
| 13248  | 0     | 0     | 0     | 0     |
| 13251  | 0     | 0     | 0     | 0     |
| 13256  | 0     | 0     | 0     | 0     |
| 13260  | 0     | 0     | 0     | 1     |
| 13261  | 0     | 0     | 0     | 0     |
| 13264  | 0     | 0     | 0     | 0     |
| 13273  | 0     | 0     | 0     | 0     |
| 13274  | 0     | 0     | 0     | 0     |
| 13276  | 0     | 1     | 0     | 0     |
| 13278  | 0     | 0     | 0     | 0     |
| 13279  | 0     | 0     | 0     | 0     |
| 13282  | 0     | 0     | 0     | 0     |

| respid | Q31_6 | Q31_7 | Q31_8 | Q31_9 |
|--------|-------|-------|-------|-------|
| 13283  | 0     | 0     | 0     | 0     |
| 13285  | 0     | 0     | 0     | 0     |
| 13286  | 0     | 0     | 0     | 0     |
| 13299  | 0     | 0     | 0     | 0     |
| 13300  | 0     | 0     | 0     | 0     |
| 13301  | 0     | 0     | 0     | 0     |
| 13303  | 0     | 0     | 0     | 0     |
| 13304  | 0     | 0     | 0     | 0     |
| 13307  | 0     | 0     | 0     | 0     |
| 13308  | 0     | 0     | 0     | 0     |
| 13312  | 0     | 0     | 0     | 0     |
| 13313  | 0     | 0     | 0     | 0     |
| 13314  | 0     | 0     | 0     | 1     |
| 13318  | 0     | 0     | 0     | 0     |
| 13320  | 0     | 0     | 0     | 0     |
| 13322  | 0     | 0     | 0     | 1     |
| 13324  | 0     | 0     | 0     | 0     |
| 13325  | 0     | 0     | 0     | 0     |
| 13327  | 0     | 0     | 0     | 0     |
| 13330  | 0     | 0     | 0     | 0     |
| 13332  | 0     | 0     | 0     | 0     |
| 13333  | 1     | 0     | 0     | 0     |
| 13334  | 0     | 0     | 0     | 0     |
| 13351  | 0     | 0     | 1     | 0     |
| 13353  | 0     | 0     | 0     | 0     |
| 13354  | 0     | 0     | 0     | 0     |
| 13355  | 0     | 0     | 1     | 0     |
| 13358  | 0     | 0     | 0     | 0     |
| 13359  | 0     | 0     | 0     | 0     |
| 13360  | 0     | 0     | 0     | 0     |
| 13364  | 0     | 0     | 0     | 0     |
| 13365  | 0     | 0     | 0     | 1     |

| respid | Q31_6 | Q31_7 | Q31_8 | Q31_9 |
|--------|-------|-------|-------|-------|
| 13368  | 0     | 0     | 0     | 0     |
| 13370  | 0     | 0     | 0     | 0     |
| 13375  | 0     | 0     | 0     | 1     |
| 13384  | 0     | 0     | 0     | 0     |
| 13387  | 0     | 0     | 0     | 0     |
| 13395  | 0     | 1     | 0     | 0     |
| 13398  | 0     | 0     | 0     | 0     |
| 13404  | 0     | 0     | 0     | 0     |
| 13405  | 0     | 0     | 0     | 1     |
| 13408  | 0     | 0     | 0     | 0     |
| 13411  | 0     | 0     | 0     | 0     |
| 13413  | 0     | 0     | 0     | 0     |
| 13419  | 0     | 0     | 0     | 0     |
| 13420  | 0     | 0     | 0     | 0     |
| 13427  | 0     | 0     | 0     | 0     |
| 13441  | 0     | 0     | 0     | 0     |
| 13444  | 0     | 0     | 0     | 0     |
| 13456  | 0     | 0     | 0     | 0     |
| 13466  | 0     | 0     | 0     | 0     |
| 13468  | 0     | 0     | 0     | 0     |
| 13475  | 0     | 0     | 0     | 0     |
| 13484  | 0     | 0     | 0     | 0     |
| 13486  | 0     | 0     | 0     | 0     |
| 13487  | 0     | 0     | 1     | 0     |
| 13491  | 0     | 0     | 0     | 0     |
| 13496  | 0     | 0     | 0     | 0     |
| 13497  | 0     | 0     | 0     | 0     |
| 13498  | 0     | 0     | 0     | 0     |
| 13502  | 0     | 0     | 0     | 0     |
| 13503  | 0     | 0     | 0     | 1     |
| 13505  | 0     | 0     | 0     | 0     |
| 13509  | 0     | 0     | 0     | 0     |

| respid | Q31_6 | Q31_7 | Q31_8 | Q31_9 |
|--------|-------|-------|-------|-------|
| 13510  | 0     | 0     | 0     | 0     |
| 13518  | 0     | 0     | 0     | 1     |
| 13521  | 0     | 0     | 0     | 0     |
| 13523  | 0     | 0     | 0     | 0     |
| 13528  | 0     | 0     | 0     | 0     |
| 13531  | 0     | 0     | 1     | 0     |
| 13532  | 0     | 0     | 0     | 0     |
| 13533  | 0     | 0     | 0     | 0     |
| 13534  | 0     | 0     | 0     | 0     |
| 13535  | 0     | 0     | 0     | 0     |
| 13538  | 0     | 0     | 0     | 0     |
| 13540  | 0     | 0     | 0     | 0     |
| 13541  | 0     | 0     | 0     | 0     |
| 13542  | 0     | 0     | 0     | 0     |
| 13550  | 0     | 0     | 0     | 0     |
| 13553  | 0     | 0     | 0     | 0     |
| 13554  | 0     | 0     | 0     | 0     |
| 13555  | 0     | 1     | 0     | 0     |
| 13556  | 0     | 0     | 0     | 0     |
| 13563  | 0     | 0     | 0     | 0     |
| 13564  | 0     | 0     | 0     | 1     |
| 13567  | 0     | 0     | 0     | 0     |
| 13568  | 0     | 0     | 0     | 0     |
| 13570  | 0     | 0     | 0     | 0     |
| 13573  | 0     | 0     | 0     | 0     |
| 13575  | 0     | 0     | 0     | 0     |
| 13577  | 0     | 0     | 0     | 0     |
| 13580  | 0     | 0     | 0     | 0     |
| 13582  | 0     | 0     | 0     | 0     |
| 13584  | 0     | 0     | 0     | 0     |
| 13585  | 0     | 0     | 0     | 0     |
| 13586  | 0     | 0     | 0     | 0     |



| respid | Q31_6 | Q31_7 | Q31_8 | Q31_9 |
|--------|-------|-------|-------|-------|
| 13587  | 0     | 1     | 0     | 1     |
| 13592  | 0     | 0     | 0     | 0     |
| 13596  | 0     | 0     | 0     | 0     |
| 13597  | 0     | 0     | 0     | 1     |
| 13599  | 0     | 0     | 0     | 0     |
| 13601  | 0     | 0     | 0     | 0     |
| 13604  | 0     | 0     | 0     | 1     |
| 13608  | 0     | 0     | 0     | 1     |
| 13616  | 0     | 0     | 0     | 0     |
| 13618  | 0     | 0     | 0     | 0     |
| 13619  | 0     | 0     | 0     | 0     |
| 13626  | 0     | 0     | 0     | 0     |
| 13628  | 0     | 0     | 0     | 0     |
| 13640  | 0     | 0     | 0     | 0     |
| 13645  | 0     | 0     | 0     | 0     |
| 13648  | 0     | 0     | 0     | 0     |
| 13653  | 0     | 0     | 0     | 0     |
| 13655  | 0     | 0     | 0     | 0     |
| 13662  | 0     | 0     | 0     | 0     |
| 13670  | 0     | 0     | 0     | 1     |
| 13673  | 0     | 0     | 0     | 0     |
| 13674  | 0     | 0     | 0     | 0     |
| 13675  | 0     | 0     | 0     | 0     |
| 13678  | 0     | 0     | 0     | 0     |
| 13680  | 0     | 0     | 0     | 0     |
| 13681  | 0     | 0     | 0     | 0     |
| 13683  | 0     | 0     | 0     | 0     |
| 13684  | 0     | 0     | 0     | 0     |
| 13685  | 0     | 0     | 0     | 0     |
| 13687  | 0     | 0     | 0     | 0     |
| 13690  | 0     | 0     | 0     | 0     |
| 13700  | 0     | 0     | 0     | 1     |

| respid | Q31_6 | Q31_7 | Q31_8 | Q31_9 |
|--------|-------|-------|-------|-------|
| 13705  | 0     | 0     | 0     | 0     |
| 13710  | 0     | 0     | 0     | 0     |
| 13711  | 0     | 0     | 0     | 0     |
| 13713  | 0     | 0     | 0     | 0     |
| 13716  | 0     | 0     | 0     | 0     |
| 13721  | 0     | 0     | 0     | 0     |
| 13722  | 0     | 0     | 0     | 0     |
| 13723  | 0     | 1     | 0     | 1     |
| 13726  | 1     | 0     | 0     | 1     |
| 13728  | 0     | 0     | 0     | 0     |
| 13730  | 0     | 0     | 0     | 0     |
| 13734  | 0     | 0     | 0     | 0     |
| 13736  | 0     | 0     | 1     | 1     |
| 13737  | 0     | 0     | 0     | 0     |
| 13739  | 0     | 0     | 0     | 0     |
| 13742  | 0     | 0     | 0     | 0     |
| 13746  | 0     | 0     | 0     | 0     |
| 13747  | 0     | 0     | 0     | 0     |
| 13749  | 0     | 0     | 0     | 0     |
| 13751  | 0     | 0     | 0     | 0     |
| 13752  | 0     | 0     | 0     | 0     |
| 13756  | 0     | 0     | 0     | 0     |
| 13757  | 0     | 0     | 0     | 0     |
| 13767  | 0     | 0     | 0     | 0     |
| 13771  | 0     | 0     | 0     | 0     |
| 13772  | 0     | 0     | 1     | 1     |
| 13779  | 0     | 0     | 0     | 0     |
| 13782  | 0     | 0     | 0     | 0     |
| 13783  | 0     | 0     | 0     | 0     |
| 13785  | 0     | 0     | 0     | 0     |
| 13786  | 1     | 0     | 0     | 0     |
| 13792  | 0     | 0     | 0     | 1     |

| respid | Q31_6 | Q31_7 | Q31_8 | Q31_9 |
|--------|-------|-------|-------|-------|
| 13796  | 0     | 0     | 1     | 0     |
| 13798  | 0     | 0     | 0     | 0     |
| 13799  | 0     | 0     | 0     | 0     |
| 13804  | 0     | 0     | 0     | 0     |
| 13805  | 0     | 0     | 0     | 0     |
| 13810  | 0     | 0     | 0     | 0     |
| 13811  | 0     | 0     | 0     | 0     |
| 13819  | 0     | 0     | 0     | 0     |
| 13821  | 0     | 0     | 0     | 0     |
| 13824  | 1     | 0     | 0     | 0     |
| 13828  | 0     | 1     | 0     | 0     |
| 13829  | 0     | 0     | 0     | 0     |
| 13831  | 0     | 0     | 0     | 0     |
| 13833  | 0     | 0     | 0     | 0     |
| 13835  | 0     | 0     | 1     | 1     |
| 13838  | 0     | 0     | 0     | 0     |
| 13839  | 1     | 0     | 0     | 0     |
| 13845  | 0     | 0     | 0     | 0     |
| 13846  | 0     | 0     | 0     | 0     |
| 13853  | 1     | 0     | 0     | 0     |
| 13855  | 0     | 0     | 0     | 0     |
| 13858  | 0     | 0     | 0     | 1     |
| 13860  | 0     | 0     | 0     | 0     |
| 13865  | 0     | 0     | 0     | 0     |
| 13870  | 0     | 0     | 0     | 0     |
| 13872  | 1     | 0     | 0     | 0     |
| 13873  | 0     | 0     | 0     | 0     |
| 13874  | 0     | 0     | 0     | 0     |
| 13875  | 0     | 0     | 0     | 0     |
| 13881  | 0     | 0     | 0     | 0     |
| 13887  | 0     | 0     | 0     | 0     |
| 13888  | 0     | 0     | 0     | 0     |

| respid | Q31_6 | Q31_7 | Q31_8 | Q31_9 |
|--------|-------|-------|-------|-------|
| 13889  | 0     | 0     | 1     | 1     |
| 13895  | 0     | 1     | 1     | 1     |
| 13897  | 0     | 0     | 0     | 0     |
| 13898  | 0     | 0     | 0     | 0     |
| 13901  | 0     | 0     | 0     | 0     |
| 13902  | 1     | 0     | 0     | 0     |
| 13903  | 0     | 0     | 0     | 0     |
| 13905  | 0     | 0     | 0     | 0     |
| 13908  | 0     | 0     | 0     | 1     |
| 13909  | 0     | 0     | 0     | 0     |
| 13910  | 0     | 1     | 0     | 0     |
| 13911  | 0     | 0     | 0     | 0     |
| 13914  | 1     | 0     | 0     | 0     |
| 13920  | 0     | 0     | 0     | 1     |
| 13926  | 0     | 0     | 0     | 0     |
| 13929  | 0     | 0     | 0     | 0     |
| 13930  | 0     | 0     | 1     | 1     |
| 13931  | 0     | 0     | 0     | 0     |
| 13932  | 0     | 0     | 0     | 1     |
| 13934  | 0     | 0     | 0     | 0     |
| 13938  | 0     | 0     | 0     | 0     |
| 13942  | 0     | 0     | 0     | 0     |
| 13945  | 0     | 0     | 0     | 0     |
| 13947  | 0     | 1     | 0     | 0     |
| 13948  | 0     | 0     | 0     | 0     |
| 13959  | 0     | 0     | 0     | 0     |
| 13962  | 0     | 0     | 0     | 0     |
| 13963  | 0     | 0     | 0     | 0     |
| 13964  | 0     | 0     | 0     | 0     |
| 13966  | 0     | 0     | 0     | 0     |
| 13968  | 0     | 0     | 1     | 0     |
| 13971  | 1     | 0     | 0     | 0     |

| respid | Q31_6 | Q31_7 | Q31_8 | Q31_9 |
|--------|-------|-------|-------|-------|
| 13979  | 1     | 0     | 0     | 0     |
| 13980  | 0     | 0     | 0     | 0     |
| 13981  | 0     | 0     | 0     | 0     |
| 13982  | 0     | 0     | 0     | 0     |
| 13984  | 0     | 0     | 0     | 0     |
| 13989  | 0     | 0     | 0     | 0     |
| 13990  | 0     | 0     | 0     | 0     |
| 13992  | 0     | 0     | 0     | 1     |
| 13998  | 0     | 0     | 0     | 0     |
| 13999  | 0     | 1     | 0     | 0     |
| 14000  | 0     | 0     | 0     | 1     |
| 14003  | 0     | 0     | 0     | 0     |
| 14004  | 0     | 1     | 0     | 0     |
| 14006  | 0     | 0     | 0     | 1     |
| 14007  | 0     | 0     | 0     | 0     |
| 14008  | 0     | 0     | 0     | 0     |
| 14013  | 0     | 0     | 0     | 0     |
| 14015  | 0     | 0     | 0     | 0     |
| 14018  | 0     | 0     | 0     | 0     |
| 14021  | 0     | 0     | 0     | 0     |
| 14023  | 0     | 0     | 0     | 0     |
| 14024  | 0     | 0     | 0     | 1     |
| 14026  | 0     | 0     | 0     | 0     |
| 14030  | 0     | 0     | 0     | 1     |
| 14032  | 0     | 0     | 0     | 0     |
| 14040  | 0     | 0     | 0     | 0     |
| 14045  | 0     | 0     | 0     | 0     |
| 14048  | 0     | 0     | 1     | 0     |
| 14049  | 0     | 1     | 0     | 1     |
| 14050  | 0     | 0     | 0     | 0     |
| 14051  | 1     | 0     | 0     | 0     |
| 14052  | 0     | 0     | 0     | 0     |

| respid | Q31_6 | Q31_7 | Q31_8 | Q31_9 |
|--------|-------|-------|-------|-------|
| 14054  | 0     | 0     | 0     | 0     |
| 14055  | 0     | 0     | 0     | 0     |
| 14057  | 0     | 0     | 0     | 0     |
| 14058  | 0     | 0     | 0     | 0     |
| 14059  | 0     | 0     | 0     | 0     |
| 14060  | 0     | 0     | 0     | 0     |
| 14061  | 1     | 0     | 0     | 0     |
| 14071  | 0     | 0     | 0     | 0     |
| 14073  | 0     | 0     | 0     | 0     |
| 14074  | 0     | 0     | 0     | 0     |
| 14076  | 0     | 0     | 0     | 0     |
| 14080  | 0     | 0     | 0     | 0     |
| 14082  | 0     | 0     | 0     | 0     |
| 14083  | 0     | 0     | 0     | 0     |
| 14084  | 0     | 0     | 0     | 0     |
| 14085  | 0     | 0     | 0     | 0     |
| 14086  | 0     | 0     | 1     | 1     |
| 14088  | 0     | 0     | 0     | 0     |
| 14090  | 0     | 0     | 0     | 0     |
| 14092  | 0     | 0     | 0     | 0     |
| 14093  | 0     | 0     | 0     | 0     |
| 14096  | 0     | 0     | 0     | 0     |
| 14103  | 1     | 0     | 0     | 0     |
| 14105  | 0     | 0     | 0     | 0     |
| 14106  | 0     | 0     | 1     | 1     |
| 14107  | 0     | 0     | 0     | 0     |
| 14108  | 0     | 0     | 0     | 1     |
| 14112  | 0     | 0     | 0     | 0     |
| 14114  | 0     | 0     | 0     | 0     |
| 14115  | 0     | 0     | 0     | 0     |
| 14116  | 0     | 0     | 0     | 0     |
| 14117  | 0     | 0     | 0     | 1     |

| respid | Q31_6 | Q31_7 | Q31_8 | Q31_9 |
|--------|-------|-------|-------|-------|
| 14118  | 0     | 0     | 0     | 0     |
| 14119  | 0     | 0     | 0     | 0     |
| 14127  | 0     | 0     | 0     | 0     |
| 14129  | 0     | 0     | 0     | 0     |
| 14131  | 0     | 0     | 0     | 0     |
| 14132  | 0     | 0     | 0     | 0     |
| 14133  | 0     | 0     | 0     | 1     |
| 14134  | 0     | 0     | 0     | 1     |
| 14135  | 0     | 0     | 0     | 0     |
| 14136  | 0     | 0     | 0     | 0     |
| 14138  | 0     | 0     | 0     | 0     |
| 14139  | 0     | 0     | 0     | 0     |
| 14140  | 0     | 0     | 0     | 0     |
| 14141  | 0     | 0     | 0     | 0     |
| 14143  | 0     | 0     | 0     | 0     |
| 14146  | 0     | 0     | 0     | 0     |
| 14147  | 0     | 1     | 1     | 1     |
| 14148  | 0     | 0     | 0     | 0     |
| 14151  | 0     | 0     | 0     | 0     |
| 14152  | 0     | 0     | 0     | 0     |
| 14153  | 0     | 0     | 0     | 0     |
| 14154  | 0     | 0     | 0     | 0     |
| 14158  | 0     | 0     | 0     | 0     |
| 14159  | 0     | 0     | 0     | 0     |
| 14160  | 0     | 1     | 0     | 0     |
| 14161  | 1     | 1     | 0     | 0     |
| 14162  | 0     | 0     | 0     | 0     |
| 14165  | 0     | 0     | 0     | 1     |
| 14166  | 0     | 0     | 0     | 0     |
| 14167  | 0     | 0     | 0     | 0     |
| 14169  | 0     | 0     | 0     | 0     |
| 14170  | 0     | 0     | 0     | 0     |

| respid | Q31_6 | Q31_7 | Q31_8 | Q31_9 |
|--------|-------|-------|-------|-------|
| 14172  | 0     | 0     | 0     | 0     |
| 14173  | 0     | 0     | 0     | 0     |
| 14174  | 0     | 0     | 0     | 0     |
| 14175  | 0     | 0     | 0     | 0     |
| 14176  | 0     | 0     | 0     | 0     |
| 14178  | 0     | 0     | 0     | 0     |
| 14179  | 0     | 0     | 0     | 0     |
| 14180  | 0     | 0     | 0     | 0     |
| 14183  | 0     | 0     | 0     | 0     |
| 14185  | 0     | 0     | 0     | 0     |
| 14187  | 0     | 0     | 0     | 0     |
| 14189  | 0     | 0     | 0     | 0     |
| 14191  | 0     | 0     | 0     | 0     |
| 14192  | 0     | 0     | 0     | 0     |
| 14195  | 0     | 0     | 0     | 1     |
| 14197  | 0     | 0     | 0     | 0     |
| 14203  | 0     | 0     | 0     | 0     |
| 14204  | 0     | 0     | 0     | 0     |
| 14205  | 0     | 0     | 0     | 0     |
| 14208  | 0     | 0     | 0     | 0     |
| 14211  | 0     | 1     | 1     | 1     |
| 14214  | 0     | 0     | 0     | 0     |
| 14215  | 0     | 0     | 0     | 0     |
| 14216  | 0     | 1     | 0     | 1     |
| 14218  | 0     | 0     | 0     | 0     |
| 14220  | 0     | 0     | 0     | 0     |
| 14223  | 0     | 0     | 0     | 0     |
| 14225  | 1     | 0     | 0     | 0     |
| 14226  | 0     | 0     | 0     | 0     |
| 14228  | 0     | 0     | 0     | 0     |
| 14231  | 0     | 0     | 0     | 0     |
| 14233  | 0     | 0     | 0     | 0     |



| respid | Q31_6 | Q31_7 | Q31_8 | Q31_9 |
|--------|-------|-------|-------|-------|
| 14237  | 0     | 0     | 0     | 0     |
| 14238  | 0     | 0     | 0     | 0     |
| 14243  | 0     | 0     | 0     | 0     |
| 14245  | 0     | 1     | 0     | 0     |
| 14246  | 0     | 0     | 0     | 0     |
| 14248  | 0     | 0     | 0     | 0     |
| 14250  | 0     | 0     | 0     | 0     |
| 14253  | 0     | 0     | 0     | 0     |
| 14254  | 0     | 0     | 0     | 1     |
| 14255  | 0     | 0     | 0     | 0     |
| 14257  | 0     | 0     | 0     | 0     |
| 14258  | 0     | 0     | 0     | 0     |
| 14259  | 0     | 0     | 0     | 1     |
| 14260  | 0     | 0     | 0     | 0     |
| 14261  | 1     | 0     | 1     | 0     |
| 14263  | 0     | 0     | 0     | 1     |
| 14264  | 0     | 0     | 0     | 0     |
| 14266  | 0     | 0     | 0     | 0     |
| 14267  | 0     | 0     | 0     | 0     |
| 14268  | 0     | 0     | 0     | 0     |
| 14275  | 0     | 0     | 0     | 0     |
| 14278  | 0     | 0     | 0     | 0     |
| 14279  | 0     | 0     | 0     | 0     |
| 14280  | 0     | 0     | 0     | 0     |
| 14281  | 0     | 0     | 0     | 0     |
| 14282  | 0     | 0     | 0     | 0     |
| 14283  | 1     | 1     | 0     | 1     |
| 14286  | 0     | 0     | 0     | 0     |
| 14287  | 0     | 0     | 0     | 0     |
| 14288  | 0     | 0     | 0     | 0     |
| 14291  | 0     | 0     | 0     | 0     |
| 14292  | 0     | 0     | 0     | 0     |

| respid | Q31_6 | Q31_7 | Q31_8 | Q31_9 |
|--------|-------|-------|-------|-------|
| 14293  | 0     | 0     | 0     | 0     |
| 14304  | 1     | 0     | 0     | 0     |
| 14308  | 0     | 0     | 0     | 1     |
| 14313  | 0     | 0     | 0     | 0     |
| 14314  | 0     | 1     | 0     | 0     |
| 14316  | 0     | 0     | 0     | 0     |
| 14317  | 0     | 0     | 0     | 0     |
| 14318  | 0     | 0     | 0     | 0     |
| 14319  | 0     | 0     | 0     | 1     |
| 14320  | 0     | 0     | 0     | 0     |
| 14321  | 0     | 0     | 0     | 0     |
| 14322  | 0     | 0     | 0     | 1     |
| 14326  | 0     | 0     | 0     | 0     |
| 14327  | 1     | 0     | 0     | 0     |
| 14328  | 0     | 0     | 0     | 0     |
| 14330  | 0     | 0     | 0     | 0     |
| 14332  | 0     | 0     | 0     | 0     |
| 14334  | 0     | 0     | 0     | 0     |
| 14336  | 0     | 0     | 0     | 0     |
| 14337  | 0     | 0     | 0     | 0     |
| 14339  | 0     | 0     | 0     | 0     |
| 14340  | 0     | 0     | 0     | 1     |
| 14341  | 0     | 0     | 0     | 0     |
| 14344  | 0     | 0     | 0     | 0     |
| 14345  | 0     | 0     | 0     | 1     |
| 14346  | 0     | 0     | 0     | 0     |
| 14348  | 0     | 0     | 0     | 0     |
| 14349  | 0     | 0     | 0     | 0     |
| 14358  | 0     | 0     | 0     | 1     |
| 14360  | 0     | 0     | 0     | 0     |
| 14362  | 0     | 0     | 0     | 0     |
| 14366  | 0     | 0     | 0     | 0     |

| respid | Q31_6 | Q31_7 | Q31_8 | Q31_9 |
|--------|-------|-------|-------|-------|
| 14367  | 0     | 0     | 0     | 1     |
| 14369  | 0     | 0     | 0     | 1     |
| 14371  | 0     | 0     | 0     | 0     |
| 14372  | 0     | 0     | 0     | 0     |
| 14374  | 0     | 0     | 0     | 0     |
| 14376  | 0     | 0     | 0     | 0     |
| 14377  | 0     | 0     | 0     | 0     |
| 14378  | 0     | 0     | 0     | 0     |
| 14379  | 0     | 0     | 0     | 1     |
| 14381  | 0     | 0     | 0     | 0     |
| 14383  | 0     | 0     | 0     | 0     |
| 14384  | 0     | 0     | 0     | 1     |
| 14385  | 1     | 0     | 0     | 0     |
| 14386  | 0     | 1     | 0     | 0     |
| 14390  | 0     | 0     | 0     | 0     |
| 14391  | 0     | 0     | 0     | 0     |
| 14392  | 0     | 0     | 0     | 1     |
| 14393  | 1     | 0     | 0     | 0     |
| 14394  | 0     | 0     | 0     | 0     |
| 14395  | 0     | 0     | 0     | 0     |
| 14396  | 0     | 0     | 0     | 0     |
| 14397  | 0     | 1     | 0     | 0     |
| 14398  | 0     | 0     | 0     | 0     |
| 14399  | 0     | 0     | 0     | 0     |
| 14400  | 0     | 0     | 0     | 0     |
| 14403  | 0     | 0     | 0     | 0     |
| 14404  | 0     | 0     | 0     | 0     |
| 14405  | 0     | 0     | 0     | 0     |
| 14407  | 0     | 0     | 0     | 0     |
| 14408  | 1     | 0     | 0     | 1     |
| 14410  | 1     | 0     | 0     | 0     |
| 14415  | 0     | 0     | 0     | 0     |

| respid | Q31_6 | Q31_7 | Q31_8 | Q31_9 |
|--------|-------|-------|-------|-------|
| 14419  | 0     | 0     | 0     | 0     |
| 14420  | 0     | 0     | 0     | 0     |
| 14421  | 0     | 0     | 0     | 0     |
| 14423  | 0     | 0     | 0     | 0     |
| 14424  | 0     | 0     | 0     | 0     |
| 14425  | 0     | 0     | 0     | 0     |
| 14426  | 0     | 0     | 0     | 0     |
| 14427  | 0     | 0     | 0     | 0     |
| 14428  | 1     | 1     | 0     | 1     |
| 14431  | 0     | 0     | 0     | 0     |
| 14433  | 0     | 0     | 0     | 0     |
| 14434  | 0     | 0     | 0     | 0     |
| 14435  | 0     | 0     | 0     | 0     |
| 14436  | 0     | 0     | 0     | 1     |
| 14438  | 0     | 0     | 0     | 0     |
| 14442  | 0     | 0     | 0     | 0     |
| 14447  | 0     | 0     | 0     | 1     |
| 14448  | 0     | 0     | 0     | 0     |
| 14450  | 0     | 0     | 0     | 0     |
| 14451  | 0     | 0     | 0     | 0     |
| 14454  | 0     | 0     | 0     | 0     |
| 14455  | 0     | 0     | 0     | 0     |
| 14456  | 0     | 0     | 0     | 1     |
| 14457  | 0     | 0     | 0     | 0     |
| 14458  | 1     | 1     | 0     | 0     |
| 14459  | 0     | 0     | 0     | 0     |
| 14460  | 0     | 0     | 0     | 0     |
| 14464  | 0     | 0     | 0     | 0     |
| 14465  | 0     | 0     | 0     | 0     |
| 14466  | 0     | 1     | 0     | 0     |
| 14467  | 0     | 0     | 0     | 0     |
| 14470  | 0     | 0     | 0     | 0     |

| respid | Q31_6 | Q31_7 | Q31_8 | Q31_9 |
|--------|-------|-------|-------|-------|
| 14472  | 0     | 0     | 0     | 0     |
| 14473  | 0     | 0     | 0     | 0     |
| 14474  | 0     | 0     | 0     | 0     |
| 14477  | 0     | 0     | 0     | 0     |
| 14478  | 0     | 0     | 0     | 0     |
| 14479  | 0     | 0     | 0     | 0     |
| 14484  | 0     | 0     | 0     | 0     |
| 14485  | 0     | 0     | 0     | 0     |
| 14486  | 0     | 0     | 0     | 0     |
| 14487  | 0     | 0     | 0     | 0     |
| 14488  | 0     | 0     | 0     | 0     |
| 14491  | 0     | 0     | 0     | 0     |
| 14495  | 0     | 0     | 0     | 0     |
| 14500  | 0     | 0     | 0     | 0     |
| 14502  | 0     | 0     | 0     | 0     |
| 14504  | 0     | 0     | 0     | 0     |
| 14505  | 1     | 0     | 0     | 0     |
| 14507  | 0     | 0     | 0     | 0     |
| 14517  | 0     | 0     | 0     | 0     |
| 14518  | 0     | 0     | 0     | 0     |
| 14519  | 0     | 0     | 0     | 0     |
| 14521  | 0     | 0     | 0     | 1     |
| 14522  | 0     | 0     | 0     | 0     |
| 14526  | 0     | 0     | 0     | 0     |
| 14528  | 0     | 0     | 0     | 0     |
| 14529  | 0     | 0     | 0     | 0     |
| 14530  | 0     | 0     | 0     | 1     |
| 14531  | 0     | 0     | 0     | 0     |
| 14534  | 0     | 0     | 0     | 0     |
| 14538  | 0     | 0     | 0     | 0     |
| 14539  | 0     | 0     | 0     | 0     |
| 14545  | 0     | 0     | 1     | 0     |

| respid | Q31_6 | Q31_7 | Q31_8 | Q31_9 |
|--------|-------|-------|-------|-------|
| 14546  | 0     | 0     | 0     | 0     |
| 14551  | 0     | 0     | 0     | 0     |
| 14553  | 0     | 0     | 0     | 1     |
| 14557  | 0     | 0     | 0     | 0     |
| 14558  | 0     | 0     | 0     | 0     |
| 14559  | 0     | 0     | 1     | 1     |
| 14560  | 0     | 0     | 1     | 0     |
| 14563  | 0     | 0     | 0     | 0     |
| 14565  | 0     | 0     | 0     | 0     |
| 14571  | 0     | 0     | 0     | 0     |
| 14572  | 0     | 0     | 0     | 0     |
| 14573  | 0     | 0     | 0     | 0     |
| 14575  | 0     | 0     | 0     | 0     |
| 14576  | 0     | 0     | 0     | 0     |
| 14578  | 0     | 0     | 0     | 0     |
| 14579  | 0     | 0     | 0     | 0     |
| 14580  | 0     | 0     | 0     | 0     |
| 14582  | 0     | 0     | 0     | 0     |
| 14585  | 0     | 0     | 0     | 0     |
| 14588  | 0     | 0     | 0     | 0     |
| 14590  | 1     | 0     | 0     | 0     |
| 14592  | 0     | 0     | 0     | 0     |
| 14593  | 0     | 0     | 0     | 0     |
| 14595  | 0     | 0     | 0     | 0     |
| 14597  | 0     | 0     | 0     | 0     |
| 14600  | 0     | 0     | 0     | 0     |
| 14602  | 0     | 0     | 0     | 1     |
| 14604  | 0     | 0     | 0     | 0     |
| 14605  | 0     | 0     | 0     | 0     |
| 14609  | 0     | 0     | 0     | 0     |
| 14610  | 0     | 0     | 0     | 0     |
| 14611  | 0     | 0     | 0     | 0     |

| respid | Q31_6 | Q31_7 | Q31_8 | Q31_9 |
|--------|-------|-------|-------|-------|
| 14612  | 0     | 0     | 0     | 0     |
| 14614  | 0     | 0     | 1     | 0     |
| 14615  | 0     | 0     | 0     | 0     |
| 14618  | 0     | 0     | 0     | 1     |
| 14621  | 0     | 0     | 0     | 0     |
| 14624  | 0     | 0     | 0     | 0     |
| 14626  | 0     | 0     | 0     | 0     |
| 14627  | 0     | 0     | 0     | 0     |
| 14628  | 0     | 0     | 0     | 0     |
| 14631  | 0     | 0     | 0     | 0     |
| 14633  | 0     | 1     | 0     | 0     |
| 14642  | 0     | 0     | 0     | 0     |
| 14647  | 0     | 0     | 0     | 0     |
| 14658  | 0     | 0     | 0     | 0     |
| 14659  | 0     | 0     | 1     | 0     |
| 14660  | 0     | 0     | 0     | 0     |
| 14661  | 0     | 0     | 0     | 0     |
| 14662  | 0     | 0     | 0     | 0     |
| 14663  | 0     | 0     | 0     | 0     |
| 14670  | 1     | 0     | 0     | 0     |
| 14671  | 0     | 0     | 0     | 0     |
| 14672  | 1     | 0     | 0     | 0     |
| 14675  | 0     | 0     | 0     | 0     |
| 14676  | 0     | 0     | 0     | 0     |
| 14677  | 0     | 0     | 0     | 0     |
| 14678  | 0     | 0     | 0     | 0     |
| 14681  | 0     | 0     | 0     | 0     |
| 14684  | 0     | 0     | 0     | 0     |
| 14688  | 0     | 0     | 0     | 0     |
| 14690  | 0     | 0     | 0     | 0     |
| 14694  | 0     | 0     | 0     | 0     |
| 14696  | 0     | 0     | 0     | 0     |

| respid | Q31_6 | Q31_7 | Q31_8 | Q31_9 |
|--------|-------|-------|-------|-------|
| 14700  | 0     | 0     | 0     | 0     |
| 14701  | 0     | 0     | 0     | 0     |
| 14703  | 1     | 0     | 0     | 0     |
| 14707  | 0     | 0     | 0     | 0     |
| 14711  | 0     | 0     | 0     | 0     |
| 14714  | 0     | 0     | 0     | 0     |
| 14715  | 0     | 0     | 0     | 0     |
| 14716  | 0     | 0     | 0     | 0     |
| 14720  | 0     | 0     | 0     | 0     |
| 14725  | 0     | 0     | 0     | 1     |
| 14726  | 0     | 0     | 0     | 0     |
| 14734  | 0     | 0     | 0     | 0     |
| 14735  | 0     | 0     | 0     | 0     |
| 14736  | 1     | 0     | 0     | 0     |
| 14740  | 0     | 0     | 0     | 0     |
| 14745  | 1     | 0     | 0     | 0     |
| 14747  | 0     | 0     | 0     | 0     |
| 14750  | 0     | 0     | 0     | 0     |
| 14751  | 0     | 0     | 0     | 0     |
| 14753  | 0     | 0     | 0     | 0     |
| 14756  | 0     | 1     | 1     | 1     |
| 14780  | 0     | 0     | 0     | 0     |
| 14782  | 0     | 0     | 0     | 0     |
| 14800  | 1     | 0     | 0     | 0     |
| 14801  | 0     | 0     | 0     | 0     |
| 14802  | 1     | 0     | 0     | 0     |
| 14805  | 0     | 0     | 0     | 1     |
| 14811  | 1     | 0     | 0     | 0     |
| 14814  | 0     | 0     | 0     | 0     |
| 14822  | 0     | 0     | 0     | 0     |
| 14827  | 0     | 0     | 0     | 0     |
| 14828  | 0     | 0     | 0     | 0     |



| respid | Q31_6 | Q31_7 | Q31_8 | Q31_9 |
|--------|-------|-------|-------|-------|
| 14830  | 0     | 0     | 0     | 0     |
| 14832  | 0     | 0     | 0     | 0     |
| 14835  | 0     | 0     | 0     | 0     |
| 14841  | 0     | 0     | 0     | 0     |
| 14849  | 0     | 0     | 0     | 0     |
| 14850  | 0     | 0     | 0     | 0     |
| 14851  | 0     | 0     | 0     | 0     |
| 14856  | 0     | 0     | 0     | 0     |
| 14862  | 0     | 0     | 0     | 0     |
| 14863  | 0     | 0     | 0     | 0     |
| 14864  | 0     | 0     | 0     | 0     |
| 14866  | 1     | 0     | 0     | 0     |
| 14867  | 0     | 0     | 0     | 0     |
| 14868  | 0     | 0     | 0     | 0     |
| 14870  | 0     | 0     | 0     | 0     |
| 14873  | 0     | 0     | 0     | 0     |
| 14878  | 0     | 0     | 0     | 0     |
| 14879  | 0     | 0     | 0     | 0     |
| 14881  | 0     | 0     | 0     | 0     |
| 14888  | 0     | 0     | 0     | 0     |
| 14895  | 0     | 0     | 0     | 1     |
| 14900  | 1     | 0     | 0     | 1     |
| 14912  | 0     | 0     | 0     | 0     |
| 14922  | 0     | 0     | 0     | 0     |
| 14923  | 1     | 1     | 0     | 0     |
| 14924  | 0     | 0     | 0     | 1     |
| 14925  | 0     | 1     | 0     | 0     |
| 14926  | 0     | 0     | 0     | 0     |
| 14927  | 0     | 0     | 0     | 0     |
| 14930  | 0     | 0     | 1     | 0     |
| 14937  | 1     | 0     | 0     | 0     |
| 14938  | 0     | 0     | 1     | 0     |

| respid | Q31_6 | Q31_7 | Q31_8 | Q31_9 |
|--------|-------|-------|-------|-------|
| 14939  | 1     | 0     | 0     | 0     |
| 14942  | 0     | 0     | 0     | 0     |
| 14943  | 0     | 0     | 0     | 0     |
| 14953  | 0     | 0     | 0     | 0     |
| 14954  | 0     | 0     | 0     | 0     |
| 14955  | 0     | 0     | 0     | 0     |
| 14957  | 1     | 0     | 0     | 0     |
| 14958  | 1     | 0     | 0     | 0     |
| 14959  | 0     | 0     | 1     | 0     |
| 14961  | 0     | 0     | 0     | 0     |
| 14963  | 1     | 0     | 0     | 0     |
| 14964  | 0     | 0     | 0     | 0     |
| 14965  | 0     | 0     | 0     | 0     |
| 14967  | 1     | 0     | 0     | 0     |
| 14970  | 0     | 0     | 1     | 0     |
| 14972  | 0     | 0     | 0     | 0     |
| 14975  | 0     | 0     | 1     | 0     |
| 14977  | 0     | 0     | 0     | 0     |
| 14982  | 1     | 0     | 0     | 0     |
| 14985  | 0     | 0     | 0     | 0     |
| 14986  | 0     | 0     | 0     | 0     |
| 14987  | 0     | 0     | 0     | 0     |
| 14988  | 0     | 1     | 0     | 0     |
| 14989  | 0     | 0     | 0     | 1     |
| 14993  | 0     | 0     | 0     | 0     |
| 15001  | 0     | 0     | 0     | 0     |
| 15002  | 0     | 0     | 0     | 1     |
| 15006  | 0     | 0     | 0     | 0     |
| 15007  | 0     | 0     | 0     | 0     |
| 15014  | 0     | 0     | 0     | 0     |
| 15020  | 1     | 1     | 0     | 0     |
| 15021  | 1     | 0     | 0     | 0     |

| respid | Q31_6 | Q31_7 | Q31_8 | Q31_9 |
|--------|-------|-------|-------|-------|
| 15023  | 0     | 0     | 1     | 0     |
| 15030  | 0     | 0     | 0     | 0     |
| 15032  | 0     | 0     | 0     | 0     |
| 15033  | 0     | 0     | 0     | 0     |
| 15034  | 0     | 1     | 0     | 0     |
| 15035  | 0     | 0     | 0     | 0     |
| 15037  | 0     | 0     | 0     | 0     |
| 15039  | 1     | 0     | 0     | 0     |
| 15040  | 0     | 0     | 0     | 0     |
| 15042  | 0     | 0     | 0     | 0     |
| 15044  | 0     | 0     | 0     | 0     |
| 15045  | 0     | 0     | 0     | 0     |
| 15046  | 0     | 0     | 0     | 0     |
| 15052  | 1     | 0     | 0     | 0     |
| 15058  | 0     | 0     | 0     | 0     |
| 15063  | 0     | 1     | 0     | 0     |
| 15066  | 0     | 0     | 0     | 0     |
| 15069  | 0     | 0     | 0     | 0     |
| 15071  | 0     | 0     | 0     | 1     |
| 15076  | 0     | 0     | 0     | 0     |
| 15078  | 0     | 0     | 0     | 0     |
| 15087  | 0     | 0     | 0     | 1     |
| 15090  | 0     | 0     | 0     | 0     |
| 15091  | 0     | 0     | 0     | 0     |
| 15092  | 0     | 0     | 0     | 0     |
| 15096  | 0     | 0     | 0     | 0     |
| 15106  | 0     | 0     | 0     | 0     |
| 15108  | 0     | 0     | 0     | 0     |
| 15113  | 0     | 0     | 0     | 0     |
| 15116  | 0     | 0     | 0     | 0     |
| 15119  | 0     | 0     | 0     | 0     |
| 15120  | 0     | 0     | 0     | 0     |

| respid | Q31_6 | Q31_7 | Q31_8 | Q31_9 |
|--------|-------|-------|-------|-------|
| 15121  | 0     | 0     | 0     | 0     |
| 15123  | 0     | 0     | 0     | 0     |
| 15124  | 0     | 0     | 0     | 0     |
| 15128  | 0     | 0     | 0     | 0     |
| 15131  | 0     | 0     | 0     | 0     |
| 15136  | 0     | 0     | 0     | 0     |
| 15137  | 0     | 0     | 0     | 0     |
| 15141  | 0     | 0     | 0     | 0     |
| 15144  | 0     | 0     | 0     | 0     |
| 15147  | 0     | 0     | 0     | 0     |
| 15151  | 0     | 0     | 0     | 0     |
| 15154  | 0     | 0     | 0     | 1     |
| 15157  | 0     | 0     | 0     | 0     |
| 15164  | 0     | 0     | 0     | 1     |
| 15168  | 0     | 0     | 0     | 0     |
| 15169  | 0     | 0     | 0     | 0     |
| 15172  | 0     | 0     | 0     | 0     |
| 15177  | 0     | 0     | 0     | 0     |
| 15178  | 0     | 0     | 0     | 0     |
| 15180  | 0     | 0     | 0     | 0     |
| 15181  | 0     | 0     | 0     | 0     |
| 15182  | 0     | 0     | 0     | 1     |
| 15183  | 0     | 0     | 0     | 0     |
| 15188  | 0     | 0     | 0     | 0     |
| 15190  | 1     | 0     | 1     | 0     |
| 15195  | 0     | 0     | 0     | 0     |
| 15201  | 0     | 0     | 1     | 1     |
| 15203  | 0     | 0     | 0     | 0     |
| 15204  | 0     | 0     | 0     | 0     |
| 15207  | 0     | 0     | 0     | 0     |
| 15208  | 0     | 1     | 0     | 0     |
| 15209  | 0     | 0     | 0     | 0     |

| respid | Q31_6 | Q31_7 | Q31_8 | Q31_9 |
|--------|-------|-------|-------|-------|
| 15212  | 0     | 0     | 0     | 0     |
| 15213  | 1     | 1     | 0     | 0     |
| 15219  | 0     | 0     | 0     | 0     |
| 15220  | 0     | 0     | 0     | 0     |
| 15221  | 0     | 0     | 0     | 0     |
| 15223  | 0     | 0     | 0     | 0     |
| 15224  | 0     | 0     | 0     | 0     |
| 15225  | 0     | 0     | 0     | 0     |
| 15226  | 0     | 0     | 0     | 0     |
| 15230  | 0     | 0     | 0     | 0     |
| 15231  | 0     | 0     | 1     | 0     |
| 15232  | 0     | 0     | 0     | 0     |
| 15237  | 0     | 0     | 0     | 0     |
| 15239  | 0     | 0     | 0     | 0     |
| 15241  | 0     | 0     | 0     | 0     |
| 15242  | 0     | 0     | 0     | 1     |
| 15247  | 0     | 0     | 0     | 0     |
| 15248  | 0     | 0     | 0     | 0     |
| 15251  | 0     | 0     | 0     | 0     |
| 15257  | 0     | 0     | 0     | 0     |
| 15260  | 0     | 0     | 0     | 0     |
| 15261  | 1     | 1     | 0     | 0     |
| 15262  | 0     | 0     | 0     | 1     |
| 15263  | 0     | 0     | 0     | 1     |
| 15265  | 0     | 0     | 0     | 0     |
| 15266  | 0     | 0     | 0     | 0     |
| 15268  | 0     | 0     | 0     | 0     |
| 15269  | 0     | 0     | 0     | 0     |
| 15270  | 1     | 1     | 0     | 1     |
| 15273  | 0     | 0     | 0     | 0     |
| 15276  | 1     | 0     | 1     | 0     |
| 15277  | 0     | 0     | 0     | 0     |

| respid | Q31_6 | Q31_7 | Q31_8 | Q31_9 |
|--------|-------|-------|-------|-------|
| 15282  | 0     | 0     | 0     | 0     |
| 15284  | 0     | 0     | 0     | 1     |
| 15285  | 0     | 0     | 0     | 0     |
| 15286  | 0     | 1     | 0     | 1     |
| 15288  | 0     | 0     | 1     | 0     |
| 15292  | 1     | 0     | 0     | 0     |
| 15296  | 0     | 0     | 0     | 0     |
| 15297  | 0     | 0     | 0     | 0     |
| 15298  | 0     | 0     | 0     | 0     |
| 15301  | 0     | 0     | 0     | 0     |
| 15302  | 1     | 0     | 0     | 0     |
| 15305  | 0     | 0     | 0     | 0     |
| 15307  | 0     | 0     | 0     | 0     |
| 15308  | 0     | 0     | 0     | 0     |
| 15309  | 0     | 0     | 0     | 0     |
| 15311  | 0     | 0     | 0     | 0     |
| 15315  | 0     | 0     | 0     | 0     |
| 15316  | 0     | 0     | 0     | 0     |
| 15318  | 0     | 0     | 0     | 0     |
| 15321  | 1     | 1     | 0     | 0     |
| 15322  | 0     | 0     | 0     | 0     |
| 15324  | 0     | 0     | 0     | 0     |
| 15326  | 0     | 0     | 0     | 0     |
| 15327  | 0     | 0     | 0     | 0     |
| 15328  | 0     | 0     | 0     | 0     |
| 15330  | 0     | 0     | 0     | 0     |
| 15332  | 0     | 0     | 0     | 1     |
| 15333  | 0     | 0     | 0     | 0     |
| 15334  | 0     | 0     | 0     | 0     |
| 15336  | 1     | 0     | 0     | 0     |
| 15337  | 0     | 0     | 0     | 0     |
| 15338  | 0     | 0     | 0     | 0     |

| respid | Q31_6 | Q31_7 | Q31_8 | Q31_9 |
|--------|-------|-------|-------|-------|
| 15339  | 0     | 0     | 0     | 0     |
| 15341  | 0     | 0     | 0     | 0     |
| 15344  | 0     | 0     | 0     | 0     |
| 15345  | 0     | 0     | 0     | 0     |
| 15350  | 0     | 0     | 0     | 0     |
| 15351  | 0     | 0     | 1     | 0     |
| 15352  | 0     | 0     | 0     | 0     |
| 15372  | 0     | 0     | 0     | 0     |
| 15373  | 0     | 0     | 0     | 0     |
| 15376  | 0     | 0     | 0     | 0     |
| 15377  | 0     | 0     | 0     | 0     |
| 15382  | 0     | 0     | 0     | 0     |
| 15383  | 0     | 0     | 0     | 1     |
| 15385  | 0     | 0     | 0     | 0     |
| 15390  | 0     | 0     | 0     | 0     |
| 15399  | 0     | 0     | 0     | 0     |
| 15404  | 0     | 0     | 0     | 0     |
| 15410  | 0     | 0     | 0     | 0     |
| 15411  | 0     | 0     | 1     | 0     |
| 15412  | 0     | 0     | 0     | 1     |
| 15413  | 0     | 0     | 0     | 0     |
| 15414  | 0     | 0     | 0     | 0     |
| 15417  | 0     | 0     | 0     | 0     |
| 15418  | 0     | 0     | 0     | 0     |
| 15421  | 0     | 0     | 0     | 0     |
| 15423  | 0     | 0     | 0     | 0     |
| 15425  | 0     | 0     | 0     | 0     |
| 15426  | 1     | 0     | 0     | 0     |
| 15430  | 0     | 0     | 0     | 0     |
| 15431  | 0     | 0     | 0     | 0     |
| 15435  | 0     | 0     | 0     | 0     |
| 15436  | 0     | 0     | 0     | 0     |

| respid | Q31_6 | Q31_7 | Q31_8 | Q31_9 |
|--------|-------|-------|-------|-------|
| 15437  | 0     | 0     | 0     | 0     |
| 15438  | 0     | 0     | 0     | 0     |
| 15439  | 0     | 0     | 0     | 0     |
| 15441  | 0     | 0     | 0     | 0     |
| 15443  | 0     | 0     | 0     | 0     |
| 15446  | 0     | 0     | 0     | 0     |
| 15449  | 0     | 1     | 0     | 0     |
| 15451  | 0     | 0     | 0     | 0     |
| 15452  | 0     | 0     | 0     | 0     |
| 15454  | 0     | 0     | 0     | 1     |
| 15456  | 0     | 0     | 0     | 0     |
| 15457  | 0     | 0     | 0     | 0     |
| 15458  | 0     | 0     | 0     | 1     |
| 15462  | 0     | 0     | 0     | 0     |
| 15467  | 0     | 0     | 1     | 0     |
| 15470  | 0     | 0     | 0     | 1     |
| 15472  | 0     | 1     | 0     | 0     |
| 15476  | 0     | 0     | 0     | 0     |
| 15477  | 0     | 0     | 0     | 0     |
| 15488  | 0     | 0     | 0     | 0     |
| 15489  | 0     | 0     | 0     | 0     |
| 15490  | 0     | 0     | 0     | 0     |
| 15496  | 0     | 0     | 0     | 1     |
| 15497  | 0     | 0     | 0     | 1     |
| 15498  | 0     | 0     | 0     | 0     |
| 15509  | 1     | 0     | 0     | 0     |
| 15510  | 0     | 0     | 0     | 0     |
| 15516  | 0     | 0     | 0     | 0     |
| 15519  | 0     | 0     | 0     | 0     |
| 15520  | 0     | 0     | 0     | 0     |
| 15524  | 0     | 0     | 0     | 0     |
| 15525  | 0     | 0     | 0     | 0     |



| respid | Q31_6 | Q31_7 | Q31_8 | Q31_9 |
|--------|-------|-------|-------|-------|
| 15526  | 0     | 1     | 0     | 0     |
| 15531  | 0     | 0     | 0     | 0     |
| 15532  | 0     | 0     | 0     | 0     |
| 15534  | 0     | 0     | 0     | 0     |
| 15535  | 0     | 0     | 0     | 0     |
| 15539  | 0     | 0     | 0     | 0     |
| 15550  | 0     | 0     | 0     | 0     |
| 15556  | 0     | 0     | 0     | 0     |
| 15558  | 0     | 0     | 0     | 0     |
| 15565  | 0     | 0     | 0     | 0     |
| 15567  | 1     | 1     | 0     | 1     |
| 15568  | 0     | 0     | 0     | 0     |
| 15571  | 0     | 0     | 0     | 0     |
| 15573  | 0     | 0     | 0     | 1     |
| 15574  | 0     | 0     | 0     | 0     |
| 15576  | 1     | 0     | 0     | 0     |
| 15587  | 0     | 0     | 0     | 0     |
| 15588  | 0     | 0     | 0     | 1     |
| 15593  | 0     | 0     | 0     | 0     |
| 15597  | 0     | 0     | 0     | 0     |
| 15598  | 0     | 0     | 0     | 0     |
| 15599  | 0     | 0     | 0     | 1     |
| 15601  | 0     | 0     | 0     | 0     |
| 15604  | 0     | 0     | 0     | 0     |
| 15611  | 0     | 0     | 0     | 0     |
| 15613  | 0     | 0     | 0     | 0     |
| 15614  | 0     | 0     | 0     | 0     |
| 15617  | 0     | 0     | 0     | 0     |
| 15622  | 0     | 0     | 0     | 0     |
| 15623  | 0     | 0     | 0     | 0     |
| 15625  | 0     | 0     | 0     | 0     |
| 15627  | 0     | 0     | 0     | 0     |

| respid | Q31_6 | Q31_7 | Q31_8 | Q31_9 |
|--------|-------|-------|-------|-------|
| 15628  | 0     | 0     | 0     | 0     |
| 15633  | 0     | 0     | 0     | 0     |
| 15634  | 0     | 0     | 0     | 0     |
| 15637  | 0     | 0     | 0     | 0     |
| 15644  | 0     | 0     | 0     | 0     |
| 15645  | 0     | 0     | 0     | 0     |
| 15649  | 0     | 0     | 0     | 0     |
| 15650  | 0     | 0     | 0     | 0     |
| 15651  | 0     | 0     | 0     | 0     |
| 15657  | 0     | 0     | 0     | 0     |
| 15658  | 0     | 0     | 0     | 0     |
| 15660  | 0     | 1     | 0     | 0     |
| 15667  | 0     | 0     | 0     | 0     |
| 15671  | 0     | 0     | 0     | 0     |
| 15679  | 0     | 0     | 0     | 0     |
| 15712  | 0     | 0     | 0     | 0     |
| 15715  | 0     | 0     | 0     | 0     |
| 15749  | 0     | 0     | 0     | 0     |
| 15754  | 0     | 0     | 0     | 0     |
| 15756  | 0     | 0     | 0     | 0     |
| 15773  | 0     | 0     | 0     | 0     |
| 15774  | 0     | 0     | 0     | 0     |
| 15776  | 0     | 0     | 0     | 1     |
| 15777  | 0     | 0     | 0     | 0     |
| 15779  | 0     | 0     | 0     | 0     |
| 15780  | 0     | 0     | 0     | 0     |
| 15792  | 0     | 0     | 0     | 0     |
| 15793  | 1     | 0     | 0     | 0     |
| 15796  | 0     | 0     | 0     | 0     |
| 15798  | 0     | 0     | 0     | 0     |
| 15809  | 0     | 0     | 0     | 0     |
| 15810  | 0     | 0     | 0     | 0     |

| respid | Q31_6 | Q31_7 | Q31_8 | Q31_9 |
|--------|-------|-------|-------|-------|
| 15815  | 0     | 0     | 0     | 0     |
| 15816  | 0     | 0     | 0     | 0     |
| 15817  | 0     | 0     | 0     | 0     |
| 15821  | 1     | 0     | 0     | 0     |
| 15823  | 0     | 0     | 0     | 0     |
| 15834  | 0     | 0     | 0     | 0     |
| 15835  | 0     | 0     | 0     | 0     |
| 15836  | 0     | 0     | 0     | 0     |
| 15837  | 0     | 0     | 0     | 0     |
| 15839  | 0     | 0     | 0     | 0     |
| 15840  | 0     | 0     | 0     | 0     |
| 15844  | 0     | 0     | 0     | 0     |
| 15845  | 0     | 0     | 0     | 0     |
| 15847  | 1     | 0     | 0     | 0     |
| 15848  | 0     | 0     | 0     | 0     |
| 15849  | 0     | 0     | 0     | 0     |
| 15857  | 0     | 0     | 0     | 0     |
| 15858  | 0     | 0     | 0     | 0     |
| 15862  | 1     | 0     | 0     | 0     |
| 15866  | 0     | 0     | 0     | 0     |
| 15870  | 0     | 0     | 0     | 0     |
| 15871  | 0     | 0     | 0     | 0     |
| 15872  | 0     | 0     | 0     | 0     |
| 15873  | 0     | 0     | 0     | 0     |
| 15874  | 0     | 0     | 0     | 0     |
| 15875  | 0     | 0     | 0     | 0     |
| 15876  | 1     | 0     | 1     | 0     |
| 15882  | 1     | 0     | 0     | 1     |
| 15884  | 0     | 0     | 1     | 1     |
| 15890  | 0     | 0     | 0     | 0     |
| 15892  | 0     | 0     | 0     | 0     |
| 15908  | 0     | 0     | 0     | 0     |

| respid | Q31_6 | Q31_7 | Q31_8 | Q31_9 |
|--------|-------|-------|-------|-------|
| 15914  | 0     | 0     | 0     | 0     |
| 15932  | 0     | 0     | 0     | 1     |
| 15933  | 0     | 0     | 0     | 0     |
| 15938  | 0     | 0     | 0     | 0     |
| 15940  | 1     | 0     | 0     | 1     |
| 15945  | 0     | 0     | 0     | 0     |
| 15947  | 0     | 0     | 0     | 0     |
| 15950  | 0     | 0     | 0     | 0     |
| 15951  | 0     | 0     | 0     | 0     |
| 15952  | 1     | 1     | 0     | 0     |
| 15953  | 0     | 0     | 0     | 0     |
| 15954  | 0     | 1     | 0     | 0     |
| 15957  | 1     | 1     | 0     | 0     |
| 15965  | 0     | 0     | 0     | 0     |
| 15966  | 0     | 0     | 0     | 0     |
| 15967  | 0     | 0     | 0     | 0     |
| 15968  | 0     | 0     | 0     | 0     |
| 15970  | 0     | 0     | 0     | 0     |
| 15973  | 0     | 0     | 0     | 0     |
| 15974  | 0     | 0     | 0     | 0     |
| 15975  | 0     | 0     | 0     | 0     |
| 15980  | 0     | 1     | 0     | 0     |
| 15984  | 0     | 0     | 0     | 0     |
| 15985  | 0     | 1     | 1     | 0     |
| 15994  | 0     | 0     | 0     | 0     |
| 15995  | 0     | 0     | 0     | 0     |
| 16000  | 0     | 0     | 0     | 0     |
| 16004  | 0     | 0     | 0     | 0     |
| 16005  | 0     | 0     | 0     | 0     |
| 16006  | 0     | 0     | 0     | 0     |
| 16009  | 0     | 0     | 0     | 0     |
| 16017  | 0     | 0     | 0     | 0     |

| respid | Q31_6 | Q31_7 | Q31_8 | Q31_9 |
|--------|-------|-------|-------|-------|
| 16019  | 0     | 0     | 0     | 0     |
| 16021  | 0     | 0     | 0     | 0     |
| 16024  | 0     | 0     | 0     | 0     |
| 16026  | 0     | 0     | 0     | 1     |
| 16029  | 0     | 0     | 0     | 0     |
| 16031  | 0     | 0     | 0     | 0     |
| 16037  | 0     | 0     | 0     | 0     |
| 16043  | 0     | 0     | 0     | 0     |
| 16044  | 0     | 0     | 1     | 0     |
| 16047  | 0     | 0     | 0     | 0     |
| 16048  | 0     | 0     | 0     | 1     |
| 16049  | 0     | 0     | 0     | 0     |
| 16051  | 0     | 0     | 0     | 0     |
| 16053  | 0     | 0     | 0     | 1     |
| 16054  | 0     | 0     | 0     | 0     |
| 16069  | 0     | 0     | 0     | 0     |
| 16070  | 0     | 0     | 0     | 0     |
| 16074  | 0     | 0     | 0     | 0     |
| 16076  | 0     | 0     | 0     | 0     |
| 16078  | 0     | 0     | 0     | 0     |
| 16081  | 0     | 0     | 0     | 0     |
| 16085  | 0     | 0     | 0     | 0     |
| 16088  | 0     | 0     | 0     | 0     |
| 16091  | 0     | 0     | 0     | 0     |
| 16092  | 0     | 0     | 0     | 0     |
| 16093  | 0     | 0     | 0     | 1     |
| 16097  | 0     | 0     | 0     | 0     |
| 16100  | 0     | 0     | 0     | 0     |
| 16101  | 0     | 0     | 0     | 0     |
| 16105  | 0     | 0     | 0     | 0     |
| 16118  | 0     | 0     | 0     | 1     |
| 16129  | 0     | 0     | 0     | 0     |

| respid | Q31_6 | Q31_7 | Q31_8 | Q31_9 |
|--------|-------|-------|-------|-------|
| 16130  | 0     | 0     | 0     | 0     |
| 16131  | 0     | 0     | 0     | 0     |
| 16136  | 0     | 0     | 0     | 0     |
| 16137  | 0     | 0     | 0     | 0     |
| 16138  | 0     | 0     | 0     | 0     |
| 16139  | 0     | 0     | 0     | 0     |
| 16140  | 0     | 0     | 0     | 0     |
| 16145  | 0     | 0     | 0     | 0     |
| 16150  | 0     | 0     | 0     | 0     |
| 16151  | 0     | 0     | 0     | 0     |
| 16153  | 0     | 0     | 0     | 0     |
| 16164  | 0     | 0     | 0     | 1     |
| 16168  | 0     | 0     | 0     | 0     |
| 16173  | 0     | 0     | 0     | 0     |
| 16174  | 0     | 0     | 0     | 0     |
| 16177  | 0     | 0     | 0     | 0     |
| 16185  | 0     | 0     | 0     | 0     |
| 16189  | 0     | 0     | 0     | 0     |
| 16192  | 0     | 0     | 0     | 1     |
| 16193  | 0     | 0     | 0     | 0     |
| 16194  | 0     | 0     | 0     | 0     |
| 16196  | 0     | 0     | 0     | 0     |
| 16202  | 0     | 0     | 0     | 0     |
| 16205  | 1     | 1     | 1     | 0     |
| 16206  | 0     | 0     | 0     | 1     |
| 16208  | 0     | 0     | 0     | 0     |
| 16211  | 1     | 0     | 0     | 1     |
| 16212  | 0     | 0     | 0     | 0     |
| 16215  | 0     | 0     | 0     | 0     |
| 16217  | 0     | 0     | 0     | 0     |
| 16221  | 0     | 0     | 0     | 1     |
| 16226  | 0     | 0     | 0     | 0     |

| respid | Q31_6 | Q31_7 | Q31_8 | Q31_9 |
|--------|-------|-------|-------|-------|
| 16228  | 0     | 0     | 0     | 0     |
| 16229  | 0     | 0     | 0     | 0     |
| 16230  | 0     | 0     | 0     | 0     |
| 16231  | 0     | 0     | 0     | 0     |
| 16232  | 0     | 0     | 0     | 1     |
| 16234  | 0     | 0     | 0     | 1     |
| 16235  | 0     | 0     | 0     | 0     |
| 16236  | 0     | 0     | 0     | 0     |
| 16237  | 0     | 0     | 0     | 0     |
| 16238  | 1     | 0     | 0     | 0     |
| 16239  | 0     | 0     | 0     | 0     |
| 16243  | 0     | 0     | 0     | 0     |
| 16248  | 0     | 0     | 0     | 0     |
| 16249  | 0     | 0     | 0     | 0     |
| 16251  | 0     | 0     | 0     | 0     |
| 16263  | 0     | 0     | 0     | 0     |
| 16265  | 0     | 0     | 0     | 0     |
| 16269  | 1     | 0     | 0     | 0     |
| 16272  | 0     | 0     | 0     | 0     |
| 16273  | 0     | 0     | 0     | 0     |
| 16281  | 0     | 0     | 0     | 0     |
| 16282  | 0     | 0     | 0     | 0     |
| 16287  | 0     | 0     | 0     | 0     |
| 16290  | 0     | 0     | 0     | 0     |
| 16294  | 0     | 0     | 0     | 0     |
| 16295  | 0     | 0     | 0     | 0     |
| 16296  | 0     | 0     | 0     | 0     |
| 16299  | 0     | 1     | 0     | 0     |
| 16302  | 0     | 0     | 0     | 0     |
| 16303  | 0     | 0     | 0     | 0     |
| 16304  | 0     | 0     | 1     | 0     |
| 16306  | 0     | 0     | 0     | 0     |

| respid | Q31_6 | Q31_7 | Q31_8 | Q31_9 |
|--------|-------|-------|-------|-------|
| 16318  | 0     | 0     | 0     | 1     |
| 16320  | 0     | 0     | 0     | 0     |
| 16321  | 0     | 0     | 0     | 1     |
| 16322  | 0     | 0     | 0     | 0     |
| 16324  | 0     | 0     | 0     | 0     |
| 16326  | 0     | 0     | 0     | 0     |
| 16328  | 0     | 0     | 0     | 0     |
| 16336  | 0     | 0     | 0     | 0     |
| 16341  | 0     | 0     | 0     | 0     |
| 16342  | 0     | 0     | 0     | 0     |
| 16343  | 0     | 0     | 0     | 0     |
| 16345  | 0     | 0     | 0     | 0     |
| 16349  | 0     | 1     | 0     | 0     |
| 16355  | 0     | 0     | 0     | 0     |
| 16364  | 0     | 0     | 0     | 0     |
| 16374  | 0     | 0     | 0     | 0     |
| 16375  | 0     | 0     | 0     | 0     |
| 16376  | 0     | 0     | 0     | 0     |
| 16393  | 1     | 0     | 0     | 0     |
| 16394  | 1     | 0     | 0     | 0     |
| 16395  | 0     | 0     | 0     | 0     |
| 16397  | 0     | 0     | 0     | 0     |
| 16398  | 1     | 0     | 0     | 1     |
| 16402  | 0     | 0     | 0     | 0     |
| 16405  | 0     | 0     | 0     | 0     |
| 16416  | 0     | 0     | 0     | 0     |
| 16422  | 0     | 0     | 0     | 0     |
| 16429  | 0     | 0     | 0     | 0     |
| 16430  | 0     | 0     | 0     | 0     |
| 16432  | 0     | 0     | 0     | 0     |
| 16433  | 0     | 0     | 0     | 0     |
| 16434  | 0     | 0     | 0     | 0     |



| respid | Q31_6 | Q31_7 | Q31_8 | Q31_9 |
|--------|-------|-------|-------|-------|
| 16437  | 0     | 0     | 0     | 0     |
| 16439  | 0     | 0     | 0     | 0     |
| 16440  | 0     | 0     | 0     | 0     |
| 16441  | 0     | 0     | 0     | 0     |
| 16442  | 0     | 0     | 0     | 0     |
| 16450  | 0     | 0     | 0     | 0     |
| 16451  | 0     | 0     | 0     | 0     |
| 16452  | 0     | 0     | 0     | 0     |
| 16467  | 0     | 0     | 0     | 0     |
| 16468  | 0     | 0     | 0     | 0     |
| 16469  | 0     | 0     | 0     | 0     |
| 16470  | 0     | 0     | 0     | 0     |
| 16471  | 0     | 0     | 0     | 1     |
| 16473  | 0     | 0     | 0     | 0     |
| 16476  | 0     | 0     | 0     | 0     |
| 16478  | 0     | 0     | 0     | 0     |
| 16484  | 0     | 0     | 0     | 0     |
| 16499  | 0     | 0     | 0     | 0     |
| 16502  | 0     | 0     | 0     | 0     |
| 16505  | 0     | 0     | 0     | 0     |
| 16514  | 0     | 0     | 0     | 0     |
| 16515  | 1     | 0     | 0     | 1     |
| 16517  | 0     | 0     | 0     | 0     |
| 16518  | 0     | 0     | 0     | 0     |
| 16519  | 0     | 0     | 0     | 1     |
| 16525  | 0     | 0     | 0     | 1     |
| 16526  | 0     | 0     | 0     | 0     |
| 16530  | 0     | 0     | 0     | 0     |
| 16532  | 0     | 0     | 0     | 0     |
| 16536  | 0     | 0     | 0     | 0     |
| 16537  | 0     | 0     | 0     | 0     |
| 16541  | 0     | 0     | 0     | 1     |

| respid | Q31_6 | Q31_7 | Q31_8 | Q31_9 |
|--------|-------|-------|-------|-------|
| 16543  | 0     | 0     | 0     | 0     |
| 16544  | 0     | 0     | 0     | 0     |
| 16545  | 0     | 0     | 0     | 1     |
| 16546  | 0     | 0     | 0     | 0     |
| 16548  | 0     | 0     | 0     | 0     |
| 16552  | 0     | 0     | 0     | 0     |
| 16559  | 0     | 0     | 0     | 0     |
| 16564  | 0     | 0     | 0     | 0     |
| 16565  | 0     | 0     | 0     | 0     |
| 16567  | 0     | 0     | 0     | 1     |
| 16571  | 0     | 0     | 0     | 0     |
| 16572  | 0     | 0     | 0     | 0     |
| 16579  | 0     | 0     | 0     | 0     |
| 16588  | 1     | 0     | 0     | 0     |
| 16599  | 0     | 0     | 0     | 0     |
| 16605  | 0     | 0     | 0     | 0     |
| 16622  | 0     | 0     | 0     | 0     |
| 16635  | 0     | 0     | 0     | 0     |
| 16638  | 0     | 0     | 0     | 0     |
| 16652  | 1     | 0     | 0     | 0     |
| 16656  | 0     | 0     | 0     | 0     |
| 16671  | 0     | 0     | 0     | 0     |
| 16676  | 0     | 0     | 0     | 0     |
| 16678  | 0     | 1     | 0     | 0     |
| 16702  | 0     | 0     | 0     | 0     |
| 16705  | 0     | 0     | 0     | 0     |
| 16707  | 1     | 1     | 0     | 0     |
| 16711  | 0     | 0     | 0     | 0     |
| 16712  | 0     | 0     | 0     | 0     |
| 16716  | 0     | 0     | 0     | 0     |
| 16724  | 0     | 0     | 0     | 0     |
| 16727  | 0     | 0     | 0     | 0     |

| respid | Q31_6 | Q31_7 | Q31_8 | Q31_9 |
|--------|-------|-------|-------|-------|
| 16734  | 0     | 0     | 0     | 0     |
| 16740  | 0     | 0     | 0     | 0     |
| 16748  | 0     | 0     | 0     | 0     |
| 16759  | 0     | 0     | 0     | 0     |
| 16761  | 0     | 0     | 0     | 0     |
| 16763  | 0     | 0     | 0     | 0     |
| 16764  | 0     | 0     | 0     | 1     |
| 16766  | 0     | 0     | 0     | 0     |
| 16767  | 0     | 0     | 0     | 0     |
| 16776  | 0     | 0     | 0     | 0     |
| 16781  | 0     | 0     | 0     | 0     |
| 16793  | 0     | 0     | 0     | 0     |
| 16796  | 0     | 1     | 0     | 1     |
| 16810  | 0     | 0     | 0     | 0     |
| 16811  | 0     | 0     | 0     | 0     |
| 16813  | 0     | 0     | 0     | 0     |
| 16814  | 0     | 0     | 0     | 0     |
| 16831  | 0     | 0     | 0     | 0     |
| 16833  | 0     | 0     | 0     | 1     |
| 16839  | 0     | 0     | 0     | 1     |
| 16843  | 0     | 0     | 0     | 0     |
| 16860  | 0     | 0     | 0     | 0     |
| 16871  | 0     | 0     | 0     | 0     |
| 16881  | 0     | 0     | 0     | 0     |
| 16884  | 0     | 0     | 0     | 0     |
| 16891  | 0     | 0     | 0     | 0     |
| 16909  | 0     | 1     | 0     | 0     |
| 16911  | 0     | 0     | 0     | 0     |
| 16922  | 0     | 0     | 0     | 0     |
| 16935  | 0     | 0     | 1     | 0     |
| 16942  | 0     | 0     | 0     | 0     |
| 16950  | 0     | 0     | 0     | 0     |

| respid | Q31_6 | Q31_7 | Q31_8 | Q31_9 |
|--------|-------|-------|-------|-------|
| 16952  | 0     | 0     | 1     | 0     |
| 16963  | 0     | 0     | 0     | 0     |
| 16967  | 0     | 0     | 0     | 1     |
| 16970  | 0     | 0     | 0     | 0     |
| 16976  | 0     | 1     | 0     | 1     |
| 16982  | 0     | 0     | 0     | 0     |
| 16995  | 0     | 0     | 0     | 0     |
| 17004  | 0     | 0     | 0     | 0     |
| 17006  | 0     | 0     | 0     | 0     |
| 17009  | 0     | 0     | 0     | 0     |
| 17021  | 0     | 0     | 0     | 0     |
| 17040  | 0     | 0     | 0     | 0     |
| 17041  | 0     | 0     | 0     | 0     |
| 17044  | 0     | 0     | 0     | 0     |
| 17046  | 0     | 0     | 0     | 0     |
| 17052  | 0     | 0     | 0     | 0     |
| 17055  | 0     | 0     | 0     | 0     |
| 17108  | 0     | 0     | 0     | 0     |
| 17109  | 0     | 0     | 0     | 0     |
| 17113  | 0     | 0     | 0     | 0     |
| 17115  | 0     | 0     | 0     | 1     |
| 17132  | 0     | 0     | 0     | 0     |
| 17135  | 0     | 0     | 1     | 0     |
| 17138  | 0     | 0     | 0     | 0     |
| 17141  | 0     | 0     | 0     | 0     |
| 17143  | 0     | 0     | 0     | 0     |
| 17148  | 0     | 0     | 0     | 0     |
| 17151  | 0     | 0     | 0     | 0     |
| 17153  | 0     | 0     | 0     | 0     |
| 17154  | 0     | 0     | 0     | 1     |
| 17157  | 0     | 0     | 0     | 1     |
| 17160  | 0     | 0     | 0     | 0     |

| respid | Q31_6 | Q31_7 | Q31_8 | Q31_9 |
|--------|-------|-------|-------|-------|
| 17167  | 0     | 0     | 0     | 0     |
| 17169  | 0     | 0     | 0     | 0     |
| 17174  | 0     | 0     | 0     | 1     |
| 17179  | 0     | 0     | 0     | 0     |
| 17180  | 0     | 0     | 0     | 0     |
| 17182  | 0     | 0     | 0     | 0     |
| 17184  | 0     | 0     | 0     | 0     |
| 17186  | 0     | 0     | 0     | 0     |
| 17187  | 0     | 0     | 0     | 0     |
| 17192  | 0     | 0     | 0     | 1     |
| 17197  | 0     | 0     | 0     | 0     |
| 17217  | 0     | 0     | 0     | 0     |
| 17226  | 0     | 0     | 0     | 0     |
| 17228  | 0     | 0     | 0     | 0     |
| 17245  | 0     | 0     | 0     | 0     |
| 17247  | 0     | 0     | 0     | 0     |
| 17258  | 0     | 0     | 0     | 0     |
| 17259  | 0     | 1     | 0     | 0     |
| 17262  | 0     | 0     | 0     | 0     |
| 17265  | 0     | 0     | 0     | 0     |
| 17281  | 0     | 0     | 0     | 0     |
| 17282  | 0     | 1     | 0     | 0     |
| 17293  | 0     | 0     | 0     | 0     |
| 17306  | 0     | 0     | 0     | 0     |
| 17312  | 0     | 1     | 0     | 0     |
| 17318  | 0     | 0     | 0     | 1     |
| 17328  | 0     | 0     | 0     | 0     |
| 17343  | 0     | 0     | 0     | 0     |
| 17344  | 0     | 0     | 0     | 0     |
| 17348  | 0     | 0     | 0     | 0     |
| 17352  | 0     | 0     | 0     | 0     |
| 17355  | 0     | 0     | 0     | 0     |

| respid | Q31_6 | Q31_7 | Q31_8 | Q31_9 |
|--------|-------|-------|-------|-------|
| 17356  | 0     | 0     | 0     | 0     |
| 17359  | 0     | 0     | 0     | 0     |
| 17373  | 1     | 0     | 0     | 0     |
| 17381  | 0     | 0     | 0     | 0     |
| 17388  | 0     | 0     | 0     | 0     |
| 17394  | 0     | 0     | 0     | 0     |
| 17401  | 0     | 0     | 0     | 0     |
| 17403  | 0     | 0     | 0     | 0     |
| 17411  | 0     | 0     | 0     | 0     |
| 17423  | 0     | 0     | 0     | 0     |
| 17427  | 0     | 0     | 0     | 0     |
| 17433  | 0     | 0     | 0     | 0     |
| 17441  | 0     | 0     | 0     | 0     |
| 17442  | 0     | 0     | 0     | 0     |
| 17447  | 0     | 0     | 0     | 0     |
| 17458  | 0     | 0     | 0     | 0     |
| 17474  | 0     | 0     | 0     | 0     |
| 17475  | 0     | 0     | 0     | 0     |
| 17476  | 0     | 0     | 0     | 0     |
| 17480  | 0     | 0     | 0     | 0     |
| 17484  | 0     | 0     | 0     | 0     |
| 17490  | 0     | 0     | 0     | 0     |
| 17491  | 0     | 0     | 0     | 0     |
| 17500  | 0     | 0     | 0     | 0     |
| 17507  | 0     | 0     | 0     | 0     |
| 17517  | 0     | 0     | 0     | 0     |
| 17520  | 0     | 0     | 0     | 0     |
| 17521  | 0     | 0     | 0     | 0     |
| 17531  | 0     | 0     | 0     | 0     |
| 17540  | 0     | 0     | 0     | 0     |
| 17550  | 0     | 0     | 0     | 1     |
| 17551  | 0     | 0     | 0     | 0     |

| respid | Q31_6 | Q31_7 | Q31_8 | Q31_9 |
|--------|-------|-------|-------|-------|
| 17555  | 0     | 0     | 0     | 0     |
| 17556  | 0     | 0     | 0     | 0     |
| 17574  | 0     | 0     | 0     | 0     |
| 17575  | 0     | 0     | 0     | 0     |
| 17582  | 0     | 0     | 0     | 0     |
| 17587  | 0     | 0     | 0     | 0     |
| 17601  | 0     | 0     | 0     | 0     |
| 17607  | 0     | 0     | 0     | 0     |
| 17609  | 0     | 0     | 0     | 0     |
| 17611  | 0     | 0     | 0     | 0     |
| 17613  | 0     | 0     | 0     | 0     |
| 17615  | 0     | 0     | 0     | 0     |
| 17620  | 0     | 0     | 0     | 0     |
| 17624  | 0     | 0     | 0     | 0     |
| 17635  | 0     | 0     | 0     | 0     |
| 17643  | 0     | 0     | 0     | 0     |
| 17645  | 0     | 0     | 0     | 0     |
| 17646  | 0     | 0     | 0     | 0     |
| 17649  | 0     | 0     | 0     | 0     |
| 17658  | 0     | 0     | 0     | 1     |
| 17666  | 0     | 0     | 0     | 0     |
| 17670  | 0     | 0     | 0     | 0     |
| 17678  | 0     | 0     | 0     | 0     |
| 17679  | 0     | 0     | 0     | 0     |
| 17695  | 0     | 0     | 0     | 0     |
| 17697  | 0     | 0     | 0     | 0     |
| 17698  | 0     | 0     | 0     | 0     |
| 17723  | 0     | 0     | 0     | 0     |
| 17727  | 0     | 0     | 0     | 0     |
| 17734  | 0     | 0     | 0     | 0     |
| 17737  | 0     | 0     | 0     | 0     |
| 17748  | 0     | 0     | 0     | 1     |

| respid | Q31_6 | Q31_7 | Q31_8 | Q31_9 |
|--------|-------|-------|-------|-------|
| 17749  | 0     | 0     | 0     | 0     |
| 17754  | 0     | 0     | 0     | 0     |
| 17766  | 0     | 0     | 0     | 0     |
| 17777  | 0     | 0     | 0     | 0     |
| 17780  | 0     | 0     | 0     | 0     |
| 17788  | 0     | 0     | 0     | 0     |
| 17801  | 0     | 0     | 1     | 1     |
| 17803  | 0     | 0     | 0     | 0     |
| 17807  | 0     | 0     | 0     | 0     |
| 17808  | 0     | 0     | 0     | 0     |
| 17809  | 0     | 0     | 0     | 0     |
| 17821  | 0     | 0     | 0     | 0     |
| 17827  | 0     | 0     | 0     | 0     |
| 17834  | 0     | 0     | 0     | 0     |
| 17838  | 1     | 1     | 0     | 1     |
| 17842  | 0     | 0     | 0     | 0     |
| 17862  | 0     | 0     | 0     | 0     |
| 17863  | 0     | 0     | 0     | 0     |
| 17871  | 0     | 0     | 0     | 1     |
| 17872  | 0     | 0     | 0     | 1     |
| 17903  | 0     | 0     | 0     | 1     |
| 17906  | 0     | 0     | 0     | 0     |
| 17910  | 0     | 0     | 0     | 0     |
| 17922  | 0     | 0     | 0     | 0     |
| 17923  | 0     | 0     | 0     | 0     |
| 17925  | 0     | 0     | 0     | 0     |
| 17926  | 0     | 0     | 0     | 0     |
| 17937  | 0     | 0     | 0     | 0     |
| 17956  | 0     | 0     | 0     | 0     |
| 17958  | 0     | 0     | 0     | 0     |
| 17985  | 0     | 0     | 0     | 0     |
| 17989  | 0     | 1     | 0     | 0     |



| respid | Q31_6 | Q31_7 | Q31_8 | Q31_9 |
|--------|-------|-------|-------|-------|
| 17995  | 0     | 0     | 0     | 0     |
| 18000  | 0     | 0     | 0     | 0     |
| 18010  | 0     | 0     | 0     | 0     |
| 18015  | 0     | 0     | 0     | 0     |
| 18018  | 0     | 0     | 0     | 0     |
| 18031  | 0     | 0     | 0     | 0     |
| 18033  | 0     | 0     | 0     | 0     |
| 18036  | 0     | 0     | 0     | 0     |
| 18041  | 0     | 0     | 0     | 0     |
| 18068  | 0     | 0     | 0     | 0     |
| 18080  | 0     | 0     | 0     | 0     |
| 18081  | 0     | 0     | 0     | 0     |
| 18083  | 0     | 0     | 0     | 0     |
| 18113  | 0     | 0     | 0     | 1     |
| 18115  | 0     | 0     | 0     | 0     |
| 18117  | 0     | 0     | 0     | 0     |
| 18129  | 0     | 0     | 0     | 0     |
| 18132  | 0     | 0     | 0     | 1     |
| 18146  | 0     | 0     | 0     | 1     |
| 18147  | 0     | 0     | 0     | 1     |
| 18153  | 0     | 0     | 0     | 0     |
| 18154  | 0     | 0     | 0     | 0     |
| 18157  | 0     | 0     | 0     | 0     |
| 18166  | 0     | 0     | 0     | 0     |
| 18169  | 0     | 0     | 0     | 0     |
| 18171  | 0     | 0     | 0     | 0     |
| 18173  | 0     | 0     | 0     | 0     |
| 18204  | 0     | 0     | 0     | 0     |
| 18210  | 0     | 0     | 0     | 0     |
| 18212  | 0     | 0     | 0     | 0     |
| 18220  | 0     | 0     | 0     | 0     |
| 18221  | 0     | 0     | 0     | 0     |

| respid | Q31_6 | Q31_7 | Q31_8 | Q31_9 |
|--------|-------|-------|-------|-------|
| 18228  | 0     | 0     | 0     | 0     |
| 18231  | 0     | 0     | 0     | 0     |
| 18233  | 1     | 0     | 0     | 0     |
| 18235  | 0     | 0     | 0     | 0     |
| 18237  | 0     | 0     | 0     | 0     |
| 18250  | 0     | 0     | 0     | 0     |
| 18253  | 0     | 0     | 0     | 0     |
| 18264  | 0     | 0     | 0     | 0     |
| 18285  | 0     | 0     | 0     | 0     |
| 18287  | 0     | 0     | 0     | 0     |
| 18296  | 0     | 0     | 0     | 0     |
| 18299  | 0     | 0     | 0     | 0     |
| 18313  | 0     | 0     | 0     | 0     |
| 18321  | 0     | 0     | 0     | 1     |
| 18324  | 0     | 0     | 0     | 0     |
| 18329  | 0     | 0     | 0     | 0     |
| 18332  | 0     | 0     | 0     | 0     |
| 18339  | 0     | 0     | 0     | 1     |
| 18340  | 0     | 0     | 1     | 0     |
| 18348  | 0     | 0     | 0     | 0     |
| 18355  | 0     | 0     | 0     | 0     |
| 18360  | 0     | 0     | 0     | 0     |
| 18380  | 0     | 0     | 0     | 0     |
| 18403  | 0     | 0     | 0     | 1     |
| 18405  | 0     | 0     | 0     | 0     |
| 18409  | 0     | 0     | 0     | 0     |
| 18445  | 0     | 0     | 0     | 0     |
| 18458  | 0     | 0     | 1     | 0     |
| 18477  | 0     | 0     | 0     | 0     |
| 18481  | 0     | 0     | 0     | 1     |
| 18491  | 0     | 0     | 0     | 0     |
| 18492  | 0     | 0     | 0     | 0     |

| respid | Q31_6 | Q31_7 | Q31_8 | Q31_9 |
|--------|-------|-------|-------|-------|
| 18494  | 0     | 0     | 0     | 0     |
| 18495  | 0     | 0     | 0     | 0     |
| 18496  | 0     | 0     | 0     | 0     |
| 18507  | 0     | 0     | 0     | 0     |
| 18509  | 0     | 0     | 0     | 0     |
| 18510  | 0     | 0     | 0     | 0     |
| 18513  | 0     | 0     | 0     | 0     |
| 18525  | 0     | 0     | 0     | 0     |
| 18526  | 0     | 0     | 0     | 0     |
| 18527  | 0     | 0     | 0     | 0     |
| 18536  | 0     | 0     | 0     | 0     |
| 18540  | 0     | 0     | 0     | 0     |
| 18548  | 0     | 0     | 0     | 1     |
| 18550  | 0     | 0     | 0     | 0     |
| 18556  | 0     | 0     | 0     | 0     |
| 18561  | 0     | 0     | 0     | 0     |
| 18577  | 0     | 0     | 0     | 1     |
| 18580  | 0     | 0     | 0     | 0     |
| 18633  | 0     | 0     | 0     | 0     |
| 18635  | 0     | 0     | 0     | 0     |
| 18636  | 0     | 0     | 0     | 0     |
| 18645  | 0     | 0     | 0     | 0     |
| 18649  | 0     | 0     | 0     | 0     |
| 18664  | 0     | 0     | 0     | 0     |
| 18668  | 0     | 0     | 0     | 0     |
| 18682  | 0     | 0     | 0     | 1     |
| 18685  | 0     | 0     | 0     | 0     |
| 18688  | 0     | 0     | 0     | 0     |
| 18689  | 0     | 0     | 0     | 0     |
| 18693  | 0     | 1     | 0     | 0     |
| 18694  | 0     | 0     | 0     | 0     |
| 18705  | 0     | 0     | 0     | 0     |

| respid | Q31_6 | Q31_7 | Q31_8 | Q31_9 |
|--------|-------|-------|-------|-------|
| 18710  | 0     | 0     | 0     | 1     |
| 18715  | 0     | 0     | 0     | 0     |
| 18718  | 0     | 0     | 0     | 0     |
| 18727  | 0     | 0     | 0     | 0     |
| 18732  | 0     | 1     | 0     | 0     |
| 18735  | 0     | 0     | 0     | 0     |
| 18742  | 0     | 0     | 0     | 0     |
| 18745  | 0     | 0     | 0     | 0     |
| 18747  | 0     | 0     | 0     | 0     |
| 18750  | 0     | 0     | 0     | 1     |
| 18751  | 0     | 0     | 0     | 1     |
| 18753  | 0     | 0     | 0     | 0     |
| 18754  | 0     | 0     | 0     | 0     |
| 18759  | 0     | 0     | 0     | 0     |
| 18780  | 0     | 0     | 0     | 0     |
| 18782  | 0     | 0     | 0     | 0     |
| 18807  | 1     | 0     | 1     | 0     |
| 18815  | 0     | 0     | 0     | 0     |
| 18818  | 0     | 0     | 0     | 0     |
| 18820  | 0     | 0     | 0     | 0     |
| 18823  | 0     | 0     | 0     | 1     |
| 18825  | 0     | 0     | 0     | 0     |
| 18828  | 0     | 0     | 0     | 0     |
| 18832  | 0     | 0     | 0     | 0     |
| 18834  | 0     | 0     | 0     | 1     |
| 18835  | 0     | 0     | 0     | 0     |
| 18837  | 0     | 0     | 0     | 0     |
| 18842  | 0     | 0     | 0     | 0     |
| 18846  | 0     | 0     | 0     | 0     |
| 18855  | 0     | 0     | 0     | 0     |
| 18856  | 0     | 0     | 0     | 0     |
| 18887  | 0     | 0     | 0     | 0     |

| respid | Q31_6 | Q31_7 | Q31_8 | Q31_9 |
|--------|-------|-------|-------|-------|
| 18903  | 0     | 0     | 0     | 1     |
| 18906  | 0     | 0     | 1     | 0     |
| 18910  | 0     | 0     | 0     | 0     |
| 18919  | 1     | 0     | 0     | 0     |
| 18928  | 0     | 0     | 0     | 0     |
| 18931  | 1     | 0     | 0     | 0     |
| 18939  | 0     | 0     | 0     | 0     |
| 18946  | 0     | 0     | 0     | 0     |
| 18952  | 0     | 0     | 0     | 0     |
| 18954  | 0     | 0     | 0     | 0     |
| 18982  | 0     | 0     | 0     | 0     |
| 18986  | 0     | 0     | 0     | 0     |
| 18989  | 0     | 0     | 0     | 0     |
| 18990  | 0     | 0     | 0     | 0     |
| 18996  | 0     | 0     | 0     | 0     |
| 18998  | 0     | 0     | 0     | 0     |
| 19009  | 0     | 0     | 0     | 0     |
| 19010  | 0     | 0     | 0     | 0     |
| 19017  | 0     | 0     | 0     | 0     |
| 19018  | 0     | 0     | 0     | 0     |
| 19020  | 0     | 0     | 0     | 0     |
| 19027  | 0     | 0     | 0     | 0     |
| 19035  | 0     | 0     | 0     | 0     |
| 19037  | 0     | 0     | 0     | 0     |
| 19048  | 0     | 1     | 0     | 0     |
| 19051  | 0     | 0     | 0     | 1     |
| 19054  | 0     | 0     | 0     | 0     |
| 19057  | 0     | 0     | 0     | 0     |
| 19073  | 0     | 0     | 1     | 0     |
| 19075  | 0     | 0     | 0     | 0     |
| 19079  | 0     | 0     | 0     | 0     |
| 19087  | 0     | 0     | 0     | 0     |

| respid | Q31_6 | Q31_7 | Q31_8 | Q31_9 |
|--------|-------|-------|-------|-------|
| 19090  | 0     | 0     | 0     | 0     |
| 19093  | 0     | 0     | 0     | 0     |
| 19099  | 1     | 0     | 0     | 1     |
| 19100  | 0     | 1     | 0     | 0     |
| 19101  | 0     | 0     | 0     | 0     |
| 19105  | 0     | 0     | 0     | 0     |
| 19111  | 0     | 0     | 0     | 0     |
| 19112  | 0     | 0     | 0     | 0     |
| 19117  | 0     | 0     | 0     | 0     |
| 19122  | 0     | 0     | 0     | 0     |
| 19126  | 0     | 0     | 0     | 0     |
| 19127  | 0     | 0     | 0     | 0     |
| 19131  | 0     | 0     | 0     | 0     |
| 19134  | 0     | 0     | 0     | 0     |
| 19149  | 0     | 0     | 0     | 0     |
| 19151  | 0     | 0     | 1     | 0     |
| 19164  | 0     | 0     | 0     | 0     |
| 19166  | 0     | 0     | 0     | 1     |
| 19172  | 0     | 0     | 0     | 0     |
| 19173  | 0     | 0     | 0     | 0     |
| 19180  | 0     | 0     | 0     | 0     |
| 19185  | 0     | 0     | 0     | 0     |
| 19189  | 0     | 0     | 0     | 0     |
| 19191  | 0     | 0     | 0     | 0     |
| 19198  | 0     | 0     | 0     | 0     |
| 19203  | 0     | 0     | 0     | 0     |
| 19209  | 0     | 0     | 0     | 0     |
| 19210  | 0     | 0     | 0     | 0     |
| 19218  | 0     | 0     | 0     | 0     |
| 19220  | 0     | 0     | 0     | 0     |
| 19225  | 0     | 0     | 0     | 0     |
| 19227  | 0     | 0     | 0     | 0     |

| respid | Q31_6 | Q31_7 | Q31_8 | Q31_9 |
|--------|-------|-------|-------|-------|
| 19228  | 0     | 0     | 0     | 0     |
| 19243  | 0     | 0     | 0     | 0     |
| 19244  | 0     | 0     | 0     | 0     |
| 19246  | 0     | 0     | 0     | 0     |
| 19248  | 0     | 0     | 0     | 0     |
| 19249  | 0     | 0     | 0     | 0     |
| 19252  | 0     | 0     | 0     | 0     |
| 19255  | 0     | 0     | 0     | 0     |
| 19257  | 0     | 0     | 0     | 0     |
| 19274  | 0     | 0     | 0     | 0     |
| 19279  | 0     | 0     | 0     | 0     |
| 19291  | 0     | 0     | 0     | 0     |
| 19292  | 0     | 0     | 0     | 0     |
| 19308  | 0     | 0     | 0     | 0     |
| 19310  | 0     | 0     | 0     | 0     |
| 19311  | 0     | 0     | 0     | 0     |
| 19326  | 0     | 0     | 0     | 0     |
| 19327  | 0     | 0     | 0     | 0     |
| 19329  | 0     | 0     | 0     | 0     |
| 19330  | 0     | 0     | 0     | 0     |
| 19333  | 0     | 0     | 0     | 0     |
| 19336  | 0     | 0     | 0     | 0     |
| 19343  | 0     | 0     | 0     | 0     |
| 19348  | 0     | 0     | 0     | 0     |
| 19349  | 0     | 0     | 0     | 0     |
| 19352  | 0     | 1     | 0     | 0     |
| 19356  | 0     | 0     | 0     | 0     |
| 19357  | 0     | 0     | 0     | 0     |
| 19358  | 0     | 0     | 0     | 0     |
| 19367  | 0     | 0     | 0     | 1     |
| 19376  | 0     | 0     | 0     | 0     |
| 19377  | 0     | 0     | 0     | 0     |

| respid | Q31_6 | Q31_7 | Q31_8 | Q31_9 |
|--------|-------|-------|-------|-------|
| 19380  | 0     | 0     | 0     | 0     |
| 19384  | 0     | 0     | 0     | 0     |
| 19391  | 0     | 0     | 0     | 1     |
| 19397  | 0     | 0     | 0     | 0     |
| 19398  | 0     | 0     | 0     | 0     |
| 19401  | 0     | 0     | 0     | 0     |
| 19402  | 0     | 0     | 0     | 0     |
| 19403  | 0     | 0     | 0     | 0     |
| 19405  | 0     | 0     | 0     | 0     |
| 19407  | 0     | 0     | 0     | 0     |
| 19415  | 0     | 0     | 0     | 0     |
| 19420  | 0     | 0     | 0     | 0     |
| 19423  | 1     | 0     | 1     | 1     |
| 19424  | 0     | 0     | 0     | 0     |
| 19426  | 0     | 1     | 0     | 0     |
| 19429  | 0     | 0     | 0     | 0     |
| 19435  | 0     | 0     | 0     | 0     |
| 19441  | 0     | 0     | 0     | 1     |
| 19450  | 0     | 0     | 0     | 0     |
| 19456  | 1     | 0     | 0     | 1     |
| 19457  | 0     | 0     | 0     | 0     |
| 19463  | 0     | 0     | 0     | 0     |
| 19467  | 0     | 0     | 0     | 0     |
| 19468  | 0     | 0     | 0     | 0     |
| 19471  | 0     | 0     | 0     | 0     |
| 19473  | 0     | 0     | 0     | 0     |
| 19478  | 0     | 0     | 1     | 0     |
| 19480  | 0     | 0     | 0     | 0     |
| 19481  | 0     | 0     | 0     | 0     |
| 19484  | 0     | 0     | 0     | 0     |
| 19487  | 0     | 0     | 0     | 0     |
| 19491  | 0     | 0     | 0     | 0     |



| respid | Q31_6 | Q31_7 | Q31_8 | Q31_9 |
|--------|-------|-------|-------|-------|
| 19495  | 0     | 0     | 0     | 0     |
| 19498  | 1     | 1     | 0     | 0     |
| 19500  | 0     | 0     | 0     | 1     |
| 19501  | 0     | 0     | 0     | 1     |
| 19503  | 0     | 0     | 0     | 0     |
| 19506  | 0     | 0     | 0     | 0     |
| 19508  | 0     | 0     | 0     | 0     |
| 19509  | 0     | 0     | 0     | 0     |
| 19518  | 0     | 0     | 0     | 0     |
| 19520  | 0     | 0     | 0     | 0     |
| 19536  | 0     | 0     | 0     | 0     |
| 19538  | 0     | 0     | 0     | 0     |
| 19541  | 0     | 1     | 0     | 1     |
| 19548  | 0     | 0     | 0     | 0     |
| 19553  | 0     | 0     | 0     | 0     |
| 19556  | 0     | 0     | 0     | 0     |
| 19559  | 0     | 0     | 0     | 0     |
| 19561  | 0     | 0     | 0     | 0     |
| 19562  | 0     | 0     | 0     | 0     |
| 19564  | 0     | 0     | 0     | 0     |
| 19567  | 1     | 0     | 1     | 1     |
| 19571  | 0     | 0     | 1     | 1     |
| 19576  | 0     | 0     | 1     | 1     |
| 19578  | 0     | 0     | 0     | 0     |
| 19606  | 0     | 0     | 0     | 0     |
| 19607  | 0     | 0     | 0     | 0     |
| 19608  | 0     | 0     | 0     | 1     |
| 19612  | 0     | 0     | 0     | 0     |
| 19618  | 0     | 0     | 0     | 0     |
| 19621  | 0     | 0     | 0     | 0     |
| 19624  | 1     | 0     | 0     | 0     |
| 19630  | 0     | 0     | 0     | 0     |

| respid | Q31_6 | Q31_7 | Q31_8 | Q31_9 |
|--------|-------|-------|-------|-------|
| 19637  | 0     | 0     | 0     | 0     |
| 19639  | 0     | 0     | 0     | 1     |
| 19647  | 0     | 0     | 0     | 0     |
| 19648  | 0     | 0     | 0     | 0     |
| 19660  | 0     | 0     | 0     | 0     |
| 19662  | 0     | 0     | 0     | 1     |
| 19669  | 0     | 0     | 0     | 0     |
| 19680  | 0     | 0     | 0     | 0     |
| 19682  | 0     | 0     | 0     | 0     |
| 19686  | 0     | 0     | 0     | 0     |
| 19700  | 0     | 0     | 0     | 0     |
| 19701  | 0     | 0     | 0     | 0     |
| 19704  | 0     | 0     | 0     | 0     |
| 19706  | 0     | 0     | 1     | 0     |
| 19707  | 0     | 0     | 0     | 0     |
| 19717  | 0     | 0     | 0     | 0     |
| 19718  | 0     | 0     | 0     | 0     |
| 19721  | 0     | 0     | 0     | 0     |
| 19722  | 0     | 0     | 0     | 0     |
| 19729  | 0     | 0     | 0     | 0     |
| 19738  | 0     | 0     | 0     | 0     |
| 19741  | 0     | 0     | 0     | 0     |
| 19742  | 0     | 0     | 0     | 0     |
| 19747  | 0     | 0     | 0     | 0     |
| 19748  | 0     | 0     | 0     | 0     |
| 19749  | 0     | 0     | 0     | 0     |
| 19756  | 0     | 0     | 0     | 0     |
| 19771  | 0     | 0     | 0     | 0     |
| 19772  | 0     | 0     | 0     | 0     |
| 19775  | 0     | 0     | 0     | 0     |
| 19783  | 0     | 0     | 0     | 0     |
| 19787  | 0     | 0     | 0     | 0     |

| respid | Q31_6 | Q31_7 | Q31_8 | Q31_9 |
|--------|-------|-------|-------|-------|
| 19790  | 0     | 0     | 0     | 0     |
| 19797  | 0     | 0     | 0     | 0     |
| 19802  | 0     | 0     | 0     | 0     |
| 19808  | 0     | 0     | 0     | 0     |
| 19810  | 0     | 0     | 0     | 0     |
| 19811  | 0     | 0     | 0     | 1     |
| 19812  | 0     | 0     | 0     | 0     |
| 19821  | 0     | 0     | 0     | 0     |
| 19826  | 0     | 0     | 0     | 0     |
| 19827  | 0     | 0     | 0     | 0     |
| 19830  | 0     | 0     | 0     | 0     |
| 19834  | 0     | 0     | 0     | 0     |
| 19838  | 0     | 0     | 0     | 0     |
| 19843  | 0     | 0     | 0     | 0     |
| 19845  | 0     | 0     | 0     | 0     |
| 19846  | 0     | 0     | 0     | 0     |
| 19852  | 0     | 0     | 0     | 1     |
| 19855  | 0     | 0     | 0     | 0     |
| 19858  | 0     | 0     | 0     | 1     |
| 19861  | 0     | 0     | 0     | 0     |
| 19863  | 0     | 0     | 1     | 0     |
| 19868  | 0     | 0     | 0     | 0     |
| 19874  | 0     | 0     | 0     | 0     |
| 19876  | 0     | 0     | 0     | 0     |
| 19880  | 0     | 0     | 0     | 0     |
| 19885  | 0     | 0     | 0     | 0     |
| 19890  | 0     | 0     | 0     | 0     |
| 19894  | 0     | 0     | 0     | 0     |
| 19895  | 0     | 0     | 0     | 0     |
| 19897  | 0     | 0     | 0     | 0     |
| 19906  | 0     | 0     | 0     | 0     |
| 19908  | 0     | 0     | 0     | 0     |

| respid | Q31_6 | Q31_7 | Q31_8 | Q31_9 |
|--------|-------|-------|-------|-------|
| 19912  | 0     | 0     | 0     | 0     |
| 19913  | 0     | 0     | 0     | 0     |
| 19914  | 0     | 0     | 0     | 0     |
| 19918  | 0     | 0     | 0     | 0     |
| 19924  | 0     | 0     | 1     | 0     |
| 19936  | 0     | 0     | 0     | 0     |
| 19940  | 0     | 0     | 0     | 0     |
| 19945  | 0     | 0     | 0     | 1     |
| 19948  | 0     | 0     | 0     | 0     |
| 19959  | 0     | 0     | 0     | 0     |
| 19961  | 0     | 0     | 0     | 0     |
| 19962  | 0     | 0     | 0     | 1     |
| 19965  | 0     | 0     | 0     | 0     |
| 19966  | 0     | 0     | 0     | 0     |
| 19973  | 0     | 0     | 0     | 0     |
| 19981  | 0     | 0     | 0     | 0     |
| 19986  | 0     | 0     | 0     | 0     |
| 19989  | 0     | 0     | 0     | 0     |
| 19998  | 0     | 0     | 0     | 0     |
| 20001  | 0     | 0     | 0     | 0     |
| 20005  | 0     | 0     | 0     | 0     |
| 20013  | 0     | 0     | 1     | 0     |
| 20015  | 0     | 0     | 0     | 0     |
| 20017  | 0     | 1     | 1     | 0     |
| 20020  | 0     | 0     | 0     | 0     |
| 20021  | 0     | 0     | 0     | 0     |
| 20026  | 0     | 0     | 0     | 0     |
| 20028  | 0     | 0     | 0     | 0     |
| 20030  | 0     | 0     | 0     | 0     |
| 20031  | 0     | 0     | 0     | 0     |
| 20034  | 0     | 0     | 0     | 0     |
| 20035  | 0     | 0     | 0     | 0     |

| respid | Q31_6 | Q31_7 | Q31_8 | Q31_9 |
|--------|-------|-------|-------|-------|
| 20040  | 0     | 0     | 0     | 0     |
| 20045  | 0     | 0     | 0     | 0     |
| 20048  | 0     | 1     | 0     | 0     |
| 20053  | 0     | 0     | 0     | 0     |
| 20064  | 0     | 0     | 0     | 0     |
| 20071  | 0     | 0     | 0     | 0     |
| 20072  | 0     | 0     | 0     | 0     |
| 20076  | 0     | 0     | 0     | 0     |
| 20081  | 1     | 0     | 0     | 0     |
| 20082  | 0     | 0     | 0     | 0     |
| 20083  | 0     | 0     | 0     | 0     |
| 20088  | 0     | 0     | 0     | 0     |
| 20089  | 1     | 0     | 1     | 1     |
| 20099  | 0     | 0     | 0     | 1     |
| 20101  | 0     | 0     | 0     | 0     |
| 20102  | 0     | 0     | 0     | 0     |
| 20109  | 0     | 0     | 0     | 0     |
| 20118  | 0     | 0     | 0     | 0     |
| 20119  | 0     | 0     | 0     | 0     |
| 20124  | 0     | 0     | 0     | 0     |
| 20126  | 0     | 0     | 0     | 0     |
| 20130  | 0     | 0     | 0     | 0     |
| 20131  | 0     | 0     | 0     | 0     |
| 20134  | 0     | 0     | 0     | 0     |
| 20146  | 0     | 0     | 0     | 0     |
| 20152  | 0     | 0     | 0     | 0     |
| 20155  | 0     | 0     | 0     | 0     |
| 20156  | 0     | 0     | 0     | 0     |
| 20157  | 0     | 0     | 0     | 0     |
| 20164  | 0     | 0     | 0     | 0     |
| 20168  | 0     | 0     | 0     | 0     |
| 20173  | 0     | 1     | 0     | 0     |

| respid | Q31_6 | Q31_7 | Q31_8 | Q31_9 |
|--------|-------|-------|-------|-------|
| 20174  | 0     | 0     | 0     | 0     |
| 20175  | 1     | 0     | 0     | 1     |
| 20189  | 0     | 0     | 0     | 0     |
| 20190  | 0     | 0     | 0     | 0     |
| 20201  | 0     | 0     | 0     | 0     |
| 20202  | 0     | 0     | 0     | 0     |
| 20204  | 0     | 0     | 0     | 0     |
| 20206  | 0     | 0     | 0     | 0     |
| 20207  | 0     | 0     | 0     | 0     |
| 20212  | 0     | 0     | 0     | 0     |
| 20213  | 0     | 0     | 0     | 0     |
| 20217  | 0     | 0     | 0     | 0     |
| 20222  | 0     | 0     | 0     | 0     |
| 20227  | 0     | 0     | 0     | 0     |
| 20228  | 0     | 0     | 0     | 0     |
| 20238  | 0     | 0     | 0     | 0     |
| 20242  | 0     | 0     | 0     | 0     |
| 20246  | 0     | 0     | 0     | 0     |
| 20255  | 0     | 0     | 0     | 1     |
| 20256  | 0     | 0     | 0     | 0     |
| 20259  | 0     | 0     | 0     | 0     |
| 20262  | 0     | 0     | 0     | 0     |
| 20274  | 0     | 0     | 0     | 0     |
| 20283  | 0     | 0     | 0     | 0     |
| 20284  | 0     | 0     | 0     | 0     |
| 20291  | 0     | 0     | 0     | 0     |
| 20292  | 0     | 0     | 0     | 0     |
| 20293  | 0     | 0     | 0     | 0     |
| 20298  | 0     | 0     | 0     | 0     |
| 20301  | 0     | 0     | 0     | 0     |
| 20303  | 0     | 0     | 0     | 0     |
| 20309  | 0     | 0     | 0     | 0     |

| respid | Q31_6 | Q31_7 | Q31_8 | Q31_9 |
|--------|-------|-------|-------|-------|
| 20318  | 0     | 0     | 0     | 1     |
| 20324  | 0     | 0     | 0     | 0     |
| 20335  | 0     | 0     | 0     | 0     |
| 20336  | 0     | 0     | 0     | 0     |
| 20339  | 0     | 0     | 1     | 0     |
| 20348  | 0     | 0     | 0     | 0     |
| 20351  | 0     | 0     | 0     | 0     |
| 20353  | 0     | 0     | 0     | 0     |
| 20356  | 0     | 0     | 0     | 0     |
| 20357  | 0     | 0     | 0     | 0     |
| 20366  | 0     | 0     | 0     | 0     |
| 20369  | 1     | 0     | 0     | 0     |
| 20372  | 0     | 0     | 0     | 0     |
| 20375  | 0     | 0     | 0     | 0     |
| 20379  | 0     | 0     | 0     | 0     |
| 20380  | 0     | 0     | 0     | 0     |
| 20396  | 0     | 0     | 0     | 0     |
| 20398  | 0     | 0     | 0     | 0     |
| 20412  | 0     | 0     | 0     | 0     |
| 20415  | 0     | 0     | 0     | 0     |
| 20424  | 0     | 0     | 0     | 0     |
| 20434  | 0     | 0     | 0     | 0     |
| 20435  | 0     | 0     | 0     | 1     |
| 20440  | 0     | 0     | 0     | 0     |
| 20441  | 0     | 0     | 0     | 0     |
| 20445  | 0     | 0     | 0     | 0     |
| 20446  | 0     | 0     | 0     | 1     |
| 20450  | 0     | 0     | 0     | 0     |
| 20453  | 0     | 0     | 0     | 0     |
| 20458  | 0     | 0     | 0     | 0     |
| 20464  | 0     | 0     | 0     | 0     |
| 20471  | 0     | 0     | 0     | 0     |

| respid | Q31_6 | Q31_7 | Q31_8 | Q31_9 |
|--------|-------|-------|-------|-------|
| 20473  | 0     | 0     | 0     | 0     |
| 20474  | 0     | 0     | 0     | 0     |
| 20477  | 0     | 0     | 0     | 0     |
| 20479  | 0     | 0     | 0     | 1     |
| 20485  | 0     | 0     | 0     | 0     |
| 20487  | 0     | 0     | 0     | 0     |
| 20488  | 0     | 0     | 0     | 0     |
| 20494  | 0     | 0     | 0     | 0     |
| 20502  | 1     | 0     | 1     | 0     |
| 20503  | 0     | 0     | 0     | 0     |
| 20510  | 0     | 0     | 0     | 0     |
| 20512  | 0     | 0     | 0     | 0     |
| 20516  | 0     | 1     | 0     | 0     |
| 20522  | 0     | 0     | 0     | 0     |
| 20527  | 0     | 0     | 0     | 0     |
| 20529  | 0     | 0     | 0     | 0     |
| 20535  | 0     | 0     | 1     | 0     |
| 20543  | 0     | 0     | 0     | 0     |
| 20546  | 0     | 0     | 0     | 1     |
| 20548  | 0     | 0     | 0     | 0     |
| 20552  | 0     | 0     | 0     | 0     |
| 20556  | 0     | 0     | 0     | 0     |
| 20566  | 0     | 0     | 0     | 0     |
| 20576  | 0     | 0     | 0     | 0     |
| 20587  | 0     | 0     | 0     | 0     |
| 20589  | 0     | 0     | 0     | 0     |
| 20593  | 0     | 0     | 0     | 0     |
| 20594  | 0     | 0     | 0     | 0     |
| 20602  | 0     | 0     | 0     | 0     |
| 20607  | 0     | 0     | 0     | 0     |
| 20608  | 0     | 0     | 0     | 0     |
| 20611  | 0     | 0     | 0     | 0     |



| respid | Q31_6 | Q31_7 | Q31_8 | Q31_9 |
|--------|-------|-------|-------|-------|
| 20612  | 0     | 0     | 0     | 0     |
| 20615  | 0     | 0     | 0     | 0     |
| 20625  | 0     | 0     | 0     | 0     |
| 20630  | 0     | 0     | 0     | 0     |
| 20639  | 0     | 0     | 0     | 0     |
| 20643  | 0     | 0     | 0     | 0     |
| 20645  | 0     | 0     | 0     | 0     |
| 20647  | 0     | 0     | 0     | 0     |
| 20652  | 1     | 0     | 0     | 1     |
| 20661  | 0     | 0     | 0     | 0     |
| 20665  | 0     | 0     | 0     | 0     |
| 20679  | 0     | 0     | 0     | 0     |
| 20682  | 0     | 0     | 0     | 0     |
| 20683  | 0     | 0     | 0     | 0     |
| 20700  | 0     | 0     | 0     | 0     |
| 20702  | 0     | 0     | 0     | 1     |
| 20709  | 0     | 0     | 0     | 0     |
| 20715  | 0     | 0     | 0     | 0     |
| 20718  | 0     | 0     | 0     | 0     |
| 20722  | 0     | 0     | 0     | 0     |
| 20729  | 0     | 0     | 0     | 0     |
| 20732  | 0     | 0     | 0     | 0     |
| 20746  | 0     | 0     | 0     | 1     |
| 20747  | 0     | 0     | 0     | 0     |
| 20758  | 0     | 0     | 0     | 0     |
| 20767  | 0     | 0     | 0     | 0     |
| 20777  | 0     | 0     | 0     | 0     |
| 20778  | 0     | 0     | 0     | 0     |
| 20780  | 0     | 0     | 0     | 1     |
| 20800  | 0     | 0     | 1     | 1     |
| 20810  | 0     | 0     | 0     | 0     |
| 20814  | 0     | 0     | 0     | 0     |

| respid | Q31_6 | Q31_7 | Q31_8 | Q31_9 |
|--------|-------|-------|-------|-------|
| 20816  | 0     | 0     | 0     | 0     |
| 20832  | 0     | 0     | 0     | 0     |
| 20838  | 0     | 0     | 0     | 0     |
| 20841  | 1     | 1     | 0     | 0     |
| 20848  | 0     | 0     | 0     | 0     |
| 20850  | 0     | 0     | 0     | 0     |
| 20851  | 0     | 0     | 0     | 0     |
| 20861  | 0     | 0     | 0     | 0     |
| 20870  | 0     | 0     | 0     | 1     |
| 20880  | 0     | 0     | 0     | 0     |
| 20883  | 0     | 0     | 0     | 0     |
| 20894  | 0     | 0     | 0     | 0     |
| 20896  | 0     | 0     | 0     | 0     |
| 20901  | 1     | 1     | 0     | 0     |
| 20903  | 0     | 0     | 0     | 0     |
| 20909  | 0     | 0     | 0     | 0     |
| 20919  | 0     | 0     | 0     | 1     |
| 20925  | 1     | 1     | 0     | 0     |
| 20935  | 0     | 0     | 0     | 0     |
| 20939  | 0     | 0     | 0     | 0     |
| 20956  | 0     | 1     | 0     | 1     |
| 20970  | 0     | 0     | 0     | 0     |
| 20974  | 0     | 0     | 0     | 0     |
| 20975  | 0     | 0     | 0     | 0     |
| 20984  | 0     | 0     | 0     | 0     |
| 20988  | 0     | 0     | 0     | 0     |
| 20996  | 0     | 0     | 0     | 0     |
| 20998  | 0     | 0     | 0     | 0     |
| 21007  | 0     | 0     | 0     | 0     |
| 21008  | 0     | 0     | 0     | 0     |
| 21014  | 0     | 0     | 0     | 0     |
| 21020  | 0     | 0     | 0     | 0     |

| respid | Q31_6 | Q31_7 | Q31_8 | Q31_9 |
|--------|-------|-------|-------|-------|
| 21022  | 0     | 0     | 0     | 0     |
| 21024  | 0     | 0     | 0     | 0     |
| 21026  | 0     | 0     | 0     | 1     |
| 21027  | 0     | 0     | 0     | 0     |
| 21030  | 0     | 0     | 0     | 0     |
| 21032  | 0     | 0     | 0     | 0     |
| 21040  | 0     | 0     | 0     | 0     |
| 21045  | 0     | 0     | 0     | 0     |
| 21058  | 0     | 1     | 0     | 0     |
| 21064  | 0     | 0     | 0     | 0     |
| 21073  | 0     | 0     | 0     | 0     |
| 21086  | 0     | 0     | 0     | 0     |
| 21092  | 1     | 0     | 1     | 0     |
| 21096  | 1     | 0     | 0     | 0     |
| 21103  | 0     | 0     | 0     | 0     |
| 21120  | 0     | 0     | 0     | 0     |
| 21125  | 0     | 0     | 0     | 0     |
| 21126  | 0     | 0     | 1     | 0     |
| 21132  | 0     | 0     | 0     | 0     |
| 21139  | 1     | 0     | 0     | 0     |
| 21147  | 0     | 0     | 0     | 0     |
| 21148  | 0     | 0     | 0     | 1     |
| 21149  | 0     | 0     | 0     | 0     |
| 21164  | 0     | 0     | 0     | 0     |
| 21165  | 0     | 0     | 0     | 0     |
| 21171  | 0     | 0     | 0     | 0     |
| 21176  | 0     | 0     | 0     | 0     |
| 21187  | 0     | 0     | 0     | 1     |
| 21192  | 0     | 0     | 0     | 1     |
| 21198  | 0     | 0     | 0     | 0     |
| 21199  | 0     | 0     | 0     | 0     |
| 21206  | 0     | 0     | 0     | 0     |

| respid | Q31_6 | Q31_7 | Q31_8 | Q31_9 |
|--------|-------|-------|-------|-------|
| 21212  | 0     | 0     | 0     | 0     |
| 21216  | 0     | 0     | 0     | 0     |
| 21217  | 1     | 0     | 1     | 0     |
| 21228  | 0     | 0     | 0     | 0     |
| 21229  | 0     | 0     | 0     | 0     |
| 21230  | 0     | 0     | 0     | 0     |
| 21243  | 0     | 0     | 0     | 0     |
| 21247  | 1     | 0     | 0     | 1     |
| 21253  | 0     | 0     | 0     | 0     |
| 21264  | 0     | 0     | 0     | 0     |
| 21265  | 0     | 0     | 0     | 0     |
| 21273  | 0     | 0     | 0     | 1     |
| 21275  | 0     | 0     | 0     | 0     |
| 21278  | 0     | 0     | 0     | 0     |
| 21291  | 0     | 0     | 0     | 0     |
| 21298  | 0     | 0     | 0     | 0     |
| 21301  | 0     | 0     | 0     | 0     |
| 21312  | 0     | 0     | 1     | 1     |
| 21323  | 0     | 0     | 0     | 0     |
| 21325  | 0     | 0     | 0     | 0     |
| 21341  | 0     | 0     | 0     | 0     |
| 21349  | 0     | 0     | 0     | 0     |
| 21350  | 0     | 0     | 0     | 0     |
| 21354  | 0     | 0     | 0     | 1     |
| 21372  | 0     | 0     | 0     | 0     |
| 21373  | 0     | 0     | 0     | 1     |
| 21378  | 0     | 0     | 0     | 0     |
| 21393  | 0     | 0     | 0     | 0     |
| 21401  | 0     | 0     | 0     | 0     |
| 21405  | 0     | 0     | 0     | 0     |
| 21406  | 0     | 0     | 0     | 0     |
| 21407  | 0     | 0     | 0     | 0     |

| respid | Q31_6 | Q31_7 | Q31_8 | Q31_9 |
|--------|-------|-------|-------|-------|
| 21418  | 0     | 0     | 0     | 0     |
| 21420  | 0     | 0     | 0     | 0     |
| 21421  | 0     | 0     | 0     | 0     |
| 21446  | 0     | 0     | 0     | 0     |
| 21449  | 0     | 0     | 0     | 0     |
| 21452  | 0     | 0     | 0     | 0     |
| 21455  | 0     | 1     | 0     | 0     |
| 21469  | 0     | 0     | 0     | 0     |
| 21471  | 0     | 1     | 0     | 0     |
| 21472  | 0     | 0     | 0     | 0     |
| 21474  | 0     | 0     | 0     | 0     |
| 21479  | 0     | 0     | 0     | 0     |
| 21485  | 0     | 0     | 0     | 0     |
| 21512  | 0     | 0     | 0     | 0     |
| 21513  | 0     | 0     | 0     | 0     |
| 21514  | 0     | 0     | 0     | 0     |
| 21520  | 0     | 0     | 0     | 0     |
| 21539  | 0     | 0     | 0     | 0     |
| 21553  | 0     | 0     | 0     | 0     |
| 21560  | 0     | 0     | 0     | 0     |
| 21561  | 0     | 0     | 0     | 0     |
| 21563  | 0     | 0     | 0     | 0     |
| 21565  | 0     | 0     | 0     | 0     |
| 21582  | 0     | 0     | 0     | 0     |
| 21584  | 0     | 0     | 0     | 0     |
| 21585  | 0     | 0     | 0     | 0     |
| 21586  | 0     | 0     | 0     | 0     |
| 21587  | 0     | 0     | 0     | 0     |
| 21590  | 1     | 0     | 0     | 0     |
| 21601  | 0     | 0     | 0     | 0     |
| 21611  | 0     | 0     | 0     | 1     |
| 21612  | 0     | 0     | 0     | 0     |

| respid | Q31_6 | Q31_7 | Q31_8 | Q31_9 |
|--------|-------|-------|-------|-------|
| 21625  | 0     | 0     | 0     | 0     |
| 21633  | 0     | 0     | 0     | 0     |
| 21640  | 0     | 0     | 0     | 0     |
| 21647  | 0     | 0     | 0     | 0     |
| 21648  | 0     | 0     | 0     | 0     |
| 21656  | 0     | 0     | 0     | 0     |
| 21657  | 0     | 0     | 0     | 0     |
| 21658  | 0     | 0     | 1     | 1     |
| 21665  | 0     | 0     | 0     | 0     |
| 21666  | 0     | 0     | 0     | 1     |
| 21668  | 1     | 0     | 0     | 0     |
| 21673  | 0     | 0     | 0     | 0     |
| 21681  | 0     | 0     | 0     | 0     |
| 21682  | 0     | 0     | 0     | 0     |
| 21685  | 0     | 0     | 0     | 0     |
| 21692  | 1     | 0     | 0     | 0     |
| 21697  | 0     | 0     | 0     | 0     |
| 21711  | 0     | 0     | 0     | 0     |
| 21715  | 1     | 0     | 0     | 1     |
| 21726  | 0     | 0     | 0     | 0     |
| 21748  | 0     | 0     | 0     | 0     |
| 21761  | 0     | 0     | 0     | 0     |
| 21769  | 0     | 0     | 0     | 0     |
| 21774  | 1     | 0     | 0     | 0     |
| 21778  | 0     | 0     | 0     | 0     |
| 21785  | 0     | 0     | 0     | 0     |
| 21799  | 0     | 0     | 0     | 0     |
| 21820  | 0     | 0     | 0     | 0     |
| 21837  | 0     | 0     | 0     | 0     |
| 21845  | 0     | 0     | 0     | 0     |
| 21846  | 0     | 0     | 0     | 0     |
| 21849  | 0     | 1     | 0     | 0     |

| respid | Q31_6 | Q31_7 | Q31_8 | Q31_9 |
|--------|-------|-------|-------|-------|
| 21850  | 0     | 0     | 0     | 0     |
| 21855  | 0     | 0     | 0     | 0     |
| 21859  | 0     | 0     | 0     | 0     |
| 21861  | 0     | 0     | 0     | 0     |
| 21866  | 0     | 0     | 0     | 0     |
| 21873  | 0     | 0     | 0     | 1     |
| 21876  | 0     | 0     | 0     | 0     |
| 21882  | 0     | 0     | 0     | 0     |
| 21884  | 0     | 0     | 0     | 0     |
| 21887  | 0     | 0     | 0     | 0     |
| 21892  | 0     | 0     | 0     | 0     |
| 21907  | 0     | 0     | 0     | 0     |
| 21910  | 0     | 0     | 0     | 0     |
| 21912  | 0     | 0     | 0     | 0     |
| 21914  | 0     | 0     | 0     | 1     |
| 21925  | 0     | 0     | 0     | 0     |
| 21937  | 0     | 0     | 0     | 0     |
| 21938  | 0     | 0     | 0     | 0     |
| 21940  | 0     | 0     | 0     | 0     |
| 21942  | 0     | 0     | 0     | 0     |
| 21947  | 0     | 0     | 0     | 0     |
| 21948  | 0     | 0     | 0     | 0     |
| 21961  | 0     | 0     | 0     | 0     |
| 21977  | 1     | 0     | 0     | 1     |
| 21983  | 0     | 0     | 0     | 0     |
| 21986  | 0     | 0     | 0     | 0     |
| 21988  | 0     | 0     | 1     | 0     |
| 21996  | 0     | 0     | 0     | 0     |
| 21997  | 0     | 0     | 0     | 0     |
| 22005  | 0     | 0     | 0     | 0     |
| 22013  | 0     | 0     | 0     | 0     |
| 22018  | 0     | 0     | 0     | 0     |

| respid | Q31_6 | Q31_7 | Q31_8 | Q31_9 |
|--------|-------|-------|-------|-------|
| 22019  | 0     | 0     | 0     | 0     |
| 22071  | 0     | 0     | 0     | 0     |
| 22082  | 0     | 0     | 0     | 0     |
| 22085  | 0     | 0     | 0     | 0     |
| 22092  | 0     | 0     | 0     | 0     |
| 22097  | 0     | 0     | 0     | 0     |
| 22111  | 0     | 0     | 0     | 0     |
| 22118  | 0     | 0     | 0     | 0     |
| 22132  | 0     | 0     | 0     | 0     |
| 22133  | 0     | 0     | 0     | 0     |
| 22139  | 0     | 0     | 0     | 0     |
| 22142  | 1     | 0     | 1     | 1     |
| 22146  | 0     | 0     | 0     | 0     |
| 22181  | 0     | 0     | 0     | 0     |
| 22202  | 0     | 0     | 0     | 0     |
| 22214  | 0     | 0     | 0     | 0     |
| 22223  | 0     | 0     | 0     | 0     |
| 22227  | 0     | 0     | 0     | 0     |
| 22229  | 0     | 0     | 0     | 0     |
| 22239  | 0     | 0     | 0     | 0     |
| 22245  | 0     | 0     | 0     | 0     |
| 22256  | 0     | 0     | 0     | 0     |
| 22260  | 0     | 0     | 0     | 0     |
| 22298  | 0     | 1     | 0     | 0     |
| 22321  | 0     | 0     | 0     | 0     |
| 22340  | 0     | 0     | 0     | 0     |
| 22346  | 0     | 1     | 0     | 0     |
| 22356  | 0     | 0     | 0     | 0     |
| 22361  | 0     | 0     | 0     | 0     |
| 22364  | 0     | 0     | 0     | 0     |
| 22368  | 0     | 0     | 0     | 0     |
| 22374  | 0     | 0     | 0     | 0     |



| respid | Q31_6 | Q31_7 | Q31_8 | Q31_9 |
|--------|-------|-------|-------|-------|
| 22375  | 0     | 0     | 0     | 0     |
| 22377  | 0     | 0     | 0     | 0     |
| 22383  | 0     | 0     | 0     | 0     |
| 22387  | 0     | 0     | 0     | 0     |
| 22392  | 0     | 0     | 0     | 0     |
| 22393  | 0     | 0     | 0     | 0     |
| 22394  | 0     | 0     | 0     | 0     |
| 22395  | 0     | 0     | 0     | 0     |
| 22401  | 0     | 0     | 0     | 0     |
| 22407  | 0     | 0     | 0     | 0     |
| 22410  | 0     | 0     | 0     | 0     |
| 22418  | 0     | 0     | 0     | 0     |
| 22421  | 0     | 0     | 0     | 0     |
| 22423  | 0     | 0     | 0     | 0     |
| 22425  | 0     | 0     | 0     | 0     |
| 22427  | 0     | 0     | 0     | 0     |
| 22431  | 0     | 0     | 0     | 0     |
| 22435  | 0     | 0     | 0     | 0     |
| 22436  | 0     | 0     | 0     | 0     |
| 22442  | 0     | 0     | 0     | 0     |
| 22444  | 0     | 0     | 0     | 1     |
| 22445  | 0     | 0     | 0     | 0     |
| 22446  | 0     | 0     | 0     | 0     |
| 22448  | 0     | 0     | 0     | 0     |
| 22449  | 0     | 0     | 0     | 0     |
| 22450  | 0     | 0     | 0     | 0     |
| 22453  | 0     | 0     | 0     | 0     |
| 22465  | 0     | 0     | 0     | 0     |
| 22472  | 0     | 0     | 0     | 0     |
| 22475  | 0     | 0     | 0     | 0     |
| 22478  | 0     | 0     | 0     | 1     |
| 22491  | 0     | 0     | 0     | 0     |

| respid | Q31_6 | Q31_7 | Q31_8 | Q31_9 |
|--------|-------|-------|-------|-------|
| 22497  | 1     | 0     | 0     | 0     |
| 22498  | 0     | 0     | 0     | 0     |
| 22499  | 0     | 0     | 0     | 0     |
| 22503  | 0     | 0     | 0     | 0     |
| 22507  | 0     | 0     | 0     | 0     |
| 22513  | 0     | 0     | 0     | 0     |
| 22517  | 0     | 1     | 0     | 0     |
| 22524  | 0     | 0     | 0     | 1     |
| 22528  | 0     | 0     | 0     | 0     |
| 22544  | 0     | 0     | 0     | 1     |
| 22571  | 0     | 0     | 0     | 0     |
| 22576  | 0     | 0     | 0     | 0     |
| 22579  | 0     | 0     | 0     | 0     |
| 22583  | 0     | 0     | 0     | 1     |
| 22591  | 0     | 0     | 0     | 0     |
| 22592  | 0     | 0     | 0     | 0     |
| 22612  | 0     | 0     | 0     | 0     |
| 22613  | 0     | 0     | 1     | 0     |
| 22615  | 0     | 0     | 0     | 0     |
| 22621  | 0     | 0     | 0     | 0     |
| 22625  | 0     | 0     | 0     | 0     |
| 22628  | 0     | 0     | 0     | 0     |
| 22632  | 0     | 0     | 0     | 0     |
| 22639  | 0     | 0     | 0     | 0     |
| 22648  | 0     | 0     | 0     | 0     |
| 22649  | 1     | 0     | 0     | 0     |
| 22655  | 0     | 0     | 0     | 0     |
| 22659  | 0     | 0     | 0     | 0     |
| 22660  | 0     | 0     | 0     | 0     |
| 22666  | 0     | 0     | 0     | 0     |
| 22667  | 0     | 0     | 0     | 0     |
| 22670  | 0     | 0     | 0     | 0     |

| respid | Q31_6 | Q31_7 | Q31_8 | Q31_9 |
|--------|-------|-------|-------|-------|
| 22681  | 0     | 0     | 0     | 0     |
| 22683  | 0     | 0     | 0     | 0     |
| 22688  | 0     | 0     | 0     | 0     |
| 22695  | 0     | 0     | 0     | 0     |
| 22696  | 0     | 0     | 0     | 0     |
| 22705  | 0     | 0     | 0     | 0     |
| 22718  | 0     | 0     | 0     | 0     |
| 22720  | 0     | 0     | 0     | 0     |
| 22724  | 0     | 0     | 0     | 0     |
| 22728  | 0     | 0     | 0     | 0     |
| 22751  | 0     | 0     | 0     | 0     |
| 22782  | 1     | 0     | 0     | 0     |
| 22786  | 0     | 0     | 0     | 1     |
| 22788  | 0     | 0     | 0     | 0     |
| 22810  | 0     | 0     | 0     | 0     |
| 22816  | 0     | 0     | 0     | 0     |
| 22818  | 0     | 0     | 0     | 0     |
| 22854  | 0     | 0     | 0     | 0     |
| 22858  | 0     | 0     | 0     | 0     |
| 22862  | 0     | 0     | 0     | 0     |
| 22865  | 0     | 0     | 0     | 0     |
| 22868  | 0     | 0     | 0     | 0     |
| 22869  | 1     | 0     | 0     | 1     |
| 22873  | 0     | 0     | 0     | 0     |
| 22875  | 0     | 0     | 0     | 0     |
| 22876  | 0     | 0     | 0     | 0     |
| 22882  | 0     | 0     | 0     | 0     |
| 22884  | 1     | 0     | 0     | 1     |
| 22887  | 0     | 0     | 0     | 0     |
| 22888  | 0     | 0     | 0     | 0     |
| 22900  | 0     | 0     | 0     | 0     |
| 22901  | 0     | 0     | 0     | 0     |

| respid | Q31_6 | Q31_7 | Q31_8 | Q31_9 |
|--------|-------|-------|-------|-------|
| 22912  | 0     | 0     | 0     | 1     |
| 22913  | 0     | 0     | 0     | 0     |
| 22921  | 0     | 0     | 0     | 0     |
| 22925  | 0     | 0     | 0     | 0     |
| 22940  | 0     | 0     | 0     | 0     |
| 22941  | 0     | 0     | 0     | 0     |
| 22947  | 0     | 0     | 0     | 0     |
| 22948  | 0     | 0     | 0     | 0     |
| 22964  | 0     | 0     | 0     | 0     |
| 22966  | 0     | 0     | 0     | 0     |
| 22969  | 0     | 0     | 0     | 0     |
| 22971  | 0     | 0     | 0     | 0     |
| 22988  | 0     | 0     | 0     | 0     |
| 22990  | 0     | 0     | 0     | 0     |
| 23000  | 0     | 0     | 0     | 0     |
| 23016  | 0     | 0     | 0     | 0     |
| 23026  | 0     | 0     | 0     | 1     |
| 23035  | 0     | 0     | 0     | 0     |
| 23037  | 0     | 0     | 0     | 1     |
| 23044  | 0     | 0     | 0     | 1     |
| 23046  | 0     | 0     | 0     | 0     |
| 23047  | 0     | 0     | 0     | 0     |
| 23049  | 0     | 0     | 0     | 0     |
| 23055  | 0     | 0     | 0     | 1     |
| 23066  | 0     | 0     | 0     | 0     |
| 23075  | 0     | 0     | 0     | 0     |
| 23081  | 0     | 0     | 0     | 1     |
| 23087  | 0     | 0     | 0     | 0     |
| 23094  | 0     | 0     | 0     | 0     |
| 23099  | 0     | 0     | 0     | 0     |
| 23101  | 0     | 0     | 0     | 0     |
| 23105  | 0     | 0     | 0     | 0     |

| respid | Q31_6 | Q31_7 | Q31_8 | Q31_9 |
|--------|-------|-------|-------|-------|
| 23115  | 0     | 0     | 0     | 0     |
| 23121  | 0     | 0     | 0     | 0     |
| 23127  | 0     | 0     | 0     | 0     |
| 23131  | 0     | 0     | 0     | 0     |
| 23134  | 0     | 0     | 0     | 0     |
| 23145  | 0     | 0     | 0     | 0     |
| 23151  | 0     | 0     | 0     | 0     |
| 23161  | 1     | 0     | 0     | 0     |
| 23169  | 0     | 0     | 0     | 0     |
| 23173  | 0     | 0     | 0     | 0     |
| 23174  | 0     | 0     | 0     | 0     |
| 23186  | 0     | 0     | 0     | 0     |
| 23195  | 0     | 0     | 0     | 0     |
| 23197  | 0     | 1     | 1     | 1     |
| 23198  | 0     | 0     | 0     | 0     |
| 23203  | 0     | 0     | 0     | 0     |
| 23204  | 0     | 0     | 0     | 0     |
| 23212  | 0     | 0     | 0     | 0     |
| 23214  | 0     | 0     | 0     | 0     |
| 23221  | 0     | 0     | 0     | 0     |
| 23237  | 0     | 0     | 0     | 0     |
| 23251  | 0     | 0     | 0     | 0     |
| 23254  | 0     | 0     | 0     | 0     |
| 23262  | 0     | 0     | 0     | 0     |
| 23267  | 0     | 0     | 0     | 0     |
| 23268  | 0     | 0     | 0     | 0     |
| 23273  | 0     | 0     | 0     | 0     |
| 23278  | 0     | 0     | 0     | 0     |
| 23279  | 0     | 0     | 0     | 0     |
| 23281  | 0     | 0     | 0     | 1     |
| 23282  | 0     | 0     | 0     | 0     |
| 23283  | 0     | 1     | 0     | 0     |

| respid | Q31_6 | Q31_7 | Q31_8 | Q31_9 |
|--------|-------|-------|-------|-------|
| 23285  | 0     | 0     | 0     | 0     |
| 23305  | 0     | 0     | 0     | 0     |
| 23309  | 0     | 0     | 0     | 0     |
| 23310  | 0     | 0     | 0     | 0     |
| 23311  | 0     | 0     | 0     | 0     |
| 23312  | 0     | 0     | 1     | 0     |
| 23319  | 0     | 0     | 0     | 0     |
| 23320  | 0     | 0     | 0     | 1     |
| 23322  | 0     | 0     | 0     | 0     |
| 23334  | 0     | 0     | 0     | 0     |
| 23340  | 0     | 0     | 0     | 0     |
| 23346  | 0     | 0     | 0     | 0     |
| 23353  | 0     | 0     | 0     | 0     |
| 23363  | 0     | 0     | 0     | 0     |
| 23364  | 0     | 0     | 0     | 1     |
| 23376  | 0     | 0     | 0     | 0     |
| 23378  | 0     | 0     | 0     | 0     |
| 23382  | 0     | 0     | 0     | 0     |
| 23383  | 0     | 0     | 0     | 0     |
| 23390  | 0     | 0     | 0     | 0     |
| 23395  | 0     | 0     | 0     | 1     |
| 23398  | 0     | 0     | 0     | 0     |
| 23399  | 0     | 0     | 0     | 0     |
| 23406  | 0     | 0     | 0     | 0     |
| 23418  | 0     | 0     | 0     | 0     |
| 23427  | 0     | 0     | 0     | 0     |
| 23428  | 0     | 0     | 0     | 0     |
| 23435  | 0     | 1     | 0     | 0     |
| 23439  | 0     | 0     | 0     | 0     |
| 23440  | 0     | 0     | 0     | 0     |
| 23444  | 0     | 0     | 0     | 0     |
| 23445  | 0     | 0     | 0     | 0     |

| respid | Q31_6 | Q31_7 | Q31_8 | Q31_9 |
|--------|-------|-------|-------|-------|
| 23455  | 0     | 0     | 0     | 0     |
| 23467  | 0     | 0     | 0     | 0     |
| 23478  | 0     | 0     | 0     | 1     |
| 23492  | 0     | 0     | 0     | 0     |
| 23498  | 0     | 0     | 0     | 0     |
| 23511  | 0     | 0     | 0     | 0     |
| 23514  | 0     | 0     | 0     | 0     |
| 23515  | 0     | 0     | 0     | 0     |
| 23522  | 0     | 0     | 0     | 0     |
| 23524  | 0     | 0     | 0     | 0     |
| 23531  | 0     | 0     | 0     | 0     |
| 23532  | 0     | 0     | 0     | 0     |
| 23533  | 0     | 0     | 0     | 0     |
| 23534  | 0     | 0     | 0     | 0     |
| 23538  | 0     | 0     | 0     | 0     |
| 23539  | 0     | 0     | 0     | 1     |
| 23548  | 0     | 0     | 0     | 0     |
| 23553  | 0     | 0     | 0     | 0     |
| 23556  | 0     | 0     | 0     | 0     |
| 23563  | 0     | 0     | 0     | 0     |
| 23572  | 0     | 0     | 0     | 0     |
| 23575  | 0     | 0     | 0     | 0     |
| 23576  | 0     | 0     | 0     | 0     |
| 23577  | 0     | 0     | 0     | 0     |
| 23578  | 0     | 0     | 0     | 0     |
| 23587  | 0     | 0     | 0     | 0     |
| 23597  | 0     | 0     | 0     | 0     |
| 23598  | 0     | 0     | 0     | 0     |
| 23604  | 0     | 0     | 0     | 0     |
| 23617  | 0     | 0     | 0     | 0     |
| 23620  | 0     | 0     | 0     | 0     |
| 23621  | 0     | 0     | 0     | 0     |

| respid | Q31_6 | Q31_7 | Q31_8 | Q31_9 |
|--------|-------|-------|-------|-------|
| 23625  | 0     | 0     | 0     | 0     |
| 23629  | 0     | 0     | 0     | 0     |
| 23635  | 0     | 0     | 0     | 0     |
| 23636  | 0     | 0     | 1     | 0     |
| 23637  | 1     | 0     | 0     | 1     |
| 23638  | 0     | 0     | 0     | 0     |
| 23644  | 0     | 0     | 0     | 0     |
| 23645  | 0     | 0     | 0     | 0     |
| 23649  | 0     | 0     | 0     | 0     |
| 23654  | 0     | 0     | 0     | 0     |
| 23662  | 0     | 0     | 0     | 0     |
| 23664  | 0     | 0     | 0     | 0     |
| 23665  | 0     | 0     | 0     | 0     |
| 23666  | 0     | 0     | 0     | 0     |
| 23671  | 0     | 0     | 0     | 0     |
| 23672  | 0     | 0     | 0     | 0     |
| 23685  | 0     | 0     | 0     | 0     |
| 23686  | 1     | 0     | 0     | 1     |
| 23689  | 1     | 0     | 0     | 1     |
| 23690  | 0     | 0     | 0     | 0     |
| 23695  | 0     | 0     | 0     | 1     |
| 23700  | 0     | 0     | 0     | 0     |
| 23714  | 0     | 0     | 0     | 0     |
| 23719  | 0     | 0     | 0     | 0     |
| 23720  | 0     | 0     | 0     | 0     |
| 23721  | 0     | 0     | 0     | 0     |
| 23729  | 0     | 0     | 0     | 0     |
| 23730  | 0     | 0     | 0     | 0     |
| 23732  | 0     | 0     | 0     | 0     |
| 23736  | 0     | 0     | 0     | 0     |
| 23754  | 0     | 0     | 0     | 0     |
| 23756  | 0     | 0     | 0     | 0     |



| respid | Q31_6 | Q31_7 | Q31_8 | Q31_9 |
|--------|-------|-------|-------|-------|
| 23759  | 0     | 0     | 0     | 0     |
| 23761  | 0     | 0     | 0     | 0     |
| 23766  | 0     | 0     | 0     | 0     |
| 23768  | 0     | 0     | 1     | 0     |
| 23773  | 0     | 0     | 0     | 0     |
| 23781  | 0     | 0     | 0     | 0     |
| 23782  | 0     | 1     | 0     | 0     |
| 23787  | 0     | 0     | 0     | 0     |
| 23788  | 0     | 0     | 0     | 0     |
| 23790  | 0     | 0     | 0     | 0     |
| 23794  | 0     | 0     | 0     | 0     |
| 23795  | 0     | 0     | 0     | 1     |
| 23801  | 0     | 0     | 0     | 0     |
| 23806  | 0     | 0     | 0     | 0     |
| 23809  | 0     | 0     | 0     | 0     |
| 23813  | 0     | 0     | 0     | 0     |
| 23815  | 0     | 0     | 0     | 0     |
| 23821  | 0     | 0     | 0     | 0     |
| 23825  | 0     | 0     | 0     | 0     |
| 23826  | 0     | 0     | 0     | 0     |
| 23830  | 0     | 0     | 0     | 0     |
| 23833  | 0     | 0     | 0     | 0     |
| 23837  | 0     | 0     | 0     | 0     |
| 23848  | 0     | 0     | 0     | 0     |
| 23850  | 0     | 0     | 0     | 0     |
| 23870  | 0     | 0     | 0     | 0     |
| 23877  | 0     | 0     | 0     | 0     |
| 23880  | 0     | 0     | 0     | 0     |
| 23882  | 0     | 0     | 0     | 0     |
| 23888  | 0     | 0     | 0     | 0     |
| 23908  | 0     | 0     | 0     | 0     |
| 23914  | 0     | 0     | 0     | 0     |

| respid | Q31_6 | Q31_7 | Q31_8 | Q31_9 |
|--------|-------|-------|-------|-------|
| 23916  | 0     | 0     | 0     | 0     |
| 23922  | 0     | 0     | 0     | 0     |
| 23932  | 0     | 0     | 0     | 0     |
| 23934  | 0     | 0     | 0     | 0     |
| 23942  | 0     | 0     | 0     | 0     |
| 23945  | 0     | 0     | 0     | 0     |
| 23948  | 0     | 0     | 0     | 0     |
| 23955  | 0     | 0     | 0     | 0     |
| 23956  | 0     | 0     | 0     | 0     |
| 23978  | 0     | 0     | 0     | 0     |
| 23981  | 0     | 0     | 0     | 0     |
| 23982  | 0     | 0     | 0     | 0     |
| 23991  | 0     | 0     | 0     | 0     |
| 23994  | 0     | 0     | 0     | 0     |
| 23995  | 0     | 0     | 0     | 0     |
| 23999  | 0     | 0     | 0     | 1     |
| 24005  | 0     | 0     | 1     | 0     |
| 24018  | 0     | 0     | 0     | 0     |
| 24021  | 0     | 0     | 0     | 0     |
| 24035  | 0     | 0     | 0     | 0     |
| 24040  | 0     | 0     | 0     | 0     |
| 24043  | 0     | 0     | 0     | 0     |
| 24046  | 0     | 0     | 0     | 0     |
| 24047  | 0     | 0     | 0     | 0     |
| 24048  | 0     | 0     | 0     | 0     |
| 24062  | 0     | 0     | 0     | 0     |
| 24063  | 0     | 0     | 0     | 0     |
| 24066  | 0     | 0     | 0     | 0     |
| 24069  | 0     | 0     | 0     | 0     |
| 24070  | 0     | 0     | 0     | 0     |
| 24074  | 0     | 0     | 0     | 0     |
| 24080  | 0     | 0     | 0     | 0     |

| respid | Q31_6 | Q31_7 | Q31_8 | Q31_9 |
|--------|-------|-------|-------|-------|
| 24082  | 0     | 0     | 0     | 0     |
| 24088  | 0     | 0     | 0     | 1     |
| 24089  | 0     | 0     | 0     | 0     |
| 24091  | 0     | 0     | 0     | 0     |
| 24095  | 0     | 0     | 0     | 0     |
| 24100  | 0     | 0     | 0     | 0     |
| 24105  | 0     | 0     | 0     | 0     |
| 24107  | 0     | 0     | 0     | 0     |
| 24108  | 0     | 0     | 0     | 0     |
| 24113  | 0     | 0     | 0     | 1     |
| 24120  | 0     | 0     | 0     | 0     |
| 24122  | 0     | 0     | 0     | 1     |
| 24123  | 0     | 0     | 0     | 0     |
| 24125  | 0     | 0     | 0     | 0     |
| 24132  | 0     | 0     | 0     | 0     |
| 24139  | 0     | 0     | 0     | 0     |
| 24140  | 0     | 0     | 0     | 0     |
| 24143  | 0     | 0     | 0     | 0     |
| 24150  | 0     | 0     | 0     | 0     |
| 24153  | 0     | 0     | 0     | 0     |
| 24161  | 0     | 0     | 0     | 0     |
| 24168  | 0     | 0     | 0     | 0     |
| 24179  | 0     | 0     | 0     | 0     |
| 24182  | 0     | 0     | 0     | 1     |
| 24194  | 0     | 0     | 0     | 0     |
| 24206  | 0     | 0     | 0     | 0     |
| 24214  | 0     | 0     | 0     | 0     |
| 24215  | 0     | 0     | 0     | 0     |
| 24224  | 0     | 0     | 0     | 0     |
| 24225  | 0     | 0     | 0     | 0     |
| 24227  | 0     | 0     | 0     | 0     |
| 24229  | 0     | 0     | 1     | 0     |

| respid | Q31_6 | Q31_7 | Q31_8 | Q31_9 |
|--------|-------|-------|-------|-------|
| 24230  | 0     | 0     | 0     | 0     |
| 24232  | 0     | 0     | 0     | 0     |
| 24253  | 0     | 0     | 0     | 0     |
| 24267  | 0     | 0     | 0     | 0     |
| 24274  | 0     | 0     | 0     | 0     |
| 24275  | 1     | 0     | 1     | 0     |
| 24277  | 0     | 0     | 0     | 0     |
| 24280  | 0     | 0     | 0     | 1     |
| 24285  | 0     | 0     | 0     | 0     |
| 24293  | 0     | 0     | 0     | 0     |
| 24295  | 0     | 0     | 0     | 0     |
| 24299  | 0     | 0     | 0     | 0     |
| 24303  | 0     | 0     | 0     | 0     |
| 24308  | 0     | 0     | 0     | 0     |
| 24322  | 0     | 0     | 0     | 0     |
| 24325  | 0     | 0     | 0     | 0     |
| 24328  | 0     | 0     | 0     | 0     |
| 24334  | 0     | 0     | 0     | 0     |
| 24342  | 0     | 0     | 0     | 0     |
| 24343  | 0     | 1     | 0     | 0     |
| 24348  | 0     | 0     | 0     | 1     |
| 24352  | 0     | 0     | 0     | 1     |
| 24354  | 1     | 0     | 0     | 0     |
| 24357  | 0     | 0     | 0     | 0     |
| 24360  | 0     | 0     | 0     | 0     |
| 24369  | 0     | 0     | 0     | 0     |
| 24373  | 0     | 0     | 0     | 0     |
| 24398  | 1     | 0     | 1     | 1     |
| 24402  | 0     | 0     | 0     | 0     |
| 24405  | 0     | 0     | 0     | 0     |
| 24407  | 0     | 0     | 0     | 0     |
| 24413  | 0     | 0     | 0     | 0     |

| respid | Q31_6 | Q31_7 | Q31_8 | Q31_9 |
|--------|-------|-------|-------|-------|
| 24443  | 0     | 0     | 0     | 0     |
| 24451  | 0     | 0     | 0     | 0     |
| 24459  | 1     | 1     | 0     | 0     |
| 24465  | 0     | 0     | 0     | 0     |
| 24481  | 0     | 0     | 0     | 0     |
| 24482  | 0     | 0     | 0     | 0     |
| 24491  | 0     | 0     | 0     | 0     |
| 24495  | 0     | 0     | 0     | 0     |
| 24497  | 1     | 0     | 0     | 1     |
| 24511  | 0     | 0     | 0     | 0     |
| 24513  | 0     | 0     | 0     | 0     |
| 24516  | 0     | 1     | 0     | 0     |
| 24518  | 0     | 0     | 1     | 0     |
| 24524  | 0     | 0     | 0     | 0     |
| 24528  | 0     | 0     | 0     | 0     |
| 24531  | 1     | 0     | 0     | 1     |
| 24533  | 0     | 0     | 0     | 0     |
| 24547  | 0     | 0     | 0     | 0     |
| 24557  | 0     | 0     | 0     | 0     |
| 24559  | 0     | 0     | 0     | 1     |
| 24567  | 0     | 0     | 0     | 0     |
| 24568  | 0     | 0     | 0     | 0     |
| 24577  | 0     | 0     | 0     | 0     |
| 24581  | 0     | 0     | 0     | 0     |
| 24588  | 0     | 0     | 0     | 0     |
| 24604  | 0     | 0     | 0     | 0     |
| 24612  | 0     | 0     | 0     | 0     |
| 24621  | 0     | 0     | 0     | 0     |
| 24625  | 0     | 0     | 0     | 1     |
| 24627  | 0     | 0     | 0     | 0     |
| 24640  | 0     | 0     | 0     | 0     |
| 24644  | 0     | 0     | 0     | 0     |

| respid | Q31_6 | Q31_7 | Q31_8 | Q31_9 |
|--------|-------|-------|-------|-------|
| 24664  | 0     | 0     | 0     | 0     |
| 24669  | 0     | 0     | 0     | 0     |
| 24685  | 0     | 0     | 0     | 0     |
| 24687  | 0     | 0     | 0     | 0     |
| 24688  | 0     | 0     | 1     | 0     |
| 24691  | 0     | 0     | 0     | 0     |
| 24693  | 0     | 0     | 0     | 0     |
| 24706  | 0     | 0     | 0     | 0     |
| 24710  | 0     | 0     | 0     | 0     |
| 24717  | 0     | 0     | 0     | 0     |
| 24720  | 0     | 0     | 0     | 0     |
| 24731  | 0     | 0     | 0     | 0     |
| 24732  | 0     | 0     | 0     | 0     |
| 24733  | 0     | 0     | 0     | 0     |
| 24747  | 0     | 0     | 0     | 0     |
| 24750  | 0     | 0     | 0     | 1     |
| 24758  | 0     | 0     | 0     | 0     |
| 24760  | 0     | 0     | 0     | 0     |
| 24765  | 0     | 0     | 0     | 0     |
| 24772  | 0     | 0     | 0     | 0     |
| 24779  | 1     | 1     | 0     | 0     |
| 24794  | 0     | 0     | 0     | 0     |
| 24796  | 0     | 0     | 1     | 0     |
| 24797  | 0     | 0     | 0     | 0     |
| 24800  | 0     | 0     | 0     | 0     |
| 24813  | 0     | 0     | 0     | 0     |
| 24815  | 0     | 0     | 0     | 0     |
| 24821  | 0     | 0     | 0     | 0     |
| 24822  | 0     | 0     | 0     | 0     |
| 24831  | 1     | 0     | 0     | 0     |
| 24835  | 0     | 0     | 0     | 0     |
| 24843  | 1     | 0     | 0     | 0     |

| respid | Q31_6 | Q31_7 | Q31_8 | Q31_9 |
|--------|-------|-------|-------|-------|
| 24844  | 0     | 0     | 0     | 0     |
| 24860  | 0     | 0     | 0     | 0     |
| 24861  | 0     | 1     | 0     | 0     |
| 24865  | 0     | 0     | 0     | 0     |
| 24870  | 0     | 0     | 0     | 0     |
| 24887  | 0     | 0     | 0     | 0     |
| 24897  | 0     | 0     | 0     | 0     |
| 24902  | 0     | 0     | 0     | 0     |
| 24914  | 0     | 0     | 0     | 0     |
| 24921  | 0     | 0     | 0     | 0     |
| 24922  | 0     | 0     | 0     | 0     |
| 24924  | 0     | 0     | 0     | 0     |
| 24927  | 0     | 0     | 0     | 0     |
| 24936  | 0     | 0     | 0     | 0     |
| 24937  | 0     | 0     | 0     | 0     |
| 24942  | 0     | 0     | 0     | 0     |
| 24947  | 0     | 0     | 0     | 0     |
| 24953  | 0     | 0     | 0     | 0     |
| 24954  | 0     | 1     | 0     | 0     |
| 24960  | 1     | 0     | 1     | 1     |
| 24965  | 0     | 0     | 0     | 0     |
| 24975  | 0     | 0     | 0     | 0     |
| 24983  | 0     | 0     | 0     | 0     |
| 24985  | 0     | 0     | 0     | 0     |
| 24990  | 0     | 0     | 0     | 0     |
| 25000  | 0     | 0     | 0     | 0     |
| 25007  | 0     | 1     | 0     | 0     |
| 25008  | 0     | 0     | 0     | 0     |
| 25010  | 0     | 0     | 0     | 0     |
| 25016  | 0     | 0     | 0     | 1     |
| 25021  | 0     | 0     | 0     | 0     |
| 25040  | 0     | 0     | 0     | 0     |

| respid | Q31_6 | Q31_7 | Q31_8 | Q31_9 |
|--------|-------|-------|-------|-------|
| 25043  | 0     | 0     | 0     | 0     |
| 25055  | 0     | 0     | 0     | 0     |
| 25057  | 0     | 0     | 0     | 0     |
| 25060  | 0     | 0     | 0     | 0     |
| 25062  | 0     | 0     | 0     | 0     |
| 25064  | 0     | 1     | 0     | 1     |
| 25069  | 0     | 0     | 0     | 0     |
| 25077  | 0     | 0     | 0     | 0     |
| 25088  | 0     | 0     | 0     | 0     |
| 25093  | 0     | 0     | 0     | 0     |
| 25121  | 0     | 0     | 0     | 0     |
| 25140  | 0     | 0     | 0     | 0     |
| 25144  | 0     | 0     | 0     | 0     |
| 25149  | 0     | 0     | 0     | 0     |
| 25159  | 0     | 0     | 0     | 0     |
| 25191  | 0     | 0     | 0     | 0     |
| 25193  | 0     | 0     | 0     | 0     |
| 25202  | 0     | 0     | 0     | 0     |
| 25215  | 0     | 0     | 1     | 0     |
| 25229  | 0     | 0     | 0     | 0     |
| 25231  | 0     | 0     | 0     | 0     |
| 25236  | 0     | 0     | 0     | 0     |
| 25242  | 0     | 0     | 0     | 0     |
| 25252  | 0     | 0     | 0     | 0     |
| 25253  | 1     | 0     | 0     | 1     |
| 25256  | 0     | 0     | 0     | 0     |
| 25260  | 0     | 0     | 0     | 0     |
| 25261  | 0     | 0     | 0     | 0     |
| 25280  | 0     | 0     | 0     | 0     |
| 25282  | 0     | 0     | 0     | 1     |
| 25289  | 0     | 0     | 0     | 1     |
| 25303  | 0     | 0     | 0     | 0     |



| respid | Q31_6 | Q31_7 | Q31_8 | Q31_9 |
|--------|-------|-------|-------|-------|
| 25304  | 0     | 0     | 0     | 0     |
| 25309  | 0     | 0     | 0     | 0     |
| 25317  | 0     | 0     | 0     | 0     |
| 25318  | 0     | 0     | 1     | 1     |
| 25320  | 0     | 0     | 0     | 0     |
| 25324  | 0     | 0     | 0     | 0     |
| 25331  | 0     | 1     | 0     | 0     |
| 25340  | 0     | 0     | 0     | 0     |
| 25342  | 0     | 0     | 0     | 0     |
| 25350  | 0     | 0     | 0     | 0     |
| 25352  | 0     | 0     | 0     | 0     |
| 25358  | 0     | 0     | 0     | 0     |
| 25375  | 0     | 0     | 0     | 0     |
| 25386  | 0     | 0     | 0     | 0     |
| 25388  | 0     | 0     | 0     | 0     |
| 25390  | 0     | 0     | 0     | 0     |
| 25391  | 0     | 0     | 0     | 0     |
| 25400  | 0     | 0     | 0     | 0     |
| 25413  | 0     | 0     | 0     | 0     |
| 25424  | 0     | 0     | 0     | 0     |
| 25426  | 0     | 0     | 0     | 0     |
| 25430  | 0     | 0     | 0     | 0     |
| 25434  | 0     | 0     | 0     | 0     |
| 25439  | 0     | 0     | 0     | 0     |
| 25441  | 0     | 0     | 0     | 0     |
| 25445  | 0     | 0     | 0     | 0     |
| 25451  | 0     | 0     | 0     | 0     |
| 25469  | 0     | 0     | 0     | 0     |
| 25471  | 0     | 0     | 0     | 0     |
| 25476  | 0     | 0     | 0     | 0     |
| 25480  | 0     | 0     | 0     | 0     |
| 25482  | 0     | 0     | 0     | 0     |

| respid | Q31_6 | Q31_7 | Q31_8 | Q31_9 |
|--------|-------|-------|-------|-------|
| 25500  | 0     | 0     | 0     | 1     |
| 25516  | 0     | 0     | 0     | 0     |
| 25521  | 0     | 0     | 0     | 0     |
| 25525  | 0     | 0     | 0     | 0     |
| 25530  | 0     | 0     | 0     | 0     |
| 25555  | 0     | 0     | 0     | 1     |
| 25558  | 0     | 0     | 0     | 0     |
| 25561  | 0     | 0     | 0     | 0     |
| 25566  | 0     | 0     | 0     | 0     |
| 25571  | 0     | 0     | 0     | 0     |
| 25572  | 0     | 0     | 0     | 0     |
| 25574  | 0     | 0     | 0     | 0     |
| 25588  | 0     | 0     | 0     | 0     |
| 25591  | 0     | 0     | 0     | 0     |
| 25599  | 0     | 0     | 0     | 0     |
| 25604  | 0     | 0     | 0     | 1     |
| 25614  | 0     | 0     | 0     | 0     |
| 25634  | 1     | 0     | 1     | 1     |
| 25642  | 0     | 0     | 0     | 0     |
| 25647  | 0     | 0     | 0     | 0     |
| 25653  | 0     | 0     | 0     | 0     |
| 25654  | 1     | 1     | 0     | 0     |
| 25660  | 0     | 0     | 0     | 0     |
| 25664  | 0     | 1     | 0     | 0     |
| 25665  | 0     | 0     | 0     | 0     |
| 25672  | 0     | 0     | 0     | 0     |
| 25677  | 0     | 1     | 0     | 0     |
| 25685  | 0     | 0     | 0     | 1     |
| 25699  | 1     | 0     | 0     | 1     |
| 25703  | 0     | 0     | 0     | 0     |
| 25704  | 0     | 0     | 0     | 0     |
| 25705  | 0     | 1     | 0     | 0     |

| respid | Q31_6 | Q31_7 | Q31_8 | Q31_9 |
|--------|-------|-------|-------|-------|
| 25711  | 0     | 0     | 0     | 0     |
| 25727  | 0     | 0     | 0     | 1     |
| 25728  | 0     | 0     | 0     | 0     |
| 25733  | 0     | 0     | 0     | 1     |
| 25735  | 0     | 0     | 0     | 0     |
| 25736  | 0     | 0     | 0     | 0     |
| 25742  | 0     | 0     | 0     | 0     |
| 25750  | 0     | 0     | 0     | 0     |
| 25754  | 0     | 0     | 0     | 0     |
| 25776  | 0     | 0     | 0     | 0     |
| 25778  | 0     | 0     | 0     | 0     |
| 25796  | 0     | 0     | 0     | 0     |
| 25852  | 0     | 0     | 0     | 0     |
| 25858  | 0     | 0     | 0     | 0     |
| 25859  | 0     | 0     | 0     | 0     |
| 25886  | 0     | 0     | 0     | 0     |
| 25890  | 1     | 0     | 0     | 0     |
| 25897  | 0     | 0     | 0     | 0     |
| 25903  | 0     | 0     | 0     | 0     |
| 25905  | 0     | 0     | 0     | 0     |
| 25917  | 0     | 0     | 0     | 0     |
| 25918  | 0     | 0     | 0     | 0     |
| 25928  | 0     | 0     | 0     | 0     |
| 25930  | 0     | 0     | 0     | 0     |
| 25949  | 0     | 0     | 0     | 0     |
| 25955  | 0     | 0     | 0     | 0     |
| 25959  | 0     | 0     | 0     | 0     |
| 25964  | 0     | 0     | 0     | 0     |
| 25972  | 0     | 0     | 0     | 0     |
| 25999  | 0     | 0     | 0     | 0     |
| 26019  | 0     | 0     | 0     | 0     |
| 26025  | 0     | 0     | 0     | 0     |

| respid | Q31_6 | Q31_7 | Q31_8 | Q31_9 |
|--------|-------|-------|-------|-------|
| 26039  | 0     | 0     | 0     | 0     |
| 26055  | 0     | 0     | 0     | 0     |
| 26061  | 0     | 0     | 0     | 0     |
| 26076  | 0     | 0     | 0     | 0     |
| 26088  | 0     | 0     | 0     | 0     |
| 26094  | 0     | 0     | 0     | 0     |
| 26104  | 0     | 0     | 0     | 0     |
| 26131  | 0     | 0     | 0     | 0     |
| 26134  | 0     | 0     | 0     | 1     |
| 26160  | 0     | 0     | 0     | 0     |
| 26168  | 0     | 0     | 0     | 0     |
| 26170  | 0     | 0     | 0     | 0     |
| 26191  | 0     | 0     | 0     | 0     |
| 26192  | 0     | 0     | 0     | 0     |
| 26195  | 0     | 0     | 0     | 0     |
| 26198  | 0     | 0     | 0     | 0     |
| 26199  | 0     | 0     | 0     | 0     |
| 26201  | 0     | 0     | 0     | 0     |
| 26202  | 0     | 0     | 0     | 0     |
| 26226  | 0     | 0     | 0     | 0     |
| 26233  | 0     | 0     | 0     | 0     |
| 26236  | 0     | 0     | 0     | 0     |
| 26242  | 0     | 0     | 0     | 0     |
| 26244  | 0     | 0     | 0     | 0     |
| 26250  | 0     | 0     | 0     | 0     |
| 26266  | 1     | 0     | 0     | 0     |
| 26274  | 0     | 0     | 0     | 0     |
| 26286  | 0     | 0     | 0     | 0     |
| 26288  | 0     | 0     | 0     | 0     |
| 26295  | 0     | 0     | 0     | 0     |
| 26296  | 0     | 0     | 0     | 0     |
| 26297  | 0     | 0     | 0     | 0     |

| respid | Q31_6 | Q31_7 | Q31_8 | Q31_9 |
|--------|-------|-------|-------|-------|
| 26300  | 0     | 0     | 0     | 0     |
| 26317  | 0     | 0     | 0     | 0     |
| 26343  | 0     | 0     | 0     | 0     |
| 26367  | 0     | 1     | 0     | 0     |
| 26372  | 1     | 0     | 0     | 0     |
| 26403  | 0     | 0     | 0     | 0     |
| 26423  | 0     | 0     | 0     | 0     |
| 26430  | 0     | 0     | 0     | 0     |
| 26437  | 0     | 0     | 0     | 0     |
| 26457  | 0     | 0     | 0     | 0     |
| 26466  | 0     | 0     | 0     | 0     |
| 26467  | 0     | 0     | 0     | 0     |
| 26469  | 0     | 0     | 0     | 0     |
| 26494  | 0     | 0     | 0     | 0     |
| 26510  | 0     | 0     | 0     | 0     |
| 26519  | 0     | 0     | 0     | 0     |
| 26525  | 0     | 0     | 0     | 0     |
| 26529  | 0     | 0     | 0     | 0     |
| 26533  | 0     | 0     | 0     | 0     |
| 26556  | 0     | 0     | 0     | 1     |
| 26559  | 0     | 0     | 0     | 0     |
| 26565  | 0     | 0     | 0     | 1     |
| 26576  | 0     | 0     | 0     | 1     |
| 26601  | 0     | 0     | 0     | 0     |
| 26607  | 0     | 0     | 0     | 0     |
| 26611  | 0     | 0     | 0     | 0     |
| 26619  | 0     | 0     | 0     | 0     |
| 26631  | 0     | 0     | 0     | 0     |
| 26654  | 0     | 0     | 0     | 0     |
| 26656  | 0     | 0     | 0     | 0     |
| 26664  | 0     | 0     | 0     | 0     |
| 26667  | 0     | 0     | 0     | 0     |

| respid | Q31_6 | Q31_7 | Q31_8 | Q31_9 |
|--------|-------|-------|-------|-------|
| 26674  | 1     | 0     | 0     | 1     |
| 26678  | 0     | 0     | 0     | 0     |
| 26693  | 0     | 0     | 0     | 0     |
| 26696  | 0     | 1     | 0     | 0     |
| 26703  | 0     | 0     | 0     | 0     |
| 26705  | 0     | 0     | 0     | 0     |
| 26706  | 0     | 0     | 0     | 0     |
| 26716  | 0     | 0     | 0     | 0     |
| 26721  | 0     | 0     | 0     | 0     |
| 26730  | 0     | 0     | 0     | 0     |
| 26752  | 0     | 0     | 0     | 0     |
| 26755  | 0     | 0     | 0     | 0     |
| 26791  | 0     | 0     | 0     | 0     |
| 26804  | 0     | 0     | 0     | 0     |
| 26810  | 0     | 0     | 0     | 0     |
| 26813  | 0     | 0     | 0     | 0     |
| 26833  | 0     | 0     | 0     | 0     |
| 26880  | 0     | 0     | 0     | 0     |
| 26884  | 0     | 0     | 0     | 0     |
| 26885  | 0     | 0     | 0     | 0     |
| 26890  | 0     | 0     | 0     | 0     |
| 26937  | 0     | 0     | 0     | 0     |
| 26939  | 0     | 0     | 0     | 0     |
| 26941  | 0     | 0     | 0     | 0     |
| 26992  | 1     | 0     | 0     | 0     |
| 27037  | 0     | 0     | 0     | 0     |
| 27045  | 0     | 0     | 0     | 1     |
| 27053  | 0     | 0     | 0     | 0     |
| 27060  | 0     | 0     | 0     | 1     |
| 27076  | 0     | 0     | 0     | 0     |
| 27124  | 0     | 0     | 0     | 0     |
| 27125  | 0     | 0     | 0     | 0     |

| respid | Q31_6 | Q31_7 | Q31_8 | Q31_9 |
|--------|-------|-------|-------|-------|
| 27132  | 0     | 0     | 0     | 0     |
| 27166  | 0     | 0     | 0     | 0     |
| 27190  | 0     | 0     | 1     | 0     |
| 27199  | 0     | 0     | 0     | 0     |
| 27221  | 0     | 0     | 0     | 1     |
| 27233  | 0     | 0     | 0     | 0     |
| 27241  | 0     | 0     | 0     | 0     |
| 27244  | 0     | 0     | 0     | 0     |
| 27245  | 1     | 1     | 1     | 1     |
| 27246  | 0     | 0     | 0     | 1     |
| 27253  | 0     | 0     | 0     | 1     |
| 27255  | 0     | 0     | 0     | 0     |
| 27267  | 0     | 0     | 0     | 0     |
| 27283  | 0     | 0     | 0     | 0     |
| 27289  | 0     | 0     | 0     | 0     |
| 27302  | 0     | 0     | 0     | 0     |
| 27317  | 0     | 0     | 0     | 0     |
| 27319  | 0     | 0     | 0     | 0     |
| 27331  | 0     | 0     | 0     | 0     |
| 27333  | 0     | 0     | 0     | 0     |
| 27340  | 0     | 0     | 0     | 0     |
| 27362  | 1     | 0     | 0     | 0     |
| 27370  | 0     | 0     | 0     | 0     |
| 27379  | 0     | 0     | 0     | 0     |
| 27386  | 0     | 0     | 0     | 0     |
| 27398  | 0     | 0     | 0     | 0     |
| 27404  | 0     | 0     | 0     | 0     |
| 27408  | 0     | 0     | 0     | 0     |
| 27412  | 1     | 0     | 0     | 0     |
| 27426  | 0     | 0     | 0     | 1     |
| 27455  | 0     | 0     | 0     | 0     |
| 27464  | 0     | 0     | 0     | 0     |

| respid | Q31_6 | Q31_7 | Q31_8 | Q31_9 |
|--------|-------|-------|-------|-------|
| 27484  | 0     | 0     | 0     | 0     |
| 27493  | 0     | 0     | 0     | 0     |
| 27512  | 0     | 0     | 0     | 1     |
| 27525  | 0     | 0     | 1     | 1     |
| 27532  | 0     | 0     | 0     | 0     |
| 27539  | 0     | 0     | 0     | 0     |
| 27540  | 1     | 0     | 0     | 0     |
| 27552  | 0     | 0     | 0     | 0     |
| 27562  | 0     | 0     | 0     | 0     |
| 27568  | 0     | 0     | 0     | 0     |
| 27574  | 1     | 0     | 1     | 1     |
| 27575  | 0     | 0     | 0     | 0     |
| 27577  | 0     | 0     | 0     | 0     |
| 27589  | 0     | 0     | 0     | 0     |
| 27593  | 0     | 0     | 0     | 0     |
| 27594  | 0     | 0     | 0     | 1     |
| 27595  | 0     | 0     | 0     | 1     |
| 27598  | 0     | 0     | 0     | 0     |
| 27620  | 0     | 0     | 0     | 0     |
| 27621  | 0     | 0     | 0     | 1     |
| 27628  | 0     | 0     | 0     | 0     |
| 27633  | 0     | 0     | 0     | 0     |
| 27643  | 0     | 0     | 0     | 0     |
| 27644  | 0     | 0     | 0     | 0     |
| 27668  | 0     | 0     | 0     | 0     |
| 27681  | 0     | 0     | 0     | 1     |
| 27691  | 0     | 0     | 0     | 0     |
| 27693  | 0     | 0     | 0     | 0     |
| 27703  | 0     | 0     | 0     | 0     |
| 27708  | 0     | 0     | 0     | 0     |
| 27719  | 0     | 0     | 0     | 0     |
| 27720  | 0     | 0     | 0     | 0     |



| respid | Q31_6 | Q31_7 | Q31_8 | Q31_9 |
|--------|-------|-------|-------|-------|
| 27723  | 0     | 0     | 0     | 0     |
| 27725  | 0     | 0     | 0     | 0     |
| 27734  | 0     | 0     | 0     | 0     |
| 27744  | 0     | 0     | 0     | 0     |
| 27749  | 0     | 0     | 1     | 0     |
| 27762  | 0     | 0     | 0     | 0     |
| 27808  | 0     | 0     | 0     | 1     |
| 27810  | 1     | 0     | 1     | 1     |
| 27812  | 0     | 0     | 0     | 0     |
| 27815  | 0     | 0     | 0     | 0     |
| 27818  | 0     | 0     | 0     | 0     |
| 27823  | 0     | 0     | 0     | 0     |
| 27841  | 0     | 0     | 0     | 1     |
| 27843  | 0     | 0     | 0     | 0     |
| 27851  | 0     | 0     | 0     | 0     |
| 27858  | 0     | 0     | 0     | 0     |
| 27859  | 0     | 0     | 0     | 0     |
| 27869  | 0     | 0     | 0     | 0     |
| 27872  | 0     | 0     | 0     | 0     |
| 27873  | 0     | 0     | 0     | 0     |
| 27884  | 0     | 0     | 0     | 0     |
| 27904  | 0     | 0     | 0     | 0     |
| 27915  | 0     | 0     | 0     | 0     |
| 27918  | 0     | 0     | 0     | 0     |
| 27937  | 0     | 0     | 0     | 1     |
| 27943  | 0     | 0     | 0     | 0     |
| 27948  | 0     | 0     | 0     | 0     |
| 27971  | 0     | 0     | 0     | 1     |
| 27991  | 0     | 0     | 0     | 0     |
| 28000  | 0     | 0     | 0     | 0     |
| 28011  | 0     | 0     | 0     | 0     |
| 28022  | 0     | 0     | 0     | 0     |

| respid | Q31_6 | Q31_7 | Q31_8 | Q31_9 |
|--------|-------|-------|-------|-------|
| 28025  | 0     | 0     | 0     | 0     |
| 28041  | 0     | 0     | 0     | 0     |
| 28057  | 0     | 0     | 0     | 1     |
| 28080  | 0     | 0     | 0     | 0     |
| 28098  | 0     | 0     | 0     | 0     |
| 28104  | 0     | 0     | 0     | 0     |
| 28109  | 0     | 0     | 0     | 0     |
| 28129  | 0     | 0     | 0     | 0     |
| 28141  | 0     | 0     | 0     | 0     |
| 28143  | 0     | 0     | 0     | 0     |
| 28149  | 0     | 0     | 0     | 0     |
| 28151  | 0     | 0     | 0     | 0     |
| 28161  | 0     | 0     | 0     | 0     |
| 28169  | 0     | 0     | 0     | 0     |
| 28194  | 1     | 0     | 1     | 1     |
| 28197  | 0     | 0     | 0     | 0     |
| 28206  | 0     | 0     | 0     | 0     |
| 28218  | 0     | 0     | 0     | 0     |
| 28227  | 0     | 0     | 0     | 0     |
| 28235  | 0     | 0     | 0     | 0     |
| 28246  | 0     | 0     | 0     | 0     |
| 28259  | 0     | 0     | 0     | 0     |
| 28263  | 0     | 0     | 0     | 0     |
| 28267  | 0     | 0     | 0     | 0     |
| 28274  | 0     | 0     | 0     | 0     |
| 28278  | 0     | 0     | 0     | 0     |
| 28288  | 0     | 0     | 0     | 0     |
| 28308  | 0     | 0     | 0     | 0     |
| 28309  | 1     | 0     | 0     | 0     |
| 28323  | 0     | 0     | 0     | 0     |
| 28335  | 0     | 0     | 0     | 0     |
| 28354  | 0     | 0     | 0     | 0     |

| respid | Q31_6 | Q31_7 | Q31_8 | Q31_9 |
|--------|-------|-------|-------|-------|
| 28355  | 0     | 0     | 0     | 1     |
| 28356  | 0     | 0     | 0     | 0     |
| 28357  | 0     | 0     | 0     | 0     |
| 28363  | 0     | 0     | 0     | 0     |
| 28366  | 0     | 0     | 0     | 0     |
| 28372  | 0     | 0     | 0     | 0     |
| 28381  | 0     | 0     | 0     | 0     |
| 28388  | 0     | 0     | 0     | 0     |
| 28413  | 0     | 0     | 0     | 0     |
| 28421  | 0     | 0     | 0     | 0     |
| 28430  | 0     | 0     | 0     | 0     |
| 28439  | 0     | 0     | 0     | 0     |
| 28458  | 1     | 0     | 1     | 1     |
| 28461  | 0     | 0     | 0     | 0     |
| 28466  | 0     | 0     | 0     | 0     |
| 28492  | 0     | 0     | 0     | 0     |
| 28534  | 0     | 0     | 0     | 0     |
| 28537  | 0     | 0     | 0     | 0     |
| 28560  | 0     | 0     | 0     | 0     |
| 28566  | 0     | 0     | 0     | 0     |
| 28569  | 0     | 0     | 0     | 0     |
| 28584  | 0     | 0     | 0     | 0     |
| 28590  | 0     | 0     | 0     | 1     |
| 28596  | 0     | 0     | 0     | 0     |
| 28608  | 0     | 0     | 1     | 0     |
| 28631  | 0     | 0     | 0     | 1     |
| 28644  | 0     | 0     | 0     | 0     |
| 28646  | 0     | 0     | 0     | 0     |
| 28665  | 0     | 0     | 0     | 0     |
| 28686  | 0     | 0     | 0     | 0     |
| 28704  | 1     | 0     | 0     | 0     |
| 28719  | 0     | 0     | 0     | 0     |

| respid | Q31_6 | Q31_7 | Q31_8 | Q31_9 |
|--------|-------|-------|-------|-------|
| 28736  | 0     | 0     | 0     | 0     |
| 28739  | 0     | 0     | 0     | 0     |
| 28758  | 0     | 0     | 0     | 0     |
| 28761  | 0     | 0     | 1     | 1     |
| 28770  | 1     | 0     | 1     | 1     |
| 28774  | 0     | 0     | 0     | 0     |
| 28778  | 0     | 0     | 0     | 1     |
| 28783  | 0     | 0     | 0     | 1     |
| 28785  | 0     | 0     | 0     | 0     |
| 28797  | 0     | 0     | 0     | 1     |
| 28801  | 0     | 0     | 0     | 0     |
| 28821  | 0     | 0     | 0     | 0     |
| 28827  | 0     | 0     | 0     | 0     |
| 28828  | 0     | 0     | 0     | 0     |
| 28871  | 0     | 1     | 0     | 0     |
| 28876  | 0     | 0     | 0     | 0     |
| 28891  | 0     | 0     | 1     | 1     |
| 28898  | 0     | 0     | 0     | 0     |
| 28909  | 0     | 0     | 0     | 0     |
| 28930  | 0     | 0     | 0     | 1     |
| 28935  | 0     | 0     | 0     | 1     |
| 28964  | 0     | 0     | 0     | 0     |
| 28965  | 0     | 0     | 0     | 0     |
| 28967  | 0     | 0     | 0     | 0     |
| 28975  | 0     | 0     | 0     | 0     |
| 28982  | 0     | 0     | 0     | 0     |
| 28989  | 0     | 0     | 0     | 0     |
| 29003  | 0     | 0     | 0     | 0     |
| 29004  | 0     | 0     | 0     | 0     |
| 29007  | 0     | 0     | 0     | 0     |
| 29008  | 0     | 0     | 0     | 0     |
| 29011  | 0     | 0     | 0     | 0     |

| respid | Q31_6 | Q31_7 | Q31_8 | Q31_9 |
|--------|-------|-------|-------|-------|
| 29012  | 0     | 0     | 0     | 0     |
| 29014  | 0     | 0     | 0     | 0     |
| 29016  | 0     | 0     | 0     | 0     |
| 29018  | 0     | 0     | 0     | 0     |
| 29048  | 1     | 0     | 0     | 0     |
| 29184  | 0     | 0     | 0     | 0     |
| 29237  | 0     | 0     | 0     | 0     |
| 29252  | 0     | 0     | 0     | 0     |
| 29267  | 0     | 0     | 0     | 0     |
| 29276  | 0     | 0     | 0     | 0     |
| 29281  | 0     | 0     | 0     | 0     |
| 29285  | 0     | 0     | 0     | 0     |
| 29291  | 0     | 0     | 0     | 0     |
| 29304  | 0     | 0     | 0     | 1     |
| 29323  | 0     | 0     | 0     | 0     |
| 29330  | 0     | 0     | 0     | 1     |
| 29357  | 0     | 0     | 0     | 0     |
| 29416  | 0     | 0     | 0     | 0     |
| 29432  | 0     | 0     | 0     | 0     |
| 29482  | 0     | 0     | 0     | 0     |
| 29506  | 0     | 0     | 0     | 0     |
| 29509  | 0     | 0     | 0     | 1     |
| 29512  | 1     | 0     | 0     | 0     |
| 29519  | 0     | 0     | 0     | 0     |
| 29520  | 0     | 0     | 0     | 0     |
| 29521  | 1     | 0     | 0     | 0     |
| 29529  | 1     | 0     | 1     | 1     |
| 29532  | 0     | 0     | 0     | 0     |
| 29547  | 0     | 0     | 0     | 0     |
| 29551  | 0     | 0     | 0     | 0     |
| 29584  | 1     | 0     | 0     | 0     |
| 29591  | 0     | 0     | 0     | 0     |

| respid | Q31_6 | Q31_7 | Q31_8 | Q31_9 |
|--------|-------|-------|-------|-------|
| 29613  | 0     | 0     | 0     | 0     |
| 29615  | 0     | 0     | 0     | 0     |
| 29625  | 1     | 0     | 0     | 1     |
| 29660  | 0     | 0     | 0     | 0     |
| 29677  | 0     | 0     | 0     | 0     |
| 29700  | 0     | 0     | 0     | 0     |
| 29715  | 0     | 1     | 0     | 0     |
| 29720  | 0     | 0     | 0     | 0     |
| 29730  | 0     | 0     | 0     | 0     |
| 29734  | 0     | 0     | 0     | 0     |
| 29754  | 0     | 0     | 0     | 0     |
| 29771  | 0     | 0     | 0     | 0     |
| 29774  | 0     | 0     | 0     | 0     |
| 29783  | 0     | 0     | 0     | 0     |
| 29812  | 0     | 0     | 0     | 0     |
| 29813  | 0     | 0     | 0     | 0     |
| 29814  | 0     | 0     | 0     | 0     |
| 29820  | 0     | 0     | 0     | 0     |
| 29906  | 0     | 0     | 0     | 0     |
| 29907  | 0     | 0     | 0     | 0     |
| 29928  | 0     | 0     | 0     | 0     |
| 29932  | 0     | 0     | 0     | 0     |
| 29958  | 0     | 0     | 0     | 0     |
| 29982  | 0     | 0     | 0     | 0     |
| 29989  | 0     | 0     | 0     | 0     |
| 29994  | 0     | 0     | 0     | 0     |
| 30005  | 0     | 0     | 0     | 0     |
| 30077  | 0     | 0     | 0     | 0     |
| 30098  | 0     | 0     | 0     | 0     |
| 30107  | 0     | 0     | 0     | 0     |
| 30154  | 0     | 0     | 0     | 0     |
| 30159  | 0     | 0     | 0     | 0     |

| respid | Q31_6 | Q31_7 | Q31_8 | Q31_9 |
|--------|-------|-------|-------|-------|
| 30162  | 0     | 0     | 0     | 0     |
| 30163  | 0     | 0     | 0     | 0     |
| 30189  | 0     | 0     | 0     | 0     |
| 30230  | 0     | 0     | 0     | 0     |
| 30259  | 0     | 0     | 0     | 0     |
| 30284  | 0     | 0     | 0     | 0     |
| 30296  | 0     | 0     | 0     | 0     |
| 30330  | 0     | 0     | 0     | 0     |
| 30341  | 0     | 0     | 0     | 1     |
| 30352  | 0     | 0     | 0     | 0     |
| 30379  | 0     | 0     | 0     | 0     |
| 30424  | 0     | 0     | 0     | 0     |
| 30447  | 0     | 0     | 0     | 0     |
| 30477  | 0     | 0     | 1     | 0     |
| 30503  | 0     | 1     | 0     | 0     |
| 30515  | 0     | 0     | 0     | 0     |
| 30516  | 0     | 0     | 0     | 0     |
| 30623  | 0     | 0     | 1     | 0     |
| 30639  | 0     | 0     | 0     | 0     |
| 30670  | 0     | 0     | 0     | 0     |
| 30697  | 0     | 0     | 0     | 0     |
| 30735  | 0     | 0     | 0     | 0     |
| 30742  | 0     | 0     | 0     | 0     |
| 30751  | 0     | 0     | 0     | 1     |
| 30789  | 0     | 0     | 0     | 0     |
| 30867  | 0     | 0     | 0     | 0     |
| 30876  | 0     | 0     | 0     | 0     |
| 30877  | 0     | 0     | 0     | 0     |
| 30887  | 0     | 0     | 0     | 0     |
| 30891  | 0     | 0     | 0     | 0     |
| 31030  | 0     | 0     | 0     | 0     |
| 31059  | 0     | 0     | 0     | 1     |

| respid | Q31_6 | Q31_7 | Q31_8 | Q31_9 |
|--------|-------|-------|-------|-------|
| 31082  | 0     | 0     | 0     | 0     |
| 31106  | 0     | 0     | 0     | 0     |
| 31110  | 0     | 0     | 0     | 0     |
| 31265  | 0     | 0     | 0     | 0     |
| 31266  | 1     | 1     | 1     | 0     |
| 31267  | 1     | 1     | 0     | 0     |
| 31310  | 0     | 0     | 0     | 0     |
| 31325  | 0     | 0     | 0     | 0     |
| 31367  | 0     | 0     | 0     | 0     |
| 31389  | 0     | 0     | 0     | 0     |
| 31440  | 0     | 0     | 0     | 0     |
| 31465  | 0     | 0     | 0     | 0     |
| 31477  | 0     | 0     | 0     | 0     |
| 31491  | 0     | 0     | 0     | 0     |
| 31494  | 0     | 0     | 0     | 0     |
| 31509  | 1     | 0     | 0     | 0     |
| 31533  | 0     | 0     | 0     | 0     |
| 31547  | 0     | 0     | 0     | 0     |
| 31558  | 0     | 0     | 0     | 0     |
| 31579  | 0     | 0     | 0     | 0     |
| 31591  | 0     | 0     | 0     | 0     |
| 31596  | 1     | 0     | 0     | 0     |
| 31601  | 0     | 0     | 1     | 1     |
| 31605  | 0     | 0     | 0     | 0     |
| 31637  | 0     | 0     | 0     | 0     |
| 31646  | 0     | 0     | 0     | 0     |
| 31647  | 0     | 1     | 0     | 1     |
| 31650  | 0     | 0     | 0     | 0     |
| 31651  | 0     | 0     | 0     | 0     |
| 31657  | 0     | 0     | 0     | 0     |
| 31660  | 0     | 0     | 0     | 0     |
| 31661  | 0     | 0     | 0     | 0     |



| respid | Q31_6 | Q31_7 | Q31_8 | Q31_9 |
|--------|-------|-------|-------|-------|
| 31667  | 0     | 1     | 0     | 0     |
| 31674  | 0     | 0     | 0     | 0     |
| 31686  | 0     | 0     | 0     | 0     |
| 31693  | 0     | 0     | 0     | 0     |
| 31716  | 0     | 0     | 0     | 0     |
| 31818  | 0     | 0     | 0     | 0     |
| 31886  | 0     | 0     | 0     | 1     |
| 31945  | 1     | 0     | 0     | 0     |
| 31957  | 0     | 0     | 0     | 0     |
| 31966  | 0     | 0     | 0     | 0     |
| 31978  | 0     | 0     | 0     | 0     |
| 31999  | 0     | 0     | 0     | 0     |
| 32026  | 0     | 0     | 0     | 0     |
| 32033  | 0     | 0     | 0     | 0     |
| 32037  | 0     | 0     | 0     | 0     |
| 32038  | 0     | 0     | 0     | 0     |
| 32047  | 0     | 0     | 1     | 1     |
| 32053  | 0     | 0     | 0     | 0     |
| 32069  | 0     | 0     | 0     | 0     |
| 32081  | 0     | 0     | 0     | 0     |
| 32123  | 0     | 0     | 0     | 0     |
| 32130  | 0     | 0     | 0     | 0     |
| 32141  | 0     | 0     | 1     | 0     |
| 32158  | 0     | 0     | 0     | 0     |
| 32165  | 0     | 0     | 0     | 0     |
| 32180  | 0     | 0     | 0     | 0     |
| 32221  | 0     | 0     | 0     | 0     |
| 32292  | 0     | 0     | 0     | 0     |
| 32318  | 0     | 0     | 0     | 0     |
| 32346  | 0     | 0     | 0     | 0     |
| 32402  | 0     | 0     | 0     | 0     |
| 32422  | 0     | 0     | 0     | 0     |

| respid | Q31_6 | Q31_7 | Q31_8 | Q31_9 |
|--------|-------|-------|-------|-------|
| 32439  | 0     | 0     | 0     | 0     |
| 32507  | 0     | 0     | 0     | 0     |
| 32522  | 0     | 0     | 0     | 0     |
| 32535  | 0     | 0     | 0     | 0     |
| 32546  | 0     | 0     | 0     | 0     |
| 32553  | 0     | 0     | 0     | 0     |
| 32570  | 0     | 0     | 0     | 0     |
| 32592  | 0     | 0     | 0     | 0     |
| 32605  | 0     | 0     | 0     | 0     |
| 32630  | 1     | 0     | 0     | 0     |
| 32642  | 0     | 0     | 0     | 0     |
| 32646  | 0     | 0     | 0     | 0     |
| 32665  | 0     | 0     | 0     | 0     |
| 32677  | 0     | 0     | 0     | 0     |
| 32694  | 0     | 0     | 0     | 0     |
| 32698  | 0     | 0     | 0     | 0     |
| 32754  | 0     | 0     | 0     | 0     |
| 32799  | 0     | 0     | 1     | 0     |
| 32816  | 0     | 0     | 0     | 0     |
| 32819  | 0     | 0     | 0     | 1     |
| 32840  | 0     | 0     | 0     | 0     |
| 32861  | 0     | 0     | 0     | 0     |
| 32866  | 0     | 1     | 0     | 0     |
| 32889  | 0     | 0     | 0     | 0     |
| 32960  | 0     | 0     | 0     | 0     |
| 32965  | 0     | 0     | 0     | 0     |
| 32986  | 0     | 0     | 0     | 0     |
| 33005  | 0     | 0     | 0     | 0     |
| 33054  | 0     | 1     | 0     | 0     |
| 33072  | 0     | 0     | 0     | 0     |
| 33095  | 0     | 0     | 0     | 0     |
| 33099  | 0     | 0     | 0     | 1     |

| respid | Q31_6 | Q31_7 | Q31_8 | Q31_9 |
|--------|-------|-------|-------|-------|
| 33121  | 0     | 0     | 0     | 0     |
| 33152  | 0     | 0     | 0     | 0     |
| 33159  | 0     | 0     | 0     | 0     |
| 33189  | 0     | 0     | 0     | 0     |
| 33198  | 0     | 0     | 0     | 0     |
| 33202  | 0     | 0     | 0     | 0     |
| 33204  | 0     | 0     | 0     | 0     |
| 33224  | 0     | 0     | 0     | 0     |
| 33272  | 0     | 0     | 0     | 0     |
| 33294  | 0     | 1     | 0     | 0     |
| 33300  | 0     | 0     | 0     | 0     |
| 33314  | 0     | 0     | 0     | 0     |
| 33338  | 0     | 0     | 0     | 0     |
| 33350  | 0     | 0     | 0     | 1     |
| 33362  | 0     | 0     | 0     | 0     |
| 33368  | 0     | 0     | 0     | 0     |
| 33374  | 0     | 0     | 0     | 1     |
| 33380  | 1     | 1     | 0     | 0     |
| 33385  | 0     | 0     | 0     | 0     |
| 33402  | 1     | 0     | 0     | 0     |
| 33414  | 0     | 0     | 0     | 0     |
| 33439  | 0     | 0     | 0     | 0     |
| 33449  | 0     | 0     | 0     | 1     |
| 33533  | 0     | 0     | 0     | 1     |
| 33540  | 0     | 0     | 0     | 0     |
| 33556  | 0     | 0     | 0     | 0     |
| 33615  | 0     | 0     | 0     | 0     |
| 33694  | 0     | 0     | 1     | 0     |
| 33717  | 0     | 0     | 0     | 0     |
| 33729  | 0     | 0     | 0     | 1     |
| 33746  | 0     | 0     | 0     | 0     |
| 33764  | 0     | 0     | 0     | 0     |

| respid | Q31_6 | Q31_7 | Q31_8 | Q31_9 |
|--------|-------|-------|-------|-------|
| 33790  | 0     | 0     | 0     | 0     |
| 33868  | 0     | 0     | 0     | 0     |
| 33872  | 0     | 0     | 0     | 0     |
| 33883  | 0     | 0     | 0     | 0     |
| 33884  | 0     | 0     | 0     | 0     |
| 33900  | 0     | 0     | 0     | 0     |
| 33933  | 0     | 0     | 0     | 0     |
| 33949  | 0     | 0     | 0     | 0     |
| 34005  | 0     | 0     | 0     | 0     |
| 34016  | 0     | 0     | 0     | 0     |
| 34041  | 0     | 0     | 0     | 0     |
| 34053  | 0     | 0     | 0     | 0     |
| 34056  | 0     | 0     | 0     | 0     |
| 34093  | 0     | 0     | 1     | 0     |
| 34112  | 0     | 0     | 0     | 0     |
| 34136  | 0     | 0     | 1     | 0     |
| 34138  | 0     | 0     | 0     | 0     |
| 34139  | 0     | 0     | 0     | 0     |
| 34189  | 0     | 0     | 0     | 1     |
| 34239  | 0     | 0     | 0     | 0     |
| 34240  | 0     | 0     | 0     | 0     |
| 34241  | 0     | 0     | 0     | 0     |
| 34259  | 0     | 0     | 0     | 0     |
| 34303  | 0     | 0     | 0     | 0     |
| 34306  | 0     | 0     | 0     | 0     |
| 34395  | 0     | 0     | 0     | 0     |
| 34463  | 1     | 0     | 0     | 0     |
| 34466  | 0     | 0     | 0     | 0     |
| 34471  | 0     | 0     | 0     | 0     |
| 34489  | 1     | 0     | 0     | 0     |
| 34518  | 0     | 0     | 0     | 0     |
| 34542  | 0     | 0     | 0     | 1     |

| respid | Q31_6 | Q31_7 | Q31_8 | Q31_9 |
|--------|-------|-------|-------|-------|
| 34595  | 0     | 0     | 0     | 0     |
| 34604  | 0     | 0     | 0     | 0     |
| 34631  | 0     | 0     | 0     | 1     |
| 34665  | 0     | 0     | 0     | 0     |
| 34716  | 0     | 0     | 0     | 0     |
| 34729  | 0     | 0     | 0     | 0     |
| 34772  | 0     | 0     | 0     | 0     |
| 34800  | 0     | 0     | 0     | 0     |
| 34819  | 0     | 0     | 0     | 0     |
| 34829  | 0     | 0     | 0     | 0     |
| 34831  | 0     | 0     | 0     | 0     |
| 34839  | 0     | 0     | 0     | 0     |
| 34868  | 0     | 0     | 0     | 0     |
| 34869  | 0     | 0     | 0     | 0     |
| 34882  | 0     | 1     | 0     | 0     |
| 34895  | 0     | 0     | 0     | 1     |
| 34901  | 0     | 0     | 0     | 0     |
| 34904  | 0     | 0     | 0     | 1     |
| 34907  | 0     | 0     | 0     | 0     |
| 34914  | 0     | 0     | 0     | 0     |
| 34918  | 0     | 0     | 0     | 0     |
| 34924  | 0     | 0     | 0     | 0     |
| 34933  | 0     | 0     | 0     | 0     |
| 34938  | 0     | 0     | 0     | 0     |
| 34952  | 1     | 0     | 0     | 0     |
| 34959  | 0     | 0     | 0     | 0     |
| 34972  | 0     | 0     | 0     | 0     |
| 34973  | 0     | 0     | 0     | 0     |
| 34975  | 0     | 0     | 0     | 1     |
| 34977  | 0     | 0     | 0     | 0     |
| 34978  | 0     | 0     | 0     | 0     |
| 34980  | 0     | 0     | 0     | 0     |

| respid | Q31_6 | Q31_7 | Q31_8 | Q31_9 |
|--------|-------|-------|-------|-------|
| 34984  | 0     | 0     | 0     | 0     |
| 34986  | 0     | 0     | 0     | 1     |
| 34994  | 0     | 0     | 0     | 0     |
| 34996  | 1     | 0     | 0     | 1     |
| 35003  | 0     | 0     | 0     | 0     |
| 35014  | 0     | 0     | 0     | 0     |
| 35029  | 0     | 0     | 0     | 0     |
| 35030  | 0     | 0     | 0     | 1     |
| 35037  | 0     | 0     | 0     | 0     |
| 35043  | 0     | 0     | 0     | 0     |
| 35048  | 0     | 0     | 0     | 0     |
| 35055  | 0     | 0     | 0     | 0     |
| 35067  | 0     | 0     | 0     | 0     |
| 35072  | 0     | 0     | 0     | 0     |
| 35078  | 0     | 0     | 0     | 0     |
| 35084  | 0     | 0     | 0     | 0     |
| 35095  | 0     | 0     | 0     | 0     |
| 35096  | 0     | 0     | 0     | 0     |
| 35097  | 0     | 0     | 0     | 0     |
| 35098  | 0     | 0     | 0     | 0     |
| 35109  | 0     | 0     | 0     | 0     |
| 35114  | 0     | 0     | 0     | 0     |
| 35115  | 0     | 0     | 0     | 0     |
| 35124  | 0     | 0     | 0     | 0     |
| 35125  | 0     | 0     | 0     | 0     |
| 35141  | 0     | 0     | 0     | 0     |
| 35142  | 0     | 0     | 0     | 0     |
| 35145  | 0     | 0     | 0     | 0     |
| 35149  | 0     | 0     | 0     | 0     |
| 35159  | 0     | 0     | 0     | 0     |
| 35163  | 1     | 0     | 0     | 0     |
| 35174  | 0     | 0     | 0     | 1     |

| respid | Q31_6 | Q31_7 | Q31_8 | Q31_9 |
|--------|-------|-------|-------|-------|
| 35188  | 0     | 0     | 0     | 0     |
| 35189  | 0     | 0     | 0     | 1     |
| 35201  | 0     | 0     | 0     | 0     |
| 35215  | 0     | 0     | 0     | 0     |
| 35228  | 0     | 0     | 0     | 0     |
| 35235  | 0     | 0     | 0     | 0     |
| 35239  | 0     | 0     | 0     | 0     |
| 35243  | 0     | 0     | 0     | 0     |
| 35245  | 0     | 0     | 0     | 0     |
| 35259  | 0     | 0     | 0     | 0     |
| 35265  | 0     | 0     | 0     | 0     |
| 35272  | 1     | 0     | 0     | 0     |
| 35280  | 0     | 0     | 0     | 0     |
| 35298  | 0     | 0     | 0     | 0     |
| 35305  | 0     | 0     | 0     | 0     |
| 35306  | 0     | 0     | 1     | 0     |
| 35307  | 0     | 0     | 0     | 0     |
| 35311  | 0     | 0     | 0     | 0     |
| 35322  | 0     | 0     | 0     | 0     |
| 35323  | 0     | 0     | 0     | 0     |
| 35327  | 1     | 0     | 0     | 1     |
| 35366  | 0     | 0     | 0     | 0     |
| 35378  | 0     | 0     | 0     | 0     |
| 35389  | 0     | 1     | 0     | 0     |
| 35390  | 0     | 0     | 0     | 0     |
| 35395  | 0     | 0     | 0     | 0     |
| 35411  | 0     | 0     | 0     | 0     |
| 35423  | 0     | 0     | 0     | 0     |
| 35425  | 0     | 0     | 0     | 0     |
| 35434  | 0     | 0     | 0     | 0     |
| 35462  | 0     | 0     | 0     | 0     |
| 35478  | 1     | 0     | 1     | 0     |

| respid | Q31_6 | Q31_7 | Q31_8 | Q31_9 |
|--------|-------|-------|-------|-------|
| 35481  | 1     | 0     | 0     | 1     |
| 35498  | 0     | 0     | 0     | 0     |
| 35499  | 0     | 0     | 0     | 0     |
| 35502  | 0     | 0     | 0     | 0     |
| 35503  | 0     | 0     | 0     | 0     |
| 35504  | 0     | 0     | 0     | 0     |
| 35508  | 0     | 1     | 0     | 0     |
| 35513  | 0     | 0     | 0     | 1     |
| 35516  | 0     | 0     | 0     | 1     |
| 35519  | 0     | 0     | 0     | 0     |
| 35530  | 0     | 0     | 0     | 0     |
| 35533  | 0     | 0     | 0     | 1     |
| 35561  | 0     | 0     | 0     | 0     |
| 35565  | 0     | 0     | 0     | 0     |
| 35588  | 0     | 0     | 0     | 0     |
| 35598  | 0     | 0     | 0     | 0     |
| 35607  | 0     | 0     | 0     | 0     |
| 35638  | 0     | 0     | 0     | 0     |
| 35642  | 0     | 0     | 0     | 0     |
| 35643  | 0     | 0     | 0     | 0     |
| 35680  | 0     | 0     | 0     | 0     |
| 35697  | 0     | 0     | 0     | 0     |
| 35703  | 0     | 0     | 0     | 0     |
| 35709  | 0     | 0     | 0     | 0     |
| 35710  | 0     | 0     | 0     | 0     |
| 35721  | 1     | 1     | 0     | 1     |
| 35723  | 0     | 0     | 0     | 0     |
| 35736  | 0     | 0     | 0     | 0     |
| 35739  | 0     | 0     | 0     | 0     |
| 35745  | 0     | 1     | 0     | 0     |
| 35748  | 0     | 0     | 0     | 0     |
| 35750  | 0     | 1     | 0     | 0     |



| respid | Q31_6 | Q31_7 | Q31_8 | Q31_9 |
|--------|-------|-------|-------|-------|
| 35752  | 0     | 0     | 0     | 1     |
| 35773  | 0     | 0     | 0     | 1     |
| 35779  | 0     | 0     | 0     | 0     |
| 35791  | 0     | 0     | 0     | 0     |
| 35801  | 0     | 0     | 0     | 0     |
| 35802  | 0     | 0     | 0     | 0     |
| 35837  | 0     | 0     | 0     | 0     |
| 35853  | 0     | 0     | 0     | 0     |
| 35858  | 0     | 0     | 0     | 1     |
| 35860  | 0     | 0     | 0     | 0     |
| 35875  | 1     | 0     | 0     | 0     |
| 35883  | 0     | 0     | 0     | 0     |
| 35890  | 0     | 0     | 0     | 0     |
| 35898  | 0     | 0     | 0     | 0     |
| 35901  | 1     | 1     | 0     | 1     |
| 35914  | 0     | 0     | 0     | 0     |
| 35924  | 0     | 0     | 0     | 0     |
| 35950  | 0     | 0     | 0     | 1     |
| 35961  | 0     | 0     | 0     | 0     |
| 35966  | 0     | 0     | 0     | 0     |
| 35967  | 0     | 0     | 0     | 0     |
| 35971  | 0     | 0     | 0     | 0     |
| 35974  | 0     | 0     | 0     | 0     |
| 35983  | 0     | 0     | 0     | 0     |
| 35992  | 0     | 0     | 1     | 1     |
| 36010  | 0     | 0     | 0     | 0     |
| 36019  | 0     | 0     | 0     | 0     |
| 36029  | 0     | 0     | 0     | 0     |
| 36033  | 0     | 0     | 0     | 0     |
| 36042  | 0     | 0     | 0     | 0     |
| 36043  | 0     | 0     | 0     | 1     |
| 36048  | 1     | 0     | 0     | 0     |

| respid | Q31_6 | Q31_7 | Q31_8 | Q31_9 |
|--------|-------|-------|-------|-------|
| 36050  | 0     | 0     | 0     | 1     |
| 36062  | 0     | 0     | 0     | 0     |
| 36063  | 0     | 0     | 0     | 0     |
| 36092  | 0     | 0     | 0     | 0     |
| 36097  | 0     | 0     | 0     | 0     |
| 36108  | 0     | 0     | 0     | 0     |
| 36113  | 1     | 0     | 1     | 0     |
| 36117  | 0     | 0     | 1     | 0     |
| 36129  | 0     | 0     | 0     | 0     |
| 36144  | 0     | 0     | 0     | 0     |
| 36152  | 0     | 0     | 0     | 0     |
| 36154  | 1     | 0     | 0     | 0     |
| 36155  | 0     | 0     | 0     | 0     |
| 36167  | 0     | 0     | 0     | 0     |
| 36172  | 0     | 0     | 0     | 0     |
| 36173  | 0     | 0     | 0     | 0     |
| 36174  | 0     | 0     | 0     | 0     |
| 36182  | 0     | 0     | 0     | 0     |
| 36192  | 1     | 0     | 0     | 0     |
| 36195  | 0     | 1     | 0     | 0     |
| 36204  | 0     | 0     | 0     | 0     |
| 36205  | 0     | 0     | 0     | 0     |
| 36208  | 0     | 0     | 0     | 0     |
| 36216  | 0     | 0     | 0     | 0     |
| 36221  | 0     | 0     | 0     | 1     |
| 36244  | 0     | 0     | 0     | 0     |
| 36255  | 0     | 0     | 0     | 0     |
| 36259  | 0     | 0     | 0     | 0     |
| 36262  | 0     | 0     | 0     | 0     |
| 36268  | 0     | 0     | 0     | 0     |
| 36308  | 0     | 0     | 0     | 0     |
| 36324  | 0     | 0     | 0     | 0     |

| respid | Q31_6 | Q31_7 | Q31_8 | Q31_9 |
|--------|-------|-------|-------|-------|
| 36330  | 0     | 0     | 0     | 0     |
| 36331  | 0     | 1     | 0     | 0     |
| 36336  | 0     | 0     | 0     | 0     |
| 36337  | 0     | 0     | 0     | 0     |
| 36364  | 0     | 0     | 0     | 0     |
| 36365  | 1     | 0     | 0     | 1     |
| 36396  | 1     | 0     | 0     | 0     |
| 36403  | 0     | 0     | 0     | 0     |
| 36410  | 0     | 0     | 0     | 0     |
| 36413  | 0     | 0     | 0     | 0     |
| 36422  | 0     | 0     | 0     | 0     |
| 36424  | 0     | 0     | 0     | 1     |
| 36425  | 0     | 0     | 0     | 0     |
| 36432  | 0     | 0     | 0     | 0     |
| 36435  | 0     | 0     | 0     | 0     |
| 36446  | 0     | 1     | 0     | 0     |
| 36451  | 0     | 0     | 0     | 0     |
| 36453  | 0     | 0     | 0     | 0     |
| 36459  | 1     | 0     | 0     | 0     |
| 36464  | 0     | 0     | 1     | 0     |
| 36465  | 1     | 0     | 0     | 0     |
| 36466  | 0     | 0     | 0     | 0     |
| 36476  | 0     | 0     | 0     | 1     |
| 36487  | 0     | 0     | 0     | 0     |
| 36488  | 0     | 0     | 0     | 0     |
| 36500  | 0     | 0     | 0     | 0     |
| 36504  | 0     | 0     | 0     | 0     |
| 36513  | 0     | 0     | 0     | 0     |
| 36515  | 0     | 0     | 0     | 0     |
| 36521  | 0     | 1     | 0     | 0     |
| 36530  | 0     | 0     | 0     | 0     |
| 36556  | 0     | 0     | 0     | 0     |

| respid | Q31_6 | Q31_7 | Q31_8 | Q31_9 |
|--------|-------|-------|-------|-------|
| 36564  | 0     | 0     | 0     | 0     |
| 36584  | 0     | 0     | 0     | 0     |
| 36585  | 0     | 0     | 0     | 0     |
| 36586  | 0     | 0     | 0     | 0     |
| 36606  | 0     | 0     | 0     | 0     |
| 36615  | 0     | 0     | 0     | 0     |
| 36628  | 0     | 0     | 0     | 0     |
| 36630  | 0     | 0     | 0     | 0     |
| 36631  | 0     | 0     | 0     | 1     |
| 36636  | 0     | 0     | 0     | 0     |
| 36637  | 0     | 0     | 0     | 0     |
| 36651  | 0     | 0     | 0     | 0     |
| 36661  | 0     | 0     | 0     | 0     |
| 36670  | 0     | 0     | 0     | 0     |
| 36671  | 0     | 0     | 0     | 1     |
| 36688  | 0     | 0     | 0     | 0     |
| 36694  | 0     | 0     | 0     | 0     |
| 36696  | 0     | 0     | 0     | 0     |
| 36703  | 0     | 0     | 0     | 0     |
| 36719  | 0     | 0     | 0     | 0     |
| 36721  | 0     | 0     | 0     | 0     |
| 36740  | 0     | 0     | 0     | 0     |
| 36755  | 0     | 0     | 0     | 0     |
| 36765  | 0     | 0     | 0     | 0     |
| 36770  | 0     | 0     | 0     | 0     |
| 36773  | 0     | 0     | 0     | 0     |
| 36813  | 0     | 0     | 0     | 1     |
| 36819  | 0     | 0     | 0     | 0     |
| 36820  | 0     | 0     | 0     | 0     |
| 36821  | 0     | 0     | 0     | 0     |
| 36827  | 0     | 0     | 0     | 0     |
| 36835  | 0     | 0     | 0     | 0     |

| respid | Q31_6 | Q31_7 | Q31_8 | Q31_9 |
|--------|-------|-------|-------|-------|
| 36837  | 0     | 0     | 0     | 0     |
| 36849  | 0     | 0     | 0     | 0     |
| 36851  | 0     | 0     | 0     | 0     |
| 36868  | 0     | 0     | 0     | 0     |
| 36870  | 0     | 0     | 0     | 0     |
| 36871  | 0     | 0     | 0     | 0     |
| 36874  | 0     | 0     | 0     | 1     |
| 36878  | 0     | 0     | 0     | 0     |
| 36887  | 0     | 0     | 0     | 1     |
| 36889  | 0     | 0     | 0     | 0     |
| 36891  | 0     | 0     | 0     | 0     |
| 36903  | 0     | 0     | 0     | 0     |
| 36905  | 0     | 0     | 0     | 0     |
| 36913  | 0     | 0     | 0     | 0     |
| 36949  | 0     | 0     | 0     | 0     |
| 36954  | 1     | 0     | 0     | 1     |
| 36962  | 0     | 0     | 0     | 0     |
| 36965  | 0     | 0     | 0     | 0     |
| 36970  | 0     | 0     | 0     | 0     |
| 36979  | 0     | 0     | 0     | 0     |
| 36990  | 0     | 0     | 0     | 0     |
| 36991  | 0     | 0     | 0     | 0     |
| 36992  | 0     | 0     | 0     | 0     |
| 37015  | 0     | 0     | 0     | 0     |
| 37017  | 0     | 0     | 0     | 0     |
| 37020  | 0     | 0     | 0     | 0     |
| 37033  | 0     | 0     | 0     | 0     |
| 37041  | 0     | 0     | 0     | 0     |
| 37048  | 0     | 0     | 0     | 0     |
| 37050  | 0     | 0     | 0     | 0     |
| 37054  | 0     | 0     | 0     | 0     |
| 37057  | 0     | 0     | 0     | 0     |

| respid | Q31_6 | Q31_7 | Q31_8 | Q31_9 |
|--------|-------|-------|-------|-------|
| 37067  | 0     | 0     | 0     | 1     |
| 37074  | 0     | 0     | 0     | 0     |
| 37088  | 0     | 0     | 0     | 0     |
| 37090  | 0     | 0     | 0     | 1     |
| 37110  | 0     | 0     | 0     | 0     |
| 37122  | 0     | 0     | 0     | 0     |
| 37124  | 1     | 0     | 0     | 0     |
| 37126  | 0     | 0     | 0     | 0     |
| 37129  | 0     | 0     | 0     | 1     |
| 37130  | 0     | 0     | 0     | 0     |
| 37142  | 0     | 0     | 0     | 1     |
| 37160  | 0     | 0     | 0     | 0     |
| 37168  | 0     | 0     | 0     | 0     |
| 37169  | 0     | 0     | 0     | 0     |
| 37191  | 0     | 0     | 0     | 0     |
| 37197  | 0     | 0     | 0     | 0     |
| 37204  | 0     | 0     | 0     | 0     |
| 37213  | 0     | 0     | 0     | 0     |
| 37238  | 0     | 0     | 0     | 1     |
| 37242  | 1     | 0     | 0     | 0     |
| 37243  | 1     | 1     | 0     | 0     |
| 37275  | 0     | 0     | 1     | 0     |
| 37305  | 0     | 0     | 0     | 0     |
| 37357  | 1     | 0     | 1     | 0     |
| 37365  | 1     | 1     | 0     | 0     |
| 37370  | 0     | 0     | 0     | 0     |
| 37406  | 0     | 0     | 0     | 0     |
| 37410  | 0     | 0     | 0     | 0     |
| 37411  | 0     | 0     | 0     | 0     |
| 37427  | 1     | 0     | 0     | 0     |
| 37437  | 1     | 0     | 0     | 0     |
| 37440  | 0     | 0     | 0     | 0     |

| respid | Q31_6 | Q31_7 | Q31_8 | Q31_9 |
|--------|-------|-------|-------|-------|
| 37452  | 0     | 0     | 0     | 0     |
| 37465  | 0     | 1     | 0     | 0     |
| 37468  | 1     | 0     | 0     | 0     |
| 37469  | 0     | 0     | 0     | 0     |
| 37477  | 1     | 0     | 0     | 0     |
| 37509  | 0     | 0     | 0     | 0     |
| 37513  | 1     | 0     | 0     | 0     |
| 37534  | 0     | 0     | 0     | 0     |
| 37537  | 0     | 0     | 0     | 0     |
| 37560  | 1     | 0     | 0     | 0     |
| 37566  | 0     | 0     | 0     | 0     |
| 37572  | 0     | 0     | 0     | 0     |
| 37574  | 0     | 0     | 0     | 0     |
| 37575  | 0     | 0     | 0     | 0     |
| 37590  | 0     | 0     | 0     | 0     |
| 37593  | 0     | 0     | 0     | 0     |
| 37599  | 0     | 0     | 0     | 0     |
| 37641  | 0     | 0     | 0     | 0     |
| 37651  | 0     | 0     | 0     | 0     |
| 37670  | 0     | 0     | 0     | 0     |
| 37680  | 0     | 0     | 0     | 0     |
| 37690  | 0     | 0     | 0     | 0     |
| 37694  | 0     | 0     | 0     | 0     |
| 37705  | 0     | 0     | 0     | 0     |
| 37710  | 0     | 0     | 0     | 0     |
| 37719  | 1     | 0     | 0     | 0     |
| 37741  | 1     | 1     | 0     | 0     |
| 37752  | 0     | 0     | 0     | 0     |
| 37755  | 0     | 0     | 0     | 0     |
| 37757  | 0     | 0     | 0     | 0     |
| 37783  | 0     | 0     | 0     | 0     |
| 37793  | 0     | 0     | 0     | 0     |

| respid | Q31_6 | Q31_7 | Q31_8 | Q31_9 |
|--------|-------|-------|-------|-------|
| 37800  | 0     | 0     | 1     | 0     |
| 37801  | 0     | 0     | 0     | 0     |
| 37820  | 0     | 0     | 0     | 0     |
| 37826  | 1     | 0     | 0     | 0     |
| 37835  | 1     | 0     | 0     | 0     |
| 37839  | 0     | 0     | 0     | 0     |
| 37871  | 0     | 0     | 0     | 0     |
| 37876  | 0     | 0     | 0     | 0     |
| 37879  | 1     | 1     | 0     | 1     |
| 37894  | 0     | 0     | 0     | 0     |
| 37895  | 0     | 0     | 0     | 0     |
| 37901  | 1     | 0     | 0     | 0     |
| 37926  | 0     | 0     | 0     | 0     |
| 37937  | 0     | 0     | 1     | 0     |
| 37938  | 0     | 0     | 0     | 0     |
| 37959  | 0     | 0     | 0     | 1     |
| 37970  | 0     | 0     | 0     | 0     |
| 37972  | 0     | 0     | 0     | 0     |
| 37988  | 0     | 0     | 1     | 0     |
| 37989  | 0     | 0     | 0     | 1     |
| 38000  | 0     | 0     | 0     | 0     |
| 38028  | 1     | 0     | 0     | 0     |
| 38042  | 0     | 0     | 0     | 0     |
| 38052  | 0     | 0     | 0     | 0     |
| 38056  | 0     | 0     | 0     | 0     |
| 38106  | 0     | 0     | 0     | 0     |
| 38114  | 0     | 0     | 0     | 0     |
| 38134  | 0     | 0     | 0     | 0     |
| 38135  | 0     | 0     | 0     | 1     |
| 38139  | 0     | 0     | 0     | 0     |
| 38160  | 0     | 0     | 0     | 0     |
| 38164  | 0     | 0     | 0     | 1     |



| respid | Q31_6 | Q31_7 | Q31_8 | Q31_9 |
|--------|-------|-------|-------|-------|
| 38168  | 0     | 0     | 0     | 0     |
| 38173  | 0     | 0     | 0     | 0     |
| 38193  | 0     | 0     | 0     | 0     |
| 38204  | 0     | 0     | 0     | 0     |
| 38206  | 0     | 0     | 0     | 0     |
| 38233  | 0     | 0     | 0     | 1     |
| 38242  | 0     | 0     | 0     | 0     |
| 38245  | 0     | 0     | 0     | 0     |
| 38261  | 0     | 0     | 0     | 0     |
| 38288  | 0     | 0     | 0     | 0     |
| 38296  | 0     | 0     | 0     | 0     |
| 38299  | 1     | 0     | 0     | 0     |
| 38300  | 0     | 0     | 0     | 0     |
| 38303  | 0     | 0     | 0     | 0     |
| 38317  | 0     | 0     | 0     | 0     |
| 38328  | 0     | 0     | 0     | 0     |
| 38333  | 0     | 0     | 0     | 0     |
| 38336  | 0     | 0     | 0     | 0     |
| 38338  | 0     | 0     | 0     | 0     |
| 38342  | 0     | 0     | 0     | 0     |
| 38360  | 0     | 0     | 0     | 0     |
| 38362  | 1     | 0     | 0     | 0     |
| 38364  | 0     | 0     | 0     | 0     |
| 38402  | 0     | 0     | 0     | 0     |
| 38423  | 0     | 0     | 0     | 0     |
| 38424  | 1     | 0     | 0     | 0     |
| 38435  | 1     | 0     | 0     | 0     |
| 38450  | 0     | 0     | 0     | 0     |
| 38455  | 0     | 0     | 0     | 0     |
| 38467  | 0     | 0     | 0     | 0     |
| 38468  | 0     | 0     | 0     | 1     |
| 38472  | 0     | 0     | 0     | 0     |

| respid | Q31_6 | Q31_7 | Q31_8 | Q31_9 |
|--------|-------|-------|-------|-------|
| 38484  | 0     | 0     | 0     | 0     |
| 38498  | 0     | 0     | 0     | 0     |
| 38507  | 0     | 0     | 0     | 0     |
| 38511  | 0     | 0     | 0     | 0     |
| 38524  | 0     | 0     | 1     | 0     |
| 38526  | 0     | 0     | 0     | 0     |
| 38534  | 0     | 0     | 0     | 0     |
| 38536  | 0     | 0     | 0     | 0     |
| 38539  | 0     | 0     | 0     | 0     |
| 38547  | 0     | 0     | 0     | 0     |
| 38549  | 0     | 0     | 0     | 0     |
| 38575  | 0     | 0     | 0     | 0     |
| 38579  | 1     | 0     | 0     | 0     |
| 38585  | 0     | 0     | 0     | 0     |
| 38589  | 0     | 0     | 0     | 1     |
| 38595  | 1     | 0     | 0     | 0     |
| 38602  | 0     | 0     | 0     | 0     |
| 38603  | 0     | 0     | 0     | 0     |
| 38612  | 0     | 0     | 0     | 0     |
| 38621  | 0     | 0     | 0     | 0     |
| 38624  | 0     | 0     | 0     | 1     |
| 38636  | 0     | 0     | 0     | 0     |
| 38656  | 0     | 0     | 1     | 0     |
| 38668  | 0     | 0     | 0     | 0     |
| 38675  | 0     | 0     | 0     | 0     |
| 38676  | 0     | 0     | 0     | 0     |
| 38682  | 0     | 0     | 0     | 0     |
| 38689  | 0     | 0     | 0     | 0     |
| 38702  | 0     | 0     | 0     | 0     |
| 38704  | 0     | 0     | 1     | 1     |
| 38713  | 0     | 0     | 0     | 0     |
| 38718  | 0     | 0     | 0     | 0     |

| respid | Q31_6 | Q31_7 | Q31_8 | Q31_9 |
|--------|-------|-------|-------|-------|
| 38725  | 0     | 0     | 0     | 0     |
| 38730  | 0     | 0     | 0     | 0     |
| 38737  | 0     | 0     | 0     | 1     |
| 38738  | 0     | 0     | 0     | 1     |
| 38744  | 0     | 0     | 0     | 0     |
| 38746  | 0     | 0     | 0     | 0     |
| 38753  | 0     | 0     | 0     | 0     |
| 38756  | 0     | 0     | 0     | 0     |
| 38760  | 0     | 0     | 0     | 0     |
| 38762  | 0     | 0     | 0     | 0     |
| 38765  | 0     | 0     | 0     | 0     |
| 38769  | 0     | 0     | 0     | 0     |
| 38781  | 1     | 1     | 0     | 0     |
| 38786  | 0     | 0     | 0     | 0     |
| 38790  | 0     | 0     | 0     | 0     |
| 38793  | 0     | 0     | 0     | 0     |
| 38797  | 0     | 0     | 0     | 0     |
| 38802  | 0     | 0     | 0     | 0     |
| 38815  | 0     | 0     | 0     | 0     |
| 38826  | 0     | 0     | 0     | 1     |
| 38828  | 0     | 0     | 0     | 0     |
| 38829  | 0     | 0     | 0     | 0     |
| 38835  | 0     | 0     | 0     | 1     |
| 38842  | 1     | 0     | 0     | 0     |
| 38853  | 0     | 0     | 0     | 0     |
| 38855  | 0     | 0     | 0     | 0     |
| 38860  | 0     | 0     | 0     | 0     |
| 38869  | 0     | 0     | 0     | 0     |
| 38882  | 1     | 0     | 0     | 0     |
| 38897  | 1     | 0     | 0     | 0     |
| 38903  | 0     | 0     | 0     | 0     |
| 38910  | 0     | 0     | 1     | 0     |

| respid | Q31_6 | Q31_7 | Q31_8 | Q31_9 |
|--------|-------|-------|-------|-------|
| 38948  | 1     | 0     | 1     | 0     |
| 38949  | 1     | 1     | 0     | 1     |
| 38953  | 1     | 0     | 0     | 0     |
| 38989  | 0     | 1     | 0     | 0     |
| 38997  | 0     | 0     | 0     | 0     |
| 38999  | 0     | 0     | 0     | 0     |
| 39002  | 1     | 0     | 0     | 0     |
| 39003  | 1     | 0     | 0     | 0     |
| 39006  | 0     | 0     | 0     | 0     |
| 39014  | 0     | 0     | 0     | 0     |
| 39017  | 0     | 0     | 0     | 0     |
| 39018  | 0     | 0     | 1     | 0     |
| 39025  | 0     | 0     | 1     | 1     |
| 39031  | 0     | 0     | 0     | 0     |
| 39061  | 0     | 1     | 0     | 0     |
| 39131  | 0     | 0     | 0     | 0     |
| 39153  | 0     | 0     | 0     | 0     |
| 39194  | 0     | 0     | 0     | 0     |
| 39204  | 0     | 0     | 0     | 0     |
| 39208  | 0     | 0     | 0     | 0     |
| 39213  | 0     | 0     | 0     | 0     |
| 39231  | 0     | 0     | 0     | 0     |
| 39251  | 0     | 0     | 0     | 0     |
| 39257  | 0     | 0     | 0     | 0     |
| 39262  | 1     | 0     | 0     | 0     |
| 39269  | 0     | 0     | 0     | 0     |
| 39272  | 0     | 0     | 0     | 0     |
| 39280  | 0     | 0     | 0     | 0     |
| 39294  | 0     | 0     | 0     | 0     |
| 39297  | 0     | 0     | 1     | 0     |
| 39300  | 0     | 0     | 0     | 0     |
| 39307  | 1     | 1     | 0     | 0     |

| respid | Q31_6 | Q31_7 | Q31_8 | Q31_9 |
|--------|-------|-------|-------|-------|
| 39320  | 0     | 1     | 0     | 0     |
| 39333  | 0     | 0     | 0     | 0     |
| 39335  | 1     | 0     | 0     | 1     |
| 39339  | 0     | 0     | 0     | 0     |
| 39375  | 0     | 0     | 0     | 0     |
| 39377  | 0     | 0     | 0     | 0     |
| 39380  | 0     | 0     | 0     | 0     |
| 39425  | 0     | 0     | 0     | 0     |
| 39590  | 0     | 0     | 0     | 0     |
| 40529  | 0     | 0     | 0     | 0     |
| 40702  | 0     | 0     | 0     | 0     |
| 40788  | 0     | 0     | 0     | 0     |
| 40841  | 0     | 0     | 0     | 0     |
| 40965  | 0     | 0     | 0     | 0     |
| 41092  | 0     | 0     | 0     | 0     |
| 41534  | 0     | 0     | 0     | 0     |
| 41919  | 0     | 0     | 0     | 0     |
| 42110  | 0     | 0     | 0     | 0     |
| 42135  | 0     | 0     | 0     | 0     |
| 42142  | 0     | 0     | 0     | 0     |
| 42163  | 0     | 0     | 0     | 0     |
| 42164  | 0     | 0     | 0     | 0     |
| 42172  | 0     | 0     | 0     | 1     |
| 42177  | 0     | 0     | 0     | 0     |
| 42181  | 0     | 0     | 0     | 0     |
| 42193  | 0     | 0     | 0     | 0     |
| 42196  | 0     | 0     | 0     | 1     |
| 42202  | 0     | 0     | 1     | 0     |
| 42248  | 0     | 0     | 0     | 1     |
| 42283  | 0     | 0     | 0     | 0     |
| 42284  | 1     | 0     | 0     | 0     |
| 42323  | 0     | 0     | 0     | 0     |

| respid | Q31_6 | Q31_7 | Q31_8 | Q31_9 |
|--------|-------|-------|-------|-------|
| 42349  | 0     | 0     | 0     | 0     |
| 42351  | 0     | 0     | 0     | 0     |
| 42357  | 0     | 0     | 0     | 0     |
| 42366  | 0     | 0     | 0     | 0     |
| 42380  | 0     | 0     | 0     | 0     |
| 42414  | 1     | 0     | 0     | 0     |
| 42420  | 0     | 0     | 0     | 0     |
| 42454  | 0     | 0     | 0     | 0     |
| 42458  | 0     | 0     | 0     | 0     |
| 42461  | 0     | 0     | 0     | 0     |
| 42488  | 0     | 0     | 0     | 0     |
| 42511  | 0     | 0     | 0     | 0     |
| 42512  | 0     | 0     | 0     | 0     |
| 42530  | 0     | 0     | 0     | 0     |
| 42531  | 0     | 0     | 0     | 0     |
| 42533  | 0     | 0     | 0     | 0     |
| 42549  | 0     | 0     | 0     | 0     |
| 42550  | 0     | 0     | 0     | 0     |
| 42553  | 0     | 0     | 0     | 0     |
| 42562  | 0     | 0     | 0     | 1     |
| 42567  | 0     | 0     | 0     | 0     |
| 42589  | 0     | 0     | 0     | 0     |
| 42604  | 0     | 0     | 0     | 1     |
| 42618  | 1     | 0     | 0     | 1     |
| 42621  | 0     | 0     | 0     | 0     |
| 42627  | 0     | 0     | 0     | 0     |
| 42641  | 0     | 0     | 0     | 0     |
| 42655  | 1     | 0     | 0     | 0     |
| 42666  | 0     | 0     | 0     | 0     |
| 42667  | 0     | 0     | 0     | 1     |
| 42697  | 0     | 0     | 0     | 0     |
| 42703  | 0     | 0     | 0     | 0     |

| respid | Q31_6 | Q31_7 | Q31_8 | Q31_9 |
|--------|-------|-------|-------|-------|
| 42712  | 0     | 0     | 0     | 0     |
| 42731  | 0     | 1     | 0     | 0     |
| 42780  | 0     | 0     | 0     | 0     |
| 42785  | 0     | 0     | 0     | 1     |
| 42788  | 0     | 0     | 0     | 0     |
| 42802  | 0     | 1     | 0     | 0     |
| 42818  | 0     | 0     | 0     | 0     |
| 42821  | 0     | 0     | 0     | 0     |
| 42824  | 0     | 0     | 0     | 0     |
| 42831  | 0     | 0     | 0     | 0     |
| 42836  | 0     | 0     | 0     | 0     |
| 42864  | 1     | 1     | 0     | 0     |
| 42875  | 0     | 0     | 0     | 1     |
| 42891  | 1     | 0     | 0     | 0     |
| 42897  | 0     | 0     | 0     | 0     |
| 42900  | 0     | 0     | 0     | 0     |
| 42902  | 0     | 0     | 0     | 0     |
| 42921  | 0     | 0     | 0     | 0     |
| 42925  | 0     | 0     | 0     | 0     |
| 42944  | 0     | 0     | 0     | 0     |
| 42950  | 0     | 0     | 0     | 0     |
| 42963  | 0     | 0     | 0     | 0     |
| 42967  | 0     | 0     | 0     | 1     |
| 42985  | 0     | 0     | 0     | 0     |
| 42990  | 0     | 0     | 0     | 1     |
| 42996  | 0     | 0     | 0     | 1     |
| 43002  | 0     | 0     | 0     | 0     |
| 43004  | 0     | 0     | 0     | 0     |
| 43012  | 0     | 0     | 0     | 0     |
| 43027  | 0     | 0     | 0     | 0     |
| 43028  | 0     | 0     | 0     | 1     |
| 43029  | 0     | 0     | 0     | 0     |

| respid | Q31_6 | Q31_7 | Q31_8 | Q31_9 |
|--------|-------|-------|-------|-------|
| 43031  | 0     | 0     | 0     | 0     |
| 43042  | 0     | 0     | 0     | 0     |
| 43054  | 0     | 0     | 0     | 0     |
| 43058  | 0     | 0     | 0     | 0     |
| 43064  | 0     | 0     | 0     | 0     |
| 43069  | 0     | 0     | 0     | 0     |
| 43071  | 0     | 0     | 0     | 0     |
| 43072  | 0     | 0     | 0     | 0     |
| 43077  | 0     | 0     | 0     | 1     |
| 43078  | 0     | 1     | 0     | 1     |
| 43082  | 0     | 0     | 0     | 0     |
| 43092  | 0     | 0     | 0     | 0     |
| 43096  | 0     | 0     | 0     | 1     |
| 43109  | 0     | 0     | 0     | 0     |
| 43113  | 0     | 0     | 0     | 0     |
| 43123  | 0     | 0     | 0     | 0     |
| 43127  | 0     | 0     | 0     | 0     |
| 43128  | 0     | 0     | 0     | 0     |
| 43129  | 0     | 0     | 0     | 1     |
| 43133  | 0     | 0     | 1     | 1     |
| 43140  | 0     | 0     | 0     | 0     |
| 43143  | 0     | 1     | 0     | 1     |
| 43149  | 0     | 1     | 0     | 0     |
| 43150  | 0     | 1     | 0     | 0     |
| 43153  | 0     | 0     | 0     | 1     |
| 43170  | 0     | 0     | 0     | 0     |
| 43187  | 0     | 0     | 0     | 0     |
| 43188  | 0     | 1     | 0     | 0     |
| 43198  | 0     | 0     | 0     | 0     |
| 43208  | 0     | 0     | 0     | 0     |
| 43216  | 0     | 0     | 0     | 0     |
| 43222  | 0     | 0     | 0     | 0     |



| respid | Q31_6 | Q31_7 | Q31_8 | Q31_9 |
|--------|-------|-------|-------|-------|
| 43224  | 0     | 0     | 0     | 1     |
| 43230  | 0     | 0     | 0     | 0     |
| 43231  | 0     | 0     | 0     | 0     |
| 43265  | 0     | 0     | 0     | 0     |
| 43270  | 0     | 0     | 0     | 0     |
| 43283  | 0     | 0     | 0     | 0     |
| 43295  | 0     | 0     | 0     | 0     |
| 43297  | 0     | 0     | 0     | 0     |
| 43299  | 0     | 1     | 0     | 0     |
| 43307  | 0     | 0     | 0     | 0     |
| 43316  | 0     | 0     | 0     | 0     |
| 43318  | 0     | 0     | 0     | 0     |
| 43319  | 0     | 0     | 0     | 1     |
| 43324  | 0     | 0     | 0     | 0     |
| 43325  | 0     | 0     | 0     | 0     |
| 43327  | 0     | 0     | 0     | 0     |
| 43338  | 0     | 0     | 0     | 0     |
| 43342  | 0     | 0     | 0     | 0     |
| 43348  | 0     | 0     | 0     | 0     |
| 43395  | 1     | 0     | 0     | 0     |
| 43404  | 0     | 0     | 0     | 0     |
| 43406  | 0     | 0     | 0     | 0     |
| 43407  | 0     | 0     | 0     | 0     |
| 43411  | 0     | 0     | 0     | 0     |
| 43416  | 0     | 0     | 0     | 0     |
| 43428  | 0     | 0     | 0     | 0     |
| 43429  | 0     | 0     | 0     | 0     |
| 43432  | 0     | 0     | 0     | 1     |
| 43443  | 0     | 0     | 0     | 0     |
| 43455  | 0     | 0     | 0     | 0     |
| 43457  | 0     | 0     | 0     | 1     |
| 43458  | 0     | 0     | 0     | 0     |

| respid | Q31_6 | Q31_7 | Q31_8 | Q31_9 |
|--------|-------|-------|-------|-------|
| 43477  | 0     | 0     | 0     | 0     |
| 43520  | 0     | 0     | 0     | 0     |
| 43521  | 0     | 0     | 0     | 0     |
| 43550  | 0     | 0     | 0     | 0     |
| 43551  | 0     | 0     | 0     | 1     |
| 43554  | 0     | 0     | 0     | 0     |
| 43560  | 1     | 0     | 0     | 0     |
| 43569  | 0     | 0     | 0     | 0     |
| 43583  | 0     | 0     | 0     | 0     |
| 43590  | 0     | 1     | 0     | 0     |
| 43591  | 0     | 0     | 0     | 0     |
| 43595  | 0     | 0     | 0     | 0     |
| 43599  | 0     | 0     | 0     | 0     |
| 43606  | 0     | 0     | 0     | 0     |
| 43609  | 0     | 0     | 0     | 0     |
| 43629  | 0     | 0     | 0     | 0     |
| 43636  | 0     | 0     | 0     | 0     |
| 43661  | 0     | 0     | 0     | 0     |
| 43668  | 0     | 0     | 0     | 0     |
| 43672  | 0     | 0     | 0     | 0     |
| 43677  | 0     | 1     | 0     | 0     |
| 43683  | 0     | 0     | 0     | 0     |
| 43708  | 1     | 0     | 0     | 0     |
| 43713  | 0     | 0     | 0     | 0     |
| 43718  | 0     | 0     | 0     | 0     |
| 43725  | 0     | 0     | 0     | 0     |
| 43747  | 0     | 0     | 0     | 0     |
| 43755  | 0     | 0     | 0     | 0     |
| 43770  | 0     | 0     | 0     | 0     |
| 43775  | 0     | 0     | 0     | 0     |
| 43788  | 0     | 0     | 0     | 0     |
| 43790  | 0     | 0     | 0     | 0     |

| respid | Q31_6 | Q31_7 | Q31_8 | Q31_9 |
|--------|-------|-------|-------|-------|
| 43797  | 0     | 0     | 0     | 0     |
| 43798  | 0     | 0     | 0     | 0     |
| 43811  | 0     | 0     | 0     | 0     |
| 43819  | 0     | 0     | 1     | 0     |
| 43821  | 0     | 0     | 0     | 0     |
| 43822  | 0     | 0     | 0     | 0     |
| 43825  | 0     | 0     | 0     | 1     |
| 43826  | 0     | 0     | 0     | 1     |
| 43831  | 0     | 0     | 0     | 0     |
| 43836  | 0     | 0     | 0     | 0     |
| 43852  | 1     | 0     | 0     | 0     |
| 43857  | 0     | 0     | 0     | 0     |
| 43858  | 0     | 0     | 1     | 1     |
| 43859  | 0     | 0     | 0     | 0     |
| 43863  | 0     | 0     | 0     | 0     |
| 43868  | 0     | 0     | 0     | 0     |
| 43872  | 0     | 0     | 0     | 0     |
| 43874  | 0     | 0     | 0     | 0     |
| 43882  | 0     | 0     | 0     | 1     |
| 43886  | 0     | 0     | 0     | 0     |
| 43903  | 1     | 0     | 0     | 0     |
| 43929  | 0     | 0     | 0     | 1     |
| 43932  | 0     | 0     | 0     | 0     |
| 43936  | 0     | 0     | 0     | 0     |
| 43962  | 0     | 0     | 0     | 0     |
| 43964  | 0     | 1     | 0     | 0     |
| 43968  | 1     | 1     | 0     | 0     |
| 43979  | 0     | 0     | 0     | 0     |
| 44006  | 0     | 0     | 0     | 0     |
| 44009  | 0     | 0     | 0     | 0     |
| 44023  | 0     | 0     | 0     | 0     |
| 44035  | 0     | 0     | 0     | 0     |

| respid | Q31_6 | Q31_7 | Q31_8 | Q31_9 |
|--------|-------|-------|-------|-------|
| 44038  | 0     | 0     | 0     | 1     |
| 44039  | 0     | 0     | 0     | 0     |
| 44043  | 0     | 0     | 0     | 0     |
| 44048  | 1     | 0     | 0     | 0     |
| 44050  | 0     | 0     | 0     | 0     |
| 44051  | 0     | 0     | 0     | 0     |
| 44061  | 0     | 0     | 0     | 0     |
| 44063  | 0     | 0     | 0     | 0     |
| 44072  | 1     | 0     | 0     | 0     |
| 44075  | 0     | 0     | 0     | 0     |
| 44089  | 0     | 0     | 0     | 0     |
| 44090  | 0     | 0     | 0     | 0     |
| 44091  | 0     | 0     | 0     | 0     |
| 44092  | 0     | 0     | 0     | 0     |
| 44110  | 0     | 0     | 0     | 0     |
| 44112  | 0     | 0     | 0     | 0     |
| 44114  | 0     | 0     | 0     | 0     |
| 44143  | 0     | 0     | 0     | 0     |
| 44179  | 0     | 0     | 0     | 0     |
| 44234  | 0     | 0     | 0     | 0     |
| 44236  | 0     | 0     | 0     | 0     |
| 44239  | 0     | 0     | 0     | 0     |
| 44241  | 0     | 0     | 0     | 0     |
| 44253  | 0     | 0     | 0     | 0     |
| 44260  | 0     | 0     | 0     | 0     |
| 44261  | 1     | 0     | 0     | 0     |
| 44263  | 0     | 0     | 0     | 0     |
| 44264  | 0     | 0     | 0     | 0     |
| 44265  | 0     | 0     | 0     | 0     |
| 44267  | 0     | 0     | 0     | 0     |
| 44306  | 0     | 0     | 0     | 1     |
| 44309  | 0     | 0     | 0     | 0     |

| respid | Q31_6 | Q31_7 | Q31_8 | Q31_9 |
|--------|-------|-------|-------|-------|
| 44310  | 0     | 0     | 0     | 0     |
| 44361  | 0     | 0     | 0     | 0     |
| 44380  | 0     | 0     | 0     | 0     |
| 44386  | 0     | 0     | 0     | 0     |
| 44419  | 0     | 0     | 0     | 1     |
| 44426  | 0     | 0     | 0     | 0     |
| 44479  | 0     | 0     | 0     | 1     |
| 44484  | 0     | 0     | 0     | 0     |
| 44487  | 0     | 0     | 0     | 0     |
| 44509  | 0     | 0     | 0     | 0     |
| 44540  | 0     | 0     | 0     | 0     |
| 44551  | 0     | 0     | 0     | 1     |
| 44553  | 0     | 0     | 0     | 0     |
| 44650  | 0     | 0     | 0     | 0     |
| 44665  | 0     | 0     | 0     | 0     |
| 44779  | 0     | 0     | 0     | 1     |
| 44797  | 0     | 0     | 0     | 0     |
| 44807  | 0     | 0     | 0     | 0     |
| 44815  | 0     | 0     | 0     | 0     |
| 44836  | 0     | 0     | 0     | 0     |
| 44868  | 0     | 0     | 0     | 0     |
| 44927  | 0     | 1     | 0     | 0     |
| 44983  | 0     | 0     | 0     | 0     |
| 45040  | 0     | 0     | 0     | 0     |
| 45051  | 0     | 0     | 0     | 0     |
| 45067  | 0     | 0     | 0     | 0     |
| 45074  | 0     | 0     | 0     | 0     |
| 45115  | 0     | 0     | 0     | 0     |
| 45187  | 0     | 0     | 1     | 1     |
| 45221  | 0     | 0     | 0     | 0     |
| 45279  | 0     | 0     | 0     | 1     |
| 45308  | 0     | 0     | 0     | 0     |

| respid | Q31_6 | Q31_7 | Q31_8 | Q31_9 |
|--------|-------|-------|-------|-------|
| 45317  | 0     | 0     | 0     | 1     |
| 45379  | 1     | 1     | 0     | 0     |
| 45451  | 0     | 0     | 0     | 0     |
| 45472  | 0     | 0     | 0     | 1     |
| 45474  | 0     | 0     | 1     | 0     |
| 45544  | 0     | 0     | 0     | 0     |
| 45561  | 0     | 0     | 0     | 0     |
| 45596  | 0     | 0     | 0     | 0     |

**Instrum**

**Symptom**

Storage

Storage

Storage

**Type of R**

Frequency

Frequency

Frequency

**Descripti**

SUI: Laughing

SUI: Sneezing

SUI: Coughing

**respid**

Q31\_99

Q31a\_1

Q31a\_2

Q31a\_3

|     |   |  |   |   |
|-----|---|--|---|---|
| 241 | 1 |  |   |   |
| 242 | 1 |  |   |   |
| 243 | 1 |  |   |   |
| 244 | 0 |  |   |   |
| 245 | 1 |  |   |   |
| 246 | 0 |  |   |   |
| 247 | 1 |  |   |   |
| 253 | 0 |  | 1 |   |
| 256 | 1 |  |   |   |
| 257 | 0 |  | 1 |   |
| 258 | 1 |  |   |   |
| 259 | 0 |  | 2 | 2 |
| 263 | 1 |  |   |   |
| 264 | 1 |  |   |   |
| 265 | 0 |  |   |   |
| 266 | 1 |  |   |   |
| 268 | 0 |  |   |   |
| 270 | 1 |  |   |   |
| 272 | 0 |  | 1 |   |
| 274 | 1 |  |   |   |

| respid | Q31_99 | Q31a_1 | Q31a_2 | Q31a_3 |
|--------|--------|--------|--------|--------|
| 275    | 1      |        |        |        |
| 276    | 1      |        |        |        |
| 277    | 1      |        |        |        |
| 279    | 0      |        |        | 1      |
| 286    | 0      |        |        |        |
| 290    | 1      |        |        |        |
| 291    | 0      |        | 1      |        |
| 295    | 1      |        |        |        |
| 297    | 0      |        |        |        |
| 299    | 1      |        |        |        |
| 300    | 0      |        |        |        |
| 303    | 1      |        |        |        |
| 304    | 1      |        |        |        |
| 306    | 1      |        |        |        |
| 307    | 1      |        |        |        |
| 312    | 0      |        |        | 5      |
| 315    | 1      |        |        |        |
| 317    | 1      |        |        |        |
| 322    | 0      | 2      | 2      | 2      |
| 335    | 0      |        | 1      |        |
| 374    | 0      | 3      | 3      |        |
| 378    | 1      |        |        |        |
| 380    | 0      |        | 1      |        |
| 382    | 0      |        |        |        |
| 384    | 0      |        |        |        |
| 385    | 0      |        | 2      | 2      |
| 395    | 1      |        |        |        |
| 396    | 1      |        |        |        |
| 398    | 1      |        |        |        |
| 402    | 0      |        | 4      | 4      |
| 414    | 0      |        |        |        |
| 415    | 1      |        |        |        |



| respid | Q31_99 | Q31a_1 | Q31a_2 | Q31a_3 |
|--------|--------|--------|--------|--------|
| 416    | 1      |        |        |        |
| 420    | 0      |        | 2      | 2      |
| 421    | 1      |        |        |        |
| 422    | 0      |        | 1      |        |
| 423    | 1      |        |        |        |
| 424    | 1      |        |        |        |
| 425    | 1      |        |        |        |
| 428    | 1      |        |        |        |
| 429    | 0      |        | 2      | 1      |
| 431    | 1      |        |        |        |
| 437    | 1      |        |        |        |
| 438    | 1      |        |        |        |
| 441    | 0      |        | 1      |        |
| 444    | 1      |        |        |        |
| 448    | 0      |        |        |        |
| 449    | 0      |        | 1      |        |
| 457    | 0      | 1      |        | 2      |
| 460    | 1      |        |        |        |
| 469    | 1      |        |        |        |
| 471    | 0      |        | 2      |        |
| 473    | 0      |        | 1      |        |
| 476    | 1      |        |        |        |
| 479    | 1      |        |        |        |
| 485    | 1      |        |        |        |
| 488    | 0      |        | 1      | 1      |
| 494    | 0      |        | 1      |        |
| 496    | 1      |        |        |        |
| 501    | 1      |        |        |        |
| 502    | 0      |        |        |        |
| 503    | 0      |        |        |        |
| 506    | 0      |        |        |        |
| 514    | 0      | 1      |        | 1      |

| respid | Q31_99 | Q31a_1 | Q31a_2 | Q31a_3 |
|--------|--------|--------|--------|--------|
| 515    | 0      |        |        |        |
| 516    | 0      |        | 1      |        |
| 519    | 0      |        |        |        |
| 522    | 1      |        |        |        |
| 525    | 0      |        |        | 1      |
| 528    | 1      |        |        |        |
| 532    | 1      |        |        |        |
| 536    | 0      |        | 1      | 1      |
| 539    | 0      |        |        |        |
| 540    | 0      | 1      | 1      |        |
| 547    | 1      |        |        |        |
| 551    | 1      |        |        |        |
| 554    | 0      |        |        |        |
| 558    | 0      |        |        |        |
| 563    | 1      |        |        |        |
| 564    | 0      |        |        |        |
| 565    | 1      |        |        |        |
| 567    | 1      |        |        |        |
| 569    | 0      |        |        | 1      |
| 572    | 1      |        |        |        |
| 574    | 1      |        |        |        |
| 583    | 0      |        |        |        |
| 589    | 1      |        |        |        |
| 592    | 0      |        |        |        |
| 593    | 1      |        |        |        |
| 594    | 0      |        |        |        |
| 597    | 1      |        |        |        |
| 601    | 1      |        |        |        |
| 607    | 1      |        |        |        |
| 610    | 1      |        |        |        |
| 612    | 0      |        |        |        |
| 627    | 1      |        |        |        |

| respid | Q31_99 | Q31a_1 | Q31a_2 | Q31a_3 |
|--------|--------|--------|--------|--------|
| 631    | 1      |        |        |        |
| 633    | 0      |        | 3      | 3      |
| 636    | 0      |        |        |        |
| 656    | 1      |        |        |        |
| 659    | 1      |        |        |        |
| 670    | 1      |        |        |        |
| 672    | 0      |        | 1      |        |
| 673    | 0      |        | 1      | 1      |
| 675    | 1      |        |        |        |
| 676    | 0      |        |        |        |
| 679    | 0      |        |        | 1      |
| 683    | 1      |        |        |        |
| 684    | 0      |        |        |        |
| 690    | 0      |        | 1      | 1      |
| 701    | 0      |        |        |        |
| 709    | 0      |        |        |        |
| 719    | 1      |        |        |        |
| 726    | 0      |        | 2      | 1      |
| 730    | 1      |        |        |        |
| 731    | 0      |        |        |        |
| 732    | 1      |        |        |        |
| 733    | 1      |        |        |        |
| 735    | 1      |        |        |        |
| 738    | 1      |        |        |        |
| 740    | 1      |        |        |        |
| 742    | 1      |        |        |        |
| 744    | 1      |        |        |        |
| 749    | 0      |        | 1      |        |
| 751    | 1      |        |        |        |
| 752    | 1      |        |        |        |
| 753    | 0      |        |        |        |
| 755    | 1      |        |        |        |

| respid | Q31_99 | Q31a_1 | Q31a_2 | Q31a_3 |
|--------|--------|--------|--------|--------|
| 756    | 1      |        |        |        |
| 759    | 0      |        | 2      |        |
| 760    | 1      |        |        |        |
| 763    | 1      |        |        |        |
| 764    | 0      |        |        |        |
| 765    | 0      |        |        | 1      |
| 766    | 1      |        |        |        |
| 767    | 0      |        |        |        |
| 771    | 1      |        |        |        |
| 773    | 1      |        |        |        |
| 774    | 0      |        | 1      |        |
| 775    | 1      |        |        |        |
| 776    | 1      |        |        |        |
| 778    | 1      |        |        |        |
| 780    | 0      |        |        |        |
| 781    | 1      |        |        |        |
| 782    | 0      |        |        | 2      |
| 783    | 1      |        |        |        |
| 786    | 1      |        |        |        |
| 788    | 1      |        |        |        |
| 792    | 1      |        |        |        |
| 794    | 0      |        |        |        |
| 795    | 1      |        |        |        |
| 799    | 0      |        | 1      |        |
| 800    | 1      |        |        |        |
| 801    | 0      |        |        |        |
| 804    | 1      |        |        |        |
| 806    | 1      |        |        |        |
| 807    | 1      |        |        |        |
| 808    | 1      |        |        |        |
| 809    | 1      |        |        |        |
| 811    | 1      |        |        |        |

| respid | Q31_99 | Q31a_1 | Q31a_2 | Q31a_3 |
|--------|--------|--------|--------|--------|
| 812    | 1      |        |        |        |
| 815    | 1      |        |        |        |
| 817    | 0      | 1      | 1      | 1      |
| 818    | 0      |        | 1      | 1      |
| 819    | 0      |        |        |        |
| 821    | 0      |        | 2      | 1      |
| 824    | 1      |        |        |        |
| 825    | 1      |        |        |        |
| 828    | 0      |        |        | 1      |
| 832    | 1      |        |        |        |
| 834    | 1      |        |        |        |
| 835    | 1      |        |        |        |
| 836    | 1      |        |        |        |
| 837    | 1      |        |        |        |
| 840    | 1      |        |        |        |
| 841    | 1      |        |        |        |
| 845    | 1      |        |        |        |
| 846    | 1      |        |        |        |
| 849    | 1      |        |        |        |
| 852    | 0      |        |        | 1      |
| 854    | 1      |        |        |        |
| 856    | 1      |        |        |        |
| 858    | 1      |        |        |        |
| 859    | 0      |        |        | 1      |
| 861    | 0      |        | 1      |        |
| 863    | 1      |        |        |        |
| 864    | 0      |        |        |        |
| 866    | 1      |        |        |        |
| 869    | 1      |        |        |        |
| 870    | 1      |        |        |        |
| 871    | 1      |        |        |        |
| 873    | 0      |        |        |        |

| respid | Q31_99 | Q31a_1 | Q31a_2 | Q31a_3 |
|--------|--------|--------|--------|--------|
| 879    | 0      |        |        |        |
| 880    | 0      | 1      | 1      | 1      |
| 881    | 1      |        |        |        |
| 882    | 1      |        |        |        |
| 885    | 1      |        |        |        |
| 886    | 1      |        |        |        |
| 887    | 0      |        | 3      | 1      |
| 888    | 1      |        |        |        |
| 889    | 1      |        |        |        |
| 890    | 1      |        |        |        |
| 900    | 1      |        |        |        |
| 901    | 1      |        |        |        |
| 902    | 1      |        |        |        |
| 903    | 1      |        |        |        |
| 906    | 1      |        |        |        |
| 907    | 0      |        |        |        |
| 908    | 0      |        |        |        |
| 910    | 0      |        | 1      |        |
| 911    | 0      |        |        |        |
| 912    | 1      |        |        |        |
| 915    | 1      |        |        |        |
| 923    | 0      |        | 2      | 2      |
| 925    | 1      |        |        |        |
| 926    | 1      |        |        |        |
| 929    | 1      |        |        |        |
| 932    | 1      |        |        |        |
| 933    | 0      |        |        |        |
| 934    | 1      |        |        |        |
| 938    | 0      |        |        |        |
| 941    | 1      |        |        |        |
| 942    | 1      |        |        |        |
| 943    | 1      |        |        |        |

| respid | Q31_99 | Q31a_1 | Q31a_2 | Q31a_3 |
|--------|--------|--------|--------|--------|
| 945    | 1      |        |        |        |
| 946    | 1      |        |        |        |
| 947    | 1      |        |        |        |
| 948    | 1      |        |        |        |
| 949    | 1      |        |        |        |
| 952    | 1      |        |        |        |
| 956    | 1      |        |        |        |
| 957    | 1      |        |        |        |
| 959    | 1      |        |        |        |
| 961    | 1      |        |        |        |
| 962    | 0      | 2      | 2      | 3      |
| 965    | 1      |        |        |        |
| 967    | 1      |        |        |        |
| 969    | 0      |        | 1      |        |
| 970    | 1      |        |        |        |
| 973    | 1      |        |        |        |
| 974    | 1      |        |        |        |
| 975    | 0      |        |        |        |
| 976    | 1      |        |        |        |
| 977    | 1      |        |        |        |
| 979    | 1      |        |        |        |
| 981    | 0      |        | 1      | 1      |
| 983    | 0      |        |        | 5      |
| 987    | 0      |        |        |        |
| 991    | 1      |        |        |        |
| 992    | 1      |        |        |        |
| 993    | 0      |        |        | 1      |
| 994    | 0      |        | 1      |        |
| 995    | 0      |        |        |        |
| 998    | 0      |        | 1      | 1      |
| 1000   | 0      | 2      |        |        |
| 1001   | 1      |        |        |        |

| respid | Q31_99 | Q31a_1 | Q31a_2 | Q31a_3 |
|--------|--------|--------|--------|--------|
| 1002   | 1      |        |        |        |
| 1004   | 1      |        |        |        |
| 1005   | 1      |        |        |        |
| 1006   | 1      |        |        |        |
| 1007   | 0      |        | 1      |        |
| 1009   | 1      |        |        |        |
| 1013   | 1      |        |        |        |
| 1015   | 1      |        |        |        |
| 1020   | 0      |        |        |        |
| 1022   | 0      |        |        |        |
| 1024   | 1      |        |        |        |
| 1025   | 1      |        |        |        |
| 1027   | 1      |        |        |        |
| 1031   | 1      |        |        |        |
| 1037   | 1      |        |        |        |
| 1039   | 1      |        |        |        |
| 1040   | 1      |        |        |        |
| 1056   | 0      |        |        |        |
| 1057   | 1      |        |        |        |
| 1062   | 1      |        |        |        |
| 1069   | 1      |        |        |        |
| 1070   | 1      |        |        |        |
| 1072   | 1      |        |        |        |
| 1076   | 1      |        |        |        |
| 1077   | 0      |        |        |        |
| 1078   | 1      |        |        |        |
| 1080   | 1      |        |        |        |
| 1094   | 0      | 2      |        | 2      |
| 1098   | 0      |        |        |        |
| 1099   | 0      |        | 1      |        |
| 1102   | 1      |        |        |        |
| 1110   | 1      |        |        |        |



| respid | Q31_99 | Q31a_1 | Q31a_2 | Q31a_3 |
|--------|--------|--------|--------|--------|
| 1117   | 0      |        | 1      | 1      |
| 1119   | 1      |        |        |        |
| 1126   | 1      |        |        |        |
| 1127   | 1      |        |        |        |
| 1130   | 1      |        |        |        |
| 1131   | 1      |        |        |        |
| 1135   | 0      |        |        |        |
| 1138   | 0      |        | 1      | 1      |
| 1139   | 1      |        |        |        |
| 1140   | 1      |        |        |        |
| 1142   | 1      |        |        |        |
| 1143   | 1      |        |        |        |
| 1145   | 1      |        |        |        |
| 1149   | 1      |        |        |        |
| 1152   | 1      |        |        |        |
| 1160   | 1      |        |        |        |
| 1164   | 1      |        |        |        |
| 1165   | 0      |        |        |        |
| 1169   | 0      |        |        |        |
| 1170   | 1      |        |        |        |
| 1179   | 1      |        |        |        |
| 1180   | 1      |        |        |        |
| 1183   | 1      |        |        |        |
| 1187   | 1      |        |        |        |
| 1188   | 1      |        |        |        |
| 1193   | 1      |        |        |        |
| 1194   | 1      |        |        |        |
| 1197   | 1      |        |        |        |
| 1202   | 1      |        |        |        |
| 1204   | 0      | 4      | 4      |        |
| 1211   | 1      |        |        |        |
| 1224   | 1      |        |        |        |

| respid | Q31_99 | Q31a_1 | Q31a_2 | Q31a_3 |
|--------|--------|--------|--------|--------|
| 1225   | 1      |        |        |        |
| 1230   | 0      |        | 1      |        |
| 1232   | 1      |        |        |        |
| 1233   | 0      |        |        |        |
| 1234   | 1      |        |        |        |
| 1235   | 0      |        |        |        |
| 1236   | 1      |        |        |        |
| 1237   | 0      |        |        | 1      |
| 1238   | 1      |        |        |        |
| 1239   | 1      |        |        |        |
| 1241   | 1      |        |        |        |
| 1242   | 1      |        |        |        |
| 1244   | 1      |        |        |        |
| 1245   | 1      |        |        |        |
| 1247   | 0      |        |        |        |
| 1248   | 0      |        | 2      |        |
| 1249   | 0      |        |        |        |
| 1250   | 1      |        |        |        |
| 1251   | 1      |        |        |        |
| 1252   | 1      |        |        |        |
| 1253   | 1      |        |        |        |
| 1254   | 0      |        |        |        |
| 1258   | 1      |        |        |        |
| 1260   | 1      |        |        |        |
| 1261   | 1      |        |        |        |
| 1262   | 1      |        |        |        |
| 1263   | 1      |        |        |        |
| 1264   | 0      | 1      |        | 1      |
| 1265   | 1      |        |        |        |
| 1266   | 1      |        |        |        |
| 1270   | 1      |        |        |        |
| 1272   | 0      |        | 2      | 2      |

| respid | Q31_99 | Q31a_1 | Q31a_2 | Q31a_3 |
|--------|--------|--------|--------|--------|
| 1273   | 0      |        | 2      |        |
| 1276   | 1      |        |        |        |
| 1277   | 1      |        |        |        |
| 1278   | 0      |        |        |        |
| 1280   | 1      |        |        |        |
| 1281   | 0      |        | 1      | 1      |
| 1282   | 0      |        |        |        |
| 1283   | 1      |        |        |        |
| 1288   | 0      |        | 2      |        |
| 1289   | 0      |        |        | 2      |
| 1290   | 1      |        |        |        |
| 1291   | 1      |        |        |        |
| 1293   | 0      | 1      | 1      | 1      |
| 1294   | 1      |        |        |        |
| 1295   | 1      |        |        |        |
| 1296   | 1      |        |        |        |
| 1297   | 0      |        | 2      |        |
| 1298   | 0      |        |        |        |
| 1300   | 0      |        |        |        |
| 1302   | 1      |        |        |        |
| 1303   | 0      |        |        |        |
| 1304   | 0      |        | 1      |        |
| 1305   | 0      |        |        |        |
| 1307   | 1      |        |        |        |
| 1312   | 0      |        | 1      |        |
| 1313   | 0      |        | 2      |        |
| 1314   | 1      |        |        |        |
| 1317   | 0      | 1      |        |        |
| 1318   | 1      |        |        |        |
| 1319   | 1      |        |        |        |
| 1321   | 1      |        |        |        |
| 1324   | 0      |        | 2      | 1      |

| respid | Q31_99 | Q31a_1 | Q31a_2 | Q31a_3 |
|--------|--------|--------|--------|--------|
| 1325   | 1      |        |        |        |
| 1326   | 1      |        |        |        |
| 1327   | 1      |        |        |        |
| 1329   | 0      |        |        |        |
| 1330   | 0      | 2      | 3      | 3      |
| 1331   | 0      |        | 1      |        |
| 1335   | 0      |        |        |        |
| 1337   | 1      |        |        |        |
| 1341   | 1      |        |        |        |
| 1342   | 1      |        |        |        |
| 1344   | 0      |        |        |        |
| 1345   | 1      |        |        |        |
| 1346   | 0      |        |        |        |
| 1350   | 0      |        | 2      | 2      |
| 1352   | 1      |        |        |        |
| 1353   | 0      |        |        |        |
| 1354   | 1      |        |        |        |
| 1355   | 1      |        |        |        |
| 1357   | 0      |        |        |        |
| 1360   | 1      |        |        |        |
| 1362   | 0      |        |        |        |
| 1363   | 0      |        |        |        |
| 1367   | 0      |        |        |        |
| 1369   | 1      |        |        |        |
| 1371   | 1      |        |        |        |
| 1372   | 1      |        |        |        |
| 1375   | 1      |        |        |        |
| 1377   | 0      |        |        |        |
| 1379   | 1      |        |        |        |
| 1380   | 1      |        |        |        |
| 1382   | 1      |        |        |        |
| 1383   | 0      |        |        | 1      |

| respid | Q31_99 | Q31a_1 | Q31a_2 | Q31a_3 |
|--------|--------|--------|--------|--------|
| 1384   | 0      |        | 1      |        |
| 1385   | 1      |        |        |        |
| 1387   | 1      |        |        |        |
| 1388   | 1      |        |        |        |
| 1389   | 0      |        | 1      | 1      |
| 1390   | 0      |        | 1      | 1      |
| 1395   | 1      |        |        |        |
| 1396   | 1      |        |        |        |
| 1397   | 0      |        | 2      |        |
| 1398   | 1      |        |        |        |
| 1399   | 1      |        |        |        |
| 1403   | 1      |        |        |        |
| 1405   | 1      |        |        |        |
| 1406   | 0      |        | 1      | 2      |
| 1407   | 0      | 2      | 2      | 2      |
| 1408   | 1      |        |        |        |
| 1409   | 1      |        |        |        |
| 1410   | 0      |        |        |        |
| 1411   | 1      |        |        |        |
| 1412   | 1      |        |        |        |
| 1413   | 0      |        | 1      |        |
| 1414   | 1      |        |        |        |
| 1415   | 1      |        |        |        |
| 1416   | 1      |        |        |        |
| 1417   | 1      |        |        |        |
| 1418   | 1      |        |        |        |
| 1419   | 0      |        | 1      |        |
| 1420   | 1      |        |        |        |
| 1421   | 0      |        |        |        |
| 1422   | 0      |        | 1      |        |
| 1423   | 1      |        |        |        |
| 1424   | 1      |        |        |        |

| respid | Q31_99 | Q31a_1 | Q31a_2 | Q31a_3 |
|--------|--------|--------|--------|--------|
| 1429   | 1      |        |        |        |
| 1430   | 1      |        |        |        |
| 1431   | 0      |        |        |        |
| 1433   | 1      |        |        |        |
| 1435   | 1      |        |        |        |
| 1436   | 1      |        |        |        |
| 1438   | 1      |        |        |        |
| 1439   | 1      |        |        |        |
| 1441   | 1      |        |        |        |
| 1442   | 1      |        |        |        |
| 1443   | 1      |        |        |        |
| 1444   | 1      |        |        |        |
| 1445   | 0      |        |        |        |
| 1446   | 0      |        | 1      |        |
| 1447   | 1      |        |        |        |
| 1449   | 0      | 1      |        |        |
| 1450   | 1      |        |        |        |
| 1451   | 0      |        |        |        |
| 1452   | 1      |        |        |        |
| 1453   | 0      |        |        |        |
| 1454   | 0      |        | 1      |        |
| 1456   | 1      |        |        |        |
| 1457   | 1      |        |        |        |
| 1459   | 1      |        |        |        |
| 1460   | 1      |        |        |        |
| 1463   | 1      |        |        |        |
| 1465   | 1      |        |        |        |
| 1467   | 1      |        |        |        |
| 1470   | 1      |        |        |        |
| 1471   | 1      |        |        |        |
| 1472   | 1      |        |        |        |
| 1474   | 0      |        |        |        |

| respid | Q31_99 | Q31a_1 | Q31a_2 | Q31a_3 |
|--------|--------|--------|--------|--------|
| 1475   | 1      |        |        |        |
| 1477   | 1      |        |        |        |
| 1478   | 1      |        |        |        |
| 1480   | 1      |        |        |        |
| 1481   | 0      |        | 3      | 2      |
| 1483   | 1      |        |        |        |
| 1484   | 1      |        |        |        |
| 1485   | 1      |        |        |        |
| 1486   | 1      |        |        |        |
| 1487   | 0      |        |        |        |
| 1488   | 1      |        |        |        |
| 1489   | 0      |        |        |        |
| 1490   | 1      |        |        |        |
| 1491   | 0      |        | 3      | 3      |
| 1492   | 1      |        |        |        |
| 1494   | 1      |        |        |        |
| 1495   | 1      |        |        |        |
| 1496   | 1      |        |        |        |
| 1498   | 1      |        |        |        |
| 1499   | 0      |        | 1      |        |
| 1500   | 0      |        |        |        |
| 1501   | 1      |        |        |        |
| 1503   | 1      |        |        |        |
| 1504   | 1      |        |        |        |
| 1508   | 1      |        |        |        |
| 1509   | 0      |        |        |        |
| 1511   | 0      |        |        |        |
| 1512   | 0      |        | 1      |        |
| 1513   | 1      |        |        |        |
| 1515   | 0      |        |        |        |
| 1517   | 1      |        |        |        |
| 1518   | 0      |        | 3      | 3      |

| respid | Q31_99 | Q31a_1 | Q31a_2 | Q31a_3 |
|--------|--------|--------|--------|--------|
| 1519   | 0      |        |        |        |
| 1520   | 1      |        |        |        |
| 1521   | 0      |        |        | 2      |
| 1522   | 1      |        |        |        |
| 1523   | 0      |        |        |        |
| 1524   | 0      |        | 1      | 1      |
| 1525   | 0      | 1      | 1      | 1      |
| 1526   | 0      |        |        |        |
| 1527   | 1      |        |        |        |
| 1534   | 0      |        | 1      |        |
| 1535   | 1      |        |        |        |
| 1536   | 0      |        |        |        |
| 1538   | 1      |        |        |        |
| 1539   | 1      |        |        |        |
| 1540   | 1      |        |        |        |
| 1541   | 1      |        |        |        |
| 1542   | 1      |        |        |        |
| 1543   | 1      |        |        |        |
| 1545   | 1      |        |        |        |
| 1546   | 1      |        |        |        |
| 1548   | 0      |        |        |        |
| 1549   | 1      |        |        |        |
| 1551   | 1      |        |        |        |
| 1552   | 1      |        |        |        |
| 1556   | 1      |        |        |        |
| 1557   | 1      |        |        |        |
| 1558   | 1      |        |        |        |
| 1561   | 1      |        |        |        |
| 1562   | 1      |        |        |        |
| 1563   | 1      |        |        |        |
| 1564   | 0      |        |        | 1      |
| 1565   | 1      |        |        |        |



| respid | Q31_99 | Q31a_1 | Q31a_2 | Q31a_3 |
|--------|--------|--------|--------|--------|
| 1566   | 1      |        |        |        |
| 1567   | 1      |        |        |        |
| 1569   | 1      |        |        |        |
| 1570   | 1      |        |        |        |
| 1574   | 1      |        |        |        |
| 1575   | 1      |        |        |        |
| 1576   | 0      |        |        | 4      |
| 1577   | 1      |        |        |        |
| 1581   | 1      |        |        |        |
| 1583   | 0      |        |        |        |
| 1585   | 1      |        |        |        |
| 1586   | 1      |        |        |        |
| 1588   | 1      |        |        |        |
| 1590   | 1      |        |        |        |
| 1592   | 0      |        | 1      |        |
| 1594   | 1      |        |        |        |
| 1598   | 1      |        |        |        |
| 1599   | 1      |        |        |        |
| 1600   | 0      |        |        |        |
| 1602   | 1      |        |        |        |
| 1603   | 0      |        | 1      |        |
| 1604   | 0      |        |        | 1      |
| 1605   | 0      |        |        |        |
| 1606   | 1      |        |        |        |
| 1610   | 1      |        |        |        |
| 1611   | 1      |        |        |        |
| 1612   | 0      |        | 1      |        |
| 1613   | 0      |        |        |        |
| 1615   | 0      |        | 2      | 1      |
| 1616   | 1      |        |        |        |
| 1617   | 1      |        |        |        |
| 1618   | 1      |        |        |        |

| respid | Q31_99 | Q31a_1 | Q31a_2 | Q31a_3 |
|--------|--------|--------|--------|--------|
| 1620   | 1      |        |        |        |
| 1621   | 0      |        |        |        |
| 1622   | 1      |        |        |        |
| 1623   | 1      |        |        |        |
| 1624   | 0      |        |        | 1      |
| 1625   | 1      |        |        |        |
| 1626   | 1      |        |        |        |
| 1627   | 1      |        |        |        |
| 1629   | 1      |        |        |        |
| 1630   | 1      |        |        |        |
| 1631   | 1      |        |        |        |
| 1634   | 0      | 1      | 1      | 1      |
| 1635   | 1      |        |        |        |
| 1636   | 1      |        |        |        |
| 1637   | 1      |        |        |        |
| 1640   | 1      |        |        |        |
| 1642   | 0      |        | 1      |        |
| 1643   | 0      | 2      |        | 2      |
| 1644   | 0      |        |        |        |
| 1645   | 1      |        |        |        |
| 1646   | 0      |        | 1      |        |
| 1647   | 1      |        |        |        |
| 1650   | 0      |        |        |        |
| 1654   | 1      |        |        |        |
| 1656   | 1      |        |        |        |
| 1657   | 0      |        |        | 2      |
| 1659   | 0      |        |        |        |
| 1662   | 0      |        |        | 1      |
| 1663   | 1      |        |        |        |
| 1664   | 1      |        |        |        |
| 1665   | 1      |        |        |        |
| 1667   | 1      |        |        |        |

| respid | Q31_99 | Q31a_1 | Q31a_2 | Q31a_3 |
|--------|--------|--------|--------|--------|
| 1668   | 1      |        |        |        |
| 1670   | 1      |        |        |        |
| 1671   | 1      |        |        |        |
| 1673   | 1      |        |        |        |
| 1674   | 1      |        |        |        |
| 1676   | 1      |        |        |        |
| 1677   | 1      |        |        |        |
| 1678   | 1      |        |        |        |
| 1680   | 0      |        | 2      |        |
| 1681   | 1      |        |        |        |
| 1683   | 1      |        |        |        |
| 1685   | 1      |        |        |        |
| 1686   | 0      |        | 2      | 2      |
| 1690   | 1      |        |        |        |
| 1691   | 0      |        | 1      | 1      |
| 1692   | 0      |        |        |        |
| 1693   | 1      |        |        |        |
| 1695   | 1      |        |        |        |
| 1696   | 1      |        |        |        |
| 1698   | 1      |        |        |        |
| 1699   | 0      |        | 1      | 1      |
| 1701   | 1      |        |        |        |
| 1702   | 1      |        |        |        |
| 1703   | 1      |        |        |        |
| 1705   | 0      |        | 1      |        |
| 1706   | 1      |        |        |        |
| 1708   | 1      |        |        |        |
| 1711   | 0      |        | 2      | 2      |
| 1712   | 1      |        |        |        |
| 1713   | 0      |        |        | 1      |
| 1715   | 1      |        |        |        |
| 1717   | 1      |        |        |        |

| respid | Q31_99 | Q31a_1 | Q31a_2 | Q31a_3 |
|--------|--------|--------|--------|--------|
| 1718   | 0      | 2      | 3      | 3      |
| 1719   | 1      |        |        |        |
| 1721   | 1      |        |        |        |
| 1722   | 0      | 1      | 1      |        |
| 1724   | 1      |        |        |        |
| 1725   | 1      |        |        |        |
| 1726   | 0      |        |        |        |
| 1727   | 1      |        |        |        |
| 1728   | 0      |        |        |        |
| 1731   | 1      |        |        |        |
| 1733   | 1      |        |        |        |
| 1734   | 1      |        |        |        |
| 1735   | 1      |        |        |        |
| 1736   | 0      |        | 1      |        |
| 1737   | 1      |        |        |        |
| 1738   | 0      |        | 1      | 1      |
| 1743   | 1      |        |        |        |
| 1755   | 0      |        | 2      |        |
| 1756   | 1      |        |        |        |
| 1757   | 1      |        |        |        |
| 1758   | 0      | 1      | 1      | 1      |
| 1759   | 0      |        |        |        |
| 1761   | 1      |        |        |        |
| 1762   | 0      |        | 1      |        |
| 1764   | 1      |        |        |        |
| 1767   | 1      |        |        |        |
| 1768   | 0      |        |        |        |
| 1769   | 1      |        |        |        |
| 1770   | 1      |        |        |        |
| 1771   | 0      |        | 1      |        |
| 1776   | 1      |        |        |        |
| 1777   | 1      |        |        |        |

| respid | Q31_99 | Q31a_1 | Q31a_2 | Q31a_3 |
|--------|--------|--------|--------|--------|
| 1778   | 0      |        |        |        |
| 1779   | 0      |        |        |        |
| 1780   | 0      |        |        |        |
| 1781   | 1      |        |        |        |
| 1783   | 1      |        |        |        |
| 1784   | 1      |        |        |        |
| 1785   | 1      |        |        |        |
| 1788   | 0      |        | 1      | 1      |
| 1792   | 1      |        |        |        |
| 1794   | 0      |        | 1      |        |
| 1798   | 0      |        |        | 3      |
| 1799   | 1      |        |        |        |
| 1800   | 1      |        |        |        |
| 1804   | 1      |        |        |        |
| 1806   | 0      |        | 1      |        |
| 1807   | 1      |        |        |        |
| 1808   | 1      |        |        |        |
| 1809   | 0      |        | 1      |        |
| 1811   | 1      |        |        |        |
| 1812   | 1      |        |        |        |
| 1813   | 1      |        |        |        |
| 1814   | 0      |        | 2      |        |
| 1815   | 1      |        |        |        |
| 1817   | 1      |        |        |        |
| 1820   | 1      |        |        |        |
| 1821   | 1      |        |        |        |
| 1822   | 0      |        |        |        |
| 1823   | 1      |        |        |        |
| 1824   | 1      |        |        |        |
| 1826   | 1      |        |        |        |
| 1828   | 0      |        |        |        |
| 1829   | 1      |        |        |        |

| respid | Q31_99 | Q31a_1 | Q31a_2 | Q31a_3 |
|--------|--------|--------|--------|--------|
| 1830   | 0      |        |        |        |
| 1831   | 1      |        |        |        |
| 1832   | 1      |        |        |        |
| 1836   | 0      |        |        |        |
| 1838   | 0      |        |        |        |
| 1839   | 1      |        |        |        |
| 1840   | 1      |        |        |        |
| 1841   | 1      |        |        |        |
| 1842   | 0      |        | 1      |        |
| 1843   | 1      |        |        |        |
| 1844   | 0      |        | 2      |        |
| 1845   | 1      |        |        |        |
| 1849   | 1      |        |        |        |
| 1850   | 0      |        |        |        |
| 1851   | 1      |        |        |        |
| 1852   | 1      |        |        |        |
| 1857   | 0      |        | 3      | 3      |
| 1858   | 1      |        |        |        |
| 1861   | 1      |        |        |        |
| 1862   | 1      |        |        |        |
| 1863   | 1      |        |        |        |
| 1864   | 1      |        |        |        |
| 1865   | 1      |        |        |        |
| 1867   | 1      |        |        |        |
| 1868   | 1      |        |        |        |
| 1869   | 1      |        |        |        |
| 1870   | 1      |        |        |        |
| 1871   | 0      |        |        |        |
| 1872   | 1      |        |        |        |
| 1873   | 1      |        |        |        |
| 1876   | 1      |        |        |        |
| 1877   | 1      |        |        |        |

| respid | Q31_99 | Q31a_1 | Q31a_2 | Q31a_3 |
|--------|--------|--------|--------|--------|
| 1878   | 0      |        | 1      |        |
| 1879   | 1      |        |        |        |
| 1880   | 1      |        |        |        |
| 1881   | 0      |        | 2      | 1      |
| 1883   | 0      |        |        |        |
| 1886   | 1      |        |        |        |
| 1888   | 0      |        |        | 4      |
| 1889   | 0      | 2      | 3      | 3      |
| 1890   | 1      |        |        |        |
| 1891   | 1      |        |        |        |
| 1893   | 1      |        |        |        |
| 1894   | 1      |        |        |        |
| 1895   | 0      |        |        |        |
| 1896   | 1      |        |        |        |
| 1897   | 1      |        |        |        |
| 1898   | 0      | 3      | 3      | 3      |
| 1899   | 1      |        |        |        |
| 1900   | 1      |        |        |        |
| 1903   | 1      |        |        |        |
| 1906   | 1      |        |        |        |
| 1907   | 0      |        | 3      | 3      |
| 1908   | 1      |        |        |        |
| 1909   | 0      |        | 1      | 2      |
| 1910   | 1      |        |        |        |
| 1911   | 0      |        |        |        |
| 1912   | 1      |        |        |        |
| 1917   | 0      | 1      | 1      | 1      |
| 1918   | 1      |        |        |        |
| 1919   | 1      |        |        |        |
| 1922   | 1      |        |        |        |
| 1925   | 1      |        |        |        |
| 1926   | 0      |        |        |        |

| respid | Q31_99 | Q31a_1 | Q31a_2 | Q31a_3 |
|--------|--------|--------|--------|--------|
| 1927   | 1      |        |        |        |
| 1928   | 1      |        |        |        |
| 1929   | 1      |        |        |        |
| 1934   | 1      |        |        |        |
| 1935   | 1      |        |        |        |
| 1936   | 0      |        | 1      |        |
| 1937   | 1      |        |        |        |
| 1938   | 1      |        |        |        |
| 1939   | 0      |        |        | 1      |
| 1940   | 1      |        |        |        |
| 1941   | 1      |        |        |        |
| 1948   | 1      |        |        |        |
| 1950   | 0      |        |        |        |
| 1955   | 0      |        | 2      | 2      |
| 1958   | 0      |        | 1      |        |
| 1960   | 1      |        |        |        |
| 1961   | 1      |        |        |        |
| 1962   | 1      |        |        |        |
| 1965   | 1      |        |        |        |
| 1966   | 1      |        |        |        |
| 1967   | 1      |        |        |        |
| 1968   | 0      |        | 1      |        |
| 1973   | 1      |        |        |        |
| 1974   | 0      |        |        |        |
| 1975   | 1      |        |        |        |
| 1977   | 1      |        |        |        |
| 1978   | 1      |        |        |        |
| 1979   | 0      |        |        | 4      |
| 1982   | 1      |        |        |        |
| 1983   | 1      |        |        |        |
| 1987   | 1      |        |        |        |
| 1988   | 1      |        |        |        |



| respid | Q31_99 | Q31a_1 | Q31a_2 | Q31a_3 |
|--------|--------|--------|--------|--------|
| 1991   | 0      |        |        |        |
| 1992   | 1      |        |        |        |
| 1993   | 0      |        | 1      |        |
| 1994   | 0      |        |        |        |
| 1995   | 1      |        |        |        |
| 1996   | 0      |        |        | 1      |
| 1997   | 0      |        | 1      |        |
| 1998   | 1      |        |        |        |
| 1999   | 0      |        | 1      | 2      |
| 2000   | 0      |        |        |        |
| 2001   | 0      |        |        |        |
| 2002   | 0      |        |        |        |
| 2003   | 1      |        |        |        |
| 2004   | 0      |        |        | 1      |
| 2005   | 0      |        | 1      |        |
| 2007   | 0      | 2      |        | 2      |
| 2009   | 0      |        |        | 1      |
| 2010   | 1      |        |        |        |
| 2011   | 1      |        |        |        |
| 2013   | 1      |        |        |        |
| 2014   | 1      |        |        |        |
| 2017   | 0      |        |        |        |
| 2020   | 1      |        |        |        |
| 2023   | 0      |        | 2      | 1      |
| 2024   | 1      |        |        |        |
| 2029   | 1      |        |        |        |
| 2030   | 1      |        |        |        |
| 2031   | 1      |        |        |        |
| 2032   | 0      |        |        |        |
| 2033   | 1      |        |        |        |
| 2034   | 1      |        |        |        |
| 2036   | 0      | 2      | 2      | 2      |

| respid | Q31_99 | Q31a_1 | Q31a_2 | Q31a_3 |
|--------|--------|--------|--------|--------|
| 2037   | 0      |        |        |        |
| 2038   | 1      |        |        |        |
| 2039   | 0      |        | 1      |        |
| 2040   | 1      |        |        |        |
| 2041   | 1      |        |        |        |
| 2042   | 1      |        |        |        |
| 2043   | 0      |        | 1      |        |
| 2051   | 1      |        |        |        |
| 2052   | 0      |        |        |        |
| 2053   | 0      | 1      |        |        |
| 2054   | 1      |        |        |        |
| 2055   | 0      | 1      |        |        |
| 2056   | 1      |        |        |        |
| 2057   | 1      |        |        |        |
| 2059   | 1      |        |        |        |
| 2063   | 1      |        |        |        |
| 2066   | 0      |        | 1      |        |
| 2068   | 1      |        |        |        |
| 2069   | 0      |        | 1      |        |
| 2070   | 1      |        |        |        |
| 2071   | 0      |        |        |        |
| 2073   | 1      |        |        |        |
| 2077   | 0      |        | 1      | 1      |
| 2079   | 1      |        |        |        |
| 2080   | 0      | 5      | 5      | 5      |
| 2081   | 0      |        |        |        |
| 2084   | 1      |        |        |        |
| 2085   | 1      |        |        |        |
| 2087   | 0      |        | 2      | 2      |
| 2089   | 0      |        |        |        |
| 2093   | 1      |        |        |        |
| 2094   | 1      |        |        |        |

| respid | Q31_99 | Q31a_1 | Q31a_2 | Q31a_3 |
|--------|--------|--------|--------|--------|
| 2095   | 1      |        |        |        |
| 2097   | 1      |        |        |        |
| 2099   | 1      |        |        |        |
| 2100   | 0      |        | 2      | 2      |
| 2101   | 1      |        |        |        |
| 2103   | 1      |        |        |        |
| 2104   | 0      |        | 1      | 1      |
| 2106   | 1      |        |        |        |
| 2111   | 0      |        |        |        |
| 2113   | 1      |        |        |        |
| 2115   | 1      |        |        |        |
| 2119   | 0      |        |        |        |
| 2120   | 1      |        |        |        |
| 2123   | 1      |        |        |        |
| 2124   | 0      |        | 1      | 2      |
| 2130   | 1      |        |        |        |
| 2131   | 0      |        | 1      |        |
| 2133   | 0      | 1      | 1      | 1      |
| 2139   | 0      | 1      |        |        |
| 2141   | 1      |        |        |        |
| 2143   | 1      |        |        |        |
| 2144   | 1      |        |        |        |
| 2147   | 1      |        |        |        |
| 2151   | 1      |        |        |        |
| 2153   | 1      |        |        |        |
| 2154   | 1      |        |        |        |
| 2155   | 1      |        |        |        |
| 2159   | 0      |        | 1      |        |
| 2160   | 0      |        |        | 2      |
| 2161   | 1      |        |        |        |
| 2163   | 1      |        |        |        |
| 2164   | 1      |        |        |        |

| respid | Q31_99 | Q31a_1 | Q31a_2 | Q31a_3 |
|--------|--------|--------|--------|--------|
| 2168   | 0      |        |        |        |
| 2169   | 1      |        |        |        |
| 2170   | 0      |        |        |        |
| 2171   | 0      |        |        |        |
| 2172   | 0      |        |        |        |
| 2173   | 1      |        |        |        |
| 2174   | 0      |        |        | 1      |
| 2175   | 0      |        |        |        |
| 2176   | 0      |        |        |        |
| 2177   | 0      | 3      | 3      | 3      |
| 2179   | 0      |        | 1      |        |
| 2181   | 1      |        |        |        |
| 2182   | 1      |        |        |        |
| 2183   | 0      |        |        |        |
| 2184   | 0      |        | 1      |        |
| 2185   | 1      |        |        |        |
| 2186   | 1      |        |        |        |
| 2187   | 1      |        |        |        |
| 2188   | 1      |        |        |        |
| 2189   | 1      |        |        |        |
| 2190   | 1      |        |        |        |
| 2193   | 1      |        |        |        |
| 2195   | 1      |        |        |        |
| 2198   | 1      |        |        |        |
| 2200   | 0      |        |        | 1      |
| 2205   | 1      |        |        |        |
| 2208   | 1      |        |        |        |
| 2209   | 1      |        |        |        |
| 2210   | 1      |        |        |        |
| 2211   | 1      |        |        |        |
| 2213   | 1      |        |        |        |
| 2214   | 0      |        | 1      |        |

| respid | Q31_99 | Q31a_1 | Q31a_2 | Q31a_3 |
|--------|--------|--------|--------|--------|
| 2216   | 0      |        |        |        |
| 2220   | 0      |        |        | 1      |
| 2225   | 1      |        |        |        |
| 2227   | 1      |        |        |        |
| 2228   | 0      |        |        |        |
| 2229   | 1      |        |        |        |
| 2230   | 1      |        |        |        |
| 2236   | 1      |        |        |        |
| 2238   | 0      |        | 3      | 2      |
| 2239   | 1      |        |        |        |
| 2240   | 1      |        |        |        |
| 2241   | 0      |        | 1      |        |
| 2243   | 1      |        |        |        |
| 2245   | 1      |        |        |        |
| 2247   | 0      |        | 1      |        |
| 2248   | 1      |        |        |        |
| 2249   | 1      |        |        |        |
| 2254   | 1      |        |        |        |
| 2256   | 1      |        |        |        |
| 2259   | 1      |        |        |        |
| 2261   | 0      |        | 1      |        |
| 2262   | 1      |        |        |        |
| 2263   | 0      |        | 2      | 2      |
| 2264   | 1      |        |        |        |
| 2265   | 1      |        |        |        |
| 2270   | 1      |        |        |        |
| 2271   | 1      |        |        |        |
| 2272   | 1      |        |        |        |
| 2273   | 1      |        |        |        |
| 2274   | 1      |        |        |        |
| 2276   | 0      |        | 1      | 1      |
| 2277   | 0      |        | 1      |        |

| respid | Q31_99 | Q31a_1 | Q31a_2 | Q31a_3 |
|--------|--------|--------|--------|--------|
| 2281   | 1      |        |        |        |
| 2288   | 1      |        |        |        |
| 2290   | 1      |        |        |        |
| 2294   | 0      | 1      |        | 1      |
| 2295   | 0      |        | 1      |        |
| 2296   | 1      |        |        |        |
| 2297   | 1      |        |        |        |
| 2298   | 1      |        |        |        |
| 2301   | 1      |        |        |        |
| 2302   | 0      |        |        |        |
| 2303   | 1      |        |        |        |
| 2305   | 1      |        |        |        |
| 2309   | 0      |        | 1      |        |
| 2310   | 1      |        |        |        |
| 2311   | 0      |        | 2      | 2      |
| 2313   | 0      |        | 1      |        |
| 2316   | 1      |        |        |        |
| 2317   | 1      |        |        |        |
| 2318   | 0      |        |        |        |
| 2319   | 0      |        | 1      | 1      |
| 2321   | 0      |        |        |        |
| 2324   | 1      |        |        |        |
| 2328   | 0      |        | 1      |        |
| 2329   | 1      |        |        |        |
| 2330   | 1      |        |        |        |
| 2333   | 1      |        |        |        |
| 2334   | 1      |        |        |        |
| 2338   | 1      |        |        |        |
| 2341   | 0      | 1      | 1      | 1      |
| 2342   | 1      |        |        |        |
| 2343   | 0      | 2      | 1      |        |
| 2346   | 0      | 1      | 1      | 1      |

| respid | Q31_99 | Q31a_1 | Q31a_2 | Q31a_3 |
|--------|--------|--------|--------|--------|
| 2347   | 0      |        | 1      |        |
| 2348   | 1      |        |        |        |
| 2349   | 0      |        |        | 1      |
| 2350   | 0      |        | 1      |        |
| 2351   | 1      |        |        |        |
| 2352   | 1      |        |        |        |
| 2359   | 0      |        |        | 1      |
| 2362   | 1      |        |        |        |
| 2363   | 1      |        |        |        |
| 2365   | 0      |        |        |        |
| 2367   | 1      |        |        |        |
| 2368   | 1      |        |        |        |
| 2369   | 1      |        |        |        |
| 2372   | 1      |        |        |        |
| 2374   | 0      |        | 1      |        |
| 2376   | 1      |        |        |        |
| 2379   | 0      |        | 1      |        |
| 2380   | 1      |        |        |        |
| 2381   | 0      |        | 1      |        |
| 2382   | 1      |        |        |        |
| 2385   | 0      |        | 1      | 1      |
| 2387   | 1      |        |        |        |
| 2388   | 1      |        |        |        |
| 2389   | 0      |        |        | 1      |
| 2391   | 0      |        |        | 1      |
| 2392   | 1      |        |        |        |
| 2393   | 1      |        |        |        |
| 2394   | 0      | 2      |        |        |
| 2397   | 1      |        |        |        |
| 2398   | 0      |        | 1      |        |
| 2400   | 1      |        |        |        |
| 2402   | 1      |        |        |        |

| respid | Q31_99 | Q31a_1 | Q31a_2 | Q31a_3 |
|--------|--------|--------|--------|--------|
| 2406   | 1      |        |        |        |
| 2408   | 0      | 1      | 1      |        |
| 2410   | 1      |        |        |        |
| 2411   | 0      |        | 2      |        |
| 2412   | 1      |        |        |        |
| 2414   | 0      |        | 3      |        |
| 2421   | 0      |        | 1      |        |
| 2423   | 1      |        |        |        |
| 2424   | 0      |        | 1      |        |
| 2425   | 0      |        |        | 1      |
| 2426   | 1      |        |        |        |
| 2429   | 0      |        | 2      | 2      |
| 2430   | 0      |        |        |        |
| 2432   | 1      |        |        |        |
| 2433   | 1      |        |        |        |
| 2434   | 0      |        | 1      |        |
| 2435   | 1      |        |        |        |
| 2436   | 0      |        | 1      | 1      |
| 2439   | 0      | 2      | 2      | 2      |
| 2440   | 1      |        |        |        |
| 2441   | 1      |        |        |        |
| 2446   | 0      |        | 1      |        |
| 2448   | 0      | 2      | 1      | 1      |
| 2449   | 1      |        |        |        |
| 2451   | 1      |        |        |        |
| 2452   | 1      |        |        |        |
| 2455   | 1      |        |        |        |
| 2457   | 0      |        | 1      |        |
| 2458   | 1      |        |        |        |
| 2459   | 0      |        | 1      |        |
| 2460   | 1      |        |        |        |
| 2462   | 0      | 3      |        |        |



| respid | Q31_99 | Q31a_1 | Q31a_2 | Q31a_3 |
|--------|--------|--------|--------|--------|
| 2464   | 0      |        |        |        |
| 2465   | 0      |        | 2      | 2      |
| 2468   | 0      |        |        |        |
| 2469   | 1      |        |        |        |
| 2470   | 1      |        |        |        |
| 2471   | 0      |        |        |        |
| 2472   | 1      |        |        |        |
| 2474   | 1      |        |        |        |
| 2476   | 0      |        |        |        |
| 2478   | 1      |        |        |        |
| 2479   | 1      |        |        |        |
| 2480   | 0      |        |        |        |
| 2482   | 1      |        |        |        |
| 2486   | 1      |        |        |        |
| 2488   | 0      |        |        | 2      |
| 2489   | 1      |        |        |        |
| 2491   | 1      |        |        |        |
| 2495   | 1      |        |        |        |
| 2496   | 1      |        |        |        |
| 2498   | 0      |        | 1      | 1      |
| 2501   | 0      |        |        |        |
| 2502   | 1      |        |        |        |
| 2503   | 0      |        |        |        |
| 2504   | 1      |        |        |        |
| 2507   | 0      |        | 1      |        |
| 2509   | 0      |        | 1      |        |
| 2512   | 1      |        |        |        |
| 2514   | 1      |        |        |        |
| 2516   | 1      |        |        |        |
| 2517   | 0      |        | 1      |        |
| 2521   | 1      |        |        |        |
| 2522   | 1      |        |        |        |

| respid | Q31_99 | Q31a_1 | Q31a_2 | Q31a_3 |
|--------|--------|--------|--------|--------|
| 2524   | 1      |        |        |        |
| 2525   | 1      |        |        |        |
| 2526   | 0      |        |        |        |
| 2527   | 0      | 1      |        |        |
| 2528   | 0      | 1      |        |        |
| 2531   | 1      |        |        |        |
| 2533   | 0      |        |        | 1      |
| 2535   | 1      |        |        |        |
| 2536   | 0      |        | 2      |        |
| 2539   | 1      |        |        |        |
| 2540   | 1      |        |        |        |
| 2543   | 1      |        |        |        |
| 2546   | 0      |        | 1      | 1      |
| 2547   | 0      |        | 1      |        |
| 2549   | 1      |        |        |        |
| 2553   | 1      |        |        |        |
| 2554   | 1      |        |        |        |
| 2555   | 1      |        |        |        |
| 2556   | 1      |        |        |        |
| 2557   | 1      |        |        |        |
| 2559   | 1      |        |        |        |
| 2560   | 0      | 3      | 3      | 2      |
| 2561   | 1      |        |        |        |
| 2566   | 1      |        |        |        |
| 2567   | 1      |        |        |        |
| 2570   | 0      |        |        |        |
| 2574   | 0      |        |        |        |
| 2578   | 1      |        |        |        |
| 2580   | 1      |        |        |        |
| 2590   | 1      |        |        |        |
| 2593   | 1      |        |        |        |
| 2594   | 1      |        |        |        |

| respid | Q31_99 | Q31a_1 | Q31a_2 | Q31a_3 |
|--------|--------|--------|--------|--------|
| 2595   | 1      |        |        |        |
| 2596   | 1      |        |        |        |
| 2597   | 0      |        |        |        |
| 2598   | 1      |        |        |        |
| 2602   | 0      |        |        |        |
| 2605   | 0      |        |        |        |
| 2606   | 1      |        |        |        |
| 2607   | 1      |        |        |        |
| 2608   | 1      |        |        |        |
| 2609   | 0      |        | 2      |        |
| 2610   | 1      |        |        |        |
| 2614   | 1      |        |        |        |
| 2615   | 1      |        |        |        |
| 2616   | 1      |        |        |        |
| 2618   | 1      |        |        |        |
| 2630   | 1      |        |        |        |
| 2633   | 1      |        |        |        |
| 2637   | 1      |        |        |        |
| 2638   | 0      |        | 1      |        |
| 2641   | 0      |        |        |        |
| 2644   | 1      |        |        |        |
| 2645   | 0      |        | 1      |        |
| 2646   | 1      |        |        |        |
| 2648   | 1      |        |        |        |
| 2651   | 1      |        |        |        |
| 2652   | 0      |        | 1      | 1      |
| 2653   | 0      |        |        |        |
| 2656   | 1      |        |        |        |
| 2657   | 1      |        |        |        |
| 2658   | 1      |        |        |        |
| 2661   | 0      | 1      | 1      | 1      |
| 2663   | 1      |        |        |        |

| respid | Q31_99 | Q31a_1 | Q31a_2 | Q31a_3 |
|--------|--------|--------|--------|--------|
| 2665   | 1      |        |        |        |
| 2670   | 1      |        |        |        |
| 2672   | 1      |        |        |        |
| 2673   | 1      |        |        |        |
| 2677   | 1      |        |        |        |
| 2686   | 0      | 3      | 3      | 2      |
| 2688   | 1      |        |        |        |
| 2689   | 1      |        |        |        |
| 2691   | 1      |        |        |        |
| 2695   | 1      |        |        |        |
| 2696   | 1      |        |        |        |
| 2697   | 1      |        |        |        |
| 2698   | 1      |        |        |        |
| 2703   | 0      |        | 1      | 1      |
| 2704   | 1      |        |        |        |
| 2706   | 1      |        |        |        |
| 2707   | 1      |        |        |        |
| 2710   | 1      |        |        |        |
| 2711   | 1      |        |        |        |
| 2712   | 1      |        |        |        |
| 2713   | 1      |        |        |        |
| 2721   | 1      |        |        |        |
| 2730   | 1      |        |        |        |
| 2731   | 1      |        |        |        |
| 2732   | 1      |        |        |        |
| 2733   | 1      |        |        |        |
| 2735   | 1      |        |        |        |
| 2736   | 1      |        |        |        |
| 2740   | 1      |        |        |        |
| 2741   | 1      |        |        |        |
| 2742   | 0      |        | 2      |        |
| 2743   | 1      |        |        |        |

| respid | Q31_99 | Q31a_1 | Q31a_2 | Q31a_3 |
|--------|--------|--------|--------|--------|
| 2744   | 1      |        |        |        |
| 2745   | 0      |        |        |        |
| 2749   | 0      |        | 2      |        |
| 2751   | 1      |        |        |        |
| 2754   | 1      |        |        |        |
| 2755   | 1      |        |        |        |
| 2757   | 1      |        |        |        |
| 2758   | 0      |        | 1      |        |
| 2759   | 1      |        |        |        |
| 2761   | 0      |        | 1      | 1      |
| 2762   | 1      |        |        |        |
| 2763   | 1      |        |        |        |
| 2764   | 0      |        | 1      | 1      |
| 2765   | 0      |        |        |        |
| 2766   | 0      |        |        |        |
| 2767   | 0      |        |        |        |
| 2769   | 0      |        | 1      | 1      |
| 2770   | 0      | 1      | 2      |        |
| 2771   | 0      | 1      | 1      |        |
| 2774   | 0      |        |        |        |
| 2777   | 0      | 2      | 2      | 2      |
| 2778   | 0      |        | 2      |        |
| 2781   | 0      |        |        |        |
| 2782   | 0      |        | 1      |        |
| 2784   | 0      |        |        |        |
| 2785   | 0      |        |        |        |
| 2786   | 1      |        |        |        |
| 2787   | 1      |        |        |        |
| 2789   | 0      |        | 2      | 2      |
| 2790   | 1      |        |        |        |
| 2791   | 1      |        |        |        |
| 2793   | 1      |        |        |        |

| respid | Q31_99 | Q31a_1 | Q31a_2 | Q31a_3 |
|--------|--------|--------|--------|--------|
| 2797   | 1      |        |        |        |
| 2798   | 1      |        |        |        |
| 2799   | 0      |        |        | 1      |
| 2801   | 1      |        |        |        |
| 2802   | 0      |        |        |        |
| 2803   | 0      |        | 2      |        |
| 2804   | 0      |        |        |        |
| 2807   | 1      |        |        |        |
| 2809   | 1      |        |        |        |
| 2810   | 0      | 2      |        |        |
| 2812   | 0      |        |        |        |
| 2814   | 1      |        |        |        |
| 2815   | 0      |        |        |        |
| 2816   | 1      |        |        |        |
| 2817   | 1      |        |        |        |
| 2819   | 1      |        |        |        |
| 2820   | 1      |        |        |        |
| 2821   | 1      |        |        |        |
| 2822   | 0      | 1      | 2      | 2      |
| 2823   | 0      |        | 5      | 5      |
| 2824   | 0      |        | 1      |        |
| 2825   | 1      |        |        |        |
| 2826   | 0      |        | 1      |        |
| 2827   | 1      |        |        |        |
| 2828   | 1      |        |        |        |
| 2829   | 1      |        |        |        |
| 2830   | 0      |        | 2      |        |
| 2831   | 1      |        |        |        |
| 2832   | 0      | 3      | 4      | 4      |
| 2833   | 1      |        |        |        |
| 2834   | 0      |        |        |        |
| 2835   | 0      |        |        | 5      |

| respid | Q31_99 | Q31a_1 | Q31a_2 | Q31a_3 |
|--------|--------|--------|--------|--------|
| 2836   | 1      |        |        |        |
| 2837   | 1      |        |        |        |
| 2838   | 0      |        |        | 2      |
| 2844   | 0      |        | 3      |        |
| 2845   | 1      |        |        |        |
| 2847   | 1      |        |        |        |
| 2848   | 1      |        |        |        |
| 2849   | 1      |        |        |        |
| 2851   | 1      |        |        |        |
| 2852   | 0      | 2      | 2      | 1      |
| 2853   | 1      |        |        |        |
| 2854   | 1      |        |        |        |
| 2856   | 0      |        |        |        |
| 2857   | 1      |        |        |        |
| 2858   | 1      |        |        |        |
| 2859   | 0      |        |        |        |
| 2860   | 0      |        | 1      |        |
| 2861   | 0      |        | 3      |        |
| 2863   | 1      |        |        |        |
| 2864   | 0      | 1      | 1      |        |
| 2866   | 0      |        | 2      | 1      |
| 2872   | 1      |        |        |        |
| 2875   | 1      |        |        |        |
| 2879   | 1      |        |        |        |
| 2881   | 1      |        |        |        |
| 2882   | 1      |        |        |        |
| 2883   | 1      |        |        |        |
| 2884   | 0      |        |        |        |
| 2885   | 0      |        |        | 1      |
| 2887   | 0      |        |        |        |
| 2888   | 1      |        |        |        |
| 2890   | 1      |        |        |        |

| respid | Q31_99 | Q31a_1 | Q31a_2 | Q31a_3 |
|--------|--------|--------|--------|--------|
| 2891   | 1      |        |        |        |
| 2892   | 1      |        |        |        |
| 2895   | 1      |        |        |        |
| 2899   | 1      |        |        |        |
| 2900   | 1      |        |        |        |
| 2902   | 0      |        |        |        |
| 2903   | 1      |        |        |        |
| 2904   | 1      |        |        |        |
| 2906   | 0      |        | 1      | 1      |
| 2908   | 1      |        |        |        |
| 2910   | 1      |        |        |        |
| 2917   | 0      |        |        |        |
| 2918   | 1      |        |        |        |
| 2919   | 1      |        |        |        |
| 2920   | 1      |        |        |        |
| 2921   | 0      |        |        |        |
| 2922   | 1      |        |        |        |
| 2923   | 1      |        |        |        |
| 2924   | 0      |        |        | 3      |
| 2926   | 0      |        | 1      | 1      |
| 2928   | 1      |        |        |        |
| 2930   | 1      |        |        |        |
| 2931   | 0      |        |        |        |
| 2933   | 1      |        |        |        |
| 2935   | 1      |        |        |        |
| 2936   | 1      |        |        |        |
| 2937   | 1      |        |        |        |
| 2938   | 1      |        |        |        |
| 2944   | 1      |        |        |        |
| 2945   | 0      |        |        |        |
| 2947   | 1      |        |        |        |
| 2949   | 1      |        |        |        |



| respid | Q31_99 | Q31a_1 | Q31a_2 | Q31a_3 |
|--------|--------|--------|--------|--------|
| 2951   | 0      |        |        | 2      |
| 2952   | 0      |        |        |        |
| 2953   | 1      |        |        |        |
| 2955   | 1      |        |        |        |
| 2957   | 1      |        |        |        |
| 2958   | 1      |        |        |        |
| 2960   | 1      |        |        |        |
| 2963   | 1      |        |        |        |
| 2964   | 1      |        |        |        |
| 2967   | 1      |        |        |        |
| 2968   | 1      |        |        |        |
| 2971   | 0      | 2      | 2      |        |
| 2974   | 1      |        |        |        |
| 2975   | 1      |        |        |        |
| 2982   | 1      |        |        |        |
| 2983   | 1      |        |        |        |
| 2985   | 1      |        |        |        |
| 2986   | 0      | 2      | 3      | 2      |
| 2987   | 0      |        | 1      |        |
| 2988   | 0      |        | 2      | 2      |
| 2993   | 1      |        |        |        |
| 2996   | 1      |        |        |        |
| 2997   | 0      |        |        |        |
| 2998   | 1      |        |        |        |
| 3004   | 1      |        |        |        |
| 3007   | 1      |        |        |        |
| 3011   | 1      |        |        |        |
| 3012   | 1      |        |        |        |
| 3013   | 1      |        |        |        |
| 3014   | 1      |        |        |        |
| 3015   | 1      |        |        |        |
| 3016   | 1      |        |        |        |

| respid | Q31_99 | Q31a_1 | Q31a_2 | Q31a_3 |
|--------|--------|--------|--------|--------|
| 3017   | 1      |        |        |        |
| 3020   | 1      |        |        |        |
| 3022   | 1      |        |        |        |
| 3023   | 1      |        |        |        |
| 3026   | 0      |        | 1      | 1      |
| 3038   | 0      |        | 1      |        |
| 3039   | 1      |        |        |        |
| 3040   | 1      |        |        |        |
| 3041   | 1      |        |        |        |
| 3042   | 1      |        |        |        |
| 3044   | 1      |        |        |        |
| 3050   | 1      |        |        |        |
| 3052   | 1      |        |        |        |
| 3056   | 0      | 1      | 1      | 1      |
| 3059   | 1      |        |        |        |
| 3060   | 1      |        |        |        |
| 3063   | 1      |        |        |        |
| 3065   | 1      |        |        |        |
| 3067   | 0      |        |        |        |
| 3068   | 1      |        |        |        |
| 3072   | 1      |        |        |        |
| 3074   | 1      |        |        |        |
| 3075   | 1      |        |        |        |
| 3076   | 0      |        | 2      |        |
| 3079   | 1      |        |        |        |
| 3082   | 0      |        |        | 3      |
| 3083   | 1      |        |        |        |
| 3084   | 0      |        |        |        |
| 3085   | 1      |        |        |        |
| 3090   | 0      |        | 1      |        |
| 3091   | 0      |        | 2      | 1      |
| 3092   | 1      |        |        |        |

| respid | Q31_99 | Q31a_1 | Q31a_2 | Q31a_3 |
|--------|--------|--------|--------|--------|
| 3095   | 1      |        |        |        |
| 3096   | 0      |        |        |        |
| 3097   | 0      | 1      |        |        |
| 3099   | 0      |        |        |        |
| 3101   | 0      |        | 2      | 2      |
| 3103   | 1      |        |        |        |
| 3104   | 1      |        |        |        |
| 3105   | 1      |        |        |        |
| 3107   | 1      |        |        |        |
| 3108   | 1      |        |        |        |
| 3109   | 1      |        |        |        |
| 3116   | 1      |        |        |        |
| 3117   | 0      |        | 2      | 2      |
| 3119   | 1      |        |        |        |
| 3120   | 1      |        |        |        |
| 3130   | 0      |        |        | 1      |
| 3131   | 0      | 2      |        |        |
| 3133   | 1      |        |        |        |
| 3134   | 1      |        |        |        |
| 3135   | 1      |        |        |        |
| 3145   | 1      |        |        |        |
| 3147   | 1      |        |        |        |
| 3152   | 1      |        |        |        |
| 3155   | 0      |        | 2      |        |
| 3156   | 1      |        |        |        |
| 3157   | 0      |        |        |        |
| 3166   | 0      |        |        |        |
| 3169   | 0      |        |        |        |
| 3179   | 0      |        | 1      |        |
| 3181   | 1      |        |        |        |
| 3185   | 1      |        |        |        |
| 3190   | 1      |        |        |        |

| respid | Q31_99 | Q31a_1 | Q31a_2 | Q31a_3 |
|--------|--------|--------|--------|--------|
| 3191   | 1      |        |        |        |
| 3192   | 1      |        |        |        |
| 3193   | 1      |        |        |        |
| 3195   | 1      |        |        |        |
| 3202   | 0      |        |        |        |
| 3204   | 1      |        |        |        |
| 3208   | 0      | 1      |        |        |
| 3212   | 1      |        |        |        |
| 3218   | 1      |        |        |        |
| 3219   | 0      |        | 1      |        |
| 3220   | 0      |        | 1      | 1      |
| 3221   | 0      |        |        |        |
| 3223   | 0      |        | 1      |        |
| 3231   | 0      |        | 1      |        |
| 3232   | 0      |        |        |        |
| 3234   | 0      |        |        |        |
| 3235   | 1      |        |        |        |
| 3237   | 1      |        |        |        |
| 3238   | 1      |        |        |        |
| 3240   | 1      |        |        |        |
| 3241   | 1      |        |        |        |
| 3243   | 0      |        | 1      |        |
| 3244   | 0      |        | 2      |        |
| 3247   | 1      |        |        |        |
| 3250   | 1      |        |        |        |
| 3251   | 0      | 2      | 2      | 2      |
| 3255   | 0      |        | 1      |        |
| 3256   | 1      |        |        |        |
| 3257   | 0      |        |        | 1      |
| 3258   | 1      |        |        |        |
| 3259   | 0      | 2      | 2      | 2      |
| 3260   | 1      |        |        |        |

| respid | Q31_99 | Q31a_1 | Q31a_2 | Q31a_3 |
|--------|--------|--------|--------|--------|
| 3261   | 1      |        |        |        |
| 3262   | 0      |        |        |        |
| 3264   | 0      |        | 2      | 1      |
| 3265   | 1      |        |        |        |
| 3267   | 1      |        |        |        |
| 3268   | 0      |        | 2      |        |
| 3270   | 1      |        |        |        |
| 3271   | 1      |        |        |        |
| 3274   | 1      |        |        |        |
| 3276   | 1      |        |        |        |
| 3277   | 1      |        |        |        |
| 3279   | 1      |        |        |        |
| 3281   | 1      |        |        |        |
| 3283   | 0      |        |        |        |
| 3285   | 1      |        |        |        |
| 3286   | 1      |        |        |        |
| 3287   | 1      |        |        |        |
| 3289   | 1      |        |        |        |
| 3290   | 1      |        |        |        |
| 3291   | 0      |        | 1      |        |
| 3292   | 0      |        | 2      | 1      |
| 3293   | 0      |        | 3      | 2      |
| 3294   | 0      |        |        |        |
| 3296   | 0      |        |        |        |
| 3306   | 0      |        |        | 1      |
| 3307   | 0      | 2      | 3      | 2      |
| 3308   | 1      |        |        |        |
| 3312   | 1      |        |        |        |
| 3313   | 1      |        |        |        |
| 3316   | 1      |        |        |        |
| 3317   | 1      |        |        |        |
| 3320   | 1      |        |        |        |

| respid | Q31_99 | Q31a_1 | Q31a_2 | Q31a_3 |
|--------|--------|--------|--------|--------|
| 3321   | 1      |        |        |        |
| 3322   | 1      |        |        |        |
| 3323   | 1      |        |        |        |
| 3325   | 1      |        |        |        |
| 3332   | 1      |        |        |        |
| 3334   | 0      |        |        |        |
| 3335   | 1      |        |        |        |
| 3341   | 0      | 1      |        |        |
| 3345   | 1      |        |        |        |
| 3346   | 1      |        |        |        |
| 3349   | 1      |        |        |        |
| 3351   | 1      |        |        |        |
| 3353   | 1      |        |        |        |
| 3354   | 0      |        |        |        |
| 3356   | 1      |        |        |        |
| 3357   | 1      |        |        |        |
| 3360   | 0      |        | 1      | 1      |
| 3361   | 1      |        |        |        |
| 3362   | 1      |        |        |        |
| 3363   | 1      |        |        |        |
| 3364   | 0      |        | 3      | 3      |
| 3368   | 1      |        |        |        |
| 3370   | 0      |        |        |        |
| 3371   | 1      |        |        |        |
| 3379   | 1      |        |        |        |
| 3380   | 0      |        |        |        |
| 3382   | 1      |        |        |        |
| 3384   | 0      |        |        |        |
| 3385   | 1      |        |        |        |
| 3388   | 1      |        |        |        |
| 3392   | 0      |        |        |        |
| 3393   | 1      |        |        |        |

| respid | Q31_99 | Q31a_1 | Q31a_2 | Q31a_3 |
|--------|--------|--------|--------|--------|
| 3394   | 0      |        |        |        |
| 3395   | 1      |        |        |        |
| 3396   | 1      |        |        |        |
| 3397   | 1      |        |        |        |
| 3398   | 1      |        |        |        |
| 3399   | 1      |        |        |        |
| 3400   | 0      |        |        |        |
| 3401   | 0      |        |        | 4      |
| 3402   | 1      |        |        |        |
| 3403   | 0      |        |        |        |
| 3405   | 0      | 1      |        | 2      |
| 3407   | 0      |        |        |        |
| 3410   | 1      |        |        |        |
| 3411   | 1      |        |        |        |
| 3413   | 1      |        |        |        |
| 3414   | 0      |        | 1      | 1      |
| 3420   | 1      |        |        |        |
| 3421   | 0      | 2      | 3      | 3      |
| 3425   | 1      |        |        |        |
| 3426   | 0      |        |        |        |
| 3429   | 0      |        |        |        |
| 3430   | 0      | 2      | 3      | 2      |
| 3433   | 1      |        |        |        |
| 3434   | 0      | 1      | 2      | 1      |
| 3437   | 1      |        |        |        |
| 3439   | 1      |        |        |        |
| 3441   | 0      |        |        |        |
| 3442   | 0      |        | 2      |        |
| 3444   | 1      |        |        |        |
| 3445   | 1      |        |        |        |
| 3450   | 1      |        |        |        |
| 3452   | 1      |        |        |        |

| respid | Q31_99 | Q31a_1 | Q31a_2 | Q31a_3 |
|--------|--------|--------|--------|--------|
| 3456   | 1      |        |        |        |
| 3459   | 1      |        |        |        |
| 3460   | 0      |        |        |        |
| 3461   | 1      |        |        |        |
| 3466   | 0      |        |        |        |
| 3471   | 1      |        |        |        |
| 3473   | 1      |        |        |        |
| 3475   | 0      |        | 3      |        |
| 3476   | 1      |        |        |        |
| 3477   | 0      |        |        |        |
| 3478   | 1      |        |        |        |
| 3479   | 0      |        |        | 1      |
| 3482   | 0      |        | 1      |        |
| 3483   | 1      |        |        |        |
| 3485   | 0      |        |        |        |
| 3489   | 1      |        |        |        |
| 3490   | 0      |        | 1      | 1      |
| 3491   | 0      | 1      | 1      | 1      |
| 3494   | 1      |        |        |        |
| 3495   | 1      |        |        |        |
| 3501   | 1      |        |        |        |
| 3506   | 1      |        |        |        |
| 3507   | 1      |        |        |        |
| 3517   | 0      |        |        | 1      |
| 3520   | 0      |        |        |        |
| 3521   | 1      |        |        |        |
| 3522   | 0      |        | 1      |        |
| 3524   | 1      |        |        |        |
| 3527   | 1      |        |        |        |
| 3528   | 1      |        |        |        |
| 3529   | 1      |        |        |        |
| 3536   | 0      |        |        | 1      |



| respid | Q31_99 | Q31a_1 | Q31a_2 | Q31a_3 |
|--------|--------|--------|--------|--------|
| 3537   | 1      |        |        |        |
| 3538   | 0      |        |        |        |
| 3540   | 0      |        |        | 1      |
| 3545   | 1      |        |        |        |
| 3547   | 1      |        |        |        |
| 3554   | 1      |        |        |        |
| 3556   | 1      |        |        |        |
| 3557   | 1      |        |        |        |
| 3559   | 0      |        | 1      |        |
| 3560   | 0      |        |        |        |
| 3562   | 1      |        |        |        |
| 3564   | 0      | 2      | 2      | 2      |
| 3565   | 0      |        |        |        |
| 3568   | 0      |        |        |        |
| 3572   | 1      |        |        |        |
| 3578   | 1      |        |        |        |
| 3581   | 1      |        |        |        |
| 3583   | 0      | 1      | 1      | 1      |
| 3588   | 1      |        |        |        |
| 3591   | 1      |        |        |        |
| 3594   | 1      |        |        |        |
| 3595   | 0      |        |        |        |
| 3596   | 0      |        |        | 1      |
| 3597   | 1      |        |        |        |
| 3598   | 1      |        |        |        |
| 3600   | 0      |        |        |        |
| 3602   | 1      |        |        |        |
| 3604   | 1      |        |        |        |
| 3605   | 0      |        |        |        |
| 3606   | 1      |        |        |        |
| 3607   | 1      |        |        |        |
| 3610   | 1      |        |        |        |

| respid | Q31_99 | Q31a_1 | Q31a_2 | Q31a_3 |
|--------|--------|--------|--------|--------|
| 3611   | 1      |        |        |        |
| 3612   | 1      |        |        |        |
| 3614   | 0      |        |        | 2      |
| 3616   | 1      |        |        |        |
| 3617   | 0      |        |        |        |
| 3618   | 1      |        |        |        |
| 3619   | 0      |        |        |        |
| 3621   | 1      |        |        |        |
| 3622   | 0      |        | 1      | 1      |
| 3624   | 1      |        |        |        |
| 3626   | 1      |        |        |        |
| 3629   | 1      |        |        |        |
| 3631   | 1      |        |        |        |
| 3632   | 1      |        |        |        |
| 3638   | 0      |        |        |        |
| 3640   | 0      |        | 1      |        |
| 3641   | 0      |        |        |        |
| 3645   | 0      |        |        | 2      |
| 3650   | 1      |        |        |        |
| 3653   | 0      |        |        |        |
| 3655   | 0      |        |        |        |
| 3657   | 0      |        | 2      | 2      |
| 3658   | 1      |        |        |        |
| 3659   | 1      |        |        |        |
| 3664   | 0      |        |        | 1      |
| 3665   | 1      |        |        |        |
| 3667   | 1      |        |        |        |
| 3668   | 0      |        |        |        |
| 3675   | 1      |        |        |        |
| 3678   | 1      |        |        |        |
| 3680   | 1      |        |        |        |
| 3684   | 0      |        | 1      |        |

| respid | Q31_99 | Q31a_1 | Q31a_2 | Q31a_3 |
|--------|--------|--------|--------|--------|
| 3685   | 1      |        |        |        |
| 3687   | 0      |        |        |        |
| 3689   | 0      |        |        |        |
| 3690   | 1      |        |        |        |
| 3693   | 1      |        |        |        |
| 3694   | 1      |        |        |        |
| 3695   | 1      |        |        |        |
| 3700   | 0      |        | 1      |        |
| 3701   | 1      |        |        |        |
| 3703   | 0      |        | 1      | 2      |
| 3704   | 0      |        | 3      | 3      |
| 3705   | 1      |        |        |        |
| 3709   | 1      |        |        |        |
| 3710   | 0      |        | 1      | 1      |
| 3722   | 1      |        |        |        |
| 3725   | 1      |        |        |        |
| 3726   | 0      |        |        |        |
| 3727   | 1      |        |        |        |
| 3728   | 1      |        |        |        |
| 3729   | 1      |        |        |        |
| 3731   | 1      |        |        |        |
| 3738   | 1      |        |        |        |
| 3739   | 1      |        |        |        |
| 3740   | 1      |        |        |        |
| 3749   | 1      |        |        |        |
| 3758   | 1      |        |        |        |
| 3762   | 1      |        |        |        |
| 3765   | 1      |        |        |        |
| 3770   | 1      |        |        |        |
| 3771   | 1      |        |        |        |
| 3778   | 0      |        |        |        |
| 3779   | 1      |        |        |        |

| respid | Q31_99 | Q31a_1 | Q31a_2 | Q31a_3 |
|--------|--------|--------|--------|--------|
| 3780   | 1      |        |        |        |
| 3782   | 0      |        | 1      |        |
| 3784   | 0      |        | 1      |        |
| 3787   | 1      |        |        |        |
| 3790   | 1      |        |        |        |
| 3791   | 1      |        |        |        |
| 3793   | 0      |        |        |        |
| 3795   | 1      |        |        |        |
| 3799   | 1      |        |        |        |
| 3801   | 1      |        |        |        |
| 3804   | 1      |        |        |        |
| 3809   | 1      |        |        |        |
| 3810   | 0      |        | 1      | 1      |
| 3813   | 0      |        |        | 1      |
| 3816   | 0      | 1      | 1      |        |
| 3820   | 1      |        |        |        |
| 3821   | 0      |        |        |        |
| 3823   | 0      |        |        |        |
| 3828   | 1      |        |        |        |
| 3829   | 1      |        |        |        |
| 3832   | 1      |        |        |        |
| 3835   | 0      |        |        | 1      |
| 3837   | 1      |        |        |        |
| 3838   | 1      |        |        |        |
| 3839   | 0      | 3      |        | 2      |
| 3840   | 1      |        |        |        |
| 3842   | 1      |        |        |        |
| 3843   | 1      |        |        |        |
| 3844   | 0      |        |        | 1      |
| 3850   | 1      |        |        |        |
| 3851   | 1      |        |        |        |
| 3856   | 1      |        |        |        |

| respid | Q31_99 | Q31a_1 | Q31a_2 | Q31a_3 |
|--------|--------|--------|--------|--------|
| 3859   | 0      |        |        |        |
| 3860   | 1      |        |        |        |
| 3863   | 0      |        | 1      |        |
| 3866   | 1      |        |        |        |
| 3867   | 1      |        |        |        |
| 3870   | 1      |        |        |        |
| 3873   | 0      |        |        |        |
| 3875   | 1      |        |        |        |
| 3878   | 1      |        |        |        |
| 3881   | 0      | 1      | 1      | 1      |
| 3883   | 0      |        | 3      | 2      |
| 3884   | 1      |        |        |        |
| 3885   | 0      |        | 3      | 2      |
| 3886   | 1      |        |        |        |
| 3887   | 1      |        |        |        |
| 3888   | 1      |        |        |        |
| 3889   | 0      | 2      | 3      | 3      |
| 3890   | 1      |        |        |        |
| 3896   | 0      |        |        | 1      |
| 3902   | 0      | 3      | 3      | 3      |
| 3909   | 1      |        |        |        |
| 3912   | 1      |        |        |        |
| 3922   | 0      |        |        | 1      |
| 3928   | 0      |        |        | 1      |
| 3930   | 1      |        |        |        |
| 3931   | 0      | 1      |        |        |
| 3933   | 0      |        | 2      |        |
| 3935   | 0      |        |        | 1      |
| 3937   | 0      |        |        |        |
| 3939   | 1      |        |        |        |
| 3942   | 1      |        |        |        |
| 3943   | 0      |        |        |        |

| respid | Q31_99 | Q31a_1 | Q31a_2 | Q31a_3 |
|--------|--------|--------|--------|--------|
| 3944   | 1      |        |        |        |
| 3945   | 1      |        |        |        |
| 3947   | 0      |        |        |        |
| 3948   | 0      |        | 1      |        |
| 3951   | 1      |        |        |        |
| 3959   | 1      |        |        |        |
| 3969   | 0      |        |        |        |
| 3973   | 0      |        |        |        |
| 3975   | 0      |        |        |        |
| 3976   | 1      |        |        |        |
| 3977   | 0      |        |        |        |
| 3978   | 0      |        |        | 1      |
| 3994   | 1      |        |        |        |
| 3995   | 1      |        |        |        |
| 3997   | 1      |        |        |        |
| 3998   | 1      |        |        |        |
| 3999   | 0      |        | 2      | 2      |
| 4002   | 0      |        |        |        |
| 4004   | 0      |        |        |        |
| 4005   | 1      |        |        |        |
| 4006   | 0      |        |        |        |
| 4008   | 1      |        |        |        |
| 4010   | 1      |        |        |        |
| 4011   | 0      |        |        |        |
| 4013   | 1      |        |        |        |
| 4014   | 1      |        |        |        |
| 4016   | 0      |        |        | 1      |
| 4017   | 1      |        |        |        |
| 4019   | 0      |        |        |        |
| 4021   | 1      |        |        |        |
| 4023   | 1      |        |        |        |
| 4024   | 1      |        |        |        |

| respid | Q31_99 | Q31a_1 | Q31a_2 | Q31a_3 |
|--------|--------|--------|--------|--------|
| 4025   | 0      |        | 1      |        |
| 4027   | 1      |        |        |        |
| 4032   | 1      |        |        |        |
| 4034   | 1      |        |        |        |
| 4035   | 1      |        |        |        |
| 4037   | 0      |        |        |        |
| 4040   | 1      |        |        |        |
| 4041   | 1      |        |        |        |
| 4042   | 0      |        | 1      | 1      |
| 4043   | 0      | 1      | 3      | 2      |
| 4045   | 0      |        | 2      | 2      |
| 4046   | 0      |        | 1      | 1      |
| 4048   | 0      |        | 1      | 2      |
| 4049   | 1      |        |        |        |
| 4050   | 0      |        |        |        |
| 4052   | 1      |        |        |        |
| 4053   | 1      |        |        |        |
| 4060   | 1      |        |        |        |
| 4065   | 0      |        |        |        |
| 4066   | 0      |        |        |        |
| 4067   | 1      |        |        |        |
| 4068   | 1      |        |        |        |
| 4069   | 1      |        |        |        |
| 4070   | 1      |        |        |        |
| 4071   | 0      |        | 3      |        |
| 4072   | 1      |        |        |        |
| 4073   | 1      |        |        |        |
| 4074   | 1      |        |        |        |
| 4075   | 1      |        |        |        |
| 4078   | 1      |        |        |        |
| 4080   | 1      |        |        |        |
| 4081   | 1      |        |        |        |

| respid | Q31_99 | Q31a_1 | Q31a_2 | Q31a_3 |
|--------|--------|--------|--------|--------|
| 4082   | 0      |        |        |        |
| 4083   | 0      |        |        |        |
| 4084   | 1      |        |        |        |
| 4086   | 1      |        |        |        |
| 4087   | 1      |        |        |        |
| 4088   | 1      |        |        |        |
| 4089   | 0      |        | 1      |        |
| 4090   | 1      |        |        |        |
| 4093   | 1      |        |        |        |
| 4094   | 1      |        |        |        |
| 4095   | 1      |        |        |        |
| 4096   | 1      |        |        |        |
| 4098   | 1      |        |        |        |
| 4103   | 0      |        |        |        |
| 4104   | 0      | 1      | 2      | 2      |
| 4107   | 1      |        |        |        |
| 4109   | 1      |        |        |        |
| 4110   | 0      |        |        | 1      |
| 4113   | 1      |        |        |        |
| 4114   | 1      |        |        |        |
| 4116   | 0      |        |        |        |
| 4119   | 0      |        |        |        |
| 4120   | 0      |        |        |        |
| 4121   | 1      |        |        |        |
| 4122   | 0      |        |        |        |
| 4124   | 0      |        | 1      |        |
| 4126   | 1      |        |        |        |
| 4127   | 1      |        |        |        |
| 4131   | 1      |        |        |        |
| 4134   | 0      |        | 1      |        |
| 4144   | 1      |        |        |        |
| 4145   | 1      |        |        |        |



| respid | Q31_99 | Q31a_1 | Q31a_2 | Q31a_3 |
|--------|--------|--------|--------|--------|
| 4146   | 1      |        |        |        |
| 4147   | 1      |        |        |        |
| 4149   | 0      |        |        |        |
| 4150   | 1      |        |        |        |
| 4151   | 0      |        | 1      |        |
| 4153   | 0      |        | 2      |        |
| 4155   | 0      |        |        | 1      |
| 4157   | 1      |        |        |        |
| 4159   | 0      | 1      | 1      |        |
| 4160   | 0      |        |        |        |
| 4161   | 0      |        |        |        |
| 4163   | 1      |        |        |        |
| 4164   | 1      |        |        |        |
| 4165   | 0      |        |        |        |
| 4166   | 1      |        |        |        |
| 4167   | 1      |        |        |        |
| 4170   | 0      |        | 1      |        |
| 4172   | 1      |        |        |        |
| 4173   | 1      |        |        |        |
| 4180   | 0      |        |        |        |
| 4185   | 0      |        |        |        |
| 4187   | 1      |        |        |        |
| 4190   | 1      |        |        |        |
| 4191   | 0      |        |        |        |
| 4193   | 1      |        |        |        |
| 4194   | 1      |        |        |        |
| 4195   | 1      |        |        |        |
| 4196   | 1      |        |        |        |
| 4197   | 0      |        | 1      |        |
| 4198   | 0      |        |        | 1      |
| 4199   | 0      |        | 1      | 3      |
| 4205   | 1      |        |        |        |

| respid | Q31_99 | Q31a_1 | Q31a_2 | Q31a_3 |
|--------|--------|--------|--------|--------|
| 4206   | 1      |        |        |        |
| 4207   | 1      |        |        |        |
| 4214   | 1      |        |        |        |
| 4215   | 1      |        |        |        |
| 4217   | 1      |        |        |        |
| 4219   | 1      |        |        |        |
| 4223   | 0      | 2      | 2      |        |
| 4226   | 0      |        |        |        |
| 4229   | 0      |        | 1      |        |
| 4230   | 1      |        |        |        |
| 4232   | 0      | 1      |        | 1      |
| 4233   | 1      |        |        |        |
| 4234   | 1      |        |        |        |
| 4235   | 1      |        |        |        |
| 4236   | 0      |        |        | 1      |
| 4237   | 0      |        | 1      |        |
| 4238   | 1      |        |        |        |
| 4240   | 0      |        |        | 1      |
| 4241   | 1      |        |        |        |
| 4247   | 1      |        |        |        |
| 4250   | 1      |        |        |        |
| 4251   | 0      |        | 1      |        |
| 4253   | 0      |        | 1      |        |
| 4254   | 1      |        |        |        |
| 4258   | 0      |        | 3      |        |
| 4260   | 1      |        |        |        |
| 4263   | 0      |        | 1      |        |
| 4265   | 1      |        |        |        |
| 4266   | 0      |        |        |        |
| 4267   | 1      |        |        |        |
| 4270   | 1      |        |        |        |
| 4273   | 1      |        |        |        |

| respid | Q31_99 | Q31a_1 | Q31a_2 | Q31a_3 |
|--------|--------|--------|--------|--------|
| 4280   | 1      |        |        |        |
| 4281   | 1      |        |        |        |
| 4282   | 1      |        |        |        |
| 4283   | 1      |        |        |        |
| 4286   | 1      |        |        |        |
| 4287   | 1      |        |        |        |
| 4289   | 0      |        | 1      |        |
| 4290   | 0      |        |        |        |
| 4291   | 0      |        | 1      | 1      |
| 4292   | 1      |        |        |        |
| 4293   | 1      |        |        |        |
| 4294   | 0      |        | 2      |        |
| 4295   | 1      |        |        |        |
| 4296   | 0      |        |        | 2      |
| 4297   | 0      |        |        |        |
| 4298   | 0      |        |        | 1      |
| 4299   | 0      |        |        | 1      |
| 4300   | 1      |        |        |        |
| 4301   | 1      |        |        |        |
| 4302   | 1      |        |        |        |
| 4304   | 1      |        |        |        |
| 4305   | 1      |        |        |        |
| 4307   | 0      |        |        |        |
| 4308   | 1      |        |        |        |
| 4312   | 1      |        |        |        |
| 4314   | 0      |        |        | 1      |
| 4316   | 1      |        |        |        |
| 4317   | 0      |        | 4      |        |
| 4319   | 0      |        |        |        |
| 4323   | 0      |        | 1      |        |
| 4337   | 1      |        |        |        |
| 4341   | 0      |        | 2      |        |

| respid | Q31_99 | Q31a_1 | Q31a_2 | Q31a_3 |
|--------|--------|--------|--------|--------|
| 4342   | 1      |        |        |        |
| 4344   | 1      |        |        |        |
| 4345   | 0      | 1      | 1      | 2      |
| 4346   | 0      |        | 2      |        |
| 4347   | 1      |        |        |        |
| 4350   | 1      |        |        |        |
| 4352   | 1      |        |        |        |
| 4353   | 1      |        |        |        |
| 4355   | 1      |        |        |        |
| 4356   | 1      |        |        |        |
| 4358   | 1      |        |        |        |
| 4359   | 0      |        |        |        |
| 4360   | 1      |        |        |        |
| 4361   | 0      |        | 2      |        |
| 4363   | 1      |        |        |        |
| 4364   | 0      |        |        |        |
| 4365   | 1      |        |        |        |
| 4367   | 1      |        |        |        |
| 4369   | 0      |        |        |        |
| 4373   | 0      |        |        |        |
| 4374   | 0      |        |        |        |
| 4375   | 1      |        |        |        |
| 4378   | 0      |        |        | 1      |
| 4379   | 0      |        | 1      |        |
| 4382   | 0      |        |        |        |
| 4383   | 1      |        |        |        |
| 4384   | 1      |        |        |        |
| 4385   | 0      |        |        |        |
| 4388   | 0      |        |        |        |
| 4389   | 1      |        |        |        |
| 4391   | 0      |        | 1      |        |
| 4392   | 0      |        |        |        |

| respid | Q31_99 | Q31a_1 | Q31a_2 | Q31a_3 |
|--------|--------|--------|--------|--------|
| 4393   | 1      |        |        |        |
| 4395   | 1      |        |        |        |
| 4397   | 0      |        | 1      |        |
| 4398   | 0      | 1      | 1      |        |
| 4399   | 1      |        |        |        |
| 4400   | 1      |        |        |        |
| 4401   | 1      |        |        |        |
| 4402   | 0      |        |        | 1      |
| 4404   | 1      |        |        |        |
| 4405   | 1      |        |        |        |
| 4407   | 1      |        |        |        |
| 4408   | 1      |        |        |        |
| 4411   | 1      |        |        |        |
| 4420   | 0      |        |        | 2      |
| 4421   | 1      |        |        |        |
| 4424   | 0      |        |        | 4      |
| 4425   | 1      |        |        |        |
| 4427   | 0      |        | 1      |        |
| 4430   | 0      |        |        |        |
| 4431   | 0      | 1      |        |        |
| 4432   | 1      |        |        |        |
| 4436   | 1      |        |        |        |
| 4439   | 1      |        |        |        |
| 4451   | 0      |        |        |        |
| 4452   | 0      | 2      |        | 3      |
| 4458   | 1      |        |        |        |
| 4464   | 1      |        |        |        |
| 4465   | 0      |        |        |        |
| 4467   | 1      |        |        |        |
| 4470   | 1      |        |        |        |
| 4471   | 1      |        |        |        |
| 4472   | 1      |        |        |        |

| respid | Q31_99 | Q31a_1 | Q31a_2 | Q31a_3 |
|--------|--------|--------|--------|--------|
| 4473   | 1      |        |        |        |
| 4475   | 0      |        |        | 1      |
| 4476   | 0      |        |        | 1      |
| 4478   | 1      |        |        |        |
| 4485   | 0      | 2      | 1      | 1      |
| 4486   | 0      | 1      |        | 1      |
| 4490   | 1      |        |        |        |
| 4502   | 1      |        |        |        |
| 4503   | 1      |        |        |        |
| 4504   | 1      |        |        |        |
| 4506   | 0      |        |        | 1      |
| 4508   | 1      |        |        |        |
| 4515   | 1      |        |        |        |
| 4516   | 0      |        | 2      |        |
| 4519   | 0      |        |        |        |
| 4523   | 1      |        |        |        |
| 4525   | 0      |        |        |        |
| 4526   | 1      |        |        |        |
| 4528   | 1      |        |        |        |
| 4530   | 1      |        |        |        |
| 4531   | 0      | 1      | 2      | 1      |
| 4532   | 1      |        |        |        |
| 4537   | 1      |        |        |        |
| 4538   | 1      |        |        |        |
| 4539   | 0      | 1      |        |        |
| 4541   | 1      |        |        |        |
| 4543   | 1      |        |        |        |
| 4544   | 1      |        |        |        |
| 4546   | 1      |        |        |        |
| 4547   | 1      |        |        |        |
| 4549   | 1      |        |        |        |
| 4550   | 1      |        |        |        |

| respid | Q31_99 | Q31a_1 | Q31a_2 | Q31a_3 |
|--------|--------|--------|--------|--------|
| 4551   | 1      |        |        |        |
| 4554   | 1      |        |        |        |
| 4557   | 1      |        |        |        |
| 4565   | 1      |        |        |        |
| 4568   | 1      |        |        |        |
| 4569   | 0      |        |        | 1      |
| 4570   | 1      |        |        |        |
| 4572   | 1      |        |        |        |
| 4574   | 1      |        |        |        |
| 4576   | 1      |        |        |        |
| 4578   | 1      |        |        |        |
| 4579   | 1      |        |        |        |
| 4580   | 0      |        |        | 1      |
| 4581   | 1      |        |        |        |
| 4584   | 1      |        |        |        |
| 4586   | 0      |        |        |        |
| 4587   | 0      |        |        |        |
| 4590   | 1      |        |        |        |
| 4592   | 1      |        |        |        |
| 4593   | 0      |        | 1      | 1      |
| 4595   | 1      |        |        |        |
| 4597   | 1      |        |        |        |
| 4598   | 1      |        |        |        |
| 4599   | 1      |        |        |        |
| 4600   | 1      |        |        |        |
| 4601   | 0      |        | 1      |        |
| 4608   | 1      |        |        |        |
| 4609   | 1      |        |        |        |
| 4611   | 1      |        |        |        |
| 4612   | 0      |        | 3      |        |
| 4613   | 1      |        |        |        |
| 4616   | 0      |        | 1      | 1      |

| respid | Q31_99 | Q31a_1 | Q31a_2 | Q31a_3 |
|--------|--------|--------|--------|--------|
| 4617   | 1      |        |        |        |
| 4620   | 1      |        |        |        |
| 4621   | 1      |        |        |        |
| 4622   | 0      |        |        |        |
| 4624   | 0      |        | 1      | 1      |
| 4625   | 0      |        |        |        |
| 4627   | 1      |        |        |        |
| 4628   | 0      |        |        |        |
| 4629   | 1      |        |        |        |
| 4630   | 0      |        | 2      |        |
| 4632   | 1      |        |        |        |
| 4634   | 0      |        | 1      |        |
| 4635   | 0      |        |        |        |
| 4636   | 1      |        |        |        |
| 4637   | 1      |        |        |        |
| 4638   | 1      |        |        |        |
| 4639   | 0      |        | 2      |        |
| 4641   | 0      |        |        | 1      |
| 4643   | 1      |        |        |        |
| 4645   | 1      |        |        |        |
| 4646   | 0      |        | 1      |        |
| 4647   | 1      |        |        |        |
| 4648   | 1      |        |        |        |
| 4649   | 0      |        |        | 1      |
| 4650   | 0      |        |        |        |
| 4651   | 1      |        |        |        |
| 4652   | 0      |        | 2      |        |
| 4653   | 1      |        |        |        |
| 4657   | 1      |        |        |        |
| 4660   | 1      |        |        |        |
| 4661   | 0      |        |        | 1      |
| 4662   | 0      |        |        | 1      |



| respid | Q31_99 | Q31a_1 | Q31a_2 | Q31a_3 |
|--------|--------|--------|--------|--------|
| 4667   | 1      |        |        |        |
| 4669   | 1      |        |        |        |
| 4671   | 1      |        |        |        |
| 4672   | 0      |        |        |        |
| 4673   | 0      |        |        | 1      |
| 4677   | 1      |        |        |        |
| 4679   | 1      |        |        |        |
| 4683   | 1      |        |        |        |
| 4684   | 0      |        | 1      |        |
| 4685   | 0      |        |        |        |
| 4686   | 0      |        | 1      |        |
| 4687   | 1      |        |        |        |
| 4688   | 1      |        |        |        |
| 4691   | 1      |        |        |        |
| 4692   | 1      |        |        |        |
| 4694   | 1      |        |        |        |
| 4695   | 1      |        |        |        |
| 4696   | 1      |        |        |        |
| 4697   | 1      |        |        |        |
| 4698   | 0      |        |        |        |
| 4699   | 1      |        |        |        |
| 4701   | 1      |        |        |        |
| 4703   | 0      |        |        |        |
| 4704   | 0      | 1      | 2      |        |
| 4705   | 1      |        |        |        |
| 4706   | 1      |        |        |        |
| 4707   | 0      |        | 1      |        |
| 4708   | 0      |        |        |        |
| 4710   | 1      |        |        |        |
| 4711   | 0      |        | 1      |        |
| 4715   | 1      |        |        |        |
| 4716   | 0      |        | 1      |        |

| respid | Q31_99 | Q31a_1 | Q31a_2 | Q31a_3 |
|--------|--------|--------|--------|--------|
| 4717   | 1      |        |        |        |
| 4718   | 1      |        |        |        |
| 4722   | 0      |        |        |        |
| 4727   | 1      |        |        |        |
| 4728   | 0      |        |        |        |
| 4729   | 1      |        |        |        |
| 4732   | 1      |        |        |        |
| 4733   | 1      |        |        |        |
| 4734   | 1      |        |        |        |
| 4735   | 1      |        |        |        |
| 4737   | 0      |        |        |        |
| 4738   | 1      |        |        |        |
| 4740   | 1      |        |        |        |
| 4741   | 0      |        |        |        |
| 4743   | 0      |        | 1      |        |
| 4746   | 1      |        |        |        |
| 4750   | 1      |        |        |        |
| 4752   | 1      |        |        |        |
| 4753   | 0      |        |        | 1      |
| 4754   | 1      |        |        |        |
| 4755   | 0      |        |        |        |
| 4758   | 1      |        |        |        |
| 4766   | 1      |        |        |        |
| 4767   | 0      |        |        | 1      |
| 4768   | 0      |        |        |        |
| 4769   | 1      |        |        |        |
| 4771   | 1      |        |        |        |
| 4772   | 1      |        |        |        |
| 4773   | 1      |        |        |        |
| 4774   | 0      |        |        |        |
| 4776   | 1      |        |        |        |
| 4777   | 0      |        |        | 1      |

| respid | Q31_99 | Q31a_1 | Q31a_2 | Q31a_3 |
|--------|--------|--------|--------|--------|
| 4779   | 1      |        |        |        |
| 4780   | 0      | 2      | 2      | 2      |
| 4781   | 0      |        |        |        |
| 4783   | 0      | 3      | 2      | 2      |
| 4784   | 1      |        |        |        |
| 4785   | 0      |        |        |        |
| 4788   | 1      |        |        |        |
| 4789   | 1      |        |        |        |
| 4790   | 1      |        |        |        |
| 4791   | 1      |        |        |        |
| 4794   | 1      |        |        |        |
| 4795   | 1      |        |        |        |
| 4797   | 1      |        |        |        |
| 4802   | 0      |        |        |        |
| 4803   | 0      |        |        |        |
| 4804   | 1      |        |        |        |
| 4805   | 1      |        |        |        |
| 4807   | 1      |        |        |        |
| 4808   | 0      |        | 1      | 1      |
| 4809   | 0      |        |        |        |
| 4811   | 1      |        |        |        |
| 4817   | 1      |        |        |        |
| 4819   | 1      |        |        |        |
| 4820   | 1      |        |        |        |
| 4821   | 0      |        | 2      | 1      |
| 4822   | 1      |        |        |        |
| 4823   | 0      |        | 1      |        |
| 4825   | 1      |        |        |        |
| 4826   | 1      |        |        |        |
| 4830   | 1      |        |        |        |
| 4832   | 1      |        |        |        |
| 4838   | 0      | 3      | 3      | 3      |

| respid | Q31_99 | Q31a_1 | Q31a_2 | Q31a_3 |
|--------|--------|--------|--------|--------|
| 4840   | 0      |        | 1      |        |
| 4841   | 1      |        |        |        |
| 4843   | 1      |        |        |        |
| 4845   | 1      |        |        |        |
| 4846   | 0      |        |        |        |
| 4848   | 1      |        |        |        |
| 4853   | 1      |        |        |        |
| 4854   | 1      |        |        |        |
| 4859   | 1      |        |        |        |
| 4861   | 1      |        |        |        |
| 4864   | 1      |        |        |        |
| 4867   | 1      |        |        |        |
| 4870   | 0      |        |        |        |
| 4872   | 0      |        |        | 1      |
| 4873   | 1      |        |        |        |
| 4874   | 0      |        |        |        |
| 4878   | 1      |        |        |        |
| 4880   | 1      |        |        |        |
| 4881   | 1      |        |        |        |
| 4882   | 0      |        |        | 2      |
| 4883   | 1      |        |        |        |
| 4885   | 1      |        |        |        |
| 4889   | 1      |        |        |        |
| 4890   | 1      |        |        |        |
| 4891   | 0      |        |        |        |
| 4894   | 1      |        |        |        |
| 4895   | 0      |        | 5      | 4      |
| 4896   | 1      |        |        |        |
| 4897   | 1      |        |        |        |
| 4898   | 0      |        |        |        |
| 4899   | 1      |        |        |        |
| 4900   | 0      |        |        |        |

| respid | Q31_99 | Q31a_1 | Q31a_2 | Q31a_3 |
|--------|--------|--------|--------|--------|
| 4901   | 1      |        |        |        |
| 4903   | 0      | 1      |        |        |
| 4904   | 1      |        |        |        |
| 4908   | 1      |        |        |        |
| 4909   | 0      |        |        |        |
| 4913   | 1      |        |        |        |
| 4917   | 1      |        |        |        |
| 4918   | 1      |        |        |        |
| 4920   | 1      |        |        |        |
| 4921   | 1      |        |        |        |
| 4925   | 0      |        | 1      |        |
| 4926   | 1      |        |        |        |
| 4927   | 0      |        |        |        |
| 4928   | 1      |        |        |        |
| 4929   | 1      |        |        |        |
| 4930   | 0      |        | 3      | 3      |
| 4931   | 1      |        |        |        |
| 4932   | 0      | 3      | 2      | 2      |
| 4933   | 1      |        |        |        |
| 4934   | 1      |        |        |        |
| 5934   | 1      |        |        |        |
| 5935   | 1      |        |        |        |
| 5936   | 1      |        |        |        |
| 5938   | 1      |        |        |        |
| 5939   | 0      |        |        | 1      |
| 5940   | 0      |        |        | 1      |
| 5942   | 1      |        |        |        |
| 5944   | 0      |        |        |        |
| 5951   | 1      |        |        |        |
| 5952   | 0      |        | 1      |        |
| 5954   | 1      |        |        |        |
| 5956   | 1      |        |        |        |

| respid | Q31_99 | Q31a_1 | Q31a_2 | Q31a_3 |
|--------|--------|--------|--------|--------|
| 5957   | 1      |        |        |        |
| 5958   | 0      |        |        |        |
| 5959   | 0      |        | 2      | 2      |
| 5960   | 1      |        |        |        |
| 5963   | 1      |        |        |        |
| 5966   | 1      |        |        |        |
| 5968   | 0      |        |        | 1      |
| 5974   | 0      |        |        | 1      |
| 5975   | 0      |        |        | 1      |
| 5976   | 0      |        |        |        |
| 5977   | 1      |        |        |        |
| 5978   | 0      |        |        | 1      |
| 5979   | 1      |        |        |        |
| 5983   | 0      |        |        | 1      |
| 5984   | 1      |        |        |        |
| 5990   | 1      |        |        |        |
| 5991   | 0      |        | 1      |        |
| 5992   | 1      |        |        |        |
| 5993   | 0      |        |        | 1      |
| 5994   | 0      | 1      | 1      |        |
| 5996   | 0      |        |        | 1      |
| 6001   | 0      |        |        |        |
| 6003   | 1      |        |        |        |
| 6004   | 1      |        |        |        |
| 6005   | 0      |        |        |        |
| 6006   | 1      |        |        |        |
| 6008   | 1      |        |        |        |
| 6009   | 1      |        |        |        |
| 6014   | 1      |        |        |        |
| 6016   | 0      |        | 1      |        |
| 6017   | 0      |        |        |        |
| 6018   | 1      |        |        |        |

| respid | Q31_99 | Q31a_1 | Q31a_2 | Q31a_3 |
|--------|--------|--------|--------|--------|
| 6020   | 1      |        |        |        |
| 6021   | 1      |        |        |        |
| 6024   | 1      |        |        |        |
| 6025   | 1      |        |        |        |
| 6026   | 0      |        |        | 1      |
| 6032   | 0      |        | 1      |        |
| 6035   | 0      |        | 1      |        |
| 6038   | 1      |        |        |        |
| 6043   | 0      |        |        |        |
| 6044   | 1      |        |        |        |
| 6046   | 0      |        |        |        |
| 6047   | 1      |        |        |        |
| 6048   | 1      |        |        |        |
| 6050   | 0      |        |        |        |
| 6051   | 1      |        |        |        |
| 6053   | 1      |        |        |        |
| 6054   | 0      |        |        |        |
| 6056   | 1      |        |        |        |
| 6058   | 0      |        | 1      |        |
| 6060   | 1      |        |        |        |
| 6061   | 0      |        | 1      |        |
| 6062   | 1      |        |        |        |
| 6067   | 1      |        |        |        |
| 6070   | 1      |        |        |        |
| 6074   | 0      |        | 1      | 2      |
| 6076   | 1      |        |        |        |
| 6078   | 1      |        |        |        |
| 6081   | 1      |        |        |        |
| 6085   | 0      |        |        |        |
| 6088   | 1      |        |        |        |
| 6092   | 0      |        |        |        |
| 6095   | 0      |        |        | 1      |

| respid | Q31_99 | Q31a_1 | Q31a_2 | Q31a_3 |
|--------|--------|--------|--------|--------|
| 6098   | 1      |        |        |        |
| 6101   | 1      |        |        |        |
| 6102   | 0      |        |        |        |
| 6105   | 1      |        |        |        |
| 6106   | 0      |        |        |        |
| 6107   | 0      |        |        |        |
| 6111   | 1      |        |        |        |
| 6112   | 1      |        |        |        |
| 6113   | 0      |        |        |        |
| 6115   | 1      |        |        |        |
| 6116   | 1      |        |        |        |
| 6117   | 1      |        |        |        |
| 6124   | 0      |        |        |        |
| 6125   | 1      |        |        |        |
| 6128   | 1      |        |        |        |
| 6133   | 1      |        |        |        |
| 6134   | 0      |        | 1      |        |
| 6135   | 0      |        |        |        |
| 6138   | 0      |        | 2      | 2      |
| 6140   | 1      |        |        |        |
| 6143   | 1      |        |        |        |
| 6147   | 1      |        |        |        |
| 6154   | 1      |        |        |        |
| 6162   | 1      |        |        |        |
| 6165   | 0      |        | 1      |        |
| 6166   | 0      |        | 1      |        |
| 6173   | 0      |        |        |        |
| 6180   | 0      |        |        | 1      |
| 6184   | 0      | 2      | 1      | 2      |
| 6185   | 1      |        |        |        |
| 6186   | 1      |        |        |        |
| 6188   | 1      |        |        |        |



| respid | Q31_99 | Q31a_1 | Q31a_2 | Q31a_3 |
|--------|--------|--------|--------|--------|
| 6192   | 0      |        |        | 2      |
| 6194   | 1      |        |        |        |
| 6195   | 1      |        |        |        |
| 6196   | 0      |        | 1      |        |
| 6199   | 0      |        | 1      |        |
| 6200   | 1      |        |        |        |
| 6201   | 1      |        |        |        |
| 6202   | 0      |        | 1      |        |
| 6203   | 1      |        |        |        |
| 6205   | 1      |        |        |        |
| 6210   | 0      |        |        |        |
| 6212   | 0      |        |        |        |
| 6216   | 0      |        |        | 1      |
| 6218   | 1      |        |        |        |
| 6221   | 0      |        |        |        |
| 6224   | 1      |        |        |        |
| 6225   | 1      |        |        |        |
| 6227   | 1      |        |        |        |
| 6230   | 1      |        |        |        |
| 6231   | 1      |        |        |        |
| 6233   | 1      |        |        |        |
| 6234   | 1      |        |        |        |
| 6235   | 1      |        |        |        |
| 6237   | 1      |        |        |        |
| 6240   | 1      |        |        |        |
| 6248   | 1      |        |        |        |
| 6249   | 1      |        |        |        |
| 6252   | 1      |        |        |        |
| 6254   | 1      |        |        |        |
| 6269   | 0      |        | 1      |        |
| 6304   | 1      |        |        |        |
| 6334   | 0      |        |        |        |

| respid | Q31_99 | Q31a_1 | Q31a_2 | Q31a_3 |
|--------|--------|--------|--------|--------|
| 6341   | 1      |        |        |        |
| 6350   | 0      |        |        | 2      |
| 6370   | 1      |        |        |        |
| 6384   | 0      |        | 1      | 1      |
| 6400   | 1      |        |        |        |
| 6418   | 1      |        |        |        |
| 6467   | 1      |        |        |        |
| 6469   | 1      |        |        |        |
| 6474   | 1      |        |        |        |
| 6475   | 1      |        |        |        |
| 6476   | 1      |        |        |        |
| 6477   | 1      |        |        |        |
| 6480   | 1      |        |        |        |
| 6481   | 0      |        |        | 1      |
| 6485   | 1      |        |        |        |
| 6488   | 0      |        |        |        |
| 6495   | 1      |        |        |        |
| 6499   | 0      |        | 1      |        |
| 6500   | 1      |        |        |        |
| 6504   | 1      |        |        |        |
| 6507   | 1      |        |        |        |
| 6512   | 0      |        | 1      | 1      |
| 6525   | 0      |        | 1      |        |
| 6532   | 1      |        |        |        |
| 6535   | 1      |        |        |        |
| 6546   | 1      |        |        |        |
| 6551   | 0      |        | 2      |        |
| 6556   | 1      |        |        |        |
| 6566   | 1      |        |        |        |
| 6569   | 1      |        |        |        |
| 6574   | 1      |        |        |        |
| 6576   | 0      |        | 1      | 1      |

| respid | Q31_99 | Q31a_1 | Q31a_2 | Q31a_3 |
|--------|--------|--------|--------|--------|
| 6580   | 1      |        |        |        |
| 6584   | 1      |        |        |        |
| 6585   | 0      |        | 1      |        |
| 6589   | 0      |        |        | 1      |
| 6590   | 0      |        | 1      |        |
| 6598   | 1      |        |        |        |
| 6603   | 0      |        |        |        |
| 6618   | 1      |        |        |        |
| 6630   | 1      |        |        |        |
| 6636   | 1      |        |        |        |
| 6649   | 1      |        |        |        |
| 6675   | 0      |        |        | 1      |
| 6678   | 1      |        |        |        |
| 6681   | 1      |        |        |        |
| 6684   | 0      |        |        |        |
| 6688   | 1      |        |        |        |
| 6691   | 1      |        |        |        |
| 6694   | 0      |        | 1      |        |
| 6696   | 1      |        |        |        |
| 6720   | 0      | 1      | 2      | 1      |
| 6722   | 0      | 3      | 3      | 3      |
| 6724   | 1      |        |        |        |
| 6725   | 1      |        |        |        |
| 6727   | 1      |        |        |        |
| 6734   | 0      |        | 1      |        |
| 6739   | 1      |        |        |        |
| 6743   | 0      |        |        |        |
| 6749   | 1      |        |        |        |
| 6756   | 1      |        |        |        |
| 6764   | 0      |        |        |        |
| 6765   | 1      |        |        |        |
| 6768   | 1      |        |        |        |

| respid | Q31_99 | Q31a_1 | Q31a_2 | Q31a_3 |
|--------|--------|--------|--------|--------|
| 6773   | 0      |        |        | 1      |
| 6775   | 1      |        |        |        |
| 6777   | 1      |        |        |        |
| 6779   | 1      |        |        |        |
| 6790   | 1      |        |        |        |
| 6797   | 1      |        |        |        |
| 6798   | 0      | 1      | 1      |        |
| 6808   | 1      |        |        |        |
| 6810   | 0      |        | 1      |        |
| 6811   | 0      |        |        |        |
| 6812   | 1      |        |        |        |
| 6814   | 0      |        | 1      |        |
| 6819   | 1      |        |        |        |
| 6820   | 0      |        |        |        |
| 6832   | 1      |        |        |        |
| 6854   | 1      |        |        |        |
| 6855   | 1      |        |        |        |
| 6857   | 1      |        |        |        |
| 6858   | 1      |        |        |        |
| 6859   | 1      |        |        |        |
| 6860   | 0      |        |        |        |
| 6862   | 0      | 1      | 1      |        |
| 6879   | 1      |        |        |        |
| 6893   | 1      |        |        |        |
| 6898   | 0      |        | 3      |        |
| 6902   | 0      | 1      | 1      | 1      |
| 6903   | 0      |        | 4      |        |
| 6907   | 0      |        |        |        |
| 6908   | 1      |        |        |        |
| 6912   | 1      |        |        |        |
| 6915   | 0      |        |        |        |
| 6916   | 0      | 1      |        |        |

| respid | Q31_99 | Q31a_1 | Q31a_2 | Q31a_3 |
|--------|--------|--------|--------|--------|
| 6917   | 0      |        | 1      | 1      |
| 6923   | 1      |        |        |        |
| 6934   | 1      |        |        |        |
| 6937   | 1      |        |        |        |
| 6945   | 1      |        |        |        |
| 6954   | 0      |        |        |        |
| 6956   | 0      |        | 1      |        |
| 6958   | 1      |        |        |        |
| 6961   | 0      |        | 1      | 1      |
| 6963   | 1      |        |        |        |
| 6964   | 1      |        |        |        |
| 6976   | 1      |        |        |        |
| 6977   | 0      |        |        |        |
| 7000   | 0      |        |        |        |
| 7001   | 1      |        |        |        |
| 7005   | 1      |        |        |        |
| 7006   | 1      |        |        |        |
| 7008   | 0      |        | 3      | 2      |
| 7009   | 0      |        |        |        |
| 7019   | 1      |        |        |        |
| 7021   | 1      |        |        |        |
| 7026   | 0      |        |        |        |
| 7030   | 0      |        |        |        |
| 7034   | 1      |        |        |        |
| 7039   | 0      |        | 2      |        |
| 7041   | 1      |        |        |        |
| 7047   | 0      |        | 1      |        |
| 7051   | 1      |        |        |        |
| 7052   | 0      |        | 1      |        |
| 7059   | 1      |        |        |        |
| 7062   | 0      |        | 2      | 2      |
| 7065   | 0      |        |        | 1      |

| respid | Q31_99 | Q31a_1 | Q31a_2 | Q31a_3 |
|--------|--------|--------|--------|--------|
| 7066   | 1      |        |        |        |
| 7069   | 1      |        |        |        |
| 7070   | 1      |        |        |        |
| 7073   | 1      |        |        |        |
| 7078   | 1      |        |        |        |
| 7083   | 1      |        |        |        |
| 7084   | 0      |        | 2      | 1      |
| 7085   | 1      |        |        |        |
| 7088   | 0      |        |        | 2      |
| 7090   | 1      |        |        |        |
| 7095   | 0      |        |        | 1      |
| 7100   | 1      |        |        |        |
| 7102   | 1      |        |        |        |
| 7103   | 0      |        |        | 1      |
| 7108   | 0      |        | 1      |        |
| 7109   | 0      |        |        | 1      |
| 7110   | 1      |        |        |        |
| 7112   | 1      |        |        |        |
| 7114   | 1      |        |        |        |
| 7116   | 1      |        |        |        |
| 7117   | 0      |        |        |        |
| 7118   | 0      |        | 3      | 3      |
| 7120   | 0      | 3      | 3      | 2      |
| 7124   | 1      |        |        |        |
| 7130   | 1      |        |        |        |
| 7135   | 1      |        |        |        |
| 7137   | 0      | 2      |        | 1      |
| 7140   | 1      |        |        |        |
| 7141   | 1      |        |        |        |
| 7148   | 1      |        |        |        |
| 7152   | 1      |        |        |        |
| 7154   | 1      |        |        |        |

| respid | Q31_99 | Q31a_1 | Q31a_2 | Q31a_3 |
|--------|--------|--------|--------|--------|
| 7156   | 1      |        |        |        |
| 7158   | 1      |        |        |        |
| 7159   | 1      |        |        |        |
| 7161   | 1      |        |        |        |
| 7164   | 1      |        |        |        |
| 7166   | 1      |        |        |        |
| 7167   | 1      |        |        |        |
| 7168   | 1      |        |        |        |
| 7170   | 1      |        |        |        |
| 7171   | 1      |        |        |        |
| 7172   | 0      |        |        | 1      |
| 7173   | 0      |        |        |        |
| 7175   | 0      |        |        |        |
| 7176   | 1      |        |        |        |
| 7180   | 1      |        |        |        |
| 7183   | 0      |        |        |        |
| 7189   | 1      |        |        |        |
| 7193   | 1      |        |        |        |
| 7194   | 0      |        |        |        |
| 7195   | 1      |        |        |        |
| 7200   | 1      |        |        |        |
| 7201   | 0      | 2      | 2      | 2      |
| 7205   | 0      | 1      |        |        |
| 7207   | 1      |        |        |        |
| 7208   | 1      |        |        |        |
| 7210   | 1      |        |        |        |
| 7211   | 1      |        |        |        |
| 7217   | 1      |        |        |        |
| 7218   | 1      |        |        |        |
| 7220   | 1      |        |        |        |
| 7225   | 1      |        |        |        |
| 7228   | 1      |        |        |        |

| respid | Q31_99 | Q31a_1 | Q31a_2 | Q31a_3 |
|--------|--------|--------|--------|--------|
| 7230   | 1      |        |        |        |
| 7233   | 1      |        |        |        |
| 7234   | 1      |        |        |        |
| 7235   | 1      |        |        |        |
| 7236   | 1      |        |        |        |
| 7241   | 1      |        |        |        |
| 7251   | 1      |        |        |        |
| 7253   | 1      |        |        |        |
| 7259   | 1      |        |        |        |
| 7260   | 0      |        | 1      |        |
| 7261   | 0      |        |        |        |
| 7263   | 1      |        |        |        |
| 7265   | 1      |        |        |        |
| 7268   | 0      |        | 1      |        |
| 7269   | 1      |        |        |        |
| 7271   | 0      |        |        | 2      |
| 7276   | 0      | 1      |        |        |
| 7280   | 0      |        |        |        |
| 7283   | 1      |        |        |        |
| 7284   | 0      |        | 1      |        |
| 7286   | 0      |        |        | 1      |
| 7287   | 1      |        |        |        |
| 7288   | 0      |        |        | 1      |
| 7294   | 0      |        | 2      |        |
| 7295   | 1      |        |        |        |
| 7296   | 1      |        |        |        |
| 7297   | 0      |        |        |        |
| 7299   | 1      |        |        |        |
| 7300   | 0      |        | 2      |        |
| 7301   | 0      |        | 1      |        |
| 7302   | 1      |        |        |        |
| 7306   | 0      |        |        | 1      |



| respid | Q31_99 | Q31a_1 | Q31a_2 | Q31a_3 |
|--------|--------|--------|--------|--------|
| 7313   | 0      | 2      | 2      | 1      |
| 7315   | 0      |        | 2      |        |
| 7317   | 1      |        |        |        |
| 7321   | 1      |        |        |        |
| 7322   | 1      |        |        |        |
| 7323   | 0      | 2      | 1      |        |
| 7333   | 0      |        |        |        |
| 7335   | 0      | 3      |        | 3      |
| 7336   | 1      |        |        |        |
| 7337   | 1      |        |        |        |
| 7338   | 1      |        |        |        |
| 7340   | 0      |        |        |        |
| 7341   | 0      |        | 1      |        |
| 7342   | 0      |        | 1      | 1      |
| 7344   | 0      |        |        |        |
| 7346   | 0      |        | 2      | 2      |
| 7347   | 0      |        |        | 1      |
| 7349   | 0      |        | 1      | 1      |
| 7352   | 1      |        |        |        |
| 7353   | 0      |        |        |        |
| 7355   | 1      |        |        |        |
| 7356   | 1      |        |        |        |
| 7360   | 0      |        | 3      | 2      |
| 7371   | 1      |        |        |        |
| 7376   | 0      |        |        |        |
| 7379   | 1      |        |        |        |
| 7381   | 1      |        |        |        |
| 7386   | 0      |        | 1      | 1      |
| 7389   | 1      |        |        |        |
| 7390   | 0      |        |        |        |
| 7393   | 1      |        |        |        |
| 7394   | 1      |        |        |        |

| respid | Q31_99 | Q31a_1 | Q31a_2 | Q31a_3 |
|--------|--------|--------|--------|--------|
| 7396   | 0      | 2      | 2      | 2      |
| 7400   | 0      | 2      |        | 1      |
| 7401   | 1      |        |        |        |
| 7403   | 1      |        |        |        |
| 7406   | 0      |        | 2      |        |
| 7409   | 0      |        | 2      | 1      |
| 7410   | 0      |        | 1      | 1      |
| 7412   | 0      |        |        |        |
| 7414   | 0      |        |        | 3      |
| 7415   | 1      |        |        |        |
| 7417   | 0      |        |        |        |
| 7421   | 0      |        |        | 3      |
| 7425   | 1      |        |        |        |
| 7430   | 1      |        |        |        |
| 7432   | 1      |        |        |        |
| 7433   | 0      | 2      | 1      | 1      |
| 7442   | 0      |        |        |        |
| 7445   | 1      |        |        |        |
| 7446   | 1      |        |        |        |
| 7449   | 1      |        |        |        |
| 7450   | 1      |        |        |        |
| 7451   | 1      |        |        |        |
| 7459   | 1      |        |        |        |
| 7462   | 0      |        | 1      |        |
| 7463   | 1      |        |        |        |
| 7469   | 1      |        |        |        |
| 7482   | 1      |        |        |        |
| 7484   | 0      |        |        |        |
| 7486   | 1      |        |        |        |
| 7496   | 1      |        |        |        |
| 7502   | 1      |        |        |        |
| 7504   | 0      |        |        |        |

| respid | Q31_99 | Q31a_1 | Q31a_2 | Q31a_3 |
|--------|--------|--------|--------|--------|
| 7509   | 1      |        |        |        |
| 7513   | 0      | 2      | 2      |        |
| 7514   | 1      |        |        |        |
| 7520   | 1      |        |        |        |
| 7523   | 1      |        |        |        |
| 7526   | 0      |        | 1      |        |
| 7529   | 1      |        |        |        |
| 7534   | 1      |        |        |        |
| 7536   | 0      |        |        |        |
| 7540   | 0      |        |        |        |
| 7541   | 0      |        |        |        |
| 7542   | 1      |        |        |        |
| 7555   | 1      |        |        |        |
| 7566   | 1      |        |        |        |
| 7568   | 0      |        | 1      |        |
| 7570   | 0      |        | 2      | 2      |
| 7572   | 0      |        |        |        |
| 7573   | 0      | 2      | 2      | 2      |
| 7576   | 1      |        |        |        |
| 7577   | 1      |        |        |        |
| 7583   | 1      |        |        |        |
| 7584   | 0      |        |        |        |
| 7585   | 0      | 3      | 3      | 3      |
| 7586   | 0      |        |        |        |
| 7587   | 1      |        |        |        |
| 7588   | 1      |        |        |        |
| 7596   | 1      |        |        |        |
| 7599   | 0      |        | 1      |        |
| 7600   | 0      | 2      |        |        |
| 7602   | 0      | 1      | 2      | 2      |
| 7613   | 1      |        |        |        |
| 7620   | 0      |        | 1      |        |

| respid | Q31_99 | Q31a_1 | Q31a_2 | Q31a_3 |
|--------|--------|--------|--------|--------|
| 7623   | 0      |        |        |        |
| 7635   | 1      |        |        |        |
| 7636   | 0      |        |        |        |
| 7643   | 0      |        | 2      | 2      |
| 7645   | 0      |        | 1      |        |
| 7649   | 0      |        | 4      |        |
| 7651   | 1      |        |        |        |
| 7652   | 0      |        |        |        |
| 7655   | 1      |        |        |        |
| 7657   | 1      |        |        |        |
| 7675   | 1      |        |        |        |
| 7676   | 1      |        |        |        |
| 7684   | 0      | 1      | 1      |        |
| 7693   | 1      |        |        |        |
| 7694   | 0      |        | 3      | 3      |
| 7695   | 1      |        |        |        |
| 7696   | 0      |        |        |        |
| 7698   | 0      |        | 2      | 2      |
| 7700   | 0      | 1      |        |        |
| 7701   | 1      |        |        |        |
| 7704   | 0      |        | 2      | 2      |
| 7709   | 1      |        |        |        |
| 7713   | 1      |        |        |        |
| 7714   | 1      |        |        |        |
| 7718   | 0      |        | 3      |        |
| 7720   | 0      |        |        |        |
| 7721   | 0      |        |        | 1      |
| 7722   | 1      |        |        |        |
| 7724   | 1      |        |        |        |
| 7728   | 1      |        |        |        |
| 7731   | 0      |        |        |        |
| 7735   | 1      |        |        |        |

| respid | Q31_99 | Q31a_1 | Q31a_2 | Q31a_3 |
|--------|--------|--------|--------|--------|
| 7737   | 1      |        |        |        |
| 7741   | 1      |        |        |        |
| 7746   | 1      |        |        |        |
| 7747   | 1      |        |        |        |
| 7748   | 1      |        |        |        |
| 7750   | 0      | 1      |        |        |
| 7754   | 0      |        | 1      |        |
| 7755   | 0      |        |        | 1      |
| 7762   | 1      |        |        |        |
| 7764   | 1      |        |        |        |
| 7766   | 1      |        |        |        |
| 7768   | 0      |        |        | 2      |
| 7770   | 0      |        |        |        |
| 7771   | 1      |        |        |        |
| 7777   | 1      |        |        |        |
| 7778   | 1      |        |        |        |
| 7783   | 0      | 2      |        |        |
| 7789   | 1      |        |        |        |
| 7790   | 1      |        |        |        |
| 7795   | 1      |        |        |        |
| 7807   | 1      |        |        |        |
| 7808   | 0      |        | 2      | 1      |
| 7818   | 0      |        | 2      | 2      |
| 7820   | 1      |        |        |        |
| 7831   | 0      |        | 2      | 2      |
| 7832   | 1      |        |        |        |
| 7837   | 1      |        |        |        |
| 7841   | 0      | 2      | 2      | 3      |
| 7845   | 0      |        | 2      | 2      |
| 7853   | 1      |        |        |        |
| 7854   | 1      |        |        |        |
| 7862   | 0      |        |        |        |

| respid | Q31_99 | Q31a_1 | Q31a_2 | Q31a_3 |
|--------|--------|--------|--------|--------|
| 7871   | 1      |        |        |        |
| 7875   | 0      |        | 1      | 2      |
| 7880   | 0      |        |        |        |
| 7881   | 0      | 1      | 2      |        |
| 7883   | 1      |        |        |        |
| 7896   | 1      |        |        |        |
| 7905   | 1      |        |        |        |
| 7919   | 1      |        |        |        |
| 7928   | 0      |        | 1      |        |
| 7929   | 0      |        |        | 1      |
| 7938   | 0      |        | 1      | 1      |
| 7940   | 1      |        |        |        |
| 7941   | 1      |        |        |        |
| 7952   | 1      |        |        |        |
| 7962   | 1      |        |        |        |
| 7968   | 1      |        |        |        |
| 7972   | 1      |        |        |        |
| 7983   | 0      |        | 1      |        |
| 7990   | 0      |        |        | 2      |
| 7993   | 0      |        | 1      |        |
| 8005   | 0      |        |        | 1      |
| 8008   | 1      |        |        |        |
| 8012   | 0      |        |        | 1      |
| 8021   | 0      | 1      | 1      |        |
| 8024   | 1      |        |        |        |
| 8043   | 1      |        |        |        |
| 8051   | 0      |        | 1      | 1      |
| 8056   | 1      |        |        |        |
| 8061   | 1      |        |        |        |
| 8066   | 1      |        |        |        |
| 8069   | 0      |        | 2      | 2      |
| 8071   | 1      |        |        |        |

| respid | Q31_99 | Q31a_1 | Q31a_2 | Q31a_3 |
|--------|--------|--------|--------|--------|
| 8072   | 0      |        | 1      | 1      |
| 8076   | 1      |        |        |        |
| 8080   | 0      |        |        |        |
| 8083   | 1      |        |        |        |
| 8093   | 0      | 1      |        | 2      |
| 8095   | 0      |        |        |        |
| 8099   | 1      |        |        |        |
| 8100   | 1      |        |        |        |
| 8103   | 1      |        |        |        |
| 8104   | 0      |        |        |        |
| 8115   | 0      |        |        |        |
| 8121   | 1      |        |        |        |
| 8128   | 1      |        |        |        |
| 8130   | 0      |        |        | 1      |
| 8131   | 0      |        |        |        |
| 8133   | 1      |        |        |        |
| 8143   | 1      |        |        |        |
| 8144   | 0      | 1      |        |        |
| 8146   | 1      |        |        |        |
| 8148   | 1      |        |        |        |
| 8157   | 1      |        |        |        |
| 8164   | 1      |        |        |        |
| 8173   | 1      |        |        |        |
| 8176   | 0      | 1      |        |        |
| 8179   | 1      |        |        |        |
| 8181   | 1      |        |        |        |
| 8182   | 1      |        |        |        |
| 8196   | 1      |        |        |        |
| 8200   | 0      |        |        | 1      |
| 8203   | 0      |        |        | 1      |
| 8204   | 0      | 2      | 1      |        |
| 8206   | 0      |        |        | 1      |

| respid | Q31_99 | Q31a_1 | Q31a_2 | Q31a_3 |
|--------|--------|--------|--------|--------|
| 8208   | 1      |        |        |        |
| 8212   | 1      |        |        |        |
| 8222   | 0      |        | 3      |        |
| 8223   | 1      |        |        |        |
| 8225   | 1      |        |        |        |
| 8226   | 1      |        |        |        |
| 8228   | 1      |        |        |        |
| 8229   | 1      |        |        |        |
| 8239   | 1      |        |        |        |
| 8246   | 0      |        |        |        |
| 8258   | 0      |        |        |        |
| 8260   | 1      |        |        |        |
| 8262   | 0      |        |        |        |
| 8263   | 1      |        |        |        |
| 8267   | 0      |        |        |        |
| 8271   | 0      | 3      | 3      | 2      |
| 8274   | 1      |        |        |        |
| 8275   | 0      |        |        |        |
| 8279   | 0      |        |        | 1      |
| 8285   | 0      | 2      | 2      | 1      |
| 8287   | 0      |        |        |        |
| 8289   | 0      |        | 1      |        |
| 8291   | 1      |        |        |        |
| 8299   | 0      |        |        |        |
| 8301   | 0      |        |        |        |
| 8302   | 0      |        | 1      | 1      |
| 8308   | 0      | 1      | 1      | 1      |
| 8313   | 1      |        |        |        |
| 8316   | 0      |        |        | 1      |
| 8317   | 1      |        |        |        |
| 8319   | 1      |        |        |        |
| 8323   | 0      |        |        |        |



| respid | Q31_99 | Q31a_1 | Q31a_2 | Q31a_3 |
|--------|--------|--------|--------|--------|
| 8324   | 1      |        |        |        |
| 8327   | 0      |        |        |        |
| 8328   | 0      |        |        | 1      |
| 8342   | 1      |        |        |        |
| 8350   | 0      |        |        | 1      |
| 8352   | 0      |        |        |        |
| 8353   | 1      |        |        |        |
| 8356   | 0      | 1      | 1      | 2      |
| 8367   | 0      |        | 1      |        |
| 8373   | 1      |        |        |        |
| 8379   | 1      |        |        |        |
| 8382   | 1      |        |        |        |
| 8387   | 1      |        |        |        |
| 8409   | 0      |        | 1      |        |
| 8410   | 1      |        |        |        |
| 8412   | 1      |        |        |        |
| 8415   | 1      |        |        |        |
| 8417   | 0      |        |        |        |
| 8422   | 0      |        | 1      |        |
| 8430   | 0      |        | 3      | 2      |
| 8434   | 1      |        |        |        |
| 8436   | 1      |        |        |        |
| 8446   | 1      |        |        |        |
| 8447   | 1      |        |        |        |
| 8448   | 1      |        |        |        |
| 8455   | 1      |        |        |        |
| 8456   | 1      |        |        |        |
| 8459   | 0      |        | 1      | 1      |
| 8460   | 1      |        |        |        |
| 8464   | 0      |        | 1      | 1      |
| 8470   | 0      |        |        | 2      |
| 8473   | 0      |        | 1      |        |

| respid | Q31_99 | Q31a_1 | Q31a_2 | Q31a_3 |
|--------|--------|--------|--------|--------|
| 8486   | 1      |        |        |        |
| 8487   | 1      |        |        |        |
| 8489   | 0      |        | 1      | 1      |
| 8494   | 1      |        |        |        |
| 8495   | 0      |        | 4      | 3      |
| 8497   | 0      | 1      |        |        |
| 8510   | 0      |        |        | 1      |
| 8515   | 0      |        |        |        |
| 8526   | 1      |        |        |        |
| 8530   | 1      |        |        |        |
| 8532   | 1      |        |        |        |
| 8533   | 1      |        |        |        |
| 8534   | 0      | 1      | 1      |        |
| 8572   | 0      |        |        |        |
| 8582   | 0      |        |        |        |
| 8584   | 1      |        |        |        |
| 8585   | 1      |        |        |        |
| 8586   | 1      |        |        |        |
| 8589   | 0      |        |        |        |
| 8593   | 1      |        |        |        |
| 8594   | 0      |        |        | 1      |
| 8601   | 0      |        |        | 1      |
| 8603   | 1      |        |        |        |
| 8604   | 1      |        |        |        |
| 8605   | 1      |        |        |        |
| 8607   | 1      |        |        |        |
| 8623   | 1      |        |        |        |
| 8626   | 0      | 1      | 2      |        |
| 8638   | 0      | 1      | 1      | 1      |
| 8640   | 0      |        | 1      | 1      |
| 8641   | 0      |        |        |        |
| 8643   | 1      |        |        |        |

| respid | Q31_99 | Q31a_1 | Q31a_2 | Q31a_3 |
|--------|--------|--------|--------|--------|
| 8644   | 0      |        | 1      | 1      |
| 8646   | 1      |        |        |        |
| 8647   | 1      |        |        |        |
| 8649   | 1      |        |        |        |
| 8650   | 0      | 1      | 1      |        |
| 8658   | 1      |        |        |        |
| 8659   | 1      |        |        |        |
| 8669   | 1      |        |        |        |
| 8672   | 0      |        |        | 3      |
| 8673   | 1      |        |        |        |
| 8676   | 1      |        |        |        |
| 8677   | 1      |        |        |        |
| 8681   | 0      | 1      |        |        |
| 8688   | 1      |        |        |        |
| 8689   | 0      |        | 1      |        |
| 8690   | 1      |        |        |        |
| 8693   | 0      |        |        |        |
| 8694   | 1      |        |        |        |
| 8699   | 1      |        |        |        |
| 8700   | 1      |        |        |        |
| 8703   | 1      |        |        |        |
| 8704   | 1      |        |        |        |
| 8706   | 0      |        |        |        |
| 8709   | 1      |        |        |        |
| 8715   | 1      |        |        |        |
| 8728   | 1      |        |        |        |
| 8729   | 1      |        |        |        |
| 8730   | 1      |        |        |        |
| 8742   | 0      |        |        | 2      |
| 8748   | 0      | 1      | 1      | 1      |
| 8749   | 1      |        |        |        |
| 8750   | 0      |        |        | 1      |

| respid | Q31_99 | Q31a_1 | Q31a_2 | Q31a_3 |
|--------|--------|--------|--------|--------|
| 8751   | 1      |        |        |        |
| 8752   | 1      |        |        |        |
| 8754   | 1      |        |        |        |
| 8757   | 1      |        |        |        |
| 8760   | 1      |        |        |        |
| 8761   | 1      |        |        |        |
| 8762   | 0      |        |        |        |
| 8763   | 1      |        |        |        |
| 8764   | 1      |        |        |        |
| 8765   | 1      |        |        |        |
| 8766   | 0      |        | 3      | 3      |
| 8767   | 0      | 2      | 2      |        |
| 8768   | 0      |        |        | 1      |
| 8770   | 1      |        |        |        |
| 8771   | 1      |        |        |        |
| 8773   | 1      |        |        |        |
| 8774   | 1      |        |        |        |
| 8776   | 0      | 1      |        |        |
| 8777   | 1      |        |        |        |
| 8778   | 0      |        | 1      | 2      |
| 8779   | 1      |        |        |        |
| 8784   | 0      |        |        | 2      |
| 8786   | 1      |        |        |        |
| 8787   | 1      |        |        |        |
| 8790   | 1      |        |        |        |
| 8791   | 0      | 2      | 2      | 2      |
| 8793   | 1      |        |        |        |
| 8795   | 0      |        | 1      |        |
| 8797   | 1      |        |        |        |
| 8801   | 1      |        |        |        |
| 8802   | 1      |        |        |        |
| 8807   | 1      |        |        |        |

| respid | Q31_99 | Q31a_1 | Q31a_2 | Q31a_3 |
|--------|--------|--------|--------|--------|
| 8813   | 1      |        |        |        |
| 8817   | 1      |        |        |        |
| 8818   | 0      |        |        |        |
| 8821   | 1      |        |        |        |
| 8822   | 1      |        |        |        |
| 8823   | 1      |        |        |        |
| 8824   | 0      |        |        |        |
| 8825   | 1      |        |        |        |
| 8834   | 0      |        |        |        |
| 8840   | 0      | 1      | 2      | 1      |
| 8843   | 0      | 5      |        | 5      |
| 8846   | 1      |        |        |        |
| 8862   | 1      |        |        |        |
| 8866   | 1      |        |        |        |
| 8869   | 1      |        |        |        |
| 8872   | 0      | 1      |        |        |
| 8903   | 1      |        |        |        |
| 8909   | 1      |        |        |        |
| 8926   | 1      |        |        |        |
| 8936   | 0      |        | 1      |        |
| 8945   | 1      |        |        |        |
| 8954   | 1      |        |        |        |
| 8955   | 0      | 2      | 3      | 3      |
| 8958   | 1      |        |        |        |
| 8959   | 0      |        | 1      |        |
| 8960   | 1      |        |        |        |
| 8976   | 0      |        | 1      | 2      |
| 8977   | 0      |        |        |        |
| 8979   | 1      |        |        |        |
| 8985   | 1      |        |        |        |
| 8994   | 1      |        |        |        |
| 8997   | 1      |        |        |        |

| respid | Q31_99 | Q31a_1 | Q31a_2 | Q31a_3 |
|--------|--------|--------|--------|--------|
| 9002   | 1      |        |        |        |
| 9005   | 0      |        | 2      | 2      |
| 9017   | 1      |        |        |        |
| 9018   | 1      |        |        |        |
| 9021   | 0      |        | 1      |        |
| 9029   | 0      | 2      | 2      |        |
| 9035   | 1      |        |        |        |
| 9038   | 1      |        |        |        |
| 9039   | 1      |        |        |        |
| 9040   | 0      |        |        | 1      |
| 9042   | 1      |        |        |        |
| 9043   | 1      |        |        |        |
| 9045   | 0      |        |        |        |
| 9051   | 1      |        |        |        |
| 9067   | 1      |        |        |        |
| 9069   | 1      |        |        |        |
| 9073   | 0      |        |        |        |
| 9084   | 1      |        |        |        |
| 9096   | 1      |        |        |        |
| 9100   | 1      |        |        |        |
| 9107   | 1      |        |        |        |
| 9110   | 1      |        |        |        |
| 9120   | 1      |        |        |        |
| 9122   | 0      | 2      |        |        |
| 9130   | 0      |        | 1      |        |
| 9134   | 1      |        |        |        |
| 9137   | 1      |        |        |        |
| 9139   | 1      |        |        |        |
| 9144   | 1      |        |        |        |
| 9157   | 0      |        |        | 1      |
| 9166   | 1      |        |        |        |
| 9177   | 0      |        |        |        |

| respid | Q31_99 | Q31a_1 | Q31a_2 | Q31a_3 |
|--------|--------|--------|--------|--------|
| 9181   | 0      |        |        |        |
| 9183   | 1      |        |        |        |
| 9184   | 0      |        |        | 1      |
| 9188   | 1      |        |        |        |
| 9197   | 1      |        |        |        |
| 9200   | 0      | 1      |        | 2      |
| 9205   | 0      |        | 1      | 1      |
| 9207   | 0      |        |        | 1      |
| 9213   | 1      |        |        |        |
| 9216   | 0      | 1      |        |        |
| 9217   | 1      |        |        |        |
| 9218   | 0      |        | 1      | 1      |
| 9219   | 0      |        | 2      | 1      |
| 9220   | 1      |        |        |        |
| 9221   | 1      |        |        |        |
| 9223   | 0      | 4      | 3      | 4      |
| 9228   | 1      |        |        |        |
| 9230   | 1      |        |        |        |
| 9231   | 0      |        |        | 1      |
| 9233   | 0      |        | 1      |        |
| 9235   | 0      | 2      |        |        |
| 9237   | 1      |        |        |        |
| 9242   | 0      | 1      | 2      |        |
| 9250   | 1      |        |        |        |
| 9253   | 0      |        | 2      | 2      |
| 9257   | 1      |        |        |        |
| 9263   | 1      |        |        |        |
| 9267   | 1      |        |        |        |
| 9272   | 0      |        | 1      | 1      |
| 9279   | 1      |        |        |        |
| 9281   | 1      |        |        |        |
| 9285   | 1      |        |        |        |

| respid | Q31_99 | Q31a_1 | Q31a_2 | Q31a_3 |
|--------|--------|--------|--------|--------|
| 9286   | 1      |        |        |        |
| 9294   | 0      |        |        | 1      |
| 9295   | 1      |        |        |        |
| 9297   | 1      |        |        |        |
| 9299   | 1      |        |        |        |
| 9309   | 0      |        |        |        |
| 9315   | 1      |        |        |        |
| 9320   | 1      |        |        |        |
| 9324   | 1      |        |        |        |
| 9326   | 1      |        |        |        |
| 9333   | 1      |        |        |        |
| 9334   | 0      |        | 1      |        |
| 9336   | 0      |        |        | 1      |
| 9337   | 1      |        |        |        |
| 9342   | 1      |        |        |        |
| 9347   | 1      |        |        |        |
| 9352   | 0      |        |        |        |
| 9355   | 1      |        |        |        |
| 9356   | 1      |        |        |        |
| 9359   | 1      |        |        |        |
| 9368   | 0      |        |        | 1      |
| 9375   | 0      |        |        |        |
| 9384   | 1      |        |        |        |
| 9388   | 1      |        |        |        |
| 9397   | 0      |        |        |        |
| 9400   | 1      |        |        |        |
| 9401   | 1      |        |        |        |
| 9402   | 1      |        |        |        |
| 9417   | 0      |        |        | 1      |
| 9424   | 1      |        |        |        |
| 9427   | 1      |        |        |        |
| 9429   | 1      |        |        |        |



| respid | Q31_99 | Q31a_1 | Q31a_2 | Q31a_3 |
|--------|--------|--------|--------|--------|
| 9437   | 0      |        |        | 4      |
| 9442   | 1      |        |        |        |
| 9446   | 0      |        | 1      |        |
| 9447   | 1      |        |        |        |
| 9448   | 0      |        | 2      | 2      |
| 9449   | 1      |        |        |        |
| 9455   | 1      |        |        |        |
| 9459   | 0      |        |        |        |
| 9460   | 1      |        |        |        |
| 9461   | 0      |        |        |        |
| 9463   | 0      |        | 1      |        |
| 9464   | 0      |        |        |        |
| 9466   | 1      |        |        |        |
| 9477   | 0      |        | 1      |        |
| 9482   | 0      |        |        |        |
| 9486   | 1      |        |        |        |
| 9488   | 0      | 3      | 2      |        |
| 9489   | 1      |        |        |        |
| 9496   | 0      |        |        |        |
| 9499   | 1      |        |        |        |
| 9512   | 1      |        |        |        |
| 9514   | 0      |        |        |        |
| 9516   | 1      |        |        |        |
| 9517   | 0      | 1      | 2      |        |
| 9520   | 1      |        |        |        |
| 9527   | 1      |        |        |        |
| 9532   | 0      |        |        |        |
| 9533   | 1      |        |        |        |
| 9543   | 1      |        |        |        |
| 9550   | 1      |        |        |        |
| 9553   | 1      |        |        |        |
| 9555   | 0      |        |        |        |

| respid | Q31_99 | Q31a_1 | Q31a_2 | Q31a_3 |
|--------|--------|--------|--------|--------|
| 9565   | 0      |        |        |        |
| 9583   | 0      |        |        |        |
| 9594   | 0      | 1      | 1      |        |
| 9596   | 1      |        |        |        |
| 9600   | 1      |        |        |        |
| 9602   | 0      |        |        |        |
| 9606   | 1      |        |        |        |
| 9608   | 1      |        |        |        |
| 9610   | 0      |        |        | 1      |
| 9612   | 0      | 1      | 1      | 1      |
| 9613   | 1      |        |        |        |
| 9614   | 0      |        |        |        |
| 9620   | 1      |        |        |        |
| 9628   | 1      |        |        |        |
| 9631   | 1      |        |        |        |
| 9632   | 1      |        |        |        |
| 9633   | 0      |        |        |        |
| 9639   | 1      |        |        |        |
| 9640   | 0      | 2      | 2      | 2      |
| 9642   | 1      |        |        |        |
| 9653   | 1      |        |        |        |
| 9658   | 0      |        | 1      |        |
| 9659   | 0      | 1      |        |        |
| 9661   | 1      |        |        |        |
| 9664   | 1      |        |        |        |
| 9665   | 0      |        |        |        |
| 9666   | 0      |        | 1      |        |
| 9667   | 0      |        |        | 1      |
| 9668   | 1      |        |        |        |
| 9670   | 1      |        |        |        |
| 9671   | 0      |        | 1      | 1      |
| 9681   | 1      |        |        |        |

| respid | Q31_99 | Q31a_1 | Q31a_2 | Q31a_3 |
|--------|--------|--------|--------|--------|
| 9684   | 1      |        |        |        |
| 9685   | 1      |        |        |        |
| 9686   | 1      |        |        |        |
| 9688   | 0      |        |        |        |
| 9692   | 1      |        |        |        |
| 9693   | 0      | 4      | 4      | 4      |
| 9698   | 0      |        |        | 1      |
| 9699   | 0      | 3      | 2      | 2      |
| 9701   | 1      |        |        |        |
| 9702   | 0      |        | 1      | 1      |
| 9709   | 1      |        |        |        |
| 9713   | 1      |        |        |        |
| 9715   | 1      |        |        |        |
| 9721   | 1      |        |        |        |
| 9725   | 1      |        |        |        |
| 9729   | 0      |        |        |        |
| 9731   | 0      |        | 1      | 1      |
| 9736   | 1      |        |        |        |
| 9740   | 1      |        |        |        |
| 9741   | 1      |        |        |        |
| 9749   | 1      |        |        |        |
| 9750   | 1      |        |        |        |
| 9751   | 0      | 2      | 3      | 1      |
| 9753   | 0      |        |        | 1      |
| 9754   | 1      |        |        |        |
| 9756   | 0      |        |        |        |
| 9758   | 0      |        | 3      |        |
| 9759   | 0      |        |        |        |
| 9760   | 0      |        | 1      |        |
| 9761   | 1      |        |        |        |
| 9762   | 1      |        |        |        |
| 9764   | 1      |        |        |        |

| respid | Q31_99 | Q31a_1 | Q31a_2 | Q31a_3 |
|--------|--------|--------|--------|--------|
| 9768   | 1      |        |        |        |
| 9769   | 0      |        | 2      |        |
| 9770   | 1      |        |        |        |
| 9771   | 1      |        |        |        |
| 9772   | 1      |        |        |        |
| 9773   | 0      |        |        |        |
| 9776   | 0      |        | 1      | 1      |
| 9786   | 0      |        |        |        |
| 9790   | 1      |        |        |        |
| 9791   | 1      |        |        |        |
| 9794   | 0      |        |        |        |
| 9797   | 0      |        | 1      | 1      |
| 9799   | 0      |        | 1      |        |
| 9804   | 1      |        |        |        |
| 9805   | 0      |        |        |        |
| 9806   | 1      |        |        |        |
| 9807   | 1      |        |        |        |
| 9813   | 0      |        | 1      |        |
| 9817   | 0      |        | 1      |        |
| 9823   | 0      |        | 1      |        |
| 9826   | 0      |        |        | 1      |
| 9830   | 0      |        |        |        |
| 9835   | 0      |        |        |        |
| 9836   | 1      |        |        |        |
| 9841   | 1      |        |        |        |
| 9842   | 1      |        |        |        |
| 9844   | 1      |        |        |        |
| 9847   | 0      |        |        |        |
| 9851   | 1      |        |        |        |
| 9852   | 1      |        |        |        |
| 9854   | 0      |        | 1      |        |
| 9855   | 0      |        |        |        |

| respid | Q31_99 | Q31a_1 | Q31a_2 | Q31a_3 |
|--------|--------|--------|--------|--------|
| 9856   | 0      | 1      | 1      | 1      |
| 9862   | 1      |        |        |        |
| 9863   | 1      |        |        |        |
| 9866   | 0      |        |        |        |
| 9867   | 1      |        |        |        |
| 9868   | 0      |        | 1      |        |
| 9869   | 0      |        |        |        |
| 9878   | 1      |        |        |        |
| 9879   | 1      |        |        |        |
| 9881   | 0      |        |        |        |
| 9882   | 1      |        |        |        |
| 9884   | 1      |        |        |        |
| 9885   | 1      |        |        |        |
| 9888   | 1      |        |        |        |
| 9889   | 1      |        |        |        |
| 9894   | 0      |        |        | 1      |
| 9895   | 1      |        |        |        |
| 9896   | 0      |        | 5      | 3      |
| 9897   | 0      |        |        |        |
| 9905   | 1      |        |        |        |
| 9907   | 0      |        | 1      |        |
| 9908   | 1      |        |        |        |
| 9909   | 0      |        |        |        |
| 9910   | 0      |        |        |        |
| 9913   | 1      |        |        |        |
| 9914   | 1      |        |        |        |
| 9915   | 0      |        | 1      | 1      |
| 9916   | 1      |        |        |        |
| 9918   | 1      |        |        |        |
| 9919   | 0      |        |        |        |
| 9922   | 1      |        |        |        |
| 9930   | 1      |        |        |        |

| respid | Q31_99 | Q31a_1 | Q31a_2 | Q31a_3 |
|--------|--------|--------|--------|--------|
| 9934   | 1      |        |        |        |
| 9936   | 1      |        |        |        |
| 9938   | 1      |        |        |        |
| 9940   | 1      |        |        |        |
| 9944   | 0      | 2      | 1      | 2      |
| 9945   | 1      |        |        |        |
| 9948   | 0      |        | 3      | 2      |
| 9949   | 0      |        |        | 2      |
| 9951   | 0      |        | 1      |        |
| 9952   | 0      |        |        |        |
| 9954   | 1      |        |        |        |
| 9955   | 0      |        | 1      |        |
| 9956   | 0      |        |        | 2      |
| 9957   | 1      |        |        |        |
| 9958   | 1      |        |        |        |
| 9959   | 0      |        | 1      |        |
| 9960   | 1      |        |        |        |
| 9961   | 1      |        |        |        |
| 9962   | 1      |        |        |        |
| 9969   | 1      |        |        |        |
| 9982   | 0      |        |        |        |
| 9984   | 0      |        |        |        |
| 9990   | 1      |        |        |        |
| 9992   | 0      | 2      |        | 1      |
| 9993   | 0      |        |        |        |
| 9997   | 1      |        |        |        |
| 9999   | 1      |        |        |        |
| 10000  | 0      |        |        |        |
| 10005  | 0      |        |        | 1      |
| 10014  | 0      |        |        |        |
| 10016  | 0      |        |        | 1      |
| 10017  | 1      |        |        |        |

| respid | Q31_99 | Q31a_1 | Q31a_2 | Q31a_3 |
|--------|--------|--------|--------|--------|
| 10018  | 1      |        |        |        |
| 10021  | 1      |        |        |        |
| 10025  | 1      |        |        |        |
| 10027  | 1      |        |        |        |
| 10028  | 1      |        |        |        |
| 10031  | 0      |        |        |        |
| 10036  | 0      |        | 1      |        |
| 10037  | 1      |        |        |        |
| 10038  | 0      |        | 1      |        |
| 10039  | 1      |        |        |        |
| 10041  | 1      |        |        |        |
| 10045  | 0      |        |        |        |
| 10046  | 0      |        |        |        |
| 10047  | 0      |        |        |        |
| 10048  | 1      |        |        |        |
| 10049  | 0      |        |        |        |
| 10051  | 1      |        |        |        |
| 10052  | 0      |        |        |        |
| 10056  | 1      |        |        |        |
| 10061  | 1      |        |        |        |
| 10064  | 1      |        |        |        |
| 10066  | 1      |        |        |        |
| 10069  | 1      |        |        |        |
| 10071  | 1      |        |        |        |
| 10074  | 1      |        |        |        |
| 10079  | 1      |        |        |        |
| 10087  | 0      |        |        |        |
| 10095  | 1      |        |        |        |
| 10097  | 1      |        |        |        |
| 10100  | 1      |        |        |        |
| 10105  | 1      |        |        |        |
| 10107  | 0      |        |        |        |

| respid | Q31_99 | Q31a_1 | Q31a_2 | Q31a_3 |
|--------|--------|--------|--------|--------|
| 10111  | 0      |        | 1      |        |
| 10116  | 0      |        |        |        |
| 10118  | 1      |        |        |        |
| 10123  | 1      |        |        |        |
| 10124  | 0      |        | 1      |        |
| 10130  | 0      |        |        |        |
| 10134  | 1      |        |        |        |
| 10135  | 1      |        |        |        |
| 10136  | 1      |        |        |        |
| 10141  | 0      |        |        |        |
| 10142  | 0      |        | 2      |        |
| 10143  | 1      |        |        |        |
| 10145  | 1      |        |        |        |
| 10149  | 0      |        |        |        |
| 10150  | 1      |        |        |        |
| 10151  | 1      |        |        |        |
| 10152  | 0      |        |        |        |
| 10153  | 1      |        |        |        |
| 10156  | 1      |        |        |        |
| 10160  | 1      |        |        |        |
| 10161  | 1      |        |        |        |
| 10167  | 0      | 2      | 2      | 3      |
| 10171  | 1      |        |        |        |
| 10172  | 1      |        |        |        |
| 10176  | 1      |        |        |        |
| 10177  | 0      |        |        |        |
| 10182  | 0      |        |        |        |
| 10184  | 1      |        |        |        |
| 10186  | 0      |        | 1      |        |
| 10189  | 1      |        |        |        |
| 10191  | 1      |        |        |        |
| 10192  | 1      |        |        |        |



| respid | Q31_99 | Q31a_1 | Q31a_2 | Q31a_3 |
|--------|--------|--------|--------|--------|
| 10195  | 1      |        |        |        |
| 10199  | 1      |        |        |        |
| 10201  | 1      |        |        |        |
| 10213  | 1      |        |        |        |
| 10222  | 0      |        | 2      |        |
| 10224  | 1      |        |        |        |
| 10245  | 1      |        |        |        |
| 10254  | 1      |        |        |        |
| 10255  | 0      |        | 2      | 2      |
| 10257  | 1      |        |        |        |
| 10260  | 0      |        |        |        |
| 10261  | 1      |        |        |        |
| 10263  | 0      |        |        |        |
| 10264  | 1      |        |        |        |
| 10268  | 0      |        |        | 1      |
| 10269  | 1      |        |        |        |
| 10270  | 1      |        |        |        |
| 10282  | 1      |        |        |        |
| 10285  | 1      |        |        |        |
| 10288  | 1      |        |        |        |
| 10291  | 1      |        |        |        |
| 10292  | 1      |        |        |        |
| 10304  | 1      |        |        |        |
| 10305  | 0      |        | 1      |        |
| 10310  | 1      |        |        |        |
| 10324  | 1      |        |        |        |
| 10325  | 0      |        | 1      |        |
| 10326  | 0      |        |        |        |
| 10329  | 1      |        |        |        |
| 10332  | 1      |        |        |        |
| 10337  | 1      |        |        |        |
| 10341  | 0      |        |        | 1      |

| respid | Q31_99 | Q31a_1 | Q31a_2 | Q31a_3 |
|--------|--------|--------|--------|--------|
| 10353  | 0      |        |        |        |
| 10354  | 1      |        |        |        |
| 10359  | 0      |        | 1      | 1      |
| 10360  | 1      |        |        |        |
| 10362  | 1      |        |        |        |
| 10364  | 1      |        |        |        |
| 10366  | 0      |        |        |        |
| 10367  | 1      |        |        |        |
| 10371  | 1      |        |        |        |
| 10374  | 0      |        | 1      |        |
| 10375  | 0      |        | 1      | 1      |
| 10376  | 1      |        |        |        |
| 10377  | 1      |        |        |        |
| 10378  | 1      |        |        |        |
| 10387  | 1      |        |        |        |
| 10396  | 1      |        |        |        |
| 10397  | 1      |        |        |        |
| 10399  | 0      |        |        |        |
| 10405  | 1      |        |        |        |
| 10406  | 1      |        |        |        |
| 10408  | 1      |        |        |        |
| 10409  | 1      |        |        |        |
| 10412  | 1      |        |        |        |
| 10413  | 1      |        |        |        |
| 10419  | 1      |        |        |        |
| 10423  | 0      | 3      |        |        |
| 10426  | 1      |        |        |        |
| 10446  | 1      |        |        |        |
| 10448  | 1      |        |        |        |
| 10450  | 1      |        |        |        |
| 10455  | 1      |        |        |        |
| 10460  | 1      |        |        |        |

| respid | Q31_99 | Q31a_1 | Q31a_2 | Q31a_3 |
|--------|--------|--------|--------|--------|
| 10461  | 1      |        |        |        |
| 10471  | 1      |        |        |        |
| 10472  | 1      |        |        |        |
| 10491  | 0      | 2      | 2      | 3      |
| 10493  | 1      |        |        |        |
| 10498  | 0      |        | 1      | 1      |
| 10533  | 0      |        | 1      |        |
| 10539  | 1      |        |        |        |
| 10540  | 1      |        |        |        |
| 10557  | 0      |        |        |        |
| 10558  | 0      | 2      | 1      | 2      |
| 10559  | 0      |        |        |        |
| 10564  | 0      |        |        |        |
| 10570  | 1      |        |        |        |
| 10572  | 1      |        |        |        |
| 10576  | 1      |        |        |        |
| 10582  | 0      | 3      |        |        |
| 10593  | 1      |        |        |        |
| 10596  | 1      |        |        |        |
| 10615  | 1      |        |        |        |
| 10616  | 1      |        |        |        |
| 10623  | 1      |        |        |        |
| 10626  | 1      |        |        |        |
| 10627  | 0      | 1      | 1      | 1      |
| 10629  | 0      |        |        | 1      |
| 10632  | 0      | 3      | 3      | 3      |
| 10641  | 1      |        |        |        |
| 10648  | 0      |        |        |        |
| 10651  | 0      | 1      |        |        |
| 10654  | 1      |        |        |        |
| 10673  | 1      |        |        |        |
| 10675  | 1      |        |        |        |

| respid | Q31_99 | Q31a_1 | Q31a_2 | Q31a_3 |
|--------|--------|--------|--------|--------|
| 10689  | 0      |        |        |        |
| 10692  | 0      |        | 2      | 2      |
| 10694  | 1      |        |        |        |
| 10695  | 1      |        |        |        |
| 10702  | 1      |        |        |        |
| 10703  | 0      |        |        | 1      |
| 10708  | 1      |        |        |        |
| 10719  | 1      |        |        |        |
| 10722  | 1      |        |        |        |
| 10723  | 0      |        | 2      |        |
| 10726  | 1      |        |        |        |
| 10727  | 1      |        |        |        |
| 10730  | 0      |        |        |        |
| 10731  | 1      |        |        |        |
| 10737  | 1      |        |        |        |
| 10743  | 1      |        |        |        |
| 10763  | 1      |        |        |        |
| 10777  | 1      |        |        |        |
| 10787  | 0      |        |        |        |
| 10798  | 0      |        | 3      |        |
| 10800  | 1      |        |        |        |
| 10802  | 0      | 1      | 1      | 1      |
| 10803  | 0      |        |        | 2      |
| 10808  | 0      |        |        |        |
| 10810  | 1      |        |        |        |
| 10819  | 1      |        |        |        |
| 10825  | 1      |        |        |        |
| 10827  | 0      |        |        | 1      |
| 10830  | 0      | 1      | 2      | 2      |
| 10847  | 1      |        |        |        |
| 10849  | 1      |        |        |        |
| 10852  | 1      |        |        |        |

| respid | Q31_99 | Q31a_1 | Q31a_2 | Q31a_3 |
|--------|--------|--------|--------|--------|
| 10854  | 0      |        | 3      | 3      |
| 10857  | 0      |        |        | 1      |
| 10861  | 0      |        | 2      | 1      |
| 10862  | 1      |        |        |        |
| 10870  | 0      |        |        |        |
| 10873  | 1      |        |        |        |
| 10881  | 0      |        | 2      | 2      |
| 10893  | 1      |        |        |        |
| 10898  | 1      |        |        |        |
| 10899  | 0      | 1      |        |        |
| 10905  | 1      |        |        |        |
| 10910  | 1      |        |        |        |
| 10911  | 0      |        |        |        |
| 10912  | 1      |        |        |        |
| 10913  | 1      |        |        |        |
| 10918  | 1      |        |        |        |
| 10995  | 1      |        |        |        |
| 11002  | 1      |        |        |        |
| 11003  | 1      |        |        |        |
| 11005  | 0      |        | 1      |        |
| 11015  | 0      |        |        |        |
| 11016  | 1      |        |        |        |
| 11017  | 1      |        |        |        |
| 11020  | 0      |        |        |        |
| 11024  | 0      |        |        |        |
| 11026  | 0      | 2      | 1      | 1      |
| 11028  | 1      |        |        |        |
| 11029  | 0      |        |        | 2      |
| 11030  | 0      |        | 1      |        |
| 11031  | 1      |        |        |        |
| 11038  | 0      |        |        | 1      |
| 11051  | 0      |        |        |        |

| respid | Q31_99 | Q31a_1 | Q31a_2 | Q31a_3 |
|--------|--------|--------|--------|--------|
| 11052  | 0      |        |        |        |
| 11053  | 0      |        | 1      | 1      |
| 11054  | 0      |        |        |        |
| 11063  | 1      |        |        |        |
| 11075  | 0      | 2      | 2      |        |
| 11083  | 0      |        |        |        |
| 11092  | 1      |        |        |        |
| 11118  | 0      | 1      |        |        |
| 11119  | 0      |        |        | 1      |
| 11134  | 1      |        |        |        |
| 11139  | 0      | 1      |        |        |
| 11154  | 1      |        |        |        |
| 11166  | 1      |        |        |        |
| 11168  | 1      |        |        |        |
| 11176  | 1      |        |        |        |
| 11183  | 0      |        |        |        |
| 11189  | 1      |        |        |        |
| 11196  | 0      | 2      |        | 2      |
| 11200  | 0      |        |        |        |
| 11201  | 1      |        |        |        |
| 11211  | 0      | 3      |        | 3      |
| 11218  | 1      |        |        |        |
| 11219  | 1      |        |        |        |
| 11221  | 0      |        | 2      |        |
| 11222  | 1      |        |        |        |
| 11230  | 0      | 3      |        | 3      |
| 11236  | 0      | 3      |        | 3      |
| 11237  | 1      |        |        |        |
| 11240  | 0      |        |        |        |
| 11244  | 0      | 3      |        | 3      |
| 11249  | 0      |        |        |        |
| 11252  | 0      | 3      |        | 3      |

| respid | Q31_99 | Q31a_1 | Q31a_2 | Q31a_3 |
|--------|--------|--------|--------|--------|
| 11254  | 0      |        |        |        |
| 11255  | 0      |        | 2      | 2      |
| 11258  | 0      | 3      | 3      |        |
| 11260  | 1      |        |        |        |
| 11264  | 0      |        | 2      | 3      |
| 11266  | 0      |        | 1      |        |
| 11268  | 0      |        |        |        |
| 11269  | 0      |        |        |        |
| 11272  | 0      |        | 2      |        |
| 11273  | 0      |        |        | 1      |
| 11275  | 0      |        | 1      | 1      |
| 11276  | 0      |        | 3      | 3      |
| 11278  | 0      | 2      | 1      |        |
| 11288  | 1      |        |        |        |
| 11289  | 1      |        |        |        |
| 11291  | 1      |        |        |        |
| 11295  | 1      |        |        |        |
| 11297  | 1      |        |        |        |
| 11304  | 0      |        |        |        |
| 11305  | 1      |        |        |        |
| 11311  | 1      |        |        |        |
| 11313  | 0      |        |        | 1      |
| 11315  | 0      |        | 2      | 2      |
| 11316  | 0      |        | 2      | 2      |
| 11318  | 0      | 1      | 2      |        |
| 11323  | 1      |        |        |        |
| 11331  | 1      |        |        |        |
| 11333  | 1      |        |        |        |
| 11334  | 0      |        |        | 3      |
| 11340  | 0      |        |        |        |
| 11345  | 1      |        |        |        |
| 11354  | 1      |        |        |        |

| respid | Q31_99 | Q31a_1 | Q31a_2 | Q31a_3 |
|--------|--------|--------|--------|--------|
| 11360  | 1      |        |        |        |
| 11361  | 0      | 2      |        |        |
| 11367  | 1      |        |        |        |
| 11370  | 1      |        |        |        |
| 11371  | 0      |        |        | 3      |
| 11372  | 0      |        |        |        |
| 11373  | 0      |        |        |        |
| 11382  | 1      |        |        |        |
| 11394  | 1      |        |        |        |
| 11395  | 0      |        | 1      |        |
| 11397  | 1      |        |        |        |
| 11402  | 0      |        |        |        |
| 11409  | 1      |        |        |        |
| 11410  | 1      |        |        |        |
| 11411  | 1      |        |        |        |
| 11418  | 0      |        |        |        |
| 11425  | 0      |        |        |        |
| 11429  | 1      |        |        |        |
| 11430  | 0      |        |        |        |
| 11431  | 0      |        |        |        |
| 11432  | 1      |        |        |        |
| 11433  | 1      |        |        |        |
| 11435  | 0      |        |        |        |
| 11436  | 0      | 2      | 2      |        |
| 11437  | 0      | 2      |        |        |
| 11439  | 1      |        |        |        |
| 11440  | 0      |        | 1      |        |
| 11447  | 1      |        |        |        |
| 11455  | 1      |        |        |        |
| 11456  | 0      |        |        |        |
| 11461  | 0      |        |        |        |
| 11463  | 0      |        | 1      | 1      |



| respid | Q31_99 | Q31a_1 | Q31a_2 | Q31a_3 |
|--------|--------|--------|--------|--------|
| 11470  | 0      |        |        |        |
| 11472  | 1      |        |        |        |
| 11475  | 1      |        |        |        |
| 11476  | 1      |        |        |        |
| 11482  | 0      |        |        |        |
| 11501  | 0      |        | 1      |        |
| 11503  | 1      |        |        |        |
| 11505  | 1      |        |        |        |
| 11510  | 0      |        | 1      | 1      |
| 11519  | 1      |        |        |        |
| 11527  | 0      | 2      | 1      |        |
| 11529  | 0      | 3      | 3      | 2      |
| 11530  | 0      |        | 3      |        |
| 11536  | 1      |        |        |        |
| 11543  | 0      |        |        | 1      |
| 11548  | 0      | 1      |        |        |
| 11566  | 1      |        |        |        |
| 11570  | 0      |        | 3      | 2      |
| 11571  | 0      |        |        |        |
| 11578  | 1      |        |        |        |
| 11579  | 1      |        |        |        |
| 11581  | 0      | 3      | 2      | 2      |
| 11582  | 1      |        |        |        |
| 11583  | 1      |        |        |        |
| 11589  | 0      | 2      |        | 1      |
| 11590  | 1      |        |        |        |
| 11592  | 1      |        |        |        |
| 11596  | 1      |        |        |        |
| 11598  | 0      |        |        |        |
| 11602  | 0      |        | 1      |        |
| 11605  | 0      |        |        |        |
| 11618  | 0      |        |        |        |

| respid | Q31_99 | Q31a_1 | Q31a_2 | Q31a_3 |
|--------|--------|--------|--------|--------|
| 11621  | 0      |        |        |        |
| 11630  | 0      |        |        |        |
| 11636  | 1      |        |        |        |
| 11640  | 0      | 2      | 2      |        |
| 11658  | 1      |        |        |        |
| 11665  | 1      |        |        |        |
| 11666  | 0      |        | 2      |        |
| 11667  | 0      |        |        |        |
| 11674  | 1      |        |        |        |
| 11680  | 1      |        |        |        |
| 11683  | 0      |        |        |        |
| 11688  | 0      |        | 2      |        |
| 11690  | 1      |        |        |        |
| 11694  | 1      |        |        |        |
| 11705  | 0      |        | 1      |        |
| 11720  | 0      |        |        |        |
| 11724  | 1      |        |        |        |
| 11738  | 0      | 2      | 2      |        |
| 11744  | 0      |        | 1      |        |
| 11745  | 1      |        |        |        |
| 11747  | 1      |        |        |        |
| 11755  | 1      |        |        |        |
| 11756  | 0      |        |        | 1      |
| 11772  | 0      |        |        | 1      |
| 11773  | 1      |        |        |        |
| 11778  | 0      |        | 3      | 2      |
| 11790  | 1      |        |        |        |
| 11794  | 1      |        |        |        |
| 11795  | 0      |        |        |        |
| 11799  | 0      |        |        |        |
| 11803  | 0      |        | 1      | 1      |
| 11806  | 0      | 4      | 5      | 4      |

| respid | Q31_99 | Q31a_1 | Q31a_2 | Q31a_3 |
|--------|--------|--------|--------|--------|
| 11808  | 1      |        |        |        |
| 11810  | 1      |        |        |        |
| 11811  | 1      |        |        |        |
| 11812  | 0      |        |        |        |
| 11813  | 0      |        | 2      |        |
| 11821  | 0      |        | 1      | 1      |
| 11827  | 1      |        |        |        |
| 11831  | 0      |        | 2      |        |
| 11841  | 1      |        |        |        |
| 11872  | 0      |        | 1      |        |
| 11898  | 1      |        |        |        |
| 11902  | 0      |        |        |        |
| 11912  | 1      |        |        |        |
| 11926  | 1      |        |        |        |
| 11928  | 0      |        | 2      | 2      |
| 11932  | 0      |        | 1      |        |
| 11934  | 1      |        |        |        |
| 11941  | 0      |        |        | 1      |
| 11942  | 1      |        |        |        |
| 11943  | 1      |        |        |        |
| 11944  | 1      |        |        |        |
| 11955  | 1      |        |        |        |
| 11958  | 0      |        |        |        |
| 11968  | 0      |        |        |        |
| 11979  | 0      |        | 2      |        |
| 11988  | 1      |        |        |        |
| 11999  | 0      |        |        |        |
| 12002  | 0      |        |        |        |
| 12004  | 1      |        |        |        |
| 12008  | 1      |        |        |        |
| 12013  | 1      |        |        |        |
| 12018  | 1      |        |        |        |

| respid | Q31_99 | Q31a_1 | Q31a_2 | Q31a_3 |
|--------|--------|--------|--------|--------|
| 12023  | 1      |        |        |        |
| 12027  | 0      | 3      | 2      | 3      |
| 12030  | 1      |        |        |        |
| 12031  | 0      | 1      |        | 2      |
| 12036  | 0      |        |        |        |
| 12037  | 0      |        |        |        |
| 12038  | 1      |        |        |        |
| 12039  | 1      |        |        |        |
| 12045  | 0      |        | 1      |        |
| 12046  | 0      | 2      |        |        |
| 12054  | 0      | 2      | 2      | 2      |
| 12055  | 0      | 2      | 3      | 2      |
| 12069  | 0      | 2      | 2      | 2      |
| 12070  | 0      |        | 2      | 2      |
| 12074  | 1      |        |        |        |
| 12075  | 0      |        | 2      |        |
| 12078  | 0      | 1      | 2      |        |
| 12089  | 0      | 1      | 1      |        |
| 12091  | 0      |        |        |        |
| 12092  | 0      |        | 2      | 2      |
| 12108  | 0      |        |        | 3      |
| 12111  | 0      |        | 1      |        |
| 12112  | 0      |        | 3      |        |
| 12126  | 1      |        |        |        |
| 12132  | 0      |        |        |        |
| 12150  | 0      |        |        |        |
| 12152  | 0      |        | 1      | 1      |
| 12154  | 1      |        |        |        |
| 12157  | 1      |        |        |        |
| 12165  | 1      |        |        |        |
| 12169  | 0      | 1      | 2      | 2      |
| 12182  | 0      |        | 4      | 4      |

| respid | Q31_99 | Q31a_1 | Q31a_2 | Q31a_3 |
|--------|--------|--------|--------|--------|
| 12198  | 0      |        | 1      |        |
| 12199  | 1      |        |        |        |
| 12202  | 1      |        |        |        |
| 12207  | 0      |        |        |        |
| 12208  | 0      |        |        |        |
| 12210  | 1      |        |        |        |
| 12219  | 0      |        |        | 4      |
| 12224  | 1      |        |        |        |
| 12230  | 0      |        | 1      |        |
| 12238  | 0      |        |        | 1      |
| 12239  | 1      |        |        |        |
| 12243  | 0      |        | 1      |        |
| 12245  | 1      |        |        |        |
| 12246  | 0      |        | 3      | 4      |
| 12247  | 1      |        |        |        |
| 12248  | 1      |        |        |        |
| 12249  | 0      |        | 2      |        |
| 12258  | 0      |        |        | 3      |
| 12265  | 1      |        |        |        |
| 12269  | 0      |        |        |        |
| 12270  | 1      |        |        |        |
| 12279  | 1      |        |        |        |
| 12280  | 0      |        |        |        |
| 12282  | 0      |        | 2      | 2      |
| 12283  | 0      |        |        | 1      |
| 12287  | 1      |        |        |        |
| 12288  | 0      | 1      | 1      |        |
| 12290  | 1      |        |        |        |
| 12292  | 0      | 1      | 2      |        |
| 12294  | 1      |        |        |        |
| 12296  | 1      |        |        |        |
| 12307  | 1      |        |        |        |

| respid | Q31_99 | Q31a_1 | Q31a_2 | Q31a_3 |
|--------|--------|--------|--------|--------|
| 12309  | 1      |        |        |        |
| 12312  | 0      |        |        |        |
| 12317  | 1      |        |        |        |
| 12319  | 0      |        |        |        |
| 12320  | 1      |        |        |        |
| 12322  | 0      |        |        |        |
| 12328  | 0      |        | 2      |        |
| 12331  | 0      | 4      | 5      |        |
| 12332  | 1      |        |        |        |
| 12334  | 0      |        | 2      | 1      |
| 12337  | 0      |        |        |        |
| 12338  | 1      |        |        |        |
| 12342  | 1      |        |        |        |
| 12349  | 1      |        |        |        |
| 12352  | 0      |        |        |        |
| 12355  | 1      |        |        |        |
| 12357  | 0      |        |        |        |
| 12358  | 1      |        |        |        |
| 12371  | 0      |        |        |        |
| 12372  | 1      |        |        |        |
| 12373  | 1      |        |        |        |
| 12379  | 1      |        |        |        |
| 12381  | 0      | 3      | 3      | 3      |
| 12383  | 0      |        |        |        |
| 12384  | 0      | 1      |        |        |
| 12386  | 1      |        |        |        |
| 12389  | 1      |        |        |        |
| 12392  | 1      |        |        |        |
| 12396  | 0      |        |        |        |
| 12397  | 1      |        |        |        |
| 12399  | 1      |        |        |        |
| 12400  | 0      |        |        |        |

| respid | Q31_99 | Q31a_1 | Q31a_2 | Q31a_3 |
|--------|--------|--------|--------|--------|
| 12406  | 0      |        | 2      |        |
| 12407  | 1      |        |        |        |
| 12410  | 1      |        |        |        |
| 12413  | 0      |        |        |        |
| 12416  | 0      |        | 1      |        |
| 12419  | 0      |        |        |        |
| 12422  | 0      | 1      | 1      |        |
| 12423  | 0      |        |        | 1      |
| 12429  | 1      |        |        |        |
| 12434  | 0      |        |        | 3      |
| 12435  | 1      |        |        |        |
| 12436  | 1      |        |        |        |
| 12442  | 1      |        |        |        |
| 12449  | 1      |        |        |        |
| 12451  | 1      |        |        |        |
| 12456  | 0      |        |        |        |
| 12457  | 1      |        |        |        |
| 12458  | 1      |        |        |        |
| 12461  | 0      |        |        | 2      |
| 12462  | 1      |        |        |        |
| 12463  | 0      |        | 3      | 3      |
| 12466  | 1      |        |        |        |
| 12470  | 0      |        |        |        |
| 12471  | 1      |        |        |        |
| 12472  | 1      |        |        |        |
| 12478  | 0      |        |        |        |
| 12479  | 0      | 2      | 2      | 2      |
| 12481  | 1      |        |        |        |
| 12482  | 0      | 2      |        |        |
| 12483  | 1      |        |        |        |
| 12496  | 1      |        |        |        |
| 12497  | 1      |        |        |        |

| respid | Q31_99 | Q31a_1 | Q31a_2 | Q31a_3 |
|--------|--------|--------|--------|--------|
| 12498  | 0      |        | 2      | 2      |
| 12500  | 1      |        |        |        |
| 12501  | 1      |        |        |        |
| 12502  | 0      |        |        | 2      |
| 12503  | 0      |        | 1      |        |
| 12505  | 1      |        |        |        |
| 12508  | 0      | 2      | 2      | 3      |
| 12509  | 0      |        |        |        |
| 12510  | 1      |        |        |        |
| 12512  | 1      |        |        |        |
| 12514  | 0      |        | 2      | 2      |
| 12515  | 0      |        |        |        |
| 12520  | 1      |        |        |        |
| 12522  | 1      |        |        |        |
| 12526  | 0      |        |        |        |
| 12527  | 1      |        |        |        |
| 12528  | 1      |        |        |        |
| 12530  | 0      |        | 3      | 3      |
| 12535  | 0      |        |        | 1      |
| 12539  | 1      |        |        |        |
| 12541  | 0      |        |        | 2      |
| 12542  | 0      |        |        | 1      |
| 12545  | 1      |        |        |        |
| 12547  | 1      |        |        |        |
| 12549  | 1      |        |        |        |
| 12550  | 0      |        | 1      |        |
| 12555  | 1      |        |        |        |
| 12557  | 0      |        | 1      |        |
| 12559  | 1      |        |        |        |
| 12561  | 1      |        |        |        |
| 12562  | 0      |        |        |        |
| 12563  | 0      |        |        | 1      |



| respid | Q31_99 | Q31a_1 | Q31a_2 | Q31a_3 |
|--------|--------|--------|--------|--------|
| 12565  | 0      | 2      | 2      | 2      |
| 12566  | 1      |        |        |        |
| 12570  | 1      |        |        |        |
| 12571  | 1      |        |        |        |
| 12572  | 0      |        | 1      |        |
| 12578  | 1      |        |        |        |
| 12579  | 0      |        |        |        |
| 12581  | 1      |        |        |        |
| 12582  | 1      |        |        |        |
| 12585  | 1      |        |        |        |
| 12586  | 0      | 4      | 4      | 4      |
| 12588  | 0      |        | 2      | 2      |
| 12589  | 0      |        | 2      | 1      |
| 12590  | 1      |        |        |        |
| 12591  | 0      |        |        |        |
| 12593  | 0      |        | 3      |        |
| 12594  | 0      |        |        |        |
| 12599  | 1      |        |        |        |
| 12600  | 0      |        | 1      |        |
| 12602  | 0      |        | 2      |        |
| 12606  | 0      |        |        |        |
| 12607  | 1      |        |        |        |
| 12608  | 1      |        |        |        |
| 12610  | 0      |        |        | 1      |
| 12611  | 1      |        |        |        |
| 12613  | 0      |        | 3      | 3      |
| 12616  | 1      |        |        |        |
| 12617  | 1      |        |        |        |
| 12619  | 1      |        |        |        |
| 12622  | 1      |        |        |        |
| 12628  | 1      |        |        |        |
| 12631  | 0      |        | 2      |        |

| respid | Q31_99 | Q31a_1 | Q31a_2 | Q31a_3 |
|--------|--------|--------|--------|--------|
| 12635  | 1      |        |        |        |
| 12638  | 1      |        |        |        |
| 12639  | 1      |        |        |        |
| 12640  | 1      |        |        |        |
| 12643  | 1      |        |        |        |
| 12646  | 0      |        |        |        |
| 12648  | 0      |        |        | 3      |
| 12650  | 1      |        |        |        |
| 12651  | 0      | 1      |        |        |
| 12658  | 0      | 2      | 2      | 2      |
| 12662  | 0      |        | 1      |        |
| 12663  | 1      |        |        |        |
| 12664  | 0      |        |        |        |
| 12669  | 0      | 3      | 3      | 3      |
| 12670  | 1      |        |        |        |
| 12673  | 1      |        |        |        |
| 12675  | 1      |        |        |        |
| 12677  | 1      |        |        |        |
| 12679  | 1      |        |        |        |
| 12682  | 0      |        |        |        |
| 12696  | 0      |        |        | 1      |
| 12697  | 1      |        |        |        |
| 12699  | 1      |        |        |        |
| 12700  | 0      | 2      | 2      | 1      |
| 12701  | 1      |        |        |        |
| 12702  | 1      |        |        |        |
| 12704  | 0      |        | 3      | 3      |
| 12705  | 1      |        |        |        |
| 12709  | 1      |        |        |        |
| 12710  | 1      |        |        |        |
| 12713  | 0      | 1      | 1      | 1      |
| 12716  | 0      |        |        |        |

| respid | Q31_99 | Q31a_1 | Q31a_2 | Q31a_3 |
|--------|--------|--------|--------|--------|
| 12719  | 0      |        |        |        |
| 12720  | 1      |        |        |        |
| 12723  | 1      |        |        |        |
| 12726  | 1      |        |        |        |
| 12728  | 1      |        |        |        |
| 12729  | 1      |        |        |        |
| 12731  | 1      |        |        |        |
| 12732  | 0      |        |        |        |
| 12733  | 0      |        |        |        |
| 12736  | 1      |        |        |        |
| 12737  | 1      |        |        |        |
| 12739  | 1      |        |        |        |
| 12742  | 1      |        |        |        |
| 12743  | 0      | 2      | 3      | 2      |
| 12744  | 0      |        | 2      |        |
| 12747  | 1      |        |        |        |
| 12751  | 1      |        |        |        |
| 12754  | 1      |        |        |        |
| 12756  | 1      |        |        |        |
| 12757  | 1      |        |        |        |
| 12760  | 1      |        |        |        |
| 12761  | 1      |        |        |        |
| 12762  | 0      |        |        |        |
| 12766  | 1      |        |        |        |
| 12769  | 0      |        |        |        |
| 12770  | 1      |        |        |        |
| 12773  | 1      |        |        |        |
| 12780  | 1      |        |        |        |
| 12789  | 1      |        |        |        |
| 12792  | 0      | 2      | 2      | 2      |
| 12795  | 0      | 1      |        |        |
| 12804  | 0      |        |        |        |

| respid | Q31_99 | Q31a_1 | Q31a_2 | Q31a_3 |
|--------|--------|--------|--------|--------|
| 12811  | 0      |        |        |        |
| 12813  | 0      |        | 3      | 3      |
| 12814  | 1      |        |        |        |
| 12815  | 1      |        |        |        |
| 12816  | 1      |        |        |        |
| 12817  | 0      |        |        |        |
| 12818  | 0      |        | 1      |        |
| 12819  | 1      |        |        |        |
| 12820  | 0      |        | 1      | 1      |
| 12821  | 1      |        |        |        |
| 12824  | 0      | 2      | 2      | 2      |
| 12827  | 1      |        |        |        |
| 12836  | 0      |        | 3      |        |
| 12837  | 1      |        |        |        |
| 12838  | 0      |        | 1      | 1      |
| 12845  | 0      | 1      | 1      |        |
| 12847  | 0      |        |        |        |
| 12849  | 0      |        |        |        |
| 12850  | 1      |        |        |        |
| 12852  | 1      |        |        |        |
| 12853  | 0      |        | 3      |        |
| 12854  | 1      |        |        |        |
| 12860  | 1      |        |        |        |
| 12861  | 1      |        |        |        |
| 12863  | 0      |        |        | 1      |
| 12865  | 1      |        |        |        |
| 12870  | 0      | 2      | 1      | 1      |
| 12871  | 1      |        |        |        |
| 12873  | 1      |        |        |        |
| 12877  | 1      |        |        |        |
| 12880  | 0      |        | 1      |        |
| 12881  | 0      |        | 1      |        |

| respid | Q31_99 | Q31a_1 | Q31a_2 | Q31a_3 |
|--------|--------|--------|--------|--------|
| 12882  | 1      |        |        |        |
| 12883  | 0      | 1      | 1      |        |
| 12885  | 0      |        |        |        |
| 12887  | 0      |        | 2      |        |
| 12889  | 0      |        |        |        |
| 12890  | 1      |        |        |        |
| 12891  | 0      |        |        | 1      |
| 12892  | 1      |        |        |        |
| 12893  | 1      |        |        |        |
| 12895  | 0      |        |        | 1      |
| 12898  | 1      |        |        |        |
| 12907  | 0      |        |        | 2      |
| 12908  | 1      |        |        |        |
| 12909  | 1      |        |        |        |
| 12914  | 1      |        |        |        |
| 12915  | 0      | 1      | 1      | 1      |
| 12916  | 1      |        |        |        |
| 12921  | 1      |        |        |        |
| 12922  | 0      |        | 2      | 2      |
| 12923  | 1      |        |        |        |
| 12926  | 0      |        |        |        |
| 12927  | 0      |        | 1      | 1      |
| 12932  | 1      |        |        |        |
| 12936  | 1      |        |        |        |
| 12937  | 1      |        |        |        |
| 12938  | 0      | 3      | 3      | 3      |
| 12939  | 1      |        |        |        |
| 12940  | 0      |        |        |        |
| 12945  | 0      |        | 2      | 1      |
| 12946  | 0      |        |        |        |
| 12947  | 0      |        |        |        |
| 12948  | 0      |        |        |        |

| respid | Q31_99 | Q31a_1 | Q31a_2 | Q31a_3 |
|--------|--------|--------|--------|--------|
| 12951  | 0      |        | 2      |        |
| 12952  | 0      |        | 2      | 2      |
| 12954  | 0      | 3      | 2      |        |
| 12960  | 1      |        |        |        |
| 12961  | 0      | 1      |        | 1      |
| 12962  | 1      |        |        |        |
| 12963  | 1      |        |        |        |
| 12964  | 0      |        |        | 1      |
| 12966  | 1      |        |        |        |
| 12967  | 0      |        |        |        |
| 12969  | 1      |        |        |        |
| 12970  | 1      |        |        |        |
| 12974  | 0      |        |        |        |
| 12979  | 1      |        |        |        |
| 12980  | 1      |        |        |        |
| 12983  | 1      |        |        |        |
| 12988  | 0      |        | 1      | 1      |
| 12994  | 0      | 1      | 1      | 1      |
| 12995  | 1      |        |        |        |
| 12996  | 1      |        |        |        |
| 12998  | 0      |        | 3      |        |
| 12999  | 1      |        |        |        |
| 13001  | 0      |        |        | 1      |
| 13005  | 1      |        |        |        |
| 13006  | 0      |        |        |        |
| 13007  | 1      |        |        |        |
| 13011  | 0      |        | 2      |        |
| 13012  | 1      |        |        |        |
| 13013  | 0      | 3      |        | 3      |
| 13016  | 1      |        |        |        |
| 13018  | 1      |        |        |        |
| 13020  | 1      |        |        |        |

| respid | Q31_99 | Q31a_1 | Q31a_2 | Q31a_3 |
|--------|--------|--------|--------|--------|
| 13024  | 1      |        |        |        |
| 13025  | 0      | 1      | 1      | 1      |
| 13027  | 0      | 1      | 1      |        |
| 13031  | 0      |        |        |        |
| 13032  | 0      |        |        |        |
| 13034  | 1      |        |        |        |
| 13036  | 0      |        | 1      | 2      |
| 13037  | 1      |        |        |        |
| 13038  | 0      |        |        | 3      |
| 13039  | 0      | 1      |        |        |
| 13040  | 0      |        | 1      | 1      |
| 13041  | 0      |        |        |        |
| 13045  | 0      |        |        |        |
| 13046  | 1      |        |        |        |
| 13048  | 1      |        |        |        |
| 13051  | 1      |        |        |        |
| 13053  | 1      |        |        |        |
| 13055  | 0      |        |        | 2      |
| 13059  | 0      |        | 1      |        |
| 13068  | 1      |        |        |        |
| 13069  | 1      |        |        |        |
| 13076  | 0      |        | 1      | 1      |
| 13081  | 1      |        |        |        |
| 13082  | 1      |        |        |        |
| 13084  | 0      |        | 2      |        |
| 13085  | 0      |        |        |        |
| 13086  | 0      | 1      |        |        |
| 13093  | 0      |        |        |        |
| 13094  | 0      |        |        | 3      |
| 13097  | 0      |        | 1      |        |
| 13098  | 1      |        |        |        |
| 13099  | 1      |        |        |        |

| respid | Q31_99 | Q31a_1 | Q31a_2 | Q31a_3 |
|--------|--------|--------|--------|--------|
| 13100  | 1      |        |        |        |
| 13101  | 1      |        |        |        |
| 13103  | 1      |        |        |        |
| 13105  | 0      |        |        | 1      |
| 13106  | 0      |        |        |        |
| 13107  | 0      |        | 1      |        |
| 13110  | 0      |        |        |        |
| 13118  | 1      |        |        |        |
| 13120  | 0      | 2      | 3      | 3      |
| 13130  | 1      |        |        |        |
| 13133  | 1      |        |        |        |
| 13134  | 1      |        |        |        |
| 13139  | 0      |        | 1      | 1      |
| 13142  | 1      |        |        |        |
| 13143  | 1      |        |        |        |
| 13145  | 1      |        |        |        |
| 13148  | 1      |        |        |        |
| 13149  | 1      |        |        |        |
| 13151  | 0      | 2      |        | 3      |
| 13153  | 1      |        |        |        |
| 13158  | 1      |        |        |        |
| 13160  | 0      |        | 1      | 1      |
| 13162  | 0      | 3      | 2      |        |
| 13169  | 1      |        |        |        |
| 13172  | 0      | 1      | 2      |        |
| 13173  | 1      |        |        |        |
| 13176  | 0      | 1      |        |        |
| 13179  | 0      |        | 1      |        |
| 13184  | 1      |        |        |        |
| 13185  | 1      |        |        |        |
| 13186  | 1      |        |        |        |
| 13188  | 0      |        |        | 2      |



| respid | Q31_99 | Q31a_1 | Q31a_2 | Q31a_3 |
|--------|--------|--------|--------|--------|
| 13190  | 0      |        |        |        |
| 13192  | 0      | 2      | 1      | 1      |
| 13193  | 1      |        |        |        |
| 13201  | 1      |        |        |        |
| 13207  | 1      |        |        |        |
| 13208  | 1      |        |        |        |
| 13209  | 0      | 4      |        |        |
| 13212  | 0      |        |        | 1      |
| 13215  | 0      |        |        | 1      |
| 13218  | 1      |        |        |        |
| 13219  | 1      |        |        |        |
| 13224  | 1      |        |        |        |
| 13225  | 1      |        |        |        |
| 13226  | 1      |        |        |        |
| 13232  | 0      |        | 1      |        |
| 13237  | 0      | 3      | 3      |        |
| 13239  | 0      |        |        | 1      |
| 13241  | 0      |        | 2      | 2      |
| 13243  | 1      |        |        |        |
| 13247  | 0      |        |        |        |
| 13248  | 1      |        |        |        |
| 13251  | 0      |        |        | 1      |
| 13256  | 1      |        |        |        |
| 13260  | 0      |        |        |        |
| 13261  | 1      |        |        |        |
| 13264  | 0      |        |        |        |
| 13273  | 0      |        | 2      |        |
| 13274  | 0      |        | 1      |        |
| 13276  | 0      |        |        |        |
| 13278  | 1      |        |        |        |
| 13279  | 0      |        | 1      |        |
| 13282  | 1      |        |        |        |

| respid | Q31_99 | Q31a_1 | Q31a_2 | Q31a_3 |
|--------|--------|--------|--------|--------|
| 13283  | 0      |        |        | 1      |
| 13285  | 1      |        |        |        |
| 13286  | 0      |        | 1      |        |
| 13299  | 0      |        |        | 1      |
| 13300  | 0      |        | 2      | 2      |
| 13301  | 1      |        |        |        |
| 13303  | 0      |        | 2      |        |
| 13304  | 1      |        |        |        |
| 13307  | 0      |        | 1      |        |
| 13308  | 1      |        |        |        |
| 13312  | 0      |        | 1      |        |
| 13313  | 1      |        |        |        |
| 13314  | 0      |        |        |        |
| 13318  | 0      |        |        | 2      |
| 13320  | 0      |        | 1      | 1      |
| 13322  | 0      |        |        |        |
| 13324  | 1      |        |        |        |
| 13325  | 0      |        |        | 1      |
| 13327  | 1      |        |        |        |
| 13330  | 0      |        | 1      | 1      |
| 13332  | 0      |        | 1      |        |
| 13333  | 0      |        |        |        |
| 13334  | 0      |        | 1      |        |
| 13351  | 0      |        |        | 2      |
| 13353  | 1      |        |        |        |
| 13354  | 1      |        |        |        |
| 13355  | 0      |        | 2      |        |
| 13358  | 0      | 1      | 1      | 1      |
| 13359  | 1      |        |        |        |
| 13360  | 0      | 2      |        | 2      |
| 13364  | 0      | 4      | 4      | 4      |
| 13365  | 0      |        |        |        |

| respid | Q31_99 | Q31a_1 | Q31a_2 | Q31a_3 |
|--------|--------|--------|--------|--------|
| 13368  | 1      |        |        |        |
| 13370  | 1      |        |        |        |
| 13375  | 0      |        |        |        |
| 13384  | 1      |        |        |        |
| 13387  | 1      |        |        |        |
| 13395  | 0      |        |        |        |
| 13398  | 1      |        |        |        |
| 13404  | 1      |        |        |        |
| 13405  | 0      |        |        |        |
| 13408  | 1      |        |        |        |
| 13411  | 0      |        | 1      |        |
| 13413  | 1      |        |        |        |
| 13419  | 1      |        |        |        |
| 13420  | 1      |        |        |        |
| 13427  | 1      |        |        |        |
| 13441  | 0      |        |        | 2      |
| 13444  | 0      |        | 1      |        |
| 13456  | 1      |        |        |        |
| 13466  | 1      |        |        |        |
| 13468  | 0      |        | 1      |        |
| 13475  | 1      |        |        |        |
| 13484  | 0      |        |        | 1      |
| 13486  | 1      |        |        |        |
| 13487  | 0      |        |        |        |
| 13491  | 1      |        |        |        |
| 13496  | 1      |        |        |        |
| 13497  | 1      |        |        |        |
| 13498  | 0      |        | 1      |        |
| 13502  | 1      |        |        |        |
| 13503  | 0      |        |        |        |
| 13505  | 1      |        |        |        |
| 13509  | 1      |        |        |        |

| respid | Q31_99 | Q31a_1 | Q31a_2 | Q31a_3 |
|--------|--------|--------|--------|--------|
| 13510  | 0      |        | 2      | 2      |
| 13518  | 0      |        |        |        |
| 13521  | 1      |        |        |        |
| 13523  | 0      |        | 2      |        |
| 13528  | 1      |        |        |        |
| 13531  | 0      |        | 1      |        |
| 13532  | 0      |        |        | 1      |
| 13533  | 0      |        | 1      | 1      |
| 13534  | 1      |        |        |        |
| 13535  | 1      |        |        |        |
| 13538  | 0      |        |        | 3      |
| 13540  | 1      |        |        |        |
| 13541  | 1      |        |        |        |
| 13542  | 1      |        |        |        |
| 13550  | 0      |        | 2      |        |
| 13553  | 1      |        |        |        |
| 13554  | 1      |        |        |        |
| 13555  | 0      |        |        | 1      |
| 13556  | 0      |        | 1      | 1      |
| 13563  | 0      |        | 2      | 3      |
| 13564  | 0      |        | 2      |        |
| 13567  | 1      |        |        |        |
| 13568  | 0      |        |        | 2      |
| 13570  | 1      |        |        |        |
| 13573  | 1      |        |        |        |
| 13575  | 1      |        |        |        |
| 13577  | 0      |        |        | 3      |
| 13580  | 0      |        |        |        |
| 13582  | 1      |        |        |        |
| 13584  | 0      |        | 3      | 3      |
| 13585  | 1      |        |        |        |
| 13586  | 0      |        | 1      |        |

| respid | Q31_99 | Q31a_1 | Q31a_2 | Q31a_3 |
|--------|--------|--------|--------|--------|
| 13587  | 0      |        | 3      | 3      |
| 13592  | 0      |        |        |        |
| 13596  | 0      |        |        |        |
| 13597  | 0      |        | 2      |        |
| 13599  | 0      |        | 2      | 1      |
| 13601  | 0      |        | 1      | 1      |
| 13604  | 0      |        |        |        |
| 13608  | 0      |        |        |        |
| 13616  | 1      |        |        |        |
| 13618  | 0      | 2      |        |        |
| 13619  | 1      |        |        |        |
| 13626  | 1      |        |        |        |
| 13628  | 0      |        | 2      |        |
| 13640  | 1      |        |        |        |
| 13645  | 1      |        |        |        |
| 13648  | 1      |        |        |        |
| 13653  | 0      | 2      |        |        |
| 13655  | 1      |        |        |        |
| 13662  | 1      |        |        |        |
| 13670  | 0      |        |        |        |
| 13673  | 0      |        | 2      |        |
| 13674  | 1      |        |        |        |
| 13675  | 0      | 1      |        |        |
| 13678  | 0      |        | 4      |        |
| 13680  | 0      |        | 1      | 1      |
| 13681  | 1      |        |        |        |
| 13683  | 0      |        | 1      |        |
| 13684  | 1      |        |        |        |
| 13685  | 1      |        |        |        |
| 13687  | 1      |        |        |        |
| 13690  | 1      |        |        |        |
| 13700  | 0      |        |        | 1      |

| respid | Q31_99 | Q31a_1 | Q31a_2 | Q31a_3 |
|--------|--------|--------|--------|--------|
| 13705  | 0      |        |        | 1      |
| 13710  | 1      |        |        |        |
| 13711  | 1      |        |        |        |
| 13713  | 1      |        |        |        |
| 13716  | 1      |        |        |        |
| 13721  | 0      |        | 1      | 1      |
| 13722  | 1      |        |        |        |
| 13723  | 0      |        |        |        |
| 13726  | 0      |        | 2      | 3      |
| 13728  | 1      |        |        |        |
| 13730  | 1      |        |        |        |
| 13734  | 1      |        |        |        |
| 13736  | 0      | 3      | 2      |        |
| 13737  | 1      |        |        |        |
| 13739  | 1      |        |        |        |
| 13742  | 1      |        |        |        |
| 13746  | 0      | 1      | 1      |        |
| 13747  | 1      |        |        |        |
| 13749  | 0      |        |        | 1      |
| 13751  | 1      |        |        |        |
| 13752  | 1      |        |        |        |
| 13756  | 0      | 1      |        |        |
| 13757  | 1      |        |        |        |
| 13767  | 0      |        |        | 1      |
| 13771  | 1      |        |        |        |
| 13772  | 0      |        |        |        |
| 13779  | 1      |        |        |        |
| 13782  | 1      |        |        |        |
| 13783  | 0      |        |        |        |
| 13785  | 1      |        |        |        |
| 13786  | 0      |        | 1      |        |
| 13792  | 0      | 2      | 1      |        |

| respid | Q31_99 | Q31a_1 | Q31a_2 | Q31a_3 |
|--------|--------|--------|--------|--------|
| 13796  | 0      |        |        |        |
| 13798  | 1      |        |        |        |
| 13799  | 1      |        |        |        |
| 13804  | 1      |        |        |        |
| 13805  | 0      |        | 2      |        |
| 13810  | 0      | 2      | 2      | 2      |
| 13811  | 1      |        |        |        |
| 13819  | 0      | 3      | 3      |        |
| 13821  | 0      |        | 4      |        |
| 13824  | 0      |        |        |        |
| 13828  | 0      | 2      |        | 2      |
| 13829  | 0      |        |        | 3      |
| 13831  | 1      |        |        |        |
| 13833  | 1      |        |        |        |
| 13835  | 0      | 2      |        |        |
| 13838  | 1      |        |        |        |
| 13839  | 0      |        |        |        |
| 13845  | 1      |        |        |        |
| 13846  | 1      |        |        |        |
| 13853  | 0      |        |        |        |
| 13855  | 0      |        |        |        |
| 13858  | 0      |        |        |        |
| 13860  | 1      |        |        |        |
| 13865  | 0      |        |        |        |
| 13870  | 1      |        |        |        |
| 13872  | 0      |        | 2      | 2      |
| 13873  | 1      |        |        |        |
| 13874  | 1      |        |        |        |
| 13875  | 0      |        |        | 1      |
| 13881  | 1      |        |        |        |
| 13887  | 1      |        |        |        |
| 13888  | 1      |        |        |        |

| respid | Q31_99 | Q31a_1 | Q31a_2 | Q31a_3 |
|--------|--------|--------|--------|--------|
| 13889  | 0      |        | 2      | 2      |
| 13895  | 0      |        |        |        |
| 13897  | 1      |        |        |        |
| 13898  | 1      |        |        |        |
| 13901  | 1      |        |        |        |
| 13902  | 0      |        |        |        |
| 13903  | 0      |        | 3      |        |
| 13905  | 0      |        |        | 2      |
| 13908  | 0      |        |        | 2      |
| 13909  | 1      |        |        |        |
| 13910  | 0      |        |        |        |
| 13911  | 1      |        |        |        |
| 13914  | 0      | 2      |        | 2      |
| 13920  | 0      |        | 3      |        |
| 13926  | 0      |        | 1      |        |
| 13929  | 0      |        |        | 1      |
| 13930  | 0      |        |        |        |
| 13931  | 1      |        |        |        |
| 13932  | 0      |        |        |        |
| 13934  | 0      |        |        | 2      |
| 13938  | 1      |        |        |        |
| 13942  | 1      |        |        |        |
| 13945  | 0      |        |        | 2      |
| 13947  | 0      |        |        |        |
| 13948  | 1      |        |        |        |
| 13959  | 1      |        |        |        |
| 13962  | 1      |        |        |        |
| 13963  | 1      |        |        |        |
| 13964  | 1      |        |        |        |
| 13966  | 0      |        |        |        |
| 13968  | 0      |        |        |        |
| 13971  | 0      |        |        |        |



| respid | Q31_99 | Q31a_1 | Q31a_2 | Q31a_3 |
|--------|--------|--------|--------|--------|
| 13979  | 0      |        |        |        |
| 13980  | 0      |        |        |        |
| 13981  | 1      |        |        |        |
| 13982  | 1      |        |        |        |
| 13984  | 1      |        |        |        |
| 13989  | 1      |        |        |        |
| 13990  | 1      |        |        |        |
| 13992  | 0      |        | 5      | 5      |
| 13998  | 0      |        |        | 1      |
| 13999  | 0      |        | 2      |        |
| 14000  | 0      |        |        |        |
| 14003  | 1      |        |        |        |
| 14004  | 0      |        | 1      |        |
| 14006  | 0      |        |        |        |
| 14007  | 1      |        |        |        |
| 14008  | 1      |        |        |        |
| 14013  | 0      |        |        | 1      |
| 14015  | 0      |        |        | 1      |
| 14018  | 0      |        |        | 1      |
| 14021  | 1      |        |        |        |
| 14023  | 1      |        |        |        |
| 14024  | 0      |        |        |        |
| 14026  | 1      |        |        |        |
| 14030  | 0      |        |        |        |
| 14032  | 0      |        | 2      |        |
| 14040  | 1      |        |        |        |
| 14045  | 1      |        |        |        |
| 14048  | 0      |        |        |        |
| 14049  | 0      |        |        |        |
| 14050  | 0      |        | 1      |        |
| 14051  | 0      |        |        |        |
| 14052  | 1      |        |        |        |

| respid | Q31_99 | Q31a_1 | Q31a_2 | Q31a_3 |
|--------|--------|--------|--------|--------|
| 14054  | 0      |        |        | 1      |
| 14055  | 1      |        |        |        |
| 14057  | 0      |        | 3      | 3      |
| 14058  | 1      |        |        |        |
| 14059  | 1      |        |        |        |
| 14060  | 0      |        | 2      | 2      |
| 14061  | 0      |        |        |        |
| 14071  | 1      |        |        |        |
| 14073  | 0      | 1      |        |        |
| 14074  | 1      |        |        |        |
| 14076  | 0      |        | 1      | 2      |
| 14080  | 1      |        |        |        |
| 14082  | 1      |        |        |        |
| 14083  | 1      |        |        |        |
| 14084  | 1      |        |        |        |
| 14085  | 1      |        |        |        |
| 14086  | 0      |        | 1      |        |
| 14088  | 0      |        | 1      |        |
| 14090  | 1      |        |        |        |
| 14092  | 1      |        |        |        |
| 14093  | 0      |        |        |        |
| 14096  | 0      |        | 1      | 1      |
| 14103  | 0      |        |        |        |
| 14105  | 0      |        |        | 1      |
| 14106  | 0      |        |        |        |
| 14107  | 0      |        |        |        |
| 14108  | 0      |        | 2      | 2      |
| 14112  | 0      |        | 1      | 1      |
| 14114  | 1      |        |        |        |
| 14115  | 1      |        |        |        |
| 14116  | 1      |        |        |        |
| 14117  | 0      |        |        |        |

| respid | Q31_99 | Q31a_1 | Q31a_2 | Q31a_3 |
|--------|--------|--------|--------|--------|
| 14118  | 0      |        | 2      |        |
| 14119  | 0      |        | 1      |        |
| 14127  | 1      |        |        |        |
| 14129  | 1      |        |        |        |
| 14131  | 1      |        |        |        |
| 14132  | 1      |        |        |        |
| 14133  | 0      |        | 2      | 2      |
| 14134  | 0      |        |        |        |
| 14135  | 0      |        | 1      |        |
| 14136  | 1      |        |        |        |
| 14138  | 1      |        |        |        |
| 14139  | 1      |        |        |        |
| 14140  | 0      |        |        | 3      |
| 14141  | 1      |        |        |        |
| 14143  | 1      |        |        |        |
| 14146  | 1      |        |        |        |
| 14147  | 0      | 2      | 2      | 2      |
| 14148  | 0      |        | 1      | 1      |
| 14151  | 0      | 1      | 1      | 2      |
| 14152  | 0      |        | 2      |        |
| 14153  | 1      |        |        |        |
| 14154  | 1      |        |        |        |
| 14158  | 0      |        | 1      |        |
| 14159  | 0      |        |        |        |
| 14160  | 0      |        |        |        |
| 14161  | 0      |        |        |        |
| 14162  | 1      |        |        |        |
| 14165  | 0      |        |        |        |
| 14166  | 0      |        |        |        |
| 14167  | 1      |        |        |        |
| 14169  | 1      |        |        |        |
| 14170  | 0      | 1      | 2      | 1      |

| respid | Q31_99 | Q31a_1 | Q31a_2 | Q31a_3 |
|--------|--------|--------|--------|--------|
| 14172  | 1      |        |        |        |
| 14173  | 1      |        |        |        |
| 14174  | 0      |        | 1      | 2      |
| 14175  | 1      |        |        |        |
| 14176  | 0      |        | 1      |        |
| 14178  | 1      |        |        |        |
| 14179  | 1      |        |        |        |
| 14180  | 0      |        | 2      |        |
| 14183  | 0      |        |        |        |
| 14185  | 1      |        |        |        |
| 14187  | 1      |        |        |        |
| 14189  | 1      |        |        |        |
| 14191  | 1      |        |        |        |
| 14192  | 1      |        |        |        |
| 14195  | 0      |        |        |        |
| 14197  | 0      |        |        | 1      |
| 14203  | 0      |        |        |        |
| 14204  | 0      |        | 1      |        |
| 14205  | 0      | 1      |        |        |
| 14208  | 1      |        |        |        |
| 14211  | 0      | 2      | 2      | 2      |
| 14214  | 0      |        |        | 1      |
| 14215  | 1      |        |        |        |
| 14216  | 0      |        |        |        |
| 14218  | 1      |        |        |        |
| 14220  | 1      |        |        |        |
| 14223  | 1      |        |        |        |
| 14225  | 0      |        |        |        |
| 14226  | 1      |        |        |        |
| 14228  | 0      |        |        |        |
| 14231  | 0      |        | 2      |        |
| 14233  | 0      |        |        | 1      |

| respid | Q31_99 | Q31a_1 | Q31a_2 | Q31a_3 |
|--------|--------|--------|--------|--------|
| 14237  | 1      |        |        |        |
| 14238  | 0      |        | 1      |        |
| 14243  | 0      |        | 1      |        |
| 14245  | 0      |        |        |        |
| 14246  | 0      |        |        |        |
| 14248  | 1      |        |        |        |
| 14250  | 1      |        |        |        |
| 14253  | 0      |        | 1      |        |
| 14254  | 0      |        |        |        |
| 14255  | 1      |        |        |        |
| 14257  | 1      |        |        |        |
| 14258  | 1      |        |        |        |
| 14259  | 0      |        |        |        |
| 14260  | 1      |        |        |        |
| 14261  | 0      |        |        | 3      |
| 14263  | 0      |        | 5      | 5      |
| 14264  | 0      |        |        |        |
| 14266  | 0      |        |        |        |
| 14267  | 0      |        |        |        |
| 14268  | 1      |        |        |        |
| 14275  | 1      |        |        |        |
| 14278  | 0      | 1      |        |        |
| 14279  | 1      |        |        |        |
| 14280  | 1      |        |        |        |
| 14281  | 0      |        | 3      | 3      |
| 14282  | 0      |        |        |        |
| 14283  | 0      |        |        |        |
| 14286  | 0      |        |        | 1      |
| 14287  | 1      |        |        |        |
| 14288  | 0      | 2      | 2      | 2      |
| 14291  | 1      |        |        |        |
| 14292  | 1      |        |        |        |

| respid | Q31_99 | Q31a_1 | Q31a_2 | Q31a_3 |
|--------|--------|--------|--------|--------|
| 14293  | 1      |        |        |        |
| 14304  | 0      |        |        |        |
| 14308  | 0      |        |        |        |
| 14313  | 1      |        |        |        |
| 14314  | 0      |        |        |        |
| 14316  | 0      |        |        |        |
| 14317  | 1      |        |        |        |
| 14318  | 0      |        | 2      |        |
| 14319  | 0      |        |        |        |
| 14320  | 0      |        |        |        |
| 14321  | 0      | 2      | 2      | 2      |
| 14322  | 0      |        | 2      |        |
| 14326  | 1      |        |        |        |
| 14327  | 0      |        |        |        |
| 14328  | 1      |        |        |        |
| 14330  | 1      |        |        |        |
| 14332  | 1      |        |        |        |
| 14334  | 1      |        |        |        |
| 14336  | 0      |        |        | 2      |
| 14337  | 1      |        |        |        |
| 14339  | 1      |        |        |        |
| 14340  | 0      | 2      |        |        |
| 14341  | 0      | 1      |        |        |
| 14344  | 1      |        |        |        |
| 14345  | 0      |        |        |        |
| 14346  | 1      |        |        |        |
| 14348  | 1      |        |        |        |
| 14349  | 1      |        |        |        |
| 14358  | 0      |        | 2      | 2      |
| 14360  | 1      |        |        |        |
| 14362  | 1      |        |        |        |
| 14366  | 1      |        |        |        |

| respid | Q31_99 | Q31a_1 | Q31a_2 | Q31a_3 |
|--------|--------|--------|--------|--------|
| 14367  | 0      |        |        |        |
| 14369  | 0      |        |        |        |
| 14371  | 1      |        |        |        |
| 14372  | 1      |        |        |        |
| 14374  | 0      |        | 2      |        |
| 14376  | 1      |        |        |        |
| 14377  | 1      |        |        |        |
| 14378  | 0      |        |        | 1      |
| 14379  | 0      |        |        |        |
| 14381  | 0      |        | 1      |        |
| 14383  | 1      |        |        |        |
| 14384  | 0      |        |        |        |
| 14385  | 0      |        |        |        |
| 14386  | 0      |        |        |        |
| 14390  | 1      |        |        |        |
| 14391  | 1      |        |        |        |
| 14392  | 0      |        |        |        |
| 14393  | 0      |        | 2      |        |
| 14394  | 0      | 1      | 1      | 1      |
| 14395  | 1      |        |        |        |
| 14396  | 1      |        |        |        |
| 14397  | 0      |        |        |        |
| 14398  | 1      |        |        |        |
| 14399  | 1      |        |        |        |
| 14400  | 0      |        | 1      |        |
| 14403  | 1      |        |        |        |
| 14404  | 0      |        | 2      |        |
| 14405  | 1      |        |        |        |
| 14407  | 1      |        |        |        |
| 14408  | 0      |        |        | 1      |
| 14410  | 0      |        |        |        |
| 14415  | 1      |        |        |        |

| respid | Q31_99 | Q31a_1 | Q31a_2 | Q31a_3 |
|--------|--------|--------|--------|--------|
| 14419  | 1      |        |        |        |
| 14420  | 1      |        |        |        |
| 14421  | 1      |        |        |        |
| 14423  | 1      |        |        |        |
| 14424  | 1      |        |        |        |
| 14425  | 1      |        |        |        |
| 14426  | 1      |        |        |        |
| 14427  | 1      |        |        |        |
| 14428  | 0      |        |        |        |
| 14431  | 0      | 1      | 2      | 1      |
| 14433  | 1      |        |        |        |
| 14434  | 1      |        |        |        |
| 14435  | 0      |        | 1      | 1      |
| 14436  | 0      |        | 2      | 2      |
| 14438  | 1      |        |        |        |
| 14442  | 0      |        | 3      | 3      |
| 14447  | 0      |        |        |        |
| 14448  | 1      |        |        |        |
| 14450  | 0      |        |        |        |
| 14451  | 1      |        |        |        |
| 14454  | 0      |        |        |        |
| 14455  | 0      | 2      |        |        |
| 14456  | 0      |        |        |        |
| 14457  | 0      |        |        | 3      |
| 14458  | 0      |        |        |        |
| 14459  | 1      |        |        |        |
| 14460  | 0      |        | 1      | 1      |
| 14464  | 0      |        | 2      |        |
| 14465  | 1      |        |        |        |
| 14466  | 0      |        |        |        |
| 14467  | 1      |        |        |        |
| 14470  | 0      | 1      |        |        |



| respid | Q31_99 | Q31a_1 | Q31a_2 | Q31a_3 |
|--------|--------|--------|--------|--------|
| 14472  | 1      |        |        |        |
| 14473  | 1      |        |        |        |
| 14474  | 1      |        |        |        |
| 14477  | 0      |        | 1      |        |
| 14478  | 1      |        |        |        |
| 14479  | 1      |        |        |        |
| 14484  | 1      |        |        |        |
| 14485  | 1      |        |        |        |
| 14486  | 0      |        |        | 2      |
| 14487  | 1      |        |        |        |
| 14488  | 0      |        | 3      | 3      |
| 14491  | 0      |        |        | 1      |
| 14495  | 1      |        |        |        |
| 14500  | 0      | 1      |        |        |
| 14502  | 1      |        |        |        |
| 14504  | 0      |        |        |        |
| 14505  | 0      |        |        |        |
| 14507  | 1      |        |        |        |
| 14517  | 1      |        |        |        |
| 14518  | 1      |        |        |        |
| 14519  | 0      |        | 1      |        |
| 14521  | 0      |        |        | 1      |
| 14522  | 1      |        |        |        |
| 14526  | 1      |        |        |        |
| 14528  | 0      |        | 2      | 2      |
| 14529  | 1      |        |        |        |
| 14530  | 0      |        |        |        |
| 14531  | 0      | 3      | 4      | 3      |
| 14534  | 0      |        |        |        |
| 14538  | 1      |        |        |        |
| 14539  | 1      |        |        |        |
| 14545  | 0      |        | 1      |        |

| respid | Q31_99 | Q31a_1 | Q31a_2 | Q31a_3 |
|--------|--------|--------|--------|--------|
| 14546  | 1      |        |        |        |
| 14551  | 1      |        |        |        |
| 14553  | 0      |        | 2      |        |
| 14557  | 1      |        |        |        |
| 14558  | 1      |        |        |        |
| 14559  | 0      |        | 1      |        |
| 14560  | 0      |        |        |        |
| 14563  | 0      |        | 2      |        |
| 14565  | 1      |        |        |        |
| 14571  | 0      |        |        |        |
| 14572  | 1      |        |        |        |
| 14573  | 0      |        | 1      | 2      |
| 14575  | 1      |        |        |        |
| 14576  | 0      |        | 2      |        |
| 14578  | 1      |        |        |        |
| 14579  | 1      |        |        |        |
| 14580  | 0      | 1      | 2      |        |
| 14582  | 1      |        |        |        |
| 14585  | 0      |        |        |        |
| 14588  | 1      |        |        |        |
| 14590  | 0      |        |        |        |
| 14592  | 0      |        |        | 2      |
| 14593  | 1      |        |        |        |
| 14595  | 1      |        |        |        |
| 14597  | 0      |        | 1      | 1      |
| 14600  | 1      |        |        |        |
| 14602  | 0      | 2      |        | 2      |
| 14604  | 1      |        |        |        |
| 14605  | 1      |        |        |        |
| 14609  | 0      |        | 2      |        |
| 14610  | 1      |        |        |        |
| 14611  | 1      |        |        |        |

| respid | Q31_99 | Q31a_1 | Q31a_2 | Q31a_3 |
|--------|--------|--------|--------|--------|
| 14612  | 0      |        |        | 1      |
| 14614  | 0      |        |        |        |
| 14615  | 0      |        | 2      | 2      |
| 14618  | 0      | 3      | 2      | 2      |
| 14621  | 1      |        |        |        |
| 14624  | 0      |        | 1      |        |
| 14626  | 0      |        | 1      |        |
| 14627  | 0      | 2      | 2      | 2      |
| 14628  | 0      |        |        |        |
| 14631  | 1      |        |        |        |
| 14633  | 0      |        | 2      |        |
| 14642  | 1      |        |        |        |
| 14647  | 1      |        |        |        |
| 14658  | 1      |        |        |        |
| 14659  | 0      |        |        | 2      |
| 14660  | 1      |        |        |        |
| 14661  | 1      |        |        |        |
| 14662  | 0      |        |        | 3      |
| 14663  | 1      |        |        |        |
| 14670  | 0      |        |        | 2      |
| 14671  | 1      |        |        |        |
| 14672  | 0      |        |        |        |
| 14675  | 1      |        |        |        |
| 14676  | 0      |        | 3      |        |
| 14677  | 0      |        |        | 2      |
| 14678  | 0      |        |        |        |
| 14681  | 0      |        |        | 1      |
| 14684  | 1      |        |        |        |
| 14688  | 1      |        |        |        |
| 14690  | 1      |        |        |        |
| 14694  | 0      |        |        |        |
| 14696  | 1      |        |        |        |

| respid | Q31_99 | Q31a_1 | Q31a_2 | Q31a_3 |
|--------|--------|--------|--------|--------|
| 14700  | 1      |        |        |        |
| 14701  | 1      |        |        |        |
| 14703  | 0      |        |        |        |
| 14707  | 1      |        |        |        |
| 14711  | 0      |        |        |        |
| 14714  | 1      |        |        |        |
| 14715  | 0      |        |        |        |
| 14716  | 0      |        | 1      |        |
| 14720  | 0      |        |        |        |
| 14725  | 0      |        |        |        |
| 14726  | 0      |        |        |        |
| 14734  | 1      |        |        |        |
| 14735  | 1      |        |        |        |
| 14736  | 0      |        | 2      |        |
| 14740  | 1      |        |        |        |
| 14745  | 0      |        |        | 1      |
| 14747  | 1      |        |        |        |
| 14750  | 0      |        |        |        |
| 14751  | 1      |        |        |        |
| 14753  | 1      |        |        |        |
| 14756  | 0      | 3      | 2      | 2      |
| 14780  | 1      |        |        |        |
| 14782  | 1      |        |        |        |
| 14800  | 0      |        | 4      | 4      |
| 14801  | 1      |        |        |        |
| 14802  | 0      |        |        |        |
| 14805  | 0      | 1      |        |        |
| 14811  | 0      | 2      |        |        |
| 14814  | 0      |        |        |        |
| 14822  | 0      |        |        | 1      |
| 14827  | 0      |        |        | 3      |
| 14828  | 1      |        |        |        |

| respid | Q31_99 | Q31a_1 | Q31a_2 | Q31a_3 |
|--------|--------|--------|--------|--------|
| 14830  | 1      |        |        |        |
| 14832  | 0      |        | 3      | 3      |
| 14835  | 0      |        | 1      |        |
| 14841  | 1      |        |        |        |
| 14849  | 1      |        |        |        |
| 14850  | 1      |        |        |        |
| 14851  | 1      |        |        |        |
| 14856  | 0      |        |        |        |
| 14862  | 0      |        |        | 2      |
| 14863  | 1      |        |        |        |
| 14864  | 1      |        |        |        |
| 14866  | 0      |        |        |        |
| 14867  | 0      |        | 3      | 3      |
| 14868  | 1      |        |        |        |
| 14870  | 1      |        |        |        |
| 14873  | 1      |        |        |        |
| 14878  | 0      | 2      | 2      | 2      |
| 14879  | 1      |        |        |        |
| 14881  | 1      |        |        |        |
| 14888  | 0      | 2      |        | 3      |
| 14895  | 0      |        |        |        |
| 14900  | 0      |        |        |        |
| 14912  | 1      |        |        |        |
| 14922  | 0      |        |        |        |
| 14923  | 0      |        | 4      |        |
| 14924  | 0      |        |        |        |
| 14925  | 0      |        |        | 2      |
| 14926  | 1      |        |        |        |
| 14927  | 0      |        |        |        |
| 14930  | 0      |        |        |        |
| 14937  | 0      | 4      |        | 4      |
| 14938  | 0      |        |        |        |

| respid | Q31_99 | Q31a_1 | Q31a_2 | Q31a_3 |
|--------|--------|--------|--------|--------|
| 14939  | 0      |        | 1      | 2      |
| 14942  | 1      |        |        |        |
| 14943  | 1      |        |        |        |
| 14953  | 1      |        |        |        |
| 14954  | 1      |        |        |        |
| 14955  | 0      | 1      | 2      | 1      |
| 14957  | 0      | 1      |        |        |
| 14958  | 0      |        | 3      |        |
| 14959  | 0      |        |        |        |
| 14961  | 1      |        |        |        |
| 14963  | 0      |        |        | 4      |
| 14964  | 1      |        |        |        |
| 14965  | 1      |        |        |        |
| 14967  | 0      |        |        |        |
| 14970  | 0      |        | 3      |        |
| 14972  | 0      | 2      |        |        |
| 14975  | 0      |        |        | 1      |
| 14977  | 1      |        |        |        |
| 14982  | 0      |        |        |        |
| 14985  | 0      |        |        | 2      |
| 14986  | 1      |        |        |        |
| 14987  | 1      |        |        |        |
| 14988  | 0      | 3      |        | 2      |
| 14989  | 0      | 1      | 2      | 1      |
| 14993  | 1      |        |        |        |
| 15001  | 1      |        |        |        |
| 15002  | 0      |        |        | 1      |
| 15006  | 1      |        |        |        |
| 15007  | 1      |        |        |        |
| 15014  | 0      |        | 3      | 2      |
| 15020  | 0      |        |        |        |
| 15021  | 0      |        |        |        |

| respid | Q31_99 | Q31a_1 | Q31a_2 | Q31a_3 |
|--------|--------|--------|--------|--------|
| 15023  | 0      |        |        | 4      |
| 15030  | 1      |        |        |        |
| 15032  | 1      |        |        |        |
| 15033  | 0      |        |        | 1      |
| 15034  | 0      |        |        |        |
| 15035  | 1      |        |        |        |
| 15037  | 1      |        |        |        |
| 15039  | 0      |        |        | 3      |
| 15040  | 1      |        |        |        |
| 15042  | 1      |        |        |        |
| 15044  | 1      |        |        |        |
| 15045  | 0      |        | 2      |        |
| 15046  | 1      |        |        |        |
| 15052  | 0      |        |        | 3      |
| 15058  | 0      |        | 2      |        |
| 15063  | 0      |        |        | 3      |
| 15066  | 1      |        |        |        |
| 15069  | 0      |        |        | 1      |
| 15071  | 0      | 1      | 1      | 1      |
| 15076  | 0      |        |        | 1      |
| 15078  | 1      |        |        |        |
| 15087  | 0      |        |        |        |
| 15090  | 1      |        |        |        |
| 15091  | 0      |        |        |        |
| 15092  | 1      |        |        |        |
| 15096  | 1      |        |        |        |
| 15106  | 0      |        |        | 3      |
| 15108  | 1      |        |        |        |
| 15113  | 1      |        |        |        |
| 15116  | 1      |        |        |        |
| 15119  | 0      |        |        |        |
| 15120  | 1      |        |        |        |

| respid | Q31_99 | Q31a_1 | Q31a_2 | Q31a_3 |
|--------|--------|--------|--------|--------|
| 15121  | 1      |        |        |        |
| 15123  | 1      |        |        |        |
| 15124  | 1      |        |        |        |
| 15128  | 0      |        |        | 1      |
| 15131  | 1      |        |        |        |
| 15136  | 0      |        |        | 3      |
| 15137  | 1      |        |        |        |
| 15141  | 1      |        |        |        |
| 15144  | 1      |        |        |        |
| 15147  | 1      |        |        |        |
| 15151  | 1      |        |        |        |
| 15154  | 0      |        | 2      |        |
| 15157  | 1      |        |        |        |
| 15164  | 0      | 3      | 3      |        |
| 15168  | 1      |        |        |        |
| 15169  | 1      |        |        |        |
| 15172  | 0      |        |        | 4      |
| 15177  | 0      |        | 3      |        |
| 15178  | 1      |        |        |        |
| 15180  | 0      |        |        |        |
| 15181  | 1      |        |        |        |
| 15182  | 0      |        |        |        |
| 15183  | 1      |        |        |        |
| 15188  | 1      |        |        |        |
| 15190  | 0      |        |        | 4      |
| 15195  | 1      |        |        |        |
| 15201  | 0      | 4      |        |        |
| 15203  | 1      |        |        |        |
| 15204  | 1      |        |        |        |
| 15207  | 1      |        |        |        |
| 15208  | 0      |        |        | 1      |
| 15209  | 1      |        |        |        |



| respid | Q31_99 | Q31a_1 | Q31a_2 | Q31a_3 |
|--------|--------|--------|--------|--------|
| 15212  | 1      |        |        |        |
| 15213  | 0      |        |        |        |
| 15219  | 1      |        |        |        |
| 15220  | 1      |        |        |        |
| 15221  | 1      |        |        |        |
| 15223  | 0      |        |        |        |
| 15224  | 1      |        |        |        |
| 15225  | 1      |        |        |        |
| 15226  | 1      |        |        |        |
| 15230  | 1      |        |        |        |
| 15231  | 0      |        | 5      | 4      |
| 15232  | 1      |        |        |        |
| 15237  | 1      |        |        |        |
| 15239  | 1      |        |        |        |
| 15241  | 1      |        |        |        |
| 15242  | 0      |        |        |        |
| 15247  | 1      |        |        |        |
| 15248  | 1      |        |        |        |
| 15251  | 1      |        |        |        |
| 15257  | 1      |        |        |        |
| 15260  | 1      |        |        |        |
| 15261  | 0      |        |        |        |
| 15262  | 0      |        |        |        |
| 15263  | 0      |        |        |        |
| 15265  | 1      |        |        |        |
| 15266  | 1      |        |        |        |
| 15268  | 1      |        |        |        |
| 15269  | 1      |        |        |        |
| 15270  | 0      |        |        | 3      |
| 15273  | 0      |        |        |        |
| 15276  | 0      |        | 3      |        |
| 15277  | 1      |        |        |        |

| respid | Q31_99 | Q31a_1 | Q31a_2 | Q31a_3 |
|--------|--------|--------|--------|--------|
| 15282  | 1      |        |        |        |
| 15284  | 0      |        |        |        |
| 15285  | 1      |        |        |        |
| 15286  | 0      | 4      |        |        |
| 15288  | 0      |        |        |        |
| 15292  | 0      |        |        | 3      |
| 15296  | 0      |        |        |        |
| 15297  | 0      | 1      |        |        |
| 15298  | 1      |        |        |        |
| 15301  | 1      |        |        |        |
| 15302  | 0      |        | 1      |        |
| 15305  | 1      |        |        |        |
| 15307  | 1      |        |        |        |
| 15308  | 0      | 1      |        |        |
| 15309  | 1      |        |        |        |
| 15311  | 1      |        |        |        |
| 15315  | 1      |        |        |        |
| 15316  | 0      |        | 1      |        |
| 15318  | 1      |        |        |        |
| 15321  | 0      |        |        |        |
| 15322  | 1      |        |        |        |
| 15324  | 0      | 2      | 2      |        |
| 15326  | 1      |        |        |        |
| 15327  | 1      |        |        |        |
| 15328  | 1      |        |        |        |
| 15330  | 1      |        |        |        |
| 15332  | 0      |        |        |        |
| 15333  | 1      |        |        |        |
| 15334  | 1      |        |        |        |
| 15336  | 0      |        |        |        |
| 15337  | 0      |        |        | 1      |
| 15338  | 1      |        |        |        |

| respid | Q31_99 | Q31a_1 | Q31a_2 | Q31a_3 |
|--------|--------|--------|--------|--------|
| 15339  | 0      | 2      | 2      | 2      |
| 15341  | 1      |        |        |        |
| 15344  | 1      |        |        |        |
| 15345  | 0      |        |        | 1      |
| 15350  | 1      |        |        |        |
| 15351  | 0      |        |        |        |
| 15352  | 1      |        |        |        |
| 15372  | 1      |        |        |        |
| 15373  | 0      |        |        | 3      |
| 15376  | 1      |        |        |        |
| 15377  | 1      |        |        |        |
| 15382  | 1      |        |        |        |
| 15383  | 0      |        |        |        |
| 15385  | 0      |        |        |        |
| 15390  | 1      |        |        |        |
| 15399  | 1      |        |        |        |
| 15404  | 0      |        | 1      | 1      |
| 15410  | 0      | 1      | 1      |        |
| 15411  | 0      |        |        |        |
| 15412  | 0      |        |        |        |
| 15413  | 1      |        |        |        |
| 15414  | 1      |        |        |        |
| 15417  | 0      | 1      |        |        |
| 15418  | 0      |        | 1      |        |
| 15421  | 1      |        |        |        |
| 15423  | 1      |        |        |        |
| 15425  | 1      |        |        |        |
| 15426  | 0      |        |        | 4      |
| 15430  | 1      |        |        |        |
| 15431  | 0      |        | 4      | 4      |
| 15435  | 1      |        |        |        |
| 15436  | 1      |        |        |        |

| respid | Q31_99 | Q31a_1 | Q31a_2 | Q31a_3 |
|--------|--------|--------|--------|--------|
| 15437  | 1      |        |        |        |
| 15438  | 1      |        |        |        |
| 15439  | 1      |        |        |        |
| 15441  | 0      |        |        |        |
| 15443  | 1      |        |        |        |
| 15446  | 1      |        |        |        |
| 15449  | 0      |        |        |        |
| 15451  | 0      |        | 2      | 2      |
| 15452  | 0      |        |        |        |
| 15454  | 0      |        |        |        |
| 15456  | 0      |        | 3      |        |
| 15457  | 1      |        |        |        |
| 15458  | 0      |        |        |        |
| 15462  | 0      |        | 2      |        |
| 15467  | 0      | 2      |        | 1      |
| 15470  | 0      |        |        |        |
| 15472  | 0      |        |        |        |
| 15476  | 1      |        |        |        |
| 15477  | 1      |        |        |        |
| 15488  | 1      |        |        |        |
| 15489  | 1      |        |        |        |
| 15490  | 1      |        |        |        |
| 15496  | 0      |        |        |        |
| 15497  | 0      |        |        |        |
| 15498  | 1      |        |        |        |
| 15509  | 0      |        |        |        |
| 15510  | 1      |        |        |        |
| 15516  | 0      | 1      | 2      | 2      |
| 15519  | 0      |        |        | 1      |
| 15520  | 1      |        |        |        |
| 15524  | 0      |        |        |        |
| 15525  | 1      |        |        |        |

| respid | Q31_99 | Q31a_1 | Q31a_2 | Q31a_3 |
|--------|--------|--------|--------|--------|
| 15526  | 0      |        |        |        |
| 15531  | 0      |        | 1      |        |
| 15532  | 1      |        |        |        |
| 15534  | 0      |        | 3      |        |
| 15535  | 0      | 2      | 3      | 4      |
| 15539  | 1      |        |        |        |
| 15550  | 1      |        |        |        |
| 15556  | 1      |        |        |        |
| 15558  | 0      |        | 3      | 3      |
| 15565  | 1      |        |        |        |
| 15567  | 0      |        |        |        |
| 15568  | 0      | 2      | 3      | 4      |
| 15571  | 1      |        |        |        |
| 15573  | 0      |        |        |        |
| 15574  | 0      | 2      | 2      | 3      |
| 15576  | 0      | 2      |        |        |
| 15587  | 0      |        | 2      | 2      |
| 15588  | 0      |        | 2      | 2      |
| 15593  | 0      |        | 2      | 2      |
| 15597  | 1      |        |        |        |
| 15598  | 1      |        |        |        |
| 15599  | 0      |        |        |        |
| 15601  | 1      |        |        |        |
| 15604  | 1      |        |        |        |
| 15611  | 1      |        |        |        |
| 15613  | 1      |        |        |        |
| 15614  | 1      |        |        |        |
| 15617  | 0      |        | 2      | 2      |
| 15622  | 1      |        |        |        |
| 15623  | 1      |        |        |        |
| 15625  | 1      |        |        |        |
| 15627  | 1      |        |        |        |

| respid | Q31_99 | Q31a_1 | Q31a_2 | Q31a_3 |
|--------|--------|--------|--------|--------|
| 15628  | 1      |        |        |        |
| 15633  | 1      |        |        |        |
| 15634  | 1      |        |        |        |
| 15637  | 1      |        |        |        |
| 15644  | 1      |        |        |        |
| 15645  | 1      |        |        |        |
| 15649  | 1      |        |        |        |
| 15650  | 1      |        |        |        |
| 15651  | 0      |        | 1      |        |
| 15657  | 0      | 2      | 2      | 2      |
| 15658  | 1      |        |        |        |
| 15660  | 0      |        |        |        |
| 15667  | 1      |        |        |        |
| 15671  | 1      |        |        |        |
| 15679  | 1      |        |        |        |
| 15712  | 1      |        |        |        |
| 15715  | 1      |        |        |        |
| 15749  | 0      | 4      | 4      | 4      |
| 15754  | 1      |        |        |        |
| 15756  | 1      |        |        |        |
| 15773  | 1      |        |        |        |
| 15774  | 1      |        |        |        |
| 15776  | 0      |        |        |        |
| 15777  | 0      |        | 3      | 3      |
| 15779  | 1      |        |        |        |
| 15780  | 1      |        |        |        |
| 15792  | 1      |        |        |        |
| 15793  | 0      |        |        |        |
| 15796  | 1      |        |        |        |
| 15798  | 1      |        |        |        |
| 15809  | 1      |        |        |        |
| 15810  | 1      |        |        |        |

| respid | Q31_99 | Q31a_1 | Q31a_2 | Q31a_3 |
|--------|--------|--------|--------|--------|
| 15815  | 0      |        | 3      | 3      |
| 15816  | 1      |        |        |        |
| 15817  | 1      |        |        |        |
| 15821  | 0      |        |        |        |
| 15823  | 0      | 1      | 1      |        |
| 15834  | 1      |        |        |        |
| 15835  | 1      |        |        |        |
| 15836  | 1      |        |        |        |
| 15837  | 1      |        |        |        |
| 15839  | 1      |        |        |        |
| 15840  | 1      |        |        |        |
| 15844  | 1      |        |        |        |
| 15845  | 1      |        |        |        |
| 15847  | 0      |        |        | 3      |
| 15848  | 1      |        |        |        |
| 15849  | 1      |        |        |        |
| 15857  | 0      | 1      | 1      |        |
| 15858  | 1      |        |        |        |
| 15862  | 0      |        |        |        |
| 15866  | 1      |        |        |        |
| 15870  | 1      |        |        |        |
| 15871  | 1      |        |        |        |
| 15872  | 1      |        |        |        |
| 15873  | 1      |        |        |        |
| 15874  | 1      |        |        |        |
| 15875  | 0      |        |        | 2      |
| 15876  | 0      |        |        | 2      |
| 15882  | 0      |        |        |        |
| 15884  | 0      |        | 1      |        |
| 15890  | 1      |        |        |        |
| 15892  | 0      | 1      | 1      | 2      |
| 15908  | 1      |        |        |        |

| respid | Q31_99 | Q31a_1 | Q31a_2 | Q31a_3 |
|--------|--------|--------|--------|--------|
| 15914  | 1      |        |        |        |
| 15932  | 0      |        |        |        |
| 15933  | 1      |        |        |        |
| 15938  | 1      |        |        |        |
| 15940  | 0      |        |        | 5      |
| 15945  | 1      |        |        |        |
| 15947  | 1      |        |        |        |
| 15950  | 1      |        |        |        |
| 15951  | 0      | 2      | 1      |        |
| 15952  | 0      |        |        |        |
| 15953  | 0      |        | 1      |        |
| 15954  | 0      |        |        |        |
| 15957  | 0      |        |        |        |
| 15965  | 0      |        | 3      | 2      |
| 15966  | 1      |        |        |        |
| 15967  | 1      |        |        |        |
| 15968  | 1      |        |        |        |
| 15970  | 0      |        | 1      |        |
| 15973  | 1      |        |        |        |
| 15974  | 1      |        |        |        |
| 15975  | 1      |        |        |        |
| 15980  | 0      |        |        | 5      |
| 15984  | 1      |        |        |        |
| 15985  | 0      |        |        |        |
| 15994  | 1      |        |        |        |
| 15995  | 0      |        |        | 1      |
| 16000  | 1      |        |        |        |
| 16004  | 1      |        |        |        |
| 16005  | 1      |        |        |        |
| 16006  | 1      |        |        |        |
| 16009  | 1      |        |        |        |
| 16017  | 1      |        |        |        |



| respid | Q31_99 | Q31a_1 | Q31a_2 | Q31a_3 |
|--------|--------|--------|--------|--------|
| 16019  | 1      |        |        |        |
| 16021  | 1      |        |        |        |
| 16024  | 1      |        |        |        |
| 16026  | 0      |        |        |        |
| 16029  | 1      |        |        |        |
| 16031  | 1      |        |        |        |
| 16037  | 1      |        |        |        |
| 16043  | 1      |        |        |        |
| 16044  | 0      |        |        | 1      |
| 16047  | 1      |        |        |        |
| 16048  | 0      |        |        |        |
| 16049  | 1      |        |        |        |
| 16051  | 0      |        | 1      |        |
| 16053  | 0      |        |        |        |
| 16054  | 0      |        | 1      | 1      |
| 16069  | 1      |        |        |        |
| 16070  | 1      |        |        |        |
| 16074  | 1      |        |        |        |
| 16076  | 1      |        |        |        |
| 16078  | 1      |        |        |        |
| 16081  | 0      |        | 1      | 1      |
| 16085  | 1      |        |        |        |
| 16088  | 0      |        | 1      |        |
| 16091  | 0      |        | 1      |        |
| 16092  | 1      |        |        |        |
| 16093  | 0      |        |        |        |
| 16097  | 1      |        |        |        |
| 16100  | 0      |        | 1      | 1      |
| 16101  | 1      |        |        |        |
| 16105  | 1      |        |        |        |
| 16118  | 0      | 2      |        | 2      |
| 16129  | 1      |        |        |        |

| respid | Q31_99 | Q31a_1 | Q31a_2 | Q31a_3 |
|--------|--------|--------|--------|--------|
| 16130  | 1      |        |        |        |
| 16131  | 0      | 2      | 1      |        |
| 16136  | 0      |        |        |        |
| 16137  | 1      |        |        |        |
| 16138  | 0      |        | 2      | 2      |
| 16139  | 0      | 2      | 2      |        |
| 16140  | 1      |        |        |        |
| 16145  | 1      |        |        |        |
| 16150  | 0      | 1      | 1      |        |
| 16151  | 0      |        |        | 1      |
| 16153  | 1      |        |        |        |
| 16164  | 0      |        |        |        |
| 16168  | 0      |        |        | 1      |
| 16173  | 1      |        |        |        |
| 16174  | 1      |        |        |        |
| 16177  | 1      |        |        |        |
| 16185  | 1      |        |        |        |
| 16189  | 0      |        | 1      |        |
| 16192  | 0      |        |        |        |
| 16193  | 0      |        | 2      | 2      |
| 16194  | 0      | 2      | 2      | 2      |
| 16196  | 1      |        |        |        |
| 16202  | 0      |        |        |        |
| 16205  | 0      |        |        |        |
| 16206  | 0      |        |        |        |
| 16208  | 1      |        |        |        |
| 16211  | 0      | 2      | 2      | 1      |
| 16212  | 1      |        |        |        |
| 16215  | 1      |        |        |        |
| 16217  | 1      |        |        |        |
| 16221  | 0      |        |        |        |
| 16226  | 0      |        | 1      |        |

| respid | Q31_99 | Q31a_1 | Q31a_2 | Q31a_3 |
|--------|--------|--------|--------|--------|
| 16228  | 0      |        |        | 2      |
| 16229  | 1      |        |        |        |
| 16230  | 1      |        |        |        |
| 16231  | 0      |        |        |        |
| 16232  | 0      |        |        |        |
| 16234  | 0      |        | 1      |        |
| 16235  | 0      |        |        | 3      |
| 16236  | 1      |        |        |        |
| 16237  | 0      |        | 1      |        |
| 16238  | 0      |        |        |        |
| 16239  | 1      |        |        |        |
| 16243  | 1      |        |        |        |
| 16248  | 1      |        |        |        |
| 16249  | 0      |        | 1      |        |
| 16251  | 1      |        |        |        |
| 16263  | 1      |        |        |        |
| 16265  | 0      | 2      | 2      | 1      |
| 16269  | 0      |        |        |        |
| 16272  | 0      |        | 1      |        |
| 16273  | 1      |        |        |        |
| 16281  | 1      |        |        |        |
| 16282  | 0      |        |        | 2      |
| 16287  | 1      |        |        |        |
| 16290  | 0      |        |        |        |
| 16294  | 1      |        |        |        |
| 16295  | 1      |        |        |        |
| 16296  | 1      |        |        |        |
| 16299  | 0      |        |        |        |
| 16302  | 1      |        |        |        |
| 16303  | 1      |        |        |        |
| 16304  | 0      |        |        |        |
| 16306  | 0      |        | 1      |        |

| respid | Q31_99 | Q31a_1 | Q31a_2 | Q31a_3 |
|--------|--------|--------|--------|--------|
| 16318  | 0      |        |        |        |
| 16320  | 0      |        | 1      |        |
| 16321  | 0      |        |        |        |
| 16322  | 1      |        |        |        |
| 16324  | 0      |        |        | 1      |
| 16326  | 1      |        |        |        |
| 16328  | 0      | 1      |        |        |
| 16336  | 0      |        | 1      |        |
| 16341  | 1      |        |        |        |
| 16342  | 0      |        | 1      |        |
| 16343  | 0      |        |        | 1      |
| 16345  | 0      |        |        |        |
| 16349  | 0      |        |        |        |
| 16355  | 1      |        |        |        |
| 16364  | 1      |        |        |        |
| 16374  | 0      |        | 1      | 1      |
| 16375  | 1      |        |        |        |
| 16376  | 1      |        |        |        |
| 16393  | 0      |        |        |        |
| 16394  | 0      |        |        |        |
| 16395  | 1      |        |        |        |
| 16397  | 0      |        |        | 1      |
| 16398  | 0      |        |        |        |
| 16402  | 0      |        | 1      | 1      |
| 16405  | 1      |        |        |        |
| 16416  | 1      |        |        |        |
| 16422  | 0      |        |        |        |
| 16429  | 1      |        |        |        |
| 16430  | 1      |        |        |        |
| 16432  | 0      |        |        |        |
| 16433  | 1      |        |        |        |
| 16434  | 1      |        |        |        |

| respid | Q31_99 | Q31a_1 | Q31a_2 | Q31a_3 |
|--------|--------|--------|--------|--------|
| 16437  | 1      |        |        |        |
| 16439  | 1      |        |        |        |
| 16440  | 1      |        |        |        |
| 16441  | 1      |        |        |        |
| 16442  | 0      |        | 1      |        |
| 16450  | 1      |        |        |        |
| 16451  | 1      |        |        |        |
| 16452  | 0      | 1      | 1      | 2      |
| 16467  | 1      |        |        |        |
| 16468  | 1      |        |        |        |
| 16469  | 0      |        |        |        |
| 16470  | 1      |        |        |        |
| 16471  | 0      | 1      | 1      |        |
| 16473  | 1      |        |        |        |
| 16476  | 1      |        |        |        |
| 16478  | 0      |        | 1      | 1      |
| 16484  | 0      |        |        |        |
| 16499  | 1      |        |        |        |
| 16502  | 1      |        |        |        |
| 16505  | 0      |        | 1      |        |
| 16514  | 1      |        |        |        |
| 16515  | 0      |        |        |        |
| 16517  | 1      |        |        |        |
| 16518  | 1      |        |        |        |
| 16519  | 0      |        |        |        |
| 16525  | 0      |        |        |        |
| 16526  | 1      |        |        |        |
| 16530  | 1      |        |        |        |
| 16532  | 1      |        |        |        |
| 16536  | 1      |        |        |        |
| 16537  | 0      |        | 2      |        |
| 16541  | 0      |        |        | 2      |

| respid | Q31_99 | Q31a_1 | Q31a_2 | Q31a_3 |
|--------|--------|--------|--------|--------|
| 16543  | 0      |        |        |        |
| 16544  | 1      |        |        |        |
| 16545  | 0      |        |        |        |
| 16546  | 0      |        |        | 1      |
| 16548  | 1      |        |        |        |
| 16552  | 1      |        |        |        |
| 16559  | 0      |        | 1      |        |
| 16564  | 0      |        | 2      |        |
| 16565  | 0      |        |        | 2      |
| 16567  | 0      |        |        | 1      |
| 16571  | 1      |        |        |        |
| 16572  | 0      |        | 1      | 1      |
| 16579  | 1      |        |        |        |
| 16588  | 0      |        |        | 3      |
| 16599  | 0      |        | 1      |        |
| 16605  | 1      |        |        |        |
| 16622  | 1      |        |        |        |
| 16635  | 0      |        | 1      |        |
| 16638  | 1      |        |        |        |
| 16652  | 0      |        |        |        |
| 16656  | 1      |        |        |        |
| 16671  | 1      |        |        |        |
| 16676  | 1      |        |        |        |
| 16678  | 0      |        |        |        |
| 16702  | 0      |        |        |        |
| 16705  | 0      |        |        |        |
| 16707  | 0      |        |        | 2      |
| 16711  | 1      |        |        |        |
| 16712  | 1      |        |        |        |
| 16716  | 1      |        |        |        |
| 16724  | 0      |        | 1      | 1      |
| 16727  | 0      |        |        | 2      |

| respid | Q31_99 | Q31a_1 | Q31a_2 | Q31a_3 |
|--------|--------|--------|--------|--------|
| 16734  | 1      |        |        |        |
| 16740  | 1      |        |        |        |
| 16748  | 1      |        |        |        |
| 16759  | 1      |        |        |        |
| 16761  | 1      |        |        |        |
| 16763  | 1      |        |        |        |
| 16764  | 0      | 2      | 2      | 2      |
| 16766  | 1      |        |        |        |
| 16767  | 1      |        |        |        |
| 16776  | 0      |        |        | 1      |
| 16781  | 1      |        |        |        |
| 16793  | 1      |        |        |        |
| 16796  | 0      | 3      | 3      |        |
| 16810  | 0      |        |        |        |
| 16811  | 1      |        |        |        |
| 16813  | 1      |        |        |        |
| 16814  | 0      |        |        |        |
| 16831  | 1      |        |        |        |
| 16833  | 0      | 1      | 2      | 1      |
| 16839  | 0      |        | 1      | 2      |
| 16843  | 1      |        |        |        |
| 16860  | 1      |        |        |        |
| 16871  | 1      |        |        |        |
| 16881  | 0      | 1      | 1      |        |
| 16884  | 0      | 1      | 1      |        |
| 16891  | 1      |        |        |        |
| 16909  | 0      |        |        |        |
| 16911  | 1      |        |        |        |
| 16922  | 1      |        |        |        |
| 16935  | 0      |        | 2      |        |
| 16942  | 1      |        |        |        |
| 16950  | 1      |        |        |        |

| respid | Q31_99 | Q31a_1 | Q31a_2 | Q31a_3 |
|--------|--------|--------|--------|--------|
| 16952  | 0      |        | 2      | 2      |
| 16963  | 1      |        |        |        |
| 16967  | 0      |        |        |        |
| 16970  | 0      |        | 3      | 3      |
| 16976  | 0      | 2      | 2      | 2      |
| 16982  | 1      |        |        |        |
| 16995  | 1      |        |        |        |
| 17004  | 1      |        |        |        |
| 17006  | 1      |        |        |        |
| 17009  | 1      |        |        |        |
| 17021  | 1      |        |        |        |
| 17040  | 1      |        |        |        |
| 17041  | 1      |        |        |        |
| 17044  | 0      |        | 1      |        |
| 17046  | 0      |        | 2      |        |
| 17052  | 1      |        |        |        |
| 17055  | 1      |        |        |        |
| 17108  | 1      |        |        |        |
| 17109  | 1      |        |        |        |
| 17113  | 1      |        |        |        |
| 17115  | 0      |        |        |        |
| 17132  | 1      |        |        |        |
| 17135  | 0      |        | 2      |        |
| 17138  | 0      |        |        |        |
| 17141  | 1      |        |        |        |
| 17143  | 0      |        |        |        |
| 17148  | 1      |        |        |        |
| 17151  | 1      |        |        |        |
| 17153  | 1      |        |        |        |
| 17154  | 0      |        |        |        |
| 17157  | 0      |        |        |        |
| 17160  | 1      |        |        |        |



| respid | Q31_99 | Q31a_1 | Q31a_2 | Q31a_3 |
|--------|--------|--------|--------|--------|
| 17167  | 0      |        | 2      | 2      |
| 17169  | 1      |        |        |        |
| 17174  | 0      |        |        |        |
| 17179  | 1      |        |        |        |
| 17180  | 1      |        |        |        |
| 17182  | 1      |        |        |        |
| 17184  | 0      |        | 1      | 1      |
| 17186  | 1      |        |        |        |
| 17187  | 1      |        |        |        |
| 17192  | 0      | 1      | 5      | 3      |
| 17197  | 1      |        |        |        |
| 17217  | 1      |        |        |        |
| 17226  | 1      |        |        |        |
| 17228  | 1      |        |        |        |
| 17245  | 1      |        |        |        |
| 17247  | 1      |        |        |        |
| 17258  | 1      |        |        |        |
| 17259  | 0      |        |        |        |
| 17262  | 1      |        |        |        |
| 17265  | 0      |        | 1      |        |
| 17281  | 1      |        |        |        |
| 17282  | 0      |        |        |        |
| 17293  | 1      |        |        |        |
| 17306  | 0      |        |        | 1      |
| 17312  | 0      |        |        |        |
| 17318  | 0      |        |        |        |
| 17328  | 0      |        | 1      |        |
| 17343  | 1      |        |        |        |
| 17344  | 1      |        |        |        |
| 17348  | 1      |        |        |        |
| 17352  | 1      |        |        |        |
| 17355  | 1      |        |        |        |

| respid | Q31_99 | Q31a_1 | Q31a_2 | Q31a_3 |
|--------|--------|--------|--------|--------|
| 17356  | 1      |        |        |        |
| 17359  | 1      |        |        |        |
| 17373  | 0      |        |        | 3      |
| 17381  | 0      |        |        |        |
| 17388  | 1      |        |        |        |
| 17394  | 0      |        |        |        |
| 17401  | 1      |        |        |        |
| 17403  | 1      |        |        |        |
| 17411  | 1      |        |        |        |
| 17423  | 1      |        |        |        |
| 17427  | 1      |        |        |        |
| 17433  | 1      |        |        |        |
| 17441  | 1      |        |        |        |
| 17442  | 1      |        |        |        |
| 17447  | 1      |        |        |        |
| 17458  | 1      |        |        |        |
| 17474  | 1      |        |        |        |
| 17475  | 0      | 2      |        |        |
| 17476  | 0      | 2      | 2      |        |
| 17480  | 0      |        | 1      |        |
| 17484  | 1      |        |        |        |
| 17490  | 0      |        | 1      |        |
| 17491  | 0      |        | 1      |        |
| 17500  | 1      |        |        |        |
| 17507  | 1      |        |        |        |
| 17517  | 1      |        |        |        |
| 17520  | 1      |        |        |        |
| 17521  | 0      |        | 1      |        |
| 17531  | 1      |        |        |        |
| 17540  | 0      |        | 2      |        |
| 17550  | 0      |        |        |        |
| 17551  | 1      |        |        |        |

| respid | Q31_99 | Q31a_1 | Q31a_2 | Q31a_3 |
|--------|--------|--------|--------|--------|
| 17555  | 0      |        | 1      | 1      |
| 17556  | 0      | 1      | 2      | 2      |
| 17574  | 1      |        |        |        |
| 17575  | 1      |        |        |        |
| 17582  | 1      |        |        |        |
| 17587  | 1      |        |        |        |
| 17601  | 0      |        | 1      |        |
| 17607  | 1      |        |        |        |
| 17609  | 1      |        |        |        |
| 17611  | 0      |        | 1      | 1      |
| 17613  | 1      |        |        |        |
| 17615  | 0      |        | 1      |        |
| 17620  | 1      |        |        |        |
| 17624  | 0      |        | 2      | 2      |
| 17635  | 1      |        |        |        |
| 17643  | 1      |        |        |        |
| 17645  | 1      |        |        |        |
| 17646  | 0      |        |        | 1      |
| 17649  | 1      |        |        |        |
| 17658  | 0      |        |        |        |
| 17666  | 1      |        |        |        |
| 17670  | 0      |        |        | 1      |
| 17678  | 1      |        |        |        |
| 17679  | 1      |        |        |        |
| 17695  | 0      | 1      | 1      | 1      |
| 17697  | 1      |        |        |        |
| 17698  | 1      |        |        |        |
| 17723  | 0      |        | 1      |        |
| 17727  | 1      |        |        |        |
| 17734  | 1      |        |        |        |
| 17737  | 1      |        |        |        |
| 17748  | 0      |        |        |        |

| respid | Q31_99 | Q31a_1 | Q31a_2 | Q31a_3 |
|--------|--------|--------|--------|--------|
| 17749  | 1      |        |        |        |
| 17754  | 0      | 1      |        |        |
| 17766  | 1      |        |        |        |
| 17777  | 1      |        |        |        |
| 17780  | 1      |        |        |        |
| 17788  | 1      |        |        |        |
| 17801  | 0      |        |        |        |
| 17803  | 1      |        |        |        |
| 17807  | 1      |        |        |        |
| 17808  | 1      |        |        |        |
| 17809  | 1      |        |        |        |
| 17821  | 1      |        |        |        |
| 17827  | 1      |        |        |        |
| 17834  | 1      |        |        |        |
| 17838  | 0      |        |        |        |
| 17842  | 1      |        |        |        |
| 17862  | 1      |        |        |        |
| 17863  | 1      |        |        |        |
| 17871  | 0      |        |        |        |
| 17872  | 0      |        |        |        |
| 17903  | 0      |        | 2      | 1      |
| 17906  | 1      |        |        |        |
| 17910  | 0      | 3      | 3      | 3      |
| 17922  | 1      |        |        |        |
| 17923  | 0      |        |        |        |
| 17925  | 0      |        |        |        |
| 17926  | 1      |        |        |        |
| 17937  | 1      |        |        |        |
| 17956  | 1      |        |        |        |
| 17958  | 0      |        |        |        |
| 17985  | 1      |        |        |        |
| 17989  | 0      |        |        |        |

| respid | Q31_99 | Q31a_1 | Q31a_2 | Q31a_3 |
|--------|--------|--------|--------|--------|
| 17995  | 0      | 1      | 1      |        |
| 18000  | 0      |        | 1      |        |
| 18010  | 1      |        |        |        |
| 18015  | 1      |        |        |        |
| 18018  | 1      |        |        |        |
| 18031  | 0      |        | 1      |        |
| 18033  | 0      | 2      | 2      | 2      |
| 18036  | 0      |        | 1      | 1      |
| 18041  | 1      |        |        |        |
| 18068  | 1      |        |        |        |
| 18080  | 1      |        |        |        |
| 18081  | 1      |        |        |        |
| 18083  | 1      |        |        |        |
| 18113  | 0      |        | 3      | 3      |
| 18115  | 1      |        |        |        |
| 18117  | 0      | 4      | 3      | 4      |
| 18129  | 0      |        |        |        |
| 18132  | 0      |        |        |        |
| 18146  | 0      |        |        |        |
| 18147  | 0      |        |        |        |
| 18153  | 1      |        |        |        |
| 18154  | 1      |        |        |        |
| 18157  | 1      |        |        |        |
| 18166  | 1      |        |        |        |
| 18169  | 1      |        |        |        |
| 18171  | 0      |        |        |        |
| 18173  | 0      | 1      | 1      | 1      |
| 18204  | 1      |        |        |        |
| 18210  | 1      |        |        |        |
| 18212  | 1      |        |        |        |
| 18220  | 0      |        | 3      | 2      |
| 18221  | 1      |        |        |        |

| respid | Q31_99 | Q31a_1 | Q31a_2 | Q31a_3 |
|--------|--------|--------|--------|--------|
| 18228  | 1      |        |        |        |
| 18231  | 1      |        |        |        |
| 18233  | 0      |        |        |        |
| 18235  | 1      |        |        |        |
| 18237  | 1      |        |        |        |
| 18250  | 0      |        | 2      | 2      |
| 18253  | 1      |        |        |        |
| 18264  | 1      |        |        |        |
| 18285  | 1      |        |        |        |
| 18287  | 1      |        |        |        |
| 18296  | 0      |        |        | 2      |
| 18299  | 1      |        |        |        |
| 18313  | 0      |        | 1      |        |
| 18321  | 0      | 1      |        |        |
| 18324  | 1      |        |        |        |
| 18329  | 1      |        |        |        |
| 18332  | 1      |        |        |        |
| 18339  | 0      |        |        |        |
| 18340  | 0      |        |        |        |
| 18348  | 1      |        |        |        |
| 18355  | 1      |        |        |        |
| 18360  | 1      |        |        |        |
| 18380  | 0      | 2      | 2      | 1      |
| 18403  | 0      |        |        |        |
| 18405  | 1      |        |        |        |
| 18409  | 1      |        |        |        |
| 18445  | 1      |        |        |        |
| 18458  | 0      |        |        |        |
| 18477  | 0      |        | 1      |        |
| 18481  | 0      |        |        |        |
| 18491  | 1      |        |        |        |
| 18492  | 1      |        |        |        |

| respid | Q31_99 | Q31a_1 | Q31a_2 | Q31a_3 |
|--------|--------|--------|--------|--------|
| 18494  | 1      |        |        |        |
| 18495  | 1      |        |        |        |
| 18496  | 1      |        |        |        |
| 18507  | 0      |        |        |        |
| 18509  | 1      |        |        |        |
| 18510  | 1      |        |        |        |
| 18513  | 0      |        | 1      |        |
| 18525  | 1      |        |        |        |
| 18526  | 0      |        |        | 3      |
| 18527  | 1      |        |        |        |
| 18536  | 1      |        |        |        |
| 18540  | 1      |        |        |        |
| 18548  | 0      |        |        |        |
| 18550  | 1      |        |        |        |
| 18556  | 1      |        |        |        |
| 18561  | 1      |        |        |        |
| 18577  | 0      |        |        |        |
| 18580  | 0      |        |        | 1      |
| 18633  | 0      |        | 1      |        |
| 18635  | 1      |        |        |        |
| 18636  | 1      |        |        |        |
| 18645  | 0      |        | 3      |        |
| 18649  | 0      |        | 1      | 1      |
| 18664  | 1      |        |        |        |
| 18668  | 1      |        |        |        |
| 18682  | 0      |        |        | 3      |
| 18685  | 0      |        | 2      | 2      |
| 18688  | 0      |        |        | 1      |
| 18689  | 0      |        | 3      | 2      |
| 18693  | 0      |        |        |        |
| 18694  | 1      |        |        |        |
| 18705  | 1      |        |        |        |

| respid | Q31_99 | Q31a_1 | Q31a_2 | Q31a_3 |
|--------|--------|--------|--------|--------|
| 18710  | 0      |        |        |        |
| 18715  | 0      | 3      | 2      |        |
| 18718  | 1      |        |        |        |
| 18727  | 0      |        | 2      |        |
| 18732  | 0      |        |        |        |
| 18735  | 0      |        |        | 1      |
| 18742  | 1      |        |        |        |
| 18745  | 1      |        |        |        |
| 18747  | 1      |        |        |        |
| 18750  | 0      |        |        |        |
| 18751  | 0      |        |        |        |
| 18753  | 0      |        | 1      |        |
| 18754  | 1      |        |        |        |
| 18759  | 1      |        |        |        |
| 18780  | 1      |        |        |        |
| 18782  | 1      |        |        |        |
| 18807  | 0      |        |        |        |
| 18815  | 1      |        |        |        |
| 18818  | 0      |        | 1      | 1      |
| 18820  | 0      |        |        | 3      |
| 18823  | 0      | 4      | 5      | 5      |
| 18825  | 1      |        |        |        |
| 18828  | 1      |        |        |        |
| 18832  | 0      | 1      | 1      |        |
| 18834  | 0      |        | 2      |        |
| 18835  | 0      |        | 3      | 3      |
| 18837  | 0      |        |        |        |
| 18842  | 1      |        |        |        |
| 18846  | 1      |        |        |        |
| 18855  | 0      |        |        |        |
| 18856  | 1      |        |        |        |
| 18887  | 1      |        |        |        |



| respid | Q31_99 | Q31a_1 | Q31a_2 | Q31a_3 |
|--------|--------|--------|--------|--------|
| 18903  | 0      |        |        |        |
| 18906  | 0      |        |        | 2      |
| 18910  | 1      |        |        |        |
| 18919  | 0      |        | 1      |        |
| 18928  | 1      |        |        |        |
| 18931  | 0      |        | 1      | 1      |
| 18939  | 1      |        |        |        |
| 18946  | 0      |        | 1      |        |
| 18952  | 0      |        |        | 1      |
| 18954  | 1      |        |        |        |
| 18982  | 1      |        |        |        |
| 18986  | 1      |        |        |        |
| 18989  | 0      | 2      | 2      |        |
| 18990  | 1      |        |        |        |
| 18996  | 1      |        |        |        |
| 18998  | 1      |        |        |        |
| 19009  | 0      |        |        |        |
| 19010  | 1      |        |        |        |
| 19017  | 1      |        |        |        |
| 19018  | 1      |        |        |        |
| 19020  | 1      |        |        |        |
| 19027  | 1      |        |        |        |
| 19035  | 0      | 1      |        |        |
| 19037  | 0      |        | 2      | 1      |
| 19048  | 0      |        |        |        |
| 19051  | 0      |        | 2      |        |
| 19054  | 1      |        |        |        |
| 19057  | 0      |        |        | 1      |
| 19073  | 0      |        |        |        |
| 19075  | 1      |        |        |        |
| 19079  | 1      |        |        |        |
| 19087  | 0      |        | 1      |        |

| respid | Q31_99 | Q31a_1 | Q31a_2 | Q31a_3 |
|--------|--------|--------|--------|--------|
| 19090  | 1      |        |        |        |
| 19093  | 1      |        |        |        |
| 19099  | 0      |        |        |        |
| 19100  | 0      |        |        |        |
| 19101  | 1      |        |        |        |
| 19105  | 0      |        | 1      |        |
| 19111  | 1      |        |        |        |
| 19112  | 1      |        |        |        |
| 19117  | 0      |        | 3      |        |
| 19122  | 1      |        |        |        |
| 19126  | 1      |        |        |        |
| 19127  | 1      |        |        |        |
| 19131  | 1      |        |        |        |
| 19134  | 1      |        |        |        |
| 19149  | 0      |        | 1      | 1      |
| 19151  | 0      |        |        |        |
| 19164  | 1      |        |        |        |
| 19166  | 0      |        | 2      |        |
| 19172  | 0      |        | 1      |        |
| 19173  | 1      |        |        |        |
| 19180  | 1      |        |        |        |
| 19185  | 1      |        |        |        |
| 19189  | 1      |        |        |        |
| 19191  | 1      |        |        |        |
| 19198  | 0      |        |        | 1      |
| 19203  | 1      |        |        |        |
| 19209  | 0      |        | 1      |        |
| 19210  | 1      |        |        |        |
| 19218  | 1      |        |        |        |
| 19220  | 1      |        |        |        |
| 19225  | 1      |        |        |        |
| 19227  | 1      |        |        |        |

| respid | Q31_99 | Q31a_1 | Q31a_2 | Q31a_3 |
|--------|--------|--------|--------|--------|
| 19228  | 1      |        |        |        |
| 19243  | 0      |        | 1      |        |
| 19244  | 1      |        |        |        |
| 19246  | 1      |        |        |        |
| 19248  | 1      |        |        |        |
| 19249  | 1      |        |        |        |
| 19252  | 0      |        |        |        |
| 19255  | 1      |        |        |        |
| 19257  | 1      |        |        |        |
| 19274  | 1      |        |        |        |
| 19279  | 1      |        |        |        |
| 19291  | 1      |        |        |        |
| 19292  | 0      |        |        | 1      |
| 19308  | 1      |        |        |        |
| 19310  | 1      |        |        |        |
| 19311  | 1      |        |        |        |
| 19326  | 0      |        |        | 1      |
| 19327  | 1      |        |        |        |
| 19329  | 1      |        |        |        |
| 19330  | 0      |        | 3      |        |
| 19333  | 0      | 2      | 2      | 2      |
| 19336  | 1      |        |        |        |
| 19343  | 0      |        |        | 1      |
| 19348  | 1      |        |        |        |
| 19349  | 0      |        | 2      |        |
| 19352  | 0      |        | 1      | 1      |
| 19356  | 1      |        |        |        |
| 19357  | 0      |        | 1      |        |
| 19358  | 0      | 1      | 1      |        |
| 19367  | 0      |        |        |        |
| 19376  | 1      |        |        |        |
| 19377  | 1      |        |        |        |

| respid | Q31_99 | Q31a_1 | Q31a_2 | Q31a_3 |
|--------|--------|--------|--------|--------|
| 19380  | 1      |        |        |        |
| 19384  | 1      |        |        |        |
| 19391  | 0      |        |        |        |
| 19397  | 1      |        |        |        |
| 19398  | 1      |        |        |        |
| 19401  | 1      |        |        |        |
| 19402  | 1      |        |        |        |
| 19403  | 1      |        |        |        |
| 19405  | 1      |        |        |        |
| 19407  | 1      |        |        |        |
| 19415  | 0      |        |        | 2      |
| 19420  | 1      |        |        |        |
| 19423  | 0      |        | 1      |        |
| 19424  | 0      |        | 2      |        |
| 19426  | 0      | 2      |        | 1      |
| 19429  | 1      |        |        |        |
| 19435  | 0      |        | 3      | 3      |
| 19441  | 0      |        | 1      | 1      |
| 19450  | 1      |        |        |        |
| 19456  | 0      |        |        |        |
| 19457  | 1      |        |        |        |
| 19463  | 0      |        | 1      |        |
| 19467  | 0      |        |        | 1      |
| 19468  | 1      |        |        |        |
| 19471  | 0      |        |        | 1      |
| 19473  | 1      |        |        |        |
| 19478  | 0      |        |        |        |
| 19480  | 1      |        |        |        |
| 19481  | 0      |        | 1      | 1      |
| 19484  | 1      |        |        |        |
| 19487  | 1      |        |        |        |
| 19491  | 0      |        | 1      |        |

| respid | Q31_99 | Q31a_1 | Q31a_2 | Q31a_3 |
|--------|--------|--------|--------|--------|
| 19495  | 0      |        |        |        |
| 19498  | 0      | 1      |        |        |
| 19500  | 0      |        |        |        |
| 19501  | 0      |        | 2      | 2      |
| 19503  | 1      |        |        |        |
| 19506  | 1      |        |        |        |
| 19508  | 1      |        |        |        |
| 19509  | 1      |        |        |        |
| 19518  | 0      | 1      | 1      | 1      |
| 19520  | 1      |        |        |        |
| 19536  | 0      |        |        | 1      |
| 19538  | 0      |        |        | 1      |
| 19541  | 0      |        | 2      | 2      |
| 19548  | 1      |        |        |        |
| 19553  | 1      |        |        |        |
| 19556  | 1      |        |        |        |
| 19559  | 1      |        |        |        |
| 19561  | 1      |        |        |        |
| 19562  | 1      |        |        |        |
| 19564  | 1      |        |        |        |
| 19567  | 0      |        | 2      | 3      |
| 19571  | 0      |        |        |        |
| 19576  | 0      |        |        |        |
| 19578  | 0      |        |        | 1      |
| 19606  | 1      |        |        |        |
| 19607  | 1      |        |        |        |
| 19608  | 0      |        |        |        |
| 19612  | 0      |        | 2      | 2      |
| 19618  | 0      |        | 2      | 2      |
| 19621  | 1      |        |        |        |
| 19624  | 0      |        |        |        |
| 19630  | 1      |        |        |        |

| respid | Q31_99 | Q31a_1 | Q31a_2 | Q31a_3 |
|--------|--------|--------|--------|--------|
| 19637  | 1      |        |        |        |
| 19639  | 0      |        |        |        |
| 19647  | 1      |        |        |        |
| 19648  | 1      |        |        |        |
| 19660  | 1      |        |        |        |
| 19662  | 0      | 3      | 3      | 3      |
| 19669  | 1      |        |        |        |
| 19680  | 1      |        |        |        |
| 19682  | 0      |        |        | 1      |
| 19686  | 0      |        | 4      |        |
| 19700  | 1      |        |        |        |
| 19701  | 1      |        |        |        |
| 19704  | 1      |        |        |        |
| 19706  | 0      |        | 1      |        |
| 19707  | 1      |        |        |        |
| 19717  | 0      |        | 2      | 2      |
| 19718  | 1      |        |        |        |
| 19721  | 0      |        | 2      |        |
| 19722  | 1      |        |        |        |
| 19729  | 1      |        |        |        |
| 19738  | 0      |        | 2      |        |
| 19741  | 1      |        |        |        |
| 19742  | 0      |        |        |        |
| 19747  | 1      |        |        |        |
| 19748  | 0      |        |        | 3      |
| 19749  | 0      |        | 1      |        |
| 19756  | 1      |        |        |        |
| 19771  | 0      |        | 2      |        |
| 19772  | 0      |        | 3      | 3      |
| 19775  | 1      |        |        |        |
| 19783  | 1      |        |        |        |
| 19787  | 1      |        |        |        |

| respid | Q31_99 | Q31a_1 | Q31a_2 | Q31a_3 |
|--------|--------|--------|--------|--------|
| 19790  | 1      |        |        |        |
| 19797  | 1      |        |        |        |
| 19802  | 1      |        |        |        |
| 19808  | 1      |        |        |        |
| 19810  | 1      |        |        |        |
| 19811  | 0      |        |        |        |
| 19812  | 0      |        | 1      |        |
| 19821  | 1      |        |        |        |
| 19826  | 1      |        |        |        |
| 19827  | 1      |        |        |        |
| 19830  | 1      |        |        |        |
| 19834  | 1      |        |        |        |
| 19838  | 0      |        | 1      | 1      |
| 19843  | 1      |        |        |        |
| 19845  | 0      |        |        | 2      |
| 19846  | 1      |        |        |        |
| 19852  | 0      |        | 3      |        |
| 19855  | 1      |        |        |        |
| 19858  | 0      |        |        |        |
| 19861  | 1      |        |        |        |
| 19863  | 0      |        |        |        |
| 19868  | 1      |        |        |        |
| 19874  | 1      |        |        |        |
| 19876  | 1      |        |        |        |
| 19880  | 0      |        | 1      | 1      |
| 19885  | 1      |        |        |        |
| 19890  | 1      |        |        |        |
| 19894  | 1      |        |        |        |
| 19895  | 1      |        |        |        |
| 19897  | 0      |        | 1      |        |
| 19906  | 0      | 1      |        |        |
| 19908  | 1      |        |        |        |

| respid | Q31_99 | Q31a_1 | Q31a_2 | Q31a_3 |
|--------|--------|--------|--------|--------|
| 19912  | 0      |        | 1      |        |
| 19913  | 1      |        |        |        |
| 19914  | 0      | 3      | 3      | 2      |
| 19918  | 0      |        | 1      |        |
| 19924  | 0      | 1      | 1      |        |
| 19936  | 1      |        |        |        |
| 19940  | 1      |        |        |        |
| 19945  | 0      |        |        |        |
| 19948  | 1      |        |        |        |
| 19959  | 1      |        |        |        |
| 19961  | 1      |        |        |        |
| 19962  | 0      |        |        |        |
| 19965  | 1      |        |        |        |
| 19966  | 0      |        |        | 1      |
| 19973  | 0      |        |        |        |
| 19981  | 1      |        |        |        |
| 19986  | 1      |        |        |        |
| 19989  | 1      |        |        |        |
| 19998  | 1      |        |        |        |
| 20001  | 1      |        |        |        |
| 20005  | 1      |        |        |        |
| 20013  | 0      | 3      | 4      | 3      |
| 20015  | 1      |        |        |        |
| 20017  | 0      |        |        |        |
| 20020  | 0      |        | 1      |        |
| 20021  | 1      |        |        |        |
| 20026  | 1      |        |        |        |
| 20028  | 1      |        |        |        |
| 20030  | 0      | 1      | 3      | 3      |
| 20031  | 1      |        |        |        |
| 20034  | 1      |        |        |        |
| 20035  | 1      |        |        |        |



| respid | Q31_99 | Q31a_1 | Q31a_2 | Q31a_3 |
|--------|--------|--------|--------|--------|
| 20040  | 0      | 2      | 2      | 1      |
| 20045  | 1      |        |        |        |
| 20048  | 0      |        |        |        |
| 20053  | 0      |        | 1      | 1      |
| 20064  | 1      |        |        |        |
| 20071  | 1      |        |        |        |
| 20072  | 1      |        |        |        |
| 20076  | 0      | 1      | 1      | 1      |
| 20081  | 0      |        |        |        |
| 20082  | 0      | 1      |        | 2      |
| 20083  | 1      |        |        |        |
| 20088  | 1      |        |        |        |
| 20089  | 0      |        |        |        |
| 20099  | 0      |        |        |        |
| 20101  | 1      |        |        |        |
| 20102  | 1      |        |        |        |
| 20109  | 1      |        |        |        |
| 20118  | 0      | 1      | 1      |        |
| 20119  | 1      |        |        |        |
| 20124  | 1      |        |        |        |
| 20126  | 1      |        |        |        |
| 20130  | 1      |        |        |        |
| 20131  | 0      | 1      |        |        |
| 20134  | 0      |        | 1      |        |
| 20146  | 0      |        | 2      |        |
| 20152  | 1      |        |        |        |
| 20155  | 1      |        |        |        |
| 20156  | 1      |        |        |        |
| 20157  | 1      |        |        |        |
| 20164  | 0      | 1      |        |        |
| 20168  | 1      |        |        |        |
| 20173  | 0      |        |        |        |

| respid | Q31_99 | Q31a_1 | Q31a_2 | Q31a_3 |
|--------|--------|--------|--------|--------|
| 20174  | 1      |        |        |        |
| 20175  | 0      | 2      |        |        |
| 20189  | 1      |        |        |        |
| 20190  | 0      |        | 1      |        |
| 20201  | 1      |        |        |        |
| 20202  | 1      |        |        |        |
| 20204  | 1      |        |        |        |
| 20206  | 1      |        |        |        |
| 20207  | 1      |        |        |        |
| 20212  | 0      | 1      | 1      | 2      |
| 20213  | 0      |        | 2      |        |
| 20217  | 1      |        |        |        |
| 20222  | 1      |        |        |        |
| 20227  | 1      |        |        |        |
| 20228  | 0      |        | 5      | 5      |
| 20238  | 1      |        |        |        |
| 20242  | 1      |        |        |        |
| 20246  | 0      | 1      |        |        |
| 20255  | 0      |        |        |        |
| 20256  | 0      |        |        |        |
| 20259  | 0      |        | 2      |        |
| 20262  | 1      |        |        |        |
| 20274  | 1      |        |        |        |
| 20283  | 0      | 1      | 2      | 2      |
| 20284  | 1      |        |        |        |
| 20291  | 1      |        |        |        |
| 20292  | 0      |        | 1      |        |
| 20293  | 0      |        |        | 1      |
| 20298  | 1      |        |        |        |
| 20301  | 1      |        |        |        |
| 20303  | 1      |        |        |        |
| 20309  | 1      |        |        |        |

| respid | Q31_99 | Q31a_1 | Q31a_2 | Q31a_3 |
|--------|--------|--------|--------|--------|
| 20318  | 0      |        |        |        |
| 20324  | 1      |        |        |        |
| 20335  | 1      |        |        |        |
| 20336  | 0      |        | 1      |        |
| 20339  | 0      |        |        |        |
| 20348  | 1      |        |        |        |
| 20351  | 1      |        |        |        |
| 20353  | 0      |        |        | 1      |
| 20356  | 1      |        |        |        |
| 20357  | 1      |        |        |        |
| 20366  | 1      |        |        |        |
| 20369  | 0      |        | 3      | 2      |
| 20372  | 1      |        |        |        |
| 20375  | 1      |        |        |        |
| 20379  | 1      |        |        |        |
| 20380  | 1      |        |        |        |
| 20396  | 0      |        | 2      | 2      |
| 20398  | 0      |        |        |        |
| 20412  | 1      |        |        |        |
| 20415  | 1      |        |        |        |
| 20424  | 0      |        | 2      | 2      |
| 20434  | 1      |        |        |        |
| 20435  | 0      |        |        |        |
| 20440  | 1      |        |        |        |
| 20441  | 1      |        |        |        |
| 20445  | 1      |        |        |        |
| 20446  | 0      |        | 3      |        |
| 20450  | 0      |        | 1      |        |
| 20453  | 0      |        |        | 2      |
| 20458  | 1      |        |        |        |
| 20464  | 1      |        |        |        |
| 20471  | 0      |        | 1      |        |

| respid | Q31_99 | Q31a_1 | Q31a_2 | Q31a_3 |
|--------|--------|--------|--------|--------|
| 20473  | 1      |        |        |        |
| 20474  | 0      |        |        | 1      |
| 20477  | 1      |        |        |        |
| 20479  | 0      | 1      | 1      |        |
| 20485  | 0      |        | 1      |        |
| 20487  | 1      |        |        |        |
| 20488  | 1      |        |        |        |
| 20494  | 0      |        | 1      |        |
| 20502  | 0      |        | 3      | 2      |
| 20503  | 1      |        |        |        |
| 20510  | 1      |        |        |        |
| 20512  | 1      |        |        |        |
| 20516  | 0      |        |        |        |
| 20522  | 0      |        | 2      |        |
| 20527  | 0      |        | 1      |        |
| 20529  | 0      | 1      | 1      | 1      |
| 20535  | 0      | 1      | 1      |        |
| 20543  | 1      |        |        |        |
| 20546  | 0      | 1      |        |        |
| 20548  | 1      |        |        |        |
| 20552  | 1      |        |        |        |
| 20556  | 1      |        |        |        |
| 20566  | 1      |        |        |        |
| 20576  | 1      |        |        |        |
| 20587  | 1      |        |        |        |
| 20589  | 1      |        |        |        |
| 20593  | 1      |        |        |        |
| 20594  | 0      |        | 2      |        |
| 20602  | 0      |        | 1      |        |
| 20607  | 1      |        |        |        |
| 20608  | 1      |        |        |        |
| 20611  | 1      |        |        |        |

| respid | Q31_99 | Q31a_1 | Q31a_2 | Q31a_3 |
|--------|--------|--------|--------|--------|
| 20612  | 0      |        | 1      |        |
| 20615  | 0      |        | 1      |        |
| 20625  | 0      |        | 1      |        |
| 20630  | 0      |        |        |        |
| 20639  | 1      |        |        |        |
| 20643  | 1      |        |        |        |
| 20645  | 1      |        |        |        |
| 20647  | 0      |        |        | 1      |
| 20652  | 0      | 2      | 1      | 1      |
| 20661  | 1      |        |        |        |
| 20665  | 1      |        |        |        |
| 20679  | 1      |        |        |        |
| 20682  | 0      |        | 2      |        |
| 20683  | 1      |        |        |        |
| 20700  | 1      |        |        |        |
| 20702  | 0      |        |        |        |
| 20709  | 0      |        |        | 1      |
| 20715  | 0      |        | 2      |        |
| 20718  | 0      |        |        | 1      |
| 20722  | 1      |        |        |        |
| 20729  | 1      |        |        |        |
| 20732  | 1      |        |        |        |
| 20746  | 0      |        | 3      | 2      |
| 20747  | 1      |        |        |        |
| 20758  | 1      |        |        |        |
| 20767  | 1      |        |        |        |
| 20777  | 1      |        |        |        |
| 20778  | 1      |        |        |        |
| 20780  | 0      |        |        |        |
| 20800  | 0      |        |        |        |
| 20810  | 1      |        |        |        |
| 20814  | 1      |        |        |        |

| respid | Q31_99 | Q31a_1 | Q31a_2 | Q31a_3 |
|--------|--------|--------|--------|--------|
| 20816  | 1      |        |        |        |
| 20832  | 0      |        | 2      | 2      |
| 20838  | 0      | 2      | 2      |        |
| 20841  | 0      |        | 1      |        |
| 20848  | 1      |        |        |        |
| 20850  | 1      |        |        |        |
| 20851  | 1      |        |        |        |
| 20861  | 1      |        |        |        |
| 20870  | 0      |        |        |        |
| 20880  | 1      |        |        |        |
| 20883  | 1      |        |        |        |
| 20894  | 0      | 2      | 1      | 1      |
| 20896  | 0      | 2      | 2      |        |
| 20901  | 0      |        |        |        |
| 20903  | 0      |        | 1      |        |
| 20909  | 1      |        |        |        |
| 20919  | 0      |        |        |        |
| 20925  | 0      |        |        |        |
| 20935  | 1      |        |        |        |
| 20939  | 0      |        |        | 2      |
| 20956  | 0      |        | 3      |        |
| 20970  | 1      |        |        |        |
| 20974  | 1      |        |        |        |
| 20975  | 1      |        |        |        |
| 20984  | 0      |        | 2      | 2      |
| 20988  | 1      |        |        |        |
| 20996  | 0      | 1      |        | 1      |
| 20998  | 1      |        |        |        |
| 21007  | 1      |        |        |        |
| 21008  | 1      |        |        |        |
| 21014  | 1      |        |        |        |
| 21020  | 1      |        |        |        |

| respid | Q31_99 | Q31a_1 | Q31a_2 | Q31a_3 |
|--------|--------|--------|--------|--------|
| 21022  | 0      | 1      | 1      | 1      |
| 21024  | 1      |        |        |        |
| 21026  | 0      |        |        |        |
| 21027  | 1      |        |        |        |
| 21030  | 1      |        |        |        |
| 21032  | 0      |        |        |        |
| 21040  | 1      |        |        |        |
| 21045  | 1      |        |        |        |
| 21058  | 0      |        |        |        |
| 21064  | 0      |        | 1      |        |
| 21073  | 1      |        |        |        |
| 21086  | 0      |        | 3      | 2      |
| 21092  | 0      | 1      |        | 1      |
| 21096  | 0      |        | 2      |        |
| 21103  | 0      |        | 1      |        |
| 21120  | 0      | 2      | 2      | 2      |
| 21125  | 1      |        |        |        |
| 21126  | 0      |        |        |        |
| 21132  | 1      |        |        |        |
| 21139  | 0      |        |        |        |
| 21147  | 1      |        |        |        |
| 21148  | 0      |        |        | 1      |
| 21149  | 0      |        | 2      |        |
| 21164  | 1      |        |        |        |
| 21165  | 1      |        |        |        |
| 21171  | 0      |        |        |        |
| 21176  | 1      |        |        |        |
| 21187  | 0      | 2      | 2      |        |
| 21192  | 0      | 1      | 2      |        |
| 21198  | 1      |        |        |        |
| 21199  | 0      |        |        | 1      |
| 21206  | 0      |        | 3      | 3      |

| respid | Q31_99 | Q31a_1 | Q31a_2 | Q31a_3 |
|--------|--------|--------|--------|--------|
| 21212  | 1      |        |        |        |
| 21216  | 1      |        |        |        |
| 21217  | 0      |        |        |        |
| 21228  | 1      |        |        |        |
| 21229  | 0      |        | 1      |        |
| 21230  | 0      | 1      |        | 1      |
| 21243  | 0      |        | 2      |        |
| 21247  | 0      |        |        |        |
| 21253  | 0      |        |        |        |
| 21264  | 1      |        |        |        |
| 21265  | 1      |        |        |        |
| 21273  | 0      |        |        |        |
| 21275  | 1      |        |        |        |
| 21278  | 0      |        |        | 1      |
| 21291  | 0      |        | 2      | 3      |
| 21298  | 1      |        |        |        |
| 21301  | 1      |        |        |        |
| 21312  | 0      |        |        |        |
| 21323  | 1      |        |        |        |
| 21325  | 1      |        |        |        |
| 21341  | 1      |        |        |        |
| 21349  | 0      |        | 2      | 2      |
| 21350  | 0      | 1      | 2      |        |
| 21354  | 0      |        | 2      | 2      |
| 21372  | 0      |        | 2      | 1      |
| 21373  | 0      |        |        |        |
| 21378  | 0      |        | 1      |        |
| 21393  | 1      |        |        |        |
| 21401  | 0      |        | 1      | 1      |
| 21405  | 1      |        |        |        |
| 21406  | 1      |        |        |        |
| 21407  | 0      |        | 1      |        |



| respid | Q31_99 | Q31a_1 | Q31a_2 | Q31a_3 |
|--------|--------|--------|--------|--------|
| 21418  | 1      |        |        |        |
| 21420  | 1      |        |        |        |
| 21421  | 1      |        |        |        |
| 21446  | 1      |        |        |        |
| 21449  | 0      | 3      |        |        |
| 21452  | 1      |        |        |        |
| 21455  | 0      |        |        | 1      |
| 21469  | 0      |        |        | 1      |
| 21471  | 0      |        |        |        |
| 21472  | 0      |        | 1      |        |
| 21474  | 1      |        |        |        |
| 21479  | 1      |        |        |        |
| 21485  | 1      |        |        |        |
| 21512  | 1      |        |        |        |
| 21513  | 1      |        |        |        |
| 21514  | 1      |        |        |        |
| 21520  | 0      |        | 2      |        |
| 21539  | 1      |        |        |        |
| 21553  | 1      |        |        |        |
| 21560  | 1      |        |        |        |
| 21561  | 1      |        |        |        |
| 21563  | 0      |        | 1      |        |
| 21565  | 1      |        |        |        |
| 21582  | 0      |        | 2      | 2      |
| 21584  | 1      |        |        |        |
| 21585  | 1      |        |        |        |
| 21586  | 1      |        |        |        |
| 21587  | 0      |        | 2      |        |
| 21590  | 0      |        |        |        |
| 21601  | 0      |        | 1      |        |
| 21611  | 0      |        |        |        |
| 21612  | 0      |        | 1      |        |

| respid | Q31_99 | Q31a_1 | Q31a_2 | Q31a_3 |
|--------|--------|--------|--------|--------|
| 21625  | 0      | 3      | 3      | 3      |
| 21633  | 1      |        |        |        |
| 21640  | 1      |        |        |        |
| 21647  | 1      |        |        |        |
| 21648  | 0      | 2      | 3      | 2      |
| 21656  | 1      |        |        |        |
| 21657  | 1      |        |        |        |
| 21658  | 0      |        | 3      |        |
| 21665  | 0      |        |        |        |
| 21666  | 0      |        | 4      |        |
| 21668  | 0      |        | 3      |        |
| 21673  | 0      |        | 2      | 2      |
| 21681  | 1      |        |        |        |
| 21682  | 1      |        |        |        |
| 21685  | 1      |        |        |        |
| 21692  | 0      |        |        |        |
| 21697  | 0      |        | 1      |        |
| 21711  | 0      |        | 3      |        |
| 21715  | 0      |        |        |        |
| 21726  | 1      |        |        |        |
| 21748  | 1      |        |        |        |
| 21761  | 0      |        |        | 1      |
| 21769  | 0      | 3      | 3      |        |
| 21774  | 0      |        |        | 2      |
| 21778  | 1      |        |        |        |
| 21785  | 1      |        |        |        |
| 21799  | 1      |        |        |        |
| 21820  | 0      | 4      |        |        |
| 21837  | 0      |        | 1      |        |
| 21845  | 0      | 2      | 3      | 2      |
| 21846  | 1      |        |        |        |
| 21849  | 0      |        |        |        |

| respid | Q31_99 | Q31a_1 | Q31a_2 | Q31a_3 |
|--------|--------|--------|--------|--------|
| 21850  | 1      |        |        |        |
| 21855  | 1      |        |        |        |
| 21859  | 1      |        |        |        |
| 21861  | 0      | 1      | 2      |        |
| 21866  | 1      |        |        |        |
| 21873  | 0      |        |        |        |
| 21876  | 1      |        |        |        |
| 21882  | 1      |        |        |        |
| 21884  | 0      |        |        | 1      |
| 21887  | 1      |        |        |        |
| 21892  | 1      |        |        |        |
| 21907  | 0      |        |        |        |
| 21910  | 0      | 4      | 4      | 3      |
| 21912  | 0      |        | 2      |        |
| 21914  | 0      |        |        |        |
| 21925  | 1      |        |        |        |
| 21937  | 1      |        |        |        |
| 21938  | 1      |        |        |        |
| 21940  | 1      |        |        |        |
| 21942  | 1      |        |        |        |
| 21947  | 1      |        |        |        |
| 21948  | 1      |        |        |        |
| 21961  | 0      | 1      | 1      | 1      |
| 21977  | 0      |        |        |        |
| 21983  | 1      |        |        |        |
| 21986  | 0      | 2      | 2      |        |
| 21988  | 0      |        |        |        |
| 21996  | 1      |        |        |        |
| 21997  | 1      |        |        |        |
| 22005  | 1      |        |        |        |
| 22013  | 1      |        |        |        |
| 22018  | 1      |        |        |        |

| respid | Q31_99 | Q31a_1 | Q31a_2 | Q31a_3 |
|--------|--------|--------|--------|--------|
| 22019  | 0      |        |        | 1      |
| 22071  | 0      |        |        | 1      |
| 22082  | 1      |        |        |        |
| 22085  | 1      |        |        |        |
| 22092  | 1      |        |        |        |
| 22097  | 1      |        |        |        |
| 22111  | 1      |        |        |        |
| 22118  | 1      |        |        |        |
| 22132  | 1      |        |        |        |
| 22133  | 1      |        |        |        |
| 22139  | 1      |        |        |        |
| 22142  | 0      |        |        |        |
| 22146  | 1      |        |        |        |
| 22181  | 1      |        |        |        |
| 22202  | 1      |        |        |        |
| 22214  | 1      |        |        |        |
| 22223  | 1      |        |        |        |
| 22227  | 0      |        | 2      | 2      |
| 22229  | 0      |        |        | 1      |
| 22239  | 1      |        |        |        |
| 22245  | 0      | 3      | 3      | 3      |
| 22256  | 1      |        |        |        |
| 22260  | 1      |        |        |        |
| 22298  | 0      |        |        |        |
| 22321  | 0      |        |        | 1      |
| 22340  | 1      |        |        |        |
| 22346  | 0      | 3      | 3      |        |
| 22356  | 1      |        |        |        |
| 22361  | 1      |        |        |        |
| 22364  | 1      |        |        |        |
| 22368  | 1      |        |        |        |
| 22374  | 0      |        |        | 4      |

| respid | Q31_99 | Q31a_1 | Q31a_2 | Q31a_3 |
|--------|--------|--------|--------|--------|
| 22375  | 1      |        |        |        |
| 22377  | 1      |        |        |        |
| 22383  | 1      |        |        |        |
| 22387  | 0      | 1      | 1      |        |
| 22392  | 1      |        |        |        |
| 22393  | 1      |        |        |        |
| 22394  | 1      |        |        |        |
| 22395  | 1      |        |        |        |
| 22401  | 1      |        |        |        |
| 22407  | 1      |        |        |        |
| 22410  | 0      |        |        |        |
| 22418  | 0      |        | 1      |        |
| 22421  | 1      |        |        |        |
| 22423  | 1      |        |        |        |
| 22425  | 1      |        |        |        |
| 22427  | 1      |        |        |        |
| 22431  | 0      |        | 3      | 2      |
| 22435  | 1      |        |        |        |
| 22436  | 0      |        | 1      |        |
| 22442  | 1      |        |        |        |
| 22444  | 0      |        |        |        |
| 22445  | 0      |        | 3      | 2      |
| 22446  | 1      |        |        |        |
| 22448  | 0      |        | 2      | 2      |
| 22449  | 1      |        |        |        |
| 22450  | 0      |        | 1      |        |
| 22453  | 0      | 3      | 4      | 3      |
| 22465  | 0      | 2      | 2      |        |
| 22472  | 1      |        |        |        |
| 22475  | 0      | 3      | 3      |        |
| 22478  | 0      |        |        |        |
| 22491  | 1      |        |        |        |

| respid | Q31_99 | Q31a_1 | Q31a_2 | Q31a_3 |
|--------|--------|--------|--------|--------|
| 22497  | 0      |        |        |        |
| 22498  | 0      | 1      |        | 1      |
| 22499  | 1      |        |        |        |
| 22503  | 1      |        |        |        |
| 22507  | 1      |        |        |        |
| 22513  | 0      |        |        | 1      |
| 22517  | 0      |        |        |        |
| 22524  | 0      |        |        |        |
| 22528  | 1      |        |        |        |
| 22544  | 0      |        |        |        |
| 22571  | 1      |        |        |        |
| 22576  | 0      |        |        |        |
| 22579  | 1      |        |        |        |
| 22583  | 0      |        |        |        |
| 22591  | 0      |        | 2      |        |
| 22592  | 1      |        |        |        |
| 22612  | 0      |        | 2      |        |
| 22613  | 0      |        |        | 1      |
| 22615  | 0      |        | 2      |        |
| 22621  | 1      |        |        |        |
| 22625  | 1      |        |        |        |
| 22628  | 1      |        |        |        |
| 22632  | 1      |        |        |        |
| 22639  | 1      |        |        |        |
| 22648  | 1      |        |        |        |
| 22649  | 0      |        |        |        |
| 22655  | 1      |        |        |        |
| 22659  | 1      |        |        |        |
| 22660  | 1      |        |        |        |
| 22666  | 1      |        |        |        |
| 22667  | 1      |        |        |        |
| 22670  | 1      |        |        |        |

| respid | Q31_99 | Q31a_1 | Q31a_2 | Q31a_3 |
|--------|--------|--------|--------|--------|
| 22681  | 1      |        |        |        |
| 22683  | 0      |        |        | 1      |
| 22688  | 1      |        |        |        |
| 22695  | 1      |        |        |        |
| 22696  | 1      |        |        |        |
| 22705  | 0      |        | 3      | 3      |
| 22718  | 0      |        | 2      | 1      |
| 22720  | 1      |        |        |        |
| 22724  | 0      |        | 2      |        |
| 22728  | 1      |        |        |        |
| 22751  | 1      |        |        |        |
| 22782  | 0      |        |        |        |
| 22786  | 0      |        |        |        |
| 22788  | 1      |        |        |        |
| 22810  | 0      | 1      | 2      | 2      |
| 22816  | 1      |        |        |        |
| 22818  | 0      |        | 1      |        |
| 22854  | 1      |        |        |        |
| 22858  | 0      |        | 1      | 1      |
| 22862  | 1      |        |        |        |
| 22865  | 1      |        |        |        |
| 22868  | 0      |        |        | 1      |
| 22869  | 0      |        |        |        |
| 22873  | 1      |        |        |        |
| 22875  | 1      |        |        |        |
| 22876  | 1      |        |        |        |
| 22882  | 1      |        |        |        |
| 22884  | 0      |        |        |        |
| 22887  | 0      | 1      | 2      | 2      |
| 22888  | 1      |        |        |        |
| 22900  | 1      |        |        |        |
| 22901  | 1      |        |        |        |

| respid | Q31_99 | Q31a_1 | Q31a_2 | Q31a_3 |
|--------|--------|--------|--------|--------|
| 22912  | 0      |        |        |        |
| 22913  | 1      |        |        |        |
| 22921  | 1      |        |        |        |
| 22925  | 1      |        |        |        |
| 22940  | 1      |        |        |        |
| 22941  | 1      |        |        |        |
| 22947  | 1      |        |        |        |
| 22948  | 1      |        |        |        |
| 22964  | 0      | 2      | 2      | 2      |
| 22966  | 1      |        |        |        |
| 22969  | 1      |        |        |        |
| 22971  | 1      |        |        |        |
| 22988  | 1      |        |        |        |
| 22990  | 1      |        |        |        |
| 23000  | 1      |        |        |        |
| 23016  | 1      |        |        |        |
| 23026  | 0      |        |        |        |
| 23035  | 1      |        |        |        |
| 23037  | 0      |        |        | 1      |
| 23044  | 0      |        |        |        |
| 23046  | 1      |        |        |        |
| 23047  | 0      |        |        | 1      |
| 23049  | 1      |        |        |        |
| 23055  | 0      |        |        |        |
| 23066  | 1      |        |        |        |
| 23075  | 1      |        |        |        |
| 23081  | 0      |        |        |        |
| 23087  | 1      |        |        |        |
| 23094  | 1      |        |        |        |
| 23099  | 1      |        |        |        |
| 23101  | 1      |        |        |        |
| 23105  | 1      |        |        |        |



| respid | Q31_99 | Q31a_1 | Q31a_2 | Q31a_3 |
|--------|--------|--------|--------|--------|
| 23115  | 0      |        |        |        |
| 23121  | 0      |        |        | 1      |
| 23127  | 0      |        | 1      |        |
| 23131  | 1      |        |        |        |
| 23134  | 1      |        |        |        |
| 23145  | 1      |        |        |        |
| 23151  | 1      |        |        |        |
| 23161  | 0      |        |        | 1      |
| 23169  | 0      |        | 2      | 2      |
| 23173  | 1      |        |        |        |
| 23174  | 1      |        |        |        |
| 23186  | 0      |        | 3      | 2      |
| 23195  | 1      |        |        |        |
| 23197  | 0      |        |        |        |
| 23198  | 1      |        |        |        |
| 23203  | 1      |        |        |        |
| 23204  | 1      |        |        |        |
| 23212  | 1      |        |        |        |
| 23214  | 1      |        |        |        |
| 23221  | 1      |        |        |        |
| 23237  | 1      |        |        |        |
| 23251  | 0      |        | 1      |        |
| 23254  | 1      |        |        |        |
| 23262  | 1      |        |        |        |
| 23267  | 1      |        |        |        |
| 23268  | 0      |        | 3      | 3      |
| 23273  | 0      |        | 1      |        |
| 23278  | 1      |        |        |        |
| 23279  | 1      |        |        |        |
| 23281  | 0      |        |        |        |
| 23282  | 1      |        |        |        |
| 23283  | 0      |        | 3      |        |

| respid | Q31_99 | Q31a_1 | Q31a_2 | Q31a_3 |
|--------|--------|--------|--------|--------|
| 23285  | 0      |        |        |        |
| 23305  | 0      |        | 2      |        |
| 23309  | 0      |        |        |        |
| 23310  | 0      |        |        |        |
| 23311  | 1      |        |        |        |
| 23312  | 0      |        |        |        |
| 23319  | 1      |        |        |        |
| 23320  | 0      |        |        |        |
| 23322  | 1      |        |        |        |
| 23334  | 0      | 1      |        |        |
| 23340  | 0      |        |        | 1      |
| 23346  | 1      |        |        |        |
| 23353  | 1      |        |        |        |
| 23363  | 0      | 2      | 2      |        |
| 23364  | 0      |        |        |        |
| 23376  | 1      |        |        |        |
| 23378  | 1      |        |        |        |
| 23382  | 1      |        |        |        |
| 23383  | 1      |        |        |        |
| 23390  | 1      |        |        |        |
| 23395  | 0      |        |        |        |
| 23398  | 0      |        |        | 2      |
| 23399  | 1      |        |        |        |
| 23406  | 1      |        |        |        |
| 23418  | 1      |        |        |        |
| 23427  | 1      |        |        |        |
| 23428  | 1      |        |        |        |
| 23435  | 0      |        | 1      |        |
| 23439  | 1      |        |        |        |
| 23440  | 1      |        |        |        |
| 23444  | 0      | 1      |        | 2      |
| 23445  | 1      |        |        |        |

| respid | Q31_99 | Q31a_1 | Q31a_2 | Q31a_3 |
|--------|--------|--------|--------|--------|
| 23455  | 1      |        |        |        |
| 23467  | 1      |        |        |        |
| 23478  | 0      |        |        |        |
| 23492  | 1      |        |        |        |
| 23498  | 1      |        |        |        |
| 23511  | 0      |        | 1      |        |
| 23514  | 1      |        |        |        |
| 23515  | 1      |        |        |        |
| 23522  | 1      |        |        |        |
| 23524  | 1      |        |        |        |
| 23531  | 1      |        |        |        |
| 23532  | 1      |        |        |        |
| 23533  | 0      |        | 1      |        |
| 23534  | 1      |        |        |        |
| 23538  | 1      |        |        |        |
| 23539  | 0      |        |        |        |
| 23548  | 1      |        |        |        |
| 23553  | 1      |        |        |        |
| 23556  | 1      |        |        |        |
| 23563  | 1      |        |        |        |
| 23572  | 1      |        |        |        |
| 23575  | 1      |        |        |        |
| 23576  | 1      |        |        |        |
| 23577  | 1      |        |        |        |
| 23578  | 0      |        | 2      | 2      |
| 23587  | 0      |        |        | 1      |
| 23597  | 0      |        |        | 1      |
| 23598  | 1      |        |        |        |
| 23604  | 1      |        |        |        |
| 23617  | 0      |        |        |        |
| 23620  | 0      |        |        | 1      |
| 23621  | 1      |        |        |        |

| respid | Q31_99 | Q31a_1 | Q31a_2 | Q31a_3 |
|--------|--------|--------|--------|--------|
| 23625  | 1      |        |        |        |
| 23629  | 0      |        | 1      | 1      |
| 23635  | 1      |        |        |        |
| 23636  | 0      |        |        |        |
| 23637  | 0      |        |        |        |
| 23638  | 1      |        |        |        |
| 23644  | 1      |        |        |        |
| 23645  | 0      | 1      | 1      |        |
| 23649  | 1      |        |        |        |
| 23654  | 1      |        |        |        |
| 23662  | 1      |        |        |        |
| 23664  | 0      |        | 1      |        |
| 23665  | 1      |        |        |        |
| 23666  | 0      |        | 2      | 2      |
| 23671  | 1      |        |        |        |
| 23672  | 1      |        |        |        |
| 23685  | 1      |        |        |        |
| 23686  | 0      |        |        |        |
| 23689  | 0      |        |        |        |
| 23690  | 1      |        |        |        |
| 23695  | 0      | 2      | 2      | 1      |
| 23700  | 1      |        |        |        |
| 23714  | 1      |        |        |        |
| 23719  | 0      | 1      |        |        |
| 23720  | 0      |        | 1      |        |
| 23721  | 1      |        |        |        |
| 23729  | 1      |        |        |        |
| 23730  | 1      |        |        |        |
| 23732  | 1      |        |        |        |
| 23736  | 1      |        |        |        |
| 23754  | 1      |        |        |        |
| 23756  | 0      |        |        | 1      |

| respid | Q31_99 | Q31a_1 | Q31a_2 | Q31a_3 |
|--------|--------|--------|--------|--------|
| 23759  | 0      |        |        | 1      |
| 23761  | 1      |        |        |        |
| 23766  | 1      |        |        |        |
| 23768  | 0      |        |        |        |
| 23773  | 1      |        |        |        |
| 23781  | 1      |        |        |        |
| 23782  | 0      |        |        |        |
| 23787  | 1      |        |        |        |
| 23788  | 0      |        |        |        |
| 23790  | 1      |        |        |        |
| 23794  | 1      |        |        |        |
| 23795  | 0      |        |        |        |
| 23801  | 1      |        |        |        |
| 23806  | 0      |        |        | 1      |
| 23809  | 1      |        |        |        |
| 23813  | 1      |        |        |        |
| 23815  | 1      |        |        |        |
| 23821  | 1      |        |        |        |
| 23825  | 1      |        |        |        |
| 23826  | 1      |        |        |        |
| 23830  | 1      |        |        |        |
| 23833  | 0      |        | 2      |        |
| 23837  | 1      |        |        |        |
| 23848  | 1      |        |        |        |
| 23850  | 1      |        |        |        |
| 23870  | 1      |        |        |        |
| 23877  | 1      |        |        |        |
| 23880  | 1      |        |        |        |
| 23882  | 0      |        | 2      |        |
| 23888  | 1      |        |        |        |
| 23908  | 0      |        | 1      |        |
| 23914  | 0      |        | 1      |        |

| respid | Q31_99 | Q31a_1 | Q31a_2 | Q31a_3 |
|--------|--------|--------|--------|--------|
| 23916  | 0      |        |        | 1      |
| 23922  | 1      |        |        |        |
| 23932  | 1      |        |        |        |
| 23934  | 1      |        |        |        |
| 23942  | 0      | 3      | 2      | 2      |
| 23945  | 0      |        | 1      |        |
| 23948  | 1      |        |        |        |
| 23955  | 1      |        |        |        |
| 23956  | 0      |        |        | 1      |
| 23978  | 1      |        |        |        |
| 23981  | 1      |        |        |        |
| 23982  | 1      |        |        |        |
| 23991  | 1      |        |        |        |
| 23994  | 0      |        | 2      | 2      |
| 23995  | 1      |        |        |        |
| 23999  | 0      |        |        |        |
| 24005  | 0      |        | 3      | 2      |
| 24018  | 1      |        |        |        |
| 24021  | 1      |        |        |        |
| 24035  | 1      |        |        |        |
| 24040  | 1      |        |        |        |
| 24043  | 1      |        |        |        |
| 24046  | 0      |        | 2      | 2      |
| 24047  | 0      |        | 1      |        |
| 24048  | 1      |        |        |        |
| 24062  | 1      |        |        |        |
| 24063  | 1      |        |        |        |
| 24066  | 1      |        |        |        |
| 24069  | 0      | 1      |        |        |
| 24070  | 1      |        |        |        |
| 24074  | 1      |        |        |        |
| 24080  | 0      |        |        | 1      |

| respid | Q31_99 | Q31a_1 | Q31a_2 | Q31a_3 |
|--------|--------|--------|--------|--------|
| 24082  | 1      |        |        |        |
| 24088  | 0      |        |        |        |
| 24089  | 1      |        |        |        |
| 24091  | 1      |        |        |        |
| 24095  | 1      |        |        |        |
| 24100  | 0      | 2      | 2      | 1      |
| 24105  | 1      |        |        |        |
| 24107  | 0      |        | 3      |        |
| 24108  | 1      |        |        |        |
| 24113  | 0      |        |        |        |
| 24120  | 1      |        |        |        |
| 24122  | 0      |        | 3      | 1      |
| 24123  | 1      |        |        |        |
| 24125  | 0      | 1      | 1      | 1      |
| 24132  | 1      |        |        |        |
| 24139  | 1      |        |        |        |
| 24140  | 1      |        |        |        |
| 24143  | 0      |        |        |        |
| 24150  | 0      |        | 2      | 2      |
| 24153  | 1      |        |        |        |
| 24161  | 1      |        |        |        |
| 24168  | 1      |        |        |        |
| 24179  | 1      |        |        |        |
| 24182  | 0      |        |        |        |
| 24194  | 1      |        |        |        |
| 24206  | 1      |        |        |        |
| 24214  | 1      |        |        |        |
| 24215  | 1      |        |        |        |
| 24224  | 1      |        |        |        |
| 24225  | 1      |        |        |        |
| 24227  | 1      |        |        |        |
| 24229  | 0      |        |        |        |

| respid | Q31_99 | Q31a_1 | Q31a_2 | Q31a_3 |
|--------|--------|--------|--------|--------|
| 24230  | 1      |        |        |        |
| 24232  | 0      |        |        | 2      |
| 24253  | 0      |        | 1      |        |
| 24267  | 0      |        |        |        |
| 24274  | 1      |        |        |        |
| 24275  | 0      |        |        |        |
| 24277  | 1      |        |        |        |
| 24280  | 0      |        | 3      |        |
| 24285  | 1      |        |        |        |
| 24293  | 1      |        |        |        |
| 24295  | 0      |        | 2      | 2      |
| 24299  | 1      |        |        |        |
| 24303  | 1      |        |        |        |
| 24308  | 1      |        |        |        |
| 24322  | 1      |        |        |        |
| 24325  | 1      |        |        |        |
| 24328  | 0      |        |        |        |
| 24334  | 1      |        |        |        |
| 24342  | 0      |        | 2      | 2      |
| 24343  | 0      |        |        |        |
| 24348  | 0      |        | 3      |        |
| 24352  | 0      |        |        |        |
| 24354  | 0      |        | 1      | 1      |
| 24357  | 1      |        |        |        |
| 24360  | 0      |        | 1      |        |
| 24369  | 0      |        |        | 1      |
| 24373  | 0      |        |        | 1      |
| 24398  | 0      |        |        |        |
| 24402  | 0      | 1      | 2      | 2      |
| 24405  | 1      |        |        |        |
| 24407  | 1      |        |        |        |
| 24413  | 0      |        | 1      | 1      |



| respid | Q31_99 | Q31a_1 | Q31a_2 | Q31a_3 |
|--------|--------|--------|--------|--------|
| 24443  | 0      |        |        |        |
| 24451  | 1      |        |        |        |
| 24459  | 0      |        |        |        |
| 24465  | 1      |        |        |        |
| 24481  | 1      |        |        |        |
| 24482  | 1      |        |        |        |
| 24491  | 0      |        | 1      |        |
| 24495  | 1      |        |        |        |
| 24497  | 0      |        | 3      | 2      |
| 24511  | 0      | 1      |        |        |
| 24513  | 0      |        | 1      |        |
| 24516  | 0      |        |        |        |
| 24518  | 0      |        |        |        |
| 24524  | 1      |        |        |        |
| 24528  | 1      |        |        |        |
| 24531  | 0      | 1      |        |        |
| 24533  | 0      |        | 1      | 2      |
| 24547  | 0      |        | 1      |        |
| 24557  | 0      |        | 2      |        |
| 24559  | 0      |        |        | 5      |
| 24567  | 1      |        |        |        |
| 24568  | 1      |        |        |        |
| 24577  | 1      |        |        |        |
| 24581  | 1      |        |        |        |
| 24588  | 1      |        |        |        |
| 24604  | 1      |        |        |        |
| 24612  | 1      |        |        |        |
| 24621  | 0      |        | 2      |        |
| 24625  | 0      |        |        | 2      |
| 24627  | 1      |        |        |        |
| 24640  | 1      |        |        |        |
| 24644  | 1      |        |        |        |

| respid | Q31_99 | Q31a_1 | Q31a_2 | Q31a_3 |
|--------|--------|--------|--------|--------|
| 24664  | 1      |        |        |        |
| 24669  | 1      |        |        |        |
| 24685  | 1      |        |        |        |
| 24687  | 0      |        |        | 2      |
| 24688  | 0      |        |        |        |
| 24691  | 0      |        | 2      |        |
| 24693  | 1      |        |        |        |
| 24706  | 1      |        |        |        |
| 24710  | 1      |        |        |        |
| 24717  | 1      |        |        |        |
| 24720  | 0      |        | 1      |        |
| 24731  | 0      |        | 2      | 1      |
| 24732  | 1      |        |        |        |
| 24733  | 1      |        |        |        |
| 24747  | 1      |        |        |        |
| 24750  | 0      |        | 3      | 2      |
| 24758  | 0      |        | 3      | 3      |
| 24760  | 1      |        |        |        |
| 24765  | 1      |        |        |        |
| 24772  | 1      |        |        |        |
| 24779  | 0      |        |        |        |
| 24794  | 1      |        |        |        |
| 24796  | 0      | 2      | 2      |        |
| 24797  | 1      |        |        |        |
| 24800  | 1      |        |        |        |
| 24813  | 0      |        | 3      |        |
| 24815  | 1      |        |        |        |
| 24821  | 1      |        |        |        |
| 24822  | 1      |        |        |        |
| 24831  | 0      |        |        |        |
| 24835  | 1      |        |        |        |
| 24843  | 0      |        | 3      | 3      |

| respid | Q31_99 | Q31a_1 | Q31a_2 | Q31a_3 |
|--------|--------|--------|--------|--------|
| 24844  | 0      |        |        | 3      |
| 24860  | 1      |        |        |        |
| 24861  | 0      |        |        |        |
| 24865  | 0      |        | 2      |        |
| 24870  | 0      |        |        |        |
| 24887  | 1      |        |        |        |
| 24897  | 0      |        |        |        |
| 24902  | 1      |        |        |        |
| 24914  | 1      |        |        |        |
| 24921  | 1      |        |        |        |
| 24922  | 1      |        |        |        |
| 24924  | 1      |        |        |        |
| 24927  | 0      |        | 1      |        |
| 24936  | 1      |        |        |        |
| 24937  | 0      |        |        | 1      |
| 24942  | 0      |        | 2      |        |
| 24947  | 1      |        |        |        |
| 24953  | 1      |        |        |        |
| 24954  | 0      |        |        |        |
| 24960  | 0      |        | 2      | 3      |
| 24965  | 1      |        |        |        |
| 24975  | 0      |        | 1      |        |
| 24983  | 0      |        | 2      |        |
| 24985  | 1      |        |        |        |
| 24990  | 1      |        |        |        |
| 25000  | 1      |        |        |        |
| 25007  | 0      |        |        |        |
| 25008  | 1      |        |        |        |
| 25010  | 1      |        |        |        |
| 25016  | 0      |        |        |        |
| 25021  | 0      |        | 1      | 1      |
| 25040  | 1      |        |        |        |

| respid | Q31_99 | Q31a_1 | Q31a_2 | Q31a_3 |
|--------|--------|--------|--------|--------|
| 25043  | 1      |        |        |        |
| 25055  | 1      |        |        |        |
| 25057  | 1      |        |        |        |
| 25060  | 0      |        |        |        |
| 25062  | 1      |        |        |        |
| 25064  | 0      |        | 2      | 2      |
| 25069  | 1      |        |        |        |
| 25077  | 1      |        |        |        |
| 25088  | 1      |        |        |        |
| 25093  | 0      | 2      | 2      |        |
| 25121  | 1      |        |        |        |
| 25140  | 0      |        | 2      |        |
| 25144  | 1      |        |        |        |
| 25149  | 1      |        |        |        |
| 25159  | 1      |        |        |        |
| 25191  | 1      |        |        |        |
| 25193  | 0      |        | 2      |        |
| 25202  | 0      |        | 2      |        |
| 25215  | 0      |        |        |        |
| 25229  | 0      | 2      | 2      |        |
| 25231  | 0      |        | 1      | 1      |
| 25236  | 1      |        |        |        |
| 25242  | 1      |        |        |        |
| 25252  | 1      |        |        |        |
| 25253  | 0      |        | 2      | 3      |
| 25256  | 0      |        | 2      |        |
| 25260  | 1      |        |        |        |
| 25261  | 1      |        |        |        |
| 25280  | 0      | 1      |        |        |
| 25282  | 0      |        | 1      |        |
| 25289  | 0      |        |        |        |
| 25303  | 1      |        |        |        |

| respid | Q31_99 | Q31a_1 | Q31a_2 | Q31a_3 |
|--------|--------|--------|--------|--------|
| 25304  | 0      |        |        |        |
| 25309  | 1      |        |        |        |
| 25317  | 1      |        |        |        |
| 25318  | 0      | 2      | 2      | 2      |
| 25320  | 1      |        |        |        |
| 25324  | 0      |        | 2      |        |
| 25331  | 0      |        |        |        |
| 25340  | 1      |        |        |        |
| 25342  | 0      |        | 1      |        |
| 25350  | 1      |        |        |        |
| 25352  | 1      |        |        |        |
| 25358  | 1      |        |        |        |
| 25375  | 0      |        | 1      | 1      |
| 25386  | 1      |        |        |        |
| 25388  | 1      |        |        |        |
| 25390  | 0      |        | 2      | 2      |
| 25391  | 1      |        |        |        |
| 25400  | 0      |        |        | 2      |
| 25413  | 0      |        | 2      |        |
| 25424  | 1      |        |        |        |
| 25426  | 0      |        | 2      |        |
| 25430  | 1      |        |        |        |
| 25434  | 0      |        | 1      | 1      |
| 25439  | 1      |        |        |        |
| 25441  | 1      |        |        |        |
| 25445  | 1      |        |        |        |
| 25451  | 1      |        |        |        |
| 25469  | 0      |        | 2      |        |
| 25471  | 0      | 2      |        | 2      |
| 25476  | 1      |        |        |        |
| 25480  | 1      |        |        |        |
| 25482  | 0      |        |        | 1      |

| respid | Q31_99 | Q31a_1 | Q31a_2 | Q31a_3 |
|--------|--------|--------|--------|--------|
| 25500  | 0      |        |        | 1      |
| 25516  | 1      |        |        |        |
| 25521  | 0      |        | 2      | 2      |
| 25525  | 1      |        |        |        |
| 25530  | 0      |        | 2      |        |
| 25555  | 0      |        |        |        |
| 25558  | 0      | 1      |        |        |
| 25561  | 0      |        |        | 3      |
| 25566  | 1      |        |        |        |
| 25571  | 0      | 1      | 1      |        |
| 25572  | 1      |        |        |        |
| 25574  | 1      |        |        |        |
| 25588  | 1      |        |        |        |
| 25591  | 0      | 2      |        | 2      |
| 25599  | 0      | 2      | 2      | 2      |
| 25604  | 0      |        | 2      |        |
| 25614  | 1      |        |        |        |
| 25634  | 0      | 1      |        | 2      |
| 25642  | 1      |        |        |        |
| 25647  | 1      |        |        |        |
| 25653  | 0      |        | 1      |        |
| 25654  | 0      |        | 1      |        |
| 25660  | 1      |        |        |        |
| 25664  | 0      |        |        |        |
| 25665  | 0      | 1      |        | 1      |
| 25672  | 0      |        |        |        |
| 25677  | 0      |        |        |        |
| 25685  | 0      |        |        |        |
| 25699  | 0      |        | 3      |        |
| 25703  | 1      |        |        |        |
| 25704  | 0      |        |        | 2      |
| 25705  | 0      |        |        |        |

| respid | Q31_99 | Q31a_1 | Q31a_2 | Q31a_3 |
|--------|--------|--------|--------|--------|
| 25711  | 1      |        |        |        |
| 25727  | 0      |        |        |        |
| 25728  | 1      |        |        |        |
| 25733  | 0      |        |        |        |
| 25735  | 1      |        |        |        |
| 25736  | 1      |        |        |        |
| 25742  | 1      |        |        |        |
| 25750  | 1      |        |        |        |
| 25754  | 1      |        |        |        |
| 25776  | 0      |        | 2      | 2      |
| 25778  | 1      |        |        |        |
| 25796  | 0      | 1      |        |        |
| 25852  | 0      | 1      | 1      | 1      |
| 25858  | 1      |        |        |        |
| 25859  | 1      |        |        |        |
| 25886  | 1      |        |        |        |
| 25890  | 0      |        |        |        |
| 25897  | 0      | 1      |        |        |
| 25903  | 1      |        |        |        |
| 25905  | 1      |        |        |        |
| 25917  | 1      |        |        |        |
| 25918  | 0      |        | 1      |        |
| 25928  | 1      |        |        |        |
| 25930  | 1      |        |        |        |
| 25949  | 0      |        | 1      | 1      |
| 25955  | 1      |        |        |        |
| 25959  | 0      |        |        |        |
| 25964  | 1      |        |        |        |
| 25972  | 1      |        |        |        |
| 25999  | 0      |        | 3      | 3      |
| 26019  | 1      |        |        |        |
| 26025  | 0      |        |        |        |

| respid | Q31_99 | Q31a_1 | Q31a_2 | Q31a_3 |
|--------|--------|--------|--------|--------|
| 26039  | 0      |        | 1      | 1      |
| 26055  | 1      |        |        |        |
| 26061  | 0      |        | 2      | 1      |
| 26076  | 1      |        |        |        |
| 26088  | 1      |        |        |        |
| 26094  | 1      |        |        |        |
| 26104  | 1      |        |        |        |
| 26131  | 1      |        |        |        |
| 26134  | 0      |        |        |        |
| 26160  | 1      |        |        |        |
| 26168  | 1      |        |        |        |
| 26170  | 1      |        |        |        |
| 26191  | 1      |        |        |        |
| 26192  | 1      |        |        |        |
| 26195  | 0      |        |        |        |
| 26198  | 1      |        |        |        |
| 26199  | 0      | 1      | 2      | 1      |
| 26201  | 1      |        |        |        |
| 26202  | 1      |        |        |        |
| 26226  | 0      |        | 2      |        |
| 26233  | 0      | 1      | 2      | 2      |
| 26236  | 1      |        |        |        |
| 26242  | 0      |        | 1      | 1      |
| 26244  | 0      |        | 1      | 1      |
| 26250  | 1      |        |        |        |
| 26266  | 0      |        |        |        |
| 26274  | 1      |        |        |        |
| 26286  | 0      | 2      | 2      | 2      |
| 26288  | 0      |        | 1      |        |
| 26295  | 1      |        |        |        |
| 26296  | 1      |        |        |        |
| 26297  | 1      |        |        |        |



| respid | Q31_99 | Q31a_1 | Q31a_2 | Q31a_3 |
|--------|--------|--------|--------|--------|
| 26300  | 0      |        | 1      |        |
| 26317  | 1      |        |        |        |
| 26343  | 1      |        |        |        |
| 26367  | 0      |        |        |        |
| 26372  | 0      |        |        |        |
| 26403  | 0      |        | 1      |        |
| 26423  | 1      |        |        |        |
| 26430  | 1      |        |        |        |
| 26437  | 0      |        | 1      |        |
| 26457  | 1      |        |        |        |
| 26466  | 1      |        |        |        |
| 26467  | 1      |        |        |        |
| 26469  | 0      | 1      | 2      | 1      |
| 26494  | 1      |        |        |        |
| 26510  | 1      |        |        |        |
| 26519  | 0      |        | 1      |        |
| 26525  | 1      |        |        |        |
| 26529  | 1      |        |        |        |
| 26533  | 0      |        | 1      |        |
| 26556  | 0      |        |        |        |
| 26559  | 0      |        | 2      | 2      |
| 26565  | 0      |        |        |        |
| 26576  | 0      |        |        |        |
| 26601  | 1      |        |        |        |
| 26607  | 0      |        | 2      |        |
| 26611  | 1      |        |        |        |
| 26619  | 0      |        |        | 1      |
| 26631  | 1      |        |        |        |
| 26654  | 1      |        |        |        |
| 26656  | 0      |        | 2      | 2      |
| 26664  | 1      |        |        |        |
| 26667  | 1      |        |        |        |

| respid | Q31_99 | Q31a_1 | Q31a_2 | Q31a_3 |
|--------|--------|--------|--------|--------|
| 26674  | 0      |        | 3      |        |
| 26678  | 0      | 1      |        |        |
| 26693  | 1      |        |        |        |
| 26696  | 0      |        |        |        |
| 26703  | 0      | 3      | 3      | 3      |
| 26705  | 1      |        |        |        |
| 26706  | 0      |        | 2      | 2      |
| 26716  | 1      |        |        |        |
| 26721  | 1      |        |        |        |
| 26730  | 0      |        |        |        |
| 26752  | 1      |        |        |        |
| 26755  | 1      |        |        |        |
| 26791  | 1      |        |        |        |
| 26804  | 1      |        |        |        |
| 26810  | 0      |        | 3      | 4      |
| 26813  | 1      |        |        |        |
| 26833  | 0      |        | 1      |        |
| 26880  | 1      |        |        |        |
| 26884  | 1      |        |        |        |
| 26885  | 1      |        |        |        |
| 26890  | 0      |        | 2      | 1      |
| 26937  | 1      |        |        |        |
| 26939  | 1      |        |        |        |
| 26941  | 1      |        |        |        |
| 26992  | 0      |        | 1      | 1      |
| 27037  | 1      |        |        |        |
| 27045  | 0      |        |        |        |
| 27053  | 0      |        | 2      | 3      |
| 27060  | 0      |        |        |        |
| 27076  | 0      |        |        |        |
| 27124  | 1      |        |        |        |
| 27125  | 1      |        |        |        |

| respid | Q31_99 | Q31a_1 | Q31a_2 | Q31a_3 |
|--------|--------|--------|--------|--------|
| 27132  | 1      |        |        |        |
| 27166  | 1      |        |        |        |
| 27190  | 0      |        |        |        |
| 27199  | 1      |        |        |        |
| 27221  | 0      |        |        |        |
| 27233  | 0      |        | 2      |        |
| 27241  | 1      |        |        |        |
| 27244  | 1      |        |        |        |
| 27245  | 0      | 3      | 3      | 3      |
| 27246  | 0      |        |        |        |
| 27253  | 0      |        |        |        |
| 27255  | 0      |        |        |        |
| 27267  | 1      |        |        |        |
| 27283  | 0      |        | 2      | 2      |
| 27289  | 1      |        |        |        |
| 27302  | 1      |        |        |        |
| 27317  | 1      |        |        |        |
| 27319  | 0      |        | 1      |        |
| 27331  | 1      |        |        |        |
| 27333  | 1      |        |        |        |
| 27340  | 1      |        |        |        |
| 27362  | 0      |        |        |        |
| 27370  | 1      |        |        |        |
| 27379  | 0      |        | 1      |        |
| 27386  | 1      |        |        |        |
| 27398  | 1      |        |        |        |
| 27404  | 1      |        |        |        |
| 27408  | 0      | 1      | 1      | 1      |
| 27412  | 0      |        |        |        |
| 27426  | 0      |        |        | 2      |
| 27455  | 1      |        |        |        |
| 27464  | 1      |        |        |        |

| respid | Q31_99 | Q31a_1 | Q31a_2 | Q31a_3 |
|--------|--------|--------|--------|--------|
| 27484  | 0      |        | 1      |        |
| 27493  | 0      |        | 2      | 5      |
| 27512  | 0      |        |        |        |
| 27525  | 0      |        |        |        |
| 27532  | 0      | 1      | 1      | 1      |
| 27539  | 1      |        |        |        |
| 27540  | 0      |        |        | 3      |
| 27552  | 0      |        | 1      |        |
| 27562  | 0      |        | 1      |        |
| 27568  | 1      |        |        |        |
| 27574  | 0      |        | 3      | 3      |
| 27575  | 0      |        | 1      |        |
| 27577  | 1      |        |        |        |
| 27589  | 1      |        |        |        |
| 27593  | 1      |        |        |        |
| 27594  | 0      |        | 4      | 4      |
| 27595  | 0      | 3      | 3      | 3      |
| 27598  | 0      |        |        |        |
| 27620  | 0      | 1      |        |        |
| 27621  | 0      |        |        |        |
| 27628  | 0      |        | 1      |        |
| 27633  | 0      |        | 1      |        |
| 27643  | 1      |        |        |        |
| 27644  | 1      |        |        |        |
| 27668  | 1      |        |        |        |
| 27681  | 0      |        |        |        |
| 27691  | 1      |        |        |        |
| 27693  | 1      |        |        |        |
| 27703  | 0      |        | 2      | 2      |
| 27708  | 0      | 1      |        |        |
| 27719  | 1      |        |        |        |
| 27720  | 1      |        |        |        |

| respid | Q31_99 | Q31a_1 | Q31a_2 | Q31a_3 |
|--------|--------|--------|--------|--------|
| 27723  | 0      | 1      | 1      |        |
| 27725  | 1      |        |        |        |
| 27734  | 1      |        |        |        |
| 27744  | 1      |        |        |        |
| 27749  | 0      |        |        |        |
| 27762  | 0      |        |        | 2      |
| 27808  | 0      |        | 1      | 2      |
| 27810  | 0      |        | 3      |        |
| 27812  | 0      |        | 1      |        |
| 27815  | 1      |        |        |        |
| 27818  | 1      |        |        |        |
| 27823  | 1      |        |        |        |
| 27841  | 0      |        |        |        |
| 27843  | 1      |        |        |        |
| 27851  | 0      |        | 1      | 1      |
| 27858  | 0      |        | 1      |        |
| 27859  | 1      |        |        |        |
| 27869  | 1      |        |        |        |
| 27872  | 1      |        |        |        |
| 27873  | 1      |        |        |        |
| 27884  | 0      |        | 2      |        |
| 27904  | 1      |        |        |        |
| 27915  | 1      |        |        |        |
| 27918  | 0      |        | 1      |        |
| 27937  | 0      |        |        |        |
| 27943  | 1      |        |        |        |
| 27948  | 0      |        | 1      |        |
| 27971  | 0      |        |        |        |
| 27991  | 1      |        |        |        |
| 28000  | 1      |        |        |        |
| 28011  | 0      |        | 2      | 2      |
| 28022  | 1      |        |        |        |

| respid | Q31_99 | Q31a_1 | Q31a_2 | Q31a_3 |
|--------|--------|--------|--------|--------|
| 28025  | 1      |        |        |        |
| 28041  | 1      |        |        |        |
| 28057  | 0      | 3      | 2      | 1      |
| 28080  | 1      |        |        |        |
| 28098  | 1      |        |        |        |
| 28104  | 1      |        |        |        |
| 28109  | 1      |        |        |        |
| 28129  | 0      | 1      |        |        |
| 28141  | 1      |        |        |        |
| 28143  | 1      |        |        |        |
| 28149  | 0      | 1      |        | 1      |
| 28151  | 0      |        |        |        |
| 28161  | 1      |        |        |        |
| 28169  | 1      |        |        |        |
| 28194  | 0      |        |        |        |
| 28197  | 1      |        |        |        |
| 28206  | 1      |        |        |        |
| 28218  | 1      |        |        |        |
| 28227  | 1      |        |        |        |
| 28235  | 1      |        |        |        |
| 28246  | 1      |        |        |        |
| 28259  | 0      |        | 2      |        |
| 28263  | 0      | 1      |        |        |
| 28267  | 0      |        | 1      |        |
| 28274  | 1      |        |        |        |
| 28278  | 0      |        |        | 1      |
| 28288  | 0      | 2      | 2      | 2      |
| 28308  | 1      |        |        |        |
| 28309  | 0      |        |        |        |
| 28323  | 0      | 2      |        | 1      |
| 28335  | 0      |        |        |        |
| 28354  | 0      |        |        |        |

| respid | Q31_99 | Q31a_1 | Q31a_2 | Q31a_3 |
|--------|--------|--------|--------|--------|
| 28355  | 0      |        |        | 2      |
| 28356  | 1      |        |        |        |
| 28357  | 1      |        |        |        |
| 28363  | 1      |        |        |        |
| 28366  | 1      |        |        |        |
| 28372  | 0      |        | 2      | 2      |
| 28381  | 0      |        | 2      | 2      |
| 28388  | 1      |        |        |        |
| 28413  | 0      |        |        |        |
| 28421  | 1      |        |        |        |
| 28430  | 1      |        |        |        |
| 28439  | 0      |        |        |        |
| 28458  | 0      |        | 4      |        |
| 28461  | 1      |        |        |        |
| 28466  | 1      |        |        |        |
| 28492  | 1      |        |        |        |
| 28534  | 1      |        |        |        |
| 28537  | 0      | 2      | 2      |        |
| 28560  | 1      |        |        |        |
| 28566  | 1      |        |        |        |
| 28569  | 1      |        |        |        |
| 28584  | 0      |        |        | 3      |
| 28590  | 0      |        |        |        |
| 28596  | 1      |        |        |        |
| 28608  | 0      |        |        |        |
| 28631  | 0      |        |        | 3      |
| 28644  | 0      |        |        | 1      |
| 28646  | 0      |        |        | 1      |
| 28665  | 1      |        |        |        |
| 28686  | 1      |        |        |        |
| 28704  | 0      |        |        |        |
| 28719  | 1      |        |        |        |

| respid | Q31_99 | Q31a_1 | Q31a_2 | Q31a_3 |
|--------|--------|--------|--------|--------|
| 28736  | 1      |        |        |        |
| 28739  | 0      |        | 2      |        |
| 28758  | 0      |        | 3      | 3      |
| 28761  | 0      | 3      |        | 3      |
| 28770  | 0      |        | 3      | 2      |
| 28774  | 0      |        | 1      | 1      |
| 28778  | 0      |        |        | 3      |
| 28783  | 0      |        |        |        |
| 28785  | 1      |        |        |        |
| 28797  | 0      |        | 2      | 1      |
| 28801  | 1      |        |        |        |
| 28821  | 1      |        |        |        |
| 28827  | 1      |        |        |        |
| 28828  | 1      |        |        |        |
| 28871  | 0      |        |        |        |
| 28876  | 1      |        |        |        |
| 28891  | 0      | 3      | 2      |        |
| 28898  | 1      |        |        |        |
| 28909  | 1      |        |        |        |
| 28930  | 0      |        |        |        |
| 28935  | 0      | 2      |        | 2      |
| 28964  | 1      |        |        |        |
| 28965  | 1      |        |        |        |
| 28967  | 0      |        |        | 3      |
| 28975  | 1      |        |        |        |
| 28982  | 1      |        |        |        |
| 28989  | 1      |        |        |        |
| 29003  | 1      |        |        |        |
| 29004  | 1      |        |        |        |
| 29007  | 1      |        |        |        |
| 29008  | 1      |        |        |        |
| 29011  | 0      | 2      |        |        |



| respid | Q31_99 | Q31a_1 | Q31a_2 | Q31a_3 |
|--------|--------|--------|--------|--------|
| 29012  | 1      |        |        |        |
| 29014  | 1      |        |        |        |
| 29016  | 0      |        | 1      |        |
| 29018  | 1      |        |        |        |
| 29048  | 0      |        |        |        |
| 29184  | 1      |        |        |        |
| 29237  | 0      | 1      |        |        |
| 29252  | 1      |        |        |        |
| 29267  | 1      |        |        |        |
| 29276  | 1      |        |        |        |
| 29281  | 0      |        | 2      | 4      |
| 29285  | 0      |        | 1      |        |
| 29291  | 0      | 2      |        | 2      |
| 29304  | 0      |        |        |        |
| 29323  | 0      |        | 1      |        |
| 29330  | 0      |        |        |        |
| 29357  | 0      |        | 2      | 2      |
| 29416  | 0      |        |        | 3      |
| 29432  | 1      |        |        |        |
| 29482  | 0      |        |        | 2      |
| 29506  | 1      |        |        |        |
| 29509  | 0      |        |        |        |
| 29512  | 0      |        |        | 2      |
| 29519  | 1      |        |        |        |
| 29520  | 1      |        |        |        |
| 29521  | 0      |        |        |        |
| 29529  | 0      | 3      | 3      | 3      |
| 29532  | 1      |        |        |        |
| 29547  | 0      |        | 2      | 2      |
| 29551  | 0      |        | 1      |        |
| 29584  | 0      |        | 2      | 2      |
| 29591  | 0      | 2      | 2      |        |

| respid | Q31_99 | Q31a_1 | Q31a_2 | Q31a_3 |
|--------|--------|--------|--------|--------|
| 29613  | 1      |        |        |        |
| 29615  | 0      | 2      |        |        |
| 29625  | 0      |        |        |        |
| 29660  | 1      |        |        |        |
| 29677  | 1      |        |        |        |
| 29700  | 0      | 2      | 2      |        |
| 29715  | 0      |        |        |        |
| 29720  | 1      |        |        |        |
| 29730  | 0      |        | 1      | 1      |
| 29734  | 0      | 2      | 2      | 2      |
| 29754  | 1      |        |        |        |
| 29771  | 1      |        |        |        |
| 29774  | 1      |        |        |        |
| 29783  | 1      |        |        |        |
| 29812  | 0      |        |        | 1      |
| 29813  | 1      |        |        |        |
| 29814  | 0      | 2      | 2      |        |
| 29820  | 0      |        | 1      | 1      |
| 29906  | 1      |        |        |        |
| 29907  | 0      |        | 1      |        |
| 29928  | 1      |        |        |        |
| 29932  | 1      |        |        |        |
| 29958  | 0      |        | 3      |        |
| 29982  | 1      |        |        |        |
| 29989  | 1      |        |        |        |
| 29994  | 0      | 1      | 1      |        |
| 30005  | 0      |        | 1      |        |
| 30077  | 1      |        |        |        |
| 30098  | 1      |        |        |        |
| 30107  | 1      |        |        |        |
| 30154  | 1      |        |        |        |
| 30159  | 1      |        |        |        |

| respid | Q31_99 | Q31a_1 | Q31a_2 | Q31a_3 |
|--------|--------|--------|--------|--------|
| 30162  | 1      |        |        |        |
| 30163  | 1      |        |        |        |
| 30189  | 1      |        |        |        |
| 30230  | 1      |        |        |        |
| 30259  | 0      |        |        |        |
| 30284  | 1      |        |        |        |
| 30296  | 1      |        |        |        |
| 30330  | 1      |        |        |        |
| 30341  | 0      |        | 1      | 1      |
| 30352  | 0      |        |        | 2      |
| 30379  | 1      |        |        |        |
| 30424  | 0      |        | 1      |        |
| 30447  | 1      |        |        |        |
| 30477  | 0      |        | 3      | 3      |
| 30503  | 0      |        |        |        |
| 30515  | 0      |        | 2      |        |
| 30516  | 1      |        |        |        |
| 30623  | 0      |        |        | 2      |
| 30639  | 1      |        |        |        |
| 30670  | 1      |        |        |        |
| 30697  | 1      |        |        |        |
| 30735  | 0      |        | 1      |        |
| 30742  | 1      |        |        |        |
| 30751  | 0      |        | 3      | 3      |
| 30789  | 1      |        |        |        |
| 30867  | 1      |        |        |        |
| 30876  | 1      |        |        |        |
| 30877  | 1      |        |        |        |
| 30887  | 1      |        |        |        |
| 30891  | 0      |        |        | 2      |
| 31030  | 1      |        |        |        |
| 31059  | 0      |        |        |        |

| respid | Q31_99 | Q31a_1 | Q31a_2 | Q31a_3 |
|--------|--------|--------|--------|--------|
| 31082  | 1      |        |        |        |
| 31106  | 1      |        |        |        |
| 31110  | 1      |        |        |        |
| 31265  | 0      |        | 3      | 3      |
| 31266  | 0      |        |        |        |
| 31267  | 0      |        |        |        |
| 31310  | 1      |        |        |        |
| 31325  | 1      |        |        |        |
| 31367  | 0      | 2      |        |        |
| 31389  | 1      |        |        |        |
| 31440  | 1      |        |        |        |
| 31465  | 1      |        |        |        |
| 31477  | 1      |        |        |        |
| 31491  | 1      |        |        |        |
| 31494  | 0      |        |        |        |
| 31509  | 0      |        |        | 2      |
| 31533  | 1      |        |        |        |
| 31547  | 0      |        | 1      |        |
| 31558  | 1      |        |        |        |
| 31579  | 0      |        | 1      | 1      |
| 31591  | 1      |        |        |        |
| 31596  | 0      |        |        |        |
| 31601  | 0      |        | 3      |        |
| 31605  | 1      |        |        |        |
| 31637  | 1      |        |        |        |
| 31646  | 1      |        |        |        |
| 31647  | 0      | 3      | 3      | 3      |
| 31650  | 1      |        |        |        |
| 31651  | 0      | 2      | 2      |        |
| 31657  | 1      |        |        |        |
| 31660  | 1      |        |        |        |
| 31661  | 0      | 2      | 2      |        |

| respid | Q31_99 | Q31a_1 | Q31a_2 | Q31a_3 |
|--------|--------|--------|--------|--------|
| 31667  | 0      |        |        |        |
| 31674  | 0      |        | 1      |        |
| 31686  | 0      |        | 1      | 2      |
| 31693  | 1      |        |        |        |
| 31716  | 1      |        |        |        |
| 31818  | 1      |        |        |        |
| 31886  | 0      |        |        |        |
| 31945  | 0      |        |        |        |
| 31957  | 1      |        |        |        |
| 31966  | 0      |        |        | 1      |
| 31978  | 1      |        |        |        |
| 31999  | 0      |        |        | 1      |
| 32026  | 0      |        | 1      | 1      |
| 32033  | 1      |        |        |        |
| 32037  | 0      |        |        |        |
| 32038  | 0      |        | 3      |        |
| 32047  | 0      |        | 1      | 1      |
| 32053  | 1      |        |        |        |
| 32069  | 1      |        |        |        |
| 32081  | 0      |        |        | 1      |
| 32123  | 0      |        | 2      | 2      |
| 32130  | 1      |        |        |        |
| 32141  | 0      |        |        |        |
| 32158  | 1      |        |        |        |
| 32165  | 1      |        |        |        |
| 32180  | 0      |        | 1      |        |
| 32221  | 0      | 1      |        |        |
| 32292  | 1      |        |        |        |
| 32318  | 0      | 2      |        | 2      |
| 32346  | 1      |        |        |        |
| 32402  | 0      |        | 2      | 2      |
| 32422  | 1      |        |        |        |

| respid | Q31_99 | Q31a_1 | Q31a_2 | Q31a_3 |
|--------|--------|--------|--------|--------|
| 32439  | 1      |        |        |        |
| 32507  | 1      |        |        |        |
| 32522  | 1      |        |        |        |
| 32535  | 1      |        |        |        |
| 32546  | 1      |        |        |        |
| 32553  | 1      |        |        |        |
| 32570  | 1      |        |        |        |
| 32592  | 0      |        |        | 2      |
| 32605  | 0      | 3      | 3      | 2      |
| 32630  | 0      |        |        |        |
| 32642  | 1      |        |        |        |
| 32646  | 1      |        |        |        |
| 32665  | 1      |        |        |        |
| 32677  | 1      |        |        |        |
| 32694  | 1      |        |        |        |
| 32698  | 1      |        |        |        |
| 32754  | 0      |        | 2      |        |
| 32799  | 0      |        |        |        |
| 32816  | 1      |        |        |        |
| 32819  | 0      |        |        |        |
| 32840  | 0      |        |        | 2      |
| 32861  | 1      |        |        |        |
| 32866  | 0      |        |        |        |
| 32889  | 0      | 3      | 3      | 2      |
| 32960  | 1      |        |        |        |
| 32965  | 1      |        |        |        |
| 32986  | 0      |        |        |        |
| 33005  | 0      |        | 1      |        |
| 33054  | 0      |        |        |        |
| 33072  | 0      |        |        |        |
| 33095  | 1      |        |        |        |
| 33099  | 0      |        |        |        |

| respid | Q31_99 | Q31a_1 | Q31a_2 | Q31a_3 |
|--------|--------|--------|--------|--------|
| 33121  | 1      |        |        |        |
| 33152  | 0      | 2      | 2      |        |
| 33159  | 0      |        |        | 1      |
| 33189  | 1      |        |        |        |
| 33198  | 0      |        | 2      |        |
| 33202  | 0      |        |        | 2      |
| 33204  | 0      |        |        | 1      |
| 33224  | 1      |        |        |        |
| 33272  | 0      |        | 2      | 2      |
| 33294  | 0      |        |        |        |
| 33300  | 0      |        |        |        |
| 33314  | 0      | 2      |        | 2      |
| 33338  | 1      |        |        |        |
| 33350  | 0      |        |        |        |
| 33362  | 1      |        |        |        |
| 33368  | 1      |        |        |        |
| 33374  | 0      |        | 2      |        |
| 33380  | 0      | 2      | 2      |        |
| 33385  | 1      |        |        |        |
| 33402  | 0      |        | 2      | 3      |
| 33414  | 1      |        |        |        |
| 33439  | 0      |        | 2      |        |
| 33449  | 0      |        |        |        |
| 33533  | 0      |        |        |        |
| 33540  | 1      |        |        |        |
| 33556  | 1      |        |        |        |
| 33615  | 0      | 1      |        |        |
| 33694  | 0      |        |        |        |
| 33717  | 1      |        |        |        |
| 33729  | 0      |        |        |        |
| 33746  | 1      |        |        |        |
| 33764  | 0      |        | 1      |        |

| respid | Q31_99 | Q31a_1 | Q31a_2 | Q31a_3 |
|--------|--------|--------|--------|--------|
| 33790  | 0      |        | 3      | 2      |
| 33868  | 0      |        | 4      |        |
| 33872  | 0      |        |        |        |
| 33883  | 1      |        |        |        |
| 33884  | 1      |        |        |        |
| 33900  | 1      |        |        |        |
| 33933  | 1      |        |        |        |
| 33949  | 1      |        |        |        |
| 34005  | 1      |        |        |        |
| 34016  | 1      |        |        |        |
| 34041  | 0      |        |        | 2      |
| 34053  | 1      |        |        |        |
| 34056  | 1      |        |        |        |
| 34093  | 0      |        |        |        |
| 34112  | 0      |        | 2      | 1      |
| 34136  | 0      | 2      | 3      |        |
| 34138  | 1      |        |        |        |
| 34139  | 1      |        |        |        |
| 34189  | 0      |        |        |        |
| 34239  | 0      |        | 1      |        |
| 34240  | 0      | 1      | 1      |        |
| 34241  | 1      |        |        |        |
| 34259  | 1      |        |        |        |
| 34303  | 0      |        |        | 1      |
| 34306  | 1      |        |        |        |
| 34395  | 1      |        |        |        |
| 34463  | 0      |        | 2      | 1      |
| 34466  | 0      | 1      |        |        |
| 34471  | 0      |        | 2      |        |
| 34489  | 0      |        |        |        |
| 34518  | 0      |        | 2      | 2      |
| 34542  | 0      | 1      |        |        |



| respid | Q31_99 | Q31a_1 | Q31a_2 | Q31a_3 |
|--------|--------|--------|--------|--------|
| 34595  | 1      |        |        |        |
| 34604  | 1      |        |        |        |
| 34631  | 0      |        | 3      | 3      |
| 34665  | 0      |        | 2      |        |
| 34716  | 1      |        |        |        |
| 34729  | 1      |        |        |        |
| 34772  | 0      |        | 1      |        |
| 34800  | 1      |        |        |        |
| 34819  | 1      |        |        |        |
| 34829  | 0      |        | 1      |        |
| 34831  | 0      |        | 1      |        |
| 34839  | 0      |        |        |        |
| 34868  | 1      |        |        |        |
| 34869  | 1      |        |        |        |
| 34882  | 0      |        |        |        |
| 34895  | 0      |        | 2      | 2      |
| 34901  | 0      |        |        | 1      |
| 34904  | 0      |        |        |        |
| 34907  | 1      |        |        |        |
| 34914  | 1      |        |        |        |
| 34918  | 0      |        | 1      | 1      |
| 34924  | 1      |        |        |        |
| 34933  | 0      | 2      | 2      |        |
| 34938  | 0      |        | 1      | 1      |
| 34952  | 0      |        |        |        |
| 34959  | 1      |        |        |        |
| 34972  | 0      | 1      |        |        |
| 34973  | 0      | 2      | 2      | 1      |
| 34975  | 0      |        |        | 1      |
| 34977  | 0      |        | 2      |        |
| 34978  | 1      |        |        |        |
| 34980  | 1      |        |        |        |

| respid | Q31_99 | Q31a_1 | Q31a_2 | Q31a_3 |
|--------|--------|--------|--------|--------|
| 34984  | 0      | 2      |        | 2      |
| 34986  | 0      |        |        |        |
| 34994  | 1      |        |        |        |
| 34996  | 0      |        |        |        |
| 35003  | 1      |        |        |        |
| 35014  | 1      |        |        |        |
| 35029  | 1      |        |        |        |
| 35030  | 0      |        |        |        |
| 35037  | 0      |        |        |        |
| 35043  | 1      |        |        |        |
| 35048  | 1      |        |        |        |
| 35055  | 1      |        |        |        |
| 35067  | 1      |        |        |        |
| 35072  | 0      |        | 1      |        |
| 35078  | 1      |        |        |        |
| 35084  | 1      |        |        |        |
| 35095  | 1      |        |        |        |
| 35096  | 1      |        |        |        |
| 35097  | 0      |        |        |        |
| 35098  | 0      |        | 2      |        |
| 35109  | 0      |        |        | 4      |
| 35114  | 1      |        |        |        |
| 35115  | 1      |        |        |        |
| 35124  | 0      |        | 2      | 2      |
| 35125  | 1      |        |        |        |
| 35141  | 1      |        |        |        |
| 35142  | 1      |        |        |        |
| 35145  | 1      |        |        |        |
| 35149  | 0      |        | 3      | 3      |
| 35159  | 1      |        |        |        |
| 35163  | 0      |        | 2      | 2      |
| 35174  | 0      |        | 1      |        |

| respid | Q31_99 | Q31a_1 | Q31a_2 | Q31a_3 |
|--------|--------|--------|--------|--------|
| 35188  | 1      |        |        |        |
| 35189  | 0      | 1      | 2      | 2      |
| 35201  | 0      |        |        | 2      |
| 35215  | 1      |        |        |        |
| 35228  | 1      |        |        |        |
| 35235  | 0      |        |        |        |
| 35239  | 0      |        | 2      | 1      |
| 35243  | 1      |        |        |        |
| 35245  | 0      | 2      | 3      | 2      |
| 35259  | 1      |        |        |        |
| 35265  | 1      |        |        |        |
| 35272  | 0      |        |        | 1      |
| 35280  | 0      |        |        | 1      |
| 35298  | 1      |        |        |        |
| 35305  | 0      |        |        | 2      |
| 35306  | 0      |        | 2      |        |
| 35307  | 1      |        |        |        |
| 35311  | 1      |        |        |        |
| 35322  | 1      |        |        |        |
| 35323  | 1      |        |        |        |
| 35327  | 0      | 1      | 1      | 1      |
| 35366  | 1      |        |        |        |
| 35378  | 1      |        |        |        |
| 35389  | 0      |        |        |        |
| 35390  | 0      |        |        | 1      |
| 35395  | 1      |        |        |        |
| 35411  | 0      |        | 2      |        |
| 35423  | 1      |        |        |        |
| 35425  | 0      |        | 1      | 2      |
| 35434  | 0      |        | 1      |        |
| 35462  | 1      |        |        |        |
| 35478  | 0      | 3      | 3      | 3      |

| respid | Q31_99 | Q31a_1 | Q31a_2 | Q31a_3 |
|--------|--------|--------|--------|--------|
| 35481  | 0      | 1      | 2      | 3      |
| 35498  | 1      |        |        |        |
| 35499  | 1      |        |        |        |
| 35502  | 0      |        |        | 2      |
| 35503  | 1      |        |        |        |
| 35504  | 1      |        |        |        |
| 35508  | 0      |        | 1      | 1      |
| 35513  | 0      |        |        | 2      |
| 35516  | 0      |        |        |        |
| 35519  | 0      |        | 1      |        |
| 35530  | 0      |        | 2      | 2      |
| 35533  | 0      |        |        |        |
| 35561  | 0      |        | 1      |        |
| 35565  | 1      |        |        |        |
| 35588  | 1      |        |        |        |
| 35598  | 1      |        |        |        |
| 35607  | 0      |        | 1      |        |
| 35638  | 1      |        |        |        |
| 35642  | 1      |        |        |        |
| 35643  | 0      | 1      |        |        |
| 35680  | 1      |        |        |        |
| 35697  | 0      |        |        | 1      |
| 35703  | 1      |        |        |        |
| 35709  | 1      |        |        |        |
| 35710  | 0      | 1      |        |        |
| 35721  | 0      | 2      | 4      | 4      |
| 35723  | 1      |        |        |        |
| 35736  | 0      |        |        | 1      |
| 35739  | 0      |        |        | 1      |
| 35745  | 0      |        |        |        |
| 35748  | 0      |        |        | 2      |
| 35750  | 0      |        |        |        |

| respid | Q31_99 | Q31a_1 | Q31a_2 | Q31a_3 |
|--------|--------|--------|--------|--------|
| 35752  | 0      |        |        | 2      |
| 35773  | 0      |        |        |        |
| 35779  | 1      |        |        |        |
| 35791  | 1      |        |        |        |
| 35801  | 0      |        | 2      |        |
| 35802  | 1      |        |        |        |
| 35837  | 1      |        |        |        |
| 35853  | 0      |        | 2      |        |
| 35858  | 0      |        |        | 1      |
| 35860  | 1      |        |        |        |
| 35875  | 0      | 2      | 2      |        |
| 35883  | 0      |        | 2      |        |
| 35890  | 0      |        |        | 1      |
| 35898  | 1      |        |        |        |
| 35901  | 0      |        |        | 2      |
| 35914  | 1      |        |        |        |
| 35924  | 0      |        | 1      |        |
| 35950  | 0      |        | 1      |        |
| 35961  | 1      |        |        |        |
| 35966  | 0      |        | 1      |        |
| 35967  | 1      |        |        |        |
| 35971  | 1      |        |        |        |
| 35974  | 0      |        |        |        |
| 35983  | 0      | 3      |        | 3      |
| 35992  | 0      | 2      | 1      |        |
| 36010  | 1      |        |        |        |
| 36019  | 1      |        |        |        |
| 36029  | 0      |        | 2      |        |
| 36033  | 1      |        |        |        |
| 36042  | 1      |        |        |        |
| 36043  | 0      |        |        |        |
| 36048  | 0      |        |        |        |

| respid | Q31_99 | Q31a_1 | Q31a_2 | Q31a_3 |
|--------|--------|--------|--------|--------|
| 36050  | 0      |        |        |        |
| 36062  | 0      |        | 1      | 1      |
| 36063  | 1      |        |        |        |
| 36092  | 1      |        |        |        |
| 36097  | 0      |        |        | 1      |
| 36108  | 1      |        |        |        |
| 36113  | 0      |        | 2      |        |
| 36117  | 0      |        |        |        |
| 36129  | 0      | 1      | 1      | 1      |
| 36144  | 1      |        |        |        |
| 36152  | 1      |        |        |        |
| 36154  | 0      |        |        |        |
| 36155  | 0      |        |        | 4      |
| 36167  | 1      |        |        |        |
| 36172  | 1      |        |        |        |
| 36173  | 1      |        |        |        |
| 36174  | 0      |        |        |        |
| 36182  | 0      |        | 2      | 1      |
| 36192  | 0      |        |        |        |
| 36195  | 0      |        |        |        |
| 36204  | 1      |        |        |        |
| 36205  | 1      |        |        |        |
| 36208  | 1      |        |        |        |
| 36216  | 0      |        | 1      |        |
| 36221  | 0      |        |        |        |
| 36244  | 1      |        |        |        |
| 36255  | 0      |        | 3      | 3      |
| 36259  | 1      |        |        |        |
| 36262  | 0      |        | 3      |        |
| 36268  | 1      |        |        |        |
| 36308  | 1      |        |        |        |
| 36324  | 1      |        |        |        |

| respid | Q31_99 | Q31a_1 | Q31a_2 | Q31a_3 |
|--------|--------|--------|--------|--------|
| 36330  | 1      |        |        |        |
| 36331  | 0      |        |        |        |
| 36336  | 1      |        |        |        |
| 36337  | 0      |        | 1      |        |
| 36364  | 1      |        |        |        |
| 36365  | 0      |        |        |        |
| 36396  | 0      |        |        |        |
| 36403  | 0      |        | 1      |        |
| 36410  | 1      |        |        |        |
| 36413  | 1      |        |        |        |
| 36422  | 0      |        | 1      |        |
| 36424  | 0      | 1      |        | 1      |
| 36425  | 0      | 4      |        | 3      |
| 36432  | 1      |        |        |        |
| 36435  | 0      |        |        | 3      |
| 36446  | 0      |        |        |        |
| 36451  | 0      |        | 1      |        |
| 36453  | 1      |        |        |        |
| 36459  | 0      |        |        |        |
| 36464  | 0      |        |        |        |
| 36465  | 0      |        |        |        |
| 36466  | 1      |        |        |        |
| 36476  | 0      |        |        |        |
| 36487  | 1      |        |        |        |
| 36488  | 1      |        |        |        |
| 36500  | 1      |        |        |        |
| 36504  | 0      |        |        | 1      |
| 36513  | 0      |        | 2      | 2      |
| 36515  | 0      |        | 2      |        |
| 36521  | 0      |        |        |        |
| 36530  | 0      |        |        | 2      |
| 36556  | 1      |        |        |        |

| respid | Q31_99 | Q31a_1 | Q31a_2 | Q31a_3 |
|--------|--------|--------|--------|--------|
| 36564  | 0      |        | 3      |        |
| 36584  | 1      |        |        |        |
| 36585  | 1      |        |        |        |
| 36586  | 1      |        |        |        |
| 36606  | 0      |        | 3      |        |
| 36615  | 0      | 2      |        | 2      |
| 36628  | 1      |        |        |        |
| 36630  | 0      |        | 1      | 1      |
| 36631  | 0      |        | 2      |        |
| 36636  | 0      |        | 2      |        |
| 36637  | 1      |        |        |        |
| 36651  | 0      |        | 1      |        |
| 36661  | 1      |        |        |        |
| 36670  | 0      | 1      | 2      | 2      |
| 36671  | 0      |        |        |        |
| 36688  | 1      |        |        |        |
| 36694  | 1      |        |        |        |
| 36696  | 1      |        |        |        |
| 36703  | 1      |        |        |        |
| 36719  | 0      | 3      |        |        |
| 36721  | 0      | 3      |        |        |
| 36740  | 1      |        |        |        |
| 36755  | 1      |        |        |        |
| 36765  | 0      | 1      | 1      |        |
| 36770  | 1      |        |        |        |
| 36773  | 0      |        | 1      |        |
| 36813  | 0      |        | 1      |        |
| 36819  | 0      |        |        |        |
| 36820  | 0      | 1      | 1      | 1      |
| 36821  | 1      |        |        |        |
| 36827  | 0      | 1      | 1      | 2      |
| 36835  | 1      |        |        |        |



| respid | Q31_99 | Q31a_1 | Q31a_2 | Q31a_3 |
|--------|--------|--------|--------|--------|
| 36837  | 1      |        |        |        |
| 36849  | 0      | 1      |        | 1      |
| 36851  | 0      |        | 1      |        |
| 36868  | 0      |        |        |        |
| 36870  | 1      |        |        |        |
| 36871  | 1      |        |        |        |
| 36874  | 0      |        |        |        |
| 36878  | 0      |        |        |        |
| 36887  | 0      |        |        |        |
| 36889  | 1      |        |        |        |
| 36891  | 1      |        |        |        |
| 36903  | 1      |        |        |        |
| 36905  | 1      |        |        |        |
| 36913  | 1      |        |        |        |
| 36949  | 0      |        | 2      |        |
| 36954  | 0      |        |        |        |
| 36962  | 0      |        | 2      |        |
| 36965  | 1      |        |        |        |
| 36970  | 1      |        |        |        |
| 36979  | 0      |        | 1      |        |
| 36990  | 0      |        | 3      | 3      |
| 36991  | 0      |        | 2      | 1      |
| 36992  | 1      |        |        |        |
| 37015  | 1      |        |        |        |
| 37017  | 1      |        |        |        |
| 37020  | 1      |        |        |        |
| 37033  | 1      |        |        |        |
| 37041  | 1      |        |        |        |
| 37048  | 0      |        | 1      | 2      |
| 37050  | 1      |        |        |        |
| 37054  | 0      | 2      | 2      | 2      |
| 37057  | 0      | 1      | 1      | 1      |

| respid | Q31_99 | Q31a_1 | Q31a_2 | Q31a_3 |
|--------|--------|--------|--------|--------|
| 37067  | 0      |        |        |        |
| 37074  | 1      |        |        |        |
| 37088  | 0      |        |        |        |
| 37090  | 0      | 1      | 2      | 3      |
| 37110  | 0      | 2      | 2      | 3      |
| 37122  | 1      |        |        |        |
| 37124  | 0      |        |        |        |
| 37126  | 1      |        |        |        |
| 37129  | 0      |        |        |        |
| 37130  | 1      |        |        |        |
| 37142  | 0      |        |        |        |
| 37160  | 0      |        | 3      |        |
| 37168  | 1      |        |        |        |
| 37169  | 1      |        |        |        |
| 37191  | 0      |        |        |        |
| 37197  | 0      |        |        |        |
| 37204  | 1      |        |        |        |
| 37213  | 1      |        |        |        |
| 37238  | 0      |        |        |        |
| 37242  | 0      |        |        |        |
| 37243  | 0      |        |        |        |
| 37275  | 0      |        |        |        |
| 37305  | 0      | 2      | 1      |        |
| 37357  | 0      |        |        | 2      |
| 37365  | 0      |        |        |        |
| 37370  | 1      |        |        |        |
| 37406  | 0      |        | 3      | 4      |
| 37410  | 0      |        |        | 3      |
| 37411  | 0      |        | 2      | 2      |
| 37427  | 0      |        | 2      | 3      |
| 37437  | 0      |        | 2      |        |
| 37440  | 1      |        |        |        |

| respid | Q31_99 | Q31a_1 | Q31a_2 | Q31a_3 |
|--------|--------|--------|--------|--------|
| 37452  | 1      |        |        |        |
| 37465  | 0      |        |        |        |
| 37468  | 0      | 1      | 2      | 2      |
| 37469  | 1      |        |        |        |
| 37477  | 0      |        | 1      | 2      |
| 37509  | 1      |        |        |        |
| 37513  | 0      |        |        |        |
| 37534  | 0      |        |        |        |
| 37537  | 1      |        |        |        |
| 37560  | 0      |        | 2      | 3      |
| 37566  | 1      |        |        |        |
| 37572  | 0      | 2      | 2      |        |
| 37574  | 0      |        | 2      |        |
| 37575  | 1      |        |        |        |
| 37590  | 0      |        |        | 1      |
| 37593  | 1      |        |        |        |
| 37599  | 1      |        |        |        |
| 37641  | 1      |        |        |        |
| 37651  | 0      |        |        |        |
| 37670  | 1      |        |        |        |
| 37680  | 0      | 3      |        |        |
| 37690  | 1      |        |        |        |
| 37694  | 1      |        |        |        |
| 37705  | 0      |        |        | 3      |
| 37710  | 0      | 2      | 2      |        |
| 37719  | 0      |        |        | 2      |
| 37741  | 0      | 2      |        |        |
| 37752  | 1      |        |        |        |
| 37755  | 0      | 1      |        | 2      |
| 37757  | 1      |        |        |        |
| 37783  | 0      | 1      |        |        |
| 37793  | 0      |        |        |        |

| respid | Q31_99 | Q31a_1 | Q31a_2 | Q31a_3 |
|--------|--------|--------|--------|--------|
| 37800  | 0      |        | 2      |        |
| 37801  | 1      |        |        |        |
| 37820  | 0      |        | 3      | 3      |
| 37826  | 0      |        |        | 2      |
| 37835  | 0      |        |        | 2      |
| 37839  | 1      |        |        |        |
| 37871  | 0      |        | 5      | 4      |
| 37876  | 0      | 2      | 2      | 3      |
| 37879  | 0      |        |        |        |
| 37894  | 1      |        |        |        |
| 37895  | 0      | 1      | 2      | 2      |
| 37901  | 0      | 3      |        | 3      |
| 37926  | 1      |        |        |        |
| 37937  | 0      |        |        | 2      |
| 37938  | 0      | 3      |        |        |
| 37959  | 0      |        |        |        |
| 37970  | 1      |        |        |        |
| 37972  | 1      |        |        |        |
| 37988  | 0      |        |        |        |
| 37989  | 0      |        |        | 2      |
| 38000  | 0      |        |        |        |
| 38028  | 0      |        |        | 4      |
| 38042  | 1      |        |        |        |
| 38052  | 1      |        |        |        |
| 38056  | 1      |        |        |        |
| 38106  | 0      |        |        | 1      |
| 38114  | 0      |        |        | 3      |
| 38134  | 1      |        |        |        |
| 38135  | 0      |        |        |        |
| 38139  | 0      |        |        | 1      |
| 38160  | 1      |        |        |        |
| 38164  | 0      |        |        |        |

| respid | Q31_99 | Q31a_1 | Q31a_2 | Q31a_3 |
|--------|--------|--------|--------|--------|
| 38168  | 1      |        |        |        |
| 38173  | 1      |        |        |        |
| 38193  | 0      | 3      | 2      | 2      |
| 38204  | 1      |        |        |        |
| 38206  | 1      |        |        |        |
| 38233  | 0      |        | 1      | 2      |
| 38242  | 0      |        | 3      | 2      |
| 38245  | 1      |        |        |        |
| 38261  | 1      |        |        |        |
| 38288  | 0      |        |        | 2      |
| 38296  | 0      |        | 1      |        |
| 38299  | 0      |        | 1      |        |
| 38300  | 0      |        |        | 1      |
| 38303  | 1      |        |        |        |
| 38317  | 1      |        |        |        |
| 38328  | 0      |        | 2      |        |
| 38333  | 0      |        |        | 2      |
| 38336  | 1      |        |        |        |
| 38338  | 0      |        | 2      |        |
| 38342  | 0      |        |        | 2      |
| 38360  | 1      |        |        |        |
| 38362  | 0      |        |        |        |
| 38364  | 0      | 2      | 2      | 2      |
| 38402  | 0      |        |        | 1      |
| 38423  | 0      |        |        | 1      |
| 38424  | 0      |        |        |        |
| 38435  | 0      |        |        |        |
| 38450  | 1      |        |        |        |
| 38455  | 1      |        |        |        |
| 38467  | 1      |        |        |        |
| 38468  | 0      |        |        |        |
| 38472  | 0      | 1      |        |        |

| respid | Q31_99 | Q31a_1 | Q31a_2 | Q31a_3 |
|--------|--------|--------|--------|--------|
| 38484  | 1      |        |        |        |
| 38498  | 1      |        |        |        |
| 38507  | 1      |        |        |        |
| 38511  | 0      |        | 1      | 1      |
| 38524  | 0      |        | 3      | 3      |
| 38526  | 1      |        |        |        |
| 38534  | 1      |        |        |        |
| 38536  | 1      |        |        |        |
| 38539  | 1      |        |        |        |
| 38547  | 1      |        |        |        |
| 38549  | 1      |        |        |        |
| 38575  | 1      |        |        |        |
| 38579  | 0      |        |        | 1      |
| 38585  | 1      |        |        |        |
| 38589  | 0      |        |        |        |
| 38595  | 0      |        |        | 3      |
| 38602  | 1      |        |        |        |
| 38603  | 1      |        |        |        |
| 38612  | 1      |        |        |        |
| 38621  | 0      |        |        | 4      |
| 38624  | 0      |        |        |        |
| 38636  | 1      |        |        |        |
| 38656  | 0      |        |        |        |
| 38668  | 1      |        |        |        |
| 38675  | 0      |        |        | 2      |
| 38676  | 1      |        |        |        |
| 38682  | 0      |        | 1      |        |
| 38689  | 1      |        |        |        |
| 38702  | 1      |        |        |        |
| 38704  | 0      |        |        |        |
| 38713  | 1      |        |        |        |
| 38718  | 0      |        | 2      | 3      |

| respid | Q31_99 | Q31a_1 | Q31a_2 | Q31a_3 |
|--------|--------|--------|--------|--------|
| 38725  | 0      | 2      |        |        |
| 38730  | 1      |        |        |        |
| 38737  | 0      |        |        |        |
| 38738  | 0      |        | 1      |        |
| 38744  | 0      | 2      |        |        |
| 38746  | 0      |        |        |        |
| 38753  | 1      |        |        |        |
| 38756  | 0      |        |        |        |
| 38760  | 0      | 1      |        |        |
| 38762  | 0      |        |        | 3      |
| 38765  | 1      |        |        |        |
| 38769  | 1      |        |        |        |
| 38781  | 0      |        |        |        |
| 38786  | 1      |        |        |        |
| 38790  | 0      |        |        | 2      |
| 38793  | 0      |        |        | 1      |
| 38797  | 1      |        |        |        |
| 38802  | 1      |        |        |        |
| 38815  | 1      |        |        |        |
| 38826  | 0      |        |        | 1      |
| 38828  | 1      |        |        |        |
| 38829  | 1      |        |        |        |
| 38835  | 0      |        | 3      |        |
| 38842  | 0      |        | 3      |        |
| 38853  | 1      |        |        |        |
| 38855  | 0      |        |        |        |
| 38860  | 0      | 2      | 2      | 3      |
| 38869  | 0      |        | 1      |        |
| 38882  | 0      | 3      |        |        |
| 38897  | 0      |        |        |        |
| 38903  | 1      |        |        |        |
| 38910  | 0      |        |        |        |

| respid | Q31_99 | Q31a_1 | Q31a_2 | Q31a_3 |
|--------|--------|--------|--------|--------|
| 38948  | 0      |        |        |        |
| 38949  | 0      |        |        |        |
| 38953  | 0      |        |        |        |
| 38989  | 0      |        | 3      | 3      |
| 38997  | 0      |        | 1      |        |
| 38999  | 1      |        |        |        |
| 39002  | 0      |        |        |        |
| 39003  | 0      |        |        |        |
| 39006  | 0      |        | 2      |        |
| 39014  | 1      |        |        |        |
| 39017  | 0      | 4      | 5      |        |
| 39018  | 0      | 4      | 3      | 2      |
| 39025  | 0      |        | 2      | 2      |
| 39031  | 0      |        | 3      |        |
| 39061  | 0      |        |        |        |
| 39131  | 1      |        |        |        |
| 39153  | 0      |        |        | 3      |
| 39194  | 0      | 4      | 4      |        |
| 39204  | 1      |        |        |        |
| 39208  | 0      |        |        | 1      |
| 39213  | 1      |        |        |        |
| 39231  | 1      |        |        |        |
| 39251  | 1      |        |        |        |
| 39257  | 0      |        | 2      |        |
| 39262  | 0      |        |        |        |
| 39269  | 0      |        |        |        |
| 39272  | 0      |        | 1      |        |
| 39280  | 1      |        |        |        |
| 39294  | 0      | 2      |        |        |
| 39297  | 0      |        |        |        |
| 39300  | 0      |        | 3      | 3      |
| 39307  | 0      |        | 2      |        |



| respid | Q31_99 | Q31a_1 | Q31a_2 | Q31a_3 |
|--------|--------|--------|--------|--------|
| 39320  | 0      |        |        |        |
| 39333  | 1      |        |        |        |
| 39335  | 0      |        |        | 1      |
| 39339  | 1      |        |        |        |
| 39375  | 0      |        |        | 1      |
| 39377  | 1      |        |        |        |
| 39380  | 1      |        |        |        |
| 39425  | 0      |        |        | 1      |
| 39590  | 1      |        |        |        |
| 40529  | 0      |        | 1      | 1      |
| 40702  | 1      |        |        |        |
| 40788  | 1      |        |        |        |
| 40841  | 1      |        |        |        |
| 40965  | 1      |        |        |        |
| 41092  | 1      |        |        |        |
| 41534  | 1      |        |        |        |
| 41919  | 0      |        |        | 1      |
| 42110  | 1      |        |        |        |
| 42135  | 1      |        |        |        |
| 42142  | 1      |        |        |        |
| 42163  | 0      |        | 2      | 2      |
| 42164  | 1      |        |        |        |
| 42172  | 0      |        | 1      |        |
| 42177  | 1      |        |        |        |
| 42181  | 1      |        |        |        |
| 42193  | 0      |        | 2      |        |
| 42196  | 0      |        |        |        |
| 42202  | 0      |        |        |        |
| 42248  | 0      |        |        |        |
| 42283  | 1      |        |        |        |
| 42284  | 0      |        |        |        |
| 42323  | 1      |        |        |        |

| respid | Q31_99 | Q31a_1 | Q31a_2 | Q31a_3 |
|--------|--------|--------|--------|--------|
| 42349  | 1      |        |        |        |
| 42351  | 1      |        |        |        |
| 42357  | 1      |        |        |        |
| 42366  | 1      |        |        |        |
| 42380  | 1      |        |        |        |
| 42414  | 0      |        | 1      |        |
| 42420  | 0      | 3      | 4      | 3      |
| 42454  | 1      |        |        |        |
| 42458  | 0      |        | 2      | 2      |
| 42461  | 1      |        |        |        |
| 42488  | 0      |        |        | 1      |
| 42511  | 1      |        |        |        |
| 42512  | 1      |        |        |        |
| 42530  | 0      |        |        | 1      |
| 42531  | 0      |        |        |        |
| 42533  | 1      |        |        |        |
| 42549  | 1      |        |        |        |
| 42550  | 0      | 3      | 3      |        |
| 42553  | 1      |        |        |        |
| 42562  | 0      |        |        | 2      |
| 42567  | 1      |        |        |        |
| 42589  | 0      |        | 2      |        |
| 42604  | 0      |        | 1      |        |
| 42618  | 0      | 1      |        |        |
| 42621  | 0      |        | 3      |        |
| 42627  | 1      |        |        |        |
| 42641  | 1      |        |        |        |
| 42655  | 0      |        |        | 3      |
| 42666  | 1      |        |        |        |
| 42667  | 0      |        |        |        |
| 42697  | 0      |        | 2      |        |
| 42703  | 1      |        |        |        |

| respid | Q31_99 | Q31a_1 | Q31a_2 | Q31a_3 |
|--------|--------|--------|--------|--------|
| 42712  | 0      |        | 1      |        |
| 42731  | 0      |        |        | 1      |
| 42780  | 1      |        |        |        |
| 42785  | 0      |        |        |        |
| 42788  | 1      |        |        |        |
| 42802  | 0      |        |        |        |
| 42818  | 0      | 2      |        |        |
| 42821  | 1      |        |        |        |
| 42824  | 1      |        |        |        |
| 42831  | 0      |        | 1      |        |
| 42836  | 1      |        |        |        |
| 42864  | 0      |        |        |        |
| 42875  | 0      |        |        |        |
| 42891  | 0      | 3      | 3      | 3      |
| 42897  | 0      |        |        |        |
| 42900  | 1      |        |        |        |
| 42902  | 0      |        |        |        |
| 42921  | 0      |        | 1      |        |
| 42925  | 0      | 1      |        |        |
| 42944  | 1      |        |        |        |
| 42950  | 1      |        |        |        |
| 42963  | 1      |        |        |        |
| 42967  | 0      |        |        |        |
| 42985  | 0      |        | 1      |        |
| 42990  | 0      |        |        |        |
| 42996  | 0      |        |        |        |
| 43002  | 0      |        | 1      | 1      |
| 43004  | 1      |        |        |        |
| 43012  | 1      |        |        |        |
| 43027  | 1      |        |        |        |
| 43028  | 0      |        |        |        |
| 43029  | 0      |        |        |        |

| respid | Q31_99 | Q31a_1 | Q31a_2 | Q31a_3 |
|--------|--------|--------|--------|--------|
| 43031  | 1      |        |        |        |
| 43042  | 1      |        |        |        |
| 43054  | 0      |        | 2      |        |
| 43058  | 1      |        |        |        |
| 43064  | 0      |        | 2      | 2      |
| 43069  | 1      |        |        |        |
| 43071  | 1      |        |        |        |
| 43072  | 1      |        |        |        |
| 43077  | 0      |        |        |        |
| 43078  | 0      |        |        | 4      |
| 43082  | 1      |        |        |        |
| 43092  | 1      |        |        |        |
| 43096  | 0      |        |        |        |
| 43109  | 1      |        |        |        |
| 43113  | 1      |        |        |        |
| 43123  | 0      |        | 2      |        |
| 43127  | 1      |        |        |        |
| 43128  | 0      |        | 2      |        |
| 43129  | 0      |        |        |        |
| 43133  | 0      |        |        |        |
| 43140  | 1      |        |        |        |
| 43143  | 0      |        |        |        |
| 43149  | 0      |        |        |        |
| 43150  | 0      |        |        | 1      |
| 43153  | 0      |        | 3      | 2      |
| 43170  | 1      |        |        |        |
| 43187  | 0      | 2      | 2      |        |
| 43188  | 0      |        |        |        |
| 43198  | 0      |        | 1      |        |
| 43208  | 1      |        |        |        |
| 43216  | 1      |        |        |        |
| 43222  | 0      |        |        | 4      |

| respid | Q31_99 | Q31a_1 | Q31a_2 | Q31a_3 |
|--------|--------|--------|--------|--------|
| 43224  | 0      |        |        |        |
| 43230  | 0      |        |        |        |
| 43231  | 0      |        |        |        |
| 43265  | 0      |        |        |        |
| 43270  | 0      |        |        |        |
| 43283  | 0      |        |        |        |
| 43295  | 0      |        |        | 2      |
| 43297  | 1      |        |        |        |
| 43299  | 0      |        |        |        |
| 43307  | 1      |        |        |        |
| 43316  | 0      |        |        | 1      |
| 43318  | 0      |        |        | 1      |
| 43319  | 0      |        |        |        |
| 43324  | 0      |        |        |        |
| 43325  | 0      |        |        | 1      |
| 43327  | 0      |        | 1      | 1      |
| 43338  | 1      |        |        |        |
| 43342  | 0      |        | 1      | 1      |
| 43348  | 1      |        |        |        |
| 43395  | 0      |        | 1      |        |
| 43404  | 0      | 2      | 2      | 2      |
| 43406  | 0      | 2      |        |        |
| 43407  | 1      |        |        |        |
| 43411  | 0      |        | 1      |        |
| 43416  | 0      |        | 2      | 2      |
| 43428  | 1      |        |        |        |
| 43429  | 0      | 3      | 3      | 3      |
| 43432  | 0      |        |        |        |
| 43443  | 1      |        |        |        |
| 43455  | 1      |        |        |        |
| 43457  | 0      |        |        |        |
| 43458  | 0      |        | 1      | 1      |

| respid | Q31_99 | Q31a_1 | Q31a_2 | Q31a_3 |
|--------|--------|--------|--------|--------|
| 43477  | 0      |        |        | 2      |
| 43520  | 1      |        |        |        |
| 43521  | 1      |        |        |        |
| 43550  | 1      |        |        |        |
| 43551  | 0      |        |        | 2      |
| 43554  | 0      |        |        | 2      |
| 43560  | 0      |        | 2      | 1      |
| 43569  | 1      |        |        |        |
| 43583  | 0      |        | 1      | 1      |
| 43590  | 0      |        |        |        |
| 43591  | 1      |        |        |        |
| 43595  | 1      |        |        |        |
| 43599  | 1      |        |        |        |
| 43606  | 0      |        | 2      | 2      |
| 43609  | 1      |        |        |        |
| 43629  | 1      |        |        |        |
| 43636  | 0      |        |        | 1      |
| 43661  | 0      |        | 1      |        |
| 43668  | 1      |        |        |        |
| 43672  | 1      |        |        |        |
| 43677  | 0      |        |        |        |
| 43683  | 1      |        |        |        |
| 43708  | 0      | 2      |        |        |
| 43713  | 0      |        | 1      |        |
| 43718  | 1      |        |        |        |
| 43725  | 1      |        |        |        |
| 43747  | 0      |        | 1      |        |
| 43755  | 1      |        |        |        |
| 43770  | 1      |        |        |        |
| 43775  | 0      |        | 1      | 1      |
| 43788  | 1      |        |        |        |
| 43790  | 0      | 4      | 4      | 4      |

| respid | Q31_99 | Q31a_1 | Q31a_2 | Q31a_3 |
|--------|--------|--------|--------|--------|
| 43797  | 0      |        | 1      | 2      |
| 43798  | 0      |        | 1      | 2      |
| 43811  | 0      |        | 1      | 1      |
| 43819  | 0      |        | 1      | 2      |
| 43821  | 0      |        | 2      |        |
| 43822  | 1      |        |        |        |
| 43825  | 0      |        | 2      | 2      |
| 43826  | 0      |        |        |        |
| 43831  | 1      |        |        |        |
| 43836  | 0      | 1      | 2      | 3      |
| 43852  | 0      |        |        |        |
| 43857  | 0      |        | 2      | 1      |
| 43858  | 0      |        |        |        |
| 43859  | 0      |        |        |        |
| 43863  | 1      |        |        |        |
| 43868  | 0      |        |        |        |
| 43872  | 0      |        |        | 2      |
| 43874  | 0      |        |        |        |
| 43882  | 0      |        |        |        |
| 43886  | 1      |        |        |        |
| 43903  | 0      |        |        |        |
| 43929  | 0      |        |        |        |
| 43932  | 0      |        | 2      | 2      |
| 43936  | 1      |        |        |        |
| 43962  | 1      |        |        |        |
| 43964  | 0      |        |        |        |
| 43968  | 0      |        |        |        |
| 43979  | 1      |        |        |        |
| 44006  | 0      | 2      | 2      | 2      |
| 44009  | 1      |        |        |        |
| 44023  | 0      |        | 1      |        |
| 44035  | 0      |        |        | 2      |

| respid | Q31_99 | Q31a_1 | Q31a_2 | Q31a_3 |
|--------|--------|--------|--------|--------|
| 44038  | 0      |        |        |        |
| 44039  | 0      |        |        | 3      |
| 44043  | 1      |        |        |        |
| 44048  | 0      |        |        |        |
| 44050  | 1      |        |        |        |
| 44051  | 0      | 3      |        | 3      |
| 44061  | 0      |        |        | 3      |
| 44063  | 0      |        | 2      | 3      |
| 44072  | 0      |        |        |        |
| 44075  | 0      | 2      | 2      |        |
| 44089  | 0      |        |        | 1      |
| 44090  | 0      |        | 2      | 1      |
| 44091  | 0      |        | 1      | 1      |
| 44092  | 1      |        |        |        |
| 44110  | 0      |        | 2      | 2      |
| 44112  | 0      |        | 3      | 4      |
| 44114  | 0      |        | 2      | 3      |
| 44143  | 1      |        |        |        |
| 44179  | 1      |        |        |        |
| 44234  | 1      |        |        |        |
| 44236  | 1      |        |        |        |
| 44239  | 0      |        |        | 2      |
| 44241  | 0      |        | 4      | 4      |
| 44253  | 1      |        |        |        |
| 44260  | 0      |        |        | 3      |
| 44261  | 0      |        |        | 2      |
| 44263  | 0      | 2      | 3      | 4      |
| 44264  | 1      |        |        |        |
| 44265  | 1      |        |        |        |
| 44267  | 0      |        | 2      | 3      |
| 44306  | 0      |        |        |        |
| 44309  | 0      | 4      | 3      | 3      |



| respid | Q31_99 | Q31a_1 | Q31a_2 | Q31a_3 |
|--------|--------|--------|--------|--------|
| 44310  | 1      |        |        |        |
| 44361  | 0      |        | 1      | 1      |
| 44380  | 0      | 1      | 1      | 1      |
| 44386  | 1      |        |        |        |
| 44419  | 0      |        |        |        |
| 44426  | 1      |        |        |        |
| 44479  | 0      |        |        |        |
| 44484  | 1      |        |        |        |
| 44487  | 1      |        |        |        |
| 44509  | 0      |        | 2      |        |
| 44540  | 1      |        |        |        |
| 44551  | 0      |        | 3      |        |
| 44553  | 1      |        |        |        |
| 44650  | 0      |        | 1      |        |
| 44665  | 0      |        |        |        |
| 44779  | 0      |        |        |        |
| 44797  | 1      |        |        |        |
| 44807  | 1      |        |        |        |
| 44815  | 1      |        |        |        |
| 44836  | 1      |        |        |        |
| 44868  | 1      |        |        |        |
| 44927  | 0      |        |        | 2      |
| 44983  | 1      |        |        |        |
| 45040  | 1      |        |        |        |
| 45051  | 0      | 3      | 3      | 2      |
| 45067  | 0      |        |        | 1      |
| 45074  | 1      |        |        |        |
| 45115  | 1      |        |        |        |
| 45187  | 0      | 2      | 1      | 1      |
| 45221  | 1      |        |        |        |
| 45279  | 0      |        | 1      |        |
| 45308  | 0      |        | 2      | 2      |

| respid | Q31_99 | Q31a_1 | Q31a_2 | Q31a_3 |
|--------|--------|--------|--------|--------|
| 45317  | 0      |        |        |        |
| 45379  | 0      |        |        |        |
| 45451  | 1      |        |        |        |
| 45472  | 0      |        | 2      | 2      |
| 45474  | 0      |        | 3      |        |
| 45544  | 0      | 1      |        |        |
| 45561  | 1      |        |        |        |
| 45596  | 0      |        |        | 2      |

SUI: Exercizing-StorageQ31a\_4 SUI: Lifting heavy objects - Incont. While sleeping - Incont. For no reason -

**Instrum**

| Symptom   | Storage   | Storage   | Storage   | Storage   |
|-----------|-----------|-----------|-----------|-----------|
| Type of R | Frequency | Frequency | Frequency | Frequency |

**Descripti** SUI: Exercizing SUI: Lifting heavy objects Incont. While sleeping Incont. For no reason

| respid | Q31a_4 | Q31a_5 | Q31a_6 | Q31a_7 |
|--------|--------|--------|--------|--------|
| 241    |        |        |        |        |
| 242    |        |        |        |        |
| 243    |        |        |        |        |
| 244    |        |        | 1      |        |
| 245    |        |        |        |        |
| 246    |        |        |        |        |
| 247    |        |        |        |        |
| 253    |        |        |        |        |
| 256    |        |        |        |        |
| 257    |        |        |        |        |
| 258    |        |        |        |        |
| 259    |        |        |        |        |
| 263    |        |        |        |        |
| 264    |        |        |        |        |
| 265    |        |        |        | 2      |
| 266    |        |        |        |        |
| 268    |        |        |        |        |
| 270    |        |        |        |        |
| 272    |        | 1      |        |        |
| 274    |        |        |        |        |

| respid | Q31a_4 | Q31a_5 | Q31a_6 | Q31a_7 |
|--------|--------|--------|--------|--------|
| 275    |        |        |        |        |
| 276    |        |        |        |        |
| 277    |        |        |        |        |
| 279    |        |        |        |        |
| 286    | 2      |        |        |        |
| 290    |        |        |        |        |
| 291    |        |        |        |        |
| 295    |        |        |        |        |
| 297    |        |        |        |        |
| 299    |        |        |        |        |
| 300    |        |        |        |        |
| 303    |        |        |        |        |
| 304    |        |        |        |        |
| 306    |        |        |        |        |
| 307    |        |        |        |        |
| 312    | 5      |        |        | 5      |
| 315    |        |        |        |        |
| 317    |        |        |        |        |
| 322    |        | 1      |        |        |
| 335    |        |        |        |        |
| 374    | 3      | 2      |        |        |
| 378    |        |        |        |        |
| 380    |        |        |        | 1      |
| 382    |        |        |        |        |
| 384    |        |        |        | 2      |
| 385    |        |        |        |        |
| 395    |        |        |        |        |
| 396    |        |        |        |        |
| 398    |        |        |        |        |
| 402    | 4      |        |        | 4      |
| 414    |        |        |        | 2      |
| 415    |        |        |        |        |

| respid | Q31a_4 | Q31a_5 | Q31a_6 | Q31a_7 |
|--------|--------|--------|--------|--------|
| 416    |        |        |        |        |
| 420    |        |        |        |        |
| 421    |        |        |        |        |
| 422    |        |        |        |        |
| 423    |        |        |        |        |
| 424    |        |        |        |        |
| 425    |        |        |        |        |
| 428    |        |        |        |        |
| 429    | 3      |        |        |        |
| 431    |        |        |        |        |
| 437    |        |        |        |        |
| 438    |        |        |        |        |
| 441    |        |        |        |        |
| 444    |        |        |        |        |
| 448    |        |        |        |        |
| 449    |        |        |        |        |
| 457    | 1      |        |        |        |
| 460    |        |        |        |        |
| 469    |        |        |        |        |
| 471    |        |        |        |        |
| 473    |        |        |        |        |
| 476    |        |        |        |        |
| 479    |        |        |        |        |
| 485    |        |        |        |        |
| 488    |        | 1      |        |        |
| 494    |        |        |        |        |
| 496    |        |        |        |        |
| 501    |        |        |        |        |
| 502    |        | 2      |        |        |
| 503    |        |        |        |        |
| 506    |        |        |        |        |
| 514    |        |        |        |        |

| respid | Q31a_4 | Q31a_5 | Q31a_6 | Q31a_7 |
|--------|--------|--------|--------|--------|
| 515    |        |        |        |        |
| 516    |        |        |        |        |
| 519    |        |        |        |        |
| 522    |        |        |        |        |
| 525    |        |        |        |        |
| 528    |        |        |        |        |
| 532    |        |        |        |        |
| 536    |        |        |        |        |
| 539    |        | 1      |        |        |
| 540    |        |        |        |        |
| 547    |        |        |        |        |
| 551    |        |        |        |        |
| 554    |        |        |        |        |
| 558    |        |        |        |        |
| 563    |        |        |        |        |
| 564    |        |        |        |        |
| 565    |        |        |        |        |
| 567    |        |        |        |        |
| 569    |        |        |        |        |
| 572    |        |        |        |        |
| 574    |        |        |        |        |
| 583    |        |        |        |        |
| 589    |        |        |        |        |
| 592    |        |        |        |        |
| 593    |        |        |        |        |
| 594    |        |        |        |        |
| 597    |        |        |        |        |
| 601    |        |        |        |        |
| 607    |        |        |        |        |
| 610    |        |        |        |        |
| 612    |        |        |        | 2      |
| 627    |        |        |        |        |

| respid | Q31a_4 | Q31a_5 | Q31a_6 | Q31a_7 |
|--------|--------|--------|--------|--------|
| 631    |        |        |        |        |
| 633    |        |        |        |        |
| 636    |        |        |        |        |
| 656    |        |        |        |        |
| 659    |        |        |        |        |
| 670    |        |        |        |        |
| 672    |        |        |        |        |
| 673    |        |        |        |        |
| 675    |        |        |        |        |
| 676    | 3      |        |        |        |
| 679    |        |        |        |        |
| 683    |        |        |        |        |
| 684    |        |        |        |        |
| 690    | 1      |        |        |        |
| 701    |        |        |        | 3      |
| 709    |        |        |        |        |
| 719    |        |        |        |        |
| 726    |        |        |        |        |
| 730    |        |        |        |        |
| 731    |        |        |        | 1      |
| 732    |        |        |        |        |
| 733    |        |        |        |        |
| 735    |        |        |        |        |
| 738    |        |        |        |        |
| 740    |        |        |        |        |
| 742    |        |        |        |        |
| 744    |        |        |        |        |
| 749    |        |        |        |        |
| 751    |        |        |        |        |
| 752    |        |        |        |        |
| 753    |        |        |        |        |
| 755    |        |        |        |        |

| respid | Q31a_4 | Q31a_5 | Q31a_6 | Q31a_7 |
|--------|--------|--------|--------|--------|
| 756    |        |        |        |        |
| 759    |        |        |        |        |
| 760    |        |        |        |        |
| 763    |        |        |        |        |
| 764    |        |        | 1      |        |
| 765    |        |        |        |        |
| 766    |        |        |        |        |
| 767    |        |        |        |        |
| 771    |        |        |        |        |
| 773    |        |        |        |        |
| 774    |        |        |        |        |
| 775    |        |        |        |        |
| 776    |        |        |        |        |
| 778    |        |        |        |        |
| 780    |        |        |        |        |
| 781    |        |        |        |        |
| 782    |        |        |        |        |
| 783    |        |        |        |        |
| 786    |        |        |        |        |
| 788    |        |        |        |        |
| 792    |        |        |        |        |
| 794    |        |        |        |        |
| 795    |        |        |        |        |
| 799    |        |        |        |        |
| 800    |        |        |        |        |
| 801    |        |        | 1      |        |
| 804    |        |        |        |        |
| 806    |        |        |        |        |
| 807    |        |        |        |        |
| 808    |        |        |        |        |
| 809    |        |        |        |        |
| 811    |        |        |        |        |



| respid | Q31a_4 | Q31a_5 | Q31a_6 | Q31a_7 |
|--------|--------|--------|--------|--------|
| 812    |        |        |        |        |
| 815    |        |        |        |        |
| 817    |        | 1      |        |        |
| 818    |        |        |        |        |
| 819    |        |        |        |        |
| 821    |        |        |        |        |
| 824    |        |        |        |        |
| 825    |        |        |        |        |
| 828    |        |        |        |        |
| 832    |        |        |        |        |
| 834    |        |        |        |        |
| 835    |        |        |        |        |
| 836    |        |        |        |        |
| 837    |        |        |        |        |
| 840    |        |        |        |        |
| 841    |        |        |        |        |
| 845    |        |        |        |        |
| 846    |        |        |        |        |
| 849    |        |        |        |        |
| 852    |        |        |        |        |
| 854    |        |        |        |        |
| 856    |        |        |        |        |
| 858    |        |        |        |        |
| 859    |        |        |        |        |
| 861    |        |        |        |        |
| 863    |        |        |        |        |
| 864    |        |        | 1      |        |
| 866    |        |        |        |        |
| 869    |        |        |        |        |
| 870    |        |        |        |        |
| 871    |        |        |        |        |
| 873    |        |        |        |        |

| respid | Q31a_4 | Q31a_5 | Q31a_6 | Q31a_7 |
|--------|--------|--------|--------|--------|
| 879    |        |        | 2      |        |
| 880    |        |        |        |        |
| 881    |        |        |        |        |
| 882    |        |        |        |        |
| 885    |        |        |        |        |
| 886    |        |        |        |        |
| 887    |        |        |        |        |
| 888    |        |        |        |        |
| 889    |        |        |        |        |
| 890    |        |        |        |        |
| 900    |        |        |        |        |
| 901    |        |        |        |        |
| 902    |        |        |        |        |
| 903    |        |        |        |        |
| 906    |        |        |        |        |
| 907    |        |        |        | 1      |
| 908    |        |        | 2      |        |
| 910    |        |        |        |        |
| 911    |        |        |        | 1      |
| 912    |        |        |        |        |
| 915    |        |        |        |        |
| 923    |        |        |        |        |
| 925    |        |        |        |        |
| 926    |        |        |        |        |
| 929    |        |        |        |        |
| 932    |        |        |        |        |
| 933    |        |        | 1      |        |
| 934    |        |        |        |        |
| 938    |        |        |        |        |
| 941    |        |        |        |        |
| 942    |        |        |        |        |
| 943    |        |        |        |        |

| respid | Q31a_4 | Q31a_5 | Q31a_6 | Q31a_7 |
|--------|--------|--------|--------|--------|
| 945    |        |        |        |        |
| 946    |        |        |        |        |
| 947    |        |        |        |        |
| 948    |        |        |        |        |
| 949    |        |        |        |        |
| 952    |        |        |        |        |
| 956    |        |        |        |        |
| 957    |        |        |        |        |
| 959    |        |        |        |        |
| 961    |        |        |        |        |
| 962    | 2      |        |        |        |
| 965    |        |        |        |        |
| 967    |        |        |        |        |
| 969    |        |        |        |        |
| 970    |        |        |        |        |
| 973    |        |        |        |        |
| 974    |        |        |        |        |
| 975    |        |        |        | 2      |
| 976    |        |        |        |        |
| 977    |        |        |        |        |
| 979    |        |        |        |        |
| 981    |        |        |        |        |
| 983    |        |        |        |        |
| 987    |        |        |        |        |
| 991    |        |        |        |        |
| 992    |        |        |        |        |
| 993    |        |        |        |        |
| 994    |        | 1      |        |        |
| 995    |        |        |        |        |
| 998    |        |        |        |        |
| 1000   | 2      | 1      | 2      | 2      |
| 1001   |        |        |        |        |

| respid | Q31a_4 | Q31a_5 | Q31a_6 | Q31a_7 |
|--------|--------|--------|--------|--------|
| 1002   |        |        |        |        |
| 1004   |        |        |        |        |
| 1005   |        |        |        |        |
| 1006   |        |        |        |        |
| 1007   |        |        |        |        |
| 1009   |        |        |        |        |
| 1013   |        |        |        |        |
| 1015   |        |        |        |        |
| 1020   |        |        | 2      |        |
| 1022   |        |        | 1      |        |
| 1024   |        |        |        |        |
| 1025   |        |        |        |        |
| 1027   |        |        |        |        |
| 1031   |        |        |        |        |
| 1037   |        |        |        |        |
| 1039   |        |        |        |        |
| 1040   |        |        |        |        |
| 1056   |        |        |        |        |
| 1057   |        |        |        |        |
| 1062   |        |        |        |        |
| 1069   |        |        |        |        |
| 1070   |        |        |        |        |
| 1072   |        |        |        |        |
| 1076   |        |        |        |        |
| 1077   |        |        |        |        |
| 1078   |        |        |        |        |
| 1080   |        |        |        |        |
| 1094   |        |        |        |        |
| 1098   |        |        |        |        |
| 1099   |        |        |        |        |
| 1102   |        |        |        |        |
| 1110   |        |        |        |        |

| respid | Q31a_4 | Q31a_5 | Q31a_6 | Q31a_7 |
|--------|--------|--------|--------|--------|
| 1117   |        |        |        |        |
| 1119   |        |        |        |        |
| 1126   |        |        |        |        |
| 1127   |        |        |        |        |
| 1130   |        |        |        |        |
| 1131   |        |        |        |        |
| 1135   | 2      | 2      |        |        |
| 1138   |        |        |        |        |
| 1139   |        |        |        |        |
| 1140   |        |        |        |        |
| 1142   |        |        |        |        |
| 1143   |        |        |        |        |
| 1145   |        |        |        |        |
| 1149   |        |        |        |        |
| 1152   |        |        |        |        |
| 1160   |        |        |        |        |
| 1164   |        |        |        |        |
| 1165   |        |        |        |        |
| 1169   |        |        |        | 2      |
| 1170   |        |        |        |        |
| 1179   |        |        |        |        |
| 1180   |        |        |        |        |
| 1183   |        |        |        |        |
| 1187   |        |        |        |        |
| 1188   |        |        |        |        |
| 1193   |        |        |        |        |
| 1194   |        |        |        |        |
| 1197   |        |        |        |        |
| 1202   |        |        |        |        |
| 1204   |        | 3      |        |        |
| 1211   |        |        |        |        |
| 1224   |        |        |        |        |

| respid | Q31a_4 | Q31a_5 | Q31a_6 | Q31a_7 |
|--------|--------|--------|--------|--------|
|--------|--------|--------|--------|--------|

1225  
1230  
1232  
1233  
1234  
1235  
1236  
1237  
1238  
1239  
1241  
1242  
1244  
1245  
1247  
1248  
1249  
1250  
1251  
1252  
1253  
1254  
1258  
1260  
1261  
1262  
1263  
1264  
1265  
1266  
1270  
1272

| respid | Q31a_4 | Q31a_5 | Q31a_6 | Q31a_7 |
|--------|--------|--------|--------|--------|
| 1273   |        |        |        |        |
| 1276   |        |        |        |        |
| 1277   |        |        |        |        |
| 1278   |        |        | 1      |        |
| 1280   |        |        |        |        |
| 1281   |        |        |        |        |
| 1282   |        |        |        |        |
| 1283   |        |        |        |        |
| 1288   |        |        |        |        |
| 1289   |        |        |        |        |
| 1290   |        |        |        |        |
| 1291   |        |        |        |        |
| 1293   |        |        |        |        |
| 1294   |        |        |        |        |
| 1295   |        |        |        |        |
| 1296   |        |        |        |        |
| 1297   |        |        |        |        |
| 1298   |        | 1      |        |        |
| 1300   | 2      |        |        |        |
| 1302   |        |        |        |        |
| 1303   |        |        |        | 1      |
| 1304   |        | 1      |        |        |
| 1305   |        |        |        |        |
| 1307   |        |        |        |        |
| 1312   |        |        |        |        |
| 1313   |        |        |        |        |
| 1314   |        |        |        |        |
| 1317   |        |        |        |        |
| 1318   |        |        |        |        |
| 1319   |        |        |        |        |
| 1321   |        |        |        |        |
| 1324   | 2      | 1      |        |        |

| respid | Q31a_4 | Q31a_5 | Q31a_6 | Q31a_7 |
|--------|--------|--------|--------|--------|
| 1325   |        |        |        |        |
| 1326   |        |        |        |        |
| 1327   |        |        |        |        |
| 1329   |        |        |        |        |
| 1330   | 2      | 1      |        |        |
| 1331   |        |        |        |        |
| 1335   |        |        |        |        |
| 1337   |        |        |        |        |
| 1341   |        |        |        |        |
| 1342   |        |        |        |        |
| 1344   |        |        |        | 1      |
| 1345   |        |        |        |        |
| 1346   |        |        |        |        |
| 1350   |        |        |        |        |
| 1352   |        |        |        |        |
| 1353   |        |        |        |        |
| 1354   |        |        |        |        |
| 1355   |        |        |        |        |
| 1357   |        |        |        |        |
| 1360   |        |        |        |        |
| 1362   |        | 1      |        |        |
| 1363   |        |        |        | 2      |
| 1367   |        |        |        |        |
| 1369   |        |        |        |        |
| 1371   |        |        |        |        |
| 1372   |        |        |        |        |
| 1375   |        |        |        |        |
| 1377   |        |        |        |        |
| 1379   |        |        |        |        |
| 1380   |        |        |        |        |
| 1382   |        |        |        |        |
| 1383   |        |        |        |        |



| respid | Q31a_4 | Q31a_5 | Q31a_6 | Q31a_7 |
|--------|--------|--------|--------|--------|
| 1384   |        |        |        |        |
| 1385   |        |        |        |        |
| 1387   |        |        |        |        |
| 1388   |        |        |        |        |
| 1389   |        |        |        |        |
| 1390   |        |        |        |        |
| 1395   |        |        |        |        |
| 1396   |        |        |        |        |
| 1397   |        |        |        | 2      |
| 1398   |        |        |        |        |
| 1399   |        |        |        |        |
| 1403   |        |        |        |        |
| 1405   |        |        |        |        |
| 1406   | 2      |        |        |        |
| 1407   | 2      | 2      |        | 2      |
| 1408   |        |        |        |        |
| 1409   |        |        |        |        |
| 1410   |        |        |        |        |
| 1411   |        |        |        |        |
| 1412   |        |        |        |        |
| 1413   |        |        |        |        |
| 1414   |        |        |        |        |
| 1415   |        |        |        |        |
| 1416   |        |        |        |        |
| 1417   |        |        |        |        |
| 1418   |        |        |        |        |
| 1419   |        |        |        |        |
| 1420   |        |        |        |        |
| 1421   | 1      |        |        |        |
| 1422   |        |        |        |        |
| 1423   |        |        |        |        |
| 1424   |        |        |        |        |

| respid | Q31a_4 | Q31a_5 | Q31a_6 | Q31a_7 |
|--------|--------|--------|--------|--------|
| 1429   |        |        |        |        |
| 1430   |        |        |        |        |
| 1431   |        |        | 3      |        |
| 1433   |        |        |        |        |
| 1435   |        |        |        |        |
| 1436   |        |        |        |        |
| 1438   |        |        |        |        |
| 1439   |        |        |        |        |
| 1441   |        |        |        |        |
| 1442   |        |        |        |        |
| 1443   |        |        |        |        |
| 1444   |        |        |        |        |
| 1445   |        |        |        | 3      |
| 1446   |        |        |        |        |
| 1447   |        |        |        |        |
| 1449   |        |        |        |        |
| 1450   |        |        |        |        |
| 1451   |        |        |        |        |
| 1452   |        |        |        |        |
| 1453   | 3      | 2      |        |        |
| 1454   |        |        |        |        |
| 1456   |        |        |        |        |
| 1457   |        |        |        |        |
| 1459   |        |        |        |        |
| 1460   |        |        |        |        |
| 1463   |        |        |        |        |
| 1465   |        |        |        |        |
| 1467   |        |        |        |        |
| 1470   |        |        |        |        |
| 1471   |        |        |        |        |
| 1472   |        |        |        |        |
| 1474   | 1      |        |        |        |

| respid | Q31a_4 | Q31a_5 | Q31a_6 | Q31a_7 |
|--------|--------|--------|--------|--------|
| 1475   |        |        |        |        |
| 1477   |        |        |        |        |
| 1478   |        |        |        |        |
| 1480   |        |        |        |        |
| 1481   |        | 1      |        |        |
| 1483   |        |        |        |        |
| 1484   |        |        |        |        |
| 1485   |        |        |        |        |
| 1486   |        |        |        |        |
| 1487   |        |        |        |        |
| 1488   |        |        |        |        |
| 1489   |        |        |        |        |
| 1490   |        |        |        |        |
| 1491   |        |        |        |        |
| 1492   |        |        |        |        |
| 1494   |        |        |        |        |
| 1495   |        |        |        |        |
| 1496   |        |        |        |        |
| 1498   |        |        |        |        |
| 1499   |        |        |        |        |
| 1500   |        |        |        | 2      |
| 1501   |        |        |        |        |
| 1503   |        |        |        |        |
| 1504   |        |        |        |        |
| 1508   |        |        |        |        |
| 1509   |        |        |        |        |
| 1511   |        |        | 2      |        |
| 1512   |        |        |        |        |
| 1513   |        |        |        |        |
| 1515   |        |        |        |        |
| 1517   |        |        |        |        |
| 1518   |        |        |        |        |

| respid | Q31a_4 | Q31a_5 | Q31a_6 | Q31a_7 |
|--------|--------|--------|--------|--------|
| 1519   | 1      |        |        | 1      |
| 1520   |        |        |        |        |
| 1521   |        | 3      |        |        |
| 1522   |        |        |        |        |
| 1523   |        |        |        | 4      |
| 1524   |        |        |        |        |
| 1525   |        |        |        |        |
| 1526   |        |        | 2      |        |
| 1527   |        |        |        |        |
| 1534   |        |        |        |        |
| 1535   |        |        |        |        |
| 1536   |        |        |        |        |
| 1538   |        |        |        |        |
| 1539   |        |        |        |        |
| 1540   |        |        |        |        |
| 1541   |        |        |        |        |
| 1542   |        |        |        |        |
| 1543   |        |        |        |        |
| 1545   |        |        |        |        |
| 1546   |        |        |        |        |
| 1548   |        |        |        |        |
| 1549   |        |        |        |        |
| 1551   |        |        |        |        |
| 1552   |        |        |        |        |
| 1556   |        |        |        |        |
| 1557   |        |        |        |        |
| 1558   |        |        |        |        |
| 1561   |        |        |        |        |
| 1562   |        |        |        |        |
| 1563   |        |        |        |        |
| 1564   |        |        |        | 2      |
| 1565   |        |        |        |        |

| respid | Q31a_4 | Q31a_5 | Q31a_6 | Q31a_7 |
|--------|--------|--------|--------|--------|
| 1566   |        |        |        |        |
| 1567   |        |        |        |        |
| 1569   |        |        |        |        |
| 1570   |        |        |        |        |
| 1574   |        |        |        |        |
| 1575   |        |        |        |        |
| 1576   |        |        |        |        |
| 1577   |        |        |        |        |
| 1581   |        |        |        |        |
| 1583   |        |        |        |        |
| 1585   |        |        |        |        |
| 1586   |        |        |        |        |
| 1588   |        |        |        |        |
| 1590   |        |        |        |        |
| 1592   |        |        |        |        |
| 1594   |        |        |        |        |
| 1598   |        |        |        |        |
| 1599   |        |        |        |        |
| 1600   |        |        |        | 1      |
| 1602   |        |        |        |        |
| 1603   |        |        |        |        |
| 1604   |        |        |        |        |
| 1605   |        |        |        |        |
| 1606   |        |        |        |        |
| 1610   |        |        |        |        |
| 1611   |        |        |        |        |
| 1612   |        |        |        |        |
| 1613   | 2      |        | 2      |        |
| 1615   |        |        |        |        |
| 1616   |        |        |        |        |
| 1617   |        |        |        |        |
| 1618   |        |        |        |        |

| respid | Q31a_4 | Q31a_5 | Q31a_6 | Q31a_7 |
|--------|--------|--------|--------|--------|
| 1620   |        |        |        |        |
| 1621   |        |        |        | 2      |
| 1622   |        |        |        |        |
| 1623   |        |        |        |        |
| 1624   |        |        |        |        |
| 1625   |        |        |        |        |
| 1626   |        |        |        |        |
| 1627   |        |        |        |        |
| 1629   |        |        |        |        |
| 1630   |        |        |        |        |
| 1631   |        |        |        |        |
| 1634   |        |        |        |        |
| 1635   |        |        |        |        |
| 1636   |        |        |        |        |
| 1637   |        |        |        |        |
| 1640   |        |        |        |        |
| 1642   |        |        |        |        |
| 1643   |        |        |        |        |
| 1644   |        |        |        |        |
| 1645   |        |        |        |        |
| 1646   |        |        |        |        |
| 1647   |        |        |        |        |
| 1650   |        |        |        |        |
| 1654   |        |        |        |        |
| 1656   |        |        |        |        |
| 1657   |        |        |        |        |
| 1659   | 1      |        |        |        |
| 1662   |        |        |        |        |
| 1663   |        |        |        |        |
| 1664   |        |        |        |        |
| 1665   |        |        |        |        |
| 1667   |        |        |        |        |

| respid | Q31a_4 | Q31a_5 | Q31a_6 | Q31a_7 |
|--------|--------|--------|--------|--------|
| 1668   |        |        |        |        |
| 1670   |        |        |        |        |
| 1671   |        |        |        |        |
| 1673   |        |        |        |        |
| 1674   |        |        |        |        |
| 1676   |        |        |        |        |
| 1677   |        |        |        |        |
| 1678   |        |        |        |        |
| 1680   |        |        |        |        |
| 1681   |        |        |        |        |
| 1683   |        |        |        |        |
| 1685   |        |        |        |        |
| 1686   |        |        |        |        |
| 1690   |        |        |        |        |
| 1691   |        |        |        |        |
| 1692   |        |        |        | 1      |
| 1693   |        |        |        |        |
| 1695   |        |        |        |        |
| 1696   |        |        |        |        |
| 1698   |        |        |        |        |
| 1699   |        |        |        |        |
| 1701   |        |        |        |        |
| 1702   |        |        |        |        |
| 1703   |        |        |        |        |
| 1705   |        |        |        |        |
| 1706   |        |        |        |        |
| 1708   |        |        |        |        |
| 1711   |        |        |        |        |
| 1712   |        |        |        |        |
| 1713   |        |        |        |        |
| 1715   |        |        |        |        |
| 1717   |        |        |        |        |

| respid | Q31a_4 | Q31a_5 | Q31a_6 | Q31a_7 |
|--------|--------|--------|--------|--------|
| 1718   | 2      | 2      |        | 3      |
| 1719   |        |        |        |        |
| 1721   |        |        |        |        |
| 1722   |        |        |        |        |
| 1724   |        |        |        |        |
| 1725   |        |        |        |        |
| 1726   |        |        |        |        |
| 1727   |        |        |        |        |
| 1728   |        |        |        |        |
| 1731   |        |        |        |        |
| 1733   |        |        |        |        |
| 1734   |        |        |        |        |
| 1735   |        |        |        |        |
| 1736   |        |        |        |        |
| 1737   |        |        |        |        |
| 1738   |        | 1      |        |        |
| 1743   |        |        |        |        |
| 1755   | 2      |        |        | 3      |
| 1756   |        |        |        |        |
| 1757   |        |        |        |        |
| 1758   | 1      |        |        | 1      |
| 1759   | 2      |        |        |        |
| 1761   |        |        |        |        |
| 1762   | 2      |        |        |        |
| 1764   |        |        |        |        |
| 1767   |        |        |        |        |
| 1768   |        |        |        |        |
| 1769   |        |        |        |        |
| 1770   |        |        |        |        |
| 1771   |        | 1      |        |        |
| 1776   |        |        |        |        |
| 1777   |        |        |        |        |



| respid | Q31a_4 | Q31a_5 | Q31a_6 | Q31a_7 |
|--------|--------|--------|--------|--------|
| 1778   |        |        | 1      |        |
| 1779   |        |        |        |        |
| 1780   |        |        |        |        |
| 1781   |        |        |        |        |
| 1783   |        |        |        |        |
| 1784   |        |        |        |        |
| 1785   |        |        |        |        |
| 1788   |        |        |        |        |
| 1792   |        |        |        |        |
| 1794   |        |        |        |        |
| 1798   |        |        | 3      | 3      |
| 1799   |        |        |        |        |
| 1800   |        |        |        |        |
| 1804   |        |        |        |        |
| 1806   |        |        |        |        |
| 1807   |        |        |        |        |
| 1808   |        |        |        |        |
| 1809   |        |        |        |        |
| 1811   |        |        |        |        |
| 1812   |        |        |        |        |
| 1813   |        |        |        |        |
| 1814   |        |        |        |        |
| 1815   |        |        |        |        |
| 1817   |        |        |        |        |
| 1820   |        |        |        |        |
| 1821   |        |        |        |        |
| 1822   |        |        |        |        |
| 1823   |        |        |        |        |
| 1824   |        |        |        |        |
| 1826   |        |        |        |        |
| 1828   |        |        |        |        |
| 1829   |        |        |        |        |

| respid | Q31a_4 | Q31a_5 | Q31a_6 | Q31a_7 |
|--------|--------|--------|--------|--------|
| 1830   |        |        |        |        |
| 1831   |        |        |        |        |
| 1832   |        |        |        |        |
| 1836   |        |        |        | 1      |
| 1838   |        |        |        |        |
| 1839   |        |        |        |        |
| 1840   |        |        |        |        |
| 1841   |        |        |        |        |
| 1842   |        |        |        |        |
| 1843   |        |        |        |        |
| 1844   | 2      |        |        |        |
| 1845   |        |        |        |        |
| 1849   |        |        |        |        |
| 1850   |        |        |        |        |
| 1851   |        |        |        |        |
| 1852   |        |        |        |        |
| 1857   |        | 3      |        |        |
| 1858   |        |        |        |        |
| 1861   |        |        |        |        |
| 1862   |        |        |        |        |
| 1863   |        |        |        |        |
| 1864   |        |        |        |        |
| 1865   |        |        |        |        |
| 1867   |        |        |        |        |
| 1868   |        |        |        |        |
| 1869   |        |        |        |        |
| 1870   |        |        |        |        |
| 1871   |        |        |        |        |
| 1872   |        |        |        |        |
| 1873   |        |        |        |        |
| 1876   |        |        |        |        |
| 1877   |        |        |        |        |

| respid | Q31a_4 | Q31a_5 | Q31a_6 | Q31a_7 |
|--------|--------|--------|--------|--------|
| 1878   |        |        |        |        |
| 1879   |        |        |        |        |
| 1880   |        |        |        |        |
| 1881   |        |        |        |        |
| 1883   |        |        |        |        |
| 1886   |        |        |        |        |
| 1888   | 3      |        |        |        |
| 1889   | 2      | 2      |        |        |
| 1890   |        |        |        |        |
| 1891   |        |        |        |        |
| 1893   |        |        |        |        |
| 1894   |        |        |        |        |
| 1895   |        |        |        |        |
| 1896   |        |        |        |        |
| 1897   |        |        |        |        |
| 1898   | 4      | 3      |        | 4      |
| 1899   |        |        |        |        |
| 1900   |        |        |        |        |
| 1903   |        |        |        |        |
| 1906   |        |        |        |        |
| 1907   |        |        |        |        |
| 1908   |        |        |        |        |
| 1909   | 2      |        |        |        |
| 1910   |        |        |        |        |
| 1911   |        |        |        |        |
| 1912   |        |        |        |        |
| 1917   |        |        |        |        |
| 1918   |        |        |        |        |
| 1919   |        |        |        |        |
| 1922   |        |        |        |        |
| 1925   |        |        |        |        |
| 1926   |        |        |        |        |

| respid | Q31a_4 | Q31a_5 | Q31a_6 | Q31a_7 |
|--------|--------|--------|--------|--------|
| 1927   |        |        |        |        |
| 1928   |        |        |        |        |
| 1929   |        |        |        |        |
| 1934   |        |        |        |        |
| 1935   |        |        |        |        |
| 1936   |        |        |        | 2      |
| 1937   |        |        |        |        |
| 1938   |        |        |        |        |
| 1939   |        |        |        |        |
| 1940   |        |        |        |        |
| 1941   |        |        |        |        |
| 1948   |        |        |        |        |
| 1950   |        |        |        |        |
| 1955   |        |        |        |        |
| 1958   |        |        |        |        |
| 1960   |        |        |        |        |
| 1961   |        |        |        |        |
| 1962   |        |        |        |        |
| 1965   |        |        |        |        |
| 1966   |        |        |        |        |
| 1967   |        |        |        |        |
| 1968   |        |        |        |        |
| 1973   |        |        |        |        |
| 1974   |        |        | 4      | 3      |
| 1975   |        |        |        |        |
| 1977   |        |        |        |        |
| 1978   |        |        |        |        |
| 1979   |        |        |        |        |
| 1982   |        |        |        |        |
| 1983   |        |        |        |        |
| 1987   |        |        |        |        |
| 1988   |        |        |        |        |

| respid | Q31a_4 | Q31a_5 | Q31a_6 | Q31a_7 |
|--------|--------|--------|--------|--------|
| 1991   |        |        |        |        |
| 1992   |        |        |        |        |
| 1993   |        |        |        |        |
| 1994   | 2      |        |        | 1      |
| 1995   |        |        |        |        |
| 1996   | 1      |        |        |        |
| 1997   |        |        |        |        |
| 1998   |        |        |        |        |
| 1999   |        | 1      | 2      | 2      |
| 2000   |        |        | 3      |        |
| 2001   |        |        |        | 1      |
| 2002   |        | 1      |        |        |
| 2003   |        |        |        |        |
| 2004   |        |        |        |        |
| 2005   |        |        |        |        |
| 2007   | 1      |        |        |        |
| 2009   |        |        |        |        |
| 2010   |        |        |        |        |
| 2011   |        |        |        |        |
| 2013   |        |        |        |        |
| 2014   |        |        |        |        |
| 2017   |        |        | 1      |        |
| 2020   |        |        |        |        |
| 2023   |        |        | 1      |        |
| 2024   |        |        |        |        |
| 2029   |        |        |        |        |
| 2030   |        |        |        |        |
| 2031   |        |        |        |        |
| 2032   |        |        |        |        |
| 2033   |        |        |        |        |
| 2034   |        |        |        |        |
| 2036   |        |        |        |        |

| respid | Q31a_4 | Q31a_5 | Q31a_6 | Q31a_7 |
|--------|--------|--------|--------|--------|
| 2037   |        |        |        |        |
| 2038   |        |        |        |        |
| 2039   |        |        |        |        |
| 2040   |        |        |        |        |
| 2041   |        |        |        |        |
| 2042   |        |        |        |        |
| 2043   |        |        |        |        |
| 2051   |        |        |        |        |
| 2052   |        |        |        |        |
| 2053   |        |        |        |        |
| 2054   |        |        |        |        |
| 2055   |        | 1      |        |        |
| 2056   |        |        |        |        |
| 2057   |        |        |        |        |
| 2059   |        |        |        |        |
| 2063   |        |        |        |        |
| 2066   |        |        |        |        |
| 2068   |        |        |        |        |
| 2069   |        |        |        | 1      |
| 2070   |        |        |        |        |
| 2071   |        |        |        |        |
| 2073   |        |        |        |        |
| 2077   |        |        |        |        |
| 2079   |        |        |        |        |
| 2080   |        |        | 3      | 5      |
| 2081   |        |        |        |        |
| 2084   |        |        |        |        |
| 2085   |        |        |        |        |
| 2087   | 3      |        |        |        |
| 2089   |        | 2      |        |        |
| 2093   |        |        |        |        |
| 2094   |        |        |        |        |

| respid | Q31a_4 | Q31a_5 | Q31a_6 | Q31a_7 |
|--------|--------|--------|--------|--------|
| 2095   |        |        |        |        |
| 2097   |        |        |        |        |
| 2099   |        |        |        |        |
| 2100   |        |        |        |        |
| 2101   |        |        |        |        |
| 2103   |        |        |        |        |
| 2104   |        |        |        |        |
| 2106   |        |        |        |        |
| 2111   |        |        |        |        |
| 2113   |        |        |        |        |
| 2115   |        |        |        |        |
| 2119   |        |        |        |        |
| 2120   |        |        |        |        |
| 2123   |        |        |        |        |
| 2124   |        |        |        |        |
| 2130   |        |        |        |        |
| 2131   |        | 1      |        |        |
| 2133   |        |        |        |        |
| 2139   |        |        |        |        |
| 2141   |        |        |        |        |
| 2143   |        |        |        |        |
| 2144   |        |        |        |        |
| 2147   |        |        |        |        |
| 2151   |        |        |        |        |
| 2153   |        |        |        |        |
| 2154   |        |        |        |        |
| 2155   |        |        |        |        |
| 2159   |        |        |        |        |
| 2160   |        | 2      | 2      |        |
| 2161   |        |        |        |        |
| 2163   |        |        |        |        |
| 2164   |        |        |        |        |

| respid | Q31a_4 | Q31a_5 | Q31a_6 | Q31a_7 |
|--------|--------|--------|--------|--------|
| 2168   |        |        |        |        |
| 2169   |        |        |        |        |
| 2170   |        |        |        |        |
| 2171   |        |        |        |        |
| 2172   |        |        |        |        |
| 2173   |        |        |        |        |
| 2174   |        |        |        |        |
| 2175   |        |        |        | 2      |
| 2176   |        |        |        |        |
| 2177   |        |        |        |        |
| 2179   |        |        |        |        |
| 2181   |        |        |        |        |
| 2182   |        |        |        |        |
| 2183   | 2      |        |        |        |
| 2184   | 1      |        |        |        |
| 2185   |        |        |        |        |
| 2186   |        |        |        |        |
| 2187   |        |        |        |        |
| 2188   |        |        |        |        |
| 2189   |        |        |        |        |
| 2190   |        |        |        |        |
| 2193   |        |        |        |        |
| 2195   |        |        |        |        |
| 2198   |        |        |        |        |
| 2200   |        |        |        |        |
| 2205   |        |        |        |        |
| 2208   |        |        |        |        |
| 2209   |        |        |        |        |
| 2210   |        |        |        |        |
| 2211   |        |        |        |        |
| 2213   |        |        |        |        |
| 2214   |        |        |        |        |



| respid | Q31a_4 | Q31a_5 | Q31a_6 | Q31a_7 |
|--------|--------|--------|--------|--------|
| 2216   |        |        |        |        |
| 2220   |        |        |        |        |
| 2225   |        |        |        |        |
| 2227   |        |        |        |        |
| 2228   |        |        |        | 2      |
| 2229   |        |        |        |        |
| 2230   |        |        |        |        |
| 2236   |        |        |        |        |
| 2238   |        | 3      |        | 3      |
| 2239   |        |        |        |        |
| 2240   |        |        |        |        |
| 2241   |        |        |        |        |
| 2243   |        |        |        |        |
| 2245   |        |        |        |        |
| 2247   |        |        |        |        |
| 2248   |        |        |        |        |
| 2249   |        |        |        |        |
| 2254   |        |        |        |        |
| 2256   |        |        |        |        |
| 2259   |        |        |        |        |
| 2261   |        |        |        |        |
| 2262   |        |        |        |        |
| 2263   |        |        |        |        |
| 2264   |        |        |        |        |
| 2265   |        |        |        |        |
| 2270   |        |        |        |        |
| 2271   |        |        |        |        |
| 2272   |        |        |        |        |
| 2273   |        |        |        |        |
| 2274   |        |        |        |        |
| 2276   |        |        |        |        |
| 2277   |        |        |        |        |

| respid | Q31a_4 | Q31a_5 | Q31a_6 | Q31a_7 |
|--------|--------|--------|--------|--------|
| 2281   |        |        |        |        |
| 2288   |        |        |        |        |
| 2290   |        |        |        |        |
| 2294   |        |        |        |        |
| 2295   |        |        |        |        |
| 2296   |        |        |        |        |
| 2297   |        |        |        |        |
| 2298   |        |        |        |        |
| 2301   |        |        |        |        |
| 2302   |        |        | 1      |        |
| 2303   |        |        |        |        |
| 2305   |        |        |        |        |
| 2309   |        |        |        |        |
| 2310   |        |        |        |        |
| 2311   |        |        |        |        |
| 2313   |        |        |        | 2      |
| 2316   |        |        |        |        |
| 2317   |        |        |        |        |
| 2318   |        |        |        | 1      |
| 2319   |        |        |        |        |
| 2321   |        |        |        |        |
| 2324   |        |        |        |        |
| 2328   |        |        |        |        |
| 2329   |        |        |        |        |
| 2330   |        |        |        |        |
| 2333   |        |        |        |        |
| 2334   |        |        |        |        |
| 2338   |        |        |        |        |
| 2341   | 1      |        | 1      |        |
| 2342   |        |        |        |        |
| 2343   |        |        |        |        |
| 2346   |        |        |        |        |

| respid | Q31a_4 | Q31a_5 | Q31a_6 | Q31a_7 |
|--------|--------|--------|--------|--------|
| 2347   |        |        |        |        |
| 2348   |        |        |        |        |
| 2349   |        |        |        |        |
| 2350   |        |        |        |        |
| 2351   |        |        |        |        |
| 2352   |        |        |        |        |
| 2359   |        |        |        |        |
| 2362   |        |        |        |        |
| 2363   |        |        |        |        |
| 2365   |        |        |        | 1      |
| 2367   |        |        |        |        |
| 2368   |        |        |        |        |
| 2369   |        |        |        |        |
| 2372   |        |        |        |        |
| 2374   |        |        |        | 2      |
| 2376   |        |        |        |        |
| 2379   |        |        |        |        |
| 2380   |        |        |        |        |
| 2381   |        |        |        |        |
| 2382   |        |        |        |        |
| 2385   |        |        |        |        |
| 2387   |        |        |        |        |
| 2388   |        |        |        |        |
| 2389   |        |        |        |        |
| 2391   |        |        |        |        |
| 2392   |        |        |        |        |
| 2393   |        |        |        |        |
| 2394   |        |        |        | 3      |
| 2397   |        |        |        |        |
| 2398   |        |        |        |        |
| 2400   |        |        |        |        |
| 2402   |        |        |        |        |

| respid | Q31a_4 | Q31a_5 | Q31a_6 | Q31a_7 |
|--------|--------|--------|--------|--------|
| 2406   |        |        |        |        |
| 2408   |        |        |        |        |
| 2410   |        |        |        |        |
| 2411   |        |        |        |        |
| 2412   |        |        |        |        |
| 2414   |        |        |        |        |
| 2421   |        |        |        |        |
| 2423   |        |        |        |        |
| 2424   |        |        |        |        |
| 2425   |        |        |        |        |
| 2426   |        |        |        |        |
| 2429   | 2      | 2      |        |        |
| 2430   |        |        |        |        |
| 2432   |        |        |        |        |
| 2433   |        |        |        |        |
| 2434   |        |        |        |        |
| 2435   |        |        |        |        |
| 2436   |        |        |        |        |
| 2439   |        |        |        |        |
| 2440   |        |        |        |        |
| 2441   |        |        |        |        |
| 2446   |        |        |        |        |
| 2448   |        |        |        |        |
| 2449   |        |        |        |        |
| 2451   |        |        |        |        |
| 2452   |        |        |        |        |
| 2455   |        |        |        |        |
| 2457   |        |        |        |        |
| 2458   |        |        |        |        |
| 2459   |        |        |        |        |
| 2460   |        |        |        |        |
| 2462   | 2      |        |        | 3      |

| respid | Q31a_4 | Q31a_5 | Q31a_6 | Q31a_7 |
|--------|--------|--------|--------|--------|
| 2464   |        |        |        |        |
| 2465   |        |        |        |        |
| 2468   |        |        |        |        |
| 2469   |        |        |        |        |
| 2470   |        |        |        |        |
| 2471   |        |        |        | 1      |
| 2472   |        |        |        |        |
| 2474   |        |        |        |        |
| 2476   |        |        |        |        |
| 2478   |        |        |        |        |
| 2479   |        |        |        |        |
| 2480   |        |        |        |        |
| 2482   |        |        |        |        |
| 2486   |        |        |        |        |
| 2488   | 2      |        |        |        |
| 2489   |        |        |        |        |
| 2491   |        |        |        |        |
| 2495   |        |        |        |        |
| 2496   |        |        |        |        |
| 2498   |        |        |        |        |
| 2501   |        |        |        |        |
| 2502   |        |        |        |        |
| 2503   |        |        |        |        |
| 2504   |        |        |        |        |
| 2507   |        |        |        |        |
| 2509   | 1      |        |        |        |
| 2512   |        |        |        |        |
| 2514   |        |        |        |        |
| 2516   |        |        |        |        |
| 2517   |        |        |        |        |
| 2521   |        |        |        |        |
| 2522   |        |        |        |        |

| respid | Q31a_4 | Q31a_5 | Q31a_6 | Q31a_7 |
|--------|--------|--------|--------|--------|
| 2524   |        |        |        |        |
| 2525   |        |        |        |        |
| 2526   |        |        |        |        |
| 2527   |        |        |        |        |
| 2528   | 1      |        |        |        |
| 2531   |        |        |        |        |
| 2533   |        |        |        |        |
| 2535   |        |        |        |        |
| 2536   |        |        |        |        |
| 2539   |        |        |        |        |
| 2540   |        |        |        |        |
| 2543   |        |        |        |        |
| 2546   |        |        |        |        |
| 2547   |        |        |        |        |
| 2549   |        |        |        |        |
| 2553   |        |        |        |        |
| 2554   |        |        |        |        |
| 2555   |        |        |        |        |
| 2556   |        |        |        |        |
| 2557   |        |        |        |        |
| 2559   |        |        |        |        |
| 2560   |        | 2      |        |        |
| 2561   |        |        |        |        |
| 2566   |        |        |        |        |
| 2567   |        |        |        |        |
| 2570   |        |        |        |        |
| 2574   |        |        |        | 2      |
| 2578   |        |        |        |        |
| 2580   |        |        |        |        |
| 2590   |        |        |        |        |
| 2593   |        |        |        |        |
| 2594   |        |        |        |        |

| respid | Q31a_4 | Q31a_5 | Q31a_6 | Q31a_7 |
|--------|--------|--------|--------|--------|
| 2595   |        |        |        |        |
| 2596   |        |        |        |        |
| 2597   |        |        | 3      |        |
| 2598   |        |        |        |        |
| 2602   |        | 1      |        |        |
| 2605   |        |        |        |        |
| 2606   |        |        |        |        |
| 2607   |        |        |        |        |
| 2608   |        |        |        |        |
| 2609   |        |        |        |        |
| 2610   |        |        |        |        |
| 2614   |        |        |        |        |
| 2615   |        |        |        |        |
| 2616   |        |        |        |        |
| 2618   |        |        |        |        |
| 2630   |        |        |        |        |
| 2633   |        |        |        |        |
| 2637   |        |        |        |        |
| 2638   |        |        |        |        |
| 2641   |        |        |        | 1      |
| 2644   |        |        |        |        |
| 2645   |        |        |        |        |
| 2646   |        |        |        |        |
| 2648   |        |        |        |        |
| 2651   |        |        |        |        |
| 2652   |        |        |        |        |
| 2653   |        |        |        |        |
| 2656   |        |        |        |        |
| 2657   |        |        |        |        |
| 2658   |        |        |        |        |
| 2661   | 1      |        |        |        |
| 2663   |        |        |        |        |

| respid | Q31a_4 | Q31a_5 | Q31a_6 | Q31a_7 |
|--------|--------|--------|--------|--------|
| 2665   |        |        |        |        |
| 2670   |        |        |        |        |
| 2672   |        |        |        |        |
| 2673   |        |        |        |        |
| 2677   |        |        |        |        |
| 2686   | 3      |        | 3      |        |
| 2688   |        |        |        |        |
| 2689   |        |        |        |        |
| 2691   |        |        |        |        |
| 2695   |        |        |        |        |
| 2696   |        |        |        |        |
| 2697   |        |        |        |        |
| 2698   |        |        |        |        |
| 2703   |        |        |        |        |
| 2704   |        |        |        |        |
| 2706   |        |        |        |        |
| 2707   |        |        |        |        |
| 2710   |        |        |        |        |
| 2711   |        |        |        |        |
| 2712   |        |        |        |        |
| 2713   |        |        |        |        |
| 2721   |        |        |        |        |
| 2730   |        |        |        |        |
| 2731   |        |        |        |        |
| 2732   |        |        |        |        |
| 2733   |        |        |        |        |
| 2735   |        |        |        |        |
| 2736   |        |        |        |        |
| 2740   |        |        |        |        |
| 2741   |        |        |        |        |
| 2742   |        |        |        |        |
| 2743   |        |        |        |        |



| respid | Q31a_4 | Q31a_5 | Q31a_6 | Q31a_7 |
|--------|--------|--------|--------|--------|
| 2744   |        |        |        |        |
| 2745   |        |        |        |        |
| 2749   |        |        |        |        |
| 2751   |        |        |        |        |
| 2754   |        |        |        |        |
| 2755   |        |        |        |        |
| 2757   |        |        |        |        |
| 2758   |        | 2      |        | 2      |
| 2759   |        |        |        |        |
| 2761   |        |        |        |        |
| 2762   |        |        |        |        |
| 2763   |        |        |        |        |
| 2764   |        | 1      |        |        |
| 2765   |        |        | 1      |        |
| 2766   |        |        |        |        |
| 2767   |        |        |        | 1      |
| 2769   |        | 1      |        |        |
| 2770   |        |        |        |        |
| 2771   | 2      |        |        |        |
| 2774   |        | 1      |        |        |
| 2777   | 2      | 2      |        |        |
| 2778   |        |        |        |        |
| 2781   |        |        |        |        |
| 2782   |        |        |        |        |
| 2784   |        |        |        | 2      |
| 2785   |        |        |        |        |
| 2786   |        |        |        |        |
| 2787   |        |        |        |        |
| 2789   |        |        |        |        |
| 2790   |        |        |        |        |
| 2791   |        |        |        |        |
| 2793   |        |        |        |        |

| respid | Q31a_4 | Q31a_5 | Q31a_6 | Q31a_7 |
|--------|--------|--------|--------|--------|
| 2797   |        |        |        |        |
| 2798   |        |        |        |        |
| 2799   |        |        |        |        |
| 2801   |        |        |        |        |
| 2802   |        |        | 1      |        |
| 2803   |        |        |        |        |
| 2804   | 2      |        |        |        |
| 2807   |        |        |        |        |
| 2809   |        |        |        |        |
| 2810   |        |        |        |        |
| 2812   |        |        |        |        |
| 2814   |        |        |        |        |
| 2815   |        |        |        |        |
| 2816   |        |        |        |        |
| 2817   |        |        |        |        |
| 2819   |        |        |        |        |
| 2820   |        |        |        |        |
| 2821   |        |        |        |        |
| 2822   | 3      | 3      |        |        |
| 2823   |        |        |        |        |
| 2824   |        |        |        |        |
| 2825   |        |        |        |        |
| 2826   |        |        |        |        |
| 2827   |        |        |        |        |
| 2828   |        |        |        |        |
| 2829   |        |        |        |        |
| 2830   | 2      |        |        |        |
| 2831   |        |        |        |        |
| 2832   |        | 3      |        |        |
| 2833   |        |        |        |        |
| 2834   |        |        |        |        |
| 2835   |        |        | 3      |        |

| respid | Q31a_4 | Q31a_5 | Q31a_6 | Q31a_7 |
|--------|--------|--------|--------|--------|
| 2836   |        |        |        |        |
| 2837   |        |        |        |        |
| 2838   |        |        |        |        |
| 2844   | 3      |        |        |        |
| 2845   |        |        |        |        |
| 2847   |        |        |        |        |
| 2848   |        |        |        |        |
| 2849   |        |        |        |        |
| 2851   |        |        |        |        |
| 2852   |        |        |        |        |
| 2853   |        |        |        |        |
| 2854   |        |        |        |        |
| 2856   |        |        |        |        |
| 2857   |        |        |        |        |
| 2858   |        |        |        |        |
| 2859   |        |        | 2      |        |
| 2860   |        |        |        |        |
| 2861   |        | 3      |        |        |
| 2863   |        |        |        |        |
| 2864   |        |        |        |        |
| 2866   |        |        |        |        |
| 2872   |        |        |        |        |
| 2875   |        |        |        |        |
| 2879   |        |        |        |        |
| 2881   |        |        |        |        |
| 2882   |        |        |        |        |
| 2883   |        |        |        |        |
| 2884   |        |        |        |        |
| 2885   |        |        |        |        |
| 2887   |        |        |        |        |
| 2888   |        |        |        |        |
| 2890   |        |        |        |        |

| respid | Q31a_4 | Q31a_5 | Q31a_6 | Q31a_7 |
|--------|--------|--------|--------|--------|
| 2891   |        |        |        |        |
| 2892   |        |        |        |        |
| 2895   |        |        |        |        |
| 2899   |        |        |        |        |
| 2900   |        |        |        |        |
| 2902   |        |        |        |        |
| 2903   |        |        |        |        |
| 2904   |        |        |        |        |
| 2906   |        |        |        |        |
| 2908   |        |        |        |        |
| 2910   |        |        |        |        |
| 2917   |        |        |        |        |
| 2918   |        |        |        |        |
| 2919   |        |        |        |        |
| 2920   |        |        |        |        |
| 2921   |        |        |        |        |
| 2922   |        |        |        |        |
| 2923   |        |        |        |        |
| 2924   | 3      |        | 2      |        |
| 2926   |        |        |        |        |
| 2928   |        |        |        |        |
| 2930   |        |        |        |        |
| 2931   |        |        |        |        |
| 2933   |        |        |        |        |
| 2935   |        |        |        |        |
| 2936   |        |        |        |        |
| 2937   |        |        |        |        |
| 2938   |        |        |        |        |
| 2944   |        |        |        |        |
| 2945   |        |        |        |        |
| 2947   |        |        |        |        |
| 2949   |        |        |        |        |

| respid | Q31a_4 | Q31a_5 | Q31a_6 | Q31a_7 |
|--------|--------|--------|--------|--------|
| 2951   |        |        |        |        |
| 2952   |        |        |        |        |
| 2953   |        |        |        |        |
| 2955   |        |        |        |        |
| 2957   |        |        |        |        |
| 2958   |        |        |        |        |
| 2960   |        |        |        |        |
| 2963   |        |        |        |        |
| 2964   |        |        |        |        |
| 2967   |        |        |        |        |
| 2968   |        |        |        |        |
| 2971   |        |        |        |        |
| 2974   |        |        |        |        |
| 2975   |        |        |        |        |
| 2982   |        |        |        |        |
| 2983   |        |        |        |        |
| 2985   |        |        |        |        |
| 2986   |        | 2      |        |        |
| 2987   |        |        |        |        |
| 2988   |        |        |        |        |
| 2993   |        |        |        |        |
| 2996   |        |        |        |        |
| 2997   |        |        |        |        |
| 2998   |        |        |        |        |
| 3004   |        |        |        |        |
| 3007   |        |        |        |        |
| 3011   |        |        |        |        |
| 3012   |        |        |        |        |
| 3013   |        |        |        |        |
| 3014   |        |        |        |        |
| 3015   |        |        |        |        |
| 3016   |        |        |        |        |

| respid | Q31a_4 | Q31a_5 | Q31a_6 | Q31a_7 |
|--------|--------|--------|--------|--------|
|--------|--------|--------|--------|--------|

3017  
3020  
3022  
3023  
3026  
3038  
3039  
3040  
3041  
3042  
3044  
3050  
3052  
3056  
3059  
3060  
3063  
3065  
3067  
3068  
3072  
3074  
3075  
3076  
3079  
3082  
3083  
3084  
3085  
3090  
3091  
3092

| respid | Q31a_4 | Q31a_5 | Q31a_6 | Q31a_7 |
|--------|--------|--------|--------|--------|
| 3095   |        |        |        |        |
| 3096   | 4      |        | 5      | 5      |
| 3097   |        |        |        |        |
| 3099   |        | 4      | 3      | 4      |
| 3101   |        |        |        |        |
| 3103   |        |        |        |        |
| 3104   |        |        |        |        |
| 3105   |        |        |        |        |
| 3107   |        |        |        |        |
| 3108   |        |        |        |        |
| 3109   |        |        |        |        |
| 3116   |        |        |        |        |
| 3117   |        |        |        |        |
| 3119   |        |        |        |        |
| 3120   |        |        |        |        |
| 3130   |        |        |        |        |
| 3131   |        |        |        | 1      |
| 3133   |        |        |        |        |
| 3134   |        |        |        |        |
| 3135   |        |        |        |        |
| 3145   |        |        |        |        |
| 3147   |        |        |        |        |
| 3152   |        |        |        |        |
| 3155   |        | 3      |        | 5      |
| 3156   |        |        |        |        |
| 3157   |        | 3      |        |        |
| 3166   |        |        |        |        |
| 3169   |        | 2      |        |        |
| 3179   |        |        |        |        |
| 3181   |        |        |        |        |
| 3185   |        |        |        |        |
| 3190   |        |        |        |        |

| respid | Q31a_4 | Q31a_5 | Q31a_6 | Q31a_7 |
|--------|--------|--------|--------|--------|
| 3191   |        |        |        |        |
| 3192   |        |        |        |        |
| 3193   |        |        |        |        |
| 3195   |        |        |        |        |
| 3202   |        | 2      | 2      |        |
| 3204   |        |        |        |        |
| 3208   |        |        |        |        |
| 3212   |        |        |        |        |
| 3218   |        |        |        |        |
| 3219   |        |        |        |        |
| 3220   |        |        |        |        |
| 3221   |        |        |        | 2      |
| 3223   |        |        |        |        |
| 3231   |        | 1      |        |        |
| 3232   | 2      |        |        | 1      |
| 3234   |        |        |        | 1      |
| 3235   |        |        |        |        |
| 3237   |        |        |        |        |
| 3238   |        |        |        |        |
| 3240   |        |        |        |        |
| 3241   |        |        |        |        |
| 3243   |        |        |        |        |
| 3244   |        |        |        |        |
| 3247   |        |        |        |        |
| 3250   |        |        |        |        |
| 3251   | 2      |        |        |        |
| 3255   |        |        |        |        |
| 3256   |        |        |        |        |
| 3257   |        |        |        |        |
| 3258   |        |        |        |        |
| 3259   | 2      |        |        | 2      |
| 3260   |        |        |        |        |



| respid | Q31a_4 | Q31a_5 | Q31a_6 | Q31a_7 |
|--------|--------|--------|--------|--------|
| 3261   |        |        |        |        |
| 3262   |        |        |        |        |
| 3264   | 1      | 2      |        |        |
| 3265   |        |        |        |        |
| 3267   |        |        |        |        |
| 3268   |        |        |        |        |
| 3270   |        |        |        |        |
| 3271   |        |        |        |        |
| 3274   |        |        |        |        |
| 3276   |        |        |        |        |
| 3277   |        |        |        |        |
| 3279   |        |        |        |        |
| 3281   |        |        |        |        |
| 3283   |        |        |        |        |
| 3285   |        |        |        |        |
| 3286   |        |        |        |        |
| 3287   |        |        |        |        |
| 3289   |        |        |        |        |
| 3290   |        |        |        |        |
| 3291   |        |        |        |        |
| 3292   | 2      |        |        |        |
| 3293   |        |        |        |        |
| 3294   |        |        |        |        |
| 3296   | 2      |        |        |        |
| 3306   |        |        |        |        |
| 3307   | 3      |        | 3      |        |
| 3308   |        |        |        |        |
| 3312   |        |        |        |        |
| 3313   |        |        |        |        |
| 3316   |        |        |        |        |
| 3317   |        |        |        |        |
| 3320   |        |        |        |        |

| respid | Q31a_4 | Q31a_5 | Q31a_6 | Q31a_7 |
|--------|--------|--------|--------|--------|
| 3321   |        |        |        |        |
| 3322   |        |        |        |        |
| 3323   |        |        |        |        |
| 3325   |        |        |        |        |
| 3332   |        |        |        |        |
| 3334   |        |        |        |        |
| 3335   |        |        |        |        |
| 3341   |        |        |        |        |
| 3345   |        |        |        |        |
| 3346   |        |        |        |        |
| 3349   |        |        |        |        |
| 3351   |        |        |        |        |
| 3353   |        |        |        |        |
| 3354   |        |        |        | 2      |
| 3356   |        |        |        |        |
| 3357   |        |        |        |        |
| 3360   |        |        |        |        |
| 3361   |        |        |        |        |
| 3362   |        |        |        |        |
| 3363   |        |        |        |        |
| 3364   | 3      | 3      |        |        |
| 3368   |        |        |        |        |
| 3370   |        |        |        | 1      |
| 3371   |        |        |        |        |
| 3379   |        |        |        |        |
| 3380   | 1      | 1      |        |        |
| 3382   |        |        |        |        |
| 3384   |        |        | 2      |        |
| 3385   |        |        |        |        |
| 3388   |        |        |        |        |
| 3392   |        | 1      |        |        |
| 3393   |        |        |        |        |

| respid | Q31a_4 | Q31a_5 | Q31a_6 | Q31a_7 |
|--------|--------|--------|--------|--------|
| 3394   | 1      | 2      |        |        |
| 3395   |        |        |        |        |
| 3396   |        |        |        |        |
| 3397   |        |        |        |        |
| 3398   |        |        |        |        |
| 3399   |        |        |        |        |
| 3400   |        |        |        |        |
| 3401   | 3      |        | 3      |        |
| 3402   |        |        |        |        |
| 3403   |        |        | 2      |        |
| 3405   |        | 3      |        | 4      |
| 3407   |        |        |        | 1      |
| 3410   |        |        |        |        |
| 3411   |        |        |        |        |
| 3413   |        |        |        |        |
| 3414   |        |        |        |        |
| 3420   |        |        |        |        |
| 3421   | 2      |        |        |        |
| 3425   |        |        |        |        |
| 3426   |        |        |        | 1      |
| 3429   |        |        |        | 2      |
| 3430   | 3      | 2      | 2      |        |
| 3433   |        |        |        |        |
| 3434   |        |        |        |        |
| 3437   |        |        |        |        |
| 3439   |        |        |        |        |
| 3441   |        |        |        |        |
| 3442   |        |        |        |        |
| 3444   |        |        |        |        |
| 3445   |        |        |        |        |
| 3450   |        |        |        |        |
| 3452   |        |        |        |        |

| respid | Q31a_4 | Q31a_5 | Q31a_6 | Q31a_7 |
|--------|--------|--------|--------|--------|
| 3456   |        |        |        |        |
| 3459   |        |        |        |        |
| 3460   |        |        |        |        |
| 3461   |        |        |        |        |
| 3466   |        |        |        |        |
| 3471   |        |        |        |        |
| 3473   |        |        |        |        |
| 3475   |        |        |        |        |
| 3476   |        |        |        |        |
| 3477   |        |        | 1      |        |
| 3478   |        |        |        |        |
| 3479   |        |        |        |        |
| 3482   |        |        |        |        |
| 3483   |        |        |        |        |
| 3485   | 1      |        |        |        |
| 3489   |        |        |        |        |
| 3490   |        |        |        |        |
| 3491   |        |        |        |        |
| 3494   |        |        |        |        |
| 3495   |        |        |        |        |
| 3501   |        |        |        |        |
| 3506   |        |        |        |        |
| 3507   |        |        |        |        |
| 3517   |        |        |        |        |
| 3520   |        |        |        |        |
| 3521   |        |        |        |        |
| 3522   | 1      |        |        |        |
| 3524   |        |        |        |        |
| 3527   |        |        |        |        |
| 3528   |        |        |        |        |
| 3529   |        |        |        |        |
| 3536   |        |        |        |        |

| respid | Q31a_4 | Q31a_5 | Q31a_6 | Q31a_7 |
|--------|--------|--------|--------|--------|
| 3537   |        |        |        |        |
| 3538   |        |        |        |        |
| 3540   |        | 1      |        |        |
| 3545   |        |        |        |        |
| 3547   |        |        |        |        |
| 3554   |        |        |        |        |
| 3556   |        |        |        |        |
| 3557   |        |        |        |        |
| 3559   |        |        |        |        |
| 3560   |        |        |        |        |
| 3562   |        |        |        |        |
| 3564   |        |        |        |        |
| 3565   |        |        |        |        |
| 3568   |        |        |        |        |
| 3572   |        |        |        |        |
| 3578   |        |        |        |        |
| 3581   |        |        |        |        |
| 3583   | 1      |        |        |        |
| 3588   |        |        |        |        |
| 3591   |        |        |        |        |
| 3594   |        |        |        |        |
| 3595   |        |        |        |        |
| 3596   |        |        |        |        |
| 3597   |        |        |        |        |
| 3598   |        |        |        |        |
| 3600   |        |        | 1      |        |
| 3602   |        |        |        |        |
| 3604   |        |        |        |        |
| 3605   |        |        |        | 1      |
| 3606   |        |        |        |        |
| 3607   |        |        |        |        |
| 3610   |        |        |        |        |

| respid | Q31a_4 | Q31a_5 | Q31a_6 | Q31a_7 |
|--------|--------|--------|--------|--------|
| 3611   |        |        |        |        |
| 3612   |        |        |        |        |
| 3614   |        | 2      |        |        |
| 3616   |        |        |        |        |
| 3617   |        | 1      |        |        |
| 3618   |        |        |        |        |
| 3619   |        |        |        |        |
| 3621   |        |        |        |        |
| 3622   |        |        |        |        |
| 3624   |        |        |        |        |
| 3626   |        |        |        |        |
| 3629   |        |        |        |        |
| 3631   |        |        |        |        |
| 3632   |        |        |        |        |
| 3638   |        |        |        |        |
| 3640   |        |        |        |        |
| 3641   | 1      |        |        |        |
| 3645   |        |        |        | 2      |
| 3650   |        |        |        |        |
| 3653   | 2      |        |        |        |
| 3655   |        |        |        |        |
| 3657   | 1      | 1      |        |        |
| 3658   |        |        |        |        |
| 3659   |        |        |        |        |
| 3664   | 3      | 2      |        |        |
| 3665   |        |        |        |        |
| 3667   |        |        |        |        |
| 3668   | 3      |        | 3      |        |
| 3675   |        |        |        |        |
| 3678   |        |        |        |        |
| 3680   |        |        |        |        |
| 3684   |        |        |        |        |

| respid | Q31a_4 | Q31a_5 | Q31a_6 | Q31a_7 |
|--------|--------|--------|--------|--------|
| 3685   |        |        |        |        |
| 3687   |        |        |        |        |
| 3689   | 2      |        |        |        |
| 3690   |        |        |        |        |
| 3693   |        |        |        |        |
| 3694   |        |        |        |        |
| 3695   |        |        |        |        |
| 3700   |        |        |        |        |
| 3701   |        |        |        |        |
| 3703   |        |        |        |        |
| 3704   |        |        |        |        |
| 3705   |        |        |        |        |
| 3709   |        |        |        |        |
| 3710   |        |        |        |        |
| 3722   |        |        |        |        |
| 3725   |        |        |        |        |
| 3726   |        |        |        |        |
| 3727   |        |        |        |        |
| 3728   |        |        |        |        |
| 3729   |        |        |        |        |
| 3731   |        |        |        |        |
| 3738   |        |        |        |        |
| 3739   |        |        |        |        |
| 3740   |        |        |        |        |
| 3749   |        |        |        |        |
| 3758   |        |        |        |        |
| 3762   |        |        |        |        |
| 3765   |        |        |        |        |
| 3770   |        |        |        |        |
| 3771   |        |        |        |        |
| 3778   |        |        |        |        |
| 3779   |        |        |        |        |

| respid | Q31a_4 | Q31a_5 | Q31a_6 | Q31a_7 |
|--------|--------|--------|--------|--------|
| 3780   |        |        |        |        |
| 3782   |        |        |        |        |
| 3784   |        |        |        |        |
| 3787   |        |        |        |        |
| 3790   |        |        |        |        |
| 3791   |        |        |        |        |
| 3793   |        |        |        |        |
| 3795   |        |        |        |        |
| 3799   |        |        |        |        |
| 3801   |        |        |        |        |
| 3804   |        |        |        |        |
| 3809   |        |        |        |        |
| 3810   |        |        |        |        |
| 3813   |        |        |        |        |
| 3816   |        |        |        |        |
| 3820   |        |        |        |        |
| 3821   |        |        |        |        |
| 3823   |        |        |        |        |
| 3828   |        |        |        |        |
| 3829   |        |        |        |        |
| 3832   |        |        |        |        |
| 3835   | 1      |        |        |        |
| 3837   |        |        |        |        |
| 3838   |        |        |        |        |
| 3839   |        | 3      |        |        |
| 3840   |        |        |        |        |
| 3842   |        |        |        |        |
| 3843   |        |        |        |        |
| 3844   |        |        |        |        |
| 3850   |        |        |        |        |
| 3851   |        |        |        |        |
| 3856   |        |        |        |        |



| respid | Q31a_4 | Q31a_5 | Q31a_6 | Q31a_7 |
|--------|--------|--------|--------|--------|
| 3859   |        |        |        | 2      |
| 3860   |        |        |        |        |
| 3863   |        |        |        |        |
| 3866   |        |        |        |        |
| 3867   |        |        |        |        |
| 3870   |        |        |        |        |
| 3873   |        |        |        | 1      |
| 3875   |        |        |        |        |
| 3878   |        |        |        |        |
| 3881   |        |        |        |        |
| 3883   |        |        | 3      |        |
| 3884   |        |        |        |        |
| 3885   | 3      | 3      | 3      |        |
| 3886   |        |        |        |        |
| 3887   |        |        |        |        |
| 3888   |        |        |        |        |
| 3889   |        |        |        |        |
| 3890   |        |        |        |        |
| 3896   |        |        |        |        |
| 3902   | 3      | 2      |        |        |
| 3909   |        |        |        |        |
| 3912   |        |        |        |        |
| 3922   |        | 1      |        |        |
| 3928   |        |        |        |        |
| 3930   |        |        |        |        |
| 3931   |        |        |        |        |
| 3933   |        | 1      |        |        |
| 3935   |        |        |        |        |
| 3937   |        |        |        |        |
| 3939   |        |        |        |        |
| 3942   |        |        |        |        |
| 3943   | 1      |        |        |        |

| respid | Q31a_4 | Q31a_5 | Q31a_6 | Q31a_7 |
|--------|--------|--------|--------|--------|
| 3944   |        |        |        |        |
| 3945   |        |        |        |        |
| 3947   |        |        |        |        |
| 3948   |        |        |        |        |
| 3951   |        |        |        |        |
| 3959   |        |        |        |        |
| 3969   |        |        |        |        |
| 3973   |        |        |        |        |
| 3975   |        |        |        |        |
| 3976   |        |        |        |        |
| 3977   |        |        | 1      |        |
| 3978   |        |        |        |        |
| 3994   |        |        |        |        |
| 3995   |        |        |        |        |
| 3997   |        |        |        |        |
| 3998   |        |        |        |        |
| 3999   |        |        |        |        |
| 4002   | 2      |        |        |        |
| 4004   |        |        | 1      |        |
| 4005   |        |        |        |        |
| 4006   |        |        |        | 1      |
| 4008   |        |        |        |        |
| 4010   |        |        |        |        |
| 4011   |        |        |        |        |
| 4013   |        |        |        |        |
| 4014   |        |        |        |        |
| 4016   |        |        |        |        |
| 4017   |        |        |        |        |
| 4019   | 2      |        |        |        |
| 4021   |        |        |        |        |
| 4023   |        |        |        |        |
| 4024   |        |        |        |        |

| respid | Q31a_4 | Q31a_5 | Q31a_6 | Q31a_7 |
|--------|--------|--------|--------|--------|
| 4025   | 1      |        |        |        |
| 4027   |        |        |        |        |
| 4032   |        |        |        |        |
| 4034   |        |        |        |        |
| 4035   |        |        |        |        |
| 4037   |        |        |        |        |
| 4040   |        |        |        |        |
| 4041   |        |        |        |        |
| 4042   |        |        |        |        |
| 4043   |        |        |        |        |
| 4045   | 2      | 1      |        |        |
| 4046   |        |        |        |        |
| 4048   |        |        |        |        |
| 4049   |        |        |        |        |
| 4050   |        |        |        | 1      |
| 4052   |        |        |        |        |
| 4053   |        |        |        |        |
| 4060   |        |        |        |        |
| 4065   |        |        | 3      | 3      |
| 4066   |        |        |        |        |
| 4067   |        |        |        |        |
| 4068   |        |        |        |        |
| 4069   |        |        |        |        |
| 4070   |        |        |        |        |
| 4071   |        |        |        |        |
| 4072   |        |        |        |        |
| 4073   |        |        |        |        |
| 4074   |        |        |        |        |
| 4075   |        |        |        |        |
| 4078   |        |        |        |        |
| 4080   |        |        |        |        |
| 4081   |        |        |        |        |

| respid | Q31a_4 | Q31a_5 | Q31a_6 | Q31a_7 |
|--------|--------|--------|--------|--------|
| 4082   | 1      |        |        |        |
| 4083   |        |        |        |        |
| 4084   |        |        |        |        |
| 4086   |        |        |        |        |
| 4087   |        |        |        |        |
| 4088   |        |        |        |        |
| 4089   |        |        |        |        |
| 4090   |        |        |        |        |
| 4093   |        |        |        |        |
| 4094   |        |        |        |        |
| 4095   |        |        |        |        |
| 4096   |        |        |        |        |
| 4098   |        |        |        |        |
| 4103   |        |        | 1      |        |
| 4104   | 2      |        |        |        |
| 4107   |        |        |        |        |
| 4109   |        |        |        |        |
| 4110   |        |        |        |        |
| 4113   |        |        |        |        |
| 4114   |        |        |        |        |
| 4116   |        |        |        |        |
| 4119   |        |        |        |        |
| 4120   |        |        |        | 1      |
| 4121   |        |        |        |        |
| 4122   | 1      |        |        |        |
| 4124   |        |        |        |        |
| 4126   |        |        |        |        |
| 4127   |        |        |        |        |
| 4131   |        |        |        |        |
| 4134   |        |        |        |        |
| 4144   |        |        |        |        |
| 4145   |        |        |        |        |

| respid | Q31a_4 | Q31a_5 | Q31a_6 | Q31a_7 |
|--------|--------|--------|--------|--------|
| 4146   |        |        |        |        |
| 4147   |        |        |        |        |
| 4149   |        | 1      |        |        |
| 4150   |        |        |        |        |
| 4151   |        |        |        |        |
| 4153   |        |        |        |        |
| 4155   |        |        |        |        |
| 4157   |        |        |        |        |
| 4159   |        |        |        |        |
| 4160   |        |        |        |        |
| 4161   |        |        |        |        |
| 4163   |        |        |        |        |
| 4164   |        |        |        |        |
| 4165   |        |        |        | 3      |
| 4166   |        |        |        |        |
| 4167   |        |        |        |        |
| 4170   |        |        |        |        |
| 4172   |        |        |        |        |
| 4173   |        |        |        |        |
| 4180   | 1      |        |        |        |
| 4185   |        |        |        |        |
| 4187   |        |        |        |        |
| 4190   |        |        |        |        |
| 4191   |        |        |        |        |
| 4193   |        |        |        |        |
| 4194   |        |        |        |        |
| 4195   |        |        |        |        |
| 4196   |        |        |        |        |
| 4197   |        |        |        |        |
| 4198   |        |        |        |        |
| 4199   | 3      |        |        |        |
| 4205   |        |        |        |        |

| respid | Q31a_4 | Q31a_5 | Q31a_6 | Q31a_7 |
|--------|--------|--------|--------|--------|
| 4206   |        |        |        |        |
| 4207   |        |        |        |        |
| 4214   |        |        |        |        |
| 4215   |        |        |        |        |
| 4217   |        |        |        |        |
| 4219   |        |        |        |        |
| 4223   |        |        |        |        |
| 4226   |        |        |        |        |
| 4229   |        |        |        |        |
| 4230   |        |        |        |        |
| 4232   | 1      |        |        |        |
| 4233   |        |        |        |        |
| 4234   |        |        |        |        |
| 4235   |        |        |        |        |
| 4236   |        |        |        |        |
| 4237   |        |        |        |        |
| 4238   |        |        |        |        |
| 4240   |        |        |        |        |
| 4241   |        |        |        |        |
| 4247   |        |        |        |        |
| 4250   |        |        |        |        |
| 4251   |        |        |        |        |
| 4253   |        |        | 2      |        |
| 4254   |        |        |        |        |
| 4258   |        |        |        |        |
| 4260   |        |        |        |        |
| 4263   |        |        |        |        |
| 4265   |        |        |        |        |
| 4266   |        |        |        |        |
| 4267   |        |        |        |        |
| 4270   |        |        |        |        |
| 4273   |        |        |        |        |

| respid | Q31a_4 | Q31a_5 | Q31a_6 | Q31a_7 |
|--------|--------|--------|--------|--------|
| 4280   |        |        |        |        |
| 4281   |        |        |        |        |
| 4282   |        |        |        |        |
| 4283   |        |        |        |        |
| 4286   |        |        |        |        |
| 4287   |        |        |        |        |
| 4289   |        |        |        |        |
| 4290   | 1      |        |        | 2      |
| 4291   |        |        |        |        |
| 4292   |        |        |        |        |
| 4293   |        |        |        |        |
| 4294   |        |        |        |        |
| 4295   |        |        |        |        |
| 4296   |        |        |        |        |
| 4297   |        |        |        |        |
| 4298   |        |        |        |        |
| 4299   |        |        |        |        |
| 4300   |        |        |        |        |
| 4301   |        |        |        |        |
| 4302   |        |        |        |        |
| 4304   |        |        |        |        |
| 4305   |        |        |        |        |
| 4307   |        |        |        |        |
| 4308   |        |        |        |        |
| 4312   |        |        |        |        |
| 4314   |        |        |        |        |
| 4316   |        |        |        |        |
| 4317   |        |        |        | 3      |
| 4319   |        |        |        | 3      |
| 4323   |        |        |        |        |
| 4337   |        |        |        |        |
| 4341   |        |        |        |        |

| respid | Q31a_4 | Q31a_5 | Q31a_6 | Q31a_7 |
|--------|--------|--------|--------|--------|
| 4342   |        |        |        |        |
| 4344   |        |        |        |        |
| 4345   |        |        |        | 2      |
| 4346   |        |        |        |        |
| 4347   |        |        |        |        |
| 4350   |        |        |        |        |
| 4352   |        |        |        |        |
| 4353   |        |        |        |        |
| 4355   |        |        |        |        |
| 4356   |        |        |        |        |
| 4358   |        |        |        |        |
| 4359   |        |        |        |        |
| 4360   |        |        |        |        |
| 4361   |        |        | 3      |        |
| 4363   |        |        |        |        |
| 4364   |        |        |        | 5      |
| 4365   |        |        |        |        |
| 4367   |        |        |        |        |
| 4369   |        |        | 1      |        |
| 4373   |        |        |        |        |
| 4374   | 1      |        |        |        |
| 4375   |        |        |        |        |
| 4378   |        |        |        |        |
| 4379   |        |        |        |        |
| 4382   |        |        |        |        |
| 4383   |        |        |        |        |
| 4384   |        |        |        |        |
| 4385   |        |        | 2      |        |
| 4388   |        |        |        |        |
| 4389   |        |        |        |        |
| 4391   |        |        |        |        |
| 4392   |        |        |        | 1      |



| respid | Q31a_4 | Q31a_5 | Q31a_6 | Q31a_7 |
|--------|--------|--------|--------|--------|
| 4393   |        |        |        |        |
| 4395   |        |        |        |        |
| 4397   |        |        |        |        |
| 4398   |        |        |        |        |
| 4399   |        |        |        |        |
| 4400   |        |        |        |        |
| 4401   |        |        |        |        |
| 4402   |        |        |        |        |
| 4404   |        |        |        |        |
| 4405   |        |        |        |        |
| 4407   |        |        |        |        |
| 4408   |        |        |        |        |
| 4411   |        |        |        |        |
| 4420   | 2      |        |        |        |
| 4421   |        |        |        |        |
| 4424   | 3      |        | 4      | 4      |
| 4425   |        |        |        |        |
| 4427   |        |        |        |        |
| 4430   |        |        |        |        |
| 4431   |        |        |        |        |
| 4432   |        |        |        |        |
| 4436   |        |        |        |        |
| 4439   |        |        |        |        |
| 4451   |        |        |        |        |
| 4452   |        |        |        |        |
| 4458   |        |        |        |        |
| 4464   |        |        |        |        |
| 4465   |        |        |        | 2      |
| 4467   |        |        |        |        |
| 4470   |        |        |        |        |
| 4471   |        |        |        |        |
| 4472   |        |        |        |        |

| respid | Q31a_4 | Q31a_5 | Q31a_6 | Q31a_7 |
|--------|--------|--------|--------|--------|
| 4473   |        |        |        |        |
| 4475   |        |        |        |        |
| 4476   |        |        |        |        |
| 4478   |        |        |        |        |
| 4485   | 2      |        |        |        |
| 4486   |        |        |        |        |
| 4490   |        |        |        |        |
| 4502   |        |        |        |        |
| 4503   |        |        |        |        |
| 4504   |        |        |        |        |
| 4506   |        |        |        |        |
| 4508   |        |        |        |        |
| 4515   |        |        |        |        |
| 4516   |        |        | 3      |        |
| 4519   |        |        |        |        |
| 4523   |        |        |        |        |
| 4525   |        |        |        |        |
| 4526   |        |        |        |        |
| 4528   |        |        |        |        |
| 4530   |        |        |        |        |
| 4531   |        |        |        |        |
| 4532   |        |        |        |        |
| 4537   |        |        |        |        |
| 4538   |        |        |        |        |
| 4539   |        |        |        |        |
| 4541   |        |        |        |        |
| 4543   |        |        |        |        |
| 4544   |        |        |        |        |
| 4546   |        |        |        |        |
| 4547   |        |        |        |        |
| 4549   |        |        |        |        |
| 4550   |        |        |        |        |

| respid | Q31a_4 | Q31a_5 | Q31a_6 | Q31a_7 |
|--------|--------|--------|--------|--------|
| 4551   |        |        |        |        |
| 4554   |        |        |        |        |
| 4557   |        |        |        |        |
| 4565   |        |        |        |        |
| 4568   |        |        |        |        |
| 4569   |        |        |        |        |
| 4570   |        |        |        |        |
| 4572   |        |        |        |        |
| 4574   |        |        |        |        |
| 4576   |        |        |        |        |
| 4578   |        |        |        |        |
| 4579   |        |        |        |        |
| 4580   |        |        |        | 1      |
| 4581   |        |        |        |        |
| 4584   |        |        |        |        |
| 4586   |        |        |        |        |
| 4587   |        | 2      |        |        |
| 4590   |        |        |        |        |
| 4592   |        |        |        |        |
| 4593   |        |        |        |        |
| 4595   |        |        |        |        |
| 4597   |        |        |        |        |
| 4598   |        |        |        |        |
| 4599   |        |        |        |        |
| 4600   |        |        |        |        |
| 4601   |        |        |        |        |
| 4608   |        |        |        |        |
| 4609   |        |        |        |        |
| 4611   |        |        |        |        |
| 4612   |        |        |        |        |
| 4613   |        |        |        |        |
| 4616   |        |        |        |        |

| respid | Q31a_4 | Q31a_5 | Q31a_6 | Q31a_7 |
|--------|--------|--------|--------|--------|
| 4617   |        |        |        |        |
| 4620   |        |        |        |        |
| 4621   |        |        |        |        |
| 4622   |        |        |        |        |
| 4624   |        |        |        |        |
| 4625   |        | 1      |        |        |
| 4627   |        |        |        |        |
| 4628   |        |        |        | 3      |
| 4629   |        |        |        |        |
| 4630   |        |        |        |        |
| 4632   |        |        |        |        |
| 4634   |        |        |        |        |
| 4635   |        |        |        |        |
| 4636   |        |        |        |        |
| 4637   |        |        |        |        |
| 4638   |        |        |        |        |
| 4639   |        |        |        |        |
| 4641   |        |        |        |        |
| 4643   |        |        |        |        |
| 4645   |        |        |        |        |
| 4646   |        | 1      |        |        |
| 4647   |        |        |        |        |
| 4648   |        |        |        |        |
| 4649   |        |        |        |        |
| 4650   |        |        |        |        |
| 4651   |        |        |        |        |
| 4652   |        |        |        |        |
| 4653   |        |        |        |        |
| 4657   |        |        |        |        |
| 4660   |        |        |        |        |
| 4661   |        |        |        |        |
| 4662   |        |        |        |        |

| respid | Q31a_4 | Q31a_5 | Q31a_6 | Q31a_7 |
|--------|--------|--------|--------|--------|
| 4667   |        |        |        |        |
| 4669   |        |        |        |        |
| 4671   |        |        |        |        |
| 4672   |        |        | 2      | 2      |
| 4673   |        |        |        |        |
| 4677   |        |        |        |        |
| 4679   |        |        |        |        |
| 4683   |        |        |        |        |
| 4684   |        |        |        |        |
| 4685   |        |        |        |        |
| 4686   |        |        |        |        |
| 4687   |        |        |        |        |
| 4688   |        |        |        |        |
| 4691   |        |        |        |        |
| 4692   |        |        |        |        |
| 4694   |        |        |        |        |
| 4695   |        |        |        |        |
| 4696   |        |        |        |        |
| 4697   |        |        |        |        |
| 4698   | 3      |        |        |        |
| 4699   |        |        |        |        |
| 4701   |        |        |        |        |
| 4703   |        |        |        |        |
| 4704   | 2      |        | 2      |        |
| 4705   |        |        |        |        |
| 4706   |        |        |        |        |
| 4707   |        |        |        |        |
| 4708   |        |        | 1      |        |
| 4710   |        |        |        |        |
| 4711   |        |        |        |        |
| 4715   |        |        |        |        |
| 4716   |        |        |        |        |

| respid | Q31a_4 | Q31a_5 | Q31a_6 | Q31a_7 |
|--------|--------|--------|--------|--------|
| 4717   |        |        |        |        |
| 4718   |        |        |        |        |
| 4722   |        |        | 1      |        |
| 4727   |        |        |        |        |
| 4728   |        |        |        |        |
| 4729   |        |        |        |        |
| 4732   |        |        |        |        |
| 4733   |        |        |        |        |
| 4734   |        |        |        |        |
| 4735   |        |        |        |        |
| 4737   |        |        |        |        |
| 4738   |        |        |        |        |
| 4740   |        |        |        |        |
| 4741   | 2      |        | 3      |        |
| 4743   |        |        |        |        |
| 4746   |        |        |        |        |
| 4750   |        |        |        |        |
| 4752   |        |        |        |        |
| 4753   | 1      |        |        |        |
| 4754   |        |        |        |        |
| 4755   |        |        |        | 2      |
| 4758   |        |        |        |        |
| 4766   |        |        |        |        |
| 4767   | 2      |        |        |        |
| 4768   |        |        |        |        |
| 4769   |        |        |        |        |
| 4771   |        |        |        |        |
| 4772   |        |        |        |        |
| 4773   |        |        |        |        |
| 4774   | 1      |        |        |        |
| 4776   |        |        |        |        |
| 4777   |        |        |        |        |

| respid | Q31a_4 | Q31a_5 | Q31a_6 | Q31a_7 |
|--------|--------|--------|--------|--------|
| 4779   |        |        |        |        |
| 4780   |        |        |        |        |
| 4781   |        |        |        |        |
| 4783   |        | 1      |        |        |
| 4784   |        |        |        |        |
| 4785   |        |        |        |        |
| 4788   |        |        |        |        |
| 4789   |        |        |        |        |
| 4790   |        |        |        |        |
| 4791   |        |        |        |        |
| 4794   |        |        |        |        |
| 4795   |        |        |        |        |
| 4797   |        |        |        |        |
| 4802   |        |        |        | 2      |
| 4803   |        |        |        | 2      |
| 4804   |        |        |        |        |
| 4805   |        |        |        |        |
| 4807   |        |        |        |        |
| 4808   |        |        |        |        |
| 4809   |        |        |        |        |
| 4811   |        |        |        |        |
| 4817   |        |        |        |        |
| 4819   |        |        |        |        |
| 4820   |        |        |        |        |
| 4821   |        |        |        |        |
| 4822   |        |        |        |        |
| 4823   |        |        |        |        |
| 4825   |        |        |        |        |
| 4826   |        |        |        |        |
| 4830   |        |        |        |        |
| 4832   |        |        |        |        |
| 4838   |        |        |        |        |

| respid | Q31a_4 | Q31a_5 | Q31a_6 | Q31a_7 |
|--------|--------|--------|--------|--------|
| 4840   |        |        |        |        |
| 4841   |        |        |        |        |
| 4843   |        |        |        |        |
| 4845   |        |        |        |        |
| 4846   |        |        |        |        |
| 4848   |        |        |        |        |
| 4853   |        |        |        |        |
| 4854   |        |        |        |        |
| 4859   |        |        |        |        |
| 4861   |        |        |        |        |
| 4864   |        |        |        |        |
| 4867   |        |        |        |        |
| 4870   | 2      |        |        |        |
| 4872   |        |        |        |        |
| 4873   |        |        |        |        |
| 4874   |        |        |        | 1      |
| 4878   |        |        |        |        |
| 4880   |        |        |        |        |
| 4881   |        |        |        |        |
| 4882   |        |        |        |        |
| 4883   |        |        |        |        |
| 4885   |        |        |        |        |
| 4889   |        |        |        |        |
| 4890   |        |        |        |        |
| 4891   |        |        |        |        |
| 4894   |        |        |        |        |
| 4895   |        |        | 5      | 5      |
| 4896   |        |        |        |        |
| 4897   |        |        |        |        |
| 4898   |        |        | 2      |        |
| 4899   |        |        |        |        |
| 4900   | 1      |        | 1      |        |



| respid | Q31a_4 | Q31a_5 | Q31a_6 | Q31a_7 |
|--------|--------|--------|--------|--------|
| 4901   |        |        |        |        |
| 4903   |        |        |        |        |
| 4904   |        |        |        |        |
| 4908   |        |        |        |        |
| 4909   | 1      |        |        |        |
| 4913   |        |        |        |        |
| 4917   |        |        |        |        |
| 4918   |        |        |        |        |
| 4920   |        |        |        |        |
| 4921   |        |        |        |        |
| 4925   |        |        |        |        |
| 4926   |        |        |        |        |
| 4927   |        |        |        |        |
| 4928   |        |        |        |        |
| 4929   |        |        |        |        |
| 4930   | 3      |        |        |        |
| 4931   |        |        |        |        |
| 4932   | 3      |        |        |        |
| 4933   |        |        |        |        |
| 4934   |        |        |        |        |
| 5934   |        |        |        |        |
| 5935   |        |        |        |        |
| 5936   |        |        |        |        |
| 5938   |        |        |        |        |
| 5939   |        |        |        |        |
| 5940   |        |        |        |        |
| 5942   |        |        |        |        |
| 5944   |        |        |        |        |
| 5951   |        |        |        |        |
| 5952   |        |        |        |        |
| 5954   |        |        |        |        |
| 5956   |        |        |        |        |

| respid | Q31a_4 | Q31a_5 | Q31a_6 | Q31a_7 |
|--------|--------|--------|--------|--------|
| 5957   |        |        |        |        |
| 5958   |        |        |        |        |
| 5959   | 2      |        |        |        |
| 5960   |        |        |        |        |
| 5963   |        |        |        |        |
| 5966   |        |        |        |        |
| 5968   |        |        |        |        |
| 5974   |        |        |        |        |
| 5975   |        |        |        |        |
| 5976   | 2      |        |        |        |
| 5977   |        |        |        |        |
| 5978   | 1      |        |        |        |
| 5979   |        |        |        |        |
| 5983   |        |        |        |        |
| 5984   |        |        |        |        |
| 5990   |        |        |        |        |
| 5991   |        |        |        |        |
| 5992   |        |        |        |        |
| 5993   |        |        |        |        |
| 5994   |        |        |        |        |
| 5996   |        |        |        |        |
| 6001   |        |        | 2      |        |
| 6003   |        |        |        |        |
| 6004   |        |        |        |        |
| 6005   |        |        | 1      |        |
| 6006   |        |        |        |        |
| 6008   |        |        |        |        |
| 6009   |        |        |        |        |
| 6014   |        |        |        |        |
| 6016   |        |        |        |        |
| 6017   |        |        |        |        |
| 6018   |        |        |        |        |

| respid | Q31a_4 | Q31a_5 | Q31a_6 | Q31a_7 |
|--------|--------|--------|--------|--------|
| 6020   |        |        |        |        |
| 6021   |        |        |        |        |
| 6024   |        |        |        |        |
| 6025   |        |        |        |        |
| 6026   |        |        |        |        |
| 6032   |        |        |        |        |
| 6035   | 1      |        |        |        |
| 6038   |        |        |        |        |
| 6043   |        |        |        |        |
| 6044   |        |        |        |        |
| 6046   |        |        |        |        |
| 6047   |        |        |        |        |
| 6048   |        |        |        |        |
| 6050   |        |        | 1      |        |
| 6051   |        |        |        |        |
| 6053   |        |        |        |        |
| 6054   |        |        |        |        |
| 6056   |        |        |        |        |
| 6058   |        |        |        |        |
| 6060   |        |        |        |        |
| 6061   |        |        |        |        |
| 6062   |        |        |        |        |
| 6067   |        |        |        |        |
| 6070   |        |        |        |        |
| 6074   | 2      |        |        |        |
| 6076   |        |        |        |        |
| 6078   |        |        |        |        |
| 6081   |        |        |        |        |
| 6085   |        |        |        |        |
| 6088   |        |        |        |        |
| 6092   |        |        |        |        |
| 6095   |        |        |        |        |

| respid | Q31a_4 | Q31a_5 | Q31a_6 | Q31a_7 |
|--------|--------|--------|--------|--------|
| 6098   |        |        |        |        |
| 6101   |        |        |        |        |
| 6102   |        | 1      |        |        |
| 6105   |        |        |        |        |
| 6106   |        |        |        |        |
| 6107   |        |        | 1      |        |
| 6111   |        |        |        |        |
| 6112   |        |        |        |        |
| 6113   |        |        |        | 1      |
| 6115   |        |        |        |        |
| 6116   |        |        |        |        |
| 6117   |        |        |        |        |
| 6124   |        |        |        |        |
| 6125   |        |        |        |        |
| 6128   |        |        |        |        |
| 6133   |        |        |        |        |
| 6134   |        |        |        |        |
| 6135   |        |        |        |        |
| 6138   |        |        |        |        |
| 6140   |        |        |        |        |
| 6143   |        |        |        |        |
| 6147   |        |        |        |        |
| 6154   |        |        |        |        |
| 6162   |        |        |        |        |
| 6165   |        |        |        |        |
| 6166   | 1      |        |        |        |
| 6173   |        |        |        |        |
| 6180   |        |        |        |        |
| 6184   |        |        |        |        |
| 6185   |        |        |        |        |
| 6186   |        |        |        |        |
| 6188   |        |        |        |        |

| respid | Q31a_4 | Q31a_5 | Q31a_6 | Q31a_7 |
|--------|--------|--------|--------|--------|
|--------|--------|--------|--------|--------|

6192  
6194  
6195  
6196  
6199  
6200  
6201  
6202  
6203  
6205  
6210  
6212  
6216  
6218  
6221  
6224  
6225  
6227  
6230  
6231  
6233  
6234  
6235  
6237  
6240  
6248  
6249  
6252  
6254  
6269  
6304  
6334

| respid | Q31a_4 | Q31a_5 | Q31a_6 | Q31a_7 |
|--------|--------|--------|--------|--------|
| 6341   |        |        |        |        |
| 6350   | 2      |        |        |        |
| 6370   |        |        |        |        |
| 6384   |        |        |        |        |
| 6400   |        |        |        |        |
| 6418   |        |        |        |        |
| 6467   |        |        |        |        |
| 6469   |        |        |        |        |
| 6474   |        |        |        |        |
| 6475   |        |        |        |        |
| 6476   |        |        |        |        |
| 6477   |        |        |        |        |
| 6480   |        |        |        |        |
| 6481   |        |        |        |        |
| 6485   |        |        |        |        |
| 6488   |        |        |        |        |
| 6495   |        |        |        |        |
| 6499   |        |        |        |        |
| 6500   |        |        |        |        |
| 6504   |        |        |        |        |
| 6507   |        |        |        |        |
| 6512   |        |        |        |        |
| 6525   |        |        |        |        |
| 6532   |        |        |        |        |
| 6535   |        |        |        |        |
| 6546   |        |        |        |        |
| 6551   |        |        |        |        |
| 6556   |        |        |        |        |
| 6566   |        |        |        |        |
| 6569   |        |        |        |        |
| 6574   |        |        |        |        |
| 6576   |        |        |        |        |

| respid | Q31a_4 | Q31a_5 | Q31a_6 | Q31a_7 |
|--------|--------|--------|--------|--------|
| 6580   |        |        |        |        |
| 6584   |        |        |        |        |
| 6585   |        |        |        |        |
| 6589   |        |        |        |        |
| 6590   |        |        |        |        |
| 6598   |        |        |        |        |
| 6603   |        |        | 2      |        |
| 6618   |        |        |        |        |
| 6630   |        |        |        |        |
| 6636   |        |        |        |        |
| 6649   |        |        |        |        |
| 6675   |        |        |        |        |
| 6678   |        |        |        |        |
| 6681   |        |        |        |        |
| 6684   |        |        | 1      |        |
| 6688   |        |        |        |        |
| 6691   |        |        |        |        |
| 6694   |        |        |        |        |
| 6696   |        |        |        |        |
| 6720   | 2      | 1      |        |        |
| 6722   | 3      | 3      |        |        |
| 6724   |        |        |        |        |
| 6725   |        |        |        |        |
| 6727   |        |        |        |        |
| 6734   |        |        |        |        |
| 6739   |        |        |        |        |
| 6743   |        |        |        | 1      |
| 6749   |        |        |        |        |
| 6756   |        |        |        |        |
| 6764   |        |        |        |        |
| 6765   |        |        |        |        |
| 6768   |        |        |        |        |

| respid | Q31a_4 | Q31a_5 | Q31a_6 | Q31a_7 |
|--------|--------|--------|--------|--------|
| 6773   |        |        |        |        |
| 6775   |        |        |        |        |
| 6777   |        |        |        |        |
| 6779   |        |        |        |        |
| 6790   |        |        |        |        |
| 6797   |        |        |        |        |
| 6798   |        |        |        |        |
| 6808   |        |        |        |        |
| 6810   |        |        |        |        |
| 6811   |        |        |        |        |
| 6812   |        |        |        |        |
| 6814   |        |        |        |        |
| 6819   |        |        |        |        |
| 6820   |        |        |        |        |
| 6832   |        |        |        |        |
| 6854   |        |        |        |        |
| 6855   |        |        |        |        |
| 6857   |        |        |        |        |
| 6858   |        |        |        |        |
| 6859   |        |        |        |        |
| 6860   |        |        |        |        |
| 6862   |        |        |        |        |
| 6879   |        |        |        |        |
| 6893   |        |        |        |        |
| 6898   |        |        |        |        |
| 6902   |        |        |        |        |
| 6903   |        |        | 4      |        |
| 6907   | 2      |        |        |        |
| 6908   |        |        |        |        |
| 6912   |        |        |        |        |
| 6915   |        |        |        |        |
| 6916   |        |        |        |        |



| respid | Q31a_4 | Q31a_5 | Q31a_6 | Q31a_7 |
|--------|--------|--------|--------|--------|
| 6917   |        |        |        |        |
| 6923   |        |        |        |        |
| 6934   |        |        |        |        |
| 6937   |        |        |        |        |
| 6945   |        |        |        |        |
| 6954   |        |        |        |        |
| 6956   |        |        |        |        |
| 6958   |        |        |        |        |
| 6961   |        |        |        |        |
| 6963   |        |        |        |        |
| 6964   |        |        |        |        |
| 6976   |        |        |        |        |
| 6977   | 1      |        |        |        |
| 7000   | 3      |        |        |        |
| 7001   |        |        |        |        |
| 7005   |        |        |        |        |
| 7006   |        |        |        |        |
| 7008   |        |        |        |        |
| 7009   |        |        |        |        |
| 7019   |        |        |        |        |
| 7021   |        |        |        |        |
| 7026   |        |        |        |        |
| 7030   | 3      | 3      |        |        |
| 7034   |        |        |        |        |
| 7039   |        |        |        |        |
| 7041   |        |        |        |        |
| 7047   |        |        |        |        |
| 7051   |        |        |        |        |
| 7052   |        |        |        |        |
| 7059   |        |        |        |        |
| 7062   |        |        |        |        |
| 7065   |        |        |        |        |

| respid | Q31a_4 | Q31a_5 | Q31a_6 | Q31a_7 |
|--------|--------|--------|--------|--------|
| 7066   |        |        |        |        |
| 7069   |        |        |        |        |
| 7070   |        |        |        |        |
| 7073   |        |        |        |        |
| 7078   |        |        |        |        |
| 7083   |        |        |        |        |
| 7084   |        |        |        |        |
| 7085   |        |        |        |        |
| 7088   |        |        |        |        |
| 7090   |        |        |        |        |
| 7095   |        |        |        |        |
| 7100   |        |        |        |        |
| 7102   |        |        |        |        |
| 7103   |        |        |        |        |
| 7108   |        |        |        |        |
| 7109   |        |        |        |        |
| 7110   |        |        |        |        |
| 7112   |        |        |        |        |
| 7114   |        |        |        |        |
| 7116   |        |        |        |        |
| 7117   |        | 1      |        |        |
| 7118   |        |        |        | 3      |
| 7120   |        |        | 1      |        |
| 7124   |        |        |        |        |
| 7130   |        |        |        |        |
| 7135   |        |        |        |        |
| 7137   | 2      |        |        |        |
| 7140   |        |        |        |        |
| 7141   |        |        |        |        |
| 7148   |        |        |        |        |
| 7152   |        |        |        |        |
| 7154   |        |        |        |        |

| respid | Q31a_4 | Q31a_5 | Q31a_6 | Q31a_7 |
|--------|--------|--------|--------|--------|
| 7156   |        |        |        |        |
| 7158   |        |        |        |        |
| 7159   |        |        |        |        |
| 7161   |        |        |        |        |
| 7164   |        |        |        |        |
| 7166   |        |        |        |        |
| 7167   |        |        |        |        |
| 7168   |        |        |        |        |
| 7170   |        |        |        |        |
| 7171   |        |        |        |        |
| 7172   |        |        |        |        |
| 7173   |        |        |        |        |
| 7175   |        |        |        |        |
| 7176   |        |        |        |        |
| 7180   |        |        |        |        |
| 7183   |        |        |        |        |
| 7189   |        |        |        |        |
| 7193   |        |        |        |        |
| 7194   |        |        |        |        |
| 7195   |        |        |        |        |
| 7200   |        |        |        |        |
| 7201   |        |        |        |        |
| 7205   |        |        | 1      | 2      |
| 7207   |        |        |        |        |
| 7208   |        |        |        |        |
| 7210   |        |        |        |        |
| 7211   |        |        |        |        |
| 7217   |        |        |        |        |
| 7218   |        |        |        |        |
| 7220   |        |        |        |        |
| 7225   |        |        |        |        |
| 7228   |        |        |        |        |

| respid | Q31a_4 | Q31a_5 | Q31a_6 | Q31a_7 |
|--------|--------|--------|--------|--------|
| 7230   |        |        |        |        |
| 7233   |        |        |        |        |
| 7234   |        |        |        |        |
| 7235   |        |        |        |        |
| 7236   |        |        |        |        |
| 7241   |        |        |        |        |
| 7251   |        |        |        |        |
| 7253   |        |        |        |        |
| 7259   |        |        |        |        |
| 7260   |        |        |        |        |
| 7261   |        |        |        |        |
| 7263   |        |        |        |        |
| 7265   |        |        |        |        |
| 7268   |        |        |        |        |
| 7269   |        |        |        |        |
| 7271   | 3      |        |        |        |
| 7276   | 2      |        | 1      | 1      |
| 7280   |        |        |        |        |
| 7283   |        |        |        |        |
| 7284   |        |        |        |        |
| 7286   |        |        |        |        |
| 7287   |        |        |        |        |
| 7288   |        |        |        |        |
| 7294   |        |        |        |        |
| 7295   |        |        |        |        |
| 7296   |        |        |        |        |
| 7297   |        |        |        |        |
| 7299   |        |        |        |        |
| 7300   |        |        |        |        |
| 7301   |        |        |        |        |
| 7302   |        |        |        |        |
| 7306   |        |        |        |        |

| respid | Q31a_4 | Q31a_5 | Q31a_6 | Q31a_7 |
|--------|--------|--------|--------|--------|
| 7313   | 1      | 1      |        |        |
| 7315   |        |        |        |        |
| 7317   |        |        |        |        |
| 7321   |        |        |        |        |
| 7322   |        |        |        |        |
| 7323   |        |        |        |        |
| 7333   |        |        |        |        |
| 7335   | 3      |        |        |        |
| 7336   |        |        |        |        |
| 7337   |        |        |        |        |
| 7338   |        |        |        |        |
| 7340   |        |        |        |        |
| 7341   |        |        |        |        |
| 7342   |        |        |        |        |
| 7344   |        |        |        |        |
| 7346   |        |        |        |        |
| 7347   |        |        |        |        |
| 7349   |        |        |        |        |
| 7352   |        |        |        |        |
| 7353   |        |        |        |        |
| 7355   |        |        |        |        |
| 7356   |        |        |        |        |
| 7360   | 3      | 4      | 3      |        |
| 7371   |        |        |        |        |
| 7376   |        |        |        |        |
| 7379   |        |        |        |        |
| 7381   |        |        |        |        |
| 7386   |        |        |        |        |
| 7389   |        |        |        |        |
| 7390   |        |        |        |        |
| 7393   |        |        |        |        |
| 7394   |        |        |        |        |

| respid | Q31a_4 | Q31a_5 | Q31a_6 | Q31a_7 |
|--------|--------|--------|--------|--------|
| 7396   |        |        |        |        |
| 7400   |        |        |        |        |
| 7401   |        |        |        |        |
| 7403   |        |        |        |        |
| 7406   |        |        |        | 3      |
| 7409   |        |        |        |        |
| 7410   |        | 2      |        |        |
| 7412   |        |        |        | 3      |
| 7414   |        |        |        |        |
| 7415   |        |        |        |        |
| 7417   |        |        |        |        |
| 7421   | 3      | 2      |        |        |
| 7425   |        |        |        |        |
| 7430   |        |        |        |        |
| 7432   |        |        |        |        |
| 7433   |        |        |        |        |
| 7442   |        |        |        |        |
| 7445   |        |        |        |        |
| 7446   |        |        |        |        |
| 7449   |        |        |        |        |
| 7450   |        |        |        |        |
| 7451   |        |        |        |        |
| 7459   |        |        |        |        |
| 7462   |        |        |        |        |
| 7463   |        |        |        |        |
| 7469   |        |        |        |        |
| 7482   |        |        |        |        |
| 7484   |        |        |        |        |
| 7486   |        |        |        |        |
| 7496   |        |        |        |        |
| 7502   |        |        |        |        |
| 7504   |        |        |        |        |

| respid | Q31a_4 | Q31a_5 | Q31a_6 | Q31a_7 |
|--------|--------|--------|--------|--------|
| 7509   |        |        |        |        |
| 7513   | 2      |        |        |        |
| 7514   |        |        |        |        |
| 7520   |        |        |        |        |
| 7523   |        |        |        |        |
| 7526   |        |        |        |        |
| 7529   |        |        |        |        |
| 7534   |        |        |        |        |
| 7536   |        | 1      | 2      |        |
| 7540   |        |        |        |        |
| 7541   |        |        | 1      |        |
| 7542   |        |        |        |        |
| 7555   |        |        |        |        |
| 7566   |        |        |        |        |
| 7568   |        |        |        |        |
| 7570   | 3      |        |        |        |
| 7572   |        |        |        |        |
| 7573   | 2      |        |        |        |
| 7576   |        |        |        |        |
| 7577   |        |        |        |        |
| 7583   |        |        |        |        |
| 7584   |        |        |        | 1      |
| 7585   | 2      | 2      |        | 3      |
| 7586   |        |        |        |        |
| 7587   |        |        |        |        |
| 7588   |        |        |        |        |
| 7596   |        |        |        |        |
| 7599   |        |        |        |        |
| 7600   |        |        |        |        |
| 7602   |        |        |        |        |
| 7613   |        |        |        |        |
| 7620   |        |        |        |        |

| respid | Q31a_4 | Q31a_5 | Q31a_6 | Q31a_7 |
|--------|--------|--------|--------|--------|
| 7623   |        |        |        |        |
| 7635   |        |        |        |        |
| 7636   |        |        |        |        |
| 7643   |        | 1      |        |        |
| 7645   |        |        |        |        |
| 7649   |        | 4      | 4      |        |
| 7651   |        |        |        |        |
| 7652   | 2      |        |        |        |
| 7655   |        |        |        |        |
| 7657   |        |        |        |        |
| 7675   |        |        |        |        |
| 7676   |        |        |        |        |
| 7684   |        |        |        |        |
| 7693   |        |        |        |        |
| 7694   | 4      | 3      |        |        |
| 7695   |        |        |        |        |
| 7696   |        |        | 3      | 4      |
| 7698   |        |        |        |        |
| 7700   |        |        |        |        |
| 7701   |        |        |        |        |
| 7704   |        |        |        |        |
| 7709   |        |        |        |        |
| 7713   |        |        |        |        |
| 7714   |        |        |        |        |
| 7718   |        |        |        | 2      |
| 7720   |        |        |        |        |
| 7721   |        |        |        |        |
| 7722   |        |        |        |        |
| 7724   |        |        |        |        |
| 7728   |        |        |        |        |
| 7731   |        |        | 3      |        |
| 7735   |        |        |        |        |



| respid | Q31a_4 | Q31a_5 | Q31a_6 | Q31a_7 |
|--------|--------|--------|--------|--------|
| 7737   |        |        |        |        |
| 7741   |        |        |        |        |
| 7746   |        |        |        |        |
| 7747   |        |        |        |        |
| 7748   |        |        |        |        |
| 7750   |        |        |        |        |
| 7754   |        |        |        |        |
| 7755   |        |        |        |        |
| 7762   |        |        |        |        |
| 7764   |        |        |        |        |
| 7766   |        |        |        |        |
| 7768   |        |        |        |        |
| 7770   |        |        |        |        |
| 7771   |        |        |        |        |
| 7777   |        |        |        |        |
| 7778   |        |        |        |        |
| 7783   | 3      | 2      |        |        |
| 7789   |        |        |        |        |
| 7790   |        |        |        |        |
| 7795   |        |        |        |        |
| 7807   |        |        |        |        |
| 7808   |        |        |        |        |
| 7818   |        | 2      |        |        |
| 7820   |        |        |        |        |
| 7831   |        |        |        |        |
| 7832   |        |        |        |        |
| 7837   |        |        |        |        |
| 7841   |        |        |        |        |
| 7845   | 2      |        |        |        |
| 7853   |        |        |        |        |
| 7854   |        |        |        |        |
| 7862   | 1      |        |        | 1      |

| respid | Q31a_4 | Q31a_5 | Q31a_6 | Q31a_7 |
|--------|--------|--------|--------|--------|
| 7871   |        |        |        |        |
| 7875   |        |        |        |        |
| 7880   |        |        |        |        |
| 7881   |        |        |        |        |
| 7883   |        |        |        |        |
| 7896   |        |        |        |        |
| 7905   |        |        |        |        |
| 7919   |        |        |        |        |
| 7928   |        |        |        | 2      |
| 7929   |        |        |        |        |
| 7938   |        |        |        |        |
| 7940   |        |        |        |        |
| 7941   |        |        |        |        |
| 7952   |        |        |        |        |
| 7962   |        |        |        |        |
| 7968   |        |        |        |        |
| 7972   |        |        |        |        |
| 7983   |        |        |        |        |
| 7990   |        |        |        |        |
| 7993   |        | 1      |        |        |
| 8005   |        |        |        |        |
| 8008   |        |        |        |        |
| 8012   |        |        |        |        |
| 8021   |        |        |        |        |
| 8024   |        |        |        |        |
| 8043   |        |        |        |        |
| 8051   |        |        |        |        |
| 8056   |        |        |        |        |
| 8061   |        |        |        |        |
| 8066   |        |        |        |        |
| 8069   |        |        |        |        |
| 8071   |        |        |        |        |

| respid | Q31a_4 | Q31a_5 | Q31a_6 | Q31a_7 |
|--------|--------|--------|--------|--------|
| 8072   |        |        |        |        |
| 8076   |        |        |        |        |
| 8080   |        |        | 1      |        |
| 8083   |        |        |        |        |
| 8093   |        |        | 1      | 2      |
| 8095   |        |        |        |        |
| 8099   |        |        |        |        |
| 8100   |        |        |        |        |
| 8103   |        |        |        |        |
| 8104   |        |        |        |        |
| 8115   |        |        |        | 3      |
| 8121   |        |        |        |        |
| 8128   |        |        |        |        |
| 8130   |        |        |        |        |
| 8131   |        |        |        |        |
| 8133   |        |        |        |        |
| 8143   |        |        |        |        |
| 8144   |        |        |        |        |
| 8146   |        |        |        |        |
| 8148   |        |        |        |        |
| 8157   |        |        |        |        |
| 8164   |        |        |        |        |
| 8173   |        |        |        |        |
| 8176   |        |        |        |        |
| 8179   |        |        |        |        |
| 8181   |        |        |        |        |
| 8182   |        |        |        |        |
| 8196   |        |        |        |        |
| 8200   |        |        |        |        |
| 8203   |        |        |        |        |
| 8204   |        |        |        |        |
| 8206   |        |        |        |        |

| respid | Q31a_4 | Q31a_5 | Q31a_6 | Q31a_7 |
|--------|--------|--------|--------|--------|
| 8208   |        |        |        |        |
| 8212   |        |        |        |        |
| 8222   |        |        |        |        |
| 8223   |        |        |        |        |
| 8225   |        |        |        |        |
| 8226   |        |        |        |        |
| 8228   |        |        |        |        |
| 8229   |        |        |        |        |
| 8239   |        |        |        |        |
| 8246   |        |        |        |        |
| 8258   | 3      |        |        |        |
| 8260   |        |        |        |        |
| 8262   |        |        |        |        |
| 8263   |        |        |        |        |
| 8267   |        |        |        |        |
| 8271   | 2      | 3      |        |        |
| 8274   |        |        |        |        |
| 8275   | 2      |        |        |        |
| 8279   |        |        |        |        |
| 8285   |        |        |        |        |
| 8287   |        |        | 4      |        |
| 8289   |        |        |        |        |
| 8291   |        |        |        |        |
| 8299   |        |        | 1      |        |
| 8301   |        |        |        |        |
| 8302   |        |        |        |        |
| 8308   |        |        |        |        |
| 8313   |        |        |        |        |
| 8316   |        |        |        |        |
| 8317   |        |        |        |        |
| 8319   |        |        |        |        |
| 8323   |        |        |        |        |

| respid | Q31a_4 | Q31a_5 | Q31a_6 | Q31a_7 |
|--------|--------|--------|--------|--------|
| 8324   |        |        |        |        |
| 8327   | 2      |        |        |        |
| 8328   |        | 1      |        |        |
| 8342   |        |        |        |        |
| 8350   |        |        |        |        |
| 8352   | 1      |        |        |        |
| 8353   |        |        |        |        |
| 8356   |        |        |        |        |
| 8367   |        |        |        |        |
| 8373   |        |        |        |        |
| 8379   |        |        |        |        |
| 8382   |        |        |        |        |
| 8387   |        |        |        |        |
| 8409   |        |        |        |        |
| 8410   |        |        |        |        |
| 8412   |        |        |        |        |
| 8415   |        |        |        |        |
| 8417   |        |        |        |        |
| 8422   |        |        |        |        |
| 8430   |        |        |        |        |
| 8434   |        |        |        |        |
| 8436   |        |        |        |        |
| 8446   |        |        |        |        |
| 8447   |        |        |        |        |
| 8448   |        |        |        |        |
| 8455   |        |        |        |        |
| 8456   |        |        |        |        |
| 8459   |        |        |        |        |
| 8460   |        |        |        |        |
| 8464   |        |        |        |        |
| 8470   |        |        |        |        |
| 8473   |        |        |        |        |

| respid | Q31a_4 | Q31a_5 | Q31a_6 | Q31a_7 |
|--------|--------|--------|--------|--------|
| 8486   |        |        |        |        |
| 8487   |        |        |        |        |
| 8489   |        |        |        |        |
| 8494   |        |        |        |        |
| 8495   |        | 4      |        | 5      |
| 8497   |        |        |        |        |
| 8510   |        |        |        |        |
| 8515   |        |        |        | 3      |
| 8526   |        |        |        |        |
| 8530   |        |        |        |        |
| 8532   |        |        |        |        |
| 8533   |        |        |        |        |
| 8534   |        |        |        |        |
| 8572   |        |        |        |        |
| 8582   |        |        |        |        |
| 8584   |        |        |        |        |
| 8585   |        |        |        |        |
| 8586   |        |        |        |        |
| 8589   | 1      |        |        |        |
| 8593   |        |        |        |        |
| 8594   |        |        |        |        |
| 8601   |        |        |        |        |
| 8603   |        |        |        |        |
| 8604   |        |        |        |        |
| 8605   |        |        |        |        |
| 8607   |        |        |        |        |
| 8623   |        |        |        |        |
| 8626   |        |        |        |        |
| 8638   |        |        |        |        |
| 8640   |        |        |        |        |
| 8641   |        |        |        |        |
| 8643   |        |        |        |        |

| respid | Q31a_4 | Q31a_5 | Q31a_6 | Q31a_7 |
|--------|--------|--------|--------|--------|
| 8644   |        |        |        |        |
| 8646   |        |        |        |        |
| 8647   |        |        |        |        |
| 8649   |        |        |        |        |
| 8650   |        |        |        |        |
| 8658   |        |        |        |        |
| 8659   |        |        |        |        |
| 8669   |        |        |        |        |
| 8672   |        |        |        |        |
| 8673   |        |        |        |        |
| 8676   |        |        |        |        |
| 8677   |        |        |        |        |
| 8681   |        |        |        |        |
| 8688   |        |        |        |        |
| 8689   |        |        |        |        |
| 8690   |        |        |        |        |
| 8693   |        |        |        | 1      |
| 8694   |        |        |        |        |
| 8699   |        |        |        |        |
| 8700   |        |        |        |        |
| 8703   |        |        |        |        |
| 8704   |        |        |        |        |
| 8706   |        |        | 1      |        |
| 8709   |        |        |        |        |
| 8715   |        |        |        |        |
| 8728   |        |        |        |        |
| 8729   |        |        |        |        |
| 8730   |        |        |        |        |
| 8742   |        |        |        |        |
| 8748   |        |        |        | 1      |
| 8749   |        |        |        |        |
| 8750   |        |        |        |        |

| respid | Q31a_4 | Q31a_5 | Q31a_6 | Q31a_7 |
|--------|--------|--------|--------|--------|
| 8751   |        |        |        |        |
| 8752   |        |        |        |        |
| 8754   |        |        |        |        |
| 8757   |        |        |        |        |
| 8760   |        |        |        |        |
| 8761   |        |        |        |        |
| 8762   |        |        |        |        |
| 8763   |        |        |        |        |
| 8764   |        |        |        |        |
| 8765   |        |        |        |        |
| 8766   |        |        |        |        |
| 8767   |        |        |        |        |
| 8768   |        |        |        |        |
| 8770   |        |        |        |        |
| 8771   |        |        |        |        |
| 8773   |        |        |        |        |
| 8774   |        |        |        |        |
| 8776   |        |        |        |        |
| 8777   |        |        |        |        |
| 8778   |        |        |        |        |
| 8779   |        |        |        |        |
| 8784   |        |        |        |        |
| 8786   |        |        |        |        |
| 8787   |        |        |        |        |
| 8790   |        |        |        |        |
| 8791   |        | 2      |        |        |
| 8793   |        |        |        |        |
| 8795   |        |        |        |        |
| 8797   |        |        |        |        |
| 8801   |        |        |        |        |
| 8802   |        |        |        |        |
| 8807   |        |        |        |        |



| respid | Q31a_4 | Q31a_5 | Q31a_6 | Q31a_7 |
|--------|--------|--------|--------|--------|
| 8813   |        |        |        |        |
| 8817   |        |        |        |        |
| 8818   | 3      |        |        |        |
| 8821   |        |        |        |        |
| 8822   |        |        |        |        |
| 8823   |        |        |        |        |
| 8824   |        |        |        | 1      |
| 8825   |        |        |        |        |
| 8834   | 4      |        |        |        |
| 8840   |        |        |        |        |
| 8843   |        |        |        |        |
| 8846   |        |        |        |        |
| 8862   |        |        |        |        |
| 8866   |        |        |        |        |
| 8869   |        |        |        |        |
| 8872   |        |        |        |        |
| 8903   |        |        |        |        |
| 8909   |        |        |        |        |
| 8926   |        |        |        |        |
| 8936   |        |        |        |        |
| 8945   |        |        |        |        |
| 8954   |        |        |        |        |
| 8955   | 1      | 2      |        |        |
| 8958   |        |        |        |        |
| 8959   |        |        |        |        |
| 8960   |        |        |        |        |
| 8976   |        |        |        |        |
| 8977   |        | 1      |        |        |
| 8979   |        |        |        |        |
| 8985   |        |        |        |        |
| 8994   |        |        |        |        |
| 8997   |        |        |        |        |

| respid | Q31a_4 | Q31a_5 | Q31a_6 | Q31a_7 |
|--------|--------|--------|--------|--------|
| 9002   |        |        |        |        |
| 9005   |        |        |        |        |
| 9017   |        |        |        |        |
| 9018   |        |        |        |        |
| 9021   |        |        |        |        |
| 9029   |        |        |        |        |
| 9035   |        |        |        |        |
| 9038   |        |        |        |        |
| 9039   |        |        |        |        |
| 9040   |        |        |        |        |
| 9042   |        |        |        |        |
| 9043   |        |        |        |        |
| 9045   |        | 1      |        |        |
| 9051   |        |        |        |        |
| 9067   |        |        |        |        |
| 9069   |        |        |        |        |
| 9073   |        |        |        |        |
| 9084   |        |        |        |        |
| 9096   |        |        |        |        |
| 9100   |        |        |        |        |
| 9107   |        |        |        |        |
| 9110   |        |        |        |        |
| 9120   |        |        |        |        |
| 9122   |        |        |        |        |
| 9130   |        |        |        |        |
| 9134   |        |        |        |        |
| 9137   |        |        |        |        |
| 9139   |        |        |        |        |
| 9144   |        |        |        |        |
| 9157   |        |        |        |        |
| 9166   |        |        |        |        |
| 9177   |        |        |        |        |

| respid | Q31a_4 | Q31a_5 | Q31a_6 | Q31a_7 |
|--------|--------|--------|--------|--------|
| 9181   | 1      |        |        |        |
| 9183   |        |        |        |        |
| 9184   | 1      |        |        |        |
| 9188   |        |        |        |        |
| 9197   |        |        |        |        |
| 9200   |        |        |        |        |
| 9205   | 1      |        |        |        |
| 9207   |        |        |        |        |
| 9213   |        |        |        |        |
| 9216   | 1      |        | 1      |        |
| 9217   |        |        |        |        |
| 9218   |        |        |        |        |
| 9219   |        |        |        |        |
| 9220   |        |        |        |        |
| 9221   |        |        |        |        |
| 9223   | 3      | 3      | 3      |        |
| 9228   |        |        |        |        |
| 9230   |        |        |        |        |
| 9231   |        |        |        |        |
| 9233   |        |        |        |        |
| 9235   |        |        |        |        |
| 9237   |        |        |        |        |
| 9242   |        |        |        |        |
| 9250   |        |        |        |        |
| 9253   |        |        |        | 3      |
| 9257   |        |        |        |        |
| 9263   |        |        |        |        |
| 9267   |        |        |        |        |
| 9272   |        |        |        |        |
| 9279   |        |        |        |        |
| 9281   |        |        |        |        |
| 9285   |        |        |        |        |

| respid | Q31a_4 | Q31a_5 | Q31a_6 | Q31a_7 |
|--------|--------|--------|--------|--------|
| 9286   |        |        |        |        |
| 9294   | 1      |        |        |        |
| 9295   |        |        |        |        |
| 9297   |        |        |        |        |
| 9299   |        |        |        |        |
| 9309   |        |        |        |        |
| 9315   |        |        |        |        |
| 9320   |        |        |        |        |
| 9324   |        |        |        |        |
| 9326   |        |        |        |        |
| 9333   |        |        |        |        |
| 9334   |        |        |        |        |
| 9336   | 1      |        | 2      |        |
| 9337   |        |        |        |        |
| 9342   |        |        |        |        |
| 9347   |        |        |        |        |
| 9352   |        |        |        |        |
| 9355   |        |        |        |        |
| 9356   |        |        |        |        |
| 9359   |        |        |        |        |
| 9368   |        |        |        |        |
| 9375   |        |        | 1      |        |
| 9384   |        |        |        |        |
| 9388   |        |        |        |        |
| 9397   |        |        |        |        |
| 9400   |        |        |        |        |
| 9401   |        |        |        |        |
| 9402   |        |        |        |        |
| 9417   |        |        |        |        |
| 9424   |        |        |        |        |
| 9427   |        |        |        |        |
| 9429   |        |        |        |        |

| respid | Q31a_4 | Q31a_5 | Q31a_6 | Q31a_7 |
|--------|--------|--------|--------|--------|
| 9437   |        |        |        |        |
| 9442   |        |        |        |        |
| 9446   |        |        |        |        |
| 9447   |        |        |        |        |
| 9448   |        |        |        |        |
| 9449   |        |        |        |        |
| 9455   |        |        |        |        |
| 9459   |        |        |        |        |
| 9460   |        |        |        |        |
| 9461   |        |        |        |        |
| 9463   |        |        |        |        |
| 9464   |        |        | 1      |        |
| 9466   |        |        |        |        |
| 9477   |        |        |        |        |
| 9482   | 2      |        | 2      |        |
| 9486   |        |        |        |        |
| 9488   |        |        | 4      |        |
| 9489   |        |        |        |        |
| 9496   |        |        |        |        |
| 9499   |        |        |        |        |
| 9512   |        |        |        |        |
| 9514   |        |        |        |        |
| 9516   |        |        |        |        |
| 9517   |        |        |        |        |
| 9520   |        |        |        |        |
| 9527   |        |        |        |        |
| 9532   |        |        |        |        |
| 9533   |        |        |        |        |
| 9543   |        |        |        |        |
| 9550   |        |        |        |        |
| 9553   |        |        |        |        |
| 9555   |        |        |        | 3      |

| respid | Q31a_4 | Q31a_5 | Q31a_6 | Q31a_7 |
|--------|--------|--------|--------|--------|
| 9565   |        |        | 1      |        |
| 9583   |        |        |        |        |
| 9594   |        |        |        |        |
| 9596   |        |        |        |        |
| 9600   |        |        |        |        |
| 9602   | 1      | 1      |        |        |
| 9606   |        |        |        |        |
| 9608   |        |        |        |        |
| 9610   |        |        |        |        |
| 9612   | 1      |        |        |        |
| 9613   |        |        |        |        |
| 9614   |        |        |        |        |
| 9620   |        |        |        |        |
| 9628   |        |        |        |        |
| 9631   |        |        |        |        |
| 9632   |        |        |        |        |
| 9633   |        |        |        | 1      |
| 9639   |        |        |        |        |
| 9640   |        |        |        |        |
| 9642   |        |        |        |        |
| 9653   |        |        |        |        |
| 9658   |        |        |        |        |
| 9659   |        |        |        |        |
| 9661   |        |        |        |        |
| 9664   |        |        |        |        |
| 9665   |        |        | 1      |        |
| 9666   |        |        |        |        |
| 9667   |        |        |        |        |
| 9668   |        |        |        |        |
| 9670   |        |        |        |        |
| 9671   |        |        |        |        |
| 9681   |        |        |        |        |

| respid | Q31a_4 | Q31a_5 | Q31a_6 | Q31a_7 |
|--------|--------|--------|--------|--------|
| 9684   |        |        |        |        |
| 9685   |        |        |        |        |
| 9686   |        |        |        |        |
| 9688   |        |        |        |        |
| 9692   |        |        |        |        |
| 9693   | 4      |        |        |        |
| 9698   |        |        |        |        |
| 9699   | 2      | 2      |        |        |
| 9701   |        |        |        |        |
| 9702   |        |        |        |        |
| 9709   |        |        |        |        |
| 9713   |        |        |        |        |
| 9715   |        |        |        |        |
| 9721   |        |        |        |        |
| 9725   |        |        |        |        |
| 9729   |        |        |        |        |
| 9731   |        |        |        |        |
| 9736   |        |        |        |        |
| 9740   |        |        |        |        |
| 9741   |        |        |        |        |
| 9749   |        |        |        |        |
| 9750   |        |        |        |        |
| 9751   | 2      |        |        |        |
| 9753   |        |        |        |        |
| 9754   |        |        |        |        |
| 9756   |        |        |        |        |
| 9758   | 2      | 4      |        |        |
| 9759   |        | 2      |        |        |
| 9760   |        |        |        |        |
| 9761   |        |        |        |        |
| 9762   |        |        |        |        |
| 9764   |        |        |        |        |

| respid | Q31a_4 | Q31a_5 | Q31a_6 | Q31a_7 |
|--------|--------|--------|--------|--------|
| 9768   |        |        |        |        |
| 9769   |        |        |        |        |
| 9770   |        |        |        |        |
| 9771   |        |        |        |        |
| 9772   |        |        |        |        |
| 9773   |        |        |        |        |
| 9776   |        |        |        |        |
| 9786   |        |        |        | 1      |
| 9790   |        |        |        |        |
| 9791   |        |        |        |        |
| 9794   |        |        |        |        |
| 9797   |        |        |        |        |
| 9799   |        |        |        |        |
| 9804   |        |        |        |        |
| 9805   |        | 1      |        |        |
| 9806   |        |        |        |        |
| 9807   |        |        |        |        |
| 9813   |        |        |        |        |
| 9817   |        |        |        |        |
| 9823   |        |        |        |        |
| 9826   |        |        |        |        |
| 9830   |        |        |        | 1      |
| 9835   | 1      |        |        |        |
| 9836   |        |        |        |        |
| 9841   |        |        |        |        |
| 9842   |        |        |        |        |
| 9844   |        |        |        |        |
| 9847   |        |        |        |        |
| 9851   |        |        |        |        |
| 9852   |        |        |        |        |
| 9854   |        |        |        |        |
| 9855   |        |        |        |        |



| respid | Q31a_4 | Q31a_5 | Q31a_6 | Q31a_7 |
|--------|--------|--------|--------|--------|
| 9856   |        |        |        | 1      |
| 9862   |        |        |        |        |
| 9863   |        |        |        |        |
| 9866   |        |        |        | 1      |
| 9867   |        |        |        |        |
| 9868   |        | 2      |        |        |
| 9869   |        |        |        |        |
| 9878   |        |        |        |        |
| 9879   |        |        |        |        |
| 9881   |        |        | 4      | 2      |
| 9882   |        |        |        |        |
| 9884   |        |        |        |        |
| 9885   |        |        |        |        |
| 9888   |        |        |        |        |
| 9889   |        |        |        |        |
| 9894   |        |        |        |        |
| 9895   |        |        |        |        |
| 9896   |        |        |        |        |
| 9897   |        |        |        |        |
| 9905   |        |        |        |        |
| 9907   |        |        |        |        |
| 9908   |        |        |        |        |
| 9909   |        |        |        |        |
| 9910   |        |        |        | 2      |
| 9913   |        |        |        |        |
| 9914   |        |        |        |        |
| 9915   |        |        |        |        |
| 9916   |        |        |        |        |
| 9918   |        |        |        |        |
| 9919   | 2      | 2      |        |        |
| 9922   |        |        |        |        |
| 9930   |        |        |        |        |

| respid | Q31a_4 | Q31a_5 | Q31a_6 | Q31a_7 |
|--------|--------|--------|--------|--------|
| 9934   |        |        |        |        |
| 9936   |        |        |        |        |
| 9938   |        |        |        |        |
| 9940   |        |        |        |        |
| 9944   |        |        |        |        |
| 9945   |        |        |        |        |
| 9948   |        |        |        |        |
| 9949   |        | 2      |        |        |
| 9951   |        |        |        |        |
| 9952   |        | 1      |        |        |
| 9954   |        |        |        |        |
| 9955   |        |        |        |        |
| 9956   |        |        | 2      |        |
| 9957   |        |        |        |        |
| 9958   |        |        |        |        |
| 9959   |        |        |        |        |
| 9960   |        |        |        |        |
| 9961   |        |        |        |        |
| 9962   |        |        |        |        |
| 9969   |        |        |        |        |
| 9982   |        |        |        |        |
| 9984   |        |        |        |        |
| 9990   |        |        |        |        |
| 9992   |        |        |        |        |
| 9993   |        |        | 2      |        |
| 9997   |        |        |        |        |
| 9999   |        |        |        |        |
| 10000  |        |        |        |        |
| 10005  |        |        | 1      |        |
| 10014  |        |        |        |        |
| 10016  |        |        |        | 2      |
| 10017  |        |        |        |        |

| respid | Q31a_4 | Q31a_5 | Q31a_6 | Q31a_7 |
|--------|--------|--------|--------|--------|
| 10018  |        |        |        |        |
| 10021  |        |        |        |        |
| 10025  |        |        |        |        |
| 10027  |        |        |        |        |
| 10028  |        |        |        |        |
| 10031  |        |        | 1      |        |
| 10036  |        |        |        |        |
| 10037  |        |        |        |        |
| 10038  |        |        |        |        |
| 10039  |        |        |        |        |
| 10041  |        |        |        |        |
| 10045  |        |        |        |        |
| 10046  |        |        |        |        |
| 10047  |        |        | 1      | 1      |
| 10048  |        |        |        |        |
| 10049  |        |        |        |        |
| 10051  |        |        |        |        |
| 10052  |        |        |        |        |
| 10056  |        |        |        |        |
| 10061  |        |        |        |        |
| 10064  |        |        |        |        |
| 10066  |        |        |        |        |
| 10069  |        |        |        |        |
| 10071  |        |        |        |        |
| 10074  |        |        |        |        |
| 10079  |        |        |        |        |
| 10087  |        |        |        |        |
| 10095  |        |        |        |        |
| 10097  |        |        |        |        |
| 10100  |        |        |        |        |
| 10105  |        |        |        |        |
| 10107  |        |        |        | 2      |

| respid | Q31a_4 | Q31a_5 | Q31a_6 | Q31a_7 |
|--------|--------|--------|--------|--------|
| 10111  |        |        |        |        |
| 10116  |        |        |        |        |
| 10118  |        |        |        |        |
| 10123  |        |        |        |        |
| 10124  |        |        |        |        |
| 10130  |        |        |        |        |
| 10134  |        |        |        |        |
| 10135  |        |        |        |        |
| 10136  |        |        |        |        |
| 10141  |        |        |        |        |
| 10142  |        |        |        |        |
| 10143  |        |        |        |        |
| 10145  |        |        |        |        |
| 10149  |        |        | 1      |        |
| 10150  |        |        |        |        |
| 10151  |        |        |        |        |
| 10152  |        |        |        |        |
| 10153  |        |        |        |        |
| 10156  |        |        |        |        |
| 10160  |        |        |        |        |
| 10161  |        |        |        |        |
| 10167  |        |        |        |        |
| 10171  |        |        |        |        |
| 10172  |        |        |        |        |
| 10176  |        |        |        |        |
| 10177  |        |        |        |        |
| 10182  |        |        |        |        |
| 10184  |        |        |        |        |
| 10186  |        | 1      | 2      |        |
| 10189  |        |        |        |        |
| 10191  |        |        |        |        |
| 10192  |        |        |        |        |

| respid | Q31a_4 | Q31a_5 | Q31a_6 | Q31a_7 |
|--------|--------|--------|--------|--------|
| 10195  |        |        |        |        |
| 10199  |        |        |        |        |
| 10201  |        |        |        |        |
| 10213  |        |        |        |        |
| 10222  |        |        |        |        |
| 10224  |        |        |        |        |
| 10245  |        |        |        |        |
| 10254  |        |        |        |        |
| 10255  |        | 2      |        |        |
| 10257  |        |        |        |        |
| 10260  |        |        |        |        |
| 10261  |        |        |        |        |
| 10263  |        |        | 3      |        |
| 10264  |        |        |        |        |
| 10268  | 2      |        |        |        |
| 10269  |        |        |        |        |
| 10270  |        |        |        |        |
| 10282  |        |        |        |        |
| 10285  |        |        |        |        |
| 10288  |        |        |        |        |
| 10291  |        |        |        |        |
| 10292  |        |        |        |        |
| 10304  |        |        |        |        |
| 10305  |        |        |        |        |
| 10310  |        |        |        |        |
| 10324  |        |        |        |        |
| 10325  |        |        |        |        |
| 10326  |        |        |        |        |
| 10329  |        |        |        |        |
| 10332  |        |        |        |        |
| 10337  |        |        |        |        |
| 10341  |        |        |        |        |

| respid | Q31a_4 | Q31a_5 | Q31a_6 | Q31a_7 |
|--------|--------|--------|--------|--------|
| 10353  |        |        |        |        |
| 10354  |        |        |        |        |
| 10359  |        |        |        | 2      |
| 10360  |        |        |        |        |
| 10362  |        |        |        |        |
| 10364  |        |        |        |        |
| 10366  | 2      |        | 3      | 2      |
| 10367  |        |        |        |        |
| 10371  |        |        |        |        |
| 10374  |        |        |        |        |
| 10375  |        |        |        |        |
| 10376  |        |        |        |        |
| 10377  |        |        |        |        |
| 10378  |        |        |        |        |
| 10387  |        |        |        |        |
| 10396  |        |        |        |        |
| 10397  |        |        |        |        |
| 10399  |        |        |        |        |
| 10405  |        |        |        |        |
| 10406  |        |        |        |        |
| 10408  |        |        |        |        |
| 10409  |        |        |        |        |
| 10412  |        |        |        |        |
| 10413  |        |        |        |        |
| 10419  |        |        |        |        |
| 10423  |        |        |        |        |
| 10426  |        |        |        |        |
| 10446  |        |        |        |        |
| 10448  |        |        |        |        |
| 10450  |        |        |        |        |
| 10455  |        |        |        |        |
| 10460  |        |        |        |        |

| respid | Q31a_4 | Q31a_5 | Q31a_6 | Q31a_7 |
|--------|--------|--------|--------|--------|
| 10461  |        |        |        |        |
| 10471  |        |        |        |        |
| 10472  |        |        |        |        |
| 10491  |        | 3      |        | 3      |
| 10493  |        |        |        |        |
| 10498  |        |        |        |        |
| 10533  |        |        |        |        |
| 10539  |        |        |        |        |
| 10540  |        |        |        |        |
| 10557  |        |        |        |        |
| 10558  |        |        |        |        |
| 10559  |        |        | 2      |        |
| 10564  |        |        |        |        |
| 10570  |        |        |        |        |
| 10572  |        |        |        |        |
| 10576  |        |        |        |        |
| 10582  |        |        |        |        |
| 10593  |        |        |        |        |
| 10596  |        |        |        |        |
| 10615  |        |        |        |        |
| 10616  |        |        |        |        |
| 10623  |        |        |        |        |
| 10626  |        |        |        |        |
| 10627  | 1      | 1      | 2      |        |
| 10629  |        |        |        |        |
| 10632  | 2      | 2      | 3      | 3      |
| 10641  |        |        |        |        |
| 10648  |        |        |        |        |
| 10651  |        |        |        |        |
| 10654  |        |        |        |        |
| 10673  |        |        |        |        |
| 10675  |        |        |        |        |

| respid | Q31a_4 | Q31a_5 | Q31a_6 | Q31a_7 |
|--------|--------|--------|--------|--------|
| 10689  |        |        | 2      |        |
| 10692  |        |        |        |        |
| 10694  |        |        |        |        |
| 10695  |        |        |        |        |
| 10702  |        |        |        |        |
| 10703  |        |        |        |        |
| 10708  |        |        |        |        |
| 10719  |        |        |        |        |
| 10722  |        |        |        |        |
| 10723  |        |        |        |        |
| 10726  |        |        |        |        |
| 10727  |        |        |        |        |
| 10730  |        |        |        |        |
| 10731  |        |        |        |        |
| 10737  |        |        |        |        |
| 10743  |        |        |        |        |
| 10763  |        |        |        |        |
| 10777  |        |        |        |        |
| 10787  |        |        |        | 1      |
| 10798  |        |        |        |        |
| 10800  |        |        |        |        |
| 10802  |        |        |        |        |
| 10803  |        |        |        |        |
| 10808  | 1      |        |        |        |
| 10810  |        |        |        |        |
| 10819  |        |        |        |        |
| 10825  |        |        |        |        |
| 10827  |        |        |        |        |
| 10830  |        | 1      |        |        |
| 10847  |        |        |        |        |
| 10849  |        |        |        |        |
| 10852  |        |        |        |        |



| respid | Q31a_4 | Q31a_5 | Q31a_6 | Q31a_7 |
|--------|--------|--------|--------|--------|
| 10854  |        |        |        | 3      |
| 10857  |        |        |        |        |
| 10861  |        |        |        |        |
| 10862  |        |        |        |        |
| 10870  |        |        |        |        |
| 10873  |        |        |        |        |
| 10881  |        |        |        |        |
| 10893  |        |        |        |        |
| 10898  |        |        |        |        |
| 10899  |        |        |        |        |
| 10905  |        |        |        |        |
| 10910  |        |        |        |        |
| 10911  | 1      |        |        |        |
| 10912  |        |        |        |        |
| 10913  |        |        |        |        |
| 10918  |        |        |        |        |
| 10995  |        |        |        |        |
| 11002  |        |        |        |        |
| 11003  |        |        |        |        |
| 11005  | 1      |        |        |        |
| 11015  |        |        |        |        |
| 11016  |        |        |        |        |
| 11017  |        |        |        |        |
| 11020  | 1      | 1      |        |        |
| 11024  |        |        |        |        |
| 11026  |        |        |        |        |
| 11028  |        |        |        |        |
| 11029  | 2      |        |        |        |
| 11030  |        |        |        |        |
| 11031  |        |        |        |        |
| 11038  |        |        |        |        |
| 11051  |        |        |        | 1      |

| respid | Q31a_4 | Q31a_5 | Q31a_6 | Q31a_7 |
|--------|--------|--------|--------|--------|
| 11052  | 1      |        |        |        |
| 11053  |        |        |        |        |
| 11054  | 3      |        |        |        |
| 11063  |        |        |        |        |
| 11075  | 2      |        |        |        |
| 11083  |        |        | 1      |        |
| 11092  |        |        |        |        |
| 11118  |        |        |        |        |
| 11119  |        |        |        |        |
| 11134  |        |        |        |        |
| 11139  |        |        |        |        |
| 11154  |        |        |        |        |
| 11166  |        |        |        |        |
| 11168  |        |        |        |        |
| 11176  |        |        |        |        |
| 11183  | 2      | 2      |        |        |
| 11189  |        |        |        |        |
| 11196  | 3      |        |        |        |
| 11200  |        |        |        |        |
| 11201  |        |        |        |        |
| 11211  | 2      |        |        |        |
| 11218  |        |        |        |        |
| 11219  |        |        |        |        |
| 11221  |        |        |        |        |
| 11222  |        |        |        |        |
| 11230  | 2      |        |        |        |
| 11236  | 2      |        |        |        |
| 11237  |        |        |        |        |
| 11240  |        |        |        |        |
| 11244  | 2      |        |        |        |
| 11249  | 1      |        | 1      |        |
| 11252  | 2      |        |        |        |

| respid | Q31a_4 | Q31a_5 | Q31a_6 | Q31a_7 |
|--------|--------|--------|--------|--------|
| 11254  | 2      |        |        |        |
| 11255  |        |        |        |        |
| 11258  | 2      |        |        |        |
| 11260  |        |        |        |        |
| 11264  |        | 2      |        |        |
| 11266  |        |        |        |        |
| 11268  |        | 1      |        |        |
| 11269  |        |        |        |        |
| 11272  |        |        |        |        |
| 11273  |        |        |        |        |
| 11275  |        |        |        |        |
| 11276  | 3      |        |        |        |
| 11278  | 2      |        |        |        |
| 11288  |        |        |        |        |
| 11289  |        |        |        |        |
| 11291  |        |        |        |        |
| 11295  |        |        |        |        |
| 11297  |        |        |        |        |
| 11304  |        |        |        | 2      |
| 11305  |        |        |        |        |
| 11311  |        |        |        |        |
| 11313  | 1      |        |        |        |
| 11315  | 3      | 3      | 2      |        |
| 11316  | 3      |        | 3      |        |
| 11318  | 2      | 3      | 3      |        |
| 11323  |        |        |        |        |
| 11331  |        |        |        |        |
| 11333  |        |        |        |        |
| 11334  |        |        |        |        |
| 11340  | 2      |        |        |        |
| 11345  |        |        |        |        |
| 11354  |        |        |        |        |

| respid | Q31a_4 | Q31a_5 | Q31a_6 | Q31a_7 |
|--------|--------|--------|--------|--------|
| 11360  |        |        |        |        |
| 11361  |        |        | 2      |        |
| 11367  |        |        |        |        |
| 11370  |        |        |        |        |
| 11371  |        | 2      |        | 3      |
| 11372  |        | 2      |        |        |
| 11373  |        |        |        | 1      |
| 11382  |        |        |        |        |
| 11394  |        |        |        |        |
| 11395  |        |        |        |        |
| 11397  |        |        |        |        |
| 11402  |        |        |        | 1      |
| 11409  |        |        |        |        |
| 11410  |        |        |        |        |
| 11411  |        |        |        |        |
| 11418  |        |        |        |        |
| 11425  |        | 2      |        |        |
| 11429  |        |        |        |        |
| 11430  |        |        |        |        |
| 11431  |        |        |        |        |
| 11432  |        |        |        |        |
| 11433  |        |        |        |        |
| 11435  |        |        |        | 2      |
| 11436  |        | 1      |        |        |
| 11437  |        | 2      | 1      |        |
| 11439  |        |        |        |        |
| 11440  |        |        |        |        |
| 11447  |        |        |        |        |
| 11455  |        |        |        |        |
| 11456  |        | 3      |        |        |
| 11461  |        |        |        |        |
| 11463  |        |        |        |        |

| respid | Q31a_4 | Q31a_5 | Q31a_6 | Q31a_7 |
|--------|--------|--------|--------|--------|
| 11470  | 1      |        |        |        |
| 11472  |        |        |        |        |
| 11475  |        |        |        |        |
| 11476  |        |        |        |        |
| 11482  |        | 2      |        |        |
| 11501  |        | 2      |        |        |
| 11503  |        |        |        |        |
| 11505  |        |        |        |        |
| 11510  |        |        |        |        |
| 11519  |        |        |        |        |
| 11527  |        |        | 2      |        |
| 11529  | 2      | 2      |        |        |
| 11530  |        |        |        |        |
| 11536  |        |        |        |        |
| 11543  |        |        |        |        |
| 11548  |        |        |        |        |
| 11566  |        |        |        |        |
| 11570  |        | 3      |        |        |
| 11571  |        |        |        |        |
| 11578  |        |        |        |        |
| 11579  |        |        |        |        |
| 11581  |        |        |        |        |
| 11582  |        |        |        |        |
| 11583  |        |        |        |        |
| 11589  |        | 2      |        |        |
| 11590  |        |        |        |        |
| 11592  |        |        |        |        |
| 11596  |        |        |        |        |
| 11598  |        | 2      |        | 3      |
| 11602  |        |        |        |        |
| 11605  |        | 1      |        |        |
| 11618  | 2      | 2      | 3      |        |

| respid | Q31a_4 | Q31a_5 | Q31a_6 | Q31a_7 |
|--------|--------|--------|--------|--------|
| 11621  |        |        |        |        |
| 11630  |        |        | 2      |        |
| 11636  |        |        |        |        |
| 11640  |        |        |        |        |
| 11658  |        |        |        |        |
| 11665  |        |        |        |        |
| 11666  |        |        |        |        |
| 11667  |        |        | 2      |        |
| 11674  |        |        |        |        |
| 11680  |        |        |        |        |
| 11683  | 2      |        |        |        |
| 11688  |        |        |        |        |
| 11690  |        |        |        |        |
| 11694  |        |        |        |        |
| 11705  |        |        |        |        |
| 11720  | 2      |        |        |        |
| 11724  |        |        |        |        |
| 11738  |        |        |        |        |
| 11744  |        |        |        |        |
| 11745  |        |        |        |        |
| 11747  |        |        |        |        |
| 11755  |        |        |        |        |
| 11756  |        |        |        |        |
| 11772  |        |        |        |        |
| 11773  |        |        |        |        |
| 11778  |        | 2      |        |        |
| 11790  |        |        |        |        |
| 11794  |        |        |        |        |
| 11795  |        |        | 2      |        |
| 11799  |        | 3      |        |        |
| 11803  |        |        |        |        |
| 11806  |        |        |        |        |

| respid | Q31a_4 | Q31a_5 | Q31a_6 | Q31a_7 |
|--------|--------|--------|--------|--------|
| 11808  |        |        |        |        |
| 11810  |        |        |        |        |
| 11811  |        |        |        |        |
| 11812  | 3      |        |        |        |
| 11813  |        |        |        |        |
| 11821  |        |        |        |        |
| 11827  |        |        |        |        |
| 11831  | 2      |        |        |        |
| 11841  |        |        |        |        |
| 11872  |        |        |        |        |
| 11898  |        |        |        |        |
| 11902  |        |        | 5      |        |
| 11912  |        |        |        |        |
| 11926  |        |        |        |        |
| 11928  |        |        |        |        |
| 11932  |        |        |        |        |
| 11934  |        |        |        |        |
| 11941  |        |        |        |        |
| 11942  |        |        |        |        |
| 11943  |        |        |        |        |
| 11944  |        |        |        |        |
| 11955  |        |        |        |        |
| 11958  |        |        |        |        |
| 11968  |        |        |        |        |
| 11979  |        | 3      |        |        |
| 11988  |        |        |        |        |
| 11999  | 1      |        |        |        |
| 12002  |        |        |        |        |
| 12004  |        |        |        |        |
| 12008  |        |        |        |        |
| 12013  |        |        |        |        |
| 12018  |        |        |        |        |

| respid | Q31a_4 | Q31a_5 | Q31a_6 | Q31a_7 |
|--------|--------|--------|--------|--------|
| 12023  |        |        |        |        |
| 12027  | 3      |        |        |        |
| 12030  |        |        |        |        |
| 12031  |        |        |        |        |
| 12036  |        |        |        | 2      |
| 12037  | 2      |        |        |        |
| 12038  |        |        |        |        |
| 12039  |        |        |        |        |
| 12045  |        |        |        |        |
| 12046  |        |        |        |        |
| 12054  |        |        | 2      |        |
| 12055  |        | 2      |        |        |
| 12069  |        |        |        |        |
| 12070  |        | 2      |        |        |
| 12074  |        |        |        |        |
| 12075  |        |        |        |        |
| 12078  |        |        |        |        |
| 12089  |        |        |        |        |
| 12091  | 3      |        |        |        |
| 12092  | 2      |        |        | 2      |
| 12108  |        |        |        |        |
| 12111  |        | 2      | 3      |        |
| 12112  |        |        | 3      | 2      |
| 12126  |        |        |        |        |
| 12132  |        |        |        |        |
| 12150  | 2      |        | 3      |        |
| 12152  |        |        |        |        |
| 12154  |        |        |        |        |
| 12157  |        |        |        |        |
| 12165  |        |        |        |        |
| 12169  |        |        | 1      |        |
| 12182  |        |        |        |        |



| respid | Q31a_4 | Q31a_5 | Q31a_6 | Q31a_7 |
|--------|--------|--------|--------|--------|
| 12198  |        |        |        |        |
| 12199  |        |        |        |        |
| 12202  |        |        |        |        |
| 12207  |        |        |        |        |
| 12208  |        |        |        | 1      |
| 12210  |        |        |        |        |
| 12219  | 4      |        |        |        |
| 12224  |        |        |        |        |
| 12230  |        |        |        |        |
| 12238  |        |        |        |        |
| 12239  |        |        |        |        |
| 12243  |        |        |        |        |
| 12245  |        |        |        |        |
| 12246  | 3      |        |        |        |
| 12247  |        |        |        |        |
| 12248  |        |        |        |        |
| 12249  | 2      |        |        |        |
| 12258  |        | 2      |        |        |
| 12265  |        |        |        |        |
| 12269  |        |        |        |        |
| 12270  |        |        |        |        |
| 12279  |        |        |        |        |
| 12280  |        |        |        |        |
| 12282  |        | 1      |        |        |
| 12283  |        |        |        |        |
| 12287  |        |        |        |        |
| 12288  |        |        |        |        |
| 12290  |        |        |        |        |
| 12292  |        |        |        |        |
| 12294  |        |        |        |        |
| 12296  |        |        |        |        |
| 12307  |        |        |        |        |

| respid | Q31a_4 | Q31a_5 | Q31a_6 | Q31a_7 |
|--------|--------|--------|--------|--------|
| 12309  |        |        |        |        |
| 12312  |        |        |        |        |
| 12317  |        |        |        |        |
| 12319  |        |        |        | 1      |
| 12320  |        |        |        |        |
| 12322  |        |        |        |        |
| 12328  |        |        |        |        |
| 12331  | 5      |        | 4      |        |
| 12332  |        |        |        |        |
| 12334  | 2      |        |        |        |
| 12337  |        |        |        |        |
| 12338  |        |        |        |        |
| 12342  |        |        |        |        |
| 12349  |        |        |        |        |
| 12352  |        |        |        |        |
| 12355  |        |        |        |        |
| 12357  | 2      |        |        |        |
| 12358  |        |        |        |        |
| 12371  | 2      |        |        |        |
| 12372  |        |        |        |        |
| 12373  |        |        |        |        |
| 12379  |        |        |        |        |
| 12381  | 3      |        |        |        |
| 12383  |        |        |        |        |
| 12384  |        |        |        |        |
| 12386  |        |        |        |        |
| 12389  |        |        |        |        |
| 12392  |        |        |        |        |
| 12396  |        | 1      |        |        |
| 12397  |        |        |        |        |
| 12399  |        |        |        |        |
| 12400  |        |        |        |        |

| respid | Q31a_4 | Q31a_5 | Q31a_6 | Q31a_7 |
|--------|--------|--------|--------|--------|
| 12406  |        |        |        |        |
| 12407  |        |        |        |        |
| 12410  |        |        |        |        |
| 12413  | 1      |        |        |        |
| 12416  | 1      | 1      |        |        |
| 12419  |        |        |        |        |
| 12422  |        |        |        |        |
| 12423  |        |        |        |        |
| 12429  |        |        |        |        |
| 12434  |        | 4      |        |        |
| 12435  |        |        |        |        |
| 12436  |        |        |        |        |
| 12442  |        |        |        |        |
| 12449  |        |        |        |        |
| 12451  |        |        |        |        |
| 12456  |        |        |        | 2      |
| 12457  |        |        |        |        |
| 12458  |        |        |        |        |
| 12461  |        |        |        |        |
| 12462  |        |        |        |        |
| 12463  | 4      | 4      |        |        |
| 12466  |        |        |        |        |
| 12470  | 2      |        |        |        |
| 12471  |        |        |        |        |
| 12472  |        |        |        |        |
| 12478  |        |        | 2      | 2      |
| 12479  |        |        |        |        |
| 12481  |        |        |        |        |
| 12482  |        |        |        |        |
| 12483  |        |        |        |        |
| 12496  |        |        |        |        |
| 12497  |        |        |        |        |

| respid | Q31a_4 | Q31a_5 | Q31a_6 | Q31a_7 |
|--------|--------|--------|--------|--------|
| 12498  | 1      |        |        | 1      |
| 12500  |        |        |        |        |
| 12501  |        |        |        |        |
| 12502  |        |        |        |        |
| 12503  |        |        |        |        |
| 12505  |        |        |        |        |
| 12508  |        |        |        |        |
| 12509  |        |        |        |        |
| 12510  |        |        |        |        |
| 12512  |        |        |        |        |
| 12514  |        |        |        |        |
| 12515  |        |        | 2      |        |
| 12520  |        |        |        |        |
| 12522  |        |        |        |        |
| 12526  |        | 3      |        |        |
| 12527  |        |        |        |        |
| 12528  |        |        |        |        |
| 12530  |        |        |        |        |
| 12535  |        |        |        |        |
| 12539  |        |        |        |        |
| 12541  | 2      |        |        |        |
| 12542  |        |        |        |        |
| 12545  |        |        |        |        |
| 12547  |        |        |        |        |
| 12549  |        |        |        |        |
| 12550  |        |        |        |        |
| 12555  |        |        |        |        |
| 12557  |        |        |        |        |
| 12559  |        |        |        |        |
| 12561  |        |        |        |        |
| 12562  |        | 4      |        |        |
| 12563  |        |        |        |        |

| respid | Q31a_4 | Q31a_5 | Q31a_6 | Q31a_7 |
|--------|--------|--------|--------|--------|
| 12565  |        | 1      |        |        |
| 12566  |        |        |        |        |
| 12570  |        |        |        |        |
| 12571  |        |        |        |        |
| 12572  |        |        |        |        |
| 12578  |        |        |        |        |
| 12579  |        |        |        |        |
| 12581  |        |        |        |        |
| 12582  |        |        |        |        |
| 12585  |        |        |        |        |
| 12586  | 4      |        |        |        |
| 12588  |        |        |        |        |
| 12589  |        |        |        |        |
| 12590  |        |        |        |        |
| 12591  |        | 3      |        |        |
| 12593  | 3      |        |        |        |
| 12594  |        |        | 1      |        |
| 12599  |        |        |        |        |
| 12600  |        |        |        |        |
| 12602  |        | 2      | 3      |        |
| 12606  |        |        |        |        |
| 12607  |        |        |        |        |
| 12608  |        |        |        |        |
| 12610  | 1      |        |        |        |
| 12611  |        |        |        |        |
| 12613  | 3      | 2      |        | 4      |
| 12616  |        |        |        |        |
| 12617  |        |        |        |        |
| 12619  |        |        |        |        |
| 12622  |        |        |        |        |
| 12628  |        |        |        |        |
| 12631  |        |        |        |        |

| respid | Q31a_4 | Q31a_5 | Q31a_6 | Q31a_7 |
|--------|--------|--------|--------|--------|
| 12635  |        |        |        |        |
| 12638  |        |        |        |        |
| 12639  |        |        |        |        |
| 12640  |        |        |        |        |
| 12643  |        |        |        |        |
| 12646  |        |        |        |        |
| 12648  |        | 2      |        |        |
| 12650  |        |        |        |        |
| 12651  |        |        |        |        |
| 12658  |        | 1      |        |        |
| 12662  |        |        |        |        |
| 12663  |        |        |        |        |
| 12664  |        |        |        |        |
| 12669  | 2      | 3      |        |        |
| 12670  |        |        |        |        |
| 12673  |        |        |        |        |
| 12675  |        |        |        |        |
| 12677  |        |        |        |        |
| 12679  |        |        |        |        |
| 12682  | 2      |        |        |        |
| 12696  |        |        |        |        |
| 12697  |        |        |        |        |
| 12699  |        |        |        |        |
| 12700  | 1      |        |        |        |
| 12701  |        |        |        |        |
| 12702  |        |        |        |        |
| 12704  | 3      |        |        |        |
| 12705  |        |        |        |        |
| 12709  |        |        |        |        |
| 12710  |        |        |        |        |
| 12713  | 1      |        |        |        |
| 12716  |        |        | 2      |        |

| respid | Q31a_4 | Q31a_5 | Q31a_6 | Q31a_7 |
|--------|--------|--------|--------|--------|
| 12719  |        |        |        |        |
| 12720  |        |        |        |        |
| 12723  |        |        |        |        |
| 12726  |        |        |        |        |
| 12728  |        |        |        |        |
| 12729  |        |        |        |        |
| 12731  |        |        |        |        |
| 12732  | 2      |        |        |        |
| 12733  |        |        |        | 2      |
| 12736  |        |        |        |        |
| 12737  |        |        |        |        |
| 12739  |        |        |        |        |
| 12742  |        |        |        |        |
| 12743  |        | 2      |        |        |
| 12744  |        |        |        |        |
| 12747  |        |        |        |        |
| 12751  |        |        |        |        |
| 12754  |        |        |        |        |
| 12756  |        |        |        |        |
| 12757  |        |        |        |        |
| 12760  |        |        |        |        |
| 12761  |        |        |        |        |
| 12762  |        |        |        | 3      |
| 12766  |        |        |        |        |
| 12769  |        |        |        |        |
| 12770  |        |        |        |        |
| 12773  |        |        |        |        |
| 12780  |        |        |        |        |
| 12789  |        |        |        |        |
| 12792  | 2      | 2      | 2      | 2      |
| 12795  |        |        |        |        |
| 12804  |        |        |        |        |

| respid | Q31a_4 | Q31a_5 | Q31a_6 | Q31a_7 |
|--------|--------|--------|--------|--------|
| 12811  |        | 1      |        |        |
| 12813  |        |        |        |        |
| 12814  |        |        |        |        |
| 12815  |        |        |        |        |
| 12816  |        |        |        |        |
| 12817  | 2      |        |        |        |
| 12818  |        |        |        |        |
| 12819  |        |        |        |        |
| 12820  |        |        |        |        |
| 12821  |        |        |        |        |
| 12824  | 2      |        |        |        |
| 12827  |        |        |        |        |
| 12836  |        | 3      |        |        |
| 12837  |        |        |        |        |
| 12838  |        |        |        |        |
| 12845  |        |        |        |        |
| 12847  |        |        |        |        |
| 12849  |        | 3      |        |        |
| 12850  |        |        |        |        |
| 12852  |        |        |        |        |
| 12853  |        |        |        |        |
| 12854  |        |        |        |        |
| 12860  |        |        |        |        |
| 12861  |        |        |        |        |
| 12863  |        |        |        |        |
| 12865  |        |        |        |        |
| 12870  |        |        |        |        |
| 12871  |        |        |        |        |
| 12873  |        |        |        |        |
| 12877  |        |        |        |        |
| 12880  |        |        |        |        |
| 12881  |        |        |        | 1      |



| respid | Q31a_4 | Q31a_5 | Q31a_6 | Q31a_7 |
|--------|--------|--------|--------|--------|
| 12882  |        |        |        |        |
| 12883  |        |        |        |        |
| 12885  |        |        |        | 1      |
| 12887  |        |        |        |        |
| 12889  | 1      |        |        |        |
| 12890  |        |        |        |        |
| 12891  |        |        |        |        |
| 12892  |        |        |        |        |
| 12893  |        |        |        |        |
| 12895  |        |        |        |        |
| 12898  |        |        |        |        |
| 12907  |        |        |        | 3      |
| 12908  |        |        |        |        |
| 12909  |        |        |        |        |
| 12914  |        |        |        |        |
| 12915  |        |        |        |        |
| 12916  |        |        |        |        |
| 12921  |        |        |        |        |
| 12922  |        |        |        |        |
| 12923  |        |        |        |        |
| 12926  |        |        |        |        |
| 12927  |        | 1      |        |        |
| 12932  |        |        |        |        |
| 12936  |        |        |        |        |
| 12937  |        |        |        |        |
| 12938  |        | 3      |        |        |
| 12939  |        |        |        |        |
| 12940  |        |        |        |        |
| 12945  |        |        |        |        |
| 12946  |        |        |        |        |
| 12947  | 1      |        |        |        |
| 12948  |        |        | 3      | 3      |

| respid | Q31a_4 | Q31a_5 | Q31a_6 | Q31a_7 |
|--------|--------|--------|--------|--------|
| 12951  |        |        |        |        |
| 12952  |        | 1      |        |        |
| 12954  | 1      |        |        | 3      |
| 12960  |        |        |        |        |
| 12961  | 1      |        |        |        |
| 12962  |        |        |        |        |
| 12963  |        |        |        |        |
| 12964  |        |        |        |        |
| 12966  |        |        |        |        |
| 12967  |        |        |        |        |
| 12969  |        |        |        |        |
| 12970  |        |        |        |        |
| 12974  |        |        | 3      | 3      |
| 12979  |        |        |        |        |
| 12980  |        |        |        |        |
| 12983  |        |        |        |        |
| 12988  |        |        |        |        |
| 12994  |        |        |        |        |
| 12995  |        |        |        |        |
| 12996  |        |        |        |        |
| 12998  | 2      |        |        |        |
| 12999  |        |        |        |        |
| 13001  |        |        |        |        |
| 13005  |        |        |        |        |
| 13006  |        | 1      | 2      |        |
| 13007  |        |        |        |        |
| 13011  |        |        |        |        |
| 13012  |        |        |        |        |
| 13013  | 2      |        |        |        |
| 13016  |        |        |        |        |
| 13018  |        |        |        |        |
| 13020  |        |        |        |        |

| respid | Q31a_4 | Q31a_5 | Q31a_6 | Q31a_7 |
|--------|--------|--------|--------|--------|
| 13024  |        |        |        |        |
| 13025  | 1      | 1      |        |        |
| 13027  | 1      |        |        |        |
| 13031  |        | 2      |        |        |
| 13032  | 2      |        |        |        |
| 13034  |        |        |        |        |
| 13036  |        |        |        |        |
| 13037  |        |        |        |        |
| 13038  | 3      |        |        |        |
| 13039  |        |        |        |        |
| 13040  |        | 1      |        |        |
| 13041  |        |        |        |        |
| 13045  | 4      |        |        |        |
| 13046  |        |        |        |        |
| 13048  |        |        |        |        |
| 13051  |        |        |        |        |
| 13053  |        |        |        |        |
| 13055  |        |        | 3      |        |
| 13059  |        |        |        |        |
| 13068  |        |        |        |        |
| 13069  |        |        |        |        |
| 13076  |        |        |        |        |
| 13081  |        |        |        |        |
| 13082  |        |        |        |        |
| 13084  | 4      |        |        |        |
| 13085  |        |        |        | 1      |
| 13086  |        |        |        |        |
| 13093  |        |        |        |        |
| 13094  |        |        |        |        |
| 13097  |        |        |        |        |
| 13098  |        |        |        |        |
| 13099  |        |        |        |        |

| respid | Q31a_4 | Q31a_5 | Q31a_6 | Q31a_7 |
|--------|--------|--------|--------|--------|
| 13100  |        |        |        |        |
| 13101  |        |        |        |        |
| 13103  |        |        |        |        |
| 13105  |        |        |        |        |
| 13106  |        |        |        |        |
| 13107  |        |        |        |        |
| 13110  |        | 2      |        |        |
| 13118  |        |        |        |        |
| 13120  |        |        |        |        |
| 13130  |        |        |        |        |
| 13133  |        |        |        |        |
| 13134  |        |        |        |        |
| 13139  |        |        |        |        |
| 13142  |        |        |        |        |
| 13143  |        |        |        |        |
| 13145  |        |        |        |        |
| 13148  |        |        |        |        |
| 13149  |        |        |        |        |
| 13151  |        |        |        |        |
| 13153  |        |        |        |        |
| 13158  |        |        |        |        |
| 13160  |        |        |        |        |
| 13162  | 2      | 2      |        |        |
| 13169  |        |        |        |        |
| 13172  |        |        |        |        |
| 13173  |        |        |        |        |
| 13176  |        |        |        |        |
| 13179  |        |        |        |        |
| 13184  |        |        |        |        |
| 13185  |        |        |        |        |
| 13186  |        |        |        |        |
| 13188  |        |        |        |        |

| respid | Q31a_4 | Q31a_5 | Q31a_6 | Q31a_7 |
|--------|--------|--------|--------|--------|
| 13190  |        | 2      |        |        |
| 13192  |        |        |        |        |
| 13193  |        |        |        |        |
| 13201  |        |        |        |        |
| 13207  |        |        |        |        |
| 13208  |        |        |        |        |
| 13209  |        |        |        |        |
| 13212  |        |        |        |        |
| 13215  |        |        |        |        |
| 13218  |        |        |        |        |
| 13219  |        |        |        |        |
| 13224  |        |        |        |        |
| 13225  |        |        |        |        |
| 13226  |        |        |        |        |
| 13232  |        |        |        |        |
| 13237  | 3      |        |        |        |
| 13239  |        |        |        |        |
| 13241  | 3      | 3      |        |        |
| 13243  |        |        |        |        |
| 13247  |        |        | 1      |        |
| 13248  |        |        |        |        |
| 13251  |        |        |        |        |
| 13256  |        |        |        |        |
| 13260  |        |        |        |        |
| 13261  |        |        |        |        |
| 13264  | 1      |        |        |        |
| 13273  |        |        |        |        |
| 13274  |        |        |        |        |
| 13276  |        |        |        | 1      |
| 13278  |        |        |        |        |
| 13279  |        |        |        |        |
| 13282  |        |        |        |        |

| respid | Q31a_4 | Q31a_5 | Q31a_6 | Q31a_7 |
|--------|--------|--------|--------|--------|
| 13283  |        |        |        |        |
| 13285  |        |        |        |        |
| 13286  |        |        |        |        |
| 13299  |        |        |        |        |
| 13300  |        |        |        |        |
| 13301  |        |        |        |        |
| 13303  |        |        |        |        |
| 13304  |        |        |        |        |
| 13307  |        |        |        |        |
| 13308  |        |        |        |        |
| 13312  |        |        |        |        |
| 13313  |        |        |        |        |
| 13314  |        |        |        |        |
| 13318  |        |        |        |        |
| 13320  |        | 1      |        |        |
| 13322  |        |        |        |        |
| 13324  |        |        |        |        |
| 13325  | 2      |        |        |        |
| 13327  |        |        |        |        |
| 13330  |        |        |        |        |
| 13332  |        |        |        |        |
| 13333  |        |        | 1      |        |
| 13334  |        |        |        |        |
| 13351  |        |        |        |        |
| 13353  |        |        |        |        |
| 13354  |        |        |        |        |
| 13355  |        |        |        |        |
| 13358  |        |        |        |        |
| 13359  |        |        |        |        |
| 13360  |        |        |        |        |
| 13364  | 4      | 4      |        |        |
| 13365  |        |        |        |        |

| respid | Q31a_4 | Q31a_5 | Q31a_6 | Q31a_7 |
|--------|--------|--------|--------|--------|
| 13368  |        |        |        |        |
| 13370  |        |        |        |        |
| 13375  |        |        |        |        |
| 13384  |        |        |        |        |
| 13387  |        |        |        |        |
| 13395  |        |        |        | 2      |
| 13398  |        |        |        |        |
| 13404  |        |        |        |        |
| 13405  |        |        |        |        |
| 13408  |        |        |        |        |
| 13411  |        |        |        |        |
| 13413  |        |        |        |        |
| 13419  |        |        |        |        |
| 13420  |        |        |        |        |
| 13427  |        |        |        |        |
| 13441  |        |        |        |        |
| 13444  |        |        |        |        |
| 13456  |        |        |        |        |
| 13466  |        |        |        |        |
| 13468  |        |        |        |        |
| 13475  |        |        |        |        |
| 13484  |        |        |        |        |
| 13486  |        |        |        |        |
| 13487  |        |        |        |        |
| 13491  |        |        |        |        |
| 13496  |        |        |        |        |
| 13497  |        |        |        |        |
| 13498  |        |        |        |        |
| 13502  |        |        |        |        |
| 13503  |        |        |        |        |
| 13505  |        |        |        |        |
| 13509  |        |        |        |        |

| respid | Q31a_4 | Q31a_5 | Q31a_6 | Q31a_7 |
|--------|--------|--------|--------|--------|
| 13510  |        |        |        |        |
| 13518  |        |        |        |        |
| 13521  |        |        |        |        |
| 13523  |        |        |        |        |
| 13528  |        |        |        |        |
| 13531  | 1      |        |        |        |
| 13532  |        |        |        |        |
| 13533  |        |        |        |        |
| 13534  |        |        |        |        |
| 13535  |        |        |        |        |
| 13538  | 2      |        |        |        |
| 13540  |        |        |        |        |
| 13541  |        |        |        |        |
| 13542  |        |        |        |        |
| 13550  | 2      |        |        |        |
| 13553  |        |        |        |        |
| 13554  |        |        |        |        |
| 13555  |        | 2      |        | 2      |
| 13556  |        |        |        |        |
| 13563  |        | 2      |        |        |
| 13564  |        |        |        |        |
| 13567  |        |        |        |        |
| 13568  |        |        |        |        |
| 13570  |        |        |        |        |
| 13573  |        |        |        |        |
| 13575  |        |        |        |        |
| 13577  | 3      |        |        |        |
| 13580  | 2      | 3      |        |        |
| 13582  |        |        |        |        |
| 13584  |        |        |        |        |
| 13585  |        |        |        |        |
| 13586  |        |        |        |        |



| respid | Q31a_4 | Q31a_5 | Q31a_6 | Q31a_7 |
|--------|--------|--------|--------|--------|
| 13587  |        |        |        | 2      |
| 13592  | 3      | 2      |        |        |
| 13596  | 1      |        |        |        |
| 13597  |        |        |        |        |
| 13599  |        |        |        |        |
| 13601  | 1      |        |        |        |
| 13604  |        |        |        |        |
| 13608  |        |        |        |        |
| 13616  |        |        |        |        |
| 13618  |        |        |        |        |
| 13619  |        |        |        |        |
| 13626  |        |        |        |        |
| 13628  | 2      |        |        |        |
| 13640  |        |        |        |        |
| 13645  |        |        |        |        |
| 13648  |        |        |        |        |
| 13653  |        |        |        |        |
| 13655  |        |        |        |        |
| 13662  |        |        |        |        |
| 13670  |        |        |        |        |
| 13673  |        |        |        |        |
| 13674  |        |        |        |        |
| 13675  |        |        |        |        |
| 13678  |        |        |        |        |
| 13680  | 1      |        |        |        |
| 13681  |        |        |        |        |
| 13683  |        |        |        |        |
| 13684  |        |        |        |        |
| 13685  |        |        |        |        |
| 13687  |        |        |        |        |
| 13690  |        |        |        |        |
| 13700  | 1      |        |        |        |

| respid | Q31a_4 | Q31a_5 | Q31a_6 | Q31a_7 |
|--------|--------|--------|--------|--------|
| 13705  |        |        |        |        |
| 13710  |        |        |        |        |
| 13711  |        |        |        |        |
| 13713  |        |        |        |        |
| 13716  |        |        |        |        |
| 13721  |        |        |        |        |
| 13722  |        |        |        |        |
| 13723  | 2      |        |        | 2      |
| 13726  |        |        | 2      |        |
| 13728  |        |        |        |        |
| 13730  |        |        |        |        |
| 13734  |        |        |        |        |
| 13736  |        |        |        |        |
| 13737  |        |        |        |        |
| 13739  |        |        |        |        |
| 13742  |        |        |        |        |
| 13746  |        |        |        |        |
| 13747  |        |        |        |        |
| 13749  |        |        |        |        |
| 13751  |        |        |        |        |
| 13752  |        |        |        |        |
| 13756  |        |        |        |        |
| 13757  |        |        |        |        |
| 13767  |        |        |        |        |
| 13771  |        |        |        |        |
| 13772  |        |        |        |        |
| 13779  |        |        |        |        |
| 13782  |        |        |        |        |
| 13783  | 1      |        |        |        |
| 13785  |        |        |        |        |
| 13786  |        |        | 1      |        |
| 13792  |        |        |        |        |

| respid | Q31a_4 | Q31a_5 | Q31a_6 | Q31a_7 |
|--------|--------|--------|--------|--------|
| 13796  |        |        |        |        |
| 13798  |        |        |        |        |
| 13799  |        |        |        |        |
| 13804  |        |        |        |        |
| 13805  |        |        |        |        |
| 13810  |        |        |        |        |
| 13811  |        |        |        |        |
| 13819  |        |        |        |        |
| 13821  | 4      | 5      |        |        |
| 13824  | 2      | 2      | 3      |        |
| 13828  |        |        |        | 2      |
| 13829  | 4      |        |        |        |
| 13831  |        |        |        |        |
| 13833  |        |        |        |        |
| 13835  |        | 2      |        |        |
| 13838  |        |        |        |        |
| 13839  |        | 2      | 2      |        |
| 13845  |        |        |        |        |
| 13846  |        |        |        |        |
| 13853  |        |        | 1      |        |
| 13855  | 1      |        |        |        |
| 13858  |        |        |        |        |
| 13860  |        |        |        |        |
| 13865  | 3      |        |        |        |
| 13870  |        |        |        |        |
| 13872  |        | 1      | 2      |        |
| 13873  |        |        |        |        |
| 13874  |        |        |        |        |
| 13875  |        |        |        |        |
| 13881  |        |        |        |        |
| 13887  |        |        |        |        |
| 13888  |        |        |        |        |

| respid | Q31a_4 | Q31a_5 | Q31a_6 | Q31a_7 |
|--------|--------|--------|--------|--------|
| 13889  |        |        |        |        |
| 13895  |        |        |        | 2      |
| 13897  |        |        |        |        |
| 13898  |        |        |        |        |
| 13901  |        |        |        |        |
| 13902  |        | 3      | 4      |        |
| 13903  |        |        |        |        |
| 13905  |        |        |        |        |
| 13908  |        | 2      |        |        |
| 13909  |        |        |        |        |
| 13910  | 4      | 3      |        | 3      |
| 13911  |        |        |        |        |
| 13914  |        |        | 3      |        |
| 13920  |        |        |        |        |
| 13926  |        |        |        |        |
| 13929  |        |        |        |        |
| 13930  |        | 2      |        |        |
| 13931  |        |        |        |        |
| 13932  | 2      |        |        |        |
| 13934  |        |        |        |        |
| 13938  |        |        |        |        |
| 13942  |        |        |        |        |
| 13945  |        |        |        |        |
| 13947  |        |        |        | 4      |
| 13948  |        |        |        |        |
| 13959  |        |        |        |        |
| 13962  |        |        |        |        |
| 13963  |        |        |        |        |
| 13964  |        |        |        |        |
| 13966  | 1      |        |        |        |
| 13968  |        |        |        |        |
| 13971  |        |        | 1      |        |

| respid | Q31a_4 | Q31a_5 | Q31a_6 | Q31a_7 |
|--------|--------|--------|--------|--------|
| 13979  |        |        | 2      |        |
| 13980  | 2      |        |        |        |
| 13981  |        |        |        |        |
| 13982  |        |        |        |        |
| 13984  |        |        |        |        |
| 13989  |        |        |        |        |
| 13990  |        |        |        |        |
| 13992  |        | 3      |        |        |
| 13998  |        |        |        |        |
| 13999  |        |        |        | 1      |
| 14000  |        |        |        |        |
| 14003  |        |        |        |        |
| 14004  |        |        |        | 2      |
| 14006  |        |        |        |        |
| 14007  |        |        |        |        |
| 14008  |        |        |        |        |
| 14013  |        |        |        |        |
| 14015  |        |        |        |        |
| 14018  |        |        |        |        |
| 14021  |        |        |        |        |
| 14023  |        |        |        |        |
| 14024  |        |        |        |        |
| 14026  |        |        |        |        |
| 14030  |        |        |        |        |
| 14032  |        |        |        |        |
| 14040  |        |        |        |        |
| 14045  |        |        |        |        |
| 14048  | 2      |        |        |        |
| 14049  |        |        |        | 1      |
| 14050  |        | 1      |        |        |
| 14051  |        | 4      | 4      |        |
| 14052  |        |        |        |        |

| respid | Q31a_4 | Q31a_5 | Q31a_6 | Q31a_7 |
|--------|--------|--------|--------|--------|
| 14054  |        |        |        |        |
| 14055  |        |        |        |        |
| 14057  |        |        |        |        |
| 14058  |        |        |        |        |
| 14059  |        |        |        |        |
| 14060  |        |        |        |        |
| 14061  |        | 2      | 2      |        |
| 14071  |        |        |        |        |
| 14073  |        |        |        |        |
| 14074  |        |        |        |        |
| 14076  |        |        |        |        |
| 14080  |        |        |        |        |
| 14082  |        |        |        |        |
| 14083  |        |        |        |        |
| 14084  |        |        |        |        |
| 14085  |        |        |        |        |
| 14086  |        |        |        |        |
| 14088  |        |        |        |        |
| 14090  |        |        |        |        |
| 14092  |        |        |        |        |
| 14093  | 2      |        |        |        |
| 14096  |        |        |        |        |
| 14103  |        |        | 2      |        |
| 14105  |        |        |        |        |
| 14106  |        |        |        |        |
| 14107  | 2      |        |        |        |
| 14108  |        |        |        |        |
| 14112  |        |        |        |        |
| 14114  |        |        |        |        |
| 14115  |        |        |        |        |
| 14116  |        |        |        |        |
| 14117  |        |        |        |        |

| respid | Q31a_4 | Q31a_5 | Q31a_6 | Q31a_7 |
|--------|--------|--------|--------|--------|
| 14118  | 2      |        |        |        |
| 14119  |        |        |        |        |
| 14127  |        |        |        |        |
| 14129  |        |        |        |        |
| 14131  |        |        |        |        |
| 14132  |        |        |        |        |
| 14133  |        | 2      |        |        |
| 14134  |        |        |        |        |
| 14135  |        |        |        |        |
| 14136  |        |        |        |        |
| 14138  |        |        |        |        |
| 14139  |        |        |        |        |
| 14140  |        |        |        |        |
| 14141  |        |        |        |        |
| 14143  |        |        |        |        |
| 14146  |        |        |        |        |
| 14147  | 2      | 2      |        | 2      |
| 14148  |        |        |        |        |
| 14151  |        | 3      |        |        |
| 14152  |        |        |        |        |
| 14153  |        |        |        |        |
| 14154  |        |        |        |        |
| 14158  |        |        |        |        |
| 14159  | 1      |        |        |        |
| 14160  |        |        |        | 2      |
| 14161  |        |        | 2      | 2      |
| 14162  |        |        |        |        |
| 14165  |        |        |        |        |
| 14166  | 2      |        |        |        |
| 14167  |        |        |        |        |
| 14169  |        |        |        |        |
| 14170  |        |        |        |        |

| respid | Q31a_4 | Q31a_5 | Q31a_6 | Q31a_7 |
|--------|--------|--------|--------|--------|
| 14172  |        |        |        |        |
| 14173  |        |        |        |        |
| 14174  |        |        |        |        |
| 14175  |        |        |        |        |
| 14176  |        |        |        |        |
| 14178  |        |        |        |        |
| 14179  |        |        |        |        |
| 14180  |        | 2      |        |        |
| 14183  | 2      |        |        |        |
| 14185  |        |        |        |        |
| 14187  |        |        |        |        |
| 14189  |        |        |        |        |
| 14191  |        |        |        |        |
| 14192  |        |        |        |        |
| 14195  |        | 2      |        |        |
| 14197  |        |        |        |        |
| 14203  |        | 2      |        |        |
| 14204  |        |        |        |        |
| 14205  |        |        |        |        |
| 14208  |        |        |        |        |
| 14211  | 2      |        |        | 2      |
| 14214  |        | 1      |        |        |
| 14215  |        |        |        |        |
| 14216  |        |        |        | 2      |
| 14218  |        |        |        |        |
| 14220  |        |        |        |        |
| 14223  |        |        |        |        |
| 14225  |        |        | 2      |        |
| 14226  |        |        |        |        |
| 14228  | 1      |        |        |        |
| 14231  |        |        |        |        |
| 14233  |        |        |        |        |



| respid | Q31a_4 | Q31a_5 | Q31a_6 | Q31a_7 |
|--------|--------|--------|--------|--------|
| 14237  |        |        |        |        |
| 14238  |        |        |        |        |
| 14243  |        |        |        |        |
| 14245  |        |        |        | 1      |
| 14246  |        | 1      |        |        |
| 14248  |        |        |        |        |
| 14250  |        |        |        |        |
| 14253  |        |        |        |        |
| 14254  |        |        |        |        |
| 14255  |        |        |        |        |
| 14257  |        |        |        |        |
| 14258  |        |        |        |        |
| 14259  |        |        |        |        |
| 14260  |        |        |        |        |
| 14261  |        |        | 4      |        |
| 14263  |        |        |        |        |
| 14264  | 1      | 2      |        |        |
| 14266  |        | 2      |        |        |
| 14267  | 1      |        |        |        |
| 14268  |        |        |        |        |
| 14275  |        |        |        |        |
| 14278  |        |        |        |        |
| 14279  |        |        |        |        |
| 14280  |        |        |        |        |
| 14281  |        |        |        |        |
| 14282  | 1      |        |        |        |
| 14283  |        |        | 4      | 2      |
| 14286  |        |        |        |        |
| 14287  |        |        |        |        |
| 14288  |        |        |        |        |
| 14291  |        |        |        |        |
| 14292  |        |        |        |        |

| respid | Q31a_4 | Q31a_5 | Q31a_6 | Q31a_7 |
|--------|--------|--------|--------|--------|
| 14293  |        |        |        |        |
| 14304  | 3      | 4      | 3      |        |
| 14308  |        |        |        |        |
| 14313  |        |        |        |        |
| 14314  |        |        |        | 1      |
| 14316  | 1      |        |        |        |
| 14317  |        |        |        |        |
| 14318  | 1      |        |        |        |
| 14319  |        |        |        |        |
| 14320  | 1      |        |        |        |
| 14321  |        |        |        |        |
| 14322  | 2      |        |        |        |
| 14326  |        |        |        |        |
| 14327  | 4      | 5      | 4      |        |
| 14328  |        |        |        |        |
| 14330  |        |        |        |        |
| 14332  |        |        |        |        |
| 14334  |        |        |        |        |
| 14336  |        |        |        |        |
| 14337  |        |        |        |        |
| 14339  |        |        |        |        |
| 14340  |        |        |        |        |
| 14341  |        |        |        |        |
| 14344  |        |        |        |        |
| 14345  |        |        |        |        |
| 14346  |        |        |        |        |
| 14348  |        |        |        |        |
| 14349  |        |        |        |        |
| 14358  | 2      |        |        |        |
| 14360  |        |        |        |        |
| 14362  |        |        |        |        |
| 14366  |        |        |        |        |

| respid | Q31a_4 | Q31a_5 | Q31a_6 | Q31a_7 |
|--------|--------|--------|--------|--------|
| 14367  |        |        |        |        |
| 14369  |        |        |        |        |
| 14371  |        |        |        |        |
| 14372  |        |        |        |        |
| 14374  |        |        |        |        |
| 14376  |        |        |        |        |
| 14377  |        |        |        |        |
| 14378  |        |        |        |        |
| 14379  |        |        |        |        |
| 14381  |        |        |        |        |
| 14383  |        |        |        |        |
| 14384  |        |        |        |        |
| 14385  | 1      | 2      | 3      |        |
| 14386  |        |        |        | 3      |
| 14390  |        |        |        |        |
| 14391  |        |        |        |        |
| 14392  |        |        |        |        |
| 14393  |        |        | 3      |        |
| 14394  |        |        |        |        |
| 14395  |        |        |        |        |
| 14396  |        |        |        |        |
| 14397  |        |        |        | 1      |
| 14398  |        |        |        |        |
| 14399  |        |        |        |        |
| 14400  |        |        |        |        |
| 14403  |        |        |        |        |
| 14404  |        |        |        |        |
| 14405  |        |        |        |        |
| 14407  |        |        |        |        |
| 14408  |        |        | 3      |        |
| 14410  | 4      |        | 5      |        |
| 14415  |        |        |        |        |

| respid | Q31a_4 | Q31a_5 | Q31a_6 | Q31a_7 |
|--------|--------|--------|--------|--------|
| 14419  |        |        |        |        |
| 14420  |        |        |        |        |
| 14421  |        |        |        |        |
| 14423  |        |        |        |        |
| 14424  |        |        |        |        |
| 14425  |        |        |        |        |
| 14426  |        |        |        |        |
| 14427  |        |        |        |        |
| 14428  |        |        | 2      | 3      |
| 14431  |        |        |        |        |
| 14433  |        |        |        |        |
| 14434  |        |        |        |        |
| 14435  |        |        |        |        |
| 14436  |        |        |        |        |
| 14438  |        |        |        |        |
| 14442  |        |        |        |        |
| 14447  |        |        |        |        |
| 14448  |        |        |        |        |
| 14450  |        | 1      |        |        |
| 14451  |        |        |        |        |
| 14454  |        | 1      |        |        |
| 14455  |        |        |        |        |
| 14456  |        |        |        |        |
| 14457  |        | 4      |        |        |
| 14458  | 4      |        | 3      | 2      |
| 14459  |        |        |        |        |
| 14460  |        |        |        |        |
| 14464  |        |        |        |        |
| 14465  |        |        |        |        |
| 14466  |        |        |        | 1      |
| 14467  |        |        |        |        |
| 14470  |        |        |        |        |

| respid | Q31a_4 | Q31a_5 | Q31a_6 | Q31a_7 |
|--------|--------|--------|--------|--------|
| 14472  |        |        |        |        |
| 14473  |        |        |        |        |
| 14474  |        |        |        |        |
| 14477  |        |        |        |        |
| 14478  |        |        |        |        |
| 14479  |        |        |        |        |
| 14484  |        |        |        |        |
| 14485  |        |        |        |        |
| 14486  |        |        |        |        |
| 14487  |        |        |        |        |
| 14488  |        |        |        |        |
| 14491  |        |        |        |        |
| 14495  |        |        |        |        |
| 14500  |        |        |        |        |
| 14502  |        |        |        |        |
| 14504  |        | 2      |        |        |
| 14505  | 3      | 3      | 4      |        |
| 14507  |        |        |        |        |
| 14517  |        |        |        |        |
| 14518  |        |        |        |        |
| 14519  |        |        |        |        |
| 14521  |        |        |        |        |
| 14522  |        |        |        |        |
| 14526  |        |        |        |        |
| 14528  |        |        |        |        |
| 14529  |        |        |        |        |
| 14530  |        |        |        |        |
| 14531  | 4      | 3      |        |        |
| 14534  | 2      |        |        |        |
| 14538  |        |        |        |        |
| 14539  |        |        |        |        |
| 14545  |        |        |        |        |

| respid | Q31a_4 | Q31a_5 | Q31a_6 | Q31a_7 |
|--------|--------|--------|--------|--------|
| 14546  |        |        |        |        |
| 14551  |        |        |        |        |
| 14553  | 2      |        |        |        |
| 14557  |        |        |        |        |
| 14558  |        |        |        |        |
| 14559  |        |        |        |        |
| 14560  |        |        |        |        |
| 14563  |        |        |        |        |
| 14565  |        |        |        |        |
| 14571  |        | 1      |        |        |
| 14572  |        |        |        |        |
| 14573  |        |        |        |        |
| 14575  |        |        |        |        |
| 14576  |        | 3      |        |        |
| 14578  |        |        |        |        |
| 14579  |        |        |        |        |
| 14580  | 2      |        |        |        |
| 14582  |        |        |        |        |
| 14585  | 1      |        |        |        |
| 14588  |        |        |        |        |
| 14590  |        |        | 2      |        |
| 14592  | 2      |        |        |        |
| 14593  |        |        |        |        |
| 14595  |        |        |        |        |
| 14597  |        |        |        |        |
| 14600  |        |        |        |        |
| 14602  |        |        |        |        |
| 14604  |        |        |        |        |
| 14605  |        |        |        |        |
| 14609  |        |        |        |        |
| 14610  |        |        |        |        |
| 14611  |        |        |        |        |

| respid | Q31a_4 | Q31a_5 | Q31a_6 | Q31a_7 |
|--------|--------|--------|--------|--------|
| 14612  |        |        |        |        |
| 14614  |        | 2      |        |        |
| 14615  |        |        |        |        |
| 14618  |        |        |        |        |
| 14621  |        |        |        |        |
| 14624  |        |        |        |        |
| 14626  |        |        |        |        |
| 14627  |        |        |        |        |
| 14628  |        | 2      |        |        |
| 14631  |        |        |        |        |
| 14633  |        |        |        | 3      |
| 14642  |        |        |        |        |
| 14647  |        |        |        |        |
| 14658  |        |        |        |        |
| 14659  |        |        |        |        |
| 14660  |        |        |        |        |
| 14661  |        |        |        |        |
| 14662  | 4      |        |        |        |
| 14663  |        |        |        |        |
| 14670  |        |        | 2      |        |
| 14671  |        |        |        |        |
| 14672  |        |        | 2      |        |
| 14675  |        |        |        |        |
| 14676  |        |        |        |        |
| 14677  |        | 2      |        |        |
| 14678  | 1      |        |        |        |
| 14681  |        |        |        |        |
| 14684  |        |        |        |        |
| 14688  |        |        |        |        |
| 14690  |        |        |        |        |
| 14694  |        | 2      |        |        |
| 14696  |        |        |        |        |

| respid | Q31a_4 | Q31a_5 | Q31a_6 | Q31a_7 |
|--------|--------|--------|--------|--------|
| 14700  |        |        |        |        |
| 14701  |        |        |        |        |
| 14703  |        | 1      | 2      |        |
| 14707  |        |        |        |        |
| 14711  | 2      |        |        |        |
| 14714  |        |        |        |        |
| 14715  | 1      |        |        |        |
| 14716  |        |        |        |        |
| 14720  | 1      |        |        |        |
| 14725  |        |        |        |        |
| 14726  | 1      |        |        |        |
| 14734  |        |        |        |        |
| 14735  |        |        |        |        |
| 14736  |        |        | 3      |        |
| 14740  |        |        |        |        |
| 14745  | 2      |        | 1      |        |
| 14747  |        |        |        |        |
| 14750  | 2      |        |        |        |
| 14751  |        |        |        |        |
| 14753  |        |        |        |        |
| 14756  | 3      | 3      |        | 3      |
| 14780  |        |        |        |        |
| 14782  |        |        |        |        |
| 14800  |        |        | 3      |        |
| 14801  |        |        |        |        |
| 14802  |        | 4      | 3      |        |
| 14805  |        |        |        |        |
| 14811  | 2      | 1      | 2      |        |
| 14814  | 3      | 3      |        |        |
| 14822  | 2      |        |        |        |
| 14827  | 4      | 3      |        |        |
| 14828  |        |        |        |        |



| respid | Q31a_4 | Q31a_5 | Q31a_6 | Q31a_7 |
|--------|--------|--------|--------|--------|
| 14830  |        |        |        |        |
| 14832  |        |        |        |        |
| 14835  |        |        |        |        |
| 14841  |        |        |        |        |
| 14849  |        |        |        |        |
| 14850  |        |        |        |        |
| 14851  |        |        |        |        |
| 14856  | 4      | 4      |        |        |
| 14862  | 2      |        |        |        |
| 14863  |        |        |        |        |
| 14864  |        |        |        |        |
| 14866  |        |        | 1      |        |
| 14867  | 3      |        |        |        |
| 14868  |        |        |        |        |
| 14870  |        |        |        |        |
| 14873  |        |        |        |        |
| 14878  |        |        |        |        |
| 14879  |        |        |        |        |
| 14881  |        |        |        |        |
| 14888  |        | 4      |        |        |
| 14895  |        |        |        |        |
| 14900  | 4      |        | 5      |        |
| 14912  |        |        |        |        |
| 14922  | 2      |        |        |        |
| 14923  |        |        | 5      | 4      |
| 14924  |        |        |        |        |
| 14925  |        | 2      |        | 1      |
| 14926  |        |        |        |        |
| 14927  | 3      | 4      |        |        |
| 14930  |        |        |        |        |
| 14937  |        |        | 4      |        |
| 14938  | 1      | 2      |        |        |

| respid | Q31a_4 | Q31a_5 | Q31a_6 | Q31a_7 |
|--------|--------|--------|--------|--------|
| 14939  |        |        | 3      |        |
| 14942  |        |        |        |        |
| 14943  |        |        |        |        |
| 14953  |        |        |        |        |
| 14954  |        |        |        |        |
| 14955  |        |        |        |        |
| 14957  |        |        | 2      |        |
| 14958  | 2      |        | 5      |        |
| 14959  | 4      |        |        |        |
| 14961  |        |        |        |        |
| 14963  | 4      |        | 3      |        |
| 14964  |        |        |        |        |
| 14965  |        |        |        |        |
| 14967  | 2      |        | 3      |        |
| 14970  |        | 4      |        |        |
| 14972  |        |        |        |        |
| 14975  | 2      |        |        |        |
| 14977  |        |        |        |        |
| 14982  |        |        | 3      |        |
| 14985  | 2      |        |        |        |
| 14986  |        |        |        |        |
| 14987  |        |        |        |        |
| 14988  |        |        |        | 5      |
| 14989  |        |        |        |        |
| 14993  |        |        |        |        |
| 15001  |        |        |        |        |
| 15002  | 5      |        |        |        |
| 15006  |        |        |        |        |
| 15007  |        |        |        |        |
| 15014  |        |        |        |        |
| 15020  |        |        | 2      | 2      |
| 15021  |        | 2      | 3      |        |

| respid | Q31a_4 | Q31a_5 | Q31a_6 | Q31a_7 |
|--------|--------|--------|--------|--------|
| 15023  |        | 4      |        |        |
| 15030  |        |        |        |        |
| 15032  |        |        |        |        |
| 15033  |        |        |        |        |
| 15034  |        |        |        | 2      |
| 15035  |        |        |        |        |
| 15037  |        |        |        |        |
| 15039  | 3      |        | 4      |        |
| 15040  |        |        |        |        |
| 15042  |        |        |        |        |
| 15044  |        |        |        |        |
| 15045  |        |        |        |        |
| 15046  |        |        |        |        |
| 15052  |        |        | 4      |        |
| 15058  |        |        |        |        |
| 15063  | 2      |        |        | 3      |
| 15066  |        |        |        |        |
| 15069  |        |        |        |        |
| 15071  | 1      |        |        |        |
| 15076  | 2      |        |        |        |
| 15078  |        |        |        |        |
| 15087  |        |        |        |        |
| 15090  |        |        |        |        |
| 15091  | 3      |        |        |        |
| 15092  |        |        |        |        |
| 15096  |        |        |        |        |
| 15106  | 3      | 4      |        |        |
| 15108  |        |        |        |        |
| 15113  |        |        |        |        |
| 15116  |        |        |        |        |
| 15119  |        | 2      |        |        |
| 15120  |        |        |        |        |

| respid | Q31a_4 | Q31a_5 | Q31a_6 | Q31a_7 |
|--------|--------|--------|--------|--------|
| 15121  |        |        |        |        |
| 15123  |        |        |        |        |
| 15124  |        |        |        |        |
| 15128  |        |        |        |        |
| 15131  |        |        |        |        |
| 15136  |        |        |        |        |
| 15137  |        |        |        |        |
| 15141  |        |        |        |        |
| 15144  |        |        |        |        |
| 15147  |        |        |        |        |
| 15151  |        |        |        |        |
| 15154  |        |        |        |        |
| 15157  |        |        |        |        |
| 15164  | 3      |        |        |        |
| 15168  |        |        |        |        |
| 15169  |        |        |        |        |
| 15172  |        |        |        |        |
| 15177  |        |        |        |        |
| 15178  |        |        |        |        |
| 15180  | 2      |        |        |        |
| 15181  |        |        |        |        |
| 15182  |        |        |        |        |
| 15183  |        |        |        |        |
| 15188  |        |        |        |        |
| 15190  |        |        | 3      |        |
| 15195  |        |        |        |        |
| 15201  |        |        |        |        |
| 15203  |        |        |        |        |
| 15204  |        |        |        |        |
| 15207  |        |        |        |        |
| 15208  | 5      |        |        | 5      |
| 15209  |        |        |        |        |

| respid | Q31a_4 | Q31a_5 | Q31a_6 | Q31a_7 |
|--------|--------|--------|--------|--------|
| 15212  |        |        |        |        |
| 15213  |        |        | 2      | 2      |
| 15219  |        |        |        |        |
| 15220  |        |        |        |        |
| 15221  |        |        |        |        |
| 15223  |        | 1      |        |        |
| 15224  |        |        |        |        |
| 15225  |        |        |        |        |
| 15226  |        |        |        |        |
| 15230  |        |        |        |        |
| 15231  |        |        |        |        |
| 15232  |        |        |        |        |
| 15237  |        |        |        |        |
| 15239  |        |        |        |        |
| 15241  |        |        |        |        |
| 15242  |        | 2      |        |        |
| 15247  |        |        |        |        |
| 15248  |        |        |        |        |
| 15251  |        |        |        |        |
| 15257  |        |        |        |        |
| 15260  |        |        |        |        |
| 15261  | 3      |        | 4      | 3      |
| 15262  |        |        |        |        |
| 15263  |        |        |        |        |
| 15265  |        |        |        |        |
| 15266  |        |        |        |        |
| 15268  |        |        |        |        |
| 15269  |        |        |        |        |
| 15270  |        |        | 3      | 4      |
| 15273  | 3      | 2      |        |        |
| 15276  |        |        | 4      |        |
| 15277  |        |        |        |        |

| respid | Q31a_4 | Q31a_5 | Q31a_6 | Q31a_7 |
|--------|--------|--------|--------|--------|
| 15282  |        |        |        |        |
| 15284  |        |        |        |        |
| 15285  |        |        |        |        |
| 15286  | 5      |        |        | 5      |
| 15288  |        |        |        |        |
| 15292  | 4      |        | 4      |        |
| 15296  |        | 1      |        |        |
| 15297  |        |        |        |        |
| 15298  |        |        |        |        |
| 15301  |        |        |        |        |
| 15302  |        | 1      | 1      |        |
| 15305  |        |        |        |        |
| 15307  |        |        |        |        |
| 15308  |        |        |        |        |
| 15309  |        |        |        |        |
| 15311  |        |        |        |        |
| 15315  |        |        |        |        |
| 15316  |        |        |        |        |
| 15318  |        |        |        |        |
| 15321  |        | 3      | 4      | 5      |
| 15322  |        |        |        |        |
| 15324  |        |        |        |        |
| 15326  |        |        |        |        |
| 15327  |        |        |        |        |
| 15328  |        |        |        |        |
| 15330  |        |        |        |        |
| 15332  |        |        |        |        |
| 15333  |        |        |        |        |
| 15334  |        |        |        |        |
| 15336  |        |        | 3      |        |
| 15337  | 1      |        |        |        |
| 15338  |        |        |        |        |

| respid | Q31a_4 | Q31a_5 | Q31a_6 | Q31a_7 |
|--------|--------|--------|--------|--------|
| 15339  |        |        |        |        |
| 15341  |        |        |        |        |
| 15344  |        |        |        |        |
| 15345  |        |        |        |        |
| 15350  |        |        |        |        |
| 15351  |        | 2      |        |        |
| 15352  |        |        |        |        |
| 15372  |        |        |        |        |
| 15373  | 4      |        |        |        |
| 15376  |        |        |        |        |
| 15377  |        |        |        |        |
| 15382  |        |        |        |        |
| 15383  |        |        |        |        |
| 15385  | 3      | 3      |        |        |
| 15390  |        |        |        |        |
| 15399  |        |        |        |        |
| 15404  |        |        |        |        |
| 15410  |        |        |        |        |
| 15411  | 2      |        |        |        |
| 15412  |        |        |        |        |
| 15413  |        |        |        |        |
| 15414  |        |        |        |        |
| 15417  |        |        |        |        |
| 15418  |        |        |        |        |
| 15421  |        |        |        |        |
| 15423  |        |        |        |        |
| 15425  |        |        |        |        |
| 15426  |        | 5      | 4      |        |
| 15430  |        |        |        |        |
| 15431  |        |        |        |        |
| 15435  |        |        |        |        |
| 15436  |        |        |        |        |

| respid | Q31a_4 | Q31a_5 | Q31a_6 | Q31a_7 |
|--------|--------|--------|--------|--------|
| 15437  |        |        |        |        |
| 15438  |        |        |        |        |
| 15439  |        |        |        |        |
| 15441  | 3      | 4      |        |        |
| 15443  |        |        |        |        |
| 15446  |        |        |        |        |
| 15449  | 2      |        |        | 3      |
| 15451  |        | 2      |        |        |
| 15452  | 4      | 4      |        |        |
| 15454  |        |        |        |        |
| 15456  |        |        |        |        |
| 15457  |        |        |        |        |
| 15458  |        | 3      |        |        |
| 15462  |        | 2      |        |        |
| 15467  |        |        |        |        |
| 15470  |        |        |        |        |
| 15472  |        |        |        | 1      |
| 15476  |        |        |        |        |
| 15477  |        |        |        |        |
| 15488  |        |        |        |        |
| 15489  |        |        |        |        |
| 15490  |        |        |        |        |
| 15496  |        |        |        |        |
| 15497  |        |        |        |        |
| 15498  |        |        |        |        |
| 15509  | 3      |        | 3      |        |
| 15510  |        |        |        |        |
| 15516  |        |        |        |        |
| 15519  |        |        |        |        |
| 15520  |        |        |        |        |
| 15524  |        | 2      |        |        |
| 15525  |        |        |        |        |



| respid | Q31a_4 | Q31a_5 | Q31a_6 | Q31a_7 |
|--------|--------|--------|--------|--------|
| 15526  |        |        |        | 1      |
| 15531  | 1      |        |        |        |
| 15532  |        |        |        |        |
| 15534  |        | 2      |        |        |
| 15535  |        |        |        |        |
| 15539  |        |        |        |        |
| 15550  |        |        |        |        |
| 15556  |        |        |        |        |
| 15558  | 4      |        |        |        |
| 15565  |        |        |        |        |
| 15567  | 1      |        | 2      | 1      |
| 15568  |        |        |        |        |
| 15571  |        |        |        |        |
| 15573  |        |        |        |        |
| 15574  |        |        |        |        |
| 15576  |        |        | 1      |        |
| 15587  | 2      |        |        |        |
| 15588  |        |        |        |        |
| 15593  |        |        |        |        |
| 15597  |        |        |        |        |
| 15598  |        |        |        |        |
| 15599  |        |        |        |        |
| 15601  |        |        |        |        |
| 15604  |        |        |        |        |
| 15611  |        |        |        |        |
| 15613  |        |        |        |        |
| 15614  |        |        |        |        |
| 15617  |        |        |        |        |
| 15622  |        |        |        |        |
| 15623  |        |        |        |        |
| 15625  |        |        |        |        |
| 15627  |        |        |        |        |

| respid | Q31a_4 | Q31a_5 | Q31a_6 | Q31a_7 |
|--------|--------|--------|--------|--------|
| 15628  |        |        |        |        |
| 15633  |        |        |        |        |
| 15634  |        |        |        |        |
| 15637  |        |        |        |        |
| 15644  |        |        |        |        |
| 15645  |        |        |        |        |
| 15649  |        |        |        |        |
| 15650  |        |        |        |        |
| 15651  |        |        |        |        |
| 15657  |        |        |        |        |
| 15658  |        |        |        |        |
| 15660  |        |        |        | 2      |
| 15667  |        |        |        |        |
| 15671  |        |        |        |        |
| 15679  |        |        |        |        |
| 15712  |        |        |        |        |
| 15715  |        |        |        |        |
| 15749  | 4      |        |        |        |
| 15754  |        |        |        |        |
| 15756  |        |        |        |        |
| 15773  |        |        |        |        |
| 15774  |        |        |        |        |
| 15776  |        |        |        |        |
| 15777  |        | 4      |        |        |
| 15779  |        |        |        |        |
| 15780  |        |        |        |        |
| 15792  |        |        |        |        |
| 15793  | 3      |        | 3      |        |
| 15796  |        |        |        |        |
| 15798  |        |        |        |        |
| 15809  |        |        |        |        |
| 15810  |        |        |        |        |

| respid | Q31a_4 | Q31a_5 | Q31a_6 | Q31a_7 |
|--------|--------|--------|--------|--------|
| 15815  | 4      |        |        |        |
| 15816  |        |        |        |        |
| 15817  |        |        |        |        |
| 15821  | 3      |        | 3      |        |
| 15823  |        |        |        |        |
| 15834  |        |        |        |        |
| 15835  |        |        |        |        |
| 15836  |        |        |        |        |
| 15837  |        |        |        |        |
| 15839  |        |        |        |        |
| 15840  |        |        |        |        |
| 15844  |        |        |        |        |
| 15845  |        |        |        |        |
| 15847  |        | 3      | 4      |        |
| 15848  |        |        |        |        |
| 15849  |        |        |        |        |
| 15857  |        |        |        |        |
| 15858  |        |        |        |        |
| 15862  |        | 3      | 4      |        |
| 15866  |        |        |        |        |
| 15870  |        |        |        |        |
| 15871  |        |        |        |        |
| 15872  |        |        |        |        |
| 15873  |        |        |        |        |
| 15874  |        |        |        |        |
| 15875  | 3      | 4      |        |        |
| 15876  |        |        | 2      |        |
| 15882  |        |        | 2      |        |
| 15884  |        |        |        |        |
| 15890  |        |        |        |        |
| 15892  | 2      |        |        |        |
| 15908  |        |        |        |        |

| respid | Q31a_4 | Q31a_5 | Q31a_6 | Q31a_7 |
|--------|--------|--------|--------|--------|
| 15914  |        |        |        |        |
| 15932  |        |        |        |        |
| 15933  |        |        |        |        |
| 15938  |        |        |        |        |
| 15940  |        |        | 3      |        |
| 15945  |        |        |        |        |
| 15947  |        |        |        |        |
| 15950  |        |        |        |        |
| 15951  |        |        |        |        |
| 15952  | 3      |        | 3      | 4      |
| 15953  |        |        |        |        |
| 15954  |        |        |        | 3      |
| 15957  |        |        | 1      | 2      |
| 15965  | 4      |        |        |        |
| 15966  |        |        |        |        |
| 15967  |        |        |        |        |
| 15968  |        |        |        |        |
| 15970  |        |        |        |        |
| 15973  |        |        |        |        |
| 15974  |        |        |        |        |
| 15975  |        |        |        |        |
| 15980  | 4      |        |        | 5      |
| 15984  |        |        |        |        |
| 15985  | 1      |        |        | 1      |
| 15994  |        |        |        |        |
| 15995  |        |        |        |        |
| 16000  |        |        |        |        |
| 16004  |        |        |        |        |
| 16005  |        |        |        |        |
| 16006  |        |        |        |        |
| 16009  |        |        |        |        |
| 16017  |        |        |        |        |

| respid | Q31a_4 | Q31a_5 | Q31a_6 | Q31a_7 |
|--------|--------|--------|--------|--------|
| 16019  |        |        |        |        |
| 16021  |        |        |        |        |
| 16024  |        |        |        |        |
| 16026  |        |        |        |        |
| 16029  |        |        |        |        |
| 16031  |        |        |        |        |
| 16037  |        |        |        |        |
| 16043  |        |        |        |        |
| 16044  |        |        |        |        |
| 16047  |        |        |        |        |
| 16048  |        |        |        |        |
| 16049  |        |        |        |        |
| 16051  |        |        |        |        |
| 16053  |        |        |        |        |
| 16054  |        | 1      |        |        |
| 16069  |        |        |        |        |
| 16070  |        |        |        |        |
| 16074  |        |        |        |        |
| 16076  |        |        |        |        |
| 16078  |        |        |        |        |
| 16081  |        |        |        |        |
| 16085  |        |        |        |        |
| 16088  |        |        |        |        |
| 16091  |        |        |        |        |
| 16092  |        |        |        |        |
| 16093  |        |        |        |        |
| 16097  |        |        |        |        |
| 16100  |        |        |        |        |
| 16101  |        |        |        |        |
| 16105  |        |        |        |        |
| 16118  |        |        |        |        |
| 16129  |        |        |        |        |

| respid | Q31a_4 | Q31a_5 | Q31a_6 | Q31a_7 |
|--------|--------|--------|--------|--------|
| 16130  |        |        |        |        |
| 16131  |        |        |        |        |
| 16136  | 2      |        |        |        |
| 16137  |        |        |        |        |
| 16138  | 2      |        |        |        |
| 16139  |        |        |        |        |
| 16140  |        |        |        |        |
| 16145  |        |        |        |        |
| 16150  |        |        |        |        |
| 16151  |        |        |        |        |
| 16153  |        |        |        |        |
| 16164  |        |        |        |        |
| 16168  | 1      |        |        |        |
| 16173  |        |        |        |        |
| 16174  |        |        |        |        |
| 16177  |        |        |        |        |
| 16185  |        |        |        |        |
| 16189  | 1      |        |        |        |
| 16192  |        |        |        |        |
| 16193  |        |        |        |        |
| 16194  |        |        |        |        |
| 16196  |        |        |        |        |
| 16202  | 2      | 2      |        |        |
| 16205  |        |        | 3      | 2      |
| 16206  |        |        |        |        |
| 16208  |        |        |        |        |
| 16211  |        | 1      | 2      |        |
| 16212  |        |        |        |        |
| 16215  |        |        |        |        |
| 16217  |        |        |        |        |
| 16221  |        |        |        |        |
| 16226  |        |        |        |        |

| respid | Q31a_4 | Q31a_5 | Q31a_6 | Q31a_7 |
|--------|--------|--------|--------|--------|
| 16228  |        |        |        |        |
| 16229  |        |        |        |        |
| 16230  |        |        |        |        |
| 16231  |        | 1      |        |        |
| 16232  |        |        |        |        |
| 16234  |        |        |        |        |
| 16235  | 3      | 3      |        |        |
| 16236  |        |        |        |        |
| 16237  |        |        |        |        |
| 16238  |        |        | 1      |        |
| 16239  |        |        |        |        |
| 16243  |        |        |        |        |
| 16248  |        |        |        |        |
| 16249  |        |        |        |        |
| 16251  |        |        |        |        |
| 16263  |        |        |        |        |
| 16265  | 2      |        |        |        |
| 16269  |        |        | 1      |        |
| 16272  |        |        |        |        |
| 16273  |        |        |        |        |
| 16281  |        |        |        |        |
| 16282  |        |        |        |        |
| 16287  |        |        |        |        |
| 16290  | 1      |        |        |        |
| 16294  |        |        |        |        |
| 16295  |        |        |        |        |
| 16296  |        |        |        |        |
| 16299  |        |        |        | 3      |
| 16302  |        |        |        |        |
| 16303  |        |        |        |        |
| 16304  |        |        |        |        |
| 16306  |        |        |        |        |

| respid | Q31a_4 | Q31a_5 | Q31a_6 | Q31a_7 |
|--------|--------|--------|--------|--------|
| 16318  |        |        |        |        |
| 16320  |        |        |        |        |
| 16321  |        |        |        |        |
| 16322  |        |        |        |        |
| 16324  |        |        |        |        |
| 16326  |        |        |        |        |
| 16328  |        |        |        |        |
| 16336  |        |        |        |        |
| 16341  |        |        |        |        |
| 16342  |        |        |        |        |
| 16343  |        |        |        |        |
| 16345  | 1      |        |        |        |
| 16349  |        |        |        | 1      |
| 16355  |        |        |        |        |
| 16364  |        |        |        |        |
| 16374  |        |        |        |        |
| 16375  |        |        |        |        |
| 16376  |        |        |        |        |
| 16393  |        |        | 1      |        |
| 16394  |        |        | 1      |        |
| 16395  |        |        |        |        |
| 16397  |        |        |        |        |
| 16398  | 2      |        | 3      |        |
| 16402  |        |        |        |        |
| 16405  |        |        |        |        |
| 16416  |        |        |        |        |
| 16422  |        | 1      |        |        |
| 16429  |        |        |        |        |
| 16430  |        |        |        |        |
| 16432  | 1      |        |        |        |
| 16433  |        |        |        |        |
| 16434  |        |        |        |        |



| respid | Q31a_4 | Q31a_5 | Q31a_6 | Q31a_7 |
|--------|--------|--------|--------|--------|
| 16437  |        |        |        |        |
| 16439  |        |        |        |        |
| 16440  |        |        |        |        |
| 16441  |        |        |        |        |
| 16442  |        |        |        |        |
| 16450  |        |        |        |        |
| 16451  |        |        |        |        |
| 16452  |        | 1      |        |        |
| 16467  |        |        |        |        |
| 16468  |        |        |        |        |
| 16469  |        | 1      |        |        |
| 16470  |        |        |        |        |
| 16471  |        |        |        |        |
| 16473  |        |        |        |        |
| 16476  |        |        |        |        |
| 16478  |        |        |        |        |
| 16484  | 1      |        |        |        |
| 16499  |        |        |        |        |
| 16502  |        |        |        |        |
| 16505  |        |        |        |        |
| 16514  |        |        |        |        |
| 16515  |        |        | 1      |        |
| 16517  |        |        |        |        |
| 16518  |        |        |        |        |
| 16519  |        |        |        |        |
| 16525  |        |        |        |        |
| 16526  |        |        |        |        |
| 16530  |        |        |        |        |
| 16532  |        |        |        |        |
| 16536  |        |        |        |        |
| 16537  |        | 2      |        |        |
| 16541  |        |        |        |        |

| respid | Q31a_4 | Q31a_5 | Q31a_6 | Q31a_7 |
|--------|--------|--------|--------|--------|
| 16543  |        | 1      |        |        |
| 16544  |        |        |        |        |
| 16545  |        |        |        |        |
| 16546  |        |        |        |        |
| 16548  |        |        |        |        |
| 16552  |        |        |        |        |
| 16559  |        |        |        |        |
| 16564  |        |        |        |        |
| 16565  |        |        |        |        |
| 16567  |        |        |        |        |
| 16571  |        |        |        |        |
| 16572  |        |        |        |        |
| 16579  |        |        |        |        |
| 16588  | 3      |        | 4      |        |
| 16599  |        |        |        |        |
| 16605  |        |        |        |        |
| 16622  |        |        |        |        |
| 16635  |        |        |        |        |
| 16638  |        |        |        |        |
| 16652  |        |        | 1      |        |
| 16656  |        |        |        |        |
| 16671  |        |        |        |        |
| 16676  |        |        |        |        |
| 16678  |        |        |        | 2      |
| 16702  |        | 1      |        |        |
| 16705  |        | 1      |        |        |
| 16707  |        | 3      | 3      | 3      |
| 16711  |        |        |        |        |
| 16712  |        |        |        |        |
| 16716  |        |        |        |        |
| 16724  |        |        |        |        |
| 16727  |        | 2      |        |        |

| respid | Q31a_4 | Q31a_5 | Q31a_6 | Q31a_7 |
|--------|--------|--------|--------|--------|
| 16734  |        |        |        |        |
| 16740  |        |        |        |        |
| 16748  |        |        |        |        |
| 16759  |        |        |        |        |
| 16761  |        |        |        |        |
| 16763  |        |        |        |        |
| 16764  | 2      | 2      |        |        |
| 16766  |        |        |        |        |
| 16767  |        |        |        |        |
| 16776  |        |        |        |        |
| 16781  |        |        |        |        |
| 16793  |        |        |        |        |
| 16796  |        | 3      |        | 4      |
| 16810  | 2      |        |        |        |
| 16811  |        |        |        |        |
| 16813  |        |        |        |        |
| 16814  |        | 1      |        |        |
| 16831  |        |        |        |        |
| 16833  | 2      | 2      |        |        |
| 16839  |        |        |        |        |
| 16843  |        |        |        |        |
| 16860  |        |        |        |        |
| 16871  |        |        |        |        |
| 16881  |        |        |        |        |
| 16884  |        |        |        |        |
| 16891  |        |        |        |        |
| 16909  |        |        |        | 1      |
| 16911  |        |        |        |        |
| 16922  |        |        |        |        |
| 16935  | 2      |        |        |        |
| 16942  |        |        |        |        |
| 16950  |        |        |        |        |

| respid | Q31a_4 | Q31a_5 | Q31a_6 | Q31a_7 |
|--------|--------|--------|--------|--------|
| 16952  |        |        | 3      |        |
| 16963  |        |        |        |        |
| 16967  | 2      |        | 2      |        |
| 16970  | 2      |        |        |        |
| 16976  |        |        |        | 1      |
| 16982  |        |        |        |        |
| 16995  |        |        |        |        |
| 17004  |        |        |        |        |
| 17006  |        |        |        |        |
| 17009  |        |        |        |        |
| 17021  |        |        |        |        |
| 17040  |        |        |        |        |
| 17041  |        |        |        |        |
| 17044  |        |        |        |        |
| 17046  |        |        |        |        |
| 17052  |        |        |        |        |
| 17055  |        |        |        |        |
| 17108  |        |        |        |        |
| 17109  |        |        |        |        |
| 17113  |        |        |        |        |
| 17115  |        |        |        |        |
| 17132  |        |        |        |        |
| 17135  |        |        |        |        |
| 17138  |        |        | 1      |        |
| 17141  |        |        |        |        |
| 17143  |        |        | 1      |        |
| 17148  |        |        |        |        |
| 17151  |        |        |        |        |
| 17153  |        |        |        |        |
| 17154  |        |        |        |        |
| 17157  |        |        |        |        |
| 17160  |        |        |        |        |

| respid | Q31a_4 | Q31a_5 | Q31a_6 | Q31a_7 |
|--------|--------|--------|--------|--------|
| 17167  |        |        |        |        |
| 17169  |        |        |        |        |
| 17174  |        | 3      |        |        |
| 17179  |        |        |        |        |
| 17180  |        |        |        |        |
| 17182  |        |        |        |        |
| 17184  |        |        |        |        |
| 17186  |        |        |        |        |
| 17187  |        |        |        |        |
| 17192  |        |        |        |        |
| 17197  |        |        |        |        |
| 17217  |        |        |        |        |
| 17226  |        |        |        |        |
| 17228  |        |        |        |        |
| 17245  |        |        |        |        |
| 17247  |        |        |        |        |
| 17258  |        |        |        |        |
| 17259  |        |        |        | 1      |
| 17262  |        |        |        |        |
| 17265  |        |        |        |        |
| 17281  |        |        |        |        |
| 17282  |        |        |        | 1      |
| 17293  |        |        |        |        |
| 17306  |        |        |        |        |
| 17312  |        |        |        | 1      |
| 17318  |        |        |        |        |
| 17328  |        |        |        |        |
| 17343  |        |        |        |        |
| 17344  |        |        |        |        |
| 17348  |        |        |        |        |
| 17352  |        |        |        |        |
| 17355  |        |        |        |        |

| respid | Q31a_4 | Q31a_5 | Q31a_6 | Q31a_7 |
|--------|--------|--------|--------|--------|
| 17356  |        |        |        |        |
| 17359  |        |        |        |        |
| 17373  | 3      |        | 3      |        |
| 17381  | 1      |        |        |        |
| 17388  |        |        |        |        |
| 17394  |        | 2      |        |        |
| 17401  |        |        |        |        |
| 17403  |        |        |        |        |
| 17411  |        |        |        |        |
| 17423  |        |        |        |        |
| 17427  |        |        |        |        |
| 17433  |        |        |        |        |
| 17441  |        |        |        |        |
| 17442  |        |        |        |        |
| 17447  |        |        |        |        |
| 17458  |        |        |        |        |
| 17474  |        |        |        |        |
| 17475  |        |        |        |        |
| 17476  |        |        |        |        |
| 17480  |        |        |        |        |
| 17484  |        |        |        |        |
| 17490  |        |        |        |        |
| 17491  |        |        |        |        |
| 17500  |        |        |        |        |
| 17507  |        |        |        |        |
| 17517  |        |        |        |        |
| 17520  |        |        |        |        |
| 17521  |        |        |        |        |
| 17531  |        |        |        |        |
| 17540  |        |        |        |        |
| 17550  |        |        |        |        |
| 17551  |        |        |        |        |

| respid | Q31a_4 | Q31a_5 | Q31a_6 | Q31a_7 |
|--------|--------|--------|--------|--------|
| 17555  |        |        |        |        |
| 17556  | 1      |        |        |        |
| 17574  |        |        |        |        |
| 17575  |        |        |        |        |
| 17582  |        |        |        |        |
| 17587  |        |        |        |        |
| 17601  |        |        |        |        |
| 17607  |        |        |        |        |
| 17609  |        |        |        |        |
| 17611  |        |        |        |        |
| 17613  |        |        |        |        |
| 17615  |        |        |        |        |
| 17620  |        |        |        |        |
| 17624  |        |        |        |        |
| 17635  |        |        |        |        |
| 17643  |        |        |        |        |
| 17645  |        |        |        |        |
| 17646  |        |        |        |        |
| 17649  |        |        |        |        |
| 17658  |        |        |        |        |
| 17666  |        |        |        |        |
| 17670  |        |        |        |        |
| 17678  |        |        |        |        |
| 17679  |        |        |        |        |
| 17695  | 1      |        |        |        |
| 17697  |        |        |        |        |
| 17698  |        |        |        |        |
| 17723  |        |        |        |        |
| 17727  |        |        |        |        |
| 17734  |        |        |        |        |
| 17737  |        |        |        |        |
| 17748  |        |        |        |        |

| respid | Q31a_4 | Q31a_5 | Q31a_6 | Q31a_7 |
|--------|--------|--------|--------|--------|
| 17749  |        |        |        |        |
| 17754  |        |        |        |        |
| 17766  |        |        |        |        |
| 17777  |        |        |        |        |
| 17780  |        |        |        |        |
| 17788  |        |        |        |        |
| 17801  |        |        |        |        |
| 17803  |        |        |        |        |
| 17807  |        |        |        |        |
| 17808  |        |        |        |        |
| 17809  |        |        |        |        |
| 17821  |        |        |        |        |
| 17827  |        |        |        |        |
| 17834  |        |        |        |        |
| 17838  | 1      | 1      | 1      | 1      |
| 17842  |        |        |        |        |
| 17862  |        |        |        |        |
| 17863  |        |        |        |        |
| 17871  |        |        |        |        |
| 17872  |        |        |        |        |
| 17903  |        |        |        |        |
| 17906  |        |        |        |        |
| 17910  |        |        |        |        |
| 17922  |        |        |        |        |
| 17923  | 2      | 2      |        |        |
| 17925  |        | 3      |        |        |
| 17926  |        |        |        |        |
| 17937  |        |        |        |        |
| 17956  |        |        |        |        |
| 17958  |        | 2      |        |        |
| 17985  |        |        |        |        |
| 17989  |        |        |        | 2      |



| respid | Q31a_4 | Q31a_5 | Q31a_6 | Q31a_7 |
|--------|--------|--------|--------|--------|
| 17995  |        |        |        |        |
| 18000  |        |        |        |        |
| 18010  |        |        |        |        |
| 18015  |        |        |        |        |
| 18018  |        |        |        |        |
| 18031  |        |        |        |        |
| 18033  |        |        |        |        |
| 18036  |        |        |        |        |
| 18041  |        |        |        |        |
| 18068  |        |        |        |        |
| 18080  |        |        |        |        |
| 18081  |        |        |        |        |
| 18083  |        |        |        |        |
| 18113  |        |        |        |        |
| 18115  |        |        |        |        |
| 18117  | 3      |        | 3      |        |
| 18129  |        |        | 1      |        |
| 18132  |        |        |        |        |
| 18146  |        |        |        |        |
| 18147  |        |        |        |        |
| 18153  |        |        |        |        |
| 18154  |        |        |        |        |
| 18157  |        |        |        |        |
| 18166  |        |        |        |        |
| 18169  |        |        |        |        |
| 18171  | 1      |        |        |        |
| 18173  |        |        |        |        |
| 18204  |        |        |        |        |
| 18210  |        |        |        |        |
| 18212  |        |        |        |        |
| 18220  | 3      |        |        |        |
| 18221  |        |        |        |        |

| respid | Q31a_4 | Q31a_5 | Q31a_6 | Q31a_7 |
|--------|--------|--------|--------|--------|
| 18228  |        |        |        |        |
| 18231  |        |        |        |        |
| 18233  |        |        | 2      |        |
| 18235  |        |        |        |        |
| 18237  |        |        |        |        |
| 18250  |        |        |        |        |
| 18253  |        |        |        |        |
| 18264  |        |        |        |        |
| 18285  |        |        |        |        |
| 18287  |        |        |        |        |
| 18296  |        |        |        |        |
| 18299  |        |        |        |        |
| 18313  |        |        |        |        |
| 18321  |        |        |        |        |
| 18324  |        |        |        |        |
| 18329  |        |        |        |        |
| 18332  |        |        |        |        |
| 18339  |        |        |        |        |
| 18340  |        |        |        |        |
| 18348  |        |        |        |        |
| 18355  |        |        |        |        |
| 18360  |        |        |        |        |
| 18380  | 1      |        |        |        |
| 18403  |        |        |        |        |
| 18405  |        |        |        |        |
| 18409  |        |        |        |        |
| 18445  |        |        |        |        |
| 18458  |        |        |        |        |
| 18477  |        |        |        |        |
| 18481  |        |        |        |        |
| 18491  |        |        |        |        |
| 18492  |        |        |        |        |

| respid | Q31a_4 | Q31a_5 | Q31a_6 | Q31a_7 |
|--------|--------|--------|--------|--------|
| 18494  |        |        |        |        |
| 18495  |        |        |        |        |
| 18496  |        |        |        |        |
| 18507  | 2      |        |        |        |
| 18509  |        |        |        |        |
| 18510  |        |        |        |        |
| 18513  |        |        |        |        |
| 18525  |        |        |        |        |
| 18526  |        |        |        |        |
| 18527  |        |        |        |        |
| 18536  |        |        |        |        |
| 18540  |        |        |        |        |
| 18548  |        |        |        |        |
| 18550  |        |        |        |        |
| 18556  |        |        |        |        |
| 18561  |        |        |        |        |
| 18577  |        |        |        |        |
| 18580  |        |        |        |        |
| 18633  |        |        |        |        |
| 18635  |        |        |        |        |
| 18636  |        |        |        |        |
| 18645  | 3      | 2      |        |        |
| 18649  |        |        |        |        |
| 18664  |        |        |        |        |
| 18668  |        |        |        |        |
| 18682  |        |        |        |        |
| 18685  |        | 2      |        |        |
| 18688  |        |        |        |        |
| 18689  | 3      |        |        |        |
| 18693  |        |        |        | 4      |
| 18694  |        |        |        |        |
| 18705  |        |        |        |        |

| respid | Q31a_4 | Q31a_5 | Q31a_6 | Q31a_7 |
|--------|--------|--------|--------|--------|
| 18710  |        |        |        |        |
| 18715  |        | 1      |        |        |
| 18718  |        |        |        |        |
| 18727  |        |        |        |        |
| 18732  |        |        |        | 1      |
| 18735  |        |        |        |        |
| 18742  |        |        |        |        |
| 18745  |        |        |        |        |
| 18747  |        |        |        |        |
| 18750  |        |        |        |        |
| 18751  |        |        |        |        |
| 18753  |        |        |        |        |
| 18754  |        |        |        |        |
| 18759  |        |        |        |        |
| 18780  |        |        |        |        |
| 18782  |        |        |        |        |
| 18807  | 4      |        | 4      |        |
| 18815  |        |        |        |        |
| 18818  |        |        |        |        |
| 18820  |        |        |        |        |
| 18823  |        | 5      |        |        |
| 18825  |        |        |        |        |
| 18828  |        |        |        |        |
| 18832  |        | 1      |        |        |
| 18834  |        |        |        |        |
| 18835  | 3      | 4      |        |        |
| 18837  | 3      | 3      |        |        |
| 18842  |        |        |        |        |
| 18846  |        |        |        |        |
| 18855  | 2      |        |        |        |
| 18856  |        |        |        |        |
| 18887  |        |        |        |        |

| respid | Q31a_4 | Q31a_5 | Q31a_6 | Q31a_7 |
|--------|--------|--------|--------|--------|
| 18903  |        |        |        |        |
| 18906  |        |        |        |        |
| 18910  |        |        |        |        |
| 18919  |        |        | 1      |        |
| 18928  |        |        |        |        |
| 18931  |        |        | 1      |        |
| 18939  |        |        |        |        |
| 18946  |        |        |        |        |
| 18952  |        |        |        |        |
| 18954  |        |        |        |        |
| 18982  |        |        |        |        |
| 18986  |        |        |        |        |
| 18989  |        |        |        |        |
| 18990  |        |        |        |        |
| 18996  |        |        |        |        |
| 18998  |        |        |        |        |
| 19009  |        | 2      |        |        |
| 19010  |        |        |        |        |
| 19017  |        |        |        |        |
| 19018  |        |        |        |        |
| 19020  |        |        |        |        |
| 19027  |        |        |        |        |
| 19035  |        |        |        |        |
| 19037  |        |        |        |        |
| 19048  |        |        |        | 1      |
| 19051  |        |        |        |        |
| 19054  |        |        |        |        |
| 19057  |        |        |        |        |
| 19073  |        |        |        |        |
| 19075  |        |        |        |        |
| 19079  |        |        |        |        |
| 19087  |        |        |        |        |

| respid | Q31a_4 | Q31a_5 | Q31a_6 | Q31a_7 |
|--------|--------|--------|--------|--------|
| 19090  |        |        |        |        |
| 19093  |        |        |        |        |
| 19099  |        |        | 1      |        |
| 19100  | 2      |        |        | 1      |
| 19101  |        |        |        |        |
| 19105  |        |        |        |        |
| 19111  |        |        |        |        |
| 19112  |        |        |        |        |
| 19117  | 2      | 1      |        |        |
| 19122  |        |        |        |        |
| 19126  |        |        |        |        |
| 19127  |        |        |        |        |
| 19131  |        |        |        |        |
| 19134  |        |        |        |        |
| 19149  |        |        |        |        |
| 19151  | 1      |        |        |        |
| 19164  |        |        |        |        |
| 19166  |        |        |        |        |
| 19172  |        |        |        |        |
| 19173  |        |        |        |        |
| 19180  |        |        |        |        |
| 19185  |        |        |        |        |
| 19189  |        |        |        |        |
| 19191  |        |        |        |        |
| 19198  |        |        |        |        |
| 19203  |        |        |        |        |
| 19209  |        |        |        |        |
| 19210  |        |        |        |        |
| 19218  |        |        |        |        |
| 19220  |        |        |        |        |
| 19225  |        |        |        |        |
| 19227  |        |        |        |        |

| respid | Q31a_4 | Q31a_5 | Q31a_6 | Q31a_7 |
|--------|--------|--------|--------|--------|
| 19228  |        |        |        |        |
| 19243  |        |        |        |        |
| 19244  |        |        |        |        |
| 19246  |        |        |        |        |
| 19248  |        |        |        |        |
| 19249  |        |        |        |        |
| 19252  | 1      |        |        |        |
| 19255  |        |        |        |        |
| 19257  |        |        |        |        |
| 19274  |        |        |        |        |
| 19279  |        |        |        |        |
| 19291  |        |        |        |        |
| 19292  |        |        |        |        |
| 19308  |        |        |        |        |
| 19310  |        |        |        |        |
| 19311  |        |        |        |        |
| 19326  |        |        |        |        |
| 19327  |        |        |        |        |
| 19329  |        |        |        |        |
| 19330  |        |        |        |        |
| 19333  |        |        |        |        |
| 19336  |        |        |        |        |
| 19343  | 1      |        |        |        |
| 19348  |        |        |        |        |
| 19349  |        |        |        |        |
| 19352  |        |        |        | 2      |
| 19356  |        |        |        |        |
| 19357  |        |        |        |        |
| 19358  |        |        |        |        |
| 19367  |        |        |        |        |
| 19376  |        |        |        |        |
| 19377  |        |        |        |        |

| respid | Q31a_4 | Q31a_5 | Q31a_6 | Q31a_7 |
|--------|--------|--------|--------|--------|
| 19380  |        |        |        |        |
| 19384  |        |        |        |        |
| 19391  |        |        |        |        |
| 19397  |        |        |        |        |
| 19398  |        |        |        |        |
| 19401  |        |        |        |        |
| 19402  |        |        |        |        |
| 19403  |        |        |        |        |
| 19405  |        |        |        |        |
| 19407  |        |        |        |        |
| 19415  |        |        |        |        |
| 19420  |        |        |        |        |
| 19423  |        | 2      | 1      |        |
| 19424  |        |        |        |        |
| 19426  |        |        |        | 1      |
| 19429  |        |        |        |        |
| 19435  |        | 3      |        |        |
| 19441  |        |        |        |        |
| 19450  |        |        |        |        |
| 19456  |        |        | 2      |        |
| 19457  |        |        |        |        |
| 19463  |        |        |        |        |
| 19467  |        |        |        |        |
| 19468  |        |        |        |        |
| 19471  |        |        |        |        |
| 19473  |        |        |        |        |
| 19478  |        |        |        |        |
| 19480  |        |        |        |        |
| 19481  |        |        |        |        |
| 19484  |        |        |        |        |
| 19487  |        |        |        |        |
| 19491  |        |        |        |        |



| respid | Q31a_4 | Q31a_5 | Q31a_6 | Q31a_7 |
|--------|--------|--------|--------|--------|
| 19495  | 1      |        |        |        |
| 19498  |        |        | 1      | 1      |
| 19500  |        |        |        |        |
| 19501  |        |        |        |        |
| 19503  |        |        |        |        |
| 19506  |        |        |        |        |
| 19508  |        |        |        |        |
| 19509  |        |        |        |        |
| 19518  |        |        |        |        |
| 19520  |        |        |        |        |
| 19536  |        |        |        |        |
| 19538  |        |        |        |        |
| 19541  |        |        |        | 2      |
| 19548  |        |        |        |        |
| 19553  |        |        |        |        |
| 19556  |        |        |        |        |
| 19559  |        |        |        |        |
| 19561  |        |        |        |        |
| 19562  |        |        |        |        |
| 19564  |        |        |        |        |
| 19567  |        |        | 3      |        |
| 19571  | 1      |        |        |        |
| 19576  |        |        |        |        |
| 19578  |        |        |        |        |
| 19606  |        |        |        |        |
| 19607  |        |        |        |        |
| 19608  |        |        |        |        |
| 19612  | 3      |        |        |        |
| 19618  |        |        |        |        |
| 19621  |        |        |        |        |
| 19624  | 1      |        | 1      |        |
| 19630  |        |        |        |        |

| respid | Q31a_4 | Q31a_5 | Q31a_6 | Q31a_7 |
|--------|--------|--------|--------|--------|
| 19637  |        |        |        |        |
| 19639  |        |        |        |        |
| 19647  |        |        |        |        |
| 19648  |        |        |        |        |
| 19660  |        |        |        |        |
| 19662  |        | 2      |        |        |
| 19669  |        |        |        |        |
| 19680  |        |        |        |        |
| 19682  |        |        |        |        |
| 19686  |        |        |        |        |
| 19700  |        |        |        |        |
| 19701  |        |        |        |        |
| 19704  |        |        |        |        |
| 19706  |        |        |        |        |
| 19707  |        |        |        |        |
| 19717  |        |        |        |        |
| 19718  |        |        |        |        |
| 19721  |        | 2      |        |        |
| 19722  |        |        |        |        |
| 19729  |        |        |        |        |
| 19738  |        |        |        |        |
| 19741  |        |        |        |        |
| 19742  | 2      | 2      |        |        |
| 19747  |        |        |        |        |
| 19748  |        |        |        |        |
| 19749  |        |        |        |        |
| 19756  |        |        |        |        |
| 19771  |        |        |        |        |
| 19772  |        | 2      |        |        |
| 19775  |        |        |        |        |
| 19783  |        |        |        |        |
| 19787  |        |        |        |        |

| respid | Q31a_4 | Q31a_5 | Q31a_6 | Q31a_7 |
|--------|--------|--------|--------|--------|
| 19790  |        |        |        |        |
| 19797  |        |        |        |        |
| 19802  |        |        |        |        |
| 19808  |        |        |        |        |
| 19810  |        |        |        |        |
| 19811  |        |        |        |        |
| 19812  |        |        |        |        |
| 19821  |        |        |        |        |
| 19826  |        |        |        |        |
| 19827  |        |        |        |        |
| 19830  |        |        |        |        |
| 19834  |        |        |        |        |
| 19838  | 1      |        |        |        |
| 19843  |        |        |        |        |
| 19845  | 2      |        |        |        |
| 19846  |        |        |        |        |
| 19852  |        | 2      |        |        |
| 19855  |        |        |        |        |
| 19858  |        |        |        |        |
| 19861  |        |        |        |        |
| 19863  |        |        |        |        |
| 19868  |        |        |        |        |
| 19874  |        |        |        |        |
| 19876  |        |        |        |        |
| 19880  |        | 1      |        |        |
| 19885  |        |        |        |        |
| 19890  |        |        |        |        |
| 19894  |        |        |        |        |
| 19895  |        |        |        |        |
| 19897  | 1      |        |        |        |
| 19906  |        |        |        |        |
| 19908  |        |        |        |        |

| respid | Q31a_4 | Q31a_5 | Q31a_6 | Q31a_7 |
|--------|--------|--------|--------|--------|
| 19912  |        |        |        |        |
| 19913  |        |        |        |        |
| 19914  | 3      | 2      |        |        |
| 19918  |        |        |        |        |
| 19924  |        |        |        |        |
| 19936  |        |        |        |        |
| 19940  |        |        |        |        |
| 19945  |        |        |        |        |
| 19948  |        |        |        |        |
| 19959  |        |        |        |        |
| 19961  |        |        |        |        |
| 19962  |        |        |        |        |
| 19965  |        |        |        |        |
| 19966  |        |        |        |        |
| 19973  | 1      |        |        |        |
| 19981  |        |        |        |        |
| 19986  |        |        |        |        |
| 19989  |        |        |        |        |
| 19998  |        |        |        |        |
| 20001  |        |        |        |        |
| 20005  |        |        |        |        |
| 20013  |        |        |        |        |
| 20015  |        |        |        |        |
| 20017  |        |        |        | 2      |
| 20020  |        |        |        |        |
| 20021  |        |        |        |        |
| 20026  |        |        |        |        |
| 20028  |        |        |        |        |
| 20030  |        |        |        |        |
| 20031  |        |        |        |        |
| 20034  |        |        |        |        |
| 20035  |        |        |        |        |

| respid | Q31a_4 | Q31a_5 | Q31a_6 | Q31a_7 |
|--------|--------|--------|--------|--------|
| 20040  | 1      | 1      |        |        |
| 20045  |        |        |        |        |
| 20048  |        |        |        | 5      |
| 20053  |        |        |        |        |
| 20064  |        |        |        |        |
| 20071  |        |        |        |        |
| 20072  |        |        |        |        |
| 20076  |        |        |        |        |
| 20081  |        |        | 1      |        |
| 20082  |        | 2      |        |        |
| 20083  |        |        |        |        |
| 20088  |        |        |        |        |
| 20089  |        |        | 1      |        |
| 20099  |        |        |        |        |
| 20101  |        |        |        |        |
| 20102  |        |        |        |        |
| 20109  |        |        |        |        |
| 20118  |        |        |        |        |
| 20119  |        |        |        |        |
| 20124  |        |        |        |        |
| 20126  |        |        |        |        |
| 20130  |        |        |        |        |
| 20131  |        |        |        |        |
| 20134  |        |        |        |        |
| 20146  |        |        |        |        |
| 20152  |        |        |        |        |
| 20155  |        |        |        |        |
| 20156  |        |        |        |        |
| 20157  |        |        |        |        |
| 20164  |        |        |        |        |
| 20168  |        |        |        |        |
| 20173  | 3      | 2      |        | 3      |

| respid | Q31a_4 | Q31a_5 | Q31a_6 | Q31a_7 |
|--------|--------|--------|--------|--------|
| 20174  |        |        |        |        |
| 20175  |        |        | 2      |        |
| 20189  |        |        |        |        |
| 20190  |        |        |        |        |
| 20201  |        |        |        |        |
| 20202  |        |        |        |        |
| 20204  |        |        |        |        |
| 20206  |        |        |        |        |
| 20207  |        |        |        |        |
| 20212  |        |        |        |        |
| 20213  |        |        |        |        |
| 20217  |        |        |        |        |
| 20222  |        |        |        |        |
| 20227  |        |        |        |        |
| 20228  |        |        |        |        |
| 20238  |        |        |        |        |
| 20242  |        |        |        |        |
| 20246  |        |        |        |        |
| 20255  |        |        |        |        |
| 20256  |        | 1      |        |        |
| 20259  |        | 2      |        |        |
| 20262  |        |        |        |        |
| 20274  |        |        |        |        |
| 20283  |        | 1      |        |        |
| 20284  |        |        |        |        |
| 20291  |        |        |        |        |
| 20292  |        |        |        |        |
| 20293  |        |        |        |        |
| 20298  |        |        |        |        |
| 20301  |        |        |        |        |
| 20303  |        |        |        |        |
| 20309  |        |        |        |        |

| respid | Q31a_4 | Q31a_5 | Q31a_6 | Q31a_7 |
|--------|--------|--------|--------|--------|
| 20318  |        |        |        |        |
| 20324  |        |        |        |        |
| 20335  |        |        |        |        |
| 20336  |        |        |        |        |
| 20339  |        |        |        |        |
| 20348  |        |        |        |        |
| 20351  |        |        |        |        |
| 20353  |        |        |        |        |
| 20356  |        |        |        |        |
| 20357  |        |        |        |        |
| 20366  |        |        |        |        |
| 20369  | 3      |        | 3      |        |
| 20372  |        |        |        |        |
| 20375  |        |        |        |        |
| 20379  |        |        |        |        |
| 20380  |        |        |        |        |
| 20396  | 2      |        |        |        |
| 20398  | 2      | 2      |        |        |
| 20412  |        |        |        |        |
| 20415  |        |        |        |        |
| 20424  |        |        |        |        |
| 20434  |        |        |        |        |
| 20435  |        |        |        |        |
| 20440  |        |        |        |        |
| 20441  |        |        |        |        |
| 20445  |        |        |        |        |
| 20446  |        | 3      |        |        |
| 20450  |        |        |        |        |
| 20453  |        |        |        |        |
| 20458  |        |        |        |        |
| 20464  |        |        |        |        |
| 20471  |        |        |        |        |

| respid | Q31a_4 | Q31a_5 | Q31a_6 | Q31a_7 |
|--------|--------|--------|--------|--------|
| 20473  |        |        |        |        |
| 20474  |        |        |        |        |
| 20477  |        |        |        |        |
| 20479  |        |        |        |        |
| 20485  |        |        |        |        |
| 20487  |        |        |        |        |
| 20488  |        |        |        |        |
| 20494  |        |        |        |        |
| 20502  | 3      | 2      | 3      |        |
| 20503  |        |        |        |        |
| 20510  |        |        |        |        |
| 20512  |        |        |        |        |
| 20516  |        |        |        | 2      |
| 20522  |        |        |        |        |
| 20527  |        |        |        |        |
| 20529  | 1      |        |        |        |
| 20535  |        |        |        |        |
| 20543  |        |        |        |        |
| 20546  |        |        |        |        |
| 20548  |        |        |        |        |
| 20552  |        |        |        |        |
| 20556  |        |        |        |        |
| 20566  |        |        |        |        |
| 20576  |        |        |        |        |
| 20587  |        |        |        |        |
| 20589  |        |        |        |        |
| 20593  |        |        |        |        |
| 20594  |        |        |        |        |
| 20602  |        |        |        |        |
| 20607  |        |        |        |        |
| 20608  |        |        |        |        |
| 20611  |        |        |        |        |



| respid | Q31a_4 | Q31a_5 | Q31a_6 | Q31a_7 |
|--------|--------|--------|--------|--------|
| 20612  |        |        |        |        |
| 20615  |        |        |        |        |
| 20625  |        |        |        |        |
| 20630  |        | 1      |        |        |
| 20639  |        |        |        |        |
| 20643  |        |        |        |        |
| 20645  |        |        |        |        |
| 20647  |        | 1      |        |        |
| 20652  |        |        | 2      |        |
| 20661  |        |        |        |        |
| 20665  |        |        |        |        |
| 20679  |        |        |        |        |
| 20682  |        | 2      |        |        |
| 20683  |        |        |        |        |
| 20700  |        |        |        |        |
| 20702  |        |        |        |        |
| 20709  |        |        |        |        |
| 20715  |        |        |        |        |
| 20718  |        |        |        |        |
| 20722  |        |        |        |        |
| 20729  |        |        |        |        |
| 20732  |        |        |        |        |
| 20746  |        | 1      |        |        |
| 20747  |        |        |        |        |
| 20758  |        |        |        |        |
| 20767  |        |        |        |        |
| 20777  |        |        |        |        |
| 20778  |        |        |        |        |
| 20780  |        |        |        |        |
| 20800  |        |        |        |        |
| 20810  |        |        |        |        |
| 20814  |        |        |        |        |

| respid | Q31a_4 | Q31a_5 | Q31a_6 | Q31a_7 |
|--------|--------|--------|--------|--------|
| 20816  |        |        |        |        |
| 20832  |        |        |        |        |
| 20838  |        |        |        |        |
| 20841  |        |        | 1      | 1      |
| 20848  |        |        |        |        |
| 20850  |        |        |        |        |
| 20851  |        |        |        |        |
| 20861  |        |        |        |        |
| 20870  |        |        |        |        |
| 20880  |        |        |        |        |
| 20883  |        |        |        |        |
| 20894  |        | 2      |        |        |
| 20896  |        |        |        |        |
| 20901  |        |        | 3      | 3      |
| 20903  |        |        |        |        |
| 20909  |        |        |        |        |
| 20919  |        |        |        |        |
| 20925  |        |        | 1      | 1      |
| 20935  |        |        |        |        |
| 20939  |        |        |        |        |
| 20956  | 3      |        |        | 2      |
| 20970  |        |        |        |        |
| 20974  |        |        |        |        |
| 20975  |        |        |        |        |
| 20984  |        | 2      |        |        |
| 20988  |        |        |        |        |
| 20996  |        |        |        |        |
| 20998  |        |        |        |        |
| 21007  |        |        |        |        |
| 21008  |        |        |        |        |
| 21014  |        |        |        |        |
| 21020  |        |        |        |        |

| respid | Q31a_4 | Q31a_5 | Q31a_6 | Q31a_7 |
|--------|--------|--------|--------|--------|
| 21022  |        |        |        |        |
| 21024  |        |        |        |        |
| 21026  |        |        |        |        |
| 21027  |        |        |        |        |
| 21030  |        |        |        |        |
| 21032  | 2      | 2      |        |        |
| 21040  |        |        |        |        |
| 21045  |        |        |        |        |
| 21058  |        |        |        | 1      |
| 21064  |        |        |        |        |
| 21073  |        |        |        |        |
| 21086  |        |        |        |        |
| 21092  | 1      |        | 2      |        |
| 21096  |        | 3      | 3      |        |
| 21103  |        |        |        |        |
| 21120  |        |        |        |        |
| 21125  |        |        |        |        |
| 21126  |        |        |        |        |
| 21132  |        |        |        |        |
| 21139  |        |        | 2      |        |
| 21147  |        |        |        |        |
| 21148  |        | 1      |        |        |
| 21149  |        |        |        |        |
| 21164  |        |        |        |        |
| 21165  |        |        |        |        |
| 21171  | 3      | 2      |        |        |
| 21176  |        |        |        |        |
| 21187  |        |        |        |        |
| 21192  |        |        |        |        |
| 21198  |        |        |        |        |
| 21199  |        |        |        |        |
| 21206  |        |        |        |        |

| respid | Q31a_4 | Q31a_5 | Q31a_6 | Q31a_7 |
|--------|--------|--------|--------|--------|
| 21212  |        |        |        |        |
| 21216  |        |        |        |        |
| 21217  |        | 2      | 2      |        |
| 21228  |        |        |        |        |
| 21229  |        |        |        |        |
| 21230  |        |        |        |        |
| 21243  |        |        |        |        |
| 21247  |        |        |        | 1      |
| 21253  | 2      |        |        |        |
| 21264  |        |        |        |        |
| 21265  |        |        |        |        |
| 21273  |        |        |        |        |
| 21275  |        |        |        |        |
| 21278  |        |        |        |        |
| 21291  |        |        |        |        |
| 21298  |        |        |        |        |
| 21301  |        |        |        |        |
| 21312  |        |        |        |        |
| 21323  |        |        |        |        |
| 21325  |        |        |        |        |
| 21341  |        |        |        |        |
| 21349  |        |        |        |        |
| 21350  |        |        |        |        |
| 21354  |        |        |        |        |
| 21372  |        |        |        |        |
| 21373  |        | 2      |        |        |
| 21378  |        |        |        |        |
| 21393  |        |        |        |        |
| 21401  |        |        |        |        |
| 21405  |        |        |        |        |
| 21406  |        |        |        |        |
| 21407  |        |        |        |        |

| respid | Q31a_4 | Q31a_5 | Q31a_6 | Q31a_7 |
|--------|--------|--------|--------|--------|
| 21418  |        |        |        |        |
| 21420  |        |        |        |        |
| 21421  |        |        |        |        |
| 21446  |        |        |        |        |
| 21449  |        |        |        |        |
| 21452  |        |        |        |        |
| 21455  | 2      |        |        | 2      |
| 21469  |        |        |        |        |
| 21471  |        |        |        | 1      |
| 21472  |        | 1      |        |        |
| 21474  |        |        |        |        |
| 21479  |        |        |        |        |
| 21485  |        |        |        |        |
| 21512  |        |        |        |        |
| 21513  |        |        |        |        |
| 21514  |        |        |        |        |
| 21520  |        |        |        |        |
| 21539  |        |        |        |        |
| 21553  |        |        |        |        |
| 21560  |        |        |        |        |
| 21561  |        |        |        |        |
| 21563  |        | 1      |        |        |
| 21565  |        |        |        |        |
| 21582  |        |        |        |        |
| 21584  |        |        |        |        |
| 21585  |        |        |        |        |
| 21586  |        |        |        |        |
| 21587  |        |        |        |        |
| 21590  | 2      | 1      | 2      |        |
| 21601  |        |        |        |        |
| 21611  | 2      |        |        |        |
| 21612  |        |        |        |        |

| respid | Q31a_4 | Q31a_5 | Q31a_6 | Q31a_7 |
|--------|--------|--------|--------|--------|
| 21625  |        |        |        |        |
| 21633  |        |        |        |        |
| 21640  |        |        |        |        |
| 21647  |        |        |        |        |
| 21648  | 2      | 2      |        |        |
| 21656  |        |        |        |        |
| 21657  |        |        |        |        |
| 21658  |        | 3      |        |        |
| 21665  | 1      | 2      |        |        |
| 21666  |        | 4      |        |        |
| 21668  | 3      |        | 3      |        |
| 21673  |        |        |        |        |
| 21681  |        |        |        |        |
| 21682  |        |        |        |        |
| 21685  |        |        |        |        |
| 21692  |        | 1      | 1      |        |
| 21697  |        |        |        |        |
| 21711  |        |        |        |        |
| 21715  |        |        | 3      |        |
| 21726  |        |        |        |        |
| 21748  |        |        |        |        |
| 21761  |        |        |        |        |
| 21769  |        |        |        |        |
| 21774  |        |        | 2      |        |
| 21778  |        |        |        |        |
| 21785  |        |        |        |        |
| 21799  |        |        |        |        |
| 21820  |        | 4      |        |        |
| 21837  |        |        |        |        |
| 21845  | 3      |        |        |        |
| 21846  |        |        |        |        |
| 21849  |        |        |        | 2      |

| respid | Q31a_4 | Q31a_5 | Q31a_6 | Q31a_7 |
|--------|--------|--------|--------|--------|
| 21850  |        |        |        |        |
| 21855  |        |        |        |        |
| 21859  |        |        |        |        |
| 21861  |        |        |        |        |
| 21866  |        |        |        |        |
| 21873  |        |        |        |        |
| 21876  |        |        |        |        |
| 21882  |        |        |        |        |
| 21884  |        | 2      |        |        |
| 21887  |        |        |        |        |
| 21892  |        |        |        |        |
| 21907  |        | 1      |        |        |
| 21910  |        | 3      |        |        |
| 21912  |        |        |        |        |
| 21914  |        |        |        |        |
| 21925  |        |        |        |        |
| 21937  |        |        |        |        |
| 21938  |        |        |        |        |
| 21940  |        |        |        |        |
| 21942  |        |        |        |        |
| 21947  |        |        |        |        |
| 21948  |        |        |        |        |
| 21961  |        |        |        |        |
| 21977  |        |        | 3      |        |
| 21983  |        |        |        |        |
| 21986  |        | 1      |        |        |
| 21988  |        |        |        |        |
| 21996  |        |        |        |        |
| 21997  |        |        |        |        |
| 22005  |        |        |        |        |
| 22013  |        |        |        |        |
| 22018  |        |        |        |        |

| respid | Q31a_4 | Q31a_5 | Q31a_6 | Q31a_7 |
|--------|--------|--------|--------|--------|
| 22019  |        |        |        |        |
| 22071  |        |        |        |        |
| 22082  |        |        |        |        |
| 22085  |        |        |        |        |
| 22092  |        |        |        |        |
| 22097  |        |        |        |        |
| 22111  |        |        |        |        |
| 22118  |        |        |        |        |
| 22132  |        |        |        |        |
| 22133  |        |        |        |        |
| 22139  |        |        |        |        |
| 22142  |        |        | 3      |        |
| 22146  |        |        |        |        |
| 22181  |        |        |        |        |
| 22202  |        |        |        |        |
| 22214  |        |        |        |        |
| 22223  |        |        |        |        |
| 22227  |        | 1      |        |        |
| 22229  |        |        |        |        |
| 22239  |        |        |        |        |
| 22245  | 3      |        |        |        |
| 22256  |        |        |        |        |
| 22260  |        |        |        |        |
| 22298  |        |        |        | 2      |
| 22321  |        |        |        |        |
| 22340  |        |        |        |        |
| 22346  |        |        |        | 2      |
| 22356  |        |        |        |        |
| 22361  |        |        |        |        |
| 22364  |        |        |        |        |
| 22368  |        |        |        |        |
| 22374  |        |        |        |        |



| respid | Q31a_4 | Q31a_5 | Q31a_6 | Q31a_7 |
|--------|--------|--------|--------|--------|
| 22375  |        |        |        |        |
| 22377  |        |        |        |        |
| 22383  |        |        |        |        |
| 22387  |        |        |        |        |
| 22392  |        |        |        |        |
| 22393  |        |        |        |        |
| 22394  |        |        |        |        |
| 22395  |        |        |        |        |
| 22401  |        |        |        |        |
| 22407  |        |        |        |        |
| 22410  |        | 1      |        |        |
| 22418  |        |        |        |        |
| 22421  |        |        |        |        |
| 22423  |        |        |        |        |
| 22425  |        |        |        |        |
| 22427  |        |        |        |        |
| 22431  |        |        |        |        |
| 22435  |        |        |        |        |
| 22436  |        |        |        |        |
| 22442  |        |        |        |        |
| 22444  |        |        |        |        |
| 22445  |        |        |        |        |
| 22446  |        |        |        |        |
| 22448  |        |        |        |        |
| 22449  |        |        |        |        |
| 22450  |        |        |        |        |
| 22453  |        | 2      |        |        |
| 22465  |        | 2      |        |        |
| 22472  |        |        |        |        |
| 22475  |        | 3      |        |        |
| 22478  |        |        |        |        |
| 22491  |        |        |        |        |

| respid | Q31a_4 | Q31a_5 | Q31a_6 | Q31a_7 |
|--------|--------|--------|--------|--------|
| 22497  |        |        | 1      |        |
| 22498  |        |        |        |        |
| 22499  |        |        |        |        |
| 22503  |        |        |        |        |
| 22507  |        |        |        |        |
| 22513  |        | 2      |        |        |
| 22517  |        |        |        | 1      |
| 22524  |        |        |        |        |
| 22528  |        |        |        |        |
| 22544  |        |        |        |        |
| 22571  |        |        |        |        |
| 22576  | 1      |        |        |        |
| 22579  |        |        |        |        |
| 22583  |        |        |        |        |
| 22591  |        |        |        |        |
| 22592  |        |        |        |        |
| 22612  |        |        |        |        |
| 22613  |        |        |        |        |
| 22615  |        |        |        |        |
| 22621  |        |        |        |        |
| 22625  |        |        |        |        |
| 22628  |        |        |        |        |
| 22632  |        |        |        |        |
| 22639  |        |        |        |        |
| 22648  |        |        |        |        |
| 22649  |        |        | 1      |        |
| 22655  |        |        |        |        |
| 22659  |        |        |        |        |
| 22660  |        |        |        |        |
| 22666  |        |        |        |        |
| 22667  |        |        |        |        |
| 22670  |        |        |        |        |

| respid | Q31a_4 | Q31a_5 | Q31a_6 | Q31a_7 |
|--------|--------|--------|--------|--------|
| 22681  |        |        |        |        |
| 22683  |        |        |        |        |
| 22688  |        |        |        |        |
| 22695  |        |        |        |        |
| 22696  |        |        |        |        |
| 22705  |        |        |        |        |
| 22718  |        |        |        |        |
| 22720  |        |        |        |        |
| 22724  |        |        |        |        |
| 22728  |        |        |        |        |
| 22751  |        |        |        |        |
| 22782  |        |        |        | 3      |
| 22786  |        |        |        |        |
| 22788  |        |        |        |        |
| 22810  |        |        |        |        |
| 22816  |        |        |        |        |
| 22818  |        |        |        |        |
| 22854  |        |        |        |        |
| 22858  |        |        |        |        |
| 22862  |        |        |        |        |
| 22865  |        |        |        |        |
| 22868  |        |        |        |        |
| 22869  |        | 2      |        | 1      |
| 22873  |        |        |        |        |
| 22875  |        |        |        |        |
| 22876  |        |        |        |        |
| 22882  |        |        |        |        |
| 22884  |        |        |        | 1      |
| 22887  |        |        |        |        |
| 22888  |        |        |        |        |
| 22900  |        |        |        |        |
| 22901  |        |        |        |        |

| respid | Q31a_4 | Q31a_5 | Q31a_6 | Q31a_7 |
|--------|--------|--------|--------|--------|
| 22912  |        |        |        |        |
| 22913  |        |        |        |        |
| 22921  |        |        |        |        |
| 22925  |        |        |        |        |
| 22940  |        |        |        |        |
| 22941  |        |        |        |        |
| 22947  |        |        |        |        |
| 22948  |        |        |        |        |
| 22964  |        |        |        |        |
| 22966  |        |        |        |        |
| 22969  |        |        |        |        |
| 22971  |        |        |        |        |
| 22988  |        |        |        |        |
| 22990  |        |        |        |        |
| 23000  |        |        |        |        |
| 23016  |        |        |        |        |
| 23026  |        |        |        |        |
| 23035  |        |        |        |        |
| 23037  |        |        |        |        |
| 23044  |        |        |        |        |
| 23046  |        |        |        |        |
| 23047  |        |        |        |        |
| 23049  |        |        |        |        |
| 23055  |        |        |        |        |
| 23066  |        |        |        |        |
| 23075  |        |        |        |        |
| 23081  |        |        |        |        |
| 23087  |        |        |        |        |
| 23094  |        |        |        |        |
| 23099  |        |        |        |        |
| 23101  |        |        |        |        |
| 23105  |        |        |        |        |

| respid | Q31a_4 | Q31a_5 | Q31a_6 | Q31a_7 |
|--------|--------|--------|--------|--------|
| 23115  |        | 2      |        |        |
| 23121  |        |        |        |        |
| 23127  |        |        |        |        |
| 23131  |        |        |        |        |
| 23134  |        |        |        |        |
| 23145  |        |        |        |        |
| 23151  |        |        |        |        |
| 23161  | 2      |        | 1      |        |
| 23169  |        |        |        |        |
| 23173  |        |        |        |        |
| 23174  |        |        |        |        |
| 23186  |        | 3      |        |        |
| 23195  |        |        |        |        |
| 23197  |        |        |        | 1      |
| 23198  |        |        |        |        |
| 23203  |        |        |        |        |
| 23204  |        |        |        |        |
| 23212  |        |        |        |        |
| 23214  |        |        |        |        |
| 23221  |        |        |        |        |
| 23237  |        |        |        |        |
| 23251  |        |        |        |        |
| 23254  |        |        |        |        |
| 23262  |        |        |        |        |
| 23267  |        |        |        |        |
| 23268  |        |        |        |        |
| 23273  |        |        |        |        |
| 23278  |        |        |        |        |
| 23279  |        |        |        |        |
| 23281  |        |        |        |        |
| 23282  |        |        |        |        |
| 23283  | 3      |        |        | 2      |

| respid | Q31a_4 | Q31a_5 | Q31a_6 | Q31a_7 |
|--------|--------|--------|--------|--------|
| 23285  |        | 1      |        |        |
| 23305  | 2      |        |        |        |
| 23309  | 1      |        |        |        |
| 23310  |        | 1      |        |        |
| 23311  |        |        |        |        |
| 23312  |        |        |        |        |
| 23319  |        |        |        |        |
| 23320  |        |        |        |        |
| 23322  |        |        |        |        |
| 23334  |        |        |        |        |
| 23340  |        |        |        |        |
| 23346  |        |        |        |        |
| 23353  |        |        |        |        |
| 23363  | 2      | 2      |        |        |
| 23364  |        | 2      |        |        |
| 23376  |        |        |        |        |
| 23378  |        |        |        |        |
| 23382  |        |        |        |        |
| 23383  |        |        |        |        |
| 23390  |        |        |        |        |
| 23395  |        |        |        |        |
| 23398  |        |        |        |        |
| 23399  |        |        |        |        |
| 23406  |        |        |        |        |
| 23418  |        |        |        |        |
| 23427  |        |        |        |        |
| 23428  |        |        |        |        |
| 23435  |        |        |        | 2      |
| 23439  |        |        |        |        |
| 23440  |        |        |        |        |
| 23444  |        |        |        |        |
| 23445  |        |        |        |        |

| respid | Q31a_4 | Q31a_5 | Q31a_6 | Q31a_7 |
|--------|--------|--------|--------|--------|
| 23455  |        |        |        |        |
| 23467  |        |        |        |        |
| 23478  |        |        |        |        |
| 23492  |        |        |        |        |
| 23498  |        |        |        |        |
| 23511  |        |        |        |        |
| 23514  |        |        |        |        |
| 23515  |        |        |        |        |
| 23522  |        |        |        |        |
| 23524  |        |        |        |        |
| 23531  |        |        |        |        |
| 23532  |        |        |        |        |
| 23533  |        |        |        |        |
| 23534  |        |        |        |        |
| 23538  |        |        |        |        |
| 23539  |        |        |        |        |
| 23548  |        |        |        |        |
| 23553  |        |        |        |        |
| 23556  |        |        |        |        |
| 23563  |        |        |        |        |
| 23572  |        |        |        |        |
| 23575  |        |        |        |        |
| 23576  |        |        |        |        |
| 23577  |        |        |        |        |
| 23578  | 1      |        | 1      |        |
| 23587  |        |        |        |        |
| 23597  |        |        |        |        |
| 23598  |        |        |        |        |
| 23604  |        |        |        |        |
| 23617  | 1      |        |        |        |
| 23620  |        |        |        |        |
| 23621  |        |        |        |        |

| respid | Q31a_4 | Q31a_5 | Q31a_6 | Q31a_7 |
|--------|--------|--------|--------|--------|
| 23625  |        |        |        |        |
| 23629  |        |        |        |        |
| 23635  |        |        |        |        |
| 23636  |        |        |        |        |
| 23637  |        |        | 3      |        |
| 23638  |        |        |        |        |
| 23644  |        |        |        |        |
| 23645  |        |        |        |        |
| 23649  |        |        |        |        |
| 23654  |        |        |        |        |
| 23662  |        |        |        |        |
| 23664  |        |        |        |        |
| 23665  |        |        |        |        |
| 23666  |        |        |        |        |
| 23671  |        |        |        |        |
| 23672  |        |        |        |        |
| 23685  |        |        |        |        |
| 23686  |        |        | 2      |        |
| 23689  |        |        | 2      |        |
| 23690  |        |        |        |        |
| 23695  |        | 2      |        |        |
| 23700  |        |        |        |        |
| 23714  |        |        |        |        |
| 23719  |        |        |        |        |
| 23720  |        |        |        |        |
| 23721  |        |        |        |        |
| 23729  |        |        |        |        |
| 23730  |        |        |        |        |
| 23732  |        |        |        |        |
| 23736  |        |        |        |        |
| 23754  |        |        |        |        |
| 23756  |        |        |        |        |



| respid | Q31a_4 | Q31a_5 | Q31a_6 | Q31a_7 |
|--------|--------|--------|--------|--------|
| 23759  |        |        |        |        |
| 23761  |        |        |        |        |
| 23766  |        |        |        |        |
| 23768  |        |        |        |        |
| 23773  |        |        |        |        |
| 23781  |        |        |        |        |
| 23782  |        |        |        | 2      |
| 23787  |        |        |        |        |
| 23788  | 2      | 2      |        |        |
| 23790  |        |        |        |        |
| 23794  |        |        |        |        |
| 23795  |        |        |        |        |
| 23801  |        |        |        |        |
| 23806  |        |        |        |        |
| 23809  |        |        |        |        |
| 23813  |        |        |        |        |
| 23815  |        |        |        |        |
| 23821  |        |        |        |        |
| 23825  |        |        |        |        |
| 23826  |        |        |        |        |
| 23830  |        |        |        |        |
| 23833  |        |        |        |        |
| 23837  |        |        |        |        |
| 23848  |        |        |        |        |
| 23850  |        |        |        |        |
| 23870  |        |        |        |        |
| 23877  |        |        |        |        |
| 23880  |        |        |        |        |
| 23882  |        |        |        |        |
| 23888  |        |        |        |        |
| 23908  |        |        |        |        |
| 23914  |        |        |        |        |

| respid | Q31a_4 | Q31a_5 | Q31a_6 | Q31a_7 |
|--------|--------|--------|--------|--------|
| 23916  |        |        |        |        |
| 23922  |        |        |        |        |
| 23932  |        |        |        |        |
| 23934  |        |        |        |        |
| 23942  | 4      |        |        |        |
| 23945  |        |        |        |        |
| 23948  |        |        |        |        |
| 23955  |        |        |        |        |
| 23956  |        |        |        |        |
| 23978  |        |        |        |        |
| 23981  |        |        |        |        |
| 23982  |        |        |        |        |
| 23991  |        |        |        |        |
| 23994  |        | 2      |        |        |
| 23995  |        |        |        |        |
| 23999  |        |        |        |        |
| 24005  |        |        |        |        |
| 24018  |        |        |        |        |
| 24021  |        |        |        |        |
| 24035  |        |        |        |        |
| 24040  |        |        |        |        |
| 24043  |        |        |        |        |
| 24046  |        |        |        |        |
| 24047  |        |        |        |        |
| 24048  |        |        |        |        |
| 24062  |        |        |        |        |
| 24063  |        |        |        |        |
| 24066  |        |        |        |        |
| 24069  |        |        |        |        |
| 24070  |        |        |        |        |
| 24074  |        |        |        |        |
| 24080  |        |        |        |        |

| respid | Q31a_4 | Q31a_5 | Q31a_6 | Q31a_7 |
|--------|--------|--------|--------|--------|
| 24082  |        |        |        |        |
| 24088  |        |        |        |        |
| 24089  |        |        |        |        |
| 24091  |        |        |        |        |
| 24095  |        |        |        |        |
| 24100  |        |        |        |        |
| 24105  |        |        |        |        |
| 24107  | 3      |        | 3      |        |
| 24108  |        |        |        |        |
| 24113  |        |        |        |        |
| 24120  |        |        |        |        |
| 24122  |        |        | 3      |        |
| 24123  |        |        |        |        |
| 24125  | 1      |        |        |        |
| 24132  |        |        |        |        |
| 24139  |        |        |        |        |
| 24140  |        |        |        |        |
| 24143  | 1      |        |        |        |
| 24150  |        |        |        |        |
| 24153  |        |        |        |        |
| 24161  |        |        |        |        |
| 24168  |        |        |        |        |
| 24179  |        |        |        |        |
| 24182  |        |        |        |        |
| 24194  |        |        |        |        |
| 24206  |        |        |        |        |
| 24214  |        |        |        |        |
| 24215  |        |        |        |        |
| 24224  |        |        |        |        |
| 24225  |        |        |        |        |
| 24227  |        |        |        |        |
| 24229  |        |        |        |        |

| respid | Q31a_4 | Q31a_5 | Q31a_6 | Q31a_7 |
|--------|--------|--------|--------|--------|
| 24230  |        |        |        |        |
| 24232  |        |        |        |        |
| 24253  |        |        |        |        |
| 24267  | 1      |        |        |        |
| 24274  |        |        |        |        |
| 24275  |        |        | 1      |        |
| 24277  |        |        |        |        |
| 24280  |        |        |        |        |
| 24285  |        |        |        |        |
| 24293  |        |        |        |        |
| 24295  |        |        |        |        |
| 24299  |        |        |        |        |
| 24303  |        |        |        |        |
| 24308  |        |        |        |        |
| 24322  |        |        |        |        |
| 24325  |        |        |        |        |
| 24328  | 1      |        |        |        |
| 24334  |        |        |        |        |
| 24342  |        | 2      |        |        |
| 24343  |        |        |        | 2      |
| 24348  |        |        |        |        |
| 24352  |        |        |        |        |
| 24354  |        |        | 1      |        |
| 24357  |        |        |        |        |
| 24360  |        |        |        |        |
| 24369  |        |        |        |        |
| 24373  |        |        |        |        |
| 24398  | 2      |        | 3      |        |
| 24402  |        |        |        |        |
| 24405  |        |        |        |        |
| 24407  |        |        |        |        |
| 24413  |        |        |        |        |

| respid | Q31a_4 | Q31a_5 | Q31a_6 | Q31a_7 |
|--------|--------|--------|--------|--------|
| 24443  |        | 2      |        |        |
| 24451  |        |        |        |        |
| 24459  |        | 2      | 2      | 2      |
| 24465  |        |        |        |        |
| 24481  |        |        |        |        |
| 24482  |        |        |        |        |
| 24491  |        | 1      |        |        |
| 24495  |        |        |        |        |
| 24497  |        |        | 3      |        |
| 24511  |        |        |        |        |
| 24513  |        |        |        |        |
| 24516  |        |        |        | 2      |
| 24518  |        |        |        |        |
| 24524  |        |        |        |        |
| 24528  |        |        |        |        |
| 24531  |        |        | 2      |        |
| 24533  | 2      | 3      |        |        |
| 24547  |        |        |        |        |
| 24557  | 2      |        |        |        |
| 24559  | 5      |        |        |        |
| 24567  |        |        |        |        |
| 24568  |        |        |        |        |
| 24577  |        |        |        |        |
| 24581  |        |        |        |        |
| 24588  |        |        |        |        |
| 24604  |        |        |        |        |
| 24612  |        |        |        |        |
| 24621  |        | 2      |        |        |
| 24625  |        |        |        |        |
| 24627  |        |        |        |        |
| 24640  |        |        |        |        |
| 24644  |        |        |        |        |

| respid | Q31a_4 | Q31a_5 | Q31a_6 | Q31a_7 |
|--------|--------|--------|--------|--------|
| 24664  |        |        |        |        |
| 24669  |        |        |        |        |
| 24685  |        |        |        |        |
| 24687  |        |        |        |        |
| 24688  |        |        |        |        |
| 24691  | 2      |        |        |        |
| 24693  |        |        |        |        |
| 24706  |        |        |        |        |
| 24710  |        |        |        |        |
| 24717  |        |        |        |        |
| 24720  |        |        |        |        |
| 24731  |        |        |        |        |
| 24732  |        |        |        |        |
| 24733  |        |        |        |        |
| 24747  |        |        |        |        |
| 24750  |        |        |        |        |
| 24758  |        |        |        |        |
| 24760  |        |        |        |        |
| 24765  |        |        |        |        |
| 24772  |        |        |        |        |
| 24779  |        |        | 2      | 2      |
| 24794  |        |        |        |        |
| 24796  | 2      |        |        |        |
| 24797  |        |        |        |        |
| 24800  |        |        |        |        |
| 24813  |        |        |        |        |
| 24815  |        |        |        |        |
| 24821  |        |        |        |        |
| 24822  |        |        |        |        |
| 24831  |        |        | 3      |        |
| 24835  |        |        |        |        |
| 24843  |        |        | 3      |        |

| respid | Q31a_4 | Q31a_5 | Q31a_6 | Q31a_7 |
|--------|--------|--------|--------|--------|
| 24844  |        |        |        |        |
| 24860  |        |        |        |        |
| 24861  |        |        |        | 1      |
| 24865  | 2      |        |        |        |
| 24870  | 1      |        |        |        |
| 24887  |        |        |        |        |
| 24897  | 1      |        |        |        |
| 24902  |        |        |        |        |
| 24914  |        |        |        |        |
| 24921  |        |        |        |        |
| 24922  |        |        |        |        |
| 24924  |        |        |        |        |
| 24927  |        |        |        |        |
| 24936  |        |        |        |        |
| 24937  |        |        |        |        |
| 24942  |        |        |        |        |
| 24947  |        |        |        |        |
| 24953  |        |        |        |        |
| 24954  | 2      |        |        | 2      |
| 24960  |        | 3      | 4      |        |
| 24965  |        |        |        |        |
| 24975  |        | 1      |        |        |
| 24983  | 2      |        |        |        |
| 24985  |        |        |        |        |
| 24990  |        |        |        |        |
| 25000  |        |        |        |        |
| 25007  |        |        |        | 2      |
| 25008  |        |        |        |        |
| 25010  |        |        |        |        |
| 25016  |        |        |        |        |
| 25021  |        | 3      |        |        |
| 25040  |        |        |        |        |

| respid | Q31a_4 | Q31a_5 | Q31a_6 | Q31a_7 |
|--------|--------|--------|--------|--------|
| 25043  |        |        |        |        |
| 25055  |        |        |        |        |
| 25057  |        |        |        |        |
| 25060  | 2      |        |        |        |
| 25062  |        |        |        |        |
| 25064  |        |        |        | 2      |
| 25069  |        |        |        |        |
| 25077  |        |        |        |        |
| 25088  |        |        |        |        |
| 25093  |        |        |        |        |
| 25121  |        |        |        |        |
| 25140  | 2      |        |        |        |
| 25144  |        |        |        |        |
| 25149  |        |        |        |        |
| 25159  |        |        |        |        |
| 25191  |        |        |        |        |
| 25193  |        | 2      |        |        |
| 25202  | 2      |        |        |        |
| 25215  | 1      |        |        |        |
| 25229  |        |        |        |        |
| 25231  |        |        |        |        |
| 25236  |        |        |        |        |
| 25242  |        |        |        |        |
| 25252  |        |        |        |        |
| 25253  |        |        | 1      |        |
| 25256  | 2      |        |        |        |
| 25260  |        |        |        |        |
| 25261  |        |        |        |        |
| 25280  |        |        |        |        |
| 25282  |        |        |        |        |
| 25289  |        |        |        |        |
| 25303  |        |        |        |        |



| respid | Q31a_4 | Q31a_5 | Q31a_6 | Q31a_7 |
|--------|--------|--------|--------|--------|
| 25304  | 1      |        |        |        |
| 25309  |        |        |        |        |
| 25317  |        |        |        |        |
| 25318  | 2      |        |        |        |
| 25320  |        |        |        |        |
| 25324  | 2      |        |        |        |
| 25331  |        |        |        | 1      |
| 25340  |        |        |        |        |
| 25342  |        |        |        |        |
| 25350  |        |        |        |        |
| 25352  |        |        |        |        |
| 25358  |        |        |        |        |
| 25375  |        |        |        |        |
| 25386  |        |        |        |        |
| 25388  |        |        |        |        |
| 25390  |        |        |        |        |
| 25391  |        |        |        |        |
| 25400  |        |        |        |        |
| 25413  | 2      |        |        |        |
| 25424  |        |        |        |        |
| 25426  |        |        |        |        |
| 25430  |        |        |        |        |
| 25434  |        |        |        |        |
| 25439  |        |        |        |        |
| 25441  |        |        |        |        |
| 25445  |        |        |        |        |
| 25451  |        |        |        |        |
| 25469  | 2      |        |        |        |
| 25471  | 2      |        |        |        |
| 25476  |        |        |        |        |
| 25480  |        |        |        |        |
| 25482  |        |        |        |        |

| respid | Q31a_4 | Q31a_5 | Q31a_6 | Q31a_7 |
|--------|--------|--------|--------|--------|
| 25500  |        |        |        |        |
| 25516  |        |        |        |        |
| 25521  | 3      | 3      |        |        |
| 25525  |        |        |        |        |
| 25530  |        |        |        |        |
| 25555  |        | 1      |        |        |
| 25558  |        |        |        |        |
| 25561  |        |        |        |        |
| 25566  |        |        |        |        |
| 25571  |        |        |        |        |
| 25572  |        |        |        |        |
| 25574  |        |        |        |        |
| 25588  |        |        |        |        |
| 25591  |        |        |        |        |
| 25599  | 1      |        |        |        |
| 25604  |        |        |        |        |
| 25614  |        |        |        |        |
| 25634  |        |        | 3      |        |
| 25642  |        |        |        |        |
| 25647  |        |        |        |        |
| 25653  |        |        |        |        |
| 25654  |        |        | 1      | 1      |
| 25660  |        |        |        |        |
| 25664  |        |        |        | 1      |
| 25665  |        |        |        |        |
| 25672  |        | 2      |        |        |
| 25677  |        |        |        | 1      |
| 25685  |        |        |        |        |
| 25699  |        | 3      | 2      |        |
| 25703  |        |        |        |        |
| 25704  |        |        |        |        |
| 25705  |        |        |        | 1      |

| respid | Q31a_4 | Q31a_5 | Q31a_6 | Q31a_7 |
|--------|--------|--------|--------|--------|
| 25711  |        |        |        |        |
| 25727  |        |        |        |        |
| 25728  |        |        |        |        |
| 25733  |        |        |        |        |
| 25735  |        |        |        |        |
| 25736  |        |        |        |        |
| 25742  |        |        |        |        |
| 25750  |        |        |        |        |
| 25754  |        |        |        |        |
| 25776  |        | 2      |        |        |
| 25778  |        |        |        |        |
| 25796  |        |        |        |        |
| 25852  |        |        |        |        |
| 25858  |        |        |        |        |
| 25859  |        |        |        |        |
| 25886  |        |        |        |        |
| 25890  |        |        | 2      |        |
| 25897  |        |        |        |        |
| 25903  |        |        |        |        |
| 25905  |        |        |        |        |
| 25917  |        |        |        |        |
| 25918  |        |        |        |        |
| 25928  |        |        |        |        |
| 25930  |        |        |        |        |
| 25949  |        |        |        |        |
| 25955  |        |        |        |        |
| 25959  |        | 1      |        |        |
| 25964  |        |        |        |        |
| 25972  |        |        |        |        |
| 25999  | 3      |        |        |        |
| 26019  |        |        |        |        |
| 26025  |        | 1      |        |        |

| respid | Q31a_4 | Q31a_5 | Q31a_6 | Q31a_7 |
|--------|--------|--------|--------|--------|
| 26039  |        |        |        |        |
| 26055  |        |        |        |        |
| 26061  |        |        |        |        |
| 26076  |        |        |        |        |
| 26088  |        |        |        |        |
| 26094  |        |        |        |        |
| 26104  |        |        |        |        |
| 26131  |        |        |        |        |
| 26134  |        |        |        |        |
| 26160  |        |        |        |        |
| 26168  |        |        |        |        |
| 26170  |        |        |        |        |
| 26191  |        |        |        |        |
| 26192  |        |        |        |        |
| 26195  | 1      |        |        |        |
| 26198  |        |        |        |        |
| 26199  |        |        |        |        |
| 26201  |        |        |        |        |
| 26202  |        |        |        |        |
| 26226  |        |        |        |        |
| 26233  |        |        |        |        |
| 26236  |        |        |        |        |
| 26242  |        |        |        |        |
| 26244  |        |        |        |        |
| 26250  |        |        |        |        |
| 26266  |        |        | 1      |        |
| 26274  |        |        |        |        |
| 26286  |        |        |        |        |
| 26288  |        |        |        |        |
| 26295  |        |        |        |        |
| 26296  |        |        |        |        |
| 26297  |        |        |        |        |

| respid | Q31a_4 | Q31a_5 | Q31a_6 | Q31a_7 |
|--------|--------|--------|--------|--------|
| 26300  |        |        |        |        |
| 26317  |        |        |        |        |
| 26343  |        |        |        |        |
| 26367  |        |        |        | 1      |
| 26372  | 2      | 1      | 1      |        |
| 26403  |        |        |        |        |
| 26423  |        |        |        |        |
| 26430  |        |        |        |        |
| 26437  |        | 2      |        |        |
| 26457  |        |        |        |        |
| 26466  |        |        |        |        |
| 26467  |        |        |        |        |
| 26469  | 1      |        |        |        |
| 26494  |        |        |        |        |
| 26510  |        |        |        |        |
| 26519  |        |        |        |        |
| 26525  |        |        |        |        |
| 26529  |        |        |        |        |
| 26533  |        |        |        |        |
| 26556  |        |        |        |        |
| 26559  |        |        |        |        |
| 26565  |        |        |        |        |
| 26576  | 2      | 2      |        |        |
| 26601  |        |        |        |        |
| 26607  |        | 1      |        |        |
| 26611  |        |        |        |        |
| 26619  | 1      |        |        |        |
| 26631  |        |        |        |        |
| 26654  |        |        |        |        |
| 26656  |        |        |        |        |
| 26664  |        |        |        |        |
| 26667  |        |        |        |        |

| respid | Q31a_4 | Q31a_5 | Q31a_6 | Q31a_7 |
|--------|--------|--------|--------|--------|
| 26674  |        | 2      | 3      |        |
| 26678  |        | 1      |        |        |
| 26693  |        |        |        |        |
| 26696  | 3      |        |        | 3      |
| 26703  | 3      | 3      |        |        |
| 26705  |        |        |        |        |
| 26706  |        |        |        |        |
| 26716  |        |        |        |        |
| 26721  |        |        |        |        |
| 26730  | 2      |        |        |        |
| 26752  |        |        |        |        |
| 26755  |        |        |        |        |
| 26791  |        |        |        |        |
| 26804  |        |        |        |        |
| 26810  | 4      |        |        |        |
| 26813  |        |        |        |        |
| 26833  |        |        |        |        |
| 26880  |        |        |        |        |
| 26884  |        |        |        |        |
| 26885  |        |        |        |        |
| 26890  |        |        |        |        |
| 26937  |        |        |        |        |
| 26939  |        |        |        |        |
| 26941  |        |        |        |        |
| 26992  |        |        | 1      |        |
| 27037  |        |        |        |        |
| 27045  |        |        |        |        |
| 27053  |        |        |        |        |
| 27060  |        |        |        |        |
| 27076  |        | 1      |        |        |
| 27124  |        |        |        |        |
| 27125  |        |        |        |        |

| respid | Q31a_4 | Q31a_5 | Q31a_6 | Q31a_7 |
|--------|--------|--------|--------|--------|
| 27132  |        |        |        |        |
| 27166  |        |        |        |        |
| 27190  |        |        |        |        |
| 27199  |        |        |        |        |
| 27221  |        |        |        |        |
| 27233  |        | 2      |        |        |
| 27241  |        |        |        |        |
| 27244  |        |        |        |        |
| 27245  | 2      | 2      | 3      | 2      |
| 27246  |        |        |        |        |
| 27253  |        |        |        |        |
| 27255  | 2      |        |        |        |
| 27267  |        |        |        |        |
| 27283  |        |        |        |        |
| 27289  |        |        |        |        |
| 27302  |        |        |        |        |
| 27317  |        |        |        |        |
| 27319  |        |        |        |        |
| 27331  |        |        |        |        |
| 27333  |        |        |        |        |
| 27340  |        |        |        |        |
| 27362  | 2      |        | 3      |        |
| 27370  |        |        |        |        |
| 27379  |        |        |        |        |
| 27386  |        |        |        |        |
| 27398  |        |        |        |        |
| 27404  |        |        |        |        |
| 27408  |        |        |        |        |
| 27412  |        |        | 3      |        |
| 27426  |        |        |        |        |
| 27455  |        |        |        |        |
| 27464  |        |        |        |        |

| respid | Q31a_4 | Q31a_5 | Q31a_6 | Q31a_7 |
|--------|--------|--------|--------|--------|
| 27484  |        |        |        |        |
| 27493  |        |        |        |        |
| 27512  |        | 3      |        |        |
| 27525  |        |        |        |        |
| 27532  |        |        |        |        |
| 27539  |        |        |        |        |
| 27540  |        |        | 3      |        |
| 27552  |        | 2      |        |        |
| 27562  |        |        |        |        |
| 27568  |        |        |        |        |
| 27574  | 4      | 3      | 4      |        |
| 27575  |        |        |        |        |
| 27577  |        |        |        |        |
| 27589  |        |        |        |        |
| 27593  |        |        |        |        |
| 27594  |        |        |        |        |
| 27595  | 3      | 2      |        |        |
| 27598  | 1      |        |        |        |
| 27620  |        |        |        |        |
| 27621  |        |        |        |        |
| 27628  |        |        |        |        |
| 27633  |        |        |        |        |
| 27643  |        |        |        |        |
| 27644  |        |        |        |        |
| 27668  |        |        |        |        |
| 27681  |        |        |        |        |
| 27691  |        |        |        |        |
| 27693  |        |        |        |        |
| 27703  |        |        |        |        |
| 27708  |        |        |        |        |
| 27719  |        |        |        |        |
| 27720  |        |        |        |        |



| respid | Q31a_4 | Q31a_5 | Q31a_6 | Q31a_7 |
|--------|--------|--------|--------|--------|
| 27723  |        |        |        |        |
| 27725  |        |        |        |        |
| 27734  |        |        |        |        |
| 27744  |        |        |        |        |
| 27749  |        |        |        |        |
| 27762  |        | 2      |        |        |
| 27808  |        |        |        |        |
| 27810  | 2      |        |        | 3      |
| 27812  |        |        |        |        |
| 27815  |        |        |        |        |
| 27818  |        |        |        |        |
| 27823  |        |        |        |        |
| 27841  |        |        |        |        |
| 27843  |        |        |        |        |
| 27851  |        |        |        |        |
| 27858  |        |        |        |        |
| 27859  |        |        |        |        |
| 27869  |        |        |        |        |
| 27872  |        |        |        |        |
| 27873  |        |        |        |        |
| 27884  |        |        |        |        |
| 27904  |        |        |        |        |
| 27915  |        |        |        |        |
| 27918  |        | 1      |        |        |
| 27937  |        |        |        |        |
| 27943  |        |        |        |        |
| 27948  |        |        |        |        |
| 27971  |        |        |        |        |
| 27991  |        |        |        |        |
| 28000  |        |        |        |        |
| 28011  |        |        |        |        |
| 28022  |        |        |        |        |

| respid | Q31a_4 | Q31a_5 | Q31a_6 | Q31a_7 |
|--------|--------|--------|--------|--------|
| 28025  |        |        |        |        |
| 28041  |        |        |        |        |
| 28057  | 4      | 1      |        |        |
| 28080  |        |        |        |        |
| 28098  |        |        |        |        |
| 28104  |        |        |        |        |
| 28109  |        |        |        |        |
| 28129  |        |        |        |        |
| 28141  |        |        |        |        |
| 28143  |        |        |        |        |
| 28149  |        |        |        |        |
| 28151  |        | 1      |        |        |
| 28161  |        |        |        |        |
| 28169  |        |        |        |        |
| 28194  | 2      |        | 2      |        |
| 28197  |        |        |        |        |
| 28206  |        |        |        |        |
| 28218  |        |        |        |        |
| 28227  |        |        |        |        |
| 28235  |        |        |        |        |
| 28246  |        |        |        |        |
| 28259  | 3      | 3      |        |        |
| 28263  |        |        |        |        |
| 28267  | 1      |        |        |        |
| 28274  |        |        |        |        |
| 28278  |        |        |        |        |
| 28288  |        |        |        |        |
| 28308  |        |        |        |        |
| 28309  | 3      | 2      | 3      |        |
| 28323  |        |        |        |        |
| 28335  |        | 1      |        |        |
| 28354  |        | 2      |        |        |

| respid | Q31a_4 | Q31a_5 | Q31a_6 | Q31a_7 |
|--------|--------|--------|--------|--------|
| 28355  |        | 2      |        |        |
| 28356  |        |        |        |        |
| 28357  |        |        |        |        |
| 28363  |        |        |        |        |
| 28366  |        |        |        |        |
| 28372  | 2      |        |        |        |
| 28381  |        |        |        |        |
| 28388  |        |        |        |        |
| 28413  | 1      |        |        |        |
| 28421  |        |        |        |        |
| 28430  |        |        |        |        |
| 28439  |        | 2      |        |        |
| 28458  | 3      |        | 4      |        |
| 28461  |        |        |        |        |
| 28466  |        |        |        |        |
| 28492  |        |        |        |        |
| 28534  |        |        |        |        |
| 28537  |        |        |        |        |
| 28560  |        |        |        |        |
| 28566  |        |        |        |        |
| 28569  |        |        |        |        |
| 28584  |        |        |        |        |
| 28590  |        |        |        |        |
| 28596  |        |        |        |        |
| 28608  |        |        |        |        |
| 28631  |        |        |        |        |
| 28644  |        |        |        |        |
| 28646  |        |        |        |        |
| 28665  |        |        |        |        |
| 28686  |        |        |        |        |
| 28704  |        |        | 3      |        |
| 28719  |        |        |        |        |

| respid | Q31a_4 | Q31a_5 | Q31a_6 | Q31a_7 |
|--------|--------|--------|--------|--------|
| 28736  |        |        |        |        |
| 28739  | 2      |        |        |        |
| 28758  |        |        |        |        |
| 28761  |        |        |        |        |
| 28770  | 3      |        | 3      |        |
| 28774  |        |        |        |        |
| 28778  | 3      |        |        |        |
| 28783  |        |        |        |        |
| 28785  |        |        |        |        |
| 28797  | 5      |        |        |        |
| 28801  |        |        |        |        |
| 28821  |        |        |        |        |
| 28827  |        |        |        |        |
| 28828  |        |        |        |        |
| 28871  |        |        |        | 1      |
| 28876  |        |        |        |        |
| 28891  | 4      |        |        |        |
| 28898  |        |        |        |        |
| 28909  |        |        |        |        |
| 28930  |        |        |        |        |
| 28935  |        |        |        |        |
| 28964  |        |        |        |        |
| 28965  |        |        |        |        |
| 28967  |        | 3      |        |        |
| 28975  |        |        |        |        |
| 28982  |        |        |        |        |
| 28989  |        |        |        |        |
| 29003  |        |        |        |        |
| 29004  |        |        |        |        |
| 29007  |        |        |        |        |
| 29008  |        |        |        |        |
| 29011  |        |        |        |        |

| respid | Q31a_4 | Q31a_5 | Q31a_6 | Q31a_7 |
|--------|--------|--------|--------|--------|
| 29012  |        |        |        |        |
| 29014  |        |        |        |        |
| 29016  |        |        |        |        |
| 29018  |        |        |        |        |
| 29048  |        |        |        | 1      |
| 29184  |        |        |        |        |
| 29237  |        |        |        |        |
| 29252  |        |        |        |        |
| 29267  |        |        |        |        |
| 29276  |        |        |        |        |
| 29281  |        | 3      |        |        |
| 29285  |        |        |        |        |
| 29291  | 3      | 2      |        |        |
| 29304  |        |        |        |        |
| 29323  |        |        |        |        |
| 29330  |        |        |        |        |
| 29357  |        |        |        |        |
| 29416  |        |        |        |        |
| 29432  |        |        |        |        |
| 29482  |        |        |        |        |
| 29506  |        |        |        |        |
| 29509  |        |        |        |        |
| 29512  |        |        |        | 2      |
| 29519  |        |        |        |        |
| 29520  |        |        |        |        |
| 29521  |        |        |        | 2      |
| 29529  | 2      | 2      |        | 3      |
| 29532  |        |        |        |        |
| 29547  | 2      |        |        |        |
| 29551  |        |        |        |        |
| 29584  |        | 2      |        | 2      |
| 29591  |        |        |        |        |

| respid | Q31a_4 | Q31a_5 | Q31a_6 | Q31a_7 |
|--------|--------|--------|--------|--------|
| 29613  |        |        |        |        |
| 29615  |        |        |        |        |
| 29625  |        |        | 1      |        |
| 29660  |        |        |        |        |
| 29677  |        |        |        |        |
| 29700  |        |        |        |        |
| 29715  |        |        |        | 5      |
| 29720  |        |        |        |        |
| 29730  |        |        |        |        |
| 29734  |        |        |        |        |
| 29754  |        |        |        |        |
| 29771  |        |        |        |        |
| 29774  |        |        |        |        |
| 29783  |        |        |        |        |
| 29812  |        | 1      |        |        |
| 29813  |        |        |        |        |
| 29814  | 1      | 2      |        |        |
| 29820  |        |        |        |        |
| 29906  |        |        |        |        |
| 29907  | 2      |        |        |        |
| 29928  |        |        |        |        |
| 29932  |        |        |        |        |
| 29958  | 3      |        |        |        |
| 29982  |        |        |        |        |
| 29989  |        |        |        |        |
| 29994  |        |        |        |        |
| 30005  |        |        |        |        |
| 30077  |        |        |        |        |
| 30098  |        |        |        |        |
| 30107  |        |        |        |        |
| 30154  |        |        |        |        |
| 30159  |        |        |        |        |

| respid | Q31a_4 | Q31a_5 | Q31a_6 | Q31a_7 |
|--------|--------|--------|--------|--------|
| 30162  |        |        |        |        |
| 30163  |        |        |        |        |
| 30189  |        |        |        |        |
| 30230  |        |        |        |        |
| 30259  | 3      |        |        |        |
| 30284  |        |        |        |        |
| 30296  |        |        |        |        |
| 30330  |        |        |        |        |
| 30341  |        |        |        |        |
| 30352  |        |        |        |        |
| 30379  |        |        |        |        |
| 30424  |        |        |        |        |
| 30447  |        |        |        |        |
| 30477  | 3      | 3      |        |        |
| 30503  |        |        |        | 2      |
| 30515  |        |        |        |        |
| 30516  |        |        |        |        |
| 30623  |        | 2      |        |        |
| 30639  |        |        |        |        |
| 30670  |        |        |        |        |
| 30697  |        |        |        |        |
| 30735  |        |        |        |        |
| 30742  |        |        |        |        |
| 30751  |        |        |        |        |
| 30789  |        |        |        |        |
| 30867  |        |        |        |        |
| 30876  |        |        |        |        |
| 30877  |        |        |        |        |
| 30887  |        |        |        |        |
| 30891  |        |        |        |        |
| 31030  |        |        |        |        |
| 31059  |        |        |        |        |

| respid | Q31a_4 | Q31a_5 | Q31a_6 | Q31a_7 |
|--------|--------|--------|--------|--------|
| 31082  |        |        |        |        |
| 31106  |        |        |        |        |
| 31110  |        |        |        |        |
| 31265  | 3      |        |        |        |
| 31266  |        |        | 3      | 3      |
| 31267  |        | 3      | 3      | 3      |
| 31310  |        |        |        |        |
| 31325  |        |        |        |        |
| 31367  |        |        |        |        |
| 31389  |        |        |        |        |
| 31440  |        |        |        |        |
| 31465  |        |        |        |        |
| 31477  |        |        |        |        |
| 31491  |        |        |        |        |
| 31494  | 2      | 2      |        |        |
| 31509  |        |        | 2      |        |
| 31533  |        |        |        |        |
| 31547  |        |        |        |        |
| 31558  |        |        |        |        |
| 31579  |        |        |        |        |
| 31591  |        |        |        |        |
| 31596  |        | 2      | 2      |        |
| 31601  |        | 3      |        |        |
| 31605  |        |        |        |        |
| 31637  |        |        |        |        |
| 31646  |        |        |        |        |
| 31647  |        | 2      |        | 2      |
| 31650  |        |        |        |        |
| 31651  |        |        |        |        |
| 31657  |        |        |        |        |
| 31660  |        |        |        |        |
| 31661  |        |        |        |        |



| respid | Q31a_4 | Q31a_5 | Q31a_6 | Q31a_7 |
|--------|--------|--------|--------|--------|
| 31667  |        |        |        | 2      |
| 31674  |        |        |        |        |
| 31686  |        |        |        |        |
| 31693  |        |        |        |        |
| 31716  |        |        |        |        |
| 31818  |        |        |        |        |
| 31886  |        |        |        |        |
| 31945  |        | 2      | 3      |        |
| 31957  |        |        |        |        |
| 31966  |        |        |        |        |
| 31978  |        |        |        |        |
| 31999  |        |        |        |        |
| 32026  |        |        |        |        |
| 32033  |        |        |        |        |
| 32037  |        | 3      |        |        |
| 32038  |        |        |        |        |
| 32047  |        |        |        |        |
| 32053  |        |        |        |        |
| 32069  |        |        |        |        |
| 32081  |        | 2      |        |        |
| 32123  |        |        |        |        |
| 32130  |        |        |        |        |
| 32141  |        |        |        |        |
| 32158  |        |        |        |        |
| 32165  |        |        |        |        |
| 32180  |        |        |        |        |
| 32221  | 1      | 2      |        |        |
| 32292  |        |        |        |        |
| 32318  |        |        |        |        |
| 32346  |        |        |        |        |
| 32402  |        |        |        |        |
| 32422  |        |        |        |        |

| respid | Q31a_4 | Q31a_5 | Q31a_6 | Q31a_7 |
|--------|--------|--------|--------|--------|
| 32439  |        |        |        |        |
| 32507  |        |        |        |        |
| 32522  |        |        |        |        |
| 32535  |        |        |        |        |
| 32546  |        |        |        |        |
| 32553  |        |        |        |        |
| 32570  |        |        |        |        |
| 32592  |        |        |        |        |
| 32605  |        | 1      |        |        |
| 32630  |        |        | 3      |        |
| 32642  |        |        |        |        |
| 32646  |        |        |        |        |
| 32665  |        |        |        |        |
| 32677  |        |        |        |        |
| 32694  |        |        |        |        |
| 32698  |        |        |        |        |
| 32754  |        |        |        |        |
| 32799  |        |        |        |        |
| 32816  |        |        |        |        |
| 32819  |        |        |        |        |
| 32840  |        |        |        |        |
| 32861  |        |        |        |        |
| 32866  |        |        |        | 1      |
| 32889  |        | 4      |        |        |
| 32960  |        |        |        |        |
| 32965  |        |        |        |        |
| 32986  |        | 2      |        |        |
| 33005  |        |        |        |        |
| 33054  |        |        |        | 2      |
| 33072  | 2      |        |        |        |
| 33095  |        |        |        |        |
| 33099  |        |        |        |        |

| respid | Q31a_4 | Q31a_5 | Q31a_6 | Q31a_7 |
|--------|--------|--------|--------|--------|
| 33121  |        |        |        |        |
| 33152  |        |        |        |        |
| 33159  |        |        |        |        |
| 33189  |        |        |        |        |
| 33198  |        |        |        |        |
| 33202  |        |        |        |        |
| 33204  |        |        |        |        |
| 33224  |        |        |        |        |
| 33272  |        |        |        |        |
| 33294  |        |        |        | 1      |
| 33300  | 2      |        |        |        |
| 33314  |        |        |        |        |
| 33338  |        |        |        |        |
| 33350  |        |        |        |        |
| 33362  |        |        |        |        |
| 33368  |        |        |        |        |
| 33374  |        |        |        |        |
| 33380  | 3      |        | 4      | 2      |
| 33385  |        |        |        |        |
| 33402  | 2      |        | 2      |        |
| 33414  |        |        |        |        |
| 33439  | 2      |        |        |        |
| 33449  |        |        |        |        |
| 33533  |        |        |        |        |
| 33540  |        |        |        |        |
| 33556  |        |        |        |        |
| 33615  |        |        |        |        |
| 33694  |        |        |        |        |
| 33717  |        |        |        |        |
| 33729  |        |        |        |        |
| 33746  |        |        |        |        |
| 33764  |        |        |        |        |

| respid | Q31a_4 | Q31a_5 | Q31a_6 | Q31a_7 |
|--------|--------|--------|--------|--------|
| 33790  |        |        |        |        |
| 33868  |        |        |        |        |
| 33872  | 3      |        |        |        |
| 33883  |        |        |        |        |
| 33884  |        |        |        |        |
| 33900  |        |        |        |        |
| 33933  |        |        |        |        |
| 33949  |        |        |        |        |
| 34005  |        |        |        |        |
| 34016  |        |        |        |        |
| 34041  |        |        |        |        |
| 34053  |        |        |        |        |
| 34056  |        |        |        |        |
| 34093  |        |        |        |        |
| 34112  |        |        |        |        |
| 34136  | 2      | 2      |        |        |
| 34138  |        |        |        |        |
| 34139  |        |        |        |        |
| 34189  |        |        |        |        |
| 34239  |        |        |        |        |
| 34240  |        |        |        |        |
| 34241  |        |        |        |        |
| 34259  |        |        |        |        |
| 34303  |        |        |        |        |
| 34306  |        |        |        |        |
| 34395  |        |        |        |        |
| 34463  |        |        | 1      |        |
| 34466  |        |        |        |        |
| 34471  |        |        |        |        |
| 34489  |        |        | 2      |        |
| 34518  | 2      | 2      |        |        |
| 34542  |        |        |        |        |

| respid | Q31a_4 | Q31a_5 | Q31a_6 | Q31a_7 |
|--------|--------|--------|--------|--------|
| 34595  |        |        |        |        |
| 34604  |        |        |        |        |
| 34631  |        |        |        |        |
| 34665  |        |        |        |        |
| 34716  |        |        |        |        |
| 34729  |        |        |        |        |
| 34772  |        | 2      |        |        |
| 34800  |        |        |        |        |
| 34819  |        |        |        |        |
| 34829  |        |        |        |        |
| 34831  |        |        |        |        |
| 34839  |        | 1      |        |        |
| 34868  |        |        |        |        |
| 34869  |        |        |        |        |
| 34882  |        |        |        | 4      |
| 34895  |        |        |        |        |
| 34901  |        |        |        |        |
| 34904  | 2      |        |        |        |
| 34907  |        |        |        |        |
| 34914  |        |        |        |        |
| 34918  | 2      |        |        |        |
| 34924  |        |        |        |        |
| 34933  |        |        |        |        |
| 34938  |        |        |        |        |
| 34952  |        |        | 2      |        |
| 34959  |        |        |        |        |
| 34972  |        |        |        |        |
| 34973  |        |        |        |        |
| 34975  | 2      | 2      |        |        |
| 34977  |        |        |        |        |
| 34978  |        |        |        |        |
| 34980  |        |        |        |        |

| respid | Q31a_4 | Q31a_5 | Q31a_6 | Q31a_7 |
|--------|--------|--------|--------|--------|
| 34984  |        |        |        |        |
| 34986  |        |        |        |        |
| 34994  |        |        |        |        |
| 34996  |        |        | 1      |        |
| 35003  |        |        |        |        |
| 35014  |        |        |        |        |
| 35029  |        |        |        |        |
| 35030  |        |        |        |        |
| 35037  | 1      |        |        |        |
| 35043  |        |        |        |        |
| 35048  |        |        |        |        |
| 35055  |        |        |        |        |
| 35067  |        |        |        |        |
| 35072  |        |        |        |        |
| 35078  |        |        |        |        |
| 35084  |        |        |        |        |
| 35095  |        |        |        |        |
| 35096  |        |        |        |        |
| 35097  | 1      | 1      |        |        |
| 35098  |        | 2      |        |        |
| 35109  |        |        |        |        |
| 35114  |        |        |        |        |
| 35115  |        |        |        |        |
| 35124  |        |        |        |        |
| 35125  |        |        |        |        |
| 35141  |        |        |        |        |
| 35142  |        |        |        |        |
| 35145  |        |        |        |        |
| 35149  |        |        |        |        |
| 35159  |        |        |        |        |
| 35163  |        |        | 1      |        |
| 35174  |        |        |        |        |

| respid | Q31a_4 | Q31a_5 | Q31a_6 | Q31a_7 |
|--------|--------|--------|--------|--------|
| 35188  |        |        |        |        |
| 35189  | 3      |        |        |        |
| 35201  |        | 1      |        |        |
| 35215  |        |        |        |        |
| 35228  |        |        |        |        |
| 35235  |        | 1      |        |        |
| 35239  | 2      | 2      |        |        |
| 35243  |        |        |        |        |
| 35245  |        |        |        |        |
| 35259  |        |        |        |        |
| 35265  |        |        |        |        |
| 35272  |        |        | 2      |        |
| 35280  |        |        |        |        |
| 35298  |        |        |        |        |
| 35305  |        |        |        |        |
| 35306  | 2      |        |        |        |
| 35307  |        |        |        |        |
| 35311  |        |        |        |        |
| 35322  |        |        |        |        |
| 35323  |        |        |        |        |
| 35327  |        |        | 1      |        |
| 35366  |        |        |        |        |
| 35378  |        |        |        |        |
| 35389  |        |        |        | 2      |
| 35390  |        |        |        |        |
| 35395  |        |        |        |        |
| 35411  |        | 3      |        |        |
| 35423  |        |        |        |        |
| 35425  |        |        |        |        |
| 35434  |        |        |        |        |
| 35462  |        |        |        |        |
| 35478  |        |        | 3      |        |

| respid | Q31a_4 | Q31a_5 | Q31a_6 | Q31a_7 |
|--------|--------|--------|--------|--------|
| 35481  |        |        | 3      |        |
| 35498  |        |        |        |        |
| 35499  |        |        |        |        |
| 35502  |        | 3      |        |        |
| 35503  |        |        |        |        |
| 35504  |        |        |        |        |
| 35508  |        |        |        | 2      |
| 35513  |        |        |        |        |
| 35516  | 1      |        |        |        |
| 35519  |        |        |        |        |
| 35530  |        | 1      |        |        |
| 35533  |        |        |        |        |
| 35561  |        |        |        |        |
| 35565  |        |        |        |        |
| 35588  |        |        |        |        |
| 35598  |        |        |        |        |
| 35607  |        |        |        |        |
| 35638  |        |        |        |        |
| 35642  |        |        |        |        |
| 35643  | 2      |        |        |        |
| 35680  |        |        |        |        |
| 35697  |        | 1      |        |        |
| 35703  |        |        |        |        |
| 35709  |        |        |        |        |
| 35710  |        |        |        |        |
| 35721  |        | 4      | 5      | 3      |
| 35723  |        |        |        |        |
| 35736  |        |        |        |        |
| 35739  |        |        |        |        |
| 35745  |        |        |        | 1      |
| 35748  |        |        |        |        |
| 35750  |        |        |        | 2      |



| respid | Q31a_4 | Q31a_5 | Q31a_6 | Q31a_7 |
|--------|--------|--------|--------|--------|
| 35752  |        |        |        |        |
| 35773  |        |        |        |        |
| 35779  |        |        |        |        |
| 35791  |        |        |        |        |
| 35801  |        |        |        |        |
| 35802  |        |        |        |        |
| 35837  |        |        |        |        |
| 35853  |        |        |        |        |
| 35858  | 1      |        |        |        |
| 35860  |        |        |        |        |
| 35875  |        |        | 2      |        |
| 35883  |        |        |        |        |
| 35890  |        |        |        |        |
| 35898  |        |        |        |        |
| 35901  |        |        | 2      | 2      |
| 35914  |        |        |        |        |
| 35924  |        |        |        |        |
| 35950  |        | 2      |        |        |
| 35961  |        |        |        |        |
| 35966  |        | 2      |        |        |
| 35967  |        |        |        |        |
| 35971  |        |        |        |        |
| 35974  |        | 1      |        |        |
| 35983  |        |        |        |        |
| 35992  |        | 1      |        |        |
| 36010  |        |        |        |        |
| 36019  |        |        |        |        |
| 36029  |        |        |        |        |
| 36033  |        |        |        |        |
| 36042  |        |        |        |        |
| 36043  |        |        |        |        |
| 36048  |        |        | 2      |        |

| respid | Q31a_4 | Q31a_5 | Q31a_6 | Q31a_7 |
|--------|--------|--------|--------|--------|
| 36050  |        |        |        |        |
| 36062  |        |        |        |        |
| 36063  |        |        |        |        |
| 36092  |        |        |        |        |
| 36097  |        |        |        |        |
| 36108  |        |        |        |        |
| 36113  |        | 1      | 3      |        |
| 36117  |        |        |        |        |
| 36129  | 1      | 1      |        |        |
| 36144  |        |        |        |        |
| 36152  |        |        |        |        |
| 36154  |        |        | 2      |        |
| 36155  |        |        |        |        |
| 36167  |        |        |        |        |
| 36172  |        |        |        |        |
| 36173  |        |        |        |        |
| 36174  | 1      | 1      |        |        |
| 36182  |        |        |        |        |
| 36192  |        |        | 1      |        |
| 36195  |        |        |        | 2      |
| 36204  |        |        |        |        |
| 36205  |        |        |        |        |
| 36208  |        |        |        |        |
| 36216  |        | 1      |        |        |
| 36221  |        |        |        |        |
| 36244  |        |        |        |        |
| 36255  |        |        |        |        |
| 36259  |        |        |        |        |
| 36262  |        |        |        |        |
| 36268  |        |        |        |        |
| 36308  |        |        |        |        |
| 36324  |        |        |        |        |

| respid | Q31a_4 | Q31a_5 | Q31a_6 | Q31a_7 |
|--------|--------|--------|--------|--------|
| 36330  |        |        |        |        |
| 36331  |        |        |        | 1      |
| 36336  |        |        |        |        |
| 36337  |        |        |        |        |
| 36364  |        |        |        |        |
| 36365  |        |        | 2      |        |
| 36396  |        |        | 1      |        |
| 36403  |        |        |        |        |
| 36410  |        |        |        |        |
| 36413  |        |        |        |        |
| 36422  |        |        |        |        |
| 36424  |        |        |        |        |
| 36425  |        | 4      |        |        |
| 36432  |        |        |        |        |
| 36435  |        |        |        |        |
| 36446  |        |        |        | 4      |
| 36451  |        |        |        |        |
| 36453  |        |        |        |        |
| 36459  | 2      |        | 3      |        |
| 36464  |        |        |        |        |
| 36465  |        |        | 1      |        |
| 36466  |        |        |        |        |
| 36476  |        |        |        |        |
| 36487  |        |        |        |        |
| 36488  |        |        |        |        |
| 36500  |        |        |        |        |
| 36504  |        |        |        |        |
| 36513  |        |        |        |        |
| 36515  | 2      |        |        |        |
| 36521  |        |        |        | 2      |
| 36530  |        |        |        |        |
| 36556  |        |        |        |        |

| respid | Q31a_4 | Q31a_5 | Q31a_6 | Q31a_7 |
|--------|--------|--------|--------|--------|
| 36564  | 4      |        | 3      |        |
| 36584  |        |        |        |        |
| 36585  |        |        |        |        |
| 36586  |        |        |        |        |
| 36606  |        |        | 3      |        |
| 36615  |        |        |        |        |
| 36628  |        |        |        |        |
| 36630  |        |        |        |        |
| 36631  |        |        |        |        |
| 36636  |        |        |        |        |
| 36637  |        |        |        |        |
| 36651  | 2      |        |        |        |
| 36661  |        |        |        |        |
| 36670  |        |        |        |        |
| 36671  |        |        |        |        |
| 36688  |        |        |        |        |
| 36694  |        |        |        |        |
| 36696  |        |        |        |        |
| 36703  |        |        |        |        |
| 36719  |        |        |        |        |
| 36721  |        |        |        |        |
| 36740  |        |        |        |        |
| 36755  |        |        |        |        |
| 36765  |        |        | 1      |        |
| 36770  |        |        |        |        |
| 36773  |        |        |        |        |
| 36813  |        |        |        |        |
| 36819  | 2      |        | 2      |        |
| 36820  |        |        |        |        |
| 36821  |        |        |        |        |
| 36827  |        |        |        |        |
| 36835  |        |        |        |        |

| respid | Q31a_4 | Q31a_5 | Q31a_6 | Q31a_7 |
|--------|--------|--------|--------|--------|
| 36837  |        |        |        |        |
| 36849  |        |        |        |        |
| 36851  |        |        |        |        |
| 36868  | 3      | 3      |        |        |
| 36870  |        |        |        |        |
| 36871  |        |        |        |        |
| 36874  |        |        |        |        |
| 36878  |        | 1      |        |        |
| 36887  |        |        |        |        |
| 36889  |        |        |        |        |
| 36891  |        |        |        |        |
| 36903  |        |        |        |        |
| 36905  |        |        |        |        |
| 36913  |        |        |        |        |
| 36949  |        |        |        |        |
| 36954  |        |        | 1      |        |
| 36962  | 1      |        |        |        |
| 36965  |        |        |        |        |
| 36970  |        |        |        |        |
| 36979  |        |        |        |        |
| 36990  |        |        |        |        |
| 36991  |        |        |        |        |
| 36992  |        |        |        |        |
| 37015  |        |        |        |        |
| 37017  |        |        |        |        |
| 37020  |        |        |        |        |
| 37033  |        |        |        |        |
| 37041  |        |        |        |        |
| 37048  |        |        |        |        |
| 37050  |        |        |        |        |
| 37054  |        |        |        |        |
| 37057  |        |        |        |        |

| respid | Q31a_4 | Q31a_5 | Q31a_6 | Q31a_7 |
|--------|--------|--------|--------|--------|
| 37067  |        |        |        |        |
| 37074  |        |        |        |        |
| 37088  | 1      |        |        |        |
| 37090  |        | 2      |        |        |
| 37110  | 3      |        |        |        |
| 37122  |        |        |        |        |
| 37124  |        | 2      | 1      |        |
| 37126  |        |        |        |        |
| 37129  |        |        |        |        |
| 37130  |        |        |        |        |
| 37142  |        |        |        |        |
| 37160  |        |        |        |        |
| 37168  |        |        |        |        |
| 37169  |        |        |        |        |
| 37191  |        | 2      |        |        |
| 37197  | 2      | 2      |        |        |
| 37204  |        |        |        |        |
| 37213  |        |        |        |        |
| 37238  |        |        |        |        |
| 37242  |        |        | 1      |        |
| 37243  |        |        | 2      | 3      |
| 37275  | 1      |        |        |        |
| 37305  |        | 2      |        |        |
| 37357  |        |        | 2      |        |
| 37365  | 3      | 2      | 3      | 4      |
| 37370  |        |        |        |        |
| 37406  |        |        |        |        |
| 37410  |        |        |        |        |
| 37411  | 1      |        |        |        |
| 37427  |        | 4      | 3      |        |
| 37437  |        | 2      | 1      |        |
| 37440  |        |        |        |        |

| respid | Q31a_4 | Q31a_5 | Q31a_6 | Q31a_7 |
|--------|--------|--------|--------|--------|
| 37452  |        |        |        |        |
| 37465  |        |        |        | 1      |
| 37468  |        |        | 1      |        |
| 37469  |        |        |        |        |
| 37477  |        | 3      | 1      |        |
| 37509  |        |        |        |        |
| 37513  |        |        | 1      |        |
| 37534  |        | 1      |        |        |
| 37537  |        |        |        |        |
| 37560  |        |        | 1      |        |
| 37566  |        |        |        |        |
| 37572  |        |        |        |        |
| 37574  | 1      |        |        |        |
| 37575  |        |        |        |        |
| 37590  | 1      |        |        |        |
| 37593  |        |        |        |        |
| 37599  |        |        |        |        |
| 37641  |        |        |        |        |
| 37651  | 2      |        |        |        |
| 37670  |        |        |        |        |
| 37680  | 2      |        |        |        |
| 37690  |        |        |        |        |
| 37694  |        |        |        |        |
| 37705  |        |        |        |        |
| 37710  |        |        |        |        |
| 37719  |        |        | 1      |        |
| 37741  |        |        | 2      | 3      |
| 37752  |        |        |        |        |
| 37755  |        |        |        |        |
| 37757  |        |        |        |        |
| 37783  |        |        |        |        |
| 37793  | 4      | 4      |        |        |

| respid | Q31a_4 | Q31a_5 | Q31a_6 | Q31a_7 |
|--------|--------|--------|--------|--------|
| 37800  |        | 2      |        |        |
| 37801  |        |        |        |        |
| 37820  | 3      |        |        |        |
| 37826  |        |        | 2      |        |
| 37835  |        | 2      | 1      |        |
| 37839  |        |        |        |        |
| 37871  | 4      |        |        |        |
| 37876  |        | 2      |        |        |
| 37879  |        |        | 2      | 1      |
| 37894  |        |        |        |        |
| 37895  |        |        |        |        |
| 37901  |        |        | 3      |        |
| 37926  |        |        |        |        |
| 37937  |        |        |        |        |
| 37938  |        |        |        |        |
| 37959  |        |        |        |        |
| 37970  |        |        |        |        |
| 37972  |        |        |        |        |
| 37988  |        |        |        |        |
| 37989  | 3      | 3      |        |        |
| 38000  | 2      | 1      |        |        |
| 38028  |        | 5      | 4      |        |
| 38042  |        |        |        |        |
| 38052  |        |        |        |        |
| 38056  |        |        |        |        |
| 38106  | 1      | 1      |        |        |
| 38114  |        |        |        |        |
| 38134  |        |        |        |        |
| 38135  |        |        |        |        |
| 38139  | 2      | 2      |        |        |
| 38160  |        |        |        |        |
| 38164  |        |        |        |        |



| respid | Q31a_4 | Q31a_5 | Q31a_6 | Q31a_7 |
|--------|--------|--------|--------|--------|
| 38168  |        |        |        |        |
| 38173  |        |        |        |        |
| 38193  |        | 3      |        |        |
| 38204  |        |        |        |        |
| 38206  |        |        |        |        |
| 38233  |        |        |        |        |
| 38242  |        |        |        |        |
| 38245  |        |        |        |        |
| 38261  |        |        |        |        |
| 38288  |        |        |        |        |
| 38296  |        | 2      |        |        |
| 38299  | 2      |        | 2      |        |
| 38300  |        |        |        |        |
| 38303  |        |        |        |        |
| 38317  |        |        |        |        |
| 38328  |        |        |        |        |
| 38333  |        |        |        |        |
| 38336  |        |        |        |        |
| 38338  |        |        |        |        |
| 38342  |        |        |        |        |
| 38360  |        |        |        |        |
| 38362  |        |        | 1      |        |
| 38364  |        |        |        |        |
| 38402  |        |        |        |        |
| 38423  | 2      |        |        |        |
| 38424  |        |        | 3      |        |
| 38435  | 3      |        | 3      |        |
| 38450  |        |        |        |        |
| 38455  |        |        |        |        |
| 38467  |        |        |        |        |
| 38468  |        |        |        |        |
| 38472  |        |        |        |        |

| respid | Q31a_4 | Q31a_5 | Q31a_6 | Q31a_7 |
|--------|--------|--------|--------|--------|
| 38484  |        |        |        |        |
| 38498  |        |        |        |        |
| 38507  |        |        |        |        |
| 38511  |        |        |        |        |
| 38524  |        | 3      |        |        |
| 38526  |        |        |        |        |
| 38534  |        |        |        |        |
| 38536  |        |        |        |        |
| 38539  |        |        |        |        |
| 38547  |        |        |        |        |
| 38549  |        |        |        |        |
| 38575  |        |        |        |        |
| 38579  |        |        |        | 2      |
| 38585  |        |        |        |        |
| 38589  |        |        |        |        |
| 38595  |        | 2      |        | 1      |
| 38602  |        |        |        |        |
| 38603  |        |        |        |        |
| 38612  |        |        |        |        |
| 38621  | 4      |        |        |        |
| 38624  |        |        |        |        |
| 38636  |        |        |        |        |
| 38656  |        |        |        |        |
| 38668  |        |        |        |        |
| 38675  |        |        |        |        |
| 38676  |        |        |        |        |
| 38682  |        |        |        |        |
| 38689  |        |        |        |        |
| 38702  |        |        |        |        |
| 38704  |        |        |        |        |
| 38713  |        |        |        |        |
| 38718  |        |        |        |        |

| respid | Q31a_4 | Q31a_5 | Q31a_6 | Q31a_7 |
|--------|--------|--------|--------|--------|
| 38725  |        |        |        |        |
| 38730  |        |        |        |        |
| 38737  |        | 1      |        |        |
| 38738  |        | 2      |        |        |
| 38744  |        |        |        |        |
| 38746  | 1      |        |        |        |
| 38753  |        |        |        |        |
| 38756  |        | 2      |        |        |
| 38760  |        |        |        |        |
| 38762  | 2      | 1      |        |        |
| 38765  |        |        |        |        |
| 38769  |        |        |        |        |
| 38781  |        | 3      | 3      | 3      |
| 38786  |        |        |        |        |
| 38790  |        |        |        |        |
| 38793  |        |        |        |        |
| 38797  |        |        |        |        |
| 38802  |        |        |        |        |
| 38815  |        |        |        |        |
| 38826  |        |        |        |        |
| 38828  |        |        |        |        |
| 38829  |        |        |        |        |
| 38835  |        |        |        |        |
| 38842  | 2      |        | 1      |        |
| 38853  |        |        |        |        |
| 38855  | 4      | 4      |        |        |
| 38860  |        |        |        |        |
| 38869  |        |        |        |        |
| 38882  |        |        | 2      |        |
| 38897  |        |        | 1      |        |
| 38903  |        |        |        |        |
| 38910  | 2      |        |        |        |

| respid | Q31a_4 | Q31a_5 | Q31a_6 | Q31a_7 |
|--------|--------|--------|--------|--------|
| 38948  | 4      |        | 3      |        |
| 38949  |        |        | 1      | 1      |
| 38953  |        | 4      | 5      |        |
| 38989  |        |        |        | 4      |
| 38997  |        |        |        |        |
| 38999  |        |        |        |        |
| 39002  | 3      | 3      | 3      |        |
| 39003  | 4      |        | 3      |        |
| 39006  |        |        |        |        |
| 39014  |        |        |        |        |
| 39017  |        |        |        |        |
| 39018  |        |        |        |        |
| 39025  |        |        |        |        |
| 39031  |        | 4      |        |        |
| 39061  |        |        |        | 2      |
| 39131  |        |        |        |        |
| 39153  | 2      |        |        |        |
| 39194  |        |        |        |        |
| 39204  |        |        |        |        |
| 39208  |        |        |        |        |
| 39213  |        |        |        |        |
| 39231  |        |        |        |        |
| 39251  |        |        |        |        |
| 39257  | 3      | 3      |        |        |
| 39262  |        |        | 2      |        |
| 39269  | 3      |        |        |        |
| 39272  |        |        |        |        |
| 39280  |        |        |        |        |
| 39294  |        |        |        |        |
| 39297  |        | 2      |        |        |
| 39300  | 3      |        |        |        |
| 39307  |        |        | 2      | 2      |

| respid | Q31a_4 | Q31a_5 | Q31a_6 | Q31a_7 |
|--------|--------|--------|--------|--------|
| 39320  |        |        |        | 2      |
| 39333  |        |        |        |        |
| 39335  |        | 2      | 2      |        |
| 39339  |        |        |        |        |
| 39375  |        |        |        |        |
| 39377  |        |        |        |        |
| 39380  |        |        |        |        |
| 39425  |        |        |        |        |
| 39590  |        |        |        |        |
| 40529  |        |        |        |        |
| 40702  |        |        |        |        |
| 40788  |        |        |        |        |
| 40841  |        |        |        |        |
| 40965  |        |        |        |        |
| 41092  |        |        |        |        |
| 41534  |        |        |        |        |
| 41919  |        |        |        |        |
| 42110  |        |        |        |        |
| 42135  |        |        |        |        |
| 42142  |        |        |        |        |
| 42163  |        | 1      |        |        |
| 42164  |        |        |        |        |
| 42172  | 1      |        |        |        |
| 42177  |        |        |        |        |
| 42181  |        |        |        |        |
| 42193  |        |        |        |        |
| 42196  |        |        |        |        |
| 42202  |        |        |        |        |
| 42248  |        | 2      |        |        |
| 42283  |        |        |        |        |
| 42284  |        |        | 1      |        |
| 42323  |        |        |        |        |

| respid | Q31a_4 | Q31a_5 | Q31a_6 | Q31a_7 |
|--------|--------|--------|--------|--------|
| 42349  |        |        |        |        |
| 42351  |        |        |        |        |
| 42357  |        |        |        |        |
| 42366  |        |        |        |        |
| 42380  |        |        |        |        |
| 42414  |        | 1      | 1      |        |
| 42420  |        |        |        |        |
| 42454  |        |        |        |        |
| 42458  |        |        |        |        |
| 42461  |        |        |        |        |
| 42488  |        |        |        |        |
| 42511  |        |        |        |        |
| 42512  |        |        |        |        |
| 42530  |        | 1      |        |        |
| 42531  | 2      | 1      |        |        |
| 42533  |        |        |        |        |
| 42549  |        |        |        |        |
| 42550  | 3      |        |        |        |
| 42553  |        |        |        |        |
| 42562  |        | 2      |        |        |
| 42567  |        |        |        |        |
| 42589  |        |        |        |        |
| 42604  |        |        |        |        |
| 42618  |        |        | 1      |        |
| 42621  |        | 3      |        |        |
| 42627  |        |        |        |        |
| 42641  |        |        |        |        |
| 42655  |        |        | 4      |        |
| 42666  |        |        |        |        |
| 42667  |        |        |        |        |
| 42697  |        |        |        |        |
| 42703  |        |        |        |        |

| respid | Q31a_4 | Q31a_5 | Q31a_6 | Q31a_7 |
|--------|--------|--------|--------|--------|
| 42712  |        |        |        |        |
| 42731  |        |        |        | 2      |
| 42780  |        |        |        |        |
| 42785  |        |        |        |        |
| 42788  |        |        |        |        |
| 42802  |        | 1      |        | 2      |
| 42818  | 1      | 1      |        |        |
| 42821  |        |        |        |        |
| 42824  |        |        |        |        |
| 42831  |        |        |        |        |
| 42836  |        |        |        |        |
| 42864  |        |        | 3      | 3      |
| 42875  |        |        |        |        |
| 42891  | 3      | 3      | 3      |        |
| 42897  |        | 1      |        |        |
| 42900  |        |        |        |        |
| 42902  | 2      |        |        |        |
| 42921  |        |        |        |        |
| 42925  |        |        |        |        |
| 42944  |        |        |        |        |
| 42950  |        |        |        |        |
| 42963  |        |        |        |        |
| 42967  |        | 1      |        |        |
| 42985  |        |        |        |        |
| 42990  |        | 2      |        |        |
| 42996  |        |        |        |        |
| 43002  |        | 1      |        |        |
| 43004  |        |        |        |        |
| 43012  |        |        |        |        |
| 43027  |        |        |        |        |
| 43028  |        |        |        |        |
| 43029  | 2      |        |        |        |

| respid | Q31a_4 | Q31a_5 | Q31a_6 | Q31a_7 |
|--------|--------|--------|--------|--------|
| 43031  |        |        |        |        |
| 43042  |        |        |        |        |
| 43054  |        |        |        |        |
| 43058  |        |        |        |        |
| 43064  |        |        |        |        |
| 43069  |        |        |        |        |
| 43071  |        |        |        |        |
| 43072  |        |        |        |        |
| 43077  |        |        |        |        |
| 43078  |        | 4      |        | 3      |
| 43082  |        |        |        |        |
| 43092  |        |        |        |        |
| 43096  |        |        |        |        |
| 43109  |        |        |        |        |
| 43113  |        |        |        |        |
| 43123  | 2      | 3      |        |        |
| 43127  |        |        |        |        |
| 43128  | 1      |        |        |        |
| 43129  |        |        |        |        |
| 43133  |        |        |        |        |
| 43140  |        |        |        |        |
| 43143  |        | 1      |        | 1      |
| 43149  |        |        |        | 3      |
| 43150  |        | 1      |        | 1      |
| 43153  |        | 2      |        |        |
| 43170  |        |        |        |        |
| 43187  | 2      | 2      |        |        |
| 43188  | 2      | 2      |        | 3      |
| 43198  |        |        |        |        |
| 43208  |        |        |        |        |
| 43216  |        |        |        |        |
| 43222  |        |        |        |        |



| respid | Q31a_4 | Q31a_5 | Q31a_6 | Q31a_7 |
|--------|--------|--------|--------|--------|
| 43224  |        |        |        |        |
| 43230  |        | 1      |        |        |
| 43231  | 4      |        |        |        |
| 43265  |        | 2      |        |        |
| 43270  | 2      |        |        |        |
| 43283  |        | 2      |        |        |
| 43295  |        |        |        |        |
| 43297  |        |        |        |        |
| 43299  |        |        |        | 2      |
| 43307  |        |        |        |        |
| 43316  |        |        |        |        |
| 43318  |        |        |        |        |
| 43319  |        |        |        |        |
| 43324  |        | 1      |        |        |
| 43325  |        | 2      |        |        |
| 43327  |        |        |        |        |
| 43338  |        |        |        |        |
| 43342  |        |        |        |        |
| 43348  |        |        |        |        |
| 43395  | 2      |        | 3      |        |
| 43404  |        |        |        |        |
| 43406  |        |        |        |        |
| 43407  |        |        |        |        |
| 43411  |        |        |        |        |
| 43416  |        |        |        |        |
| 43428  |        |        |        |        |
| 43429  |        |        |        |        |
| 43432  |        |        |        |        |
| 43443  |        |        |        |        |
| 43455  |        |        |        |        |
| 43457  |        |        |        |        |
| 43458  |        |        |        |        |

| respid | Q31a_4 | Q31a_5 | Q31a_6 | Q31a_7 |
|--------|--------|--------|--------|--------|
| 43477  | 1      |        |        |        |
| 43520  |        |        |        |        |
| 43521  |        |        |        |        |
| 43550  |        |        |        |        |
| 43551  |        |        |        |        |
| 43554  |        |        |        |        |
| 43560  |        |        | 1      |        |
| 43569  |        |        |        |        |
| 43583  |        |        |        |        |
| 43590  |        |        |        | 3      |
| 43591  |        |        |        |        |
| 43595  |        |        |        |        |
| 43599  |        |        |        |        |
| 43606  |        |        |        |        |
| 43609  |        |        |        |        |
| 43629  |        |        |        |        |
| 43636  |        |        |        |        |
| 43661  |        |        |        |        |
| 43668  |        |        |        |        |
| 43672  |        |        |        |        |
| 43677  | 1      |        |        | 1      |
| 43683  |        |        |        |        |
| 43708  |        |        | 2      |        |
| 43713  |        |        |        |        |
| 43718  |        |        |        |        |
| 43725  |        |        |        |        |
| 43747  |        |        |        |        |
| 43755  |        |        |        |        |
| 43770  |        |        |        |        |
| 43775  |        | 1      |        |        |
| 43788  |        |        |        |        |
| 43790  |        |        |        |        |

| respid | Q31a_4 | Q31a_5 | Q31a_6 | Q31a_7 |
|--------|--------|--------|--------|--------|
| 43797  | 3      |        |        |        |
| 43798  |        |        |        |        |
| 43811  | 1      |        |        |        |
| 43819  | 3      |        |        |        |
| 43821  |        |        |        |        |
| 43822  |        |        |        |        |
| 43825  |        | 1      |        |        |
| 43826  |        |        |        |        |
| 43831  |        |        |        |        |
| 43836  |        |        |        |        |
| 43852  |        |        | 1      |        |
| 43857  |        |        |        |        |
| 43858  |        |        |        |        |
| 43859  | 1      |        |        |        |
| 43863  |        |        |        |        |
| 43868  | 2      |        |        |        |
| 43872  |        |        |        |        |
| 43874  | 2      |        |        |        |
| 43882  |        |        |        |        |
| 43886  |        |        |        |        |
| 43903  |        |        | 2      |        |
| 43929  |        |        |        |        |
| 43932  |        |        |        |        |
| 43936  |        |        |        |        |
| 43962  |        |        |        |        |
| 43964  |        |        |        | 1      |
| 43968  |        |        | 1      | 1      |
| 43979  |        |        |        |        |
| 44006  |        | 2      |        |        |
| 44009  |        |        |        |        |
| 44023  |        |        |        |        |
| 44035  |        |        |        |        |

| respid | Q31a_4 | Q31a_5 | Q31a_6 | Q31a_7 |
|--------|--------|--------|--------|--------|
| 44038  |        |        |        |        |
| 44039  |        |        |        |        |
| 44043  |        |        |        |        |
| 44048  | 2      | 3      | 4      |        |
| 44050  |        |        |        |        |
| 44051  |        | 2      |        |        |
| 44061  | 4      | 4      |        |        |
| 44063  | 4      |        |        |        |
| 44072  | 1      | 2      | 3      |        |
| 44075  |        |        |        |        |
| 44089  |        | 1      |        |        |
| 44090  |        |        |        |        |
| 44091  |        |        |        |        |
| 44092  |        |        |        |        |
| 44110  | 3      |        |        |        |
| 44112  | 4      |        |        |        |
| 44114  | 4      |        |        |        |
| 44143  |        |        |        |        |
| 44179  |        |        |        |        |
| 44234  |        |        |        |        |
| 44236  |        |        |        |        |
| 44239  | 3      | 4      |        |        |
| 44241  | 4      |        |        |        |
| 44253  |        |        |        |        |
| 44260  | 4      | 5      |        |        |
| 44261  | 3      |        | 3      |        |
| 44263  |        |        |        |        |
| 44264  |        |        |        |        |
| 44265  |        |        |        |        |
| 44267  | 4      |        |        |        |
| 44306  |        |        |        |        |
| 44309  | 4      |        |        |        |

| respid | Q31a_4 | Q31a_5 | Q31a_6 | Q31a_7 |
|--------|--------|--------|--------|--------|
| 44310  |        |        |        |        |
| 44361  |        |        |        |        |
| 44380  |        |        |        |        |
| 44386  |        |        |        |        |
| 44419  |        |        |        |        |
| 44426  |        |        |        |        |
| 44479  |        |        |        |        |
| 44484  |        |        |        |        |
| 44487  |        |        |        |        |
| 44509  |        |        |        |        |
| 44540  |        |        |        |        |
| 44551  |        |        |        |        |
| 44553  |        |        |        |        |
| 44650  |        |        |        |        |
| 44665  | 2      | 2      |        |        |
| 44779  |        |        |        |        |
| 44797  |        |        |        |        |
| 44807  |        |        |        |        |
| 44815  |        |        |        |        |
| 44836  |        |        |        |        |
| 44868  |        |        |        |        |
| 44927  |        |        |        | 1      |
| 44983  |        |        |        |        |
| 45040  |        |        |        |        |
| 45051  |        |        |        |        |
| 45067  |        |        |        |        |
| 45074  |        |        |        |        |
| 45115  |        |        |        |        |
| 45187  | 2      |        |        |        |
| 45221  |        |        |        |        |
| 45279  |        |        |        |        |
| 45308  |        |        |        |        |

| respid | Q31a_4 | Q31a_5 | Q31a_6 | Q31a_7 |
|--------|--------|--------|--------|--------|
| 45317  |        |        |        |        |
| 45379  |        |        | 1      | 2      |
| 45451  |        |        |        |        |
| 45472  |        | 1      |        |        |
| 45474  |        |        |        |        |
| 45544  |        |        |        |        |
| 45561  |        |        |        |        |
| 45596  |        | 1      |        |        |

Incont. During sexual activity - SUI: Just after you have

**Instrum**

**Symptom** Storage

Postmicturition

**Type of R** Frequency

Frequency

Bother

Bother

**Descripti** Incont. During sexual activity

SUI: Just after you have finished urinating

SUI: Laughing

SUI: Sneezing

respid Q31a\_8

Q31a\_9

Q31b\_1

Q31b\_2

241

242

243

244

245

246

1

247

253

1

256

257

1

258

259

1

263

264

265

3

266

268

1

270

272

2

1

274

| respid | Q31a_8 | Q31a_9 | Q31b_1 | Q31b_2 |
|--------|--------|--------|--------|--------|
| 275    |        |        |        |        |
| 276    |        |        |        |        |
| 277    |        |        |        |        |
| 279    |        |        |        |        |
| 286    |        |        |        |        |
| 290    |        |        |        |        |
| 291    |        |        |        | 1      |
| 295    |        |        |        |        |
| 297    |        | 2      |        |        |
| 299    |        |        |        |        |
| 300    |        | 1      |        |        |
| 303    |        |        |        |        |
| 304    |        |        |        |        |
| 306    |        |        |        |        |
| 307    |        |        |        |        |
| 312    |        |        |        |        |
| 315    |        |        |        |        |
| 317    |        |        |        |        |
| 322    |        |        | 2      | 1      |
| 335    |        |        |        | 0      |
| 374    |        |        | 1      | 2      |
| 378    |        |        |        |        |
| 380    |        |        |        | 0      |
| 382    |        | 2      |        |        |
| 384    |        |        |        |        |
| 385    |        |        |        | 1      |
| 395    |        |        |        |        |
| 396    |        |        |        |        |
| 398    |        |        |        |        |
| 402    |        |        |        | 3      |
| 414    | 2      | 3      |        |        |
| 415    |        |        |        |        |



| respid | Q31a_8 | Q31a_9 | Q31b_1 | Q31b_2 |
|--------|--------|--------|--------|--------|
| 416    |        |        |        |        |
| 420    |        |        |        | 1      |
| 421    |        |        |        |        |
| 422    |        |        |        | 0      |
| 423    |        |        |        |        |
| 424    |        |        |        |        |
| 425    |        |        |        |        |
| 428    |        |        |        |        |
| 429    |        |        |        | 1      |
| 431    |        |        |        |        |
| 437    |        |        |        |        |
| 438    |        |        |        |        |
| 441    |        |        |        | 1      |
| 444    |        |        |        |        |
| 448    |        | 1      |        |        |
| 449    |        |        |        | 1      |
| 457    |        |        | 1      |        |
| 460    |        |        |        |        |
| 469    |        |        |        |        |
| 471    |        |        |        | 1      |
| 473    |        | 2      |        | 2      |
| 476    |        |        |        |        |
| 479    |        |        |        |        |
| 485    |        |        |        |        |
| 488    |        |        |        | 1      |
| 494    |        |        |        | 0      |
| 496    |        |        |        |        |
| 501    |        |        |        |        |
| 502    |        |        |        |        |
| 503    |        | 1      |        |        |
| 506    |        | 1      |        |        |
| 514    |        |        | 1      |        |

| respid | Q31a_8 | Q31a_9 | Q31b_1 | Q31b_2 |
|--------|--------|--------|--------|--------|
| 515    |        | 2      |        |        |
| 516    |        |        |        | 0      |
| 519    | 1      |        |        |        |
| 522    |        |        |        |        |
| 525    |        |        |        |        |
| 528    |        |        |        |        |
| 532    |        |        |        |        |
| 536    |        |        |        | 1      |
| 539    |        |        |        |        |
| 540    |        |        | 1      | 1      |
| 547    |        |        |        |        |
| 551    |        |        |        |        |
| 554    |        | 1      |        |        |
| 558    |        | 1      |        |        |
| 563    |        |        |        |        |
| 564    |        | 2      |        |        |
| 565    |        |        |        |        |
| 567    |        |        |        |        |
| 569    |        |        |        |        |
| 572    |        |        |        |        |
| 574    |        |        |        |        |
| 583    |        | 2      |        |        |
| 589    |        |        |        |        |
| 592    |        | 3      |        |        |
| 593    |        |        |        |        |
| 594    |        | 2      |        |        |
| 597    |        |        |        |        |
| 601    |        |        |        |        |
| 607    |        |        |        |        |
| 610    |        |        |        |        |
| 612    |        |        |        |        |
| 627    |        |        |        |        |

| respid | Q31a_8 | Q31a_9 | Q31b_1 | Q31b_2 |
|--------|--------|--------|--------|--------|
| 631    |        |        |        |        |
| 633    |        |        | 2      | 2      |
| 636    | 1      |        |        |        |
| 656    |        |        |        |        |
| 659    |        |        |        |        |
| 670    |        |        |        |        |
| 672    |        |        | 1      | 1      |
| 673    |        |        |        | 1      |
| 675    |        |        |        |        |
| 676    |        |        |        |        |
| 679    |        |        |        |        |
| 683    |        |        |        |        |
| 684    |        |        | 1      |        |
| 690    |        |        |        | 0      |
| 701    |        |        |        |        |
| 709    |        |        | 2      |        |
| 719    |        |        |        |        |
| 726    |        |        |        | 2      |
| 730    |        |        |        |        |
| 731    |        |        |        |        |
| 732    |        |        |        |        |
| 733    |        |        |        |        |
| 735    |        |        |        |        |
| 738    |        |        |        |        |
| 740    |        |        |        |        |
| 742    |        |        |        |        |
| 744    |        |        |        |        |
| 749    |        |        |        | 0      |
| 751    |        |        |        |        |
| 752    |        |        |        |        |
| 753    |        |        | 2      |        |
| 755    |        |        |        |        |

| respid | Q31a_8 | Q31a_9 | Q31b_1 | Q31b_2 |
|--------|--------|--------|--------|--------|
| 756    |        |        |        |        |
| 759    |        |        |        | 0      |
| 760    |        |        |        |        |
| 763    |        |        |        |        |
| 764    |        |        |        |        |
| 765    |        |        |        |        |
| 766    |        |        |        |        |
| 767    | 1      |        |        |        |
| 771    |        |        |        |        |
| 773    |        |        |        |        |
| 774    |        |        |        | 0      |
| 775    |        |        |        |        |
| 776    |        |        |        |        |
| 778    |        |        |        |        |
| 780    |        | 2      |        |        |
| 781    |        |        |        |        |
| 782    |        |        |        |        |
| 783    |        |        |        |        |
| 786    |        |        |        |        |
| 788    |        |        |        |        |
| 792    |        |        |        |        |
| 794    |        | 3      |        |        |
| 795    |        |        |        |        |
| 799    |        | 1      |        | 1      |
| 800    |        |        |        |        |
| 801    |        |        |        |        |
| 804    |        |        |        |        |
| 806    |        |        |        |        |
| 807    |        |        |        |        |
| 808    |        |        |        |        |
| 809    |        |        |        |        |
| 811    |        |        |        |        |

| respid | Q31a_8 | Q31a_9 | Q31b_1 | Q31b_2 |
|--------|--------|--------|--------|--------|
| 812    |        |        |        |        |
| 815    |        |        |        |        |
| 817    |        | 2      | 0      | 0      |
| 818    |        |        |        | 1      |
| 819    |        | 2      |        |        |
| 821    |        |        |        | 1      |
| 824    |        |        |        |        |
| 825    |        |        |        |        |
| 828    |        |        |        |        |
| 832    |        |        |        |        |
| 834    |        |        |        |        |
| 835    |        |        |        |        |
| 836    |        |        |        |        |
| 837    |        |        |        |        |
| 840    |        |        |        |        |
| 841    |        |        |        |        |
| 845    |        |        |        |        |
| 846    |        |        |        |        |
| 849    |        |        |        |        |
| 852    |        |        |        |        |
| 854    |        |        |        |        |
| 856    |        |        |        |        |
| 858    |        |        |        |        |
| 859    |        |        |        |        |
| 861    |        |        |        | 1      |
| 863    |        |        |        |        |
| 864    |        |        |        |        |
| 866    |        |        |        |        |
| 869    |        |        |        |        |
| 870    |        |        |        |        |
| 871    |        |        |        |        |
| 873    |        | 1      |        |        |

| respid | Q31a_8 | Q31a_9 | Q31b_1 | Q31b_2 |
|--------|--------|--------|--------|--------|
| 879    |        |        |        |        |
| 880    |        |        | 1      | 1      |
| 881    |        |        |        |        |
| 882    |        |        |        |        |
| 885    |        |        |        |        |
| 886    |        |        |        |        |
| 887    | 2      | 3      |        | 3      |
| 888    |        |        |        |        |
| 889    |        |        |        |        |
| 890    |        |        |        |        |
| 900    |        |        |        |        |
| 901    |        |        |        |        |
| 902    |        |        |        |        |
| 903    |        |        |        |        |
| 906    |        |        |        |        |
| 907    |        | 1      |        |        |
| 908    |        |        |        |        |
| 910    |        |        |        | 1      |
| 911    |        |        |        |        |
| 912    |        |        |        |        |
| 915    |        |        |        |        |
| 923    |        | 2      |        | 3      |
| 925    |        |        |        |        |
| 926    |        |        |        |        |
| 929    |        |        |        |        |
| 932    |        |        |        |        |
| 933    |        |        |        |        |
| 934    |        |        |        |        |
| 938    |        | 1      |        |        |
| 941    |        |        |        |        |
| 942    |        |        |        |        |
| 943    |        |        |        |        |

| respid | Q31a_8 | Q31a_9 | Q31b_1 | Q31b_2 |
|--------|--------|--------|--------|--------|
| 945    |        |        |        |        |
| 946    |        |        |        |        |
| 947    |        |        |        |        |
| 948    |        |        |        |        |
| 949    |        |        |        |        |
| 952    |        |        |        |        |
| 956    |        |        |        |        |
| 957    |        |        |        |        |
| 959    |        |        |        |        |
| 961    |        |        |        |        |
| 962    |        |        | 3      | 3      |
| 965    |        |        |        |        |
| 967    |        |        |        |        |
| 969    |        |        |        | 1      |
| 970    |        |        |        |        |
| 973    |        |        |        |        |
| 974    |        |        |        |        |
| 975    |        | 2      |        |        |
| 976    |        |        |        |        |
| 977    |        |        |        |        |
| 979    |        |        |        |        |
| 981    |        |        |        | 2      |
| 983    |        |        |        |        |
| 987    |        | 1      |        |        |
| 991    |        |        |        |        |
| 992    |        |        |        |        |
| 993    |        |        |        |        |
| 994    |        |        |        | 1      |
| 995    |        | 1      |        |        |
| 998    |        |        |        | 1      |
| 1000   | 2      | 2      | 1      |        |
| 1001   |        |        |        |        |

| respid | Q31a_8 | Q31a_9 | Q31b_1 | Q31b_2 |
|--------|--------|--------|--------|--------|
| 1002   |        |        |        |        |
| 1004   |        |        |        |        |
| 1005   |        |        |        |        |
| 1006   |        |        |        |        |
| 1007   |        |        |        | 1      |
| 1009   |        |        |        |        |
| 1013   |        |        |        |        |
| 1015   |        |        |        |        |
| 1020   |        |        |        |        |
| 1022   |        |        |        |        |
| 1024   |        |        |        |        |
| 1025   |        |        |        |        |
| 1027   |        |        |        |        |
| 1031   |        |        |        |        |
| 1037   |        |        |        |        |
| 1039   |        |        |        |        |
| 1040   |        |        |        |        |
| 1056   |        | 1      |        |        |
| 1057   |        |        |        |        |
| 1062   |        |        |        |        |
| 1069   |        |        |        |        |
| 1070   |        |        |        |        |
| 1072   |        |        |        |        |
| 1076   |        |        |        |        |
| 1077   |        | 1      |        |        |
| 1078   |        |        |        |        |
| 1080   |        |        |        |        |
| 1094   |        |        | 3      |        |
| 1098   |        | 2      |        |        |
| 1099   |        |        |        | 0      |
| 1102   |        |        |        |        |
| 1110   |        |        |        |        |



| respid | Q31a_8 | Q31a_9 | Q31b_1 | Q31b_2 |
|--------|--------|--------|--------|--------|
| 1117   |        |        |        | 1      |
| 1119   |        |        |        |        |
| 1126   |        |        |        |        |
| 1127   |        |        |        |        |
| 1130   |        |        |        |        |
| 1131   |        |        |        |        |
| 1135   |        | 3      |        |        |
| 1138   |        |        |        | 1      |
| 1139   |        |        |        |        |
| 1140   |        |        |        |        |
| 1142   |        |        |        |        |
| 1143   |        |        |        |        |
| 1145   |        |        |        |        |
| 1149   |        |        |        |        |
| 1152   |        |        |        |        |
| 1160   |        |        |        |        |
| 1164   |        |        |        |        |
| 1165   |        | 1      |        |        |
| 1169   |        |        |        |        |
| 1170   |        |        |        |        |
| 1179   |        |        |        |        |
| 1180   |        |        |        |        |
| 1183   |        |        |        |        |
| 1187   |        |        |        |        |
| 1188   |        |        |        |        |
| 1193   |        |        |        |        |
| 1194   |        |        |        |        |
| 1197   |        |        |        |        |
| 1202   |        |        |        |        |
| 1204   |        |        | 4      | 3      |
| 1211   |        |        |        |        |
| 1224   |        |        |        |        |

| respid | Q31a_8 | Q31a_9 | Q31b_1 | Q31b_2 |
|--------|--------|--------|--------|--------|
| 1225   |        |        |        |        |
| 1230   |        |        |        | 0      |
| 1232   |        |        |        |        |
| 1233   |        | 1      |        |        |
| 1234   |        |        |        |        |
| 1235   |        | 2      |        |        |
| 1236   |        |        |        |        |
| 1237   |        |        |        |        |
| 1238   |        |        |        |        |
| 1239   |        |        |        |        |
| 1241   |        |        |        |        |
| 1242   |        |        |        |        |
| 1244   |        |        |        |        |
| 1245   |        |        |        |        |
| 1247   |        | 2      |        |        |
| 1248   |        |        |        | 1      |
| 1249   |        | 4      |        |        |
| 1250   |        |        |        |        |
| 1251   |        |        |        |        |
| 1252   |        |        |        |        |
| 1253   |        |        |        |        |
| 1254   |        | 2      |        |        |
| 1258   |        |        |        |        |
| 1260   |        |        |        |        |
| 1261   |        |        |        |        |
| 1262   |        |        |        |        |
| 1263   |        |        |        |        |
| 1264   |        |        | 3      |        |
| 1265   |        |        |        |        |
| 1266   |        |        |        |        |
| 1270   |        |        |        |        |
| 1272   |        |        |        | 2      |

| respid | Q31a_8 | Q31a_9 | Q31b_1 | Q31b_2 |
|--------|--------|--------|--------|--------|
| 1273   |        |        |        | 2      |
| 1276   |        |        |        |        |
| 1277   |        |        |        |        |
| 1278   |        |        |        |        |
| 1280   |        |        |        |        |
| 1281   |        |        |        | 2      |
| 1282   |        | 2      |        |        |
| 1283   |        |        |        |        |
| 1288   |        |        |        | 2      |
| 1289   |        |        |        |        |
| 1290   |        |        |        |        |
| 1291   |        |        |        |        |
| 1293   |        |        | 1      | 2      |
| 1294   |        |        |        |        |
| 1295   |        |        |        |        |
| 1296   |        |        |        |        |
| 1297   |        |        |        | 2      |
| 1298   |        |        |        |        |
| 1300   |        | 2      |        |        |
| 1302   |        |        |        |        |
| 1303   |        |        |        |        |
| 1304   |        |        |        | 1      |
| 1305   |        | 1      |        |        |
| 1307   |        |        |        |        |
| 1312   |        |        |        | 0      |
| 1313   |        |        |        | 0      |
| 1314   |        |        |        |        |
| 1317   |        |        | 1      |        |
| 1318   |        |        |        |        |
| 1319   |        |        |        |        |
| 1321   |        |        |        |        |
| 1324   |        |        |        | 3      |

| respid | Q31a_8 | Q31a_9 | Q31b_1 | Q31b_2 |
|--------|--------|--------|--------|--------|
| 1325   |        |        |        |        |
| 1326   |        |        |        |        |
| 1327   |        |        |        |        |
| 1329   |        | 2      |        |        |
| 1330   |        |        | 1      | 2      |
| 1331   |        |        |        | 0      |
| 1335   |        | 1      |        |        |
| 1337   |        |        |        |        |
| 1341   |        |        |        |        |
| 1342   |        |        |        |        |
| 1344   |        | 2      |        |        |
| 1345   |        |        |        |        |
| 1346   |        | 2      |        |        |
| 1350   |        |        |        | 2      |
| 1352   |        |        |        |        |
| 1353   |        | 2      |        |        |
| 1354   |        |        |        |        |
| 1355   |        |        |        |        |
| 1357   |        | 5      |        |        |
| 1360   |        |        |        |        |
| 1362   |        |        |        |        |
| 1363   |        |        |        |        |
| 1367   |        | 1      |        |        |
| 1369   |        |        |        |        |
| 1371   |        |        |        |        |
| 1372   |        |        |        |        |
| 1375   |        |        |        |        |
| 1377   | 1      |        |        |        |
| 1379   |        |        |        |        |
| 1380   |        |        |        |        |
| 1382   |        |        |        |        |
| 1383   |        |        |        |        |

| respid | Q31a_8 | Q31a_9 | Q31b_1 | Q31b_2 |
|--------|--------|--------|--------|--------|
| 1384   |        |        |        | 0      |
| 1385   |        |        |        |        |
| 1387   |        |        |        |        |
| 1388   |        |        |        |        |
| 1389   |        |        |        | 1      |
| 1390   |        |        |        | 1      |
| 1395   |        |        |        |        |
| 1396   |        |        |        |        |
| 1397   |        |        |        | 1      |
| 1398   |        |        |        |        |
| 1399   |        |        |        |        |
| 1403   |        |        |        |        |
| 1405   |        |        |        |        |
| 1406   |        |        |        | 1      |
| 1407   |        | 2      | 2      | 2      |
| 1408   |        |        |        |        |
| 1409   |        |        |        |        |
| 1410   |        | 5      |        |        |
| 1411   |        |        |        |        |
| 1412   |        |        |        |        |
| 1413   |        |        |        | 1      |
| 1414   |        |        |        |        |
| 1415   |        |        |        |        |
| 1416   |        |        |        |        |
| 1417   |        |        |        |        |
| 1418   |        |        |        |        |
| 1419   |        |        |        | 0      |
| 1420   |        |        |        |        |
| 1421   |        |        |        |        |
| 1422   |        |        |        | 0      |
| 1423   |        |        |        |        |
| 1424   |        |        |        |        |

| respid | Q31a_8 | Q31a_9 | Q31b_1 | Q31b_2 |
|--------|--------|--------|--------|--------|
| 1429   |        |        |        |        |
| 1430   |        |        |        |        |
| 1431   |        |        |        |        |
| 1433   |        |        |        |        |
| 1435   |        |        |        |        |
| 1436   |        |        |        |        |
| 1438   |        |        |        |        |
| 1439   |        |        |        |        |
| 1441   |        |        |        |        |
| 1442   |        |        |        |        |
| 1443   |        |        |        |        |
| 1444   |        |        |        |        |
| 1445   |        |        |        |        |
| 1446   |        |        |        | 2      |
| 1447   |        |        |        |        |
| 1449   |        |        | 1      |        |
| 1450   |        |        |        |        |
| 1451   |        | 1      |        |        |
| 1452   |        |        |        |        |
| 1453   |        |        |        |        |
| 1454   | 1      |        |        | 1      |
| 1456   |        |        |        |        |
| 1457   |        |        |        |        |
| 1459   |        |        |        |        |
| 1460   |        |        |        |        |
| 1463   |        |        |        |        |
| 1465   |        |        |        |        |
| 1467   |        |        |        |        |
| 1470   |        |        |        |        |
| 1471   |        |        |        |        |
| 1472   |        |        |        |        |
| 1474   |        |        |        |        |

| respid | Q31a_8 | Q31a_9 | Q31b_1 | Q31b_2 |
|--------|--------|--------|--------|--------|
| 1475   |        |        |        |        |
| 1477   |        |        |        |        |
| 1478   |        |        |        |        |
| 1480   |        |        |        |        |
| 1481   |        |        |        | 2      |
| 1483   |        |        |        |        |
| 1484   |        |        |        |        |
| 1485   |        |        |        |        |
| 1486   |        |        |        |        |
| 1487   |        | 4      |        |        |
| 1488   |        |        |        |        |
| 1489   |        | 2      |        |        |
| 1490   |        |        |        |        |
| 1491   |        |        |        | 2      |
| 1492   |        |        |        |        |
| 1494   |        |        |        |        |
| 1495   |        |        |        |        |
| 1496   |        |        |        |        |
| 1498   |        |        |        |        |
| 1499   |        |        |        | 1      |
| 1500   |        |        |        |        |
| 1501   |        |        |        |        |
| 1503   |        |        |        |        |
| 1504   |        |        |        |        |
| 1508   |        |        |        |        |
| 1509   |        | 2      |        |        |
| 1511   |        | 3      |        |        |
| 1512   |        |        |        | 1      |
| 1513   |        |        |        |        |
| 1515   |        | 1      |        |        |
| 1517   |        |        |        |        |
| 1518   |        |        |        | 1      |

| respid | Q31a_8 | Q31a_9 | Q31b_1 | Q31b_2 |
|--------|--------|--------|--------|--------|
| 1519   |        |        |        |        |
| 1520   |        |        |        |        |
| 1521   |        |        |        |        |
| 1522   |        |        |        |        |
| 1523   |        |        |        |        |
| 1524   |        |        |        | 1      |
| 1525   |        |        | 1      | 1      |
| 1526   |        | 2      |        |        |
| 1527   |        |        |        |        |
| 1534   |        |        |        | 0      |
| 1535   |        |        |        |        |
| 1536   |        | 1      |        |        |
| 1538   |        |        |        |        |
| 1539   |        |        |        |        |
| 1540   |        |        |        |        |
| 1541   |        |        |        |        |
| 1542   |        |        |        |        |
| 1543   |        |        |        |        |
| 1545   |        |        |        |        |
| 1546   |        |        |        |        |
| 1548   |        | 5      |        |        |
| 1549   |        |        |        |        |
| 1551   |        |        |        |        |
| 1552   |        |        |        |        |
| 1556   |        |        |        |        |
| 1557   |        |        |        |        |
| 1558   |        |        |        |        |
| 1561   |        |        |        |        |
| 1562   |        |        |        |        |
| 1563   |        |        |        |        |
| 1564   | 2      | 1      |        |        |
| 1565   |        |        |        |        |



| respid | Q31a_8 | Q31a_9 | Q31b_1 | Q31b_2 |
|--------|--------|--------|--------|--------|
| 1566   |        |        |        |        |
| 1567   |        |        |        |        |
| 1569   |        |        |        |        |
| 1570   |        |        |        |        |
| 1574   |        |        |        |        |
| 1575   |        |        |        |        |
| 1576   |        |        |        |        |
| 1577   |        |        |        |        |
| 1581   |        |        |        |        |
| 1583   |        | 2      |        |        |
| 1585   |        |        |        |        |
| 1586   |        |        |        |        |
| 1588   |        |        |        |        |
| 1590   |        |        |        |        |
| 1592   |        |        |        | 0      |
| 1594   |        |        |        |        |
| 1598   |        |        |        |        |
| 1599   |        |        |        |        |
| 1600   |        |        |        |        |
| 1602   |        |        |        |        |
| 1603   |        |        |        | 0      |
| 1604   |        |        |        |        |
| 1605   |        | 3      |        |        |
| 1606   |        |        |        |        |
| 1610   |        |        |        |        |
| 1611   |        |        |        |        |
| 1612   |        |        |        | 1      |
| 1613   |        |        |        |        |
| 1615   |        |        |        | 1      |
| 1616   |        |        |        |        |
| 1617   |        |        |        |        |
| 1618   |        |        |        |        |

| respid | Q31a_8 | Q31a_9 | Q31b_1 | Q31b_2 |
|--------|--------|--------|--------|--------|
| 1620   |        |        |        |        |
| 1621   |        |        |        |        |
| 1622   |        |        |        |        |
| 1623   |        |        |        |        |
| 1624   |        |        |        |        |
| 1625   |        |        |        |        |
| 1626   |        |        |        |        |
| 1627   |        |        |        |        |
| 1629   |        |        |        |        |
| 1630   |        |        |        |        |
| 1631   |        |        |        |        |
| 1634   |        |        | 1      | 1      |
| 1635   |        |        |        |        |
| 1636   |        |        |        |        |
| 1637   |        |        |        |        |
| 1640   |        |        |        |        |
| 1642   |        |        |        | 1      |
| 1643   |        |        | 1      |        |
| 1644   |        | 1      |        |        |
| 1645   |        |        |        |        |
| 1646   |        |        |        | 0      |
| 1647   |        |        |        |        |
| 1650   |        | 1      |        |        |
| 1654   |        |        |        |        |
| 1656   |        |        |        |        |
| 1657   |        |        |        |        |
| 1659   |        |        |        |        |
| 1662   |        |        |        |        |
| 1663   |        |        |        |        |
| 1664   |        |        |        |        |
| 1665   |        |        |        |        |
| 1667   |        |        |        |        |

| respid | Q31a_8 | Q31a_9 | Q31b_1 | Q31b_2 |
|--------|--------|--------|--------|--------|
| 1668   |        |        |        |        |
| 1670   |        |        |        |        |
| 1671   |        |        |        |        |
| 1673   |        |        |        |        |
| 1674   |        |        |        |        |
| 1676   |        |        |        |        |
| 1677   |        |        |        |        |
| 1678   |        |        |        |        |
| 1680   |        |        |        | 1      |
| 1681   |        |        |        |        |
| 1683   |        |        |        |        |
| 1685   |        |        |        |        |
| 1686   |        |        |        | 1      |
| 1690   |        |        |        |        |
| 1691   |        |        |        | 0      |
| 1692   |        |        |        |        |
| 1693   |        |        |        |        |
| 1695   |        |        |        |        |
| 1696   |        |        |        |        |
| 1698   |        |        |        |        |
| 1699   |        |        |        | 0      |
| 1701   |        |        |        |        |
| 1702   |        |        |        |        |
| 1703   |        |        |        |        |
| 1705   |        |        |        | 1      |
| 1706   |        |        |        |        |
| 1708   |        |        |        |        |
| 1711   |        |        |        | 1      |
| 1712   |        |        |        |        |
| 1713   |        |        |        |        |
| 1715   |        |        |        |        |
| 1717   |        |        |        |        |

| respid | Q31a_8 | Q31a_9 | Q31b_1 | Q31b_2 |
|--------|--------|--------|--------|--------|
| 1718   |        |        | 4      | 4      |
| 1719   |        |        |        |        |
| 1721   |        |        |        |        |
| 1722   |        |        | 1      | 1      |
| 1724   |        |        |        |        |
| 1725   |        |        |        |        |
| 1726   |        | 1      |        |        |
| 1727   |        |        |        |        |
| 1728   |        | 1      |        |        |
| 1731   |        |        |        |        |
| 1733   |        |        |        |        |
| 1734   |        |        |        |        |
| 1735   |        |        |        |        |
| 1736   |        |        |        | 0      |
| 1737   |        |        |        |        |
| 1738   |        |        |        | 1      |
| 1743   |        |        |        |        |
| 1755   |        |        |        | 2      |
| 1756   |        |        |        |        |
| 1757   |        |        |        |        |
| 1758   |        |        | 1      | 1      |
| 1759   |        |        |        |        |
| 1761   |        |        |        |        |
| 1762   |        |        |        | 1      |
| 1764   |        |        |        |        |
| 1767   |        |        |        |        |
| 1768   |        | 2      |        |        |
| 1769   |        |        |        |        |
| 1770   |        |        |        |        |
| 1771   |        |        |        | 2      |
| 1776   |        |        |        |        |
| 1777   |        |        |        |        |

| respid | Q31a_8 | Q31a_9 | Q31b_1 | Q31b_2 |
|--------|--------|--------|--------|--------|
| 1778   |        |        |        |        |
| 1779   |        | 2      |        |        |
| 1780   |        | 1      |        |        |
| 1781   |        |        |        |        |
| 1783   |        |        |        |        |
| 1784   |        |        |        |        |
| 1785   |        |        |        |        |
| 1788   |        |        |        | 1      |
| 1792   |        |        |        |        |
| 1794   |        |        |        | 0      |
| 1798   |        |        |        |        |
| 1799   |        |        |        |        |
| 1800   |        |        |        |        |
| 1804   |        |        |        |        |
| 1806   |        |        |        | 1      |
| 1807   |        |        |        |        |
| 1808   |        |        |        |        |
| 1809   |        |        |        | 1      |
| 1811   |        |        |        |        |
| 1812   |        |        |        |        |
| 1813   |        |        |        |        |
| 1814   |        |        |        | 2      |
| 1815   |        |        |        |        |
| 1817   |        |        |        |        |
| 1820   |        |        |        |        |
| 1821   |        |        |        |        |
| 1822   |        | 1      |        |        |
| 1823   |        |        |        |        |
| 1824   |        |        |        |        |
| 1826   |        |        |        |        |
| 1828   |        | 1      |        |        |
| 1829   |        |        |        |        |

| respid | Q31a_8 | Q31a_9 | Q31b_1 | Q31b_2 |
|--------|--------|--------|--------|--------|
| 1830   |        | 1      |        |        |
| 1831   |        |        |        |        |
| 1832   |        |        |        |        |
| 1836   |        |        |        |        |
| 1838   |        | 2      |        |        |
| 1839   |        |        |        |        |
| 1840   |        |        |        |        |
| 1841   |        |        |        |        |
| 1842   |        | 2      |        | 0      |
| 1843   |        |        |        |        |
| 1844   |        |        |        | 1      |
| 1845   |        |        |        |        |
| 1849   |        |        |        |        |
| 1850   |        | 1      |        |        |
| 1851   |        |        |        |        |
| 1852   |        |        |        |        |
| 1857   |        |        |        | 2      |
| 1858   |        |        |        |        |
| 1861   |        |        |        |        |
| 1862   |        |        |        |        |
| 1863   |        |        |        |        |
| 1864   |        |        |        |        |
| 1865   |        |        |        |        |
| 1867   |        |        |        |        |
| 1868   |        |        |        |        |
| 1869   |        |        |        |        |
| 1870   |        |        |        |        |
| 1871   |        | 3      |        |        |
| 1872   |        |        |        |        |
| 1873   |        |        |        |        |
| 1876   |        |        |        |        |
| 1877   |        |        |        |        |

| respid | Q31a_8 | Q31a_9 | Q31b_1 | Q31b_2 |
|--------|--------|--------|--------|--------|
| 1878   |        | 1      |        | 0      |
| 1879   |        |        |        |        |
| 1880   |        |        |        |        |
| 1881   |        |        |        | 1      |
| 1883   |        | 2      |        |        |
| 1886   |        |        |        |        |
| 1888   |        |        |        |        |
| 1889   |        |        | 1      | 3      |
| 1890   |        |        |        |        |
| 1891   |        |        |        |        |
| 1893   |        |        |        |        |
| 1894   |        |        |        |        |
| 1895   |        | 2      |        |        |
| 1896   |        |        |        |        |
| 1897   |        |        |        |        |
| 1898   | 2      |        | 3      | 3      |
| 1899   |        |        |        |        |
| 1900   |        |        |        |        |
| 1903   |        |        |        |        |
| 1906   |        |        |        |        |
| 1907   |        |        |        | 2      |
| 1908   |        |        |        |        |
| 1909   |        |        |        | 1      |
| 1910   |        |        |        |        |
| 1911   |        | 1      |        |        |
| 1912   |        |        |        |        |
| 1917   |        |        | 1      | 1      |
| 1918   |        |        |        |        |
| 1919   |        |        |        |        |
| 1922   |        |        |        |        |
| 1925   |        |        |        |        |
| 1926   | 1      |        |        |        |

| respid | Q31a_8 | Q31a_9 | Q31b_1 | Q31b_2 |
|--------|--------|--------|--------|--------|
| 1927   |        |        |        |        |
| 1928   |        |        |        |        |
| 1929   |        |        |        |        |
| 1934   |        |        |        |        |
| 1935   |        |        |        |        |
| 1936   |        | 2      |        | 1      |
| 1937   |        |        |        |        |
| 1938   |        |        |        |        |
| 1939   |        |        |        |        |
| 1940   |        |        |        |        |
| 1941   |        |        |        |        |
| 1948   |        |        |        |        |
| 1950   |        | 2      |        |        |
| 1955   |        |        |        | 2      |
| 1958   |        |        |        | 0      |
| 1960   |        |        |        |        |
| 1961   |        |        |        |        |
| 1962   |        |        |        |        |
| 1965   |        |        |        |        |
| 1966   |        |        |        |        |
| 1967   |        |        |        |        |
| 1968   |        |        |        | 1      |
| 1973   |        |        |        |        |
| 1974   |        | 4      |        |        |
| 1975   |        |        |        |        |
| 1977   |        |        |        |        |
| 1978   |        |        |        |        |
| 1979   |        |        |        |        |
| 1982   |        |        |        |        |
| 1983   |        |        |        |        |
| 1987   |        |        |        |        |
| 1988   |        |        |        |        |



| respid | Q31a_8 | Q31a_9 | Q31b_1 | Q31b_2 |
|--------|--------|--------|--------|--------|
| 1991   |        | 1      |        |        |
| 1992   |        |        |        |        |
| 1993   |        |        |        | 1      |
| 1994   |        |        |        |        |
| 1995   |        |        |        |        |
| 1996   |        |        |        |        |
| 1997   |        |        |        | 1      |
| 1998   |        |        |        |        |
| 1999   |        |        |        | 1      |
| 2000   |        | 2      |        |        |
| 2001   |        |        |        |        |
| 2002   |        |        |        |        |
| 2003   |        |        |        |        |
| 2004   |        |        |        |        |
| 2005   |        |        |        | 1      |
| 2007   |        | 1      | 1      |        |
| 2009   |        |        |        |        |
| 2010   |        |        |        |        |
| 2011   |        |        |        |        |
| 2013   |        |        |        |        |
| 2014   |        |        |        |        |
| 2017   |        | 1      |        |        |
| 2020   |        |        |        |        |
| 2023   |        |        |        | 1      |
| 2024   |        |        |        |        |
| 2029   |        |        |        |        |
| 2030   |        |        |        |        |
| 2031   |        |        |        |        |
| 2032   |        | 3      |        |        |
| 2033   |        |        |        |        |
| 2034   |        |        |        |        |
| 2036   |        |        | 2      | 2      |

| respid | Q31a_8 | Q31a_9 | Q31b_1 | Q31b_2 |
|--------|--------|--------|--------|--------|
| 2037   |        | 1      |        |        |
| 2038   |        |        |        |        |
| 2039   |        |        |        | 1      |
| 2040   |        |        |        |        |
| 2041   |        |        |        |        |
| 2042   |        |        |        |        |
| 2043   |        |        |        | 1      |
| 2051   |        |        |        |        |
| 2052   |        | 1      |        |        |
| 2053   |        |        | 0      |        |
| 2054   |        |        |        |        |
| 2055   |        |        | 1      |        |
| 2056   |        |        |        |        |
| 2057   |        |        |        |        |
| 2059   |        |        |        |        |
| 2063   |        |        |        |        |
| 2066   |        |        |        | 1      |
| 2068   |        |        |        |        |
| 2069   |        | 1      |        | 2      |
| 2070   |        |        |        |        |
| 2071   |        | 2      |        |        |
| 2073   |        |        |        |        |
| 2077   |        |        |        | 1      |
| 2079   |        |        |        |        |
| 2080   |        |        | 4      | 4      |
| 2081   | 2      | 2      |        |        |
| 2084   |        |        |        |        |
| 2085   |        |        |        |        |
| 2087   |        |        |        | 3      |
| 2089   |        |        |        |        |
| 2093   |        |        |        |        |
| 2094   |        |        |        |        |

| respid | Q31a_8 | Q31a_9 | Q31b_1 | Q31b_2 |
|--------|--------|--------|--------|--------|
| 2095   |        |        |        |        |
| 2097   |        |        |        |        |
| 2099   |        |        |        |        |
| 2100   |        |        |        | 1      |
| 2101   |        |        |        |        |
| 2103   |        |        |        |        |
| 2104   |        |        |        | 1      |
| 2106   |        |        |        |        |
| 2111   |        | 4      |        |        |
| 2113   |        |        |        |        |
| 2115   |        |        |        |        |
| 2119   |        | 1      |        |        |
| 2120   |        |        |        |        |
| 2123   |        |        |        |        |
| 2124   |        | 1      |        | 3      |
| 2130   |        |        |        |        |
| 2131   |        |        |        | 1      |
| 2133   |        |        | 3      | 3      |
| 2139   |        |        | 1      |        |
| 2141   |        |        |        |        |
| 2143   |        |        |        |        |
| 2144   |        |        |        |        |
| 2147   |        |        |        |        |
| 2151   |        |        |        |        |
| 2153   |        |        |        |        |
| 2154   |        |        |        |        |
| 2155   |        |        |        |        |
| 2159   |        |        |        | 0      |
| 2160   | 3      |        |        |        |
| 2161   |        |        |        |        |
| 2163   |        |        |        |        |
| 2164   |        |        |        |        |

| respid | Q31a_8 | Q31a_9 | Q31b_1 | Q31b_2 |
|--------|--------|--------|--------|--------|
| 2168   |        | 1      |        |        |
| 2169   |        |        |        |        |
| 2170   |        | 1      |        |        |
| 2171   |        | 2      |        |        |
| 2172   | 2      | 4      |        |        |
| 2173   |        |        |        |        |
| 2174   |        |        |        |        |
| 2175   |        |        |        |        |
| 2176   |        | 2      |        |        |
| 2177   |        |        | 3      | 3      |
| 2179   |        |        |        | 1      |
| 2181   |        |        |        |        |
| 2182   |        |        |        |        |
| 2183   |        |        |        |        |
| 2184   |        |        |        | 2      |
| 2185   |        |        |        |        |
| 2186   |        |        |        |        |
| 2187   |        |        |        |        |
| 2188   |        |        |        |        |
| 2189   |        |        |        |        |
| 2190   |        |        |        |        |
| 2193   |        |        |        |        |
| 2195   |        |        |        |        |
| 2198   |        |        |        |        |
| 2200   |        |        |        |        |
| 2205   |        |        |        |        |
| 2208   |        |        |        |        |
| 2209   |        |        |        |        |
| 2210   |        |        |        |        |
| 2211   |        |        |        |        |
| 2213   |        |        |        |        |
| 2214   |        |        |        | 2      |

| respid | Q31a_8 | Q31a_9 | Q31b_1 | Q31b_2 |
|--------|--------|--------|--------|--------|
| 2216   |        | 1      |        |        |
| 2220   |        |        |        |        |
| 2225   |        |        |        |        |
| 2227   |        |        |        |        |
| 2228   |        |        |        |        |
| 2229   |        |        |        |        |
| 2230   |        |        |        |        |
| 2236   |        |        |        |        |
| 2238   | 2      |        |        | 3      |
| 2239   |        |        |        |        |
| 2240   |        |        |        |        |
| 2241   |        |        |        | 1      |
| 2243   |        |        |        |        |
| 2245   |        |        |        |        |
| 2247   |        |        |        | 0      |
| 2248   |        |        |        |        |
| 2249   |        |        |        |        |
| 2254   |        |        |        |        |
| 2256   |        |        |        |        |
| 2259   |        |        |        |        |
| 2261   |        |        |        | 1      |
| 2262   |        |        |        |        |
| 2263   |        |        |        | 1      |
| 2264   |        |        |        |        |
| 2265   |        |        |        |        |
| 2270   |        |        |        |        |
| 2271   |        |        |        |        |
| 2272   |        |        |        |        |
| 2273   |        |        |        |        |
| 2274   |        |        |        |        |
| 2276   |        |        |        | 1      |
| 2277   |        |        |        | 1      |

| respid | Q31a_8 | Q31a_9 | Q31b_1 | Q31b_2 |
|--------|--------|--------|--------|--------|
| 2281   |        |        |        |        |
| 2288   |        |        |        |        |
| 2290   |        |        |        |        |
| 2294   |        |        | 1      |        |
| 2295   |        |        |        | 0      |
| 2296   |        |        |        |        |
| 2297   |        |        |        |        |
| 2298   |        |        |        |        |
| 2301   |        |        |        |        |
| 2302   | 1      | 1      |        |        |
| 2303   |        |        |        |        |
| 2305   |        |        |        |        |
| 2309   |        |        |        | 0      |
| 2310   |        |        |        |        |
| 2311   |        | 2      |        | 2      |
| 2313   |        | 4      |        | 1      |
| 2316   |        |        |        |        |
| 2317   |        |        |        |        |
| 2318   |        |        |        |        |
| 2319   |        |        |        | 1      |
| 2321   |        | 3      |        |        |
| 2324   |        |        |        |        |
| 2328   |        |        |        | 1      |
| 2329   |        |        |        |        |
| 2330   |        |        |        |        |
| 2333   |        |        |        |        |
| 2334   |        |        |        |        |
| 2338   |        |        |        |        |
| 2341   |        |        | 1      | 1      |
| 2342   |        |        |        |        |
| 2343   |        | 2      | 3      | 4      |
| 2346   |        |        | 1      | 0      |

| respid | Q31a_8 | Q31a_9 | Q31b_1 | Q31b_2 |
|--------|--------|--------|--------|--------|
| 2347   |        |        |        | 1      |
| 2348   |        |        |        |        |
| 2349   |        |        |        |        |
| 2350   |        |        |        | 0      |
| 2351   |        |        |        |        |
| 2352   |        |        |        |        |
| 2359   |        |        |        |        |
| 2362   |        |        |        |        |
| 2363   |        |        |        |        |
| 2365   |        |        |        |        |
| 2367   |        |        |        |        |
| 2368   |        |        |        |        |
| 2369   |        |        |        |        |
| 2372   |        |        |        |        |
| 2374   |        |        |        | 0      |
| 2376   |        |        |        |        |
| 2379   |        | 1      |        | 1      |
| 2380   |        |        |        |        |
| 2381   |        |        |        | 1      |
| 2382   |        |        |        |        |
| 2385   |        |        |        | 1      |
| 2387   |        |        |        |        |
| 2388   |        |        |        |        |
| 2389   |        |        |        |        |
| 2391   |        |        |        |        |
| 2392   |        |        |        |        |
| 2393   |        |        |        |        |
| 2394   |        |        | 1      |        |
| 2397   |        |        |        |        |
| 2398   |        |        |        | 1      |
| 2400   |        |        |        |        |
| 2402   |        |        |        |        |

| respid | Q31a_8 | Q31a_9 | Q31b_1 | Q31b_2 |
|--------|--------|--------|--------|--------|
| 2406   |        |        |        |        |
| 2408   |        |        | 0      | 0      |
| 2410   |        |        |        |        |
| 2411   |        | 2      |        | 1      |
| 2412   |        |        |        |        |
| 2414   |        |        |        | 2      |
| 2421   |        |        |        | 1      |
| 2423   |        |        |        |        |
| 2424   |        | 1      |        | 1      |
| 2425   |        |        |        |        |
| 2426   |        |        |        |        |
| 2429   |        |        |        | 4      |
| 2430   |        | 1      |        |        |
| 2432   |        |        |        |        |
| 2433   |        |        |        |        |
| 2434   |        |        |        | 1      |
| 2435   |        |        |        |        |
| 2436   |        |        |        | 1      |
| 2439   |        |        | 2      | 2      |
| 2440   |        |        |        |        |
| 2441   |        |        |        |        |
| 2446   |        |        |        | 0      |
| 2448   |        | 2      | 2      | 1      |
| 2449   |        |        |        |        |
| 2451   |        |        |        |        |
| 2452   |        |        |        |        |
| 2455   |        |        |        |        |
| 2457   |        |        |        | 1      |
| 2458   |        |        |        |        |
| 2459   |        |        |        | 0      |
| 2460   |        |        |        |        |
| 2462   |        | 2      | 3      |        |



| respid | Q31a_8 | Q31a_9 | Q31b_1 | Q31b_2 |
|--------|--------|--------|--------|--------|
| 2464   |        | 5      |        |        |
| 2465   |        |        |        | 1      |
| 2468   | 1      | 2      |        |        |
| 2469   |        |        |        |        |
| 2470   |        |        |        |        |
| 2471   |        |        |        |        |
| 2472   |        |        |        |        |
| 2474   |        |        |        |        |
| 2476   |        | 2      |        |        |
| 2478   |        |        |        |        |
| 2479   |        |        |        |        |
| 2480   |        | 1      |        |        |
| 2482   |        |        |        |        |
| 2486   |        |        |        |        |
| 2488   |        |        |        |        |
| 2489   |        |        |        |        |
| 2491   |        |        |        |        |
| 2495   |        |        |        |        |
| 2496   |        |        |        |        |
| 2498   |        |        |        | 1      |
| 2501   |        | 4      |        |        |
| 2502   |        |        |        |        |
| 2503   |        | 1      |        |        |
| 2504   |        |        |        |        |
| 2507   |        |        |        | 1      |
| 2509   |        |        |        | 2      |
| 2512   |        |        |        |        |
| 2514   |        |        |        |        |
| 2516   |        |        |        |        |
| 2517   |        | 2      |        | 0      |
| 2521   |        |        |        |        |
| 2522   |        |        |        |        |

| respid | Q31a_8 | Q31a_9 | Q31b_1 | Q31b_2 |
|--------|--------|--------|--------|--------|
| 2524   |        |        |        |        |
| 2525   |        |        |        |        |
| 2526   |        | 2      |        |        |
| 2527   |        |        | 0      |        |
| 2528   |        |        | 1      |        |
| 2531   |        |        |        |        |
| 2533   |        |        |        |        |
| 2535   |        |        |        |        |
| 2536   |        | 3      |        | 1      |
| 2539   |        |        |        |        |
| 2540   |        |        |        |        |
| 2543   |        |        |        |        |
| 2546   |        |        |        | 1      |
| 2547   |        | 2      |        | 1      |
| 2549   |        |        |        |        |
| 2553   |        |        |        |        |
| 2554   |        |        |        |        |
| 2555   |        |        |        |        |
| 2556   |        |        |        |        |
| 2557   |        |        |        |        |
| 2559   |        |        |        |        |
| 2560   |        |        | 3      | 3      |
| 2561   |        |        |        |        |
| 2566   |        |        |        |        |
| 2567   |        |        |        |        |
| 2570   |        | 1      |        |        |
| 2574   |        | 2      |        |        |
| 2578   |        |        |        |        |
| 2580   |        |        |        |        |
| 2590   |        |        |        |        |
| 2593   |        |        |        |        |
| 2594   |        |        |        |        |

| respid | Q31a_8 | Q31a_9 | Q31b_1 | Q31b_2 |
|--------|--------|--------|--------|--------|
| 2595   |        |        |        |        |
| 2596   |        |        |        |        |
| 2597   |        |        |        |        |
| 2598   |        |        |        |        |
| 2602   |        |        |        |        |
| 2605   | 2      | 3      |        |        |
| 2606   |        |        |        |        |
| 2607   |        |        |        |        |
| 2608   |        |        |        |        |
| 2609   |        |        |        | 1      |
| 2610   |        |        |        |        |
| 2614   |        |        |        |        |
| 2615   |        |        |        |        |
| 2616   |        |        |        |        |
| 2618   |        |        |        |        |
| 2630   |        |        |        |        |
| 2633   |        |        |        |        |
| 2637   |        |        |        |        |
| 2638   |        |        |        | 1      |
| 2641   |        |        |        |        |
| 2644   |        |        |        |        |
| 2645   |        |        |        | 0      |
| 2646   |        |        |        |        |
| 2648   |        |        |        |        |
| 2651   |        |        |        |        |
| 2652   |        |        |        | 1      |
| 2653   |        | 1      |        |        |
| 2656   |        |        |        |        |
| 2657   |        |        |        |        |
| 2658   |        |        |        |        |
| 2661   |        |        | 1      | 1      |
| 2663   |        |        |        |        |

| respid | Q31a_8 | Q31a_9 | Q31b_1 | Q31b_2 |
|--------|--------|--------|--------|--------|
| 2665   |        |        |        |        |
| 2670   |        |        |        |        |
| 2672   |        |        |        |        |
| 2673   |        |        |        |        |
| 2677   |        |        |        |        |
| 2686   |        |        | 4      | 4      |
| 2688   |        |        |        |        |
| 2689   |        |        |        |        |
| 2691   |        |        |        |        |
| 2695   |        |        |        |        |
| 2696   |        |        |        |        |
| 2697   |        |        |        |        |
| 2698   |        |        |        |        |
| 2703   |        |        |        | 2      |
| 2704   |        |        |        |        |
| 2706   |        |        |        |        |
| 2707   |        |        |        |        |
| 2710   |        |        |        |        |
| 2711   |        |        |        |        |
| 2712   |        |        |        |        |
| 2713   |        |        |        |        |
| 2721   |        |        |        |        |
| 2730   |        |        |        |        |
| 2731   |        |        |        |        |
| 2732   |        |        |        |        |
| 2733   |        |        |        |        |
| 2735   |        |        |        |        |
| 2736   |        |        |        |        |
| 2740   |        |        |        |        |
| 2741   |        |        |        |        |
| 2742   |        |        |        | 4      |
| 2743   |        |        |        |        |

| respid | Q31a_8 | Q31a_9 | Q31b_1 | Q31b_2 |
|--------|--------|--------|--------|--------|
| 2744   |        |        |        |        |
| 2745   |        | 2      |        |        |
| 2749   |        |        |        | 1      |
| 2751   |        |        |        |        |
| 2754   |        |        |        |        |
| 2755   |        |        |        |        |
| 2757   |        |        |        |        |
| 2758   |        |        |        | 1      |
| 2759   |        |        |        |        |
| 2761   |        |        |        | 1      |
| 2762   |        |        |        |        |
| 2763   |        |        |        |        |
| 2764   |        | 2      |        | 1      |
| 2765   |        |        |        |        |
| 2766   |        | 2      |        |        |
| 2767   |        |        |        |        |
| 2769   |        |        |        | 1      |
| 2770   |        | 2      | 1      | 2      |
| 2771   |        |        | 1      | 1      |
| 2774   |        | 1      |        |        |
| 2777   | 1      | 2      | 2      | 2      |
| 2778   |        | 2      |        | 1      |
| 2781   | 2      |        |        |        |
| 2782   |        | 1      |        | 1      |
| 2784   |        |        |        |        |
| 2785   |        | 2      |        |        |
| 2786   |        |        |        |        |
| 2787   |        |        |        |        |
| 2789   |        |        |        | 1      |
| 2790   |        |        |        |        |
| 2791   |        |        |        |        |
| 2793   |        |        |        |        |

| respid | Q31a_8 | Q31a_9 | Q31b_1 | Q31b_2 |
|--------|--------|--------|--------|--------|
| 2797   |        |        |        |        |
| 2798   |        |        |        |        |
| 2799   |        |        |        |        |
| 2801   |        |        |        |        |
| 2802   |        |        |        |        |
| 2803   |        |        |        | 3      |
| 2804   |        | 2      |        |        |
| 2807   |        |        |        |        |
| 2809   |        |        |        |        |
| 2810   |        |        | 1      |        |
| 2812   |        | 1      |        |        |
| 2814   |        |        |        |        |
| 2815   |        | 1      |        |        |
| 2816   |        |        |        |        |
| 2817   |        |        |        |        |
| 2819   |        |        |        |        |
| 2820   |        |        |        |        |
| 2821   |        |        |        |        |
| 2822   |        | 3      | 1      | 1      |
| 2823   |        |        |        | 2      |
| 2824   |        |        |        | 1      |
| 2825   |        |        |        |        |
| 2826   |        |        |        | 1      |
| 2827   |        |        |        |        |
| 2828   |        |        |        |        |
| 2829   |        |        |        |        |
| 2830   |        |        |        | 1      |
| 2831   |        |        |        |        |
| 2832   |        | 3      | 2      | 3      |
| 2833   |        |        |        |        |
| 2834   |        | 2      |        |        |
| 2835   |        |        |        |        |

| respid | Q31a_8 | Q31a_9 | Q31b_1 | Q31b_2 |
|--------|--------|--------|--------|--------|
| 2836   |        |        |        |        |
| 2837   |        |        |        |        |
| 2838   | 2      | 2      |        |        |
| 2844   |        |        |        | 3      |
| 2845   |        |        |        |        |
| 2847   |        |        |        |        |
| 2848   |        |        |        |        |
| 2849   |        |        |        |        |
| 2851   |        |        |        |        |
| 2852   |        |        | 1      | 1      |
| 2853   |        |        |        |        |
| 2854   |        |        |        |        |
| 2856   |        | 2      |        |        |
| 2857   |        |        |        |        |
| 2858   |        |        |        |        |
| 2859   |        | 2      |        |        |
| 2860   |        |        |        | 1      |
| 2861   |        | 3      |        | 2      |
| 2863   |        |        |        |        |
| 2864   |        |        | 1      | 1      |
| 2866   |        |        |        | 3      |
| 2872   |        |        |        |        |
| 2875   |        |        |        |        |
| 2879   |        |        |        |        |
| 2881   |        |        |        |        |
| 2882   |        |        |        |        |
| 2883   |        |        |        |        |
| 2884   |        | 3      |        |        |
| 2885   |        |        |        |        |
| 2887   |        | 1      |        |        |
| 2888   |        |        |        |        |
| 2890   |        |        |        |        |

| respid | Q31a_8 | Q31a_9 | Q31b_1 | Q31b_2 |
|--------|--------|--------|--------|--------|
| 2891   |        |        |        |        |
| 2892   |        |        |        |        |
| 2895   |        |        |        |        |
| 2899   |        |        |        |        |
| 2900   |        |        |        |        |
| 2902   |        | 3      |        |        |
| 2903   |        |        |        |        |
| 2904   |        |        |        |        |
| 2906   |        |        |        | 1      |
| 2908   |        |        |        |        |
| 2910   |        |        |        |        |
| 2917   |        | 2      |        |        |
| 2918   |        |        |        |        |
| 2919   |        |        |        |        |
| 2920   |        |        |        |        |
| 2921   |        | 3      |        |        |
| 2922   |        |        |        |        |
| 2923   |        |        |        |        |
| 2924   |        |        |        |        |
| 2926   |        |        |        | 1      |
| 2928   |        |        |        |        |
| 2930   |        |        |        |        |
| 2931   |        | 2      |        |        |
| 2933   |        |        |        |        |
| 2935   |        |        |        |        |
| 2936   |        |        |        |        |
| 2937   |        |        |        |        |
| 2938   |        |        |        |        |
| 2944   |        |        |        |        |
| 2945   |        | 1      |        |        |
| 2947   |        |        |        |        |
| 2949   |        |        |        |        |



| respid | Q31a_8 | Q31a_9 | Q31b_1 | Q31b_2 |
|--------|--------|--------|--------|--------|
| 2951   |        |        |        |        |
| 2952   |        | 2      |        |        |
| 2953   |        |        |        |        |
| 2955   |        |        |        |        |
| 2957   |        |        |        |        |
| 2958   |        |        |        |        |
| 2960   |        |        |        |        |
| 2963   |        |        |        |        |
| 2964   |        |        |        |        |
| 2967   |        |        |        |        |
| 2968   |        |        |        |        |
| 2971   |        |        | 2      | 3      |
| 2974   |        |        |        |        |
| 2975   |        |        |        |        |
| 2982   |        |        |        |        |
| 2983   |        |        |        |        |
| 2985   |        |        |        |        |
| 2986   |        | 3      | 1      | 2      |
| 2987   |        |        |        | 1      |
| 2988   |        |        |        | 2      |
| 2993   |        |        |        |        |
| 2996   |        |        |        |        |
| 2997   |        | 4      |        |        |
| 2998   |        |        |        |        |
| 3004   |        |        |        |        |
| 3007   |        |        |        |        |
| 3011   |        |        |        |        |
| 3012   |        |        |        |        |
| 3013   |        |        |        |        |
| 3014   |        |        |        |        |
| 3015   |        |        |        |        |
| 3016   |        |        |        |        |

| respid | Q31a_8 | Q31a_9 | Q31b_1 | Q31b_2 |
|--------|--------|--------|--------|--------|
| 3017   |        |        |        |        |
| 3020   |        |        |        |        |
| 3022   |        |        |        |        |
| 3023   |        |        |        |        |
| 3026   |        |        |        | 1      |
| 3038   |        |        |        | 0      |
| 3039   |        |        |        |        |
| 3040   |        |        |        |        |
| 3041   |        |        |        |        |
| 3042   |        |        |        |        |
| 3044   |        |        |        |        |
| 3050   |        |        |        |        |
| 3052   |        |        |        |        |
| 3056   | 2      |        | 2      | 2      |
| 3059   |        |        |        |        |
| 3060   |        |        |        |        |
| 3063   |        |        |        |        |
| 3065   |        |        |        |        |
| 3067   |        | 1      |        |        |
| 3068   |        |        |        |        |
| 3072   |        |        |        |        |
| 3074   |        |        |        |        |
| 3075   |        |        |        |        |
| 3076   |        |        |        | 1      |
| 3079   |        |        |        |        |
| 3082   |        | 2      |        |        |
| 3083   |        |        |        |        |
| 3084   |        |        |        |        |
| 3085   |        |        |        |        |
| 3090   |        |        |        | 0      |
| 3091   |        |        |        | 3      |
| 3092   |        |        |        |        |

| respid | Q31a_8 | Q31a_9 | Q31b_1 | Q31b_2 |
|--------|--------|--------|--------|--------|
| 3095   |        |        |        |        |
| 3096   | 4      |        |        |        |
| 3097   |        |        | 2      |        |
| 3099   |        |        |        |        |
| 3101   |        |        |        | 1      |
| 3103   |        |        |        |        |
| 3104   |        |        |        |        |
| 3105   |        |        |        |        |
| 3107   |        |        |        |        |
| 3108   |        |        |        |        |
| 3109   |        |        |        |        |
| 3116   |        |        |        |        |
| 3117   |        |        |        | 1      |
| 3119   |        |        |        |        |
| 3120   |        |        |        |        |
| 3130   |        |        |        |        |
| 3131   |        |        | 3      |        |
| 3133   |        |        |        |        |
| 3134   |        |        |        |        |
| 3135   |        |        |        |        |
| 3145   |        |        |        |        |
| 3147   |        |        |        |        |
| 3152   |        |        |        |        |
| 3155   |        | 4      |        | 3      |
| 3156   |        |        |        |        |
| 3157   |        | 3      |        |        |
| 3166   |        | 1      |        |        |
| 3169   |        |        |        |        |
| 3179   |        |        |        | 1      |
| 3181   |        |        |        |        |
| 3185   |        |        |        |        |
| 3190   |        |        |        |        |

| respid | Q31a_8 | Q31a_9 | Q31b_1 | Q31b_2 |
|--------|--------|--------|--------|--------|
| 3191   |        |        |        |        |
| 3192   |        |        |        |        |
| 3193   |        |        |        |        |
| 3195   |        |        |        |        |
| 3202   |        | 5      |        |        |
| 3204   |        |        |        |        |
| 3208   |        |        | 0      |        |
| 3212   |        |        |        |        |
| 3218   |        |        |        |        |
| 3219   |        |        |        | 0      |
| 3220   |        |        |        | 1      |
| 3221   |        |        |        |        |
| 3223   |        |        |        | 1      |
| 3231   |        |        |        | 1      |
| 3232   |        |        |        |        |
| 3234   |        |        |        |        |
| 3235   |        |        |        |        |
| 3237   |        |        |        |        |
| 3238   |        |        |        |        |
| 3240   |        |        |        |        |
| 3241   |        |        |        |        |
| 3243   |        |        |        | 1      |
| 3244   | 2      |        |        | 1      |
| 3247   |        |        |        |        |
| 3250   |        |        |        |        |
| 3251   |        | 2      | 2      | 2      |
| 3255   |        |        |        | 0      |
| 3256   |        |        |        |        |
| 3257   |        |        |        |        |
| 3258   |        |        |        |        |
| 3259   |        |        | 2      | 2      |
| 3260   |        |        |        |        |

| respid | Q31a_8 | Q31a_9 | Q31b_1 | Q31b_2 |
|--------|--------|--------|--------|--------|
| 3261   |        |        |        |        |
| 3262   |        | 1      |        |        |
| 3264   |        |        |        | 3      |
| 3265   |        |        |        |        |
| 3267   |        |        |        |        |
| 3268   |        | 1      |        | 1      |
| 3270   |        |        |        |        |
| 3271   |        |        |        |        |
| 3274   |        |        |        |        |
| 3276   |        |        |        |        |
| 3277   |        |        |        |        |
| 3279   |        |        |        |        |
| 3281   |        |        |        |        |
| 3283   |        | 2      |        |        |
| 3285   |        |        |        |        |
| 3286   |        |        |        |        |
| 3287   |        |        |        |        |
| 3289   |        |        |        |        |
| 3290   |        |        |        |        |
| 3291   |        |        |        | 1      |
| 3292   |        |        |        | 2      |
| 3293   |        |        |        | 3      |
| 3294   |        | 1      |        |        |
| 3296   |        |        |        |        |
| 3306   |        |        |        |        |
| 3307   |        |        | 3      | 2      |
| 3308   |        |        |        |        |
| 3312   |        |        |        |        |
| 3313   |        |        |        |        |
| 3316   |        |        |        |        |
| 3317   |        |        |        |        |
| 3320   |        |        |        |        |

| respid | Q31a_8 | Q31a_9 | Q31b_1 | Q31b_2 |
|--------|--------|--------|--------|--------|
| 3321   |        |        |        |        |
| 3322   |        |        |        |        |
| 3323   |        |        |        |        |
| 3325   |        |        |        |        |
| 3332   |        |        |        |        |
| 3334   |        | 2      |        |        |
| 3335   |        |        |        |        |
| 3341   |        |        | 0      |        |
| 3345   |        |        |        |        |
| 3346   |        |        |        |        |
| 3349   |        |        |        |        |
| 3351   |        |        |        |        |
| 3353   |        |        |        |        |
| 3354   |        |        |        |        |
| 3356   |        |        |        |        |
| 3357   |        |        |        |        |
| 3360   |        |        |        | 0      |
| 3361   |        |        |        |        |
| 3362   |        |        |        |        |
| 3363   |        |        |        |        |
| 3364   |        |        |        | 2      |
| 3368   |        |        |        |        |
| 3370   |        |        |        |        |
| 3371   |        |        |        |        |
| 3379   |        |        |        |        |
| 3380   |        |        |        |        |
| 3382   |        |        |        |        |
| 3384   |        |        |        |        |
| 3385   |        |        |        |        |
| 3388   |        |        |        |        |
| 3392   |        |        |        |        |
| 3393   |        |        |        |        |

| respid | Q31a_8 | Q31a_9 | Q31b_1 | Q31b_2 |
|--------|--------|--------|--------|--------|
| 3394   |        | 2      |        |        |
| 3395   |        |        |        |        |
| 3396   |        |        |        |        |
| 3397   |        |        |        |        |
| 3398   |        |        |        |        |
| 3399   |        |        |        |        |
| 3400   |        | 1      |        |        |
| 3401   |        |        |        |        |
| 3402   |        |        |        |        |
| 3403   |        | 2      |        |        |
| 3405   |        | 5      | 0      |        |
| 3407   |        |        |        |        |
| 3410   |        |        |        |        |
| 3411   |        |        |        |        |
| 3413   |        |        |        |        |
| 3414   |        |        |        | 1      |
| 3420   |        |        |        |        |
| 3421   |        | 3      | 1      | 3      |
| 3425   |        |        |        |        |
| 3426   |        |        |        |        |
| 3429   |        |        |        |        |
| 3430   | 3      |        | 3      | 2      |
| 3433   |        |        |        |        |
| 3434   |        | 2      | 3      | 4      |
| 3437   |        |        |        |        |
| 3439   |        |        |        |        |
| 3441   |        | 2      |        |        |
| 3442   |        |        |        | 2      |
| 3444   |        |        |        |        |
| 3445   |        |        |        |        |
| 3450   |        |        |        |        |
| 3452   |        |        |        |        |

| respid | Q31a_8 | Q31a_9 | Q31b_1 | Q31b_2 |
|--------|--------|--------|--------|--------|
| 3456   |        |        |        |        |
| 3459   |        |        |        |        |
| 3460   |        | 2      |        |        |
| 3461   |        |        |        |        |
| 3466   |        | 2      |        |        |
| 3471   |        |        |        |        |
| 3473   |        |        |        |        |
| 3475   |        | 3      |        | 2      |
| 3476   |        |        |        |        |
| 3477   |        |        |        |        |
| 3478   |        |        |        |        |
| 3479   |        |        |        |        |
| 3482   |        |        |        | 1      |
| 3483   |        |        |        |        |
| 3485   |        |        |        |        |
| 3489   |        |        |        |        |
| 3490   |        |        |        | 1      |
| 3491   |        | 2      | 2      | 1      |
| 3494   |        |        |        |        |
| 3495   |        |        |        |        |
| 3501   |        |        |        |        |
| 3506   |        |        |        |        |
| 3507   |        |        |        |        |
| 3517   |        |        |        |        |
| 3520   |        | 2      |        |        |
| 3521   |        |        |        |        |
| 3522   |        |        |        | 1      |
| 3524   |        |        |        |        |
| 3527   |        |        |        |        |
| 3528   |        |        |        |        |
| 3529   |        |        |        |        |
| 3536   |        |        |        |        |



| respid | Q31a_8 | Q31a_9 | Q31b_1 | Q31b_2 |
|--------|--------|--------|--------|--------|
| 3537   |        |        |        |        |
| 3538   |        | 1      |        |        |
| 3540   |        |        |        |        |
| 3545   |        |        |        |        |
| 3547   |        |        |        |        |
| 3554   |        |        |        |        |
| 3556   |        |        |        |        |
| 3557   |        |        |        |        |
| 3559   |        |        |        | 3      |
| 3560   |        | 1      |        |        |
| 3562   |        |        |        |        |
| 3564   | 1      |        | 2      | 1      |
| 3565   |        | 2      |        |        |
| 3568   |        | 2      |        |        |
| 3572   |        |        |        |        |
| 3578   |        |        |        |        |
| 3581   |        |        |        |        |
| 3583   |        |        | 1      | 1      |
| 3588   |        |        |        |        |
| 3591   |        |        |        |        |
| 3594   |        |        |        |        |
| 3595   |        | 2      |        |        |
| 3596   |        |        |        |        |
| 3597   |        |        |        |        |
| 3598   |        |        |        |        |
| 3600   |        |        |        |        |
| 3602   |        |        |        |        |
| 3604   |        |        |        |        |
| 3605   |        |        |        |        |
| 3606   |        |        |        |        |
| 3607   |        |        |        |        |
| 3610   |        |        |        |        |

| respid | Q31a_8 | Q31a_9 | Q31b_1 | Q31b_2 |
|--------|--------|--------|--------|--------|
| 3611   |        |        |        |        |
| 3612   |        |        |        |        |
| 3614   |        |        |        |        |
| 3616   |        |        |        |        |
| 3617   |        |        |        |        |
| 3618   |        |        |        |        |
| 3619   |        | 1      |        |        |
| 3621   |        |        |        |        |
| 3622   |        |        |        | 2      |
| 3624   |        |        |        |        |
| 3626   |        |        |        |        |
| 3629   |        |        |        |        |
| 3631   |        |        |        |        |
| 3632   |        |        |        |        |
| 3638   |        | 1      |        |        |
| 3640   |        |        |        | 0      |
| 3641   |        |        |        |        |
| 3645   |        | 3      |        |        |
| 3650   |        |        |        |        |
| 3653   |        | 1      |        |        |
| 3655   |        | 2      |        |        |
| 3657   |        | 1      |        | 3      |
| 3658   |        |        |        |        |
| 3659   |        |        |        |        |
| 3664   | 2      | 3      |        |        |
| 3665   |        |        |        |        |
| 3667   |        |        |        |        |
| 3668   |        |        |        |        |
| 3675   |        |        |        |        |
| 3678   |        |        |        |        |
| 3680   |        |        |        |        |
| 3684   | 1      | 2      |        | 1      |

| respid | Q31a_8 | Q31a_9 | Q31b_1 | Q31b_2 |
|--------|--------|--------|--------|--------|
| 3685   |        |        |        |        |
| 3687   |        | 4      |        |        |
| 3689   | 2      |        |        |        |
| 3690   |        |        |        |        |
| 3693   |        |        |        |        |
| 3694   |        |        |        |        |
| 3695   |        |        |        |        |
| 3700   |        |        |        | 1      |
| 3701   |        |        |        |        |
| 3703   |        | 1      |        | 2      |
| 3704   |        | 2      |        | 3      |
| 3705   |        |        |        |        |
| 3709   |        |        |        |        |
| 3710   |        | 2      |        | 3      |
| 3722   |        |        |        |        |
| 3725   |        |        |        |        |
| 3726   |        | 1      |        |        |
| 3727   |        |        |        |        |
| 3728   |        |        |        |        |
| 3729   |        |        |        |        |
| 3731   |        |        |        |        |
| 3738   |        |        |        |        |
| 3739   |        |        |        |        |
| 3740   |        |        |        |        |
| 3749   |        |        |        |        |
| 3758   |        |        |        |        |
| 3762   |        |        |        |        |
| 3765   |        |        |        |        |
| 3770   |        |        |        |        |
| 3771   |        |        |        |        |
| 3778   | 1      |        |        |        |
| 3779   |        |        |        |        |

| respid | Q31a_8 | Q31a_9 | Q31b_1 | Q31b_2 |
|--------|--------|--------|--------|--------|
| 3780   |        |        |        |        |
| 3782   |        |        |        | 0      |
| 3784   |        | 1      |        | 1      |
| 3787   |        |        |        |        |
| 3790   |        |        |        |        |
| 3791   |        |        |        |        |
| 3793   |        | 3      |        |        |
| 3795   |        |        |        |        |
| 3799   |        |        |        |        |
| 3801   |        |        |        |        |
| 3804   |        |        |        |        |
| 3809   |        |        |        |        |
| 3810   |        |        |        | 1      |
| 3813   |        | 1      |        |        |
| 3816   |        |        | 1      | 1      |
| 3820   |        |        |        |        |
| 3821   |        | 1      |        |        |
| 3823   |        | 4      |        |        |
| 3828   |        |        |        |        |
| 3829   |        |        |        |        |
| 3832   |        |        |        |        |
| 3835   |        |        |        |        |
| 3837   |        |        |        |        |
| 3838   |        |        |        |        |
| 3839   |        | 3      | 4      |        |
| 3840   |        |        |        |        |
| 3842   |        |        |        |        |
| 3843   |        |        |        |        |
| 3844   |        |        |        |        |
| 3850   |        |        |        |        |
| 3851   |        |        |        |        |
| 3856   |        |        |        |        |

| respid | Q31a_8 | Q31a_9 | Q31b_1 | Q31b_2 |
|--------|--------|--------|--------|--------|
| 3859   |        |        |        |        |
| 3860   |        |        |        |        |
| 3863   |        |        |        | 1      |
| 3866   |        |        |        |        |
| 3867   |        |        |        |        |
| 3870   |        |        |        |        |
| 3873   |        |        |        |        |
| 3875   |        |        |        |        |
| 3878   |        |        |        |        |
| 3881   |        |        | 1      | 1      |
| 3883   |        |        |        | 2      |
| 3884   |        |        |        |        |
| 3885   | 2      | 3      |        | 2      |
| 3886   |        |        |        |        |
| 3887   |        |        |        |        |
| 3888   |        |        |        |        |
| 3889   |        | 2      | 2      | 2      |
| 3890   |        |        |        |        |
| 3896   |        |        |        |        |
| 3902   |        | 3      | 3      | 3      |
| 3909   |        |        |        |        |
| 3912   |        |        |        |        |
| 3922   |        |        |        |        |
| 3928   |        |        |        |        |
| 3930   |        |        |        |        |
| 3931   |        |        | 0      |        |
| 3933   |        |        |        | 3      |
| 3935   |        |        |        |        |
| 3937   | 1      |        |        |        |
| 3939   |        |        |        |        |
| 3942   |        |        |        |        |
| 3943   |        |        |        |        |

| respid | Q31a_8 | Q31a_9 | Q31b_1 | Q31b_2 |
|--------|--------|--------|--------|--------|
| 3944   |        |        |        |        |
| 3945   |        |        |        |        |
| 3947   |        | 1      |        |        |
| 3948   |        |        |        | 2      |
| 3951   |        |        |        |        |
| 3959   |        |        |        |        |
| 3969   |        | 3      |        |        |
| 3973   |        | 1      |        |        |
| 3975   |        | 2      |        |        |
| 3976   |        |        |        |        |
| 3977   |        |        |        |        |
| 3978   |        |        |        |        |
| 3994   |        |        |        |        |
| 3995   |        |        |        |        |
| 3997   |        |        |        |        |
| 3998   |        |        |        |        |
| 3999   |        | 1      |        | 1      |
| 4002   |        | 2      |        |        |
| 4004   |        |        |        |        |
| 4005   |        |        |        |        |
| 4006   |        |        |        |        |
| 4008   |        |        |        |        |
| 4010   |        |        |        |        |
| 4011   |        | 1      |        |        |
| 4013   |        |        |        |        |
| 4014   |        |        |        |        |
| 4016   |        |        |        |        |
| 4017   |        |        |        |        |
| 4019   |        |        |        |        |
| 4021   |        |        |        |        |
| 4023   |        |        |        |        |
| 4024   |        |        |        |        |

| respid | Q31a_8 | Q31a_9 | Q31b_1 | Q31b_2 |
|--------|--------|--------|--------|--------|
| 4025   |        |        |        | 1      |
| 4027   |        |        |        |        |
| 4032   |        |        |        |        |
| 4034   |        |        |        |        |
| 4035   |        |        |        |        |
| 4037   |        | 2      |        |        |
| 4040   |        |        |        |        |
| 4041   |        |        |        |        |
| 4042   |        |        |        | 2      |
| 4043   |        |        | 1      | 3      |
| 4045   |        |        |        | 2      |
| 4046   |        |        |        | 2      |
| 4048   |        |        |        | 0      |
| 4049   |        |        |        |        |
| 4050   |        |        |        |        |
| 4052   |        |        |        |        |
| 4053   |        |        |        |        |
| 4060   |        |        |        |        |
| 4065   |        |        |        |        |
| 4066   |        | 1      |        |        |
| 4067   |        |        |        |        |
| 4068   |        |        |        |        |
| 4069   |        |        |        |        |
| 4070   |        |        |        |        |
| 4071   |        |        |        | 2      |
| 4072   |        |        |        |        |
| 4073   |        |        |        |        |
| 4074   |        |        |        |        |
| 4075   |        |        |        |        |
| 4078   |        |        |        |        |
| 4080   |        |        |        |        |
| 4081   |        |        |        |        |

| respid | Q31a_8 | Q31a_9 | Q31b_1 | Q31b_2 |
|--------|--------|--------|--------|--------|
| 4082   |        |        |        |        |
| 4083   |        | 2      |        |        |
| 4084   |        |        |        |        |
| 4086   |        |        |        |        |
| 4087   |        |        |        |        |
| 4088   |        |        |        |        |
| 4089   |        |        |        | 1      |
| 4090   |        |        |        |        |
| 4093   |        |        |        |        |
| 4094   |        |        |        |        |
| 4095   |        |        |        |        |
| 4096   |        |        |        |        |
| 4098   |        |        |        |        |
| 4103   | 1      | 2      |        |        |
| 4104   |        |        | 2      | 2      |
| 4107   |        |        |        |        |
| 4109   |        |        |        |        |
| 4110   |        |        |        |        |
| 4113   |        |        |        |        |
| 4114   |        |        |        |        |
| 4116   | 1      |        |        |        |
| 4119   |        | 1      |        |        |
| 4120   |        |        |        |        |
| 4121   |        |        |        |        |
| 4122   |        |        |        |        |
| 4124   |        |        |        | 1      |
| 4126   |        |        |        |        |
| 4127   |        |        |        |        |
| 4131   |        |        |        |        |
| 4134   |        |        |        | 1      |
| 4144   |        |        |        |        |
| 4145   |        |        |        |        |



| respid | Q31a_8 | Q31a_9 | Q31b_1 | Q31b_2 |
|--------|--------|--------|--------|--------|
| 4146   |        |        |        |        |
| 4147   |        |        |        |        |
| 4149   |        |        |        |        |
| 4150   |        |        |        |        |
| 4151   |        |        |        | 2      |
| 4153   |        |        |        | 1      |
| 4155   |        |        |        |        |
| 4157   |        |        |        |        |
| 4159   |        |        | 1      | 1      |
| 4160   |        | 1      |        |        |
| 4161   |        | 1      |        |        |
| 4163   |        |        |        |        |
| 4164   |        |        |        |        |
| 4165   |        |        |        |        |
| 4166   |        |        |        |        |
| 4167   |        |        |        |        |
| 4170   |        |        |        | 2      |
| 4172   |        |        |        |        |
| 4173   |        |        |        |        |
| 4180   |        | 1      |        |        |
| 4185   |        | 1      |        |        |
| 4187   |        |        |        |        |
| 4190   |        |        |        |        |
| 4191   |        | 1      |        |        |
| 4193   |        |        |        |        |
| 4194   |        |        |        |        |
| 4195   |        |        |        |        |
| 4196   |        |        |        |        |
| 4197   |        |        |        | 0      |
| 4198   |        |        |        |        |
| 4199   |        |        |        | 1      |
| 4205   |        |        |        |        |

| respid | Q31a_8 | Q31a_9 | Q31b_1 | Q31b_2 |
|--------|--------|--------|--------|--------|
| 4206   |        |        |        |        |
| 4207   |        |        |        |        |
| 4214   |        |        |        |        |
| 4215   |        |        |        |        |
| 4217   |        |        |        |        |
| 4219   |        |        |        |        |
| 4223   |        |        | 2      | 2      |
| 4226   |        | 1      |        |        |
| 4229   |        |        |        | 0      |
| 4230   |        |        |        |        |
| 4232   |        |        | 1      |        |
| 4233   |        |        |        |        |
| 4234   |        |        |        |        |
| 4235   |        |        |        |        |
| 4236   |        |        |        |        |
| 4237   |        |        |        | 0      |
| 4238   |        |        |        |        |
| 4240   |        |        |        |        |
| 4241   |        |        |        |        |
| 4247   |        |        |        |        |
| 4250   |        |        |        |        |
| 4251   |        |        |        | 1      |
| 4253   |        | 2      |        | 2      |
| 4254   |        |        |        |        |
| 4258   |        |        |        | 1      |
| 4260   |        |        |        |        |
| 4263   |        |        |        | 1      |
| 4265   |        |        |        |        |
| 4266   |        | 2      |        |        |
| 4267   |        |        |        |        |
| 4270   |        |        |        |        |
| 4273   |        |        |        |        |

| respid | Q31a_8 | Q31a_9 | Q31b_1 | Q31b_2 |
|--------|--------|--------|--------|--------|
| 4280   |        |        |        |        |
| 4281   |        |        |        |        |
| 4282   |        |        |        |        |
| 4283   |        |        |        |        |
| 4286   |        |        |        |        |
| 4287   |        |        |        |        |
| 4289   |        |        |        | 2      |
| 4290   |        |        |        |        |
| 4291   |        |        |        | 1      |
| 4292   |        |        |        |        |
| 4293   |        |        |        |        |
| 4294   |        |        |        | 3      |
| 4295   |        |        |        |        |
| 4296   |        |        |        |        |
| 4297   |        | 1      |        |        |
| 4298   |        |        |        |        |
| 4299   |        |        |        |        |
| 4300   |        |        |        |        |
| 4301   |        |        |        |        |
| 4302   |        |        |        |        |
| 4304   |        |        |        |        |
| 4305   |        |        |        |        |
| 4307   |        | 1      |        |        |
| 4308   |        |        |        |        |
| 4312   |        |        |        |        |
| 4314   |        | 1      |        |        |
| 4316   |        |        |        |        |
| 4317   | 4      |        |        | 2      |
| 4319   |        |        |        |        |
| 4323   |        |        |        | 1      |
| 4337   |        |        |        |        |
| 4341   |        |        |        | 3      |

| respid | Q31a_8 | Q31a_9 | Q31b_1 | Q31b_2 |
|--------|--------|--------|--------|--------|
| 4342   |        |        |        |        |
| 4344   |        |        |        |        |
| 4345   |        |        | 1      | 1      |
| 4346   |        |        |        | 1      |
| 4347   |        |        |        |        |
| 4350   |        |        |        |        |
| 4352   |        |        |        |        |
| 4353   |        |        |        |        |
| 4355   |        |        |        |        |
| 4356   |        |        |        |        |
| 4358   |        |        |        |        |
| 4359   |        | 1      |        |        |
| 4360   |        |        |        |        |
| 4361   | 2      | 2      |        | 3      |
| 4363   |        |        |        |        |
| 4364   |        |        |        |        |
| 4365   |        |        |        |        |
| 4367   |        |        |        |        |
| 4369   |        | 1      |        |        |
| 4373   |        | 2      |        |        |
| 4374   |        |        |        |        |
| 4375   |        |        |        |        |
| 4378   |        |        |        |        |
| 4379   |        |        |        | 1      |
| 4382   |        | 1      |        |        |
| 4383   |        |        |        |        |
| 4384   |        |        |        |        |
| 4385   |        |        |        |        |
| 4388   |        | 2      |        |        |
| 4389   |        |        |        |        |
| 4391   |        |        |        | 1      |
| 4392   |        |        |        |        |

| respid | Q31a_8 | Q31a_9 | Q31b_1 | Q31b_2 |
|--------|--------|--------|--------|--------|
| 4393   |        |        |        |        |
| 4395   |        |        |        |        |
| 4397   |        |        |        | 1      |
| 4398   |        |        | 1      | 1      |
| 4399   |        |        |        |        |
| 4400   |        |        |        |        |
| 4401   |        |        |        |        |
| 4402   |        |        |        |        |
| 4404   |        |        |        |        |
| 4405   |        |        |        |        |
| 4407   |        |        |        |        |
| 4408   |        |        |        |        |
| 4411   |        |        |        |        |
| 4420   |        |        |        |        |
| 4421   |        |        |        |        |
| 4424   |        |        |        |        |
| 4425   |        |        |        |        |
| 4427   |        |        |        | 0      |
| 4430   |        | 2      |        |        |
| 4431   |        |        | 0      |        |
| 4432   |        |        |        |        |
| 4436   |        |        |        |        |
| 4439   |        |        |        |        |
| 4451   |        | 1      |        |        |
| 4452   |        |        | 3      |        |
| 4458   |        |        |        |        |
| 4464   |        |        |        |        |
| 4465   |        |        |        |        |
| 4467   |        |        |        |        |
| 4470   |        |        |        |        |
| 4471   |        |        |        |        |
| 4472   |        |        |        |        |

| respid | Q31a_8 | Q31a_9 | Q31b_1 | Q31b_2 |
|--------|--------|--------|--------|--------|
| 4473   |        |        |        |        |
| 4475   |        |        |        |        |
| 4476   |        |        |        |        |
| 4478   |        |        |        |        |
| 4485   |        |        | 1      | 1      |
| 4486   |        |        | 1      |        |
| 4490   |        |        |        |        |
| 4502   |        |        |        |        |
| 4503   |        |        |        |        |
| 4504   |        |        |        |        |
| 4506   |        |        |        |        |
| 4508   |        |        |        |        |
| 4515   |        |        |        |        |
| 4516   |        |        |        | 1      |
| 4519   |        | 1      |        |        |
| 4523   |        |        |        |        |
| 4525   |        | 2      |        |        |
| 4526   |        |        |        |        |
| 4528   |        |        |        |        |
| 4530   |        |        |        |        |
| 4531   | 2      |        | 1      | 2      |
| 4532   |        |        |        |        |
| 4537   |        |        |        |        |
| 4538   |        |        |        |        |
| 4539   |        |        | 1      |        |
| 4541   |        |        |        |        |
| 4543   |        |        |        |        |
| 4544   |        |        |        |        |
| 4546   |        |        |        |        |
| 4547   |        |        |        |        |
| 4549   |        |        |        |        |
| 4550   |        |        |        |        |

| respid | Q31a_8 | Q31a_9 | Q31b_1 | Q31b_2 |
|--------|--------|--------|--------|--------|
| 4551   |        |        |        |        |
| 4554   |        |        |        |        |
| 4557   |        |        |        |        |
| 4565   |        |        |        |        |
| 4568   |        |        |        |        |
| 4569   |        |        |        |        |
| 4570   |        |        |        |        |
| 4572   |        |        |        |        |
| 4574   |        |        |        |        |
| 4576   |        |        |        |        |
| 4578   |        |        |        |        |
| 4579   |        |        |        |        |
| 4580   |        | 2      |        |        |
| 4581   |        |        |        |        |
| 4584   |        |        |        |        |
| 4586   | 1      |        |        |        |
| 4587   |        |        |        |        |
| 4590   |        |        |        |        |
| 4592   |        |        |        |        |
| 4593   |        |        |        | 1      |
| 4595   |        |        |        |        |
| 4597   |        |        |        |        |
| 4598   |        |        |        |        |
| 4599   |        |        |        |        |
| 4600   |        |        |        |        |
| 4601   |        |        |        | 1      |
| 4608   |        |        |        |        |
| 4609   |        |        |        |        |
| 4611   |        |        |        |        |
| 4612   |        |        |        | 2      |
| 4613   |        |        |        |        |
| 4616   |        |        |        | 1      |

| respid | Q31a_8 | Q31a_9 | Q31b_1 | Q31b_2 |
|--------|--------|--------|--------|--------|
| 4617   |        |        |        |        |
| 4620   |        |        |        |        |
| 4621   |        |        |        |        |
| 4622   |        | 2      |        |        |
| 4624   |        |        |        | 1      |
| 4625   |        |        |        |        |
| 4627   |        |        |        |        |
| 4628   |        |        |        |        |
| 4629   |        |        |        |        |
| 4630   |        |        |        | 1      |
| 4632   |        |        |        |        |
| 4634   |        |        |        | 1      |
| 4635   |        | 2      |        |        |
| 4636   |        |        |        |        |
| 4637   |        |        |        |        |
| 4638   |        |        |        |        |
| 4639   |        | 2      |        | 2      |
| 4641   |        |        |        |        |
| 4643   |        |        |        |        |
| 4645   |        |        |        |        |
| 4646   |        |        |        | 1      |
| 4647   |        |        |        |        |
| 4648   |        |        |        |        |
| 4649   |        |        |        |        |
| 4650   |        | 2      |        |        |
| 4651   |        |        |        |        |
| 4652   |        |        |        | 1      |
| 4653   |        |        |        |        |
| 4657   |        |        |        |        |
| 4660   |        |        |        |        |
| 4661   |        |        |        |        |
| 4662   |        |        |        |        |



| respid | Q31a_8 | Q31a_9 | Q31b_1 | Q31b_2 |
|--------|--------|--------|--------|--------|
| 4667   |        |        |        |        |
| 4669   |        |        |        |        |
| 4671   |        |        |        |        |
| 4672   |        |        |        |        |
| 4673   |        |        |        |        |
| 4677   |        |        |        |        |
| 4679   |        |        |        |        |
| 4683   |        |        |        |        |
| 4684   |        | 1      |        | 1      |
| 4685   | 1      |        |        |        |
| 4686   |        |        |        | 0      |
| 4687   |        |        |        |        |
| 4688   |        |        |        |        |
| 4691   |        |        |        |        |
| 4692   |        |        |        |        |
| 4694   |        |        |        |        |
| 4695   |        |        |        |        |
| 4696   |        |        |        |        |
| 4697   |        |        |        |        |
| 4698   |        |        |        |        |
| 4699   |        |        |        |        |
| 4701   |        |        |        |        |
| 4703   |        | 4      |        |        |
| 4704   |        |        | 3      | 3      |
| 4705   |        |        |        |        |
| 4706   |        |        |        |        |
| 4707   |        |        |        | 0      |
| 4708   |        |        |        |        |
| 4710   |        |        |        |        |
| 4711   |        | 2      |        | 1      |
| 4715   |        |        |        |        |
| 4716   |        |        |        | 1      |

| respid | Q31a_8 | Q31a_9 | Q31b_1 | Q31b_2 |
|--------|--------|--------|--------|--------|
| 4717   |        |        |        |        |
| 4718   |        |        |        |        |
| 4722   |        |        |        |        |
| 4727   |        |        |        |        |
| 4728   |        | 3      |        |        |
| 4729   |        |        |        |        |
| 4732   |        |        |        |        |
| 4733   |        |        |        |        |
| 4734   |        |        |        |        |
| 4735   |        |        |        |        |
| 4737   |        | 2      |        |        |
| 4738   |        |        |        |        |
| 4740   |        |        |        |        |
| 4741   |        |        |        |        |
| 4743   |        |        |        | 1      |
| 4746   |        |        |        |        |
| 4750   |        |        |        |        |
| 4752   |        |        |        |        |
| 4753   |        | 1      |        |        |
| 4754   |        |        |        |        |
| 4755   |        | 2      |        |        |
| 4758   |        |        |        |        |
| 4766   |        |        |        |        |
| 4767   |        |        |        |        |
| 4768   |        | 1      |        |        |
| 4769   |        |        |        |        |
| 4771   |        |        |        |        |
| 4772   |        |        |        |        |
| 4773   |        |        |        |        |
| 4774   |        |        |        |        |
| 4776   |        |        |        |        |
| 4777   |        |        |        |        |

| respid | Q31a_8 | Q31a_9 | Q31b_1 | Q31b_2 |
|--------|--------|--------|--------|--------|
| 4779   |        |        |        |        |
| 4780   |        |        | 1      | 1      |
| 4781   |        | 2      |        |        |
| 4783   |        |        | 4      | 3      |
| 4784   |        |        |        |        |
| 4785   |        | 2      |        |        |
| 4788   |        |        |        |        |
| 4789   |        |        |        |        |
| 4790   |        |        |        |        |
| 4791   |        |        |        |        |
| 4794   |        |        |        |        |
| 4795   |        |        |        |        |
| 4797   |        |        |        |        |
| 4802   |        |        |        |        |
| 4803   |        |        |        |        |
| 4804   |        |        |        |        |
| 4805   |        |        |        |        |
| 4807   |        |        |        |        |
| 4808   |        |        |        | 2      |
| 4809   |        | 3      |        |        |
| 4811   |        |        |        |        |
| 4817   |        |        |        |        |
| 4819   |        |        |        |        |
| 4820   |        |        |        |        |
| 4821   | 3      |        |        | 1      |
| 4822   |        |        |        |        |
| 4823   |        |        |        | 1      |
| 4825   |        |        |        |        |
| 4826   |        |        |        |        |
| 4830   |        |        |        |        |
| 4832   |        |        |        |        |
| 4838   |        |        | 2      | 2      |

| respid | Q31a_8 | Q31a_9 | Q31b_1 | Q31b_2 |
|--------|--------|--------|--------|--------|
| 4840   |        |        |        | 1      |
| 4841   |        |        |        |        |
| 4843   |        |        |        |        |
| 4845   |        |        |        |        |
| 4846   |        | 2      |        |        |
| 4848   |        |        |        |        |
| 4853   |        |        |        |        |
| 4854   |        |        |        |        |
| 4859   |        |        |        |        |
| 4861   |        |        |        |        |
| 4864   |        |        |        |        |
| 4867   |        |        |        |        |
| 4870   |        |        |        |        |
| 4872   |        |        |        |        |
| 4873   |        |        |        |        |
| 4874   |        |        |        |        |
| 4878   |        |        |        |        |
| 4880   |        |        |        |        |
| 4881   |        |        |        |        |
| 4882   |        |        |        |        |
| 4883   |        |        |        |        |
| 4885   |        |        |        |        |
| 4889   |        |        |        |        |
| 4890   |        |        |        |        |
| 4891   |        | 1      |        |        |
| 4894   |        |        |        |        |
| 4895   |        | 4      |        | 3      |
| 4896   |        |        |        |        |
| 4897   |        |        |        |        |
| 4898   |        |        |        |        |
| 4899   |        |        |        |        |
| 4900   |        | 1      |        |        |

| respid | Q31a_8 | Q31a_9 | Q31b_1 | Q31b_2 |
|--------|--------|--------|--------|--------|
| 4901   |        |        |        |        |
| 4903   |        |        | 1      |        |
| 4904   |        |        |        |        |
| 4908   |        |        |        |        |
| 4909   |        |        |        |        |
| 4913   |        |        |        |        |
| 4917   |        |        |        |        |
| 4918   |        |        |        |        |
| 4920   |        |        |        |        |
| 4921   |        |        |        |        |
| 4925   |        |        |        | 1      |
| 4926   |        |        |        |        |
| 4927   |        | 1      |        |        |
| 4928   |        |        |        |        |
| 4929   |        |        |        |        |
| 4930   |        |        |        | 3      |
| 4931   |        |        |        |        |
| 4932   |        |        | 2      | 1      |
| 4933   |        |        |        |        |
| 4934   |        |        |        |        |
| 5934   |        |        |        |        |
| 5935   |        |        |        |        |
| 5936   |        |        |        |        |
| 5938   |        |        |        |        |
| 5939   |        |        |        |        |
| 5940   |        |        |        |        |
| 5942   |        |        |        |        |
| 5944   |        | 2      |        |        |
| 5951   |        |        |        |        |
| 5952   |        |        |        | 2      |
| 5954   |        |        |        |        |
| 5956   |        |        |        |        |

| respid | Q31a_8 | Q31a_9 | Q31b_1 | Q31b_2 |
|--------|--------|--------|--------|--------|
| 5957   |        |        |        |        |
| 5958   |        | 1      |        |        |
| 5959   |        | 2      |        | 1      |
| 5960   |        |        |        |        |
| 5963   |        |        |        |        |
| 5966   |        |        |        |        |
| 5968   |        | 1      |        |        |
| 5974   |        |        |        |        |
| 5975   |        |        |        |        |
| 5976   |        |        |        |        |
| 5977   |        |        |        |        |
| 5978   |        |        |        |        |
| 5979   |        |        |        |        |
| 5983   |        |        |        |        |
| 5984   |        |        |        |        |
| 5990   |        |        |        |        |
| 5991   |        |        |        | 0      |
| 5992   |        |        |        |        |
| 5993   |        |        |        |        |
| 5994   |        |        | 0      | 0      |
| 5996   |        |        |        |        |
| 6001   |        |        |        |        |
| 6003   |        |        |        |        |
| 6004   |        |        |        |        |
| 6005   |        |        |        |        |
| 6006   |        |        |        |        |
| 6008   |        |        |        |        |
| 6009   |        |        |        |        |
| 6014   |        |        |        |        |
| 6016   |        |        |        | 0      |
| 6017   |        | 1      |        |        |
| 6018   |        |        |        |        |

| respid | Q31a_8 | Q31a_9 | Q31b_1 | Q31b_2 |
|--------|--------|--------|--------|--------|
| 6020   |        |        |        |        |
| 6021   |        |        |        |        |
| 6024   |        |        |        |        |
| 6025   |        |        |        |        |
| 6026   |        |        |        |        |
| 6032   |        |        |        | 1      |
| 6035   |        |        |        | 1      |
| 6038   |        |        |        |        |
| 6043   |        | 1      |        |        |
| 6044   |        |        |        |        |
| 6046   |        | 1      |        |        |
| 6047   |        |        |        |        |
| 6048   |        |        |        |        |
| 6050   |        |        |        |        |
| 6051   |        |        |        |        |
| 6053   |        |        |        |        |
| 6054   |        | 5      |        |        |
| 6056   |        |        |        |        |
| 6058   |        |        |        | 1      |
| 6060   |        |        |        |        |
| 6061   |        |        |        | 0      |
| 6062   |        |        |        |        |
| 6067   |        |        |        |        |
| 6070   |        |        |        |        |
| 6074   |        |        |        | 1      |
| 6076   |        |        |        |        |
| 6078   |        |        |        |        |
| 6081   |        |        |        |        |
| 6085   |        | 1      |        |        |
| 6088   |        |        |        |        |
| 6092   |        | 1      |        |        |
| 6095   |        |        |        |        |

| respid | Q31a_8 | Q31a_9 | Q31b_1 | Q31b_2 |
|--------|--------|--------|--------|--------|
| 6098   |        |        |        |        |
| 6101   |        |        |        |        |
| 6102   |        |        |        |        |
| 6105   |        |        |        |        |
| 6106   |        | 2      |        |        |
| 6107   |        |        |        |        |
| 6111   |        |        |        |        |
| 6112   |        |        |        |        |
| 6113   |        |        |        |        |
| 6115   |        |        |        |        |
| 6116   |        |        |        |        |
| 6117   |        |        |        |        |
| 6124   |        | 2      |        |        |
| 6125   |        |        |        |        |
| 6128   |        |        |        |        |
| 6133   |        |        |        |        |
| 6134   |        |        |        | 2      |
| 6135   |        | 4      |        |        |
| 6138   |        |        |        | 3      |
| 6140   |        |        |        |        |
| 6143   |        |        |        |        |
| 6147   |        |        |        |        |
| 6154   |        |        |        |        |
| 6162   |        |        |        |        |
| 6165   |        |        |        | 1      |
| 6166   |        | 2      |        | 1      |
| 6173   |        | 2      |        |        |
| 6180   |        | 1      |        |        |
| 6184   |        | 2      | 3      | 3      |
| 6185   |        |        |        |        |
| 6186   |        |        |        |        |
| 6188   |        |        |        |        |



| respid | Q31a_8 | Q31a_9 | Q31b_1 | Q31b_2 |
|--------|--------|--------|--------|--------|
| 6192   |        |        |        |        |
| 6194   |        |        |        |        |
| 6195   |        |        |        |        |
| 6196   |        |        |        | 1      |
| 6199   |        | 2      |        | 1      |
| 6200   |        |        |        |        |
| 6201   |        |        |        |        |
| 6202   |        |        |        | 2      |
| 6203   |        |        |        |        |
| 6205   |        |        |        |        |
| 6210   |        | 2      |        |        |
| 6212   |        | 1      |        |        |
| 6216   |        |        |        |        |
| 6218   |        |        |        |        |
| 6221   |        | 1      |        |        |
| 6224   |        |        |        |        |
| 6225   |        |        |        |        |
| 6227   |        |        |        |        |
| 6230   |        |        |        |        |
| 6231   |        |        |        |        |
| 6233   |        |        |        |        |
| 6234   |        |        |        |        |
| 6235   |        |        |        |        |
| 6237   |        |        |        |        |
| 6240   |        |        |        |        |
| 6248   |        |        |        |        |
| 6249   |        |        |        |        |
| 6252   |        |        |        |        |
| 6254   |        |        |        |        |
| 6269   |        |        |        | 1      |
| 6304   |        |        |        |        |
| 6334   |        | 2      |        |        |

| respid | Q31a_8 | Q31a_9 | Q31b_1 | Q31b_2 |
|--------|--------|--------|--------|--------|
| 6341   |        |        |        |        |
| 6350   |        |        |        |        |
| 6370   |        |        |        |        |
| 6384   |        |        |        | 1      |
| 6400   |        |        |        |        |
| 6418   |        |        |        |        |
| 6467   |        |        |        |        |
| 6469   |        |        |        |        |
| 6474   |        |        |        |        |
| 6475   |        |        |        |        |
| 6476   |        |        |        |        |
| 6477   |        |        |        |        |
| 6480   |        |        |        |        |
| 6481   |        |        |        |        |
| 6485   |        |        |        |        |
| 6488   |        | 2      |        |        |
| 6495   |        |        |        |        |
| 6499   |        |        |        | 1      |
| 6500   |        |        |        |        |
| 6504   |        |        |        |        |
| 6507   |        |        |        |        |
| 6512   |        |        |        | 1      |
| 6525   |        |        |        | 2      |
| 6532   |        |        |        |        |
| 6535   |        |        |        |        |
| 6546   |        |        |        |        |
| 6551   |        | 2      |        | 3      |
| 6556   |        |        |        |        |
| 6566   |        |        |        |        |
| 6569   |        |        |        |        |
| 6574   |        |        |        |        |
| 6576   |        |        |        | 2      |

| respid | Q31a_8 | Q31a_9 | Q31b_1 | Q31b_2 |
|--------|--------|--------|--------|--------|
| 6580   |        |        |        |        |
| 6584   |        |        |        |        |
| 6585   |        | 1      |        | 1      |
| 6589   |        |        |        |        |
| 6590   |        |        |        | 0      |
| 6598   |        |        |        |        |
| 6603   |        |        |        |        |
| 6618   |        |        |        |        |
| 6630   |        |        |        |        |
| 6636   |        |        |        |        |
| 6649   |        |        |        |        |
| 6675   |        |        |        |        |
| 6678   |        |        |        |        |
| 6681   |        |        |        |        |
| 6684   |        |        |        |        |
| 6688   |        |        |        |        |
| 6691   |        |        |        |        |
| 6694   |        |        |        | 1      |
| 6696   |        |        |        |        |
| 6720   | 2      | 1      | 2      | 3      |
| 6722   |        | 3      | 3      | 3      |
| 6724   |        |        |        |        |
| 6725   |        |        |        |        |
| 6727   |        |        |        |        |
| 6734   |        |        |        | 1      |
| 6739   |        |        |        |        |
| 6743   |        |        |        |        |
| 6749   |        |        |        |        |
| 6756   |        |        |        |        |
| 6764   |        | 1      |        |        |
| 6765   |        |        |        |        |
| 6768   |        |        |        |        |

| respid | Q31a_8 | Q31a_9 | Q31b_1 | Q31b_2 |
|--------|--------|--------|--------|--------|
| 6773   |        |        |        |        |
| 6775   |        |        |        |        |
| 6777   |        |        |        |        |
| 6779   |        |        |        |        |
| 6790   |        |        |        |        |
| 6797   |        |        |        |        |
| 6798   |        |        | 2      | 2      |
| 6808   |        |        |        |        |
| 6810   |        |        |        | 1      |
| 6811   |        | 1      |        |        |
| 6812   |        |        |        |        |
| 6814   |        |        |        | 2      |
| 6819   |        |        |        |        |
| 6820   |        | 1      |        |        |
| 6832   |        |        |        |        |
| 6854   |        |        |        |        |
| 6855   |        |        |        |        |
| 6857   |        |        |        |        |
| 6858   |        |        |        |        |
| 6859   |        |        |        |        |
| 6860   |        | 1      |        |        |
| 6862   |        |        | 1      | 1      |
| 6879   |        |        |        |        |
| 6893   |        |        |        |        |
| 6898   |        |        |        | 0      |
| 6902   |        | 2      | 1      | 1      |
| 6903   |        |        |        | 2      |
| 6907   |        |        |        |        |
| 6908   |        |        |        |        |
| 6912   |        |        |        |        |
| 6915   |        | 1      |        |        |
| 6916   |        |        | 1      |        |

| respid | Q31a_8 | Q31a_9 | Q31b_1 | Q31b_2 |
|--------|--------|--------|--------|--------|
| 6917   |        |        |        | 3      |
| 6923   |        |        |        |        |
| 6934   |        |        |        |        |
| 6937   |        |        |        |        |
| 6945   |        |        |        |        |
| 6954   |        | 1      |        |        |
| 6956   |        | 2      |        | 1      |
| 6958   |        |        |        |        |
| 6961   |        |        |        | 0      |
| 6963   |        |        |        |        |
| 6964   |        |        |        |        |
| 6976   |        |        |        |        |
| 6977   |        |        |        |        |
| 7000   | 2      |        |        |        |
| 7001   |        |        |        |        |
| 7005   |        |        |        |        |
| 7006   |        |        |        |        |
| 7008   |        |        |        | 3      |
| 7009   | 1      |        |        |        |
| 7019   |        |        |        |        |
| 7021   |        |        |        |        |
| 7026   |        | 2      |        |        |
| 7030   |        |        |        |        |
| 7034   |        |        |        |        |
| 7039   |        |        |        | 2      |
| 7041   |        |        |        |        |
| 7047   |        |        |        | 0      |
| 7051   |        |        |        |        |
| 7052   |        |        |        | 1      |
| 7059   |        |        |        |        |
| 7062   |        |        |        | 1      |
| 7065   |        | 1      |        |        |

| respid | Q31a_8 | Q31a_9 | Q31b_1 | Q31b_2 |
|--------|--------|--------|--------|--------|
| 7066   |        |        |        |        |
| 7069   |        |        |        |        |
| 7070   |        |        |        |        |
| 7073   |        |        |        |        |
| 7078   |        |        |        |        |
| 7083   |        |        |        |        |
| 7084   |        |        |        | 2      |
| 7085   |        |        |        |        |
| 7088   |        |        |        |        |
| 7090   |        |        |        |        |
| 7095   |        |        |        |        |
| 7100   |        |        |        |        |
| 7102   |        |        |        |        |
| 7103   |        |        |        |        |
| 7108   |        |        |        | 0      |
| 7109   |        |        |        |        |
| 7110   |        |        |        |        |
| 7112   |        |        |        |        |
| 7114   |        |        |        |        |
| 7116   |        |        |        |        |
| 7117   |        |        |        |        |
| 7118   |        |        |        | 3      |
| 7120   |        |        | 3      | 3      |
| 7124   |        |        |        |        |
| 7130   |        |        |        |        |
| 7135   |        |        |        |        |
| 7137   |        | 2      | 3      |        |
| 7140   |        |        |        |        |
| 7141   |        |        |        |        |
| 7148   |        |        |        |        |
| 7152   |        |        |        |        |
| 7154   |        |        |        |        |

| respid | Q31a_8 | Q31a_9 | Q31b_1 | Q31b_2 |
|--------|--------|--------|--------|--------|
| 7156   |        |        |        |        |
| 7158   |        |        |        |        |
| 7159   |        |        |        |        |
| 7161   |        |        |        |        |
| 7164   |        |        |        |        |
| 7166   |        |        |        |        |
| 7167   |        |        |        |        |
| 7168   |        |        |        |        |
| 7170   |        |        |        |        |
| 7171   |        |        |        |        |
| 7172   |        |        |        |        |
| 7173   |        | 1      |        |        |
| 7175   |        | 1      |        |        |
| 7176   |        |        |        |        |
| 7180   |        |        |        |        |
| 7183   |        | 1      |        |        |
| 7189   |        |        |        |        |
| 7193   |        |        |        |        |
| 7194   | 1      |        |        |        |
| 7195   |        |        |        |        |
| 7200   |        |        |        |        |
| 7201   |        |        | 2      | 2      |
| 7205   |        | 2      | 1      |        |
| 7207   |        |        |        |        |
| 7208   |        |        |        |        |
| 7210   |        |        |        |        |
| 7211   |        |        |        |        |
| 7217   |        |        |        |        |
| 7218   |        |        |        |        |
| 7220   |        |        |        |        |
| 7225   |        |        |        |        |
| 7228   |        |        |        |        |

| respid | Q31a_8 | Q31a_9 | Q31b_1 | Q31b_2 |
|--------|--------|--------|--------|--------|
| 7230   |        |        |        |        |
| 7233   |        |        |        |        |
| 7234   |        |        |        |        |
| 7235   |        |        |        |        |
| 7236   |        |        |        |        |
| 7241   |        |        |        |        |
| 7251   |        |        |        |        |
| 7253   |        |        |        |        |
| 7259   |        |        |        |        |
| 7260   |        |        |        | 1      |
| 7261   |        | 1      |        |        |
| 7263   |        |        |        |        |
| 7265   |        |        |        |        |
| 7268   |        |        |        | 0      |
| 7269   |        |        |        |        |
| 7271   |        |        |        |        |
| 7276   |        | 4      | 1      |        |
| 7280   |        | 1      |        |        |
| 7283   |        |        |        |        |
| 7284   |        |        |        | 2      |
| 7286   |        |        |        |        |
| 7287   |        |        |        |        |
| 7288   |        |        |        |        |
| 7294   |        |        |        | 1      |
| 7295   |        |        |        |        |
| 7296   |        |        |        |        |
| 7297   | 1      |        |        |        |
| 7299   |        |        |        |        |
| 7300   |        |        |        | 1      |
| 7301   |        |        |        | 1      |
| 7302   |        |        |        |        |
| 7306   |        |        |        |        |



| respid | Q31a_8 | Q31a_9 | Q31b_1 | Q31b_2 |
|--------|--------|--------|--------|--------|
| 7313   |        | 3      | 3      | 3      |
| 7315   |        |        |        | 1      |
| 7317   |        |        |        |        |
| 7321   |        |        |        |        |
| 7322   |        |        |        |        |
| 7323   |        |        | 0      | 1      |
| 7333   |        | 3      |        |        |
| 7335   |        | 3      | 4      |        |
| 7336   |        |        |        |        |
| 7337   |        |        |        |        |
| 7338   |        |        |        |        |
| 7340   |        | 1      |        |        |
| 7341   |        |        |        | 2      |
| 7342   |        |        |        | 0      |
| 7344   |        | 1      |        |        |
| 7346   |        |        |        | 2      |
| 7347   |        |        |        |        |
| 7349   |        |        |        | 1      |
| 7352   |        |        |        |        |
| 7353   |        | 1      |        |        |
| 7355   |        |        |        |        |
| 7356   |        |        |        |        |
| 7360   |        |        |        | 2      |
| 7371   |        |        |        |        |
| 7376   | 1      |        |        |        |
| 7379   |        |        |        |        |
| 7381   |        |        |        |        |
| 7386   |        |        |        | 1      |
| 7389   |        |        |        |        |
| 7390   |        | 2      |        |        |
| 7393   |        |        |        |        |
| 7394   |        |        |        |        |

| respid | Q31a_8 | Q31a_9 | Q31b_1 | Q31b_2 |
|--------|--------|--------|--------|--------|
| 7396   |        |        | 1      | 1      |
| 7400   |        |        | 2      |        |
| 7401   |        |        |        |        |
| 7403   |        |        |        |        |
| 7406   |        | 4      |        | 4      |
| 7409   |        |        |        | 0      |
| 7410   |        |        |        | 2      |
| 7412   |        |        |        |        |
| 7414   |        |        |        |        |
| 7415   |        |        |        |        |
| 7417   |        | 1      |        |        |
| 7421   | 2      | 3      |        |        |
| 7425   |        |        |        |        |
| 7430   |        |        |        |        |
| 7432   |        |        |        |        |
| 7433   |        |        | 2      | 2      |
| 7442   | 1      | 1      |        |        |
| 7445   |        |        |        |        |
| 7446   |        |        |        |        |
| 7449   |        |        |        |        |
| 7450   |        |        |        |        |
| 7451   |        |        |        |        |
| 7459   |        |        |        |        |
| 7462   |        |        |        | 3      |
| 7463   |        |        |        |        |
| 7469   |        |        |        |        |
| 7482   |        |        |        |        |
| 7484   |        | 1      |        |        |
| 7486   |        |        |        |        |
| 7496   |        |        |        |        |
| 7502   |        |        |        |        |
| 7504   |        | 1      |        |        |

| respid | Q31a_8 | Q31a_9 | Q31b_1 | Q31b_2 |
|--------|--------|--------|--------|--------|
| 7509   |        |        |        |        |
| 7513   |        |        | 2      | 2      |
| 7514   |        |        |        |        |
| 7520   |        |        |        |        |
| 7523   |        |        |        |        |
| 7526   |        |        |        | 1      |
| 7529   |        |        |        |        |
| 7534   |        |        |        |        |
| 7536   | 2      |        |        |        |
| 7540   |        | 1      |        |        |
| 7541   |        |        |        |        |
| 7542   |        |        |        |        |
| 7555   |        |        |        |        |
| 7566   |        |        |        |        |
| 7568   |        |        |        | 0      |
| 7570   |        |        |        | 2      |
| 7572   | 1      |        |        |        |
| 7573   |        |        | 4      | 4      |
| 7576   |        |        |        |        |
| 7577   |        |        |        |        |
| 7583   |        |        |        |        |
| 7584   |        |        |        |        |
| 7585   |        | 3      | 3      | 3      |
| 7586   |        | 1      |        |        |
| 7587   |        |        |        |        |
| 7588   |        |        |        |        |
| 7596   |        |        |        |        |
| 7599   |        |        |        | 1      |
| 7600   |        |        | 1      |        |
| 7602   |        |        | 1      | 1      |
| 7613   |        |        |        |        |
| 7620   |        |        |        | 1      |

| respid | Q31a_8 | Q31a_9 | Q31b_1 | Q31b_2 |
|--------|--------|--------|--------|--------|
| 7623   | 1      |        |        |        |
| 7635   |        |        |        |        |
| 7636   |        | 1      |        |        |
| 7643   |        |        |        | 1      |
| 7645   |        |        |        | 2      |
| 7649   |        |        |        | 2      |
| 7651   |        |        |        |        |
| 7652   |        | 3      |        |        |
| 7655   |        |        |        |        |
| 7657   |        |        |        |        |
| 7675   |        |        |        |        |
| 7676   |        |        |        |        |
| 7684   |        |        | 1      | 1      |
| 7693   |        |        |        |        |
| 7694   |        |        |        | 4      |
| 7695   |        |        |        |        |
| 7696   | 3      |        |        |        |
| 7698   |        |        |        | 3      |
| 7700   |        |        | 1      |        |
| 7701   |        |        |        |        |
| 7704   |        |        |        | 1      |
| 7709   |        |        |        |        |
| 7713   |        |        |        |        |
| 7714   |        |        |        |        |
| 7718   |        | 3      |        | 3      |
| 7720   | 1      |        |        |        |
| 7721   |        |        |        |        |
| 7722   |        |        |        |        |
| 7724   |        |        |        |        |
| 7728   |        |        |        |        |
| 7731   |        |        |        |        |
| 7735   |        |        |        |        |

| respid | Q31a_8 | Q31a_9 | Q31b_1 | Q31b_2 |
|--------|--------|--------|--------|--------|
| 7737   |        |        |        |        |
| 7741   |        |        |        |        |
| 7746   |        |        |        |        |
| 7747   |        |        |        |        |
| 7748   |        |        |        |        |
| 7750   |        |        | 0      |        |
| 7754   |        |        |        | 1      |
| 7755   |        |        |        |        |
| 7762   |        |        |        |        |
| 7764   |        |        |        |        |
| 7766   |        |        |        |        |
| 7768   |        |        |        |        |
| 7770   | 1      |        |        |        |
| 7771   |        |        |        |        |
| 7777   |        |        |        |        |
| 7778   |        |        |        |        |
| 7783   | 2      | 3      | 2      |        |
| 7789   |        |        |        |        |
| 7790   |        |        |        |        |
| 7795   |        |        |        |        |
| 7807   |        |        |        |        |
| 7808   |        | 3      |        | 2      |
| 7818   |        |        |        | 3      |
| 7820   |        |        |        |        |
| 7831   |        |        |        | 2      |
| 7832   |        |        |        |        |
| 7837   |        |        |        |        |
| 7841   |        | 4      | 1      | 1      |
| 7845   |        |        |        | 1      |
| 7853   |        |        |        |        |
| 7854   |        |        |        |        |
| 7862   |        | 1      |        |        |

| respid | Q31a_8 | Q31a_9 | Q31b_1 | Q31b_2 |
|--------|--------|--------|--------|--------|
| 7871   |        |        |        |        |
| 7875   |        |        |        | 0      |
| 7880   |        | 1      |        |        |
| 7881   |        |        | 2      | 3      |
| 7883   |        |        |        |        |
| 7896   |        |        |        |        |
| 7905   |        |        |        |        |
| 7919   |        |        |        |        |
| 7928   |        |        |        | 3      |
| 7929   |        |        |        |        |
| 7938   |        |        |        | 1      |
| 7940   |        |        |        |        |
| 7941   |        |        |        |        |
| 7952   |        |        |        |        |
| 7962   |        |        |        |        |
| 7968   |        |        |        |        |
| 7972   |        |        |        |        |
| 7983   |        |        |        | 1      |
| 7990   |        |        |        |        |
| 7993   |        |        |        | 0      |
| 8005   |        |        |        |        |
| 8008   |        |        |        |        |
| 8012   |        |        |        |        |
| 8021   |        |        | 0      | 0      |
| 8024   |        |        |        |        |
| 8043   |        |        |        |        |
| 8051   |        |        |        | 1      |
| 8056   |        |        |        |        |
| 8061   |        |        |        |        |
| 8066   |        |        |        |        |
| 8069   |        |        |        | 2      |
| 8071   |        |        |        |        |

| respid | Q31a_8 | Q31a_9 | Q31b_1 | Q31b_2 |
|--------|--------|--------|--------|--------|
| 8072   |        |        |        | 0      |
| 8076   |        |        |        |        |
| 8080   |        |        |        |        |
| 8083   |        |        |        |        |
| 8093   |        |        | 1      |        |
| 8095   |        | 1      |        |        |
| 8099   |        |        |        |        |
| 8100   |        |        |        |        |
| 8103   |        |        |        |        |
| 8104   |        | 1      |        |        |
| 8115   |        | 4      |        |        |
| 8121   |        |        |        |        |
| 8128   |        |        |        |        |
| 8130   |        |        |        |        |
| 8131   |        | 1      |        |        |
| 8133   |        |        |        |        |
| 8143   |        |        |        |        |
| 8144   |        |        | 1      |        |
| 8146   |        |        |        |        |
| 8148   |        |        |        |        |
| 8157   |        |        |        |        |
| 8164   |        |        |        |        |
| 8173   |        |        |        |        |
| 8176   |        |        | 1      |        |
| 8179   |        |        |        |        |
| 8181   |        |        |        |        |
| 8182   |        |        |        |        |
| 8196   |        |        |        |        |
| 8200   |        | 1      |        |        |
| 8203   |        |        |        |        |
| 8204   |        |        | 4      | 4      |
| 8206   |        |        |        |        |

| respid | Q31a_8 | Q31a_9 | Q31b_1 | Q31b_2 |
|--------|--------|--------|--------|--------|
| 8208   |        |        |        |        |
| 8212   |        |        |        |        |
| 8222   |        |        |        | 2      |
| 8223   |        |        |        |        |
| 8225   |        |        |        |        |
| 8226   |        |        |        |        |
| 8228   |        |        |        |        |
| 8229   |        |        |        |        |
| 8239   |        |        |        |        |
| 8246   |        | 1      |        |        |
| 8258   |        |        |        |        |
| 8260   |        |        |        |        |
| 8262   |        | 2      |        |        |
| 8263   |        |        |        |        |
| 8267   | 1      |        |        |        |
| 8271   |        | 2      | 3      | 3      |
| 8274   |        |        |        |        |
| 8275   |        |        |        |        |
| 8279   |        |        |        |        |
| 8285   |        | 2      | 2      | 3      |
| 8287   |        |        |        |        |
| 8289   |        |        |        | 0      |
| 8291   |        |        |        |        |
| 8299   |        |        |        |        |
| 8301   |        | 1      |        |        |
| 8302   |        |        |        | 1      |
| 8308   |        |        | 0      | 1      |
| 8313   |        |        |        |        |
| 8316   |        |        |        |        |
| 8317   |        |        |        |        |
| 8319   |        |        |        |        |
| 8323   | 3      | 2      |        |        |



| respid | Q31a_8 | Q31a_9 | Q31b_1 | Q31b_2 |
|--------|--------|--------|--------|--------|
| 8324   |        |        |        |        |
| 8327   |        |        |        |        |
| 8328   |        |        |        |        |
| 8342   |        |        |        |        |
| 8350   |        |        |        |        |
| 8352   |        |        |        |        |
| 8353   |        |        |        |        |
| 8356   |        |        | 0      | 0      |
| 8367   |        |        |        | 1      |
| 8373   |        |        |        |        |
| 8379   |        |        |        |        |
| 8382   |        |        |        |        |
| 8387   |        |        |        |        |
| 8409   |        |        |        | 1      |
| 8410   |        |        |        |        |
| 8412   |        |        |        |        |
| 8415   |        |        |        |        |
| 8417   |        | 2      |        |        |
| 8422   |        |        |        | 1      |
| 8430   |        |        |        | 1      |
| 8434   |        |        |        |        |
| 8436   |        |        |        |        |
| 8446   |        |        |        |        |
| 8447   |        |        |        |        |
| 8448   |        |        |        |        |
| 8455   |        |        |        |        |
| 8456   |        |        |        |        |
| 8459   |        |        |        | 1      |
| 8460   |        |        |        |        |
| 8464   |        | 2      |        | 1      |
| 8470   |        |        |        |        |
| 8473   |        |        |        | 0      |

| respid | Q31a_8 | Q31a_9 | Q31b_1 | Q31b_2 |
|--------|--------|--------|--------|--------|
| 8486   |        |        |        |        |
| 8487   |        |        |        |        |
| 8489   |        |        |        | 1      |
| 8494   |        |        |        |        |
| 8495   | 3      | 3      |        | 4      |
| 8497   |        |        | 1      |        |
| 8510   |        |        |        |        |
| 8515   |        | 3      |        |        |
| 8526   |        |        |        |        |
| 8530   |        |        |        |        |
| 8532   |        |        |        |        |
| 8533   |        |        |        |        |
| 8534   |        |        | 1      | 1      |
| 8572   |        | 1      |        |        |
| 8582   |        | 1      |        |        |
| 8584   |        |        |        |        |
| 8585   |        |        |        |        |
| 8586   |        |        |        |        |
| 8589   |        |        |        |        |
| 8593   |        |        |        |        |
| 8594   |        |        |        |        |
| 8601   |        |        |        |        |
| 8603   |        |        |        |        |
| 8604   |        |        |        |        |
| 8605   |        |        |        |        |
| 8607   |        |        |        |        |
| 8623   |        |        |        |        |
| 8626   |        | 2      | 0      | 1      |
| 8638   |        |        | 0      | 0      |
| 8640   |        |        |        | 2      |
| 8641   |        | 2      |        |        |
| 8643   |        |        |        |        |

| respid | Q31a_8 | Q31a_9 | Q31b_1 | Q31b_2 |
|--------|--------|--------|--------|--------|
| 8644   |        |        |        | 2      |
| 8646   |        |        |        |        |
| 8647   |        |        |        |        |
| 8649   |        |        |        |        |
| 8650   |        |        | 0      | 0      |
| 8658   |        |        |        |        |
| 8659   |        |        |        |        |
| 8669   |        |        |        |        |
| 8672   |        |        |        |        |
| 8673   |        |        |        |        |
| 8676   |        |        |        |        |
| 8677   |        |        |        |        |
| 8681   |        |        | 0      |        |
| 8688   |        |        |        |        |
| 8689   |        |        |        | 2      |
| 8690   |        |        |        |        |
| 8693   |        |        |        |        |
| 8694   |        |        |        |        |
| 8699   |        |        |        |        |
| 8700   |        |        |        |        |
| 8703   |        |        |        |        |
| 8704   |        |        |        |        |
| 8706   |        | 2      |        |        |
| 8709   |        |        |        |        |
| 8715   |        |        |        |        |
| 8728   |        |        |        |        |
| 8729   |        |        |        |        |
| 8730   |        |        |        |        |
| 8742   |        | 3      |        |        |
| 8748   |        |        | 1      | 1      |
| 8749   |        |        |        |        |
| 8750   |        |        |        |        |

| respid | Q31a_8 | Q31a_9 | Q31b_1 | Q31b_2 |
|--------|--------|--------|--------|--------|
| 8751   |        |        |        |        |
| 8752   |        |        |        |        |
| 8754   |        |        |        |        |
| 8757   |        |        |        |        |
| 8760   |        |        |        |        |
| 8761   |        |        |        |        |
| 8762   | 1      |        |        |        |
| 8763   |        |        |        |        |
| 8764   |        |        |        |        |
| 8765   |        |        |        |        |
| 8766   | 2      |        |        | 2      |
| 8767   |        |        | 2      | 2      |
| 8768   |        |        |        |        |
| 8770   |        |        |        |        |
| 8771   |        |        |        |        |
| 8773   |        |        |        |        |
| 8774   |        |        |        |        |
| 8776   |        |        | 0      |        |
| 8777   |        |        |        |        |
| 8778   |        |        |        | 1      |
| 8779   |        |        |        |        |
| 8784   |        |        |        |        |
| 8786   |        |        |        |        |
| 8787   |        |        |        |        |
| 8790   |        |        |        |        |
| 8791   |        | 2      | 4      | 4      |
| 8793   |        |        |        |        |
| 8795   |        |        |        | 1      |
| 8797   |        |        |        |        |
| 8801   |        |        |        |        |
| 8802   |        |        |        |        |
| 8807   |        |        |        |        |

| respid | Q31a_8 | Q31a_9 | Q31b_1 | Q31b_2 |
|--------|--------|--------|--------|--------|
| 8813   |        |        |        |        |
| 8817   |        |        |        |        |
| 8818   |        | 2      |        |        |
| 8821   |        |        |        |        |
| 8822   |        |        |        |        |
| 8823   |        |        |        |        |
| 8824   |        |        |        |        |
| 8825   |        |        |        |        |
| 8834   |        |        |        |        |
| 8840   |        |        | 4      | 4      |
| 8843   |        |        | 4      |        |
| 8846   |        |        |        |        |
| 8862   |        |        |        |        |
| 8866   |        |        |        |        |
| 8869   |        |        |        |        |
| 8872   |        |        | 2      |        |
| 8903   |        |        |        |        |
| 8909   |        |        |        |        |
| 8926   |        |        |        |        |
| 8936   |        |        |        | 0      |
| 8945   |        |        |        |        |
| 8954   |        |        |        |        |
| 8955   |        |        | 3      | 4      |
| 8958   |        |        |        |        |
| 8959   |        |        |        | 1      |
| 8960   |        |        |        |        |
| 8976   |        |        |        | 0      |
| 8977   |        |        |        |        |
| 8979   |        |        |        |        |
| 8985   |        |        |        |        |
| 8994   |        |        |        |        |
| 8997   |        |        |        |        |

| respid | Q31a_8 | Q31a_9 | Q31b_1 | Q31b_2 |
|--------|--------|--------|--------|--------|
| 9002   |        |        |        |        |
| 9005   |        |        |        | 2      |
| 9017   |        |        |        |        |
| 9018   |        |        |        |        |
| 9021   |        |        |        | 1      |
| 9029   |        |        | 3      | 2      |
| 9035   |        |        |        |        |
| 9038   |        |        |        |        |
| 9039   |        |        |        |        |
| 9040   |        |        |        |        |
| 9042   |        |        |        |        |
| 9043   |        |        |        |        |
| 9045   |        |        |        |        |
| 9051   |        |        |        |        |
| 9067   |        |        |        |        |
| 9069   |        |        |        |        |
| 9073   |        | 3      |        |        |
| 9084   |        |        |        |        |
| 9096   |        |        |        |        |
| 9100   |        |        |        |        |
| 9107   |        |        |        |        |
| 9110   |        |        |        |        |
| 9120   |        |        |        |        |
| 9122   |        |        | 3      |        |
| 9130   |        |        |        | 0      |
| 9134   |        |        |        |        |
| 9137   |        |        |        |        |
| 9139   |        |        |        |        |
| 9144   |        |        |        |        |
| 9157   |        |        |        |        |
| 9166   |        |        |        |        |
| 9177   | 1      | 2      |        |        |

| respid | Q31a_8 | Q31a_9 | Q31b_1 | Q31b_2 |
|--------|--------|--------|--------|--------|
| 9181   |        |        |        |        |
| 9183   |        |        |        |        |
| 9184   |        |        |        |        |
| 9188   |        |        |        |        |
| 9197   |        |        |        |        |
| 9200   |        |        | 1      |        |
| 9205   |        |        |        | 1      |
| 9207   |        |        |        |        |
| 9213   |        |        |        |        |
| 9216   |        |        | 1      |        |
| 9217   |        |        |        |        |
| 9218   |        |        |        | 1      |
| 9219   |        | 2      |        | 1      |
| 9220   |        |        |        |        |
| 9221   |        |        |        |        |
| 9223   |        |        | 3      | 3      |
| 9228   |        |        |        |        |
| 9230   |        |        |        |        |
| 9231   |        |        |        |        |
| 9233   |        |        |        | 1      |
| 9235   |        |        | 0      |        |
| 9237   |        |        |        |        |
| 9242   |        |        | 1      | 1      |
| 9250   |        |        |        |        |
| 9253   |        |        |        | 4      |
| 9257   |        |        |        |        |
| 9263   |        |        |        |        |
| 9267   |        |        |        |        |
| 9272   |        |        |        | 1      |
| 9279   |        |        |        |        |
| 9281   |        |        |        |        |
| 9285   |        |        |        |        |

| respid | Q31a_8 | Q31a_9 | Q31b_1 | Q31b_2 |
|--------|--------|--------|--------|--------|
| 9286   |        |        |        |        |
| 9294   |        |        |        |        |
| 9295   |        |        |        |        |
| 9297   |        |        |        |        |
| 9299   |        |        |        |        |
| 9309   |        | 1      |        |        |
| 9315   |        |        |        |        |
| 9320   |        |        |        |        |
| 9324   |        |        |        |        |
| 9326   |        |        |        |        |
| 9333   |        |        |        |        |
| 9334   |        | 1      |        | 1      |
| 9336   |        |        |        |        |
| 9337   |        |        |        |        |
| 9342   |        |        |        |        |
| 9347   |        |        |        |        |
| 9352   |        | 2      |        |        |
| 9355   |        |        |        |        |
| 9356   |        |        |        |        |
| 9359   |        |        |        |        |
| 9368   |        |        |        |        |
| 9375   |        |        |        |        |
| 9384   |        |        |        |        |
| 9388   |        |        |        |        |
| 9397   |        | 1      |        |        |
| 9400   |        |        |        |        |
| 9401   |        |        |        |        |
| 9402   |        |        |        |        |
| 9417   |        | 2      |        |        |
| 9424   |        |        |        |        |
| 9427   |        |        |        |        |
| 9429   |        |        |        |        |



| respid | Q31a_8 | Q31a_9 | Q31b_1 | Q31b_2 |
|--------|--------|--------|--------|--------|
| 9437   |        |        |        |        |
| 9442   |        |        |        |        |
| 9446   |        |        |        | 1      |
| 9447   |        |        |        |        |
| 9448   |        |        |        | 2      |
| 9449   |        |        |        |        |
| 9455   |        |        |        |        |
| 9459   |        | 1      |        |        |
| 9460   |        |        |        |        |
| 9461   |        | 1      |        |        |
| 9463   |        |        |        | 1      |
| 9464   |        |        |        |        |
| 9466   |        |        |        |        |
| 9477   |        |        |        | 0      |
| 9482   |        |        |        |        |
| 9486   |        |        |        |        |
| 9488   |        |        | 2      | 1      |
| 9489   |        |        |        |        |
| 9496   | 2      | 2      |        |        |
| 9499   |        |        |        |        |
| 9512   |        |        |        |        |
| 9514   |        | 1      |        |        |
| 9516   |        |        |        |        |
| 9517   |        |        | 1      | 2      |
| 9520   |        |        |        |        |
| 9527   |        |        |        |        |
| 9532   |        | 2      |        |        |
| 9533   |        |        |        |        |
| 9543   |        |        |        |        |
| 9550   |        |        |        |        |
| 9553   |        |        |        |        |
| 9555   |        |        |        |        |

| respid | Q31a_8 | Q31a_9 | Q31b_1 | Q31b_2 |
|--------|--------|--------|--------|--------|
| 9565   |        |        |        |        |
| 9583   |        | 3      |        |        |
| 9594   |        |        | 0      | 0      |
| 9596   |        |        |        |        |
| 9600   |        |        |        |        |
| 9602   |        |        |        |        |
| 9606   |        |        |        |        |
| 9608   |        |        |        |        |
| 9610   |        |        |        |        |
| 9612   |        |        | 2      | 2      |
| 9613   |        |        |        |        |
| 9614   |        | 2      |        |        |
| 9620   |        |        |        |        |
| 9628   |        |        |        |        |
| 9631   |        |        |        |        |
| 9632   |        |        |        |        |
| 9633   |        |        |        |        |
| 9639   |        |        |        |        |
| 9640   |        |        | 2      | 2      |
| 9642   |        |        |        |        |
| 9653   |        |        |        |        |
| 9658   |        |        |        | 2      |
| 9659   |        |        | 1      |        |
| 9661   |        |        |        |        |
| 9664   |        |        |        |        |
| 9665   |        |        |        |        |
| 9666   |        |        |        | 1      |
| 9667   |        |        |        |        |
| 9668   |        |        |        |        |
| 9670   |        |        |        |        |
| 9671   |        |        |        | 1      |
| 9681   |        |        |        |        |

| respid | Q31a_8 | Q31a_9 | Q31b_1 | Q31b_2 |
|--------|--------|--------|--------|--------|
| 9684   |        |        |        |        |
| 9685   |        |        |        |        |
| 9686   |        |        |        |        |
| 9688   |        | 2      |        |        |
| 9692   |        |        |        |        |
| 9693   |        |        | 4      | 4      |
| 9698   |        |        |        |        |
| 9699   |        |        | 2      | 1      |
| 9701   |        |        |        |        |
| 9702   |        |        |        | 0      |
| 9709   |        |        |        |        |
| 9713   |        |        |        |        |
| 9715   |        |        |        |        |
| 9721   |        |        |        |        |
| 9725   |        |        |        |        |
| 9729   |        | 1      |        |        |
| 9731   |        |        |        | 1      |
| 9736   |        |        |        |        |
| 9740   |        |        |        |        |
| 9741   |        |        |        |        |
| 9749   |        |        |        |        |
| 9750   |        |        |        |        |
| 9751   |        | 2      | 2      | 3      |
| 9753   |        |        |        |        |
| 9754   |        |        |        |        |
| 9756   |        | 2      |        |        |
| 9758   |        |        |        | 3      |
| 9759   |        | 2      |        |        |
| 9760   |        |        |        | 1      |
| 9761   |        |        |        |        |
| 9762   |        |        |        |        |
| 9764   |        |        |        |        |

| respid | Q31a_8 | Q31a_9 | Q31b_1 | Q31b_2 |
|--------|--------|--------|--------|--------|
| 9768   |        |        |        |        |
| 9769   |        |        |        | 1      |
| 9770   |        |        |        |        |
| 9771   |        |        |        |        |
| 9772   |        |        |        |        |
| 9773   |        | 1      |        |        |
| 9776   |        |        |        | 0      |
| 9786   |        |        |        |        |
| 9790   |        |        |        |        |
| 9791   |        |        |        |        |
| 9794   |        | 2      |        |        |
| 9797   |        |        |        | 1      |
| 9799   |        |        |        | 0      |
| 9804   |        |        |        |        |
| 9805   |        |        |        |        |
| 9806   |        |        |        |        |
| 9807   |        |        |        |        |
| 9813   |        |        |        | 0      |
| 9817   |        |        |        | 1      |
| 9823   |        |        |        | 2      |
| 9826   |        |        |        |        |
| 9830   |        |        |        |        |
| 9835   |        |        |        |        |
| 9836   |        |        |        |        |
| 9841   |        |        |        |        |
| 9842   |        |        |        |        |
| 9844   |        |        |        |        |
| 9847   |        | 2      |        |        |
| 9851   |        |        |        |        |
| 9852   |        |        |        |        |
| 9854   |        |        |        | 1      |
| 9855   |        | 2      |        |        |

| respid | Q31a_8 | Q31a_9 | Q31b_1 | Q31b_2 |
|--------|--------|--------|--------|--------|
| 9856   |        | 1      | 1      | 1      |
| 9862   |        |        |        |        |
| 9863   |        |        |        |        |
| 9866   |        |        |        |        |
| 9867   |        |        |        |        |
| 9868   |        | 1      |        | 1      |
| 9869   |        | 2      |        |        |
| 9878   |        |        |        |        |
| 9879   |        |        |        |        |
| 9881   |        |        |        |        |
| 9882   |        |        |        |        |
| 9884   |        |        |        |        |
| 9885   |        |        |        |        |
| 9888   |        |        |        |        |
| 9889   |        |        |        |        |
| 9894   |        |        |        |        |
| 9895   |        |        |        |        |
| 9896   |        |        |        | 4      |
| 9897   |        | 2      |        |        |
| 9905   |        |        |        |        |
| 9907   |        |        |        | 1      |
| 9908   |        |        |        |        |
| 9909   |        | 2      |        |        |
| 9910   |        |        |        |        |
| 9913   |        |        |        |        |
| 9914   |        |        |        |        |
| 9915   |        |        |        | 2      |
| 9916   |        |        |        |        |
| 9918   |        |        |        |        |
| 9919   |        |        |        |        |
| 9922   |        |        |        |        |
| 9930   |        |        |        |        |

| respid | Q31a_8 | Q31a_9 | Q31b_1 | Q31b_2 |
|--------|--------|--------|--------|--------|
| 9934   |        |        |        |        |
| 9936   |        |        |        |        |
| 9938   |        |        |        |        |
| 9940   |        |        |        |        |
| 9944   |        |        | 2      | 2      |
| 9945   |        |        |        |        |
| 9948   |        |        |        | 3      |
| 9949   |        |        |        |        |
| 9951   |        |        |        | 1      |
| 9952   |        |        |        |        |
| 9954   |        |        |        |        |
| 9955   |        |        |        | 0      |
| 9956   |        | 2      |        |        |
| 9957   |        |        |        |        |
| 9958   |        |        |        |        |
| 9959   |        |        |        | 2      |
| 9960   |        |        |        |        |
| 9961   |        |        |        |        |
| 9962   |        |        |        |        |
| 9969   |        |        |        |        |
| 9982   |        | 3      |        |        |
| 9984   |        | 3      |        |        |
| 9990   |        |        |        |        |
| 9992   |        |        | 1      |        |
| 9993   |        |        |        |        |
| 9997   |        |        |        |        |
| 9999   |        |        |        |        |
| 10000  |        | 1      |        |        |
| 10005  |        |        |        |        |
| 10014  |        | 1      |        |        |
| 10016  |        |        |        |        |
| 10017  |        |        |        |        |

| respid | Q31a_8 | Q31a_9 | Q31b_1 | Q31b_2 |
|--------|--------|--------|--------|--------|
| 10018  |        |        |        |        |
| 10021  |        |        |        |        |
| 10025  |        |        |        |        |
| 10027  |        |        |        |        |
| 10028  |        |        |        |        |
| 10031  |        |        |        |        |
| 10036  |        | 2      |        | 0      |
| 10037  |        |        |        |        |
| 10038  |        |        |        | 1      |
| 10039  |        |        |        |        |
| 10041  |        |        |        |        |
| 10045  |        | 3      |        |        |
| 10046  |        | 2      |        |        |
| 10047  | 1      |        |        |        |
| 10048  |        |        |        |        |
| 10049  |        | 1      |        |        |
| 10051  |        |        |        |        |
| 10052  |        | 2      |        |        |
| 10056  |        |        |        |        |
| 10061  |        |        |        |        |
| 10064  |        |        |        |        |
| 10066  |        |        |        |        |
| 10069  |        |        |        |        |
| 10071  |        |        |        |        |
| 10074  |        |        |        |        |
| 10079  |        |        |        |        |
| 10087  |        | 1      |        |        |
| 10095  |        |        |        |        |
| 10097  |        |        |        |        |
| 10100  |        |        |        |        |
| 10105  |        |        |        |        |
| 10107  |        |        |        |        |

| respid | Q31a_8 | Q31a_9 | Q31b_1 | Q31b_2 |
|--------|--------|--------|--------|--------|
| 10111  |        |        |        | 1      |
| 10116  | 1      |        |        |        |
| 10118  |        |        |        |        |
| 10123  |        |        |        |        |
| 10124  |        |        |        | 1      |
| 10130  |        | 2      |        |        |
| 10134  |        |        |        |        |
| 10135  |        |        |        |        |
| 10136  |        |        |        |        |
| 10141  |        | 1      |        |        |
| 10142  |        |        |        | 1      |
| 10143  |        |        |        |        |
| 10145  |        |        |        |        |
| 10149  |        |        |        |        |
| 10150  |        |        |        |        |
| 10151  |        |        |        |        |
| 10152  |        | 1      |        |        |
| 10153  |        |        |        |        |
| 10156  |        |        |        |        |
| 10160  |        |        |        |        |
| 10161  |        |        |        |        |
| 10167  |        |        | 1      | 2      |
| 10171  |        |        |        |        |
| 10172  |        |        |        |        |
| 10176  |        |        |        |        |
| 10177  |        | 1      |        |        |
| 10182  |        | 3      |        |        |
| 10184  |        |        |        |        |
| 10186  |        |        |        | 3      |
| 10189  |        |        |        |        |
| 10191  |        |        |        |        |
| 10192  |        |        |        |        |



| respid | Q31a_8 | Q31a_9 | Q31b_1 | Q31b_2 |
|--------|--------|--------|--------|--------|
| 10195  |        |        |        |        |
| 10199  |        |        |        |        |
| 10201  |        |        |        |        |
| 10213  |        |        |        |        |
| 10222  | 2      |        |        | 2      |
| 10224  |        |        |        |        |
| 10245  |        |        |        |        |
| 10254  |        |        |        |        |
| 10255  |        | 3      |        | 4      |
| 10257  |        |        |        |        |
| 10260  |        | 1      |        |        |
| 10261  |        |        |        |        |
| 10263  |        | 3      |        |        |
| 10264  |        |        |        |        |
| 10268  |        | 3      |        |        |
| 10269  |        |        |        |        |
| 10270  |        |        |        |        |
| 10282  |        |        |        |        |
| 10285  |        |        |        |        |
| 10288  |        |        |        |        |
| 10291  |        |        |        |        |
| 10292  |        |        |        |        |
| 10304  |        |        |        |        |
| 10305  |        |        |        | 4      |
| 10310  |        |        |        |        |
| 10324  |        |        |        |        |
| 10325  |        |        |        | 1      |
| 10326  |        | 2      |        |        |
| 10329  |        |        |        |        |
| 10332  |        |        |        |        |
| 10337  |        |        |        |        |
| 10341  |        |        |        |        |

| respid | Q31a_8 | Q31a_9 | Q31b_1 | Q31b_2 |
|--------|--------|--------|--------|--------|
| 10353  |        | 1      |        |        |
| 10354  |        |        |        |        |
| 10359  |        |        |        | 1      |
| 10360  |        |        |        |        |
| 10362  |        |        |        |        |
| 10364  |        |        |        |        |
| 10366  |        |        |        |        |
| 10367  |        |        |        |        |
| 10371  |        |        |        |        |
| 10374  |        |        |        | 0      |
| 10375  | 1      |        |        | 1      |
| 10376  |        |        |        |        |
| 10377  |        |        |        |        |
| 10378  |        |        |        |        |
| 10387  |        |        |        |        |
| 10396  |        |        |        |        |
| 10397  |        |        |        |        |
| 10399  | 4      |        |        |        |
| 10405  |        |        |        |        |
| 10406  |        |        |        |        |
| 10408  |        |        |        |        |
| 10409  |        |        |        |        |
| 10412  |        |        |        |        |
| 10413  |        |        |        |        |
| 10419  |        |        |        |        |
| 10423  |        |        | 3      |        |
| 10426  |        |        |        |        |
| 10446  |        |        |        |        |
| 10448  |        |        |        |        |
| 10450  |        |        |        |        |
| 10455  |        |        |        |        |
| 10460  |        |        |        |        |

| respid | Q31a_8 | Q31a_9 | Q31b_1 | Q31b_2 |
|--------|--------|--------|--------|--------|
| 10461  |        |        |        |        |
| 10471  |        |        |        |        |
| 10472  |        |        |        |        |
| 10491  |        |        | 3      | 3      |
| 10493  |        |        |        |        |
| 10498  |        |        |        | 1      |
| 10533  |        |        |        | 1      |
| 10539  |        |        |        |        |
| 10540  |        |        |        |        |
| 10557  |        | 2      |        |        |
| 10558  |        |        | 1      | 2      |
| 10559  |        | 2      |        |        |
| 10564  |        | 2      |        |        |
| 10570  |        |        |        |        |
| 10572  |        |        |        |        |
| 10576  |        |        |        |        |
| 10582  |        |        | 0      |        |
| 10593  |        |        |        |        |
| 10596  |        |        |        |        |
| 10615  |        |        |        |        |
| 10616  |        |        |        |        |
| 10623  |        |        |        |        |
| 10626  |        |        |        |        |
| 10627  |        |        | 3      | 2      |
| 10629  |        |        |        |        |
| 10632  | 3      | 3      | 1      | 1      |
| 10641  |        |        |        |        |
| 10648  | 2      |        |        |        |
| 10651  |        |        | 1      |        |
| 10654  |        |        |        |        |
| 10673  |        |        |        |        |
| 10675  |        |        |        |        |

| respid | Q31a_8 | Q31a_9 | Q31b_1 | Q31b_2 |
|--------|--------|--------|--------|--------|
| 10689  |        |        |        |        |
| 10692  |        |        |        | 2      |
| 10694  |        |        |        |        |
| 10695  |        |        |        |        |
| 10702  |        |        |        |        |
| 10703  |        |        |        |        |
| 10708  |        |        |        |        |
| 10719  |        |        |        |        |
| 10722  |        |        |        |        |
| 10723  |        | 2      |        | 1      |
| 10726  |        |        |        |        |
| 10727  |        |        |        |        |
| 10730  |        | 1      |        |        |
| 10731  |        |        |        |        |
| 10737  |        |        |        |        |
| 10743  |        |        |        |        |
| 10763  |        |        |        |        |
| 10777  |        |        |        |        |
| 10787  |        | 2      |        |        |
| 10798  |        |        |        | 1      |
| 10800  |        |        |        |        |
| 10802  |        |        | 3      | 3      |
| 10803  |        |        |        |        |
| 10808  |        |        |        |        |
| 10810  |        |        |        |        |
| 10819  |        |        |        |        |
| 10825  |        |        |        |        |
| 10827  |        |        |        |        |
| 10830  |        |        | 0      | 1      |
| 10847  |        |        |        |        |
| 10849  |        |        |        |        |
| 10852  |        |        |        |        |

| respid | Q31a_8 | Q31a_9 | Q31b_1 | Q31b_2 |
|--------|--------|--------|--------|--------|
| 10854  |        |        |        | 3      |
| 10857  |        |        |        |        |
| 10861  |        | 2      |        | 3      |
| 10862  |        |        |        |        |
| 10870  |        | 1      |        |        |
| 10873  |        |        |        |        |
| 10881  |        |        |        | 1      |
| 10893  |        |        |        |        |
| 10898  |        |        |        |        |
| 10899  |        |        | 0      |        |
| 10905  |        |        |        |        |
| 10910  |        |        |        |        |
| 10911  |        | 1      |        |        |
| 10912  |        |        |        |        |
| 10913  |        |        |        |        |
| 10918  |        |        |        |        |
| 10995  |        |        |        |        |
| 11002  |        |        |        |        |
| 11003  |        |        |        |        |
| 11005  |        |        |        | 0      |
| 11015  | 2      |        |        |        |
| 11016  |        |        |        |        |
| 11017  |        |        |        |        |
| 11020  |        |        |        |        |
| 11024  |        | 1      |        |        |
| 11026  |        |        | 1      | 1      |
| 11028  |        |        |        |        |
| 11029  |        |        |        |        |
| 11030  |        | 1      |        | 0      |
| 11031  |        |        |        |        |
| 11038  |        |        |        |        |
| 11051  |        |        |        |        |

| respid | Q31a_8 | Q31a_9 | Q31b_1 | Q31b_2 |
|--------|--------|--------|--------|--------|
| 11052  |        |        |        |        |
| 11053  |        |        |        | 0      |
| 11054  |        |        |        |        |
| 11063  |        |        |        |        |
| 11075  |        |        | 1      | 1      |
| 11083  |        |        |        |        |
| 11092  |        |        |        |        |
| 11118  |        |        | 0      |        |
| 11119  |        |        |        |        |
| 11134  |        |        |        |        |
| 11139  |        |        | 0      |        |
| 11154  |        |        |        |        |
| 11166  |        |        |        |        |
| 11168  |        |        |        |        |
| 11176  |        |        |        |        |
| 11183  |        |        |        |        |
| 11189  |        |        |        |        |
| 11196  |        |        | 2      |        |
| 11200  |        | 3      |        |        |
| 11201  |        |        |        |        |
| 11211  |        |        | 2      |        |
| 11218  |        |        |        |        |
| 11219  |        |        |        |        |
| 11221  |        |        |        | 1      |
| 11222  |        |        |        |        |
| 11230  |        |        | 2      |        |
| 11236  |        |        | 2      |        |
| 11237  |        |        |        |        |
| 11240  |        | 3      |        |        |
| 11244  |        |        | 2      |        |
| 11249  |        | 1      |        |        |
| 11252  |        |        | 2      |        |

| respid | Q31a_8 | Q31a_9 | Q31b_1 | Q31b_2 |
|--------|--------|--------|--------|--------|
| 11254  |        |        |        |        |
| 11255  |        |        |        | 3      |
| 11258  |        |        | 2      | 2      |
| 11260  |        |        |        |        |
| 11264  |        | 2      |        | 2      |
| 11266  |        |        |        | 1      |
| 11268  |        |        |        |        |
| 11269  |        | 2      |        |        |
| 11272  |        |        |        | 1      |
| 11273  |        |        |        |        |
| 11275  |        |        |        | 0      |
| 11276  |        |        |        | 3      |
| 11278  |        |        | 2      | 2      |
| 11288  |        |        |        |        |
| 11289  |        |        |        |        |
| 11291  |        |        |        |        |
| 11295  |        |        |        |        |
| 11297  |        |        |        |        |
| 11304  |        |        |        |        |
| 11305  |        |        |        |        |
| 11311  |        |        |        |        |
| 11313  |        |        |        |        |
| 11315  |        |        |        | 4      |
| 11316  | 3      |        |        | 4      |
| 11318  |        |        | 2      | 3      |
| 11323  |        |        |        |        |
| 11331  |        |        |        |        |
| 11333  |        |        |        |        |
| 11334  |        |        |        |        |
| 11340  |        |        |        |        |
| 11345  |        |        |        |        |
| 11354  |        |        |        |        |

| respid | Q31a_8 | Q31a_9 | Q31b_1 | Q31b_2 |
|--------|--------|--------|--------|--------|
| 11360  |        |        |        |        |
| 11361  |        |        | 2      |        |
| 11367  |        |        |        |        |
| 11370  |        |        |        |        |
| 11371  |        |        |        |        |
| 11372  |        |        |        |        |
| 11373  |        |        |        |        |
| 11382  |        |        |        |        |
| 11394  |        |        |        |        |
| 11395  |        | 2      |        | 1      |
| 11397  |        |        |        |        |
| 11402  |        |        |        |        |
| 11409  |        |        |        |        |
| 11410  |        |        |        |        |
| 11411  |        |        |        |        |
| 11418  |        | 1      |        |        |
| 11425  |        |        |        |        |
| 11429  |        |        |        |        |
| 11430  | 2      |        |        |        |
| 11431  |        | 2      |        |        |
| 11432  |        |        |        |        |
| 11433  |        |        |        |        |
| 11435  | 2      |        |        |        |
| 11436  |        |        | 1      | 1      |
| 11437  |        |        | 1      |        |
| 11439  |        |        |        |        |
| 11440  |        |        |        | 0      |
| 11447  |        |        |        |        |
| 11455  |        |        |        |        |
| 11456  |        |        |        |        |
| 11461  |        | 1      |        |        |
| 11463  |        |        |        | 4      |



| respid | Q31a_8 | Q31a_9 | Q31b_1 | Q31b_2 |
|--------|--------|--------|--------|--------|
| 11470  | 1      |        |        |        |
| 11472  |        |        |        |        |
| 11475  |        |        |        |        |
| 11476  |        |        |        |        |
| 11482  |        |        |        |        |
| 11501  |        | 2      |        | 2      |
| 11503  |        |        |        |        |
| 11505  |        |        |        |        |
| 11510  | 1      |        |        | 1      |
| 11519  |        |        |        |        |
| 11527  |        | 2      | 3      | 2      |
| 11529  |        | 3      | 2      | 2      |
| 11530  |        |        |        | 1      |
| 11536  |        |        |        |        |
| 11543  |        |        |        |        |
| 11548  |        |        | 2      |        |
| 11566  |        |        |        |        |
| 11570  |        |        |        | 3      |
| 11571  |        | 1      |        |        |
| 11578  |        |        |        |        |
| 11579  |        |        |        |        |
| 11581  |        |        | 4      | 3      |
| 11582  |        |        |        |        |
| 11583  |        |        |        |        |
| 11589  |        |        | 1      |        |
| 11590  |        |        |        |        |
| 11592  |        |        |        |        |
| 11596  |        |        |        |        |
| 11598  |        | 3      |        |        |
| 11602  |        |        |        | 1      |
| 11605  |        | 1      |        |        |
| 11618  |        |        |        |        |

| respid | Q31a_8 | Q31a_9 | Q31b_1 | Q31b_2 |
|--------|--------|--------|--------|--------|
| 11621  |        | 3      |        |        |
| 11630  | 1      |        |        |        |
| 11636  |        |        |        |        |
| 11640  | 3      | 1      | 3      | 3      |
| 11658  |        |        |        |        |
| 11665  |        |        |        |        |
| 11666  |        |        |        | 1      |
| 11667  |        |        |        |        |
| 11674  |        |        |        |        |
| 11680  |        |        |        |        |
| 11683  |        |        |        |        |
| 11688  |        |        |        | 3      |
| 11690  |        |        |        |        |
| 11694  |        |        |        |        |
| 11705  |        |        |        | 1      |
| 11720  |        |        |        |        |
| 11724  |        |        |        |        |
| 11738  |        |        | 1      | 1      |
| 11744  | 2      |        |        | 2      |
| 11745  |        |        |        |        |
| 11747  |        |        |        |        |
| 11755  |        |        |        |        |
| 11756  |        | 2      |        |        |
| 11772  |        |        |        |        |
| 11773  |        |        |        |        |
| 11778  |        | 4      |        | 2      |
| 11790  |        |        |        |        |
| 11794  |        |        |        |        |
| 11795  |        |        |        |        |
| 11799  |        |        |        |        |
| 11803  |        |        |        | 1      |
| 11806  | 5      |        | 2      | 3      |

| respid | Q31a_8 | Q31a_9 | Q31b_1 | Q31b_2 |
|--------|--------|--------|--------|--------|
| 11808  |        |        |        |        |
| 11810  |        |        |        |        |
| 11811  |        |        |        |        |
| 11812  |        | 2      |        |        |
| 11813  |        | 2      |        | 1      |
| 11821  |        |        |        | 3      |
| 11827  |        |        |        |        |
| 11831  |        |        |        | 3      |
| 11841  |        |        |        |        |
| 11872  |        |        |        | 1      |
| 11898  |        |        |        |        |
| 11902  |        | 4      |        |        |
| 11912  |        |        |        |        |
| 11926  |        |        |        |        |
| 11928  |        |        |        | 2      |
| 11932  |        |        |        | 1      |
| 11934  |        |        |        |        |
| 11941  |        | 2      |        |        |
| 11942  |        |        |        |        |
| 11943  |        |        |        |        |
| 11944  |        |        |        |        |
| 11955  |        |        |        |        |
| 11958  |        | 3      |        |        |
| 11968  |        | 2      |        |        |
| 11979  |        | 3      |        | 2      |
| 11988  |        |        |        |        |
| 11999  |        |        |        |        |
| 12002  | 1      |        |        |        |
| 12004  |        |        |        |        |
| 12008  |        |        |        |        |
| 12013  |        |        |        |        |
| 12018  |        |        |        |        |

| respid | Q31a_8 | Q31a_9 | Q31b_1 | Q31b_2 |
|--------|--------|--------|--------|--------|
| 12023  |        |        |        |        |
| 12027  |        |        | 3      | 4      |
| 12030  |        |        |        |        |
| 12031  |        |        | 0      |        |
| 12036  |        | 3      |        |        |
| 12037  |        | 4      |        |        |
| 12038  |        |        |        |        |
| 12039  |        |        |        |        |
| 12045  |        | 2      |        | 0      |
| 12046  |        |        | 1      |        |
| 12054  |        |        | 1      | 1      |
| 12055  |        |        | 1      | 2      |
| 12069  |        |        | 1      | 1      |
| 12070  |        |        |        | 3      |
| 12074  |        |        |        |        |
| 12075  |        |        |        | 2      |
| 12078  |        |        | 1      | 1      |
| 12089  |        |        | 1      | 1      |
| 12091  |        |        |        |        |
| 12092  |        |        |        | 3      |
| 12108  |        |        |        |        |
| 12111  | 2      | 3      |        | 2      |
| 12112  |        |        |        | 2      |
| 12126  |        |        |        |        |
| 12132  |        | 3      |        |        |
| 12150  |        |        |        |        |
| 12152  |        |        |        | 1      |
| 12154  |        |        |        |        |
| 12157  |        |        |        |        |
| 12165  |        |        |        |        |
| 12169  |        | 2      | 2      | 2      |
| 12182  |        |        |        | 3      |

| respid | Q31a_8 | Q31a_9 | Q31b_1 | Q31b_2 |
|--------|--------|--------|--------|--------|
| 12198  |        |        |        | 1      |
| 12199  |        |        |        |        |
| 12202  |        |        |        |        |
| 12207  |        | 2      |        |        |
| 12208  | 1      |        |        |        |
| 12210  |        |        |        |        |
| 12219  |        |        |        |        |
| 12224  |        |        |        |        |
| 12230  |        |        |        | 1      |
| 12238  |        |        |        |        |
| 12239  |        |        |        |        |
| 12243  |        |        |        | 0      |
| 12245  |        |        |        |        |
| 12246  |        |        |        | 2      |
| 12247  |        |        |        |        |
| 12248  |        |        |        |        |
| 12249  | 1      |        |        | 2      |
| 12258  |        |        |        |        |
| 12265  |        |        |        |        |
| 12269  | 2      |        |        |        |
| 12270  |        |        |        |        |
| 12279  |        |        |        |        |
| 12280  | 2      |        |        |        |
| 12282  |        |        |        | 1      |
| 12283  |        |        |        |        |
| 12287  |        |        |        |        |
| 12288  |        |        | 1      | 1      |
| 12290  |        |        |        |        |
| 12292  |        | 1      | 1      | 2      |
| 12294  |        |        |        |        |
| 12296  |        |        |        |        |
| 12307  |        |        |        |        |

| respid | Q31a_8 | Q31a_9 | Q31b_1 | Q31b_2 |
|--------|--------|--------|--------|--------|
| 12309  |        |        |        |        |
| 12312  |        | 2      |        |        |
| 12317  |        |        |        |        |
| 12319  |        |        |        |        |
| 12320  |        |        |        |        |
| 12322  |        | 1      |        |        |
| 12328  |        |        |        | 1      |
| 12331  |        |        | 3      | 3      |
| 12332  |        |        |        |        |
| 12334  |        |        |        | 1      |
| 12337  |        | 2      |        |        |
| 12338  |        |        |        |        |
| 12342  |        |        |        |        |
| 12349  |        |        |        |        |
| 12352  |        | 2      |        |        |
| 12355  |        |        |        |        |
| 12357  |        |        |        |        |
| 12358  |        |        |        |        |
| 12371  |        |        |        |        |
| 12372  |        |        |        |        |
| 12373  |        |        |        |        |
| 12379  |        |        |        |        |
| 12381  |        |        | 2      | 2      |
| 12383  |        | 2      |        |        |
| 12384  |        |        | 0      |        |
| 12386  |        |        |        |        |
| 12389  |        |        |        |        |
| 12392  |        |        |        |        |
| 12396  |        |        |        |        |
| 12397  |        |        |        |        |
| 12399  |        |        |        |        |
| 12400  |        | 3      |        |        |

| respid | Q31a_8 | Q31a_9 | Q31b_1 | Q31b_2 |
|--------|--------|--------|--------|--------|
| 12406  |        |        |        | 3      |
| 12407  |        |        |        |        |
| 12410  |        |        |        |        |
| 12413  |        |        |        |        |
| 12416  |        |        |        | 2      |
| 12419  |        | 1      |        |        |
| 12422  |        |        | 3      | 3      |
| 12423  |        |        |        |        |
| 12429  |        |        |        |        |
| 12434  |        | 4      |        |        |
| 12435  |        |        |        |        |
| 12436  |        |        |        |        |
| 12442  |        |        |        |        |
| 12449  |        |        |        |        |
| 12451  |        |        |        |        |
| 12456  |        |        |        |        |
| 12457  |        |        |        |        |
| 12458  |        |        |        |        |
| 12461  |        |        |        |        |
| 12462  |        |        |        |        |
| 12463  |        |        |        | 2      |
| 12466  |        |        |        |        |
| 12470  |        |        |        |        |
| 12471  |        |        |        |        |
| 12472  |        |        |        |        |
| 12478  |        |        |        |        |
| 12479  |        |        | 3      | 3      |
| 12481  |        |        |        |        |
| 12482  |        |        | 1      |        |
| 12483  |        |        |        |        |
| 12496  |        |        |        |        |
| 12497  |        |        |        |        |

| respid | Q31a_8 | Q31a_9 | Q31b_1 | Q31b_2 |
|--------|--------|--------|--------|--------|
| 12498  | 1      |        |        | 2      |
| 12500  |        |        |        |        |
| 12501  |        |        |        |        |
| 12502  |        |        |        |        |
| 12503  |        |        |        | 0      |
| 12505  |        |        |        |        |
| 12508  |        |        | 2      | 2      |
| 12509  |        | 2      |        |        |
| 12510  |        |        |        |        |
| 12512  |        |        |        |        |
| 12514  | 1      |        |        | 2      |
| 12515  |        |        |        |        |
| 12520  |        |        |        |        |
| 12522  |        |        |        |        |
| 12526  |        |        |        |        |
| 12527  |        |        |        |        |
| 12528  |        |        |        |        |
| 12530  |        |        |        | 2      |
| 12535  |        |        |        |        |
| 12539  |        |        |        |        |
| 12541  |        |        |        |        |
| 12542  |        |        |        |        |
| 12545  |        |        |        |        |
| 12547  |        |        |        |        |
| 12549  |        |        |        |        |
| 12550  |        |        |        | 1      |
| 12555  |        |        |        |        |
| 12557  |        |        |        | 0      |
| 12559  |        |        |        |        |
| 12561  |        |        |        |        |
| 12562  |        |        |        |        |
| 12563  |        |        |        |        |



| respid | Q31a_8 | Q31a_9 | Q31b_1 | Q31b_2 |
|--------|--------|--------|--------|--------|
| 12565  |        | 2      | 4      | 4      |
| 12566  |        |        |        |        |
| 12570  |        |        |        |        |
| 12571  |        |        |        |        |
| 12572  |        |        |        | 0      |
| 12578  |        |        |        |        |
| 12579  |        | 1      |        |        |
| 12581  |        |        |        |        |
| 12582  |        |        |        |        |
| 12585  |        |        |        |        |
| 12586  |        |        | 3      | 3      |
| 12588  |        | 2      |        | 3      |
| 12589  |        |        |        | 2      |
| 12590  |        |        |        |        |
| 12591  |        |        |        |        |
| 12593  |        |        |        | 2      |
| 12594  |        |        |        |        |
| 12599  |        |        |        |        |
| 12600  |        |        |        | 0      |
| 12602  | 2      |        |        | 1      |
| 12606  |        | 2      |        |        |
| 12607  |        |        |        |        |
| 12608  |        |        |        |        |
| 12610  |        |        |        |        |
| 12611  |        |        |        |        |
| 12613  |        | 4      |        | 2      |
| 12616  |        |        |        |        |
| 12617  |        |        |        |        |
| 12619  |        |        |        |        |
| 12622  |        |        |        |        |
| 12628  |        |        |        |        |
| 12631  |        |        |        | 1      |

| respid | Q31a_8 | Q31a_9 | Q31b_1 | Q31b_2 |
|--------|--------|--------|--------|--------|
| 12635  |        |        |        |        |
| 12638  |        |        |        |        |
| 12639  |        |        |        |        |
| 12640  |        |        |        |        |
| 12643  |        |        |        |        |
| 12646  |        | 2      |        |        |
| 12648  | 2      |        |        |        |
| 12650  |        |        |        |        |
| 12651  |        |        | 1      |        |
| 12658  |        |        | 1      | 2      |
| 12662  |        |        |        | 1      |
| 12663  |        |        |        |        |
| 12664  |        | 1      |        |        |
| 12669  |        | 3      | 3      | 3      |
| 12670  |        |        |        |        |
| 12673  |        |        |        |        |
| 12675  |        |        |        |        |
| 12677  |        |        |        |        |
| 12679  |        |        |        |        |
| 12682  |        |        |        |        |
| 12696  |        |        |        |        |
| 12697  |        |        |        |        |
| 12699  |        |        |        |        |
| 12700  |        |        | 2      | 2      |
| 12701  |        |        |        |        |
| 12702  |        |        |        |        |
| 12704  |        |        |        | 3      |
| 12705  |        |        |        |        |
| 12709  |        |        |        |        |
| 12710  |        |        |        |        |
| 12713  |        |        | 1      | 2      |
| 12716  |        |        |        |        |

| respid | Q31a_8 | Q31a_9 | Q31b_1 | Q31b_2 |
|--------|--------|--------|--------|--------|
| 12719  |        | 2      |        |        |
| 12720  |        |        |        |        |
| 12723  |        |        |        |        |
| 12726  |        |        |        |        |
| 12728  |        |        |        |        |
| 12729  |        |        |        |        |
| 12731  |        |        |        |        |
| 12732  |        |        |        |        |
| 12733  |        |        |        |        |
| 12736  |        |        |        |        |
| 12737  |        |        |        |        |
| 12739  |        |        |        |        |
| 12742  |        |        |        |        |
| 12743  |        | 4      | 4      | 3      |
| 12744  |        |        |        | 1      |
| 12747  |        |        |        |        |
| 12751  |        |        |        |        |
| 12754  |        |        |        |        |
| 12756  |        |        |        |        |
| 12757  |        |        |        |        |
| 12760  |        |        |        |        |
| 12761  |        |        |        |        |
| 12762  |        | 3      |        |        |
| 12766  |        |        |        |        |
| 12769  |        | 2      |        |        |
| 12770  |        |        |        |        |
| 12773  |        |        |        |        |
| 12780  |        |        |        |        |
| 12789  |        |        |        |        |
| 12792  | 2      | 2      | 3      | 3      |
| 12795  |        |        | 1      |        |
| 12804  |        | 1      |        |        |

| respid | Q31a_8 | Q31a_9 | Q31b_1 | Q31b_2 |
|--------|--------|--------|--------|--------|
| 12811  |        |        |        |        |
| 12813  |        |        |        | 2      |
| 12814  |        |        |        |        |
| 12815  |        |        |        |        |
| 12816  |        |        |        |        |
| 12817  |        |        |        |        |
| 12818  |        | 1      |        | 0      |
| 12819  |        |        |        |        |
| 12820  |        |        |        | 0      |
| 12821  |        |        |        |        |
| 12824  |        |        | 2      | 3      |
| 12827  |        |        |        |        |
| 12836  | 2      |        |        | 2      |
| 12837  |        |        |        |        |
| 12838  |        |        |        | 1      |
| 12845  |        |        | 0      | 0      |
| 12847  |        | 2      |        |        |
| 12849  |        |        |        |        |
| 12850  |        |        |        |        |
| 12852  |        |        |        |        |
| 12853  |        |        |        | 2      |
| 12854  |        |        |        |        |
| 12860  |        |        |        |        |
| 12861  |        |        |        |        |
| 12863  |        |        |        |        |
| 12865  |        |        |        |        |
| 12870  |        |        | 1      | 1      |
| 12871  |        |        |        |        |
| 12873  |        |        |        |        |
| 12877  |        |        |        |        |
| 12880  |        |        |        | 1      |
| 12881  |        |        |        | 0      |

| respid | Q31a_8 | Q31a_9 | Q31b_1 | Q31b_2 |
|--------|--------|--------|--------|--------|
| 12882  |        |        |        |        |
| 12883  |        |        | 1      | 0      |
| 12885  |        |        |        |        |
| 12887  |        |        |        | 1      |
| 12889  |        |        |        |        |
| 12890  |        |        |        |        |
| 12891  |        | 2      |        |        |
| 12892  |        |        |        |        |
| 12893  |        |        |        |        |
| 12895  |        |        |        |        |
| 12898  |        |        |        |        |
| 12907  |        |        |        |        |
| 12908  |        |        |        |        |
| 12909  |        |        |        |        |
| 12914  |        |        |        |        |
| 12915  |        |        | 1      | 1      |
| 12916  |        |        |        |        |
| 12921  |        |        |        |        |
| 12922  |        |        |        | 1      |
| 12923  |        |        |        |        |
| 12926  |        | 2      |        |        |
| 12927  |        | 1      |        | 1      |
| 12932  |        |        |        |        |
| 12936  |        |        |        |        |
| 12937  |        |        |        |        |
| 12938  |        |        | 4      | 4      |
| 12939  |        |        |        |        |
| 12940  | 2      |        |        |        |
| 12945  |        |        |        | 3      |
| 12946  |        | 1      |        |        |
| 12947  |        |        |        |        |
| 12948  |        |        |        |        |

| respid | Q31a_8 | Q31a_9 | Q31b_1 | Q31b_2 |
|--------|--------|--------|--------|--------|
| 12951  |        |        |        | 2      |
| 12952  |        |        |        | 1      |
| 12954  |        | 2      | 2      | 2      |
| 12960  |        |        |        |        |
| 12961  |        |        | 1      |        |
| 12962  |        |        |        |        |
| 12963  |        |        |        |        |
| 12964  |        |        |        |        |
| 12966  |        |        |        |        |
| 12967  |        | 4      |        |        |
| 12969  |        |        |        |        |
| 12970  |        |        |        |        |
| 12974  | 3      |        |        |        |
| 12979  |        |        |        |        |
| 12980  |        |        |        |        |
| 12983  |        |        |        |        |
| 12988  |        |        |        | 1      |
| 12994  |        | 1      | 1      | 1      |
| 12995  |        |        |        |        |
| 12996  |        |        |        |        |
| 12998  |        |        |        | 3      |
| 12999  |        |        |        |        |
| 13001  |        |        |        |        |
| 13005  |        |        |        |        |
| 13006  |        |        |        |        |
| 13007  |        |        |        |        |
| 13011  |        |        |        | 1      |
| 13012  |        |        |        |        |
| 13013  |        |        | 2      |        |
| 13016  |        |        |        |        |
| 13018  |        |        |        |        |
| 13020  |        |        |        |        |

| respid | Q31a_8 | Q31a_9 | Q31b_1 | Q31b_2 |
|--------|--------|--------|--------|--------|
| 13024  |        |        |        |        |
| 13025  |        |        | 1      | 1      |
| 13027  |        |        | 0      | 1      |
| 13031  |        | 2      |        |        |
| 13032  |        |        |        |        |
| 13034  |        |        |        |        |
| 13036  |        | 2      |        | 2      |
| 13037  |        |        |        |        |
| 13038  |        | 3      |        |        |
| 13039  |        |        | 0      |        |
| 13040  |        |        |        | 1      |
| 13041  | 1      |        |        |        |
| 13045  |        |        |        |        |
| 13046  |        |        |        |        |
| 13048  |        |        |        |        |
| 13051  |        |        |        |        |
| 13053  |        |        |        |        |
| 13055  |        |        |        |        |
| 13059  |        |        |        | 1      |
| 13068  |        |        |        |        |
| 13069  |        |        |        |        |
| 13076  |        |        |        | 1      |
| 13081  |        |        |        |        |
| 13082  |        |        |        |        |
| 13084  |        |        |        | 3      |
| 13085  |        |        |        |        |
| 13086  |        |        | 1      |        |
| 13093  | 2      |        |        |        |
| 13094  |        | 3      |        |        |
| 13097  |        |        |        | 1      |
| 13098  |        |        |        |        |
| 13099  |        |        |        |        |

| respid | Q31a_8 | Q31a_9 | Q31b_1 | Q31b_2 |
|--------|--------|--------|--------|--------|
| 13100  |        |        |        |        |
| 13101  |        |        |        |        |
| 13103  |        |        |        |        |
| 13105  |        |        |        |        |
| 13106  |        | 1      |        |        |
| 13107  |        |        |        | 0      |
| 13110  |        |        |        |        |
| 13118  |        |        |        |        |
| 13120  |        |        | 4      | 4      |
| 13130  |        |        |        |        |
| 13133  |        |        |        |        |
| 13134  |        |        |        |        |
| 13139  |        |        |        | 0      |
| 13142  |        |        |        |        |
| 13143  |        |        |        |        |
| 13145  |        |        |        |        |
| 13148  |        |        |        |        |
| 13149  |        |        |        |        |
| 13151  |        | 3      | 2      |        |
| 13153  |        |        |        |        |
| 13158  |        |        |        |        |
| 13160  |        | 2      |        | 1      |
| 13162  |        |        | 2      | 2      |
| 13169  |        |        |        |        |
| 13172  | 1      |        | 1      | 1      |
| 13173  |        |        |        |        |
| 13176  |        |        | 1      |        |
| 13179  |        |        |        | 1      |
| 13184  |        |        |        |        |
| 13185  |        |        |        |        |
| 13186  |        |        |        |        |
| 13188  |        | 2      |        |        |



| respid | Q31a_8 | Q31a_9 | Q31b_1 | Q31b_2 |
|--------|--------|--------|--------|--------|
| 13190  |        |        |        |        |
| 13192  |        |        | 2      | 0      |
| 13193  |        |        |        |        |
| 13201  |        |        |        |        |
| 13207  |        |        |        |        |
| 13208  |        |        |        |        |
| 13209  |        |        | 3      |        |
| 13212  |        |        |        |        |
| 13215  |        |        |        |        |
| 13218  |        |        |        |        |
| 13219  |        |        |        |        |
| 13224  |        |        |        |        |
| 13225  |        |        |        |        |
| 13226  |        |        |        |        |
| 13232  |        |        |        | 0      |
| 13237  |        |        | 2      | 3      |
| 13239  |        |        |        |        |
| 13241  |        |        |        | 3      |
| 13243  |        |        |        |        |
| 13247  |        |        |        |        |
| 13248  |        |        |        |        |
| 13251  |        |        |        |        |
| 13256  |        |        |        |        |
| 13260  |        | 1      |        |        |
| 13261  |        |        |        |        |
| 13264  |        |        |        |        |
| 13273  |        |        |        | 2      |
| 13274  |        |        |        | 1      |
| 13276  |        |        |        |        |
| 13278  |        |        |        |        |
| 13279  |        |        |        | 0      |
| 13282  |        |        |        |        |

| respid | Q31a_8 | Q31a_9 | Q31b_1 | Q31b_2 |
|--------|--------|--------|--------|--------|
| 13283  |        |        |        |        |
| 13285  |        |        |        |        |
| 13286  |        |        |        | 0      |
| 13299  |        |        |        |        |
| 13300  |        |        |        | 1      |
| 13301  |        |        |        |        |
| 13303  |        |        |        | 1      |
| 13304  |        |        |        |        |
| 13307  |        |        |        | 1      |
| 13308  |        |        |        |        |
| 13312  |        |        |        | 0      |
| 13313  |        |        |        |        |
| 13314  |        | 1      |        |        |
| 13318  |        |        |        |        |
| 13320  |        |        |        | 1      |
| 13322  |        | 1      |        |        |
| 13324  |        |        |        |        |
| 13325  |        |        |        |        |
| 13327  |        |        |        |        |
| 13330  |        |        |        | 0      |
| 13332  |        |        |        | 0      |
| 13333  |        |        |        |        |
| 13334  |        |        |        | 1      |
| 13351  | 1      |        |        |        |
| 13353  |        |        |        |        |
| 13354  |        |        |        |        |
| 13355  | 2      |        |        | 2      |
| 13358  |        |        | 1      | 1      |
| 13359  |        |        |        |        |
| 13360  |        |        | 1      |        |
| 13364  |        |        | 4      | 4      |
| 13365  |        | 3      |        |        |

| respid | Q31a_8 | Q31a_9 | Q31b_1 | Q31b_2 |
|--------|--------|--------|--------|--------|
| 13368  |        |        |        |        |
| 13370  |        |        |        |        |
| 13375  |        | 1      |        |        |
| 13384  |        |        |        |        |
| 13387  |        |        |        |        |
| 13395  |        |        |        |        |
| 13398  |        |        |        |        |
| 13404  |        |        |        |        |
| 13405  |        | 1      |        |        |
| 13408  |        |        |        |        |
| 13411  |        |        |        | 0      |
| 13413  |        |        |        |        |
| 13419  |        |        |        |        |
| 13420  |        |        |        |        |
| 13427  |        |        |        |        |
| 13441  |        |        |        |        |
| 13444  |        |        |        | 1      |
| 13456  |        |        |        |        |
| 13466  |        |        |        |        |
| 13468  |        |        |        | 0      |
| 13475  |        |        |        |        |
| 13484  |        |        |        |        |
| 13486  |        |        |        |        |
| 13487  | 1      |        |        |        |
| 13491  |        |        |        |        |
| 13496  |        |        |        |        |
| 13497  |        |        |        |        |
| 13498  |        |        |        | 0      |
| 13502  |        |        |        |        |
| 13503  |        | 4      |        |        |
| 13505  |        |        |        |        |
| 13509  |        |        |        |        |

| respid | Q31a_8 | Q31a_9 | Q31b_1 | Q31b_2 |
|--------|--------|--------|--------|--------|
| 13510  |        |        |        | 2      |
| 13518  |        | 1      |        |        |
| 13521  |        |        |        |        |
| 13523  |        |        |        | 2      |
| 13528  |        |        |        |        |
| 13531  | 1      |        |        | 1      |
| 13532  |        |        |        |        |
| 13533  |        |        |        | 0      |
| 13534  |        |        |        |        |
| 13535  |        |        |        |        |
| 13538  |        |        |        |        |
| 13540  |        |        |        |        |
| 13541  |        |        |        |        |
| 13542  |        |        |        |        |
| 13550  |        |        |        | 2      |
| 13553  |        |        |        |        |
| 13554  |        |        |        |        |
| 13555  |        |        |        |        |
| 13556  |        |        |        | 2      |
| 13563  |        |        |        | 2      |
| 13564  |        | 2      |        | 1      |
| 13567  |        |        |        |        |
| 13568  |        |        |        |        |
| 13570  |        |        |        |        |
| 13573  |        |        |        |        |
| 13575  |        |        |        |        |
| 13577  |        |        |        |        |
| 13580  |        |        |        |        |
| 13582  |        |        |        |        |
| 13584  |        |        |        | 2      |
| 13585  |        |        |        |        |
| 13586  |        |        |        | 1      |

| respid | Q31a_8 | Q31a_9 | Q31b_1 | Q31b_2 |
|--------|--------|--------|--------|--------|
| 13587  |        | 3      |        | 1      |
| 13592  |        |        |        |        |
| 13596  |        |        |        |        |
| 13597  |        | 1      |        | 1      |
| 13599  |        |        |        | 1      |
| 13601  |        |        |        | 0      |
| 13604  |        | 2      |        |        |
| 13608  |        | 3      |        |        |
| 13616  |        |        |        |        |
| 13618  |        |        | 2      |        |
| 13619  |        |        |        |        |
| 13626  |        |        |        |        |
| 13628  |        |        |        | 1      |
| 13640  |        |        |        |        |
| 13645  |        |        |        |        |
| 13648  |        |        |        |        |
| 13653  |        |        | 1      |        |
| 13655  |        |        |        |        |
| 13662  |        |        |        |        |
| 13670  |        | 1      |        |        |
| 13673  |        |        |        | 1      |
| 13674  |        |        |        |        |
| 13675  |        |        | 1      |        |
| 13678  |        |        |        | 2      |
| 13680  |        |        |        | 1      |
| 13681  |        |        |        |        |
| 13683  |        |        |        | 1      |
| 13684  |        |        |        |        |
| 13685  |        |        |        |        |
| 13687  |        |        |        |        |
| 13690  |        |        |        |        |
| 13700  |        | 1      |        |        |

| respid | Q31a_8 | Q31a_9 | Q31b_1 | Q31b_2 |
|--------|--------|--------|--------|--------|
| 13705  |        |        |        |        |
| 13710  |        |        |        |        |
| 13711  |        |        |        |        |
| 13713  |        |        |        |        |
| 13716  |        |        |        |        |
| 13721  |        |        |        | 1      |
| 13722  |        |        |        |        |
| 13723  |        | 3      |        |        |
| 13726  |        | 3      |        | 1      |
| 13728  |        |        |        |        |
| 13730  |        |        |        |        |
| 13734  |        |        |        |        |
| 13736  | 1      | 4      | 4      | 3      |
| 13737  |        |        |        |        |
| 13739  |        |        |        |        |
| 13742  |        |        |        |        |
| 13746  |        |        | 0      | 0      |
| 13747  |        |        |        |        |
| 13749  |        |        |        |        |
| 13751  |        |        |        |        |
| 13752  |        |        |        |        |
| 13756  |        |        | 1      |        |
| 13757  |        |        |        |        |
| 13767  |        |        |        |        |
| 13771  |        |        |        |        |
| 13772  | 1      | 3      |        |        |
| 13779  |        |        |        |        |
| 13782  |        |        |        |        |
| 13783  |        |        |        |        |
| 13785  |        |        |        |        |
| 13786  |        |        |        | 1      |
| 13792  |        | 5      | 1      | 1      |

| respid | Q31a_8 | Q31a_9 | Q31b_1 | Q31b_2 |
|--------|--------|--------|--------|--------|
| 13796  | 1      |        |        |        |
| 13798  |        |        |        |        |
| 13799  |        |        |        |        |
| 13804  |        |        |        |        |
| 13805  |        |        |        | 1      |
| 13810  |        |        | 3      | 3      |
| 13811  |        |        |        |        |
| 13819  |        |        | 4      | 4      |
| 13821  |        |        |        | 2      |
| 13824  |        |        |        |        |
| 13828  |        |        | 2      |        |
| 13829  |        |        |        |        |
| 13831  |        |        |        |        |
| 13833  |        |        |        |        |
| 13835  | 2      | 4      | 2      |        |
| 13838  |        |        |        |        |
| 13839  |        |        |        |        |
| 13845  |        |        |        |        |
| 13846  |        |        |        |        |
| 13853  |        |        |        |        |
| 13855  |        |        |        |        |
| 13858  |        | 3      |        |        |
| 13860  |        |        |        |        |
| 13865  |        |        |        |        |
| 13870  |        |        |        |        |
| 13872  |        |        |        | 4      |
| 13873  |        |        |        |        |
| 13874  |        |        |        |        |
| 13875  |        |        |        |        |
| 13881  |        |        |        |        |
| 13887  |        |        |        |        |
| 13888  |        |        |        |        |

| respid | Q31a_8 | Q31a_9 | Q31b_1 | Q31b_2 |
|--------|--------|--------|--------|--------|
| 13889  | 1      | 2      |        | 4      |
| 13895  | 2      | 4      |        |        |
| 13897  |        |        |        |        |
| 13898  |        |        |        |        |
| 13901  |        |        |        |        |
| 13902  |        |        |        |        |
| 13903  |        |        |        | 4      |
| 13905  |        |        |        |        |
| 13908  |        | 2      |        |        |
| 13909  |        |        |        |        |
| 13910  |        |        |        |        |
| 13911  |        |        |        |        |
| 13914  |        |        | 1      |        |
| 13920  |        | 2      |        | 3      |
| 13926  |        |        |        | 1      |
| 13929  |        |        |        |        |
| 13930  | 2      | 3      |        |        |
| 13931  |        |        |        |        |
| 13932  |        | 2      |        |        |
| 13934  |        |        |        |        |
| 13938  |        |        |        |        |
| 13942  |        |        |        |        |
| 13945  |        |        |        |        |
| 13947  |        |        |        |        |
| 13948  |        |        |        |        |
| 13959  |        |        |        |        |
| 13962  |        |        |        |        |
| 13963  |        |        |        |        |
| 13964  |        |        |        |        |
| 13966  |        |        |        |        |
| 13968  | 1      |        |        |        |
| 13971  |        |        |        |        |



| respid | Q31a_8 | Q31a_9 | Q31b_1 | Q31b_2 |
|--------|--------|--------|--------|--------|
| 13979  |        |        |        |        |
| 13980  |        |        |        |        |
| 13981  |        |        |        |        |
| 13982  |        |        |        |        |
| 13984  |        |        |        |        |
| 13989  |        |        |        |        |
| 13990  |        |        |        |        |
| 13992  |        |        | 5      | 4      |
| 13998  |        |        |        |        |
| 13999  |        |        |        | 1      |
| 14000  |        |        | 1      |        |
| 14003  |        |        |        |        |
| 14004  |        |        |        | 1      |
| 14006  |        |        | 1      |        |
| 14007  |        |        |        |        |
| 14008  |        |        |        |        |
| 14013  |        |        |        |        |
| 14015  |        |        |        |        |
| 14018  |        |        |        |        |
| 14021  |        |        |        |        |
| 14023  |        |        |        |        |
| 14024  |        |        | 1      |        |
| 14026  |        |        |        |        |
| 14030  |        |        | 1      |        |
| 14032  |        |        |        | 1      |
| 14040  |        |        |        |        |
| 14045  |        |        |        |        |
| 14048  | 1      |        |        |        |
| 14049  |        |        | 3      |        |
| 14050  |        |        |        | 0      |
| 14051  |        |        |        |        |
| 14052  |        |        |        |        |

| respid | Q31a_8 | Q31a_9 | Q31b_1 | Q31b_2 |
|--------|--------|--------|--------|--------|
| 14054  |        |        |        |        |
| 14055  |        |        |        |        |
| 14057  |        |        |        | 2      |
| 14058  |        |        |        |        |
| 14059  |        |        |        |        |
| 14060  |        |        |        | 2      |
| 14061  |        |        |        |        |
| 14071  |        |        |        |        |
| 14073  |        |        | 0      |        |
| 14074  |        |        |        |        |
| 14076  |        |        |        | 2      |
| 14080  |        |        |        |        |
| 14082  |        |        |        |        |
| 14083  |        |        |        |        |
| 14084  |        |        |        |        |
| 14085  |        |        |        |        |
| 14086  | 1      | 3      |        | 1      |
| 14088  |        |        |        | 1      |
| 14090  |        |        |        |        |
| 14092  |        |        |        |        |
| 14093  |        |        |        |        |
| 14096  |        |        |        | 1      |
| 14103  |        |        |        |        |
| 14105  |        |        |        |        |
| 14106  | 1      | 1      |        |        |
| 14107  |        |        |        |        |
| 14108  |        | 2      |        | 3      |
| 14112  |        |        |        | 1      |
| 14114  |        |        |        |        |
| 14115  |        |        |        |        |
| 14116  |        |        |        |        |
| 14117  |        | 4      |        |        |

| respid | Q31a_8 | Q31a_9 | Q31b_1 | Q31b_2 |
|--------|--------|--------|--------|--------|
| 14118  |        |        |        | 1      |
| 14119  |        |        |        | 1      |
| 14127  |        |        |        |        |
| 14129  |        |        |        |        |
| 14131  |        |        |        |        |
| 14132  |        |        |        |        |
| 14133  |        | 2      |        | 3      |
| 14134  |        | 2      |        |        |
| 14135  |        |        |        | 1      |
| 14136  |        |        |        |        |
| 14138  |        |        |        |        |
| 14139  |        |        |        |        |
| 14140  |        |        |        |        |
| 14141  |        |        |        |        |
| 14143  |        |        |        |        |
| 14146  |        |        |        |        |
| 14147  | 2      | 4      | 2      | 2      |
| 14148  |        |        |        | 0      |
| 14151  |        |        | 1      | 1      |
| 14152  |        |        |        | 2      |
| 14153  |        |        |        |        |
| 14154  |        |        |        |        |
| 14158  |        |        |        | 1      |
| 14159  |        |        |        |        |
| 14160  |        |        |        |        |
| 14161  |        |        |        |        |
| 14162  |        |        |        |        |
| 14165  |        | 1      |        |        |
| 14166  |        |        |        |        |
| 14167  |        |        |        |        |
| 14169  |        |        |        |        |
| 14170  |        |        | 1      | 1      |

| respid | Q31a_8 | Q31a_9 | Q31b_1 | Q31b_2 |
|--------|--------|--------|--------|--------|
| 14172  |        |        |        |        |
| 14173  |        |        |        |        |
| 14174  |        |        |        | 0      |
| 14175  |        |        |        |        |
| 14176  |        |        |        | 1      |
| 14178  |        |        |        |        |
| 14179  |        |        |        |        |
| 14180  |        |        |        | 1      |
| 14183  |        |        |        |        |
| 14185  |        |        |        |        |
| 14187  |        |        |        |        |
| 14189  |        |        |        |        |
| 14191  |        |        |        |        |
| 14192  |        |        |        |        |
| 14195  |        | 2      |        |        |
| 14197  |        |        |        |        |
| 14203  |        |        |        |        |
| 14204  |        |        |        | 1      |
| 14205  |        |        | 0      |        |
| 14208  |        |        |        |        |
| 14211  | 2      | 4      | 3      | 2      |
| 14214  |        |        |        |        |
| 14215  |        |        |        |        |
| 14216  |        | 2      |        |        |
| 14218  |        |        |        |        |
| 14220  |        |        |        |        |
| 14223  |        |        |        |        |
| 14225  |        |        |        |        |
| 14226  |        |        |        |        |
| 14228  |        |        |        |        |
| 14231  |        |        |        | 1      |
| 14233  |        |        |        |        |

| respid | Q31a_8 | Q31a_9 | Q31b_1 | Q31b_2 |
|--------|--------|--------|--------|--------|
| 14237  |        |        |        |        |
| 14238  |        |        |        | 0      |
| 14243  |        |        |        | 1      |
| 14245  |        |        |        |        |
| 14246  |        |        |        |        |
| 14248  |        |        |        |        |
| 14250  |        |        |        |        |
| 14253  |        |        |        | 0      |
| 14254  |        | 1      |        |        |
| 14255  |        |        |        |        |
| 14257  |        |        |        |        |
| 14258  |        |        |        |        |
| 14259  |        | 3      |        |        |
| 14260  |        |        |        |        |
| 14261  | 3      |        |        |        |
| 14263  |        | 3      |        | 4      |
| 14264  |        |        |        |        |
| 14266  |        |        |        |        |
| 14267  |        |        |        |        |
| 14268  |        |        |        |        |
| 14275  |        |        |        |        |
| 14278  |        |        | 2      |        |
| 14279  |        |        |        |        |
| 14280  |        |        |        |        |
| 14281  |        |        |        | 2      |
| 14282  |        |        |        |        |
| 14283  |        | 2      |        |        |
| 14286  |        |        |        |        |
| 14287  |        |        |        |        |
| 14288  |        |        | 2      | 2      |
| 14291  |        |        |        |        |
| 14292  |        |        |        |        |

| respid | Q31a_8 | Q31a_9 | Q31b_1 | Q31b_2 |
|--------|--------|--------|--------|--------|
| 14293  |        |        |        |        |
| 14304  |        |        |        |        |
| 14308  |        | 2      |        |        |
| 14313  |        |        |        |        |
| 14314  |        |        |        |        |
| 14316  |        |        |        |        |
| 14317  |        |        |        |        |
| 14318  |        |        |        | 2      |
| 14319  |        | 2      |        |        |
| 14320  |        |        |        |        |
| 14321  |        |        | 1      | 1      |
| 14322  |        | 2      |        | 3      |
| 14326  |        |        |        |        |
| 14327  |        |        |        |        |
| 14328  |        |        |        |        |
| 14330  |        |        |        |        |
| 14332  |        |        |        |        |
| 14334  |        |        |        |        |
| 14336  |        |        |        |        |
| 14337  |        |        |        |        |
| 14339  |        |        |        |        |
| 14340  |        | 2      | 2      |        |
| 14341  |        |        | 0      |        |
| 14344  |        |        |        |        |
| 14345  |        | 2      |        |        |
| 14346  |        |        |        |        |
| 14348  |        |        |        |        |
| 14349  |        |        |        |        |
| 14358  |        | 2      |        | 2      |
| 14360  |        |        |        |        |
| 14362  |        |        |        |        |
| 14366  |        |        |        |        |

| respid | Q31a_8 | Q31a_9 | Q31b_1 | Q31b_2 |
|--------|--------|--------|--------|--------|
| 14367  |        | 1      |        |        |
| 14369  |        | 2      |        |        |
| 14371  |        |        |        |        |
| 14372  |        |        |        |        |
| 14374  |        |        |        | 2      |
| 14376  |        |        |        |        |
| 14377  |        |        |        |        |
| 14378  |        |        |        |        |
| 14379  |        | 2      |        |        |
| 14381  |        |        |        | 1      |
| 14383  |        |        |        |        |
| 14384  |        | 1      |        |        |
| 14385  |        |        |        |        |
| 14386  |        |        |        |        |
| 14390  |        |        |        |        |
| 14391  |        |        |        |        |
| 14392  |        | 1      |        |        |
| 14393  |        |        |        | 1      |
| 14394  |        |        | 1      | 1      |
| 14395  |        |        |        |        |
| 14396  |        |        |        |        |
| 14397  |        |        |        |        |
| 14398  |        |        |        |        |
| 14399  |        |        |        |        |
| 14400  |        |        |        | 1      |
| 14403  |        |        |        |        |
| 14404  |        |        |        | 1      |
| 14405  |        |        |        |        |
| 14407  |        |        |        |        |
| 14408  |        | 4      |        |        |
| 14410  |        |        |        |        |
| 14415  |        |        |        |        |

| respid | Q31a_8 | Q31a_9 | Q31b_1 | Q31b_2 |
|--------|--------|--------|--------|--------|
| 14419  |        |        |        |        |
| 14420  |        |        |        |        |
| 14421  |        |        |        |        |
| 14423  |        |        |        |        |
| 14424  |        |        |        |        |
| 14425  |        |        |        |        |
| 14426  |        |        |        |        |
| 14427  |        |        |        |        |
| 14428  |        | 1      |        |        |
| 14431  |        |        | 1      | 1      |
| 14433  |        |        |        |        |
| 14434  |        |        |        |        |
| 14435  |        |        |        | 1      |
| 14436  |        | 2      |        | 2      |
| 14438  |        |        |        |        |
| 14442  |        |        |        | 2      |
| 14447  |        | 1      |        |        |
| 14448  |        |        |        |        |
| 14450  |        |        |        |        |
| 14451  |        |        |        |        |
| 14454  |        |        |        |        |
| 14455  |        |        | 3      |        |
| 14456  |        | 2      |        |        |
| 14457  |        |        |        |        |
| 14458  |        |        |        |        |
| 14459  |        |        |        |        |
| 14460  |        |        |        | 3      |
| 14464  |        |        |        | 1      |
| 14465  |        |        |        |        |
| 14466  |        |        |        |        |
| 14467  |        |        |        |        |
| 14470  |        |        | 1      |        |



| respid | Q31a_8 | Q31a_9 | Q31b_1 | Q31b_2 |
|--------|--------|--------|--------|--------|
| 14472  |        |        |        |        |
| 14473  |        |        |        |        |
| 14474  |        |        |        |        |
| 14477  |        |        |        | 1      |
| 14478  |        |        |        |        |
| 14479  |        |        |        |        |
| 14484  |        |        |        |        |
| 14485  |        |        |        |        |
| 14486  |        |        |        |        |
| 14487  |        |        |        |        |
| 14488  |        |        |        | 2      |
| 14491  |        |        |        |        |
| 14495  |        |        |        |        |
| 14500  |        |        | 1      |        |
| 14502  |        |        |        |        |
| 14504  |        |        |        |        |
| 14505  |        |        |        |        |
| 14507  |        |        |        |        |
| 14517  |        |        |        |        |
| 14518  |        |        |        |        |
| 14519  |        |        |        | 1      |
| 14521  |        | 2      |        |        |
| 14522  |        |        |        |        |
| 14526  |        |        |        |        |
| 14528  |        |        |        | 4      |
| 14529  |        |        |        |        |
| 14530  |        | 2      |        |        |
| 14531  |        |        | 3      | 4      |
| 14534  |        |        |        |        |
| 14538  |        |        |        |        |
| 14539  |        |        |        |        |
| 14545  | 1      |        |        | 0      |

| respid | Q31a_8 | Q31a_9 | Q31b_1 | Q31b_2 |
|--------|--------|--------|--------|--------|
| 14546  |        |        |        |        |
| 14551  |        |        |        |        |
| 14553  |        | 2      |        | 2      |
| 14557  |        |        |        |        |
| 14558  |        |        |        |        |
| 14559  | 1      | 1      |        | 1      |
| 14560  | 2      |        |        |        |
| 14563  |        |        |        | 1      |
| 14565  |        |        |        |        |
| 14571  |        |        |        |        |
| 14572  |        |        |        |        |
| 14573  |        |        |        | 1      |
| 14575  |        |        |        |        |
| 14576  |        |        |        | 2      |
| 14578  |        |        |        |        |
| 14579  |        |        |        |        |
| 14580  |        |        | 2      | 3      |
| 14582  |        |        |        |        |
| 14585  |        |        |        |        |
| 14588  |        |        |        |        |
| 14590  |        |        |        |        |
| 14592  |        |        |        |        |
| 14593  |        |        |        |        |
| 14595  |        |        |        |        |
| 14597  |        |        |        | 1      |
| 14600  |        |        |        |        |
| 14602  |        | 2      | 2      |        |
| 14604  |        |        |        |        |
| 14605  |        |        |        |        |
| 14609  |        |        |        | 1      |
| 14610  |        |        |        |        |
| 14611  |        |        |        |        |

| respid | Q31a_8 | Q31a_9 | Q31b_1 | Q31b_2 |
|--------|--------|--------|--------|--------|
| 14612  |        |        |        |        |
| 14614  | 2      |        |        |        |
| 14615  |        |        |        | 1      |
| 14618  |        | 3      | 2      | 3      |
| 14621  |        |        |        |        |
| 14624  |        |        |        | 0      |
| 14626  |        |        |        | 1      |
| 14627  |        |        | 2      | 2      |
| 14628  |        |        |        |        |
| 14631  |        |        |        |        |
| 14633  |        |        |        | 1      |
| 14642  |        |        |        |        |
| 14647  |        |        |        |        |
| 14658  |        |        |        |        |
| 14659  | 3      |        |        |        |
| 14660  |        |        |        |        |
| 14661  |        |        |        |        |
| 14662  |        |        |        |        |
| 14663  |        |        |        |        |
| 14670  |        |        |        |        |
| 14671  |        |        |        |        |
| 14672  |        |        |        |        |
| 14675  |        |        |        |        |
| 14676  |        |        |        | 0      |
| 14677  |        |        |        |        |
| 14678  |        |        |        |        |
| 14681  |        |        |        |        |
| 14684  |        |        |        |        |
| 14688  |        |        |        |        |
| 14690  |        |        |        |        |
| 14694  |        |        |        |        |
| 14696  |        |        |        |        |

| respid | Q31a_8 | Q31a_9 | Q31b_1 | Q31b_2 |
|--------|--------|--------|--------|--------|
| 14700  |        |        |        |        |
| 14701  |        |        |        |        |
| 14703  |        |        |        |        |
| 14707  |        |        |        |        |
| 14711  |        |        |        |        |
| 14714  |        |        |        |        |
| 14715  |        |        |        |        |
| 14716  |        |        |        | 0      |
| 14720  |        |        |        |        |
| 14725  |        | 1      |        |        |
| 14726  |        |        |        |        |
| 14734  |        |        |        |        |
| 14735  |        |        |        |        |
| 14736  |        |        |        | 1      |
| 14740  |        |        |        |        |
| 14745  |        |        |        |        |
| 14747  |        |        |        |        |
| 14750  |        |        |        |        |
| 14751  |        |        |        |        |
| 14753  |        |        |        |        |
| 14756  | 2      | 5      | 4      | 3      |
| 14780  |        |        |        |        |
| 14782  |        |        |        |        |
| 14800  |        |        |        | 3      |
| 14801  |        |        |        |        |
| 14802  |        |        |        |        |
| 14805  |        | 1      | 1      |        |
| 14811  |        |        | 1      |        |
| 14814  |        |        |        |        |
| 14822  |        |        |        |        |
| 14827  |        |        |        |        |
| 14828  |        |        |        |        |

| respid | Q31a_8 | Q31a_9 | Q31b_1 | Q31b_2 |
|--------|--------|--------|--------|--------|
| 14830  |        |        |        |        |
| 14832  |        |        |        | 1      |
| 14835  |        |        |        | 1      |
| 14841  |        |        |        |        |
| 14849  |        |        |        |        |
| 14850  |        |        |        |        |
| 14851  |        |        |        |        |
| 14856  |        |        |        |        |
| 14862  |        |        |        |        |
| 14863  |        |        |        |        |
| 14864  |        |        |        |        |
| 14866  |        |        |        |        |
| 14867  |        |        |        | 3      |
| 14868  |        |        |        |        |
| 14870  |        |        |        |        |
| 14873  |        |        |        |        |
| 14878  |        |        | 0      | 1      |
| 14879  |        |        |        |        |
| 14881  |        |        |        |        |
| 14888  |        |        | 2      |        |
| 14895  |        | 1      |        |        |
| 14900  |        | 5      |        |        |
| 14912  |        |        |        |        |
| 14922  |        |        |        |        |
| 14923  |        |        |        | 3      |
| 14924  |        | 4      |        |        |
| 14925  |        |        |        |        |
| 14926  |        |        |        |        |
| 14927  |        |        |        |        |
| 14930  | 2      |        |        |        |
| 14937  |        |        | 2      |        |
| 14938  | 4      |        |        |        |

| respid | Q31a_8 | Q31a_9 | Q31b_1 | Q31b_2 |
|--------|--------|--------|--------|--------|
| 14939  |        |        |        | 1      |
| 14942  |        |        |        |        |
| 14943  |        |        |        |        |
| 14953  |        |        |        |        |
| 14954  |        |        |        |        |
| 14955  |        |        | 1      | 2      |
| 14957  |        |        | 0      |        |
| 14958  |        |        |        | 4      |
| 14959  | 4      |        |        |        |
| 14961  |        |        |        |        |
| 14963  |        |        |        |        |
| 14964  |        |        |        |        |
| 14965  |        |        |        |        |
| 14967  |        |        |        |        |
| 14970  | 5      |        |        | 4      |
| 14972  |        |        | 1      |        |
| 14975  | 5      |        |        |        |
| 14977  |        |        |        |        |
| 14982  |        |        |        |        |
| 14985  |        |        |        |        |
| 14986  |        |        |        |        |
| 14987  |        |        |        |        |
| 14988  |        |        | 2      |        |
| 14989  |        | 2      | 2      | 3      |
| 14993  |        |        |        |        |
| 15001  |        |        |        |        |
| 15002  |        | 4      |        |        |
| 15006  |        |        |        |        |
| 15007  |        |        |        |        |
| 15014  |        |        |        | 2      |
| 15020  |        |        |        |        |
| 15021  |        |        |        |        |

| respid | Q31a_8 | Q31a_9 | Q31b_1 | Q31b_2 |
|--------|--------|--------|--------|--------|
| 15023  | 3      |        |        |        |
| 15030  |        |        |        |        |
| 15032  |        |        |        |        |
| 15033  |        |        |        |        |
| 15034  |        |        |        |        |
| 15035  |        |        |        |        |
| 15037  |        |        |        |        |
| 15039  |        |        |        |        |
| 15040  |        |        |        |        |
| 15042  |        |        |        |        |
| 15044  |        |        |        |        |
| 15045  |        |        |        | 2      |
| 15046  |        |        |        |        |
| 15052  |        |        |        |        |
| 15058  |        |        |        | 4      |
| 15063  |        |        |        |        |
| 15066  |        |        |        |        |
| 15069  |        |        |        |        |
| 15071  |        | 1      | 2      | 2      |
| 15076  |        |        |        |        |
| 15078  |        |        |        |        |
| 15087  |        | 2      |        |        |
| 15090  |        |        |        |        |
| 15091  |        |        |        |        |
| 15092  |        |        |        |        |
| 15096  |        |        |        |        |
| 15106  |        |        |        |        |
| 15108  |        |        |        |        |
| 15113  |        |        |        |        |
| 15116  |        |        |        |        |
| 15119  |        |        |        |        |
| 15120  |        |        |        |        |

| respid | Q31a_8 | Q31a_9 | Q31b_1 | Q31b_2 |
|--------|--------|--------|--------|--------|
| 15121  |        |        |        |        |
| 15123  |        |        |        |        |
| 15124  |        |        |        |        |
| 15128  |        |        |        |        |
| 15131  |        |        |        |        |
| 15136  |        |        |        |        |
| 15137  |        |        |        |        |
| 15141  |        |        |        |        |
| 15144  |        |        |        |        |
| 15147  |        |        |        |        |
| 15151  |        |        |        |        |
| 15154  |        | 2      |        | 3      |
| 15157  |        |        |        |        |
| 15164  |        | 4      | 3      | 3      |
| 15168  |        |        |        |        |
| 15169  |        |        |        |        |
| 15172  |        |        |        |        |
| 15177  |        |        |        | 2      |
| 15178  |        |        |        |        |
| 15180  |        |        |        |        |
| 15181  |        |        |        |        |
| 15182  |        | 2      |        |        |
| 15183  |        |        |        |        |
| 15188  |        |        |        |        |
| 15190  | 5      |        |        |        |
| 15195  |        |        |        |        |
| 15201  | 5      | 4      | 3      |        |
| 15203  |        |        |        |        |
| 15204  |        |        |        |        |
| 15207  |        |        |        |        |
| 15208  |        |        |        |        |
| 15209  |        |        |        |        |



| respid | Q31a_8 | Q31a_9 | Q31b_1 | Q31b_2 |
|--------|--------|--------|--------|--------|
| 15212  |        |        |        |        |
| 15213  |        |        |        |        |
| 15219  |        |        |        |        |
| 15220  |        |        |        |        |
| 15221  |        |        |        |        |
| 15223  |        |        |        |        |
| 15224  |        |        |        |        |
| 15225  |        |        |        |        |
| 15226  |        |        |        |        |
| 15230  |        |        |        |        |
| 15231  | 4      |        |        | 4      |
| 15232  |        |        |        |        |
| 15237  |        |        |        |        |
| 15239  |        |        |        |        |
| 15241  |        |        |        |        |
| 15242  |        | 3      |        |        |
| 15247  |        |        |        |        |
| 15248  |        |        |        |        |
| 15251  |        |        |        |        |
| 15257  |        |        |        |        |
| 15260  |        |        |        |        |
| 15261  |        |        |        |        |
| 15262  |        | 2      |        |        |
| 15263  |        | 1      |        |        |
| 15265  |        |        |        |        |
| 15266  |        |        |        |        |
| 15268  |        |        |        |        |
| 15269  |        |        |        |        |
| 15270  |        | 5      |        |        |
| 15273  |        |        |        |        |
| 15276  | 5      |        |        | 4      |
| 15277  |        |        |        |        |

| respid | Q31a_8 | Q31a_9 | Q31b_1 | Q31b_2 |
|--------|--------|--------|--------|--------|
| 15282  |        |        |        |        |
| 15284  |        | 2      |        |        |
| 15285  |        |        |        |        |
| 15286  |        | 4      | 3      |        |
| 15288  | 2      |        |        |        |
| 15292  |        |        |        |        |
| 15296  |        |        |        |        |
| 15297  |        |        | 0      |        |
| 15298  |        |        |        |        |
| 15301  |        |        |        |        |
| 15302  |        |        |        | 1      |
| 15305  |        |        |        |        |
| 15307  |        |        |        |        |
| 15308  |        |        | 0      |        |
| 15309  |        |        |        |        |
| 15311  |        |        |        |        |
| 15315  |        |        |        |        |
| 15316  |        |        |        | 1      |
| 15318  |        |        |        |        |
| 15321  |        |        |        |        |
| 15322  |        |        |        |        |
| 15324  |        |        | 0      | 0      |
| 15326  |        |        |        |        |
| 15327  |        |        |        |        |
| 15328  |        |        |        |        |
| 15330  |        |        |        |        |
| 15332  |        | 1      |        |        |
| 15333  |        |        |        |        |
| 15334  |        |        |        |        |
| 15336  |        |        |        |        |
| 15337  |        |        |        |        |
| 15338  |        |        |        |        |

| respid | Q31a_8 | Q31a_9 | Q31b_1 | Q31b_2 |
|--------|--------|--------|--------|--------|
| 15339  |        |        | 4      | 4      |
| 15341  |        |        |        |        |
| 15344  |        |        |        |        |
| 15345  |        |        |        |        |
| 15350  |        |        |        |        |
| 15351  | 1      |        |        |        |
| 15352  |        |        |        |        |
| 15372  |        |        |        |        |
| 15373  |        |        |        |        |
| 15376  |        |        |        |        |
| 15377  |        |        |        |        |
| 15382  |        |        |        |        |
| 15383  |        | 1      |        |        |
| 15385  |        |        |        |        |
| 15390  |        |        |        |        |
| 15399  |        |        |        |        |
| 15404  |        |        |        | 1      |
| 15410  |        |        | 1      | 1      |
| 15411  | 3      |        |        |        |
| 15412  |        | 2      |        |        |
| 15413  |        |        |        |        |
| 15414  |        |        |        |        |
| 15417  |        |        | 2      |        |
| 15418  |        |        |        | 1      |
| 15421  |        |        |        |        |
| 15423  |        |        |        |        |
| 15425  |        |        |        |        |
| 15426  |        |        |        |        |
| 15430  |        |        |        |        |
| 15431  |        |        |        | 2      |
| 15435  |        |        |        |        |
| 15436  |        |        |        |        |

| respid | Q31a_8 | Q31a_9 | Q31b_1 | Q31b_2 |
|--------|--------|--------|--------|--------|
| 15437  |        |        |        |        |
| 15438  |        |        |        |        |
| 15439  |        |        |        |        |
| 15441  |        |        |        |        |
| 15443  |        |        |        |        |
| 15446  |        |        |        |        |
| 15449  |        |        |        |        |
| 15451  |        |        |        | 3      |
| 15452  |        |        |        |        |
| 15454  |        | 2      |        |        |
| 15456  |        |        |        | 3      |
| 15457  |        |        |        |        |
| 15458  |        | 3      |        |        |
| 15462  |        |        |        | 3      |
| 15467  | 1      |        | 1      |        |
| 15470  |        | 2      |        |        |
| 15472  |        |        |        |        |
| 15476  |        |        |        |        |
| 15477  |        |        |        |        |
| 15488  |        |        |        |        |
| 15489  |        |        |        |        |
| 15490  |        |        |        |        |
| 15496  |        | 3      |        |        |
| 15497  |        | 2      |        |        |
| 15498  |        |        |        |        |
| 15509  |        |        |        |        |
| 15510  |        |        |        |        |
| 15516  |        |        | 2      | 3      |
| 15519  |        |        |        |        |
| 15520  |        |        |        |        |
| 15524  |        |        |        |        |
| 15525  |        |        |        |        |

| respid | Q31a_8 | Q31a_9 | Q31b_1 | Q31b_2 |
|--------|--------|--------|--------|--------|
| 15526  |        |        |        |        |
| 15531  |        |        |        | 2      |
| 15532  |        |        |        |        |
| 15534  |        |        |        | 3      |
| 15535  |        |        | 2      | 3      |
| 15539  |        |        |        |        |
| 15550  |        |        |        |        |
| 15556  |        |        |        |        |
| 15558  |        |        |        | 3      |
| 15565  |        |        |        |        |
| 15567  |        | 2      |        |        |
| 15568  |        |        | 1      | 1      |
| 15571  |        |        |        |        |
| 15573  |        | 1      |        |        |
| 15574  |        |        | 2      | 2      |
| 15576  |        |        | 1      |        |
| 15587  |        |        |        | 1      |
| 15588  |        | 3      |        | 3      |
| 15593  |        |        |        | 2      |
| 15597  |        |        |        |        |
| 15598  |        |        |        |        |
| 15599  |        | 3      |        |        |
| 15601  |        |        |        |        |
| 15604  |        |        |        |        |
| 15611  |        |        |        |        |
| 15613  |        |        |        |        |
| 15614  |        |        |        |        |
| 15617  |        |        |        | 1      |
| 15622  |        |        |        |        |
| 15623  |        |        |        |        |
| 15625  |        |        |        |        |
| 15627  |        |        |        |        |

| respid | Q31a_8 | Q31a_9 | Q31b_1 | Q31b_2 |
|--------|--------|--------|--------|--------|
| 15628  |        |        |        |        |
| 15633  |        |        |        |        |
| 15634  |        |        |        |        |
| 15637  |        |        |        |        |
| 15644  |        |        |        |        |
| 15645  |        |        |        |        |
| 15649  |        |        |        |        |
| 15650  |        |        |        |        |
| 15651  |        |        |        | 0      |
| 15657  |        |        | 4      | 3      |
| 15658  |        |        |        |        |
| 15660  |        |        |        |        |
| 15667  |        |        |        |        |
| 15671  |        |        |        |        |
| 15679  |        |        |        |        |
| 15712  |        |        |        |        |
| 15715  |        |        |        |        |
| 15749  |        |        | 4      | 4      |
| 15754  |        |        |        |        |
| 15756  |        |        |        |        |
| 15773  |        |        |        |        |
| 15774  |        |        |        |        |
| 15776  |        | 2      |        |        |
| 15777  |        |        |        | 2      |
| 15779  |        |        |        |        |
| 15780  |        |        |        |        |
| 15792  |        |        |        |        |
| 15793  |        |        |        |        |
| 15796  |        |        |        |        |
| 15798  |        |        |        |        |
| 15809  |        |        |        |        |
| 15810  |        |        |        |        |

| respid | Q31a_8 | Q31a_9 | Q31b_1 | Q31b_2 |
|--------|--------|--------|--------|--------|
| 15815  |        |        |        | 2      |
| 15816  |        |        |        |        |
| 15817  |        |        |        |        |
| 15821  |        |        |        |        |
| 15823  |        |        | 1      | 1      |
| 15834  |        |        |        |        |
| 15835  |        |        |        |        |
| 15836  |        |        |        |        |
| 15837  |        |        |        |        |
| 15839  |        |        |        |        |
| 15840  |        |        |        |        |
| 15844  |        |        |        |        |
| 15845  |        |        |        |        |
| 15847  |        |        |        |        |
| 15848  |        |        |        |        |
| 15849  |        |        |        |        |
| 15857  |        |        | 1      | 1      |
| 15858  |        |        |        |        |
| 15862  |        |        |        |        |
| 15866  |        |        |        |        |
| 15870  |        |        |        |        |
| 15871  |        |        |        |        |
| 15872  |        |        |        |        |
| 15873  |        |        |        |        |
| 15874  |        |        |        |        |
| 15875  |        |        |        |        |
| 15876  | 1      |        |        |        |
| 15882  |        | 2      |        |        |
| 15884  | 1      | 2      |        | 2      |
| 15890  |        |        |        |        |
| 15892  |        |        | 4      | 4      |
| 15908  |        |        |        |        |

| respid | Q31a_8 | Q31a_9 | Q31b_1 | Q31b_2 |
|--------|--------|--------|--------|--------|
| 15914  |        |        |        |        |
| 15932  |        | 2      |        |        |
| 15933  |        |        |        |        |
| 15938  |        |        |        |        |
| 15940  |        | 4      |        |        |
| 15945  |        |        |        |        |
| 15947  |        |        |        |        |
| 15950  |        |        |        |        |
| 15951  |        |        | 1      | 1      |
| 15952  |        |        |        |        |
| 15953  |        |        |        | 1      |
| 15954  |        |        |        |        |
| 15957  |        |        |        |        |
| 15965  |        |        |        | 2      |
| 15966  |        |        |        |        |
| 15967  |        |        |        |        |
| 15968  |        |        |        |        |
| 15970  |        |        |        | 0      |
| 15973  |        |        |        |        |
| 15974  |        |        |        |        |
| 15975  |        |        |        |        |
| 15980  |        |        |        |        |
| 15984  |        |        |        |        |
| 15985  | 2      |        |        |        |
| 15994  |        |        |        |        |
| 15995  |        |        |        |        |
| 16000  |        |        |        |        |
| 16004  |        |        |        |        |
| 16005  |        |        |        |        |
| 16006  |        |        |        |        |
| 16009  |        |        |        |        |
| 16017  |        |        |        |        |



| respid | Q31a_8 | Q31a_9 | Q31b_1 | Q31b_2 |
|--------|--------|--------|--------|--------|
| 16019  |        |        |        |        |
| 16021  |        |        |        |        |
| 16024  |        |        |        |        |
| 16026  |        | 1      |        |        |
| 16029  |        |        |        |        |
| 16031  |        |        |        |        |
| 16037  |        |        |        |        |
| 16043  |        |        |        |        |
| 16044  | 1      |        |        |        |
| 16047  |        |        |        |        |
| 16048  |        | 3      |        |        |
| 16049  |        |        |        |        |
| 16051  |        |        |        | 1      |
| 16053  |        | 2      |        |        |
| 16054  |        |        |        | 1      |
| 16069  |        |        |        |        |
| 16070  |        |        |        |        |
| 16074  |        |        |        |        |
| 16076  |        |        |        |        |
| 16078  |        |        |        |        |
| 16081  |        |        |        | 1      |
| 16085  |        |        |        |        |
| 16088  |        |        |        | 0      |
| 16091  |        |        |        | 2      |
| 16092  |        |        |        |        |
| 16093  |        | 3      |        |        |
| 16097  |        |        |        |        |
| 16100  |        |        |        | 0      |
| 16101  |        |        |        |        |
| 16105  |        |        |        |        |
| 16118  |        | 2      | 2      |        |
| 16129  |        |        |        |        |

| respid | Q31a_8 | Q31a_9 | Q31b_1 | Q31b_2 |
|--------|--------|--------|--------|--------|
| 16130  |        |        |        |        |
| 16131  |        |        | 3      | 3      |
| 16136  |        |        |        |        |
| 16137  |        |        |        |        |
| 16138  |        |        |        | 3      |
| 16139  |        |        | 1      | 1      |
| 16140  |        |        |        |        |
| 16145  |        |        |        |        |
| 16150  |        |        | 4      | 4      |
| 16151  |        |        |        |        |
| 16153  |        |        |        |        |
| 16164  |        | 4      |        |        |
| 16168  |        |        |        |        |
| 16173  |        |        |        |        |
| 16174  |        |        |        |        |
| 16177  |        |        |        |        |
| 16185  |        |        |        |        |
| 16189  |        |        |        | 3      |
| 16192  |        | 1      |        |        |
| 16193  |        |        |        | 1      |
| 16194  |        |        | 0      | 1      |
| 16196  |        |        |        |        |
| 16202  |        |        |        |        |
| 16205  | 2      |        |        |        |
| 16206  |        | 3      |        |        |
| 16208  |        |        |        |        |
| 16211  |        | 2      | 1      | 2      |
| 16212  |        |        |        |        |
| 16215  |        |        |        |        |
| 16217  |        |        |        |        |
| 16221  |        | 1      |        |        |
| 16226  |        |        |        | 3      |

| respid | Q31a_8 | Q31a_9 | Q31b_1 | Q31b_2 |
|--------|--------|--------|--------|--------|
| 16228  |        |        |        |        |
| 16229  |        |        |        |        |
| 16230  |        |        |        |        |
| 16231  |        |        |        |        |
| 16232  |        | 1      |        |        |
| 16234  |        | 3      |        | 1      |
| 16235  |        |        |        |        |
| 16236  |        |        |        |        |
| 16237  |        |        |        | 0      |
| 16238  |        |        |        |        |
| 16239  |        |        |        |        |
| 16243  |        |        |        |        |
| 16248  |        |        |        |        |
| 16249  |        |        |        | 0      |
| 16251  |        |        |        |        |
| 16263  |        |        |        |        |
| 16265  |        |        | 1      | 2      |
| 16269  |        |        |        |        |
| 16272  |        |        |        | 1      |
| 16273  |        |        |        |        |
| 16281  |        |        |        |        |
| 16282  |        |        |        |        |
| 16287  |        |        |        |        |
| 16290  |        |        |        |        |
| 16294  |        |        |        |        |
| 16295  |        |        |        |        |
| 16296  |        |        |        |        |
| 16299  |        |        |        |        |
| 16302  |        |        |        |        |
| 16303  |        |        |        |        |
| 16304  | 1      |        |        |        |
| 16306  |        |        |        | 1      |

| respid | Q31a_8 | Q31a_9 | Q31b_1 | Q31b_2 |
|--------|--------|--------|--------|--------|
| 16318  |        | 1      |        |        |
| 16320  |        |        |        | 0      |
| 16321  |        | 2      |        |        |
| 16322  |        |        |        |        |
| 16324  |        |        |        |        |
| 16326  |        |        |        |        |
| 16328  |        |        | 1      |        |
| 16336  |        |        |        | 1      |
| 16341  |        |        |        |        |
| 16342  |        |        |        | 0      |
| 16343  |        |        |        |        |
| 16345  |        |        |        |        |
| 16349  |        |        |        |        |
| 16355  |        |        |        |        |
| 16364  |        |        |        |        |
| 16374  |        |        |        | 1      |
| 16375  |        |        |        |        |
| 16376  |        |        |        |        |
| 16393  |        |        |        |        |
| 16394  |        |        |        |        |
| 16395  |        |        |        |        |
| 16397  |        |        |        |        |
| 16398  |        | 3      |        |        |
| 16402  |        |        |        | 1      |
| 16405  |        |        |        |        |
| 16416  |        |        |        |        |
| 16422  |        |        |        |        |
| 16429  |        |        |        |        |
| 16430  |        |        |        |        |
| 16432  |        |        |        |        |
| 16433  |        |        |        |        |
| 16434  |        |        |        |        |

| respid | Q31a_8 | Q31a_9 | Q31b_1 | Q31b_2 |
|--------|--------|--------|--------|--------|
| 16437  |        |        |        |        |
| 16439  |        |        |        |        |
| 16440  |        |        |        |        |
| 16441  |        |        |        |        |
| 16442  |        |        |        | 0      |
| 16450  |        |        |        |        |
| 16451  |        |        |        |        |
| 16452  |        |        | 1      | 1      |
| 16467  |        |        |        |        |
| 16468  |        |        |        |        |
| 16469  |        |        |        |        |
| 16470  |        |        |        |        |
| 16471  |        | 2      | 1      | 1      |
| 16473  |        |        |        |        |
| 16476  |        |        |        |        |
| 16478  |        |        |        | 1      |
| 16484  |        |        |        |        |
| 16499  |        |        |        |        |
| 16502  |        |        |        |        |
| 16505  |        |        |        | 1      |
| 16514  |        |        |        |        |
| 16515  |        | 1      |        |        |
| 16517  |        |        |        |        |
| 16518  |        |        |        |        |
| 16519  |        | 1      |        |        |
| 16525  |        | 2      |        |        |
| 16526  |        |        |        |        |
| 16530  |        |        |        |        |
| 16532  |        |        |        |        |
| 16536  |        |        |        |        |
| 16537  |        |        |        | 1      |
| 16541  |        | 2      |        |        |

| respid | Q31a_8 | Q31a_9 | Q31b_1 | Q31b_2 |
|--------|--------|--------|--------|--------|
| 16543  |        |        |        |        |
| 16544  |        |        |        |        |
| 16545  |        | 2      |        |        |
| 16546  |        |        |        |        |
| 16548  |        |        |        |        |
| 16552  |        |        |        |        |
| 16559  |        |        |        | 0      |
| 16564  |        |        |        | 3      |
| 16565  |        |        |        |        |
| 16567  |        | 2      |        |        |
| 16571  |        |        |        |        |
| 16572  |        |        |        | 1      |
| 16579  |        |        |        |        |
| 16588  |        |        |        |        |
| 16599  |        |        |        | 0      |
| 16605  |        |        |        |        |
| 16622  |        |        |        |        |
| 16635  |        |        |        | 0      |
| 16638  |        |        |        |        |
| 16652  |        |        |        |        |
| 16656  |        |        |        |        |
| 16671  |        |        |        |        |
| 16676  |        |        |        |        |
| 16678  |        |        |        |        |
| 16702  |        |        |        |        |
| 16705  |        |        |        |        |
| 16707  |        |        |        |        |
| 16711  |        |        |        |        |
| 16712  |        |        |        |        |
| 16716  |        |        |        |        |
| 16724  |        |        |        | 1      |
| 16727  |        |        |        |        |

| respid | Q31a_8 | Q31a_9 | Q31b_1 | Q31b_2 |
|--------|--------|--------|--------|--------|
| 16734  |        |        |        |        |
| 16740  |        |        |        |        |
| 16748  |        |        |        |        |
| 16759  |        |        |        |        |
| 16761  |        |        |        |        |
| 16763  |        |        |        |        |
| 16764  |        | 2      | 1      | 2      |
| 16766  |        |        |        |        |
| 16767  |        |        |        |        |
| 16776  |        |        |        |        |
| 16781  |        |        |        |        |
| 16793  |        |        |        |        |
| 16796  |        | 5      | 3      | 3      |
| 16810  |        |        |        |        |
| 16811  |        |        |        |        |
| 16813  |        |        |        |        |
| 16814  |        |        |        |        |
| 16831  |        |        |        |        |
| 16833  |        | 1      | 2      | 3      |
| 16839  |        | 1      |        | 1      |
| 16843  |        |        |        |        |
| 16860  |        |        |        |        |
| 16871  |        |        |        |        |
| 16881  |        |        | 3      | 3      |
| 16884  |        |        | 1      | 1      |
| 16891  |        |        |        |        |
| 16909  |        |        |        |        |
| 16911  |        |        |        |        |
| 16922  |        |        |        |        |
| 16935  | 1      |        |        | 2      |
| 16942  |        |        |        |        |
| 16950  |        |        |        |        |

| respid | Q31a_8 | Q31a_9 | Q31b_1 | Q31b_2 |
|--------|--------|--------|--------|--------|
| 16952  | 2      |        |        | 1      |
| 16963  |        |        |        |        |
| 16967  |        | 3      |        |        |
| 16970  |        |        |        | 3      |
| 16976  |        | 2      | 2      | 2      |
| 16982  |        |        |        |        |
| 16995  |        |        |        |        |
| 17004  |        |        |        |        |
| 17006  |        |        |        |        |
| 17009  |        |        |        |        |
| 17021  |        |        |        |        |
| 17040  |        |        |        |        |
| 17041  |        |        |        |        |
| 17044  |        |        |        | 1      |
| 17046  |        |        |        | 1      |
| 17052  |        |        |        |        |
| 17055  |        |        |        |        |
| 17108  |        |        |        |        |
| 17109  |        |        |        |        |
| 17113  |        |        |        |        |
| 17115  |        | 2      |        |        |
| 17132  |        |        |        |        |
| 17135  | 2      |        |        | 2      |
| 17138  |        |        |        |        |
| 17141  |        |        |        |        |
| 17143  |        |        |        |        |
| 17148  |        |        |        |        |
| 17151  |        |        |        |        |
| 17153  |        |        |        |        |
| 17154  |        | 3      |        |        |
| 17157  |        | 2      |        |        |
| 17160  |        |        |        |        |



| respid | Q31a_8 | Q31a_9 | Q31b_1 | Q31b_2 |
|--------|--------|--------|--------|--------|
| 17167  |        |        |        | 1      |
| 17169  |        |        |        |        |
| 17174  |        | 4      |        |        |
| 17179  |        |        |        |        |
| 17180  |        |        |        |        |
| 17182  |        |        |        |        |
| 17184  |        |        |        | 0      |
| 17186  |        |        |        |        |
| 17187  |        |        |        |        |
| 17192  |        | 3      | 1      | 4      |
| 17197  |        |        |        |        |
| 17217  |        |        |        |        |
| 17226  |        |        |        |        |
| 17228  |        |        |        |        |
| 17245  |        |        |        |        |
| 17247  |        |        |        |        |
| 17258  |        |        |        |        |
| 17259  |        |        |        |        |
| 17262  |        |        |        |        |
| 17265  |        |        |        | 0      |
| 17281  |        |        |        |        |
| 17282  |        |        |        |        |
| 17293  |        |        |        |        |
| 17306  |        |        |        |        |
| 17312  |        |        |        |        |
| 17318  |        | 1      |        |        |
| 17328  |        |        |        | 3      |
| 17343  |        |        |        |        |
| 17344  |        |        |        |        |
| 17348  |        |        |        |        |
| 17352  |        |        |        |        |
| 17355  |        |        |        |        |

| respid | Q31a_8 | Q31a_9 | Q31b_1 | Q31b_2 |
|--------|--------|--------|--------|--------|
| 17356  |        |        |        |        |
| 17359  |        |        |        |        |
| 17373  |        |        |        |        |
| 17381  |        |        |        |        |
| 17388  |        |        |        |        |
| 17394  |        |        |        |        |
| 17401  |        |        |        |        |
| 17403  |        |        |        |        |
| 17411  |        |        |        |        |
| 17423  |        |        |        |        |
| 17427  |        |        |        |        |
| 17433  |        |        |        |        |
| 17441  |        |        |        |        |
| 17442  |        |        |        |        |
| 17447  |        |        |        |        |
| 17458  |        |        |        |        |
| 17474  |        |        |        |        |
| 17475  |        |        | 1      |        |
| 17476  |        |        | 2      | 2      |
| 17480  |        |        |        | 0      |
| 17484  |        |        |        |        |
| 17490  |        |        |        | 1      |
| 17491  |        |        |        | 0      |
| 17500  |        |        |        |        |
| 17507  |        |        |        |        |
| 17517  |        |        |        |        |
| 17520  |        |        |        |        |
| 17521  |        |        |        | 0      |
| 17531  |        |        |        |        |
| 17540  |        |        |        | 1      |
| 17550  |        | 1      |        |        |
| 17551  |        |        |        |        |

| respid | Q31a_8 | Q31a_9 | Q31b_1 | Q31b_2 |
|--------|--------|--------|--------|--------|
| 17555  |        |        |        | 3      |
| 17556  |        |        | 1      | 1      |
| 17574  |        |        |        |        |
| 17575  |        |        |        |        |
| 17582  |        |        |        |        |
| 17587  |        |        |        |        |
| 17601  |        |        |        | 1      |
| 17607  |        |        |        |        |
| 17609  |        |        |        |        |
| 17611  |        |        |        | 2      |
| 17613  |        |        |        |        |
| 17615  |        |        |        | 0      |
| 17620  |        |        |        |        |
| 17624  |        |        |        | 2      |
| 17635  |        |        |        |        |
| 17643  |        |        |        |        |
| 17645  |        |        |        |        |
| 17646  |        |        |        |        |
| 17649  |        |        |        |        |
| 17658  |        | 1      |        |        |
| 17666  |        |        |        |        |
| 17670  |        |        |        |        |
| 17678  |        |        |        |        |
| 17679  |        |        |        |        |
| 17695  |        |        | 1      | 1      |
| 17697  |        |        |        |        |
| 17698  |        |        |        |        |
| 17723  |        |        |        | 1      |
| 17727  |        |        |        |        |
| 17734  |        |        |        |        |
| 17737  |        |        |        |        |
| 17748  |        | 1      |        |        |

| respid | Q31a_8 | Q31a_9 | Q31b_1 | Q31b_2 |
|--------|--------|--------|--------|--------|
| 17749  |        |        |        |        |
| 17754  |        |        | 1      |        |
| 17766  |        |        |        |        |
| 17777  |        |        |        |        |
| 17780  |        |        |        |        |
| 17788  |        |        |        |        |
| 17801  | 2      | 2      |        |        |
| 17803  |        |        |        |        |
| 17807  |        |        |        |        |
| 17808  |        |        |        |        |
| 17809  |        |        |        |        |
| 17821  |        |        |        |        |
| 17827  |        |        |        |        |
| 17834  |        |        |        |        |
| 17838  |        | 1      |        |        |
| 17842  |        |        |        |        |
| 17862  |        |        |        |        |
| 17863  |        |        |        |        |
| 17871  |        | 1      |        |        |
| 17872  |        | 1      |        |        |
| 17903  |        | 1      |        | 1      |
| 17906  |        |        |        |        |
| 17910  |        |        | 2      | 2      |
| 17922  |        |        |        |        |
| 17923  |        |        |        |        |
| 17925  |        |        |        |        |
| 17926  |        |        |        |        |
| 17937  |        |        |        |        |
| 17956  |        |        |        |        |
| 17958  |        |        |        |        |
| 17985  |        |        |        |        |
| 17989  |        |        |        |        |

| respid | Q31a_8 | Q31a_9 | Q31b_1 | Q31b_2 |
|--------|--------|--------|--------|--------|
| 17995  |        |        | 0      | 0      |
| 18000  |        |        |        | 1      |
| 18010  |        |        |        |        |
| 18015  |        |        |        |        |
| 18018  |        |        |        |        |
| 18031  |        |        |        | 1      |
| 18033  |        |        | 2      | 2      |
| 18036  |        |        |        | 0      |
| 18041  |        |        |        |        |
| 18068  |        |        |        |        |
| 18080  |        |        |        |        |
| 18081  |        |        |        |        |
| 18083  |        |        |        |        |
| 18113  |        | 3      |        | 2      |
| 18115  |        |        |        |        |
| 18117  |        |        | 3      | 3      |
| 18129  |        |        |        |        |
| 18132  |        | 3      |        |        |
| 18146  |        | 3      |        |        |
| 18147  |        | 2      |        |        |
| 18153  |        |        |        |        |
| 18154  |        |        |        |        |
| 18157  |        |        |        |        |
| 18166  |        |        |        |        |
| 18169  |        |        |        |        |
| 18171  |        |        |        |        |
| 18173  |        |        | 1      | 1      |
| 18204  |        |        |        |        |
| 18210  |        |        |        |        |
| 18212  |        |        |        |        |
| 18220  |        |        |        | 1      |
| 18221  |        |        |        |        |

| respid | Q31a_8 | Q31a_9 | Q31b_1 | Q31b_2 |
|--------|--------|--------|--------|--------|
| 18228  |        |        |        |        |
| 18231  |        |        |        |        |
| 18233  |        |        |        |        |
| 18235  |        |        |        |        |
| 18237  |        |        |        |        |
| 18250  |        |        |        | 1      |
| 18253  |        |        |        |        |
| 18264  |        |        |        |        |
| 18285  |        |        |        |        |
| 18287  |        |        |        |        |
| 18296  |        |        |        |        |
| 18299  |        |        |        |        |
| 18313  |        |        |        | 2      |
| 18321  |        | 1      | 1      |        |
| 18324  |        |        |        |        |
| 18329  |        |        |        |        |
| 18332  |        |        |        |        |
| 18339  |        | 3      |        |        |
| 18340  | 2      |        |        |        |
| 18348  |        |        |        |        |
| 18355  |        |        |        |        |
| 18360  |        |        |        |        |
| 18380  |        |        | 2      | 2      |
| 18403  |        | 5      |        |        |
| 18405  |        |        |        |        |
| 18409  |        |        |        |        |
| 18445  |        |        |        |        |
| 18458  | 2      |        |        |        |
| 18477  |        |        |        | 2      |
| 18481  |        | 1      |        |        |
| 18491  |        |        |        |        |
| 18492  |        |        |        |        |

| respid | Q31a_8 | Q31a_9 | Q31b_1 | Q31b_2 |
|--------|--------|--------|--------|--------|
| 18494  |        |        |        |        |
| 18495  |        |        |        |        |
| 18496  |        |        |        |        |
| 18507  |        |        |        |        |
| 18509  |        |        |        |        |
| 18510  |        |        |        |        |
| 18513  |        |        |        | 1      |
| 18525  |        |        |        |        |
| 18526  |        |        |        |        |
| 18527  |        |        |        |        |
| 18536  |        |        |        |        |
| 18540  |        |        |        |        |
| 18548  |        | 1      |        |        |
| 18550  |        |        |        |        |
| 18556  |        |        |        |        |
| 18561  |        |        |        |        |
| 18577  |        | 1      |        |        |
| 18580  |        |        |        |        |
| 18633  |        |        |        | 2      |
| 18635  |        |        |        |        |
| 18636  |        |        |        |        |
| 18645  |        |        |        | 4      |
| 18649  |        |        |        | 1      |
| 18664  |        |        |        |        |
| 18668  |        |        |        |        |
| 18682  |        | 3      |        |        |
| 18685  |        |        |        | 1      |
| 18688  |        |        |        |        |
| 18689  |        |        |        | 2      |
| 18693  |        |        |        |        |
| 18694  |        |        |        |        |
| 18705  |        |        |        |        |

| respid | Q31a_8 | Q31a_9 | Q31b_1 | Q31b_2 |
|--------|--------|--------|--------|--------|
| 18710  |        | 2      |        |        |
| 18715  |        |        | 1      | 1      |
| 18718  |        |        |        |        |
| 18727  |        |        |        | 1      |
| 18732  |        |        |        |        |
| 18735  |        |        |        |        |
| 18742  |        |        |        |        |
| 18745  |        |        |        |        |
| 18747  |        |        |        |        |
| 18750  |        | 1      |        |        |
| 18751  |        | 1      |        |        |
| 18753  |        |        |        | 1      |
| 18754  |        |        |        |        |
| 18759  |        |        |        |        |
| 18780  |        |        |        |        |
| 18782  |        |        |        |        |
| 18807  | 5      |        |        |        |
| 18815  |        |        |        |        |
| 18818  |        |        |        | 1      |
| 18820  |        |        |        |        |
| 18823  |        | 4      | 4      | 4      |
| 18825  |        |        |        |        |
| 18828  |        |        |        |        |
| 18832  |        |        | 1      | 1      |
| 18834  |        | 3      |        | 2      |
| 18835  |        |        |        | 3      |
| 18837  |        |        |        |        |
| 18842  |        |        |        |        |
| 18846  |        |        |        |        |
| 18855  |        |        |        |        |
| 18856  |        |        |        |        |
| 18887  |        |        |        |        |



| respid | Q31a_8 | Q31a_9 | Q31b_1 | Q31b_2 |
|--------|--------|--------|--------|--------|
| 18903  |        | 1      |        |        |
| 18906  | 1      |        |        |        |
| 18910  |        |        |        |        |
| 18919  |        |        |        | 1      |
| 18928  |        |        |        |        |
| 18931  |        |        |        | 3      |
| 18939  |        |        |        |        |
| 18946  |        |        |        | 1      |
| 18952  |        |        |        |        |
| 18954  |        |        |        |        |
| 18982  |        |        |        |        |
| 18986  |        |        |        |        |
| 18989  |        |        | 3      | 3      |
| 18990  |        |        |        |        |
| 18996  |        |        |        |        |
| 18998  |        |        |        |        |
| 19009  |        |        |        |        |
| 19010  |        |        |        |        |
| 19017  |        |        |        |        |
| 19018  |        |        |        |        |
| 19020  |        |        |        |        |
| 19027  |        |        |        |        |
| 19035  |        |        | 1      |        |
| 19037  |        |        |        | 1      |
| 19048  |        |        |        |        |
| 19051  |        | 2      |        | 2      |
| 19054  |        |        |        |        |
| 19057  |        |        |        |        |
| 19073  | 1      |        |        |        |
| 19075  |        |        |        |        |
| 19079  |        |        |        |        |
| 19087  |        |        |        | 1      |

| respid | Q31a_8 | Q31a_9 | Q31b_1 | Q31b_2 |
|--------|--------|--------|--------|--------|
| 19090  |        |        |        |        |
| 19093  |        |        |        |        |
| 19099  |        | 2      |        |        |
| 19100  |        |        |        |        |
| 19101  |        |        |        |        |
| 19105  |        |        |        | 1      |
| 19111  |        |        |        |        |
| 19112  |        |        |        |        |
| 19117  |        |        |        | 1      |
| 19122  |        |        |        |        |
| 19126  |        |        |        |        |
| 19127  |        |        |        |        |
| 19131  |        |        |        |        |
| 19134  |        |        |        |        |
| 19149  |        |        |        | 1      |
| 19151  | 2      |        |        |        |
| 19164  |        |        |        |        |
| 19166  |        | 2      |        | 1      |
| 19172  |        |        |        | 1      |
| 19173  |        |        |        |        |
| 19180  |        |        |        |        |
| 19185  |        |        |        |        |
| 19189  |        |        |        |        |
| 19191  |        |        |        |        |
| 19198  |        |        |        |        |
| 19203  |        |        |        |        |
| 19209  |        |        |        | 2      |
| 19210  |        |        |        |        |
| 19218  |        |        |        |        |
| 19220  |        |        |        |        |
| 19225  |        |        |        |        |
| 19227  |        |        |        |        |

| respid | Q31a_8 | Q31a_9 | Q31b_1 | Q31b_2 |
|--------|--------|--------|--------|--------|
| 19228  |        |        |        |        |
| 19243  |        |        |        | 1      |
| 19244  |        |        |        |        |
| 19246  |        |        |        |        |
| 19248  |        |        |        |        |
| 19249  |        |        |        |        |
| 19252  |        |        |        |        |
| 19255  |        |        |        |        |
| 19257  |        |        |        |        |
| 19274  |        |        |        |        |
| 19279  |        |        |        |        |
| 19291  |        |        |        |        |
| 19292  |        |        |        |        |
| 19308  |        |        |        |        |
| 19310  |        |        |        |        |
| 19311  |        |        |        |        |
| 19326  |        |        |        |        |
| 19327  |        |        |        |        |
| 19329  |        |        |        |        |
| 19330  |        |        |        | 2      |
| 19333  |        |        | 1      | 2      |
| 19336  |        |        |        |        |
| 19343  |        |        |        |        |
| 19348  |        |        |        |        |
| 19349  |        |        |        | 2      |
| 19352  |        |        |        | 1      |
| 19356  |        |        |        |        |
| 19357  |        |        |        | 1      |
| 19358  |        |        | 1      | 1      |
| 19367  |        | 1      |        |        |
| 19376  |        |        |        |        |
| 19377  |        |        |        |        |

| respid | Q31a_8 | Q31a_9 | Q31b_1 | Q31b_2 |
|--------|--------|--------|--------|--------|
| 19380  |        |        |        |        |
| 19384  |        |        |        |        |
| 19391  |        | 3      |        |        |
| 19397  |        |        |        |        |
| 19398  |        |        |        |        |
| 19401  |        |        |        |        |
| 19402  |        |        |        |        |
| 19403  |        |        |        |        |
| 19405  |        |        |        |        |
| 19407  |        |        |        |        |
| 19415  |        |        |        |        |
| 19420  |        |        |        |        |
| 19423  | 2      | 2      |        | 2      |
| 19424  |        |        |        | 3      |
| 19426  |        |        | 3      |        |
| 19429  |        |        |        |        |
| 19435  |        |        |        | 2      |
| 19441  |        | 1      |        | 1      |
| 19450  |        |        |        |        |
| 19456  |        | 2      |        |        |
| 19457  |        |        |        |        |
| 19463  |        |        |        | 1      |
| 19467  |        |        |        |        |
| 19468  |        |        |        |        |
| 19471  |        |        |        |        |
| 19473  |        |        |        |        |
| 19478  | 2      |        |        |        |
| 19480  |        |        |        |        |
| 19481  |        |        |        | 0      |
| 19484  |        |        |        |        |
| 19487  |        |        |        |        |
| 19491  |        |        |        | 2      |

| respid | Q31a_8 | Q31a_9 | Q31b_1 | Q31b_2 |
|--------|--------|--------|--------|--------|
| 19495  |        |        |        |        |
| 19498  |        |        | 1      |        |
| 19500  |        | 1      |        |        |
| 19501  |        | 2      |        | 2      |
| 19503  |        |        |        |        |
| 19506  |        |        |        |        |
| 19508  |        |        |        |        |
| 19509  |        |        |        |        |
| 19518  |        |        | 1      | 1      |
| 19520  |        |        |        |        |
| 19536  |        |        |        |        |
| 19538  |        |        |        |        |
| 19541  |        | 2      |        | 2      |
| 19548  |        |        |        |        |
| 19553  |        |        |        |        |
| 19556  |        |        |        |        |
| 19559  |        |        |        |        |
| 19561  |        |        |        |        |
| 19562  |        |        |        |        |
| 19564  |        |        |        |        |
| 19567  | 2      | 4      |        | 3      |
| 19571  | 1      | 2      |        |        |
| 19576  | 2      | 2      |        |        |
| 19578  |        |        |        |        |
| 19606  |        |        |        |        |
| 19607  |        |        |        |        |
| 19608  |        | 1      |        |        |
| 19612  |        |        |        | 3      |
| 19618  |        |        |        | 2      |
| 19621  |        |        |        |        |
| 19624  |        |        |        |        |
| 19630  |        |        |        |        |

| respid | Q31a_8 | Q31a_9 | Q31b_1 | Q31b_2 |
|--------|--------|--------|--------|--------|
| 19637  |        |        |        |        |
| 19639  |        | 1      |        |        |
| 19647  |        |        |        |        |
| 19648  |        |        |        |        |
| 19660  |        |        |        |        |
| 19662  |        | 2      | 3      | 3      |
| 19669  |        |        |        |        |
| 19680  |        |        |        |        |
| 19682  |        |        |        |        |
| 19686  |        |        |        | 3      |
| 19700  |        |        |        |        |
| 19701  |        |        |        |        |
| 19704  |        |        |        |        |
| 19706  | 1      |        |        | 0      |
| 19707  |        |        |        |        |
| 19717  |        |        |        | 2      |
| 19718  |        |        |        |        |
| 19721  |        |        |        | 1      |
| 19722  |        |        |        |        |
| 19729  |        |        |        |        |
| 19738  |        |        |        | 2      |
| 19741  |        |        |        |        |
| 19742  |        |        |        |        |
| 19747  |        |        |        |        |
| 19748  |        |        |        |        |
| 19749  |        |        |        | 0      |
| 19756  |        |        |        |        |
| 19771  |        |        |        | 1      |
| 19772  |        |        |        | 2      |
| 19775  |        |        |        |        |
| 19783  |        |        |        |        |
| 19787  |        |        |        |        |

| respid | Q31a_8 | Q31a_9 | Q31b_1 | Q31b_2 |
|--------|--------|--------|--------|--------|
| 19790  |        |        |        |        |
| 19797  |        |        |        |        |
| 19802  |        |        |        |        |
| 19808  |        |        |        |        |
| 19810  |        |        |        |        |
| 19811  |        | 2      |        |        |
| 19812  |        |        |        | 1      |
| 19821  |        |        |        |        |
| 19826  |        |        |        |        |
| 19827  |        |        |        |        |
| 19830  |        |        |        |        |
| 19834  |        |        |        |        |
| 19838  |        |        |        | 1      |
| 19843  |        |        |        |        |
| 19845  |        |        |        |        |
| 19846  |        |        |        |        |
| 19852  |        | 4      |        | 3      |
| 19855  |        |        |        |        |
| 19858  |        | 2      |        |        |
| 19861  |        |        |        |        |
| 19863  | 1      |        |        |        |
| 19868  |        |        |        |        |
| 19874  |        |        |        |        |
| 19876  |        |        |        |        |
| 19880  |        |        |        | 2      |
| 19885  |        |        |        |        |
| 19890  |        |        |        |        |
| 19894  |        |        |        |        |
| 19895  |        |        |        |        |
| 19897  |        |        |        | 1      |
| 19906  |        |        | 1      |        |
| 19908  |        |        |        |        |

| respid | Q31a_8 | Q31a_9 | Q31b_1 | Q31b_2 |
|--------|--------|--------|--------|--------|
| 19912  |        |        |        | 0      |
| 19913  |        |        |        |        |
| 19914  |        |        | 3      | 3      |
| 19918  |        |        |        | 1      |
| 19924  | 2      |        | 1      | 1      |
| 19936  |        |        |        |        |
| 19940  |        |        |        |        |
| 19945  |        | 2      |        |        |
| 19948  |        |        |        |        |
| 19959  |        |        |        |        |
| 19961  |        |        |        |        |
| 19962  |        | 1      |        |        |
| 19965  |        |        |        |        |
| 19966  |        |        |        |        |
| 19973  |        |        |        |        |
| 19981  |        |        |        |        |
| 19986  |        |        |        |        |
| 19989  |        |        |        |        |
| 19998  |        |        |        |        |
| 20001  |        |        |        |        |
| 20005  |        |        |        |        |
| 20013  | 4      |        | 2      | 3      |
| 20015  |        |        |        |        |
| 20017  | 1      |        |        |        |
| 20020  |        |        |        | 0      |
| 20021  |        |        |        |        |
| 20026  |        |        |        |        |
| 20028  |        |        |        |        |
| 20030  |        |        | 1      | 3      |
| 20031  |        |        |        |        |
| 20034  |        |        |        |        |
| 20035  |        |        |        |        |



| respid | Q31a_8 | Q31a_9 | Q31b_1 | Q31b_2 |
|--------|--------|--------|--------|--------|
| 20040  |        |        | 3      | 4      |
| 20045  |        |        |        |        |
| 20048  |        |        |        |        |
| 20053  |        |        |        | 0      |
| 20064  |        |        |        |        |
| 20071  |        |        |        |        |
| 20072  |        |        |        |        |
| 20076  |        |        | 0      | 1      |
| 20081  |        |        |        |        |
| 20082  |        |        | 1      |        |
| 20083  |        |        |        |        |
| 20088  |        |        |        |        |
| 20089  | 1      | 1      |        |        |
| 20099  |        | 1      |        |        |
| 20101  |        |        |        |        |
| 20102  |        |        |        |        |
| 20109  |        |        |        |        |
| 20118  |        |        | 1      | 1      |
| 20119  |        |        |        |        |
| 20124  |        |        |        |        |
| 20126  |        |        |        |        |
| 20130  |        |        |        |        |
| 20131  |        |        | 1      |        |
| 20134  |        |        |        | 1      |
| 20146  |        |        |        | 0      |
| 20152  |        |        |        |        |
| 20155  |        |        |        |        |
| 20156  |        |        |        |        |
| 20157  |        |        |        |        |
| 20164  |        |        | 0      |        |
| 20168  |        |        |        |        |
| 20173  |        |        |        |        |

| respid | Q31a_8 | Q31a_9 | Q31b_1 | Q31b_2 |
|--------|--------|--------|--------|--------|
| 20174  |        |        |        |        |
| 20175  |        | 2      | 3      |        |
| 20189  |        |        |        |        |
| 20190  |        |        |        | 1      |
| 20201  |        |        |        |        |
| 20202  |        |        |        |        |
| 20204  |        |        |        |        |
| 20206  |        |        |        |        |
| 20207  |        |        |        |        |
| 20212  |        |        | 1      | 1      |
| 20213  |        |        |        | 1      |
| 20217  |        |        |        |        |
| 20222  |        |        |        |        |
| 20227  |        |        |        |        |
| 20228  |        |        |        | 2      |
| 20238  |        |        |        |        |
| 20242  |        |        |        |        |
| 20246  |        |        | 0      |        |
| 20255  |        | 3      |        |        |
| 20256  |        |        |        |        |
| 20259  |        |        |        | 2      |
| 20262  |        |        |        |        |
| 20274  |        |        |        |        |
| 20283  |        |        | 2      | 3      |
| 20284  |        |        |        |        |
| 20291  |        |        |        |        |
| 20292  |        |        |        | 1      |
| 20293  |        |        |        |        |
| 20298  |        |        |        |        |
| 20301  |        |        |        |        |
| 20303  |        |        |        |        |
| 20309  |        |        |        |        |

| respid | Q31a_8 | Q31a_9 | Q31b_1 | Q31b_2 |
|--------|--------|--------|--------|--------|
| 20318  |        |        | 2      |        |
| 20324  |        |        |        |        |
| 20335  |        |        |        |        |
| 20336  |        |        |        | 1      |
| 20339  | 2      |        |        |        |
| 20348  |        |        |        |        |
| 20351  |        |        |        |        |
| 20353  |        |        |        |        |
| 20356  |        |        |        |        |
| 20357  |        |        |        |        |
| 20366  |        |        |        |        |
| 20369  |        |        |        | 4      |
| 20372  |        |        |        |        |
| 20375  |        |        |        |        |
| 20379  |        |        |        |        |
| 20380  |        |        |        |        |
| 20396  |        |        |        | 2      |
| 20398  |        |        |        |        |
| 20412  |        |        |        |        |
| 20415  |        |        |        |        |
| 20424  |        |        |        | 2      |
| 20434  |        |        |        |        |
| 20435  |        | 2      |        |        |
| 20440  |        |        |        |        |
| 20441  |        |        |        |        |
| 20445  |        |        |        |        |
| 20446  |        | 3      |        | 2      |
| 20450  |        |        |        | 1      |
| 20453  |        |        |        |        |
| 20458  |        |        |        |        |
| 20464  |        |        |        |        |
| 20471  |        |        |        | 1      |

| respid | Q31a_8 | Q31a_9 | Q31b_1 | Q31b_2 |
|--------|--------|--------|--------|--------|
| 20473  |        |        |        |        |
| 20474  |        |        |        |        |
| 20477  |        |        |        |        |
| 20479  |        | 2      | 4      | 4      |
| 20485  |        |        |        | 1      |
| 20487  |        |        |        |        |
| 20488  |        |        |        |        |
| 20494  |        |        |        | 1      |
| 20502  | 2      |        |        | 2      |
| 20503  |        |        |        |        |
| 20510  |        |        |        |        |
| 20512  |        |        |        |        |
| 20516  |        |        |        |        |
| 20522  |        |        |        | 2      |
| 20527  |        |        |        | 0      |
| 20529  |        |        | 1      | 1      |
| 20535  | 1      |        | 1      | 0      |
| 20543  |        |        |        |        |
| 20546  |        | 1      | 1      |        |
| 20548  |        |        |        |        |
| 20552  |        |        |        |        |
| 20556  |        |        |        |        |
| 20566  |        |        |        |        |
| 20576  |        |        |        |        |
| 20587  |        |        |        |        |
| 20589  |        |        |        |        |
| 20593  |        |        |        |        |
| 20594  |        |        |        | 0      |
| 20602  |        |        |        | 1      |
| 20607  |        |        |        |        |
| 20608  |        |        |        |        |
| 20611  |        |        |        |        |

| respid | Q31a_8 | Q31a_9 | Q31b_1 | Q31b_2 |
|--------|--------|--------|--------|--------|
| 20612  |        |        |        | 0      |
| 20615  |        |        |        | 0      |
| 20625  |        |        |        | 1      |
| 20630  |        |        |        |        |
| 20639  |        |        |        |        |
| 20643  |        |        |        |        |
| 20645  |        |        |        |        |
| 20647  |        |        |        |        |
| 20652  |        | 2      | 3      | 4      |
| 20661  |        |        |        |        |
| 20665  |        |        |        |        |
| 20679  |        |        |        |        |
| 20682  |        |        |        | 2      |
| 20683  |        |        |        |        |
| 20700  |        |        |        |        |
| 20702  |        | 2      |        |        |
| 20709  |        |        |        |        |
| 20715  |        |        |        | 2      |
| 20718  |        |        |        |        |
| 20722  |        |        |        |        |
| 20729  |        |        |        |        |
| 20732  |        |        |        |        |
| 20746  |        | 2      |        | 3      |
| 20747  |        |        |        |        |
| 20758  |        |        |        |        |
| 20767  |        |        |        |        |
| 20777  |        |        |        |        |
| 20778  |        |        |        |        |
| 20780  |        | 1      |        |        |
| 20800  | 1      | 1      |        |        |
| 20810  |        |        |        |        |
| 20814  |        |        |        |        |

| respid | Q31a_8 | Q31a_9 | Q31b_1 | Q31b_2 |
|--------|--------|--------|--------|--------|
| 20816  |        |        |        |        |
| 20832  |        |        |        | 4      |
| 20838  |        |        | 4      | 4      |
| 20841  |        |        |        | 1      |
| 20848  |        |        |        |        |
| 20850  |        |        |        |        |
| 20851  |        |        |        |        |
| 20861  |        |        |        |        |
| 20870  |        | 2      |        |        |
| 20880  |        |        |        |        |
| 20883  |        |        |        |        |
| 20894  |        |        | 0      | 1      |
| 20896  |        |        | 1      | 1      |
| 20901  |        |        |        |        |
| 20903  |        |        |        | 0      |
| 20909  |        |        |        |        |
| 20919  |        | 1      |        |        |
| 20925  |        |        |        |        |
| 20935  |        |        |        |        |
| 20939  |        |        |        |        |
| 20956  |        | 3      |        | 4      |
| 20970  |        |        |        |        |
| 20974  |        |        |        |        |
| 20975  |        |        |        |        |
| 20984  |        |        |        | 1      |
| 20988  |        |        |        |        |
| 20996  |        |        | 0      |        |
| 20998  |        |        |        |        |
| 21007  |        |        |        |        |
| 21008  |        |        |        |        |
| 21014  |        |        |        |        |
| 21020  |        |        |        |        |

| respid | Q31a_8 | Q31a_9 | Q31b_1 | Q31b_2 |
|--------|--------|--------|--------|--------|
| 21022  |        |        | 1      | 1      |
| 21024  |        |        |        |        |
| 21026  |        | 1      |        |        |
| 21027  |        |        |        |        |
| 21030  |        |        |        |        |
| 21032  |        |        |        |        |
| 21040  |        |        |        |        |
| 21045  |        |        |        |        |
| 21058  |        |        |        |        |
| 21064  |        |        |        | 1      |
| 21073  |        |        |        |        |
| 21086  |        |        |        | 2      |
| 21092  | 2      |        | 4      |        |
| 21096  |        |        |        | 2      |
| 21103  |        |        |        | 2      |
| 21120  |        |        | 3      | 2      |
| 21125  |        |        |        |        |
| 21126  | 1      |        |        |        |
| 21132  |        |        |        |        |
| 21139  |        |        |        |        |
| 21147  |        |        |        |        |
| 21148  |        | 2      |        |        |
| 21149  |        |        |        | 2      |
| 21164  |        |        |        |        |
| 21165  |        |        |        |        |
| 21171  |        |        |        |        |
| 21176  |        |        |        |        |
| 21187  |        | 2      | 1      | 1      |
| 21192  |        | 1      | 1      | 2      |
| 21198  |        |        |        |        |
| 21199  |        |        |        |        |
| 21206  |        |        |        | 1      |

| respid | Q31a_8 | Q31a_9 | Q31b_1 | Q31b_2 |
|--------|--------|--------|--------|--------|
| 21212  |        |        |        |        |
| 21216  |        |        |        |        |
| 21217  | 2      |        |        |        |
| 21228  |        |        |        |        |
| 21229  |        |        |        | 1      |
| 21230  |        |        | 0      |        |
| 21243  |        |        |        | 1      |
| 21247  |        | 2      |        |        |
| 21253  |        |        |        |        |
| 21264  |        |        |        |        |
| 21265  |        |        |        |        |
| 21273  |        | 2      |        |        |
| 21275  |        |        |        |        |
| 21278  |        |        |        |        |
| 21291  |        |        |        | 1      |
| 21298  |        |        |        |        |
| 21301  |        |        |        |        |
| 21312  | 2      | 3      |        |        |
| 21323  |        |        |        |        |
| 21325  |        |        |        |        |
| 21341  |        |        |        |        |
| 21349  |        |        |        | 1      |
| 21350  |        |        | 1      | 1      |
| 21354  |        | 3      |        | 3      |
| 21372  |        |        |        | 3      |
| 21373  |        | 2      |        |        |
| 21378  |        |        |        | 2      |
| 21393  |        |        |        |        |
| 21401  |        |        |        | 1      |
| 21405  |        |        |        |        |
| 21406  |        |        |        |        |
| 21407  |        |        |        | 1      |



| respid | Q31a_8 | Q31a_9 | Q31b_1 | Q31b_2 |
|--------|--------|--------|--------|--------|
| 21418  |        |        |        |        |
| 21420  |        |        |        |        |
| 21421  |        |        |        |        |
| 21446  |        |        |        |        |
| 21449  |        |        | 2      |        |
| 21452  |        |        |        |        |
| 21455  |        |        |        |        |
| 21469  |        |        |        |        |
| 21471  |        |        |        |        |
| 21472  |        |        |        | 1      |
| 21474  |        |        |        |        |
| 21479  |        |        |        |        |
| 21485  |        |        |        |        |
| 21512  |        |        |        |        |
| 21513  |        |        |        |        |
| 21514  |        |        |        |        |
| 21520  |        |        |        | 2      |
| 21539  |        |        |        |        |
| 21553  |        |        |        |        |
| 21560  |        |        |        |        |
| 21561  |        |        |        |        |
| 21563  |        |        |        | 3      |
| 21565  |        |        |        |        |
| 21582  |        |        |        | 2      |
| 21584  |        |        |        |        |
| 21585  |        |        |        |        |
| 21586  |        |        |        |        |
| 21587  |        |        |        | 2      |
| 21590  |        |        |        |        |
| 21601  |        |        |        | 1      |
| 21611  |        | 2      |        |        |
| 21612  |        |        |        | 1      |

| respid | Q31a_8 | Q31a_9 | Q31b_1 | Q31b_2 |
|--------|--------|--------|--------|--------|
| 21625  |        |        | 2      | 2      |
| 21633  |        |        |        |        |
| 21640  |        |        |        |        |
| 21647  |        |        |        |        |
| 21648  |        |        | 4      | 3      |
| 21656  |        |        |        |        |
| 21657  |        |        |        |        |
| 21658  | 2      | 2      |        | 3      |
| 21665  |        |        |        |        |
| 21666  |        | 4      |        | 3      |
| 21668  |        |        |        | 2      |
| 21673  |        |        |        | 1      |
| 21681  |        |        |        |        |
| 21682  |        |        |        |        |
| 21685  |        |        |        |        |
| 21692  |        |        |        |        |
| 21697  |        |        |        | 0      |
| 21711  |        |        |        | 3      |
| 21715  |        | 5      |        |        |
| 21726  |        |        |        |        |
| 21748  |        |        |        |        |
| 21761  |        |        |        |        |
| 21769  |        |        | 2      | 2      |
| 21774  |        |        |        |        |
| 21778  |        |        |        |        |
| 21785  |        |        |        |        |
| 21799  |        |        |        |        |
| 21820  |        |        | 4      |        |
| 21837  |        |        |        | 0      |
| 21845  |        |        | 2      | 3      |
| 21846  |        |        |        |        |
| 21849  |        |        |        |        |

| respid | Q31a_8 | Q31a_9 | Q31b_1 | Q31b_2 |
|--------|--------|--------|--------|--------|
| 21850  |        |        |        |        |
| 21855  |        |        |        |        |
| 21859  |        |        |        |        |
| 21861  |        |        | 0      | 1      |
| 21866  |        |        |        |        |
| 21873  |        | 1      |        |        |
| 21876  |        |        |        |        |
| 21882  |        |        |        |        |
| 21884  |        |        |        |        |
| 21887  |        |        |        |        |
| 21892  |        |        |        |        |
| 21907  |        |        |        |        |
| 21910  |        |        | 3      | 3      |
| 21912  |        |        |        | 1      |
| 21914  |        | 2      |        |        |
| 21925  |        |        |        |        |
| 21937  |        |        |        |        |
| 21938  |        |        |        |        |
| 21940  |        |        |        |        |
| 21942  |        |        |        |        |
| 21947  |        |        |        |        |
| 21948  |        |        |        |        |
| 21961  |        |        | 1      | 1      |
| 21977  |        | 3      |        |        |
| 21983  |        |        |        |        |
| 21986  |        |        | 2      | 2      |
| 21988  | 1      |        |        |        |
| 21996  |        |        |        |        |
| 21997  |        |        |        |        |
| 22005  |        |        |        |        |
| 22013  |        |        |        |        |
| 22018  |        |        |        |        |

| respid | Q31a_8 | Q31a_9 | Q31b_1 | Q31b_2 |
|--------|--------|--------|--------|--------|
| 22019  |        |        |        |        |
| 22071  |        |        |        |        |
| 22082  |        |        |        |        |
| 22085  |        |        |        |        |
| 22092  |        |        |        |        |
| 22097  |        |        |        |        |
| 22111  |        |        |        |        |
| 22118  |        |        |        |        |
| 22132  |        |        |        |        |
| 22133  |        |        |        |        |
| 22139  |        |        |        |        |
| 22142  | 3      | 3      |        |        |
| 22146  |        |        |        |        |
| 22181  |        |        |        |        |
| 22202  |        |        |        |        |
| 22214  |        |        |        |        |
| 22223  |        |        |        |        |
| 22227  |        |        |        | 1      |
| 22229  |        |        |        |        |
| 22239  |        |        |        |        |
| 22245  |        |        | 3      | 3      |
| 22256  |        |        |        |        |
| 22260  |        |        |        |        |
| 22298  |        |        |        |        |
| 22321  |        |        |        |        |
| 22340  |        |        |        |        |
| 22346  |        |        | 2      | 2      |
| 22356  |        |        |        |        |
| 22361  |        |        |        |        |
| 22364  |        |        |        |        |
| 22368  |        |        |        |        |
| 22374  |        |        |        |        |

| respid | Q31a_8 | Q31a_9 | Q31b_1 | Q31b_2 |
|--------|--------|--------|--------|--------|
| 22375  |        |        |        |        |
| 22377  |        |        |        |        |
| 22383  |        |        |        |        |
| 22387  |        |        | 2      | 2      |
| 22392  |        |        |        |        |
| 22393  |        |        |        |        |
| 22394  |        |        |        |        |
| 22395  |        |        |        |        |
| 22401  |        |        |        |        |
| 22407  |        |        |        |        |
| 22410  |        |        |        |        |
| 22418  |        |        |        | 1      |
| 22421  |        |        |        |        |
| 22423  |        |        |        |        |
| 22425  |        |        |        |        |
| 22427  |        |        |        |        |
| 22431  |        |        |        | 4      |
| 22435  |        |        |        |        |
| 22436  |        |        |        | 1      |
| 22442  |        |        |        |        |
| 22444  |        | 1      |        |        |
| 22445  |        |        |        | 3      |
| 22446  |        |        |        |        |
| 22448  |        |        |        | 2      |
| 22449  |        |        |        |        |
| 22450  |        |        |        | 2      |
| 22453  |        |        | 2      | 1      |
| 22465  |        |        | 2      | 2      |
| 22472  |        |        |        |        |
| 22475  |        |        | 4      | 4      |
| 22478  |        | 2      |        |        |
| 22491  |        |        |        |        |

| respid | Q31a_8 | Q31a_9 | Q31b_1 | Q31b_2 |
|--------|--------|--------|--------|--------|
| 22497  |        |        |        |        |
| 22498  |        |        | 1      |        |
| 22499  |        |        |        |        |
| 22503  |        |        |        |        |
| 22507  |        |        |        |        |
| 22513  |        |        |        |        |
| 22517  |        |        |        |        |
| 22524  |        | 2      |        |        |
| 22528  |        |        |        |        |
| 22544  |        | 1      |        |        |
| 22571  |        |        |        |        |
| 22576  |        |        |        |        |
| 22579  |        |        |        |        |
| 22583  |        | 1      |        |        |
| 22591  |        |        |        | 2      |
| 22592  |        |        |        |        |
| 22612  |        |        |        | 0      |
| 22613  | 1      |        |        |        |
| 22615  |        |        |        | 1      |
| 22621  |        |        |        |        |
| 22625  |        |        |        |        |
| 22628  |        |        |        |        |
| 22632  |        |        |        |        |
| 22639  |        |        |        |        |
| 22648  |        |        |        |        |
| 22649  |        |        |        |        |
| 22655  |        |        |        |        |
| 22659  |        |        |        |        |
| 22660  |        |        |        |        |
| 22666  |        |        |        |        |
| 22667  |        |        |        |        |
| 22670  |        |        |        |        |

| respid | Q31a_8 | Q31a_9 | Q31b_1 | Q31b_2 |
|--------|--------|--------|--------|--------|
| 22681  |        |        |        |        |
| 22683  |        |        |        |        |
| 22688  |        |        |        |        |
| 22695  |        |        |        |        |
| 22696  |        |        |        |        |
| 22705  |        |        |        | 2      |
| 22718  |        |        |        | 2      |
| 22720  |        |        |        |        |
| 22724  |        |        |        | 1      |
| 22728  |        |        |        |        |
| 22751  |        |        |        |        |
| 22782  |        |        |        |        |
| 22786  |        | 1      |        |        |
| 22788  |        |        |        |        |
| 22810  |        |        | 1      | 1      |
| 22816  |        |        |        |        |
| 22818  |        |        |        | 1      |
| 22854  |        |        |        |        |
| 22858  |        |        |        | 2      |
| 22862  |        |        |        |        |
| 22865  |        |        |        |        |
| 22868  |        |        |        |        |
| 22869  |        | 2      |        |        |
| 22873  |        |        |        |        |
| 22875  |        |        |        |        |
| 22876  |        |        |        |        |
| 22882  |        |        |        |        |
| 22884  |        | 2      |        |        |
| 22887  |        |        | 1      | 1      |
| 22888  |        |        |        |        |
| 22900  |        |        |        |        |
| 22901  |        |        |        |        |

| respid | Q31a_8 | Q31a_9 | Q31b_1 | Q31b_2 |
|--------|--------|--------|--------|--------|
| 22912  |        | 3      |        |        |
| 22913  |        |        |        |        |
| 22921  |        |        |        |        |
| 22925  |        |        |        |        |
| 22940  |        |        |        |        |
| 22941  |        |        |        |        |
| 22947  |        |        |        |        |
| 22948  |        |        |        |        |
| 22964  |        |        | 2      | 2      |
| 22966  |        |        |        |        |
| 22969  |        |        |        |        |
| 22971  |        |        |        |        |
| 22988  |        |        |        |        |
| 22990  |        |        |        |        |
| 23000  |        |        |        |        |
| 23016  |        |        |        |        |
| 23026  |        | 2      |        |        |
| 23035  |        |        |        |        |
| 23037  |        | 2      |        |        |
| 23044  |        | 1      |        |        |
| 23046  |        |        |        |        |
| 23047  |        |        |        |        |
| 23049  |        |        |        |        |
| 23055  |        | 1      |        |        |
| 23066  |        |        |        |        |
| 23075  |        |        |        |        |
| 23081  |        | 2      |        |        |
| 23087  |        |        |        |        |
| 23094  |        |        |        |        |
| 23099  |        |        |        |        |
| 23101  |        |        |        |        |
| 23105  |        |        |        |        |



| respid | Q31a_8 | Q31a_9 | Q31b_1 | Q31b_2 |
|--------|--------|--------|--------|--------|
| 23115  |        |        |        |        |
| 23121  |        |        |        |        |
| 23127  |        |        |        | 1      |
| 23131  |        |        |        |        |
| 23134  |        |        |        |        |
| 23145  |        |        |        |        |
| 23151  |        |        |        |        |
| 23161  |        |        |        |        |
| 23169  |        |        |        | 1      |
| 23173  |        |        |        |        |
| 23174  |        |        |        |        |
| 23186  |        |        |        | 3      |
| 23195  |        |        |        |        |
| 23197  | 3      |        | 1      |        |
| 23198  |        |        |        |        |
| 23203  |        |        |        |        |
| 23204  |        |        |        |        |
| 23212  |        |        |        |        |
| 23214  |        |        |        |        |
| 23221  |        |        |        |        |
| 23237  |        |        |        |        |
| 23251  |        |        |        | 0      |
| 23254  |        |        |        |        |
| 23262  |        |        |        |        |
| 23267  |        |        |        |        |
| 23268  |        |        |        | 3      |
| 23273  |        |        |        | 1      |
| 23278  |        |        |        |        |
| 23279  |        |        |        |        |
| 23281  |        |        | 3      |        |
| 23282  |        |        |        |        |
| 23283  |        |        |        | 3      |

| respid | Q31a_8 | Q31a_9 | Q31b_1 | Q31b_2 |
|--------|--------|--------|--------|--------|
| 23285  |        |        |        |        |
| 23305  |        |        |        | 4      |
| 23309  |        |        |        |        |
| 23310  |        |        |        |        |
| 23311  |        |        |        |        |
| 23312  | 2      |        |        |        |
| 23319  |        |        |        |        |
| 23320  |        | 1      |        |        |
| 23322  |        |        |        |        |
| 23334  |        |        | 1      |        |
| 23340  |        |        |        |        |
| 23346  |        |        |        |        |
| 23353  |        |        |        |        |
| 23363  |        |        | 2      | 2      |
| 23364  |        | 2      |        |        |
| 23376  |        |        |        |        |
| 23378  |        |        |        |        |
| 23382  |        |        |        |        |
| 23383  |        |        |        |        |
| 23390  |        |        |        |        |
| 23395  |        | 1      |        |        |
| 23398  |        |        |        |        |
| 23399  |        |        |        |        |
| 23406  |        |        |        |        |
| 23418  |        |        |        |        |
| 23427  |        |        |        |        |
| 23428  |        |        |        |        |
| 23435  |        |        |        | 0      |
| 23439  |        |        |        |        |
| 23440  |        |        |        |        |
| 23444  |        |        | 2      |        |
| 23445  |        |        |        |        |

| respid | Q31a_8 | Q31a_9 | Q31b_1 | Q31b_2 |
|--------|--------|--------|--------|--------|
| 23455  |        |        |        |        |
| 23467  |        |        |        |        |
| 23478  |        | 1      |        |        |
| 23492  |        |        |        |        |
| 23498  |        |        |        |        |
| 23511  |        |        |        | 1      |
| 23514  |        |        |        |        |
| 23515  |        |        |        |        |
| 23522  |        |        |        |        |
| 23524  |        |        |        |        |
| 23531  |        |        |        |        |
| 23532  |        |        |        |        |
| 23533  |        |        |        | 1      |
| 23534  |        |        |        |        |
| 23538  |        |        |        |        |
| 23539  |        | 1      |        |        |
| 23548  |        |        |        |        |
| 23553  |        |        |        |        |
| 23556  |        |        |        |        |
| 23563  |        |        |        |        |
| 23572  |        |        |        |        |
| 23575  |        |        |        |        |
| 23576  |        |        |        |        |
| 23577  |        |        |        |        |
| 23578  |        |        |        | 1      |
| 23587  |        |        |        |        |
| 23597  |        |        |        |        |
| 23598  |        |        |        |        |
| 23604  |        |        |        |        |
| 23617  |        |        |        |        |
| 23620  |        |        |        |        |
| 23621  |        |        |        |        |

| respid | Q31a_8 | Q31a_9 | Q31b_1 | Q31b_2 |
|--------|--------|--------|--------|--------|
| 23625  |        |        |        |        |
| 23629  |        |        |        | 0      |
| 23635  |        |        |        |        |
| 23636  | 1      |        |        |        |
| 23637  |        | 3      |        |        |
| 23638  |        |        |        |        |
| 23644  |        |        |        |        |
| 23645  |        |        | 1      | 1      |
| 23649  |        |        |        |        |
| 23654  |        |        |        |        |
| 23662  |        |        |        |        |
| 23664  |        |        |        | 1      |
| 23665  |        |        |        |        |
| 23666  |        |        |        | 1      |
| 23671  |        |        |        |        |
| 23672  |        |        |        |        |
| 23685  |        |        |        |        |
| 23686  |        | 2      |        |        |
| 23689  |        | 3      |        |        |
| 23690  |        |        |        |        |
| 23695  |        | 3      | 1      | 2      |
| 23700  |        |        |        |        |
| 23714  |        |        |        |        |
| 23719  |        |        | 1      |        |
| 23720  |        |        |        | 1      |
| 23721  |        |        |        |        |
| 23729  |        |        |        |        |
| 23730  |        |        |        |        |
| 23732  |        |        |        |        |
| 23736  |        |        |        |        |
| 23754  |        |        |        |        |
| 23756  |        |        |        |        |

| respid | Q31a_8 | Q31a_9 | Q31b_1 | Q31b_2 |
|--------|--------|--------|--------|--------|
| 23759  |        |        |        |        |
| 23761  |        |        |        |        |
| 23766  |        |        |        |        |
| 23768  | 3      |        |        |        |
| 23773  |        |        |        |        |
| 23781  |        |        |        |        |
| 23782  |        |        |        |        |
| 23787  |        |        |        |        |
| 23788  |        |        |        |        |
| 23790  |        |        |        |        |
| 23794  |        |        |        |        |
| 23795  |        | 2      |        |        |
| 23801  |        |        |        |        |
| 23806  |        |        |        |        |
| 23809  |        |        |        |        |
| 23813  |        |        |        |        |
| 23815  |        |        |        |        |
| 23821  |        |        |        |        |
| 23825  |        |        |        |        |
| 23826  |        |        |        |        |
| 23830  |        |        |        |        |
| 23833  |        |        |        | 1      |
| 23837  |        |        |        |        |
| 23848  |        |        |        |        |
| 23850  |        |        |        |        |
| 23870  |        |        |        |        |
| 23877  |        |        |        |        |
| 23880  |        |        |        |        |
| 23882  |        |        |        | 1      |
| 23888  |        |        |        |        |
| 23908  |        |        |        | 1      |
| 23914  |        |        |        | 1      |

| respid | Q31a_8 | Q31a_9 | Q31b_1 | Q31b_2 |
|--------|--------|--------|--------|--------|
| 23916  |        |        |        |        |
| 23922  |        |        |        |        |
| 23932  |        |        |        |        |
| 23934  |        |        |        |        |
| 23942  |        |        | 3      | 2      |
| 23945  |        |        |        | 0      |
| 23948  |        |        |        |        |
| 23955  |        |        |        |        |
| 23956  |        |        |        |        |
| 23978  |        |        |        |        |
| 23981  |        |        |        |        |
| 23982  |        |        |        |        |
| 23991  |        |        |        |        |
| 23994  |        |        |        | 1      |
| 23995  |        |        |        |        |
| 23999  |        | 1      |        |        |
| 24005  | 3      |        |        | 3      |
| 24018  |        |        |        |        |
| 24021  |        |        |        |        |
| 24035  |        |        |        |        |
| 24040  |        |        |        |        |
| 24043  |        |        |        |        |
| 24046  |        |        |        | 2      |
| 24047  |        |        |        | 1      |
| 24048  |        |        |        |        |
| 24062  |        |        |        |        |
| 24063  |        |        |        |        |
| 24066  |        |        |        |        |
| 24069  |        |        | 0      |        |
| 24070  |        |        |        |        |
| 24074  |        |        |        |        |
| 24080  |        |        |        |        |

| respid | Q31a_8 | Q31a_9 | Q31b_1 | Q31b_2 |
|--------|--------|--------|--------|--------|
| 24082  |        |        |        |        |
| 24088  |        | 1      |        |        |
| 24089  |        |        |        |        |
| 24091  |        |        |        |        |
| 24095  |        |        |        |        |
| 24100  |        |        | 2      | 2      |
| 24105  |        |        |        |        |
| 24107  |        |        |        | 3      |
| 24108  |        |        |        |        |
| 24113  |        | 2      |        |        |
| 24120  |        |        |        |        |
| 24122  |        | 3      |        | 2      |
| 24123  |        |        |        |        |
| 24125  |        |        | 1      | 1      |
| 24132  |        |        |        |        |
| 24139  |        |        |        |        |
| 24140  |        |        |        |        |
| 24143  |        |        |        |        |
| 24150  |        |        |        | 2      |
| 24153  |        |        |        |        |
| 24161  |        |        |        |        |
| 24168  |        |        |        |        |
| 24179  |        |        |        |        |
| 24182  |        | 2      |        |        |
| 24194  |        |        |        |        |
| 24206  |        |        |        |        |
| 24214  |        |        |        |        |
| 24215  |        |        |        |        |
| 24224  |        |        |        |        |
| 24225  |        |        |        |        |
| 24227  |        |        |        |        |
| 24229  | 1      |        |        |        |

| respid | Q31a_8 | Q31a_9 | Q31b_1 | Q31b_2 |
|--------|--------|--------|--------|--------|
| 24230  |        |        |        |        |
| 24232  |        |        |        |        |
| 24253  |        |        |        | 1      |
| 24267  |        |        |        |        |
| 24274  |        |        |        |        |
| 24275  | 1      |        |        |        |
| 24277  |        |        |        |        |
| 24280  |        | 3      |        | 3      |
| 24285  |        |        |        |        |
| 24293  |        |        |        |        |
| 24295  |        |        |        | 3      |
| 24299  |        |        |        |        |
| 24303  |        |        |        |        |
| 24308  |        |        |        |        |
| 24322  |        |        |        |        |
| 24325  |        |        |        |        |
| 24328  |        |        |        |        |
| 24334  |        |        |        |        |
| 24342  |        |        |        | 1      |
| 24343  |        |        |        |        |
| 24348  |        | 3      |        | 3      |
| 24352  |        | 2      |        |        |
| 24354  |        |        |        | 1      |
| 24357  |        |        |        |        |
| 24360  |        |        |        | 1      |
| 24369  |        |        |        |        |
| 24373  |        |        |        |        |
| 24398  | 3      | 4      |        |        |
| 24402  |        |        | 0      | 1      |
| 24405  |        |        |        |        |
| 24407  |        |        |        |        |
| 24413  |        |        |        | 1      |



| respid | Q31a_8 | Q31a_9 | Q31b_1 | Q31b_2 |
|--------|--------|--------|--------|--------|
| 24443  |        |        |        |        |
| 24451  |        |        |        |        |
| 24459  |        |        |        |        |
| 24465  |        |        |        |        |
| 24481  |        |        |        |        |
| 24482  |        |        |        |        |
| 24491  |        |        |        | 1      |
| 24495  |        |        |        |        |
| 24497  |        | 3      |        | 3      |
| 24511  |        |        | 0      |        |
| 24513  |        |        |        | 1      |
| 24516  |        |        |        |        |
| 24518  | 1      |        |        |        |
| 24524  |        |        |        |        |
| 24528  |        |        |        |        |
| 24531  |        | 2      | 2      |        |
| 24533  |        |        |        | 2      |
| 24547  |        |        |        | 0      |
| 24557  |        |        |        | 2      |
| 24559  |        | 5      |        |        |
| 24567  |        |        |        |        |
| 24568  |        |        |        |        |
| 24577  |        |        |        |        |
| 24581  |        |        |        |        |
| 24588  |        |        |        |        |
| 24604  |        |        |        |        |
| 24612  |        |        |        |        |
| 24621  |        |        |        | 2      |
| 24625  |        | 2      |        |        |
| 24627  |        |        |        |        |
| 24640  |        |        |        |        |
| 24644  |        |        |        |        |

| respid | Q31a_8 | Q31a_9 | Q31b_1 | Q31b_2 |
|--------|--------|--------|--------|--------|
| 24664  |        |        |        |        |
| 24669  |        |        |        |        |
| 24685  |        |        |        |        |
| 24687  |        |        |        |        |
| 24688  | 1      |        |        |        |
| 24691  |        |        |        | 2      |
| 24693  |        |        |        |        |
| 24706  |        |        |        |        |
| 24710  |        |        |        |        |
| 24717  |        |        |        |        |
| 24720  |        |        |        | 0      |
| 24731  |        |        |        | 2      |
| 24732  |        |        |        |        |
| 24733  |        |        |        |        |
| 24747  |        |        |        |        |
| 24750  |        | 2      |        | 3      |
| 24758  |        |        |        | 2      |
| 24760  |        |        |        |        |
| 24765  |        |        |        |        |
| 24772  |        |        |        |        |
| 24779  |        |        |        |        |
| 24794  |        |        |        |        |
| 24796  | 2      |        | 3      | 3      |
| 24797  |        |        |        |        |
| 24800  |        |        |        |        |
| 24813  |        |        |        | 3      |
| 24815  |        |        |        |        |
| 24821  |        |        |        |        |
| 24822  |        |        |        |        |
| 24831  |        |        |        |        |
| 24835  |        |        |        |        |
| 24843  |        |        |        | 2      |

| respid | Q31a_8 | Q31a_9 | Q31b_1 | Q31b_2 |
|--------|--------|--------|--------|--------|
| 24844  |        |        |        |        |
| 24860  |        |        |        |        |
| 24861  |        |        |        |        |
| 24865  |        |        |        | 2      |
| 24870  |        |        |        |        |
| 24887  |        |        |        |        |
| 24897  |        |        |        |        |
| 24902  |        |        |        |        |
| 24914  |        |        |        |        |
| 24921  |        |        |        |        |
| 24922  |        |        |        |        |
| 24924  |        |        |        |        |
| 24927  |        |        |        | 0      |
| 24936  |        |        |        |        |
| 24937  |        |        |        |        |
| 24942  |        |        |        | 2      |
| 24947  |        |        |        |        |
| 24953  |        |        |        |        |
| 24954  |        |        |        |        |
| 24960  | 2      |        | 4      | 2      |
| 24965  |        |        |        |        |
| 24975  |        |        |        | 1      |
| 24983  |        |        |        | 2      |
| 24985  |        |        |        |        |
| 24990  |        |        |        |        |
| 25000  |        |        |        |        |
| 25007  |        |        |        |        |
| 25008  |        |        |        |        |
| 25010  |        |        |        |        |
| 25016  |        |        | 1      |        |
| 25021  |        |        |        | 1      |
| 25040  |        |        |        |        |

| respid | Q31a_8 | Q31a_9 | Q31b_1 | Q31b_2 |
|--------|--------|--------|--------|--------|
| 25043  |        |        |        |        |
| 25055  |        |        |        |        |
| 25057  |        |        |        |        |
| 25060  |        |        |        |        |
| 25062  |        |        |        |        |
| 25064  |        | 2      |        | 2      |
| 25069  |        |        |        |        |
| 25077  |        |        |        |        |
| 25088  |        |        |        |        |
| 25093  |        |        | 1      | 1      |
| 25121  |        |        |        |        |
| 25140  |        |        |        | 2      |
| 25144  |        |        |        |        |
| 25149  |        |        |        |        |
| 25159  |        |        |        |        |
| 25191  |        |        |        |        |
| 25193  |        |        |        | 3      |
| 25202  |        |        |        | 2      |
| 25215  | 1      |        |        |        |
| 25229  |        |        | 2      | 2      |
| 25231  |        |        |        | 0      |
| 25236  |        |        |        |        |
| 25242  |        |        |        |        |
| 25252  |        |        |        |        |
| 25253  |        | 3      |        | 1      |
| 25256  |        |        |        | 2      |
| 25260  |        |        |        |        |
| 25261  |        |        |        |        |
| 25280  |        |        | 1      |        |
| 25282  |        | 1      |        | 1      |
| 25289  |        | 1      |        |        |
| 25303  |        |        |        |        |

| respid | Q31a_8 | Q31a_9 | Q31b_1 | Q31b_2 |
|--------|--------|--------|--------|--------|
| 25304  |        |        |        |        |
| 25309  |        |        |        |        |
| 25317  |        |        |        |        |
| 25318  | 2      | 2      | 2      | 2      |
| 25320  |        |        |        |        |
| 25324  |        |        |        | 2      |
| 25331  |        |        |        |        |
| 25340  |        |        |        |        |
| 25342  |        |        |        | 1      |
| 25350  |        |        |        |        |
| 25352  |        |        |        |        |
| 25358  |        |        |        |        |
| 25375  |        |        |        | 0      |
| 25386  |        |        |        |        |
| 25388  |        |        |        |        |
| 25390  |        |        |        | 2      |
| 25391  |        |        |        |        |
| 25400  |        |        |        |        |
| 25413  |        |        |        | 2      |
| 25424  |        |        |        |        |
| 25426  |        |        |        | 2      |
| 25430  |        |        |        |        |
| 25434  |        |        |        | 0      |
| 25439  |        |        |        |        |
| 25441  |        |        |        |        |
| 25445  |        |        |        |        |
| 25451  |        |        |        |        |
| 25469  |        |        |        | 2      |
| 25471  |        |        | 2      |        |
| 25476  |        |        |        |        |
| 25480  |        |        |        |        |
| 25482  |        |        |        |        |

| respid | Q31a_8 | Q31a_9 | Q31b_1 | Q31b_2 |
|--------|--------|--------|--------|--------|
| 25500  |        | 4      |        |        |
| 25516  |        |        |        |        |
| 25521  |        |        |        | 3      |
| 25525  |        |        |        |        |
| 25530  |        |        |        | 2      |
| 25555  |        | 2      |        |        |
| 25558  |        |        | 1      |        |
| 25561  |        |        |        |        |
| 25566  |        |        |        |        |
| 25571  |        |        | 3      | 3      |
| 25572  |        |        |        |        |
| 25574  |        |        |        |        |
| 25588  |        |        |        |        |
| 25591  |        |        | 2      |        |
| 25599  |        |        | 0      | 1      |
| 25604  |        | 4      |        | 1      |
| 25614  |        |        |        |        |
| 25634  | 3      | 2      | 1      |        |
| 25642  |        |        |        |        |
| 25647  |        |        |        |        |
| 25653  |        |        |        | 1      |
| 25654  |        |        |        | 1      |
| 25660  |        |        |        |        |
| 25664  |        |        |        |        |
| 25665  |        |        | 1      |        |
| 25672  |        |        |        |        |
| 25677  |        |        |        |        |
| 25685  |        | 2      |        |        |
| 25699  |        | 2      |        | 1      |
| 25703  |        |        |        |        |
| 25704  |        |        |        |        |
| 25705  |        |        |        |        |

| respid | Q31a_8 | Q31a_9 | Q31b_1 | Q31b_2 |
|--------|--------|--------|--------|--------|
| 25711  |        |        |        |        |
| 25727  |        | 1      |        |        |
| 25728  |        |        |        |        |
| 25733  |        | 2      |        |        |
| 25735  |        |        |        |        |
| 25736  |        |        |        |        |
| 25742  |        |        |        |        |
| 25750  |        |        |        |        |
| 25754  |        |        |        |        |
| 25776  |        |        |        | 2      |
| 25778  |        |        |        |        |
| 25796  |        |        | 0      |        |
| 25852  |        |        | 1      | 2      |
| 25858  |        |        |        |        |
| 25859  |        |        |        |        |
| 25886  |        |        |        |        |
| 25890  |        |        |        |        |
| 25897  |        |        | 0      |        |
| 25903  |        |        |        |        |
| 25905  |        |        |        |        |
| 25917  |        |        |        |        |
| 25918  |        |        |        | 0      |
| 25928  |        |        |        |        |
| 25930  |        |        |        |        |
| 25949  |        |        |        | 1      |
| 25955  |        |        |        |        |
| 25959  |        |        |        |        |
| 25964  |        |        |        |        |
| 25972  |        |        |        |        |
| 25999  |        |        |        | 2      |
| 26019  |        |        |        |        |
| 26025  |        |        |        |        |

| respid | Q31a_8 | Q31a_9 | Q31b_1 | Q31b_2 |
|--------|--------|--------|--------|--------|
| 26039  |        |        |        | 3      |
| 26055  |        |        |        |        |
| 26061  |        |        |        | 1      |
| 26076  |        |        |        |        |
| 26088  |        |        |        |        |
| 26094  |        |        |        |        |
| 26104  |        |        |        |        |
| 26131  |        |        |        |        |
| 26134  |        | 2      |        |        |
| 26160  |        |        |        |        |
| 26168  |        |        |        |        |
| 26170  |        |        |        |        |
| 26191  |        |        |        |        |
| 26192  |        |        |        |        |
| 26195  |        |        |        |        |
| 26198  |        |        |        |        |
| 26199  |        |        | 2      | 2      |
| 26201  |        |        |        |        |
| 26202  |        |        |        |        |
| 26226  |        |        |        | 1      |
| 26233  |        |        | 2      | 3      |
| 26236  |        |        |        |        |
| 26242  |        |        |        | 1      |
| 26244  |        |        |        | 1      |
| 26250  |        |        |        |        |
| 26266  |        |        |        |        |
| 26274  |        |        |        |        |
| 26286  |        |        | 1      | 1      |
| 26288  |        |        |        | 1      |
| 26295  |        |        |        |        |
| 26296  |        |        |        |        |
| 26297  |        |        |        |        |



| respid | Q31a_8 | Q31a_9 | Q31b_1 | Q31b_2 |
|--------|--------|--------|--------|--------|
| 26300  |        |        |        | 1      |
| 26317  |        |        |        |        |
| 26343  |        |        |        |        |
| 26367  |        |        |        |        |
| 26372  |        |        |        |        |
| 26403  |        |        |        | 1      |
| 26423  |        |        |        |        |
| 26430  |        |        |        |        |
| 26437  |        |        |        | 1      |
| 26457  |        |        |        |        |
| 26466  |        |        |        |        |
| 26467  |        |        |        |        |
| 26469  |        |        | 1      | 1      |
| 26494  |        |        |        |        |
| 26510  |        |        |        |        |
| 26519  |        |        |        | 0      |
| 26525  |        |        |        |        |
| 26529  |        |        |        |        |
| 26533  |        |        |        | 0      |
| 26556  |        | 1      |        |        |
| 26559  |        |        |        | 2      |
| 26565  |        | 2      |        |        |
| 26576  |        | 4      |        |        |
| 26601  |        |        |        |        |
| 26607  |        |        |        | 1      |
| 26611  |        |        |        |        |
| 26619  |        |        |        |        |
| 26631  |        |        |        |        |
| 26654  |        |        |        |        |
| 26656  |        |        |        | 1      |
| 26664  |        |        |        |        |
| 26667  |        |        |        |        |

| respid | Q31a_8 | Q31a_9 | Q31b_1 | Q31b_2 |
|--------|--------|--------|--------|--------|
| 26674  |        | 2      |        | 1      |
| 26678  |        |        | 1      |        |
| 26693  |        |        |        |        |
| 26696  |        |        |        |        |
| 26703  |        |        | 3      | 3      |
| 26705  |        |        |        |        |
| 26706  |        |        |        | 1      |
| 26716  |        |        |        |        |
| 26721  |        |        |        |        |
| 26730  |        |        |        |        |
| 26752  |        |        |        |        |
| 26755  |        |        |        |        |
| 26791  |        |        |        |        |
| 26804  |        |        |        |        |
| 26810  |        |        |        | 1      |
| 26813  |        |        |        |        |
| 26833  |        |        |        | 1      |
| 26880  |        |        |        |        |
| 26884  |        |        |        |        |
| 26885  |        |        |        |        |
| 26890  |        |        |        | 2      |
| 26937  |        |        |        |        |
| 26939  |        |        |        |        |
| 26941  |        |        |        |        |
| 26992  |        |        |        | 4      |
| 27037  |        |        |        |        |
| 27045  |        | 2      |        |        |
| 27053  |        |        |        | 4      |
| 27060  |        | 2      |        |        |
| 27076  |        |        |        |        |
| 27124  |        |        |        |        |
| 27125  |        |        |        |        |

| respid | Q31a_8 | Q31a_9 | Q31b_1 | Q31b_2 |
|--------|--------|--------|--------|--------|
| 27132  |        |        |        |        |
| 27166  |        |        |        |        |
| 27190  | 1      |        |        |        |
| 27199  |        |        |        |        |
| 27221  |        | 2      |        |        |
| 27233  |        |        |        | 1      |
| 27241  |        |        |        |        |
| 27244  |        |        |        |        |
| 27245  | 3      | 3      | 3      | 3      |
| 27246  |        | 1      |        |        |
| 27253  |        | 1      |        |        |
| 27255  |        |        |        |        |
| 27267  |        |        |        |        |
| 27283  |        |        |        | 2      |
| 27289  |        |        |        |        |
| 27302  |        |        |        |        |
| 27317  |        |        |        |        |
| 27319  |        |        |        | 0      |
| 27331  |        |        |        |        |
| 27333  |        |        |        |        |
| 27340  |        |        |        |        |
| 27362  |        |        |        |        |
| 27370  |        |        |        |        |
| 27379  |        |        |        | 3      |
| 27386  |        |        |        |        |
| 27398  |        |        |        |        |
| 27404  |        |        |        |        |
| 27408  |        |        | 1      | 1      |
| 27412  |        |        |        |        |
| 27426  |        | 2      |        |        |
| 27455  |        |        |        |        |
| 27464  |        |        |        |        |

| respid | Q31a_8 | Q31a_9 | Q31b_1 | Q31b_2 |
|--------|--------|--------|--------|--------|
| 27484  |        |        |        | 2      |
| 27493  |        |        |        | 3      |
| 27512  |        | 4      |        |        |
| 27525  | 1      | 2      |        |        |
| 27532  |        |        | 1      | 1      |
| 27539  |        |        |        |        |
| 27540  |        |        |        |        |
| 27552  |        |        |        | 4      |
| 27562  |        |        |        | 0      |
| 27568  |        |        |        |        |
| 27574  | 2      | 3      |        | 2      |
| 27575  |        |        |        | 0      |
| 27577  |        |        |        |        |
| 27589  |        |        |        |        |
| 27593  |        |        |        |        |
| 27594  |        | 4      |        | 3      |
| 27595  |        | 3      | 3      | 3      |
| 27598  |        |        |        |        |
| 27620  |        |        | 0      |        |
| 27621  |        | 1      |        |        |
| 27628  |        |        |        | 0      |
| 27633  |        |        |        | 2      |
| 27643  |        |        |        |        |
| 27644  |        |        |        |        |
| 27668  |        |        |        |        |
| 27681  |        | 1      |        |        |
| 27691  |        |        |        |        |
| 27693  |        |        |        |        |
| 27703  |        |        |        | 1      |
| 27708  |        |        | 3      |        |
| 27719  |        |        |        |        |
| 27720  |        |        |        |        |

| respid | Q31a_8 | Q31a_9 | Q31b_1 | Q31b_2 |
|--------|--------|--------|--------|--------|
| 27723  |        |        | 1      | 1      |
| 27725  |        |        |        |        |
| 27734  |        |        |        |        |
| 27744  |        |        |        |        |
| 27749  | 1      |        |        |        |
| 27762  |        |        |        |        |
| 27808  |        | 1      |        | 1      |
| 27810  | 2      | 3      |        | 3      |
| 27812  |        |        |        | 1      |
| 27815  |        |        |        |        |
| 27818  |        |        |        |        |
| 27823  |        |        |        |        |
| 27841  |        | 2      |        |        |
| 27843  |        |        |        |        |
| 27851  |        |        |        | 1      |
| 27858  |        |        |        | 1      |
| 27859  |        |        |        |        |
| 27869  |        |        |        |        |
| 27872  |        |        |        |        |
| 27873  |        |        |        |        |
| 27884  |        |        |        | 1      |
| 27904  |        |        |        |        |
| 27915  |        |        |        |        |
| 27918  |        |        |        | 1      |
| 27937  |        | 1      |        |        |
| 27943  |        |        |        |        |
| 27948  |        |        |        | 0      |
| 27971  |        | 1      |        |        |
| 27991  |        |        |        |        |
| 28000  |        |        |        |        |
| 28011  |        |        |        | 2      |
| 28022  |        |        |        |        |

| respid | Q31a_8 | Q31a_9 | Q31b_1 | Q31b_2 |
|--------|--------|--------|--------|--------|
| 28025  |        |        |        |        |
| 28041  |        |        |        |        |
| 28057  |        | 3      | 2      | 1      |
| 28080  |        |        |        |        |
| 28098  |        |        |        |        |
| 28104  |        |        |        |        |
| 28109  |        |        |        |        |
| 28129  |        |        | 0      |        |
| 28141  |        |        |        |        |
| 28143  |        |        |        |        |
| 28149  |        |        | 1      |        |
| 28151  |        |        |        |        |
| 28161  |        |        |        |        |
| 28169  |        |        |        |        |
| 28194  | 2      | 2      |        |        |
| 28197  |        |        |        |        |
| 28206  |        |        |        |        |
| 28218  |        |        |        |        |
| 28227  |        |        |        |        |
| 28235  |        |        |        |        |
| 28246  |        |        |        |        |
| 28259  |        |        |        | 3      |
| 28263  |        |        | 1      |        |
| 28267  |        |        |        | 2      |
| 28274  |        |        |        |        |
| 28278  |        |        |        |        |
| 28288  |        |        | 2      | 2      |
| 28308  |        |        |        |        |
| 28309  |        |        |        |        |
| 28323  |        |        | 2      |        |
| 28335  |        |        |        |        |
| 28354  |        |        |        |        |

| respid | Q31a_8 | Q31a_9 | Q31b_1 | Q31b_2 |
|--------|--------|--------|--------|--------|
| 28355  |        | 3      |        |        |
| 28356  |        |        |        |        |
| 28357  |        |        |        |        |
| 28363  |        |        |        |        |
| 28366  |        |        |        |        |
| 28372  |        |        |        | 2      |
| 28381  |        |        |        | 1      |
| 28388  |        |        |        |        |
| 28413  |        |        |        |        |
| 28421  |        |        |        |        |
| 28430  |        |        |        |        |
| 28439  |        |        |        |        |
| 28458  | 2      | 3      |        | 2      |
| 28461  |        |        |        |        |
| 28466  |        |        |        |        |
| 28492  |        |        |        |        |
| 28534  |        |        |        |        |
| 28537  |        |        | 1      | 2      |
| 28560  |        |        |        |        |
| 28566  |        |        |        |        |
| 28569  |        |        |        |        |
| 28584  |        |        |        |        |
| 28590  |        | 3      |        |        |
| 28596  |        |        |        |        |
| 28608  | 1      |        |        |        |
| 28631  |        | 2      |        |        |
| 28644  |        |        |        |        |
| 28646  |        |        |        |        |
| 28665  |        |        |        |        |
| 28686  |        |        |        |        |
| 28704  |        |        |        |        |
| 28719  |        |        |        |        |

| respid | Q31a_8 | Q31a_9 | Q31b_1 | Q31b_2 |
|--------|--------|--------|--------|--------|
| 28736  |        |        |        |        |
| 28739  |        |        |        | 1      |
| 28758  |        |        |        | 3      |
| 28761  | 3      | 3      | 3      |        |
| 28770  | 2      | 3      |        | 3      |
| 28774  |        |        |        | 1      |
| 28778  |        | 3      |        |        |
| 28783  |        | 1      |        |        |
| 28785  |        |        |        |        |
| 28797  |        | 3      |        | 2      |
| 28801  |        |        |        |        |
| 28821  |        |        |        |        |
| 28827  |        |        |        |        |
| 28828  |        |        |        |        |
| 28871  |        |        |        |        |
| 28876  |        |        |        |        |
| 28891  | 2      | 3      | 1      | 1      |
| 28898  |        |        |        |        |
| 28909  |        |        |        |        |
| 28930  |        | 1      |        |        |
| 28935  |        | 2      | 2      |        |
| 28964  |        |        |        |        |
| 28965  |        |        |        |        |
| 28967  |        |        |        |        |
| 28975  |        |        |        |        |
| 28982  |        |        |        |        |
| 28989  |        |        |        |        |
| 29003  |        |        |        |        |
| 29004  |        |        |        |        |
| 29007  |        |        |        |        |
| 29008  |        |        |        |        |
| 29011  |        |        | 1      |        |



| respid | Q31a_8 | Q31a_9 | Q31b_1 | Q31b_2 |
|--------|--------|--------|--------|--------|
| 29012  |        |        |        |        |
| 29014  |        |        |        |        |
| 29016  |        |        |        | 1      |
| 29018  |        |        |        |        |
| 29048  |        |        |        |        |
| 29184  |        |        |        |        |
| 29237  |        |        | 1      |        |
| 29252  |        |        |        |        |
| 29267  |        |        |        |        |
| 29276  |        |        |        |        |
| 29281  |        |        |        | 3      |
| 29285  |        |        |        | 0      |
| 29291  |        |        | 3      |        |
| 29304  |        | 1      |        |        |
| 29323  |        |        |        | 1      |
| 29330  |        | 3      |        |        |
| 29357  |        |        |        | 4      |
| 29416  |        |        |        |        |
| 29432  |        |        |        |        |
| 29482  |        |        |        |        |
| 29506  |        |        |        |        |
| 29509  |        | 2      |        |        |
| 29512  |        |        |        |        |
| 29519  |        |        |        |        |
| 29520  |        |        |        |        |
| 29521  |        |        |        |        |
| 29529  | 1      | 3      | 3      | 3      |
| 29532  |        |        |        |        |
| 29547  |        |        |        | 3      |
| 29551  |        |        |        | 0      |
| 29584  |        |        |        | 3      |
| 29591  |        |        | 3      | 3      |

| respid | Q31a_8 | Q31a_9 | Q31b_1 | Q31b_2 |
|--------|--------|--------|--------|--------|
| 29613  |        |        |        |        |
| 29615  |        |        | 2      |        |
| 29625  |        | 2      |        |        |
| 29660  |        |        |        |        |
| 29677  |        |        |        |        |
| 29700  |        |        | 1      | 1      |
| 29715  |        |        |        |        |
| 29720  |        |        |        |        |
| 29730  |        |        |        | 0      |
| 29734  |        |        | 2      | 2      |
| 29754  |        |        |        |        |
| 29771  |        |        |        |        |
| 29774  |        |        |        |        |
| 29783  |        |        |        |        |
| 29812  |        |        |        |        |
| 29813  |        |        |        |        |
| 29814  |        |        | 2      | 2      |
| 29820  |        |        |        | 1      |
| 29906  |        |        |        |        |
| 29907  |        |        |        | 2      |
| 29928  |        |        |        |        |
| 29932  |        |        |        |        |
| 29958  |        |        |        | 2      |
| 29982  |        |        |        |        |
| 29989  |        |        |        |        |
| 29994  |        |        | 1      | 1      |
| 30005  |        |        |        | 0      |
| 30077  |        |        |        |        |
| 30098  |        |        |        |        |
| 30107  |        |        |        |        |
| 30154  |        |        |        |        |
| 30159  |        |        |        |        |

| respid | Q31a_8 | Q31a_9 | Q31b_1 | Q31b_2 |
|--------|--------|--------|--------|--------|
| 30162  |        |        |        |        |
| 30163  |        |        |        |        |
| 30189  |        |        |        |        |
| 30230  |        |        |        |        |
| 30259  |        |        |        |        |
| 30284  |        |        |        |        |
| 30296  |        |        |        |        |
| 30330  |        |        |        |        |
| 30341  |        | 1      |        | 1      |
| 30352  |        |        |        |        |
| 30379  |        |        |        |        |
| 30424  |        |        |        | 2      |
| 30447  |        |        |        |        |
| 30477  | 3      |        |        | 3      |
| 30503  |        |        |        |        |
| 30515  |        |        |        | 2      |
| 30516  |        |        |        |        |
| 30623  | 2      |        |        |        |
| 30639  |        |        |        |        |
| 30670  |        |        |        |        |
| 30697  |        |        |        |        |
| 30735  |        |        |        | 1      |
| 30742  |        |        |        |        |
| 30751  |        | 2      |        | 2      |
| 30789  |        |        |        |        |
| 30867  |        |        |        |        |
| 30876  |        |        |        |        |
| 30877  |        |        |        |        |
| 30887  |        |        |        |        |
| 30891  |        |        |        |        |
| 31030  |        |        |        |        |
| 31059  |        | 1      |        |        |

| respid | Q31a_8 | Q31a_9 | Q31b_1 | Q31b_2 |
|--------|--------|--------|--------|--------|
| 31082  |        |        |        |        |
| 31106  |        |        |        |        |
| 31110  |        |        |        |        |
| 31265  |        |        |        | 4      |
| 31266  | 3      |        |        |        |
| 31267  |        |        |        |        |
| 31310  |        |        |        |        |
| 31325  |        |        |        |        |
| 31367  |        |        | 0      |        |
| 31389  |        |        |        |        |
| 31440  |        |        |        |        |
| 31465  |        |        |        |        |
| 31477  |        |        |        |        |
| 31491  |        |        |        |        |
| 31494  |        |        |        |        |
| 31509  |        |        |        |        |
| 31533  |        |        |        |        |
| 31547  |        |        |        | 1      |
| 31558  |        |        |        |        |
| 31579  |        |        |        | 1      |
| 31591  |        |        |        |        |
| 31596  |        |        |        |        |
| 31601  | 2      | 4      |        | 2      |
| 31605  |        |        |        |        |
| 31637  |        |        |        |        |
| 31646  |        |        |        |        |
| 31647  |        | 3      | 4      | 4      |
| 31650  |        |        |        |        |
| 31651  |        |        | 1      | 0      |
| 31657  |        |        |        |        |
| 31660  |        |        |        |        |
| 31661  |        |        | 1      | 1      |

| respid | Q31a_8 | Q31a_9 | Q31b_1 | Q31b_2 |
|--------|--------|--------|--------|--------|
| 31667  |        |        |        |        |
| 31674  |        |        |        | 0      |
| 31686  |        |        |        | 1      |
| 31693  |        |        |        |        |
| 31716  |        |        |        |        |
| 31818  |        |        |        |        |
| 31886  |        | 2      |        |        |
| 31945  |        |        |        |        |
| 31957  |        |        |        |        |
| 31966  |        |        |        |        |
| 31978  |        |        |        |        |
| 31999  |        |        |        |        |
| 32026  |        |        |        | 0      |
| 32033  |        |        |        |        |
| 32037  |        |        |        |        |
| 32038  |        |        |        | 4      |
| 32047  | 2      | 2      |        | 2      |
| 32053  |        |        |        |        |
| 32069  |        |        |        |        |
| 32081  |        |        |        |        |
| 32123  |        |        |        | 2      |
| 32130  |        |        |        |        |
| 32141  | 2      |        |        |        |
| 32158  |        |        |        |        |
| 32165  |        |        |        |        |
| 32180  |        |        |        | 0      |
| 32221  |        |        | 4      |        |
| 32292  |        |        |        |        |
| 32318  |        |        | 1      |        |
| 32346  |        |        |        |        |
| 32402  |        |        |        | 1      |
| 32422  |        |        |        |        |

| respid | Q31a_8 | Q31a_9 | Q31b_1 | Q31b_2 |
|--------|--------|--------|--------|--------|
| 32439  |        |        |        |        |
| 32507  |        |        |        |        |
| 32522  |        |        |        |        |
| 32535  |        |        |        |        |
| 32546  |        |        |        |        |
| 32553  |        |        |        |        |
| 32570  |        |        |        |        |
| 32592  |        |        |        |        |
| 32605  |        |        | 2      | 1      |
| 32630  |        |        |        |        |
| 32642  |        |        |        |        |
| 32646  |        |        |        |        |
| 32665  |        |        |        |        |
| 32677  |        |        |        |        |
| 32694  |        |        |        |        |
| 32698  |        |        |        |        |
| 32754  |        |        |        | 3      |
| 32799  | 2      |        |        |        |
| 32816  |        |        |        |        |
| 32819  |        | 1      |        |        |
| 32840  |        |        |        |        |
| 32861  |        |        |        |        |
| 32866  |        |        |        |        |
| 32889  |        |        | 2      | 2      |
| 32960  |        |        |        |        |
| 32965  |        |        |        |        |
| 32986  |        |        |        |        |
| 33005  |        |        |        | 1      |
| 33054  |        |        |        |        |
| 33072  |        |        |        |        |
| 33095  |        |        |        |        |
| 33099  |        | 1      |        |        |

| respid | Q31a_8 | Q31a_9 | Q31b_1 | Q31b_2 |
|--------|--------|--------|--------|--------|
| 33121  |        |        |        |        |
| 33152  |        |        | 1      | 1      |
| 33159  |        |        |        |        |
| 33189  |        |        |        |        |
| 33198  |        |        |        | 1      |
| 33202  |        |        |        |        |
| 33204  |        |        |        |        |
| 33224  |        |        |        |        |
| 33272  |        |        |        | 3      |
| 33294  |        |        |        |        |
| 33300  |        |        |        |        |
| 33314  |        |        | 2      |        |
| 33338  |        |        |        |        |
| 33350  |        | 3      |        |        |
| 33362  |        |        |        |        |
| 33368  |        |        |        |        |
| 33374  |        | 2      |        | 1      |
| 33380  |        |        | 2      | 2      |
| 33385  |        |        |        |        |
| 33402  |        |        |        | 1      |
| 33414  |        |        |        |        |
| 33439  |        |        |        | 1      |
| 33449  |        | 2      |        |        |
| 33533  |        | 1      |        |        |
| 33540  |        |        |        |        |
| 33556  |        |        |        |        |
| 33615  |        |        | 0      |        |
| 33694  | 1      |        |        |        |
| 33717  |        |        |        |        |
| 33729  |        | 1      |        |        |
| 33746  |        |        |        |        |
| 33764  |        |        |        | 0      |

| respid | Q31a_8 | Q31a_9 | Q31b_1 | Q31b_2 |
|--------|--------|--------|--------|--------|
| 33790  |        |        |        | 2      |
| 33868  |        |        |        | 3      |
| 33872  |        |        |        |        |
| 33883  |        |        |        |        |
| 33884  |        |        |        |        |
| 33900  |        |        |        |        |
| 33933  |        |        |        |        |
| 33949  |        |        |        |        |
| 34005  |        |        |        |        |
| 34016  |        |        |        |        |
| 34041  |        |        |        |        |
| 34053  |        |        |        |        |
| 34056  |        |        |        |        |
| 34093  | 1      |        |        |        |
| 34112  |        |        |        | 1      |
| 34136  | 1      |        | 2      | 3      |
| 34138  |        |        |        |        |
| 34139  |        |        |        |        |
| 34189  |        | 5      |        |        |
| 34239  |        |        |        | 1      |
| 34240  |        |        | 0      | 0      |
| 34241  |        |        |        |        |
| 34259  |        |        |        |        |
| 34303  |        |        |        |        |
| 34306  |        |        |        |        |
| 34395  |        |        |        |        |
| 34463  |        |        |        | 1      |
| 34466  |        |        | 0      |        |
| 34471  |        |        |        | 1      |
| 34489  |        |        |        |        |
| 34518  |        |        |        | 1      |
| 34542  |        | 1      | 4      |        |



| respid | Q31a_8 | Q31a_9 | Q31b_1 | Q31b_2 |
|--------|--------|--------|--------|--------|
| 34595  |        |        |        |        |
| 34604  |        |        |        |        |
| 34631  |        | 2      |        | 4      |
| 34665  |        |        |        | 1      |
| 34716  |        |        |        |        |
| 34729  |        |        |        |        |
| 34772  |        |        |        | 2      |
| 34800  |        |        |        |        |
| 34819  |        |        |        |        |
| 34829  |        |        |        | 4      |
| 34831  |        |        |        | 1      |
| 34839  |        |        |        |        |
| 34868  |        |        |        |        |
| 34869  |        |        |        |        |
| 34882  |        |        |        |        |
| 34895  |        | 2      |        | 3      |
| 34901  |        |        |        |        |
| 34904  |        | 2      |        |        |
| 34907  |        |        |        |        |
| 34914  |        |        |        |        |
| 34918  |        |        |        | 1      |
| 34924  |        |        |        |        |
| 34933  |        |        | 2      | 2      |
| 34938  |        |        |        | 1      |
| 34952  |        |        |        |        |
| 34959  |        |        |        |        |
| 34972  |        |        | 0      |        |
| 34973  |        |        | 1      | 1      |
| 34975  |        | 2      |        |        |
| 34977  |        |        |        | 2      |
| 34978  |        |        |        |        |
| 34980  |        |        |        |        |

| respid | Q31a_8 | Q31a_9 | Q31b_1 | Q31b_2 |
|--------|--------|--------|--------|--------|
| 34984  |        |        | 1      |        |
| 34986  |        | 2      |        |        |
| 34994  |        |        |        |        |
| 34996  |        | 2      |        |        |
| 35003  |        |        |        |        |
| 35014  |        |        |        |        |
| 35029  |        |        |        |        |
| 35030  |        | 2      |        |        |
| 35037  |        |        |        |        |
| 35043  |        |        |        |        |
| 35048  |        |        |        |        |
| 35055  |        |        |        |        |
| 35067  |        |        |        |        |
| 35072  |        |        |        | 1      |
| 35078  |        |        |        |        |
| 35084  |        |        |        |        |
| 35095  |        |        |        |        |
| 35096  |        |        |        |        |
| 35097  |        |        |        |        |
| 35098  |        |        |        | 2      |
| 35109  |        |        |        |        |
| 35114  |        |        |        |        |
| 35115  |        |        |        |        |
| 35124  |        |        |        | 1      |
| 35125  |        |        |        |        |
| 35141  |        |        |        |        |
| 35142  |        |        |        |        |
| 35145  |        |        |        |        |
| 35149  |        |        |        | 3      |
| 35159  |        |        |        |        |
| 35163  |        |        |        | 2      |
| 35174  |        | 1      |        | 2      |

| respid | Q31a_8 | Q31a_9 | Q31b_1 | Q31b_2 |
|--------|--------|--------|--------|--------|
| 35188  |        |        |        |        |
| 35189  |        | 3      | 1      | 4      |
| 35201  |        |        |        |        |
| 35215  |        |        |        |        |
| 35228  |        |        |        |        |
| 35235  |        |        |        |        |
| 35239  |        |        |        | 2      |
| 35243  |        |        |        |        |
| 35245  |        |        | 1      | 3      |
| 35259  |        |        |        |        |
| 35265  |        |        |        |        |
| 35272  |        |        |        |        |
| 35280  |        |        |        |        |
| 35298  |        |        |        |        |
| 35305  |        |        |        |        |
| 35306  | 2      |        |        | 2      |
| 35307  |        |        |        |        |
| 35311  |        |        |        |        |
| 35322  |        |        |        |        |
| 35323  |        |        |        |        |
| 35327  |        | 2      | 0      | 0      |
| 35366  |        |        |        |        |
| 35378  |        |        |        |        |
| 35389  |        |        |        |        |
| 35390  |        |        |        |        |
| 35395  |        |        |        |        |
| 35411  |        |        |        | 3      |
| 35423  |        |        |        |        |
| 35425  |        |        |        | 0      |
| 35434  |        |        |        | 0      |
| 35462  |        |        |        |        |
| 35478  | 2      |        | 2      | 2      |

| respid | Q31a_8 | Q31a_9 | Q31b_1 | Q31b_2 |
|--------|--------|--------|--------|--------|
| 35481  |        | 4      | 2      | 3      |
| 35498  |        |        |        |        |
| 35499  |        |        |        |        |
| 35502  |        |        |        |        |
| 35503  |        |        |        |        |
| 35504  |        |        |        |        |
| 35508  |        |        |        | 2      |
| 35513  |        | 2      |        |        |
| 35516  |        | 2      |        |        |
| 35519  |        |        |        | 2      |
| 35530  |        |        |        | 3      |
| 35533  |        | 1      |        |        |
| 35561  |        |        |        | 1      |
| 35565  |        |        |        |        |
| 35588  |        |        |        |        |
| 35598  |        |        |        |        |
| 35607  |        |        |        | 2      |
| 35638  |        |        |        |        |
| 35642  |        |        |        |        |
| 35643  |        |        | 2      |        |
| 35680  |        |        |        |        |
| 35697  |        |        |        |        |
| 35703  |        |        |        |        |
| 35709  |        |        |        |        |
| 35710  |        |        | 3      |        |
| 35721  |        | 5      | 1      | 1      |
| 35723  |        |        |        |        |
| 35736  |        |        |        |        |
| 35739  |        |        |        |        |
| 35745  |        |        |        |        |
| 35748  |        |        |        |        |
| 35750  |        |        |        |        |

| respid | Q31a_8 | Q31a_9 | Q31b_1 | Q31b_2 |
|--------|--------|--------|--------|--------|
| 35752  |        | 1      |        |        |
| 35773  |        | 1      |        |        |
| 35779  |        |        |        |        |
| 35791  |        |        |        |        |
| 35801  |        |        |        | 2      |
| 35802  |        |        |        |        |
| 35837  |        |        |        |        |
| 35853  |        |        |        | 2      |
| 35858  |        | 1      |        |        |
| 35860  |        |        |        |        |
| 35875  |        |        | 3      | 3      |
| 35883  |        |        |        | 2      |
| 35890  |        |        |        |        |
| 35898  |        |        |        |        |
| 35901  |        | 2      |        |        |
| 35914  |        |        |        |        |
| 35924  |        |        |        | 1      |
| 35950  |        | 2      |        | 2      |
| 35961  |        |        |        |        |
| 35966  |        |        |        | 1      |
| 35967  |        |        |        |        |
| 35971  |        |        |        |        |
| 35974  |        |        |        |        |
| 35983  |        |        | 3      |        |
| 35992  | 1      | 3      | 4      | 4      |
| 36010  |        |        |        |        |
| 36019  |        |        |        |        |
| 36029  |        |        |        | 2      |
| 36033  |        |        |        |        |
| 36042  |        |        |        |        |
| 36043  |        | 1      |        |        |
| 36048  |        |        |        |        |

| respid | Q31a_8 | Q31a_9 | Q31b_1 | Q31b_2 |
|--------|--------|--------|--------|--------|
| 36050  |        | 2      |        |        |
| 36062  |        |        |        | 2      |
| 36063  |        |        |        |        |
| 36092  |        |        |        |        |
| 36097  |        |        |        |        |
| 36108  |        |        |        |        |
| 36113  | 2      |        |        | 3      |
| 36117  | 1      |        |        |        |
| 36129  |        |        | 1      | 1      |
| 36144  |        |        |        |        |
| 36152  |        |        |        |        |
| 36154  |        |        |        |        |
| 36155  |        |        |        |        |
| 36167  |        |        |        |        |
| 36172  |        |        |        |        |
| 36173  |        |        |        |        |
| 36174  |        |        |        |        |
| 36182  |        |        |        | 1      |
| 36192  |        |        |        |        |
| 36195  |        |        |        |        |
| 36204  |        |        |        |        |
| 36205  |        |        |        |        |
| 36208  |        |        |        |        |
| 36216  |        |        |        | 1      |
| 36221  |        | 2      |        |        |
| 36244  |        |        |        |        |
| 36255  |        |        |        | 1      |
| 36259  |        |        |        |        |
| 36262  |        |        |        | 2      |
| 36268  |        |        |        |        |
| 36308  |        |        |        |        |
| 36324  |        |        |        |        |

| respid | Q31a_8 | Q31a_9 | Q31b_1 | Q31b_2 |
|--------|--------|--------|--------|--------|
| 36330  |        |        |        |        |
| 36331  |        |        |        |        |
| 36336  |        |        |        |        |
| 36337  |        |        |        | 1      |
| 36364  |        |        |        |        |
| 36365  |        | 3      |        |        |
| 36396  |        |        |        |        |
| 36403  |        |        |        | 1      |
| 36410  |        |        |        |        |
| 36413  |        |        |        |        |
| 36422  |        |        |        | 1      |
| 36424  |        | 2      | 2      |        |
| 36425  |        |        | 3      |        |
| 36432  |        |        |        |        |
| 36435  |        |        |        |        |
| 36446  |        |        |        |        |
| 36451  |        |        |        | 1      |
| 36453  |        |        |        |        |
| 36459  |        |        |        |        |
| 36464  | 2      |        |        |        |
| 36465  |        |        |        |        |
| 36466  |        |        |        |        |
| 36476  |        | 1      |        |        |
| 36487  |        |        |        |        |
| 36488  |        |        |        |        |
| 36500  |        |        |        |        |
| 36504  |        |        |        |        |
| 36513  |        |        |        | 2      |
| 36515  |        |        |        | 1      |
| 36521  |        |        |        |        |
| 36530  |        |        |        |        |
| 36556  |        |        |        |        |

| respid | Q31a_8 | Q31a_9 | Q31b_1 | Q31b_2 |
|--------|--------|--------|--------|--------|
| 36564  |        |        |        | 4      |
| 36584  |        |        |        |        |
| 36585  |        |        |        |        |
| 36586  |        |        |        |        |
| 36606  |        |        |        | 4      |
| 36615  |        |        | 1      |        |
| 36628  |        |        |        |        |
| 36630  |        |        |        | 0      |
| 36631  |        | 3      |        | 3      |
| 36636  |        |        |        | 1      |
| 36637  |        |        |        |        |
| 36651  |        |        |        | 3      |
| 36661  |        |        |        |        |
| 36670  |        |        | 1      | 1      |
| 36671  |        | 1      |        |        |
| 36688  |        |        |        |        |
| 36694  |        |        |        |        |
| 36696  |        |        |        |        |
| 36703  |        |        |        |        |
| 36719  |        |        | 4      |        |
| 36721  |        |        | 4      |        |
| 36740  |        |        |        |        |
| 36755  |        |        |        |        |
| 36765  |        |        | 1      | 1      |
| 36770  |        |        |        |        |
| 36773  |        |        |        | 1      |
| 36813  |        | 1      |        | 1      |
| 36819  |        |        |        |        |
| 36820  |        |        | 2      | 2      |
| 36821  |        |        |        |        |
| 36827  |        |        | 1      | 0      |
| 36835  |        |        |        |        |



| respid | Q31a_8 | Q31a_9 | Q31b_1 | Q31b_2 |
|--------|--------|--------|--------|--------|
| 36837  |        |        |        |        |
| 36849  |        |        | 0      |        |
| 36851  |        |        |        | 1      |
| 36868  |        |        |        |        |
| 36870  |        |        |        |        |
| 36871  |        |        |        |        |
| 36874  |        | 1      |        |        |
| 36878  |        |        |        |        |
| 36887  |        | 1      |        |        |
| 36889  |        |        |        |        |
| 36891  |        |        |        |        |
| 36903  |        |        |        |        |
| 36905  |        |        |        |        |
| 36913  |        |        |        |        |
| 36949  |        |        |        | 2      |
| 36954  |        | 2      |        |        |
| 36962  |        |        |        | 1      |
| 36965  |        |        |        |        |
| 36970  |        |        |        |        |
| 36979  |        |        |        | 2      |
| 36990  |        |        |        | 2      |
| 36991  |        |        |        | 2      |
| 36992  |        |        |        |        |
| 37015  |        |        |        |        |
| 37017  |        |        |        |        |
| 37020  |        |        |        |        |
| 37033  |        |        |        |        |
| 37041  |        |        |        |        |
| 37048  |        |        |        | 0      |
| 37050  |        |        |        |        |
| 37054  |        |        | 3      | 3      |
| 37057  |        |        | 3      | 3      |

| respid | Q31a_8 | Q31a_9 | Q31b_1 | Q31b_2 |
|--------|--------|--------|--------|--------|
| 37067  |        | 2      |        |        |
| 37074  |        |        |        |        |
| 37088  |        |        |        |        |
| 37090  |        | 1      | 1      | 2      |
| 37110  |        |        | 1      | 2      |
| 37122  |        |        |        |        |
| 37124  |        |        |        |        |
| 37126  |        |        |        |        |
| 37129  |        | 2      |        |        |
| 37130  |        |        |        |        |
| 37142  |        | 1      |        |        |
| 37160  |        |        |        | 2      |
| 37168  |        |        |        |        |
| 37169  |        |        |        |        |
| 37191  |        |        |        |        |
| 37197  |        |        |        |        |
| 37204  |        |        |        |        |
| 37213  |        |        |        |        |
| 37238  |        | 3      |        |        |
| 37242  |        |        |        |        |
| 37243  |        |        |        |        |
| 37275  | 1      |        |        |        |
| 37305  |        |        | 2      | 1      |
| 37357  | 3      |        |        |        |
| 37365  |        |        |        |        |
| 37370  |        |        |        |        |
| 37406  |        |        |        | 3      |
| 37410  |        |        |        |        |
| 37411  |        |        |        | 3      |
| 37427  |        |        |        | 1      |
| 37437  |        |        |        | 2      |
| 37440  |        |        |        |        |

| respid | Q31a_8 | Q31a_9 | Q31b_1 | Q31b_2 |
|--------|--------|--------|--------|--------|
| 37452  |        |        |        |        |
| 37465  |        |        |        |        |
| 37468  |        |        | 3      | 3      |
| 37469  |        |        |        |        |
| 37477  |        |        |        | 2      |
| 37509  |        |        |        |        |
| 37513  |        |        |        |        |
| 37534  |        |        |        |        |
| 37537  |        |        |        |        |
| 37560  |        |        |        | 2      |
| 37566  |        |        |        |        |
| 37572  |        |        | 1      | 1      |
| 37574  |        |        |        | 2      |
| 37575  |        |        |        |        |
| 37590  |        |        |        |        |
| 37593  |        |        |        |        |
| 37599  |        |        |        |        |
| 37641  |        |        |        |        |
| 37651  |        |        |        |        |
| 37670  |        |        |        |        |
| 37680  |        |        | 1      |        |
| 37690  |        |        |        |        |
| 37694  |        |        |        |        |
| 37705  |        |        |        |        |
| 37710  |        |        | 2      | 2      |
| 37719  |        |        |        |        |
| 37741  |        |        | 1      |        |
| 37752  |        |        |        |        |
| 37755  |        |        | 4      |        |
| 37757  |        |        |        |        |
| 37783  |        |        | 2      |        |
| 37793  |        |        |        |        |

| respid | Q31a_8 | Q31a_9 | Q31b_1 | Q31b_2 |
|--------|--------|--------|--------|--------|
| 37800  | 2      |        |        | 3      |
| 37801  |        |        |        |        |
| 37820  |        |        |        | 2      |
| 37826  |        |        |        |        |
| 37835  |        |        |        |        |
| 37839  |        |        |        |        |
| 37871  |        |        |        | 3      |
| 37876  |        |        | 2      | 2      |
| 37879  |        | 2      |        |        |
| 37894  |        |        |        |        |
| 37895  |        |        | 1      | 1      |
| 37901  |        |        | 2      |        |
| 37926  |        |        |        |        |
| 37937  | 3      |        |        |        |
| 37938  |        |        | 4      |        |
| 37959  |        | 2      |        |        |
| 37970  |        |        |        |        |
| 37972  |        |        |        |        |
| 37988  | 2      |        |        |        |
| 37989  |        | 2      |        |        |
| 38000  |        |        |        |        |
| 38028  |        |        |        |        |
| 38042  |        |        |        |        |
| 38052  |        |        |        |        |
| 38056  |        |        |        |        |
| 38106  |        |        |        |        |
| 38114  |        |        |        |        |
| 38134  |        |        |        |        |
| 38135  |        | 1      |        |        |
| 38139  |        |        |        |        |
| 38160  |        |        |        |        |
| 38164  |        | 1      |        |        |

| respid | Q31a_8 | Q31a_9 | Q31b_1 | Q31b_2 |
|--------|--------|--------|--------|--------|
| 38168  |        |        |        |        |
| 38173  |        |        |        |        |
| 38193  |        |        | 1      | 2      |
| 38204  |        |        |        |        |
| 38206  |        |        |        |        |
| 38233  |        | 4      |        | 3      |
| 38242  |        |        |        | 1      |
| 38245  |        |        |        |        |
| 38261  |        |        |        |        |
| 38288  |        |        |        |        |
| 38296  |        |        |        | 0      |
| 38299  |        |        |        | 0      |
| 38300  |        |        |        |        |
| 38303  |        |        |        |        |
| 38317  |        |        |        |        |
| 38328  |        |        |        | 2      |
| 38333  |        |        |        |        |
| 38336  |        |        |        |        |
| 38338  |        |        |        | 4      |
| 38342  |        |        |        |        |
| 38360  |        |        |        |        |
| 38362  |        |        |        |        |
| 38364  |        |        | 3      | 3      |
| 38402  |        |        |        |        |
| 38423  |        |        |        |        |
| 38424  |        |        |        |        |
| 38435  |        |        |        |        |
| 38450  |        |        |        |        |
| 38455  |        |        |        |        |
| 38467  |        |        |        |        |
| 38468  |        | 2      |        |        |
| 38472  |        |        | 0      |        |

| respid | Q31a_8 | Q31a_9 | Q31b_1 | Q31b_2 |
|--------|--------|--------|--------|--------|
| 38484  |        |        |        |        |
| 38498  |        |        |        |        |
| 38507  |        |        |        |        |
| 38511  |        |        |        | 1      |
| 38524  | 2      |        |        | 3      |
| 38526  |        |        |        |        |
| 38534  |        |        |        |        |
| 38536  |        |        |        |        |
| 38539  |        |        |        |        |
| 38547  |        |        |        |        |
| 38549  |        |        |        |        |
| 38575  |        |        |        |        |
| 38579  |        |        |        |        |
| 38585  |        |        |        |        |
| 38589  |        | 2      |        |        |
| 38595  |        |        |        |        |
| 38602  |        |        |        |        |
| 38603  |        |        |        |        |
| 38612  |        |        |        |        |
| 38621  |        |        |        |        |
| 38624  |        | 2      |        |        |
| 38636  |        |        |        |        |
| 38656  | 2      |        |        |        |
| 38668  |        |        |        |        |
| 38675  |        |        |        |        |
| 38676  |        |        |        |        |
| 38682  |        |        |        | 1      |
| 38689  |        |        |        |        |
| 38702  |        |        |        |        |
| 38704  | 4      | 3      |        |        |
| 38713  |        |        |        |        |
| 38718  |        |        |        | 1      |

| respid | Q31a_8 | Q31a_9 | Q31b_1 | Q31b_2 |
|--------|--------|--------|--------|--------|
| 38725  |        |        | 1      |        |
| 38730  |        |        |        |        |
| 38737  |        | 1      |        |        |
| 38738  |        | 2      |        | 0      |
| 38744  |        |        | 4      |        |
| 38746  |        |        |        |        |
| 38753  |        |        |        |        |
| 38756  |        |        |        |        |
| 38760  |        |        | 1      |        |
| 38762  |        |        |        |        |
| 38765  |        |        |        |        |
| 38769  |        |        |        |        |
| 38781  |        |        |        |        |
| 38786  |        |        |        |        |
| 38790  |        |        |        |        |
| 38793  |        |        |        |        |
| 38797  |        |        |        |        |
| 38802  |        |        |        |        |
| 38815  |        |        |        |        |
| 38826  |        | 2      |        |        |
| 38828  |        |        |        |        |
| 38829  |        |        |        |        |
| 38835  |        | 2      |        | 2      |
| 38842  |        |        |        | 3      |
| 38853  |        |        |        |        |
| 38855  |        |        |        |        |
| 38860  |        |        | 3      | 3      |
| 38869  |        |        |        | 1      |
| 38882  |        |        | 3      |        |
| 38897  |        |        |        |        |
| 38903  |        |        |        |        |
| 38910  | 2      |        |        |        |

| respid | Q31a_8 | Q31a_9 | Q31b_1 | Q31b_2 |
|--------|--------|--------|--------|--------|
| 38948  | 2      |        |        |        |
| 38949  |        | 2      |        |        |
| 38953  |        |        |        |        |
| 38989  |        |        |        | 2      |
| 38997  |        |        |        | 1      |
| 38999  |        |        |        |        |
| 39002  |        |        |        |        |
| 39003  |        |        |        |        |
| 39006  |        |        |        | 0      |
| 39014  |        |        |        |        |
| 39017  |        |        | 3      | 4      |
| 39018  | 4      |        | 3      | 2      |
| 39025  | 2      | 4      |        | 1      |
| 39031  |        |        |        | 3      |
| 39061  |        |        |        |        |
| 39131  |        |        |        |        |
| 39153  |        |        |        |        |
| 39194  |        |        | 4      | 4      |
| 39204  |        |        |        |        |
| 39208  |        |        |        |        |
| 39213  |        |        |        |        |
| 39231  |        |        |        |        |
| 39251  |        |        |        |        |
| 39257  |        |        |        | 1      |
| 39262  |        |        |        |        |
| 39269  |        |        |        |        |
| 39272  |        |        |        | 1      |
| 39280  |        |        |        |        |
| 39294  |        |        | 2      |        |
| 39297  | 3      |        |        |        |
| 39300  |        |        |        | 3      |
| 39307  |        |        |        | 1      |



| respid | Q31a_8 | Q31a_9 | Q31b_1 | Q31b_2 |
|--------|--------|--------|--------|--------|
| 39320  |        |        |        |        |
| 39333  |        |        |        |        |
| 39335  |        | 2      |        |        |
| 39339  |        |        |        |        |
| 39375  |        |        |        |        |
| 39377  |        |        |        |        |
| 39380  |        |        |        |        |
| 39425  |        |        |        |        |
| 39590  |        |        |        |        |
| 40529  |        |        |        | 1      |
| 40702  |        |        |        |        |
| 40788  |        |        |        |        |
| 40841  |        |        |        |        |
| 40965  |        |        |        |        |
| 41092  |        |        |        |        |
| 41534  |        |        |        |        |
| 41919  |        |        |        |        |
| 42110  |        |        |        |        |
| 42135  |        |        |        |        |
| 42142  |        |        |        |        |
| 42163  |        |        |        | 3      |
| 42164  |        |        |        |        |
| 42172  |        | 2      |        | 3      |
| 42177  |        |        |        |        |
| 42181  |        |        |        |        |
| 42193  |        |        |        | 1      |
| 42196  |        | 1      |        |        |
| 42202  | 2      |        |        |        |
| 42248  |        | 1      |        |        |
| 42283  |        |        |        |        |
| 42284  |        |        |        |        |
| 42323  |        |        |        |        |

| respid | Q31a_8 | Q31a_9 | Q31b_1 | Q31b_2 |
|--------|--------|--------|--------|--------|
| 42349  |        |        |        |        |
| 42351  |        |        |        |        |
| 42357  |        |        |        |        |
| 42366  |        |        |        |        |
| 42380  |        |        |        |        |
| 42414  |        |        |        | 3      |
| 42420  |        |        | 3      | 3      |
| 42454  |        |        |        |        |
| 42458  |        |        |        | 2      |
| 42461  |        |        |        |        |
| 42488  |        |        |        |        |
| 42511  |        |        |        |        |
| 42512  |        |        |        |        |
| 42530  |        |        |        |        |
| 42531  |        |        |        |        |
| 42533  |        |        |        |        |
| 42549  |        |        |        |        |
| 42550  |        |        | 2      | 3      |
| 42553  |        |        |        |        |
| 42562  |        | 2      |        |        |
| 42567  |        |        |        |        |
| 42589  |        |        |        | 1      |
| 42604  |        | 1      |        | 1      |
| 42618  |        | 1      | 1      |        |
| 42621  |        |        |        | 2      |
| 42627  |        |        |        |        |
| 42641  |        |        |        |        |
| 42655  |        |        |        |        |
| 42666  |        |        |        |        |
| 42667  |        | 1      |        |        |
| 42697  |        |        |        | 2      |
| 42703  |        |        |        |        |

| respid | Q31a_8 | Q31a_9 | Q31b_1 | Q31b_2 |
|--------|--------|--------|--------|--------|
| 42712  |        |        |        | 1      |
| 42731  |        |        |        |        |
| 42780  |        |        |        |        |
| 42785  |        | 1      |        |        |
| 42788  |        |        |        |        |
| 42802  |        |        |        |        |
| 42818  |        |        | 2      |        |
| 42821  |        |        |        |        |
| 42824  |        |        |        |        |
| 42831  |        |        |        | 1      |
| 42836  |        |        |        |        |
| 42864  |        |        |        |        |
| 42875  |        | 1      |        |        |
| 42891  |        |        | 4      | 4      |
| 42897  |        |        |        |        |
| 42900  |        |        |        |        |
| 42902  |        |        |        |        |
| 42921  |        |        |        | 1      |
| 42925  |        |        | 2      |        |
| 42944  |        |        |        |        |
| 42950  |        |        |        |        |
| 42963  |        |        |        |        |
| 42967  |        | 1      |        |        |
| 42985  |        |        |        | 1      |
| 42990  |        | 1      |        |        |
| 42996  |        | 3      |        |        |
| 43002  |        |        |        | 2      |
| 43004  |        |        |        |        |
| 43012  |        |        |        |        |
| 43027  |        |        |        |        |
| 43028  |        | 1      |        |        |
| 43029  |        |        |        |        |

| respid | Q31a_8 | Q31a_9 | Q31b_1 | Q31b_2 |
|--------|--------|--------|--------|--------|
| 43031  |        |        |        |        |
| 43042  |        |        |        |        |
| 43054  |        |        |        | 3      |
| 43058  |        |        |        |        |
| 43064  |        |        |        | 1      |
| 43069  |        |        |        |        |
| 43071  |        |        |        |        |
| 43072  |        |        |        |        |
| 43077  |        | 1      |        |        |
| 43078  |        | 3      |        |        |
| 43082  |        |        |        |        |
| 43092  |        |        |        |        |
| 43096  |        | 3      |        |        |
| 43109  |        |        |        |        |
| 43113  |        |        |        |        |
| 43123  |        |        |        | 1      |
| 43127  |        |        |        |        |
| 43128  |        |        |        | 2      |
| 43129  |        | 2      |        |        |
| 43133  | 2      | 3      |        |        |
| 43140  |        |        |        |        |
| 43143  |        | 1      |        |        |
| 43149  |        |        |        |        |
| 43150  |        |        |        |        |
| 43153  |        | 3      |        | 2      |
| 43170  |        |        |        |        |
| 43187  |        |        | 2      | 2      |
| 43188  |        |        |        |        |
| 43198  |        |        |        | 1      |
| 43208  |        |        |        |        |
| 43216  |        |        |        |        |
| 43222  |        |        |        |        |

| respid | Q31a_8 | Q31a_9 | Q31b_1 | Q31b_2 |
|--------|--------|--------|--------|--------|
| 43224  |        | 1      |        |        |
| 43230  |        |        |        |        |
| 43231  |        |        |        |        |
| 43265  |        |        |        |        |
| 43270  |        |        |        |        |
| 43283  |        |        |        |        |
| 43295  |        |        |        |        |
| 43297  |        |        |        |        |
| 43299  |        |        |        |        |
| 43307  |        |        |        |        |
| 43316  |        |        |        |        |
| 43318  |        |        |        |        |
| 43319  |        | 1      |        |        |
| 43324  |        |        |        |        |
| 43325  |        |        |        |        |
| 43327  |        |        |        | 1      |
| 43338  |        |        |        |        |
| 43342  |        |        |        | 1      |
| 43348  |        |        |        |        |
| 43395  |        |        |        | 1      |
| 43404  |        |        | 1      | 1      |
| 43406  |        |        | 1      |        |
| 43407  |        |        |        |        |
| 43411  |        |        |        | 0      |
| 43416  |        |        |        | 1      |
| 43428  |        |        |        |        |
| 43429  |        |        | 3      | 3      |
| 43432  |        | 1      |        |        |
| 43443  |        |        |        |        |
| 43455  |        |        |        |        |
| 43457  |        | 1      |        |        |
| 43458  |        |        |        | 1      |

| respid | Q31a_8 | Q31a_9 | Q31b_1 | Q31b_2 |
|--------|--------|--------|--------|--------|
| 43477  |        |        |        |        |
| 43520  |        |        |        |        |
| 43521  |        |        |        |        |
| 43550  |        |        |        |        |
| 43551  |        | 2      |        |        |
| 43554  |        |        |        |        |
| 43560  |        |        |        | 1      |
| 43569  |        |        |        |        |
| 43583  |        |        |        | 1      |
| 43590  |        |        |        |        |
| 43591  |        |        |        |        |
| 43595  |        |        |        |        |
| 43599  |        |        |        |        |
| 43606  |        |        |        | 1      |
| 43609  |        |        |        |        |
| 43629  |        |        |        |        |
| 43636  |        |        |        |        |
| 43661  |        |        |        | 0      |
| 43668  |        |        |        |        |
| 43672  |        |        |        |        |
| 43677  |        |        |        |        |
| 43683  |        |        |        |        |
| 43708  |        |        | 1      |        |
| 43713  |        |        |        | 1      |
| 43718  |        |        |        |        |
| 43725  |        |        |        |        |
| 43747  |        |        |        | 1      |
| 43755  |        |        |        |        |
| 43770  |        |        |        |        |
| 43775  |        |        |        | 0      |
| 43788  |        |        |        |        |
| 43790  |        |        | 2      | 2      |

| respid | Q31a_8 | Q31a_9 | Q31b_1 | Q31b_2 |
|--------|--------|--------|--------|--------|
| 43797  |        |        |        | 1      |
| 43798  |        |        |        | 1      |
| 43811  |        |        |        | 1      |
| 43819  | 2      |        |        | 1      |
| 43821  |        |        |        | 1      |
| 43822  |        |        |        |        |
| 43825  |        | 3      |        | 2      |
| 43826  |        | 1      |        |        |
| 43831  |        |        |        |        |
| 43836  |        |        | 1      | 1      |
| 43852  |        |        |        |        |
| 43857  |        |        |        | 3      |
| 43858  | 1      | 1      |        |        |
| 43859  |        |        |        |        |
| 43863  |        |        |        |        |
| 43868  |        |        |        |        |
| 43872  |        |        |        |        |
| 43874  |        |        |        |        |
| 43882  |        | 1      |        |        |
| 43886  |        |        |        |        |
| 43903  |        |        |        |        |
| 43929  |        | 1      |        |        |
| 43932  |        |        |        | 1      |
| 43936  |        |        |        |        |
| 43962  |        |        |        |        |
| 43964  |        |        |        |        |
| 43968  |        |        |        |        |
| 43979  |        |        |        |        |
| 44006  |        |        | 2      | 2      |
| 44009  |        |        |        |        |
| 44023  |        |        |        | 1      |
| 44035  |        |        |        |        |

| respid | Q31a_8 | Q31a_9 | Q31b_1 | Q31b_2 |
|--------|--------|--------|--------|--------|
| 44038  |        | 2      |        |        |
| 44039  |        |        |        |        |
| 44043  |        |        |        |        |
| 44048  |        |        |        |        |
| 44050  |        |        |        |        |
| 44051  |        |        | 1      |        |
| 44061  |        |        |        |        |
| 44063  |        |        |        | 2      |
| 44072  |        |        |        |        |
| 44075  |        |        | 1      | 2      |
| 44089  |        |        |        |        |
| 44090  |        |        |        | 3      |
| 44091  |        |        |        | 1      |
| 44092  |        |        |        |        |
| 44110  |        |        |        | 1      |
| 44112  |        |        |        | 2      |
| 44114  |        |        |        | 1      |
| 44143  |        |        |        |        |
| 44179  |        |        |        |        |
| 44234  |        |        |        |        |
| 44236  |        |        |        |        |
| 44239  |        |        |        |        |
| 44241  |        |        |        | 3      |
| 44253  |        |        |        |        |
| 44260  |        |        |        |        |
| 44261  |        |        |        |        |
| 44263  |        |        | 2      | 3      |
| 44264  |        |        |        |        |
| 44265  |        |        |        |        |
| 44267  |        |        |        | 1      |
| 44306  |        | 2      |        |        |
| 44309  |        |        | 2      | 2      |



| respid | Q31a_8 | Q31a_9 | Q31b_1 | Q31b_2 |
|--------|--------|--------|--------|--------|
| 44310  |        |        |        |        |
| 44361  |        |        |        | 0      |
| 44380  |        |        | 1      | 1      |
| 44386  |        |        |        |        |
| 44419  |        | 1      |        |        |
| 44426  |        |        |        |        |
| 44479  |        | 4      |        |        |
| 44484  |        |        |        |        |
| 44487  |        |        |        |        |
| 44509  |        |        |        | 1      |
| 44540  |        |        |        |        |
| 44551  |        | 3      |        | 1      |
| 44553  |        |        |        |        |
| 44650  |        |        |        | 1      |
| 44665  |        |        |        |        |
| 44779  |        | 2      |        |        |
| 44797  |        |        |        |        |
| 44807  |        |        |        |        |
| 44815  |        |        |        |        |
| 44836  |        |        |        |        |
| 44868  |        |        |        |        |
| 44927  |        |        |        |        |
| 44983  |        |        |        |        |
| 45040  |        |        |        |        |
| 45051  |        |        | 3      | 3      |
| 45067  |        |        |        |        |
| 45074  |        |        |        |        |
| 45115  |        |        |        |        |
| 45187  | 2      | 2      | 2      | 1      |
| 45221  |        |        |        |        |
| 45279  |        | 2      |        | 1      |
| 45308  |        |        |        | 1      |

| respid | Q31a_8 | Q31a_9 | Q31b_1 | Q31b_2 |
|--------|--------|--------|--------|--------|
| 45317  |        | 1      |        |        |
| 45379  |        |        |        |        |
| 45451  |        |        |        |        |
| 45472  |        | 2      |        | 3      |
| 45474  | 2      |        |        | 4      |
| 45544  |        |        | 3      |        |
| 45561  |        |        |        |        |
| 45596  |        |        |        |        |

---

**Instrum**

---

**Symptom**

---

**Type of R**Bother

Bother

Bother

Bother

---

**Descripti**SUI: Coughing

SUI: Exercizing

SUI: Lifting heavy objects

SUI: While sleeping

respid Q31b\_3

Q31b\_4

Q31b\_5

Q31b\_6

241

242

243

244

245

246

247

253

256

257

258

259 1

263

264

265

266

268

270

272

274

4

1

| respid | Q31b_3 | Q31b_4 | Q31b_5 | Q31b_6 |
|--------|--------|--------|--------|--------|
| 275    |        |        |        |        |
| 276    |        |        |        |        |
| 277    |        |        |        |        |
| 279    | 1      |        |        |        |
| 286    |        | 2      |        |        |
| 290    |        |        |        |        |
| 291    |        |        |        |        |
| 295    |        |        |        |        |
| 297    |        |        |        |        |
| 299    |        |        |        |        |
| 300    |        |        |        |        |
| 303    |        |        |        |        |
| 304    |        |        |        |        |
| 306    |        |        |        |        |
| 307    |        |        |        |        |
| 312    | 3      | 3      |        |        |
| 315    |        |        |        |        |
| 317    |        |        |        |        |
| 322    | 1      |        | 1      |        |
| 335    |        |        |        |        |
| 374    |        | 2      | 2      |        |
| 378    |        |        |        |        |
| 380    |        |        |        |        |
| 382    |        |        |        |        |
| 384    |        |        |        |        |
| 385    | 1      |        |        |        |
| 395    |        |        |        |        |
| 396    |        |        |        |        |
| 398    |        |        |        |        |
| 402    | 3      | 3      |        |        |
| 414    |        |        |        |        |
| 415    |        |        |        |        |

| respid | Q31b_3 | Q31b_4 | Q31b_5 | Q31b_6 |
|--------|--------|--------|--------|--------|
| 416    |        |        |        |        |
| 420    | 1      |        |        |        |
| 421    |        |        |        |        |
| 422    |        |        |        |        |
| 423    |        |        |        |        |
| 424    |        |        |        |        |
| 425    |        |        |        |        |
| 428    |        |        |        |        |
| 429    | 0      | 1      |        |        |
| 431    |        |        |        |        |
| 437    |        |        |        |        |
| 438    |        |        |        |        |
| 441    |        |        |        |        |
| 444    |        |        |        |        |
| 448    |        |        |        |        |
| 449    |        |        |        |        |
| 457    | 1      | 1      |        |        |
| 460    |        |        |        |        |
| 469    |        |        |        |        |
| 471    |        |        |        |        |
| 473    |        |        |        |        |
| 476    |        |        |        |        |
| 479    |        |        |        |        |
| 485    |        |        |        |        |
| 488    | 1      |        | 1      |        |
| 494    |        |        |        |        |
| 496    |        |        |        |        |
| 501    |        |        |        |        |
| 502    |        |        | 1      |        |
| 503    |        |        |        |        |
| 506    |        |        |        |        |
| 514    | 1      |        |        |        |

| respid | Q31b_3 | Q31b_4 | Q31b_5 | Q31b_6 |
|--------|--------|--------|--------|--------|
| 515    |        |        |        |        |
| 516    |        |        |        |        |
| 519    |        |        |        |        |
| 522    |        |        |        |        |
| 525    | 0      |        |        |        |
| 528    |        |        |        |        |
| 532    |        |        |        |        |
| 536    | 1      |        |        |        |
| 539    |        |        | 0      |        |
| 540    |        |        |        |        |
| 547    |        |        |        |        |
| 551    |        |        |        |        |
| 554    |        |        |        |        |
| 558    |        |        |        |        |
| 563    |        |        |        |        |
| 564    |        |        |        |        |
| 565    |        |        |        |        |
| 567    |        |        |        |        |
| 569    | 0      |        |        |        |
| 572    |        |        |        |        |
| 574    |        |        |        |        |
| 583    |        |        |        |        |
| 589    |        |        |        |        |
| 592    |        |        |        |        |
| 593    |        |        |        |        |
| 594    |        |        |        |        |
| 597    |        |        |        |        |
| 601    |        |        |        |        |
| 607    |        |        |        |        |
| 610    |        |        |        |        |
| 612    |        |        |        |        |
| 627    |        |        |        |        |

| respid | Q31b_3 | Q31b_4 | Q31b_5 | Q31b_6 |
|--------|--------|--------|--------|--------|
| 631    |        |        |        |        |
| 633    | 2      |        |        |        |
| 636    |        |        |        |        |
| 656    |        |        |        |        |
| 659    |        |        |        |        |
| 670    |        |        |        |        |
| 672    |        |        |        |        |
| 673    | 1      |        |        |        |
| 675    |        |        |        |        |
| 676    |        | 1      |        |        |
| 679    | 2      |        |        |        |
| 683    |        |        |        |        |
| 684    |        |        |        |        |
| 690    | 0      | 0      |        |        |
| 701    |        |        |        |        |
| 709    |        |        |        |        |
| 719    |        |        |        |        |
| 726    | 1      |        |        |        |
| 730    |        |        |        |        |
| 731    |        |        |        |        |
| 732    |        |        |        |        |
| 733    |        |        |        |        |
| 735    |        |        |        |        |
| 738    |        |        |        |        |
| 740    |        |        |        |        |
| 742    |        |        |        |        |
| 744    |        |        |        |        |
| 749    |        |        |        |        |
| 751    |        |        |        |        |
| 752    |        |        |        |        |
| 753    |        |        |        |        |
| 755    |        |        |        |        |

| respid | Q31b_3 | Q31b_4 | Q31b_5 | Q31b_6 |
|--------|--------|--------|--------|--------|
| 756    |        |        |        |        |
| 759    |        |        |        |        |
| 760    |        |        |        |        |
| 763    |        |        |        |        |
| 764    |        |        |        | 1      |
| 765    | 0      |        |        |        |
| 766    |        |        |        |        |
| 767    |        |        |        |        |
| 771    |        |        |        |        |
| 773    |        |        |        |        |
| 774    |        |        |        |        |
| 775    |        |        |        |        |
| 776    |        |        |        |        |
| 778    |        |        |        |        |
| 780    |        |        |        |        |
| 781    |        |        |        |        |
| 782    | 2      |        |        |        |
| 783    |        |        |        |        |
| 786    |        |        |        |        |
| 788    |        |        |        |        |
| 792    |        |        |        |        |
| 794    |        |        |        |        |
| 795    |        |        |        |        |
| 799    |        |        |        |        |
| 800    |        |        |        |        |
| 801    |        |        |        | 1      |
| 804    |        |        |        |        |
| 806    |        |        |        |        |
| 807    |        |        |        |        |
| 808    |        |        |        |        |
| 809    |        |        |        |        |
| 811    |        |        |        |        |



| respid | Q31b_3 | Q31b_4 | Q31b_5 | Q31b_6 |
|--------|--------|--------|--------|--------|
| 812    |        |        |        |        |
| 815    |        |        |        |        |
| 817    | 0      |        | 0      |        |
| 818    | 1      |        |        |        |
| 819    |        |        |        |        |
| 821    | 1      |        |        |        |
| 824    |        |        |        |        |
| 825    |        |        |        |        |
| 828    | 0      |        |        |        |
| 832    |        |        |        |        |
| 834    |        |        |        |        |
| 835    |        |        |        |        |
| 836    |        |        |        |        |
| 837    |        |        |        |        |
| 840    |        |        |        |        |
| 841    |        |        |        |        |
| 845    |        |        |        |        |
| 846    |        |        |        |        |
| 849    |        |        |        |        |
| 852    | 0      |        |        |        |
| 854    |        |        |        |        |
| 856    |        |        |        |        |
| 858    |        |        |        |        |
| 859    | 2      |        |        |        |
| 861    |        |        |        |        |
| 863    |        |        |        |        |
| 864    |        |        |        | 1      |
| 866    |        |        |        |        |
| 869    |        |        |        |        |
| 870    |        |        |        |        |
| 871    |        |        |        |        |
| 873    |        |        |        |        |

| respid | Q31b_3 | Q31b_4 | Q31b_5 | Q31b_6 |
|--------|--------|--------|--------|--------|
| 879    |        |        |        | 0      |
| 880    | 1      |        |        |        |
| 881    |        |        |        |        |
| 882    |        |        |        |        |
| 885    |        |        |        |        |
| 886    |        |        |        |        |
| 887    | 2      |        |        |        |
| 888    |        |        |        |        |
| 889    |        |        |        |        |
| 890    |        |        |        |        |
| 900    |        |        |        |        |
| 901    |        |        |        |        |
| 902    |        |        |        |        |
| 903    |        |        |        |        |
| 906    |        |        |        |        |
| 907    |        |        |        |        |
| 908    |        |        |        | 1      |
| 910    |        |        |        |        |
| 911    |        |        |        |        |
| 912    |        |        |        |        |
| 915    |        |        |        |        |
| 923    | 4      |        |        |        |
| 925    |        |        |        |        |
| 926    |        |        |        |        |
| 929    |        |        |        |        |
| 932    |        |        |        |        |
| 933    |        |        |        | 4      |
| 934    |        |        |        |        |
| 938    |        |        |        |        |
| 941    |        |        |        |        |
| 942    |        |        |        |        |
| 943    |        |        |        |        |

| respid | Q31b_3 | Q31b_4 | Q31b_5 | Q31b_6 |
|--------|--------|--------|--------|--------|
| 945    |        |        |        |        |
| 946    |        |        |        |        |
| 947    |        |        |        |        |
| 948    |        |        |        |        |
| 949    |        |        |        |        |
| 952    |        |        |        |        |
| 956    |        |        |        |        |
| 957    |        |        |        |        |
| 959    |        |        |        |        |
| 961    |        |        |        |        |
| 962    | 3      | 3      |        |        |
| 965    |        |        |        |        |
| 967    |        |        |        |        |
| 969    |        |        |        |        |
| 970    |        |        |        |        |
| 973    |        |        |        |        |
| 974    |        |        |        |        |
| 975    |        |        |        |        |
| 976    |        |        |        |        |
| 977    |        |        |        |        |
| 979    |        |        |        |        |
| 981    | 2      |        |        |        |
| 983    | 4      |        |        |        |
| 987    |        |        |        |        |
| 991    |        |        |        |        |
| 992    |        |        |        |        |
| 993    | 0      |        |        |        |
| 994    |        |        | 1      |        |
| 995    |        |        |        |        |
| 998    | 1      |        |        |        |
| 1000   |        | 1      | 1      | 1      |
| 1001   |        |        |        |        |

| respid | Q31b_3 | Q31b_4 | Q31b_5 | Q31b_6 |
|--------|--------|--------|--------|--------|
| 1002   |        |        |        |        |
| 1004   |        |        |        |        |
| 1005   |        |        |        |        |
| 1006   |        |        |        |        |
| 1007   |        |        |        |        |
| 1009   |        |        |        |        |
| 1013   |        |        |        |        |
| 1015   |        |        |        |        |
| 1020   |        |        |        | 1      |
| 1022   |        |        |        | 1      |
| 1024   |        |        |        |        |
| 1025   |        |        |        |        |
| 1027   |        |        |        |        |
| 1031   |        |        |        |        |
| 1037   |        |        |        |        |
| 1039   |        |        |        |        |
| 1040   |        |        |        |        |
| 1056   |        |        |        |        |
| 1057   |        |        |        |        |
| 1062   |        |        |        |        |
| 1069   |        |        |        |        |
| 1070   |        |        |        |        |
| 1072   |        |        |        |        |
| 1076   |        |        |        |        |
| 1077   |        |        |        |        |
| 1078   |        |        |        |        |
| 1080   |        |        |        |        |
| 1094   | 3      |        |        |        |
| 1098   |        |        |        |        |
| 1099   |        |        |        |        |
| 1102   |        |        |        |        |
| 1110   |        |        |        |        |

| respid | Q31b_3 | Q31b_4 | Q31b_5 | Q31b_6 |
|--------|--------|--------|--------|--------|
| 1117   | 1      |        |        |        |
| 1119   |        |        |        |        |
| 1126   |        |        |        |        |
| 1127   |        |        |        |        |
| 1130   |        |        |        |        |
| 1131   |        |        |        |        |
| 1135   |        | 2      | 3      |        |
| 1138   | 1      |        |        |        |
| 1139   |        |        |        |        |
| 1140   |        |        |        |        |
| 1142   |        |        |        |        |
| 1143   |        |        |        |        |
| 1145   |        |        |        |        |
| 1149   |        |        |        |        |
| 1152   |        |        |        |        |
| 1160   |        |        |        |        |
| 1164   |        |        |        |        |
| 1165   |        |        |        |        |
| 1169   |        |        |        |        |
| 1170   |        |        |        |        |
| 1179   |        |        |        |        |
| 1180   |        |        |        |        |
| 1183   |        |        |        |        |
| 1187   |        |        |        |        |
| 1188   |        |        |        |        |
| 1193   |        |        |        |        |
| 1194   |        |        |        |        |
| 1197   |        |        |        |        |
| 1202   |        |        |        |        |
| 1204   |        |        | 4      |        |
| 1211   |        |        |        |        |
| 1224   |        |        |        |        |

| respid | Q31b_3 | Q31b_4 | Q31b_5 | Q31b_6 |
|--------|--------|--------|--------|--------|
| 1225   |        |        |        |        |
| 1230   |        |        |        |        |
| 1232   |        |        |        |        |
| 1233   |        |        |        |        |
| 1234   |        |        |        |        |
| 1235   |        |        |        |        |
| 1236   |        |        |        |        |
| 1237   | 1      |        |        |        |
| 1238   |        |        |        |        |
| 1239   |        |        |        |        |
| 1241   |        |        |        |        |
| 1242   |        |        |        |        |
| 1244   |        |        |        |        |
| 1245   |        |        |        |        |
| 1247   |        |        |        |        |
| 1248   |        |        |        |        |
| 1249   |        |        |        |        |
| 1250   |        |        |        |        |
| 1251   |        |        |        |        |
| 1252   |        |        |        |        |
| 1253   |        |        |        |        |
| 1254   |        |        |        |        |
| 1258   |        |        |        |        |
| 1260   |        |        |        |        |
| 1261   |        |        |        |        |
| 1262   |        |        |        |        |
| 1263   |        |        |        |        |
| 1264   | 3      |        |        |        |
| 1265   |        |        |        |        |
| 1266   |        |        |        |        |
| 1270   |        |        |        |        |
| 1272   | 2      |        |        |        |

| respid | Q31b_3 | Q31b_4 | Q31b_5 | Q31b_6 |
|--------|--------|--------|--------|--------|
| 1273   |        |        |        |        |
| 1276   |        |        |        |        |
| 1277   |        |        |        |        |
| 1278   |        |        |        | 0      |
| 1280   |        |        |        |        |
| 1281   | 2      |        |        |        |
| 1282   |        |        |        |        |
| 1283   |        |        |        |        |
| 1288   |        |        |        |        |
| 1289   | 2      |        |        |        |
| 1290   |        |        |        |        |
| 1291   |        |        |        |        |
| 1293   | 2      |        |        |        |
| 1294   |        |        |        |        |
| 1295   |        |        |        |        |
| 1296   |        |        |        |        |
| 1297   |        |        |        |        |
| 1298   |        |        | 0      |        |
| 1300   |        | 2      |        |        |
| 1302   |        |        |        |        |
| 1303   |        |        |        |        |
| 1304   |        |        | 1      |        |
| 1305   |        |        |        |        |
| 1307   |        |        |        |        |
| 1312   |        |        |        |        |
| 1313   |        |        |        |        |
| 1314   |        |        |        |        |
| 1317   |        |        |        |        |
| 1318   |        |        |        |        |
| 1319   |        |        |        |        |
| 1321   |        |        |        |        |
| 1324   | 2      | 3      | 2      |        |

| respid | Q31b_3 | Q31b_4 | Q31b_5 | Q31b_6 |
|--------|--------|--------|--------|--------|
| 1325   |        |        |        |        |
| 1326   |        |        |        |        |
| 1327   |        |        |        |        |
| 1329   |        |        |        |        |
| 1330   | 2      | 1      | 1      |        |
| 1331   |        |        |        |        |
| 1335   |        |        |        |        |
| 1337   |        |        |        |        |
| 1341   |        |        |        |        |
| 1342   |        |        |        |        |
| 1344   |        |        |        |        |
| 1345   |        |        |        |        |
| 1346   |        |        |        |        |
| 1350   | 2      |        |        |        |
| 1352   |        |        |        |        |
| 1353   |        |        |        |        |
| 1354   |        |        |        |        |
| 1355   |        |        |        |        |
| 1357   |        |        |        |        |
| 1360   |        |        |        |        |
| 1362   |        |        | 0      |        |
| 1363   |        |        |        |        |
| 1367   |        |        |        |        |
| 1369   |        |        |        |        |
| 1371   |        |        |        |        |
| 1372   |        |        |        |        |
| 1375   |        |        |        |        |
| 1377   |        |        |        |        |
| 1379   |        |        |        |        |
| 1380   |        |        |        |        |
| 1382   |        |        |        |        |
| 1383   | 0      |        |        |        |



| respid | Q31b_3 | Q31b_4 | Q31b_5 | Q31b_6 |
|--------|--------|--------|--------|--------|
| 1384   |        |        |        |        |
| 1385   |        |        |        |        |
| 1387   |        |        |        |        |
| 1388   |        |        |        |        |
| 1389   | 1      |        |        |        |
| 1390   | 1      |        |        |        |
| 1395   |        |        |        |        |
| 1396   |        |        |        |        |
| 1397   |        |        |        |        |
| 1398   |        |        |        |        |
| 1399   |        |        |        |        |
| 1403   |        |        |        |        |
| 1405   |        |        |        |        |
| 1406   | 1      | 1      |        |        |
| 1407   | 2      | 2      | 2      |        |
| 1408   |        |        |        |        |
| 1409   |        |        |        |        |
| 1410   |        |        |        |        |
| 1411   |        |        |        |        |
| 1412   |        |        |        |        |
| 1413   |        |        |        |        |
| 1414   |        |        |        |        |
| 1415   |        |        |        |        |
| 1416   |        |        |        |        |
| 1417   |        |        |        |        |
| 1418   |        |        |        |        |
| 1419   |        |        |        |        |
| 1420   |        |        |        |        |
| 1421   |        | 0      |        |        |
| 1422   |        |        |        |        |
| 1423   |        |        |        |        |
| 1424   |        |        |        |        |

| respid | Q31b_3 | Q31b_4 | Q31b_5 | Q31b_6 |
|--------|--------|--------|--------|--------|
| 1429   |        |        |        |        |
| 1430   |        |        |        |        |
| 1431   |        |        |        | 2      |
| 1433   |        |        |        |        |
| 1435   |        |        |        |        |
| 1436   |        |        |        |        |
| 1438   |        |        |        |        |
| 1439   |        |        |        |        |
| 1441   |        |        |        |        |
| 1442   |        |        |        |        |
| 1443   |        |        |        |        |
| 1444   |        |        |        |        |
| 1445   |        |        |        |        |
| 1446   |        |        |        |        |
| 1447   |        |        |        |        |
| 1449   |        |        |        |        |
| 1450   |        |        |        |        |
| 1451   |        |        |        |        |
| 1452   |        |        |        |        |
| 1453   |        | 2      | 1      |        |
| 1454   |        |        |        |        |
| 1456   |        |        |        |        |
| 1457   |        |        |        |        |
| 1459   |        |        |        |        |
| 1460   |        |        |        |        |
| 1463   |        |        |        |        |
| 1465   |        |        |        |        |
| 1467   |        |        |        |        |
| 1470   |        |        |        |        |
| 1471   |        |        |        |        |
| 1472   |        |        |        |        |
| 1474   |        | 1      |        |        |

| respid | Q31b_3 | Q31b_4 | Q31b_5 | Q31b_6 |
|--------|--------|--------|--------|--------|
| 1475   |        |        |        |        |
| 1477   |        |        |        |        |
| 1478   |        |        |        |        |
| 1480   |        |        |        |        |
| 1481   | 1      |        | 1      |        |
| 1483   |        |        |        |        |
| 1484   |        |        |        |        |
| 1485   |        |        |        |        |
| 1486   |        |        |        |        |
| 1487   |        |        |        |        |
| 1488   |        |        |        |        |
| 1489   |        |        |        |        |
| 1490   |        |        |        |        |
| 1491   | 1      |        |        |        |
| 1492   |        |        |        |        |
| 1494   |        |        |        |        |
| 1495   |        |        |        |        |
| 1496   |        |        |        |        |
| 1498   |        |        |        |        |
| 1499   |        |        |        |        |
| 1500   |        |        |        |        |
| 1501   |        |        |        |        |
| 1503   |        |        |        |        |
| 1504   |        |        |        |        |
| 1508   |        |        |        |        |
| 1509   |        |        |        |        |
| 1511   |        |        |        | 2      |
| 1512   |        |        |        |        |
| 1513   |        |        |        |        |
| 1515   |        |        |        |        |
| 1517   |        |        |        |        |
| 1518   | 1      |        |        |        |

| respid | Q31b_3 | Q31b_4 | Q31b_5 | Q31b_6 |
|--------|--------|--------|--------|--------|
| 1519   |        | 1      |        |        |
| 1520   |        |        |        |        |
| 1521   | 1      |        | 0      |        |
| 1522   |        |        |        |        |
| 1523   |        |        |        |        |
| 1524   | 1      |        |        |        |
| 1525   | 1      |        |        |        |
| 1526   |        |        |        | 1      |
| 1527   |        |        |        |        |
| 1534   |        |        |        |        |
| 1535   |        |        |        |        |
| 1536   |        |        |        |        |
| 1538   |        |        |        |        |
| 1539   |        |        |        |        |
| 1540   |        |        |        |        |
| 1541   |        |        |        |        |
| 1542   |        |        |        |        |
| 1543   |        |        |        |        |
| 1545   |        |        |        |        |
| 1546   |        |        |        |        |
| 1548   |        |        |        |        |
| 1549   |        |        |        |        |
| 1551   |        |        |        |        |
| 1552   |        |        |        |        |
| 1556   |        |        |        |        |
| 1557   |        |        |        |        |
| 1558   |        |        |        |        |
| 1561   |        |        |        |        |
| 1562   |        |        |        |        |
| 1563   |        |        |        |        |
| 1564   | 3      |        |        |        |
| 1565   |        |        |        |        |

| respid | Q31b_3 | Q31b_4 | Q31b_5 | Q31b_6 |
|--------|--------|--------|--------|--------|
| 1566   |        |        |        |        |
| 1567   |        |        |        |        |
| 1569   |        |        |        |        |
| 1570   |        |        |        |        |
| 1574   |        |        |        |        |
| 1575   |        |        |        |        |
| 1576   | 0      |        |        |        |
| 1577   |        |        |        |        |
| 1581   |        |        |        |        |
| 1583   |        |        |        |        |
| 1585   |        |        |        |        |
| 1586   |        |        |        |        |
| 1588   |        |        |        |        |
| 1590   |        |        |        |        |
| 1592   |        |        |        |        |
| 1594   |        |        |        |        |
| 1598   |        |        |        |        |
| 1599   |        |        |        |        |
| 1600   |        |        |        |        |
| 1602   |        |        |        |        |
| 1603   |        |        |        |        |
| 1604   | 2      |        |        |        |
| 1605   |        |        |        |        |
| 1606   |        |        |        |        |
| 1610   |        |        |        |        |
| 1611   |        |        |        |        |
| 1612   |        |        |        |        |
| 1613   |        | 2      |        | 2      |
| 1615   | 1      |        |        |        |
| 1616   |        |        |        |        |
| 1617   |        |        |        |        |
| 1618   |        |        |        |        |

| respid | Q31b_3 | Q31b_4 | Q31b_5 | Q31b_6 |
|--------|--------|--------|--------|--------|
| 1620   |        |        |        |        |
| 1621   |        |        |        |        |
| 1622   |        |        |        |        |
| 1623   |        |        |        |        |
| 1624   | 3      |        |        |        |
| 1625   |        |        |        |        |
| 1626   |        |        |        |        |
| 1627   |        |        |        |        |
| 1629   |        |        |        |        |
| 1630   |        |        |        |        |
| 1631   |        |        |        |        |
| 1634   | 1      |        |        |        |
| 1635   |        |        |        |        |
| 1636   |        |        |        |        |
| 1637   |        |        |        |        |
| 1640   |        |        |        |        |
| 1642   |        |        |        |        |
| 1643   | 1      |        |        |        |
| 1644   |        |        |        |        |
| 1645   |        |        |        |        |
| 1646   |        |        |        |        |
| 1647   |        |        |        |        |
| 1650   |        |        |        |        |
| 1654   |        |        |        |        |
| 1656   |        |        |        |        |
| 1657   | 3      |        |        |        |
| 1659   |        | 1      |        |        |
| 1662   | 1      |        |        |        |
| 1663   |        |        |        |        |
| 1664   |        |        |        |        |
| 1665   |        |        |        |        |
| 1667   |        |        |        |        |

| respid | Q31b_3 | Q31b_4 | Q31b_5 | Q31b_6 |
|--------|--------|--------|--------|--------|
| 1668   |        |        |        |        |
| 1670   |        |        |        |        |
| 1671   |        |        |        |        |
| 1673   |        |        |        |        |
| 1674   |        |        |        |        |
| 1676   |        |        |        |        |
| 1677   |        |        |        |        |
| 1678   |        |        |        |        |
| 1680   |        |        |        |        |
| 1681   |        |        |        |        |
| 1683   |        |        |        |        |
| 1685   |        |        |        |        |
| 1686   | 1      |        |        |        |
| 1690   |        |        |        |        |
| 1691   | 0      |        |        |        |
| 1692   |        |        |        |        |
| 1693   |        |        |        |        |
| 1695   |        |        |        |        |
| 1696   |        |        |        |        |
| 1698   |        |        |        |        |
| 1699   | 0      |        |        |        |
| 1701   |        |        |        |        |
| 1702   |        |        |        |        |
| 1703   |        |        |        |        |
| 1705   |        |        |        |        |
| 1706   |        |        |        |        |
| 1708   |        |        |        |        |
| 1711   | 1      |        |        |        |
| 1712   |        |        |        |        |
| 1713   | 0      |        |        |        |
| 1715   |        |        |        |        |
| 1717   |        |        |        |        |

| respid | Q31b_3 | Q31b_4 | Q31b_5 | Q31b_6 |
|--------|--------|--------|--------|--------|
| 1718   | 4      | 4      | 4      |        |
| 1719   |        |        |        |        |
| 1721   |        |        |        |        |
| 1722   |        |        |        |        |
| 1724   |        |        |        |        |
| 1725   |        |        |        |        |
| 1726   |        |        |        |        |
| 1727   |        |        |        |        |
| 1728   |        |        |        |        |
| 1731   |        |        |        |        |
| 1733   |        |        |        |        |
| 1734   |        |        |        |        |
| 1735   |        |        |        |        |
| 1736   |        |        |        |        |
| 1737   |        |        |        |        |
| 1738   | 1      |        | 1      |        |
| 1743   |        |        |        |        |
| 1755   |        | 1      |        |        |
| 1756   |        |        |        |        |
| 1757   |        |        |        |        |
| 1758   | 1      | 1      |        |        |
| 1759   |        | 1      |        |        |
| 1761   |        |        |        |        |
| 1762   |        | 1      |        |        |
| 1764   |        |        |        |        |
| 1767   |        |        |        |        |
| 1768   |        |        |        |        |
| 1769   |        |        |        |        |
| 1770   |        |        |        |        |
| 1771   |        |        | 2      |        |
| 1776   |        |        |        |        |
| 1777   |        |        |        |        |



| respid | Q31b_3 | Q31b_4 | Q31b_5 | Q31b_6 |
|--------|--------|--------|--------|--------|
| 1778   |        |        |        | 1      |
| 1779   |        |        |        |        |
| 1780   |        |        |        |        |
| 1781   |        |        |        |        |
| 1783   |        |        |        |        |
| 1784   |        |        |        |        |
| 1785   |        |        |        |        |
| 1788   | 1      |        |        |        |
| 1792   |        |        |        |        |
| 1794   |        |        |        |        |
| 1798   | 2      |        |        | 3      |
| 1799   |        |        |        |        |
| 1800   |        |        |        |        |
| 1804   |        |        |        |        |
| 1806   |        |        |        |        |
| 1807   |        |        |        |        |
| 1808   |        |        |        |        |
| 1809   |        |        |        |        |
| 1811   |        |        |        |        |
| 1812   |        |        |        |        |
| 1813   |        |        |        |        |
| 1814   |        |        |        |        |
| 1815   |        |        |        |        |
| 1817   |        |        |        |        |
| 1820   |        |        |        |        |
| 1821   |        |        |        |        |
| 1822   |        |        |        |        |
| 1823   |        |        |        |        |
| 1824   |        |        |        |        |
| 1826   |        |        |        |        |
| 1828   |        |        |        |        |
| 1829   |        |        |        |        |

| respid | Q31b_3 | Q31b_4 | Q31b_5 | Q31b_6 |
|--------|--------|--------|--------|--------|
| 1830   |        |        |        |        |
| 1831   |        |        |        |        |
| 1832   |        |        |        |        |
| 1836   |        |        |        |        |
| 1838   |        |        |        |        |
| 1839   |        |        |        |        |
| 1840   |        |        |        |        |
| 1841   |        |        |        |        |
| 1842   |        |        |        |        |
| 1843   |        |        |        |        |
| 1844   |        | 1      |        |        |
| 1845   |        |        |        |        |
| 1849   |        |        |        |        |
| 1850   |        |        |        |        |
| 1851   |        |        |        |        |
| 1852   |        |        |        |        |
| 1857   | 2      |        | 2      |        |
| 1858   |        |        |        |        |
| 1861   |        |        |        |        |
| 1862   |        |        |        |        |
| 1863   |        |        |        |        |
| 1864   |        |        |        |        |
| 1865   |        |        |        |        |
| 1867   |        |        |        |        |
| 1868   |        |        |        |        |
| 1869   |        |        |        |        |
| 1870   |        |        |        |        |
| 1871   |        |        |        |        |
| 1872   |        |        |        |        |
| 1873   |        |        |        |        |
| 1876   |        |        |        |        |
| 1877   |        |        |        |        |

| respid | Q31b_3 | Q31b_4 | Q31b_5 | Q31b_6 |
|--------|--------|--------|--------|--------|
| 1878   |        |        |        |        |
| 1879   |        |        |        |        |
| 1880   |        |        |        |        |
| 1881   | 1      |        |        |        |
| 1883   |        |        |        |        |
| 1886   |        |        |        |        |
| 1888   | 2      | 2      |        |        |
| 1889   | 4      | 2      | 2      |        |
| 1890   |        |        |        |        |
| 1891   |        |        |        |        |
| 1893   |        |        |        |        |
| 1894   |        |        |        |        |
| 1895   |        |        |        |        |
| 1896   |        |        |        |        |
| 1897   |        |        |        |        |
| 1898   | 3      | 4      | 3      |        |
| 1899   |        |        |        |        |
| 1900   |        |        |        |        |
| 1903   |        |        |        |        |
| 1906   |        |        |        |        |
| 1907   | 2      |        |        |        |
| 1908   |        |        |        |        |
| 1909   | 3      | 3      |        |        |
| 1910   |        |        |        |        |
| 1911   |        |        |        |        |
| 1912   |        |        |        |        |
| 1917   | 1      |        |        |        |
| 1918   |        |        |        |        |
| 1919   |        |        |        |        |
| 1922   |        |        |        |        |
| 1925   |        |        |        |        |
| 1926   |        |        |        |        |

| respid | Q31b_3 | Q31b_4 | Q31b_5 | Q31b_6 |
|--------|--------|--------|--------|--------|
| 1927   |        |        |        |        |
| 1928   |        |        |        |        |
| 1929   |        |        |        |        |
| 1934   |        |        |        |        |
| 1935   |        |        |        |        |
| 1936   |        |        |        |        |
| 1937   |        |        |        |        |
| 1938   |        |        |        |        |
| 1939   | 0      |        |        |        |
| 1940   |        |        |        |        |
| 1941   |        |        |        |        |
| 1948   |        |        |        |        |
| 1950   |        |        |        |        |
| 1955   | 2      |        |        |        |
| 1958   |        |        |        |        |
| 1960   |        |        |        |        |
| 1961   |        |        |        |        |
| 1962   |        |        |        |        |
| 1965   |        |        |        |        |
| 1966   |        |        |        |        |
| 1967   |        |        |        |        |
| 1968   |        |        |        |        |
| 1973   |        |        |        |        |
| 1974   |        |        |        | 4      |
| 1975   |        |        |        |        |
| 1977   |        |        |        |        |
| 1978   |        |        |        |        |
| 1979   | 3      |        |        |        |
| 1982   |        |        |        |        |
| 1983   |        |        |        |        |
| 1987   |        |        |        |        |
| 1988   |        |        |        |        |

| respid | Q31b_3 | Q31b_4 | Q31b_5 | Q31b_6 |
|--------|--------|--------|--------|--------|
| 1991   |        |        |        |        |
| 1992   |        |        |        |        |
| 1993   |        |        |        |        |
| 1994   |        | 2      |        |        |
| 1995   |        |        |        |        |
| 1996   | 1      | 1      |        |        |
| 1997   |        |        |        |        |
| 1998   |        |        |        |        |
| 1999   | 1      |        | 1      | 2      |
| 2000   |        |        |        | 1      |
| 2001   |        |        |        |        |
| 2002   |        |        | 1      |        |
| 2003   |        |        |        |        |
| 2004   | 1      |        |        |        |
| 2005   |        |        |        |        |
| 2007   | 1      | 1      |        |        |
| 2009   | 0      |        |        |        |
| 2010   |        |        |        |        |
| 2011   |        |        |        |        |
| 2013   |        |        |        |        |
| 2014   |        |        |        |        |
| 2017   |        |        |        | 1      |
| 2020   |        |        |        |        |
| 2023   | 0      |        |        | 1      |
| 2024   |        |        |        |        |
| 2029   |        |        |        |        |
| 2030   |        |        |        |        |
| 2031   |        |        |        |        |
| 2032   |        |        |        |        |
| 2033   |        |        |        |        |
| 2034   |        |        |        |        |
| 2036   | 2      |        |        |        |

| respid | Q31b_3 | Q31b_4 | Q31b_5 | Q31b_6 |
|--------|--------|--------|--------|--------|
| 2037   |        |        |        |        |
| 2038   |        |        |        |        |
| 2039   |        |        |        |        |
| 2040   |        |        |        |        |
| 2041   |        |        |        |        |
| 2042   |        |        |        |        |
| 2043   |        |        |        |        |
| 2051   |        |        |        |        |
| 2052   |        |        |        |        |
| 2053   |        |        |        |        |
| 2054   |        |        |        |        |
| 2055   |        |        | 1      |        |
| 2056   |        |        |        |        |
| 2057   |        |        |        |        |
| 2059   |        |        |        |        |
| 2063   |        |        |        |        |
| 2066   |        |        |        |        |
| 2068   |        |        |        |        |
| 2069   |        |        |        |        |
| 2070   |        |        |        |        |
| 2071   |        |        |        |        |
| 2073   |        |        |        |        |
| 2077   | 1      |        |        |        |
| 2079   |        |        |        |        |
| 2080   | 4      |        |        | 4      |
| 2081   |        |        |        |        |
| 2084   |        |        |        |        |
| 2085   |        |        |        |        |
| 2087   | 3      | 3      |        |        |
| 2089   |        |        | 1      |        |
| 2093   |        |        |        |        |
| 2094   |        |        |        |        |

| respid | Q31b_3 | Q31b_4 | Q31b_5 | Q31b_6 |
|--------|--------|--------|--------|--------|
| 2095   |        |        |        |        |
| 2097   |        |        |        |        |
| 2099   |        |        |        |        |
| 2100   | 1      |        |        |        |
| 2101   |        |        |        |        |
| 2103   |        |        |        |        |
| 2104   | 1      |        |        |        |
| 2106   |        |        |        |        |
| 2111   |        |        |        |        |
| 2113   |        |        |        |        |
| 2115   |        |        |        |        |
| 2119   |        |        |        |        |
| 2120   |        |        |        |        |
| 2123   |        |        |        |        |
| 2124   | 4      |        |        |        |
| 2130   |        |        |        |        |
| 2131   |        |        | 1      |        |
| 2133   | 3      |        |        |        |
| 2139   |        |        |        |        |
| 2141   |        |        |        |        |
| 2143   |        |        |        |        |
| 2144   |        |        |        |        |
| 2147   |        |        |        |        |
| 2151   |        |        |        |        |
| 2153   |        |        |        |        |
| 2154   |        |        |        |        |
| 2155   |        |        |        |        |
| 2159   |        |        |        |        |
| 2160   | 1      |        | 1      | 2      |
| 2161   |        |        |        |        |
| 2163   |        |        |        |        |
| 2164   |        |        |        |        |

| respid | Q31b_3 | Q31b_4 | Q31b_5 | Q31b_6 |
|--------|--------|--------|--------|--------|
| 2168   |        |        |        |        |
| 2169   |        |        |        |        |
| 2170   |        |        |        |        |
| 2171   |        |        |        |        |
| 2172   |        |        |        |        |
| 2173   |        |        |        |        |
| 2174   | 1      |        |        |        |
| 2175   |        |        |        |        |
| 2176   |        |        |        |        |
| 2177   | 3      |        |        |        |
| 2179   |        |        |        |        |
| 2181   |        |        |        |        |
| 2182   |        |        |        |        |
| 2183   |        | 1      |        |        |
| 2184   |        | 2      |        |        |
| 2185   |        |        |        |        |
| 2186   |        |        |        |        |
| 2187   |        |        |        |        |
| 2188   |        |        |        |        |
| 2189   |        |        |        |        |
| 2190   |        |        |        |        |
| 2193   |        |        |        |        |
| 2195   |        |        |        |        |
| 2198   |        |        |        |        |
| 2200   | 1      |        |        |        |
| 2205   |        |        |        |        |
| 2208   |        |        |        |        |
| 2209   |        |        |        |        |
| 2210   |        |        |        |        |
| 2211   |        |        |        |        |
| 2213   |        |        |        |        |
| 2214   |        |        |        |        |



| respid | Q31b_3 | Q31b_4 | Q31b_5 | Q31b_6 |
|--------|--------|--------|--------|--------|
| 2216   |        |        |        |        |
| 2220   | 1      |        |        |        |
| 2225   |        |        |        |        |
| 2227   |        |        |        |        |
| 2228   |        |        |        |        |
| 2229   |        |        |        |        |
| 2230   |        |        |        |        |
| 2236   |        |        |        |        |
| 2238   | 2      |        | 2      |        |
| 2239   |        |        |        |        |
| 2240   |        |        |        |        |
| 2241   |        |        |        |        |
| 2243   |        |        |        |        |
| 2245   |        |        |        |        |
| 2247   |        |        |        |        |
| 2248   |        |        |        |        |
| 2249   |        |        |        |        |
| 2254   |        |        |        |        |
| 2256   |        |        |        |        |
| 2259   |        |        |        |        |
| 2261   |        |        |        |        |
| 2262   |        |        |        |        |
| 2263   | 1      |        |        |        |
| 2264   |        |        |        |        |
| 2265   |        |        |        |        |
| 2270   |        |        |        |        |
| 2271   |        |        |        |        |
| 2272   |        |        |        |        |
| 2273   |        |        |        |        |
| 2274   |        |        |        |        |
| 2276   | 1      |        |        |        |
| 2277   |        |        |        |        |

| respid | Q31b_3 | Q31b_4 | Q31b_5 | Q31b_6 |
|--------|--------|--------|--------|--------|
| 2281   |        |        |        |        |
| 2288   |        |        |        |        |
| 2290   |        |        |        |        |
| 2294   | 1      |        |        |        |
| 2295   |        |        |        |        |
| 2296   |        |        |        |        |
| 2297   |        |        |        |        |
| 2298   |        |        |        |        |
| 2301   |        |        |        |        |
| 2302   |        |        |        | 1      |
| 2303   |        |        |        |        |
| 2305   |        |        |        |        |
| 2309   |        |        |        |        |
| 2310   |        |        |        |        |
| 2311   | 2      |        |        |        |
| 2313   |        |        |        |        |
| 2316   |        |        |        |        |
| 2317   |        |        |        |        |
| 2318   |        |        |        |        |
| 2319   | 1      |        |        |        |
| 2321   |        |        |        |        |
| 2324   |        |        |        |        |
| 2328   |        |        |        |        |
| 2329   |        |        |        |        |
| 2330   |        |        |        |        |
| 2333   |        |        |        |        |
| 2334   |        |        |        |        |
| 2338   |        |        |        |        |
| 2341   | 1      | 1      |        | 1      |
| 2342   |        |        |        |        |
| 2343   |        |        |        |        |
| 2346   | 0      |        |        |        |

| respid | Q31b_3 | Q31b_4 | Q31b_5 | Q31b_6 |
|--------|--------|--------|--------|--------|
| 2347   |        |        |        |        |
| 2348   |        |        |        |        |
| 2349   | 1      |        |        |        |
| 2350   |        |        |        |        |
| 2351   |        |        |        |        |
| 2352   |        |        |        |        |
| 2359   | 1      |        |        |        |
| 2362   |        |        |        |        |
| 2363   |        |        |        |        |
| 2365   |        |        |        |        |
| 2367   |        |        |        |        |
| 2368   |        |        |        |        |
| 2369   |        |        |        |        |
| 2372   |        |        |        |        |
| 2374   |        |        |        |        |
| 2376   |        |        |        |        |
| 2379   |        |        |        |        |
| 2380   |        |        |        |        |
| 2381   |        |        |        |        |
| 2382   |        |        |        |        |
| 2385   | 1      |        |        |        |
| 2387   |        |        |        |        |
| 2388   |        |        |        |        |
| 2389   | 1      |        |        |        |
| 2391   | 1      |        |        |        |
| 2392   |        |        |        |        |
| 2393   |        |        |        |        |
| 2394   |        |        |        |        |
| 2397   |        |        |        |        |
| 2398   |        |        |        |        |
| 2400   |        |        |        |        |
| 2402   |        |        |        |        |

| respid | Q31b_3 | Q31b_4 | Q31b_5 | Q31b_6 |
|--------|--------|--------|--------|--------|
| 2406   |        |        |        |        |
| 2408   |        |        |        |        |
| 2410   |        |        |        |        |
| 2411   |        |        |        |        |
| 2412   |        |        |        |        |
| 2414   |        |        |        |        |
| 2421   |        |        |        |        |
| 2423   |        |        |        |        |
| 2424   |        |        |        |        |
| 2425   | 1      |        |        |        |
| 2426   |        |        |        |        |
| 2429   | 4      | 4      | 4      |        |
| 2430   |        |        |        |        |
| 2432   |        |        |        |        |
| 2433   |        |        |        |        |
| 2434   |        |        |        |        |
| 2435   |        |        |        |        |
| 2436   | 1      |        |        |        |
| 2439   | 2      |        |        |        |
| 2440   |        |        |        |        |
| 2441   |        |        |        |        |
| 2446   |        |        |        |        |
| 2448   | 1      |        |        |        |
| 2449   |        |        |        |        |
| 2451   |        |        |        |        |
| 2452   |        |        |        |        |
| 2455   |        |        |        |        |
| 2457   |        |        |        |        |
| 2458   |        |        |        |        |
| 2459   |        |        |        |        |
| 2460   |        |        |        |        |
| 2462   |        | 2      |        |        |

| respid | Q31b_3 | Q31b_4 | Q31b_5 | Q31b_6 |
|--------|--------|--------|--------|--------|
| 2464   |        |        |        |        |
| 2465   | 1      |        |        |        |
| 2468   |        |        |        |        |
| 2469   |        |        |        |        |
| 2470   |        |        |        |        |
| 2471   |        |        |        |        |
| 2472   |        |        |        |        |
| 2474   |        |        |        |        |
| 2476   |        |        |        |        |
| 2478   |        |        |        |        |
| 2479   |        |        |        |        |
| 2480   |        |        |        |        |
| 2482   |        |        |        |        |
| 2486   |        |        |        |        |
| 2488   | 2      | 2      |        |        |
| 2489   |        |        |        |        |
| 2491   |        |        |        |        |
| 2495   |        |        |        |        |
| 2496   |        |        |        |        |
| 2498   | 1      |        |        |        |
| 2501   |        |        |        |        |
| 2502   |        |        |        |        |
| 2503   |        |        |        |        |
| 2504   |        |        |        |        |
| 2507   |        |        |        |        |
| 2509   |        | 2      |        |        |
| 2512   |        |        |        |        |
| 2514   |        |        |        |        |
| 2516   |        |        |        |        |
| 2517   |        |        |        |        |
| 2521   |        |        |        |        |
| 2522   |        |        |        |        |

| respid | Q31b_3 | Q31b_4 | Q31b_5 | Q31b_6 |
|--------|--------|--------|--------|--------|
| 2524   |        |        |        |        |
| 2525   |        |        |        |        |
| 2526   |        |        |        |        |
| 2527   |        |        |        |        |
| 2528   |        | 1      |        |        |
| 2531   |        |        |        |        |
| 2533   | 1      |        |        |        |
| 2535   |        |        |        |        |
| 2536   |        |        |        |        |
| 2539   |        |        |        |        |
| 2540   |        |        |        |        |
| 2543   |        |        |        |        |
| 2546   | 1      |        |        |        |
| 2547   |        |        |        |        |
| 2549   |        |        |        |        |
| 2553   |        |        |        |        |
| 2554   |        |        |        |        |
| 2555   |        |        |        |        |
| 2556   |        |        |        |        |
| 2557   |        |        |        |        |
| 2559   |        |        |        |        |
| 2560   | 2      |        | 2      |        |
| 2561   |        |        |        |        |
| 2566   |        |        |        |        |
| 2567   |        |        |        |        |
| 2570   |        |        |        |        |
| 2574   |        |        |        |        |
| 2578   |        |        |        |        |
| 2580   |        |        |        |        |
| 2590   |        |        |        |        |
| 2593   |        |        |        |        |
| 2594   |        |        |        |        |

| respid | Q31b_3 | Q31b_4 | Q31b_5 | Q31b_6 |
|--------|--------|--------|--------|--------|
| 2595   |        |        |        |        |
| 2596   |        |        |        |        |
| 2597   |        |        |        | 2      |
| 2598   |        |        |        |        |
| 2602   |        |        | 0      |        |
| 2605   |        |        |        |        |
| 2606   |        |        |        |        |
| 2607   |        |        |        |        |
| 2608   |        |        |        |        |
| 2609   |        |        |        |        |
| 2610   |        |        |        |        |
| 2614   |        |        |        |        |
| 2615   |        |        |        |        |
| 2616   |        |        |        |        |
| 2618   |        |        |        |        |
| 2630   |        |        |        |        |
| 2633   |        |        |        |        |
| 2637   |        |        |        |        |
| 2638   |        |        |        |        |
| 2641   |        |        |        |        |
| 2644   |        |        |        |        |
| 2645   |        |        |        |        |
| 2646   |        |        |        |        |
| 2648   |        |        |        |        |
| 2651   |        |        |        |        |
| 2652   | 1      |        |        |        |
| 2653   |        |        |        |        |
| 2656   |        |        |        |        |
| 2657   |        |        |        |        |
| 2658   |        |        |        |        |
| 2661   | 1      | 1      |        |        |
| 2663   |        |        |        |        |

| respid | Q31b_3 | Q31b_4 | Q31b_5 | Q31b_6 |
|--------|--------|--------|--------|--------|
| 2665   |        |        |        |        |
| 2670   |        |        |        |        |
| 2672   |        |        |        |        |
| 2673   |        |        |        |        |
| 2677   |        |        |        |        |
| 2686   | 3      | 4      | 3      |        |
| 2688   |        |        |        |        |
| 2689   |        |        |        |        |
| 2691   |        |        |        |        |
| 2695   |        |        |        |        |
| 2696   |        |        |        |        |
| 2697   |        |        |        |        |
| 2698   |        |        |        |        |
| 2703   | 2      |        |        |        |
| 2704   |        |        |        |        |
| 2706   |        |        |        |        |
| 2707   |        |        |        |        |
| 2710   |        |        |        |        |
| 2711   |        |        |        |        |
| 2712   |        |        |        |        |
| 2713   |        |        |        |        |
| 2721   |        |        |        |        |
| 2730   |        |        |        |        |
| 2731   |        |        |        |        |
| 2732   |        |        |        |        |
| 2733   |        |        |        |        |
| 2735   |        |        |        |        |
| 2736   |        |        |        |        |
| 2740   |        |        |        |        |
| 2741   |        |        |        |        |
| 2742   |        |        |        |        |
| 2743   |        |        |        |        |



| respid | Q31b_3 | Q31b_4 | Q31b_5 | Q31b_6 |
|--------|--------|--------|--------|--------|
| 2744   |        |        |        |        |
| 2745   |        |        |        |        |
| 2749   |        |        |        |        |
| 2751   |        |        |        |        |
| 2754   |        |        |        |        |
| 2755   |        |        |        |        |
| 2757   |        |        |        |        |
| 2758   |        |        | 2      |        |
| 2759   |        |        |        |        |
| 2761   | 1      |        |        |        |
| 2762   |        |        |        |        |
| 2763   |        |        |        |        |
| 2764   | 1      |        | 1      |        |
| 2765   |        |        |        | 1      |
| 2766   |        |        |        |        |
| 2767   |        |        |        |        |
| 2769   | 1      |        | 2      |        |
| 2770   |        |        |        |        |
| 2771   |        | 1      |        |        |
| 2774   |        |        | 2      |        |
| 2777   | 2      | 3      | 2      |        |
| 2778   |        |        |        |        |
| 2781   |        |        |        |        |
| 2782   |        |        |        |        |
| 2784   |        |        |        |        |
| 2785   |        |        |        |        |
| 2786   |        |        |        |        |
| 2787   |        |        |        |        |
| 2789   | 1      |        |        |        |
| 2790   |        |        |        |        |
| 2791   |        |        |        |        |
| 2793   |        |        |        |        |

| respid | Q31b_3 | Q31b_4 | Q31b_5 | Q31b_6 |
|--------|--------|--------|--------|--------|
| 2797   |        |        |        |        |
| 2798   |        |        |        |        |
| 2799   | 1      |        |        |        |
| 2801   |        |        |        |        |
| 2802   |        |        |        | 4      |
| 2803   |        |        |        |        |
| 2804   |        | 1      |        |        |
| 2807   |        |        |        |        |
| 2809   |        |        |        |        |
| 2810   |        |        |        |        |
| 2812   |        |        |        |        |
| 2814   |        |        |        |        |
| 2815   |        |        |        |        |
| 2816   |        |        |        |        |
| 2817   |        |        |        |        |
| 2819   |        |        |        |        |
| 2820   |        |        |        |        |
| 2821   |        |        |        |        |
| 2822   | 1      | 1      | 1      |        |
| 2823   | 2      |        |        |        |
| 2824   |        |        |        |        |
| 2825   |        |        |        |        |
| 2826   |        |        |        |        |
| 2827   |        |        |        |        |
| 2828   |        |        |        |        |
| 2829   |        |        |        |        |
| 2830   |        | 1      |        |        |
| 2831   |        |        |        |        |
| 2832   | 4      |        | 2      |        |
| 2833   |        |        |        |        |
| 2834   |        |        |        |        |
| 2835   | 2      |        |        | 3      |

| respid | Q31b_3 | Q31b_4 | Q31b_5 | Q31b_6 |
|--------|--------|--------|--------|--------|
| 2836   |        |        |        |        |
| 2837   |        |        |        |        |
| 2838   | 2      |        |        |        |
| 2844   |        | 3      |        |        |
| 2845   |        |        |        |        |
| 2847   |        |        |        |        |
| 2848   |        |        |        |        |
| 2849   |        |        |        |        |
| 2851   |        |        |        |        |
| 2852   | 1      |        |        |        |
| 2853   |        |        |        |        |
| 2854   |        |        |        |        |
| 2856   |        |        |        |        |
| 2857   |        |        |        |        |
| 2858   |        |        |        |        |
| 2859   |        |        |        | 2      |
| 2860   |        |        |        |        |
| 2861   |        |        | 2      |        |
| 2863   |        |        |        |        |
| 2864   |        |        |        |        |
| 2866   | 3      |        |        |        |
| 2872   |        |        |        |        |
| 2875   |        |        |        |        |
| 2879   |        |        |        |        |
| 2881   |        |        |        |        |
| 2882   |        |        |        |        |
| 2883   |        |        |        |        |
| 2884   |        |        |        |        |
| 2885   | 1      |        |        |        |
| 2887   |        |        |        |        |
| 2888   |        |        |        |        |
| 2890   |        |        |        |        |

| respid | Q31b_3 | Q31b_4 | Q31b_5 | Q31b_6 |
|--------|--------|--------|--------|--------|
| 2891   |        |        |        |        |
| 2892   |        |        |        |        |
| 2895   |        |        |        |        |
| 2899   |        |        |        |        |
| 2900   |        |        |        |        |
| 2902   |        |        |        |        |
| 2903   |        |        |        |        |
| 2904   |        |        |        |        |
| 2906   | 1      |        |        |        |
| 2908   |        |        |        |        |
| 2910   |        |        |        |        |
| 2917   |        |        |        |        |
| 2918   |        |        |        |        |
| 2919   |        |        |        |        |
| 2920   |        |        |        |        |
| 2921   |        |        |        |        |
| 2922   |        |        |        |        |
| 2923   |        |        |        |        |
| 2924   | 2      | 2      |        | 3      |
| 2926   | 1      |        |        |        |
| 2928   |        |        |        |        |
| 2930   |        |        |        |        |
| 2931   |        |        |        |        |
| 2933   |        |        |        |        |
| 2935   |        |        |        |        |
| 2936   |        |        |        |        |
| 2937   |        |        |        |        |
| 2938   |        |        |        |        |
| 2944   |        |        |        |        |
| 2945   |        |        |        |        |
| 2947   |        |        |        |        |
| 2949   |        |        |        |        |

| respid | Q31b_3 | Q31b_4 | Q31b_5 | Q31b_6 |
|--------|--------|--------|--------|--------|
| 2951   |        | 4      |        |        |
| 2952   |        |        |        |        |
| 2953   |        |        |        |        |
| 2955   |        |        |        |        |
| 2957   |        |        |        |        |
| 2958   |        |        |        |        |
| 2960   |        |        |        |        |
| 2963   |        |        |        |        |
| 2964   |        |        |        |        |
| 2967   |        |        |        |        |
| 2968   |        |        |        |        |
| 2971   |        |        |        |        |
| 2974   |        |        |        |        |
| 2975   |        |        |        |        |
| 2982   |        |        |        |        |
| 2983   |        |        |        |        |
| 2985   |        |        |        |        |
| 2986   |        | 2      | 2      |        |
| 2987   |        |        |        |        |
| 2988   |        | 2      |        |        |
| 2993   |        |        |        |        |
| 2996   |        |        |        |        |
| 2997   |        |        |        |        |
| 2998   |        |        |        |        |
| 3004   |        |        |        |        |
| 3007   |        |        |        |        |
| 3011   |        |        |        |        |
| 3012   |        |        |        |        |
| 3013   |        |        |        |        |
| 3014   |        |        |        |        |
| 3015   |        |        |        |        |
| 3016   |        |        |        |        |

| respid | Q31b_3 | Q31b_4 | Q31b_5 | Q31b_6 |
|--------|--------|--------|--------|--------|
| 3017   |        |        |        |        |
| 3020   |        |        |        |        |
| 3022   |        |        |        |        |
| 3023   |        |        |        |        |
| 3026   | 1      |        |        |        |
| 3038   |        |        |        |        |
| 3039   |        |        |        |        |
| 3040   |        |        |        |        |
| 3041   |        |        |        |        |
| 3042   |        |        |        |        |
| 3044   |        |        |        |        |
| 3050   |        |        |        |        |
| 3052   |        |        |        |        |
| 3056   | 2      |        |        |        |
| 3059   |        |        |        |        |
| 3060   |        |        |        |        |
| 3063   |        |        |        |        |
| 3065   |        |        |        |        |
| 3067   |        |        |        |        |
| 3068   |        |        |        |        |
| 3072   |        |        |        |        |
| 3074   |        |        |        |        |
| 3075   |        |        |        |        |
| 3076   |        |        |        |        |
| 3079   |        |        |        |        |
| 3082   | 3      |        |        |        |
| 3083   |        |        |        |        |
| 3084   |        |        |        | 0      |
| 3085   |        |        |        |        |
| 3090   |        |        |        |        |
| 3091   | 2      |        |        |        |
| 3092   |        |        |        |        |

| respid | Q31b_3 | Q31b_4 | Q31b_5 | Q31b_6 |
|--------|--------|--------|--------|--------|
| 3095   |        |        |        |        |
| 3096   |        | 3      |        | 3      |
| 3097   |        |        |        |        |
| 3099   |        |        | 3      | 3      |
| 3101   | 1      |        |        |        |
| 3103   |        |        |        |        |
| 3104   |        |        |        |        |
| 3105   |        |        |        |        |
| 3107   |        |        |        |        |
| 3108   |        |        |        |        |
| 3109   |        |        |        |        |
| 3116   |        |        |        |        |
| 3117   | 1      |        |        |        |
| 3119   |        |        |        |        |
| 3120   |        |        |        |        |
| 3130   | 2      |        |        |        |
| 3131   |        |        |        |        |
| 3133   |        |        |        |        |
| 3134   |        |        |        |        |
| 3135   |        |        |        |        |
| 3145   |        |        |        |        |
| 3147   |        |        |        |        |
| 3152   |        |        |        |        |
| 3155   |        |        | 2      |        |
| 3156   |        |        |        |        |
| 3157   |        |        | 2      |        |
| 3166   |        |        |        |        |
| 3169   |        |        | 2      |        |
| 3179   |        |        |        |        |
| 3181   |        |        |        |        |
| 3185   |        |        |        |        |
| 3190   |        |        |        |        |

| respid | Q31b_3 | Q31b_4 | Q31b_5 | Q31b_6 |
|--------|--------|--------|--------|--------|
| 3191   |        |        |        |        |
| 3192   |        |        |        |        |
| 3193   |        |        |        |        |
| 3195   |        |        |        |        |
| 3202   |        |        | 0      | 1      |
| 3204   |        |        |        |        |
| 3208   |        |        |        |        |
| 3212   |        |        |        |        |
| 3218   |        |        |        |        |
| 3219   |        |        |        |        |
| 3220   | 1      |        |        |        |
| 3221   |        |        |        |        |
| 3223   |        |        |        |        |
| 3231   |        |        | 1      |        |
| 3232   |        | 1      |        |        |
| 3234   |        |        |        |        |
| 3235   |        |        |        |        |
| 3237   |        |        |        |        |
| 3238   |        |        |        |        |
| 3240   |        |        |        |        |
| 3241   |        |        |        |        |
| 3243   |        |        |        |        |
| 3244   |        |        |        |        |
| 3247   |        |        |        |        |
| 3250   |        |        |        |        |
| 3251   | 3      | 2      |        |        |
| 3255   |        |        |        |        |
| 3256   |        |        |        |        |
| 3257   | 1      |        |        |        |
| 3258   |        |        |        |        |
| 3259   | 2      | 2      |        |        |
| 3260   |        |        |        |        |



| respid | Q31b_3 | Q31b_4 | Q31b_5 | Q31b_6 |
|--------|--------|--------|--------|--------|
| 3261   |        |        |        |        |
| 3262   |        |        |        |        |
| 3264   | 3      | 3      | 3      |        |
| 3265   |        |        |        |        |
| 3267   |        |        |        |        |
| 3268   |        |        |        |        |
| 3270   |        |        |        |        |
| 3271   |        |        |        |        |
| 3274   |        |        |        |        |
| 3276   |        |        |        |        |
| 3277   |        |        |        |        |
| 3279   |        |        |        |        |
| 3281   |        |        |        |        |
| 3283   |        |        |        |        |
| 3285   |        |        |        |        |
| 3286   |        |        |        |        |
| 3287   |        |        |        |        |
| 3289   |        |        |        |        |
| 3290   |        |        |        |        |
| 3291   |        |        |        |        |
| 3292   | 1      | 2      |        |        |
| 3293   | 2      |        |        |        |
| 3294   |        |        |        |        |
| 3296   |        | 2      |        |        |
| 3306   | 1      |        |        |        |
| 3307   | 3      | 4      |        | 3      |
| 3308   |        |        |        |        |
| 3312   |        |        |        |        |
| 3313   |        |        |        |        |
| 3316   |        |        |        |        |
| 3317   |        |        |        |        |
| 3320   |        |        |        |        |

| respid | Q31b_3 | Q31b_4 | Q31b_5 | Q31b_6 |
|--------|--------|--------|--------|--------|
| 3321   |        |        |        |        |
| 3322   |        |        |        |        |
| 3323   |        |        |        |        |
| 3325   |        |        |        |        |
| 3332   |        |        |        |        |
| 3334   |        |        |        |        |
| 3335   |        |        |        |        |
| 3341   |        |        |        |        |
| 3345   |        |        |        |        |
| 3346   |        |        |        |        |
| 3349   |        |        |        |        |
| 3351   |        |        |        |        |
| 3353   |        |        |        |        |
| 3354   |        |        |        |        |
| 3356   |        |        |        |        |
| 3357   |        |        |        |        |
| 3360   | 0      |        |        |        |
| 3361   |        |        |        |        |
| 3362   |        |        |        |        |
| 3363   |        |        |        |        |
| 3364   | 3      | 3      | 4      |        |
| 3368   |        |        |        |        |
| 3370   |        |        |        |        |
| 3371   |        |        |        |        |
| 3379   |        |        |        |        |
| 3380   |        | 0      | 1      |        |
| 3382   |        |        |        |        |
| 3384   |        |        |        | 0      |
| 3385   |        |        |        |        |
| 3388   |        |        |        |        |
| 3392   |        |        | 1      |        |
| 3393   |        |        |        |        |

| respid | Q31b_3 | Q31b_4 | Q31b_5 | Q31b_6 |
|--------|--------|--------|--------|--------|
| 3394   |        | 1      | 2      |        |
| 3395   |        |        |        |        |
| 3396   |        |        |        |        |
| 3397   |        |        |        |        |
| 3398   |        |        |        |        |
| 3399   |        |        |        |        |
| 3400   |        |        |        |        |
| 3401   | 3      | 3      |        | 3      |
| 3402   |        |        |        |        |
| 3403   |        |        |        | 1      |
| 3405   | 1      |        | 2      |        |
| 3407   |        |        |        |        |
| 3410   |        |        |        |        |
| 3411   |        |        |        |        |
| 3413   |        |        |        |        |
| 3414   | 1      |        |        |        |
| 3420   |        |        |        |        |
| 3421   | 2      | 2      |        |        |
| 3425   |        |        |        |        |
| 3426   |        |        |        |        |
| 3429   |        |        |        |        |
| 3430   | 1      | 2      | 3      | 2      |
| 3433   |        |        |        |        |
| 3434   | 3      |        |        |        |
| 3437   |        |        |        |        |
| 3439   |        |        |        |        |
| 3441   |        |        |        |        |
| 3442   |        |        |        |        |
| 3444   |        |        |        |        |
| 3445   |        |        |        |        |
| 3450   |        |        |        |        |
| 3452   |        |        |        |        |

| respid | Q31b_3 | Q31b_4 | Q31b_5 | Q31b_6 |
|--------|--------|--------|--------|--------|
| 3456   |        |        |        |        |
| 3459   |        |        |        |        |
| 3460   |        |        |        |        |
| 3461   |        |        |        |        |
| 3466   |        |        |        |        |
| 3471   |        |        |        |        |
| 3473   |        |        |        |        |
| 3475   |        |        |        |        |
| 3476   |        |        |        |        |
| 3477   |        |        |        | 1      |
| 3478   |        |        |        |        |
| 3479   | 0      |        |        |        |
| 3482   |        |        |        |        |
| 3483   |        |        |        |        |
| 3485   |        | 2      |        |        |
| 3489   |        |        |        |        |
| 3490   | 1      |        |        |        |
| 3491   | 1      |        |        |        |
| 3494   |        |        |        |        |
| 3495   |        |        |        |        |
| 3501   |        |        |        |        |
| 3506   |        |        |        |        |
| 3507   |        |        |        |        |
| 3517   | 1      |        |        |        |
| 3520   |        |        |        |        |
| 3521   |        |        |        |        |
| 3522   |        | 1      |        |        |
| 3524   |        |        |        |        |
| 3527   |        |        |        |        |
| 3528   |        |        |        |        |
| 3529   |        |        |        |        |
| 3536   | 2      |        |        |        |

| respid | Q31b_3 | Q31b_4 | Q31b_5 | Q31b_6 |
|--------|--------|--------|--------|--------|
| 3537   |        |        |        |        |
| 3538   |        |        |        |        |
| 3540   | 1      |        | 2      |        |
| 3545   |        |        |        |        |
| 3547   |        |        |        |        |
| 3554   |        |        |        |        |
| 3556   |        |        |        |        |
| 3557   |        |        |        |        |
| 3559   |        |        |        |        |
| 3560   |        |        |        |        |
| 3562   |        |        |        |        |
| 3564   | 1      |        |        |        |
| 3565   |        |        |        |        |
| 3568   |        |        |        |        |
| 3572   |        |        |        |        |
| 3578   |        |        |        |        |
| 3581   |        |        |        |        |
| 3583   | 1      | 1      |        |        |
| 3588   |        |        |        |        |
| 3591   |        |        |        |        |
| 3594   |        |        |        |        |
| 3595   |        |        |        |        |
| 3596   | 1      |        |        |        |
| 3597   |        |        |        |        |
| 3598   |        |        |        |        |
| 3600   |        |        |        | 0      |
| 3602   |        |        |        |        |
| 3604   |        |        |        |        |
| 3605   |        |        |        |        |
| 3606   |        |        |        |        |
| 3607   |        |        |        |        |
| 3610   |        |        |        |        |

| respid | Q31b_3 | Q31b_4 | Q31b_5 | Q31b_6 |
|--------|--------|--------|--------|--------|
| 3611   |        |        |        |        |
| 3612   |        |        |        |        |
| 3614   | 2      |        | 2      |        |
| 3616   |        |        |        |        |
| 3617   |        |        | 1      |        |
| 3618   |        |        |        |        |
| 3619   |        |        |        |        |
| 3621   |        |        |        |        |
| 3622   | 2      |        |        |        |
| 3624   |        |        |        |        |
| 3626   |        |        |        |        |
| 3629   |        |        |        |        |
| 3631   |        |        |        |        |
| 3632   |        |        |        |        |
| 3638   |        |        |        |        |
| 3640   |        |        |        |        |
| 3641   |        | 1      |        |        |
| 3645   | 1      |        |        |        |
| 3650   |        |        |        |        |
| 3653   |        | 2      |        |        |
| 3655   |        |        |        |        |
| 3657   | 2      | 1      | 1      |        |
| 3658   |        |        |        |        |
| 3659   |        |        |        |        |
| 3664   | 1      | 2      | 3      |        |
| 3665   |        |        |        |        |
| 3667   |        |        |        |        |
| 3668   |        | 2      |        | 2      |
| 3675   |        |        |        |        |
| 3678   |        |        |        |        |
| 3680   |        |        |        |        |
| 3684   |        |        |        |        |

| respid | Q31b_3 | Q31b_4 | Q31b_5 | Q31b_6 |
|--------|--------|--------|--------|--------|
| 3685   |        |        |        |        |
| 3687   |        |        |        |        |
| 3689   |        | 2      |        |        |
| 3690   |        |        |        |        |
| 3693   |        |        |        |        |
| 3694   |        |        |        |        |
| 3695   |        |        |        |        |
| 3700   |        |        |        |        |
| 3701   |        |        |        |        |
| 3703   | 2      |        |        |        |
| 3704   | 2      |        |        |        |
| 3705   |        |        |        |        |
| 3709   |        |        |        |        |
| 3710   | 3      |        |        |        |
| 3722   |        |        |        |        |
| 3725   |        |        |        |        |
| 3726   |        |        |        |        |
| 3727   |        |        |        |        |
| 3728   |        |        |        |        |
| 3729   |        |        |        |        |
| 3731   |        |        |        |        |
| 3738   |        |        |        |        |
| 3739   |        |        |        |        |
| 3740   |        |        |        |        |
| 3749   |        |        |        |        |
| 3758   |        |        |        |        |
| 3762   |        |        |        |        |
| 3765   |        |        |        |        |
| 3770   |        |        |        |        |
| 3771   |        |        |        |        |
| 3778   |        |        |        |        |
| 3779   |        |        |        |        |

| respid | Q31b_3 | Q31b_4 | Q31b_5 | Q31b_6 |
|--------|--------|--------|--------|--------|
| 3780   |        |        |        |        |
| 3782   |        |        |        |        |
| 3784   |        |        |        |        |
| 3787   |        |        |        |        |
| 3790   |        |        |        |        |
| 3791   |        |        |        |        |
| 3793   |        |        |        |        |
| 3795   |        |        |        |        |
| 3799   |        |        |        |        |
| 3801   |        |        |        |        |
| 3804   |        |        |        |        |
| 3809   |        |        |        |        |
| 3810   | 1      |        |        |        |
| 3813   | 2      |        |        |        |
| 3816   |        |        |        |        |
| 3820   |        |        |        |        |
| 3821   |        |        |        |        |
| 3823   |        |        |        |        |
| 3828   |        |        |        |        |
| 3829   |        |        |        |        |
| 3832   |        |        |        |        |
| 3835   | 1      | 1      |        |        |
| 3837   |        |        |        |        |
| 3838   |        |        |        |        |
| 3839   | 4      |        | 3      |        |
| 3840   |        |        |        |        |
| 3842   |        |        |        |        |
| 3843   |        |        |        |        |
| 3844   | 1      |        |        |        |
| 3850   |        |        |        |        |
| 3851   |        |        |        |        |
| 3856   |        |        |        |        |



| respid | Q31b_3 | Q31b_4 | Q31b_5 | Q31b_6 |
|--------|--------|--------|--------|--------|
| 3859   |        |        |        |        |
| 3860   |        |        |        |        |
| 3863   |        |        |        |        |
| 3866   |        |        |        |        |
| 3867   |        |        |        |        |
| 3870   |        |        |        |        |
| 3873   |        |        |        |        |
| 3875   |        |        |        |        |
| 3878   |        |        |        |        |
| 3881   | 1      |        |        |        |
| 3883   | 3      |        |        | 2      |
| 3884   |        |        |        |        |
| 3885   | 3      | 3      | 2      | 3      |
| 3886   |        |        |        |        |
| 3887   |        |        |        |        |
| 3888   |        |        |        |        |
| 3889   | 3      |        |        |        |
| 3890   |        |        |        |        |
| 3896   | 1      |        |        |        |
| 3902   | 3      | 3      | 2      |        |
| 3909   |        |        |        |        |
| 3912   |        |        |        |        |
| 3922   | 1      |        | 0      |        |
| 3928   | 0      |        |        |        |
| 3930   |        |        |        |        |
| 3931   |        |        |        |        |
| 3933   |        |        | 2      |        |
| 3935   | 0      |        |        |        |
| 3937   |        |        |        |        |
| 3939   |        |        |        |        |
| 3942   |        |        |        |        |
| 3943   |        | 1      |        |        |

| respid | Q31b_3 | Q31b_4 | Q31b_5 | Q31b_6 |
|--------|--------|--------|--------|--------|
| 3944   |        |        |        |        |
| 3945   |        |        |        |        |
| 3947   |        |        |        |        |
| 3948   |        |        |        |        |
| 3951   |        |        |        |        |
| 3959   |        |        |        |        |
| 3969   |        |        |        |        |
| 3973   |        |        |        |        |
| 3975   |        |        |        |        |
| 3976   |        |        |        |        |
| 3977   |        |        |        | 1      |
| 3978   | 0      |        |        |        |
| 3994   |        |        |        |        |
| 3995   |        |        |        |        |
| 3997   |        |        |        |        |
| 3998   |        |        |        |        |
| 3999   | 1      |        |        |        |
| 4002   |        | 2      |        |        |
| 4004   |        |        |        | 1      |
| 4005   |        |        |        |        |
| 4006   |        |        |        |        |
| 4008   |        |        |        |        |
| 4010   |        |        |        |        |
| 4011   |        |        |        |        |
| 4013   |        |        |        |        |
| 4014   |        |        |        |        |
| 4016   | 0      |        |        |        |
| 4017   |        |        |        |        |
| 4019   |        | 1      |        |        |
| 4021   |        |        |        |        |
| 4023   |        |        |        |        |
| 4024   |        |        |        |        |

| respid | Q31b_3 | Q31b_4 | Q31b_5 | Q31b_6 |
|--------|--------|--------|--------|--------|
| 4025   |        | 1      |        |        |
| 4027   |        |        |        |        |
| 4032   |        |        |        |        |
| 4034   |        |        |        |        |
| 4035   |        |        |        |        |
| 4037   |        |        |        |        |
| 4040   |        |        |        |        |
| 4041   |        |        |        |        |
| 4042   | 2      |        |        |        |
| 4043   | 3      |        |        |        |
| 4045   | 2      | 2      | 1      |        |
| 4046   | 2      |        |        |        |
| 4048   | 1      |        |        |        |
| 4049   |        |        |        |        |
| 4050   |        |        |        |        |
| 4052   |        |        |        |        |
| 4053   |        |        |        |        |
| 4060   |        |        |        |        |
| 4065   |        |        |        | 2      |
| 4066   |        |        |        |        |
| 4067   |        |        |        |        |
| 4068   |        |        |        |        |
| 4069   |        |        |        |        |
| 4070   |        |        |        |        |
| 4071   |        |        |        |        |
| 4072   |        |        |        |        |
| 4073   |        |        |        |        |
| 4074   |        |        |        |        |
| 4075   |        |        |        |        |
| 4078   |        |        |        |        |
| 4080   |        |        |        |        |
| 4081   |        |        |        |        |

| respid | Q31b_3 | Q31b_4 | Q31b_5 | Q31b_6 |
|--------|--------|--------|--------|--------|
| 4082   |        | 1      |        |        |
| 4083   |        |        |        |        |
| 4084   |        |        |        |        |
| 4086   |        |        |        |        |
| 4087   |        |        |        |        |
| 4088   |        |        |        |        |
| 4089   |        |        |        |        |
| 4090   |        |        |        |        |
| 4093   |        |        |        |        |
| 4094   |        |        |        |        |
| 4095   |        |        |        |        |
| 4096   |        |        |        |        |
| 4098   |        |        |        |        |
| 4103   |        |        |        | 1      |
| 4104   | 2      | 2      |        |        |
| 4107   |        |        |        |        |
| 4109   |        |        |        |        |
| 4110   | 3      |        |        |        |
| 4113   |        |        |        |        |
| 4114   |        |        |        |        |
| 4116   |        |        |        |        |
| 4119   |        |        |        |        |
| 4120   |        |        |        |        |
| 4121   |        |        |        |        |
| 4122   |        | 0      |        |        |
| 4124   |        |        |        |        |
| 4126   |        |        |        |        |
| 4127   |        |        |        |        |
| 4131   |        |        |        |        |
| 4134   |        |        |        |        |
| 4144   |        |        |        |        |
| 4145   |        |        |        |        |

| respid | Q31b_3 | Q31b_4 | Q31b_5 | Q31b_6 |
|--------|--------|--------|--------|--------|
| 4146   |        |        |        |        |
| 4147   |        |        |        |        |
| 4149   |        |        | 1      |        |
| 4150   |        |        |        |        |
| 4151   |        |        |        |        |
| 4153   |        |        |        |        |
| 4155   | 1      |        |        |        |
| 4157   |        |        |        |        |
| 4159   |        |        |        |        |
| 4160   |        |        |        |        |
| 4161   |        |        |        |        |
| 4163   |        |        |        |        |
| 4164   |        |        |        |        |
| 4165   |        |        |        |        |
| 4166   |        |        |        |        |
| 4167   |        |        |        |        |
| 4170   |        |        |        |        |
| 4172   |        |        |        |        |
| 4173   |        |        |        |        |
| 4180   |        | 1      |        |        |
| 4185   |        |        |        |        |
| 4187   |        |        |        |        |
| 4190   |        |        |        |        |
| 4191   |        |        |        |        |
| 4193   |        |        |        |        |
| 4194   |        |        |        |        |
| 4195   |        |        |        |        |
| 4196   |        |        |        |        |
| 4197   |        |        |        |        |
| 4198   | 0      |        |        |        |
| 4199   | 2      | 2      |        |        |
| 4205   |        |        |        |        |

| respid | Q31b_3 | Q31b_4 | Q31b_5 | Q31b_6 |
|--------|--------|--------|--------|--------|
| 4206   |        |        |        |        |
| 4207   |        |        |        |        |
| 4214   |        |        |        |        |
| 4215   |        |        |        |        |
| 4217   |        |        |        |        |
| 4219   |        |        |        |        |
| 4223   |        |        |        |        |
| 4226   |        |        |        |        |
| 4229   |        |        |        |        |
| 4230   |        |        |        |        |
| 4232   | 1      | 1      |        |        |
| 4233   |        |        |        |        |
| 4234   |        |        |        |        |
| 4235   |        |        |        |        |
| 4236   | 1      |        |        |        |
| 4237   |        |        |        |        |
| 4238   |        |        |        |        |
| 4240   | 1      |        |        |        |
| 4241   |        |        |        |        |
| 4247   |        |        |        |        |
| 4250   |        |        |        |        |
| 4251   |        |        |        |        |
| 4253   |        |        |        | 1      |
| 4254   |        |        |        |        |
| 4258   |        |        |        |        |
| 4260   |        |        |        |        |
| 4263   |        |        |        |        |
| 4265   |        |        |        |        |
| 4266   |        |        |        |        |
| 4267   |        |        |        |        |
| 4270   |        |        |        |        |
| 4273   |        |        |        |        |

| respid | Q31b_3 | Q31b_4 | Q31b_5 | Q31b_6 |
|--------|--------|--------|--------|--------|
| 4280   |        |        |        |        |
| 4281   |        |        |        |        |
| 4282   |        |        |        |        |
| 4283   |        |        |        |        |
| 4286   |        |        |        |        |
| 4287   |        |        |        |        |
| 4289   |        |        |        |        |
| 4290   |        | 2      |        |        |
| 4291   | 1      |        |        |        |
| 4292   |        |        |        |        |
| 4293   |        |        |        |        |
| 4294   |        |        |        |        |
| 4295   |        |        |        |        |
| 4296   | 1      |        |        |        |
| 4297   |        |        |        |        |
| 4298   | 1      |        |        |        |
| 4299   | 1      |        |        |        |
| 4300   |        |        |        |        |
| 4301   |        |        |        |        |
| 4302   |        |        |        |        |
| 4304   |        |        |        |        |
| 4305   |        |        |        |        |
| 4307   |        |        |        |        |
| 4308   |        |        |        |        |
| 4312   |        |        |        |        |
| 4314   | 2      |        |        |        |
| 4316   |        |        |        |        |
| 4317   |        |        |        |        |
| 4319   |        |        |        |        |
| 4323   |        |        |        |        |
| 4337   |        |        |        |        |
| 4341   |        |        |        |        |

| respid | Q31b_3 | Q31b_4 | Q31b_5 | Q31b_6 |
|--------|--------|--------|--------|--------|
| 4342   |        |        |        |        |
| 4344   |        |        |        |        |
| 4345   | 1      |        |        |        |
| 4346   |        |        |        |        |
| 4347   |        |        |        |        |
| 4350   |        |        |        |        |
| 4352   |        |        |        |        |
| 4353   |        |        |        |        |
| 4355   |        |        |        |        |
| 4356   |        |        |        |        |
| 4358   |        |        |        |        |
| 4359   |        |        |        |        |
| 4360   |        |        |        |        |
| 4361   |        |        |        | 2      |
| 4363   |        |        |        |        |
| 4364   |        |        |        |        |
| 4365   |        |        |        |        |
| 4367   |        |        |        |        |
| 4369   |        |        |        | 1      |
| 4373   |        |        |        |        |
| 4374   |        | 2      |        |        |
| 4375   |        |        |        |        |
| 4378   | 0      |        |        |        |
| 4379   |        |        |        |        |
| 4382   |        |        |        |        |
| 4383   |        |        |        |        |
| 4384   |        |        |        |        |
| 4385   |        |        |        | 1      |
| 4388   |        |        |        |        |
| 4389   |        |        |        |        |
| 4391   |        |        |        |        |
| 4392   |        |        |        |        |



| respid | Q31b_3 | Q31b_4 | Q31b_5 | Q31b_6 |
|--------|--------|--------|--------|--------|
| 4393   |        |        |        |        |
| 4395   |        |        |        |        |
| 4397   |        |        |        |        |
| 4398   |        |        |        |        |
| 4399   |        |        |        |        |
| 4400   |        |        |        |        |
| 4401   |        |        |        |        |
| 4402   | 0      |        |        |        |
| 4404   |        |        |        |        |
| 4405   |        |        |        |        |
| 4407   |        |        |        |        |
| 4408   |        |        |        |        |
| 4411   |        |        |        |        |
| 4420   | 2      | 2      |        |        |
| 4421   |        |        |        |        |
| 4424   | 4      | 4      |        | 3      |
| 4425   |        |        |        |        |
| 4427   |        |        |        |        |
| 4430   |        |        |        |        |
| 4431   |        |        |        |        |
| 4432   |        |        |        |        |
| 4436   |        |        |        |        |
| 4439   |        |        |        |        |
| 4451   |        |        |        |        |
| 4452   | 3      |        |        |        |
| 4458   |        |        |        |        |
| 4464   |        |        |        |        |
| 4465   |        |        |        |        |
| 4467   |        |        |        |        |
| 4470   |        |        |        |        |
| 4471   |        |        |        |        |
| 4472   |        |        |        |        |

| respid | Q31b_3 | Q31b_4 | Q31b_5 | Q31b_6 |
|--------|--------|--------|--------|--------|
| 4473   |        |        |        |        |
| 4475   | 1      |        |        |        |
| 4476   | 2      |        |        |        |
| 4478   |        |        |        |        |
| 4485   | 1      | 1      |        |        |
| 4486   | 1      |        |        |        |
| 4490   |        |        |        |        |
| 4502   |        |        |        |        |
| 4503   |        |        |        |        |
| 4504   |        |        |        |        |
| 4506   | 0      |        |        |        |
| 4508   |        |        |        |        |
| 4515   |        |        |        |        |
| 4516   |        |        |        | 2      |
| 4519   |        |        |        |        |
| 4523   |        |        |        |        |
| 4525   |        |        |        |        |
| 4526   |        |        |        |        |
| 4528   |        |        |        |        |
| 4530   |        |        |        |        |
| 4531   | 1      |        |        |        |
| 4532   |        |        |        |        |
| 4537   |        |        |        |        |
| 4538   |        |        |        |        |
| 4539   |        |        |        |        |
| 4541   |        |        |        |        |
| 4543   |        |        |        |        |
| 4544   |        |        |        |        |
| 4546   |        |        |        |        |
| 4547   |        |        |        |        |
| 4549   |        |        |        |        |
| 4550   |        |        |        |        |

| respid | Q31b_3 | Q31b_4 | Q31b_5 | Q31b_6 |
|--------|--------|--------|--------|--------|
| 4551   |        |        |        |        |
| 4554   |        |        |        |        |
| 4557   |        |        |        |        |
| 4565   |        |        |        |        |
| 4568   |        |        |        |        |
| 4569   | 1      |        |        |        |
| 4570   |        |        |        |        |
| 4572   |        |        |        |        |
| 4574   |        |        |        |        |
| 4576   |        |        |        |        |
| 4578   |        |        |        |        |
| 4579   |        |        |        |        |
| 4580   | 1      |        |        |        |
| 4581   |        |        |        |        |
| 4584   |        |        |        |        |
| 4586   |        |        |        |        |
| 4587   |        |        | 3      |        |
| 4590   |        |        |        |        |
| 4592   |        |        |        |        |
| 4593   | 1      |        |        |        |
| 4595   |        |        |        |        |
| 4597   |        |        |        |        |
| 4598   |        |        |        |        |
| 4599   |        |        |        |        |
| 4600   |        |        |        |        |
| 4601   |        |        |        |        |
| 4608   |        |        |        |        |
| 4609   |        |        |        |        |
| 4611   |        |        |        |        |
| 4612   |        |        |        |        |
| 4613   |        |        |        |        |
| 4616   | 1      |        |        |        |

| respid | Q31b_3 | Q31b_4 | Q31b_5 | Q31b_6 |
|--------|--------|--------|--------|--------|
| 4617   |        |        |        |        |
| 4620   |        |        |        |        |
| 4621   |        |        |        |        |
| 4622   |        |        |        |        |
| 4624   | 1      |        |        |        |
| 4625   |        |        | 1      |        |
| 4627   |        |        |        |        |
| 4628   |        |        |        |        |
| 4629   |        |        |        |        |
| 4630   |        |        |        |        |
| 4632   |        |        |        |        |
| 4634   |        |        |        |        |
| 4635   |        |        |        |        |
| 4636   |        |        |        |        |
| 4637   |        |        |        |        |
| 4638   |        |        |        |        |
| 4639   |        |        |        |        |
| 4641   | 0      |        |        |        |
| 4643   |        |        |        |        |
| 4645   |        |        |        |        |
| 4646   |        |        | 0      |        |
| 4647   |        |        |        |        |
| 4648   |        |        |        |        |
| 4649   | 1      |        |        |        |
| 4650   |        |        |        |        |
| 4651   |        |        |        |        |
| 4652   |        |        |        |        |
| 4653   |        |        |        |        |
| 4657   |        |        |        |        |
| 4660   |        |        |        |        |
| 4661   | 1      |        |        |        |
| 4662   | 1      |        |        |        |

| respid | Q31b_3 | Q31b_4 | Q31b_5 | Q31b_6 |
|--------|--------|--------|--------|--------|
| 4667   |        |        |        |        |
| 4669   |        |        |        |        |
| 4671   |        |        |        |        |
| 4672   |        |        |        | 3      |
| 4673   | 2      |        |        |        |
| 4677   |        |        |        |        |
| 4679   |        |        |        |        |
| 4683   |        |        |        |        |
| 4684   |        |        |        |        |
| 4685   |        |        |        |        |
| 4686   |        |        |        |        |
| 4687   |        |        |        |        |
| 4688   |        |        |        |        |
| 4691   |        |        |        |        |
| 4692   |        |        |        |        |
| 4694   |        |        |        |        |
| 4695   |        |        |        |        |
| 4696   |        |        |        |        |
| 4697   |        |        |        |        |
| 4698   |        | 2      |        |        |
| 4699   |        |        |        |        |
| 4701   |        |        |        |        |
| 4703   |        |        |        |        |
| 4704   |        | 4      |        | 3      |
| 4705   |        |        |        |        |
| 4706   |        |        |        |        |
| 4707   |        |        |        |        |
| 4708   |        |        |        | 0      |
| 4710   |        |        |        |        |
| 4711   |        |        |        |        |
| 4715   |        |        |        |        |
| 4716   |        |        |        |        |

| respid | Q31b_3 | Q31b_4 | Q31b_5 | Q31b_6 |
|--------|--------|--------|--------|--------|
| 4717   |        |        |        |        |
| 4718   |        |        |        |        |
| 4722   |        |        |        | 1      |
| 4727   |        |        |        |        |
| 4728   |        |        |        |        |
| 4729   |        |        |        |        |
| 4732   |        |        |        |        |
| 4733   |        |        |        |        |
| 4734   |        |        |        |        |
| 4735   |        |        |        |        |
| 4737   |        |        |        |        |
| 4738   |        |        |        |        |
| 4740   |        |        |        |        |
| 4741   |        | 2      |        | 1      |
| 4743   |        |        |        |        |
| 4746   |        |        |        |        |
| 4750   |        |        |        |        |
| 4752   |        |        |        |        |
| 4753   | 1      | 1      |        |        |
| 4754   |        |        |        |        |
| 4755   |        |        |        |        |
| 4758   |        |        |        |        |
| 4766   |        |        |        |        |
| 4767   | 1      | 2      |        |        |
| 4768   |        |        |        |        |
| 4769   |        |        |        |        |
| 4771   |        |        |        |        |
| 4772   |        |        |        |        |
| 4773   |        |        |        |        |
| 4774   |        | 2      |        |        |
| 4776   |        |        |        |        |
| 4777   | 1      |        |        |        |

| respid | Q31b_3 | Q31b_4 | Q31b_5 | Q31b_6 |
|--------|--------|--------|--------|--------|
| 4779   |        |        |        |        |
| 4780   | 1      |        |        |        |
| 4781   |        |        |        |        |
| 4783   | 3      |        | 3      |        |
| 4784   |        |        |        |        |
| 4785   |        |        |        |        |
| 4788   |        |        |        |        |
| 4789   |        |        |        |        |
| 4790   |        |        |        |        |
| 4791   |        |        |        |        |
| 4794   |        |        |        |        |
| 4795   |        |        |        |        |
| 4797   |        |        |        |        |
| 4802   |        |        |        |        |
| 4803   |        |        |        |        |
| 4804   |        |        |        |        |
| 4805   |        |        |        |        |
| 4807   |        |        |        |        |
| 4808   | 2      |        |        |        |
| 4809   |        |        |        |        |
| 4811   |        |        |        |        |
| 4817   |        |        |        |        |
| 4819   |        |        |        |        |
| 4820   |        |        |        |        |
| 4821   | 2      |        |        |        |
| 4822   |        |        |        |        |
| 4823   |        |        |        |        |
| 4825   |        |        |        |        |
| 4826   |        |        |        |        |
| 4830   |        |        |        |        |
| 4832   |        |        |        |        |
| 4838   | 2      |        |        |        |

| respid | Q31b_3 | Q31b_4 | Q31b_5 | Q31b_6 |
|--------|--------|--------|--------|--------|
| 4840   |        |        |        |        |
| 4841   |        |        |        |        |
| 4843   |        |        |        |        |
| 4845   |        |        |        |        |
| 4846   |        |        |        |        |
| 4848   |        |        |        |        |
| 4853   |        |        |        |        |
| 4854   |        |        |        |        |
| 4859   |        |        |        |        |
| 4861   |        |        |        |        |
| 4864   |        |        |        |        |
| 4867   |        |        |        |        |
| 4870   |        | 1      |        |        |
| 4872   | 1      |        |        |        |
| 4873   |        |        |        |        |
| 4874   |        |        |        |        |
| 4878   |        |        |        |        |
| 4880   |        |        |        |        |
| 4881   |        |        |        |        |
| 4882   | 2      |        |        |        |
| 4883   |        |        |        |        |
| 4885   |        |        |        |        |
| 4889   |        |        |        |        |
| 4890   |        |        |        |        |
| 4891   |        |        |        |        |
| 4894   |        |        |        |        |
| 4895   | 3      |        |        | 2      |
| 4896   |        |        |        |        |
| 4897   |        |        |        |        |
| 4898   |        |        |        | 1      |
| 4899   |        |        |        |        |
| 4900   |        | 4      |        | 4      |



| respid | Q31b_3 | Q31b_4 | Q31b_5 | Q31b_6 |
|--------|--------|--------|--------|--------|
| 4901   |        |        |        |        |
| 4903   |        |        |        |        |
| 4904   |        |        |        |        |
| 4908   |        |        |        |        |
| 4909   |        | 0      |        |        |
| 4913   |        |        |        |        |
| 4917   |        |        |        |        |
| 4918   |        |        |        |        |
| 4920   |        |        |        |        |
| 4921   |        |        |        |        |
| 4925   |        |        |        |        |
| 4926   |        |        |        |        |
| 4927   |        |        |        |        |
| 4928   |        |        |        |        |
| 4929   |        |        |        |        |
| 4930   | 3      | 2      |        |        |
| 4931   |        |        |        |        |
| 4932   | 1      | 2      |        |        |
| 4933   |        |        |        |        |
| 4934   |        |        |        |        |
| 5934   |        |        |        |        |
| 5935   |        |        |        |        |
| 5936   |        |        |        |        |
| 5938   |        |        |        |        |
| 5939   | 1      |        |        |        |
| 5940   | 2      |        |        |        |
| 5942   |        |        |        |        |
| 5944   |        |        |        |        |
| 5951   |        |        |        |        |
| 5952   |        |        |        |        |
| 5954   |        |        |        |        |
| 5956   |        |        |        |        |

| respid | Q31b_3 | Q31b_4 | Q31b_5 | Q31b_6 |
|--------|--------|--------|--------|--------|
| 5957   |        |        |        |        |
| 5958   |        |        |        |        |
| 5959   | 1      | 1      |        |        |
| 5960   |        |        |        |        |
| 5963   |        |        |        |        |
| 5966   |        |        |        |        |
| 5968   | 0      |        |        |        |
| 5974   | 0      |        |        |        |
| 5975   | 0      |        |        |        |
| 5976   |        | 0      |        |        |
| 5977   |        |        |        |        |
| 5978   | 2      | 2      |        |        |
| 5979   |        |        |        |        |
| 5983   | 1      |        |        |        |
| 5984   |        |        |        |        |
| 5990   |        |        |        |        |
| 5991   |        |        |        |        |
| 5992   |        |        |        |        |
| 5993   | 1      |        |        |        |
| 5994   |        |        |        |        |
| 5996   | 2      |        |        |        |
| 6001   |        |        |        | 2      |
| 6003   |        |        |        |        |
| 6004   |        |        |        |        |
| 6005   |        |        |        | 0      |
| 6006   |        |        |        |        |
| 6008   |        |        |        |        |
| 6009   |        |        |        |        |
| 6014   |        |        |        |        |
| 6016   |        |        |        |        |
| 6017   |        |        |        |        |
| 6018   |        |        |        |        |

| respid | Q31b_3 | Q31b_4 | Q31b_5 | Q31b_6 |
|--------|--------|--------|--------|--------|
| 6020   |        |        |        |        |
| 6021   |        |        |        |        |
| 6024   |        |        |        |        |
| 6025   |        |        |        |        |
| 6026   | 1      |        |        |        |
| 6032   |        |        |        |        |
| 6035   |        | 1      |        |        |
| 6038   |        |        |        |        |
| 6043   |        |        |        |        |
| 6044   |        |        |        |        |
| 6046   |        |        |        |        |
| 6047   |        |        |        |        |
| 6048   |        |        |        |        |
| 6050   |        |        |        | 2      |
| 6051   |        |        |        |        |
| 6053   |        |        |        |        |
| 6054   |        |        |        |        |
| 6056   |        |        |        |        |
| 6058   |        |        |        |        |
| 6060   |        |        |        |        |
| 6061   |        |        |        |        |
| 6062   |        |        |        |        |
| 6067   |        |        |        |        |
| 6070   |        |        |        |        |
| 6074   | 1      | 1      |        |        |
| 6076   |        |        |        |        |
| 6078   |        |        |        |        |
| 6081   |        |        |        |        |
| 6085   |        |        |        |        |
| 6088   |        |        |        |        |
| 6092   |        |        |        |        |
| 6095   | 1      |        |        |        |

| respid | Q31b_3 | Q31b_4 | Q31b_5 | Q31b_6 |
|--------|--------|--------|--------|--------|
| 6098   |        |        |        |        |
| 6101   |        |        |        |        |
| 6102   |        |        | 1      |        |
| 6105   |        |        |        |        |
| 6106   |        |        |        |        |
| 6107   |        |        |        | 0      |
| 6111   |        |        |        |        |
| 6112   |        |        |        |        |
| 6113   |        |        |        |        |
| 6115   |        |        |        |        |
| 6116   |        |        |        |        |
| 6117   |        |        |        |        |
| 6124   |        |        |        |        |
| 6125   |        |        |        |        |
| 6128   |        |        |        |        |
| 6133   |        |        |        |        |
| 6134   |        |        |        |        |
| 6135   |        |        |        |        |
| 6138   | 3      |        |        |        |
| 6140   |        |        |        |        |
| 6143   |        |        |        |        |
| 6147   |        |        |        |        |
| 6154   |        |        |        |        |
| 6162   |        |        |        |        |
| 6165   |        |        |        |        |
| 6166   |        | 1      |        |        |
| 6173   |        |        |        |        |
| 6180   | 1      |        |        |        |
| 6184   | 3      |        |        |        |
| 6185   |        |        |        |        |
| 6186   |        |        |        |        |
| 6188   |        |        |        |        |

| respid | Q31b_3 | Q31b_4 | Q31b_5 | Q31b_6 |
|--------|--------|--------|--------|--------|
| 6192   |        | 1      |        |        |
| 6194   |        |        |        |        |
| 6195   |        |        |        |        |
| 6196   |        |        |        |        |
| 6199   |        |        |        |        |
| 6200   |        |        |        |        |
| 6201   |        |        |        |        |
| 6202   |        |        |        |        |
| 6203   |        |        |        |        |
| 6205   |        |        |        |        |
| 6210   |        |        |        |        |
| 6212   |        |        |        |        |
| 6216   |        | 1      |        |        |
| 6218   |        |        |        |        |
| 6221   |        |        |        |        |
| 6224   |        |        |        |        |
| 6225   |        |        |        |        |
| 6227   |        |        |        |        |
| 6230   |        |        |        |        |
| 6231   |        |        |        |        |
| 6233   |        |        |        |        |
| 6234   |        |        |        |        |
| 6235   |        |        |        |        |
| 6237   |        |        |        |        |
| 6240   |        |        |        |        |
| 6248   |        |        |        |        |
| 6249   |        |        |        |        |
| 6252   |        |        |        |        |
| 6254   |        |        |        |        |
| 6269   |        |        |        |        |
| 6304   |        |        |        |        |
| 6334   |        |        |        |        |

| respid | Q31b_3 | Q31b_4 | Q31b_5 | Q31b_6 |
|--------|--------|--------|--------|--------|
| 6341   |        |        |        |        |
| 6350   | 2      | 1      |        |        |
| 6370   |        |        |        |        |
| 6384   | 1      |        |        |        |
| 6400   |        |        |        |        |
| 6418   |        |        |        |        |
| 6467   |        |        |        |        |
| 6469   |        |        |        |        |
| 6474   |        |        |        |        |
| 6475   |        |        |        |        |
| 6476   |        |        |        |        |
| 6477   |        |        |        |        |
| 6480   |        |        |        |        |
| 6481   | 2      |        |        |        |
| 6485   |        |        |        |        |
| 6488   |        |        |        |        |
| 6495   |        |        |        |        |
| 6499   |        |        |        |        |
| 6500   |        |        |        |        |
| 6504   |        |        |        |        |
| 6507   |        |        |        |        |
| 6512   | 1      |        |        |        |
| 6525   |        |        |        |        |
| 6532   |        |        |        |        |
| 6535   |        |        |        |        |
| 6546   |        |        |        |        |
| 6551   |        |        |        |        |
| 6556   |        |        |        |        |
| 6566   |        |        |        |        |
| 6569   |        |        |        |        |
| 6574   |        |        |        |        |
| 6576   | 2      |        |        |        |

| respid | Q31b_3 | Q31b_4 | Q31b_5 | Q31b_6 |
|--------|--------|--------|--------|--------|
| 6580   |        |        |        |        |
| 6584   |        |        |        |        |
| 6585   |        |        |        |        |
| 6589   | 1      |        |        |        |
| 6590   |        |        |        |        |
| 6598   |        |        |        |        |
| 6603   |        |        |        | 2      |
| 6618   |        |        |        |        |
| 6630   |        |        |        |        |
| 6636   |        |        |        |        |
| 6649   |        |        |        |        |
| 6675   | 1      |        |        |        |
| 6678   |        |        |        |        |
| 6681   |        |        |        |        |
| 6684   |        |        |        | 1      |
| 6688   |        |        |        |        |
| 6691   |        |        |        |        |
| 6694   |        |        |        |        |
| 6696   |        |        |        |        |
| 6720   | 2      | 3      | 2      |        |
| 6722   | 3      | 3      | 3      |        |
| 6724   |        |        |        |        |
| 6725   |        |        |        |        |
| 6727   |        |        |        |        |
| 6734   |        |        |        |        |
| 6739   |        |        |        |        |
| 6743   |        |        |        |        |
| 6749   |        |        |        |        |
| 6756   |        |        |        |        |
| 6764   |        |        |        |        |
| 6765   |        |        |        |        |
| 6768   |        |        |        |        |

| respid | Q31b_3 | Q31b_4 | Q31b_5 | Q31b_6 |
|--------|--------|--------|--------|--------|
| 6773   | 1      |        |        |        |
| 6775   |        |        |        |        |
| 6777   |        |        |        |        |
| 6779   |        |        |        |        |
| 6790   |        |        |        |        |
| 6797   |        |        |        |        |
| 6798   |        |        |        |        |
| 6808   |        |        |        |        |
| 6810   |        |        |        |        |
| 6811   |        |        |        |        |
| 6812   |        |        |        |        |
| 6814   |        |        |        |        |
| 6819   |        |        |        |        |
| 6820   |        |        |        |        |
| 6832   |        |        |        |        |
| 6854   |        |        |        |        |
| 6855   |        |        |        |        |
| 6857   |        |        |        |        |
| 6858   |        |        |        |        |
| 6859   |        |        |        |        |
| 6860   |        |        |        |        |
| 6862   |        |        |        |        |
| 6879   |        |        |        |        |
| 6893   |        |        |        |        |
| 6898   |        |        |        |        |
| 6902   | 1      |        |        |        |
| 6903   |        |        |        | 2      |
| 6907   |        | 2      |        |        |
| 6908   |        |        |        |        |
| 6912   |        |        |        |        |
| 6915   |        |        |        |        |
| 6916   |        |        |        |        |



| respid | Q31b_3 | Q31b_4 | Q31b_5 | Q31b_6 |
|--------|--------|--------|--------|--------|
| 6917   | 3      |        |        |        |
| 6923   |        |        |        |        |
| 6934   |        |        |        |        |
| 6937   |        |        |        |        |
| 6945   |        |        |        |        |
| 6954   |        |        |        |        |
| 6956   |        |        |        |        |
| 6958   |        |        |        |        |
| 6961   | 0      |        |        |        |
| 6963   |        |        |        |        |
| 6964   |        |        |        |        |
| 6976   |        |        |        |        |
| 6977   |        | 1      |        |        |
| 7000   |        | 1      |        |        |
| 7001   |        |        |        |        |
| 7005   |        |        |        |        |
| 7006   |        |        |        |        |
| 7008   | 3      |        |        |        |
| 7009   |        |        |        |        |
| 7019   |        |        |        |        |
| 7021   |        |        |        |        |
| 7026   |        |        |        |        |
| 7030   |        | 2      | 3      |        |
| 7034   |        |        |        |        |
| 7039   |        |        |        |        |
| 7041   |        |        |        |        |
| 7047   |        |        |        |        |
| 7051   |        |        |        |        |
| 7052   |        |        |        |        |
| 7059   |        |        |        |        |
| 7062   | 1      |        |        |        |
| 7065   | 1      |        |        |        |

| respid | Q31b_3 | Q31b_4 | Q31b_5 | Q31b_6 |
|--------|--------|--------|--------|--------|
| 7066   |        |        |        |        |
| 7069   |        |        |        |        |
| 7070   |        |        |        |        |
| 7073   |        |        |        |        |
| 7078   |        |        |        |        |
| 7083   |        |        |        |        |
| 7084   | 2      |        |        |        |
| 7085   |        |        |        |        |
| 7088   | 2      |        |        |        |
| 7090   |        |        |        |        |
| 7095   | 1      |        |        |        |
| 7100   |        |        |        |        |
| 7102   |        |        |        |        |
| 7103   | 0      |        |        |        |
| 7108   |        |        |        |        |
| 7109   | 0      |        |        |        |
| 7110   |        |        |        |        |
| 7112   |        |        |        |        |
| 7114   |        |        |        |        |
| 7116   |        |        |        |        |
| 7117   |        |        | 1      |        |
| 7118   | 3      |        |        |        |
| 7120   | 3      |        |        | 2      |
| 7124   |        |        |        |        |
| 7130   |        |        |        |        |
| 7135   |        |        |        |        |
| 7137   | 3      | 4      |        |        |
| 7140   |        |        |        |        |
| 7141   |        |        |        |        |
| 7148   |        |        |        |        |
| 7152   |        |        |        |        |
| 7154   |        |        |        |        |

| respid | Q31b_3 | Q31b_4 | Q31b_5 | Q31b_6 |
|--------|--------|--------|--------|--------|
| 7156   |        |        |        |        |
| 7158   |        |        |        |        |
| 7159   |        |        |        |        |
| 7161   |        |        |        |        |
| 7164   |        |        |        |        |
| 7166   |        |        |        |        |
| 7167   |        |        |        |        |
| 7168   |        |        |        |        |
| 7170   |        |        |        |        |
| 7171   |        |        |        |        |
| 7172   | 2      |        |        |        |
| 7173   |        |        |        |        |
| 7175   |        |        |        |        |
| 7176   |        |        |        |        |
| 7180   |        |        |        |        |
| 7183   |        |        |        |        |
| 7189   |        |        |        |        |
| 7193   |        |        |        |        |
| 7194   |        |        |        |        |
| 7195   |        |        |        |        |
| 7200   |        |        |        |        |
| 7201   | 2      |        |        |        |
| 7205   |        |        |        | 1      |
| 7207   |        |        |        |        |
| 7208   |        |        |        |        |
| 7210   |        |        |        |        |
| 7211   |        |        |        |        |
| 7217   |        |        |        |        |
| 7218   |        |        |        |        |
| 7220   |        |        |        |        |
| 7225   |        |        |        |        |
| 7228   |        |        |        |        |

| respid | Q31b_3 | Q31b_4 | Q31b_5 | Q31b_6 |
|--------|--------|--------|--------|--------|
| 7230   |        |        |        |        |
| 7233   |        |        |        |        |
| 7234   |        |        |        |        |
| 7235   |        |        |        |        |
| 7236   |        |        |        |        |
| 7241   |        |        |        |        |
| 7251   |        |        |        |        |
| 7253   |        |        |        |        |
| 7259   |        |        |        |        |
| 7260   |        |        |        |        |
| 7261   |        |        |        |        |
| 7263   |        |        |        |        |
| 7265   |        |        |        |        |
| 7268   |        |        |        |        |
| 7269   |        |        |        |        |
| 7271   | 2      |        | 2      |        |
| 7276   |        |        | 2      | 1      |
| 7280   |        |        |        |        |
| 7283   |        |        |        |        |
| 7284   |        |        |        |        |
| 7286   | 1      |        |        |        |
| 7287   |        |        |        |        |
| 7288   | 1      |        |        |        |
| 7294   |        |        |        |        |
| 7295   |        |        |        |        |
| 7296   |        |        |        |        |
| 7297   |        |        |        |        |
| 7299   |        |        |        |        |
| 7300   |        |        |        |        |
| 7301   |        |        |        |        |
| 7302   |        |        |        |        |
| 7306   | 2      |        |        |        |

| respid | Q31b_3 | Q31b_4 | Q31b_5 | Q31b_6 |
|--------|--------|--------|--------|--------|
| 7313   | 3      | 3      | 4      |        |
| 7315   |        |        |        |        |
| 7317   |        |        |        |        |
| 7321   |        |        |        |        |
| 7322   |        |        |        |        |
| 7323   |        |        |        |        |
| 7333   |        |        |        |        |
| 7335   | 4      | 4      |        |        |
| 7336   |        |        |        |        |
| 7337   |        |        |        |        |
| 7338   |        |        |        |        |
| 7340   |        |        |        |        |
| 7341   |        |        |        |        |
| 7342   | 0      |        |        |        |
| 7344   |        |        |        |        |
| 7346   | 3      |        |        |        |
| 7347   | 1      |        |        |        |
| 7349   | 1      |        |        |        |
| 7352   |        |        |        |        |
| 7353   |        |        |        |        |
| 7355   |        |        |        |        |
| 7356   |        |        |        |        |
| 7360   | 3      | 2      | 1      | 4      |
| 7371   |        |        |        |        |
| 7376   |        |        |        |        |
| 7379   |        |        |        |        |
| 7381   |        |        |        |        |
| 7386   | 1      |        |        |        |
| 7389   |        |        |        |        |
| 7390   |        |        |        |        |
| 7393   |        |        |        |        |
| 7394   |        |        |        |        |

| respid | Q31b_3 | Q31b_4 | Q31b_5 | Q31b_6 |
|--------|--------|--------|--------|--------|
| 7396   | 1      |        |        |        |
| 7400   | 2      |        |        |        |
| 7401   |        |        |        |        |
| 7403   |        |        |        |        |
| 7406   |        |        |        | 4      |
| 7409   | 1      |        |        |        |
| 7410   | 2      |        | 3      |        |
| 7412   |        |        |        | 2      |
| 7414   | 0      |        |        |        |
| 7415   |        |        |        |        |
| 7417   |        |        |        |        |
| 7421   | 2      | 3      | 2      |        |
| 7425   |        |        |        |        |
| 7430   |        |        |        |        |
| 7432   |        |        |        |        |
| 7433   | 2      |        |        |        |
| 7442   |        |        |        |        |
| 7445   |        |        |        |        |
| 7446   |        |        |        |        |
| 7449   |        |        |        |        |
| 7450   |        |        |        |        |
| 7451   |        |        |        |        |
| 7459   |        |        |        |        |
| 7462   |        |        |        |        |
| 7463   |        |        |        |        |
| 7469   |        |        |        |        |
| 7482   |        |        |        |        |
| 7484   |        |        |        |        |
| 7486   |        |        |        |        |
| 7496   |        |        |        |        |
| 7502   |        |        |        |        |
| 7504   |        |        |        |        |

| respid | Q31b_3 | Q31b_4 | Q31b_5 | Q31b_6 |
|--------|--------|--------|--------|--------|
| 7509   |        |        |        |        |
| 7513   |        | 2      |        |        |
| 7514   |        |        |        |        |
| 7520   |        |        |        |        |
| 7523   |        |        |        |        |
| 7526   |        |        |        |        |
| 7529   |        |        |        |        |
| 7534   |        |        |        |        |
| 7536   |        |        | 2      | 1      |
| 7540   |        |        |        |        |
| 7541   |        |        |        | 1      |
| 7542   |        |        |        |        |
| 7555   |        |        |        |        |
| 7566   |        |        |        |        |
| 7568   |        |        |        |        |
| 7570   | 1      | 2      |        |        |
| 7572   |        |        |        |        |
| 7573   | 4      | 4      |        |        |
| 7576   |        |        |        |        |
| 7577   |        |        |        |        |
| 7583   |        |        |        |        |
| 7584   |        |        |        |        |
| 7585   | 3      | 2      | 2      |        |
| 7586   |        |        |        |        |
| 7587   |        |        |        |        |
| 7588   |        |        |        |        |
| 7596   |        |        |        |        |
| 7599   |        |        |        |        |
| 7600   |        |        |        |        |
| 7602   | 1      |        |        |        |
| 7613   |        |        |        |        |
| 7620   |        |        |        |        |

| respid | Q31b_3 | Q31b_4 | Q31b_5 | Q31b_6 |
|--------|--------|--------|--------|--------|
| 7623   |        |        |        |        |
| 7635   |        |        |        |        |
| 7636   |        |        |        |        |
| 7643   | 1      |        | 1      |        |
| 7645   |        |        |        |        |
| 7649   |        |        | 2      | 2      |
| 7651   |        |        |        |        |
| 7652   |        | 2      |        |        |
| 7655   |        |        |        |        |
| 7657   |        |        |        |        |
| 7675   |        |        |        |        |
| 7676   |        |        |        |        |
| 7684   |        |        |        |        |
| 7693   |        |        |        |        |
| 7694   | 4      | 4      | 4      |        |
| 7695   |        |        |        |        |
| 7696   |        |        |        | 4      |
| 7698   | 3      |        |        |        |
| 7700   |        |        |        |        |
| 7701   |        |        |        |        |
| 7704   | 1      |        |        |        |
| 7709   |        |        |        |        |
| 7713   |        |        |        |        |
| 7714   |        |        |        |        |
| 7718   |        |        |        |        |
| 7720   |        |        |        |        |
| 7721   | 0      |        |        |        |
| 7722   |        |        |        |        |
| 7724   |        |        |        |        |
| 7728   |        |        |        |        |
| 7731   |        |        |        | 2      |
| 7735   |        |        |        |        |



| respid | Q31b_3 | Q31b_4 | Q31b_5 | Q31b_6 |
|--------|--------|--------|--------|--------|
| 7737   |        |        |        |        |
| 7741   |        |        |        |        |
| 7746   |        |        |        |        |
| 7747   |        |        |        |        |
| 7748   |        |        |        |        |
| 7750   |        |        |        |        |
| 7754   |        |        |        |        |
| 7755   | 1      |        |        |        |
| 7762   |        |        |        |        |
| 7764   |        |        |        |        |
| 7766   |        |        |        |        |
| 7768   | 1      |        |        |        |
| 7770   |        |        |        |        |
| 7771   |        |        |        |        |
| 7777   |        |        |        |        |
| 7778   |        |        |        |        |
| 7783   |        | 3      | 3      |        |
| 7789   |        |        |        |        |
| 7790   |        |        |        |        |
| 7795   |        |        |        |        |
| 7807   |        |        |        |        |
| 7808   | 1      |        |        |        |
| 7818   | 3      |        | 3      |        |
| 7820   |        |        |        |        |
| 7831   | 2      |        |        |        |
| 7832   |        |        |        |        |
| 7837   |        |        |        |        |
| 7841   | 1      |        |        |        |
| 7845   | 2      | 2      |        |        |
| 7853   |        |        |        |        |
| 7854   |        |        |        |        |
| 7862   |        | 2      |        |        |

| respid | Q31b_3 | Q31b_4 | Q31b_5 | Q31b_6 |
|--------|--------|--------|--------|--------|
| 7871   |        |        |        |        |
| 7875   | 0      |        |        |        |
| 7880   |        |        |        |        |
| 7881   |        |        |        |        |
| 7883   |        |        |        |        |
| 7896   |        |        |        |        |
| 7905   |        |        |        |        |
| 7919   |        |        |        |        |
| 7928   |        |        |        |        |
| 7929   | 0      |        |        |        |
| 7938   | 1      |        |        |        |
| 7940   |        |        |        |        |
| 7941   |        |        |        |        |
| 7952   |        |        |        |        |
| 7962   |        |        |        |        |
| 7968   |        |        |        |        |
| 7972   |        |        |        |        |
| 7983   |        |        |        |        |
| 7990   | 1      |        |        |        |
| 7993   |        |        | 0      |        |
| 8005   | 4      |        |        |        |
| 8008   |        |        |        |        |
| 8012   | 1      |        |        |        |
| 8021   |        |        |        |        |
| 8024   |        |        |        |        |
| 8043   |        |        |        |        |
| 8051   | 1      |        |        |        |
| 8056   |        |        |        |        |
| 8061   |        |        |        |        |
| 8066   |        |        |        |        |
| 8069   | 2      |        |        |        |
| 8071   |        |        |        |        |

| respid | Q31b_3 | Q31b_4 | Q31b_5 | Q31b_6 |
|--------|--------|--------|--------|--------|
| 8072   | 0      |        |        |        |
| 8076   |        |        |        |        |
| 8080   |        |        |        | 1      |
| 8083   |        |        |        |        |
| 8093   | 2      |        |        | 1      |
| 8095   |        |        |        |        |
| 8099   |        |        |        |        |
| 8100   |        |        |        |        |
| 8103   |        |        |        |        |
| 8104   |        |        |        |        |
| 8115   |        |        |        |        |
| 8121   |        |        |        |        |
| 8128   |        |        |        |        |
| 8130   | 1      |        |        |        |
| 8131   |        |        |        |        |
| 8133   |        |        |        |        |
| 8143   |        |        |        |        |
| 8144   |        |        |        |        |
| 8146   |        |        |        |        |
| 8148   |        |        |        |        |
| 8157   |        |        |        |        |
| 8164   |        |        |        |        |
| 8173   |        |        |        |        |
| 8176   |        |        |        |        |
| 8179   |        |        |        |        |
| 8181   |        |        |        |        |
| 8182   |        |        |        |        |
| 8196   |        |        |        |        |
| 8200   | 1      |        |        |        |
| 8203   | 0      |        |        |        |
| 8204   |        |        |        |        |
| 8206   | 1      |        |        |        |

| respid | Q31b_3 | Q31b_4 | Q31b_5 | Q31b_6 |
|--------|--------|--------|--------|--------|
| 8208   |        |        |        |        |
| 8212   |        |        |        |        |
| 8222   |        |        |        |        |
| 8223   |        |        |        |        |
| 8225   |        |        |        |        |
| 8226   |        |        |        |        |
| 8228   |        |        |        |        |
| 8229   |        |        |        |        |
| 8239   |        |        |        |        |
| 8246   |        |        |        |        |
| 8258   |        | 1      |        |        |
| 8260   |        |        |        |        |
| 8262   |        |        |        |        |
| 8263   |        |        |        |        |
| 8267   |        |        |        |        |
| 8271   | 3      | 3      | 3      |        |
| 8274   |        |        |        |        |
| 8275   |        | 2      |        |        |
| 8279   | 1      |        |        |        |
| 8285   | 1      |        |        |        |
| 8287   |        |        |        | 4      |
| 8289   |        |        |        |        |
| 8291   |        |        |        |        |
| 8299   |        |        |        | 3      |
| 8301   |        |        |        |        |
| 8302   | 1      |        |        |        |
| 8308   | 1      |        |        |        |
| 8313   |        |        |        |        |
| 8316   | 1      |        |        |        |
| 8317   |        |        |        |        |
| 8319   |        |        |        |        |
| 8323   |        |        |        |        |

| respid | Q31b_3 | Q31b_4 | Q31b_5 | Q31b_6 |
|--------|--------|--------|--------|--------|
| 8324   |        |        |        |        |
| 8327   |        | 2      |        |        |
| 8328   | 1      |        | 1      |        |
| 8342   |        |        |        |        |
| 8350   | 1      |        |        |        |
| 8352   |        | 1      |        |        |
| 8353   |        |        |        |        |
| 8356   | 1      |        |        |        |
| 8367   |        |        |        |        |
| 8373   |        |        |        |        |
| 8379   |        |        |        |        |
| 8382   |        |        |        |        |
| 8387   |        |        |        |        |
| 8409   |        |        |        |        |
| 8410   |        |        |        |        |
| 8412   |        |        |        |        |
| 8415   |        |        |        |        |
| 8417   |        |        |        |        |
| 8422   |        |        |        |        |
| 8430   | 2      |        |        |        |
| 8434   |        |        |        |        |
| 8436   |        |        |        |        |
| 8446   |        |        |        |        |
| 8447   |        |        |        |        |
| 8448   |        |        |        |        |
| 8455   |        |        |        |        |
| 8456   |        |        |        |        |
| 8459   | 1      |        |        |        |
| 8460   |        |        |        |        |
| 8464   | 1      |        |        |        |
| 8470   | 1      |        |        |        |
| 8473   |        |        |        |        |

| respid | Q31b_3 | Q31b_4 | Q31b_5 | Q31b_6 |
|--------|--------|--------|--------|--------|
| 8486   |        |        |        |        |
| 8487   |        |        |        |        |
| 8489   | 1      |        |        |        |
| 8494   |        |        |        |        |
| 8495   | 3      |        | 4      | 4      |
| 8497   |        |        |        |        |
| 8510   | 1      |        |        |        |
| 8515   |        |        |        | 1      |
| 8526   |        |        |        |        |
| 8530   |        |        |        |        |
| 8532   |        |        |        |        |
| 8533   |        |        |        |        |
| 8534   |        |        |        |        |
| 8572   |        |        |        |        |
| 8582   |        |        |        |        |
| 8584   |        |        |        |        |
| 8585   |        |        |        |        |
| 8586   |        |        |        |        |
| 8589   |        | 0      |        |        |
| 8593   |        |        |        |        |
| 8594   | 1      |        |        |        |
| 8601   | 1      |        |        |        |
| 8603   |        |        |        |        |
| 8604   |        |        |        |        |
| 8605   |        |        |        |        |
| 8607   |        |        |        |        |
| 8623   |        |        |        |        |
| 8626   |        |        |        |        |
| 8638   | 0      |        |        |        |
| 8640   | 2      |        |        |        |
| 8641   |        |        |        |        |
| 8643   |        |        |        |        |

| respid | Q31b_3 | Q31b_4 | Q31b_5 | Q31b_6 |
|--------|--------|--------|--------|--------|
| 8644   | 2      |        |        |        |
| 8646   |        |        |        |        |
| 8647   |        |        |        |        |
| 8649   |        |        |        |        |
| 8650   |        |        |        |        |
| 8658   |        |        |        |        |
| 8659   |        |        |        |        |
| 8669   |        |        |        |        |
| 8672   | 3      |        |        |        |
| 8673   |        |        |        |        |
| 8676   |        |        |        |        |
| 8677   |        |        |        |        |
| 8681   |        |        |        |        |
| 8688   |        |        |        |        |
| 8689   |        |        |        |        |
| 8690   |        |        |        |        |
| 8693   |        |        |        |        |
| 8694   |        |        |        |        |
| 8699   |        |        |        |        |
| 8700   |        |        |        |        |
| 8703   |        |        |        |        |
| 8704   |        |        |        |        |
| 8706   |        |        |        | 1      |
| 8709   |        |        |        |        |
| 8715   |        |        |        |        |
| 8728   |        |        |        |        |
| 8729   |        |        |        |        |
| 8730   |        |        |        |        |
| 8742   | 1      |        |        |        |
| 8748   | 1      |        |        |        |
| 8749   |        |        |        |        |
| 8750   | 1      |        |        |        |

| respid | Q31b_3 | Q31b_4 | Q31b_5 | Q31b_6 |
|--------|--------|--------|--------|--------|
| 8751   |        |        |        |        |
| 8752   |        |        |        |        |
| 8754   |        |        |        |        |
| 8757   |        |        |        |        |
| 8760   |        |        |        |        |
| 8761   |        |        |        |        |
| 8762   |        |        |        |        |
| 8763   |        |        |        |        |
| 8764   |        |        |        |        |
| 8765   |        |        |        |        |
| 8766   | 2      |        |        |        |
| 8767   |        |        |        |        |
| 8768   | 1      |        |        |        |
| 8770   |        |        |        |        |
| 8771   |        |        |        |        |
| 8773   |        |        |        |        |
| 8774   |        |        |        |        |
| 8776   |        |        |        |        |
| 8777   |        |        |        |        |
| 8778   | 1      |        |        |        |
| 8779   |        |        |        |        |
| 8784   | 1      |        |        |        |
| 8786   |        |        |        |        |
| 8787   |        |        |        |        |
| 8790   |        |        |        |        |
| 8791   | 4      |        | 4      |        |
| 8793   |        |        |        |        |
| 8795   |        |        |        |        |
| 8797   |        |        |        |        |
| 8801   |        |        |        |        |
| 8802   |        |        |        |        |
| 8807   |        |        |        |        |



| respid | Q31b_3 | Q31b_4 | Q31b_5 | Q31b_6 |
|--------|--------|--------|--------|--------|
| 8813   |        |        |        |        |
| 8817   |        |        |        |        |
| 8818   |        | 2      |        |        |
| 8821   |        |        |        |        |
| 8822   |        |        |        |        |
| 8823   |        |        |        |        |
| 8824   |        |        |        |        |
| 8825   |        |        |        |        |
| 8834   |        | 3      |        |        |
| 8840   | 4      |        |        |        |
| 8843   | 4      |        |        |        |
| 8846   |        |        |        |        |
| 8862   |        |        |        |        |
| 8866   |        |        |        |        |
| 8869   |        |        |        |        |
| 8872   |        |        |        |        |
| 8903   |        |        |        |        |
| 8909   |        |        |        |        |
| 8926   |        |        |        |        |
| 8936   |        |        |        |        |
| 8945   |        |        |        |        |
| 8954   |        |        |        |        |
| 8955   | 4      | 2      | 2      |        |
| 8958   |        |        |        |        |
| 8959   |        |        |        |        |
| 8960   |        |        |        |        |
| 8976   | 1      |        |        |        |
| 8977   |        |        | 1      |        |
| 8979   |        |        |        |        |
| 8985   |        |        |        |        |
| 8994   |        |        |        |        |
| 8997   |        |        |        |        |

| respid | Q31b_3 | Q31b_4 | Q31b_5 | Q31b_6 |
|--------|--------|--------|--------|--------|
| 9002   |        |        |        |        |
| 9005   | 2      |        |        |        |
| 9017   |        |        |        |        |
| 9018   |        |        |        |        |
| 9021   |        |        |        |        |
| 9029   |        |        |        |        |
| 9035   |        |        |        |        |
| 9038   |        |        |        |        |
| 9039   |        |        |        |        |
| 9040   | 2      |        |        |        |
| 9042   |        |        |        |        |
| 9043   |        |        |        |        |
| 9045   |        |        | 0      |        |
| 9051   |        |        |        |        |
| 9067   |        |        |        |        |
| 9069   |        |        |        |        |
| 9073   |        |        |        |        |
| 9084   |        |        |        |        |
| 9096   |        |        |        |        |
| 9100   |        |        |        |        |
| 9107   |        |        |        |        |
| 9110   |        |        |        |        |
| 9120   |        |        |        |        |
| 9122   |        |        |        |        |
| 9130   |        |        |        |        |
| 9134   |        |        |        |        |
| 9137   |        |        |        |        |
| 9139   |        |        |        |        |
| 9144   |        |        |        |        |
| 9157   | 0      |        |        |        |
| 9166   |        |        |        |        |
| 9177   |        |        |        |        |

| respid | Q31b_3 | Q31b_4 | Q31b_5 | Q31b_6 |
|--------|--------|--------|--------|--------|
| 9181   |        | 0      |        |        |
| 9183   |        |        |        |        |
| 9184   | 3      | 3      |        |        |
| 9188   |        |        |        |        |
| 9197   |        |        |        |        |
| 9200   | 2      |        |        |        |
| 9205   | 2      | 1      |        |        |
| 9207   | 0      |        |        |        |
| 9213   |        |        |        |        |
| 9216   |        | 0      |        | 1      |
| 9217   |        |        |        |        |
| 9218   | 1      |        |        |        |
| 9219   | 2      |        |        |        |
| 9220   |        |        |        |        |
| 9221   |        |        |        |        |
| 9223   | 4      | 3      | 3      | 3      |
| 9228   |        |        |        |        |
| 9230   |        |        |        |        |
| 9231   | 1      |        |        |        |
| 9233   |        |        |        |        |
| 9235   |        |        |        |        |
| 9237   |        |        |        |        |
| 9242   |        |        |        |        |
| 9250   |        |        |        |        |
| 9253   | 4      |        |        |        |
| 9257   |        |        |        |        |
| 9263   |        |        |        |        |
| 9267   |        |        |        |        |
| 9272   | 2      |        |        |        |
| 9279   |        |        |        |        |
| 9281   |        |        |        |        |
| 9285   |        |        |        |        |

| respid | Q31b_3 | Q31b_4 | Q31b_5 | Q31b_6 |
|--------|--------|--------|--------|--------|
| 9286   |        |        |        |        |
| 9294   | 1      | 1      |        |        |
| 9295   |        |        |        |        |
| 9297   |        |        |        |        |
| 9299   |        |        |        |        |
| 9309   |        |        |        |        |
| 9315   |        |        |        |        |
| 9320   |        |        |        |        |
| 9324   |        |        |        |        |
| 9326   |        |        |        |        |
| 9333   |        |        |        |        |
| 9334   |        |        |        |        |
| 9336   | 1      | 1      |        | 2      |
| 9337   |        |        |        |        |
| 9342   |        |        |        |        |
| 9347   |        |        |        |        |
| 9352   |        |        |        |        |
| 9355   |        |        |        |        |
| 9356   |        |        |        |        |
| 9359   |        |        |        |        |
| 9368   | 0      |        |        |        |
| 9375   |        |        |        | 1      |
| 9384   |        |        |        |        |
| 9388   |        |        |        |        |
| 9397   |        |        |        |        |
| 9400   |        |        |        |        |
| 9401   |        |        |        |        |
| 9402   |        |        |        |        |
| 9417   | 1      |        |        |        |
| 9424   |        |        |        |        |
| 9427   |        |        |        |        |
| 9429   |        |        |        |        |

| respid | Q31b_3 | Q31b_4 | Q31b_5 | Q31b_6 |
|--------|--------|--------|--------|--------|
| 9437   | 3      |        |        |        |
| 9442   |        |        |        |        |
| 9446   |        |        |        |        |
| 9447   |        |        |        |        |
| 9448   | 2      |        |        |        |
| 9449   |        |        |        |        |
| 9455   |        |        |        |        |
| 9459   |        |        |        |        |
| 9460   |        |        |        |        |
| 9461   |        |        |        |        |
| 9463   |        |        |        |        |
| 9464   |        |        |        | 1      |
| 9466   |        |        |        |        |
| 9477   |        |        |        |        |
| 9482   |        | 3      |        | 3      |
| 9486   |        |        |        |        |
| 9488   |        |        |        | 4      |
| 9489   |        |        |        |        |
| 9496   |        |        |        |        |
| 9499   |        |        |        |        |
| 9512   |        |        |        |        |
| 9514   |        |        |        |        |
| 9516   |        |        |        |        |
| 9517   |        |        |        |        |
| 9520   |        |        |        |        |
| 9527   |        |        |        |        |
| 9532   |        |        |        |        |
| 9533   |        |        |        |        |
| 9543   |        |        |        |        |
| 9550   |        |        |        |        |
| 9553   |        |        |        |        |
| 9555   |        |        |        |        |

| respid | Q31b_3 | Q31b_4 | Q31b_5 | Q31b_6 |
|--------|--------|--------|--------|--------|
| 9565   |        |        |        | 1      |
| 9583   |        |        |        |        |
| 9594   |        |        |        |        |
| 9596   |        |        |        |        |
| 9600   |        |        |        |        |
| 9602   |        | 1      | 1      |        |
| 9606   |        |        |        |        |
| 9608   |        |        |        |        |
| 9610   | 1      |        |        |        |
| 9612   | 1      | 2      |        |        |
| 9613   |        |        |        |        |
| 9614   |        |        |        |        |
| 9620   |        |        |        |        |
| 9628   |        |        |        |        |
| 9631   |        |        |        |        |
| 9632   |        |        |        |        |
| 9633   |        |        |        |        |
| 9639   |        |        |        |        |
| 9640   | 2      |        |        |        |
| 9642   |        |        |        |        |
| 9653   |        |        |        |        |
| 9658   |        |        |        |        |
| 9659   |        |        |        |        |
| 9661   |        |        |        |        |
| 9664   |        |        |        |        |
| 9665   |        |        |        | 1      |
| 9666   |        |        |        |        |
| 9667   | 1      |        |        |        |
| 9668   |        |        |        |        |
| 9670   |        |        |        |        |
| 9671   | 1      |        |        |        |
| 9681   |        |        |        |        |

| respid | Q31b_3 | Q31b_4 | Q31b_5 | Q31b_6 |
|--------|--------|--------|--------|--------|
| 9684   |        |        |        |        |
| 9685   |        |        |        |        |
| 9686   |        |        |        |        |
| 9688   |        |        |        |        |
| 9692   |        |        |        |        |
| 9693   | 4      | 4      |        |        |
| 9698   | 1      |        |        |        |
| 9699   | 1      | 1      | 1      |        |
| 9701   |        |        |        |        |
| 9702   | 0      |        |        |        |
| 9709   |        |        |        |        |
| 9713   |        |        |        |        |
| 9715   |        |        |        |        |
| 9721   |        |        |        |        |
| 9725   |        |        |        |        |
| 9729   |        |        |        |        |
| 9731   | 1      |        |        |        |
| 9736   |        |        |        |        |
| 9740   |        |        |        |        |
| 9741   |        |        |        |        |
| 9749   |        |        |        |        |
| 9750   |        |        |        |        |
| 9751   | 3      | 2      |        |        |
| 9753   | 2      |        |        |        |
| 9754   |        |        |        |        |
| 9756   |        |        |        |        |
| 9758   |        | 2      |        | 3      |
| 9759   |        |        |        | 1      |
| 9760   |        |        |        |        |
| 9761   |        |        |        |        |
| 9762   |        |        |        |        |
| 9764   |        |        |        |        |

| respid | Q31b_3 | Q31b_4 | Q31b_5 | Q31b_6 |
|--------|--------|--------|--------|--------|
| 9768   |        |        |        |        |
| 9769   |        |        |        |        |
| 9770   |        |        |        |        |
| 9771   |        |        |        |        |
| 9772   |        |        |        |        |
| 9773   |        |        |        |        |
| 9776   | 0      |        |        |        |
| 9786   |        |        |        |        |
| 9790   |        |        |        |        |
| 9791   |        |        |        |        |
| 9794   |        |        |        |        |
| 9797   | 1      |        |        |        |
| 9799   |        |        |        |        |
| 9804   |        |        |        |        |
| 9805   |        |        | 1      |        |
| 9806   |        |        |        |        |
| 9807   |        |        |        |        |
| 9813   |        |        |        |        |
| 9817   |        |        |        |        |
| 9823   |        |        |        |        |
| 9826   | 1      |        |        |        |
| 9830   |        |        |        |        |
| 9835   |        | 2      |        |        |
| 9836   |        |        |        |        |
| 9841   |        |        |        |        |
| 9842   |        |        |        |        |
| 9844   |        |        |        |        |
| 9847   |        |        |        |        |
| 9851   |        |        |        |        |
| 9852   |        |        |        |        |
| 9854   |        |        |        |        |
| 9855   |        |        |        |        |



| respid | Q31b_3 | Q31b_4 | Q31b_5 | Q31b_6 |
|--------|--------|--------|--------|--------|
| 9856   | 1      |        |        |        |
| 9862   |        |        |        |        |
| 9863   |        |        |        |        |
| 9866   |        |        |        |        |
| 9867   |        |        |        |        |
| 9868   |        |        | 2      |        |
| 9869   |        |        |        |        |
| 9878   |        |        |        |        |
| 9879   |        |        |        |        |
| 9881   |        |        |        | 0      |
| 9882   |        |        |        |        |
| 9884   |        |        |        |        |
| 9885   |        |        |        |        |
| 9888   |        |        |        |        |
| 9889   |        |        |        |        |
| 9894   | 2      |        |        |        |
| 9895   |        |        |        |        |
| 9896   | 3      |        |        |        |
| 9897   |        |        |        |        |
| 9905   |        |        |        |        |
| 9907   |        |        |        |        |
| 9908   |        |        |        |        |
| 9909   |        |        |        |        |
| 9910   |        |        |        |        |
| 9913   |        |        |        |        |
| 9914   |        |        |        |        |
| 9915   | 1      |        |        |        |
| 9916   |        |        |        |        |
| 9918   |        |        |        |        |
| 9919   |        | 0      | 1      |        |
| 9922   |        |        |        |        |
| 9930   |        |        |        |        |

| respid | Q31b_3 | Q31b_4 | Q31b_5 | Q31b_6 |
|--------|--------|--------|--------|--------|
| 9934   |        |        |        |        |
| 9936   |        |        |        |        |
| 9938   |        |        |        |        |
| 9940   |        |        |        |        |
| 9944   | 2      |        |        |        |
| 9945   |        |        |        |        |
| 9948   | 3      |        |        |        |
| 9949   | 2      |        | 2      |        |
| 9951   |        |        |        |        |
| 9952   |        |        | 1      |        |
| 9954   |        |        |        |        |
| 9955   |        |        |        |        |
| 9956   | 2      |        |        | 2      |
| 9957   |        |        |        |        |
| 9958   |        |        |        |        |
| 9959   |        |        |        |        |
| 9960   |        |        |        |        |
| 9961   |        |        |        |        |
| 9962   |        |        |        |        |
| 9969   |        |        |        |        |
| 9982   |        |        |        |        |
| 9984   |        |        |        |        |
| 9990   |        |        |        |        |
| 9992   | 1      |        |        |        |
| 9993   |        |        |        | 3      |
| 9997   |        |        |        |        |
| 9999   |        |        |        |        |
| 10000  |        |        |        |        |
| 10005  | 3      |        |        | 3      |
| 10014  |        |        |        |        |
| 10016  | 1      |        |        |        |
| 10017  |        |        |        |        |

| respid | Q31b_3 | Q31b_4 | Q31b_5 | Q31b_6 |
|--------|--------|--------|--------|--------|
| 10018  |        |        |        |        |
| 10021  |        |        |        |        |
| 10025  |        |        |        |        |
| 10027  |        |        |        |        |
| 10028  |        |        |        |        |
| 10031  |        |        |        | 4      |
| 10036  |        |        |        |        |
| 10037  |        |        |        |        |
| 10038  |        |        |        |        |
| 10039  |        |        |        |        |
| 10041  |        |        |        |        |
| 10045  |        |        |        |        |
| 10046  |        |        |        |        |
| 10047  |        |        |        | 1      |
| 10048  |        |        |        |        |
| 10049  |        |        |        |        |
| 10051  |        |        |        |        |
| 10052  |        |        |        |        |
| 10056  |        |        |        |        |
| 10061  |        |        |        |        |
| 10064  |        |        |        |        |
| 10066  |        |        |        |        |
| 10069  |        |        |        |        |
| 10071  |        |        |        |        |
| 10074  |        |        |        |        |
| 10079  |        |        |        |        |
| 10087  |        |        |        |        |
| 10095  |        |        |        |        |
| 10097  |        |        |        |        |
| 10100  |        |        |        |        |
| 10105  |        |        |        |        |
| 10107  |        |        |        |        |

| respid | Q31b_3 | Q31b_4 | Q31b_5 | Q31b_6 |
|--------|--------|--------|--------|--------|
| 10111  |        |        |        |        |
| 10116  |        |        |        |        |
| 10118  |        |        |        |        |
| 10123  |        |        |        |        |
| 10124  |        |        |        |        |
| 10130  |        |        |        |        |
| 10134  |        |        |        |        |
| 10135  |        |        |        |        |
| 10136  |        |        |        |        |
| 10141  |        |        |        |        |
| 10142  |        |        |        |        |
| 10143  |        |        |        |        |
| 10145  |        |        |        |        |
| 10149  |        |        |        | 1      |
| 10150  |        |        |        |        |
| 10151  |        |        |        |        |
| 10152  |        |        |        |        |
| 10153  |        |        |        |        |
| 10156  |        |        |        |        |
| 10160  |        |        |        |        |
| 10161  |        |        |        |        |
| 10167  | 2      |        |        |        |
| 10171  |        |        |        |        |
| 10172  |        |        |        |        |
| 10176  |        |        |        |        |
| 10177  |        |        |        |        |
| 10182  |        |        |        |        |
| 10184  |        |        |        |        |
| 10186  |        |        | 3      | 3      |
| 10189  |        |        |        |        |
| 10191  |        |        |        |        |
| 10192  |        |        |        |        |

| respid | Q31b_3 | Q31b_4 | Q31b_5 | Q31b_6 |
|--------|--------|--------|--------|--------|
| 10195  |        |        |        |        |
| 10199  |        |        |        |        |
| 10201  |        |        |        |        |
| 10213  |        |        |        |        |
| 10222  |        |        |        |        |
| 10224  |        |        |        |        |
| 10245  |        |        |        |        |
| 10254  |        |        |        |        |
| 10255  | 4      |        | 4      |        |
| 10257  |        |        |        |        |
| 10260  |        |        |        |        |
| 10261  |        |        |        |        |
| 10263  |        |        |        | 4      |
| 10264  |        |        |        |        |
| 10268  | 1      | 2      |        |        |
| 10269  |        |        |        |        |
| 10270  |        |        |        |        |
| 10282  |        |        |        |        |
| 10285  |        |        |        |        |
| 10288  |        |        |        |        |
| 10291  |        |        |        |        |
| 10292  |        |        |        |        |
| 10304  |        |        |        |        |
| 10305  |        |        |        |        |
| 10310  |        |        |        |        |
| 10324  |        |        |        |        |
| 10325  |        |        |        |        |
| 10326  |        |        |        |        |
| 10329  |        |        |        |        |
| 10332  |        |        |        |        |
| 10337  |        |        |        |        |
| 10341  | 1      |        |        |        |

| respid | Q31b_3 | Q31b_4 | Q31b_5 | Q31b_6 |
|--------|--------|--------|--------|--------|
| 10353  |        |        |        |        |
| 10354  |        |        |        |        |
| 10359  | 1      |        |        |        |
| 10360  |        |        |        |        |
| 10362  |        |        |        |        |
| 10364  |        |        |        |        |
| 10366  |        | 2      |        | 3      |
| 10367  |        |        |        |        |
| 10371  |        |        |        |        |
| 10374  |        |        |        |        |
| 10375  | 2      |        |        |        |
| 10376  |        |        |        |        |
| 10377  |        |        |        |        |
| 10378  |        |        |        |        |
| 10387  |        |        |        |        |
| 10396  |        |        |        |        |
| 10397  |        |        |        |        |
| 10399  |        |        |        |        |
| 10405  |        |        |        |        |
| 10406  |        |        |        |        |
| 10408  |        |        |        |        |
| 10409  |        |        |        |        |
| 10412  |        |        |        |        |
| 10413  |        |        |        |        |
| 10419  |        |        |        |        |
| 10423  |        |        |        |        |
| 10426  |        |        |        |        |
| 10446  |        |        |        |        |
| 10448  |        |        |        |        |
| 10450  |        |        |        |        |
| 10455  |        |        |        |        |
| 10460  |        |        |        |        |

| respid | Q31b_3 | Q31b_4 | Q31b_5 | Q31b_6 |
|--------|--------|--------|--------|--------|
| 10461  |        |        |        |        |
| 10471  |        |        |        |        |
| 10472  |        |        |        |        |
| 10491  | 3      |        | 3      |        |
| 10493  |        |        |        |        |
| 10498  | 1      |        |        |        |
| 10533  |        |        |        |        |
| 10539  |        |        |        |        |
| 10540  |        |        |        |        |
| 10557  |        |        |        |        |
| 10558  | 3      |        |        |        |
| 10559  |        |        |        | 1      |
| 10564  |        |        |        |        |
| 10570  |        |        |        |        |
| 10572  |        |        |        |        |
| 10576  |        |        |        |        |
| 10582  |        |        |        |        |
| 10593  |        |        |        |        |
| 10596  |        |        |        |        |
| 10615  |        |        |        |        |
| 10616  |        |        |        |        |
| 10623  |        |        |        |        |
| 10626  |        |        |        |        |
| 10627  | 2      | 2      | 2      | 2      |
| 10629  | 2      |        |        |        |
| 10632  | 1      | 2      | 2      | 2      |
| 10641  |        |        |        |        |
| 10648  |        |        |        |        |
| 10651  |        |        |        |        |
| 10654  |        |        |        |        |
| 10673  |        |        |        |        |
| 10675  |        |        |        |        |

| respid | Q31b_3 | Q31b_4 | Q31b_5 | Q31b_6 |
|--------|--------|--------|--------|--------|
| 10689  |        |        |        | 3      |
| 10692  | 2      |        |        |        |
| 10694  |        |        |        |        |
| 10695  |        |        |        |        |
| 10702  |        |        |        |        |
| 10703  | 0      |        |        |        |
| 10708  |        |        |        |        |
| 10719  |        |        |        |        |
| 10722  |        |        |        |        |
| 10723  |        |        |        |        |
| 10726  |        |        |        |        |
| 10727  |        |        |        |        |
| 10730  |        |        |        |        |
| 10731  |        |        |        |        |
| 10737  |        |        |        |        |
| 10743  |        |        |        |        |
| 10763  |        |        |        |        |
| 10777  |        |        |        |        |
| 10787  |        |        |        |        |
| 10798  |        |        |        |        |
| 10800  |        |        |        |        |
| 10802  | 3      |        |        |        |
| 10803  | 2      |        |        |        |
| 10808  |        | 2      |        |        |
| 10810  |        |        |        |        |
| 10819  |        |        |        |        |
| 10825  |        |        |        |        |
| 10827  | 1      |        |        |        |
| 10830  | 1      |        | 1      |        |
| 10847  |        |        |        |        |
| 10849  |        |        |        |        |
| 10852  |        |        |        |        |



| respid | Q31b_3 | Q31b_4 | Q31b_5 | Q31b_6 |
|--------|--------|--------|--------|--------|
| 10854  | 3      |        |        |        |
| 10857  | 1      |        |        |        |
| 10861  | 3      |        |        |        |
| 10862  |        |        |        |        |
| 10870  |        |        |        |        |
| 10873  |        |        |        |        |
| 10881  | 0      |        |        |        |
| 10893  |        |        |        |        |
| 10898  |        |        |        |        |
| 10899  |        |        |        |        |
| 10905  |        |        |        |        |
| 10910  |        |        |        |        |
| 10911  |        | 1      |        |        |
| 10912  |        |        |        |        |
| 10913  |        |        |        |        |
| 10918  |        |        |        |        |
| 10995  |        |        |        |        |
| 11002  |        |        |        |        |
| 11003  |        |        |        |        |
| 11005  |        | 0      |        |        |
| 11015  |        |        |        |        |
| 11016  |        |        |        |        |
| 11017  |        |        |        |        |
| 11020  |        | 2      | 2      |        |
| 11024  |        |        |        |        |
| 11026  | 1      |        |        |        |
| 11028  |        |        |        |        |
| 11029  | 1      | 1      |        |        |
| 11030  |        |        |        |        |
| 11031  |        |        |        |        |
| 11038  | 0      |        |        |        |
| 11051  |        |        |        |        |

| respid | Q31b_3 | Q31b_4 | Q31b_5 | Q31b_6 |
|--------|--------|--------|--------|--------|
| 11052  |        | 3      |        |        |
| 11053  | 1      |        |        |        |
| 11054  |        | 2      |        |        |
| 11063  |        |        |        |        |
| 11075  |        | 1      |        |        |
| 11083  |        |        |        | 2      |
| 11092  |        |        |        |        |
| 11118  |        |        |        |        |
| 11119  | 2      |        |        |        |
| 11134  |        |        |        |        |
| 11139  |        |        |        |        |
| 11154  |        |        |        |        |
| 11166  |        |        |        |        |
| 11168  |        |        |        |        |
| 11176  |        |        |        |        |
| 11183  |        | 3      | 2      |        |
| 11189  |        |        |        |        |
| 11196  | 2      | 3      |        |        |
| 11200  |        |        |        |        |
| 11201  |        |        |        |        |
| 11211  | 2      | 3      |        |        |
| 11218  |        |        |        |        |
| 11219  |        |        |        |        |
| 11221  |        |        |        |        |
| 11222  |        |        |        |        |
| 11230  | 2      | 3      |        |        |
| 11236  | 2      | 3      |        |        |
| 11237  |        |        |        |        |
| 11240  |        |        |        |        |
| 11244  | 2      | 3      |        |        |
| 11249  |        | 1      |        | 1      |
| 11252  | 2      | 3      |        |        |

| respid | Q31b_3 | Q31b_4 | Q31b_5 | Q31b_6 |
|--------|--------|--------|--------|--------|
| 11254  |        | 2      |        |        |
| 11255  | 3      |        |        |        |
| 11258  |        | 3      |        |        |
| 11260  |        |        |        |        |
| 11264  | 3      |        | 2      |        |
| 11266  |        |        |        |        |
| 11268  |        |        | 1      |        |
| 11269  |        |        |        |        |
| 11272  |        |        |        |        |
| 11273  | 0      |        |        |        |
| 11275  | 0      |        |        |        |
| 11276  | 3      | 3      |        |        |
| 11278  |        | 2      |        |        |
| 11288  |        |        |        |        |
| 11289  |        |        |        |        |
| 11291  |        |        |        |        |
| 11295  |        |        |        |        |
| 11297  |        |        |        |        |
| 11304  |        |        |        |        |
| 11305  |        |        |        |        |
| 11311  |        |        |        |        |
| 11313  | 1      | 1      |        |        |
| 11315  | 4      | 4      | 3      | 3      |
| 11316  | 4      | 4      |        | 3      |
| 11318  |        | 3      | 4      | 3      |
| 11323  |        |        |        |        |
| 11331  |        |        |        |        |
| 11333  |        |        |        |        |
| 11334  | 2      |        |        |        |
| 11340  |        | 3      |        |        |
| 11345  |        |        |        |        |
| 11354  |        |        |        |        |

| respid | Q31b_3 | Q31b_4 | Q31b_5 | Q31b_6 |
|--------|--------|--------|--------|--------|
| 11360  |        |        |        |        |
| 11361  |        |        |        | 1      |
| 11367  |        |        |        |        |
| 11370  |        |        |        |        |
| 11371  | 2      |        | 3      |        |
| 11372  |        |        | 2      |        |
| 11373  |        |        |        |        |
| 11382  |        |        |        |        |
| 11394  |        |        |        |        |
| 11395  |        |        |        |        |
| 11397  |        |        |        |        |
| 11402  |        |        |        |        |
| 11409  |        |        |        |        |
| 11410  |        |        |        |        |
| 11411  |        |        |        |        |
| 11418  |        |        |        |        |
| 11425  |        |        | 3      |        |
| 11429  |        |        |        |        |
| 11430  |        |        |        |        |
| 11431  |        |        |        |        |
| 11432  |        |        |        |        |
| 11433  |        |        |        |        |
| 11435  |        |        |        |        |
| 11436  |        |        | 0      |        |
| 11437  |        |        | 2      | 1      |
| 11439  |        |        |        |        |
| 11440  |        |        |        |        |
| 11447  |        |        |        |        |
| 11455  |        |        |        |        |
| 11456  |        |        | 2      |        |
| 11461  |        |        |        |        |
| 11463  | 4      |        |        |        |

| respid | Q31b_3 | Q31b_4 | Q31b_5 | Q31b_6 |
|--------|--------|--------|--------|--------|
| 11470  |        | 3      |        |        |
| 11472  |        |        |        |        |
| 11475  |        |        |        |        |
| 11476  |        |        |        |        |
| 11482  |        |        | 2      |        |
| 11501  |        |        | 2      |        |
| 11503  |        |        |        |        |
| 11505  |        |        |        |        |
| 11510  | 0      |        |        |        |
| 11519  |        |        |        |        |
| 11527  |        |        |        | 4      |
| 11529  | 2      | 1      | 1      |        |
| 11530  |        |        |        |        |
| 11536  |        |        |        |        |
| 11543  | 2      |        |        |        |
| 11548  |        |        |        |        |
| 11566  |        |        |        |        |
| 11570  | 2      |        | 2      |        |
| 11571  |        |        |        |        |
| 11578  |        |        |        |        |
| 11579  |        |        |        |        |
| 11581  | 3      |        |        |        |
| 11582  |        |        |        |        |
| 11583  |        |        |        |        |
| 11589  | 1      |        | 1      |        |
| 11590  |        |        |        |        |
| 11592  |        |        |        |        |
| 11596  |        |        |        |        |
| 11598  |        |        | 2      |        |
| 11602  |        |        |        |        |
| 11605  |        |        | 1      |        |
| 11618  |        | 1      | 2      | 3      |

| respid | Q31b_3 | Q31b_4 | Q31b_5 | Q31b_6 |
|--------|--------|--------|--------|--------|
| 11621  |        |        |        |        |
| 11630  |        |        |        | 1      |
| 11636  |        |        |        |        |
| 11640  |        |        |        |        |
| 11658  |        |        |        |        |
| 11665  |        |        |        |        |
| 11666  |        |        |        |        |
| 11667  |        |        |        | 1      |
| 11674  |        |        |        |        |
| 11680  |        |        |        |        |
| 11683  |        | 1      |        |        |
| 11688  |        |        |        |        |
| 11690  |        |        |        |        |
| 11694  |        |        |        |        |
| 11705  |        |        |        |        |
| 11720  |        | 2      |        |        |
| 11724  |        |        |        |        |
| 11738  |        |        |        |        |
| 11744  |        |        |        |        |
| 11745  |        |        |        |        |
| 11747  |        |        |        |        |
| 11755  |        |        |        |        |
| 11756  | 1      |        |        |        |
| 11772  | 1      |        |        |        |
| 11773  |        |        |        |        |
| 11778  | 2      |        | 2      |        |
| 11790  |        |        |        |        |
| 11794  |        |        |        |        |
| 11795  |        |        |        | 2      |
| 11799  |        |        | 1      |        |
| 11803  | 1      |        |        |        |
| 11806  | 3      |        |        |        |

| respid | Q31b_3 | Q31b_4 | Q31b_5 | Q31b_6 |
|--------|--------|--------|--------|--------|
| 11808  |        |        |        |        |
| 11810  |        |        |        |        |
| 11811  |        |        |        |        |
| 11812  |        | 1      |        |        |
| 11813  |        |        |        |        |
| 11821  | 3      |        |        |        |
| 11827  |        |        |        |        |
| 11831  |        | 4      |        |        |
| 11841  |        |        |        |        |
| 11872  |        |        |        |        |
| 11898  |        |        |        |        |
| 11902  |        |        |        | 4      |
| 11912  |        |        |        |        |
| 11926  |        |        |        |        |
| 11928  | 2      |        |        |        |
| 11932  |        |        |        |        |
| 11934  |        |        |        |        |
| 11941  | 2      |        |        |        |
| 11942  |        |        |        |        |
| 11943  |        |        |        |        |
| 11944  |        |        |        |        |
| 11955  |        |        |        |        |
| 11958  |        |        |        |        |
| 11968  |        |        |        |        |
| 11979  |        |        | 1      |        |
| 11988  |        |        |        |        |
| 11999  |        | 2      |        |        |
| 12002  |        |        |        |        |
| 12004  |        |        |        |        |
| 12008  |        |        |        |        |
| 12013  |        |        |        |        |
| 12018  |        |        |        |        |

| respid | Q31b_3 | Q31b_4 | Q31b_5 | Q31b_6 |
|--------|--------|--------|--------|--------|
| 12023  |        |        |        |        |
| 12027  | 3      | 3      |        |        |
| 12030  |        |        |        |        |
| 12031  | 1      |        |        |        |
| 12036  |        |        |        |        |
| 12037  |        | 2      |        |        |
| 12038  |        |        |        |        |
| 12039  |        |        |        |        |
| 12045  |        |        |        |        |
| 12046  |        |        |        |        |
| 12054  | 1      |        |        | 2      |
| 12055  | 1      |        | 1      |        |
| 12069  | 1      |        |        |        |
| 12070  | 3      |        | 2      |        |
| 12074  |        |        |        |        |
| 12075  |        |        |        |        |
| 12078  |        |        |        |        |
| 12089  |        |        |        |        |
| 12091  |        | 2      |        |        |
| 12092  | 3      | 2      |        |        |
| 12108  | 2      |        |        |        |
| 12111  |        |        | 2      | 4      |
| 12112  |        |        |        | 3      |
| 12126  |        |        |        |        |
| 12132  |        |        |        |        |
| 12150  |        | 3      |        | 3      |
| 12152  | 1      |        |        |        |
| 12154  |        |        |        |        |
| 12157  |        |        |        |        |
| 12165  |        |        |        |        |
| 12169  | 3      |        |        | 2      |
| 12182  | 3      |        |        |        |



| respid | Q31b_3 | Q31b_4 | Q31b_5 | Q31b_6 |
|--------|--------|--------|--------|--------|
| 12198  |        |        |        |        |
| 12199  |        |        |        |        |
| 12202  |        |        |        |        |
| 12207  |        |        |        |        |
| 12208  |        |        |        |        |
| 12210  |        |        |        |        |
| 12219  | 3      | 4      |        |        |
| 12224  |        |        |        |        |
| 12230  |        |        |        |        |
| 12238  | 2      |        |        |        |
| 12239  |        |        |        |        |
| 12243  |        |        |        |        |
| 12245  |        |        |        |        |
| 12246  | 3      | 3      |        |        |
| 12247  |        |        |        |        |
| 12248  |        |        |        |        |
| 12249  |        | 2      |        |        |
| 12258  | 3      |        | 2      |        |
| 12265  |        |        |        |        |
| 12269  |        |        |        |        |
| 12270  |        |        |        |        |
| 12279  |        |        |        |        |
| 12280  |        |        |        |        |
| 12282  | 2      |        | 1      |        |
| 12283  | 1      |        |        |        |
| 12287  |        |        |        |        |
| 12288  |        |        |        |        |
| 12290  |        |        |        |        |
| 12292  |        |        |        |        |
| 12294  |        |        |        |        |
| 12296  |        |        |        |        |
| 12307  |        |        |        |        |

| respid | Q31b_3 | Q31b_4 | Q31b_5 | Q31b_6 |
|--------|--------|--------|--------|--------|
| 12309  |        |        |        |        |
| 12312  |        |        |        |        |
| 12317  |        |        |        |        |
| 12319  |        |        |        |        |
| 12320  |        |        |        |        |
| 12322  |        |        |        |        |
| 12328  |        |        |        |        |
| 12331  |        | 4      |        | 2      |
| 12332  |        |        |        |        |
| 12334  | 1      | 1      |        |        |
| 12337  |        |        |        |        |
| 12338  |        |        |        |        |
| 12342  |        |        |        |        |
| 12349  |        |        |        |        |
| 12352  |        |        |        |        |
| 12355  |        |        |        |        |
| 12357  |        | 1      |        |        |
| 12358  |        |        |        |        |
| 12371  |        | 1      |        |        |
| 12372  |        |        |        |        |
| 12373  |        |        |        |        |
| 12379  |        |        |        |        |
| 12381  | 2      | 3      |        |        |
| 12383  |        |        |        |        |
| 12384  |        |        |        |        |
| 12386  |        |        |        |        |
| 12389  |        |        |        |        |
| 12392  |        |        |        |        |
| 12396  |        |        | 1      |        |
| 12397  |        |        |        |        |
| 12399  |        |        |        |        |
| 12400  |        |        |        |        |

| respid | Q31b_3 | Q31b_4 | Q31b_5 | Q31b_6 |
|--------|--------|--------|--------|--------|
| 12406  |        |        |        |        |
| 12407  |        |        |        |        |
| 12410  |        |        |        |        |
| 12413  |        | 2      |        |        |
| 12416  |        | 3      | 2      |        |
| 12419  |        |        |        |        |
| 12422  |        |        |        |        |
| 12423  | 1      |        |        |        |
| 12429  |        |        |        |        |
| 12434  | 3      |        | 3      |        |
| 12435  |        |        |        |        |
| 12436  |        |        |        |        |
| 12442  |        |        |        |        |
| 12449  |        |        |        |        |
| 12451  |        |        |        |        |
| 12456  |        |        |        |        |
| 12457  |        |        |        |        |
| 12458  |        |        |        |        |
| 12461  | 1      |        |        |        |
| 12462  |        |        |        |        |
| 12463  | 2      | 1      | 1      |        |
| 12466  |        |        |        |        |
| 12470  |        | 1      |        |        |
| 12471  |        |        |        |        |
| 12472  |        |        |        |        |
| 12478  |        |        |        | 2      |
| 12479  | 3      |        |        |        |
| 12481  |        |        |        |        |
| 12482  |        |        |        |        |
| 12483  |        |        |        |        |
| 12496  |        |        |        |        |
| 12497  |        |        |        |        |

| respid | Q31b_3 | Q31b_4 | Q31b_5 | Q31b_6 |
|--------|--------|--------|--------|--------|
| 12498  | 2      | 2      |        |        |
| 12500  |        |        |        |        |
| 12501  |        |        |        |        |
| 12502  | 1      |        |        |        |
| 12503  |        |        |        |        |
| 12505  |        |        |        |        |
| 12508  | 3      |        |        |        |
| 12509  |        |        |        |        |
| 12510  |        |        |        |        |
| 12512  |        |        |        |        |
| 12514  | 2      |        |        |        |
| 12515  |        |        |        | 4      |
| 12520  |        |        |        |        |
| 12522  |        |        |        |        |
| 12526  |        |        | 2      |        |
| 12527  |        |        |        |        |
| 12528  |        |        |        |        |
| 12530  | 2      |        |        |        |
| 12535  | 0      |        |        |        |
| 12539  |        |        |        |        |
| 12541  | 1      | 3      |        |        |
| 12542  | 0      |        |        |        |
| 12545  |        |        |        |        |
| 12547  |        |        |        |        |
| 12549  |        |        |        |        |
| 12550  |        |        |        |        |
| 12555  |        |        |        |        |
| 12557  |        |        |        |        |
| 12559  |        |        |        |        |
| 12561  |        |        |        |        |
| 12562  |        |        | 3      |        |
| 12563  | 0      |        |        |        |

| respid | Q31b_3 | Q31b_4 | Q31b_5 | Q31b_6 |
|--------|--------|--------|--------|--------|
| 12565  | 4      |        | 4      |        |
| 12566  |        |        |        |        |
| 12570  |        |        |        |        |
| 12571  |        |        |        |        |
| 12572  |        |        |        |        |
| 12578  |        |        |        |        |
| 12579  |        |        |        |        |
| 12581  |        |        |        |        |
| 12582  |        |        |        |        |
| 12585  |        |        |        |        |
| 12586  | 3      | 3      |        |        |
| 12588  | 2      |        |        |        |
| 12589  | 0      |        |        |        |
| 12590  |        |        |        |        |
| 12591  |        |        | 2      |        |
| 12593  |        | 2      |        |        |
| 12594  |        |        |        | 0      |
| 12599  |        |        |        |        |
| 12600  |        |        |        |        |
| 12602  |        |        | 1      | 3      |
| 12606  |        |        |        |        |
| 12607  |        |        |        |        |
| 12608  |        |        |        |        |
| 12610  | 0      | 1      |        |        |
| 12611  |        |        |        |        |
| 12613  | 3      | 3      | 4      |        |
| 12616  |        |        |        |        |
| 12617  |        |        |        |        |
| 12619  |        |        |        |        |
| 12622  |        |        |        |        |
| 12628  |        |        |        |        |
| 12631  |        |        |        |        |

| respid | Q31b_3 | Q31b_4 | Q31b_5 | Q31b_6 |
|--------|--------|--------|--------|--------|
| 12635  |        |        |        |        |
| 12638  |        |        |        |        |
| 12639  |        |        |        |        |
| 12640  |        |        |        |        |
| 12643  |        |        |        |        |
| 12646  |        |        |        |        |
| 12648  | 4      |        | 4      |        |
| 12650  |        |        |        |        |
| 12651  |        |        |        |        |
| 12658  | 1      |        | 1      |        |
| 12662  |        |        |        |        |
| 12663  |        |        |        |        |
| 12664  |        |        |        |        |
| 12669  | 3      | 2      | 3      |        |
| 12670  |        |        |        |        |
| 12673  |        |        |        |        |
| 12675  |        |        |        |        |
| 12677  |        |        |        |        |
| 12679  |        |        |        |        |
| 12682  |        | 3      |        |        |
| 12696  | 1      |        |        |        |
| 12697  |        |        |        |        |
| 12699  |        |        |        |        |
| 12700  | 1      | 1      |        |        |
| 12701  |        |        |        |        |
| 12702  |        |        |        |        |
| 12704  | 3      | 3      |        |        |
| 12705  |        |        |        |        |
| 12709  |        |        |        |        |
| 12710  |        |        |        |        |
| 12713  | 1      | 1      |        |        |
| 12716  |        |        |        | 1      |

| respid | Q31b_3 | Q31b_4 | Q31b_5 | Q31b_6 |
|--------|--------|--------|--------|--------|
| 12719  |        |        |        |        |
| 12720  |        |        |        |        |
| 12723  |        |        |        |        |
| 12726  |        |        |        |        |
| 12728  |        |        |        |        |
| 12729  |        |        |        |        |
| 12731  |        |        |        |        |
| 12732  |        | 1      |        |        |
| 12733  |        |        |        |        |
| 12736  |        |        |        |        |
| 12737  |        |        |        |        |
| 12739  |        |        |        |        |
| 12742  |        |        |        |        |
| 12743  | 3      |        | 4      |        |
| 12744  |        |        |        |        |
| 12747  |        |        |        |        |
| 12751  |        |        |        |        |
| 12754  |        |        |        |        |
| 12756  |        |        |        |        |
| 12757  |        |        |        |        |
| 12760  |        |        |        |        |
| 12761  |        |        |        |        |
| 12762  |        |        |        |        |
| 12766  |        |        |        |        |
| 12769  |        |        |        |        |
| 12770  |        |        |        |        |
| 12773  |        |        |        |        |
| 12780  |        |        |        |        |
| 12789  |        |        |        |        |
| 12792  | 3      | 3      | 3      | 3      |
| 12795  |        |        |        |        |
| 12804  |        |        |        |        |

| respid | Q31b_3 | Q31b_4 | Q31b_5 | Q31b_6 |
|--------|--------|--------|--------|--------|
| 12811  |        |        | 0      |        |
| 12813  | 2      |        |        |        |
| 12814  |        |        |        |        |
| 12815  |        |        |        |        |
| 12816  |        |        |        |        |
| 12817  |        | 1      |        |        |
| 12818  |        |        |        |        |
| 12819  |        |        |        |        |
| 12820  | 0      |        |        |        |
| 12821  |        |        |        |        |
| 12824  | 3      | 2      |        |        |
| 12827  |        |        |        |        |
| 12836  |        |        | 2      |        |
| 12837  |        |        |        |        |
| 12838  | 1      |        |        |        |
| 12845  |        |        |        |        |
| 12847  |        |        |        |        |
| 12849  |        |        | 2      |        |
| 12850  |        |        |        |        |
| 12852  |        |        |        |        |
| 12853  |        |        |        |        |
| 12854  |        |        |        |        |
| 12860  |        |        |        |        |
| 12861  |        |        |        |        |
| 12863  | 1      |        |        |        |
| 12865  |        |        |        |        |
| 12870  | 1      |        |        |        |
| 12871  |        |        |        |        |
| 12873  |        |        |        |        |
| 12877  |        |        |        |        |
| 12880  |        |        |        |        |
| 12881  |        |        |        |        |



| respid | Q31b_3 | Q31b_4 | Q31b_5 | Q31b_6 |
|--------|--------|--------|--------|--------|
| 12882  |        |        |        |        |
| 12883  |        |        |        |        |
| 12885  |        |        |        |        |
| 12887  |        |        |        |        |
| 12889  |        | 1      |        |        |
| 12890  |        |        |        |        |
| 12891  | 0      |        |        |        |
| 12892  |        |        |        |        |
| 12893  |        |        |        |        |
| 12895  | 1      |        |        |        |
| 12898  |        |        |        |        |
| 12907  | 2      |        |        |        |
| 12908  |        |        |        |        |
| 12909  |        |        |        |        |
| 12914  |        |        |        |        |
| 12915  | 1      |        |        |        |
| 12916  |        |        |        |        |
| 12921  |        |        |        |        |
| 12922  | 1      |        |        |        |
| 12923  |        |        |        |        |
| 12926  |        |        |        |        |
| 12927  | 1      |        | 1      |        |
| 12932  |        |        |        |        |
| 12936  |        |        |        |        |
| 12937  |        |        |        |        |
| 12938  | 4      |        | 4      |        |
| 12939  |        |        |        |        |
| 12940  |        |        |        |        |
| 12945  | 3      |        |        |        |
| 12946  |        |        |        |        |
| 12947  |        | 1      |        |        |
| 12948  |        |        |        | 3      |

| respid | Q31b_3 | Q31b_4 | Q31b_5 | Q31b_6 |
|--------|--------|--------|--------|--------|
| 12951  |        |        |        |        |
| 12952  | 1      |        | 1      |        |
| 12954  |        | 2      |        |        |
| 12960  |        |        |        |        |
| 12961  | 1      | 1      |        |        |
| 12962  |        |        |        |        |
| 12963  |        |        |        |        |
| 12964  | 1      |        |        |        |
| 12966  |        |        |        |        |
| 12967  |        |        |        |        |
| 12969  |        |        |        |        |
| 12970  |        |        |        |        |
| 12974  |        |        |        | 2      |
| 12979  |        |        |        |        |
| 12980  |        |        |        |        |
| 12983  |        |        |        |        |
| 12988  | 1      |        |        |        |
| 12994  | 1      |        |        |        |
| 12995  |        |        |        |        |
| 12996  |        |        |        |        |
| 12998  |        | 2      |        |        |
| 12999  |        |        |        |        |
| 13001  | 1      |        |        |        |
| 13005  |        |        |        |        |
| 13006  |        |        | 1      | 2      |
| 13007  |        |        |        |        |
| 13011  |        |        |        |        |
| 13012  |        |        |        |        |
| 13013  | 2      | 3      |        |        |
| 13016  |        |        |        |        |
| 13018  |        |        |        |        |
| 13020  |        |        |        |        |

| respid | Q31b_3 | Q31b_4 | Q31b_5 | Q31b_6 |
|--------|--------|--------|--------|--------|
| 13024  |        |        |        |        |
| 13025  | 1      | 1      | 1      |        |
| 13027  |        | 0      |        |        |
| 13031  |        |        | 2      |        |
| 13032  |        | 2      |        |        |
| 13034  |        |        |        |        |
| 13036  | 1      |        |        |        |
| 13037  |        |        |        |        |
| 13038  | 3      | 3      |        |        |
| 13039  |        |        |        |        |
| 13040  | 1      |        | 1      |        |
| 13041  |        |        |        |        |
| 13045  |        | 3      |        |        |
| 13046  |        |        |        |        |
| 13048  |        |        |        |        |
| 13051  |        |        |        |        |
| 13053  |        |        |        |        |
| 13055  | 3      |        |        | 3      |
| 13059  |        |        |        |        |
| 13068  |        |        |        |        |
| 13069  |        |        |        |        |
| 13076  | 1      |        |        |        |
| 13081  |        |        |        |        |
| 13082  |        |        |        |        |
| 13084  |        | 3      |        |        |
| 13085  |        |        |        |        |
| 13086  |        |        |        |        |
| 13093  |        |        |        |        |
| 13094  | 2      |        |        |        |
| 13097  |        |        |        |        |
| 13098  |        |        |        |        |
| 13099  |        |        |        |        |

| respid | Q31b_3 | Q31b_4 | Q31b_5 | Q31b_6 |
|--------|--------|--------|--------|--------|
| 13100  |        |        |        |        |
| 13101  |        |        |        |        |
| 13103  |        |        |        |        |
| 13105  | 0      |        |        |        |
| 13106  |        |        |        |        |
| 13107  |        |        |        |        |
| 13110  |        |        | 1      |        |
| 13118  |        |        |        |        |
| 13120  | 4      |        |        |        |
| 13130  |        |        |        |        |
| 13133  |        |        |        |        |
| 13134  |        |        |        |        |
| 13139  | 0      |        |        |        |
| 13142  |        |        |        |        |
| 13143  |        |        |        |        |
| 13145  |        |        |        |        |
| 13148  |        |        |        |        |
| 13149  |        |        |        |        |
| 13151  | 3      |        |        |        |
| 13153  |        |        |        |        |
| 13158  |        |        |        |        |
| 13160  | 1      |        |        |        |
| 13162  |        | 1      | 1      |        |
| 13169  |        |        |        |        |
| 13172  |        |        |        |        |
| 13173  |        |        |        |        |
| 13176  |        |        |        |        |
| 13179  |        |        |        |        |
| 13184  |        |        |        |        |
| 13185  |        |        |        |        |
| 13186  |        |        |        |        |
| 13188  | 1      |        |        |        |

| respid | Q31b_3 | Q31b_4 | Q31b_5 | Q31b_6 |
|--------|--------|--------|--------|--------|
| 13190  |        |        | 1      |        |
| 13192  | 0      |        |        |        |
| 13193  |        |        |        |        |
| 13201  |        |        |        |        |
| 13207  |        |        |        |        |
| 13208  |        |        |        |        |
| 13209  |        |        |        |        |
| 13212  | 1      |        |        |        |
| 13215  | 1      |        |        |        |
| 13218  |        |        |        |        |
| 13219  |        |        |        |        |
| 13224  |        |        |        |        |
| 13225  |        |        |        |        |
| 13226  |        |        |        |        |
| 13232  |        |        |        |        |
| 13237  |        | 2      |        |        |
| 13239  | 0      |        |        |        |
| 13241  | 3      | 2      | 2      |        |
| 13243  |        |        |        |        |
| 13247  |        |        |        | 4      |
| 13248  |        |        |        |        |
| 13251  | 0      |        |        |        |
| 13256  |        |        |        |        |
| 13260  |        |        |        |        |
| 13261  |        |        |        |        |
| 13264  |        | 1      |        |        |
| 13273  |        |        |        |        |
| 13274  |        |        |        |        |
| 13276  |        |        |        |        |
| 13278  |        |        |        |        |
| 13279  |        |        |        |        |
| 13282  |        |        |        |        |

| respid | Q31b_3 | Q31b_4 | Q31b_5 | Q31b_6 |
|--------|--------|--------|--------|--------|
| 13283  | 1      |        |        |        |
| 13285  |        |        |        |        |
| 13286  |        |        |        |        |
| 13299  | 1      |        |        |        |
| 13300  | 1      |        |        |        |
| 13301  |        |        |        |        |
| 13303  |        |        |        |        |
| 13304  |        |        |        |        |
| 13307  |        |        |        |        |
| 13308  |        |        |        |        |
| 13312  |        |        |        |        |
| 13313  |        |        |        |        |
| 13314  |        |        |        |        |
| 13318  | 1      |        |        |        |
| 13320  | 1      |        | 1      |        |
| 13322  |        |        |        |        |
| 13324  |        |        |        |        |
| 13325  | 1      | 1      |        |        |
| 13327  |        |        |        |        |
| 13330  | 0      |        |        |        |
| 13332  |        |        |        |        |
| 13333  |        |        |        | 3      |
| 13334  |        |        |        |        |
| 13351  | 4      |        |        |        |
| 13353  |        |        |        |        |
| 13354  |        |        |        |        |
| 13355  |        |        |        |        |
| 13358  | 1      |        |        |        |
| 13359  |        |        |        |        |
| 13360  | 1      |        |        |        |
| 13364  | 4      | 4      | 4      |        |
| 13365  |        |        |        |        |

| respid | Q31b_3 | Q31b_4 | Q31b_5 | Q31b_6 |
|--------|--------|--------|--------|--------|
| 13368  |        |        |        |        |
| 13370  |        |        |        |        |
| 13375  |        |        |        |        |
| 13384  |        |        |        |        |
| 13387  |        |        |        |        |
| 13395  |        |        |        |        |
| 13398  |        |        |        |        |
| 13404  |        |        |        |        |
| 13405  |        |        |        |        |
| 13408  |        |        |        |        |
| 13411  |        |        |        |        |
| 13413  |        |        |        |        |
| 13419  |        |        |        |        |
| 13420  |        |        |        |        |
| 13427  |        |        |        |        |
| 13441  | 3      |        |        |        |
| 13444  |        |        |        |        |
| 13456  |        |        |        |        |
| 13466  |        |        |        |        |
| 13468  |        |        |        |        |
| 13475  |        |        |        |        |
| 13484  | 0      |        |        |        |
| 13486  |        |        |        |        |
| 13487  |        |        |        |        |
| 13491  |        |        |        |        |
| 13496  |        |        |        |        |
| 13497  |        |        |        |        |
| 13498  |        |        |        |        |
| 13502  |        |        |        |        |
| 13503  |        |        |        |        |
| 13505  |        |        |        |        |
| 13509  |        |        |        |        |

| respid | Q31b_3 | Q31b_4 | Q31b_5 | Q31b_6 |
|--------|--------|--------|--------|--------|
| 13510  | 2      |        |        |        |
| 13518  |        |        |        |        |
| 13521  |        |        |        |        |
| 13523  |        |        |        |        |
| 13528  |        |        |        |        |
| 13531  |        | 1      |        |        |
| 13532  | 0      |        |        |        |
| 13533  | 1      |        |        |        |
| 13534  |        |        |        |        |
| 13535  |        |        |        |        |
| 13538  | 2      | 2      |        |        |
| 13540  |        |        |        |        |
| 13541  |        |        |        |        |
| 13542  |        |        |        |        |
| 13550  |        | 2      |        |        |
| 13553  |        |        |        |        |
| 13554  |        |        |        |        |
| 13555  | 0      |        | 0      |        |
| 13556  | 2      |        |        |        |
| 13563  | 2      |        | 1      |        |
| 13564  |        |        |        |        |
| 13567  |        |        |        |        |
| 13568  | 1      |        |        |        |
| 13570  |        |        |        |        |
| 13573  |        |        |        |        |
| 13575  |        |        |        |        |
| 13577  | 2      | 2      |        |        |
| 13580  |        | 1      | 2      |        |
| 13582  |        |        |        |        |
| 13584  | 3      |        |        |        |
| 13585  |        |        |        |        |
| 13586  |        |        |        |        |



| respid | Q31b_3 | Q31b_4 | Q31b_5 | Q31b_6 |
|--------|--------|--------|--------|--------|
| 13587  | 1      |        |        |        |
| 13592  |        | 2      | 2      |        |
| 13596  |        | 0      |        |        |
| 13597  |        |        |        |        |
| 13599  | 2      |        |        |        |
| 13601  | 0      | 0      |        |        |
| 13604  |        |        |        |        |
| 13608  |        |        |        |        |
| 13616  |        |        |        |        |
| 13618  |        |        |        |        |
| 13619  |        |        |        |        |
| 13626  |        |        |        |        |
| 13628  |        | 1      |        |        |
| 13640  |        |        |        |        |
| 13645  |        |        |        |        |
| 13648  |        |        |        |        |
| 13653  |        |        |        |        |
| 13655  |        |        |        |        |
| 13662  |        |        |        |        |
| 13670  |        |        |        |        |
| 13673  |        |        |        |        |
| 13674  |        |        |        |        |
| 13675  |        |        |        |        |
| 13678  |        |        |        |        |
| 13680  | 1      | 1      |        |        |
| 13681  |        |        |        |        |
| 13683  |        |        |        |        |
| 13684  |        |        |        |        |
| 13685  |        |        |        |        |
| 13687  |        |        |        |        |
| 13690  |        |        |        |        |
| 13700  | 2      | 2      |        |        |

| respid | Q31b_3 | Q31b_4 | Q31b_5 | Q31b_6 |
|--------|--------|--------|--------|--------|
| 13705  | 1      |        |        |        |
| 13710  |        |        |        |        |
| 13711  |        |        |        |        |
| 13713  |        |        |        |        |
| 13716  |        |        |        |        |
| 13721  | 1      |        |        |        |
| 13722  |        |        |        |        |
| 13723  |        | 4      |        |        |
| 13726  | 2      |        |        | 1      |
| 13728  |        |        |        |        |
| 13730  |        |        |        |        |
| 13734  |        |        |        |        |
| 13736  |        |        |        |        |
| 13737  |        |        |        |        |
| 13739  |        |        |        |        |
| 13742  |        |        |        |        |
| 13746  |        |        |        |        |
| 13747  |        |        |        |        |
| 13749  | 0      |        |        |        |
| 13751  |        |        |        |        |
| 13752  |        |        |        |        |
| 13756  |        |        |        |        |
| 13757  |        |        |        |        |
| 13767  | 2      |        |        |        |
| 13771  |        |        |        |        |
| 13772  |        |        |        |        |
| 13779  |        |        |        |        |
| 13782  |        |        |        |        |
| 13783  |        | 0      |        |        |
| 13785  |        |        |        |        |
| 13786  |        |        |        | 2      |
| 13792  |        |        |        |        |

| respid | Q31b_3 | Q31b_4 | Q31b_5 | Q31b_6 |
|--------|--------|--------|--------|--------|
| 13796  |        |        |        |        |
| 13798  |        |        |        |        |
| 13799  |        |        |        |        |
| 13804  |        |        |        |        |
| 13805  |        |        |        |        |
| 13810  | 3      |        |        |        |
| 13811  |        |        |        |        |
| 13819  |        |        |        |        |
| 13821  |        | 3      | 3      |        |
| 13824  |        | 2      | 2      | 3      |
| 13828  | 2      |        |        |        |
| 13829  | 2      | 3      |        |        |
| 13831  |        |        |        |        |
| 13833  |        |        |        |        |
| 13835  |        |        | 2      |        |
| 13838  |        |        |        |        |
| 13839  |        |        | 3      | 3      |
| 13845  |        |        |        |        |
| 13846  |        |        |        |        |
| 13853  |        |        |        | 1      |
| 13855  |        | 3      |        |        |
| 13858  |        |        |        |        |
| 13860  |        |        |        |        |
| 13865  |        | 4      |        |        |
| 13870  |        |        |        |        |
| 13872  | 4      |        | 3      | 4      |
| 13873  |        |        |        |        |
| 13874  |        |        |        |        |
| 13875  | 0      |        |        |        |
| 13881  |        |        |        |        |
| 13887  |        |        |        |        |
| 13888  |        |        |        |        |

| respid | Q31b_3 | Q31b_4 | Q31b_5 | Q31b_6 |
|--------|--------|--------|--------|--------|
| 13889  | 4      |        |        |        |
| 13895  |        |        |        |        |
| 13897  |        |        |        |        |
| 13898  |        |        |        |        |
| 13901  |        |        |        |        |
| 13902  |        |        | 3      | 4      |
| 13903  |        |        |        |        |
| 13905  | 1      |        |        |        |
| 13908  | 1      |        | 1      |        |
| 13909  |        |        |        |        |
| 13910  |        | 3      | 3      |        |
| 13911  |        |        |        |        |
| 13914  | 0      |        |        | 1      |
| 13920  |        |        |        |        |
| 13926  |        |        |        |        |
| 13929  | 1      |        |        |        |
| 13930  |        |        | 1      |        |
| 13931  |        |        |        |        |
| 13932  |        | 2      |        |        |
| 13934  | 1      |        |        |        |
| 13938  |        |        |        |        |
| 13942  |        |        |        |        |
| 13945  | 1      |        |        |        |
| 13947  |        |        |        |        |
| 13948  |        |        |        |        |
| 13959  |        |        |        |        |
| 13962  |        |        |        |        |
| 13963  |        |        |        |        |
| 13964  |        |        |        |        |
| 13966  |        | 1      |        |        |
| 13968  |        |        |        |        |
| 13971  |        |        |        | 0      |

| respid | Q31b_3 | Q31b_4 | Q31b_5 | Q31b_6 |
|--------|--------|--------|--------|--------|
| 13979  |        |        |        | 2      |
| 13980  |        | 1      |        |        |
| 13981  |        |        |        |        |
| 13982  |        |        |        |        |
| 13984  |        |        |        |        |
| 13989  |        |        |        |        |
| 13990  |        |        |        |        |
| 13992  | 3      |        | 1      |        |
| 13998  | 1      |        |        |        |
| 13999  |        |        |        |        |
| 14000  |        |        |        |        |
| 14003  |        |        |        |        |
| 14004  |        |        |        |        |
| 14006  |        |        |        |        |
| 14007  |        |        |        |        |
| 14008  |        |        |        |        |
| 14013  | 0      |        |        |        |
| 14015  | 1      |        |        |        |
| 14018  | 0      |        |        |        |
| 14021  |        |        |        |        |
| 14023  |        |        |        |        |
| 14024  |        |        |        |        |
| 14026  |        |        |        |        |
| 14030  |        |        |        |        |
| 14032  |        |        |        |        |
| 14040  |        |        |        |        |
| 14045  |        |        |        |        |
| 14048  |        | 1      |        |        |
| 14049  |        |        |        |        |
| 14050  |        |        | 0      |        |
| 14051  |        |        | 4      | 4      |
| 14052  |        |        |        |        |

| respid | Q31b_3 | Q31b_4 | Q31b_5 | Q31b_6 |
|--------|--------|--------|--------|--------|
| 14054  | 1      |        |        |        |
| 14055  |        |        |        |        |
| 14057  | 2      |        |        |        |
| 14058  |        |        |        |        |
| 14059  |        |        |        |        |
| 14060  | 2      |        |        |        |
| 14061  |        |        | 3      | 3      |
| 14071  |        |        |        |        |
| 14073  |        |        |        |        |
| 14074  |        |        |        |        |
| 14076  | 2      |        |        |        |
| 14080  |        |        |        |        |
| 14082  |        |        |        |        |
| 14083  |        |        |        |        |
| 14084  |        |        |        |        |
| 14085  |        |        |        |        |
| 14086  |        |        |        |        |
| 14088  |        |        |        |        |
| 14090  |        |        |        |        |
| 14092  |        |        |        |        |
| 14093  |        | 2      |        |        |
| 14096  | 1      |        |        |        |
| 14103  |        |        |        | 2      |
| 14105  | 0      |        |        |        |
| 14106  |        |        |        |        |
| 14107  |        | 1      |        |        |
| 14108  | 3      |        |        |        |
| 14112  | 1      |        |        |        |
| 14114  |        |        |        |        |
| 14115  |        |        |        |        |
| 14116  |        |        |        |        |
| 14117  |        |        |        |        |

| respid | Q31b_3 | Q31b_4 | Q31b_5 | Q31b_6 |
|--------|--------|--------|--------|--------|
| 14118  |        | 2      |        |        |
| 14119  |        |        |        |        |
| 14127  |        |        |        |        |
| 14129  |        |        |        |        |
| 14131  |        |        |        |        |
| 14132  |        |        |        |        |
| 14133  | 3      |        | 3      |        |
| 14134  |        |        |        |        |
| 14135  |        |        |        |        |
| 14136  |        |        |        |        |
| 14138  |        |        |        |        |
| 14139  |        |        |        |        |
| 14140  | 2      |        |        |        |
| 14141  |        |        |        |        |
| 14143  |        |        |        |        |
| 14146  |        |        |        |        |
| 14147  | 2      | 3      | 2      |        |
| 14148  | 1      |        |        |        |
| 14151  | 1      |        | 2      |        |
| 14152  |        |        |        |        |
| 14153  |        |        |        |        |
| 14154  |        |        |        |        |
| 14158  |        |        |        |        |
| 14159  |        | 1      |        |        |
| 14160  |        |        |        |        |
| 14161  |        |        |        | 1      |
| 14162  |        |        |        |        |
| 14165  |        |        |        |        |
| 14166  |        | 1      |        |        |
| 14167  |        |        |        |        |
| 14169  |        |        |        |        |
| 14170  | 1      |        |        |        |

| respid | Q31b_3 | Q31b_4 | Q31b_5 | Q31b_6 |
|--------|--------|--------|--------|--------|
| 14172  |        |        |        |        |
| 14173  |        |        |        |        |
| 14174  | 1      |        |        |        |
| 14175  |        |        |        |        |
| 14176  |        |        |        |        |
| 14178  |        |        |        |        |
| 14179  |        |        |        |        |
| 14180  |        |        | 2      |        |
| 14183  |        | 3      |        |        |
| 14185  |        |        |        |        |
| 14187  |        |        |        |        |
| 14189  |        |        |        |        |
| 14191  |        |        |        |        |
| 14192  |        |        |        |        |
| 14195  |        |        | 2      |        |
| 14197  | 1      |        |        |        |
| 14203  |        |        | 2      |        |
| 14204  |        |        |        |        |
| 14205  |        |        |        |        |
| 14208  |        |        |        |        |
| 14211  | 2      | 2      |        |        |
| 14214  | 0      |        | 0      |        |
| 14215  |        |        |        |        |
| 14216  |        |        |        |        |
| 14218  |        |        |        |        |
| 14220  |        |        |        |        |
| 14223  |        |        |        |        |
| 14225  |        |        |        | 2      |
| 14226  |        |        |        |        |
| 14228  |        | 0      |        |        |
| 14231  |        |        |        |        |
| 14233  | 2      |        |        |        |



| respid | Q31b_3 | Q31b_4 | Q31b_5 | Q31b_6 |
|--------|--------|--------|--------|--------|
| 14237  |        |        |        |        |
| 14238  |        |        |        |        |
| 14243  |        |        |        |        |
| 14245  |        |        |        |        |
| 14246  |        |        | 0      |        |
| 14248  |        |        |        |        |
| 14250  |        |        |        |        |
| 14253  |        |        |        |        |
| 14254  |        |        |        |        |
| 14255  |        |        |        |        |
| 14257  |        |        |        |        |
| 14258  |        |        |        |        |
| 14259  |        |        |        |        |
| 14260  |        |        |        |        |
| 14261  | 3      |        |        | 2      |
| 14263  | 4      |        |        |        |
| 14264  |        | 1      | 2      |        |
| 14266  |        |        | 0      |        |
| 14267  |        | 0      |        |        |
| 14268  |        |        |        |        |
| 14275  |        |        |        |        |
| 14278  |        |        |        |        |
| 14279  |        |        |        |        |
| 14280  |        |        |        |        |
| 14281  | 3      |        |        |        |
| 14282  |        | 2      |        |        |
| 14283  |        |        |        | 2      |
| 14286  | 0      |        |        |        |
| 14287  |        |        |        |        |
| 14288  | 2      |        |        |        |
| 14291  |        |        |        |        |
| 14292  |        |        |        |        |

| respid | Q31b_3 | Q31b_4 | Q31b_5 | Q31b_6 |
|--------|--------|--------|--------|--------|
| 14293  |        |        |        |        |
| 14304  |        | 3      | 4      | 3      |
| 14308  |        |        |        |        |
| 14313  |        |        |        |        |
| 14314  |        |        |        |        |
| 14316  |        | 0      |        |        |
| 14317  |        |        |        |        |
| 14318  |        | 2      |        |        |
| 14319  |        |        |        |        |
| 14320  |        | 0      |        |        |
| 14321  | 1      |        |        |        |
| 14322  |        | 3      |        |        |
| 14326  |        |        |        |        |
| 14327  |        | 3      | 4      | 2      |
| 14328  |        |        |        |        |
| 14330  |        |        |        |        |
| 14332  |        |        |        |        |
| 14334  |        |        |        |        |
| 14336  | 3      |        |        |        |
| 14337  |        |        |        |        |
| 14339  |        |        |        |        |
| 14340  |        |        |        |        |
| 14341  |        |        |        |        |
| 14344  |        |        |        |        |
| 14345  |        |        |        |        |
| 14346  |        |        |        |        |
| 14348  |        |        |        |        |
| 14349  |        |        |        |        |
| 14358  | 2      | 2      |        |        |
| 14360  |        |        |        |        |
| 14362  |        |        |        |        |
| 14366  |        |        |        |        |

| respid | Q31b_3 | Q31b_4 | Q31b_5 | Q31b_6 |
|--------|--------|--------|--------|--------|
| 14367  |        |        |        |        |
| 14369  |        |        |        |        |
| 14371  |        |        |        |        |
| 14372  |        |        |        |        |
| 14374  |        |        |        |        |
| 14376  |        |        |        |        |
| 14377  |        |        |        |        |
| 14378  | 0      |        |        |        |
| 14379  |        |        |        |        |
| 14381  |        |        |        |        |
| 14383  |        |        |        |        |
| 14384  |        |        |        |        |
| 14385  |        | 1      | 2      | 1      |
| 14386  |        |        |        |        |
| 14390  |        |        |        |        |
| 14391  |        |        |        |        |
| 14392  |        |        |        |        |
| 14393  |        |        |        | 3      |
| 14394  | 1      |        |        |        |
| 14395  |        |        |        |        |
| 14396  |        |        |        |        |
| 14397  |        |        |        |        |
| 14398  |        |        |        |        |
| 14399  |        |        |        |        |
| 14400  |        |        |        |        |
| 14403  |        |        |        |        |
| 14404  |        |        |        |        |
| 14405  |        |        |        |        |
| 14407  |        |        |        |        |
| 14408  | 1      |        |        | 3      |
| 14410  |        | 3      |        | 3      |
| 14415  |        |        |        |        |

| respid | Q31b_3 | Q31b_4 | Q31b_5 | Q31b_6 |
|--------|--------|--------|--------|--------|
| 14419  |        |        |        |        |
| 14420  |        |        |        |        |
| 14421  |        |        |        |        |
| 14423  |        |        |        |        |
| 14424  |        |        |        |        |
| 14425  |        |        |        |        |
| 14426  |        |        |        |        |
| 14427  |        |        |        |        |
| 14428  |        |        |        | 1      |
| 14431  | 1      |        |        |        |
| 14433  |        |        |        |        |
| 14434  |        |        |        |        |
| 14435  | 1      |        |        |        |
| 14436  | 2      |        |        |        |
| 14438  |        |        |        |        |
| 14442  | 3      |        |        |        |
| 14447  |        |        |        |        |
| 14448  |        |        |        |        |
| 14450  |        |        | 0      |        |
| 14451  |        |        |        |        |
| 14454  |        |        | 1      |        |
| 14455  |        |        |        |        |
| 14456  |        |        |        |        |
| 14457  | 2      |        | 3      |        |
| 14458  |        | 2      |        | 3      |
| 14459  |        |        |        |        |
| 14460  | 2      |        |        |        |
| 14464  |        |        |        |        |
| 14465  |        |        |        |        |
| 14466  |        |        |        |        |
| 14467  |        |        |        |        |
| 14470  |        |        |        |        |

| respid | Q31b_3 | Q31b_4 | Q31b_5 | Q31b_6 |
|--------|--------|--------|--------|--------|
| 14472  |        |        |        |        |
| 14473  |        |        |        |        |
| 14474  |        |        |        |        |
| 14477  |        |        |        |        |
| 14478  |        |        |        |        |
| 14479  |        |        |        |        |
| 14484  |        |        |        |        |
| 14485  |        |        |        |        |
| 14486  | 1      |        |        |        |
| 14487  |        |        |        |        |
| 14488  | 2      |        |        |        |
| 14491  | 1      |        |        |        |
| 14495  |        |        |        |        |
| 14500  |        |        |        |        |
| 14502  |        |        |        |        |
| 14504  |        |        | 2      |        |
| 14505  |        | 1      | 2      | 2      |
| 14507  |        |        |        |        |
| 14517  |        |        |        |        |
| 14518  |        |        |        |        |
| 14519  |        |        |        |        |
| 14521  | 1      |        |        |        |
| 14522  |        |        |        |        |
| 14526  |        |        |        |        |
| 14528  | 4      |        |        |        |
| 14529  |        |        |        |        |
| 14530  |        |        |        |        |
| 14531  | 3      | 4      | 3      |        |
| 14534  |        | 2      |        |        |
| 14538  |        |        |        |        |
| 14539  |        |        |        |        |
| 14545  |        |        |        |        |

| respid | Q31b_3 | Q31b_4 | Q31b_5 | Q31b_6 |
|--------|--------|--------|--------|--------|
| 14546  |        |        |        |        |
| 14551  |        |        |        |        |
| 14553  |        | 2      |        |        |
| 14557  |        |        |        |        |
| 14558  |        |        |        |        |
| 14559  |        |        |        |        |
| 14560  |        |        |        |        |
| 14563  |        |        |        |        |
| 14565  |        |        |        |        |
| 14571  |        |        | 1      |        |
| 14572  |        |        |        |        |
| 14573  | 2      |        |        |        |
| 14575  |        |        |        |        |
| 14576  |        |        | 2      |        |
| 14578  |        |        |        |        |
| 14579  |        |        |        |        |
| 14580  |        | 3      |        |        |
| 14582  |        |        |        |        |
| 14585  |        | 1      |        |        |
| 14588  |        |        |        |        |
| 14590  |        |        |        | 2      |
| 14592  | 1      | 1      |        |        |
| 14593  |        |        |        |        |
| 14595  |        |        |        |        |
| 14597  | 1      |        |        |        |
| 14600  |        |        |        |        |
| 14602  | 2      |        |        |        |
| 14604  |        |        |        |        |
| 14605  |        |        |        |        |
| 14609  |        |        |        |        |
| 14610  |        |        |        |        |
| 14611  |        |        |        |        |

| respid | Q31b_3 | Q31b_4 | Q31b_5 | Q31b_6 |
|--------|--------|--------|--------|--------|
| 14612  | 2      |        |        |        |
| 14614  |        |        | 1      |        |
| 14615  | 1      |        |        |        |
| 14618  | 3      |        |        |        |
| 14621  |        |        |        |        |
| 14624  |        |        |        |        |
| 14626  |        |        |        |        |
| 14627  | 2      |        |        |        |
| 14628  |        |        | 4      |        |
| 14631  |        |        |        |        |
| 14633  |        |        |        |        |
| 14642  |        |        |        |        |
| 14647  |        |        |        |        |
| 14658  |        |        |        |        |
| 14659  | 1      |        |        |        |
| 14660  |        |        |        |        |
| 14661  |        |        |        |        |
| 14662  | 2      | 4      |        |        |
| 14663  |        |        |        |        |
| 14670  | 3      |        |        | 3      |
| 14671  |        |        |        |        |
| 14672  |        |        |        | 2      |
| 14675  |        |        |        |        |
| 14676  |        |        |        |        |
| 14677  | 1      |        | 2      |        |
| 14678  |        | 1      |        |        |
| 14681  | 1      |        |        |        |
| 14684  |        |        |        |        |
| 14688  |        |        |        |        |
| 14690  |        |        |        |        |
| 14694  |        |        | 1      |        |
| 14696  |        |        |        |        |

| respid | Q31b_3 | Q31b_4 | Q31b_5 | Q31b_6 |
|--------|--------|--------|--------|--------|
| 14700  |        |        |        |        |
| 14701  |        |        |        |        |
| 14703  |        |        | 1      | 2      |
| 14707  |        |        |        |        |
| 14711  |        | 2      |        |        |
| 14714  |        |        |        |        |
| 14715  |        | 3      |        |        |
| 14716  |        |        |        |        |
| 14720  |        | 4      |        |        |
| 14725  |        |        |        |        |
| 14726  |        | 0      |        |        |
| 14734  |        |        |        |        |
| 14735  |        |        |        |        |
| 14736  |        |        |        | 1      |
| 14740  |        |        |        |        |
| 14745  | 2      | 2      |        | 2      |
| 14747  |        |        |        |        |
| 14750  |        | 2      |        |        |
| 14751  |        |        |        |        |
| 14753  |        |        |        |        |
| 14756  | 3      | 3      | 3      |        |
| 14780  |        |        |        |        |
| 14782  |        |        |        |        |
| 14800  | 2      |        |        | 2      |
| 14801  |        |        |        |        |
| 14802  |        |        | 2      | 3      |
| 14805  |        |        |        |        |
| 14811  |        | 1      | 2      | 1      |
| 14814  |        | 2      | 1      |        |
| 14822  | 0      | 1      |        |        |
| 14827  | 1      | 2      | 3      |        |
| 14828  |        |        |        |        |



| respid | Q31b_3 | Q31b_4 | Q31b_5 | Q31b_6 |
|--------|--------|--------|--------|--------|
| 14830  |        |        |        |        |
| 14832  | 2      |        |        |        |
| 14835  |        |        |        |        |
| 14841  |        |        |        |        |
| 14849  |        |        |        |        |
| 14850  |        |        |        |        |
| 14851  |        |        |        |        |
| 14856  |        | 3      | 3      |        |
| 14862  | 0      | 1      |        |        |
| 14863  |        |        |        |        |
| 14864  |        |        |        |        |
| 14866  |        |        |        | 1      |
| 14867  | 3      | 3      |        |        |
| 14868  |        |        |        |        |
| 14870  |        |        |        |        |
| 14873  |        |        |        |        |
| 14878  | 1      |        |        |        |
| 14879  |        |        |        |        |
| 14881  |        |        |        |        |
| 14888  | 3      |        | 4      |        |
| 14895  |        |        |        |        |
| 14900  |        | 3      |        | 4      |
| 14912  |        |        |        |        |
| 14922  |        | 1      |        |        |
| 14923  |        |        |        | 4      |
| 14924  |        |        |        |        |
| 14925  | 2      |        | 2      |        |
| 14926  |        |        |        |        |
| 14927  |        | 3      | 4      |        |
| 14930  |        |        |        |        |
| 14937  | 3      |        |        | 3      |
| 14938  |        | 2      | 2      |        |

| respid | Q31b_3 | Q31b_4 | Q31b_5 | Q31b_6 |
|--------|--------|--------|--------|--------|
| 14939  | 2      |        |        | 3      |
| 14942  |        |        |        |        |
| 14943  |        |        |        |        |
| 14953  |        |        |        |        |
| 14954  |        |        |        |        |
| 14955  | 2      |        |        |        |
| 14957  |        |        |        | 2      |
| 14958  |        | 3      |        | 4      |
| 14959  |        | 2      |        |        |
| 14961  |        |        |        |        |
| 14963  | 2      | 2      |        | 3      |
| 14964  |        |        |        |        |
| 14965  |        |        |        |        |
| 14967  |        | 1      |        | 2      |
| 14970  |        |        | 3      |        |
| 14972  |        |        |        |        |
| 14975  | 4      | 4      |        |        |
| 14977  |        |        |        |        |
| 14982  |        |        |        | 1      |
| 14985  | 1      | 1      |        |        |
| 14986  |        |        |        |        |
| 14987  |        |        |        |        |
| 14988  | 3      |        |        |        |
| 14989  | 3      |        |        |        |
| 14993  |        |        |        |        |
| 15001  |        |        |        |        |
| 15002  | 2      | 3      |        |        |
| 15006  |        |        |        |        |
| 15007  |        |        |        |        |
| 15014  | 3      |        |        |        |
| 15020  |        |        |        | 1      |
| 15021  |        |        | 1      | 2      |

| respid | Q31b_3 | Q31b_4 | Q31b_5 | Q31b_6 |
|--------|--------|--------|--------|--------|
| 15023  | 3      |        | 3      |        |
| 15030  |        |        |        |        |
| 15032  |        |        |        |        |
| 15033  | 1      |        |        |        |
| 15034  |        |        |        |        |
| 15035  |        |        |        |        |
| 15037  |        |        |        |        |
| 15039  | 2      | 2      |        | 3      |
| 15040  |        |        |        |        |
| 15042  |        |        |        |        |
| 15044  |        |        |        |        |
| 15045  |        |        |        |        |
| 15046  |        |        |        |        |
| 15052  | 3      |        |        | 3      |
| 15058  |        |        |        |        |
| 15063  | 2      | 2      |        |        |
| 15066  |        |        |        |        |
| 15069  | 0      |        |        |        |
| 15071  | 2      | 2      |        |        |
| 15076  | 2      | 3      |        |        |
| 15078  |        |        |        |        |
| 15087  |        |        |        |        |
| 15090  |        |        |        |        |
| 15091  |        | 4      |        |        |
| 15092  |        |        |        |        |
| 15096  |        |        |        |        |
| 15106  | 2      | 2      | 3      |        |
| 15108  |        |        |        |        |
| 15113  |        |        |        |        |
| 15116  |        |        |        |        |
| 15119  |        |        | 1      |        |
| 15120  |        |        |        |        |

| respid | Q31b_3 | Q31b_4 | Q31b_5 | Q31b_6 |
|--------|--------|--------|--------|--------|
| 15121  |        |        |        |        |
| 15123  |        |        |        |        |
| 15124  |        |        |        |        |
| 15128  | 1      |        |        |        |
| 15131  |        |        |        |        |
| 15136  | 2      |        |        |        |
| 15137  |        |        |        |        |
| 15141  |        |        |        |        |
| 15144  |        |        |        |        |
| 15147  |        |        |        |        |
| 15151  |        |        |        |        |
| 15154  |        |        |        |        |
| 15157  |        |        |        |        |
| 15164  |        | 3      |        |        |
| 15168  |        |        |        |        |
| 15169  |        |        |        |        |
| 15172  | 3      |        |        |        |
| 15177  |        |        |        |        |
| 15178  |        |        |        |        |
| 15180  |        | 0      |        |        |
| 15181  |        |        |        |        |
| 15182  |        |        |        |        |
| 15183  |        |        |        |        |
| 15188  |        |        |        |        |
| 15190  | 3      |        |        | 4      |
| 15195  |        |        |        |        |
| 15201  |        |        |        |        |
| 15203  |        |        |        |        |
| 15204  |        |        |        |        |
| 15207  |        |        |        |        |
| 15208  | 3      | 4      |        |        |
| 15209  |        |        |        |        |

| respid | Q31b_3 | Q31b_4 | Q31b_5 | Q31b_6 |
|--------|--------|--------|--------|--------|
| 15212  |        |        |        |        |
| 15213  |        |        |        | 1      |
| 15219  |        |        |        |        |
| 15220  |        |        |        |        |
| 15221  |        |        |        |        |
| 15223  |        |        | 1      |        |
| 15224  |        |        |        |        |
| 15225  |        |        |        |        |
| 15226  |        |        |        |        |
| 15230  |        |        |        |        |
| 15231  | 3      |        |        |        |
| 15232  |        |        |        |        |
| 15237  |        |        |        |        |
| 15239  |        |        |        |        |
| 15241  |        |        |        |        |
| 15242  |        |        | 2      |        |
| 15247  |        |        |        |        |
| 15248  |        |        |        |        |
| 15251  |        |        |        |        |
| 15257  |        |        |        |        |
| 15260  |        |        |        |        |
| 15261  |        | 1      |        | 2      |
| 15262  |        |        |        |        |
| 15263  |        |        |        |        |
| 15265  |        |        |        |        |
| 15266  |        |        |        |        |
| 15268  |        |        |        |        |
| 15269  |        |        |        |        |
| 15270  | 4      |        |        | 4      |
| 15273  |        | 2      | 1      |        |
| 15276  |        |        |        | 3      |
| 15277  |        |        |        |        |

| respid | Q31b_3 | Q31b_4 | Q31b_5 | Q31b_6 |
|--------|--------|--------|--------|--------|
| 15282  |        |        |        |        |
| 15284  |        |        |        |        |
| 15285  |        |        |        |        |
| 15286  |        | 3      |        |        |
| 15288  |        |        |        |        |
| 15292  | 2      | 4      |        | 3      |
| 15296  |        |        | 0      |        |
| 15297  |        |        |        |        |
| 15298  |        |        |        |        |
| 15301  |        |        |        |        |
| 15302  |        |        | 1      | 1      |
| 15305  |        |        |        |        |
| 15307  |        |        |        |        |
| 15308  |        |        |        |        |
| 15309  |        |        |        |        |
| 15311  |        |        |        |        |
| 15315  |        |        |        |        |
| 15316  |        |        |        |        |
| 15318  |        |        |        |        |
| 15321  |        |        | 3      | 4      |
| 15322  |        |        |        |        |
| 15324  |        |        |        |        |
| 15326  |        |        |        |        |
| 15327  |        |        |        |        |
| 15328  |        |        |        |        |
| 15330  |        |        |        |        |
| 15332  |        |        |        |        |
| 15333  |        |        |        |        |
| 15334  |        |        |        |        |
| 15336  |        |        |        | 3      |
| 15337  | 1      | 1      |        |        |
| 15338  |        |        |        |        |

| respid | Q31b_3 | Q31b_4 | Q31b_5 | Q31b_6 |
|--------|--------|--------|--------|--------|
| 15339  | 4      |        |        |        |
| 15341  |        |        |        |        |
| 15344  |        |        |        |        |
| 15345  | 1      |        |        |        |
| 15350  |        |        |        |        |
| 15351  |        |        | 2      |        |
| 15352  |        |        |        |        |
| 15372  |        |        |        |        |
| 15373  | 1      | 2      |        |        |
| 15376  |        |        |        |        |
| 15377  |        |        |        |        |
| 15382  |        |        |        |        |
| 15383  |        |        |        |        |
| 15385  |        | 3      | 3      |        |
| 15390  |        |        |        |        |
| 15399  |        |        |        |        |
| 15404  | 1      |        |        |        |
| 15410  |        |        |        |        |
| 15411  |        | 1      |        |        |
| 15412  |        |        |        |        |
| 15413  |        |        |        |        |
| 15414  |        |        |        |        |
| 15417  |        |        |        |        |
| 15418  |        |        |        |        |
| 15421  |        |        |        |        |
| 15423  |        |        |        |        |
| 15425  |        |        |        |        |
| 15426  | 1      |        | 2      | 2      |
| 15430  |        |        |        |        |
| 15431  | 2      |        |        |        |
| 15435  |        |        |        |        |
| 15436  |        |        |        |        |

| respid | Q31b_3 | Q31b_4 | Q31b_5 | Q31b_6 |
|--------|--------|--------|--------|--------|
| 15437  |        |        |        |        |
| 15438  |        |        |        |        |
| 15439  |        |        |        |        |
| 15441  |        | 3      | 4      |        |
| 15443  |        |        |        |        |
| 15446  |        |        |        |        |
| 15449  |        | 1      |        |        |
| 15451  | 3      |        | 3      |        |
| 15452  |        | 3      | 3      |        |
| 15454  |        |        |        |        |
| 15456  |        |        |        |        |
| 15457  |        |        |        |        |
| 15458  |        |        | 2      |        |
| 15462  |        |        | 3      |        |
| 15467  | 1      |        |        |        |
| 15470  |        |        |        |        |
| 15472  |        |        |        |        |
| 15476  |        |        |        |        |
| 15477  |        |        |        |        |
| 15488  |        |        |        |        |
| 15489  |        |        |        |        |
| 15490  |        |        |        |        |
| 15496  |        |        |        |        |
| 15497  |        |        |        |        |
| 15498  |        |        |        |        |
| 15509  |        | 2      |        | 3      |
| 15510  |        |        |        |        |
| 15516  | 3      |        |        |        |
| 15519  | 1      |        |        |        |
| 15520  |        |        |        |        |
| 15524  |        |        | 2      |        |
| 15525  |        |        |        |        |



| respid | Q31b_3 | Q31b_4 | Q31b_5 | Q31b_6 |
|--------|--------|--------|--------|--------|
| 15526  |        |        |        |        |
| 15531  |        | 1      |        |        |
| 15532  |        |        |        |        |
| 15534  |        |        | 3      |        |
| 15535  | 3      |        |        |        |
| 15539  |        |        |        |        |
| 15550  |        |        |        |        |
| 15556  |        |        |        |        |
| 15558  | 3      | 2      |        |        |
| 15565  |        |        |        |        |
| 15567  |        | 4      |        | 3      |
| 15568  | 2      |        |        |        |
| 15571  |        |        |        |        |
| 15573  |        |        |        |        |
| 15574  | 2      |        |        |        |
| 15576  |        |        |        | 2      |
| 15587  | 1      | 2      |        |        |
| 15588  | 3      |        |        |        |
| 15593  | 2      |        |        |        |
| 15597  |        |        |        |        |
| 15598  |        |        |        |        |
| 15599  |        |        |        |        |
| 15601  |        |        |        |        |
| 15604  |        |        |        |        |
| 15611  |        |        |        |        |
| 15613  |        |        |        |        |
| 15614  |        |        |        |        |
| 15617  | 1      |        |        |        |
| 15622  |        |        |        |        |
| 15623  |        |        |        |        |
| 15625  |        |        |        |        |
| 15627  |        |        |        |        |

| respid | Q31b_3 | Q31b_4 | Q31b_5 | Q31b_6 |
|--------|--------|--------|--------|--------|
| 15628  |        |        |        |        |
| 15633  |        |        |        |        |
| 15634  |        |        |        |        |
| 15637  |        |        |        |        |
| 15644  |        |        |        |        |
| 15645  |        |        |        |        |
| 15649  |        |        |        |        |
| 15650  |        |        |        |        |
| 15651  |        |        |        |        |
| 15657  | 2      |        |        |        |
| 15658  |        |        |        |        |
| 15660  |        |        |        |        |
| 15667  |        |        |        |        |
| 15671  |        |        |        |        |
| 15679  |        |        |        |        |
| 15712  |        |        |        |        |
| 15715  |        |        |        |        |
| 15749  | 4      | 4      |        |        |
| 15754  |        |        |        |        |
| 15756  |        |        |        |        |
| 15773  |        |        |        |        |
| 15774  |        |        |        |        |
| 15776  |        |        |        |        |
| 15777  | 2      |        | 3      |        |
| 15779  |        |        |        |        |
| 15780  |        |        |        |        |
| 15792  |        |        |        |        |
| 15793  |        | 2      |        | 3      |
| 15796  |        |        |        |        |
| 15798  |        |        |        |        |
| 15809  |        |        |        |        |
| 15810  |        |        |        |        |

| respid | Q31b_3 | Q31b_4 | Q31b_5 | Q31b_6 |
|--------|--------|--------|--------|--------|
| 15815  | 2      | 2      |        |        |
| 15816  |        |        |        |        |
| 15817  |        |        |        |        |
| 15821  |        | 2      |        | 2      |
| 15823  |        |        |        |        |
| 15834  |        |        |        |        |
| 15835  |        |        |        |        |
| 15836  |        |        |        |        |
| 15837  |        |        |        |        |
| 15839  |        |        |        |        |
| 15840  |        |        |        |        |
| 15844  |        |        |        |        |
| 15845  |        |        |        |        |
| 15847  | 2      |        | 3      | 3      |
| 15848  |        |        |        |        |
| 15849  |        |        |        |        |
| 15857  |        |        |        |        |
| 15858  |        |        |        |        |
| 15862  |        |        | 3      | 4      |
| 15866  |        |        |        |        |
| 15870  |        |        |        |        |
| 15871  |        |        |        |        |
| 15872  |        |        |        |        |
| 15873  |        |        |        |        |
| 15874  |        |        |        |        |
| 15875  | 2      | 2      | 3      |        |
| 15876  | 1      |        |        | 2      |
| 15882  |        |        |        | 4      |
| 15884  |        |        |        |        |
| 15890  |        |        |        |        |
| 15892  | 4      | 4      |        |        |
| 15908  |        |        |        |        |

| respid | Q31b_3 | Q31b_4 | Q31b_5 | Q31b_6 |
|--------|--------|--------|--------|--------|
| 15914  |        |        |        |        |
| 15932  |        |        |        |        |
| 15933  |        |        |        |        |
| 15938  |        |        |        |        |
| 15940  | 4      |        |        | 2      |
| 15945  |        |        |        |        |
| 15947  |        |        |        |        |
| 15950  |        |        |        |        |
| 15951  |        |        |        |        |
| 15952  |        | 2      |        | 2      |
| 15953  |        |        |        |        |
| 15954  |        |        |        |        |
| 15957  |        |        |        | 1      |
| 15965  | 3      | 2      |        |        |
| 15966  |        |        |        |        |
| 15967  |        |        |        |        |
| 15968  |        |        |        |        |
| 15970  |        |        |        |        |
| 15973  |        |        |        |        |
| 15974  |        |        |        |        |
| 15975  |        |        |        |        |
| 15980  | 4      | 3      |        |        |
| 15984  |        |        |        |        |
| 15985  |        | 2      |        |        |
| 15994  |        |        |        |        |
| 15995  | 1      |        |        |        |
| 16000  |        |        |        |        |
| 16004  |        |        |        |        |
| 16005  |        |        |        |        |
| 16006  |        |        |        |        |
| 16009  |        |        |        |        |
| 16017  |        |        |        |        |

| respid | Q31b_3 | Q31b_4 | Q31b_5 | Q31b_6 |
|--------|--------|--------|--------|--------|
| 16019  |        |        |        |        |
| 16021  |        |        |        |        |
| 16024  |        |        |        |        |
| 16026  |        |        |        |        |
| 16029  |        |        |        |        |
| 16031  |        |        |        |        |
| 16037  |        |        |        |        |
| 16043  |        |        |        |        |
| 16044  | 0      |        |        |        |
| 16047  |        |        |        |        |
| 16048  |        |        |        |        |
| 16049  |        |        |        |        |
| 16051  |        |        |        |        |
| 16053  |        |        |        |        |
| 16054  | 0      |        | 1      |        |
| 16069  |        |        |        |        |
| 16070  |        |        |        |        |
| 16074  |        |        |        |        |
| 16076  |        |        |        |        |
| 16078  |        |        |        |        |
| 16081  | 1      |        |        |        |
| 16085  |        |        |        |        |
| 16088  |        |        |        |        |
| 16091  |        |        |        |        |
| 16092  |        |        |        |        |
| 16093  |        |        |        |        |
| 16097  |        |        |        |        |
| 16100  | 0      |        |        |        |
| 16101  |        |        |        |        |
| 16105  |        |        |        |        |
| 16118  | 3      |        |        |        |
| 16129  |        |        |        |        |

| respid | Q31b_3 | Q31b_4 | Q31b_5 | Q31b_6 |
|--------|--------|--------|--------|--------|
| 16130  |        |        |        |        |
| 16131  |        |        |        |        |
| 16136  |        | 1      |        |        |
| 16137  |        |        |        |        |
| 16138  | 3      | 3      |        |        |
| 16139  |        |        |        |        |
| 16140  |        |        |        |        |
| 16145  |        |        |        |        |
| 16150  |        |        |        |        |
| 16151  | 1      |        |        |        |
| 16153  |        |        |        |        |
| 16164  |        |        |        |        |
| 16168  | 1      | 1      |        |        |
| 16173  |        |        |        |        |
| 16174  |        |        |        |        |
| 16177  |        |        |        |        |
| 16185  |        |        |        |        |
| 16189  |        | 3      |        |        |
| 16192  |        |        |        |        |
| 16193  | 1      |        |        |        |
| 16194  | 0      |        |        |        |
| 16196  |        |        |        |        |
| 16202  |        | 1      | 1      |        |
| 16205  |        |        |        | 2      |
| 16206  |        |        |        |        |
| 16208  |        |        |        |        |
| 16211  | 2      |        | 1      | 2      |
| 16212  |        |        |        |        |
| 16215  |        |        |        |        |
| 16217  |        |        |        |        |
| 16221  |        |        |        |        |
| 16226  |        |        |        |        |

| respid | Q31b_3 | Q31b_4 | Q31b_5 | Q31b_6 |
|--------|--------|--------|--------|--------|
| 16228  | 2      |        |        |        |
| 16229  |        |        |        |        |
| 16230  |        |        |        |        |
| 16231  |        |        | 0      |        |
| 16232  |        |        |        |        |
| 16234  |        |        |        |        |
| 16235  | 2      | 2      | 2      |        |
| 16236  |        |        |        |        |
| 16237  |        |        |        |        |
| 16238  |        |        |        | 2      |
| 16239  |        |        |        |        |
| 16243  |        |        |        |        |
| 16248  |        |        |        |        |
| 16249  |        |        |        |        |
| 16251  |        |        |        |        |
| 16263  |        |        |        |        |
| 16265  | 1      | 2      |        |        |
| 16269  |        |        |        | 0      |
| 16272  |        |        |        |        |
| 16273  |        |        |        |        |
| 16281  |        |        |        |        |
| 16282  | 1      |        |        |        |
| 16287  |        |        |        |        |
| 16290  |        | 0      |        |        |
| 16294  |        |        |        |        |
| 16295  |        |        |        |        |
| 16296  |        |        |        |        |
| 16299  |        |        |        |        |
| 16302  |        |        |        |        |
| 16303  |        |        |        |        |
| 16304  |        |        |        |        |
| 16306  |        |        |        |        |

| respid | Q31b_3 | Q31b_4 | Q31b_5 | Q31b_6 |
|--------|--------|--------|--------|--------|
| 16318  |        |        |        |        |
| 16320  |        |        |        |        |
| 16321  |        |        |        |        |
| 16322  |        |        |        |        |
| 16324  | 1      |        |        |        |
| 16326  |        |        |        |        |
| 16328  |        |        |        |        |
| 16336  |        |        |        |        |
| 16341  |        |        |        |        |
| 16342  |        |        |        |        |
| 16343  | 1      |        |        |        |
| 16345  |        | 3      |        |        |
| 16349  |        |        |        |        |
| 16355  |        |        |        |        |
| 16364  |        |        |        |        |
| 16374  | 1      |        |        |        |
| 16375  |        |        |        |        |
| 16376  |        |        |        |        |
| 16393  |        |        |        | 1      |
| 16394  |        |        |        | 1      |
| 16395  |        |        |        |        |
| 16397  | 2      |        |        |        |
| 16398  |        | 1      |        | 3      |
| 16402  | 1      |        |        |        |
| 16405  |        |        |        |        |
| 16416  |        |        |        |        |
| 16422  |        |        | 1      |        |
| 16429  |        |        |        |        |
| 16430  |        |        |        |        |
| 16432  |        | 2      |        |        |
| 16433  |        |        |        |        |
| 16434  |        |        |        |        |



| respid | Q31b_3 | Q31b_4 | Q31b_5 | Q31b_6 |
|--------|--------|--------|--------|--------|
| 16437  |        |        |        |        |
| 16439  |        |        |        |        |
| 16440  |        |        |        |        |
| 16441  |        |        |        |        |
| 16442  |        |        |        |        |
| 16450  |        |        |        |        |
| 16451  |        |        |        |        |
| 16452  | 2      |        | 1      |        |
| 16467  |        |        |        |        |
| 16468  |        |        |        |        |
| 16469  |        |        | 1      |        |
| 16470  |        |        |        |        |
| 16471  |        |        |        |        |
| 16473  |        |        |        |        |
| 16476  |        |        |        |        |
| 16478  | 1      |        |        |        |
| 16484  |        | 0      |        |        |
| 16499  |        |        |        |        |
| 16502  |        |        |        |        |
| 16505  |        |        |        |        |
| 16514  |        |        |        |        |
| 16515  |        |        |        | 1      |
| 16517  |        |        |        |        |
| 16518  |        |        |        |        |
| 16519  |        |        |        |        |
| 16525  |        |        |        |        |
| 16526  |        |        |        |        |
| 16530  |        |        |        |        |
| 16532  |        |        |        |        |
| 16536  |        |        |        |        |
| 16537  |        |        | 1      |        |
| 16541  | 1      |        |        |        |

| respid | Q31b_3 | Q31b_4 | Q31b_5 | Q31b_6 |
|--------|--------|--------|--------|--------|
| 16543  |        |        | 0      |        |
| 16544  |        |        |        |        |
| 16545  |        |        |        |        |
| 16546  | 0      |        |        |        |
| 16548  |        |        |        |        |
| 16552  |        |        |        |        |
| 16559  |        |        |        |        |
| 16564  |        |        |        |        |
| 16565  | 0      |        |        |        |
| 16567  | 1      |        |        |        |
| 16571  |        |        |        |        |
| 16572  | 1      |        |        |        |
| 16579  |        |        |        |        |
| 16588  | 3      | 3      |        | 4      |
| 16599  |        |        |        |        |
| 16605  |        |        |        |        |
| 16622  |        |        |        |        |
| 16635  |        |        |        |        |
| 16638  |        |        |        |        |
| 16652  |        |        |        | 4      |
| 16656  |        |        |        |        |
| 16671  |        |        |        |        |
| 16676  |        |        |        |        |
| 16678  |        |        |        |        |
| 16702  |        |        | 0      |        |
| 16705  |        |        | 0      |        |
| 16707  | 2      |        | 3      | 3      |
| 16711  |        |        |        |        |
| 16712  |        |        |        |        |
| 16716  |        |        |        |        |
| 16724  | 1      |        |        |        |
| 16727  | 1      |        | 1      |        |

| respid | Q31b_3 | Q31b_4 | Q31b_5 | Q31b_6 |
|--------|--------|--------|--------|--------|
| 16734  |        |        |        |        |
| 16740  |        |        |        |        |
| 16748  |        |        |        |        |
| 16759  |        |        |        |        |
| 16761  |        |        |        |        |
| 16763  |        |        |        |        |
| 16764  | 2      | 1      | 3      |        |
| 16766  |        |        |        |        |
| 16767  |        |        |        |        |
| 16776  | 1      |        |        |        |
| 16781  |        |        |        |        |
| 16793  |        |        |        |        |
| 16796  |        |        | 2      |        |
| 16810  |        | 0      |        |        |
| 16811  |        |        |        |        |
| 16813  |        |        |        |        |
| 16814  |        |        | 1      |        |
| 16831  |        |        |        |        |
| 16833  | 1      | 1      | 2      |        |
| 16839  | 1      |        |        |        |
| 16843  |        |        |        |        |
| 16860  |        |        |        |        |
| 16871  |        |        |        |        |
| 16881  |        |        |        |        |
| 16884  |        |        |        |        |
| 16891  |        |        |        |        |
| 16909  |        |        |        |        |
| 16911  |        |        |        |        |
| 16922  |        |        |        |        |
| 16935  |        | 2      |        |        |
| 16942  |        |        |        |        |
| 16950  |        |        |        |        |

| respid | Q31b_3 | Q31b_4 | Q31b_5 | Q31b_6 |
|--------|--------|--------|--------|--------|
| 16952  | 2      |        | 2      |        |
| 16963  |        |        |        |        |
| 16967  |        | 2      | 2      |        |
| 16970  | 3      | 2      |        |        |
| 16976  | 2      |        |        |        |
| 16982  |        |        |        |        |
| 16995  |        |        |        |        |
| 17004  |        |        |        |        |
| 17006  |        |        |        |        |
| 17009  |        |        |        |        |
| 17021  |        |        |        |        |
| 17040  |        |        |        |        |
| 17041  |        |        |        |        |
| 17044  |        |        |        |        |
| 17046  |        |        |        |        |
| 17052  |        |        |        |        |
| 17055  |        |        |        |        |
| 17108  |        |        |        |        |
| 17109  |        |        |        |        |
| 17113  |        |        |        |        |
| 17115  |        |        |        |        |
| 17132  |        |        |        |        |
| 17135  |        |        |        |        |
| 17138  |        |        | 0      |        |
| 17141  |        |        |        |        |
| 17143  |        |        | 2      |        |
| 17148  |        |        |        |        |
| 17151  |        |        |        |        |
| 17153  |        |        |        |        |
| 17154  |        |        |        |        |
| 17157  |        |        |        |        |
| 17160  |        |        |        |        |

| respid | Q31b_3 | Q31b_4 | Q31b_5 | Q31b_6 |
|--------|--------|--------|--------|--------|
| 17167  | 1      |        |        |        |
| 17169  |        |        |        |        |
| 17174  |        |        | 2      |        |
| 17179  |        |        |        |        |
| 17180  |        |        |        |        |
| 17182  |        |        |        |        |
| 17184  | 0      |        |        |        |
| 17186  |        |        |        |        |
| 17187  |        |        |        |        |
| 17192  | 2      |        |        |        |
| 17197  |        |        |        |        |
| 17217  |        |        |        |        |
| 17226  |        |        |        |        |
| 17228  |        |        |        |        |
| 17245  |        |        |        |        |
| 17247  |        |        |        |        |
| 17258  |        |        |        |        |
| 17259  |        |        |        |        |
| 17262  |        |        |        |        |
| 17265  |        |        |        |        |
| 17281  |        |        |        |        |
| 17282  |        |        |        |        |
| 17293  |        |        |        |        |
| 17306  | 1      |        |        |        |
| 17312  |        |        |        |        |
| 17318  |        |        |        |        |
| 17328  |        |        |        |        |
| 17343  |        |        |        |        |
| 17344  |        |        |        |        |
| 17348  |        |        |        |        |
| 17352  |        |        |        |        |
| 17355  |        |        |        |        |

| respid | Q31b_3 | Q31b_4 | Q31b_5 | Q31b_6 |
|--------|--------|--------|--------|--------|
| 17356  |        |        |        |        |
| 17359  |        |        |        |        |
| 17373  | 3      | 2      |        | 3      |
| 17381  |        | 1      |        |        |
| 17388  |        |        |        |        |
| 17394  |        |        | 2      |        |
| 17401  |        |        |        |        |
| 17403  |        |        |        |        |
| 17411  |        |        |        |        |
| 17423  |        |        |        |        |
| 17427  |        |        |        |        |
| 17433  |        |        |        |        |
| 17441  |        |        |        |        |
| 17442  |        |        |        |        |
| 17447  |        |        |        |        |
| 17458  |        |        |        |        |
| 17474  |        |        |        |        |
| 17475  |        |        |        |        |
| 17476  |        |        |        |        |
| 17480  |        |        |        |        |
| 17484  |        |        |        |        |
| 17490  |        |        |        |        |
| 17491  |        |        |        |        |
| 17500  |        |        |        |        |
| 17507  |        |        |        |        |
| 17517  |        |        |        |        |
| 17520  |        |        |        |        |
| 17521  |        |        |        |        |
| 17531  |        |        |        |        |
| 17540  |        |        |        |        |
| 17550  |        |        |        |        |
| 17551  |        |        |        |        |

| respid | Q31b_3 | Q31b_4 | Q31b_5 | Q31b_6 |
|--------|--------|--------|--------|--------|
| 17555  | 3      |        |        |        |
| 17556  | 1      | 1      |        |        |
| 17574  |        |        |        |        |
| 17575  |        |        |        |        |
| 17582  |        |        |        |        |
| 17587  |        |        |        |        |
| 17601  |        |        |        |        |
| 17607  |        |        |        |        |
| 17609  |        |        |        |        |
| 17611  | 2      |        |        |        |
| 17613  |        |        |        |        |
| 17615  |        |        |        |        |
| 17620  |        |        |        |        |
| 17624  | 2      |        |        |        |
| 17635  |        |        |        |        |
| 17643  |        |        |        |        |
| 17645  |        |        |        |        |
| 17646  | 1      |        |        |        |
| 17649  |        |        |        |        |
| 17658  |        |        |        |        |
| 17666  |        |        |        |        |
| 17670  | 0      |        |        |        |
| 17678  |        |        |        |        |
| 17679  |        |        |        |        |
| 17695  | 1      | 2      |        |        |
| 17697  |        |        |        |        |
| 17698  |        |        |        |        |
| 17723  |        |        |        |        |
| 17727  |        |        |        |        |
| 17734  |        |        |        |        |
| 17737  |        |        |        |        |
| 17748  |        |        |        |        |

| respid | Q31b_3 | Q31b_4 | Q31b_5 | Q31b_6 |
|--------|--------|--------|--------|--------|
| 17749  |        |        |        |        |
| 17754  |        |        |        |        |
| 17766  |        |        |        |        |
| 17777  |        |        |        |        |
| 17780  |        |        |        |        |
| 17788  |        |        |        |        |
| 17801  |        |        |        |        |
| 17803  |        |        |        |        |
| 17807  |        |        |        |        |
| 17808  |        |        |        |        |
| 17809  |        |        |        |        |
| 17821  |        |        |        |        |
| 17827  |        |        |        |        |
| 17834  |        |        |        |        |
| 17838  |        | 1      | 1      | 1      |
| 17842  |        |        |        |        |
| 17862  |        |        |        |        |
| 17863  |        |        |        |        |
| 17871  |        |        |        |        |
| 17872  |        |        |        |        |
| 17903  | 1      |        |        |        |
| 17906  |        |        |        |        |
| 17910  | 2      |        |        |        |
| 17922  |        |        |        |        |
| 17923  |        | 2      | 2      |        |
| 17925  |        |        | 2      |        |
| 17926  |        |        |        |        |
| 17937  |        |        |        |        |
| 17956  |        |        |        |        |
| 17958  |        |        | 2      |        |
| 17985  |        |        |        |        |
| 17989  |        |        |        |        |



| respid | Q31b_3 | Q31b_4 | Q31b_5 | Q31b_6 |
|--------|--------|--------|--------|--------|
| 17995  |        |        |        |        |
| 18000  |        |        |        |        |
| 18010  |        |        |        |        |
| 18015  |        |        |        |        |
| 18018  |        |        |        |        |
| 18031  |        |        |        |        |
| 18033  | 2      |        |        |        |
| 18036  | 0      |        |        |        |
| 18041  |        |        |        |        |
| 18068  |        |        |        |        |
| 18080  |        |        |        |        |
| 18081  |        |        |        |        |
| 18083  |        |        |        |        |
| 18113  | 2      |        |        |        |
| 18115  |        |        |        |        |
| 18117  | 3      | 4      | 3      |        |
| 18129  |        |        | 2      |        |
| 18132  |        |        |        |        |
| 18146  |        |        |        |        |
| 18147  |        |        |        |        |
| 18153  |        |        |        |        |
| 18154  |        |        |        |        |
| 18157  |        |        |        |        |
| 18166  |        |        |        |        |
| 18169  |        |        |        |        |
| 18171  |        | 1      |        |        |
| 18173  | 2      |        |        |        |
| 18204  |        |        |        |        |
| 18210  |        |        |        |        |
| 18212  |        |        |        |        |
| 18220  | 2      | 2      |        |        |
| 18221  |        |        |        |        |

| respid | Q31b_3 | Q31b_4 | Q31b_5 | Q31b_6 |
|--------|--------|--------|--------|--------|
| 18228  |        |        |        |        |
| 18231  |        |        |        |        |
| 18233  |        |        |        | 1      |
| 18235  |        |        |        |        |
| 18237  |        |        |        |        |
| 18250  | 1      |        |        |        |
| 18253  |        |        |        |        |
| 18264  |        |        |        |        |
| 18285  |        |        |        |        |
| 18287  |        |        |        |        |
| 18296  | 1      |        |        |        |
| 18299  |        |        |        |        |
| 18313  |        |        |        |        |
| 18321  |        |        |        |        |
| 18324  |        |        |        |        |
| 18329  |        |        |        |        |
| 18332  |        |        |        |        |
| 18339  |        |        |        |        |
| 18340  |        |        |        |        |
| 18348  |        |        |        |        |
| 18355  |        |        |        |        |
| 18360  |        |        |        |        |
| 18380  | 1      | 1      |        |        |
| 18403  |        |        |        |        |
| 18405  |        |        |        |        |
| 18409  |        |        |        |        |
| 18445  |        |        |        |        |
| 18458  |        |        |        |        |
| 18477  |        |        |        |        |
| 18481  |        |        |        |        |
| 18491  |        |        |        |        |
| 18492  |        |        |        |        |

| respid | Q31b_3 | Q31b_4 | Q31b_5 | Q31b_6 |
|--------|--------|--------|--------|--------|
| 18494  |        |        |        |        |
| 18495  |        |        |        |        |
| 18496  |        |        |        |        |
| 18507  |        | 1      |        |        |
| 18509  |        |        |        |        |
| 18510  |        |        |        |        |
| 18513  |        |        |        |        |
| 18525  |        |        |        |        |
| 18526  | 2      |        |        |        |
| 18527  |        |        |        |        |
| 18536  |        |        |        |        |
| 18540  |        |        |        |        |
| 18548  |        |        |        |        |
| 18550  |        |        |        |        |
| 18556  |        |        |        |        |
| 18561  |        |        |        |        |
| 18577  |        |        |        |        |
| 18580  | 0      |        |        |        |
| 18633  |        |        |        |        |
| 18635  |        |        |        |        |
| 18636  |        |        |        |        |
| 18645  |        | 4      | 3      |        |
| 18649  | 1      |        |        |        |
| 18664  |        |        |        |        |
| 18668  |        |        |        |        |
| 18682  | 3      |        |        |        |
| 18685  | 1      |        | 1      |        |
| 18688  | 1      |        |        |        |
| 18689  | 2      | 3      |        |        |
| 18693  |        |        |        |        |
| 18694  |        |        |        |        |
| 18705  |        |        |        |        |

| respid | Q31b_3 | Q31b_4 | Q31b_5 | Q31b_6 |
|--------|--------|--------|--------|--------|
| 18710  |        |        |        |        |
| 18715  |        |        | 1      |        |
| 18718  |        |        |        |        |
| 18727  |        |        |        |        |
| 18732  |        |        |        |        |
| 18735  | 2      |        |        |        |
| 18742  |        |        |        |        |
| 18745  |        |        |        |        |
| 18747  |        |        |        |        |
| 18750  |        |        |        |        |
| 18751  |        |        |        |        |
| 18753  |        |        |        |        |
| 18754  |        |        |        |        |
| 18759  |        |        |        |        |
| 18780  |        |        |        |        |
| 18782  |        |        |        |        |
| 18807  |        | 3      |        | 4      |
| 18815  |        |        |        |        |
| 18818  | 1      |        |        |        |
| 18820  | 2      |        |        |        |
| 18823  | 4      |        | 4      |        |
| 18825  |        |        |        |        |
| 18828  |        |        |        |        |
| 18832  |        |        | 1      |        |
| 18834  |        |        |        |        |
| 18835  | 3      | 2      | 2      |        |
| 18837  |        | 2      | 2      |        |
| 18842  |        |        |        |        |
| 18846  |        |        |        |        |
| 18855  |        | 1      |        |        |
| 18856  |        |        |        |        |
| 18887  |        |        |        |        |

| respid | Q31b_3 | Q31b_4 | Q31b_5 | Q31b_6 |
|--------|--------|--------|--------|--------|
| 18903  |        |        |        |        |
| 18906  | 1      |        |        |        |
| 18910  |        |        |        |        |
| 18919  |        |        |        | 1      |
| 18928  |        |        |        |        |
| 18931  | 3      |        |        | 2      |
| 18939  |        |        |        |        |
| 18946  |        |        |        |        |
| 18952  | 1      |        |        |        |
| 18954  |        |        |        |        |
| 18982  |        |        |        |        |
| 18986  |        |        |        |        |
| 18989  |        |        |        |        |
| 18990  |        |        |        |        |
| 18996  |        |        |        |        |
| 18998  |        |        |        |        |
| 19009  |        |        | 2      |        |
| 19010  |        |        |        |        |
| 19017  |        |        |        |        |
| 19018  |        |        |        |        |
| 19020  |        |        |        |        |
| 19027  |        |        |        |        |
| 19035  |        |        |        |        |
| 19037  | 1      |        |        |        |
| 19048  |        |        |        |        |
| 19051  |        |        |        |        |
| 19054  |        |        |        |        |
| 19057  | 2      |        |        |        |
| 19073  |        |        |        |        |
| 19075  |        |        |        |        |
| 19079  |        |        |        |        |
| 19087  |        |        |        |        |

| respid | Q31b_3 | Q31b_4 | Q31b_5 | Q31b_6 |
|--------|--------|--------|--------|--------|
| 19090  |        |        |        |        |
| 19093  |        |        |        |        |
| 19099  |        |        |        | 3      |
| 19100  |        | 2      |        |        |
| 19101  |        |        |        |        |
| 19105  |        |        |        |        |
| 19111  |        |        |        |        |
| 19112  |        |        |        |        |
| 19117  |        | 2      | 1      |        |
| 19122  |        |        |        |        |
| 19126  |        |        |        |        |
| 19127  |        |        |        |        |
| 19131  |        |        |        |        |
| 19134  |        |        |        |        |
| 19149  | 1      |        |        |        |
| 19151  |        | 1      |        |        |
| 19164  |        |        |        |        |
| 19166  |        |        |        |        |
| 19172  |        |        |        |        |
| 19173  |        |        |        |        |
| 19180  |        |        |        |        |
| 19185  |        |        |        |        |
| 19189  |        |        |        |        |
| 19191  |        |        |        |        |
| 19198  | 0      |        |        |        |
| 19203  |        |        |        |        |
| 19209  |        |        |        |        |
| 19210  |        |        |        |        |
| 19218  |        |        |        |        |
| 19220  |        |        |        |        |
| 19225  |        |        |        |        |
| 19227  |        |        |        |        |

| respid | Q31b_3 | Q31b_4 | Q31b_5 | Q31b_6 |
|--------|--------|--------|--------|--------|
| 19228  |        |        |        |        |
| 19243  |        |        |        |        |
| 19244  |        |        |        |        |
| 19246  |        |        |        |        |
| 19248  |        |        |        |        |
| 19249  |        |        |        |        |
| 19252  |        |        | 1      |        |
| 19255  |        |        |        |        |
| 19257  |        |        |        |        |
| 19274  |        |        |        |        |
| 19279  |        |        |        |        |
| 19291  |        |        |        |        |
| 19292  | 0      |        |        |        |
| 19308  |        |        |        |        |
| 19310  |        |        |        |        |
| 19311  |        |        |        |        |
| 19326  | 1      |        |        |        |
| 19327  |        |        |        |        |
| 19329  |        |        |        |        |
| 19330  |        |        |        |        |
| 19333  | 3      |        |        |        |
| 19336  |        |        |        |        |
| 19343  | 1      |        | 1      |        |
| 19348  |        |        |        |        |
| 19349  |        |        |        |        |
| 19352  | 1      |        |        |        |
| 19356  |        |        |        |        |
| 19357  |        |        |        |        |
| 19358  |        |        |        |        |
| 19367  |        |        |        |        |
| 19376  |        |        |        |        |
| 19377  |        |        |        |        |

| respid | Q31b_3 | Q31b_4 | Q31b_5 | Q31b_6 |
|--------|--------|--------|--------|--------|
| 19380  |        |        |        |        |
| 19384  |        |        |        |        |
| 19391  |        |        |        |        |
| 19397  |        |        |        |        |
| 19398  |        |        |        |        |
| 19401  |        |        |        |        |
| 19402  |        |        |        |        |
| 19403  |        |        |        |        |
| 19405  |        |        |        |        |
| 19407  |        |        |        |        |
| 19415  | 3      |        |        |        |
| 19420  |        |        |        |        |
| 19423  |        |        | 1      | 2      |
| 19424  |        |        |        |        |
| 19426  | 2      |        |        |        |
| 19429  |        |        |        |        |
| 19435  | 3      |        | 2      |        |
| 19441  | 1      |        |        |        |
| 19450  |        |        |        |        |
| 19456  |        |        |        | 2      |
| 19457  |        |        |        |        |
| 19463  |        |        |        |        |
| 19467  | 4      |        |        |        |
| 19468  |        |        |        |        |
| 19471  | 1      |        |        |        |
| 19473  |        |        |        |        |
| 19478  |        |        |        |        |
| 19480  |        |        |        |        |
| 19481  | 0      |        |        |        |
| 19484  |        |        |        |        |
| 19487  |        |        |        |        |
| 19491  |        |        |        |        |



| respid | Q31b_3 | Q31b_4 | Q31b_5 | Q31b_6 |
|--------|--------|--------|--------|--------|
| 19495  |        | 4      |        |        |
| 19498  |        |        |        | 1      |
| 19500  |        |        |        |        |
| 19501  | 3      |        |        |        |
| 19503  |        |        |        |        |
| 19506  |        |        |        |        |
| 19508  |        |        |        |        |
| 19509  |        |        |        |        |
| 19518  | 1      |        |        |        |
| 19520  |        |        |        |        |
| 19536  | 0      |        |        |        |
| 19538  | 2      |        |        |        |
| 19541  | 2      |        |        |        |
| 19548  |        |        |        |        |
| 19553  |        |        |        |        |
| 19556  |        |        |        |        |
| 19559  |        |        |        |        |
| 19561  |        |        |        |        |
| 19562  |        |        |        |        |
| 19564  |        |        |        |        |
| 19567  | 2      |        |        | 3      |
| 19571  |        | 1      |        |        |
| 19576  |        |        |        |        |
| 19578  | 0      |        |        |        |
| 19606  |        |        |        |        |
| 19607  |        |        |        |        |
| 19608  |        |        |        |        |
| 19612  | 3      | 3      |        |        |
| 19618  | 3      |        |        |        |
| 19621  |        |        |        |        |
| 19624  |        | 2      |        | 2      |
| 19630  |        |        |        |        |

| respid | Q31b_3 | Q31b_4 | Q31b_5 | Q31b_6 |
|--------|--------|--------|--------|--------|
| 19637  |        |        |        |        |
| 19639  |        |        |        |        |
| 19647  |        |        |        |        |
| 19648  |        |        |        |        |
| 19660  |        |        |        |        |
| 19662  | 3      |        |        | 2      |
| 19669  |        |        |        |        |
| 19680  |        |        |        |        |
| 19682  | 1      |        |        |        |
| 19686  |        |        |        |        |
| 19700  |        |        |        |        |
| 19701  |        |        |        |        |
| 19704  |        |        |        |        |
| 19706  |        |        |        |        |
| 19707  |        |        |        |        |
| 19717  | 2      |        |        |        |
| 19718  |        |        |        |        |
| 19721  |        |        |        | 1      |
| 19722  |        |        |        |        |
| 19729  |        |        |        |        |
| 19738  |        |        |        |        |
| 19741  |        |        |        |        |
| 19742  |        | 1      |        | 1      |
| 19747  |        |        |        |        |
| 19748  | 2      |        |        |        |
| 19749  |        |        |        |        |
| 19756  |        |        |        |        |
| 19771  |        |        |        |        |
| 19772  | 2      |        |        | 1      |
| 19775  |        |        |        |        |
| 19783  |        |        |        |        |
| 19787  |        |        |        |        |

| respid | Q31b_3 | Q31b_4 | Q31b_5 | Q31b_6 |
|--------|--------|--------|--------|--------|
| 19790  |        |        |        |        |
| 19797  |        |        |        |        |
| 19802  |        |        |        |        |
| 19808  |        |        |        |        |
| 19810  |        |        |        |        |
| 19811  |        |        |        |        |
| 19812  |        |        |        |        |
| 19821  |        |        |        |        |
| 19826  |        |        |        |        |
| 19827  |        |        |        |        |
| 19830  |        |        |        |        |
| 19834  |        |        |        |        |
| 19838  | 1      | 1      |        |        |
| 19843  |        |        |        |        |
| 19845  | 2      | 3      |        |        |
| 19846  |        |        |        |        |
| 19852  |        |        | 3      |        |
| 19855  |        |        |        |        |
| 19858  |        |        |        |        |
| 19861  |        |        |        |        |
| 19863  |        |        |        |        |
| 19868  |        |        |        |        |
| 19874  |        |        |        |        |
| 19876  |        |        |        |        |
| 19880  | 1      |        | 1      |        |
| 19885  |        |        |        |        |
| 19890  |        |        |        |        |
| 19894  |        |        |        |        |
| 19895  |        |        |        |        |
| 19897  |        | 1      |        |        |
| 19906  |        |        |        |        |
| 19908  |        |        |        |        |

| respid | Q31b_3 | Q31b_4 | Q31b_5 | Q31b_6 |
|--------|--------|--------|--------|--------|
| 19912  |        |        |        |        |
| 19913  |        |        |        |        |
| 19914  | 2      | 3      | 2      |        |
| 19918  |        |        |        |        |
| 19924  |        |        |        |        |
| 19936  |        |        |        |        |
| 19940  |        |        |        |        |
| 19945  |        |        |        |        |
| 19948  |        |        |        |        |
| 19959  |        |        |        |        |
| 19961  |        |        |        |        |
| 19962  |        |        |        |        |
| 19965  |        |        |        |        |
| 19966  | 2      |        |        |        |
| 19973  |        | 1      |        |        |
| 19981  |        |        |        |        |
| 19986  |        |        |        |        |
| 19989  |        |        |        |        |
| 19998  |        |        |        |        |
| 20001  |        |        |        |        |
| 20005  |        |        |        |        |
| 20013  | 2      |        |        |        |
| 20015  |        |        |        |        |
| 20017  |        |        |        |        |
| 20020  |        |        |        |        |
| 20021  |        |        |        |        |
| 20026  |        |        |        |        |
| 20028  |        |        |        |        |
| 20030  | 3      |        |        |        |
| 20031  |        |        |        |        |
| 20034  |        |        |        |        |
| 20035  |        |        |        |        |

| respid | Q31b_3 | Q31b_4 | Q31b_5 | Q31b_6 |
|--------|--------|--------|--------|--------|
| 20040  | 4      | 2      | 2      |        |
| 20045  |        |        |        |        |
| 20048  |        |        |        |        |
| 20053  | 0      |        |        |        |
| 20064  |        |        |        |        |
| 20071  |        |        |        |        |
| 20072  |        |        |        |        |
| 20076  | 0      |        |        |        |
| 20081  |        |        |        | 1      |
| 20082  | 1      |        | 0      |        |
| 20083  |        |        |        |        |
| 20088  |        |        |        |        |
| 20089  |        |        |        | 1      |
| 20099  |        |        |        |        |
| 20101  |        |        |        |        |
| 20102  |        |        |        |        |
| 20109  |        |        |        |        |
| 20118  |        |        |        |        |
| 20119  |        |        |        |        |
| 20124  |        |        |        |        |
| 20126  |        |        |        |        |
| 20130  |        |        |        |        |
| 20131  |        |        |        |        |
| 20134  |        |        |        |        |
| 20146  |        |        |        |        |
| 20152  |        |        |        |        |
| 20155  |        |        |        |        |
| 20156  |        |        |        |        |
| 20157  |        |        |        |        |
| 20164  |        |        |        |        |
| 20168  |        |        |        |        |
| 20173  |        | 1      | 2      |        |

| respid | Q31b_3 | Q31b_4 | Q31b_5 | Q31b_6 |
|--------|--------|--------|--------|--------|
| 20174  |        |        |        |        |
| 20175  |        |        |        | 4      |
| 20189  |        |        |        |        |
| 20190  |        |        |        |        |
| 20201  |        |        |        |        |
| 20202  |        |        |        |        |
| 20204  |        |        |        |        |
| 20206  |        |        |        |        |
| 20207  |        |        |        |        |
| 20212  | 1      |        |        |        |
| 20213  |        |        |        |        |
| 20217  |        |        |        |        |
| 20222  |        |        |        |        |
| 20227  |        |        |        |        |
| 20228  | 2      |        |        |        |
| 20238  |        |        |        |        |
| 20242  |        |        |        |        |
| 20246  |        |        |        |        |
| 20255  |        |        |        |        |
| 20256  |        |        | 2      |        |
| 20259  |        |        | 2      |        |
| 20262  |        |        |        |        |
| 20274  |        |        |        |        |
| 20283  | 3      |        | 2      |        |
| 20284  |        |        |        |        |
| 20291  |        |        |        |        |
| 20292  |        |        |        |        |
| 20293  | 1      |        |        |        |
| 20298  |        |        |        |        |
| 20301  |        |        |        |        |
| 20303  |        |        |        |        |
| 20309  |        |        |        |        |

| respid | Q31b_3 | Q31b_4 | Q31b_5 | Q31b_6 |
|--------|--------|--------|--------|--------|
| 20318  |        |        |        |        |
| 20324  |        |        |        |        |
| 20335  |        |        |        |        |
| 20336  |        |        |        |        |
| 20339  |        |        |        |        |
| 20348  |        |        |        |        |
| 20351  |        |        |        |        |
| 20353  | 0      |        |        |        |
| 20356  |        |        |        |        |
| 20357  |        |        |        |        |
| 20366  |        |        |        |        |
| 20369  | 3      | 4      |        | 4      |
| 20372  |        |        |        |        |
| 20375  |        |        |        |        |
| 20379  |        |        |        |        |
| 20380  |        |        |        |        |
| 20396  | 2      | 2      |        |        |
| 20398  |        | 2      | 2      |        |
| 20412  |        |        |        |        |
| 20415  |        |        |        |        |
| 20424  | 2      |        |        |        |
| 20434  |        |        |        |        |
| 20435  |        |        |        |        |
| 20440  |        |        |        |        |
| 20441  |        |        |        |        |
| 20445  |        |        |        |        |
| 20446  |        |        | 2      |        |
| 20450  |        |        |        |        |
| 20453  | 2      |        |        |        |
| 20458  |        |        |        |        |
| 20464  |        |        |        |        |
| 20471  |        |        |        |        |

| respid | Q31b_3 | Q31b_4 | Q31b_5 | Q31b_6 |
|--------|--------|--------|--------|--------|
| 20473  |        |        |        |        |
| 20474  | 1      |        |        |        |
| 20477  |        |        |        |        |
| 20479  |        |        |        |        |
| 20485  |        |        |        |        |
| 20487  |        |        |        |        |
| 20488  |        |        |        |        |
| 20494  |        |        |        |        |
| 20502  | 3      | 3      | 2      | 3      |
| 20503  |        |        |        |        |
| 20510  |        |        |        |        |
| 20512  |        |        |        |        |
| 20516  |        |        |        |        |
| 20522  |        |        |        |        |
| 20527  |        |        |        |        |
| 20529  | 1      | 1      |        |        |
| 20535  |        |        |        |        |
| 20543  |        |        |        |        |
| 20546  |        |        |        |        |
| 20548  |        |        |        |        |
| 20552  |        |        |        |        |
| 20556  |        |        |        |        |
| 20566  |        |        |        |        |
| 20576  |        |        |        |        |
| 20587  |        |        |        |        |
| 20589  |        |        |        |        |
| 20593  |        |        |        |        |
| 20594  |        |        |        |        |
| 20602  |        |        |        |        |
| 20607  |        |        |        |        |
| 20608  |        |        |        |        |
| 20611  |        |        |        |        |



| respid | Q31b_3 | Q31b_4 | Q31b_5 | Q31b_6 |
|--------|--------|--------|--------|--------|
| 20612  |        |        |        |        |
| 20615  |        |        |        |        |
| 20625  |        |        |        |        |
| 20630  |        |        | 0      |        |
| 20639  |        |        |        |        |
| 20643  |        |        |        |        |
| 20645  |        |        |        |        |
| 20647  | 0      |        | 0      |        |
| 20652  | 3      |        |        | 4      |
| 20661  |        |        |        |        |
| 20665  |        |        |        |        |
| 20679  |        |        |        |        |
| 20682  |        |        | 1      |        |
| 20683  |        |        |        |        |
| 20700  |        |        |        |        |
| 20702  |        |        |        |        |
| 20709  | 1      |        |        |        |
| 20715  |        |        |        |        |
| 20718  | 1      |        |        |        |
| 20722  |        |        |        |        |
| 20729  |        |        |        |        |
| 20732  |        |        |        |        |
| 20746  | 2      |        | 1      |        |
| 20747  |        |        |        |        |
| 20758  |        |        |        |        |
| 20767  |        |        |        |        |
| 20777  |        |        |        |        |
| 20778  |        |        |        |        |
| 20780  |        |        |        |        |
| 20800  |        |        |        |        |
| 20810  |        |        |        |        |
| 20814  |        |        |        |        |

| respid | Q31b_3 | Q31b_4 | Q31b_5 | Q31b_6 |
|--------|--------|--------|--------|--------|
| 20816  |        |        |        |        |
| 20832  | 4      |        |        |        |
| 20838  |        |        |        |        |
| 20841  |        |        |        | 1      |
| 20848  |        |        |        |        |
| 20850  |        |        |        |        |
| 20851  |        |        |        |        |
| 20861  |        |        |        |        |
| 20870  |        |        |        |        |
| 20880  |        |        |        |        |
| 20883  |        |        |        |        |
| 20894  | 1      |        | 0      |        |
| 20896  |        |        |        |        |
| 20901  |        |        |        | 2      |
| 20903  |        |        |        |        |
| 20909  |        |        |        |        |
| 20919  |        |        |        |        |
| 20925  |        |        |        | 0      |
| 20935  |        |        |        |        |
| 20939  | 2      |        |        |        |
| 20956  |        | 4      |        |        |
| 20970  |        |        |        |        |
| 20974  |        |        |        |        |
| 20975  |        |        |        |        |
| 20984  | 1      |        | 1      |        |
| 20988  |        |        |        |        |
| 20996  | 0      |        |        |        |
| 20998  |        |        |        |        |
| 21007  |        |        |        |        |
| 21008  |        |        |        |        |
| 21014  |        |        |        |        |
| 21020  |        |        |        |        |

| respid | Q31b_3 | Q31b_4 | Q31b_5 | Q31b_6 |
|--------|--------|--------|--------|--------|
| 21022  | 1      |        |        |        |
| 21024  |        |        |        |        |
| 21026  |        |        |        |        |
| 21027  |        |        |        |        |
| 21030  |        |        |        |        |
| 21032  |        | 2      | 2      |        |
| 21040  |        |        |        |        |
| 21045  |        |        |        |        |
| 21058  |        |        |        |        |
| 21064  |        |        |        |        |
| 21073  |        |        |        |        |
| 21086  | 2      |        |        |        |
| 21092  | 4      | 3      |        | 3      |
| 21096  |        |        | 3      | 3      |
| 21103  |        |        |        |        |
| 21120  | 2      |        |        |        |
| 21125  |        |        |        |        |
| 21126  |        |        |        |        |
| 21132  |        |        |        |        |
| 21139  |        |        |        | 2      |
| 21147  |        |        |        |        |
| 21148  | 1      |        | 1      |        |
| 21149  |        |        |        |        |
| 21164  |        |        |        |        |
| 21165  |        |        |        |        |
| 21171  |        | 2      | 2      |        |
| 21176  |        |        |        |        |
| 21187  |        |        |        |        |
| 21192  |        |        |        |        |
| 21198  |        |        |        |        |
| 21199  | 1      |        |        |        |
| 21206  | 1      |        |        |        |

| respid | Q31b_3 | Q31b_4 | Q31b_5 | Q31b_6 |
|--------|--------|--------|--------|--------|
| 21212  |        |        |        |        |
| 21216  |        |        |        |        |
| 21217  |        |        | 2      | 3      |
| 21228  |        |        |        |        |
| 21229  |        |        |        |        |
| 21230  | 0      |        |        |        |
| 21243  |        |        |        |        |
| 21247  |        |        |        | 0      |
| 21253  |        | 1      |        |        |
| 21264  |        |        |        |        |
| 21265  |        |        |        |        |
| 21273  |        |        |        |        |
| 21275  |        |        |        |        |
| 21278  | 0      |        |        |        |
| 21291  | 2      |        |        |        |
| 21298  |        |        |        |        |
| 21301  |        |        |        |        |
| 21312  |        |        |        |        |
| 21323  |        |        |        |        |
| 21325  |        |        |        |        |
| 21341  |        |        |        |        |
| 21349  | 1      |        |        |        |
| 21350  |        |        |        |        |
| 21354  | 3      |        |        |        |
| 21372  | 2      |        |        |        |
| 21373  |        |        | 2      |        |
| 21378  |        |        |        |        |
| 21393  |        |        |        |        |
| 21401  | 1      |        |        |        |
| 21405  |        |        |        |        |
| 21406  |        |        |        |        |
| 21407  |        |        |        |        |

| respid | Q31b_3 | Q31b_4 | Q31b_5 | Q31b_6 |
|--------|--------|--------|--------|--------|
| 21418  |        |        |        |        |
| 21420  |        |        |        |        |
| 21421  |        |        |        |        |
| 21446  |        |        |        |        |
| 21449  |        |        |        |        |
| 21452  |        |        |        |        |
| 21455  | 2      | 2      |        |        |
| 21469  | 0      |        |        |        |
| 21471  |        |        |        |        |
| 21472  |        |        | 1      |        |
| 21474  |        |        |        |        |
| 21479  |        |        |        |        |
| 21485  |        |        |        |        |
| 21512  |        |        |        |        |
| 21513  |        |        |        |        |
| 21514  |        |        |        |        |
| 21520  |        |        |        |        |
| 21539  |        |        |        |        |
| 21553  |        |        |        |        |
| 21560  |        |        |        |        |
| 21561  |        |        |        |        |
| 21563  |        |        | 3      |        |
| 21565  |        |        |        |        |
| 21582  | 2      |        |        |        |
| 21584  |        |        |        |        |
| 21585  |        |        |        |        |
| 21586  |        |        |        |        |
| 21587  |        |        |        |        |
| 21590  |        | 4      | 4      | 4      |
| 21601  |        |        |        |        |
| 21611  |        | 3      |        |        |
| 21612  |        |        |        |        |

| respid | Q31b_3 | Q31b_4 | Q31b_5 | Q31b_6 |
|--------|--------|--------|--------|--------|
| 21625  | 2      |        |        |        |
| 21633  |        |        |        |        |
| 21640  |        |        |        |        |
| 21647  |        |        |        |        |
| 21648  | 4      | 4      | 4      |        |
| 21656  |        |        |        |        |
| 21657  |        |        |        |        |
| 21658  |        |        | 4      |        |
| 21665  |        | 1      | 3      |        |
| 21666  |        |        | 2      |        |
| 21668  |        | 2      |        | 2      |
| 21673  | 2      |        |        |        |
| 21681  |        |        |        |        |
| 21682  |        |        |        |        |
| 21685  |        |        |        |        |
| 21692  |        |        | 1      | 1      |
| 21697  |        |        |        |        |
| 21711  |        |        |        |        |
| 21715  |        |        |        | 2      |
| 21726  |        |        |        |        |
| 21748  |        |        |        |        |
| 21761  | 1      |        |        |        |
| 21769  |        |        |        |        |
| 21774  | 1      |        |        | 1      |
| 21778  |        |        |        |        |
| 21785  |        |        |        |        |
| 21799  |        |        |        |        |
| 21820  |        |        | 4      |        |
| 21837  |        |        |        |        |
| 21845  | 2      | 3      |        |        |
| 21846  |        |        |        |        |
| 21849  |        |        |        |        |

| respid | Q31b_3 | Q31b_4 | Q31b_5 | Q31b_6 |
|--------|--------|--------|--------|--------|
| 21850  |        |        |        |        |
| 21855  |        |        |        |        |
| 21859  |        |        |        |        |
| 21861  |        |        |        |        |
| 21866  |        |        |        |        |
| 21873  |        |        |        |        |
| 21876  |        |        |        |        |
| 21882  |        |        |        |        |
| 21884  | 2      |        | 2      |        |
| 21887  |        |        |        |        |
| 21892  |        |        |        |        |
| 21907  |        |        | 1      |        |
| 21910  | 3      |        | 3      |        |
| 21912  |        |        |        |        |
| 21914  |        |        |        |        |
| 21925  |        |        |        |        |
| 21937  |        |        |        |        |
| 21938  |        |        |        |        |
| 21940  |        |        |        |        |
| 21942  |        |        |        |        |
| 21947  |        |        |        |        |
| 21948  |        |        |        |        |
| 21961  | 1      |        |        |        |
| 21977  |        |        |        | 3      |
| 21983  |        |        |        |        |
| 21986  |        |        | 2      |        |
| 21988  |        |        |        |        |
| 21996  |        |        |        |        |
| 21997  |        |        |        |        |
| 22005  |        |        |        |        |
| 22013  |        |        |        |        |
| 22018  |        |        |        |        |

| respid | Q31b_3 | Q31b_4 | Q31b_5 | Q31b_6 |
|--------|--------|--------|--------|--------|
| 22019  | 2      |        |        |        |
| 22071  | 2      |        |        |        |
| 22082  |        |        |        |        |
| 22085  |        |        |        |        |
| 22092  |        |        |        |        |
| 22097  |        |        |        |        |
| 22111  |        |        |        |        |
| 22118  |        |        |        |        |
| 22132  |        |        |        |        |
| 22133  |        |        |        |        |
| 22139  |        |        |        |        |
| 22142  |        |        |        | 4      |
| 22146  |        |        |        |        |
| 22181  |        |        |        |        |
| 22202  |        |        |        |        |
| 22214  |        |        |        |        |
| 22223  |        |        |        |        |
| 22227  | 1      |        | 0      |        |
| 22229  | 0      |        |        |        |
| 22239  |        |        |        |        |
| 22245  | 3      | 3      |        |        |
| 22256  |        |        |        |        |
| 22260  |        |        |        |        |
| 22298  |        |        |        |        |
| 22321  | 1      |        |        |        |
| 22340  |        |        |        |        |
| 22346  |        |        |        |        |
| 22356  |        |        |        |        |
| 22361  |        |        |        |        |
| 22364  |        |        |        |        |
| 22368  |        |        |        |        |
| 22374  | 3      |        |        |        |



| respid | Q31b_3 | Q31b_4 | Q31b_5 | Q31b_6 |
|--------|--------|--------|--------|--------|
| 22375  |        |        |        |        |
| 22377  |        |        |        |        |
| 22383  |        |        |        |        |
| 22387  |        |        |        |        |
| 22392  |        |        |        |        |
| 22393  |        |        |        |        |
| 22394  |        |        |        |        |
| 22395  |        |        |        |        |
| 22401  |        |        |        |        |
| 22407  |        |        |        |        |
| 22410  |        |        | 1      |        |
| 22418  |        |        |        |        |
| 22421  |        |        |        |        |
| 22423  |        |        |        |        |
| 22425  |        |        |        |        |
| 22427  |        |        |        |        |
| 22431  | 4      |        |        |        |
| 22435  |        |        |        |        |
| 22436  |        |        |        |        |
| 22442  |        |        |        |        |
| 22444  |        |        |        |        |
| 22445  | 3      |        |        |        |
| 22446  |        |        |        |        |
| 22448  | 2      |        |        |        |
| 22449  |        |        |        |        |
| 22450  |        |        |        |        |
| 22453  | 2      |        | 2      |        |
| 22465  |        |        | 2      |        |
| 22472  |        |        |        |        |
| 22475  |        |        | 4      |        |
| 22478  |        |        |        |        |
| 22491  |        |        |        |        |

| respid | Q31b_3 | Q31b_4 | Q31b_5 | Q31b_6 |
|--------|--------|--------|--------|--------|
| 22497  |        |        |        | 1      |
| 22498  | 1      |        |        |        |
| 22499  |        |        |        |        |
| 22503  |        |        |        |        |
| 22507  |        |        |        |        |
| 22513  | 4      |        | 4      |        |
| 22517  |        |        |        |        |
| 22524  |        |        |        |        |
| 22528  |        |        |        |        |
| 22544  |        |        |        |        |
| 22571  |        |        |        |        |
| 22576  |        | 0      |        |        |
| 22579  |        |        |        |        |
| 22583  |        |        |        |        |
| 22591  |        |        |        |        |
| 22592  |        |        |        |        |
| 22612  |        |        |        |        |
| 22613  | 1      |        |        |        |
| 22615  |        |        |        |        |
| 22621  |        |        |        |        |
| 22625  |        |        |        |        |
| 22628  |        |        |        |        |
| 22632  |        |        |        |        |
| 22639  |        |        |        |        |
| 22648  |        |        |        |        |
| 22649  |        |        |        | 2      |
| 22655  |        |        |        |        |
| 22659  |        |        |        |        |
| 22660  |        |        |        |        |
| 22666  |        |        |        |        |
| 22667  |        |        |        |        |
| 22670  |        |        |        |        |

| respid | Q31b_3 | Q31b_4 | Q31b_5 | Q31b_6 |
|--------|--------|--------|--------|--------|
| 22681  |        |        |        |        |
| 22683  | 2      |        |        |        |
| 22688  |        |        |        |        |
| 22695  |        |        |        |        |
| 22696  |        |        |        |        |
| 22705  | 2      |        |        |        |
| 22718  | 1      |        |        |        |
| 22720  |        |        |        |        |
| 22724  |        |        |        |        |
| 22728  |        |        |        |        |
| 22751  |        |        |        |        |
| 22782  |        |        |        | 4      |
| 22786  |        |        |        |        |
| 22788  |        |        |        |        |
| 22810  | 2      |        |        |        |
| 22816  |        |        |        |        |
| 22818  |        |        |        |        |
| 22854  |        |        |        |        |
| 22858  | 2      |        |        |        |
| 22862  |        |        |        |        |
| 22865  |        |        |        |        |
| 22868  | 1      |        |        |        |
| 22869  |        |        | 2      | 1      |
| 22873  |        |        |        |        |
| 22875  |        |        |        |        |
| 22876  |        |        |        |        |
| 22882  |        |        |        |        |
| 22884  |        |        |        | 1      |
| 22887  | 1      |        |        |        |
| 22888  |        |        |        |        |
| 22900  |        |        |        |        |
| 22901  |        |        |        |        |

| respid | Q31b_3 | Q31b_4 | Q31b_5 | Q31b_6 |
|--------|--------|--------|--------|--------|
| 22912  |        |        |        |        |
| 22913  |        |        |        |        |
| 22921  |        |        |        |        |
| 22925  |        |        |        |        |
| 22940  |        |        |        |        |
| 22941  |        |        |        |        |
| 22947  |        |        |        |        |
| 22948  |        |        |        |        |
| 22964  | 2      |        |        |        |
| 22966  |        |        |        |        |
| 22969  |        |        |        |        |
| 22971  |        |        |        |        |
| 22988  |        |        |        |        |
| 22990  |        |        |        |        |
| 23000  |        |        |        |        |
| 23016  |        |        |        |        |
| 23026  |        |        |        |        |
| 23035  |        |        |        |        |
| 23037  | 4      |        |        |        |
| 23044  |        |        |        |        |
| 23046  |        |        |        |        |
| 23047  | 1      |        |        |        |
| 23049  |        |        |        |        |
| 23055  |        |        |        |        |
| 23066  |        |        |        |        |
| 23075  |        |        |        |        |
| 23081  |        |        |        |        |
| 23087  |        |        |        |        |
| 23094  |        |        |        |        |
| 23099  |        |        |        |        |
| 23101  |        |        |        |        |
| 23105  |        |        |        |        |

| respid | Q31b_3 | Q31b_4 | Q31b_5 | Q31b_6 |
|--------|--------|--------|--------|--------|
| 23115  |        |        | 1      |        |
| 23121  | 3      |        |        |        |
| 23127  |        |        |        |        |
| 23131  |        |        |        |        |
| 23134  |        |        |        |        |
| 23145  |        |        |        |        |
| 23151  |        |        |        |        |
| 23161  | 1      | 1      |        | 1      |
| 23169  | 1      |        |        |        |
| 23173  |        |        |        |        |
| 23174  |        |        |        |        |
| 23186  | 4      |        | 3      |        |
| 23195  |        |        |        |        |
| 23197  |        |        |        |        |
| 23198  |        |        |        |        |
| 23203  |        |        |        |        |
| 23204  |        |        |        |        |
| 23212  |        |        |        |        |
| 23214  |        |        |        |        |
| 23221  |        |        |        |        |
| 23237  |        |        |        |        |
| 23251  |        |        |        |        |
| 23254  |        |        |        |        |
| 23262  |        |        |        |        |
| 23267  |        |        |        |        |
| 23268  | 3      |        |        |        |
| 23273  |        |        |        |        |
| 23278  |        |        |        |        |
| 23279  |        |        |        |        |
| 23281  |        |        |        |        |
| 23282  |        |        |        |        |
| 23283  |        | 3      |        |        |

| respid | Q31b_3 | Q31b_4 | Q31b_5 | Q31b_6 |
|--------|--------|--------|--------|--------|
| 23285  |        |        | 0      |        |
| 23305  |        | 3      |        |        |
| 23309  |        | 1      |        |        |
| 23310  |        |        | 2      |        |
| 23311  |        |        |        |        |
| 23312  |        |        |        |        |
| 23319  |        |        |        |        |
| 23320  |        |        |        |        |
| 23322  |        |        |        |        |
| 23334  |        |        |        |        |
| 23340  | 1      |        |        |        |
| 23346  |        |        |        |        |
| 23353  |        |        |        |        |
| 23363  |        | 2      | 2      |        |
| 23364  |        |        | 1      |        |
| 23376  |        |        |        |        |
| 23378  |        |        |        |        |
| 23382  |        |        |        |        |
| 23383  |        |        |        |        |
| 23390  |        |        |        |        |
| 23395  |        |        |        |        |
| 23398  | 0      |        |        |        |
| 23399  |        |        |        |        |
| 23406  |        |        |        |        |
| 23418  |        |        |        |        |
| 23427  |        |        |        |        |
| 23428  |        |        |        |        |
| 23435  |        |        |        |        |
| 23439  |        |        |        |        |
| 23440  |        |        |        |        |
| 23444  | 2      |        |        |        |
| 23445  |        |        |        |        |

| respid | Q31b_3 | Q31b_4 | Q31b_5 | Q31b_6 |
|--------|--------|--------|--------|--------|
| 23455  |        |        |        |        |
| 23467  |        |        |        |        |
| 23478  |        |        |        |        |
| 23492  |        |        |        |        |
| 23498  |        |        |        |        |
| 23511  |        |        |        |        |
| 23514  |        |        |        |        |
| 23515  |        |        |        |        |
| 23522  |        |        |        |        |
| 23524  |        |        |        |        |
| 23531  |        |        |        |        |
| 23532  |        |        |        |        |
| 23533  |        |        |        |        |
| 23534  |        |        |        |        |
| 23538  |        |        |        |        |
| 23539  |        |        |        |        |
| 23548  |        |        |        |        |
| 23553  |        |        |        |        |
| 23556  |        |        |        |        |
| 23563  |        |        |        |        |
| 23572  |        |        |        |        |
| 23575  |        |        |        |        |
| 23576  |        |        |        |        |
| 23577  |        |        |        |        |
| 23578  | 1      | 1      | 1      |        |
| 23587  | 1      |        |        |        |
| 23597  | 2      |        |        |        |
| 23598  |        |        |        |        |
| 23604  |        |        |        |        |
| 23617  |        | 1      |        |        |
| 23620  | 1      |        |        |        |
| 23621  |        |        |        |        |

| respid | Q31b_3 | Q31b_4 | Q31b_5 | Q31b_6 |
|--------|--------|--------|--------|--------|
| 23625  |        |        |        |        |
| 23629  | 0      |        |        |        |
| 23635  |        |        |        |        |
| 23636  |        |        |        |        |
| 23637  |        |        |        | 4      |
| 23638  |        |        |        |        |
| 23644  |        |        |        |        |
| 23645  |        |        |        |        |
| 23649  |        |        |        |        |
| 23654  |        |        |        |        |
| 23662  |        |        |        |        |
| 23664  |        |        |        |        |
| 23665  |        |        |        |        |
| 23666  | 1      |        |        |        |
| 23671  |        |        |        |        |
| 23672  |        |        |        |        |
| 23685  |        |        |        |        |
| 23686  |        |        |        | 1      |
| 23689  |        |        |        | 2      |
| 23690  |        |        |        |        |
| 23695  | 3      |        | 3      |        |
| 23700  |        |        |        |        |
| 23714  |        |        |        |        |
| 23719  |        |        |        |        |
| 23720  |        |        |        |        |
| 23721  |        |        |        |        |
| 23729  |        |        |        |        |
| 23730  |        |        |        |        |
| 23732  |        |        |        |        |
| 23736  |        |        |        |        |
| 23754  |        |        |        |        |
| 23756  | 0      |        |        |        |



| respid | Q31b_3 | Q31b_4 | Q31b_5 | Q31b_6 |
|--------|--------|--------|--------|--------|
| 23759  | 1      |        |        |        |
| 23761  |        |        |        |        |
| 23766  |        |        |        |        |
| 23768  |        |        |        |        |
| 23773  |        |        |        |        |
| 23781  |        |        |        |        |
| 23782  |        |        |        |        |
| 23787  |        |        |        |        |
| 23788  |        | 2      | 2      |        |
| 23790  |        |        |        |        |
| 23794  |        |        |        |        |
| 23795  |        |        |        |        |
| 23801  |        |        |        |        |
| 23806  | 1      |        |        |        |
| 23809  |        |        |        |        |
| 23813  |        |        |        |        |
| 23815  |        |        |        |        |
| 23821  |        |        |        |        |
| 23825  |        |        |        |        |
| 23826  |        |        |        |        |
| 23830  |        |        |        |        |
| 23833  |        |        |        |        |
| 23837  |        |        |        |        |
| 23848  |        |        |        |        |
| 23850  |        |        |        |        |
| 23870  |        |        |        |        |
| 23877  |        |        |        |        |
| 23880  |        |        |        |        |
| 23882  |        |        |        |        |
| 23888  |        |        |        |        |
| 23908  |        |        |        |        |
| 23914  |        |        |        |        |

| respid | Q31b_3 | Q31b_4 | Q31b_5 | Q31b_6 |
|--------|--------|--------|--------|--------|
| 23916  | 0      |        |        |        |
| 23922  |        |        |        |        |
| 23932  |        |        |        |        |
| 23934  |        |        |        |        |
| 23942  | 2      | 4      |        |        |
| 23945  |        |        |        |        |
| 23948  |        |        |        |        |
| 23955  |        |        |        |        |
| 23956  | 2      |        |        |        |
| 23978  |        |        |        |        |
| 23981  |        |        |        |        |
| 23982  |        |        |        |        |
| 23991  |        |        |        |        |
| 23994  | 1      |        | 1      |        |
| 23995  |        |        |        |        |
| 23999  |        |        |        |        |
| 24005  | 1      |        |        |        |
| 24018  |        |        |        |        |
| 24021  |        |        |        |        |
| 24035  |        |        |        |        |
| 24040  |        |        |        |        |
| 24043  |        |        |        |        |
| 24046  | 2      |        |        |        |
| 24047  |        |        |        |        |
| 24048  |        |        |        |        |
| 24062  |        |        |        |        |
| 24063  |        |        |        |        |
| 24066  |        |        |        |        |
| 24069  |        |        |        |        |
| 24070  |        |        |        |        |
| 24074  |        |        |        |        |
| 24080  | 0      |        |        |        |

| respid | Q31b_3 | Q31b_4 | Q31b_5 | Q31b_6 |
|--------|--------|--------|--------|--------|
| 24082  |        |        |        |        |
| 24088  |        |        |        |        |
| 24089  |        |        |        |        |
| 24091  |        |        |        |        |
| 24095  |        |        |        |        |
| 24100  | 2      |        |        |        |
| 24105  |        |        |        |        |
| 24107  |        | 3      | 3      |        |
| 24108  |        |        |        |        |
| 24113  |        |        |        |        |
| 24120  |        |        |        |        |
| 24122  | 1      |        | 2      |        |
| 24123  |        |        |        |        |
| 24125  | 1      | 1      |        |        |
| 24132  |        |        |        |        |
| 24139  |        |        |        |        |
| 24140  |        |        |        |        |
| 24143  |        | 1      |        |        |
| 24150  | 2      |        |        |        |
| 24153  |        |        |        |        |
| 24161  |        |        |        |        |
| 24168  |        |        |        |        |
| 24179  |        |        |        |        |
| 24182  |        |        |        |        |
| 24194  |        |        |        |        |
| 24206  |        |        |        |        |
| 24214  |        |        |        |        |
| 24215  |        |        |        |        |
| 24224  |        |        |        |        |
| 24225  |        |        |        |        |
| 24227  |        |        |        |        |
| 24229  |        |        |        |        |

| respid | Q31b_3 | Q31b_4 | Q31b_5 | Q31b_6 |
|--------|--------|--------|--------|--------|
| 24230  |        |        |        |        |
| 24232  | 2      |        |        |        |
| 24253  |        |        |        |        |
| 24267  |        | 1      |        |        |
| 24274  |        |        |        |        |
| 24275  |        |        |        | 1      |
| 24277  |        |        |        |        |
| 24280  |        |        |        |        |
| 24285  |        |        |        |        |
| 24293  |        |        |        |        |
| 24295  | 3      |        |        |        |
| 24299  |        |        |        |        |
| 24303  |        |        |        |        |
| 24308  |        |        |        |        |
| 24322  |        |        |        |        |
| 24325  |        |        |        |        |
| 24328  |        | 1      |        |        |
| 24334  |        |        |        |        |
| 24342  | 1      |        | 1      |        |
| 24343  |        |        |        |        |
| 24348  |        |        |        |        |
| 24352  |        |        |        |        |
| 24354  | 1      |        |        | 1      |
| 24357  |        |        |        |        |
| 24360  |        |        |        |        |
| 24369  | 4      |        |        |        |
| 24373  | 1      |        |        |        |
| 24398  |        | 3      |        | 3      |
| 24402  | 1      |        |        |        |
| 24405  |        |        |        |        |
| 24407  |        |        |        |        |
| 24413  | 1      |        |        |        |

| respid | Q31b_3 | Q31b_4 | Q31b_5 | Q31b_6 |
|--------|--------|--------|--------|--------|
| 24443  |        |        | 1      |        |
| 24451  |        |        |        |        |
| 24459  |        |        | 2      | 2      |
| 24465  |        |        |        |        |
| 24481  |        |        |        |        |
| 24482  |        |        |        |        |
| 24491  |        |        | 1      |        |
| 24495  |        |        |        |        |
| 24497  | 3      |        |        | 3      |
| 24511  |        |        |        |        |
| 24513  |        |        |        |        |
| 24516  |        |        |        |        |
| 24518  |        |        |        |        |
| 24524  |        |        |        |        |
| 24528  |        |        |        |        |
| 24531  |        |        |        | 4      |
| 24533  | 3      | 1      | 2      |        |
| 24547  |        |        |        |        |
| 24557  |        | 2      |        |        |
| 24559  | 4      | 4      |        |        |
| 24567  |        |        |        |        |
| 24568  |        |        |        |        |
| 24577  |        |        |        |        |
| 24581  |        |        |        |        |
| 24588  |        |        |        |        |
| 24604  |        |        |        |        |
| 24612  |        |        |        |        |
| 24621  |        |        | 3      |        |
| 24625  | 1      |        |        |        |
| 24627  |        |        |        |        |
| 24640  |        |        |        |        |
| 24644  |        |        |        |        |

| respid | Q31b_3 | Q31b_4 | Q31b_5 | Q31b_6 |
|--------|--------|--------|--------|--------|
| 24664  |        |        |        |        |
| 24669  |        |        |        |        |
| 24685  |        |        |        |        |
| 24687  | 1      |        |        |        |
| 24688  |        |        |        |        |
| 24691  |        | 2      |        |        |
| 24693  |        |        |        |        |
| 24706  |        |        |        |        |
| 24710  |        |        |        |        |
| 24717  |        |        |        |        |
| 24720  |        |        |        |        |
| 24731  | 2      |        |        |        |
| 24732  |        |        |        |        |
| 24733  |        |        |        |        |
| 24747  |        |        |        |        |
| 24750  | 4      |        |        |        |
| 24758  | 2      |        |        |        |
| 24760  |        |        |        |        |
| 24765  |        |        |        |        |
| 24772  |        |        |        |        |
| 24779  |        |        |        | 2      |
| 24794  |        |        |        |        |
| 24796  |        | 3      |        |        |
| 24797  |        |        |        |        |
| 24800  |        |        |        |        |
| 24813  |        |        |        |        |
| 24815  |        |        |        |        |
| 24821  |        |        |        |        |
| 24822  |        |        |        |        |
| 24831  |        |        |        | 0      |
| 24835  |        |        |        |        |
| 24843  | 3      |        |        | 2      |

| respid | Q31b_3 | Q31b_4 | Q31b_5 | Q31b_6 |
|--------|--------|--------|--------|--------|
| 24844  | 2      |        |        |        |
| 24860  |        |        |        |        |
| 24861  |        |        |        |        |
| 24865  |        | 2      |        |        |
| 24870  |        | 1      |        |        |
| 24887  |        |        |        |        |
| 24897  |        | 1      |        |        |
| 24902  |        |        |        |        |
| 24914  |        |        |        |        |
| 24921  |        |        |        |        |
| 24922  |        |        |        |        |
| 24924  |        |        |        |        |
| 24927  |        |        |        |        |
| 24936  |        |        |        |        |
| 24937  | 1      |        |        |        |
| 24942  |        |        |        |        |
| 24947  |        |        |        |        |
| 24953  |        |        |        |        |
| 24954  |        | 1      |        |        |
| 24960  | 3      |        | 2      | 4      |
| 24965  |        |        |        |        |
| 24975  |        |        | 1      |        |
| 24983  |        | 2      |        |        |
| 24985  |        |        |        |        |
| 24990  |        |        |        |        |
| 25000  |        |        |        |        |
| 25007  |        |        |        |        |
| 25008  |        |        |        |        |
| 25010  |        |        |        |        |
| 25016  |        |        |        |        |
| 25021  | 1      |        | 3      |        |
| 25040  |        |        |        |        |

| respid | Q31b_3 | Q31b_4 | Q31b_5 | Q31b_6 |
|--------|--------|--------|--------|--------|
| 25043  |        |        |        |        |
| 25055  |        |        |        |        |
| 25057  |        |        |        |        |
| 25060  |        | 1      |        |        |
| 25062  |        |        |        |        |
| 25064  | 2      |        |        |        |
| 25069  |        |        |        |        |
| 25077  |        |        |        |        |
| 25088  |        |        |        |        |
| 25093  |        |        |        |        |
| 25121  |        |        |        |        |
| 25140  |        | 2      |        |        |
| 25144  |        |        |        |        |
| 25149  |        |        |        |        |
| 25159  |        |        |        |        |
| 25191  |        |        |        |        |
| 25193  |        |        | 2      |        |
| 25202  |        | 2      |        |        |
| 25215  |        | 2      |        |        |
| 25229  |        |        |        |        |
| 25231  | 0      |        |        |        |
| 25236  |        |        |        |        |
| 25242  |        |        |        |        |
| 25252  |        |        |        |        |
| 25253  | 3      |        |        | 4      |
| 25256  |        | 2      |        |        |
| 25260  |        |        |        |        |
| 25261  |        |        |        |        |
| 25280  |        |        |        |        |
| 25282  |        |        |        |        |
| 25289  |        |        |        |        |
| 25303  |        |        |        |        |



| respid | Q31b_3 | Q31b_4 | Q31b_5 | Q31b_6 |
|--------|--------|--------|--------|--------|
| 25304  |        | 1      |        |        |
| 25309  |        |        |        |        |
| 25317  |        |        |        |        |
| 25318  | 2      | 2      |        |        |
| 25320  |        |        |        |        |
| 25324  |        | 2      |        |        |
| 25331  |        |        |        |        |
| 25340  |        |        |        |        |
| 25342  |        |        |        |        |
| 25350  |        |        |        |        |
| 25352  |        |        |        |        |
| 25358  |        |        |        |        |
| 25375  | 0      |        |        |        |
| 25386  |        |        |        |        |
| 25388  |        |        |        |        |
| 25390  | 2      |        |        |        |
| 25391  |        |        |        |        |
| 25400  | 3      |        |        |        |
| 25413  |        | 2      |        |        |
| 25424  |        |        |        |        |
| 25426  |        |        |        |        |
| 25430  |        |        |        |        |
| 25434  | 1      |        |        |        |
| 25439  |        |        |        |        |
| 25441  |        |        |        |        |
| 25445  |        |        |        |        |
| 25451  |        |        |        |        |
| 25469  |        | 2      |        |        |
| 25471  | 1      | 2      |        |        |
| 25476  |        |        |        |        |
| 25480  |        |        |        |        |
| 25482  | 1      |        |        |        |

| respid | Q31b_3 | Q31b_4 | Q31b_5 | Q31b_6 |
|--------|--------|--------|--------|--------|
| 25500  | 4      |        |        |        |
| 25516  |        |        |        |        |
| 25521  | 3      | 3      | 2      |        |
| 25525  |        |        |        |        |
| 25530  |        |        |        |        |
| 25555  |        |        | 2      |        |
| 25558  |        |        |        |        |
| 25561  | 2      |        |        |        |
| 25566  |        |        |        |        |
| 25571  |        |        |        |        |
| 25572  |        |        |        |        |
| 25574  |        |        |        |        |
| 25588  |        |        |        |        |
| 25591  | 2      |        |        |        |
| 25599  | 1      | 1      |        |        |
| 25604  |        |        |        |        |
| 25614  |        |        |        |        |
| 25634  | 2      |        |        | 3      |
| 25642  |        |        |        |        |
| 25647  |        |        |        |        |
| 25653  |        |        |        |        |
| 25654  |        |        |        | 1      |
| 25660  |        |        |        |        |
| 25664  |        |        |        |        |
| 25665  | 1      |        |        |        |
| 25672  |        |        | 2      |        |
| 25677  |        |        |        |        |
| 25685  |        |        |        |        |
| 25699  |        |        | 1      | 2      |
| 25703  |        |        |        |        |
| 25704  | 2      |        |        |        |
| 25705  |        |        |        |        |

| respid | Q31b_3 | Q31b_4 | Q31b_5 | Q31b_6 |
|--------|--------|--------|--------|--------|
| 25711  |        |        |        |        |
| 25727  |        |        |        |        |
| 25728  |        |        |        |        |
| 25733  |        |        |        |        |
| 25735  |        |        |        |        |
| 25736  |        |        |        |        |
| 25742  |        |        |        |        |
| 25750  |        |        |        |        |
| 25754  |        |        |        |        |
| 25776  | 1      |        | 3      |        |
| 25778  |        |        |        |        |
| 25796  |        |        |        |        |
| 25852  | 2      |        |        |        |
| 25858  |        |        |        |        |
| 25859  |        |        |        |        |
| 25886  |        |        |        |        |
| 25890  |        |        |        | 2      |
| 25897  |        |        |        |        |
| 25903  |        |        |        |        |
| 25905  |        |        |        |        |
| 25917  |        |        |        |        |
| 25918  |        |        |        |        |
| 25928  |        |        |        |        |
| 25930  |        |        |        |        |
| 25949  | 1      |        |        |        |
| 25955  |        |        |        |        |
| 25959  |        |        | 1      |        |
| 25964  |        |        |        |        |
| 25972  |        |        |        |        |
| 25999  | 3      | 3      |        |        |
| 26019  |        |        |        |        |
| 26025  |        |        | 2      |        |

| respid | Q31b_3 | Q31b_4 | Q31b_5 | Q31b_6 |
|--------|--------|--------|--------|--------|
| 26039  | 2      |        |        |        |
| 26055  |        |        |        |        |
| 26061  | 0      |        |        |        |
| 26076  |        |        |        |        |
| 26088  |        |        |        |        |
| 26094  |        |        |        |        |
| 26104  |        |        |        |        |
| 26131  |        |        |        |        |
| 26134  |        |        |        |        |
| 26160  |        |        |        |        |
| 26168  |        |        |        |        |
| 26170  |        |        |        |        |
| 26191  |        |        |        |        |
| 26192  |        |        |        |        |
| 26195  |        | 1      |        |        |
| 26198  |        |        |        |        |
| 26199  | 2      |        |        |        |
| 26201  |        |        |        |        |
| 26202  |        |        |        |        |
| 26226  |        |        |        |        |
| 26233  | 3      |        |        |        |
| 26236  |        |        |        |        |
| 26242  | 1      |        |        |        |
| 26244  | 1      |        |        |        |
| 26250  |        |        |        |        |
| 26266  |        |        |        | 0      |
| 26274  |        |        |        |        |
| 26286  | 1      |        |        |        |
| 26288  |        |        |        |        |
| 26295  |        |        |        |        |
| 26296  |        |        |        |        |
| 26297  |        |        |        |        |

| respid | Q31b_3 | Q31b_4 | Q31b_5 | Q31b_6 |
|--------|--------|--------|--------|--------|
| 26300  |        |        |        |        |
| 26317  |        |        |        |        |
| 26343  |        |        |        |        |
| 26367  |        |        |        |        |
| 26372  |        | 0      | 0      | 0      |
| 26403  |        |        |        |        |
| 26423  |        |        |        |        |
| 26430  |        |        |        |        |
| 26437  |        |        | 1      |        |
| 26457  |        |        |        |        |
| 26466  |        |        |        |        |
| 26467  |        |        |        |        |
| 26469  | 1      | 1      |        |        |
| 26494  |        |        |        |        |
| 26510  |        |        |        |        |
| 26519  |        |        |        |        |
| 26525  |        |        |        |        |
| 26529  |        |        |        |        |
| 26533  |        |        |        |        |
| 26556  |        |        |        |        |
| 26559  | 2      |        |        |        |
| 26565  |        |        |        |        |
| 26576  |        | 2      | 2      |        |
| 26601  |        |        |        |        |
| 26607  |        |        | 1      |        |
| 26611  |        |        |        |        |
| 26619  | 0      | 0      |        |        |
| 26631  |        |        |        |        |
| 26654  |        |        |        |        |
| 26656  | 1      |        |        |        |
| 26664  |        |        |        |        |
| 26667  |        |        |        |        |

| respid | Q31b_3 | Q31b_4 | Q31b_5 | Q31b_6 |
|--------|--------|--------|--------|--------|
| 26674  |        |        | 2      | 3      |
| 26678  |        |        | 1      |        |
| 26693  |        |        |        |        |
| 26696  |        | 3      |        |        |
| 26703  | 3      | 3      | 3      |        |
| 26705  |        |        |        |        |
| 26706  | 1      |        |        |        |
| 26716  |        |        |        |        |
| 26721  |        |        |        |        |
| 26730  |        | 1      |        |        |
| 26752  |        |        |        |        |
| 26755  |        |        |        |        |
| 26791  |        |        |        |        |
| 26804  |        |        |        |        |
| 26810  | 2      | 4      |        |        |
| 26813  |        |        |        |        |
| 26833  |        |        |        |        |
| 26880  |        |        |        |        |
| 26884  |        |        |        |        |
| 26885  |        |        |        |        |
| 26890  | 2      |        |        |        |
| 26937  |        |        |        |        |
| 26939  |        |        |        |        |
| 26941  |        |        |        |        |
| 26992  | 4      |        |        | 4      |
| 27037  |        |        |        |        |
| 27045  |        |        |        |        |
| 27053  | 4      |        |        |        |
| 27060  |        |        |        |        |
| 27076  |        |        | 1      |        |
| 27124  |        |        |        |        |
| 27125  |        |        |        |        |

| respid | Q31b_3 | Q31b_4 | Q31b_5 | Q31b_6 |
|--------|--------|--------|--------|--------|
| 27132  |        |        |        |        |
| 27166  |        |        |        |        |
| 27190  |        |        |        |        |
| 27199  |        |        |        |        |
| 27221  |        |        |        |        |
| 27233  |        |        | 1      |        |
| 27241  |        |        |        |        |
| 27244  |        |        |        |        |
| 27245  | 3      | 2      | 2      | 3      |
| 27246  |        |        |        |        |
| 27253  |        |        |        |        |
| 27255  |        | 3      |        |        |
| 27267  |        |        |        |        |
| 27283  | 2      |        |        |        |
| 27289  |        |        |        |        |
| 27302  |        |        |        |        |
| 27317  |        |        |        |        |
| 27319  |        |        |        |        |
| 27331  |        |        |        |        |
| 27333  |        |        |        |        |
| 27340  |        |        |        |        |
| 27362  |        | 1      |        | 2      |
| 27370  |        |        |        |        |
| 27379  |        |        |        |        |
| 27386  |        |        |        |        |
| 27398  |        |        |        |        |
| 27404  |        |        |        |        |
| 27408  | 1      |        |        |        |
| 27412  |        |        |        | 3      |
| 27426  | 2      |        |        |        |
| 27455  |        |        |        |        |
| 27464  |        |        |        |        |

| respid | Q31b_3 | Q31b_4 | Q31b_5 | Q31b_6 |
|--------|--------|--------|--------|--------|
| 27484  |        |        |        |        |
| 27493  | 4      |        |        |        |
| 27512  |        |        | 3      |        |
| 27525  |        |        |        |        |
| 27532  | 1      |        |        |        |
| 27539  |        |        |        |        |
| 27540  | 3      |        |        | 2      |
| 27552  |        |        | 4      |        |
| 27562  |        |        |        |        |
| 27568  |        |        |        |        |
| 27574  | 3      | 3      | 3      | 4      |
| 27575  |        |        |        |        |
| 27577  |        |        |        |        |
| 27589  |        |        |        |        |
| 27593  |        |        |        |        |
| 27594  | 3      |        |        |        |
| 27595  | 3      | 2      | 2      |        |
| 27598  |        | 1      |        |        |
| 27620  |        |        |        |        |
| 27621  |        |        |        |        |
| 27628  |        |        |        |        |
| 27633  |        |        |        |        |
| 27643  |        |        |        |        |
| 27644  |        |        |        |        |
| 27668  |        |        |        |        |
| 27681  |        |        |        |        |
| 27691  |        |        |        |        |
| 27693  |        |        |        |        |
| 27703  | 1      |        |        |        |
| 27708  |        |        |        |        |
| 27719  |        |        |        |        |
| 27720  |        |        |        |        |



| respid | Q31b_3 | Q31b_4 | Q31b_5 | Q31b_6 |
|--------|--------|--------|--------|--------|
| 27723  |        |        |        |        |
| 27725  |        |        |        |        |
| 27734  |        |        |        |        |
| 27744  |        |        |        |        |
| 27749  |        |        |        |        |
| 27762  | 2      |        | 2      |        |
| 27808  | 2      |        |        |        |
| 27810  |        | 4      |        | 4      |
| 27812  |        |        |        |        |
| 27815  |        |        |        |        |
| 27818  |        |        |        |        |
| 27823  |        |        |        |        |
| 27841  |        |        |        |        |
| 27843  |        |        |        |        |
| 27851  | 1      |        |        |        |
| 27858  |        |        |        |        |
| 27859  |        |        |        |        |
| 27869  |        |        |        |        |
| 27872  |        |        |        |        |
| 27873  |        |        |        |        |
| 27884  |        |        |        |        |
| 27904  |        |        |        |        |
| 27915  |        |        |        |        |
| 27918  |        |        | 1      |        |
| 27937  |        |        |        |        |
| 27943  |        |        |        |        |
| 27948  |        |        |        |        |
| 27971  |        |        |        |        |
| 27991  |        |        |        |        |
| 28000  |        |        |        |        |
| 28011  | 2      |        |        |        |
| 28022  |        |        |        |        |

| respid | Q31b_3 | Q31b_4 | Q31b_5 | Q31b_6 |
|--------|--------|--------|--------|--------|
| 28025  |        |        |        |        |
| 28041  |        |        |        |        |
| 28057  | 2      | 3      | 1      |        |
| 28080  |        |        |        |        |
| 28098  |        |        |        |        |
| 28104  |        |        |        |        |
| 28109  |        |        |        |        |
| 28129  |        |        |        |        |
| 28141  |        |        |        |        |
| 28143  |        |        |        |        |
| 28149  | 1      |        |        |        |
| 28151  |        |        | 3      |        |
| 28161  |        |        |        |        |
| 28169  |        |        |        |        |
| 28194  |        | 3      |        | 3      |
| 28197  |        |        |        |        |
| 28206  |        |        |        |        |
| 28218  |        |        |        |        |
| 28227  |        |        |        |        |
| 28235  |        |        |        |        |
| 28246  |        |        |        |        |
| 28259  |        | 3      | 3      |        |
| 28263  |        |        |        |        |
| 28267  |        | 2      |        |        |
| 28274  |        |        |        |        |
| 28278  | 0      |        |        |        |
| 28288  | 2      |        |        |        |
| 28308  |        |        |        |        |
| 28309  |        | 2      | 1      | 2      |
| 28323  | 2      |        |        |        |
| 28335  |        |        | 1      |        |
| 28354  |        |        | 0      |        |

| respid | Q31b_3 | Q31b_4 | Q31b_5 | Q31b_6 |
|--------|--------|--------|--------|--------|
| 28355  | 2      |        | 2      |        |
| 28356  |        |        |        |        |
| 28357  |        |        |        |        |
| 28363  |        |        |        |        |
| 28366  |        |        |        |        |
| 28372  | 2      | 2      |        |        |
| 28381  | 1      |        |        |        |
| 28388  |        |        |        |        |
| 28413  |        | 1      |        |        |
| 28421  |        |        |        |        |
| 28430  |        |        |        |        |
| 28439  |        |        | 3      |        |
| 28458  |        | 3      |        | 3      |
| 28461  |        |        |        |        |
| 28466  |        |        |        |        |
| 28492  |        |        |        |        |
| 28534  |        |        |        |        |
| 28537  |        |        |        |        |
| 28560  |        |        |        |        |
| 28566  |        |        |        |        |
| 28569  |        |        |        |        |
| 28584  | 3      |        |        |        |
| 28590  |        |        |        |        |
| 28596  |        |        |        |        |
| 28608  |        |        |        |        |
| 28631  | 2      |        |        |        |
| 28644  | 1      |        |        |        |
| 28646  | 0      |        |        |        |
| 28665  |        |        |        |        |
| 28686  |        |        |        |        |
| 28704  |        |        |        | 1      |
| 28719  |        |        |        |        |

| respid | Q31b_3 | Q31b_4 | Q31b_5 | Q31b_6 |
|--------|--------|--------|--------|--------|
| 28736  |        |        |        |        |
| 28739  |        | 2      |        |        |
| 28758  | 3      |        |        |        |
| 28761  | 3      |        |        |        |
| 28770  | 2      | 2      |        | 2      |
| 28774  | 1      |        |        |        |
| 28778  | 3      | 4      |        |        |
| 28783  |        |        |        |        |
| 28785  |        |        |        |        |
| 28797  | 1      | 3      |        |        |
| 28801  |        |        |        |        |
| 28821  |        |        |        |        |
| 28827  |        |        |        |        |
| 28828  |        |        |        |        |
| 28871  |        |        |        |        |
| 28876  |        |        |        |        |
| 28891  |        | 3      |        |        |
| 28898  |        |        |        |        |
| 28909  |        |        |        |        |
| 28930  |        |        |        |        |
| 28935  | 3      |        |        |        |
| 28964  |        |        |        |        |
| 28965  |        |        |        |        |
| 28967  | 2      |        | 2      |        |
| 28975  |        |        |        |        |
| 28982  |        |        |        |        |
| 28989  |        |        |        |        |
| 29003  |        |        |        |        |
| 29004  |        |        |        |        |
| 29007  |        |        |        |        |
| 29008  |        |        |        |        |
| 29011  |        |        |        |        |

| respid | Q31b_3 | Q31b_4 | Q31b_5 | Q31b_6 |
|--------|--------|--------|--------|--------|
| 29012  |        |        |        |        |
| 29014  |        |        |        |        |
| 29016  |        |        |        |        |
| 29018  |        |        |        |        |
| 29048  |        |        |        | 1      |
| 29184  |        |        |        |        |
| 29237  |        |        |        |        |
| 29252  |        |        |        |        |
| 29267  |        |        |        |        |
| 29276  |        |        |        |        |
| 29281  | 2      |        | 2      |        |
| 29285  |        |        |        |        |
| 29291  | 4      | 4      | 4      |        |
| 29304  |        |        |        |        |
| 29323  |        |        |        |        |
| 29330  |        |        |        |        |
| 29357  | 4      |        |        |        |
| 29416  | 1      |        |        |        |
| 29432  |        |        |        |        |
| 29482  | 1      |        |        |        |
| 29506  |        |        |        |        |
| 29509  |        |        |        |        |
| 29512  | 1      |        |        | 1      |
| 29519  |        |        |        |        |
| 29520  |        |        |        |        |
| 29521  |        |        |        | 1      |
| 29529  | 3      | 2      | 2      | 3      |
| 29532  |        |        |        |        |
| 29547  | 3      | 3      |        |        |
| 29551  |        |        |        |        |
| 29584  | 3      |        | 4      | 4      |
| 29591  |        |        |        |        |

| respid | Q31b_3 | Q31b_4 | Q31b_5 | Q31b_6 |
|--------|--------|--------|--------|--------|
| 29613  |        |        |        |        |
| 29615  |        |        |        |        |
| 29625  |        |        |        | 1      |
| 29660  |        |        |        |        |
| 29677  |        |        |        |        |
| 29700  |        |        |        |        |
| 29715  |        |        |        |        |
| 29720  |        |        |        |        |
| 29730  | 0      |        |        |        |
| 29734  | 2      |        |        |        |
| 29754  |        |        |        |        |
| 29771  |        |        |        |        |
| 29774  |        |        |        |        |
| 29783  |        |        |        |        |
| 29812  | 1      |        | 1      |        |
| 29813  |        |        |        |        |
| 29814  |        | 2      | 2      |        |
| 29820  | 1      |        |        |        |
| 29906  |        |        |        |        |
| 29907  |        | 2      |        |        |
| 29928  |        |        |        |        |
| 29932  |        |        |        |        |
| 29958  |        | 2      |        |        |
| 29982  |        |        |        |        |
| 29989  |        |        |        |        |
| 29994  |        |        |        |        |
| 30005  |        |        |        |        |
| 30077  |        |        |        |        |
| 30098  |        |        |        |        |
| 30107  |        |        |        |        |
| 30154  |        |        |        |        |
| 30159  |        |        |        |        |

| respid | Q31b_3 | Q31b_4 | Q31b_5 | Q31b_6 |
|--------|--------|--------|--------|--------|
| 30162  |        |        |        |        |
| 30163  |        |        |        |        |
| 30189  |        |        |        |        |
| 30230  |        |        |        |        |
| 30259  |        | 2      |        |        |
| 30284  |        |        |        |        |
| 30296  |        |        |        |        |
| 30330  |        |        |        |        |
| 30341  | 1      |        |        |        |
| 30352  | 2      |        |        |        |
| 30379  |        |        |        |        |
| 30424  |        |        |        |        |
| 30447  |        |        |        |        |
| 30477  | 2      | 2      | 3      |        |
| 30503  |        |        |        |        |
| 30515  |        |        |        |        |
| 30516  |        |        |        |        |
| 30623  | 1      |        | 1      |        |
| 30639  |        |        |        |        |
| 30670  |        |        |        |        |
| 30697  |        |        |        |        |
| 30735  |        |        |        |        |
| 30742  |        |        |        |        |
| 30751  | 2      |        |        |        |
| 30789  |        |        |        |        |
| 30867  |        |        |        |        |
| 30876  |        |        |        |        |
| 30877  |        |        |        |        |
| 30887  |        |        |        |        |
| 30891  | 1      |        |        |        |
| 31030  |        |        |        |        |
| 31059  |        |        |        |        |

| respid | Q31b_3 | Q31b_4 | Q31b_5 | Q31b_6 |
|--------|--------|--------|--------|--------|
| 31082  |        |        |        |        |
| 31106  |        |        |        |        |
| 31110  |        |        |        |        |
| 31265  | 4      | 4      |        |        |
| 31266  |        |        |        | 4      |
| 31267  |        |        | 4      | 4      |
| 31310  |        |        |        |        |
| 31325  |        |        |        |        |
| 31367  |        |        |        |        |
| 31389  |        |        |        |        |
| 31440  |        |        |        |        |
| 31465  |        |        |        |        |
| 31477  |        |        |        |        |
| 31491  |        |        |        |        |
| 31494  |        | 1      | 1      |        |
| 31509  | 4      |        |        | 4      |
| 31533  |        |        |        |        |
| 31547  |        |        |        |        |
| 31558  |        |        |        |        |
| 31579  | 1      |        |        |        |
| 31591  |        |        |        |        |
| 31596  |        |        | 2      | 2      |
| 31601  |        |        | 3      |        |
| 31605  |        |        |        |        |
| 31637  |        |        |        |        |
| 31646  |        |        |        |        |
| 31647  | 4      |        | 1      |        |
| 31650  |        |        |        |        |
| 31651  |        |        |        |        |
| 31657  |        |        |        |        |
| 31660  |        |        |        |        |
| 31661  |        |        |        |        |



| respid | Q31b_3 | Q31b_4 | Q31b_5 | Q31b_6 |
|--------|--------|--------|--------|--------|
| 31667  |        |        |        |        |
| 31674  |        |        |        |        |
| 31686  | 2      |        |        |        |
| 31693  |        |        |        |        |
| 31716  |        |        |        |        |
| 31818  |        |        |        |        |
| 31886  |        |        |        |        |
| 31945  |        |        | 3      | 3      |
| 31957  |        |        |        |        |
| 31966  | 1      |        |        |        |
| 31978  |        |        |        |        |
| 31999  | 1      |        |        |        |
| 32026  | 0      |        |        |        |
| 32033  |        |        |        |        |
| 32037  |        |        | 4      |        |
| 32038  |        |        |        |        |
| 32047  | 2      |        |        |        |
| 32053  |        |        |        |        |
| 32069  |        |        |        |        |
| 32081  | 1      |        | 2      |        |
| 32123  | 2      |        |        |        |
| 32130  |        |        |        |        |
| 32141  |        |        |        |        |
| 32158  |        |        |        |        |
| 32165  |        |        |        |        |
| 32180  |        |        |        |        |
| 32221  |        | 3      | 3      |        |
| 32292  |        |        |        |        |
| 32318  | 1      |        |        |        |
| 32346  |        |        |        |        |
| 32402  | 1      |        |        |        |
| 32422  |        |        |        |        |

| respid | Q31b_3 | Q31b_4 | Q31b_5 | Q31b_6 |
|--------|--------|--------|--------|--------|
| 32439  |        |        |        |        |
| 32507  |        |        |        |        |
| 32522  |        |        |        |        |
| 32535  |        |        |        |        |
| 32546  |        |        |        |        |
| 32553  |        |        |        |        |
| 32570  |        |        |        |        |
| 32592  | 1      |        |        |        |
| 32605  | 1      |        | 1      |        |
| 32630  |        |        |        | 2      |
| 32642  |        |        |        |        |
| 32646  |        |        |        |        |
| 32665  |        |        |        |        |
| 32677  |        |        |        |        |
| 32694  |        |        |        |        |
| 32698  |        |        |        |        |
| 32754  |        |        |        |        |
| 32799  |        |        |        |        |
| 32816  |        |        |        |        |
| 32819  |        |        |        |        |
| 32840  | 2      |        |        |        |
| 32861  |        |        |        |        |
| 32866  |        |        |        |        |
| 32889  | 1      |        | 4      |        |
| 32960  |        |        |        |        |
| 32965  |        |        |        |        |
| 32986  |        |        | 3      |        |
| 33005  |        |        |        |        |
| 33054  |        |        |        |        |
| 33072  |        | 2      |        |        |
| 33095  |        |        |        |        |
| 33099  |        |        |        |        |

| respid | Q31b_3 | Q31b_4 | Q31b_5 | Q31b_6 |
|--------|--------|--------|--------|--------|
| 33121  |        |        |        |        |
| 33152  |        |        |        |        |
| 33159  | 0      |        |        |        |
| 33189  |        |        |        |        |
| 33198  |        |        |        |        |
| 33202  | 1      |        |        |        |
| 33204  | 1      |        |        |        |
| 33224  |        |        |        |        |
| 33272  | 3      |        |        |        |
| 33294  |        |        |        |        |
| 33300  |        | 1      |        |        |
| 33314  | 1      |        |        |        |
| 33338  |        |        |        |        |
| 33350  |        |        |        |        |
| 33362  |        |        |        |        |
| 33368  |        |        |        |        |
| 33374  |        |        |        |        |
| 33380  |        | 4      |        | 4      |
| 33385  |        |        |        |        |
| 33402  | 2      | 2      |        | 1      |
| 33414  |        |        |        |        |
| 33439  |        | 1      |        |        |
| 33449  |        |        |        |        |
| 33533  |        |        |        |        |
| 33540  |        |        |        |        |
| 33556  |        |        |        |        |
| 33615  |        |        |        |        |
| 33694  |        |        |        |        |
| 33717  |        |        |        |        |
| 33729  |        |        |        |        |
| 33746  |        |        |        |        |
| 33764  |        |        |        |        |

| respid | Q31b_3 | Q31b_4 | Q31b_5 | Q31b_6 |
|--------|--------|--------|--------|--------|
| 33790  | 2      |        |        |        |
| 33868  |        |        |        |        |
| 33872  |        | 2      |        |        |
| 33883  |        |        |        |        |
| 33884  |        |        |        |        |
| 33900  |        |        |        |        |
| 33933  |        |        |        |        |
| 33949  |        |        |        |        |
| 34005  |        |        |        |        |
| 34016  |        |        |        |        |
| 34041  | 3      |        |        |        |
| 34053  |        |        |        |        |
| 34056  |        |        |        |        |
| 34093  |        |        |        |        |
| 34112  | 1      |        |        |        |
| 34136  |        | 2      | 2      |        |
| 34138  |        |        |        |        |
| 34139  |        |        |        |        |
| 34189  |        |        |        |        |
| 34239  |        |        |        |        |
| 34240  |        |        |        |        |
| 34241  |        |        |        |        |
| 34259  |        |        |        |        |
| 34303  | 3      |        |        |        |
| 34306  |        |        |        |        |
| 34395  |        |        |        |        |
| 34463  | 1      |        |        | 1      |
| 34466  |        |        |        |        |
| 34471  |        |        |        |        |
| 34489  |        |        |        | 2      |
| 34518  | 1      | 2      | 3      |        |
| 34542  |        |        |        |        |

| respid | Q31b_3 | Q31b_4 | Q31b_5 | Q31b_6 |
|--------|--------|--------|--------|--------|
| 34595  |        |        |        |        |
| 34604  |        |        |        |        |
| 34631  | 4      |        |        |        |
| 34665  |        |        |        |        |
| 34716  |        |        |        |        |
| 34729  |        |        |        |        |
| 34772  |        |        | 3      |        |
| 34800  |        |        |        |        |
| 34819  |        |        |        |        |
| 34829  |        |        |        |        |
| 34831  |        |        |        |        |
| 34839  |        |        | 1      |        |
| 34868  |        |        |        |        |
| 34869  |        |        |        |        |
| 34882  |        |        |        |        |
| 34895  | 3      |        |        |        |
| 34901  | 2      |        |        |        |
| 34904  |        | 1      |        |        |
| 34907  |        |        |        |        |
| 34914  |        |        |        |        |
| 34918  | 1      | 3      |        |        |
| 34924  |        |        |        |        |
| 34933  |        |        |        |        |
| 34938  | 1      |        |        |        |
| 34952  |        |        |        | 4      |
| 34959  |        |        |        |        |
| 34972  |        |        |        |        |
| 34973  | 2      |        |        |        |
| 34975  | 2      | 3      | 2      |        |
| 34977  |        |        |        |        |
| 34978  |        |        |        |        |
| 34980  |        |        |        |        |

| respid | Q31b_3 | Q31b_4 | Q31b_5 | Q31b_6 |
|--------|--------|--------|--------|--------|
| 34984  | 1      |        |        |        |
| 34986  |        |        |        |        |
| 34994  |        |        |        |        |
| 34996  |        |        |        | 2      |
| 35003  |        |        |        |        |
| 35014  |        |        |        |        |
| 35029  |        |        |        |        |
| 35030  |        |        |        |        |
| 35037  |        | 1      |        |        |
| 35043  |        |        |        |        |
| 35048  |        |        |        |        |
| 35055  |        |        |        |        |
| 35067  |        |        |        |        |
| 35072  |        |        |        |        |
| 35078  |        |        |        |        |
| 35084  |        |        |        |        |
| 35095  |        |        |        |        |
| 35096  |        |        |        |        |
| 35097  |        | 2      | 1      |        |
| 35098  |        |        | 2      |        |
| 35109  | 3      |        |        |        |
| 35114  |        |        |        |        |
| 35115  |        |        |        |        |
| 35124  | 3      |        |        |        |
| 35125  |        |        |        |        |
| 35141  |        |        |        |        |
| 35142  |        |        |        |        |
| 35145  |        |        |        |        |
| 35149  | 3      |        |        |        |
| 35159  |        |        |        |        |
| 35163  | 2      |        |        | 3      |
| 35174  |        |        |        |        |

| respid | Q31b_3 | Q31b_4 | Q31b_5 | Q31b_6 |
|--------|--------|--------|--------|--------|
| 35188  |        |        |        |        |
| 35189  | 4      | 4      |        |        |
| 35201  | 2      |        | 1      |        |
| 35215  |        |        |        |        |
| 35228  |        |        |        |        |
| 35235  |        |        | 1      |        |
| 35239  | 3      | 3      | 3      |        |
| 35243  |        |        |        |        |
| 35245  | 2      |        |        |        |
| 35259  |        |        |        |        |
| 35265  |        |        |        |        |
| 35272  | 1      |        |        | 1      |
| 35280  | 1      |        |        |        |
| 35298  |        |        |        |        |
| 35305  | 0      |        |        |        |
| 35306  |        | 2      |        |        |
| 35307  |        |        |        |        |
| 35311  |        |        |        |        |
| 35322  |        |        |        |        |
| 35323  |        |        |        |        |
| 35327  | 0      |        |        | 0      |
| 35366  |        |        |        |        |
| 35378  |        |        |        |        |
| 35389  |        |        |        |        |
| 35390  | 1      |        |        |        |
| 35395  |        |        |        |        |
| 35411  |        |        | 3      |        |
| 35423  |        |        |        |        |
| 35425  | 2      |        |        |        |
| 35434  |        |        |        |        |
| 35462  |        |        |        |        |
| 35478  | 2      |        |        | 2      |

| respid | Q31b_3 | Q31b_4 | Q31b_5 | Q31b_6 |
|--------|--------|--------|--------|--------|
| 35481  | 4      |        |        | 3      |
| 35498  |        |        |        |        |
| 35499  |        |        |        |        |
| 35502  | 2      |        | 2      |        |
| 35503  |        |        |        |        |
| 35504  |        |        |        |        |
| 35508  | 2      |        |        |        |
| 35513  | 1      |        |        |        |
| 35516  |        | 0      |        |        |
| 35519  |        |        |        |        |
| 35530  | 3      |        | 3      |        |
| 35533  |        |        |        |        |
| 35561  |        |        |        |        |
| 35565  |        |        |        |        |
| 35588  |        |        |        |        |
| 35598  |        |        |        |        |
| 35607  |        |        |        |        |
| 35638  |        |        |        |        |
| 35642  |        |        |        |        |
| 35643  |        | 3      |        |        |
| 35680  |        |        |        |        |
| 35697  | 0      |        | 0      |        |
| 35703  |        |        |        |        |
| 35709  |        |        |        |        |
| 35710  |        |        |        |        |
| 35721  | 1      |        | 1      | 1      |
| 35723  |        |        |        |        |
| 35736  | 1      |        |        |        |
| 35739  | 1      |        |        |        |
| 35745  |        |        |        |        |
| 35748  | 4      |        |        |        |
| 35750  |        |        |        |        |



| respid | Q31b_3 | Q31b_4 | Q31b_5 | Q31b_6 |
|--------|--------|--------|--------|--------|
| 35752  | 2      |        |        |        |
| 35773  |        |        |        |        |
| 35779  |        |        |        |        |
| 35791  |        |        |        |        |
| 35801  |        |        |        |        |
| 35802  |        |        |        |        |
| 35837  |        |        |        |        |
| 35853  |        |        |        |        |
| 35858  | 1      | 1      |        |        |
| 35860  |        |        |        |        |
| 35875  |        |        |        | 4      |
| 35883  |        |        |        |        |
| 35890  | 0      |        |        |        |
| 35898  |        |        |        |        |
| 35901  | 3      |        |        | 4      |
| 35914  |        |        |        |        |
| 35924  |        |        |        |        |
| 35950  |        |        | 2      |        |
| 35961  |        |        |        |        |
| 35966  |        |        | 1      |        |
| 35967  |        |        |        |        |
| 35971  |        |        |        |        |
| 35974  |        |        | 0      |        |
| 35983  | 4      |        |        |        |
| 35992  |        |        | 3      |        |
| 36010  |        |        |        |        |
| 36019  |        |        |        |        |
| 36029  |        |        |        |        |
| 36033  |        |        |        |        |
| 36042  |        |        |        |        |
| 36043  |        |        |        |        |
| 36048  |        |        |        | 2      |

| respid | Q31b_3 | Q31b_4 | Q31b_5 | Q31b_6 |
|--------|--------|--------|--------|--------|
| 36050  |        |        |        |        |
| 36062  | 1      |        |        |        |
| 36063  |        |        |        |        |
| 36092  |        |        |        |        |
| 36097  | 2      |        |        |        |
| 36108  |        |        |        |        |
| 36113  |        |        | 2      | 4      |
| 36117  |        |        |        |        |
| 36129  | 1      | 1      | 1      |        |
| 36144  |        |        |        |        |
| 36152  |        |        |        |        |
| 36154  |        |        |        | 2      |
| 36155  | 2      |        |        |        |
| 36167  |        |        |        |        |
| 36172  |        |        |        |        |
| 36173  |        |        |        |        |
| 36174  |        | 1      | 1      |        |
| 36182  | 0      |        |        |        |
| 36192  |        |        |        | 1      |
| 36195  |        |        |        |        |
| 36204  |        |        |        |        |
| 36205  |        |        |        |        |
| 36208  |        |        |        |        |
| 36216  |        |        | 2      |        |
| 36221  |        |        |        |        |
| 36244  |        |        |        |        |
| 36255  | 2      |        |        |        |
| 36259  |        |        |        |        |
| 36262  |        |        |        |        |
| 36268  |        |        |        |        |
| 36308  |        |        |        |        |
| 36324  |        |        |        |        |

| respid | Q31b_3 | Q31b_4 | Q31b_5 | Q31b_6 |
|--------|--------|--------|--------|--------|
| 36330  |        |        |        |        |
| 36331  |        |        |        |        |
| 36336  |        |        |        |        |
| 36337  |        |        |        |        |
| 36364  |        |        |        |        |
| 36365  |        |        |        | 3      |
| 36396  |        |        |        | 1      |
| 36403  |        |        |        |        |
| 36410  |        |        |        |        |
| 36413  |        |        |        |        |
| 36422  |        |        |        |        |
| 36424  | 2      |        |        |        |
| 36425  | 2      |        | 3      |        |
| 36432  |        |        |        |        |
| 36435  | 3      |        |        |        |
| 36446  |        |        |        |        |
| 36451  |        |        |        |        |
| 36453  |        |        |        |        |
| 36459  |        | 1      |        | 1      |
| 36464  |        |        |        |        |
| 36465  |        |        |        | 2      |
| 36466  |        |        |        |        |
| 36476  |        |        |        |        |
| 36487  |        |        |        |        |
| 36488  |        |        |        |        |
| 36500  |        |        |        |        |
| 36504  | 1      |        |        |        |
| 36513  | 2      |        |        |        |
| 36515  |        | 1      |        |        |
| 36521  |        |        |        |        |
| 36530  | 2      |        |        |        |
| 36556  |        |        |        |        |

| respid | Q31b_3 | Q31b_4 | Q31b_5 | Q31b_6 |
|--------|--------|--------|--------|--------|
| 36564  |        | 4      | 4      |        |
| 36584  |        |        |        |        |
| 36585  |        |        |        |        |
| 36586  |        |        |        |        |
| 36606  |        |        | 4      |        |
| 36615  | 1      |        |        |        |
| 36628  |        |        |        |        |
| 36630  | 0      |        |        |        |
| 36631  |        |        |        |        |
| 36636  |        |        |        |        |
| 36637  |        |        |        |        |
| 36651  |        | 3      |        |        |
| 36661  |        |        |        |        |
| 36670  | 1      |        |        |        |
| 36671  |        |        |        |        |
| 36688  |        |        |        |        |
| 36694  |        |        |        |        |
| 36696  |        |        |        |        |
| 36703  |        |        |        |        |
| 36719  |        |        |        |        |
| 36721  |        |        |        |        |
| 36740  |        |        |        |        |
| 36755  |        |        |        |        |
| 36765  |        |        | 1      |        |
| 36770  |        |        |        |        |
| 36773  |        |        |        |        |
| 36813  |        |        |        |        |
| 36819  |        | 2      | 2      |        |
| 36820  | 2      |        |        |        |
| 36821  |        |        |        |        |
| 36827  | 2      |        |        |        |
| 36835  |        |        |        |        |

| respid | Q31b_3 | Q31b_4 | Q31b_5 | Q31b_6 |
|--------|--------|--------|--------|--------|
| 36837  |        |        |        |        |
| 36849  | 0      |        |        |        |
| 36851  |        |        |        |        |
| 36868  |        | 3      | 3      |        |
| 36870  |        |        |        |        |
| 36871  |        |        |        |        |
| 36874  |        |        |        |        |
| 36878  |        |        | 2      |        |
| 36887  |        |        |        |        |
| 36889  |        |        |        |        |
| 36891  |        |        |        |        |
| 36903  |        |        |        |        |
| 36905  |        |        |        |        |
| 36913  |        |        |        |        |
| 36949  |        |        |        |        |
| 36954  |        |        |        | 2      |
| 36962  |        | 1      |        |        |
| 36965  |        |        |        |        |
| 36970  |        |        |        |        |
| 36979  |        |        |        |        |
| 36990  | 2      |        |        |        |
| 36991  | 1      |        |        |        |
| 36992  |        |        |        |        |
| 37015  |        |        |        |        |
| 37017  |        |        |        |        |
| 37020  |        |        |        |        |
| 37033  |        |        |        |        |
| 37041  |        |        |        |        |
| 37048  | 1      |        |        |        |
| 37050  |        |        |        |        |
| 37054  | 3      |        |        |        |
| 37057  | 3      |        |        |        |

| respid | Q31b_3 | Q31b_4 | Q31b_5 | Q31b_6 |
|--------|--------|--------|--------|--------|
| 37067  |        |        |        |        |
| 37074  |        |        |        |        |
| 37088  |        | 1      |        |        |
| 37090  | 1      |        | 2      |        |
| 37110  | 1      | 2      |        |        |
| 37122  |        |        |        |        |
| 37124  |        |        | 1      | 1      |
| 37126  |        |        |        |        |
| 37129  |        |        |        |        |
| 37130  |        |        |        |        |
| 37142  |        |        |        |        |
| 37160  |        |        |        |        |
| 37168  |        |        |        |        |
| 37169  |        |        |        |        |
| 37191  |        |        | 1      |        |
| 37197  |        | 2      | 3      |        |
| 37204  |        |        |        |        |
| 37213  |        |        |        |        |
| 37238  |        |        |        |        |
| 37242  |        |        |        | 1      |
| 37243  |        |        |        | 2      |
| 37275  |        | 1      |        |        |
| 37305  |        |        | 2      |        |
| 37357  | 2      |        |        | 2      |
| 37365  |        | 2      | 1      | 2      |
| 37370  |        |        |        |        |
| 37406  | 3      |        |        |        |
| 37410  | 2      |        |        |        |
| 37411  | 3      | 3      |        |        |
| 37427  | 2      |        | 1      | 3      |
| 37437  |        |        | 1      | 2      |
| 37440  |        |        |        |        |

| respid | Q31b_3 | Q31b_4 | Q31b_5 | Q31b_6 |
|--------|--------|--------|--------|--------|
| 37452  |        |        |        |        |
| 37465  |        |        |        |        |
| 37468  | 3      |        |        | 3      |
| 37469  |        |        |        |        |
| 37477  | 2      |        | 1      | 2      |
| 37509  |        |        |        |        |
| 37513  |        |        |        | 0      |
| 37534  |        |        | 1      |        |
| 37537  |        |        |        |        |
| 37560  | 1      |        |        | 2      |
| 37566  |        |        |        |        |
| 37572  |        |        |        |        |
| 37574  |        | 2      |        |        |
| 37575  |        |        |        |        |
| 37590  | 0      | 0      |        |        |
| 37593  |        |        |        |        |
| 37599  |        |        |        |        |
| 37641  |        |        |        |        |
| 37651  |        | 1      |        |        |
| 37670  |        |        |        |        |
| 37680  |        | 1      |        |        |
| 37690  |        |        |        |        |
| 37694  |        |        |        |        |
| 37705  | 2      |        |        |        |
| 37710  |        |        |        |        |
| 37719  | 2      |        |        | 2      |
| 37741  |        |        |        | 2      |
| 37752  |        |        |        |        |
| 37755  | 4      |        |        |        |
| 37757  |        |        |        |        |
| 37783  |        |        |        |        |
| 37793  |        | 3      | 4      |        |

| respid | Q31b_3 | Q31b_4 | Q31b_5 | Q31b_6 |
|--------|--------|--------|--------|--------|
| 37800  |        |        | 3      |        |
| 37801  |        |        |        |        |
| 37820  | 2      | 2      |        |        |
| 37826  | 2      |        |        | 1      |
| 37835  | 1      |        | 2      | 2      |
| 37839  |        |        |        |        |
| 37871  | 4      | 3      |        |        |
| 37876  | 3      |        | 2      |        |
| 37879  |        |        |        | 2      |
| 37894  |        |        |        |        |
| 37895  | 1      |        |        |        |
| 37901  | 2      |        |        | 1      |
| 37926  |        |        |        |        |
| 37937  | 1      |        |        |        |
| 37938  |        |        |        |        |
| 37959  |        |        |        |        |
| 37970  |        |        |        |        |
| 37972  |        |        |        |        |
| 37988  |        |        |        |        |
| 37989  | 1      | 2      | 2      |        |
| 38000  |        | 1      | 2      |        |
| 38028  | 3      |        | 3      | 4      |
| 38042  |        |        |        |        |
| 38052  |        |        |        |        |
| 38056  |        |        |        |        |
| 38106  | 1      | 1      | 1      |        |
| 38114  | 3      |        |        |        |
| 38134  |        |        |        |        |
| 38135  |        |        |        |        |
| 38139  | 2      | 2      | 2      |        |
| 38160  |        |        |        |        |
| 38164  |        |        |        |        |



| respid | Q31b_3 | Q31b_4 | Q31b_5 | Q31b_6 |
|--------|--------|--------|--------|--------|
| 38168  |        |        |        |        |
| 38173  |        |        |        |        |
| 38193  | 1      |        | 2      |        |
| 38204  |        |        |        |        |
| 38206  |        |        |        |        |
| 38233  | 2      |        |        |        |
| 38242  | 2      |        |        |        |
| 38245  |        |        |        |        |
| 38261  |        |        |        |        |
| 38288  | 1      |        |        |        |
| 38296  |        |        | 1      |        |
| 38299  |        | 1      |        | 2      |
| 38300  | 1      |        |        |        |
| 38303  |        |        |        |        |
| 38317  |        |        |        |        |
| 38328  |        |        |        |        |
| 38333  | 1      |        |        |        |
| 38336  |        |        |        |        |
| 38338  |        |        |        |        |
| 38342  | 2      |        |        |        |
| 38360  |        |        |        |        |
| 38362  |        |        |        | 1      |
| 38364  | 3      |        |        |        |
| 38402  | 0      |        |        |        |
| 38423  | 0      | 2      |        |        |
| 38424  |        |        |        | 4      |
| 38435  |        | 1      |        | 2      |
| 38450  |        |        |        |        |
| 38455  |        |        |        |        |
| 38467  |        |        |        |        |
| 38468  |        |        |        |        |
| 38472  |        |        |        |        |

| respid | Q31b_3 | Q31b_4 | Q31b_5 | Q31b_6 |
|--------|--------|--------|--------|--------|
| 38484  |        |        |        |        |
| 38498  |        |        |        |        |
| 38507  |        |        |        |        |
| 38511  | 1      |        |        |        |
| 38524  | 3      |        | 3      |        |
| 38526  |        |        |        |        |
| 38534  |        |        |        |        |
| 38536  |        |        |        |        |
| 38539  |        |        |        |        |
| 38547  |        |        |        |        |
| 38549  |        |        |        |        |
| 38575  |        |        |        |        |
| 38579  | 1      |        |        | 2      |
| 38585  |        |        |        |        |
| 38589  |        |        |        |        |
| 38595  | 2      |        | 3      | 1      |
| 38602  |        |        |        |        |
| 38603  |        |        |        |        |
| 38612  |        |        |        |        |
| 38621  | 3      | 3      |        |        |
| 38624  |        |        |        |        |
| 38636  |        |        |        |        |
| 38656  |        |        |        |        |
| 38668  |        |        |        |        |
| 38675  | 1      |        |        |        |
| 38676  |        |        |        |        |
| 38682  |        |        |        |        |
| 38689  |        |        |        |        |
| 38702  |        |        |        |        |
| 38704  |        |        |        |        |
| 38713  |        |        |        |        |
| 38718  | 3      |        |        |        |

| respid | Q31b_3 | Q31b_4 | Q31b_5 | Q31b_6 |
|--------|--------|--------|--------|--------|
| 38725  |        |        |        |        |
| 38730  |        |        |        |        |
| 38737  |        |        | 1      |        |
| 38738  |        |        | 1      |        |
| 38744  |        |        |        |        |
| 38746  |        | 1      |        |        |
| 38753  |        |        |        |        |
| 38756  |        |        | 2      |        |
| 38760  |        |        |        |        |
| 38762  | 3      | 2      | 1      |        |
| 38765  |        |        |        |        |
| 38769  |        |        |        |        |
| 38781  |        |        | 3      | 3      |
| 38786  |        |        |        |        |
| 38790  | 3      |        |        |        |
| 38793  | 0      |        |        |        |
| 38797  |        |        |        |        |
| 38802  |        |        |        |        |
| 38815  |        |        |        |        |
| 38826  | 1      |        |        |        |
| 38828  |        |        |        |        |
| 38829  |        |        |        |        |
| 38835  |        |        |        |        |
| 38842  |        | 3      |        | 2      |
| 38853  |        |        |        |        |
| 38855  |        | 3      | 3      |        |
| 38860  | 2      |        |        |        |
| 38869  |        |        |        |        |
| 38882  |        |        |        | 2      |
| 38897  |        |        |        | 1      |
| 38903  |        |        |        |        |
| 38910  |        | 2      |        |        |

| respid | Q31b_3 | Q31b_4 | Q31b_5 | Q31b_6 |
|--------|--------|--------|--------|--------|
| 38948  |        | 2      |        | 1      |
| 38949  |        |        |        | 3      |
| 38953  |        |        | 3      | 3      |
| 38989  | 3      |        |        |        |
| 38997  |        |        |        |        |
| 38999  |        |        |        |        |
| 39002  |        | 3      | 4      | 4      |
| 39003  |        | 2      |        | 3      |
| 39006  |        |        |        |        |
| 39014  |        |        |        |        |
| 39017  |        |        |        |        |
| 39018  | 3      |        |        |        |
| 39025  | 1      |        |        |        |
| 39031  |        |        | 4      |        |
| 39061  |        |        |        |        |
| 39131  |        |        |        |        |
| 39153  | 4      | 4      |        |        |
| 39194  |        |        |        |        |
| 39204  |        |        |        |        |
| 39208  | 3      |        |        |        |
| 39213  |        |        |        |        |
| 39231  |        |        |        |        |
| 39251  |        |        |        |        |
| 39257  |        | 2      | 3      |        |
| 39262  |        |        |        | 2      |
| 39269  |        | 3      |        |        |
| 39272  |        |        |        |        |
| 39280  |        |        |        |        |
| 39294  |        |        |        |        |
| 39297  |        |        | 2      |        |
| 39300  | 3      | 3      |        |        |
| 39307  |        |        |        | 1      |

| respid | Q31b_3 | Q31b_4 | Q31b_5 | Q31b_6 |
|--------|--------|--------|--------|--------|
| 39320  |        |        |        |        |
| 39333  |        |        |        |        |
| 39335  | 4      |        | 4      | 4      |
| 39339  |        |        |        |        |
| 39375  | 0      |        |        |        |
| 39377  |        |        |        |        |
| 39380  |        |        |        |        |
| 39425  | 1      |        |        |        |
| 39590  |        |        |        |        |
| 40529  | 1      |        |        |        |
| 40702  |        |        |        |        |
| 40788  |        |        |        |        |
| 40841  |        |        |        |        |
| 40965  |        |        |        |        |
| 41092  |        |        |        |        |
| 41534  |        |        |        |        |
| 41919  | 1      |        |        |        |
| 42110  |        |        |        |        |
| 42135  |        |        |        |        |
| 42142  |        |        |        |        |
| 42163  | 3      |        | 3      |        |
| 42164  |        |        |        |        |
| 42172  |        | 3      |        |        |
| 42177  |        |        |        |        |
| 42181  |        |        |        |        |
| 42193  |        |        |        |        |
| 42196  |        |        |        |        |
| 42202  |        |        |        |        |
| 42248  |        |        | 2      |        |
| 42283  |        |        |        |        |
| 42284  |        |        |        | 1      |
| 42323  |        |        |        |        |

| respid | Q31b_3 | Q31b_4 | Q31b_5 | Q31b_6 |
|--------|--------|--------|--------|--------|
| 42349  |        |        |        |        |
| 42351  |        |        |        |        |
| 42357  |        |        |        |        |
| 42366  |        |        |        |        |
| 42380  |        |        |        |        |
| 42414  |        |        | 3      | 3      |
| 42420  | 3      |        |        |        |
| 42454  |        |        |        |        |
| 42458  | 2      |        |        |        |
| 42461  |        |        |        |        |
| 42488  | 1      |        |        |        |
| 42511  |        |        |        |        |
| 42512  |        |        |        |        |
| 42530  | 2      |        | 2      |        |
| 42531  |        | 3      | 3      |        |
| 42533  |        |        |        |        |
| 42549  |        |        |        |        |
| 42550  |        | 1      |        |        |
| 42553  |        |        |        |        |
| 42562  | 3      |        | 2      |        |
| 42567  |        |        |        |        |
| 42589  |        |        |        |        |
| 42604  |        |        |        |        |
| 42618  |        |        |        | 1      |
| 42621  |        |        | 2      |        |
| 42627  |        |        |        |        |
| 42641  |        |        |        |        |
| 42655  | 2      |        |        | 3      |
| 42666  |        |        |        |        |
| 42667  |        |        |        |        |
| 42697  |        |        |        |        |
| 42703  |        |        |        |        |

| respid | Q31b_3 | Q31b_4 | Q31b_5 | Q31b_6 |
|--------|--------|--------|--------|--------|
| 42712  |        |        |        |        |
| 42731  | 1      |        |        |        |
| 42780  |        |        |        |        |
| 42785  |        |        |        |        |
| 42788  |        |        |        |        |
| 42802  |        |        | 1      |        |
| 42818  |        | 1      | 1      |        |
| 42821  |        |        |        |        |
| 42824  |        |        |        |        |
| 42831  |        |        |        |        |
| 42836  |        |        |        |        |
| 42864  |        |        |        | 1      |
| 42875  |        |        |        |        |
| 42891  | 4      | 4      | 4      | 4      |
| 42897  |        |        | 0      |        |
| 42900  |        |        |        |        |
| 42902  |        | 2      |        |        |
| 42921  |        |        |        |        |
| 42925  |        |        |        |        |
| 42944  |        |        |        |        |
| 42950  |        |        |        |        |
| 42963  |        |        |        |        |
| 42967  |        |        | 1      |        |
| 42985  |        |        |        |        |
| 42990  |        |        | 2      |        |
| 42996  |        |        |        |        |
| 43002  | 2      |        | 2      |        |
| 43004  |        |        |        |        |
| 43012  |        |        |        |        |
| 43027  |        |        |        |        |
| 43028  |        |        |        |        |
| 43029  |        | 1      |        |        |

| respid | Q31b_3 | Q31b_4 | Q31b_5 | Q31b_6 |
|--------|--------|--------|--------|--------|
| 43031  |        |        |        |        |
| 43042  |        |        |        |        |
| 43054  |        |        |        |        |
| 43058  |        |        |        |        |
| 43064  | 1      |        |        |        |
| 43069  |        |        |        |        |
| 43071  |        |        |        |        |
| 43072  |        |        |        |        |
| 43077  |        |        |        |        |
| 43078  | 1      |        | 1      |        |
| 43082  |        |        |        |        |
| 43092  |        |        |        |        |
| 43096  |        |        |        |        |
| 43109  |        |        |        |        |
| 43113  |        |        |        |        |
| 43123  |        | 1      | 1      |        |
| 43127  |        |        |        |        |
| 43128  |        | 2      |        |        |
| 43129  |        |        |        |        |
| 43133  |        |        |        |        |
| 43140  |        |        |        |        |
| 43143  |        |        | 0      |        |
| 43149  |        |        |        |        |
| 43150  | 1      |        | 2      |        |
| 43153  | 1      |        | 1      |        |
| 43170  |        |        |        |        |
| 43187  |        | 2      | 2      |        |
| 43188  |        | 3      | 3      |        |
| 43198  |        |        |        |        |
| 43208  |        |        |        |        |
| 43216  |        |        |        |        |
| 43222  | 1      |        |        |        |



| respid | Q31b_3 | Q31b_4 | Q31b_5 | Q31b_6 |
|--------|--------|--------|--------|--------|
| 43224  |        |        |        |        |
| 43230  |        |        | 1      |        |
| 43231  |        | 3      |        |        |
| 43265  |        |        | 1      |        |
| 43270  |        | 2      |        |        |
| 43283  |        |        | 0      |        |
| 43295  | 1      |        |        |        |
| 43297  |        |        |        |        |
| 43299  |        |        |        |        |
| 43307  |        |        |        |        |
| 43316  | 1      |        |        |        |
| 43318  | 1      |        |        |        |
| 43319  |        |        |        |        |
| 43324  |        |        | 1      |        |
| 43325  | 2      |        | 2      |        |
| 43327  | 1      |        |        |        |
| 43338  |        |        |        |        |
| 43342  | 1      |        |        |        |
| 43348  |        |        |        |        |
| 43395  |        | 1      |        | 1      |
| 43404  | 1      |        |        |        |
| 43406  |        |        |        |        |
| 43407  |        |        |        |        |
| 43411  |        |        |        |        |
| 43416  | 1      |        |        |        |
| 43428  |        |        |        |        |
| 43429  | 3      |        |        |        |
| 43432  |        |        |        |        |
| 43443  |        |        |        |        |
| 43455  |        |        |        |        |
| 43457  |        |        |        |        |
| 43458  | 1      |        |        |        |

| respid | Q31b_3 | Q31b_4 | Q31b_5 | Q31b_6 |
|--------|--------|--------|--------|--------|
| 43477  | 2      | 1      |        |        |
| 43520  |        |        |        |        |
| 43521  |        |        |        |        |
| 43550  |        |        |        |        |
| 43551  | 1      |        |        |        |
| 43554  | 1      |        |        |        |
| 43560  | 1      |        |        | 0      |
| 43569  |        |        |        |        |
| 43583  | 1      |        |        |        |
| 43590  |        |        |        |        |
| 43591  |        |        |        |        |
| 43595  |        |        |        |        |
| 43599  |        |        |        |        |
| 43606  | 1      |        |        |        |
| 43609  |        |        |        |        |
| 43629  |        |        |        |        |
| 43636  | 1      |        |        |        |
| 43661  |        |        |        |        |
| 43668  |        |        |        |        |
| 43672  |        |        |        |        |
| 43677  |        | 1      |        |        |
| 43683  |        |        |        |        |
| 43708  |        |        |        | 2      |
| 43713  |        |        |        |        |
| 43718  |        |        |        |        |
| 43725  |        |        |        |        |
| 43747  |        |        |        |        |
| 43755  |        |        |        |        |
| 43770  |        |        |        |        |
| 43775  | 1      |        | 1      |        |
| 43788  |        |        |        |        |
| 43790  | 2      |        |        |        |

| respid | Q31b_3 | Q31b_4 | Q31b_5 | Q31b_6 |
|--------|--------|--------|--------|--------|
| 43797  | 1      | 1      |        |        |
| 43798  | 1      |        |        |        |
| 43811  | 2      | 3      |        |        |
| 43819  | 2      | 1      |        |        |
| 43821  |        |        |        |        |
| 43822  |        |        |        |        |
| 43825  | 2      |        | 1      |        |
| 43826  |        |        |        |        |
| 43831  |        |        |        |        |
| 43836  | 2      |        |        |        |
| 43852  |        |        |        | 1      |
| 43857  | 3      |        |        |        |
| 43858  |        |        |        |        |
| 43859  |        | 2      |        |        |
| 43863  |        |        |        |        |
| 43868  |        | 2      |        |        |
| 43872  | 2      |        |        |        |
| 43874  |        | 1      |        |        |
| 43882  |        |        |        |        |
| 43886  |        |        |        |        |
| 43903  |        |        |        | 2      |
| 43929  |        |        |        |        |
| 43932  | 1      |        |        |        |
| 43936  |        |        |        |        |
| 43962  |        |        |        |        |
| 43964  |        |        |        |        |
| 43968  |        |        |        | 0      |
| 43979  |        |        |        |        |
| 44006  | 2      |        | 2      |        |
| 44009  |        |        |        |        |
| 44023  |        |        |        |        |
| 44035  | 1      |        |        |        |

| respid | Q31b_3 | Q31b_4 | Q31b_5 | Q31b_6 |
|--------|--------|--------|--------|--------|
| 44038  |        |        |        |        |
| 44039  | 2      |        |        |        |
| 44043  |        |        |        |        |
| 44048  |        | 2      | 2      | 2      |
| 44050  |        |        |        |        |
| 44051  | 1      |        | 2      |        |
| 44061  | 3      | 3      | 3      |        |
| 44063  | 2      | 2      |        |        |
| 44072  |        | 1      | 1      | 1      |
| 44075  |        |        |        |        |
| 44089  | 2      |        | 2      |        |
| 44090  | 2      |        |        |        |
| 44091  | 1      |        |        |        |
| 44092  |        |        |        |        |
| 44110  | 1      | 1      |        |        |
| 44112  | 2      | 3      |        |        |
| 44114  | 2      | 3      |        |        |
| 44143  |        |        |        |        |
| 44179  |        |        |        |        |
| 44234  |        |        |        |        |
| 44236  |        |        |        |        |
| 44239  | 1      | 2      | 3      |        |
| 44241  | 3      | 3      |        |        |
| 44253  |        |        |        |        |
| 44260  | 2      | 2      | 3      |        |
| 44261  | 1      | 2      |        | 3      |
| 44263  | 4      |        |        |        |
| 44264  |        |        |        |        |
| 44265  |        |        |        |        |
| 44267  | 2      | 3      |        |        |
| 44306  |        |        |        |        |
| 44309  | 1      | 1      |        |        |

| respid | Q31b_3 | Q31b_4 | Q31b_5 | Q31b_6 |
|--------|--------|--------|--------|--------|
| 44310  |        |        |        |        |
| 44361  | 0      |        |        |        |
| 44380  | 1      |        |        |        |
| 44386  |        |        |        |        |
| 44419  |        |        |        |        |
| 44426  |        |        |        |        |
| 44479  |        |        |        |        |
| 44484  |        |        |        |        |
| 44487  |        |        |        |        |
| 44509  |        |        |        |        |
| 44540  |        |        |        |        |
| 44551  |        |        |        |        |
| 44553  |        |        |        |        |
| 44650  |        |        |        |        |
| 44665  |        | 2      | 2      |        |
| 44779  |        |        |        |        |
| 44797  |        |        |        |        |
| 44807  |        |        |        |        |
| 44815  |        |        |        |        |
| 44836  |        |        |        |        |
| 44868  |        |        |        |        |
| 44927  | 1      |        |        |        |
| 44983  |        |        |        |        |
| 45040  |        |        |        |        |
| 45051  | 3      |        |        |        |
| 45067  | 2      |        |        |        |
| 45074  |        |        |        |        |
| 45115  |        |        |        |        |
| 45187  | 1      | 3      |        |        |
| 45221  |        |        |        |        |
| 45279  |        |        |        |        |
| 45308  | 1      |        |        |        |

| respid | Q31b_3 | Q31b_4 | Q31b_5 | Q31b_6 |
|--------|--------|--------|--------|--------|
| 45317  |        |        |        |        |
| 45379  |        |        |        | 2      |
| 45451  |        |        |        |        |
| 45472  | 3      |        | 1      |        |
| 45474  |        |        |        |        |
| 45544  |        |        |        |        |
| 45561  |        |        |        |        |
| 45596  | 1      |        | 1      |        |

| Instrum   |                    | ICS                         |                                             |                     |        |
|-----------|--------------------|-----------------------------|---------------------------------------------|---------------------|--------|
| Symptom   |                    | Storage                     |                                             |                     |        |
| Type of R | Bother             | Bother                      | Bother                                      | Symptom             | Bother |
| Descripti | SUI: For no reason | SUI: During sexual activity | SUI: Just after you have finished urinating | Perceived frequency | Bother |
| respid    | Q31b_7             | Q31b_8                      | Q31b_9                                      | Q32                 | Q32a   |
| 241       |                    |                             |                                             | 2                   |        |
| 242       |                    |                             |                                             | 2                   |        |
| 243       |                    |                             |                                             | 1                   | 2      |
| 244       |                    |                             |                                             | 1                   | 3      |
| 245       |                    |                             |                                             | 2                   |        |
| 246       |                    |                             | 1                                           | 2                   |        |
| 247       |                    |                             |                                             | 2                   |        |
| 253       |                    |                             |                                             | 2                   |        |
| 256       |                    |                             |                                             | 2                   |        |
| 257       |                    |                             |                                             | 2                   |        |
| 258       |                    |                             |                                             | 2                   |        |
| 259       |                    |                             |                                             | 2                   |        |
| 263       |                    |                             |                                             | 1                   | 1      |
| 264       |                    |                             |                                             | 2                   |        |
| 265       | 2                  |                             | 2                                           | 1                   | 2      |
| 266       |                    |                             |                                             | 2                   |        |
| 268       |                    |                             | 1                                           | 2                   |        |
| 270       |                    |                             |                                             | 2                   |        |
| 272       |                    |                             | 2                                           | 2                   |        |
| 274       |                    |                             |                                             | 2                   |        |

| respid | Q31b_7 | Q31b_8 | Q31b_9 | Q32 | Q32a |   |
|--------|--------|--------|--------|-----|------|---|
| 275    |        |        |        |     | 2    |   |
| 276    |        |        |        |     | 2    |   |
| 277    |        |        |        |     | 2    |   |
| 279    |        |        |        |     | 1    | 2 |
| 286    |        |        |        |     | 1    | 2 |
| 290    |        |        |        |     | 2    |   |
| 291    |        |        |        |     | 2    |   |
| 295    |        |        |        |     | 2    |   |
| 297    |        |        | 2      |     | 2    |   |
| 299    |        |        |        |     | 1    | 1 |
| 300    |        |        | 1      |     | 1    | 2 |
| 303    |        |        |        |     | 2    |   |
| 304    |        |        |        |     | 2    |   |
| 306    |        |        |        |     | 2    |   |
| 307    |        |        |        |     | 1    | 1 |
| 312    | 3      |        |        |     | 1    | 3 |
| 315    |        |        |        |     | 2    |   |
| 317    |        |        |        |     | 2    |   |
| 322    |        |        |        |     | 2    |   |
| 335    |        |        |        |     | 2    |   |
| 374    |        |        |        |     | 1    | 2 |
| 378    |        |        |        |     | 2    |   |
| 380    | 1      |        |        |     | 2    |   |
| 382    |        |        | 3      |     | 2    |   |
| 384    | 2      |        |        |     | 2    |   |
| 385    |        |        |        |     | 2    |   |
| 395    |        |        |        |     | 2    |   |
| 396    |        |        |        |     | 2    |   |
| 398    |        |        |        |     | 2    |   |
| 402    | 3      |        |        |     | 1    | 3 |
| 414    | 0      | 1      | 0      |     | 1    | 2 |
| 415    |        |        |        |     | 2    |   |



| respid | Q31b_7 | Q31b_8 | Q31b_9 | Q32 | Q32a |
|--------|--------|--------|--------|-----|------|
| 416    |        |        |        | 2   |      |
| 420    |        |        |        | 1   | 2    |
| 421    |        |        |        | 2   |      |
| 422    |        |        |        | 2   |      |
| 423    |        |        |        | 2   |      |
| 424    |        |        |        | 2   |      |
| 425    |        |        |        | 2   |      |
| 428    |        |        |        | 2   |      |
| 429    |        |        |        | 2   |      |
| 431    |        |        |        | 2   |      |
| 437    |        |        |        | 2   |      |
| 438    |        |        |        | 2   |      |
| 441    |        |        |        | 1   | 1    |
| 444    |        |        |        | 2   |      |
| 448    |        |        | 0      | 2   |      |
| 449    |        |        |        | 1   | 1    |
| 457    |        |        |        | 1   | 2    |
| 460    |        |        |        | 2   |      |
| 469    |        |        |        | 2   |      |
| 471    |        |        |        | 1   | 1    |
| 473    |        |        | 3      | 1   | 3    |
| 476    |        |        |        | 2   |      |
| 479    |        |        |        | 2   |      |
| 485    |        |        |        | 2   |      |
| 488    |        |        |        | 1   | 1    |
| 494    |        |        |        | 2   |      |
| 496    |        |        |        | 2   |      |
| 501    |        |        |        | 2   |      |
| 502    |        |        |        | 1   | 2    |
| 503    |        |        | 1      | 1   | 2    |
| 506    |        |        | 0      | 2   |      |
| 514    |        |        |        | 1   | 2    |

| respid | Q31b_7 | Q31b_8 | Q31b_9 | Q32 | Q32a |
|--------|--------|--------|--------|-----|------|
| 515    |        |        | 1      | 2   |      |
| 516    |        |        |        | 2   |      |
| 519    |        | 1      |        | 2   |      |
| 522    |        |        |        | 2   |      |
| 525    |        |        |        | 2   |      |
| 528    |        |        |        | 2   |      |
| 532    |        |        |        | 2   |      |
| 536    |        |        |        | 2   |      |
| 539    |        |        |        | 2   |      |
| 540    |        |        |        | 1   | 1    |
| 547    |        |        |        | 1   | 0    |
| 551    |        |        |        | 2   |      |
| 554    |        |        | 1      | 1   | 2    |
| 558    |        |        | 1      | 2   |      |
| 563    |        |        |        | 2   |      |
| 564    |        |        | 1      | 2   |      |
| 565    |        |        |        | 2   |      |
| 567    |        |        |        | 2   |      |
| 569    |        |        |        | 1   | 0    |
| 572    |        |        |        | 2   |      |
| 574    |        |        |        | 1   | 2    |
| 583    |        |        | 1      | 2   |      |
| 589    |        |        |        | 2   |      |
| 592    |        |        | 1      | 2   |      |
| 593    |        |        |        | 2   |      |
| 594    |        |        | 1      | 2   |      |
| 597    |        |        |        | 2   |      |
| 601    |        |        |        | 1   | 1    |
| 607    |        |        |        | 2   |      |
| 610    |        |        |        | 2   |      |
| 612    | 2      |        |        | 1   | 3    |
| 627    |        |        |        | 2   |      |

| respid | Q31b_7 | Q31b_8 | Q31b_9 | Q32 | Q32a |   |
|--------|--------|--------|--------|-----|------|---|
| 631    |        |        |        |     | 2    |   |
| 633    |        |        | 1      |     | 2    |   |
| 636    |        | 0      |        |     | 2    |   |
| 656    |        |        |        |     | 2    |   |
| 659    |        |        |        |     | 2    |   |
| 670    |        |        |        |     | 2    |   |
| 672    |        |        | 1      |     | 2    |   |
| 673    |        |        |        |     | 2    |   |
| 675    |        |        |        |     | 2    |   |
| 676    |        |        |        |     | 2    |   |
| 679    |        |        |        |     | 2    |   |
| 683    |        |        |        |     | 2    |   |
| 684    |        |        | 1      |     | 1    | 1 |
| 690    |        |        |        |     | 2    |   |
| 701    | 2      |        |        |     | 1    | 3 |
| 709    |        |        | 1      |     | 1    | 2 |
| 719    |        |        |        |     | 2    |   |
| 726    |        |        |        |     | 2    |   |
| 730    |        |        |        |     | 2    |   |
| 731    | 0      |        |        |     | 2    |   |
| 732    |        |        |        |     | 2    |   |
| 733    |        |        |        |     | 2    |   |
| 735    |        |        |        |     | 2    |   |
| 738    |        |        |        |     | 2    |   |
| 740    |        |        |        |     | 2    |   |
| 742    |        |        |        |     | 2    |   |
| 744    |        |        |        |     | 2    |   |
| 749    |        |        |        |     | 2    |   |
| 751    |        |        |        |     | 2    |   |
| 752    |        |        |        |     | 1    | 1 |
| 753    |        |        | 2      |     | 2    |   |
| 755    |        |        |        |     | 2    |   |

| respid | Q31b_7 | Q31b_8 | Q31b_9 | Q32 | Q32a |   |
|--------|--------|--------|--------|-----|------|---|
| 756    |        |        |        |     | 2    |   |
| 759    |        |        |        |     | 2    |   |
| 760    |        |        |        |     | 2    |   |
| 763    |        |        |        |     | 2    |   |
| 764    |        |        |        |     | 2    |   |
| 765    |        |        |        |     | 2    |   |
| 766    |        |        |        |     | 2    |   |
| 767    |        | 0      |        |     | 2    |   |
| 771    |        |        |        |     | 2    |   |
| 773    |        |        |        |     | 2    |   |
| 774    |        |        |        |     | 2    |   |
| 775    |        |        |        |     | 1    | 2 |
| 776    |        |        |        |     | 2    |   |
| 778    |        |        |        |     | 2    |   |
| 780    |        |        | 2      |     | 2    |   |
| 781    |        |        |        |     | 1    | 1 |
| 782    |        |        |        |     | 1    | 1 |
| 783    |        |        |        |     | 2    |   |
| 786    |        |        |        |     | 1    | 3 |
| 788    |        |        |        |     | 2    |   |
| 792    |        |        |        |     | 2    |   |
| 794    |        |        | 3      |     | 1    | 3 |
| 795    |        |        |        |     | 2    |   |
| 799    |        |        | 1      |     | 1    | 1 |
| 800    |        |        |        |     | 2    |   |
| 801    |        |        |        |     | 1    | 2 |
| 804    |        |        |        |     | 2    |   |
| 806    |        |        |        |     | 2    |   |
| 807    |        |        |        |     | 2    |   |
| 808    |        |        |        |     | 2    |   |
| 809    |        |        |        |     | 2    |   |
| 811    |        |        |        |     | 2    |   |

| respid | Q31b_7 | Q31b_8 | Q31b_9 | Q32 | Q32a |
|--------|--------|--------|--------|-----|------|
| 812    |        |        |        | 2   |      |
| 815    |        |        |        | 2   |      |
| 817    |        |        | 1      | 1   | 0    |
| 818    |        |        |        | 2   |      |
| 819    |        |        | 1      | 2   |      |
| 821    |        |        |        | 2   |      |
| 824    |        |        |        | 2   |      |
| 825    |        |        |        | 2   |      |
| 828    |        |        |        | 2   |      |
| 832    |        |        |        | 1   | 1    |
| 834    |        |        |        | 2   |      |
| 835    |        |        |        | 1   | 3    |
| 836    |        |        |        | 2   |      |
| 837    |        |        |        | 2   |      |
| 840    |        |        |        | 2   |      |
| 841    |        |        |        | 2   |      |
| 845    |        |        |        | 2   |      |
| 846    |        |        |        | 2   |      |
| 849    |        |        |        | 2   |      |
| 852    |        |        |        | 2   |      |
| 854    |        |        |        | 2   |      |
| 856    |        |        |        | 2   |      |
| 858    |        |        |        | 2   |      |
| 859    |        |        |        | 2   |      |
| 861    |        |        |        | 2   |      |
| 863    |        |        |        | 2   |      |
| 864    |        |        |        | 1   | 2    |
| 866    |        |        |        | 2   |      |
| 869    |        |        |        | 2   |      |
| 870    |        |        |        | 2   |      |
| 871    |        |        |        | 2   |      |
| 873    |        |        | 1      | 2   |      |

| respid | Q31b_7 | Q31b_8 | Q31b_9 | Q32 | Q32a |   |
|--------|--------|--------|--------|-----|------|---|
| 879    |        |        |        |     | 2    |   |
| 880    |        |        |        |     | 2    |   |
| 881    |        |        |        |     | 1    | 2 |
| 882    |        |        |        |     | 2    |   |
| 885    |        |        |        |     | 2    |   |
| 886    |        |        |        |     | 2    |   |
| 887    |        | 2      | 3      |     | 1    | 2 |
| 888    |        |        |        |     | 2    |   |
| 889    |        |        |        |     | 1    | 3 |
| 890    |        |        |        |     | 2    |   |
| 900    |        |        |        |     | 2    |   |
| 901    |        |        |        |     | 2    |   |
| 902    |        |        |        |     | 2    |   |
| 903    |        |        |        |     | 2    |   |
| 906    |        |        |        |     | 1    | 1 |
| 907    | 1      |        | 1      |     | 1    | 2 |
| 908    |        |        |        |     | 1    | 1 |
| 910    |        |        |        |     | 2    |   |
| 911    | 1      |        |        |     | 2    |   |
| 912    |        |        |        |     | 2    |   |
| 915    |        |        |        |     | 2    |   |
| 923    |        |        | 4      |     | 1    | 3 |
| 925    |        |        |        |     | 2    |   |
| 926    |        |        |        |     | 1    | 1 |
| 929    |        |        |        |     | 2    |   |
| 932    |        |        |        |     | 2    |   |
| 933    |        |        |        |     | 2    |   |
| 934    |        |        |        |     | 2    |   |
| 938    |        |        | 1      |     | 1    | 1 |
| 941    |        |        |        |     | 2    |   |
| 942    |        |        |        |     | 2    |   |
| 943    |        |        |        |     | 2    |   |

| respid | Q31b_7 | Q31b_8 | Q31b_9 | Q32 | Q32a |   |
|--------|--------|--------|--------|-----|------|---|
| 945    |        |        |        |     | 2    |   |
| 946    |        |        |        |     | 2    |   |
| 947    |        |        |        |     | 2    |   |
| 948    |        |        |        |     | 2    |   |
| 949    |        |        |        |     | 2    |   |
| 952    |        |        |        |     | 2    |   |
| 956    |        |        |        |     | 1    | 1 |
| 957    |        |        |        |     | 2    |   |
| 959    |        |        |        |     | 2    |   |
| 961    |        |        |        |     | 2    |   |
| 962    |        |        |        |     | 1    | 3 |
| 965    |        |        |        |     | 2    |   |
| 967    |        |        |        |     | 2    |   |
| 969    |        |        |        |     | 2    |   |
| 970    |        |        |        |     | 2    |   |
| 973    |        |        |        |     | 1    | 1 |
| 974    |        |        |        |     | 2    |   |
| 975    | 2      |        | 2      |     | 1    | 1 |
| 976    |        |        |        |     | 2    |   |
| 977    |        |        |        |     | 2    |   |
| 979    |        |        |        |     | 2    |   |
| 981    |        |        |        |     | 2    |   |
| 983    |        |        |        |     | 2    |   |
| 987    |        |        | 2      |     | 2    |   |
| 991    |        |        |        |     | 2    |   |
| 992    |        |        |        |     | 2    |   |
| 993    |        |        |        |     | 2    |   |
| 994    |        |        |        |     | 1    | 2 |
| 995    |        |        | 1      |     | 1    | 2 |
| 998    |        |        |        |     | 1    | 1 |
| 1000   | 1      | 1      | 1      |     | 1    | 2 |
| 1001   |        |        |        |     | 1    | 2 |

| respid | Q31b_7 | Q31b_8 | Q31b_9 | Q32 | Q32a |
|--------|--------|--------|--------|-----|------|
| 1002   |        |        |        | 2   |      |
| 1004   |        |        |        | 2   |      |
| 1005   |        |        |        | 2   |      |
| 1006   |        |        |        | 1   | 2    |
| 1007   |        |        |        | 1   | 0    |
| 1009   |        |        |        | 2   |      |
| 1013   |        |        |        | 2   |      |
| 1015   |        |        |        | 2   |      |
| 1020   |        |        |        | 1   | 1    |
| 1022   |        |        |        | 1   | 2    |
| 1024   |        |        |        | 2   |      |
| 1025   |        |        |        | 2   |      |
| 1027   |        |        |        | 2   |      |
| 1031   |        |        |        | 2   |      |
| 1037   |        |        |        | 2   |      |
| 1039   |        |        |        | 2   |      |
| 1040   |        |        |        | 2   |      |
| 1056   |        |        | 1      | 1   | 2    |
| 1057   |        |        |        | 2   |      |
| 1062   |        |        |        | 2   |      |
| 1069   |        |        |        | 2   |      |
| 1070   |        |        |        | 2   |      |
| 1072   |        |        |        | 2   |      |
| 1076   |        |        |        | 2   |      |
| 1077   |        |        | 1      | 2   |      |
| 1078   |        |        |        | 2   |      |
| 1080   |        |        |        | 2   |      |
| 1094   |        |        |        | 1   | 2    |
| 1098   |        |        | 1      | 1   | 1    |
| 1099   |        |        |        | 2   |      |
| 1102   |        |        |        | 2   |      |
| 1110   |        |        |        | 2   |      |



| respid | Q31b_7 | Q31b_8 | Q31b_9 | Q32 | Q32a |
|--------|--------|--------|--------|-----|------|
| 1117   |        |        |        |     | 2    |
| 1119   |        |        |        |     | 2    |
| 1126   |        |        |        |     | 2    |
| 1127   |        |        |        |     | 2    |
| 1130   |        |        |        |     | 2    |
| 1131   |        |        |        |     | 2    |
| 1135   |        |        | 4      |     | 1 3  |
| 1138   |        |        |        |     | 2    |
| 1139   |        |        |        |     | 2    |
| 1140   |        |        |        |     | 2    |
| 1142   |        |        |        |     | 2    |
| 1143   |        |        |        |     | 2    |
| 1145   |        |        |        |     | 2    |
| 1149   |        |        |        |     | 2    |
| 1152   |        |        |        |     | 2    |
| 1160   |        |        |        |     | 1 2  |
| 1164   |        |        |        |     | 2    |
| 1165   |        |        | 1      |     | 2    |
| 1169   | 2      |        |        |     | 1 2  |
| 1170   |        |        |        |     | 2    |
| 1179   |        |        |        |     | 2    |
| 1180   |        |        |        |     | 2    |
| 1183   |        |        |        |     | 2    |
| 1187   |        |        |        |     | 2    |
| 1188   |        |        |        |     | 2    |
| 1193   |        |        |        |     | 2    |
| 1194   |        |        |        |     | 2    |
| 1197   |        |        |        |     | 2    |
| 1202   |        |        |        |     | 2    |
| 1204   |        |        |        |     | 1 3  |
| 1211   |        |        |        |     | 2    |
| 1224   |        |        |        |     | 2    |

| respid | Q31b_7 | Q31b_8 | Q31b_9 | Q32 | Q32a |
|--------|--------|--------|--------|-----|------|
| 1225   |        |        |        | 2   |      |
| 1230   |        |        |        | 2   |      |
| 1232   |        |        |        | 1   | 0    |
| 1233   |        |        | 2      | 1   | 2    |
| 1234   |        |        |        | 2   |      |
| 1235   |        |        | 1      | 1   | 2    |
| 1236   |        |        |        | 1   | 1    |
| 1237   |        |        |        | 2   |      |
| 1238   |        |        |        | 1   | 1    |
| 1239   |        |        |        | 1   | 1    |
| 1241   |        |        |        | 1   | 0    |
| 1242   |        |        |        | 2   |      |
| 1244   |        |        |        | 2   |      |
| 1245   |        |        |        | 2   |      |
| 1247   |        |        | 2      | 1   | 3    |
| 1248   |        |        |        | 1   | 1    |
| 1249   |        |        | 2      | 1   | 2    |
| 1250   |        |        |        | 2   |      |
| 1251   |        |        |        | 2   |      |
| 1252   |        |        |        | 2   |      |
| 1253   |        |        |        | 2   |      |
| 1254   |        |        | 3      | 1   | 4    |
| 1258   |        |        |        | 2   |      |
| 1260   |        |        |        | 2   |      |
| 1261   |        |        |        | 1   | 0    |
| 1262   |        |        |        | 1   | 1    |
| 1263   |        |        |        | 2   |      |
| 1264   |        |        |        | 2   |      |
| 1265   |        |        |        | 1   | 2    |
| 1266   |        |        |        | 2   |      |
| 1270   |        |        |        | 2   |      |
| 1272   |        |        |        | 1   | 2    |

| respid | Q31b_7 | Q31b_8 | Q31b_9 | Q32 | Q32a |
|--------|--------|--------|--------|-----|------|
| 1273   |        |        |        | 2   |      |
| 1276   |        |        |        | 2   |      |
| 1277   |        |        |        | 2   |      |
| 1278   |        |        |        | 2   |      |
| 1280   |        |        |        | 2   |      |
| 1281   |        |        |        | 2   |      |
| 1282   |        |        | 1      | 2   |      |
| 1283   |        |        |        | 2   |      |
| 1288   |        |        |        | 2   |      |
| 1289   |        |        |        | 1   | 0    |
| 1290   |        |        |        | 1   | 1    |
| 1291   |        |        |        | 2   |      |
| 1293   |        |        |        | 2   |      |
| 1294   |        |        |        | 1   | 2    |
| 1295   |        |        |        | 2   |      |
| 1296   |        |        |        | 1   | 2    |
| 1297   |        |        |        | 1   | 2    |
| 1298   |        |        |        | 1   | 1    |
| 1300   |        |        | 1      | 1   | 1    |
| 1302   |        |        |        | 2   |      |
| 1303   | 1      |        |        | 2   |      |
| 1304   |        |        |        | 2   |      |
| 1305   |        |        | 1      | 2   |      |
| 1307   |        |        |        | 2   |      |
| 1312   |        |        |        | 2   |      |
| 1313   |        |        |        | 2   |      |
| 1314   |        |        |        | 2   |      |
| 1317   |        |        |        | 2   |      |
| 1318   |        |        |        | 2   |      |
| 1319   |        |        |        | 2   |      |
| 1321   |        |        |        | 2   |      |
| 1324   |        |        |        | 1   | 3    |

| respid | Q31b_7 | Q31b_8 | Q31b_9 | Q32 | Q32a |   |
|--------|--------|--------|--------|-----|------|---|
| 1325   |        |        |        |     | 2    |   |
| 1326   |        |        |        |     | 2    |   |
| 1327   |        |        |        |     | 2    |   |
| 1329   |        |        | 1      |     | 2    |   |
| 1330   |        |        |        |     | 2    |   |
| 1331   |        |        |        |     | 2    |   |
| 1335   |        |        | 0      |     | 2    |   |
| 1337   |        |        |        |     | 2    |   |
| 1341   |        |        |        |     | 2    |   |
| 1342   |        |        |        |     | 2    |   |
| 1344   | 3      |        | 3      |     | 2    |   |
| 1345   |        |        |        |     | 1    | 2 |
| 1346   |        |        | 1      |     | 2    |   |
| 1350   |        |        |        |     | 2    |   |
| 1352   |        |        |        |     | 2    |   |
| 1353   |        |        | 1      |     | 2    |   |
| 1354   |        |        |        |     | 2    |   |
| 1355   |        |        |        |     | 2    |   |
| 1357   |        |        | 3      |     | 2    |   |
| 1360   |        |        |        |     | 2    |   |
| 1362   |        |        |        |     | 2    |   |
| 1363   | 1      |        |        |     | 1    | 1 |
| 1367   |        |        | 0      |     | 2    |   |
| 1369   |        |        |        |     | 2    |   |
| 1371   |        |        |        |     | 2    |   |
| 1372   |        |        |        |     | 2    |   |
| 1375   |        |        |        |     | 2    |   |
| 1377   |        | 0      |        |     | 2    |   |
| 1379   |        |        |        |     | 1    | 1 |
| 1380   |        |        |        |     | 2    |   |
| 1382   |        |        |        |     | 2    |   |
| 1383   |        |        |        |     | 2    |   |

| respid | Q31b_7 | Q31b_8 | Q31b_9 | Q32 | Q32a |
|--------|--------|--------|--------|-----|------|
| 1384   |        |        |        | 2   |      |
| 1385   |        |        |        | 2   |      |
| 1387   |        |        |        | 1   | 1    |
| 1388   |        |        |        | 2   |      |
| 1389   |        |        |        | 1   | 1    |
| 1390   |        |        |        | 2   |      |
| 1395   |        |        |        | 2   |      |
| 1396   |        |        |        | 2   |      |
| 1397   | 1      |        |        | 2   |      |
| 1398   |        |        |        | 2   |      |
| 1399   |        |        |        | 2   |      |
| 1403   |        |        |        | 2   |      |
| 1405   |        |        |        | 2   |      |
| 1406   |        |        |        | 2   |      |
| 1407   | 2      |        | 2      | 1   | 3    |
| 1408   |        |        |        | 2   |      |
| 1409   |        |        |        | 2   |      |
| 1410   |        |        | 4      | 1   | 4    |
| 1411   |        |        |        | 1   | 1    |
| 1412   |        |        |        | 2   |      |
| 1413   |        |        |        | 2   |      |
| 1414   |        |        |        | 2   |      |
| 1415   |        |        |        | 1   | 0    |
| 1416   |        |        |        | 2   |      |
| 1417   |        |        |        | 2   |      |
| 1418   |        |        |        | 2   |      |
| 1419   |        |        |        | 2   |      |
| 1420   |        |        |        | 2   |      |
| 1421   |        |        |        | 2   |      |
| 1422   |        |        |        | 2   |      |
| 1423   |        |        |        | 2   |      |
| 1424   |        |        |        | 1   | 2    |

| respid | Q31b_7 | Q31b_8 | Q31b_9 | Q32 | Q32a |   |
|--------|--------|--------|--------|-----|------|---|
| 1429   |        |        |        |     | 2    |   |
| 1430   |        |        |        |     | 2    |   |
| 1431   |        |        |        |     | 2    |   |
| 1433   |        |        |        |     | 2    |   |
| 1435   |        |        |        |     | 2    |   |
| 1436   |        |        |        |     | 2    |   |
| 1438   |        |        |        |     | 2    |   |
| 1439   |        |        |        |     | 2    |   |
| 1441   |        |        |        |     | 2    |   |
| 1442   |        |        |        |     | 2    |   |
| 1443   |        |        |        |     | 2    |   |
| 1444   |        |        |        |     | 2    |   |
| 1445   | 3      |        |        |     | 1    | 3 |
| 1446   |        |        |        |     | 1    | 1 |
| 1447   |        |        |        |     | 2    |   |
| 1449   |        |        |        |     | 1    | 1 |
| 1450   |        |        |        |     | 2    |   |
| 1451   |        |        | 3      |     | 2    |   |
| 1452   |        |        |        |     | 2    |   |
| 1453   |        |        |        |     | 1    | 2 |
| 1454   |        | 1      |        |     | 1    | 2 |
| 1456   |        |        |        |     | 2    |   |
| 1457   |        |        |        |     | 1    | 2 |
| 1459   |        |        |        |     | 2    |   |
| 1460   |        |        |        |     | 2    |   |
| 1463   |        |        |        |     | 2    |   |
| 1465   |        |        |        |     | 2    |   |
| 1467   |        |        |        |     | 2    |   |
| 1470   |        |        |        |     | 1    | 1 |
| 1471   |        |        |        |     | 2    |   |
| 1472   |        |        |        |     | 2    |   |
| 1474   |        |        |        |     | 1    | 2 |

| respid | Q31b_7 | Q31b_8 | Q31b_9 | Q32 | Q32a |
|--------|--------|--------|--------|-----|------|
| 1475   |        |        |        | 2   |      |
| 1477   |        |        |        | 2   |      |
| 1478   |        |        |        | 2   |      |
| 1480   |        |        |        | 2   |      |
| 1481   |        |        |        | 1   | 1    |
| 1483   |        |        |        | 2   |      |
| 1484   |        |        |        | 2   |      |
| 1485   |        |        |        | 2   |      |
| 1486   |        |        |        | 2   |      |
| 1487   |        |        | 3      | 2   |      |
| 1488   |        |        |        | 2   |      |
| 1489   |        |        | 2      | 2   |      |
| 1490   |        |        |        | 2   |      |
| 1491   |        |        |        | 1   | 2    |
| 1492   |        |        |        | 1   | 1    |
| 1494   |        |        |        | 2   |      |
| 1495   |        |        |        | 2   |      |
| 1496   |        |        |        | 2   |      |
| 1498   |        |        |        | 2   |      |
| 1499   |        |        |        | 2   |      |
| 1500   | 1      |        |        | 2   |      |
| 1501   |        |        |        | 2   |      |
| 1503   |        |        |        | 2   |      |
| 1504   |        |        |        | 2   |      |
| 1508   |        |        |        | 1   | 1    |
| 1509   |        |        | 3      | 2   |      |
| 1511   |        |        | 2      | 1   | 3    |
| 1512   |        |        |        | 2   |      |
| 1513   |        |        |        | 1   | 2    |
| 1515   |        |        | 1      | 1   | 1    |
| 1517   |        |        |        | 1   | 1    |
| 1518   |        |        |        | 2   |      |

| respid | Q31b_7 | Q31b_8 | Q31b_9 | Q32 | Q32a |
|--------|--------|--------|--------|-----|------|
| 1519   | 1      |        |        | 2   |      |
| 1520   |        |        |        | 2   |      |
| 1521   |        |        |        | 2   |      |
| 1522   |        |        |        | 2   |      |
| 1523   | 4      |        |        | 1   | 3    |
| 1524   |        |        |        | 2   |      |
| 1525   |        |        |        | 1   | 1    |
| 1526   |        |        | 1      | 2   |      |
| 1527   |        |        |        | 2   |      |
| 1534   |        |        |        | 2   |      |
| 1535   |        |        |        | 2   |      |
| 1536   |        |        | 1      | 1   | 1    |
| 1538   |        |        |        | 1   | 2    |
| 1539   |        |        |        | 2   |      |
| 1540   |        |        |        | 2   |      |
| 1541   |        |        |        | 2   |      |
| 1542   |        |        |        | 2   |      |
| 1543   |        |        |        | 1   | 1    |
| 1545   |        |        |        | 1   | 2    |
| 1546   |        |        |        | 2   |      |
| 1548   |        |        | 4      | 1   | 3    |
| 1549   |        |        |        | 2   |      |
| 1551   |        |        |        | 2   |      |
| 1552   |        |        |        | 2   |      |
| 1556   |        |        |        | 1   | 0    |
| 1557   |        |        |        | 2   |      |
| 1558   |        |        |        | 2   |      |
| 1561   |        |        |        | 2   |      |
| 1562   |        |        |        | 2   |      |
| 1563   |        |        |        | 2   |      |
| 1564   | 4      | 3      | 2      | 1   | 2    |
| 1565   |        |        |        | 2   |      |



| respid | Q31b_7 | Q31b_8 | Q31b_9 | Q32 | Q32a |
|--------|--------|--------|--------|-----|------|
| 1566   |        |        |        |     | 2    |
| 1567   |        |        |        |     | 2    |
| 1569   |        |        |        |     | 2    |
| 1570   |        |        |        |     | 2    |
| 1574   |        |        |        |     | 2    |
| 1575   |        |        |        |     | 2    |
| 1576   |        |        |        |     | 2    |
| 1577   |        |        |        |     | 2    |
| 1581   |        |        |        |     | 2    |
| 1583   |        |        | 3      |     | 2    |
| 1585   |        |        |        |     | 2    |
| 1586   |        |        |        |     | 2    |
| 1588   |        |        |        |     | 2    |
| 1590   |        |        |        |     | 2    |
| 1592   |        |        |        |     | 2    |
| 1594   |        |        |        |     | 1    |
| 1598   |        |        |        |     | 2    |
| 1599   |        |        |        |     | 2    |
| 1600   | 1      |        |        |     | 2    |
| 1602   |        |        |        |     | 2    |
| 1603   |        |        |        |     | 2    |
| 1604   |        |        |        |     | 2    |
| 1605   |        |        | 2      |     | 2    |
| 1606   |        |        |        |     | 2    |
| 1610   |        |        |        |     | 2    |
| 1611   |        |        |        |     | 1    |
| 1612   |        |        |        |     | 2    |
| 1613   |        |        |        |     | 2    |
| 1615   |        |        |        |     | 2    |
| 1616   |        |        |        |     | 2    |
| 1617   |        |        |        |     | 1    |
| 1618   |        |        |        |     | 2    |

| respid | Q31b_7 | Q31b_8 | Q31b_9 | Q32 | Q32a |
|--------|--------|--------|--------|-----|------|
| 1620   |        |        |        | 1   | 1    |
| 1621   | 2      |        |        | 1   | 2    |
| 1622   |        |        |        | 2   |      |
| 1623   |        |        |        | 2   |      |
| 1624   |        |        |        | 2   |      |
| 1625   |        |        |        | 2   |      |
| 1626   |        |        |        | 2   |      |
| 1627   |        |        |        | 2   |      |
| 1629   |        |        |        | 2   |      |
| 1630   |        |        |        | 2   |      |
| 1631   |        |        |        | 2   |      |
| 1634   |        |        |        | 1   | 1    |
| 1635   |        |        |        | 2   |      |
| 1636   |        |        |        | 2   |      |
| 1637   |        |        |        | 2   |      |
| 1640   |        |        |        | 1   | 0    |
| 1642   |        |        |        | 2   |      |
| 1643   |        |        |        | 2   |      |
| 1644   |        |        | 1      | 2   |      |
| 1645   |        |        |        | 1   | 1    |
| 1646   |        |        |        | 2   |      |
| 1647   |        |        |        | 1   | 0    |
| 1650   |        |        | 1      | 1   | 1    |
| 1654   |        |        |        | 2   |      |
| 1656   |        |        |        | 2   |      |
| 1657   |        |        |        | 1   | 3    |
| 1659   |        |        |        | 2   |      |
| 1662   |        |        |        | 2   |      |
| 1663   |        |        |        | 2   |      |
| 1664   |        |        |        | 2   |      |
| 1665   |        |        |        | 2   |      |
| 1667   |        |        |        | 2   |      |

| respid | Q31b_7 | Q31b_8 | Q31b_9 | Q32 | Q32a |
|--------|--------|--------|--------|-----|------|
| 1668   |        |        |        | 2   |      |
| 1670   |        |        |        | 2   |      |
| 1671   |        |        |        | 2   |      |
| 1673   |        |        |        | 2   |      |
| 1674   |        |        |        | 2   |      |
| 1676   |        |        |        | 1   | 1    |
| 1677   |        |        |        | 2   |      |
| 1678   |        |        |        | 2   |      |
| 1680   |        |        |        | 2   |      |
| 1681   |        |        |        | 2   |      |
| 1683   |        |        |        | 2   |      |
| 1685   |        |        |        | 2   |      |
| 1686   |        |        |        | 2   |      |
| 1690   |        |        |        | 2   |      |
| 1691   |        |        |        | 2   |      |
| 1692   | 1      |        |        | 2   |      |
| 1693   |        |        |        | 2   |      |
| 1695   |        |        |        | 2   |      |
| 1696   |        |        |        | 2   |      |
| 1698   |        |        |        | 2   |      |
| 1699   |        |        |        | 2   |      |
| 1701   |        |        |        | 1   | 0    |
| 1702   |        |        |        | 2   |      |
| 1703   |        |        |        | 2   |      |
| 1705   |        |        |        | 2   |      |
| 1706   |        |        |        | 2   |      |
| 1708   |        |        |        | 2   |      |
| 1711   |        |        |        | 2   |      |
| 1712   |        |        |        | 1   | 2    |
| 1713   |        |        |        | 2   |      |
| 1715   |        |        |        | 2   |      |
| 1717   |        |        |        | 2   |      |

| respid | Q31b_7 | Q31b_8 | Q31b_9 | Q32 | Q32a |
|--------|--------|--------|--------|-----|------|
| 1718   | 4      |        |        | 1   | 4    |
| 1719   |        |        |        | 2   |      |
| 1721   |        |        |        | 2   |      |
| 1722   |        |        |        | 2   |      |
| 1724   |        |        |        | 2   |      |
| 1725   |        |        |        | 2   |      |
| 1726   |        |        | 1      | 2   |      |
| 1727   |        |        |        | 2   |      |
| 1728   |        |        | 0      | 1   | 2    |
| 1731   |        |        |        | 1   | 1    |
| 1733   |        |        |        | 2   |      |
| 1734   |        |        |        | 1   | 0    |
| 1735   |        |        |        | 2   |      |
| 1736   |        |        |        | 2   |      |
| 1737   |        |        |        | 2   |      |
| 1738   |        |        |        | 1   | 2    |
| 1743   |        |        |        | 1   | 1    |
| 1755   | 2      |        |        | 1   | 2    |
| 1756   |        |        |        | 2   |      |
| 1757   |        |        |        | 2   |      |
| 1758   | 1      |        |        | 1   | 1    |
| 1759   |        |        |        | 1   | 2    |
| 1761   |        |        |        | 1   | 0    |
| 1762   |        |        |        | 1   | 0    |
| 1764   |        |        |        | 2   |      |
| 1767   |        |        |        | 1   | 2    |
| 1768   |        |        | 2      | 2   |      |
| 1769   |        |        |        | 2   |      |
| 1770   |        |        |        | 2   |      |
| 1771   |        |        |        | 1   | 1    |
| 1776   |        |        |        | 2   |      |
| 1777   |        |        |        | 2   |      |

| respid | Q31b_7 | Q31b_8 | Q31b_9 | Q32 | Q32a |
|--------|--------|--------|--------|-----|------|
| 1778   |        |        |        | 1   | 1    |
| 1779   |        |        | 1      | 2   |      |
| 1780   |        |        | 1      | 2   |      |
| 1781   |        |        |        | 2   |      |
| 1783   |        |        |        | 2   |      |
| 1784   |        |        |        | 1   | 3    |
| 1785   |        |        |        | 2   |      |
| 1788   |        |        |        | 2   |      |
| 1792   |        |        |        | 2   |      |
| 1794   |        |        |        | 2   |      |
| 1798   | 3      |        |        | 1   | 4    |
| 1799   |        |        |        | 1   | 2    |
| 1800   |        |        |        | 2   |      |
| 1804   |        |        |        | 2   |      |
| 1806   |        |        |        | 1   | 1    |
| 1807   |        |        |        | 2   |      |
| 1808   |        |        |        | 2   |      |
| 1809   |        |        |        | 2   |      |
| 1811   |        |        |        | 1   | 1    |
| 1812   |        |        |        | 2   |      |
| 1813   |        |        |        | 2   |      |
| 1814   |        |        |        | 1   | 2    |
| 1815   |        |        |        | 1   | 1    |
| 1817   |        |        |        | 2   |      |
| 1820   |        |        |        | 1   | 1    |
| 1821   |        |        |        | 2   |      |
| 1822   |        |        | 1      | 2   |      |
| 1823   |        |        |        | 2   |      |
| 1824   |        |        |        | 2   |      |
| 1826   |        |        |        | 2   |      |
| 1828   |        |        | 1      | 2   |      |
| 1829   |        |        |        | 2   |      |

| respid | Q31b_7 | Q31b_8 | Q31b_9 | Q32 | Q32a |
|--------|--------|--------|--------|-----|------|
| 1830   |        |        | 0      | 2   |      |
| 1831   |        |        |        | 2   |      |
| 1832   |        |        |        | 2   |      |
| 1836   | 1      |        |        | 2   |      |
| 1838   |        |        | 3      | 2   |      |
| 1839   |        |        |        | 1   | 2    |
| 1840   |        |        |        | 2   |      |
| 1841   |        |        |        | 2   |      |
| 1842   |        |        | 1      | 1   | 2    |
| 1843   |        |        |        | 1   | 2    |
| 1844   |        |        |        | 2   |      |
| 1845   |        |        |        | 2   |      |
| 1849   |        |        |        | 2   |      |
| 1850   |        |        | 1      | 2   |      |
| 1851   |        |        |        | 2   |      |
| 1852   |        |        |        | 2   |      |
| 1857   |        |        |        | 1   | 1    |
| 1858   |        |        |        | 2   |      |
| 1861   |        |        |        | 2   |      |
| 1862   |        |        |        | 2   |      |
| 1863   |        |        |        | 2   |      |
| 1864   |        |        |        | 2   |      |
| 1865   |        |        |        | 2   |      |
| 1867   |        |        |        | 2   |      |
| 1868   |        |        |        | 1   | 1    |
| 1869   |        |        |        | 2   |      |
| 1870   |        |        |        | 2   |      |
| 1871   |        |        | 2      | 1   | 2    |
| 1872   |        |        |        | 2   |      |
| 1873   |        |        |        | 1   | 1    |
| 1876   |        |        |        | 2   |      |
| 1877   |        |        |        | 2   |      |

| respid | Q31b_7 | Q31b_8 | Q31b_9 | Q32 | Q32a |
|--------|--------|--------|--------|-----|------|
| 1878   |        |        | 0      | 2   |      |
| 1879   |        |        |        | 2   |      |
| 1880   |        |        |        | 2   |      |
| 1881   |        |        |        | 2   |      |
| 1883   |        |        | 1      | 1   | 2    |
| 1886   |        |        |        | 2   |      |
| 1888   |        |        |        | 1   | 2    |
| 1889   |        |        |        | 1   | 3    |
| 1890   |        |        |        | 1   | 2    |
| 1891   |        |        |        | 2   |      |
| 1893   |        |        |        | 2   |      |
| 1894   |        |        |        | 2   |      |
| 1895   |        |        | 1      | 1   | 2    |
| 1896   |        |        |        | 1   | 1    |
| 1897   |        |        |        | 2   |      |
| 1898   | 4      | 4      |        | 1   | 3    |
| 1899   |        |        |        | 1   | 2    |
| 1900   |        |        |        | 2   |      |
| 1903   |        |        |        | 2   |      |
| 1906   |        |        |        | 2   |      |
| 1907   |        |        |        | 1   | 3    |
| 1908   |        |        |        | 2   |      |
| 1909   |        |        |        | 1   | 3    |
| 1910   |        |        |        | 2   |      |
| 1911   |        |        | 1      | 2   |      |
| 1912   |        |        |        | 2   |      |
| 1917   |        |        |        | 2   |      |
| 1918   |        |        |        | 1   | 2    |
| 1919   |        |        |        | 1   | 0    |
| 1922   |        |        |        | 2   |      |
| 1925   |        |        |        | 2   |      |
| 1926   |        | 0      |        | 2   |      |

| respid | Q31b_7 | Q31b_8 | Q31b_9 | Q32 | Q32a |
|--------|--------|--------|--------|-----|------|
| 1927   |        |        |        |     | 2    |
| 1928   |        |        |        |     | 2    |
| 1929   |        |        |        |     | 2    |
| 1934   |        |        |        |     | 2    |
| 1935   |        |        |        |     | 2    |
| 1936   | 2      |        | 2      |     | 1    |
| 1937   |        |        |        |     | 2    |
| 1938   |        |        |        |     | 2    |
| 1939   |        |        |        |     | 2    |
| 1940   |        |        |        |     | 2    |
| 1941   |        |        |        |     | 2    |
| 1948   |        |        |        |     | 2    |
| 1950   |        |        | 3      |     | 2    |
| 1955   |        |        |        |     | 2    |
| 1958   |        |        |        |     | 2    |
| 1960   |        |        |        |     | 2    |
| 1961   |        |        |        |     | 2    |
| 1962   |        |        |        |     | 2    |
| 1965   |        |        |        |     | 2    |
| 1966   |        |        |        |     | 2    |
| 1967   |        |        |        |     | 2    |
| 1968   |        |        |        |     | 1    |
| 1973   |        |        |        |     | 2    |
| 1974   | 3      |        | 3      |     | 1    |
| 1975   |        |        |        |     | 2    |
| 1977   |        |        |        |     | 2    |
| 1978   |        |        |        |     | 2    |
| 1979   |        |        |        |     | 1    |
| 1982   |        |        |        |     | 1    |
| 1983   |        |        |        |     | 2    |
| 1987   |        |        |        |     | 2    |
| 1988   |        |        |        |     | 2    |



| respid | Q31b_7 | Q31b_8 | Q31b_9 | Q32 | Q32a |
|--------|--------|--------|--------|-----|------|
| 1991   |        |        | 0      | 1   | 0    |
| 1992   |        |        |        | 2   |      |
| 1993   |        |        |        | 2   |      |
| 1994   | 2      |        |        | 2   |      |
| 1995   |        |        |        | 2   |      |
| 1996   |        |        |        | 2   |      |
| 1997   |        |        |        | 2   |      |
| 1998   |        |        |        | 2   |      |
| 1999   | 1      |        |        | 1   | 3    |
| 2000   |        |        | 1      | 1   | 1    |
| 2001   | 2      |        |        | 2   |      |
| 2002   |        |        |        | 2   |      |
| 2003   |        |        |        | 2   |      |
| 2004   |        |        |        | 2   |      |
| 2005   |        |        |        | 2   |      |
| 2007   |        |        | 1      | 1   | 2    |
| 2009   |        |        |        | 2   |      |
| 2010   |        |        |        | 2   |      |
| 2011   |        |        |        | 2   |      |
| 2013   |        |        |        | 2   |      |
| 2014   |        |        |        | 2   |      |
| 2017   |        |        | 1      | 1   | 1    |
| 2020   |        |        |        | 2   |      |
| 2023   |        |        |        | 2   |      |
| 2024   |        |        |        | 2   |      |
| 2029   |        |        |        | 2   |      |
| 2030   |        |        |        | 2   |      |
| 2031   |        |        |        | 2   |      |
| 2032   |        |        | 2      | 1   | 2    |
| 2033   |        |        |        | 2   |      |
| 2034   |        |        |        | 2   |      |
| 2036   |        |        |        | 2   |      |

| respid | Q31b_7 | Q31b_8 | Q31b_9 | Q32 | Q32a |
|--------|--------|--------|--------|-----|------|
| 2037   |        |        | 0      | 1   | 2    |
| 2038   |        |        |        | 2   |      |
| 2039   |        |        |        | 2   |      |
| 2040   |        |        |        | 2   |      |
| 2041   |        |        |        | 2   |      |
| 2042   |        |        |        | 2   |      |
| 2043   |        |        |        | 2   |      |
| 2051   |        |        |        | 2   |      |
| 2052   |        |        | 1      | 2   |      |
| 2053   |        |        |        | 2   |      |
| 2054   |        |        |        | 2   |      |
| 2055   |        |        |        | 2   |      |
| 2056   |        |        |        | 2   |      |
| 2057   |        |        |        | 1   | 0    |
| 2059   |        |        |        | 2   |      |
| 2063   |        |        |        | 2   |      |
| 2066   |        |        |        | 1   | 1    |
| 2068   |        |        |        | 2   |      |
| 2069   | 2      |        | 2      | 2   |      |
| 2070   |        |        |        | 2   |      |
| 2071   |        |        | 1      | 2   |      |
| 2073   |        |        |        | 2   |      |
| 2077   |        |        |        | 2   |      |
| 2079   |        |        |        | 2   |      |
| 2080   | 4      |        |        | 2   |      |
| 2081   |        | 3      | 2      | 1   | 3    |
| 2084   |        |        |        | 2   |      |
| 2085   |        |        |        | 2   |      |
| 2087   |        |        |        | 1   | 2    |
| 2089   |        |        |        | 2   |      |
| 2093   |        |        |        | 2   |      |
| 2094   |        |        |        | 2   |      |

| respid | Q31b_7 | Q31b_8 | Q31b_9 | Q32 | Q32a |
|--------|--------|--------|--------|-----|------|
| 2095   |        |        |        | 1   | 3    |
| 2097   |        |        |        | 2   |      |
| 2099   |        |        |        | 2   |      |
| 2100   |        |        |        | 2   |      |
| 2101   |        |        |        | 2   |      |
| 2103   |        |        |        | 2   |      |
| 2104   |        |        |        | 2   |      |
| 2106   |        |        |        | 2   |      |
| 2111   |        |        | 3      | 1   | 2    |
| 2113   |        |        |        | 2   |      |
| 2115   |        |        |        | 2   |      |
| 2119   |        |        | 2      | 2   |      |
| 2120   |        |        |        | 2   |      |
| 2123   |        |        |        | 2   |      |
| 2124   |        |        | 3      | 2   |      |
| 2130   |        |        |        | 2   |      |
| 2131   |        |        |        | 2   |      |
| 2133   |        |        |        | 1   | 4    |
| 2139   |        |        |        | 2   |      |
| 2141   |        |        |        | 2   |      |
| 2143   |        |        |        | 2   |      |
| 2144   |        |        |        | 2   |      |
| 2147   |        |        |        | 2   |      |
| 2151   |        |        |        | 2   |      |
| 2153   |        |        |        | 2   |      |
| 2154   |        |        |        | 2   |      |
| 2155   |        |        |        | 2   |      |
| 2159   |        |        |        | 2   |      |
| 2160   |        | 3      |        | 1   | 2    |
| 2161   |        |        |        | 2   |      |
| 2163   |        |        |        | 2   |      |
| 2164   |        |        |        | 2   |      |

| respid | Q31b_7 | Q31b_8 | Q31b_9 | Q32 | Q32a |
|--------|--------|--------|--------|-----|------|
| 2168   |        |        | 0      | 2   |      |
| 2169   |        |        |        | 1   | 2    |
| 2170   |        |        | 1      | 2   |      |
| 2171   |        |        | 2      | 1   | 2    |
| 2172   |        | 1      | 3      | 1   | 2    |
| 2173   |        |        |        | 2   |      |
| 2174   |        |        |        | 2   |      |
| 2175   | 3      |        |        | 2   |      |
| 2176   |        |        | 2      | 2   |      |
| 2177   |        |        |        | 1   | 3    |
| 2179   |        |        |        | 2   |      |
| 2181   |        |        |        | 2   |      |
| 2182   |        |        |        | 2   |      |
| 2183   |        |        |        | 1   | 1    |
| 2184   |        |        |        | 2   |      |
| 2185   |        |        |        | 2   |      |
| 2186   |        |        |        | 2   |      |
| 2187   |        |        |        | 1   | 1    |
| 2188   |        |        |        | 2   |      |
| 2189   |        |        |        | 2   |      |
| 2190   |        |        |        | 2   |      |
| 2193   |        |        |        | 2   |      |
| 2195   |        |        |        | 2   |      |
| 2198   |        |        |        | 2   |      |
| 2200   |        |        |        | 2   |      |
| 2205   |        |        |        | 2   |      |
| 2208   |        |        |        | 2   |      |
| 2209   |        |        |        | 1   | 2    |
| 2210   |        |        |        | 2   |      |
| 2211   |        |        |        | 2   |      |
| 2213   |        |        |        | 2   |      |
| 2214   |        |        |        | 2   |      |

| respid | Q31b_7 | Q31b_8 | Q31b_9 | Q32 | Q32a |
|--------|--------|--------|--------|-----|------|
| 2216   |        |        | 1      | 1   | 0    |
| 2220   |        |        |        | 2   |      |
| 2225   |        |        |        | 2   |      |
| 2227   |        |        |        | 2   |      |
| 2228   | 1      |        |        | 2   |      |
| 2229   |        |        |        | 1   | 0    |
| 2230   |        |        |        | 2   |      |
| 2236   |        |        |        | 2   |      |
| 2238   | 3      | 4      |        | 1   | 4    |
| 2239   |        |        |        | 1   | 0    |
| 2240   |        |        |        | 1   | 0    |
| 2241   |        |        |        | 1   | 2    |
| 2243   |        |        |        | 2   |      |
| 2245   |        |        |        | 2   |      |
| 2247   |        |        |        | 1   | 1    |
| 2248   |        |        |        | 2   |      |
| 2249   |        |        |        | 2   |      |
| 2254   |        |        |        | 1   | 0    |
| 2256   |        |        |        | 2   |      |
| 2259   |        |        |        | 2   |      |
| 2261   |        |        |        | 2   |      |
| 2262   |        |        |        | 2   |      |
| 2263   |        |        |        | 1   | 0    |
| 2264   |        |        |        | 1   | 2    |
| 2265   |        |        |        | 2   |      |
| 2270   |        |        |        | 2   |      |
| 2271   |        |        |        | 2   |      |
| 2272   |        |        |        | 2   |      |
| 2273   |        |        |        | 2   |      |
| 2274   |        |        |        | 1   | 1    |
| 2276   |        |        |        | 2   |      |
| 2277   |        |        |        | 2   |      |

| respid | Q31b_7 | Q31b_8 | Q31b_9 | Q32 | Q32a |
|--------|--------|--------|--------|-----|------|
| 2281   |        |        |        | 2   |      |
| 2288   |        |        |        | 2   |      |
| 2290   |        |        |        | 2   |      |
| 2294   |        |        |        | 1   | 1    |
| 2295   |        |        |        | 1   | 0    |
| 2296   |        |        |        | 2   |      |
| 2297   |        |        |        | 2   |      |
| 2298   |        |        |        | 2   |      |
| 2301   |        |        |        | 1   | 2    |
| 2302   |        | 1      | 1      | 1   | 1    |
| 2303   |        |        |        | 2   |      |
| 2305   |        |        |        | 2   |      |
| 2309   |        |        |        | 2   |      |
| 2310   |        |        |        | 2   |      |
| 2311   |        |        | 2      | 2   |      |
| 2313   | 1      |        | 4      | 1   | 1    |
| 2316   |        |        |        | 2   |      |
| 2317   |        |        |        | 2   |      |
| 2318   | 1      |        |        | 2   |      |
| 2319   |        |        |        | 1   | 2    |
| 2321   |        |        | 3      | 1   | 2    |
| 2324   |        |        |        | 2   |      |
| 2328   |        |        |        | 2   |      |
| 2329   |        |        |        | 2   |      |
| 2330   |        |        |        | 2   |      |
| 2333   |        |        |        | 2   |      |
| 2334   |        |        |        | 2   |      |
| 2338   |        |        |        | 2   |      |
| 2341   |        |        |        | 2   |      |
| 2342   |        |        |        | 1   | 2    |
| 2343   |        |        | 2      | 1   | 3    |
| 2346   |        |        |        | 1   | 1    |

| respid | Q31b_7 | Q31b_8 | Q31b_9 | Q32 | Q32a |
|--------|--------|--------|--------|-----|------|
| 2347   |        |        |        | 2   |      |
| 2348   |        |        |        | 2   |      |
| 2349   |        |        |        | 2   |      |
| 2350   |        |        |        | 2   |      |
| 2351   |        |        |        | 2   |      |
| 2352   |        |        |        | 2   |      |
| 2359   |        |        |        | 2   |      |
| 2362   |        |        |        | 1   | 0    |
| 2363   |        |        |        | 2   |      |
| 2365   | 0      |        |        | 2   |      |
| 2367   |        |        |        | 1   | 2    |
| 2368   |        |        |        | 2   |      |
| 2369   |        |        |        | 2   |      |
| 2372   |        |        |        | 2   |      |
| 2374   | 1      |        |        | 2   |      |
| 2376   |        |        |        | 2   |      |
| 2379   |        |        | 1      | 1   | 2    |
| 2380   |        |        |        | 2   |      |
| 2381   |        |        |        | 2   |      |
| 2382   |        |        |        | 2   |      |
| 2385   |        |        |        | 2   |      |
| 2387   |        |        |        | 1   | 3    |
| 2388   |        |        |        | 2   |      |
| 2389   |        |        |        | 2   |      |
| 2391   |        |        |        | 1   | 1    |
| 2392   |        |        |        | 1   | 2    |
| 2393   |        |        |        | 2   |      |
| 2394   | 3      |        |        | 1   | 2    |
| 2397   |        |        |        | 2   |      |
| 2398   |        |        |        | 2   |      |
| 2400   |        |        |        | 1   | 0    |
| 2402   |        |        |        | 2   |      |

| respid | Q31b_7 | Q31b_8 | Q31b_9 | Q32 | Q32a |   |
|--------|--------|--------|--------|-----|------|---|
| 2406   |        |        |        |     | 2    |   |
| 2408   |        |        |        |     | 2    |   |
| 2410   |        |        |        |     | 2    |   |
| 2411   |        |        | 1      |     | 1    | 3 |
| 2412   |        |        |        |     | 2    |   |
| 2414   |        |        |        |     | 2    |   |
| 2421   |        |        |        |     | 2    |   |
| 2423   |        |        |        |     | 2    |   |
| 2424   |        |        | 1      |     | 1    | 1 |
| 2425   |        |        |        |     | 2    |   |
| 2426   |        |        |        |     | 1    | 1 |
| 2429   |        |        |        |     | 1    | 4 |
| 2430   |        |        | 1      |     | 2    |   |
| 2432   |        |        |        |     | 2    |   |
| 2433   |        |        |        |     | 2    |   |
| 2434   |        |        |        |     | 2    |   |
| 2435   |        |        |        |     | 2    |   |
| 2436   |        |        |        |     | 1    | 1 |
| 2439   |        |        |        |     | 2    |   |
| 2440   |        |        |        |     | 2    |   |
| 2441   |        |        |        |     | 2    |   |
| 2446   |        |        |        |     | 2    |   |
| 2448   |        |        | 3      |     | 1    | 2 |
| 2449   |        |        |        |     | 2    |   |
| 2451   |        |        |        |     | 1    | 2 |
| 2452   |        |        |        |     | 2    |   |
| 2455   |        |        |        |     | 2    |   |
| 2457   |        |        |        |     | 2    |   |
| 2458   |        |        |        |     | 2    |   |
| 2459   |        |        |        |     | 2    |   |
| 2460   |        |        |        |     | 2    |   |
| 2462   | 2      |        | 2      |     | 1    | 3 |



| respid | Q31b_7 | Q31b_8 | Q31b_9 | Q32 | Q32a |
|--------|--------|--------|--------|-----|------|
| 2464   |        |        | 3      | 1   | 3    |
| 2465   |        |        |        | 1   | 2    |
| 2468   |        | 1      | 1      | 2   |      |
| 2469   |        |        |        | 2   |      |
| 2470   |        |        |        | 1   | 1    |
| 2471   | 2      |        |        | 1   | 2    |
| 2472   |        |        |        | 2   |      |
| 2474   |        |        |        | 2   |      |
| 2476   |        |        | 2      | 2   |      |
| 2478   |        |        |        | 2   |      |
| 2479   |        |        |        | 2   |      |
| 2480   |        |        | 1      | 2   |      |
| 2482   |        |        |        | 2   |      |
| 2486   |        |        |        | 2   |      |
| 2488   |        |        |        | 1   | 3    |
| 2489   |        |        |        | 1   | 1    |
| 2491   |        |        |        | 2   |      |
| 2495   |        |        |        | 2   |      |
| 2496   |        |        |        | 2   |      |
| 2498   |        |        |        | 1   | 2    |
| 2501   |        |        | 3      | 2   |      |
| 2502   |        |        |        | 2   |      |
| 2503   |        |        | 2      | 2   |      |
| 2504   |        |        |        | 2   |      |
| 2507   |        |        |        | 2   |      |
| 2509   |        |        |        | 1   | 2    |
| 2512   |        |        |        | 2   |      |
| 2514   |        |        |        | 2   |      |
| 2516   |        |        |        | 2   |      |
| 2517   |        |        | 1      | 2   |      |
| 2521   |        |        |        | 2   |      |
| 2522   |        |        |        | 2   |      |

| respid | Q31b_7 | Q31b_8 | Q31b_9 | Q32 | Q32a |   |
|--------|--------|--------|--------|-----|------|---|
| 2524   |        |        |        |     | 2    |   |
| 2525   |        |        |        |     | 2    |   |
| 2526   |        |        | 3      |     | 2    |   |
| 2527   |        |        |        |     | 2    |   |
| 2528   |        |        |        |     | 2    |   |
| 2531   |        |        |        |     | 2    |   |
| 2533   |        |        |        |     | 1    | 2 |
| 2535   |        |        |        |     | 2    |   |
| 2536   |        |        | 3      |     | 1    | 2 |
| 2539   |        |        |        |     | 2    |   |
| 2540   |        |        |        |     | 2    |   |
| 2543   |        |        |        |     | 2    |   |
| 2546   |        |        |        |     | 2    |   |
| 2547   |        |        | 1      |     | 2    |   |
| 2549   |        |        |        |     | 2    |   |
| 2553   |        |        |        |     | 2    |   |
| 2554   |        |        |        |     | 2    |   |
| 2555   |        |        |        |     | 1    | 0 |
| 2556   |        |        |        |     | 2    |   |
| 2557   |        |        |        |     | 2    |   |
| 2559   |        |        |        |     | 2    |   |
| 2560   |        |        |        |     | 1    | 3 |
| 2561   |        |        |        |     | 2    |   |
| 2566   |        |        |        |     | 2    |   |
| 2567   |        |        |        |     | 2    |   |
| 2570   |        |        | 0      |     | 1    | 0 |
| 2574   | 2      |        | 2      |     | 1    | 4 |
| 2578   |        |        |        |     | 2    |   |
| 2580   |        |        |        |     | 2    |   |
| 2590   |        |        |        |     | 2    |   |
| 2593   |        |        |        |     | 2    |   |
| 2594   |        |        |        |     | 1    | 1 |

| respid | Q31b_7 | Q31b_8 | Q31b_9 | Q32 | Q32a |   |
|--------|--------|--------|--------|-----|------|---|
| 2595   |        |        |        |     | 2    |   |
| 2596   |        |        |        |     | 2    |   |
| 2597   |        |        |        |     | 1    | 3 |
| 2598   |        |        |        |     | 2    |   |
| 2602   |        |        |        |     | 2    |   |
| 2605   |        | 1      | 3      |     | 1    | 3 |
| 2606   |        |        |        |     | 2    |   |
| 2607   |        |        |        |     | 2    |   |
| 2608   |        |        |        |     | 2    |   |
| 2609   |        |        |        |     | 2    |   |
| 2610   |        |        |        |     | 2    |   |
| 2614   |        |        |        |     | 2    |   |
| 2615   |        |        |        |     | 2    |   |
| 2616   |        |        |        |     | 2    |   |
| 2618   |        |        |        |     | 2    |   |
| 2630   |        |        |        |     | 1    | 2 |
| 2633   |        |        |        |     | 2    |   |
| 2637   |        |        |        |     | 2    |   |
| 2638   |        |        |        |     | 2    |   |
| 2641   | 2      |        |        |     | 2    |   |
| 2644   |        |        |        |     | 2    |   |
| 2645   |        |        |        |     | 2    |   |
| 2646   |        |        |        |     | 2    |   |
| 2648   |        |        |        |     | 2    |   |
| 2651   |        |        |        |     | 2    |   |
| 2652   |        |        |        |     | 1    | 1 |
| 2653   |        |        | 1      |     | 2    |   |
| 2656   |        |        |        |     | 2    |   |
| 2657   |        |        |        |     | 2    |   |
| 2658   |        |        |        |     | 2    |   |
| 2661   |        |        |        |     | 2    |   |
| 2663   |        |        |        |     | 2    |   |

| respid | Q31b_7 | Q31b_8 | Q31b_9 | Q32 | Q32a |
|--------|--------|--------|--------|-----|------|
| 2665   |        |        |        | 2   |      |
| 2670   |        |        |        | 2   |      |
| 2672   |        |        |        | 2   |      |
| 2673   |        |        |        | 2   |      |
| 2677   |        |        |        | 2   |      |
| 2686   |        |        |        | 1   | 4    |
| 2688   |        |        |        | 2   |      |
| 2689   |        |        |        | 2   |      |
| 2691   |        |        |        | 2   |      |
| 2695   |        |        |        | 1   | 2    |
| 2696   |        |        |        | 1   | 1    |
| 2697   |        |        |        | 2   |      |
| 2698   |        |        |        | 2   |      |
| 2703   |        |        |        | 2   |      |
| 2704   |        |        |        | 2   |      |
| 2706   |        |        |        | 1   | 1    |
| 2707   |        |        |        | 2   |      |
| 2710   |        |        |        | 2   |      |
| 2711   |        |        |        | 2   |      |
| 2712   |        |        |        | 2   |      |
| 2713   |        |        |        | 2   |      |
| 2721   |        |        |        | 2   |      |
| 2730   |        |        |        | 2   |      |
| 2731   |        |        |        | 2   |      |
| 2732   |        |        |        | 2   |      |
| 2733   |        |        |        | 2   |      |
| 2735   |        |        |        | 2   |      |
| 2736   |        |        |        | 2   |      |
| 2740   |        |        |        | 2   |      |
| 2741   |        |        |        | 1   | 1    |
| 2742   |        |        |        | 2   |      |
| 2743   |        |        |        | 2   |      |

| respid | Q31b_7 | Q31b_8 | Q31b_9 | Q32 | Q32a |   |
|--------|--------|--------|--------|-----|------|---|
| 2744   |        |        |        |     | 2    |   |
| 2745   |        |        | 2      |     | 2    |   |
| 2749   |        |        |        |     | 2    |   |
| 2751   |        |        |        |     | 2    |   |
| 2754   |        |        |        |     | 2    |   |
| 2755   |        |        |        |     | 1    | 2 |
| 2757   |        |        |        |     | 2    |   |
| 2758   | 2      |        |        |     | 2    |   |
| 2759   |        |        |        |     | 2    |   |
| 2761   |        |        |        |     | 1    | 0 |
| 2762   |        |        |        |     | 1    | 3 |
| 2763   |        |        |        |     | 2    |   |
| 2764   |        |        | 3      |     | 1    | 3 |
| 2765   |        |        |        |     | 1    | 1 |
| 2766   |        |        | 0      |     | 2    |   |
| 2767   | 1      |        |        |     | 1    | 0 |
| 2769   |        |        |        |     | 2    |   |
| 2770   |        |        | 2      |     | 2    |   |
| 2771   |        |        |        |     | 2    |   |
| 2774   |        |        | 2      |     | 2    |   |
| 2777   |        | 2      | 2      |     | 1    | 2 |
| 2778   |        |        | 2      |     | 1    | 1 |
| 2781   |        | 1      |        |     | 1    | 1 |
| 2782   |        |        | 1      |     | 2    |   |
| 2784   | 3      |        |        |     | 2    |   |
| 2785   |        |        | 2      |     | 2    |   |
| 2786   |        |        |        |     | 2    |   |
| 2787   |        |        |        |     | 2    |   |
| 2789   |        |        |        |     | 1    | 2 |
| 2790   |        |        |        |     | 1    | 2 |
| 2791   |        |        |        |     | 2    |   |
| 2793   |        |        |        |     | 2    |   |

| respid | Q31b_7 | Q31b_8 | Q31b_9 | Q32 | Q32a |
|--------|--------|--------|--------|-----|------|
| 2797   |        |        |        | 1   | 1    |
| 2798   |        |        |        | 2   |      |
| 2799   |        |        |        | 1   | 2    |
| 2801   |        |        |        | 1   | 1    |
| 2802   |        |        |        | 1   | 1    |
| 2803   |        |        |        | 2   |      |
| 2804   |        |        | 1      | 1   | 3    |
| 2807   |        |        |        | 2   |      |
| 2809   |        |        |        | 1   | 1    |
| 2810   |        |        |        | 2   |      |
| 2812   |        |        | 0      | 2   |      |
| 2814   |        |        |        | 2   |      |
| 2815   |        |        | 1      | 2   |      |
| 2816   |        |        |        | 1   | 1    |
| 2817   |        |        |        | 2   |      |
| 2819   |        |        |        | 1   | 1    |
| 2820   |        |        |        | 2   |      |
| 2821   |        |        |        | 1   | 0    |
| 2822   |        |        | 2      | 2   |      |
| 2823   |        |        |        | 1   | 1    |
| 2824   |        |        |        | 2   |      |
| 2825   |        |        |        | 2   |      |
| 2826   |        |        |        | 2   |      |
| 2827   |        |        |        | 2   |      |
| 2828   |        |        |        | 2   |      |
| 2829   |        |        |        | 2   |      |
| 2830   |        |        |        | 1   | 1    |
| 2831   |        |        |        | 2   |      |
| 2832   |        |        | 2      | 1   | 2    |
| 2833   |        |        |        | 2   |      |
| 2834   |        |        | 1      | 2   |      |
| 2835   |        |        |        | 1   | 2    |

| respid | Q31b_7 | Q31b_8 | Q31b_9 | Q32 | Q32a |   |
|--------|--------|--------|--------|-----|------|---|
| 2836   |        |        |        |     | 2    |   |
| 2837   |        |        |        |     | 2    |   |
| 2838   |        | 2      | 2      |     | 2    |   |
| 2844   |        |        |        |     | 1    | 3 |
| 2845   |        |        |        |     | 2    |   |
| 2847   |        |        |        |     | 1    | 4 |
| 2848   |        |        |        |     | 2    |   |
| 2849   |        |        |        |     | 2    |   |
| 2851   |        |        |        |     | 2    |   |
| 2852   |        |        |        |     | 1    | 0 |
| 2853   |        |        |        |     | 2    |   |
| 2854   |        |        |        |     | 2    |   |
| 2856   |        |        | 1      |     | 2    |   |
| 2857   |        |        |        |     | 1    | 1 |
| 2858   |        |        |        |     | 1    | 1 |
| 2859   |        |        | 2      |     | 1    | 2 |
| 2860   |        |        |        |     | 2    |   |
| 2861   |        |        | 2      |     | 1    | 2 |
| 2863   |        |        |        |     | 2    |   |
| 2864   |        |        |        |     | 1    | 0 |
| 2866   |        |        |        |     | 2    |   |
| 2872   |        |        |        |     | 2    |   |
| 2875   |        |        |        |     | 2    |   |
| 2879   |        |        |        |     | 2    |   |
| 2881   |        |        |        |     | 2    |   |
| 2882   |        |        |        |     | 2    |   |
| 2883   |        |        |        |     | 2    |   |
| 2884   |        |        | 2      |     | 2    |   |
| 2885   |        |        |        |     | 2    |   |
| 2887   |        |        | 1      |     | 2    |   |
| 2888   |        |        |        |     | 2    |   |
| 2890   |        |        |        |     | 2    |   |

| respid | Q31b_7 | Q31b_8 | Q31b_9 | Q32 | Q32a |
|--------|--------|--------|--------|-----|------|
| 2891   |        |        |        | 2   |      |
| 2892   |        |        |        | 2   |      |
| 2895   |        |        |        | 2   |      |
| 2899   |        |        |        | 1   | 1    |
| 2900   |        |        |        | 1   | 0    |
| 2902   |        |        | 2      | 1   | 3    |
| 2903   |        |        |        | 2   |      |
| 2904   |        |        |        | 2   |      |
| 2906   |        |        |        | 1   | 1    |
| 2908   |        |        |        | 2   |      |
| 2910   |        |        |        | 1   | 2    |
| 2917   |        |        | 3      | 1   | 2    |
| 2918   |        |        |        | 2   |      |
| 2919   |        |        |        | 2   |      |
| 2920   |        |        |        | 1   | 0    |
| 2921   |        |        | 2      | 1   | 2    |
| 2922   |        |        |        | 2   |      |
| 2923   |        |        |        | 2   |      |
| 2924   |        |        |        | 1   | 3    |
| 2926   |        |        |        | 1   | 2    |
| 2928   |        |        |        | 2   |      |
| 2930   |        |        |        | 2   |      |
| 2931   |        |        | 1      | 2   |      |
| 2933   |        |        |        | 2   |      |
| 2935   |        |        |        | 2   |      |
| 2936   |        |        |        | 2   |      |
| 2937   |        |        |        | 2   |      |
| 2938   |        |        |        | 2   |      |
| 2944   |        |        |        | 1   | 1    |
| 2945   |        |        | 0      | 2   |      |
| 2947   |        |        |        | 2   |      |
| 2949   |        |        |        | 2   |      |



| respid | Q31b_7 | Q31b_8 | Q31b_9 | Q32 | Q32a |
|--------|--------|--------|--------|-----|------|
| 2951   |        |        |        | 1   | 3    |
| 2952   |        |        | 1      | 2   |      |
| 2953   |        |        |        | 2   |      |
| 2955   |        |        |        | 2   |      |
| 2957   |        |        |        | 1   | 0    |
| 2958   |        |        |        | 1   | 0    |
| 2960   |        |        |        | 1   | 2    |
| 2963   |        |        |        | 2   |      |
| 2964   |        |        |        | 2   |      |
| 2967   |        |        |        | 2   |      |
| 2968   |        |        |        | 2   |      |
| 2971   |        |        |        | 1   | 2    |
| 2974   |        |        |        | 2   |      |
| 2975   |        |        |        | 2   |      |
| 2982   |        |        |        | 2   |      |
| 2983   |        |        |        | 2   |      |
| 2985   |        |        |        | 2   |      |
| 2986   |        |        | 1      | 1   | 3    |
| 2987   |        |        |        | 2   |      |
| 2988   |        |        |        | 2   |      |
| 2993   |        |        |        | 1   | 0    |
| 2996   |        |        |        | 2   |      |
| 2997   |        |        | 3      | 1   | 4    |
| 2998   |        |        |        | 1   | 2    |
| 3004   |        |        |        | 2   |      |
| 3007   |        |        |        | 2   |      |
| 3011   |        |        |        | 2   |      |
| 3012   |        |        |        | 2   |      |
| 3013   |        |        |        | 2   |      |
| 3014   |        |        |        | 2   |      |
| 3015   |        |        |        | 1   | 1    |
| 3016   |        |        |        | 2   |      |

| respid | Q31b_7 | Q31b_8 | Q31b_9 | Q32 | Q32a |
|--------|--------|--------|--------|-----|------|
| 3017   |        |        |        | 2   |      |
| 3020   |        |        |        | 1   | 2    |
| 3022   |        |        |        | 2   |      |
| 3023   |        |        |        | 2   |      |
| 3026   |        |        |        | 1   | 3    |
| 3038   |        |        |        | 1   | 0    |
| 3039   |        |        |        | 2   |      |
| 3040   |        |        |        | 2   |      |
| 3041   |        |        |        | 2   |      |
| 3042   |        |        |        | 2   |      |
| 3044   |        |        |        | 2   |      |
| 3050   |        |        |        | 2   |      |
| 3052   |        |        |        | 2   |      |
| 3056   |        | 1      |        | 1   | 2    |
| 3059   |        |        |        | 2   |      |
| 3060   |        |        |        | 2   |      |
| 3063   |        |        |        | 1   | 2    |
| 3065   |        |        |        | 2   |      |
| 3067   |        |        | 2      | 2   |      |
| 3068   |        |        |        | 1   | 0    |
| 3072   |        |        |        | 2   |      |
| 3074   |        |        |        | 2   |      |
| 3075   |        |        |        | 1   | 1    |
| 3076   |        |        |        | 1   | 0    |
| 3079   |        |        |        | 2   |      |
| 3082   |        |        | 2      | 1   | 3    |
| 3083   |        |        |        | 2   |      |
| 3084   |        |        |        | 1   | 0    |
| 3085   |        |        |        | 2   |      |
| 3090   |        |        |        | 2   |      |
| 3091   |        |        |        | 2   |      |
| 3092   |        |        |        | 2   |      |

| respid | Q31b_7 | Q31b_8 | Q31b_9 | Q32 | Q32a |
|--------|--------|--------|--------|-----|------|
| 3095   |        |        |        | 2   |      |
| 3096   | 4      | 3      |        | 1   | 4    |
| 3097   |        |        |        | 2   |      |
| 3099   | 3      |        |        | 1   | 3    |
| 3101   |        |        |        | 1   | 2    |
| 3103   |        |        |        | 2   |      |
| 3104   |        |        |        | 2   |      |
| 3105   |        |        |        | 2   |      |
| 3107   |        |        |        | 2   |      |
| 3108   |        |        |        | 2   |      |
| 3109   |        |        |        | 2   |      |
| 3116   |        |        |        | 2   |      |
| 3117   |        |        |        | 1   | 1    |
| 3119   |        |        |        | 2   |      |
| 3120   |        |        |        | 2   |      |
| 3130   |        |        |        | 2   |      |
| 3131   | 3      |        |        | 2   |      |
| 3133   |        |        |        | 2   |      |
| 3134   |        |        |        | 1   | 2    |
| 3135   |        |        |        | 2   |      |
| 3145   |        |        |        | 1   | 1    |
| 3147   |        |        |        | 2   |      |
| 3152   |        |        |        | 1   | 1    |
| 3155   | 3      |        | 4      | 1   | 4    |
| 3156   |        |        |        | 2   |      |
| 3157   |        |        | 2      | 2   |      |
| 3166   |        |        | 1      | 2   |      |
| 3169   |        |        |        | 2   |      |
| 3179   |        |        |        | 2   |      |
| 3181   |        |        |        | 2   |      |
| 3185   |        |        |        | 2   |      |
| 3190   |        |        |        | 2   |      |

| respid | Q31b_7 | Q31b_8 | Q31b_9 | Q32 | Q32a |   |
|--------|--------|--------|--------|-----|------|---|
| 3191   |        |        |        |     | 2    |   |
| 3192   |        |        |        |     | 2    |   |
| 3193   |        |        |        |     | 2    |   |
| 3195   |        |        |        |     | 2    |   |
| 3202   |        |        | 1      |     | 2    |   |
| 3204   |        |        |        |     | 2    |   |
| 3208   |        |        |        |     | 2    |   |
| 3212   |        |        |        |     | 2    |   |
| 3218   |        |        |        |     | 2    |   |
| 3219   |        |        |        |     | 1    | 1 |
| 3220   |        |        |        |     | 2    |   |
| 3221   | 3      |        |        |     | 2    |   |
| 3223   |        |        |        |     | 2    |   |
| 3231   |        |        |        |     | 2    |   |
| 3232   | 0      |        |        |     | 1    | 2 |
| 3234   | 1      |        |        |     | 2    |   |
| 3235   |        |        |        |     | 2    |   |
| 3237   |        |        |        |     | 2    |   |
| 3238   |        |        |        |     | 2    |   |
| 3240   |        |        |        |     | 2    |   |
| 3241   |        |        |        |     | 2    |   |
| 3243   |        |        |        |     | 1    | 1 |
| 3244   |        | 3      |        |     | 2    |   |
| 3247   |        |        |        |     | 2    |   |
| 3250   |        |        |        |     | 2    |   |
| 3251   |        |        | 3      |     | 1    | 2 |
| 3255   |        |        |        |     | 2    |   |
| 3256   |        |        |        |     | 2    |   |
| 3257   |        |        |        |     | 2    |   |
| 3258   |        |        |        |     | 2    |   |
| 3259   | 2      |        |        |     | 1    | 1 |
| 3260   |        |        |        |     | 2    |   |

| respid | Q31b_7 | Q31b_8 | Q31b_9 | Q32 | Q32a |
|--------|--------|--------|--------|-----|------|
| 3261   |        |        |        | 2   |      |
| 3262   |        |        | 1      | 2   |      |
| 3264   |        |        |        | 1   | 3    |
| 3265   |        |        |        | 2   |      |
| 3267   |        |        |        | 1   | 0    |
| 3268   |        |        | 0      | 1   | 1    |
| 3270   |        |        |        | 2   |      |
| 3271   |        |        |        | 2   |      |
| 3274   |        |        |        | 2   |      |
| 3276   |        |        |        | 2   |      |
| 3277   |        |        |        | 2   |      |
| 3279   |        |        |        | 2   |      |
| 3281   |        |        |        | 2   |      |
| 3283   |        |        | 1      | 2   |      |
| 3285   |        |        |        | 2   |      |
| 3286   |        |        |        | 1   | 1    |
| 3287   |        |        |        | 2   |      |
| 3289   |        |        |        | 1   | 1    |
| 3290   |        |        |        | 2   |      |
| 3291   |        |        |        | 2   |      |
| 3292   |        |        |        | 1   | 3    |
| 3293   |        |        |        | 1   | 2    |
| 3294   |        |        | 0      | 2   |      |
| 3296   |        |        |        | 2   |      |
| 3306   |        |        |        | 2   |      |
| 3307   |        |        |        | 1   | 3    |
| 3308   |        |        |        | 2   |      |
| 3312   |        |        |        | 2   |      |
| 3313   |        |        |        | 1   | 1    |
| 3316   |        |        |        | 2   |      |
| 3317   |        |        |        | 1   | 3    |
| 3320   |        |        |        | 2   |      |

| respid | Q31b_7 | Q31b_8 | Q31b_9 | Q32 | Q32a |
|--------|--------|--------|--------|-----|------|
| 3321   |        |        |        | 2   |      |
| 3322   |        |        |        | 2   |      |
| 3323   |        |        |        | 2   |      |
| 3325   |        |        |        | 2   |      |
| 3332   |        |        |        | 2   |      |
| 3334   |        |        | 0      | 2   |      |
| 3335   |        |        |        | 2   |      |
| 3341   |        |        |        | 2   |      |
| 3345   |        |        |        | 2   |      |
| 3346   |        |        |        | 2   |      |
| 3349   |        |        |        | 2   |      |
| 3351   |        |        |        | 2   |      |
| 3353   |        |        |        | 1   | 2    |
| 3354   | 1      |        |        | 2   |      |
| 3356   |        |        |        | 2   |      |
| 3357   |        |        |        | 2   |      |
| 3360   |        |        |        | 1   | 0    |
| 3361   |        |        |        | 2   |      |
| 3362   |        |        |        | 2   |      |
| 3363   |        |        |        | 2   |      |
| 3364   |        |        |        | 1   | 3    |
| 3368   |        |        |        | 2   |      |
| 3370   | 0      |        |        | 2   |      |
| 3371   |        |        |        | 1   | 2    |
| 3379   |        |        |        | 1   | 1    |
| 3380   |        |        |        | 2   |      |
| 3382   |        |        |        | 2   |      |
| 3384   |        |        |        | 2   |      |
| 3385   |        |        |        | 1   | 0    |
| 3388   |        |        |        | 2   |      |
| 3392   |        |        |        | 2   |      |
| 3393   |        |        |        | 2   |      |

| respid | Q31b_7 | Q31b_8 | Q31b_9 | Q32 | Q32a |
|--------|--------|--------|--------|-----|------|
| 3394   |        |        | 2      | 1   | 3    |
| 3395   |        |        |        | 1   | 0    |
| 3396   |        |        |        | 2   |      |
| 3397   |        |        |        | 2   |      |
| 3398   |        |        |        | 2   |      |
| 3399   |        |        |        | 1   | 0    |
| 3400   |        |        | 1      | 1   | 1    |
| 3401   |        |        |        | 1   | 4    |
| 3402   |        |        |        | 1   | 2    |
| 3403   |        |        | 1      | 2   |      |
| 3405   | 3      |        | 4      | 2   |      |
| 3407   | 1      |        |        | 2   |      |
| 3410   |        |        |        | 2   |      |
| 3411   |        |        |        | 2   |      |
| 3413   |        |        |        | 2   |      |
| 3414   |        |        |        | 1   | 1    |
| 3420   |        |        |        | 2   |      |
| 3421   |        |        | 3      | 1   | 4    |
| 3425   |        |        |        | 2   |      |
| 3426   | 1      |        |        | 2   |      |
| 3429   | 1      |        |        | 2   |      |
| 3430   |        | 4      |        | 1   | 1    |
| 3433   |        |        |        | 2   |      |
| 3434   |        |        | 4      | 1   | 2    |
| 3437   |        |        |        | 2   |      |
| 3439   |        |        |        | 1   | 2    |
| 3441   |        |        | 1      | 1   | 1    |
| 3442   |        |        |        | 1   | 2    |
| 3444   |        |        |        | 1   | 0    |
| 3445   |        |        |        | 2   |      |
| 3450   |        |        |        | 1   | 2    |
| 3452   |        |        |        | 2   |      |

| respid | Q31b_7 | Q31b_8 | Q31b_9 | Q32 | Q32a |
|--------|--------|--------|--------|-----|------|
| 3456   |        |        |        | 2   |      |
| 3459   |        |        |        | 2   |      |
| 3460   |        |        | 1      | 2   |      |
| 3461   |        |        |        | 2   |      |
| 3466   |        |        | 1      | 1   | 1    |
| 3471   |        |        |        | 2   |      |
| 3473   |        |        |        | 2   |      |
| 3475   |        |        | 3      | 1   | 3    |
| 3476   |        |        |        | 1   | 0    |
| 3477   |        |        |        | 2   |      |
| 3478   |        |        |        | 2   |      |
| 3479   |        |        |        | 2   |      |
| 3482   |        |        |        | 1   | 2    |
| 3483   |        |        |        | 2   |      |
| 3485   |        |        |        | 2   |      |
| 3489   |        |        |        | 2   |      |
| 3490   |        |        |        | 2   |      |
| 3491   |        |        | 3      | 1   | 2    |
| 3494   |        |        |        | 1   | 2    |
| 3495   |        |        |        | 1   | 2    |
| 3501   |        |        |        | 2   |      |
| 3506   |        |        |        | 1   | 1    |
| 3507   |        |        |        | 2   |      |
| 3517   |        |        |        | 2   |      |
| 3520   |        |        | 1      | 2   |      |
| 3521   |        |        |        | 1   | 0    |
| 3522   |        |        |        | 2   |      |
| 3524   |        |        |        | 2   |      |
| 3527   |        |        |        | 2   |      |
| 3528   |        |        |        | 2   |      |
| 3529   |        |        |        | 2   |      |
| 3536   |        |        |        | 2   |      |



| respid | Q31b_7 | Q31b_8 | Q31b_9 | Q32 | Q32a |
|--------|--------|--------|--------|-----|------|
| 3537   |        |        |        | 1   | 0    |
| 3538   |        |        | 1      | 2   |      |
| 3540   |        |        |        | 1   | 2    |
| 3545   |        |        |        | 2   |      |
| 3547   |        |        |        | 1   | 2    |
| 3554   |        |        |        | 1   | 0    |
| 3556   |        |        |        | 2   |      |
| 3557   |        |        |        | 1   | 2    |
| 3559   |        |        |        | 2   |      |
| 3560   |        |        | 1      | 2   |      |
| 3562   |        |        |        | 2   |      |
| 3564   |        | 0      |        | 2   |      |
| 3565   |        |        | 4      | 1   | 3    |
| 3568   |        |        | 2      | 1   | 2    |
| 3572   |        |        |        | 2   |      |
| 3578   |        |        |        | 2   |      |
| 3581   |        |        |        | 2   |      |
| 3583   |        |        |        | 1   | 1    |
| 3588   |        |        |        | 2   |      |
| 3591   |        |        |        | 2   |      |
| 3594   |        |        |        | 2   |      |
| 3595   |        |        | 1      | 2   |      |
| 3596   |        |        |        | 2   |      |
| 3597   |        |        |        | 1   | 2    |
| 3598   |        |        |        | 2   |      |
| 3600   |        |        |        | 2   |      |
| 3602   |        |        |        | 2   |      |
| 3604   |        |        |        | 2   |      |
| 3605   | 0      |        |        | 2   |      |
| 3606   |        |        |        | 2   |      |
| 3607   |        |        |        | 2   |      |
| 3610   |        |        |        | 2   |      |

| respid | Q31b_7 | Q31b_8 | Q31b_9 | Q32 | Q32a |
|--------|--------|--------|--------|-----|------|
| 3611   |        |        |        |     | 2    |
| 3612   |        |        |        |     | 2    |
| 3614   |        |        |        |     | 2    |
| 3616   |        |        |        |     | 2    |
| 3617   |        |        |        |     | 2    |
| 3618   |        |        |        |     | 2    |
| 3619   |        |        | 1      |     | 1 3  |
| 3621   |        |        |        |     | 1 0  |
| 3622   |        |        |        |     | 2    |
| 3624   |        |        |        |     | 2    |
| 3626   |        |        |        |     | 2    |
| 3629   |        |        |        |     | 2    |
| 3631   |        |        |        |     | 2    |
| 3632   |        |        |        |     | 2    |
| 3638   |        |        | 0      |     | 2    |
| 3640   |        |        |        |     | 2    |
| 3641   |        |        |        |     | 2    |
| 3645   | 1      |        | 2      |     | 1 2  |
| 3650   |        |        |        |     | 2    |
| 3653   |        |        | 1      |     | 2    |
| 3655   |        |        | 1      |     | 2    |
| 3657   |        |        | 1      |     | 2    |
| 3658   |        |        |        |     | 2    |
| 3659   |        |        |        |     | 2    |
| 3664   |        | 3      | 2      |     | 1 3  |
| 3665   |        |        |        |     | 2    |
| 3667   |        |        |        |     | 2    |
| 3668   |        |        |        |     | 1 4  |
| 3675   |        |        |        |     | 2    |
| 3678   |        |        |        |     | 2    |
| 3680   |        |        |        |     | 2    |
| 3684   |        | 3      | 2      |     | 2    |

| respid | Q31b_7 | Q31b_8 | Q31b_9 | Q32 | Q32a |
|--------|--------|--------|--------|-----|------|
| 3685   |        |        |        | 1   | 2    |
| 3687   |        |        | 4      | 2   |      |
| 3689   |        | 3      |        | 1   | 3    |
| 3690   |        |        |        | 2   |      |
| 3693   |        |        |        | 2   |      |
| 3694   |        |        |        | 2   |      |
| 3695   |        |        |        | 2   |      |
| 3700   |        |        |        | 2   |      |
| 3701   |        |        |        | 2   |      |
| 3703   |        |        | 1      | 2   |      |
| 3704   |        |        | 2      | 2   |      |
| 3705   |        |        |        | 2   |      |
| 3709   |        |        |        | 2   |      |
| 3710   |        |        | 3      | 1   | 2    |
| 3722   |        |        |        | 2   |      |
| 3725   |        |        |        | 2   |      |
| 3726   |        |        | 1      | 2   |      |
| 3727   |        |        |        | 2   |      |
| 3728   |        |        |        | 1   | 1    |
| 3729   |        |        |        | 2   |      |
| 3731   |        |        |        | 2   |      |
| 3738   |        |        |        | 2   |      |
| 3739   |        |        |        | 1   | 1    |
| 3740   |        |        |        | 2   |      |
| 3749   |        |        |        | 2   |      |
| 3758   |        |        |        | 1   | 2    |
| 3762   |        |        |        | 2   |      |
| 3765   |        |        |        | 2   |      |
| 3770   |        |        |        | 2   |      |
| 3771   |        |        |        | 2   |      |
| 3778   |        | 1      |        | 2   |      |
| 3779   |        |        |        | 2   |      |

| respid | Q31b_7 | Q31b_8 | Q31b_9 | Q32 | Q32a |
|--------|--------|--------|--------|-----|------|
| 3780   |        |        |        | 2   |      |
| 3782   |        |        |        | 1   | 1    |
| 3784   |        |        | 1      | 2   |      |
| 3787   |        |        |        | 2   |      |
| 3790   |        |        |        | 1   | 2    |
| 3791   |        |        |        | 2   |      |
| 3793   |        |        | 3      | 1   | 3    |
| 3795   |        |        |        | 2   |      |
| 3799   |        |        |        | 2   |      |
| 3801   |        |        |        | 1   | 2    |
| 3804   |        |        |        | 2   |      |
| 3809   |        |        |        | 1   | 1    |
| 3810   |        |        |        | 2   |      |
| 3813   |        |        | 2      | 2   |      |
| 3816   |        |        |        | 2   |      |
| 3820   |        |        |        | 2   |      |
| 3821   |        |        | 0      | 2   |      |
| 3823   |        |        | 3      | 1   | 2    |
| 3828   |        |        |        | 2   |      |
| 3829   |        |        |        | 2   |      |
| 3832   |        |        |        | 2   |      |
| 3835   |        |        |        | 2   |      |
| 3837   |        |        |        | 2   |      |
| 3838   |        |        |        | 1   | 1    |
| 3839   |        |        | 4      | 1   | 4    |
| 3840   |        |        |        | 2   |      |
| 3842   |        |        |        | 2   |      |
| 3843   |        |        |        | 2   |      |
| 3844   |        |        |        | 1   | 2    |
| 3850   |        |        |        | 2   |      |
| 3851   |        |        |        | 2   |      |
| 3856   |        |        |        | 2   |      |

| respid | Q31b_7 | Q31b_8 | Q31b_9 | Q32 | Q32a |
|--------|--------|--------|--------|-----|------|
| 3859   | 2      |        |        | 1   | 2    |
| 3860   |        |        |        | 2   |      |
| 3863   |        |        |        | 2   |      |
| 3866   |        |        |        | 2   |      |
| 3867   |        |        |        | 2   |      |
| 3870   |        |        |        | 2   |      |
| 3873   | 1      |        |        | 1   | 3    |
| 3875   |        |        |        | 2   |      |
| 3878   |        |        |        | 1   | 2    |
| 3881   |        |        |        | 2   |      |
| 3883   |        |        |        | 1   | 3    |
| 3884   |        |        |        | 1   | 0    |
| 3885   |        | 3      | 2      | 1   | 3    |
| 3886   |        |        |        | 1   | 3    |
| 3887   |        |        |        | 2   |      |
| 3888   |        |        |        | 2   |      |
| 3889   |        |        | 2      | 1   | 2    |
| 3890   |        |        |        | 2   |      |
| 3896   |        |        |        | 1   | 1    |
| 3902   |        |        | 3      | 1   | 3    |
| 3909   |        |        |        | 1   | 1    |
| 3912   |        |        |        | 2   |      |
| 3922   |        |        |        | 2   |      |
| 3928   |        |        |        | 2   |      |
| 3930   |        |        |        | 2   |      |
| 3931   |        |        |        | 2   |      |
| 3933   |        |        |        | 2   |      |
| 3935   |        |        |        | 1   | 1    |
| 3937   |        | 0      |        | 2   |      |
| 3939   |        |        |        | 2   |      |
| 3942   |        |        |        | 2   |      |
| 3943   |        |        |        | 1   | 1    |

| respid | Q31b_7 | Q31b_8 | Q31b_9 | Q32 | Q32a |
|--------|--------|--------|--------|-----|------|
| 3944   |        |        |        | 2   |      |
| 3945   |        |        |        | 2   |      |
| 3947   |        |        | 1      | 1   | 2    |
| 3948   |        |        |        | 2   |      |
| 3951   |        |        |        | 2   |      |
| 3959   |        |        |        | 2   |      |
| 3969   |        |        | 4      | 1   | 4    |
| 3973   |        |        | 1      | 2   |      |
| 3975   |        |        | 3      | 1   | 1    |
| 3976   |        |        |        | 2   |      |
| 3977   |        |        |        | 2   |      |
| 3978   |        |        |        | 2   |      |
| 3994   |        |        |        | 2   |      |
| 3995   |        |        |        | 1   | 3    |
| 3997   |        |        |        | 2   |      |
| 3998   |        |        |        | 2   |      |
| 3999   |        |        | 1      | 1   | 1    |
| 4002   |        |        | 2      | 1   | 2    |
| 4004   |        |        |        | 2   |      |
| 4005   |        |        |        | 2   |      |
| 4006   | 1      |        |        | 1   | 1    |
| 4008   |        |        |        | 1   | 0    |
| 4010   |        |        |        | 2   |      |
| 4011   |        |        | 1      | 1   | 3    |
| 4013   |        |        |        | 2   |      |
| 4014   |        |        |        | 2   |      |
| 4016   |        |        |        | 2   |      |
| 4017   |        |        |        | 2   |      |
| 4019   |        |        |        | 2   |      |
| 4021   |        |        |        | 2   |      |
| 4023   |        |        |        | 2   |      |
| 4024   |        |        |        | 2   |      |

| respid | Q31b_7 | Q31b_8 | Q31b_9 | Q32 | Q32a |
|--------|--------|--------|--------|-----|------|
| 4025   |        |        |        | 1   | 1    |
| 4027   |        |        |        | 2   |      |
| 4032   |        |        |        | 2   |      |
| 4034   |        |        |        | 2   |      |
| 4035   |        |        |        | 2   |      |
| 4037   |        |        | 1      | 2   |      |
| 4040   |        |        |        | 2   |      |
| 4041   |        |        |        | 2   |      |
| 4042   |        |        |        | 2   |      |
| 4043   |        |        |        | 2   |      |
| 4045   |        |        |        | 2   |      |
| 4046   |        |        |        | 1   | 2    |
| 4048   |        |        |        | 2   |      |
| 4049   |        |        |        | 1   | 0    |
| 4050   | 1      |        |        | 1   | 1    |
| 4052   |        |        |        | 2   |      |
| 4053   |        |        |        | 2   |      |
| 4060   |        |        |        | 2   |      |
| 4065   | 2      |        |        | 1   | 3    |
| 4066   |        |        | 1      | 1   | 2    |
| 4067   |        |        |        | 2   |      |
| 4068   |        |        |        | 2   |      |
| 4069   |        |        |        | 2   |      |
| 4070   |        |        |        | 2   |      |
| 4071   |        |        |        | 2   |      |
| 4072   |        |        |        | 2   |      |
| 4073   |        |        |        | 2   |      |
| 4074   |        |        |        | 2   |      |
| 4075   |        |        |        | 2   |      |
| 4078   |        |        |        | 2   |      |
| 4080   |        |        |        | 2   |      |
| 4081   |        |        |        | 2   |      |

| respid | Q31b_7 | Q31b_8 | Q31b_9 | Q32 | Q32a |   |
|--------|--------|--------|--------|-----|------|---|
| 4082   |        |        |        |     | 2    |   |
| 4083   |        |        | 1      |     | 2    |   |
| 4084   |        |        |        |     | 2    |   |
| 4086   |        |        |        |     | 2    |   |
| 4087   |        |        |        |     | 2    |   |
| 4088   |        |        |        |     | 1    | 2 |
| 4089   |        |        |        |     | 2    |   |
| 4090   |        |        |        |     | 2    |   |
| 4093   |        |        |        |     | 1    | 1 |
| 4094   |        |        |        |     | 2    |   |
| 4095   |        |        |        |     | 2    |   |
| 4096   |        |        |        |     | 2    |   |
| 4098   |        |        |        |     | 2    |   |
| 4103   |        | 1      | 1      |     | 1    | 1 |
| 4104   |        |        |        |     | 2    |   |
| 4107   |        |        |        |     | 2    |   |
| 4109   |        |        |        |     | 2    |   |
| 4110   |        |        |        |     | 1    | 3 |
| 4113   |        |        |        |     | 1    | 1 |
| 4114   |        |        |        |     | 2    |   |
| 4116   |        | 1      |        |     | 2    |   |
| 4119   |        |        | 1      |     | 2    |   |
| 4120   | 0      |        |        |     | 2    |   |
| 4121   |        |        |        |     | 2    |   |
| 4122   |        |        |        |     | 1    | 2 |
| 4124   |        |        |        |     | 2    |   |
| 4126   |        |        |        |     | 2    |   |
| 4127   |        |        |        |     | 1    | 3 |
| 4131   |        |        |        |     | 2    |   |
| 4134   |        |        |        |     | 2    |   |
| 4144   |        |        |        |     | 2    |   |
| 4145   |        |        |        |     | 2    |   |



| respid | Q31b_7 | Q31b_8 | Q31b_9 | Q32 | Q32a |
|--------|--------|--------|--------|-----|------|
| 4146   |        |        |        | 2   |      |
| 4147   |        |        |        | 2   |      |
| 4149   |        |        |        | 2   |      |
| 4150   |        |        |        | 2   |      |
| 4151   |        |        |        | 1   | 2    |
| 4153   |        |        |        | 2   |      |
| 4155   |        |        |        | 2   |      |
| 4157   |        |        |        | 2   |      |
| 4159   |        |        |        | 2   |      |
| 4160   |        |        | 1      | 2   |      |
| 4161   |        |        | 0      | 2   |      |
| 4163   |        |        |        | 1   | 0    |
| 4164   |        |        |        | 2   |      |
| 4165   | 1      |        |        | 2   |      |
| 4166   |        |        |        | 1   | 1    |
| 4167   |        |        |        | 2   |      |
| 4170   |        |        |        | 1   | 2    |
| 4172   |        |        |        | 2   |      |
| 4173   |        |        |        | 2   |      |
| 4180   |        |        | 1      | 2   |      |
| 4185   |        |        | 3      | 1   | 1    |
| 4187   |        |        |        | 2   |      |
| 4190   |        |        |        | 2   |      |
| 4191   |        |        | 1      | 2   |      |
| 4193   |        |        |        | 2   |      |
| 4194   |        |        |        | 1   | 0    |
| 4195   |        |        |        | 2   |      |
| 4196   |        |        |        | 2   |      |
| 4197   |        |        |        | 2   |      |
| 4198   |        |        |        | 2   |      |
| 4199   |        |        |        | 2   |      |
| 4205   |        |        |        | 1   | 0    |

| respid | Q31b_7 | Q31b_8 | Q31b_9 | Q32 | Q32a |
|--------|--------|--------|--------|-----|------|
| 4206   |        |        |        | 2   |      |
| 4207   |        |        |        | 2   |      |
| 4214   |        |        |        | 2   |      |
| 4215   |        |        |        | 2   |      |
| 4217   |        |        |        | 2   |      |
| 4219   |        |        |        | 2   |      |
| 4223   |        |        |        | 2   |      |
| 4226   |        |        | 0      | 2   |      |
| 4229   |        |        |        | 2   |      |
| 4230   |        |        |        | 2   |      |
| 4232   |        |        |        | 2   |      |
| 4233   |        |        |        | 2   |      |
| 4234   |        |        |        | 1   | 1    |
| 4235   |        |        |        | 1   | 1    |
| 4236   |        |        |        | 2   |      |
| 4237   |        |        |        | 1   | 1    |
| 4238   |        |        |        | 2   |      |
| 4240   |        |        |        | 2   |      |
| 4241   |        |        |        | 2   |      |
| 4247   |        |        |        | 2   |      |
| 4250   |        |        |        | 2   |      |
| 4251   |        |        |        | 2   |      |
| 4253   |        |        | 2      | 1   | 1    |
| 4254   |        |        |        | 1   | 0    |
| 4258   |        |        |        | 1   | 1    |
| 4260   |        |        |        | 2   |      |
| 4263   |        |        |        | 2   |      |
| 4265   |        |        |        | 2   |      |
| 4266   |        |        | 2      | 2   |      |
| 4267   |        |        |        | 2   |      |
| 4270   |        |        |        | 2   |      |
| 4273   |        |        |        | 2   |      |

| respid | Q31b_7 | Q31b_8 | Q31b_9 | Q32 | Q32a |
|--------|--------|--------|--------|-----|------|
| 4280   |        |        |        | 2   |      |
| 4281   |        |        |        | 1   | 0    |
| 4282   |        |        |        | 2   |      |
| 4283   |        |        |        | 2   |      |
| 4286   |        |        |        | 2   |      |
| 4287   |        |        |        | 1   | 1    |
| 4289   |        |        |        | 2   |      |
| 4290   | 2      |        |        | 1   | 2    |
| 4291   |        |        |        | 2   |      |
| 4292   |        |        |        | 2   |      |
| 4293   |        |        |        | 2   |      |
| 4294   |        |        |        | 2   |      |
| 4295   |        |        |        | 2   |      |
| 4296   |        |        |        | 2   |      |
| 4297   |        |        | 0      | 2   |      |
| 4298   |        |        |        | 2   |      |
| 4299   |        |        |        | 2   |      |
| 4300   |        |        |        | 2   |      |
| 4301   |        |        |        | 2   |      |
| 4302   |        |        |        | 1   | 0    |
| 4304   |        |        |        | 2   |      |
| 4305   |        |        |        | 2   |      |
| 4307   |        |        | 0      | 1   | 0    |
| 4308   |        |        |        | 2   |      |
| 4312   |        |        |        | 2   |      |
| 4314   |        |        | 1      | 1   | 2    |
| 4316   |        |        |        | 2   |      |
| 4317   | 3      | 4      |        | 1   | 3    |
| 4319   | 3      |        |        | 1   | 3    |
| 4323   |        |        |        | 1   | 2    |
| 4337   |        |        |        | 2   |      |
| 4341   |        |        |        | 1   | 2    |

| respid | Q31b_7 | Q31b_8 | Q31b_9 | Q32 | Q32a |   |
|--------|--------|--------|--------|-----|------|---|
| 4342   |        |        |        |     | 2    |   |
| 4344   |        |        |        |     | 2    |   |
| 4345   | 1      |        |        |     | 1    | 2 |
| 4346   |        |        |        |     | 2    |   |
| 4347   |        |        |        |     | 2    |   |
| 4350   |        |        |        |     | 2    |   |
| 4352   |        |        |        |     | 1    | 0 |
| 4353   |        |        |        |     | 2    |   |
| 4355   |        |        |        |     | 2    |   |
| 4356   |        |        |        |     | 2    |   |
| 4358   |        |        |        |     | 2    |   |
| 4359   |        |        | 0      |     | 2    |   |
| 4360   |        |        |        |     | 2    |   |
| 4361   |        | 3      | 2      |     | 1    | 3 |
| 4363   |        |        |        |     | 1    | 0 |
| 4364   | 3      |        |        |     | 2    |   |
| 4365   |        |        |        |     | 1    | 1 |
| 4367   |        |        |        |     | 2    |   |
| 4369   |        |        | 1      |     | 2    |   |
| 4373   |        |        | 2      |     | 2    |   |
| 4374   |        |        |        |     | 1    | 1 |
| 4375   |        |        |        |     | 1    | 0 |
| 4378   |        |        |        |     | 2    |   |
| 4379   |        |        |        |     | 2    |   |
| 4382   |        |        | 0      |     | 1    | 0 |
| 4383   |        |        |        |     | 2    |   |
| 4384   |        |        |        |     | 1    | 2 |
| 4385   |        |        |        |     | 2    |   |
| 4388   |        |        | 1      |     | 2    |   |
| 4389   |        |        |        |     | 1    | 0 |
| 4391   |        |        |        |     | 2    |   |
| 4392   | 1      |        |        |     | 2    |   |

| respid | Q31b_7 | Q31b_8 | Q31b_9 | Q32 | Q32a |   |
|--------|--------|--------|--------|-----|------|---|
| 4393   |        |        |        |     | 2    |   |
| 4395   |        |        |        |     | 2    |   |
| 4397   |        |        |        |     | 2    |   |
| 4398   |        |        |        |     | 2    |   |
| 4399   |        |        |        |     | 2    |   |
| 4400   |        |        |        |     | 2    |   |
| 4401   |        |        |        |     | 2    |   |
| 4402   |        |        |        |     | 2    |   |
| 4404   |        |        |        |     | 2    |   |
| 4405   |        |        |        |     | 2    |   |
| 4407   |        |        |        |     | 2    |   |
| 4408   |        |        |        |     | 1    | 2 |
| 4411   |        |        |        |     | 2    |   |
| 4420   |        |        |        |     | 2    |   |
| 4421   |        |        |        |     | 2    |   |
| 4424   | 4      |        |        |     | 1    | 3 |
| 4425   |        |        |        |     | 2    |   |
| 4427   |        |        |        |     | 2    |   |
| 4430   |        |        | 0      |     | 2    |   |
| 4431   |        |        |        |     | 2    |   |
| 4432   |        |        |        |     | 2    |   |
| 4436   |        |        |        |     | 2    |   |
| 4439   |        |        |        |     | 2    |   |
| 4451   |        |        | 1      |     | 1    | 1 |
| 4452   |        |        |        |     | 2    |   |
| 4458   |        |        |        |     | 2    |   |
| 4464   |        |        |        |     | 1    | 1 |
| 4465   | 2      |        |        |     | 1    | 1 |
| 4467   |        |        |        |     | 2    |   |
| 4470   |        |        |        |     | 1    | 3 |
| 4471   |        |        |        |     | 2    |   |
| 4472   |        |        |        |     | 2    |   |

| respid | Q31b_7 | Q31b_8 | Q31b_9 | Q32 | Q32a |
|--------|--------|--------|--------|-----|------|
| 4473   |        |        |        | 1   | 2    |
| 4475   |        |        |        | 2   |      |
| 4476   |        |        |        | 1   | 0    |
| 4478   |        |        |        | 1   | 0    |
| 4485   |        |        |        | 2   |      |
| 4486   |        |        |        | 2   |      |
| 4490   |        |        |        | 2   |      |
| 4502   |        |        |        | 2   |      |
| 4503   |        |        |        | 1   | 4    |
| 4504   |        |        |        | 2   |      |
| 4506   |        |        |        | 2   |      |
| 4508   |        |        |        | 2   |      |
| 4515   |        |        |        | 2   |      |
| 4516   |        |        |        | 1   | 2    |
| 4519   |        |        | 1      | 2   |      |
| 4523   |        |        |        | 2   |      |
| 4525   |        |        | 1      | 2   |      |
| 4526   |        |        |        | 2   |      |
| 4528   |        |        |        | 2   |      |
| 4530   |        |        |        | 2   |      |
| 4531   |        | 2      |        | 1   | 1    |
| 4532   |        |        |        | 2   |      |
| 4537   |        |        |        | 2   |      |
| 4538   |        |        |        | 2   |      |
| 4539   |        |        |        | 2   |      |
| 4541   |        |        |        | 2   |      |
| 4543   |        |        |        | 2   |      |
| 4544   |        |        |        | 2   |      |
| 4546   |        |        |        | 2   |      |
| 4547   |        |        |        | 2   |      |
| 4549   |        |        |        | 2   |      |
| 4550   |        |        |        | 2   |      |

| respid | Q31b_7 | Q31b_8 | Q31b_9 | Q32 | Q32a |
|--------|--------|--------|--------|-----|------|
| 4551   |        |        |        | 2   |      |
| 4554   |        |        |        | 2   |      |
| 4557   |        |        |        | 2   |      |
| 4565   |        |        |        | 2   |      |
| 4568   |        |        |        | 2   |      |
| 4569   |        |        |        | 2   |      |
| 4570   |        |        |        | 2   |      |
| 4572   |        |        |        | 2   |      |
| 4574   |        |        |        | 2   |      |
| 4576   |        |        |        | 2   |      |
| 4578   |        |        |        | 2   |      |
| 4579   |        |        |        | 2   |      |
| 4580   | 1      |        | 2      | 1   | 3    |
| 4581   |        |        |        | 2   |      |
| 4584   |        |        |        | 2   |      |
| 4586   |        | 3      |        | 1   | 3    |
| 4587   |        |        |        | 1   | 2    |
| 4590   |        |        |        | 2   |      |
| 4592   |        |        |        | 2   |      |
| 4593   |        |        |        | 2   |      |
| 4595   |        |        |        | 2   |      |
| 4597   |        |        |        | 2   |      |
| 4598   |        |        |        | 1   | 2    |
| 4599   |        |        |        | 1   | 1    |
| 4600   |        |        |        | 1   | 1    |
| 4601   |        |        |        | 2   |      |
| 4608   |        |        |        | 2   |      |
| 4609   |        |        |        | 2   |      |
| 4611   |        |        |        | 2   |      |
| 4612   |        |        |        | 1   | 2    |
| 4613   |        |        |        | 2   |      |
| 4616   |        |        |        | 1   | 2    |

| respid | Q31b_7 | Q31b_8 | Q31b_9 | Q32 | Q32a |
|--------|--------|--------|--------|-----|------|
| 4617   |        |        |        | 2   |      |
| 4620   |        |        |        | 1   | 1    |
| 4621   |        |        |        | 2   |      |
| 4622   |        |        | 1      | 1   | 1    |
| 4624   |        |        |        | 2   |      |
| 4625   |        |        |        | 1   | 2    |
| 4627   |        |        |        | 1   | 3    |
| 4628   | 2      |        |        | 1   | 2    |
| 4629   |        |        |        | 2   |      |
| 4630   |        |        |        | 1   | 1    |
| 4632   |        |        |        | 2   |      |
| 4634   |        |        |        | 2   |      |
| 4635   |        |        | 3      | 1   | 4    |
| 4636   |        |        |        | 2   |      |
| 4637   |        |        |        | 2   |      |
| 4638   |        |        |        | 1   | 3    |
| 4639   |        |        | 1      | 2   |      |
| 4641   |        |        |        | 2   |      |
| 4643   |        |        |        | 2   |      |
| 4645   |        |        |        | 2   |      |
| 4646   |        |        |        | 2   |      |
| 4647   |        |        |        | 2   |      |
| 4648   |        |        |        | 2   |      |
| 4649   |        |        |        | 2   |      |
| 4650   |        |        | 2      | 2   |      |
| 4651   |        |        |        | 1   | 1    |
| 4652   |        |        |        | 2   |      |
| 4653   |        |        |        | 2   |      |
| 4657   |        |        |        | 2   |      |
| 4660   |        |        |        | 1   | 2    |
| 4661   |        |        |        | 2   |      |
| 4662   |        |        |        | 1   | 1    |



| respid | Q31b_7 | Q31b_8 | Q31b_9 | Q32 | Q32a |
|--------|--------|--------|--------|-----|------|
| 4667   |        |        |        | 1   | 1    |
| 4669   |        |        |        | 2   |      |
| 4671   |        |        |        | 2   |      |
| 4672   | 2      |        |        | 1   | 0    |
| 4673   |        |        |        | 2   |      |
| 4677   |        |        |        | 2   |      |
| 4679   |        |        |        | 2   |      |
| 4683   |        |        |        | 2   |      |
| 4684   |        |        | 1      | 2   |      |
| 4685   |        | 1      |        | 2   |      |
| 4686   |        |        |        | 2   |      |
| 4687   |        |        |        | 2   |      |
| 4688   |        |        |        | 2   |      |
| 4691   |        |        |        | 2   |      |
| 4692   |        |        |        | 2   |      |
| 4694   |        |        |        | 2   |      |
| 4695   |        |        |        | 2   |      |
| 4696   |        |        |        | 1   | 2    |
| 4697   |        |        |        | 2   |      |
| 4698   |        |        |        | 1   | 2    |
| 4699   |        |        |        | 2   |      |
| 4701   |        |        |        | 2   |      |
| 4703   |        |        | 1      | 1   | 0    |
| 4704   |        |        |        | 1   | 3    |
| 4705   |        |        |        | 2   |      |
| 4706   |        |        |        | 2   |      |
| 4707   |        |        |        | 2   |      |
| 4708   |        |        |        | 2   |      |
| 4710   |        |        |        | 2   |      |
| 4711   |        |        | 2      | 1   | 2    |
| 4715   |        |        |        | 2   |      |
| 4716   |        |        |        | 2   |      |

| respid | Q31b_7 | Q31b_8 | Q31b_9 | Q32 | Q32a |
|--------|--------|--------|--------|-----|------|
| 4717   |        |        |        | 2   |      |
| 4718   |        |        |        | 2   |      |
| 4722   |        |        |        | 1   | 0    |
| 4727   |        |        |        | 1   | 1    |
| 4728   |        |        | 4      | 1   | 3    |
| 4729   |        |        |        | 2   |      |
| 4732   |        |        |        | 2   |      |
| 4733   |        |        |        | 2   |      |
| 4734   |        |        |        | 2   |      |
| 4735   |        |        |        | 2   |      |
| 4737   |        |        | 1      | 2   |      |
| 4738   |        |        |        | 2   |      |
| 4740   |        |        |        | 2   |      |
| 4741   |        |        |        | 1   | 1    |
| 4743   |        |        |        | 2   |      |
| 4746   |        |        |        | 1   | 1    |
| 4750   |        |        |        | 2   |      |
| 4752   |        |        |        | 1   | 1    |
| 4753   |        |        | 1      | 2   |      |
| 4754   |        |        |        | 1   | 3    |
| 4755   | 2      |        | 2      | 1   | 3    |
| 4758   |        |        |        | 1   | 2    |
| 4766   |        |        |        | 2   |      |
| 4767   |        |        |        | 1   | 2    |
| 4768   |        |        | 1      | 2   |      |
| 4769   |        |        |        | 1   | 1    |
| 4771   |        |        |        | 2   |      |
| 4772   |        |        |        | 2   |      |
| 4773   |        |        |        | 2   |      |
| 4774   |        |        |        | 2   |      |
| 4776   |        |        |        | 1   | 2    |
| 4777   |        |        |        | 1   | 0    |

| respid | Q31b_7 | Q31b_8 | Q31b_9 | Q32 | Q32a |
|--------|--------|--------|--------|-----|------|
| 4779   |        |        |        | 2   |      |
| 4780   |        |        |        | 1   | 1    |
| 4781   |        |        | 1      | 2   |      |
| 4783   |        |        |        | 2   |      |
| 4784   |        |        |        | 2   |      |
| 4785   |        |        | 2      | 1   | 1    |
| 4788   |        |        |        | 2   |      |
| 4789   |        |        |        | 1   | 1    |
| 4790   |        |        |        | 2   |      |
| 4791   |        |        |        | 2   |      |
| 4794   |        |        |        | 2   |      |
| 4795   |        |        |        | 2   |      |
| 4797   |        |        |        | 2   |      |
| 4802   | 1      |        |        | 1   | 1    |
| 4803   | 1      |        |        | 1   | 1    |
| 4804   |        |        |        | 2   |      |
| 4805   |        |        |        | 1   | 0    |
| 4807   |        |        |        | 2   |      |
| 4808   |        |        |        | 2   |      |
| 4809   |        |        | 2      | 1   | 3    |
| 4811   |        |        |        | 2   |      |
| 4817   |        |        |        | 2   |      |
| 4819   |        |        |        | 2   |      |
| 4820   |        |        |        | 2   |      |
| 4821   |        | 3      |        | 1   | 1    |
| 4822   |        |        |        | 2   |      |
| 4823   |        |        |        | 2   |      |
| 4825   |        |        |        | 1   | 1    |
| 4826   |        |        |        | 2   |      |
| 4830   |        |        |        | 2   |      |
| 4832   |        |        |        | 2   |      |
| 4838   |        |        |        | 2   |      |

| respid | Q31b_7 | Q31b_8 | Q31b_9 | Q32 | Q32a |   |
|--------|--------|--------|--------|-----|------|---|
| 4840   |        |        |        |     | 2    |   |
| 4841   |        |        |        |     | 2    |   |
| 4843   |        |        |        |     | 2    |   |
| 4845   |        |        |        |     | 2    |   |
| 4846   |        |        | 1      |     | 2    |   |
| 4848   |        |        |        |     | 2    |   |
| 4853   |        |        |        |     | 2    |   |
| 4854   |        |        |        |     | 2    |   |
| 4859   |        |        |        |     | 1    | 1 |
| 4861   |        |        |        |     | 2    |   |
| 4864   |        |        |        |     | 2    |   |
| 4867   |        |        |        |     | 2    |   |
| 4870   |        |        |        |     | 2    |   |
| 4872   |        |        |        |     | 2    |   |
| 4873   |        |        |        |     | 2    |   |
| 4874   | 0      |        |        |     | 2    |   |
| 4878   |        |        |        |     | 2    |   |
| 4880   |        |        |        |     | 2    |   |
| 4881   |        |        |        |     | 2    |   |
| 4882   |        |        |        |     | 1    | 1 |
| 4883   |        |        |        |     | 2    |   |
| 4885   |        |        |        |     | 2    |   |
| 4889   |        |        |        |     | 2    |   |
| 4890   |        |        |        |     | 2    |   |
| 4891   |        |        | 0      |     | 2    |   |
| 4894   |        |        |        |     | 2    |   |
| 4895   | 3      |        | 2      |     | 1    | 3 |
| 4896   |        |        |        |     | 2    |   |
| 4897   |        |        |        |     | 2    |   |
| 4898   |        |        |        |     | 1    | 1 |
| 4899   |        |        |        |     | 2    |   |
| 4900   |        |        | 4      |     | 2    |   |

| respid | Q31b_7 | Q31b_8 | Q31b_9 | Q32 | Q32a |
|--------|--------|--------|--------|-----|------|
| 4901   |        |        |        | 2   |      |
| 4903   |        |        |        | 1   | 1    |
| 4904   |        |        |        | 1   | 0    |
| 4908   |        |        |        | 2   |      |
| 4909   |        |        |        | 2   |      |
| 4913   |        |        |        | 2   |      |
| 4917   |        |        |        | 1   | 0    |
| 4918   |        |        |        | 2   |      |
| 4920   |        |        |        | 2   |      |
| 4921   |        |        |        | 1   | 2    |
| 4925   |        |        |        | 2   |      |
| 4926   |        |        |        | 2   |      |
| 4927   |        |        | 0      | 2   |      |
| 4928   |        |        |        | 1   | 1    |
| 4929   |        |        |        | 2   |      |
| 4930   |        |        |        | 2   |      |
| 4931   |        |        |        | 2   |      |
| 4932   |        |        |        | 1   | 2    |
| 4933   |        |        |        | 2   |      |
| 4934   |        |        |        | 2   |      |
| 5934   |        |        |        | 2   |      |
| 5935   |        |        |        | 2   |      |
| 5936   |        |        |        | 2   |      |
| 5938   |        |        |        | 2   |      |
| 5939   |        |        |        | 2   |      |
| 5940   |        |        |        | 1   | 1    |
| 5942   |        |        |        | 2   |      |
| 5944   |        |        | 2      | 2   |      |
| 5951   |        |        |        | 1   | 3    |
| 5952   |        |        |        | 2   |      |
| 5954   |        |        |        | 2   |      |
| 5956   |        |        |        | 2   |      |

| respid | Q31b_7 | Q31b_8 | Q31b_9 | Q32 | Q32a |
|--------|--------|--------|--------|-----|------|
| 5957   |        |        |        | 1   | 1    |
| 5958   |        |        | 1      | 2   |      |
| 5959   |        |        | 1      | 2   |      |
| 5960   |        |        |        | 2   |      |
| 5963   |        |        |        | 2   |      |
| 5966   |        |        |        | 2   |      |
| 5968   |        |        | 1      | 2   |      |
| 5974   |        |        |        | 2   |      |
| 5975   |        |        |        | 2   |      |
| 5976   |        |        |        | 2   |      |
| 5977   |        |        |        | 1   | 0    |
| 5978   |        |        |        | 2   |      |
| 5979   |        |        |        | 2   |      |
| 5983   |        |        |        | 2   |      |
| 5984   |        |        |        | 2   |      |
| 5990   |        |        |        | 2   |      |
| 5991   |        |        |        | 2   |      |
| 5992   |        |        |        | 2   |      |
| 5993   |        |        |        | 2   |      |
| 5994   |        |        |        | 2   |      |
| 5996   |        |        |        | 2   |      |
| 6001   |        |        |        | 1   | 2    |
| 6003   |        |        |        | 2   |      |
| 6004   |        |        |        | 1   | 2    |
| 6005   |        |        |        | 2   |      |
| 6006   |        |        |        | 2   |      |
| 6008   |        |        |        | 1   | 2    |
| 6009   |        |        |        | 1   | 2    |
| 6014   |        |        |        | 2   |      |
| 6016   |        |        |        | 1   | 1    |
| 6017   |        |        | 2      | 2   |      |
| 6018   |        |        |        | 2   |      |

| respid | Q31b_7 | Q31b_8 | Q31b_9 | Q32 | Q32a |
|--------|--------|--------|--------|-----|------|
| 6020   |        |        |        | 2   |      |
| 6021   |        |        |        | 2   |      |
| 6024   |        |        |        | 2   |      |
| 6025   |        |        |        | 2   |      |
| 6026   |        |        |        | 2   |      |
| 6032   |        |        |        | 1   | 1    |
| 6035   |        |        |        | 2   |      |
| 6038   |        |        |        | 2   |      |
| 6043   |        |        | 1      | 1   | 2    |
| 6044   |        |        |        | 2   |      |
| 6046   |        |        | 1      | 1   | 1    |
| 6047   |        |        |        | 2   |      |
| 6048   |        |        |        | 1   | 1    |
| 6050   |        |        |        | 1   | 2    |
| 6051   |        |        |        | 1   | 1    |
| 6053   |        |        |        | 2   |      |
| 6054   |        |        | 2      | 2   |      |
| 6056   |        |        |        | 2   |      |
| 6058   |        |        |        | 2   |      |
| 6060   |        |        |        | 2   |      |
| 6061   |        |        |        | 2   |      |
| 6062   |        |        |        | 2   |      |
| 6067   |        |        |        | 2   |      |
| 6070   |        |        |        | 2   |      |
| 6074   |        |        |        | 1   | 2    |
| 6076   |        |        |        | 1   | 1    |
| 6078   |        |        |        | 2   |      |
| 6081   |        |        |        | 2   |      |
| 6085   |        |        | 1      | 2   |      |
| 6088   |        |        |        | 2   |      |
| 6092   |        |        | 1      | 2   |      |
| 6095   |        |        |        | 2   |      |

| respid | Q31b_7 | Q31b_8 | Q31b_9 | Q32 | Q32a |   |
|--------|--------|--------|--------|-----|------|---|
| 6098   |        |        |        |     | 2    |   |
| 6101   |        |        |        |     | 2    |   |
| 6102   |        |        |        |     | 2    |   |
| 6105   |        |        |        |     | 2    |   |
| 6106   |        |        | 1      |     | 2    |   |
| 6107   |        |        |        |     | 2    |   |
| 6111   |        |        |        |     | 2    |   |
| 6112   |        |        |        |     | 1    | 2 |
| 6113   | 1      |        |        |     | 2    |   |
| 6115   |        |        |        |     | 2    |   |
| 6116   |        |        |        |     | 2    |   |
| 6117   |        |        |        |     | 2    |   |
| 6124   |        |        | 2      |     | 1    | 1 |
| 6125   |        |        |        |     | 2    |   |
| 6128   |        |        |        |     | 2    |   |
| 6133   |        |        |        |     | 2    |   |
| 6134   |        |        |        |     | 2    |   |
| 6135   |        |        | 3      |     | 2    |   |
| 6138   |        |        |        |     | 2    |   |
| 6140   |        |        |        |     | 2    |   |
| 6143   |        |        |        |     | 2    |   |
| 6147   |        |        |        |     | 1    | 2 |
| 6154   |        |        |        |     | 2    |   |
| 6162   |        |        |        |     | 2    |   |
| 6165   |        |        |        |     | 1    | 2 |
| 6166   |        |        | 1      |     | 1    | 1 |
| 6173   |        |        | 1      |     | 1    | 3 |
| 6180   |        |        | 1      |     | 1    | 1 |
| 6184   |        |        | 4      |     | 1    | 3 |
| 6185   |        |        |        |     | 2    |   |
| 6186   |        |        |        |     | 2    |   |
| 6188   |        |        |        |     | 2    |   |



| respid | Q31b_7 | Q31b_8 | Q31b_9 | Q32 | Q32a |
|--------|--------|--------|--------|-----|------|
| 6192   |        |        |        | 2   |      |
| 6194   |        |        |        | 2   |      |
| 6195   |        |        |        | 2   |      |
| 6196   |        |        |        | 2   |      |
| 6199   |        |        | 1      | 2   |      |
| 6200   |        |        |        | 2   |      |
| 6201   |        |        |        | 2   |      |
| 6202   |        |        |        | 2   |      |
| 6203   |        |        |        | 2   |      |
| 6205   |        |        |        | 2   |      |
| 6210   |        |        | 1      | 1   | 1    |
| 6212   |        |        | 1      | 2   |      |
| 6216   |        |        |        | 1   | 2    |
| 6218   |        |        |        | 1   | 3    |
| 6221   |        |        | 0      | 2   |      |
| 6224   |        |        |        | 2   |      |
| 6225   |        |        |        | 2   |      |
| 6227   |        |        |        | 2   |      |
| 6230   |        |        |        | 2   |      |
| 6231   |        |        |        | 2   |      |
| 6233   |        |        |        | 1   | 0    |
| 6234   |        |        |        | 2   |      |
| 6235   |        |        |        | 2   |      |
| 6237   |        |        |        | 2   |      |
| 6240   |        |        |        | 2   |      |
| 6248   |        |        |        | 2   |      |
| 6249   |        |        |        | 2   |      |
| 6252   |        |        |        | 1   | 2    |
| 6254   |        |        |        | 2   |      |
| 6269   | 1      |        |        | 1   | 1    |
| 6304   |        |        |        | 2   |      |
| 6334   |        |        | 1      | 1   | 0    |

| respid | Q31b_7 | Q31b_8 | Q31b_9 | Q32 | Q32a |
|--------|--------|--------|--------|-----|------|
| 6341   |        |        |        | 1   | 2    |
| 6350   |        |        |        | 1   | 2    |
| 6370   |        |        |        | 2   |      |
| 6384   |        |        |        | 2   |      |
| 6400   |        |        |        | 2   |      |
| 6418   |        |        |        | 2   |      |
| 6467   |        |        |        | 2   |      |
| 6469   |        |        |        | 2   |      |
| 6474   |        |        |        | 2   |      |
| 6475   |        |        |        | 2   |      |
| 6476   |        |        |        | 2   |      |
| 6477   |        |        |        | 2   |      |
| 6480   |        |        |        | 2   |      |
| 6481   |        |        |        | 1   | 2    |
| 6485   |        |        |        | 2   |      |
| 6488   |        |        | 1      | 1   | 2    |
| 6495   |        |        |        | 2   |      |
| 6499   |        |        |        | 2   |      |
| 6500   |        |        |        | 2   |      |
| 6504   |        |        |        | 2   |      |
| 6507   |        |        |        | 2   |      |
| 6512   |        |        |        | 2   |      |
| 6525   |        |        |        | 1   | 3    |
| 6532   |        |        |        | 2   |      |
| 6535   |        |        |        | 2   |      |
| 6546   |        |        |        | 2   |      |
| 6551   |        |        | 4      | 1   | 3    |
| 6556   |        |        |        | 2   |      |
| 6566   |        |        |        | 1   | 3    |
| 6569   |        |        |        | 2   |      |
| 6574   |        |        |        | 2   |      |
| 6576   |        |        |        | 2   |      |

| respid | Q31b_7 | Q31b_8 | Q31b_9 | Q32 | Q32a |
|--------|--------|--------|--------|-----|------|
| 6580   |        |        |        | 2   |      |
| 6584   |        |        |        | 2   |      |
| 6585   |        |        | 1      | 2   |      |
| 6589   |        |        |        | 2   |      |
| 6590   |        |        |        | 2   |      |
| 6598   |        |        |        | 2   |      |
| 6603   |        |        |        | 1   | 0    |
| 6618   |        |        |        | 2   |      |
| 6630   |        |        |        | 1   | 0    |
| 6636   |        |        |        | 2   |      |
| 6649   |        |        |        | 2   |      |
| 6675   |        |        |        | 2   |      |
| 6678   |        |        |        | 2   |      |
| 6681   |        |        |        | 2   |      |
| 6684   |        |        |        | 2   |      |
| 6688   |        |        |        | 2   |      |
| 6691   |        |        |        | 2   |      |
| 6694   |        |        |        | 1   | 1    |
| 6696   |        |        |        | 2   |      |
| 6720   |        | 3      | 2      | 1   | 3    |
| 6722   |        |        | 3      | 1   | 3    |
| 6724   |        |        |        | 2   |      |
| 6725   |        |        |        | 2   |      |
| 6727   |        |        |        | 2   |      |
| 6734   |        |        |        | 1   | 1    |
| 6739   |        |        |        | 1   | 2    |
| 6743   | 2      |        |        | 1   | 2    |
| 6749   |        |        |        | 2   |      |
| 6756   |        |        |        | 2   |      |
| 6764   |        |        | 1      | 2   |      |
| 6765   |        |        |        | 2   |      |
| 6768   |        |        |        | 2   |      |

| respid | Q31b_7 | Q31b_8 | Q31b_9 | Q32 | Q32a |
|--------|--------|--------|--------|-----|------|
| 6773   |        |        |        | 2   |      |
| 6775   |        |        |        | 1   | 1    |
| 6777   |        |        |        | 2   |      |
| 6779   |        |        |        | 1   | 0    |
| 6790   |        |        |        | 2   |      |
| 6797   |        |        |        | 2   |      |
| 6798   |        |        |        | 2   |      |
| 6808   |        |        |        | 2   |      |
| 6810   |        |        |        | 1   | 0    |
| 6811   |        |        | 2      | 1   | 3    |
| 6812   |        |        |        | 2   |      |
| 6814   |        |        |        | 2   |      |
| 6819   |        |        |        | 2   |      |
| 6820   |        |        | 1      | 1   | 2    |
| 6832   |        |        |        | 2   |      |
| 6854   |        |        |        | 1   | 1    |
| 6855   |        |        |        | 2   |      |
| 6857   |        |        |        | 2   |      |
| 6858   |        |        |        | 2   |      |
| 6859   |        |        |        | 2   |      |
| 6860   |        |        | 1      | 2   |      |
| 6862   |        |        |        | 1   | 1    |
| 6879   |        |        |        | 2   |      |
| 6893   |        |        |        | 2   |      |
| 6898   |        |        |        | 1   | 0    |
| 6902   |        |        | 2      | 1   | 2    |
| 6903   |        |        |        | 1   | 0    |
| 6907   |        |        |        | 1   | 3    |
| 6908   |        |        |        | 2   |      |
| 6912   |        |        |        | 2   |      |
| 6915   |        |        | 1      | 2   |      |
| 6916   |        |        |        | 2   |      |

| respid | Q31b_7 | Q31b_8 | Q31b_9 | Q32 | Q32a |
|--------|--------|--------|--------|-----|------|
| 6917   |        |        |        | 1   | 2    |
| 6923   |        |        |        | 2   |      |
| 6934   |        |        |        | 2   |      |
| 6937   |        |        |        | 2   |      |
| 6945   |        |        |        | 2   |      |
| 6954   |        |        | 0      | 2   |      |
| 6956   |        |        | 2      | 1   | 1    |
| 6958   |        |        |        | 2   |      |
| 6961   |        |        |        | 2   |      |
| 6963   |        |        |        | 2   |      |
| 6964   |        |        |        | 2   |      |
| 6976   |        |        |        | 2   |      |
| 6977   |        |        |        | 2   |      |
| 7000   |        | 2      |        | 1   | 3    |
| 7001   |        |        |        | 2   |      |
| 7005   |        |        |        | 2   |      |
| 7006   |        |        |        | 2   |      |
| 7008   |        |        |        | 1   | 4    |
| 7009   |        | 2      |        | 2   |      |
| 7019   |        |        |        | 2   |      |
| 7021   |        |        |        | 2   |      |
| 7026   |        |        | 2      | 1   | 2    |
| 7030   |        |        |        | 1   | 3    |
| 7034   |        |        |        | 2   |      |
| 7039   |        |        |        | 2   |      |
| 7041   |        |        |        | 2   |      |
| 7047   |        |        |        | 2   |      |
| 7051   |        |        |        | 2   |      |
| 7052   |        |        |        | 2   |      |
| 7059   |        |        |        | 1   | 1    |
| 7062   |        |        |        | 2   |      |
| 7065   |        |        | 1      | 2   |      |

| respid | Q31b_7 | Q31b_8 | Q31b_9 | Q32 | Q32a |
|--------|--------|--------|--------|-----|------|
| 7066   |        |        |        | 2   |      |
| 7069   |        |        |        | 1   | 1    |
| 7070   |        |        |        | 2   |      |
| 7073   |        |        |        | 2   |      |
| 7078   |        |        |        | 2   |      |
| 7083   |        |        |        | 1   | 2    |
| 7084   |        |        |        | 1   | 3    |
| 7085   |        |        |        | 2   |      |
| 7088   |        |        |        | 1   | 2    |
| 7090   |        |        |        | 1   | 2    |
| 7095   |        |        |        | 2   |      |
| 7100   |        |        |        | 2   |      |
| 7102   |        |        |        | 2   |      |
| 7103   |        |        |        | 2   |      |
| 7108   |        |        |        | 2   |      |
| 7109   |        |        |        | 2   |      |
| 7110   |        |        |        | 2   |      |
| 7112   |        |        |        | 2   |      |
| 7114   |        |        |        | 2   |      |
| 7116   |        |        |        | 2   |      |
| 7117   |        |        |        | 2   |      |
| 7118   | 3      |        |        | 1   | 2    |
| 7120   |        |        |        | 1   | 3    |
| 7124   |        |        |        | 2   |      |
| 7130   |        |        |        | 2   |      |
| 7135   |        |        |        | 2   |      |
| 7137   |        |        | 3      | 1   | 1    |
| 7140   |        |        |        | 2   |      |
| 7141   |        |        |        | 2   |      |
| 7148   |        |        |        | 2   |      |
| 7152   |        |        |        | 2   |      |
| 7154   |        |        |        | 1   | 0    |

| respid | Q31b_7 | Q31b_8 | Q31b_9 | Q32 | Q32a |
|--------|--------|--------|--------|-----|------|
| 7156   |        |        |        | 1   | 1    |
| 7158   |        |        |        | 2   |      |
| 7159   |        |        |        | 2   |      |
| 7161   |        |        |        | 2   |      |
| 7164   |        |        |        | 2   |      |
| 7166   |        |        |        | 2   |      |
| 7167   |        |        |        | 2   |      |
| 7168   |        |        |        | 2   |      |
| 7170   |        |        |        | 2   |      |
| 7171   |        |        |        | 2   |      |
| 7172   |        |        |        | 2   |      |
| 7173   |        |        | 1      | 1   | 2    |
| 7175   |        |        | 0      | 2   |      |
| 7176   |        |        |        | 1   | 1    |
| 7180   |        |        |        | 2   |      |
| 7183   |        |        | 1      | 2   |      |
| 7189   |        |        |        | 2   |      |
| 7193   |        |        |        | 2   |      |
| 7194   |        | 0      |        | 1   | 2    |
| 7195   |        |        |        | 2   |      |
| 7200   |        |        |        | 2   |      |
| 7201   |        |        |        | 1   | 3    |
| 7205   | 2      |        | 2      | 2   |      |
| 7207   |        |        |        | 2   |      |
| 7208   |        |        |        | 2   |      |
| 7210   |        |        |        | 2   |      |
| 7211   |        |        |        | 2   |      |
| 7217   |        |        |        | 1   | 0    |
| 7218   |        |        |        | 2   |      |
| 7220   |        |        |        | 2   |      |
| 7225   |        |        |        | 2   |      |
| 7228   |        |        |        | 2   |      |

| respid | Q31b_7 | Q31b_8 | Q31b_9 | Q32 | Q32a |
|--------|--------|--------|--------|-----|------|
| 7230   |        |        |        | 1   | 1    |
| 7233   |        |        |        | 2   |      |
| 7234   |        |        |        | 2   |      |
| 7235   |        |        |        | 2   |      |
| 7236   |        |        |        | 2   |      |
| 7241   |        |        |        | 2   |      |
| 7251   |        |        |        | 2   |      |
| 7253   |        |        |        | 2   |      |
| 7259   |        |        |        | 2   |      |
| 7260   |        |        |        | 2   |      |
| 7261   |        |        | 1      | 1   | 1    |
| 7263   |        |        |        | 2   |      |
| 7265   |        |        |        | 2   |      |
| 7268   |        |        |        | 2   |      |
| 7269   |        |        |        | 2   |      |
| 7271   |        |        |        | 1   | 2    |
| 7276   | 4      |        | 3      | 1   | 4    |
| 7280   |        |        | 1      | 2   |      |
| 7283   |        |        |        | 2   |      |
| 7284   |        |        |        | 1   | 1    |
| 7286   |        |        |        | 2   |      |
| 7287   |        |        |        | 2   |      |
| 7288   |        |        |        | 1   | 0    |
| 7294   |        |        |        | 2   |      |
| 7295   |        |        |        | 2   |      |
| 7296   |        |        |        | 2   |      |
| 7297   |        | 0      |        | 2   |      |
| 7299   |        |        |        | 2   |      |
| 7300   |        |        |        | 2   |      |
| 7301   |        |        |        | 2   |      |
| 7302   |        |        |        | 2   |      |
| 7306   |        |        |        | 2   |      |



| respid | Q31b_7 | Q31b_8 | Q31b_9 | Q32 | Q32a |
|--------|--------|--------|--------|-----|------|
| 7313   |        |        | 4      | 1   | 3    |
| 7315   |        |        |        | 2   |      |
| 7317   |        |        |        | 2   |      |
| 7321   |        |        |        | 2   |      |
| 7322   |        |        |        | 2   |      |
| 7323   |        |        |        | 1   | 0    |
| 7333   |        |        | 3      | 1   | 2    |
| 7335   |        |        | 4      | 2   |      |
| 7336   |        |        |        | 2   |      |
| 7337   |        |        |        | 2   |      |
| 7338   |        |        |        | 2   |      |
| 7340   |        |        | 1      | 2   |      |
| 7341   |        |        |        | 1   | 2    |
| 7342   |        |        |        | 2   |      |
| 7344   |        |        | 1      | 2   |      |
| 7346   |        |        |        | 2   |      |
| 7347   |        |        |        | 2   |      |
| 7349   |        |        |        | 2   |      |
| 7352   |        |        |        | 2   |      |
| 7353   |        |        | 0      | 2   |      |
| 7355   |        |        |        | 1   | 0    |
| 7356   |        |        |        | 2   |      |
| 7360   |        |        |        | 1   | 3    |
| 7371   |        |        |        | 2   |      |
| 7376   |        | 1      |        | 2   |      |
| 7379   |        |        |        | 1   | 2    |
| 7381   |        |        |        | 2   |      |
| 7386   |        |        |        | 2   |      |
| 7389   |        |        |        | 2   |      |
| 7390   |        |        | 4      | 1   | 2    |
| 7393   |        |        |        | 2   |      |
| 7394   |        |        |        | 2   |      |

| respid | Q31b_7 | Q31b_8 | Q31b_9 | Q32 | Q32a |
|--------|--------|--------|--------|-----|------|
| 7396   |        |        |        | 2   |      |
| 7400   |        |        |        | 1   | 1    |
| 7401   |        |        |        | 2   |      |
| 7403   |        |        |        | 2   |      |
| 7406   |        |        | 4      | 2   |      |
| 7409   |        |        |        | 2   |      |
| 7410   |        |        |        | 1   | 3    |
| 7412   |        |        |        | 2   |      |
| 7414   |        |        |        | 2   |      |
| 7415   |        |        |        | 2   |      |
| 7417   |        |        | 1      | 2   |      |
| 7421   | 3      |        | 3      | 1   | 3    |
| 7425   |        |        |        | 1   | 2    |
| 7430   |        |        |        | 2   |      |
| 7432   |        |        |        | 2   |      |
| 7433   |        |        |        | 2   |      |
| 7442   | 0      |        | 0      | 2   |      |
| 7445   |        |        |        | 2   |      |
| 7446   |        |        |        | 1   | 1    |
| 7449   |        |        |        | 2   |      |
| 7450   |        |        |        | 2   |      |
| 7451   |        |        |        | 2   |      |
| 7459   |        |        |        | 2   |      |
| 7462   |        |        |        | 2   |      |
| 7463   |        |        |        | 2   |      |
| 7469   |        |        |        | 2   |      |
| 7482   |        |        |        | 2   |      |
| 7484   |        |        | 0      | 2   |      |
| 7486   |        |        |        | 2   |      |
| 7496   |        |        |        | 2   |      |
| 7502   |        |        |        | 1   | 1    |
| 7504   |        |        | 1      | 1   | 1    |

| respid | Q31b_7 | Q31b_8 | Q31b_9 | Q32 | Q32a |
|--------|--------|--------|--------|-----|------|
| 7509   |        |        |        | 1   | 3    |
| 7513   |        |        |        | 1   | 2    |
| 7514   |        |        |        | 2   |      |
| 7520   |        |        |        | 2   |      |
| 7523   |        |        |        | 2   |      |
| 7526   |        |        |        | 1   | 1    |
| 7529   |        |        |        | 2   |      |
| 7534   |        |        |        | 2   |      |
| 7536   |        | 2      |        | 2   |      |
| 7540   |        |        | 1      | 2   |      |
| 7541   |        |        |        | 1   | 2    |
| 7542   |        |        |        | 2   |      |
| 7555   |        |        |        | 2   |      |
| 7566   |        |        |        | 1   | 0    |
| 7568   |        |        |        | 2   |      |
| 7570   |        |        |        | 1   | 1    |
| 7572   |        | 0      |        | 2   |      |
| 7573   |        |        |        | 2   |      |
| 7576   |        |        |        | 2   |      |
| 7577   |        |        |        | 1   | 2    |
| 7583   |        |        |        | 2   |      |
| 7584   | 0      |        |        | 2   |      |
| 7585   | 3      |        | 3      | 1   | 4    |
| 7586   |        |        | 0      | 2   |      |
| 7587   |        |        |        | 2   |      |
| 7588   |        |        |        | 2   |      |
| 7596   |        |        |        | 2   |      |
| 7599   |        |        |        | 2   |      |
| 7600   |        |        |        | 1   | 2    |
| 7602   |        |        |        | 2   |      |
| 7613   |        |        |        | 2   |      |
| 7620   |        |        |        | 2   |      |

| respid | Q31b_7 | Q31b_8 | Q31b_9 | Q32 | Q32a |
|--------|--------|--------|--------|-----|------|
| 7623   |        | 1      |        | 2   |      |
| 7635   |        |        |        | 2   |      |
| 7636   |        |        | 1      | 1   | 2    |
| 7643   |        |        |        | 1   | 2    |
| 7645   |        |        |        | 1   | 2    |
| 7649   |        |        |        | 1   | 3    |
| 7651   |        |        |        | 2   |      |
| 7652   |        |        | 3      | 2   |      |
| 7655   |        |        |        | 2   |      |
| 7657   |        |        |        | 2   |      |
| 7675   |        |        |        | 1   | 0    |
| 7676   |        |        |        | 2   |      |
| 7684   |        |        |        | 2   |      |
| 7693   |        |        |        | 2   |      |
| 7694   |        |        |        | 1   | 4    |
| 7695   |        |        |        | 2   |      |
| 7696   | 4      | 4      |        | 1   | 4    |
| 7698   |        |        |        | 2   |      |
| 7700   |        |        |        | 2   |      |
| 7701   |        |        |        | 2   |      |
| 7704   |        |        |        | 2   |      |
| 7709   |        |        |        | 2   |      |
| 7713   |        |        |        | 2   |      |
| 7714   |        |        |        | 2   |      |
| 7718   | 4      |        | 4      | 1   | 3    |
| 7720   |        | 1      |        | 2   |      |
| 7721   |        |        |        | 2   |      |
| 7722   |        |        |        | 1   | 0    |
| 7724   |        |        |        | 2   |      |
| 7728   |        |        |        | 2   |      |
| 7731   |        |        |        | 2   |      |
| 7735   |        |        |        | 2   |      |

| respid | Q31b_7 | Q31b_8 | Q31b_9 | Q32 | Q32a |
|--------|--------|--------|--------|-----|------|
| 7737   |        |        |        | 2   |      |
| 7741   |        |        |        | 1   | 0    |
| 7746   |        |        |        | 2   |      |
| 7747   |        |        |        | 2   |      |
| 7748   |        |        |        | 2   |      |
| 7750   |        |        |        | 2   |      |
| 7754   |        |        |        | 2   |      |
| 7755   |        |        |        | 2   |      |
| 7762   |        |        |        | 2   |      |
| 7764   |        |        |        | 2   |      |
| 7766   |        |        |        | 2   |      |
| 7768   |        |        |        | 1   | 2    |
| 7770   |        | 3      |        | 1   | 1    |
| 7771   |        |        |        | 2   |      |
| 7777   |        |        |        | 2   |      |
| 7778   |        |        |        | 2   |      |
| 7783   |        | 3      | 2      | 1   | 3    |
| 7789   |        |        |        | 1   | 1    |
| 7790   |        |        |        | 2   |      |
| 7795   |        |        |        | 2   |      |
| 7807   |        |        |        | 2   |      |
| 7808   |        |        | 2      | 2   |      |
| 7818   |        |        |        | 1   | 2    |
| 7820   |        |        |        | 2   |      |
| 7831   |        |        |        | 1   | 2    |
| 7832   |        |        |        | 2   |      |
| 7837   |        |        |        | 2   |      |
| 7841   |        |        | 2      | 2   |      |
| 7845   |        |        |        | 1   | 2    |
| 7853   |        |        |        | 1   | 1    |
| 7854   |        |        |        | 2   |      |
| 7862   | 2      |        | 2      | 1   | 3    |

| respid | Q31b_7 | Q31b_8 | Q31b_9 | Q32 | Q32a |   |
|--------|--------|--------|--------|-----|------|---|
| 7871   |        |        |        |     | 2    |   |
| 7875   |        |        |        |     | 2    |   |
| 7880   |        |        | 1      |     | 2    |   |
| 7881   |        |        |        |     | 2    |   |
| 7883   |        |        |        |     | 1    | 3 |
| 7896   |        |        |        |     | 2    |   |
| 7905   |        |        |        |     | 2    |   |
| 7919   |        |        |        |     | 2    |   |
| 7928   | 3      |        |        |     | 1    | 4 |
| 7929   |        |        |        |     | 2    |   |
| 7938   |        |        |        |     | 2    |   |
| 7940   |        |        |        |     | 2    |   |
| 7941   |        |        |        |     | 2    |   |
| 7952   |        |        |        |     | 2    |   |
| 7962   |        |        |        |     | 2    |   |
| 7968   |        |        |        |     | 2    |   |
| 7972   |        |        |        |     | 1    | 1 |
| 7983   |        |        |        |     | 2    |   |
| 7990   |        |        |        |     | 2    |   |
| 7993   |        |        |        |     | 2    |   |
| 8005   |        |        |        |     | 2    |   |
| 8008   |        |        |        |     | 2    |   |
| 8012   |        |        |        |     | 2    |   |
| 8021   |        |        |        |     | 2    |   |
| 8024   |        |        |        |     | 2    |   |
| 8043   |        |        |        |     | 2    |   |
| 8051   |        |        |        |     | 2    |   |
| 8056   |        |        |        |     | 2    |   |
| 8061   |        |        |        |     | 2    |   |
| 8066   |        |        |        |     | 2    |   |
| 8069   |        |        |        |     | 2    |   |
| 8071   |        |        |        |     | 2    |   |

| respid | Q31b_7 | Q31b_8 | Q31b_9 | Q32 | Q32a |
|--------|--------|--------|--------|-----|------|
| 8072   |        |        |        | 1   | 0    |
| 8076   |        |        |        | 2   |      |
| 8080   |        |        |        | 2   |      |
| 8083   |        |        |        | 1   | 0    |
| 8093   | 2      |        |        | 1   | 1    |
| 8095   |        |        | 2      | 2   |      |
| 8099   |        |        |        | 2   |      |
| 8100   |        |        |        | 1   | 1    |
| 8103   |        |        |        | 2   |      |
| 8104   |        |        | 1      | 2   |      |
| 8115   | 1      |        | 1      | 2   |      |
| 8121   |        |        |        | 2   |      |
| 8128   |        |        |        | 2   |      |
| 8130   |        |        |        | 2   |      |
| 8131   |        |        | 1      | 2   |      |
| 8133   |        |        |        | 2   |      |
| 8143   |        |        |        | 2   |      |
| 8144   |        |        |        | 2   |      |
| 8146   |        |        |        | 2   |      |
| 8148   |        |        |        | 2   |      |
| 8157   |        |        |        | 2   |      |
| 8164   |        |        |        | 2   |      |
| 8173   |        |        |        | 2   |      |
| 8176   |        |        |        | 2   |      |
| 8179   |        |        |        | 2   |      |
| 8181   |        |        |        | 2   |      |
| 8182   |        |        |        | 2   |      |
| 8196   |        |        |        | 2   |      |
| 8200   |        |        | 1      | 1   | 2    |
| 8203   |        |        |        | 2   |      |
| 8204   |        |        |        | 1   | 4    |
| 8206   |        |        |        | 2   |      |

| respid | Q31b_7 | Q31b_8 | Q31b_9 | Q32 | Q32a |   |
|--------|--------|--------|--------|-----|------|---|
| 8208   |        |        |        |     | 2    |   |
| 8212   |        |        |        |     | 2    |   |
| 8222   |        |        |        |     | 2    |   |
| 8223   |        |        |        |     | 2    |   |
| 8225   |        |        |        |     | 2    |   |
| 8226   |        |        |        |     | 2    |   |
| 8228   |        |        |        |     | 1    | 0 |
| 8229   |        |        |        |     | 2    |   |
| 8239   |        |        |        |     | 2    |   |
| 8246   |        |        | 2      |     | 1    | 1 |
| 8258   |        |        |        |     | 2    |   |
| 8260   |        |        |        |     | 2    |   |
| 8262   |        |        | 1      |     | 1    | 2 |
| 8263   |        |        |        |     | 2    |   |
| 8267   |        | 3      |        |     | 2    |   |
| 8271   |        |        | 3      |     | 1    | 3 |
| 8274   |        |        |        |     | 2    |   |
| 8275   |        |        |        |     | 1    | 2 |
| 8279   |        |        |        |     | 1    | 2 |
| 8285   |        |        | 2      |     | 1    | 2 |
| 8287   |        |        |        |     | 1    | 4 |
| 8289   |        |        |        |     | 2    |   |
| 8291   |        |        |        |     | 2    |   |
| 8299   |        |        |        |     | 1    | 1 |
| 8301   |        |        | 1      |     | 2    |   |
| 8302   |        |        |        |     | 1    | 0 |
| 8308   |        |        |        |     | 1    | 2 |
| 8313   |        |        |        |     | 1    | 1 |
| 8316   |        |        |        |     | 1    | 2 |
| 8317   |        |        |        |     | 2    |   |
| 8319   |        |        |        |     | 2    |   |
| 8323   |        | 1      | 1      |     | 1    | 2 |



| respid | Q31b_7 | Q31b_8 | Q31b_9 | Q32 | Q32a |
|--------|--------|--------|--------|-----|------|
| 8324   |        |        |        | 2   |      |
| 8327   |        |        |        | 2   |      |
| 8328   |        |        |        | 2   |      |
| 8342   |        |        |        | 2   |      |
| 8350   |        |        |        | 2   |      |
| 8352   |        |        |        | 2   |      |
| 8353   |        |        |        | 2   |      |
| 8356   |        |        |        | 2   |      |
| 8367   |        |        |        | 2   |      |
| 8373   |        |        |        | 2   |      |
| 8379   |        |        |        | 2   |      |
| 8382   |        |        |        | 2   |      |
| 8387   |        |        |        | 1   | 0    |
| 8409   |        |        |        | 2   |      |
| 8410   |        |        |        | 2   |      |
| 8412   |        |        |        | 1   | 2    |
| 8415   |        |        |        | 2   |      |
| 8417   |        |        | 1      | 2   |      |
| 8422   |        |        |        | 2   |      |
| 8430   |        |        |        | 1   | 2    |
| 8434   |        |        |        | 2   |      |
| 8436   |        |        |        | 2   |      |
| 8446   |        |        |        | 2   |      |
| 8447   |        |        |        | 2   |      |
| 8448   |        |        |        | 2   |      |
| 8455   |        |        |        | 2   |      |
| 8456   |        |        |        | 2   |      |
| 8459   |        |        |        | 2   |      |
| 8460   |        |        |        | 2   |      |
| 8464   |        |        | 2      | 2   |      |
| 8470   |        |        |        | 1   | 2    |
| 8473   |        |        |        | 2   |      |

| respid | Q31b_7 | Q31b_8 | Q31b_9 | Q32 | Q32a |
|--------|--------|--------|--------|-----|------|
| 8486   |        |        |        | 2   |      |
| 8487   |        |        |        | 2   |      |
| 8489   |        |        |        | 2   |      |
| 8494   |        |        |        | 1   | 1    |
| 8495   |        | 4      | 4      | 1   | 4    |
| 8497   |        |        |        | 2   |      |
| 8510   |        |        |        | 2   |      |
| 8515   |        |        | 1      | 1   | 2    |
| 8526   |        |        |        | 2   |      |
| 8530   |        |        |        | 2   |      |
| 8532   |        |        |        | 2   |      |
| 8533   |        |        |        | 2   |      |
| 8534   |        |        |        | 1   | 1    |
| 8572   |        |        | 1      | 1   | 2    |
| 8582   |        |        | 1      | 2   |      |
| 8584   |        |        |        | 2   |      |
| 8585   |        |        |        | 2   |      |
| 8586   |        |        |        | 2   |      |
| 8589   |        |        |        | 1   | 2    |
| 8593   |        |        |        | 2   |      |
| 8594   |        |        |        | 2   |      |
| 8601   |        |        |        | 2   |      |
| 8603   |        |        |        | 2   |      |
| 8604   |        |        |        | 2   |      |
| 8605   |        |        |        | 2   |      |
| 8607   |        |        |        | 2   |      |
| 8623   |        |        |        | 1   | 1    |
| 8626   |        |        | 1      | 2   |      |
| 8638   |        |        |        | 2   |      |
| 8640   |        |        |        | 2   |      |
| 8641   |        |        | 0      | 1   | 1    |
| 8643   |        |        |        | 2   |      |

| respid | Q31b_7 | Q31b_8 | Q31b_9 | Q32 | Q32a |
|--------|--------|--------|--------|-----|------|
| 8644   |        |        |        | 1   | 2    |
| 8646   |        |        |        | 2   |      |
| 8647   |        |        |        | 2   |      |
| 8649   |        |        |        | 1   | 2    |
| 8650   |        |        |        | 2   |      |
| 8658   |        |        |        | 2   |      |
| 8659   |        |        |        | 2   |      |
| 8669   |        |        |        | 2   |      |
| 8672   |        |        |        | 1   | 3    |
| 8673   |        |        |        | 1   | 2    |
| 8676   |        |        |        | 2   |      |
| 8677   |        |        |        | 2   |      |
| 8681   |        |        |        | 2   |      |
| 8688   |        |        |        | 2   |      |
| 8689   |        |        |        | 1   | 0    |
| 8690   |        |        |        | 1   | 2    |
| 8693   | 0      |        |        | 2   |      |
| 8694   |        |        |        | 1   | 1    |
| 8699   |        |        |        | 1   | 1    |
| 8700   |        |        |        | 2   |      |
| 8703   |        |        |        | 2   |      |
| 8704   |        |        |        | 2   |      |
| 8706   |        |        | 2      | 1   | 2    |
| 8709   |        |        |        | 2   |      |
| 8715   |        |        |        | 2   |      |
| 8728   |        |        |        | 1   | 1    |
| 8729   |        |        |        | 2   |      |
| 8730   |        |        |        | 1   | 2    |
| 8742   |        |        | 2      | 2   |      |
| 8748   | 1      |        |        | 2   |      |
| 8749   |        |        |        | 2   |      |
| 8750   |        |        |        | 2   |      |

| respid | Q31b_7 | Q31b_8 | Q31b_9 | Q32 | Q32a |   |
|--------|--------|--------|--------|-----|------|---|
| 8751   |        |        |        |     | 2    |   |
| 8752   |        |        |        |     | 2    |   |
| 8754   |        |        |        |     | 2    |   |
| 8757   |        |        |        |     | 2    |   |
| 8760   |        |        |        |     | 2    |   |
| 8761   |        |        |        |     | 2    |   |
| 8762   |        | 1      |        |     | 2    |   |
| 8763   |        |        |        |     | 2    |   |
| 8764   |        |        |        |     | 1    | 1 |
| 8765   |        |        |        |     | 2    |   |
| 8766   |        | 2      |        |     | 2    |   |
| 8767   |        |        |        |     | 1    | 1 |
| 8768   |        |        |        |     | 2    |   |
| 8770   |        |        |        |     | 2    |   |
| 8771   |        |        |        |     | 2    |   |
| 8773   |        |        |        |     | 2    |   |
| 8774   |        |        |        |     | 2    |   |
| 8776   |        |        |        |     | 2    |   |
| 8777   |        |        |        |     | 2    |   |
| 8778   |        |        |        |     | 2    |   |
| 8779   |        |        |        |     | 2    |   |
| 8784   |        |        |        |     | 2    |   |
| 8786   |        |        |        |     | 2    |   |
| 8787   |        |        |        |     | 2    |   |
| 8790   |        |        |        |     | 2    |   |
| 8791   |        |        | 3      |     | 1    | 4 |
| 8793   |        |        |        |     | 2    |   |
| 8795   |        |        |        |     | 2    |   |
| 8797   |        |        |        |     | 2    |   |
| 8801   |        |        |        |     | 2    |   |
| 8802   |        |        |        |     | 2    |   |
| 8807   |        |        |        |     | 2    |   |

| respid | Q31b_7 | Q31b_8 | Q31b_9 | Q32 | Q32a |
|--------|--------|--------|--------|-----|------|
| 8813   |        |        |        | 2   |      |
| 8817   |        |        |        | 2   |      |
| 8818   |        |        | 1      | 2   |      |
| 8821   |        |        |        | 2   |      |
| 8822   |        |        |        | 2   |      |
| 8823   |        |        |        | 2   |      |
| 8824   | 1      |        |        | 2   |      |
| 8825   |        |        |        | 2   |      |
| 8834   |        |        |        | 1   | 3    |
| 8840   |        |        |        | 1   | 1    |
| 8843   |        |        |        | 1   | 4    |
| 8846   |        |        |        | 2   |      |
| 8862   |        |        |        | 2   |      |
| 8866   |        |        |        | 2   |      |
| 8869   |        |        |        | 2   |      |
| 8872   |        |        |        | 2   |      |
| 8903   |        |        |        | 2   |      |
| 8909   |        |        |        | 2   |      |
| 8926   |        |        |        | 2   |      |
| 8936   |        |        |        | 2   |      |
| 8945   |        |        |        | 2   |      |
| 8954   |        |        |        | 2   |      |
| 8955   |        |        |        | 2   |      |
| 8958   |        |        |        | 2   |      |
| 8959   |        |        |        | 2   |      |
| 8960   |        |        |        | 2   |      |
| 8976   |        |        |        | 2   |      |
| 8977   |        |        |        | 2   |      |
| 8979   |        |        |        | 2   |      |
| 8985   |        |        |        | 2   |      |
| 8994   |        |        |        | 2   |      |
| 8997   |        |        |        | 2   |      |

| respid | Q31b_7 | Q31b_8 | Q31b_9 | Q32 | Q32a |   |
|--------|--------|--------|--------|-----|------|---|
| 9002   |        |        |        |     | 2    |   |
| 9005   |        |        |        |     | 2    |   |
| 9017   |        |        |        |     | 2    |   |
| 9018   |        |        |        |     | 2    |   |
| 9021   |        |        |        |     | 2    |   |
| 9029   |        |        |        |     | 1    | 3 |
| 9035   |        |        |        |     | 2    |   |
| 9038   |        |        |        |     | 2    |   |
| 9039   |        |        |        |     | 2    |   |
| 9040   |        |        |        |     | 2    |   |
| 9042   |        |        |        |     | 2    |   |
| 9043   |        |        |        |     | 2    |   |
| 9045   |        |        |        |     | 2    |   |
| 9051   |        |        |        |     | 2    |   |
| 9067   |        |        |        |     | 2    |   |
| 9069   |        |        |        |     | 2    |   |
| 9073   |        |        | 2      |     | 1    | 2 |
| 9084   |        |        |        |     | 2    |   |
| 9096   |        |        |        |     | 2    |   |
| 9100   |        |        |        |     | 2    |   |
| 9107   |        |        |        |     | 2    |   |
| 9110   |        |        |        |     | 2    |   |
| 9120   |        |        |        |     | 2    |   |
| 9122   |        |        |        |     | 1    | 3 |
| 9130   |        |        |        |     | 2    |   |
| 9134   |        |        |        |     | 1    | 2 |
| 9137   |        |        |        |     | 2    |   |
| 9139   |        |        |        |     | 2    |   |
| 9144   |        |        |        |     | 2    |   |
| 9157   |        |        |        |     | 2    |   |
| 9166   |        |        |        |     | 1    | 2 |
| 9177   |        | 1      | 1      |     | 1    | 3 |

| respid | Q31b_7 | Q31b_8 | Q31b_9 | Q32 | Q32a |
|--------|--------|--------|--------|-----|------|
| 9181   |        |        |        | 2   |      |
| 9183   |        |        |        | 2   |      |
| 9184   |        |        |        | 1   | 2    |
| 9188   |        |        |        | 2   |      |
| 9197   |        |        |        | 2   |      |
| 9200   |        |        |        | 1   | 2    |
| 9205   |        |        |        | 2   |      |
| 9207   |        |        |        | 2   |      |
| 9213   |        |        |        | 2   |      |
| 9216   |        |        |        | 2   |      |
| 9217   |        |        |        | 2   |      |
| 9218   |        |        |        | 2   |      |
| 9219   |        |        | 1      | 1   | 2    |
| 9220   |        |        |        | 2   |      |
| 9221   |        |        |        | 2   |      |
| 9223   |        |        |        | 1   | 2    |
| 9228   |        |        |        | 2   |      |
| 9230   |        |        |        | 2   |      |
| 9231   |        |        |        | 2   |      |
| 9233   |        |        |        | 2   |      |
| 9235   |        |        |        | 1   | 0    |
| 9237   |        |        |        | 2   |      |
| 9242   |        |        |        | 2   |      |
| 9250   |        |        |        | 2   |      |
| 9253   | 4      |        |        | 2   |      |
| 9257   |        |        |        | 1   | 0    |
| 9263   |        |        |        | 2   |      |
| 9267   |        |        |        | 1   | 2    |
| 9272   |        |        |        | 2   |      |
| 9279   |        |        |        | 2   |      |
| 9281   |        |        |        | 2   |      |
| 9285   |        |        |        | 2   |      |

| respid | Q31b_7 | Q31b_8 | Q31b_9 | Q32 | Q32a |   |
|--------|--------|--------|--------|-----|------|---|
| 9286   |        |        |        |     | 2    |   |
| 9294   |        |        |        |     | 2    |   |
| 9295   |        |        |        |     | 2    |   |
| 9297   |        |        |        |     | 2    |   |
| 9299   |        |        |        |     | 1    | 2 |
| 9309   |        |        | 0      |     | 1    | 2 |
| 9315   |        |        |        |     | 2    |   |
| 9320   |        |        |        |     | 2    |   |
| 9324   |        |        |        |     | 2    |   |
| 9326   |        |        |        |     | 2    |   |
| 9333   |        |        |        |     | 2    |   |
| 9334   |        |        | 1      |     | 2    |   |
| 9336   |        |        |        |     | 1    | 2 |
| 9337   |        |        |        |     | 2    |   |
| 9342   |        |        |        |     | 2    |   |
| 9347   |        |        |        |     | 2    |   |
| 9352   |        |        | 1      |     | 2    |   |
| 9355   |        |        |        |     | 2    |   |
| 9356   |        |        |        |     | 2    |   |
| 9359   |        |        |        |     | 1    | 2 |
| 9368   |        |        |        |     | 2    |   |
| 9375   |        |        |        |     | 2    |   |
| 9384   |        |        |        |     | 2    |   |
| 9388   |        |        |        |     | 1    | 1 |
| 9397   |        |        | 3      |     | 2    |   |
| 9400   |        |        |        |     | 2    |   |
| 9401   |        |        |        |     | 2    |   |
| 9402   |        |        |        |     | 2    |   |
| 9417   |        |        | 2      |     | 1    | 2 |
| 9424   |        |        |        |     | 2    |   |
| 9427   |        |        |        |     | 2    |   |
| 9429   |        |        |        |     | 2    |   |



| respid | Q31b_7 | Q31b_8 | Q31b_9 | Q32 | Q32a |
|--------|--------|--------|--------|-----|------|
| 9437   |        |        |        | 1   | 3    |
| 9442   |        |        |        | 2   |      |
| 9446   |        |        |        | 2   |      |
| 9447   |        |        |        | 2   |      |
| 9448   |        |        |        | 1   | 0    |
| 9449   |        |        |        | 2   |      |
| 9455   |        |        |        | 2   |      |
| 9459   |        |        | 1      | 2   |      |
| 9460   |        |        |        | 2   |      |
| 9461   |        |        | 1      | 2   |      |
| 9463   |        |        |        | 2   |      |
| 9464   |        |        |        | 2   |      |
| 9466   |        |        |        | 2   |      |
| 9477   |        |        |        | 2   |      |
| 9482   |        |        |        | 1   | 3    |
| 9486   |        |        |        | 2   |      |
| 9488   |        |        |        | 1   | 3    |
| 9489   |        |        |        | 2   |      |
| 9496   |        | 1      | 2      | 2   |      |
| 9499   |        |        |        | 2   |      |
| 9512   |        |        |        | 2   |      |
| 9514   |        |        | 0      | 2   |      |
| 9516   |        |        |        | 2   |      |
| 9517   |        |        |        | 1   | 1    |
| 9520   |        |        |        | 2   |      |
| 9527   |        |        |        | 2   |      |
| 9532   |        |        | 2      | 1   | 2    |
| 9533   |        |        |        | 2   |      |
| 9543   |        |        |        | 2   |      |
| 9550   |        |        |        | 2   |      |
| 9553   |        |        |        | 1   | 0    |
| 9555   | 1      |        |        | 2   |      |

| respid | Q31b_7 | Q31b_8 | Q31b_9 | Q32 | Q32a |
|--------|--------|--------|--------|-----|------|
| 9565   |        |        |        | 1   | 2    |
| 9583   |        |        | 3      | 2   |      |
| 9594   |        |        |        | 2   |      |
| 9596   |        |        |        | 2   |      |
| 9600   |        |        |        | 1   | 2    |
| 9602   |        |        |        | 2   |      |
| 9606   |        |        |        | 2   |      |
| 9608   |        |        |        | 1   | 2    |
| 9610   |        |        |        | 2   |      |
| 9612   |        |        |        | 2   |      |
| 9613   |        |        |        | 2   |      |
| 9614   |        |        | 2      | 1   | 2    |
| 9620   |        |        |        | 2   |      |
| 9628   |        |        |        | 2   |      |
| 9631   |        |        |        | 2   |      |
| 9632   |        |        |        | 2   |      |
| 9633   | 1      |        |        | 1   | 1    |
| 9639   |        |        |        | 2   |      |
| 9640   |        |        |        | 2   |      |
| 9642   |        |        |        | 2   |      |
| 9653   |        |        |        | 1   | 1    |
| 9658   |        |        |        | 2   |      |
| 9659   |        |        |        | 2   |      |
| 9661   |        |        |        | 2   |      |
| 9664   |        |        |        | 2   |      |
| 9665   |        |        |        | 2   |      |
| 9666   |        |        |        | 2   |      |
| 9667   |        |        |        | 1   | 0    |
| 9668   |        |        |        | 2   |      |
| 9670   |        |        |        | 2   |      |
| 9671   |        |        |        | 2   |      |
| 9681   |        |        |        | 2   |      |

| respid | Q31b_7 | Q31b_8 | Q31b_9 | Q32 | Q32a |
|--------|--------|--------|--------|-----|------|
| 9684   |        |        |        | 1   | 0    |
| 9685   |        |        |        | 2   |      |
| 9686   |        |        |        | 2   |      |
| 9688   |        |        | 2      | 1   | 2    |
| 9692   |        |        |        | 1   | 0    |
| 9693   |        |        |        | 1   | 1    |
| 9698   |        |        |        | 1   | 1    |
| 9699   |        |        |        | 2   |      |
| 9701   |        |        |        | 2   |      |
| 9702   |        |        |        | 2   |      |
| 9709   |        |        |        | 1   | 1    |
| 9713   |        |        |        | 2   |      |
| 9715   |        |        |        | 2   |      |
| 9721   |        |        |        | 2   |      |
| 9725   |        |        |        | 2   |      |
| 9729   |        |        | 0      | 2   |      |
| 9731   |        |        |        | 2   |      |
| 9736   |        |        |        | 2   |      |
| 9740   |        |        |        | 2   |      |
| 9741   |        |        |        | 2   |      |
| 9749   |        |        |        | 1   | 1    |
| 9750   |        |        |        | 2   |      |
| 9751   |        |        | 2      | 1   | 3    |
| 9753   |        |        |        | 2   |      |
| 9754   |        |        |        | 1   | 3    |
| 9756   |        |        | 2      | 1   | 1    |
| 9758   |        |        |        | 1   | 3    |
| 9759   |        |        | 1      | 2   |      |
| 9760   |        |        |        | 2   |      |
| 9761   |        |        |        | 2   |      |
| 9762   |        |        |        | 1   | 2    |
| 9764   |        |        |        | 2   |      |

| respid | Q31b_7 | Q31b_8 | Q31b_9 | Q32 | Q32a |
|--------|--------|--------|--------|-----|------|
| 9768   |        |        |        | 2   |      |
| 9769   |        |        |        | 1   | 1    |
| 9770   |        |        |        | 2   |      |
| 9771   |        |        |        | 2   |      |
| 9772   |        |        |        | 2   |      |
| 9773   |        |        | 1      | 1   | 1    |
| 9776   |        |        |        | 2   |      |
| 9786   | 0      |        |        | 1   | 2    |
| 9790   |        |        |        | 1   | 0    |
| 9791   |        |        |        | 2   |      |
| 9794   |        |        | 2      | 1   | 2    |
| 9797   |        |        |        | 2   |      |
| 9799   |        |        |        | 2   |      |
| 9804   |        |        |        | 2   |      |
| 9805   |        |        |        | 2   |      |
| 9806   |        |        |        | 2   |      |
| 9807   |        |        |        | 2   |      |
| 9813   |        |        |        | 2   |      |
| 9817   |        |        |        | 2   |      |
| 9823   |        |        |        | 2   |      |
| 9826   |        |        |        | 2   |      |
| 9830   | 1      |        |        | 2   |      |
| 9835   |        |        |        | 2   |      |
| 9836   |        |        |        | 2   |      |
| 9841   |        |        |        | 2   |      |
| 9842   |        |        |        | 2   |      |
| 9844   |        |        |        | 2   |      |
| 9847   |        |        | 3      | 2   |      |
| 9851   |        |        |        | 2   |      |
| 9852   |        |        |        | 1   | 2    |
| 9854   |        |        |        | 2   |      |
| 9855   |        |        | 1      | 2   |      |

| respid | Q31b_7 | Q31b_8 | Q31b_9 | Q32 | Q32a |
|--------|--------|--------|--------|-----|------|
| 9856   | 1      |        | 1      | 2   |      |
| 9862   |        |        |        | 2   |      |
| 9863   |        |        |        | 2   |      |
| 9866   | 1      |        |        | 2   |      |
| 9867   |        |        |        | 1   | 1    |
| 9868   |        |        | 1      | 1   | 2    |
| 9869   |        |        | 1      | 2   |      |
| 9878   |        |        |        | 2   |      |
| 9879   |        |        |        | 1   | 0    |
| 9881   | 0      |        |        | 2   |      |
| 9882   |        |        |        | 2   |      |
| 9884   |        |        |        | 2   |      |
| 9885   |        |        |        | 2   |      |
| 9888   |        |        |        | 2   |      |
| 9889   |        |        |        | 2   |      |
| 9894   |        |        |        | 2   |      |
| 9895   |        |        |        | 2   |      |
| 9896   |        |        |        | 1   | 4    |
| 9897   |        |        | 2      | 2   |      |
| 9905   |        |        |        | 2   |      |
| 9907   |        |        |        | 2   |      |
| 9908   |        |        |        | 2   |      |
| 9909   |        |        | 1      | 2   |      |
| 9910   | 4      |        |        | 1   | 2    |
| 9913   |        |        |        | 1   | 1    |
| 9914   |        |        |        | 2   |      |
| 9915   |        |        |        | 2   |      |
| 9916   |        |        |        | 2   |      |
| 9918   |        |        |        | 2   |      |
| 9919   |        |        |        | 1   | 1    |
| 9922   |        |        |        | 2   |      |
| 9930   |        |        |        | 2   |      |

| respid | Q31b_7 | Q31b_8 | Q31b_9 | Q32 | Q32a |
|--------|--------|--------|--------|-----|------|
| 9934   |        |        |        | 2   |      |
| 9936   |        |        |        | 2   |      |
| 9938   |        |        |        | 2   |      |
| 9940   |        |        |        | 2   |      |
| 9944   |        |        |        | 2   |      |
| 9945   |        |        |        | 2   |      |
| 9948   |        |        |        | 1   | 2    |
| 9949   |        |        |        | 1   | 1    |
| 9951   |        |        |        | 1   | 0    |
| 9952   |        |        |        | 2   |      |
| 9954   |        |        |        | 2   |      |
| 9955   |        |        |        | 2   |      |
| 9956   |        |        | 2      | 1   | 2    |
| 9957   |        |        |        | 1   | 2    |
| 9958   |        |        |        | 2   |      |
| 9959   |        |        |        | 2   |      |
| 9960   |        |        |        | 2   |      |
| 9961   |        |        |        | 2   |      |
| 9962   |        |        |        | 2   |      |
| 9969   |        |        |        | 2   |      |
| 9982   |        |        | 2      | 1   | 2    |
| 9984   |        |        | 2      | 2   |      |
| 9990   |        |        |        | 2   |      |
| 9992   |        |        |        | 1   | 1    |
| 9993   |        |        |        | 1   | 1    |
| 9997   |        |        |        | 2   |      |
| 9999   |        |        |        | 2   |      |
| 10000  |        |        | 2      | 2   |      |
| 10005  |        |        |        | 1   | 2    |
| 10014  |        |        | 0      | 2   |      |
| 10016  | 2      |        |        | 1   | 4    |
| 10017  |        |        |        | 2   |      |

| respid | Q31b_7 | Q31b_8 | Q31b_9 | Q32 | Q32a |
|--------|--------|--------|--------|-----|------|
| 10018  |        |        |        | 1   | 3    |
| 10021  |        |        |        | 2   |      |
| 10025  |        |        |        | 1   | 2    |
| 10027  |        |        |        | 2   |      |
| 10028  |        |        |        | 2   |      |
| 10031  |        |        |        | 2   |      |
| 10036  |        |        | 1      | 2   |      |
| 10037  |        |        |        | 1   | 1    |
| 10038  |        |        |        | 2   |      |
| 10039  |        |        |        | 2   |      |
| 10041  |        |        |        | 2   |      |
| 10045  |        |        | 2      | 1   | 3    |
| 10046  |        |        | 3      | 1   | 3    |
| 10047  | 1      | 1      |        | 2   |      |
| 10048  |        |        |        | 2   |      |
| 10049  |        |        | 0      | 2   |      |
| 10051  |        |        |        | 1   | 1    |
| 10052  |        |        | 2      | 1   | 1    |
| 10056  |        |        |        | 2   |      |
| 10061  |        |        |        | 2   |      |
| 10064  |        |        |        | 2   |      |
| 10066  |        |        |        | 2   |      |
| 10069  |        |        |        | 2   |      |
| 10071  |        |        |        | 2   |      |
| 10074  |        |        |        | 2   |      |
| 10079  |        |        |        | 2   |      |
| 10087  |        |        | 3      | 2   |      |
| 10095  |        |        |        | 2   |      |
| 10097  |        |        |        | 2   |      |
| 10100  |        |        |        | 2   |      |
| 10105  |        |        |        | 2   |      |
| 10107  | 2      |        |        | 2   |      |

| respid | Q31b_7 | Q31b_8 | Q31b_9 | Q32 | Q32a |   |
|--------|--------|--------|--------|-----|------|---|
| 10111  |        |        |        |     | 2    |   |
| 10116  |        | 0      |        |     | 2    |   |
| 10118  |        |        |        |     | 2    |   |
| 10123  |        |        |        |     | 2    |   |
| 10124  |        |        |        |     | 2    |   |
| 10130  |        |        | 2      |     | 2    |   |
| 10134  |        |        |        |     | 1    | 1 |
| 10135  |        |        |        |     | 2    |   |
| 10136  |        |        |        |     | 2    |   |
| 10141  |        |        | 1      |     | 1    | 1 |
| 10142  |        |        |        |     | 2    |   |
| 10143  |        |        |        |     | 2    |   |
| 10145  |        |        |        |     | 2    |   |
| 10149  |        |        |        |     | 1    | 2 |
| 10150  |        |        |        |     | 2    |   |
| 10151  |        |        |        |     | 2    |   |
| 10152  |        |        | 1      |     | 1    | 2 |
| 10153  |        |        |        |     | 2    |   |
| 10156  |        |        |        |     | 2    |   |
| 10160  |        |        |        |     | 1    | 0 |
| 10161  |        |        |        |     | 2    |   |
| 10167  |        |        |        |     | 1    | 3 |
| 10171  |        |        |        |     | 2    |   |
| 10172  |        |        |        |     | 2    |   |
| 10176  |        |        |        |     | 2    |   |
| 10177  |        |        | 2      |     | 2    |   |
| 10182  |        |        | 1      |     | 1    | 2 |
| 10184  |        |        |        |     | 2    |   |
| 10186  |        |        |        |     | 1    | 2 |
| 10189  |        |        |        |     | 2    |   |
| 10191  |        |        |        |     | 2    |   |
| 10192  |        |        |        |     | 2    |   |



| respid | Q31b_7 | Q31b_8 | Q31b_9 | Q32 | Q32a |
|--------|--------|--------|--------|-----|------|
| 10195  |        |        |        |     | 2    |
| 10199  |        |        |        |     | 2    |
| 10201  |        |        |        |     | 2    |
| 10213  |        |        |        |     | 2    |
| 10222  |        | 2      |        |     | 1    |
| 10224  |        |        |        |     | 2    |
| 10245  |        |        |        |     | 2    |
| 10254  |        |        |        |     | 2    |
| 10255  |        |        | 4      |     | 1    |
| 10257  |        |        |        |     | 2    |
| 10260  |        |        | 1      |     | 2    |
| 10261  |        |        |        |     | 1    |
| 10263  |        |        | 4      |     | 1    |
| 10264  |        |        |        |     | 2    |
| 10268  |        |        | 2      |     | 2    |
| 10269  |        |        |        |     | 2    |
| 10270  |        |        |        |     | 2    |
| 10282  |        |        |        |     | 2    |
| 10285  |        |        |        |     | 2    |
| 10288  |        |        |        |     | 2    |
| 10291  |        |        |        |     | 2    |
| 10292  |        |        |        |     | 2    |
| 10304  |        |        |        |     | 2    |
| 10305  |        |        |        |     | 2    |
| 10310  |        |        |        |     | 2    |
| 10324  |        |        |        |     | 2    |
| 10325  |        |        |        |     | 1    |
| 10326  |        |        | 3      |     | 2    |
| 10329  |        |        |        |     | 2    |
| 10332  |        |        |        |     | 2    |
| 10337  |        |        |        |     | 1    |
| 10341  |        |        |        |     | 2    |

| respid | Q31b_7 | Q31b_8 | Q31b_9 | Q32 | Q32a |
|--------|--------|--------|--------|-----|------|
| 10353  |        |        | 1      | 2   |      |
| 10354  |        |        |        | 2   |      |
| 10359  | 2      |        |        | 2   |      |
| 10360  |        |        |        | 2   |      |
| 10362  |        |        |        | 2   |      |
| 10364  |        |        |        | 2   |      |
| 10366  | 2      |        |        | 1   | 3    |
| 10367  |        |        |        | 2   |      |
| 10371  |        |        |        | 2   |      |
| 10374  |        |        |        | 1   | 1    |
| 10375  |        | 1      |        | 2   |      |
| 10376  |        |        |        | 2   |      |
| 10377  |        |        |        | 2   |      |
| 10378  |        |        |        | 2   |      |
| 10387  |        |        |        | 2   |      |
| 10396  |        |        |        | 2   |      |
| 10397  |        |        |        | 2   |      |
| 10399  |        | 3      |        | 1   | 3    |
| 10405  |        |        |        | 2   |      |
| 10406  |        |        |        | 2   |      |
| 10408  |        |        |        | 2   |      |
| 10409  |        |        |        | 2   |      |
| 10412  |        |        |        | 2   |      |
| 10413  |        |        |        | 2   |      |
| 10419  |        |        |        | 1   | 1    |
| 10423  |        |        |        | 1   | 3    |
| 10426  |        |        |        | 2   |      |
| 10446  |        |        |        | 2   |      |
| 10448  |        |        |        | 2   |      |
| 10450  |        |        |        | 2   |      |
| 10455  |        |        |        | 2   |      |
| 10460  |        |        |        | 2   |      |

| respid | Q31b_7 | Q31b_8 | Q31b_9 | Q32 | Q32a |   |
|--------|--------|--------|--------|-----|------|---|
| 10461  |        |        |        |     | 2    |   |
| 10471  |        |        |        |     | 2    |   |
| 10472  |        |        |        |     | 2    |   |
| 10491  | 3      |        |        |     | 2    |   |
| 10493  |        |        |        |     | 1    | 2 |
| 10498  |        |        |        |     | 2    |   |
| 10533  |        |        |        |     | 2    |   |
| 10539  |        |        |        |     | 2    |   |
| 10540  |        |        |        |     | 2    |   |
| 10557  |        |        | 3      |     | 2    |   |
| 10558  |        |        |        |     | 1    | 2 |
| 10559  |        |        | 2      |     | 1    | 0 |
| 10564  |        |        | 2      |     | 2    |   |
| 10570  |        |        |        |     | 2    |   |
| 10572  |        |        |        |     | 2    |   |
| 10576  |        |        |        |     | 2    |   |
| 10582  |        |        |        |     | 1    | 0 |
| 10593  |        |        |        |     | 2    |   |
| 10596  |        |        |        |     | 2    |   |
| 10615  |        |        |        |     | 2    |   |
| 10616  |        |        |        |     | 2    |   |
| 10623  |        |        |        |     | 2    |   |
| 10626  |        |        |        |     | 2    |   |
| 10627  |        |        |        |     | 2    |   |
| 10629  |        |        |        |     | 2    |   |
| 10632  | 2      | 2      | 2      |     | 2    |   |
| 10641  |        |        |        |     | 2    |   |
| 10648  |        | 2      |        |     | 2    |   |
| 10651  |        |        |        |     | 1    | 1 |
| 10654  |        |        |        |     | 2    |   |
| 10673  |        |        |        |     | 2    |   |
| 10675  |        |        |        |     | 1    | 2 |

| respid | Q31b_7 | Q31b_8 | Q31b_9 | Q32 | Q32a |   |
|--------|--------|--------|--------|-----|------|---|
| 10689  |        |        |        |     | 2    |   |
| 10692  |        |        |        |     | 2    |   |
| 10694  |        |        |        |     | 2    |   |
| 10695  |        |        |        |     | 2    |   |
| 10702  |        |        |        |     | 1    | 1 |
| 10703  |        |        |        |     | 2    |   |
| 10708  |        |        |        |     | 2    |   |
| 10719  |        |        |        |     | 2    |   |
| 10722  |        |        |        |     | 2    |   |
| 10723  |        |        | 0      |     | 2    |   |
| 10726  |        |        |        |     | 2    |   |
| 10727  |        |        |        |     | 2    |   |
| 10730  |        |        | 1      |     | 2    |   |
| 10731  |        |        |        |     | 2    |   |
| 10737  |        |        |        |     | 2    |   |
| 10743  |        |        |        |     | 1    | 0 |
| 10763  |        |        |        |     | 2    |   |
| 10777  |        |        |        |     | 2    |   |
| 10787  | 1      |        | 1      |     | 1    | 2 |
| 10798  |        |        |        |     | 2    |   |
| 10800  |        |        |        |     | 2    |   |
| 10802  |        |        |        |     | 2    |   |
| 10803  |        |        |        |     | 1    | 2 |
| 10808  |        |        |        |     | 2    |   |
| 10810  |        |        |        |     | 1    | 0 |
| 10819  |        |        |        |     | 2    |   |
| 10825  |        |        |        |     | 2    |   |
| 10827  |        |        |        |     | 1    | 1 |
| 10830  |        |        |        |     | 2    |   |
| 10847  |        |        |        |     | 2    |   |
| 10849  |        |        |        |     | 1    | 2 |
| 10852  |        |        |        |     | 2    |   |

| respid | Q31b_7 | Q31b_8 | Q31b_9 | Q32 | Q32a |
|--------|--------|--------|--------|-----|------|
| 10854  | 3      |        |        | 2   |      |
| 10857  |        |        |        | 2   |      |
| 10861  |        |        | 3      | 1   | 2    |
| 10862  |        |        |        | 2   |      |
| 10870  |        |        | 0      | 2   |      |
| 10873  |        |        |        | 2   |      |
| 10881  |        |        |        | 1   | 0    |
| 10893  |        |        |        | 2   |      |
| 10898  |        |        |        | 2   |      |
| 10899  |        |        |        | 2   |      |
| 10905  |        |        |        | 2   |      |
| 10910  |        |        |        | 2   |      |
| 10911  |        |        | 0      | 2   |      |
| 10912  |        |        |        | 2   |      |
| 10913  |        |        |        | 2   |      |
| 10918  |        |        |        | 2   |      |
| 10995  |        |        |        | 1   | 0    |
| 11002  |        |        |        | 1   | 1    |
| 11003  |        |        |        | 2   |      |
| 11005  |        |        |        | 2   |      |
| 11015  |        | 1      |        | 2   |      |
| 11016  |        |        |        | 2   |      |
| 11017  |        |        |        | 2   |      |
| 11020  |        |        |        | 2   |      |
| 11024  |        |        | 1      | 2   |      |
| 11026  |        |        |        | 1   | 1    |
| 11028  |        |        |        | 1   | 2    |
| 11029  |        |        |        | 2   |      |
| 11030  |        |        | 1      | 2   |      |
| 11031  |        |        |        | 1   | 2    |
| 11038  |        |        |        | 2   |      |
| 11051  | 1      |        |        | 2   |      |

| respid | Q31b_7 | Q31b_8 | Q31b_9 | Q32 | Q32a |
|--------|--------|--------|--------|-----|------|
| 11052  |        |        |        | 2   |      |
| 11053  |        |        |        | 2   |      |
| 11054  |        |        |        | 2   |      |
| 11063  |        |        |        | 2   |      |
| 11075  |        |        |        | 1   | 2    |
| 11083  |        |        |        | 2   |      |
| 11092  |        |        |        | 2   |      |
| 11118  |        |        |        | 2   |      |
| 11119  |        |        |        | 1   | 2    |
| 11134  |        |        |        | 2   |      |
| 11139  |        |        |        | 2   |      |
| 11154  |        |        |        | 2   |      |
| 11166  |        |        |        | 2   |      |
| 11168  |        |        |        | 2   |      |
| 11176  |        |        |        | 1   | 2    |
| 11183  |        |        |        | 1   | 2    |
| 11189  |        |        |        | 2   |      |
| 11196  |        |        |        | 1   | 3    |
| 11200  |        |        | 2      | 2   |      |
| 11201  |        |        |        | 2   |      |
| 11211  |        |        |        | 1   | 2    |
| 11218  |        |        |        | 2   |      |
| 11219  |        |        |        | 2   |      |
| 11221  |        |        |        | 1   | 1    |
| 11222  |        |        |        | 2   |      |
| 11230  |        |        |        | 1   | 2    |
| 11236  |        |        |        | 1   | 3    |
| 11237  |        |        |        | 2   |      |
| 11240  |        |        | 2      | 1   | 2    |
| 11244  |        |        |        | 1   | 3    |
| 11249  |        |        | 1      | 2   |      |
| 11252  |        |        |        | 1   | 3    |

| respid | Q31b_7 | Q31b_8 | Q31b_9 | Q32 | Q32a |   |
|--------|--------|--------|--------|-----|------|---|
| 11254  |        |        |        |     | 2    |   |
| 11255  |        |        |        |     | 1    | 3 |
| 11258  |        |        |        |     | 1    | 2 |
| 11260  |        |        |        |     | 2    |   |
| 11264  |        |        | 2      |     | 1    | 2 |
| 11266  |        |        |        |     | 2    |   |
| 11268  |        |        |        |     | 1    | 2 |
| 11269  |        |        | 2      |     | 1    | 1 |
| 11272  |        |        |        |     | 2    |   |
| 11273  |        |        |        |     | 2    |   |
| 11275  |        |        |        |     | 2    |   |
| 11276  |        |        |        |     | 2    |   |
| 11278  |        |        |        |     | 1    | 1 |
| 11288  |        |        |        |     | 2    |   |
| 11289  |        |        |        |     | 2    |   |
| 11291  |        |        |        |     | 2    |   |
| 11295  |        |        |        |     | 2    |   |
| 11297  |        |        |        |     | 2    |   |
| 11304  | 4      |        |        |     | 1    | 3 |
| 11305  |        |        |        |     | 2    |   |
| 11311  |        |        |        |     | 2    |   |
| 11313  |        |        |        |     | 2    |   |
| 11315  |        |        |        |     | 1    | 4 |
| 11316  |        | 3      |        |     | 1    | 4 |
| 11318  |        |        |        |     | 1    | 4 |
| 11323  |        |        |        |     | 2    |   |
| 11331  |        |        |        |     | 1    | 0 |
| 11333  |        |        |        |     | 1    | 2 |
| 11334  |        |        |        |     | 1    | 2 |
| 11340  |        |        |        |     | 1    | 3 |
| 11345  |        |        |        |     | 2    |   |
| 11354  |        |        |        |     | 2    |   |

| respid | Q31b_7 | Q31b_8 | Q31b_9 | Q32 | Q32a |   |
|--------|--------|--------|--------|-----|------|---|
| 11360  |        |        |        |     | 2    |   |
| 11361  |        |        |        |     | 2    |   |
| 11367  |        |        |        |     | 2    |   |
| 11370  |        |        |        |     | 2    |   |
| 11371  | 2      |        |        |     | 2    |   |
| 11372  |        |        |        |     | 1    | 3 |
| 11373  | 1      |        |        |     | 2    |   |
| 11382  |        |        |        |     | 2    |   |
| 11394  |        |        |        |     | 2    |   |
| 11395  |        |        | 1      |     | 1    | 1 |
| 11397  |        |        |        |     | 2    |   |
| 11402  | 2      |        |        |     | 1    | 2 |
| 11409  |        |        |        |     | 2    |   |
| 11410  |        |        |        |     | 2    |   |
| 11411  |        |        |        |     | 2    |   |
| 11418  |        |        | 0      |     | 2    |   |
| 11425  |        |        |        |     | 2    |   |
| 11429  |        |        |        |     | 2    |   |
| 11430  |        | 3      |        |     | 1    | 3 |
| 11431  |        |        | 2      |     | 2    |   |
| 11432  |        |        |        |     | 2    |   |
| 11433  |        |        |        |     | 2    |   |
| 11435  | 2      | 1      |        |     | 1    | 1 |
| 11436  |        |        |        |     | 1    | 2 |
| 11437  |        |        |        |     | 1    | 1 |
| 11439  |        |        |        |     | 2    |   |
| 11440  |        |        |        |     | 2    |   |
| 11447  |        |        |        |     | 2    |   |
| 11455  |        |        |        |     | 2    |   |
| 11456  |        |        |        |     | 2    |   |
| 11461  |        |        | 1      |     | 1    | 1 |
| 11463  |        |        |        |     | 1    | 3 |



| respid | Q31b_7 | Q31b_8 | Q31b_9 | Q32 | Q32a |
|--------|--------|--------|--------|-----|------|
| 11470  |        | 1      |        | 2   |      |
| 11472  |        |        |        | 2   |      |
| 11475  |        |        |        | 2   |      |
| 11476  |        |        |        | 2   |      |
| 11482  |        |        |        | 1   | 2    |
| 11501  |        |        | 3      | 2   |      |
| 11503  |        |        |        | 2   |      |
| 11505  |        |        |        | 1   | 0    |
| 11510  |        | 2      |        | 2   |      |
| 11519  |        |        |        | 2   |      |
| 11527  |        |        | 4      | 1   | 4    |
| 11529  |        |        | 2      | 1   | 2    |
| 11530  |        |        |        | 2   |      |
| 11536  |        |        |        | 1   | 4    |
| 11543  |        |        |        | 2   |      |
| 11548  |        |        |        | 2   |      |
| 11566  |        |        |        | 2   |      |
| 11570  |        |        |        | 1   | 3    |
| 11571  |        |        | 2      | 2   |      |
| 11578  |        |        |        | 2   |      |
| 11579  |        |        |        | 2   |      |
| 11581  |        |        |        | 1   | 4    |
| 11582  |        |        |        | 2   |      |
| 11583  |        |        |        | 2   |      |
| 11589  |        |        |        | 2   |      |
| 11590  |        |        |        | 2   |      |
| 11592  |        |        |        | 2   |      |
| 11596  |        |        |        | 2   |      |
| 11598  | 2      |        | 2      | 2   |      |
| 11602  |        |        |        | 2   |      |
| 11605  |        |        | 2      | 1   | 2    |
| 11618  |        |        |        | 1   | 2    |

| respid | Q31b_7 | Q31b_8 | Q31b_9 | Q32 | Q32a |
|--------|--------|--------|--------|-----|------|
| 11621  |        |        | 2      | 1   | 1    |
| 11630  |        | 1      |        | 2   |      |
| 11636  |        |        |        | 2   |      |
| 11640  |        | 1      | 1      | 1   | 2    |
| 11658  |        |        |        | 2   |      |
| 11665  |        |        |        | 1   | 2    |
| 11666  |        |        |        | 2   |      |
| 11667  |        |        |        | 1   | 2    |
| 11674  |        |        |        | 1   | 0    |
| 11680  |        |        |        | 2   |      |
| 11683  |        |        |        | 1   | 1    |
| 11688  |        |        |        | 2   |      |
| 11690  |        |        |        | 2   |      |
| 11694  |        |        |        | 2   |      |
| 11705  |        |        |        | 2   |      |
| 11720  |        |        |        | 2   |      |
| 11724  |        |        |        | 2   |      |
| 11738  |        |        |        | 2   |      |
| 11744  |        | 1      |        | 1   | 3    |
| 11745  |        |        |        | 1   | 2    |
| 11747  |        |        |        | 2   |      |
| 11755  |        |        |        | 1   | 1    |
| 11756  |        |        | 1      | 1   | 0    |
| 11772  |        |        |        | 2   |      |
| 11773  |        |        |        | 2   |      |
| 11778  |        |        | 3      | 1   | 3    |
| 11790  |        |        |        | 1   | 3    |
| 11794  |        |        |        | 2   |      |
| 11795  |        |        |        | 2   |      |
| 11799  |        |        |        | 1   | 3    |
| 11803  |        |        |        | 2   |      |
| 11806  |        | 4      |        | 1   | 3    |

| respid | Q31b_7 | Q31b_8 | Q31b_9 | Q32 | Q32a |
|--------|--------|--------|--------|-----|------|
| 11808  |        |        |        | 2   |      |
| 11810  |        |        |        | 2   |      |
| 11811  |        |        |        | 2   |      |
| 11812  |        |        | 2      | 1   | 2    |
| 11813  |        |        | 1      | 2   |      |
| 11821  |        |        |        | 1   | 0    |
| 11827  |        |        |        | 2   |      |
| 11831  |        |        |        | 2   |      |
| 11841  |        |        |        | 2   |      |
| 11872  |        |        |        | 1   | 2    |
| 11898  |        |        |        | 2   |      |
| 11902  |        |        | 4      | 1   | 2    |
| 11912  |        |        |        | 1   | 1    |
| 11926  |        |        |        | 2   |      |
| 11928  |        |        |        | 2   |      |
| 11932  |        |        |        | 1   | 0    |
| 11934  |        |        |        | 2   |      |
| 11941  |        |        | 3      | 1   | 2    |
| 11942  |        |        |        | 2   |      |
| 11943  |        |        |        | 1   | 3    |
| 11944  |        |        |        | 1   | 1    |
| 11955  |        |        |        | 2   |      |
| 11958  |        |        | 2      | 1   | 2    |
| 11968  |        |        | 2      | 1   | 1    |
| 11979  |        |        | 2      | 1   | 3    |
| 11988  |        |        |        | 2   |      |
| 11999  |        |        |        | 1   | 3    |
| 12002  |        | 1      |        | 2   |      |
| 12004  |        |        |        | 2   |      |
| 12008  |        |        |        | 2   |      |
| 12013  |        |        |        | 1   | 2    |
| 12018  |        |        |        | 1   | 0    |

| respid | Q31b_7 | Q31b_8 | Q31b_9 | Q32 | Q32a |
|--------|--------|--------|--------|-----|------|
| 12023  |        |        |        | 2   |      |
| 12027  |        |        |        | 1   | 3    |
| 12030  |        |        |        | 1   | 1    |
| 12031  |        |        |        | 2   |      |
| 12036  | 4      |        | 3      | 2   |      |
| 12037  |        |        | 3      | 1   | 3    |
| 12038  |        |        |        | 2   |      |
| 12039  |        |        |        | 2   |      |
| 12045  |        |        | 2      | 2   |      |
| 12046  |        |        |        | 2   |      |
| 12054  |        |        |        | 1   | 1    |
| 12055  |        |        |        | 1   | 1    |
| 12069  |        |        |        | 2   |      |
| 12070  |        |        |        | 1   | 2    |
| 12074  |        |        |        | 2   |      |
| 12075  |        |        |        | 1   | 3    |
| 12078  |        |        |        | 2   |      |
| 12089  |        |        |        | 1   | 1    |
| 12091  |        |        |        | 1   | 2    |
| 12092  | 2      |        |        | 1   | 2    |
| 12108  |        |        |        | 1   | 0    |
| 12111  |        | 3      | 3      | 1   | 4    |
| 12112  | 3      |        |        | 1   | 3    |
| 12126  |        |        |        | 2   |      |
| 12132  |        |        | 2      | 1   | 2    |
| 12150  |        |        |        | 1   | 3    |
| 12152  |        |        |        | 2   |      |
| 12154  |        |        |        | 2   |      |
| 12157  |        |        |        | 1   | 2    |
| 12165  |        |        |        | 1   | 1    |
| 12169  |        |        | 2      | 1   | 2    |
| 12182  |        |        |        | 1   | 4    |

| respid | Q31b_7 | Q31b_8 | Q31b_9 | Q32 | Q32a |
|--------|--------|--------|--------|-----|------|
| 12198  |        |        |        |     | 2    |
| 12199  |        |        |        |     | 2    |
| 12202  |        |        |        |     | 2    |
| 12207  |        |        | 2      |     | 2    |
| 12208  | 1      | 2      |        |     | 1    |
| 12210  |        |        |        |     | 2    |
| 12219  |        |        |        |     | 1    |
| 12224  |        |        |        |     | 3    |
| 12230  |        |        |        |     | 2    |
| 12238  |        |        |        |     | 2    |
| 12239  |        |        |        |     | 2    |
| 12243  |        |        |        |     | 2    |
| 12245  |        |        |        |     | 1    |
| 12246  |        |        |        |     | 1    |
| 12247  |        |        |        |     | 3    |
| 12248  |        |        |        |     | 2    |
| 12249  |        | 2      |        |     | 2    |
| 12258  |        |        |        |     | 1    |
| 12265  |        |        |        |     | 2    |
| 12269  |        | 1      |        |     | 1    |
| 12270  |        |        |        |     | 2    |
| 12279  |        |        |        |     | 2    |
| 12280  |        | 4      |        |     | 1    |
| 12282  |        |        |        |     | 2    |
| 12283  |        |        |        |     | 2    |
| 12287  |        |        |        |     | 2    |
| 12288  |        |        |        |     | 2    |
| 12290  |        |        |        |     | 2    |
| 12292  |        |        | 1      |     | 2    |
| 12294  |        |        |        |     | 2    |
| 12296  |        |        |        |     | 2    |
| 12307  |        |        |        |     | 2    |

| respid | Q31b_7 | Q31b_8 | Q31b_9 | Q32 | Q32a |   |
|--------|--------|--------|--------|-----|------|---|
| 12309  |        |        |        |     | 2    |   |
| 12312  |        |        | 1      |     | 2    |   |
| 12317  |        |        |        |     | 2    |   |
| 12319  | 0      |        |        |     | 2    |   |
| 12320  |        |        |        |     | 2    |   |
| 12322  |        |        | 1      |     | 2    |   |
| 12328  |        |        |        |     | 2    |   |
| 12331  |        |        |        |     | 1    | 3 |
| 12332  |        |        |        |     | 2    |   |
| 12334  |        |        |        |     | 2    |   |
| 12337  |        |        | 2      |     | 2    |   |
| 12338  |        |        |        |     | 2    |   |
| 12342  |        |        |        |     | 2    |   |
| 12349  |        |        |        |     | 2    |   |
| 12352  |        |        | 1      |     | 2    |   |
| 12355  |        |        |        |     | 2    |   |
| 12357  |        |        |        |     | 2    |   |
| 12358  |        |        |        |     | 2    |   |
| 12371  |        |        |        |     | 2    |   |
| 12372  |        |        |        |     | 2    |   |
| 12373  |        |        |        |     | 2    |   |
| 12379  |        |        |        |     | 2    |   |
| 12381  |        |        |        |     | 1    | 3 |
| 12383  |        |        | 2      |     | 1    | 1 |
| 12384  |        |        |        |     | 2    |   |
| 12386  |        |        |        |     | 2    |   |
| 12389  |        |        |        |     | 2    |   |
| 12392  |        |        |        |     | 1    | 1 |
| 12396  |        |        |        |     | 2    |   |
| 12397  |        |        |        |     | 1    | 1 |
| 12399  |        |        |        |     | 2    |   |
| 12400  |        |        | 2      |     | 1    | 3 |

| respid | Q31b_7 | Q31b_8 | Q31b_9 | Q32 | Q32a |
|--------|--------|--------|--------|-----|------|
| 12406  |        |        |        | 1   | 4    |
| 12407  |        |        |        | 2   |      |
| 12410  |        |        |        | 2   |      |
| 12413  |        |        |        | 2   |      |
| 12416  |        |        |        | 1   | 2    |
| 12419  |        |        | 2      | 2   |      |
| 12422  |        |        |        | 2   |      |
| 12423  |        |        |        | 2   |      |
| 12429  |        |        |        | 2   |      |
| 12434  |        |        | 2      | 1   | 3    |
| 12435  |        |        |        | 2   |      |
| 12436  |        |        |        | 2   |      |
| 12442  |        |        |        | 2   |      |
| 12449  |        |        |        | 1   | 2    |
| 12451  |        |        |        | 2   |      |
| 12456  | 3      |        |        | 2   |      |
| 12457  |        |        |        | 2   |      |
| 12458  |        |        |        | 2   |      |
| 12461  |        |        |        | 1   | 1    |
| 12462  |        |        |        | 2   |      |
| 12463  |        |        |        | 2   |      |
| 12466  |        |        |        | 2   |      |
| 12470  |        |        |        | 2   |      |
| 12471  |        |        |        | 2   |      |
| 12472  |        |        |        | 2   |      |
| 12478  | 2      |        |        | 1   | 1    |
| 12479  |        |        |        | 1   | 1    |
| 12481  |        |        |        | 2   |      |
| 12482  |        |        |        | 2   |      |
| 12483  |        |        |        | 2   |      |
| 12496  |        |        |        | 2   |      |
| 12497  |        |        |        | 2   |      |

| respid | Q31b_7 | Q31b_8 | Q31b_9 | Q32 | Q32a |
|--------|--------|--------|--------|-----|------|
| 12498  | 1      | 2      |        | 1   | 2    |
| 12500  |        |        |        | 2   |      |
| 12501  |        |        |        | 1   | 1    |
| 12502  |        |        |        | 2   |      |
| 12503  |        |        |        | 1   | 0    |
| 12505  |        |        |        | 1   | 3    |
| 12508  |        |        |        | 2   |      |
| 12509  |        |        | 1      | 1   | 1    |
| 12510  |        |        |        | 2   |      |
| 12512  |        |        |        | 1   | 2    |
| 12514  |        | 1      |        | 1   | 1    |
| 12515  |        |        |        | 2   |      |
| 12520  |        |        |        | 2   |      |
| 12522  |        |        |        | 2   |      |
| 12526  |        |        |        | 2   |      |
| 12527  |        |        |        | 2   |      |
| 12528  |        |        |        | 2   |      |
| 12530  |        |        |        | 2   |      |
| 12535  |        |        |        | 2   |      |
| 12539  |        |        |        | 2   |      |
| 12541  |        |        |        | 2   |      |
| 12542  |        |        |        | 2   |      |
| 12545  |        |        |        | 1   | 3    |
| 12547  |        |        |        | 2   |      |
| 12549  |        |        |        | 2   |      |
| 12550  |        |        |        | 2   |      |
| 12555  |        |        |        | 2   |      |
| 12557  |        |        |        | 2   |      |
| 12559  |        |        |        | 2   |      |
| 12561  |        |        |        | 2   |      |
| 12562  |        |        |        | 2   |      |
| 12563  |        |        |        | 2   |      |



| respid | Q31b_7 | Q31b_8 | Q31b_9 | Q32 | Q32a |
|--------|--------|--------|--------|-----|------|
| 12565  |        |        | 2      | 1   | 2    |
| 12566  |        |        |        | 2   |      |
| 12570  |        |        |        | 2   |      |
| 12571  |        |        |        | 2   |      |
| 12572  |        |        |        | 2   |      |
| 12578  |        |        |        | 2   |      |
| 12579  |        |        | 0      | 1   | 0    |
| 12581  |        |        |        | 2   |      |
| 12582  |        |        |        | 1   | 3    |
| 12585  |        |        |        | 2   |      |
| 12586  |        |        |        | 1   | 2    |
| 12588  |        |        | 1      | 1   | 1    |
| 12589  |        |        |        | 1   | 1    |
| 12590  |        |        |        | 2   |      |
| 12591  |        |        |        | 2   |      |
| 12593  |        |        |        | 2   |      |
| 12594  |        |        |        | 2   |      |
| 12599  |        |        |        | 2   |      |
| 12600  |        |        |        | 1   | 1    |
| 12602  |        | 2      |        | 1   | 2    |
| 12606  |        |        | 3      | 2   |      |
| 12607  |        |        |        | 2   |      |
| 12608  |        |        |        | 2   |      |
| 12610  |        |        |        | 2   |      |
| 12611  |        |        |        | 2   |      |
| 12613  | 4      |        | 4      | 1   | 3    |
| 12616  |        |        |        | 2   |      |
| 12617  |        |        |        | 1   | 1    |
| 12619  |        |        |        | 2   |      |
| 12622  |        |        |        | 2   |      |
| 12628  |        |        |        | 1   | 0    |
| 12631  |        |        |        | 2   |      |

| respid | Q31b_7 | Q31b_8 | Q31b_9 | Q32 | Q32a |   |
|--------|--------|--------|--------|-----|------|---|
| 12635  |        |        |        |     | 2    |   |
| 12638  |        |        |        |     | 2    |   |
| 12639  |        |        |        |     | 2    |   |
| 12640  |        |        |        |     | 2    |   |
| 12643  |        |        |        |     | 2    |   |
| 12646  |        |        | 4      |     | 1    | 4 |
| 12648  |        | 3      |        |     | 1    | 3 |
| 12650  |        |        |        |     | 2    |   |
| 12651  |        |        |        |     | 2    |   |
| 12658  |        |        |        |     | 1    | 1 |
| 12662  |        |        |        |     | 1    | 1 |
| 12663  |        |        |        |     | 2    |   |
| 12664  |        |        | 1      |     | 1    | 4 |
| 12669  |        |        | 3      |     | 1    | 3 |
| 12670  |        |        |        |     | 2    |   |
| 12673  |        |        |        |     | 2    |   |
| 12675  |        |        |        |     | 2    |   |
| 12677  |        |        |        |     | 2    |   |
| 12679  |        |        |        |     | 2    |   |
| 12682  |        |        |        |     | 2    |   |
| 12696  |        |        |        |     | 2    |   |
| 12697  |        |        |        |     | 2    |   |
| 12699  |        |        |        |     | 2    |   |
| 12700  |        |        |        |     | 2    |   |
| 12701  |        |        |        |     | 2    |   |
| 12702  |        |        |        |     | 2    |   |
| 12704  |        |        |        |     | 1    | 3 |
| 12705  |        |        |        |     | 2    |   |
| 12709  |        |        |        |     | 2    |   |
| 12710  |        |        |        |     | 2    |   |
| 12713  |        |        |        |     | 1    | 0 |
| 12716  |        |        |        |     | 2    |   |

| respid | Q31b_7 | Q31b_8 | Q31b_9 | Q32 | Q32a |
|--------|--------|--------|--------|-----|------|
| 12719  |        |        | 2      | 1   | 2    |
| 12720  |        |        |        | 2   |      |
| 12723  |        |        |        | 1   | 0    |
| 12726  |        |        |        | 2   |      |
| 12728  |        |        |        | 2   |      |
| 12729  |        |        |        | 2   |      |
| 12731  |        |        |        | 2   |      |
| 12732  |        |        |        | 1   | 2    |
| 12733  | 3      |        |        | 2   |      |
| 12736  |        |        |        | 2   |      |
| 12737  |        |        |        | 2   |      |
| 12739  |        |        |        | 2   |      |
| 12742  |        |        |        | 2   |      |
| 12743  |        |        | 4      | 1   | 4    |
| 12744  |        |        |        | 2   |      |
| 12747  |        |        |        | 2   |      |
| 12751  |        |        |        | 2   |      |
| 12754  |        |        |        | 2   |      |
| 12756  |        |        |        | 2   |      |
| 12757  |        |        |        | 2   |      |
| 12760  |        |        |        | 2   |      |
| 12761  |        |        |        | 2   |      |
| 12762  | 2      |        | 2      | 2   |      |
| 12766  |        |        |        | 2   |      |
| 12769  |        |        | 1      | 2   |      |
| 12770  |        |        |        | 1   | 2    |
| 12773  |        |        |        | 2   |      |
| 12780  |        |        |        | 1   | 2    |
| 12789  |        |        |        | 2   |      |
| 12792  | 3      | 3      | 3      | 1   | 2    |
| 12795  |        |        |        | 2   |      |
| 12804  |        |        | 3      | 1   | 4    |

| respid | Q31b_7 | Q31b_8 | Q31b_9 | Q32 | Q32a |
|--------|--------|--------|--------|-----|------|
| 12811  |        |        |        | 2   |      |
| 12813  |        |        |        | 1   | 3    |
| 12814  |        |        |        | 2   |      |
| 12815  |        |        |        | 1   | 2    |
| 12816  |        |        |        | 2   |      |
| 12817  |        |        |        | 2   |      |
| 12818  |        |        | 0      | 1   | 0    |
| 12819  |        |        |        | 2   |      |
| 12820  |        |        |        | 2   |      |
| 12821  |        |        |        | 2   |      |
| 12824  |        |        |        | 2   |      |
| 12827  |        |        |        | 1   | 2    |
| 12836  |        | 3      |        | 1   | 2    |
| 12837  |        |        |        | 2   |      |
| 12838  |        |        |        | 1   | 1    |
| 12845  |        |        |        | 2   |      |
| 12847  |        |        | 2      | 1   | 1    |
| 12849  |        |        |        | 2   |      |
| 12850  |        |        |        | 2   |      |
| 12852  |        |        |        | 2   |      |
| 12853  |        |        |        | 2   |      |
| 12854  |        |        |        | 2   |      |
| 12860  |        |        |        | 2   |      |
| 12861  |        |        |        | 2   |      |
| 12863  |        |        |        | 2   |      |
| 12865  |        |        |        | 2   |      |
| 12870  |        |        |        | 1   | 1    |
| 12871  |        |        |        | 2   |      |
| 12873  |        |        |        | 1   | 1    |
| 12877  |        |        |        | 2   |      |
| 12880  |        |        |        | 1   | 0    |
| 12881  | 0      |        |        | 2   |      |

| respid | Q31b_7 | Q31b_8 | Q31b_9 | Q32 | Q32a |
|--------|--------|--------|--------|-----|------|
| 12882  |        |        |        |     | 2    |
| 12883  |        |        |        |     | 2    |
| 12885  | 2      |        |        |     | 1    |
| 12887  |        |        |        |     | 1    |
| 12889  |        |        |        |     | 2    |
| 12890  |        |        |        |     | 2    |
| 12891  |        |        | 1      |     | 2    |
| 12892  |        |        |        |     | 1    |
| 12893  |        |        |        |     | 2    |
| 12895  |        |        |        |     | 2    |
| 12898  |        |        |        |     | 2    |
| 12907  | 2      |        |        |     | 1    |
| 12908  |        |        |        |     | 2    |
| 12909  |        |        |        |     | 2    |
| 12914  |        |        |        |     | 2    |
| 12915  |        |        |        |     | 1    |
| 12916  |        |        |        |     | 2    |
| 12921  |        |        |        |     | 2    |
| 12922  |        |        |        |     | 2    |
| 12923  |        |        |        |     | 2    |
| 12926  |        |        | 1      |     | 2    |
| 12927  |        |        | 1      |     | 2    |
| 12932  |        |        |        |     | 2    |
| 12936  |        |        |        |     | 2    |
| 12937  |        |        |        |     | 2    |
| 12938  |        |        |        |     | 1    |
| 12939  |        |        |        |     | 2    |
| 12940  |        | 2      |        |     | 1    |
| 12945  |        |        |        |     | 2    |
| 12946  |        |        | 1      |     | 1    |
| 12947  |        |        |        |     | 1    |
| 12948  | 3      |        |        |     | 1    |

| respid | Q31b_7 | Q31b_8 | Q31b_9 | Q32 | Q32a |
|--------|--------|--------|--------|-----|------|
| 12951  |        |        |        | 2   |      |
| 12952  |        |        |        | 1   | 2    |
| 12954  | 3      |        | 3      | 1   | 3    |
| 12960  |        |        |        | 2   |      |
| 12961  |        |        |        | 2   |      |
| 12962  |        |        |        | 2   |      |
| 12963  |        |        |        | 2   |      |
| 12964  |        |        |        | 2   |      |
| 12966  |        |        |        | 2   |      |
| 12967  |        |        | 4      | 2   |      |
| 12969  |        |        |        | 2   |      |
| 12970  |        |        |        | 1   | 1    |
| 12974  | 2      | 2      |        | 1   | 2    |
| 12979  |        |        |        | 2   |      |
| 12980  |        |        |        | 2   |      |
| 12983  |        |        |        | 2   |      |
| 12988  |        |        |        | 2   |      |
| 12994  |        |        | 1      | 2   |      |
| 12995  |        |        |        | 2   |      |
| 12996  |        |        |        | 2   |      |
| 12998  |        |        |        | 2   |      |
| 12999  |        |        |        | 2   |      |
| 13001  |        |        |        | 2   |      |
| 13005  |        |        |        | 2   |      |
| 13006  |        |        |        | 1   | 4    |
| 13007  |        |        |        | 2   |      |
| 13011  |        |        |        | 1   | 1    |
| 13012  |        |        |        | 2   |      |
| 13013  |        |        |        | 1   | 3    |
| 13016  |        |        |        | 2   |      |
| 13018  |        |        |        | 2   |      |
| 13020  |        |        |        | 2   |      |

| respid | Q31b_7 | Q31b_8 | Q31b_9 | Q32 | Q32a |   |
|--------|--------|--------|--------|-----|------|---|
| 13024  |        |        |        |     | 2    |   |
| 13025  |        |        |        |     | 2    |   |
| 13027  |        |        |        |     | 1    | 0 |
| 13031  |        |        | 2      |     | 2    |   |
| 13032  |        |        |        |     | 1    | 2 |
| 13034  |        |        |        |     | 1    | 2 |
| 13036  |        |        | 1      |     | 2    |   |
| 13037  |        |        |        |     | 2    |   |
| 13038  |        |        | 3      |     | 1    | 3 |
| 13039  |        |        |        |     | 2    |   |
| 13040  |        |        |        |     | 1    | 1 |
| 13041  |        | 1      |        |     | 1    | 1 |
| 13045  |        |        |        |     | 1    | 3 |
| 13046  |        |        |        |     | 2    |   |
| 13048  |        |        |        |     | 2    |   |
| 13051  |        |        |        |     | 2    |   |
| 13053  |        |        |        |     | 2    |   |
| 13055  |        |        |        |     | 1    | 3 |
| 13059  |        |        |        |     | 1    | 1 |
| 13068  |        |        |        |     | 2    |   |
| 13069  |        |        |        |     | 2    |   |
| 13076  |        |        |        |     | 2    |   |
| 13081  |        |        |        |     | 2    |   |
| 13082  |        |        |        |     | 1    | 2 |
| 13084  |        |        |        |     | 2    |   |
| 13085  | 1      |        |        |     | 1    | 1 |
| 13086  |        |        |        |     | 2    |   |
| 13093  |        | 1      |        |     | 1    | 1 |
| 13094  |        |        | 2      |     | 1    | 2 |
| 13097  |        |        |        |     | 2    |   |
| 13098  |        |        |        |     | 1    | 1 |
| 13099  |        |        |        |     | 2    |   |

| respid | Q31b_7 | Q31b_8 | Q31b_9 | Q32 | Q32a |
|--------|--------|--------|--------|-----|------|
| 13100  |        |        |        | 2   |      |
| 13101  |        |        |        | 2   |      |
| 13103  |        |        |        | 2   |      |
| 13105  |        |        |        | 2   |      |
| 13106  |        |        | 0      | 2   |      |
| 13107  |        |        |        | 1   | 1    |
| 13110  |        |        |        | 1   | 2    |
| 13118  |        |        |        | 1   | 0    |
| 13120  |        |        |        | 1   | 3    |
| 13130  |        |        |        | 1   | 0    |
| 13133  |        |        |        | 1   | 1    |
| 13134  |        |        |        | 2   |      |
| 13139  |        |        |        | 2   |      |
| 13142  |        |        |        | 2   |      |
| 13143  |        |        |        | 2   |      |
| 13145  |        |        |        | 2   |      |
| 13148  |        |        |        | 1   | 2    |
| 13149  |        |        |        | 2   |      |
| 13151  |        |        | 3      | 1   | 2    |
| 13153  |        |        |        | 2   |      |
| 13158  |        |        |        | 2   |      |
| 13160  |        |        | 1      | 2   |      |
| 13162  |        |        |        | 1   | 2    |
| 13169  |        |        |        | 2   |      |
| 13172  |        | 1      |        | 2   |      |
| 13173  |        |        |        | 2   |      |
| 13176  |        |        |        | 1   | 0    |
| 13179  |        |        |        | 2   |      |
| 13184  |        |        |        | 2   |      |
| 13185  |        |        |        | 2   |      |
| 13186  |        |        |        | 2   |      |
| 13188  |        |        | 1      | 1   | 1    |



| respid | Q31b_7 | Q31b_8 | Q31b_9 | Q32 | Q32a |
|--------|--------|--------|--------|-----|------|
| 13190  |        |        |        | 1   | 2    |
| 13192  |        |        |        | 2   |      |
| 13193  |        |        |        | 2   |      |
| 13201  |        |        |        | 2   |      |
| 13207  |        |        |        | 2   |      |
| 13208  |        |        |        | 2   |      |
| 13209  |        |        |        | 1   | 2    |
| 13212  |        |        |        | 2   |      |
| 13215  |        |        |        | 1   | 1    |
| 13218  |        |        |        | 2   |      |
| 13219  |        |        |        | 2   |      |
| 13224  |        |        |        | 2   |      |
| 13225  |        |        |        | 2   |      |
| 13226  |        |        |        | 2   |      |
| 13232  |        |        |        | 2   |      |
| 13237  |        |        |        | 2   |      |
| 13239  |        |        |        | 2   |      |
| 13241  |        |        |        | 1   | 2    |
| 13243  |        |        |        | 2   |      |
| 13247  |        |        |        | 2   |      |
| 13248  |        |        |        | 2   |      |
| 13251  |        |        |        | 2   |      |
| 13256  |        |        |        | 2   |      |
| 13260  |        |        | 1      | 2   |      |
| 13261  |        |        |        | 2   |      |
| 13264  |        |        |        | 2   |      |
| 13273  |        |        |        | 2   |      |
| 13274  |        |        |        | 2   |      |
| 13276  | 1      |        |        | 2   |      |
| 13278  |        |        |        | 2   |      |
| 13279  |        |        |        | 2   |      |
| 13282  |        |        |        | 2   |      |

| respid | Q31b_7 | Q31b_8 | Q31b_9 | Q32 | Q32a |
|--------|--------|--------|--------|-----|------|
| 13283  |        |        |        | 2   |      |
| 13285  |        |        |        | 1   | 3    |
| 13286  |        |        |        | 2   |      |
| 13299  |        |        |        | 2   |      |
| 13300  |        |        |        | 2   |      |
| 13301  |        |        |        | 2   |      |
| 13303  |        |        |        | 2   |      |
| 13304  |        |        |        | 2   |      |
| 13307  |        |        |        | 2   |      |
| 13308  |        |        |        | 2   |      |
| 13312  |        |        |        | 2   |      |
| 13313  |        |        |        | 2   |      |
| 13314  |        |        | 1      | 2   |      |
| 13318  |        |        |        | 2   |      |
| 13320  |        |        |        | 2   |      |
| 13322  |        |        | 1      | 2   |      |
| 13324  |        |        |        | 2   |      |
| 13325  |        |        |        | 1   | 2    |
| 13327  |        |        |        | 2   |      |
| 13330  |        |        |        | 2   |      |
| 13332  |        |        |        | 2   |      |
| 13333  |        |        |        | 2   |      |
| 13334  |        |        |        | 2   |      |
| 13351  |        | 3      |        | 1   | 0    |
| 13353  |        |        |        | 2   |      |
| 13354  |        |        |        | 2   |      |
| 13355  |        | 2      |        | 1   | 0    |
| 13358  |        |        |        | 2   |      |
| 13359  |        |        |        | 1   | 1    |
| 13360  |        |        |        | 2   |      |
| 13364  |        |        |        | 1   | 1    |
| 13365  |        |        | 2      | 2   |      |

| respid | Q31b_7 | Q31b_8 | Q31b_9 | Q32 | Q32a |
|--------|--------|--------|--------|-----|------|
| 13368  |        |        |        | 2   |      |
| 13370  |        |        |        | 2   |      |
| 13375  |        |        | 0      | 2   |      |
| 13384  |        |        |        | 1   | 0    |
| 13387  |        |        |        | 2   |      |
| 13395  | 2      |        |        | 1   | 2    |
| 13398  |        |        |        | 2   |      |
| 13404  |        |        |        | 2   |      |
| 13405  |        |        | 0      | 2   |      |
| 13408  |        |        |        | 2   |      |
| 13411  |        |        |        | 2   |      |
| 13413  |        |        |        | 2   |      |
| 13419  |        |        |        | 2   |      |
| 13420  |        |        |        | 2   |      |
| 13427  |        |        |        | 2   |      |
| 13441  |        |        |        | 1   | 2    |
| 13444  |        |        |        | 1   | 1    |
| 13456  |        |        |        | 2   |      |
| 13466  |        |        |        | 2   |      |
| 13468  |        |        |        | 1   | 0    |
| 13475  |        |        |        | 2   |      |
| 13484  |        |        |        | 1   | 0    |
| 13486  |        |        |        | 2   |      |
| 13487  |        | 0      |        | 1   | 2    |
| 13491  |        |        |        | 2   |      |
| 13496  |        |        |        | 2   |      |
| 13497  |        |        |        | 2   |      |
| 13498  |        |        |        | 1   | 0    |
| 13502  |        |        |        | 2   |      |
| 13503  |        |        | 2      | 1   | 0    |
| 13505  |        |        |        | 2   |      |
| 13509  |        |        |        | 2   |      |

| respid | Q31b_7 | Q31b_8 | Q31b_9 | Q32 | Q32a |
|--------|--------|--------|--------|-----|------|
| 13510  |        |        |        | 2   |      |
| 13518  |        |        | 1      | 2   |      |
| 13521  |        |        |        | 2   |      |
| 13523  |        |        |        | 2   |      |
| 13528  |        |        |        | 2   |      |
| 13531  |        | 2      |        | 1   | 1    |
| 13532  |        |        |        | 2   |      |
| 13533  |        |        |        | 2   |      |
| 13534  |        |        |        | 2   |      |
| 13535  |        |        |        | 2   |      |
| 13538  |        |        |        | 1   | 2    |
| 13540  |        |        |        | 2   |      |
| 13541  |        |        |        | 2   |      |
| 13542  |        |        |        | 1   | 0    |
| 13550  |        |        |        | 2   |      |
| 13553  |        |        |        | 1   | 1    |
| 13554  |        |        |        | 2   |      |
| 13555  | 1      |        |        | 2   |      |
| 13556  |        |        |        | 1   | 1    |
| 13563  |        |        |        | 1   | 1    |
| 13564  |        |        | 1      | 2   |      |
| 13567  |        |        |        | 2   |      |
| 13568  |        |        |        | 1   | 2    |
| 13570  |        |        |        | 2   |      |
| 13573  |        |        |        | 2   |      |
| 13575  |        |        |        | 1   | 2    |
| 13577  |        |        |        | 1   | 2    |
| 13580  |        |        |        | 2   |      |
| 13582  |        |        |        | 2   |      |
| 13584  |        |        |        | 2   |      |
| 13585  |        |        |        | 2   |      |
| 13586  |        |        |        | 2   |      |

| respid | Q31b_7 | Q31b_8 | Q31b_9 | Q32 | Q32a |
|--------|--------|--------|--------|-----|------|
| 13587  | 1      |        | 2      | 1   | 1    |
| 13592  |        |        |        | 2   |      |
| 13596  |        |        |        | 2   |      |
| 13597  |        |        | 1      | 2   |      |
| 13599  |        |        |        | 1   | 2    |
| 13601  |        |        |        | 2   |      |
| 13604  |        |        | 1      | 2   |      |
| 13608  |        |        | 1      | 2   |      |
| 13616  |        |        |        | 2   |      |
| 13618  |        |        |        | 2   |      |
| 13619  |        |        |        | 2   |      |
| 13626  |        |        |        | 2   |      |
| 13628  |        |        |        | 1   | 1    |
| 13640  |        |        |        | 2   |      |
| 13645  |        |        |        | 2   |      |
| 13648  |        |        |        | 2   |      |
| 13653  |        |        |        | 2   |      |
| 13655  |        |        |        | 2   |      |
| 13662  |        |        |        | 2   |      |
| 13670  |        |        | 1      | 2   |      |
| 13673  |        |        |        | 2   |      |
| 13674  |        |        |        | 2   |      |
| 13675  |        |        |        | 2   |      |
| 13678  |        |        |        | 2   |      |
| 13680  |        |        |        | 2   |      |
| 13681  |        |        |        | 2   |      |
| 13683  |        |        |        | 2   |      |
| 13684  |        |        |        | 2   |      |
| 13685  |        |        |        | 2   |      |
| 13687  |        |        |        | 2   |      |
| 13690  |        |        |        | 2   |      |
| 13700  |        |        | 2      | 1   | 2    |

| respid | Q31b_7 | Q31b_8 | Q31b_9 | Q32 | Q32a |
|--------|--------|--------|--------|-----|------|
| 13705  |        |        |        | 1   | 1    |
| 13710  |        |        |        | 2   |      |
| 13711  |        |        |        | 2   |      |
| 13713  |        |        |        | 2   |      |
| 13716  |        |        |        | 2   |      |
| 13721  |        |        |        | 1   | 2    |
| 13722  |        |        |        | 1   | 4    |
| 13723  | 4      |        | 4      | 1   | 3    |
| 13726  |        |        | 2      | 1   | 2    |
| 13728  |        |        |        | 2   |      |
| 13730  |        |        |        | 2   |      |
| 13734  |        |        |        | 2   |      |
| 13736  |        | 4      | 2      | 1   | 4    |
| 13737  |        |        |        | 2   |      |
| 13739  |        |        |        | 2   |      |
| 13742  |        |        |        | 2   |      |
| 13746  |        |        |        | 2   |      |
| 13747  |        |        |        | 2   |      |
| 13749  |        |        |        | 2   |      |
| 13751  |        |        |        | 2   |      |
| 13752  |        |        |        | 2   |      |
| 13756  |        |        |        | 2   |      |
| 13757  |        |        |        | 2   |      |
| 13767  |        |        |        | 1   | 2    |
| 13771  |        |        |        | 2   |      |
| 13772  |        | 4      | 3      | 1   | 3    |
| 13779  |        |        |        | 2   |      |
| 13782  |        |        |        | 2   |      |
| 13783  |        |        |        | 2   |      |
| 13785  |        |        |        | 2   |      |
| 13786  |        |        |        | 2   |      |
| 13792  |        |        | 3      | 1   | 2    |

| respid | Q31b_7 | Q31b_8 | Q31b_9 | Q32 | Q32a |
|--------|--------|--------|--------|-----|------|
| 13796  |        | 2      |        | 2   |      |
| 13798  |        |        |        | 1   | 0    |
| 13799  |        |        |        | 1   | 1    |
| 13804  |        |        |        | 2   |      |
| 13805  |        |        |        | 2   |      |
| 13810  |        |        |        | 1   | 3    |
| 13811  |        |        |        | 2   |      |
| 13819  |        |        |        | 1   | 2    |
| 13821  |        |        |        | 1   | 3    |
| 13824  |        |        |        | 1   | 2    |
| 13828  | 2      |        |        | 1   | 1    |
| 13829  |        |        |        | 1   | 4    |
| 13831  |        |        |        | 1   | 0    |
| 13833  |        |        |        | 2   |      |
| 13835  |        | 4      | 3      | 1   | 4    |
| 13838  |        |        |        | 2   |      |
| 13839  |        |        |        | 1   | 3    |
| 13845  |        |        |        | 2   |      |
| 13846  |        |        |        | 2   |      |
| 13853  |        |        |        | 1   | 1    |
| 13855  |        |        |        | 1   | 1    |
| 13858  |        |        | 3      | 1   | 2    |
| 13860  |        |        |        | 2   |      |
| 13865  |        |        |        | 1   | 3    |
| 13870  |        |        |        | 2   |      |
| 13872  |        |        |        | 1   | 3    |
| 13873  |        |        |        | 2   |      |
| 13874  |        |        |        | 2   |      |
| 13875  |        |        |        | 1   | 3    |
| 13881  |        |        |        | 2   |      |
| 13887  |        |        |        | 1   | 1    |
| 13888  |        |        |        | 1   | 2    |

| respid | Q31b_7 | Q31b_8 | Q31b_9 | Q32 | Q32a |
|--------|--------|--------|--------|-----|------|
| 13889  |        | 4      | 4      | 1   | 3    |
| 13895  | 1      | 4      | 3      | 1   | 4    |
| 13897  |        |        |        | 2   |      |
| 13898  |        |        |        | 1   | 1    |
| 13901  |        |        |        | 2   |      |
| 13902  |        |        |        | 1   | 2    |
| 13903  |        |        |        | 2   |      |
| 13905  |        |        |        | 1   | 0    |
| 13908  |        |        | 2      | 1   | 1    |
| 13909  |        |        |        | 2   |      |
| 13910  | 4      |        |        | 1   | 3    |
| 13911  |        |        |        | 2   |      |
| 13914  |        |        |        | 1   | 1    |
| 13920  |        |        | 2      | 1   | 2    |
| 13926  |        |        |        | 2   |      |
| 13929  |        |        |        | 1   | 2    |
| 13930  |        | 4      | 2      | 1   | 4    |
| 13931  |        |        |        | 2   |      |
| 13932  |        |        | 2      | 1   | 1    |
| 13934  |        |        |        | 1   | 1    |
| 13938  |        |        |        | 2   |      |
| 13942  |        |        |        | 2   |      |
| 13945  |        |        |        | 1   | 1    |
| 13947  | 2      |        |        | 1   | 3    |
| 13948  |        |        |        | 2   |      |
| 13959  |        |        |        | 2   |      |
| 13962  |        |        |        | 2   |      |
| 13963  |        |        |        | 2   |      |
| 13964  |        |        |        | 2   |      |
| 13966  |        |        |        | 1   | 1    |
| 13968  |        | 0      |        | 1   | 1    |
| 13971  |        |        |        | 2   |      |



| respid | Q31b_7 | Q31b_8 | Q31b_9 | Q32 | Q32a |
|--------|--------|--------|--------|-----|------|
| 13979  |        |        |        | 1   | 2    |
| 13980  |        |        |        | 1   | 1    |
| 13981  |        |        |        | 1   | 1    |
| 13982  |        |        |        | 2   |      |
| 13984  |        |        |        | 2   |      |
| 13989  |        |        |        | 2   |      |
| 13990  |        |        |        | 2   |      |
| 13992  |        |        | 4      | 1   | 2    |
| 13998  |        |        |        | 2   |      |
| 13999  | 1      |        |        | 1   | 2    |
| 14000  |        |        | 1      | 2   |      |
| 14003  |        |        |        | 1   | 1    |
| 14004  | 0      |        |        | 2   |      |
| 14006  |        |        | 2      | 2   |      |
| 14007  |        |        |        | 2   |      |
| 14008  |        |        |        | 2   |      |
| 14013  |        |        |        | 2   |      |
| 14015  |        |        |        | 2   |      |
| 14018  |        |        |        | 2   |      |
| 14021  |        |        |        | 2   |      |
| 14023  |        |        |        | 2   |      |
| 14024  |        |        | 1      | 1   | 1    |
| 14026  |        |        |        | 2   |      |
| 14030  |        |        | 0      | 2   |      |
| 14032  |        |        |        | 1   | 1    |
| 14040  |        |        |        | 2   |      |
| 14045  |        |        |        | 2   |      |
| 14048  |        | 1      |        | 1   | 1    |
| 14049  | 1      |        | 4      | 1   | 3    |
| 14050  |        |        |        | 2   |      |
| 14051  |        |        |        | 1   | 4    |
| 14052  |        |        |        | 2   |      |

| respid | Q31b_7 | Q31b_8 | Q31b_9 | Q32 | Q32a |
|--------|--------|--------|--------|-----|------|
| 14054  |        |        |        | 1   | 1    |
| 14055  |        |        |        | 2   |      |
| 14057  |        |        |        | 1   | 1    |
| 14058  |        |        |        | 2   |      |
| 14059  |        |        |        | 2   |      |
| 14060  |        |        |        | 1   | 1    |
| 14061  |        |        |        | 1   | 3    |
| 14071  |        |        |        | 2   |      |
| 14073  |        |        |        | 2   |      |
| 14074  |        |        |        | 2   |      |
| 14076  |        |        |        | 2   |      |
| 14080  |        |        |        | 2   |      |
| 14082  |        |        |        | 2   |      |
| 14083  |        |        |        | 1   | 2    |
| 14084  |        |        |        | 2   |      |
| 14085  |        |        |        | 2   |      |
| 14086  |        | 3      | 2      | 1   | 2    |
| 14088  |        |        |        | 2   |      |
| 14090  |        |        |        | 2   |      |
| 14092  |        |        |        | 2   |      |
| 14093  |        |        |        | 2   |      |
| 14096  |        |        |        | 2   |      |
| 14103  |        |        |        | 1   | 2    |
| 14105  |        |        |        | 2   |      |
| 14106  |        | 1      | 1      | 2   |      |
| 14107  |        |        |        | 1   | 1    |
| 14108  |        |        | 3      | 1   | 3    |
| 14112  |        |        |        | 1   | 1    |
| 14114  |        |        |        | 1   | 3    |
| 14115  |        |        |        | 2   |      |
| 14116  |        |        |        | 2   |      |
| 14117  |        |        | 3      | 2   |      |

| respid | Q31b_7 | Q31b_8 | Q31b_9 | Q32 | Q32a |
|--------|--------|--------|--------|-----|------|
| 14118  |        |        |        | 1   | 1    |
| 14119  |        |        |        | 2   |      |
| 14127  |        |        |        | 2   |      |
| 14129  |        |        |        | 2   |      |
| 14131  |        |        |        | 1   | 2    |
| 14132  |        |        |        | 2   |      |
| 14133  |        |        | 3      | 1   | 3    |
| 14134  |        |        | 1      | 2   |      |
| 14135  |        |        |        | 2   |      |
| 14136  |        |        |        | 2   |      |
| 14138  |        |        |        | 2   |      |
| 14139  |        |        |        | 2   |      |
| 14140  |        |        |        | 2   |      |
| 14141  |        |        |        | 2   |      |
| 14143  |        |        |        | 2   |      |
| 14146  |        |        |        | 2   |      |
| 14147  | 3      | 4      | 4      | 1   | 4    |
| 14148  |        |        |        | 2   |      |
| 14151  |        |        |        | 1   | 2    |
| 14152  |        |        |        | 1   | 1    |
| 14153  |        |        |        | 2   |      |
| 14154  |        |        |        | 2   |      |
| 14158  |        |        |        | 1   | 1    |
| 14159  |        |        |        | 1   | 1    |
| 14160  | 3      |        |        | 1   | 3    |
| 14161  | 2      |        |        | 1   | 1    |
| 14162  |        |        |        | 2   |      |
| 14165  |        |        | 1      | 1   | 3    |
| 14166  |        |        |        | 1   | 1    |
| 14167  |        |        |        | 2   |      |
| 14169  |        |        |        | 2   |      |
| 14170  |        |        |        | 2   |      |

| respid | Q31b_7 | Q31b_8 | Q31b_9 | Q32 | Q32a |
|--------|--------|--------|--------|-----|------|
| 14172  |        |        |        | 2   |      |
| 14173  |        |        |        | 2   |      |
| 14174  |        |        |        | 2   |      |
| 14175  |        |        |        | 1   | 1    |
| 14176  |        |        |        | 2   |      |
| 14178  |        |        |        | 1   | 0    |
| 14179  |        |        |        | 2   |      |
| 14180  |        |        |        | 1   | 1    |
| 14183  |        |        |        | 1   | 2    |
| 14185  |        |        |        | 2   |      |
| 14187  |        |        |        | 1   | 2    |
| 14189  |        |        |        | 2   |      |
| 14191  |        |        |        | 1   | 1    |
| 14192  |        |        |        | 2   |      |
| 14195  |        |        | 2      | 2   |      |
| 14197  |        |        |        | 1   | 1    |
| 14203  |        |        |        | 1   | 1    |
| 14204  |        |        |        | 2   |      |
| 14205  |        |        |        | 2   |      |
| 14208  |        |        |        | 2   |      |
| 14211  | 2      | 4      | 4      | 1   | 4    |
| 14214  |        |        |        | 2   |      |
| 14215  |        |        |        | 1   | 2    |
| 14216  | 3      |        | 2      | 1   | 2    |
| 14218  |        |        |        | 2   |      |
| 14220  |        |        |        | 2   |      |
| 14223  |        |        |        | 2   |      |
| 14225  |        |        |        | 2   |      |
| 14226  |        |        |        | 2   |      |
| 14228  |        |        |        | 1   | 3    |
| 14231  |        |        |        | 2   |      |
| 14233  |        |        |        | 1   | 2    |

| respid | Q31b_7 | Q31b_8 | Q31b_9 | Q32 | Q32a |
|--------|--------|--------|--------|-----|------|
| 14237  |        |        |        | 2   |      |
| 14238  |        |        |        | 2   |      |
| 14243  |        |        |        | 2   |      |
| 14245  | 0      |        |        | 2   |      |
| 14246  |        |        |        | 2   |      |
| 14248  |        |        |        | 2   |      |
| 14250  |        |        |        | 2   |      |
| 14253  |        |        |        | 1   | 1    |
| 14254  |        |        | 0      | 2   |      |
| 14255  |        |        |        | 2   |      |
| 14257  |        |        |        | 2   |      |
| 14258  |        |        |        | 2   |      |
| 14259  |        |        | 1      | 1   | 2    |
| 14260  |        |        |        | 2   |      |
| 14261  |        | 4      |        | 1   | 4    |
| 14263  |        |        | 3      | 1   | 2    |
| 14264  |        |        |        | 2   |      |
| 14266  |        |        |        | 2   |      |
| 14267  |        |        |        | 2   |      |
| 14268  |        |        |        | 2   |      |
| 14275  |        |        |        | 1   | 1    |
| 14278  |        |        |        | 1   | 3    |
| 14279  |        |        |        | 2   |      |
| 14280  |        |        |        | 2   |      |
| 14281  |        |        |        | 2   |      |
| 14282  |        |        |        | 1   | 1    |
| 14283  | 1      |        | 1      | 1   | 2    |
| 14286  |        |        |        | 2   |      |
| 14287  |        |        |        | 2   |      |
| 14288  |        |        |        | 1   | 2    |
| 14291  |        |        |        | 2   |      |
| 14292  |        |        |        | 2   |      |

| respid | Q31b_7 | Q31b_8 | Q31b_9 | Q32 | Q32a |
|--------|--------|--------|--------|-----|------|
| 14293  |        |        |        | 2   |      |
| 14304  |        |        |        | 1   | 3    |
| 14308  |        |        | 1      | 2   |      |
| 14313  |        |        |        | 1   | 0    |
| 14314  | 1      |        |        | 2   |      |
| 14316  |        |        |        | 2   |      |
| 14317  |        |        |        | 2   |      |
| 14318  |        |        |        | 1   | 2    |
| 14319  |        |        | 2      | 2   |      |
| 14320  |        |        |        | 1   | 2    |
| 14321  |        |        |        | 2   |      |
| 14322  |        |        | 3      | 1   | 3    |
| 14326  |        |        |        | 2   |      |
| 14327  |        |        |        | 1   | 4    |
| 14328  |        |        |        | 1   | 0    |
| 14330  |        |        |        | 2   |      |
| 14332  |        |        |        | 1   | 0    |
| 14334  |        |        |        | 2   |      |
| 14336  |        |        |        | 1   | 1    |
| 14337  |        |        |        | 2   |      |
| 14339  |        |        |        | 2   |      |
| 14340  |        |        | 2      | 1   | 2    |
| 14341  |        |        |        | 2   |      |
| 14344  |        |        |        | 2   |      |
| 14345  |        |        | 1      | 2   |      |
| 14346  |        |        |        | 2   |      |
| 14348  |        |        |        | 2   |      |
| 14349  |        |        |        | 2   |      |
| 14358  |        |        | 2      | 1   | 3    |
| 14360  |        |        |        | 2   |      |
| 14362  |        |        |        | 2   |      |
| 14366  |        |        |        | 2   |      |

| respid | Q31b_7 | Q31b_8 | Q31b_9 | Q32 | Q32a |
|--------|--------|--------|--------|-----|------|
| 14367  |        |        | 1      | 1   | 2    |
| 14369  |        |        | 2      | 1   | 2    |
| 14371  |        |        |        | 2   |      |
| 14372  |        |        |        | 2   |      |
| 14374  |        |        |        | 2   |      |
| 14376  |        |        |        | 2   |      |
| 14377  |        |        |        | 2   |      |
| 14378  |        |        |        | 1   | 0    |
| 14379  |        |        | 1      | 2   |      |
| 14381  |        |        |        | 2   |      |
| 14383  |        |        |        | 2   |      |
| 14384  |        |        | 1      | 1   | 2    |
| 14385  |        |        |        | 1   | 3    |
| 14386  | 2      |        |        | 1   | 2    |
| 14390  |        |        |        | 2   |      |
| 14391  |        |        |        | 2   |      |
| 14392  |        |        | 1      | 2   |      |
| 14393  |        |        |        | 1   | 4    |
| 14394  |        |        |        | 2   |      |
| 14395  |        |        |        | 2   |      |
| 14396  |        |        |        | 2   |      |
| 14397  | 0      |        |        | 2   |      |
| 14398  |        |        |        | 2   |      |
| 14399  |        |        |        | 2   |      |
| 14400  |        |        |        | 2   |      |
| 14403  |        |        |        | 2   |      |
| 14404  |        |        |        | 2   |      |
| 14405  |        |        |        | 2   |      |
| 14407  |        |        |        | 2   |      |
| 14408  |        |        | 1      | 1   | 3    |
| 14410  |        |        |        | 1   | 3    |
| 14415  |        |        |        | 2   |      |

| respid | Q31b_7 | Q31b_8 | Q31b_9 | Q32 | Q32a |
|--------|--------|--------|--------|-----|------|
| 14419  |        |        |        | 1   | 2    |
| 14420  |        |        |        | 2   |      |
| 14421  |        |        |        | 2   |      |
| 14423  |        |        |        | 2   |      |
| 14424  |        |        |        | 2   |      |
| 14425  |        |        |        | 2   |      |
| 14426  |        |        |        | 2   |      |
| 14427  |        |        |        | 2   |      |
| 14428  | 2      |        | 3      | 1   | 3    |
| 14431  |        |        |        | 1   | 1    |
| 14433  |        |        |        | 2   |      |
| 14434  |        |        |        | 1   | 1    |
| 14435  |        |        |        | 1   | 0    |
| 14436  |        |        | 2      | 1   | 3    |
| 14438  |        |        |        | 2   |      |
| 14442  |        |        |        | 1   | 3    |
| 14447  |        |        | 1      | 2   |      |
| 14448  |        |        |        | 2   |      |
| 14450  |        |        |        | 2   |      |
| 14451  |        |        |        | 1   | 0    |
| 14454  |        |        |        | 1   | 2    |
| 14455  |        |        |        | 2   |      |
| 14456  |        |        | 3      | 2   |      |
| 14457  |        |        |        | 1   | 3    |
| 14458  | 1      |        |        | 1   | 2    |
| 14459  |        |        |        | 1   | 0    |
| 14460  |        |        |        | 1   | 0    |
| 14464  |        |        |        | 2   |      |
| 14465  |        |        |        | 1   | 1    |
| 14466  | 1      |        |        | 2   |      |
| 14467  |        |        |        | 2   |      |
| 14470  |        |        |        | 2   |      |



| respid | Q31b_7 | Q31b_8 | Q31b_9 | Q32 | Q32a |
|--------|--------|--------|--------|-----|------|
| 14472  |        |        |        | 2   |      |
| 14473  |        |        |        | 2   |      |
| 14474  |        |        |        | 2   |      |
| 14477  |        |        |        | 1   | 1    |
| 14478  |        |        |        | 2   |      |
| 14479  |        |        |        | 2   |      |
| 14484  |        |        |        | 2   |      |
| 14485  |        |        |        | 2   |      |
| 14486  |        |        |        | 1   | 2    |
| 14487  |        |        |        | 2   |      |
| 14488  |        |        |        | 1   | 2    |
| 14491  |        |        |        | 1   | 1    |
| 14495  |        |        |        | 1   | 2    |
| 14500  |        |        |        | 1   | 1    |
| 14502  |        |        |        | 2   |      |
| 14504  |        |        |        | 1   | 2    |
| 14505  |        |        |        | 1   | 3    |
| 14507  |        |        |        | 2   |      |
| 14517  |        |        |        | 2   |      |
| 14518  |        |        |        | 2   |      |
| 14519  |        |        |        | 1   | 0    |
| 14521  |        |        | 1      | 1   | 1    |
| 14522  |        |        |        | 2   |      |
| 14526  |        |        |        | 2   |      |
| 14528  |        |        |        | 2   |      |
| 14529  |        |        |        | 2   |      |
| 14530  |        |        | 1      | 1   | 2    |
| 14531  |        |        |        | 1   | 4    |
| 14534  |        |        |        | 1   | 1    |
| 14538  |        |        |        | 2   |      |
| 14539  |        |        |        | 2   |      |
| 14545  |        | 1      |        | 2   |      |

| respid | Q31b_7 | Q31b_8 | Q31b_9 | Q32 | Q32a |
|--------|--------|--------|--------|-----|------|
| 14546  |        |        |        |     | 2    |
| 14551  |        |        |        |     | 2    |
| 14553  |        |        | 2      |     | 1    |
| 14557  |        |        |        |     | 2    |
| 14558  |        |        |        |     | 2    |
| 14559  |        | 2      | 1      |     | 1    |
| 14560  |        | 2      |        |     | 2    |
| 14563  |        |        |        |     | 2    |
| 14565  |        |        |        |     | 2    |
| 14571  |        |        |        |     | 1    |
| 14572  |        |        |        |     | 2    |
| 14573  |        |        |        |     | 1    |
| 14575  |        |        |        |     | 2    |
| 14576  |        |        |        |     | 1    |
| 14578  |        |        |        |     | 1    |
| 14579  |        |        |        |     | 2    |
| 14580  |        |        |        |     | 2    |
| 14582  |        |        |        |     | 2    |
| 14585  |        |        |        |     | 1    |
| 14588  |        |        |        |     | 2    |
| 14590  |        |        |        |     | 1    |
| 14592  |        |        |        |     | 1    |
| 14593  |        |        |        |     | 2    |
| 14595  |        |        |        |     | 2    |
| 14597  |        |        |        |     | 1    |
| 14600  |        |        |        |     | 2    |
| 14602  |        |        | 2      |     | 1    |
| 14604  |        |        |        |     | 1    |
| 14605  |        |        |        |     | 2    |
| 14609  |        |        |        |     | 1    |
| 14610  |        |        |        |     | 2    |
| 14611  |        |        |        |     | 2    |

| respid | Q31b_7 | Q31b_8 | Q31b_9 | Q32 | Q32a |
|--------|--------|--------|--------|-----|------|
| 14612  |        |        |        | 2   |      |
| 14614  |        | 2      |        | 2   |      |
| 14615  |        |        |        | 2   |      |
| 14618  |        |        | 2      | 1   | 4    |
| 14621  |        |        |        | 2   |      |
| 14624  |        |        |        | 1   | 0    |
| 14626  |        |        |        | 2   |      |
| 14627  |        |        |        | 2   |      |
| 14628  |        |        |        | 1   | 1    |
| 14631  |        |        |        | 2   |      |
| 14633  | 2      |        |        | 1   | 1    |
| 14642  |        |        |        | 2   |      |
| 14647  |        |        |        | 2   |      |
| 14658  |        |        |        | 2   |      |
| 14659  |        | 1      |        | 1   | 2    |
| 14660  |        |        |        | 2   |      |
| 14661  |        |        |        | 2   |      |
| 14662  |        |        |        | 1   | 4    |
| 14663  |        |        |        | 2   |      |
| 14670  |        |        |        | 1   | 4    |
| 14671  |        |        |        | 2   |      |
| 14672  |        |        |        | 1   | 2    |
| 14675  |        |        |        | 2   |      |
| 14676  |        |        |        | 1   | 0    |
| 14677  |        |        |        | 1   | 3    |
| 14678  |        |        |        | 2   |      |
| 14681  |        |        |        | 1   | 2    |
| 14684  |        |        |        | 2   |      |
| 14688  |        |        |        | 2   |      |
| 14690  |        |        |        | 2   |      |
| 14694  |        |        |        | 1   | 2    |
| 14696  |        |        |        | 2   |      |

| respid | Q31b_7 | Q31b_8 | Q31b_9 | Q32 | Q32a |   |
|--------|--------|--------|--------|-----|------|---|
| 14700  |        |        |        |     | 2    |   |
| 14701  |        |        |        |     | 2    |   |
| 14703  |        |        |        |     | 1    | 1 |
| 14707  |        |        |        |     | 2    |   |
| 14711  |        |        |        |     | 1    | 1 |
| 14714  |        |        |        |     | 2    |   |
| 14715  |        |        |        |     | 1    | 4 |
| 14716  |        |        |        |     | 2    |   |
| 14720  |        |        |        |     | 2    |   |
| 14725  |        |        | 1      |     | 2    |   |
| 14726  |        |        |        |     | 1    | 0 |
| 14734  |        |        |        |     | 2    |   |
| 14735  |        |        |        |     | 2    |   |
| 14736  |        |        |        |     | 1    | 1 |
| 14740  |        |        |        |     | 2    |   |
| 14745  |        |        |        |     | 2    |   |
| 14747  |        |        |        |     | 2    |   |
| 14750  |        |        |        |     | 1    | 2 |
| 14751  |        |        |        |     | 2    |   |
| 14753  |        |        |        |     | 2    |   |
| 14756  | 3      | 4      | 4      |     | 1    | 4 |
| 14780  |        |        |        |     | 1    | 2 |
| 14782  |        |        |        |     | 2    |   |
| 14800  |        |        |        |     | 1    | 3 |
| 14801  |        |        |        |     | 2    |   |
| 14802  |        |        |        |     | 1    | 2 |
| 14805  |        |        | 1      |     | 1    | 1 |
| 14811  |        |        |        |     | 1    | 2 |
| 14814  |        |        |        |     | 1    | 2 |
| 14822  |        |        |        |     | 1    | 1 |
| 14827  |        |        |        |     | 1    | 0 |
| 14828  |        |        |        |     | 1    | 2 |

| respid | Q31b_7 | Q31b_8 | Q31b_9 | Q32 | Q32a |
|--------|--------|--------|--------|-----|------|
| 14830  |        |        |        | 2   |      |
| 14832  |        |        |        | 1   | 2    |
| 14835  |        |        |        | 1   | 3    |
| 14841  |        |        |        | 2   |      |
| 14849  |        |        |        | 2   |      |
| 14850  |        |        |        | 2   |      |
| 14851  |        |        |        | 2   |      |
| 14856  |        |        |        | 1   | 3    |
| 14862  |        |        |        | 1   | 1    |
| 14863  |        |        |        | 2   |      |
| 14864  |        |        |        | 2   |      |
| 14866  |        |        |        | 2   |      |
| 14867  |        |        |        | 1   | 3    |
| 14868  |        |        |        | 2   |      |
| 14870  |        |        |        | 2   |      |
| 14873  |        |        |        | 2   |      |
| 14878  |        |        |        | 2   |      |
| 14879  |        |        |        | 2   |      |
| 14881  |        |        |        | 1   | 3    |
| 14888  |        |        |        | 1   | 2    |
| 14895  |        |        | 1      | 2   |      |
| 14900  |        |        | 4      | 1   | 3    |
| 14912  |        |        |        | 2   |      |
| 14922  |        |        |        | 2   |      |
| 14923  | 4      |        |        | 1   | 3    |
| 14924  |        |        | 4      | 2   |      |
| 14925  | 1      |        |        | 1   | 2    |
| 14926  |        |        |        | 2   |      |
| 14927  |        |        |        | 1   | 2    |
| 14930  |        | 0      |        | 2   |      |
| 14937  |        |        |        | 1   | 3    |
| 14938  |        | 1      |        | 1   | 3    |

| respid | Q31b_7 | Q31b_8 | Q31b_9 | Q32 | Q32a |
|--------|--------|--------|--------|-----|------|
| 14939  |        |        |        | 1   | 0    |
| 14942  |        |        |        | 2   |      |
| 14943  |        |        |        | 2   |      |
| 14953  |        |        |        | 2   |      |
| 14954  |        |        |        | 2   |      |
| 14955  |        |        |        | 1   | 1    |
| 14957  |        |        |        | 1   | 1    |
| 14958  |        |        |        | 1   | 4    |
| 14959  |        | 2      |        | 1   | 3    |
| 14961  |        |        |        | 2   |      |
| 14963  |        |        |        | 1   | 3    |
| 14964  |        |        |        | 2   |      |
| 14965  |        |        |        | 2   |      |
| 14967  |        |        |        | 1   | 4    |
| 14970  |        | 4      |        | 1   | 4    |
| 14972  |        |        |        | 1   | 1    |
| 14975  |        | 3      |        | 1   | 3    |
| 14977  |        |        |        | 2   |      |
| 14982  |        |        |        | 1   | 1    |
| 14985  |        |        |        | 1   | 2    |
| 14986  |        |        |        | 2   |      |
| 14987  |        |        |        | 2   |      |
| 14988  | 4      |        |        | 1   | 4    |
| 14989  |        |        | 2      | 1   | 2    |
| 14993  |        |        |        | 1   | 1    |
| 15001  |        |        |        | 2   |      |
| 15002  |        |        | 3      | 1   | 3    |
| 15006  |        |        |        | 1   | 1    |
| 15007  |        |        |        | 2   |      |
| 15014  |        |        |        | 1   | 3    |
| 15020  | 1      |        |        | 1   | 1    |
| 15021  |        |        |        | 1   | 2    |

| respid | Q31b_7 | Q31b_8 | Q31b_9 | Q32 | Q32a |
|--------|--------|--------|--------|-----|------|
| 15023  |        | 4      |        | 1   | 3    |
| 15030  |        |        |        | 2   |      |
| 15032  |        |        |        | 2   |      |
| 15033  |        |        |        | 2   |      |
| 15034  | 1      |        |        | 1   | 1    |
| 15035  |        |        |        | 2   |      |
| 15037  |        |        |        | 2   |      |
| 15039  |        |        |        | 2   |      |
| 15040  |        |        |        | 2   |      |
| 15042  |        |        |        | 1   | 3    |
| 15044  |        |        |        | 2   |      |
| 15045  |        |        |        | 2   |      |
| 15046  |        |        |        | 2   |      |
| 15052  |        |        |        | 2   |      |
| 15058  |        |        |        | 2   |      |
| 15063  | 3      |        |        | 1   | 2    |
| 15066  |        |        |        | 2   |      |
| 15069  |        |        |        | 2   |      |
| 15071  |        |        | 2      | 1   | 2    |
| 15076  |        |        |        | 1   | 3    |
| 15078  |        |        |        | 2   |      |
| 15087  |        |        | 2      | 1   | 2    |
| 15090  |        |        |        | 1   | 3    |
| 15091  |        |        |        | 2   |      |
| 15092  |        |        |        | 2   |      |
| 15096  |        |        |        | 1   | 1    |
| 15106  |        |        |        | 1   | 2    |
| 15108  |        |        |        | 2   |      |
| 15113  |        |        |        | 2   |      |
| 15116  |        |        |        | 2   |      |
| 15119  |        |        |        | 1   | 1    |
| 15120  |        |        |        | 2   |      |

| respid | Q31b_7 | Q31b_8 | Q31b_9 | Q32 | Q32a |
|--------|--------|--------|--------|-----|------|
| 15121  |        |        |        | 1   | 2    |
| 15123  |        |        |        | 2   |      |
| 15124  |        |        |        | 2   |      |
| 15128  |        |        |        | 2   |      |
| 15131  |        |        |        | 2   |      |
| 15136  |        |        |        | 2   |      |
| 15137  |        |        |        | 2   |      |
| 15141  |        |        |        | 1   | 2    |
| 15144  |        |        |        | 2   |      |
| 15147  |        |        |        | 1   | 2    |
| 15151  |        |        |        | 1   | 1    |
| 15154  |        |        | 4      | 2   |      |
| 15157  |        |        |        | 2   |      |
| 15164  |        |        | 4      | 1   | 3    |
| 15168  |        |        |        | 2   |      |
| 15169  |        |        |        | 2   |      |
| 15172  |        |        |        | 1   | 3    |
| 15177  |        |        |        | 1   | 3    |
| 15178  |        |        |        | 1   | 0    |
| 15180  |        |        |        | 1   | 1    |
| 15181  |        |        |        | 2   |      |
| 15182  |        |        | 3      | 1   | 2    |
| 15183  |        |        |        | 2   |      |
| 15188  |        |        |        | 2   |      |
| 15190  |        | 4      |        | 1   | 4    |
| 15195  |        |        |        | 2   |      |
| 15201  |        | 4      | 4      | 1   | 4    |
| 15203  |        |        |        | 2   |      |
| 15204  |        |        |        | 2   |      |
| 15207  |        |        |        | 2   |      |
| 15208  | 4      |        |        | 1   | 3    |
| 15209  |        |        |        | 1   | 1    |



| respid | Q31b_7 | Q31b_8 | Q31b_9 | Q32 | Q32a |
|--------|--------|--------|--------|-----|------|
| 15212  |        |        |        | 2   |      |
| 15213  | 1      |        |        | 1   | 0    |
| 15219  |        |        |        | 1   | 1    |
| 15220  |        |        |        | 1   | 2    |
| 15221  |        |        |        | 2   |      |
| 15223  |        |        |        | 1   | 1    |
| 15224  |        |        |        | 1   | 1    |
| 15225  |        |        |        | 2   |      |
| 15226  |        |        |        | 2   |      |
| 15230  |        |        |        | 2   |      |
| 15231  |        | 3      |        | 1   | 4    |
| 15232  |        |        |        | 2   |      |
| 15237  |        |        |        | 2   |      |
| 15239  |        |        |        | 2   |      |
| 15241  |        |        |        | 2   |      |
| 15242  |        |        | 2      | 2   |      |
| 15247  |        |        |        | 2   |      |
| 15248  |        |        |        | 2   |      |
| 15251  |        |        |        | 2   |      |
| 15257  |        |        |        | 2   |      |
| 15260  |        |        |        | 2   |      |
| 15261  | 3      |        |        | 1   | 4    |
| 15262  |        |        | 3      | 1   | 3    |
| 15263  |        |        | 1      | 2   |      |
| 15265  |        |        |        | 2   |      |
| 15266  |        |        |        | 2   |      |
| 15268  |        |        |        | 2   |      |
| 15269  |        |        |        | 2   |      |
| 15270  | 4      |        | 4      | 1   | 4    |
| 15273  |        |        |        | 1   | 1    |
| 15276  |        | 3      |        | 1   | 4    |
| 15277  |        |        |        | 2   |      |

| respid | Q31b_7 | Q31b_8 | Q31b_9 | Q32 | Q32a |
|--------|--------|--------|--------|-----|------|
| 15282  |        |        |        | 1   | 4    |
| 15284  |        |        | 3      | 1   | 3    |
| 15285  |        |        |        | 2   |      |
| 15286  | 2      |        | 4      | 1   | 3    |
| 15288  |        | 1      |        | 1   | 2    |
| 15292  |        |        |        | 1   | 4    |
| 15296  |        |        |        | 2   |      |
| 15297  |        |        |        | 1   | 1    |
| 15298  |        |        |        | 2   |      |
| 15301  |        |        |        | 2   |      |
| 15302  |        |        |        | 2   |      |
| 15305  |        |        |        | 1   | 1    |
| 15307  |        |        |        | 2   |      |
| 15308  |        |        |        | 1   | 1    |
| 15309  |        |        |        | 2   |      |
| 15311  |        |        |        | 2   |      |
| 15315  |        |        |        | 2   |      |
| 15316  |        |        |        | 2   |      |
| 15318  |        |        |        | 2   |      |
| 15321  | 3      |        |        | 1   | 3    |
| 15322  |        |        |        | 2   |      |
| 15324  |        |        |        | 2   |      |
| 15326  |        |        |        | 2   |      |
| 15327  |        |        |        | 2   |      |
| 15328  |        |        |        | 2   |      |
| 15330  |        |        |        | 2   |      |
| 15332  |        |        | 0      | 2   |      |
| 15333  |        |        |        | 2   |      |
| 15334  |        |        |        | 2   |      |
| 15336  |        |        |        | 1   | 4    |
| 15337  |        |        |        | 2   |      |
| 15338  |        |        |        | 2   |      |

| respid | Q31b_7 | Q31b_8 | Q31b_9 | Q32 | Q32a |
|--------|--------|--------|--------|-----|------|
| 15339  |        |        |        | 1   | 4    |
| 15341  |        |        |        | 2   |      |
| 15344  |        |        |        | 2   |      |
| 15345  |        |        |        | 2   |      |
| 15350  |        |        |        | 2   |      |
| 15351  |        | 1      |        | 2   |      |
| 15352  |        |        |        | 2   |      |
| 15372  |        |        |        | 2   |      |
| 15373  |        |        |        | 1   | 3    |
| 15376  |        |        |        | 2   |      |
| 15377  |        |        |        | 2   |      |
| 15382  |        |        |        | 2   |      |
| 15383  |        |        | 1      | 2   |      |
| 15385  |        |        |        | 1   | 3    |
| 15390  |        |        |        | 2   |      |
| 15399  |        |        |        | 2   |      |
| 15404  |        |        |        | 1   | 2    |
| 15410  |        |        |        | 2   |      |
| 15411  |        | 1      |        | 2   |      |
| 15412  |        |        | 2      | 2   |      |
| 15413  |        |        |        | 1   | 2    |
| 15414  |        |        |        | 2   |      |
| 15417  |        |        |        | 2   |      |
| 15418  |        |        |        | 2   |      |
| 15421  |        |        |        | 2   |      |
| 15423  |        |        |        | 2   |      |
| 15425  |        |        |        | 1   | 0    |
| 15426  |        |        |        | 1   | 3    |
| 15430  |        |        |        | 2   |      |
| 15431  |        |        |        | 1   | 3    |
| 15435  |        |        |        | 2   |      |
| 15436  |        |        |        | 2   |      |

| respid | Q31b_7 | Q31b_8 | Q31b_9 | Q32 | Q32a |
|--------|--------|--------|--------|-----|------|
| 15437  |        |        |        | 2   |      |
| 15438  |        |        |        | 2   |      |
| 15439  |        |        |        | 2   |      |
| 15441  |        |        |        | 2   |      |
| 15443  |        |        |        | 2   |      |
| 15446  |        |        |        | 2   |      |
| 15449  | 1      |        |        | 1   | 2    |
| 15451  |        |        |        | 1   | 3    |
| 15452  |        |        |        | 1   | 4    |
| 15454  |        |        | 1      | 2   |      |
| 15456  |        |        |        | 1   | 3    |
| 15457  |        |        |        | 2   |      |
| 15458  |        |        | 2      | 1   | 2    |
| 15462  |        |        |        | 1   | 1    |
| 15467  |        | 3      |        | 1   | 2    |
| 15470  |        |        | 3      | 1   | 2    |
| 15472  | 1      |        |        | 1   | 0    |
| 15476  |        |        |        | 1   | 1    |
| 15477  |        |        |        | 2   |      |
| 15488  |        |        |        | 2   |      |
| 15489  |        |        |        | 1   | 2    |
| 15490  |        |        |        | 2   |      |
| 15496  |        |        | 2      | 1   | 2    |
| 15497  |        |        | 2      | 1   | 2    |
| 15498  |        |        |        | 2   |      |
| 15509  |        |        |        | 2   |      |
| 15510  |        |        |        | 2   |      |
| 15516  |        |        |        | 1   | 2    |
| 15519  |        |        |        | 2   |      |
| 15520  |        |        |        | 2   |      |
| 15524  |        |        |        | 1   | 2    |
| 15525  |        |        |        | 2   |      |

| respid | Q31b_7 | Q31b_8 | Q31b_9 | Q32 | Q32a |
|--------|--------|--------|--------|-----|------|
| 15526  | 2      |        |        | 2   |      |
| 15531  |        |        |        | 2   |      |
| 15532  |        |        |        | 1   | 2    |
| 15534  |        |        |        | 1   | 3    |
| 15535  |        |        |        | 1   | 3    |
| 15539  |        |        |        | 2   |      |
| 15550  |        |        |        | 2   |      |
| 15556  |        |        |        | 2   |      |
| 15558  |        |        |        | 1   | 3    |
| 15565  |        |        |        | 2   |      |
| 15567  | 3      |        | 4      | 1   | 3    |
| 15568  |        |        |        | 1   | 3    |
| 15571  |        |        |        | 2   |      |
| 15573  |        |        | 1      | 2   |      |
| 15574  |        |        |        | 1   | 3    |
| 15576  |        |        |        | 2   |      |
| 15587  |        |        |        | 2   |      |
| 15588  |        |        | 2      | 1   | 2    |
| 15593  |        |        |        | 1   | 0    |
| 15597  |        |        |        | 2   |      |
| 15598  |        |        |        | 1   | 2    |
| 15599  |        |        | 2      | 2   |      |
| 15601  |        |        |        | 2   |      |
| 15604  |        |        |        | 2   |      |
| 15611  |        |        |        | 2   |      |
| 15613  |        |        |        | 2   |      |
| 15614  |        |        |        | 2   |      |
| 15617  |        |        |        | 2   |      |
| 15622  |        |        |        | 2   |      |
| 15623  |        |        |        | 1   | 1    |
| 15625  |        |        |        | 1   | 3    |
| 15627  |        |        |        | 2   |      |

| respid | Q31b_7 | Q31b_8 | Q31b_9 | Q32 | Q32a |   |
|--------|--------|--------|--------|-----|------|---|
| 15628  |        |        |        |     | 2    |   |
| 15633  |        |        |        |     | 2    |   |
| 15634  |        |        |        |     | 2    |   |
| 15637  |        |        |        |     | 2    |   |
| 15644  |        |        |        |     | 2    |   |
| 15645  |        |        |        |     | 2    |   |
| 15649  |        |        |        |     | 2    |   |
| 15650  |        |        |        |     | 2    |   |
| 15651  |        |        |        |     | 2    |   |
| 15657  |        |        |        |     | 1    | 4 |
| 15658  |        |        |        |     | 2    |   |
| 15660  | 1      |        |        |     | 2    |   |
| 15667  |        |        |        |     | 2    |   |
| 15671  |        |        |        |     | 2    |   |
| 15679  |        |        |        |     | 1    | 3 |
| 15712  |        |        |        |     | 2    |   |
| 15715  |        |        |        |     | 2    |   |
| 15749  |        |        |        |     | 2    |   |
| 15754  |        |        |        |     | 2    |   |
| 15756  |        |        |        |     | 1    | 3 |
| 15773  |        |        |        |     | 2    |   |
| 15774  |        |        |        |     | 2    |   |
| 15776  |        |        | 1      |     | 1    | 3 |
| 15777  |        |        |        |     | 2    |   |
| 15779  |        |        |        |     | 2    |   |
| 15780  |        |        |        |     | 2    |   |
| 15792  |        |        |        |     | 2    |   |
| 15793  |        |        |        |     | 2    |   |
| 15796  |        |        |        |     | 2    |   |
| 15798  |        |        |        |     | 2    |   |
| 15809  |        |        |        |     | 2    |   |
| 15810  |        |        |        |     | 2    |   |

| respid | Q31b_7 | Q31b_8 | Q31b_9 | Q32 | Q32a |
|--------|--------|--------|--------|-----|------|
| 15815  |        |        |        | 2   |      |
| 15816  |        |        |        | 2   |      |
| 15817  |        |        |        | 2   |      |
| 15821  |        |        |        | 2   |      |
| 15823  |        |        |        | 2   |      |
| 15834  |        |        |        | 2   |      |
| 15835  |        |        |        | 2   |      |
| 15836  |        |        |        | 2   |      |
| 15837  |        |        |        | 2   |      |
| 15839  |        |        |        | 2   |      |
| 15840  |        |        |        | 2   |      |
| 15844  |        |        |        | 2   |      |
| 15845  |        |        |        | 2   |      |
| 15847  |        |        |        | 1   | 2    |
| 15848  |        |        |        | 2   |      |
| 15849  |        |        |        | 2   |      |
| 15857  |        |        |        | 2   |      |
| 15858  |        |        |        | 1   | 1    |
| 15862  |        |        |        | 1   | 4    |
| 15866  |        |        |        | 2   |      |
| 15870  |        |        |        | 2   |      |
| 15871  |        |        |        | 1   | 1    |
| 15872  |        |        |        | 2   |      |
| 15873  |        |        |        | 2   |      |
| 15874  |        |        |        | 2   |      |
| 15875  |        |        |        | 2   |      |
| 15876  |        | 1      |        | 1   | 1    |
| 15882  |        |        | 4      | 1   | 3    |
| 15884  |        | 3      | 0      | 1   | 1    |
| 15890  |        |        |        | 1   | 0    |
| 15892  |        |        |        | 1   | 1    |
| 15908  |        |        |        | 2   |      |

| respid | Q31b_7 | Q31b_8 | Q31b_9 | Q32 | Q32a |
|--------|--------|--------|--------|-----|------|
| 15914  |        |        |        | 2   |      |
| 15932  |        |        | 1      | 2   |      |
| 15933  |        |        |        | 1   | 2    |
| 15938  |        |        |        | 2   |      |
| 15940  |        |        | 3      | 1   | 2    |
| 15945  |        |        |        | 2   |      |
| 15947  |        |        |        | 2   |      |
| 15950  |        |        |        | 2   |      |
| 15951  |        |        |        | 2   |      |
| 15952  | 3      |        |        | 2   |      |
| 15953  |        |        |        | 2   |      |
| 15954  | 3      |        |        | 1   | 2    |
| 15957  | 2      |        |        | 1   | 2    |
| 15965  |        |        |        | 1   | 3    |
| 15966  |        |        |        | 2   |      |
| 15967  |        |        |        | 2   |      |
| 15968  |        |        |        | 1   | 3    |
| 15970  |        |        |        | 2   |      |
| 15973  |        |        |        | 2   |      |
| 15974  |        |        |        | 2   |      |
| 15975  |        |        |        | 2   |      |
| 15980  | 4      |        |        | 1   | 3    |
| 15984  |        |        |        | 2   |      |
| 15985  | 2      | 1      |        | 1   | 1    |
| 15994  |        |        |        | 2   |      |
| 15995  |        |        |        | 2   |      |
| 16000  |        |        |        | 2   |      |
| 16004  |        |        |        | 2   |      |
| 16005  |        |        |        | 2   |      |
| 16006  |        |        |        | 2   |      |
| 16009  |        |        |        | 2   |      |
| 16017  |        |        |        | 2   |      |



| respid | Q31b_7 | Q31b_8 | Q31b_9 | Q32 | Q32a |
|--------|--------|--------|--------|-----|------|
| 16019  |        |        |        |     | 2    |
| 16021  |        |        |        |     | 1    |
| 16024  |        |        |        |     | 2    |
| 16026  |        |        | 1      |     | 1    |
| 16029  |        |        |        |     | 2    |
| 16031  |        |        |        |     | 1    |
| 16037  |        |        |        |     | 2    |
| 16043  |        |        |        |     | 2    |
| 16044  |        | 0      |        |     | 2    |
| 16047  |        |        |        |     | 1    |
| 16048  |        |        | 3      |     | 1    |
| 16049  |        |        |        |     | 2    |
| 16051  |        |        |        |     | 2    |
| 16053  |        |        | 1      |     | 2    |
| 16054  |        |        |        |     | 2    |
| 16069  |        |        |        |     | 2    |
| 16070  |        |        |        |     | 2    |
| 16074  |        |        |        |     | 2    |
| 16076  |        |        |        |     | 2    |
| 16078  |        |        |        |     | 2    |
| 16081  |        |        |        |     | 2    |
| 16085  |        |        |        |     | 2    |
| 16088  |        |        |        |     | 2    |
| 16091  |        |        |        |     | 2    |
| 16092  |        |        |        |     | 2    |
| 16093  |        |        | 2      |     | 1    |
| 16097  |        |        |        |     | 2    |
| 16100  |        |        |        |     | 2    |
| 16101  |        |        |        |     | 2    |
| 16105  |        |        |        |     | 2    |
| 16118  |        |        | 3      |     | 1    |
| 16129  |        |        |        |     | 2    |

| respid | Q31b_7 | Q31b_8 | Q31b_9 | Q32 | Q32a |
|--------|--------|--------|--------|-----|------|
| 16130  |        |        |        | 2   |      |
| 16131  |        |        |        | 1   | 3    |
| 16136  |        |        |        | 2   |      |
| 16137  |        |        |        | 2   |      |
| 16138  |        |        |        | 1   | 2    |
| 16139  |        |        |        | 1   | 1    |
| 16140  |        |        |        | 2   |      |
| 16145  |        |        |        | 2   |      |
| 16150  |        |        |        | 2   |      |
| 16151  |        |        |        | 1   | 1    |
| 16153  |        |        |        | 2   |      |
| 16164  |        |        | 2      | 1   | 1    |
| 16168  |        |        |        | 2   |      |
| 16173  |        |        |        | 1   | 2    |
| 16174  |        |        |        | 2   |      |
| 16177  |        |        |        | 1   | 1    |
| 16185  |        |        |        | 2   |      |
| 16189  |        |        |        | 2   |      |
| 16192  |        |        | 1      | 2   |      |
| 16193  |        |        |        | 2   |      |
| 16194  |        |        |        | 2   |      |
| 16196  |        |        |        | 2   |      |
| 16202  |        |        |        | 2   |      |
| 16205  | 2      | 3      |        | 1   | 1    |
| 16206  |        |        | 1      | 2   |      |
| 16208  |        |        |        | 2   |      |
| 16211  |        |        | 1      | 2   |      |
| 16212  |        |        |        | 2   |      |
| 16215  |        |        |        | 2   |      |
| 16217  |        |        |        | 2   |      |
| 16221  |        |        | 0      | 2   |      |
| 16226  |        |        |        | 1   | 2    |

| respid | Q31b_7 | Q31b_8 | Q31b_9 | Q32 | Q32a |
|--------|--------|--------|--------|-----|------|
| 16228  |        |        |        | 1   | 1    |
| 16229  |        |        |        | 2   |      |
| 16230  |        |        |        | 2   |      |
| 16231  |        |        |        | 1   | 4    |
| 16232  |        |        | 3      | 2   |      |
| 16234  |        |        | 1      | 1   | 1    |
| 16235  |        |        |        | 1   | 2    |
| 16236  |        |        |        | 2   |      |
| 16237  |        |        |        | 2   |      |
| 16238  |        |        |        | 2   |      |
| 16239  |        |        |        | 2   |      |
| 16243  |        |        |        | 2   |      |
| 16248  |        |        |        | 2   |      |
| 16249  |        |        |        | 2   |      |
| 16251  |        |        |        | 2   |      |
| 16263  |        |        |        | 2   |      |
| 16265  |        |        |        | 2   |      |
| 16269  |        |        |        | 2   |      |
| 16272  |        |        |        | 1   | 2    |
| 16273  |        |        |        | 2   |      |
| 16281  |        |        |        | 2   |      |
| 16282  |        |        |        | 2   |      |
| 16287  |        |        |        | 2   |      |
| 16290  |        |        |        | 2   |      |
| 16294  |        |        |        | 2   |      |
| 16295  |        |        |        | 2   |      |
| 16296  |        |        |        | 2   |      |
| 16299  | 2      |        |        | 1   | 2    |
| 16302  |        |        |        | 2   |      |
| 16303  |        |        |        | 1   | 1    |
| 16304  |        | 0      |        | 2   |      |
| 16306  |        |        |        | 2   |      |

| respid | Q31b_7 | Q31b_8 | Q31b_9 | Q32 | Q32a |
|--------|--------|--------|--------|-----|------|
| 16318  |        |        | 1      | 2   |      |
| 16320  |        |        |        | 2   |      |
| 16321  |        |        | 2      | 2   |      |
| 16322  |        |        |        | 1   | 1    |
| 16324  |        |        |        | 2   |      |
| 16326  |        |        |        | 2   |      |
| 16328  |        |        |        | 2   |      |
| 16336  |        |        |        | 1   | 1    |
| 16341  |        |        |        | 2   |      |
| 16342  |        |        |        | 2   |      |
| 16343  |        |        |        | 1   | 1    |
| 16345  |        |        |        | 2   |      |
| 16349  | 1      |        |        | 2   |      |
| 16355  |        |        |        | 2   |      |
| 16364  |        |        |        | 1   | 2    |
| 16374  |        |        |        | 2   |      |
| 16375  |        |        |        | 2   |      |
| 16376  |        |        |        | 1   | 2    |
| 16393  |        |        |        | 2   |      |
| 16394  |        |        |        | 2   |      |
| 16395  |        |        |        | 2   |      |
| 16397  |        |        |        | 2   |      |
| 16398  |        |        | 2      | 1   | 2    |
| 16402  |        |        |        | 2   |      |
| 16405  |        |        |        | 2   |      |
| 16416  |        |        |        | 2   |      |
| 16422  |        |        |        | 1   | 2    |
| 16429  |        |        |        | 2   |      |
| 16430  |        |        |        | 1   | 0    |
| 16432  |        |        |        | 1   | 2    |
| 16433  |        |        |        | 1   | 1    |
| 16434  |        |        |        | 2   |      |

| respid | Q31b_7 | Q31b_8 | Q31b_9 | Q32 | Q32a |
|--------|--------|--------|--------|-----|------|
| 16437  |        |        |        | 2   |      |
| 16439  |        |        |        | 2   |      |
| 16440  |        |        |        | 1   | 1    |
| 16441  |        |        |        | 2   |      |
| 16442  |        |        |        | 2   |      |
| 16450  |        |        |        | 2   |      |
| 16451  |        |        |        | 2   |      |
| 16452  |        |        |        | 2   |      |
| 16467  |        |        |        | 2   |      |
| 16468  |        |        |        | 2   |      |
| 16469  |        |        |        | 2   |      |
| 16470  |        |        |        | 2   |      |
| 16471  |        |        | 1      | 1   | 1    |
| 16473  |        |        |        | 2   |      |
| 16476  |        |        |        | 2   |      |
| 16478  |        |        |        | 2   |      |
| 16484  |        |        |        | 2   |      |
| 16499  |        |        |        | 2   |      |
| 16502  |        |        |        | 2   |      |
| 16505  |        |        |        | 2   |      |
| 16514  |        |        |        | 2   |      |
| 16515  |        |        | 1      | 2   |      |
| 16517  |        |        |        | 2   |      |
| 16518  |        |        |        | 2   |      |
| 16519  |        |        | 1      | 2   |      |
| 16525  |        |        | 1      | 1   | 1    |
| 16526  |        |        |        | 2   |      |
| 16530  |        |        |        | 2   |      |
| 16532  |        |        |        | 2   |      |
| 16536  |        |        |        | 2   |      |
| 16537  |        |        |        | 1   | 1    |
| 16541  |        |        | 2      | 1   | 3    |

| respid | Q31b_7 | Q31b_8 | Q31b_9 | Q32 | Q32a |
|--------|--------|--------|--------|-----|------|
| 16543  |        |        |        | 2   |      |
| 16544  |        |        |        | 2   |      |
| 16545  |        |        | 2      | 2   |      |
| 16546  |        |        |        | 1   | 2    |
| 16548  |        |        |        | 1   | 1    |
| 16552  |        |        |        | 2   |      |
| 16559  |        |        |        | 1   | 0    |
| 16564  |        |        |        | 1   | 2    |
| 16565  |        |        |        | 1   | 1    |
| 16567  |        |        | 2      | 2   |      |
| 16571  |        |        |        | 2   |      |
| 16572  |        |        |        | 2   |      |
| 16579  |        |        |        | 2   |      |
| 16588  |        |        |        | 1   | 3    |
| 16599  |        |        |        | 2   |      |
| 16605  |        |        |        | 2   |      |
| 16622  |        |        |        | 2   |      |
| 16635  |        |        |        | 1   | 0    |
| 16638  |        |        |        | 1   | 1    |
| 16652  |        |        |        | 1   | 1    |
| 16656  |        |        |        | 2   |      |
| 16671  |        |        |        | 2   |      |
| 16676  |        |        |        | 2   |      |
| 16678  | 1      |        |        | 2   |      |
| 16702  |        |        |        | 1   | 1    |
| 16705  |        |        |        | 1   | 2    |
| 16707  | 3      |        |        | 1   | 0    |
| 16711  |        |        |        | 2   |      |
| 16712  |        |        |        | 2   |      |
| 16716  |        |        |        | 2   |      |
| 16724  |        |        |        | 2   |      |
| 16727  |        |        |        | 2   |      |

| respid | Q31b_7 | Q31b_8 | Q31b_9 | Q32 | Q32a |   |
|--------|--------|--------|--------|-----|------|---|
| 16734  |        |        |        |     | 2    |   |
| 16740  |        |        |        |     | 2    |   |
| 16748  |        |        |        |     | 1    | 0 |
| 16759  |        |        |        |     | 2    |   |
| 16761  |        |        |        |     | 2    |   |
| 16763  |        |        |        |     | 2    |   |
| 16764  |        |        | 2      |     | 1    | 3 |
| 16766  |        |        |        |     | 2    |   |
| 16767  |        |        |        |     | 1    | 0 |
| 16776  |        |        |        |     | 2    |   |
| 16781  |        |        |        |     | 2    |   |
| 16793  |        |        |        |     | 2    |   |
| 16796  | 3      |        | 4      |     | 1    | 4 |
| 16810  |        |        |        |     | 2    |   |
| 16811  |        |        |        |     | 1    | 1 |
| 16813  |        |        |        |     | 2    |   |
| 16814  |        |        |        |     | 2    |   |
| 16831  |        |        |        |     | 2    |   |
| 16833  |        |        | 1      |     | 1    | 4 |
| 16839  |        |        | 1      |     | 1    | 1 |
| 16843  |        |        |        |     | 2    |   |
| 16860  |        |        |        |     | 2    |   |
| 16871  |        |        |        |     | 1    | 1 |
| 16881  |        |        |        |     | 2    |   |
| 16884  |        |        |        |     | 2    |   |
| 16891  |        |        |        |     | 1    | 2 |
| 16909  | 0      |        |        |     | 2    |   |
| 16911  |        |        |        |     | 2    |   |
| 16922  |        |        |        |     | 1    | 3 |
| 16935  |        | 1      |        |     | 2    |   |
| 16942  |        |        |        |     | 2    |   |
| 16950  |        |        |        |     | 2    |   |

| respid | Q31b_7 | Q31b_8 | Q31b_9 | Q32 | Q32a |
|--------|--------|--------|--------|-----|------|
| 16952  |        | 2      |        | 1   | 2    |
| 16963  |        |        |        | 2   |      |
| 16967  |        |        | 3      | 2   |      |
| 16970  |        |        |        | 2   |      |
| 16976  | 3      |        | 3      | 1   | 1    |
| 16982  |        |        |        | 2   |      |
| 16995  |        |        |        | 2   |      |
| 17004  |        |        |        | 2   |      |
| 17006  |        |        |        | 2   |      |
| 17009  |        |        |        | 2   |      |
| 17021  |        |        |        | 2   |      |
| 17040  |        |        |        | 2   |      |
| 17041  |        |        |        | 2   |      |
| 17044  |        |        |        | 2   |      |
| 17046  |        |        |        | 2   |      |
| 17052  |        |        |        | 2   |      |
| 17055  |        |        |        | 2   |      |
| 17108  |        |        |        | 1   | 1    |
| 17109  |        |        |        | 1   | 1    |
| 17113  |        |        |        | 2   |      |
| 17115  |        |        | 3      | 2   |      |
| 17132  |        |        |        | 2   |      |
| 17135  |        | 2      |        | 1   | 2    |
| 17138  |        |        |        | 2   |      |
| 17141  |        |        |        | 2   |      |
| 17143  |        |        |        | 1   | 0    |
| 17148  |        |        |        | 2   |      |
| 17151  |        |        |        | 1   | 1    |
| 17153  |        |        |        | 2   |      |
| 17154  |        |        | 3      | 2   |      |
| 17157  |        |        | 1      | 2   |      |
| 17160  |        |        |        | 2   |      |



| respid | Q31b_7 | Q31b_8 | Q31b_9 | Q32 | Q32a |
|--------|--------|--------|--------|-----|------|
| 17167  |        |        |        | 2   |      |
| 17169  |        |        |        | 1   | 1    |
| 17174  |        |        | 3      | 2   |      |
| 17179  |        |        |        | 2   |      |
| 17180  |        |        |        | 1   | 1    |
| 17182  |        |        |        | 2   |      |
| 17184  |        |        |        | 1   | 1    |
| 17186  |        |        |        | 2   |      |
| 17187  |        |        |        | 2   |      |
| 17192  |        |        | 2      | 2   |      |
| 17197  |        |        |        | 2   |      |
| 17217  |        |        |        | 2   |      |
| 17226  |        |        |        | 2   |      |
| 17228  |        |        |        | 2   |      |
| 17245  |        |        |        | 1   | 2    |
| 17247  |        |        |        | 2   |      |
| 17258  |        |        |        | 2   |      |
| 17259  | 1      |        |        | 2   |      |
| 17262  |        |        |        | 2   |      |
| 17265  |        |        |        | 1   | 0    |
| 17281  |        |        |        | 2   |      |
| 17282  | 3      |        |        | 2   |      |
| 17293  |        |        |        | 1   | 0    |
| 17306  |        |        |        | 2   |      |
| 17312  | 0      |        |        | 2   |      |
| 17318  |        |        | 1      | 2   |      |
| 17328  |        |        |        | 1   | 3    |
| 17343  |        |        |        | 2   |      |
| 17344  |        |        |        | 2   |      |
| 17348  |        |        |        | 2   |      |
| 17352  |        |        |        | 2   |      |
| 17355  |        |        |        | 2   |      |

| respid | Q31b_7 | Q31b_8 | Q31b_9 | Q32 | Q32a |
|--------|--------|--------|--------|-----|------|
| 17356  |        |        |        | 1   | 2    |
| 17359  |        |        |        | 2   |      |
| 17373  |        |        |        | 1   | 3    |
| 17381  |        |        |        | 2   |      |
| 17388  |        |        |        | 2   |      |
| 17394  |        |        |        | 1   | 2    |
| 17401  |        |        |        | 2   |      |
| 17403  |        |        |        | 2   |      |
| 17411  |        |        |        | 2   |      |
| 17423  |        |        |        | 2   |      |
| 17427  |        |        |        | 2   |      |
| 17433  |        |        |        | 2   |      |
| 17441  |        |        |        | 2   |      |
| 17442  |        |        |        | 2   |      |
| 17447  |        |        |        | 2   |      |
| 17458  |        |        |        | 2   |      |
| 17474  |        |        |        | 2   |      |
| 17475  |        |        |        | 2   |      |
| 17476  |        |        |        | 2   |      |
| 17480  |        |        |        | 2   |      |
| 17484  |        |        |        | 2   |      |
| 17490  |        |        |        | 2   |      |
| 17491  |        |        |        | 2   |      |
| 17500  |        |        |        | 2   |      |
| 17507  |        |        |        | 2   |      |
| 17517  |        |        |        | 2   |      |
| 17520  |        |        |        | 2   |      |
| 17521  |        |        |        | 2   |      |
| 17531  |        |        |        | 2   |      |
| 17540  |        |        |        | 1   | 0    |
| 17550  |        |        | 0      | 2   |      |
| 17551  |        |        |        | 2   |      |

| respid | Q31b_7 | Q31b_8 | Q31b_9 | Q32 | Q32a |
|--------|--------|--------|--------|-----|------|
| 17555  |        |        |        | 1   | 1    |
| 17556  |        |        |        | 2   |      |
| 17574  |        |        |        | 2   |      |
| 17575  |        |        |        | 2   |      |
| 17582  |        |        |        | 2   |      |
| 17587  |        |        |        | 2   |      |
| 17601  |        |        |        | 2   |      |
| 17607  |        |        |        | 1   | 3    |
| 17609  |        |        |        | 2   |      |
| 17611  |        |        |        | 2   |      |
| 17613  |        |        |        | 2   |      |
| 17615  |        |        |        | 2   |      |
| 17620  |        |        |        | 1   | 1    |
| 17624  |        |        |        | 2   |      |
| 17635  |        |        |        | 2   |      |
| 17643  |        |        |        | 2   |      |
| 17645  |        |        |        | 1   | 1    |
| 17646  |        |        |        | 2   |      |
| 17649  |        |        |        | 2   |      |
| 17658  |        |        | 0      | 2   |      |
| 17666  |        |        |        | 2   |      |
| 17670  |        |        |        | 2   |      |
| 17678  |        |        |        | 2   |      |
| 17679  |        |        |        | 1   | 1    |
| 17695  |        |        |        | 2   |      |
| 17697  |        |        |        | 1   | 1    |
| 17698  |        |        |        | 1   | 2    |
| 17723  |        |        |        | 1   | 2    |
| 17727  |        |        |        | 2   |      |
| 17734  |        |        |        | 2   |      |
| 17737  |        |        |        | 2   |      |
| 17748  |        |        | 1      | 1   | 1    |

| respid | Q31b_7 | Q31b_8 | Q31b_9 | Q32 | Q32a |
|--------|--------|--------|--------|-----|------|
| 17749  |        |        |        |     | 2    |
| 17754  |        |        |        |     | 2    |
| 17766  |        |        |        |     | 2    |
| 17777  |        |        |        |     | 2    |
| 17780  |        |        |        |     | 2    |
| 17788  |        |        |        |     | 2    |
| 17801  |        | 1      | 1      |     | 1 3  |
| 17803  |        |        |        |     | 2    |
| 17807  |        |        |        |     | 2    |
| 17808  |        |        |        |     | 2    |
| 17809  |        |        |        |     | 2    |
| 17821  |        |        |        |     | 2    |
| 17827  |        |        |        |     | 2    |
| 17834  |        |        |        |     | 2    |
| 17838  | 1      |        | 1      |     | 1 1  |
| 17842  |        |        |        |     | 2    |
| 17862  |        |        |        |     | 2    |
| 17863  |        |        |        |     | 2    |
| 17871  |        |        | 2      |     | 1 2  |
| 17872  |        |        | 0      |     | 2    |
| 17903  |        |        | 0      |     | 1 3  |
| 17906  |        |        |        |     | 2    |
| 17910  |        |        |        |     | 1 2  |
| 17922  |        |        |        |     | 1 1  |
| 17923  |        |        |        |     | 1 1  |
| 17925  |        |        |        |     | 1 2  |
| 17926  |        |        |        |     | 2    |
| 17937  |        |        |        |     | 2    |
| 17956  |        |        |        |     | 2    |
| 17958  |        |        |        |     | 2    |
| 17985  |        |        |        |     | 2    |
| 17989  | 3      |        |        |     | 2    |

| respid | Q31b_7 | Q31b_8 | Q31b_9 | Q32 | Q32a |
|--------|--------|--------|--------|-----|------|
| 17995  |        |        |        | 2   |      |
| 18000  |        |        |        | 2   |      |
| 18010  |        |        |        | 2   |      |
| 18015  |        |        |        | 2   |      |
| 18018  |        |        |        | 1   | 2    |
| 18031  |        |        |        | 1   | 0    |
| 18033  |        |        |        | 2   |      |
| 18036  |        |        |        | 2   |      |
| 18041  |        |        |        | 2   |      |
| 18068  |        |        |        | 2   |      |
| 18080  |        |        |        | 2   |      |
| 18081  |        |        |        | 2   |      |
| 18083  |        |        |        | 1   | 2    |
| 18113  |        |        | 1      | 1   | 2    |
| 18115  |        |        |        | 2   |      |
| 18117  |        |        |        | 1   | 3    |
| 18129  |        |        |        | 2   |      |
| 18132  |        |        | 2      | 2   |      |
| 18146  |        |        | 1      | 1   | 0    |
| 18147  |        |        | 4      | 1   | 3    |
| 18153  |        |        |        | 2   |      |
| 18154  |        |        |        | 2   |      |
| 18157  |        |        |        | 2   |      |
| 18166  |        |        |        | 2   |      |
| 18169  |        |        |        | 2   |      |
| 18171  |        |        |        | 1   | 2    |
| 18173  |        |        |        | 2   |      |
| 18204  |        |        |        | 2   |      |
| 18210  |        |        |        | 2   |      |
| 18212  |        |        |        | 2   |      |
| 18220  |        |        |        | 1   | 3    |
| 18221  |        |        |        | 2   |      |

| respid | Q31b_7 | Q31b_8 | Q31b_9 | Q32 | Q32a |   |
|--------|--------|--------|--------|-----|------|---|
| 18228  |        |        |        |     | 2    |   |
| 18231  |        |        |        |     | 2    |   |
| 18233  |        |        |        |     | 2    |   |
| 18235  |        |        |        |     | 2    |   |
| 18237  |        |        |        |     | 2    |   |
| 18250  |        |        |        |     | 2    |   |
| 18253  |        |        |        |     | 1    | 3 |
| 18264  |        |        |        |     | 2    |   |
| 18285  |        |        |        |     | 2    |   |
| 18287  |        |        |        |     | 2    |   |
| 18296  |        |        |        |     | 2    |   |
| 18299  |        |        |        |     | 1    | 1 |
| 18313  |        |        |        |     | 1    | 1 |
| 18321  |        |        | 1      |     | 1    | 1 |
| 18324  |        |        |        |     | 2    |   |
| 18329  |        |        |        |     | 2    |   |
| 18332  |        |        |        |     | 2    |   |
| 18339  |        |        | 4      |     | 1    | 2 |
| 18340  |        | 1      |        |     | 2    |   |
| 18348  |        |        |        |     | 2    |   |
| 18355  |        |        |        |     | 2    |   |
| 18360  |        |        |        |     | 2    |   |
| 18380  |        |        |        |     | 1    | 1 |
| 18403  |        |        | 3      |     | 2    |   |
| 18405  |        |        |        |     | 2    |   |
| 18409  |        |        |        |     | 2    |   |
| 18445  |        |        |        |     | 2    |   |
| 18458  |        | 1      |        |     | 1    | 1 |
| 18477  |        |        |        |     | 1    | 2 |
| 18481  |        |        | 0      |     | 2    |   |
| 18491  |        |        |        |     | 2    |   |
| 18492  |        |        |        |     | 2    |   |

| respid | Q31b_7 | Q31b_8 | Q31b_9 | Q32 | Q32a |
|--------|--------|--------|--------|-----|------|
| 18494  |        |        |        | 2   |      |
| 18495  |        |        |        | 2   |      |
| 18496  |        |        |        | 1   | 1    |
| 18507  |        |        |        | 1   | 1    |
| 18509  |        |        |        | 2   |      |
| 18510  |        |        |        | 1   | 2    |
| 18513  |        |        |        | 2   |      |
| 18525  |        |        |        | 2   |      |
| 18526  |        |        |        | 2   |      |
| 18527  |        |        |        | 2   |      |
| 18536  |        |        |        | 2   |      |
| 18540  |        |        |        | 2   |      |
| 18548  |        |        | 1      | 2   |      |
| 18550  |        |        |        | 2   |      |
| 18556  |        |        |        | 2   |      |
| 18561  |        |        |        | 2   |      |
| 18577  |        |        | 1      | 2   |      |
| 18580  |        |        |        | 2   |      |
| 18633  |        |        |        | 1   | 1    |
| 18635  |        |        |        | 2   |      |
| 18636  |        |        |        | 2   |      |
| 18645  |        |        |        | 1   | 3    |
| 18649  |        |        |        | 2   |      |
| 18664  |        |        |        | 2   |      |
| 18668  |        |        |        | 2   |      |
| 18682  |        |        | 3      | 1   | 4    |
| 18685  |        |        |        | 2   |      |
| 18688  |        |        |        | 2   |      |
| 18689  |        |        |        | 1   | 2    |
| 18693  | 3      |        |        | 2   |      |
| 18694  |        |        |        | 2   |      |
| 18705  |        |        |        | 2   |      |

| respid | Q31b_7 | Q31b_8 | Q31b_9 | Q32 | Q32a |
|--------|--------|--------|--------|-----|------|
| 18710  |        |        | 1      | 2   |      |
| 18715  |        |        |        | 2   |      |
| 18718  |        |        |        | 2   |      |
| 18727  |        |        |        | 1   | 1    |
| 18732  | 0      |        |        | 2   |      |
| 18735  |        |        |        | 2   |      |
| 18742  |        |        |        | 2   |      |
| 18745  |        |        |        | 2   |      |
| 18747  |        |        |        | 2   |      |
| 18750  |        |        | 0      | 2   |      |
| 18751  |        |        | 1      | 2   |      |
| 18753  |        |        |        | 2   |      |
| 18754  |        |        |        | 2   |      |
| 18759  |        |        |        | 2   |      |
| 18780  |        |        |        | 2   |      |
| 18782  |        |        |        | 1   | 0    |
| 18807  |        | 4      |        | 1   | 4    |
| 18815  |        |        |        | 2   |      |
| 18818  |        |        |        | 2   |      |
| 18820  |        |        |        | 2   |      |
| 18823  |        |        | 4      | 1   | 4    |
| 18825  |        |        |        | 2   |      |
| 18828  |        |        |        | 2   |      |
| 18832  |        |        |        | 1   | 1    |
| 18834  |        |        | 3      | 1   | 2    |
| 18835  |        |        |        | 1   | 4    |
| 18837  |        |        |        | 2   |      |
| 18842  |        |        |        | 2   |      |
| 18846  |        |        |        | 2   |      |
| 18855  |        |        |        | 2   |      |
| 18856  |        |        |        | 2   |      |
| 18887  |        |        |        | 2   |      |



| respid | Q31b_7 | Q31b_8 | Q31b_9 | Q32 | Q32a |
|--------|--------|--------|--------|-----|------|
| 18903  |        |        | 1      | 2   |      |
| 18906  |        | 0      |        | 2   |      |
| 18910  |        |        |        | 2   |      |
| 18919  |        |        |        | 2   |      |
| 18928  |        |        |        | 2   |      |
| 18931  |        |        |        | 1   | 1    |
| 18939  |        |        |        | 2   |      |
| 18946  |        |        |        | 1   | 1    |
| 18952  |        |        |        | 1   | 1    |
| 18954  |        |        |        | 2   |      |
| 18982  |        |        |        | 2   |      |
| 18986  |        |        |        | 2   |      |
| 18989  |        |        |        | 1   | 4    |
| 18990  |        |        |        | 1   | 0    |
| 18996  |        |        |        | 1   | 2    |
| 18998  |        |        |        | 2   |      |
| 19009  |        |        |        | 1   | 3    |
| 19010  |        |        |        | 2   |      |
| 19017  |        |        |        | 2   |      |
| 19018  |        |        |        | 2   |      |
| 19020  |        |        |        | 2   |      |
| 19027  |        |        |        | 1   | 2    |
| 19035  |        |        |        | 2   |      |
| 19037  |        |        |        | 2   |      |
| 19048  | 0      |        |        | 2   |      |
| 19051  |        |        | 3      | 2   |      |
| 19054  |        |        |        | 2   |      |
| 19057  |        |        |        | 2   |      |
| 19073  |        | 2      |        | 1   | 0    |
| 19075  |        |        |        | 2   |      |
| 19079  |        |        |        | 1   | 2    |
| 19087  |        |        |        | 2   |      |

| respid | Q31b_7 | Q31b_8 | Q31b_9 | Q32 | Q32a |
|--------|--------|--------|--------|-----|------|
| 19090  |        |        |        | 1   | 3    |
| 19093  |        |        |        | 2   |      |
| 19099  |        |        | 2      | 1   | 2    |
| 19100  | 2      |        |        | 2   |      |
| 19101  |        |        |        | 2   |      |
| 19105  |        |        |        | 2   |      |
| 19111  |        |        |        | 1   | 1    |
| 19112  |        |        |        | 2   |      |
| 19117  |        |        |        | 1   | 2    |
| 19122  |        |        |        | 2   |      |
| 19126  |        |        |        | 2   |      |
| 19127  |        |        |        | 2   |      |
| 19131  |        |        |        | 1   | 1    |
| 19134  |        |        |        | 2   |      |
| 19149  |        |        |        | 2   |      |
| 19151  |        | 1      |        | 1   | 1    |
| 19164  |        |        |        | 2   |      |
| 19166  |        |        | 1      | 2   |      |
| 19172  |        |        |        | 2   |      |
| 19173  |        |        |        | 1   | 2    |
| 19180  |        |        |        | 1   | 0    |
| 19185  |        |        |        | 1   | 1    |
| 19189  |        |        |        | 2   |      |
| 19191  |        |        |        | 2   |      |
| 19198  |        |        |        | 2   |      |
| 19203  |        |        |        | 2   |      |
| 19209  |        |        |        | 2   |      |
| 19210  |        |        |        | 2   |      |
| 19218  |        |        |        | 2   |      |
| 19220  |        |        |        | 2   |      |
| 19225  |        |        |        | 2   |      |
| 19227  |        |        |        | 2   |      |

| respid | Q31b_7 | Q31b_8 | Q31b_9 | Q32 | Q32a |
|--------|--------|--------|--------|-----|------|
| 19228  |        |        |        | 2   |      |
| 19243  |        |        |        | 1   | 1    |
| 19244  |        |        |        | 1   | 2    |
| 19246  |        |        |        | 2   |      |
| 19248  |        |        |        | 2   |      |
| 19249  |        |        |        | 1   | 0    |
| 19252  |        |        |        | 1   | 0    |
| 19255  |        |        |        | 1   | 0    |
| 19257  |        |        |        | 2   |      |
| 19274  |        |        |        | 2   |      |
| 19279  |        |        |        | 2   |      |
| 19291  |        |        |        | 2   |      |
| 19292  |        |        |        | 1   | 2    |
| 19308  |        |        |        | 2   |      |
| 19310  |        |        |        | 1   | 2    |
| 19311  |        |        |        | 2   |      |
| 19326  |        |        |        | 2   |      |
| 19327  |        |        |        | 2   |      |
| 19329  |        |        |        | 2   |      |
| 19330  |        |        |        | 1   | 2    |
| 19333  |        |        |        | 1   | 0    |
| 19336  |        |        |        | 1   | 0    |
| 19343  |        |        |        | 2   |      |
| 19348  |        |        |        | 2   |      |
| 19349  |        |        |        | 1   | 2    |
| 19352  | 2      |        |        | 1   | 3    |
| 19356  |        |        |        | 2   |      |
| 19357  |        |        |        | 2   |      |
| 19358  |        |        |        | 1   | 0    |
| 19367  |        |        | 1      | 2   |      |
| 19376  |        |        |        | 2   |      |
| 19377  |        |        |        | 2   |      |

| respid | Q31b_7 | Q31b_8 | Q31b_9 | Q32 | Q32a |
|--------|--------|--------|--------|-----|------|
| 19380  |        |        |        |     | 2    |
| 19384  |        |        |        |     | 2    |
| 19391  |        |        | 4      |     | 2    |
| 19397  |        |        |        |     | 2    |
| 19398  |        |        |        |     | 2    |
| 19401  |        |        |        |     | 2    |
| 19402  |        |        |        |     | 2    |
| 19403  |        |        |        |     | 2    |
| 19405  |        |        |        |     | 2    |
| 19407  |        |        |        |     | 2    |
| 19415  |        |        |        |     | 2    |
| 19420  |        |        |        |     | 2    |
| 19423  |        | 2      | 1      |     | 1    |
| 19424  |        |        |        |     | 2    |
| 19426  | 2      |        |        |     | 2    |
| 19429  |        |        |        |     | 2    |
| 19435  |        |        |        |     | 1    |
| 19441  |        |        | 2      |     | 2    |
| 19450  |        |        |        |     | 2    |
| 19456  |        |        | 1      |     | 2    |
| 19457  |        |        |        |     | 2    |
| 19463  |        |        |        |     | 2    |
| 19467  |        |        |        |     | 1    |
| 19468  |        |        |        |     | 2    |
| 19471  |        |        |        |     | 2    |
| 19473  |        |        |        |     | 2    |
| 19478  |        | 4      |        |     | 1    |
| 19480  |        |        |        |     | 2    |
| 19481  |        |        |        |     | 2    |
| 19484  |        |        |        |     | 2    |
| 19487  |        |        |        |     | 2    |
| 19491  |        |        |        |     | 2    |

| respid | Q31b_7 | Q31b_8 | Q31b_9 | Q32 | Q32a |
|--------|--------|--------|--------|-----|------|
| 19495  |        |        |        | 1   | 4    |
| 19498  | 1      |        |        | 1   | 1    |
| 19500  |        |        | 1      | 1   | 1    |
| 19501  |        |        | 2      | 1   | 3    |
| 19503  |        |        |        | 2   |      |
| 19506  |        |        |        | 2   |      |
| 19508  |        |        |        | 2   |      |
| 19509  |        |        |        | 1   | 2    |
| 19518  |        |        |        | 2   |      |
| 19520  |        |        |        | 2   |      |
| 19536  |        |        |        | 2   |      |
| 19538  |        |        |        | 2   |      |
| 19541  | 1      |        | 1      | 2   |      |
| 19548  |        |        |        | 2   |      |
| 19553  |        |        |        | 2   |      |
| 19556  |        |        |        | 2   |      |
| 19559  |        |        |        | 2   |      |
| 19561  |        |        |        | 1   | 2    |
| 19562  |        |        |        | 2   |      |
| 19564  |        |        |        | 2   |      |
| 19567  |        | 3      | 3      | 1   | 4    |
| 19571  |        | 2      | 1      | 2   |      |
| 19576  |        | 2      | 1      | 1   | 1    |
| 19578  |        |        |        | 2   |      |
| 19606  |        |        |        | 2   |      |
| 19607  |        |        |        | 2   |      |
| 19608  |        |        | 2      | 2   |      |
| 19612  |        |        |        | 1   | 3    |
| 19618  |        |        |        | 1   | 2    |
| 19621  |        |        |        | 2   |      |
| 19624  |        |        |        | 1   | 2    |
| 19630  |        |        |        | 2   |      |

| respid | Q31b_7 | Q31b_8 | Q31b_9 | Q32 | Q32a |
|--------|--------|--------|--------|-----|------|
| 19637  |        |        |        | 2   |      |
| 19639  |        |        | 0      | 2   |      |
| 19647  |        |        |        | 2   |      |
| 19648  |        |        |        | 1   | 2    |
| 19660  |        |        |        | 2   |      |
| 19662  |        |        | 2      | 1   | 3    |
| 19669  |        |        |        | 2   |      |
| 19680  |        |        |        | 2   |      |
| 19682  |        |        |        | 2   |      |
| 19686  |        |        |        | 2   |      |
| 19700  |        |        |        | 2   |      |
| 19701  |        |        |        | 2   |      |
| 19704  |        |        |        | 2   |      |
| 19706  |        | 1      |        | 2   |      |
| 19707  |        |        |        | 2   |      |
| 19717  |        |        |        | 1   | 3    |
| 19718  |        |        |        | 2   |      |
| 19721  |        |        |        | 1   | 1    |
| 19722  |        |        |        | 2   |      |
| 19729  |        |        |        | 2   |      |
| 19738  |        |        |        | 1   | 1    |
| 19741  |        |        |        | 2   |      |
| 19742  |        |        |        | 2   |      |
| 19747  |        |        |        | 2   |      |
| 19748  |        |        |        | 2   |      |
| 19749  |        |        |        | 2   |      |
| 19756  |        |        |        | 1   | 2    |
| 19771  |        |        |        | 2   |      |
| 19772  |        |        |        | 1   | 2    |
| 19775  |        |        |        | 2   |      |
| 19783  |        |        |        | 2   |      |
| 19787  |        |        |        | 2   |      |

| respid | Q31b_7 | Q31b_8 | Q31b_9 | Q32 | Q32a |
|--------|--------|--------|--------|-----|------|
| 19790  |        |        |        | 2   |      |
| 19797  |        |        |        | 1   | 2    |
| 19802  |        |        |        | 1   | 0    |
| 19808  |        |        |        | 2   |      |
| 19810  |        |        |        | 2   |      |
| 19811  |        |        | 1      | 1   | 0    |
| 19812  |        |        |        | 2   |      |
| 19821  |        |        |        | 2   |      |
| 19826  |        |        |        | 2   |      |
| 19827  |        |        |        | 2   |      |
| 19830  |        |        |        | 2   |      |
| 19834  |        |        |        | 2   |      |
| 19838  |        |        |        | 1   | 3    |
| 19843  |        |        |        | 1   | 0    |
| 19845  |        |        |        | 2   |      |
| 19846  |        |        |        | 2   |      |
| 19852  |        |        | 3      | 1   | 3    |
| 19855  |        |        |        | 2   |      |
| 19858  |        |        | 2      | 1   | 1    |
| 19861  |        |        |        | 1   | 2    |
| 19863  |        | 1      |        | 2   |      |
| 19868  |        |        |        | 1   | 1    |
| 19874  |        |        |        | 1   | 2    |
| 19876  |        |        |        | 2   |      |
| 19880  |        |        |        | 1   | 1    |
| 19885  |        |        |        | 2   |      |
| 19890  |        |        |        | 2   |      |
| 19894  |        |        |        | 2   |      |
| 19895  |        |        |        | 2   |      |
| 19897  |        |        |        | 1   | 1    |
| 19906  |        |        |        | 2   |      |
| 19908  |        |        |        | 2   |      |

| respid | Q31b_7 | Q31b_8 | Q31b_9 | Q32 | Q32a |   |
|--------|--------|--------|--------|-----|------|---|
| 19912  |        |        |        |     | 2    |   |
| 19913  |        |        |        |     | 2    |   |
| 19914  |        |        |        |     | 1    | 3 |
| 19918  |        |        |        |     | 2    |   |
| 19924  |        | 2      |        |     | 1    | 2 |
| 19936  |        |        |        |     | 2    |   |
| 19940  |        |        |        |     | 2    |   |
| 19945  |        |        | 1      |     | 2    |   |
| 19948  |        |        |        |     | 2    |   |
| 19959  |        |        |        |     | 2    |   |
| 19961  |        |        |        |     | 2    |   |
| 19962  |        |        | 1      |     | 1    | 1 |
| 19965  |        |        |        |     | 2    |   |
| 19966  |        |        |        |     | 2    |   |
| 19973  |        |        |        |     | 2    |   |
| 19981  |        |        |        |     | 2    |   |
| 19986  |        |        |        |     | 2    |   |
| 19989  |        |        |        |     | 2    |   |
| 19998  |        |        |        |     | 2    |   |
| 20001  |        |        |        |     | 1    | 0 |
| 20005  |        |        |        |     | 2    |   |
| 20013  |        | 3      |        |     | 1    | 3 |
| 20015  |        |        |        |     | 2    |   |
| 20017  | 2      | 0      |        |     | 1    | 2 |
| 20020  |        |        |        |     | 2    |   |
| 20021  |        |        |        |     | 2    |   |
| 20026  |        |        |        |     | 2    |   |
| 20028  |        |        |        |     | 2    |   |
| 20030  |        |        |        |     | 2    |   |
| 20031  |        |        |        |     | 2    |   |
| 20034  |        |        |        |     | 2    |   |
| 20035  |        |        |        |     | 2    |   |



| respid | Q31b_7 | Q31b_8 | Q31b_9 | Q32 | Q32a |
|--------|--------|--------|--------|-----|------|
| 20040  |        |        |        | 1   | 1    |
| 20045  |        |        |        | 2   |      |
| 20048  | 4      |        |        | 2   |      |
| 20053  |        |        |        | 2   |      |
| 20064  |        |        |        | 2   |      |
| 20071  |        |        |        | 2   |      |
| 20072  |        |        |        | 1   | 4    |
| 20076  |        |        |        | 2   |      |
| 20081  |        |        |        | 2   |      |
| 20082  |        |        |        | 1   | 0    |
| 20083  |        |        |        | 1   | 2    |
| 20088  |        |        |        | 2   |      |
| 20089  |        | 1      | 1      | 2   |      |
| 20099  |        |        | 1      | 2   |      |
| 20101  |        |        |        | 2   |      |
| 20102  |        |        |        | 2   |      |
| 20109  |        |        |        | 2   |      |
| 20118  |        |        |        | 2   |      |
| 20119  |        |        |        | 2   |      |
| 20124  |        |        |        | 2   |      |
| 20126  |        |        |        | 2   |      |
| 20130  |        |        |        | 2   |      |
| 20131  |        |        |        | 2   |      |
| 20134  |        |        |        | 1   | 2    |
| 20146  |        |        |        | 2   |      |
| 20152  |        |        |        | 2   |      |
| 20155  |        |        |        | 1   | 2    |
| 20156  |        |        |        | 2   |      |
| 20157  |        |        |        | 2   |      |
| 20164  |        |        |        | 2   |      |
| 20168  |        |        |        | 2   |      |
| 20173  | 3      |        |        | 2   |      |

| respid | Q31b_7 | Q31b_8 | Q31b_9 | Q32 | Q32a |
|--------|--------|--------|--------|-----|------|
| 20174  |        |        |        | 2   |      |
| 20175  |        |        | 3      | 1   | 4    |
| 20189  |        |        |        | 2   |      |
| 20190  |        |        |        | 2   |      |
| 20201  |        |        |        | 2   |      |
| 20202  |        |        |        | 2   |      |
| 20204  |        |        |        | 2   |      |
| 20206  |        |        |        | 1   | 1    |
| 20207  |        |        |        | 2   |      |
| 20212  |        |        |        | 1   | 1    |
| 20213  |        |        |        | 2   |      |
| 20217  |        |        |        | 1   | 1    |
| 20222  |        |        |        | 2   |      |
| 20227  |        |        |        | 2   |      |
| 20228  |        |        |        | 2   |      |
| 20238  |        |        |        | 2   |      |
| 20242  |        |        |        | 2   |      |
| 20246  |        |        |        | 2   |      |
| 20255  |        |        | 2      | 2   |      |
| 20256  |        |        |        | 2   |      |
| 20259  |        |        |        | 1   | 3    |
| 20262  |        |        |        | 2   |      |
| 20274  |        |        |        | 2   |      |
| 20283  |        |        |        | 2   |      |
| 20284  |        |        |        | 2   |      |
| 20291  |        |        |        | 2   |      |
| 20292  |        |        |        | 2   |      |
| 20293  |        |        |        | 2   |      |
| 20298  |        |        |        | 2   |      |
| 20301  |        |        |        | 2   |      |
| 20303  |        |        |        | 2   |      |
| 20309  |        |        |        | 2   |      |

| respid | Q31b_7 | Q31b_8 | Q31b_9 | Q32 | Q32a |
|--------|--------|--------|--------|-----|------|
| 20318  |        |        | 1      | 2   |      |
| 20324  |        |        |        | 2   |      |
| 20335  |        |        |        | 2   |      |
| 20336  |        |        |        | 2   |      |
| 20339  |        | 1      |        | 2   |      |
| 20348  |        |        |        | 2   |      |
| 20351  |        |        |        | 2   |      |
| 20353  |        |        |        | 2   |      |
| 20356  |        |        |        | 2   |      |
| 20357  |        |        |        | 2   |      |
| 20366  |        |        |        | 2   |      |
| 20369  |        |        |        | 1   | 4    |
| 20372  |        |        |        | 2   |      |
| 20375  |        |        |        | 2   |      |
| 20379  |        |        |        | 2   |      |
| 20380  |        |        |        | 2   |      |
| 20396  |        |        |        | 2   |      |
| 20398  |        |        |        | 2   |      |
| 20412  |        |        |        | 2   |      |
| 20415  |        |        |        | 2   |      |
| 20424  |        |        |        | 1   | 3    |
| 20434  |        |        |        | 2   |      |
| 20435  |        |        | 1      | 2   |      |
| 20440  |        |        |        | 2   |      |
| 20441  |        |        |        | 2   |      |
| 20445  |        |        |        | 2   |      |
| 20446  |        |        | 2      | 1   | 2    |
| 20450  |        |        |        | 2   |      |
| 20453  |        |        |        | 1   | 3    |
| 20458  |        |        |        | 2   |      |
| 20464  |        |        |        | 2   |      |
| 20471  |        |        |        | 2   |      |

| respid | Q31b_7 | Q31b_8 | Q31b_9 | Q32 | Q32a |   |
|--------|--------|--------|--------|-----|------|---|
| 20473  |        |        |        |     | 2    |   |
| 20474  |        |        |        |     | 2    |   |
| 20477  |        |        |        |     | 2    |   |
| 20479  |        |        | 4      |     | 2    |   |
| 20485  |        |        |        |     | 2    |   |
| 20487  |        |        |        |     | 2    |   |
| 20488  |        |        |        |     | 2    |   |
| 20494  |        |        |        |     | 2    |   |
| 20502  |        | 3      |        |     | 1    | 2 |
| 20503  |        |        |        |     | 1    | 3 |
| 20510  |        |        |        |     | 1    | 0 |
| 20512  |        |        |        |     | 2    |   |
| 20516  | 2      |        |        |     | 2    |   |
| 20522  |        |        |        |     | 1    | 2 |
| 20527  |        |        |        |     | 2    |   |
| 20529  |        |        |        |     | 1    | 2 |
| 20535  |        | 0      |        |     | 1    | 1 |
| 20543  |        |        |        |     | 2    |   |
| 20546  |        |        | 1      |     | 2    |   |
| 20548  |        |        |        |     | 2    |   |
| 20552  |        |        |        |     | 2    |   |
| 20556  |        |        |        |     | 1    | 1 |
| 20566  |        |        |        |     | 1    | 3 |
| 20576  |        |        |        |     | 2    |   |
| 20587  |        |        |        |     | 2    |   |
| 20589  |        |        |        |     | 2    |   |
| 20593  |        |        |        |     | 2    |   |
| 20594  |        |        |        |     | 1    | 0 |
| 20602  |        |        |        |     | 2    |   |
| 20607  |        |        |        |     | 2    |   |
| 20608  |        |        |        |     | 1    | 1 |
| 20611  |        |        |        |     | 2    |   |

| respid | Q31b_7 | Q31b_8 | Q31b_9 | Q32 | Q32a |
|--------|--------|--------|--------|-----|------|
| 20612  |        |        |        |     | 2    |
| 20615  |        |        |        |     | 2    |
| 20625  |        |        |        |     | 2    |
| 20630  |        |        |        |     | 2    |
| 20639  |        |        |        |     | 2    |
| 20643  |        |        |        |     | 2    |
| 20645  |        |        |        |     | 2    |
| 20647  |        |        |        |     | 2    |
| 20652  |        |        | 4      |     | 1    |
| 20661  |        |        |        |     | 2    |
| 20665  |        |        |        |     | 2    |
| 20679  |        |        |        |     | 2    |
| 20682  |        |        |        |     | 1    |
| 20683  |        |        |        |     | 2    |
| 20700  |        |        |        |     | 2    |
| 20702  |        |        | 4      |     | 1    |
| 20709  |        |        |        |     | 2    |
| 20715  |        |        |        |     | 1    |
| 20718  |        |        |        |     | 2    |
| 20722  |        |        |        |     | 2    |
| 20729  |        |        |        |     | 2    |
| 20732  |        |        |        |     | 2    |
| 20746  |        |        | 2      |     | 1    |
| 20747  |        |        |        |     | 2    |
| 20758  |        |        |        |     | 2    |
| 20767  |        |        |        |     | 1    |
| 20777  |        |        |        |     | 2    |
| 20778  |        |        |        |     | 2    |
| 20780  |        |        | 1      |     | 2    |
| 20800  |        | 0      | 0      |     | 2    |
| 20810  |        |        |        |     | 2    |
| 20814  |        |        |        |     | 2    |

| respid | Q31b_7 | Q31b_8 | Q31b_9 | Q32 | Q32a |
|--------|--------|--------|--------|-----|------|
| 20816  |        |        |        | 2   |      |
| 20832  |        |        |        | 2   |      |
| 20838  |        |        |        | 1   | 0    |
| 20841  | 1      |        |        | 2   |      |
| 20848  |        |        |        | 2   |      |
| 20850  |        |        |        | 2   |      |
| 20851  |        |        |        | 2   |      |
| 20861  |        |        |        | 2   |      |
| 20870  |        |        | 2      | 1   | 2    |
| 20880  |        |        |        | 2   |      |
| 20883  |        |        |        | 2   |      |
| 20894  |        |        |        | 2   |      |
| 20896  |        |        |        | 1   | 2    |
| 20901  | 2      |        |        | 1   | 2    |
| 20903  |        |        |        | 2   |      |
| 20909  |        |        |        | 2   |      |
| 20919  |        |        | 0      | 2   |      |
| 20925  | 1      |        |        | 2   |      |
| 20935  |        |        |        | 2   |      |
| 20939  |        |        |        | 1   | 1    |
| 20956  | 3      |        | 4      | 1   | 4    |
| 20970  |        |        |        | 1   | 1    |
| 20974  |        |        |        | 1   | 2    |
| 20975  |        |        |        | 2   |      |
| 20984  |        |        |        | 2   |      |
| 20988  |        |        |        | 2   |      |
| 20996  |        |        |        | 2   |      |
| 20998  |        |        |        | 1   | 1    |
| 21007  |        |        |        | 2   |      |
| 21008  |        |        |        | 2   |      |
| 21014  |        |        |        | 2   |      |
| 21020  |        |        |        | 2   |      |

| respid | Q31b_7 | Q31b_8 | Q31b_9 | Q32 | Q32a |
|--------|--------|--------|--------|-----|------|
| 21022  |        |        |        | 1   | 1    |
| 21024  |        |        |        | 2   |      |
| 21026  |        |        | 1      | 2   |      |
| 21027  |        |        |        | 2   |      |
| 21030  |        |        |        | 2   |      |
| 21032  |        |        |        | 2   |      |
| 21040  |        |        |        | 2   |      |
| 21045  |        |        |        | 2   |      |
| 21058  | 1      |        |        | 2   |      |
| 21064  |        |        |        | 2   |      |
| 21073  |        |        |        | 2   |      |
| 21086  |        |        |        | 1   | 2    |
| 21092  |        | 2      |        | 1   | 4    |
| 21096  |        |        |        | 1   | 3    |
| 21103  |        |        |        | 2   |      |
| 21120  |        |        |        | 1   | 3    |
| 21125  |        |        |        | 2   |      |
| 21126  |        | 1      |        | 2   |      |
| 21132  |        |        |        | 2   |      |
| 21139  |        |        |        | 1   | 2    |
| 21147  |        |        |        | 2   |      |
| 21148  |        |        | 1      | 2   |      |
| 21149  |        |        |        | 2   |      |
| 21164  |        |        |        | 2   |      |
| 21165  |        |        |        | 2   |      |
| 21171  |        |        |        | 2   |      |
| 21176  |        |        |        | 2   |      |
| 21187  |        |        | 1      | 1   | 2    |
| 21192  |        |        | 1      | 1   | 1    |
| 21198  |        |        |        | 2   |      |
| 21199  |        |        |        | 2   |      |
| 21206  |        |        |        | 1   | 2    |

| respid | Q31b_7 | Q31b_8 | Q31b_9 | Q32 | Q32a |
|--------|--------|--------|--------|-----|------|
| 21212  |        |        |        |     | 2    |
| 21216  |        |        |        |     | 2    |
| 21217  |        | 3      |        |     | 2    |
| 21228  |        |        |        |     | 1    |
| 21229  |        |        |        |     | 2    |
| 21230  |        |        |        |     | 2    |
| 21243  |        |        |        |     | 1    |
| 21247  |        |        | 0      |     | 1    |
| 21253  |        |        |        |     | 1    |
| 21264  |        |        |        |     | 2    |
| 21265  |        |        |        |     | 2    |
| 21273  |        |        | 1      |     | 2    |
| 21275  |        |        |        |     | 2    |
| 21278  |        |        |        |     | 2    |
| 21291  |        |        |        |     | 2    |
| 21298  |        |        |        |     | 2    |
| 21301  |        |        |        |     | 1    |
| 21312  |        | 2      | 2      |     | 1    |
| 21323  |        |        |        |     | 1    |
| 21325  |        |        |        |     | 1    |
| 21341  |        |        |        |     | 2    |
| 21349  |        |        |        |     | 1    |
| 21350  |        |        |        |     | 1    |
| 21354  |        |        | 4      |     | 1    |
| 21372  |        |        |        |     | 1    |
| 21373  |        |        | 2      |     | 2    |
| 21378  |        |        |        |     | 2    |
| 21393  |        |        |        |     | 2    |
| 21401  |        |        |        |     | 2    |
| 21405  |        |        |        |     | 2    |
| 21406  |        |        |        |     | 2    |
| 21407  |        |        |        |     | 2    |



| respid | Q31b_7 | Q31b_8 | Q31b_9 | Q32 | Q32a |
|--------|--------|--------|--------|-----|------|
| 21418  |        |        |        | 2   |      |
| 21420  |        |        |        | 2   |      |
| 21421  |        |        |        | 2   |      |
| 21446  |        |        |        | 1   | 2    |
| 21449  |        |        |        | 1   | 2    |
| 21452  |        |        |        | 2   |      |
| 21455  | 3      |        |        | 2   |      |
| 21469  |        |        |        | 2   |      |
| 21471  | 0      |        |        | 1   | 0    |
| 21472  |        |        |        | 2   |      |
| 21474  |        |        |        | 2   |      |
| 21479  |        |        |        | 2   |      |
| 21485  |        |        |        | 2   |      |
| 21512  |        |        |        | 2   |      |
| 21513  |        |        |        | 2   |      |
| 21514  |        |        |        | 1   | 2    |
| 21520  |        |        |        | 2   |      |
| 21539  |        |        |        | 2   |      |
| 21553  |        |        |        | 1   | 1    |
| 21560  |        |        |        | 2   |      |
| 21561  |        |        |        | 2   |      |
| 21563  |        |        |        | 1   | 2    |
| 21565  |        |        |        | 2   |      |
| 21582  |        |        |        | 2   |      |
| 21584  |        |        |        | 1   | 1    |
| 21585  |        |        |        | 2   |      |
| 21586  |        |        |        | 2   |      |
| 21587  |        |        |        | 1   | 2    |
| 21590  |        |        |        | 1   | 3    |
| 21601  |        |        |        | 2   |      |
| 21611  |        |        | 2      | 1   | 3    |
| 21612  |        |        |        | 2   |      |

| respid | Q31b_7 | Q31b_8 | Q31b_9 | Q32 | Q32a |   |
|--------|--------|--------|--------|-----|------|---|
| 21625  |        |        |        |     | 2    |   |
| 21633  |        |        |        |     | 2    |   |
| 21640  |        |        |        |     | 2    |   |
| 21647  |        |        |        |     | 2    |   |
| 21648  |        |        |        |     | 1    | 4 |
| 21656  |        |        |        |     | 2    |   |
| 21657  |        |        |        |     | 2    |   |
| 21658  |        | 3      |        | 3   | 1    | 3 |
| 21665  |        |        |        |     | 1    | 2 |
| 21666  |        |        |        | 3   | 1    | 3 |
| 21668  |        |        |        |     | 1    | 3 |
| 21673  |        |        |        |     | 2    |   |
| 21681  |        |        |        |     | 2    |   |
| 21682  |        |        |        |     | 1    | 2 |
| 21685  |        |        |        |     | 2    |   |
| 21692  |        |        |        |     | 2    |   |
| 21697  |        |        |        |     | 2    |   |
| 21711  |        |        |        |     | 2    |   |
| 21715  |        |        |        | 4   | 1    | 3 |
| 21726  |        |        |        |     | 2    |   |
| 21748  |        |        |        |     | 2    |   |
| 21761  |        |        |        |     | 2    |   |
| 21769  |        |        |        |     | 1    | 2 |
| 21774  |        |        |        |     | 1    | 1 |
| 21778  |        |        |        |     | 2    |   |
| 21785  |        |        |        |     | 2    |   |
| 21799  |        |        |        |     | 1    | 1 |
| 21820  |        |        |        |     | 1    | 4 |
| 21837  |        |        |        |     | 2    |   |
| 21845  |        |        |        |     | 1    | 3 |
| 21846  |        |        |        |     | 2    |   |
| 21849  | 2      |        |        |     | 2    |   |

| respid | Q31b_7 | Q31b_8 | Q31b_9 | Q32 | Q32a |
|--------|--------|--------|--------|-----|------|
| 21850  |        |        |        | 2   |      |
| 21855  |        |        |        | 2   |      |
| 21859  |        |        |        | 1   | 0    |
| 21861  |        |        |        | 2   |      |
| 21866  |        |        |        | 2   |      |
| 21873  |        |        | 1      | 2   |      |
| 21876  |        |        |        | 2   |      |
| 21882  |        |        |        | 2   |      |
| 21884  |        |        |        | 2   |      |
| 21887  |        |        |        | 2   |      |
| 21892  |        |        |        | 2   |      |
| 21907  |        |        |        | 2   |      |
| 21910  |        |        |        | 1   | 3    |
| 21912  |        |        |        | 2   |      |
| 21914  |        |        | 1      | 2   |      |
| 21925  |        |        |        | 2   |      |
| 21937  |        |        |        | 2   |      |
| 21938  |        |        |        | 2   |      |
| 21940  |        |        |        | 2   |      |
| 21942  |        |        |        | 2   |      |
| 21947  |        |        |        | 2   |      |
| 21948  |        |        |        | 2   |      |
| 21961  |        |        |        | 2   |      |
| 21977  |        |        | 3      | 1   | 4    |
| 21983  |        |        |        | 2   |      |
| 21986  |        |        |        | 1   | 2    |
| 21988  |        | 0      |        | 2   |      |
| 21996  |        |        |        | 1   | 4    |
| 21997  |        |        |        | 1   | 0    |
| 22005  |        |        |        | 1   | 2    |
| 22013  |        |        |        | 2   |      |
| 22018  |        |        |        | 2   |      |

| respid | Q31b_7 | Q31b_8 | Q31b_9 | Q32 | Q32a |   |
|--------|--------|--------|--------|-----|------|---|
| 22019  |        |        |        |     | 2    |   |
| 22071  |        |        |        |     | 2    |   |
| 22082  |        |        |        |     | 2    |   |
| 22085  |        |        |        |     | 2    |   |
| 22092  |        |        |        |     | 2    |   |
| 22097  |        |        |        |     | 2    |   |
| 22111  |        |        |        |     | 2    |   |
| 22118  |        |        |        |     | 2    |   |
| 22132  |        |        |        |     | 2    |   |
| 22133  |        |        |        |     | 1    | 2 |
| 22139  |        |        |        |     | 2    |   |
| 22142  |        | 4      | 4      |     | 1    | 3 |
| 22146  |        |        |        |     | 2    |   |
| 22181  |        |        |        |     | 2    |   |
| 22202  |        |        |        |     | 2    |   |
| 22214  |        |        |        |     | 2    |   |
| 22223  |        |        |        |     | 2    |   |
| 22227  |        |        |        |     | 1    | 1 |
| 22229  |        |        |        |     | 2    |   |
| 22239  |        |        |        |     | 1    | 2 |
| 22245  |        |        |        |     | 1    | 3 |
| 22256  |        |        |        |     | 2    |   |
| 22260  |        |        |        |     | 2    |   |
| 22298  | 1      |        |        |     | 1    | 1 |
| 22321  |        |        |        |     | 2    |   |
| 22340  |        |        |        |     | 2    |   |
| 22346  | 3      |        |        |     | 1    | 2 |
| 22356  |        |        |        |     | 2    |   |
| 22361  |        |        |        |     | 1    | 2 |
| 22364  |        |        |        |     | 2    |   |
| 22368  |        |        |        |     | 2    |   |
| 22374  |        |        |        |     | 1    | 0 |

| respid | Q31b_7 | Q31b_8 | Q31b_9 | Q32 | Q32a |   |
|--------|--------|--------|--------|-----|------|---|
| 22375  |        |        |        |     | 2    |   |
| 22377  |        |        |        |     | 2    |   |
| 22383  |        |        |        |     | 2    |   |
| 22387  |        |        |        |     | 1    | 2 |
| 22392  |        |        |        |     | 2    |   |
| 22393  |        |        |        |     | 2    |   |
| 22394  |        |        |        |     | 2    |   |
| 22395  |        |        |        |     | 2    |   |
| 22401  |        |        |        |     | 2    |   |
| 22407  |        |        |        |     | 2    |   |
| 22410  |        |        |        |     | 2    |   |
| 22418  |        |        |        |     | 2    |   |
| 22421  |        |        |        |     | 2    |   |
| 22423  |        |        |        |     | 2    |   |
| 22425  |        |        |        |     | 1    | 1 |
| 22427  |        |        |        |     | 2    |   |
| 22431  |        |        |        |     | 1    | 4 |
| 22435  |        |        |        |     | 2    |   |
| 22436  |        |        |        |     | 2    |   |
| 22442  |        |        |        |     | 2    |   |
| 22444  |        |        | 3      |     | 2    |   |
| 22445  |        |        |        |     | 1    | 2 |
| 22446  |        |        |        |     | 2    |   |
| 22448  |        |        |        |     | 2    |   |
| 22449  |        |        |        |     | 2    |   |
| 22450  |        |        |        |     | 2    |   |
| 22453  |        |        |        |     | 1    | 2 |
| 22465  |        |        |        |     | 1    | 1 |
| 22472  |        |        |        |     | 2    |   |
| 22475  |        |        |        |     | 1    | 3 |
| 22478  |        |        | 2      |     | 1    | 2 |
| 22491  |        |        |        |     | 2    |   |

| respid | Q31b_7 | Q31b_8 | Q31b_9 | Q32 | Q32a |
|--------|--------|--------|--------|-----|------|
| 22497  |        |        |        | 1   | 2    |
| 22498  |        |        |        | 1   | 1    |
| 22499  |        |        |        | 2   |      |
| 22503  |        |        |        | 2   |      |
| 22507  |        |        |        | 2   |      |
| 22513  |        |        |        | 2   |      |
| 22517  | 1      |        |        | 2   |      |
| 22524  |        |        | 2      | 1   | 1    |
| 22528  |        |        |        | 2   |      |
| 22544  |        |        | 1      | 1   | 0    |
| 22571  |        |        |        | 2   |      |
| 22576  |        |        |        | 2   |      |
| 22579  |        |        |        | 1   | 2    |
| 22583  |        |        | 1      | 1   | 2    |
| 22591  |        |        |        | 1   | 3    |
| 22592  |        |        |        | 2   |      |
| 22612  |        |        |        | 2   |      |
| 22613  |        | 1      |        | 2   |      |
| 22615  |        |        |        | 2   |      |
| 22621  |        |        |        | 2   |      |
| 22625  |        |        |        | 2   |      |
| 22628  |        |        |        | 2   |      |
| 22632  |        |        |        | 2   |      |
| 22639  |        |        |        | 2   |      |
| 22648  |        |        |        | 1   | 3    |
| 22649  |        |        |        | 2   |      |
| 22655  |        |        |        | 2   |      |
| 22659  |        |        |        | 2   |      |
| 22660  |        |        |        | 2   |      |
| 22666  |        |        |        | 2   |      |
| 22667  |        |        |        | 2   |      |
| 22670  |        |        |        | 2   |      |

| respid | Q31b_7 | Q31b_8 | Q31b_9 | Q32 | Q32a |
|--------|--------|--------|--------|-----|------|
| 22681  |        |        |        | 2   |      |
| 22683  |        |        |        | 2   |      |
| 22688  |        |        |        | 2   |      |
| 22695  |        |        |        | 2   |      |
| 22696  |        |        |        | 2   |      |
| 22705  |        |        |        | 2   |      |
| 22718  |        |        |        | 1   | 3    |
| 22720  |        |        |        | 2   |      |
| 22724  |        |        |        | 2   |      |
| 22728  |        |        |        | 2   |      |
| 22751  |        |        |        | 2   |      |
| 22782  |        |        |        | 1   | 4    |
| 22786  |        |        | 1      | 1   | 1    |
| 22788  |        |        |        | 2   |      |
| 22810  |        |        |        | 1   | 1    |
| 22816  |        |        |        | 2   |      |
| 22818  |        |        |        | 2   |      |
| 22854  |        |        |        | 2   |      |
| 22858  |        |        |        | 2   |      |
| 22862  |        |        |        | 2   |      |
| 22865  |        |        |        | 2   |      |
| 22868  |        |        |        | 2   |      |
| 22869  |        |        | 1      | 2   |      |
| 22873  |        |        |        | 2   |      |
| 22875  |        |        |        | 1   | 0    |
| 22876  |        |        |        | 2   |      |
| 22882  |        |        |        | 2   |      |
| 22884  |        |        | 3      | 1   | 2    |
| 22887  |        |        |        | 2   |      |
| 22888  |        |        |        | 2   |      |
| 22900  |        |        |        | 2   |      |
| 22901  |        |        |        | 2   |      |

| respid | Q31b_7 | Q31b_8 | Q31b_9 | Q32 | Q32a |
|--------|--------|--------|--------|-----|------|
| 22912  |        |        | 1      | 2   |      |
| 22913  |        |        |        | 2   |      |
| 22921  |        |        |        | 2   |      |
| 22925  |        |        |        | 2   |      |
| 22940  |        |        |        | 2   |      |
| 22941  |        |        |        | 1   | 0    |
| 22947  |        |        |        | 1   | 1    |
| 22948  |        |        |        | 2   |      |
| 22964  |        |        |        | 1   | 2    |
| 22966  |        |        |        | 1   | 0    |
| 22969  |        |        |        | 2   |      |
| 22971  |        |        |        | 2   |      |
| 22988  |        |        |        | 2   |      |
| 22990  |        |        |        | 2   |      |
| 23000  |        |        |        | 2   |      |
| 23016  |        |        |        | 2   |      |
| 23026  |        |        | 0      | 1   | 0    |
| 23035  |        |        |        | 2   |      |
| 23037  |        |        | 4      | 1   | 3    |
| 23044  |        |        | 0      | 2   |      |
| 23046  |        |        |        | 2   |      |
| 23047  |        |        |        | 2   |      |
| 23049  |        |        |        | 1   | 0    |
| 23055  |        |        | 1      | 2   |      |
| 23066  |        |        |        | 2   |      |
| 23075  |        |        |        | 2   |      |
| 23081  |        |        | 0      | 1   | 0    |
| 23087  |        |        |        | 2   |      |
| 23094  |        |        |        | 2   |      |
| 23099  |        |        |        | 2   |      |
| 23101  |        |        |        | 2   |      |
| 23105  |        |        |        | 2   |      |



| respid | Q31b_7 | Q31b_8 | Q31b_9 | Q32 | Q32a |   |
|--------|--------|--------|--------|-----|------|---|
| 23115  |        |        |        |     | 2    |   |
| 23121  |        |        |        |     | 2    |   |
| 23127  |        |        |        |     | 2    |   |
| 23131  |        |        |        |     | 2    |   |
| 23134  |        |        |        |     | 2    |   |
| 23145  |        |        |        |     | 2    |   |
| 23151  |        |        |        |     | 2    |   |
| 23161  |        |        |        |     | 1    | 1 |
| 23169  |        |        |        |     | 2    |   |
| 23173  |        |        |        |     | 2    |   |
| 23174  |        |        |        |     | 2    |   |
| 23186  |        |        |        |     | 1    | 2 |
| 23195  |        |        |        |     | 2    |   |
| 23197  | 0      | 1      | 1      |     | 1    | 0 |
| 23198  |        |        |        |     | 2    |   |
| 23203  |        |        |        |     | 2    |   |
| 23204  |        |        |        |     | 1    | 2 |
| 23212  |        |        |        |     | 1    | 2 |
| 23214  |        |        |        |     | 2    |   |
| 23221  |        |        |        |     | 2    |   |
| 23237  |        |        |        |     | 2    |   |
| 23251  |        |        |        |     | 1    | 0 |
| 23254  |        |        |        |     | 2    |   |
| 23262  |        |        |        |     | 2    |   |
| 23267  |        |        |        |     | 2    |   |
| 23268  |        |        |        |     | 1    | 3 |
| 23273  |        |        |        |     | 2    |   |
| 23278  |        |        |        |     | 2    |   |
| 23279  |        |        |        |     | 2    |   |
| 23281  |        |        | 3      |     | 1    | 2 |
| 23282  |        |        |        |     | 1    | 2 |
| 23283  | 3      |        |        |     | 1    | 2 |

| respid | Q31b_7 | Q31b_8 | Q31b_9 | Q32 | Q32a |
|--------|--------|--------|--------|-----|------|
| 23285  |        |        |        |     | 2    |
| 23305  |        |        |        |     | 1    |
| 23309  |        |        |        |     | 2    |
| 23310  |        |        |        |     | 2    |
| 23311  |        |        |        |     | 1    |
| 23312  |        | 3      |        |     | 2    |
| 23319  |        |        |        |     | 1    |
| 23320  |        |        | 1      |     | 1    |
| 23322  |        |        |        |     | 2    |
| 23334  |        |        |        |     | 2    |
| 23340  |        |        |        |     | 2    |
| 23346  |        |        |        |     | 2    |
| 23353  |        |        |        |     | 2    |
| 23363  |        |        |        |     | 1    |
| 23364  |        |        | 2      |     | 1    |
| 23376  |        |        |        |     | 2    |
| 23378  |        |        |        |     | 2    |
| 23382  |        |        |        |     | 2    |
| 23383  |        |        |        |     | 2    |
| 23390  |        |        |        |     | 2    |
| 23395  |        |        | 0      |     | 2    |
| 23398  |        |        |        |     | 2    |
| 23399  |        |        |        |     | 2    |
| 23406  |        |        |        |     | 1    |
| 23418  |        |        |        |     | 2    |
| 23427  |        |        |        |     | 2    |
| 23428  |        |        |        |     | 2    |
| 23435  | 2      |        |        |     | 1    |
| 23439  |        |        |        |     | 2    |
| 23440  |        |        |        |     | 2    |
| 23444  |        |        |        |     | 1    |
| 23445  |        |        |        |     | 2    |

| respid | Q31b_7 | Q31b_8 | Q31b_9 | Q32 | Q32a |
|--------|--------|--------|--------|-----|------|
| 23455  |        |        |        | 2   |      |
| 23467  |        |        |        | 2   |      |
| 23478  |        |        | 1      | 1   | 1    |
| 23492  |        |        |        | 1   | 0    |
| 23498  |        |        |        | 2   |      |
| 23511  |        |        |        | 2   |      |
| 23514  |        |        |        | 2   |      |
| 23515  |        |        |        | 2   |      |
| 23522  |        |        |        | 2   |      |
| 23524  |        |        |        | 2   |      |
| 23531  |        |        |        | 2   |      |
| 23532  |        |        |        | 1   | 0    |
| 23533  |        |        |        | 2   |      |
| 23534  |        |        |        | 2   |      |
| 23538  |        |        |        | 2   |      |
| 23539  |        |        | 1      | 1   | 3    |
| 23548  |        |        |        | 2   |      |
| 23553  |        |        |        | 2   |      |
| 23556  |        |        |        | 2   |      |
| 23563  |        |        |        | 1   | 1    |
| 23572  |        |        |        | 2   |      |
| 23575  |        |        |        | 2   |      |
| 23576  |        |        |        | 2   |      |
| 23577  |        |        |        | 2   |      |
| 23578  |        |        |        | 2   |      |
| 23587  |        |        |        | 2   |      |
| 23597  |        |        |        | 2   |      |
| 23598  |        |        |        | 2   |      |
| 23604  |        |        |        | 2   |      |
| 23617  |        |        |        | 1   | 2    |
| 23620  |        |        |        | 2   |      |
| 23621  |        |        |        | 2   |      |

| respid | Q31b_7 | Q31b_8 | Q31b_9 | Q32 | Q32a |
|--------|--------|--------|--------|-----|------|
| 23625  |        |        |        | 2   |      |
| 23629  |        |        |        | 1   | 0    |
| 23635  |        |        |        | 2   |      |
| 23636  |        | 0      |        | 2   |      |
| 23637  |        |        | 4      | 1   | 2    |
| 23638  |        |        |        | 2   |      |
| 23644  |        |        |        | 2   |      |
| 23645  |        |        |        | 1   | 1    |
| 23649  |        |        |        | 1   | 0    |
| 23654  |        |        |        | 2   |      |
| 23662  |        |        |        | 2   |      |
| 23664  |        |        |        | 2   |      |
| 23665  |        |        |        | 2   |      |
| 23666  |        |        |        | 2   |      |
| 23671  |        |        |        | 2   |      |
| 23672  |        |        |        | 2   |      |
| 23685  |        |        |        | 2   |      |
| 23686  |        |        | 1      | 2   |      |
| 23689  |        |        | 3      | 1   | 2    |
| 23690  |        |        |        | 2   |      |
| 23695  |        |        | 1      | 2   |      |
| 23700  |        |        |        | 2   |      |
| 23714  |        |        |        | 1   | 0    |
| 23719  |        |        |        | 2   |      |
| 23720  |        |        |        | 2   |      |
| 23721  |        |        |        | 2   |      |
| 23729  |        |        |        | 2   |      |
| 23730  |        |        |        | 2   |      |
| 23732  |        |        |        | 2   |      |
| 23736  |        |        |        | 2   |      |
| 23754  |        |        |        | 2   |      |
| 23756  |        |        |        | 2   |      |

| respid | Q31b_7 | Q31b_8 | Q31b_9 | Q32 | Q32a |
|--------|--------|--------|--------|-----|------|
| 23759  |        |        |        | 1   | 1    |
| 23761  |        |        |        | 1   | 1    |
| 23766  |        |        |        | 2   |      |
| 23768  |        | 3      |        | 1   | 2    |
| 23773  |        |        |        | 1   | 0    |
| 23781  |        |        |        | 2   |      |
| 23782  | 3      |        |        | 1   | 3    |
| 23787  |        |        |        | 2   |      |
| 23788  |        |        |        | 1   | 2    |
| 23790  |        |        |        | 2   |      |
| 23794  |        |        |        | 2   |      |
| 23795  |        |        | 2      | 2   |      |
| 23801  |        |        |        | 2   |      |
| 23806  |        |        |        | 2   |      |
| 23809  |        |        |        | 2   |      |
| 23813  |        |        |        | 1   | 1    |
| 23815  |        |        |        | 2   |      |
| 23821  |        |        |        | 2   |      |
| 23825  |        |        |        | 2   |      |
| 23826  |        |        |        | 2   |      |
| 23830  |        |        |        | 2   |      |
| 23833  |        |        |        | 2   |      |
| 23837  |        |        |        | 2   |      |
| 23848  |        |        |        | 2   |      |
| 23850  |        |        |        | 2   |      |
| 23870  |        |        |        | 2   |      |
| 23877  |        |        |        | 2   |      |
| 23880  |        |        |        | 2   |      |
| 23882  |        |        |        | 2   |      |
| 23888  |        |        |        | 2   |      |
| 23908  |        |        |        | 1   | 2    |
| 23914  |        |        |        | 2   |      |

| respid | Q31b_7 | Q31b_8 | Q31b_9 | Q32 | Q32a |
|--------|--------|--------|--------|-----|------|
| 23916  |        |        |        | 1   | 1    |
| 23922  |        |        |        | 2   |      |
| 23932  |        |        |        | 2   |      |
| 23934  |        |        |        | 2   |      |
| 23942  |        |        |        | 1   | 3    |
| 23945  |        |        |        | 2   |      |
| 23948  |        |        |        | 2   |      |
| 23955  |        |        |        | 2   |      |
| 23956  |        |        |        | 1   | 2    |
| 23978  |        |        |        | 1   | 1    |
| 23981  |        |        |        | 2   |      |
| 23982  |        |        |        | 2   |      |
| 23991  |        |        |        | 2   |      |
| 23994  |        |        |        | 2   |      |
| 23995  |        |        |        | 2   |      |
| 23999  |        |        | 1      | 2   |      |
| 24005  |        | 4      |        | 1   | 4    |
| 24018  |        |        |        | 2   |      |
| 24021  |        |        |        | 2   |      |
| 24035  |        |        |        | 2   |      |
| 24040  |        |        |        | 2   |      |
| 24043  |        |        |        | 2   |      |
| 24046  |        |        |        | 1   | 2    |
| 24047  |        |        |        | 2   |      |
| 24048  |        |        |        | 2   |      |
| 24062  |        |        |        | 2   |      |
| 24063  |        |        |        | 2   |      |
| 24066  |        |        |        | 2   |      |
| 24069  |        |        |        | 2   |      |
| 24070  |        |        |        | 2   |      |
| 24074  |        |        |        | 2   |      |
| 24080  |        |        |        | 2   |      |

| respid | Q31b_7 | Q31b_8 | Q31b_9 | Q32 | Q32a |
|--------|--------|--------|--------|-----|------|
| 24082  |        |        |        | 2   |      |
| 24088  |        |        | 1      | 2   |      |
| 24089  |        |        |        | 2   |      |
| 24091  |        |        |        | 2   |      |
| 24095  |        |        |        | 2   |      |
| 24100  |        |        |        | 2   |      |
| 24105  |        |        |        | 1   | 3    |
| 24107  |        |        |        | 1   | 0    |
| 24108  |        |        |        | 2   |      |
| 24113  |        |        | 0      | 2   |      |
| 24120  |        |        |        | 2   |      |
| 24122  |        |        | 1      | 1   | 2    |
| 24123  |        |        |        | 2   |      |
| 24125  |        |        |        | 1   | 1    |
| 24132  |        |        |        | 2   |      |
| 24139  |        |        |        | 1   | 1    |
| 24140  |        |        |        | 2   |      |
| 24143  |        |        |        | 1   | 0    |
| 24150  |        |        |        | 1   | 2    |
| 24153  |        |        |        | 2   |      |
| 24161  |        |        |        | 2   |      |
| 24168  |        |        |        | 2   |      |
| 24179  |        |        |        | 2   |      |
| 24182  |        |        | 1      | 1   | 1    |
| 24194  |        |        |        | 2   |      |
| 24206  |        |        |        | 2   |      |
| 24214  |        |        |        | 2   |      |
| 24215  |        |        |        | 2   |      |
| 24224  |        |        |        | 2   |      |
| 24225  |        |        |        | 2   |      |
| 24227  |        |        |        | 2   |      |
| 24229  |        | 0      |        | 2   |      |

| respid | Q31b_7 | Q31b_8 | Q31b_9 | Q32 | Q32a |   |
|--------|--------|--------|--------|-----|------|---|
| 24230  |        |        |        |     | 2    |   |
| 24232  |        |        |        |     | 1    | 2 |
| 24253  |        |        |        |     | 2    |   |
| 24267  |        |        |        |     | 2    |   |
| 24274  |        |        |        |     | 2    |   |
| 24275  |        | 1      |        |     | 2    |   |
| 24277  |        |        |        |     | 2    |   |
| 24280  |        |        | 3      |     | 2    |   |
| 24285  |        |        |        |     | 2    |   |
| 24293  |        |        |        |     | 2    |   |
| 24295  |        |        |        |     | 2    |   |
| 24299  |        |        |        |     | 2    |   |
| 24303  |        |        |        |     | 1    | 1 |
| 24308  |        |        |        |     | 2    |   |
| 24322  |        |        |        |     | 2    |   |
| 24325  |        |        |        |     | 2    |   |
| 24328  |        |        |        |     | 2    |   |
| 24334  |        |        |        |     | 2    |   |
| 24342  |        |        |        |     | 1    | 1 |
| 24343  | 2      |        |        |     | 1    | 2 |
| 24348  |        |        | 1      |     | 1    | 4 |
| 24352  |        |        | 2      |     | 1    | 2 |
| 24354  |        |        |        |     | 2    |   |
| 24357  |        |        |        |     | 2    |   |
| 24360  |        |        |        |     | 1    | 1 |
| 24369  |        |        |        |     | 1    | 4 |
| 24373  |        |        |        |     | 2    |   |
| 24398  |        | 4      | 3      |     | 1    | 3 |
| 24402  |        |        |        |     | 2    |   |
| 24405  |        |        |        |     | 2    |   |
| 24407  |        |        |        |     | 2    |   |
| 24413  |        |        |        |     | 2    |   |



| respid | Q31b_7 | Q31b_8 | Q31b_9 | Q32 | Q32a |
|--------|--------|--------|--------|-----|------|
| 24443  |        |        |        |     | 2    |
| 24451  |        |        |        |     | 2    |
| 24459  | 2      |        |        |     | 1    |
| 24465  |        |        |        |     | 2    |
| 24481  |        |        |        |     | 2    |
| 24482  |        |        |        |     | 2    |
| 24491  |        |        |        |     | 2    |
| 24495  |        |        |        |     | 2    |
| 24497  |        |        | 3      |     | 1    |
| 24511  |        |        |        |     | 2    |
| 24513  |        |        |        |     | 2    |
| 24516  | 1      |        |        |     | 1    |
| 24518  |        | 2      |        |     | 1    |
| 24524  |        |        |        |     | 2    |
| 24528  |        |        |        |     | 2    |
| 24531  |        |        | 3      |     | 1    |
| 24533  |        |        |        |     | 1    |
| 24547  |        |        |        |     | 2    |
| 24557  |        |        |        |     | 1    |
| 24559  |        |        | 4      |     | 1    |
| 24567  |        |        |        |     | 2    |
| 24568  |        |        |        |     | 2    |
| 24577  |        |        |        |     | 2    |
| 24581  |        |        |        |     | 2    |
| 24588  |        |        |        |     | 2    |
| 24604  |        |        |        |     | 1    |
| 24612  |        |        |        |     | 2    |
| 24621  |        |        |        |     | 1    |
| 24625  |        |        | 1      |     | 2    |
| 24627  |        |        |        |     | 2    |
| 24640  |        |        |        |     | 2    |
| 24644  |        |        |        |     | 1    |

| respid | Q31b_7 | Q31b_8 | Q31b_9 | Q32 | Q32a |
|--------|--------|--------|--------|-----|------|
| 24664  |        |        |        | 1   | 2    |
| 24669  |        |        |        | 2   |      |
| 24685  |        |        |        | 2   |      |
| 24687  |        |        |        | 1   | 2    |
| 24688  |        | 1      |        | 1   | 1    |
| 24691  |        |        |        | 1   | 3    |
| 24693  |        |        |        | 2   |      |
| 24706  |        |        |        | 2   |      |
| 24710  |        |        |        | 2   |      |
| 24717  |        |        |        | 2   |      |
| 24720  |        |        |        | 2   |      |
| 24731  |        |        |        | 1   | 1    |
| 24732  |        |        |        | 2   |      |
| 24733  |        |        |        | 2   |      |
| 24747  |        |        |        | 2   |      |
| 24750  |        |        | 4      | 2   |      |
| 24758  |        |        |        | 2   |      |
| 24760  |        |        |        | 2   |      |
| 24765  |        |        |        | 2   |      |
| 24772  |        |        |        | 2   |      |
| 24779  | 2      |        |        | 2   |      |
| 24794  |        |        |        | 2   |      |
| 24796  |        | 2      |        | 1   | 2    |
| 24797  |        |        |        | 2   |      |
| 24800  |        |        |        | 2   |      |
| 24813  |        |        |        | 1   | 3    |
| 24815  |        |        |        | 1   | 0    |
| 24821  |        |        |        | 2   |      |
| 24822  |        |        |        | 2   |      |
| 24831  |        |        |        | 2   |      |
| 24835  |        |        |        | 2   |      |
| 24843  |        |        |        | 2   |      |

| respid | Q31b_7 | Q31b_8 | Q31b_9 | Q32 | Q32a |
|--------|--------|--------|--------|-----|------|
| 24844  |        |        |        | 1   | 2    |
| 24860  |        |        |        | 2   |      |
| 24861  | 2      |        |        | 2   |      |
| 24865  |        |        |        | 1   | 3    |
| 24870  |        |        |        | 2   |      |
| 24887  |        |        |        | 2   |      |
| 24897  |        |        |        | 1   | 2    |
| 24902  |        |        |        | 1   | 2    |
| 24914  |        |        |        | 2   |      |
| 24921  |        |        |        | 2   |      |
| 24922  |        |        |        | 2   |      |
| 24924  |        |        |        | 2   |      |
| 24927  |        |        |        | 2   |      |
| 24936  |        |        |        | 2   |      |
| 24937  |        |        |        | 2   |      |
| 24942  |        |        |        | 2   |      |
| 24947  |        |        |        | 2   |      |
| 24953  |        |        |        | 2   |      |
| 24954  | 1      |        |        | 1   | 1    |
| 24960  |        | 2      | 3      | 1   | 4    |
| 24965  |        |        |        | 2   |      |
| 24975  |        |        |        | 2   |      |
| 24983  |        |        |        | 1   | 3    |
| 24985  |        |        |        | 2   |      |
| 24990  |        |        |        | 2   |      |
| 25000  |        |        |        | 2   |      |
| 25007  | 1      |        |        | 2   |      |
| 25008  |        |        |        | 2   |      |
| 25010  |        |        |        | 2   |      |
| 25016  |        |        | 1      | 2   |      |
| 25021  |        |        |        | 2   |      |
| 25040  |        |        |        | 2   |      |

| respid | Q31b_7 | Q31b_8 | Q31b_9 | Q32 | Q32a |   |
|--------|--------|--------|--------|-----|------|---|
| 25043  |        |        |        |     | 2    |   |
| 25055  |        |        |        |     | 2    |   |
| 25057  |        |        |        |     | 2    |   |
| 25060  |        |        |        |     | 1    | 1 |
| 25062  |        |        |        |     | 2    |   |
| 25064  | 2      |        | 2      |     | 1    | 2 |
| 25069  |        |        |        |     | 2    |   |
| 25077  |        |        |        |     | 2    |   |
| 25088  |        |        |        |     | 2    |   |
| 25093  |        |        |        |     | 2    |   |
| 25121  |        |        |        |     | 2    |   |
| 25140  |        |        |        |     | 1    | 3 |
| 25144  |        |        |        |     | 2    |   |
| 25149  |        |        |        |     | 1    | 1 |
| 25159  |        |        |        |     | 2    |   |
| 25191  |        |        |        |     | 2    |   |
| 25193  |        |        |        |     | 1    | 2 |
| 25202  |        |        |        |     | 1    | 2 |
| 25215  |        | 1      |        |     | 1    | 1 |
| 25229  |        |        |        |     | 2    |   |
| 25231  |        |        |        |     | 2    |   |
| 25236  |        |        |        |     | 2    |   |
| 25242  |        |        |        |     | 2    |   |
| 25252  |        |        |        |     | 2    |   |
| 25253  |        |        | 3      |     | 1    | 4 |
| 25256  |        |        |        |     | 1    | 3 |
| 25260  |        |        |        |     | 2    |   |
| 25261  |        |        |        |     | 2    |   |
| 25280  |        |        |        |     | 1    | 1 |
| 25282  |        |        | 1      |     | 1    | 1 |
| 25289  |        |        | 1      |     | 2    |   |
| 25303  |        |        |        |     | 2    |   |

| respid | Q31b_7 | Q31b_8 | Q31b_9 | Q32 | Q32a |
|--------|--------|--------|--------|-----|------|
| 25304  |        |        |        | 1   | 1    |
| 25309  |        |        |        | 2   |      |
| 25317  |        |        |        | 2   |      |
| 25318  |        | 2      | 2      | 1   | 2    |
| 25320  |        |        |        | 2   |      |
| 25324  |        |        |        | 1   | 3    |
| 25331  | 1      |        |        | 2   |      |
| 25340  |        |        |        | 1   | 0    |
| 25342  |        |        |        | 2   |      |
| 25350  |        |        |        | 2   |      |
| 25352  |        |        |        | 2   |      |
| 25358  |        |        |        | 2   |      |
| 25375  |        |        |        | 2   |      |
| 25386  |        |        |        | 2   |      |
| 25388  |        |        |        | 2   |      |
| 25390  |        |        |        | 1   | 2    |
| 25391  |        |        |        | 2   |      |
| 25400  |        |        |        | 2   |      |
| 25413  |        |        |        | 1   | 3    |
| 25424  |        |        |        | 1   | 1    |
| 25426  |        |        |        | 1   | 2    |
| 25430  |        |        |        | 2   |      |
| 25434  |        |        |        | 2   |      |
| 25439  |        |        |        | 2   |      |
| 25441  |        |        |        | 2   |      |
| 25445  |        |        |        | 2   |      |
| 25451  |        |        |        | 2   |      |
| 25469  |        |        |        | 1   | 3    |
| 25471  |        |        |        | 1   | 2    |
| 25476  |        |        |        | 2   |      |
| 25480  |        |        |        | 2   |      |
| 25482  |        |        |        | 2   |      |

| respid | Q31b_7 | Q31b_8 | Q31b_9 | Q32 | Q32a |
|--------|--------|--------|--------|-----|------|
| 25500  |        |        | 4      | 2   |      |
| 25516  |        |        |        | 2   |      |
| 25521  |        |        |        | 1   | 3    |
| 25525  |        |        |        | 2   |      |
| 25530  |        |        |        | 1   | 3    |
| 25555  |        |        | 2      | 2   |      |
| 25558  |        |        |        | 2   |      |
| 25561  |        |        |        | 2   |      |
| 25566  |        |        |        | 2   |      |
| 25571  |        |        |        | 2   |      |
| 25572  |        |        |        | 2   |      |
| 25574  |        |        |        | 2   |      |
| 25588  |        |        |        | 2   |      |
| 25591  |        |        |        | 1   | 1    |
| 25599  |        |        |        | 1   | 1    |
| 25604  |        |        | 2      | 2   |      |
| 25614  |        |        |        | 1   | 3    |
| 25634  |        | 2      | 2      | 1   | 2    |
| 25642  |        |        |        | 2   |      |
| 25647  |        |        |        | 2   |      |
| 25653  |        |        |        | 2   |      |
| 25654  | 1      |        |        | 1   | 0    |
| 25660  |        |        |        | 2   |      |
| 25664  | 0      |        |        | 2   |      |
| 25665  |        |        |        | 2   |      |
| 25672  |        |        |        | 1   | 2    |
| 25677  | 1      |        |        | 2   |      |
| 25685  |        |        | 3      | 2   |      |
| 25699  |        |        | 2      | 2   |      |
| 25703  |        |        |        | 2   |      |
| 25704  |        |        |        | 2   |      |
| 25705  | 2      |        |        | 1   | 2    |

| respid | Q31b_7 | Q31b_8 | Q31b_9 | Q32 | Q32a |
|--------|--------|--------|--------|-----|------|
| 25711  |        |        |        | 2   |      |
| 25727  |        |        | 2      | 1   | 3    |
| 25728  |        |        |        | 2   |      |
| 25733  |        |        | 2      | 1   | 2    |
| 25735  |        |        |        | 2   |      |
| 25736  |        |        |        | 2   |      |
| 25742  |        |        |        | 2   |      |
| 25750  |        |        |        | 2   |      |
| 25754  |        |        |        | 2   |      |
| 25776  |        |        |        | 1   | 2    |
| 25778  |        |        |        | 2   |      |
| 25796  |        |        |        | 2   |      |
| 25852  |        |        |        | 2   |      |
| 25858  |        |        |        | 2   |      |
| 25859  |        |        |        | 2   |      |
| 25886  |        |        |        | 1   | 3    |
| 25890  |        |        |        | 2   |      |
| 25897  |        |        |        | 2   |      |
| 25903  |        |        |        | 2   |      |
| 25905  |        |        |        | 2   |      |
| 25917  |        |        |        | 2   |      |
| 25918  |        |        |        | 2   |      |
| 25928  |        |        |        | 2   |      |
| 25930  |        |        |        | 2   |      |
| 25949  |        |        |        | 2   |      |
| 25955  |        |        |        | 2   |      |
| 25959  |        |        |        | 2   |      |
| 25964  |        |        |        | 2   |      |
| 25972  |        |        |        | 2   |      |
| 25999  |        |        |        | 1   | 2    |
| 26019  |        |        |        | 2   |      |
| 26025  |        |        |        | 2   |      |

| respid | Q31b_7 | Q31b_8 | Q31b_9 | Q32 | Q32a |
|--------|--------|--------|--------|-----|------|
| 26039  |        |        |        | 1   | 2    |
| 26055  |        |        |        | 2   |      |
| 26061  |        |        |        | 1   | 0    |
| 26076  |        |        |        | 2   |      |
| 26088  |        |        |        | 2   |      |
| 26094  |        |        |        | 2   |      |
| 26104  |        |        |        | 2   |      |
| 26131  |        |        |        | 2   |      |
| 26134  |        |        | 2      | 1   | 2    |
| 26160  |        |        |        | 2   |      |
| 26168  |        |        |        | 2   |      |
| 26170  |        |        |        | 2   |      |
| 26191  |        |        |        | 1   | 2    |
| 26192  |        |        |        | 2   |      |
| 26195  |        |        |        | 2   |      |
| 26198  |        |        |        | 2   |      |
| 26199  |        |        |        | 2   |      |
| 26201  |        |        |        | 2   |      |
| 26202  |        |        |        | 2   |      |
| 26226  |        |        |        | 2   |      |
| 26233  |        |        |        | 1   | 0    |
| 26236  |        |        |        | 2   |      |
| 26242  |        |        |        | 2   |      |
| 26244  |        |        |        | 2   |      |
| 26250  |        |        |        | 2   |      |
| 26266  |        |        |        | 1   | 0    |
| 26274  |        |        |        | 2   |      |
| 26286  |        |        |        | 2   |      |
| 26288  |        |        |        | 2   |      |
| 26295  |        |        |        | 2   |      |
| 26296  |        |        |        | 2   |      |
| 26297  |        |        |        | 2   |      |



| respid | Q31b_7 | Q31b_8 | Q31b_9 | Q32 | Q32a |   |
|--------|--------|--------|--------|-----|------|---|
| 26300  |        |        |        |     | 2    |   |
| 26317  |        |        |        |     | 2    |   |
| 26343  |        |        |        |     | 2    |   |
| 26367  | 0      |        |        |     | 2    |   |
| 26372  |        |        |        |     | 2    |   |
| 26403  |        |        |        |     | 2    |   |
| 26423  |        |        |        |     | 2    |   |
| 26430  |        |        |        |     | 2    |   |
| 26437  |        |        |        |     | 1    | 1 |
| 26457  |        |        |        |     | 2    |   |
| 26466  |        |        |        |     | 2    |   |
| 26467  |        |        |        |     | 2    |   |
| 26469  |        |        |        |     | 2    |   |
| 26494  |        |        |        |     | 2    |   |
| 26510  |        |        |        |     | 2    |   |
| 26519  |        |        |        |     | 2    |   |
| 26525  |        |        |        |     | 2    |   |
| 26529  |        |        |        |     | 2    |   |
| 26533  |        |        |        |     | 2    |   |
| 26556  |        |        | 0      |     | 1    | 0 |
| 26559  |        |        |        |     | 1    | 2 |
| 26565  |        |        | 3      |     | 1    | 2 |
| 26576  |        |        | 3      |     | 2    |   |
| 26601  |        |        |        |     | 2    |   |
| 26607  |        |        |        |     | 1    | 0 |
| 26611  |        |        |        |     | 2    |   |
| 26619  |        |        |        |     | 2    |   |
| 26631  |        |        |        |     | 2    |   |
| 26654  |        |        |        |     | 2    |   |
| 26656  |        |        |        |     | 2    |   |
| 26664  |        |        |        |     | 2    |   |
| 26667  |        |        |        |     | 2    |   |

| respid | Q31b_7 | Q31b_8 | Q31b_9 | Q32 | Q32a |
|--------|--------|--------|--------|-----|------|
| 26674  |        |        | 3      | 2   |      |
| 26678  |        |        |        | 2   |      |
| 26693  |        |        |        | 2   |      |
| 26696  | 3      |        |        | 1   | 4    |
| 26703  |        |        |        | 1   | 4    |
| 26705  |        |        |        | 2   |      |
| 26706  |        |        |        | 2   |      |
| 26716  |        |        |        | 2   |      |
| 26721  |        |        |        | 1   | 1    |
| 26730  |        |        |        | 2   |      |
| 26752  |        |        |        | 2   |      |
| 26755  |        |        |        | 2   |      |
| 26791  |        |        |        | 2   |      |
| 26804  |        |        |        | 2   |      |
| 26810  |        |        |        | 2   |      |
| 26813  |        |        |        | 2   |      |
| 26833  |        |        |        | 1   | 1    |
| 26880  |        |        |        | 2   |      |
| 26884  |        |        |        | 2   |      |
| 26885  |        |        |        | 2   |      |
| 26890  |        |        |        | 1   | 2    |
| 26937  |        |        |        | 2   |      |
| 26939  |        |        |        | 1   | 1    |
| 26941  |        |        |        | 2   |      |
| 26992  |        |        |        | 2   |      |
| 27037  |        |        |        | 2   |      |
| 27045  |        |        | 3      | 1   | 3    |
| 27053  |        |        |        | 1   | 2    |
| 27060  |        |        | 2      | 1   | 2    |
| 27076  |        |        |        | 1   | 2    |
| 27124  |        |        |        | 2   |      |
| 27125  |        |        |        | 2   |      |

| respid | Q31b_7 | Q31b_8 | Q31b_9 | Q32 | Q32a |
|--------|--------|--------|--------|-----|------|
| 27132  |        |        |        |     | 2    |
| 27166  |        |        |        |     | 2    |
| 27190  |        | 1      |        |     | 1    |
| 27199  |        |        |        |     | 1    |
| 27221  |        |        | 2      |     | 1    |
| 27233  |        |        |        |     | 2    |
| 27241  |        |        |        |     | 1    |
| 27244  |        |        |        |     | 2    |
| 27245  | 3      | 3      | 3      |     | 1    |
| 27246  |        |        | 1      |     | 1    |
| 27253  |        |        | 1      |     | 2    |
| 27255  |        |        |        |     | 2    |
| 27267  |        |        |        |     | 2    |
| 27283  |        |        |        |     | 2    |
| 27289  |        |        |        |     | 1    |
| 27302  |        |        |        |     | 2    |
| 27317  |        |        |        |     | 2    |
| 27319  |        |        |        |     | 2    |
| 27331  |        |        |        |     | 2    |
| 27333  |        |        |        |     | 2    |
| 27340  |        |        |        |     | 2    |
| 27362  |        |        |        |     | 1    |
| 27370  |        |        |        |     | 2    |
| 27379  |        |        |        |     | 2    |
| 27386  |        |        |        |     | 2    |
| 27398  |        |        |        |     | 2    |
| 27404  |        |        |        |     | 2    |
| 27408  |        |        |        |     | 2    |
| 27412  |        |        |        |     | 1    |
| 27426  |        |        | 2      |     | 2    |
| 27455  |        |        |        |     | 2    |
| 27464  |        |        |        |     | 1    |

| respid | Q31b_7 | Q31b_8 | Q31b_9 | Q32 | Q32a |   |
|--------|--------|--------|--------|-----|------|---|
| 27484  |        |        |        |     | 2    |   |
| 27493  |        |        |        |     | 2    |   |
| 27512  |        |        | 4      |     | 1    | 0 |
| 27525  |        | 3      | 1      |     | 1    | 1 |
| 27532  |        |        |        |     | 1    | 1 |
| 27539  |        |        |        |     | 2    |   |
| 27540  |        |        |        |     | 2    |   |
| 27552  |        |        |        |     | 1    | 3 |
| 27562  |        |        |        |     | 2    |   |
| 27568  |        |        |        |     | 2    |   |
| 27574  |        | 4      | 3      |     | 1    | 3 |
| 27575  |        |        |        |     | 2    |   |
| 27577  |        |        |        |     | 2    |   |
| 27589  |        |        |        |     | 2    |   |
| 27593  |        |        |        |     | 2    |   |
| 27594  |        |        | 3      |     | 1    | 3 |
| 27595  |        |        | 3      |     | 1    | 3 |
| 27598  |        |        |        |     | 2    |   |
| 27620  |        |        |        |     | 1    | 0 |
| 27621  |        |        | 1      |     | 1    | 1 |
| 27628  |        |        |        |     | 2    |   |
| 27633  |        |        |        |     | 2    |   |
| 27643  |        |        |        |     | 2    |   |
| 27644  |        |        |        |     | 1    | 3 |
| 27668  |        |        |        |     | 2    |   |
| 27681  |        |        | 0      |     | 1    | 1 |
| 27691  |        |        |        |     | 2    |   |
| 27693  |        |        |        |     | 1    | 1 |
| 27703  |        |        |        |     | 2    |   |
| 27708  |        |        |        |     | 2    |   |
| 27719  |        |        |        |     | 1    | 2 |
| 27720  |        |        |        |     | 2    |   |

| respid | Q31b_7 | Q31b_8 | Q31b_9 | Q32 | Q32a |   |
|--------|--------|--------|--------|-----|------|---|
| 27723  |        |        |        |     | 2    |   |
| 27725  |        |        |        |     | 2    |   |
| 27734  |        |        |        |     | 2    |   |
| 27744  |        |        |        |     | 2    |   |
| 27749  |        | 2      |        |     | 2    |   |
| 27762  |        |        |        |     | 2    |   |
| 27808  |        |        | 1      |     | 1    | 3 |
| 27810  |        | 3      | 3      |     | 1    | 4 |
| 27812  |        |        |        |     | 2    |   |
| 27815  |        |        |        |     | 2    |   |
| 27818  |        |        |        |     | 2    |   |
| 27823  |        |        |        |     | 2    |   |
| 27841  |        |        | 1      |     | 1    | 2 |
| 27843  |        |        |        |     | 2    |   |
| 27851  |        |        |        |     | 2    |   |
| 27858  |        |        |        |     | 2    |   |
| 27859  |        |        |        |     | 2    |   |
| 27869  |        |        |        |     | 2    |   |
| 27872  |        |        |        |     | 2    |   |
| 27873  |        |        |        |     | 2    |   |
| 27884  |        |        |        |     | 2    |   |
| 27904  |        |        |        |     | 1    | 2 |
| 27915  |        |        |        |     | 2    |   |
| 27918  |        |        |        |     | 2    |   |
| 27937  |        |        | 0      |     | 2    |   |
| 27943  |        |        |        |     | 2    |   |
| 27948  |        |        |        |     | 2    |   |
| 27971  |        |        | 2      |     | 1    | 2 |
| 27991  |        |        |        |     | 2    |   |
| 28000  |        |        |        |     | 2    |   |
| 28011  |        |        |        |     | 2    |   |
| 28022  |        |        |        |     | 2    |   |

| respid | Q31b_7 | Q31b_8 | Q31b_9 | Q32 | Q32a |
|--------|--------|--------|--------|-----|------|
| 28025  |        |        |        |     | 2    |
| 28041  |        |        |        |     | 2    |
| 28057  |        |        | 2      |     | 1    |
| 28080  |        |        |        |     | 2    |
| 28098  |        |        |        |     | 2    |
| 28104  |        |        |        |     | 1    |
| 28109  |        |        |        |     | 1    |
| 28129  |        |        |        |     | 2    |
| 28141  |        |        |        |     | 2    |
| 28143  |        |        |        |     | 2    |
| 28149  |        |        |        |     | 2    |
| 28151  |        |        |        |     | 1    |
| 28161  |        |        |        |     | 1    |
| 28169  |        |        |        |     | 2    |
| 28194  |        | 3      | 3      |     | 1    |
| 28197  |        |        |        |     | 2    |
| 28206  |        |        |        |     | 2    |
| 28218  |        |        |        |     | 2    |
| 28227  |        |        |        |     | 2    |
| 28235  |        |        |        |     | 2    |
| 28246  |        |        |        |     | 2    |
| 28259  |        |        |        |     | 1    |
| 28263  |        |        |        |     | 2    |
| 28267  |        |        |        |     | 1    |
| 28274  |        |        |        |     | 2    |
| 28278  |        |        |        |     | 2    |
| 28288  |        |        |        |     | 2    |
| 28308  |        |        |        |     | 2    |
| 28309  |        |        |        |     | 2    |
| 28323  |        |        |        |     | 2    |
| 28335  |        |        |        |     | 2    |
| 28354  |        |        |        |     | 2    |

| respid | Q31b_7 | Q31b_8 | Q31b_9 | Q32 | Q32a |
|--------|--------|--------|--------|-----|------|
| 28355  |        |        | 3      | 1   | 2    |
| 28356  |        |        |        | 1   | 2    |
| 28357  |        |        |        | 2   |      |
| 28363  |        |        |        | 2   |      |
| 28366  |        |        |        | 2   |      |
| 28372  |        |        |        | 1   | 2    |
| 28381  |        |        |        | 1   | 1    |
| 28388  |        |        |        | 2   |      |
| 28413  |        |        |        | 2   |      |
| 28421  |        |        |        | 2   |      |
| 28430  |        |        |        | 2   |      |
| 28439  |        |        |        | 2   |      |
| 28458  |        | 4      | 2      | 1   | 3    |
| 28461  |        |        |        | 2   |      |
| 28466  |        |        |        | 2   |      |
| 28492  |        |        |        | 1   | 2    |
| 28534  |        |        |        | 2   |      |
| 28537  |        |        |        | 2   |      |
| 28560  |        |        |        | 2   |      |
| 28566  |        |        |        | 2   |      |
| 28569  |        |        |        | 2   |      |
| 28584  |        |        |        | 2   |      |
| 28590  |        |        | 2      | 1   | 0    |
| 28596  |        |        |        | 2   |      |
| 28608  |        | 2      |        | 1   | 1    |
| 28631  |        |        | 1      | 1   | 1    |
| 28644  |        |        |        | 2   |      |
| 28646  |        |        |        | 2   |      |
| 28665  |        |        |        | 2   |      |
| 28686  |        |        |        | 2   |      |
| 28704  |        |        |        | 2   |      |
| 28719  |        |        |        | 2   |      |

| respid | Q31b_7 | Q31b_8 | Q31b_9 | Q32 | Q32a |
|--------|--------|--------|--------|-----|------|
| 28736  |        |        |        |     | 2    |
| 28739  |        |        |        |     | 2    |
| 28758  |        |        |        |     | 2    |
| 28761  |        | 3      | 3      | 1   | 1    |
| 28770  |        | 1      | 2      | 1   | 3    |
| 28774  |        |        |        |     | 2    |
| 28778  |        |        | 4      | 1   | 3    |
| 28783  |        |        | 1      | 1   | 2    |
| 28785  |        |        |        |     | 2    |
| 28797  |        |        | 1      | 1   | 2    |
| 28801  |        |        |        |     | 2    |
| 28821  |        |        |        |     | 2    |
| 28827  |        |        |        |     | 2    |
| 28828  |        |        |        |     | 2    |
| 28871  | 1      |        |        | 1   | 1    |
| 28876  |        |        |        |     | 2    |
| 28891  |        | 3      | 2      | 2   |      |
| 28898  |        |        |        |     | 2    |
| 28909  |        |        |        |     | 2    |
| 28930  |        |        | 0      | 2   |      |
| 28935  |        |        | 1      | 2   |      |
| 28964  |        |        |        |     | 2    |
| 28965  |        |        |        |     | 2    |
| 28967  |        |        |        | 1   | 3    |
| 28975  |        |        |        |     | 2    |
| 28982  |        |        |        |     | 2    |
| 28989  |        |        |        |     | 2    |
| 29003  |        |        |        |     | 2    |
| 29004  |        |        |        |     | 2    |
| 29007  |        |        |        | 1   | 1    |
| 29008  |        |        |        |     | 2    |
| 29011  |        |        |        |     | 2    |



| respid | Q31b_7 | Q31b_8 | Q31b_9 | Q32 | Q32a |   |
|--------|--------|--------|--------|-----|------|---|
| 29012  |        |        |        |     | 2    |   |
| 29014  |        |        |        |     | 2    |   |
| 29016  |        |        |        |     | 2    |   |
| 29018  |        |        |        |     | 1    | 2 |
| 29048  |        |        |        |     | 2    |   |
| 29184  |        |        |        |     | 2    |   |
| 29237  |        |        |        |     | 2    |   |
| 29252  |        |        |        |     | 2    |   |
| 29267  |        |        |        |     | 2    |   |
| 29276  |        |        |        |     | 2    |   |
| 29281  |        |        |        |     | 1    | 3 |
| 29285  |        |        |        |     | 2    |   |
| 29291  |        |        |        |     | 1    | 4 |
| 29304  |        |        | 1      |     | 2    |   |
| 29323  |        |        |        |     | 2    |   |
| 29330  |        |        | 2      |     | 1    | 2 |
| 29357  |        |        |        |     | 1    | 4 |
| 29416  |        |        |        |     | 2    |   |
| 29432  |        |        |        |     | 2    |   |
| 29482  |        |        |        |     | 2    |   |
| 29506  |        |        |        |     | 2    |   |
| 29509  |        |        | 1      |     | 2    |   |
| 29512  |        |        |        |     | 2    |   |
| 29519  |        |        |        |     | 2    |   |
| 29520  |        |        |        |     | 2    |   |
| 29521  |        |        |        |     | 2    |   |
| 29529  |        | 3      | 3      |     | 1    | 3 |
| 29532  |        |        |        |     | 2    |   |
| 29547  |        |        |        |     | 1    | 0 |
| 29551  |        |        |        |     | 2    |   |
| 29584  |        |        |        |     | 1    | 3 |
| 29591  |        |        |        |     | 1    | 2 |

| respid | Q31b_7 | Q31b_8 | Q31b_9 | Q32 | Q32a |
|--------|--------|--------|--------|-----|------|
| 29613  |        |        |        | 1   | 1    |
| 29615  |        |        |        | 2   |      |
| 29625  |        |        | 2      | 2   |      |
| 29660  |        |        |        | 2   |      |
| 29677  |        |        |        | 2   |      |
| 29700  |        |        |        | 2   |      |
| 29715  | 4      |        |        | 1   | 4    |
| 29720  |        |        |        | 2   |      |
| 29730  |        |        |        | 1   | 0    |
| 29734  |        |        |        | 2   |      |
| 29754  |        |        |        | 2   |      |
| 29771  |        |        |        | 2   |      |
| 29774  |        |        |        | 2   |      |
| 29783  |        |        |        | 2   |      |
| 29812  |        |        |        | 2   |      |
| 29813  |        |        |        | 2   |      |
| 29814  |        |        |        | 2   |      |
| 29820  |        |        |        | 2   |      |
| 29906  |        |        |        | 2   |      |
| 29907  |        |        |        | 2   |      |
| 29928  |        |        |        | 2   |      |
| 29932  |        |        |        | 2   |      |
| 29958  |        |        |        | 2   |      |
| 29982  |        |        |        | 2   |      |
| 29989  |        |        |        | 2   |      |
| 29994  |        |        |        | 2   |      |
| 30005  |        |        |        | 2   |      |
| 30077  |        |        |        | 2   |      |
| 30098  |        |        |        | 2   |      |
| 30107  |        |        |        | 2   |      |
| 30154  |        |        |        | 1   | 0    |
| 30159  |        |        |        | 2   |      |

| respid | Q31b_7 | Q31b_8 | Q31b_9 | Q32 | Q32a |   |
|--------|--------|--------|--------|-----|------|---|
| 30162  |        |        |        |     | 2    |   |
| 30163  |        |        |        |     | 2    |   |
| 30189  |        |        |        |     | 1    | 1 |
| 30230  |        |        |        |     | 2    |   |
| 30259  |        |        |        |     | 2    |   |
| 30284  |        |        |        |     | 1    | 1 |
| 30296  |        |        |        |     | 2    |   |
| 30330  |        |        |        |     | 2    |   |
| 30341  |        |        | 1      |     | 2    |   |
| 30352  |        |        |        |     | 1    | 2 |
| 30379  |        |        |        |     | 2    |   |
| 30424  |        |        |        |     | 2    |   |
| 30447  |        |        |        |     | 2    |   |
| 30477  |        | 3      |        |     | 1    | 2 |
| 30503  | 1      |        |        |     | 2    |   |
| 30515  |        |        |        |     | 2    |   |
| 30516  |        |        |        |     | 1    | 2 |
| 30623  |        | 2      |        |     | 1    | 2 |
| 30639  |        |        |        |     | 2    |   |
| 30670  |        |        |        |     | 2    |   |
| 30697  |        |        |        |     | 2    |   |
| 30735  |        |        |        |     | 2    |   |
| 30742  |        |        |        |     | 1    | 1 |
| 30751  |        |        | 1      |     | 1    | 3 |
| 30789  |        |        |        |     | 2    |   |
| 30867  |        |        |        |     | 2    |   |
| 30876  |        |        |        |     | 2    |   |
| 30877  |        |        |        |     | 2    |   |
| 30887  |        |        |        |     | 2    |   |
| 30891  |        |        |        |     | 1    | 2 |
| 31030  |        |        |        |     | 2    |   |
| 31059  |        |        | 1      |     | 1    | 1 |

| respid | Q31b_7 | Q31b_8 | Q31b_9 | Q32 | Q32a |
|--------|--------|--------|--------|-----|------|
| 31082  |        |        |        | 2   |      |
| 31106  |        |        |        | 2   |      |
| 31110  |        |        |        | 2   |      |
| 31265  |        |        |        | 1   | 4    |
| 31266  | 4      | 4      |        | 1   | 4    |
| 31267  | 4      |        |        | 1   | 4    |
| 31310  |        |        |        | 2   |      |
| 31325  |        |        |        | 2   |      |
| 31367  |        |        |        | 2   |      |
| 31389  |        |        |        | 2   |      |
| 31440  |        |        |        | 2   |      |
| 31465  |        |        |        | 2   |      |
| 31477  |        |        |        | 1   | 2    |
| 31491  |        |        |        | 2   |      |
| 31494  |        |        |        | 2   |      |
| 31509  |        |        |        | 1   | 0    |
| 31533  |        |        |        | 2   |      |
| 31547  |        |        |        | 2   |      |
| 31558  |        |        |        | 2   |      |
| 31579  |        |        |        | 1   | 2    |
| 31591  |        |        |        | 1   | 1    |
| 31596  |        |        |        | 2   |      |
| 31601  |        | 2      | 3      | 1   | 3    |
| 31605  |        |        |        | 1   | 1    |
| 31637  |        |        |        | 2   |      |
| 31646  |        |        |        | 2   |      |
| 31647  | 2      |        | 3      | 1   | 2    |
| 31650  |        |        |        | 2   |      |
| 31651  |        |        |        | 2   |      |
| 31657  |        |        |        | 2   |      |
| 31660  |        |        |        | 2   |      |
| 31661  |        |        |        | 2   |      |

| respid | Q31b_7 | Q31b_8 | Q31b_9 | Q32 | Q32a |
|--------|--------|--------|--------|-----|------|
| 31667  | 1      |        |        | 2   |      |
| 31674  |        |        |        | 2   |      |
| 31686  |        |        |        | 1   | 2    |
| 31693  |        |        |        | 2   |      |
| 31716  |        |        |        | 2   |      |
| 31818  |        |        |        | 2   |      |
| 31886  |        |        | 1      | 2   |      |
| 31945  |        |        |        | 1   | 3    |
| 31957  |        |        |        | 2   |      |
| 31966  |        |        |        | 2   |      |
| 31978  |        |        |        | 1   | 1    |
| 31999  |        |        |        | 2   |      |
| 32026  |        |        |        | 2   |      |
| 32033  |        |        |        | 1   | 0    |
| 32037  |        |        |        | 1   | 4    |
| 32038  |        |        |        | 1   | 4    |
| 32047  |        | 3      | 2      | 1   | 1    |
| 32053  |        |        |        | 2   |      |
| 32069  |        |        |        | 1   | 2    |
| 32081  |        |        |        | 2   |      |
| 32123  |        |        |        | 1   | 0    |
| 32130  |        |        |        | 2   |      |
| 32141  |        | 1      |        | 2   |      |
| 32158  |        |        |        | 2   |      |
| 32165  |        |        |        | 2   |      |
| 32180  |        |        |        | 2   |      |
| 32221  |        |        |        | 1   | 2    |
| 32292  |        |        |        | 2   |      |
| 32318  |        |        |        | 2   |      |
| 32346  |        |        |        | 2   |      |
| 32402  |        |        |        | 1   | 2    |
| 32422  |        |        |        | 2   |      |

| respid | Q31b_7 | Q31b_8 | Q31b_9 | Q32 | Q32a |   |
|--------|--------|--------|--------|-----|------|---|
| 32439  |        |        |        |     | 2    |   |
| 32507  |        |        |        |     | 1    | 2 |
| 32522  |        |        |        |     | 2    |   |
| 32535  |        |        |        |     | 2    |   |
| 32546  |        |        |        |     | 2    |   |
| 32553  |        |        |        |     | 2    |   |
| 32570  |        |        |        |     | 2    |   |
| 32592  |        |        |        |     | 2    |   |
| 32605  |        |        |        |     | 1    | 3 |
| 32630  |        |        |        |     | 1    | 2 |
| 32642  |        |        |        |     | 1    | 2 |
| 32646  |        |        |        |     | 2    |   |
| 32665  |        |        |        |     | 1    | 1 |
| 32677  |        |        |        |     | 2    |   |
| 32694  |        |        |        |     | 2    |   |
| 32698  |        |        |        |     | 2    |   |
| 32754  |        |        |        |     | 1    | 3 |
| 32799  |        | 1      |        |     | 1    | 1 |
| 32816  |        |        |        |     | 2    |   |
| 32819  |        |        | 2      |     | 2    |   |
| 32840  |        |        |        |     | 1    | 0 |
| 32861  |        |        |        |     | 1    | 1 |
| 32866  | 0      |        |        |     | 2    |   |
| 32889  |        |        |        |     | 1    | 3 |
| 32960  |        |        |        |     | 2    |   |
| 32965  |        |        |        |     | 1    | 1 |
| 32986  |        |        |        |     | 2    |   |
| 33005  |        |        |        |     | 2    |   |
| 33054  | 2      |        |        |     | 1    | 2 |
| 33072  |        |        |        |     | 2    |   |
| 33095  |        |        |        |     | 2    |   |
| 33099  |        |        | 1      |     | 1    | 1 |

| respid | Q31b_7 | Q31b_8 | Q31b_9 | Q32 | Q32a |
|--------|--------|--------|--------|-----|------|
| 33121  |        |        |        |     | 2    |
| 33152  |        |        |        |     | 2    |
| 33159  |        |        |        |     | 2    |
| 33189  |        |        |        |     | 2    |
| 33198  |        |        |        | 1   | 3    |
| 33202  |        |        |        |     | 2    |
| 33204  |        |        |        |     | 2    |
| 33224  |        |        |        |     | 2    |
| 33272  |        |        |        | 1   | 1    |
| 33294  | 0      |        |        |     | 2    |
| 33300  |        |        |        |     | 2    |
| 33314  |        |        |        | 1   | 1    |
| 33338  |        |        |        |     | 2    |
| 33350  |        |        | 3      |     | 1    |
| 33362  |        |        |        |     | 1    |
| 33368  |        |        |        |     | 2    |
| 33374  |        |        | 1      |     | 2    |
| 33380  | 3      |        |        |     | 1    |
| 33385  |        |        |        |     | 2    |
| 33402  |        |        |        |     | 2    |
| 33414  |        |        |        |     | 1    |
| 33439  |        |        |        |     | 2    |
| 33449  |        |        | 2      |     | 1    |
| 33533  |        |        | 1      |     | 2    |
| 33540  |        |        |        |     | 2    |
| 33556  |        |        |        |     | 2    |
| 33615  |        |        |        |     | 2    |
| 33694  |        | 2      |        |     | 1    |
| 33717  |        |        |        |     | 2    |
| 33729  |        |        | 0      |     | 2    |
| 33746  |        |        |        |     | 2    |
| 33764  |        |        |        |     | 2    |

| respid | Q31b_7 | Q31b_8 | Q31b_9 | Q32 | Q32a |
|--------|--------|--------|--------|-----|------|
| 33790  |        |        |        | 2   |      |
| 33868  |        |        |        | 1   | 2    |
| 33872  |        |        |        | 1   | 1    |
| 33883  |        |        |        | 2   |      |
| 33884  |        |        |        | 2   |      |
| 33900  |        |        |        | 2   |      |
| 33933  |        |        |        | 2   |      |
| 33949  |        |        |        | 2   |      |
| 34005  |        |        |        | 2   |      |
| 34016  |        |        |        | 2   |      |
| 34041  |        |        |        | 1   | 1    |
| 34053  |        |        |        | 2   |      |
| 34056  |        |        |        | 2   |      |
| 34093  |        | 2      |        | 2   |      |
| 34112  |        |        |        | 2   |      |
| 34136  |        | 3      |        | 1   | 2    |
| 34138  |        |        |        | 2   |      |
| 34139  |        |        |        | 2   |      |
| 34189  |        |        | 4      | 2   |      |
| 34239  |        |        |        | 2   |      |
| 34240  |        |        |        | 2   |      |
| 34241  |        |        |        | 2   |      |
| 34259  |        |        |        | 1   | 1    |
| 34303  |        |        |        | 1   | 2    |
| 34306  |        |        |        | 2   |      |
| 34395  |        |        |        | 2   |      |
| 34463  |        |        |        | 2   |      |
| 34466  |        |        |        | 1   | 2    |
| 34471  |        |        |        | 2   |      |
| 34489  |        |        |        | 1   | 3    |
| 34518  |        |        |        | 1   | 3    |
| 34542  |        |        | 0      | 2   |      |



| respid | Q31b_7 | Q31b_8 | Q31b_9 | Q32 | Q32a |
|--------|--------|--------|--------|-----|------|
| 34595  |        |        |        | 2   |      |
| 34604  |        |        |        | 2   |      |
| 34631  |        |        | 4      | 1   | 2    |
| 34665  |        |        |        | 2   |      |
| 34716  |        |        |        | 2   |      |
| 34729  |        |        |        | 2   |      |
| 34772  |        |        |        | 1   | 2    |
| 34800  |        |        |        | 1   | 2    |
| 34819  |        |        |        | 1   | 1    |
| 34829  |        |        |        | 1   | 1    |
| 34831  |        |        |        | 2   |      |
| 34839  |        |        |        | 2   |      |
| 34868  |        |        |        | 1   | 1    |
| 34869  |        |        |        | 2   |      |
| 34882  | 3      |        |        | 2   |      |
| 34895  |        |        | 3      | 1   | 2    |
| 34901  |        |        |        | 1   | 3    |
| 34904  |        |        | 1      | 2   |      |
| 34907  |        |        |        | 1   | 2    |
| 34914  |        |        |        | 2   |      |
| 34918  |        |        |        | 2   |      |
| 34924  |        |        |        | 2   |      |
| 34933  |        |        |        | 1   | 2    |
| 34938  |        |        |        | 2   |      |
| 34952  |        |        |        | 1   | 3    |
| 34959  |        |        |        | 1   | 0    |
| 34972  |        |        |        | 1   | 0    |
| 34973  |        |        |        | 2   |      |
| 34975  |        |        | 3      | 1   | 3    |
| 34977  |        |        |        | 1   | 2    |
| 34978  |        |        |        | 2   |      |
| 34980  |        |        |        | 2   |      |

| respid | Q31b_7 | Q31b_8 | Q31b_9 | Q32 | Q32a |
|--------|--------|--------|--------|-----|------|
| 34984  |        |        |        | 1   | 2    |
| 34986  |        |        | 2      | 1   | 3    |
| 34994  |        |        |        | 2   |      |
| 34996  |        |        | 1      | 2   |      |
| 35003  |        |        |        | 2   |      |
| 35014  |        |        |        | 2   |      |
| 35029  |        |        |        | 2   |      |
| 35030  |        |        | 2      | 1   | 2    |
| 35037  |        |        |        | 2   |      |
| 35043  |        |        |        | 2   |      |
| 35048  |        |        |        | 2   |      |
| 35055  |        |        |        | 2   |      |
| 35067  |        |        |        | 2   |      |
| 35072  |        |        |        | 2   |      |
| 35078  |        |        |        | 1   | 1    |
| 35084  |        |        |        | 2   |      |
| 35095  |        |        |        | 1   | 0    |
| 35096  |        |        |        | 2   |      |
| 35097  |        |        |        | 1   | 2    |
| 35098  |        |        |        | 2   |      |
| 35109  |        |        |        | 1   | 3    |
| 35114  |        |        |        | 2   |      |
| 35115  |        |        |        | 2   |      |
| 35124  |        |        |        | 1   | 2    |
| 35125  |        |        |        | 2   |      |
| 35141  |        |        |        | 2   |      |
| 35142  |        |        |        | 2   |      |
| 35145  |        |        |        | 2   |      |
| 35149  |        |        |        | 1   | 3    |
| 35159  |        |        |        | 2   |      |
| 35163  |        |        |        | 1   | 1    |
| 35174  |        |        | 2      | 1   | 2    |

| respid | Q31b_7 | Q31b_8 | Q31b_9 | Q32 | Q32a |
|--------|--------|--------|--------|-----|------|
| 35188  |        |        |        | 2   |      |
| 35189  |        |        | 4      | 1   | 1    |
| 35201  |        |        |        | 1   | 3    |
| 35215  |        |        |        | 2   |      |
| 35228  |        |        |        | 2   |      |
| 35235  |        |        |        | 2   |      |
| 35239  |        |        |        | 1   | 3    |
| 35243  |        |        |        | 2   |      |
| 35245  |        |        |        | 2   |      |
| 35259  |        |        |        | 2   |      |
| 35265  |        |        |        | 1   | 3    |
| 35272  |        |        |        | 2   |      |
| 35280  |        |        |        | 1   | 2    |
| 35298  |        |        |        | 2   |      |
| 35305  |        |        |        | 2   |      |
| 35306  |        | 3      |        | 1   | 3    |
| 35307  |        |        |        | 2   |      |
| 35311  |        |        |        | 2   |      |
| 35322  |        |        |        | 2   |      |
| 35323  |        |        |        | 2   |      |
| 35327  |        |        | 0      | 2   |      |
| 35366  |        |        |        | 2   |      |
| 35378  |        |        |        | 2   |      |
| 35389  | 1      |        |        | 1   | 2    |
| 35390  |        |        |        | 2   |      |
| 35395  |        |        |        | 1   | 2    |
| 35411  |        |        |        | 2   |      |
| 35423  |        |        |        | 2   |      |
| 35425  |        |        |        | 1   | 3    |
| 35434  |        |        |        | 2   |      |
| 35462  |        |        |        | 2   |      |
| 35478  |        | 2      |        | 1   | 2    |

| respid | Q31b_7 | Q31b_8 | Q31b_9 | Q32 | Q32a |
|--------|--------|--------|--------|-----|------|
| 35481  |        |        | 2      | 1   | 4    |
| 35498  |        |        |        | 2   |      |
| 35499  |        |        |        | 2   |      |
| 35502  |        |        |        | 1   | 1    |
| 35503  |        |        |        | 2   |      |
| 35504  |        |        |        | 2   |      |
| 35508  | 2      |        |        | 2   |      |
| 35513  |        |        | 1      | 2   |      |
| 35516  |        |        | 0      | 2   |      |
| 35519  |        |        |        | 1   | 2    |
| 35530  |        |        |        | 1   | 2    |
| 35533  |        |        | 1      | 1   | 0    |
| 35561  |        |        |        | 1   | 3    |
| 35565  |        |        |        | 2   |      |
| 35588  |        |        |        | 2   |      |
| 35598  |        |        |        | 2   |      |
| 35607  |        |        |        | 2   |      |
| 35638  |        |        |        | 2   |      |
| 35642  |        |        |        | 2   |      |
| 35643  |        |        |        | 2   |      |
| 35680  |        |        |        | 2   |      |
| 35697  |        |        |        | 1   | 1    |
| 35703  |        |        |        | 2   |      |
| 35709  |        |        |        | 1   | 0    |
| 35710  |        |        |        | 2   |      |
| 35721  | 1      |        | 0      | 2   |      |
| 35723  |        |        |        | 2   |      |
| 35736  |        |        |        | 2   |      |
| 35739  |        |        |        | 2   |      |
| 35745  | 3      |        |        | 1   | 2    |
| 35748  |        |        |        | 1   | 0    |
| 35750  | 2      |        |        | 2   |      |

| respid | Q31b_7 | Q31b_8 | Q31b_9 | Q32 | Q32a |
|--------|--------|--------|--------|-----|------|
| 35752  |        |        | 1      | 2   |      |
| 35773  |        |        | 1      | 2   |      |
| 35779  |        |        |        | 2   |      |
| 35791  |        |        |        | 2   |      |
| 35801  |        |        |        | 1   | 1    |
| 35802  |        |        |        | 2   |      |
| 35837  |        |        |        | 1   | 2    |
| 35853  |        |        |        | 2   |      |
| 35858  |        |        | 0      | 2   |      |
| 35860  |        |        |        | 1   | 2    |
| 35875  |        |        |        | 1   | 4    |
| 35883  |        |        |        | 2   |      |
| 35890  |        |        |        | 2   |      |
| 35898  |        |        |        | 2   |      |
| 35901  | 4      |        | 4      | 1   | 3    |
| 35914  |        |        |        | 2   |      |
| 35924  |        |        |        | 2   |      |
| 35950  |        |        | 2      | 1   | 2    |
| 35961  |        |        |        | 2   |      |
| 35966  |        |        |        | 2   |      |
| 35967  |        |        |        | 2   |      |
| 35971  |        |        |        | 2   |      |
| 35974  |        |        |        | 2   |      |
| 35983  |        |        |        | 1   | 3    |
| 35992  |        | 3      | 4      | 1   | 4    |
| 36010  |        |        |        | 2   |      |
| 36019  |        |        |        | 1   | 4    |
| 36029  |        |        |        | 1   | 1    |
| 36033  |        |        |        | 2   |      |
| 36042  |        |        |        | 2   |      |
| 36043  |        |        | 1      | 2   |      |
| 36048  |        |        |        | 2   |      |

| respid | Q31b_7 | Q31b_8 | Q31b_9 | Q32 | Q32a |
|--------|--------|--------|--------|-----|------|
| 36050  |        |        | 1      | 2   |      |
| 36062  |        |        |        | 2   |      |
| 36063  |        |        |        | 2   |      |
| 36092  |        |        |        | 1   | 0    |
| 36097  |        |        |        | 1   | 2    |
| 36108  |        |        |        | 2   |      |
| 36113  |        | 3      |        | 1   | 4    |
| 36117  |        | 2      |        | 2   |      |
| 36129  |        |        |        | 1   | 2    |
| 36144  |        |        |        | 2   |      |
| 36152  |        |        |        | 2   |      |
| 36154  |        |        |        | 2   |      |
| 36155  |        |        |        | 2   |      |
| 36167  |        |        |        | 2   |      |
| 36172  |        |        |        | 1   | 0    |
| 36173  |        |        |        | 2   |      |
| 36174  |        |        |        | 1   | 1    |
| 36182  |        |        |        | 2   |      |
| 36192  |        |        |        | 2   |      |
| 36195  | 3      |        |        | 1   | 3    |
| 36204  |        |        |        | 2   |      |
| 36205  |        |        |        | 2   |      |
| 36208  |        |        |        | 2   |      |
| 36216  |        |        |        | 1   | 1    |
| 36221  |        |        | 2      | 2   |      |
| 36244  |        |        |        | 2   |      |
| 36255  |        |        |        | 1   | 1    |
| 36259  |        |        |        | 2   |      |
| 36262  |        |        |        | 1   | 2    |
| 36268  |        |        |        | 2   |      |
| 36308  |        |        |        | 1   | 3    |
| 36324  |        |        |        | 2   |      |

| respid | Q31b_7 | Q31b_8 | Q31b_9 | Q32 | Q32a |
|--------|--------|--------|--------|-----|------|
| 36330  |        |        |        | 2   |      |
| 36331  | 0      |        |        | 1   | 2    |
| 36336  |        |        |        | 2   |      |
| 36337  |        |        |        | 2   |      |
| 36364  |        |        |        | 2   |      |
| 36365  |        |        | 2      | 2   |      |
| 36396  |        |        |        | 2   |      |
| 36403  |        |        |        | 2   |      |
| 36410  |        |        |        | 2   |      |
| 36413  |        |        |        | 2   |      |
| 36422  |        |        |        | 2   |      |
| 36424  |        |        | 3      | 2   |      |
| 36425  |        |        |        | 1   | 3    |
| 36432  |        |        |        | 1   | 0    |
| 36435  |        |        |        | 1   | 3    |
| 36446  | 3      |        |        | 1   | 3    |
| 36451  |        |        |        | 2   |      |
| 36453  |        |        |        | 2   |      |
| 36459  |        |        |        | 1   | 2    |
| 36464  |        | 2      |        | 1   | 2    |
| 36465  |        |        |        | 1   | 1    |
| 36466  |        |        |        | 2   |      |
| 36476  |        |        | 0      | 2   |      |
| 36487  |        |        |        | 1   | 0    |
| 36488  |        |        |        | 2   |      |
| 36500  |        |        |        | 2   |      |
| 36504  |        |        |        | 2   |      |
| 36513  |        |        |        | 2   |      |
| 36515  |        |        |        | 2   |      |
| 36521  | 3      |        |        | 1   | 1    |
| 36530  |        |        |        | 1   | 1    |
| 36556  |        |        |        | 1   | 2    |

| respid | Q31b_7 | Q31b_8 | Q31b_9 | Q32 | Q32a |
|--------|--------|--------|--------|-----|------|
| 36564  |        |        |        | 1   | 2    |
| 36584  |        |        |        | 2   |      |
| 36585  |        |        |        | 2   |      |
| 36586  |        |        |        | 2   |      |
| 36606  |        |        |        | 1   | 4    |
| 36615  |        |        |        | 2   |      |
| 36628  |        |        |        | 2   |      |
| 36630  |        |        |        | 1   | 2    |
| 36631  |        |        | 4      | 2   |      |
| 36636  |        |        |        | 2   |      |
| 36637  |        |        |        | 2   |      |
| 36651  |        |        |        | 1   | 3    |
| 36661  |        |        |        | 2   |      |
| 36670  |        |        |        | 1   | 2    |
| 36671  |        |        | 1      | 2   |      |
| 36688  |        |        |        | 2   |      |
| 36694  |        |        |        | 2   |      |
| 36696  |        |        |        | 2   |      |
| 36703  |        |        |        | 2   |      |
| 36719  |        |        |        | 2   |      |
| 36721  |        |        |        | 2   |      |
| 36740  |        |        |        | 2   |      |
| 36755  |        |        |        | 2   |      |
| 36765  |        |        |        | 1   | 2    |
| 36770  |        |        |        | 2   |      |
| 36773  |        |        |        | 1   | 1    |
| 36813  |        |        | 1      | 2   |      |
| 36819  |        |        |        | 2   |      |
| 36820  |        |        |        | 2   |      |
| 36821  |        |        |        | 2   |      |
| 36827  |        |        |        | 2   |      |
| 36835  |        |        |        | 2   |      |



| respid | Q31b_7 | Q31b_8 | Q31b_9 | Q32 | Q32a |
|--------|--------|--------|--------|-----|------|
| 36837  |        |        |        | 2   |      |
| 36849  |        |        |        | 2   |      |
| 36851  |        |        |        | 2   |      |
| 36868  |        |        |        | 1   | 2    |
| 36870  |        |        |        | 2   |      |
| 36871  |        |        |        | 2   |      |
| 36874  |        |        | 2      | 1   | 2    |
| 36878  |        |        |        | 2   |      |
| 36887  |        |        | 0      | 2   |      |
| 36889  |        |        |        | 1   | 1    |
| 36891  |        |        |        | 2   |      |
| 36903  |        |        |        | 2   |      |
| 36905  |        |        |        | 2   |      |
| 36913  |        |        |        | 2   |      |
| 36949  |        |        |        | 2   |      |
| 36954  |        |        | 2      | 1   | 3    |
| 36962  |        |        |        | 2   |      |
| 36965  |        |        |        | 2   |      |
| 36970  |        |        |        | 2   |      |
| 36979  |        |        |        | 2   |      |
| 36990  |        |        |        | 2   |      |
| 36991  |        |        |        | 2   |      |
| 36992  |        |        |        | 2   |      |
| 37015  |        |        |        | 2   |      |
| 37017  |        |        |        | 2   |      |
| 37020  |        |        |        | 2   |      |
| 37033  |        |        |        | 1   | 1    |
| 37041  |        |        |        | 2   |      |
| 37048  |        |        |        | 2   |      |
| 37050  |        |        |        | 2   |      |
| 37054  |        |        |        | 1   | 2    |
| 37057  |        |        |        | 2   |      |

| respid | Q31b_7 | Q31b_8 | Q31b_9 | Q32 | Q32a |
|--------|--------|--------|--------|-----|------|
| 37067  |        |        | 2      | 2   |      |
| 37074  |        |        |        | 2   |      |
| 37088  |        |        |        | 2   |      |
| 37090  |        |        | 3      | 1   | 0    |
| 37110  |        |        |        | 1   | 3    |
| 37122  |        |        |        | 2   |      |
| 37124  |        |        |        | 2   |      |
| 37126  |        |        |        | 2   |      |
| 37129  |        |        | 1      | 2   |      |
| 37130  |        |        |        | 2   |      |
| 37142  |        |        | 2      | 1   | 3    |
| 37160  |        |        |        | 1   | 0    |
| 37168  |        |        |        | 2   |      |
| 37169  |        |        |        | 1   | 2    |
| 37191  |        |        |        | 2   |      |
| 37197  |        |        |        | 1   | 2    |
| 37204  |        |        |        | 2   |      |
| 37213  |        |        |        | 1   | 2    |
| 37238  |        |        | 1      | 1   | 2    |
| 37242  |        |        |        | 1   | 0    |
| 37243  | 2      |        |        | 1   | 4    |
| 37275  |        | 2      |        | 1   | 1    |
| 37305  |        |        |        | 1   | 2    |
| 37357  |        | 1      |        | 1   | 1    |
| 37365  | 0      |        |        | 2   |      |
| 37370  |        |        |        | 2   |      |
| 37406  |        |        |        | 1   | 2    |
| 37410  |        |        |        | 2   |      |
| 37411  |        |        |        | 1   | 3    |
| 37427  |        |        |        | 2   |      |
| 37437  |        |        |        | 2   |      |
| 37440  |        |        |        | 2   |      |

| respid | Q31b_7 | Q31b_8 | Q31b_9 | Q32 | Q32a |
|--------|--------|--------|--------|-----|------|
| 37452  |        |        |        | 2   |      |
| 37465  | 1      |        |        | 1   | 2    |
| 37468  |        |        |        | 1   | 4    |
| 37469  |        |        |        | 2   |      |
| 37477  |        |        |        | 2   |      |
| 37509  |        |        |        | 2   |      |
| 37513  |        |        |        | 2   |      |
| 37534  |        |        |        | 1   | 2    |
| 37537  |        |        |        | 2   |      |
| 37560  |        |        |        | 1   | 1    |
| 37566  |        |        |        | 1   | 2    |
| 37572  |        |        |        | 2   |      |
| 37574  |        |        |        | 1   | 2    |
| 37575  |        |        |        | 2   |      |
| 37590  |        |        |        | 2   |      |
| 37593  |        |        |        | 2   |      |
| 37599  |        |        |        | 2   |      |
| 37641  |        |        |        | 2   |      |
| 37651  |        |        |        | 1   | 1    |
| 37670  |        |        |        | 2   |      |
| 37680  |        |        |        | 2   |      |
| 37690  |        |        |        | 1   | 0    |
| 37694  |        |        |        | 2   |      |
| 37705  |        |        |        | 2   |      |
| 37710  |        |        |        | 2   |      |
| 37719  |        |        |        | 1   | 3    |
| 37741  | 1      |        |        | 1   | 1    |
| 37752  |        |        |        | 2   |      |
| 37755  |        |        |        | 1   | 2    |
| 37757  |        |        |        | 2   |      |
| 37783  |        |        |        | 2   |      |
| 37793  |        |        |        | 1   | 3    |

| respid | Q31b_7 | Q31b_8 | Q31b_9 | Q32 | Q32a |
|--------|--------|--------|--------|-----|------|
| 37800  |        | 4      |        | 1   | 1    |
| 37801  |        |        |        | 1   | 4    |
| 37820  |        |        |        | 1   | 2    |
| 37826  |        |        |        | 1   | 2    |
| 37835  |        |        |        | 1   | 1    |
| 37839  |        |        |        | 1   | 2    |
| 37871  |        |        |        | 1   | 2    |
| 37876  |        |        |        | 2   |      |
| 37879  | 3      |        | 2      | 1   | 1    |
| 37894  |        |        |        | 2   |      |
| 37895  |        |        |        | 1   | 2    |
| 37901  |        |        |        | 1   | 0    |
| 37926  |        |        |        | 2   |      |
| 37937  |        | 2      |        | 1   | 1    |
| 37938  |        |        |        | 1   | 0    |
| 37959  |        |        | 1      | 2   |      |
| 37970  |        |        |        | 2   |      |
| 37972  |        |        |        | 1   | 2    |
| 37988  |        | 1      |        | 2   |      |
| 37989  |        |        | 1      | 2   |      |
| 38000  |        |        |        | 2   |      |
| 38028  |        |        |        | 1   | 3    |
| 38042  |        |        |        | 1   | 2    |
| 38052  |        |        |        | 2   |      |
| 38056  |        |        |        | 2   |      |
| 38106  |        |        |        | 2   |      |
| 38114  |        |        |        | 1   | 4    |
| 38134  |        |        |        | 2   |      |
| 38135  |        |        | 1      | 2   |      |
| 38139  |        |        |        | 1   | 1    |
| 38160  |        |        |        | 2   |      |
| 38164  |        |        | 1      | 2   |      |

| respid | Q31b_7 | Q31b_8 | Q31b_9 | Q32 | Q32a |
|--------|--------|--------|--------|-----|------|
| 38168  |        |        |        | 2   |      |
| 38173  |        |        |        | 2   |      |
| 38193  |        |        |        | 2   |      |
| 38204  |        |        |        | 2   |      |
| 38206  |        |        |        | 2   |      |
| 38233  |        |        | 4      | 1   | 3    |
| 38242  |        |        |        | 1   | 2    |
| 38245  |        |        |        | 2   |      |
| 38261  |        |        |        | 1   | 2    |
| 38288  |        |        |        | 2   |      |
| 38296  |        |        |        | 1   | 2    |
| 38299  |        |        |        | 1   | 1    |
| 38300  |        |        |        | 1   | 2    |
| 38303  |        |        |        | 2   |      |
| 38317  |        |        |        | 2   |      |
| 38328  |        |        |        | 1   | 3    |
| 38333  |        |        |        | 2   |      |
| 38336  |        |        |        | 2   |      |
| 38338  |        |        |        | 2   |      |
| 38342  |        |        |        | 2   |      |
| 38360  |        |        |        | 2   |      |
| 38362  |        |        |        | 1   | 0    |
| 38364  |        |        |        | 2   |      |
| 38402  |        |        |        | 2   |      |
| 38423  |        |        |        | 1   | 2    |
| 38424  |        |        |        | 1   | 0    |
| 38435  |        |        |        | 1   | 1    |
| 38450  |        |        |        | 2   |      |
| 38455  |        |        |        | 2   |      |
| 38467  |        |        |        | 1   | 3    |
| 38468  |        |        | 4      | 1   | 4    |
| 38472  |        |        |        | 2   |      |

| respid | Q31b_7 | Q31b_8 | Q31b_9 | Q32 | Q32a |   |
|--------|--------|--------|--------|-----|------|---|
| 38484  |        |        |        |     | 2    |   |
| 38498  |        |        |        |     | 2    |   |
| 38507  |        |        |        |     | 2    |   |
| 38511  |        |        |        |     | 1    | 1 |
| 38524  |        | 4      |        |     | 1    | 3 |
| 38526  |        |        |        |     | 1    | 2 |
| 38534  |        |        |        |     | 2    |   |
| 38536  |        |        |        |     | 2    |   |
| 38539  |        |        |        |     | 2    |   |
| 38547  |        |        |        |     | 2    |   |
| 38549  |        |        |        |     | 2    |   |
| 38575  |        |        |        |     | 1    | 2 |
| 38579  |        |        |        |     | 2    |   |
| 38585  |        |        |        |     | 2    |   |
| 38589  |        |        | 4      |     | 1    | 3 |
| 38595  |        |        |        |     | 1    | 2 |
| 38602  |        |        |        |     | 2    |   |
| 38603  |        |        |        |     | 1    | 3 |
| 38612  |        |        |        |     | 2    |   |
| 38621  |        |        |        |     | 1    | 3 |
| 38624  |        |        | 2      |     | 1    | 3 |
| 38636  |        |        |        |     | 2    |   |
| 38656  |        | 0      |        |     | 2    |   |
| 38668  |        |        |        |     | 2    |   |
| 38675  |        |        |        |     | 2    |   |
| 38676  |        |        |        |     | 2    |   |
| 38682  |        |        |        |     | 2    |   |
| 38689  |        |        |        |     | 2    |   |
| 38702  |        |        |        |     | 2    |   |
| 38704  |        | 2      | 3      |     | 1    | 3 |
| 38713  |        |        |        |     | 2    |   |
| 38718  |        |        |        |     | 2    |   |

| respid | Q31b_7 | Q31b_8 | Q31b_9 | Q32 | Q32a |
|--------|--------|--------|--------|-----|------|
| 38725  |        |        |        | 2   |      |
| 38730  |        |        |        | 1   | 2    |
| 38737  |        |        | 1      | 2   |      |
| 38738  |        |        | 2      | 1   | 3    |
| 38744  |        |        |        | 2   |      |
| 38746  |        |        |        | 2   |      |
| 38753  |        |        |        | 2   |      |
| 38756  |        |        |        | 2   |      |
| 38760  |        |        |        | 1   | 1    |
| 38762  |        |        |        | 2   |      |
| 38765  |        |        |        | 2   |      |
| 38769  |        |        |        | 2   |      |
| 38781  | 2      |        |        | 1   | 3    |
| 38786  |        |        |        | 2   |      |
| 38790  |        |        |        | 1   | 1    |
| 38793  |        |        |        | 2   |      |
| 38797  |        |        |        | 2   |      |
| 38802  |        |        |        | 2   |      |
| 38815  |        |        |        | 1   | 2    |
| 38826  |        |        | 3      | 1   | 4    |
| 38828  |        |        |        | 2   |      |
| 38829  |        |        |        | 1   | 3    |
| 38835  |        |        | 3      | 2   |      |
| 38842  |        |        |        | 2   |      |
| 38853  |        |        |        | 2   |      |
| 38855  |        |        |        | 1   | 2    |
| 38860  |        |        |        | 1   | 2    |
| 38869  |        |        |        | 2   |      |
| 38882  |        |        |        | 1   | 2    |
| 38897  |        |        |        | 2   |      |
| 38903  |        |        |        | 2   |      |
| 38910  |        | 2      |        | 1   | 3    |

| respid | Q31b_7 | Q31b_8 | Q31b_9 | Q32 | Q32a |
|--------|--------|--------|--------|-----|------|
| 38948  |        | 4      |        | 1   | 2    |
| 38949  | 2      |        | 2      | 1   | 3    |
| 38953  |        |        |        | 1   | 3    |
| 38989  | 4      |        |        | 2   |      |
| 38997  |        |        |        | 2   |      |
| 38999  |        |        |        | 1   | 1    |
| 39002  |        |        |        | 1   | 3    |
| 39003  |        |        |        | 1   | 4    |
| 39006  |        |        |        | 2   |      |
| 39014  |        |        |        | 2   |      |
| 39017  |        |        |        | 1   | 4    |
| 39018  |        | 3      |        | 1   | 3    |
| 39025  |        | 3      | 4      | 1   | 3    |
| 39031  |        |        |        | 1   | 0    |
| 39061  | 2      |        |        | 2   |      |
| 39131  |        |        |        | 1   | 0    |
| 39153  |        |        |        | 1   | 4    |
| 39194  |        |        |        | 1   | 3    |
| 39204  |        |        |        | 2   |      |
| 39208  |        |        |        | 1   | 1    |
| 39213  |        |        |        | 1   | 3    |
| 39231  |        |        |        | 2   |      |
| 39251  |        |        |        | 2   |      |
| 39257  |        |        |        | 1   | 2    |
| 39262  |        |        |        | 1   | 4    |
| 39269  |        |        |        | 1   | 3    |
| 39272  |        |        |        | 1   | 0    |
| 39280  |        |        |        | 1   | 1    |
| 39294  |        |        |        | 1   | 3    |
| 39297  |        | 1      |        | 1   | 2    |
| 39300  |        |        |        | 1   | 2    |
| 39307  | 2      |        |        | 2   |      |



| respid | Q31b_7 | Q31b_8 | Q31b_9 | Q32 | Q32a |
|--------|--------|--------|--------|-----|------|
| 39320  | 3      |        |        | 2   |      |
| 39333  |        |        |        | 2   |      |
| 39335  |        |        | 4      | 1   | 3    |
| 39339  |        |        |        | 2   |      |
| 39375  |        |        |        | 1   | 0    |
| 39377  |        |        |        | 2   |      |
| 39380  |        |        |        | 2   |      |
| 39425  |        |        |        | 1   | 1    |
| 39590  |        |        |        | 2   |      |
| 40529  |        |        |        | 2   |      |
| 40702  |        |        |        | 2   |      |
| 40788  |        |        |        | 2   |      |
| 40841  |        |        |        | 2   |      |
| 40965  |        |        |        | 2   |      |
| 41092  |        |        |        | 2   |      |
| 41534  |        |        |        | 2   |      |
| 41919  |        |        |        | 2   |      |
| 42110  |        |        |        | 2   |      |
| 42135  |        |        |        | 1   | 2    |
| 42142  |        |        |        | 1   | 1    |
| 42163  |        |        |        | 2   |      |
| 42164  |        |        |        | 2   |      |
| 42172  |        |        | 2      | 1   | 0    |
| 42177  |        |        |        | 2   |      |
| 42181  |        |        |        | 2   |      |
| 42193  |        |        |        | 1   | 2    |
| 42196  |        |        | 1      | 2   |      |
| 42202  |        | 1      |        | 2   |      |
| 42248  |        |        | 1      | 1   | 1    |
| 42283  |        |        |        | 2   |      |
| 42284  |        |        |        | 1   | 1    |
| 42323  |        |        |        | 2   |      |

| respid | Q31b_7 | Q31b_8 | Q31b_9 | Q32 | Q32a |
|--------|--------|--------|--------|-----|------|
| 42349  |        |        |        | 2   |      |
| 42351  |        |        |        | 2   |      |
| 42357  |        |        |        | 1   | 0    |
| 42366  |        |        |        | 2   |      |
| 42380  |        |        |        | 2   |      |
| 42414  |        |        |        | 1   | 3    |
| 42420  |        |        |        | 1   | 3    |
| 42454  |        |        |        | 2   |      |
| 42458  |        |        |        | 2   |      |
| 42461  |        |        |        | 1   | 0    |
| 42488  |        |        |        | 1   | 2    |
| 42511  |        |        |        | 1   | 4    |
| 42512  |        |        |        | 2   |      |
| 42530  |        |        |        | 1   | 1    |
| 42531  |        |        |        | 1   | 4    |
| 42533  |        |        |        | 1   | 4    |
| 42549  |        |        |        | 2   |      |
| 42550  |        |        |        | 1   | 1    |
| 42553  |        |        |        | 2   |      |
| 42562  |        |        | 3      | 2   |      |
| 42567  |        |        |        | 1   | 0    |
| 42589  |        |        |        | 2   |      |
| 42604  |        |        | 1      | 1   | 1    |
| 42618  |        |        | 1      | 2   |      |
| 42621  |        |        |        | 1   | 2    |
| 42627  |        |        |        | 2   |      |
| 42641  |        |        |        | 2   |      |
| 42655  |        |        |        | 1   | 2    |
| 42666  |        |        |        | 2   |      |
| 42667  |        |        | 2      | 1   | 1    |
| 42697  |        |        |        | 2   |      |
| 42703  |        |        |        | 2   |      |

| respid | Q31b_7 | Q31b_8 | Q31b_9 | Q32 | Q32a |
|--------|--------|--------|--------|-----|------|
| 42712  |        |        |        | 1   | 1    |
| 42731  | 2      |        |        | 1   | 1    |
| 42780  |        |        |        | 2   |      |
| 42785  |        |        | 1      | 1   | 1    |
| 42788  |        |        |        | 2   |      |
| 42802  | 0      |        |        | 1   | 2    |
| 42818  |        |        |        | 2   |      |
| 42821  |        |        |        | 2   |      |
| 42824  |        |        |        | 2   |      |
| 42831  |        |        |        | 1   | 1    |
| 42836  |        |        |        | 2   |      |
| 42864  | 1      |        |        | 1   | 1    |
| 42875  |        |        | 0      | 2   |      |
| 42891  |        |        |        | 1   | 4    |
| 42897  |        |        |        | 2   |      |
| 42900  |        |        |        | 2   |      |
| 42902  |        |        |        | 1   | 2    |
| 42921  |        |        |        | 2   |      |
| 42925  |        |        |        | 1   | 1    |
| 42944  |        |        |        | 2   |      |
| 42950  |        |        |        | 2   |      |
| 42963  |        |        |        | 2   |      |
| 42967  |        |        | 1      | 2   |      |
| 42985  |        |        |        | 2   |      |
| 42990  |        |        | 1      | 2   |      |
| 42996  |        |        | 2      | 1   | 0    |
| 43002  |        |        |        | 2   |      |
| 43004  |        |        |        | 2   |      |
| 43012  |        |        |        | 1   | 0    |
| 43027  |        |        |        | 2   |      |
| 43028  |        |        | 1      | 2   |      |
| 43029  |        |        |        | 1   | 0    |

| respid | Q31b_7 | Q31b_8 | Q31b_9 | Q32 | Q32a |
|--------|--------|--------|--------|-----|------|
| 43031  |        |        |        | 1   | 2    |
| 43042  |        |        |        | 1   | 0    |
| 43054  |        |        |        | 2   |      |
| 43058  |        |        |        | 2   |      |
| 43064  |        |        |        | 2   |      |
| 43069  |        |        |        | 2   |      |
| 43071  |        |        |        | 2   |      |
| 43072  |        |        |        | 2   |      |
| 43077  |        |        | 1      | 2   |      |
| 43078  | 2      |        | 2      | 1   | 0    |
| 43082  |        |        |        | 2   |      |
| 43092  |        |        |        | 2   |      |
| 43096  |        |        | 1      | 2   |      |
| 43109  |        |        |        | 2   |      |
| 43113  |        |        |        | 2   |      |
| 43123  |        |        |        | 2   |      |
| 43127  |        |        |        | 2   |      |
| 43128  |        |        |        | 2   |      |
| 43129  |        |        | 1      | 2   |      |
| 43133  |        | 1      | 2      | 1   | 2    |
| 43140  |        |        |        | 2   |      |
| 43143  | 1      |        | 2      | 1   | 0    |
| 43149  | 1      |        |        | 1   | 0    |
| 43150  | 3      |        |        | 1   | 1    |
| 43153  |        |        | 2      | 1   | 3    |
| 43170  |        |        |        | 2   |      |
| 43187  |        |        |        | 2   |      |
| 43188  | 4      |        |        | 1   | 2    |
| 43198  |        |        |        | 2   |      |
| 43208  |        |        |        | 2   |      |
| 43216  |        |        |        | 2   |      |
| 43222  |        |        |        | 2   |      |

| respid | Q31b_7 | Q31b_8 | Q31b_9 | Q32 | Q32a |
|--------|--------|--------|--------|-----|------|
| 43224  |        |        | 0      | 2   |      |
| 43230  |        |        |        | 1   | 0    |
| 43231  |        |        |        | 1   | 0    |
| 43265  |        |        |        | 1   | 0    |
| 43270  |        |        |        | 1   | 1    |
| 43283  |        |        |        | 1   | 2    |
| 43295  |        |        |        | 1   | 2    |
| 43297  |        |        |        | 2   |      |
| 43299  | 1      |        |        | 1   | 1    |
| 43307  |        |        |        | 2   |      |
| 43316  |        |        |        | 1   | 2    |
| 43318  |        |        |        | 2   |      |
| 43319  |        |        | 1      | 2   |      |
| 43324  |        |        |        | 1   | 0    |
| 43325  |        |        |        | 1   | 4    |
| 43327  |        |        |        | 2   |      |
| 43338  |        |        |        | 2   |      |
| 43342  |        |        |        | 2   |      |
| 43348  |        |        |        | 2   |      |
| 43395  |        |        |        | 2   |      |
| 43404  |        |        |        | 1   | 1    |
| 43406  |        |        |        | 2   |      |
| 43407  |        |        |        | 2   |      |
| 43411  |        |        |        | 2   |      |
| 43416  |        |        |        | 1   | 2    |
| 43428  |        |        |        | 2   |      |
| 43429  |        |        |        | 1   | 2    |
| 43432  |        |        | 1      | 2   |      |
| 43443  |        |        |        | 2   |      |
| 43455  |        |        |        | 2   |      |
| 43457  |        |        | 1      | 1   | 1    |
| 43458  |        |        |        | 2   |      |

| respid | Q31b_7 | Q31b_8 | Q31b_9 | Q32 | Q32a |
|--------|--------|--------|--------|-----|------|
| 43477  |        |        |        | 1   | 2    |
| 43520  |        |        |        | 2   |      |
| 43521  |        |        |        | 2   |      |
| 43550  |        |        |        | 2   |      |
| 43551  |        |        | 1      | 1   | 2    |
| 43554  |        |        |        | 1   | 2    |
| 43560  |        |        |        | 2   |      |
| 43569  |        |        |        | 2   |      |
| 43583  |        |        |        | 2   |      |
| 43590  | 2      |        |        | 2   |      |
| 43591  |        |        |        | 2   |      |
| 43595  |        |        |        | 2   |      |
| 43599  |        |        |        | 2   |      |
| 43606  |        |        |        | 2   |      |
| 43609  |        |        |        | 2   |      |
| 43629  |        |        |        | 2   |      |
| 43636  |        |        |        | 2   |      |
| 43661  |        |        |        | 2   |      |
| 43668  |        |        |        | 2   |      |
| 43672  |        |        |        | 2   |      |
| 43677  | 2      |        |        | 1   | 2    |
| 43683  |        |        |        | 1   | 2    |
| 43708  |        |        |        | 1   | 2    |
| 43713  |        |        |        | 2   |      |
| 43718  |        |        |        | 2   |      |
| 43725  |        |        |        | 2   |      |
| 43747  |        |        |        | 2   |      |
| 43755  |        |        |        | 1   | 0    |
| 43770  |        |        |        | 2   |      |
| 43775  |        |        |        | 1   | 2    |
| 43788  |        |        |        | 2   |      |
| 43790  |        |        |        | 1   | 2    |

| respid | Q31b_7 | Q31b_8 | Q31b_9 | Q32 | Q32a |
|--------|--------|--------|--------|-----|------|
| 43797  |        |        |        | 1   | 2    |
| 43798  |        |        |        | 2   |      |
| 43811  |        |        |        | 2   |      |
| 43819  |        | 2      |        | 1   | 1    |
| 43821  |        |        |        | 2   |      |
| 43822  |        |        |        | 2   |      |
| 43825  |        |        | 3      | 1   | 2    |
| 43826  |        |        | 1      | 1   | 2    |
| 43831  |        |        |        | 2   |      |
| 43836  |        |        |        | 2   |      |
| 43852  |        |        |        | 2   |      |
| 43857  |        |        |        | 2   |      |
| 43858  |        | 3      | 0      | 1   | 3    |
| 43859  |        |        |        | 2   |      |
| 43863  |        |        |        | 2   |      |
| 43868  |        |        |        | 2   |      |
| 43872  |        |        |        | 2   |      |
| 43874  |        |        |        | 2   |      |
| 43882  |        |        | 0      | 1   | 0    |
| 43886  |        |        |        | 2   |      |
| 43903  |        |        |        | 2   |      |
| 43929  |        |        | 0      | 2   |      |
| 43932  |        |        |        | 2   |      |
| 43936  |        |        |        | 2   |      |
| 43962  |        |        |        | 1   | 0    |
| 43964  | 0      |        |        | 2   |      |
| 43968  | 0      |        |        | 2   |      |
| 43979  |        |        |        | 2   |      |
| 44006  |        |        |        | 1   | 3    |
| 44009  |        |        |        | 2   |      |
| 44023  |        |        |        | 1   | 2    |
| 44035  |        |        |        | 2   |      |

| respid | Q31b_7 | Q31b_8 | Q31b_9 | Q32 | Q32a |
|--------|--------|--------|--------|-----|------|
| 44038  |        |        | 2      | 1   | 3    |
| 44039  |        |        |        | 2   |      |
| 44043  |        |        |        | 2   |      |
| 44048  |        |        |        | 2   |      |
| 44050  |        |        |        | 2   |      |
| 44051  |        |        |        | 2   |      |
| 44061  |        |        |        | 1   | 2    |
| 44063  |        |        |        | 1   | 2    |
| 44072  |        |        |        | 2   |      |
| 44075  |        |        |        | 2   |      |
| 44089  |        |        |        | 2   |      |
| 44090  |        |        |        | 1   | 4    |
| 44091  |        |        |        | 2   |      |
| 44092  |        |        |        | 2   |      |
| 44110  |        |        |        | 2   |      |
| 44112  |        |        |        | 1   | 1    |
| 44114  |        |        |        | 2   |      |
| 44143  |        |        |        | 2   |      |
| 44179  |        |        |        | 2   |      |
| 44234  |        |        |        | 1   | 0    |
| 44236  |        |        |        | 2   |      |
| 44239  |        |        |        | 1   | 1    |
| 44241  |        |        |        | 2   |      |
| 44253  |        |        |        | 2   |      |
| 44260  |        |        |        | 2   |      |
| 44261  |        |        |        | 2   |      |
| 44263  |        |        |        | 2   |      |
| 44264  |        |        |        | 2   |      |
| 44265  |        |        |        | 2   |      |
| 44267  |        |        |        | 2   |      |
| 44306  |        |        | 1      | 2   |      |
| 44309  |        |        |        | 1   | 2    |



| respid | Q31b_7 | Q31b_8 | Q31b_9 | Q32 | Q32a |
|--------|--------|--------|--------|-----|------|
| 44310  |        |        |        | 1   | 0    |
| 44361  |        |        |        | 2   |      |
| 44380  |        |        |        | 1   | 1    |
| 44386  |        |        |        | 2   |      |
| 44419  |        |        | 1      | 1   | 1    |
| 44426  |        |        |        | 2   |      |
| 44479  |        |        | 4      | 2   |      |
| 44484  |        |        |        | 2   |      |
| 44487  |        |        |        | 2   |      |
| 44509  |        |        |        | 2   |      |
| 44540  |        |        |        | 2   |      |
| 44551  |        |        | 1      | 1   | 2    |
| 44553  |        |        |        | 2   |      |
| 44650  |        |        |        | 2   |      |
| 44665  |        |        |        | 1   | 1    |
| 44779  |        |        | 1      | 2   |      |
| 44797  |        |        |        | 2   |      |
| 44807  |        |        |        | 2   |      |
| 44815  |        |        |        | 1   | 1    |
| 44836  |        |        |        | 1   | 1    |
| 44868  |        |        |        | 1   | 3    |
| 44927  | 1      |        |        | 2   |      |
| 44983  |        |        |        | 2   |      |
| 45040  |        |        |        | 2   |      |
| 45051  |        |        |        | 2   |      |
| 45067  |        |        |        | 2   |      |
| 45074  |        |        |        | 2   |      |
| 45115  |        |        |        | 2   |      |
| 45187  |        | 4      | 2      | 1   | 2    |
| 45221  |        |        |        | 1   | 2    |
| 45279  |        |        | 1      | 2   |      |
| 45308  |        |        |        | 2   |      |

| respid | Q31b_7 | Q31b_8 | Q31b_9 | Q32 | Q32a |
|--------|--------|--------|--------|-----|------|
| 45317  |        |        | 1      | 2   |      |
| 45379  | 3      |        |        | 2   |      |
| 45451  |        |        |        | 2   |      |
| 45472  |        |        | 2      | 1   | 1    |
| 45474  |        | 4      |        | 1   | 3    |
| 45544  |        |        |        | 1   | 4    |
| 45561  |        |        |        | 2   |      |
| 45596  |        |        |        | 1   | 2    |

| Instrum   | OABSS   | OABSS   | OABSS   | OABSS   |
|-----------|---------|---------|---------|---------|
| Symptom   |         |         |         |         |
| Type of R | Symptom | Symptom | Symptom | Symptom |

**Descripti** Day time frequency      Night wake up      Sudden desire to urinate      Leak urine

| respid | Q33 | Q34 | Q35 | Q36 |
|--------|-----|-----|-----|-----|
| 241    | 0   | 1   | 0   | 0   |
| 242    | 0   | 2   | 2   | 0   |
| 243    | 1   | 1   | 1   | 1   |
| 244    | 1   | 1   | 1   | 1   |
| 245    | 0   | 0   | 1   | 0   |
| 246    | 1   | 1   | 1   | 1   |
| 247    | 0   | 0   | 1   | 1   |
| 253    | 1   | 1   | 2   | 0   |
| 256    | 0   | 1   | 1   | 0   |
| 257    | 1   | 1   | 1   | 1   |
| 258    | 0   | 0   | 0   | 0   |
| 259    | 0   | 0   | 1   | 0   |
| 263    | 1   | 0   | 0   | 0   |
| 264    | 0   | 1   | 1   | 0   |
| 265    | 1   | 0   | 2   | 2   |
| 266    | 0   | 1   | 0   | 0   |
| 268    | 1   | 0   | 3   | 0   |
| 270    | 1   | 1   | 1   | 0   |
| 272    | 0   | 1   | 0   | 0   |
| 274    | 0   | 0   | 1   | 0   |

| respid | Q33 | Q34 | Q35 | Q36 |
|--------|-----|-----|-----|-----|
| 275    | 0   | 0   | 2   | 0   |
| 276    | 1   | 1   | 0   | 0   |
| 277    | 0   | 0   | 0   | 0   |
| 279    | 1   | 1   | 1   | 1   |
| 286    | 1   | 1   | 4   | 2   |
| 290    | 0   | 0   | 1   | 1   |
| 291    | 0   | 1   | 0   | 0   |
| 295    | 1   | 0   | 0   | 0   |
| 297    | 0   | 1   | 0   | 0   |
| 299    | 0   | 1   | 1   | 0   |
| 300    | 0   | 1   | 1   | 1   |
| 303    | 0   | 0   | 0   | 0   |
| 304    | 1   | 0   | 0   | 0   |
| 306    | 0   | 0   | 2   | 1   |
| 307    | 0   | 1   | 0   | 0   |
| 312    | 1   | 3   | 4   | 4   |
| 315    | 0   | 0   | 0   | 0   |
| 317    | 0   | 1   | 0   | 0   |
| 322    | 1   | 1   | 2   | 1   |
| 335    | 0   | 1   | 1   | 1   |
| 374    | 0   | 1   | 2   | 2   |
| 378    | 0   | 1   | 0   | 0   |
| 380    | 1   | 0   | 2   | 1   |
| 382    | 0   | 0   | 1   | 0   |
| 384    | 0   | 1   | 2   | 2   |
| 385    | 0   | 2   | 1   | 1   |
| 395    | 0   | 0   | 1   | 0   |
| 396    | 0   | 0   | 0   | 0   |
| 398    | 1   | 0   | 0   | 0   |
| 402    | 1   | 3   | 4   | 4   |
| 414    | 1   | 0   | 2   | 2   |
| 415    | 0   | 0   | 0   | 0   |

| respid | Q33 | Q34 | Q35 | Q36 |
|--------|-----|-----|-----|-----|
| 416    | 0   | 0   | 0   | 0   |
| 420    | 1   | 1   | 2   | 1   |
| 421    | 0   | 1   | 0   | 0   |
| 422    | 0   | 0   | 0   | 0   |
| 423    | 1   | 0   | 0   | 0   |
| 424    | 0   | 0   | 0   | 0   |
| 425    | 1   | 2   | 0   | 0   |
| 428    | 0   | 1   | 0   | 0   |
| 429    | 0   | 0   | 1   | 0   |
| 431    | 0   | 0   | 0   | 0   |
| 437    | 0   | 1   | 1   | 0   |
| 438    | 0   | 0   | 2   | 0   |
| 441    | 0   | 2   | 0   | 0   |
| 444    | 0   | 0   | 0   | 0   |
| 448    | 0   | 0   | 0   | 0   |
| 449    | 1   | 1   | 0   | 0   |
| 457    | 1   | 1   | 0   | 0   |
| 460    | 0   | 0   | 0   | 0   |
| 469    | 0   | 0   | 1   | 0   |
| 471    | 1   | 1   | 1   | 1   |
| 473    | 2   | 1   | 2   | 0   |
| 476    | 0   | 1   | 1   | 0   |
| 479    | 0   | 1   | 0   | 0   |
| 485    | 0   | 0   | 0   | 0   |
| 488    | 1   | 2   | 2   | 0   |
| 494    | 0   | 1   | 0   | 0   |
| 496    | 1   | 0   | 0   | 0   |
| 501    | 0   | 0   | 0   | 0   |
| 502    | 1   | 2   | 2   | 2   |
| 503    | 1   | 2   | 2   | 0   |
| 506    | 0   | 0   | 0   | 0   |
| 514    | 0   | 1   | 1   | 1   |

| respid | Q33 | Q34 | Q35 | Q36 |
|--------|-----|-----|-----|-----|
| 515    | 0   | 1   | 2   | 1   |
| 516    | 1   | 0   | 0   | 0   |
| 519    | 0   | 2   | 5   | 2   |
| 522    | 0   | 0   | 0   | 0   |
| 525    | 0   | 0   | 1   | 0   |
| 528    | 1   | 1   | 0   | 0   |
| 532    | 0   | 0   | 1   | 0   |
| 536    | 1   | 1   | 1   | 1   |
| 539    | 0   | 1   | 2   | 0   |
| 540    | 1   | 0   | 1   | 0   |
| 547    | 1   | 2   | 2   | 0   |
| 551    | 1   | 0   | 0   | 0   |
| 554    | 0   | 1   | 1   | 1   |
| 558    | 1   | 0   | 0   | 0   |
| 563    | 0   | 0   | 1   | 1   |
| 564    | 1   | 2   | 2   | 1   |
| 565    | 0   | 1   | 1   | 0   |
| 567    | 0   | 1   | 0   | 0   |
| 569    | 0   | 0   | 1   | 1   |
| 572    | 0   | 0   | 0   | 0   |
| 574    | 0   | 1   | 0   | 0   |
| 583    | 0   | 3   | 2   | 1   |
| 589    | 1   | 1   | 0   | 0   |
| 592    | 0   | 0   | 1   | 0   |
| 593    | 0   | 0   | 0   | 0   |
| 594    | 0   | 1   | 1   | 1   |
| 597    | 0   | 0   | 0   | 0   |
| 601    | 2   | 3   | 0   | 0   |
| 607    | 1   | 1   | 1   | 0   |
| 610    | 1   | 0   | 0   | 0   |
| 612    | 1   | 1   | 3   | 1   |
| 627    | 0   | 0   | 0   | 0   |

| respid | Q33 | Q34 | Q35 | Q36 |
|--------|-----|-----|-----|-----|
| 631    | 0   | 1   | 0   | 0   |
| 633    | 1   | 1   | 2   | 2   |
| 636    | 0   | 1   | 1   | 0   |
| 656    | 1   | 0   | 0   | 0   |
| 659    | 1   | 1   | 0   | 0   |
| 670    | 1   | 0   | 0   | 0   |
| 672    | 1   | 0   | 1   | 1   |
| 673    | 0   | 1   | 1   | 1   |
| 675    | 0   | 0   | 0   | 0   |
| 676    | 0   | 1   | 1   | 1   |
| 679    | 0   | 2   | 1   | 0   |
| 683    | 0   | 0   | 0   | 0   |
| 684    | 1   | 0   | 0   | 0   |
| 690    | 0   | 1   | 1   | 0   |
| 701    | 0   | 2   | 4   | 4   |
| 709    | 1   | 2   | 0   | 0   |
| 719    | 1   | 1   | 0   | 0   |
| 726    | 1   | 1   | 0   | 0   |
| 730    | 1   | 2   | 0   | 0   |
| 731    | 0   | 1   | 0   | 0   |
| 732    | 1   | 0   | 0   | 0   |
| 733    | 0   | 1   | 0   | 0   |
| 735    | 0   | 0   | 0   | 0   |
| 738    | 0   | 0   | 1   | 0   |
| 740    | 0   | 1   | 0   | 0   |
| 742    | 1   | 0   | 0   | 0   |
| 744    | 0   | 1   | 0   | 0   |
| 749    | 0   | 1   | 2   | 0   |
| 751    | 1   | 1   | 1   | 0   |
| 752    | 1   | 1   | 0   | 0   |
| 753    | 1   | 1   | 2   | 1   |
| 755    | 1   | 1   | 0   | 0   |

| respid | Q33 | Q34 | Q35 | Q36 |
|--------|-----|-----|-----|-----|
| 756    | 0   | 0   | 0   | 0   |
| 759    | 0   | 0   | 1   | 0   |
| 760    | 1   | 1   | 1   | 0   |
| 763    | 0   | 1   | 0   | 0   |
| 764    | 1   | 0   | 1   | 0   |
| 765    | 0   | 2   | 1   | 1   |
| 766    | 1   | 1   | 1   | 0   |
| 767    | 0   | 1   | 0   | 0   |
| 771    | 0   | 2   | 3   | 0   |
| 773    | 1   | 2   | 0   | 0   |
| 774    | 1   | 1   | 0   | 0   |
| 775    | 1   | 1   | 2   | 0   |
| 776    | 1   | 0   | 1   | 0   |
| 778    | 1   | 1   | 1   | 1   |
| 780    | 0   | 2   | 0   | 0   |
| 781    | 1   | 0   | 0   | 0   |
| 782    | 1   | 2   | 4   | 0   |
| 783    | 0   | 3   | 0   | 0   |
| 786    | 1   | 2   | 2   | 4   |
| 788    | 0   | 0   | 1   | 0   |
| 792    | 0   | 0   | 0   | 0   |
| 794    | 1   | 2   | 2   | 2   |
| 795    | 0   | 0   | 0   | 0   |
| 799    | 1   | 1   | 1   | 0   |
| 800    | 0   | 0   | 0   | 0   |
| 801    | 1   | 1   | 2   | 1   |
| 804    | 0   | 1   | 1   | 1   |
| 806    | 0   | 0   | 0   | 0   |
| 807    | 1   | 1   | 0   | 0   |
| 808    | 0   | 2   | 0   | 0   |
| 809    | 0   | 0   | 0   | 0   |
| 811    | 0   | 1   | 0   | 0   |



| respid | Q33 | Q34 | Q35 | Q36 |
|--------|-----|-----|-----|-----|
| 812    | 0   | 1   | 0   | 0   |
| 815    | 0   | 1   | 0   | 0   |
| 817    | 0   | 0   | 1   | 0   |
| 818    | 0   | 1   | 1   | 1   |
| 819    | 0   | 1   | 0   | 0   |
| 821    | 1   | 0   | 0   | 2   |
| 824    | 0   | 1   | 0   | 0   |
| 825    | 1   | 1   | 0   | 0   |
| 828    | 0   | 1   | 0   | 0   |
| 832    | 1   | 1   | 0   | 0   |
| 834    | 0   | 1   | 1   | 1   |
| 835    | 1   | 3   | 4   | 0   |
| 836    | 1   | 1   | 0   | 0   |
| 837    | 1   | 0   | 0   | 0   |
| 840    | 0   | 1   | 0   | 0   |
| 841    | 1   | 0   | 0   | 0   |
| 845    | 0   | 0   | 0   | 0   |
| 846    | 0   | 0   | 0   | 0   |
| 849    | 1   | 2   | 0   | 0   |
| 852    | 0   | 1   | 0   | 0   |
| 854    | 0   | 0   | 1   | 0   |
| 856    | 0   | 0   | 0   | 0   |
| 858    | 1   | 1   | 0   | 0   |
| 859    | 1   | 0   | 1   | 1   |
| 861    | 0   | 0   | 1   | 1   |
| 863    | 0   | 1   | 0   | 0   |
| 864    | 0   | 2   | 1   | 1   |
| 866    | 0   | 1   | 0   | 0   |
| 869    | 0   | 0   | 0   | 0   |
| 870    | 1   | 1   | 1   | 0   |
| 871    | 0   | 1   | 0   | 0   |
| 873    | 0   | 1   | 1   | 0   |

| respid | Q33 | Q34 | Q35 | Q36 |
|--------|-----|-----|-----|-----|
| 879    | 1   | 1   | 1   | 1   |
| 880    | 0   | 2   | 0   | 1   |
| 881    | 0   | 1   | 0   | 0   |
| 882    | 0   | 1   | 1   | 0   |
| 885    | 0   | 0   | 0   | 0   |
| 886    | 1   | 0   | 0   | 0   |
| 887    | 1   | 2   | 3   | 2   |
| 888    | 1   | 1   | 0   | 0   |
| 889    | 0   | 1   | 0   | 0   |
| 890    | 0   | 0   | 1   | 1   |
| 900    | 0   | 0   | 0   | 0   |
| 901    | 1   | 0   | 0   | 0   |
| 902    | 1   | 2   | 0   | 0   |
| 903    | 0   | 0   | 0   | 0   |
| 906    | 1   | 3   | 0   | 0   |
| 907    | 1   | 2   | 2   | 1   |
| 908    | 1   | 1   | 2   | 0   |
| 910    | 1   | 1   | 0   | 0   |
| 911    | 0   | 0   | 1   | 1   |
| 912    | 1   | 1   | 1   | 1   |
| 915    | 0   | 0   | 0   | 0   |
| 923    | 1   | 3   | 2   | 1   |
| 925    | 0   | 0   | 0   | 0   |
| 926    | 1   | 0   | 1   | 0   |
| 929    | 0   | 0   | 0   | 0   |
| 932    | 0   | 2   | 1   | 2   |
| 933    | 0   | 1   | 0   | 1   |
| 934    | 1   | 1   | 0   | 0   |
| 938    | 0   | 2   | 1   | 1   |
| 941    | 1   | 0   | 0   | 0   |
| 942    | 0   | 1   | 0   | 0   |
| 943    | 0   | 0   | 0   | 0   |

| respid | Q33 | Q34 | Q35 | Q36 |
|--------|-----|-----|-----|-----|
| 945    | 0   | 1   | 0   | 0   |
| 946    | 0   | 0   | 0   | 0   |
| 947    | 0   | 0   | 0   | 0   |
| 948    | 0   | 1   | 0   | 0   |
| 949    | 0   | 0   | 0   | 0   |
| 952    | 1   | 1   | 0   | 1   |
| 956    | 1   | 1   | 1   | 0   |
| 957    | 1   | 0   | 0   | 0   |
| 959    | 1   | 0   | 1   | 0   |
| 961    | 0   | 1   | 0   | 0   |
| 962    | 0   | 2   | 1   | 1   |
| 965    | 0   | 1   | 0   | 0   |
| 967    | 0   | 0   | 1   | 0   |
| 969    | 0   | 1   | 0   | 0   |
| 970    | 0   | 0   | 0   | 0   |
| 973    | 1   | 2   | 0   | 0   |
| 974    | 0   | 2   | 0   | 0   |
| 975    | 1   | 1   | 0   | 0   |
| 976    | 1   | 0   | 1   | 0   |
| 977    | 0   | 0   | 1   | 0   |
| 979    | 0   | 0   | 0   | 0   |
| 981    | 0   | 0   | 0   | 0   |
| 983    | 0   | 0   | 0   | 0   |
| 987    | 0   | 0   | 0   | 0   |
| 991    | 0   | 0   | 0   | 0   |
| 992    | 0   | 1   | 0   | 0   |
| 993    | 1   | 3   | 0   | 0   |
| 994    | 1   | 2   | 1   | 1   |
| 995    | 1   | 2   | 0   | 0   |
| 998    | 0   | 2   | 0   | 0   |
| 1000   | 1   | 3   | 4   | 2   |
| 1001   | 1   | 3   | 1   | 0   |

| respid | Q33 | Q34 | Q35 | Q36 |
|--------|-----|-----|-----|-----|
| 1002   | 0   | 0   | 0   | 0   |
| 1004   | 0   | 1   | 0   | 0   |
| 1005   | 0   | 1   | 2   | 2   |
| 1006   | 1   | 2   | 0   | 0   |
| 1007   | 1   | 2   | 0   | 0   |
| 1009   | 0   | 0   | 0   | 0   |
| 1013   | 0   | 3   | 0   | 0   |
| 1015   | 0   | 1   | 0   | 0   |
| 1020   | 1   | 1   | 2   | 2   |
| 1022   | 1   | 2   | 3   | 3   |
| 1024   | 0   | 1   | 0   | 0   |
| 1025   | 0   | 1   | 0   | 0   |
| 1027   | 0   | 0   | 0   | 0   |
| 1031   | 0   | 0   | 0   | 0   |
| 1037   | 0   | 0   | 0   | 0   |
| 1039   | 0   | 1   | 0   | 0   |
| 1040   | 0   | 0   | 0   | 0   |
| 1056   | 1   | 2   | 2   | 0   |
| 1057   | 0   | 1   | 1   | 0   |
| 1062   | 0   | 1   | 0   | 0   |
| 1069   | 0   | 1   | 0   | 0   |
| 1070   | 0   | 1   | 0   | 0   |
| 1072   | 0   | 1   | 0   | 0   |
| 1076   | 0   | 1   | 0   | 0   |
| 1077   | 0   | 1   | 0   | 0   |
| 1078   | 0   | 1   | 0   | 0   |
| 1080   | 0   | 1   | 0   | 0   |
| 1094   | 1   | 3   | 3   | 1   |
| 1098   | 1   | 2   | 0   | 0   |
| 1099   | 1   | 1   | 0   | 0   |
| 1102   | 0   | 1   | 0   | 0   |
| 1110   | 0   | 0   | 0   | 0   |

| respid | Q33 | Q34 | Q35 | Q36 |
|--------|-----|-----|-----|-----|
| 1117   | 0   | 1   | 4   | 4   |
| 1119   | 0   | 1   | 0   | 0   |
| 1126   | 1   | 1   | 0   | 0   |
| 1127   | 1   | 1   | 0   | 0   |
| 1130   | 0   | 1   | 0   | 0   |
| 1131   | 0   | 1   | 0   | 0   |
| 1135   | 0   | 2   | 2   | 1   |
| 1138   | 0   | 1   | 1   | 0   |
| 1139   | 0   | 1   | 0   | 0   |
| 1140   | 0   | 1   | 0   | 0   |
| 1142   | 0   | 0   | 0   | 0   |
| 1143   | 0   | 0   | 0   | 0   |
| 1145   | 0   | 0   | 0   | 0   |
| 1149   | 0   | 0   | 0   | 0   |
| 1152   | 1   | 1   | 1   | 0   |
| 1160   | 0   | 1   | 0   | 0   |
| 1164   | 0   | 0   | 0   | 0   |
| 1165   | 0   | 1   | 0   | 0   |
| 1169   | 1   | 0   | 2   | 2   |
| 1170   | 1   | 1   | 0   | 0   |
| 1179   | 0   | 1   | 1   | 0   |
| 1180   | 0   | 0   | 0   | 0   |
| 1183   | 0   | 0   | 0   | 0   |
| 1187   | 0   | 1   | 0   | 0   |
| 1188   | 0   | 1   | 1   | 0   |
| 1193   | 0   | 0   | 0   | 0   |
| 1194   | 0   | 2   | 1   | 0   |
| 1197   | 0   | 1   | 0   | 0   |
| 1202   | 0   | 0   | 0   | 0   |
| 1204   | 1   | 3   | 3   | 3   |
| 1211   | 0   | 1   | 0   | 0   |
| 1224   | 0   | 1   | 1   | 1   |

| respid | Q33 | Q34 | Q35 | Q36 |
|--------|-----|-----|-----|-----|
| 1225   | 0   | 0   | 0   | 0   |
| 1230   | 0   | 1   | 0   | 0   |
| 1232   | 1   | 1   | 1   | 0   |
| 1233   | 0   | 1   | 4   | 0   |
| 1234   | 0   | 1   | 0   | 0   |
| 1235   | 0   | 2   | 2   | 1   |
| 1236   | 1   | 1   | 1   | 0   |
| 1237   | 0   | 2   | 1   | 0   |
| 1238   | 1   | 1   | 0   | 0   |
| 1239   | 0   | 1   | 0   | 0   |
| 1241   | 1   | 1   | 2   | 0   |
| 1242   | 0   | 0   | 0   | 0   |
| 1244   | 1   | 1   | 0   | 0   |
| 1245   | 0   | 0   | 0   | 0   |
| 1247   | 1   | 2   | 1   | 1   |
| 1248   | 0   | 1   | 2   | 0   |
| 1249   | 2   | 0   | 0   | 0   |
| 1250   | 1   | 0   | 0   | 0   |
| 1251   | 1   | 1   | 0   | 0   |
| 1252   | 1   | 2   | 0   | 0   |
| 1253   | 0   | 0   | 0   | 0   |
| 1254   | 1   | 2   | 3   | 0   |
| 1258   | 1   | 1   | 0   | 0   |
| 1260   | 1   | 1   | 0   | 0   |
| 1261   | 0   | 1   | 0   | 0   |
| 1262   | 0   | 2   | 0   | 0   |
| 1263   | 0   | 2   | 2   | 1   |
| 1264   | 1   | 0   | 1   | 0   |
| 1265   | 0   | 2   | 1   | 0   |
| 1266   | 1   | 1   | 2   | 0   |
| 1270   | 0   | 1   | 0   | 0   |
| 1272   | 1   | 2   | 2   | 1   |

| respid | Q33 | Q34 | Q35 | Q36 |
|--------|-----|-----|-----|-----|
| 1273   | 0   | 0   | 1   | 1   |
| 1276   | 0   | 0   | 0   | 0   |
| 1277   | 0   | 1   | 0   | 0   |
| 1278   | 1   | 1   | 3   | 0   |
| 1280   | 1   | 1   | 0   | 0   |
| 1281   | 0   | 1   | 1   | 1   |
| 1282   | 0   | 2   | 2   | 0   |
| 1283   | 0   | 0   | 1   | 0   |
| 1288   | 0   | 0   | 0   | 0   |
| 1289   | 1   | 0   | 1   | 0   |
| 1290   | 1   | 1   | 1   | 0   |
| 1291   | 1   | 0   | 0   | 0   |
| 1293   | 1   | 0   | 1   | 1   |
| 1294   | 1   | 1   | 2   | 0   |
| 1295   | 0   | 0   | 2   | 0   |
| 1296   | 1   | 1   | 0   | 0   |
| 1297   | 1   | 1   | 0   | 0   |
| 1298   | 1   | 2   | 2   | 2   |
| 1300   | 1   | 0   | 1   | 1   |
| 1302   | 0   | 1   | 0   | 0   |
| 1303   | 0   | 2   | 1   | 0   |
| 1304   | 1   | 1   | 2   | 1   |
| 1305   | 0   | 1   | 1   | 0   |
| 1307   | 0   | 1   | 1   | 0   |
| 1312   | 1   | 1   | 1   | 0   |
| 1313   | 0   | 0   | 1   | 0   |
| 1314   | 0   | 0   | 0   | 0   |
| 1317   | 1   | 1   | 3   | 0   |
| 1318   | 0   | 1   | 0   | 0   |
| 1319   | 0   | 1   | 1   | 0   |
| 1321   | 0   | 1   | 0   | 0   |
| 1324   | 1   | 1   | 2   | 1   |

| respid | Q33 | Q34 | Q35 | Q36 |
|--------|-----|-----|-----|-----|
| 1325   | 0   | 1   | 0   | 1   |
| 1326   | 0   | 0   | 0   | 0   |
| 1327   | 2   | 1   | 0   | 0   |
| 1329   | 1   | 2   | 2   | 1   |
| 1330   | 1   | 3   | 0   | 0   |
| 1331   | 0   | 0   | 1   | 0   |
| 1335   | 1   | 1   | 1   | 0   |
| 1337   | 0   | 0   | 0   | 0   |
| 1341   | 0   | 1   | 0   | 0   |
| 1342   | 0   | 0   | 0   | 0   |
| 1344   | 0   | 1   | 1   | 1   |
| 1345   | 1   | 0   | 0   | 0   |
| 1346   | 0   | 0   | 1   | 0   |
| 1350   | 0   | 1   | 2   | 1   |
| 1352   | 0   | 1   | 0   | 0   |
| 1353   | 1   | 1   | 1   | 0   |
| 1354   | 0   | 1   | 0   | 0   |
| 1355   | 0   | 1   | 0   | 0   |
| 1357   | 0   | 0   | 2   | 1   |
| 1360   | 0   | 0   | 0   | 0   |
| 1362   | 0   | 1   | 0   | 0   |
| 1363   | 1   | 1   | 1   | 1   |
| 1367   | 1   | 0   | 1   | 0   |
| 1369   | 0   | 2   | 1   | 0   |
| 1371   | 0   | 1   | 0   | 0   |
| 1372   | 1   | 1   | 0   | 0   |
| 1375   | 0   | 0   | 0   | 0   |
| 1377   | 0   | 0   | 0   | 0   |
| 1379   | 1   | 1   | 2   | 1   |
| 1380   | 0   | 1   | 1   | 0   |
| 1382   | 0   | 0   | 1   | 1   |
| 1383   | 0   | 1   | 1   | 0   |



| respid | Q33 | Q34 | Q35 | Q36 |
|--------|-----|-----|-----|-----|
| 1384   | 0   | 0   | 0   | 0   |
| 1385   | 0   | 1   | 3   | 0   |
| 1387   | 1   | 0   | 0   | 0   |
| 1388   | 0   | 1   | 0   | 0   |
| 1389   | 1   | 0   | 1   | 1   |
| 1390   | 0   | 1   | 1   | 0   |
| 1395   | 0   | 0   | 0   | 0   |
| 1396   | 0   | 1   | 1   | 0   |
| 1397   | 0   | 1   | 1   | 1   |
| 1398   | 1   | 0   | 0   | 0   |
| 1399   | 0   | 0   | 0   | 0   |
| 1403   | 0   | 0   | 0   | 0   |
| 1405   | 0   | 1   | 1   | 0   |
| 1406   | 1   | 1   | 0   | 1   |
| 1407   | 1   | 3   | 2   | 2   |
| 1408   | 0   | 1   | 1   | 0   |
| 1409   | 0   | 1   | 0   | 0   |
| 1410   | 2   | 3   | 0   | 0   |
| 1411   | 0   | 1   | 1   | 1   |
| 1412   | 0   | 0   | 0   | 0   |
| 1413   | 0   | 0   | 1   | 0   |
| 1414   | 1   | 2   | 1   | 0   |
| 1415   | 0   | 1   | 0   | 0   |
| 1416   | 0   | 1   | 0   | 0   |
| 1417   | 0   | 0   | 0   | 0   |
| 1418   | 0   | 0   | 0   | 0   |
| 1419   | 1   | 1   | 1   | 2   |
| 1420   | 0   | 0   | 1   | 1   |
| 1421   | 0   | 1   | 1   | 1   |
| 1422   | 1   | 1   | 0   | 0   |
| 1423   | 1   | 2   | 0   | 0   |
| 1424   | 1   | 1   | 1   | 0   |

| respid | Q33 | Q34 | Q35 | Q36 |
|--------|-----|-----|-----|-----|
| 1429   | 0   | 0   | 0   | 0   |
| 1430   | 0   | 1   | 0   | 0   |
| 1431   | 0   | 3   | 1   | 1   |
| 1433   | 0   | 1   | 1   | 2   |
| 1435   | 1   | 0   | 0   | 0   |
| 1436   | 0   | 0   | 0   | 0   |
| 1438   | 0   | 0   | 0   | 0   |
| 1439   | 0   | 2   | 0   | 0   |
| 1441   | 0   | 1   | 1   | 0   |
| 1442   | 0   | 0   | 1   | 0   |
| 1443   | 0   | 1   | 0   | 0   |
| 1444   | 0   | 1   | 0   | 0   |
| 1445   | 1   | 2   | 2   | 3   |
| 1446   | 0   | 1   | 2   | 1   |
| 1447   | 0   | 1   | 0   | 0   |
| 1449   | 1   | 2   | 2   | 1   |
| 1450   | 0   | 0   | 0   | 0   |
| 1451   | 0   | 1   | 1   | 0   |
| 1452   | 0   | 0   | 1   | 0   |
| 1453   | 1   | 1   | 2   | 2   |
| 1454   | 1   | 2   | 1   | 1   |
| 1456   | 0   | 0   | 0   | 0   |
| 1457   | 1   | 1   | 2   | 1   |
| 1459   | 0   | 1   | 0   | 2   |
| 1460   | 0   | 1   | 0   | 0   |
| 1463   | 1   | 1   | 0   | 0   |
| 1465   | 0   | 0   | 1   | 1   |
| 1467   | 0   | 1   | 0   | 0   |
| 1470   | 1   | 0   | 1   | 0   |
| 1471   | 0   | 2   | 2   | 0   |
| 1472   | 0   | 1   | 0   | 0   |
| 1474   | 0   | 0   | 2   | 1   |

| respid | Q33 | Q34 | Q35 | Q36 |
|--------|-----|-----|-----|-----|
| 1475   | 1   | 1   | 1   | 0   |
| 1477   | 1   | 0   | 0   | 0   |
| 1478   | 0   | 1   | 1   | 1   |
| 1480   | 0   | 0   | 0   | 0   |
| 1481   | 1   | 1   | 1   | 1   |
| 1483   | 0   | 1   | 0   | 0   |
| 1484   | 0   | 1   | 0   | 0   |
| 1485   | 0   | 0   | 0   | 0   |
| 1486   | 1   | 2   | 0   | 0   |
| 1487   | 1   | 1   | 0   | 0   |
| 1488   | 1   | 1   | 0   | 0   |
| 1489   | 0   | 1   | 2   | 1   |
| 1490   | 1   | 0   | 2   | 0   |
| 1491   | 1   | 1   | 1   | 2   |
| 1492   | 1   | 0   | 1   | 0   |
| 1494   | 0   | 0   | 0   | 0   |
| 1495   | 1   | 2   | 1   | 0   |
| 1496   | 0   | 1   | 0   | 1   |
| 1498   | 1   | 1   | 0   | 0   |
| 1499   | 0   | 1   | 0   | 0   |
| 1500   | 0   | 1   | 1   | 1   |
| 1501   | 0   | 1   | 0   | 0   |
| 1503   | 0   | 0   | 1   | 0   |
| 1504   | 0   | 2   | 0   | 0   |
| 1508   | 0   | 2   | 2   | 0   |
| 1509   | 0   | 1   | 1   | 0   |
| 1511   | 1   | 2   | 2   | 2   |
| 1512   | 1   | 1   | 1   | 0   |
| 1513   | 0   | 1   | 1   | 0   |
| 1515   | 1   | 1   | 1   | 0   |
| 1517   | 0   | 0   | 1   | 1   |
| 1518   | 0   | 1   | 2   | 0   |

| respid | Q33 | Q34 | Q35 | Q36 |
|--------|-----|-----|-----|-----|
| 1519   | 1   | 1   | 2   | 1   |
| 1520   | 0   | 0   | 0   | 0   |
| 1521   | 0   | 1   | 0   | 0   |
| 1522   | 0   | 0   | 1   | 0   |
| 1523   | 1   | 3   | 4   | 4   |
| 1524   | 0   | 1   | 0   | 0   |
| 1525   | 1   | 1   | 1   | 0   |
| 1526   | 1   | 2   | 1   | 1   |
| 1527   | 0   | 1   | 0   | 0   |
| 1534   | 0   | 0   | 0   | 0   |
| 1535   | 0   | 0   | 1   | 0   |
| 1536   | 2   | 1   | 1   | 0   |
| 1538   | 1   | 1   | 0   | 0   |
| 1539   | 1   | 0   | 0   | 0   |
| 1540   | 1   | 1   | 0   | 0   |
| 1541   | 1   | 1   | 0   | 0   |
| 1542   | 0   | 1   | 1   | 0   |
| 1543   | 0   | 1   | 1   | 0   |
| 1545   | 1   | 1   | 1   | 1   |
| 1546   | 1   | 0   | 1   | 0   |
| 1548   | 1   | 2   | 2   | 0   |
| 1549   | 0   | 0   | 1   | 0   |
| 1551   | 0   | 0   | 0   | 0   |
| 1552   | 1   | 1   | 0   | 0   |
| 1556   | 0   | 0   | 0   | 0   |
| 1557   | 0   | 1   | 0   | 0   |
| 1558   | 0   | 0   | 1   | 0   |
| 1561   | 0   | 1   | 1   | 0   |
| 1562   | 0   | 1   | 0   | 0   |
| 1563   | 0   | 0   | 0   | 0   |
| 1564   | 0   | 3   | 1   | 1   |
| 1565   | 0   | 0   | 0   | 0   |

| respid | Q33 | Q34 | Q35 | Q36 |
|--------|-----|-----|-----|-----|
| 1566   | 0   | 1   | 0   | 0   |
| 1567   | 1   | 2   | 0   | 0   |
| 1569   | 0   | 0   | 0   | 0   |
| 1570   | 0   | 0   | 0   | 0   |
| 1574   | 0   | 0   | 0   | 0   |
| 1575   | 0   | 0   | 0   | 0   |
| 1576   | 0   | 0   | 0   | 0   |
| 1577   | 0   | 2   | 0   | 0   |
| 1581   | 0   | 1   | 1   | 0   |
| 1583   | 0   | 2   | 0   | 0   |
| 1585   | 0   | 0   | 0   | 0   |
| 1586   | 0   | 1   | 0   | 0   |
| 1588   | 0   | 0   | 0   | 0   |
| 1590   | 1   | 0   | 0   | 0   |
| 1592   | 0   | 1   | 0   | 0   |
| 1594   | 1   | 2   | 2   | 0   |
| 1598   | 1   | 1   | 1   | 1   |
| 1599   | 0   | 3   | 2   | 0   |
| 1600   | 0   | 1   | 1   | 1   |
| 1602   | 0   | 0   | 0   | 0   |
| 1603   | 1   | 1   | 0   | 0   |
| 1604   | 0   | 1   | 0   | 0   |
| 1605   | 0   | 2   | 3   | 1   |
| 1606   | 0   | 1   | 0   | 0   |
| 1610   | 1   | 1   | 0   | 0   |
| 1611   | 1   | 0   | 0   | 0   |
| 1612   | 1   | 0   | 1   | 0   |
| 1613   | 1   | 2   | 2   | 3   |
| 1615   | 1   | 2   | 1   | 1   |
| 1616   | 1   | 1   | 0   | 0   |
| 1617   | 1   | 1   | 1   | 0   |
| 1618   | 0   | 2   | 0   | 0   |

| respid | Q33 | Q34 | Q35 | Q36 |
|--------|-----|-----|-----|-----|
| 1620   | 0   | 1   | 0   | 0   |
| 1621   | 0   | 1   | 1   | 1   |
| 1622   | 0   | 1   | 0   | 0   |
| 1623   | 0   | 0   | 0   | 0   |
| 1624   | 1   | 1   | 1   | 0   |
| 1625   | 0   | 1   | 0   | 0   |
| 1626   | 0   | 0   | 0   | 0   |
| 1627   | 0   | 1   | 1   | 0   |
| 1629   | 0   | 0   | 0   | 0   |
| 1630   | 0   | 0   | 0   | 0   |
| 1631   | 0   | 1   | 1   | 0   |
| 1634   | 1   | 2   | 1   | 1   |
| 1635   | 1   | 0   | 0   | 0   |
| 1636   | 1   | 0   | 0   | 0   |
| 1637   | 1   | 0   | 0   | 0   |
| 1640   | 0   | 0   | 1   | 0   |
| 1642   | 0   | 0   | 0   | 0   |
| 1643   | 1   | 1   | 2   | 1   |
| 1644   | 0   | 0   | 0   | 0   |
| 1645   | 0   | 1   | 1   | 0   |
| 1646   | 0   | 1   | 0   | 0   |
| 1647   | 0   | 1   | 1   | 0   |
| 1650   | 0   | 0   | 1   | 0   |
| 1654   | 0   | 1   | 0   | 0   |
| 1656   | 0   | 0   | 0   | 0   |
| 1657   | 1   | 2   | 2   | 2   |
| 1659   | 1   | 0   | 1   | 0   |
| 1662   | 1   | 1   | 1   | 1   |
| 1663   | 1   | 0   | 0   | 0   |
| 1664   | 0   | 0   | 0   | 0   |
| 1665   | 0   | 0   | 0   | 0   |
| 1667   | 1   | 0   | 0   | 0   |

| respid | Q33 | Q34 | Q35 | Q36 |
|--------|-----|-----|-----|-----|
| 1668   | 1   | 0   | 1   | 0   |
| 1670   | 0   | 0   | 1   | 0   |
| 1671   | 1   | 0   | 1   | 0   |
| 1673   | 1   | 1   | 0   | 0   |
| 1674   | 0   | 1   | 0   | 0   |
| 1676   | 0   | 2   | 0   | 0   |
| 1677   | 0   | 0   | 1   | 0   |
| 1678   | 0   | 1   | 0   | 0   |
| 1680   | 0   | 0   | 0   | 0   |
| 1681   | 1   | 1   | 0   | 0   |
| 1683   | 0   | 1   | 0   | 0   |
| 1685   | 1   | 1   | 1   | 1   |
| 1686   | 0   | 1   | 1   | 1   |
| 1690   | 0   | 1   | 0   | 0   |
| 1691   | 1   | 1   | 1   | 0   |
| 1692   | 1   | 1   | 1   | 1   |
| 1693   | 0   | 0   | 1   | 0   |
| 1695   | 0   | 1   | 0   | 0   |
| 1696   | 1   | 1   | 0   | 0   |
| 1698   | 0   | 0   | 0   | 0   |
| 1699   | 1   | 1   | 1   | 0   |
| 1701   | 1   | 2   | 0   | 0   |
| 1702   | 0   | 0   | 0   | 0   |
| 1703   | 0   | 1   | 0   | 0   |
| 1705   | 1   | 1   | 0   | 0   |
| 1706   | 0   | 0   | 0   | 0   |
| 1708   | 0   | 0   | 0   | 0   |
| 1711   | 0   | 1   | 1   | 1   |
| 1712   | 1   | 1   | 3   | 1   |
| 1713   | 0   | 0   | 0   | 0   |
| 1715   | 1   | 1   | 0   | 0   |
| 1717   | 1   | 0   | 0   | 0   |

| respid | Q33 | Q34 | Q35 | Q36 |
|--------|-----|-----|-----|-----|
| 1718   | 1   | 3   | 4   | 2   |
| 1719   | 0   | 0   | 1   | 0   |
| 1721   | 0   | 1   | 0   | 0   |
| 1722   | 0   | 0   | 1   | 1   |
| 1724   | 1   | 2   | 0   | 0   |
| 1725   | 0   | 0   | 0   | 0   |
| 1726   | 0   | 1   | 1   | 0   |
| 1727   | 0   | 0   | 0   | 0   |
| 1728   | 1   | 1   | 3   | 0   |
| 1731   | 1   | 2   | 1   | 0   |
| 1733   | 0   | 0   | 1   | 0   |
| 1734   | 1   | 1   | 0   | 0   |
| 1735   | 0   | 0   | 0   | 0   |
| 1736   | 0   | 1   | 0   | 0   |
| 1737   | 0   | 1   | 1   | 0   |
| 1738   | 0   | 3   | 1   | 1   |
| 1743   | 2   | 1   | 2   | 0   |
| 1755   | 1   | 2   | 1   | 2   |
| 1756   | 0   | 2   | 0   | 0   |
| 1757   | 1   | 1   | 1   | 0   |
| 1758   | 0   | 2   | 1   | 1   |
| 1759   | 0   | 1   | 1   | 1   |
| 1761   | 0   | 2   | 0   | 0   |
| 1762   | 1   | 1   | 0   | 0   |
| 1764   | 0   | 0   | 0   | 0   |
| 1767   | 0   | 0   | 0   | 0   |
| 1768   | 0   | 1   | 0   | 0   |
| 1769   | 0   | 1   | 1   | 0   |
| 1770   | 0   | 1   | 1   | 0   |
| 1771   | 1   | 1   | 2   | 1   |
| 1776   | 0   | 0   | 1   | 0   |
| 1777   | 0   | 1   | 0   | 0   |



| respid | Q33 | Q34 | Q35 | Q36 |
|--------|-----|-----|-----|-----|
| 1778   | 1   | 2   | 2   | 1   |
| 1779   | 1   | 0   | 0   | 0   |
| 1780   | 0   | 1   | 1   | 0   |
| 1781   | 0   | 0   | 0   | 0   |
| 1783   | 1   | 1   | 0   | 0   |
| 1784   | 0   | 3   | 2   | 0   |
| 1785   | 0   | 1   | 1   | 0   |
| 1788   | 0   | 1   | 1   | 1   |
| 1792   | 0   | 0   | 0   | 0   |
| 1794   | 1   | 0   | 0   | 0   |
| 1798   | 1   | 2   | 3   | 2   |
| 1799   | 1   | 3   | 0   | 0   |
| 1800   | 1   | 1   | 0   | 0   |
| 1804   | 1   | 1   | 0   | 0   |
| 1806   | 1   | 1   | 1   | 0   |
| 1807   | 0   | 0   | 1   | 0   |
| 1808   | 1   | 1   | 0   | 0   |
| 1809   | 0   | 2   | 3   | 0   |
| 1811   | 0   | 1   | 2   | 0   |
| 1812   | 0   | 2   | 0   | 0   |
| 1813   | 1   | 0   | 0   | 0   |
| 1814   | 1   | 1   | 0   | 2   |
| 1815   | 1   | 1   | 0   | 0   |
| 1817   | 0   | 1   | 0   | 0   |
| 1820   | 1   | 1   | 0   | 0   |
| 1821   | 0   | 1   | 2   | 0   |
| 1822   | 0   | 1   | 0   | 0   |
| 1823   | 0   | 2   | 0   | 0   |
| 1824   | 0   | 0   | 0   | 0   |
| 1826   | 0   | 0   | 0   | 0   |
| 1828   | 0   | 0   | 0   | 0   |
| 1829   | 0   | 0   | 0   | 0   |

| respid | Q33 | Q34 | Q35 | Q36 |
|--------|-----|-----|-----|-----|
| 1830   | 0   | 1   | 0   | 0   |
| 1831   | 0   | 1   | 1   | 0   |
| 1832   | 1   | 2   | 0   | 0   |
| 1836   | 0   | 2   | 2   | 2   |
| 1838   | 1   | 2   | 3   | 2   |
| 1839   | 1   | 3   | 1   | 1   |
| 1840   | 1   | 1   | 2   | 0   |
| 1841   | 0   | 1   | 1   | 0   |
| 1842   | 1   | 1   | 1   | 0   |
| 1843   | 0   | 1   | 1   | 0   |
| 1844   | 0   | 1   | 1   | 1   |
| 1845   | 1   | 0   | 0   | 0   |
| 1849   | 0   | 1   | 0   | 0   |
| 1850   | 0   | 1   | 2   | 0   |
| 1851   | 0   | 1   | 0   | 1   |
| 1852   | 1   | 2   | 0   | 0   |
| 1857   | 0   | 1   | 0   | 0   |
| 1858   | 0   | 1   | 0   | 0   |
| 1861   | 0   | 1   | 0   | 0   |
| 1862   | 1   | 1   | 0   | 0   |
| 1863   | 1   | 1   | 1   | 1   |
| 1864   | 1   | 1   | 2   | 0   |
| 1865   | 0   | 0   | 0   | 0   |
| 1867   | 0   | 0   | 0   | 0   |
| 1868   | 1   | 1   | 0   | 1   |
| 1869   | 0   | 1   | 0   | 0   |
| 1870   | 0   | 0   | 0   | 0   |
| 1871   | 0   | 1   | 0   | 0   |
| 1872   | 0   | 1   | 0   | 0   |
| 1873   | 1   | 1   | 1   | 0   |
| 1876   | 0   | 0   | 0   | 0   |
| 1877   | 0   | 0   | 0   | 0   |

| respid | Q33 | Q34 | Q35 | Q36 |
|--------|-----|-----|-----|-----|
| 1878   | 1   | 0   | 0   | 0   |
| 1879   | 0   | 2   | 1   | 0   |
| 1880   | 0   | 1   | 0   | 0   |
| 1881   | 1   | 1   | 0   | 0   |
| 1883   | 1   | 2   | 0   | 0   |
| 1886   | 0   | 0   | 0   | 0   |
| 1888   | 1   | 2   | 3   | 3   |
| 1889   | 1   | 2   | 2   | 1   |
| 1890   | 1   | 1   | 2   | 0   |
| 1891   | 0   | 1   | 0   | 0   |
| 1893   | 0   | 0   | 0   | 0   |
| 1894   | 1   | 1   | 1   | 0   |
| 1895   | 1   | 2   | 4   | 2   |
| 1896   | 0   | 0   | 0   | 0   |
| 1897   | 1   | 1   | 1   | 0   |
| 1898   | 1   | 2   | 4   | 4   |
| 1899   | 1   | 0   | 1   | 0   |
| 1900   | 1   | 1   | 0   | 0   |
| 1903   | 1   | 1   | 0   | 0   |
| 1906   | 1   | 1   | 0   | 0   |
| 1907   | 1   | 3   | 1   | 2   |
| 1908   | 0   | 1   | 0   | 0   |
| 1909   | 1   | 3   | 3   | 3   |
| 1910   | 0   | 1   | 0   | 0   |
| 1911   | 0   | 0   | 0   | 0   |
| 1912   | 0   | 0   | 0   | 0   |
| 1917   | 0   | 2   | 0   | 1   |
| 1918   | 1   | 1   | 0   | 0   |
| 1919   | 0   | 0   | 3   | 0   |
| 1922   | 0   | 0   | 0   | 0   |
| 1925   | 0   | 0   | 0   | 0   |
| 1926   | 0   | 1   | 0   | 0   |

| respid | Q33 | Q34 | Q35 | Q36 |
|--------|-----|-----|-----|-----|
| 1927   | 0   | 1   | 0   | 0   |
| 1928   | 0   | 0   | 0   | 0   |
| 1929   | 1   | 0   | 1   | 0   |
| 1934   | 0   | 0   | 0   | 0   |
| 1935   | 0   | 1   | 1   | 0   |
| 1936   | 1   | 0   | 1   | 1   |
| 1937   | 1   | 0   | 0   | 0   |
| 1938   | 0   | 0   | 0   | 0   |
| 1939   | 0   | 0   | 1   | 0   |
| 1940   | 0   | 0   | 1   | 0   |
| 1941   | 1   | 0   | 0   | 0   |
| 1948   | 0   | 0   | 0   | 0   |
| 1950   | 0   | 0   | 0   | 0   |
| 1955   | 1   | 2   | 3   | 2   |
| 1958   | 0   | 1   | 0   | 0   |
| 1960   | 0   | 1   | 0   | 0   |
| 1961   | 0   | 0   | 0   | 0   |
| 1962   | 0   | 2   | 0   | 0   |
| 1965   | 0   | 0   | 0   | 0   |
| 1966   | 0   | 1   | 0   | 0   |
| 1967   | 0   | 0   | 0   | 0   |
| 1968   | 1   | 1   | 0   | 0   |
| 1973   | 0   | 2   | 0   | 0   |
| 1974   | 1   | 2   | 4   | 4   |
| 1975   | 0   | 0   | 0   | 0   |
| 1977   | 1   | 1   | 0   | 0   |
| 1978   | 1   | 0   | 0   | 0   |
| 1979   | 1   | 3   | 4   | 4   |
| 1982   | 0   | 1   | 0   | 0   |
| 1983   | 0   | 0   | 0   | 0   |
| 1987   | 0   | 1   | 0   | 0   |
| 1988   | 1   | 2   | 0   | 0   |

| respid | Q33 | Q34 | Q35 | Q36 |
|--------|-----|-----|-----|-----|
| 1991   | 1   | 1   | 1   | 0   |
| 1992   | 1   | 0   | 1   | 0   |
| 1993   | 0   | 1   | 1   | 0   |
| 1994   | 0   | 1   | 2   | 2   |
| 1995   | 0   | 0   | 0   | 0   |
| 1996   | 0   | 1   | 0   | 0   |
| 1997   | 0   | 0   | 1   | 0   |
| 1998   | 0   | 0   | 0   | 0   |
| 1999   | 1   | 2   | 2   | 2   |
| 2000   | 0   | 1   | 2   | 2   |
| 2001   | 0   | 0   | 0   | 1   |
| 2002   | 0   | 0   | 0   | 0   |
| 2003   | 0   | 0   | 0   | 0   |
| 2004   | 0   | 1   | 0   | 0   |
| 2005   | 1   | 1   | 0   | 0   |
| 2007   | 1   | 2   | 3   | 1   |
| 2009   | 0   | 0   | 0   | 0   |
| 2010   | 0   | 0   | 0   | 0   |
| 2011   | 1   | 0   | 0   | 1   |
| 2013   | 0   | 0   | 1   | 1   |
| 2014   | 0   | 3   | 1   | 0   |
| 2017   | 1   | 1   | 1   | 1   |
| 2020   | 0   | 0   | 0   | 0   |
| 2023   | 1   | 1   | 1   | 0   |
| 2024   | 0   | 1   | 0   | 0   |
| 2029   | 1   | 0   | 0   | 0   |
| 2030   | 0   | 0   | 0   | 0   |
| 2031   | 0   | 1   | 2   | 0   |
| 2032   | 1   | 0   | 1   | 1   |
| 2033   | 0   | 0   | 0   | 0   |
| 2034   | 1   | 1   | 1   | 0   |
| 2036   | 0   | 1   | 1   | 1   |

| respid | Q33 | Q34 | Q35 | Q36 |
|--------|-----|-----|-----|-----|
| 2037   | 0   | 1   | 1   | 1   |
| 2038   | 0   | 0   | 1   | 0   |
| 2039   | 0   | 1   | 1   | 0   |
| 2040   | 1   | 0   | 0   | 0   |
| 2041   | 0   | 0   | 0   | 0   |
| 2042   | 0   | 0   | 0   | 0   |
| 2043   | 0   | 1   | 1   | 0   |
| 2051   | 0   | 0   | 0   | 0   |
| 2052   | 0   | 1   | 0   | 0   |
| 2053   | 0   | 0   | 0   | 0   |
| 2054   | 0   | 0   | 0   | 0   |
| 2055   | 0   | 1   | 1   | 0   |
| 2056   | 0   | 1   | 1   | 0   |
| 2057   | 0   | 2   | 0   | 0   |
| 2059   | 0   | 1   | 0   | 0   |
| 2063   | 1   | 1   | 0   | 0   |
| 2066   | 1   | 3   | 1   | 0   |
| 2068   | 1   | 2   | 0   | 0   |
| 2069   | 0   | 2   | 1   | 1   |
| 2070   | 0   | 0   | 0   | 0   |
| 2071   | 0   | 1   | 0   | 0   |
| 2073   | 0   | 1   | 0   | 0   |
| 2077   | 0   | 1   | 1   | 1   |
| 2079   | 1   | 1   | 0   | 0   |
| 2080   | 0   | 2   | 3   | 3   |
| 2081   | 1   | 3   | 1   | 1   |
| 2084   | 1   | 0   | 0   | 0   |
| 2085   | 0   | 2   | 0   | 0   |
| 2087   | 1   | 1   | 1   | 0   |
| 2089   | 0   | 1   | 1   | 0   |
| 2093   | 0   | 1   | 1   | 0   |
| 2094   | 0   | 1   | 0   | 1   |

| respid | Q33 | Q34 | Q35 | Q36 |
|--------|-----|-----|-----|-----|
| 2095   | 1   | 2   | 0   | 0   |
| 2097   | 0   | 0   | 0   | 0   |
| 2099   | 0   | 0   | 0   | 0   |
| 2100   | 0   | 1   | 1   | 0   |
| 2101   | 0   | 0   | 0   | 0   |
| 2103   | 1   | 0   | 0   | 0   |
| 2104   | 1   | 2   | 0   | 0   |
| 2106   | 0   | 1   | 0   | 0   |
| 2111   | 1   | 3   | 0   | 0   |
| 2113   | 0   | 1   | 0   | 0   |
| 2115   | 0   | 0   | 0   | 0   |
| 2119   | 0   | 1   | 0   | 0   |
| 2120   | 0   | 0   | 0   | 0   |
| 2123   | 0   | 1   | 0   | 0   |
| 2124   | 0   | 3   | 0   | 0   |
| 2130   | 0   | 0   | 0   | 0   |
| 2131   | 0   | 1   | 1   | 1   |
| 2133   | 0   | 3   | 2   | 2   |
| 2139   | 1   | 2   | 1   | 1   |
| 2141   | 0   | 0   | 0   | 0   |
| 2143   | 0   | 1   | 1   | 0   |
| 2144   | 1   | 1   | 0   | 0   |
| 2147   | 0   | 1   | 0   | 0   |
| 2151   | 0   | 0   | 0   | 0   |
| 2153   | 0   | 1   | 0   | 0   |
| 2154   | 0   | 1   | 0   | 0   |
| 2155   | 0   | 1   | 1   | 0   |
| 2159   | 1   | 0   | 0   | 0   |
| 2160   | 1   | 1   | 2   | 2   |
| 2161   | 1   | 1   | 0   | 0   |
| 2163   | 0   | 2   | 1   | 0   |
| 2164   | 0   | 0   | 0   | 0   |

| respid | Q33 | Q34 | Q35 | Q36 |
|--------|-----|-----|-----|-----|
| 2168   | 0   | 2   | 2   | 1   |
| 2169   | 0   | 2   | 1   | 1   |
| 2170   | 0   | 1   | 1   | 1   |
| 2171   | 0   | 1   | 2   | 0   |
| 2172   | 0   | 1   | 0   | 0   |
| 2173   | 0   | 0   | 0   | 0   |
| 2174   | 1   | 0   | 0   | 0   |
| 2175   | 0   | 0   | 1   | 1   |
| 2176   | 0   | 0   | 0   | 0   |
| 2177   | 2   | 2   | 2   | 2   |
| 2179   | 0   | 1   | 0   | 0   |
| 2181   | 0   | 0   | 0   | 0   |
| 2182   | 0   | 0   | 0   | 0   |
| 2183   | 1   | 1   | 4   | 2   |
| 2184   | 0   | 1   | 1   | 0   |
| 2185   | 0   | 0   | 0   | 0   |
| 2186   | 0   | 1   | 0   | 0   |
| 2187   | 0   | 1   | 1   | 0   |
| 2188   | 0   | 0   | 1   | 0   |
| 2189   | 0   | 0   | 0   | 0   |
| 2190   | 1   | 0   | 0   | 0   |
| 2193   | 0   | 1   | 0   | 0   |
| 2195   | 0   | 2   | 0   | 0   |
| 2198   | 0   | 1   | 1   | 0   |
| 2200   | 0   | 0   | 0   | 0   |
| 2205   | 0   | 0   | 1   | 1   |
| 2208   | 0   | 0   | 0   | 0   |
| 2209   | 1   | 2   | 0   | 0   |
| 2210   | 0   | 0   | 0   | 0   |
| 2211   | 0   | 1   | 1   | 0   |
| 2213   | 0   | 0   | 0   | 0   |
| 2214   | 0   | 1   | 0   | 0   |



| respid | Q33 | Q34 | Q35 | Q36 |
|--------|-----|-----|-----|-----|
| 2216   | 1   | 1   | 1   | 0   |
| 2220   | 1   | 1   | 1   | 0   |
| 2225   | 0   | 0   | 0   | 0   |
| 2227   | 0   | 0   | 0   | 0   |
| 2228   | 1   | 1   | 2   | 2   |
| 2229   | 1   | 2   | 0   | 0   |
| 2230   | 0   | 0   | 0   | 0   |
| 2236   | 0   | 0   | 0   | 0   |
| 2238   | 0   | 3   | 3   | 4   |
| 2239   | 1   | 1   | 1   | 0   |
| 2240   | 1   | 1   | 1   | 0   |
| 2241   | 1   | 3   | 1   | 0   |
| 2243   | 1   | 0   | 0   | 0   |
| 2245   | 1   | 0   | 0   | 0   |
| 2247   | 0   | 1   | 1   | 1   |
| 2248   | 0   | 1   | 0   | 0   |
| 2249   | 0   | 2   | 0   | 0   |
| 2254   | 1   | 2   | 0   | 0   |
| 2256   | 1   | 1   | 0   | 0   |
| 2259   | 1   | 1   | 0   | 0   |
| 2261   | 1   | 2   | 0   | 0   |
| 2262   | 0   | 1   | 0   | 0   |
| 2263   | 0   | 0   | 2   | 1   |
| 2264   | 1   | 2   | 0   | 0   |
| 2265   | 0   | 2   | 1   | 0   |
| 2270   | 1   | 1   | 0   | 0   |
| 2271   | 0   | 0   | 0   | 0   |
| 2272   | 0   | 1   | 0   | 0   |
| 2273   | 0   | 1   | 1   | 0   |
| 2274   | 1   | 1   | 0   | 0   |
| 2276   | 0   | 2   | 1   | 1   |
| 2277   | 0   | 1   | 0   | 0   |

| respid | Q33 | Q34 | Q35 | Q36 |
|--------|-----|-----|-----|-----|
| 2281   | 0   | 1   | 0   | 0   |
| 2288   | 0   | 1   | 0   | 0   |
| 2290   | 0   | 1   | 1   | 0   |
| 2294   | 0   | 1   | 1   | 1   |
| 2295   | 0   | 1   | 0   | 0   |
| 2296   | 0   | 1   | 0   | 0   |
| 2297   | 0   | 0   | 0   | 0   |
| 2298   | 0   | 0   | 0   | 0   |
| 2301   | 1   | 1   | 1   | 0   |
| 2302   | 1   | 2   | 1   | 1   |
| 2303   | 0   | 0   | 0   | 0   |
| 2305   | 0   | 0   | 0   | 0   |
| 2309   | 1   | 0   | 0   | 0   |
| 2310   | 0   | 1   | 0   | 0   |
| 2311   | 1   | 2   | 1   | 1   |
| 2313   | 1   | 2   | 3   | 2   |
| 2316   | 0   | 2   | 2   | 2   |
| 2317   | 1   | 0   | 0   | 0   |
| 2318   | 1   | 1   | 1   | 1   |
| 2319   | 1   | 2   | 4   | 2   |
| 2321   | 1   | 1   | 2   | 1   |
| 2324   | 0   | 1   | 0   | 0   |
| 2328   | 0   | 1   | 0   | 0   |
| 2329   | 0   | 0   | 1   | 0   |
| 2330   | 0   | 0   | 0   | 0   |
| 2333   | 0   | 1   | 1   | 0   |
| 2334   | 0   | 1   | 2   | 1   |
| 2338   | 1   | 2   | 0   | 0   |
| 2341   | 1   | 2   | 1   | 1   |
| 2342   | 1   | 1   | 1   | 0   |
| 2343   | 1   | 3   | 0   | 0   |
| 2346   | 1   | 1   | 0   | 0   |

| respid | Q33 | Q34 | Q35 | Q36 |
|--------|-----|-----|-----|-----|
| 2347   | 0   | 1   | 1   | 1   |
| 2348   | 0   | 0   | 0   | 0   |
| 2349   | 1   | 1   | 1   | 0   |
| 2350   | 0   | 0   | 0   | 0   |
| 2351   | 1   | 1   | 1   | 1   |
| 2352   | 0   | 0   | 1   | 1   |
| 2359   | 0   | 0   | 0   | 0   |
| 2362   | 1   | 1   | 0   | 0   |
| 2363   | 0   | 1   | 0   | 0   |
| 2365   | 1   | 1   | 1   | 0   |
| 2367   | 1   | 1   | 2   | 0   |
| 2368   | 0   | 1   | 0   | 0   |
| 2369   | 0   | 1   | 0   | 0   |
| 2372   | 0   | 1   | 1   | 0   |
| 2374   | 1   | 2   | 1   | 2   |
| 2376   | 0   | 1   | 0   | 0   |
| 2379   | 1   | 3   | 1   | 1   |
| 2380   | 0   | 1   | 0   | 0   |
| 2381   | 0   | 1   | 0   | 0   |
| 2382   | 1   | 0   | 0   | 0   |
| 2385   | 0   | 2   | 0   | 0   |
| 2387   | 1   | 2   | 3   | 1   |
| 2388   | 0   | 1   | 1   | 0   |
| 2389   | 0   | 1   | 1   | 1   |
| 2391   | 0   | 0   | 0   | 0   |
| 2392   | 1   | 1   | 1   | 1   |
| 2393   | 0   | 1   | 0   | 0   |
| 2394   | 1   | 1   | 3   | 3   |
| 2397   | 1   | 0   | 0   | 0   |
| 2398   | 0   | 1   | 1   | 1   |
| 2400   | 0   | 0   | 1   | 0   |
| 2402   | 1   | 2   | 1   | 1   |

| respid | Q33 | Q34 | Q35 | Q36 |
|--------|-----|-----|-----|-----|
| 2406   | 0   | 1   | 0   | 0   |
| 2408   | 0   | 1   | 1   | 1   |
| 2410   | 0   | 0   | 0   | 0   |
| 2411   | 0   | 1   | 2   | 2   |
| 2412   | 1   | 1   | 4   | 0   |
| 2414   | 0   | 1   | 2   | 1   |
| 2421   | 0   | 1   | 0   | 0   |
| 2423   | 0   | 1   | 1   | 0   |
| 2424   | 0   | 0   | 2   | 1   |
| 2425   | 0   | 0   | 0   | 0   |
| 2426   | 0   | 0   | 1   | 0   |
| 2429   | 2   | 3   | 2   | 0   |
| 2430   | 0   | 1   | 1   | 1   |
| 2432   | 1   | 0   | 1   | 0   |
| 2433   | 1   | 0   | 0   | 0   |
| 2434   | 0   | 1   | 1   | 0   |
| 2435   | 1   | 1   | 1   | 1   |
| 2436   | 1   | 0   | 0   | 1   |
| 2439   | 0   | 1   | 3   | 0   |
| 2440   | 0   | 1   | 1   | 0   |
| 2441   | 1   | 0   | 1   | 0   |
| 2446   | 0   | 0   | 1   | 0   |
| 2448   | 1   | 3   | 1   | 1   |
| 2449   | 0   | 0   | 1   | 0   |
| 2451   | 1   | 1   | 0   | 0   |
| 2452   | 0   | 1   | 0   | 0   |
| 2455   | 0   | 0   | 0   | 0   |
| 2457   | 0   | 1   | 2   | 1   |
| 2458   | 1   | 1   | 1   | 0   |
| 2459   | 1   | 0   | 1   | 1   |
| 2460   | 0   | 0   | 0   | 0   |
| 2462   | 1   | 3   | 1   | 4   |

| respid | Q33 | Q34 | Q35 | Q36 |
|--------|-----|-----|-----|-----|
| 2464   | 1   | 1   | 4   | 2   |
| 2465   | 1   | 1   | 1   | 1   |
| 2468   | 1   | 1   | 2   | 1   |
| 2469   | 0   | 0   | 0   | 0   |
| 2470   | 1   | 0   | 0   | 1   |
| 2471   | 1   | 2   | 1   | 1   |
| 2472   | 0   | 3   | 1   | 0   |
| 2474   | 1   | 3   | 0   | 0   |
| 2476   | 0   | 1   | 1   | 0   |
| 2478   | 1   | 1   | 0   | 1   |
| 2479   | 1   | 1   | 0   | 0   |
| 2480   | 1   | 1   | 0   | 0   |
| 2482   | 0   | 0   | 0   | 0   |
| 2486   | 1   | 1   | 0   | 0   |
| 2488   | 1   | 2   | 1   | 0   |
| 2489   | 2   | 1   | 1   | 0   |
| 2491   | 0   | 1   | 0   | 0   |
| 2495   | 1   | 0   | 1   | 0   |
| 2496   | 0   | 0   | 0   | 0   |
| 2498   | 1   | 1   | 1   | 1   |
| 2501   | 1   | 1   | 0   | 0   |
| 2502   | 1   | 0   | 0   | 0   |
| 2503   | 1   | 1   | 1   | 0   |
| 2504   | 0   | 0   | 0   | 0   |
| 2507   | 0   | 1   | 1   | 1   |
| 2509   | 1   | 1   | 1   | 1   |
| 2512   | 0   | 1   | 1   | 0   |
| 2514   | 0   | 0   | 1   | 1   |
| 2516   | 0   | 0   | 0   | 0   |
| 2517   | 0   | 0   | 1   | 1   |
| 2521   | 0   | 1   | 0   | 0   |
| 2522   | 1   | 1   | 0   | 0   |

| respid | Q33 | Q34 | Q35 | Q36 |
|--------|-----|-----|-----|-----|
| 2524   | 0   | 0   | 0   | 0   |
| 2525   | 1   | 0   | 1   | 0   |
| 2526   | 0   | 0   | 0   | 0   |
| 2527   | 0   | 0   | 1   | 1   |
| 2528   | 1   | 1   | 1   | 0   |
| 2531   | 0   | 0   | 0   | 0   |
| 2533   | 1   | 3   | 1   | 0   |
| 2535   | 0   | 1   | 0   | 0   |
| 2536   | 1   | 2   | 2   | 0   |
| 2539   | 0   | 0   | 0   | 0   |
| 2540   | 0   | 2   | 0   | 0   |
| 2543   | 1   | 1   | 0   | 0   |
| 2546   | 1   | 1   | 0   | 0   |
| 2547   | 0   | 2   | 0   | 1   |
| 2549   | 0   | 1   | 1   | 0   |
| 2553   | 0   | 1   | 0   | 0   |
| 2554   | 1   | 0   | 1   | 0   |
| 2555   | 0   | 1   | 1   | 0   |
| 2556   | 0   | 1   | 0   | 0   |
| 2557   | 1   | 1   | 1   | 0   |
| 2559   | 1   | 1   | 1   | 0   |
| 2560   | 1   | 1   | 2   | 2   |
| 2561   | 1   | 0   | 1   | 1   |
| 2566   | 1   | 1   | 0   | 0   |
| 2567   | 0   | 1   | 0   | 0   |
| 2570   | 1   | 0   | 0   | 0   |
| 2574   | 1   | 2   | 3   | 1   |
| 2578   | 0   | 0   | 0   | 0   |
| 2580   | 0   | 2   | 0   | 0   |
| 2590   | 0   | 1   | 1   | 0   |
| 2593   | 0   | 0   | 1   | 0   |
| 2594   | 0   | 1   | 5   | 0   |

| respid | Q33 | Q34 | Q35 | Q36 |
|--------|-----|-----|-----|-----|
| 2595   | 1   | 0   | 1   | 0   |
| 2596   | 0   | 0   | 0   | 0   |
| 2597   | 2   | 3   | 2   | 2   |
| 2598   | 0   | 1   | 0   | 0   |
| 2602   | 0   | 1   | 0   | 0   |
| 2605   | 1   | 3   | 2   | 2   |
| 2606   | 0   | 1   | 0   | 0   |
| 2607   | 0   | 1   | 1   | 0   |
| 2608   | 0   | 0   | 0   | 0   |
| 2609   | 0   | 0   | 0   | 0   |
| 2610   | 0   | 1   | 0   | 0   |
| 2614   | 0   | 0   | 0   | 0   |
| 2615   | 0   | 1   | 0   | 0   |
| 2616   | 0   | 2   | 0   | 0   |
| 2618   | 1   | 1   | 0   | 0   |
| 2630   | 0   | 3   | 0   | 0   |
| 2633   | 0   | 1   | 0   | 0   |
| 2637   | 1   | 0   | 1   | 1   |
| 2638   | 0   | 1   | 1   | 0   |
| 2641   | 0   | 1   | 0   | 0   |
| 2644   | 0   | 1   | 0   | 0   |
| 2645   | 0   | 1   | 0   | 0   |
| 2646   | 0   | 1   | 0   | 0   |
| 2648   | 0   | 0   | 0   | 0   |
| 2651   | 0   | 0   | 0   | 0   |
| 2652   | 1   | 1   | 1   | 1   |
| 2653   | 0   | 1   | 0   | 0   |
| 2656   | 0   | 2   | 0   | 0   |
| 2657   | 0   | 0   | 0   | 0   |
| 2658   | 1   | 0   | 2   | 0   |
| 2661   | 0   | 2   | 0   | 0   |
| 2663   | 0   | 1   | 0   | 0   |

| respid | Q33 | Q34 | Q35 | Q36 |
|--------|-----|-----|-----|-----|
| 2665   | 0   | 1   | 0   | 0   |
| 2670   | 1   | 2   | 0   | 0   |
| 2672   | 1   | 1   | 1   | 0   |
| 2673   | 1   | 0   | 0   | 0   |
| 2677   | 0   | 1   | 0   | 0   |
| 2686   | 1   | 3   | 4   | 2   |
| 2688   | 0   | 1   | 1   | 1   |
| 2689   | 0   | 0   | 1   | 0   |
| 2691   | 0   | 0   | 0   | 0   |
| 2695   | 1   | 1   | 4   | 0   |
| 2696   | 1   | 1   | 3   | 0   |
| 2697   | 0   | 0   | 0   | 0   |
| 2698   | 0   | 0   | 0   | 0   |
| 2703   | 0   | 0   | 0   | 0   |
| 2704   | 0   | 0   | 0   | 0   |
| 2706   | 1   | 2   | 2   | 0   |
| 2707   | 0   | 1   | 0   | 0   |
| 2710   | 0   | 1   | 0   | 0   |
| 2711   | 1   | 1   | 0   | 0   |
| 2712   | 1   | 0   | 0   | 0   |
| 2713   | 0   | 0   | 0   | 0   |
| 2721   | 0   | 0   | 0   | 0   |
| 2730   | 0   | 0   | 0   | 0   |
| 2731   | 0   | 0   | 1   | 1   |
| 2732   | 0   | 1   | 1   | 0   |
| 2733   | 1   | 1   | 1   | 0   |
| 2735   | 0   | 1   | 0   | 0   |
| 2736   | 0   | 1   | 0   | 0   |
| 2740   | 0   | 1   | 1   | 0   |
| 2741   | 0   | 0   | 1   | 1   |
| 2742   | 0   | 1   | 0   | 0   |
| 2743   | 1   | 1   | 1   | 0   |



| respid | Q33 | Q34 | Q35 | Q36 |
|--------|-----|-----|-----|-----|
| 2744   | 0   | 1   | 0   | 0   |
| 2745   | 1   | 0   | 1   | 1   |
| 2749   | 0   | 0   | 1   | 1   |
| 2751   | 0   | 1   | 1   | 0   |
| 2754   | 0   | 0   | 0   | 0   |
| 2755   | 1   | 1   | 1   | 0   |
| 2757   | 0   | 1   | 0   | 0   |
| 2758   | 1   | 1   | 1   | 0   |
| 2759   | 0   | 1   | 1   | 1   |
| 2761   | 0   | 0   | 0   | 0   |
| 2762   | 1   | 0   | 0   | 0   |
| 2763   | 0   | 1   | 0   | 0   |
| 2764   | 2   | 1   | 4   | 1   |
| 2765   | 1   | 1   | 1   | 0   |
| 2766   | 0   | 0   | 0   | 0   |
| 2767   | 0   | 1   | 1   | 1   |
| 2769   | 1   | 1   | 1   | 0   |
| 2770   | 1   | 1   | 1   | 1   |
| 2771   | 1   | 0   | 2   | 1   |
| 2774   | 1   | 2   | 1   | 1   |
| 2777   | 1   | 1   | 2   | 1   |
| 2778   | 1   | 1   | 2   | 2   |
| 2781   | 1   | 1   | 1   | 1   |
| 2782   | 0   | 1   | 1   | 1   |
| 2784   | 0   | 2   | 1   | 1   |
| 2785   | 0   | 2   | 2   | 0   |
| 2786   | 1   | 2   | 0   | 0   |
| 2787   | 1   | 0   | 0   | 0   |
| 2789   | 1   | 1   | 1   | 1   |
| 2790   | 1   | 1   | 1   | 0   |
| 2791   | 1   | 1   | 0   | 0   |
| 2793   | 0   | 1   | 2   | 0   |

| respid | Q33 | Q34 | Q35 | Q36 |
|--------|-----|-----|-----|-----|
| 2797   | 1   | 0   | 1   | 0   |
| 2798   | 0   | 0   | 1   | 0   |
| 2799   | 1   | 1   | 1   | 1   |
| 2801   | 0   | 0   | 0   | 0   |
| 2802   | 1   | 1   | 4   | 1   |
| 2803   | 0   | 1   | 1   | 1   |
| 2804   | 2   | 1   | 2   | 1   |
| 2807   | 0   | 0   | 0   | 0   |
| 2809   | 1   | 0   | 0   | 0   |
| 2810   | 1   | 1   | 2   | 1   |
| 2812   | 1   | 1   | 0   | 0   |
| 2814   | 1   | 0   | 0   | 0   |
| 2815   | 0   | 1   | 1   | 0   |
| 2816   | 1   | 0   | 0   | 0   |
| 2817   | 0   | 0   | 1   | 0   |
| 2819   | 1   | 1   | 0   | 0   |
| 2820   | 1   | 0   | 0   | 0   |
| 2821   | 1   | 2   | 0   | 0   |
| 2822   | 1   | 2   | 3   | 1   |
| 2823   | 1   | 0   | 0   | 0   |
| 2824   | 0   | 1   | 1   | 0   |
| 2825   | 1   | 1   | 0   | 0   |
| 2826   | 0   | 0   | 1   | 1   |
| 2827   | 1   | 0   | 1   | 0   |
| 2828   | 0   | 1   | 0   | 0   |
| 2829   | 0   | 1   | 0   | 0   |
| 2830   | 1   | 1   | 2   | 2   |
| 2831   | 0   | 2   | 1   | 0   |
| 2832   | 1   | 0   | 2   | 1   |
| 2833   | 0   | 1   | 1   | 0   |
| 2834   | 0   | 1   | 1   | 0   |
| 2835   | 1   | 2   | 1   | 3   |

| respid | Q33 | Q34 | Q35 | Q36 |
|--------|-----|-----|-----|-----|
| 2836   | 0   | 1   | 0   | 0   |
| 2837   | 0   | 1   | 1   | 0   |
| 2838   | 0   | 2   | 1   | 1   |
| 2844   | 1   | 2   | 3   | 0   |
| 2845   | 0   | 0   | 0   | 0   |
| 2847   | 2   | 3   | 0   | 0   |
| 2848   | 0   | 1   | 0   | 0   |
| 2849   | 1   | 0   | 0   | 0   |
| 2851   | 1   | 1   | 0   | 0   |
| 2852   | 1   | 0   | 1   | 1   |
| 2853   | 0   | 0   | 1   | 0   |
| 2854   | 0   | 1   | 0   | 0   |
| 2856   | 1   | 0   | 0   | 0   |
| 2857   | 0   | 1   | 2   | 0   |
| 2858   | 1   | 1   | 1   | 1   |
| 2859   | 1   | 2   | 1   | 1   |
| 2860   | 1   | 1   | 1   | 1   |
| 2861   | 2   | 2   | 4   | 2   |
| 2863   | 0   | 1   | 1   | 0   |
| 2864   | 0   | 0   | 1   | 0   |
| 2866   | 0   | 0   | 0   | 0   |
| 2872   | 1   | 0   | 0   | 0   |
| 2875   | 1   | 1   | 0   | 0   |
| 2879   | 0   | 0   | 0   | 0   |
| 2881   | 0   | 2   | 1   | 0   |
| 2882   | 0   | 0   | 0   | 1   |
| 2883   | 0   | 0   | 0   | 0   |
| 2884   | 0   | 1   | 2   | 3   |
| 2885   | 0   | 0   | 1   | 0   |
| 2887   | 1   | 1   | 0   | 0   |
| 2888   | 0   | 0   | 0   | 0   |
| 2890   | 1   | 1   | 1   | 0   |

| respid | Q33 | Q34 | Q35 | Q36 |
|--------|-----|-----|-----|-----|
| 2891   | 0   | 0   | 0   | 0   |
| 2892   | 0   | 0   | 0   | 0   |
| 2895   | 1   | 0   | 0   | 0   |
| 2899   | 1   | 2   | 1   | 0   |
| 2900   | 0   | 0   | 0   | 0   |
| 2902   | 2   | 2   | 5   | 1   |
| 2903   | 0   | 0   | 0   | 0   |
| 2904   | 0   | 1   | 0   | 0   |
| 2906   | 1   | 0   | 1   | 0   |
| 2908   | 1   | 1   | 0   | 0   |
| 2910   | 1   | 3   | 0   | 0   |
| 2917   | 1   | 2   | 2   | 1   |
| 2918   | 0   | 2   | 1   | 0   |
| 2919   | 0   | 0   | 0   | 0   |
| 2920   | 1   | 2   | 0   | 0   |
| 2921   | 1   | 1   | 2   | 2   |
| 2922   | 0   | 1   | 0   | 0   |
| 2923   | 0   | 0   | 1   | 0   |
| 2924   | 1   | 2   | 2   | 3   |
| 2926   | 0   | 2   | 1   | 1   |
| 2928   | 0   | 0   | 0   | 0   |
| 2930   | 0   | 1   | 0   | 0   |
| 2931   | 1   | 1   | 4   | 2   |
| 2933   | 1   | 0   | 0   | 0   |
| 2935   | 0   | 1   | 0   | 0   |
| 2936   | 0   | 0   | 0   | 0   |
| 2937   | 0   | 2   | 0   | 0   |
| 2938   | 0   | 0   | 0   | 0   |
| 2944   | 1   | 0   | 0   | 0   |
| 2945   | 0   | 1   | 0   | 1   |
| 2947   | 1   | 1   | 0   | 0   |
| 2949   | 0   | 0   | 0   | 0   |

| respid | Q33 | Q34 | Q35 | Q36 |
|--------|-----|-----|-----|-----|
| 2951   | 1   | 2   | 4   | 0   |
| 2952   | 1   | 1   | 1   | 0   |
| 2953   | 0   | 0   | 0   | 0   |
| 2955   | 0   | 0   | 0   | 0   |
| 2957   | 0   | 1   | 0   | 0   |
| 2958   | 1   | 1   | 0   | 0   |
| 2960   | 0   | 1   | 0   | 0   |
| 2963   | 0   | 1   | 1   | 0   |
| 2964   | 0   | 1   | 0   | 0   |
| 2967   | 1   | 0   | 0   | 0   |
| 2968   | 0   | 3   | 0   | 0   |
| 2971   | 1   | 2   | 2   | 2   |
| 2974   | 0   | 1   | 0   | 0   |
| 2975   | 0   | 1   | 0   | 0   |
| 2982   | 0   | 0   | 0   | 0   |
| 2983   | 0   | 2   | 0   | 0   |
| 2985   | 0   | 1   | 0   | 0   |
| 2986   | 2   | 1   | 1   | 3   |
| 2987   | 0   | 2   | 2   | 1   |
| 2988   | 0   | 2   | 0   | 0   |
| 2993   | 1   | 0   | 0   | 0   |
| 2996   | 1   | 0   | 0   | 0   |
| 2997   | 1   | 1   | 1   | 0   |
| 2998   | 1   | 2   | 0   | 0   |
| 3004   | 0   | 0   | 0   | 0   |
| 3007   | 0   | 1   | 2   | 0   |
| 3011   | 0   | 2   | 1   | 2   |
| 3012   | 1   | 2   | 1   | 0   |
| 3013   | 0   | 1   | 0   | 0   |
| 3014   | 0   | 0   | 0   | 0   |
| 3015   | 1   | 0   | 1   | 0   |
| 3016   | 0   | 0   | 0   | 0   |

| respid | Q33 | Q34 | Q35 | Q36 |
|--------|-----|-----|-----|-----|
| 3017   | 0   | 0   | 0   | 0   |
| 3020   | 1   | 1   | 2   | 0   |
| 3022   | 0   | 1   | 0   | 0   |
| 3023   | 1   | 1   | 0   | 0   |
| 3026   | 1   | 2   | 2   | 1   |
| 3038   | 1   | 1   | 1   | 1   |
| 3039   | 0   | 1   | 1   | 0   |
| 3040   | 0   | 0   | 0   | 0   |
| 3041   | 0   | 0   | 0   | 0   |
| 3042   | 0   | 0   | 0   | 1   |
| 3044   | 0   | 2   | 0   | 0   |
| 3050   | 0   | 0   | 0   | 0   |
| 3052   | 0   | 0   | 0   | 0   |
| 3056   | 1   | 2   | 1   | 1   |
| 3059   | 0   | 1   | 0   | 0   |
| 3060   | 1   | 1   | 0   | 0   |
| 3063   | 1   | 2   | 1   | 0   |
| 3065   | 0   | 0   | 1   | 0   |
| 3067   | 0   | 0   | 0   | 0   |
| 3068   | 0   | 3   | 0   | 0   |
| 3072   | 0   | 0   | 0   | 0   |
| 3074   | 0   | 1   | 0   | 0   |
| 3075   | 1   | 2   | 2   | 2   |
| 3076   | 1   | 1   | 0   | 0   |
| 3079   | 1   | 2   | 0   | 0   |
| 3082   | 1   | 2   | 2   | 2   |
| 3083   | 0   | 0   | 0   | 0   |
| 3084   | 1   | 1   | 0   | 0   |
| 3085   | 1   | 1   | 0   | 0   |
| 3090   | 0   | 0   | 0   | 0   |
| 3091   | 0   | 1   | 1   | 0   |
| 3092   | 0   | 1   | 1   | 1   |

| respid | Q33 | Q34 | Q35 | Q36 |
|--------|-----|-----|-----|-----|
| 3095   | 0   | 1   | 1   | 0   |
| 3096   | 1   | 2   | 3   | 3   |
| 3097   | 0   | 1   | 1   | 1   |
| 3099   | 1   | 2   | 1   | 3   |
| 3101   | 1   | 1   | 2   | 1   |
| 3103   | 0   | 0   | 0   | 0   |
| 3104   | 0   | 1   | 0   | 0   |
| 3105   | 0   | 0   | 0   | 0   |
| 3107   | 0   | 0   | 0   | 0   |
| 3108   | 0   | 2   | 0   | 0   |
| 3109   | 0   | 1   | 1   | 0   |
| 3116   | 0   | 2   | 0   | 0   |
| 3117   | 1   | 1   | 0   | 0   |
| 3119   | 0   | 1   | 0   | 0   |
| 3120   | 0   | 2   | 0   | 0   |
| 3130   | 0   | 1   | 1   | 1   |
| 3131   | 0   | 2   | 1   | 1   |
| 3133   | 1   | 1   | 0   | 0   |
| 3134   | 1   | 0   | 2   | 0   |
| 3135   | 0   | 0   | 0   | 1   |
| 3145   | 0   | 2   | 0   | 0   |
| 3147   | 0   | 0   | 0   | 0   |
| 3152   | 1   | 1   | 1   | 0   |
| 3155   | 1   | 2   | 3   | 2   |
| 3156   | 0   | 0   | 0   | 0   |
| 3157   | 0   | 1   | 1   | 1   |
| 3166   | 0   | 2   | 0   | 1   |
| 3169   | 0   | 1   | 1   | 1   |
| 3179   | 0   | 1   | 0   | 0   |
| 3181   | 1   | 1   | 1   | 0   |
| 3185   | 0   | 1   | 0   | 0   |
| 3190   | 0   | 1   | 1   | 0   |

| respid | Q33 | Q34 | Q35 | Q36 |
|--------|-----|-----|-----|-----|
| 3191   | 1   | 1   | 1   | 1   |
| 3192   | 0   | 1   | 0   | 0   |
| 3193   | 0   | 3   | 0   | 0   |
| 3195   | 0   | 0   | 0   | 0   |
| 3202   | 0   | 1   | 0   | 0   |
| 3204   | 0   | 0   | 0   | 0   |
| 3208   | 0   | 1   | 0   | 0   |
| 3212   | 0   | 0   | 0   | 1   |
| 3218   | 0   | 1   | 0   | 0   |
| 3219   | 1   | 0   | 2   | 0   |
| 3220   | 0   | 1   | 1   | 0   |
| 3221   | 1   | 0   | 1   | 1   |
| 3223   | 0   | 1   | 1   | 1   |
| 3231   | 0   | 1   | 1   | 0   |
| 3232   | 0   | 1   | 2   | 3   |
| 3234   | 0   | 1   | 1   | 0   |
| 3235   | 0   | 0   | 0   | 0   |
| 3237   | 1   | 0   | 0   | 0   |
| 3238   | 1   | 2   | 0   | 0   |
| 3240   | 0   | 1   | 0   | 0   |
| 3241   | 0   | 1   | 1   | 0   |
| 3243   | 1   | 1   | 1   | 1   |
| 3244   | 0   | 1   | 2   | 0   |
| 3247   | 1   | 0   | 0   | 0   |
| 3250   | 0   | 0   | 0   | 0   |
| 3251   | 1   | 1   | 2   | 2   |
| 3255   | 0   | 0   | 0   | 0   |
| 3256   | 0   | 0   | 0   | 0   |
| 3257   | 0   | 2   | 0   | 0   |
| 3258   | 0   | 0   | 0   | 0   |
| 3259   | 1   | 1   | 3   | 2   |
| 3260   | 0   | 1   | 1   | 0   |



| respid | Q33 | Q34 | Q35 | Q36 |
|--------|-----|-----|-----|-----|
| 3261   | 0   | 0   | 0   | 0   |
| 3262   | 1   | 3   | 1   | 1   |
| 3264   | 0   | 2   | 2   | 1   |
| 3265   | 0   | 2   | 0   | 0   |
| 3267   | 1   | 1   | 0   | 0   |
| 3268   | 1   | 1   | 2   | 0   |
| 3270   | 0   | 1   | 0   | 0   |
| 3271   | 0   | 1   | 0   | 0   |
| 3274   | 0   | 0   | 0   | 0   |
| 3276   | 0   | 0   | 0   | 0   |
| 3277   | 0   | 1   | 0   | 0   |
| 3279   | 0   | 0   | 1   | 0   |
| 3281   | 0   | 0   | 0   | 0   |
| 3283   | 1   | 1   | 1   | 1   |
| 3285   | 0   | 0   | 0   | 0   |
| 3286   | 0   | 2   | 1   | 0   |
| 3287   | 0   | 0   | 0   | 0   |
| 3289   | 1   | 0   | 1   | 0   |
| 3290   | 0   | 1   | 0   | 0   |
| 3291   | 0   | 0   | 1   | 0   |
| 3292   | 1   | 3   | 2   | 1   |
| 3293   | 1   | 2   | 2   | 2   |
| 3294   | 0   | 1   | 1   | 1   |
| 3296   | 0   | 1   | 0   | 0   |
| 3306   | 0   | 1   | 0   | 0   |
| 3307   | 1   | 2   | 4   | 2   |
| 3308   | 1   | 2   | 2   | 1   |
| 3312   | 0   | 0   | 0   | 0   |
| 3313   | 0   | 1   | 1   | 0   |
| 3316   | 0   | 1   | 0   | 0   |
| 3317   | 0   | 2   | 2   | 0   |
| 3320   | 1   | 1   | 0   | 0   |

| respid | Q33 | Q34 | Q35 | Q36 |
|--------|-----|-----|-----|-----|
| 3321   | 0   | 0   | 1   | 0   |
| 3322   | 1   | 0   | 1   | 0   |
| 3323   | 0   | 1   | 0   | 0   |
| 3325   | 1   | 1   | 0   | 0   |
| 3332   | 0   | 1   | 0   | 0   |
| 3334   | 0   | 0   | 0   | 0   |
| 3335   | 0   | 1   | 0   | 0   |
| 3341   | 0   | 1   | 1   | 0   |
| 3345   | 0   | 1   | 0   | 0   |
| 3346   | 0   | 0   | 1   | 0   |
| 3349   | 1   | 2   | 1   | 0   |
| 3351   | 0   | 0   | 0   | 0   |
| 3353   | 0   | 0   | 1   | 0   |
| 3354   | 0   | 1   | 1   | 1   |
| 3356   | 0   | 1   | 0   | 0   |
| 3357   | 1   | 2   | 0   | 0   |
| 3360   | 1   | 1   | 2   | 0   |
| 3361   | 1   | 1   | 0   | 0   |
| 3362   | 0   | 0   | 1   | 0   |
| 3363   | 1   | 0   | 0   | 0   |
| 3364   | 1   | 2   | 3   | 2   |
| 3368   | 0   | 1   | 1   | 0   |
| 3370   | 0   | 1   | 1   | 0   |
| 3371   | 1   | 1   | 1   | 0   |
| 3379   | 1   | 2   | 0   | 0   |
| 3380   | 0   | 1   | 1   | 0   |
| 3382   | 0   | 0   | 0   | 0   |
| 3384   | 0   | 1   | 0   | 0   |
| 3385   | 1   | 1   | 0   | 0   |
| 3388   | 0   | 1   | 1   | 0   |
| 3392   | 0   | 1   | 1   | 1   |
| 3393   | 0   | 0   | 0   | 0   |

| respid | Q33 | Q34 | Q35 | Q36 |
|--------|-----|-----|-----|-----|
| 3394   | 1   | 1   | 2   | 1   |
| 3395   | 1   | 1   | 0   | 0   |
| 3396   | 0   | 0   | 1   | 0   |
| 3397   | 1   | 1   | 0   | 0   |
| 3398   | 1   | 2   | 0   | 0   |
| 3399   | 1   | 1   | 1   | 0   |
| 3400   | 1   | 1   | 0   | 0   |
| 3401   | 1   | 2   | 3   | 4   |
| 3402   | 1   | 1   | 1   | 0   |
| 3403   | 0   | 1   | 2   | 2   |
| 3405   | 1   | 0   | 0   | 0   |
| 3407   | 1   | 2   | 1   | 1   |
| 3410   | 1   | 1   | 0   | 0   |
| 3411   | 1   | 0   | 0   | 0   |
| 3413   | 0   | 0   | 0   | 0   |
| 3414   | 0   | 1   | 1   | 0   |
| 3420   | 0   | 0   | 0   | 0   |
| 3421   | 1   | 2   | 4   | 0   |
| 3425   | 1   | 1   | 0   | 0   |
| 3426   | 0   | 1   | 1   | 0   |
| 3429   | 0   | 1   | 1   | 1   |
| 3430   | 1   | 3   | 0   | 0   |
| 3433   | 0   | 1   | 0   | 0   |
| 3434   | 1   | 3   | 4   | 2   |
| 3437   | 1   | 3   | 0   | 0   |
| 3439   | 1   | 2   | 1   | 0   |
| 3441   | 1   | 1   | 2   | 1   |
| 3442   | 1   | 1   | 1   | 0   |
| 3444   | 1   | 0   | 1   | 1   |
| 3445   | 0   | 1   | 0   | 0   |
| 3450   | 1   | 1   | 1   | 0   |
| 3452   | 1   | 1   | 3   | 1   |

| respid | Q33 | Q34 | Q35 | Q36 |
|--------|-----|-----|-----|-----|
| 3456   | 1   | 1   | 1   | 0   |
| 3459   | 0   | 0   | 0   | 0   |
| 3460   | 0   | 0   | 0   | 0   |
| 3461   | 0   | 2   | 0   | 0   |
| 3466   | 1   | 1   | 2   | 1   |
| 3471   | 0   | 1   | 0   | 0   |
| 3473   | 0   | 1   | 0   | 0   |
| 3475   | 1   | 2   | 3   | 3   |
| 3476   | 1   | 1   | 1   | 0   |
| 3477   | 0   | 2   | 3   | 1   |
| 3478   | 0   | 1   | 0   | 0   |
| 3479   | 0   | 1   | 0   | 0   |
| 3482   | 1   | 2   | 1   | 0   |
| 3483   | 0   | 1   | 0   | 0   |
| 3485   | 0   | 1   | 1   | 1   |
| 3489   | 0   | 0   | 0   | 0   |
| 3490   | 0   | 0   | 1   | 0   |
| 3491   | 1   | 1   | 2   | 1   |
| 3494   | 1   | 0   | 1   | 0   |
| 3495   | 0   | 1   | 0   | 0   |
| 3501   | 0   | 1   | 0   | 0   |
| 3506   | 1   | 1   | 0   | 0   |
| 3507   | 0   | 0   | 0   | 0   |
| 3517   | 0   | 1   | 2   | 1   |
| 3520   | 0   | 1   | 2   | 2   |
| 3521   | 0   | 1   | 1   | 0   |
| 3522   | 0   | 0   | 0   | 0   |
| 3524   | 0   | 1   | 1   | 2   |
| 3527   | 0   | 1   | 0   | 0   |
| 3528   | 0   | 0   | 0   | 0   |
| 3529   | 0   | 1   | 0   | 0   |
| 3536   | 1   | 1   | 0   | 0   |

| respid | Q33 | Q34 | Q35 | Q36 |
|--------|-----|-----|-----|-----|
| 3537   | 1   | 0   | 1   | 0   |
| 3538   | 1   | 1   | 0   | 0   |
| 3540   | 1   | 1   | 1   | 1   |
| 3545   | 0   | 1   | 0   | 0   |
| 3547   | 1   | 3   | 1   | 0   |
| 3554   | 1   | 0   | 0   | 1   |
| 3556   | 0   | 1   | 0   | 0   |
| 3557   | 1   | 1   | 0   | 0   |
| 3559   | 0   | 2   | 1   | 0   |
| 3560   | 0   | 3   | 0   | 0   |
| 3562   | 1   | 0   | 0   | 0   |
| 3564   | 0   | 1   | 1   | 1   |
| 3565   | 0   | 3   | 0   | 0   |
| 3568   | 1   | 3   | 1   | 0   |
| 3572   | 0   | 0   | 0   | 0   |
| 3578   | 0   | 1   | 0   | 0   |
| 3581   | 0   | 1   | 0   | 0   |
| 3583   | 0   | 1   | 1   | 0   |
| 3588   | 1   | 0   | 0   | 0   |
| 3591   | 1   | 2   | 1   | 0   |
| 3594   | 0   | 0   | 0   | 0   |
| 3595   | 0   | 1   | 3   | 1   |
| 3596   | 1   | 1   | 0   | 0   |
| 3597   | 1   | 1   | 1   | 0   |
| 3598   | 0   | 0   | 0   | 0   |
| 3600   | 0   | 2   | 1   | 1   |
| 3602   | 0   | 0   | 0   | 0   |
| 3604   | 0   | 0   | 0   | 0   |
| 3605   | 0   | 2   | 1   | 1   |
| 3606   | 0   | 0   | 0   | 0   |
| 3607   | 0   | 0   | 0   | 0   |
| 3610   | 0   | 1   | 0   | 0   |

| respid | Q33 | Q34 | Q35 | Q36 |
|--------|-----|-----|-----|-----|
| 3611   | 0   | 1   | 0   | 0   |
| 3612   | 1   | 2   | 2   | 0   |
| 3614   | 1   | 0   | 0   | 0   |
| 3616   | 0   | 1   | 0   | 0   |
| 3617   | 0   | 1   | 0   | 0   |
| 3618   | 1   | 1   | 0   | 0   |
| 3619   | 1   | 2   | 1   | 0   |
| 3621   | 1   | 1   | 1   | 0   |
| 3622   | 0   | 1   | 1   | 0   |
| 3624   | 1   | 1   | 0   | 0   |
| 3626   | 0   | 1   | 0   | 0   |
| 3629   | 0   | 1   | 0   | 0   |
| 3631   | 1   | 1   | 1   | 0   |
| 3632   | 0   | 1   | 1   | 0   |
| 3638   | 0   | 1   | 0   | 0   |
| 3640   | 0   | 0   | 0   | 0   |
| 3641   | 1   | 1   | 2   | 0   |
| 3645   | 1   | 1   | 2   | 1   |
| 3650   | 0   | 0   | 0   | 0   |
| 3653   | 1   | 1   | 2   | 1   |
| 3655   | 0   | 0   | 2   | 1   |
| 3657   | 0   | 1   | 1   | 1   |
| 3658   | 1   | 2   | 1   | 0   |
| 3659   | 0   | 1   | 0   | 0   |
| 3664   | 0   | 3   | 2   | 2   |
| 3665   | 0   | 0   | 1   | 0   |
| 3667   | 0   | 0   | 0   | 0   |
| 3668   | 1   | 2   | 2   | 3   |
| 3675   | 1   | 0   | 0   | 0   |
| 3678   | 0   | 0   | 0   | 0   |
| 3680   | 0   | 0   | 0   | 0   |
| 3684   | 0   | 1   | 1   | 1   |

| respid | Q33 | Q34 | Q35 | Q36 |
|--------|-----|-----|-----|-----|
| 3685   | 0   | 3   | 2   | 1   |
| 3687   | 1   | 2   | 0   | 1   |
| 3689   | 1   | 3   | 2   | 1   |
| 3690   | 0   | 0   | 0   | 0   |
| 3693   | 0   | 1   | 0   | 0   |
| 3694   | 1   | 1   | 0   | 0   |
| 3695   | 0   | 0   | 0   | 0   |
| 3700   | 0   | 1   | 0   | 0   |
| 3701   | 0   | 1   | 1   | 0   |
| 3703   | 1   | 3   | 1   | 0   |
| 3704   | 1   | 3   | 2   | 2   |
| 3705   | 0   | 0   | 0   | 0   |
| 3709   | 0   | 1   | 0   | 0   |
| 3710   | 1   | 2   | 0   | 0   |
| 3722   | 1   | 1   | 0   | 0   |
| 3725   | 0   | 2   | 1   | 0   |
| 3726   | 1   | 1   | 0   | 0   |
| 3727   | 0   | 1   | 0   | 0   |
| 3728   | 1   | 1   | 3   | 0   |
| 3729   | 0   | 0   | 0   | 0   |
| 3731   | 0   | 0   | 0   | 0   |
| 3738   | 0   | 0   | 0   | 0   |
| 3739   | 0   | 0   | 0   | 0   |
| 3740   | 1   | 1   | 0   | 0   |
| 3749   | 0   | 1   | 1   | 1   |
| 3758   | 0   | 1   | 1   | 0   |
| 3762   | 0   | 3   | 0   | 0   |
| 3765   | 0   | 0   | 1   | 1   |
| 3770   | 0   | 0   | 0   | 0   |
| 3771   | 2   | 0   | 0   | 0   |
| 3778   | 1   | 1   | 0   | 0   |
| 3779   | 1   | 0   | 1   | 0   |

| respid | Q33 | Q34 | Q35 | Q36 |
|--------|-----|-----|-----|-----|
| 3780   | 1   | 0   | 1   | 0   |
| 3782   | 1   | 1   | 4   | 0   |
| 3784   | 0   | 0   | 0   | 0   |
| 3787   | 0   | 2   | 1   | 1   |
| 3790   | 0   | 2   | 0   | 0   |
| 3791   | 0   | 1   | 0   | 0   |
| 3793   | 1   | 3   | 4   | 2   |
| 3795   | 0   | 1   | 0   | 0   |
| 3799   | 1   | 1   | 0   | 0   |
| 3801   | 1   | 1   | 1   | 0   |
| 3804   | 0   | 1   | 0   | 0   |
| 3809   | 1   | 1   | 0   | 0   |
| 3810   | 0   | 1   | 0   | 0   |
| 3813   | 0   | 0   | 1   | 0   |
| 3816   | 0   | 0   | 0   | 0   |
| 3820   | 0   | 1   | 0   | 0   |
| 3821   | 0   | 1   | 0   | 0   |
| 3823   | 1   | 1   | 1   | 1   |
| 3828   | 0   | 1   | 1   | 0   |
| 3829   | 0   | 0   | 1   | 0   |
| 3832   | 0   | 1   | 0   | 0   |
| 3835   | 0   | 1   | 0   | 0   |
| 3837   | 1   | 1   | 0   | 0   |
| 3838   | 0   | 1   | 0   | 0   |
| 3839   | 2   | 3   | 5   | 4   |
| 3840   | 0   | 0   | 0   | 0   |
| 3842   | 0   | 0   | 0   | 0   |
| 3843   | 1   | 1   | 0   | 0   |
| 3844   | 1   | 2   | 1   | 0   |
| 3850   | 0   | 1   | 0   | 0   |
| 3851   | 0   | 1   | 0   | 0   |
| 3856   | 0   | 1   | 1   | 0   |



| respid | Q33 | Q34 | Q35 | Q36 |
|--------|-----|-----|-----|-----|
| 3859   | 0   | 2   | 4   | 2   |
| 3860   | 1   | 1   | 0   | 0   |
| 3863   | 0   | 1   | 0   | 0   |
| 3866   | 1   | 1   | 0   | 0   |
| 3867   | 0   | 0   | 0   | 0   |
| 3870   | 0   | 1   | 1   | 0   |
| 3873   | 1   | 3   | 1   | 1   |
| 3875   | 0   | 1   | 0   | 1   |
| 3878   | 0   | 0   | 0   | 1   |
| 3881   | 1   | 0   | 0   | 0   |
| 3883   | 1   | 2   | 2   | 2   |
| 3884   | 1   | 0   | 1   | 0   |
| 3885   | 0   | 3   | 2   | 2   |
| 3886   | 0   | 3   | 2   | 1   |
| 3887   | 0   | 1   | 0   | 0   |
| 3888   | 0   | 0   | 0   | 0   |
| 3889   | 0   | 3   | 1   | 1   |
| 3890   | 0   | 1   | 1   | 0   |
| 3896   | 1   | 1   | 1   | 1   |
| 3902   | 1   | 3   | 1   | 1   |
| 3909   | 1   | 1   | 0   | 0   |
| 3912   | 0   | 2   | 1   | 0   |
| 3922   | 0   | 1   | 1   | 1   |
| 3928   | 0   | 1   | 1   | 1   |
| 3930   | 0   | 1   | 0   | 0   |
| 3931   | 0   | 1   | 0   | 0   |
| 3933   | 0   | 1   | 0   | 0   |
| 3935   | 1   | 1   | 1   | 4   |
| 3937   | 0   | 0   | 0   | 0   |
| 3939   | 0   | 1   | 1   | 0   |
| 3942   | 0   | 0   | 1   | 0   |
| 3943   | 1   | 2   | 0   | 0   |

| respid | Q33 | Q34 | Q35 | Q36 |
|--------|-----|-----|-----|-----|
| 3944   | 0   | 1   | 0   | 0   |
| 3945   | 0   | 0   | 0   | 0   |
| 3947   | 1   | 0   | 2   | 1   |
| 3948   | 0   | 1   | 1   | 0   |
| 3951   | 0   | 1   | 1   | 0   |
| 3959   | 1   | 0   | 1   | 0   |
| 3969   | 1   | 2   | 3   | 0   |
| 3973   | 1   | 1   | 0   | 0   |
| 3975   | 1   | 2   | 3   | 2   |
| 3976   | 0   | 0   | 0   | 0   |
| 3977   | 1   | 1   | 1   | 1   |
| 3978   | 0   | 0   | 1   | 0   |
| 3994   | 0   | 1   | 1   | 0   |
| 3995   | 1   | 3   | 0   | 0   |
| 3997   | 0   | 1   | 1   | 0   |
| 3998   | 0   | 0   | 0   | 0   |
| 3999   | 0   | 0   | 1   | 1   |
| 4002   | 0   | 2   | 2   | 1   |
| 4004   | 0   | 1   | 2   | 1   |
| 4005   | 0   | 0   | 0   | 0   |
| 4006   | 1   | 1   | 2   | 2   |
| 4008   | 1   | 0   | 0   | 0   |
| 4010   | 0   | 1   | 0   | 0   |
| 4011   | 0   | 1   | 2   | 2   |
| 4013   | 0   | 1   | 1   | 0   |
| 4014   | 1   | 2   | 0   | 0   |
| 4016   | 0   | 1   | 1   | 0   |
| 4017   | 0   | 1   | 0   | 0   |
| 4019   | 0   | 0   | 1   | 1   |
| 4021   | 0   | 0   | 0   | 0   |
| 4023   | 0   | 0   | 0   | 0   |
| 4024   | 0   | 0   | 0   | 0   |

| respid | Q33 | Q34 | Q35 | Q36 |
|--------|-----|-----|-----|-----|
| 4025   | 1   | 1   | 0   | 0   |
| 4027   | 0   | 0   | 0   | 0   |
| 4032   | 0   | 0   | 0   | 0   |
| 4034   | 0   | 0   | 1   | 0   |
| 4035   | 0   | 1   | 2   | 2   |
| 4037   | 0   | 1   | 1   | 1   |
| 4040   | 0   | 0   | 1   | 0   |
| 4041   | 0   | 1   | 0   | 0   |
| 4042   | 0   | 1   | 0   | 0   |
| 4043   | 0   | 0   | 0   | 0   |
| 4045   | 0   | 1   | 2   | 1   |
| 4046   | 1   | 2   | 1   | 0   |
| 4048   | 0   | 0   | 1   | 0   |
| 4049   | 1   | 1   | 2   | 1   |
| 4050   | 0   | 2   | 2   | 1   |
| 4052   | 0   | 2   | 0   | 0   |
| 4053   | 0   | 0   | 0   | 0   |
| 4060   | 1   | 0   | 0   | 0   |
| 4065   | 1   | 1   | 3   | 2   |
| 4066   | 0   | 0   | 1   | 0   |
| 4067   | 0   | 0   | 1   | 0   |
| 4068   | 0   | 1   | 0   | 0   |
| 4069   | 1   | 1   | 1   | 0   |
| 4070   | 0   | 0   | 0   | 0   |
| 4071   | 1   | 1   | 1   | 2   |
| 4072   | 0   | 0   | 1   | 0   |
| 4073   | 1   | 0   | 0   | 0   |
| 4074   | 0   | 0   | 1   | 0   |
| 4075   | 0   | 0   | 3   | 0   |
| 4078   | 0   | 1   | 0   | 0   |
| 4080   | 0   | 1   | 0   | 0   |
| 4081   | 0   | 0   | 0   | 0   |

| respid | Q33 | Q34 | Q35 | Q36 |
|--------|-----|-----|-----|-----|
| 4082   | 1   | 0   | 0   | 0   |
| 4083   | 1   | 0   | 1   | 1   |
| 4084   | 0   | 1   | 0   | 0   |
| 4086   | 1   | 0   | 0   | 0   |
| 4087   | 0   | 0   | 0   | 0   |
| 4088   | 1   | 1   | 1   | 0   |
| 4089   | 1   | 0   | 0   | 0   |
| 4090   | 0   | 1   | 0   | 0   |
| 4093   | 1   | 1   | 0   | 0   |
| 4094   | 0   | 0   | 0   | 0   |
| 4095   | 0   | 1   | 1   | 0   |
| 4096   | 0   | 0   | 0   | 0   |
| 4098   | 1   | 1   | 0   | 0   |
| 4103   | 0   | 1   | 1   | 0   |
| 4104   | 0   | 1   | 1   | 1   |
| 4107   | 1   | 2   | 0   | 0   |
| 4109   | 0   | 0   | 0   | 0   |
| 4110   | 0   | 3   | 2   | 1   |
| 4113   | 0   | 0   | 0   | 1   |
| 4114   | 0   | 1   | 0   | 0   |
| 4116   | 1   | 1   | 0   | 0   |
| 4119   | 0   | 1   | 0   | 0   |
| 4120   | 0   | 0   | 0   | 0   |
| 4121   | 0   | 0   | 0   | 0   |
| 4122   | 1   | 2   | 2   | 0   |
| 4124   | 0   | 0   | 1   | 1   |
| 4126   | 0   | 1   | 0   | 0   |
| 4127   | 2   | 1   | 5   | 5   |
| 4131   | 0   | 2   | 1   | 0   |
| 4134   | 0   | 2   | 1   | 0   |
| 4144   | 1   | 1   | 1   | 1   |
| 4145   | 0   | 0   | 0   | 0   |

| respid | Q33 | Q34 | Q35 | Q36 |
|--------|-----|-----|-----|-----|
| 4146   | 1   | 0   | 0   | 0   |
| 4147   | 1   | 1   | 0   | 0   |
| 4149   | 1   | 2   | 0   | 0   |
| 4150   | 0   | 0   | 0   | 0   |
| 4151   | 0   | 1   | 2   | 0   |
| 4153   | 1   | 1   | 1   | 0   |
| 4155   | 1   | 0   | 1   | 0   |
| 4157   | 1   | 0   | 0   | 0   |
| 4159   | 0   | 0   | 1   | 0   |
| 4160   | 0   | 0   | 0   | 0   |
| 4161   | 0   | 0   | 1   | 0   |
| 4163   | 0   | 1   | 0   | 0   |
| 4164   | 1   | 0   | 0   | 0   |
| 4165   | 0   | 2   | 3   | 2   |
| 4166   | 0   | 0   | 0   | 0   |
| 4167   | 0   | 1   | 0   | 0   |
| 4170   | 1   | 1   | 2   | 0   |
| 4172   | 0   | 0   | 0   | 0   |
| 4173   | 0   | 2   | 1   | 1   |
| 4180   | 0   | 1   | 1   | 1   |
| 4185   | 1   | 1   | 1   | 0   |
| 4187   | 0   | 1   | 0   | 0   |
| 4190   | 0   | 0   | 0   | 0   |
| 4191   | 0   | 1   | 1   | 0   |
| 4193   | 0   | 0   | 0   | 0   |
| 4194   | 0   | 1   | 0   | 0   |
| 4195   | 0   | 0   | 1   | 0   |
| 4196   | 0   | 0   | 0   | 0   |
| 4197   | 0   | 1   | 0   | 0   |
| 4198   | 0   | 1   | 0   | 0   |
| 4199   | 0   | 1   | 0   | 0   |
| 4205   | 1   | 1   | 0   | 0   |

| respid | Q33 | Q34 | Q35 | Q36 |
|--------|-----|-----|-----|-----|
| 4206   | 0   | 0   | 0   | 0   |
| 4207   | 0   | 1   | 2   | 0   |
| 4214   | 1   | 1   | 0   | 1   |
| 4215   | 0   | 0   | 0   | 0   |
| 4217   | 0   | 0   | 0   | 0   |
| 4219   | 0   | 0   | 0   | 0   |
| 4223   | 1   | 1   | 1   | 1   |
| 4226   | 1   | 1   | 0   | 0   |
| 4229   | 0   | 1   | 0   | 0   |
| 4230   | 0   | 1   | 1   | 0   |
| 4232   | 0   | 0   | 0   | 0   |
| 4233   | 0   | 0   | 0   | 0   |
| 4234   | 1   | 2   | 1   | 0   |
| 4235   | 1   | 2   | 0   | 0   |
| 4236   | 1   | 2   | 1   | 0   |
| 4237   | 1   | 0   | 0   | 0   |
| 4238   | 1   | 0   | 0   | 0   |
| 4240   | 0   | 2   | 1   | 0   |
| 4241   | 1   | 1   | 0   | 0   |
| 4247   | 0   | 0   | 0   | 0   |
| 4250   | 2   | 2   | 0   | 0   |
| 4251   | 0   | 1   | 0   | 1   |
| 4253   | 1   | 1   | 2   | 2   |
| 4254   | 0   | 1   | 0   | 0   |
| 4258   | 1   | 2   | 1   | 1   |
| 4260   | 0   | 1   | 1   | 0   |
| 4263   | 1   | 2   | 2   | 0   |
| 4265   | 0   | 0   | 0   | 0   |
| 4266   | 0   | 0   | 0   | 0   |
| 4267   | 0   | 1   | 0   | 0   |
| 4270   | 0   | 0   | 0   | 0   |
| 4273   | 0   | 1   | 0   | 1   |

| respid | Q33 | Q34 | Q35 | Q36 |
|--------|-----|-----|-----|-----|
| 4280   | 1   | 1   | 0   | 0   |
| 4281   | 0   | 1   | 0   | 0   |
| 4282   | 1   | 1   | 1   | 0   |
| 4283   | 0   | 0   | 0   | 0   |
| 4286   | 1   | 1   | 0   | 0   |
| 4287   | 1   | 1   | 0   | 0   |
| 4289   | 1   | 1   | 1   | 0   |
| 4290   | 0   | 1   | 1   | 1   |
| 4291   | 1   | 2   | 1   | 1   |
| 4292   | 0   | 0   | 0   | 0   |
| 4293   | 0   | 0   | 0   | 0   |
| 4294   | 0   | 0   | 1   | 0   |
| 4295   | 0   | 0   | 1   | 1   |
| 4296   | 0   | 0   | 1   | 0   |
| 4297   | 0   | 3   | 0   | 0   |
| 4298   | 1   | 0   | 0   | 0   |
| 4299   | 0   | 0   | 1   | 1   |
| 4300   | 0   | 0   | 0   | 0   |
| 4301   | 0   | 0   | 0   | 0   |
| 4302   | 0   | 0   | 0   | 0   |
| 4304   | 0   | 1   | 0   | 0   |
| 4305   | 0   | 1   | 1   | 0   |
| 4307   | 0   | 1   | 2   | 0   |
| 4308   | 1   | 0   | 0   | 0   |
| 4312   | 0   | 0   | 0   | 0   |
| 4314   | 1   | 0   | 1   | 0   |
| 4316   | 0   | 1   | 1   | 0   |
| 4317   | 0   | 2   | 1   | 2   |
| 4319   | 1   | 0   | 2   | 2   |
| 4323   | 1   | 1   | 1   | 1   |
| 4337   | 0   | 2   | 0   | 0   |
| 4341   | 1   | 1   | 0   | 0   |

| respid | Q33 | Q34 | Q35 | Q36 |
|--------|-----|-----|-----|-----|
| 4342   | 1   | 1   | 0   | 0   |
| 4344   | 0   | 1   | 1   | 0   |
| 4345   | 1   | 2   | 0   | 0   |
| 4346   | 0   | 3   | 2   | 2   |
| 4347   | 0   | 1   | 0   | 0   |
| 4350   | 0   | 0   | 0   | 0   |
| 4352   | 0   | 0   | 0   | 0   |
| 4353   | 0   | 0   | 0   | 0   |
| 4355   | 0   | 0   | 0   | 1   |
| 4356   | 0   | 0   | 1   | 0   |
| 4358   | 0   | 0   | 0   | 0   |
| 4359   | 0   | 0   | 0   | 0   |
| 4360   | 0   | 1   | 1   | 0   |
| 4361   | 1   | 2   | 2   | 1   |
| 4363   | 1   | 0   | 0   | 0   |
| 4364   | 0   | 0   | 0   | 0   |
| 4365   | 1   | 2   | 0   | 0   |
| 4367   | 0   | 1   | 0   | 0   |
| 4369   | 0   | 1   | 2   | 1   |
| 4373   | 1   | 2   | 0   | 0   |
| 4374   | 0   | 1   | 0   | 0   |
| 4375   | 0   | 0   | 0   | 0   |
| 4378   | 0   | 0   | 0   | 0   |
| 4379   | 0   | 1   | 1   | 1   |
| 4382   | 1   | 0   | 1   | 1   |
| 4383   | 0   | 0   | 0   | 0   |
| 4384   | 1   | 1   | 3   | 2   |
| 4385   | 0   | 1   | 0   | 0   |
| 4388   | 0   | 1   | 1   | 0   |
| 4389   | 0   | 1   | 1   | 1   |
| 4391   | 0   | 1   | 0   | 0   |
| 4392   | 0   | 0   | 1   | 1   |



| respid | Q33 | Q34 | Q35 | Q36 |
|--------|-----|-----|-----|-----|
| 4393   | 1   | 0   | 0   | 0   |
| 4395   | 0   | 0   | 1   | 0   |
| 4397   | 0   | 0   | 0   | 0   |
| 4398   | 1   | 0   | 0   | 1   |
| 4399   | 0   | 0   | 0   | 0   |
| 4400   | 0   | 0   | 0   | 0   |
| 4401   | 0   | 1   | 0   | 0   |
| 4402   | 0   | 0   | 0   | 0   |
| 4404   | 0   | 0   | 0   | 0   |
| 4405   | 0   | 0   | 0   | 0   |
| 4407   | 1   | 2   | 1   | 0   |
| 4408   | 1   | 1   | 0   | 0   |
| 4411   | 0   | 0   | 0   | 0   |
| 4420   | 0   | 0   | 0   | 0   |
| 4421   | 0   | 1   | 0   | 0   |
| 4424   | 2   | 2   | 4   | 4   |
| 4425   | 0   | 1   | 1   | 0   |
| 4427   | 0   | 0   | 1   | 1   |
| 4430   | 0   | 0   | 1   | 1   |
| 4431   | 0   | 0   | 0   | 0   |
| 4432   | 1   | 0   | 0   | 0   |
| 4436   | 1   | 1   | 0   | 0   |
| 4439   | 0   | 1   | 0   | 0   |
| 4451   | 1   | 2   | 2   | 1   |
| 4452   | 0   | 3   | 2   | 2   |
| 4458   | 0   | 0   | 1   | 0   |
| 4464   | 1   | 1   | 2   | 0   |
| 4465   | 1   | 0   | 1   | 1   |
| 4467   | 0   | 0   | 1   | 1   |
| 4470   | 1   | 1   | 1   | 0   |
| 4471   | 1   | 0   | 0   | 0   |
| 4472   | 0   | 2   | 1   | 0   |

| respid | Q33 | Q34 | Q35 | Q36 |
|--------|-----|-----|-----|-----|
| 4473   | 1   | 0   | 0   | 0   |
| 4475   | 0   | 1   | 0   | 0   |
| 4476   | 1   | 0   | 1   | 1   |
| 4478   | 0   | 0   | 0   | 0   |
| 4485   | 1   | 0   | 0   | 0   |
| 4486   | 0   | 1   | 1   | 0   |
| 4490   | 1   | 2   | 0   | 0   |
| 4502   | 0   | 0   | 0   | 0   |
| 4503   | 1   | 1   | 4   | 0   |
| 4504   | 0   | 2   | 0   | 0   |
| 4506   | 0   | 1   | 0   | 0   |
| 4508   | 1   | 1   | 1   | 0   |
| 4515   | 0   | 2   | 0   | 0   |
| 4516   | 1   | 3   | 4   | 4   |
| 4519   | 0   | 0   | 0   | 0   |
| 4523   | 0   | 1   | 1   | 1   |
| 4525   | 0   | 0   | 1   | 0   |
| 4526   | 0   | 0   | 0   | 0   |
| 4528   | 0   | 1   | 0   | 0   |
| 4530   | 0   | 1   | 0   | 0   |
| 4531   | 1   | 3   | 1   | 0   |
| 4532   | 1   | 0   | 0   | 0   |
| 4537   | 0   | 0   | 0   | 0   |
| 4538   | 0   | 1   | 0   | 0   |
| 4539   | 0   | 3   | 2   | 1   |
| 4541   | 0   | 0   | 0   | 0   |
| 4543   | 0   | 1   | 0   | 0   |
| 4544   | 1   | 0   | 0   | 0   |
| 4546   | 1   | 1   | 0   | 0   |
| 4547   | 0   | 2   | 0   | 0   |
| 4549   | 0   | 0   | 0   | 0   |
| 4550   | 0   | 2   | 0   | 0   |

| respid | Q33 | Q34 | Q35 | Q36 |
|--------|-----|-----|-----|-----|
| 4551   | 0   | 0   | 1   | 0   |
| 4554   | 0   | 1   | 0   | 0   |
| 4557   | 1   | 0   | 0   | 0   |
| 4565   | 0   | 1   | 0   | 0   |
| 4568   | 0   | 1   | 1   | 0   |
| 4569   | 0   | 1   | 0   | 0   |
| 4570   | 0   | 0   | 0   | 0   |
| 4572   | 0   | 1   | 0   | 0   |
| 4574   | 0   | 0   | 0   | 0   |
| 4576   | 1   | 2   | 2   | 0   |
| 4578   | 0   | 1   | 0   | 0   |
| 4579   | 0   | 0   | 0   | 0   |
| 4580   | 1   | 1   | 0   | 0   |
| 4581   | 1   | 1   | 0   | 0   |
| 4584   | 0   | 0   | 0   | 0   |
| 4586   | 1   | 1   | 2   | 0   |
| 4587   | 1   | 2   | 4   | 1   |
| 4590   | 0   | 1   | 0   | 0   |
| 4592   | 1   | 1   | 0   | 0   |
| 4593   | 0   | 1   | 1   | 1   |
| 4595   | 1   | 1   | 0   | 0   |
| 4597   | 0   | 0   | 0   | 0   |
| 4598   | 0   | 1   | 2   | 0   |
| 4599   | 1   | 1   | 0   | 0   |
| 4600   | 1   | 1   | 1   | 1   |
| 4601   | 1   | 1   | 1   | 2   |
| 4608   | 1   | 2   | 1   | 0   |
| 4609   | 0   | 1   | 0   | 0   |
| 4611   | 1   | 1   | 0   | 0   |
| 4612   | 0   | 1   | 3   | 1   |
| 4613   | 0   | 0   | 0   | 0   |
| 4616   | 1   | 2   | 1   | 0   |

| respid | Q33 | Q34 | Q35 | Q36 |
|--------|-----|-----|-----|-----|
| 4617   | 0   | 1   | 0   | 0   |
| 4620   | 0   | 1   | 1   | 0   |
| 4621   | 0   | 2   | 0   | 0   |
| 4622   | 0   | 1   | 2   | 0   |
| 4624   | 0   | 1   | 1   | 1   |
| 4625   | 1   | 3   | 1   | 0   |
| 4627   | 1   | 1   | 3   | 2   |
| 4628   | 0   | 2   | 2   | 2   |
| 4629   | 0   | 0   | 0   | 0   |
| 4630   | 0   | 1   | 1   | 1   |
| 4632   | 1   | 1   | 1   | 1   |
| 4634   | 0   | 1   | 1   | 1   |
| 4635   | 1   | 2   | 2   | 0   |
| 4636   | 0   | 0   | 0   | 0   |
| 4637   | 0   | 1   | 0   | 0   |
| 4638   | 1   | 1   | 2   | 0   |
| 4639   | 1   | 2   | 1   | 1   |
| 4641   | 1   | 0   | 0   | 0   |
| 4643   | 0   | 0   | 0   | 0   |
| 4645   | 0   | 0   | 0   | 0   |
| 4646   | 0   | 2   | 1   | 1   |
| 4647   | 0   | 0   | 0   | 0   |
| 4648   | 0   | 1   | 0   | 0   |
| 4649   | 1   | 0   | 0   | 0   |
| 4650   | 0   | 1   | 2   | 1   |
| 4651   | 1   | 1   | 0   | 0   |
| 4652   | 0   | 1   | 2   | 1   |
| 4653   | 0   | 0   | 0   | 0   |
| 4657   | 0   | 0   | 0   | 0   |
| 4660   | 1   | 1   | 2   | 0   |
| 4661   | 1   | 0   | 0   | 1   |
| 4662   | 1   | 1   | 0   | 0   |

| respid | Q33 | Q34 | Q35 | Q36 |
|--------|-----|-----|-----|-----|
| 4667   | 1   | 1   | 3   | 1   |
| 4669   | 2   | 1   | 0   | 0   |
| 4671   | 0   | 0   | 0   | 0   |
| 4672   | 0   | 1   | 1   | 0   |
| 4673   | 0   | 1   | 0   | 0   |
| 4677   | 0   | 0   | 0   | 0   |
| 4679   | 1   | 0   | 1   | 0   |
| 4683   | 0   | 0   | 1   | 0   |
| 4684   | 1   | 2   | 1   | 0   |
| 4685   | 1   | 1   | 1   | 0   |
| 4686   | 0   | 1   | 1   | 0   |
| 4687   | 0   | 1   | 1   | 0   |
| 4688   | 0   | 0   | 0   | 0   |
| 4691   | 1   | 1   | 0   | 0   |
| 4692   | 0   | 0   | 0   | 0   |
| 4694   | 1   | 1   | 0   | 0   |
| 4695   | 1   | 2   | 1   | 0   |
| 4696   | 1   | 1   | 0   | 0   |
| 4697   | 0   | 0   | 0   | 0   |
| 4698   | 0   | 2   | 2   | 2   |
| 4699   | 0   | 1   | 0   | 0   |
| 4701   | 1   | 0   | 0   | 0   |
| 4703   | 2   | 2   | 3   | 3   |
| 4704   | 1   | 2   | 4   | 4   |
| 4705   | 0   | 1   | 0   | 0   |
| 4706   | 0   | 1   | 0   | 0   |
| 4707   | 0   | 0   | 0   | 0   |
| 4708   | 0   | 0   | 0   | 0   |
| 4710   | 0   | 1   | 1   | 0   |
| 4711   | 0   | 1   | 2   | 1   |
| 4715   | 0   | 1   | 0   | 0   |
| 4716   | 0   | 0   | 1   | 1   |

| respid | Q33 | Q34 | Q35 | Q36 |
|--------|-----|-----|-----|-----|
| 4717   | 0   | 1   | 0   | 0   |
| 4718   | 0   | 2   | 0   | 0   |
| 4722   | 0   | 1   | 1   | 1   |
| 4727   | 1   | 1   | 0   | 0   |
| 4728   | 1   | 3   | 2   | 2   |
| 4729   | 0   | 0   | 0   | 0   |
| 4732   | 0   | 0   | 1   | 0   |
| 4733   | 0   | 1   | 0   | 0   |
| 4734   | 1   | 0   | 2   | 1   |
| 4735   | 0   | 1   | 0   | 0   |
| 4737   | 0   | 1   | 2   | 2   |
| 4738   | 0   | 1   | 0   | 0   |
| 4740   | 0   | 1   | 0   | 0   |
| 4741   | 0   | 1   | 2   | 1   |
| 4743   | 0   | 1   | 0   | 0   |
| 4746   | 1   | 0   | 0   | 0   |
| 4750   | 0   | 0   | 1   | 0   |
| 4752   | 1   | 0   | 1   | 1   |
| 4753   | 0   | 1   | 1   | 0   |
| 4754   | 1   | 2   | 0   | 0   |
| 4755   | 2   | 1   | 3   | 1   |
| 4758   | 0   | 2   | 0   | 0   |
| 4766   | 0   | 0   | 0   | 0   |
| 4767   | 1   | 2   | 1   | 1   |
| 4768   | 0   | 1   | 0   | 0   |
| 4769   | 1   | 1   | 3   | 0   |
| 4771   | 1   | 1   | 0   | 0   |
| 4772   | 0   | 1   | 0   | 0   |
| 4773   | 0   | 1   | 0   | 0   |
| 4774   | 0   | 0   | 1   | 0   |
| 4776   | 0   | 1   | 2   | 2   |
| 4777   | 0   | 1   | 0   | 0   |

| respid | Q33 | Q34 | Q35 | Q36 |
|--------|-----|-----|-----|-----|
| 4779   | 0   | 0   | 0   | 0   |
| 4780   | 1   | 1   | 1   | 1   |
| 4781   | 0   | 0   | 0   | 0   |
| 4783   | 1   | 2   | 2   | 1   |
| 4784   | 0   | 3   | 0   | 0   |
| 4785   | 2   | 2   | 0   | 0   |
| 4788   | 0   | 0   | 0   | 0   |
| 4789   | 1   | 2   | 2   | 2   |
| 4790   | 1   | 0   | 0   | 0   |
| 4791   | 0   | 0   | 1   | 0   |
| 4794   | 0   | 0   | 0   | 0   |
| 4795   | 0   | 1   | 0   | 0   |
| 4797   | 0   | 0   | 0   | 0   |
| 4802   | 1   | 1   | 2   | 2   |
| 4803   | 1   | 1   | 2   | 2   |
| 4804   | 0   | 0   | 1   | 0   |
| 4805   | 1   | 1   | 0   | 0   |
| 4807   | 1   | 0   | 0   | 0   |
| 4808   | 0   | 1   | 1   | 1   |
| 4809   | 1   | 3   | 4   | 0   |
| 4811   | 0   | 0   | 0   | 0   |
| 4817   | 1   | 0   | 0   | 0   |
| 4819   | 0   | 1   | 1   | 0   |
| 4820   | 1   | 0   | 0   | 0   |
| 4821   | 1   | 1   | 0   | 0   |
| 4822   | 0   | 0   | 0   | 0   |
| 4823   | 0   | 2   | 0   | 0   |
| 4825   | 2   | 1   | 0   | 0   |
| 4826   | 0   | 0   | 0   | 0   |
| 4830   | 0   | 2   | 0   | 0   |
| 4832   | 0   | 0   | 0   | 0   |
| 4838   | 1   | 1   | 2   | 2   |

| respid | Q33 | Q34 | Q35 | Q36 |
|--------|-----|-----|-----|-----|
| 4840   | 0   | 1   | 1   | 0   |
| 4841   | 0   | 0   | 0   | 0   |
| 4843   | 0   | 1   | 0   | 0   |
| 4845   | 0   | 0   | 0   | 0   |
| 4846   | 0   | 0   | 1   | 0   |
| 4848   | 0   | 1   | 0   | 0   |
| 4853   | 0   | 0   | 0   | 0   |
| 4854   | 0   | 0   | 1   | 0   |
| 4859   | 1   | 0   | 1   | 0   |
| 4861   | 1   | 0   | 0   | 0   |
| 4864   | 2   | 0   | 0   | 0   |
| 4867   | 0   | 0   | 0   | 0   |
| 4870   | 0   | 0   | 0   | 0   |
| 4872   | 0   | 0   | 1   | 0   |
| 4873   | 0   | 1   | 0   | 0   |
| 4874   | 0   | 1   | 0   | 0   |
| 4878   | 0   | 1   | 2   | 0   |
| 4880   | 0   | 0   | 0   | 0   |
| 4881   | 0   | 1   | 1   | 0   |
| 4882   | 0   | 2   | 1   | 0   |
| 4883   | 0   | 0   | 0   | 0   |
| 4885   | 1   | 0   | 0   | 0   |
| 4889   | 1   | 0   | 1   | 1   |
| 4890   | 0   | 1   | 0   | 0   |
| 4891   | 0   | 0   | 1   | 0   |
| 4894   | 0   | 0   | 0   | 0   |
| 4895   | 1   | 3   | 5   | 4   |
| 4896   | 0   | 1   | 0   | 0   |
| 4897   | 0   | 0   | 0   | 0   |
| 4898   | 0   | 1   | 2   | 2   |
| 4899   | 1   | 0   | 0   | 0   |
| 4900   | 0   | 1   | 0   | 0   |



| respid | Q33 | Q34 | Q35 | Q36 |
|--------|-----|-----|-----|-----|
| 4901   | 0   | 0   | 1   | 0   |
| 4903   | 1   | 1   | 1   | 1   |
| 4904   | 0   | 0   | 0   | 0   |
| 4908   | 1   | 1   | 1   | 0   |
| 4909   | 0   | 2   | 0   | 0   |
| 4913   | 0   | 1   | 0   | 0   |
| 4917   | 1   | 1   | 0   | 0   |
| 4918   | 0   | 1   | 1   | 0   |
| 4920   | 0   | 0   | 0   | 0   |
| 4921   | 1   | 1   | 1   | 0   |
| 4925   | 0   | 1   | 1   | 0   |
| 4926   | 0   | 1   | 0   | 0   |
| 4927   | 0   | 1   | 0   | 0   |
| 4928   | 0   | 1   | 1   | 0   |
| 4929   | 1   | 0   | 1   | 0   |
| 4930   | 0   | 1   | 2   | 2   |
| 4931   | 1   | 0   | 0   | 0   |
| 4932   | 0   | 2   | 2   | 2   |
| 4933   | 1   | 0   | 0   | 0   |
| 4934   | 0   | 1   | 1   | 0   |
| 5934   | 0   | 0   | 0   | 0   |
| 5935   | 0   | 1   | 0   | 0   |
| 5936   | 1   | 0   | 1   | 0   |
| 5938   | 1   | 1   | 0   | 0   |
| 5939   | 0   | 0   | 1   | 0   |
| 5940   | 0   | 1   | 1   | 1   |
| 5942   | 0   | 1   | 1   | 0   |
| 5944   | 0   | 1   | 0   | 0   |
| 5951   | 0   | 3   | 3   | 1   |
| 5952   | 0   | 1   | 0   | 0   |
| 5954   | 0   | 1   | 0   | 0   |
| 5956   | 0   | 1   | 0   | 0   |

| respid | Q33 | Q34 | Q35 | Q36 |
|--------|-----|-----|-----|-----|
| 5957   | 0   | 2   | 1   | 0   |
| 5958   | 0   | 2   | 0   | 0   |
| 5959   | 1   | 1   | 1   | 1   |
| 5960   | 1   | 1   | 0   | 0   |
| 5963   | 1   | 1   | 1   | 0   |
| 5966   | 0   | 1   | 1   | 0   |
| 5968   | 0   | 1   | 0   | 0   |
| 5974   | 0   | 2   | 0   | 0   |
| 5975   | 0   | 1   | 0   | 0   |
| 5976   | 1   | 0   | 0   | 1   |
| 5977   | 0   | 1   | 0   | 0   |
| 5978   | 0   | 1   | 0   | 0   |
| 5979   | 1   | 1   | 1   | 0   |
| 5983   | 0   | 1   | 0   | 0   |
| 5984   | 1   | 0   | 2   | 0   |
| 5990   | 0   | 1   | 0   | 0   |
| 5991   | 0   | 0   | 0   | 0   |
| 5992   | 0   | 0   | 0   | 0   |
| 5993   | 0   | 0   | 1   | 0   |
| 5994   | 0   | 0   | 1   | 1   |
| 5996   | 0   | 1   | 0   | 0   |
| 6001   | 0   | 2   | 2   | 2   |
| 6003   | 0   | 0   | 0   | 0   |
| 6004   | 0   | 1   | 0   | 0   |
| 6005   | 0   | 2   | 1   | 0   |
| 6006   | 0   | 0   | 0   | 0   |
| 6008   | 1   | 2   | 2   | 0   |
| 6009   | 1   | 1   | 0   | 0   |
| 6014   | 0   | 0   | 0   | 0   |
| 6016   | 1   | 2   | 1   | 1   |
| 6017   | 1   | 2   | 1   | 1   |
| 6018   | 0   | 2   | 1   | 0   |

| respid | Q33 | Q34 | Q35 | Q36 |
|--------|-----|-----|-----|-----|
| 6020   | 0   | 2   | 2   | 0   |
| 6021   | 1   | 0   | 1   | 0   |
| 6024   | 1   | 2   | 1   | 0   |
| 6025   | 0   | 1   | 0   | 0   |
| 6026   | 0   | 1   | 1   | 0   |
| 6032   | 1   | 2   | 1   | 0   |
| 6035   | 1   | 1   | 1   | 0   |
| 6038   | 1   | 0   | 1   | 1   |
| 6043   | 1   | 2   | 1   | 1   |
| 6044   | 1   | 1   | 0   | 0   |
| 6046   | 1   | 1   | 1   | 1   |
| 6047   | 0   | 1   | 1   | 0   |
| 6048   | 1   | 1   | 0   | 0   |
| 6050   | 1   | 2   | 1   | 1   |
| 6051   | 1   | 1   | 1   | 0   |
| 6053   | 1   | 3   | 0   | 0   |
| 6054   | 1   | 1   | 0   | 0   |
| 6056   | 0   | 1   | 0   | 0   |
| 6058   | 0   | 0   | 1   | 1   |
| 6060   | 1   | 1   | 0   | 0   |
| 6061   | 1   | 0   | 0   | 0   |
| 6062   | 1   | 1   | 2   | 0   |
| 6067   | 1   | 0   | 0   | 0   |
| 6070   | 1   | 1   | 0   | 0   |
| 6074   | 0   | 2   | 2   | 1   |
| 6076   | 1   | 1   | 0   | 0   |
| 6078   | 0   | 0   | 0   | 0   |
| 6081   | 0   | 1   | 0   | 0   |
| 6085   | 0   | 2   | 0   | 0   |
| 6088   | 0   | 0   | 0   | 0   |
| 6092   | 1   | 0   | 0   | 0   |
| 6095   | 0   | 1   | 0   | 0   |

| respid | Q33 | Q34 | Q35 | Q36 |
|--------|-----|-----|-----|-----|
| 6098   | 0   | 1   | 1   | 1   |
| 6101   | 0   | 0   | 0   | 0   |
| 6102   | 0   | 2   | 1   | 1   |
| 6105   | 1   | 2   | 0   | 0   |
| 6106   | 1   | 1   | 1   | 1   |
| 6107   | 0   | 1   | 0   | 0   |
| 6111   | 0   | 1   | 0   | 0   |
| 6112   | 1   | 2   | 1   | 0   |
| 6113   | 1   | 2   | 2   | 1   |
| 6115   | 0   | 0   | 0   | 0   |
| 6116   | 0   | 0   | 0   | 0   |
| 6117   | 0   | 2   | 1   | 0   |
| 6124   | 1   | 1   | 1   | 1   |
| 6125   | 0   | 1   | 0   | 0   |
| 6128   | 0   | 0   | 0   | 0   |
| 6133   | 0   | 1   | 0   | 0   |
| 6134   | 1   | 1   | 1   | 0   |
| 6135   | 0   | 0   | 3   | 0   |
| 6138   | 0   | 1   | 1   | 1   |
| 6140   | 0   | 1   | 0   | 0   |
| 6143   | 0   | 0   | 0   | 0   |
| 6147   | 1   | 2   | 0   | 0   |
| 6154   | 0   | 1   | 0   | 0   |
| 6162   | 0   | 0   | 0   | 0   |
| 6165   | 1   | 1   | 1   | 1   |
| 6166   | 1   | 1   | 1   | 1   |
| 6173   | 1   | 2   | 1   | 0   |
| 6180   | 0   | 1   | 2   | 0   |
| 6184   | 1   | 2   | 2   | 2   |
| 6185   | 0   | 0   | 0   | 0   |
| 6186   | 0   | 1   | 1   | 0   |
| 6188   | 0   | 1   | 1   | 0   |

| respid | Q33 | Q34 | Q35 | Q36 |
|--------|-----|-----|-----|-----|
| 6192   | 0   | 0   | 3   | 1   |
| 6194   | 0   | 2   | 0   | 0   |
| 6195   | 1   | 1   | 0   | 0   |
| 6196   | 1   | 1   | 0   | 0   |
| 6199   | 0   | 1   | 0   | 0   |
| 6200   | 0   | 0   | 0   | 0   |
| 6201   | 1   | 1   | 1   | 0   |
| 6202   | 0   | 1   | 1   | 1   |
| 6203   | 0   | 1   | 0   | 0   |
| 6205   | 0   | 1   | 0   | 0   |
| 6210   | 1   | 1   | 2   | 2   |
| 6212   | 0   | 1   | 1   | 1   |
| 6216   | 1   | 1   | 1   | 1   |
| 6218   | 1   | 3   | 0   | 0   |
| 6221   | 0   | 1   | 0   | 0   |
| 6224   | 0   | 1   | 0   | 0   |
| 6225   | 0   | 0   | 0   | 0   |
| 6227   | 1   | 1   | 0   | 0   |
| 6230   | 0   | 1   | 0   | 0   |
| 6231   | 0   | 1   | 0   | 0   |
| 6233   | 1   | 1   | 0   | 0   |
| 6234   | 1   | 2   | 0   | 0   |
| 6235   | 0   | 0   | 0   | 0   |
| 6237   | 0   | 0   | 0   | 0   |
| 6240   | 0   | 3   | 0   | 0   |
| 6248   | 0   | 0   | 0   | 0   |
| 6249   | 2   | 0   | 0   | 0   |
| 6252   | 0   | 0   | 3   | 2   |
| 6254   | 0   | 1   | 0   | 0   |
| 6269   | 1   | 2   | 1   | 1   |
| 6304   | 0   | 0   | 0   | 0   |
| 6334   | 1   | 3   | 1   | 0   |

| respid | Q33 | Q34 | Q35 | Q36 |
|--------|-----|-----|-----|-----|
| 6341   | 1   | 2   | 2   | 0   |
| 6350   | 1   | 2   | 1   | 2   |
| 6370   | 0   | 0   | 0   | 0   |
| 6384   | 0   | 2   | 1   | 0   |
| 6400   | 0   | 0   | 0   | 0   |
| 6418   | 1   | 0   | 0   | 0   |
| 6467   | 0   | 2   | 0   | 0   |
| 6469   | 0   | 1   | 0   | 0   |
| 6474   | 0   | 1   | 0   | 0   |
| 6475   | 0   | 0   | 0   | 0   |
| 6476   | 1   | 1   | 2   | 2   |
| 6477   | 0   | 1   | 0   | 0   |
| 6480   | 0   | 1   | 0   | 0   |
| 6481   | 1   | 2   | 2   | 2   |
| 6485   | 0   | 0   | 0   | 0   |
| 6488   | 0   | 1   | 2   | 2   |
| 6495   | 0   | 1   | 0   | 0   |
| 6499   | 0   | 0   | 1   | 1   |
| 6500   | 0   | 0   | 1   | 1   |
| 6504   | 0   | 0   | 0   | 0   |
| 6507   | 0   | 3   | 0   | 0   |
| 6512   | 0   | 1   | 1   | 0   |
| 6525   | 1   | 3   | 1   | 1   |
| 6532   | 0   | 1   | 1   | 0   |
| 6535   | 0   | 1   | 0   | 0   |
| 6546   | 1   | 0   | 0   | 0   |
| 6551   | 1   | 1   | 2   | 1   |
| 6556   | 0   | 1   | 2   | 2   |
| 6566   | 1   | 2   | 1   | 0   |
| 6569   | 0   | 0   | 0   | 0   |
| 6574   | 1   | 0   | 0   | 0   |
| 6576   | 0   | 1   | 1   | 0   |

| respid | Q33 | Q34 | Q35 | Q36 |
|--------|-----|-----|-----|-----|
| 6580   | 0   | 0   | 0   | 0   |
| 6584   | 0   | 0   | 0   | 0   |
| 6585   | 0   | 1   | 2   | 0   |
| 6589   | 0   | 1   | 0   | 0   |
| 6590   | 1   | 1   | 0   | 0   |
| 6598   | 0   | 0   | 0   | 0   |
| 6603   | 0   | 0   | 0   | 0   |
| 6618   | 0   | 0   | 1   | 1   |
| 6630   | 0   | 1   | 0   | 0   |
| 6636   | 0   | 1   | 1   | 0   |
| 6649   | 0   | 0   | 0   | 0   |
| 6675   | 0   | 1   | 1   | 0   |
| 6678   | 0   | 1   | 0   | 0   |
| 6681   | 0   | 1   | 0   | 0   |
| 6684   | 0   | 1   | 2   | 1   |
| 6688   | 0   | 0   | 0   | 0   |
| 6691   | 0   | 1   | 0   | 0   |
| 6694   | 0   | 2   | 1   | 1   |
| 6696   | 0   | 1   | 0   | 0   |
| 6720   | 1   | 2   | 1   | 2   |
| 6722   | 1   | 3   | 2   | 2   |
| 6724   | 0   | 1   | 0   | 0   |
| 6725   | 0   | 1   | 0   | 0   |
| 6727   | 0   | 1   | 0   | 0   |
| 6734   | 0   | 2   | 1   | 1   |
| 6739   | 1   | 3   | 0   | 0   |
| 6743   | 1   | 1   | 2   | 2   |
| 6749   | 0   | 1   | 0   | 0   |
| 6756   | 1   | 1   | 1   | 0   |
| 6764   | 0   | 0   | 0   | 0   |
| 6765   | 0   | 1   | 0   | 0   |
| 6768   | 0   | 0   | 0   | 0   |

| respid | Q33 | Q34 | Q35 | Q36 |
|--------|-----|-----|-----|-----|
| 6773   | 0   | 1   | 0   | 0   |
| 6775   | 1   | 1   | 1   | 0   |
| 6777   | 2   | 1   | 0   | 0   |
| 6779   | 1   | 0   | 0   | 0   |
| 6790   | 0   | 0   | 1   | 0   |
| 6797   | 0   | 2   | 0   | 0   |
| 6798   | 0   | 2   | 0   | 0   |
| 6808   | 1   | 0   | 0   | 0   |
| 6810   | 0   | 1   | 0   | 0   |
| 6811   | 1   | 1   | 4   | 1   |
| 6812   | 1   | 1   | 0   | 0   |
| 6814   | 0   | 1   | 1   | 0   |
| 6819   | 0   | 1   | 0   | 0   |
| 6820   | 1   | 1   | 1   | 1   |
| 6832   | 1   | 0   | 0   | 0   |
| 6854   | 0   | 3   | 0   | 0   |
| 6855   | 0   | 0   | 0   | 0   |
| 6857   | 0   | 1   | 0   | 0   |
| 6858   | 0   | 2   | 0   | 0   |
| 6859   | 1   | 1   | 0   | 0   |
| 6860   | 0   | 1   | 0   | 0   |
| 6862   | 0   | 1   | 1   | 0   |
| 6879   | 0   | 1   | 0   | 0   |
| 6893   | 0   | 1   | 0   | 0   |
| 6898   | 1   | 0   | 0   | 0   |
| 6902   | 1   | 3   | 1   | 1   |
| 6903   | 0   | 2   | 3   | 1   |
| 6907   | 1   | 2   | 2   | 2   |
| 6908   | 0   | 2   | 0   | 0   |
| 6912   | 1   | 1   | 0   | 0   |
| 6915   | 0   | 1   | 2   | 1   |
| 6916   | 0   | 0   | 0   | 0   |



| respid | Q33 | Q34 | Q35 | Q36 |
|--------|-----|-----|-----|-----|
| 6917   | 1   | 0   | 2   | 0   |
| 6923   | 0   | 1   | 0   | 0   |
| 6934   | 0   | 0   | 0   | 0   |
| 6937   | 1   | 0   | 0   | 0   |
| 6945   | 1   | 1   | 0   | 0   |
| 6954   | 0   | 0   | 0   | 0   |
| 6956   | 1   | 2   | 0   | 0   |
| 6958   | 0   | 0   | 0   | 0   |
| 6961   | 0   | 1   | 0   | 0   |
| 6963   | 0   | 1   | 0   | 0   |
| 6964   | 0   | 1   | 0   | 0   |
| 6976   | 0   | 0   | 0   | 0   |
| 6977   | 0   | 1   | 3   | 3   |
| 7000   | 0   | 1   | 2   | 1   |
| 7001   | 0   | 0   | 0   | 0   |
| 7005   | 1   | 1   | 0   | 0   |
| 7006   | 0   | 1   | 1   | 0   |
| 7008   | 0   | 2   | 2   | 2   |
| 7009   | 1   | 1   | 0   | 0   |
| 7019   | 1   | 1   | 1   | 1   |
| 7021   | 1   | 0   | 0   | 0   |
| 7026   | 1   | 1   | 2   | 0   |
| 7030   | 0   | 1   | 1   | 1   |
| 7034   | 0   | 1   | 0   | 0   |
| 7039   | 0   | 0   | 1   | 1   |
| 7041   | 0   | 1   | 0   | 0   |
| 7047   | 0   | 2   | 0   | 0   |
| 7051   | 0   | 0   | 0   | 0   |
| 7052   | 0   | 1   | 1   | 1   |
| 7059   | 1   | 1   | 3   | 0   |
| 7062   | 0   | 1   | 1   | 1   |
| 7065   | 0   | 1   | 0   | 0   |

| respid | Q33 | Q34 | Q35 | Q36 |
|--------|-----|-----|-----|-----|
| 7066   | 0   | 1   | 0   | 0   |
| 7069   | 1   | 1   | 0   | 0   |
| 7070   | 0   | 0   | 0   | 0   |
| 7073   | 0   | 0   | 0   | 0   |
| 7078   | 0   | 0   | 0   | 0   |
| 7083   | 1   | 2   | 2   | 2   |
| 7084   | 1   | 3   | 1   | 0   |
| 7085   | 0   | 1   | 0   | 0   |
| 7088   | 2   | 3   | 4   | 0   |
| 7090   | 0   | 3   | 1   | 1   |
| 7095   | 0   | 0   | 1   | 0   |
| 7100   | 1   | 0   | 0   | 0   |
| 7102   | 1   | 1   | 1   | 0   |
| 7103   | 1   | 1   | 0   | 0   |
| 7108   | 0   | 1   | 1   | 0   |
| 7109   | 1   | 0   | 0   | 0   |
| 7110   | 0   | 0   | 0   | 0   |
| 7112   | 0   | 0   | 0   | 0   |
| 7114   | 0   | 2   | 1   | 0   |
| 7116   | 1   | 1   | 1   | 0   |
| 7117   | 0   | 1   | 2   | 0   |
| 7118   | 1   | 3   | 3   | 2   |
| 7120   | 1   | 2   | 2   | 2   |
| 7124   | 0   | 1   | 1   | 0   |
| 7130   | 1   | 1   | 1   | 0   |
| 7135   | 0   | 1   | 0   | 0   |
| 7137   | 0   | 3   | 3   | 2   |
| 7140   | 0   | 0   | 0   | 0   |
| 7141   | 0   | 0   | 0   | 0   |
| 7148   | 1   | 0   | 0   | 0   |
| 7152   | 0   | 0   | 0   | 0   |
| 7154   | 1   | 3   | 2   | 0   |

| respid | Q33 | Q34 | Q35 | Q36 |
|--------|-----|-----|-----|-----|
| 7156   | 1   | 0   | 0   | 0   |
| 7158   | 0   | 0   | 2   | 1   |
| 7159   | 1   | 1   | 0   | 0   |
| 7161   | 0   | 1   | 0   | 0   |
| 7164   | 0   | 0   | 0   | 0   |
| 7166   | 1   | 0   | 0   | 0   |
| 7167   | 0   | 0   | 0   | 0   |
| 7168   | 1   | 0   | 0   | 0   |
| 7170   | 1   | 0   | 0   | 0   |
| 7171   | 0   | 1   | 0   | 0   |
| 7172   | 0   | 0   | 0   | 0   |
| 7173   | 1   | 2   | 1   | 0   |
| 7175   | 0   | 1   | 1   | 0   |
| 7176   | 1   | 2   | 1   | 1   |
| 7180   | 1   | 1   | 0   | 0   |
| 7183   | 1   | 1   | 1   | 0   |
| 7189   | 1   | 0   | 1   | 0   |
| 7193   | 1   | 1   | 0   | 0   |
| 7194   | 1   | 2   | 3   | 0   |
| 7195   | 0   | 1   | 0   | 0   |
| 7200   | 0   | 1   | 0   | 0   |
| 7201   | 1   | 3   | 4   | 4   |
| 7205   | 1   | 2   | 2   | 1   |
| 7207   | 1   | 1   | 0   | 0   |
| 7208   | 0   | 0   | 0   | 0   |
| 7210   | 1   | 3   | 0   | 0   |
| 7211   | 1   | 0   | 0   | 0   |
| 7217   | 0   | 2   | 0   | 0   |
| 7218   | 1   | 0   | 0   | 0   |
| 7220   | 1   | 0   | 0   | 0   |
| 7225   | 0   | 0   | 0   | 0   |
| 7228   | 1   | 2   | 1   | 0   |

| respid | Q33 | Q34 | Q35 | Q36 |
|--------|-----|-----|-----|-----|
| 7230   | 1   | 0   | 1   | 1   |
| 7233   | 0   | 1   | 0   | 0   |
| 7234   | 0   | 1   | 1   | 1   |
| 7235   | 0   | 0   | 0   | 0   |
| 7236   | 1   | 0   | 0   | 0   |
| 7241   | 0   | 1   | 0   | 0   |
| 7251   | 0   | 1   | 0   | 0   |
| 7253   | 1   | 1   | 0   | 0   |
| 7259   | 0   | 1   | 0   | 0   |
| 7260   | 0   | 0   | 0   | 0   |
| 7261   | 1   | 2   | 1   | 1   |
| 7263   | 0   | 1   | 0   | 0   |
| 7265   | 0   | 0   | 0   | 0   |
| 7268   | 1   | 0   | 0   | 0   |
| 7269   | 1   | 0   | 0   | 0   |
| 7271   | 1   | 1   | 2   | 2   |
| 7276   | 1   | 3   | 4   | 3   |
| 7280   | 1   | 0   | 0   | 0   |
| 7283   | 0   | 0   | 0   | 0   |
| 7284   | 1   | 0   | 0   | 0   |
| 7286   | 0   | 1   | 1   | 0   |
| 7287   | 0   | 0   | 0   | 0   |
| 7288   | 0   | 2   | 0   | 0   |
| 7294   | 1   | 0   | 1   | 0   |
| 7295   | 0   | 0   | 0   | 0   |
| 7296   | 0   | 1   | 1   | 2   |
| 7297   | 0   | 1   | 0   | 0   |
| 7299   | 0   | 1   | 0   | 0   |
| 7300   | 0   | 0   | 0   | 0   |
| 7301   | 0   | 1   | 0   | 0   |
| 7302   | 0   | 1   | 0   | 0   |
| 7306   | 0   | 1   | 0   | 0   |

| respid | Q33 | Q34 | Q35 | Q36 |
|--------|-----|-----|-----|-----|
| 7313   | 1   | 2   | 4   | 3   |
| 7315   | 1   | 1   | 4   | 2   |
| 7317   | 1   | 0   | 0   | 0   |
| 7321   | 1   | 0   | 0   | 0   |
| 7322   | 0   | 2   | 2   | 0   |
| 7323   | 0   | 1   | 2   | 2   |
| 7333   | 1   | 1   | 1   | 2   |
| 7335   | 1   | 0   | 1   | 1   |
| 7336   | 1   | 0   | 0   | 0   |
| 7337   | 0   | 1   | 0   | 0   |
| 7338   | 0   | 0   | 0   | 0   |
| 7340   | 0   | 0   | 0   | 0   |
| 7341   | 1   | 3   | 1   | 0   |
| 7342   | 0   | 0   | 0   | 0   |
| 7344   | 1   | 2   | 1   | 0   |
| 7346   | 0   | 1   | 0   | 0   |
| 7347   | 1   | 0   | 0   | 0   |
| 7349   | 0   | 2   | 2   | 2   |
| 7352   | 0   | 0   | 0   | 0   |
| 7353   | 1   | 2   | 0   | 0   |
| 7355   | 0   | 1   | 0   | 0   |
| 7356   | 0   | 0   | 0   | 0   |
| 7360   | 1   | 2   | 5   | 2   |
| 7371   | 0   | 1   | 0   | 0   |
| 7376   | 0   | 1   | 2   | 1   |
| 7379   | 1   | 2   | 0   | 0   |
| 7381   | 0   | 0   | 0   | 0   |
| 7386   | 1   | 1   | 1   | 0   |
| 7389   | 0   | 1   | 1   | 0   |
| 7390   | 0   | 3   | 2   | 0   |
| 7393   | 0   | 1   | 0   | 0   |
| 7394   | 0   | 1   | 1   | 1   |

| respid | Q33 | Q34 | Q35 | Q36 |
|--------|-----|-----|-----|-----|
| 7396   | 0   | 1   | 2   | 1   |
| 7400   | 0   | 2   | 2   | 1   |
| 7401   | 0   | 1   | 1   | 1   |
| 7403   | 2   | 0   | 1   | 0   |
| 7406   | 1   | 1   | 0   | 0   |
| 7409   | 0   | 1   | 0   | 0   |
| 7410   | 1   | 2   | 1   | 1   |
| 7412   | 1   | 2   | 2   | 2   |
| 7414   | 0   | 2   | 1   | 0   |
| 7415   | 1   | 1   | 1   | 2   |
| 7417   | 1   | 2   | 2   | 2   |
| 7421   | 1   | 2   | 2   | 2   |
| 7425   | 1   | 1   | 2   | 0   |
| 7430   | 1   | 1   | 1   | 0   |
| 7432   | 0   | 0   | 0   | 0   |
| 7433   | 0   | 2   | 0   | 0   |
| 7442   | 0   | 3   | 1   | 0   |
| 7445   | 0   | 2   | 1   | 0   |
| 7446   | 1   | 0   | 0   | 0   |
| 7449   | 0   | 0   | 0   | 0   |
| 7450   | 0   | 1   | 0   | 0   |
| 7451   | 1   | 1   | 1   | 1   |
| 7459   | 0   | 1   | 0   | 0   |
| 7462   | 0   | 1   | 1   | 1   |
| 7463   | 0   | 3   | 0   | 0   |
| 7469   | 0   | 0   | 0   | 0   |
| 7482   | 1   | 0   | 0   | 0   |
| 7484   | 1   | 1   | 1   | 1   |
| 7486   | 0   | 1   | 0   | 0   |
| 7496   | 0   | 1   | 0   | 0   |
| 7502   | 1   | 1   | 0   | 0   |
| 7504   | 1   | 1   | 1   | 1   |

| respid | Q33 | Q34 | Q35 | Q36 |
|--------|-----|-----|-----|-----|
| 7509   | 1   | 3   | 3   | 0   |
| 7513   | 1   | 2   | 2   | 2   |
| 7514   | 0   | 0   | 0   | 0   |
| 7520   | 1   | 0   | 0   | 0   |
| 7523   | 0   | 0   | 0   | 0   |
| 7526   | 1   | 1   | 4   | 0   |
| 7529   | 1   | 0   | 1   | 0   |
| 7534   | 0   | 0   | 0   | 0   |
| 7536   | 0   | 1   | 1   | 1   |
| 7540   | 0   | 1   | 0   | 0   |
| 7541   | 1   | 1   | 2   | 1   |
| 7542   | 0   | 0   | 0   | 0   |
| 7555   | 0   | 1   | 0   | 0   |
| 7566   | 0   | 0   | 0   | 0   |
| 7568   | 0   | 2   | 0   | 0   |
| 7570   | 0   | 3   | 2   | 2   |
| 7572   | 0   | 1   | 0   | 0   |
| 7573   | 1   | 1   | 1   | 1   |
| 7576   | 1   | 1   | 0   | 0   |
| 7577   | 2   | 3   | 1   | 0   |
| 7583   | 1   | 1   | 0   | 0   |
| 7584   | 0   | 1   | 0   | 0   |
| 7585   | 1   | 2   | 4   | 4   |
| 7586   | 0   | 2   | 2   | 0   |
| 7587   | 0   | 1   | 0   | 0   |
| 7588   | 1   | 0   | 0   | 0   |
| 7596   | 0   | 0   | 1   | 0   |
| 7599   | 0   | 0   | 0   | 0   |
| 7600   | 0   | 2   | 2   | 2   |
| 7602   | 0   | 0   | 0   | 0   |
| 7613   | 0   | 0   | 0   | 0   |
| 7620   | 1   | 1   | 1   | 0   |

| respid | Q33 | Q34 | Q35 | Q36 |
|--------|-----|-----|-----|-----|
| 7623   | 1   | 1   | 0   | 0   |
| 7635   | 0   | 1   | 1   | 1   |
| 7636   | 0   | 1   | 1   | 0   |
| 7643   | 0   | 3   | 3   | 3   |
| 7645   | 1   | 2   | 2   | 1   |
| 7649   | 0   | 3   | 4   | 4   |
| 7651   | 0   | 1   | 0   | 0   |
| 7652   | 1   | 2   | 2   | 1   |
| 7655   | 0   | 1   | 1   | 0   |
| 7657   | 0   | 1   | 1   | 1   |
| 7675   | 1   | 2   | 0   | 0   |
| 7676   | 0   | 2   | 1   | 0   |
| 7684   | 0   | 1   | 1   | 0   |
| 7693   | 1   | 1   | 1   | 0   |
| 7694   | 1   | 2   | 3   | 3   |
| 7695   | 0   | 1   | 0   | 0   |
| 7696   | 1   | 2   | 3   | 3   |
| 7698   | 0   | 0   | 0   | 0   |
| 7700   | 0   | 1   | 0   | 0   |
| 7701   | 0   | 1   | 0   | 0   |
| 7704   | 0   | 0   | 0   | 0   |
| 7709   | 0   | 1   | 0   | 0   |
| 7713   | 0   | 1   | 0   | 0   |
| 7714   | 0   | 0   | 0   | 0   |
| 7718   | 2   | 3   | 2   | 4   |
| 7720   | 1   | 1   | 0   | 0   |
| 7721   | 0   | 2   | 1   | 0   |
| 7722   | 0   | 1   | 0   | 0   |
| 7724   | 0   | 1   | 1   | 0   |
| 7728   | 0   | 0   | 0   | 0   |
| 7731   | 0   | 1   | 0   | 0   |
| 7735   | 0   | 1   | 0   | 0   |



| respid | Q33 | Q34 | Q35 | Q36 |
|--------|-----|-----|-----|-----|
| 7737   | 0   | 3   | 0   | 0   |
| 7741   | 1   | 0   | 0   | 0   |
| 7746   | 0   | 0   | 0   | 0   |
| 7747   | 0   | 2   | 0   | 0   |
| 7748   | 0   | 2   | 0   | 0   |
| 7750   | 0   | 0   | 0   | 0   |
| 7754   | 0   | 1   | 0   | 0   |
| 7755   | 0   | 1   | 0   | 0   |
| 7762   | 0   | 0   | 1   | 0   |
| 7764   | 0   | 1   | 0   | 0   |
| 7766   | 1   | 0   | 0   | 0   |
| 7768   | 0   | 3   | 0   | 0   |
| 7770   | 0   | 2   | 1   | 1   |
| 7771   | 0   | 0   | 0   | 0   |
| 7777   | 0   | 0   | 0   | 0   |
| 7778   | 0   | 0   | 0   | 0   |
| 7783   | 1   | 3   | 2   | 2   |
| 7789   | 1   | 0   | 0   | 0   |
| 7790   | 0   | 0   | 0   | 0   |
| 7795   | 0   | 1   | 1   | 0   |
| 7807   | 0   | 1   | 0   | 0   |
| 7808   | 1   | 2   | 0   | 0   |
| 7818   | 0   | 2   | 1   | 0   |
| 7820   | 0   | 0   | 0   | 0   |
| 7831   | 1   | 2   | 0   | 0   |
| 7832   | 1   | 1   | 0   | 0   |
| 7837   | 0   | 1   | 0   | 0   |
| 7841   | 0   | 1   | 2   | 0   |
| 7845   | 0   | 2   | 2   | 2   |
| 7853   | 1   | 1   | 1   | 0   |
| 7854   | 0   | 0   | 0   | 0   |
| 7862   | 1   | 3   | 4   | 1   |

| respid | Q33 | Q34 | Q35 | Q36 |
|--------|-----|-----|-----|-----|
| 7871   | 0   | 1   | 1   | 0   |
| 7875   | 0   | 1   | 0   | 1   |
| 7880   | 0   | 2   | 1   | 1   |
| 7881   | 0   | 1   | 0   | 0   |
| 7883   | 1   | 1   | 0   | 0   |
| 7896   | 0   | 1   | 0   | 0   |
| 7905   | 1   | 0   | 0   | 0   |
| 7919   | 0   | 1   | 1   | 0   |
| 7928   | 1   | 2   | 2   | 1   |
| 7929   | 2   | 0   | 0   | 0   |
| 7938   | 0   | 2   | 0   | 0   |
| 7940   | 0   | 0   | 1   | 0   |
| 7941   | 0   | 1   | 0   | 0   |
| 7952   | 0   | 0   | 0   | 0   |
| 7962   | 0   | 1   | 0   | 0   |
| 7968   | 0   | 1   | 0   | 0   |
| 7972   | 0   | 1   | 1   | 0   |
| 7983   | 1   | 2   | 1   | 1   |
| 7990   | 0   | 1   | 0   | 0   |
| 7993   | 0   | 0   | 0   | 0   |
| 8005   | 0   | 0   | 1   | 0   |
| 8008   | 0   | 1   | 0   | 0   |
| 8012   | 0   | 2   | 1   | 0   |
| 8021   | 0   | 2   | 0   | 0   |
| 8024   | 0   | 1   | 1   | 1   |
| 8043   | 0   | 0   | 0   | 0   |
| 8051   | 0   | 1   | 1   | 0   |
| 8056   | 0   | 1   | 0   | 0   |
| 8061   | 0   | 1   | 0   | 1   |
| 8066   | 1   | 0   | 0   | 0   |
| 8069   | 0   | 2   | 2   | 1   |
| 8071   | 0   | 0   | 0   | 0   |

| respid | Q33 | Q34 | Q35 | Q36 |
|--------|-----|-----|-----|-----|
| 8072   | 0   | 1   | 1   | 1   |
| 8076   | 1   | 1   | 0   | 0   |
| 8080   | 0   | 1   | 1   | 0   |
| 8083   | 0   | 1   | 1   | 0   |
| 8093   | 1   | 2   | 2   | 1   |
| 8095   | 1   | 1   | 1   | 1   |
| 8099   | 0   | 1   | 0   | 0   |
| 8100   | 1   | 2   | 2   | 0   |
| 8103   | 0   | 0   | 0   | 0   |
| 8104   | 0   | 1   | 0   | 0   |
| 8115   | 1   | 2   | 2   | 2   |
| 8121   | 1   | 0   | 0   | 0   |
| 8128   | 0   | 1   | 0   | 0   |
| 8130   | 0   | 1   | 0   | 0   |
| 8131   | 1   | 2   | 0   | 0   |
| 8133   | 1   | 1   | 1   | 0   |
| 8143   | 0   | 1   | 0   | 0   |
| 8144   | 0   | 1   | 0   | 0   |
| 8146   | 0   | 1   | 0   | 0   |
| 8148   | 0   | 2   | 0   | 0   |
| 8157   | 0   | 0   | 0   | 0   |
| 8164   | 1   | 0   | 0   | 0   |
| 8173   | 2   | 1   | 0   | 0   |
| 8176   | 0   | 1   | 0   | 0   |
| 8179   | 0   | 2   | 0   | 0   |
| 8181   | 1   | 0   | 0   | 0   |
| 8182   | 0   | 1   | 0   | 0   |
| 8196   | 0   | 1   | 0   | 0   |
| 8200   | 1   | 1   | 1   | 1   |
| 8203   | 0   | 1   | 0   | 0   |
| 8204   | 0   | 3   | 3   | 1   |
| 8206   | 0   | 0   | 0   | 0   |

| respid | Q33 | Q34 | Q35 | Q36 |
|--------|-----|-----|-----|-----|
| 8208   | 0   | 0   | 0   | 0   |
| 8212   | 0   | 1   | 0   | 0   |
| 8222   | 0   | 2   | 0   | 0   |
| 8223   | 1   | 0   | 0   | 0   |
| 8225   | 1   | 1   | 0   | 0   |
| 8226   | 1   | 0   | 0   | 0   |
| 8228   | 0   | 3   | 0   | 0   |
| 8229   | 0   | 1   | 0   | 0   |
| 8239   | 0   | 0   | 1   | 0   |
| 8246   | 0   | 1   | 1   | 0   |
| 8258   | 1   | 1   | 2   | 2   |
| 8260   | 0   | 1   | 0   | 0   |
| 8262   | 0   | 1   | 0   | 0   |
| 8263   | 0   | 1   | 1   | 1   |
| 8267   | 0   | 1   | 1   | 1   |
| 8271   | 0   | 2   | 2   | 2   |
| 8274   | 0   | 1   | 0   | 0   |
| 8275   | 1   | 3   | 4   | 4   |
| 8279   | 0   | 2   | 0   | 0   |
| 8285   | 1   | 2   | 3   | 2   |
| 8287   | 1   | 3   | 3   | 3   |
| 8289   | 0   | 2   | 0   | 0   |
| 8291   | 0   | 0   | 1   | 0   |
| 8299   | 1   | 1   | 1   | 1   |
| 8301   | 0   | 2   | 4   | 0   |
| 8302   | 0   | 0   | 0   | 0   |
| 8308   | 1   | 2   | 1   | 0   |
| 8313   | 0   | 1   | 0   | 0   |
| 8316   | 1   | 2   | 0   | 0   |
| 8317   | 0   | 1   | 0   | 0   |
| 8319   | 1   | 0   | 0   | 0   |
| 8323   | 1   | 0   | 2   | 0   |

| respid | Q33 | Q34 | Q35 | Q36 |
|--------|-----|-----|-----|-----|
| 8324   | 0   | 1   | 1   | 1   |
| 8327   | 0   | 1   | 1   | 0   |
| 8328   | 0   | 1   | 1   | 0   |
| 8342   | 0   | 0   | 2   | 0   |
| 8350   | 1   | 1   | 0   | 0   |
| 8352   | 0   | 0   | 0   | 0   |
| 8353   | 0   | 1   | 0   | 0   |
| 8356   | 0   | 2   | 0   | 0   |
| 8367   | 0   | 0   | 0   | 0   |
| 8373   | 0   | 1   | 2   | 0   |
| 8379   | 0   | 0   | 0   | 0   |
| 8382   | 0   | 1   | 1   | 0   |
| 8387   | 1   | 2   | 5   | 0   |
| 8409   | 0   | 1   | 0   | 0   |
| 8410   | 0   | 1   | 0   | 0   |
| 8412   | 1   | 2   | 0   | 0   |
| 8415   | 1   | 1   | 1   | 0   |
| 8417   | 1   | 1   | 1   | 0   |
| 8422   | 1   | 1   | 1   | 0   |
| 8430   | 1   | 1   | 1   | 1   |
| 8434   | 0   | 1   | 1   | 0   |
| 8436   | 1   | 1   | 0   | 0   |
| 8446   | 0   | 1   | 0   | 0   |
| 8447   | 0   | 2   | 0   | 0   |
| 8448   | 1   | 1   | 0   | 0   |
| 8455   | 1   | 1   | 0   | 0   |
| 8456   | 1   | 1   | 0   | 0   |
| 8459   | 0   | 0   | 1   | 1   |
| 8460   | 0   | 1   | 0   | 0   |
| 8464   | 1   | 1   | 1   | 1   |
| 8470   | 1   | 0   | 0   | 0   |
| 8473   | 0   | 1   | 0   | 0   |

| respid | Q33 | Q34 | Q35 | Q36 |
|--------|-----|-----|-----|-----|
| 8486   | 0   | 0   | 0   | 0   |
| 8487   | 1   | 2   | 0   | 0   |
| 8489   | 0   | 0   | 1   | 0   |
| 8494   | 0   | 2   | 0   | 0   |
| 8495   | 1   | 2   | 4   | 4   |
| 8497   | 0   | 1   | 0   | 0   |
| 8510   | 0   | 2   | 0   | 0   |
| 8515   | 1   | 3   | 2   | 2   |
| 8526   | 0   | 0   | 0   | 0   |
| 8530   | 0   | 0   | 0   | 0   |
| 8532   | 1   | 1   | 0   | 0   |
| 8533   | 1   | 0   | 0   | 0   |
| 8534   | 1   | 1   | 1   | 0   |
| 8572   | 1   | 2   | 1   | 0   |
| 8582   | 0   | 1   | 1   | 0   |
| 8584   | 0   | 0   | 0   | 0   |
| 8585   | 0   | 0   | 0   | 0   |
| 8586   | 0   | 0   | 0   | 0   |
| 8589   | 1   | 0   | 0   | 0   |
| 8593   | 0   | 1   | 0   | 0   |
| 8594   | 0   | 0   | 1   | 0   |
| 8601   | 0   | 0   | 0   | 0   |
| 8603   | 1   | 1   | 0   | 0   |
| 8604   | 0   | 0   | 1   | 0   |
| 8605   | 0   | 0   | 0   | 0   |
| 8607   | 0   | 1   | 1   | 1   |
| 8623   | 0   | 3   | 0   | 0   |
| 8626   | 0   | 1   | 1   | 1   |
| 8638   | 1   | 1   | 0   | 0   |
| 8640   | 0   | 1   | 0   | 0   |
| 8641   | 0   | 0   | 1   | 0   |
| 8643   | 0   | 1   | 1   | 0   |

| respid | Q33 | Q34 | Q35 | Q36 |
|--------|-----|-----|-----|-----|
| 8644   | 1   | 1   | 2   | 0   |
| 8646   | 1   | 1   | 0   | 0   |
| 8647   | 0   | 0   | 0   | 0   |
| 8649   | 1   | 2   | 2   | 0   |
| 8650   | 0   | 2   | 0   | 0   |
| 8658   | 0   | 1   | 0   | 0   |
| 8659   | 1   | 1   | 0   | 0   |
| 8669   | 0   | 2   | 0   | 0   |
| 8672   | 0   | 0   | 0   | 0   |
| 8673   | 1   | 1   | 1   | 0   |
| 8676   | 1   | 1   | 0   | 0   |
| 8677   | 0   | 0   | 0   | 0   |
| 8681   | 0   | 1   | 0   | 0   |
| 8688   | 0   | 0   | 0   | 0   |
| 8689   | 1   | 3   | 1   | 1   |
| 8690   | 1   | 1   | 0   | 0   |
| 8693   | 0   | 0   | 1   | 0   |
| 8694   | 1   | 2   | 0   | 0   |
| 8699   | 0   | 2   | 2   | 0   |
| 8700   | 1   | 0   | 0   | 0   |
| 8703   | 1   | 0   | 0   | 0   |
| 8704   | 0   | 1   | 1   | 0   |
| 8706   | 1   | 3   | 2   | 2   |
| 8709   | 0   | 0   | 1   | 0   |
| 8715   | 1   | 0   | 0   | 0   |
| 8728   | 1   | 1   | 1   | 0   |
| 8729   | 0   | 0   | 0   | 0   |
| 8730   | 1   | 0   | 1   | 0   |
| 8742   | 1   | 1   | 0   | 0   |
| 8748   | 0   | 0   | 0   | 0   |
| 8749   | 1   | 0   | 0   | 0   |
| 8750   | 1   | 0   | 0   | 0   |

| respid | Q33 | Q34 | Q35 | Q36 |
|--------|-----|-----|-----|-----|
| 8751   | 0   | 1   | 0   | 0   |
| 8752   | 0   | 1   | 1   | 0   |
| 8754   | 0   | 1   | 1   | 0   |
| 8757   | 0   | 1   | 1   | 0   |
| 8760   | 0   | 1   | 2   | 0   |
| 8761   | 0   | 0   | 0   | 0   |
| 8762   | 0   | 1   | 1   | 0   |
| 8763   | 1   | 1   | 0   | 0   |
| 8764   | 1   | 1   | 0   | 0   |
| 8765   | 0   | 0   | 0   | 0   |
| 8766   | 1   | 1   | 1   | 1   |
| 8767   | 1   | 1   | 3   | 2   |
| 8768   | 0   | 1   | 0   | 0   |
| 8770   | 1   | 1   | 0   | 0   |
| 8771   | 0   | 1   | 0   | 0   |
| 8773   | 0   | 0   | 0   | 0   |
| 8774   | 1   | 1   | 1   | 0   |
| 8776   | 0   | 0   | 0   | 0   |
| 8777   | 0   | 0   | 1   | 0   |
| 8778   | 1   | 1   | 0   | 1   |
| 8779   | 0   | 1   | 0   | 0   |
| 8784   | 0   | 1   | 1   | 1   |
| 8786   | 1   | 0   | 0   | 0   |
| 8787   | 0   | 1   | 1   | 0   |
| 8790   | 0   | 0   | 0   | 0   |
| 8791   | 1   | 2   | 4   | 2   |
| 8793   | 0   | 2   | 0   | 0   |
| 8795   | 1   | 1   | 0   | 0   |
| 8797   | 1   | 1   | 0   | 0   |
| 8801   | 0   | 1   | 0   | 0   |
| 8802   | 0   | 1   | 0   | 0   |
| 8807   | 0   | 1   | 2   | 0   |



| respid | Q33 | Q34 | Q35 | Q36 |
|--------|-----|-----|-----|-----|
| 8813   | 0   | 1   | 0   | 0   |
| 8817   | 1   | 1   | 1   | 0   |
| 8818   | 0   | 1   | 2   | 1   |
| 8821   | 0   | 1   | 0   | 0   |
| 8822   | 0   | 2   | 0   | 0   |
| 8823   | 0   | 0   | 0   | 0   |
| 8824   | 0   | 1   | 1   | 0   |
| 8825   | 0   | 1   | 0   | 0   |
| 8834   | 1   | 0   | 2   | 2   |
| 8840   | 1   | 2   | 3   | 3   |
| 8843   | 0   | 3   | 5   | 2   |
| 8846   | 0   | 1   | 0   | 0   |
| 8862   | 0   | 0   | 0   | 0   |
| 8866   | 0   | 0   | 0   | 0   |
| 8869   | 1   | 0   | 0   | 0   |
| 8872   | 0   | 2   | 1   | 0   |
| 8903   | 1   | 0   | 0   | 0   |
| 8909   | 1   | 0   | 0   | 0   |
| 8926   | 0   | 1   | 1   | 0   |
| 8936   | 1   | 1   | 0   | 0   |
| 8945   | 1   | 0   | 0   | 0   |
| 8954   | 0   | 1   | 0   | 0   |
| 8955   | 1   | 2   | 0   | 0   |
| 8958   | 0   | 0   | 0   | 0   |
| 8959   | 0   | 1   | 0   | 0   |
| 8960   | 0   | 1   | 0   | 0   |
| 8976   | 1   | 2   | 1   | 1   |
| 8977   | 0   | 1   | 1   | 0   |
| 8979   | 0   | 1   | 1   | 1   |
| 8985   | 0   | 0   | 0   | 0   |
| 8994   | 0   | 1   | 0   | 0   |
| 8997   | 0   | 2   | 2   | 1   |

| respid | Q33 | Q34 | Q35 | Q36 |
|--------|-----|-----|-----|-----|
| 9002   | 0   | 1   | 0   | 0   |
| 9005   | 1   | 3   | 0   | 0   |
| 9017   | 0   | 0   | 1   | 0   |
| 9018   | 0   | 1   | 0   | 0   |
| 9021   | 0   | 1   | 0   | 0   |
| 9029   | 1   | 3   | 2   | 2   |
| 9035   | 0   | 2   | 1   | 0   |
| 9038   | 0   | 0   | 0   | 0   |
| 9039   | 0   | 1   | 0   | 0   |
| 9040   | 0   | 1   | 0   | 0   |
| 9042   | 0   | 1   | 0   | 0   |
| 9043   | 0   | 2   | 0   | 0   |
| 9045   | 0   | 3   | 1   | 0   |
| 9051   | 0   | 1   | 0   | 0   |
| 9067   | 0   | 1   | 0   | 0   |
| 9069   | 0   | 1   | 0   | 0   |
| 9073   | 1   | 0   | 1   | 1   |
| 9084   | 0   | 2   | 2   | 0   |
| 9096   | 0   | 0   | 0   | 0   |
| 9100   | 0   | 1   | 1   | 3   |
| 9107   | 0   | 0   | 0   | 0   |
| 9110   | 0   | 0   | 0   | 0   |
| 9120   | 0   | 0   | 0   | 0   |
| 9122   | 1   | 3   | 1   | 0   |
| 9130   | 2   | 1   | 0   | 0   |
| 9134   | 0   | 2   | 1   | 0   |
| 9137   | 1   | 1   | 0   | 0   |
| 9139   | 0   | 1   | 1   | 0   |
| 9144   | 0   | 0   | 1   | 0   |
| 9157   | 0   | 1   | 1   | 0   |
| 9166   | 0   | 0   | 0   | 0   |
| 9177   | 1   | 3   | 2   | 1   |

| respid | Q33 | Q34 | Q35 | Q36 |
|--------|-----|-----|-----|-----|
| 9181   | 0   | 0   | 0   | 0   |
| 9183   | 0   | 1   | 0   | 0   |
| 9184   | 1   | 2   | 1   | 1   |
| 9188   | 0   | 0   | 0   | 0   |
| 9197   | 0   | 0   | 0   | 0   |
| 9200   | 0   | 1   | 2   | 1   |
| 9205   | 0   | 1   | 0   | 0   |
| 9207   | 0   | 1   | 2   | 1   |
| 9213   | 1   | 1   | 1   | 0   |
| 9216   | 1   | 1   | 1   | 1   |
| 9217   | 0   | 0   | 0   | 0   |
| 9218   | 0   | 0   | 0   | 0   |
| 9219   | 1   | 3   | 2   | 1   |
| 9220   | 0   | 0   | 0   | 0   |
| 9221   | 0   | 2   | 1   | 0   |
| 9223   | 1   | 2   | 3   | 4   |
| 9228   | 0   | 0   | 0   | 0   |
| 9230   | 1   | 1   | 0   | 0   |
| 9231   | 0   | 1   | 1   | 1   |
| 9233   | 0   | 1   | 0   | 0   |
| 9235   | 1   | 2   | 0   | 0   |
| 9237   | 1   | 0   | 1   | 1   |
| 9242   | 0   | 1   | 0   | 0   |
| 9250   | 0   | 0   | 0   | 0   |
| 9253   | 0   | 1   | 0   | 0   |
| 9257   | 0   | 1   | 0   | 0   |
| 9263   | 0   | 2   | 0   | 0   |
| 9267   | 0   | 1   | 0   | 0   |
| 9272   | 0   | 1   | 0   | 0   |
| 9279   | 0   | 0   | 0   | 0   |
| 9281   | 0   | 1   | 0   | 1   |
| 9285   | 0   | 2   | 0   | 0   |

| respid | Q33 | Q34 | Q35 | Q36 |
|--------|-----|-----|-----|-----|
| 9286   | 0   | 2   | 1   | 0   |
| 9294   | 0   | 1   | 0   | 0   |
| 9295   | 0   | 1   | 1   | 0   |
| 9297   | 1   | 1   | 1   | 1   |
| 9299   | 1   | 1   | 0   | 0   |
| 9309   | 0   | 1   | 1   | 0   |
| 9315   | 0   | 0   | 0   | 0   |
| 9320   | 0   | 0   | 1   | 0   |
| 9324   | 1   | 1   | 0   | 0   |
| 9326   | 0   | 0   | 0   | 0   |
| 9333   | 0   | 1   | 0   | 0   |
| 9334   | 0   | 0   | 1   | 1   |
| 9336   | 0   | 2   | 1   | 1   |
| 9337   | 0   | 1   | 0   | 0   |
| 9342   | 0   | 0   | 0   | 0   |
| 9347   | 0   | 1   | 0   | 0   |
| 9352   | 0   | 0   | 1   | 1   |
| 9355   | 0   | 0   | 1   | 0   |
| 9356   | 0   | 1   | 1   | 0   |
| 9359   | 0   | 3   | 1   | 0   |
| 9368   | 0   | 0   | 0   | 0   |
| 9375   | 1   | 1   | 2   | 1   |
| 9384   | 0   | 1   | 1   | 0   |
| 9388   | 0   | 0   | 1   | 0   |
| 9397   | 0   | 2   | 2   | 2   |
| 9400   | 0   | 0   | 0   | 0   |
| 9401   | 1   | 2   | 0   | 0   |
| 9402   | 0   | 0   | 0   | 0   |
| 9417   | 0   | 2   | 1   | 0   |
| 9424   | 0   | 0   | 0   | 0   |
| 9427   | 0   | 3   | 0   | 0   |
| 9429   | 0   | 2   | 0   | 0   |

| respid | Q33 | Q34 | Q35 | Q36 |
|--------|-----|-----|-----|-----|
| 9437   | 1   | 2   | 0   | 0   |
| 9442   | 0   | 2   | 0   | 0   |
| 9446   | 0   | 0   | 1   | 0   |
| 9447   | 0   | 0   | 0   | 0   |
| 9448   | 0   | 2   | 1   | 1   |
| 9449   | 0   | 0   | 1   | 1   |
| 9455   | 0   | 1   | 0   | 0   |
| 9459   | 0   | 1   | 2   | 0   |
| 9460   | 0   | 1   | 0   | 0   |
| 9461   | 0   | 0   | 0   | 0   |
| 9463   | 0   | 0   | 1   | 0   |
| 9464   | 0   | 2   | 2   | 0   |
| 9466   | 0   | 0   | 1   | 0   |
| 9477   | 0   | 0   | 0   | 0   |
| 9482   | 0   | 2   | 2   | 1   |
| 9486   | 0   | 1   | 2   | 2   |
| 9488   | 0   | 1   | 2   | 2   |
| 9489   | 1   | 1   | 0   | 0   |
| 9496   | 0   | 1   | 1   | 1   |
| 9499   | 0   | 1   | 0   | 0   |
| 9512   | 0   | 1   | 0   | 0   |
| 9514   | 0   | 1   | 0   | 0   |
| 9516   | 0   | 0   | 0   | 0   |
| 9517   | 0   | 1   | 2   | 2   |
| 9520   | 0   | 1   | 0   | 0   |
| 9527   | 1   | 1   | 0   | 0   |
| 9532   | 0   | 2   | 2   | 0   |
| 9533   | 1   | 0   | 0   | 0   |
| 9543   | 0   | 1   | 0   | 0   |
| 9550   | 0   | 1   | 1   | 0   |
| 9553   | 1   | 1   | 0   | 0   |
| 9555   | 0   | 1   | 4   | 4   |

| respid | Q33 | Q34 | Q35 | Q36 |
|--------|-----|-----|-----|-----|
| 9565   | 0   | 3   | 0   | 0   |
| 9583   | 0   | 2   | 0   | 0   |
| 9594   | 0   | 1   | 0   | 0   |
| 9596   | 1   | 1   | 0   | 0   |
| 9600   | 0   | 2   | 1   | 0   |
| 9602   | 0   | 1   | 0   | 0   |
| 9606   | 0   | 1   | 0   | 0   |
| 9608   | 0   | 3   | 0   | 0   |
| 9610   | 0   | 1   | 2   | 2   |
| 9612   | 1   | 2   | 0   | 0   |
| 9613   | 0   | 0   | 0   | 0   |
| 9614   | 0   | 2   | 0   | 0   |
| 9620   | 0   | 0   | 0   | 0   |
| 9628   | 0   | 0   | 0   | 0   |
| 9631   | 0   | 1   | 0   | 0   |
| 9632   | 1   | 1   | 1   | 0   |
| 9633   | 1   | 2   | 0   | 1   |
| 9639   | 0   | 1   | 0   | 0   |
| 9640   | 1   | 2   | 0   | 0   |
| 9642   | 1   | 0   | 0   | 0   |
| 9653   | 1   | 2   | 3   | 0   |
| 9658   | 1   | 0   | 1   | 1   |
| 9659   | 1   | 2   | 1   | 0   |
| 9661   | 0   | 1   | 0   | 0   |
| 9664   | 0   | 2   | 1   | 0   |
| 9665   | 0   | 1   | 1   | 1   |
| 9666   | 0   | 2   | 1   | 0   |
| 9667   | 0   | 1   | 1   | 0   |
| 9668   | 1   | 0   | 0   | 0   |
| 9670   | 0   | 1   | 1   | 0   |
| 9671   | 0   | 1   | 0   | 0   |
| 9681   | 0   | 1   | 0   | 1   |

| respid | Q33 | Q34 | Q35 | Q36 |
|--------|-----|-----|-----|-----|
| 9684   | 1   | 1   | 0   | 0   |
| 9685   | 1   | 1   | 0   | 0   |
| 9686   | 0   | 0   | 0   | 0   |
| 9688   | 1   | 1   | 0   | 0   |
| 9692   | 1   | 1   | 1   | 0   |
| 9693   | 0   | 2   | 1   | 5   |
| 9698   | 1   | 1   | 0   | 0   |
| 9699   | 0   | 1   | 1   | 1   |
| 9701   | 0   | 1   | 0   | 0   |
| 9702   | 0   | 1   | 0   | 0   |
| 9709   | 1   | 1   | 0   | 0   |
| 9713   | 0   | 0   | 0   | 0   |
| 9715   | 0   | 0   | 0   | 0   |
| 9721   | 1   | 0   | 0   | 0   |
| 9725   | 0   | 0   | 0   | 0   |
| 9729   | 0   | 0   | 1   | 0   |
| 9731   | 0   | 0   | 1   | 1   |
| 9736   | 0   | 1   | 0   | 0   |
| 9740   | 0   | 0   | 0   | 0   |
| 9741   | 0   | 1   | 0   | 0   |
| 9749   | 1   | 1   | 1   | 0   |
| 9750   | 1   | 2   | 0   | 1   |
| 9751   | 1   | 3   | 2   | 1   |
| 9753   | 1   | 1   | 0   | 0   |
| 9754   | 2   | 1   | 2   | 2   |
| 9756   | 1   | 2   | 4   | 4   |
| 9758   | 1   | 3   | 4   | 3   |
| 9759   | 0   | 2   | 0   | 0   |
| 9760   | 0   | 0   | 0   | 0   |
| 9761   | 0   | 0   | 0   | 0   |
| 9762   | 0   | 1   | 0   | 0   |
| 9764   | 0   | 1   | 0   | 0   |

| respid | Q33 | Q34 | Q35 | Q36 |
|--------|-----|-----|-----|-----|
| 9768   | 0   | 0   | 0   | 0   |
| 9769   | 1   | 2   | 2   | 0   |
| 9770   | 0   | 1   | 0   | 0   |
| 9771   | 0   | 2   | 1   | 0   |
| 9772   | 0   | 0   | 0   | 0   |
| 9773   | 1   | 1   | 1   | 0   |
| 9776   | 1   | 1   | 0   | 0   |
| 9786   | 1   | 1   | 1   | 1   |
| 9790   | 2   | 0   | 0   | 0   |
| 9791   | 0   | 0   | 0   | 0   |
| 9794   | 0   | 2   | 2   | 1   |
| 9797   | 0   | 1   | 0   | 0   |
| 9799   | 0   | 1   | 1   | 1   |
| 9804   | 0   | 1   | 0   | 0   |
| 9805   | 0   | 1   | 1   | 0   |
| 9806   | 0   | 0   | 0   | 0   |
| 9807   | 1   | 1   | 0   | 0   |
| 9813   | 0   | 1   | 0   | 0   |
| 9817   | 0   | 0   | 0   | 0   |
| 9823   | 0   | 0   | 0   | 0   |
| 9826   | 0   | 1   | 1   | 0   |
| 9830   | 0   | 0   | 0   | 1   |
| 9835   | 1   | 1   | 0   | 1   |
| 9836   | 0   | 1   | 1   | 0   |
| 9841   | 1   | 0   | 0   | 0   |
| 9842   | 0   | 1   | 0   | 0   |
| 9844   | 0   | 2   | 0   | 0   |
| 9847   | 0   | 1   | 0   | 0   |
| 9851   | 1   | 1   | 0   | 0   |
| 9852   | 0   | 0   | 2   | 1   |
| 9854   | 0   | 0   | 0   | 0   |
| 9855   | 1   | 0   | 1   | 1   |



| respid | Q33 | Q34 | Q35 | Q36 |
|--------|-----|-----|-----|-----|
| 9856   | 0   | 1   | 0   | 0   |
| 9862   | 1   | 0   | 0   | 0   |
| 9863   | 0   | 0   | 0   | 0   |
| 9866   | 0   | 2   | 0   | 0   |
| 9867   | 1   | 2   | 1   | 1   |
| 9868   | 1   | 2   | 2   | 1   |
| 9869   | 1   | 0   | 0   | 0   |
| 9878   | 0   | 1   | 1   | 1   |
| 9879   | 1   | 2   | 1   | 0   |
| 9881   | 0   | 1   | 1   | 0   |
| 9882   | 0   | 0   | 0   | 0   |
| 9884   | 0   | 1   | 0   | 0   |
| 9885   | 1   | 0   | 0   | 0   |
| 9888   | 1   | 0   | 0   | 0   |
| 9889   | 0   | 0   | 0   | 0   |
| 9894   | 1   | 3   | 1   | 1   |
| 9895   | 0   | 0   | 0   | 0   |
| 9896   | 1   | 2   | 4   | 4   |
| 9897   | 1   | 1   | 2   | 1   |
| 9905   | 0   | 1   | 0   | 0   |
| 9907   | 1   | 0   | 0   | 0   |
| 9908   | 0   | 1   | 0   | 0   |
| 9909   | 1   | 1   | 0   | 0   |
| 9910   | 1   | 1   | 3   | 2   |
| 9913   | 1   | 2   | 2   | 0   |
| 9914   | 0   | 0   | 0   | 0   |
| 9915   | 0   | 1   | 1   | 0   |
| 9916   | 0   | 1   | 0   | 0   |
| 9918   | 1   | 0   | 0   | 0   |
| 9919   | 1   | 3   | 2   | 1   |
| 9922   | 0   | 1   | 2   | 1   |
| 9930   | 0   | 1   | 0   | 0   |

| respid | Q33 | Q34 | Q35 | Q36 |
|--------|-----|-----|-----|-----|
| 9934   | 0   | 1   | 0   | 0   |
| 9936   | 0   | 2   | 1   | 1   |
| 9938   | 1   | 0   | 0   | 0   |
| 9940   | 1   | 1   | 0   | 0   |
| 9944   | 0   | 1   | 0   | 0   |
| 9945   | 0   | 0   | 0   | 0   |
| 9948   | 1   | 2   | 0   | 2   |
| 9949   | 1   | 2   | 1   | 1   |
| 9951   | 0   | 1   | 0   | 0   |
| 9952   | 0   | 1   | 1   | 1   |
| 9954   | 0   | 0   | 0   | 0   |
| 9955   | 0   | 0   | 0   | 0   |
| 9956   | 0   | 3   | 4   | 1   |
| 9957   | 0   | 3   | 0   | 0   |
| 9958   | 0   | 1   | 1   | 1   |
| 9959   | 1   | 1   | 1   | 0   |
| 9960   | 0   | 1   | 1   | 0   |
| 9961   | 1   | 2   | 0   | 0   |
| 9962   | 0   | 2   | 0   | 0   |
| 9969   | 1   | 2   | 0   | 0   |
| 9982   | 1   | 1   | 3   | 2   |
| 9984   | 1   | 1   | 0   | 0   |
| 9990   | 0   | 1   | 0   | 0   |
| 9992   | 1   | 1   | 2   | 2   |
| 9993   | 0   | 1   | 1   | 1   |
| 9997   | 0   | 2   | 0   | 0   |
| 9999   | 0   | 1   | 0   | 0   |
| 10000  | 0   | 0   | 0   | 0   |
| 10005  | 1   | 1   | 2   | 0   |
| 10014  | 0   | 1   | 0   | 0   |
| 10016  | 2   | 2   | 3   | 1   |
| 10017  | 1   | 2   | 0   | 0   |

| respid | Q33 | Q34 | Q35 | Q36 |
|--------|-----|-----|-----|-----|
| 10018  | 1   | 1   | 3   | 3   |
| 10021  | 0   | 1   | 1   | 1   |
| 10025  | 1   | 2   | 1   | 0   |
| 10027  | 0   | 0   | 1   | 0   |
| 10028  | 1   | 1   | 1   | 1   |
| 10031  | 1   | 1   | 1   | 1   |
| 10036  | 0   | 0   | 0   | 0   |
| 10037  | 1   | 2   | 1   | 1   |
| 10038  | 1   | 1   | 1   | 0   |
| 10039  | 0   | 0   | 0   | 0   |
| 10041  | 0   | 1   | 3   | 2   |
| 10045  | 1   | 1   | 2   | 1   |
| 10046  | 0   | 1   | 1   | 0   |
| 10047  | 1   | 2   | 2   | 1   |
| 10048  | 0   | 1   | 0   | 0   |
| 10049  | 0   | 1   | 1   | 0   |
| 10051  | 1   | 2   | 0   | 0   |
| 10052  | 1   | 2   | 2   | 1   |
| 10056  | 0   | 1   | 0   | 0   |
| 10061  | 1   | 2   | 1   | 0   |
| 10064  | 0   | 1   | 0   | 0   |
| 10066  | 0   | 0   | 0   | 0   |
| 10069  | 0   | 1   | 0   | 0   |
| 10071  | 0   | 1   | 1   | 1   |
| 10074  | 0   | 1   | 0   | 0   |
| 10079  | 0   | 1   | 0   | 0   |
| 10087  | 0   | 0   | 1   | 1   |
| 10095  | 0   | 0   | 0   | 0   |
| 10097  | 0   | 0   | 0   | 0   |
| 10100  | 1   | 2   | 3   | 0   |
| 10105  | 0   | 0   | 0   | 0   |
| 10107  | 0   | 2   | 2   | 1   |

| respid | Q33 | Q34 | Q35 | Q36 |
|--------|-----|-----|-----|-----|
| 10111  | 0   | 1   | 1   | 0   |
| 10116  | 1   | 1   | 0   | 0   |
| 10118  | 0   | 1   | 0   | 0   |
| 10123  | 0   | 0   | 0   | 0   |
| 10124  | 0   | 2   | 1   | 0   |
| 10130  | 0   | 0   | 0   | 0   |
| 10134  | 1   | 1   | 1   | 1   |
| 10135  | 0   | 0   | 0   | 0   |
| 10136  | 0   | 1   | 0   | 0   |
| 10141  | 1   | 2   | 1   | 0   |
| 10142  | 1   | 1   | 0   | 0   |
| 10143  | 0   | 0   | 0   | 0   |
| 10145  | 0   | 0   | 1   | 0   |
| 10149  | 0   | 2   | 1   | 0   |
| 10150  | 0   | 0   | 1   | 0   |
| 10151  | 0   | 1   | 1   | 0   |
| 10152  | 1   | 3   | 1   | 1   |
| 10153  | 0   | 0   | 0   | 0   |
| 10156  | 0   | 1   | 0   | 0   |
| 10160  | 0   | 1   | 0   | 0   |
| 10161  | 1   | 1   | 0   | 0   |
| 10167  | 1   | 1   | 1   | 1   |
| 10171  | 0   | 0   | 0   | 0   |
| 10172  | 0   | 2   | 0   | 0   |
| 10176  | 0   | 1   | 0   | 0   |
| 10177  | 1   | 2   | 1   | 0   |
| 10182  | 0   | 2   | 1   | 1   |
| 10184  | 0   | 0   | 1   | 1   |
| 10186  | 1   | 2   | 2   | 2   |
| 10189  | 0   | 2   | 0   | 0   |
| 10191  | 0   | 1   | 0   | 0   |
| 10192  | 0   | 2   | 1   | 0   |

| respid | Q33 | Q34 | Q35 | Q36 |
|--------|-----|-----|-----|-----|
| 10195  | 0   | 2   | 0   | 0   |
| 10199  | 0   | 3   | 0   | 0   |
| 10201  | 0   | 1   | 0   | 0   |
| 10213  | 0   | 0   | 0   | 0   |
| 10222  | 1   | 3   | 2   | 2   |
| 10224  | 0   | 1   | 0   | 0   |
| 10245  | 0   | 1   | 0   | 0   |
| 10254  | 0   | 1   | 0   | 0   |
| 10255  | 1   | 3   | 2   | 1   |
| 10257  | 0   | 2   | 0   | 0   |
| 10260  | 0   | 2   | 3   | 0   |
| 10261  | 1   | 1   | 0   | 0   |
| 10263  | 1   | 3   | 4   | 2   |
| 10264  | 0   | 1   | 1   | 0   |
| 10268  | 0   | 2   | 2   | 2   |
| 10269  | 0   | 2   | 3   | 0   |
| 10270  | 0   | 0   | 0   | 0   |
| 10282  | 0   | 1   | 0   | 0   |
| 10285  | 1   | 1   | 0   | 0   |
| 10288  | 0   | 1   | 0   | 0   |
| 10291  | 0   | 0   | 0   | 0   |
| 10292  | 0   | 1   | 0   | 0   |
| 10304  | 0   | 0   | 0   | 0   |
| 10305  | 0   | 1   | 0   | 0   |
| 10310  | 0   | 1   | 0   | 0   |
| 10324  | 0   | 0   | 0   | 0   |
| 10325  | 1   | 1   | 1   | 0   |
| 10326  | 1   | 2   | 1   | 0   |
| 10329  | 0   | 0   | 0   | 0   |
| 10332  | 0   | 1   | 0   | 0   |
| 10337  | 0   | 0   | 1   | 0   |
| 10341  | 0   | 1   | 1   | 0   |

| respid | Q33 | Q34 | Q35 | Q36 |
|--------|-----|-----|-----|-----|
| 10353  | 0   | 0   | 1   | 0   |
| 10354  | 0   | 0   | 0   | 0   |
| 10359  | 1   | 3   | 2   | 2   |
| 10360  | 0   | 1   | 0   | 0   |
| 10362  | 0   | 1   | 1   | 0   |
| 10364  | 0   | 1   | 0   | 0   |
| 10366  | 1   | 3   | 2   | 1   |
| 10367  | 2   | 2   | 0   | 1   |
| 10371  | 0   | 0   | 0   | 0   |
| 10374  | 1   | 1   | 1   | 1   |
| 10375  | 0   | 0   | 0   | 0   |
| 10376  | 0   | 1   | 0   | 0   |
| 10377  | 1   | 1   | 0   | 0   |
| 10378  | 0   | 1   | 1   | 1   |
| 10387  | 0   | 2   | 0   | 0   |
| 10396  | 1   | 3   | 4   | 0   |
| 10397  | 0   | 1   | 0   | 0   |
| 10399  | 0   | 2   | 4   | 2   |
| 10405  | 0   | 1   | 1   | 0   |
| 10406  | 1   | 1   | 0   | 0   |
| 10408  | 1   | 0   | 1   | 0   |
| 10409  | 0   | 0   | 0   | 0   |
| 10412  | 0   | 1   | 0   | 0   |
| 10413  | 0   | 1   | 0   | 0   |
| 10419  | 1   | 3   | 1   | 0   |
| 10423  | 1   | 3   | 2   | 1   |
| 10426  | 0   | 1   | 1   | 0   |
| 10446  | 0   | 2   | 0   | 0   |
| 10448  | 0   | 1   | 0   | 0   |
| 10450  | 0   | 0   | 1   | 0   |
| 10455  | 0   | 1   | 1   | 1   |
| 10460  | 1   | 0   | 1   | 0   |

| respid | Q33 | Q34 | Q35 | Q36 |
|--------|-----|-----|-----|-----|
| 10461  | 0   | 1   | 0   | 0   |
| 10471  | 0   | 1   | 0   | 0   |
| 10472  | 0   | 0   | 0   | 0   |
| 10491  | 1   | 2   | 2   | 2   |
| 10493  | 1   | 1   | 0   | 0   |
| 10498  | 0   | 2   | 0   | 0   |
| 10533  | 1   | 0   | 0   | 0   |
| 10539  | 0   | 0   | 1   | 0   |
| 10540  | 0   | 1   | 1   | 0   |
| 10557  | 0   | 0   | 0   | 0   |
| 10558  | 0   | 1   | 1   | 1   |
| 10559  | 0   | 2   | 2   | 1   |
| 10564  | 0   | 0   | 0   | 0   |
| 10570  | 0   | 0   | 1   | 0   |
| 10572  | 0   | 0   | 0   | 0   |
| 10576  | 1   | 1   | 0   | 0   |
| 10582  | 1   | 1   | 1   | 1   |
| 10593  | 0   | 1   | 1   | 0   |
| 10596  | 0   | 2   | 0   | 0   |
| 10615  | 1   | 0   | 0   | 0   |
| 10616  | 0   | 0   | 0   | 0   |
| 10623  | 0   | 0   | 0   | 0   |
| 10626  | 0   | 3   | 2   | 0   |
| 10627  | 0   | 1   | 1   | 2   |
| 10629  | 0   | 2   | 0   | 0   |
| 10632  | 0   | 1   | 2   | 2   |
| 10641  | 1   | 1   | 0   | 0   |
| 10648  | 0   | 3   | 1   | 0   |
| 10651  | 0   | 2   | 0   | 0   |
| 10654  | 0   | 1   | 0   | 0   |
| 10673  | 0   | 1   | 0   | 0   |
| 10675  | 1   | 1   | 0   | 0   |

| respid | Q33 | Q34 | Q35 | Q36 |
|--------|-----|-----|-----|-----|
| 10689  | 0   | 1   | 3   | 3   |
| 10692  | 0   | 1   | 0   | 0   |
| 10694  | 0   | 1   | 0   | 0   |
| 10695  | 0   | 0   | 0   | 0   |
| 10702  | 1   | 1   | 0   | 2   |
| 10703  | 0   | 1   | 1   | 1   |
| 10708  | 0   | 0   | 0   | 0   |
| 10719  | 0   | 1   | 0   | 0   |
| 10722  | 0   | 2   | 0   | 0   |
| 10723  | 1   | 1   | 1   | 1   |
| 10726  | 1   | 2   | 0   | 0   |
| 10727  | 0   | 1   | 0   | 0   |
| 10730  | 0   | 0   | 0   | 0   |
| 10731  | 0   | 0   | 0   | 0   |
| 10737  | 1   | 2   | 0   | 0   |
| 10743  | 1   | 1   | 0   | 0   |
| 10763  | 1   | 1   | 1   | 0   |
| 10777  | 0   | 1   | 0   | 0   |
| 10787  | 1   | 1   | 1   | 0   |
| 10798  | 0   | 1   | 1   | 1   |
| 10800  | 0   | 1   | 1   | 0   |
| 10802  | 1   | 1   | 1   | 1   |
| 10803  | 1   | 2   | 4   | 0   |
| 10808  | 1   | 1   | 0   | 0   |
| 10810  | 0   | 3   | 1   | 0   |
| 10819  | 0   | 1   | 0   | 0   |
| 10825  | 0   | 1   | 0   | 0   |
| 10827  | 1   | 2   | 2   | 1   |
| 10830  | 1   | 1   | 1   | 0   |
| 10847  | 0   | 1   | 0   | 0   |
| 10849  | 1   | 0   | 0   | 0   |
| 10852  | 0   | 1   | 0   | 0   |



| respid | Q33 | Q34 | Q35 | Q36 |
|--------|-----|-----|-----|-----|
| 10854  | 0   | 2   | 3   | 3   |
| 10857  | 0   | 2   | 0   | 0   |
| 10861  | 0   | 2   | 1   | 1   |
| 10862  | 0   | 0   | 0   | 0   |
| 10870  | 1   | 1   | 1   | 1   |
| 10873  | 0   | 1   | 2   | 0   |
| 10881  | 0   | 1   | 0   | 0   |
| 10893  | 0   | 0   | 0   | 0   |
| 10898  | 1   | 0   | 0   | 0   |
| 10899  | 1   | 2   | 1   | 0   |
| 10905  | 0   | 2   | 0   | 0   |
| 10910  | 0   | 0   | 0   | 0   |
| 10911  | 1   | 0   | 1   | 1   |
| 10912  | 1   | 0   | 0   | 0   |
| 10913  | 1   | 1   | 0   | 0   |
| 10918  | 0   | 1   | 1   | 0   |
| 10995  | 0   | 0   | 1   | 0   |
| 11002  | 0   | 0   | 1   | 1   |
| 11003  | 0   | 1   | 1   | 1   |
| 11005  | 0   | 1   | 0   | 0   |
| 11015  | 1   | 0   | 0   | 0   |
| 11016  | 1   | 2   | 0   | 0   |
| 11017  | 0   | 1   | 0   | 0   |
| 11020  | 1   | 1   | 2   | 2   |
| 11024  | 1   | 1   | 0   | 0   |
| 11026  | 1   | 2   | 4   | 4   |
| 11028  | 0   | 1   | 1   | 1   |
| 11029  | 1   | 1   | 1   | 2   |
| 11030  | 0   | 1   | 0   | 0   |
| 11031  | 0   | 1   | 0   | 0   |
| 11038  | 0   | 0   | 0   | 0   |
| 11051  | 0   | 0   | 0   | 0   |

| respid | Q33 | Q34 | Q35 | Q36 |
|--------|-----|-----|-----|-----|
| 11052  | 1   | 1   | 2   | 2   |
| 11053  | 0   | 0   | 0   | 0   |
| 11054  | 1   | 1   | 2   | 2   |
| 11063  | 0   | 1   | 0   | 0   |
| 11075  | 1   | 1   | 3   | 2   |
| 11083  | 0   | 1   | 0   | 0   |
| 11092  | 0   | 1   | 0   | 0   |
| 11118  | 0   | 0   | 0   | 0   |
| 11119  | 1   | 3   | 3   | 1   |
| 11134  | 1   | 2   | 0   | 0   |
| 11139  | 0   | 2   | 0   | 0   |
| 11154  | 0   | 1   | 0   | 0   |
| 11166  | 0   | 0   | 0   | 0   |
| 11168  | 0   | 0   | 0   | 0   |
| 11176  | 0   | 2   | 1   | 1   |
| 11183  | 1   | 2   | 2   | 0   |
| 11189  | 1   | 1   | 0   | 0   |
| 11196  | 1   | 2   | 4   | 4   |
| 11200  | 1   | 1   | 2   | 0   |
| 11201  | 0   | 1   | 1   | 0   |
| 11211  | 1   | 2   | 4   | 4   |
| 11218  | 0   | 1   | 1   | 0   |
| 11219  | 0   | 1   | 0   | 1   |
| 11221  | 1   | 2   | 1   | 0   |
| 11222  | 0   | 1   | 0   | 0   |
| 11230  | 1   | 2   | 4   | 4   |
| 11236  | 1   | 2   | 4   | 4   |
| 11237  | 0   | 1   | 1   | 0   |
| 11240  | 0   | 3   | 2   | 1   |
| 11244  | 1   | 2   | 4   | 4   |
| 11249  | 0   | 1   | 1   | 1   |
| 11252  | 1   | 2   | 4   | 4   |

| respid | Q33 | Q34 | Q35 | Q36 |
|--------|-----|-----|-----|-----|
| 11254  | 0   | 2   | 1   | 1   |
| 11255  | 0   | 2   | 1   | 1   |
| 11258  | 1   | 2   | 4   | 4   |
| 11260  | 0   | 2   | 0   | 1   |
| 11264  | 2   | 3   | 2   | 2   |
| 11266  | 0   | 2   | 1   | 0   |
| 11268  | 0   | 3   | 2   | 1   |
| 11269  | 0   | 2   | 2   | 0   |
| 11272  | 0   | 1   | 1   | 1   |
| 11273  | 0   | 0   | 0   | 0   |
| 11275  | 0   | 1   | 0   | 0   |
| 11276  | 0   | 1   | 0   | 0   |
| 11278  | 0   | 2   | 2   | 0   |
| 11288  | 0   | 0   | 0   | 0   |
| 11289  | 1   | 0   | 0   | 0   |
| 11291  | 0   | 1   | 0   | 0   |
| 11295  | 0   | 1   | 0   | 0   |
| 11297  | 1   | 1   | 1   | 1   |
| 11304  | 0   | 2   | 2   | 0   |
| 11305  | 0   | 1   | 0   | 0   |
| 11311  | 1   | 0   | 0   | 0   |
| 11313  | 0   | 1   | 0   | 0   |
| 11315  | 1   | 3   | 4   | 4   |
| 11316  | 1   | 3   | 4   | 3   |
| 11318  | 1   | 2   | 2   | 2   |
| 11323  | 0   | 1   | 0   | 0   |
| 11331  | 0   | 2   | 2   | 0   |
| 11333  | 1   | 1   | 1   | 0   |
| 11334  | 0   | 1   | 1   | 1   |
| 11340  | 0   | 1   | 3   | 1   |
| 11345  | 0   | 0   | 0   | 0   |
| 11354  | 0   | 1   | 0   | 0   |

| respid | Q33 | Q34 | Q35 | Q36 |
|--------|-----|-----|-----|-----|
| 11360  | 0   | 1   | 0   | 0   |
| 11361  | 1   | 2   | 2   | 4   |
| 11367  | 0   | 1   | 0   | 0   |
| 11370  | 1   | 0   | 0   | 0   |
| 11371  | 0   | 3   | 1   | 1   |
| 11372  | 1   | 2   | 3   | 2   |
| 11373  | 0   | 2   | 1   | 0   |
| 11382  | 0   | 1   | 0   | 0   |
| 11394  | 1   | 1   | 1   | 0   |
| 11395  | 0   | 1   | 2   | 1   |
| 11397  | 0   | 0   | 0   | 0   |
| 11402  | 0   | 3   | 0   | 1   |
| 11409  | 0   | 1   | 1   | 0   |
| 11410  | 0   | 2   | 1   | 1   |
| 11411  | 0   | 1   | 0   | 0   |
| 11418  | 0   | 1   | 1   | 0   |
| 11425  | 0   | 2   | 3   | 3   |
| 11429  | 0   | 1   | 0   | 0   |
| 11430  | 0   | 2   | 1   | 1   |
| 11431  | 1   | 0   | 0   | 0   |
| 11432  | 0   | 0   | 0   | 0   |
| 11433  | 0   | 3   | 0   | 0   |
| 11435  | 0   | 2   | 2   | 1   |
| 11436  | 1   | 1   | 2   | 2   |
| 11437  | 2   | 3   | 2   | 2   |
| 11439  | 0   | 0   | 0   | 0   |
| 11440  | 0   | 2   | 0   | 0   |
| 11447  | 0   | 1   | 0   | 0   |
| 11455  | 0   | 1   | 0   | 0   |
| 11456  | 0   | 2   | 3   | 3   |
| 11461  | 0   | 1   | 1   | 1   |
| 11463  | 1   | 1   | 2   | 1   |

| respid | Q33 | Q34 | Q35 | Q36 |
|--------|-----|-----|-----|-----|
| 11470  | 1   | 2   | 1   | 1   |
| 11472  | 0   | 0   | 0   | 0   |
| 11475  | 0   | 0   | 1   | 0   |
| 11476  | 0   | 3   | 1   | 0   |
| 11482  | 1   | 2   | 3   | 3   |
| 11501  | 0   | 2   | 1   | 2   |
| 11503  | 0   | 2   | 1   | 0   |
| 11505  | 1   | 1   | 0   | 0   |
| 11510  | 0   | 2   | 0   | 0   |
| 11519  | 0   | 0   | 0   | 0   |
| 11527  | 1   | 3   | 3   | 3   |
| 11529  | 1   | 2   | 2   | 2   |
| 11530  | 0   | 2   | 0   | 1   |
| 11536  | 1   | 3   | 4   | 0   |
| 11543  | 0   | 1   | 0   | 0   |
| 11548  | 0   | 1   | 1   | 1   |
| 11566  | 0   | 1   | 0   | 0   |
| 11570  | 1   | 1   | 2   | 2   |
| 11571  | 1   | 1   | 1   | 0   |
| 11578  | 0   | 0   | 0   | 0   |
| 11579  | 0   | 0   | 0   | 0   |
| 11581  | 1   | 2   | 2   | 0   |
| 11582  | 0   | 2   | 0   | 0   |
| 11583  | 0   | 1   | 0   | 0   |
| 11589  | 0   | 1   | 2   | 2   |
| 11590  | 0   | 1   | 0   | 0   |
| 11592  | 0   | 1   | 0   | 0   |
| 11596  | 0   | 0   | 0   | 0   |
| 11598  | 0   | 1   | 2   | 2   |
| 11602  | 0   | 2   | 2   | 0   |
| 11605  | 1   | 1   | 2   | 0   |
| 11618  | 1   | 3   | 1   | 1   |

| respid | Q33 | Q34 | Q35 | Q36 |
|--------|-----|-----|-----|-----|
| 11621  | 0   | 1   | 2   | 0   |
| 11630  | 0   | 3   | 0   | 0   |
| 11636  | 0   | 2   | 1   | 0   |
| 11640  | 1   | 2   | 2   | 1   |
| 11658  | 0   | 1   | 2   | 0   |
| 11665  | 1   | 1   | 0   | 0   |
| 11666  | 0   | 3   | 1   | 0   |
| 11667  | 0   | 2   | 2   | 1   |
| 11674  | 0   | 1   | 0   | 0   |
| 11680  | 0   | 0   | 0   | 0   |
| 11683  | 1   | 2   | 1   | 1   |
| 11688  | 1   | 2   | 1   | 0   |
| 11690  | 0   | 0   | 0   | 0   |
| 11694  | 0   | 1   | 0   | 0   |
| 11705  | 0   | 1   | 0   | 0   |
| 11720  | 0   | 1   | 1   | 2   |
| 11724  | 0   | 0   | 0   | 0   |
| 11738  | 0   | 1   | 1   | 1   |
| 11744  | 1   | 3   | 1   | 1   |
| 11745  | 1   | 2   | 0   | 0   |
| 11747  | 0   | 0   | 0   | 0   |
| 11755  | 0   | 2   | 1   | 0   |
| 11756  | 1   | 2   | 1   | 1   |
| 11772  | 1   | 1   | 1   | 0   |
| 11773  | 0   | 0   | 0   | 0   |
| 11778  | 1   | 3   | 2   | 2   |
| 11790  | 0   | 1   | 0   | 0   |
| 11794  | 0   | 0   | 0   | 0   |
| 11795  | 0   | 2   | 2   | 2   |
| 11799  | 0   | 1   | 2   | 3   |
| 11803  | 0   | 1   | 1   | 1   |
| 11806  | 2   | 3   | 5   | 4   |

| respid | Q33 | Q34 | Q35 | Q36 |
|--------|-----|-----|-----|-----|
| 11808  | 0   | 1   | 2   | 2   |
| 11810  | 0   | 0   | 0   | 0   |
| 11811  | 0   | 0   | 0   | 0   |
| 11812  | 1   | 2   | 2   | 2   |
| 11813  | 0   | 1   | 2   | 2   |
| 11821  | 0   | 3   | 1   | 1   |
| 11827  | 0   | 0   | 0   | 0   |
| 11831  | 1   | 1   | 2   | 2   |
| 11841  | 0   | 0   | 0   | 0   |
| 11872  | 1   | 1   | 1   | 0   |
| 11898  | 0   | 2   | 0   | 0   |
| 11902  | 1   | 3   | 2   | 2   |
| 11912  | 1   | 2   | 1   | 0   |
| 11926  | 0   | 1   | 0   | 0   |
| 11928  | 1   | 1   | 1   | 1   |
| 11932  | 1   | 1   | 1   | 0   |
| 11934  | 0   | 1   | 0   | 0   |
| 11941  | 1   | 2   | 2   | 1   |
| 11942  | 0   | 0   | 0   | 0   |
| 11943  | 1   | 1   | 0   | 1   |
| 11944  | 1   | 1   | 2   | 1   |
| 11955  | 1   | 0   | 0   | 0   |
| 11958  | 1   | 2   | 1   | 1   |
| 11968  | 0   | 1   | 0   | 0   |
| 11979  | 0   | 2   | 2   | 1   |
| 11988  | 1   | 1   | 1   | 1   |
| 11999  | 1   | 2   | 3   | 1   |
| 12002  | 0   | 1   | 0   | 0   |
| 12004  | 0   | 3   | 0   | 0   |
| 12008  | 0   | 1   | 0   | 0   |
| 12013  | 1   | 3   | 2   | 1   |
| 12018  | 0   | 1   | 1   | 0   |

| respid | Q33 | Q34 | Q35 | Q36 |
|--------|-----|-----|-----|-----|
| 12023  | 0   | 1   | 0   | 0   |
| 12027  | 1   | 2   | 2   | 2   |
| 12030  | 0   | 2   | 1   | 0   |
| 12031  | 0   | 1   | 1   | 0   |
| 12036  | 1   | 1   | 1   | 1   |
| 12037  | 1   | 2   | 4   | 2   |
| 12038  | 0   | 0   | 2   | 0   |
| 12039  | 0   | 1   | 0   | 0   |
| 12045  | 0   | 0   | 0   | 0   |
| 12046  | 0   | 1   | 1   | 1   |
| 12054  | 1   | 2   | 2   | 2   |
| 12055  | 1   | 1   | 2   | 2   |
| 12069  | 1   | 3   | 1   | 1   |
| 12070  | 1   | 2   | 3   | 1   |
| 12074  | 1   | 1   | 0   | 0   |
| 12075  | 1   | 2   | 2   | 2   |
| 12078  | 0   | 1   | 1   | 1   |
| 12089  | 0   | 1   | 0   | 0   |
| 12091  | 0   | 2   | 2   | 2   |
| 12092  | 0   | 2   | 1   | 1   |
| 12108  | 1   | 2   | 2   | 3   |
| 12111  | 1   | 3   | 4   | 2   |
| 12112  | 0   | 2   | 2   | 2   |
| 12126  | 0   | 0   | 0   | 0   |
| 12132  | 0   | 3   | 2   | 2   |
| 12150  | 2   | 3   | 2   | 2   |
| 12152  | 0   | 1   | 1   | 1   |
| 12154  | 1   | 1   | 0   | 0   |
| 12157  | 1   | 3   | 2   | 2   |
| 12165  | 0   | 3   | 0   | 0   |
| 12169  | 0   | 2   | 2   | 1   |
| 12182  | 1   | 3   | 4   | 4   |



| respid | Q33 | Q34 | Q35 | Q36 |
|--------|-----|-----|-----|-----|
| 12198  | 0   | 0   | 0   | 0   |
| 12199  | 0   | 0   | 0   | 0   |
| 12202  | 0   | 1   | 1   | 1   |
| 12207  | 0   | 1   | 1   | 0   |
| 12208  | 0   | 1   | 2   | 0   |
| 12210  | 0   | 1   | 0   | 0   |
| 12219  | 1   | 3   | 4   | 3   |
| 12224  | 1   | 1   | 0   | 0   |
| 12230  | 0   | 1   | 0   | 0   |
| 12238  | 0   | 1   | 0   | 0   |
| 12239  | 0   | 0   | 0   | 0   |
| 12243  | 0   | 0   | 0   | 0   |
| 12245  | 1   | 3   | 1   | 0   |
| 12246  | 1   | 3   | 3   | 3   |
| 12247  | 1   | 1   | 0   | 0   |
| 12248  | 1   | 1   | 0   | 0   |
| 12249  | 0   | 1   | 1   | 1   |
| 12258  | 1   | 2   | 3   | 3   |
| 12265  | 0   | 3   | 2   | 0   |
| 12269  | 0   | 1   | 0   | 0   |
| 12270  | 0   | 1   | 0   | 0   |
| 12279  | 0   | 2   | 0   | 0   |
| 12280  | 1   | 2   | 1   | 0   |
| 12282  | 0   | 1   | 1   | 0   |
| 12283  | 1   | 2   | 0   | 0   |
| 12287  | 0   | 1   | 0   | 0   |
| 12288  | 1   | 1   | 0   | 0   |
| 12290  | 0   | 2   | 0   | 0   |
| 12292  | 0   | 1   | 1   | 0   |
| 12294  | 1   | 0   | 0   | 0   |
| 12296  | 0   | 2   | 0   | 0   |
| 12307  | 1   | 2   | 1   | 0   |

| respid | Q33 | Q34 | Q35 | Q36 |
|--------|-----|-----|-----|-----|
| 12309  | 0   | 1   | 0   | 0   |
| 12312  | 1   | 0   | 2   | 1   |
| 12317  | 0   | 1   | 0   | 0   |
| 12319  | 0   | 1   | 1   | 1   |
| 12320  | 1   | 0   | 1   | 0   |
| 12322  | 0   | 1   | 0   | 0   |
| 12328  | 0   | 1   | 1   | 1   |
| 12331  | 1   | 3   | 4   | 3   |
| 12332  | 0   | 0   | 0   | 0   |
| 12334  | 0   | 1   | 0   | 2   |
| 12337  | 0   | 1   | 0   | 0   |
| 12338  | 0   | 0   | 0   | 0   |
| 12342  | 0   | 1   | 1   | 1   |
| 12349  | 0   | 1   | 0   | 0   |
| 12352  | 0   | 1   | 1   | 1   |
| 12355  | 0   | 1   | 0   | 0   |
| 12357  | 0   | 1   | 1   | 2   |
| 12358  | 0   | 2   | 0   | 0   |
| 12371  | 1   | 2   | 2   | 0   |
| 12372  | 0   | 1   | 0   | 0   |
| 12373  | 0   | 1   | 0   | 0   |
| 12379  | 0   | 1   | 0   | 0   |
| 12381  | 1   | 1   | 1   | 1   |
| 12383  | 1   | 2   | 0   | 0   |
| 12384  | 0   | 0   | 0   | 0   |
| 12386  | 0   | 1   | 1   | 0   |
| 12389  | 0   | 0   | 0   | 0   |
| 12392  | 1   | 0   | 0   | 0   |
| 12396  | 0   | 1   | 0   | 0   |
| 12397  | 1   | 1   | 1   | 0   |
| 12399  | 0   | 3   | 1   | 1   |
| 12400  | 1   | 1   | 4   | 0   |

| respid | Q33 | Q34 | Q35 | Q36 |
|--------|-----|-----|-----|-----|
| 12406  | 0   | 2   | 2   | 1   |
| 12407  | 0   | 1   | 1   | 0   |
| 12410  | 0   | 1   | 0   | 0   |
| 12413  | 0   | 1   | 1   | 0   |
| 12416  | 0   | 2   | 2   | 0   |
| 12419  | 0   | 2   | 1   | 1   |
| 12422  | 0   | 1   | 1   | 1   |
| 12423  | 0   | 1   | 1   | 0   |
| 12429  | 0   | 1   | 0   | 0   |
| 12434  | 1   | 3   | 2   | 2   |
| 12435  | 0   | 1   | 0   | 0   |
| 12436  | 0   | 2   | 0   | 0   |
| 12442  | 0   | 0   | 0   | 0   |
| 12449  | 0   | 1   | 0   | 0   |
| 12451  | 0   | 1   | 0   | 0   |
| 12456  | 1   | 3   | 2   | 0   |
| 12457  | 1   | 1   | 0   | 0   |
| 12458  | 0   | 1   | 0   | 0   |
| 12461  | 0   | 2   | 1   | 1   |
| 12462  | 0   | 1   | 1   | 0   |
| 12463  | 1   | 1   | 1   | 1   |
| 12466  | 0   | 0   | 0   | 0   |
| 12470  | 0   | 2   | 2   | 2   |
| 12471  | 0   | 0   | 0   | 0   |
| 12472  | 1   | 1   | 0   | 0   |
| 12478  | 0   | 2   | 1   | 2   |
| 12479  | 0   | 1   | 1   | 1   |
| 12481  | 0   | 1   | 0   | 0   |
| 12482  | 0   | 2   | 2   | 2   |
| 12483  | 0   | 0   | 0   | 0   |
| 12496  | 0   | 0   | 0   | 0   |
| 12497  | 1   | 2   | 1   | 0   |

| respid | Q33 | Q34 | Q35 | Q36 |
|--------|-----|-----|-----|-----|
| 12498  | 1   | 1   | 2   | 2   |
| 12500  | 0   | 2   | 2   | 2   |
| 12501  | 1   | 1   | 1   | 0   |
| 12502  | 0   | 1   | 1   | 1   |
| 12503  | 1   | 0   | 0   | 0   |
| 12505  | 1   | 1   | 1   | 1   |
| 12508  | 0   | 1   | 2   | 2   |
| 12509  | 0   | 1   | 1   | 1   |
| 12510  | 0   | 0   | 0   | 0   |
| 12512  | 1   | 2   | 1   | 0   |
| 12514  | 0   | 2   | 2   | 2   |
| 12515  | 0   | 2   | 2   | 2   |
| 12520  | 1   | 0   | 0   | 0   |
| 12522  | 0   | 0   | 0   | 0   |
| 12526  | 0   | 2   | 2   | 2   |
| 12527  | 0   | 0   | 0   | 0   |
| 12528  | 0   | 1   | 1   | 0   |
| 12530  | 0   | 2   | 4   | 4   |
| 12535  | 0   | 1   | 0   | 0   |
| 12539  | 0   | 1   | 1   | 0   |
| 12541  | 1   | 2   | 2   | 2   |
| 12542  | 0   | 1   | 0   | 0   |
| 12545  | 2   | 2   | 2   | 0   |
| 12547  | 1   | 3   | 2   | 2   |
| 12549  | 0   | 0   | 1   | 1   |
| 12550  | 0   | 1   | 0   | 0   |
| 12555  | 0   | 0   | 0   | 0   |
| 12557  | 0   | 1   | 1   | 1   |
| 12559  | 0   | 1   | 1   | 0   |
| 12561  | 0   | 1   | 1   | 1   |
| 12562  | 0   | 2   | 1   | 1   |
| 12563  | 0   | 0   | 0   | 1   |

| respid | Q33 | Q34 | Q35 | Q36 |
|--------|-----|-----|-----|-----|
| 12565  | 1   | 1   | 1   | 0   |
| 12566  | 0   | 2   | 0   | 0   |
| 12570  | 0   | 1   | 0   | 0   |
| 12571  | 0   | 1   | 1   | 0   |
| 12572  | 0   | 2   | 2   | 2   |
| 12578  | 0   | 1   | 1   | 1   |
| 12579  | 0   | 2   | 1   | 1   |
| 12581  | 1   | 2   | 0   | 0   |
| 12582  | 1   | 2   | 1   | 0   |
| 12585  | 0   | 2   | 0   | 0   |
| 12586  | 1   | 2   | 1   | 0   |
| 12588  | 1   | 1   | 2   | 2   |
| 12589  | 1   | 1   | 1   | 0   |
| 12590  | 0   | 0   | 0   | 0   |
| 12591  | 0   | 2   | 1   | 1   |
| 12593  | 1   | 1   | 2   | 2   |
| 12594  | 0   | 1   | 0   | 0   |
| 12599  | 0   | 1   | 1   | 1   |
| 12600  | 1   | 0   | 1   | 0   |
| 12602  | 1   | 1   | 3   | 2   |
| 12606  | 1   | 3   | 2   | 2   |
| 12607  | 1   | 0   | 0   | 0   |
| 12608  | 0   | 0   | 0   | 0   |
| 12610  | 0   | 2   | 2   | 2   |
| 12611  | 1   | 1   | 0   | 0   |
| 12613  | 0   | 0   | 2   | 4   |
| 12616  | 0   | 1   | 1   | 1   |
| 12617  | 1   | 1   | 3   | 3   |
| 12619  | 1   | 1   | 0   | 0   |
| 12622  | 0   | 0   | 0   | 0   |
| 12628  | 1   | 2   | 0   | 0   |
| 12631  | 0   | 1   | 1   | 0   |

| respid | Q33 | Q34 | Q35 | Q36 |
|--------|-----|-----|-----|-----|
| 12635  | 0   | 2   | 2   | 2   |
| 12638  | 0   | 1   | 0   | 0   |
| 12639  | 0   | 1   | 1   | 0   |
| 12640  | 0   | 1   | 0   | 0   |
| 12643  | 0   | 1   | 0   | 0   |
| 12646  | 0   | 3   | 1   | 1   |
| 12648  | 1   | 2   | 2   | 2   |
| 12650  | 0   | 2   | 2   | 2   |
| 12651  | 0   | 1   | 1   | 1   |
| 12658  | 1   | 1   | 2   | 2   |
| 12662  | 0   | 1   | 0   | 0   |
| 12663  | 0   | 2   | 2   | 2   |
| 12664  | 2   | 3   | 0   | 0   |
| 12669  | 1   | 3   | 4   | 4   |
| 12670  | 0   | 1   | 1   | 1   |
| 12673  | 0   | 0   | 0   | 0   |
| 12675  | 0   | 0   | 0   | 0   |
| 12677  | 0   | 1   | 1   | 1   |
| 12679  | 0   | 1   | 0   | 0   |
| 12682  | 0   | 2   | 2   | 2   |
| 12696  | 0   | 1   | 1   | 1   |
| 12697  | 0   | 1   | 1   | 1   |
| 12699  | 0   | 1   | 0   | 0   |
| 12700  | 0   | 2   | 0   | 1   |
| 12701  | 0   | 2   | 2   | 2   |
| 12702  | 0   | 1   | 1   | 1   |
| 12704  | 1   | 3   | 4   | 2   |
| 12705  | 1   | 1   | 0   | 0   |
| 12709  | 0   | 1   | 0   | 0   |
| 12710  | 0   | 1   | 1   | 1   |
| 12713  | 1   | 1   | 1   | 1   |
| 12716  | 0   | 1   | 1   | 1   |

| respid | Q33 | Q34 | Q35 | Q36 |
|--------|-----|-----|-----|-----|
| 12719  | 0   | 1   | 1   | 1   |
| 12720  | 0   | 1   | 1   | 1   |
| 12723  | 0   | 0   | 0   | 0   |
| 12726  | 0   | 1   | 1   | 1   |
| 12728  | 0   | 2   | 2   | 2   |
| 12729  | 0   | 1   | 0   | 0   |
| 12731  | 0   | 1   | 1   | 1   |
| 12732  | 0   | 2   | 2   | 2   |
| 12733  | 1   | 1   | 2   | 2   |
| 12736  | 0   | 1   | 0   | 0   |
| 12737  | 0   | 2   | 1   | 1   |
| 12739  | 0   | 2   | 2   | 2   |
| 12742  | 0   | 1   | 1   | 1   |
| 12743  | 0   | 3   | 3   | 2   |
| 12744  | 0   | 2   | 0   | 0   |
| 12747  | 0   | 3   | 3   | 1   |
| 12751  | 0   | 1   | 0   | 0   |
| 12754  | 0   | 1   | 1   | 1   |
| 12756  | 0   | 3   | 0   | 0   |
| 12757  | 0   | 1   | 1   | 1   |
| 12760  | 0   | 2   | 0   | 0   |
| 12761  | 0   | 2   | 1   | 1   |
| 12762  | 0   | 1   | 3   | 2   |
| 12766  | 0   | 1   | 0   | 0   |
| 12769  | 1   | 2   | 0   | 0   |
| 12770  | 0   | 2   | 2   | 2   |
| 12773  | 1   | 1   | 2   | 1   |
| 12780  | 0   | 1   | 1   | 0   |
| 12789  | 0   | 1   | 0   | 0   |
| 12792  | 1   | 1   | 2   | 3   |
| 12795  | 0   | 1   | 1   | 1   |
| 12804  | 2   | 1   | 1   | 0   |

| respid | Q33 | Q34 | Q35 | Q36 |
|--------|-----|-----|-----|-----|
| 12811  | 1   | 1   | 0   | 0   |
| 12813  | 1   | 1   | 1   | 1   |
| 12814  | 0   | 0   | 2   | 2   |
| 12815  | 0   | 1   | 0   | 0   |
| 12816  | 0   | 0   | 0   | 0   |
| 12817  | 0   | 1   | 0   | 0   |
| 12818  | 0   | 1   | 0   | 0   |
| 12819  | 0   | 0   | 0   | 0   |
| 12820  | 0   | 0   | 0   | 0   |
| 12821  | 0   | 1   | 0   | 0   |
| 12824  | 0   | 0   | 1   | 0   |
| 12827  | 0   | 2   | 0   | 0   |
| 12836  | 1   | 3   | 4   | 3   |
| 12837  | 0   | 1   | 1   | 1   |
| 12838  | 0   | 1   | 1   | 1   |
| 12845  | 0   | 0   | 1   | 1   |
| 12847  | 0   | 1   | 2   | 0   |
| 12849  | 1   | 1   | 2   | 2   |
| 12850  | 0   | 1   | 3   | 1   |
| 12852  | 0   | 1   | 0   | 0   |
| 12853  | 1   | 1   | 1   | 2   |
| 12854  | 0   | 1   | 0   | 0   |
| 12860  | 0   | 1   | 0   | 0   |
| 12861  | 1   | 2   | 0   | 0   |
| 12863  | 0   | 1   | 0   | 0   |
| 12865  | 1   | 1   | 0   | 0   |
| 12870  | 1   | 0   | 1   | 0   |
| 12871  | 0   | 1   | 0   | 0   |
| 12873  | 1   | 2   | 0   | 0   |
| 12877  | 0   | 1   | 0   | 0   |
| 12880  | 0   | 2   | 0   | 0   |
| 12881  | 0   | 1   | 1   | 0   |



| respid | Q33 | Q34 | Q35 | Q36 |
|--------|-----|-----|-----|-----|
| 12882  | 0   | 0   | 1   | 0   |
| 12883  | 0   | 1   | 1   | 0   |
| 12885  | 0   | 2   | 0   | 1   |
| 12887  | 1   | 1   | 2   | 1   |
| 12889  | 1   | 0   | 1   | 0   |
| 12890  | 1   | 1   | 0   | 0   |
| 12891  | 1   | 1   | 1   | 2   |
| 12892  | 0   | 2   | 2   | 2   |
| 12893  | 0   | 1   | 0   | 0   |
| 12895  | 0   | 1   | 1   | 1   |
| 12898  | 0   | 1   | 0   | 0   |
| 12907  | 0   | 3   | 2   | 1   |
| 12908  | 0   | 1   | 0   | 0   |
| 12909  | 0   | 0   | 0   | 0   |
| 12914  | 1   | 0   | 1   | 0   |
| 12915  | 1   | 3   | 1   | 0   |
| 12916  | 0   | 1   | 0   | 0   |
| 12921  | 0   | 1   | 1   | 1   |
| 12922  | 0   | 1   | 0   | 0   |
| 12923  | 0   | 2   | 1   | 0   |
| 12926  | 0   | 0   | 0   | 0   |
| 12927  | 1   | 1   | 1   | 1   |
| 12932  | 1   | 2   | 0   | 0   |
| 12936  | 1   | 0   | 0   | 0   |
| 12937  | 1   | 1   | 1   | 0   |
| 12938  | 0   | 3   | 4   | 3   |
| 12939  | 0   | 1   | 0   | 0   |
| 12940  | 0   | 3   | 2   | 2   |
| 12945  | 0   | 1   | 0   | 0   |
| 12946  | 0   | 1   | 0   | 0   |
| 12947  | 1   | 2   | 2   | 3   |
| 12948  | 1   | 2   | 3   | 2   |

| respid | Q33 | Q34 | Q35 | Q36 |
|--------|-----|-----|-----|-----|
| 12951  | 0   | 2   | 1   | 1   |
| 12952  | 1   | 1   | 0   | 0   |
| 12954  | 1   | 1   | 2   | 2   |
| 12960  | 0   | 1   | 0   | 0   |
| 12961  | 0   | 1   | 1   | 0   |
| 12962  | 0   | 0   | 0   | 0   |
| 12963  | 1   | 1   | 0   | 0   |
| 12964  | 0   | 0   | 0   | 0   |
| 12966  | 1   | 0   | 0   | 0   |
| 12967  | 0   | 1   | 0   | 0   |
| 12969  | 1   | 0   | 0   | 0   |
| 12970  | 0   | 1   | 0   | 0   |
| 12974  | 1   | 3   | 2   | 2   |
| 12979  | 0   | 0   | 0   | 0   |
| 12980  | 0   | 0   | 0   | 0   |
| 12983  | 0   | 1   | 0   | 0   |
| 12988  | 1   | 1   | 1   | 0   |
| 12994  | 1   | 2   | 0   | 0   |
| 12995  | 0   | 2   | 0   | 0   |
| 12996  | 1   | 0   | 0   | 0   |
| 12998  | 1   | 1   | 0   | 0   |
| 12999  | 1   | 1   | 0   | 0   |
| 13001  | 0   | 1   | 0   | 0   |
| 13005  | 0   | 0   | 1   | 0   |
| 13006  | 1   | 2   | 2   | 2   |
| 13007  | 0   | 0   | 0   | 0   |
| 13011  | 0   | 1   | 3   | 1   |
| 13012  | 0   | 1   | 0   | 0   |
| 13013  | 1   | 2   | 4   | 4   |
| 13016  | 0   | 1   | 0   | 0   |
| 13018  | 0   | 1   | 1   | 0   |
| 13020  | 0   | 0   | 0   | 0   |

| respid | Q33 | Q34 | Q35 | Q36 |
|--------|-----|-----|-----|-----|
| 13024  | 0   | 0   | 1   | 0   |
| 13025  | 0   | 1   | 0   | 0   |
| 13027  | 1   | 1   | 1   | 1   |
| 13031  | 0   | 1   | 0   | 0   |
| 13032  | 1   | 2   | 2   | 2   |
| 13034  | 1   | 0   | 1   | 0   |
| 13036  | 0   | 1   | 1   | 0   |
| 13037  | 0   | 0   | 0   | 0   |
| 13038  | 1   | 3   | 3   | 3   |
| 13039  | 0   | 1   | 1   | 0   |
| 13040  | 0   | 1   | 1   | 1   |
| 13041  | 0   | 1   | 1   | 0   |
| 13045  | 1   | 1   | 1   | 1   |
| 13046  | 1   | 1   | 0   | 0   |
| 13048  | 1   | 1   | 0   | 0   |
| 13051  | 0   | 1   | 1   | 0   |
| 13053  | 0   | 0   | 0   | 0   |
| 13055  | 1   | 2   | 3   | 3   |
| 13059  | 1   | 1   | 0   | 0   |
| 13068  | 0   | 1   | 0   | 0   |
| 13069  | 0   | 1   | 0   | 0   |
| 13076  | 0   | 1   | 1   | 0   |
| 13081  | 0   | 1   | 0   | 0   |
| 13082  | 1   | 1   | 0   | 0   |
| 13084  | 1   | 1   | 2   | 3   |
| 13085  | 0   | 2   | 0   | 0   |
| 13086  | 0   | 2   | 0   | 0   |
| 13093  | 0   | 1   | 1   | 0   |
| 13094  | 1   | 2   | 4   | 4   |
| 13097  | 1   | 0   | 0   | 0   |
| 13098  | 0   | 0   | 1   | 1   |
| 13099  | 0   | 0   | 2   | 0   |

| respid | Q33 | Q34 | Q35 | Q36 |
|--------|-----|-----|-----|-----|
| 13100  | 0   | 1   | 0   | 0   |
| 13101  | 0   | 0   | 0   | 0   |
| 13103  | 0   | 0   | 0   | 0   |
| 13105  | 0   | 0   | 0   | 0   |
| 13106  | 0   | 1   | 1   | 0   |
| 13107  | 1   | 1   | 0   | 0   |
| 13110  | 1   | 2   | 2   | 1   |
| 13118  | 0   | 1   | 1   | 0   |
| 13120  | 0   | 3   | 1   | 1   |
| 13130  | 1   | 0   | 0   | 0   |
| 13133  | 1   | 1   | 0   | 0   |
| 13134  | 0   | 0   | 0   | 0   |
| 13139  | 1   | 1   | 1   | 1   |
| 13142  | 0   | 0   | 0   | 0   |
| 13143  | 0   | 1   | 3   | 0   |
| 13145  | 1   | 1   | 1   | 0   |
| 13148  | 0   | 0   | 0   | 0   |
| 13149  | 0   | 0   | 0   | 0   |
| 13151  | 1   | 3   | 4   | 3   |
| 13153  | 0   | 0   | 0   | 0   |
| 13158  | 0   | 0   | 0   | 0   |
| 13160  | 1   | 1   | 1   | 0   |
| 13162  | 1   | 2   | 2   | 1   |
| 13169  | 0   | 2   | 0   | 0   |
| 13172  | 0   | 2   | 2   | 2   |
| 13173  | 0   | 1   | 1   | 0   |
| 13176  | 0   | 0   | 0   | 0   |
| 13179  | 1   | 0   | 0   | 0   |
| 13184  | 0   | 1   | 1   | 0   |
| 13185  | 0   | 1   | 1   | 1   |
| 13186  | 0   | 0   | 0   | 0   |
| 13188  | 0   | 2   | 1   | 0   |

| respid | Q33 | Q34 | Q35 | Q36 |
|--------|-----|-----|-----|-----|
| 13190  | 1   | 1   | 2   | 2   |
| 13192  | 0   | 0   | 1   | 0   |
| 13193  | 0   | 0   | 0   | 0   |
| 13201  | 0   | 1   | 1   | 1   |
| 13207  | 0   | 1   | 0   | 0   |
| 13208  | 1   | 0   | 0   | 0   |
| 13209  | 1   | 2   | 3   | 3   |
| 13212  | 0   | 1   | 0   | 0   |
| 13215  | 1   | 1   | 0   | 0   |
| 13218  | 1   | 3   | 1   | 0   |
| 13219  | 0   | 0   | 0   | 0   |
| 13224  | 0   | 1   | 1   | 2   |
| 13225  | 0   | 0   | 0   | 0   |
| 13226  | 0   | 1   | 0   | 0   |
| 13232  | 2   | 1   | 0   | 0   |
| 13237  | 0   | 1   | 0   | 0   |
| 13239  | 1   | 1   | 1   | 1   |
| 13241  | 1   | 1   | 0   | 0   |
| 13243  | 0   | 3   | 2   | 0   |
| 13247  | 0   | 1   | 0   | 0   |
| 13248  | 0   | 1   | 0   | 0   |
| 13251  | 1   | 1   | 0   | 0   |
| 13256  | 1   | 0   | 1   | 0   |
| 13260  | 0   | 1   | 0   | 1   |
| 13261  | 1   | 1   | 1   | 0   |
| 13264  | 0   | 0   | 0   | 0   |
| 13273  | 0   | 1   | 1   | 0   |
| 13274  | 0   | 1   | 0   | 0   |
| 13276  | 0   | 0   | 0   | 1   |
| 13278  | 0   | 0   | 0   | 0   |
| 13279  | 0   | 1   | 0   | 0   |
| 13282  | 0   | 0   | 0   | 0   |

| respid | Q33 | Q34 | Q35 | Q36 |
|--------|-----|-----|-----|-----|
| 13283  | 1   | 2   | 1   | 1   |
| 13285  | 1   | 1   | 0   | 0   |
| 13286  | 0   | 1   | 0   | 0   |
| 13299  | 1   | 0   | 1   | 1   |
| 13300  | 0   | 1   | 1   | 1   |
| 13301  | 0   | 0   | 0   | 0   |
| 13303  | 0   | 1   | 2   | 1   |
| 13304  | 0   | 1   | 0   | 1   |
| 13307  | 0   | 1   | 2   | 2   |
| 13308  | 1   | 0   | 0   | 0   |
| 13312  | 0   | 1   | 1   | 1   |
| 13313  | 1   | 0   | 0   | 0   |
| 13314  | 0   | 1   | 1   | 1   |
| 13318  | 0   | 1   | 1   | 1   |
| 13320  | 1   | 3   | 1   | 1   |
| 13322  | 0   | 1   | 1   | 1   |
| 13324  | 0   | 2   | 0   | 0   |
| 13325  | 0   | 1   | 1   | 1   |
| 13327  | 0   | 1   | 1   | 0   |
| 13330  | 0   | 1   | 0   | 0   |
| 13332  | 0   | 1   | 1   | 1   |
| 13333  | 0   | 1   | 1   | 1   |
| 13334  | 0   | 1   | 0   | 0   |
| 13351  | 1   | 2   | 3   | 2   |
| 13353  | 0   | 1   | 1   | 1   |
| 13354  | 1   | 1   | 0   | 0   |
| 13355  | 0   | 1   | 2   | 1   |
| 13358  | 0   | 0   | 0   | 0   |
| 13359  | 0   | 0   | 0   | 0   |
| 13360  | 1   | 1   | 1   | 1   |
| 13364  | 1   | 1   | 1   | 0   |
| 13365  | 0   | 3   | 3   | 0   |

| respid | Q33 | Q34 | Q35 | Q36 |
|--------|-----|-----|-----|-----|
| 13368  | 0   | 0   | 0   | 0   |
| 13370  | 0   | 1   | 0   | 0   |
| 13375  | 0   | 0   | 0   | 0   |
| 13384  | 1   | 1   | 0   | 0   |
| 13387  | 0   | 1   | 1   | 1   |
| 13395  | 1   | 1   | 4   | 2   |
| 13398  | 0   | 0   | 0   | 0   |
| 13404  | 0   | 2   | 1   | 0   |
| 13405  | 0   | 0   | 1   | 0   |
| 13408  | 0   | 1   | 0   | 0   |
| 13411  | 0   | 0   | 0   | 0   |
| 13413  | 0   | 1   | 0   | 0   |
| 13419  | 0   | 2   | 0   | 0   |
| 13420  | 0   | 0   | 0   | 0   |
| 13427  | 0   | 1   | 0   | 0   |
| 13441  | 0   | 2   | 3   | 3   |
| 13444  | 0   | 1   | 1   | 0   |
| 13456  | 0   | 1   | 0   | 0   |
| 13466  | 0   | 1   | 0   | 0   |
| 13468  | 0   | 0   | 0   | 0   |
| 13475  | 0   | 1   | 0   | 0   |
| 13484  | 0   | 1   | 1   | 0   |
| 13486  | 0   | 1   | 1   | 0   |
| 13487  | 1   | 2   | 1   | 0   |
| 13491  | 0   | 0   | 0   | 0   |
| 13496  | 1   | 3   | 0   | 0   |
| 13497  | 0   | 1   | 0   | 0   |
| 13498  | 1   | 2   | 1   | 0   |
| 13502  | 0   | 0   | 0   | 0   |
| 13503  | 1   | 3   | 2   | 2   |
| 13505  | 0   | 1   | 1   | 0   |
| 13509  | 0   | 1   | 0   | 0   |

| respid | Q33 | Q34 | Q35 | Q36 |
|--------|-----|-----|-----|-----|
| 13510  | 0   | 1   | 2   | 1   |
| 13518  | 0   | 2   | 2   | 1   |
| 13521  | 0   | 0   | 0   | 0   |
| 13523  | 0   | 1   | 1   | 1   |
| 13528  | 0   | 1   | 0   | 0   |
| 13531  | 0   | 3   | 1   | 0   |
| 13532  | 0   | 0   | 0   | 0   |
| 13533  | 0   | 0   | 1   | 0   |
| 13534  | 0   | 1   | 0   | 0   |
| 13535  | 0   | 1   | 0   | 0   |
| 13538  | 0   | 2   | 2   | 2   |
| 13540  | 1   | 1   | 2   | 1   |
| 13541  | 0   | 1   | 1   | 0   |
| 13542  | 0   | 1   | 1   | 0   |
| 13550  | 0   | 1   | 0   | 0   |
| 13553  | 1   | 1   | 2   | 0   |
| 13554  | 0   | 2   | 0   | 0   |
| 13555  | 0   | 2   | 0   | 2   |
| 13556  | 1   | 3   | 1   | 1   |
| 13563  | 1   | 1   | 1   | 1   |
| 13564  | 0   | 1   | 1   | 1   |
| 13567  | 0   | 0   | 0   | 0   |
| 13568  | 1   | 2   | 2   | 2   |
| 13570  | 0   | 0   | 0   | 0   |
| 13573  | 1   | 0   | 1   | 1   |
| 13575  | 1   | 1   | 2   | 2   |
| 13577  | 1   | 1   | 2   | 2   |
| 13580  | 1   | 1   | 2   | 3   |
| 13582  | 1   | 0   | 0   | 0   |
| 13584  | 1   | 2   | 3   | 2   |
| 13585  | 0   | 0   | 0   | 0   |
| 13586  | 0   | 1   | 1   | 0   |



| respid | Q33 | Q34 | Q35 | Q36 |
|--------|-----|-----|-----|-----|
| 13587  | 0   | 1   | 2   | 2   |
| 13592  | 1   | 1   | 2   | 2   |
| 13596  | 0   | 0   | 0   | 0   |
| 13597  | 0   | 1   | 1   | 0   |
| 13599  | 0   | 1   | 1   | 0   |
| 13601  | 0   | 1   | 1   | 1   |
| 13604  | 0   | 0   | 1   | 0   |
| 13608  | 0   | 0   | 1   | 0   |
| 13616  | 0   | 1   | 0   | 0   |
| 13618  | 0   | 2   | 0   | 0   |
| 13619  | 0   | 1   | 1   | 0   |
| 13626  | 0   | 0   | 0   | 0   |
| 13628  | 0   | 1   | 2   | 1   |
| 13640  | 0   | 2   | 1   | 0   |
| 13645  | 0   | 1   | 0   | 0   |
| 13648  | 0   | 0   | 0   | 0   |
| 13653  | 1   | 1   | 0   | 0   |
| 13655  | 0   | 0   | 1   | 0   |
| 13662  | 1   | 0   | 0   | 0   |
| 13670  | 1   | 1   | 1   | 0   |
| 13673  | 0   | 1   | 2   | 1   |
| 13674  | 1   | 1   | 1   | 1   |
| 13675  | 0   | 2   | 0   | 0   |
| 13678  | 1   | 1   | 1   | 0   |
| 13680  | 0   | 2   | 1   | 1   |
| 13681  | 0   | 1   | 0   | 0   |
| 13683  | 0   | 1   | 0   | 0   |
| 13684  | 0   | 0   | 0   | 0   |
| 13685  | 0   | 1   | 0   | 0   |
| 13687  | 0   | 3   | 0   | 0   |
| 13690  | 1   | 1   | 0   | 0   |
| 13700  | 0   | 1   | 2   | 1   |

| respid | Q33 | Q34 | Q35 | Q36 |
|--------|-----|-----|-----|-----|
| 13705  | 1   | 2   | 1   | 1   |
| 13710  | 0   | 0   | 0   | 0   |
| 13711  | 0   | 1   | 0   | 0   |
| 13713  | 0   | 1   | 0   | 0   |
| 13716  | 0   | 1   | 0   | 0   |
| 13721  | 0   | 1   | 1   | 0   |
| 13722  | 1   | 3   | 4   | 0   |
| 13723  | 1   | 1   | 2   | 2   |
| 13726  | 0   | 3   | 1   | 2   |
| 13728  | 0   | 1   | 1   | 0   |
| 13730  | 0   | 1   | 1   | 1   |
| 13734  | 1   | 1   | 0   | 0   |
| 13736  | 1   | 3   | 4   | 2   |
| 13737  | 1   | 1   | 0   | 0   |
| 13739  | 0   | 1   | 0   | 0   |
| 13742  | 0   | 0   | 0   | 0   |
| 13746  | 0   | 2   | 1   | 0   |
| 13747  | 0   | 1   | 0   | 0   |
| 13749  | 0   | 1   | 0   | 0   |
| 13751  | 1   | 1   | 1   | 1   |
| 13752  | 0   | 1   | 1   | 0   |
| 13756  | 0   | 2   | 1   | 1   |
| 13757  | 0   | 1   | 0   | 0   |
| 13767  | 0   | 2   | 2   | 0   |
| 13771  | 1   | 1   | 0   | 0   |
| 13772  | 1   | 3   | 5   | 2   |
| 13779  | 0   | 0   | 0   | 0   |
| 13782  | 1   | 1   | 0   | 0   |
| 13783  | 0   | 1   | 0   | 0   |
| 13785  | 0   | 1   | 0   | 0   |
| 13786  | 0   | 1   | 1   | 2   |
| 13792  | 1   | 2   | 2   | 4   |

| respid | Q33 | Q34 | Q35 | Q36 |
|--------|-----|-----|-----|-----|
| 13796  | 0   | 3   | 1   | 0   |
| 13798  | 0   | 1   | 2   | 0   |
| 13799  | 0   | 2   | 0   | 0   |
| 13804  | 0   | 0   | 0   | 0   |
| 13805  | 1   | 1   | 0   | 0   |
| 13810  | 1   | 3   | 3   | 2   |
| 13811  | 0   | 1   | 0   | 0   |
| 13819  | 0   | 1   | 4   | 4   |
| 13821  | 1   | 3   | 4   | 3   |
| 13824  | 1   | 1   | 1   | 1   |
| 13828  | 1   | 1   | 2   | 1   |
| 13829  | 1   | 3   | 2   | 3   |
| 13831  | 1   | 0   | 0   | 0   |
| 13833  | 0   | 1   | 0   | 1   |
| 13835  | 1   | 3   | 4   | 2   |
| 13838  | 0   | 1   | 0   | 0   |
| 13839  | 1   | 2   | 2   | 2   |
| 13845  | 0   | 0   | 0   | 0   |
| 13846  | 0   | 1   | 0   | 0   |
| 13853  | 0   | 2   | 0   | 0   |
| 13855  | 0   | 2   | 3   | 3   |
| 13858  | 0   | 1   | 1   | 0   |
| 13860  | 0   | 0   | 0   | 0   |
| 13865  | 1   | 3   | 2   | 2   |
| 13870  | 1   | 1   | 0   | 0   |
| 13872  | 1   | 3   | 2   | 1   |
| 13873  | 0   | 1   | 3   | 0   |
| 13874  | 0   | 0   | 0   | 0   |
| 13875  | 0   | 1   | 2   | 1   |
| 13881  | 0   | 1   | 0   | 0   |
| 13887  | 0   | 3   | 0   | 0   |
| 13888  | 0   | 3   | 2   | 0   |

| respid | Q33 | Q34 | Q35 | Q36 |
|--------|-----|-----|-----|-----|
| 13889  | 1   | 3   | 2   | 1   |
| 13895  | 1   | 3   | 4   | 2   |
| 13897  | 0   | 0   | 0   | 0   |
| 13898  | 1   | 0   | 0   | 0   |
| 13901  | 1   | 2   | 0   | 0   |
| 13902  | 1   | 2   | 3   | 3   |
| 13903  | 0   | 3   | 0   | 0   |
| 13905  | 0   | 1   | 1   | 2   |
| 13908  | 1   | 3   | 4   | 4   |
| 13909  | 0   | 1   | 0   | 0   |
| 13910  | 1   | 2   | 2   | 2   |
| 13911  | 0   | 1   | 0   | 0   |
| 13914  | 1   | 3   | 3   | 2   |
| 13920  | 1   | 3   | 4   | 4   |
| 13926  | 0   | 1   | 0   | 0   |
| 13929  | 0   | 1   | 1   | 1   |
| 13930  | 2   | 3   | 4   | 3   |
| 13931  | 0   | 0   | 0   | 0   |
| 13932  | 1   | 2   | 2   | 0   |
| 13934  | 0   | 1   | 2   | 2   |
| 13938  | 1   | 0   | 0   | 0   |
| 13942  | 0   | 0   | 0   | 0   |
| 13945  | 1   | 3   | 2   | 2   |
| 13947  | 0   | 2   | 4   | 4   |
| 13948  | 1   | 0   | 0   | 0   |
| 13959  | 0   | 1   | 0   | 0   |
| 13962  | 0   | 0   | 0   | 0   |
| 13963  | 0   | 0   | 0   | 0   |
| 13964  | 0   | 1   | 1   | 1   |
| 13966  | 0   | 1   | 1   | 1   |
| 13968  | 0   | 0   | 0   | 0   |
| 13971  | 0   | 1   | 1   | 0   |

| respid | Q33 | Q34 | Q35 | Q36 |
|--------|-----|-----|-----|-----|
| 13979  | 0   | 2   | 2   | 2   |
| 13980  | 0   | 1   | 3   | 2   |
| 13981  | 1   | 1   | 2   | 0   |
| 13982  | 0   | 0   | 1   | 0   |
| 13984  | 1   | 1   | 1   | 0   |
| 13989  | 0   | 0   | 0   | 0   |
| 13990  | 0   | 1   | 0   | 0   |
| 13992  | 1   | 3   | 4   | 4   |
| 13998  | 0   | 1   | 2   | 0   |
| 13999  | 0   | 3   | 4   | 3   |
| 14000  | 0   | 0   | 1   | 0   |
| 14003  | 0   | 1   | 1   | 0   |
| 14004  | 1   | 0   | 0   | 0   |
| 14006  | 0   | 1   | 1   | 0   |
| 14007  | 0   | 0   | 1   | 0   |
| 14008  | 0   | 2   | 0   | 0   |
| 14013  | 0   | 1   | 0   | 0   |
| 14015  | 0   | 1   | 1   | 0   |
| 14018  | 0   | 0   | 1   | 1   |
| 14021  | 0   | 1   | 3   | 3   |
| 14023  | 1   | 0   | 0   | 0   |
| 14024  | 0   | 3   | 3   | 0   |
| 14026  | 0   | 0   | 0   | 0   |
| 14030  | 1   | 2   | 0   | 0   |
| 14032  | 1   | 2   | 1   | 1   |
| 14040  | 0   | 0   | 0   | 0   |
| 14045  | 0   | 1   | 1   | 0   |
| 14048  | 1   | 3   | 2   | 2   |
| 14049  | 1   | 2   | 2   | 1   |
| 14050  | 0   | 0   | 0   | 0   |
| 14051  | 0   | 1   | 3   | 3   |
| 14052  | 0   | 2   | 1   | 2   |

| respid | Q33 | Q34 | Q35 | Q36 |
|--------|-----|-----|-----|-----|
| 14054  | 1   | 0   | 1   | 0   |
| 14055  | 0   | 0   | 0   | 0   |
| 14057  | 0   | 1   | 2   | 3   |
| 14058  | 1   | 2   | 0   | 0   |
| 14059  | 0   | 1   | 0   | 0   |
| 14060  | 1   | 0   | 1   | 0   |
| 14061  | 1   | 2   | 3   | 2   |
| 14071  | 0   | 1   | 0   | 0   |
| 14073  | 0   | 1   | 1   | 0   |
| 14074  | 0   | 3   | 4   | 0   |
| 14076  | 0   | 1   | 2   | 0   |
| 14080  | 0   | 1   | 0   | 0   |
| 14082  | 0   | 1   | 0   | 0   |
| 14083  | 0   | 2   | 1   | 0   |
| 14084  | 0   | 0   | 1   | 0   |
| 14085  | 0   | 0   | 0   | 0   |
| 14086  | 1   | 2   | 3   | 1   |
| 14088  | 0   | 1   | 0   | 1   |
| 14090  | 0   | 0   | 1   | 0   |
| 14092  | 0   | 0   | 1   | 0   |
| 14093  | 0   | 1   | 0   | 0   |
| 14096  | 0   | 0   | 0   | 0   |
| 14103  | 0   | 3   | 2   | 2   |
| 14105  | 0   | 0   | 0   | 0   |
| 14106  | 0   | 2   | 1   | 0   |
| 14107  | 0   | 1   | 1   | 1   |
| 14108  | 1   | 3   | 2   | 2   |
| 14112  | 1   | 0   | 1   | 0   |
| 14114  | 2   | 1   | 2   | 0   |
| 14115  | 1   | 1   | 1   | 0   |
| 14116  | 0   | 1   | 0   | 0   |
| 14117  | 0   | 1   | 0   | 0   |

| respid | Q33 | Q34 | Q35 | Q36 |
|--------|-----|-----|-----|-----|
| 14118  | 1   | 3   | 2   | 2   |
| 14119  | 1   | 0   | 0   | 0   |
| 14127  | 0   | 2   | 0   | 0   |
| 14129  | 0   | 1   | 0   | 0   |
| 14131  | 1   | 1   | 1   | 1   |
| 14132  | 0   | 1   | 1   | 0   |
| 14133  | 1   | 3   | 2   | 2   |
| 14134  | 1   | 0   | 1   | 0   |
| 14135  | 1   | 2   | 0   | 0   |
| 14136  | 1   | 3   | 1   | 0   |
| 14138  | 0   | 1   | 0   | 0   |
| 14139  | 0   | 0   | 0   | 0   |
| 14140  | 0   | 2   | 2   | 1   |
| 14141  | 0   | 0   | 0   | 0   |
| 14143  | 0   | 0   | 0   | 0   |
| 14146  | 0   | 1   | 0   | 0   |
| 14147  | 2   | 3   | 5   | 3   |
| 14148  | 0   | 1   | 1   | 0   |
| 14151  | 0   | 2   | 2   | 1   |
| 14152  | 0   | 3   | 2   | 2   |
| 14153  | 0   | 2   | 1   | 0   |
| 14154  | 0   | 0   | 0   | 0   |
| 14158  | 1   | 1   | 1   | 0   |
| 14159  | 0   | 1   | 1   | 1   |
| 14160  | 0   | 1   | 1   | 1   |
| 14161  | 1   | 3   | 2   | 2   |
| 14162  | 0   | 2   | 2   | 0   |
| 14165  | 0   | 1   | 1   | 0   |
| 14166  | 0   | 3   | 2   | 2   |
| 14167  | 0   | 1   | 1   | 0   |
| 14169  | 1   | 1   | 1   | 2   |
| 14170  | 0   | 0   | 1   | 0   |

| respid | Q33 | Q34 | Q35 | Q36 |
|--------|-----|-----|-----|-----|
| 14172  | 0   | 0   | 1   | 1   |
| 14173  | 0   | 0   | 0   | 0   |
| 14174  | 1   | 1   | 2   | 1   |
| 14175  | 0   | 1   | 1   | 0   |
| 14176  | 0   | 1   | 1   | 1   |
| 14178  | 1   | 2   | 2   | 0   |
| 14179  | 0   | 0   | 0   | 0   |
| 14180  | 0   | 3   | 2   | 2   |
| 14183  | 0   | 2   | 1   | 2   |
| 14185  | 0   | 0   | 0   | 0   |
| 14187  | 1   | 2   | 1   | 0   |
| 14189  | 0   | 0   | 0   | 0   |
| 14191  | 1   | 3   | 2   | 2   |
| 14192  | 0   | 1   | 0   | 0   |
| 14195  | 1   | 2   | 2   | 2   |
| 14197  | 0   | 0   | 0   | 0   |
| 14203  | 0   | 3   | 1   | 1   |
| 14204  | 1   | 1   | 1   | 1   |
| 14205  | 0   | 2   | 1   | 0   |
| 14208  | 0   | 2   | 0   | 0   |
| 14211  | 2   | 3   | 5   | 3   |
| 14214  | 0   | 1   | 0   | 0   |
| 14215  | 1   | 2   | 1   | 0   |
| 14216  | 1   | 2   | 4   | 3   |
| 14218  | 1   | 1   | 0   | 0   |
| 14220  | 0   | 0   | 0   | 0   |
| 14223  | 0   | 1   | 0   | 0   |
| 14225  | 0   | 2   | 2   | 2   |
| 14226  | 0   | 0   | 0   | 0   |
| 14228  | 0   | 1   | 2   | 1   |
| 14231  | 0   | 1   | 2   | 2   |
| 14233  | 0   | 1   | 2   | 1   |



| respid | Q33 | Q34 | Q35 | Q36 |
|--------|-----|-----|-----|-----|
| 14237  | 0   | 0   | 0   | 0   |
| 14238  | 0   | 3   | 2   | 2   |
| 14243  | 1   | 1   | 2   | 1   |
| 14245  | 0   | 1   | 0   | 0   |
| 14246  | 0   | 2   | 2   | 2   |
| 14248  | 0   | 1   | 0   | 0   |
| 14250  | 1   | 1   | 0   | 0   |
| 14253  | 0   | 1   | 1   | 0   |
| 14254  | 0   | 1   | 2   | 1   |
| 14255  | 0   | 0   | 0   | 0   |
| 14257  | 0   | 0   | 0   | 0   |
| 14258  | 0   | 0   | 0   | 0   |
| 14259  | 1   | 1   | 3   | 3   |
| 14260  | 0   | 0   | 0   | 0   |
| 14261  | 1   | 2   | 2   | 2   |
| 14263  | 1   | 2   | 4   | 2   |
| 14264  | 0   | 1   | 1   | 0   |
| 14266  | 1   | 2   | 2   | 2   |
| 14267  | 1   | 1   | 2   | 2   |
| 14268  | 0   | 1   | 0   | 0   |
| 14275  | 0   | 1   | 1   | 1   |
| 14278  | 1   | 0   | 1   | 0   |
| 14279  | 0   | 0   | 0   | 0   |
| 14280  | 0   | 1   | 1   | 0   |
| 14281  | 1   | 3   | 0   | 0   |
| 14282  | 0   | 1   | 1   | 1   |
| 14283  | 1   | 2   | 2   | 1   |
| 14286  | 0   | 0   | 0   | 0   |
| 14287  | 0   | 0   | 0   | 0   |
| 14288  | 0   | 1   | 2   | 1   |
| 14291  | 0   | 0   | 0   | 0   |
| 14292  | 0   | 1   | 0   | 0   |

| respid | Q33 | Q34 | Q35 | Q36 |
|--------|-----|-----|-----|-----|
| 14293  | 0   | 0   | 1   | 0   |
| 14304  | 1   | 2   | 3   | 3   |
| 14308  | 0   | 2   | 1   | 0   |
| 14313  | 1   | 3   | 1   | 1   |
| 14314  | 0   | 0   | 1   | 1   |
| 14316  | 0   | 0   | 0   | 0   |
| 14317  | 0   | 1   | 0   | 0   |
| 14318  | 1   | 2   | 3   | 1   |
| 14319  | 0   | 0   | 2   | 0   |
| 14320  | 0   | 1   | 1   | 1   |
| 14321  | 1   | 0   | 1   | 1   |
| 14322  | 1   | 3   | 2   | 2   |
| 14326  | 0   | 1   | 0   | 0   |
| 14327  | 1   | 2   | 3   | 1   |
| 14328  | 1   | 1   | 0   | 0   |
| 14330  | 0   | 0   | 0   | 0   |
| 14332  | 0   | 1   | 0   | 0   |
| 14334  | 0   | 1   | 0   | 0   |
| 14336  | 0   | 1   | 0   | 0   |
| 14337  | 0   | 0   | 1   | 1   |
| 14339  | 0   | 1   | 0   | 0   |
| 14340  | 1   | 2   | 3   | 1   |
| 14341  | 0   | 1   | 0   | 0   |
| 14344  | 0   | 2   | 0   | 0   |
| 14345  | 0   | 1   | 1   | 0   |
| 14346  | 0   | 1   | 0   | 0   |
| 14348  | 0   | 1   | 0   | 0   |
| 14349  | 0   | 0   | 1   | 1   |
| 14358  | 1   | 3   | 2   | 2   |
| 14360  | 0   | 1   | 0   | 0   |
| 14362  | 1   | 0   | 1   | 1   |
| 14366  | 1   | 1   | 0   | 0   |

| respid | Q33 | Q34 | Q35 | Q36 |
|--------|-----|-----|-----|-----|
| 14367  | 1   | 3   | 0   | 0   |
| 14369  | 1   | 3   | 1   | 0   |
| 14371  | 0   | 1   | 1   | 0   |
| 14372  | 0   | 0   | 1   | 0   |
| 14374  | 0   | 0   | 0   | 0   |
| 14376  | 0   | 1   | 1   | 0   |
| 14377  | 0   | 1   | 0   | 0   |
| 14378  | 1   | 1   | 1   | 0   |
| 14379  | 0   | 1   | 1   | 0   |
| 14381  | 1   | 0   | 0   | 0   |
| 14383  | 0   | 1   | 1   | 1   |
| 14384  | 1   | 1   | 2   | 1   |
| 14385  | 1   | 1   | 1   | 2   |
| 14386  | 1   | 3   | 3   | 2   |
| 14390  | 0   | 2   | 1   | 0   |
| 14391  | 0   | 1   | 0   | 0   |
| 14392  | 0   | 1   | 1   | 1   |
| 14393  | 1   | 2   | 1   | 1   |
| 14394  | 0   | 1   | 2   | 2   |
| 14395  | 0   | 0   | 1   | 0   |
| 14396  | 0   | 2   | 0   | 0   |
| 14397  | 0   | 0   | 0   | 0   |
| 14398  | 1   | 0   | 0   | 0   |
| 14399  | 1   | 2   | 0   | 0   |
| 14400  | 1   | 1   | 0   | 0   |
| 14403  | 0   | 1   | 1   | 0   |
| 14404  | 0   | 1   | 2   | 0   |
| 14405  | 0   | 1   | 1   | 0   |
| 14407  | 1   | 2   | 0   | 0   |
| 14408  | 1   | 3   | 3   | 3   |
| 14410  | 1   | 1   | 2   | 2   |
| 14415  | 0   | 1   | 0   | 0   |

| respid | Q33 | Q34 | Q35 | Q36 |
|--------|-----|-----|-----|-----|
| 14419  | 1   | 1   | 3   | 3   |
| 14420  | 0   | 0   | 0   | 0   |
| 14421  | 1   | 0   | 0   | 0   |
| 14423  | 0   | 0   | 0   | 0   |
| 14424  | 0   | 2   | 0   | 0   |
| 14425  | 0   | 1   | 1   | 0   |
| 14426  | 0   | 2   | 0   | 0   |
| 14427  | 0   | 1   | 0   | 0   |
| 14428  | 1   | 1   | 1   | 2   |
| 14431  | 1   | 2   | 2   | 2   |
| 14433  | 0   | 1   | 0   | 0   |
| 14434  | 1   | 1   | 1   | 0   |
| 14435  | 0   | 1   | 1   | 1   |
| 14436  | 1   | 1   | 2   | 1   |
| 14438  | 1   | 3   | 0   | 0   |
| 14442  | 1   | 2   | 3   | 3   |
| 14447  | 0   | 0   | 0   | 0   |
| 14448  | 1   | 2   | 0   | 0   |
| 14450  | 0   | 1   | 1   | 0   |
| 14451  | 0   | 0   | 0   | 0   |
| 14454  | 1   | 1   | 2   | 3   |
| 14455  | 0   | 0   | 0   | 0   |
| 14456  | 0   | 2   | 2   | 1   |
| 14457  | 1   | 1   | 2   | 2   |
| 14458  | 1   | 1   | 2   | 3   |
| 14459  | 0   | 0   | 0   | 0   |
| 14460  | 1   | 2   | 0   | 0   |
| 14464  | 0   | 2   | 1   | 1   |
| 14465  | 1   | 0   | 1   | 1   |
| 14466  | 0   | 1   | 0   | 0   |
| 14467  | 0   | 1   | 0   | 0   |
| 14470  | 0   | 2   | 3   | 0   |

| respid | Q33 | Q34 | Q35 | Q36 |
|--------|-----|-----|-----|-----|
| 14472  | 0   | 0   | 1   | 0   |
| 14473  | 1   | 1   | 0   | 0   |
| 14474  | 1   | 0   | 0   | 0   |
| 14477  | 0   | 1   | 0   | 0   |
| 14478  | 0   | 0   | 1   | 0   |
| 14479  | 1   | 0   | 0   | 0   |
| 14484  | 0   | 1   | 0   | 0   |
| 14485  | 0   | 0   | 0   | 0   |
| 14486  | 0   | 2   | 2   | 1   |
| 14487  | 0   | 2   | 0   | 0   |
| 14488  | 0   | 2   | 4   | 3   |
| 14491  | 0   | 1   | 2   | 2   |
| 14495  | 2   | 1   | 1   | 0   |
| 14500  | 1   | 1   | 1   | 0   |
| 14502  | 0   | 2   | 0   | 0   |
| 14504  | 1   | 2   | 2   | 2   |
| 14505  | 1   | 1   | 2   | 2   |
| 14507  | 1   | 1   | 0   | 0   |
| 14517  | 0   | 2   | 0   | 0   |
| 14518  | 0   | 1   | 3   | 0   |
| 14519  | 1   | 1   | 0   | 0   |
| 14521  | 0   | 2   | 4   | 2   |
| 14522  | 0   | 1   | 0   | 0   |
| 14526  | 0   | 0   | 0   | 0   |
| 14528  | 0   | 2   | 2   | 2   |
| 14529  | 0   | 0   | 1   | 0   |
| 14530  | 1   | 2   | 3   | 1   |
| 14531  | 0   | 3   | 2   | 2   |
| 14534  | 1   | 1   | 2   | 2   |
| 14538  | 0   | 2   | 0   | 2   |
| 14539  | 0   | 0   | 0   | 0   |
| 14545  | 0   | 1   | 1   | 0   |

| respid | Q33 | Q34 | Q35 | Q36 |
|--------|-----|-----|-----|-----|
| 14546  | 0   | 3   | 1   | 1   |
| 14551  | 0   | 2   | 0   | 0   |
| 14553  | 1   | 3   | 2   | 2   |
| 14557  | 0   | 1   | 0   | 0   |
| 14558  | 0   | 2   | 0   | 2   |
| 14559  | 1   | 2   | 4   | 2   |
| 14560  | 0   | 1   | 1   | 1   |
| 14563  | 0   | 1   | 1   | 1   |
| 14565  | 0   | 0   | 0   | 0   |
| 14571  | 1   | 1   | 3   | 3   |
| 14572  | 0   | 2   | 0   | 0   |
| 14573  | 1   | 2   | 2   | 1   |
| 14575  | 1   | 0   | 2   | 2   |
| 14576  | 0   | 2   | 2   | 2   |
| 14578  | 1   | 2   | 4   | 2   |
| 14579  | 0   | 1   | 0   | 0   |
| 14580  | 1   | 2   | 0   | 0   |
| 14582  | 0   | 1   | 1   | 0   |
| 14585  | 0   | 2   | 1   | 1   |
| 14588  | 0   | 1   | 1   | 0   |
| 14590  | 1   | 1   | 3   | 2   |
| 14592  | 1   | 3   | 2   | 2   |
| 14593  | 1   | 2   | 1   | 3   |
| 14595  | 1   | 1   | 1   | 0   |
| 14597  | 0   | 1   | 1   | 0   |
| 14600  | 0   | 1   | 2   | 0   |
| 14602  | 1   | 3   | 2   | 2   |
| 14604  | 0   | 2   | 1   | 0   |
| 14605  | 0   | 1   | 0   | 0   |
| 14609  | 0   | 1   | 1   | 0   |
| 14610  | 0   | 2   | 0   | 0   |
| 14611  | 0   | 0   | 1   | 1   |

| respid | Q33 | Q34 | Q35 | Q36 |
|--------|-----|-----|-----|-----|
| 14612  | 1   | 3   | 4   | 0   |
| 14614  | 0   | 1   | 2   | 2   |
| 14615  | 0   | 0   | 0   | 0   |
| 14618  | 1   | 2   | 2   | 2   |
| 14621  | 0   | 1   | 0   | 0   |
| 14624  | 0   | 1   | 2   | 0   |
| 14626  | 0   | 0   | 0   | 0   |
| 14627  | 0   | 1   | 1   | 1   |
| 14628  | 1   | 2   | 3   | 3   |
| 14631  | 0   | 2   | 0   | 2   |
| 14633  | 1   | 2   | 4   | 2   |
| 14642  | 1   | 1   | 2   | 2   |
| 14647  | 0   | 1   | 0   | 0   |
| 14658  | 0   | 1   | 1   | 1   |
| 14659  | 1   | 2   | 2   | 2   |
| 14660  | 0   | 2   | 0   | 0   |
| 14661  | 0   | 2   | 2   | 2   |
| 14662  | 1   | 1   | 2   | 2   |
| 14663  | 0   | 1   | 0   | 0   |
| 14670  | 1   | 3   | 4   | 4   |
| 14671  | 0   | 1   | 0   | 0   |
| 14672  | 1   | 2   | 2   | 2   |
| 14675  | 0   | 2   | 0   | 0   |
| 14676  | 1   | 3   | 3   | 0   |
| 14677  | 0   | 1   | 2   | 2   |
| 14678  | 1   | 1   | 4   | 2   |
| 14681  | 1   | 1   | 2   | 2   |
| 14684  | 0   | 1   | 0   | 0   |
| 14688  | 1   | 2   | 0   | 0   |
| 14690  | 1   | 3   | 4   | 3   |
| 14694  | 1   | 1   | 2   | 2   |
| 14696  | 0   | 1   | 0   | 0   |

| respid | Q33 | Q34 | Q35 | Q36 |
|--------|-----|-----|-----|-----|
| 14700  | 0   | 0   | 0   | 0   |
| 14701  | 0   | 1   | 0   | 0   |
| 14703  | 1   | 2   | 1   | 3   |
| 14707  | 0   | 1   | 1   | 0   |
| 14711  | 1   | 1   | 2   | 2   |
| 14714  | 0   | 1   | 0   | 0   |
| 14715  | 1   | 1   | 1   | 2   |
| 14716  | 0   | 1   | 0   | 0   |
| 14720  | 0   | 0   | 1   | 0   |
| 14725  | 0   | 2   | 1   | 0   |
| 14726  | 1   | 2   | 0   | 1   |
| 14734  | 0   | 1   | 1   | 0   |
| 14735  | 0   | 2   | 2   | 0   |
| 14736  | 1   | 2   | 2   | 2   |
| 14740  | 0   | 2   | 0   | 0   |
| 14745  | 0   | 2   | 0   | 0   |
| 14747  | 1   | 2   | 0   | 0   |
| 14750  | 1   | 1   | 1   | 3   |
| 14751  | 1   | 1   | 0   | 0   |
| 14753  | 1   | 1   | 0   | 0   |
| 14756  | 2   | 3   | 5   | 4   |
| 14780  | 0   | 1   | 3   | 0   |
| 14782  | 1   | 1   | 1   | 0   |
| 14800  | 1   | 1   | 2   | 3   |
| 14801  | 1   | 3   | 0   | 0   |
| 14802  | 1   | 1   | 2   | 2   |
| 14805  | 1   | 2   | 4   | 1   |
| 14811  | 1   | 3   | 2   | 2   |
| 14814  | 1   | 2   | 4   | 2   |
| 14822  | 0   | 1   | 2   | 1   |
| 14827  | 1   | 1   | 1   | 2   |
| 14828  | 1   | 3   | 2   | 2   |



| respid | Q33 | Q34 | Q35 | Q36 |
|--------|-----|-----|-----|-----|
| 14830  | 0   | 0   | 0   | 0   |
| 14832  | 1   | 1   | 3   | 1   |
| 14835  | 1   | 3   | 4   | 1   |
| 14841  | 0   | 1   | 0   | 0   |
| 14849  | 0   | 0   | 3   | 0   |
| 14850  | 0   | 0   | 0   | 0   |
| 14851  | 0   | 1   | 0   | 0   |
| 14856  | 0   | 3   | 4   | 3   |
| 14862  | 0   | 1   | 1   | 1   |
| 14863  | 0   | 1   | 0   | 0   |
| 14864  | 0   | 2   | 0   | 0   |
| 14866  | 0   | 1   | 0   | 0   |
| 14867  | 1   | 2   | 4   | 4   |
| 14868  | 0   | 0   | 0   | 0   |
| 14870  | 1   | 1   | 0   | 0   |
| 14873  | 0   | 2   | 0   | 0   |
| 14878  | 1   | 0   | 0   | 1   |
| 14879  | 0   | 0   | 0   | 0   |
| 14881  | 0   | 3   | 2   | 2   |
| 14888  | 1   | 3   | 2   | 5   |
| 14895  | 0   | 0   | 3   | 0   |
| 14900  | 1   | 2   | 4   | 2   |
| 14912  | 0   | 0   | 0   | 0   |
| 14922  | 0   | 1   | 1   | 2   |
| 14923  | 0   | 2   | 2   | 2   |
| 14924  | 0   | 2   | 2   | 1   |
| 14925  | 1   | 1   | 2   | 3   |
| 14926  | 0   | 2   | 1   | 1   |
| 14927  | 1   | 3   | 3   | 3   |
| 14930  | 0   | 1   | 0   | 0   |
| 14937  | 1   | 3   | 2   | 2   |
| 14938  | 1   | 2   | 2   | 3   |

| respid | Q33 | Q34 | Q35 | Q36 |
|--------|-----|-----|-----|-----|
| 14939  | 1   | 3   | 1   | 2   |
| 14942  | 0   | 0   | 0   | 0   |
| 14943  | 0   | 0   | 0   | 0   |
| 14953  | 0   | 1   | 4   | 0   |
| 14954  | 0   | 1   | 1   | 1   |
| 14955  | 1   | 1   | 1   | 1   |
| 14957  | 0   | 2   | 2   | 2   |
| 14958  | 2   | 3   | 5   | 5   |
| 14959  | 0   | 2   | 5   | 3   |
| 14961  | 0   | 0   | 0   | 0   |
| 14963  | 1   | 3   | 2   | 2   |
| 14964  | 0   | 1   | 0   | 0   |
| 14965  | 0   | 1   | 1   | 1   |
| 14967  | 1   | 1   | 2   | 2   |
| 14970  | 1   | 3   | 2   | 3   |
| 14972  | 0   | 3   | 2   | 2   |
| 14975  | 1   | 2   | 2   | 3   |
| 14977  | 0   | 1   | 1   | 1   |
| 14982  | 0   | 2   | 0   | 0   |
| 14985  | 1   | 3   | 2   | 2   |
| 14986  | 0   | 0   | 0   | 0   |
| 14987  | 0   | 0   | 0   | 0   |
| 14988  | 1   | 2   | 3   | 4   |
| 14989  | 0   | 3   | 1   | 2   |
| 14993  | 0   | 3   | 2   | 2   |
| 15001  | 0   | 1   | 0   | 0   |
| 15002  | 2   | 3   | 5   | 3   |
| 15006  | 0   | 3   | 1   | 0   |
| 15007  | 0   | 1   | 2   | 2   |
| 15014  | 1   | 2   | 1   | 2   |
| 15020  | 0   | 3   | 2   | 1   |
| 15021  | 0   | 3   | 2   | 2   |

| respid | Q33 | Q34 | Q35 | Q36 |
|--------|-----|-----|-----|-----|
| 15023  | 1   | 2   | 4   | 3   |
| 15030  | 0   | 1   | 1   | 2   |
| 15032  | 0   | 0   | 0   | 0   |
| 15033  | 0   | 1   | 0   | 0   |
| 15034  | 0   | 3   | 2   | 1   |
| 15035  | 0   | 0   | 2   | 0   |
| 15037  | 1   | 1   | 0   | 0   |
| 15039  | 1   | 2   | 2   | 2   |
| 15040  | 1   | 0   | 0   | 0   |
| 15042  | 1   | 0   | 4   | 0   |
| 15044  | 0   | 0   | 0   | 0   |
| 15045  | 0   | 0   | 0   | 0   |
| 15046  | 0   | 1   | 0   | 0   |
| 15052  | 1   | 1   | 2   | 2   |
| 15058  | 1   | 1   | 2   | 2   |
| 15063  | 1   | 3   | 2   | 2   |
| 15066  | 0   | 2   | 1   | 0   |
| 15069  | 0   | 0   | 1   | 0   |
| 15071  | 1   | 2   | 1   | 1   |
| 15076  | 1   | 1   | 2   | 2   |
| 15078  | 0   | 0   | 0   | 0   |
| 15087  | 1   | 1   | 4   | 0   |
| 15090  | 0   | 2   | 2   | 1   |
| 15091  | 1   | 2   | 1   | 2   |
| 15092  | 0   | 1   | 0   | 0   |
| 15096  | 0   | 2   | 1   | 2   |
| 15106  | 1   | 1   | 2   | 2   |
| 15108  | 0   | 0   | 0   | 0   |
| 15113  | 0   | 1   | 1   | 1   |
| 15116  | 0   | 0   | 0   | 0   |
| 15119  | 0   | 2   | 1   | 2   |
| 15120  | 0   | 1   | 0   | 1   |

| respid | Q33 | Q34 | Q35 | Q36 |
|--------|-----|-----|-----|-----|
| 15121  | 1   | 1   | 4   | 0   |
| 15123  | 0   | 0   | 0   | 0   |
| 15124  | 1   | 2   | 1   | 0   |
| 15128  | 0   | 1   | 0   | 0   |
| 15131  | 0   | 0   | 0   | 0   |
| 15136  | 0   | 0   | 0   | 1   |
| 15137  | 1   | 2   | 2   | 2   |
| 15141  | 0   | 0   | 3   | 0   |
| 15144  | 0   | 1   | 1   | 2   |
| 15147  | 1   | 1   | 2   | 2   |
| 15151  | 1   | 2   | 0   | 0   |
| 15154  | 1   | 3   | 2   | 1   |
| 15157  | 0   | 1   | 1   | 2   |
| 15164  | 1   | 3   | 4   | 4   |
| 15168  | 0   | 1   | 1   | 1   |
| 15169  | 1   | 2   | 2   | 2   |
| 15172  | 1   | 2   | 1   | 2   |
| 15177  | 0   | 2   | 3   | 4   |
| 15178  | 0   | 0   | 1   | 1   |
| 15180  | 0   | 2   | 2   | 2   |
| 15181  | 0   | 1   | 1   | 0   |
| 15182  | 1   | 1   | 4   | 0   |
| 15183  | 0   | 0   | 1   | 1   |
| 15188  | 0   | 0   | 0   | 1   |
| 15190  | 1   | 2   | 4   | 4   |
| 15195  | 0   | 1   | 1   | 1   |
| 15201  | 1   | 2   | 4   | 3   |
| 15203  | 0   | 1   | 0   | 2   |
| 15204  | 1   | 1   | 0   | 0   |
| 15207  | 0   | 0   | 0   | 0   |
| 15208  | 1   | 3   | 5   | 5   |
| 15209  | 0   | 0   | 2   | 0   |

| respid | Q33 | Q34 | Q35 | Q36 |
|--------|-----|-----|-----|-----|
| 15212  | 0   | 0   | 0   | 0   |
| 15213  | 0   | 3   | 1   | 1   |
| 15219  | 0   | 3   | 0   | 0   |
| 15220  | 1   | 1   | 4   | 0   |
| 15221  | 0   | 1   | 2   | 2   |
| 15223  | 1   | 1   | 2   | 2   |
| 15224  | 0   | 3   | 1   | 0   |
| 15225  | 0   | 2   | 0   | 0   |
| 15226  | 0   | 1   | 2   | 2   |
| 15230  | 0   | 1   | 2   | 2   |
| 15231  | 1   | 3   | 3   | 4   |
| 15232  | 0   | 0   | 0   | 0   |
| 15237  | 0   | 1   | 0   | 0   |
| 15239  | 0   | 2   | 2   | 2   |
| 15241  | 0   | 2   | 2   | 2   |
| 15242  | 1   | 2   | 2   | 1   |
| 15247  | 0   | 2   | 2   | 1   |
| 15248  | 0   | 0   | 0   | 0   |
| 15251  | 0   | 0   | 0   | 0   |
| 15257  | 0   | 0   | 0   | 0   |
| 15260  | 0   | 1   | 1   | 1   |
| 15261  | 1   | 1   | 2   | 2   |
| 15262  | 1   | 2   | 4   | 0   |
| 15263  | 1   | 1   | 1   | 0   |
| 15265  | 0   | 1   | 1   | 1   |
| 15266  | 0   | 2   | 0   | 0   |
| 15268  | 1   | 2   | 1   | 0   |
| 15269  | 0   | 1   | 3   | 2   |
| 15270  | 0   | 2   | 4   | 3   |
| 15273  | 1   | 2   | 2   | 1   |
| 15276  | 1   | 1   | 2   | 1   |
| 15277  | 0   | 1   | 2   | 1   |

| respid | Q33 | Q34 | Q35 | Q36 |
|--------|-----|-----|-----|-----|
| 15282  | 2   | 3   | 0   | 0   |
| 15284  | 1   | 1   | 4   | 0   |
| 15285  | 0   | 1   | 0   | 0   |
| 15286  | 1   | 3   | 5   | 3   |
| 15288  | 1   | 1   | 4   | 2   |
| 15292  | 1   | 3   | 0   | 2   |
| 15296  | 0   | 1   | 0   | 0   |
| 15297  | 0   | 1   | 0   | 0   |
| 15298  | 0   | 0   | 0   | 0   |
| 15301  | 0   | 0   | 0   | 0   |
| 15302  | 0   | 1   | 0   | 0   |
| 15305  | 0   | 0   | 3   | 0   |
| 15307  | 1   | 0   | 1   | 0   |
| 15308  | 1   | 2   | 1   | 0   |
| 15309  | 0   | 1   | 1   | 0   |
| 15311  | 0   | 1   | 1   | 0   |
| 15315  | 0   | 2   | 0   | 0   |
| 15316  | 0   | 1   | 0   | 0   |
| 15318  | 0   | 1   | 0   | 0   |
| 15321  | 1   | 0   | 3   | 2   |
| 15322  | 0   | 0   | 0   | 0   |
| 15324  | 1   | 2   | 3   | 1   |
| 15326  | 0   | 2   | 0   | 0   |
| 15327  | 1   | 1   | 1   | 0   |
| 15328  | 0   | 2   | 0   | 0   |
| 15330  | 1   | 2   | 3   | 0   |
| 15332  | 0   | 0   | 0   | 0   |
| 15333  | 0   | 0   | 0   | 0   |
| 15334  | 1   | 3   | 0   | 0   |
| 15336  | 1   | 2   | 2   | 2   |
| 15337  | 0   | 1   | 0   | 0   |
| 15338  | 0   | 1   | 1   | 1   |

| respid | Q33 | Q34 | Q35 | Q36 |
|--------|-----|-----|-----|-----|
| 15339  | 1   | 3   | 2   | 2   |
| 15341  | 0   | 1   | 0   | 0   |
| 15344  | 0   | 0   | 0   | 0   |
| 15345  | 1   | 0   | 1   | 1   |
| 15350  | 0   | 0   | 0   | 0   |
| 15351  | 0   | 2   | 0   | 0   |
| 15352  | 0   | 1   | 1   | 0   |
| 15372  | 0   | 2   | 0   | 0   |
| 15373  | 1   | 1   | 2   | 2   |
| 15376  | 0   | 1   | 1   | 0   |
| 15377  | 1   | 1   | 2   | 2   |
| 15382  | 0   | 2   | 0   | 0   |
| 15383  | 0   | 1   | 3   | 1   |
| 15385  | 0   | 2   | 3   | 2   |
| 15390  | 0   | 1   | 1   | 1   |
| 15399  | 0   | 1   | 0   | 0   |
| 15404  | 1   | 1   | 1   | 0   |
| 15410  | 0   | 1   | 0   | 0   |
| 15411  | 1   | 2   | 2   | 2   |
| 15412  | 0   | 1   | 1   | 1   |
| 15413  | 1   | 1   | 3   | 0   |
| 15414  | 0   | 1   | 1   | 1   |
| 15417  | 0   | 0   | 1   | 0   |
| 15418  | 0   | 1   | 2   | 2   |
| 15421  | 0   | 1   | 1   | 1   |
| 15423  | 0   | 2   | 0   | 2   |
| 15425  | 1   | 2   | 1   | 0   |
| 15426  | 1   | 1   | 1   | 2   |
| 15430  | 0   | 1   | 0   | 0   |
| 15431  | 1   | 2   | 3   | 4   |
| 15435  | 0   | 0   | 0   | 0   |
| 15436  | 1   | 0   | 0   | 0   |

| respid | Q33 | Q34 | Q35 | Q36 |
|--------|-----|-----|-----|-----|
| 15437  | 0   | 0   | 0   | 0   |
| 15438  | 0   | 0   | 0   | 0   |
| 15439  | 0   | 1   | 0   | 0   |
| 15441  | 1   | 1   | 3   | 2   |
| 15443  | 0   | 1   | 0   | 1   |
| 15446  | 1   | 2   | 0   | 0   |
| 15449  | 1   | 2   | 2   | 2   |
| 15451  | 1   | 1   | 2   | 2   |
| 15452  | 0   | 2   | 3   | 3   |
| 15454  | 0   | 1   | 0   | 0   |
| 15456  | 0   | 2   | 2   | 1   |
| 15457  | 0   | 0   | 0   | 0   |
| 15458  | 1   | 1   | 2   | 1   |
| 15462  | 1   | 1   | 2   | 1   |
| 15467  | 1   | 2   | 3   | 0   |
| 15470  | 1   | 2   | 2   | 2   |
| 15472  | 0   | 0   | 1   | 1   |
| 15476  | 0   | 0   | 1   | 0   |
| 15477  | 0   | 1   | 1   | 1   |
| 15488  | 1   | 0   | 0   | 0   |
| 15489  | 0   | 1   | 0   | 0   |
| 15490  | 0   | 1   | 2   | 2   |
| 15496  | 1   | 1   | 1   | 0   |
| 15497  | 1   | 2   | 0   | 0   |
| 15498  | 0   | 0   | 0   | 0   |
| 15509  | 1   | 3   | 4   | 4   |
| 15510  | 0   | 1   | 2   | 2   |
| 15516  | 1   | 1   | 0   | 0   |
| 15519  | 0   | 1   | 1   | 0   |
| 15520  | 0   | 1   | 1   | 2   |
| 15524  | 1   | 1   | 1   | 1   |
| 15525  | 0   | 0   | 1   | 0   |



| respid | Q33 | Q34 | Q35 | Q36 |
|--------|-----|-----|-----|-----|
| 15526  | 0   | 2   | 2   | 1   |
| 15531  | 0   | 2   | 1   | 1   |
| 15532  | 0   | 1   | 0   | 0   |
| 15534  | 1   | 3   | 4   | 2   |
| 15535  | 1   | 1   | 1   | 1   |
| 15539  | 0   | 1   | 1   | 0   |
| 15550  | 1   | 0   | 0   | 0   |
| 15556  | 0   | 1   | 1   | 1   |
| 15558  | 1   | 1   | 1   | 2   |
| 15565  | 0   | 0   | 0   | 0   |
| 15567  | 1   | 2   | 2   | 2   |
| 15568  | 1   | 1   | 1   | 1   |
| 15571  | 0   | 1   | 1   | 0   |
| 15573  | 0   | 0   | 0   | 1   |
| 15574  | 0   | 2   | 2   | 1   |
| 15576  | 0   | 2   | 1   | 0   |
| 15587  | 0   | 1   | 3   | 1   |
| 15588  | 0   | 3   | 0   | 0   |
| 15593  | 0   | 0   | 1   | 1   |
| 15597  | 0   | 1   | 0   | 0   |
| 15598  | 1   | 0   | 2   | 0   |
| 15599  | 0   | 2   | 1   | 2   |
| 15601  | 0   | 2   | 0   | 0   |
| 15604  | 0   | 1   | 2   | 1   |
| 15611  | 1   | 0   | 0   | 0   |
| 15613  | 0   | 1   | 0   | 0   |
| 15614  | 0   | 1   | 0   | 0   |
| 15617  | 0   | 2   | 3   | 2   |
| 15622  | 0   | 1   | 0   | 0   |
| 15623  | 1   | 0   | 1   | 0   |
| 15625  | 1   | 1   | 2   | 0   |
| 15627  | 2   | 0   | 0   | 0   |

| respid | Q33 | Q34 | Q35 | Q36 |
|--------|-----|-----|-----|-----|
| 15628  | 0   | 2   | 0   | 0   |
| 15633  | 0   | 1   | 0   | 0   |
| 15634  | 1   | 1   | 0   | 0   |
| 15637  | 1   | 2   | 0   | 0   |
| 15644  | 0   | 2   | 1   | 1   |
| 15645  | 1   | 1   | 1   | 0   |
| 15649  | 0   | 1   | 0   | 0   |
| 15650  | 0   | 0   | 0   | 0   |
| 15651  | 0   | 0   | 0   | 0   |
| 15657  | 1   | 3   | 4   | 1   |
| 15658  | 0   | 2   | 0   | 0   |
| 15660  | 0   | 3   | 1   | 0   |
| 15667  | 1   | 0   | 0   | 0   |
| 15671  | 1   | 1   | 0   | 0   |
| 15679  | 1   | 1   | 4   | 4   |
| 15712  | 0   | 1   | 0   | 0   |
| 15715  | 0   | 0   | 0   | 0   |
| 15749  | 0   | 1   | 0   | 0   |
| 15754  | 0   | 3   | 1   | 1   |
| 15756  | 1   | 0   | 3   | 0   |
| 15773  | 1   | 1   | 0   | 0   |
| 15774  | 1   | 1   | 0   | 0   |
| 15776  | 0   | 1   | 1   | 0   |
| 15777  | 1   | 3   | 2   | 2   |
| 15779  | 0   | 1   | 0   | 0   |
| 15780  | 0   | 3   | 1   | 1   |
| 15792  | 0   | 0   | 1   | 0   |
| 15793  | 1   | 3   | 2   | 2   |
| 15796  | 1   | 1   | 0   | 0   |
| 15798  | 0   | 1   | 0   | 0   |
| 15809  | 1   | 0   | 1   | 0   |
| 15810  | 0   | 1   | 0   | 0   |

| respid | Q33 | Q34 | Q35 | Q36 |
|--------|-----|-----|-----|-----|
| 15815  | 0   | 1   | 0   | 0   |
| 15816  | 1   | 1   | 0   | 0   |
| 15817  | 0   | 0   | 0   | 0   |
| 15821  | 1   | 3   | 2   | 2   |
| 15823  | 0   | 1   | 2   | 2   |
| 15834  | 1   | 2   | 0   | 0   |
| 15835  | 0   | 0   | 0   | 0   |
| 15836  | 1   | 1   | 0   | 0   |
| 15837  | 1   | 0   | 1   | 0   |
| 15839  | 0   | 2   | 0   | 0   |
| 15840  | 0   | 1   | 1   | 2   |
| 15844  | 0   | 1   | 2   | 0   |
| 15845  | 0   | 2   | 0   | 0   |
| 15847  | 1   | 3   | 2   | 2   |
| 15848  | 0   | 1   | 0   | 0   |
| 15849  | 0   | 2   | 0   | 0   |
| 15857  | 0   | 1   | 1   | 1   |
| 15858  | 0   | 0   | 3   | 0   |
| 15862  | 1   | 1   | 2   | 1   |
| 15866  | 0   | 1   | 1   | 1   |
| 15870  | 0   | 1   | 2   | 2   |
| 15871  | 1   | 0   | 1   | 0   |
| 15872  | 1   | 2   | 0   | 0   |
| 15873  | 0   | 0   | 0   | 0   |
| 15874  | 0   | 0   | 0   | 0   |
| 15875  | 1   | 2   | 2   | 2   |
| 15876  | 1   | 2   | 2   | 2   |
| 15882  | 1   | 3   | 3   | 3   |
| 15884  | 1   | 3   | 0   | 0   |
| 15890  | 1   | 3   | 0   | 0   |
| 15892  | 0   | 2   | 1   | 0   |
| 15908  | 1   | 1   | 0   | 0   |

| respid | Q33 | Q34 | Q35 | Q36 |
|--------|-----|-----|-----|-----|
| 15914  | 0   | 2   | 1   | 1   |
| 15932  | 0   | 0   | 1   | 2   |
| 15933  | 0   | 0   | 3   | 0   |
| 15938  | 0   | 0   | 0   | 0   |
| 15940  | 2   | 2   | 4   | 4   |
| 15945  | 0   | 1   | 2   | 2   |
| 15947  | 1   | 3   | 0   | 0   |
| 15950  | 0   | 1   | 1   | 2   |
| 15951  | 1   | 2   | 1   | 0   |
| 15952  | 1   | 2   | 2   | 2   |
| 15953  | 0   | 1   | 1   | 1   |
| 15954  | 1   | 2   | 2   | 1   |
| 15957  | 1   | 1   | 1   | 2   |
| 15965  | 0   | 2   | 1   | 2   |
| 15966  | 0   | 0   | 0   | 0   |
| 15967  | 0   | 1   | 0   | 2   |
| 15968  | 1   | 0   | 4   | 0   |
| 15970  | 1   | 1   | 0   | 0   |
| 15973  | 1   | 1   | 2   | 2   |
| 15974  | 0   | 1   | 2   | 2   |
| 15975  | 0   | 0   | 0   | 0   |
| 15980  | 2   | 3   | 5   | 5   |
| 15984  | 0   | 1   | 0   | 0   |
| 15985  | 1   | 2   | 2   | 2   |
| 15994  | 0   | 0   | 0   | 0   |
| 15995  | 0   | 1   | 0   | 0   |
| 16000  | 1   | 2   | 0   | 0   |
| 16004  | 1   | 2   | 2   | 2   |
| 16005  | 1   | 2   | 2   | 2   |
| 16006  | 0   | 0   | 0   | 0   |
| 16009  | 0   | 0   | 0   | 0   |
| 16017  | 0   | 0   | 0   | 0   |

| respid | Q33 | Q34 | Q35 | Q36 |
|--------|-----|-----|-----|-----|
| 16019  | 1   | 1   | 2   | 0   |
| 16021  | 1   | 1   | 1   | 0   |
| 16024  | 0   | 1   | 0   | 0   |
| 16026  | 1   | 2   | 2   | 0   |
| 16029  | 0   | 0   | 0   | 0   |
| 16031  | 1   | 2   | 2   | 0   |
| 16037  | 0   | 1   | 1   | 0   |
| 16043  | 0   | 0   | 1   | 0   |
| 16044  | 1   | 0   | 1   | 1   |
| 16047  | 1   | 0   | 1   | 0   |
| 16048  | 2   | 1   | 4   | 0   |
| 16049  | 0   | 0   | 0   | 0   |
| 16051  | 1   | 1   | 1   | 1   |
| 16053  | 1   | 2   | 1   | 1   |
| 16054  | 0   | 2   | 0   | 0   |
| 16069  | 0   | 0   | 1   | 0   |
| 16070  | 1   | 1   | 1   | 0   |
| 16074  | 0   | 0   | 0   | 0   |
| 16076  | 0   | 0   | 0   | 0   |
| 16078  | 0   | 1   | 0   | 0   |
| 16081  | 0   | 0   | 0   | 0   |
| 16085  | 0   | 0   | 0   | 0   |
| 16088  | 0   | 1   | 0   | 0   |
| 16091  | 0   | 1   | 1   | 1   |
| 16092  | 1   | 1   | 1   | 0   |
| 16093  | 1   | 1   | 1   | 1   |
| 16097  | 0   | 0   | 2   | 1   |
| 16100  | 1   | 0   | 1   | 0   |
| 16101  | 1   | 0   | 0   | 0   |
| 16105  | 0   | 0   | 0   | 0   |
| 16118  | 0   | 2   | 3   | 4   |
| 16129  | 0   | 0   | 0   | 0   |

| respid | Q33 | Q34 | Q35 | Q36 |
|--------|-----|-----|-----|-----|
| 16130  | 1   | 2   | 2   | 1   |
| 16131  | 1   | 3   | 4   | 4   |
| 16136  | 0   | 1   | 0   | 0   |
| 16137  | 0   | 0   | 0   | 0   |
| 16138  | 0   | 1   | 2   | 0   |
| 16139  | 1   | 1   | 1   | 0   |
| 16140  | 0   | 1   | 0   | 0   |
| 16145  | 0   | 1   | 1   | 1   |
| 16150  | 1   | 0   | 1   | 1   |
| 16151  | 1   | 2   | 0   | 0   |
| 16153  | 0   | 1   | 1   | 0   |
| 16164  | 1   | 0   | 2   | 0   |
| 16168  | 0   | 1   | 1   | 1   |
| 16173  | 1   | 0   | 1   | 0   |
| 16174  | 0   | 0   | 1   | 0   |
| 16177  | 1   | 0   | 1   | 1   |
| 16185  | 1   | 1   | 1   | 1   |
| 16189  | 0   | 1   | 1   | 1   |
| 16192  | 2   | 1   | 0   | 0   |
| 16193  | 0   | 0   | 1   | 0   |
| 16194  | 1   | 2   | 2   | 1   |
| 16196  | 0   | 0   | 0   | 0   |
| 16202  | 0   | 2   | 1   | 1   |
| 16205  | 1   | 1   | 2   | 2   |
| 16206  | 0   | 2   | 2   | 2   |
| 16208  | 0   | 0   | 0   | 0   |
| 16211  | 0   | 2   | 1   | 1   |
| 16212  | 0   | 0   | 0   | 0   |
| 16215  | 1   | 0   | 0   | 0   |
| 16217  | 0   | 2   | 1   | 1   |
| 16221  | 1   | 2   | 1   | 0   |
| 16226  | 1   | 3   | 1   | 1   |

| respid | Q33 | Q34 | Q35 | Q36 |
|--------|-----|-----|-----|-----|
| 16228  | 1   | 2   | 1   | 1   |
| 16229  | 1   | 1   | 1   | 0   |
| 16230  | 0   | 2   | 0   | 0   |
| 16231  | 1   | 2   | 3   | 2   |
| 16232  | 0   | 1   | 2   | 1   |
| 16234  | 1   | 2   | 1   | 0   |
| 16235  | 1   | 3   | 3   | 3   |
| 16236  | 1   | 2   | 0   | 0   |
| 16237  | 1   | 1   | 0   | 0   |
| 16238  | 0   | 2   | 2   | 2   |
| 16239  | 0   | 1   | 0   | 0   |
| 16243  | 0   | 0   | 1   | 0   |
| 16248  | 1   | 0   | 1   | 1   |
| 16249  | 0   | 1   | 0   | 0   |
| 16251  | 0   | 0   | 0   | 0   |
| 16263  | 0   | 0   | 0   | 0   |
| 16265  | 1   | 1   | 2   | 2   |
| 16269  | 0   | 0   | 0   | 1   |
| 16272  | 1   | 1   | 0   | 0   |
| 16273  | 0   | 0   | 0   | 0   |
| 16281  | 0   | 1   | 1   | 0   |
| 16282  | 1   | 1   | 0   | 0   |
| 16287  | 0   | 1   | 0   | 0   |
| 16290  | 0   | 1   | 0   | 0   |
| 16294  | 0   | 0   | 1   | 0   |
| 16295  | 1   | 1   | 0   | 0   |
| 16296  | 0   | 0   | 0   | 0   |
| 16299  | 1   | 2   | 4   | 4   |
| 16302  | 0   | 0   | 0   | 0   |
| 16303  | 1   | 2   | 4   | 0   |
| 16304  | 0   | 2   | 0   | 0   |
| 16306  | 1   | 0   | 1   | 1   |

| respid | Q33 | Q34 | Q35 | Q36 |
|--------|-----|-----|-----|-----|
| 16318  | 1   | 1   | 2   | 1   |
| 16320  | 1   | 1   | 1   | 1   |
| 16321  | 0   | 3   | 2   | 1   |
| 16322  | 1   | 1   | 0   | 0   |
| 16324  | 1   | 1   | 0   | 0   |
| 16326  | 1   | 1   | 2   | 0   |
| 16328  | 0   | 2   | 2   | 1   |
| 16336  | 1   | 3   | 1   | 1   |
| 16341  | 1   | 1   | 1   | 1   |
| 16342  | 0   | 0   | 0   | 0   |
| 16343  | 1   | 2   | 1   | 0   |
| 16345  | 0   | 2   | 2   | 2   |
| 16349  | 0   | 1   | 1   | 0   |
| 16355  | 1   | 1   | 0   | 0   |
| 16364  | 1   | 1   | 2   | 2   |
| 16374  | 0   | 0   | 0   | 0   |
| 16375  | 0   | 0   | 0   | 0   |
| 16376  | 1   | 2   | 3   | 1   |
| 16393  | 1   | 1   | 0   | 0   |
| 16394  | 1   | 1   | 2   | 2   |
| 16395  | 0   | 1   | 1   | 0   |
| 16397  | 0   | 1   | 1   | 0   |
| 16398  | 1   | 3   | 2   | 2   |
| 16402  | 1   | 0   | 1   | 1   |
| 16405  | 0   | 1   | 1   | 0   |
| 16416  | 0   | 1   | 1   | 1   |
| 16422  | 0   | 2   | 1   | 1   |
| 16429  | 0   | 0   | 0   | 0   |
| 16430  | 1   | 1   | 1   | 0   |
| 16432  | 1   | 1   | 3   | 2   |
| 16433  | 0   | 2   | 2   | 2   |
| 16434  | 1   | 0   | 0   | 0   |



| respid | Q33 | Q34 | Q35 | Q36 |
|--------|-----|-----|-----|-----|
| 16437  | 0   | 0   | 1   | 0   |
| 16439  | 0   | 1   | 0   | 0   |
| 16440  | 0   | 0   | 0   | 0   |
| 16441  | 0   | 1   | 0   | 0   |
| 16442  | 0   | 0   | 0   | 0   |
| 16450  | 0   | 1   | 0   | 0   |
| 16451  | 0   | 1   | 0   | 0   |
| 16452  | 0   | 1   | 2   | 2   |
| 16467  | 0   | 1   | 0   | 0   |
| 16468  | 0   | 0   | 0   | 0   |
| 16469  | 0   | 2   | 1   | 1   |
| 16470  | 0   | 0   | 0   | 0   |
| 16471  | 1   | 1   | 1   | 1   |
| 16473  | 1   | 1   | 0   | 0   |
| 16476  | 0   | 0   | 0   | 0   |
| 16478  | 0   | 2   | 1   | 0   |
| 16484  | 1   | 0   | 0   | 0   |
| 16499  | 0   | 0   | 0   | 0   |
| 16502  | 0   | 0   | 0   | 0   |
| 16505  | 0   | 0   | 0   | 0   |
| 16514  | 1   | 1   | 0   | 0   |
| 16515  | 0   | 1   | 1   | 1   |
| 16517  | 0   | 2   | 0   | 0   |
| 16518  | 0   | 2   | 0   | 0   |
| 16519  | 0   | 1   | 2   | 0   |
| 16525  | 1   | 1   | 0   | 0   |
| 16526  | 0   | 1   | 0   | 0   |
| 16530  | 1   | 2   | 1   | 0   |
| 16532  | 0   | 1   | 0   | 0   |
| 16536  | 0   | 1   | 0   | 0   |
| 16537  | 1   | 2   | 3   | 4   |
| 16541  | 1   | 2   | 1   | 0   |

| respid | Q33 | Q34 | Q35 | Q36 |
|--------|-----|-----|-----|-----|
| 16543  | 0   | 1   | 1   | 0   |
| 16544  | 0   | 1   | 0   | 0   |
| 16545  | 0   | 1   | 3   | 0   |
| 16546  | 1   | 0   | 2   | 0   |
| 16548  | 1   | 0   | 1   | 0   |
| 16552  | 0   | 1   | 0   | 0   |
| 16559  | 0   | 0   | 0   | 0   |
| 16564  | 1   | 1   | 5   | 4   |
| 16565  | 0   | 0   | 0   | 0   |
| 16567  | 0   | 2   | 1   | 1   |
| 16571  | 0   | 1   | 0   | 0   |
| 16572  | 0   | 1   | 1   | 1   |
| 16579  | 1   | 1   | 0   | 0   |
| 16588  | 1   | 3   | 4   | 2   |
| 16599  | 0   | 0   | 0   | 0   |
| 16605  | 0   | 0   | 1   | 0   |
| 16622  | 1   | 1   | 0   | 0   |
| 16635  | 0   | 2   | 4   | 3   |
| 16638  | 1   | 1   | 0   | 0   |
| 16652  | 1   | 2   | 2   | 0   |
| 16656  | 0   | 1   | 0   | 0   |
| 16671  | 0   | 0   | 0   | 0   |
| 16676  | 1   | 0   | 0   | 0   |
| 16678  | 0   | 1   | 2   | 2   |
| 16702  | 0   | 1   | 1   | 0   |
| 16705  | 1   | 1   | 2   | 0   |
| 16707  | 1   | 2   | 4   | 3   |
| 16711  | 1   | 1   | 1   | 1   |
| 16712  | 0   | 1   | 0   | 0   |
| 16716  | 0   | 2   | 0   | 0   |
| 16724  | 1   | 1   | 1   | 0   |
| 16727  | 1   | 1   | 1   | 1   |

| respid | Q33 | Q34 | Q35 | Q36 |
|--------|-----|-----|-----|-----|
| 16734  | 0   | 2   | 0   | 0   |
| 16740  | 1   | 0   | 0   | 0   |
| 16748  | 1   | 2   | 1   | 0   |
| 16759  | 0   | 0   | 0   | 0   |
| 16761  | 0   | 0   | 0   | 0   |
| 16763  | 0   | 0   | 0   | 0   |
| 16764  | 1   | 2   | 2   | 3   |
| 16766  | 0   | 1   | 0   | 0   |
| 16767  | 1   | 1   | 1   | 1   |
| 16776  | 1   | 0   | 1   | 1   |
| 16781  | 0   | 0   | 1   | 0   |
| 16793  | 0   | 1   | 3   | 1   |
| 16796  | 1   | 1   | 4   | 4   |
| 16810  | 0   | 0   | 0   | 0   |
| 16811  | 1   | 1   | 2   | 0   |
| 16813  | 0   | 1   | 0   | 0   |
| 16814  | 0   | 0   | 1   | 0   |
| 16831  | 0   | 1   | 1   | 0   |
| 16833  | 1   | 3   | 0   | 0   |
| 16839  | 1   | 1   | 1   | 1   |
| 16843  | 1   | 1   | 1   | 0   |
| 16860  | 1   | 1   | 0   | 0   |
| 16871  | 1   | 1   | 0   | 0   |
| 16881  | 1   | 1   | 2   | 1   |
| 16884  | 0   | 0   | 0   | 1   |
| 16891  | 0   | 1   | 2   | 0   |
| 16909  | 0   | 1   | 1   | 0   |
| 16911  | 0   | 0   | 0   | 0   |
| 16922  | 1   | 2   | 3   | 0   |
| 16935  | 0   | 2   | 2   | 2   |
| 16942  | 0   | 2   | 0   | 0   |
| 16950  | 1   | 2   | 0   | 0   |

| respid | Q33 | Q34 | Q35 | Q36 |
|--------|-----|-----|-----|-----|
| 16952  | 1   | 2   | 1   | 2   |
| 16963  | 0   | 0   | 0   | 0   |
| 16967  | 1   | 1   | 0   | 0   |
| 16970  | 0   | 1   | 2   | 1   |
| 16976  | 1   | 1   | 2   | 2   |
| 16982  | 0   | 1   | 1   | 0   |
| 16995  | 1   | 0   | 0   | 0   |
| 17004  | 0   | 0   | 1   | 0   |
| 17006  | 0   | 0   | 0   | 0   |
| 17009  | 0   | 0   | 0   | 0   |
| 17021  | 1   | 1   | 0   | 0   |
| 17040  | 0   | 1   | 1   | 0   |
| 17041  | 0   | 0   | 0   | 0   |
| 17044  | 1   | 1   | 1   | 1   |
| 17046  | 1   | 2   | 2   | 2   |
| 17052  | 0   | 1   | 2   | 0   |
| 17055  | 0   | 0   | 1   | 1   |
| 17108  | 1   | 3   | 2   | 0   |
| 17109  | 1   | 1   | 1   | 1   |
| 17113  | 0   | 0   | 0   | 0   |
| 17115  | 0   | 1   | 1   | 0   |
| 17132  | 1   | 1   | 0   | 0   |
| 17135  | 0   | 1   | 2   | 1   |
| 17138  | 0   | 1   | 1   | 0   |
| 17141  | 1   | 0   | 0   | 0   |
| 17143  | 0   | 1   | 0   | 0   |
| 17148  | 0   | 1   | 0   | 0   |
| 17151  | 0   | 0   | 1   | 0   |
| 17153  | 0   | 0   | 0   | 0   |
| 17154  | 0   | 1   | 2   | 2   |
| 17157  | 1   | 2   | 0   | 0   |
| 17160  | 1   | 0   | 0   | 0   |

| respid | Q33 | Q34 | Q35 | Q36 |
|--------|-----|-----|-----|-----|
| 17167  | 0   | 0   | 2   | 2   |
| 17169  | 1   | 1   | 1   | 0   |
| 17174  | 1   | 1   | 1   | 1   |
| 17179  | 1   | 1   | 0   | 0   |
| 17180  | 1   | 0   | 1   | 0   |
| 17182  | 1   | 0   | 0   | 0   |
| 17184  | 1   | 2   | 2   | 2   |
| 17186  | 0   | 0   | 1   | 0   |
| 17187  | 0   | 0   | 0   | 0   |
| 17192  | 1   | 1   | 1   | 0   |
| 17197  | 1   | 1   | 1   | 0   |
| 17217  | 0   | 1   | 0   | 0   |
| 17226  | 0   | 1   | 0   | 0   |
| 17228  | 0   | 1   | 0   | 0   |
| 17245  | 1   | 1   | 1   | 0   |
| 17247  | 0   | 0   | 0   | 0   |
| 17258  | 0   | 1   | 0   | 0   |
| 17259  | 1   | 2   | 2   | 2   |
| 17262  | 0   | 2   | 1   | 0   |
| 17265  | 1   | 1   | 1   | 0   |
| 17281  | 0   | 1   | 0   | 0   |
| 17282  | 0   | 0   | 2   | 1   |
| 17293  | 0   | 0   | 0   | 0   |
| 17306  | 1   | 3   | 2   | 2   |
| 17312  | 0   | 1   | 0   | 0   |
| 17318  | 0   | 1   | 1   | 1   |
| 17328  | 1   | 1   | 1   | 1   |
| 17343  | 0   | 0   | 1   | 0   |
| 17344  | 1   | 1   | 0   | 0   |
| 17348  | 0   | 1   | 1   | 0   |
| 17352  | 0   | 1   | 1   | 0   |
| 17355  | 1   | 1   | 1   | 0   |

| respid | Q33 | Q34 | Q35 | Q36 |
|--------|-----|-----|-----|-----|
| 17356  | 1   | 2   | 0   | 0   |
| 17359  | 1   | 1   | 1   | 0   |
| 17373  | 0   | 2   | 2   | 2   |
| 17381  | 0   | 1   | 1   | 1   |
| 17388  | 1   | 1   | 1   | 0   |
| 17394  | 1   | 3   | 4   | 3   |
| 17401  | 0   | 0   | 0   | 0   |
| 17403  | 1   | 1   | 0   | 0   |
| 17411  | 0   | 0   | 0   | 0   |
| 17423  | 0   | 1   | 0   | 0   |
| 17427  | 0   | 0   | 0   | 0   |
| 17433  | 0   | 0   | 0   | 0   |
| 17441  | 0   | 1   | 0   | 0   |
| 17442  | 1   | 1   | 2   | 0   |
| 17447  | 0   | 0   | 2   | 0   |
| 17458  | 0   | 1   | 0   | 0   |
| 17474  | 0   | 1   | 0   | 0   |
| 17475  | 0   | 1   | 1   | 2   |
| 17476  | 0   | 2   | 2   | 0   |
| 17480  | 0   | 0   | 0   | 0   |
| 17484  | 0   | 1   | 0   | 0   |
| 17490  | 0   | 0   | 1   | 0   |
| 17491  | 0   | 0   | 1   | 0   |
| 17500  | 0   | 1   | 0   | 0   |
| 17507  | 0   | 1   | 0   | 0   |
| 17517  | 0   | 0   | 1   | 0   |
| 17520  | 0   | 1   | 0   | 0   |
| 17521  | 0   | 2   | 0   | 0   |
| 17531  | 0   | 1   | 0   | 0   |
| 17540  | 1   | 1   | 1   | 0   |
| 17550  | 1   | 2   | 1   | 1   |
| 17551  | 0   | 1   | 0   | 0   |

| respid | Q33 | Q34 | Q35 | Q36 |
|--------|-----|-----|-----|-----|
| 17555  | 1   | 2   | 2   | 2   |
| 17556  | 0   | 1   | 2   | 2   |
| 17574  | 0   | 1   | 0   | 0   |
| 17575  | 0   | 1   | 0   | 0   |
| 17582  | 0   | 1   | 0   | 0   |
| 17587  | 0   | 1   | 1   | 1   |
| 17601  | 0   | 1   | 0   | 0   |
| 17607  | 1   | 2   | 2   | 0   |
| 17609  | 0   | 0   | 0   | 0   |
| 17611  | 1   | 0   | 0   | 0   |
| 17613  | 1   | 1   | 0   | 0   |
| 17615  | 0   | 0   | 0   | 0   |
| 17620  | 1   | 1   | 1   | 0   |
| 17624  | 0   | 1   | 3   | 2   |
| 17635  | 0   | 1   | 0   | 0   |
| 17643  | 0   | 1   | 1   | 0   |
| 17645  | 1   | 1   | 2   | 1   |
| 17646  | 0   | 1   | 0   | 0   |
| 17649  | 1   | 1   | 1   | 0   |
| 17658  | 1   | 1   | 0   | 0   |
| 17666  | 0   | 1   | 0   | 0   |
| 17670  | 0   | 0   | 0   | 0   |
| 17678  | 1   | 1   | 0   | 0   |
| 17679  | 1   | 3   | 0   | 0   |
| 17695  | 0   | 1   | 0   | 0   |
| 17697  | 0   | 3   | 1   | 0   |
| 17698  | 1   | 1   | 1   | 0   |
| 17723  | 0   | 2   | 2   | 1   |
| 17727  | 0   | 0   | 0   | 0   |
| 17734  | 0   | 1   | 0   | 0   |
| 17737  | 0   | 2   | 0   | 0   |
| 17748  | 1   | 2   | 1   | 1   |

| respid | Q33 | Q34 | Q35 | Q36 |
|--------|-----|-----|-----|-----|
| 17749  | 0   | 0   | 0   | 0   |
| 17754  | 0   | 1   | 1   | 1   |
| 17766  | 1   | 3   | 1   | 0   |
| 17777  | 0   | 1   | 0   | 0   |
| 17780  | 0   | 1   | 0   | 0   |
| 17788  | 0   | 0   | 0   | 0   |
| 17801  | 1   | 3   | 1   | 1   |
| 17803  | 0   | 2   | 0   | 0   |
| 17807  | 0   | 1   | 0   | 0   |
| 17808  | 0   | 0   | 0   | 0   |
| 17809  | 1   | 1   | 0   | 0   |
| 17821  | 0   | 0   | 0   | 0   |
| 17827  | 0   | 3   | 4   | 0   |
| 17834  | 0   | 1   | 2   | 2   |
| 17838  | 0   | 1   | 1   | 1   |
| 17842  | 0   | 1   | 0   | 0   |
| 17862  | 0   | 1   | 1   | 0   |
| 17863  | 0   | 1   | 0   | 0   |
| 17871  | 1   | 3   | 2   | 0   |
| 17872  | 0   | 0   | 0   | 0   |
| 17903  | 0   | 2   | 2   | 3   |
| 17906  | 0   | 0   | 0   | 0   |
| 17910  | 0   | 2   | 3   | 3   |
| 17922  | 0   | 2   | 1   | 1   |
| 17923  | 1   | 2   | 1   | 1   |
| 17925  | 0   | 1   | 3   | 0   |
| 17926  | 0   | 0   | 0   | 0   |
| 17937  | 0   | 1   | 0   | 0   |
| 17956  | 1   | 1   | 1   | 0   |
| 17958  | 0   | 0   | 1   | 0   |
| 17985  | 0   | 0   | 0   | 0   |
| 17989  | 0   | 1   | 1   | 0   |



| respid | Q33 | Q34 | Q35 | Q36 |
|--------|-----|-----|-----|-----|
| 17995  | 1   | 0   | 0   | 0   |
| 18000  | 1   | 1   | 1   | 1   |
| 18010  | 0   | 0   | 0   | 0   |
| 18015  | 0   | 0   | 0   | 0   |
| 18018  | 1   | 3   | 4   | 1   |
| 18031  | 1   | 1   | 1   | 1   |
| 18033  | 0   | 1   | 2   | 2   |
| 18036  | 0   | 1   | 0   | 0   |
| 18041  | 0   | 1   | 0   | 0   |
| 18068  | 0   | 0   | 0   | 0   |
| 18080  | 0   | 0   | 0   | 0   |
| 18081  | 0   | 1   | 1   | 1   |
| 18083  | 2   | 2   | 2   | 0   |
| 18113  | 0   | 1   | 1   | 0   |
| 18115  | 1   | 1   | 1   | 2   |
| 18117  | 1   | 3   | 4   | 4   |
| 18129  | 0   | 0   | 1   | 0   |
| 18132  | 1   | 1   | 2   | 1   |
| 18146  | 0   | 1   | 1   | 1   |
| 18147  | 1   | 3   | 2   | 1   |
| 18153  | 0   | 1   | 0   | 0   |
| 18154  | 0   | 1   | 1   | 0   |
| 18157  | 2   | 2   | 2   | 0   |
| 18166  | 1   | 2   | 0   | 0   |
| 18169  | 0   | 0   | 1   | 0   |
| 18171  | 1   | 1   | 1   | 0   |
| 18173  | 1   | 1   | 1   | 0   |
| 18204  | 0   | 1   | 0   | 0   |
| 18210  | 1   | 1   | 1   | 0   |
| 18212  | 0   | 1   | 2   | 0   |
| 18220  | 1   | 1   | 3   | 2   |
| 18221  | 1   | 2   | 0   | 0   |

| respid | Q33 | Q34 | Q35 | Q36 |
|--------|-----|-----|-----|-----|
| 18228  | 0   | 0   | 0   | 0   |
| 18231  | 0   | 3   | 0   | 0   |
| 18233  | 1   | 2   | 2   | 1   |
| 18235  | 0   | 0   | 0   | 1   |
| 18237  | 0   | 0   | 0   | 0   |
| 18250  | 1   | 1   | 1   | 1   |
| 18253  | 1   | 2   | 2   | 0   |
| 18264  | 0   | 0   | 1   | 0   |
| 18285  | 1   | 1   | 0   | 0   |
| 18287  | 0   | 0   | 0   | 0   |
| 18296  | 0   | 1   | 1   | 0   |
| 18299  | 1   | 2   | 2   | 2   |
| 18313  | 1   | 1   | 0   | 0   |
| 18321  | 1   | 1   | 1   | 1   |
| 18324  | 1   | 0   | 0   | 0   |
| 18329  | 0   | 0   | 1   | 0   |
| 18332  | 0   | 1   | 0   | 0   |
| 18339  | 1   | 2   | 2   | 2   |
| 18340  | 1   | 1   | 0   | 0   |
| 18348  | 0   | 1   | 0   | 0   |
| 18355  | 0   | 1   | 1   | 0   |
| 18360  | 0   | 1   | 1   | 1   |
| 18380  | 1   | 1   | 0   | 0   |
| 18403  | 1   | 2   | 4   | 3   |
| 18405  | 0   | 1   | 1   | 1   |
| 18409  | 0   | 2   | 0   | 0   |
| 18445  | 1   | 0   | 1   | 0   |
| 18458  | 0   | 1   | 0   | 0   |
| 18477  | 1   | 3   | 0   | 0   |
| 18481  | 0   | 1   | 1   | 1   |
| 18491  | 0   | 0   | 0   | 0   |
| 18492  | 0   | 1   | 0   | 0   |

| respid | Q33 | Q34 | Q35 | Q36 |
|--------|-----|-----|-----|-----|
| 18494  | 0   | 2   | 0   | 0   |
| 18495  | 0   | 1   | 1   | 0   |
| 18496  | 0   | 2   | 1   | 0   |
| 18507  | 0   | 2   | 2   | 3   |
| 18509  | 0   | 2   | 0   | 0   |
| 18510  | 1   | 1   | 4   | 0   |
| 18513  | 0   | 1   | 0   | 0   |
| 18525  | 0   | 0   | 0   | 0   |
| 18526  | 1   | 1   | 0   | 1   |
| 18527  | 1   | 2   | 2   | 0   |
| 18536  | 0   | 1   | 0   | 0   |
| 18540  | 1   | 1   | 1   | 0   |
| 18548  | 0   | 0   | 0   | 0   |
| 18550  | 0   | 0   | 0   | 0   |
| 18556  | 1   | 1   | 1   | 0   |
| 18561  | 0   | 0   | 0   | 0   |
| 18577  | 1   | 2   | 1   | 0   |
| 18580  | 0   | 1   | 0   | 0   |
| 18633  | 1   | 2   | 2   | 1   |
| 18635  | 0   | 2   | 1   | 0   |
| 18636  | 1   | 0   | 0   | 0   |
| 18645  | 1   | 2   | 3   | 2   |
| 18649  | 0   | 1   | 0   | 0   |
| 18664  | 0   | 0   | 0   | 0   |
| 18668  | 0   | 1   | 0   | 0   |
| 18682  | 1   | 2   | 2   | 2   |
| 18685  | 0   | 1   | 1   | 1   |
| 18688  | 1   | 1   | 1   | 1   |
| 18689  | 1   | 2   | 3   | 4   |
| 18693  | 0   | 1   | 5   | 2   |
| 18694  | 0   | 0   | 2   | 0   |
| 18705  | 0   | 1   | 0   | 0   |

| respid | Q33 | Q34 | Q35 | Q36 |
|--------|-----|-----|-----|-----|
| 18710  | 0   | 1   | 1   | 0   |
| 18715  | 0   | 1   | 0   | 0   |
| 18718  | 1   | 0   | 0   | 0   |
| 18727  | 1   | 1   | 1   | 1   |
| 18732  | 0   | 1   | 1   | 1   |
| 18735  | 0   | 1   | 0   | 0   |
| 18742  | 0   | 1   | 0   | 0   |
| 18745  | 1   | 3   | 1   | 0   |
| 18747  | 0   | 1   | 0   | 0   |
| 18750  | 1   | 0   | 0   | 0   |
| 18751  | 0   | 1   | 1   | 0   |
| 18753  | 1   | 3   | 0   | 0   |
| 18754  | 1   | 0   | 0   | 0   |
| 18759  | 0   | 1   | 0   | 0   |
| 18780  | 0   | 1   | 0   | 0   |
| 18782  | 0   | 1   | 0   | 0   |
| 18807  | 1   | 3   | 5   | 5   |
| 18815  | 0   | 1   | 0   | 0   |
| 18818  | 1   | 1   | 0   | 0   |
| 18820  | 1   | 1   | 0   | 0   |
| 18823  | 1   | 3   | 5   | 4   |
| 18825  | 0   | 1   | 1   | 0   |
| 18828  | 2   | 0   | 0   | 0   |
| 18832  | 1   | 3   | 4   | 2   |
| 18834  | 0   | 1   | 2   | 1   |
| 18835  | 1   | 2   | 3   | 3   |
| 18837  | 0   | 2   | 0   | 0   |
| 18842  | 0   | 1   | 1   | 1   |
| 18846  | 0   | 0   | 0   | 0   |
| 18855  | 1   | 1   | 2   | 2   |
| 18856  | 0   | 0   | 1   | 1   |
| 18887  | 0   | 1   | 0   | 0   |

| respid | Q33 | Q34 | Q35 | Q36 |
|--------|-----|-----|-----|-----|
| 18903  | 0   | 1   | 0   | 0   |
| 18906  | 0   | 1   | 1   | 1   |
| 18910  | 0   | 0   | 0   | 0   |
| 18919  | 0   | 1   | 1   | 1   |
| 18928  | 0   | 1   | 1   | 0   |
| 18931  | 1   | 3   | 2   | 1   |
| 18939  | 1   | 1   | 1   | 1   |
| 18946  | 1   | 1   | 0   | 0   |
| 18952  | 1   | 1   | 1   | 1   |
| 18954  | 0   | 1   | 1   | 0   |
| 18982  | 0   | 0   | 0   | 0   |
| 18986  | 0   | 1   | 0   | 0   |
| 18989  | 1   | 2   | 2   | 2   |
| 18990  | 1   | 1   | 0   | 0   |
| 18996  | 0   | 2   | 0   | 0   |
| 18998  | 0   | 1   | 0   | 0   |
| 19009  | 0   | 3   | 2   | 2   |
| 19010  | 1   | 1   | 0   | 0   |
| 19017  | 0   | 1   | 0   | 0   |
| 19018  | 0   | 0   | 0   | 0   |
| 19020  | 0   | 1   | 0   | 0   |
| 19027  | 1   | 0   | 2   | 0   |
| 19035  | 0   | 0   | 0   | 0   |
| 19037  | 0   | 1   | 0   | 0   |
| 19048  | 0   | 1   | 0   | 0   |
| 19051  | 0   | 1   | 0   | 1   |
| 19054  | 0   | 0   | 0   | 0   |
| 19057  | 0   | 1   | 0   | 0   |
| 19073  | 0   | 1   | 1   | 0   |
| 19075  | 0   | 0   | 0   | 0   |
| 19079  | 1   | 1   | 1   | 1   |
| 19087  | 0   | 0   | 0   | 0   |

| respid | Q33 | Q34 | Q35 | Q36 |
|--------|-----|-----|-----|-----|
| 19090  | 1   | 2   | 1   | 0   |
| 19093  | 0   | 0   | 2   | 0   |
| 19099  | 2   | 1   | 3   | 2   |
| 19100  | 0   | 0   | 1   | 1   |
| 19101  | 0   | 1   | 0   | 0   |
| 19105  | 1   | 1   | 0   | 0   |
| 19111  | 1   | 2   | 0   | 0   |
| 19112  | 0   | 1   | 0   | 0   |
| 19117  | 1   | 3   | 2   | 1   |
| 19122  | 0   | 0   | 0   | 0   |
| 19126  | 1   | 0   | 0   | 0   |
| 19127  | 0   | 0   | 0   | 0   |
| 19131  | 1   | 2   | 1   | 0   |
| 19134  | 0   | 1   | 1   | 0   |
| 19149  | 1   | 0   | 0   | 0   |
| 19151  | 1   | 1   | 1   | 1   |
| 19164  | 1   | 1   | 1   | 0   |
| 19166  | 1   | 1   | 0   | 0   |
| 19172  | 1   | 1   | 2   | 0   |
| 19173  | 0   | 2   | 1   | 0   |
| 19180  | 0   | 1   | 0   | 0   |
| 19185  | 0   | 2   | 1   | 1   |
| 19189  | 0   | 1   | 0   | 0   |
| 19191  | 0   | 0   | 0   | 0   |
| 19198  | 0   | 0   | 0   | 0   |
| 19203  | 0   | 1   | 0   | 0   |
| 19209  | 0   | 2   | 0   | 0   |
| 19210  | 1   | 1   | 0   | 0   |
| 19218  | 0   | 0   | 0   | 0   |
| 19220  | 1   | 0   | 0   | 0   |
| 19225  | 0   | 1   | 1   | 0   |
| 19227  | 0   | 2   | 0   | 0   |

| respid | Q33 | Q34 | Q35 | Q36 |
|--------|-----|-----|-----|-----|
| 19228  | 0   | 1   | 0   | 0   |
| 19243  | 0   | 1   | 1   | 0   |
| 19244  | 1   | 0   | 1   | 1   |
| 19246  | 1   | 0   | 0   | 0   |
| 19248  | 0   | 0   | 0   | 0   |
| 19249  | 0   | 1   | 0   | 0   |
| 19252  | 0   | 1   | 0   | 0   |
| 19255  | 1   | 3   | 0   | 0   |
| 19257  | 0   | 1   | 0   | 0   |
| 19274  | 0   | 0   | 0   | 0   |
| 19279  | 1   | 0   | 0   | 0   |
| 19291  | 0   | 0   | 0   | 0   |
| 19292  | 0   | 1   | 0   | 0   |
| 19308  | 1   | 1   | 1   | 1   |
| 19310  | 0   | 2   | 0   | 0   |
| 19311  | 0   | 0   | 1   | 1   |
| 19326  | 1   | 2   | 0   | 0   |
| 19327  | 0   | 0   | 0   | 0   |
| 19329  | 0   | 0   | 0   | 0   |
| 19330  | 0   | 2   | 4   | 3   |
| 19333  | 1   | 2   | 3   | 2   |
| 19336  | 1   | 0   | 1   | 0   |
| 19343  | 0   | 1   | 1   | 1   |
| 19348  | 0   | 1   | 1   | 0   |
| 19349  | 0   | 2   | 2   | 1   |
| 19352  | 1   | 3   | 4   | 1   |
| 19356  | 1   | 1   | 0   | 0   |
| 19357  | 1   | 0   | 1   | 0   |
| 19358  | 1   | 0   | 1   | 0   |
| 19367  | 0   | 1   | 0   | 0   |
| 19376  | 0   | 0   | 0   | 0   |
| 19377  | 0   | 1   | 0   | 0   |

| respid | Q33 | Q34 | Q35 | Q36 |
|--------|-----|-----|-----|-----|
| 19380  | 1   | 0   | 1   | 0   |
| 19384  | 0   | 1   | 0   | 0   |
| 19391  | 1   | 1   | 2   | 1   |
| 19397  | 1   | 0   | 0   | 0   |
| 19398  | 0   | 0   | 0   | 0   |
| 19401  | 0   | 0   | 0   | 0   |
| 19402  | 0   | 1   | 0   | 0   |
| 19403  | 1   | 0   | 0   | 0   |
| 19405  | 0   | 0   | 0   | 0   |
| 19407  | 0   | 0   | 0   | 0   |
| 19415  | 0   | 1   | 0   | 0   |
| 19420  | 0   | 0   | 0   | 0   |
| 19423  | 0   | 1   | 3   | 2   |
| 19424  | 0   | 1   | 1   | 1   |
| 19426  | 0   | 0   | 4   | 3   |
| 19429  | 0   | 1   | 0   | 0   |
| 19435  | 1   | 2   | 2   | 3   |
| 19441  | 1   | 1   | 0   | 0   |
| 19450  | 0   | 1   | 0   | 0   |
| 19456  | 1   | 1   | 2   | 2   |
| 19457  | 0   | 0   | 0   | 0   |
| 19463  | 0   | 1   | 0   | 0   |
| 19467  | 0   | 1   | 1   | 0   |
| 19468  | 0   | 1   | 0   | 0   |
| 19471  | 0   | 1   | 0   | 0   |
| 19473  | 0   | 0   | 0   | 0   |
| 19478  | 0   | 1   | 0   | 0   |
| 19480  | 0   | 0   | 0   | 0   |
| 19481  | 0   | 0   | 0   | 0   |
| 19484  | 0   | 0   | 0   | 0   |
| 19487  | 0   | 0   | 0   | 0   |
| 19491  | 0   | 0   | 1   | 1   |



| respid | Q33 | Q34 | Q35 | Q36 |
|--------|-----|-----|-----|-----|
| 19495  | 1   | 1   | 2   | 2   |
| 19498  | 0   | 2   | 1   | 2   |
| 19500  | 0   | 3   | 1   | 0   |
| 19501  | 1   | 3   | 2   | 1   |
| 19503  | 0   | 0   | 0   | 0   |
| 19506  | 0   | 1   | 0   | 0   |
| 19508  | 0   | 1   | 0   | 0   |
| 19509  | 1   | 1   | 0   | 0   |
| 19518  | 1   | 2   | 1   | 1   |
| 19520  | 0   | 2   | 1   | 1   |
| 19536  | 0   | 2   | 0   | 0   |
| 19538  | 0   | 2   | 1   | 0   |
| 19541  | 1   | 2   | 2   | 1   |
| 19548  | 0   | 2   | 1   | 0   |
| 19553  | 1   | 0   | 1   | 0   |
| 19556  | 1   | 0   | 0   | 0   |
| 19559  | 0   | 0   | 0   | 0   |
| 19561  | 1   | 2   | 1   | 0   |
| 19562  | 1   | 1   | 0   | 0   |
| 19564  | 0   | 1   | 1   | 0   |
| 19567  | 1   | 3   | 2   | 3   |
| 19571  | 1   | 2   | 2   | 1   |
| 19576  | 1   | 2   | 2   | 2   |
| 19578  | 0   | 0   | 0   | 0   |
| 19606  | 0   | 0   | 0   | 0   |
| 19607  | 0   | 0   | 0   | 0   |
| 19608  | 0   | 2   | 0   | 0   |
| 19612  | 1   | 2   | 2   | 2   |
| 19618  | 0   | 2   | 1   | 1   |
| 19621  | 0   | 1   | 0   | 0   |
| 19624  | 1   | 3   | 4   | 4   |
| 19630  | 0   | 0   | 0   | 0   |

| respid | Q33 | Q34 | Q35 | Q36 |
|--------|-----|-----|-----|-----|
| 19637  | 1   | 0   | 0   | 0   |
| 19639  | 1   | 1   | 1   | 0   |
| 19647  | 0   | 0   | 1   | 0   |
| 19648  | 0   | 2   | 2   | 2   |
| 19660  | 0   | 1   | 0   | 0   |
| 19662  | 1   | 3   | 3   | 2   |
| 19669  | 1   | 1   | 0   | 0   |
| 19680  | 0   | 0   | 0   | 0   |
| 19682  | 0   | 1   | 1   | 0   |
| 19686  | 0   | 0   | 0   | 0   |
| 19700  | 0   | 1   | 0   | 0   |
| 19701  | 1   | 1   | 0   | 0   |
| 19704  | 0   | 0   | 0   | 0   |
| 19706  | 0   | 1   | 1   | 1   |
| 19707  | 1   | 1   | 1   | 0   |
| 19717  | 1   | 3   | 2   | 1   |
| 19718  | 0   | 0   | 0   | 0   |
| 19721  | 0   | 1   | 2   | 2   |
| 19722  | 0   | 2   | 0   | 0   |
| 19729  | 0   | 1   | 0   | 0   |
| 19738  | 1   | 1   | 2   | 1   |
| 19741  | 1   | 2   | 2   | 0   |
| 19742  | 1   | 1   | 1   | 2   |
| 19747  | 0   | 2   | 0   | 0   |
| 19748  | 0   | 1   | 0   | 0   |
| 19749  | 0   | 1   | 0   | 0   |
| 19756  | 0   | 2   | 1   | 0   |
| 19771  | 0   | 1   | 0   | 0   |
| 19772  | 1   | 2   | 3   | 3   |
| 19775  | 0   | 1   | 0   | 0   |
| 19783  | 1   | 0   | 0   | 0   |
| 19787  | 0   | 1   | 0   | 0   |

| respid | Q33 | Q34 | Q35 | Q36 |
|--------|-----|-----|-----|-----|
| 19790  | 0   | 1   | 0   | 0   |
| 19797  | 0   | 2   | 0   | 0   |
| 19802  | 0   | 1   | 0   | 0   |
| 19808  | 0   | 2   | 0   | 0   |
| 19810  | 0   | 1   | 0   | 0   |
| 19811  | 0   | 1   | 0   | 0   |
| 19812  | 0   | 1   | 1   | 1   |
| 19821  | 1   | 1   | 2   | 0   |
| 19826  | 0   | 1   | 0   | 0   |
| 19827  | 0   | 1   | 0   | 0   |
| 19830  | 0   | 1   | 0   | 0   |
| 19834  | 1   | 1   | 0   | 0   |
| 19838  | 1   | 1   | 1   | 1   |
| 19843  | 1   | 1   | 1   | 0   |
| 19845  | 0   | 1   | 2   | 2   |
| 19846  | 0   | 0   | 0   | 0   |
| 19852  | 1   | 2   | 4   | 3   |
| 19855  | 0   | 1   | 1   | 0   |
| 19858  | 0   | 3   | 1   | 0   |
| 19861  | 1   | 1   | 3   | 3   |
| 19863  | 1   | 1   | 0   | 0   |
| 19868  | 1   | 1   | 1   | 0   |
| 19874  | 1   | 1   | 0   | 0   |
| 19876  | 0   | 0   | 0   | 0   |
| 19880  | 1   | 2   | 2   | 1   |
| 19885  | 0   | 0   | 1   | 0   |
| 19890  | 1   | 0   | 0   | 0   |
| 19894  | 0   | 0   | 0   | 0   |
| 19895  | 0   | 1   | 0   | 0   |
| 19897  | 1   | 3   | 2   | 1   |
| 19906  | 0   | 1   | 0   | 0   |
| 19908  | 0   | 1   | 0   | 0   |

| respid | Q33 | Q34 | Q35 | Q36 |
|--------|-----|-----|-----|-----|
| 19912  | 0   | 1   | 0   | 0   |
| 19913  | 0   | 1   | 0   | 1   |
| 19914  | 1   | 3   | 2   | 2   |
| 19918  | 1   | 2   | 0   | 0   |
| 19924  | 1   | 3   | 2   | 1   |
| 19936  | 0   | 1   | 0   | 0   |
| 19940  | 0   | 0   | 0   | 0   |
| 19945  | 1   | 1   | 1   | 1   |
| 19948  | 0   | 0   | 0   | 0   |
| 19959  | 0   | 0   | 0   | 0   |
| 19961  | 1   | 2   | 1   | 0   |
| 19962  | 1   | 2   | 0   | 0   |
| 19965  | 0   | 1   | 0   | 0   |
| 19966  | 0   | 1   | 1   | 1   |
| 19973  | 0   | 1   | 1   | 0   |
| 19981  | 1   | 1   | 1   | 0   |
| 19986  | 0   | 1   | 0   | 0   |
| 19989  | 1   | 1   | 0   | 0   |
| 19998  | 0   | 0   | 0   | 0   |
| 20001  | 1   | 1   | 0   | 0   |
| 20005  | 0   | 0   | 0   | 0   |
| 20013  | 1   | 3   | 5   | 4   |
| 20015  | 1   | 1   | 0   | 0   |
| 20017  | 1   | 1   | 4   | 4   |
| 20020  | 0   | 1   | 0   | 0   |
| 20021  | 0   | 1   | 0   | 0   |
| 20026  | 0   | 1   | 0   | 0   |
| 20028  | 0   | 1   | 0   | 0   |
| 20030  | 0   | 1   | 1   | 1   |
| 20031  | 1   | 0   | 0   | 0   |
| 20034  | 1   | 1   | 0   | 0   |
| 20035  | 1   | 0   | 0   | 0   |

| respid | Q33 | Q34 | Q35 | Q36 |
|--------|-----|-----|-----|-----|
| 20040  | 1   | 1   | 1   | 0   |
| 20045  | 0   | 1   | 0   | 0   |
| 20048  | 2   | 0   | 2   | 5   |
| 20053  | 1   | 2   | 1   | 0   |
| 20064  | 0   | 1   | 1   | 0   |
| 20071  | 1   | 1   | 2   | 0   |
| 20072  | 0   | 1   | 0   | 0   |
| 20076  | 0   | 1   | 0   | 0   |
| 20081  | 1   | 2   | 2   | 1   |
| 20082  | 1   | 1   | 2   | 2   |
| 20083  | 1   | 1   | 0   | 0   |
| 20088  | 0   | 2   | 1   | 0   |
| 20089  | 0   | 0   | 0   | 1   |
| 20099  | 0   | 1   | 0   | 0   |
| 20101  | 0   | 1   | 0   | 0   |
| 20102  | 0   | 0   | 1   | 0   |
| 20109  | 1   | 1   | 0   | 0   |
| 20118  | 0   | 1   | 0   | 0   |
| 20119  | 1   | 1   | 0   | 0   |
| 20124  | 1   | 1   | 0   | 0   |
| 20126  | 0   | 1   | 0   | 0   |
| 20130  | 0   | 1   | 0   | 0   |
| 20131  | 0   | 0   | 1   | 0   |
| 20134  | 0   | 2   | 2   | 0   |
| 20146  | 0   | 0   | 0   | 0   |
| 20152  | 0   | 0   | 0   | 0   |
| 20155  | 1   | 2   | 0   | 0   |
| 20156  | 0   | 0   | 0   | 0   |
| 20157  | 0   | 0   | 0   | 0   |
| 20164  | 0   | 0   | 0   | 0   |
| 20168  | 0   | 0   | 1   | 0   |
| 20173  | 1   | 2   | 3   | 2   |

| respid | Q33 | Q34 | Q35 | Q36 |
|--------|-----|-----|-----|-----|
| 20174  | 0   | 0   | 0   | 0   |
| 20175  | 1   | 3   | 3   | 2   |
| 20189  | 0   | 1   | 0   | 0   |
| 20190  | 0   | 2   | 1   | 1   |
| 20201  | 0   | 0   | 0   | 0   |
| 20202  | 0   | 1   | 0   | 0   |
| 20204  | 2   | 3   | 5   | 5   |
| 20206  | 1   | 2   | 3   | 0   |
| 20207  | 0   | 0   | 0   | 0   |
| 20212  | 0   | 2   | 0   | 1   |
| 20213  | 0   | 3   | 1   | 0   |
| 20217  | 0   | 2   | 1   | 0   |
| 20222  | 0   | 2   | 0   | 0   |
| 20227  | 1   | 2   | 0   | 0   |
| 20228  | 0   | 0   | 0   | 0   |
| 20238  | 0   | 2   | 0   | 0   |
| 20242  | 0   | 1   | 0   | 0   |
| 20246  | 0   | 0   | 0   | 0   |
| 20255  | 0   | 1   | 0   | 2   |
| 20256  | 1   | 1   | 0   | 0   |
| 20259  | 1   | 1   | 1   | 1   |
| 20262  | 0   | 0   | 0   | 0   |
| 20274  | 0   | 0   | 0   | 0   |
| 20283  | 0   | 1   | 2   | 1   |
| 20284  | 0   | 0   | 0   | 0   |
| 20291  | 0   | 1   | 0   | 0   |
| 20292  | 0   | 1   | 0   | 0   |
| 20293  | 0   | 1   | 0   | 0   |
| 20298  | 2   | 2   | 1   | 1   |
| 20301  | 1   | 1   | 0   | 0   |
| 20303  | 0   | 2   | 1   | 0   |
| 20309  | 0   | 0   | 0   | 0   |

| respid | Q33 | Q34 | Q35 | Q36 |
|--------|-----|-----|-----|-----|
| 20318  | 0   | 1   | 1   | 0   |
| 20324  | 1   | 0   | 0   | 0   |
| 20335  | 0   | 0   | 1   | 0   |
| 20336  | 0   | 1   | 0   | 0   |
| 20339  | 1   | 1   | 0   | 0   |
| 20348  | 0   | 2   | 2   | 2   |
| 20351  | 0   | 1   | 0   | 0   |
| 20353  | 0   | 1   | 0   | 0   |
| 20356  | 0   | 2   | 1   | 0   |
| 20357  | 0   | 0   | 0   | 0   |
| 20366  | 0   | 0   | 0   | 0   |
| 20369  | 1   | 2   | 5   | 4   |
| 20372  | 0   | 1   | 1   | 0   |
| 20375  | 0   | 1   | 0   | 0   |
| 20379  | 0   | 1   | 0   | 0   |
| 20380  | 0   | 1   | 2   | 0   |
| 20396  | 0   | 1   | 0   | 0   |
| 20398  | 1   | 2   | 2   | 0   |
| 20412  | 0   | 1   | 0   | 0   |
| 20415  | 0   | 1   | 2   | 0   |
| 20424  | 0   | 2   | 4   | 4   |
| 20434  | 0   | 1   | 1   | 0   |
| 20435  | 1   | 2   | 1   | 0   |
| 20440  | 1   | 2   | 0   | 0   |
| 20441  | 0   | 0   | 1   | 0   |
| 20445  | 0   | 0   | 0   | 0   |
| 20446  | 1   | 2   | 4   | 3   |
| 20450  | 0   | 1   | 0   | 0   |
| 20453  | 0   | 2   | 2   | 2   |
| 20458  | 0   | 0   | 0   | 0   |
| 20464  | 0   | 0   | 0   | 0   |
| 20471  | 0   | 1   | 0   | 0   |

| respid | Q33 | Q34 | Q35 | Q36 |
|--------|-----|-----|-----|-----|
| 20473  | 0   | 0   | 0   | 0   |
| 20474  | 0   | 1   | 1   | 1   |
| 20477  | 1   | 0   | 0   | 0   |
| 20479  | 0   | 0   | 5   | 2   |
| 20485  | 0   | 1   | 0   | 0   |
| 20487  | 0   | 1   | 0   | 0   |
| 20488  | 0   | 2   | 0   | 0   |
| 20494  | 0   | 2   | 0   | 0   |
| 20502  | 1   | 3   | 3   | 3   |
| 20503  | 1   | 3   | 0   | 0   |
| 20510  | 1   | 0   | 0   | 0   |
| 20512  | 0   | 0   | 0   | 0   |
| 20516  | 1   | 0   | 0   | 0   |
| 20522  | 1   | 1   | 1   | 1   |
| 20527  | 0   | 1   | 1   | 0   |
| 20529  | 0   | 2   | 1   | 1   |
| 20535  | 1   | 1   | 0   | 0   |
| 20543  | 0   | 1   | 0   | 0   |
| 20546  | 0   | 1   | 1   | 1   |
| 20548  | 0   | 1   | 0   | 0   |
| 20552  | 0   | 1   | 0   | 0   |
| 20556  | 1   | 3   | 1   | 0   |
| 20566  | 1   | 2   | 1   | 1   |
| 20576  | 0   | 0   | 0   | 0   |
| 20587  | 0   | 0   | 0   | 0   |
| 20589  | 0   | 0   | 0   | 0   |
| 20593  | 0   | 0   | 0   | 0   |
| 20594  | 1   | 1   | 0   | 0   |
| 20602  | 1   | 0   | 1   | 1   |
| 20607  | 1   | 1   | 0   | 0   |
| 20608  | 1   | 1   | 0   | 0   |
| 20611  | 0   | 0   | 0   | 0   |



| respid | Q33 | Q34 | Q35 | Q36 |
|--------|-----|-----|-----|-----|
| 20612  | 0   | 1   | 0   | 0   |
| 20615  | 1   | 2   | 1   | 1   |
| 20625  | 0   | 1   | 0   | 0   |
| 20630  | 0   | 1   | 1   | 1   |
| 20639  | 0   | 1   | 0   | 0   |
| 20643  | 0   | 0   | 0   | 0   |
| 20645  | 0   | 1   | 0   | 0   |
| 20647  | 0   | 0   | 0   | 0   |
| 20652  | 1   | 2   | 2   | 2   |
| 20661  | 0   | 0   | 0   | 0   |
| 20665  | 0   | 0   | 0   | 0   |
| 20679  | 0   | 0   | 0   | 0   |
| 20682  | 1   | 2   | 2   | 1   |
| 20683  | 0   | 0   | 0   | 0   |
| 20700  | 0   | 1   | 0   | 0   |
| 20702  | 1   | 2   | 4   | 1   |
| 20709  | 0   | 1   | 0   | 0   |
| 20715  | 1   | 1   | 5   | 3   |
| 20718  | 0   | 0   | 0   | 0   |
| 20722  | 1   | 1   | 0   | 0   |
| 20729  | 0   | 0   | 0   | 0   |
| 20732  | 1   | 0   | 0   | 0   |
| 20746  | 0   | 2   | 4   | 3   |
| 20747  | 0   | 1   | 0   | 1   |
| 20758  | 0   | 0   | 0   | 0   |
| 20767  | 1   | 3   | 1   | 0   |
| 20777  | 0   | 1   | 0   | 0   |
| 20778  | 0   | 1   | 0   | 0   |
| 20780  | 0   | 0   | 1   | 2   |
| 20800  | 0   | 1   | 1   | 0   |
| 20810  | 0   | 1   | 0   | 0   |
| 20814  | 1   | 1   | 1   | 1   |

| respid | Q33 | Q34 | Q35 | Q36 |
|--------|-----|-----|-----|-----|
| 20816  | 1   | 0   | 0   | 0   |
| 20832  | 0   | 0   | 0   | 0   |
| 20838  | 1   | 2   | 2   | 0   |
| 20841  | 0   | 1   | 1   | 1   |
| 20848  | 0   | 1   | 0   | 0   |
| 20850  | 0   | 0   | 0   | 0   |
| 20851  | 1   | 2   | 1   | 0   |
| 20861  | 0   | 1   | 0   | 0   |
| 20870  | 1   | 1   | 1   | 1   |
| 20880  | 1   | 1   | 0   | 0   |
| 20883  | 1   | 1   | 0   | 0   |
| 20894  | 1   | 1   | 1   | 0   |
| 20896  | 0   | 2   | 3   | 2   |
| 20901  | 1   | 1   | 2   | 2   |
| 20903  | 0   | 0   | 0   | 0   |
| 20909  | 0   | 0   | 0   | 0   |
| 20919  | 0   | 0   | 0   | 0   |
| 20925  | 0   | 1   | 0   | 0   |
| 20935  | 1   | 3   | 0   | 0   |
| 20939  | 1   | 1   | 2   | 1   |
| 20956  | 1   | 3   | 4   | 2   |
| 20970  | 1   | 1   | 0   | 0   |
| 20974  | 1   | 2   | 1   | 0   |
| 20975  | 0   | 1   | 0   | 0   |
| 20984  | 0   | 2   | 1   | 0   |
| 20988  | 0   | 0   | 0   | 0   |
| 20996  | 0   | 1   | 0   | 0   |
| 20998  | 1   | 1   | 1   | 1   |
| 21007  | 0   | 0   | 0   | 0   |
| 21008  | 0   | 1   | 1   | 0   |
| 21014  | 0   | 0   | 0   | 0   |
| 21020  | 0   | 1   | 0   | 0   |

| respid | Q33 | Q34 | Q35 | Q36 |
|--------|-----|-----|-----|-----|
| 21022  | 1   | 2   | 1   | 1   |
| 21024  | 1   | 1   | 0   | 0   |
| 21026  | 0   | 2   | 0   | 0   |
| 21027  | 2   | 2   | 0   | 0   |
| 21030  | 0   | 0   | 0   | 0   |
| 21032  | 1   | 1   | 3   | 2   |
| 21040  | 0   | 0   | 0   | 0   |
| 21045  | 1   | 1   | 0   | 0   |
| 21058  | 1   | 0   | 0   | 0   |
| 21064  | 1   | 1   | 0   | 0   |
| 21073  | 0   | 1   | 0   | 0   |
| 21086  | 1   | 3   | 2   | 2   |
| 21092  | 1   | 3   | 5   | 2   |
| 21096  | 0   | 2   | 2   | 1   |
| 21103  | 0   | 1   | 0   | 0   |
| 21120  | 1   | 3   | 2   | 2   |
| 21125  | 0   | 0   | 0   | 0   |
| 21126  | 1   | 0   | 0   | 0   |
| 21132  | 0   | 0   | 0   | 0   |
| 21139  | 1   | 1   | 1   | 2   |
| 21147  | 0   | 0   | 0   | 0   |
| 21148  | 0   | 1   | 0   | 0   |
| 21149  | 1   | 1   | 1   | 1   |
| 21164  | 0   | 1   | 1   | 1   |
| 21165  | 0   | 1   | 0   | 0   |
| 21171  | 1   | 2   | 2   | 2   |
| 21176  | 0   | 1   | 0   | 0   |
| 21187  | 1   | 3   | 1   | 2   |
| 21192  | 0   | 1   | 1   | 0   |
| 21198  | 0   | 1   | 0   | 0   |
| 21199  | 1   | 1   | 1   | 0   |
| 21206  | 0   | 2   | 2   | 2   |

| respid | Q33 | Q34 | Q35 | Q36 |
|--------|-----|-----|-----|-----|
| 21212  | 0   | 2   | 0   | 0   |
| 21216  | 1   | 1   | 0   | 0   |
| 21217  | 0   | 2   | 2   | 1   |
| 21228  | 0   | 1   | 1   | 1   |
| 21229  | 0   | 1   | 0   | 0   |
| 21230  | 0   | 2   | 0   | 0   |
| 21243  | 1   | 1   | 1   | 1   |
| 21247  | 1   | 2   | 1   | 1   |
| 21253  | 1   | 2   | 2   | 1   |
| 21264  | 1   | 3   | 1   | 2   |
| 21265  | 0   | 0   | 0   | 0   |
| 21273  | 1   | 2   | 1   | 0   |
| 21275  | 0   | 1   | 2   | 1   |
| 21278  | 1   | 0   | 0   | 0   |
| 21291  | 1   | 2   | 2   | 2   |
| 21298  | 0   | 1   | 0   | 0   |
| 21301  | 0   | 0   | 1   | 0   |
| 21312  | 1   | 1   | 2   | 2   |
| 21323  | 1   | 1   | 2   | 0   |
| 21325  | 1   | 2   | 1   | 1   |
| 21341  | 0   | 1   | 0   | 0   |
| 21349  | 1   | 3   | 1   | 1   |
| 21350  | 1   | 1   | 0   | 0   |
| 21354  | 1   | 3   | 2   | 1   |
| 21372  | 1   | 2   | 2   | 1   |
| 21373  | 0   | 0   | 2   | 1   |
| 21378  | 0   | 0   | 1   | 0   |
| 21393  | 0   | 1   | 0   | 0   |
| 21401  | 0   | 1   | 0   | 2   |
| 21405  | 1   | 1   | 0   | 0   |
| 21406  | 0   | 1   | 0   | 0   |
| 21407  | 0   | 1   | 1   | 0   |

| respid | Q33 | Q34 | Q35 | Q36 |
|--------|-----|-----|-----|-----|
| 21418  | 1   | 0   | 0   | 0   |
| 21420  | 0   | 0   | 1   | 0   |
| 21421  | 0   | 0   | 0   | 0   |
| 21446  | 1   | 3   | 4   | 0   |
| 21449  | 0   | 1   | 1   | 1   |
| 21452  | 0   | 0   | 0   | 2   |
| 21455  | 1   | 2   | 3   | 3   |
| 21469  | 1   | 1   | 0   | 0   |
| 21471  | 1   | 2   | 1   | 0   |
| 21472  | 0   | 1   | 0   | 0   |
| 21474  | 1   | 0   | 0   | 0   |
| 21479  | 0   | 0   | 0   | 0   |
| 21485  | 0   | 1   | 0   | 0   |
| 21512  | 0   | 1   | 0   | 0   |
| 21513  | 0   | 1   | 0   | 0   |
| 21514  | 1   | 2   | 3   | 3   |
| 21520  | 0   | 1   | 1   | 1   |
| 21539  | 1   | 1   | 0   | 0   |
| 21553  | 1   | 0   | 2   | 1   |
| 21560  | 0   | 1   | 1   | 0   |
| 21561  | 0   | 1   | 0   | 0   |
| 21563  | 1   | 2   | 1   | 1   |
| 21565  | 1   | 1   | 0   | 0   |
| 21582  | 1   | 1   | 0   | 0   |
| 21584  | 0   | 1   | 1   | 0   |
| 21585  | 1   | 2   | 3   | 3   |
| 21586  | 0   | 0   | 0   | 0   |
| 21587  | 1   | 1   | 2   | 0   |
| 21590  | 1   | 3   | 2   | 0   |
| 21601  | 0   | 1   | 2   | 2   |
| 21611  | 1   | 0   | 2   | 3   |
| 21612  | 0   | 1   | 0   | 0   |

| respid | Q33 | Q34 | Q35 | Q36 |
|--------|-----|-----|-----|-----|
| 21625  | 0   | 1   | 1   | 1   |
| 21633  | 0   | 0   | 0   | 0   |
| 21640  | 0   | 2   | 0   | 0   |
| 21647  | 1   | 1   | 0   | 0   |
| 21648  | 1   | 3   | 2   | 2   |
| 21656  | 0   | 1   | 0   | 0   |
| 21657  | 1   | 0   | 0   | 0   |
| 21658  | 1   | 3   | 2   | 2   |
| 21665  | 1   | 3   | 1   | 2   |
| 21666  | 1   | 1   | 4   | 4   |
| 21668  | 1   | 2   | 4   | 3   |
| 21673  | 1   | 2   | 1   | 1   |
| 21681  | 1   | 2   | 3   | 3   |
| 21682  | 1   | 2   | 2   | 0   |
| 21685  | 0   | 1   | 0   | 0   |
| 21692  | 0   | 1   | 1   | 1   |
| 21697  | 0   | 1   | 0   | 0   |
| 21711  | 0   | 1   | 1   | 1   |
| 21715  | 0   | 3   | 4   | 4   |
| 21726  | 0   | 1   | 0   | 0   |
| 21748  | 0   | 0   | 0   | 0   |
| 21761  | 0   | 1   | 0   | 0   |
| 21769  | 1   | 2   | 4   | 2   |
| 21774  | 1   | 2   | 2   | 2   |
| 21778  | 0   | 1   | 1   | 0   |
| 21785  | 1   | 2   | 3   | 3   |
| 21799  | 1   | 2   | 1   | 1   |
| 21820  | 1   | 3   | 4   | 3   |
| 21837  | 0   | 1   | 0   | 0   |
| 21845  | 1   | 3   | 3   | 3   |
| 21846  | 0   | 1   | 1   | 0   |
| 21849  | 0   | 1   | 2   | 1   |

| respid | Q33 | Q34 | Q35 | Q36 |
|--------|-----|-----|-----|-----|
| 21850  | 1   | 1   | 1   | 0   |
| 21855  | 0   | 1   | 0   | 0   |
| 21859  | 1   | 1   | 0   | 0   |
| 21861  | 0   | 0   | 1   | 0   |
| 21866  | 0   | 0   | 0   | 0   |
| 21873  | 1   | 1   | 1   | 1   |
| 21876  | 0   | 1   | 1   | 0   |
| 21882  | 0   | 0   | 0   | 0   |
| 21884  | 1   | 1   | 1   | 1   |
| 21887  | 0   | 1   | 0   | 0   |
| 21892  | 0   | 0   | 0   | 0   |
| 21907  | 1   | 2   | 1   | 1   |
| 21910  | 1   | 3   | 4   | 4   |
| 21912  | 0   | 3   | 2   | 2   |
| 21914  | 0   | 1   | 0   | 0   |
| 21925  | 0   | 1   | 0   | 0   |
| 21937  | 0   | 0   | 1   | 0   |
| 21938  | 1   | 1   | 2   | 1   |
| 21940  | 1   | 1   | 0   | 0   |
| 21942  | 0   | 1   | 0   | 0   |
| 21947  | 0   | 0   | 0   | 0   |
| 21948  | 0   | 1   | 0   | 0   |
| 21961  | 1   | 1   | 1   | 1   |
| 21977  | 1   | 3   | 4   | 4   |
| 21983  | 0   | 0   | 0   | 0   |
| 21986  | 0   | 2   | 2   | 3   |
| 21988  | 0   | 1   | 1   | 0   |
| 21996  | 1   | 1   | 3   | 0   |
| 21997  | 1   | 2   | 0   | 0   |
| 22005  | 1   | 1   | 1   | 0   |
| 22013  | 0   | 1   | 0   | 0   |
| 22018  | 1   | 0   | 0   | 0   |

| respid | Q33 | Q34 | Q35 | Q36 |
|--------|-----|-----|-----|-----|
| 22019  | 0   | 1   | 1   | 0   |
| 22071  | 1   | 2   | 2   | 0   |
| 22082  | 0   | 1   | 0   | 0   |
| 22085  | 0   | 1   | 0   | 0   |
| 22092  | 0   | 1   | 0   | 0   |
| 22097  | 0   | 1   | 0   | 0   |
| 22111  | 0   | 0   | 0   | 0   |
| 22118  | 1   | 1   | 1   | 0   |
| 22132  | 0   | 1   | 0   | 0   |
| 22133  | 1   | 0   | 1   | 0   |
| 22139  | 0   | 0   | 0   | 0   |
| 22142  | 1   | 3   | 2   | 2   |
| 22146  | 0   | 1   | 0   | 0   |
| 22181  | 1   | 0   | 0   | 0   |
| 22202  | 1   | 0   | 0   | 0   |
| 22214  | 0   | 0   | 0   | 0   |
| 22223  | 1   | 1   | 0   | 0   |
| 22227  | 1   | 1   | 2   | 2   |
| 22229  | 0   | 0   | 0   | 0   |
| 22239  | 1   | 3   | 2   | 1   |
| 22245  | 1   | 3   | 4   | 4   |
| 22256  | 1   | 1   | 0   | 0   |
| 22260  | 1   | 0   | 1   | 0   |
| 22298  | 1   | 2   | 2   | 1   |
| 22321  | 0   | 1   | 1   | 1   |
| 22340  | 0   | 1   | 0   | 0   |
| 22346  | 2   | 3   | 2   | 1   |
| 22356  | 0   | 1   | 1   | 0   |
| 22361  | 1   | 2   | 2   | 0   |
| 22364  | 0   | 1   | 1   | 0   |
| 22368  | 0   | 0   | 0   | 0   |
| 22374  | 0   | 2   | 3   | 2   |



| respid | Q33 | Q34 | Q35 | Q36 |
|--------|-----|-----|-----|-----|
| 22375  | 0   | 0   | 0   | 0   |
| 22377  | 0   | 1   | 1   | 1   |
| 22383  | 0   | 0   | 0   | 0   |
| 22387  | 1   | 2   | 0   | 0   |
| 22392  | 0   | 0   | 0   | 0   |
| 22393  | 0   | 1   | 1   | 0   |
| 22394  | 0   | 1   | 2   | 0   |
| 22395  | 1   | 2   | 0   | 0   |
| 22401  | 0   | 1   | 0   | 0   |
| 22407  | 1   | 0   | 0   | 0   |
| 22410  | 0   | 1   | 0   | 0   |
| 22418  | 1   | 1   | 0   | 0   |
| 22421  | 0   | 0   | 0   | 0   |
| 22423  | 0   | 0   | 0   | 0   |
| 22425  | 1   | 2   | 1   | 0   |
| 22427  | 0   | 1   | 0   | 0   |
| 22431  | 1   | 3   | 2   | 2   |
| 22435  | 0   | 0   | 0   | 1   |
| 22436  | 0   | 0   | 1   | 1   |
| 22442  | 0   | 0   | 0   | 0   |
| 22444  | 1   | 1   | 1   | 1   |
| 22445  | 1   | 3   | 2   | 2   |
| 22446  | 0   | 0   | 0   | 0   |
| 22448  | 0   | 1   | 1   | 0   |
| 22449  | 0   | 1   | 0   | 0   |
| 22450  | 1   | 2   | 2   | 1   |
| 22453  | 0   | 2   | 2   | 2   |
| 22465  | 0   | 3   | 1   | 1   |
| 22472  | 0   | 1   | 1   | 0   |
| 22475  | 0   | 2   | 2   | 2   |
| 22478  | 0   | 1   | 2   | 1   |
| 22491  | 0   | 1   | 0   | 0   |

| respid | Q33 | Q34 | Q35 | Q36 |
|--------|-----|-----|-----|-----|
| 22497  | 1   | 2   | 2   | 2   |
| 22498  | 1   | 1   | 2   | 1   |
| 22499  | 0   | 2   | 1   | 0   |
| 22503  | 1   | 1   | 1   | 0   |
| 22507  | 0   | 0   | 1   | 0   |
| 22513  | 0   | 2   | 1   | 1   |
| 22517  | 1   | 1   | 0   | 0   |
| 22524  | 1   | 2   | 2   | 2   |
| 22528  | 0   | 1   | 0   | 0   |
| 22544  | 1   | 2   | 1   | 0   |
| 22571  | 0   | 1   | 0   | 0   |
| 22576  | 0   | 0   | 1   | 2   |
| 22579  | 1   | 2   | 0   | 0   |
| 22583  | 1   | 1   | 2   | 1   |
| 22591  | 0   | 2   | 2   | 1   |
| 22592  | 0   | 1   | 1   | 1   |
| 22612  | 0   | 0   | 0   | 0   |
| 22613  | 0   | 1   | 1   | 1   |
| 22615  | 0   | 1   | 0   | 0   |
| 22621  | 0   | 2   | 0   | 0   |
| 22625  | 1   | 1   | 0   | 0   |
| 22628  | 0   | 0   | 0   | 0   |
| 22632  | 1   | 2   | 1   | 0   |
| 22639  | 0   | 0   | 0   | 0   |
| 22648  | 1   | 2   | 5   | 0   |
| 22649  | 0   | 1   | 1   | 1   |
| 22655  | 0   | 0   | 0   | 0   |
| 22659  | 0   | 0   | 0   | 0   |
| 22660  | 0   | 1   | 0   | 0   |
| 22666  | 1   | 2   | 2   | 1   |
| 22667  | 0   | 1   | 1   | 0   |
| 22670  | 0   | 0   | 0   | 0   |

| respid | Q33 | Q34 | Q35 | Q36 |
|--------|-----|-----|-----|-----|
| 22681  | 0   | 0   | 0   | 0   |
| 22683  | 1   | 0   | 1   | 0   |
| 22688  | 0   | 1   | 0   | 1   |
| 22695  | 0   | 1   | 0   | 0   |
| 22696  | 0   | 0   | 0   | 0   |
| 22705  | 1   | 3   | 3   | 2   |
| 22718  | 1   | 1   | 2   | 2   |
| 22720  | 0   | 1   | 2   | 0   |
| 22724  | 0   | 0   | 0   | 0   |
| 22728  | 0   | 0   | 0   | 0   |
| 22751  | 0   | 1   | 1   | 0   |
| 22782  | 1   | 2   | 4   | 3   |
| 22786  | 0   | 2   | 1   | 1   |
| 22788  | 0   | 1   | 0   | 0   |
| 22810  | 1   | 1   | 2   | 2   |
| 22816  | 0   | 1   | 0   | 0   |
| 22818  | 0   | 1   | 0   | 0   |
| 22854  | 0   | 1   | 0   | 0   |
| 22858  | 0   | 1   | 1   | 0   |
| 22862  | 1   | 2   | 0   | 0   |
| 22865  | 0   | 0   | 0   | 0   |
| 22868  | 1   | 1   | 1   | 0   |
| 22869  | 1   | 2   | 2   | 1   |
| 22873  | 1   | 0   | 0   | 0   |
| 22875  | 0   | 1   | 0   | 0   |
| 22876  | 0   | 0   | 0   | 0   |
| 22882  | 0   | 2   | 2   | 1   |
| 22884  | 1   | 3   | 2   | 2   |
| 22887  | 0   | 2   | 1   | 1   |
| 22888  | 0   | 1   | 0   | 0   |
| 22900  | 0   | 0   | 0   | 0   |
| 22901  | 0   | 0   | 0   | 0   |

| respid | Q33 | Q34 | Q35 | Q36 |
|--------|-----|-----|-----|-----|
| 22912  | 0   | 0   | 1   | 0   |
| 22913  | 1   | 1   | 0   | 0   |
| 22921  | 0   | 1   | 0   | 0   |
| 22925  | 1   | 0   | 0   | 0   |
| 22940  | 0   | 0   | 0   | 0   |
| 22941  | 0   | 2   | 2   | 0   |
| 22947  | 0   | 1   | 1   | 0   |
| 22948  | 0   | 0   | 0   | 0   |
| 22964  | 1   | 2   | 2   | 1   |
| 22966  | 0   | 0   | 0   | 0   |
| 22969  | 1   | 1   | 0   | 0   |
| 22971  | 1   | 0   | 0   | 0   |
| 22988  | 0   | 0   | 0   | 0   |
| 22990  | 0   | 0   | 1   | 0   |
| 23000  | 0   | 1   | 0   | 0   |
| 23016  | 0   | 0   | 0   | 0   |
| 23026  | 2   | 2   | 2   | 1   |
| 23035  | 0   | 1   | 0   | 0   |
| 23037  | 1   | 3   | 2   | 2   |
| 23044  | 0   | 2   | 1   | 1   |
| 23046  | 0   | 1   | 0   | 0   |
| 23047  | 0   | 0   | 0   | 0   |
| 23049  | 0   | 0   | 0   | 0   |
| 23055  | 0   | 0   | 0   | 0   |
| 23066  | 0   | 1   | 0   | 0   |
| 23075  | 0   | 3   | 0   | 0   |
| 23081  | 1   | 2   | 2   | 0   |
| 23087  | 0   | 1   | 0   | 0   |
| 23094  | 0   | 0   | 0   | 0   |
| 23099  | 0   | 0   | 0   | 0   |
| 23101  | 0   | 1   | 0   | 0   |
| 23105  | 0   | 1   | 0   | 0   |

| respid | Q33 | Q34 | Q35 | Q36 |
|--------|-----|-----|-----|-----|
| 23115  | 1   | 1   | 1   | 1   |
| 23121  | 0   | 2   | 0   | 0   |
| 23127  | 0   | 1   | 0   | 0   |
| 23131  | 0   | 2   | 0   | 0   |
| 23134  | 0   | 1   | 0   | 0   |
| 23145  | 0   | 1   | 0   | 0   |
| 23151  | 0   | 1   | 0   | 0   |
| 23161  | 0   | 2   | 0   | 0   |
| 23169  | 2   | 3   | 3   | 3   |
| 23173  | 0   | 0   | 0   | 0   |
| 23174  | 0   | 0   | 1   | 0   |
| 23186  | 1   | 3   | 3   | 2   |
| 23195  | 1   | 1   | 0   | 0   |
| 23197  | 0   | 0   | 0   | 0   |
| 23198  | 0   | 1   | 0   | 0   |
| 23203  | 1   | 0   | 0   | 0   |
| 23204  | 1   | 1   | 1   | 0   |
| 23212  | 1   | 1   | 0   | 0   |
| 23214  | 0   | 1   | 0   | 0   |
| 23221  | 0   | 1   | 0   | 0   |
| 23237  | 1   | 1   | 0   | 0   |
| 23251  | 0   | 1   | 0   | 0   |
| 23254  | 1   | 0   | 1   | 0   |
| 23262  | 1   | 1   | 1   | 0   |
| 23267  | 0   | 1   | 0   | 0   |
| 23268  | 1   | 3   | 4   | 0   |
| 23273  | 0   | 1   | 0   | 0   |
| 23278  | 0   | 0   | 0   | 0   |
| 23279  | 0   | 1   | 0   | 0   |
| 23281  | 0   | 0   | 1   | 0   |
| 23282  | 1   | 1   | 0   | 0   |
| 23283  | 1   | 1   | 0   | 1   |

| respid | Q33 | Q34 | Q35 | Q36 |
|--------|-----|-----|-----|-----|
| 23285  | 0   | 1   | 1   | 0   |
| 23305  | 2   | 2   | 1   | 1   |
| 23309  | 0   | 1   | 0   | 0   |
| 23310  | 0   | 1   | 0   | 0   |
| 23311  | 0   | 2   | 1   | 0   |
| 23312  | 0   | 1   | 0   | 0   |
| 23319  | 1   | 1   | 0   | 0   |
| 23320  | 1   | 1   | 0   | 0   |
| 23322  | 0   | 2   | 0   | 0   |
| 23334  | 0   | 1   | 1   | 0   |
| 23340  | 0   | 1   | 0   | 0   |
| 23346  | 0   | 1   | 0   | 0   |
| 23353  | 0   | 1   | 0   | 0   |
| 23363  | 1   | 2   | 2   | 1   |
| 23364  | 1   | 2   | 2   | 2   |
| 23376  | 0   | 0   | 0   | 0   |
| 23378  | 0   | 1   | 0   | 0   |
| 23382  | 0   | 0   | 0   | 0   |
| 23383  | 0   | 1   | 1   | 1   |
| 23390  | 0   | 0   | 0   | 0   |
| 23395  | 0   | 0   | 0   | 0   |
| 23398  | 0   | 1   | 2   | 2   |
| 23399  | 0   | 1   | 0   | 0   |
| 23406  | 1   | 2   | 0   | 0   |
| 23418  | 1   | 1   | 1   | 0   |
| 23427  | 0   | 1   | 0   | 0   |
| 23428  | 0   | 0   | 1   | 0   |
| 23435  | 0   | 2   | 3   | 1   |
| 23439  | 1   | 1   | 0   | 0   |
| 23440  | 0   | 1   | 0   | 0   |
| 23444  | 1   | 1   | 3   | 0   |
| 23445  | 0   | 3   | 0   | 0   |

| respid | Q33 | Q34 | Q35 | Q36 |
|--------|-----|-----|-----|-----|
| 23455  | 0   | 0   | 0   | 0   |
| 23467  | 0   | 1   | 1   | 0   |
| 23478  | 1   | 1   | 1   | 0   |
| 23492  | 1   | 2   | 1   | 0   |
| 23498  | 1   | 2   | 0   | 0   |
| 23511  | 0   | 1   | 0   | 0   |
| 23514  | 0   | 0   | 0   | 0   |
| 23515  | 0   | 1   | 1   | 0   |
| 23522  | 0   | 0   | 0   | 0   |
| 23524  | 0   | 1   | 0   | 0   |
| 23531  | 1   | 0   | 1   | 0   |
| 23532  | 0   | 0   | 0   | 0   |
| 23533  | 1   | 1   | 0   | 0   |
| 23534  | 0   | 1   | 0   | 0   |
| 23538  | 0   | 1   | 0   | 0   |
| 23539  | 0   | 0   | 1   | 1   |
| 23548  | 1   | 1   | 1   | 0   |
| 23553  | 0   | 0   | 0   | 0   |
| 23556  | 0   | 1   | 0   | 0   |
| 23563  | 2   | 2   | 4   | 1   |
| 23572  | 1   | 1   | 0   | 0   |
| 23575  | 0   | 0   | 0   | 0   |
| 23576  | 0   | 1   | 0   | 0   |
| 23577  | 0   | 1   | 0   | 0   |
| 23578  | 1   | 2   | 1   | 0   |
| 23587  | 1   | 1   | 1   | 0   |
| 23597  | 0   | 1   | 0   | 0   |
| 23598  | 0   | 1   | 1   | 0   |
| 23604  | 1   | 0   | 0   | 0   |
| 23617  | 0   | 0   | 0   | 0   |
| 23620  | 1   | 1   | 0   | 0   |
| 23621  | 0   | 0   | 0   | 0   |

| respid | Q33 | Q34 | Q35 | Q36 |
|--------|-----|-----|-----|-----|
| 23625  | 0   | 1   | 0   | 0   |
| 23629  | 0   | 1   | 0   | 0   |
| 23635  | 0   | 0   | 0   | 0   |
| 23636  | 0   | 1   | 0   | 0   |
| 23637  | 1   | 1   | 2   | 3   |
| 23638  | 0   | 1   | 0   | 0   |
| 23644  | 0   | 1   | 0   | 0   |
| 23645  | 1   | 1   | 1   | 1   |
| 23649  | 1   | 1   | 2   | 2   |
| 23654  | 0   | 2   | 0   | 0   |
| 23662  | 0   | 1   | 0   | 0   |
| 23664  | 0   | 0   | 1   | 0   |
| 23665  | 0   | 1   | 0   | 0   |
| 23666  | 0   | 1   | 1   | 1   |
| 23671  | 0   | 1   | 0   | 0   |
| 23672  | 0   | 0   | 0   | 0   |
| 23685  | 1   | 1   | 1   | 0   |
| 23686  | 1   | 2   | 2   | 3   |
| 23689  | 1   | 1   | 2   | 2   |
| 23690  | 1   | 1   | 2   | 1   |
| 23695  | 0   | 2   | 1   | 0   |
| 23700  | 1   | 1   | 0   | 0   |
| 23714  | 1   | 1   | 0   | 0   |
| 23719  | 0   | 1   | 0   | 0   |
| 23720  | 1   | 1   | 0   | 0   |
| 23721  | 0   | 1   | 0   | 0   |
| 23729  | 0   | 0   | 0   | 0   |
| 23730  | 0   | 1   | 0   | 0   |
| 23732  | 0   | 1   | 0   | 0   |
| 23736  | 0   | 1   | 0   | 0   |
| 23754  | 0   | 0   | 0   | 0   |
| 23756  | 0   | 0   | 1   | 1   |



| respid | Q33 | Q34 | Q35 | Q36 |
|--------|-----|-----|-----|-----|
| 23759  | 1   | 2   | 1   | 1   |
| 23761  | 2   | 1   | 1   | 1   |
| 23766  | 0   | 1   | 1   | 0   |
| 23768  | 1   | 2   | 2   | 2   |
| 23773  | 0   | 0   | 0   | 0   |
| 23781  | 0   | 0   | 0   | 0   |
| 23782  | 1   | 3   | 4   | 0   |
| 23787  | 0   | 1   | 1   | 1   |
| 23788  | 2   | 3   | 3   | 2   |
| 23790  | 1   | 0   | 0   | 0   |
| 23794  | 0   | 1   | 0   | 0   |
| 23795  | 0   | 1   | 2   | 0   |
| 23801  | 1   | 1   | 0   | 0   |
| 23806  | 0   | 1   | 1   | 1   |
| 23809  | 0   | 2   | 1   | 0   |
| 23813  | 0   | 2   | 0   | 0   |
| 23815  | 0   | 0   | 0   | 0   |
| 23821  | 0   | 1   | 0   | 0   |
| 23825  | 1   | 0   | 0   | 0   |
| 23826  | 0   | 0   | 0   | 0   |
| 23830  | 0   | 1   | 0   | 0   |
| 23833  | 0   | 1   | 0   | 0   |
| 23837  | 0   | 1   | 0   | 0   |
| 23848  | 0   | 3   | 5   | 5   |
| 23850  | 0   | 1   | 0   | 0   |
| 23870  | 0   | 1   | 0   | 0   |
| 23877  | 0   | 0   | 0   | 0   |
| 23880  | 1   | 1   | 0   | 0   |
| 23882  | 0   | 1   | 0   | 0   |
| 23888  | 0   | 0   | 0   | 0   |
| 23908  | 1   | 2   | 1   | 1   |
| 23914  | 0   | 1   | 1   | 0   |

| respid | Q33 | Q34 | Q35 | Q36 |
|--------|-----|-----|-----|-----|
| 23916  | 0   | 1   | 1   | 1   |
| 23922  | 1   | 2   | 3   | 2   |
| 23932  | 1   | 1   | 0   | 0   |
| 23934  | 0   | 0   | 0   | 0   |
| 23942  | 0   | 1   | 1   | 0   |
| 23945  | 0   | 0   | 0   | 0   |
| 23948  | 0   | 1   | 0   | 0   |
| 23955  | 0   | 1   | 0   | 0   |
| 23956  | 1   | 2   | 1   | 0   |
| 23978  | 1   | 2   | 0   | 0   |
| 23981  | 0   | 0   | 0   | 0   |
| 23982  | 0   | 1   | 0   | 0   |
| 23991  | 0   | 0   | 0   | 0   |
| 23994  | 1   | 0   | 0   | 0   |
| 23995  | 0   | 0   | 1   | 0   |
| 23999  | 1   | 0   | 1   | 1   |
| 24005  | 1   | 3   | 2   | 2   |
| 24018  | 0   | 1   | 0   | 0   |
| 24021  | 0   | 0   | 0   | 0   |
| 24035  | 0   | 0   | 0   | 0   |
| 24040  | 0   | 1   | 0   | 0   |
| 24043  | 0   | 0   | 0   | 0   |
| 24046  | 0   | 1   | 1   | 2   |
| 24047  | 1   | 1   | 1   | 0   |
| 24048  | 0   | 2   | 0   | 0   |
| 24062  | 0   | 1   | 1   | 1   |
| 24063  | 1   | 2   | 1   | 1   |
| 24066  | 0   | 1   | 0   | 0   |
| 24069  | 0   | 0   | 0   | 0   |
| 24070  | 0   | 0   | 0   | 0   |
| 24074  | 0   | 1   | 0   | 0   |
| 24080  | 0   | 0   | 0   | 0   |

| respid | Q33 | Q34 | Q35 | Q36 |
|--------|-----|-----|-----|-----|
| 24082  | 0   | 1   | 0   | 0   |
| 24088  | 0   | 0   | 1   | 1   |
| 24089  | 0   | 0   | 0   | 0   |
| 24091  | 0   | 1   | 1   | 0   |
| 24095  | 1   | 0   | 0   | 0   |
| 24100  | 0   | 2   | 1   | 1   |
| 24105  | 1   | 2   | 2   | 0   |
| 24107  | 1   | 3   | 0   | 2   |
| 24108  | 0   | 0   | 0   | 0   |
| 24113  | 0   | 2   | 3   | 1   |
| 24120  | 0   | 0   | 0   | 0   |
| 24122  | 1   | 3   | 2   | 0   |
| 24123  | 1   | 2   | 1   | 1   |
| 24125  | 1   | 3   | 0   | 0   |
| 24132  | 0   | 1   | 0   | 0   |
| 24139  | 2   | 2   | 0   | 0   |
| 24140  | 0   | 1   | 0   | 0   |
| 24143  | 0   | 1   | 0   | 0   |
| 24150  | 2   | 3   | 3   | 1   |
| 24153  | 1   | 1   | 0   | 0   |
| 24161  | 0   | 0   | 0   | 0   |
| 24168  | 0   | 2   | 0   | 3   |
| 24179  | 1   | 0   | 0   | 0   |
| 24182  | 1   | 2   | 2   | 1   |
| 24194  | 0   | 1   | 0   | 1   |
| 24206  | 0   | 1   | 0   | 0   |
| 24214  | 0   | 1   | 0   | 0   |
| 24215  | 1   | 1   | 1   | 0   |
| 24224  | 0   | 1   | 0   | 0   |
| 24225  | 0   | 0   | 0   | 0   |
| 24227  | 0   | 0   | 0   | 0   |
| 24229  | 0   | 1   | 0   | 0   |

| respid | Q33 | Q34 | Q35 | Q36 |
|--------|-----|-----|-----|-----|
| 24230  | 0   | 0   | 0   | 0   |
| 24232  | 1   | 3   | 2   | 1   |
| 24253  | 0   | 2   | 1   | 1   |
| 24267  | 0   | 0   | 0   | 0   |
| 24274  | 0   | 1   | 0   | 0   |
| 24275  | 0   | 2   | 1   | 0   |
| 24277  | 0   | 1   | 0   | 0   |
| 24280  | 0   | 2   | 0   | 0   |
| 24285  | 1   | 0   | 1   | 0   |
| 24293  | 0   | 0   | 0   | 0   |
| 24295  | 1   | 2   | 1   | 0   |
| 24299  | 0   | 0   | 0   | 0   |
| 24303  | 0   | 2   | 0   | 0   |
| 24308  | 0   | 2   | 0   | 0   |
| 24322  | 1   | 0   | 0   | 0   |
| 24325  | 0   | 0   | 0   | 0   |
| 24328  | 0   | 0   | 0   | 0   |
| 24334  | 0   | 2   | 0   | 0   |
| 24342  | 0   | 2   | 0   | 0   |
| 24343  | 1   | 1   | 2   | 1   |
| 24348  | 2   | 3   | 1   | 1   |
| 24352  | 1   | 3   | 1   | 1   |
| 24354  | 0   | 1   | 1   | 1   |
| 24357  | 0   | 1   | 1   | 0   |
| 24360  | 0   | 1   | 1   | 1   |
| 24369  | 1   | 3   | 0   | 0   |
| 24373  | 0   | 1   | 1   | 1   |
| 24398  | 1   | 3   | 4   | 3   |
| 24402  | 0   | 1   | 0   | 0   |
| 24405  | 0   | 1   | 0   | 0   |
| 24407  | 1   | 1   | 0   | 0   |
| 24413  | 0   | 1   | 0   | 0   |

| respid | Q33 | Q34 | Q35 | Q36 |
|--------|-----|-----|-----|-----|
| 24443  | 1   | 1   | 3   | 3   |
| 24451  | 0   | 1   | 0   | 0   |
| 24459  | 1   | 2   | 1   | 1   |
| 24465  | 0   | 1   | 1   | 0   |
| 24481  | 0   | 1   | 1   | 0   |
| 24482  | 1   | 0   | 0   | 0   |
| 24491  | 0   | 2   | 1   | 1   |
| 24495  | 0   | 1   | 1   | 0   |
| 24497  | 0   | 3   | 2   | 2   |
| 24511  | 0   | 2   | 0   | 0   |
| 24513  | 0   | 2   | 2   | 2   |
| 24516  | 1   | 1   | 1   | 1   |
| 24518  | 1   | 1   | 0   | 0   |
| 24524  | 0   | 2   | 0   | 0   |
| 24528  | 0   | 0   | 0   | 0   |
| 24531  | 1   | 3   | 3   | 2   |
| 24533  | 1   | 3   | 2   | 2   |
| 24547  | 0   | 0   | 1   | 0   |
| 24557  | 1   | 2   | 4   | 4   |
| 24559  | 1   | 3   | 4   | 2   |
| 24567  | 1   | 2   | 0   | 0   |
| 24568  | 1   | 0   | 0   | 0   |
| 24577  | 0   | 0   | 0   | 0   |
| 24581  | 0   | 1   | 0   | 0   |
| 24588  | 1   | 1   | 0   | 0   |
| 24604  | 1   | 3   | 1   | 1   |
| 24612  | 0   | 1   | 3   | 1   |
| 24621  | 0   | 1   | 2   | 2   |
| 24625  | 0   | 1   | 1   | 0   |
| 24627  | 0   | 1   | 0   | 0   |
| 24640  | 0   | 1   | 1   | 0   |
| 24644  | 1   | 1   | 0   | 0   |

| respid | Q33 | Q34 | Q35 | Q36 |
|--------|-----|-----|-----|-----|
| 24664  | 0   | 1   | 1   | 0   |
| 24669  | 0   | 1   | 0   | 0   |
| 24685  | 0   | 1   | 0   | 0   |
| 24687  | 1   | 3   | 4   | 3   |
| 24688  | 1   | 1   | 2   | 1   |
| 24691  | 1   | 2   | 4   | 4   |
| 24693  | 0   | 2   | 0   | 0   |
| 24706  | 1   | 0   | 0   | 0   |
| 24710  | 0   | 0   | 0   | 0   |
| 24717  | 0   | 1   | 0   | 0   |
| 24720  | 1   | 0   | 0   | 0   |
| 24731  | 1   | 1   | 1   | 1   |
| 24732  | 0   | 0   | 0   | 0   |
| 24733  | 0   | 0   | 0   | 0   |
| 24747  | 0   | 0   | 0   | 0   |
| 24750  | 1   | 2   | 2   | 2   |
| 24758  | 0   | 3   | 2   | 0   |
| 24760  | 0   | 1   | 0   | 0   |
| 24765  | 1   | 0   | 0   | 0   |
| 24772  | 0   | 1   | 0   | 0   |
| 24779  | 0   | 0   | 2   | 2   |
| 24794  | 0   | 0   | 0   | 0   |
| 24796  | 1   | 2   | 2   | 3   |
| 24797  | 0   | 0   | 0   | 0   |
| 24800  | 0   | 0   | 1   | 0   |
| 24813  | 1   | 2   | 2   | 2   |
| 24815  | 1   | 1   | 0   | 0   |
| 24821  | 0   | 1   | 0   | 0   |
| 24822  | 1   | 0   | 0   | 0   |
| 24831  | 1   | 0   | 0   | 0   |
| 24835  | 0   | 0   | 0   | 0   |
| 24843  | 2   | 2   | 2   | 3   |

| respid | Q33 | Q34 | Q35 | Q36 |
|--------|-----|-----|-----|-----|
| 24844  | 0   | 2   | 2   | 2   |
| 24860  | 0   | 0   | 0   | 0   |
| 24861  | 1   | 1   | 1   | 1   |
| 24865  | 1   | 2   | 4   | 4   |
| 24870  | 1   | 1   | 1   | 2   |
| 24887  | 1   | 2   | 0   | 0   |
| 24897  | 1   | 2   | 2   | 1   |
| 24902  | 1   | 1   | 1   | 1   |
| 24914  | 1   | 1   | 0   | 0   |
| 24921  | 1   | 1   | 0   | 0   |
| 24922  | 0   | 0   | 0   | 0   |
| 24924  | 1   | 0   | 0   | 0   |
| 24927  | 1   | 2   | 1   | 0   |
| 24936  | 1   | 1   | 0   | 0   |
| 24937  | 0   | 0   | 1   | 0   |
| 24942  | 0   | 1   | 1   | 1   |
| 24947  | 0   | 1   | 0   | 0   |
| 24953  | 1   | 1   | 0   | 0   |
| 24954  | 1   | 2   | 2   | 2   |
| 24960  | 1   | 3   | 4   | 3   |
| 24965  | 0   | 3   | 0   | 0   |
| 24975  | 1   | 1   | 0   | 0   |
| 24983  | 1   | 2   | 4   | 4   |
| 24985  | 0   | 1   | 0   | 0   |
| 24990  | 0   | 0   | 0   | 0   |
| 25000  | 0   | 0   | 0   | 0   |
| 25007  | 1   | 1   | 0   | 0   |
| 25008  | 0   | 1   | 0   | 0   |
| 25010  | 0   | 0   | 0   | 0   |
| 25016  | 1   | 1   | 0   | 0   |
| 25021  | 1   | 3   | 0   | 0   |
| 25040  | 0   | 0   | 0   | 0   |

| respid | Q33 | Q34 | Q35 | Q36 |
|--------|-----|-----|-----|-----|
| 25043  | 0   | 1   | 0   | 0   |
| 25055  | 1   | 1   | 0   | 0   |
| 25057  | 0   | 2   | 0   | 0   |
| 25060  | 0   | 2   | 0   | 0   |
| 25062  | 1   | 2   | 1   | 0   |
| 25064  | 1   | 2   | 2   | 2   |
| 25069  | 1   | 0   | 0   | 0   |
| 25077  | 0   | 0   | 0   | 0   |
| 25088  | 0   | 0   | 0   | 0   |
| 25093  | 0   | 1   | 1   | 0   |
| 25121  | 1   | 2   | 2   | 0   |
| 25140  | 1   | 2   | 4   | 4   |
| 25144  | 1   | 1   | 0   | 0   |
| 25149  | 1   | 1   | 1   | 0   |
| 25159  | 1   | 1   | 0   | 0   |
| 25191  | 1   | 1   | 1   | 0   |
| 25193  | 1   | 3   | 2   | 3   |
| 25202  | 1   | 2   | 4   | 4   |
| 25215  | 1   | 2   | 1   | 0   |
| 25229  | 0   | 2   | 2   | 2   |
| 25231  | 1   | 2   | 1   | 0   |
| 25236  | 0   | 1   | 0   | 0   |
| 25242  | 0   | 1   | 0   | 0   |
| 25252  | 0   | 1   | 0   | 0   |
| 25253  | 0   | 3   | 2   | 1   |
| 25256  | 1   | 2   | 4   | 4   |
| 25260  | 0   | 1   | 0   | 0   |
| 25261  | 1   | 1   | 0   | 0   |
| 25280  | 1   | 1   | 1   | 0   |
| 25282  | 1   | 2   | 1   | 1   |
| 25289  | 1   | 1   | 1   | 1   |
| 25303  | 0   | 1   | 0   | 0   |



| respid | Q33 | Q34 | Q35 | Q36 |
|--------|-----|-----|-----|-----|
| 25304  | 1   | 3   | 1   | 0   |
| 25309  | 0   | 0   | 2   | 0   |
| 25317  | 0   | 0   | 1   | 1   |
| 25318  | 0   | 3   | 2   | 2   |
| 25320  | 1   | 1   | 2   | 2   |
| 25324  | 1   | 2   | 4   | 4   |
| 25331  | 0   | 2   | 1   | 1   |
| 25340  | 1   | 3   | 0   | 0   |
| 25342  | 0   | 1   | 1   | 0   |
| 25350  | 0   | 1   | 0   | 0   |
| 25352  | 1   | 0   | 0   | 0   |
| 25358  | 0   | 0   | 0   | 0   |
| 25375  | 0   | 0   | 1   | 0   |
| 25386  | 0   | 1   | 1   | 0   |
| 25388  | 0   | 0   | 2   | 1   |
| 25390  | 1   | 1   | 1   | 1   |
| 25391  | 0   | 1   | 0   | 0   |
| 25400  | 1   | 1   | 2   | 0   |
| 25413  | 1   | 2   | 4   | 4   |
| 25424  | 1   | 1   | 1   | 0   |
| 25426  | 1   | 1   | 2   | 2   |
| 25430  | 0   | 1   | 0   | 0   |
| 25434  | 1   | 1   | 1   | 1   |
| 25439  | 0   | 0   | 1   | 0   |
| 25441  | 0   | 1   | 0   | 0   |
| 25445  | 1   | 2   | 0   | 0   |
| 25451  | 0   | 1   | 0   | 0   |
| 25469  | 1   | 2   | 4   | 4   |
| 25471  | 0   | 1   | 2   | 2   |
| 25476  | 1   | 1   | 1   | 2   |
| 25480  | 0   | 1   | 1   | 0   |
| 25482  | 0   | 1   | 1   | 1   |

| respid | Q33 | Q34 | Q35 | Q36 |
|--------|-----|-----|-----|-----|
| 25500  | 0   | 2   | 5   | 0   |
| 25516  | 0   | 2   | 0   | 0   |
| 25521  | 1   | 2   | 4   | 4   |
| 25525  | 0   | 3   | 1   | 0   |
| 25530  | 0   | 1   | 1   | 2   |
| 25555  | 0   | 1   | 2   | 2   |
| 25558  | 1   | 2   | 0   | 0   |
| 25561  | 1   | 1   | 2   | 1   |
| 25566  | 0   | 0   | 0   | 0   |
| 25571  | 0   | 2   | 1   | 1   |
| 25572  | 1   | 0   | 0   | 0   |
| 25574  | 0   | 1   | 1   | 2   |
| 25588  | 0   | 1   | 0   | 0   |
| 25591  | 1   | 2   | 1   | 1   |
| 25599  | 1   | 1   | 2   | 2   |
| 25604  | 1   | 1   | 0   | 0   |
| 25614  | 1   | 1   | 3   | 0   |
| 25634  | 1   | 2   | 2   | 2   |
| 25642  | 0   | 1   | 0   | 0   |
| 25647  | 0   | 1   | 0   | 0   |
| 25653  | 0   | 1   | 0   | 0   |
| 25654  | 0   | 3   | 4   | 0   |
| 25660  | 0   | 0   | 0   | 0   |
| 25664  | 0   | 1   | 0   | 0   |
| 25665  | 1   | 0   | 0   | 0   |
| 25672  | 1   | 3   | 2   | 3   |
| 25677  | 0   | 3   | 2   | 2   |
| 25685  | 0   | 1   | 2   | 0   |
| 25699  | 0   | 2   | 3   | 3   |
| 25703  | 1   | 2   | 0   | 0   |
| 25704  | 0   | 2   | 1   | 2   |
| 25705  | 1   | 1   | 2   | 2   |

| respid | Q33 | Q34 | Q35 | Q36 |
|--------|-----|-----|-----|-----|
| 25711  | 0   | 1   | 1   | 0   |
| 25727  | 1   | 3   | 0   | 0   |
| 25728  | 0   | 1   | 1   | 0   |
| 25733  | 1   | 1   | 1   | 0   |
| 25735  | 0   | 1   | 0   | 0   |
| 25736  | 0   | 2   | 0   | 0   |
| 25742  | 0   | 1   | 0   | 0   |
| 25750  | 0   | 1   | 0   | 0   |
| 25754  | 0   | 2   | 0   | 0   |
| 25776  | 0   | 1   | 2   | 3   |
| 25778  | 0   | 0   | 0   | 0   |
| 25796  | 0   | 1   | 0   | 0   |
| 25852  | 0   | 1   | 1   | 0   |
| 25858  | 0   | 0   | 0   | 0   |
| 25859  | 0   | 0   | 0   | 0   |
| 25886  | 2   | 1   | 2   | 2   |
| 25890  | 0   | 2   | 1   | 0   |
| 25897  | 0   | 0   | 0   | 0   |
| 25903  | 0   | 1   | 0   | 0   |
| 25905  | 1   | 1   | 1   | 2   |
| 25917  | 0   | 0   | 0   | 0   |
| 25918  | 0   | 1   | 1   | 0   |
| 25928  | 0   | 1   | 1   | 0   |
| 25930  | 1   | 0   | 0   | 0   |
| 25949  | 1   | 0   | 0   | 0   |
| 25955  | 0   | 1   | 0   | 0   |
| 25959  | 0   | 1   | 0   | 1   |
| 25964  | 1   | 1   | 1   | 1   |
| 25972  | 0   | 1   | 0   | 0   |
| 25999  | 1   | 3   | 4   | 4   |
| 26019  | 0   | 2   | 1   | 0   |
| 26025  | 1   | 2   | 1   | 0   |

| respid | Q33 | Q34 | Q35 | Q36 |
|--------|-----|-----|-----|-----|
| 26039  | 1   | 2   | 1   | 0   |
| 26055  | 0   | 1   | 0   | 0   |
| 26061  | 1   | 1   | 2   | 0   |
| 26076  | 1   | 1   | 0   | 0   |
| 26088  | 0   | 1   | 1   | 0   |
| 26094  | 0   | 0   | 0   | 0   |
| 26104  | 2   | 0   | 1   | 1   |
| 26131  | 0   | 1   | 0   | 0   |
| 26134  | 1   | 2   | 1   | 0   |
| 26160  | 0   | 0   | 0   | 0   |
| 26168  | 0   | 1   | 0   | 1   |
| 26170  | 1   | 0   | 0   | 0   |
| 26191  | 1   | 1   | 2   | 0   |
| 26192  | 0   | 0   | 0   | 0   |
| 26195  | 1   | 2   | 1   | 1   |
| 26198  | 0   | 1   | 0   | 0   |
| 26199  | 0   | 1   | 1   | 1   |
| 26201  | 0   | 0   | 0   | 0   |
| 26202  | 0   | 1   | 1   | 0   |
| 26226  | 0   | 2   | 1   | 0   |
| 26233  | 0   | 2   | 1   | 1   |
| 26236  | 0   | 1   | 0   | 0   |
| 26242  | 0   | 0   | 0   | 0   |
| 26244  | 0   | 0   | 0   | 0   |
| 26250  | 1   | 1   | 1   | 2   |
| 26266  | 0   | 1   | 0   | 0   |
| 26274  | 1   | 2   | 0   | 0   |
| 26286  | 1   | 2   | 1   | 1   |
| 26288  | 1   | 0   | 0   | 0   |
| 26295  | 1   | 0   | 0   | 0   |
| 26296  | 0   | 1   | 0   | 0   |
| 26297  | 1   | 2   | 0   | 0   |

| respid | Q33 | Q34 | Q35 | Q36 |
|--------|-----|-----|-----|-----|
| 26300  | 0   | 1   | 1   | 1   |
| 26317  | 1   | 0   | 0   | 0   |
| 26343  | 0   | 0   | 0   | 0   |
| 26367  | 1   | 1   | 0   | 0   |
| 26372  | 1   | 0   | 1   | 1   |
| 26403  | 0   | 1   | 1   | 1   |
| 26423  | 0   | 1   | 0   | 0   |
| 26430  | 1   | 0   | 0   | 0   |
| 26437  | 0   | 1   | 0   | 0   |
| 26457  | 0   | 0   | 0   | 0   |
| 26466  | 0   | 0   | 0   | 0   |
| 26467  | 0   | 0   | 0   | 0   |
| 26469  | 0   | 2   | 0   | 1   |
| 26494  | 0   | 1   | 0   | 0   |
| 26510  | 0   | 1   | 2   | 0   |
| 26519  | 0   | 0   | 0   | 0   |
| 26525  | 1   | 1   | 0   | 0   |
| 26529  | 0   | 0   | 0   | 0   |
| 26533  | 1   | 1   | 0   | 0   |
| 26556  | 1   | 2   | 2   | 2   |
| 26559  | 1   | 2   | 1   | 1   |
| 26565  | 1   | 2   | 1   | 0   |
| 26576  | 1   | 1   | 1   | 1   |
| 26601  | 0   | 0   | 0   | 0   |
| 26607  | 1   | 2   | 2   | 1   |
| 26611  | 0   | 2   | 2   | 2   |
| 26619  | 0   | 1   | 0   | 1   |
| 26631  | 0   | 1   | 0   | 0   |
| 26654  | 1   | 3   | 0   | 0   |
| 26656  | 1   | 1   | 0   | 0   |
| 26664  | 0   | 0   | 1   | 0   |
| 26667  | 0   | 1   | 1   | 0   |

| respid | Q33 | Q34 | Q35 | Q36 |
|--------|-----|-----|-----|-----|
| 26674  | 1   | 3   | 4   | 4   |
| 26678  | 1   | 1   | 1   | 1   |
| 26693  | 1   | 1   | 0   | 0   |
| 26696  | 1   | 2   | 4   | 3   |
| 26703  | 1   | 3   | 4   | 4   |
| 26705  | 0   | 0   | 0   | 0   |
| 26706  | 0   | 1   | 2   | 1   |
| 26716  | 0   | 2   | 0   | 0   |
| 26721  | 1   | 1   | 1   | 0   |
| 26730  | 0   | 1   | 2   | 0   |
| 26752  | 1   | 1   | 0   | 0   |
| 26755  | 0   | 0   | 0   | 0   |
| 26791  | 0   | 1   | 0   | 0   |
| 26804  | 0   | 1   | 2   | 2   |
| 26810  | 0   | 1   | 1   | 3   |
| 26813  | 0   | 1   | 2   | 1   |
| 26833  | 1   | 1   | 1   | 1   |
| 26880  | 0   | 1   | 1   | 2   |
| 26884  | 0   | 1   | 0   | 0   |
| 26885  | 0   | 1   | 0   | 0   |
| 26890  | 1   | 1   | 2   | 1   |
| 26937  | 0   | 1   | 1   | 1   |
| 26939  | 2   | 2   | 2   | 2   |
| 26941  | 0   | 0   | 0   | 0   |
| 26992  | 1   | 2   | 2   | 1   |
| 27037  | 0   | 2   | 0   | 0   |
| 27045  | 1   | 3   | 2   | 2   |
| 27053  | 1   | 3   | 2   | 2   |
| 27060  | 1   | 3   | 2   | 2   |
| 27076  | 1   | 2   | 1   | 0   |
| 27124  | 0   | 2   | 1   | 0   |
| 27125  | 0   | 1   | 1   | 1   |

| respid | Q33 | Q34 | Q35 | Q36 |
|--------|-----|-----|-----|-----|
| 27132  | 1   | 1   | 0   | 0   |
| 27166  | 0   | 1   | 1   | 0   |
| 27190  | 0   | 1   | 0   | 1   |
| 27199  | 0   | 2   | 2   | 0   |
| 27221  | 1   | 3   | 2   | 2   |
| 27233  | 0   | 2   | 1   | 1   |
| 27241  | 1   | 1   | 0   | 0   |
| 27244  | 0   | 0   | 0   | 0   |
| 27245  | 1   | 3   | 2   | 2   |
| 27246  | 0   | 1   | 1   | 1   |
| 27253  | 0   | 1   | 1   | 0   |
| 27255  | 0   | 1   | 2   | 2   |
| 27267  | 1   | 1   | 1   | 1   |
| 27283  | 1   | 0   | 2   | 1   |
| 27289  | 1   | 1   | 1   | 0   |
| 27302  | 0   | 0   | 0   | 0   |
| 27317  | 0   | 1   | 0   | 0   |
| 27319  | 0   | 1   | 0   | 0   |
| 27331  | 1   | 2   | 1   | 1   |
| 27333  | 1   | 2   | 0   | 0   |
| 27340  | 0   | 0   | 0   | 0   |
| 27362  | 0   | 3   | 2   | 2   |
| 27370  | 0   | 0   | 0   | 0   |
| 27379  | 0   | 1   | 1   | 1   |
| 27386  | 0   | 0   | 0   | 0   |
| 27398  | 0   | 0   | 0   | 0   |
| 27404  | 0   | 1   | 0   | 0   |
| 27408  | 0   | 0   | 1   | 0   |
| 27412  | 1   | 2   | 2   | 3   |
| 27426  | 0   | 1   | 2   | 1   |
| 27455  | 0   | 1   | 0   | 1   |
| 27464  | 1   | 2   | 3   | 0   |

| respid | Q33 | Q34 | Q35 | Q36 |
|--------|-----|-----|-----|-----|
| 27484  | 0   | 2   | 1   | 1   |
| 27493  | 1   | 1   | 0   | 1   |
| 27512  | 1   | 3   | 2   | 1   |
| 27525  | 1   | 2   | 1   | 1   |
| 27532  | 1   | 2   | 1   | 1   |
| 27539  | 0   | 1   | 0   | 0   |
| 27540  | 0   | 1   | 0   | 2   |
| 27552  | 1   | 2   | 2   | 2   |
| 27562  | 0   | 1   | 0   | 0   |
| 27568  | 0   | 1   | 2   | 0   |
| 27574  | 1   | 3   | 3   | 3   |
| 27575  | 1   | 1   | 0   | 0   |
| 27577  | 1   | 1   | 0   | 0   |
| 27589  | 0   | 1   | 0   | 0   |
| 27593  | 1   | 1   | 0   | 0   |
| 27594  | 1   | 3   | 5   | 3   |
| 27595  | 1   | 2   | 4   | 2   |
| 27598  | 0   | 1   | 0   | 0   |
| 27620  | 0   | 1   | 1   | 0   |
| 27621  | 1   | 3   | 2   | 2   |
| 27628  | 0   | 1   | 0   | 0   |
| 27633  | 0   | 2   | 1   | 0   |
| 27643  | 1   | 1   | 2   | 2   |
| 27644  | 1   | 3   | 0   | 0   |
| 27668  | 0   | 0   | 0   | 0   |
| 27681  | 1   | 2   | 0   | 0   |
| 27691  | 0   | 1   | 0   | 0   |
| 27693  | 0   | 1   | 2   | 3   |
| 27703  | 1   | 1   | 1   | 1   |
| 27708  | 0   | 1   | 1   | 0   |
| 27719  | 1   | 2   | 2   | 0   |
| 27720  | 0   | 1   | 0   | 0   |



| respid | Q33 | Q34 | Q35 | Q36 |
|--------|-----|-----|-----|-----|
| 27723  | 1   | 1   | 1   | 0   |
| 27725  | 0   | 1   | 0   | 0   |
| 27734  | 0   | 3   | 0   | 0   |
| 27744  | 1   | 2   | 0   | 0   |
| 27749  | 1   | 2   | 2   | 1   |
| 27762  | 0   | 2   | 1   | 1   |
| 27808  | 1   | 2   | 2   | 2   |
| 27810  | 0   | 2   | 3   | 4   |
| 27812  | 0   | 0   | 1   | 0   |
| 27815  | 0   | 1   | 0   | 0   |
| 27818  | 1   | 1   | 0   | 0   |
| 27823  | 0   | 1   | 0   | 0   |
| 27841  | 0   | 1   | 2   | 1   |
| 27843  | 0   | 0   | 0   | 0   |
| 27851  | 0   | 1   | 1   | 0   |
| 27858  | 1   | 1   | 1   | 0   |
| 27859  | 1   | 2   | 1   | 0   |
| 27869  | 0   | 1   | 0   | 0   |
| 27872  | 0   | 1   | 0   | 0   |
| 27873  | 0   | 1   | 0   | 0   |
| 27884  | 1   | 1   | 1   | 1   |
| 27904  | 1   | 1   | 2   | 2   |
| 27915  | 1   | 3   | 0   | 0   |
| 27918  | 0   | 2   | 2   | 1   |
| 27937  | 0   | 1   | 1   | 1   |
| 27943  | 0   | 0   | 0   | 0   |
| 27948  | 1   | 1   | 0   | 0   |
| 27971  | 0   | 1   | 1   | 0   |
| 27991  | 0   | 1   | 0   | 0   |
| 28000  | 0   | 1   | 1   | 1   |
| 28011  | 0   | 1   | 1   | 1   |
| 28022  | 0   | 1   | 0   | 0   |

| respid | Q33 | Q34 | Q35 | Q36 |
|--------|-----|-----|-----|-----|
| 28025  | 0   | 1   | 0   | 0   |
| 28041  | 1   | 1   | 0   | 0   |
| 28057  | 1   | 3   | 1   | 1   |
| 28080  | 1   | 0   | 0   | 0   |
| 28098  | 0   | 1   | 0   | 0   |
| 28104  | 1   | 2   | 1   | 0   |
| 28109  | 1   | 3   | 1   | 0   |
| 28129  | 1   | 0   | 3   | 3   |
| 28141  | 0   | 0   | 0   | 0   |
| 28143  | 0   | 1   | 0   | 0   |
| 28149  | 0   | 2   | 0   | 0   |
| 28151  | 1   | 0   | 0   | 0   |
| 28161  | 1   | 3   | 2   | 1   |
| 28169  | 0   | 3   | 1   | 0   |
| 28194  | 2   | 3   | 4   | 4   |
| 28197  | 0   | 1   | 0   | 0   |
| 28206  | 0   | 1   | 0   | 0   |
| 28218  | 0   | 2   | 0   | 0   |
| 28227  | 1   | 1   | 0   | 0   |
| 28235  | 0   | 1   | 0   | 0   |
| 28246  | 1   | 1   | 1   | 1   |
| 28259  | 1   | 2   | 2   | 1   |
| 28263  | 0   | 0   | 1   | 0   |
| 28267  | 1   | 2   | 1   | 0   |
| 28274  | 0   | 0   | 0   | 0   |
| 28278  | 0   | 1   | 0   | 0   |
| 28288  | 1   | 0   | 0   | 0   |
| 28308  | 0   | 1   | 0   | 0   |
| 28309  | 0   | 2   | 2   | 2   |
| 28323  | 0   | 1   | 1   | 1   |
| 28335  | 1   | 1   | 3   | 3   |
| 28354  | 2   | 3   | 3   | 2   |

| respid | Q33 | Q34 | Q35 | Q36 |
|--------|-----|-----|-----|-----|
| 28355  | 1   | 2   | 3   | 3   |
| 28356  | 1   | 3   | 1   | 1   |
| 28357  | 0   | 2   | 1   | 0   |
| 28363  | 1   | 1   | 0   | 0   |
| 28366  | 1   | 1   | 0   | 0   |
| 28372  | 0   | 2   | 2   | 1   |
| 28381  | 0   | 1   | 1   | 1   |
| 28388  | 1   | 1   | 0   | 1   |
| 28413  | 1   | 2   | 3   | 2   |
| 28421  | 1   | 1   | 0   | 0   |
| 28430  | 1   | 1   | 0   | 0   |
| 28439  | 1   | 2   | 3   | 2   |
| 28458  | 0   | 2   | 3   | 4   |
| 28461  | 0   | 1   | 1   | 1   |
| 28466  | 0   | 2   | 0   | 0   |
| 28492  | 1   | 1   | 0   | 0   |
| 28534  | 1   | 0   | 0   | 0   |
| 28537  | 0   | 1   | 1   | 1   |
| 28560  | 0   | 1   | 0   | 0   |
| 28566  | 0   | 3   | 0   | 0   |
| 28569  | 0   | 1   | 1   | 0   |
| 28584  | 0   | 1   | 0   | 0   |
| 28590  | 1   | 2   | 0   | 0   |
| 28596  | 0   | 2   | 0   | 0   |
| 28608  | 1   | 1   | 1   | 0   |
| 28631  | 0   | 3   | 3   | 3   |
| 28644  | 1   | 1   | 1   | 1   |
| 28646  | 0   | 1   | 0   | 0   |
| 28665  | 0   | 0   | 0   | 0   |
| 28686  | 0   | 2   | 0   | 0   |
| 28704  | 1   | 1   | 1   | 1   |
| 28719  | 1   | 1   | 0   | 0   |

| respid | Q33 | Q34 | Q35 | Q36 |
|--------|-----|-----|-----|-----|
| 28736  | 1   | 0   | 1   | 0   |
| 28739  | 0   | 2   | 1   | 1   |
| 28758  | 0   | 1   | 2   | 1   |
| 28761  | 1   | 3   | 4   | 4   |
| 28770  | 1   | 2   | 4   | 3   |
| 28774  | 0   | 1   | 0   | 0   |
| 28778  | 1   | 3   | 4   | 2   |
| 28783  | 1   | 2   | 1   | 0   |
| 28785  | 0   | 1   | 0   | 0   |
| 28797  | 1   | 3   | 1   | 0   |
| 28801  | 1   | 2   | 0   | 0   |
| 28821  | 0   | 0   | 0   | 0   |
| 28827  | 1   | 0   | 0   | 0   |
| 28828  | 0   | 1   | 1   | 1   |
| 28871  | 1   | 1   | 1   | 1   |
| 28876  | 1   | 2   | 0   | 0   |
| 28891  | 0   | 2   | 4   | 2   |
| 28898  | 0   | 0   | 0   | 0   |
| 28909  | 0   | 1   | 0   | 0   |
| 28930  | 0   | 1   | 1   | 1   |
| 28935  | 0   | 1   | 2   | 1   |
| 28964  | 0   | 0   | 0   | 0   |
| 28965  | 0   | 1   | 0   | 0   |
| 28967  | 1   | 2   | 3   | 2   |
| 28975  | 0   | 0   | 0   | 0   |
| 28982  | 0   | 1   | 0   | 0   |
| 28989  | 1   | 1   | 0   | 0   |
| 29003  | 1   | 2   | 1   | 1   |
| 29004  | 1   | 1   | 0   | 0   |
| 29007  | 0   | 1   | 3   | 3   |
| 29008  | 0   | 0   | 0   | 0   |
| 29011  | 0   | 1   | 1   | 1   |

| respid | Q33 | Q34 | Q35 | Q36 |
|--------|-----|-----|-----|-----|
| 29012  | 0   | 1   | 1   | 0   |
| 29014  | 1   | 0   | 0   | 0   |
| 29016  | 1   | 0   | 0   | 0   |
| 29018  | 0   | 2   | 2   | 1   |
| 29048  | 0   | 1   | 1   | 1   |
| 29184  | 0   | 2   | 0   | 0   |
| 29237  | 0   | 0   | 0   | 0   |
| 29252  | 0   | 1   | 0   | 0   |
| 29267  | 1   | 1   | 0   | 0   |
| 29276  | 0   | 1   | 1   | 0   |
| 29281  | 0   | 2   | 2   | 2   |
| 29285  | 0   | 1   | 0   | 0   |
| 29291  | 0   | 3   | 3   | 2   |
| 29304  | 1   | 1   | 1   | 1   |
| 29323  | 0   | 1   | 0   | 0   |
| 29330  | 0   | 2   | 2   | 1   |
| 29357  | 1   | 1   | 2   | 2   |
| 29416  | 0   | 1   | 2   | 0   |
| 29432  | 0   | 1   | 0   | 0   |
| 29482  | 0   | 2   | 1   | 2   |
| 29506  | 1   | 1   | 1   | 0   |
| 29509  | 1   | 0   | 1   | 1   |
| 29512  | 0   | 2   | 2   | 2   |
| 29519  | 0   | 1   | 1   | 1   |
| 29520  | 0   | 1   | 1   | 0   |
| 29521  | 1   | 2   | 2   | 2   |
| 29529  | 1   | 3   | 2   | 2   |
| 29532  | 0   | 1   | 0   | 0   |
| 29547  | 1   | 1   | 2   | 2   |
| 29551  | 0   | 0   | 0   | 0   |
| 29584  | 1   | 3   | 2   | 2   |
| 29591  | 1   | 2   | 2   | 2   |

| respid | Q33 | Q34 | Q35 | Q36 |
|--------|-----|-----|-----|-----|
| 29613  | 1   | 1   | 1   | 0   |
| 29615  | 1   | 1   | 2   | 2   |
| 29625  | 0   | 2   | 1   | 0   |
| 29660  | 0   | 1   | 1   | 1   |
| 29677  | 0   | 0   | 0   | 0   |
| 29700  | 0   | 1   | 1   | 0   |
| 29715  | 1   | 2   | 1   | 0   |
| 29720  | 0   | 0   | 0   | 0   |
| 29730  | 1   | 1   | 0   | 0   |
| 29734  | 1   | 1   | 1   | 2   |
| 29754  | 1   | 0   | 0   | 0   |
| 29771  | 1   | 1   | 0   | 0   |
| 29774  | 0   | 1   | 1   | 0   |
| 29783  | 0   | 1   | 0   | 0   |
| 29812  | 1   | 1   | 1   | 1   |
| 29813  | 0   | 1   | 0   | 0   |
| 29814  | 1   | 1   | 1   | 1   |
| 29820  | 0   | 1   | 1   | 1   |
| 29906  | 0   | 3   | 0   | 0   |
| 29907  | 0   | 1   | 2   | 1   |
| 29928  | 1   | 0   | 1   | 0   |
| 29932  | 1   | 1   | 1   | 0   |
| 29958  | 0   | 2   | 3   | 2   |
| 29982  | 0   | 2   | 0   | 0   |
| 29989  | 0   | 0   | 1   | 1   |
| 29994  | 1   | 1   | 1   | 0   |
| 30005  | 1   | 1   | 0   | 1   |
| 30077  | 0   | 1   | 0   | 0   |
| 30098  | 0   | 0   | 0   | 0   |
| 30107  | 0   | 1   | 0   | 0   |
| 30154  | 0   | 1   | 0   | 0   |
| 30159  | 0   | 1   | 0   | 0   |

| respid | Q33 | Q34 | Q35 | Q36 |
|--------|-----|-----|-----|-----|
| 30162  | 0   | 0   | 0   | 0   |
| 30163  | 1   | 1   | 0   | 0   |
| 30189  | 0   | 1   | 1   | 1   |
| 30230  | 1   | 1   | 0   | 0   |
| 30259  | 1   | 1   | 2   | 2   |
| 30284  | 1   | 1   | 0   | 0   |
| 30296  | 0   | 1   | 0   | 0   |
| 30330  | 0   | 1   | 1   | 1   |
| 30341  | 0   | 1   | 1   | 1   |
| 30352  | 1   | 1   | 2   | 3   |
| 30379  | 0   | 1   | 0   | 0   |
| 30424  | 0   | 1   | 0   | 1   |
| 30447  | 0   | 2   | 0   | 0   |
| 30477  | 0   | 3   | 2   | 2   |
| 30503  | 0   | 1   | 0   | 0   |
| 30515  | 1   | 3   | 2   | 0   |
| 30516  | 1   | 3   | 1   | 1   |
| 30623  | 1   | 2   | 2   | 2   |
| 30639  | 0   | 1   | 0   | 0   |
| 30670  | 1   | 1   | 1   | 1   |
| 30697  | 1   | 1   | 0   | 0   |
| 30735  | 0   | 1   | 1   | 0   |
| 30742  | 1   | 1   | 0   | 0   |
| 30751  | 1   | 2   | 2   | 2   |
| 30789  | 0   | 1   | 0   | 0   |
| 30867  | 1   | 1   | 2   | 2   |
| 30876  | 0   | 1   | 0   | 0   |
| 30877  | 0   | 1   | 1   | 1   |
| 30887  | 0   | 1   | 0   | 0   |
| 30891  | 1   | 3   | 2   | 2   |
| 31030  | 0   | 1   | 0   | 0   |
| 31059  | 0   | 2   | 1   | 0   |

| respid | Q33 | Q34 | Q35 | Q36 |
|--------|-----|-----|-----|-----|
| 31082  | 0   | 0   | 0   | 0   |
| 31106  | 0   | 0   | 2   | 1   |
| 31110  | 0   | 1   | 0   | 0   |
| 31265  | 1   | 2   | 3   | 2   |
| 31266  | 1   | 2   | 4   | 2   |
| 31267  | 1   | 2   | 3   | 3   |
| 31310  | 1   | 1   | 1   | 0   |
| 31325  | 0   | 1   | 0   | 0   |
| 31367  | 0   | 1   | 1   | 1   |
| 31389  | 0   | 1   | 0   | 0   |
| 31440  | 0   | 1   | 0   | 0   |
| 31465  | 0   | 1   | 0   | 0   |
| 31477  | 1   | 0   | 1   | 0   |
| 31491  | 0   | 0   | 1   | 0   |
| 31494  | 1   | 1   | 2   | 2   |
| 31509  | 1   | 3   | 1   | 1   |
| 31533  | 0   | 0   | 1   | 0   |
| 31547  | 0   | 1   | 1   | 0   |
| 31558  | 1   | 1   | 0   | 0   |
| 31579  | 1   | 0   | 2   | 1   |
| 31591  | 1   | 2   | 2   | 0   |
| 31596  | 1   | 1   | 2   | 2   |
| 31601  | 1   | 3   | 4   | 2   |
| 31605  | 1   | 1   | 0   | 0   |
| 31637  | 0   | 1   | 1   | 2   |
| 31646  | 0   | 1   | 0   | 0   |
| 31647  | 0   | 2   | 5   | 5   |
| 31650  | 0   | 1   | 1   | 0   |
| 31651  | 1   | 1   | 2   | 1   |
| 31657  | 0   | 0   | 0   | 0   |
| 31660  | 0   | 2   | 0   | 0   |
| 31661  | 1   | 1   | 1   | 2   |



| respid | Q33 | Q34 | Q35 | Q36 |
|--------|-----|-----|-----|-----|
| 31667  | 0   | 1   | 1   | 2   |
| 31674  | 0   | 1   | 1   | 2   |
| 31686  | 1   | 1   | 2   | 1   |
| 31693  | 0   | 0   | 0   | 0   |
| 31716  | 1   | 0   | 0   | 0   |
| 31818  | 0   | 1   | 2   | 1   |
| 31886  | 1   | 1   | 0   | 0   |
| 31945  | 1   | 3   | 2   | 1   |
| 31957  | 1   | 2   | 1   | 0   |
| 31966  | 0   | 2   | 0   | 0   |
| 31978  | 1   | 2   | 2   | 0   |
| 31999  | 0   | 2   | 1   | 1   |
| 32026  | 0   | 2   | 0   | 1   |
| 32033  | 1   | 2   | 0   | 0   |
| 32037  | 1   | 2   | 3   | 3   |
| 32038  | 1   | 2   | 3   | 3   |
| 32047  | 0   | 2   | 1   | 1   |
| 32053  | 0   | 0   | 0   | 0   |
| 32069  | 1   | 1   | 1   | 1   |
| 32081  | 0   | 1   | 1   | 0   |
| 32123  | 0   | 2   | 2   | 2   |
| 32130  | 0   | 1   | 1   | 0   |
| 32141  | 1   | 0   | 0   | 0   |
| 32158  | 0   | 0   | 0   | 0   |
| 32165  | 1   | 2   | 0   | 0   |
| 32180  | 0   | 1   | 0   | 0   |
| 32221  | 1   | 3   | 1   | 1   |
| 32292  | 1   | 1   | 0   | 0   |
| 32318  | 0   | 2   | 1   | 1   |
| 32346  | 0   | 2   | 1   | 1   |
| 32402  | 1   | 1   | 1   | 1   |
| 32422  | 0   | 1   | 1   | 0   |

| respid | Q33 | Q34 | Q35 | Q36 |
|--------|-----|-----|-----|-----|
| 32439  | 0   | 1   | 0   | 0   |
| 32507  | 1   | 2   | 1   | 1   |
| 32522  | 0   | 1   | 0   | 0   |
| 32535  | 0   | 1   | 1   | 1   |
| 32546  | 0   | 1   | 0   | 0   |
| 32553  | 0   | 1   | 1   | 2   |
| 32570  | 1   | 0   | 0   | 0   |
| 32592  | 0   | 2   | 0   | 0   |
| 32605  | 2   | 1   | 4   | 2   |
| 32630  | 1   | 1   | 2   | 2   |
| 32642  | 1   | 2   | 2   | 0   |
| 32646  | 1   | 1   | 1   | 0   |
| 32665  | 1   | 1   | 1   | 0   |
| 32677  | 1   | 1   | 0   | 0   |
| 32694  | 1   | 1   | 0   | 0   |
| 32698  | 1   | 3   | 1   | 0   |
| 32754  | 1   | 3   | 4   | 2   |
| 32799  | 1   | 2   | 2   | 2   |
| 32816  | 0   | 1   | 0   | 0   |
| 32819  | 0   | 2   | 2   | 1   |
| 32840  | 1   | 2   | 3   | 0   |
| 32861  | 1   | 1   | 2   | 0   |
| 32866  | 0   | 1   | 1   | 1   |
| 32889  | 1   | 2   | 3   | 3   |
| 32960  | 1   | 1   | 0   | 0   |
| 32965  | 1   | 1   | 2   | 2   |
| 32986  | 0   | 0   | 0   | 0   |
| 33005  | 1   | 1   | 0   | 0   |
| 33054  | 1   | 2   | 2   | 1   |
| 33072  | 0   | 2   | 1   | 1   |
| 33095  | 1   | 2   | 0   | 0   |
| 33099  | 0   | 2   | 1   | 0   |

| respid | Q33 | Q34 | Q35 | Q36 |
|--------|-----|-----|-----|-----|
| 33121  | 0   | 1   | 1   | 0   |
| 33152  | 0   | 2   | 2   | 3   |
| 33159  | 0   | 1   | 1   | 0   |
| 33189  | 1   | 1   | 0   | 0   |
| 33198  | 0   | 2   | 2   | 2   |
| 33202  | 0   | 1   | 1   | 1   |
| 33204  | 0   | 1   | 0   | 0   |
| 33224  | 0   | 1   | 0   | 0   |
| 33272  | 1   | 2   | 2   | 1   |
| 33294  | 0   | 1   | 1   | 1   |
| 33300  | 1   | 1   | 3   | 1   |
| 33314  | 0   | 1   | 2   | 2   |
| 33338  | 0   | 1   | 0   | 0   |
| 33350  | 1   | 3   | 4   | 3   |
| 33362  | 1   | 2   | 1   | 1   |
| 33368  | 0   | 1   | 0   | 0   |
| 33374  | 1   | 2   | 2   | 1   |
| 33380  | 0   | 3   | 2   | 2   |
| 33385  | 0   | 1   | 1   | 0   |
| 33402  | 0   | 2   | 2   | 2   |
| 33414  | 0   | 1   | 0   | 0   |
| 33439  | 0   | 1   | 1   | 2   |
| 33449  | 1   | 2   | 1   | 1   |
| 33533  | 1   | 1   | 1   | 0   |
| 33540  | 0   | 1   | 0   | 0   |
| 33556  | 0   | 1   | 2   | 0   |
| 33615  | 0   | 0   | 0   | 0   |
| 33694  | 1   | 3   | 2   | 3   |
| 33717  | 0   | 1   | 0   | 0   |
| 33729  | 0   | 1   | 1   | 0   |
| 33746  | 0   | 0   | 0   | 0   |
| 33764  | 0   | 1   | 0   | 0   |

| respid | Q33 | Q34 | Q35 | Q36 |
|--------|-----|-----|-----|-----|
| 33790  | 0   | 2   | 1   | 1   |
| 33868  | 0   | 1   | 2   | 3   |
| 33872  | 0   | 1   | 3   | 2   |
| 33883  | 1   | 0   | 1   | 0   |
| 33884  | 0   | 1   | 0   | 0   |
| 33900  | 1   | 1   | 1   | 0   |
| 33933  | 1   | 2   | 0   | 0   |
| 33949  | 1   | 1   | 1   | 0   |
| 34005  | 0   | 0   | 1   | 0   |
| 34016  | 0   | 0   | 0   | 0   |
| 34041  | 1   | 2   | 2   | 2   |
| 34053  | 0   | 2   | 0   | 0   |
| 34056  | 0   | 1   | 0   | 0   |
| 34093  | 0   | 3   | 1   | 0   |
| 34112  | 1   | 1   | 0   | 1   |
| 34136  | 1   | 3   | 4   | 4   |
| 34138  | 0   | 1   | 0   | 0   |
| 34139  | 0   | 1   | 0   | 1   |
| 34189  | 0   | 0   | 0   | 0   |
| 34239  | 0   | 1   | 1   | 1   |
| 34240  | 1   | 1   | 0   | 0   |
| 34241  | 0   | 0   | 0   | 0   |
| 34259  | 0   | 1   | 1   | 0   |
| 34303  | 0   | 0   | 0   | 1   |
| 34306  | 0   | 0   | 1   | 0   |
| 34395  | 0   | 1   | 1   | 0   |
| 34463  | 0   | 1   | 1   | 1   |
| 34466  | 0   | 1   | 1   | 0   |
| 34471  | 0   | 2   | 0   | 0   |
| 34489  | 0   | 2   | 1   | 1   |
| 34518  | 1   | 0   | 2   | 0   |
| 34542  | 0   | 1   | 1   | 1   |

| respid | Q33 | Q34 | Q35 | Q36 |
|--------|-----|-----|-----|-----|
| 34595  | 1   | 0   | 0   | 0   |
| 34604  | 0   | 0   | 0   | 0   |
| 34631  | 1   | 2   | 2   | 1   |
| 34665  | 0   | 1   | 2   | 0   |
| 34716  | 0   | 1   | 0   | 0   |
| 34729  | 1   | 0   | 0   | 0   |
| 34772  | 1   | 2   | 1   | 1   |
| 34800  | 0   | 2   | 3   | 1   |
| 34819  | 1   | 1   | 1   | 0   |
| 34829  | 0   | 2   | 2   | 1   |
| 34831  | 0   | 2   | 2   | 1   |
| 34839  | 0   | 1   | 0   | 0   |
| 34868  | 0   | 2   | 2   | 0   |
| 34869  | 1   | 1   | 0   | 0   |
| 34882  | 0   | 2   | 5   | 0   |
| 34895  | 0   | 3   | 2   | 1   |
| 34901  | 1   | 3   | 1   | 0   |
| 34904  | 0   | 2   | 1   | 1   |
| 34907  | 0   | 3   | 1   | 0   |
| 34914  | 1   | 1   | 0   | 0   |
| 34918  | 0   | 1   | 1   | 0   |
| 34924  | 0   | 1   | 0   | 0   |
| 34933  | 1   | 3   | 2   | 2   |
| 34938  | 0   | 1   | 0   | 0   |
| 34952  | 1   | 2   | 2   | 1   |
| 34959  | 1   | 2   | 1   | 0   |
| 34972  | 0   | 2   | 0   | 0   |
| 34973  | 1   | 2   | 1   | 1   |
| 34975  | 1   | 2   | 2   | 2   |
| 34977  | 0   | 1   | 0   | 1   |
| 34978  | 0   | 1   | 1   | 0   |
| 34980  | 0   | 1   | 0   | 0   |

| respid | Q33 | Q34 | Q35 | Q36 |
|--------|-----|-----|-----|-----|
| 34984  | 0   | 2   | 2   | 2   |
| 34986  | 1   | 1   | 4   | 2   |
| 34994  | 1   | 1   | 1   | 1   |
| 34996  | 1   | 3   | 1   | 0   |
| 35003  | 1   | 0   | 0   | 0   |
| 35014  | 0   | 0   | 0   | 0   |
| 35029  | 0   | 1   | 1   | 1   |
| 35030  | 0   | 3   | 2   | 2   |
| 35037  | 0   | 1   | 0   | 0   |
| 35043  | 0   | 0   | 0   | 0   |
| 35048  | 0   | 0   | 0   | 0   |
| 35055  | 0   | 1   | 1   | 0   |
| 35067  | 1   | 1   | 2   | 0   |
| 35072  | 0   | 1   | 0   | 0   |
| 35078  | 0   | 1   | 1   | 0   |
| 35084  | 0   | 0   | 0   | 0   |
| 35095  | 0   | 1   | 0   | 0   |
| 35096  | 0   | 0   | 0   | 0   |
| 35097  | 1   | 2   | 2   | 2   |
| 35098  | 1   | 1   | 2   | 2   |
| 35109  | 1   | 3   | 4   | 4   |
| 35114  | 0   | 2   | 0   | 0   |
| 35115  | 0   | 2   | 0   | 0   |
| 35124  | 0   | 2   | 2   | 2   |
| 35125  | 0   | 0   | 1   | 0   |
| 35141  | 0   | 0   | 0   | 0   |
| 35142  | 0   | 0   | 0   | 0   |
| 35145  | 0   | 0   | 1   | 0   |
| 35149  | 1   | 3   | 4   | 0   |
| 35159  | 1   | 3   | 0   | 0   |
| 35163  | 0   | 3   | 2   | 2   |
| 35174  | 1   | 3   | 1   | 0   |

| respid | Q33 | Q34 | Q35 | Q36 |
|--------|-----|-----|-----|-----|
| 35188  | 1   | 0   | 0   | 0   |
| 35189  | 0   | 2   | 1   | 1   |
| 35201  | 2   | 3   | 2   | 1   |
| 35215  | 0   | 1   | 0   | 0   |
| 35228  | 0   | 1   | 0   | 0   |
| 35235  | 1   | 2   | 0   | 1   |
| 35239  | 1   | 3   | 3   | 3   |
| 35243  | 0   | 1   | 1   | 0   |
| 35245  | 0   | 2   | 2   | 2   |
| 35259  | 0   | 0   | 0   | 0   |
| 35265  | 0   | 1   | 2   | 1   |
| 35272  | 1   | 1   | 2   | 2   |
| 35280  | 0   | 1   | 1   | 0   |
| 35298  | 0   | 1   | 0   | 0   |
| 35305  | 0   | 2   | 1   | 0   |
| 35306  | 0   | 3   | 3   | 2   |
| 35307  | 0   | 1   | 0   | 0   |
| 35311  | 1   | 2   | 0   | 0   |
| 35322  | 0   | 2   | 1   | 0   |
| 35323  | 0   | 1   | 0   | 0   |
| 35327  | 0   | 1   | 1   | 0   |
| 35366  | 0   | 1   | 1   | 1   |
| 35378  | 0   | 2   | 2   | 1   |
| 35389  | 1   | 3   | 3   | 3   |
| 35390  | 0   | 1   | 0   | 0   |
| 35395  | 1   | 2   | 0   | 0   |
| 35411  | 1   | 1   | 2   | 1   |
| 35423  | 0   | 1   | 0   | 0   |
| 35425  | 0   | 2   | 1   | 0   |
| 35434  | 1   | 1   | 1   | 0   |
| 35462  | 0   | 1   | 0   | 0   |
| 35478  | 1   | 3   | 2   | 2   |

| respid | Q33 | Q34 | Q35 | Q36 |
|--------|-----|-----|-----|-----|
| 35481  | 1   | 2   | 3   | 4   |
| 35498  | 0   | 2   | 0   | 0   |
| 35499  | 0   | 0   | 0   | 0   |
| 35502  | 1   | 2   | 3   | 2   |
| 35503  | 1   | 1   | 0   | 0   |
| 35504  | 0   | 0   | 0   | 0   |
| 35508  | 0   | 2   | 3   | 2   |
| 35513  | 1   | 1   | 1   | 1   |
| 35516  | 0   | 0   | 1   | 0   |
| 35519  | 0   | 3   | 2   | 1   |
| 35530  | 1   | 1   | 1   | 1   |
| 35533  | 1   | 1   | 1   | 0   |
| 35561  | 1   | 2   | 2   | 1   |
| 35565  | 0   | 1   | 0   | 0   |
| 35588  | 0   | 1   | 0   | 0   |
| 35598  | 0   | 0   | 0   | 0   |
| 35607  | 0   | 1   | 0   | 0   |
| 35638  | 0   | 3   | 0   | 0   |
| 35642  | 0   | 1   | 0   | 0   |
| 35643  | 0   | 1   | 2   | 0   |
| 35680  | 0   | 1   | 0   | 0   |
| 35697  | 0   | 3   | 0   | 0   |
| 35703  | 0   | 0   | 0   | 0   |
| 35709  | 1   | 1   | 0   | 0   |
| 35710  | 0   | 1   | 0   | 1   |
| 35721  | 1   | 3   | 4   | 4   |
| 35723  | 0   | 2   | 0   | 0   |
| 35736  | 0   | 3   | 1   | 1   |
| 35739  | 0   | 1   | 0   | 0   |
| 35745  | 1   | 2   | 1   | 1   |
| 35748  | 1   | 3   | 0   | 1   |
| 35750  | 0   | 1   | 2   | 2   |



| respid | Q33 | Q34 | Q35 | Q36 |
|--------|-----|-----|-----|-----|
| 35752  | 1   | 3   | 1   | 0   |
| 35773  | 1   | 1   | 0   | 0   |
| 35779  | 0   | 2   | 0   | 0   |
| 35791  | 0   | 0   | 0   | 0   |
| 35801  | 0   | 2   | 0   | 0   |
| 35802  | 1   | 1   | 0   | 0   |
| 35837  | 1   | 3   | 0   | 0   |
| 35853  | 0   | 1   | 0   | 0   |
| 35858  | 1   | 2   | 0   | 0   |
| 35860  | 1   | 2   | 2   | 2   |
| 35875  | 1   | 3   | 2   | 2   |
| 35883  | 0   | 2   | 1   | 0   |
| 35890  | 0   | 1   | 0   | 0   |
| 35898  | 0   | 1   | 0   | 0   |
| 35901  | 2   | 2   | 2   | 1   |
| 35914  | 1   | 1   | 0   | 0   |
| 35924  | 1   | 1   | 1   | 2   |
| 35950  | 2   | 3   | 2   | 1   |
| 35961  | 0   | 1   | 0   | 0   |
| 35966  | 1   | 1   | 1   | 0   |
| 35967  | 0   | 1   | 0   | 0   |
| 35971  | 0   | 1   | 0   | 0   |
| 35974  | 1   | 1   | 0   | 0   |
| 35983  | 1   | 3   | 3   | 2   |
| 35992  | 1   | 3   | 5   | 4   |
| 36010  | 0   | 1   | 0   | 0   |
| 36019  | 1   | 3   | 2   | 0   |
| 36029  | 1   | 2   | 2   | 2   |
| 36033  | 0   | 1   | 0   | 0   |
| 36042  | 0   | 3   | 1   | 1   |
| 36043  | 0   | 2   | 1   | 1   |
| 36048  | 1   | 1   | 1   | 0   |

| respid | Q33 | Q34 | Q35 | Q36 |
|--------|-----|-----|-----|-----|
| 36050  | 0   | 0   | 1   | 0   |
| 36062  | 0   | 2   | 1   | 0   |
| 36063  | 0   | 1   | 0   | 0   |
| 36092  | 0   | 2   | 2   | 0   |
| 36097  | 1   | 1   | 1   | 2   |
| 36108  | 0   | 2   | 0   | 0   |
| 36113  | 1   | 3   | 3   | 2   |
| 36117  | 0   | 1   | 0   | 0   |
| 36129  | 0   | 3   | 0   | 0   |
| 36144  | 0   | 2   | 0   | 0   |
| 36152  | 0   | 1   | 0   | 0   |
| 36154  | 1   | 1   | 3   | 1   |
| 36155  | 0   | 1   | 0   | 0   |
| 36167  | 0   | 3   | 0   | 0   |
| 36172  | 0   | 1   | 0   | 0   |
| 36173  | 0   | 1   | 0   | 0   |
| 36174  | 1   | 3   | 1   | 1   |
| 36182  | 0   | 1   | 0   | 0   |
| 36192  | 0   | 1   | 2   | 0   |
| 36195  | 0   | 3   | 2   | 1   |
| 36204  | 0   | 1   | 2   | 0   |
| 36205  | 0   | 0   | 0   | 0   |
| 36208  | 0   | 1   | 0   | 0   |
| 36216  | 1   | 2   | 1   | 2   |
| 36221  | 0   | 2   | 1   | 1   |
| 36244  | 0   | 3   | 0   | 0   |
| 36255  | 0   | 2   | 2   | 2   |
| 36259  | 0   | 1   | 0   | 0   |
| 36262  | 0   | 2   | 2   | 2   |
| 36268  | 0   | 1   | 0   | 0   |
| 36308  | 1   | 2   | 2   | 0   |
| 36324  | 0   | 2   | 0   | 0   |

| respid | Q33 | Q34 | Q35 | Q36 |
|--------|-----|-----|-----|-----|
| 36330  | 0   | 1   | 0   | 0   |
| 36331  | 1   | 3   | 0   | 1   |
| 36336  | 0   | 1   | 1   | 0   |
| 36337  | 1   | 2   | 2   | 0   |
| 36364  | 0   | 2   | 1   | 1   |
| 36365  | 0   | 2   | 1   | 1   |
| 36396  | 1   | 1   | 1   | 0   |
| 36403  | 1   | 1   | 0   | 0   |
| 36410  | 1   | 1   | 0   | 0   |
| 36413  | 0   | 1   | 0   | 0   |
| 36422  | 0   | 1   | 0   | 0   |
| 36424  | 0   | 2   | 1   | 1   |
| 36425  | 1   | 3   | 4   | 4   |
| 36432  | 0   | 1   | 0   | 0   |
| 36435  | 1   | 3   | 4   | 4   |
| 36446  | 1   | 3   | 3   | 3   |
| 36451  | 0   | 2   | 1   | 1   |
| 36453  | 0   | 2   | 0   | 0   |
| 36459  | 1   | 1   | 2   | 2   |
| 36464  | 1   | 3   | 2   | 1   |
| 36465  | 0   | 1   | 1   | 1   |
| 36466  | 0   | 0   | 0   | 0   |
| 36476  | 1   | 2   | 1   | 1   |
| 36487  | 0   | 3   | 0   | 0   |
| 36488  | 0   | 1   | 0   | 0   |
| 36500  | 0   | 0   | 0   | 0   |
| 36504  | 1   | 2   | 0   | 0   |
| 36513  | 0   | 2   | 0   | 0   |
| 36515  | 0   | 2   | 2   | 2   |
| 36521  | 0   | 2   | 4   | 4   |
| 36530  | 0   | 2   | 2   | 2   |
| 36556  | 1   | 2   | 2   | 0   |

| respid | Q33 | Q34 | Q35 | Q36 |
|--------|-----|-----|-----|-----|
| 36564  | 0   | 3   | 2   | 3   |
| 36584  | 0   | 1   | 0   | 0   |
| 36585  | 0   | 0   | 0   | 0   |
| 36586  | 0   | 0   | 0   | 0   |
| 36606  | 1   | 3   | 4   | 2   |
| 36615  | 0   | 1   | 0   | 0   |
| 36628  | 0   | 1   | 1   | 0   |
| 36630  | 1   | 2   | 0   | 0   |
| 36631  | 0   | 2   | 1   | 0   |
| 36636  | 0   | 1   | 0   | 0   |
| 36637  | 0   | 1   | 1   | 0   |
| 36651  | 0   | 2   | 2   | 1   |
| 36661  | 0   | 1   | 0   | 0   |
| 36670  | 1   | 2   | 1   | 0   |
| 36671  | 1   | 2   | 0   | 1   |
| 36688  | 0   | 0   | 0   | 0   |
| 36694  | 0   | 0   | 0   | 0   |
| 36696  | 0   | 1   | 0   | 0   |
| 36703  | 0   | 0   | 0   | 0   |
| 36719  | 1   | 2   | 3   | 3   |
| 36721  | 1   | 2   | 3   | 3   |
| 36740  | 1   | 1   | 1   | 1   |
| 36755  | 0   | 2   | 0   | 0   |
| 36765  | 0   | 2   | 2   | 2   |
| 36770  | 0   | 0   | 0   | 0   |
| 36773  | 1   | 1   | 1   | 2   |
| 36813  | 1   | 2   | 1   | 0   |
| 36819  | 0   | 2   | 2   | 2   |
| 36820  | 1   | 3   | 0   | 0   |
| 36821  | 0   | 1   | 0   | 0   |
| 36827  | 0   | 2   | 0   | 0   |
| 36835  | 1   | 1   | 0   | 0   |

| respid | Q33 | Q34 | Q35 | Q36 |
|--------|-----|-----|-----|-----|
| 36837  | 0   | 2   | 1   | 1   |
| 36849  | 0   | 2   | 1   | 0   |
| 36851  | 1   | 2   | 1   | 2   |
| 36868  | 1   | 1   | 2   | 0   |
| 36870  | 0   | 1   | 0   | 0   |
| 36871  | 0   | 1   | 0   | 0   |
| 36874  | 0   | 2   | 2   | 1   |
| 36878  | 1   | 1   | 1   | 0   |
| 36887  | 0   | 1   | 0   | 0   |
| 36889  | 1   | 2   | 2   | 0   |
| 36891  | 0   | 1   | 0   | 0   |
| 36903  | 1   | 2   | 0   | 0   |
| 36905  | 0   | 1   | 1   | 0   |
| 36913  | 0   | 1   | 0   | 0   |
| 36949  | 0   | 1   | 1   | 1   |
| 36954  | 1   | 2   | 2   | 1   |
| 36962  | 1   | 2   | 0   | 0   |
| 36965  | 0   | 1   | 1   | 0   |
| 36970  | 0   | 1   | 0   | 0   |
| 36979  | 1   | 1   | 0   | 0   |
| 36990  | 0   | 1   | 0   | 0   |
| 36991  | 0   | 2   | 1   | 0   |
| 36992  | 0   | 1   | 1   | 1   |
| 37015  | 0   | 0   | 0   | 0   |
| 37017  | 0   | 1   | 0   | 0   |
| 37020  | 0   | 0   | 0   | 0   |
| 37033  | 1   | 3   | 2   | 0   |
| 37041  | 0   | 1   | 0   | 0   |
| 37048  | 0   | 1   | 2   | 2   |
| 37050  | 0   | 1   | 0   | 0   |
| 37054  | 0   | 2   | 3   | 1   |
| 37057  | 0   | 2   | 1   | 2   |

| respid | Q33 | Q34 | Q35 | Q36 |
|--------|-----|-----|-----|-----|
| 37067  | 1   | 1   | 0   | 0   |
| 37074  | 0   | 1   | 0   | 0   |
| 37088  | 0   | 2   | 1   | 1   |
| 37090  | 1   | 3   | 2   | 2   |
| 37110  | 1   | 3   | 3   | 3   |
| 37122  | 0   | 1   | 1   | 0   |
| 37124  | 0   | 2   | 0   | 1   |
| 37126  | 0   | 0   | 0   | 0   |
| 37129  | 1   | 2   | 2   | 0   |
| 37130  | 0   | 1   | 0   | 0   |
| 37142  | 1   | 2   | 1   | 1   |
| 37160  | 0   | 3   | 1   | 1   |
| 37168  | 0   | 1   | 0   | 0   |
| 37169  | 1   | 2   | 0   | 0   |
| 37191  | 0   | 1   | 1   | 1   |
| 37197  | 1   | 3   | 1   | 1   |
| 37204  | 1   | 1   | 0   | 0   |
| 37213  | 1   | 3   | 2   | 0   |
| 37238  | 1   | 2   | 0   | 0   |
| 37242  | 0   | 2   | 1   | 1   |
| 37243  | 1   | 2   | 3   | 2   |
| 37275  | 0   | 2   | 3   | 2   |
| 37305  | 1   | 2   | 1   | 1   |
| 37357  | 0   | 1   | 3   | 1   |
| 37365  | 1   | 2   | 2   | 2   |
| 37370  | 0   | 0   | 1   | 1   |
| 37406  | 1   | 2   | 4   | 4   |
| 37410  | 0   | 2   | 0   | 0   |
| 37411  | 0   | 2   | 3   | 2   |
| 37427  | 0   | 2   | 2   | 2   |
| 37437  | 0   | 2   | 2   | 1   |
| 37440  | 0   | 0   | 1   | 1   |

| respid | Q33 | Q34 | Q35 | Q36 |
|--------|-----|-----|-----|-----|
| 37452  | 0   | 0   | 1   | 0   |
| 37465  | 1   | 2   | 2   | 1   |
| 37468  | 1   | 3   | 4   | 0   |
| 37469  | 0   | 1   | 0   | 0   |
| 37477  | 0   | 1   | 2   | 1   |
| 37509  | 1   | 0   | 0   | 0   |
| 37513  | 0   | 1   | 2   | 1   |
| 37534  | 0   | 2   | 1   | 0   |
| 37537  | 0   | 1   | 0   | 0   |
| 37560  | 1   | 1   | 2   | 1   |
| 37566  | 1   | 2   | 2   | 1   |
| 37572  | 0   | 2   | 1   | 2   |
| 37574  | 1   | 2   | 1   | 1   |
| 37575  | 1   | 2   | 0   | 0   |
| 37590  | 2   | 3   | 2   | 2   |
| 37593  | 1   | 1   | 1   | 1   |
| 37599  | 0   | 1   | 0   | 0   |
| 37641  | 1   | 1   | 1   | 1   |
| 37651  | 1   | 2   | 1   | 1   |
| 37670  | 0   | 1   | 0   | 0   |
| 37680  | 1   | 2   | 1   | 2   |
| 37690  | 1   | 1   | 2   | 0   |
| 37694  | 0   | 0   | 0   | 0   |
| 37705  | 0   | 1   | 2   | 2   |
| 37710  | 1   | 1   | 2   | 2   |
| 37719  | 1   | 2   | 2   | 0   |
| 37741  | 1   | 2   | 5   | 3   |
| 37752  | 0   | 1   | 0   | 0   |
| 37755  | 0   | 3   | 2   | 2   |
| 37757  | 0   | 1   | 0   | 0   |
| 37783  | 0   | 0   | 1   | 0   |
| 37793  | 1   | 3   | 4   | 3   |

| respid | Q33 | Q34 | Q35 | Q36 |
|--------|-----|-----|-----|-----|
| 37800  | 1   | 3   | 2   | 1   |
| 37801  | 1   | 2   | 0   | 0   |
| 37820  | 1   | 3   | 2   | 2   |
| 37826  | 1   | 2   | 2   | 1   |
| 37835  | 0   | 1   | 1   | 2   |
| 37839  | 1   | 3   | 2   | 1   |
| 37871  | 1   | 2   | 3   | 4   |
| 37876  | 0   | 1   | 2   | 2   |
| 37879  | 0   | 2   | 1   | 1   |
| 37894  | 0   | 1   | 0   | 0   |
| 37895  | 0   | 3   | 4   | 2   |
| 37901  | 1   | 1   | 3   | 1   |
| 37926  | 1   | 1   | 0   | 1   |
| 37937  | 0   | 2   | 3   | 4   |
| 37938  | 1   | 0   | 3   | 3   |
| 37959  | 0   | 2   | 1   | 0   |
| 37970  | 0   | 2   | 0   | 0   |
| 37972  | 1   | 3   | 0   | 0   |
| 37988  | 0   | 1   | 0   | 1   |
| 37989  | 1   | 2   | 2   | 2   |
| 38000  | 1   | 1   | 1   | 1   |
| 38028  | 0   | 2   | 3   | 4   |
| 38042  | 1   | 3   | 2   | 0   |
| 38052  | 1   | 1   | 3   | 0   |
| 38056  | 1   | 2   | 0   | 0   |
| 38106  | 0   | 1   | 2   | 0   |
| 38114  | 1   | 3   | 4   | 4   |
| 38134  | 1   | 2   | 0   | 0   |
| 38135  | 1   | 1   | 1   | 0   |
| 38139  | 1   | 2   | 2   | 3   |
| 38160  | 1   | 1   | 0   | 0   |
| 38164  | 1   | 2   | 1   | 1   |



| respid | Q33 | Q34 | Q35 | Q36 |
|--------|-----|-----|-----|-----|
| 38168  | 1   | 0   | 0   | 0   |
| 38173  | 2   | 1   | 0   | 0   |
| 38193  | 0   | 1   | 0   | 2   |
| 38204  | 0   | 1   | 0   | 0   |
| 38206  | 1   | 1   | 1   | 1   |
| 38233  | 2   | 2   | 2   | 2   |
| 38242  | 2   | 2   | 2   | 0   |
| 38245  | 0   | 2   | 0   | 0   |
| 38261  | 1   | 3   | 2   | 1   |
| 38288  | 0   | 2   | 0   | 0   |
| 38296  | 1   | 2   | 2   | 2   |
| 38299  | 0   | 1   | 1   | 1   |
| 38300  | 0   | 2   | 1   | 2   |
| 38303  | 0   | 1   | 0   | 0   |
| 38317  | 0   | 1   | 0   | 0   |
| 38328  | 1   | 3   | 1   | 0   |
| 38333  | 0   | 1   | 1   | 1   |
| 38336  | 0   | 1   | 0   | 0   |
| 38338  | 0   | 0   | 0   | 0   |
| 38342  | 0   | 2   | 2   | 2   |
| 38360  | 0   | 1   | 1   | 0   |
| 38362  | 0   | 1   | 2   | 2   |
| 38364  | 1   | 0   | 1   | 1   |
| 38402  | 0   | 3   | 1   | 0   |
| 38423  | 0   | 3   | 2   | 2   |
| 38424  | 1   | 0   | 1   | 5   |
| 38435  | 1   | 1   | 3   | 2   |
| 38450  | 0   | 0   | 0   | 0   |
| 38455  | 0   | 2   | 2   | 0   |
| 38467  | 0   | 3   | 4   | 0   |
| 38468  | 0   | 3   | 2   | 2   |
| 38472  | 0   | 1   | 1   | 0   |

| respid | Q33 | Q34 | Q35 | Q36 |
|--------|-----|-----|-----|-----|
| 38484  | 1   | 1   | 0   | 0   |
| 38498  | 0   | 1   | 0   | 0   |
| 38507  | 0   | 1   | 0   | 0   |
| 38511  | 1   | 1   | 1   | 1   |
| 38524  | 2   | 3   | 5   | 4   |
| 38526  | 1   | 2   | 0   | 0   |
| 38534  | 1   | 1   | 0   | 0   |
| 38536  | 0   | 1   | 1   | 0   |
| 38539  | 0   | 1   | 0   | 0   |
| 38547  | 0   | 1   | 0   | 0   |
| 38549  | 1   | 1   | 0   | 0   |
| 38575  | 1   | 3   | 2   | 0   |
| 38579  | 1   | 2   | 0   | 0   |
| 38585  | 0   | 1   | 1   | 1   |
| 38589  | 0   | 2   | 2   | 0   |
| 38595  | 0   | 1   | 3   | 1   |
| 38602  | 0   | 0   | 0   | 0   |
| 38603  | 1   | 3   | 1   | 0   |
| 38612  | 0   | 2   | 0   | 0   |
| 38621  | 1   | 2   | 4   | 4   |
| 38624  | 1   | 2   | 1   | 2   |
| 38636  | 1   | 0   | 0   | 0   |
| 38656  | 0   | 1   | 1   | 0   |
| 38668  | 0   | 1   | 0   | 0   |
| 38675  | 0   | 1   | 1   | 1   |
| 38676  | 0   | 0   | 0   | 0   |
| 38682  | 0   | 1   | 1   | 1   |
| 38689  | 0   | 2   | 0   | 0   |
| 38702  | 0   | 2   | 1   | 0   |
| 38704  | 0   | 2   | 4   | 4   |
| 38713  | 0   | 1   | 0   | 0   |
| 38718  | 1   | 1   | 2   | 2   |

| respid | Q33 | Q34 | Q35 | Q36 |
|--------|-----|-----|-----|-----|
| 38725  | 0   | 2   | 0   | 0   |
| 38730  | 1   | 3   | 3   | 0   |
| 38737  | 0   | 1   | 2   | 0   |
| 38738  | 1   | 3   | 2   | 2   |
| 38744  | 1   | 0   | 0   | 0   |
| 38746  | 0   | 2   | 0   | 0   |
| 38753  | 0   | 1   | 0   | 0   |
| 38756  | 0   | 3   | 2   | 1   |
| 38760  | 1   | 0   | 1   | 0   |
| 38762  | 1   | 2   | 2   | 3   |
| 38765  | 1   | 1   | 0   | 0   |
| 38769  | 0   | 1   | 1   | 1   |
| 38781  | 0   | 2   | 3   | 4   |
| 38786  | 0   | 1   | 0   | 0   |
| 38790  | 0   | 2   | 2   | 2   |
| 38793  | 0   | 0   | 0   | 0   |
| 38797  | 0   | 1   | 1   | 0   |
| 38802  | 1   | 1   | 0   | 0   |
| 38815  | 1   | 3   | 2   | 0   |
| 38826  | 1   | 3   | 2   | 2   |
| 38828  | 0   | 1   | 0   | 0   |
| 38829  | 0   | 2   | 3   | 2   |
| 38835  | 1   | 1   | 1   | 1   |
| 38842  | 0   | 2   | 2   | 2   |
| 38853  | 0   | 1   | 0   | 0   |
| 38855  | 0   | 2   | 4   | 4   |
| 38860  | 1   | 2   | 2   | 2   |
| 38869  | 0   | 2   | 0   | 0   |
| 38882  | 2   | 1   | 2   | 3   |
| 38897  | 0   | 1   | 0   | 0   |
| 38903  | 2   | 0   | 0   | 0   |
| 38910  | 1   | 3   | 2   | 2   |

| respid | Q33 | Q34 | Q35 | Q36 |
|--------|-----|-----|-----|-----|
| 38948  | 1   | 2   | 2   | 1   |
| 38949  | 0   | 3   | 1   | 1   |
| 38953  | 0   | 2   | 4   | 3   |
| 38989  | 0   | 2   | 2   | 2   |
| 38997  | 0   | 1   | 0   | 0   |
| 38999  | 1   | 1   | 0   | 0   |
| 39002  | 1   | 3   | 4   | 4   |
| 39003  | 2   | 1   | 4   | 2   |
| 39006  | 1   | 1   | 0   | 0   |
| 39014  | 0   | 0   | 0   | 0   |
| 39017  | 0   | 1   | 3   | 4   |
| 39018  | 2   | 3   | 5   | 5   |
| 39025  | 2   | 3   | 4   | 5   |
| 39031  | 0   | 2   | 1   | 3   |
| 39061  | 0   | 1   | 1   | 0   |
| 39131  | 0   | 1   | 1   | 0   |
| 39153  | 0   | 2   | 2   | 0   |
| 39194  | 2   | 3   | 0   | 1   |
| 39204  | 0   | 1   | 1   | 0   |
| 39208  | 0   | 2   | 2   | 0   |
| 39213  | 1   | 2   | 2   | 2   |
| 39231  | 0   | 1   | 0   | 0   |
| 39251  | 0   | 2   | 2   | 1   |
| 39257  | 1   | 3   | 3   | 1   |
| 39262  | 2   | 2   | 2   | 1   |
| 39269  | 2   | 3   | 2   | 2   |
| 39272  | 1   | 0   | 1   | 1   |
| 39280  | 1   | 3   | 2   | 0   |
| 39294  | 1   | 2   | 1   | 1   |
| 39297  | 1   | 3   | 2   | 1   |
| 39300  | 1   | 1   | 1   | 0   |
| 39307  | 0   | 2   | 1   | 2   |

| respid | Q33 | Q34 | Q35 | Q36 |
|--------|-----|-----|-----|-----|
| 39320  | 1   | 3   | 2   | 1   |
| 39333  | 0   | 2   | 1   | 0   |
| 39335  | 1   | 3   | 2   | 1   |
| 39339  | 0   | 0   | 1   | 1   |
| 39375  | 1   | 2   | 0   | 0   |
| 39377  | 0   | 0   | 0   | 0   |
| 39380  | 0   | 2   | 1   | 2   |
| 39425  | 1   | 2   | 1   | 1   |
| 39590  | 0   | 1   | 0   | 0   |
| 40529  | 0   | 1   | 0   | 0   |
| 40702  | 0   | 1   | 1   | 0   |
| 40788  | 0   | 1   | 0   | 0   |
| 40841  | 1   | 0   | 0   | 0   |
| 40965  | 0   | 1   | 1   | 0   |
| 41092  | 1   | 1   | 0   | 0   |
| 41534  | 0   | 0   | 0   | 0   |
| 41919  | 0   | 1   | 1   | 1   |
| 42110  | 0   | 0   | 0   | 0   |
| 42135  | 1   | 1   | 1   | 0   |
| 42142  | 1   | 1   | 1   | 0   |
| 42163  | 1   | 2   | 3   | 2   |
| 42164  | 0   | 2   | 0   | 0   |
| 42172  | 1   | 2   | 2   | 4   |
| 42177  | 0   | 0   | 0   | 0   |
| 42181  | 0   | 1   | 0   | 0   |
| 42193  | 0   | 2   | 2   | 0   |
| 42196  | 0   | 1   | 0   | 0   |
| 42202  | 0   | 1   | 2   | 1   |
| 42248  | 1   | 2   | 1   | 0   |
| 42283  | 1   | 1   | 1   | 0   |
| 42284  | 1   | 1   | 2   | 2   |
| 42323  | 1   | 0   | 0   | 0   |

| respid | Q33 | Q34 | Q35 | Q36 |
|--------|-----|-----|-----|-----|
| 42349  | 0   | 2   | 2   | 0   |
| 42351  | 1   | 0   | 0   | 0   |
| 42357  | 0   | 1   | 0   | 0   |
| 42366  | 1   | 0   | 0   | 0   |
| 42380  | 1   | 1   | 0   | 0   |
| 42414  | 1   | 2   | 1   | 1   |
| 42420  | 2   | 3   | 4   | 4   |
| 42454  | 0   | 1   | 0   | 0   |
| 42458  | 0   | 1   | 0   | 0   |
| 42461  | 1   | 1   | 1   | 0   |
| 42488  | 1   | 1   | 2   | 1   |
| 42511  | 1   | 0   | 1   | 0   |
| 42512  | 0   | 1   | 0   | 0   |
| 42530  | 1   | 1   | 2   | 1   |
| 42531  | 1   | 3   | 2   | 2   |
| 42533  | 1   | 3   | 0   | 0   |
| 42549  | 1   | 1   | 1   | 1   |
| 42550  | 1   | 3   | 4   | 4   |
| 42553  | 1   | 0   | 1   | 0   |
| 42562  | 0   | 1   | 2   | 2   |
| 42567  | 1   | 1   | 1   | 1   |
| 42589  | 0   | 0   | 0   | 0   |
| 42604  | 0   | 1   | 1   | 0   |
| 42618  | 0   | 1   | 0   | 0   |
| 42621  | 1   | 1   | 2   | 3   |
| 42627  | 0   | 1   | 1   | 0   |
| 42641  | 0   | 0   | 1   | 0   |
| 42655  | 1   | 3   | 5   | 5   |
| 42666  | 0   | 1   | 2   | 0   |
| 42667  | 1   | 1   | 1   | 0   |
| 42697  | 0   | 1   | 2   | 1   |
| 42703  | 0   | 0   | 1   | 0   |

| respid | Q33 | Q34 | Q35 | Q36 |
|--------|-----|-----|-----|-----|
| 42712  | 1   | 0   | 1   | 0   |
| 42731  | 1   | 0   | 2   | 1   |
| 42780  | 0   | 2   | 1   | 0   |
| 42785  | 1   | 2   | 1   | 1   |
| 42788  | 0   | 1   | 0   | 1   |
| 42802  | 0   | 1   | 2   | 2   |
| 42818  | 0   | 1   | 1   | 2   |
| 42821  | 0   | 1   | 1   | 0   |
| 42824  | 0   | 1   | 0   | 0   |
| 42831  | 1   | 3   | 1   | 0   |
| 42836  | 0   | 1   | 0   | 0   |
| 42864  | 1   | 2   | 3   | 0   |
| 42875  | 0   | 1   | 1   | 1   |
| 42891  | 1   | 2   | 3   | 3   |
| 42897  | 0   | 1   | 2   | 0   |
| 42900  | 0   | 3   | 1   | 0   |
| 42902  | 0   | 2   | 2   | 2   |
| 42921  | 1   | 1   | 0   | 0   |
| 42925  | 0   | 0   | 1   | 0   |
| 42944  | 0   | 0   | 0   | 0   |
| 42950  | 1   | 0   | 0   | 0   |
| 42963  | 0   | 1   | 0   | 0   |
| 42967  | 0   | 1   | 1   | 1   |
| 42985  | 0   | 0   | 0   | 0   |
| 42990  | 0   | 1   | 1   | 0   |
| 42996  | 1   | 3   | 3   | 0   |
| 43002  | 0   | 2   | 1   | 1   |
| 43004  | 1   | 0   | 0   | 0   |
| 43012  | 0   | 0   | 0   | 0   |
| 43027  | 1   | 0   | 1   | 1   |
| 43028  | 1   | 1   | 0   | 0   |
| 43029  | 1   | 1   | 2   | 2   |

| respid | Q33 | Q34 | Q35 | Q36 |
|--------|-----|-----|-----|-----|
| 43031  | 0   | 1   | 1   | 0   |
| 43042  | 0   | 0   | 0   | 0   |
| 43054  | 1   | 1   | 2   | 2   |
| 43058  | 0   | 0   | 1   | 0   |
| 43064  | 0   | 3   | 2   | 1   |
| 43069  | 0   | 1   | 0   | 0   |
| 43071  | 0   | 0   | 1   | 0   |
| 43072  | 0   | 1   | 0   | 0   |
| 43077  | 0   | 2   | 1   | 1   |
| 43078  | 1   | 2   | 1   | 1   |
| 43082  | 0   | 0   | 0   | 0   |
| 43092  | 0   | 1   | 0   | 0   |
| 43096  | 1   | 1   | 0   | 0   |
| 43109  | 0   | 0   | 0   | 0   |
| 43113  | 0   | 1   | 1   | 0   |
| 43123  | 1   | 1   | 1   | 1   |
| 43127  | 0   | 0   | 1   | 0   |
| 43128  | 0   | 1   | 0   | 0   |
| 43129  | 0   | 1   | 1   | 1   |
| 43133  | 1   | 1   | 0   | 2   |
| 43140  | 0   | 0   | 0   | 0   |
| 43143  | 1   | 0   | 1   | 1   |
| 43149  | 0   | 1   | 1   | 2   |
| 43150  | 0   | 1   | 2   | 2   |
| 43153  | 2   | 3   | 2   | 2   |
| 43170  | 1   | 1   | 1   | 0   |
| 43187  | 0   | 2   | 1   | 1   |
| 43188  | 1   | 1   | 1   | 0   |
| 43198  | 0   | 1   | 1   | 0   |
| 43208  | 0   | 1   | 0   | 0   |
| 43216  | 0   | 1   | 0   | 0   |
| 43222  | 1   | 1   | 1   | 1   |



| respid | Q33 | Q34 | Q35 | Q36 |
|--------|-----|-----|-----|-----|
| 43224  | 0   | 2   | 1   | 0   |
| 43230  | 1   | 2   | 1   | 1   |
| 43231  | 0   | 1   | 1   | 2   |
| 43265  | 1   | 1   | 1   | 2   |
| 43270  | 0   | 1   | 2   | 2   |
| 43283  | 0   | 1   | 1   | 1   |
| 43295  | 0   | 1   | 3   | 1   |
| 43297  | 0   | 1   | 0   | 0   |
| 43299  | 1   | 2   | 1   | 2   |
| 43307  | 1   | 2   | 1   | 0   |
| 43316  | 1   | 1   | 1   | 1   |
| 43318  | 1   | 2   | 2   | 2   |
| 43319  | 0   | 1   | 1   | 0   |
| 43324  | 1   | 2   | 2   | 2   |
| 43325  | 1   | 3   | 1   | 0   |
| 43327  | 0   | 1   | 1   | 1   |
| 43338  | 1   | 2   | 0   | 0   |
| 43342  | 0   | 2   | 1   | 0   |
| 43348  | 0   | 0   | 0   | 0   |
| 43395  | 1   | 1   | 2   | 2   |
| 43404  | 1   | 1   | 2   | 2   |
| 43406  | 0   | 1   | 1   | 1   |
| 43407  | 1   | 1   | 0   | 0   |
| 43411  | 0   | 0   | 2   | 0   |
| 43416  | 1   | 1   | 1   | 1   |
| 43428  | 0   | 1   | 0   | 0   |
| 43429  | 0   | 2   | 1   | 2   |
| 43432  | 0   | 1   | 1   | 0   |
| 43443  | 0   | 1   | 0   | 0   |
| 43455  | 0   | 0   | 0   | 0   |
| 43457  | 0   | 1   | 2   | 1   |
| 43458  | 0   | 0   | 0   | 0   |

| respid | Q33 | Q34 | Q35 | Q36 |
|--------|-----|-----|-----|-----|
| 43477  | 1   | 3   | 1   | 1   |
| 43520  | 0   | 1   | 0   | 0   |
| 43521  | 1   | 1   | 0   | 0   |
| 43550  | 0   | 0   | 0   | 0   |
| 43551  | 1   | 1   | 2   | 1   |
| 43554  | 1   | 2   | 2   | 1   |
| 43560  | 0   | 2   | 1   | 1   |
| 43569  | 0   | 1   | 0   | 0   |
| 43583  | 0   | 0   | 1   | 1   |
| 43590  | 0   | 1   | 0   | 0   |
| 43591  | 0   | 1   | 0   | 0   |
| 43595  | 0   | 0   | 0   | 0   |
| 43599  | 1   | 1   | 1   | 1   |
| 43606  | 1   | 1   | 1   | 0   |
| 43609  | 0   | 3   | 0   | 0   |
| 43629  | 1   | 1   | 0   | 0   |
| 43636  | 0   | 2   | 1   | 0   |
| 43661  | 0   | 1   | 1   | 0   |
| 43668  | 1   | 1   | 1   | 0   |
| 43672  | 0   | 0   | 0   | 0   |
| 43677  | 1   | 2   | 1   | 1   |
| 43683  | 2   | 2   | 0   | 0   |
| 43708  | 0   | 2   | 4   | 2   |
| 43713  | 1   | 0   | 1   | 0   |
| 43718  | 1   | 1   | 0   | 0   |
| 43725  | 0   | 0   | 0   | 0   |
| 43747  | 1   | 2   | 1   | 1   |
| 43755  | 0   | 1   | 1   | 0   |
| 43770  | 0   | 0   | 0   | 0   |
| 43775  | 2   | 2   | 2   | 2   |
| 43788  | 0   | 0   | 0   | 0   |
| 43790  | 1   | 1   | 1   | 2   |

| respid | Q33 | Q34 | Q35 | Q36 |
|--------|-----|-----|-----|-----|
| 43797  | 1   | 1   | 2   | 1   |
| 43798  | 1   | 3   | 2   | 2   |
| 43811  | 1   | 2   | 1   | 2   |
| 43819  | 0   | 1   | 1   | 2   |
| 43821  | 0   | 1   | 1   | 1   |
| 43822  | 0   | 1   | 0   | 0   |
| 43825  | 1   | 2   | 3   | 2   |
| 43826  | 1   | 2   | 1   | 1   |
| 43831  | 0   | 2   | 1   | 1   |
| 43836  | 0   | 1   | 1   | 1   |
| 43852  | 1   | 1   | 1   | 2   |
| 43857  | 0   | 3   | 0   | 0   |
| 43858  | 1   | 1   | 1   | 0   |
| 43859  | 0   | 1   | 1   | 1   |
| 43863  | 0   | 0   | 0   | 0   |
| 43868  | 0   | 1   | 1   | 1   |
| 43872  | 0   | 1   | 1   | 1   |
| 43874  | 0   | 1   | 1   | 1   |
| 43882  | 0   | 1   | 1   | 0   |
| 43886  | 1   | 1   | 0   | 0   |
| 43903  | 0   | 3   | 2   | 2   |
| 43929  | 1   | 1   | 1   | 1   |
| 43932  | 0   | 0   | 0   | 0   |
| 43936  | 1   | 1   | 1   | 0   |
| 43962  | 0   | 1   | 0   | 0   |
| 43964  | 0   | 1   | 0   | 0   |
| 43968  | 0   | 0   | 2   | 0   |
| 43979  | 1   | 2   | 2   | 0   |
| 44006  | 2   | 2   | 2   | 2   |
| 44009  | 0   | 0   | 3   | 0   |
| 44023  | 1   | 1   | 2   | 0   |
| 44035  | 0   | 0   | 1   | 1   |

| respid | Q33 | Q34 | Q35 | Q36 |
|--------|-----|-----|-----|-----|
| 44038  | 1   | 3   | 3   | 3   |
| 44039  | 0   | 1   | 2   | 2   |
| 44043  | 0   | 1   | 1   | 1   |
| 44048  | 0   | 1   | 1   | 1   |
| 44050  | 0   | 0   | 0   | 0   |
| 44051  | 1   | 1   | 1   | 1   |
| 44061  | 0   | 1   | 1   | 1   |
| 44063  | 0   | 1   | 1   | 1   |
| 44072  | 0   | 1   | 1   | 1   |
| 44075  | 0   | 0   | 1   | 2   |
| 44089  | 0   | 1   | 1   | 1   |
| 44090  | 2   | 3   | 2   | 1   |
| 44091  | 0   | 1   | 1   | 1   |
| 44092  | 0   | 2   | 1   | 0   |
| 44110  | 0   | 1   | 1   | 1   |
| 44112  | 0   | 1   | 1   | 1   |
| 44114  | 0   | 1   | 1   | 1   |
| 44143  | 0   | 1   | 1   | 1   |
| 44179  | 0   | 0   | 1   | 0   |
| 44234  | 1   | 0   | 1   | 0   |
| 44236  | 0   | 1   | 0   | 0   |
| 44239  | 0   | 1   | 1   | 1   |
| 44241  | 0   | 1   | 1   | 1   |
| 44253  | 0   | 0   | 0   | 0   |
| 44260  | 0   | 1   | 1   | 1   |
| 44261  | 0   | 1   | 1   | 1   |
| 44263  | 0   | 1   | 1   | 1   |
| 44264  | 0   | 1   | 0   | 0   |
| 44265  | 0   | 0   | 0   | 0   |
| 44267  | 1   | 1   | 1   | 1   |
| 44306  | 1   | 1   | 1   | 0   |
| 44309  | 0   | 2   | 2   | 2   |

| respid | Q33 | Q34 | Q35 | Q36 |
|--------|-----|-----|-----|-----|
| 44310  | 1   | 1   | 2   | 0   |
| 44361  | 0   | 1   | 1   | 0   |
| 44380  | 0   | 1   | 1   | 1   |
| 44386  | 0   | 0   | 1   | 0   |
| 44419  | 1   | 2   | 2   | 1   |
| 44426  | 0   | 1   | 1   | 0   |
| 44479  | 0   | 0   | 1   | 1   |
| 44484  | 0   | 1   | 0   | 0   |
| 44487  | 0   | 2   | 0   | 0   |
| 44509  | 0   | 1   | 1   | 1   |
| 44540  | 1   | 1   | 1   | 0   |
| 44551  | 0   | 1   | 2   | 0   |
| 44553  | 0   | 1   | 0   | 0   |
| 44650  | 0   | 1   | 1   | 0   |
| 44665  | 2   | 2   | 2   | 1   |
| 44779  | 0   | 1   | 0   | 0   |
| 44797  | 0   | 1   | 0   | 0   |
| 44807  | 0   | 2   | 2   | 0   |
| 44815  | 2   | 2   | 2   | 1   |
| 44836  | 0   | 1   | 0   | 0   |
| 44868  | 2   | 2   | 1   | 1   |
| 44927  | 0   | 2   | 1   | 1   |
| 44983  | 0   | 0   | 0   | 0   |
| 45040  | 1   | 1   | 1   | 1   |
| 45051  | 1   | 0   | 1   | 1   |
| 45067  | 1   | 2   | 0   | 0   |
| 45074  | 0   | 1   | 0   | 0   |
| 45115  | 1   | 2   | 1   | 1   |
| 45187  | 1   | 3   | 3   | 3   |
| 45221  | 1   | 2   | 2   | 0   |
| 45279  | 0   | 1   | 1   | 1   |
| 45308  | 0   | 1   | 1   | 1   |

| respid | Q33 | Q34 | Q35 | Q36 |
|--------|-----|-----|-----|-----|
| 45317  | 1   | 1   | 1   | 2   |
| 45379  | 0   | 2   | 2   | 0   |
| 45451  | 0   | 1   | 2   | 0   |
| 45472  | 2   | 3   | 4   | 1   |
| 45474  | 0   | 3   | 2   | 2   |
| 45544  | 0   | 1   | 2   | 2   |
| 45561  | 0   | 0   | 0   | 0   |
| 45596  | 0   | 1   | 1   | 0   |

| InstrumPPBC       |     | IPSS-QoL |   | OAB-q SF                             |   | OAB-q SF                                               |  |
|-------------------|-----|----------|---|--------------------------------------|---|--------------------------------------------------------|--|
| Symptom           |     |          |   |                                      |   |                                                        |  |
| Type of RQoL-PPBC |     |          |   | Bother                               |   | Bother                                                 |  |
| Descripti         |     | IPSS-QoL |   | a. An uncomfortable urge to urinate? |   | b. A sudden urge to urinate with little or no warning? |  |
| respid            | Q37 | Q38_1    |   | Q39_1                                |   | Q39_2                                                  |  |
| 241               | 0   | 2        | 1 | 1                                    | 1 |                                                        |  |
| 242               | 0   | 3        | 1 | 1                                    | 1 |                                                        |  |
| 243               | 1   | 3        | 3 | 3                                    | 2 |                                                        |  |
| 244               | 3   | 6        | 3 | 3                                    | 4 |                                                        |  |
| 245               | 1   | 2        | 2 | 2                                    | 2 |                                                        |  |
| 246               | 1   | 3        | 1 | 1                                    | 1 |                                                        |  |
| 247               | 2   | 4        | 2 | 2                                    | 3 |                                                        |  |
| 253               | 1   | 3        | 2 | 2                                    | 2 |                                                        |  |
| 256               | 3   | 4        | 2 | 2                                    | 2 |                                                        |  |
| 257               | 0   | 2        | 2 | 2                                    | 1 |                                                        |  |
| 258               | 0   | 2        | 1 | 1                                    | 1 |                                                        |  |
| 259               | 1   | 3        | 1 | 1                                    | 1 |                                                        |  |
| 263               | 0   | 3        | 1 | 1                                    | 1 |                                                        |  |
| 264               | 0   | 0        | 1 | 1                                    | 1 |                                                        |  |
| 265               | 2   | 4        | 3 | 3                                    | 4 |                                                        |  |
| 266               | 0   | 2        | 1 | 1                                    | 1 |                                                        |  |
| 268               | 0   | 1        | 1 | 1                                    | 1 |                                                        |  |
| 270               | 1   | 2        | 1 | 1                                    | 2 |                                                        |  |
| 272               | 1   | 3        | 1 | 1                                    | 1 |                                                        |  |
| 274               | 0   | 4        | 2 | 2                                    | 1 |                                                        |  |

| respid | Q37 | Q38_1 | Q39_1 | Q39_2 |
|--------|-----|-------|-------|-------|
| 275    | 0   |       |       |       |
| 276    | 0   | 1     | 1     | 1     |
| 277    | 0   | 3     | 1     | 1     |
| 279    | 1   | 3     | 2     | 2     |
| 286    | 2   | 5     | 3     | 4     |
| 290    | 1   | 2     | 1     | 2     |
| 291    | 0   | 4     | 1     | 1     |
| 295    | 0   |       |       |       |
| 297    | 1   | 4     | 1     | 1     |
| 299    | 1   | 4     | 3     | 3     |
| 300    | 1   | 6     | 2     | 3     |
| 303    | 1   | 3     | 2     | 1     |
| 304    | 1   | 2     | 2     | 1     |
| 306    | 1   | 4     | 3     | 2     |
| 307    | 0   | 4     | 2     | 1     |
| 312    | 3   | 5     | 4     | 4     |
| 315    | 1   | 3     | 4     | 3     |
| 317    | 0   | 2     | 1     | 1     |
| 322    | 1   | 5     | 2     | 1     |
| 335    | 1   | 3     | 2     | 3     |
| 374    | 1   | 4     | 2     | 3     |
| 378    | 0   | 5     | 1     | 1     |
| 380    | 1   | 4     | 3     | 3     |
| 382    | 2   | 6     | 2     | 1     |
| 384    | 2   | 4     | 2     | 4     |
| 385    | 1   | 5     | 2     | 1     |
| 395    | 1   | 2     | 1     | 1     |
| 396    | 0   |       |       |       |
| 398    | 0   |       |       |       |
| 402    | 2   | 5     | 4     | 4     |
| 414    | 1   | 4     | 2     | 2     |
| 415    | 0   | 0     | 1     | 1     |



| respid | Q37 | Q38_1 | Q39_1 | Q39_2 |
|--------|-----|-------|-------|-------|
| 416    | 0   | 3     | 1     | 1     |
| 420    | 1   | 4     | 2     | 2     |
| 421    | 1   | 5     | 1     | 2     |
| 422    | 0   | 0     | 1     | 1     |
| 423    | 0   | 1     | 1     | 1     |
| 424    | 0   | 1     | 1     | 1     |
| 425    | 1   | 4     | 2     | 1     |
| 428    | 1   | 1     | 2     | 2     |
| 429    | 1   | 1     | 1     | 2     |
| 431    | 0   | 1     | 1     | 1     |
| 437    | 0   | 1     | 2     | 2     |
| 438    | 0   | 1     | 1     | 1     |
| 441    | 0   | 2     | 1     | 1     |
| 444    | 0   | 2     | 1     | 1     |
| 448    | 0   | 2     | 1     | 1     |
| 449    | 2   | 4     | 2     | 1     |
| 457    | 1   | 4     | 2     | 1     |
| 460    | 0   | 1     | 1     | 1     |
| 469    | 1   | 4     | 3     | 4     |
| 471    | 0   | 4     | 1     | 1     |
| 473    | 3   | 5     | 4     | 2     |
| 476    | 1   | 2     | 2     | 2     |
| 479    | 0   | 1     | 1     | 1     |
| 485    | 0   | 0     | 1     | 1     |
| 488    | 1   | 4     | 3     | 2     |
| 494    | 0   | 2     | 1     | 2     |
| 496    | 0   | 2     | 1     | 1     |
| 501    | 0   |       |       |       |
| 502    | 1   | 4     | 2     | 3     |
| 503    | 1   | 4     | 3     | 3     |
| 506    | 1   | 3     | 2     | 1     |
| 514    | 2   | 4     | 2     | 2     |

| respid | Q37 | Q38_1 | Q39_1 | Q39_2 |
|--------|-----|-------|-------|-------|
| 515    | 1   | 4     | 2     | 1     |
| 516    | 0   | 0     | 1     | 1     |
| 519    | 2   | 4     | 2     | 2     |
| 522    | 0   |       |       |       |
| 525    | 0   | 1     | 1     | 1     |
| 528    | 0   | 0     | 1     | 1     |
| 532    | 1   | 3     | 1     | 2     |
| 536    | 2   | 4     | 3     | 3     |
| 539    | 0   | 1     | 3     | 3     |
| 540    | 1   | 3     | 2     | 1     |
| 547    | 1   | 4     | 3     | 1     |
| 551    | 0   | 2     | 1     | 1     |
| 554    | 0   | 2     | 2     | 2     |
| 558    | 0   | 1     | 1     | 2     |
| 563    | 0   | 1     | 1     | 1     |
| 564    | 0   | 3     | 3     | 3     |
| 565    | 0   | 1     | 2     | 1     |
| 567    | 0   | 6     | 2     | 1     |
| 569    | 0   | 2     | 1     | 1     |
| 572    | 0   | 2     | 1     | 1     |
| 574    | 1   | 3     | 2     | 1     |
| 583    | 1   | 3     | 2     | 2     |
| 589    | 0   | 1     | 1     | 1     |
| 592    | 0   | 1     | 2     | 1     |
| 593    | 0   |       |       |       |
| 594    | 3   | 4     | 2     | 3     |
| 597    | 1   | 3     | 1     | 1     |
| 601    | 1   | 3     | 3     | 1     |
| 607    | 1   | 3     | 2     | 2     |
| 610    | 0   | 1     | 1     | 1     |
| 612    | 2   | 5     | 4     | 5     |
| 627    | 0   | 1     | 1     | 1     |

| respid | Q37 | Q38_1 | Q39_1 | Q39_2 |
|--------|-----|-------|-------|-------|
| 631    | 0   | 0     | 1     | 1     |
| 633    | 0   | 4     | 3     | 3     |
| 636    | 1   | 3     | 1     | 1     |
| 656    | 0   | 3     | 2     | 2     |
| 659    | 0   | 1     | 1     | 1     |
| 670    | 0   | 3     | 1     | 1     |
| 672    | 1   | 4     | 3     | 3     |
| 673    | 2   | 4     | 3     | 2     |
| 675    | 0   | 0     | 1     | 1     |
| 676    | 2   | 3     | 3     | 2     |
| 679    | 2   | 4     | 2     | 2     |
| 683    | 1   | 2     | 1     | 1     |
| 684    | 1   | 4     | 2     | 1     |
| 690    | 0   | 2     | 1     | 1     |
| 701    | 4   | 5     | 5     | 5     |
| 709    | 1   | 5     | 2     | 1     |
| 719    | 0   | 1     | 1     | 1     |
| 726    | 0   | 3     | 1     | 1     |
| 730    | 0   | 1     | 1     | 1     |
| 731    | 0   | 1     | 2     | 1     |
| 732    | 0   | 3     | 1     | 1     |
| 733    | 0   | 1     | 1     | 1     |
| 735    | 0   | 0     | 1     | 1     |
| 738    | 0   | 1     | 1     | 1     |
| 740    | 1   | 0     | 2     | 1     |
| 742    | 0   | 3     | 1     | 1     |
| 744    | 0   | 1     | 1     | 1     |
| 749    | 1   | 2     | 2     | 2     |
| 751    | 0   | 2     | 1     | 2     |
| 752    | 2   | 4     | 2     | 1     |
| 753    | 2   | 2     | 4     | 3     |
| 755    | 1   | 2     | 2     | 1     |

| respid | Q37 | Q38_1 | Q39_1 | Q39_2 |
|--------|-----|-------|-------|-------|
| 756    | 0   |       |       |       |
| 759    | 0   | 2     | 1     | 1     |
| 760    | 2   | 2     | 2     | 1     |
| 763    | 0   | 2     | 1     | 1     |
| 764    | 0   | 1     | 1     | 1     |
| 765    | 0   | 2     | 1     | 2     |
| 766    | 1   | 2     | 2     | 1     |
| 767    | 0   | 2     | 2     | 1     |
| 771    | 1   | 3     | 2     | 3     |
| 773    | 0   | 1     | 3     | 2     |
| 774    | 0   | 2     | 2     | 2     |
| 775    | 2   | 3     | 2     | 2     |
| 776    | 1   | 1     | 2     | 1     |
| 778    | 2   | 4     | 2     | 3     |
| 780    | 2   | 2     | 1     | 1     |
| 781    | 0   | 1     | 1     | 1     |
| 782    | 2   | 4     | 2     | 3     |
| 783    | 1   | 3     | 3     | 3     |
| 786    | 2   | 5     | 5     | 5     |
| 788    | 0   |       |       |       |
| 792    | 0   | 0     | 1     | 2     |
| 794    | 3   | 3     | 4     | 4     |
| 795    | 0   | 0     | 1     | 1     |
| 799    | 1   | 2     | 2     | 2     |
| 800    | 0   | 1     | 1     | 1     |
| 801    | 1   | 3     | 3     | 2     |
| 804    | 1   | 1     | 2     | 2     |
| 806    | 0   | 0     | 2     | 1     |
| 807    | 1   | 1     | 2     | 1     |
| 808    | 3   | 4     | 3     | 2     |
| 809    | 0   | 2     | 1     | 1     |
| 811    | 0   | 1     | 1     | 1     |

| respid | Q37 | Q38_1 | Q39_1 | Q39_2 |
|--------|-----|-------|-------|-------|
| 812    | 0   | 1     | 1     | 1     |
| 815    | 0   | 0     | 1     | 1     |
| 817    | 0   | 2     | 2     | 2     |
| 818    | 1   | 1     | 1     | 2     |
| 819    | 1   | 2     | 1     | 1     |
| 821    | 2   | 3     | 1     | 2     |
| 824    | 1   | 5     | 1     | 1     |
| 825    | 0   | 1     | 1     | 1     |
| 828    | 0   | 0     | 1     | 1     |
| 832    | 1   | 2     | 2     | 2     |
| 834    | 1   | 1     | 2     | 2     |
| 835    | 3   | 3     | 4     | 4     |
| 836    | 0   | 0     | 1     | 1     |
| 837    | 0   | 0     | 1     | 1     |
| 840    | 1   | 2     | 3     | 2     |
| 841    | 0   | 2     | 1     | 1     |
| 845    | 0   | 3     | 2     | 1     |
| 846    | 0   | 1     | 1     | 1     |
| 849    | 1   | 1     | 2     | 1     |
| 852    | 0   | 1     | 2     | 1     |
| 854    | 1   | 2     | 2     | 1     |
| 856    | 0   | 1     | 1     | 1     |
| 858    | 0   | 2     | 1     | 1     |
| 859    | 1   | 2     | 2     | 2     |
| 861    | 0   | 2     | 1     | 2     |
| 863    | 0   | 3     | 1     | 1     |
| 864    | 2   | 3     | 2     | 2     |
| 866    | 0   | 5     | 1     | 1     |
| 869    | 0   | 1     | 1     | 1     |
| 870    | 1   | 2     | 2     | 3     |
| 871    | 0   | 2     | 3     | 4     |
| 873    | 2   | 3     | 2     | 1     |

| respid | Q37 | Q38_1 | Q39_1 | Q39_2 |
|--------|-----|-------|-------|-------|
| 879    | 0   | 1     | 1     | 1     |
| 880    | 0   | 2     | 2     | 1     |
| 881    | 1   | 4     | 3     | 1     |
| 882    | 0   | 2     | 2     | 1     |
| 885    | 0   |       |       |       |
| 886    | 1   | 3     | 1     | 1     |
| 887    | 2   | 4     | 3     | 3     |
| 888    | 0   | 1     | 1     | 1     |
| 889    | 2   | 3     | 1     | 1     |
| 890    | 1   | 2     | 1     | 1     |
| 900    | 0   |       |       |       |
| 901    | 1   | 2     | 1     | 1     |
| 902    | 1   | 3     | 2     | 1     |
| 903    | 0   | 0     | 1     | 1     |
| 906    | 1   | 4     | 2     | 2     |
| 907    | 2   | 3     | 2     | 3     |
| 908    | 1   | 2     | 2     | 2     |
| 910    | 1   | 2     | 1     | 1     |
| 911    | 1   | 4     | 2     | 2     |
| 912    | 0   | 2     | 2     | 1     |
| 915    | 0   |       |       |       |
| 923    | 3   | 6     | 5     | 5     |
| 925    | 0   | 0     | 1     | 1     |
| 926    | 1   | 2     | 2     | 2     |
| 929    | 0   |       |       |       |
| 932    | 5   | 4     | 5     | 1     |
| 933    | 2   | 3     | 1     | 1     |
| 934    | 0   | 1     | 1     | 1     |
| 938    | 2   | 4     | 2     | 2     |
| 941    | 0   |       |       |       |
| 942    | 1   | 2     | 2     | 3     |
| 943    | 0   |       |       |       |

| respid | Q37 | Q38_1 | Q39_1 | Q39_2 |
|--------|-----|-------|-------|-------|
| 945    | 0   | 2     | 1     | 1     |
| 946    | 0   |       |       |       |
| 947    | 0   | 2     | 1     | 1     |
| 948    | 0   | 2     | 1     | 1     |
| 949    | 0   | 1     | 1     | 1     |
| 952    | 0   | 1     | 1     | 1     |
| 956    | 1   | 3     | 1     | 1     |
| 957    | 0   | 0     | 1     | 1     |
| 959    | 1   | 1     | 1     | 1     |
| 961    | 0   | 1     | 1     | 1     |
| 962    | 3   | 5     | 4     | 4     |
| 965    | 1   | 2     | 2     | 1     |
| 967    | 1   | 2     | 2     | 2     |
| 969    | 1   | 4     | 1     | 1     |
| 970    | 0   |       |       |       |
| 973    | 0   | 5     | 1     | 1     |
| 974    | 0   | 2     | 1     | 1     |
| 975    | 2   | 5     | 3     | 3     |
| 976    | 0   | 2     | 2     | 1     |
| 977    | 1   | 3     | 2     | 1     |
| 979    | 1   | 3     | 2     | 1     |
| 981    | 0   | 1     | 2     | 2     |
| 983    | 0   | 1     | 2     | 1     |
| 987    | 0   | 3     | 1     | 1     |
| 991    | 0   |       |       |       |
| 992    | 0   | 0     | 1     | 1     |
| 993    | 0   | 1     | 2     | 2     |
| 994    | 1   | 2     | 3     | 1     |
| 995    | 2   | 3     | 2     | 2     |
| 998    | 1   | 3     | 2     | 1     |
| 1000   | 2   | 4     | 2     | 3     |
| 1001   | 1   | 4     | 3     | 2     |

| respid | Q37 | Q38_1 | Q39_1 | Q39_2 |
|--------|-----|-------|-------|-------|
| 1002   | 0   |       |       |       |
| 1004   | 0   | 1     | 1     | 1     |
| 1005   | 2   | 2     | 2     | 2     |
| 1006   | 2   | 4     | 2     | 1     |
| 1007   | 2   | 2     | 2     | 1     |
| 1009   | 0   |       |       |       |
| 1013   | 2   | 2     | 3     | 1     |
| 1015   | 0   | 1     | 4     | 3     |
| 1020   | 2   | 4     | 2     | 1     |
| 1022   | 2   | 3     | 3     | 3     |
| 1024   | 0   | 1     | 2     | 1     |
| 1025   | 0   |       |       |       |
| 1027   | 0   | 2     | 1     | 1     |
| 1031   | 0   | 1     | 1     | 1     |
| 1037   | 0   | 3     | 1     | 1     |
| 1039   | 0   | 1     | 1     | 1     |
| 1040   | 1   | 3     | 1     | 1     |
| 1056   | 2   | 4     | 2     | 2     |
| 1057   | 0   | 2     | 2     | 1     |
| 1062   | 0   | 2     | 1     | 1     |
| 1069   | 0   | 3     | 1     | 1     |
| 1070   | 0   | 1     | 1     | 1     |
| 1072   | 0   | 5     | 2     | 2     |
| 1076   | 0   | 0     | 1     | 1     |
| 1077   | 1   | 4     | 1     | 1     |
| 1078   | 0   | 1     | 2     | 1     |
| 1080   | 0   |       |       |       |
| 1094   | 3   | 3     | 5     | 4     |
| 1098   | 1   | 2     | 3     | 2     |
| 1099   | 0   | 1     | 1     | 1     |
| 1102   | 0   | 1     | 1     | 1     |
| 1110   | 0   | 1     | 1     | 1     |



| respid | Q37 | Q38_1 | Q39_1 | Q39_2 |
|--------|-----|-------|-------|-------|
| 1117   | 1   | 4     | 4     | 2     |
| 1119   | 0   |       |       |       |
| 1126   | 1   | 4     | 2     | 1     |
| 1127   | 0   | 1     | 1     | 1     |
| 1130   | 0   | 1     | 1     | 1     |
| 1131   | 0   | 2     | 1     | 1     |
| 1135   | 3   | 5     | 4     | 5     |
| 1138   | 1   | 4     | 2     | 2     |
| 1139   | 0   |       |       |       |
| 1140   | 0   | 1     | 1     | 1     |
| 1142   | 0   |       |       |       |
| 1143   | 0   |       |       |       |
| 1145   | 0   | 1     | 4     | 4     |
| 1149   | 0   |       |       |       |
| 1152   | 0   | 1     | 1     | 1     |
| 1160   | 1   | 2     | 2     | 2     |
| 1164   | 0   |       |       |       |
| 1165   | 0   | 4     | 2     | 2     |
| 1169   | 3   | 5     | 4     | 4     |
| 1170   | 0   | 1     | 1     | 1     |
| 1179   | 1   | 3     | 2     | 1     |
| 1180   | 0   | 1     | 1     | 1     |
| 1183   | 0   | 6     | 1     | 1     |
| 1187   | 0   | 1     | 1     | 1     |
| 1188   | 0   | 4     | 1     | 1     |
| 1193   | 0   | 2     | 1     | 1     |
| 1194   | 1   | 2     | 4     | 5     |
| 1197   | 0   | 1     | 1     | 1     |
| 1202   | 0   |       |       |       |
| 1204   | 5   | 5     | 5     | 4     |
| 1211   | 1   | 4     | 2     | 1     |
| 1224   | 1   | 1     | 2     | 1     |

| respid | Q37 | Q38_1 | Q39_1 | Q39_2 |
|--------|-----|-------|-------|-------|
| 1225   | 0   | 2     | 1     | 1     |
| 1230   | 0   | 2     | 1     | 1     |
| 1232   | 1   | 3     | 3     | 1     |
| 1233   | 2   | 4     | 3     | 3     |
| 1234   | 1   | 1     | 1     | 1     |
| 1235   | 2   | 4     | 2     | 3     |
| 1236   | 2   | 4     | 3     | 1     |
| 1237   | 1   | 2     | 2     | 1     |
| 1238   | 2   | 2     | 3     | 1     |
| 1239   | 0   | 3     | 2     | 1     |
| 1241   | 2   | 4     | 3     | 2     |
| 1242   | 0   | 0     | 1     | 1     |
| 1244   | 1   | 2     | 2     | 1     |
| 1245   | 0   | 2     | 1     | 1     |
| 1247   | 3   | 4     | 4     | 4     |
| 1248   | 1   | 4     | 2     | 3     |
| 1249   | 1   | 4     | 1     | 1     |
| 1250   | 0   | 1     | 1     | 1     |
| 1251   | 0   | 3     | 1     | 1     |
| 1252   | 0   | 1     | 1     | 1     |
| 1253   | 0   | 1     | 1     | 1     |
| 1254   | 3   | 5     | 4     | 4     |
| 1258   | 0   | 4     | 1     | 1     |
| 1260   | 0   | 2     | 1     | 1     |
| 1261   | 0   | 1     | 1     | 1     |
| 1262   | 1   | 5     | 2     | 3     |
| 1263   | 2   | 3     | 3     | 2     |
| 1264   | 2   | 3     | 2     | 2     |
| 1265   | 1   | 1     | 3     | 2     |
| 1266   | 1   | 2     | 2     | 1     |
| 1270   | 0   | 2     | 1     | 1     |
| 1272   | 3   | 4     | 4     | 3     |

| respid | Q37 | Q38_1 | Q39_1 | Q39_2 |
|--------|-----|-------|-------|-------|
| 1273   | 0   | 3     | 1     | 2     |
| 1276   | 1   | 3     | 1     | 1     |
| 1277   | 0   | 0     | 2     | 2     |
| 1278   | 1   | 5     | 1     | 1     |
| 1280   | 0   | 2     | 1     | 1     |
| 1281   | 1   | 4     | 2     | 2     |
| 1282   | 0   | 3     | 2     | 2     |
| 1283   | 0   | 2     | 1     | 1     |
| 1288   | 0   | 1     | 1     | 1     |
| 1289   | 1   | 3     | 2     | 1     |
| 1290   | 1   | 2     | 3     | 2     |
| 1291   | 0   |       |       |       |
| 1293   | 1   | 4     | 2     | 1     |
| 1294   | 2   | 4     | 3     | 2     |
| 1295   | 1   | 2     | 2     | 2     |
| 1296   | 1   | 4     | 6     | 1     |
| 1297   | 2   | 5     | 2     | 1     |
| 1298   | 1   | 4     | 2     | 2     |
| 1300   | 2   | 4     | 2     | 2     |
| 1302   | 0   | 3     | 2     | 1     |
| 1303   | 0   | 2     | 2     | 2     |
| 1304   | 2   | 4     | 2     | 1     |
| 1305   | 0   | 3     | 1     | 1     |
| 1307   | 0   | 1     | 2     | 1     |
| 1312   | 1   | 3     | 1     | 1     |
| 1313   | 0   | 2     | 1     | 1     |
| 1314   | 1   | 6     | 2     | 3     |
| 1317   | 1   | 2     | 1     | 1     |
| 1318   | 1   | 3     | 1     | 2     |
| 1319   | 1   | 3     | 1     | 1     |
| 1321   | 0   | 0     | 1     | 1     |
| 1324   | 2   | 5     | 3     | 3     |

| respid | Q37 | Q38_1 | Q39_1 | Q39_2 |
|--------|-----|-------|-------|-------|
| 1325   | 0   | 2     | 1     | 1     |
| 1326   | 0   | 1     | 1     | 1     |
| 1327   | 0   | 0     | 1     | 1     |
| 1329   | 1   | 3     | 3     | 3     |
| 1330   | 0   | 3     | 1     | 1     |
| 1331   | 0   | 1     | 1     | 1     |
| 1335   | 1   | 3     | 1     | 1     |
| 1337   | 0   | 1     | 1     | 1     |
| 1341   | 0   | 1     | 1     | 1     |
| 1342   | 0   | 0     | 1     | 1     |
| 1344   | 1   | 6     | 4     | 5     |
| 1345   | 1   | 3     | 3     | 1     |
| 1346   | 1   | 3     | 1     | 1     |
| 1350   | 2   | 4     | 3     | 3     |
| 1352   | 0   | 6     | 1     | 1     |
| 1353   | 1   | 4     | 2     | 2     |
| 1354   | 1   | 2     | 1     | 1     |
| 1355   | 0   | 1     | 1     | 1     |
| 1357   | 1   | 2     | 2     | 2     |
| 1360   | 0   |       |       |       |
| 1362   | 1   | 1     | 1     | 2     |
| 1363   | 1   | 2     | 2     | 1     |
| 1367   | 1   | 3     | 2     | 1     |
| 1369   | 0   | 3     | 2     | 1     |
| 1371   | 0   |       |       |       |
| 1372   | 0   |       |       |       |
| 1375   | 0   |       |       |       |
| 1377   | 0   | 2     | 2     | 2     |
| 1379   | 1   | 3     | 2     | 2     |
| 1380   | 0   | 3     | 1     | 1     |
| 1382   | 0   | 1     | 2     | 1     |
| 1383   | 0   | 1     | 1     | 1     |

| respid | Q37 | Q38_1 | Q39_1 | Q39_2 |
|--------|-----|-------|-------|-------|
| 1384   | 0   | 1     | 1     | 1     |
| 1385   | 1   | 3     | 2     | 1     |
| 1387   | 1   | 1     | 1     | 1     |
| 1388   | 0   | 1     | 1     | 1     |
| 1389   | 1   | 4     | 6     | 6     |
| 1390   | 1   | 5     | 2     | 1     |
| 1395   | 0   | 1     | 1     | 1     |
| 1396   | 0   | 1     | 1     | 1     |
| 1397   | 2   | 4     | 3     | 4     |
| 1398   | 0   | 0     | 1     | 1     |
| 1399   | 0   | 2     | 1     | 1     |
| 1403   | 0   | 0     | 1     | 1     |
| 1405   | 0   | 2     | 1     | 1     |
| 1406   | 1   | 4     | 4     | 1     |
| 1407   | 3   | 5     | 4     | 5     |
| 1408   | 0   | 2     | 1     | 2     |
| 1409   | 0   | 1     | 1     | 1     |
| 1410   | 5   | 6     | 6     | 1     |
| 1411   | 0   | 2     | 1     | 1     |
| 1412   | 0   | 0     | 1     | 1     |
| 1413   | 1   | 3     | 2     | 2     |
| 1414   | 0   | 2     | 1     | 1     |
| 1415   | 0   | 1     | 1     | 1     |
| 1416   | 0   | 4     | 1     | 1     |
| 1417   | 0   | 1     | 1     | 1     |
| 1418   | 0   | 2     | 1     | 1     |
| 1419   | 1   | 0     | 1     | 2     |
| 1420   | 0   | 1     | 2     | 2     |
| 1421   | 2   | 4     | 2     | 1     |
| 1422   | 0   | 1     | 1     | 1     |
| 1423   | 1   | 4     | 1     | 1     |
| 1424   | 3   | 5     | 2     | 1     |

| respid | Q37 | Q38_1 | Q39_1 | Q39_2 |
|--------|-----|-------|-------|-------|
| 1429   | 0   | 0     | 1     | 1     |
| 1430   | 0   | 3     | 1     | 1     |
| 1431   | 2   | 5     | 4     | 4     |
| 1433   | 1   | 2     | 2     | 2     |
| 1435   | 0   |       |       |       |
| 1436   | 0   | 3     | 1     | 1     |
| 1438   | 0   |       |       |       |
| 1439   | 0   | 1     | 1     | 1     |
| 1441   | 0   | 2     | 1     | 1     |
| 1442   | 0   | 2     | 2     | 2     |
| 1443   | 0   |       |       |       |
| 1444   | 0   | 1     | 1     | 1     |
| 1445   | 4   | 6     | 5     | 4     |
| 1446   | 1   | 4     | 1     | 1     |
| 1447   | 0   | 1     | 1     | 1     |
| 1449   | 2   | 4     | 2     | 2     |
| 1450   | 0   | 3     | 1     | 1     |
| 1451   | 0   | 3     | 4     | 3     |
| 1452   | 0   |       |       |       |
| 1453   | 2   | 3     | 3     | 4     |
| 1454   | 1   | 3     | 2     | 2     |
| 1456   | 0   | 1     | 1     | 1     |
| 1457   | 2   | 4     | 2     | 2     |
| 1459   | 1   | 2     | 2     | 2     |
| 1460   | 0   | 1     | 1     | 1     |
| 1463   | 0   | 1     | 1     | 1     |
| 1465   | 1   | 2     | 2     | 2     |
| 1467   | 0   | 3     | 3     | 1     |
| 1470   | 0   | 3     | 3     | 2     |
| 1471   | 1   | 5     | 3     | 2     |
| 1472   | 0   | 1     | 1     | 1     |
| 1474   | 1   | 3     | 3     | 3     |

| respid | Q37 | Q38_1 | Q39_1 | Q39_2 |
|--------|-----|-------|-------|-------|
| 1475   | 1   | 5     | 2     | 1     |
| 1477   | 0   | 1     | 1     | 1     |
| 1478   | 1   | 2     | 2     | 2     |
| 1480   | 0   |       |       |       |
| 1481   | 1   | 4     | 3     | 2     |
| 1483   | 0   | 1     | 1     | 1     |
| 1484   | 0   | 2     | 1     | 1     |
| 1485   | 0   | 2     | 2     | 1     |
| 1486   | 1   | 3     | 1     | 1     |
| 1487   | 3   | 5     | 2     | 2     |
| 1488   | 0   | 3     | 1     | 1     |
| 1489   | 2   | 5     | 4     | 4     |
| 1490   | 1   | 3     | 3     | 2     |
| 1491   | 2   | 3     | 1     | 3     |
| 1492   | 1   | 3     | 2     | 2     |
| 1494   | 0   | 1     | 1     | 1     |
| 1495   | 3   | 5     | 3     | 2     |
| 1496   | 0   | 3     | 1     | 1     |
| 1498   | 2   | 3     | 2     | 2     |
| 1499   | 1   | 2     | 2     | 2     |
| 1500   | 1   | 4     | 2     | 3     |
| 1501   | 0   | 1     | 1     | 1     |
| 1503   | 0   |       |       |       |
| 1504   | 0   | 3     | 1     | 1     |
| 1508   | 0   | 4     | 3     | 3     |
| 1509   | 2   | 4     | 1     | 2     |
| 1511   | 3   | 5     | 4     | 4     |
| 1512   | 1   | 3     | 3     | 3     |
| 1513   | 0   | 1     | 2     | 2     |
| 1515   | 1   | 3     | 2     | 1     |
| 1517   | 1   | 3     | 2     | 2     |
| 1518   | 1   | 4     | 2     | 2     |

| respid | Q37 | Q38_1 | Q39_1 | Q39_2 |
|--------|-----|-------|-------|-------|
| 1519   | 1   | 4     | 2     | 2     |
| 1520   | 0   | 1     | 1     | 1     |
| 1521   | 0   | 2     | 2     | 3     |
| 1522   | 0   | 2     | 1     | 1     |
| 1523   | 1   | 6     | 6     | 6     |
| 1524   | 1   | 2     | 2     | 1     |
| 1525   | 1   | 2     | 2     | 2     |
| 1526   | 1   | 4     | 2     | 2     |
| 1527   | 0   | 1     | 1     | 1     |
| 1534   | 0   | 3     | 1     | 1     |
| 1535   | 0   | 2     | 1     | 1     |
| 1536   | 1   | 3     | 3     | 1     |
| 1538   | 2   | 5     | 3     | 2     |
| 1539   | 0   | 2     | 1     | 1     |
| 1540   | 0   | 2     | 1     | 2     |
| 1541   | 0   | 1     | 1     | 1     |
| 1542   | 0   | 2     | 1     | 1     |
| 1543   | 1   | 3     | 2     | 2     |
| 1545   | 1   | 4     | 3     | 3     |
| 1546   | 0   | 3     | 3     | 2     |
| 1548   | 4   | 6     | 6     | 6     |
| 1549   | 0   |       |       |       |
| 1551   | 0   | 1     | 1     | 1     |
| 1552   | 0   | 2     | 1     | 1     |
| 1556   | 0   | 2     | 1     | 1     |
| 1557   | 0   |       |       |       |
| 1558   | 0   | 1     | 1     | 1     |
| 1561   | 0   | 1     | 1     | 1     |
| 1562   | 0   | 3     | 2     | 2     |
| 1563   | 0   | 1     | 1     | 1     |
| 1564   | 3   | 5     | 3     | 4     |
| 1565   | 0   |       |       |       |



| respid | Q37 | Q38_1 | Q39_1 | Q39_2 |
|--------|-----|-------|-------|-------|
| 1566   | 0   | 1     | 2     | 2     |
| 1567   | 1   | 3     | 1     | 1     |
| 1569   | 0   |       |       |       |
| 1570   | 0   | 1     | 2     | 1     |
| 1574   | 1   | 2     | 1     | 1     |
| 1575   | 0   | 1     | 1     | 1     |
| 1576   | 0   | 2     | 1     | 1     |
| 1577   | 1   | 3     | 1     | 1     |
| 1581   | 1   | 2     | 2     | 1     |
| 1583   | 3   | 5     | 2     | 2     |
| 1585   | 0   | 0     | 1     | 1     |
| 1586   | 0   | 2     | 1     | 1     |
| 1588   | 0   | 2     | 1     | 1     |
| 1590   | 0   | 0     | 1     | 1     |
| 1592   | 0   | 1     | 1     | 1     |
| 1594   | 1   | 4     | 2     | 1     |
| 1598   | 1   | 2     | 2     | 2     |
| 1599   | 1   | 3     | 2     | 1     |
| 1600   | 1   | 4     | 2     | 3     |
| 1602   | 0   | 1     | 1     | 1     |
| 1603   | 0   | 3     | 1     | 1     |
| 1604   | 1   | 4     | 2     | 2     |
| 1605   | 4   | 6     | 3     | 2     |
| 1606   | 0   | 4     | 1     | 1     |
| 1610   | 0   | 2     | 1     | 1     |
| 1611   | 2   | 2     | 1     | 1     |
| 1612   | 0   | 2     | 1     | 1     |
| 1613   | 2   | 4     | 3     | 3     |
| 1615   | 1   | 4     | 2     | 2     |
| 1616   | 0   | 2     | 2     | 2     |
| 1617   | 1   | 3     | 2     | 1     |
| 1618   | 1   | 4     | 1     | 1     |

| respid | Q37 | Q38_1 | Q39_1 | Q39_2 |
|--------|-----|-------|-------|-------|
| 1620   | 0   | 2     | 1     | 1     |
| 1621   | 1   | 4     | 2     | 3     |
| 1622   | 0   |       |       |       |
| 1623   | 2   | 2     | 1     | 1     |
| 1624   | 0   | 2     | 1     | 3     |
| 1625   | 0   | 2     | 1     | 1     |
| 1626   | 0   |       |       |       |
| 1627   | 0   | 2     | 2     | 1     |
| 1629   | 0   | 2     | 1     | 1     |
| 1630   | 0   | 4     | 1     | 1     |
| 1631   | 0   | 1     | 1     | 2     |
| 1634   | 1   | 2     | 2     | 2     |
| 1635   | 0   | 2     | 1     | 1     |
| 1636   | 0   |       |       |       |
| 1637   | 0   | 0     | 1     | 1     |
| 1640   | 0   | 2     | 1     | 1     |
| 1642   | 0   | 2     | 1     | 1     |
| 1643   | 2   | 4     | 2     | 3     |
| 1644   | 0   | 3     | 1     | 1     |
| 1645   | 1   | 2     | 2     | 1     |
| 1646   | 0   | 0     | 1     | 1     |
| 1647   | 0   | 1     | 1     | 2     |
| 1650   | 2   | 2     | 2     | 2     |
| 1654   | 1   | 3     | 1     | 1     |
| 1656   | 0   | 2     | 1     | 1     |
| 1657   | 3   | 3     | 4     | 5     |
| 1659   | 1   | 4     | 3     | 5     |
| 1662   | 1   | 2     | 3     | 2     |
| 1663   | 1   | 2     | 2     | 1     |
| 1664   | 0   | 4     | 2     | 1     |
| 1665   | 0   | 1     | 1     | 1     |
| 1667   | 0   | 1     | 2     | 2     |

| respid | Q37 | Q38_1 | Q39_1 | Q39_2 |
|--------|-----|-------|-------|-------|
| 1668   | 0   | 1     | 2     | 1     |
| 1670   | 0   | 2     | 1     | 1     |
| 1671   | 1   | 2     | 2     | 2     |
| 1673   | 0   | 3     | 1     | 1     |
| 1674   | 0   | 1     | 1     | 1     |
| 1676   | 1   | 3     | 1     | 1     |
| 1677   | 1   | 2     | 3     | 1     |
| 1678   | 0   | 2     | 2     | 1     |
| 1680   | 1   | 2     | 1     | 1     |
| 1681   | 1   | 2     | 1     | 1     |
| 1683   | 0   | 0     | 1     | 1     |
| 1685   | 1   | 4     | 2     | 2     |
| 1686   | 1   | 4     | 1     | 1     |
| 1690   | 0   | 1     | 2     | 2     |
| 1691   | 0   | 2     | 2     | 1     |
| 1692   | 1   | 4     | 2     | 1     |
| 1693   | 2   | 5     | 3     | 2     |
| 1695   | 1   | 3     | 2     | 2     |
| 1696   | 1   | 3     | 2     | 1     |
| 1698   | 1   | 1     | 2     | 1     |
| 1699   | 0   | 2     | 1     | 1     |
| 1701   | 0   | 3     | 3     | 4     |
| 1702   | 0   | 2     | 1     | 1     |
| 1703   | 0   |       |       |       |
| 1705   | 0   | 1     | 2     | 1     |
| 1706   | 0   | 1     | 1     | 1     |
| 1708   | 0   |       |       |       |
| 1711   | 0   | 3     | 3     | 3     |
| 1712   | 1   | 3     | 2     | 2     |
| 1713   | 0   | 2     | 1     | 1     |
| 1715   | 0   | 1     | 2     | 1     |
| 1717   | 0   | 0     | 1     | 1     |

| respid | Q37 | Q38_1 | Q39_1 | Q39_2 |
|--------|-----|-------|-------|-------|
| 1718   | 4   | 5     | 4     | 4     |
| 1719   | 0   | 1     | 1     | 1     |
| 1721   | 0   | 1     | 1     | 1     |
| 1722   | 1   | 2     | 2     | 2     |
| 1724   | 0   | 3     | 1     | 1     |
| 1725   | 0   | 0     | 1     | 1     |
| 1726   | 0   | 3     | 2     | 1     |
| 1727   | 0   | 0     | 1     | 1     |
| 1728   | 1   | 4     | 1     | 1     |
| 1731   | 1   | 2     | 2     | 3     |
| 1733   | 1   | 2     | 1     | 1     |
| 1734   | 1   | 3     | 2     | 1     |
| 1735   | 0   |       |       |       |
| 1736   | 0   | 2     | 1     | 1     |
| 1737   | 1   | 2     | 2     | 1     |
| 1738   | 1   | 3     | 2     | 2     |
| 1743   | 2   | 4     | 2     | 2     |
| 1755   | 2   | 4     | 4     | 3     |
| 1756   | 1   | 3     | 1     | 1     |
| 1757   | 0   | 1     | 2     | 1     |
| 1758   | 2   | 5     | 2     | 2     |
| 1759   | 1   | 4     | 2     | 2     |
| 1761   | 1   | 2     | 2     | 1     |
| 1762   | 0   | 1     | 2     | 1     |
| 1764   | 0   |       |       |       |
| 1767   | 1   | 3     | 2     | 3     |
| 1768   | 1   | 5     | 1     | 1     |
| 1769   | 1   | 1     | 2     | 1     |
| 1770   | 0   | 4     | 1     | 1     |
| 1771   | 2   | 3     | 2     | 2     |
| 1776   | 1   | 4     | 1     | 1     |
| 1777   | 0   | 3     | 3     | 2     |

| respid | Q37 | Q38_1 | Q39_1 | Q39_2 |
|--------|-----|-------|-------|-------|
| 1778   | 2   | 3     | 3     | 2     |
| 1779   | 1   | 4     | 1     | 1     |
| 1780   | 1   | 3     | 1     | 2     |
| 1781   | 0   |       |       |       |
| 1783   | 0   | 0     | 1     | 1     |
| 1784   | 1   | 4     | 6     | 5     |
| 1785   | 0   | 2     | 1     | 1     |
| 1788   | 1   | 4     | 2     | 3     |
| 1792   | 0   | 1     | 1     | 2     |
| 1794   | 0   | 0     | 1     | 1     |
| 1798   | 4   | 6     | 5     | 5     |
| 1799   | 1   | 3     | 2     | 1     |
| 1800   | 0   | 1     | 1     | 1     |
| 1804   | 2   | 4     | 3     | 3     |
| 1806   | 0   | 4     | 3     | 3     |
| 1807   | 1   | 1     | 1     | 1     |
| 1808   | 0   | 2     | 1     | 1     |
| 1809   | 0   | 4     | 1     | 1     |
| 1811   | 1   | 2     | 2     | 2     |
| 1812   | 1   | 4     | 1     | 1     |
| 1813   | 2   | 3     | 3     | 3     |
| 1814   | 1   | 3     | 2     | 1     |
| 1815   | 1   | 2     | 1     | 1     |
| 1817   | 0   | 1     | 2     | 2     |
| 1820   | 0   | 2     | 1     | 1     |
| 1821   | 2   | 2     | 1     | 2     |
| 1822   | 0   | 1     | 2     | 1     |
| 1823   | 2   | 3     | 1     | 1     |
| 1824   | 0   | 2     | 1     | 1     |
| 1826   | 0   |       |       |       |
| 1828   | 0   | 1     | 1     | 1     |
| 1829   | 0   | 2     | 1     | 1     |

| respid | Q37 | Q38_1 | Q39_1 | Q39_2 |
|--------|-----|-------|-------|-------|
| 1830   | 0   | 1     | 1     | 1     |
| 1831   | 0   | 1     | 1     | 1     |
| 1832   | 0   | 2     | 1     | 1     |
| 1836   | 0   | 2     | 2     | 2     |
| 1838   | 1   | 5     | 3     | 4     |
| 1839   | 1   | 4     | 3     | 4     |
| 1840   | 0   | 4     | 2     | 2     |
| 1841   | 0   | 3     | 2     | 3     |
| 1842   | 1   | 3     | 2     | 2     |
| 1843   | 0   | 2     | 3     | 3     |
| 1844   | 1   | 3     | 2     | 2     |
| 1845   | 0   | 1     | 1     | 1     |
| 1849   | 0   | 0     | 1     | 1     |
| 1850   | 2   | 4     | 3     | 2     |
| 1851   | 1   | 4     | 2     | 2     |
| 1852   | 0   |       |       |       |
| 1857   | 2   | 4     | 1     | 1     |
| 1858   | 0   | 3     | 1     | 1     |
| 1861   | 0   | 1     | 1     | 2     |
| 1862   | 0   | 1     | 1     | 1     |
| 1863   | 2   | 3     | 3     | 3     |
| 1864   | 0   | 3     | 1     | 2     |
| 1865   | 0   |       |       |       |
| 1867   | 0   | 0     | 1     | 1     |
| 1868   | 1   | 3     | 2     | 2     |
| 1869   | 0   | 1     | 5     | 5     |
| 1870   | 0   | 1     | 2     | 1     |
| 1871   | 2   | 5     | 3     | 4     |
| 1872   | 0   | 1     | 1     | 1     |
| 1873   | 1   | 3     | 2     | 2     |
| 1876   | 0   |       |       |       |
| 1877   | 0   |       |       |       |

| respid | Q37 | Q38_1 | Q39_1 | Q39_2 |
|--------|-----|-------|-------|-------|
| 1878   | 0   | 1     | 1     | 1     |
| 1879   | 1   | 4     | 2     | 1     |
| 1880   | 0   | 2     | 1     | 1     |
| 1881   | 1   | 2     | 1     | 1     |
| 1883   | 1   | 3     | 3     | 2     |
| 1886   | 0   | 2     | 1     | 1     |
| 1888   | 3   | 4     | 2     | 3     |
| 1889   | 2   | 4     | 3     | 3     |
| 1890   | 2   | 4     | 4     | 4     |
| 1891   | 0   | 3     | 1     | 1     |
| 1893   | 0   | 0     | 1     | 1     |
| 1894   | 0   | 3     | 1     | 1     |
| 1895   | 2   | 4     | 2     | 3     |
| 1896   | 1   | 4     | 2     | 2     |
| 1897   | 1   | 2     | 2     | 1     |
| 1898   | 3   | 6     | 6     | 5     |
| 1899   | 1   | 3     | 2     | 1     |
| 1900   | 0   |       |       |       |
| 1903   | 1   | 2     | 1     | 2     |
| 1906   | 0   | 1     | 2     | 1     |
| 1907   | 2   | 4     | 4     | 4     |
| 1908   | 0   | 5     | 1     | 3     |
| 1909   | 3   | 3     | 3     | 3     |
| 1910   | 0   | 2     | 1     | 1     |
| 1911   | 1   | 4     | 1     | 1     |
| 1912   | 0   |       |       |       |
| 1917   | 0   | 2     | 1     | 1     |
| 1918   | 1   | 2     | 2     | 2     |
| 1919   | 0   | 3     | 1     | 1     |
| 1922   | 0   |       |       |       |
| 1925   | 0   |       |       |       |
| 1926   | 0   | 1     | 1     | 1     |

| respid | Q37 | Q38_1 | Q39_1 | Q39_2 |
|--------|-----|-------|-------|-------|
| 1927   | 0   | 1     | 1     | 1     |
| 1928   | 0   |       |       |       |
| 1929   | 0   | 0     | 1     | 1     |
| 1934   | 0   | 4     | 2     | 1     |
| 1935   | 0   | 2     | 1     | 1     |
| 1936   | 1   | 4     | 1     | 2     |
| 1937   | 0   |       |       |       |
| 1938   | 0   |       |       |       |
| 1939   | 1   | 4     | 3     | 2     |
| 1940   | 1   | 4     | 1     | 1     |
| 1941   | 0   |       |       |       |
| 1948   | 0   |       |       |       |
| 1950   | 1   | 3     | 1     | 1     |
| 1955   | 2   | 4     | 3     | 3     |
| 1958   | 0   | 1     | 1     | 1     |
| 1960   | 0   | 1     | 1     | 1     |
| 1961   | 0   |       |       |       |
| 1962   | 0   | 4     | 1     | 1     |
| 1965   | 0   |       |       |       |
| 1966   | 0   | 2     | 1     | 1     |
| 1967   | 0   |       |       |       |
| 1968   | 1   | 1     | 2     | 2     |
| 1973   | 0   | 2     | 2     | 2     |
| 1974   | 3   | 5     | 4     | 4     |
| 1975   | 0   |       |       |       |
| 1977   | 1   | 4     | 1     | 1     |
| 1978   | 0   |       |       |       |
| 1979   | 3   | 4     | 4     | 4     |
| 1982   | 0   | 5     | 1     | 1     |
| 1983   | 0   | 1     | 1     | 1     |
| 1987   | 0   | 6     | 1     | 1     |
| 1988   | 0   | 2     | 3     | 1     |



| respid | Q37 | Q38_1 | Q39_1 | Q39_2 |
|--------|-----|-------|-------|-------|
| 1991   | 1   | 3     | 2     | 1     |
| 1992   | 0   | 1     | 1     | 2     |
| 1993   | 1   | 2     | 1     | 1     |
| 1994   | 1   | 2     | 2     | 3     |
| 1995   | 0   | 1     | 1     | 1     |
| 1996   | 0   | 2     | 2     | 2     |
| 1997   | 0   | 2     | 1     | 1     |
| 1998   | 0   | 5     | 1     | 1     |
| 1999   | 4   | 6     | 4     | 5     |
| 2000   | 1   | 2     | 3     | 2     |
| 2001   | 1   | 1     | 2     | 1     |
| 2002   | 0   | 1     | 1     | 1     |
| 2003   | 0   |       |       |       |
| 2004   | 0   | 3     | 1     | 1     |
| 2005   | 0   | 1     | 1     | 1     |
| 2007   | 0   | 2     | 2     | 1     |
| 2009   | 0   | 1     | 1     | 1     |
| 2010   | 0   |       |       |       |
| 2011   | 0   | 5     | 1     | 1     |
| 2013   | 0   | 1     | 2     | 1     |
| 2014   | 0   | 4     | 1     | 1     |
| 2017   | 1   | 2     | 2     | 2     |
| 2020   | 0   | 0     | 1     | 1     |
| 2023   | 2   | 4     | 2     | 2     |
| 2024   | 0   | 1     | 1     | 1     |
| 2029   | 0   | 2     | 1     | 1     |
| 2030   | 0   |       |       |       |
| 2031   | 3   | 5     | 3     | 3     |
| 2032   | 1   | 4     | 2     | 2     |
| 2033   | 0   |       |       |       |
| 2034   | 1   | 3     | 1     | 1     |
| 2036   | 2   | 4     | 3     | 2     |

| respid | Q37 | Q38_1 | Q39_1 | Q39_2 |
|--------|-----|-------|-------|-------|
| 2037   | 3   | 5     | 4     | 3     |
| 2038   | 0   | 1     | 1     | 1     |
| 2039   | 1   | 4     | 1     | 2     |
| 2040   | 0   |       |       |       |
| 2041   | 0   |       |       |       |
| 2042   | 0   | 0     | 1     | 1     |
| 2043   | 0   | 3     | 2     | 1     |
| 2051   | 1   | 2     | 1     | 1     |
| 2052   | 0   | 2     | 1     | 1     |
| 2053   | 0   | 0     | 1     | 1     |
| 2054   | 0   |       |       |       |
| 2055   | 0   | 4     | 1     | 1     |
| 2056   | 2   | 3     | 2     | 2     |
| 2057   | 1   | 1     | 1     | 1     |
| 2059   | 0   | 4     | 1     | 1     |
| 2063   | 0   | 1     | 1     | 1     |
| 2066   | 3   | 4     | 2     | 2     |
| 2068   | 0   | 2     | 1     | 1     |
| 2069   | 2   | 5     | 2     | 2     |
| 2070   | 0   |       |       |       |
| 2071   | 1   | 2     | 1     | 1     |
| 2073   | 0   |       |       |       |
| 2077   | 1   | 2     | 2     | 2     |
| 2079   | 0   |       |       |       |
| 2080   | 0   | 0     | 6     | 6     |
| 2081   | 1   | 5     | 5     | 5     |
| 2084   | 0   |       |       |       |
| 2085   | 0   | 2     | 1     | 1     |
| 2087   | 3   | 5     | 2     | 2     |
| 2089   | 0   | 2     | 1     | 1     |
| 2093   | 0   | 3     | 1     | 1     |
| 2094   | 1   | 5     | 2     | 2     |

| respid | Q37 | Q38_1 | Q39_1 | Q39_2 |
|--------|-----|-------|-------|-------|
| 2095   | 3   | 4     | 1     | 1     |
| 2097   | 0   | 1     | 1     | 1     |
| 2099   | 0   | 2     | 2     | 3     |
| 2100   | 1   | 2     | 2     | 2     |
| 2101   | 1   | 2     | 1     | 1     |
| 2103   | 1   | 4     | 1     | 1     |
| 2104   | 1   | 1     | 1     | 1     |
| 2106   | 0   | 5     | 1     | 1     |
| 2111   | 1   | 4     | 2     | 1     |
| 2113   | 0   | 0     | 1     | 1     |
| 2115   | 0   |       |       |       |
| 2119   | 1   | 2     | 2     | 1     |
| 2120   | 0   |       |       |       |
| 2123   | 0   |       |       |       |
| 2124   | 1   | 6     | 3     | 2     |
| 2130   | 0   |       |       |       |
| 2131   | 1   | 2     | 2     | 2     |
| 2133   | 3   | 5     | 3     | 3     |
| 2139   | 1   | 3     | 2     | 3     |
| 2141   | 0   |       |       |       |
| 2143   | 1   | 3     | 2     | 1     |
| 2144   | 0   | 0     | 1     | 1     |
| 2147   | 0   |       |       |       |
| 2151   | 0   | 2     | 1     | 1     |
| 2153   | 0   | 6     | 1     | 1     |
| 2154   | 0   | 2     | 1     | 1     |
| 2155   | 1   | 2     | 1     | 1     |
| 2159   | 0   | 1     | 2     | 1     |
| 2160   | 3   | 5     | 2     | 3     |
| 2161   | 0   | 1     | 1     | 1     |
| 2163   | 1   | 4     | 1     | 1     |
| 2164   | 0   | 2     | 2     | 1     |

| respid | Q37 | Q38_1 | Q39_1 | Q39_2 |
|--------|-----|-------|-------|-------|
| 2168   | 1   | 4     | 2     | 1     |
| 2169   | 0   | 2     | 2     | 2     |
| 2170   | 0   | 4     | 2     | 1     |
| 2171   | 1   | 4     | 1     | 3     |
| 2172   | 1   | 5     | 3     | 2     |
| 2173   | 1   | 1     | 1     | 1     |
| 2174   | 1   | 3     | 1     | 1     |
| 2175   | 2   | 5     | 3     | 4     |
| 2176   | 2   | 2     | 1     | 1     |
| 2177   | 3   | 5     | 5     | 5     |
| 2179   | 1   | 4     | 1     | 1     |
| 2181   | 0   | 2     | 1     | 1     |
| 2182   | 0   | 3     | 1     | 1     |
| 2183   | 2   | 5     | 3     | 4     |
| 2184   | 0   | 3     | 2     | 1     |
| 2185   | 0   |       |       |       |
| 2186   | 1   | 1     | 2     | 3     |
| 2187   | 1   | 2     | 1     | 1     |
| 2188   | 1   | 2     | 1     | 1     |
| 2189   | 0   |       |       |       |
| 2190   | 0   | 0     | 1     | 1     |
| 2193   | 0   | 2     | 1     | 1     |
| 2195   | 0   | 1     | 3     | 2     |
| 2198   | 0   | 2     | 2     | 1     |
| 2200   | 0   | 1     | 1     | 1     |
| 2205   | 3   | 3     | 3     | 3     |
| 2208   | 0   |       |       |       |
| 2209   | 2   | 3     | 3     | 2     |
| 2210   | 0   | 1     | 1     | 1     |
| 2211   | 1   | 2     | 2     | 1     |
| 2213   | 0   | 1     | 1     | 1     |
| 2214   | 1   | 4     | 2     | 1     |

| respid | Q37 | Q38_1 | Q39_1 | Q39_2 |
|--------|-----|-------|-------|-------|
| 2216   | 0   | 2     | 2     | 3     |
| 2220   | 0   | 2     | 1     | 1     |
| 2225   | 0   | 1     | 1     | 1     |
| 2227   | 2   | 3     | 1     | 1     |
| 2228   | 0   | 4     | 2     | 2     |
| 2229   | 0   | 1     | 1     | 1     |
| 2230   | 0   |       |       |       |
| 2236   | 0   |       |       |       |
| 2238   | 5   | 6     | 6     | 6     |
| 2239   | 0   | 4     | 3     | 3     |
| 2240   | 0   | 1     | 1     | 1     |
| 2241   | 1   | 5     | 2     | 2     |
| 2243   | 0   |       |       |       |
| 2245   | 0   | 1     | 1     | 1     |
| 2247   | 1   | 5     | 2     | 2     |
| 2248   | 0   | 2     | 1     | 1     |
| 2249   | 0   | 3     | 1     | 1     |
| 2254   | 0   | 2     | 1     | 1     |
| 2256   | 1   | 2     | 1     | 1     |
| 2259   | 0   | 0     | 2     | 1     |
| 2261   | 0   | 3     | 1     | 1     |
| 2262   | 1   | 2     | 1     | 2     |
| 2263   | 1   | 6     | 4     | 3     |
| 2264   | 0   | 4     | 2     | 1     |
| 2265   | 1   | 3     | 3     | 3     |
| 2270   | 1   | 4     | 1     | 2     |
| 2271   | 0   | 1     | 1     | 1     |
| 2272   | 0   | 1     | 1     | 1     |
| 2273   | 0   | 0     | 1     | 1     |
| 2274   | 1   | 4     | 1     | 1     |
| 2276   | 1   | 4     | 2     | 2     |
| 2277   | 1   | 2     | 1     | 1     |

| respid | Q37 | Q38_1 | Q39_1 | Q39_2 |
|--------|-----|-------|-------|-------|
| 2281   | 0   | 0     | 1     | 1     |
| 2288   | 0   | 1     | 1     | 1     |
| 2290   | 1   | 2     | 1     | 2     |
| 2294   | 1   | 3     | 2     | 2     |
| 2295   | 0   | 3     | 1     | 1     |
| 2296   | 0   | 2     | 2     | 2     |
| 2297   | 0   |       |       |       |
| 2298   | 0   | 1     | 1     | 1     |
| 2301   | 2   | 5     | 3     | 2     |
| 2302   | 2   | 3     | 2     | 2     |
| 2303   | 0   |       |       |       |
| 2305   | 0   | 6     | 1     | 1     |
| 2309   | 0   | 1     | 1     | 1     |
| 2310   | 0   | 6     | 1     | 1     |
| 2311   | 1   | 4     | 3     | 4     |
| 2313   | 4   | 6     | 3     | 4     |
| 2316   | 0   |       |       |       |
| 2317   | 0   | 1     | 1     | 1     |
| 2318   | 1   | 4     | 2     | 3     |
| 2319   | 1   | 3     | 3     | 3     |
| 2321   | 3   | 5     | 3     | 3     |
| 2324   | 1   | 2     | 2     | 1     |
| 2328   | 0   | 1     | 1     | 1     |
| 2329   | 0   |       |       |       |
| 2330   | 0   | 1     | 1     | 1     |
| 2333   | 1   | 2     | 1     | 2     |
| 2334   | 1   | 2     | 2     | 2     |
| 2338   | 0   | 0     | 1     | 1     |
| 2341   | 1   | 2     | 2     | 2     |
| 2342   | 2   | 3     | 3     | 3     |
| 2343   | 2   | 5     | 5     | 6     |
| 2346   | 0   | 3     | 1     | 1     |

| respid | Q37 | Q38_1 | Q39_1 | Q39_2 |
|--------|-----|-------|-------|-------|
| 2347   | 1   | 2     | 2     | 3     |
| 2348   | 1   | 3     | 2     | 2     |
| 2349   | 2   | 4     | 3     | 3     |
| 2350   | 0   | 0     | 1     | 1     |
| 2351   | 0   | 3     | 1     | 2     |
| 2352   | 1   | 1     | 2     | 1     |
| 2359   | 0   | 3     | 2     | 2     |
| 2362   | 0   |       |       |       |
| 2363   | 0   | 0     | 1     | 1     |
| 2365   | 1   | 2     | 2     | 1     |
| 2367   | 1   | 3     | 3     | 3     |
| 2368   | 0   | 1     | 1     | 1     |
| 2369   | 0   | 2     | 1     | 1     |
| 2372   | 0   |       |       |       |
| 2374   | 1   | 5     | 3     | 2     |
| 2376   | 0   | 0     | 1     | 1     |
| 2379   | 2   | 5     | 3     | 3     |
| 2380   | 0   | 1     | 1     | 1     |
| 2381   | 1   | 4     | 1     | 1     |
| 2382   | 2   | 3     | 3     | 1     |
| 2385   | 1   | 3     | 2     | 2     |
| 2387   | 1   | 3     | 3     | 3     |
| 2388   | 0   | 2     | 2     | 2     |
| 2389   | 0   | 2     | 1     | 1     |
| 2391   | 1   | 3     | 1     | 2     |
| 2392   | 1   | 2     | 2     | 2     |
| 2393   | 0   | 1     | 1     | 1     |
| 2394   | 3   | 4     | 2     | 4     |
| 2397   | 1   | 1     | 1     | 1     |
| 2398   | 1   | 3     | 2     | 2     |
| 2400   | 0   | 1     | 1     | 1     |
| 2402   | 1   | 1     | 2     | 1     |

| respid | Q37 | Q38_1 | Q39_1 | Q39_2 |
|--------|-----|-------|-------|-------|
| 2406   | 0   | 1     | 1     | 1     |
| 2408   | 1   | 2     | 1     | 1     |
| 2410   | 0   | 4     | 1     | 1     |
| 2411   | 1   | 6     | 4     | 3     |
| 2412   | 0   | 2     | 2     | 2     |
| 2414   | 1   | 3     | 2     | 2     |
| 2421   | 1   | 0     | 1     | 1     |
| 2423   | 1   | 4     | 2     | 2     |
| 2424   | 2   | 3     | 2     | 2     |
| 2425   | 0   | 1     | 1     | 1     |
| 2426   | 2   | 3     | 2     | 2     |
| 2429   | 5   | 5     | 6     | 6     |
| 2430   | 1   | 3     | 2     | 1     |
| 2432   | 0   | 1     | 1     | 1     |
| 2433   | 0   | 1     | 1     | 1     |
| 2434   | 1   | 2     | 1     | 1     |
| 2435   | 1   | 1     | 2     | 1     |
| 2436   | 0   | 3     | 1     | 1     |
| 2439   | 1   | 5     | 4     | 3     |
| 2440   | 0   | 1     | 1     | 1     |
| 2441   | 1   | 2     | 2     | 1     |
| 2446   | 0   | 1     | 1     | 2     |
| 2448   | 3   | 5     | 3     | 4     |
| 2449   | 0   | 3     | 1     | 1     |
| 2451   | 2   | 3     | 1     | 1     |
| 2452   | 0   | 2     | 1     | 1     |
| 2455   | 0   |       |       |       |
| 2457   | 2   | 4     | 2     | 1     |
| 2458   | 0   | 2     | 1     | 1     |
| 2459   | 0   | 1     | 1     | 1     |
| 2460   | 0   | 1     | 1     | 1     |
| 2462   | 1   | 4     | 4     | 4     |



| respid | Q37 | Q38_1 | Q39_1 | Q39_2 |
|--------|-----|-------|-------|-------|
| 2464   | 4   | 6     | 5     | 5     |
| 2465   | 1   | 5     | 2     | 2     |
| 2468   | 0   | 4     | 2     | 1     |
| 2469   | 0   |       |       |       |
| 2470   | 0   | 1     | 2     | 1     |
| 2471   | 1   | 5     | 2     | 4     |
| 2472   | 0   | 0     | 1     | 1     |
| 2474   | 1   | 4     | 3     | 1     |
| 2476   | 2   | 6     | 2     | 2     |
| 2478   | 1   | 2     | 1     | 1     |
| 2479   | 2   | 4     | 2     | 1     |
| 2480   | 0   | 2     | 1     | 1     |
| 2482   | 0   | 2     | 1     | 1     |
| 2486   | 2   | 6     | 5     | 4     |
| 2488   | 2   | 6     | 4     | 3     |
| 2489   | 0   | 2     | 1     | 1     |
| 2491   | 0   | 0     | 1     | 1     |
| 2495   | 1   | 4     | 2     | 2     |
| 2496   | 0   | 1     | 1     | 1     |
| 2498   | 1   | 4     | 2     | 2     |
| 2501   | 2   | 1     | 2     | 2     |
| 2502   | 0   | 2     | 4     | 3     |
| 2503   | 0   | 1     | 2     | 2     |
| 2504   | 0   | 1     | 2     | 1     |
| 2507   | 0   | 3     | 1     | 1     |
| 2509   | 2   | 3     | 2     | 1     |
| 2512   | 1   | 3     | 2     | 3     |
| 2514   | 0   | 2     | 1     | 1     |
| 2516   | 0   | 2     | 3     | 2     |
| 2517   | 0   | 2     | 2     | 1     |
| 2521   | 0   | 1     | 1     | 1     |
| 2522   | 0   | 0     | 1     | 1     |

| respid | Q37 | Q38_1 | Q39_1 | Q39_2 |
|--------|-----|-------|-------|-------|
| 2524   | 0   | 1     | 1     | 2     |
| 2525   | 0   | 1     | 1     | 1     |
| 2526   | 1   | 3     | 1     | 1     |
| 2527   | 1   | 1     | 1     | 3     |
| 2528   | 1   | 2     | 1     | 1     |
| 2531   | 0   |       |       |       |
| 2533   | 1   | 3     | 2     | 2     |
| 2535   | 0   | 3     | 1     | 2     |
| 2536   | 2   | 5     | 6     | 5     |
| 2539   | 0   | 1     | 1     | 1     |
| 2540   | 0   | 0     | 1     | 1     |
| 2543   | 0   | 1     | 1     | 1     |
| 2546   | 1   | 1     | 2     | 1     |
| 2547   | 1   | 2     | 2     | 2     |
| 2549   | 0   | 0     | 2     | 1     |
| 2553   | 0   | 2     | 1     | 1     |
| 2554   | 0   | 1     | 3     | 1     |
| 2555   | 0   | 4     | 1     | 1     |
| 2556   | 0   | 0     | 1     | 1     |
| 2557   | 0   | 2     | 1     | 1     |
| 2559   | 0   | 2     | 1     | 1     |
| 2560   | 3   | 5     | 2     | 2     |
| 2561   | 0   | 2     | 1     | 1     |
| 2566   | 0   | 3     | 1     | 1     |
| 2567   | 0   |       |       |       |
| 2570   | 1   | 4     | 1     | 1     |
| 2574   | 3   | 4     | 4     | 3     |
| 2578   | 0   | 1     | 1     | 1     |
| 2580   | 0   | 5     | 2     | 2     |
| 2590   | 0   | 2     | 1     | 1     |
| 2593   | 0   | 1     | 2     | 1     |
| 2594   | 2   | 4     | 4     | 4     |

| respid | Q37 | Q38_1 | Q39_1 | Q39_2 |
|--------|-----|-------|-------|-------|
| 2595   | 1   | 3     | 1     | 1     |
| 2596   | 0   | 3     | 1     | 1     |
| 2597   | 5   | 5     | 3     | 4     |
| 2598   | 0   | 3     | 2     | 1     |
| 2602   | 0   | 3     | 1     | 1     |
| 2605   | 4   | 6     | 4     | 3     |
| 2606   | 0   |       |       |       |
| 2607   | 1   | 3     | 3     | 2     |
| 2608   | 0   |       |       |       |
| 2609   | 0   | 2     | 1     | 1     |
| 2610   | 0   | 2     | 1     | 1     |
| 2614   | 0   |       |       |       |
| 2615   | 0   | 3     | 1     | 1     |
| 2616   | 1   | 1     | 1     | 2     |
| 2618   | 0   | 0     | 1     | 1     |
| 2630   | 1   | 3     | 3     | 4     |
| 2633   | 0   | 2     | 1     | 1     |
| 2637   | 0   | 2     | 2     | 2     |
| 2638   | 1   | 4     | 3     | 3     |
| 2641   | 2   | 3     | 2     | 1     |
| 2644   | 0   | 0     | 1     | 1     |
| 2645   | 0   | 1     | 1     | 1     |
| 2646   | 0   | 1     | 1     | 6     |
| 2648   | 0   | 3     | 1     | 1     |
| 2651   | 0   |       |       |       |
| 2652   | 1   | 2     | 4     | 5     |
| 2653   | 1   | 3     | 1     | 1     |
| 2656   | 0   |       |       |       |
| 2657   | 0   | 1     | 1     | 1     |
| 2658   | 0   | 4     | 2     | 1     |
| 2661   | 0   | 5     | 1     | 1     |
| 2663   | 0   | 1     | 2     | 1     |

| respid | Q37 | Q38_1 | Q39_1 | Q39_2 |
|--------|-----|-------|-------|-------|
| 2665   | 0   | 1     | 1     | 1     |
| 2670   | 0   | 0     | 1     | 1     |
| 2672   | 0   | 1     | 2     | 1     |
| 2673   | 0   |       |       |       |
| 2677   | 0   | 4     | 1     | 1     |
| 2686   | 4   | 5     | 5     | 4     |
| 2688   | 1   | 4     | 2     | 2     |
| 2689   | 0   | 2     | 2     | 2     |
| 2691   | 0   | 1     | 1     | 1     |
| 2695   | 3   | 6     | 4     | 4     |
| 2696   | 1   | 3     | 2     | 1     |
| 2697   | 0   |       |       |       |
| 2698   | 0   |       |       |       |
| 2703   | 1   | 2     | 1     | 1     |
| 2704   | 0   | 0     | 1     | 1     |
| 2706   | 0   | 3     | 3     | 4     |
| 2707   | 1   | 2     | 1     | 1     |
| 2710   | 0   | 0     | 1     | 1     |
| 2711   | 1   | 2     | 1     | 1     |
| 2712   | 0   | 2     | 1     | 1     |
| 2713   | 0   |       |       |       |
| 2721   | 0   |       |       |       |
| 2730   | 0   | 0     | 1     | 1     |
| 2731   | 0   | 2     | 2     | 2     |
| 2732   | 0   | 1     | 1     | 1     |
| 2733   | 2   | 1     | 2     | 3     |
| 2735   | 0   | 1     | 1     | 1     |
| 2736   | 1   | 5     | 6     | 6     |
| 2740   | 1   | 3     | 1     | 1     |
| 2741   | 0   | 1     | 2     | 1     |
| 2742   | 1   | 3     | 1     | 1     |
| 2743   | 0   | 1     | 1     | 2     |

| respid | Q37 | Q38_1 | Q39_1 | Q39_2 |
|--------|-----|-------|-------|-------|
| 2744   | 0   | 5     | 1     | 1     |
| 2745   | 1   | 4     | 3     | 2     |
| 2749   | 1   | 2     | 1     | 1     |
| 2751   | 2   | 2     | 2     | 1     |
| 2754   | 1   | 6     | 1     | 1     |
| 2755   | 1   | 4     | 3     | 2     |
| 2757   | 0   | 0     | 1     | 1     |
| 2758   | 1   | 5     | 1     | 1     |
| 2759   | 1   | 5     | 1     | 3     |
| 2761   | 0   | 0     | 1     | 1     |
| 2762   | 2   | 4     | 2     | 1     |
| 2763   | 0   | 1     | 1     | 1     |
| 2764   | 4   | 6     | 6     | 5     |
| 2765   | 1   | 5     | 2     | 1     |
| 2766   | 0   | 2     | 1     | 1     |
| 2767   | 1   | 4     | 2     | 2     |
| 2769   | 1   | 4     | 3     | 2     |
| 2770   | 3   | 4     | 1     | 1     |
| 2771   | 1   | 3     | 2     | 3     |
| 2774   | 1   | 2     | 2     | 2     |
| 2777   | 2   | 4     | 3     | 4     |
| 2778   | 0   | 2     | 1     | 2     |
| 2781   | 1   | 3     | 2     | 2     |
| 2782   | 1   | 3     | 2     | 2     |
| 2784   | 3   | 6     | 2     | 2     |
| 2785   | 2   | 4     | 3     | 3     |
| 2786   | 1   | 1     | 2     | 1     |
| 2787   | 0   | 0     | 1     | 1     |
| 2789   | 2   | 3     | 3     | 4     |
| 2790   | 1   | 3     | 2     | 2     |
| 2791   | 2   | 3     | 1     | 1     |
| 2793   | 3   | 6     | 3     | 4     |

| respid | Q37 | Q38_1 | Q39_1 | Q39_2 |
|--------|-----|-------|-------|-------|
| 2797   | 1   | 4     | 3     | 1     |
| 2798   | 0   | 1     | 2     | 1     |
| 2799   | 2   | 4     | 1     | 3     |
| 2801   | 1   | 4     | 2     | 1     |
| 2802   | 2   | 5     | 5     | 5     |
| 2803   | 1   | 2     | 2     | 1     |
| 2804   | 2   | 3     | 3     | 3     |
| 2807   | 0   | 1     | 1     | 1     |
| 2809   | 0   | 2     | 2     | 2     |
| 2810   | 1   | 4     | 2     | 2     |
| 2812   | 1   | 1     | 2     | 1     |
| 2814   | 0   | 1     | 1     | 1     |
| 2815   | 1   | 3     | 2     | 1     |
| 2816   | 0   | 4     | 1     | 1     |
| 2817   | 0   | 2     | 1     | 2     |
| 2819   | 1   | 4     | 2     | 2     |
| 2820   | 0   | 2     | 1     | 1     |
| 2821   | 1   | 5     | 4     | 2     |
| 2822   | 2   | 5     | 4     | 3     |
| 2823   | 2   | 5     | 1     | 1     |
| 2824   | 1   | 3     | 1     | 1     |
| 2825   | 0   | 2     | 1     | 1     |
| 2826   | 0   | 4     | 1     | 1     |
| 2827   | 1   | 1     | 2     | 1     |
| 2828   | 0   | 4     | 1     | 1     |
| 2829   | 0   | 3     | 3     | 3     |
| 2830   | 2   | 4     | 2     | 2     |
| 2831   | 0   | 1     | 1     | 2     |
| 2832   | 3   | 6     | 3     | 3     |
| 2833   | 0   | 0     | 1     | 1     |
| 2834   | 1   | 2     | 1     | 1     |
| 2835   | 2   | 3     | 5     | 4     |

| respid | Q37 | Q38_1 | Q39_1 | Q39_2 |
|--------|-----|-------|-------|-------|
| 2836   | 1   | 5     | 1     | 1     |
| 2837   | 1   | 1     | 2     | 2     |
| 2838   | 2   | 4     | 3     | 1     |
| 2844   | 3   | 5     | 4     | 4     |
| 2845   | 0   | 1     | 1     | 1     |
| 2847   | 5   | 6     | 6     | 6     |
| 2848   | 0   | 1     | 1     | 1     |
| 2849   | 2   | 4     | 2     | 1     |
| 2851   | 0   | 2     | 2     | 1     |
| 2852   | 1   | 4     | 2     | 2     |
| 2853   | 1   | 3     | 3     | 4     |
| 2854   | 0   | 0     | 1     | 1     |
| 2856   | 0   | 1     | 1     | 1     |
| 2857   | 1   | 3     | 3     | 3     |
| 2858   | 1   | 4     | 2     | 2     |
| 2859   | 2   | 4     | 2     | 2     |
| 2860   | 1   | 2     | 2     | 1     |
| 2861   | 2   | 4     | 3     | 3     |
| 2863   | 0   | 3     | 1     | 1     |
| 2864   | 0   | 2     | 2     | 1     |
| 2866   | 2   | 2     | 3     | 1     |
| 2872   | 0   | 2     | 1     | 2     |
| 2875   | 0   | 2     | 1     | 1     |
| 2879   | 0   |       |       |       |
| 2881   | 1   | 4     | 2     | 1     |
| 2882   | 0   | 0     | 1     | 1     |
| 2883   | 0   | 1     | 1     | 1     |
| 2884   | 2   | 4     | 2     | 3     |
| 2885   | 0   | 1     | 1     | 1     |
| 2887   | 0   | 2     | 1     | 1     |
| 2888   | 0   | 1     | 2     | 1     |
| 2890   | 0   | 1     | 2     | 1     |

| respid | Q37 | Q38_1 | Q39_1 | Q39_2 |
|--------|-----|-------|-------|-------|
| 2891   | 0   | 2     | 1     | 2     |
| 2892   | 0   |       |       |       |
| 2895   | 0   | 1     | 1     | 1     |
| 2899   | 1   | 2     | 2     | 1     |
| 2900   | 0   | 1     | 1     | 1     |
| 2902   | 4   | 6     | 5     | 6     |
| 2903   | 0   |       |       |       |
| 2904   | 0   | 0     | 1     | 1     |
| 2906   | 1   | 3     | 2     | 2     |
| 2908   | 0   | 3     | 1     | 1     |
| 2910   | 0   | 3     | 1     | 1     |
| 2917   | 3   | 6     | 5     | 5     |
| 2918   | 1   | 1     | 2     | 2     |
| 2919   | 0   | 1     | 1     | 1     |
| 2920   | 0   | 0     | 1     | 1     |
| 2921   | 2   | 4     | 4     | 5     |
| 2922   | 0   | 0     | 1     | 1     |
| 2923   | 0   |       |       |       |
| 2924   | 2   | 3     | 2     | 3     |
| 2926   | 2   | 3     | 1     | 1     |
| 2928   | 0   | 1     | 2     | 1     |
| 2930   | 0   |       |       |       |
| 2931   | 2   | 5     | 3     | 3     |
| 2933   | 0   | 0     | 1     | 1     |
| 2935   | 0   | 4     | 1     | 1     |
| 2936   | 0   |       |       |       |
| 2937   | 0   | 3     | 1     | 1     |
| 2938   | 0   | 2     | 1     | 1     |
| 2944   | 0   | 2     | 1     | 1     |
| 2945   | 1   | 4     | 2     | 1     |
| 2947   | 1   | 2     | 1     | 1     |
| 2949   | 0   | 1     | 1     | 1     |



| respid | Q37 | Q38_1 | Q39_1 | Q39_2 |
|--------|-----|-------|-------|-------|
| 2951   | 2   | 4     | 4     | 4     |
| 2952   | 1   | 2     | 2     | 1     |
| 2953   | 0   |       |       |       |
| 2955   | 0   | 1     | 1     | 1     |
| 2957   | 0   | 0     | 1     | 1     |
| 2958   | 0   | 1     | 1     | 1     |
| 2960   | 2   | 3     | 3     | 3     |
| 2963   | 0   | 1     | 1     | 1     |
| 2964   | 0   | 1     | 1     | 1     |
| 2967   | 0   |       |       |       |
| 2968   | 0   | 1     | 1     | 1     |
| 2971   | 2   | 4     | 3     | 4     |
| 2974   | 0   | 6     | 1     | 1     |
| 2975   | 0   | 1     | 1     | 1     |
| 2982   | 0   |       |       |       |
| 2983   | 0   |       |       |       |
| 2985   | 0   | 1     | 1     | 1     |
| 2986   | 1   | 4     | 5     | 4     |
| 2987   | 1   | 2     | 2     | 2     |
| 2988   | 1   | 4     | 2     | 2     |
| 2993   | 1   | 3     | 1     | 1     |
| 2996   | 0   | 1     | 1     | 1     |
| 2997   | 3   | 3     | 1     | 1     |
| 2998   | 0   | 2     | 1     | 1     |
| 3004   | 0   | 1     | 2     | 2     |
| 3007   | 1   | 2     | 3     | 2     |
| 3011   | 2   | 1     | 3     | 2     |
| 3012   | 0   | 2     | 2     | 1     |
| 3013   | 0   | 3     | 2     | 2     |
| 3014   | 0   |       |       |       |
| 3015   | 0   | 0     | 2     | 2     |
| 3016   | 0   |       |       |       |

| respid | Q37 | Q38_1 | Q39_1 | Q39_2 |
|--------|-----|-------|-------|-------|
| 3017   | 0   | 0     | 1     | 1     |
| 3020   | 1   | 3     | 3     | 3     |
| 3022   | 0   | 1     | 1     | 1     |
| 3023   | 0   | 0     | 1     | 1     |
| 3026   | 2   | 3     | 5     | 2     |
| 3038   | 0   | 3     | 2     | 3     |
| 3039   | 1   | 3     | 3     | 1     |
| 3040   | 1   | 3     | 1     | 2     |
| 3041   | 0   |       |       |       |
| 3042   | 1   | 2     | 2     | 2     |
| 3044   | 0   | 1     | 2     | 2     |
| 3050   | 0   | 6     | 2     | 1     |
| 3052   | 0   | 2     | 1     | 1     |
| 3056   | 2   | 4     | 4     | 5     |
| 3059   | 0   | 2     | 1     | 1     |
| 3060   | 2   | 2     | 2     | 1     |
| 3063   | 1   | 4     | 3     | 3     |
| 3065   | 0   | 1     | 1     | 1     |
| 3067   | 2   | 4     | 1     | 1     |
| 3068   | 0   |       |       |       |
| 3072   | 0   | 1     | 3     | 3     |
| 3074   | 1   | 3     | 2     | 2     |
| 3075   | 1   | 4     | 2     | 1     |
| 3076   | 2   | 2     | 2     | 2     |
| 3079   | 0   | 1     | 2     | 2     |
| 3082   | 1   | 3     | 4     | 3     |
| 3083   | 0   | 1     | 1     | 1     |
| 3084   | 0   | 0     | 1     | 1     |
| 3085   | 0   | 2     | 1     | 1     |
| 3090   | 0   | 1     | 1     | 1     |
| 3091   | 2   | 4     | 2     | 1     |
| 3092   | 1   | 2     | 1     | 1     |

| respid | Q37 | Q38_1 | Q39_1 | Q39_2 |
|--------|-----|-------|-------|-------|
| 3095   | 0   | 1     | 1     | 1     |
| 3096   | 4   | 5     | 4     | 5     |
| 3097   | 1   | 4     | 2     | 1     |
| 3099   | 1   | 0     | 5     | 5     |
| 3101   | 2   | 4     | 3     | 3     |
| 3103   | 0   | 3     | 1     | 1     |
| 3104   | 0   | 3     | 1     | 1     |
| 3105   | 0   |       |       |       |
| 3107   | 0   | 0     | 1     | 1     |
| 3108   | 2   | 5     | 3     | 1     |
| 3109   | 0   | 1     | 2     | 1     |
| 3116   | 0   | 5     | 1     | 1     |
| 3117   | 1   | 4     | 2     | 1     |
| 3119   | 0   | 3     | 1     | 1     |
| 3120   | 0   | 2     | 1     | 1     |
| 3130   | 1   | 2     | 2     | 1     |
| 3131   | 2   | 6     | 2     | 3     |
| 3133   | 0   | 1     | 1     | 1     |
| 3134   | 2   | 4     | 3     | 3     |
| 3135   | 0   | 1     | 2     | 1     |
| 3145   | 2   | 4     | 3     | 1     |
| 3147   | 0   | 0     | 1     | 1     |
| 3152   | 1   | 2     | 2     | 2     |
| 3155   | 4   | 6     | 5     | 3     |
| 3156   | 0   |       |       |       |
| 3157   | 2   | 3     | 2     | 3     |
| 3166   | 0   | 1     | 2     | 2     |
| 3169   | 0   | 3     | 3     | 4     |
| 3179   | 0   | 6     | 1     | 1     |
| 3181   | 1   | 1     | 2     | 1     |
| 3185   | 0   |       |       |       |
| 3190   | 0   | 3     | 2     | 1     |

| respid | Q37 | Q38_1 | Q39_1 | Q39_2 |
|--------|-----|-------|-------|-------|
| 3191   | 0   |       |       |       |
| 3192   | 0   | 1     | 1     | 1     |
| 3193   | 0   | 1     | 1     | 1     |
| 3195   | 0   | 2     | 1     | 1     |
| 3202   | 1   | 2     | 2     | 2     |
| 3204   | 0   | 2     | 2     | 1     |
| 3208   | 0   | 1     | 1     | 1     |
| 3212   | 1   | 2     | 1     | 2     |
| 3218   | 0   | 0     | 1     | 1     |
| 3219   | 1   | 2     | 2     | 2     |
| 3220   | 1   | 3     | 3     | 3     |
| 3221   | 2   | 4     | 3     | 3     |
| 3223   | 0   | 0     | 1     | 1     |
| 3231   | 1   | 1     | 2     | 2     |
| 3232   | 3   | 3     | 4     | 3     |
| 3234   | 1   | 2     | 2     | 2     |
| 3235   | 0   | 0     | 1     | 1     |
| 3237   | 0   | 0     | 1     | 1     |
| 3238   | 0   | 1     | 1     | 1     |
| 3240   | 0   | 1     | 1     | 1     |
| 3241   | 1   | 1     | 2     | 1     |
| 3243   | 1   | 5     | 2     | 2     |
| 3244   | 1   | 3     | 2     | 1     |
| 3247   | 0   | 0     | 5     | 6     |
| 3250   | 0   | 2     | 1     | 1     |
| 3251   | 3   | 5     | 3     | 2     |
| 3255   | 0   | 1     | 6     | 6     |
| 3256   | 0   | 0     | 1     | 1     |
| 3257   | 0   | 2     | 1     | 1     |
| 3258   | 0   |       |       |       |
| 3259   | 2   | 4     | 2     | 3     |
| 3260   | 0   | 1     | 1     | 1     |

| respid | Q37 | Q38_1 | Q39_1 | Q39_2 |
|--------|-----|-------|-------|-------|
| 3261   | 0   |       |       |       |
| 3262   | 2   | 4     | 2     | 2     |
| 3264   | 2   | 3     | 3     | 2     |
| 3265   | 0   | 1     | 1     | 1     |
| 3267   | 0   | 2     | 1     | 1     |
| 3268   | 0   | 3     | 1     | 1     |
| 3270   | 0   | 2     | 1     | 1     |
| 3271   | 0   | 1     | 1     | 1     |
| 3274   | 0   |       |       |       |
| 3276   | 0   | 1     | 1     | 1     |
| 3277   | 0   | 2     | 1     | 1     |
| 3279   | 0   | 1     | 2     | 1     |
| 3281   | 0   |       |       |       |
| 3283   | 2   | 5     | 2     | 3     |
| 3285   | 0   | 3     | 3     | 3     |
| 3286   | 1   | 4     | 2     | 3     |
| 3287   | 0   | 1     | 1     | 1     |
| 3289   | 0   | 2     | 2     | 1     |
| 3290   | 0   | 3     | 1     | 1     |
| 3291   | 0   | 1     | 1     | 1     |
| 3292   | 3   | 5     | 4     | 4     |
| 3293   | 2   | 5     | 2     | 3     |
| 3294   | 1   | 2     | 2     | 2     |
| 3296   | 1   | 3     | 1     | 2     |
| 3306   | 1   | 2     | 1     | 1     |
| 3307   | 3   | 5     | 5     | 4     |
| 3308   | 1   | 1     | 3     | 2     |
| 3312   | 0   | 0     | 1     | 1     |
| 3313   | 0   | 3     | 3     | 1     |
| 3316   | 0   | 6     | 1     | 1     |
| 3317   | 2   | 5     | 5     | 3     |
| 3320   | 0   | 3     | 3     | 2     |

| respid | Q37 | Q38_1 | Q39_1 | Q39_2 |
|--------|-----|-------|-------|-------|
| 3321   | 0   | 1     | 1     | 2     |
| 3322   | 0   | 2     | 1     | 1     |
| 3323   | 0   | 0     | 1     | 1     |
| 3325   | 0   |       |       |       |
| 3332   | 0   | 2     | 1     | 1     |
| 3334   | 0   | 3     | 1     | 1     |
| 3335   | 0   | 4     | 3     | 1     |
| 3341   | 0   | 2     | 1     | 1     |
| 3345   | 0   | 3     | 2     | 2     |
| 3346   | 1   | 1     | 2     | 1     |
| 3349   | 0   | 2     | 2     | 2     |
| 3351   | 0   | 1     | 1     | 1     |
| 3353   | 1   | 2     | 1     | 1     |
| 3354   | 1   | 3     | 2     | 3     |
| 3356   | 0   | 2     | 1     | 1     |
| 3357   | 1   | 3     | 1     | 1     |
| 3360   | 0   | 2     | 2     | 1     |
| 3361   | 1   | 1     | 1     | 2     |
| 3362   | 0   | 1     | 1     | 2     |
| 3363   | 0   |       |       |       |
| 3364   | 1   | 3     | 4     | 5     |
| 3368   | 1   | 2     | 1     | 1     |
| 3370   | 0   | 1     | 2     | 1     |
| 3371   | 0   | 2     | 1     | 1     |
| 3379   | 1   | 1     | 1     | 1     |
| 3380   | 0   | 2     | 2     | 2     |
| 3382   | 1   | 3     | 1     | 1     |
| 3384   | 0   | 3     | 2     | 2     |
| 3385   | 2   | 3     | 2     | 2     |
| 3388   | 0   | 1     | 1     | 1     |
| 3392   | 0   | 2     | 2     | 2     |
| 3393   | 0   | 0     | 1     | 1     |

| respid | Q37 | Q38_1 | Q39_1 | Q39_2 |
|--------|-----|-------|-------|-------|
| 3394   | 2   | 3     | 2     | 2     |
| 3395   | 0   | 5     | 1     | 1     |
| 3396   | 0   | 3     | 3     | 3     |
| 3397   | 0   | 3     | 3     | 3     |
| 3398   | 1   | 2     | 2     | 1     |
| 3399   | 2   | 3     | 3     | 3     |
| 3400   | 1   | 2     | 1     | 1     |
| 3401   | 3   | 3     | 4     | 5     |
| 3402   | 3   | 5     | 3     | 2     |
| 3403   | 1   | 2     | 3     | 2     |
| 3405   | 0   | 3     | 1     | 2     |
| 3407   | 1   | 4     | 2     | 2     |
| 3410   | 0   | 1     | 1     | 1     |
| 3411   | 1   | 2     | 1     | 1     |
| 3413   | 0   |       |       |       |
| 3414   | 1   | 1     | 1     | 1     |
| 3420   | 0   | 0     | 1     | 1     |
| 3421   | 2   | 5     | 5     | 4     |
| 3425   | 0   | 2     | 1     | 1     |
| 3426   | 1   | 4     | 3     | 2     |
| 3429   | 2   | 3     | 2     | 2     |
| 3430   | 2   | 4     | 5     | 5     |
| 3433   | 0   | 0     | 1     | 1     |
| 3434   | 3   | 5     | 3     | 4     |
| 3437   | 0   | 1     | 1     | 1     |
| 3439   | 1   | 4     | 3     | 1     |
| 3441   | 1   | 3     | 2     | 3     |
| 3442   | 1   | 4     | 2     | 1     |
| 3444   | 1   | 1     | 1     | 1     |
| 3445   | 0   | 3     | 1     | 2     |
| 3450   | 2   | 4     | 2     | 3     |
| 3452   | 2   | 3     | 3     | 1     |

| respid | Q37 | Q38_1 | Q39_1 | Q39_2 |
|--------|-----|-------|-------|-------|
| 3456   | 1   | 2     | 2     | 2     |
| 3459   | 0   |       |       |       |
| 3460   | 0   | 3     | 2     | 1     |
| 3461   | 0   | 1     | 1     | 1     |
| 3466   | 1   | 4     | 3     | 3     |
| 3471   | 2   | 4     | 1     | 1     |
| 3473   | 0   | 0     | 2     | 1     |
| 3475   | 3   | 5     | 4     | 3     |
| 3476   | 0   | 1     | 2     | 1     |
| 3477   | 1   | 2     | 2     | 2     |
| 3478   | 0   |       |       |       |
| 3479   | 0   | 1     | 1     | 1     |
| 3482   | 2   | 3     | 3     | 3     |
| 3483   | 0   | 3     | 1     | 1     |
| 3485   | 1   | 3     | 2     | 2     |
| 3489   | 0   |       |       |       |
| 3490   | 2   | 3     | 1     | 2     |
| 3491   | 2   | 4     | 4     | 4     |
| 3494   | 1   | 2     | 2     | 1     |
| 3495   | 1   | 3     | 2     | 1     |
| 3501   | 0   | 3     | 1     | 1     |
| 3506   | 1   | 2     | 1     | 1     |
| 3507   | 0   | 1     | 1     | 1     |
| 3517   | 1   | 2     | 2     | 2     |
| 3520   | 1   | 3     | 2     | 1     |
| 3521   | 0   | 2     | 1     | 1     |
| 3522   | 0   | 2     | 1     | 1     |
| 3524   | 1   | 3     | 2     | 3     |
| 3527   | 0   | 1     | 1     | 1     |
| 3528   | 0   | 0     | 1     | 1     |
| 3529   | 0   | 2     | 1     | 1     |
| 3536   | 0   | 1     | 1     | 1     |



| respid | Q37 | Q38_1 | Q39_1 | Q39_2 |
|--------|-----|-------|-------|-------|
| 3537   | 0   | 1     | 1     | 1     |
| 3538   | 1   | 2     | 1     | 2     |
| 3540   | 1   | 2     | 2     | 4     |
| 3545   | 0   | 2     | 1     | 1     |
| 3547   | 2   | 4     | 2     | 2     |
| 3554   | 1   | 5     | 2     | 1     |
| 3556   | 0   | 1     | 1     | 1     |
| 3557   | 0   | 3     | 1     | 1     |
| 3559   | 1   | 3     | 3     | 3     |
| 3560   | 2   | 4     | 3     | 1     |
| 3562   | 1   | 1     | 1     | 1     |
| 3564   | 2   | 4     | 4     | 3     |
| 3565   | 3   | 6     | 3     | 4     |
| 3568   | 2   | 4     | 3     | 4     |
| 3572   | 0   |       |       |       |
| 3578   | 0   |       |       |       |
| 3581   | 0   | 1     | 1     | 1     |
| 3583   | 1   | 2     | 2     | 1     |
| 3588   | 0   | 1     | 1     | 1     |
| 3591   | 0   | 2     | 1     | 1     |
| 3594   | 0   | 1     | 1     | 1     |
| 3595   | 1   | 4     | 2     | 2     |
| 3596   | 0   | 1     | 1     | 1     |
| 3597   | 3   | 4     | 1     | 1     |
| 3598   | 0   |       |       |       |
| 3600   | 0   | 2     | 2     | 1     |
| 3602   | 0   | 0     | 2     | 1     |
| 3604   | 0   | 0     | 1     | 1     |
| 3605   | 1   | 2     | 2     | 2     |
| 3606   | 0   | 1     | 1     | 1     |
| 3607   | 0   |       |       |       |
| 3610   | 0   | 0     | 1     | 1     |

| respid | Q37 | Q38_1 | Q39_1 | Q39_2 |
|--------|-----|-------|-------|-------|
| 3611   | 0   | 0     | 1     | 1     |
| 3612   | 0   | 2     | 3     | 1     |
| 3614   | 1   | 1     | 1     | 1     |
| 3616   | 1   | 1     | 1     | 1     |
| 3617   | 1   | 3     | 2     | 1     |
| 3618   | 0   |       |       |       |
| 3619   | 3   | 4     | 3     | 3     |
| 3621   | 2   | 6     | 2     | 2     |
| 3622   | 1   | 5     | 1     | 2     |
| 3624   | 1   | 1     | 2     | 1     |
| 3626   | 0   | 1     | 1     | 1     |
| 3629   | 0   | 2     | 1     | 1     |
| 3631   | 0   | 1     | 1     | 1     |
| 3632   | 0   | 2     | 1     | 1     |
| 3638   | 0   | 2     | 2     | 1     |
| 3640   | 1   | 5     | 1     | 1     |
| 3641   | 1   | 4     | 3     | 1     |
| 3645   | 3   | 5     | 4     | 4     |
| 3650   | 0   |       |       |       |
| 3653   | 1   | 4     | 2     | 2     |
| 3655   | 2   | 4     | 3     | 4     |
| 3657   | 1   | 5     | 2     | 1     |
| 3658   | 0   | 2     | 2     | 2     |
| 3659   | 0   | 1     | 1     | 1     |
| 3664   | 3   | 2     | 5     | 5     |
| 3665   | 1   | 1     | 1     | 1     |
| 3667   | 0   | 0     | 1     | 1     |
| 3668   | 2   | 3     | 3     | 4     |
| 3675   | 0   |       |       |       |
| 3678   | 0   |       |       |       |
| 3680   | 0   |       |       |       |
| 3684   | 2   | 4     | 2     | 2     |

| respid | Q37 | Q38_1 | Q39_1 | Q39_2 |
|--------|-----|-------|-------|-------|
| 3685   | 0   | 3     | 4     | 4     |
| 3687   | 3   | 2     | 2     | 1     |
| 3689   | 3   | 5     | 4     | 5     |
| 3690   | 0   | 5     | 1     | 1     |
| 3693   | 0   |       |       |       |
| 3694   | 0   | 0     | 1     | 1     |
| 3695   | 0   |       |       |       |
| 3700   | 1   | 1     | 1     | 1     |
| 3701   | 1   | 3     | 2     | 2     |
| 3703   | 0   | 2     | 3     | 3     |
| 3704   | 2   | 5     | 4     | 5     |
| 3705   | 0   |       |       |       |
| 3709   | 0   | 0     | 1     | 1     |
| 3710   | 2   | 5     | 3     | 3     |
| 3722   | 0   | 0     | 1     | 1     |
| 3725   | 0   | 1     | 1     | 1     |
| 3726   | 0   | 0     | 1     | 1     |
| 3727   | 0   | 6     | 2     | 1     |
| 3728   | 1   | 4     | 2     | 2     |
| 3729   | 0   | 1     | 1     | 1     |
| 3731   | 0   |       |       |       |
| 3738   | 0   | 6     | 1     | 1     |
| 3739   | 0   | 2     | 1     | 1     |
| 3740   | 0   | 1     | 1     | 1     |
| 3749   | 1   | 3     | 2     | 2     |
| 3758   | 1   | 5     | 2     | 4     |
| 3762   | 0   | 1     | 1     | 1     |
| 3765   | 2   | 1     | 2     | 2     |
| 3770   | 0   | 1     | 1     | 1     |
| 3771   | 0   |       |       |       |
| 3778   | 1   | 4     | 1     | 1     |
| 3779   | 0   | 1     | 2     | 2     |

| respid | Q37 | Q38_1 | Q39_1 | Q39_2 |
|--------|-----|-------|-------|-------|
| 3780   | 1   | 3     | 2     | 1     |
| 3782   | 2   | 1     | 2     | 2     |
| 3784   | 0   | 5     | 3     | 2     |
| 3787   | 1   | 3     | 1     | 1     |
| 3790   | 0   | 3     | 3     | 5     |
| 3791   | 0   | 1     | 1     | 1     |
| 3793   | 3   | 6     | 5     | 5     |
| 3795   | 0   | 1     | 1     | 1     |
| 3799   | 0   |       |       |       |
| 3801   | 2   | 3     | 2     | 3     |
| 3804   | 2   | 4     | 1     | 1     |
| 3809   | 0   | 4     | 2     | 1     |
| 3810   | 1   | 4     | 1     | 1     |
| 3813   | 0   | 6     | 2     | 2     |
| 3816   | 1   | 2     | 1     | 1     |
| 3820   | 1   | 3     | 1     | 1     |
| 3821   | 0   | 1     | 1     | 2     |
| 3823   | 1   | 4     | 3     | 3     |
| 3828   | 0   | 0     | 1     | 1     |
| 3829   | 0   | 2     | 2     | 1     |
| 3832   | 0   | 1     | 1     | 1     |
| 3835   | 0   | 2     | 1     | 1     |
| 3837   | 1   | 1     | 2     | 2     |
| 3838   | 1   | 2     | 3     | 2     |
| 3839   | 4   | 5     | 4     | 5     |
| 3840   | 0   |       |       |       |
| 3842   | 0   |       |       |       |
| 3843   | 0   | 1     | 1     | 1     |
| 3844   | 1   | 1     | 1     | 2     |
| 3850   | 0   | 3     | 1     | 1     |
| 3851   | 0   |       |       |       |
| 3856   | 2   | 3     | 3     | 3     |

| respid | Q37 | Q38_1 | Q39_1 | Q39_2 |
|--------|-----|-------|-------|-------|
| 3859   | 2   | 5     | 2     | 3     |
| 3860   | 0   | 1     | 1     | 1     |
| 3863   | 1   | 1     | 1     | 1     |
| 3866   | 0   | 3     | 1     | 1     |
| 3867   | 0   | 0     | 1     | 1     |
| 3870   | 0   | 2     | 1     | 1     |
| 3873   | 3   | 5     | 3     | 2     |
| 3875   | 0   | 1     | 2     | 3     |
| 3878   | 1   | 3     | 1     | 1     |
| 3881   | 0   | 2     | 1     | 2     |
| 3883   | 1   | 4     | 3     | 2     |
| 3884   | 0   | 2     | 1     | 5     |
| 3885   | 4   | 5     | 4     | 3     |
| 3886   | 1   | 4     | 2     | 2     |
| 3887   | 0   | 1     | 1     | 1     |
| 3888   | 0   |       |       |       |
| 3889   | 3   | 5     | 4     | 5     |
| 3890   | 0   | 3     | 2     | 2     |
| 3896   | 1   | 4     | 2     | 1     |
| 3902   | 3   | 5     | 5     | 5     |
| 3909   | 0   | 2     | 1     | 1     |
| 3912   | 1   | 4     | 2     | 1     |
| 3922   | 1   | 3     | 2     | 2     |
| 3928   | 0   | 1     | 2     | 1     |
| 3930   | 0   | 2     | 1     | 1     |
| 3931   | 0   | 2     | 1     | 3     |
| 3933   | 1   | 6     | 2     | 1     |
| 3935   | 0   | 1     | 1     | 1     |
| 3937   | 0   | 3     | 2     | 2     |
| 3939   | 1   | 5     | 3     | 3     |
| 3942   | 0   | 3     | 1     | 1     |
| 3943   | 1   | 5     | 2     | 2     |

| respid | Q37 | Q38_1 | Q39_1 | Q39_2 |
|--------|-----|-------|-------|-------|
| 3944   | 0   |       |       |       |
| 3945   | 1   | 1     | 1     | 1     |
| 3947   | 1   | 4     | 2     | 1     |
| 3948   | 2   | 4     | 3     | 2     |
| 3951   | 0   | 4     | 2     | 2     |
| 3959   | 1   | 1     | 2     | 1     |
| 3969   | 4   | 6     | 6     | 6     |
| 3973   | 0   | 2     | 1     | 1     |
| 3975   | 3   | 3     | 3     | 3     |
| 3976   | 0   | 1     | 1     | 1     |
| 3977   | 1   | 3     | 2     | 2     |
| 3978   | 1   | 2     | 1     | 1     |
| 3994   | 1   | 2     | 3     | 2     |
| 3995   | 4   | 4     | 2     | 1     |
| 3997   | 0   | 3     | 1     | 2     |
| 3998   | 0   | 1     | 1     | 1     |
| 3999   | 2   | 3     | 2     | 2     |
| 4002   | 1   | 3     | 2     | 2     |
| 4004   | 1   | 4     | 3     | 2     |
| 4005   | 0   |       |       |       |
| 4006   | 1   | 4     | 2     | 3     |
| 4008   | 0   | 1     | 2     | 1     |
| 4010   | 0   | 1     | 2     | 1     |
| 4011   | 2   | 3     | 2     | 3     |
| 4013   | 0   | 2     | 3     | 1     |
| 4014   | 0   | 2     | 1     | 1     |
| 4016   | 0   | 2     | 1     | 1     |
| 4017   | 0   | 2     | 1     | 1     |
| 4019   | 0   | 1     | 1     | 1     |
| 4021   | 0   |       |       |       |
| 4023   | 1   | 2     | 2     | 1     |
| 4024   | 0   | 0     | 1     | 1     |

| respid | Q37 | Q38_1 | Q39_1 | Q39_2 |
|--------|-----|-------|-------|-------|
| 4025   | 1   | 5     | 5     | 4     |
| 4027   | 0   | 0     | 1     | 1     |
| 4032   | 0   |       |       |       |
| 4034   | 0   | 2     | 1     | 1     |
| 4035   | 3   | 3     | 4     | 4     |
| 4037   | 1   | 4     | 3     | 2     |
| 4040   | 1   | 1     | 2     | 2     |
| 4041   | 1   | 2     | 2     | 1     |
| 4042   | 1   | 4     | 2     | 1     |
| 4043   | 3   | 6     | 1     | 1     |
| 4045   | 1   | 4     | 3     | 3     |
| 4046   | 2   | 3     | 3     | 2     |
| 4048   | 0   | 1     | 2     | 1     |
| 4049   | 0   | 1     | 1     | 1     |
| 4050   | 1   | 4     | 2     | 2     |
| 4052   | 0   | 3     | 1     | 1     |
| 4053   | 0   |       |       |       |
| 4060   | 0   | 2     | 1     | 1     |
| 4065   | 2   | 4     | 4     | 4     |
| 4066   | 1   | 3     | 2     | 2     |
| 4067   | 0   | 2     | 2     | 2     |
| 4068   | 2   | 3     | 3     | 3     |
| 4069   | 0   | 1     | 1     | 1     |
| 4070   | 0   | 1     | 1     | 1     |
| 4071   | 3   | 3     | 4     | 4     |
| 4072   | 0   | 0     | 1     | 2     |
| 4073   | 0   | 1     | 1     | 1     |
| 4074   | 0   | 1     | 1     | 1     |
| 4075   | 0   | 3     | 2     | 1     |
| 4078   | 0   | 1     | 1     | 1     |
| 4080   | 1   | 3     | 1     | 1     |
| 4081   | 0   |       |       |       |

| respid | Q37 | Q38_1 | Q39_1 | Q39_2 |
|--------|-----|-------|-------|-------|
| 4082   | 1   | 2     | 1     | 1     |
| 4083   | 1   | 3     | 3     | 2     |
| 4084   | 0   | 0     | 1     | 1     |
| 4086   | 0   |       |       |       |
| 4087   | 0   | 1     | 1     | 1     |
| 4088   | 1   | 3     | 2     | 2     |
| 4089   | 0   | 1     | 1     | 1     |
| 4090   | 0   | 4     | 2     | 3     |
| 4093   | 1   | 5     | 1     | 1     |
| 4094   | 0   | 3     | 1     | 1     |
| 4095   | 0   | 2     | 1     | 1     |
| 4096   | 0   |       |       |       |
| 4098   | 0   | 0     | 1     | 1     |
| 4103   | 2   | 4     | 2     | 2     |
| 4104   | 1   | 3     | 2     | 2     |
| 4107   | 0   | 0     | 1     | 1     |
| 4109   | 0   | 0     | 2     | 1     |
| 4110   | 4   | 5     | 2     | 1     |
| 4113   | 0   | 2     | 2     | 2     |
| 4114   | 1   | 1     | 1     | 1     |
| 4116   | 1   | 1     | 2     | 2     |
| 4119   | 0   | 1     | 1     | 1     |
| 4120   | 0   | 1     | 1     | 1     |
| 4121   | 0   | 0     | 2     | 1     |
| 4122   | 1   | 4     | 2     | 2     |
| 4124   | 1   | 4     | 1     | 1     |
| 4126   | 0   | 2     | 1     | 1     |
| 4127   | 4   | 5     | 5     | 5     |
| 4131   | 0   | 2     | 1     | 1     |
| 4134   | 0   | 3     | 2     | 2     |
| 4144   | 0   | 2     | 2     | 2     |
| 4145   | 0   | 2     | 1     | 1     |



| respid | Q37 | Q38_1 | Q39_1 | Q39_2 |
|--------|-----|-------|-------|-------|
| 4146   | 0   | 1     | 1     | 1     |
| 4147   | 0   | 0     | 1     | 1     |
| 4149   | 2   | 4     | 2     | 1     |
| 4150   | 0   |       |       |       |
| 4151   | 3   | 5     | 3     | 3     |
| 4153   | 0   | 3     | 1     | 1     |
| 4155   | 2   | 1     | 3     | 3     |
| 4157   | 1   | 1     | 1     | 1     |
| 4159   | 1   | 2     | 1     | 1     |
| 4160   | 0   | 1     | 1     | 1     |
| 4161   | 0   | 1     | 1     | 1     |
| 4163   | 1   | 3     | 1     | 1     |
| 4164   | 1   | 4     | 2     | 1     |
| 4165   | 1   | 1     | 3     | 2     |
| 4166   | 1   | 4     | 1     | 1     |
| 4167   | 0   | 2     | 1     | 1     |
| 4170   | 2   | 6     | 2     | 4     |
| 4172   | 0   | 1     | 1     | 1     |
| 4173   | 1   | 4     | 3     | 3     |
| 4180   | 0   | 2     | 2     | 2     |
| 4185   | 2   | 6     | 1     | 1     |
| 4187   | 0   | 1     | 1     | 1     |
| 4190   | 0   | 2     | 1     | 1     |
| 4191   | 1   | 4     | 3     | 2     |
| 4193   | 0   |       |       |       |
| 4194   | 0   | 0     | 1     | 1     |
| 4195   | 0   | 2     | 2     | 1     |
| 4196   | 0   |       |       |       |
| 4197   | 1   | 0     | 1     | 2     |
| 4198   | 0   | 1     | 1     | 1     |
| 4199   | 1   | 4     | 2     | 1     |
| 4205   | 0   | 3     | 1     | 1     |

| respid | Q37 | Q38_1 | Q39_1 | Q39_2 |
|--------|-----|-------|-------|-------|
| 4206   | 0   |       |       |       |
| 4207   | 1   | 4     | 3     | 3     |
| 4214   | 0   | 1     | 2     | 1     |
| 4215   | 0   | 1     | 1     | 1     |
| 4217   | 0   | 3     | 1     | 1     |
| 4219   | 0   | 1     | 1     | 1     |
| 4223   | 2   | 5     | 3     | 4     |
| 4226   | 1   | 2     | 1     | 2     |
| 4229   | 0   | 2     | 1     | 1     |
| 4230   | 1   | 1     | 2     | 1     |
| 4232   | 1   | 3     | 1     | 1     |
| 4233   | 0   | 1     | 1     | 1     |
| 4234   | 1   | 5     | 4     | 5     |
| 4235   | 2   | 3     | 2     | 2     |
| 4236   | 0   | 0     | 1     | 2     |
| 4237   | 1   | 3     | 1     | 1     |
| 4238   | 1   | 1     | 1     | 1     |
| 4240   | 0   | 2     | 1     | 1     |
| 4241   | 0   | 0     | 1     | 1     |
| 4247   | 0   | 1     | 1     | 1     |
| 4250   | 0   | 1     | 1     | 1     |
| 4251   | 1   | 3     | 2     | 2     |
| 4253   | 2   | 4     | 3     | 2     |
| 4254   | 0   | 2     | 2     | 1     |
| 4258   | 2   | 3     | 4     | 5     |
| 4260   | 0   | 1     | 1     | 1     |
| 4263   | 1   | 4     | 2     | 1     |
| 4265   | 0   | 0     | 1     | 1     |
| 4266   | 0   | 1     | 1     | 1     |
| 4267   | 1   | 2     | 2     | 1     |
| 4270   | 0   | 0     | 1     | 1     |
| 4273   | 1   | 2     | 2     | 2     |

| respid | Q37 | Q38_1 | Q39_1 | Q39_2 |
|--------|-----|-------|-------|-------|
| 4280   | 0   | 1     | 1     | 1     |
| 4281   | 0   | 5     | 1     | 1     |
| 4282   | 0   | 1     | 1     | 1     |
| 4283   | 0   |       |       |       |
| 4286   | 0   | 3     | 2     | 3     |
| 4287   | 0   | 1     | 1     | 1     |
| 4289   | 1   | 4     | 1     | 2     |
| 4290   | 1   | 5     | 4     | 5     |
| 4291   | 1   | 3     | 1     | 1     |
| 4292   | 1   | 4     | 1     | 1     |
| 4293   | 1   | 2     | 1     | 1     |
| 4294   | 1   | 2     | 2     | 1     |
| 4295   | 0   |       |       |       |
| 4296   | 1   | 2     | 2     | 2     |
| 4297   | 0   | 2     | 1     | 1     |
| 4298   | 0   | 1     | 1     | 1     |
| 4299   | 1   | 3     | 2     | 1     |
| 4300   | 0   | 1     | 1     | 1     |
| 4301   | 0   |       |       |       |
| 4302   | 0   | 1     | 1     | 1     |
| 4304   | 0   | 3     | 1     | 1     |
| 4305   | 1   | 3     | 2     | 1     |
| 4307   | 0   | 0     | 3     | 4     |
| 4308   | 0   | 1     | 1     | 1     |
| 4312   | 0   |       |       |       |
| 4314   | 2   | 4     | 2     | 2     |
| 4316   | 0   | 2     | 1     | 1     |
| 4317   | 3   | 5     | 2     | 4     |
| 4319   | 2   | 5     | 6     | 6     |
| 4323   | 1   | 2     | 2     | 2     |
| 4337   | 0   | 2     | 1     | 1     |
| 4341   | 2   | 5     | 2     | 1     |

| respid | Q37 | Q38_1 | Q39_1 | Q39_2 |
|--------|-----|-------|-------|-------|
| 4342   | 1   | 4     | 2     | 2     |
| 4344   | 1   | 4     | 2     | 2     |
| 4345   | 2   | 4     | 2     | 1     |
| 4346   | 1   | 4     | 2     | 3     |
| 4347   | 0   | 3     | 1     | 1     |
| 4350   | 0   |       |       |       |
| 4352   | 0   | 0     | 1     | 1     |
| 4353   | 0   |       |       |       |
| 4355   | 0   | 2     | 1     | 1     |
| 4356   | 2   | 4     | 1     | 1     |
| 4358   | 0   |       |       |       |
| 4359   | 0   | 2     | 1     | 1     |
| 4360   | 1   | 5     | 2     | 1     |
| 4361   | 4   | 6     | 2     | 5     |
| 4363   | 0   | 2     | 1     | 1     |
| 4364   | 3   | 6     | 4     | 2     |
| 4365   | 1   | 2     | 1     | 1     |
| 4367   | 0   | 6     | 5     | 4     |
| 4369   | 1   | 1     | 2     | 3     |
| 4373   | 3   | 4     | 4     | 1     |
| 4374   | 2   | 3     | 4     | 5     |
| 4375   | 0   |       |       |       |
| 4378   | 0   | 0     | 1     | 1     |
| 4379   | 1   | 5     | 2     | 3     |
| 4382   | 0   | 3     | 2     | 2     |
| 4383   | 0   |       |       |       |
| 4384   | 3   | 6     | 5     | 4     |
| 4385   | 1   | 2     | 2     | 1     |
| 4388   | 0   | 2     | 2     | 2     |
| 4389   | 1   | 3     | 1     | 1     |
| 4391   | 0   | 1     | 1     | 1     |
| 4392   | 1   | 4     | 3     | 3     |

| respid | Q37 | Q38_1 | Q39_1 | Q39_2 |
|--------|-----|-------|-------|-------|
| 4393   | 0   | 1     | 1     | 1     |
| 4395   | 1   | 2     | 1     | 2     |
| 4397   | 1   | 2     | 1     | 1     |
| 4398   | 0   | 1     | 1     | 1     |
| 4399   | 0   | 1     | 1     | 1     |
| 4400   | 0   |       |       |       |
| 4401   | 1   | 2     | 3     | 1     |
| 4402   | 0   | 2     | 2     | 1     |
| 4404   | 1   | 4     | 1     | 1     |
| 4405   | 0   |       |       |       |
| 4407   | 1   | 2     | 1     | 1     |
| 4408   | 0   | 5     | 2     | 2     |
| 4411   | 0   |       |       |       |
| 4420   | 0   | 3     | 1     | 1     |
| 4421   | 0   | 1     | 1     | 2     |
| 4424   | 4   | 5     | 5     | 4     |
| 4425   | 1   | 2     | 1     | 1     |
| 4427   | 1   | 4     | 1     | 2     |
| 4430   | 1   | 5     | 2     | 2     |
| 4431   | 0   | 1     | 1     | 1     |
| 4432   | 2   | 3     | 1     | 1     |
| 4436   | 1   | 3     | 1     | 2     |
| 4439   | 0   | 1     | 1     | 1     |
| 4451   | 1   | 3     | 3     | 3     |
| 4452   | 1   | 4     | 4     | 3     |
| 4458   | 0   | 1     | 1     | 1     |
| 4464   | 1   | 4     | 3     | 3     |
| 4465   | 1   | 2     | 2     | 2     |
| 4467   | 0   | 2     | 1     | 1     |
| 4470   | 2   | 4     | 4     | 4     |
| 4471   | 0   | 2     | 3     | 3     |
| 4472   | 0   | 2     | 2     | 1     |

| respid | Q37 | Q38_1 | Q39_1 | Q39_2 |
|--------|-----|-------|-------|-------|
| 4473   | 0   | 2     | 1     | 1     |
| 4475   | 1   | 3     | 1     | 1     |
| 4476   | 1   | 2     | 2     | 2     |
| 4478   | 0   | 2     | 1     | 1     |
| 4485   | 0   | 1     | 1     | 1     |
| 4486   | 1   | 2     | 1     | 1     |
| 4490   | 0   |       |       |       |
| 4502   | 0   |       |       |       |
| 4503   | 3   | 6     | 5     | 4     |
| 4504   | 0   | 1     | 1     | 1     |
| 4506   | 0   | 3     | 1     | 1     |
| 4508   | 0   | 0     | 2     | 1     |
| 4515   | 0   | 3     | 1     | 1     |
| 4516   | 3   | 3     | 3     | 3     |
| 4519   | 0   | 0     | 1     | 1     |
| 4523   | 0   | 1     | 2     | 2     |
| 4525   | 0   | 2     | 1     | 1     |
| 4526   | 0   | 0     | 1     | 1     |
| 4528   | 0   |       |       |       |
| 4530   | 0   | 0     | 1     | 1     |
| 4531   | 2   | 4     | 4     | 5     |
| 4532   | 0   | 2     | 1     | 1     |
| 4537   | 0   | 5     | 2     | 1     |
| 4538   | 0   | 2     | 1     | 1     |
| 4539   | 1   | 3     | 1     | 2     |
| 4541   | 3   | 4     | 1     | 1     |
| 4543   | 0   |       |       |       |
| 4544   | 0   | 1     | 1     | 1     |
| 4546   | 0   | 0     | 1     | 1     |
| 4547   | 0   | 1     | 1     | 1     |
| 4549   | 0   |       |       |       |
| 4550   | 0   | 1     | 1     | 2     |

| respid | Q37 | Q38_1 | Q39_1 | Q39_2 |
|--------|-----|-------|-------|-------|
| 4551   | 0   | 3     | 1     | 1     |
| 4554   | 0   | 1     | 1     | 1     |
| 4557   | 0   |       |       |       |
| 4565   | 0   | 0     | 1     | 1     |
| 4568   | 0   | 1     | 3     | 1     |
| 4569   | 0   | 4     | 1     | 2     |
| 4570   | 0   | 1     | 2     | 1     |
| 4572   | 0   | 2     | 1     | 1     |
| 4574   | 1   | 2     | 2     | 1     |
| 4576   | 1   | 4     | 2     | 2     |
| 4578   | 0   | 5     | 1     | 1     |
| 4579   | 0   |       |       |       |
| 4580   | 2   | 1     | 1     | 1     |
| 4581   | 0   |       |       |       |
| 4584   | 0   | 0     | 1     | 1     |
| 4586   | 2   | 3     | 2     | 2     |
| 4587   | 3   | 4     | 4     | 4     |
| 4590   | 0   | 1     | 1     | 1     |
| 4592   | 0   | 0     | 1     | 1     |
| 4593   | 0   | 1     | 1     | 1     |
| 4595   | 1   | 3     | 2     | 2     |
| 4597   | 0   | 1     | 1     | 1     |
| 4598   | 2   | 3     | 3     | 3     |
| 4599   | 1   | 4     | 3     | 3     |
| 4600   | 1   | 2     | 2     | 2     |
| 4601   | 1   | 1     | 2     | 2     |
| 4608   | 1   | 3     | 1     | 1     |
| 4609   | 1   | 2     | 3     | 2     |
| 4611   | 1   | 2     | 1     | 1     |
| 4612   | 2   | 3     | 2     | 2     |
| 4613   | 0   |       |       |       |
| 4616   | 1   | 4     | 2     | 2     |

| respid | Q37 | Q38_1 | Q39_1 | Q39_2 |
|--------|-----|-------|-------|-------|
| 4617   | 0   | 2     | 1     | 1     |
| 4620   | 1   | 5     | 2     | 1     |
| 4621   | 0   | 1     | 3     | 3     |
| 4622   | 1   | 2     | 3     | 3     |
| 4624   | 1   | 3     | 2     | 2     |
| 4625   | 1   | 2     | 2     | 2     |
| 4627   | 2   | 4     | 3     | 2     |
| 4628   | 3   | 3     | 3     | 3     |
| 4629   | 0   |       |       |       |
| 4630   | 1   | 3     | 2     | 3     |
| 4632   | 0   | 2     | 2     | 2     |
| 4634   | 1   | 4     | 2     | 2     |
| 4635   | 3   | 5     | 3     | 3     |
| 4636   | 0   | 2     | 1     | 1     |
| 4637   | 1   | 2     | 2     | 2     |
| 4638   | 3   | 3     | 3     | 3     |
| 4639   | 1   | 3     | 2     | 3     |
| 4641   | 0   | 1     | 1     | 1     |
| 4643   | 0   | 2     | 1     | 1     |
| 4645   | 0   | 4     | 1     | 1     |
| 4646   | 1   | 3     | 2     | 2     |
| 4647   | 0   |       |       |       |
| 4648   | 0   | 0     | 1     | 1     |
| 4649   | 2   | 1     | 1     | 1     |
| 4650   | 1   | 5     | 3     | 2     |
| 4651   | 1   | 3     | 1     | 2     |
| 4652   | 0   | 1     | 2     | 1     |
| 4653   | 0   |       |       |       |
| 4657   | 0   |       |       |       |
| 4660   | 2   | 5     | 3     | 3     |
| 4661   | 0   | 2     | 1     | 1     |
| 4662   | 1   | 1     | 1     | 1     |



| respid | Q37 | Q38_1 | Q39_1 | Q39_2 |
|--------|-----|-------|-------|-------|
| 4667   | 1   | 3     | 3     | 2     |
| 4669   | 1   | 2     | 2     | 1     |
| 4671   | 0   |       |       |       |
| 4672   | 1   | 4     | 3     | 3     |
| 4673   | 0   | 3     | 1     | 1     |
| 4677   | 0   |       |       |       |
| 4679   | 2   | 1     | 1     | 1     |
| 4683   | 0   | 2     | 2     | 1     |
| 4684   | 0   | 1     | 1     | 1     |
| 4685   | 0   | 2     | 2     | 1     |
| 4686   | 0   | 2     | 1     | 2     |
| 4687   | 0   | 1     | 1     | 1     |
| 4688   | 0   | 3     | 1     | 1     |
| 4691   | 0   | 1     | 1     | 1     |
| 4692   | 0   | 2     | 1     | 1     |
| 4694   | 0   | 4     | 2     | 2     |
| 4695   | 1   | 3     | 3     | 3     |
| 4696   | 1   | 3     | 2     | 1     |
| 4697   | 0   |       |       |       |
| 4698   | 3   | 2     | 1     | 2     |
| 4699   | 0   | 1     | 2     | 1     |
| 4701   | 0   |       |       |       |
| 4703   | 2   | 3     | 2     | 1     |
| 4704   | 4   | 5     | 5     | 5     |
| 4705   | 0   | 2     | 1     | 1     |
| 4706   | 0   | 0     | 1     | 1     |
| 4707   | 0   | 0     | 1     | 1     |
| 4708   | 0   | 2     | 1     | 1     |
| 4710   | 1   | 2     | 1     | 1     |
| 4711   | 1   | 3     | 4     | 3     |
| 4715   | 0   |       |       |       |
| 4716   | 2   | 4     | 3     | 1     |

| respid | Q37 | Q38_1 | Q39_1 | Q39_2 |
|--------|-----|-------|-------|-------|
| 4717   | 0   | 1     | 1     | 1     |
| 4718   | 0   | 4     | 2     | 2     |
| 4722   | 1   | 5     | 2     | 2     |
| 4727   | 2   | 3     | 2     | 1     |
| 4728   | 4   | 6     | 5     | 3     |
| 4729   | 0   | 0     | 1     | 1     |
| 4732   | 0   | 2     | 2     | 1     |
| 4733   | 0   | 1     | 1     | 1     |
| 4734   | 2   | 4     | 2     | 2     |
| 4735   | 0   | 0     | 1     | 1     |
| 4737   | 1   | 4     | 2     | 1     |
| 4738   | 0   | 2     | 1     | 1     |
| 4740   | 0   | 1     | 1     | 1     |
| 4741   | 1   | 5     | 4     | 3     |
| 4743   | 0   | 0     | 1     | 1     |
| 4746   | 1   | 4     | 2     | 1     |
| 4750   | 1   | 2     | 1     | 1     |
| 4752   | 1   | 4     | 2     | 2     |
| 4753   | 1   | 5     | 2     | 2     |
| 4754   | 2   | 4     | 2     | 3     |
| 4755   | 3   | 4     | 3     | 3     |
| 4758   | 1   | 4     | 3     | 1     |
| 4766   | 0   |       |       |       |
| 4767   | 1   | 5     | 3     | 2     |
| 4768   | 0   | 2     | 1     | 2     |
| 4769   | 1   | 3     | 2     | 2     |
| 4771   | 2   | 6     | 4     | 2     |
| 4772   | 0   | 2     | 2     | 3     |
| 4773   | 0   | 1     | 2     | 2     |
| 4774   | 1   | 3     | 2     | 1     |
| 4776   | 1   | 4     | 5     | 4     |
| 4777   | 0   | 3     | 2     | 1     |

| respid | Q37 | Q38_1 | Q39_1 | Q39_2 |
|--------|-----|-------|-------|-------|
| 4779   | 0   |       |       |       |
| 4780   | 0   | 2     | 1     | 1     |
| 4781   | 1   | 4     | 1     | 1     |
| 4783   | 2   | 5     | 3     | 5     |
| 4784   | 0   | 1     | 1     | 1     |
| 4785   | 2   | 5     | 2     | 1     |
| 4788   | 0   |       |       |       |
| 4789   | 2   | 5     | 4     | 4     |
| 4790   | 0   | 1     | 1     | 1     |
| 4791   | 0   |       |       |       |
| 4794   | 0   |       |       |       |
| 4795   | 0   | 1     | 1     | 1     |
| 4797   | 0   | 2     | 1     | 1     |
| 4802   | 2   | 5     | 3     | 4     |
| 4803   | 2   | 3     | 3     | 4     |
| 4804   | 0   |       |       |       |
| 4805   | 0   | 3     | 1     | 1     |
| 4807   | 0   |       |       |       |
| 4808   | 2   | 6     | 3     | 2     |
| 4809   | 2   | 4     | 4     | 4     |
| 4811   | 0   | 1     | 1     | 2     |
| 4817   | 0   |       |       |       |
| 4819   | 0   | 2     | 1     | 1     |
| 4820   | 0   |       |       |       |
| 4821   | 2   | 2     | 3     | 2     |
| 4822   | 0   | 3     | 1     | 1     |
| 4823   | 0   | 4     | 2     | 1     |
| 4825   | 1   | 4     | 1     | 1     |
| 4826   | 0   |       |       |       |
| 4830   | 0   | 0     | 1     | 1     |
| 4832   | 0   |       |       |       |
| 4838   | 2   | 3     | 3     | 3     |

| respid | Q37 | Q38_1 | Q39_1 | Q39_2 |
|--------|-----|-------|-------|-------|
| 4840   | 0   | 2     | 1     | 1     |
| 4841   | 0   |       |       |       |
| 4843   | 0   | 1     | 2     | 1     |
| 4845   | 0   | 4     | 2     | 2     |
| 4846   | 1   | 3     | 3     | 3     |
| 4848   | 0   | 3     | 1     | 1     |
| 4853   | 0   | 1     | 1     | 1     |
| 4854   | 0   | 1     | 1     | 1     |
| 4859   | 1   | 2     | 2     | 2     |
| 4861   | 0   |       |       |       |
| 4864   | 1   | 5     | 4     | 5     |
| 4867   | 0   |       |       |       |
| 4870   | 0   | 2     | 1     | 1     |
| 4872   | 1   | 2     | 2     | 1     |
| 4873   | 0   | 5     | 5     | 3     |
| 4874   | 0   | 2     | 1     | 1     |
| 4878   | 0   | 1     | 1     | 1     |
| 4880   | 0   | 1     | 1     | 1     |
| 4881   | 0   | 3     | 2     | 1     |
| 4882   | 1   | 4     | 3     | 3     |
| 4883   | 0   | 2     | 1     | 1     |
| 4885   | 0   | 1     | 1     | 1     |
| 4889   | 0   |       |       |       |
| 4890   | 0   |       |       |       |
| 4891   | 0   | 1     | 1     | 1     |
| 4894   | 0   | 2     | 3     | 2     |
| 4895   | 4   | 5     | 4     | 3     |
| 4896   | 0   | 3     | 1     | 1     |
| 4897   | 0   | 1     | 1     | 1     |
| 4898   | 2   | 3     | 3     | 3     |
| 4899   | 0   |       |       |       |
| 4900   | 1   | 3     | 2     | 1     |

| respid | Q37 | Q38_1 | Q39_1 | Q39_2 |
|--------|-----|-------|-------|-------|
| 4901   | 0   | 1     | 1     | 1     |
| 4903   | 1   | 1     | 2     | 2     |
| 4904   | 0   | 1     | 1     | 1     |
| 4908   | 0   | 0     | 1     | 1     |
| 4909   | 2   | 0     | 2     | 2     |
| 4913   | 0   | 2     | 1     | 1     |
| 4917   | 0   | 3     | 1     | 1     |
| 4918   | 1   | 4     | 3     | 3     |
| 4920   | 0   |       |       |       |
| 4921   | 0   | 3     | 1     | 1     |
| 4925   | 1   | 2     | 2     | 2     |
| 4926   | 0   | 3     | 1     | 1     |
| 4927   | 0   | 1     | 1     | 1     |
| 4928   | 0   | 3     | 3     | 3     |
| 4929   | 0   | 1     | 1     | 2     |
| 4930   | 2   | 3     | 4     | 5     |
| 4931   | 0   | 2     | 1     | 1     |
| 4932   | 2   | 3     | 4     | 3     |
| 4933   | 0   | 2     | 1     | 1     |
| 4934   | 0   | 1     | 1     | 1     |
| 5934   | 0   | 1     | 1     | 1     |
| 5935   | 1   | 3     | 1     | 1     |
| 5936   | 0   | 2     | 1     | 1     |
| 5938   | 0   |       |       |       |
| 5939   | 0   | 2     | 1     | 1     |
| 5940   | 2   | 5     | 3     | 3     |
| 5942   | 0   | 0     | 4     | 5     |
| 5944   | 1   | 2     | 1     | 2     |
| 5951   | 3   | 4     | 5     | 4     |
| 5952   | 1   | 2     | 1     | 1     |
| 5954   | 1   | 3     | 3     | 2     |
| 5956   | 0   | 3     | 1     | 1     |

| respid | Q37 | Q38_1 | Q39_1 | Q39_2 |
|--------|-----|-------|-------|-------|
| 5957   | 1   | 3     | 2     | 1     |
| 5958   | 2   | 5     | 2     | 2     |
| 5959   | 1   | 3     | 3     | 3     |
| 5960   | 0   | 1     | 1     | 1     |
| 5963   | 0   | 1     | 6     | 6     |
| 5966   | 1   | 1     | 2     | 1     |
| 5968   | 0   | 1     | 2     | 2     |
| 5974   | 0   | 2     | 1     | 1     |
| 5975   | 0   | 1     | 1     | 1     |
| 5976   | 2   | 1     | 3     | 2     |
| 5977   | 1   | 3     | 1     | 2     |
| 5978   | 1   | 5     | 3     | 3     |
| 5979   | 0   | 0     | 2     | 2     |
| 5983   | 0   | 1     | 1     | 1     |
| 5984   | 0   | 2     | 2     | 2     |
| 5990   | 0   | 0     | 1     | 1     |
| 5991   | 0   | 1     | 1     | 1     |
| 5992   | 0   |       |       |       |
| 5993   | 1   | 3     | 2     | 1     |
| 5994   | 0   | 1     | 1     | 2     |
| 5996   | 0   | 1     | 1     | 1     |
| 6001   | 3   | 4     | 3     | 3     |
| 6003   | 0   | 0     | 1     | 1     |
| 6004   | 2   | 3     | 1     | 2     |
| 6005   | 1   | 3     | 2     | 3     |
| 6006   | 0   | 2     | 1     | 1     |
| 6008   | 2   | 4     | 1     | 1     |
| 6009   | 1   | 2     | 3     | 1     |
| 6014   | 0   |       |       |       |
| 6016   | 1   | 1     | 2     | 2     |
| 6017   | 1   | 1     | 1     | 1     |
| 6018   | 0   | 2     | 2     | 1     |

| respid | Q37 | Q38_1 | Q39_1 | Q39_2 |
|--------|-----|-------|-------|-------|
| 6020   | 2   | 4     | 3     | 3     |
| 6021   | 0   |       |       |       |
| 6024   | 0   | 2     | 1     | 1     |
| 6025   | 0   | 1     | 1     | 1     |
| 6026   | 1   | 2     | 1     | 1     |
| 6032   | 1   | 5     | 1     | 1     |
| 6035   | 1   | 3     | 1     | 1     |
| 6038   | 1   | 2     | 2     | 1     |
| 6043   | 1   | 4     | 2     | 1     |
| 6044   | 1   | 1     | 2     | 1     |
| 6046   | 1   | 4     | 2     | 1     |
| 6047   | 0   | 0     | 2     | 1     |
| 6048   | 1   | 2     | 2     | 3     |
| 6050   | 2   | 3     | 2     | 2     |
| 6051   | 1   | 3     | 2     | 1     |
| 6053   | 0   | 2     | 1     | 1     |
| 6054   | 2   | 3     | 1     | 1     |
| 6056   | 0   | 3     | 1     | 1     |
| 6058   | 1   | 1     | 2     | 2     |
| 6060   | 1   | 2     | 2     | 2     |
| 6061   | 0   | 0     | 1     | 1     |
| 6062   | 2   | 3     | 2     | 2     |
| 6067   | 0   | 1     | 1     | 1     |
| 6070   | 1   | 2     | 2     | 1     |
| 6074   | 1   | 3     | 1     | 1     |
| 6076   | 1   | 1     | 2     | 1     |
| 6078   | 0   |       |       |       |
| 6081   | 0   | 2     | 1     | 1     |
| 6085   | 0   | 4     | 2     | 1     |
| 6088   | 0   |       |       |       |
| 6092   | 1   | 2     | 1     | 3     |
| 6095   | 0   | 1     | 2     | 1     |

| respid | Q37 | Q38_1 | Q39_1 | Q39_2 |
|--------|-----|-------|-------|-------|
| 6098   | 0   | 2     | 2     | 2     |
| 6101   | 0   |       |       |       |
| 6102   | 1   | 2     | 1     | 2     |
| 6105   | 1   | 2     | 2     | 2     |
| 6106   | 1   | 2     | 2     | 1     |
| 6107   | 0   | 2     | 2     | 2     |
| 6111   | 0   | 0     | 1     | 1     |
| 6112   | 0   | 3     | 1     | 1     |
| 6113   | 2   | 4     | 3     | 3     |
| 6115   | 0   | 2     | 1     | 1     |
| 6116   | 0   |       |       |       |
| 6117   | 1   | 4     | 3     | 4     |
| 6124   | 2   | 3     | 3     | 4     |
| 6125   | 0   | 1     | 2     | 2     |
| 6128   | 0   |       |       |       |
| 6133   | 0   | 3     | 1     | 1     |
| 6134   | 0   | 3     | 1     | 1     |
| 6135   | 1   | 3     | 2     | 2     |
| 6138   | 2   | 4     | 2     | 2     |
| 6140   | 1   | 3     | 1     | 1     |
| 6143   | 1   | 2     | 1     | 1     |
| 6147   | 2   | 4     | 2     | 1     |
| 6154   | 0   | 0     | 1     | 1     |
| 6162   | 0   |       |       |       |
| 6165   | 1   | 2     | 1     | 2     |
| 6166   | 1   | 3     | 2     | 3     |
| 6173   | 2   | 3     | 3     | 3     |
| 6180   | 1   | 1     | 2     | 2     |
| 6184   | 3   | 6     | 5     | 5     |
| 6185   | 1   | 2     | 1     | 1     |
| 6186   | 0   | 2     | 1     | 1     |
| 6188   | 0   | 2     | 1     | 1     |



| respid | Q37 | Q38_1 | Q39_1 | Q39_2 |
|--------|-----|-------|-------|-------|
| 6192   | 3   | 4     | 4     | 4     |
| 6194   | 0   |       |       |       |
| 6195   | 0   | 2     | 1     | 1     |
| 6196   | 0   | 3     | 2     | 3     |
| 6199   | 1   | 3     | 2     | 2     |
| 6200   | 0   |       |       |       |
| 6201   | 0   | 1     | 1     | 1     |
| 6202   | 1   | 3     | 1     | 1     |
| 6203   | 0   | 0     | 1     | 1     |
| 6205   | 0   | 2     | 1     | 1     |
| 6210   | 1   | 1     | 3     | 3     |
| 6212   | 1   | 2     | 2     | 2     |
| 6216   | 1   | 4     | 2     | 2     |
| 6218   | 2   | 4     | 3     | 3     |
| 6221   | 0   | 2     | 2     | 2     |
| 6224   | 0   | 1     | 1     | 1     |
| 6225   | 1   | 2     | 1     | 1     |
| 6227   | 0   | 0     | 2     | 1     |
| 6230   | 0   |       |       |       |
| 6231   | 0   | 1     | 1     | 1     |
| 6233   | 1   | 3     | 3     | 3     |
| 6234   | 1   | 3     | 1     | 1     |
| 6235   | 0   |       |       |       |
| 6237   | 0   |       |       |       |
| 6240   | 0   |       |       |       |
| 6248   | 0   | 2     | 3     | 3     |
| 6249   | 0   | 1     | 1     | 1     |
| 6252   | 2   | 3     | 3     | 3     |
| 6254   | 1   | 1     | 2     | 2     |
| 6269   | 1   | 5     | 2     | 2     |
| 6304   | 0   |       |       |       |
| 6334   | 2   | 3     | 2     | 2     |

| respid | Q37 | Q38_1 | Q39_1 | Q39_2 |
|--------|-----|-------|-------|-------|
| 6341   | 2   | 4     | 3     | 1     |
| 6350   | 2   | 4     | 2     | 3     |
| 6370   | 0   | 0     | 1     | 1     |
| 6384   | 0   | 2     | 2     | 2     |
| 6400   | 0   | 0     | 1     | 1     |
| 6418   | 0   |       |       |       |
| 6467   | 1   | 2     | 2     | 2     |
| 6469   | 0   | 0     | 1     | 1     |
| 6474   | 0   | 2     | 1     | 1     |
| 6475   | 0   |       |       |       |
| 6476   | 1   | 4     | 2     | 2     |
| 6477   | 0   | 2     | 1     | 1     |
| 6480   | 2   | 2     | 1     | 1     |
| 6481   | 2   | 3     | 3     | 3     |
| 6485   | 0   | 1     | 1     | 1     |
| 6488   | 1   | 2     | 3     | 4     |
| 6495   | 2   | 4     | 2     | 1     |
| 6499   | 1   | 3     | 2     | 1     |
| 6500   | 0   | 2     | 2     | 1     |
| 6504   | 0   | 1     | 2     | 3     |
| 6507   | 0   | 3     | 1     | 1     |
| 6512   | 0   | 4     | 2     | 2     |
| 6525   | 2   | 3     | 3     | 3     |
| 6532   | 0   | 2     | 2     | 2     |
| 6535   | 0   | 0     | 2     | 2     |
| 6546   | 0   | 3     | 1     | 1     |
| 6551   | 3   | 5     | 6     | 4     |
| 6556   | 0   | 3     | 3     | 3     |
| 6566   | 3   | 4     | 2     | 1     |
| 6569   | 0   |       |       |       |
| 6574   | 0   | 2     | 1     | 1     |
| 6576   | 2   | 3     | 2     | 2     |

| respid | Q37 | Q38_1 | Q39_1 | Q39_2 |
|--------|-----|-------|-------|-------|
| 6580   | 0   |       |       |       |
| 6584   | 0   |       |       |       |
| 6585   | 1   | 2     | 2     | 3     |
| 6589   | 0   | 1     | 1     | 1     |
| 6590   | 0   | 2     | 1     | 1     |
| 6598   | 0   | 1     | 2     | 1     |
| 6603   | 2   | 1     | 2     | 2     |
| 6618   | 0   | 1     | 1     | 2     |
| 6630   | 0   | 6     | 1     | 1     |
| 6636   | 0   | 3     | 3     | 3     |
| 6649   | 0   |       |       |       |
| 6675   | 0   | 3     | 2     | 1     |
| 6678   | 0   | 1     | 1     | 1     |
| 6681   | 0   | 1     | 1     | 1     |
| 6684   | 1   | 3     | 2     | 2     |
| 6688   | 0   |       |       |       |
| 6691   | 0   | 1     | 1     | 1     |
| 6694   | 1   | 4     | 2     | 2     |
| 6696   | 0   | 0     | 1     | 1     |
| 6720   | 4   | 5     | 4     | 5     |
| 6722   | 4   | 6     | 5     | 6     |
| 6724   | 0   | 1     | 1     | 1     |
| 6725   | 0   | 2     | 1     | 1     |
| 6727   | 0   | 6     | 1     | 1     |
| 6734   | 1   | 4     | 2     | 2     |
| 6739   | 2   | 4     | 1     | 1     |
| 6743   | 3   | 5     | 4     | 4     |
| 6749   | 0   | 5     | 1     | 1     |
| 6756   | 1   | 2     | 2     | 1     |
| 6764   | 0   | 1     | 1     | 1     |
| 6765   | 0   | 4     | 2     | 1     |
| 6768   | 0   | 3     | 1     | 1     |

| respid | Q37 | Q38_1 | Q39_1 | Q39_2 |
|--------|-----|-------|-------|-------|
| 6773   | 0   | 1     | 1     | 1     |
| 6775   | 1   | 4     | 3     | 3     |
| 6777   | 0   | 0     | 1     | 1     |
| 6779   | 0   | 0     | 1     | 1     |
| 6790   | 1   | 3     | 2     | 1     |
| 6797   | 0   |       |       |       |
| 6798   | 1   | 4     | 3     | 2     |
| 6808   | 0   |       |       |       |
| 6810   | 2   | 5     | 2     | 2     |
| 6811   | 5   | 6     | 6     | 5     |
| 6812   | 0   | 3     | 1     | 1     |
| 6814   | 0   | 3     | 2     | 2     |
| 6819   | 1   | 4     | 3     | 2     |
| 6820   | 0   | 3     | 2     | 3     |
| 6832   | 0   | 2     | 1     | 1     |
| 6854   | 1   | 3     | 2     | 1     |
| 6855   | 0   |       |       |       |
| 6857   | 0   | 1     | 1     | 2     |
| 6858   | 1   | 4     | 1     | 1     |
| 6859   | 1   | 2     | 2     | 1     |
| 6860   | 1   | 4     | 2     | 1     |
| 6862   | 1   | 5     | 2     | 2     |
| 6879   | 0   |       |       |       |
| 6893   | 0   | 3     | 1     | 1     |
| 6898   | 1   | 4     | 2     | 2     |
| 6902   | 1   | 2     | 3     | 4     |
| 6903   | 1   | 5     | 4     | 5     |
| 6907   | 3   | 4     | 4     | 4     |
| 6908   | 0   |       |       |       |
| 6912   | 0   |       |       |       |
| 6915   | 2   | 4     | 3     | 3     |
| 6916   | 1   | 3     | 2     | 3     |

| respid | Q37 | Q38_1 | Q39_1 | Q39_2 |
|--------|-----|-------|-------|-------|
| 6917   | 3   | 5     | 3     | 1     |
| 6923   | 1   | 3     | 1     | 1     |
| 6934   | 0   | 3     | 2     | 1     |
| 6937   | 0   |       |       |       |
| 6945   | 0   | 2     | 1     | 1     |
| 6954   | 0   | 3     | 1     | 1     |
| 6956   | 0   | 3     | 1     | 1     |
| 6958   | 0   | 1     | 1     | 1     |
| 6961   | 0   | 2     | 2     | 1     |
| 6963   | 0   | 1     | 1     | 2     |
| 6964   | 0   | 1     | 1     | 1     |
| 6976   | 0   |       |       |       |
| 6977   | 0   | 1     | 1     | 1     |
| 7000   | 1   | 3     | 2     | 3     |
| 7001   | 0   | 0     | 1     | 1     |
| 7005   | 0   | 1     | 1     | 1     |
| 7006   | 1   | 2     | 2     | 1     |
| 7008   | 5   | 6     | 6     | 3     |
| 7009   | 0   | 3     | 1     | 1     |
| 7019   | 0   | 1     | 1     | 1     |
| 7021   | 0   | 3     | 2     | 1     |
| 7026   | 2   | 4     | 3     | 2     |
| 7030   | 1   | 5     | 3     | 3     |
| 7034   | 0   |       |       |       |
| 7039   | 1   | 3     | 2     | 1     |
| 7041   | 0   | 1     | 1     | 1     |
| 7047   | 0   | 3     | 1     | 1     |
| 7051   | 0   | 1     | 2     | 1     |
| 7052   | 0   | 2     | 2     | 2     |
| 7059   | 1   | 4     | 2     | 1     |
| 7062   | 2   | 4     | 2     | 2     |
| 7065   | 1   | 4     | 1     | 1     |

| respid | Q37 | Q38_1 | Q39_1 | Q39_2 |
|--------|-----|-------|-------|-------|
| 7066   | 0   | 1     | 1     | 1     |
| 7069   | 1   | 4     | 1     | 1     |
| 7070   | 0   |       |       |       |
| 7073   | 0   |       |       |       |
| 7078   | 0   | 3     | 3     | 1     |
| 7083   | 2   | 6     | 3     | 2     |
| 7084   | 4   | 6     | 5     | 5     |
| 7085   | 0   | 5     | 1     | 1     |
| 7088   | 2   | 3     | 3     | 3     |
| 7090   | 1   | 1     | 2     | 3     |
| 7095   | 1   | 3     | 1     | 1     |
| 7100   | 0   |       |       |       |
| 7102   | 2   | 3     | 3     | 2     |
| 7103   | 0   | 0     | 1     | 1     |
| 7108   | 1   | 1     | 1     | 2     |
| 7109   | 0   | 0     | 1     | 1     |
| 7110   | 0   |       |       |       |
| 7112   | 0   |       |       |       |
| 7114   | 0   | 4     | 1     | 1     |
| 7116   | 1   | 2     | 1     | 1     |
| 7117   | 1   | 2     | 2     | 2     |
| 7118   | 3   | 3     | 3     | 3     |
| 7120   | 3   | 5     | 5     | 5     |
| 7124   | 1   | 2     | 2     | 1     |
| 7130   | 1   | 3     | 1     | 1     |
| 7135   | 0   | 1     | 1     | 1     |
| 7137   | 3   | 4     | 4     | 4     |
| 7140   | 0   | 1     | 1     | 1     |
| 7141   | 0   | 1     | 1     | 1     |
| 7148   | 0   | 1     | 1     | 1     |
| 7152   | 0   |       |       |       |
| 7154   | 0   | 1     | 2     | 3     |

| respid | Q37 | Q38_1 | Q39_1 | Q39_2 |
|--------|-----|-------|-------|-------|
| 7156   | 1   | 2     | 1     | 1     |
| 7158   | 1   | 2     | 3     | 2     |
| 7159   | 0   |       |       |       |
| 7161   | 0   |       |       |       |
| 7164   | 0   | 0     | 1     | 1     |
| 7166   | 0   |       |       |       |
| 7167   | 0   |       |       |       |
| 7168   | 0   |       |       |       |
| 7170   | 0   |       |       |       |
| 7171   | 0   | 1     | 1     | 1     |
| 7172   | 0   | 3     | 1     | 1     |
| 7173   | 1   | 2     | 2     | 2     |
| 7175   | 1   | 1     | 1     | 2     |
| 7176   | 1   | 2     | 2     | 2     |
| 7180   | 0   | 0     | 1     | 1     |
| 7183   | 1   | 2     | 2     | 1     |
| 7189   | 0   | 1     | 1     | 1     |
| 7193   | 0   | 1     | 1     | 1     |
| 7194   | 2   | 3     | 4     | 3     |
| 7195   | 1   | 1     | 1     | 1     |
| 7200   | 2   | 3     | 1     | 2     |
| 7201   | 2   | 3     | 3     | 3     |
| 7205   | 2   | 3     | 2     | 3     |
| 7207   | 0   | 1     | 1     | 1     |
| 7208   | 0   |       |       |       |
| 7210   | 0   | 3     | 1     | 1     |
| 7211   | 0   | 1     | 1     | 1     |
| 7217   | 0   | 1     | 1     | 2     |
| 7218   | 0   | 0     | 1     | 1     |
| 7220   | 0   |       |       |       |
| 7225   | 0   | 1     | 1     | 1     |
| 7228   | 0   | 2     | 1     | 1     |

| respid | Q37 | Q38_1 | Q39_1 | Q39_2 |
|--------|-----|-------|-------|-------|
| 7230   | 1   | 2     | 2     | 1     |
| 7233   | 1   | 2     | 1     | 1     |
| 7234   | 1   | 2     | 2     | 1     |
| 7235   | 0   |       |       |       |
| 7236   | 0   |       |       |       |
| 7241   | 0   | 0     | 1     | 1     |
| 7251   | 0   | 1     | 1     | 1     |
| 7253   | 1   | 6     | 2     | 5     |
| 7259   | 1   | 3     | 2     | 1     |
| 7260   | 0   | 2     | 2     | 1     |
| 7261   | 1   | 4     | 2     | 2     |
| 7263   | 0   | 0     | 1     | 1     |
| 7265   | 0   |       |       |       |
| 7268   | 0   | 1     | 1     | 1     |
| 7269   | 0   |       |       |       |
| 7271   | 1   | 3     | 2     | 2     |
| 7276   | 3   | 3     | 3     | 5     |
| 7280   | 1   | 3     | 2     | 2     |
| 7283   | 0   | 1     | 1     | 1     |
| 7284   | 2   | 3     | 1     | 2     |
| 7286   | 0   | 0     | 1     | 1     |
| 7287   | 0   |       |       |       |
| 7288   | 1   | 3     | 3     | 3     |
| 7294   | 1   | 3     | 1     | 1     |
| 7295   | 0   | 0     | 1     | 1     |
| 7296   | 2   | 1     | 4     | 3     |
| 7297   | 0   | 0     | 1     | 2     |
| 7299   | 0   | 5     | 1     | 2     |
| 7300   | 1   | 4     | 3     | 2     |
| 7301   | 1   | 3     | 2     | 1     |
| 7302   | 0   |       |       |       |
| 7306   | 0   | 0     | 1     | 1     |



| respid | Q37 | Q38_1 | Q39_1 | Q39_2 |
|--------|-----|-------|-------|-------|
| 7313   | 3   | 5     | 5     | 6     |
| 7315   | 2   | 3     | 3     | 2     |
| 7317   | 0   | 1     | 1     | 1     |
| 7321   | 1   | 1     | 1     | 1     |
| 7322   | 1   | 0     | 2     | 2     |
| 7323   | 1   | 4     | 4     | 4     |
| 7333   | 3   | 5     | 2     | 2     |
| 7335   | 2   | 5     | 2     | 2     |
| 7336   | 0   | 2     | 1     | 1     |
| 7337   | 0   | 3     | 2     | 3     |
| 7338   | 0   | 1     | 1     | 1     |
| 7340   | 0   | 2     | 1     | 1     |
| 7341   | 0   | 3     | 2     | 2     |
| 7342   | 0   | 2     | 1     | 1     |
| 7344   | 1   | 3     | 3     | 3     |
| 7346   | 1   | 4     | 1     | 1     |
| 7347   | 0   | 0     | 1     | 1     |
| 7349   | 2   | 4     | 2     | 4     |
| 7352   | 0   | 1     | 1     | 1     |
| 7353   | 0   | 1     | 1     | 1     |
| 7355   | 0   | 2     | 1     | 1     |
| 7356   | 0   |       |       |       |
| 7360   | 3   | 4     | 6     | 5     |
| 7371   | 0   | 1     | 1     | 2     |
| 7376   | 1   | 4     | 2     | 3     |
| 7379   | 2   | 3     | 3     | 1     |
| 7381   | 1   | 5     | 1     | 1     |
| 7386   | 0   | 5     | 1     | 2     |
| 7389   | 1   | 1     | 1     | 1     |
| 7390   | 3   | 6     | 6     | 6     |
| 7393   | 0   | 1     | 1     | 1     |
| 7394   | 0   | 1     | 1     | 1     |

| respid | Q37 | Q38_1 | Q39_1 | Q39_2 |
|--------|-----|-------|-------|-------|
| 7396   | 1   | 3     | 3     | 3     |
| 7400   | 2   | 4     | 2     | 3     |
| 7401   | 0   | 2     | 2     | 1     |
| 7403   | 1   | 1     | 2     | 1     |
| 7406   | 2   | 6     | 1     | 1     |
| 7409   | 0   | 5     | 6     | 6     |
| 7410   | 3   | 6     | 4     | 4     |
| 7412   | 1   | 3     | 3     | 4     |
| 7414   | 0   | 1     | 1     | 1     |
| 7415   | 2   | 3     | 2     | 3     |
| 7417   | 2   | 3     | 5     | 3     |
| 7421   | 2   | 3     | 4     | 4     |
| 7425   | 1   | 4     | 2     | 2     |
| 7430   | 1   | 3     | 1     | 1     |
| 7432   | 0   | 1     | 1     | 1     |
| 7433   | 1   | 2     | 2     | 2     |
| 7442   | 0   | 2     | 2     | 2     |
| 7445   | 1   | 1     | 1     | 1     |
| 7446   | 0   | 1     | 1     | 1     |
| 7449   | 0   |       |       |       |
| 7450   | 0   |       |       |       |
| 7451   | 1   | 1     | 2     | 2     |
| 7459   | 1   | 2     | 1     | 1     |
| 7462   | 2   | 5     | 2     | 2     |
| 7463   | 0   | 3     | 1     | 1     |
| 7469   | 0   |       |       |       |
| 7482   | 0   | 3     | 1     | 1     |
| 7484   | 1   | 2     | 2     | 2     |
| 7486   | 0   | 2     | 1     | 1     |
| 7496   | 0   | 0     | 1     | 1     |
| 7502   | 0   | 2     | 1     | 1     |
| 7504   | 0   | 3     | 2     | 2     |

| respid | Q37 | Q38_1 | Q39_1 | Q39_2 |
|--------|-----|-------|-------|-------|
| 7509   | 4   | 6     | 6     | 6     |
| 7513   | 2   | 4     | 2     | 2     |
| 7514   | 0   |       |       |       |
| 7520   | 0   | 1     | 2     | 1     |
| 7523   | 0   |       |       |       |
| 7526   | 0   | 4     | 3     | 3     |
| 7529   | 0   | 5     | 3     | 3     |
| 7534   | 0   |       |       |       |
| 7536   | 1   | 4     | 3     | 2     |
| 7540   | 1   | 4     | 1     | 1     |
| 7541   | 1   | 3     | 2     | 2     |
| 7542   | 0   |       |       |       |
| 7555   | 0   | 4     | 3     | 3     |
| 7566   | 1   | 3     | 3     | 3     |
| 7568   | 0   | 1     | 1     | 1     |
| 7570   | 3   | 3     | 2     | 3     |
| 7572   | 0   | 5     | 2     | 2     |
| 7573   | 3   | 3     | 2     | 2     |
| 7576   | 0   | 3     | 1     | 1     |
| 7577   | 4   | 5     | 2     | 4     |
| 7583   | 0   | 3     | 1     | 1     |
| 7584   | 0   | 1     | 1     | 1     |
| 7585   | 4   | 6     | 5     | 5     |
| 7586   | 1   | 3     | 2     | 3     |
| 7587   | 0   | 1     | 1     | 1     |
| 7588   | 0   | 1     | 1     | 1     |
| 7596   | 0   | 2     | 1     | 1     |
| 7599   | 0   | 1     | 1     | 1     |
| 7600   | 3   | 4     | 4     | 3     |
| 7602   | 0   | 5     | 1     | 1     |
| 7613   | 0   | 4     | 1     | 1     |
| 7620   | 1   | 2     | 1     | 1     |

| respid | Q37 | Q38_1 | Q39_1 | Q39_2 |
|--------|-----|-------|-------|-------|
| 7623   | 0   | 2     | 1     | 1     |
| 7635   | 0   | 2     | 2     | 2     |
| 7636   | 1   | 4     | 2     | 1     |
| 7643   | 2   | 5     | 4     | 4     |
| 7645   | 2   | 2     | 2     | 2     |
| 7649   | 2   | 4     | 3     | 3     |
| 7651   | 0   | 6     | 1     | 1     |
| 7652   | 4   | 5     | 3     | 3     |
| 7655   | 0   | 4     | 2     | 3     |
| 7657   | 0   | 0     | 1     | 1     |
| 7675   | 0   | 2     | 2     | 1     |
| 7676   | 1   | 5     | 2     | 1     |
| 7684   | 1   | 4     | 2     | 3     |
| 7693   | 1   | 2     | 3     | 2     |
| 7694   | 5   | 6     | 6     | 6     |
| 7695   | 0   | 3     | 1     | 1     |
| 7696   | 5   | 6     | 6     | 6     |
| 7698   | 0   | 1     | 1     | 1     |
| 7700   | 0   | 2     | 1     | 1     |
| 7701   | 0   | 1     | 1     | 1     |
| 7704   | 0   | 5     | 1     | 1     |
| 7709   | 0   | 5     | 2     | 2     |
| 7713   | 0   | 2     | 1     | 1     |
| 7714   | 0   | 1     | 1     | 1     |
| 7718   | 5   | 6     | 4     | 5     |
| 7720   | 0   | 1     | 1     | 1     |
| 7721   | 0   | 5     | 2     | 2     |
| 7722   | 0   | 1     | 1     | 1     |
| 7724   | 2   | 6     | 1     | 1     |
| 7728   | 0   |       |       |       |
| 7731   | 1   | 3     | 3     | 4     |
| 7735   | 0   | 1     | 1     | 1     |

| respid | Q37 | Q38_1 | Q39_1 | Q39_2 |
|--------|-----|-------|-------|-------|
| 7737   | 1   | 2     | 1     | 1     |
| 7741   | 0   | 0     | 1     | 1     |
| 7746   | 1   | 1     | 2     | 1     |
| 7747   | 0   | 2     | 1     | 1     |
| 7748   | 0   | 0     | 1     | 1     |
| 7750   | 0   | 0     | 1     | 1     |
| 7754   | 0   | 0     | 1     | 1     |
| 7755   | 0   | 4     | 3     | 4     |
| 7762   | 0   |       |       |       |
| 7764   | 0   | 6     | 1     | 2     |
| 7766   | 0   |       |       |       |
| 7768   | 1   | 3     | 3     | 2     |
| 7770   | 0   | 4     | 3     | 2     |
| 7771   | 0   | 0     | 1     | 1     |
| 7777   | 0   | 1     | 1     | 1     |
| 7778   | 0   |       |       |       |
| 7783   | 4   | 5     | 5     | 4     |
| 7789   | 0   | 4     | 1     | 1     |
| 7790   | 1   | 3     | 2     | 3     |
| 7795   | 1   | 1     | 3     | 2     |
| 7807   | 0   | 3     | 1     | 1     |
| 7808   | 1   | 5     | 3     | 4     |
| 7818   | 3   | 5     | 3     | 3     |
| 7820   | 0   |       |       |       |
| 7831   | 1   | 4     | 2     | 1     |
| 7832   | 0   | 3     | 1     | 1     |
| 7837   | 1   | 1     | 1     | 1     |
| 7841   | 1   | 4     | 2     | 2     |
| 7845   | 2   | 3     | 3     | 3     |
| 7853   | 0   | 2     | 2     | 2     |
| 7854   | 0   | 2     | 1     | 1     |
| 7862   | 3   | 4     | 4     | 4     |

| respid | Q37 | Q38_1 | Q39_1 | Q39_2 |
|--------|-----|-------|-------|-------|
| 7871   | 0   | 1     | 1     | 1     |
| 7875   | 1   | 2     | 2     | 1     |
| 7880   | 0   | 6     | 3     | 4     |
| 7881   | 1   | 3     | 1     | 1     |
| 7883   | 1   | 4     | 4     | 5     |
| 7896   | 0   | 1     | 1     | 1     |
| 7905   | 0   | 1     | 2     | 1     |
| 7919   | 1   | 1     | 2     | 2     |
| 7928   | 2   | 5     | 2     | 2     |
| 7929   | 0   | 0     | 1     | 1     |
| 7938   | 1   | 2     | 2     | 2     |
| 7940   | 0   | 1     | 1     | 1     |
| 7941   | 1   | 4     | 4     | 4     |
| 7952   | 0   |       |       |       |
| 7962   | 0   | 1     | 1     | 1     |
| 7968   | 0   | 3     | 2     | 1     |
| 7972   | 1   | 3     | 1     | 1     |
| 7983   | 2   | 4     | 2     | 3     |
| 7990   | 0   | 1     | 1     | 1     |
| 7993   | 0   | 1     | 1     | 1     |
| 8005   | 2   | 6     | 1     | 1     |
| 8008   | 0   |       |       |       |
| 8012   | 0   | 4     | 2     | 3     |
| 8021   | 0   | 2     | 1     | 1     |
| 8024   | 0   | 2     | 1     | 2     |
| 8043   | 0   | 1     | 1     | 1     |
| 8051   | 0   | 4     | 2     | 2     |
| 8056   | 1   | 2     | 2     | 1     |
| 8061   | 0   | 6     | 4     | 6     |
| 8066   | 0   |       |       |       |
| 8069   | 2   | 3     | 2     | 2     |
| 8071   | 0   | 2     | 1     | 1     |

| respid | Q37 | Q38_1 | Q39_1 | Q39_2 |
|--------|-----|-------|-------|-------|
| 8072   | 1   | 4     | 2     | 2     |
| 8076   | 0   | 1     | 1     | 1     |
| 8080   | 1   | 2     | 2     | 2     |
| 8083   | 1   | 4     | 2     | 1     |
| 8093   | 2   | 5     | 4     | 4     |
| 8095   | 1   | 2     | 2     | 2     |
| 8099   | 0   | 1     | 1     | 1     |
| 8100   | 1   | 3     | 3     | 1     |
| 8103   | 0   |       |       |       |
| 8104   | 1   | 4     | 2     | 1     |
| 8115   | 1   | 3     | 2     | 2     |
| 8121   | 2   | 1     | 2     | 1     |
| 8128   | 0   | 1     | 1     | 1     |
| 8130   | 0   | 1     | 1     | 1     |
| 8131   | 1   | 2     | 2     | 2     |
| 8133   | 1   | 1     | 2     | 2     |
| 8143   | 1   | 4     | 3     | 3     |
| 8144   | 1   | 2     | 2     | 2     |
| 8146   | 0   | 1     | 1     | 1     |
| 8148   | 0   |       |       |       |
| 8157   | 0   |       |       |       |
| 8164   | 0   |       |       |       |
| 8173   | 0   |       |       |       |
| 8176   | 0   | 1     | 1     | 1     |
| 8179   | 0   | 1     | 3     | 3     |
| 8181   | 0   |       |       |       |
| 8182   | 0   | 3     | 2     | 1     |
| 8196   | 0   | 2     | 3     | 3     |
| 8200   | 2   | 3     | 2     | 1     |
| 8203   | 0   | 3     | 1     | 1     |
| 8204   | 2   | 4     | 3     | 6     |
| 8206   | 1   | 2     | 2     | 1     |

| respid | Q37 | Q38_1 | Q39_1 | Q39_2 |
|--------|-----|-------|-------|-------|
| 8208   | 0   | 0     | 1     | 1     |
| 8212   | 0   | 3     | 6     | 5     |
| 8222   | 3   | 2     | 3     | 4     |
| 8223   | 0   | 1     | 1     | 1     |
| 8225   | 0   | 2     | 1     | 1     |
| 8226   | 0   | 5     | 3     | 3     |
| 8228   | 2   | 3     | 3     | 4     |
| 8229   | 0   | 1     | 1     | 1     |
| 8239   | 0   | 4     | 2     | 2     |
| 8246   | 2   | 4     | 2     | 1     |
| 8258   | 0   | 3     | 3     | 2     |
| 8260   | 0   | 3     | 1     | 1     |
| 8262   | 1   | 4     | 3     | 3     |
| 8263   | 1   | 3     | 2     | 2     |
| 8267   | 2   | 4     | 3     | 3     |
| 8271   | 3   | 5     | 3     | 4     |
| 8274   | 1   | 4     | 2     | 1     |
| 8275   | 2   | 5     | 3     | 3     |
| 8279   | 1   | 3     | 1     | 1     |
| 8285   | 3   | 5     | 4     | 5     |
| 8287   | 5   | 6     | 6     | 6     |
| 8289   | 0   | 3     | 1     | 1     |
| 8291   | 0   | 1     | 2     | 5     |
| 8299   | 0   | 6     | 5     | 6     |
| 8301   | 1   | 2     | 3     | 1     |
| 8302   | 0   | 2     | 1     | 1     |
| 8308   | 1   | 5     | 2     | 3     |
| 8313   | 0   | 3     | 3     | 2     |
| 8316   | 2   | 5     | 3     | 5     |
| 8317   | 0   | 0     | 1     | 1     |
| 8319   | 0   | 1     | 1     | 1     |
| 8323   | 2   | 4     | 3     | 2     |



| respid | Q37 | Q38_1 | Q39_1 | Q39_2 |
|--------|-----|-------|-------|-------|
| 8324   | 0   | 1     | 2     | 2     |
| 8327   | 2   | 5     | 3     | 4     |
| 8328   | 1   | 1     | 3     | 2     |
| 8342   | 2   | 4     | 2     | 1     |
| 8350   | 1   | 2     | 1     | 1     |
| 8352   | 0   | 1     | 1     | 1     |
| 8353   | 0   | 1     | 2     | 1     |
| 8356   | 0   | 2     | 1     | 1     |
| 8367   | 0   | 1     | 1     | 1     |
| 8373   | 1   | 3     | 2     | 1     |
| 8379   | 0   |       |       |       |
| 8382   | 1   | 5     | 3     | 4     |
| 8387   | 2   | 6     | 3     | 1     |
| 8409   | 0   | 3     | 2     | 5     |
| 8410   | 0   | 1     | 1     | 1     |
| 8412   | 2   | 3     | 2     | 2     |
| 8415   | 0   | 2     | 2     | 1     |
| 8417   | 1   | 2     | 2     | 1     |
| 8422   | 1   | 3     | 2     | 1     |
| 8430   | 2   | 4     | 3     | 3     |
| 8434   | 0   | 2     | 1     | 1     |
| 8436   | 0   |       |       |       |
| 8446   | 1   | 4     | 2     | 2     |
| 8447   | 0   | 3     | 1     | 1     |
| 8448   | 0   | 5     | 2     | 2     |
| 8455   | 2   | 4     | 2     | 2     |
| 8456   | 0   | 0     | 2     | 1     |
| 8459   | 1   | 2     | 2     | 1     |
| 8460   | 0   | 1     | 1     | 1     |
| 8464   | 1   | 4     | 3     | 4     |
| 8470   | 0   | 4     | 1     | 1     |
| 8473   | 1   | 1     | 2     | 1     |

| respid | Q37 | Q38_1 | Q39_1 | Q39_2 |
|--------|-----|-------|-------|-------|
| 8486   | 0   | 0     | 1     | 1     |
| 8487   | 1   | 3     | 2     | 1     |
| 8489   | 1   | 3     | 3     | 3     |
| 8494   | 0   | 2     | 2     | 2     |
| 8495   | 4   | 5     | 5     | 6     |
| 8497   | 0   | 4     | 2     | 2     |
| 8510   | 1   | 3     | 2     | 1     |
| 8515   | 1   | 3     | 2     | 2     |
| 8526   | 0   |       |       |       |
| 8530   | 0   |       |       |       |
| 8532   | 2   | 2     | 2     | 2     |
| 8533   | 0   |       |       |       |
| 8534   | 2   | 4     | 2     | 1     |
| 8572   | 2   | 3     | 3     | 2     |
| 8582   | 1   | 2     | 1     | 1     |
| 8584   | 0   | 4     | 2     | 1     |
| 8585   | 0   |       |       |       |
| 8586   | 0   |       |       |       |
| 8589   | 1   | 5     | 2     | 2     |
| 8593   | 0   | 1     | 1     | 1     |
| 8594   | 1   | 2     | 1     | 1     |
| 8601   | 1   | 2     | 1     | 1     |
| 8603   | 2   | 2     | 3     | 3     |
| 8604   | 0   |       |       |       |
| 8605   | 0   |       |       |       |
| 8607   | 0   | 3     | 2     | 2     |
| 8623   | 1   | 3     | 1     | 1     |
| 8626   | 2   | 4     | 2     | 1     |
| 8638   | 1   | 2     | 1     | 1     |
| 8640   | 0   | 4     | 1     | 1     |
| 8641   | 2   | 5     | 3     | 4     |
| 8643   | 1   | 1     | 1     | 1     |

| respid | Q37 | Q38_1 | Q39_1 | Q39_2 |
|--------|-----|-------|-------|-------|
| 8644   | 2   | 5     | 2     | 2     |
| 8646   | 0   | 1     | 1     | 1     |
| 8647   | 0   |       |       |       |
| 8649   | 1   | 4     | 2     | 2     |
| 8650   | 1   | 3     | 1     | 1     |
| 8658   | 0   | 2     | 1     | 1     |
| 8659   | 2   | 4     | 1     | 1     |
| 8669   | 1   | 4     | 1     | 1     |
| 8672   | 1   | 4     | 2     | 1     |
| 8673   | 1   | 3     | 1     | 2     |
| 8676   | 0   | 1     | 1     | 1     |
| 8677   | 0   |       |       |       |
| 8681   | 0   | 1     | 3     | 1     |
| 8688   | 1   | 2     | 2     | 1     |
| 8689   | 2   | 5     | 3     | 1     |
| 8690   | 0   | 4     | 1     | 1     |
| 8693   | 0   | 2     | 1     | 2     |
| 8694   | 1   | 1     | 2     | 1     |
| 8699   | 1   | 3     | 2     | 2     |
| 8700   | 0   |       |       |       |
| 8703   | 0   | 0     | 1     | 1     |
| 8704   | 0   | 1     | 1     | 1     |
| 8706   | 2   | 3     | 3     | 2     |
| 8709   | 1   | 2     | 2     | 1     |
| 8715   | 0   | 2     | 1     | 1     |
| 8728   | 2   | 4     | 3     | 1     |
| 8729   | 1   | 1     | 1     | 1     |
| 8730   | 1   | 2     | 2     | 2     |
| 8742   | 1   | 3     | 1     | 1     |
| 8748   | 1   | 2     | 1     | 1     |
| 8749   | 0   | 2     | 2     | 1     |
| 8750   | 1   | 2     | 1     | 1     |

| respid | Q37 | Q38_1 | Q39_1 | Q39_2 |
|--------|-----|-------|-------|-------|
| 8751   | 0   | 1     | 1     | 1     |
| 8752   | 2   | 4     | 2     | 2     |
| 8754   | 0   | 2     | 1     | 1     |
| 8757   | 0   | 1     | 2     | 1     |
| 8760   | 0   | 3     | 1     | 1     |
| 8761   | 3   | 3     | 3     | 4     |
| 8762   | 1   | 4     | 2     | 1     |
| 8763   | 0   | 1     | 1     | 1     |
| 8764   | 0   | 4     | 1     | 1     |
| 8765   | 0   | 1     | 1     | 1     |
| 8766   | 2   | 4     | 2     | 2     |
| 8767   | 2   | 2     | 3     | 2     |
| 8768   | 1   | 2     | 1     | 1     |
| 8770   | 0   | 1     | 1     | 1     |
| 8771   | 0   |       |       |       |
| 8773   | 0   | 2     | 2     | 1     |
| 8774   | 1   | 3     | 2     | 2     |
| 8776   | 0   | 1     | 1     | 1     |
| 8777   | 0   | 0     | 1     | 1     |
| 8778   | 0   | 3     | 2     | 2     |
| 8779   | 0   |       |       |       |
| 8784   | 1   | 3     | 2     | 2     |
| 8786   | 0   |       |       |       |
| 8787   | 1   | 2     | 2     | 2     |
| 8790   | 0   |       |       |       |
| 8791   | 5   | 6     | 5     | 6     |
| 8793   | 0   |       |       |       |
| 8795   | 1   | 1     | 3     | 2     |
| 8797   | 0   | 1     | 1     | 1     |
| 8801   | 0   | 3     | 3     | 3     |
| 8802   | 0   | 1     | 1     | 1     |
| 8807   | 0   |       |       |       |

| respid | Q37 | Q38_1 | Q39_1 | Q39_2 |
|--------|-----|-------|-------|-------|
| 8813   | 0   | 3     | 1     | 1     |
| 8817   | 1   | 2     | 2     | 1     |
| 8818   | 1   | 2     | 2     | 2     |
| 8821   | 0   | 3     | 1     | 1     |
| 8822   | 2   | 1     | 2     | 1     |
| 8823   | 0   | 2     | 1     | 1     |
| 8824   | 0   | 2     | 1     | 1     |
| 8825   | 0   | 0     | 2     | 1     |
| 8834   | 1   | 2     | 1     | 2     |
| 8840   | 5   | 4     | 6     | 6     |
| 8843   | 3   | 6     | 4     | 5     |
| 8846   | 1   | 3     | 1     | 1     |
| 8862   | 0   |       |       |       |
| 8866   | 0   | 1     | 1     | 1     |
| 8869   | 1   | 2     | 1     | 1     |
| 8872   | 1   | 5     | 3     | 4     |
| 8903   | 0   |       |       |       |
| 8909   | 0   |       |       |       |
| 8926   | 0   | 3     | 2     | 1     |
| 8936   | 0   | 3     | 2     | 1     |
| 8945   | 0   |       |       |       |
| 8954   | 0   | 1     | 2     | 2     |
| 8955   | 2   | 4     | 3     | 1     |
| 8958   | 1   | 2     | 2     | 1     |
| 8959   | 1   | 3     | 1     | 1     |
| 8960   | 0   | 6     | 1     | 1     |
| 8976   | 0   | 1     | 1     | 2     |
| 8977   | 1   | 2     | 2     | 1     |
| 8979   | 2   | 3     | 3     | 2     |
| 8985   | 0   |       |       |       |
| 8994   | 0   | 3     | 3     | 3     |
| 8997   | 0   | 4     | 3     | 3     |

| respid | Q37 | Q38_1 | Q39_1 | Q39_2 |
|--------|-----|-------|-------|-------|
| 9002   | 0   | 2     | 1     | 1     |
| 9005   | 1   | 4     | 2     | 1     |
| 9017   | 0   | 1     | 1     | 1     |
| 9018   | 0   | 1     | 1     | 1     |
| 9021   | 0   | 2     | 1     | 1     |
| 9029   | 3   | 5     | 5     | 4     |
| 9035   | 1   | 2     | 2     | 1     |
| 9038   | 0   | 1     | 1     | 1     |
| 9039   | 0   |       |       |       |
| 9040   | 1   | 3     | 2     | 2     |
| 9042   | 0   | 4     | 2     | 1     |
| 9043   | 0   | 3     | 1     | 1     |
| 9045   | 1   | 3     | 3     | 1     |
| 9051   | 0   | 0     | 1     | 1     |
| 9067   | 0   | 0     | 1     | 1     |
| 9069   | 1   | 3     | 3     | 2     |
| 9073   | 1   | 3     | 2     | 1     |
| 9084   | 1   | 4     | 2     | 2     |
| 9096   | 0   |       |       |       |
| 9100   | 2   | 1     | 1     | 1     |
| 9107   | 0   |       |       |       |
| 9110   | 0   | 1     | 1     | 1     |
| 9120   | 0   | 0     | 1     | 1     |
| 9122   | 3   | 3     | 4     | 3     |
| 9130   | 0   | 1     | 1     | 1     |
| 9134   | 1   | 0     | 6     | 6     |
| 9137   | 0   | 4     | 2     | 3     |
| 9139   | 0   | 1     | 1     | 1     |
| 9144   | 0   |       |       |       |
| 9157   | 1   | 4     | 2     | 1     |
| 9166   | 1   | 4     | 2     | 4     |
| 9177   | 3   | 4     | 4     | 3     |

| respid | Q37 | Q38_1 | Q39_1 | Q39_2 |
|--------|-----|-------|-------|-------|
| 9181   | 0   | 1     | 1     | 1     |
| 9183   | 0   | 3     | 2     | 3     |
| 9184   | 2   | 4     | 3     | 3     |
| 9188   | 0   |       |       |       |
| 9197   | 0   | 3     | 1     | 1     |
| 9200   | 2   | 3     | 3     | 3     |
| 9205   | 0   | 5     | 3     | 2     |
| 9207   | 1   | 2     | 2     | 2     |
| 9213   | 1   | 2     | 2     | 1     |
| 9216   | 1   | 2     | 2     | 2     |
| 9217   | 0   |       |       |       |
| 9218   | 1   | 2     | 1     | 1     |
| 9219   | 2   | 5     | 4     | 5     |
| 9220   | 0   |       |       |       |
| 9221   | 1   | 4     | 3     | 2     |
| 9223   | 3   | 5     | 5     | 5     |
| 9228   | 0   |       |       |       |
| 9230   | 0   | 0     | 2     | 2     |
| 9231   | 1   | 1     | 2     | 1     |
| 9233   | 0   | 1     | 2     | 1     |
| 9235   | 0   | 2     | 1     | 1     |
| 9237   | 0   | 1     | 2     | 1     |
| 9242   | 1   | 3     | 2     | 1     |
| 9250   | 0   |       |       |       |
| 9253   | 3   | 6     | 6     | 6     |
| 9257   | 0   | 6     | 2     | 4     |
| 9263   | 0   | 3     | 1     | 1     |
| 9267   | 1   | 2     | 2     | 2     |
| 9272   | 2   | 3     | 3     | 1     |
| 9279   | 0   |       |       |       |
| 9281   | 0   | 4     | 2     | 2     |
| 9285   | 0   | 4     | 1     | 2     |

| respid | Q37 | Q38_1 | Q39_1 | Q39_2 |
|--------|-----|-------|-------|-------|
| 9286   | 1   | 5     | 3     | 2     |
| 9294   | 1   | 3     | 2     | 2     |
| 9295   | 0   | 0     | 1     | 1     |
| 9297   | 1   | 2     | 2     | 2     |
| 9299   | 0   | 3     | 4     | 3     |
| 9309   | 1   | 6     | 1     | 4     |
| 9315   | 0   |       |       |       |
| 9320   | 0   | 1     | 2     | 1     |
| 9324   | 0   | 1     | 2     | 1     |
| 9326   | 0   | 1     | 1     | 1     |
| 9333   | 0   | 3     | 1     | 1     |
| 9334   | 1   | 4     | 2     | 2     |
| 9336   | 1   | 6     | 2     | 4     |
| 9337   | 0   | 1     | 1     | 1     |
| 9342   | 1   | 2     | 1     | 1     |
| 9347   | 0   | 4     | 1     | 1     |
| 9352   | 0   | 2     | 2     | 1     |
| 9355   | 0   | 0     | 1     | 2     |
| 9356   | 1   | 3     | 2     | 2     |
| 9359   | 1   | 2     | 2     | 1     |
| 9368   | 0   | 0     | 1     | 1     |
| 9375   | 1   | 5     | 2     | 3     |
| 9384   | 1   | 3     | 2     | 3     |
| 9388   | 0   | 3     | 2     | 1     |
| 9397   | 1   | 5     | 4     | 4     |
| 9400   | 0   | 4     | 1     | 1     |
| 9401   | 3   | 4     | 4     | 4     |
| 9402   | 0   |       |       |       |
| 9417   | 1   | 5     | 5     | 4     |
| 9424   | 0   | 1     | 1     | 1     |
| 9427   | 0   | 6     | 2     | 2     |
| 9429   | 1   | 1     | 1     | 1     |



| respid | Q37 | Q38_1 | Q39_1 | Q39_2 |
|--------|-----|-------|-------|-------|
| 9437   | 1   | 5     | 4     | 4     |
| 9442   | 2   | 3     | 3     | 2     |
| 9446   | 0   | 3     | 2     | 2     |
| 9447   | 0   | 5     | 2     | 2     |
| 9448   | 1   | 2     | 2     | 2     |
| 9449   | 0   | 2     | 2     | 5     |
| 9455   | 0   |       |       |       |
| 9459   | 1   | 5     | 2     | 3     |
| 9460   | 0   | 1     | 1     | 1     |
| 9461   | 1   | 3     | 1     | 1     |
| 9463   | 0   | 2     | 2     | 1     |
| 9464   | 1   | 2     | 2     | 2     |
| 9466   | 2   | 4     | 3     | 2     |
| 9477   | 0   | 1     | 1     | 1     |
| 9482   | 4   | 5     | 4     | 5     |
| 9486   | 1   | 4     | 2     | 2     |
| 9488   | 3   | 5     | 4     | 5     |
| 9489   | 0   | 4     | 2     | 1     |
| 9496   | 1   | 1     | 2     | 1     |
| 9499   | 0   | 3     | 1     | 1     |
| 9512   | 0   | 1     | 1     | 1     |
| 9514   | 0   | 2     | 1     | 1     |
| 9516   | 0   | 5     | 1     | 1     |
| 9517   | 1   | 2     | 2     | 4     |
| 9520   | 0   | 1     | 1     | 1     |
| 9527   | 1   | 1     | 1     | 1     |
| 9532   | 2   | 5     | 3     | 3     |
| 9533   | 0   | 0     | 1     | 1     |
| 9543   | 0   | 4     | 1     | 1     |
| 9550   | 1   | 2     | 2     | 3     |
| 9553   | 0   | 3     | 2     | 2     |
| 9555   | 3   | 5     | 5     | 4     |

| respid | Q37 | Q38_1 | Q39_1 | Q39_2 |
|--------|-----|-------|-------|-------|
| 9565   | 2   | 3     | 1     | 1     |
| 9583   | 2   | 3     | 3     | 1     |
| 9594   | 0   | 0     | 1     | 1     |
| 9596   | 1   | 4     | 2     | 1     |
| 9600   | 2   | 5     | 2     | 3     |
| 9602   | 1   | 0     | 1     | 1     |
| 9606   | 0   | 1     | 1     | 2     |
| 9608   | 1   | 4     | 3     | 3     |
| 9610   | 1   | 2     | 2     | 1     |
| 9612   | 0   | 4     | 3     | 4     |
| 9613   | 0   | 2     | 1     | 1     |
| 9614   | 0   | 5     | 1     | 2     |
| 9620   | 0   | 1     | 1     | 1     |
| 9628   | 0   | 1     | 2     | 1     |
| 9631   | 0   | 2     | 1     | 1     |
| 9632   | 0   | 1     | 2     | 1     |
| 9633   | 1   | 2     | 1     | 1     |
| 9639   | 0   |       |       |       |
| 9640   | 1   | 1     | 2     | 1     |
| 9642   | 0   | 1     | 2     | 3     |
| 9653   | 0   | 3     | 2     | 2     |
| 9658   | 1   | 2     | 2     | 1     |
| 9659   | 2   | 4     | 1     | 1     |
| 9661   | 0   | 1     | 1     | 1     |
| 9664   | 0   | 3     | 2     | 1     |
| 9665   | 2   | 2     | 1     | 1     |
| 9666   | 1   | 4     | 2     | 1     |
| 9667   | 1   | 3     | 3     | 3     |
| 9668   | 0   |       |       |       |
| 9670   | 1   | 3     | 2     | 2     |
| 9671   | 0   | 0     | 1     | 1     |
| 9681   | 0   | 1     | 2     | 1     |

| respid | Q37 | Q38_1 | Q39_1 | Q39_2 |
|--------|-----|-------|-------|-------|
| 9684   | 1   | 2     | 1     | 2     |
| 9685   | 0   | 3     | 2     | 1     |
| 9686   | 4   | 5     | 3     | 4     |
| 9688   | 3   | 5     | 2     | 2     |
| 9692   | 1   | 1     | 2     | 1     |
| 9693   | 1   | 5     | 3     | 2     |
| 9698   | 1   | 4     | 2     | 1     |
| 9699   | 1   | 3     | 2     | 2     |
| 9701   | 0   | 2     | 1     | 1     |
| 9702   | 0   | 1     | 1     | 1     |
| 9709   | 0   | 3     | 1     | 1     |
| 9713   | 0   |       |       |       |
| 9715   | 0   |       |       |       |
| 9721   | 0   | 0     | 1     | 1     |
| 9725   | 0   | 1     | 1     | 1     |
| 9729   | 0   | 2     | 1     | 3     |
| 9731   | 1   | 2     | 2     | 2     |
| 9736   | 0   | 4     | 1     | 1     |
| 9740   | 0   |       |       |       |
| 9741   | 0   | 1     | 1     | 1     |
| 9749   | 1   | 3     | 2     | 3     |
| 9750   | 0   | 1     | 2     | 2     |
| 9751   | 2   | 5     | 4     | 5     |
| 9753   | 0   | 1     | 1     | 1     |
| 9754   | 3   | 4     | 4     | 4     |
| 9756   | 2   | 4     | 3     | 3     |
| 9758   | 3   | 5     | 4     | 3     |
| 9759   | 0   | 2     | 1     | 1     |
| 9760   | 0   | 1     | 2     | 2     |
| 9761   | 0   |       |       |       |
| 9762   | 0   | 4     | 2     | 2     |
| 9764   | 0   | 3     | 1     | 1     |

| respid | Q37 | Q38_1 | Q39_1 | Q39_2 |
|--------|-----|-------|-------|-------|
| 9768   | 0   | 1     | 1     | 1     |
| 9769   | 1   | 3     | 2     | 2     |
| 9770   | 0   | 1     | 1     | 1     |
| 9771   | 1   | 2     | 2     | 1     |
| 9772   | 1   | 1     | 1     | 1     |
| 9773   | 2   | 2     | 2     | 1     |
| 9776   | 0   | 2     | 1     | 1     |
| 9786   | 1   | 3     | 3     | 2     |
| 9790   | 0   | 3     | 2     | 1     |
| 9791   | 0   | 1     | 1     | 1     |
| 9794   | 2   | 4     | 3     | 2     |
| 9797   | 0   | 2     | 1     | 1     |
| 9799   | 1   | 3     | 2     | 1     |
| 9804   | 0   | 1     | 1     | 1     |
| 9805   | 1   | 4     | 2     | 2     |
| 9806   | 1   | 2     | 1     | 1     |
| 9807   | 0   | 2     | 1     | 2     |
| 9813   | 1   | 1     | 2     | 1     |
| 9817   | 0   | 1     | 1     | 1     |
| 9823   | 0   | 2     | 1     | 1     |
| 9826   | 0   | 5     | 2     | 1     |
| 9830   | 1   | 1     | 2     | 2     |
| 9835   | 2   | 2     | 2     | 1     |
| 9836   | 0   | 2     | 2     | 2     |
| 9841   | 0   |       |       |       |
| 9842   | 0   | 1     | 1     | 1     |
| 9844   | 0   | 2     | 3     | 3     |
| 9847   | 0   | 1     | 1     | 1     |
| 9851   | 0   | 1     | 1     | 1     |
| 9852   | 0   | 3     | 2     | 2     |
| 9854   | 0   | 1     | 2     | 1     |
| 9855   | 1   | 2     | 1     | 1     |

| respid | Q37 | Q38_1 | Q39_1 | Q39_2 |
|--------|-----|-------|-------|-------|
| 9856   | 1   | 2     | 1     | 1     |
| 9862   | 1   | 2     | 1     | 1     |
| 9863   | 0   |       |       |       |
| 9866   | 1   | 2     | 2     | 2     |
| 9867   | 3   | 5     | 2     | 2     |
| 9868   | 2   | 5     | 3     | 2     |
| 9869   | 0   | 3     | 1     | 1     |
| 9878   | 1   | 4     | 2     | 2     |
| 9879   | 3   | 4     | 2     | 1     |
| 9881   | 0   | 2     | 1     | 2     |
| 9882   | 1   | 3     | 1     | 1     |
| 9884   | 0   | 1     | 2     | 1     |
| 9885   | 0   | 1     | 1     | 1     |
| 9888   | 0   | 2     | 3     | 1     |
| 9889   | 0   | 1     | 1     | 1     |
| 9894   | 3   | 4     | 3     | 3     |
| 9895   | 1   | 2     | 1     | 1     |
| 9896   | 4   | 5     | 6     | 5     |
| 9897   | 3   | 4     | 4     | 4     |
| 9905   | 1   | 3     | 1     | 1     |
| 9907   | 0   | 1     | 1     | 1     |
| 9908   | 0   | 1     | 2     | 1     |
| 9909   | 0   | 1     | 2     | 2     |
| 9910   | 3   | 6     | 2     | 4     |
| 9913   | 2   | 3     | 2     | 2     |
| 9914   | 1   | 2     | 1     | 1     |
| 9915   | 0   | 2     | 2     | 1     |
| 9916   | 0   | 0     | 1     | 1     |
| 9918   | 0   |       |       |       |
| 9919   | 1   | 2     | 2     | 2     |
| 9922   | 2   | 5     | 2     | 3     |
| 9930   | 0   | 1     | 1     | 1     |

| respid | Q37 | Q38_1 | Q39_1 | Q39_2 |
|--------|-----|-------|-------|-------|
| 9934   | 0   | 0     | 1     | 1     |
| 9936   | 0   | 2     | 3     | 2     |
| 9938   | 0   | 1     | 1     | 1     |
| 9940   | 1   | 1     | 1     | 1     |
| 9944   | 2   | 4     | 2     | 3     |
| 9945   | 0   | 3     | 1     | 1     |
| 9948   | 3   | 5     | 3     | 2     |
| 9949   | 2   | 5     | 2     | 3     |
| 9951   | 1   | 1     | 2     | 2     |
| 9952   | 2   | 1     | 2     | 2     |
| 9954   | 0   | 0     | 1     | 1     |
| 9955   | 0   | 0     | 1     | 1     |
| 9956   | 3   | 5     | 3     | 3     |
| 9957   | 3   | 3     | 3     | 3     |
| 9958   | 0   | 1     | 2     | 3     |
| 9959   | 2   | 2     | 3     | 1     |
| 9960   | 1   | 4     | 2     | 2     |
| 9961   | 0   | 3     | 1     | 1     |
| 9962   | 0   | 3     | 2     | 3     |
| 9969   | 0   | 5     | 2     | 1     |
| 9982   | 2   | 3     | 2     | 2     |
| 9984   | 2   | 2     | 1     | 2     |
| 9990   | 1   | 3     | 1     | 1     |
| 9992   | 2   | 1     | 3     | 2     |
| 9993   | 1   | 3     | 3     | 4     |
| 9997   | 0   | 0     | 1     | 1     |
| 9999   | 0   | 3     | 2     | 1     |
| 10000  | 2   | 5     | 2     | 1     |
| 10005  | 2   | 3     | 5     | 4     |
| 10014  | 0   | 0     | 1     | 1     |
| 10016  | 4   | 3     | 4     | 2     |
| 10017  | 0   | 3     | 1     | 1     |

| respid | Q37 | Q38_1 | Q39_1 | Q39_2 |
|--------|-----|-------|-------|-------|
| 10018  | 2   | 2     | 4     | 3     |
| 10021  | 0   | 1     | 1     | 2     |
| 10025  | 1   | 5     | 4     | 3     |
| 10027  | 0   | 5     | 2     | 1     |
| 10028  | 0   | 3     | 1     | 2     |
| 10031  | 2   | 2     | 2     | 2     |
| 10036  | 1   | 4     | 2     | 1     |
| 10037  | 1   | 2     | 2     | 2     |
| 10038  | 1   | 3     | 2     | 2     |
| 10039  | 0   |       |       |       |
| 10041  | 2   | 1     | 1     | 1     |
| 10045  | 3   | 5     | 5     | 5     |
| 10046  | 3   | 6     | 2     | 2     |
| 10047  | 1   | 3     | 2     | 2     |
| 10048  | 1   | 1     | 1     | 1     |
| 10049  | 1   | 3     | 2     | 2     |
| 10051  | 0   | 3     | 1     | 1     |
| 10052  | 2   | 3     | 1     | 2     |
| 10056  | 0   | 2     | 1     | 1     |
| 10061  | 0   | 2     | 2     | 1     |
| 10064  | 1   | 1     | 2     | 1     |
| 10066  | 0   | 1     | 1     | 1     |
| 10069  | 0   | 0     | 1     | 1     |
| 10071  | 0   | 3     | 2     | 2     |
| 10074  | 0   | 1     | 1     | 1     |
| 10079  | 1   | 1     | 1     | 1     |
| 10087  | 3   | 5     | 6     | 6     |
| 10095  | 2   | 2     | 1     | 1     |
| 10097  | 0   | 1     | 1     | 1     |
| 10100  | 1   | 3     | 3     | 3     |
| 10105  | 0   | 1     | 1     | 1     |
| 10107  | 2   | 4     | 2     | 1     |

| respid | Q37 | Q38_1 | Q39_1 | Q39_2 |
|--------|-----|-------|-------|-------|
| 10111  | 1   | 1     | 1     | 1     |
| 10116  | 0   | 2     | 1     | 1     |
| 10118  | 0   | 5     | 3     | 3     |
| 10123  | 0   |       |       |       |
| 10124  | 1   | 4     | 2     | 1     |
| 10130  | 1   | 5     | 2     | 1     |
| 10134  | 1   | 2     | 1     | 1     |
| 10135  | 0   | 1     | 1     | 1     |
| 10136  | 0   |       |       |       |
| 10141  | 2   | 3     | 2     | 2     |
| 10142  | 0   | 0     | 1     | 1     |
| 10143  | 0   | 0     | 1     | 1     |
| 10145  | 0   | 1     | 2     | 1     |
| 10149  | 0   | 2     | 1     | 1     |
| 10150  | 1   | 3     | 1     | 1     |
| 10151  | 0   | 1     | 1     | 2     |
| 10152  | 2   | 4     | 4     | 4     |
| 10153  | 0   | 1     | 1     | 1     |
| 10156  | 0   | 1     | 1     | 1     |
| 10160  | 1   | 4     | 3     | 2     |
| 10161  | 1   | 3     | 2     | 3     |
| 10167  | 2   | 3     | 4     | 3     |
| 10171  | 0   |       |       |       |
| 10172  | 0   | 1     | 1     | 1     |
| 10176  | 1   | 4     | 1     | 1     |
| 10177  | 2   | 3     | 2     | 1     |
| 10182  | 1   | 4     | 2     | 2     |
| 10184  | 0   | 1     | 1     | 1     |
| 10186  | 3   | 4     | 4     | 4     |
| 10189  | 0   | 4     | 1     | 1     |
| 10191  | 0   | 1     | 1     | 1     |
| 10192  | 0   | 2     | 2     | 1     |



| respid | Q37 | Q38_1 | Q39_1 | Q39_2 |
|--------|-----|-------|-------|-------|
| 10195  | 0   | 2     | 1     | 1     |
| 10199  | 0   |       |       |       |
| 10201  | 0   | 2     | 1     | 1     |
| 10213  | 1   | 1     | 2     | 1     |
| 10222  | 3   | 5     | 3     | 3     |
| 10224  | 0   |       |       |       |
| 10245  | 0   | 6     | 1     | 1     |
| 10254  | 0   | 3     | 2     | 1     |
| 10255  | 4   | 6     | 6     | 6     |
| 10257  | 1   | 3     | 3     | 1     |
| 10260  | 2   | 4     | 1     | 2     |
| 10261  | 2   | 5     | 2     | 2     |
| 10263  | 5   | 6     | 6     | 6     |
| 10264  | 0   | 3     | 1     | 1     |
| 10268  | 2   | 2     | 2     | 3     |
| 10269  | 2   | 3     | 2     | 3     |
| 10270  | 0   |       |       |       |
| 10282  | 0   | 1     | 1     | 1     |
| 10285  | 0   |       |       |       |
| 10288  | 0   | 2     | 1     | 1     |
| 10291  | 0   | 3     | 3     | 1     |
| 10292  | 0   | 3     | 1     | 1     |
| 10304  | 0   |       |       |       |
| 10305  | 0   | 2     | 1     | 1     |
| 10310  | 1   | 1     | 2     | 1     |
| 10324  | 0   | 0     | 1     | 1     |
| 10325  | 0   | 3     | 2     | 2     |
| 10326  | 3   | 4     | 2     | 1     |
| 10329  | 0   |       |       |       |
| 10332  | 0   | 0     | 1     | 1     |
| 10337  | 1   | 4     | 2     | 1     |
| 10341  | 1   | 3     | 2     | 1     |

| respid | Q37 | Q38_1 | Q39_1 | Q39_2 |
|--------|-----|-------|-------|-------|
| 10353  | 1   | 4     | 2     | 2     |
| 10354  | 0   |       |       |       |
| 10359  | 2   | 3     | 2     | 3     |
| 10360  | 0   | 1     | 1     | 1     |
| 10362  | 1   | 2     | 2     | 1     |
| 10364  | 1   | 1     | 1     | 1     |
| 10366  | 3   | 4     | 2     | 4     |
| 10367  | 0   | 3     | 1     | 1     |
| 10371  | 0   | 1     | 1     | 1     |
| 10374  | 1   | 3     | 2     | 1     |
| 10375  | 0   | 1     | 1     | 1     |
| 10376  | 0   | 1     | 1     | 1     |
| 10377  | 1   | 0     | 1     | 1     |
| 10378  | 2   | 2     | 4     | 4     |
| 10387  | 0   | 3     | 1     | 1     |
| 10396  | 3   | 5     | 4     | 4     |
| 10397  | 0   | 1     | 1     | 1     |
| 10399  | 1   | 5     | 3     | 2     |
| 10405  | 0   | 5     | 2     | 1     |
| 10406  | 0   | 2     | 1     | 1     |
| 10408  | 0   | 1     | 1     | 1     |
| 10409  | 0   |       |       |       |
| 10412  | 0   | 3     | 1     | 1     |
| 10413  | 0   | 1     | 1     | 1     |
| 10419  | 0   | 4     | 3     | 4     |
| 10423  | 2   | 5     | 4     | 4     |
| 10426  | 0   | 3     | 1     | 1     |
| 10446  | 0   | 4     | 1     | 1     |
| 10448  | 0   | 2     | 1     | 1     |
| 10450  | 0   | 4     | 1     | 1     |
| 10455  | 0   | 3     | 2     | 2     |
| 10460  | 0   | 2     | 1     | 3     |

| respid | Q37 | Q38_1 | Q39_1 | Q39_2 |
|--------|-----|-------|-------|-------|
| 10461  | 0   | 3     | 2     | 2     |
| 10471  | 0   | 1     | 1     | 1     |
| 10472  | 0   | 2     | 1     | 1     |
| 10491  | 4   | 5     | 5     | 5     |
| 10493  | 1   | 4     | 3     | 2     |
| 10498  | 1   | 2     | 1     | 1     |
| 10533  | 1   | 3     | 1     | 1     |
| 10539  | 1   | 3     | 2     | 1     |
| 10540  | 0   | 2     | 1     | 1     |
| 10557  | 0   | 3     | 3     | 2     |
| 10558  | 3   | 3     | 3     | 4     |
| 10559  | 2   | 4     | 2     | 3     |
| 10564  | 1   | 4     | 1     | 1     |
| 10570  | 0   |       |       |       |
| 10572  | 0   | 2     | 2     | 2     |
| 10576  | 0   | 2     | 1     | 1     |
| 10582  | 0   | 0     | 1     | 2     |
| 10593  | 0   | 1     | 1     | 1     |
| 10596  | 0   | 3     | 2     | 3     |
| 10615  | 0   |       |       |       |
| 10616  | 0   | 1     | 1     | 1     |
| 10623  | 0   | 6     | 2     | 4     |
| 10626  | 1   | 1     | 2     | 2     |
| 10627  | 1   | 1     | 4     | 4     |
| 10629  | 1   | 3     | 2     | 1     |
| 10632  | 1   | 2     | 3     | 3     |
| 10641  | 0   |       |       |       |
| 10648  | 2   | 4     | 2     | 2     |
| 10651  | 1   | 4     | 2     | 2     |
| 10654  | 0   | 0     | 1     | 1     |
| 10673  | 0   | 0     | 1     | 1     |
| 10675  | 0   | 3     | 2     | 1     |

| respid | Q37 | Q38_1 | Q39_1 | Q39_2 |
|--------|-----|-------|-------|-------|
| 10689  | 1   | 2     | 1     | 1     |
| 10692  | 1   | 5     | 1     | 1     |
| 10694  | 0   | 1     | 1     | 1     |
| 10695  | 0   | 1     | 1     | 1     |
| 10702  | 1   | 3     | 2     | 3     |
| 10703  | 1   | 1     | 5     | 5     |
| 10708  | 0   | 1     | 1     | 1     |
| 10719  | 0   | 2     | 2     | 1     |
| 10722  | 0   | 3     | 1     | 1     |
| 10723  | 0   | 3     | 2     | 2     |
| 10726  | 0   | 2     | 2     | 1     |
| 10727  | 0   | 1     | 1     | 1     |
| 10730  | 0   | 2     | 2     | 1     |
| 10731  | 0   |       |       |       |
| 10737  | 1   | 2     | 1     | 1     |
| 10743  | 0   | 3     | 2     | 1     |
| 10763  | 0   | 1     | 1     | 1     |
| 10777  | 0   |       |       |       |
| 10787  | 2   | 5     | 4     | 3     |
| 10798  | 1   | 1     | 4     | 4     |
| 10800  | 0   | 2     | 1     | 1     |
| 10802  | 1   | 1     | 4     | 4     |
| 10803  | 3   | 5     | 5     | 5     |
| 10808  | 0   | 2     | 2     | 1     |
| 10810  | 1   | 2     | 3     | 1     |
| 10819  | 0   | 0     | 1     | 1     |
| 10825  | 0   | 1     | 1     | 1     |
| 10827  | 2   | 4     | 3     | 2     |
| 10830  | 1   | 4     | 4     | 2     |
| 10847  | 0   | 2     | 1     | 1     |
| 10849  | 0   | 3     | 2     | 2     |
| 10852  | 0   | 2     | 1     | 1     |

| respid | Q37 | Q38_1 | Q39_1 | Q39_2 |
|--------|-----|-------|-------|-------|
| 10854  | 3   | 4     | 4     | 4     |
| 10857  | 0   | 3     | 1     | 1     |
| 10861  | 2   | 5     | 3     | 3     |
| 10862  | 0   |       |       |       |
| 10870  | 1   | 3     | 3     | 5     |
| 10873  | 1   | 1     | 2     | 2     |
| 10881  | 0   | 3     | 2     | 1     |
| 10893  | 0   |       |       |       |
| 10898  | 0   | 1     | 1     | 2     |
| 10899  | 2   | 4     | 3     | 5     |
| 10905  | 2   | 3     | 2     | 2     |
| 10910  | 0   |       |       |       |
| 10911  | 1   | 2     | 2     | 2     |
| 10912  | 0   | 0     | 1     | 1     |
| 10913  | 0   | 1     | 1     | 1     |
| 10918  | 0   |       |       |       |
| 10995  | 0   |       |       |       |
| 11002  | 0   | 1     | 2     | 3     |
| 11003  | 1   | 2     | 2     | 2     |
| 11005  | 1   | 4     | 1     | 1     |
| 11015  | 0   | 1     | 1     | 1     |
| 11016  | 5   | 2     | 6     | 6     |
| 11017  | 0   | 0     | 1     | 1     |
| 11020  | 1   | 1     | 4     | 4     |
| 11024  | 0   | 3     | 2     | 2     |
| 11026  | 2   | 3     | 5     | 4     |
| 11028  | 2   | 3     | 3     | 3     |
| 11029  | 1   | 1     | 5     | 5     |
| 11030  | 0   | 2     | 1     | 1     |
| 11031  | 0   | 3     | 1     | 1     |
| 11038  | 0   | 0     | 1     | 1     |
| 11051  | 0   | 1     | 1     | 1     |

| respid | Q37 | Q38_1 | Q39_1 | Q39_2 |
|--------|-----|-------|-------|-------|
| 11052  | 2   | 2     | 4     | 4     |
| 11053  | 1   | 1     | 2     | 1     |
| 11054  | 2   | 1     | 4     | 4     |
| 11063  | 0   | 1     | 1     | 1     |
| 11075  | 2   | 2     | 3     | 4     |
| 11083  | 0   | 3     | 4     | 5     |
| 11092  | 0   | 2     | 1     | 1     |
| 11118  | 0   | 1     | 1     | 1     |
| 11119  | 1   | 3     | 2     | 3     |
| 11134  | 1   | 5     | 3     | 3     |
| 11139  | 0   | 6     | 1     | 1     |
| 11154  | 0   | 1     | 1     | 1     |
| 11166  | 1   | 0     | 5     | 5     |
| 11168  | 0   |       |       |       |
| 11176  | 2   | 5     | 2     | 3     |
| 11183  | 2   | 4     | 3     | 3     |
| 11189  | 0   | 1     | 1     | 1     |
| 11196  | 4   | 5     | 4     | 5     |
| 11200  | 0   | 2     | 2     | 2     |
| 11201  | 0   | 2     | 1     | 1     |
| 11211  | 4   | 5     | 3     | 4     |
| 11218  | 1   | 3     | 1     | 1     |
| 11219  | 0   | 1     | 2     | 2     |
| 11221  | 2   | 3     | 2     | 2     |
| 11222  | 0   | 3     | 1     | 1     |
| 11230  | 4   | 5     | 4     | 3     |
| 11236  | 4   | 4     | 3     | 4     |
| 11237  | 0   | 2     | 3     | 2     |
| 11240  | 3   | 6     | 5     | 5     |
| 11244  | 4   | 4     | 3     | 4     |
| 11249  | 1   | 1     | 2     | 2     |
| 11252  | 4   | 5     | 3     | 4     |

| respid | Q37 | Q38_1 | Q39_1 | Q39_2 |
|--------|-----|-------|-------|-------|
| 11254  | 1   | 2     | 2     | 2     |
| 11255  | 3   | 4     | 3     | 3     |
| 11258  | 4   | 4     | 3     | 4     |
| 11260  | 1   | 3     | 1     | 1     |
| 11264  | 3   | 5     | 4     | 4     |
| 11266  | 2   | 5     | 5     | 5     |
| 11268  | 3   | 4     | 2     | 3     |
| 11269  | 1   | 5     | 2     | 2     |
| 11272  | 0   | 2     | 2     | 2     |
| 11273  | 0   | 1     | 1     | 1     |
| 11275  | 0   | 3     | 1     | 1     |
| 11276  | 2   | 4     | 1     | 1     |
| 11278  | 3   | 4     | 3     | 3     |
| 11288  | 0   |       |       |       |
| 11289  | 0   |       |       |       |
| 11291  | 0   | 3     | 1     | 1     |
| 11295  | 0   | 3     | 1     | 1     |
| 11297  | 0   | 1     | 2     | 1     |
| 11304  | 2   | 4     | 4     | 5     |
| 11305  | 0   | 0     | 1     | 1     |
| 11311  | 0   | 0     | 1     | 1     |
| 11313  | 0   | 1     | 1     | 1     |
| 11315  | 5   | 5     | 6     | 6     |
| 11316  | 5   | 6     | 6     | 6     |
| 11318  | 4   | 5     | 5     | 6     |
| 11323  | 0   | 1     | 1     | 1     |
| 11331  | 2   | 4     | 2     | 4     |
| 11333  | 1   | 2     | 2     | 2     |
| 11334  | 1   | 4     | 3     | 3     |
| 11340  | 4   | 6     | 5     | 4     |
| 11345  | 1   | 2     | 1     | 1     |
| 11354  | 0   | 4     | 1     | 1     |

| respid | Q37 | Q38_1 | Q39_1 | Q39_2 |
|--------|-----|-------|-------|-------|
| 11360  | 0   |       |       |       |
| 11361  | 2   | 3     | 3     | 2     |
| 11367  | 0   |       |       |       |
| 11370  | 0   |       |       |       |
| 11371  | 2   | 4     | 4     | 4     |
| 11372  | 2   | 4     | 3     | 3     |
| 11373  | 1   | 3     | 2     | 2     |
| 11382  | 0   | 2     | 1     | 1     |
| 11394  | 0   | 1     | 2     | 3     |
| 11395  | 3   | 5     | 3     | 4     |
| 11397  | 0   |       |       |       |
| 11402  | 0   | 5     | 2     | 2     |
| 11409  | 0   | 3     | 2     | 2     |
| 11410  | 1   | 5     | 2     | 2     |
| 11411  | 1   | 3     | 2     | 1     |
| 11418  | 0   | 2     | 1     | 1     |
| 11425  | 2   | 4     | 3     | 3     |
| 11429  | 0   | 1     | 1     | 1     |
| 11430  | 2   | 4     | 4     | 5     |
| 11431  | 3   | 5     | 3     | 3     |
| 11432  | 0   |       |       |       |
| 11433  | 2   | 5     | 1     | 1     |
| 11435  | 2   | 3     | 2     | 2     |
| 11436  | 2   | 4     | 2     | 3     |
| 11437  | 3   | 5     | 4     | 3     |
| 11439  | 0   |       |       |       |
| 11440  | 1   | 5     | 1     | 1     |
| 11447  | 0   | 1     | 1     | 1     |
| 11455  | 0   | 0     | 1     | 1     |
| 11456  | 2   | 3     | 3     | 3     |
| 11461  | 1   | 4     | 2     | 2     |
| 11463  | 5   | 6     | 6     | 6     |



| respid | Q37 | Q38_1 | Q39_1 | Q39_2 |
|--------|-----|-------|-------|-------|
| 11470  | 3   | 2     | 4     | 4     |
| 11472  | 0   |       |       |       |
| 11475  | 0   | 4     | 2     | 2     |
| 11476  | 1   | 5     | 3     | 2     |
| 11482  | 2   | 3     | 3     | 3     |
| 11501  | 2   | 4     | 3     | 4     |
| 11503  | 1   | 2     | 4     | 4     |
| 11505  | 0   | 3     | 1     | 1     |
| 11510  | 1   | 3     | 2     | 1     |
| 11519  | 0   |       |       |       |
| 11527  | 3   | 6     | 6     | 5     |
| 11529  | 3   | 6     | 5     | 5     |
| 11530  | 1   | 3     | 3     | 3     |
| 11536  | 4   | 5     | 5     | 5     |
| 11543  | 2   | 3     | 1     | 1     |
| 11548  | 1   | 3     | 2     | 3     |
| 11566  | 0   | 1     | 1     | 1     |
| 11570  | 3   | 3     | 3     | 4     |
| 11571  | 1   | 3     | 3     | 4     |
| 11578  | 0   |       |       |       |
| 11579  | 0   | 6     | 1     | 1     |
| 11581  | 3   | 5     | 6     | 5     |
| 11582  | 1   | 4     | 2     | 1     |
| 11583  | 0   | 3     | 6     | 6     |
| 11589  | 1   | 1     | 3     | 2     |
| 11590  | 0   | 0     | 1     | 1     |
| 11592  | 0   | 3     | 1     | 1     |
| 11596  | 0   |       |       |       |
| 11598  | 2   | 4     | 4     | 4     |
| 11602  | 1   | 5     | 3     | 4     |
| 11605  | 2   | 5     | 4     | 4     |
| 11618  | 1   | 2     | 2     | 3     |

| respid | Q37 | Q38_1 | Q39_1 | Q39_2 |
|--------|-----|-------|-------|-------|
| 11621  | 1   | 4     | 3     | 2     |
| 11630  | 0   | 5     | 4     | 3     |
| 11636  | 1   | 5     | 5     | 5     |
| 11640  | 3   | 5     | 5     | 5     |
| 11658  | 1   | 2     | 3     | 2     |
| 11665  | 2   | 4     | 2     | 2     |
| 11666  | 1   | 2     | 5     | 4     |
| 11667  | 3   | 4     | 2     | 3     |
| 11674  | 0   | 2     | 3     | 3     |
| 11680  | 0   | 1     | 2     | 1     |
| 11683  | 1   | 4     | 1     | 2     |
| 11688  | 2   | 1     | 2     | 3     |
| 11690  | 0   |       |       |       |
| 11694  | 0   |       |       |       |
| 11705  | 1   | 3     | 1     | 2     |
| 11720  | 2   | 2     | 2     | 3     |
| 11724  | 0   |       |       |       |
| 11738  | 0   | 1     | 3     | 2     |
| 11744  | 3   | 5     | 3     | 4     |
| 11745  | 2   | 5     | 2     | 1     |
| 11747  | 0   |       |       |       |
| 11755  | 2   | 4     | 3     | 3     |
| 11756  | 1   | 4     | 1     | 3     |
| 11772  | 1   | 5     | 2     | 1     |
| 11773  | 0   |       |       |       |
| 11778  | 3   | 5     | 4     | 3     |
| 11790  | 2   | 6     | 3     | 4     |
| 11794  | 0   |       |       |       |
| 11795  | 2   | 3     | 4     | 3     |
| 11799  | 2   | 2     | 3     | 2     |
| 11803  | 0   | 1     | 2     | 2     |
| 11806  | 4   | 5     | 4     | 5     |

| respid | Q37 | Q38_1 | Q39_1 | Q39_2 |
|--------|-----|-------|-------|-------|
| 11808  | 1   | 2     | 1     | 2     |
| 11810  | 0   |       |       |       |
| 11811  | 0   |       |       |       |
| 11812  | 4   | 5     | 3     | 4     |
| 11813  | 0   | 4     | 3     | 5     |
| 11821  | 3   | 5     | 4     | 3     |
| 11827  | 0   |       |       |       |
| 11831  | 4   | 2     | 5     | 5     |
| 11841  | 0   |       |       |       |
| 11872  | 1   | 3     | 2     | 3     |
| 11898  | 0   | 2     | 1     | 1     |
| 11902  | 4   | 6     | 4     | 5     |
| 11912  | 1   | 2     | 2     | 2     |
| 11926  | 0   | 3     | 1     | 1     |
| 11928  | 1   | 1     | 4     | 4     |
| 11932  | 1   | 4     | 2     | 2     |
| 11934  | 0   | 6     | 1     | 1     |
| 11941  | 2   | 5     | 3     | 4     |
| 11942  | 0   |       |       |       |
| 11943  | 0   | 4     | 4     | 4     |
| 11944  | 3   | 4     | 3     | 3     |
| 11955  | 0   |       |       |       |
| 11958  | 0   | 3     | 3     | 3     |
| 11968  | 1   | 4     | 3     | 3     |
| 11979  | 2   | 2     | 2     | 3     |
| 11988  | 0   |       |       |       |
| 11999  | 3   | 4     | 4     | 4     |
| 12002  | 0   | 1     | 1     | 1     |
| 12004  | 0   | 1     | 1     | 1     |
| 12008  | 0   | 3     | 1     | 1     |
| 12013  | 2   | 4     | 1     | 1     |
| 12018  | 0   | 4     | 2     | 6     |

| respid | Q37 | Q38_1 | Q39_1 | Q39_2 |
|--------|-----|-------|-------|-------|
| 12023  | 1   | 2     | 2     | 2     |
| 12027  | 4   | 5     | 5     | 6     |
| 12030  | 1   | 2     | 2     | 2     |
| 12031  | 1   | 5     | 3     | 4     |
| 12036  | 3   | 5     | 3     | 4     |
| 12037  | 3   | 5     | 5     | 5     |
| 12038  | 3   | 5     | 6     | 5     |
| 12039  | 0   | 2     | 1     | 1     |
| 12045  | 1   | 4     | 1     | 1     |
| 12046  | 0   | 2     | 3     | 2     |
| 12054  | 3   | 4     | 3     | 4     |
| 12055  | 3   | 4     | 2     | 2     |
| 12069  | 2   | 4     | 3     | 3     |
| 12070  | 3   | 5     | 5     | 4     |
| 12074  | 0   | 0     | 1     | 1     |
| 12075  | 2   | 4     | 3     | 4     |
| 12078  | 1   | 0     | 2     | 1     |
| 12089  | 0   | 5     | 1     | 1     |
| 12091  | 4   | 5     | 3     | 3     |
| 12092  | 2   | 5     | 3     | 3     |
| 12108  | 3   | 2     | 2     | 3     |
| 12111  | 4   | 6     | 4     | 5     |
| 12112  | 4   | 4     | 4     | 3     |
| 12126  | 0   |       |       |       |
| 12132  | 4   | 4     | 3     | 4     |
| 12150  | 3   | 5     | 4     | 4     |
| 12152  | 0   | 2     | 2     | 2     |
| 12154  | 1   | 2     | 3     | 2     |
| 12157  | 5   | 4     | 3     | 5     |
| 12165  | 0   | 4     | 1     | 1     |
| 12169  | 2   | 5     | 4     | 4     |
| 12182  | 4   | 5     | 5     | 4     |

| respid | Q37 | Q38_1 | Q39_1 | Q39_2 |
|--------|-----|-------|-------|-------|
| 12198  | 0   | 0     | 1     | 1     |
| 12199  | 0   |       |       |       |
| 12202  | 1   | 3     | 1     | 1     |
| 12207  | 1   | 3     | 2     | 1     |
| 12208  | 1   | 4     | 2     | 3     |
| 12210  | 0   | 2     | 2     | 2     |
| 12219  | 3   | 5     | 4     | 5     |
| 12224  | 0   | 1     | 1     | 1     |
| 12230  | 1   | 2     | 3     | 3     |
| 12238  | 0   | 1     | 2     | 3     |
| 12239  | 0   | 0     | 1     | 1     |
| 12243  | 0   | 6     | 2     | 2     |
| 12245  | 0   | 3     | 2     | 2     |
| 12246  | 3   | 5     | 5     | 4     |
| 12247  | 0   | 1     | 1     | 1     |
| 12248  | 0   | 3     | 1     | 1     |
| 12249  | 2   | 4     | 2     | 1     |
| 12258  | 3   | 4     | 2     | 3     |
| 12265  | 2   | 5     | 4     | 3     |
| 12269  | 0   | 1     | 1     | 1     |
| 12270  | 0   | 1     | 1     | 1     |
| 12279  | 0   | 1     | 3     | 1     |
| 12280  | 1   | 5     | 5     | 2     |
| 12282  | 2   | 4     | 3     | 2     |
| 12283  | 0   | 1     | 1     | 2     |
| 12287  | 0   | 2     | 1     | 1     |
| 12288  | 1   | 5     | 3     | 3     |
| 12290  | 0   | 0     | 1     | 1     |
| 12292  | 1   | 2     | 2     | 2     |
| 12294  | 0   | 1     | 1     | 1     |
| 12296  | 0   | 0     | 1     | 2     |
| 12307  | 1   | 1     | 1     | 1     |

| respid | Q37 | Q38_1 | Q39_1 | Q39_2 |
|--------|-----|-------|-------|-------|
| 12309  | 1   | 3     | 2     | 4     |
| 12312  | 0   | 2     | 3     | 3     |
| 12317  | 1   | 4     | 2     | 1     |
| 12319  | 0   | 0     | 1     | 2     |
| 12320  | 0   | 1     | 2     | 1     |
| 12322  | 0   | 3     | 2     | 2     |
| 12328  | 2   | 5     | 4     | 5     |
| 12331  | 3   | 4     | 5     | 5     |
| 12332  | 0   | 1     | 1     | 1     |
| 12334  | 1   | 3     | 3     | 1     |
| 12337  | 2   | 5     | 1     | 1     |
| 12338  | 1   | 1     | 1     | 1     |
| 12342  | 1   | 2     | 1     | 2     |
| 12349  | 0   | 1     | 1     | 1     |
| 12352  | 2   | 5     | 2     | 2     |
| 12355  | 0   | 4     | 3     | 3     |
| 12357  | 2   | 4     | 3     | 2     |
| 12358  | 0   | 2     | 2     | 1     |
| 12371  | 2   | 2     | 3     | 2     |
| 12372  | 0   | 0     | 1     | 1     |
| 12373  | 0   | 3     | 2     | 2     |
| 12379  | 0   | 1     | 1     | 1     |
| 12381  | 3   | 5     | 3     | 4     |
| 12383  | 0   | 2     | 2     | 1     |
| 12384  | 0   | 2     | 1     | 1     |
| 12386  | 0   | 3     | 1     | 2     |
| 12389  | 0   |       |       |       |
| 12392  | 0   | 3     | 1     | 2     |
| 12396  | 1   | 3     | 2     | 1     |
| 12397  | 0   | 2     | 1     | 2     |
| 12399  | 2   | 3     | 2     | 4     |
| 12400  | 1   | 4     | 5     | 5     |

| respid | Q37 | Q38_1 | Q39_1 | Q39_2 |
|--------|-----|-------|-------|-------|
| 12406  | 3   | 5     | 3     | 3     |
| 12407  | 1   | 4     | 2     | 1     |
| 12410  | 0   | 0     | 1     | 1     |
| 12413  | 0   | 3     | 1     | 2     |
| 12416  | 1   | 4     | 3     | 4     |
| 12419  | 1   | 5     | 3     | 4     |
| 12422  | 1   | 6     | 6     | 6     |
| 12423  | 1   | 3     | 3     | 1     |
| 12429  | 0   | 1     | 2     | 2     |
| 12434  | 3   | 5     | 4     | 5     |
| 12435  | 0   | 4     | 3     | 1     |
| 12436  | 0   | 4     | 2     | 1     |
| 12442  | 0   |       |       |       |
| 12449  | 0   | 3     | 4     | 4     |
| 12451  | 1   | 1     | 1     | 1     |
| 12456  | 3   | 4     | 2     | 1     |
| 12457  | 0   | 2     | 1     | 1     |
| 12458  | 0   | 1     | 1     | 1     |
| 12461  | 2   | 4     | 2     | 2     |
| 12462  | 0   | 1     | 1     | 1     |
| 12463  | 1   | 3     | 3     | 3     |
| 12466  | 0   | 1     | 1     | 1     |
| 12470  | 2   | 2     | 2     | 1     |
| 12471  | 0   | 3     | 2     | 2     |
| 12472  | 1   | 2     | 1     | 2     |
| 12478  | 1   | 5     | 2     | 3     |
| 12479  | 2   | 3     | 3     | 4     |
| 12481  | 0   | 2     | 1     | 1     |
| 12482  | 3   | 1     | 4     | 1     |
| 12483  | 0   |       |       |       |
| 12496  | 0   | 1     | 1     | 1     |
| 12497  | 0   | 2     | 2     | 2     |

| respid | Q37 | Q38_1 | Q39_1 | Q39_2 |
|--------|-----|-------|-------|-------|
| 12498  | 2   | 5     | 2     | 3     |
| 12500  | 1   | 1     | 1     | 2     |
| 12501  | 1   | 4     | 2     | 3     |
| 12502  | 1   | 2     | 1     | 1     |
| 12503  | 0   | 1     | 2     | 1     |
| 12505  | 0   | 4     | 3     | 1     |
| 12508  | 2   | 5     | 5     | 6     |
| 12509  | 1   | 3     | 2     | 2     |
| 12510  | 0   |       |       |       |
| 12512  | 2   | 4     | 3     | 3     |
| 12514  | 2   | 4     | 3     | 3     |
| 12515  | 1   | 2     | 3     | 2     |
| 12520  | 0   | 1     | 1     | 1     |
| 12522  | 0   | 0     | 1     | 1     |
| 12526  | 4   | 4     | 4     | 3     |
| 12527  | 0   |       |       |       |
| 12528  | 2   | 3     | 1     | 1     |
| 12530  | 3   | 3     | 3     | 4     |
| 12535  | 0   | 2     | 1     | 1     |
| 12539  | 1   | 1     | 1     | 1     |
| 12541  | 2   | 2     | 3     | 2     |
| 12542  | 0   | 3     | 2     | 3     |
| 12545  | 3   | 5     | 3     | 4     |
| 12547  | 3   | 5     | 3     | 2     |
| 12549  | 1   | 2     | 2     | 2     |
| 12550  | 0   | 3     | 2     | 1     |
| 12555  | 0   |       |       |       |
| 12557  | 1   | 5     | 1     | 1     |
| 12559  | 1   | 3     | 3     | 2     |
| 12561  | 0   | 3     | 2     | 3     |
| 12562  | 2   | 2     | 2     | 1     |
| 12563  | 0   | 1     | 1     | 1     |



| respid | Q37 | Q38_1 | Q39_1 | Q39_2 |
|--------|-----|-------|-------|-------|
| 12565  | 2   | 4     | 5     | 4     |
| 12566  | 0   |       |       |       |
| 12570  | 0   |       |       |       |
| 12571  | 0   | 1     | 1     | 1     |
| 12572  | 4   | 2     | 4     | 2     |
| 12578  | 0   |       |       |       |
| 12579  | 0   | 0     | 2     | 1     |
| 12581  | 0   | 1     | 1     | 1     |
| 12582  | 3   | 4     | 2     | 2     |
| 12585  | 0   | 1     | 5     | 6     |
| 12586  | 2   | 3     | 2     | 2     |
| 12588  | 1   | 3     | 4     | 4     |
| 12589  | 1   | 3     | 2     | 1     |
| 12590  | 0   | 0     | 1     | 1     |
| 12591  | 2   | 4     | 3     | 2     |
| 12593  | 2   | 2     | 2     | 2     |
| 12594  | 0   | 2     | 3     | 3     |
| 12599  | 0   | 2     | 2     | 2     |
| 12600  | 0   | 1     | 1     | 1     |
| 12602  | 3   | 5     | 5     | 4     |
| 12606  | 2   | 4     | 4     | 4     |
| 12607  | 0   |       |       |       |
| 12608  | 0   |       |       |       |
| 12610  | 1   | 1     | 1     | 2     |
| 12611  | 0   | 2     | 1     | 1     |
| 12613  | 4   | 6     | 5     | 5     |
| 12616  | 0   | 3     | 3     | 2     |
| 12617  | 2   | 4     | 2     | 2     |
| 12619  | 0   | 1     | 2     | 1     |
| 12622  | 0   |       |       |       |
| 12628  | 0   | 3     | 3     | 3     |
| 12631  | 1   | 4     | 2     | 2     |

| respid | Q37 | Q38_1 | Q39_1 | Q39_2 |
|--------|-----|-------|-------|-------|
| 12635  | 2   | 1     | 4     | 3     |
| 12638  | 0   | 1     | 1     | 1     |
| 12639  | 1   | 3     | 1     | 2     |
| 12640  | 1   | 3     | 1     | 2     |
| 12643  | 0   | 4     | 1     | 2     |
| 12646  | 4   | 6     | 5     | 6     |
| 12648  | 4   | 6     | 4     | 6     |
| 12650  | 2   | 2     | 2     | 2     |
| 12651  | 1   | 3     | 2     | 2     |
| 12658  | 2   | 4     | 2     | 2     |
| 12662  | 1   | 3     | 2     | 2     |
| 12663  | 2   | 2     | 2     | 1     |
| 12664  | 1   | 5     | 5     | 4     |
| 12669  | 4   | 6     | 5     | 5     |
| 12670  | 1   | 2     | 3     | 3     |
| 12673  | 0   |       |       |       |
| 12675  | 0   | 1     | 1     | 1     |
| 12677  | 1   | 1     | 3     | 3     |
| 12679  | 0   | 1     | 1     | 1     |
| 12682  | 2   | 1     | 5     | 5     |
| 12696  | 2   | 3     | 3     | 2     |
| 12697  | 1   | 1     | 3     | 4     |
| 12699  | 0   | 1     | 1     | 1     |
| 12700  | 1   | 5     | 2     | 2     |
| 12701  | 1   | 1     | 1     | 2     |
| 12702  | 1   | 1     | 3     | 3     |
| 12704  | 4   | 5     | 5     | 4     |
| 12705  | 1   | 2     | 1     | 1     |
| 12709  | 0   | 1     | 5     | 5     |
| 12710  | 0   | 1     | 2     | 2     |
| 12713  | 2   | 2     | 2     | 1     |
| 12716  | 2   | 4     | 3     | 2     |

| respid | Q37 | Q38_1 | Q39_1 | Q39_2 |
|--------|-----|-------|-------|-------|
| 12719  | 0   | 2     | 2     | 2     |
| 12720  | 0   | 1     | 2     | 2     |
| 12723  | 0   | 2     | 1     | 1     |
| 12726  | 0   | 3     | 2     | 2     |
| 12728  | 3   | 2     | 3     | 2     |
| 12729  | 1   | 4     | 1     | 2     |
| 12731  | 1   | 1     | 2     | 2     |
| 12732  | 1   | 5     | 3     | 4     |
| 12733  | 2   | 3     | 4     | 4     |
| 12736  | 0   | 1     | 1     | 1     |
| 12737  | 1   | 3     | 2     | 3     |
| 12739  | 3   | 5     | 4     | 4     |
| 12742  | 0   | 1     | 2     | 2     |
| 12743  | 5   | 6     | 6     | 6     |
| 12744  | 0   | 1     | 1     | 1     |
| 12747  | 4   | 6     | 3     | 2     |
| 12751  | 0   | 1     | 1     | 1     |
| 12754  | 1   | 1     | 2     | 2     |
| 12756  | 2   | 5     | 2     | 1     |
| 12757  | 0   | 1     | 2     | 1     |
| 12760  | 3   | 5     | 2     | 1     |
| 12761  | 1   | 2     | 1     | 2     |
| 12762  | 2   | 3     | 2     | 3     |
| 12766  | 0   | 5     | 1     | 1     |
| 12769  | 1   | 2     | 1     | 1     |
| 12770  | 4   | 6     | 4     | 2     |
| 12773  | 1   | 3     | 2     | 1     |
| 12780  | 2   | 4     | 2     | 3     |
| 12789  | 0   | 2     | 4     | 4     |
| 12792  | 2   | 5     | 4     | 4     |
| 12795  | 1   | 3     | 2     | 2     |
| 12804  | 3   | 3     | 6     | 6     |

| respid | Q37 | Q38_1 | Q39_1 | Q39_2 |
|--------|-----|-------|-------|-------|
| 12811  | 0   | 2     | 1     | 1     |
| 12813  | 2   | 5     | 3     | 4     |
| 12814  | 4   | 6     | 5     | 5     |
| 12815  | 2   | 4     | 3     | 3     |
| 12816  | 0   | 1     | 1     | 1     |
| 12817  | 1   | 3     | 1     | 1     |
| 12818  | 1   | 2     | 1     | 1     |
| 12819  | 0   | 2     | 4     | 3     |
| 12820  | 0   | 1     | 1     | 1     |
| 12821  | 0   | 1     | 1     | 1     |
| 12824  | 2   | 4     | 3     | 2     |
| 12827  | 2   | 3     | 1     | 1     |
| 12836  | 3   | 4     | 4     | 4     |
| 12837  | 0   | 1     | 2     | 2     |
| 12838  | 1   | 4     | 2     | 2     |
| 12845  | 0   | 2     | 1     | 1     |
| 12847  | 2   | 5     | 4     | 2     |
| 12849  | 1   | 1     | 5     | 5     |
| 12850  | 1   | 1     | 1     | 1     |
| 12852  | 0   | 1     | 1     | 1     |
| 12853  | 1   | 2     | 4     | 4     |
| 12854  | 0   | 2     | 2     | 1     |
| 12860  | 0   | 1     | 1     | 1     |
| 12861  | 0   | 3     | 1     | 1     |
| 12863  | 0   | 2     | 1     | 1     |
| 12865  | 0   | 0     | 1     | 1     |
| 12870  | 1   | 4     | 1     | 2     |
| 12871  | 0   | 2     | 2     | 1     |
| 12873  | 1   | 3     | 2     | 1     |
| 12877  | 0   | 3     | 1     | 1     |
| 12880  | 0   | 2     | 1     | 2     |
| 12881  | 1   | 5     | 1     | 2     |

| respid | Q37 | Q38_1 | Q39_1 | Q39_2 |
|--------|-----|-------|-------|-------|
| 12882  | 0   | 1     | 1     | 1     |
| 12883  | 1   | 1     | 2     | 3     |
| 12885  | 2   | 3     | 3     | 3     |
| 12887  | 1   | 3     | 2     | 3     |
| 12889  | 1   | 4     | 2     | 1     |
| 12890  | 0   | 5     | 2     | 1     |
| 12891  | 1   | 3     | 3     | 2     |
| 12892  | 3   | 5     | 4     | 4     |
| 12893  | 0   | 0     | 1     | 1     |
| 12895  | 1   | 2     | 2     | 2     |
| 12898  | 0   | 1     | 1     | 1     |
| 12907  | 3   | 5     | 4     | 5     |
| 12908  | 0   | 2     | 1     | 1     |
| 12909  | 0   |       |       |       |
| 12914  | 0   | 0     | 1     | 1     |
| 12915  | 3   | 5     | 4     | 1     |
| 12916  | 0   |       |       |       |
| 12921  | 1   | 1     | 2     | 3     |
| 12922  | 0   | 3     | 2     | 2     |
| 12923  | 0   | 5     | 3     | 4     |
| 12926  | 0   | 3     | 1     | 1     |
| 12927  | 1   | 2     | 2     | 1     |
| 12932  | 0   | 1     | 1     | 1     |
| 12936  | 0   | 0     | 1     | 1     |
| 12937  | 0   | 1     | 1     | 1     |
| 12938  | 4   | 6     | 5     | 6     |
| 12939  | 0   | 1     | 1     | 1     |
| 12940  | 1   | 3     | 3     | 4     |
| 12945  | 1   | 2     | 2     | 1     |
| 12946  | 1   | 4     | 2     | 2     |
| 12947  | 1   | 3     | 3     | 3     |
| 12948  | 3   | 5     | 4     | 4     |

| respid | Q37 | Q38_1 | Q39_1 | Q39_2 |
|--------|-----|-------|-------|-------|
| 12951  | 1   | 3     | 2     | 1     |
| 12952  | 0   | 4     | 1     | 2     |
| 12954  | 2   | 4     | 3     | 4     |
| 12960  | 1   | 3     | 2     | 2     |
| 12961  | 0   | 1     | 1     | 1     |
| 12962  | 0   | 0     | 1     | 1     |
| 12963  | 0   | 2     | 1     | 1     |
| 12964  | 0   | 1     | 1     | 1     |
| 12966  | 0   | 0     | 1     | 1     |
| 12967  | 1   | 5     | 2     | 1     |
| 12969  | 0   | 3     | 1     | 1     |
| 12970  | 0   | 4     | 2     | 1     |
| 12974  | 3   | 4     | 4     | 4     |
| 12979  | 0   |       |       |       |
| 12980  | 0   | 1     | 1     | 1     |
| 12983  | 0   | 0     | 1     | 2     |
| 12988  | 0   | 1     | 2     | 1     |
| 12994  | 1   | 2     | 1     | 1     |
| 12995  | 0   | 1     | 1     | 1     |
| 12996  | 0   | 1     | 1     | 1     |
| 12998  | 0   | 3     | 1     | 1     |
| 12999  | 0   | 1     | 1     | 1     |
| 13001  | 1   | 4     | 2     | 2     |
| 13005  | 0   | 3     | 2     | 1     |
| 13006  | 4   | 5     | 4     | 4     |
| 13007  | 1   | 3     | 2     | 1     |
| 13011  | 2   | 3     | 3     | 4     |
| 13012  | 0   | 0     | 1     | 1     |
| 13013  | 4   | 5     | 3     | 4     |
| 13016  | 0   | 1     | 1     | 1     |
| 13018  | 0   | 1     | 1     | 1     |
| 13020  | 0   |       |       |       |

| respid | Q37 | Q38_1 | Q39_1 | Q39_2 |
|--------|-----|-------|-------|-------|
| 13024  | 0   | 1     | 1     | 1     |
| 13025  | 0   | 1     | 1     | 1     |
| 13027  | 0   | 2     | 2     | 2     |
| 13031  | 1   | 4     | 2     | 2     |
| 13032  | 2   | 5     | 3     | 2     |
| 13034  | 1   | 4     | 2     | 1     |
| 13036  | 1   | 4     | 2     | 4     |
| 13037  | 0   | 0     | 1     | 1     |
| 13038  | 4   | 6     | 5     | 5     |
| 13039  | 0   | 1     | 1     | 1     |
| 13040  | 1   | 5     | 3     | 2     |
| 13041  | 1   | 4     | 4     | 3     |
| 13045  | 1   | 1     | 5     | 5     |
| 13046  | 0   | 1     | 1     | 1     |
| 13048  | 0   | 0     | 1     | 1     |
| 13051  | 1   | 2     | 4     | 1     |
| 13053  | 0   | 6     | 1     | 1     |
| 13055  | 2   | 4     | 2     | 2     |
| 13059  | 1   | 3     | 2     | 1     |
| 13068  | 0   | 2     | 2     | 1     |
| 13069  | 0   | 0     | 1     | 1     |
| 13076  | 1   | 3     | 1     | 1     |
| 13081  | 0   | 0     | 1     | 1     |
| 13082  | 1   | 3     | 2     | 2     |
| 13084  | 3   | 5     | 2     | 3     |
| 13085  | 0   | 3     | 2     | 1     |
| 13086  | 0   | 3     | 2     | 1     |
| 13093  | 1   | 4     | 2     | 2     |
| 13094  | 2   | 3     | 4     | 4     |
| 13097  | 1   | 1     | 1     | 1     |
| 13098  | 1   | 4     | 2     | 2     |
| 13099  | 1   | 4     | 2     | 2     |

| respid | Q37 | Q38_1 | Q39_1 | Q39_2 |
|--------|-----|-------|-------|-------|
| 13100  | 0   | 3     | 1     | 1     |
| 13101  | 0   |       |       |       |
| 13103  | 0   |       |       |       |
| 13105  | 0   | 1     | 1     | 1     |
| 13106  | 0   | 2     | 2     | 1     |
| 13107  | 1   | 2     | 2     | 1     |
| 13110  | 1   | 4     | 2     | 2     |
| 13118  | 0   | 4     | 2     | 1     |
| 13120  | 3   | 6     | 6     | 6     |
| 13130  | 1   | 3     | 1     | 1     |
| 13133  | 0   | 3     | 2     | 2     |
| 13134  | 0   | 1     | 1     | 1     |
| 13139  | 0   | 2     | 2     | 2     |
| 13142  | 0   | 1     | 1     | 1     |
| 13143  | 0   | 0     | 1     | 1     |
| 13145  | 1   | 2     | 1     | 1     |
| 13148  | 0   | 2     | 1     | 1     |
| 13149  | 0   | 0     | 1     | 1     |
| 13151  | 4   | 5     | 4     | 5     |
| 13153  | 0   | 1     | 2     | 1     |
| 13158  | 0   | 2     | 2     | 1     |
| 13160  | 1   | 4     | 2     | 2     |
| 13162  | 1   | 3     | 2     | 2     |
| 13169  | 0   | 1     | 1     | 1     |
| 13172  | 3   | 4     | 2     | 2     |
| 13173  | 1   | 2     | 1     | 1     |
| 13176  | 0   | 1     | 2     | 1     |
| 13179  | 0   | 0     | 1     | 1     |
| 13184  | 1   | 5     | 2     | 3     |
| 13185  | 1   | 1     | 2     | 3     |
| 13186  | 0   | 1     | 1     | 1     |
| 13188  | 2   | 5     | 3     | 2     |



| respid | Q37 | Q38_1 | Q39_1 | Q39_2 |
|--------|-----|-------|-------|-------|
| 13190  | 2   | 4     | 3     | 3     |
| 13192  | 1   | 3     | 1     | 1     |
| 13193  | 0   |       |       |       |
| 13201  | 0   | 2     | 1     | 3     |
| 13207  | 0   | 3     | 1     | 1     |
| 13208  | 0   |       |       |       |
| 13209  | 3   | 3     | 3     | 3     |
| 13212  | 1   | 2     | 1     | 1     |
| 13215  | 1   | 3     | 1     | 1     |
| 13218  | 2   | 5     | 2     | 2     |
| 13219  | 0   | 0     | 1     | 1     |
| 13224  | 1   | 1     | 1     | 2     |
| 13225  | 0   | 1     | 1     | 1     |
| 13226  | 1   | 3     | 1     | 1     |
| 13232  | 0   | 1     | 1     | 1     |
| 13237  | 2   | 5     | 1     | 1     |
| 13239  | 0   | 2     | 2     | 2     |
| 13241  | 2   | 4     | 2     | 1     |
| 13243  | 0   | 3     | 4     | 3     |
| 13247  | 1   | 1     | 3     | 2     |
| 13248  | 0   | 0     | 1     | 1     |
| 13251  | 0   | 2     | 1     | 1     |
| 13256  | 1   | 4     | 1     | 1     |
| 13260  | 1   | 1     | 2     | 2     |
| 13261  | 1   | 5     | 2     | 2     |
| 13264  | 0   | 1     | 1     | 1     |
| 13273  | 1   | 3     | 2     | 1     |
| 13274  | 0   | 2     | 1     | 1     |
| 13276  | 1   | 2     | 1     | 1     |
| 13278  | 0   |       |       |       |
| 13279  | 0   | 1     | 1     | 1     |
| 13282  | 0   | 2     | 1     | 1     |

| respid | Q37 | Q38_1 | Q39_1 | Q39_2 |
|--------|-----|-------|-------|-------|
| 13283  | 1   | 4     | 2     | 3     |
| 13285  | 1   | 3     | 1     | 1     |
| 13286  | 1   | 5     | 2     | 2     |
| 13299  | 0   | 1     | 1     | 1     |
| 13300  | 1   | 3     | 3     | 3     |
| 13301  | 0   |       |       |       |
| 13303  | 1   | 4     | 3     | 3     |
| 13304  | 0   | 1     | 1     | 1     |
| 13307  | 2   | 4     | 2     | 2     |
| 13308  | 0   | 0     | 1     | 1     |
| 13312  | 0   | 2     | 1     | 1     |
| 13313  | 0   | 1     | 1     | 1     |
| 13314  | 2   | 3     | 2     | 2     |
| 13318  | 2   | 3     | 3     | 4     |
| 13320  | 1   | 5     | 3     | 3     |
| 13322  | 2   | 3     | 3     | 3     |
| 13324  | 0   | 2     | 2     | 1     |
| 13325  | 1   | 3     | 3     | 3     |
| 13327  | 0   | 1     | 1     | 1     |
| 13330  | 0   | 1     | 1     | 1     |
| 13332  | 0   | 1     | 2     | 1     |
| 13333  | 1   | 4     | 2     | 2     |
| 13334  | 0   | 0     | 1     | 1     |
| 13351  | 2   | 1     | 2     | 1     |
| 13353  | 1   | 3     | 1     | 1     |
| 13354  | 0   | 0     | 1     | 1     |
| 13355  | 1   | 4     | 2     | 1     |
| 13358  | 0   | 2     | 1     | 1     |
| 13359  | 2   | 4     | 3     | 1     |
| 13360  | 1   | 2     | 3     | 3     |
| 13364  | 1   | 5     | 2     | 2     |
| 13365  | 1   | 5     | 2     | 2     |

| respid | Q37 | Q38_1 | Q39_1 | Q39_2 |
|--------|-----|-------|-------|-------|
| 13368  | 0   | 2     | 1     | 1     |
| 13370  | 0   | 0     | 1     | 1     |
| 13375  | 0   | 0     | 1     | 2     |
| 13384  | 0   | 2     | 1     | 1     |
| 13387  | 1   | 2     | 2     | 1     |
| 13395  | 2   | 4     | 3     | 3     |
| 13398  | 1   | 2     | 1     | 1     |
| 13404  | 1   | 3     | 1     | 1     |
| 13405  | 1   | 4     | 2     | 1     |
| 13408  | 0   |       |       |       |
| 13411  | 0   | 1     | 1     | 1     |
| 13413  | 0   | 0     | 1     | 1     |
| 13419  | 0   | 2     | 1     | 1     |
| 13420  | 0   | 2     | 1     | 1     |
| 13427  | 2   | 3     | 3     | 3     |
| 13441  | 2   | 3     | 4     | 4     |
| 13444  | 0   | 4     | 2     | 3     |
| 13456  | 0   | 0     | 1     | 1     |
| 13466  | 0   | 1     | 2     | 3     |
| 13468  | 0   | 2     | 1     | 1     |
| 13475  | 0   | 0     | 1     | 1     |
| 13484  | 1   | 3     | 1     | 1     |
| 13486  | 0   | 2     | 1     | 1     |
| 13487  | 1   | 3     | 2     | 2     |
| 13491  | 0   |       |       |       |
| 13496  | 1   | 2     | 1     | 1     |
| 13497  | 1   | 3     | 3     | 2     |
| 13498  | 0   | 2     | 2     | 2     |
| 13502  | 0   |       |       |       |
| 13503  | 1   | 3     | 2     | 2     |
| 13505  | 0   | 1     | 2     | 2     |
| 13509  | 1   | 3     | 1     | 1     |

| respid | Q37 | Q38_1 | Q39_1 | Q39_2 |
|--------|-----|-------|-------|-------|
| 13510  | 2   | 4     | 3     | 3     |
| 13518  | 1   | 0     | 2     | 3     |
| 13521  | 0   | 3     | 1     | 1     |
| 13523  | 1   | 5     | 4     | 3     |
| 13528  | 0   | 1     | 1     | 2     |
| 13531  | 0   | 3     | 1     | 1     |
| 13532  | 0   | 0     | 1     | 1     |
| 13533  | 0   | 2     | 1     | 1     |
| 13534  | 0   |       |       |       |
| 13535  | 0   | 2     | 1     | 1     |
| 13538  | 1   | 3     | 2     | 3     |
| 13540  | 1   | 3     | 3     | 1     |
| 13541  | 1   | 3     | 3     | 3     |
| 13542  | 0   | 2     | 1     | 1     |
| 13550  | 0   | 3     | 2     | 2     |
| 13553  | 2   | 5     | 3     | 2     |
| 13554  | 0   | 1     | 1     | 1     |
| 13555  | 2   | 3     | 4     | 4     |
| 13556  | 2   | 4     | 3     | 4     |
| 13563  | 0   | 3     | 4     | 3     |
| 13564  | 1   | 2     | 2     | 2     |
| 13567  | 0   |       |       |       |
| 13568  | 1   | 0     | 1     | 2     |
| 13570  | 0   |       |       |       |
| 13573  | 1   | 2     | 2     | 2     |
| 13575  | 3   | 6     | 2     | 4     |
| 13577  | 1   | 1     | 4     | 4     |
| 13580  | 2   | 2     | 3     | 4     |
| 13582  | 0   | 3     | 1     | 1     |
| 13584  | 3   | 1     | 3     | 4     |
| 13585  | 0   |       |       |       |
| 13586  | 0   | 3     | 2     | 3     |

| respid | Q37 | Q38_1 | Q39_1 | Q39_2 |
|--------|-----|-------|-------|-------|
| 13587  | 1   | 4     | 3     | 3     |
| 13592  | 1   | 1     | 3     | 3     |
| 13596  | 0   | 0     | 1     | 1     |
| 13597  | 1   | 4     | 2     | 2     |
| 13599  | 1   | 5     | 3     | 2     |
| 13601  | 1   | 2     | 1     | 2     |
| 13604  | 1   | 3     | 2     | 1     |
| 13608  | 0   | 4     | 1     | 3     |
| 13616  | 0   | 2     | 1     | 1     |
| 13618  | 0   | 3     | 4     | 3     |
| 13619  | 1   | 3     | 2     | 2     |
| 13626  | 0   |       |       |       |
| 13628  | 1   | 5     | 2     | 2     |
| 13640  | 1   | 4     | 3     | 4     |
| 13645  | 1   | 2     | 1     | 2     |
| 13648  | 0   |       |       |       |
| 13653  | 0   | 1     | 2     | 1     |
| 13655  | 0   | 2     | 2     | 1     |
| 13662  | 0   | 2     | 1     | 1     |
| 13670  | 1   | 3     | 3     | 3     |
| 13673  | 1   | 4     | 2     | 1     |
| 13674  | 1   | 2     | 2     | 2     |
| 13675  | 0   | 2     | 2     | 1     |
| 13678  | 1   | 4     | 3     | 3     |
| 13680  | 1   | 4     | 2     | 2     |
| 13681  | 0   | 1     | 1     | 1     |
| 13683  | 0   | 2     | 2     | 1     |
| 13684  | 1   | 3     | 2     | 2     |
| 13685  | 0   | 2     | 1     | 1     |
| 13687  | 0   |       |       |       |
| 13690  | 0   | 3     | 1     | 1     |
| 13700  | 2   | 4     | 3     | 3     |

| respid | Q37 | Q38_1 | Q39_1 | Q39_2 |
|--------|-----|-------|-------|-------|
| 13705  | 2   | 4     | 2     | 3     |
| 13710  | 0   | 2     | 2     | 1     |
| 13711  | 2   | 4     | 2     | 1     |
| 13713  | 0   | 0     | 1     | 1     |
| 13716  | 0   | 1     | 1     | 1     |
| 13721  | 1   | 2     | 2     | 2     |
| 13722  | 4   | 5     | 4     | 5     |
| 13723  | 5   | 4     | 5     | 5     |
| 13726  | 2   | 4     | 3     | 5     |
| 13728  | 1   | 3     | 3     | 3     |
| 13730  | 2   | 5     | 3     | 3     |
| 13734  | 0   | 1     | 1     | 1     |
| 13736  | 4   | 6     | 6     | 5     |
| 13737  | 1   | 1     | 2     | 2     |
| 13739  | 0   | 1     | 2     | 1     |
| 13742  | 0   |       |       |       |
| 13746  | 1   | 3     | 1     | 1     |
| 13747  | 1   | 4     | 2     | 1     |
| 13749  | 0   | 3     | 1     | 1     |
| 13751  | 1   | 4     | 2     | 1     |
| 13752  | 0   | 1     | 1     | 1     |
| 13756  | 1   | 2     | 2     | 3     |
| 13757  | 0   | 0     | 1     | 1     |
| 13767  | 0   | 3     | 2     | 3     |
| 13771  | 0   | 1     | 1     | 1     |
| 13772  | 4   | 6     | 5     | 5     |
| 13779  | 0   |       |       |       |
| 13782  | 1   | 2     | 2     | 1     |
| 13783  | 0   | 1     | 1     | 1     |
| 13785  | 0   | 2     | 1     | 1     |
| 13786  | 2   | 2     | 1     | 1     |
| 13792  | 3   | 5     | 4     | 4     |

| respid | Q37 | Q38_1 | Q39_1 | Q39_2 |
|--------|-----|-------|-------|-------|
| 13796  | 1   | 4     | 2     | 2     |
| 13798  | 1   | 4     | 2     | 2     |
| 13799  | 0   | 4     | 2     | 1     |
| 13804  | 0   | 1     | 1     | 1     |
| 13805  | 0   | 3     | 1     | 1     |
| 13810  | 3   | 5     | 5     | 5     |
| 13811  | 0   | 1     | 3     | 2     |
| 13819  | 5   | 6     | 6     | 6     |
| 13821  | 2   | 5     | 3     | 5     |
| 13824  | 3   | 3     | 3     | 4     |
| 13828  | 2   | 4     | 3     | 2     |
| 13829  | 2   | 4     | 2     | 2     |
| 13831  | 0   |       |       |       |
| 13833  | 2   | 5     | 2     | 2     |
| 13835  | 5   | 6     | 6     | 5     |
| 13838  | 0   |       |       |       |
| 13839  | 2   | 3     | 2     | 5     |
| 13845  | 0   |       |       |       |
| 13846  | 0   | 2     | 1     | 1     |
| 13853  | 1   | 4     | 3     | 3     |
| 13855  | 2   | 2     | 4     | 3     |
| 13858  | 2   | 6     | 3     | 5     |
| 13860  | 0   |       |       |       |
| 13865  | 3   | 4     | 3     | 4     |
| 13870  | 0   | 6     | 1     | 1     |
| 13872  | 4   | 6     | 5     | 6     |
| 13873  | 0   | 3     | 1     | 2     |
| 13874  | 0   |       |       |       |
| 13875  | 0   | 0     | 1     | 4     |
| 13881  | 0   |       |       |       |
| 13887  | 1   | 4     | 3     | 2     |
| 13888  | 1   | 4     | 2     | 2     |

| respid | Q37 | Q38_1 | Q39_1 | Q39_2 |
|--------|-----|-------|-------|-------|
| 13889  | 3   | 6     | 6     | 6     |
| 13895  | 5   | 6     | 6     | 5     |
| 13897  | 0   |       |       |       |
| 13898  | 2   | 4     | 3     | 2     |
| 13901  | 0   | 1     | 1     | 1     |
| 13902  | 3   | 5     | 4     | 5     |
| 13903  | 3   | 6     | 1     | 1     |
| 13905  | 3   | 1     | 1     | 4     |
| 13908  | 3   | 4     | 2     | 3     |
| 13909  | 0   | 0     | 1     | 1     |
| 13910  | 1   | 4     | 5     | 4     |
| 13911  | 0   |       |       |       |
| 13914  | 2   | 4     | 3     | 4     |
| 13920  | 2   | 4     | 3     | 4     |
| 13926  | 0   | 2     | 1     | 1     |
| 13929  | 0   | 0     | 1     | 2     |
| 13930  | 5   | 6     | 6     | 5     |
| 13931  | 0   |       |       |       |
| 13932  | 1   | 5     | 3     | 3     |
| 13934  | 2   | 2     | 2     | 1     |
| 13938  | 0   | 2     | 1     | 1     |
| 13942  | 0   | 0     | 1     | 1     |
| 13945  | 1   | 4     | 3     | 2     |
| 13947  | 3   | 6     | 5     | 5     |
| 13948  | 0   |       |       |       |
| 13959  | 0   | 3     | 1     | 1     |
| 13962  | 0   | 1     | 1     | 1     |
| 13963  | 0   | 2     | 1     | 1     |
| 13964  | 1   | 3     | 2     | 1     |
| 13966  | 1   | 1     | 1     | 3     |
| 13968  | 1   | 4     | 1     | 2     |
| 13971  | 0   | 1     | 2     | 1     |



| respid | Q37 | Q38_1 | Q39_1 | Q39_2 |
|--------|-----|-------|-------|-------|
| 13979  | 2   | 3     | 4     | 4     |
| 13980  | 2   | 2     | 3     | 2     |
| 13981  | 1   | 3     | 2     | 2     |
| 13982  | 0   | 3     | 2     | 1     |
| 13984  | 1   | 5     | 2     | 1     |
| 13989  | 0   | 0     | 1     | 1     |
| 13990  | 0   | 1     | 1     | 1     |
| 13992  | 2   | 4     | 3     | 5     |
| 13998  | 2   | 3     | 2     | 3     |
| 13999  | 2   | 4     | 2     | 3     |
| 14000  | 1   | 2     | 2     | 1     |
| 14003  | 1   | 4     | 3     | 2     |
| 14004  | 0   | 2     | 3     | 2     |
| 14006  | 0   | 2     | 2     | 1     |
| 14007  | 0   | 2     | 1     | 1     |
| 14008  | 0   |       |       |       |
| 14013  | 0   | 0     | 1     | 1     |
| 14015  | 0   | 2     | 2     | 1     |
| 14018  | 0   | 2     | 1     | 1     |
| 14021  | 3   | 0     | 1     | 1     |
| 14023  | 0   | 4     | 2     | 1     |
| 14024  | 2   | 5     | 5     | 4     |
| 14026  | 0   | 1     | 1     | 1     |
| 14030  | 2   | 4     | 3     | 4     |
| 14032  | 1   | 4     | 2     | 2     |
| 14040  | 0   |       |       |       |
| 14045  | 0   | 1     | 1     | 1     |
| 14048  | 3   | 4     | 3     | 2     |
| 14049  | 3   | 5     | 5     | 4     |
| 14050  | 0   | 2     | 1     | 1     |
| 14051  | 3   | 5     | 5     | 5     |
| 14052  | 1   | 2     | 2     | 3     |

| respid | Q37 | Q38_1 | Q39_1 | Q39_2 |
|--------|-----|-------|-------|-------|
| 14054  | 1   | 4     | 1     | 1     |
| 14055  | 0   |       |       |       |
| 14057  | 0   | 2     | 3     | 3     |
| 14058  | 0   | 1     | 1     | 1     |
| 14059  | 0   | 1     | 1     | 1     |
| 14060  | 2   | 4     | 1     | 2     |
| 14061  | 2   | 5     | 4     | 3     |
| 14071  | 0   | 0     | 1     | 1     |
| 14073  | 0   | 2     | 1     | 1     |
| 14074  | 1   | 3     | 4     | 3     |
| 14076  | 0   | 3     | 4     | 1     |
| 14080  | 0   | 1     | 1     | 1     |
| 14082  | 0   | 1     | 1     | 1     |
| 14083  | 1   | 4     | 1     | 2     |
| 14084  | 0   | 1     | 1     | 1     |
| 14085  | 0   |       |       |       |
| 14086  | 3   | 6     | 6     | 4     |
| 14088  | 1   | 1     | 1     | 1     |
| 14090  | 0   | 0     | 1     | 1     |
| 14092  | 0   | 1     | 1     | 2     |
| 14093  | 1   | 1     | 2     | 1     |
| 14096  | 0   | 2     | 2     | 1     |
| 14103  | 2   | 4     | 2     | 3     |
| 14105  | 0   | 0     | 1     | 1     |
| 14106  | 1   | 3     | 2     | 2     |
| 14107  | 1   | 0     | 1     | 2     |
| 14108  | 3   | 5     | 4     | 4     |
| 14112  | 2   | 3     | 1     | 1     |
| 14114  | 3   | 5     | 4     | 4     |
| 14115  | 1   | 3     | 2     | 1     |
| 14116  | 0   | 4     | 1     | 1     |
| 14117  | 2   | 4     | 1     | 1     |

| respid | Q37 | Q38_1 | Q39_1 | Q39_2 |
|--------|-----|-------|-------|-------|
| 14118  | 2   | 4     | 2     | 2     |
| 14119  | 1   | 1     | 1     | 1     |
| 14127  | 0   |       |       |       |
| 14129  | 1   | 3     | 1     | 1     |
| 14131  | 0   | 4     | 3     | 1     |
| 14132  | 1   | 1     | 1     | 1     |
| 14133  | 3   | 5     | 4     | 4     |
| 14134  | 1   | 3     | 2     | 2     |
| 14135  | 0   | 1     | 2     | 1     |
| 14136  | 2   | 5     | 3     | 3     |
| 14138  | 0   |       |       |       |
| 14139  | 0   |       |       |       |
| 14140  | 2   | 3     | 3     | 2     |
| 14141  | 0   | 0     | 1     | 1     |
| 14143  | 0   | 1     | 1     | 1     |
| 14146  | 0   | 0     | 1     | 1     |
| 14147  | 5   | 6     | 6     | 6     |
| 14148  | 0   | 3     | 1     | 1     |
| 14151  | 2   | 5     | 3     | 3     |
| 14152  | 1   | 3     | 2     | 3     |
| 14153  | 0   | 1     | 1     | 2     |
| 14154  | 1   | 4     | 2     | 1     |
| 14158  | 1   | 3     | 1     | 1     |
| 14159  | 1   | 0     | 1     | 1     |
| 14160  | 1   | 4     | 4     | 4     |
| 14161  | 2   | 4     | 2     | 3     |
| 14162  | 2   | 6     | 2     | 1     |
| 14165  | 3   | 5     | 4     | 3     |
| 14166  | 3   | 3     | 2     | 3     |
| 14167  | 1   | 3     | 2     | 2     |
| 14169  | 1   | 2     | 2     | 1     |
| 14170  | 1   | 1     | 1     | 1     |

| respid | Q37 | Q38_1 | Q39_1 | Q39_2 |
|--------|-----|-------|-------|-------|
| 14172  | 1   | 1     | 2     | 1     |
| 14173  | 0   |       |       |       |
| 14174  | 1   | 4     | 2     | 1     |
| 14175  | 1   | 4     | 2     | 1     |
| 14176  | 1   | 4     | 1     | 2     |
| 14178  | 0   | 1     | 1     | 2     |
| 14179  | 0   | 1     | 1     | 1     |
| 14180  | 1   | 3     | 2     | 3     |
| 14183  | 1   | 2     | 1     | 2     |
| 14185  | 0   | 1     | 1     | 2     |
| 14187  | 1   | 4     | 3     | 1     |
| 14189  | 0   | 1     | 1     | 1     |
| 14191  | 2   | 3     | 3     | 2     |
| 14192  | 0   |       |       |       |
| 14195  | 2   | 5     | 2     | 4     |
| 14197  | 2   | 3     | 3     | 3     |
| 14203  | 3   | 3     | 3     | 2     |
| 14204  | 0   | 3     | 1     | 1     |
| 14205  | 1   | 2     | 3     | 1     |
| 14208  | 0   | 5     | 1     | 1     |
| 14211  | 5   | 6     | 6     | 6     |
| 14214  | 1   | 4     | 1     | 1     |
| 14215  | 2   | 4     | 3     | 3     |
| 14216  | 3   | 5     | 3     | 4     |
| 14218  | 0   | 1     | 1     | 1     |
| 14220  | 0   | 1     | 1     | 1     |
| 14223  | 0   |       |       |       |
| 14225  | 2   | 4     | 3     | 2     |
| 14226  | 0   | 1     | 1     | 1     |
| 14228  | 1   | 0     | 1     | 2     |
| 14231  | 2   | 3     | 3     | 3     |
| 14233  | 1   | 4     | 3     | 2     |

| respid | Q37 | Q38_1 | Q39_1 | Q39_2 |
|--------|-----|-------|-------|-------|
| 14237  | 0   | 1     | 1     | 1     |
| 14238  | 3   | 2     | 2     | 3     |
| 14243  | 0   | 1     | 2     | 2     |
| 14245  | 0   | 5     | 1     | 1     |
| 14246  | 2   | 1     | 1     | 2     |
| 14248  | 0   | 6     | 6     | 6     |
| 14250  | 2   | 2     | 2     | 1     |
| 14253  | 1   | 3     | 1     | 1     |
| 14254  | 0   | 1     | 1     | 1     |
| 14255  | 1   | 2     | 1     | 1     |
| 14257  | 0   | 1     | 1     | 1     |
| 14258  | 0   | 3     | 1     | 1     |
| 14259  | 2   | 4     | 3     | 2     |
| 14260  | 0   |       |       |       |
| 14261  | 4   | 5     | 4     | 5     |
| 14263  | 2   | 5     | 4     | 4     |
| 14264  | 1   | 3     | 1     | 2     |
| 14266  | 1   | 2     | 2     | 3     |
| 14267  | 1   | 0     | 4     | 3     |
| 14268  | 0   | 2     | 2     | 1     |
| 14275  | 0   | 2     | 2     | 2     |
| 14278  | 2   | 4     | 2     | 2     |
| 14279  | 0   |       |       |       |
| 14280  | 0   |       |       |       |
| 14281  | 0   | 2     | 1     | 1     |
| 14282  | 1   | 0     | 1     | 1     |
| 14283  | 2   | 4     | 4     | 4     |
| 14286  | 0   | 0     | 1     | 1     |
| 14287  | 0   |       |       |       |
| 14288  | 2   | 4     | 2     | 2     |
| 14291  | 0   |       |       |       |
| 14292  | 0   |       |       |       |

| respid | Q37 | Q38_1 | Q39_1 | Q39_2 |
|--------|-----|-------|-------|-------|
| 14293  | 1   | 1     | 2     | 1     |
| 14304  | 4   | 5     | 4     | 5     |
| 14308  | 1   | 4     | 2     | 1     |
| 14313  | 2   | 3     | 1     | 1     |
| 14314  | 1   | 4     | 3     | 3     |
| 14316  | 0   | 1     | 1     | 1     |
| 14317  | 0   | 1     | 1     | 2     |
| 14318  | 3   | 5     | 5     | 4     |
| 14319  | 1   | 4     | 2     | 2     |
| 14320  | 2   | 3     | 1     | 2     |
| 14321  | 0   | 2     | 1     | 1     |
| 14322  | 3   | 5     | 4     | 4     |
| 14326  | 0   | 1     | 1     | 2     |
| 14327  | 4   | 5     | 4     | 6     |
| 14328  | 0   |       |       |       |
| 14330  | 0   | 2     | 1     | 1     |
| 14332  | 0   | 1     | 2     | 1     |
| 14334  | 0   | 1     | 1     | 1     |
| 14336  | 2   | 3     | 2     | 1     |
| 14337  | 1   | 2     | 1     | 1     |
| 14339  | 0   |       |       |       |
| 14340  | 3   | 5     | 4     | 4     |
| 14341  | 0   | 1     | 1     | 1     |
| 14344  | 0   | 0     | 2     | 1     |
| 14345  | 1   | 3     | 2     | 1     |
| 14346  | 0   |       |       |       |
| 14348  | 1   | 5     | 2     | 2     |
| 14349  | 1   | 2     | 2     | 1     |
| 14358  | 3   | 5     | 4     | 4     |
| 14360  | 0   | 1     | 1     | 1     |
| 14362  | 0   |       |       |       |
| 14366  | 0   | 0     | 2     | 1     |

| respid | Q37 | Q38_1 | Q39_1 | Q39_2 |
|--------|-----|-------|-------|-------|
| 14367  | 2   | 3     | 2     | 1     |
| 14369  | 2   | 5     | 3     | 1     |
| 14371  | 0   | 2     | 1     | 1     |
| 14372  | 0   | 0     | 1     | 1     |
| 14374  | 0   | 2     | 2     | 1     |
| 14376  | 0   | 3     | 1     | 2     |
| 14377  | 0   |       |       |       |
| 14378  | 0   | 1     | 2     | 1     |
| 14379  | 0   | 2     | 2     | 1     |
| 14381  | 0   | 6     | 2     | 1     |
| 14383  | 2   | 3     | 2     | 2     |
| 14384  | 2   | 4     | 4     | 3     |
| 14385  | 4   | 4     | 4     | 5     |
| 14386  | 3   | 4     | 4     | 4     |
| 14390  | 1   | 2     | 2     | 1     |
| 14391  | 0   | 0     | 1     | 1     |
| 14392  | 1   | 4     | 1     | 2     |
| 14393  | 3   | 5     | 3     | 2     |
| 14394  | 2   | 4     | 3     | 3     |
| 14395  | 0   |       |       |       |
| 14396  | 0   |       |       |       |
| 14397  | 3   | 4     | 2     | 1     |
| 14398  | 0   | 1     | 2     | 1     |
| 14399  | 0   | 2     | 1     | 1     |
| 14400  | 0   | 3     | 1     | 1     |
| 14403  | 0   | 2     | 2     | 1     |
| 14404  | 1   | 3     | 2     | 2     |
| 14405  | 0   | 1     | 1     | 1     |
| 14407  | 0   | 5     | 2     | 3     |
| 14408  | 2   | 5     | 3     | 5     |
| 14410  | 0   | 4     | 1     | 2     |
| 14415  | 1   | 3     | 1     | 1     |

| respid | Q37 | Q38_1 | Q39_1 | Q39_2 |
|--------|-----|-------|-------|-------|
| 14419  | 2   | 4     | 4     | 4     |
| 14420  | 0   |       |       |       |
| 14421  | 0   |       |       |       |
| 14423  | 1   | 1     | 1     | 1     |
| 14424  | 0   | 6     | 3     | 2     |
| 14425  | 1   | 2     | 2     | 1     |
| 14426  | 0   | 6     | 2     | 3     |
| 14427  | 0   | 2     | 1     | 1     |
| 14428  | 4   | 5     | 4     | 3     |
| 14431  | 1   | 4     | 3     | 2     |
| 14433  | 0   | 0     | 1     | 1     |
| 14434  | 0   | 2     | 1     | 1     |
| 14435  | 1   | 4     | 1     | 2     |
| 14436  | 3   | 6     | 5     | 5     |
| 14438  | 0   | 5     | 3     | 2     |
| 14442  | 4   | 4     | 4     | 4     |
| 14447  | 0   | 2     | 1     | 3     |
| 14448  | 0   | 5     | 3     | 3     |
| 14450  | 1   | 3     | 2     | 3     |
| 14451  | 1   | 3     | 1     | 2     |
| 14454  | 2   | 4     | 2     | 3     |
| 14455  | 0   | 1     | 1     | 1     |
| 14456  | 2   | 4     | 3     | 4     |
| 14457  | 2   | 3     | 1     | 3     |
| 14458  | 1   | 4     | 3     | 4     |
| 14459  | 0   |       |       |       |
| 14460  | 1   | 5     | 3     | 2     |
| 14464  | 1   | 4     | 2     | 2     |
| 14465  | 1   | 3     | 2     | 2     |
| 14466  | 1   | 5     | 2     | 1     |
| 14467  | 0   | 2     | 1     | 1     |
| 14470  | 1   | 3     | 2     | 2     |



| respid | Q37 | Q38_1 | Q39_1 | Q39_2 |
|--------|-----|-------|-------|-------|
| 14472  | 1   | 4     | 4     | 4     |
| 14473  | 0   | 1     | 1     | 1     |
| 14474  | 0   |       |       |       |
| 14477  | 1   | 6     | 3     | 2     |
| 14478  | 0   | 0     | 1     | 1     |
| 14479  | 0   |       |       |       |
| 14484  | 0   | 1     | 1     | 1     |
| 14485  | 0   |       |       |       |
| 14486  | 1   | 3     | 3     | 2     |
| 14487  | 0   | 6     | 2     | 2     |
| 14488  | 3   | 4     | 3     | 3     |
| 14491  | 1   | 5     | 2     | 3     |
| 14495  | 0   | 3     | 1     | 1     |
| 14500  | 0   | 2     | 2     | 1     |
| 14502  | 0   | 6     | 2     | 3     |
| 14504  | 2   | 4     | 2     | 3     |
| 14505  | 2   | 3     | 3     | 4     |
| 14507  | 0   | 5     | 1     | 1     |
| 14517  | 0   | 2     | 1     | 1     |
| 14518  | 1   | 4     | 1     | 2     |
| 14519  | 1   | 3     | 1     | 1     |
| 14521  | 3   | 3     | 3     | 2     |
| 14522  | 0   | 1     | 1     | 1     |
| 14526  | 0   | 1     | 1     | 1     |
| 14528  | 2   | 4     | 6     | 5     |
| 14529  | 0   | 1     | 1     | 1     |
| 14530  | 2   | 3     | 3     | 4     |
| 14531  | 4   | 6     | 5     | 6     |
| 14534  | 1   | 2     | 2     | 3     |
| 14538  | 1   | 6     | 4     | 1     |
| 14539  | 0   | 3     | 3     | 4     |
| 14545  | 0   | 1     | 2     | 1     |

| respid | Q37 | Q38_1 | Q39_1 | Q39_2 |
|--------|-----|-------|-------|-------|
| 14546  | 1   | 4     | 2     | 1     |
| 14551  | 0   | 2     | 1     | 1     |
| 14553  | 3   | 5     | 4     | 4     |
| 14557  | 0   |       |       |       |
| 14558  | 0   | 5     | 3     | 3     |
| 14559  | 2   | 2     | 2     | 3     |
| 14560  | 1   | 3     | 2     | 1     |
| 14563  | 1   | 5     | 1     | 1     |
| 14565  | 0   | 3     | 1     | 1     |
| 14571  | 2   | 2     | 3     | 4     |
| 14572  | 1   | 5     | 2     | 3     |
| 14573  | 2   | 4     | 3     | 3     |
| 14575  | 2   | 3     | 4     | 3     |
| 14576  | 1   | 2     | 2     | 3     |
| 14578  | 2   | 3     | 2     | 2     |
| 14579  | 0   | 3     | 1     | 1     |
| 14580  | 3   | 6     | 1     | 2     |
| 14582  | 1   | 2     | 3     | 1     |
| 14585  | 1   | 2     | 2     | 2     |
| 14588  | 0   | 0     | 1     | 1     |
| 14590  | 1   | 3     | 3     | 3     |
| 14592  | 1   | 4     | 3     | 4     |
| 14593  | 2   | 6     | 2     | 3     |
| 14595  | 1   | 4     | 2     | 1     |
| 14597  | 1   | 3     | 2     | 2     |
| 14600  | 1   | 3     | 3     | 2     |
| 14602  | 3   | 5     | 3     | 3     |
| 14604  | 1   | 3     | 2     | 1     |
| 14605  | 1   | 3     | 1     | 1     |
| 14609  | 1   | 4     | 3     | 3     |
| 14610  | 0   | 1     | 1     | 1     |
| 14611  | 1   | 4     | 2     | 2     |

| respid | Q37 | Q38_1 | Q39_1 | Q39_2 |
|--------|-----|-------|-------|-------|
| 14612  | 3   | 6     | 3     | 3     |
| 14614  | 1   | 2     | 2     | 3     |
| 14615  | 1   | 2     | 1     | 1     |
| 14618  | 3   | 5     | 3     | 4     |
| 14621  | 0   |       |       |       |
| 14624  | 0   | 1     | 3     | 2     |
| 14626  | 0   | 2     | 1     | 1     |
| 14627  | 1   | 5     | 3     | 4     |
| 14628  | 1   | 5     | 4     | 5     |
| 14631  | 2   | 6     | 3     | 2     |
| 14633  | 2   | 3     | 3     | 2     |
| 14642  | 1   | 1     | 5     | 4     |
| 14647  | 0   | 6     | 6     | 6     |
| 14658  | 0   | 2     | 2     | 1     |
| 14659  | 2   | 2     | 2     | 3     |
| 14660  | 0   | 2     | 2     | 1     |
| 14661  | 2   | 5     | 2     | 2     |
| 14662  | 3   | 5     | 2     | 3     |
| 14663  | 1   | 5     | 2     | 1     |
| 14670  | 5   | 5     | 1     | 2     |
| 14671  | 0   |       |       |       |
| 14672  | 1   | 3     | 2     | 3     |
| 14675  | 2   | 2     | 2     | 1     |
| 14676  | 3   | 6     | 3     | 2     |
| 14677  | 3   | 4     | 3     | 4     |
| 14678  | 1   | 2     | 3     | 1     |
| 14681  | 2   | 3     | 2     | 3     |
| 14684  | 0   | 6     | 6     | 6     |
| 14688  | 3   | 6     | 1     | 2     |
| 14690  | 2   | 3     | 2     | 3     |
| 14694  | 1   | 2     | 3     | 2     |
| 14696  | 1   | 2     | 1     | 2     |

| respid | Q37 | Q38_1 | Q39_1 | Q39_2 |
|--------|-----|-------|-------|-------|
| 14700  | 0   |       |       |       |
| 14701  | 0   | 3     | 3     | 3     |
| 14703  | 2   | 1     | 1     | 2     |
| 14707  | 0   | 3     | 2     | 2     |
| 14711  | 1   | 2     | 2     | 3     |
| 14714  | 0   | 3     | 1     | 1     |
| 14715  | 0   | 1     | 1     | 2     |
| 14716  | 0   | 1     | 1     | 1     |
| 14720  | 0   | 6     | 6     | 6     |
| 14725  | 0   | 3     | 1     | 1     |
| 14726  | 1   | 1     | 1     | 1     |
| 14734  | 1   | 6     | 2     | 3     |
| 14735  | 1   | 6     | 1     | 2     |
| 14736  | 2   | 2     | 2     | 3     |
| 14740  | 0   | 6     | 1     | 3     |
| 14745  | 2   | 6     | 3     | 2     |
| 14747  | 0   | 5     | 3     | 2     |
| 14750  | 1   | 3     | 2     | 3     |
| 14751  | 0   | 5     | 2     | 1     |
| 14753  | 1   | 5     | 2     | 3     |
| 14756  | 5   | 6     | 6     | 6     |
| 14780  | 1   | 4     | 4     | 3     |
| 14782  | 0   | 1     | 2     | 1     |
| 14800  | 4   | 3     | 4     | 3     |
| 14801  | 0   | 6     | 1     | 1     |
| 14802  | 3   | 5     | 3     | 3     |
| 14805  | 3   | 6     | 5     | 4     |
| 14811  | 2   | 3     | 3     | 3     |
| 14814  | 2   | 5     | 3     | 4     |
| 14822  | 2   | 2     | 1     | 2     |
| 14827  | 3   | 6     | 4     | 4     |
| 14828  | 1   | 2     | 3     | 3     |

| respid | Q37 | Q38_1 | Q39_1 | Q39_2 |
|--------|-----|-------|-------|-------|
| 14830  | 0   |       |       |       |
| 14832  | 2   | 5     | 3     | 3     |
| 14835  | 3   | 6     | 6     | 4     |
| 14841  | 0   |       |       |       |
| 14849  | 1   | 2     | 3     | 2     |
| 14850  | 0   |       |       |       |
| 14851  | 0   | 6     | 6     | 6     |
| 14856  | 3   | 5     | 4     | 4     |
| 14862  | 1   | 1     | 1     | 2     |
| 14863  | 0   | 1     | 1     | 1     |
| 14864  | 0   | 1     | 3     | 3     |
| 14866  | 1   | 2     | 1     | 2     |
| 14867  | 3   | 5     | 4     | 4     |
| 14868  | 0   | 3     | 1     | 1     |
| 14870  | 0   | 1     | 3     | 2     |
| 14873  | 0   |       |       |       |
| 14878  | 1   | 1     | 2     | 1     |
| 14879  | 0   |       |       |       |
| 14881  | 2   | 3     | 5     | 4     |
| 14888  | 3   | 4     | 4     | 4     |
| 14895  | 1   | 2     | 5     | 2     |
| 14900  | 3   | 4     | 4     | 3     |
| 14912  | 0   |       |       |       |
| 14922  | 1   | 2     | 1     | 2     |
| 14923  | 4   | 3     | 3     | 4     |
| 14924  | 3   | 4     | 3     | 4     |
| 14925  | 1   | 1     | 1     | 2     |
| 14926  | 2   | 1     | 2     | 3     |
| 14927  | 3   | 4     | 3     | 3     |
| 14930  | 0   | 3     | 1     | 1     |
| 14937  | 2   | 4     | 4     | 4     |
| 14938  | 1   | 3     | 2     | 3     |

| respid | Q37 | Q38_1 | Q39_1 | Q39_2 |
|--------|-----|-------|-------|-------|
| 14939  | 2   | 4     | 3     | 3     |
| 14942  | 0   |       |       |       |
| 14943  | 0   |       |       |       |
| 14953  | 2   | 4     | 4     | 2     |
| 14954  | 1   | 1     | 2     | 3     |
| 14955  | 2   | 3     | 2     | 3     |
| 14957  | 3   | 4     | 3     | 4     |
| 14958  | 4   | 5     | 4     | 4     |
| 14959  | 2   | 3     | 3     | 3     |
| 14961  | 0   |       |       |       |
| 14963  | 1   | 2     | 4     | 4     |
| 14964  | 0   | 0     | 3     | 4     |
| 14965  | 2   | 2     | 1     | 3     |
| 14967  | 1   | 2     | 1     | 2     |
| 14970  | 4   | 4     | 3     | 4     |
| 14972  | 1   | 4     | 3     | 2     |
| 14975  | 4   | 4     | 4     | 4     |
| 14977  | 1   | 1     | 3     | 2     |
| 14982  | 1   | 3     | 2     | 1     |
| 14985  | 2   | 4     | 2     | 3     |
| 14986  | 0   |       |       |       |
| 14987  | 0   |       |       |       |
| 14988  | 4   | 5     | 4     | 4     |
| 14989  | 3   | 5     | 4     | 4     |
| 14993  | 2   | 3     | 3     | 2     |
| 15001  | 0   | 0     | 2     | 3     |
| 15002  | 5   | 5     | 6     | 6     |
| 15006  | 3   | 3     | 3     | 2     |
| 15007  | 1   | 1     | 2     | 3     |
| 15014  | 1   | 2     | 3     | 3     |
| 15020  | 3   | 4     | 2     | 3     |
| 15021  | 2   | 2     | 5     | 4     |

| respid | Q37 | Q38_1 | Q39_1 | Q39_2 |
|--------|-----|-------|-------|-------|
| 15023  | 3   | 3     | 5     | 5     |
| 15030  | 1   | 1     | 2     | 3     |
| 15032  | 0   |       |       |       |
| 15033  | 0   | 3     | 3     | 3     |
| 15034  | 2   | 2     | 2     | 3     |
| 15035  | 1   | 2     | 5     | 2     |
| 15037  | 0   | 6     | 1     | 3     |
| 15039  | 1   | 3     | 4     | 4     |
| 15040  | 0   | 6     | 6     | 6     |
| 15042  | 2   | 5     | 6     | 4     |
| 15044  | 0   |       |       |       |
| 15045  | 2   | 2     | 1     | 1     |
| 15046  | 1   | 0     | 1     | 2     |
| 15052  | 2   | 2     | 3     | 3     |
| 15058  | 3   | 4     | 4     | 3     |
| 15063  | 3   | 3     | 3     | 3     |
| 15066  | 2   | 1     | 1     | 2     |
| 15069  | 1   | 2     | 2     | 3     |
| 15071  | 2   | 4     | 3     | 3     |
| 15076  | 1   | 0     | 3     | 4     |
| 15078  | 0   | 1     | 1     | 1     |
| 15087  | 3   | 5     | 6     | 3     |
| 15090  | 2   | 2     | 5     | 5     |
| 15091  | 3   | 4     | 3     | 3     |
| 15092  | 0   | 1     | 1     | 1     |
| 15096  | 2   | 1     | 1     | 2     |
| 15106  | 2   | 4     | 3     | 3     |
| 15108  | 0   |       |       |       |
| 15113  | 1   | 2     | 2     | 2     |
| 15116  | 0   |       |       |       |
| 15119  | 1   | 1     | 1     | 2     |
| 15120  | 2   | 3     | 3     | 3     |

| respid | Q37 | Q38_1 | Q39_1 | Q39_2 |
|--------|-----|-------|-------|-------|
| 15121  | 3   | 5     | 5     | 4     |
| 15123  | 0   |       |       |       |
| 15124  | 1   | 4     | 4     | 5     |
| 15128  | 0   | 1     | 1     | 1     |
| 15131  | 0   |       |       |       |
| 15136  | 1   | 6     | 2     | 3     |
| 15137  | 3   | 2     | 1     | 2     |
| 15141  | 2   | 4     | 4     | 2     |
| 15144  | 0   | 3     | 2     | 2     |
| 15147  | 2   | 1     | 1     | 2     |
| 15151  | 1   | 4     | 2     | 3     |
| 15154  | 3   | 5     | 4     | 5     |
| 15157  | 1   | 4     | 2     | 3     |
| 15164  | 4   | 6     | 4     | 4     |
| 15168  | 0   | 1     | 1     | 2     |
| 15169  | 2   | 1     | 1     | 2     |
| 15172  | 0   | 3     | 2     | 3     |
| 15177  | 3   | 4     | 2     | 3     |
| 15178  | 0   |       |       |       |
| 15180  | 2   | 1     | 1     | 2     |
| 15181  | 0   | 2     | 1     | 1     |
| 15182  | 3   | 5     | 5     | 3     |
| 15183  | 0   |       |       |       |
| 15188  | 1   | 1     | 3     | 3     |
| 15190  | 3   | 4     | 5     | 5     |
| 15195  | 0   |       |       |       |
| 15201  | 4   | 4     | 5     | 5     |
| 15203  | 3   | 5     | 2     | 3     |
| 15204  | 0   | 1     | 1     | 1     |
| 15207  | 0   |       |       |       |
| 15208  | 2   | 3     | 6     | 6     |
| 15209  | 1   | 2     | 3     | 2     |



| respid | Q37 | Q38_1 | Q39_1 | Q39_2 |
|--------|-----|-------|-------|-------|
| 15212  | 0   |       |       |       |
| 15213  | 3   | 4     | 3     | 3     |
| 15219  | 2   | 4     | 2     | 3     |
| 15220  | 3   | 6     | 5     | 4     |
| 15221  | 1   | 1     | 2     | 1     |
| 15223  | 2   | 1     | 1     | 2     |
| 15224  | 2   | 3     | 2     | 1     |
| 15225  | 0   | 0     | 1     | 1     |
| 15226  | 2   | 2     | 2     | 1     |
| 15230  | 2   | 1     | 3     | 2     |
| 15231  | 4   | 4     | 2     | 4     |
| 15232  | 1   | 3     | 1     | 3     |
| 15237  | 0   | 6     | 4     | 3     |
| 15239  | 2   | 2     | 1     | 2     |
| 15241  | 2   | 1     | 3     | 1     |
| 15242  | 1   | 5     | 2     | 3     |
| 15247  | 1   | 1     | 1     | 2     |
| 15248  | 0   |       |       |       |
| 15251  | 0   |       |       |       |
| 15257  | 0   |       |       |       |
| 15260  | 2   | 1     | 1     | 2     |
| 15261  | 3   | 5     | 2     | 4     |
| 15262  | 3   | 6     | 6     | 4     |
| 15263  | 1   | 4     | 2     | 3     |
| 15265  | 1   | 1     | 2     | 1     |
| 15266  | 3   | 5     | 1     | 1     |
| 15268  | 3   | 5     | 1     | 2     |
| 15269  | 2   | 3     | 3     | 3     |
| 15270  | 4   | 6     | 5     | 6     |
| 15273  | 0   | 1     | 2     | 1     |
| 15276  | 1   | 5     | 5     | 4     |
| 15277  | 1   | 1     | 1     | 2     |

| respid | Q37 | Q38_1 | Q39_1 | Q39_2 |
|--------|-----|-------|-------|-------|
| 15282  | 5   | 6     | 6     | 6     |
| 15284  | 3   | 6     | 6     | 5     |
| 15285  | 1   | 2     | 1     | 1     |
| 15286  | 1   | 1     | 6     | 5     |
| 15288  | 2   | 3     | 2     | 3     |
| 15292  | 3   | 5     | 4     | 5     |
| 15296  | 0   | 3     | 1     | 1     |
| 15297  | 1   | 4     | 2     | 1     |
| 15298  | 0   |       |       |       |
| 15301  | 1   | 2     | 2     | 1     |
| 15302  | 1   | 5     | 3     | 2     |
| 15305  | 1   | 2     | 4     | 2     |
| 15307  | 0   | 1     | 1     | 1     |
| 15308  | 1   | 3     | 2     | 2     |
| 15309  | 0   | 2     | 2     | 1     |
| 15311  | 1   | 1     | 1     | 1     |
| 15315  | 0   | 6     | 3     | 2     |
| 15316  | 0   | 2     | 2     | 1     |
| 15318  | 0   |       |       |       |
| 15321  | 3   | 5     | 4     | 5     |
| 15322  | 0   | 1     | 1     | 1     |
| 15324  | 0   | 1     | 1     | 1     |
| 15326  | 1   | 6     | 3     | 2     |
| 15327  | 0   | 2     | 1     | 1     |
| 15328  | 0   | 6     | 2     | 3     |
| 15330  | 0   | 2     | 2     | 3     |
| 15332  | 0   | 1     | 1     | 1     |
| 15333  | 0   |       |       |       |
| 15334  | 2   | 6     | 3     | 4     |
| 15336  | 1   | 4     | 6     | 5     |
| 15337  | 0   | 3     | 2     | 1     |
| 15338  | 2   | 1     | 1     | 2     |

| respid | Q37 | Q38_1 | Q39_1 | Q39_2 |
|--------|-----|-------|-------|-------|
| 15339  | 5   | 6     | 6     | 6     |
| 15341  | 0   | 2     | 2     | 1     |
| 15344  | 0   |       |       |       |
| 15345  | 0   | 3     | 2     | 2     |
| 15350  | 0   |       |       |       |
| 15351  | 1   | 6     | 3     | 1     |
| 15352  | 1   | 2     | 1     | 1     |
| 15372  | 1   | 5     | 4     | 3     |
| 15373  | 3   | 2     | 3     | 1     |
| 15376  | 0   | 1     | 1     | 1     |
| 15377  | 1   | 1     | 1     | 2     |
| 15382  | 0   | 5     | 3     | 2     |
| 15383  | 1   | 2     | 2     | 2     |
| 15385  | 4   | 4     | 3     | 4     |
| 15390  | 2   | 1     | 1     | 2     |
| 15399  | 0   |       |       |       |
| 15404  | 2   | 5     | 3     | 3     |
| 15410  | 0   | 2     | 1     | 1     |
| 15411  | 2   | 2     | 2     | 3     |
| 15412  | 2   | 4     | 4     | 3     |
| 15413  | 3   | 4     | 3     | 3     |
| 15414  | 1   | 1     | 1     | 2     |
| 15417  | 1   | 2     | 1     | 1     |
| 15418  | 1   | 4     | 2     | 2     |
| 15421  | 1   | 2     | 2     | 1     |
| 15423  | 1   | 5     | 2     | 3     |
| 15425  | 1   | 2     | 2     | 1     |
| 15426  | 2   | 5     | 4     | 5     |
| 15430  | 0   | 6     | 3     | 2     |
| 15431  | 2   | 4     | 4     | 4     |
| 15435  | 0   |       |       |       |
| 15436  | 0   |       |       |       |

| respid | Q37 | Q38_1 | Q39_1 | Q39_2 |
|--------|-----|-------|-------|-------|
| 15437  | 0   |       |       |       |
| 15438  | 0   | 1     | 1     | 1     |
| 15439  | 0   | 6     | 2     | 3     |
| 15441  | 2   | 5     | 3     | 4     |
| 15443  | 1   | 2     | 2     | 1     |
| 15446  | 0   | 5     | 1     | 2     |
| 15449  | 2   | 2     | 2     | 3     |
| 15451  | 2   | 4     | 4     | 5     |
| 15452  | 4   | 3     | 4     | 4     |
| 15454  | 1   | 1     | 1     | 1     |
| 15456  | 1   | 5     | 3     | 3     |
| 15457  | 0   |       |       |       |
| 15458  | 2   | 4     | 3     | 3     |
| 15462  | 3   | 5     | 4     | 5     |
| 15467  | 1   | 5     | 2     | 3     |
| 15470  | 3   | 5     | 3     | 3     |
| 15472  | 1   | 4     | 2     | 2     |
| 15476  | 1   | 3     | 5     | 5     |
| 15477  | 1   | 1     | 3     | 2     |
| 15488  | 1   | 3     | 1     | 2     |
| 15489  | 1   | 3     | 1     | 1     |
| 15490  | 1   | 2     | 2     | 2     |
| 15496  | 3   | 5     | 2     | 2     |
| 15497  | 1   | 3     | 3     | 2     |
| 15498  | 0   |       |       |       |
| 15509  | 1   | 4     | 3     | 3     |
| 15510  | 1   | 2     | 2     | 1     |
| 15516  | 1   | 2     | 3     | 1     |
| 15519  | 1   | 2     | 1     | 1     |
| 15520  | 2   | 2     | 1     | 2     |
| 15524  | 1   | 5     | 2     | 2     |
| 15525  | 0   | 6     | 1     | 1     |

| respid | Q37 | Q38_1 | Q39_1 | Q39_2 |
|--------|-----|-------|-------|-------|
| 15526  | 2   | 5     | 3     | 4     |
| 15531  | 1   | 5     | 2     | 4     |
| 15532  | 0   | 4     | 2     | 2     |
| 15534  | 2   | 3     | 5     | 5     |
| 15535  | 0   | 3     | 2     | 3     |
| 15539  | 1   | 4     | 2     | 2     |
| 15550  | 0   | 0     | 1     | 1     |
| 15556  | 1   | 1     | 2     | 1     |
| 15558  | 0   | 3     | 2     | 3     |
| 15565  | 0   | 2     | 1     | 1     |
| 15567  | 2   | 4     | 3     | 3     |
| 15568  | 0   | 3     | 2     | 2     |
| 15571  | 1   | 4     | 2     | 1     |
| 15573  | 0   | 1     | 1     | 1     |
| 15574  | 1   | 3     | 2     | 2     |
| 15576  | 0   | 3     | 1     | 1     |
| 15587  | 1   | 3     | 2     | 3     |
| 15588  | 3   | 5     | 1     | 1     |
| 15593  | 3   | 5     | 4     | 4     |
| 15597  | 1   | 4     | 1     | 1     |
| 15598  | 1   | 4     | 2     | 1     |
| 15599  | 2   | 5     | 2     | 2     |
| 15601  | 0   | 0     | 1     | 1     |
| 15604  | 1   | 2     | 1     | 1     |
| 15611  | 0   | 1     | 1     | 1     |
| 15613  | 0   | 3     | 1     | 1     |
| 15614  | 0   | 4     | 1     | 1     |
| 15617  | 2   | 4     | 3     | 3     |
| 15622  | 0   |       |       |       |
| 15623  | 0   | 5     | 2     | 1     |
| 15625  | 2   | 5     | 3     | 2     |
| 15627  | 0   |       |       |       |

| respid | Q37 | Q38_1 | Q39_1 | Q39_2 |
|--------|-----|-------|-------|-------|
| 15628  | 0   | 5     | 2     | 1     |
| 15633  | 0   | 3     | 2     | 2     |
| 15634  | 0   | 6     | 1     | 2     |
| 15637  | 0   | 6     | 1     | 2     |
| 15644  | 1   | 3     | 2     | 2     |
| 15645  | 1   | 4     | 2     | 3     |
| 15649  | 0   | 1     | 1     | 1     |
| 15650  | 0   | 1     | 1     | 1     |
| 15651  | 0   | 1     | 2     | 1     |
| 15657  | 4   | 6     | 6     | 5     |
| 15658  | 1   | 3     | 2     | 1     |
| 15660  | 2   | 4     | 2     | 3     |
| 15667  | 0   | 1     | 1     | 1     |
| 15671  | 0   | 1     | 1     | 1     |
| 15679  | 3   | 5     | 3     | 3     |
| 15712  | 0   | 6     | 1     | 1     |
| 15715  | 0   | 1     | 2     | 2     |
| 15749  | 2   | 5     | 1     | 1     |
| 15754  | 1   | 3     | 2     | 2     |
| 15756  | 2   | 4     | 6     | 4     |
| 15773  | 1   | 2     | 1     | 1     |
| 15774  | 0   | 2     | 2     | 1     |
| 15776  | 2   | 4     | 3     | 3     |
| 15777  | 2   | 4     | 5     | 3     |
| 15779  | 0   |       |       |       |
| 15780  | 2   | 3     | 2     | 2     |
| 15792  | 0   | 2     | 1     | 2     |
| 15793  | 1   | 3     | 3     | 4     |
| 15796  | 0   | 5     | 1     | 3     |
| 15798  | 0   | 1     | 1     | 1     |
| 15809  | 1   | 4     | 3     | 3     |
| 15810  | 0   | 6     | 6     | 6     |

| respid | Q37 | Q38_1 | Q39_1 | Q39_2 |
|--------|-----|-------|-------|-------|
| 15815  | 1   | 4     | 2     | 2     |
| 15816  | 0   | 5     | 2     | 1     |
| 15817  | 0   |       |       |       |
| 15821  | 1   | 3     | 3     | 4     |
| 15823  | 1   | 3     | 2     | 2     |
| 15834  | 3   | 6     | 3     | 1     |
| 15835  | 0   |       |       |       |
| 15836  | 0   | 4     | 1     | 1     |
| 15837  | 0   | 1     | 1     | 1     |
| 15839  | 2   | 5     | 4     | 4     |
| 15840  | 1   | 1     | 1     | 2     |
| 15844  | 1   | 3     | 1     | 1     |
| 15845  | 1   | 1     | 1     | 1     |
| 15847  | 3   | 2     | 4     | 4     |
| 15848  | 0   | 2     | 1     | 1     |
| 15849  | 1   | 6     | 3     | 4     |
| 15857  | 1   | 3     | 2     | 2     |
| 15858  | 1   | 2     | 3     | 2     |
| 15862  | 2   | 5     | 6     | 4     |
| 15866  | 1   | 2     | 1     | 2     |
| 15870  | 1   | 3     | 3     | 2     |
| 15871  | 2   | 5     | 1     | 1     |
| 15872  | 0   | 6     | 4     | 3     |
| 15873  | 0   | 0     | 1     | 1     |
| 15874  | 0   |       |       |       |
| 15875  | 2   | 3     | 2     | 2     |
| 15876  | 1   | 4     | 3     | 2     |
| 15882  | 3   | 5     | 4     | 4     |
| 15884  | 1   | 4     | 2     | 3     |
| 15890  | 3   | 6     | 2     | 3     |
| 15892  | 3   | 4     | 5     | 5     |
| 15908  | 3   | 5     | 2     | 3     |

| respid | Q37 | Q38_1 | Q39_1 | Q39_2 |
|--------|-----|-------|-------|-------|
| 15914  | 1   | 2     | 2     | 3     |
| 15932  | 2   | 3     | 2     | 3     |
| 15933  | 1   | 2     | 4     | 2     |
| 15938  | 0   | 1     | 1     | 1     |
| 15940  | 5   | 4     | 6     | 5     |
| 15945  | 1   | 3     | 2     | 2     |
| 15947  | 1   | 6     | 3     | 2     |
| 15950  | 1   | 2     | 1     | 2     |
| 15951  | 1   | 4     | 3     | 3     |
| 15952  | 2   | 1     | 2     | 2     |
| 15953  | 1   | 4     | 2     | 2     |
| 15954  | 2   | 4     | 5     | 3     |
| 15957  | 2   | 2     | 1     | 2     |
| 15965  | 1   | 4     | 2     | 2     |
| 15966  | 0   |       |       |       |
| 15967  | 2   | 6     | 2     | 4     |
| 15968  | 3   | 5     | 6     | 3     |
| 15970  | 0   | 6     | 1     | 1     |
| 15973  | 1   | 1     | 3     | 2     |
| 15974  | 1   | 2     | 1     | 2     |
| 15975  | 0   |       |       |       |
| 15980  | 4   | 4     | 4     | 5     |
| 15984  | 0   | 6     | 2     | 3     |
| 15985  | 1   | 3     | 2     | 3     |
| 15994  | 0   |       |       |       |
| 15995  | 0   | 1     | 1     | 1     |
| 16000  | 0   | 5     | 3     | 2     |
| 16004  | 1   | 3     | 2     | 3     |
| 16005  | 1   | 2     | 3     | 2     |
| 16006  | 0   |       |       |       |
| 16009  | 0   | 4     | 1     | 1     |
| 16017  | 0   | 1     | 1     | 1     |



| respid | Q37 | Q38_1 | Q39_1 | Q39_2 |
|--------|-----|-------|-------|-------|
| 16019  | 1   | 4     | 3     | 3     |
| 16021  | 1   | 3     | 2     | 2     |
| 16024  | 0   | 2     | 1     | 1     |
| 16026  | 1   | 3     | 2     | 2     |
| 16029  | 0   |       |       |       |
| 16031  | 2   | 5     | 3     | 4     |
| 16037  | 0   | 0     | 1     | 2     |
| 16043  | 0   | 1     | 1     | 1     |
| 16044  | 0   | 1     | 1     | 1     |
| 16047  | 2   | 3     | 2     | 1     |
| 16048  | 3   | 6     | 3     | 3     |
| 16049  | 0   | 1     | 1     | 1     |
| 16051  | 1   | 3     | 1     | 1     |
| 16053  | 1   | 5     | 2     | 2     |
| 16054  | 1   | 2     | 1     | 1     |
| 16069  | 1   | 2     | 1     | 1     |
| 16070  | 1   | 3     | 2     | 1     |
| 16074  | 0   |       |       |       |
| 16076  | 0   |       |       |       |
| 16078  | 0   |       |       |       |
| 16081  | 0   | 3     | 1     | 1     |
| 16085  | 0   |       |       |       |
| 16088  | 0   | 1     | 1     | 1     |
| 16091  | 2   | 5     | 4     | 5     |
| 16092  | 1   | 3     | 2     | 2     |
| 16093  | 1   | 3     | 1     | 1     |
| 16097  | 1   | 3     | 1     | 2     |
| 16100  | 0   | 3     | 2     | 2     |
| 16101  | 0   | 1     | 2     | 1     |
| 16105  | 0   |       |       |       |
| 16118  | 2   | 5     | 4     | 3     |
| 16129  | 0   | 1     | 1     | 1     |

| respid | Q37 | Q38_1 | Q39_1 | Q39_2 |
|--------|-----|-------|-------|-------|
| 16130  | 2   | 2     | 2     | 2     |
| 16131  | 1   | 5     | 3     | 3     |
| 16136  | 0   | 4     | 1     | 1     |
| 16137  | 0   | 1     | 1     | 1     |
| 16138  | 1   | 4     | 2     | 2     |
| 16139  | 1   | 3     | 3     | 3     |
| 16140  | 0   | 5     | 5     | 5     |
| 16145  | 2   | 4     | 2     | 3     |
| 16150  | 4   | 6     | 6     | 1     |
| 16151  | 1   | 1     | 1     | 1     |
| 16153  | 0   | 1     | 1     | 1     |
| 16164  | 2   | 2     | 2     | 2     |
| 16168  | 2   | 3     | 3     | 2     |
| 16173  | 2   | 4     | 2     | 2     |
| 16174  | 0   | 1     | 1     | 1     |
| 16177  | 2   | 6     | 3     | 3     |
| 16185  | 0   | 1     | 1     | 1     |
| 16189  | 2   | 3     | 3     | 3     |
| 16192  | 1   | 3     | 3     | 4     |
| 16193  | 0   | 1     | 1     | 1     |
| 16194  | 1   | 5     | 3     | 2     |
| 16196  | 0   |       |       |       |
| 16202  | 2   | 3     | 2     | 3     |
| 16205  | 3   | 5     | 3     | 4     |
| 16206  | 1   | 5     | 2     | 2     |
| 16208  | 0   |       |       |       |
| 16211  | 2   | 4     | 4     | 3     |
| 16212  | 0   | 3     | 1     | 1     |
| 16215  | 0   |       |       |       |
| 16217  | 0   | 1     | 1     | 2     |
| 16221  | 0   | 1     | 1     | 1     |
| 16226  | 3   | 5     | 2     | 3     |

| respid | Q37 | Q38_1 | Q39_1 | Q39_2 |
|--------|-----|-------|-------|-------|
| 16228  | 2   | 5     | 4     | 4     |
| 16229  | 0   | 4     | 1     | 1     |
| 16230  | 0   | 2     | 1     | 1     |
| 16231  | 2   | 5     | 5     | 6     |
| 16232  | 1   | 4     | 1     | 4     |
| 16234  | 1   | 4     | 2     | 1     |
| 16235  | 3   | 3     | 4     | 4     |
| 16236  | 1   | 2     | 1     | 1     |
| 16237  | 1   | 3     | 2     | 2     |
| 16238  | 2   | 4     | 2     | 1     |
| 16239  | 0   | 1     | 1     | 1     |
| 16243  | 1   | 2     | 3     | 3     |
| 16248  | 2   | 4     | 2     | 2     |
| 16249  | 0   | 1     | 1     | 1     |
| 16251  | 0   |       |       |       |
| 16263  | 0   | 0     | 1     | 1     |
| 16265  | 1   | 4     | 1     | 2     |
| 16269  | 0   | 0     | 1     | 1     |
| 16272  | 1   | 4     | 2     | 2     |
| 16273  | 0   |       |       |       |
| 16281  | 0   | 3     | 1     | 1     |
| 16282  | 0   | 1     | 1     | 1     |
| 16287  | 0   | 2     | 1     | 2     |
| 16290  | 0   | 2     | 2     | 1     |
| 16294  | 1   | 2     | 1     | 1     |
| 16295  | 0   | 2     | 2     | 1     |
| 16296  | 1   | 4     | 2     | 1     |
| 16299  | 3   | 6     | 4     | 5     |
| 16302  | 0   | 2     | 1     | 1     |
| 16303  | 0   | 2     | 1     | 1     |
| 16304  | 1   | 3     | 1     | 1     |
| 16306  | 1   | 2     | 2     | 2     |

| respid | Q37 | Q38_1 | Q39_1 | Q39_2 |
|--------|-----|-------|-------|-------|
| 16318  | 2   | 3     | 4     | 3     |
| 16320  | 1   | 2     | 1     | 1     |
| 16321  | 2   | 4     | 3     | 3     |
| 16322  | 1   | 5     | 3     | 1     |
| 16324  | 0   | 3     | 1     | 1     |
| 16326  | 0   | 2     | 3     | 2     |
| 16328  | 1   | 3     | 2     | 2     |
| 16336  | 2   | 4     | 2     | 3     |
| 16341  | 1   | 2     | 2     | 1     |
| 16342  | 0   | 2     | 1     | 1     |
| 16343  | 1   | 3     | 2     | 2     |
| 16345  | 2   | 4     | 2     | 1     |
| 16349  | 1   | 3     | 1     | 1     |
| 16355  | 0   | 2     | 1     | 1     |
| 16364  | 1   | 4     | 2     | 3     |
| 16374  | 0   | 0     | 1     | 1     |
| 16375  | 0   |       |       |       |
| 16376  | 2   | 3     | 2     | 2     |
| 16393  | 1   | 3     | 2     | 2     |
| 16394  | 2   | 4     | 2     | 2     |
| 16395  | 1   | 1     | 1     | 2     |
| 16397  | 1   | 4     | 3     | 2     |
| 16398  | 2   | 4     | 3     | 4     |
| 16402  | 1   | 4     | 2     | 2     |
| 16405  | 0   | 3     | 1     | 1     |
| 16416  | 0   | 1     | 2     | 2     |
| 16422  | 1   | 5     | 2     | 2     |
| 16429  | 0   | 1     | 1     | 1     |
| 16430  | 0   | 0     | 1     | 2     |
| 16432  | 2   | 3     | 2     | 3     |
| 16433  | 0   | 4     | 1     | 1     |
| 16434  | 0   |       |       |       |

| respid | Q37 | Q38_1 | Q39_1 | Q39_2 |
|--------|-----|-------|-------|-------|
| 16437  | 0   | 2     | 2     | 1     |
| 16439  | 0   | 1     | 1     | 1     |
| 16440  | 1   | 3     | 2     | 1     |
| 16441  | 1   | 4     | 1     | 1     |
| 16442  | 0   | 3     | 3     | 3     |
| 16450  | 0   | 2     | 1     | 2     |
| 16451  | 0   | 0     | 1     | 1     |
| 16452  | 2   | 3     | 3     | 2     |
| 16467  | 0   | 0     | 1     | 1     |
| 16468  | 0   |       |       |       |
| 16469  | 1   | 5     | 2     | 2     |
| 16470  | 0   |       |       |       |
| 16471  | 1   | 1     | 2     | 1     |
| 16473  | 0   | 0     | 2     | 2     |
| 16476  | 0   | 2     | 1     | 1     |
| 16478  | 1   | 1     | 1     | 1     |
| 16484  | 0   | 1     | 1     | 1     |
| 16499  | 0   | 2     | 3     | 4     |
| 16502  | 0   |       |       |       |
| 16505  | 0   | 1     | 1     | 1     |
| 16514  | 0   | 1     | 1     | 1     |
| 16515  | 1   | 3     | 3     | 2     |
| 16517  | 0   | 3     | 2     | 3     |
| 16518  | 0   | 3     | 1     | 1     |
| 16519  | 2   | 3     | 2     | 1     |
| 16525  | 1   | 2     | 2     | 1     |
| 16526  | 0   | 1     | 1     | 1     |
| 16530  | 0   | 1     | 1     | 1     |
| 16532  | 0   | 1     | 1     | 1     |
| 16536  | 0   | 0     | 1     | 1     |
| 16537  | 1   | 4     | 4     | 5     |
| 16541  | 3   | 6     | 3     | 4     |

| respid | Q37 | Q38_1 | Q39_1 | Q39_2 |
|--------|-----|-------|-------|-------|
| 16543  | 0   | 1     | 2     | 2     |
| 16544  | 0   | 3     | 2     | 2     |
| 16545  | 1   | 2     | 2     | 3     |
| 16546  | 0   | 2     | 2     | 2     |
| 16548  | 0   | 2     | 2     | 2     |
| 16552  | 3   | 5     | 2     | 2     |
| 16559  | 0   | 0     | 1     | 1     |
| 16564  | 4   | 6     | 3     | 5     |
| 16565  | 2   | 0     | 2     | 2     |
| 16567  | 1   | 4     | 2     | 3     |
| 16571  | 0   |       |       |       |
| 16572  | 1   | 2     | 2     | 2     |
| 16579  | 0   | 6     | 1     | 2     |
| 16588  | 4   | 6     | 5     | 6     |
| 16599  | 0   | 3     | 1     | 1     |
| 16605  | 1   | 2     | 2     | 2     |
| 16622  | 1   | 1     | 2     | 2     |
| 16635  | 1   | 3     | 2     | 2     |
| 16638  | 1   | 3     | 2     | 2     |
| 16652  | 1   | 6     | 2     | 1     |
| 16656  | 0   | 2     | 1     | 1     |
| 16671  | 0   |       |       |       |
| 16676  | 0   | 1     | 1     | 1     |
| 16678  | 1   | 2     | 2     | 2     |
| 16702  | 1   | 3     | 1     | 1     |
| 16705  | 1   | 4     | 1     | 2     |
| 16707  | 4   | 5     | 5     | 5     |
| 16711  | 1   | 4     | 2     | 2     |
| 16712  | 0   | 1     | 1     | 1     |
| 16716  | 0   |       |       |       |
| 16724  | 1   | 4     | 2     | 2     |
| 16727  | 1   | 4     | 2     | 2     |

| respid | Q37 | Q38_1 | Q39_1 | Q39_2 |
|--------|-----|-------|-------|-------|
| 16734  | 0   | 2     | 2     | 1     |
| 16740  | 0   | 2     | 1     | 1     |
| 16748  | 0   | 0     | 2     | 2     |
| 16759  | 0   | 0     | 1     | 1     |
| 16761  | 0   |       |       |       |
| 16763  | 2   | 3     | 1     | 1     |
| 16764  | 1   | 4     | 3     | 3     |
| 16766  | 0   | 0     | 1     | 1     |
| 16767  | 1   | 3     | 2     | 1     |
| 16776  | 0   | 0     | 1     | 1     |
| 16781  | 0   | 0     | 1     | 1     |
| 16793  | 1   | 3     | 2     | 2     |
| 16796  | 3   | 6     | 5     | 4     |
| 16810  | 0   | 1     | 1     | 1     |
| 16811  | 1   | 4     | 2     | 2     |
| 16813  | 0   |       |       |       |
| 16814  | 0   | 3     | 2     | 1     |
| 16831  | 2   | 5     | 2     | 2     |
| 16833  | 1   | 5     | 1     | 3     |
| 16839  | 2   | 4     | 1     | 2     |
| 16843  | 0   | 3     | 1     | 2     |
| 16860  | 0   |       |       |       |
| 16871  | 0   | 0     | 1     | 1     |
| 16881  | 2   | 4     | 3     | 2     |
| 16884  | 0   | 2     | 3     | 3     |
| 16891  | 1   | 3     | 3     | 3     |
| 16909  | 0   | 2     | 1     | 1     |
| 16911  | 0   |       |       |       |
| 16922  | 2   | 4     | 4     | 3     |
| 16935  | 2   | 1     | 3     | 3     |
| 16942  | 1   | 2     | 2     | 1     |
| 16950  | 0   |       |       |       |

| respid | Q37 | Q38_1 | Q39_1 | Q39_2 |
|--------|-----|-------|-------|-------|
| 16952  | 1   | 4     | 3     | 3     |
| 16963  | 1   | 1     | 1     | 2     |
| 16967  | 3   | 4     | 4     | 4     |
| 16970  | 2   | 4     | 2     | 2     |
| 16976  | 2   | 5     | 3     | 4     |
| 16982  | 1   | 3     | 1     | 1     |
| 16995  | 0   | 2     | 1     | 1     |
| 17004  | 1   | 3     | 2     | 2     |
| 17006  | 0   | 1     | 1     | 1     |
| 17009  | 1   | 4     | 2     | 1     |
| 17021  | 0   |       |       |       |
| 17040  | 1   | 2     | 3     | 2     |
| 17041  | 0   |       |       |       |
| 17044  | 1   | 4     | 2     | 3     |
| 17046  | 1   | 3     | 4     | 4     |
| 17052  | 1   | 3     | 2     | 2     |
| 17055  | 1   | 3     | 3     | 3     |
| 17108  | 1   | 3     | 1     | 2     |
| 17109  | 0   | 2     | 2     | 1     |
| 17113  | 0   |       |       |       |
| 17115  | 2   | 5     | 2     | 2     |
| 17132  | 0   |       |       |       |
| 17135  | 2   | 5     | 3     | 3     |
| 17138  | 1   | 3     | 3     | 2     |
| 17141  | 0   | 1     | 1     | 1     |
| 17143  | 0   | 2     | 2     | 1     |
| 17148  | 0   | 2     | 1     | 1     |
| 17151  | 1   | 4     | 2     | 1     |
| 17153  | 0   | 3     | 1     | 1     |
| 17154  | 1   | 4     | 3     | 1     |
| 17157  | 3   | 4     | 2     | 1     |
| 17160  | 0   | 1     | 1     | 1     |



| respid | Q37 | Q38_1 | Q39_1 | Q39_2 |
|--------|-----|-------|-------|-------|
| 17167  | 1   | 4     | 2     | 2     |
| 17169  | 1   | 2     | 2     | 2     |
| 17174  | 2   | 1     | 5     | 6     |
| 17179  | 0   | 1     | 1     | 1     |
| 17180  | 1   | 3     | 2     | 1     |
| 17182  | 0   | 1     | 1     | 1     |
| 17184  | 3   | 3     | 4     | 3     |
| 17186  | 0   | 2     | 1     | 1     |
| 17187  | 0   | 1     | 1     | 1     |
| 17192  | 2   | 4     | 2     | 1     |
| 17197  | 0   | 1     | 1     | 1     |
| 17217  | 0   | 1     | 1     | 1     |
| 17226  | 1   | 4     | 1     | 1     |
| 17228  | 1   | 2     | 2     | 2     |
| 17245  | 1   | 4     | 2     | 2     |
| 17247  | 0   |       |       |       |
| 17258  | 0   | 2     | 1     | 1     |
| 17259  | 1   | 3     | 2     | 2     |
| 17262  | 0   | 0     | 1     | 1     |
| 17265  | 0   | 4     | 2     | 1     |
| 17281  | 0   | 3     | 1     | 1     |
| 17282  | 3   | 3     | 3     | 4     |
| 17293  | 0   | 2     | 1     | 1     |
| 17306  | 2   | 3     | 3     | 2     |
| 17312  | 0   | 2     | 3     | 3     |
| 17318  | 1   | 3     | 2     | 2     |
| 17328  | 3   | 6     | 3     | 2     |
| 17343  | 0   | 2     | 1     | 1     |
| 17344  | 0   | 1     | 1     | 1     |
| 17348  | 0   | 3     | 1     | 2     |
| 17352  | 1   | 3     | 1     | 1     |
| 17355  | 1   | 3     | 2     | 1     |

| respid | Q37 | Q38_1 | Q39_1 | Q39_2 |
|--------|-----|-------|-------|-------|
| 17356  | 1   | 3     | 1     | 1     |
| 17359  | 1   | 2     | 2     | 2     |
| 17373  | 2   | 4     | 3     | 2     |
| 17381  | 0   | 3     | 2     | 1     |
| 17388  | 0   | 2     | 1     | 1     |
| 17394  | 2   | 4     | 2     | 2     |
| 17401  | 0   |       |       |       |
| 17403  | 0   | 1     | 1     | 1     |
| 17411  | 0   |       |       |       |
| 17423  | 0   | 3     | 2     | 1     |
| 17427  | 0   |       |       |       |
| 17433  | 0   | 1     | 1     | 1     |
| 17441  | 0   | 1     | 1     | 1     |
| 17442  | 0   | 3     | 4     | 4     |
| 17447  | 0   | 2     | 2     | 1     |
| 17458  | 0   | 1     | 1     | 1     |
| 17474  | 0   | 0     | 2     | 2     |
| 17475  | 2   | 3     | 3     | 3     |
| 17476  | 1   | 3     | 3     | 2     |
| 17480  | 0   | 0     | 1     | 1     |
| 17484  | 0   | 0     | 1     | 1     |
| 17490  | 1   | 1     | 1     | 1     |
| 17491  | 0   | 3     | 1     | 1     |
| 17500  | 0   | 1     | 1     | 1     |
| 17507  | 0   | 2     | 1     | 1     |
| 17517  | 0   | 0     | 3     | 3     |
| 17520  | 3   | 6     | 1     | 1     |
| 17521  | 0   | 2     | 2     | 1     |
| 17531  | 0   | 2     | 1     | 1     |
| 17540  | 1   | 2     | 2     | 3     |
| 17550  | 0   | 1     | 2     | 2     |
| 17551  | 0   | 1     | 1     | 1     |

| respid | Q37 | Q38_1 | Q39_1 | Q39_2 |
|--------|-----|-------|-------|-------|
| 17555  | 2   | 3     | 3     | 4     |
| 17556  | 2   | 2     | 2     | 2     |
| 17574  | 1   | 4     | 2     | 2     |
| 17575  | 0   | 3     | 1     | 1     |
| 17582  | 0   | 0     | 1     | 2     |
| 17587  | 0   |       |       |       |
| 17601  | 2   | 4     | 2     | 1     |
| 17607  | 2   | 4     | 3     | 3     |
| 17609  | 0   | 1     | 1     | 1     |
| 17611  | 0   | 6     | 1     | 1     |
| 17613  | 1   | 2     | 2     | 2     |
| 17615  | 0   | 3     | 3     | 1     |
| 17620  | 1   | 4     | 2     | 2     |
| 17624  | 1   | 4     | 2     | 2     |
| 17635  | 0   | 3     | 1     | 1     |
| 17643  | 1   | 5     | 2     | 3     |
| 17645  | 1   | 3     | 4     | 2     |
| 17646  | 0   | 1     | 1     | 1     |
| 17649  | 1   | 1     | 2     | 2     |
| 17658  | 0   | 2     | 1     | 1     |
| 17666  | 0   |       |       |       |
| 17670  | 0   | 0     | 2     | 1     |
| 17678  | 0   | 1     | 1     | 1     |
| 17679  | 0   | 3     | 2     | 2     |
| 17695  | 0   | 1     | 1     | 1     |
| 17697  | 2   | 4     | 2     | 2     |
| 17698  | 2   | 3     | 2     | 2     |
| 17723  | 2   | 3     | 3     | 2     |
| 17727  | 0   | 0     | 1     | 1     |
| 17734  | 0   | 3     | 1     | 1     |
| 17737  | 0   | 1     | 1     | 1     |
| 17748  | 0   | 4     | 2     | 1     |

| respid | Q37 | Q38_1 | Q39_1 | Q39_2 |
|--------|-----|-------|-------|-------|
| 17749  | 0   |       |       |       |
| 17754  | 1   | 3     | 4     | 2     |
| 17766  | 1   | 4     | 2     | 2     |
| 17777  | 0   | 1     | 1     | 1     |
| 17780  | 0   | 4     | 1     | 1     |
| 17788  | 0   | 1     | 1     | 1     |
| 17801  | 3   | 6     | 5     | 5     |
| 17803  | 0   | 1     | 1     | 1     |
| 17807  | 0   | 2     | 1     | 1     |
| 17808  | 0   | 2     | 1     | 1     |
| 17809  | 1   | 2     | 2     | 3     |
| 17821  | 0   | 1     | 4     | 5     |
| 17827  | 3   | 3     | 3     | 3     |
| 17834  | 1   | 4     | 2     | 2     |
| 17838  | 1   | 4     | 2     | 2     |
| 17842  | 0   | 0     | 1     | 1     |
| 17862  | 1   | 4     | 2     | 1     |
| 17863  | 0   | 3     | 1     | 3     |
| 17871  | 3   | 4     | 3     | 3     |
| 17872  | 0   | 0     | 1     | 1     |
| 17903  | 2   | 4     | 3     | 2     |
| 17906  | 1   | 3     | 2     | 1     |
| 17910  | 3   | 3     | 4     | 4     |
| 17922  | 1   | 2     | 1     | 1     |
| 17923  | 2   | 4     | 3     | 2     |
| 17925  | 1   | 3     | 2     | 2     |
| 17926  | 0   | 0     | 1     | 1     |
| 17937  | 0   | 0     | 1     | 1     |
| 17956  | 0   | 2     | 1     | 1     |
| 17958  | 1   | 4     | 2     | 1     |
| 17985  | 0   | 1     | 1     | 1     |
| 17989  | 2   | 4     | 3     | 2     |

| respid | Q37 | Q38_1 | Q39_1 | Q39_2 |
|--------|-----|-------|-------|-------|
| 17995  | 0   | 2     | 1     | 1     |
| 18000  | 0   | 1     | 2     | 1     |
| 18010  | 0   | 2     | 1     | 1     |
| 18015  | 0   | 2     | 1     | 1     |
| 18018  | 0   | 5     | 3     | 3     |
| 18031  | 1   | 2     | 2     | 1     |
| 18033  | 1   | 4     | 2     | 3     |
| 18036  | 0   | 2     | 1     | 1     |
| 18041  | 0   | 2     | 1     | 1     |
| 18068  | 0   |       |       |       |
| 18080  | 0   | 0     | 1     | 1     |
| 18081  | 1   | 2     | 2     | 2     |
| 18083  | 2   | 4     | 3     | 3     |
| 18113  | 1   | 4     | 3     | 2     |
| 18115  | 1   | 2     | 2     | 2     |
| 18117  | 4   | 6     | 6     | 6     |
| 18129  | 1   | 2     | 1     | 2     |
| 18132  | 2   | 5     | 2     | 2     |
| 18146  | 0   | 2     | 2     | 2     |
| 18147  | 2   | 5     | 5     | 6     |
| 18153  | 0   |       |       |       |
| 18154  | 2   | 3     | 3     | 3     |
| 18157  | 1   | 0     | 3     | 2     |
| 18166  | 0   | 1     | 2     | 1     |
| 18169  | 0   | 2     | 2     | 1     |
| 18171  | 0   | 1     | 3     | 2     |
| 18173  | 1   | 6     | 3     | 2     |
| 18204  | 0   | 2     | 1     | 1     |
| 18210  | 2   | 4     | 4     | 2     |
| 18212  | 0   |       |       |       |
| 18220  | 3   | 4     | 3     | 4     |
| 18221  | 0   | 1     | 1     | 1     |

| respid | Q37 | Q38_1 | Q39_1 | Q39_2 |
|--------|-----|-------|-------|-------|
| 18228  | 0   | 3     | 1     | 1     |
| 18231  | 0   | 1     | 1     | 1     |
| 18233  | 2   | 3     | 2     | 2     |
| 18235  | 1   | 5     | 2     | 1     |
| 18237  | 0   |       |       |       |
| 18250  | 1   | 1     | 1     | 1     |
| 18253  | 2   | 4     | 2     | 2     |
| 18264  | 0   | 2     | 1     | 1     |
| 18285  | 0   | 1     | 1     | 1     |
| 18287  | 0   |       |       |       |
| 18296  | 1   | 2     | 1     | 1     |
| 18299  | 1   | 2     | 2     | 1     |
| 18313  | 2   | 2     | 1     | 1     |
| 18321  | 1   | 1     | 2     | 2     |
| 18324  | 0   |       |       |       |
| 18329  | 0   | 1     | 3     | 3     |
| 18332  | 0   | 2     | 1     | 1     |
| 18339  | 3   | 3     | 4     | 4     |
| 18340  | 0   | 2     | 2     | 1     |
| 18348  | 0   | 1     | 1     | 1     |
| 18355  | 1   | 4     | 2     | 2     |
| 18360  | 1   | 1     | 1     | 1     |
| 18380  | 1   | 2     | 2     | 1     |
| 18403  | 2   | 4     | 4     | 3     |
| 18405  | 2   | 2     | 2     | 2     |
| 18409  | 1   | 1     | 2     | 2     |
| 18445  | 0   | 1     | 1     | 2     |
| 18458  | 0   | 1     | 2     | 3     |
| 18477  | 2   | 3     | 1     | 1     |
| 18481  | 1   | 2     | 1     | 2     |
| 18491  | 0   | 6     | 1     | 1     |
| 18492  | 0   | 0     | 1     | 1     |

| respid | Q37 | Q38_1 | Q39_1 | Q39_2 |
|--------|-----|-------|-------|-------|
| 18494  | 2   | 2     | 1     | 1     |
| 18495  | 2   | 3     | 1     | 1     |
| 18496  | 1   | 3     | 3     | 2     |
| 18507  | 2   | 2     | 1     | 2     |
| 18509  | 0   |       |       |       |
| 18510  | 2   | 3     | 1     | 1     |
| 18513  | 0   | 1     | 2     | 2     |
| 18525  | 0   |       |       |       |
| 18526  | 2   | 2     | 1     | 2     |
| 18527  | 1   | 4     | 2     | 2     |
| 18536  | 0   | 3     | 1     | 1     |
| 18540  | 0   | 2     | 1     | 1     |
| 18548  | 1   | 1     | 1     | 1     |
| 18550  | 0   |       |       |       |
| 18556  | 0   | 3     | 1     | 1     |
| 18561  | 0   |       |       |       |
| 18577  | 1   | 5     | 2     | 1     |
| 18580  | 0   | 1     | 1     | 1     |
| 18633  | 1   | 5     | 2     | 2     |
| 18635  | 1   | 2     | 2     | 1     |
| 18636  | 0   |       |       |       |
| 18645  | 2   | 5     | 3     | 3     |
| 18649  | 1   | 4     | 3     | 3     |
| 18664  | 0   | 0     | 1     | 1     |
| 18668  | 0   | 3     | 3     | 2     |
| 18682  | 4   | 5     | 5     | 5     |
| 18685  | 2   | 4     | 2     | 2     |
| 18688  | 1   | 2     | 2     | 2     |
| 18689  | 2   | 3     | 3     | 2     |
| 18693  | 5   | 3     | 6     | 6     |
| 18694  | 1   | 1     | 2     | 2     |
| 18705  | 0   | 1     | 1     | 1     |

| respid | Q37 | Q38_1 | Q39_1 | Q39_2 |
|--------|-----|-------|-------|-------|
| 18710  | 1   | 3     | 2     | 2     |
| 18715  | 5   | 4     | 4     | 3     |
| 18718  | 1   | 3     | 2     | 2     |
| 18727  | 1   | 3     | 2     | 2     |
| 18732  | 1   | 3     | 1     | 1     |
| 18735  | 1   | 2     | 3     | 2     |
| 18742  | 0   | 4     | 2     | 2     |
| 18745  | 1   | 3     | 1     | 1     |
| 18747  | 0   | 2     | 1     | 1     |
| 18750  | 0   | 2     | 1     | 1     |
| 18751  | 2   | 4     | 2     | 2     |
| 18753  | 1   | 2     | 3     | 3     |
| 18754  | 0   |       |       |       |
| 18759  | 1   | 3     | 2     | 3     |
| 18780  | 0   | 3     | 1     | 1     |
| 18782  | 0   | 1     | 1     | 1     |
| 18807  | 5   | 4     | 6     | 6     |
| 18815  | 0   | 2     | 1     | 1     |
| 18818  | 0   | 0     | 1     | 2     |
| 18820  | 1   | 2     | 2     | 1     |
| 18823  | 5   | 6     | 6     | 6     |
| 18825  | 0   | 0     | 1     | 1     |
| 18828  | 0   |       |       |       |
| 18832  | 1   | 3     | 2     | 3     |
| 18834  | 2   | 4     | 3     | 3     |
| 18835  | 4   | 6     | 5     | 4     |
| 18837  | 1   | 2     | 2     | 1     |
| 18842  | 1   | 3     | 2     | 2     |
| 18846  | 0   |       |       |       |
| 18855  | 1   | 1     | 2     | 3     |
| 18856  | 1   | 2     | 2     | 1     |
| 18887  | 1   | 5     | 1     | 1     |



| respid | Q37 | Q38_1 | Q39_1 | Q39_2 |
|--------|-----|-------|-------|-------|
| 18903  | 1   | 2     | 3     | 2     |
| 18906  | 1   | 3     | 2     | 2     |
| 18910  | 0   |       |       |       |
| 18919  | 0   | 3     | 1     | 1     |
| 18928  | 1   | 4     | 1     | 1     |
| 18931  | 2   | 6     | 4     | 5     |
| 18939  | 1   | 2     | 2     | 1     |
| 18946  | 1   | 2     | 2     | 2     |
| 18952  | 1   | 3     | 2     | 3     |
| 18954  | 0   | 1     | 1     | 1     |
| 18982  | 0   |       |       |       |
| 18986  | 0   | 2     | 1     | 1     |
| 18989  | 5   | 6     | 6     | 6     |
| 18990  | 0   | 3     | 2     | 1     |
| 18996  | 1   | 5     | 4     | 3     |
| 18998  | 0   | 1     | 1     | 1     |
| 19009  | 3   | 5     | 2     | 3     |
| 19010  | 0   | 1     | 1     | 1     |
| 19017  | 0   | 1     | 1     | 1     |
| 19018  | 0   | 6     | 1     | 1     |
| 19020  | 0   | 3     | 1     | 1     |
| 19027  | 2   | 3     | 3     | 1     |
| 19035  | 1   | 3     | 1     | 1     |
| 19037  | 2   | 5     | 3     | 4     |
| 19048  | 0   | 1     | 1     | 1     |
| 19051  | 2   | 2     | 2     | 1     |
| 19054  | 0   | 4     | 2     | 1     |
| 19057  | 0   | 5     | 1     | 1     |
| 19073  | 1   | 2     | 2     | 1     |
| 19075  | 0   | 2     | 1     | 1     |
| 19079  | 2   | 4     | 3     | 3     |
| 19087  | 0   | 2     | 1     | 1     |

| respid | Q37 | Q38_1 | Q39_1 | Q39_2 |
|--------|-----|-------|-------|-------|
| 19090  | 1   | 3     | 1     | 1     |
| 19093  | 1   | 2     | 1     | 1     |
| 19099  | 2   | 4     | 2     | 3     |
| 19100  | 0   | 4     | 2     | 3     |
| 19101  | 0   | 5     | 4     | 4     |
| 19105  | 1   | 1     | 1     | 1     |
| 19111  | 0   | 4     | 1     | 1     |
| 19112  | 0   | 0     | 1     | 1     |
| 19117  | 1   | 5     | 3     | 4     |
| 19122  | 0   | 6     | 1     | 1     |
| 19126  | 0   | 1     | 1     | 1     |
| 19127  | 0   | 3     | 1     | 1     |
| 19131  | 0   | 3     | 3     | 2     |
| 19134  | 0   | 3     | 1     | 1     |
| 19149  | 1   | 2     | 1     | 1     |
| 19151  | 1   | 3     | 2     | 2     |
| 19164  | 0   | 2     | 2     | 1     |
| 19166  | 0   | 4     | 1     | 1     |
| 19172  | 1   | 4     | 3     | 2     |
| 19173  | 1   | 4     | 2     | 2     |
| 19180  | 0   | 3     | 1     | 1     |
| 19185  | 1   | 4     | 2     | 3     |
| 19189  | 0   | 1     | 1     | 1     |
| 19191  | 0   |       |       |       |
| 19198  | 0   | 0     | 1     | 1     |
| 19203  | 0   | 3     | 1     | 1     |
| 19209  | 0   | 3     | 2     | 1     |
| 19210  | 0   |       |       |       |
| 19218  | 0   |       |       |       |
| 19220  | 0   |       |       |       |
| 19225  | 1   | 3     | 2     | 3     |
| 19227  | 0   | 3     | 1     | 1     |

| respid | Q37 | Q38_1 | Q39_1 | Q39_2 |
|--------|-----|-------|-------|-------|
| 19228  | 0   | 1     | 1     | 1     |
| 19243  | 2   | 4     | 2     | 1     |
| 19244  | 2   | 3     | 3     | 2     |
| 19246  | 0   | 3     | 1     | 1     |
| 19248  | 0   |       |       |       |
| 19249  | 1   | 1     | 1     | 1     |
| 19252  | 0   | 2     | 2     | 1     |
| 19255  | 0   | 1     | 2     | 2     |
| 19257  | 0   | 6     | 2     | 3     |
| 19274  | 0   |       |       |       |
| 19279  | 0   |       |       |       |
| 19291  | 0   | 1     | 1     | 1     |
| 19292  | 0   | 3     | 2     | 2     |
| 19308  | 2   | 3     | 3     | 3     |
| 19310  | 1   | 3     | 1     | 1     |
| 19311  | 5   | 3     | 2     | 3     |
| 19326  | 1   | 2     | 2     | 2     |
| 19327  | 0   |       |       |       |
| 19329  | 0   |       |       |       |
| 19330  | 2   | 3     | 3     | 4     |
| 19333  | 1   | 5     | 3     | 2     |
| 19336  | 0   | 1     | 1     | 1     |
| 19343  | 0   | 2     | 2     | 1     |
| 19348  | 0   | 2     | 1     | 2     |
| 19349  | 2   | 3     | 2     | 4     |
| 19352  | 2   | 5     | 5     | 4     |
| 19356  | 1   | 2     | 2     | 1     |
| 19357  | 0   | 4     | 3     | 4     |
| 19358  | 0   | 1     | 2     | 1     |
| 19367  | 0   | 4     | 2     | 2     |
| 19376  | 0   |       |       |       |
| 19377  | 0   | 1     | 1     | 1     |

| respid | Q37 | Q38_1 | Q39_1 | Q39_2 |
|--------|-----|-------|-------|-------|
| 19380  | 1   | 2     | 2     | 2     |
| 19384  | 0   | 5     | 1     | 1     |
| 19391  | 3   | 5     | 5     | 4     |
| 19397  | 0   |       |       |       |
| 19398  | 0   | 1     | 1     | 1     |
| 19401  | 0   |       |       |       |
| 19402  | 0   | 3     | 1     | 1     |
| 19403  | 0   |       |       |       |
| 19405  | 0   |       |       |       |
| 19407  | 0   | 1     | 1     | 1     |
| 19415  | 0   | 2     | 1     | 1     |
| 19420  | 0   |       |       |       |
| 19423  | 3   | 2     | 2     | 3     |
| 19424  | 2   | 3     | 2     | 2     |
| 19426  | 2   | 4     | 4     | 3     |
| 19429  | 0   | 0     | 1     | 1     |
| 19435  | 3   | 4     | 4     | 5     |
| 19441  | 1   | 4     | 2     | 2     |
| 19450  | 0   | 2     | 3     | 2     |
| 19456  | 2   | 4     | 2     | 3     |
| 19457  | 0   | 1     | 1     | 1     |
| 19463  | 2   | 4     | 3     | 3     |
| 19467  | 3   | 5     | 6     | 6     |
| 19468  | 0   | 2     | 1     | 1     |
| 19471  | 0   | 2     | 2     | 2     |
| 19473  | 0   | 5     | 5     | 4     |
| 19478  | 0   | 4     | 3     | 3     |
| 19480  | 0   |       |       |       |
| 19481  | 0   | 0     | 2     | 3     |
| 19484  | 0   | 3     | 1     | 2     |
| 19487  | 0   | 6     | 6     | 6     |
| 19491  | 2   | 4     | 3     | 3     |

| respid | Q37 | Q38_1 | Q39_1 | Q39_2 |
|--------|-----|-------|-------|-------|
| 19495  | 5   | 6     | 6     | 6     |
| 19498  | 2   | 5     | 2     | 2     |
| 19500  | 2   | 5     | 4     | 3     |
| 19501  | 2   | 5     | 4     | 3     |
| 19503  | 0   |       |       |       |
| 19506  | 0   | 0     | 1     | 1     |
| 19508  | 0   | 1     | 2     | 1     |
| 19509  | 1   | 2     | 2     | 1     |
| 19518  | 0   | 1     | 2     | 2     |
| 19520  | 1   | 2     | 2     | 2     |
| 19536  | 0   | 1     | 1     | 1     |
| 19538  | 2   | 4     | 3     | 4     |
| 19541  | 2   | 3     | 2     | 3     |
| 19548  | 1   | 4     | 3     | 3     |
| 19553  | 0   |       |       |       |
| 19556  | 0   | 0     | 1     | 1     |
| 19559  | 0   |       |       |       |
| 19561  | 2   | 4     | 2     | 2     |
| 19562  | 0   | 0     | 1     | 1     |
| 19564  | 1   | 2     | 2     | 1     |
| 19567  | 5   | 5     | 5     | 4     |
| 19571  | 2   | 4     | 2     | 3     |
| 19576  | 2   | 5     | 3     | 4     |
| 19578  | 0   | 2     | 1     | 1     |
| 19606  | 0   |       |       |       |
| 19607  | 0   |       |       |       |
| 19608  | 1   | 4     | 3     | 1     |
| 19612  | 2   | 4     | 5     | 5     |
| 19618  | 2   | 4     | 5     | 4     |
| 19621  | 1   | 3     | 5     | 5     |
| 19624  | 3   | 5     | 5     | 4     |
| 19630  | 0   |       |       |       |

| respid | Q37 | Q38_1 | Q39_1 | Q39_2 |
|--------|-----|-------|-------|-------|
| 19637  | 1   | 5     | 5     | 3     |
| 19639  | 0   | 2     | 1     | 1     |
| 19647  | 0   | 2     | 2     | 1     |
| 19648  | 1   | 5     | 4     | 4     |
| 19660  | 0   | 3     | 2     | 1     |
| 19662  | 3   | 5     | 3     | 5     |
| 19669  | 0   | 3     | 1     | 1     |
| 19680  | 0   | 0     | 1     | 1     |
| 19682  | 1   | 4     | 2     | 1     |
| 19686  | 0   | 5     | 1     | 1     |
| 19700  | 0   | 1     | 1     | 1     |
| 19701  | 0   | 2     | 1     | 1     |
| 19704  | 0   |       |       |       |
| 19706  | 0   | 1     | 1     | 2     |
| 19707  | 1   | 2     | 2     | 1     |
| 19717  | 2   | 5     | 4     | 3     |
| 19718  | 0   | 2     | 1     | 1     |
| 19721  | 2   | 4     | 3     | 3     |
| 19722  | 0   | 1     | 1     | 1     |
| 19729  | 0   |       |       |       |
| 19738  | 2   | 5     | 4     | 4     |
| 19741  | 1   | 2     | 2     | 1     |
| 19742  | 2   | 2     | 2     | 3     |
| 19747  | 0   | 2     | 1     | 1     |
| 19748  | 0   | 3     | 3     | 2     |
| 19749  | 0   | 2     | 1     | 1     |
| 19756  | 0   | 5     | 2     | 1     |
| 19771  | 1   | 2     | 2     | 2     |
| 19772  | 2   | 4     | 3     | 3     |
| 19775  | 0   | 3     | 1     | 1     |
| 19783  | 0   |       |       |       |
| 19787  | 0   | 1     | 1     | 1     |

| respid | Q37 | Q38_1 | Q39_1 | Q39_2 |
|--------|-----|-------|-------|-------|
| 19790  | 0   |       |       |       |
| 19797  | 2   | 3     | 2     | 1     |
| 19802  | 0   | 1     | 1     | 1     |
| 19808  | 0   | 2     | 3     | 3     |
| 19810  | 0   | 5     | 4     | 3     |
| 19811  | 0   | 4     | 1     | 1     |
| 19812  | 1   | 1     | 2     | 3     |
| 19821  | 2   | 4     | 3     | 3     |
| 19826  | 0   | 2     | 2     | 1     |
| 19827  | 1   | 3     | 1     | 1     |
| 19830  | 0   | 3     | 1     | 1     |
| 19834  | 0   | 1     | 1     | 2     |
| 19838  | 2   | 3     | 3     | 3     |
| 19843  | 0   |       |       |       |
| 19845  | 2   | 1     | 4     | 5     |
| 19846  | 0   | 1     | 2     | 2     |
| 19852  | 4   | 6     | 6     | 5     |
| 19855  | 0   | 1     | 2     | 1     |
| 19858  | 2   | 5     | 4     | 3     |
| 19861  | 3   | 5     | 4     | 5     |
| 19863  | 0   | 1     | 1     | 1     |
| 19868  | 1   | 2     | 2     | 2     |
| 19874  | 0   | 3     | 1     | 1     |
| 19876  | 0   |       |       |       |
| 19880  | 1   | 4     | 5     | 4     |
| 19885  | 1   | 2     | 1     | 1     |
| 19890  | 0   |       |       |       |
| 19894  | 0   |       |       |       |
| 19895  | 0   | 3     | 1     | 1     |
| 19897  | 1   | 2     | 2     | 2     |
| 19906  | 0   | 4     | 2     | 2     |
| 19908  | 0   | 0     | 1     | 1     |

| respid | Q37 | Q38_1 | Q39_1 | Q39_2 |
|--------|-----|-------|-------|-------|
| 19912  | 0   | 1     | 1     | 1     |
| 19913  | 1   | 3     | 2     | 1     |
| 19914  | 4   | 5     | 4     | 4     |
| 19918  | 2   | 5     | 2     | 3     |
| 19924  | 2   | 5     | 3     | 3     |
| 19936  | 0   |       |       |       |
| 19940  | 0   |       |       |       |
| 19945  | 1   | 3     | 1     | 1     |
| 19948  | 0   |       |       |       |
| 19959  | 0   | 2     | 1     | 1     |
| 19961  | 0   | 1     | 1     | 1     |
| 19962  | 1   | 2     | 1     | 1     |
| 19965  | 0   | 1     | 1     | 1     |
| 19966  | 1   | 3     | 2     | 3     |
| 19973  | 1   | 2     | 2     | 3     |
| 19981  | 1   | 2     | 2     | 2     |
| 19986  | 0   | 2     | 1     | 2     |
| 19989  | 0   | 3     | 1     | 1     |
| 19998  | 0   | 4     | 3     | 3     |
| 20001  | 0   | 3     | 1     | 1     |
| 20005  | 0   |       |       |       |
| 20013  | 4   | 5     | 5     | 4     |
| 20015  | 0   | 1     | 1     | 1     |
| 20017  | 3   | 5     | 4     | 5     |
| 20020  | 0   | 3     | 1     | 1     |
| 20021  | 0   | 3     | 1     | 1     |
| 20026  | 0   | 3     | 2     | 1     |
| 20028  | 0   | 2     | 1     | 1     |
| 20030  | 1   | 4     | 1     | 1     |
| 20031  | 0   |       |       |       |
| 20034  | 0   | 0     | 1     | 2     |
| 20035  | 0   |       |       |       |



| respid | Q37 | Q38_1 | Q39_1 | Q39_2 |
|--------|-----|-------|-------|-------|
| 20040  | 2   | 5     | 3     | 2     |
| 20045  | 0   | 3     | 2     | 3     |
| 20048  | 5   | 6     | 6     | 6     |
| 20053  | 1   | 1     | 2     | 2     |
| 20064  | 2   | 2     | 2     | 3     |
| 20071  | 1   | 3     | 1     | 2     |
| 20072  | 1   | 5     | 4     | 2     |
| 20076  | 0   | 2     | 1     | 1     |
| 20081  | 2   | 3     | 2     | 2     |
| 20082  | 1   | 2     | 1     | 2     |
| 20083  | 1   | 2     | 2     | 1     |
| 20088  | 1   | 2     | 2     | 1     |
| 20089  | 0   | 2     | 2     | 1     |
| 20099  | 0   | 2     | 1     | 1     |
| 20101  | 0   | 1     | 4     | 6     |
| 20102  | 0   | 1     | 1     | 1     |
| 20109  | 0   | 1     | 1     | 1     |
| 20118  | 1   | 4     | 1     | 1     |
| 20119  | 0   | 1     | 2     | 2     |
| 20124  | 0   |       |       |       |
| 20126  | 0   | 3     | 2     | 1     |
| 20130  | 0   |       |       |       |
| 20131  | 1   | 3     | 2     | 1     |
| 20134  | 1   | 3     | 3     | 4     |
| 20146  | 0   | 6     | 5     | 6     |
| 20152  | 0   |       |       |       |
| 20155  | 1   | 4     | 2     | 1     |
| 20156  | 0   |       |       |       |
| 20157  | 0   |       |       |       |
| 20164  | 0   | 1     | 1     | 1     |
| 20168  | 1   | 2     | 1     | 1     |
| 20173  | 2   | 3     | 3     | 2     |

| respid | Q37 | Q38_1 | Q39_1 | Q39_2 |
|--------|-----|-------|-------|-------|
| 20174  | 0   | 6     | 5     | 5     |
| 20175  | 4   | 6     | 5     | 6     |
| 20189  | 0   | 1     | 1     | 1     |
| 20190  | 0   | 2     | 2     | 2     |
| 20201  | 0   | 2     | 1     | 1     |
| 20202  | 0   | 3     | 1     | 1     |
| 20204  | 4   | 0     | 4     | 4     |
| 20206  | 1   | 3     | 3     | 3     |
| 20207  | 0   | 1     | 1     | 1     |
| 20212  | 1   | 3     | 3     | 1     |
| 20213  | 0   | 3     | 2     | 2     |
| 20217  | 1   | 3     | 2     | 1     |
| 20222  | 1   | 3     | 1     | 1     |
| 20227  | 0   |       |       |       |
| 20228  | 0   | 1     | 3     | 1     |
| 20238  | 0   | 1     | 1     | 1     |
| 20242  | 0   | 6     | 1     | 1     |
| 20246  | 0   | 0     | 1     | 1     |
| 20255  | 1   | 3     | 2     | 3     |
| 20256  | 1   | 3     | 2     | 2     |
| 20259  | 2   | 4     | 3     | 3     |
| 20262  | 0   | 2     | 1     | 1     |
| 20274  | 0   | 1     | 1     | 1     |
| 20283  | 3   | 4     | 4     | 4     |
| 20284  | 0   |       |       |       |
| 20291  | 1   | 1     | 3     | 4     |
| 20292  | 0   | 1     | 1     | 1     |
| 20293  | 0   | 3     | 1     | 1     |
| 20298  | 1   | 0     | 4     | 5     |
| 20301  | 0   |       |       |       |
| 20303  | 1   | 4     | 2     | 2     |
| 20309  | 0   |       |       |       |

| respid | Q37 | Q38_1 | Q39_1 | Q39_2 |
|--------|-----|-------|-------|-------|
| 20318  | 0   | 2     | 1     | 1     |
| 20324  | 0   | 3     | 1     | 1     |
| 20335  | 0   | 1     | 1     | 1     |
| 20336  | 1   | 0     | 1     | 1     |
| 20339  | 1   | 4     | 1     | 1     |
| 20348  | 1   | 1     | 2     | 2     |
| 20351  | 0   | 1     | 1     | 1     |
| 20353  | 1   | 1     | 2     | 1     |
| 20356  | 1   | 1     | 1     | 1     |
| 20357  | 0   |       |       |       |
| 20366  | 0   | 0     | 1     | 1     |
| 20369  | 5   | 6     | 6     | 5     |
| 20372  | 0   | 3     | 1     | 1     |
| 20375  | 0   | 0     | 1     | 1     |
| 20379  | 0   | 4     | 2     | 1     |
| 20380  | 0   | 1     | 1     | 2     |
| 20396  | 2   | 3     | 3     | 3     |
| 20398  | 2   | 4     | 3     | 2     |
| 20412  | 0   | 3     | 1     | 1     |
| 20415  | 1   | 3     | 2     | 2     |
| 20424  | 4   | 4     | 3     | 3     |
| 20434  | 0   | 1     | 1     | 1     |
| 20435  | 0   | 3     | 2     | 2     |
| 20440  | 0   | 4     | 1     | 1     |
| 20441  | 1   | 2     | 2     | 2     |
| 20445  | 0   | 1     | 1     | 1     |
| 20446  | 2   | 3     | 3     | 3     |
| 20450  | 0   | 4     | 1     | 1     |
| 20453  | 1   | 5     | 3     | 4     |
| 20458  | 0   | 0     | 1     | 1     |
| 20464  | 0   | 1     | 1     | 1     |
| 20471  | 0   | 4     | 1     | 1     |

| respid | Q37 | Q38_1 | Q39_1 | Q39_2 |
|--------|-----|-------|-------|-------|
| 20473  | 0   | 2     | 1     | 1     |
| 20474  | 1   | 1     | 1     | 1     |
| 20477  | 0   |       |       |       |
| 20479  | 5   | 6     | 6     | 6     |
| 20485  | 0   | 1     | 1     | 1     |
| 20487  | 0   | 0     | 1     | 1     |
| 20488  | 0   | 6     | 6     | 6     |
| 20494  | 1   | 2     | 1     | 1     |
| 20502  | 4   | 5     | 5     | 4     |
| 20503  | 3   | 5     | 2     | 2     |
| 20510  | 0   | 5     | 1     | 1     |
| 20512  | 0   |       |       |       |
| 20516  | 1   | 2     | 2     | 2     |
| 20522  | 2   | 3     | 3     | 1     |
| 20527  | 0   | 2     | 2     | 2     |
| 20529  | 1   | 4     | 2     | 2     |
| 20535  | 1   | 4     | 3     | 2     |
| 20543  | 0   | 1     | 3     | 3     |
| 20546  | 0   | 3     | 4     | 4     |
| 20548  | 0   | 3     | 1     | 1     |
| 20552  | 0   | 5     | 1     | 2     |
| 20556  | 2   | 4     | 4     | 2     |
| 20566  | 2   | 3     | 3     | 4     |
| 20576  | 1   | 1     | 2     | 2     |
| 20587  | 0   | 3     | 1     | 1     |
| 20589  | 0   | 0     | 1     | 1     |
| 20593  | 0   |       |       |       |
| 20594  | 0   | 3     | 2     | 1     |
| 20602  | 1   | 2     | 2     | 1     |
| 20607  | 0   |       |       |       |
| 20608  | 1   | 5     | 1     | 1     |
| 20611  | 1   | 2     | 1     | 1     |

| respid | Q37 | Q38_1 | Q39_1 | Q39_2 |
|--------|-----|-------|-------|-------|
| 20612  | 1   | 1     | 1     | 1     |
| 20615  | 1   | 2     | 2     | 2     |
| 20625  | 0   | 5     | 2     | 1     |
| 20630  | 1   | 2     | 2     | 2     |
| 20639  | 0   | 1     | 1     | 1     |
| 20643  | 0   | 2     | 1     | 1     |
| 20645  | 0   |       |       |       |
| 20647  | 0   | 3     | 1     | 2     |
| 20652  | 4   | 6     | 6     | 5     |
| 20661  | 0   | 0     | 1     | 1     |
| 20665  | 0   |       |       |       |
| 20679  | 0   | 0     | 1     | 1     |
| 20682  | 2   | 4     | 3     | 4     |
| 20683  | 0   |       |       |       |
| 20700  | 0   | 1     | 1     | 1     |
| 20702  | 2   | 5     | 2     | 2     |
| 20709  | 1   | 1     | 1     | 1     |
| 20715  | 1   | 3     | 3     | 3     |
| 20718  | 0   | 1     | 5     | 4     |
| 20722  | 0   | 1     | 1     | 1     |
| 20729  | 0   |       |       |       |
| 20732  | 0   |       |       |       |
| 20746  | 2   | 4     | 5     | 4     |
| 20747  | 0   |       |       |       |
| 20758  | 0   | 1     | 1     | 1     |
| 20767  | 2   | 5     | 3     | 3     |
| 20777  | 0   | 6     | 1     | 1     |
| 20778  | 0   | 3     | 1     | 1     |
| 20780  | 1   | 1     | 1     | 1     |
| 20800  | 0   | 2     | 3     | 2     |
| 20810  | 0   | 2     | 1     | 1     |
| 20814  | 1   | 2     | 2     | 2     |

| respid | Q37 | Q38_1 | Q39_1 | Q39_2 |
|--------|-----|-------|-------|-------|
| 20816  | 0   | 1     | 1     | 1     |
| 20832  | 0   | 5     | 4     | 4     |
| 20838  | 4   | 5     | 6     | 5     |
| 20841  | 2   | 4     | 3     | 3     |
| 20848  | 0   | 1     | 1     | 1     |
| 20850  | 0   |       |       |       |
| 20851  | 1   | 3     | 2     | 1     |
| 20861  | 0   | 4     | 1     | 1     |
| 20870  | 1   | 4     | 2     | 2     |
| 20880  | 0   | 1     | 1     | 1     |
| 20883  | 1   | 2     | 1     | 1     |
| 20894  | 0   | 1     | 1     | 1     |
| 20896  | 1   | 2     | 2     | 2     |
| 20901  | 3   | 3     | 3     | 3     |
| 20903  | 0   | 1     | 2     | 1     |
| 20909  | 0   |       |       |       |
| 20919  | 0   | 4     | 1     | 1     |
| 20925  | 0   | 1     | 1     | 1     |
| 20935  | 0   | 2     | 1     | 1     |
| 20939  | 2   | 4     | 3     | 3     |
| 20956  | 5   | 6     | 5     | 6     |
| 20970  | 2   | 4     | 3     | 1     |
| 20974  | 3   | 4     | 3     | 3     |
| 20975  | 0   | 0     | 1     | 1     |
| 20984  | 1   | 3     | 2     | 1     |
| 20988  | 0   |       |       |       |
| 20996  | 0   | 2     | 2     | 1     |
| 20998  | 1   | 3     | 2     | 2     |
| 21007  | 0   |       |       |       |
| 21008  | 0   |       |       |       |
| 21014  | 0   | 1     | 1     | 1     |
| 21020  | 0   | 0     | 1     | 1     |

| respid | Q37 | Q38_1 | Q39_1 | Q39_2 |
|--------|-----|-------|-------|-------|
| 21022  | 1   | 2     | 4     | 2     |
| 21024  | 0   |       |       |       |
| 21026  | 1   | 3     | 3     | 4     |
| 21027  | 0   | 3     | 5     | 1     |
| 21030  | 1   | 5     | 6     | 6     |
| 21032  | 1   | 1     | 2     | 2     |
| 21040  | 0   | 1     | 1     | 1     |
| 21045  | 0   | 1     | 1     | 1     |
| 21058  | 0   | 3     | 1     | 1     |
| 21064  | 0   | 2     | 1     | 1     |
| 21073  | 0   | 1     | 1     | 1     |
| 21086  | 3   | 3     | 3     | 4     |
| 21092  | 4   | 6     | 6     | 6     |
| 21096  | 2   | 4     | 3     | 2     |
| 21103  | 0   | 3     | 2     | 1     |
| 21120  | 3   | 5     | 3     | 4     |
| 21125  | 0   |       |       |       |
| 21126  | 0   | 5     | 1     | 1     |
| 21132  | 0   |       |       |       |
| 21139  | 1   | 2     | 2     | 2     |
| 21147  | 0   |       |       |       |
| 21148  | 1   | 3     | 1     | 2     |
| 21149  | 2   | 3     | 2     | 1     |
| 21164  | 1   | 3     | 2     | 2     |
| 21165  | 0   | 3     | 1     | 1     |
| 21171  | 3   | 4     | 5     | 4     |
| 21176  | 0   | 0     | 1     | 1     |
| 21187  | 2   | 4     | 3     | 3     |
| 21192  | 1   | 3     | 3     | 3     |
| 21198  | 0   | 6     | 1     | 1     |
| 21199  | 1   | 4     | 3     | 3     |
| 21206  | 2   | 4     | 3     | 2     |

| respid | Q37 | Q38_1 | Q39_1 | Q39_2 |
|--------|-----|-------|-------|-------|
| 21212  | 1   | 2     | 1     | 1     |
| 21216  | 0   | 6     | 2     | 1     |
| 21217  | 2   | 2     | 5     | 5     |
| 21228  | 2   | 4     | 4     | 3     |
| 21229  | 0   | 2     | 3     | 4     |
| 21230  | 0   | 2     | 1     | 1     |
| 21243  | 2   | 3     | 3     | 4     |
| 21247  | 1   | 2     | 2     | 1     |
| 21253  | 2   | 4     | 3     | 4     |
| 21264  | 1   | 2     | 2     | 2     |
| 21265  | 0   | 1     | 1     | 1     |
| 21273  | 1   | 4     | 3     | 1     |
| 21275  | 0   | 4     | 2     | 3     |
| 21278  | 0   | 2     | 3     | 3     |
| 21291  | 2   | 3     | 2     | 3     |
| 21298  | 0   | 3     | 2     | 1     |
| 21301  | 1   | 4     | 5     | 6     |
| 21312  | 3   | 4     | 4     | 4     |
| 21323  | 1   | 4     | 2     | 2     |
| 21325  | 1   | 3     | 2     | 2     |
| 21341  | 0   | 1     | 1     | 1     |
| 21349  | 2   | 3     | 3     | 3     |
| 21350  | 2   | 3     | 1     | 1     |
| 21354  | 4   | 6     | 5     | 6     |
| 21372  | 2   | 3     | 3     | 2     |
| 21373  | 1   | 2     | 2     | 2     |
| 21378  | 1   | 2     | 3     | 2     |
| 21393  | 0   |       |       |       |
| 21401  | 2   | 2     | 2     | 2     |
| 21405  | 0   | 2     | 1     | 1     |
| 21406  | 0   |       |       |       |
| 21407  | 1   | 2     | 2     | 3     |



| respid | Q37 | Q38_1 | Q39_1 | Q39_2 |
|--------|-----|-------|-------|-------|
| 21418  | 0   | 2     | 1     | 1     |
| 21420  | 0   | 1     | 1     | 1     |
| 21421  | 0   |       |       |       |
| 21446  | 2   | 3     | 3     | 4     |
| 21449  | 2   | 3     | 3     | 3     |
| 21452  | 0   | 2     | 2     | 1     |
| 21455  | 1   | 1     | 4     | 4     |
| 21469  | 0   | 1     | 1     | 1     |
| 21471  | 1   | 3     | 1     | 1     |
| 21472  | 0   | 3     | 2     | 1     |
| 21474  | 0   | 2     | 1     | 1     |
| 21479  | 0   | 3     | 2     | 1     |
| 21485  | 1   | 2     | 2     | 2     |
| 21512  | 0   |       |       |       |
| 21513  | 0   | 0     | 1     | 1     |
| 21514  | 3   | 4     | 4     | 4     |
| 21520  | 1   | 3     | 2     | 3     |
| 21539  | 1   | 2     | 1     | 2     |
| 21553  | 1   | 2     | 2     | 1     |
| 21560  | 0   | 3     | 2     | 2     |
| 21561  | 0   | 3     | 1     | 1     |
| 21563  | 2   | 2     | 2     | 3     |
| 21565  | 0   |       |       |       |
| 21582  | 0   | 0     | 1     | 1     |
| 21584  | 1   | 5     | 2     | 3     |
| 21585  | 2   | 2     | 3     | 3     |
| 21586  | 0   | 1     | 1     | 1     |
| 21587  | 2   | 2     | 2     | 3     |
| 21590  | 5   | 5     | 4     | 5     |
| 21601  | 1   | 3     | 2     | 2     |
| 21611  | 2   | 6     | 3     | 4     |
| 21612  | 0   | 2     | 1     | 1     |

| respid | Q37 | Q38_1 | Q39_1 | Q39_2 |
|--------|-----|-------|-------|-------|
| 21625  | 2   | 3     | 2     | 2     |
| 21633  | 0   |       |       |       |
| 21640  | 0   | 3     | 1     | 1     |
| 21647  | 0   | 1     | 1     | 1     |
| 21648  | 5   | 6     | 6     | 6     |
| 21656  | 0   | 2     | 1     | 1     |
| 21657  | 0   | 0     | 1     | 1     |
| 21658  | 3   | 5     | 5     | 6     |
| 21665  | 4   | 5     | 3     | 4     |
| 21666  | 4   | 5     | 5     | 4     |
| 21668  | 1   | 4     | 5     | 4     |
| 21673  | 2   | 4     | 1     | 2     |
| 21681  | 2   | 3     | 3     | 3     |
| 21682  | 1   | 3     | 2     | 3     |
| 21685  | 0   | 5     | 2     | 1     |
| 21692  | 1   | 2     | 2     | 2     |
| 21697  | 0   | 2     | 2     | 1     |
| 21711  | 0   | 4     | 1     | 1     |
| 21715  | 2   | 4     | 2     | 6     |
| 21726  | 1   | 0     | 2     | 1     |
| 21748  | 0   |       |       |       |
| 21761  | 0   | 0     | 1     | 1     |
| 21769  | 3   | 4     | 4     | 4     |
| 21774  | 2   | 2     | 2     | 3     |
| 21778  | 0   |       |       |       |
| 21785  | 2   | 2     | 2     | 2     |
| 21799  | 2   | 3     | 3     | 3     |
| 21820  | 5   | 6     | 6     | 6     |
| 21837  | 0   | 1     | 1     | 1     |
| 21845  | 1   | 5     | 4     | 5     |
| 21846  | 0   | 0     | 1     | 1     |
| 21849  | 3   | 4     | 5     | 3     |

| respid | Q37 | Q38_1 | Q39_1 | Q39_2 |
|--------|-----|-------|-------|-------|
| 21850  | 1   | 4     | 2     | 2     |
| 21855  | 0   | 0     | 1     | 1     |
| 21859  | 0   | 3     | 1     | 1     |
| 21861  | 1   | 2     | 2     | 1     |
| 21866  | 0   |       |       |       |
| 21873  | 1   | 2     | 1     | 2     |
| 21876  | 0   | 2     | 1     | 1     |
| 21882  | 0   |       |       |       |
| 21884  | 1   | 3     | 2     | 2     |
| 21887  | 1   | 2     | 2     | 2     |
| 21892  | 0   | 1     | 1     | 1     |
| 21907  | 1   | 2     | 2     | 2     |
| 21910  | 4   | 5     | 4     | 5     |
| 21912  | 2   | 3     | 3     | 2     |
| 21914  | 0   | 4     | 2     | 1     |
| 21925  | 0   | 1     | 1     | 1     |
| 21937  | 0   |       |       |       |
| 21938  | 4   | 4     | 3     | 3     |
| 21940  | 1   | 1     | 1     | 1     |
| 21942  | 0   | 1     | 1     | 1     |
| 21947  | 0   |       |       |       |
| 21948  | 0   | 2     | 3     | 1     |
| 21961  | 0   | 2     | 2     | 2     |
| 21977  | 3   | 3     | 4     | 2     |
| 21983  | 0   |       |       |       |
| 21986  | 2   | 4     | 4     | 3     |
| 21988  | 0   | 6     | 1     | 1     |
| 21996  | 2   | 3     | 3     | 2     |
| 21997  | 1   | 1     | 1     | 1     |
| 22005  | 0   | 5     | 2     | 2     |
| 22013  | 0   | 0     | 1     | 1     |
| 22018  | 0   |       |       |       |

| respid | Q37 | Q38_1 | Q39_1 | Q39_2 |
|--------|-----|-------|-------|-------|
| 22019  | 0   | 3     | 3     | 3     |
| 22071  | 0   | 0     | 1     | 1     |
| 22082  | 0   | 0     | 1     | 1     |
| 22085  | 0   | 1     | 1     | 1     |
| 22092  | 0   | 3     | 1     | 1     |
| 22097  | 0   | 3     | 2     | 1     |
| 22111  | 0   |       |       |       |
| 22118  | 0   | 4     | 1     | 1     |
| 22132  | 0   | 2     | 1     | 1     |
| 22133  | 0   | 2     | 1     | 1     |
| 22139  | 0   |       |       |       |
| 22142  | 5   | 5     | 5     | 6     |
| 22146  | 0   | 4     | 1     | 2     |
| 22181  | 0   |       |       |       |
| 22202  | 0   | 2     | 2     | 3     |
| 22214  | 0   |       |       |       |
| 22223  | 0   | 1     | 1     | 1     |
| 22227  | 2   | 4     | 2     | 2     |
| 22229  | 0   | 1     | 1     | 1     |
| 22239  | 2   | 4     | 2     | 3     |
| 22245  | 4   | 5     | 4     | 4     |
| 22256  | 0   | 3     | 1     | 1     |
| 22260  | 1   | 3     | 2     | 1     |
| 22298  | 2   | 3     | 2     | 2     |
| 22321  | 1   | 4     | 2     | 2     |
| 22340  | 0   |       |       |       |
| 22346  | 3   | 4     | 3     | 2     |
| 22356  | 1   | 3     | 1     | 1     |
| 22361  | 3   | 3     | 2     | 2     |
| 22364  | 0   | 1     | 1     | 1     |
| 22368  | 0   |       |       |       |
| 22374  | 0   | 4     | 2     | 4     |

| respid | Q37 | Q38_1 | Q39_1 | Q39_2 |
|--------|-----|-------|-------|-------|
| 22375  | 0   | 1     | 1     | 2     |
| 22377  | 1   | 2     | 1     | 1     |
| 22383  | 0   |       |       |       |
| 22387  | 1   | 4     | 3     | 3     |
| 22392  | 0   |       |       |       |
| 22393  | 1   | 2     | 2     | 2     |
| 22394  | 1   | 3     | 3     | 3     |
| 22395  | 0   |       |       |       |
| 22401  | 0   | 4     | 2     | 2     |
| 22407  | 0   |       |       |       |
| 22410  | 1   | 1     | 2     | 2     |
| 22418  | 0   | 1     | 1     | 1     |
| 22421  | 0   |       |       |       |
| 22423  | 0   |       |       |       |
| 22425  | 1   | 4     | 2     | 1     |
| 22427  | 0   | 0     | 1     | 1     |
| 22431  | 5   | 6     | 6     | 6     |
| 22435  | 0   | 1     | 1     | 1     |
| 22436  | 1   | 2     | 3     | 2     |
| 22442  | 0   |       |       |       |
| 22444  | 2   | 4     | 3     | 3     |
| 22445  | 3   | 4     | 3     | 4     |
| 22446  | 0   |       |       |       |
| 22448  | 2   | 5     | 4     | 4     |
| 22449  | 0   | 1     | 1     | 1     |
| 22450  | 1   | 4     | 2     | 1     |
| 22453  | 3   | 3     | 3     | 4     |
| 22465  | 1   | 3     | 2     | 2     |
| 22472  | 1   | 2     | 2     | 2     |
| 22475  | 4   | 5     | 3     | 4     |
| 22478  | 2   | 4     | 3     | 2     |
| 22491  | 0   | 1     | 1     | 1     |

| respid | Q37 | Q38_1 | Q39_1 | Q39_2 |
|--------|-----|-------|-------|-------|
| 22497  | 1   | 3     | 2     | 2     |
| 22498  | 2   | 3     | 2     | 2     |
| 22499  | 1   | 4     | 2     | 2     |
| 22503  | 1   | 2     | 1     | 1     |
| 22507  | 0   | 1     | 1     | 1     |
| 22513  | 4   | 5     | 2     | 2     |
| 22517  | 1   | 2     | 1     | 2     |
| 22524  | 3   | 4     | 3     | 4     |
| 22528  | 0   | 1     | 1     | 1     |
| 22544  | 2   | 5     | 3     | 3     |
| 22571  | 0   | 1     | 1     | 1     |
| 22576  | 1   | 0     | 2     | 2     |
| 22579  | 2   | 4     | 2     | 1     |
| 22583  | 1   | 3     | 3     | 4     |
| 22591  | 1   | 4     | 5     | 4     |
| 22592  | 2   | 2     | 3     | 3     |
| 22612  | 0   | 0     | 2     | 2     |
| 22613  | 1   | 2     | 2     | 3     |
| 22615  | 1   | 5     | 2     | 2     |
| 22621  | 0   | 3     | 2     | 1     |
| 22625  | 0   | 1     | 1     | 1     |
| 22628  | 0   | 1     | 1     | 1     |
| 22632  | 1   | 4     | 2     | 3     |
| 22639  | 0   |       |       |       |
| 22648  | 2   | 6     | 4     | 2     |
| 22649  | 0   | 4     | 3     | 2     |
| 22655  | 0   |       |       |       |
| 22659  | 0   |       |       |       |
| 22660  | 0   | 3     | 1     | 1     |
| 22666  | 1   | 4     | 3     | 4     |
| 22667  | 1   | 5     | 1     | 1     |
| 22670  | 0   |       |       |       |

| respid | Q37 | Q38_1 | Q39_1 | Q39_2 |
|--------|-----|-------|-------|-------|
| 22681  | 0   |       |       |       |
| 22683  | 0   | 3     | 1     | 2     |
| 22688  | 0   | 1     | 1     | 1     |
| 22695  | 0   | 4     | 3     | 2     |
| 22696  | 0   | 2     | 1     | 1     |
| 22705  | 2   | 4     | 3     | 2     |
| 22718  | 2   | 4     | 3     | 3     |
| 22720  | 2   | 2     | 3     | 2     |
| 22724  | 0   | 2     | 2     | 2     |
| 22728  | 0   | 1     | 1     | 1     |
| 22751  | 0   | 1     | 2     | 1     |
| 22782  | 3   | 5     | 6     | 4     |
| 22786  | 2   | 3     | 2     | 1     |
| 22788  | 1   | 2     | 1     | 1     |
| 22810  | 2   | 4     | 2     | 2     |
| 22816  | 0   | 2     | 1     | 1     |
| 22818  | 0   | 2     | 1     | 1     |
| 22854  | 0   |       |       |       |
| 22858  | 0   | 1     | 1     | 1     |
| 22862  | 0   | 1     | 1     | 1     |
| 22865  | 0   | 2     | 1     | 1     |
| 22868  | 1   | 0     | 1     | 1     |
| 22869  | 2   | 3     | 3     | 4     |
| 22873  | 0   | 1     | 1     | 1     |
| 22875  | 0   | 1     | 1     | 1     |
| 22876  | 0   | 4     | 1     | 1     |
| 22882  | 2   | 3     | 3     | 3     |
| 22884  | 3   | 4     | 4     | 4     |
| 22887  | 1   | 1     | 2     | 3     |
| 22888  | 0   | 1     | 1     | 1     |
| 22900  | 0   |       |       |       |
| 22901  | 0   |       |       |       |

| respid | Q37 | Q38_1 | Q39_1 | Q39_2 |
|--------|-----|-------|-------|-------|
| 22912  | 0   | 3     | 2     | 1     |
| 22913  | 0   | 2     | 1     | 2     |
| 22921  | 0   | 6     | 1     | 1     |
| 22925  | 0   | 2     | 1     | 1     |
| 22940  | 0   | 1     | 1     | 1     |
| 22941  | 0   | 4     | 1     | 2     |
| 22947  | 1   | 4     | 2     | 2     |
| 22948  | 0   |       |       |       |
| 22964  | 2   | 5     | 2     | 2     |
| 22966  | 2   | 3     | 2     | 1     |
| 22969  | 0   | 1     | 1     | 2     |
| 22971  | 0   |       |       |       |
| 22988  | 0   |       |       |       |
| 22990  | 0   |       |       |       |
| 23000  | 0   | 2     | 1     | 1     |
| 23016  | 0   |       |       |       |
| 23026  | 2   | 2     | 1     | 2     |
| 23035  | 0   | 1     | 1     | 1     |
| 23037  | 4   | 6     | 5     | 5     |
| 23044  | 1   | 3     | 2     | 2     |
| 23046  | 0   | 2     | 1     | 2     |
| 23047  | 0   | 1     | 1     | 2     |
| 23049  | 0   | 1     | 1     | 2     |
| 23055  | 0   | 0     | 1     | 1     |
| 23066  | 0   | 3     | 1     | 1     |
| 23075  | 0   | 2     | 1     | 1     |
| 23081  | 1   | 2     | 1     | 2     |
| 23087  | 0   | 2     | 2     | 3     |
| 23094  | 0   |       |       |       |
| 23099  | 0   |       |       |       |
| 23101  | 4   | 1     | 1     | 1     |
| 23105  | 0   |       |       |       |



| respid | Q37 | Q38_1 | Q39_1 | Q39_2 |
|--------|-----|-------|-------|-------|
| 23115  | 1   | 2     | 2     | 2     |
| 23121  | 0   | 2     | 1     | 1     |
| 23127  | 0   | 1     | 1     | 1     |
| 23131  | 0   | 3     | 2     | 2     |
| 23134  | 0   | 1     | 1     | 1     |
| 23145  | 0   | 1     | 1     | 1     |
| 23151  | 0   | 0     | 1     | 1     |
| 23161  | 0   | 4     | 2     | 1     |
| 23169  | 1   | 4     | 2     | 2     |
| 23173  | 0   | 2     | 1     | 1     |
| 23174  | 0   | 1     | 1     | 1     |
| 23186  | 3   | 5     | 4     | 5     |
| 23195  | 0   | 1     | 1     | 1     |
| 23197  | 0   | 2     | 3     | 2     |
| 23198  | 0   | 2     | 1     | 1     |
| 23203  | 0   |       |       |       |
| 23204  | 2   | 2     | 2     | 1     |
| 23212  | 1   | 4     | 1     | 1     |
| 23214  | 0   | 1     | 1     | 1     |
| 23221  | 1   | 3     | 2     | 1     |
| 23237  | 0   | 0     | 1     | 1     |
| 23251  | 0   | 0     | 1     | 1     |
| 23254  | 0   | 1     | 1     | 1     |
| 23262  | 1   | 3     | 2     | 2     |
| 23267  | 1   | 4     | 1     | 1     |
| 23268  | 4   | 5     | 3     | 2     |
| 23273  | 0   | 3     | 2     | 3     |
| 23278  | 0   | 3     | 1     | 1     |
| 23279  | 0   |       |       |       |
| 23281  | 0   | 4     | 3     | 3     |
| 23282  | 2   | 3     | 4     | 4     |
| 23283  | 3   | 5     | 3     | 4     |

| respid | Q37 | Q38_1 | Q39_1 | Q39_2 |
|--------|-----|-------|-------|-------|
| 23285  | 0   | 2     | 1     | 1     |
| 23305  | 2   | 3     | 2     | 1     |
| 23309  | 0   | 1     | 1     | 1     |
| 23310  | 1   | 3     | 2     | 1     |
| 23311  | 1   | 6     | 1     | 2     |
| 23312  | 2   | 4     | 4     | 4     |
| 23319  | 1   | 3     | 1     | 1     |
| 23320  | 0   | 1     | 1     | 1     |
| 23322  | 1   | 2     | 1     | 1     |
| 23334  | 0   | 5     | 2     | 4     |
| 23340  | 1   | 1     | 1     | 1     |
| 23346  | 0   | 0     | 1     | 1     |
| 23353  | 0   | 1     | 1     | 1     |
| 23363  | 2   | 4     | 4     | 3     |
| 23364  | 2   | 4     | 3     | 3     |
| 23376  | 0   |       |       |       |
| 23378  | 0   | 2     | 1     | 1     |
| 23382  | 0   |       |       |       |
| 23383  | 0   |       |       |       |
| 23390  | 0   | 1     | 1     | 1     |
| 23395  | 0   | 2     | 1     | 1     |
| 23398  | 1   | 3     | 1     | 2     |
| 23399  | 0   | 2     | 1     | 1     |
| 23406  | 1   | 1     | 1     | 1     |
| 23418  | 1   | 2     | 2     | 1     |
| 23427  | 0   | 1     | 1     | 1     |
| 23428  | 0   | 1     | 1     | 1     |
| 23435  | 2   | 4     | 3     | 3     |
| 23439  | 0   | 1     | 1     | 1     |
| 23440  | 0   |       |       |       |
| 23444  | 3   | 5     | 4     | 2     |
| 23445  | 0   | 1     | 1     | 1     |

| respid | Q37 | Q38_1 | Q39_1 | Q39_2 |
|--------|-----|-------|-------|-------|
| 23455  | 0   |       |       |       |
| 23467  | 2   | 3     | 1     | 2     |
| 23478  | 0   | 4     | 2     | 3     |
| 23492  | 1   | 4     | 1     | 1     |
| 23498  | 1   | 1     | 1     | 1     |
| 23511  | 1   | 4     | 1     | 1     |
| 23514  | 0   | 0     | 1     | 1     |
| 23515  | 2   | 3     | 2     | 2     |
| 23522  | 0   |       |       |       |
| 23524  | 0   |       |       |       |
| 23531  | 1   | 5     | 3     | 2     |
| 23532  | 0   | 3     | 1     | 1     |
| 23533  | 1   | 2     | 2     | 1     |
| 23534  | 0   | 1     | 1     | 1     |
| 23538  | 0   | 1     | 1     | 1     |
| 23539  | 3   | 5     | 3     | 2     |
| 23548  | 1   | 2     | 2     | 1     |
| 23553  | 0   |       |       |       |
| 23556  | 0   | 3     | 1     | 1     |
| 23563  | 1   | 3     | 3     | 2     |
| 23572  | 0   | 2     | 2     | 1     |
| 23575  | 0   | 0     | 1     | 1     |
| 23576  | 0   | 3     | 1     | 1     |
| 23577  | 0   | 1     | 2     | 1     |
| 23578  | 2   | 2     | 2     | 3     |
| 23587  | 1   | 3     | 2     | 2     |
| 23597  | 0   | 1     | 3     | 3     |
| 23598  | 0   | 2     | 2     | 2     |
| 23604  | 0   |       |       |       |
| 23617  | 0   | 4     | 1     | 1     |
| 23620  | 1   | 2     | 1     | 1     |
| 23621  | 0   |       |       |       |

| respid | Q37 | Q38_1 | Q39_1 | Q39_2 |
|--------|-----|-------|-------|-------|
| 23625  | 1   | 1     | 2     | 1     |
| 23629  | 0   | 6     | 1     | 1     |
| 23635  | 0   | 1     | 6     | 1     |
| 23636  | 0   | 2     | 2     | 3     |
| 23637  | 3   | 5     | 6     | 6     |
| 23638  | 0   | 0     | 1     | 1     |
| 23644  | 0   | 0     | 1     | 1     |
| 23645  | 1   | 4     | 2     | 2     |
| 23649  | 2   | 0     | 1     | 1     |
| 23654  | 1   | 2     | 1     | 1     |
| 23662  | 1   | 4     | 1     | 1     |
| 23664  | 1   | 1     | 1     | 1     |
| 23665  | 0   | 1     | 1     | 1     |
| 23666  | 0   | 3     | 1     | 2     |
| 23671  | 0   | 3     | 1     | 1     |
| 23672  | 1   | 0     | 1     | 1     |
| 23685  | 1   | 2     | 1     | 2     |
| 23686  | 2   | 2     | 3     | 2     |
| 23689  | 3   | 3     | 3     | 4     |
| 23690  | 2   | 4     | 2     | 2     |
| 23695  | 2   | 5     | 2     | 4     |
| 23700  | 0   | 3     | 1     | 1     |
| 23714  | 0   | 1     | 1     | 1     |
| 23719  | 0   | 0     | 1     | 1     |
| 23720  | 0   | 2     | 1     | 1     |
| 23721  | 0   | 1     | 2     | 1     |
| 23729  | 0   | 0     | 6     | 6     |
| 23730  | 0   | 0     | 1     | 1     |
| 23732  | 1   | 3     | 1     | 1     |
| 23736  | 0   | 3     | 1     | 1     |
| 23754  | 0   |       |       |       |
| 23756  | 0   | 2     | 1     | 1     |

| respid | Q37 | Q38_1 | Q39_1 | Q39_2 |
|--------|-----|-------|-------|-------|
| 23759  | 2   | 4     | 2     | 2     |
| 23761  | 2   | 4     | 3     | 1     |
| 23766  | 0   | 2     | 1     | 2     |
| 23768  | 3   | 2     | 4     | 4     |
| 23773  | 0   | 3     | 1     | 1     |
| 23781  | 0   |       |       |       |
| 23782  | 4   | 4     | 5     | 5     |
| 23787  | 1   | 2     | 2     | 2     |
| 23788  | 2   | 5     | 4     | 4     |
| 23790  | 0   |       |       |       |
| 23794  | 0   | 4     | 1     | 1     |
| 23795  | 2   | 4     | 3     | 3     |
| 23801  | 0   | 2     | 1     | 1     |
| 23806  | 0   | 2     | 2     | 2     |
| 23809  | 2   | 5     | 2     | 2     |
| 23813  | 1   | 4     | 2     | 1     |
| 23815  | 0   | 1     | 1     | 2     |
| 23821  | 0   | 1     | 2     | 1     |
| 23825  | 0   | 1     | 2     | 2     |
| 23826  | 0   | 1     | 1     | 2     |
| 23830  | 0   | 0     | 1     | 1     |
| 23833  | 1   | 2     | 2     | 1     |
| 23837  | 0   | 1     | 1     | 1     |
| 23848  | 5   | 6     | 6     | 6     |
| 23850  | 0   | 1     | 1     | 2     |
| 23870  | 1   | 1     | 1     | 1     |
| 23877  | 0   |       |       |       |
| 23880  | 0   | 1     | 1     | 1     |
| 23882  | 1   | 3     | 3     | 3     |
| 23888  | 0   |       |       |       |
| 23908  | 1   | 4     | 2     | 3     |
| 23914  | 0   | 3     | 2     | 2     |

| respid | Q37 | Q38_1 | Q39_1 | Q39_2 |
|--------|-----|-------|-------|-------|
| 23916  | 1   | 1     | 2     | 2     |
| 23922  | 1   | 2     | 2     | 2     |
| 23932  | 1   | 1     | 1     | 1     |
| 23934  | 0   |       |       |       |
| 23942  | 3   | 5     | 2     | 2     |
| 23945  | 0   | 2     | 1     | 1     |
| 23948  | 0   | 2     | 1     | 1     |
| 23955  | 0   | 1     | 3     | 3     |
| 23956  | 2   | 5     | 4     | 3     |
| 23978  | 1   | 3     | 2     | 1     |
| 23981  | 0   |       |       |       |
| 23982  | 0   | 1     | 1     | 1     |
| 23991  | 0   | 4     | 1     | 1     |
| 23994  | 1   | 2     | 1     | 1     |
| 23995  | 0   | 1     | 2     | 1     |
| 23999  | 1   | 1     | 1     | 1     |
| 24005  | 5   | 6     | 5     | 6     |
| 24018  | 0   | 0     | 1     | 1     |
| 24021  | 0   |       |       |       |
| 24035  | 0   |       |       |       |
| 24040  | 0   | 3     | 1     | 1     |
| 24043  | 0   |       |       |       |
| 24046  | 0   | 1     | 2     | 3     |
| 24047  | 1   | 4     | 2     | 2     |
| 24048  | 0   | 3     | 1     | 1     |
| 24062  | 0   | 3     | 2     | 2     |
| 24063  | 1   | 2     | 2     | 1     |
| 24066  | 0   | 0     | 1     | 1     |
| 24069  | 0   | 0     | 2     | 2     |
| 24070  | 0   | 5     | 1     | 1     |
| 24074  | 0   | 1     | 1     | 1     |
| 24080  | 0   | 1     | 1     | 1     |

| respid | Q37 | Q38_1 | Q39_1 | Q39_2 |
|--------|-----|-------|-------|-------|
| 24082  | 0   | 0     | 1     | 1     |
| 24088  | 1   | 1     | 3     | 1     |
| 24089  | 0   | 2     | 1     | 1     |
| 24091  | 0   | 0     | 1     | 1     |
| 24095  | 0   |       |       |       |
| 24100  | 2   | 4     | 2     | 1     |
| 24105  | 3   | 4     | 4     | 4     |
| 24107  | 3   | 5     | 5     | 5     |
| 24108  | 0   |       |       |       |
| 24113  | 1   | 4     | 2     | 2     |
| 24120  | 0   |       |       |       |
| 24122  | 2   | 4     | 3     | 3     |
| 24123  | 1   | 2     | 1     | 1     |
| 24125  | 1   | 5     | 2     | 3     |
| 24132  | 0   | 0     | 1     | 1     |
| 24139  | 1   | 3     | 1     | 1     |
| 24140  | 0   | 2     | 1     | 1     |
| 24143  | 3   | 5     | 2     | 1     |
| 24150  | 2   | 3     | 3     | 3     |
| 24153  | 0   |       |       |       |
| 24161  | 0   |       |       |       |
| 24168  | 3   | 5     | 1     | 1     |
| 24179  | 1   | 4     | 1     | 1     |
| 24182  | 1   | 5     | 4     | 4     |
| 24194  | 0   | 3     | 2     | 2     |
| 24206  | 0   |       |       |       |
| 24214  | 0   |       |       |       |
| 24215  | 0   | 4     | 4     | 4     |
| 24224  | 0   | 1     | 1     | 1     |
| 24225  | 0   | 2     | 2     | 1     |
| 24227  | 0   |       |       |       |
| 24229  | 1   | 0     | 1     | 1     |

| respid | Q37 | Q38_1 | Q39_1 | Q39_2 |
|--------|-----|-------|-------|-------|
| 24230  | 0   | 1     | 1     | 1     |
| 24232  | 2   | 5     | 3     | 2     |
| 24253  | 1   | 3     | 2     | 2     |
| 24267  | 0   | 2     | 1     | 1     |
| 24274  | 0   | 4     | 3     | 4     |
| 24275  | 1   | 4     | 1     | 1     |
| 24277  | 0   | 1     | 1     | 1     |
| 24280  | 2   | 4     | 2     | 2     |
| 24285  | 0   | 3     | 2     | 1     |
| 24293  | 0   |       |       |       |
| 24295  | 1   | 5     | 2     | 1     |
| 24299  | 0   |       |       |       |
| 24303  | 1   | 1     | 1     | 1     |
| 24308  | 2   | 4     | 1     | 2     |
| 24322  | 0   |       |       |       |
| 24325  | 0   |       |       |       |
| 24328  | 0   | 3     | 1     | 1     |
| 24334  | 0   | 2     | 1     | 1     |
| 24342  | 1   | 2     | 1     | 1     |
| 24343  | 2   | 4     | 3     | 2     |
| 24348  | 4   | 6     | 6     | 4     |
| 24352  | 2   | 4     | 3     | 5     |
| 24354  | 1   | 4     | 2     | 3     |
| 24357  | 0   | 6     | 1     | 1     |
| 24360  | 0   | 3     | 2     | 2     |
| 24369  | 2   | 5     | 5     | 5     |
| 24373  | 1   | 2     | 2     | 2     |
| 24398  | 4   | 5     | 5     | 6     |
| 24402  | 0   | 5     | 3     | 3     |
| 24405  | 0   | 2     | 1     | 1     |
| 24407  | 0   | 5     | 1     | 1     |
| 24413  | 0   | 1     | 1     | 1     |



| respid | Q37 | Q38_1 | Q39_1 | Q39_2 |
|--------|-----|-------|-------|-------|
| 24443  | 3   | 3     | 2     | 2     |
| 24451  | 0   |       |       |       |
| 24459  | 3   | 3     | 3     | 4     |
| 24465  | 0   | 2     | 2     | 1     |
| 24481  | 1   | 3     | 4     | 3     |
| 24482  | 0   | 2     | 1     | 1     |
| 24491  | 1   | 2     | 2     | 2     |
| 24495  | 0   | 1     | 1     | 1     |
| 24497  | 1   | 5     | 4     | 4     |
| 24511  | 0   | 3     | 1     | 4     |
| 24513  | 1   | 3     | 3     | 2     |
| 24516  | 1   | 4     | 2     | 3     |
| 24518  | 0   | 1     | 3     | 1     |
| 24524  | 0   | 1     | 1     | 1     |
| 24528  | 1   | 3     | 1     | 1     |
| 24531  | 4   | 6     | 5     | 6     |
| 24533  | 3   | 5     | 3     | 4     |
| 24547  | 0   | 2     | 1     | 1     |
| 24557  | 4   | 4     | 3     | 4     |
| 24559  | 4   | 5     | 5     | 6     |
| 24567  | 0   | 1     | 2     | 1     |
| 24568  | 0   |       |       |       |
| 24577  | 0   |       |       |       |
| 24581  | 0   | 3     | 1     | 1     |
| 24588  | 0   | 1     | 1     | 1     |
| 24604  | 4   | 4     | 5     | 5     |
| 24612  | 2   | 2     | 2     | 3     |
| 24621  | 3   | 2     | 3     | 5     |
| 24625  | 0   | 3     | 2     | 3     |
| 24627  | 1   | 4     | 1     | 1     |
| 24640  | 1   | 1     | 2     | 1     |
| 24644  | 1   | 3     | 1     | 1     |

| respid | Q37 | Q38_1 | Q39_1 | Q39_2 |
|--------|-----|-------|-------|-------|
| 24664  | 1   | 4     | 3     | 1     |
| 24669  | 2   | 3     | 2     | 3     |
| 24685  | 0   | 1     | 1     | 1     |
| 24687  | 2   | 4     | 2     | 2     |
| 24688  | 1   | 2     | 2     | 2     |
| 24691  | 4   | 5     | 3     | 4     |
| 24693  | 1   | 4     | 3     | 6     |
| 24706  | 0   |       |       |       |
| 24710  | 0   |       |       |       |
| 24717  | 0   | 0     | 1     | 1     |
| 24720  | 1   | 2     | 1     | 1     |
| 24731  | 2   | 4     | 3     | 3     |
| 24732  | 1   | 3     | 2     | 1     |
| 24733  | 0   |       |       |       |
| 24747  | 0   | 1     | 1     | 1     |
| 24750  | 4   | 5     | 5     | 6     |
| 24758  | 2   | 5     | 2     | 3     |
| 24760  | 0   | 5     | 1     | 1     |
| 24765  | 0   |       |       |       |
| 24772  | 0   | 1     | 2     | 1     |
| 24779  | 1   | 3     | 3     | 3     |
| 24794  | 0   | 2     | 1     | 1     |
| 24796  | 3   | 5     | 4     | 5     |
| 24797  | 0   | 1     | 1     | 1     |
| 24800  | 0   | 1     | 1     | 1     |
| 24813  | 3   | 4     | 4     | 4     |
| 24815  | 0   | 1     | 3     | 3     |
| 24821  | 0   | 0     | 1     | 1     |
| 24822  | 1   | 1     | 2     | 1     |
| 24831  | 0   | 1     | 1     | 1     |
| 24835  | 0   |       |       |       |
| 24843  | 2   | 4     | 4     | 3     |

| respid | Q37 | Q38_1 | Q39_1 | Q39_2 |
|--------|-----|-------|-------|-------|
| 24844  | 2   | 3     | 3     | 3     |
| 24860  | 0   |       |       |       |
| 24861  | 2   | 4     | 1     | 1     |
| 24865  | 4   | 4     | 3     | 4     |
| 24870  | 2   | 1     | 3     | 4     |
| 24887  | 0   | 1     | 1     | 1     |
| 24897  | 2   | 4     | 3     | 2     |
| 24902  | 2   | 3     | 3     | 3     |
| 24914  | 0   | 2     | 2     | 2     |
| 24921  | 1   | 3     | 3     | 4     |
| 24922  | 0   | 1     | 1     | 1     |
| 24924  | 0   |       |       |       |
| 24927  | 0   | 3     | 1     | 1     |
| 24936  | 0   | 3     | 1     | 1     |
| 24937  | 0   | 3     | 1     | 1     |
| 24942  | 1   | 3     | 2     | 2     |
| 24947  | 0   | 4     | 1     | 1     |
| 24953  | 1   | 3     | 2     | 1     |
| 24954  | 1   | 1     | 2     | 2     |
| 24960  | 5   | 5     | 4     | 5     |
| 24965  | 0   | 1     | 1     | 1     |
| 24975  | 0   | 1     | 1     | 1     |
| 24983  | 4   | 5     | 3     | 4     |
| 24985  | 0   | 1     | 1     | 1     |
| 24990  | 0   | 2     | 1     | 1     |
| 25000  | 0   | 1     | 1     | 1     |
| 25007  | 2   | 3     | 3     | 3     |
| 25008  | 0   | 1     | 1     | 1     |
| 25010  | 0   |       |       |       |
| 25016  | 1   | 5     | 2     | 1     |
| 25021  | 0   | 2     | 1     | 1     |
| 25040  | 0   |       |       |       |

| respid | Q37 | Q38_1 | Q39_1 | Q39_2 |
|--------|-----|-------|-------|-------|
| 25043  | 0   | 2     | 1     | 1     |
| 25055  | 0   | 1     | 1     | 1     |
| 25057  | 1   | 2     | 3     | 2     |
| 25060  | 1   | 3     | 2     | 2     |
| 25062  | 1   | 1     | 2     | 1     |
| 25064  | 3   | 6     | 3     | 3     |
| 25069  | 0   |       |       |       |
| 25077  | 0   | 0     | 1     | 1     |
| 25088  | 0   |       |       |       |
| 25093  | 2   | 5     | 4     | 2     |
| 25121  | 1   | 1     | 2     | 3     |
| 25140  | 4   | 5     | 3     | 4     |
| 25144  | 1   | 2     | 1     | 1     |
| 25149  | 1   | 3     | 2     | 2     |
| 25159  | 0   | 2     | 1     | 1     |
| 25191  | 2   | 4     | 2     | 2     |
| 25193  | 4   | 4     | 3     | 6     |
| 25202  | 4   | 5     | 3     | 4     |
| 25215  | 1   | 2     | 3     | 2     |
| 25229  | 4   | 4     | 3     | 3     |
| 25231  | 1   | 3     | 2     | 1     |
| 25236  | 0   | 2     | 1     | 1     |
| 25242  | 0   | 0     | 1     | 1     |
| 25252  | 0   | 0     | 1     | 1     |
| 25253  | 3   | 6     | 3     | 6     |
| 25256  | 4   | 5     | 3     | 4     |
| 25260  | 0   | 0     | 4     | 6     |
| 25261  | 0   | 5     | 2     | 1     |
| 25280  | 1   | 3     | 2     | 3     |
| 25282  | 1   | 4     | 2     | 1     |
| 25289  | 0   | 3     | 6     | 5     |
| 25303  | 0   | 3     | 2     | 1     |

| respid | Q37 | Q38_1 | Q39_1 | Q39_2 |
|--------|-----|-------|-------|-------|
| 25304  | 2   | 4     | 3     | 3     |
| 25309  | 0   | 1     | 2     | 1     |
| 25317  | 2   | 3     | 2     | 2     |
| 25318  | 3   | 5     | 4     | 4     |
| 25320  | 0   | 3     | 2     | 3     |
| 25324  | 4   | 5     | 3     | 4     |
| 25331  | 1   | 4     | 1     | 1     |
| 25340  | 0   | 4     | 1     | 1     |
| 25342  | 1   | 2     | 2     | 1     |
| 25350  | 0   | 0     | 1     | 1     |
| 25352  | 0   |       |       |       |
| 25358  | 0   | 1     | 1     | 1     |
| 25375  | 0   | 1     | 1     | 1     |
| 25386  | 0   | 1     | 1     | 1     |
| 25388  | 1   | 4     | 2     | 2     |
| 25390  | 1   | 3     | 2     | 1     |
| 25391  | 0   | 3     | 3     | 3     |
| 25400  | 1   | 5     | 2     | 3     |
| 25413  | 4   | 5     | 3     | 4     |
| 25424  | 1   | 4     | 2     | 2     |
| 25426  | 2   | 3     | 3     | 3     |
| 25430  | 0   | 1     | 1     | 1     |
| 25434  | 1   | 2     | 2     | 3     |
| 25439  | 1   | 5     | 3     | 3     |
| 25441  | 0   | 2     | 1     | 1     |
| 25445  | 0   | 3     | 1     | 1     |
| 25451  | 0   | 0     | 1     | 1     |
| 25469  | 4   | 5     | 3     | 4     |
| 25471  | 2   | 5     | 3     | 2     |
| 25476  | 1   | 1     | 2     | 3     |
| 25480  | 1   | 1     | 1     | 2     |
| 25482  | 1   | 3     | 2     | 2     |

| respid | Q37 | Q38_1 | Q39_1 | Q39_2 |
|--------|-----|-------|-------|-------|
| 25500  | 4   | 5     | 5     | 5     |
| 25516  | 0   | 1     | 1     | 1     |
| 25521  | 3   | 4     | 5     | 4     |
| 25525  | 2   | 3     | 2     | 2     |
| 25530  | 1   | 4     | 5     | 4     |
| 25555  | 1   | 5     | 2     | 5     |
| 25558  | 0   | 2     | 1     | 1     |
| 25561  | 1   | 2     | 3     | 4     |
| 25566  | 0   |       |       |       |
| 25571  | 2   | 5     | 2     | 2     |
| 25572  | 0   | 1     | 1     | 2     |
| 25574  | 0   |       |       |       |
| 25588  | 0   | 0     | 1     | 1     |
| 25591  | 3   | 4     | 2     | 3     |
| 25599  | 2   | 4     | 2     | 2     |
| 25604  | 1   | 2     | 1     | 1     |
| 25614  | 3   | 4     | 2     | 1     |
| 25634  | 3   | 5     | 2     | 3     |
| 25642  | 1   | 2     | 1     | 1     |
| 25647  | 0   | 1     | 1     | 1     |
| 25653  | 0   | 2     | 2     | 1     |
| 25654  | 1   | 3     | 3     | 3     |
| 25660  | 0   | 1     | 1     | 1     |
| 25664  | 0   | 1     | 1     | 1     |
| 25665  | 0   | 2     | 3     | 3     |
| 25672  | 3   | 4     | 2     | 2     |
| 25677  | 1   | 4     | 2     | 2     |
| 25685  | 3   | 5     | 3     | 2     |
| 25699  | 2   | 3     | 3     | 3     |
| 25703  | 0   | 2     | 2     | 2     |
| 25704  | 2   | 4     | 3     | 4     |
| 25705  | 2   | 4     | 4     | 3     |

| respid | Q37 | Q38_1 | Q39_1 | Q39_2 |
|--------|-----|-------|-------|-------|
| 25711  | 0   | 3     | 1     | 1     |
| 25727  | 2   | 5     | 3     | 1     |
| 25728  | 1   | 3     | 3     | 3     |
| 25733  | 2   | 5     | 3     | 4     |
| 25735  | 0   | 2     | 1     | 1     |
| 25736  | 0   | 2     | 1     | 1     |
| 25742  | 0   | 1     | 1     | 1     |
| 25750  | 0   | 3     | 2     | 2     |
| 25754  | 0   |       |       |       |
| 25776  | 3   | 3     | 3     | 3     |
| 25778  | 0   |       |       |       |
| 25796  | 0   | 3     | 1     | 1     |
| 25852  | 1   | 4     | 4     | 4     |
| 25858  | 0   | 1     | 1     | 1     |
| 25859  | 0   |       |       |       |
| 25886  | 3   | 3     | 4     | 4     |
| 25890  | 1   | 3     | 2     | 3     |
| 25897  | 0   | 2     | 1     | 1     |
| 25903  | 0   | 4     | 1     | 1     |
| 25905  | 1   | 0     | 3     | 2     |
| 25917  | 0   |       |       |       |
| 25918  | 0   | 2     | 1     | 1     |
| 25928  | 1   | 2     | 2     | 2     |
| 25930  | 0   |       |       |       |
| 25949  | 1   | 3     | 2     | 2     |
| 25955  | 0   | 1     | 1     | 1     |
| 25959  | 1   | 1     | 2     | 1     |
| 25964  | 1   | 3     | 2     | 1     |
| 25972  | 0   | 3     | 1     | 1     |
| 25999  | 3   | 5     | 4     | 4     |
| 26019  | 0   | 3     | 2     | 2     |
| 26025  | 1   | 3     | 2     | 2     |

| respid | Q37 | Q38_1 | Q39_1 | Q39_2 |
|--------|-----|-------|-------|-------|
| 26039  | 3   | 5     | 5     | 4     |
| 26055  | 0   | 0     | 1     | 1     |
| 26061  | 2   | 2     | 2     | 3     |
| 26076  | 0   | 1     | 2     | 2     |
| 26088  | 0   | 3     | 1     | 2     |
| 26094  | 0   |       |       |       |
| 26104  | 0   | 1     | 1     | 1     |
| 26131  | 0   | 4     | 1     | 1     |
| 26134  | 2   | 5     | 2     | 3     |
| 26160  | 0   | 1     | 1     | 1     |
| 26168  | 0   | 1     | 2     | 1     |
| 26170  | 0   |       |       |       |
| 26191  | 3   | 4     | 2     | 2     |
| 26192  | 0   |       |       |       |
| 26195  | 2   | 4     | 2     | 3     |
| 26198  | 0   | 0     | 1     | 1     |
| 26199  | 1   | 2     | 1     | 1     |
| 26201  | 0   |       |       |       |
| 26202  | 1   | 3     | 2     | 2     |
| 26226  | 1   | 3     | 2     | 2     |
| 26233  | 2   | 5     | 5     | 4     |
| 26236  | 0   | 1     | 1     | 1     |
| 26242  | 1   | 2     | 2     | 2     |
| 26244  | 0   | 6     | 1     | 1     |
| 26250  | 2   | 1     | 4     | 3     |
| 26266  | 0   | 3     | 1     | 1     |
| 26274  | 0   | 4     | 2     | 1     |
| 26286  | 2   | 3     | 2     | 2     |
| 26288  | 1   | 3     | 2     | 4     |
| 26295  | 0   |       |       |       |
| 26296  | 0   | 1     | 1     | 1     |
| 26297  | 0   |       |       |       |



| respid | Q37 | Q38_1 | Q39_1 | Q39_2 |
|--------|-----|-------|-------|-------|
| 26300  | 1   | 2     | 2     | 2     |
| 26317  | 0   | 2     | 1     | 1     |
| 26343  | 0   |       |       |       |
| 26367  | 3   | 5     | 2     | 1     |
| 26372  | 0   | 1     | 1     | 1     |
| 26403  | 1   | 1     | 2     | 2     |
| 26423  | 0   | 0     | 1     | 1     |
| 26430  | 0   | 0     | 1     | 1     |
| 26437  | 2   | 3     | 2     | 1     |
| 26457  | 0   |       |       |       |
| 26466  | 0   | 0     | 3     | 1     |
| 26467  | 0   | 1     | 3     | 3     |
| 26469  | 1   | 4     | 3     | 2     |
| 26494  | 0   | 2     | 1     | 1     |
| 26510  | 0   | 2     | 2     | 2     |
| 26519  | 0   | 0     | 1     | 1     |
| 26525  | 2   | 3     | 1     | 1     |
| 26529  | 0   |       |       |       |
| 26533  | 0   | 2     | 1     | 1     |
| 26556  | 0   | 2     | 1     | 2     |
| 26559  | 2   | 3     | 3     | 3     |
| 26565  | 2   | 5     | 4     | 5     |
| 26576  | 2   | 4     | 4     | 4     |
| 26601  | 0   |       |       |       |
| 26607  | 1   | 3     | 2     | 2     |
| 26611  | 0   | 0     | 2     | 2     |
| 26619  | 0   | 2     | 2     | 2     |
| 26631  | 0   | 2     | 1     | 1     |
| 26654  | 0   | 4     | 2     | 1     |
| 26656  | 1   | 1     | 1     | 1     |
| 26664  | 0   |       |       |       |
| 26667  | 1   | 2     | 3     | 2     |

| respid | Q37 | Q38_1 | Q39_1 | Q39_2 |
|--------|-----|-------|-------|-------|
| 26674  | 3   | 5     | 4     | 3     |
| 26678  | 1   | 2     | 2     | 2     |
| 26693  | 1   | 1     | 1     | 1     |
| 26696  | 3   | 5     | 5     | 5     |
| 26703  | 3   | 5     | 5     | 5     |
| 26705  | 0   | 3     | 3     | 3     |
| 26706  | 2   | 4     | 3     | 3     |
| 26716  | 1   | 3     | 3     | 4     |
| 26721  | 1   | 2     | 2     | 3     |
| 26730  | 0   | 1     | 1     | 1     |
| 26752  | 0   | 2     | 1     | 1     |
| 26755  | 0   | 3     | 1     | 1     |
| 26791  | 0   | 1     | 1     | 1     |
| 26804  | 1   | 3     | 2     | 2     |
| 26810  | 3   | 4     | 3     | 4     |
| 26813  | 2   | 4     | 3     | 2     |
| 26833  | 2   | 3     | 2     | 2     |
| 26880  | 2   | 1     | 3     | 3     |
| 26884  | 1   | 1     | 2     | 1     |
| 26885  | 0   | 1     | 1     | 1     |
| 26890  | 2   | 4     | 4     | 3     |
| 26937  | 1   | 3     | 1     | 2     |
| 26939  | 3   | 3     | 2     | 2     |
| 26941  | 0   |       |       |       |
| 26992  | 3   | 4     | 2     | 3     |
| 27037  | 0   | 2     | 2     | 3     |
| 27045  | 3   | 5     | 4     | 5     |
| 27053  | 4   | 4     | 4     | 5     |
| 27060  | 3   | 4     | 5     | 4     |
| 27076  | 2   | 4     | 2     | 2     |
| 27124  | 1   | 3     | 2     | 1     |
| 27125  | 1   | 3     | 2     | 2     |

| respid | Q37 | Q38_1 | Q39_1 | Q39_2 |
|--------|-----|-------|-------|-------|
| 27132  | 0   | 1     | 1     | 1     |
| 27166  | 0   | 2     | 2     | 1     |
| 27190  | 1   | 3     | 2     | 2     |
| 27199  | 1   | 4     | 2     | 3     |
| 27221  | 3   | 4     | 4     | 3     |
| 27233  | 2   | 3     | 2     | 2     |
| 27241  | 1   | 2     | 2     | 1     |
| 27244  | 0   | 0     | 1     | 1     |
| 27245  | 3   | 5     | 5     | 5     |
| 27246  | 1   | 2     | 2     | 2     |
| 27253  | 0   | 2     | 2     | 1     |
| 27255  | 1   | 3     | 4     | 3     |
| 27267  | 1   | 1     | 2     | 2     |
| 27283  | 2   | 2     | 2     | 2     |
| 27289  | 2   | 4     | 4     | 3     |
| 27302  | 0   | 0     | 1     | 3     |
| 27317  | 0   | 0     | 1     | 1     |
| 27319  | 0   | 2     | 1     | 1     |
| 27331  | 1   | 3     | 2     | 2     |
| 27333  | 0   | 4     | 1     | 1     |
| 27340  | 0   |       |       |       |
| 27362  | 1   | 4     | 3     | 4     |
| 27370  | 0   | 0     | 1     | 1     |
| 27379  | 2   | 4     | 3     | 2     |
| 27386  | 0   |       |       |       |
| 27398  | 0   | 2     | 2     | 1     |
| 27404  | 0   | 1     | 1     | 1     |
| 27408  | 0   | 1     | 1     | 1     |
| 27412  | 3   | 5     | 3     | 4     |
| 27426  | 1   | 4     | 2     | 2     |
| 27455  | 1   | 2     | 1     | 1     |
| 27464  | 3   | 4     | 4     | 4     |

| respid | Q37 | Q38_1 | Q39_1 | Q39_2 |
|--------|-----|-------|-------|-------|
| 27484  | 0   | 0     | 1     | 2     |
| 27493  | 0   | 4     | 4     | 5     |
| 27512  | 3   | 5     | 3     | 4     |
| 27525  | 2   | 4     | 4     | 3     |
| 27532  | 1   | 4     | 3     | 3     |
| 27539  | 0   | 0     | 1     | 2     |
| 27540  | 2   | 2     | 3     | 5     |
| 27552  | 3   | 6     | 4     | 5     |
| 27562  | 0   | 3     | 1     | 1     |
| 27568  | 0   | 3     | 2     | 1     |
| 27574  | 4   | 5     | 5     | 4     |
| 27575  | 0   | 3     | 1     | 1     |
| 27577  | 0   | 4     | 2     | 1     |
| 27589  | 0   | 1     | 1     | 4     |
| 27593  | 0   | 3     | 1     | 1     |
| 27594  | 3   | 4     | 4     | 4     |
| 27595  | 4   | 6     | 6     | 6     |
| 27598  | 0   | 6     | 1     | 1     |
| 27620  | 1   | 1     | 2     | 4     |
| 27621  | 3   | 4     | 3     | 3     |
| 27628  | 1   | 1     | 1     | 2     |
| 27633  | 1   | 4     | 2     | 3     |
| 27643  | 1   | 1     | 2     | 3     |
| 27644  | 0   | 4     | 3     | 3     |
| 27668  | 0   | 5     | 2     | 2     |
| 27681  | 1   | 3     | 2     | 3     |
| 27691  | 0   | 1     | 1     | 1     |
| 27693  | 3   | 4     | 3     | 4     |
| 27703  | 2   | 3     | 2     | 2     |
| 27708  | 1   | 3     | 2     | 2     |
| 27719  | 3   | 3     | 3     | 3     |
| 27720  | 0   | 0     | 1     | 1     |

| respid | Q37 | Q38_1 | Q39_1 | Q39_2 |
|--------|-----|-------|-------|-------|
| 27723  | 1   | 3     | 3     | 2     |
| 27725  | 2   | 2     | 1     | 1     |
| 27734  | 1   | 3     | 3     | 3     |
| 27744  | 0   | 4     | 1     | 1     |
| 27749  | 2   | 5     | 5     | 3     |
| 27762  | 2   | 4     | 4     | 3     |
| 27808  | 2   | 3     | 2     | 3     |
| 27810  | 4   | 6     | 6     | 4     |
| 27812  | 1   | 5     | 2     | 1     |
| 27815  | 0   |       |       |       |
| 27818  | 0   | 1     | 1     | 1     |
| 27823  | 0   | 1     | 1     | 1     |
| 27841  | 1   | 2     | 2     | 3     |
| 27843  | 0   |       |       |       |
| 27851  | 1   | 3     | 4     | 5     |
| 27858  | 1   | 2     | 1     | 1     |
| 27859  | 2   | 4     | 1     | 1     |
| 27869  | 0   | 0     | 1     | 1     |
| 27872  | 1   | 3     | 1     | 1     |
| 27873  | 1   | 3     | 1     | 1     |
| 27884  | 2   | 2     | 3     | 2     |
| 27904  | 3   | 2     | 2     | 2     |
| 27915  | 0   | 5     | 2     | 2     |
| 27918  | 1   | 2     | 2     | 2     |
| 27937  | 1   | 3     | 1     | 1     |
| 27943  | 3   | 3     | 3     | 3     |
| 27948  | 0   | 1     | 1     | 1     |
| 27971  | 1   | 5     | 4     | 3     |
| 27991  | 0   | 2     | 2     | 1     |
| 28000  | 1   | 2     | 1     | 1     |
| 28011  | 1   | 4     | 1     | 1     |
| 28022  | 0   | 3     | 1     | 2     |

| respid | Q37 | Q38_1 | Q39_1 | Q39_2 |
|--------|-----|-------|-------|-------|
| 28025  | 0   | 1     | 2     | 1     |
| 28041  | 0   | 1     | 1     | 1     |
| 28057  | 3   | 5     | 5     | 4     |
| 28080  | 0   |       |       |       |
| 28098  | 0   | 1     | 1     | 1     |
| 28104  | 3   | 5     | 3     | 2     |
| 28109  | 3   | 4     | 2     | 3     |
| 28129  | 3   | 1     | 4     | 5     |
| 28141  | 0   |       |       |       |
| 28143  | 0   | 0     | 1     | 1     |
| 28149  | 1   | 1     | 1     | 1     |
| 28151  | 1   | 1     | 3     | 3     |
| 28161  | 4   | 6     | 4     | 3     |
| 28169  | 1   | 1     | 2     | 2     |
| 28194  | 4   | 5     | 3     | 3     |
| 28197  | 0   |       |       |       |
| 28206  | 1   | 1     | 1     | 1     |
| 28218  | 0   | 6     | 2     | 1     |
| 28227  | 0   | 1     | 1     | 1     |
| 28235  | 1   | 5     | 5     | 6     |
| 28246  | 2   | 2     | 2     | 1     |
| 28259  | 3   | 6     | 5     | 5     |
| 28263  | 1   | 1     | 2     | 3     |
| 28267  | 3   | 6     | 5     | 5     |
| 28274  | 0   | 1     | 2     | 2     |
| 28278  | 0   | 3     | 1     | 1     |
| 28288  | 0   | 5     | 2     | 2     |
| 28308  | 0   |       |       |       |
| 28309  | 1   | 2     | 2     | 3     |
| 28323  | 1   | 3     | 1     | 2     |
| 28335  | 2   | 1     | 3     | 3     |
| 28354  | 3   | 2     | 2     | 3     |

| respid | Q37 | Q38_1 | Q39_1 | Q39_2 |
|--------|-----|-------|-------|-------|
| 28355  | 2   | 4     | 3     | 4     |
| 28356  | 3   | 4     | 1     | 1     |
| 28357  | 1   | 1     | 2     | 2     |
| 28363  | 0   | 2     | 1     | 1     |
| 28366  | 0   | 1     | 1     | 1     |
| 28372  | 2   | 5     | 3     | 4     |
| 28381  | 2   | 4     | 2     | 2     |
| 28388  | 2   | 3     | 4     | 3     |
| 28413  | 2   | 1     | 2     | 2     |
| 28421  | 1   | 2     | 3     | 3     |
| 28430  | 0   | 1     | 2     | 2     |
| 28439  | 2   | 1     | 3     | 3     |
| 28458  | 4   | 5     | 5     | 4     |
| 28461  | 1   | 6     | 1     | 1     |
| 28466  | 0   | 4     | 3     | 3     |
| 28492  | 2   | 3     | 1     | 1     |
| 28534  | 0   |       |       |       |
| 28537  | 2   | 3     | 3     | 3     |
| 28560  | 0   | 0     | 1     | 1     |
| 28566  | 0   | 2     | 1     | 1     |
| 28569  | 1   | 3     | 2     | 1     |
| 28584  | 0   | 1     | 3     | 2     |
| 28590  | 1   | 4     | 1     | 1     |
| 28596  | 0   |       |       |       |
| 28608  | 2   | 5     | 2     | 2     |
| 28631  | 2   | 4     | 4     | 2     |
| 28644  | 1   | 2     | 2     | 2     |
| 28646  | 0   | 2     | 2     | 2     |
| 28665  | 0   |       |       |       |
| 28686  | 0   | 1     | 1     | 1     |
| 28704  | 1   | 4     | 4     | 3     |
| 28719  | 0   | 2     | 2     | 1     |

| respid | Q37 | Q38_1 | Q39_1 | Q39_2 |
|--------|-----|-------|-------|-------|
| 28736  | 2   | 3     | 3     | 1     |
| 28739  | 2   | 4     | 3     | 2     |
| 28758  | 2   | 4     | 3     | 3     |
| 28761  | 4   | 4     | 4     | 3     |
| 28770  | 3   | 4     | 5     | 4     |
| 28774  | 0   | 3     | 1     | 1     |
| 28778  | 4   | 5     | 5     | 4     |
| 28783  | 2   | 4     | 5     | 3     |
| 28785  | 0   | 1     | 1     | 1     |
| 28797  | 2   | 4     | 3     | 4     |
| 28801  | 0   | 5     | 3     | 3     |
| 28821  | 0   |       |       |       |
| 28827  | 2   | 5     | 1     | 1     |
| 28828  | 1   | 2     | 1     | 1     |
| 28871  | 1   | 2     | 2     | 3     |
| 28876  | 1   | 4     | 2     | 1     |
| 28891  | 3   | 6     | 2     | 4     |
| 28898  | 0   |       |       |       |
| 28909  | 0   | 2     | 1     | 1     |
| 28930  | 1   | 2     | 2     | 3     |
| 28935  | 2   | 3     | 2     | 2     |
| 28964  | 0   | 1     | 1     | 1     |
| 28965  | 0   | 3     | 1     | 1     |
| 28967  | 3   | 6     | 5     | 6     |
| 28975  | 0   |       |       |       |
| 28982  | 0   | 1     | 1     | 1     |
| 28989  | 1   | 3     | 2     | 1     |
| 29003  | 1   | 4     | 2     | 2     |
| 29004  | 1   | 2     | 1     | 1     |
| 29007  | 2   | 2     | 2     | 2     |
| 29008  | 0   | 0     | 1     | 1     |
| 29011  | 1   | 5     | 4     | 3     |



| respid | Q37 | Q38_1 | Q39_1 | Q39_2 |
|--------|-----|-------|-------|-------|
| 29012  | 1   | 2     | 2     | 2     |
| 29014  | 0   |       |       |       |
| 29016  | 1   | 1     | 2     | 2     |
| 29018  | 3   | 5     | 5     | 4     |
| 29048  | 2   | 2     | 1     | 1     |
| 29184  | 0   | 1     | 1     | 1     |
| 29237  | 0   | 1     | 2     | 1     |
| 29252  | 1   | 3     | 3     | 6     |
| 29267  | 1   | 3     | 1     | 2     |
| 29276  | 0   |       |       |       |
| 29281  | 3   | 4     | 3     | 3     |
| 29285  | 0   | 1     | 1     | 1     |
| 29291  | 4   | 5     | 5     | 6     |
| 29304  | 1   | 3     | 2     | 2     |
| 29323  | 0   | 2     | 1     | 1     |
| 29330  | 2   | 5     | 2     | 2     |
| 29357  | 5   | 6     | 6     | 6     |
| 29416  | 1   | 1     | 1     | 1     |
| 29432  | 0   | 1     | 1     | 1     |
| 29482  | 1   | 2     | 3     | 2     |
| 29506  | 2   | 3     | 3     | 2     |
| 29509  | 2   | 3     | 3     | 3     |
| 29512  | 1   | 2     | 3     | 2     |
| 29519  | 1   | 2     | 2     | 2     |
| 29520  | 1   | 3     | 1     | 1     |
| 29521  | 2   | 2     | 2     | 3     |
| 29529  | 3   | 5     | 5     | 5     |
| 29532  | 0   | 1     | 1     | 1     |
| 29547  | 3   | 3     | 3     | 3     |
| 29551  | 0   | 1     | 2     | 2     |
| 29584  | 3   | 5     | 3     | 4     |
| 29591  | 2   | 5     | 3     | 5     |

| respid | Q37 | Q38_1 | Q39_1 | Q39_2 |
|--------|-----|-------|-------|-------|
| 29613  | 0   | 1     | 2     | 2     |
| 29615  | 2   | 4     | 2     | 4     |
| 29625  | 1   | 5     | 2     | 1     |
| 29660  | 0   | 1     | 1     | 1     |
| 29677  | 0   |       |       |       |
| 29700  | 1   | 3     | 2     | 2     |
| 29715  | 3   | 6     | 6     | 6     |
| 29720  | 0   |       |       |       |
| 29730  | 0   | 2     | 1     | 1     |
| 29734  | 3   | 5     | 3     | 3     |
| 29754  | 0   |       |       |       |
| 29771  | 0   | 1     | 1     | 1     |
| 29774  | 1   | 2     | 2     | 2     |
| 29783  | 0   | 1     | 2     | 1     |
| 29812  | 1   | 2     | 1     | 1     |
| 29813  | 0   | 1     | 3     | 2     |
| 29814  | 2   | 5     | 2     | 3     |
| 29820  | 1   | 3     | 2     | 2     |
| 29906  | 0   | 4     | 2     | 1     |
| 29907  | 2   | 3     | 3     | 3     |
| 29928  | 0   |       |       |       |
| 29932  | 1   | 2     | 2     | 2     |
| 29958  | 2   | 3     | 3     | 3     |
| 29982  | 1   | 2     | 3     | 1     |
| 29989  | 1   | 2     | 2     | 1     |
| 29994  | 1   | 3     | 2     | 2     |
| 30005  | 0   | 0     | 2     | 1     |
| 30077  | 0   | 1     | 1     | 1     |
| 30098  | 0   |       |       |       |
| 30107  | 1   | 2     | 1     | 1     |
| 30154  | 0   | 3     | 2     | 2     |
| 30159  | 0   | 1     | 1     | 1     |

| respid | Q37 | Q38_1 | Q39_1 | Q39_2 |
|--------|-----|-------|-------|-------|
| 30162  | 0   | 1     | 1     | 1     |
| 30163  | 0   |       |       |       |
| 30189  | 1   | 2     | 3     | 2     |
| 30230  | 0   | 1     | 1     | 1     |
| 30259  | 1   | 3     | 3     | 3     |
| 30284  | 1   | 2     | 2     | 1     |
| 30296  | 0   | 2     | 1     | 1     |
| 30330  | 2   | 4     | 2     | 2     |
| 30341  | 1   | 2     | 2     | 2     |
| 30352  | 3   | 2     | 2     | 2     |
| 30379  | 0   | 2     | 1     | 1     |
| 30424  | 1   | 3     | 1     | 2     |
| 30447  | 0   | 3     | 1     | 1     |
| 30477  | 3   | 5     | 4     | 4     |
| 30503  | 0   | 1     | 2     | 1     |
| 30515  | 4   | 5     | 4     | 4     |
| 30516  | 1   | 2     | 1     | 1     |
| 30623  | 3   | 2     | 2     | 3     |
| 30639  | 0   | 0     | 1     | 1     |
| 30670  | 1   | 2     | 1     | 1     |
| 30697  | 0   | 0     | 1     | 1     |
| 30735  | 1   | 1     | 2     | 2     |
| 30742  | 1   | 2     | 2     | 2     |
| 30751  | 3   | 5     | 3     | 3     |
| 30789  | 0   |       |       |       |
| 30867  | 1   | 0     | 2     | 2     |
| 30876  | 0   | 3     | 3     | 3     |
| 30877  | 0   | 1     | 1     | 1     |
| 30887  | 0   | 2     | 2     | 1     |
| 30891  | 1   | 2     | 4     | 5     |
| 31030  | 0   | 6     | 1     | 1     |
| 31059  | 1   | 2     | 2     | 2     |

| respid | Q37 | Q38_1 | Q39_1 | Q39_2 |
|--------|-----|-------|-------|-------|
| 31082  | 0   |       |       |       |
| 31106  | 0   | 2     | 2     | 1     |
| 31110  | 0   | 1     | 6     | 5     |
| 31265  | 5   | 6     | 6     | 6     |
| 31266  | 5   | 6     | 6     | 6     |
| 31267  | 5   | 6     | 6     | 6     |
| 31310  | 0   | 1     | 1     | 1     |
| 31325  | 0   | 3     | 1     | 1     |
| 31367  | 1   | 1     | 2     | 2     |
| 31389  | 0   | 0     | 1     | 1     |
| 31440  | 0   | 2     | 1     | 2     |
| 31465  | 1   | 2     | 1     | 1     |
| 31477  | 0   | 3     | 1     | 1     |
| 31491  | 1   | 3     | 2     | 2     |
| 31494  | 2   | 2     | 3     | 3     |
| 31509  | 4   | 6     | 5     | 6     |
| 31533  | 1   | 4     | 1     | 1     |
| 31547  | 1   | 2     | 1     | 1     |
| 31558  | 0   | 1     | 1     | 1     |
| 31579  | 2   | 3     | 1     | 1     |
| 31591  | 1   | 3     | 3     | 2     |
| 31596  | 1   | 1     | 2     | 2     |
| 31601  | 3   | 4     | 4     | 5     |
| 31605  | 1   | 1     | 2     | 1     |
| 31637  | 0   | 1     | 2     | 2     |
| 31646  | 1   | 1     | 1     | 1     |
| 31647  | 3   | 4     | 5     | 6     |
| 31650  | 0   | 0     | 1     | 1     |
| 31651  | 1   | 2     | 4     | 3     |
| 31657  | 0   | 1     | 1     | 1     |
| 31660  | 1   | 2     | 1     | 1     |
| 31661  | 1   | 1     | 2     | 3     |

| respid | Q37 | Q38_1 | Q39_1 | Q39_2 |
|--------|-----|-------|-------|-------|
| 31667  | 1   | 1     | 3     | 4     |
| 31674  | 1   | 1     | 3     | 1     |
| 31686  | 2   | 4     | 3     | 3     |
| 31693  | 0   |       |       |       |
| 31716  | 0   |       |       |       |
| 31818  | 0   | 1     | 1     | 2     |
| 31886  | 1   | 3     | 2     | 1     |
| 31945  | 3   | 5     | 5     | 4     |
| 31957  | 2   | 3     | 2     | 2     |
| 31966  | 1   | 2     | 2     | 2     |
| 31978  | 1   | 3     | 2     | 2     |
| 31999  | 1   | 2     | 3     | 3     |
| 32026  | 1   | 1     | 2     | 2     |
| 32033  | 1   | 3     | 1     | 1     |
| 32037  | 5   | 6     | 6     | 6     |
| 32038  | 5   | 6     | 6     | 6     |
| 32047  | 2   | 4     | 3     | 4     |
| 32053  | 0   |       |       |       |
| 32069  | 1   | 1     | 2     | 2     |
| 32081  | 2   | 2     | 1     | 2     |
| 32123  | 1   | 3     | 2     | 1     |
| 32130  | 1   | 1     | 2     | 2     |
| 32141  | 1   | 2     | 1     | 1     |
| 32158  | 0   |       |       |       |
| 32165  | 0   | 2     | 1     | 1     |
| 32180  | 0   | 1     | 1     | 1     |
| 32221  | 4   | 6     | 6     | 5     |
| 32292  | 0   | 1     | 1     | 1     |
| 32318  | 1   | 2     | 1     | 1     |
| 32346  | 0   | 2     | 2     | 1     |
| 32402  | 2   | 3     | 3     | 3     |
| 32422  | 1   | 2     | 2     | 2     |

| respid | Q37 | Q38_1 | Q39_1 | Q39_2 |
|--------|-----|-------|-------|-------|
| 32439  | 0   | 1     | 1     | 1     |
| 32507  | 2   | 3     | 3     | 3     |
| 32522  | 0   |       |       |       |
| 32535  | 0   |       |       |       |
| 32546  | 0   | 3     | 1     | 1     |
| 32553  | 0   | 0     | 2     | 1     |
| 32570  | 0   |       |       |       |
| 32592  | 2   | 4     | 3     | 2     |
| 32605  | 2   | 3     | 2     | 3     |
| 32630  | 2   | 2     | 2     | 3     |
| 32642  | 2   | 4     | 2     | 3     |
| 32646  | 0   | 2     | 2     | 1     |
| 32665  | 1   | 3     | 2     | 1     |
| 32677  | 0   | 1     | 1     | 1     |
| 32694  | 0   | 1     | 1     | 1     |
| 32698  | 3   | 3     | 2     | 2     |
| 32754  | 4   | 5     | 5     | 5     |
| 32799  | 1   | 3     | 2     | 2     |
| 32816  | 0   |       |       |       |
| 32819  | 2   | 3     | 2     | 2     |
| 32840  | 2   | 3     | 3     | 2     |
| 32861  | 2   | 3     | 3     | 3     |
| 32866  | 1   | 3     | 2     | 2     |
| 32889  | 4   | 5     | 2     | 2     |
| 32960  | 0   | 3     | 1     | 1     |
| 32965  | 1   | 2     | 2     | 2     |
| 32986  | 0   | 3     | 2     | 3     |
| 33005  | 1   | 2     | 4     | 4     |
| 33054  | 2   | 4     | 3     | 3     |
| 33072  | 1   | 2     | 2     | 2     |
| 33095  | 1   | 2     | 2     | 1     |
| 33099  | 1   | 3     | 4     | 2     |

| respid | Q37 | Q38_1 | Q39_1 | Q39_2 |
|--------|-----|-------|-------|-------|
| 33121  | 0   | 0     | 1     | 1     |
| 33152  | 1   | 3     | 3     | 3     |
| 33159  | 1   | 2     | 2     | 1     |
| 33189  | 0   | 1     | 1     | 1     |
| 33198  | 3   | 4     | 5     | 1     |
| 33202  | 1   | 4     | 4     | 3     |
| 33204  | 1   | 2     | 1     | 2     |
| 33224  | 0   | 2     | 1     | 1     |
| 33272  | 2   | 5     | 2     | 2     |
| 33294  | 0   | 0     | 1     | 1     |
| 33300  | 1   | 1     | 4     | 5     |
| 33314  | 2   | 4     | 4     | 3     |
| 33338  | 1   | 0     | 2     | 2     |
| 33350  | 4   | 5     | 5     | 5     |
| 33362  | 4   | 5     | 2     | 2     |
| 33368  | 0   |       |       |       |
| 33374  | 1   | 4     | 2     | 3     |
| 33380  | 4   | 5     | 4     | 4     |
| 33385  | 3   | 4     | 2     | 2     |
| 33402  | 1   | 2     | 3     | 4     |
| 33414  | 0   | 3     | 2     | 1     |
| 33439  | 2   | 2     | 3     | 2     |
| 33449  | 1   | 3     | 4     | 5     |
| 33533  | 1   | 4     | 2     | 2     |
| 33540  | 0   | 2     | 1     | 1     |
| 33556  | 1   | 3     | 2     | 2     |
| 33615  | 0   | 2     | 1     | 1     |
| 33694  | 1   | 4     | 3     | 2     |
| 33717  | 0   | 2     | 1     | 1     |
| 33729  | 0   | 3     | 1     | 1     |
| 33746  | 1   | 2     | 1     | 1     |
| 33764  | 0   | 2     | 3     | 1     |

| respid | Q37 | Q38_1 | Q39_1 | Q39_2 |
|--------|-----|-------|-------|-------|
| 33790  | 1   | 2     | 2     | 3     |
| 33868  | 2   | 3     | 2     | 5     |
| 33872  | 1   | 4     | 2     | 3     |
| 33883  | 1   | 2     | 3     | 1     |
| 33884  | 1   | 1     | 1     | 1     |
| 33900  | 1   | 1     | 2     | 1     |
| 33933  | 1   | 3     | 2     | 1     |
| 33949  | 1   | 3     | 1     | 1     |
| 34005  | 0   |       |       |       |
| 34016  | 0   |       |       |       |
| 34041  | 3   | 4     | 5     | 5     |
| 34053  | 2   | 2     | 1     | 1     |
| 34056  | 0   | 1     | 1     | 1     |
| 34093  | 0   | 2     | 2     | 2     |
| 34112  | 2   | 3     | 2     | 2     |
| 34136  | 2   | 5     | 5     | 4     |
| 34138  | 0   | 1     | 1     | 1     |
| 34139  | 1   | 4     | 3     | 2     |
| 34189  | 2   | 4     | 1     | 1     |
| 34239  | 1   | 3     | 2     | 2     |
| 34240  | 0   | 1     | 2     | 1     |
| 34241  | 1   | 1     | 1     | 1     |
| 34259  | 2   | 5     | 2     | 3     |
| 34303  | 0   | 1     | 1     | 2     |
| 34306  | 0   | 1     | 2     | 2     |
| 34395  | 1   | 2     | 1     | 1     |
| 34463  | 2   | 3     | 3     | 2     |
| 34466  | 0   | 2     | 2     | 3     |
| 34471  | 1   | 2     | 1     | 1     |
| 34489  | 2   | 5     | 4     | 2     |
| 34518  | 0   | 4     | 4     | 2     |
| 34542  | 2   | 4     | 3     | 3     |



| respid | Q37 | Q38_1 | Q39_1 | Q39_2 |
|--------|-----|-------|-------|-------|
| 34595  | 0   |       |       |       |
| 34604  | 0   | 0     | 2     | 2     |
| 34631  | 3   | 3     | 3     | 3     |
| 34665  | 0   | 2     | 1     | 2     |
| 34716  | 0   | 0     | 1     | 1     |
| 34729  | 0   | 1     | 3     | 3     |
| 34772  | 3   | 4     | 3     | 4     |
| 34800  | 2   | 3     | 3     | 3     |
| 34819  | 0   | 4     | 3     | 3     |
| 34829  | 2   | 5     | 3     | 4     |
| 34831  | 1   | 2     | 2     | 3     |
| 34839  | 1   | 2     | 1     | 1     |
| 34868  | 2   | 3     | 4     | 2     |
| 34869  | 0   | 1     | 1     | 1     |
| 34882  | 1   | 3     | 1     | 3     |
| 34895  | 3   | 5     | 5     | 5     |
| 34901  | 0   | 4     | 2     | 1     |
| 34904  | 1   | 4     | 2     | 3     |
| 34907  | 1   | 4     | 3     | 3     |
| 34914  | 1   | 3     | 1     | 1     |
| 34918  | 2   | 4     | 4     | 4     |
| 34924  | 0   | 1     | 1     | 1     |
| 34933  | 3   | 5     | 4     | 5     |
| 34938  | 1   | 4     | 1     | 1     |
| 34952  | 2   | 5     | 5     | 5     |
| 34959  | 2   | 5     | 3     | 3     |
| 34972  | 0   | 3     | 1     | 1     |
| 34973  | 2   | 4     | 3     | 3     |
| 34975  | 2   | 4     | 3     | 3     |
| 34977  | 1   | 4     | 2     | 3     |
| 34978  | 0   | 5     | 1     | 2     |
| 34980  | 0   | 4     | 3     | 3     |

| respid | Q37 | Q38_1 | Q39_1 | Q39_2 |
|--------|-----|-------|-------|-------|
| 34984  | 2   | 4     | 3     | 3     |
| 34986  | 2   | 4     | 4     | 4     |
| 34994  | 1   | 3     | 1     | 2     |
| 34996  | 0   | 4     | 3     | 4     |
| 35003  | 0   | 1     | 1     | 1     |
| 35014  | 0   | 1     | 1     | 1     |
| 35029  | 1   | 2     | 2     | 1     |
| 35030  | 3   | 5     | 4     | 2     |
| 35037  | 1   | 3     | 2     | 3     |
| 35043  | 0   |       |       |       |
| 35048  | 0   |       |       |       |
| 35055  | 1   | 2     | 2     | 2     |
| 35067  | 1   | 2     | 2     | 1     |
| 35072  | 0   | 4     | 2     | 1     |
| 35078  | 1   | 3     | 3     | 3     |
| 35084  | 2   | 3     | 2     | 2     |
| 35095  | 0   |       |       |       |
| 35096  | 0   |       |       |       |
| 35097  | 2   | 5     | 3     | 2     |
| 35098  | 2   | 3     | 3     | 3     |
| 35109  | 3   | 5     | 4     | 5     |
| 35114  | 0   | 1     | 1     | 1     |
| 35115  | 0   | 1     | 1     | 1     |
| 35124  | 2   | 4     | 4     | 4     |
| 35125  | 0   | 4     | 1     | 1     |
| 35141  | 0   |       |       |       |
| 35142  | 0   | 5     | 1     | 1     |
| 35145  | 0   |       |       |       |
| 35149  | 2   | 5     | 4     | 4     |
| 35159  | 0   | 3     | 1     | 1     |
| 35163  | 3   | 5     | 3     | 2     |
| 35174  | 2   | 3     | 3     | 3     |

| respid | Q37 | Q38_1 | Q39_1 | Q39_2 |
|--------|-----|-------|-------|-------|
| 35188  | 0   |       |       |       |
| 35189  | 3   | 4     | 2     | 1     |
| 35201  | 2   | 5     | 2     | 3     |
| 35215  | 0   | 0     | 1     | 1     |
| 35228  | 0   | 6     | 1     | 1     |
| 35235  | 2   | 3     | 2     | 2     |
| 35239  | 3   | 5     | 4     | 5     |
| 35243  | 1   | 4     | 3     | 2     |
| 35245  | 2   | 4     | 3     | 6     |
| 35259  | 0   |       |       |       |
| 35265  | 3   | 5     | 4     | 5     |
| 35272  | 2   | 1     | 2     | 2     |
| 35280  | 2   | 3     | 2     | 2     |
| 35298  | 0   | 3     | 1     | 1     |
| 35305  | 2   | 2     | 3     | 2     |
| 35306  | 3   | 5     | 3     | 4     |
| 35307  | 0   | 0     | 1     | 1     |
| 35311  | 0   | 5     | 1     | 1     |
| 35322  | 1   | 2     | 3     | 3     |
| 35323  | 0   | 1     | 1     | 1     |
| 35327  | 0   | 3     | 2     | 2     |
| 35366  | 1   | 1     | 2     | 1     |
| 35378  | 2   | 3     | 4     | 2     |
| 35389  | 2   | 2     | 2     | 2     |
| 35390  | 0   | 1     | 1     | 1     |
| 35395  | 0   | 3     | 3     | 2     |
| 35411  | 0   | 4     | 3     | 4     |
| 35423  | 0   | 5     | 1     | 1     |
| 35425  | 1   | 1     | 2     | 1     |
| 35434  | 1   | 1     | 2     | 2     |
| 35462  | 0   | 1     | 1     | 1     |
| 35478  | 3   | 5     | 3     | 3     |

| respid | Q37 | Q38_1 | Q39_1 | Q39_2 |
|--------|-----|-------|-------|-------|
| 35481  | 3   | 4     | 3     | 4     |
| 35498  | 0   | 1     | 1     | 2     |
| 35499  | 0   |       |       |       |
| 35502  | 1   | 4     | 2     | 3     |
| 35503  | 0   |       |       |       |
| 35504  | 0   |       |       |       |
| 35508  | 3   | 5     | 3     | 3     |
| 35513  | 1   | 1     | 2     | 2     |
| 35516  | 0   | 3     | 2     | 3     |
| 35519  | 1   | 4     | 2     | 3     |
| 35530  | 3   | 6     | 4     | 5     |
| 35533  | 2   | 5     | 4     | 4     |
| 35561  | 1   | 1     | 2     | 2     |
| 35565  | 0   | 1     | 1     | 1     |
| 35588  | 0   | 3     | 2     | 2     |
| 35598  | 0   | 1     | 1     | 1     |
| 35607  | 0   | 2     | 1     | 1     |
| 35638  | 0   | 3     | 3     | 3     |
| 35642  | 1   | 2     | 1     | 1     |
| 35643  | 2   | 6     | 4     | 2     |
| 35680  | 0   | 3     | 1     | 1     |
| 35697  | 1   | 3     | 2     | 1     |
| 35703  | 0   |       |       |       |
| 35709  | 1   | 4     | 3     | 4     |
| 35710  | 0   | 1     | 2     | 1     |
| 35721  | 1   | 4     | 2     | 2     |
| 35723  | 0   | 2     | 1     | 1     |
| 35736  | 1   | 3     | 3     | 2     |
| 35739  | 1   | 3     | 2     | 2     |
| 35745  | 2   | 5     | 2     | 2     |
| 35748  | 5   | 6     | 1     | 6     |
| 35750  | 2   | 2     | 3     | 3     |

| respid | Q37 | Q38_1 | Q39_1 | Q39_2 |
|--------|-----|-------|-------|-------|
| 35752  | 2   | 5     | 3     | 2     |
| 35773  | 0   | 1     | 2     | 3     |
| 35779  | 0   | 1     | 1     | 1     |
| 35791  | 0   | 3     | 1     | 1     |
| 35801  | 0   | 3     | 2     | 1     |
| 35802  | 0   | 1     | 1     | 1     |
| 35837  | 2   | 4     | 3     | 3     |
| 35853  | 0   | 2     | 2     | 1     |
| 35858  | 0   | 4     | 2     | 3     |
| 35860  | 2   | 4     | 4     | 5     |
| 35875  | 4   | 6     | 5     | 5     |
| 35883  | 2   | 3     | 2     | 1     |
| 35890  | 0   | 2     | 1     | 1     |
| 35898  | 0   | 1     | 1     | 1     |
| 35901  | 3   | 6     | 4     | 6     |
| 35914  | 0   | 3     | 2     | 2     |
| 35924  | 0   | 2     | 3     | 4     |
| 35950  | 3   | 4     | 4     | 4     |
| 35961  | 0   | 3     | 2     | 3     |
| 35966  | 1   | 4     | 2     | 2     |
| 35967  | 0   | 0     | 1     | 1     |
| 35971  | 0   | 1     | 1     | 1     |
| 35974  | 0   | 1     | 1     | 1     |
| 35983  | 3   | 4     | 5     | 5     |
| 35992  | 5   | 6     | 5     | 6     |
| 36010  | 0   | 1     | 1     | 1     |
| 36019  | 4   | 6     | 6     | 6     |
| 36029  | 3   | 4     | 3     | 2     |
| 36033  | 0   | 1     | 2     | 3     |
| 36042  | 0   | 1     | 1     | 2     |
| 36043  | 1   | 3     | 3     | 3     |
| 36048  | 2   | 4     | 4     | 4     |

| respid | Q37 | Q38_1 | Q39_1 | Q39_2 |
|--------|-----|-------|-------|-------|
| 36050  | 0   | 1     | 2     | 2     |
| 36062  | 0   | 5     | 2     | 1     |
| 36063  | 0   |       |       |       |
| 36092  | 1   | 3     | 3     | 2     |
| 36097  | 2   | 2     | 3     | 2     |
| 36108  | 0   | 0     | 1     | 1     |
| 36113  | 5   | 6     | 5     | 4     |
| 36117  | 1   | 1     | 1     | 1     |
| 36129  | 0   | 4     | 3     | 3     |
| 36144  | 0   | 0     | 1     | 1     |
| 36152  | 0   | 1     | 1     | 1     |
| 36154  | 0   | 5     | 2     | 3     |
| 36155  | 0   | 2     | 1     | 1     |
| 36167  | 0   | 0     | 1     | 1     |
| 36172  | 1   | 4     | 2     | 1     |
| 36173  | 0   | 2     | 2     | 2     |
| 36174  | 1   | 4     | 2     | 3     |
| 36182  | 1   | 2     | 1     | 2     |
| 36192  | 2   | 4     | 3     | 4     |
| 36195  | 3   | 5     | 3     | 3     |
| 36204  | 1   | 3     | 3     | 2     |
| 36205  | 0   | 3     | 1     | 1     |
| 36208  | 0   | 1     | 1     | 1     |
| 36216  | 3   | 4     | 2     | 3     |
| 36221  | 3   | 3     | 5     | 4     |
| 36244  | 0   | 0     | 1     | 1     |
| 36255  | 1   | 2     | 4     | 3     |
| 36259  | 0   | 1     | 1     | 1     |
| 36262  | 1   | 2     | 2     | 2     |
| 36268  | 0   | 0     | 1     | 1     |
| 36308  | 3   | 5     | 4     | 4     |
| 36324  | 1   | 1     | 3     | 1     |

| respid | Q37 | Q38_1 | Q39_1 | Q39_2 |
|--------|-----|-------|-------|-------|
| 36330  | 0   | 1     | 1     | 1     |
| 36331  | 0   | 4     | 4     | 2     |
| 36336  | 0   | 3     | 1     | 1     |
| 36337  | 1   | 3     | 2     | 2     |
| 36364  | 0   | 2     | 2     | 2     |
| 36365  | 2   | 3     | 2     | 4     |
| 36396  | 1   | 2     | 3     | 2     |
| 36403  | 0   | 4     | 1     | 1     |
| 36410  | 0   | 0     | 1     | 1     |
| 36413  | 0   | 1     | 1     | 1     |
| 36422  | 1   | 3     | 2     | 2     |
| 36424  | 0   | 5     | 3     | 3     |
| 36425  | 4   | 5     | 6     | 5     |
| 36432  | 1   | 4     | 4     | 4     |
| 36435  | 3   | 6     | 5     | 5     |
| 36446  | 2   | 5     | 5     | 5     |
| 36451  | 1   | 3     | 2     | 3     |
| 36453  | 1   | 2     | 3     | 5     |
| 36459  | 2   | 4     | 2     | 3     |
| 36464  | 3   | 4     | 3     | 2     |
| 36465  | 2   | 4     | 2     | 3     |
| 36466  | 0   |       |       |       |
| 36476  | 1   | 2     | 2     | 2     |
| 36487  | 0   | 2     | 1     | 1     |
| 36488  | 0   | 3     | 3     | 3     |
| 36500  | 0   |       |       |       |
| 36504  | 1   | 3     | 2     | 2     |
| 36513  | 0   | 2     | 2     | 2     |
| 36515  | 1   | 3     | 3     | 3     |
| 36521  | 4   | 5     | 4     | 5     |
| 36530  | 1   | 2     | 3     | 3     |
| 36556  | 2   | 5     | 2     | 2     |

| respid | Q37 | Q38_1 | Q39_1 | Q39_2 |
|--------|-----|-------|-------|-------|
| 36564  | 3   | 4     | 2     | 2     |
| 36584  | 0   | 0     | 3     | 2     |
| 36585  | 0   |       |       |       |
| 36586  | 0   |       |       |       |
| 36606  | 3   | 5     | 3     | 3     |
| 36615  | 0   | 5     | 1     | 1     |
| 36628  | 0   | 2     | 1     | 1     |
| 36630  | 0   | 3     | 2     | 2     |
| 36631  | 2   | 5     | 2     | 2     |
| 36636  | 0   | 2     | 1     | 1     |
| 36637  | 1   | 2     | 1     | 1     |
| 36651  | 2   | 4     | 4     | 4     |
| 36661  | 0   | 0     | 1     | 1     |
| 36670  | 1   | 4     | 2     | 2     |
| 36671  | 2   | 4     | 1     | 2     |
| 36688  | 0   |       |       |       |
| 36694  | 0   | 2     | 1     | 2     |
| 36696  | 0   |       |       |       |
| 36703  | 0   |       |       |       |
| 36719  | 5   | 6     | 6     | 6     |
| 36721  | 5   | 6     | 6     | 6     |
| 36740  | 1   | 0     | 1     | 1     |
| 36755  | 0   | 2     | 2     | 2     |
| 36765  | 1   | 4     | 2     | 2     |
| 36770  | 0   |       |       |       |
| 36773  | 1   | 2     | 2     | 2     |
| 36813  | 0   | 3     | 2     | 2     |
| 36819  | 2   | 3     | 2     | 2     |
| 36820  | 0   | 3     | 4     | 3     |
| 36821  | 0   | 3     | 1     | 1     |
| 36827  | 0   | 6     | 2     | 4     |
| 36835  | 0   | 1     | 1     | 1     |



| respid | Q37 | Q38_1 | Q39_1 | Q39_2 |
|--------|-----|-------|-------|-------|
| 36837  | 0   | 4     | 2     | 2     |
| 36849  | 0   | 3     | 1     | 1     |
| 36851  | 2   | 2     | 2     | 2     |
| 36868  | 2   | 3     | 4     | 3     |
| 36870  | 0   | 3     | 1     | 1     |
| 36871  | 0   |       |       |       |
| 36874  | 2   | 5     | 4     | 4     |
| 36878  | 0   | 4     | 3     | 4     |
| 36887  | 0   | 2     | 1     | 1     |
| 36889  | 0   | 2     | 2     | 3     |
| 36891  | 0   | 1     | 1     | 1     |
| 36903  | 1   | 3     | 2     | 4     |
| 36905  | 0   | 1     | 1     | 1     |
| 36913  | 0   | 1     | 1     | 1     |
| 36949  | 1   | 4     | 3     | 3     |
| 36954  | 2   | 4     | 4     | 3     |
| 36962  | 1   | 3     | 2     | 2     |
| 36965  | 0   | 2     | 2     | 2     |
| 36970  | 0   | 5     | 2     | 3     |
| 36979  | 1   | 3     | 3     | 2     |
| 36990  | 1   | 4     | 3     | 3     |
| 36991  | 1   | 3     | 2     | 3     |
| 36992  | 2   | 2     | 2     | 1     |
| 37015  | 0   |       |       |       |
| 37017  | 0   | 1     | 1     | 1     |
| 37020  | 0   |       |       |       |
| 37033  | 2   | 2     | 5     | 4     |
| 37041  | 0   | 3     | 2     | 1     |
| 37048  | 1   | 5     | 2     | 2     |
| 37050  | 0   | 2     | 1     | 1     |
| 37054  | 2   | 6     | 5     | 5     |
| 37057  | 2   | 3     | 3     | 2     |

| respid | Q37 | Q38_1 | Q39_1 | Q39_2 |
|--------|-----|-------|-------|-------|
| 37067  | 1   | 5     | 2     | 2     |
| 37074  | 0   | 3     | 2     | 1     |
| 37088  | 1   | 2     | 2     | 2     |
| 37090  | 2   | 2     | 2     | 3     |
| 37110  | 3   | 5     | 2     | 3     |
| 37122  | 0   | 4     | 2     | 3     |
| 37124  | 1   | 4     | 2     | 3     |
| 37126  | 0   |       |       |       |
| 37129  | 1   | 5     | 3     | 4     |
| 37130  | 0   | 6     | 1     | 1     |
| 37142  | 3   | 5     | 3     | 3     |
| 37160  | 2   | 3     | 2     | 2     |
| 37168  | 0   | 0     | 1     | 1     |
| 37169  | 0   | 2     | 3     | 3     |
| 37191  | 1   | 1     | 2     | 2     |
| 37197  | 1   | 2     | 5     | 5     |
| 37204  | 0   | 5     | 4     | 5     |
| 37213  | 2   | 2     | 4     | 4     |
| 37238  | 1   | 3     | 1     | 1     |
| 37242  | 2   | 4     | 2     | 3     |
| 37243  | 3   | 5     | 2     | 3     |
| 37275  | 1   | 4     | 3     | 2     |
| 37305  | 3   | 4     | 3     | 2     |
| 37357  | 1   | 1     | 2     | 3     |
| 37365  | 2   | 2     | 2     | 3     |
| 37370  | 0   |       |       |       |
| 37406  | 3   | 5     | 4     | 4     |
| 37410  | 3   | 5     | 3     | 4     |
| 37411  | 1   | 3     | 3     | 3     |
| 37427  | 3   | 2     | 3     | 2     |
| 37437  | 4   | 3     | 3     | 4     |
| 37440  | 2   | 3     | 2     | 2     |

| respid | Q37 | Q38_1 | Q39_1 | Q39_2 |
|--------|-----|-------|-------|-------|
| 37452  | 0   | 3     | 2     | 1     |
| 37465  | 3   | 2     | 3     | 4     |
| 37468  | 1   | 5     | 5     | 5     |
| 37469  | 1   | 2     | 1     | 1     |
| 37477  | 2   | 2     | 4     | 3     |
| 37509  | 0   | 1     | 1     | 1     |
| 37513  | 3   | 2     | 4     | 4     |
| 37534  | 1   | 4     | 3     | 3     |
| 37537  | 0   | 6     | 1     | 1     |
| 37560  | 3   | 2     | 3     | 4     |
| 37566  | 3   | 4     | 5     | 4     |
| 37572  | 2   | 2     | 2     | 1     |
| 37574  | 1   | 4     | 4     | 4     |
| 37575  | 1   | 5     | 4     | 4     |
| 37590  | 4   | 4     | 3     | 2     |
| 37593  | 1   | 2     | 2     | 2     |
| 37599  | 0   | 0     | 1     | 1     |
| 37641  | 1   | 1     | 1     | 1     |
| 37651  | 2   | 4     | 2     | 2     |
| 37670  | 0   | 0     | 1     | 1     |
| 37680  | 4   | 3     | 3     | 2     |
| 37690  | 1   | 6     | 5     | 5     |
| 37694  | 0   |       |       |       |
| 37705  | 2   | 3     | 3     | 3     |
| 37710  | 1   | 2     | 2     | 2     |
| 37719  | 2   | 5     | 2     | 5     |
| 37741  | 3   | 2     | 2     | 3     |
| 37752  | 1   | 1     | 1     | 1     |
| 37755  | 2   | 4     | 2     | 3     |
| 37757  | 0   | 1     | 1     | 1     |
| 37783  | 1   | 3     | 3     | 2     |
| 37793  | 3   | 4     | 4     | 4     |

| respid | Q37 | Q38_1 | Q39_1 | Q39_2 |
|--------|-----|-------|-------|-------|
| 37800  | 3   | 5     | 3     | 5     |
| 37801  | 0   | 6     | 6     | 6     |
| 37820  | 3   | 5     | 3     | 3     |
| 37826  | 2   | 5     | 3     | 4     |
| 37835  | 1   | 1     | 2     | 3     |
| 37839  | 2   | 2     | 4     | 5     |
| 37871  | 4   | 5     | 5     | 5     |
| 37876  | 1   | 1     | 2     | 3     |
| 37879  | 1   | 4     | 3     | 3     |
| 37894  | 1   | 2     | 1     | 1     |
| 37895  | 2   | 5     | 3     | 3     |
| 37901  | 2   | 4     | 3     | 3     |
| 37926  | 1   | 3     | 2     | 1     |
| 37937  | 2   | 2     | 1     | 2     |
| 37938  | 0   | 6     | 6     | 6     |
| 37959  | 1   | 5     | 2     | 1     |
| 37970  | 0   |       |       |       |
| 37972  | 2   | 1     | 3     | 4     |
| 37988  | 1   | 2     | 2     | 2     |
| 37989  | 2   | 2     | 3     | 4     |
| 38000  | 1   | 3     | 2     | 3     |
| 38028  | 3   | 5     | 5     | 5     |
| 38042  | 2   | 2     | 5     | 4     |
| 38052  | 0   | 2     | 3     | 2     |
| 38056  | 1   | 4     | 1     | 1     |
| 38106  | 4   | 2     | 3     | 4     |
| 38114  | 3   | 5     | 4     | 4     |
| 38134  | 1   | 3     | 1     | 1     |
| 38135  | 0   | 3     | 2     | 2     |
| 38139  | 0   | 1     | 2     | 3     |
| 38160  | 1   | 3     | 3     | 1     |
| 38164  | 1   | 1     | 4     | 6     |

| respid | Q37 | Q38_1 | Q39_1 | Q39_2 |
|--------|-----|-------|-------|-------|
| 38168  | 0   |       |       |       |
| 38173  | 0   | 1     | 1     | 1     |
| 38193  | 1   | 3     | 2     | 3     |
| 38204  | 1   | 5     | 2     | 2     |
| 38206  | 1   | 3     | 2     | 2     |
| 38233  | 3   | 5     | 5     | 6     |
| 38242  | 1   | 3     | 3     | 4     |
| 38245  | 1   | 4     | 2     | 2     |
| 38261  | 2   | 2     | 5     | 4     |
| 38288  | 1   | 3     | 2     | 2     |
| 38296  | 2   | 5     | 2     | 3     |
| 38299  | 1   | 1     | 2     | 3     |
| 38300  | 2   | 3     | 2     | 3     |
| 38303  | 1   | 2     | 1     | 1     |
| 38317  | 0   | 0     | 1     | 1     |
| 38328  | 4   | 5     | 4     | 4     |
| 38333  | 2   | 2     | 3     | 2     |
| 38336  | 0   | 4     | 1     | 1     |
| 38338  | 0   | 6     | 1     | 1     |
| 38342  | 2   | 4     | 2     | 3     |
| 38360  | 0   | 3     | 2     | 1     |
| 38362  | 3   | 2     | 2     | 3     |
| 38364  | 0   | 3     | 4     | 4     |
| 38402  | 1   | 4     | 2     | 2     |
| 38423  | 3   | 4     | 3     | 3     |
| 38424  | 4   | 1     | 2     | 1     |
| 38435  | 2   | 4     | 3     | 3     |
| 38450  | 0   | 6     | 1     | 1     |
| 38455  | 2   | 4     | 4     | 2     |
| 38467  | 2   | 5     | 3     | 4     |
| 38468  | 1   | 4     | 5     | 6     |
| 38472  | 0   | 5     | 3     | 4     |

| respid | Q37 | Q38_1 | Q39_1 | Q39_2 |
|--------|-----|-------|-------|-------|
| 38484  | 0   | 3     | 1     | 1     |
| 38498  | 1   | 2     | 2     | 1     |
| 38507  | 0   | 5     | 1     | 1     |
| 38511  | 2   | 1     | 1     | 1     |
| 38524  | 4   | 5     | 4     | 5     |
| 38526  | 1   | 4     | 3     | 2     |
| 38534  | 0   | 5     | 3     | 2     |
| 38536  | 1   | 3     | 2     | 1     |
| 38539  | 0   | 2     | 1     | 1     |
| 38547  | 0   | 1     | 1     | 1     |
| 38549  | 0   | 3     | 1     | 1     |
| 38575  | 2   | 3     | 5     | 4     |
| 38579  | 2   | 4     | 1     | 1     |
| 38585  | 0   | 1     | 2     | 1     |
| 38589  | 3   | 5     | 5     | 5     |
| 38595  | 3   | 1     | 4     | 3     |
| 38602  | 0   | 1     | 1     | 1     |
| 38603  | 2   | 3     | 2     | 2     |
| 38612  | 1   | 3     | 2     | 2     |
| 38621  | 3   | 4     | 4     | 5     |
| 38624  | 2   | 5     | 3     | 5     |
| 38636  | 0   |       |       |       |
| 38656  | 0   | 3     | 1     | 1     |
| 38668  | 0   | 1     | 1     | 1     |
| 38675  | 2   | 1     | 2     | 3     |
| 38676  | 0   | 1     | 1     | 1     |
| 38682  | 1   | 3     | 3     | 4     |
| 38689  | 0   | 1     | 1     | 1     |
| 38702  | 0   |       |       |       |
| 38704  | 4   | 6     | 5     | 5     |
| 38713  | 0   | 3     | 1     | 1     |
| 38718  | 2   | 4     | 2     | 1     |

| respid | Q37 | Q38_1 | Q39_1 | Q39_2 |
|--------|-----|-------|-------|-------|
| 38725  | 0   | 3     | 1     | 1     |
| 38730  | 2   | 3     | 4     | 5     |
| 38737  | 1   | 3     | 2     | 1     |
| 38738  | 3   | 6     | 3     | 4     |
| 38744  | 0   | 6     | 1     | 1     |
| 38746  | 1   | 3     | 1     | 1     |
| 38753  | 0   | 2     | 1     | 1     |
| 38756  | 2   | 2     | 3     | 3     |
| 38760  | 0   | 1     | 1     | 1     |
| 38762  | 4   | 4     | 3     | 4     |
| 38765  | 0   | 5     | 1     | 1     |
| 38769  | 0   | 0     | 2     | 2     |
| 38781  | 3   | 4     | 2     | 4     |
| 38786  | 0   | 1     | 1     | 1     |
| 38790  | 3   | 4     | 2     | 4     |
| 38793  | 0   | 3     | 2     | 1     |
| 38797  | 1   | 2     | 2     | 2     |
| 38802  | 2   | 3     | 3     | 3     |
| 38815  | 2   | 4     | 2     | 2     |
| 38826  | 4   | 6     | 4     | 4     |
| 38828  | 0   | 2     | 2     | 3     |
| 38829  | 3   | 5     | 4     | 3     |
| 38835  | 2   | 4     | 2     | 3     |
| 38842  | 3   | 5     | 2     | 4     |
| 38853  | 1   | 5     | 3     | 3     |
| 38855  | 3   | 3     | 4     | 4     |
| 38860  | 2   | 3     | 4     | 5     |
| 38869  | 1   | 5     | 3     | 3     |
| 38882  | 1   | 4     | 4     | 3     |
| 38897  | 2   | 4     | 3     | 2     |
| 38903  | 0   | 0     | 1     | 1     |
| 38910  | 4   | 6     | 3     | 3     |

| respid | Q37 | Q38_1 | Q39_1 | Q39_2 |
|--------|-----|-------|-------|-------|
| 38948  | 3   | 4     | 3     | 4     |
| 38949  | 2   | 4     | 2     | 3     |
| 38953  | 3   | 2     | 4     | 4     |
| 38989  | 3   | 5     | 5     | 6     |
| 38997  | 1   | 2     | 2     | 3     |
| 38999  | 0   | 3     | 2     | 3     |
| 39002  | 5   | 6     | 4     | 4     |
| 39003  | 2   | 5     | 4     | 4     |
| 39006  | 0   | 1     | 2     | 1     |
| 39014  | 0   |       |       |       |
| 39017  | 3   | 5     | 5     | 5     |
| 39018  | 4   | 5     | 4     | 5     |
| 39025  | 5   | 6     | 5     | 5     |
| 39031  | 4   | 6     | 2     | 4     |
| 39061  | 2   | 5     | 3     | 2     |
| 39131  | 0   | 4     | 2     | 3     |
| 39153  | 3   | 5     | 5     | 4     |
| 39194  | 5   | 6     | 6     | 6     |
| 39204  | 1   | 4     | 4     | 2     |
| 39208  | 3   | 5     | 2     | 3     |
| 39213  | 5   | 3     | 5     | 4     |
| 39231  | 1   | 3     | 2     | 2     |
| 39251  | 4   | 3     | 2     | 4     |
| 39257  | 5   | 5     | 5     | 4     |
| 39262  | 5   | 4     | 5     | 4     |
| 39269  | 5   | 5     | 5     | 5     |
| 39272  | 0   | 5     | 4     | 5     |
| 39280  | 1   | 2     | 4     | 5     |
| 39294  | 5   | 4     | 4     | 4     |
| 39297  | 2   | 2     | 4     | 5     |
| 39300  | 3   | 5     | 4     | 4     |
| 39307  | 4   | 4     | 4     | 4     |



| respid | Q37 | Q38_1 | Q39_1 | Q39_2 |
|--------|-----|-------|-------|-------|
| 39320  | 5   | 4     | 5     | 4     |
| 39333  | 0   | 1     | 1     | 1     |
| 39335  | 5   | 6     | 5     | 5     |
| 39339  | 2   | 1     | 2     | 2     |
| 39375  | 0   | 0     | 2     | 3     |
| 39377  | 0   | 6     | 6     | 6     |
| 39380  | 4   | 5     | 5     | 5     |
| 39425  | 0   | 1     | 1     | 1     |
| 39590  | 0   | 1     | 1     | 1     |
| 40529  | 0   | 1     | 1     | 1     |
| 40702  | 0   | 2     | 1     | 2     |
| 40788  | 1   | 1     | 2     | 2     |
| 40841  | 1   | 1     | 1     | 1     |
| 40965  | 0   | 1     | 1     | 1     |
| 41092  | 1   | 2     | 2     | 1     |
| 41534  | 0   |       |       |       |
| 41919  | 1   | 2     | 1     | 1     |
| 42110  | 1   | 2     | 3     | 3     |
| 42135  | 1   | 3     | 3     | 3     |
| 42142  | 0   | 1     | 1     | 1     |
| 42163  | 2   | 3     | 3     | 2     |
| 42164  | 0   | 2     | 1     | 1     |
| 42172  | 1   | 4     | 3     | 4     |
| 42177  | 0   | 3     | 1     | 1     |
| 42181  | 1   | 3     | 2     | 1     |
| 42193  | 2   | 4     | 3     | 4     |
| 42196  | 1   | 2     | 3     | 4     |
| 42202  | 1   | 5     | 3     | 3     |
| 42248  | 2   | 4     | 3     | 3     |
| 42283  | 2   | 3     | 2     | 2     |
| 42284  | 1   | 2     | 1     | 1     |
| 42323  | 0   |       |       |       |

| respid | Q37 | Q38_1 | Q39_1 | Q39_2 |
|--------|-----|-------|-------|-------|
| 42349  | 1   | 2     | 3     | 2     |
| 42351  | 0   |       |       |       |
| 42357  | 0   | 0     | 1     | 1     |
| 42366  | 0   |       |       |       |
| 42380  | 0   | 1     | 1     | 1     |
| 42414  | 1   | 3     | 5     | 5     |
| 42420  | 1   | 4     | 3     | 4     |
| 42454  | 0   |       |       |       |
| 42458  | 1   | 1     | 2     | 1     |
| 42461  | 0   | 3     | 1     | 1     |
| 42488  | 2   | 2     | 2     | 3     |
| 42511  | 1   | 6     | 6     | 6     |
| 42512  | 0   | 2     | 1     | 1     |
| 42530  | 2   | 5     | 3     | 4     |
| 42531  | 4   | 6     | 5     | 4     |
| 42533  | 3   | 4     | 1     | 1     |
| 42549  | 1   | 2     | 1     | 2     |
| 42550  | 4   | 2     | 3     | 4     |
| 42553  | 0   |       |       |       |
| 42562  | 2   | 3     | 2     | 3     |
| 42567  | 1   | 2     | 2     | 1     |
| 42589  | 2   | 3     | 2     | 2     |
| 42604  | 0   | 3     | 1     | 2     |
| 42618  | 0   | 1     | 2     | 2     |
| 42621  | 5   | 3     | 3     | 2     |
| 42627  | 0   | 2     | 2     | 2     |
| 42641  | 0   | 1     | 1     | 1     |
| 42655  | 5   | 2     | 2     | 1     |
| 42666  | 1   | 2     | 2     | 2     |
| 42667  | 1   | 3     | 4     | 4     |
| 42697  | 1   | 2     | 3     | 3     |
| 42703  | 0   | 1     | 1     | 2     |

| respid | Q37 | Q38_1 | Q39_1 | Q39_2 |
|--------|-----|-------|-------|-------|
| 42712  | 1   | 6     | 2     | 2     |
| 42731  | 1   | 5     | 4     | 5     |
| 42780  | 0   | 1     | 1     | 1     |
| 42785  | 1   | 2     | 2     | 2     |
| 42788  | 0   | 3     | 2     | 1     |
| 42802  | 2   | 5     | 2     | 3     |
| 42818  | 1   | 3     | 3     | 2     |
| 42821  | 1   | 5     | 5     | 2     |
| 42824  | 0   | 3     | 1     | 1     |
| 42831  | 1   | 4     | 2     | 1     |
| 42836  | 1   | 1     | 2     | 2     |
| 42864  | 0   | 5     | 4     | 3     |
| 42875  | 1   | 2     | 2     | 3     |
| 42891  | 4   | 6     | 6     | 6     |
| 42897  | 0   | 1     | 1     | 1     |
| 42900  | 1   | 3     | 4     | 4     |
| 42902  | 1   | 2     | 1     | 2     |
| 42921  | 1   | 2     | 1     | 1     |
| 42925  | 1   | 4     | 2     | 3     |
| 42944  | 0   |       |       |       |
| 42950  | 0   |       |       |       |
| 42963  | 0   | 1     | 2     | 1     |
| 42967  | 1   | 1     | 2     | 1     |
| 42985  | 0   | 2     | 1     | 2     |
| 42990  | 1   | 4     | 2     | 2     |
| 42996  | 3   | 3     | 2     | 2     |
| 43002  | 1   | 3     | 2     | 1     |
| 43004  | 1   | 4     | 1     | 1     |
| 43012  | 0   | 0     | 1     | 1     |
| 43027  | 1   | 3     | 3     | 4     |
| 43028  | 1   | 2     | 1     | 1     |
| 43029  | 2   | 4     | 3     | 3     |

| respid | Q37 | Q38_1 | Q39_1 | Q39_2 |
|--------|-----|-------|-------|-------|
| 43031  | 1   | 1     | 2     | 2     |
| 43042  | 0   | 0     | 1     | 1     |
| 43054  | 3   | 5     | 3     | 3     |
| 43058  | 0   | 1     | 1     | 2     |
| 43064  | 2   | 2     | 2     | 1     |
| 43069  | 0   | 3     | 2     | 3     |
| 43071  | 0   |       |       |       |
| 43072  | 0   | 2     | 1     | 1     |
| 43077  | 1   | 3     | 2     | 2     |
| 43078  | 1   | 1     | 3     | 3     |
| 43082  | 0   |       |       |       |
| 43092  | 1   | 3     | 1     | 1     |
| 43096  | 0   | 2     | 1     | 1     |
| 43109  | 0   |       |       |       |
| 43113  | 0   | 2     | 1     | 1     |
| 43123  | 1   | 2     | 2     | 2     |
| 43127  | 0   | 1     | 2     | 1     |
| 43128  | 1   | 2     | 2     | 1     |
| 43129  | 1   | 3     | 2     | 1     |
| 43133  | 3   | 2     | 2     | 4     |
| 43140  | 0   |       |       |       |
| 43143  | 1   | 1     | 1     | 2     |
| 43149  | 1   | 3     | 1     | 2     |
| 43150  | 1   | 2     | 2     | 3     |
| 43153  | 3   | 4     | 2     | 3     |
| 43170  | 0   | 1     | 1     | 1     |
| 43187  | 1   | 4     | 2     | 2     |
| 43188  | 2   | 5     | 4     | 4     |
| 43198  | 0   | 1     | 1     | 1     |
| 43208  | 0   | 0     | 1     | 1     |
| 43216  | 0   | 3     | 2     | 1     |
| 43222  | 1   | 2     | 2     | 3     |

| respid | Q37 | Q38_1 | Q39_1 | Q39_2 |
|--------|-----|-------|-------|-------|
| 43224  | 0   | 2     | 2     | 2     |
| 43230  | 1   | 1     | 2     | 3     |
| 43231  | 1   | 2     | 2     | 2     |
| 43265  | 1   | 3     | 2     | 3     |
| 43270  | 1   | 2     | 2     | 2     |
| 43283  | 1   | 3     | 3     | 3     |
| 43295  | 1   | 2     | 2     | 3     |
| 43297  | 0   | 1     | 1     | 1     |
| 43299  | 1   | 0     | 2     | 2     |
| 43307  | 2   | 2     | 1     | 1     |
| 43316  | 1   | 3     | 2     | 2     |
| 43318  | 1   | 2     | 2     | 3     |
| 43319  | 1   | 2     | 1     | 1     |
| 43324  | 1   | 2     | 2     | 3     |
| 43325  | 4   | 5     | 6     | 5     |
| 43327  | 0   | 2     | 2     | 1     |
| 43338  | 1   | 4     | 2     | 2     |
| 43342  | 1   | 2     | 2     | 1     |
| 43348  | 1   | 1     | 1     | 1     |
| 43395  | 1   | 1     | 2     | 3     |
| 43404  | 1   | 1     | 2     | 2     |
| 43406  | 0   | 4     | 3     | 2     |
| 43407  | 0   | 0     | 1     | 1     |
| 43411  | 0   | 1     | 1     | 1     |
| 43416  | 0   | 1     | 1     | 1     |
| 43428  | 0   | 1     | 1     | 2     |
| 43429  | 2   | 3     | 3     | 3     |
| 43432  | 1   | 1     | 2     | 2     |
| 43443  | 1   | 2     | 1     | 1     |
| 43455  | 0   |       |       |       |
| 43457  | 1   | 4     | 3     | 3     |
| 43458  | 0   | 1     | 2     | 2     |

| respid | Q37 | Q38_1 | Q39_1 | Q39_2 |
|--------|-----|-------|-------|-------|
| 43477  | 2   | 4     | 3     | 4     |
| 43520  | 0   | 1     | 3     | 3     |
| 43521  | 1   | 3     | 2     | 2     |
| 43550  | 0   | 0     | 2     | 1     |
| 43551  | 1   | 3     | 2     | 2     |
| 43554  | 2   | 3     | 4     | 3     |
| 43560  | 1   | 3     | 2     | 2     |
| 43569  | 0   | 3     | 1     | 1     |
| 43583  | 1   | 2     | 1     | 2     |
| 43590  | 3   | 4     | 3     | 3     |
| 43591  | 0   | 1     | 1     | 1     |
| 43595  | 0   |       |       |       |
| 43599  | 2   | 3     | 3     | 2     |
| 43606  | 1   | 1     | 2     | 2     |
| 43609  | 0   | 0     | 1     | 1     |
| 43629  | 0   | 2     | 1     | 1     |
| 43636  | 0   | 1     | 2     | 2     |
| 43661  | 0   | 3     | 2     | 1     |
| 43668  | 0   | 3     | 2     | 1     |
| 43672  | 0   |       |       |       |
| 43677  | 2   | 3     | 2     | 3     |
| 43683  | 2   | 3     | 3     | 1     |
| 43708  | 2   | 4     | 2     | 3     |
| 43713  | 1   | 2     | 2     | 3     |
| 43718  | 0   |       |       |       |
| 43725  | 0   | 0     | 1     | 1     |
| 43747  | 1   | 2     | 2     | 1     |
| 43755  | 0   | 1     | 1     | 2     |
| 43770  | 1   | 2     | 1     | 1     |
| 43775  | 2   | 3     | 2     | 3     |
| 43788  | 0   |       |       |       |
| 43790  | 1   | 3     | 3     | 3     |

| respid | Q37 | Q38_1 | Q39_1 | Q39_2 |
|--------|-----|-------|-------|-------|
| 43797  | 1   | 2     | 1     | 2     |
| 43798  | 1   | 1     | 2     | 3     |
| 43811  | 1   | 1     | 2     | 3     |
| 43819  | 1   | 3     | 3     | 3     |
| 43821  | 1   | 2     | 2     | 3     |
| 43822  | 1   | 2     | 1     | 1     |
| 43825  | 2   | 3     | 2     | 3     |
| 43826  | 2   | 3     | 2     | 2     |
| 43831  | 2   | 4     | 3     | 2     |
| 43836  | 1   | 2     | 3     | 3     |
| 43852  | 1   | 1     | 2     | 3     |
| 43857  | 2   | 5     | 1     | 2     |
| 43858  | 2   | 4     | 4     | 4     |
| 43859  | 1   | 1     | 3     | 3     |
| 43863  | 0   | 0     | 1     | 1     |
| 43868  | 1   | 1     | 2     | 3     |
| 43872  | 1   | 1     | 2     | 3     |
| 43874  | 1   | 2     | 2     | 3     |
| 43882  | 0   | 2     | 1     | 2     |
| 43886  | 0   |       |       |       |
| 43903  | 2   | 3     | 2     | 2     |
| 43929  | 1   | 3     | 3     | 2     |
| 43932  | 1   | 2     | 1     | 1     |
| 43936  | 0   | 3     | 1     | 1     |
| 43962  | 2   | 1     | 1     | 1     |
| 43964  | 0   | 1     | 2     | 1     |
| 43968  | 0   | 3     | 1     | 2     |
| 43979  | 1   | 2     | 2     | 3     |
| 44006  | 3   | 5     | 5     | 5     |
| 44009  | 2   | 5     | 3     | 4     |
| 44023  | 0   | 2     | 3     | 3     |
| 44035  | 0   | 2     | 2     | 3     |

| respid | Q37 | Q38_1 | Q39_1 | Q39_2 |
|--------|-----|-------|-------|-------|
| 44038  | 2   | 3     | 3     | 3     |
| 44039  | 1   | 2     | 3     | 4     |
| 44043  | 2   | 2     | 2     | 2     |
| 44048  | 1   | 1     | 3     | 3     |
| 44050  | 0   | 1     | 2     | 1     |
| 44051  | 1   | 2     | 2     | 3     |
| 44061  | 1   | 3     | 3     | 3     |
| 44063  | 1   | 1     | 3     | 3     |
| 44072  | 1   | 0     | 4     | 4     |
| 44075  | 1   | 2     | 2     | 2     |
| 44089  | 1   | 1     | 3     | 3     |
| 44090  | 3   | 5     | 4     | 3     |
| 44091  | 1   | 1     | 3     | 3     |
| 44092  | 1   | 2     | 2     | 2     |
| 44110  | 1   | 1     | 3     | 3     |
| 44112  | 1   | 2     | 3     | 4     |
| 44114  | 1   | 2     | 2     | 2     |
| 44143  | 2   | 3     | 3     | 3     |
| 44179  | 0   | 1     | 1     | 2     |
| 44234  | 1   | 2     | 2     | 1     |
| 44236  | 0   | 1     | 3     | 3     |
| 44239  | 1   | 1     | 2     | 3     |
| 44241  | 1   | 1     | 3     | 3     |
| 44253  | 0   |       |       |       |
| 44260  | 1   | 1     | 3     | 3     |
| 44261  | 1   | 1     | 2     | 3     |
| 44263  | 0   | 2     | 2     | 3     |
| 44264  | 0   | 2     | 1     | 1     |
| 44265  | 0   | 3     | 1     | 1     |
| 44267  | 1   | 1     | 2     | 3     |
| 44306  | 1   | 2     | 3     | 4     |
| 44309  | 2   | 2     | 3     | 4     |



| respid | Q37 | Q38_1 | Q39_1 | Q39_2 |
|--------|-----|-------|-------|-------|
| 44310  | 0   | 2     | 4     | 1     |
| 44361  | 0   | 3     | 1     | 2     |
| 44380  | 0   | 2     | 2     | 1     |
| 44386  | 0   | 2     | 2     | 1     |
| 44419  | 1   | 3     | 2     | 3     |
| 44426  | 1   | 2     | 2     | 2     |
| 44479  | 2   | 2     | 2     | 1     |
| 44484  | 0   | 3     | 1     | 1     |
| 44487  | 0   | 1     | 3     | 4     |
| 44509  | 0   | 2     | 1     | 1     |
| 44540  | 1   | 2     | 3     | 4     |
| 44551  | 2   | 1     | 2     | 2     |
| 44553  | 1   | 4     | 1     | 1     |
| 44650  | 0   | 2     | 2     | 1     |
| 44665  | 3   | 3     | 3     | 4     |
| 44779  | 1   | 1     | 2     | 2     |
| 44797  | 1   | 3     | 2     | 2     |
| 44807  | 0   | 2     | 1     | 1     |
| 44815  | 3   | 2     | 3     | 4     |
| 44836  | 1   | 3     | 2     | 1     |
| 44868  | 1   | 2     | 3     | 2     |
| 44927  | 1   | 5     | 2     | 2     |
| 44983  | 0   |       |       |       |
| 45040  | 0   | 1     | 2     | 1     |
| 45051  | 2   | 3     | 3     | 3     |
| 45067  | 1   | 3     | 2     | 1     |
| 45074  | 0   |       |       |       |
| 45115  | 1   | 3     | 2     | 1     |
| 45187  | 3   | 5     | 3     | 4     |
| 45221  | 2   | 6     | 3     | 4     |
| 45279  | 1   | 3     | 2     | 3     |
| 45308  | 1   | 2     | 2     | 2     |

| respid | Q37 | Q38_1 | Q39_1 | Q39_2 |
|--------|-----|-------|-------|-------|
| 45317  | 1   | 2     | 2     | 1     |
| 45379  | 2   | 3     | 4     | 3     |
| 45451  | 1   | 3     | 2     | 1     |
| 45472  | 4   | 5     | 4     | 5     |
| 45474  | 4   | 5     | 5     | 6     |
| 45544  | 2   | 5     | 6     | 6     |
| 45561  | 1   | 2     | 1     | 1     |
| 45596  | 1   | 4     | 2     | 1     |

| Instrum   | OAB-q SF                                      | OAB-q SF                 | OAB-q SF                                          | OAB-q SF                                                  |
|-----------|-----------------------------------------------|--------------------------|---------------------------------------------------|-----------------------------------------------------------|
| Symptom   |                                               |                          |                                                   |                                                           |
| Type of R | Bother                                        | Bother                   | Bother                                            | Bother                                                    |
| Descripti | c. Accidental loss of small amounts of urine? | d. Night-time urination? | e. Waking up at night because you had to urinate? | f. Urine loss associated with a strong desire to urinate? |
| respid    | Q39_3                                         | Q39_4                    | Q39_5                                             | Q39_6                                                     |
| 241       | 1                                             | 2                        | 2                                                 | 1                                                         |
| 242       | 1                                             | 1                        | 1                                                 | 1                                                         |
| 243       | 2                                             | 2                        | 2                                                 | 2                                                         |
| 244       | 6                                             | 4                        | 5                                                 | 6                                                         |
| 245       | 1                                             | 1                        | 1                                                 | 1                                                         |
| 246       | 2                                             | 2                        | 2                                                 | 1                                                         |
| 247       | 4                                             | 2                        | 2                                                 | 2                                                         |
| 253       | 1                                             | 2                        | 2                                                 | 1                                                         |
| 256       | 2                                             | 2                        | 2                                                 | 2                                                         |
| 257       | 1                                             | 2                        | 2                                                 | 1                                                         |
| 258       | 2                                             | 2                        | 2                                                 | 1                                                         |
| 259       | 1                                             | 1                        | 1                                                 | 1                                                         |
| 263       | 1                                             | 1                        | 1                                                 | 1                                                         |
| 264       | 1                                             | 1                        | 2                                                 | 1                                                         |
| 265       | 4                                             | 3                        | 4                                                 | 4                                                         |
| 266       | 1                                             | 1                        | 2                                                 | 1                                                         |
| 268       | 1                                             | 1                        | 1                                                 | 1                                                         |
| 270       | 1                                             | 1                        | 1                                                 | 1                                                         |
| 272       | 2                                             | 1                        | 2                                                 | 1                                                         |
| 274       | 1                                             | 1                        | 1                                                 | 1                                                         |

| respid | Q39_3 | Q39_4 | Q39_5 | Q39_6 |
|--------|-------|-------|-------|-------|
| 275    |       |       |       |       |
| 276    | 1     | 1     | 1     | 1     |
| 277    | 1     | 1     | 1     | 1     |
| 279    | 2     | 2     | 2     | 2     |
| 286    | 5     | 2     | 2     | 3     |
| 290    | 2     | 1     | 1     | 1     |
| 291    | 1     | 1     | 1     | 1     |
| 295    |       |       |       |       |
| 297    | 2     | 2     | 2     | 1     |
| 299    | 2     | 3     | 4     | 1     |
| 300    | 2     | 3     | 2     | 3     |
| 303    | 1     | 1     | 1     | 1     |
| 304    | 1     | 1     | 1     | 1     |
| 306    | 1     | 1     | 1     | 1     |
| 307    | 1     | 4     | 5     | 1     |
| 312    | 4     | 4     | 3     | 3     |
| 315    | 3     | 3     | 3     | 3     |
| 317    | 1     | 1     | 1     | 1     |
| 322    | 2     | 2     | 2     | 2     |
| 335    | 1     | 1     | 1     | 1     |
| 374    | 2     | 2     | 2     | 3     |
| 378    | 1     | 1     | 1     | 2     |
| 380    | 3     | 3     | 2     | 3     |
| 382    | 1     | 2     | 1     | 1     |
| 384    | 3     | 3     | 3     | 3     |
| 385    | 2     | 3     | 3     | 2     |
| 395    | 1     | 1     | 1     | 1     |
| 396    |       |       |       |       |
| 398    |       |       |       |       |
| 402    | 4     | 4     | 4     | 4     |
| 414    | 2     | 2     | 1     | 1     |
| 415    | 1     | 1     | 1     | 1     |

| respid | Q39_3 | Q39_4 | Q39_5 | Q39_6 |
|--------|-------|-------|-------|-------|
| 416    | 1     | 1     | 1     | 1     |
| 420    | 2     | 3     | 4     | 3     |
| 421    | 1     | 3     | 3     | 1     |
| 422    | 1     | 1     | 1     | 1     |
| 423    | 1     | 1     | 1     | 1     |
| 424    | 1     | 1     | 1     | 1     |
| 425    | 1     | 3     | 3     | 1     |
| 428    | 2     | 1     | 1     | 1     |
| 429    | 2     | 1     | 1     | 1     |
| 431    | 1     | 1     | 1     | 1     |
| 437    | 1     | 2     | 2     | 1     |
| 438    | 1     | 1     | 1     | 1     |
| 441    | 2     | 2     | 2     | 1     |
| 444    | 1     | 1     | 1     | 1     |
| 448    | 1     | 1     | 1     | 1     |
| 449    | 1     | 3     | 3     | 1     |
| 457    | 3     | 2     | 2     | 1     |
| 460    | 1     | 1     | 1     | 1     |
| 469    | 2     | 2     | 2     | 2     |
| 471    | 2     | 3     | 4     | 2     |
| 473    | 2     | 3     | 5     | 4     |
| 476    | 2     | 2     | 2     | 3     |
| 479    | 1     | 1     | 1     | 1     |
| 485    | 1     | 1     | 1     | 1     |
| 488    | 1     | 2     | 4     | 1     |
| 494    | 1     | 1     | 2     | 1     |
| 496    | 1     | 1     | 1     | 1     |
| 501    |       |       |       |       |
| 502    | 4     | 5     | 6     | 5     |
| 503    | 2     | 3     | 3     | 1     |
| 506    | 1     | 1     | 1     | 1     |
| 514    | 2     | 3     | 3     | 3     |

| respid | Q39_3 | Q39_4 | Q39_5 | Q39_6 |
|--------|-------|-------|-------|-------|
| 515    | 3     | 2     | 2     | 2     |
| 516    | 1     | 1     | 1     | 1     |
| 519    | 2     | 1     | 2     | 1     |
| 522    |       |       |       |       |
| 525    | 1     | 1     | 1     | 1     |
| 528    | 1     | 1     | 1     | 1     |
| 532    | 1     | 1     | 1     | 2     |
| 536    | 2     | 2     | 2     | 3     |
| 539    | 3     | 5     | 5     | 3     |
| 540    | 2     | 1     | 1     | 1     |
| 547    | 1     | 3     | 3     | 1     |
| 551    | 1     | 1     | 1     | 1     |
| 554    | 1     | 3     | 4     | 1     |
| 558    | 1     | 1     | 2     | 1     |
| 563    | 1     | 1     | 1     | 1     |
| 564    | 3     | 3     | 3     | 3     |
| 565    | 1     | 2     | 2     | 1     |
| 567    | 1     | 1     | 2     | 1     |
| 569    | 2     | 1     | 1     | 2     |
| 572    | 1     | 1     | 1     | 1     |
| 574    | 1     | 1     | 2     | 1     |
| 583    | 2     | 3     | 3     | 2     |
| 589    | 1     | 1     | 1     | 1     |
| 592    | 1     | 2     | 2     | 1     |
| 593    |       |       |       |       |
| 594    | 4     | 4     | 3     | 3     |
| 597    | 1     | 2     | 1     | 1     |
| 601    | 1     | 2     | 2     | 1     |
| 607    | 1     | 2     | 2     | 1     |
| 610    | 1     | 1     | 1     | 1     |
| 612    | 4     | 3     | 3     | 2     |
| 627    | 1     | 1     | 1     | 1     |

| respid | Q39_3 | Q39_4 | Q39_5 | Q39_6 |
|--------|-------|-------|-------|-------|
| 631    | 1     | 1     | 1     | 1     |
| 633    | 2     | 1     | 1     | 2     |
| 636    | 1     | 2     | 2     | 1     |
| 656    | 2     | 2     | 2     | 2     |
| 659    | 1     | 2     | 2     | 1     |
| 670    | 1     | 1     | 1     | 1     |
| 672    | 3     | 3     | 3     | 2     |
| 673    | 3     | 3     | 3     | 3     |
| 675    | 1     | 1     | 1     | 1     |
| 676    | 2     | 2     | 3     | 3     |
| 679    | 1     | 2     | 2     | 1     |
| 683    | 1     | 1     | 1     | 1     |
| 684    | 1     | 1     | 1     | 1     |
| 690    | 1     | 1     | 1     | 1     |
| 701    | 5     | 5     | 6     | 6     |
| 709    | 2     | 3     | 3     | 1     |
| 719    | 1     | 1     | 1     | 1     |
| 726    | 2     | 1     | 2     | 1     |
| 730    | 1     | 1     | 2     | 1     |
| 731    | 1     | 2     | 2     | 1     |
| 732    | 1     | 1     | 1     | 1     |
| 733    | 1     | 2     | 1     | 1     |
| 735    | 1     | 1     | 1     | 1     |
| 738    | 1     | 1     | 1     | 1     |
| 740    | 1     | 1     | 2     | 1     |
| 742    | 1     | 1     | 1     | 1     |
| 744    | 1     | 1     | 2     | 1     |
| 749    | 1     | 1     | 2     | 1     |
| 751    | 1     | 3     | 3     | 1     |
| 752    | 1     | 4     | 6     | 1     |
| 753    | 2     | 4     | 3     | 2     |
| 755    | 1     | 2     | 2     | 1     |

| respid | Q39_3 | Q39_4 | Q39_5 | Q39_6 |
|--------|-------|-------|-------|-------|
| 756    |       |       |       |       |
| 759    | 1     | 1     | 1     | 1     |
| 760    | 1     | 1     | 2     | 1     |
| 763    | 1     | 2     | 2     | 1     |
| 764    | 1     | 2     | 1     | 1     |
| 765    | 1     | 1     | 1     | 1     |
| 766    | 1     | 2     | 1     | 1     |
| 767    | 1     | 1     | 1     | 1     |
| 771    | 3     | 4     | 4     | 3     |
| 773    | 1     | 2     | 3     | 1     |
| 774    | 3     | 2     | 2     | 1     |
| 775    | 1     | 1     | 2     | 1     |
| 776    | 1     | 2     | 2     | 1     |
| 778    | 2     | 2     | 2     | 2     |
| 780    | 1     | 3     | 3     | 1     |
| 781    | 1     | 1     | 1     | 1     |
| 782    | 1     | 4     | 4     | 1     |
| 783    | 3     | 3     | 3     | 3     |
| 786    | 5     | 5     | 4     | 5     |
| 788    |       |       |       |       |
| 792    | 1     | 1     | 1     | 1     |
| 794    | 4     | 1     | 3     | 1     |
| 795    | 1     | 1     | 1     | 1     |
| 799    | 1     | 1     | 2     | 1     |
| 800    | 1     | 1     | 1     | 1     |
| 801    | 2     | 2     | 6     | 1     |
| 804    | 1     | 2     | 2     | 1     |
| 806    | 1     | 1     | 1     | 1     |
| 807    | 1     | 2     | 2     | 1     |
| 808    | 1     | 2     | 3     | 1     |
| 809    | 1     | 1     | 1     | 1     |
| 811    | 1     | 1     | 1     | 1     |



| respid | Q39_3 | Q39_4 | Q39_5 | Q39_6 |
|--------|-------|-------|-------|-------|
| 812    | 1     | 3     | 3     | 1     |
| 815    | 1     | 2     | 2     | 1     |
| 817    | 1     | 1     | 1     | 1     |
| 818    | 2     | 2     | 2     | 1     |
| 819    | 2     | 2     | 2     | 1     |
| 821    | 2     | 1     | 1     | 1     |
| 824    | 1     | 3     | 4     | 1     |
| 825    | 1     | 2     | 2     | 1     |
| 828    | 1     | 2     | 2     | 1     |
| 832    | 2     | 3     | 2     | 2     |
| 834    | 2     | 2     | 2     | 2     |
| 835    | 1     | 4     | 4     | 1     |
| 836    | 1     | 1     | 1     | 1     |
| 837    | 1     | 1     | 1     | 1     |
| 840    | 1     | 1     | 2     | 1     |
| 841    | 1     | 1     | 1     | 1     |
| 845    | 1     | 1     | 1     | 1     |
| 846    | 1     | 1     | 1     | 1     |
| 849    | 1     | 2     | 2     | 1     |
| 852    | 1     | 1     | 2     | 1     |
| 854    | 1     | 2     | 2     | 1     |
| 856    | 1     | 1     | 1     | 1     |
| 858    | 1     | 2     | 1     | 1     |
| 859    | 3     | 1     | 2     | 1     |
| 861    | 2     | 2     | 2     | 2     |
| 863    | 1     | 1     | 1     | 1     |
| 864    | 3     | 4     | 4     | 2     |
| 866    | 1     | 1     | 1     | 1     |
| 869    | 1     | 1     | 2     | 1     |
| 870    | 2     | 1     | 3     | 1     |
| 871    | 3     | 4     | 3     | 3     |
| 873    | 1     | 2     | 3     | 1     |

| respid | Q39_3 | Q39_4 | Q39_5 | Q39_6 |
|--------|-------|-------|-------|-------|
| 879    | 1     | 1     | 1     | 1     |
| 880    | 1     | 1     | 2     | 1     |
| 881    | 2     | 4     | 4     | 3     |
| 882    | 1     | 2     | 2     | 1     |
| 885    |       |       |       |       |
| 886    | 1     | 1     | 1     | 1     |
| 887    | 4     | 3     | 4     | 3     |
| 888    | 1     | 1     | 1     | 1     |
| 889    | 1     | 2     | 2     | 1     |
| 890    | 1     | 1     | 1     | 1     |
| 900    |       |       |       |       |
| 901    | 1     | 2     | 2     | 1     |
| 902    | 1     | 3     | 4     | 1     |
| 903    | 1     | 1     | 1     | 1     |
| 906    | 1     | 6     | 6     | 1     |
| 907    | 3     | 2     | 2     | 1     |
| 908    | 2     | 2     | 2     | 1     |
| 910    | 2     | 2     | 1     | 1     |
| 911    | 2     | 1     | 1     | 2     |
| 912    | 1     | 1     | 2     | 1     |
| 915    |       |       |       |       |
| 923    | 6     | 6     | 5     | 6     |
| 925    | 1     | 1     | 1     | 1     |
| 926    | 1     | 2     | 1     | 1     |
| 929    |       |       |       |       |
| 932    | 6     | 1     | 1     | 6     |
| 933    | 2     | 3     | 2     | 2     |
| 934    | 1     | 1     | 1     | 1     |
| 938    | 2     | 2     | 3     | 1     |
| 941    |       |       |       |       |
| 942    | 1     | 2     | 2     | 2     |
| 943    |       |       |       |       |

| respid | Q39_3 | Q39_4 | Q39_5 | Q39_6 |
|--------|-------|-------|-------|-------|
| 945    | 1     | 1     | 1     | 1     |
| 946    |       |       |       |       |
| 947    | 1     | 1     | 1     | 1     |
| 948    | 1     | 1     | 2     | 1     |
| 949    | 1     | 1     | 1     | 1     |
| 952    | 1     | 1     | 1     | 1     |
| 956    | 1     | 1     | 1     | 1     |
| 957    | 1     | 1     | 1     | 1     |
| 959    | 1     | 1     | 1     | 1     |
| 961    | 1     | 1     | 3     | 1     |
| 962    | 4     | 4     | 4     | 4     |
| 965    | 1     | 3     | 3     | 1     |
| 967    | 1     | 2     | 1     | 1     |
| 969    | 1     | 2     | 2     | 1     |
| 970    |       |       |       |       |
| 973    | 1     | 2     | 2     | 1     |
| 974    | 1     | 2     | 2     | 1     |
| 975    | 3     | 2     | 3     | 2     |
| 976    | 1     | 2     | 2     | 1     |
| 977    | 1     | 1     | 1     | 1     |
| 979    | 1     | 1     | 1     | 1     |
| 981    | 4     | 1     | 1     | 1     |
| 983    | 1     | 1     | 1     | 1     |
| 987    | 1     | 1     | 3     | 1     |
| 991    |       |       |       |       |
| 992    | 1     | 1     | 2     | 1     |
| 993    | 2     | 2     | 2     | 2     |
| 994    | 1     | 1     | 4     | 1     |
| 995    | 2     | 4     | 4     | 2     |
| 998    | 2     | 2     | 2     | 2     |
| 1000   | 3     | 3     | 3     | 3     |
| 1001   | 1     | 5     | 5     | 2     |

| respid | Q39_3 | Q39_4 | Q39_5 | Q39_6 |
|--------|-------|-------|-------|-------|
| 1002   |       |       |       |       |
| 1004   | 1     | 2     | 2     | 1     |
| 1005   | 1     | 2     | 2     | 1     |
| 1006   | 1     | 3     | 3     | 1     |
| 1007   | 2     | 4     | 4     | 1     |
| 1009   |       |       |       |       |
| 1013   | 1     | 2     | 2     | 1     |
| 1015   | 3     | 2     | 2     | 2     |
| 1020   | 2     | 1     | 2     | 2     |
| 1022   | 3     | 3     | 3     | 3     |
| 1024   | 1     | 2     | 2     | 1     |
| 1025   |       |       |       |       |
| 1027   | 1     | 1     | 1     | 1     |
| 1031   | 1     | 1     | 2     | 1     |
| 1037   | 1     | 1     | 1     | 1     |
| 1039   | 1     | 1     | 1     | 1     |
| 1040   | 2     | 1     | 1     | 1     |
| 1056   | 1     | 3     | 3     | 1     |
| 1057   | 1     | 2     | 2     | 1     |
| 1062   | 1     | 1     | 1     | 1     |
| 1069   | 1     | 1     | 1     | 1     |
| 1070   | 1     | 1     | 1     | 1     |
| 1072   | 3     | 2     | 2     | 4     |
| 1076   | 2     | 1     | 1     | 1     |
| 1077   | 2     | 2     | 2     | 1     |
| 1078   | 1     | 1     | 2     | 1     |
| 1080   |       |       |       |       |
| 1094   | 3     | 4     | 4     | 3     |
| 1098   | 2     | 3     | 3     | 3     |
| 1099   | 1     | 1     | 1     | 1     |
| 1102   | 1     | 1     | 2     | 1     |
| 1110   | 1     | 1     | 1     | 1     |

| respid | Q39_3 | Q39_4 | Q39_5 | Q39_6 |
|--------|-------|-------|-------|-------|
| 1117   | 2     | 2     | 3     | 2     |
| 1119   |       |       |       |       |
| 1126   | 1     | 1     | 2     | 1     |
| 1127   | 1     | 1     | 1     | 1     |
| 1130   | 1     | 1     | 1     | 1     |
| 1131   | 1     | 1     | 1     | 1     |
| 1135   | 5     | 3     | 3     | 6     |
| 1138   | 2     | 2     | 2     | 2     |
| 1139   |       |       |       |       |
| 1140   | 1     | 1     | 1     | 1     |
| 1142   |       |       |       |       |
| 1143   |       |       |       |       |
| 1145   | 4     | 4     | 4     | 4     |
| 1149   |       |       |       |       |
| 1152   | 1     | 2     | 2     | 2     |
| 1160   | 2     | 3     | 3     | 2     |
| 1164   |       |       |       |       |
| 1165   | 2     | 1     | 2     | 2     |
| 1169   | 4     | 1     | 1     | 2     |
| 1170   | 1     | 2     | 2     | 1     |
| 1179   | 1     | 2     | 2     | 1     |
| 1180   | 1     | 1     | 1     | 1     |
| 1183   | 1     | 1     | 1     | 1     |
| 1187   | 1     | 1     | 1     | 1     |
| 1188   | 1     | 1     | 1     | 1     |
| 1193   | 1     | 2     | 2     | 1     |
| 1194   | 4     | 4     | 4     | 4     |
| 1197   | 1     | 1     | 1     | 1     |
| 1202   |       |       |       |       |
| 1204   | 6     | 5     | 6     | 5     |
| 1211   | 1     | 1     | 1     | 1     |
| 1224   | 1     | 2     | 2     | 1     |

| respid | Q39_3 | Q39_4 | Q39_5 | Q39_6 |
|--------|-------|-------|-------|-------|
| 1225   | 1     | 1     | 1     | 1     |
| 1230   | 1     | 1     | 1     | 1     |
| 1232   | 1     | 1     | 2     | 1     |
| 1233   | 3     | 3     | 2     | 2     |
| 1234   | 1     | 1     | 2     | 1     |
| 1235   | 2     | 3     | 3     | 2     |
| 1236   | 1     | 4     | 5     | 1     |
| 1237   | 1     | 2     | 2     | 1     |
| 1238   | 1     | 1     | 3     | 1     |
| 1239   | 1     | 2     | 2     | 1     |
| 1241   | 1     | 2     | 2     | 1     |
| 1242   | 1     | 1     | 1     | 1     |
| 1244   | 1     | 1     | 2     | 1     |
| 1245   | 1     | 1     | 1     | 1     |
| 1247   | 3     | 4     | 5     | 3     |
| 1248   | 2     | 2     | 3     | 1     |
| 1249   | 2     | 1     | 1     | 1     |
| 1250   | 1     | 1     | 1     | 1     |
| 1251   | 1     | 1     | 1     | 1     |
| 1252   | 1     | 1     | 1     | 1     |
| 1253   | 1     | 1     | 1     | 1     |
| 1254   | 2     | 4     | 5     | 1     |
| 1258   | 1     | 2     | 2     | 1     |
| 1260   | 1     | 1     | 2     | 1     |
| 1261   | 1     | 1     | 1     | 1     |
| 1262   | 2     | 3     | 3     | 3     |
| 1263   | 2     | 4     | 4     | 3     |
| 1264   | 2     | 1     | 1     | 1     |
| 1265   | 1     | 1     | 3     | 2     |
| 1266   | 1     | 2     | 2     | 1     |
| 1270   | 1     | 1     | 1     | 1     |
| 1272   | 3     | 3     | 3     | 2     |

| respid | Q39_3 | Q39_4 | Q39_5 | Q39_6 |
|--------|-------|-------|-------|-------|
| 1273   | 1     | 1     | 2     | 1     |
| 1276   | 1     | 2     | 1     | 1     |
| 1277   | 2     | 3     | 2     | 1     |
| 1278   | 1     | 1     | 2     | 1     |
| 1280   | 1     | 1     | 1     | 1     |
| 1281   | 2     | 2     | 2     | 2     |
| 1282   | 2     | 2     | 2     | 2     |
| 1283   | 1     | 1     | 1     | 1     |
| 1288   | 1     | 1     | 1     | 1     |
| 1289   | 2     | 1     | 1     | 1     |
| 1290   | 1     | 3     | 4     | 1     |
| 1291   |       |       |       |       |
| 1293   | 2     | 1     | 1     | 1     |
| 1294   | 1     | 3     | 3     | 1     |
| 1295   | 1     | 2     | 2     | 1     |
| 1296   | 1     | 5     | 5     | 1     |
| 1297   | 2     | 2     | 3     | 2     |
| 1298   | 2     | 2     | 2     | 1     |
| 1300   | 2     | 3     | 1     | 2     |
| 1302   | 1     | 2     | 2     | 1     |
| 1303   | 3     | 3     | 3     | 2     |
| 1304   | 2     | 2     | 3     | 1     |
| 1305   | 2     | 1     | 2     | 1     |
| 1307   | 1     | 2     | 2     | 1     |
| 1312   | 1     | 1     | 1     | 1     |
| 1313   | 1     | 1     | 1     | 1     |
| 1314   | 1     | 1     | 1     | 1     |
| 1317   | 1     | 2     | 2     | 1     |
| 1318   | 1     | 2     | 2     | 1     |
| 1319   | 1     | 1     | 1     | 1     |
| 1321   | 1     | 1     | 1     | 1     |
| 1324   | 4     | 3     | 4     | 2     |

| respid | Q39_3 | Q39_4 | Q39_5 | Q39_6 |
|--------|-------|-------|-------|-------|
| 1325   | 1     | 2     | 3     | 1     |
| 1326   | 1     | 1     | 1     | 1     |
| 1327   | 1     | 1     | 1     | 1     |
| 1329   | 1     | 4     | 4     | 1     |
| 1330   | 2     | 4     | 4     | 1     |
| 1331   | 1     | 1     | 2     | 2     |
| 1335   | 1     | 2     | 2     | 1     |
| 1337   | 1     | 1     | 1     | 1     |
| 1341   | 1     | 1     | 1     | 1     |
| 1342   | 1     | 1     | 1     | 1     |
| 1344   | 2     | 1     | 1     | 3     |
| 1345   | 1     | 1     | 1     | 1     |
| 1346   | 1     | 1     | 1     | 1     |
| 1350   | 2     | 3     | 3     | 3     |
| 1352   | 1     | 1     | 1     | 1     |
| 1353   | 2     | 2     | 2     | 2     |
| 1354   | 1     | 2     | 2     | 1     |
| 1355   | 1     | 1     | 2     | 1     |
| 1357   | 2     | 2     | 2     | 1     |
| 1360   |       |       |       |       |
| 1362   | 1     | 1     | 1     | 1     |
| 1363   | 2     | 2     | 2     | 1     |
| 1367   | 2     | 1     | 2     | 1     |
| 1369   | 1     | 3     | 3     | 1     |
| 1371   |       |       |       |       |
| 1372   |       |       |       |       |
| 1375   |       |       |       |       |
| 1377   | 2     | 2     | 2     | 1     |
| 1379   | 2     | 2     | 2     | 2     |
| 1380   | 1     | 3     | 4     | 1     |
| 1382   | 1     | 1     | 1     | 1     |
| 1383   | 1     | 2     | 1     | 1     |



| respid | Q39_3 | Q39_4 | Q39_5 | Q39_6 |
|--------|-------|-------|-------|-------|
| 1384   | 1     | 1     | 1     | 1     |
| 1385   | 1     | 2     | 2     | 1     |
| 1387   | 1     | 1     | 1     | 1     |
| 1388   | 1     | 1     | 3     | 1     |
| 1389   | 6     | 2     | 2     | 6     |
| 1390   | 2     | 1     | 3     | 1     |
| 1395   | 1     | 1     | 1     | 1     |
| 1396   | 1     | 2     | 2     | 1     |
| 1397   | 3     | 3     | 3     | 4     |
| 1398   | 1     | 1     | 1     | 1     |
| 1399   | 1     | 1     | 1     | 1     |
| 1403   | 1     | 1     | 1     | 1     |
| 1405   | 1     | 1     | 1     | 1     |
| 1406   | 3     | 2     | 2     | 3     |
| 1407   | 4     | 5     | 6     | 5     |
| 1408   | 1     | 4     | 4     | 1     |
| 1409   | 1     | 2     | 2     | 1     |
| 1410   | 1     | 5     | 5     | 1     |
| 1411   | 1     | 1     | 1     | 1     |
| 1412   | 1     | 1     | 1     | 1     |
| 1413   | 2     | 2     | 2     | 1     |
| 1414   | 1     | 1     | 2     | 1     |
| 1415   | 1     | 1     | 1     | 1     |
| 1416   | 2     | 1     | 2     | 1     |
| 1417   | 1     | 1     | 1     | 1     |
| 1418   | 1     | 2     | 2     | 1     |
| 1419   | 2     | 2     | 3     | 3     |
| 1420   | 2     | 2     | 1     | 2     |
| 1421   | 1     | 2     | 2     | 1     |
| 1422   | 1     | 1     | 1     | 1     |
| 1423   | 1     | 2     | 1     | 1     |
| 1424   | 1     | 3     | 3     | 1     |

| respid | Q39_3 | Q39_4 | Q39_5 | Q39_6 |
|--------|-------|-------|-------|-------|
| 1429   | 1     | 1     | 1     | 1     |
| 1430   | 1     | 1     | 1     | 1     |
| 1431   | 4     | 4     | 4     | 4     |
| 1433   | 1     | 2     | 2     | 2     |
| 1435   |       |       |       |       |
| 1436   | 1     | 1     | 1     | 1     |
| 1438   |       |       |       |       |
| 1439   | 1     | 1     | 2     | 1     |
| 1441   | 2     | 2     | 2     | 1     |
| 1442   | 1     | 2     | 2     | 1     |
| 1443   |       |       |       |       |
| 1444   | 1     | 1     | 1     | 1     |
| 1445   | 3     | 5     | 5     | 5     |
| 1446   | 3     | 2     | 3     | 3     |
| 1447   | 1     | 1     | 1     | 1     |
| 1449   | 2     | 2     | 2     | 2     |
| 1450   | 1     | 1     | 1     | 1     |
| 1451   | 6     | 6     | 6     | 6     |
| 1452   |       |       |       |       |
| 1453   | 2     | 3     | 3     | 3     |
| 1454   | 3     | 2     | 2     | 2     |
| 1456   | 1     | 1     | 1     | 1     |
| 1457   | 2     | 3     | 3     | 2     |
| 1459   | 2     | 2     | 2     | 2     |
| 1460   | 1     | 1     | 2     | 1     |
| 1463   | 1     | 1     | 1     | 1     |
| 1465   | 2     | 2     | 2     | 2     |
| 1467   | 1     | 3     | 3     | 1     |
| 1470   | 1     | 2     | 2     | 1     |
| 1471   | 1     | 6     | 6     | 1     |
| 1472   | 1     | 1     | 1     | 1     |
| 1474   | 3     | 1     | 2     | 1     |

| respid | Q39_3 | Q39_4 | Q39_5 | Q39_6 |
|--------|-------|-------|-------|-------|
| 1475   | 1     | 3     | 3     | 1     |
| 1477   | 1     | 1     | 2     | 1     |
| 1478   | 2     | 2     | 2     | 2     |
| 1480   |       |       |       |       |
| 1481   | 3     | 2     | 2     | 3     |
| 1483   | 1     | 1     | 1     | 1     |
| 1484   | 1     | 1     | 1     | 1     |
| 1485   | 2     | 1     | 1     | 1     |
| 1486   | 1     | 3     | 3     | 1     |
| 1487   | 4     | 3     | 4     | 2     |
| 1488   | 1     | 3     | 3     | 1     |
| 1489   | 4     | 2     | 2     | 4     |
| 1490   | 1     | 1     | 3     | 2     |
| 1491   | 3     | 4     | 4     | 3     |
| 1492   | 1     | 1     | 1     | 2     |
| 1494   | 1     | 1     | 1     | 1     |
| 1495   | 2     | 1     | 1     | 2     |
| 1496   | 2     | 1     | 2     | 1     |
| 1498   | 1     | 2     | 2     | 1     |
| 1499   | 2     | 2     | 2     | 2     |
| 1500   | 3     | 3     | 3     | 2     |
| 1501   | 1     | 1     | 1     | 1     |
| 1503   |       |       |       |       |
| 1504   | 1     | 2     | 2     | 1     |
| 1508   | 3     | 3     | 3     | 3     |
| 1509   | 5     | 3     | 3     | 2     |
| 1511   | 4     | 5     | 5     | 3     |
| 1512   | 4     | 4     | 4     | 2     |
| 1513   | 1     | 3     | 3     | 3     |
| 1515   | 2     | 2     | 1     | 1     |
| 1517   | 2     | 2     | 2     | 2     |
| 1518   | 1     | 2     | 2     | 1     |

| respid | Q39_3 | Q39_4 | Q39_5 | Q39_6 |
|--------|-------|-------|-------|-------|
| 1519   | 2     | 3     | 2     | 2     |
| 1520   | 1     | 1     | 1     | 1     |
| 1521   | 4     | 3     | 5     | 6     |
| 1522   | 1     | 1     | 1     | 1     |
| 1523   | 6     | 6     | 6     | 6     |
| 1524   | 1     | 1     | 1     | 1     |
| 1525   | 1     | 2     | 2     | 1     |
| 1526   | 2     | 4     | 6     | 2     |
| 1527   | 1     | 2     | 2     | 1     |
| 1534   | 1     | 1     | 1     | 1     |
| 1535   | 1     | 1     | 1     | 1     |
| 1536   | 1     | 2     | 2     | 1     |
| 1538   | 3     | 2     | 2     | 2     |
| 1539   | 1     | 1     | 1     | 1     |
| 1540   | 1     | 2     | 2     | 1     |
| 1541   | 1     | 2     | 2     | 1     |
| 1542   | 1     | 2     | 1     | 1     |
| 1543   | 2     | 2     | 2     | 2     |
| 1545   | 3     | 3     | 3     | 3     |
| 1546   | 1     | 1     | 1     | 1     |
| 1548   | 2     | 6     | 6     | 2     |
| 1549   |       |       |       |       |
| 1551   | 1     | 1     | 1     | 1     |
| 1552   | 1     | 3     | 3     | 1     |
| 1556   | 1     | 1     | 1     | 1     |
| 1557   |       |       |       |       |
| 1558   | 1     | 1     | 1     | 1     |
| 1561   | 1     | 1     | 1     | 1     |
| 1562   | 3     | 3     | 3     | 2     |
| 1563   | 1     | 1     | 1     | 1     |
| 1564   | 6     | 4     | 4     | 4     |
| 1565   |       |       |       |       |

| respid | Q39_3 | Q39_4 | Q39_5 | Q39_6 |
|--------|-------|-------|-------|-------|
| 1566   | 1     | 2     | 2     | 1     |
| 1567   | 1     | 2     | 2     | 1     |
| 1569   |       |       |       |       |
| 1570   | 1     | 1     | 1     | 1     |
| 1574   | 1     | 2     | 2     | 1     |
| 1575   | 1     | 1     | 1     | 1     |
| 1576   | 1     | 1     | 1     | 1     |
| 1577   | 1     | 1     | 1     | 1     |
| 1581   | 1     | 1     | 1     | 1     |
| 1583   | 2     | 3     | 3     | 1     |
| 1585   | 1     | 1     | 1     | 1     |
| 1586   | 1     | 1     | 1     | 1     |
| 1588   | 1     | 1     | 1     | 1     |
| 1590   | 1     | 1     | 1     | 1     |
| 1592   | 1     | 2     | 2     | 1     |
| 1594   | 1     | 2     | 2     | 2     |
| 1598   | 2     | 2     | 2     | 2     |
| 1599   | 1     | 4     | 4     | 1     |
| 1600   | 2     | 1     | 1     | 3     |
| 1602   | 1     | 1     | 1     | 1     |
| 1603   | 1     | 1     | 2     | 1     |
| 1604   | 2     | 2     | 2     | 2     |
| 1605   | 2     | 4     | 5     | 2     |
| 1606   | 1     | 2     | 2     | 1     |
| 1610   | 1     | 2     | 2     | 1     |
| 1611   | 1     | 2     | 1     | 1     |
| 1612   | 2     | 1     | 1     | 2     |
| 1613   | 3     | 2     | 2     | 1     |
| 1615   | 2     | 3     | 3     | 1     |
| 1616   | 1     | 2     | 2     | 1     |
| 1617   | 1     | 3     | 3     | 1     |
| 1618   | 1     | 2     | 4     | 2     |

| respid | Q39_3 | Q39_4 | Q39_5 | Q39_6 |
|--------|-------|-------|-------|-------|
| 1620   | 1     | 2     | 2     | 1     |
| 1621   | 3     | 3     | 2     | 3     |
| 1622   |       |       |       |       |
| 1623   | 1     | 1     | 1     | 1     |
| 1624   | 1     | 2     | 2     | 1     |
| 1625   | 1     | 1     | 1     | 1     |
| 1626   |       |       |       |       |
| 1627   | 1     | 1     | 2     | 1     |
| 1629   | 1     | 1     | 1     | 1     |
| 1630   | 1     | 1     | 1     | 1     |
| 1631   | 1     | 1     | 2     | 1     |
| 1634   | 2     | 2     | 2     | 1     |
| 1635   | 1     | 1     | 3     | 1     |
| 1636   |       |       |       |       |
| 1637   | 1     | 1     | 1     | 1     |
| 1640   | 1     | 2     | 1     | 2     |
| 1642   | 1     | 1     | 1     | 1     |
| 1643   | 2     | 4     | 4     | 3     |
| 1644   | 2     | 1     | 1     | 1     |
| 1645   | 1     | 1     | 2     | 1     |
| 1646   | 2     | 1     | 2     | 1     |
| 1647   | 2     | 1     | 2     | 1     |
| 1650   | 1     | 2     | 2     | 1     |
| 1654   | 2     | 1     | 2     | 1     |
| 1656   | 1     | 1     | 1     | 1     |
| 1657   | 4     | 3     | 4     | 4     |
| 1659   | 4     | 1     | 2     | 3     |
| 1662   | 2     | 2     | 3     | 2     |
| 1663   | 1     | 5     | 1     | 1     |
| 1664   | 1     | 1     | 1     | 2     |
| 1665   | 1     | 1     | 1     | 1     |
| 1667   | 1     | 1     | 2     | 1     |

| respid | Q39_3 | Q39_4 | Q39_5 | Q39_6 |
|--------|-------|-------|-------|-------|
| 1668   | 1     | 1     | 2     | 1     |
| 1670   | 1     | 1     | 1     | 1     |
| 1671   | 1     | 2     | 2     | 1     |
| 1673   | 1     | 1     | 2     | 1     |
| 1674   | 1     | 1     | 2     | 1     |
| 1676   | 1     | 2     | 2     | 1     |
| 1677   | 1     | 1     | 1     | 1     |
| 1678   | 1     | 2     | 3     | 1     |
| 1680   | 2     | 1     | 1     | 1     |
| 1681   | 1     | 1     | 1     | 1     |
| 1683   | 1     | 1     | 1     | 1     |
| 1685   | 2     | 3     | 3     | 2     |
| 1686   | 3     | 2     | 2     | 2     |
| 1690   | 1     | 1     | 3     | 1     |
| 1691   | 2     | 1     | 3     | 1     |
| 1692   | 1     | 2     | 3     | 2     |
| 1693   | 1     | 1     | 1     | 3     |
| 1695   | 1     | 2     | 2     | 1     |
| 1696   | 1     | 3     | 4     | 1     |
| 1698   | 1     | 1     | 1     | 1     |
| 1699   | 1     | 1     | 1     | 1     |
| 1701   | 3     | 2     | 3     | 4     |
| 1702   | 1     | 1     | 1     | 1     |
| 1703   |       |       |       |       |
| 1705   | 2     | 1     | 2     | 1     |
| 1706   | 1     | 1     | 2     | 1     |
| 1708   |       |       |       |       |
| 1711   | 3     | 3     | 4     | 3     |
| 1712   | 1     | 2     | 2     | 1     |
| 1713   | 1     | 1     | 2     | 1     |
| 1715   | 1     | 2     | 2     | 1     |
| 1717   | 1     | 1     | 1     | 1     |

| respid | Q39_3 | Q39_4 | Q39_5 | Q39_6 |
|--------|-------|-------|-------|-------|
| 1718   | 4     | 5     | 5     | 2     |
| 1719   | 1     | 1     | 1     | 1     |
| 1721   | 1     | 2     | 2     | 1     |
| 1722   | 2     | 1     | 1     | 2     |
| 1724   | 1     | 2     | 2     | 1     |
| 1725   | 1     | 1     | 1     | 1     |
| 1726   | 1     | 1     | 2     | 1     |
| 1727   | 1     | 1     | 1     | 1     |
| 1728   | 1     | 2     | 3     | 1     |
| 1731   | 1     | 1     | 4     | 1     |
| 1733   | 1     | 1     | 1     | 1     |
| 1734   | 1     | 2     | 1     | 1     |
| 1735   |       |       |       |       |
| 1736   | 1     | 2     | 2     | 1     |
| 1737   | 1     | 1     | 2     | 1     |
| 1738   | 2     | 3     | 3     | 2     |
| 1743   | 1     | 4     | 3     | 1     |
| 1755   | 4     | 3     | 5     | 4     |
| 1756   | 1     | 3     | 4     | 1     |
| 1757   | 1     | 2     | 2     | 1     |
| 1758   | 2     | 1     | 2     | 1     |
| 1759   | 2     | 2     | 2     | 2     |
| 1761   | 1     | 1     | 2     | 1     |
| 1762   | 1     | 1     | 2     | 1     |
| 1764   |       |       |       |       |
| 1767   | 2     | 2     | 1     | 1     |
| 1768   | 4     | 2     | 2     | 1     |
| 1769   | 1     | 1     | 1     | 1     |
| 1770   | 1     | 2     | 2     | 1     |
| 1771   | 1     | 2     | 2     | 1     |
| 1776   | 1     | 1     | 2     | 1     |
| 1777   | 2     | 2     | 2     | 2     |



| respid | Q39_3 | Q39_4 | Q39_5 | Q39_6 |
|--------|-------|-------|-------|-------|
| 1778   | 3     | 4     | 4     | 1     |
| 1779   | 2     | 1     | 1     | 1     |
| 1780   | 1     | 3     | 3     | 1     |
| 1781   |       |       |       |       |
| 1783   | 1     | 2     | 1     | 1     |
| 1784   | 4     | 4     | 5     | 5     |
| 1785   | 1     | 1     | 2     | 1     |
| 1788   | 2     | 2     | 3     | 3     |
| 1792   | 2     | 1     | 1     | 1     |
| 1794   | 1     | 1     | 1     | 1     |
| 1798   | 6     | 5     | 5     | 5     |
| 1799   | 1     | 2     | 2     | 1     |
| 1800   | 1     | 2     | 2     | 1     |
| 1804   | 3     | 3     | 3     | 3     |
| 1806   | 3     | 3     | 3     | 3     |
| 1807   | 1     | 1     | 1     | 1     |
| 1808   | 1     | 1     | 2     | 1     |
| 1809   | 1     | 1     | 2     | 1     |
| 1811   | 1     | 1     | 1     | 1     |
| 1812   | 1     | 3     | 3     | 1     |
| 1813   | 3     | 1     | 3     | 3     |
| 1814   | 1     | 2     | 3     | 1     |
| 1815   | 1     | 2     | 2     | 1     |
| 1817   | 1     | 1     | 3     | 1     |
| 1820   | 1     | 3     | 3     | 2     |
| 1821   | 1     | 1     | 2     | 1     |
| 1822   | 1     | 2     | 1     | 1     |
| 1823   | 1     | 2     | 2     | 1     |
| 1824   | 1     | 1     | 1     | 1     |
| 1826   |       |       |       |       |
| 1828   | 1     | 1     | 1     | 1     |
| 1829   | 1     | 1     | 1     | 1     |

| respid | Q39_3 | Q39_4 | Q39_5 | Q39_6 |
|--------|-------|-------|-------|-------|
| 1830   | 1     | 1     | 2     | 1     |
| 1831   | 1     | 1     | 2     | 1     |
| 1832   | 1     | 1     | 1     | 1     |
| 1836   | 2     | 3     | 3     | 2     |
| 1838   | 5     | 2     | 3     | 4     |
| 1839   | 2     | 3     | 4     | 3     |
| 1840   | 1     | 2     | 2     | 1     |
| 1841   | 3     | 1     | 1     | 2     |
| 1842   | 2     | 3     | 3     | 1     |
| 1843   | 2     | 1     | 1     | 1     |
| 1844   | 2     | 2     | 3     | 2     |
| 1845   | 1     | 1     | 1     | 1     |
| 1849   | 1     | 1     | 2     | 1     |
| 1850   | 2     | 1     | 2     | 3     |
| 1851   | 3     | 1     | 1     | 1     |
| 1852   |       |       |       |       |
| 1857   | 3     | 1     | 1     | 1     |
| 1858   | 1     | 1     | 1     | 1     |
| 1861   | 2     | 1     | 2     | 1     |
| 1862   | 1     | 1     | 1     | 1     |
| 1863   | 3     | 3     | 3     | 3     |
| 1864   | 1     | 3     | 3     | 1     |
| 1865   |       |       |       |       |
| 1867   | 1     | 1     | 1     | 1     |
| 1868   | 2     | 2     | 3     | 2     |
| 1869   | 5     | 5     | 5     | 5     |
| 1870   | 1     | 1     | 2     | 1     |
| 1871   | 1     | 4     | 4     | 2     |
| 1872   | 1     | 1     | 1     | 1     |
| 1873   | 1     | 2     | 2     | 1     |
| 1876   |       |       |       |       |
| 1877   |       |       |       |       |

| respid | Q39_3 | Q39_4 | Q39_5 | Q39_6 |
|--------|-------|-------|-------|-------|
| 1878   | 1     | 2     | 2     | 1     |
| 1879   | 1     | 2     | 2     | 1     |
| 1880   | 1     | 1     | 1     | 1     |
| 1881   | 1     | 2     | 2     | 1     |
| 1883   | 4     | 3     | 3     | 1     |
| 1886   | 1     | 1     | 1     | 1     |
| 1888   | 3     | 3     | 3     | 3     |
| 1889   | 2     | 3     | 3     | 2     |
| 1890   | 4     | 3     | 3     | 4     |
| 1891   | 1     | 1     | 1     | 1     |
| 1893   | 1     | 1     | 1     | 1     |
| 1894   | 1     | 2     | 2     | 1     |
| 1895   | 2     | 3     | 5     | 1     |
| 1896   | 1     | 1     | 1     | 1     |
| 1897   | 1     | 2     | 1     | 1     |
| 1898   | 5     | 5     | 6     | 5     |
| 1899   | 1     | 1     | 1     | 1     |
| 1900   |       |       |       |       |
| 1903   | 1     | 1     | 2     | 1     |
| 1906   | 1     | 2     | 2     | 1     |
| 1907   | 4     | 5     | 4     | 5     |
| 1908   | 1     | 2     | 2     | 1     |
| 1909   | 4     | 5     | 5     | 3     |
| 1910   | 1     | 1     | 1     | 1     |
| 1911   | 1     | 1     | 1     | 1     |
| 1912   |       |       |       |       |
| 1917   | 1     | 1     | 1     | 1     |
| 1918   | 1     | 1     | 2     | 1     |
| 1919   | 1     | 1     | 1     | 1     |
| 1922   |       |       |       |       |
| 1925   |       |       |       |       |
| 1926   | 1     | 1     | 1     | 1     |

| respid | Q39_3 | Q39_4 | Q39_5 | Q39_6 |
|--------|-------|-------|-------|-------|
| 1927   | 1     | 1     | 1     | 1     |
| 1928   |       |       |       |       |
| 1929   | 1     | 1     | 2     | 1     |
| 1934   | 1     | 1     | 1     | 1     |
| 1935   | 1     | 1     | 2     | 1     |
| 1936   | 4     | 1     | 1     | 2     |
| 1937   |       |       |       |       |
| 1938   |       |       |       |       |
| 1939   | 1     | 1     | 1     | 1     |
| 1940   | 1     | 1     | 1     | 1     |
| 1941   |       |       |       |       |
| 1948   |       |       |       |       |
| 1950   | 2     | 1     | 1     | 1     |
| 1955   | 2     | 3     | 3     | 1     |
| 1958   | 1     | 1     | 1     | 1     |
| 1960   | 1     | 1     | 2     | 1     |
| 1961   |       |       |       |       |
| 1962   | 1     | 1     | 1     | 1     |
| 1965   |       |       |       |       |
| 1966   | 1     | 1     | 1     | 1     |
| 1967   |       |       |       |       |
| 1968   | 2     | 2     | 2     | 2     |
| 1973   | 2     | 2     | 2     | 1     |
| 1974   | 5     | 4     | 6     | 4     |
| 1975   |       |       |       |       |
| 1977   | 1     | 2     | 2     | 1     |
| 1978   |       |       |       |       |
| 1979   | 3     | 3     | 3     | 3     |
| 1982   | 1     | 1     | 1     | 1     |
| 1983   | 1     | 1     | 1     | 1     |
| 1987   | 1     | 2     | 2     | 1     |
| 1988   | 1     | 2     | 3     | 1     |

| respid | Q39_3 | Q39_4 | Q39_5 | Q39_6 |
|--------|-------|-------|-------|-------|
| 1991   | 2     | 2     | 2     | 1     |
| 1992   | 1     | 1     | 1     | 1     |
| 1993   | 1     | 2     | 2     | 1     |
| 1994   | 4     | 5     | 5     | 5     |
| 1995   | 1     | 1     | 1     | 1     |
| 1996   | 2     | 2     | 2     | 2     |
| 1997   | 1     | 1     | 1     | 1     |
| 1998   | 1     | 1     | 1     | 1     |
| 1999   | 3     | 4     | 5     | 3     |
| 2000   | 4     | 4     | 3     | 2     |
| 2001   | 2     | 2     | 2     | 1     |
| 2002   | 1     | 1     | 1     | 1     |
| 2003   |       |       |       |       |
| 2004   | 1     | 1     | 1     | 1     |
| 2005   | 2     | 1     | 2     | 1     |
| 2007   | 2     | 3     | 2     | 1     |
| 2009   | 1     | 1     | 1     | 1     |
| 2010   |       |       |       |       |
| 2011   | 1     | 1     | 1     | 1     |
| 2013   | 1     | 1     | 1     | 1     |
| 2014   | 1     | 4     | 4     | 1     |
| 2017   | 1     | 3     | 3     | 2     |
| 2020   | 1     | 1     | 1     | 1     |
| 2023   | 3     | 2     | 3     | 2     |
| 2024   | 1     | 1     | 1     | 1     |
| 2029   | 1     | 1     | 1     | 1     |
| 2030   |       |       |       |       |
| 2031   | 1     | 2     | 3     | 1     |
| 2032   | 2     | 1     | 1     | 2     |
| 2033   |       |       |       |       |
| 2034   | 1     | 2     | 2     | 1     |
| 2036   | 3     | 3     | 2     | 3     |

| respid | Q39_3 | Q39_4 | Q39_5 | Q39_6 |
|--------|-------|-------|-------|-------|
| 2037   | 5     | 5     | 5     | 6     |
| 2038   | 1     | 1     | 2     | 1     |
| 2039   | 1     | 1     | 2     | 1     |
| 2040   |       |       |       |       |
| 2041   |       |       |       |       |
| 2042   | 1     | 1     | 1     | 1     |
| 2043   | 2     | 1     | 1     | 2     |
| 2051   | 1     | 1     | 1     | 1     |
| 2052   | 2     | 1     | 1     | 1     |
| 2053   | 1     | 1     | 1     | 1     |
| 2054   |       |       |       |       |
| 2055   | 1     | 1     | 2     | 1     |
| 2056   | 2     | 2     | 2     | 2     |
| 2057   | 1     | 1     | 2     | 1     |
| 2059   | 1     | 1     | 1     | 1     |
| 2063   | 1     | 2     | 2     | 1     |
| 2066   | 1     | 4     | 4     | 1     |
| 2068   | 1     | 2     | 2     | 1     |
| 2069   | 3     | 2     | 3     | 3     |
| 2070   |       |       |       |       |
| 2071   | 2     | 1     | 2     | 1     |
| 2073   |       |       |       |       |
| 2077   | 2     | 2     | 2     | 2     |
| 2079   |       |       |       |       |
| 2080   | 6     | 4     | 4     | 6     |
| 2081   | 3     | 6     | 6     | 3     |
| 2084   |       |       |       |       |
| 2085   | 1     | 1     | 2     | 1     |
| 2087   | 2     | 3     | 3     | 1     |
| 2089   | 2     | 1     | 1     | 1     |
| 2093   | 1     | 2     | 2     | 1     |
| 2094   | 3     | 2     | 1     | 1     |

| respid | Q39_3 | Q39_4 | Q39_5 | Q39_6 |
|--------|-------|-------|-------|-------|
| 2095   | 1     | 5     | 5     | 1     |
| 2097   | 1     | 1     | 1     | 1     |
| 2099   | 2     | 2     | 2     | 3     |
| 2100   | 2     | 2     | 2     | 2     |
| 2101   | 1     | 1     | 2     | 1     |
| 2103   | 2     | 2     | 1     | 1     |
| 2104   | 1     | 1     | 1     | 1     |
| 2106   | 1     | 1     | 1     | 1     |
| 2111   | 2     | 4     | 5     | 1     |
| 2113   | 1     | 1     | 1     | 1     |
| 2115   |       |       |       |       |
| 2119   | 2     | 2     | 2     | 1     |
| 2120   |       |       |       |       |
| 2123   |       |       |       |       |
| 2124   | 2     | 3     | 4     | 3     |
| 2130   |       |       |       |       |
| 2131   | 2     | 1     | 1     | 1     |
| 2133   | 2     | 3     | 3     | 2     |
| 2139   | 2     | 2     | 2     | 2     |
| 2141   |       |       |       |       |
| 2143   | 1     | 2     | 2     | 2     |
| 2144   | 1     | 2     | 2     | 1     |
| 2147   |       |       |       |       |
| 2151   | 1     | 1     | 1     | 1     |
| 2153   | 1     | 2     | 1     | 1     |
| 2154   | 1     | 1     | 1     | 1     |
| 2155   | 1     | 2     | 2     | 1     |
| 2159   | 1     | 1     | 1     | 1     |
| 2160   | 3     | 3     | 4     | 3     |
| 2161   | 1     | 1     | 1     | 1     |
| 2163   | 1     | 1     | 2     | 1     |
| 2164   | 1     | 1     | 2     | 1     |

| respid | Q39_3 | Q39_4 | Q39_5 | Q39_6 |
|--------|-------|-------|-------|-------|
| 2168   | 1     | 1     | 2     | 1     |
| 2169   | 2     | 3     | 3     | 2     |
| 2170   | 2     | 1     | 1     | 2     |
| 2171   | 2     | 2     | 2     | 1     |
| 2172   | 3     | 4     | 5     | 5     |
| 2173   | 1     | 1     | 1     | 1     |
| 2174   | 1     | 1     | 2     | 1     |
| 2175   | 5     | 2     | 2     | 4     |
| 2176   | 2     | 1     | 2     | 1     |
| 2177   | 5     | 6     | 6     | 5     |
| 2179   | 1     | 1     | 1     | 1     |
| 2181   | 1     | 1     | 1     | 1     |
| 2182   | 1     | 1     | 1     | 1     |
| 2183   | 4     | 4     | 4     | 3     |
| 2184   | 2     | 2     | 2     | 2     |
| 2185   |       |       |       |       |
| 2186   | 1     | 1     | 1     | 1     |
| 2187   | 1     | 1     | 1     | 1     |
| 2188   | 1     | 1     | 2     | 1     |
| 2189   |       |       |       |       |
| 2190   | 1     | 1     | 1     | 1     |
| 2193   | 1     | 1     | 2     | 1     |
| 2195   | 1     | 1     | 3     | 1     |
| 2198   | 1     | 2     | 2     | 1     |
| 2200   | 1     | 1     | 1     | 1     |
| 2205   | 4     | 3     | 3     | 2     |
| 2208   |       |       |       |       |
| 2209   | 1     | 2     | 3     | 1     |
| 2210   | 1     | 1     | 1     | 1     |
| 2211   | 1     | 2     | 2     | 1     |
| 2213   | 1     | 1     | 1     | 1     |
| 2214   | 3     | 4     | 4     | 1     |



| respid | Q39_3 | Q39_4 | Q39_5 | Q39_6 |
|--------|-------|-------|-------|-------|
| 2216   | 2     | 3     | 2     | 2     |
| 2220   | 1     | 2     | 1     | 1     |
| 2225   | 1     | 1     | 1     | 1     |
| 2227   | 1     | 1     | 1     | 1     |
| 2228   | 2     | 3     | 3     | 2     |
| 2229   | 1     | 1     | 1     | 1     |
| 2230   |       |       |       |       |
| 2236   |       |       |       |       |
| 2238   | 5     | 6     | 5     | 6     |
| 2239   | 4     | 4     | 6     | 3     |
| 2240   | 1     | 1     | 1     | 1     |
| 2241   | 1     | 1     | 3     | 1     |
| 2243   |       |       |       |       |
| 2245   | 1     | 1     | 1     | 1     |
| 2247   | 2     | 1     | 1     | 2     |
| 2248   | 1     | 1     | 2     | 1     |
| 2249   | 1     | 2     | 2     | 1     |
| 2254   | 1     | 2     | 2     | 2     |
| 2256   | 1     | 2     | 2     | 1     |
| 2259   | 1     | 1     | 2     | 1     |
| 2261   | 1     | 1     | 1     | 1     |
| 2262   | 1     | 1     | 1     | 1     |
| 2263   | 4     | 2     | 2     | 3     |
| 2264   | 1     | 2     | 2     | 2     |
| 2265   | 3     | 3     | 3     | 3     |
| 2270   | 1     | 1     | 2     | 1     |
| 2271   | 1     | 1     | 1     | 1     |
| 2272   | 1     | 1     | 1     | 1     |
| 2273   | 1     | 1     | 2     | 1     |
| 2274   | 1     | 1     | 2     | 1     |
| 2276   | 3     | 5     | 6     | 4     |
| 2277   | 2     | 2     | 2     | 1     |

| respid | Q39_3 | Q39_4 | Q39_5 | Q39_6 |
|--------|-------|-------|-------|-------|
| 2281   | 1     | 1     | 1     | 1     |
| 2288   | 1     | 1     | 2     | 1     |
| 2290   | 2     | 1     | 1     | 1     |
| 2294   | 3     | 2     | 3     | 2     |
| 2295   | 1     | 2     | 2     | 1     |
| 2296   | 3     | 2     | 2     | 2     |
| 2297   |       |       |       |       |
| 2298   | 1     | 1     | 1     | 1     |
| 2301   | 1     | 3     | 3     | 1     |
| 2302   | 2     | 3     | 3     | 2     |
| 2303   |       |       |       |       |
| 2305   | 1     | 1     | 1     | 1     |
| 2309   | 1     | 1     | 1     | 1     |
| 2310   | 1     | 1     | 1     | 1     |
| 2311   | 4     | 3     | 4     | 4     |
| 2313   | 2     | 2     | 4     | 3     |
| 2316   |       |       |       |       |
| 2317   | 1     | 1     | 1     | 1     |
| 2318   | 2     | 2     | 2     | 2     |
| 2319   | 1     | 4     | 4     | 3     |
| 2321   | 4     | 3     | 4     | 3     |
| 2324   | 1     | 1     | 2     | 1     |
| 2328   | 2     | 1     | 2     | 1     |
| 2329   |       |       |       |       |
| 2330   | 1     | 2     | 1     | 1     |
| 2333   | 1     | 2     | 2     | 1     |
| 2334   | 1     | 2     | 2     | 1     |
| 2338   | 1     | 1     | 1     | 1     |
| 2341   | 2     | 2     | 2     | 2     |
| 2342   | 2     | 3     | 3     | 2     |
| 2343   | 4     | 2     | 2     | 3     |
| 2346   | 2     | 1     | 1     | 1     |

| respid | Q39_3 | Q39_4 | Q39_5 | Q39_6 |
|--------|-------|-------|-------|-------|
| 2347   | 3     | 2     | 2     | 3     |
| 2348   | 2     | 2     | 2     | 2     |
| 2349   | 3     | 5     | 5     | 3     |
| 2350   | 2     | 1     | 1     | 1     |
| 2351   | 1     | 1     | 2     | 1     |
| 2352   | 2     | 1     | 1     | 2     |
| 2359   | 1     | 1     | 1     | 1     |
| 2362   |       |       |       |       |
| 2363   | 1     | 1     | 1     | 1     |
| 2365   | 1     | 2     | 2     | 1     |
| 2367   | 1     | 4     | 4     | 1     |
| 2368   | 1     | 1     | 1     | 1     |
| 2369   | 1     | 2     | 2     | 1     |
| 2372   |       |       |       |       |
| 2374   | 4     | 4     | 5     | 2     |
| 2376   | 1     | 1     | 1     | 1     |
| 2379   | 2     | 4     | 4     | 2     |
| 2380   | 1     | 1     | 1     | 1     |
| 2381   | 2     | 3     | 3     | 1     |
| 2382   | 1     | 1     | 1     | 1     |
| 2385   | 2     | 2     | 2     | 2     |
| 2387   | 1     | 4     | 4     | 1     |
| 2388   | 1     | 2     | 2     | 1     |
| 2389   | 1     | 2     | 2     | 1     |
| 2391   | 3     | 4     | 4     | 1     |
| 2392   | 1     | 3     | 3     | 2     |
| 2393   | 1     | 1     | 1     | 1     |
| 2394   | 5     | 3     | 4     | 5     |
| 2397   | 1     | 1     | 1     | 1     |
| 2398   | 2     | 2     | 2     | 2     |
| 2400   | 1     | 2     | 2     | 1     |
| 2402   | 1     | 1     | 2     | 1     |

| respid | Q39_3 | Q39_4 | Q39_5 | Q39_6 |
|--------|-------|-------|-------|-------|
| 2406   | 1     | 2     | 1     | 1     |
| 2408   | 1     | 1     | 1     | 1     |
| 2410   | 1     | 1     | 1     | 1     |
| 2411   | 5     | 5     | 4     | 4     |
| 2412   | 1     | 1     | 2     | 1     |
| 2414   | 2     | 2     | 3     | 2     |
| 2421   | 1     | 2     | 2     | 1     |
| 2423   | 1     | 3     | 3     | 1     |
| 2424   | 2     | 1     | 1     | 1     |
| 2425   | 1     | 1     | 1     | 1     |
| 2426   | 1     | 1     | 1     | 1     |
| 2429   | 6     | 6     | 6     | 1     |
| 2430   | 2     | 2     | 2     | 1     |
| 2432   | 1     | 1     | 1     | 1     |
| 2433   | 1     | 1     | 1     | 1     |
| 2434   | 1     | 2     | 2     | 1     |
| 2435   | 1     | 2     | 3     | 2     |
| 2436   | 1     | 1     | 1     | 1     |
| 2439   | 4     | 4     | 3     | 3     |
| 2440   | 2     | 1     | 1     | 1     |
| 2441   | 1     | 1     | 2     | 1     |
| 2446   | 1     | 1     | 1     | 1     |
| 2448   | 4     | 2     | 3     | 3     |
| 2449   | 1     | 1     | 1     | 1     |
| 2451   | 1     | 3     | 3     | 1     |
| 2452   | 1     | 1     | 1     | 1     |
| 2455   |       |       |       |       |
| 2457   | 3     | 2     | 1     | 2     |
| 2458   | 1     | 1     | 1     | 1     |
| 2459   | 1     | 1     | 1     | 1     |
| 2460   | 1     | 1     | 1     | 1     |
| 2462   | 4     | 4     | 4     | 4     |

| respid | Q39_3 | Q39_4 | Q39_5 | Q39_6 |
|--------|-------|-------|-------|-------|
| 2464   | 5     | 5     | 5     | 5     |
| 2465   | 2     | 2     | 2     | 2     |
| 2468   | 1     | 2     | 1     | 1     |
| 2469   |       |       |       |       |
| 2470   | 1     | 2     | 2     | 1     |
| 2471   | 5     | 4     | 4     | 6     |
| 2472   | 1     | 1     | 1     | 1     |
| 2474   | 1     | 1     | 3     | 1     |
| 2476   | 1     | 2     | 3     | 2     |
| 2478   | 2     | 1     | 2     | 1     |
| 2479   | 1     | 3     | 2     | 1     |
| 2480   | 1     | 1     | 2     | 1     |
| 2482   | 1     | 1     | 1     | 1     |
| 2486   | 5     | 6     | 6     | 5     |
| 2488   | 2     | 5     | 5     | 2     |
| 2489   | 1     | 1     | 1     | 1     |
| 2491   | 1     | 1     | 1     | 1     |
| 2495   | 1     | 1     | 1     | 1     |
| 2496   | 1     | 1     | 1     | 1     |
| 2498   | 2     | 2     | 2     | 3     |
| 2501   | 1     | 1     | 1     | 1     |
| 2502   | 4     | 4     | 3     | 3     |
| 2503   | 1     | 3     | 3     | 1     |
| 2504   | 1     | 1     | 2     | 1     |
| 2507   | 2     | 2     | 1     | 1     |
| 2509   | 2     | 2     | 2     | 1     |
| 2512   | 1     | 2     | 2     | 1     |
| 2514   | 1     | 1     | 1     | 1     |
| 2516   | 1     | 1     | 3     | 1     |
| 2517   | 2     | 1     | 1     | 1     |
| 2521   | 1     | 2     | 2     | 1     |
| 2522   | 1     | 1     | 1     | 1     |

| respid | Q39_3 | Q39_4 | Q39_5 | Q39_6 |
|--------|-------|-------|-------|-------|
| 2524   | 1     | 1     | 1     | 1     |
| 2525   | 1     | 1     | 1     | 1     |
| 2526   | 2     | 1     | 1     | 1     |
| 2527   | 1     | 1     | 1     | 1     |
| 2528   | 2     | 2     | 2     | 1     |
| 2531   |       |       |       |       |
| 2533   | 2     | 3     | 4     | 2     |
| 2535   | 2     | 2     | 1     | 1     |
| 2536   | 6     | 5     | 6     | 4     |
| 2539   | 1     | 1     | 1     | 1     |
| 2540   | 1     | 1     | 1     | 1     |
| 2543   | 1     | 1     | 1     | 1     |
| 2546   | 1     | 1     | 2     | 1     |
| 2547   | 3     | 3     | 3     | 3     |
| 2549   | 1     | 1     | 1     | 1     |
| 2553   | 1     | 1     | 1     | 1     |
| 2554   | 1     | 1     | 2     | 1     |
| 2555   | 1     | 2     | 2     | 1     |
| 2556   | 1     | 1     | 1     | 1     |
| 2557   | 1     | 1     | 2     | 1     |
| 2559   | 1     | 1     | 1     | 1     |
| 2560   | 3     | 2     | 3     | 2     |
| 2561   | 1     | 1     | 1     | 1     |
| 2566   | 1     | 2     | 2     | 1     |
| 2567   |       |       |       |       |
| 2570   | 1     | 1     | 2     | 1     |
| 2574   | 2     | 4     | 5     | 2     |
| 2578   | 1     | 1     | 1     | 1     |
| 2580   | 2     | 4     | 5     | 3     |
| 2590   | 1     | 1     | 2     | 1     |
| 2593   | 2     | 1     | 1     | 1     |
| 2594   | 1     | 2     | 3     | 1     |

| respid | Q39_3 | Q39_4 | Q39_5 | Q39_6 |
|--------|-------|-------|-------|-------|
| 2595   | 1     | 1     | 1     | 1     |
| 2596   | 1     | 1     | 1     | 1     |
| 2597   | 3     | 4     | 4     | 4     |
| 2598   | 1     | 2     | 2     | 1     |
| 2602   | 1     | 1     | 1     | 1     |
| 2605   | 3     | 5     | 5     | 4     |
| 2606   |       |       |       |       |
| 2607   | 1     | 2     | 3     | 3     |
| 2608   |       |       |       |       |
| 2609   | 2     | 1     | 1     | 1     |
| 2610   | 1     | 1     | 2     | 1     |
| 2614   |       |       |       |       |
| 2615   | 1     | 2     | 1     | 1     |
| 2616   | 1     | 2     | 2     | 1     |
| 2618   | 1     | 2     | 2     | 1     |
| 2630   | 1     | 4     | 5     | 3     |
| 2633   | 1     | 6     | 6     | 1     |
| 2637   | 2     | 2     | 2     | 1     |
| 2638   | 2     | 2     | 2     | 2     |
| 2641   | 1     | 2     | 2     | 1     |
| 2644   | 1     | 1     | 1     | 1     |
| 2645   | 1     | 1     | 3     | 1     |
| 2646   | 6     | 2     | 3     | 6     |
| 2648   | 1     | 1     | 1     | 1     |
| 2651   |       |       |       |       |
| 2652   | 4     | 5     | 4     | 5     |
| 2653   | 1     | 2     | 2     | 1     |
| 2656   |       |       |       |       |
| 2657   | 1     | 1     | 1     | 1     |
| 2658   | 1     | 1     | 1     | 1     |
| 2661   | 1     | 1     | 1     | 1     |
| 2663   | 1     | 2     | 2     | 1     |

| respid | Q39_3 | Q39_4 | Q39_5 | Q39_6 |
|--------|-------|-------|-------|-------|
| 2665   | 1     | 2     | 2     | 1     |
| 2670   | 1     | 2     | 2     | 1     |
| 2672   | 1     | 2     | 2     | 1     |
| 2673   |       |       |       |       |
| 2677   | 1     | 1     | 1     | 1     |
| 2686   | 5     | 6     | 5     | 5     |
| 2688   | 3     | 1     | 2     | 2     |
| 2689   | 1     | 1     | 2     | 1     |
| 2691   | 1     | 1     | 1     | 1     |
| 2695   | 1     | 2     | 2     | 1     |
| 2696   | 1     | 2     | 1     | 1     |
| 2697   |       |       |       |       |
| 2698   |       |       |       |       |
| 2703   | 1     | 1     | 2     | 1     |
| 2704   | 1     | 1     | 1     | 1     |
| 2706   | 2     | 3     | 4     | 2     |
| 2707   | 1     | 1     | 3     | 1     |
| 2710   | 1     | 1     | 2     | 1     |
| 2711   | 1     | 1     | 1     | 1     |
| 2712   | 1     | 1     | 2     | 1     |
| 2713   |       |       |       |       |
| 2721   |       |       |       |       |
| 2730   | 1     | 1     | 1     | 1     |
| 2731   | 2     | 1     | 1     | 1     |
| 2732   | 1     | 1     | 2     | 1     |
| 2733   | 1     | 1     | 1     | 1     |
| 2735   | 1     | 2     | 2     | 1     |
| 2736   | 6     | 4     | 4     | 6     |
| 2740   | 1     | 2     | 2     | 1     |
| 2741   | 1     | 1     | 1     | 1     |
| 2742   | 2     | 2     | 2     | 1     |
| 2743   | 1     | 2     | 2     | 1     |



| respid | Q39_3 | Q39_4 | Q39_5 | Q39_6 |
|--------|-------|-------|-------|-------|
| 2744   | 2     | 1     | 1     | 1     |
| 2745   | 2     | 2     | 2     | 2     |
| 2749   | 2     | 1     | 1     | 1     |
| 2751   | 1     | 2     | 2     | 1     |
| 2754   | 1     | 1     | 2     | 1     |
| 2755   | 1     | 1     | 1     | 1     |
| 2757   | 1     | 1     | 1     | 1     |
| 2758   | 2     | 3     | 3     | 1     |
| 2759   | 1     | 3     | 5     | 1     |
| 2761   | 1     | 1     | 1     | 1     |
| 2762   | 1     | 1     | 1     | 1     |
| 2763   | 1     | 1     | 1     | 1     |
| 2764   | 3     | 4     | 5     | 4     |
| 2765   | 1     | 2     | 2     | 1     |
| 2766   | 1     | 1     | 1     | 2     |
| 2767   | 1     | 2     | 2     | 1     |
| 2769   | 2     | 2     | 2     | 1     |
| 2770   | 2     | 2     | 2     | 1     |
| 2771   | 2     | 1     | 1     | 2     |
| 2774   | 2     | 3     | 3     | 2     |
| 2777   | 3     | 3     | 2     | 3     |
| 2778   | 2     | 1     | 2     | 2     |
| 2781   | 2     | 2     | 2     | 2     |
| 2782   | 2     | 2     | 2     | 2     |
| 2784   | 4     | 6     | 6     | 2     |
| 2785   | 2     | 3     | 3     | 1     |
| 2786   | 1     | 1     | 2     | 1     |
| 2787   | 1     | 1     | 1     | 1     |
| 2789   | 4     | 3     | 4     | 4     |
| 2790   | 1     | 2     | 2     | 1     |
| 2791   | 1     | 5     | 5     | 1     |
| 2793   | 5     | 3     | 6     | 1     |

| respid | Q39_3 | Q39_4 | Q39_5 | Q39_6 |
|--------|-------|-------|-------|-------|
| 2797   | 1     | 1     | 1     | 1     |
| 2798   | 1     | 1     | 1     | 1     |
| 2799   | 2     | 2     | 2     | 2     |
| 2801   | 1     | 1     | 1     | 1     |
| 2802   | 5     | 4     | 6     | 6     |
| 2803   | 3     | 3     | 3     | 2     |
| 2804   | 3     | 3     | 3     | 3     |
| 2807   | 1     | 1     | 1     | 1     |
| 2809   | 2     | 1     | 1     | 1     |
| 2810   | 2     | 2     | 4     | 4     |
| 2812   | 1     | 2     | 2     | 1     |
| 2814   | 1     | 1     | 1     | 1     |
| 2815   | 2     | 2     | 3     | 1     |
| 2816   | 1     | 1     | 1     | 1     |
| 2817   | 1     | 1     | 1     | 1     |
| 2819   | 1     | 2     | 2     | 1     |
| 2820   | 1     | 1     | 1     | 1     |
| 2821   | 1     | 4     | 5     | 1     |
| 2822   | 4     | 5     | 6     | 4     |
| 2823   | 1     | 1     | 1     | 1     |
| 2824   | 2     | 2     | 2     | 1     |
| 2825   | 1     | 2     | 2     | 1     |
| 2826   | 2     | 1     | 2     | 2     |
| 2827   | 1     | 1     | 1     | 1     |
| 2828   | 1     | 2     | 2     | 1     |
| 2829   | 3     | 3     | 3     | 3     |
| 2830   | 3     | 2     | 2     | 2     |
| 2831   | 1     | 1     | 3     | 1     |
| 2832   | 4     | 2     | 3     | 3     |
| 2833   | 1     | 1     | 1     | 1     |
| 2834   | 2     | 1     | 1     | 1     |
| 2835   | 3     | 4     | 4     | 6     |

| respid | Q39_3 | Q39_4 | Q39_5 | Q39_6 |
|--------|-------|-------|-------|-------|
| 2836   | 1     | 2     | 2     | 1     |
| 2837   | 1     | 1     | 2     | 1     |
| 2838   | 3     | 3     | 3     | 1     |
| 2844   | 2     | 6     | 6     | 4     |
| 2845   | 1     | 1     | 1     | 1     |
| 2847   | 6     | 6     | 6     | 6     |
| 2848   | 1     | 1     | 2     | 1     |
| 2849   | 2     | 2     | 2     | 1     |
| 2851   | 1     | 2     | 2     | 1     |
| 2852   | 3     | 1     | 1     | 2     |
| 2853   | 3     | 4     | 3     | 4     |
| 2854   | 1     | 1     | 1     | 1     |
| 2856   | 1     | 1     | 1     | 1     |
| 2857   | 1     | 2     | 3     | 3     |
| 2858   | 1     | 2     | 2     | 1     |
| 2859   | 2     | 5     | 6     | 2     |
| 2860   | 2     | 3     | 3     | 2     |
| 2861   | 3     | 3     | 3     | 3     |
| 2863   | 1     | 1     | 1     | 1     |
| 2864   | 2     | 1     | 1     | 1     |
| 2866   | 4     | 1     | 1     | 2     |
| 2872   | 1     | 1     | 1     | 1     |
| 2875   | 1     | 1     | 2     | 1     |
| 2879   |       |       |       |       |
| 2881   | 1     | 2     | 2     | 1     |
| 2882   | 1     | 1     | 1     | 1     |
| 2883   | 1     | 1     | 1     | 1     |
| 2884   | 3     | 3     | 2     | 3     |
| 2885   | 1     | 1     | 2     | 1     |
| 2887   | 1     | 1     | 1     | 1     |
| 2888   | 1     | 2     | 1     | 1     |
| 2890   | 1     | 1     | 2     | 1     |

| respid | Q39_3 | Q39_4 | Q39_5 | Q39_6 |
|--------|-------|-------|-------|-------|
| 2891   | 1     | 1     | 1     | 1     |
| 2892   |       |       |       |       |
| 2895   | 1     | 1     | 1     | 1     |
| 2899   | 1     | 2     | 2     | 1     |
| 2900   | 1     | 1     | 1     | 1     |
| 2902   | 2     | 5     | 6     | 2     |
| 2903   |       |       |       |       |
| 2904   | 1     | 1     | 2     | 1     |
| 2906   | 1     | 1     | 1     | 1     |
| 2908   | 1     | 2     | 1     | 1     |
| 2910   | 1     | 1     | 1     | 1     |
| 2917   | 5     | 4     | 4     | 5     |
| 2918   | 2     | 2     | 2     | 2     |
| 2919   | 1     | 1     | 1     | 1     |
| 2920   | 1     | 1     | 2     | 1     |
| 2921   | 5     | 5     | 5     | 5     |
| 2922   | 1     | 2     | 2     | 1     |
| 2923   |       |       |       |       |
| 2924   | 4     | 4     | 3     | 4     |
| 2926   | 2     | 3     | 3     | 1     |
| 2928   | 1     | 1     | 1     | 1     |
| 2930   |       |       |       |       |
| 2931   | 2     | 1     | 2     | 1     |
| 2933   | 1     | 2     | 3     | 3     |
| 2935   | 1     | 1     | 1     | 1     |
| 2936   |       |       |       |       |
| 2937   | 1     | 2     | 2     | 1     |
| 2938   | 1     | 2     | 2     | 1     |
| 2944   | 1     | 1     | 1     | 1     |
| 2945   | 2     | 1     | 1     | 2     |
| 2947   | 1     | 2     | 1     | 1     |
| 2949   | 1     | 1     | 1     | 1     |

| respid | Q39_3 | Q39_4 | Q39_5 | Q39_6 |
|--------|-------|-------|-------|-------|
| 2951   | 2     | 5     | 5     | 2     |
| 2952   | 1     | 2     | 2     | 1     |
| 2953   |       |       |       |       |
| 2955   | 1     | 1     | 1     | 1     |
| 2957   | 1     | 2     | 2     | 1     |
| 2958   | 1     | 1     | 1     | 1     |
| 2960   | 1     | 2     | 3     | 1     |
| 2963   | 1     | 2     | 2     | 1     |
| 2964   | 2     | 2     | 1     | 1     |
| 2967   |       |       |       |       |
| 2968   | 1     | 2     | 2     | 1     |
| 2971   | 3     | 4     | 4     | 2     |
| 2974   | 1     | 1     | 1     | 1     |
| 2975   | 1     | 1     | 2     | 1     |
| 2982   |       |       |       |       |
| 2983   |       |       |       |       |
| 2985   | 1     | 1     | 2     | 1     |
| 2986   | 4     | 4     | 4     | 5     |
| 2987   | 2     | 2     | 2     | 1     |
| 2988   | 4     | 3     | 3     | 3     |
| 2993   | 1     | 1     | 1     | 1     |
| 2996   | 1     | 1     | 1     | 1     |
| 2997   | 1     | 1     | 2     | 1     |
| 2998   | 1     | 1     | 3     | 1     |
| 3004   | 2     | 2     | 2     | 2     |
| 3007   | 1     | 2     | 2     | 1     |
| 3011   | 2     | 2     | 3     | 3     |
| 3012   | 1     | 1     | 4     | 1     |
| 3013   | 1     | 2     | 2     | 1     |
| 3014   |       |       |       |       |
| 3015   | 1     | 2     | 2     | 1     |
| 3016   |       |       |       |       |

| respid | Q39_3 | Q39_4 | Q39_5 | Q39_6 |
|--------|-------|-------|-------|-------|
| 3017   | 1     | 1     | 2     | 1     |
| 3020   | 3     | 2     | 3     | 3     |
| 3022   | 1     | 1     | 2     | 1     |
| 3023   | 1     | 1     | 1     | 1     |
| 3026   | 2     | 2     | 2     | 2     |
| 3038   | 3     | 2     | 2     | 3     |
| 3039   | 2     | 2     | 3     | 2     |
| 3040   | 1     | 1     | 1     | 1     |
| 3041   |       |       |       |       |
| 3042   | 3     | 3     | 3     | 2     |
| 3044   | 3     | 2     | 2     | 3     |
| 3050   | 6     | 5     | 4     | 3     |
| 3052   | 2     | 1     | 1     | 1     |
| 3056   | 4     | 2     | 2     | 3     |
| 3059   | 1     | 1     | 1     | 1     |
| 3060   | 1     | 2     | 2     | 1     |
| 3063   | 1     | 2     | 2     | 1     |
| 3065   | 1     | 1     | 2     | 1     |
| 3067   | 3     | 1     | 1     | 1     |
| 3068   |       |       |       |       |
| 3072   | 2     | 2     | 3     | 3     |
| 3074   | 2     | 2     | 2     | 2     |
| 3075   | 3     | 2     | 2     | 1     |
| 3076   | 2     | 1     | 1     | 1     |
| 3079   | 2     | 2     | 2     | 1     |
| 3082   | 3     | 4     | 3     | 3     |
| 3083   | 1     | 1     | 1     | 1     |
| 3084   | 1     | 1     | 2     | 1     |
| 3085   | 1     | 1     | 1     | 1     |
| 3090   | 1     | 1     | 1     | 1     |
| 3091   | 3     | 2     | 2     | 1     |
| 3092   | 1     | 1     | 1     | 1     |

| respid | Q39_3 | Q39_4 | Q39_5 | Q39_6 |
|--------|-------|-------|-------|-------|
| 3095   | 1     | 2     | 2     | 1     |
| 3096   | 5     | 5     | 6     | 5     |
| 3097   | 2     | 3     | 4     | 1     |
| 3099   | 5     | 5     | 5     | 6     |
| 3101   | 3     | 3     | 3     | 3     |
| 3103   | 1     | 1     | 1     | 1     |
| 3104   | 1     | 2     | 2     | 1     |
| 3105   |       |       |       |       |
| 3107   | 1     | 1     | 1     | 1     |
| 3108   | 1     | 4     | 6     | 1     |
| 3109   | 1     | 2     | 2     | 1     |
| 3116   | 1     | 3     | 3     | 1     |
| 3117   | 2     | 1     | 3     | 1     |
| 3119   | 1     | 2     | 1     | 1     |
| 3120   | 1     | 1     | 1     | 1     |
| 3130   | 1     | 2     | 2     | 1     |
| 3131   | 4     | 5     | 5     | 3     |
| 3133   | 1     | 1     | 2     | 1     |
| 3134   | 1     | 1     | 1     | 1     |
| 3135   | 1     | 1     | 2     | 1     |
| 3145   | 1     | 3     | 6     | 1     |
| 3147   | 1     | 1     | 1     | 1     |
| 3152   | 2     | 2     | 2     | 2     |
| 3155   | 6     | 4     | 5     | 4     |
| 3156   |       |       |       |       |
| 3157   | 3     | 3     | 3     | 3     |
| 3166   | 2     | 2     | 2     | 2     |
| 3169   | 2     | 1     | 2     | 3     |
| 3179   | 1     | 1     | 1     | 1     |
| 3181   | 1     | 2     | 2     | 1     |
| 3185   |       |       |       |       |
| 3190   | 1     | 2     | 2     | 1     |

| respid | Q39_3 | Q39_4 | Q39_5 | Q39_6 |
|--------|-------|-------|-------|-------|
| 3191   |       |       |       |       |
| 3192   | 1     | 2     | 2     | 1     |
| 3193   | 1     | 1     | 1     | 1     |
| 3195   | 1     | 1     | 1     | 1     |
| 3202   | 2     | 1     | 3     | 1     |
| 3204   | 1     | 1     | 1     | 1     |
| 3208   | 1     | 1     | 1     | 1     |
| 3212   | 2     | 1     | 1     | 2     |
| 3218   | 1     | 1     | 1     | 1     |
| 3219   | 1     | 1     | 2     | 1     |
| 3220   | 1     | 2     | 2     | 1     |
| 3221   | 4     | 1     | 1     | 3     |
| 3223   | 1     | 2     | 2     | 1     |
| 3231   | 1     | 2     | 2     | 1     |
| 3232   | 3     | 4     | 4     | 4     |
| 3234   | 2     | 1     | 2     | 2     |
| 3235   | 1     | 1     | 1     | 1     |
| 3237   | 1     | 1     | 1     | 1     |
| 3238   | 1     | 1     | 1     | 1     |
| 3240   | 1     | 1     | 4     | 1     |
| 3241   | 1     | 2     | 2     | 1     |
| 3243   | 4     | 4     | 4     | 2     |
| 3244   | 2     | 2     | 2     | 1     |
| 3247   | 6     | 3     | 4     | 5     |
| 3250   | 1     | 1     | 1     | 1     |
| 3251   | 3     | 3     | 2     | 3     |
| 3255   | 6     | 6     | 6     | 6     |
| 3256   | 1     | 1     | 1     | 1     |
| 3257   | 1     | 1     | 2     | 1     |
| 3258   |       |       |       |       |
| 3259   | 3     | 2     | 2     | 3     |
| 3260   | 1     | 2     | 2     | 1     |



| respid | Q39_3 | Q39_4 | Q39_5 | Q39_6 |
|--------|-------|-------|-------|-------|
| 3261   |       |       |       |       |
| 3262   | 1     | 3     | 3     | 1     |
| 3264   | 3     | 2     | 4     | 1     |
| 3265   | 1     | 2     | 2     | 1     |
| 3267   | 1     | 2     | 2     | 1     |
| 3268   | 2     | 2     | 2     | 1     |
| 3270   | 1     | 1     | 2     | 1     |
| 3271   | 1     | 2     | 2     | 1     |
| 3274   |       |       |       |       |
| 3276   | 1     | 1     | 1     | 1     |
| 3277   | 1     | 2     | 2     | 1     |
| 3279   | 1     | 1     | 1     | 1     |
| 3281   |       |       |       |       |
| 3283   | 2     | 4     | 6     | 3     |
| 3285   | 4     | 1     | 2     | 2     |
| 3286   | 3     | 3     | 2     | 2     |
| 3287   | 1     | 1     | 1     | 1     |
| 3289   | 1     | 1     | 2     | 1     |
| 3290   | 1     | 1     | 1     | 1     |
| 3291   | 2     | 1     | 1     | 1     |
| 3292   | 3     | 4     | 4     | 3     |
| 3293   | 4     | 3     | 5     | 3     |
| 3294   | 2     | 2     | 2     | 1     |
| 3296   | 3     | 1     | 2     | 2     |
| 3306   | 2     | 1     | 2     | 1     |
| 3307   | 5     | 4     | 5     | 5     |
| 3308   | 3     | 2     | 2     | 1     |
| 3312   | 1     | 1     | 1     | 1     |
| 3313   | 1     | 2     | 2     | 2     |
| 3316   | 1     | 1     | 2     | 1     |
| 3317   | 1     | 5     | 5     | 1     |
| 3320   | 1     | 4     | 4     | 1     |

| respid | Q39_3 | Q39_4 | Q39_5 | Q39_6 |
|--------|-------|-------|-------|-------|
| 3321   | 1     | 1     | 1     | 1     |
| 3322   | 1     | 1     | 1     | 1     |
| 3323   | 1     | 1     | 1     | 1     |
| 3325   |       |       |       |       |
| 3332   | 1     | 1     | 1     | 1     |
| 3334   | 1     | 1     | 1     | 1     |
| 3335   | 1     | 1     | 2     | 2     |
| 3341   | 1     | 1     | 2     | 2     |
| 3345   | 2     | 2     | 2     | 2     |
| 3346   | 1     | 2     | 2     | 1     |
| 3349   | 1     | 2     | 3     | 1     |
| 3351   | 1     | 1     | 2     | 1     |
| 3353   | 1     | 1     | 2     | 1     |
| 3354   | 2     | 2     | 2     | 2     |
| 3356   | 1     | 2     | 2     | 1     |
| 3357   | 1     | 2     | 2     | 1     |
| 3360   | 1     | 3     | 3     | 1     |
| 3361   | 1     | 2     | 2     | 1     |
| 3362   | 1     | 1     | 2     | 1     |
| 3363   |       |       |       |       |
| 3364   | 5     | 6     | 6     | 5     |
| 3368   | 2     | 2     | 2     | 1     |
| 3370   | 1     | 2     | 2     | 2     |
| 3371   | 1     | 2     | 2     | 1     |
| 3379   | 1     | 1     | 2     | 1     |
| 3380   | 1     | 1     | 2     | 2     |
| 3382   | 1     | 1     | 1     | 1     |
| 3384   | 2     | 2     | 3     | 3     |
| 3385   | 1     | 3     | 3     | 1     |
| 3388   | 1     | 1     | 2     | 1     |
| 3392   | 2     | 2     | 2     | 2     |
| 3393   | 1     | 1     | 1     | 1     |

| respid | Q39_3 | Q39_4 | Q39_5 | Q39_6 |
|--------|-------|-------|-------|-------|
| 3394   | 3     | 3     | 3     | 2     |
| 3395   | 1     | 3     | 4     | 1     |
| 3396   | 1     | 1     | 1     | 1     |
| 3397   | 1     | 1     | 4     | 1     |
| 3398   | 1     | 3     | 3     | 1     |
| 3399   | 1     | 2     | 2     | 1     |
| 3400   | 1     | 1     | 1     | 1     |
| 3401   | 5     | 4     | 4     | 4     |
| 3402   | 1     | 2     | 3     | 2     |
| 3403   | 2     | 2     | 2     | 2     |
| 3405   | 3     | 4     | 5     | 6     |
| 3407   | 2     | 2     | 3     | 2     |
| 3410   | 1     | 1     | 1     | 1     |
| 3411   | 1     | 1     | 2     | 1     |
| 3413   |       |       |       |       |
| 3414   | 1     | 1     | 2     | 1     |
| 3420   | 1     | 1     | 1     | 1     |
| 3421   | 5     | 5     | 6     | 5     |
| 3425   | 1     | 1     | 2     | 1     |
| 3426   | 3     | 4     | 3     | 2     |
| 3429   | 2     | 3     | 3     | 1     |
| 3430   | 4     | 4     | 5     | 4     |
| 3433   | 1     | 1     | 2     | 1     |
| 3434   | 4     | 4     | 3     | 3     |
| 3437   | 1     | 1     | 1     | 1     |
| 3439   | 1     | 3     | 3     | 1     |
| 3441   | 3     | 2     | 2     | 2     |
| 3442   | 2     | 2     | 2     | 1     |
| 3444   | 2     | 1     | 1     | 1     |
| 3445   | 3     | 2     | 1     | 2     |
| 3450   | 1     | 4     | 3     | 1     |
| 3452   | 2     | 5     | 5     | 5     |

| respid | Q39_3 | Q39_4 | Q39_5 | Q39_6 |
|--------|-------|-------|-------|-------|
| 3456   | 1     | 1     | 2     | 1     |
| 3459   |       |       |       |       |
| 3460   | 3     | 1     | 1     | 1     |
| 3461   | 1     | 3     | 3     | 1     |
| 3466   | 4     | 3     | 4     | 3     |
| 3471   | 1     | 3     | 3     | 1     |
| 3473   | 1     | 1     | 2     | 1     |
| 3475   | 4     | 5     | 4     | 4     |
| 3476   | 1     | 1     | 1     | 1     |
| 3477   | 1     | 3     | 4     | 1     |
| 3478   |       |       |       |       |
| 3479   | 1     | 1     | 2     | 1     |
| 3482   | 2     | 3     | 3     | 2     |
| 3483   | 1     | 1     | 1     | 1     |
| 3485   | 2     | 1     | 1     | 2     |
| 3489   |       |       |       |       |
| 3490   | 1     | 1     | 2     | 1     |
| 3491   | 4     | 3     | 3     | 4     |
| 3494   | 1     | 1     | 2     | 1     |
| 3495   | 1     | 2     | 2     | 1     |
| 3501   | 1     | 1     | 2     | 1     |
| 3506   | 1     | 2     | 2     | 1     |
| 3507   | 1     | 1     | 1     | 1     |
| 3517   | 2     | 2     | 2     | 2     |
| 3520   | 1     | 1     | 2     | 2     |
| 3521   | 1     | 2     | 2     | 1     |
| 3522   | 2     | 1     | 1     | 1     |
| 3524   | 2     | 1     | 2     | 2     |
| 3527   | 1     | 1     | 1     | 1     |
| 3528   | 1     | 1     | 1     | 1     |
| 3529   | 1     | 1     | 2     | 1     |
| 3536   | 2     | 3     | 3     | 1     |

| respid | Q39_3 | Q39_4 | Q39_5 | Q39_6 |
|--------|-------|-------|-------|-------|
| 3537   | 1     | 1     | 1     | 1     |
| 3538   | 1     | 1     | 2     | 1     |
| 3540   | 3     | 4     | 2     | 2     |
| 3545   | 1     | 1     | 1     | 1     |
| 3547   | 1     | 3     | 3     | 1     |
| 3554   | 1     | 1     | 1     | 1     |
| 3556   | 1     | 2     | 1     | 1     |
| 3557   | 1     | 2     | 2     | 1     |
| 3559   | 3     | 3     | 4     | 3     |
| 3560   | 1     | 5     | 5     | 1     |
| 3562   | 1     | 1     | 2     | 1     |
| 3564   | 2     | 2     | 4     | 1     |
| 3565   | 6     | 5     | 4     | 5     |
| 3568   | 3     | 3     | 3     | 3     |
| 3572   |       |       |       |       |
| 3578   |       |       |       |       |
| 3581   | 1     | 1     | 1     | 1     |
| 3583   | 1     | 3     | 4     | 1     |
| 3588   | 1     | 1     | 1     | 1     |
| 3591   | 1     | 3     | 3     | 1     |
| 3594   | 1     | 1     | 1     | 1     |
| 3595   | 2     | 2     | 2     | 2     |
| 3596   | 1     | 2     | 2     | 1     |
| 3597   | 1     | 1     | 1     | 1     |
| 3598   |       |       |       |       |
| 3600   | 1     | 2     | 2     | 1     |
| 3602   | 1     | 1     | 1     | 1     |
| 3604   | 1     | 1     | 1     | 1     |
| 3605   | 2     | 2     | 2     | 2     |
| 3606   | 1     | 1     | 1     | 1     |
| 3607   |       |       |       |       |
| 3610   | 1     | 1     | 2     | 1     |

| respid | Q39_3 | Q39_4 | Q39_5 | Q39_6 |
|--------|-------|-------|-------|-------|
| 3611   | 1     | 2     | 2     | 1     |
| 3612   | 1     | 2     | 2     | 1     |
| 3614   | 1     | 1     | 1     | 1     |
| 3616   | 1     | 1     | 1     | 1     |
| 3617   | 2     | 1     | 2     | 1     |
| 3618   |       |       |       |       |
| 3619   | 1     | 4     | 6     | 2     |
| 3621   | 1     | 3     | 4     | 1     |
| 3622   | 2     | 2     | 2     | 2     |
| 3624   | 1     | 1     | 2     | 1     |
| 3626   | 1     | 1     | 1     | 1     |
| 3629   | 1     | 1     | 1     | 1     |
| 3631   | 1     | 1     | 2     | 1     |
| 3632   | 1     | 1     | 1     | 1     |
| 3638   | 2     | 2     | 2     | 1     |
| 3640   | 2     | 1     | 2     | 1     |
| 3641   | 2     | 1     | 3     | 2     |
| 3645   | 2     | 3     | 4     | 2     |
| 3650   |       |       |       |       |
| 3653   | 3     | 4     | 4     | 1     |
| 3655   | 2     | 1     | 1     | 4     |
| 3657   | 3     | 1     | 3     | 2     |
| 3658   | 1     | 2     | 2     | 1     |
| 3659   | 1     | 1     | 1     | 1     |
| 3664   | 4     | 6     | 6     | 4     |
| 3665   | 1     | 2     | 2     | 1     |
| 3667   | 1     | 2     | 2     | 1     |
| 3668   | 4     | 5     | 5     | 4     |
| 3675   |       |       |       |       |
| 3678   |       |       |       |       |
| 3680   |       |       |       |       |
| 3684   | 4     | 3     | 4     | 3     |

| respid | Q39_3 | Q39_4 | Q39_5 | Q39_6 |
|--------|-------|-------|-------|-------|
| 3685   | 4     | 4     | 4     | 4     |
| 3687   | 1     | 4     | 5     | 1     |
| 3689   | 5     | 5     | 4     | 5     |
| 3690   | 1     | 1     | 1     | 1     |
| 3693   |       |       |       |       |
| 3694   | 1     | 1     | 1     | 1     |
| 3695   |       |       |       |       |
| 3700   | 1     | 2     | 1     | 1     |
| 3701   | 1     | 1     | 3     | 1     |
| 3703   | 3     | 2     | 3     | 5     |
| 3704   | 5     | 5     | 6     | 5     |
| 3705   |       |       |       |       |
| 3709   | 1     | 2     | 2     | 1     |
| 3710   | 4     | 4     | 5     | 3     |
| 3722   | 1     | 2     | 1     | 1     |
| 3725   | 1     | 1     | 2     | 1     |
| 3726   | 1     | 1     | 1     | 1     |
| 3727   | 1     | 1     | 3     | 1     |
| 3728   | 1     | 3     | 3     | 1     |
| 3729   | 1     | 1     | 2     | 1     |
| 3731   |       |       |       |       |
| 3738   | 1     | 1     | 1     | 1     |
| 3739   | 1     | 1     | 2     | 1     |
| 3740   | 1     | 2     | 2     | 1     |
| 3749   | 2     | 2     | 2     | 2     |
| 3758   | 3     | 3     | 4     | 3     |
| 3762   | 1     | 3     | 3     | 1     |
| 3765   | 2     | 1     | 1     | 1     |
| 3770   | 1     | 1     | 1     | 1     |
| 3771   |       |       |       |       |
| 3778   | 2     | 2     | 2     | 1     |
| 3779   | 2     | 1     | 1     | 2     |

| respid | Q39_3 | Q39_4 | Q39_5 | Q39_6 |
|--------|-------|-------|-------|-------|
| 3780   | 1     | 1     | 1     | 1     |
| 3782   | 1     | 1     | 2     | 1     |
| 3784   | 3     | 1     | 1     | 1     |
| 3787   | 1     | 2     | 2     | 1     |
| 3790   | 3     | 2     | 2     | 2     |
| 3791   | 1     | 1     | 1     | 1     |
| 3793   | 5     | 6     | 6     | 4     |
| 3795   | 1     | 1     | 1     | 1     |
| 3799   |       |       |       |       |
| 3801   | 3     | 2     | 2     | 1     |
| 3804   | 1     | 2     | 2     | 1     |
| 3809   | 1     | 1     | 2     | 1     |
| 3810   | 1     | 1     | 2     | 1     |
| 3813   | 1     | 2     | 2     | 1     |
| 3816   | 1     | 2     | 2     | 1     |
| 3820   | 1     | 2     | 2     | 1     |
| 3821   | 2     | 1     | 1     | 2     |
| 3823   | 3     | 5     | 5     | 3     |
| 3828   | 1     | 1     | 1     | 1     |
| 3829   | 1     | 1     | 1     | 1     |
| 3832   | 1     | 1     | 1     | 1     |
| 3835   | 2     | 1     | 1     | 1     |
| 3837   | 1     | 1     | 3     | 1     |
| 3838   | 1     | 2     | 1     | 1     |
| 3839   | 6     | 5     | 6     | 6     |
| 3840   |       |       |       |       |
| 3842   |       |       |       |       |
| 3843   | 1     | 2     | 2     | 1     |
| 3844   | 1     | 3     | 3     | 1     |
| 3850   | 1     | 1     | 1     | 1     |
| 3851   |       |       |       |       |
| 3856   | 1     | 3     | 3     | 1     |



| respid | Q39_3 | Q39_4 | Q39_5 | Q39_6 |
|--------|-------|-------|-------|-------|
| 3859   | 1     | 2     | 2     | 2     |
| 3860   | 1     | 1     | 2     | 1     |
| 3863   | 1     | 2     | 2     | 1     |
| 3866   | 1     | 2     | 2     | 1     |
| 3867   | 1     | 1     | 1     | 1     |
| 3870   | 1     | 2     | 2     | 1     |
| 3873   | 2     | 2     | 2     | 1     |
| 3875   | 1     | 2     | 2     | 1     |
| 3878   | 1     | 1     | 1     | 1     |
| 3881   | 2     | 1     | 1     | 1     |
| 3883   | 3     | 2     | 2     | 3     |
| 3884   | 3     | 3     | 4     | 4     |
| 3885   | 4     | 5     | 5     | 4     |
| 3886   | 1     | 3     | 4     | 1     |
| 3887   | 1     | 1     | 1     | 1     |
| 3888   |       |       |       |       |
| 3889   | 5     | 4     | 5     | 4     |
| 3890   | 2     | 1     | 1     | 1     |
| 3896   | 2     | 3     | 3     | 1     |
| 3902   | 5     | 6     | 6     | 5     |
| 3909   | 1     | 1     | 2     | 1     |
| 3912   | 1     | 2     | 2     | 1     |
| 3922   | 2     | 1     | 1     | 3     |
| 3928   | 2     | 1     | 2     | 1     |
| 3930   | 1     | 2     | 2     | 1     |
| 3931   | 2     | 5     | 4     | 4     |
| 3933   | 3     | 2     | 4     | 1     |
| 3935   | 1     | 1     | 1     | 1     |
| 3937   | 2     | 2     | 2     | 2     |
| 3939   | 4     | 1     | 1     | 1     |
| 3942   | 1     | 1     | 1     | 1     |
| 3943   | 2     | 1     | 2     | 1     |

| respid | Q39_3 | Q39_4 | Q39_5 | Q39_6 |
|--------|-------|-------|-------|-------|
| 3944   |       |       |       |       |
| 3945   | 1     | 1     | 1     | 1     |
| 3947   | 2     | 1     | 1     | 1     |
| 3948   | 1     | 1     | 2     | 2     |
| 3951   | 1     | 2     | 3     | 1     |
| 3959   | 1     | 2     | 2     | 1     |
| 3969   | 6     | 6     | 6     | 6     |
| 3973   | 2     | 1     | 2     | 1     |
| 3975   | 3     | 2     | 3     | 3     |
| 3976   | 1     | 1     | 1     | 1     |
| 3977   | 2     | 3     | 3     | 2     |
| 3978   | 1     | 1     | 1     | 1     |
| 3994   | 1     | 4     | 4     | 1     |
| 3995   | 1     | 6     | 6     | 1     |
| 3997   | 1     | 2     | 2     | 1     |
| 3998   | 1     | 1     | 1     | 1     |
| 3999   | 2     | 1     | 1     | 1     |
| 4002   | 4     | 3     | 4     | 2     |
| 4004   | 2     | 4     | 3     | 3     |
| 4005   |       |       |       |       |
| 4006   | 3     | 2     | 2     | 2     |
| 4008   | 1     | 1     | 1     | 1     |
| 4010   | 1     | 2     | 2     | 1     |
| 4011   | 3     | 2     | 2     | 2     |
| 4013   | 1     | 3     | 3     | 1     |
| 4014   | 1     | 2     | 2     | 1     |
| 4016   | 2     | 1     | 1     | 1     |
| 4017   | 1     | 3     | 3     | 1     |
| 4019   | 2     | 1     | 2     | 2     |
| 4021   |       |       |       |       |
| 4023   | 1     | 1     | 1     | 1     |
| 4024   | 1     | 1     | 1     | 1     |

| respid | Q39_3 | Q39_4 | Q39_5 | Q39_6 |
|--------|-------|-------|-------|-------|
| 4025   | 4     | 4     | 4     | 4     |
| 4027   | 1     | 1     | 1     | 1     |
| 4032   |       |       |       |       |
| 4034   | 1     | 1     | 1     | 1     |
| 4035   | 4     | 2     | 2     | 2     |
| 4037   | 2     | 3     | 3     | 2     |
| 4040   | 1     | 1     | 1     | 1     |
| 4041   | 1     | 2     | 2     | 1     |
| 4042   | 1     | 1     | 3     | 1     |
| 4043   | 4     | 1     | 1     | 1     |
| 4045   | 3     | 4     | 3     | 3     |
| 4046   | 1     | 3     | 4     | 1     |
| 4048   | 2     | 1     | 2     | 1     |
| 4049   | 1     | 3     | 3     | 2     |
| 4050   | 3     | 4     | 5     | 5     |
| 4052   | 1     | 3     | 4     | 1     |
| 4053   |       |       |       |       |
| 4060   | 1     | 1     | 1     | 1     |
| 4065   | 3     | 3     | 4     | 4     |
| 4066   | 1     | 1     | 1     | 1     |
| 4067   | 1     | 1     | 1     | 1     |
| 4068   | 3     | 3     | 3     | 3     |
| 4069   | 1     | 1     | 2     | 1     |
| 4070   | 1     | 1     | 1     | 1     |
| 4071   | 3     | 3     | 3     | 3     |
| 4072   | 1     | 1     | 1     | 1     |
| 4073   | 1     | 1     | 1     | 1     |
| 4074   | 1     | 1     | 1     | 1     |
| 4075   | 1     | 1     | 1     | 1     |
| 4078   | 1     | 1     | 2     | 1     |
| 4080   | 1     | 1     | 2     | 1     |
| 4081   |       |       |       |       |

| respid | Q39_3 | Q39_4 | Q39_5 | Q39_6 |
|--------|-------|-------|-------|-------|
| 4082   | 1     | 1     | 2     | 1     |
| 4083   | 2     | 3     | 2     | 2     |
| 4084   | 1     | 1     | 1     | 1     |
| 4086   |       |       |       |       |
| 4087   | 1     | 2     | 2     | 1     |
| 4088   | 6     | 2     | 2     | 6     |
| 4089   | 1     | 1     | 1     | 1     |
| 4090   | 2     | 1     | 2     | 2     |
| 4093   | 1     | 2     | 2     | 1     |
| 4094   | 1     | 1     | 1     | 1     |
| 4095   | 1     | 4     | 4     | 1     |
| 4096   |       |       |       |       |
| 4098   | 1     | 1     | 2     | 1     |
| 4103   | 1     | 3     | 3     | 1     |
| 4104   | 2     | 2     | 1     | 2     |
| 4107   | 1     | 1     | 1     | 1     |
| 4109   | 1     | 1     | 1     | 1     |
| 4110   | 1     | 1     | 4     | 1     |
| 4113   | 2     | 1     | 1     | 1     |
| 4114   | 1     | 1     | 1     | 1     |
| 4116   | 2     | 1     | 2     | 1     |
| 4119   | 2     | 1     | 1     | 1     |
| 4120   | 2     | 1     | 1     | 1     |
| 4121   | 2     | 1     | 2     | 1     |
| 4122   | 1     | 3     | 3     | 1     |
| 4124   | 2     | 1     | 2     | 1     |
| 4126   | 1     | 3     | 2     | 1     |
| 4127   | 5     | 5     | 5     | 5     |
| 4131   | 1     | 3     | 3     | 1     |
| 4134   | 1     | 2     | 3     | 1     |
| 4144   | 1     | 2     | 2     | 1     |
| 4145   | 1     | 1     | 1     | 1     |

| respid | Q39_3 | Q39_4 | Q39_5 | Q39_6 |
|--------|-------|-------|-------|-------|
| 4146   | 1     | 1     | 1     | 1     |
| 4147   | 1     | 1     | 1     | 1     |
| 4149   | 1     | 4     | 5     | 1     |
| 4150   |       |       |       |       |
| 4151   | 2     | 5     | 5     | 1     |
| 4153   | 2     | 1     | 1     | 1     |
| 4155   | 3     | 3     | 3     | 3     |
| 4157   | 1     | 2     | 2     | 1     |
| 4159   | 1     | 1     | 1     | 1     |
| 4160   | 1     | 2     | 2     | 1     |
| 4161   | 1     | 1     | 1     | 1     |
| 4163   | 1     | 3     | 3     | 1     |
| 4164   | 1     | 1     | 2     | 1     |
| 4165   | 2     | 2     | 2     | 1     |
| 4166   | 1     | 1     | 1     | 1     |
| 4167   | 1     | 1     | 1     | 1     |
| 4170   | 1     | 3     | 4     | 1     |
| 4172   | 1     | 1     | 1     | 1     |
| 4173   | 1     | 4     | 4     | 1     |
| 4180   | 2     | 2     | 2     | 2     |
| 4185   | 1     | 4     | 4     | 1     |
| 4187   | 1     | 1     | 2     | 1     |
| 4190   | 1     | 1     | 1     | 1     |
| 4191   | 2     | 2     | 3     | 1     |
| 4193   |       |       |       |       |
| 4194   | 1     | 2     | 3     | 1     |
| 4195   | 1     | 1     | 1     | 1     |
| 4196   |       |       |       |       |
| 4197   | 1     | 1     | 2     | 1     |
| 4198   | 1     | 1     | 2     | 1     |
| 4199   | 1     | 1     | 1     | 1     |
| 4205   | 1     | 1     | 2     | 1     |

| respid | Q39_3 | Q39_4 | Q39_5 | Q39_6 |
|--------|-------|-------|-------|-------|
| 4206   |       |       |       |       |
| 4207   | 1     | 3     | 3     | 1     |
| 4214   | 1     | 1     | 2     | 1     |
| 4215   | 1     | 1     | 1     | 1     |
| 4217   | 1     | 1     | 1     | 1     |
| 4219   | 1     | 1     | 1     | 1     |
| 4223   | 5     | 4     | 4     | 4     |
| 4226   | 1     | 3     | 2     | 1     |
| 4229   | 1     | 1     | 1     | 1     |
| 4230   | 2     | 2     | 2     | 1     |
| 4232   | 3     | 1     | 1     | 1     |
| 4233   | 1     | 1     | 1     | 1     |
| 4234   | 5     | 6     | 6     | 5     |
| 4235   | 2     | 2     | 2     | 2     |
| 4236   | 2     | 3     | 3     | 1     |
| 4237   | 2     | 1     | 1     | 1     |
| 4238   | 1     | 1     | 1     | 1     |
| 4240   | 1     | 1     | 2     | 1     |
| 4241   | 1     | 1     | 1     | 1     |
| 4247   | 1     | 1     | 1     | 1     |
| 4250   | 1     | 2     | 2     | 1     |
| 4251   | 1     | 2     | 2     | 2     |
| 4253   | 4     | 3     | 4     | 3     |
| 4254   | 1     | 2     | 2     | 1     |
| 4258   | 3     | 4     | 4     | 3     |
| 4260   | 1     | 1     | 2     | 1     |
| 4263   | 3     | 2     | 2     | 1     |
| 4265   | 1     | 1     | 1     | 1     |
| 4266   | 1     | 1     | 2     | 1     |
| 4267   | 1     | 1     | 2     | 1     |
| 4270   | 1     | 1     | 1     | 1     |
| 4273   | 2     | 2     | 2     | 2     |

| respid | Q39_3 | Q39_4 | Q39_5 | Q39_6 |
|--------|-------|-------|-------|-------|
| 4280   | 1     | 2     | 2     | 1     |
| 4281   | 1     | 1     | 1     | 1     |
| 4282   | 1     | 1     | 1     | 1     |
| 4283   |       |       |       |       |
| 4286   | 1     | 2     | 3     | 1     |
| 4287   | 1     | 1     | 1     | 1     |
| 4289   | 2     | 4     | 4     | 1     |
| 4290   | 4     | 4     | 5     | 4     |
| 4291   | 2     | 1     | 2     | 2     |
| 4292   | 1     | 1     | 1     | 1     |
| 4293   | 1     | 1     | 1     | 1     |
| 4294   | 3     | 1     | 1     | 1     |
| 4295   |       |       |       |       |
| 4296   | 2     | 2     | 2     | 2     |
| 4297   | 1     | 1     | 1     | 1     |
| 4298   | 1     | 1     | 1     | 1     |
| 4299   | 2     | 1     | 1     | 1     |
| 4300   | 1     | 1     | 1     | 1     |
| 4301   |       |       |       |       |
| 4302   | 1     | 1     | 1     | 1     |
| 4304   | 1     | 2     | 3     | 1     |
| 4305   | 1     | 2     | 2     | 2     |
| 4307   | 3     | 4     | 4     | 3     |
| 4308   | 1     | 1     | 1     | 1     |
| 4312   |       |       |       |       |
| 4314   | 2     | 1     | 1     | 1     |
| 4316   | 1     | 1     | 1     | 1     |
| 4317   | 4     | 3     | 5     | 4     |
| 4319   | 6     | 1     | 1     | 6     |
| 4323   | 2     | 3     | 3     | 1     |
| 4337   | 1     | 1     | 1     | 1     |
| 4341   | 3     | 3     | 4     | 1     |

| respid | Q39_3 | Q39_4 | Q39_5 | Q39_6 |
|--------|-------|-------|-------|-------|
| 4342   | 1     | 3     | 3     | 1     |
| 4344   | 1     | 2     | 2     | 1     |
| 4345   | 2     | 2     | 2     | 1     |
| 4346   | 3     | 4     | 3     | 3     |
| 4347   | 1     | 1     | 2     | 1     |
| 4350   |       |       |       |       |
| 4352   | 1     | 1     | 1     | 1     |
| 4353   |       |       |       |       |
| 4355   | 2     | 1     | 1     | 1     |
| 4356   | 2     | 1     | 1     | 2     |
| 4358   |       |       |       |       |
| 4359   | 1     | 1     | 1     | 1     |
| 4360   | 1     | 2     | 2     | 1     |
| 4361   | 5     | 6     | 6     | 2     |
| 4363   | 1     | 1     | 1     | 1     |
| 4364   | 4     | 1     | 1     | 1     |
| 4365   | 1     | 2     | 2     | 1     |
| 4367   | 6     | 3     | 3     | 3     |
| 4369   | 1     | 1     | 2     | 2     |
| 4373   | 1     | 5     | 5     | 1     |
| 4374   | 5     | 3     | 4     | 4     |
| 4375   |       |       |       |       |
| 4378   | 1     | 1     | 1     | 1     |
| 4379   | 2     | 2     | 2     | 2     |
| 4382   | 1     | 1     | 1     | 1     |
| 4383   |       |       |       |       |
| 4384   | 1     | 2     | 2     | 6     |
| 4385   | 1     | 2     | 1     | 2     |
| 4388   | 2     | 3     | 3     | 2     |
| 4389   | 1     | 2     | 1     | 1     |
| 4391   | 1     | 1     | 1     | 1     |
| 4392   | 3     | 1     | 1     | 1     |



| respid | Q39_3 | Q39_4 | Q39_5 | Q39_6 |
|--------|-------|-------|-------|-------|
| 4393   | 1     | 1     | 1     | 1     |
| 4395   | 1     | 2     | 1     | 1     |
| 4397   | 3     | 1     | 1     | 1     |
| 4398   | 1     | 1     | 1     | 1     |
| 4399   | 1     | 1     | 1     | 1     |
| 4400   |       |       |       |       |
| 4401   | 1     | 3     | 3     | 1     |
| 4402   | 1     | 1     | 1     | 1     |
| 4404   | 1     | 1     | 1     | 1     |
| 4405   |       |       |       |       |
| 4407   | 1     | 2     | 2     | 1     |
| 4408   | 1     | 4     | 4     | 1     |
| 4411   |       |       |       |       |
| 4420   | 2     | 1     | 1     | 1     |
| 4421   | 3     | 1     | 1     | 1     |
| 4424   | 4     | 4     | 5     | 5     |
| 4425   | 1     | 2     | 2     | 1     |
| 4427   | 2     | 1     | 1     | 1     |
| 4430   | 2     | 2     | 2     | 2     |
| 4431   | 1     | 2     | 2     | 2     |
| 4432   | 1     | 1     | 1     | 1     |
| 4436   | 1     | 1     | 3     | 1     |
| 4439   | 1     | 1     | 2     | 1     |
| 4451   | 2     | 3     | 2     | 2     |
| 4452   | 4     | 4     | 3     | 4     |
| 4458   | 1     | 1     | 1     | 1     |
| 4464   | 1     | 2     | 2     | 1     |
| 4465   | 4     | 2     | 3     | 2     |
| 4467   | 1     | 1     | 1     | 2     |
| 4470   | 2     | 5     | 5     | 1     |
| 4471   | 1     | 2     | 2     | 1     |
| 4472   | 1     | 3     | 4     | 1     |

| respid | Q39_3 | Q39_4 | Q39_5 | Q39_6 |
|--------|-------|-------|-------|-------|
| 4473   | 1     | 1     | 1     | 1     |
| 4475   | 1     | 2     | 2     | 1     |
| 4476   | 3     | 1     | 1     | 2     |
| 4478   | 1     | 1     | 1     | 1     |
| 4485   | 1     | 1     | 1     | 1     |
| 4486   | 1     | 1     | 2     | 1     |
| 4490   |       |       |       |       |
| 4502   |       |       |       |       |
| 4503   | 3     | 4     | 5     | 5     |
| 4504   | 1     | 1     | 1     | 1     |
| 4506   | 1     | 1     | 2     | 1     |
| 4508   | 1     | 1     | 2     | 1     |
| 4515   | 1     | 1     | 2     | 1     |
| 4516   | 3     | 4     | 4     | 3     |
| 4519   | 1     | 1     | 1     | 1     |
| 4523   | 1     | 2     | 2     | 2     |
| 4525   | 1     | 1     | 1     | 1     |
| 4526   | 1     | 1     | 1     | 1     |
| 4528   |       |       |       |       |
| 4530   | 1     | 1     | 1     | 1     |
| 4531   | 3     | 2     | 2     | 3     |
| 4532   | 1     | 1     | 2     | 1     |
| 4537   | 1     | 1     | 2     | 1     |
| 4538   | 1     | 2     | 2     | 1     |
| 4539   | 2     | 1     | 3     | 2     |
| 4541   | 1     | 1     | 1     | 1     |
| 4543   |       |       |       |       |
| 4544   | 1     | 1     | 1     | 1     |
| 4546   | 1     | 1     | 1     | 1     |
| 4547   | 1     | 2     | 2     | 1     |
| 4549   |       |       |       |       |
| 4550   | 1     | 2     | 2     | 1     |

| respid | Q39_3 | Q39_4 | Q39_5 | Q39_6 |
|--------|-------|-------|-------|-------|
| 4551   | 1     | 1     | 2     | 1     |
| 4554   | 1     | 1     | 1     | 1     |
| 4557   |       |       |       |       |
| 4565   | 1     | 1     | 2     | 1     |
| 4568   | 1     | 1     | 2     | 1     |
| 4569   | 2     | 2     | 2     | 2     |
| 4570   | 1     | 2     | 2     | 1     |
| 4572   | 1     | 2     | 2     | 1     |
| 4574   | 1     | 2     | 2     | 1     |
| 4576   | 1     | 6     | 6     | 2     |
| 4578   | 1     | 1     | 1     | 1     |
| 4579   |       |       |       |       |
| 4580   | 1     | 1     | 2     | 1     |
| 4581   |       |       |       |       |
| 4584   | 1     | 1     | 1     | 1     |
| 4586   | 2     | 2     | 2     | 2     |
| 4587   | 4     | 4     | 4     | 3     |
| 4590   | 1     | 1     | 1     | 1     |
| 4592   | 1     | 2     | 1     | 1     |
| 4593   | 2     | 1     | 2     | 1     |
| 4595   | 1     | 1     | 2     | 1     |
| 4597   | 1     | 1     | 1     | 1     |
| 4598   | 3     | 3     | 3     | 3     |
| 4599   | 1     | 3     | 3     | 1     |
| 4600   | 1     | 3     | 3     | 1     |
| 4601   | 2     | 2     | 2     | 2     |
| 4608   | 1     | 2     | 2     | 1     |
| 4609   | 1     | 2     | 2     | 1     |
| 4611   | 1     | 2     | 2     | 1     |
| 4612   | 2     | 3     | 2     | 2     |
| 4613   |       |       |       |       |
| 4616   | 1     | 3     | 3     | 1     |

| respid | Q39_3 | Q39_4 | Q39_5 | Q39_6 |
|--------|-------|-------|-------|-------|
| 4617   | 1     | 1     | 2     | 1     |
| 4620   | 2     | 2     | 3     | 1     |
| 4621   | 3     | 3     | 3     | 3     |
| 4622   | 3     | 2     | 2     | 2     |
| 4624   | 1     | 2     | 2     | 1     |
| 4625   | 1     | 3     | 2     | 2     |
| 4627   | 1     | 3     | 3     | 1     |
| 4628   | 3     | 3     | 3     | 3     |
| 4629   |       |       |       |       |
| 4630   | 1     | 2     | 3     | 2     |
| 4632   | 2     | 2     | 2     | 2     |
| 4634   | 2     | 2     | 2     | 2     |
| 4635   | 1     | 1     | 3     | 1     |
| 4636   | 1     | 1     | 1     | 1     |
| 4637   | 2     | 2     | 2     | 2     |
| 4638   | 1     | 2     | 3     | 1     |
| 4639   | 2     | 2     | 2     | 1     |
| 4641   | 1     | 1     | 1     | 1     |
| 4643   | 1     | 1     | 2     | 1     |
| 4645   | 2     | 1     | 1     | 1     |
| 4646   | 2     | 2     | 2     | 2     |
| 4647   |       |       |       |       |
| 4648   | 1     | 1     | 1     | 1     |
| 4649   | 1     | 1     | 1     | 1     |
| 4650   | 4     | 6     | 6     | 3     |
| 4651   | 1     | 1     | 2     | 1     |
| 4652   | 2     | 1     | 1     | 1     |
| 4653   |       |       |       |       |
| 4657   |       |       |       |       |
| 4660   | 1     | 2     | 2     | 1     |
| 4661   | 1     | 1     | 1     | 1     |
| 4662   | 2     | 2     | 2     | 1     |

| respid | Q39_3 | Q39_4 | Q39_5 | Q39_6 |
|--------|-------|-------|-------|-------|
| 4667   | 2     | 2     | 2     | 1     |
| 4669   | 1     | 1     | 2     | 1     |
| 4671   |       |       |       |       |
| 4672   | 1     | 5     | 5     | 1     |
| 4673   | 1     | 2     | 2     | 1     |
| 4677   |       |       |       |       |
| 4679   | 1     | 1     | 1     | 1     |
| 4683   | 1     | 1     | 1     | 1     |
| 4684   | 1     | 3     | 3     | 1     |
| 4685   | 1     | 2     | 2     | 1     |
| 4686   | 2     | 1     | 1     | 1     |
| 4687   | 1     | 1     | 1     | 1     |
| 4688   | 1     | 1     | 1     | 1     |
| 4691   | 1     | 1     | 1     | 1     |
| 4692   | 1     | 1     | 1     | 1     |
| 4694   | 2     | 2     | 2     | 2     |
| 4695   | 2     | 2     | 2     | 1     |
| 4696   | 1     | 1     | 2     | 1     |
| 4697   |       |       |       |       |
| 4698   | 3     | 3     | 3     | 3     |
| 4699   | 1     | 1     | 2     | 1     |
| 4701   |       |       |       |       |
| 4703   | 2     | 2     | 3     | 1     |
| 4704   | 6     | 5     | 5     | 5     |
| 4705   | 1     | 2     | 2     | 1     |
| 4706   | 1     | 1     | 1     | 1     |
| 4707   | 1     | 1     | 1     | 1     |
| 4708   | 1     | 1     | 1     | 1     |
| 4710   | 1     | 2     | 2     | 1     |
| 4711   | 3     | 3     | 4     | 3     |
| 4715   |       |       |       |       |
| 4716   | 2     | 1     | 1     | 1     |

| respid | Q39_3 | Q39_4 | Q39_5 | Q39_6 |
|--------|-------|-------|-------|-------|
| 4717   | 1     | 1     | 1     | 1     |
| 4718   | 2     | 2     | 2     | 2     |
| 4722   | 2     | 2     | 2     | 2     |
| 4727   | 2     | 3     | 3     | 3     |
| 4728   | 2     | 6     | 6     | 2     |
| 4729   | 1     | 1     | 1     | 1     |
| 4732   | 1     | 2     | 2     | 1     |
| 4733   | 1     | 1     | 1     | 1     |
| 4734   | 2     | 1     | 1     | 2     |
| 4735   | 1     | 1     | 1     | 1     |
| 4737   | 1     | 1     | 1     | 1     |
| 4738   | 1     | 2     | 2     | 1     |
| 4740   | 1     | 1     | 1     | 1     |
| 4741   | 3     | 3     | 2     | 3     |
| 4743   | 1     | 1     | 1     | 1     |
| 4746   | 1     | 1     | 1     | 1     |
| 4750   | 1     | 1     | 1     | 1     |
| 4752   | 1     | 1     | 1     | 1     |
| 4753   | 1     | 1     | 2     | 1     |
| 4754   | 4     | 4     | 3     | 3     |
| 4755   | 3     | 4     | 4     | 3     |
| 4758   | 1     | 4     | 4     | 1     |
| 4766   |       |       |       |       |
| 4767   | 3     | 4     | 4     | 3     |
| 4768   | 1     | 1     | 2     | 1     |
| 4769   | 2     | 1     | 1     | 1     |
| 4771   | 1     | 5     | 4     | 4     |
| 4772   | 3     | 1     | 1     | 1     |
| 4773   | 2     | 2     | 2     | 2     |
| 4774   | 3     | 2     | 2     | 1     |
| 4776   | 3     | 2     | 2     | 2     |
| 4777   | 2     | 1     | 2     | 2     |

| respid | Q39_3 | Q39_4 | Q39_5 | Q39_6 |
|--------|-------|-------|-------|-------|
| 4779   |       |       |       |       |
| 4780   | 1     | 1     | 2     | 1     |
| 4781   | 1     | 1     | 1     | 1     |
| 4783   | 6     | 3     | 4     | 5     |
| 4784   | 1     | 1     | 1     | 1     |
| 4785   | 2     | 3     | 3     | 1     |
| 4788   |       |       |       |       |
| 4789   | 4     | 4     | 5     | 6     |
| 4790   | 1     | 1     | 1     | 1     |
| 4791   |       |       |       |       |
| 4794   |       |       |       |       |
| 4795   | 1     | 1     | 1     | 1     |
| 4797   | 1     | 1     | 1     | 1     |
| 4802   | 4     | 3     | 3     | 4     |
| 4803   | 3     | 2     | 2     | 2     |
| 4804   |       |       |       |       |
| 4805   | 1     | 1     | 1     | 1     |
| 4807   |       |       |       |       |
| 4808   | 3     | 3     | 4     | 1     |
| 4809   | 5     | 5     | 6     | 5     |
| 4811   | 1     | 2     | 2     | 1     |
| 4817   |       |       |       |       |
| 4819   | 1     | 2     | 2     | 1     |
| 4820   |       |       |       |       |
| 4821   | 3     | 2     | 1     | 1     |
| 4822   | 1     | 1     | 1     | 1     |
| 4823   | 2     | 2     | 2     | 1     |
| 4825   | 1     | 1     | 1     | 1     |
| 4826   |       |       |       |       |
| 4830   | 1     | 1     | 2     | 1     |
| 4832   |       |       |       |       |
| 4838   | 3     | 3     | 3     | 3     |

| respid | Q39_3 | Q39_4 | Q39_5 | Q39_6 |
|--------|-------|-------|-------|-------|
| 4840   | 2     | 1     | 1     | 1     |
| 4841   |       |       |       |       |
| 4843   | 2     | 1     | 1     | 1     |
| 4845   | 1     | 2     | 3     | 1     |
| 4846   | 3     | 3     | 3     | 3     |
| 4848   | 2     | 1     | 1     | 1     |
| 4853   | 1     | 1     | 1     | 1     |
| 4854   | 1     | 1     | 1     | 1     |
| 4859   | 1     | 1     | 1     | 1     |
| 4861   |       |       |       |       |
| 4864   | 6     | 5     | 5     | 3     |
| 4867   |       |       |       |       |
| 4870   | 2     | 1     | 1     | 1     |
| 4872   | 1     | 2     | 2     | 1     |
| 4873   | 3     | 3     | 3     | 3     |
| 4874   | 1     | 1     | 2     | 1     |
| 4878   | 1     | 1     | 1     | 1     |
| 4880   | 1     | 1     | 1     | 1     |
| 4881   | 1     | 2     | 2     | 1     |
| 4882   | 3     | 3     | 3     | 3     |
| 4883   | 1     | 1     | 1     | 1     |
| 4885   | 1     | 1     | 1     | 1     |
| 4889   |       |       |       |       |
| 4890   |       |       |       |       |
| 4891   | 1     | 1     | 1     | 1     |
| 4894   | 2     | 2     | 2     | 2     |
| 4895   | 4     | 3     | 3     | 4     |
| 4896   | 1     | 1     | 1     | 1     |
| 4897   | 1     | 1     | 1     | 1     |
| 4898   | 3     | 3     | 3     | 3     |
| 4899   |       |       |       |       |
| 4900   | 2     | 2     | 2     | 2     |



| respid | Q39_3 | Q39_4 | Q39_5 | Q39_6 |
|--------|-------|-------|-------|-------|
| 4901   | 1     | 1     | 1     | 1     |
| 4903   | 2     | 1     | 1     | 2     |
| 4904   | 1     | 1     | 1     | 1     |
| 4908   | 1     | 1     | 2     | 1     |
| 4909   | 3     | 3     | 2     | 1     |
| 4913   | 1     | 1     | 1     | 1     |
| 4917   | 1     | 1     | 2     | 1     |
| 4918   | 1     | 3     | 5     | 1     |
| 4920   |       |       |       |       |
| 4921   | 1     | 2     | 2     | 1     |
| 4925   | 2     | 2     | 2     | 2     |
| 4926   | 1     | 1     | 1     | 1     |
| 4927   | 2     | 1     | 2     | 1     |
| 4928   | 1     | 2     | 2     | 1     |
| 4929   | 1     | 1     | 2     | 1     |
| 4930   | 5     | 6     | 6     | 5     |
| 4931   | 1     | 1     | 2     | 1     |
| 4932   | 3     | 4     | 4     | 3     |
| 4933   | 2     | 1     | 1     | 1     |
| 4934   | 1     | 1     | 1     | 1     |
| 5934   | 1     | 1     | 1     | 1     |
| 5935   | 1     | 2     | 2     | 1     |
| 5936   | 1     | 1     | 1     | 1     |
| 5938   |       |       |       |       |
| 5939   | 1     | 1     | 1     | 1     |
| 5940   | 2     | 2     | 1     | 1     |
| 5942   | 6     | 6     | 5     | 4     |
| 5944   | 2     | 2     | 2     | 1     |
| 5951   | 3     | 6     | 6     | 4     |
| 5952   | 1     | 3     | 3     | 1     |
| 5954   | 2     | 2     | 2     | 2     |
| 5956   | 1     | 2     | 2     | 1     |

| respid | Q39_3 | Q39_4 | Q39_5 | Q39_6 |
|--------|-------|-------|-------|-------|
| 5957   | 1     | 3     | 3     | 1     |
| 5958   | 2     | 2     | 2     | 2     |
| 5959   | 3     | 3     | 3     | 3     |
| 5960   | 1     | 1     | 2     | 1     |
| 5963   | 5     | 6     | 6     | 6     |
| 5966   | 1     | 2     | 2     | 2     |
| 5968   | 2     | 1     | 2     | 2     |
| 5974   | 1     | 1     | 1     | 1     |
| 5975   | 1     | 1     | 1     | 1     |
| 5976   | 2     | 2     | 3     | 3     |
| 5977   | 1     | 2     | 2     | 1     |
| 5978   | 3     | 3     | 3     | 3     |
| 5979   | 3     | 2     | 2     | 2     |
| 5983   | 1     | 1     | 2     | 1     |
| 5984   | 1     | 1     | 1     | 1     |
| 5990   | 1     | 1     | 1     | 1     |
| 5991   | 1     | 1     | 1     | 1     |
| 5992   |       |       |       |       |
| 5993   | 2     | 1     | 1     | 1     |
| 5994   | 1     | 1     | 1     | 1     |
| 5996   | 1     | 1     | 1     | 1     |
| 6001   | 3     | 2     | 3     | 3     |
| 6003   | 1     | 1     | 1     | 1     |
| 6004   | 3     | 2     | 2     | 1     |
| 6005   | 1     | 4     | 4     | 1     |
| 6006   | 1     | 1     | 1     | 1     |
| 6008   | 1     | 3     | 4     | 1     |
| 6009   | 1     | 3     | 3     | 1     |
| 6014   |       |       |       |       |
| 6016   | 2     | 2     | 2     | 2     |
| 6017   | 1     | 1     | 2     | 1     |
| 6018   | 1     | 2     | 2     | 1     |

| respid | Q39_3 | Q39_4 | Q39_5 | Q39_6 |
|--------|-------|-------|-------|-------|
| 6020   | 1     | 4     | 5     | 1     |
| 6021   |       |       |       |       |
| 6024   | 1     | 2     | 2     | 1     |
| 6025   | 1     | 2     | 2     | 1     |
| 6026   | 2     | 2     | 2     | 1     |
| 6032   | 2     | 2     | 2     | 1     |
| 6035   | 1     | 2     | 2     | 1     |
| 6038   | 1     | 2     | 2     | 1     |
| 6043   | 1     | 2     | 3     | 2     |
| 6044   | 1     | 2     | 2     | 1     |
| 6046   | 2     | 1     | 1     | 2     |
| 6047   | 1     | 1     | 2     | 1     |
| 6048   | 1     | 2     | 2     | 1     |
| 6050   | 2     | 3     | 4     | 2     |
| 6051   | 1     | 1     | 2     | 1     |
| 6053   | 1     | 1     | 1     | 1     |
| 6054   | 1     | 2     | 3     | 1     |
| 6056   | 1     | 1     | 1     | 1     |
| 6058   | 1     | 2     | 2     | 1     |
| 6060   | 1     | 1     | 2     | 1     |
| 6061   | 1     | 1     | 1     | 1     |
| 6062   | 1     | 2     | 2     | 1     |
| 6067   | 1     | 1     | 1     | 1     |
| 6070   | 1     | 1     | 3     | 1     |
| 6074   | 1     | 2     | 2     | 1     |
| 6076   | 1     | 2     | 2     | 1     |
| 6078   |       |       |       |       |
| 6081   | 1     | 1     | 2     | 1     |
| 6085   | 2     | 2     | 2     | 1     |
| 6088   |       |       |       |       |
| 6092   | 2     | 2     | 2     | 1     |
| 6095   | 1     | 2     | 2     | 1     |

| respid | Q39_3 | Q39_4 | Q39_5 | Q39_6 |
|--------|-------|-------|-------|-------|
| 6098   | 1     | 1     | 1     | 1     |
| 6101   |       |       |       |       |
| 6102   | 1     | 2     | 3     | 1     |
| 6105   | 1     | 2     | 3     | 1     |
| 6106   | 1     | 2     | 2     | 1     |
| 6107   | 1     | 1     | 1     | 1     |
| 6111   | 1     | 1     | 1     | 1     |
| 6112   | 1     | 2     | 2     | 1     |
| 6113   | 3     | 3     | 4     | 3     |
| 6115   | 1     | 1     | 1     | 1     |
| 6116   |       |       |       |       |
| 6117   | 5     | 3     | 4     | 4     |
| 6124   | 2     | 3     | 5     | 2     |
| 6125   | 1     | 1     | 2     | 1     |
| 6128   |       |       |       |       |
| 6133   | 1     | 1     | 1     | 1     |
| 6134   | 1     | 2     | 2     | 1     |
| 6135   | 1     | 1     | 1     | 1     |
| 6138   | 2     | 2     | 2     | 2     |
| 6140   | 1     | 1     | 1     | 1     |
| 6143   | 1     | 1     | 1     | 1     |
| 6147   | 1     | 2     | 3     | 1     |
| 6154   | 1     | 1     | 1     | 1     |
| 6162   |       |       |       |       |
| 6165   | 1     | 1     | 3     | 1     |
| 6166   | 3     | 3     | 2     | 2     |
| 6173   | 2     | 5     | 5     | 2     |
| 6180   | 2     | 2     | 2     | 2     |
| 6184   | 4     | 5     | 6     | 4     |
| 6185   | 1     | 1     | 1     | 2     |
| 6186   | 1     | 1     | 2     | 1     |
| 6188   | 1     | 1     | 2     | 1     |

| respid | Q39_3 | Q39_4 | Q39_5 | Q39_6 |
|--------|-------|-------|-------|-------|
| 6192   | 3     | 1     | 1     | 2     |
| 6194   |       |       |       |       |
| 6195   | 1     | 1     | 1     | 1     |
| 6196   | 4     | 3     | 3     | 3     |
| 6199   | 2     | 2     | 2     | 2     |
| 6200   |       |       |       |       |
| 6201   | 1     | 1     | 2     | 1     |
| 6202   | 1     | 3     | 3     | 1     |
| 6203   | 1     | 1     | 1     | 1     |
| 6205   | 1     | 1     | 1     | 1     |
| 6210   | 2     | 2     | 2     | 1     |
| 6212   | 1     | 1     | 2     | 1     |
| 6216   | 2     | 4     | 4     | 3     |
| 6218   | 1     | 4     | 4     | 1     |
| 6221   | 1     | 2     | 3     | 1     |
| 6224   | 1     | 1     | 1     | 1     |
| 6225   | 1     | 2     | 2     | 1     |
| 6227   | 1     | 1     | 2     | 1     |
| 6230   |       |       |       |       |
| 6231   | 1     | 1     | 2     | 1     |
| 6233   | 3     | 2     | 1     | 1     |
| 6234   | 1     | 1     | 3     | 1     |
| 6235   |       |       |       |       |
| 6237   |       |       |       |       |
| 6240   |       |       |       |       |
| 6248   | 1     | 1     | 1     | 1     |
| 6249   | 1     | 1     | 1     | 1     |
| 6252   | 3     | 1     | 1     | 1     |
| 6254   | 1     | 1     | 2     | 1     |
| 6269   | 2     | 2     | 2     | 2     |
| 6304   |       |       |       |       |
| 6334   | 2     | 2     | 1     | 2     |

| respid | Q39_3 | Q39_4 | Q39_5 | Q39_6 |
|--------|-------|-------|-------|-------|
| 6341   | 2     | 3     | 6     | 1     |
| 6350   | 2     | 2     | 3     | 2     |
| 6370   | 1     | 1     | 1     | 1     |
| 6384   | 2     | 1     | 1     | 1     |
| 6400   | 1     | 1     | 1     | 1     |
| 6418   |       |       |       |       |
| 6467   | 1     | 3     | 3     | 2     |
| 6469   | 1     | 1     | 1     | 1     |
| 6474   | 1     | 1     | 1     | 1     |
| 6475   |       |       |       |       |
| 6476   | 2     | 2     | 2     | 2     |
| 6477   | 1     | 2     | 3     | 1     |
| 6480   | 1     | 2     | 2     | 1     |
| 6481   | 2     | 4     | 5     | 3     |
| 6485   | 1     | 1     | 1     | 1     |
| 6488   | 2     | 3     | 3     | 2     |
| 6495   | 1     | 3     | 2     | 1     |
| 6499   | 3     | 3     | 4     | 3     |
| 6500   | 1     | 2     | 2     | 1     |
| 6504   | 3     | 3     | 3     | 3     |
| 6507   | 2     | 3     | 3     | 1     |
| 6512   | 2     | 2     | 2     | 1     |
| 6525   | 3     | 3     | 3     | 3     |
| 6532   | 1     | 2     | 2     | 1     |
| 6535   | 3     | 2     | 2     | 2     |
| 6546   | 1     | 1     | 1     | 1     |
| 6551   | 3     | 6     | 6     | 5     |
| 6556   | 3     | 3     | 3     | 3     |
| 6566   | 1     | 4     | 4     | 1     |
| 6569   |       |       |       |       |
| 6574   | 1     | 1     | 1     | 1     |
| 6576   | 1     | 1     | 3     | 1     |

| respid | Q39_3 | Q39_4 | Q39_5 | Q39_6 |
|--------|-------|-------|-------|-------|
| 6580   |       |       |       |       |
| 6584   |       |       |       |       |
| 6585   | 3     | 2     | 2     | 3     |
| 6589   | 1     | 2     | 1     | 1     |
| 6590   | 1     | 2     | 2     | 1     |
| 6598   | 1     | 1     | 1     | 1     |
| 6603   | 2     | 2     | 2     | 2     |
| 6618   | 1     | 2     | 1     | 2     |
| 6630   | 1     | 1     | 1     | 1     |
| 6636   | 3     | 3     | 3     | 3     |
| 6649   |       |       |       |       |
| 6675   | 1     | 1     | 1     | 1     |
| 6678   | 1     | 1     | 1     | 1     |
| 6681   | 1     | 1     | 1     | 1     |
| 6684   | 2     | 2     | 2     | 2     |
| 6688   |       |       |       |       |
| 6691   | 1     | 1     | 1     | 1     |
| 6694   | 2     | 2     | 2     | 2     |
| 6696   | 1     | 1     | 1     | 1     |
| 6720   | 4     | 5     | 4     | 5     |
| 6722   | 6     | 5     | 5     | 6     |
| 6724   | 1     | 1     | 2     | 1     |
| 6725   | 1     | 1     | 1     | 1     |
| 6727   | 1     | 2     | 2     | 1     |
| 6734   | 2     | 2     | 2     | 2     |
| 6739   | 1     | 1     | 4     | 1     |
| 6743   | 4     | 4     | 4     | 4     |
| 6749   | 1     | 1     | 1     | 1     |
| 6756   | 1     | 3     | 2     | 1     |
| 6764   | 1     | 1     | 1     | 1     |
| 6765   | 1     | 1     | 1     | 1     |
| 6768   | 1     | 1     | 1     | 1     |

| respid | Q39_3 | Q39_4 | Q39_5 | Q39_6 |
|--------|-------|-------|-------|-------|
| 6773   | 1     | 2     | 2     | 1     |
| 6775   | 3     | 3     | 3     | 3     |
| 6777   | 1     | 1     | 1     | 1     |
| 6779   | 1     | 1     | 1     | 1     |
| 6790   | 1     | 1     | 2     | 1     |
| 6797   |       |       |       |       |
| 6798   | 3     | 2     | 2     | 2     |
| 6808   |       |       |       |       |
| 6810   | 4     | 3     | 3     | 3     |
| 6811   | 3     | 6     | 6     | 3     |
| 6812   | 1     | 2     | 2     | 1     |
| 6814   | 1     | 2     | 2     | 1     |
| 6819   | 2     | 2     | 2     | 1     |
| 6820   | 3     | 4     | 4     | 3     |
| 6832   | 1     | 1     | 1     | 1     |
| 6854   | 1     | 1     | 1     | 1     |
| 6855   |       |       |       |       |
| 6857   | 1     | 1     | 2     | 1     |
| 6858   | 1     | 2     | 2     | 1     |
| 6859   | 1     | 1     | 2     | 1     |
| 6860   | 1     | 2     | 2     | 1     |
| 6862   | 2     | 2     | 2     | 2     |
| 6879   |       |       |       |       |
| 6893   | 1     | 1     | 2     | 1     |
| 6898   | 3     | 1     | 1     | 2     |
| 6902   | 5     | 2     | 2     | 3     |
| 6903   | 6     | 6     | 6     | 6     |
| 6907   | 5     | 4     | 3     | 4     |
| 6908   |       |       |       |       |
| 6912   |       |       |       |       |
| 6915   | 2     | 4     | 4     | 1     |
| 6916   | 4     | 1     | 2     | 4     |



| respid | Q39_3 | Q39_4 | Q39_5 | Q39_6 |
|--------|-------|-------|-------|-------|
| 6917   | 1     | 1     | 1     | 1     |
| 6923   | 1     | 1     | 1     | 1     |
| 6934   | 1     | 1     | 1     | 1     |
| 6937   |       |       |       |       |
| 6945   | 1     | 2     | 2     | 1     |
| 6954   | 2     | 1     | 1     | 1     |
| 6956   | 2     | 4     | 4     | 2     |
| 6958   | 1     | 2     | 2     | 1     |
| 6961   | 3     | 2     | 2     | 1     |
| 6963   | 2     | 1     | 1     | 1     |
| 6964   | 1     | 1     | 1     | 1     |
| 6976   |       |       |       |       |
| 6977   | 1     | 1     | 2     | 2     |
| 7000   | 4     | 2     | 1     | 2     |
| 7001   | 1     | 1     | 1     | 1     |
| 7005   | 1     | 1     | 2     | 1     |
| 7006   | 1     | 3     | 1     | 1     |
| 7008   | 6     | 2     | 5     | 6     |
| 7009   | 1     | 1     | 1     | 1     |
| 7019   | 1     | 1     | 2     | 1     |
| 7021   | 1     | 1     | 2     | 1     |
| 7026   | 2     | 3     | 2     | 3     |
| 7030   | 4     | 4     | 3     | 3     |
| 7034   |       |       |       |       |
| 7039   | 1     | 1     | 2     | 2     |
| 7041   | 1     | 1     | 2     | 1     |
| 7047   | 1     | 1     | 2     | 1     |
| 7051   | 1     | 1     | 1     | 1     |
| 7052   | 2     | 2     | 2     | 2     |
| 7059   | 1     | 2     | 2     | 1     |
| 7062   | 3     | 3     | 3     | 2     |
| 7065   | 1     | 2     | 2     | 1     |

| respid | Q39_3 | Q39_4 | Q39_5 | Q39_6 |
|--------|-------|-------|-------|-------|
| 7066   | 1     | 2     | 2     | 1     |
| 7069   | 1     | 2     | 2     | 1     |
| 7070   |       |       |       |       |
| 7073   |       |       |       |       |
| 7078   | 1     | 1     | 1     | 1     |
| 7083   | 2     | 3     | 3     | 5     |
| 7084   | 5     | 5     | 5     | 4     |
| 7085   | 1     | 2     | 1     | 1     |
| 7088   | 4     | 4     | 5     | 5     |
| 7090   | 1     | 3     | 2     | 2     |
| 7095   | 2     | 1     | 2     | 1     |
| 7100   |       |       |       |       |
| 7102   | 1     | 1     | 4     | 1     |
| 7103   | 1     | 2     | 1     | 1     |
| 7108   | 1     | 1     | 2     | 1     |
| 7109   | 1     | 1     | 1     | 1     |
| 7110   |       |       |       |       |
| 7112   |       |       |       |       |
| 7114   | 1     | 2     | 2     | 1     |
| 7116   | 1     | 2     | 1     | 1     |
| 7117   | 1     | 1     | 2     | 2     |
| 7118   | 4     | 5     | 5     | 4     |
| 7120   | 5     | 4     | 4     | 5     |
| 7124   | 1     | 2     | 2     | 1     |
| 7130   | 1     | 1     | 1     | 1     |
| 7135   | 1     | 1     | 1     | 1     |
| 7137   | 5     | 3     | 4     | 4     |
| 7140   | 1     | 1     | 1     | 1     |
| 7141   | 1     | 1     | 1     | 1     |
| 7148   | 1     | 1     | 1     | 1     |
| 7152   |       |       |       |       |
| 7154   | 1     | 4     | 6     | 1     |

| respid | Q39_3 | Q39_4 | Q39_5 | Q39_6 |
|--------|-------|-------|-------|-------|
| 7156   | 1     | 1     | 2     | 1     |
| 7158   | 3     | 3     | 2     | 2     |
| 7159   |       |       |       |       |
| 7161   |       |       |       |       |
| 7164   | 1     | 1     | 1     | 1     |
| 7166   |       |       |       |       |
| 7167   |       |       |       |       |
| 7168   |       |       |       |       |
| 7170   |       |       |       |       |
| 7171   | 1     | 2     | 2     | 1     |
| 7172   | 1     | 1     | 1     | 1     |
| 7173   | 1     | 3     | 3     | 2     |
| 7175   | 1     | 1     | 2     | 1     |
| 7176   | 2     | 2     | 2     | 2     |
| 7180   | 1     | 1     | 2     | 1     |
| 7183   | 1     | 2     | 2     | 1     |
| 7189   | 1     | 1     | 1     | 1     |
| 7193   | 1     | 1     | 2     | 1     |
| 7194   | 1     | 1     | 5     | 1     |
| 7195   | 1     | 1     | 2     | 1     |
| 7200   | 1     | 1     | 1     | 1     |
| 7201   | 3     | 4     | 4     | 3     |
| 7205   | 3     | 4     | 5     | 3     |
| 7207   | 1     | 2     | 1     | 1     |
| 7208   |       |       |       |       |
| 7210   | 1     | 2     | 2     | 1     |
| 7211   | 1     | 1     | 1     | 1     |
| 7217   | 3     | 1     | 2     | 1     |
| 7218   | 1     | 1     | 1     | 1     |
| 7220   |       |       |       |       |
| 7225   | 1     | 1     | 1     | 1     |
| 7228   | 1     | 1     | 1     | 1     |

| respid | Q39_3 | Q39_4 | Q39_5 | Q39_6 |
|--------|-------|-------|-------|-------|
| 7230   | 1     | 1     | 2     | 1     |
| 7233   | 2     | 1     | 1     | 1     |
| 7234   | 1     | 1     | 2     | 1     |
| 7235   |       |       |       |       |
| 7236   |       |       |       |       |
| 7241   | 1     | 2     | 2     | 1     |
| 7251   | 1     | 1     | 1     | 1     |
| 7253   | 6     | 1     | 6     | 5     |
| 7259   | 1     | 1     | 4     | 1     |
| 7260   | 1     | 1     | 2     | 1     |
| 7261   | 2     | 2     | 2     | 2     |
| 7263   | 1     | 1     | 3     | 1     |
| 7265   |       |       |       |       |
| 7268   | 1     | 1     | 1     | 1     |
| 7269   |       |       |       |       |
| 7271   | 3     | 3     | 4     | 3     |
| 7276   | 6     | 4     | 5     | 1     |
| 7280   | 2     | 2     | 1     | 1     |
| 7283   | 1     | 1     | 2     | 1     |
| 7284   | 1     | 1     | 1     | 1     |
| 7286   | 1     | 1     | 1     | 1     |
| 7287   |       |       |       |       |
| 7288   | 3     | 3     | 3     | 3     |
| 7294   | 2     | 1     | 1     | 1     |
| 7295   | 1     | 1     | 1     | 1     |
| 7296   | 3     | 3     | 2     | 3     |
| 7297   | 2     | 1     | 2     | 1     |
| 7299   | 2     | 3     | 2     | 2     |
| 7300   | 4     | 2     | 2     | 3     |
| 7301   | 1     | 2     | 2     | 1     |
| 7302   |       |       |       |       |
| 7306   | 1     | 1     | 1     | 1     |

| respid | Q39_3 | Q39_4 | Q39_5 | Q39_6 |
|--------|-------|-------|-------|-------|
| 7313   | 6     | 5     | 6     | 5     |
| 7315   | 1     | 1     | 2     | 1     |
| 7317   | 1     | 1     | 1     | 1     |
| 7321   | 1     | 2     | 2     | 1     |
| 7322   | 1     | 1     | 2     | 1     |
| 7323   | 5     | 2     | 2     | 2     |
| 7333   | 3     | 2     | 2     | 3     |
| 7335   | 5     | 1     | 1     | 3     |
| 7336   | 1     | 1     | 1     | 1     |
| 7337   | 4     | 3     | 3     | 2     |
| 7338   | 1     | 1     | 1     | 1     |
| 7340   | 1     | 1     | 1     | 1     |
| 7341   | 1     | 1     | 3     | 1     |
| 7342   | 1     | 1     | 1     | 1     |
| 7344   | 3     | 4     | 5     | 3     |
| 7346   | 1     | 2     | 3     | 3     |
| 7347   | 1     | 1     | 1     | 1     |
| 7349   | 6     | 5     | 5     | 5     |
| 7352   | 1     | 1     | 2     | 1     |
| 7353   | 1     | 1     | 3     | 1     |
| 7355   | 1     | 3     | 3     | 1     |
| 7356   |       |       |       |       |
| 7360   | 4     | 3     | 5     | 4     |
| 7371   | 4     | 1     | 1     | 1     |
| 7376   | 3     | 2     | 3     | 3     |
| 7379   | 1     | 3     | 3     | 3     |
| 7381   | 1     | 1     | 1     | 1     |
| 7386   | 2     | 2     | 2     | 1     |
| 7389   | 1     | 2     | 2     | 1     |
| 7390   | 6     | 5     | 6     | 5     |
| 7393   | 1     | 1     | 1     | 1     |
| 7394   | 1     | 2     | 1     | 1     |

| respid | Q39_3 | Q39_4 | Q39_5 | Q39_6 |
|--------|-------|-------|-------|-------|
| 7396   | 2     | 2     | 3     | 1     |
| 7400   | 3     | 4     | 4     | 3     |
| 7401   | 1     | 1     | 2     | 2     |
| 7403   | 1     | 2     | 1     | 1     |
| 7406   | 6     | 6     | 6     | 6     |
| 7409   | 5     | 5     | 6     | 5     |
| 7410   | 5     | 4     | 5     | 5     |
| 7412   | 4     | 3     | 3     | 3     |
| 7414   | 1     | 2     | 2     | 3     |
| 7415   | 2     | 3     | 2     | 3     |
| 7417   | 4     | 5     | 3     | 4     |
| 7421   | 5     | 5     | 5     | 5     |
| 7425   | 2     | 2     | 3     | 2     |
| 7430   | 2     | 3     | 3     | 1     |
| 7432   | 1     | 1     | 1     | 1     |
| 7433   | 3     | 3     | 3     | 2     |
| 7442   | 2     | 2     | 2     | 2     |
| 7445   | 1     | 1     | 1     | 1     |
| 7446   | 1     | 1     | 1     | 1     |
| 7449   |       |       |       |       |
| 7450   |       |       |       |       |
| 7451   | 2     | 2     | 2     | 2     |
| 7459   | 1     | 3     | 3     | 1     |
| 7462   | 3     | 3     | 2     | 2     |
| 7463   | 1     | 1     | 1     | 1     |
| 7469   |       |       |       |       |
| 7482   | 1     | 1     | 1     | 1     |
| 7484   | 2     | 2     | 2     | 1     |
| 7486   | 2     | 2     | 2     | 1     |
| 7496   | 1     | 1     | 1     | 1     |
| 7502   | 1     | 2     | 2     | 1     |
| 7504   | 1     | 2     | 3     | 1     |

| respid | Q39_3 | Q39_4 | Q39_5 | Q39_6 |
|--------|-------|-------|-------|-------|
| 7509   | 6     | 6     | 6     | 6     |
| 7513   | 2     | 3     | 4     | 2     |
| 7514   |       |       |       |       |
| 7520   | 1     | 1     | 1     | 1     |
| 7523   |       |       |       |       |
| 7526   | 1     | 2     | 4     | 3     |
| 7529   | 3     | 4     | 5     | 3     |
| 7534   |       |       |       |       |
| 7536   | 2     | 3     | 4     | 2     |
| 7540   | 1     | 1     | 2     | 1     |
| 7541   | 2     | 2     | 2     | 2     |
| 7542   |       |       |       |       |
| 7555   | 3     | 3     | 3     | 3     |
| 7566   | 2     | 2     | 3     | 2     |
| 7568   | 1     | 1     | 2     | 1     |
| 7570   | 2     | 3     | 4     | 3     |
| 7572   | 2     | 1     | 3     | 1     |
| 7573   | 2     | 4     | 5     | 2     |
| 7576   | 1     | 2     | 2     | 1     |
| 7577   | 1     | 6     | 6     | 1     |
| 7583   | 1     | 1     | 1     | 1     |
| 7584   | 1     | 1     | 1     | 1     |
| 7585   | 5     | 6     | 6     | 5     |
| 7586   | 3     | 3     | 2     | 2     |
| 7587   | 1     | 1     | 1     | 1     |
| 7588   | 1     | 1     | 1     | 1     |
| 7596   | 1     | 1     | 1     | 1     |
| 7599   | 1     | 1     | 1     | 1     |
| 7600   | 4     | 5     | 4     | 4     |
| 7602   | 1     | 1     | 1     | 1     |
| 7613   | 1     | 1     | 1     | 1     |
| 7620   | 1     | 1     | 2     | 1     |

| respid | Q39_3 | Q39_4 | Q39_5 | Q39_6 |
|--------|-------|-------|-------|-------|
| 7623   | 1     | 1     | 2     | 1     |
| 7635   | 1     | 2     | 2     | 1     |
| 7636   | 1     | 2     | 2     | 1     |
| 7643   | 3     | 3     | 3     | 3     |
| 7645   | 2     | 4     | 4     | 2     |
| 7649   | 4     | 4     | 3     | 3     |
| 7651   | 1     | 1     | 1     | 1     |
| 7652   | 3     | 5     | 6     | 3     |
| 7655   | 3     | 3     | 3     | 3     |
| 7657   | 1     | 1     | 1     | 1     |
| 7675   | 1     | 4     | 4     | 1     |
| 7676   | 4     | 2     | 3     | 3     |
| 7684   | 2     | 3     | 2     | 2     |
| 7693   | 1     | 1     | 1     | 2     |
| 7694   | 6     | 5     | 6     | 6     |
| 7695   | 1     | 1     | 1     | 1     |
| 7696   | 6     | 5     | 6     | 6     |
| 7698   | 1     | 1     | 1     | 1     |
| 7700   | 1     | 1     | 2     | 1     |
| 7701   | 1     | 2     | 2     | 1     |
| 7704   | 1     | 1     | 1     | 1     |
| 7709   | 3     | 3     | 3     | 2     |
| 7713   | 1     | 1     | 1     | 1     |
| 7714   | 1     | 1     | 1     | 1     |
| 7718   | 6     | 6     | 6     | 5     |
| 7720   | 1     | 1     | 2     | 1     |
| 7721   | 2     | 2     | 1     | 2     |
| 7722   | 2     | 1     | 1     | 2     |
| 7724   | 1     | 5     | 6     | 1     |
| 7728   |       |       |       |       |
| 7731   | 3     | 3     | 5     | 3     |
| 7735   | 1     | 1     | 1     | 1     |



| respid | Q39_3 | Q39_4 | Q39_5 | Q39_6 |
|--------|-------|-------|-------|-------|
| 7737   | 1     | 2     | 3     | 1     |
| 7741   | 1     | 1     | 1     | 1     |
| 7746   | 1     | 2     | 1     | 1     |
| 7747   | 1     | 2     | 2     | 1     |
| 7748   | 1     | 1     | 1     | 1     |
| 7750   | 1     | 1     | 1     | 1     |
| 7754   | 1     | 2     | 2     | 1     |
| 7755   | 3     | 2     | 2     | 2     |
| 7762   |       |       |       |       |
| 7764   | 1     | 1     | 1     | 1     |
| 7766   |       |       |       |       |
| 7768   | 2     | 2     | 2     | 2     |
| 7770   | 1     | 4     | 3     | 3     |
| 7771   | 1     | 1     | 1     | 1     |
| 7777   | 1     | 1     | 1     | 1     |
| 7778   |       |       |       |       |
| 7783   | 3     | 5     | 6     | 5     |
| 7789   | 1     | 3     | 2     | 1     |
| 7790   | 1     | 1     | 2     | 1     |
| 7795   | 3     | 2     | 3     | 3     |
| 7807   | 1     | 1     | 1     | 1     |
| 7808   | 5     | 4     | 5     | 3     |
| 7818   | 4     | 2     | 3     | 2     |
| 7820   |       |       |       |       |
| 7831   | 1     | 2     | 2     | 2     |
| 7832   | 1     | 2     | 2     | 1     |
| 7837   | 1     | 2     | 2     | 1     |
| 7841   | 4     | 4     | 3     | 2     |
| 7845   | 4     | 3     | 4     | 3     |
| 7853   | 1     | 1     | 2     | 1     |
| 7854   | 1     | 1     | 1     | 1     |
| 7862   | 4     | 4     | 4     | 4     |

| respid | Q39_3 | Q39_4 | Q39_5 | Q39_6 |
|--------|-------|-------|-------|-------|
| 7871   | 1     | 1     | 1     | 1     |
| 7875   | 2     | 1     | 3     | 1     |
| 7880   | 4     | 1     | 1     | 1     |
| 7881   | 2     | 3     | 4     | 1     |
| 7883   | 6     | 3     | 4     | 4     |
| 7896   | 1     | 2     | 2     | 1     |
| 7905   | 1     | 1     | 1     | 1     |
| 7919   | 1     | 2     | 2     | 1     |
| 7928   | 4     | 3     | 3     | 2     |
| 7929   | 1     | 1     | 1     | 1     |
| 7938   | 3     | 3     | 2     | 2     |
| 7940   | 1     | 2     | 2     | 1     |
| 7941   | 4     | 3     | 3     | 3     |
| 7952   |       |       |       |       |
| 7962   | 1     | 1     | 1     | 1     |
| 7968   | 1     | 2     | 1     | 1     |
| 7972   | 1     | 3     | 2     | 1     |
| 7983   | 2     | 2     | 3     | 4     |
| 7990   | 1     | 2     | 1     | 1     |
| 7993   | 1     | 1     | 1     | 1     |
| 8005   | 1     | 1     | 2     | 1     |
| 8008   |       |       |       |       |
| 8012   | 4     | 2     | 2     | 2     |
| 8021   | 1     | 1     | 1     | 1     |
| 8024   | 1     | 1     | 2     | 1     |
| 8043   | 1     | 1     | 1     | 1     |
| 8051   | 2     | 3     | 4     | 2     |
| 8056   | 1     | 2     | 2     | 1     |
| 8061   | 4     | 5     | 5     | 4     |
| 8066   |       |       |       |       |
| 8069   | 3     | 2     | 2     | 3     |
| 8071   | 1     | 1     | 1     | 1     |

| respid | Q39_3 | Q39_4 | Q39_5 | Q39_6 |
|--------|-------|-------|-------|-------|
| 8072   | 2     | 2     | 2     | 2     |
| 8076   | 1     | 2     | 3     | 1     |
| 8080   | 1     | 2     | 2     | 1     |
| 8083   | 1     | 2     | 2     | 1     |
| 8093   | 4     | 3     | 5     | 3     |
| 8095   | 1     | 3     | 3     | 2     |
| 8099   | 1     | 1     | 1     | 1     |
| 8100   | 1     | 3     | 3     | 1     |
| 8103   |       |       |       |       |
| 8104   | 1     | 2     | 1     | 2     |
| 8115   | 2     | 4     | 5     | 3     |
| 8121   | 1     | 1     | 2     | 1     |
| 8128   | 1     | 1     | 1     | 1     |
| 8130   | 1     | 1     | 1     | 1     |
| 8131   | 2     | 3     | 3     | 2     |
| 8133   | 1     | 1     | 1     | 1     |
| 8143   | 3     | 1     | 2     | 3     |
| 8144   | 3     | 2     | 4     | 2     |
| 8146   | 1     | 1     | 1     | 1     |
| 8148   |       |       |       |       |
| 8157   |       |       |       |       |
| 8164   |       |       |       |       |
| 8173   |       |       |       |       |
| 8176   | 1     | 1     | 1     | 1     |
| 8179   | 3     | 3     | 3     | 3     |
| 8181   |       |       |       |       |
| 8182   | 1     | 2     | 2     | 1     |
| 8196   | 2     | 1     | 1     | 2     |
| 8200   | 1     | 2     | 2     | 1     |
| 8203   | 1     | 1     | 2     | 1     |
| 8204   | 6     | 6     | 6     | 4     |
| 8206   | 1     | 1     | 1     | 1     |

| respid | Q39_3 | Q39_4 | Q39_5 | Q39_6 |
|--------|-------|-------|-------|-------|
| 8208   | 1     | 1     | 1     | 1     |
| 8212   | 4     | 2     | 3     | 1     |
| 8222   | 4     | 5     | 4     | 4     |
| 8223   | 1     | 1     | 1     | 1     |
| 8225   | 1     | 1     | 1     | 1     |
| 8226   | 3     | 2     | 2     | 2     |
| 8228   | 5     | 3     | 3     | 3     |
| 8229   | 1     | 1     | 1     | 1     |
| 8239   | 2     | 2     | 2     | 2     |
| 8246   | 3     | 1     | 1     | 3     |
| 8258   | 4     | 4     | 4     | 4     |
| 8260   | 1     | 2     | 2     | 1     |
| 8262   | 3     | 2     | 2     | 1     |
| 8263   | 2     | 2     | 2     | 2     |
| 8267   | 3     | 3     | 4     | 3     |
| 8271   | 4     | 4     | 5     | 4     |
| 8274   | 1     | 1     | 1     | 2     |
| 8275   | 3     | 3     | 4     | 4     |
| 8279   | 1     | 2     | 2     | 2     |
| 8285   | 5     | 4     | 5     | 3     |
| 8287   | 6     | 6     | 6     | 6     |
| 8289   | 3     | 3     | 4     | 2     |
| 8291   | 6     | 3     | 3     | 3     |
| 8299   | 6     | 4     | 4     | 2     |
| 8301   | 1     | 1     | 4     | 1     |
| 8302   | 1     | 1     | 1     | 1     |
| 8308   | 2     | 3     | 6     | 2     |
| 8313   | 2     | 2     | 3     | 2     |
| 8316   | 5     | 2     | 3     | 2     |
| 8317   | 1     | 1     | 2     | 1     |
| 8319   | 1     | 1     | 1     | 1     |
| 8323   | 1     | 1     | 1     | 2     |

| respid | Q39_3 | Q39_4 | Q39_5 | Q39_6 |
|--------|-------|-------|-------|-------|
| 8324   | 1     | 1     | 2     | 1     |
| 8327   | 4     | 3     | 2     | 4     |
| 8328   | 2     | 2     | 3     | 1     |
| 8342   | 2     | 4     | 4     | 1     |
| 8350   | 2     | 2     | 2     | 1     |
| 8352   | 1     | 1     | 1     | 1     |
| 8353   | 1     | 2     | 1     | 1     |
| 8356   | 1     | 2     | 2     | 1     |
| 8367   | 1     | 2     | 1     | 1     |
| 8373   | 1     | 1     | 2     | 1     |
| 8379   |       |       |       |       |
| 8382   | 4     | 5     | 5     | 4     |
| 8387   | 1     | 2     | 3     | 2     |
| 8409   | 4     | 4     | 5     | 5     |
| 8410   | 1     | 1     | 2     | 1     |
| 8412   | 1     | 2     | 3     | 2     |
| 8415   | 1     | 2     | 2     | 1     |
| 8417   | 1     | 2     | 2     | 1     |
| 8422   | 2     | 2     | 2     | 1     |
| 8430   | 4     | 2     | 2     | 2     |
| 8434   | 1     | 1     | 2     | 1     |
| 8436   |       |       |       |       |
| 8446   | 4     | 2     | 2     | 2     |
| 8447   | 1     | 2     | 2     | 1     |
| 8448   | 1     | 2     | 2     | 1     |
| 8455   | 3     | 1     | 2     | 1     |
| 8456   | 1     | 3     | 3     | 1     |
| 8459   | 2     | 1     | 1     | 1     |
| 8460   | 1     | 1     | 1     | 1     |
| 8464   | 4     | 4     | 4     | 4     |
| 8470   | 1     | 1     | 1     | 1     |
| 8473   | 1     | 2     | 2     | 1     |

| respid | Q39_3 | Q39_4 | Q39_5 | Q39_6 |
|--------|-------|-------|-------|-------|
| 8486   | 1     | 1     | 1     | 1     |
| 8487   | 1     | 2     | 2     | 1     |
| 8489   | 3     | 1     | 1     | 2     |
| 8494   | 1     | 1     | 1     | 1     |
| 8495   | 5     | 6     | 6     | 6     |
| 8497   | 2     | 2     | 2     | 2     |
| 8510   | 1     | 2     | 2     | 3     |
| 8515   | 2     | 3     | 4     | 2     |
| 8526   |       |       |       |       |
| 8530   |       |       |       |       |
| 8532   | 1     | 2     | 2     | 1     |
| 8533   |       |       |       |       |
| 8534   | 1     | 2     | 3     | 3     |
| 8572   | 2     | 2     | 2     | 3     |
| 8582   | 2     | 1     | 1     | 1     |
| 8584   | 1     | 1     | 1     | 1     |
| 8585   |       |       |       |       |
| 8586   |       |       |       |       |
| 8589   | 1     | 3     | 2     | 2     |
| 8593   | 1     | 1     | 2     | 1     |
| 8594   | 1     | 1     | 2     | 1     |
| 8601   | 2     | 1     | 1     | 2     |
| 8603   | 1     | 1     | 1     | 1     |
| 8604   |       |       |       |       |
| 8605   |       |       |       |       |
| 8607   | 2     | 2     | 2     | 2     |
| 8623   | 1     | 1     | 2     | 1     |
| 8626   | 3     | 2     | 2     | 2     |
| 8638   | 1     | 1     | 2     | 1     |
| 8640   | 3     | 1     | 1     | 1     |
| 8641   | 3     | 1     | 1     | 1     |
| 8643   | 1     | 2     | 3     | 1     |

| respid | Q39_3 | Q39_4 | Q39_5 | Q39_6 |
|--------|-------|-------|-------|-------|
| 8644   | 1     | 4     | 4     | 2     |
| 8646   | 1     | 1     | 1     | 1     |
| 8647   |       |       |       |       |
| 8649   | 1     | 4     | 4     | 1     |
| 8650   | 1     | 1     | 2     | 1     |
| 8658   | 1     | 2     | 2     | 1     |
| 8659   | 2     | 2     | 2     | 2     |
| 8669   | 1     | 1     | 5     | 1     |
| 8672   | 2     | 1     | 1     | 3     |
| 8673   | 1     | 3     | 3     | 1     |
| 8676   | 1     | 1     | 1     | 1     |
| 8677   |       |       |       |       |
| 8681   | 1     | 2     | 2     | 1     |
| 8688   | 1     | 1     | 1     | 1     |
| 8689   | 2     | 4     | 4     | 4     |
| 8690   | 1     | 1     | 1     | 1     |
| 8693   | 1     | 1     | 1     | 1     |
| 8694   | 1     | 3     | 4     | 1     |
| 8699   | 1     | 4     | 4     | 1     |
| 8700   |       |       |       |       |
| 8703   | 1     | 1     | 1     | 1     |
| 8704   | 1     | 2     | 2     | 1     |
| 8706   | 2     | 1     | 3     | 3     |
| 8709   | 1     | 1     | 1     | 1     |
| 8715   | 1     | 1     | 1     | 1     |
| 8728   | 1     | 4     | 3     | 3     |
| 8729   | 1     | 1     | 1     | 1     |
| 8730   | 1     | 1     | 1     | 1     |
| 8742   | 2     | 1     | 2     | 1     |
| 8748   | 1     | 1     | 1     | 1     |
| 8749   | 1     | 1     | 1     | 1     |
| 8750   | 1     | 1     | 1     | 1     |

| respid | Q39_3 | Q39_4 | Q39_5 | Q39_6 |
|--------|-------|-------|-------|-------|
| 8751   | 1     | 1     | 1     | 1     |
| 8752   | 2     | 2     | 3     | 2     |
| 8754   | 1     | 2     | 2     | 1     |
| 8757   | 1     | 2     | 2     | 1     |
| 8760   | 2     | 1     | 1     | 2     |
| 8761   | 4     | 2     | 2     | 2     |
| 8762   | 1     | 3     | 4     | 3     |
| 8763   | 1     | 1     | 2     | 1     |
| 8764   | 1     | 2     | 2     | 1     |
| 8765   | 1     | 1     | 1     | 1     |
| 8766   | 2     | 2     | 2     | 1     |
| 8767   | 2     | 1     | 3     | 1     |
| 8768   | 1     | 1     | 1     | 1     |
| 8770   | 1     | 1     | 1     | 1     |
| 8771   |       |       |       |       |
| 8773   | 1     | 1     | 1     | 1     |
| 8774   | 2     | 2     | 2     | 2     |
| 8776   | 1     | 1     | 1     | 1     |
| 8777   | 1     | 1     | 1     | 1     |
| 8778   | 3     | 3     | 3     | 1     |
| 8779   |       |       |       |       |
| 8784   | 2     | 2     | 2     | 2     |
| 8786   |       |       |       |       |
| 8787   | 1     | 2     | 3     | 1     |
| 8790   |       |       |       |       |
| 8791   | 6     | 5     | 6     | 6     |
| 8793   |       |       |       |       |
| 8795   | 2     | 3     | 3     | 1     |
| 8797   | 1     | 2     | 2     | 1     |
| 8801   | 4     | 3     | 3     | 3     |
| 8802   | 1     | 2     | 1     | 1     |
| 8807   |       |       |       |       |



| respid | Q39_3 | Q39_4 | Q39_5 | Q39_6 |
|--------|-------|-------|-------|-------|
| 8813   | 1     | 2     | 1     | 1     |
| 8817   | 1     | 2     | 2     | 1     |
| 8818   | 1     | 2     | 3     | 1     |
| 8821   | 1     | 1     | 1     | 1     |
| 8822   | 2     | 3     | 2     | 3     |
| 8823   | 1     | 1     | 1     | 1     |
| 8824   | 2     | 3     | 3     | 1     |
| 8825   | 1     | 2     | 1     | 1     |
| 8834   | 3     | 3     | 4     | 4     |
| 8840   | 6     | 6     | 6     | 6     |
| 8843   | 5     | 6     | 5     | 6     |
| 8846   | 1     | 1     | 1     | 1     |
| 8862   |       |       |       |       |
| 8866   | 1     | 1     | 1     | 1     |
| 8869   | 1     | 1     | 1     | 1     |
| 8872   | 3     | 3     | 4     | 4     |
| 8903   |       |       |       |       |
| 8909   |       |       |       |       |
| 8926   | 1     | 1     | 2     | 1     |
| 8936   | 1     | 2     | 2     | 1     |
| 8945   |       |       |       |       |
| 8954   | 1     | 2     | 2     | 1     |
| 8955   | 1     | 4     | 5     | 3     |
| 8958   | 1     | 1     | 1     | 1     |
| 8959   | 1     | 2     | 2     | 1     |
| 8960   | 1     | 1     | 1     | 1     |
| 8976   | 1     | 1     | 2     | 1     |
| 8977   | 2     | 2     | 2     | 1     |
| 8979   | 3     | 2     | 3     | 2     |
| 8985   |       |       |       |       |
| 8994   | 3     | 3     | 3     | 3     |
| 8997   | 3     | 3     | 3     | 3     |

| respid | Q39_3 | Q39_4 | Q39_5 | Q39_6 |
|--------|-------|-------|-------|-------|
| 9002   | 1     | 1     | 1     | 1     |
| 9005   | 1     | 4     | 4     | 1     |
| 9017   | 1     | 1     | 1     | 1     |
| 9018   | 1     | 1     | 1     | 1     |
| 9021   | 2     | 1     | 1     | 1     |
| 9029   | 5     | 5     | 4     | 5     |
| 9035   | 1     | 3     | 4     | 1     |
| 9038   | 1     | 1     | 1     | 1     |
| 9039   |       |       |       |       |
| 9040   | 2     | 1     | 2     | 1     |
| 9042   | 1     | 1     | 2     | 1     |
| 9043   | 1     | 1     | 1     | 1     |
| 9045   | 1     | 2     | 2     | 1     |
| 9051   | 1     | 2     | 1     | 1     |
| 9067   | 1     | 1     | 1     | 1     |
| 9069   | 1     | 1     | 3     | 1     |
| 9073   | 3     | 2     | 2     | 1     |
| 9084   | 2     | 2     | 2     | 2     |
| 9096   |       |       |       |       |
| 9100   | 1     | 1     | 1     | 1     |
| 9107   |       |       |       |       |
| 9110   | 1     | 1     | 1     | 1     |
| 9120   | 1     | 1     | 1     | 1     |
| 9122   | 3     | 3     | 3     | 3     |
| 9130   | 1     | 1     | 2     | 1     |
| 9134   | 6     | 6     | 6     | 6     |
| 9137   | 2     | 1     | 1     | 2     |
| 9139   | 1     | 2     | 1     | 1     |
| 9144   |       |       |       |       |
| 9157   | 1     | 2     | 2     | 2     |
| 9166   | 2     | 5     | 4     | 2     |
| 9177   | 1     | 1     | 6     | 2     |

| respid | Q39_3 | Q39_4 | Q39_5 | Q39_6 |
|--------|-------|-------|-------|-------|
| 9181   | 1     | 1     | 1     | 1     |
| 9183   | 4     | 3     | 3     | 3     |
| 9184   | 2     | 4     | 5     | 4     |
| 9188   |       |       |       |       |
| 9197   | 1     | 1     | 1     | 1     |
| 9200   | 3     | 3     | 4     | 2     |
| 9205   | 4     | 3     | 4     | 3     |
| 9207   | 1     | 1     | 2     | 1     |
| 9213   | 1     | 1     | 2     | 1     |
| 9216   | 3     | 2     | 2     | 1     |
| 9217   |       |       |       |       |
| 9218   | 1     | 1     | 1     | 1     |
| 9219   | 6     | 3     | 5     | 1     |
| 9220   |       |       |       |       |
| 9221   | 1     | 3     | 3     | 1     |
| 9223   | 4     | 4     | 4     | 5     |
| 9228   |       |       |       |       |
| 9230   | 2     | 2     | 2     | 2     |
| 9231   | 2     | 1     | 2     | 1     |
| 9233   | 2     | 1     | 1     | 1     |
| 9235   | 1     | 2     | 3     | 1     |
| 9237   | 1     | 1     | 1     | 1     |
| 9242   | 3     | 1     | 3     | 2     |
| 9250   |       |       |       |       |
| 9253   | 6     | 4     | 4     | 6     |
| 9257   | 6     | 4     | 4     | 3     |
| 9263   | 1     | 1     | 1     | 1     |
| 9267   | 2     | 2     | 2     | 2     |
| 9272   | 1     | 1     | 1     | 2     |
| 9279   |       |       |       |       |
| 9281   | 2     | 2     | 2     | 2     |
| 9285   | 4     | 2     | 2     | 2     |

| respid | Q39_3 | Q39_4 | Q39_5 | Q39_6 |
|--------|-------|-------|-------|-------|
| 9286   | 1     | 2     | 4     | 1     |
| 9294   | 2     | 1     | 3     | 2     |
| 9295   | 1     | 1     | 1     | 1     |
| 9297   | 1     | 1     | 1     | 1     |
| 9299   | 5     | 4     | 5     | 4     |
| 9309   | 4     | 1     | 2     | 3     |
| 9315   |       |       |       |       |
| 9320   | 1     | 1     | 1     | 1     |
| 9324   | 1     | 1     | 2     | 1     |
| 9326   | 1     | 1     | 1     | 1     |
| 9333   | 1     | 2     | 2     | 1     |
| 9334   | 3     | 2     | 3     | 2     |
| 9336   | 4     | 3     | 4     | 3     |
| 9337   | 1     | 1     | 2     | 1     |
| 9342   | 1     | 1     | 2     | 1     |
| 9347   | 1     | 2     | 5     | 1     |
| 9352   | 2     | 1     | 1     | 1     |
| 9355   | 3     | 2     | 3     | 2     |
| 9356   | 1     | 2     | 2     | 1     |
| 9359   | 1     | 2     | 2     | 1     |
| 9368   | 1     | 1     | 1     | 1     |
| 9375   | 2     | 3     | 4     | 2     |
| 9384   | 2     | 2     | 2     | 2     |
| 9388   | 1     | 1     | 2     | 1     |
| 9397   | 4     | 4     | 4     | 4     |
| 9400   | 2     | 1     | 1     | 1     |
| 9401   | 4     | 4     | 4     | 4     |
| 9402   |       |       |       |       |
| 9417   | 5     | 5     | 4     | 5     |
| 9424   | 1     | 1     | 2     | 1     |
| 9427   | 2     | 2     | 2     | 2     |
| 9429   | 1     | 2     | 3     | 1     |

| respid | Q39_3 | Q39_4 | Q39_5 | Q39_6 |
|--------|-------|-------|-------|-------|
| 9437   | 4     | 4     | 4     | 4     |
| 9442   | 2     | 3     | 2     | 3     |
| 9446   | 2     | 1     | 1     | 2     |
| 9447   | 2     | 2     | 2     | 2     |
| 9448   | 2     | 2     | 2     | 2     |
| 9449   | 5     | 4     | 6     | 3     |
| 9455   |       |       |       |       |
| 9459   | 2     | 3     | 2     | 1     |
| 9460   | 1     | 2     | 2     | 1     |
| 9461   | 1     | 1     | 1     | 1     |
| 9463   | 1     | 1     | 2     | 1     |
| 9464   | 3     | 2     | 2     | 2     |
| 9466   | 1     | 2     | 2     | 2     |
| 9477   | 1     | 1     | 1     | 1     |
| 9482   | 5     | 3     | 3     | 4     |
| 9486   | 2     | 2     | 2     | 2     |
| 9488   | 5     | 5     | 4     | 3     |
| 9489   | 1     | 2     | 2     | 2     |
| 9496   | 2     | 2     | 2     | 2     |
| 9499   | 1     | 1     | 1     | 1     |
| 9512   | 1     | 2     | 2     | 1     |
| 9514   | 1     | 1     | 1     | 1     |
| 9516   | 1     | 1     | 2     | 1     |
| 9517   | 4     | 3     | 3     | 4     |
| 9520   | 1     | 2     | 1     | 1     |
| 9527   | 1     | 1     | 2     | 1     |
| 9532   | 4     | 2     | 3     | 3     |
| 9533   | 1     | 1     | 1     | 1     |
| 9543   | 1     | 2     | 2     | 1     |
| 9550   | 1     | 2     | 2     | 2     |
| 9553   | 1     | 1     | 1     | 1     |
| 9555   | 3     | 2     | 3     | 3     |

| respid | Q39_3 | Q39_4 | Q39_5 | Q39_6 |
|--------|-------|-------|-------|-------|
| 9565   | 1     | 4     | 5     | 1     |
| 9583   | 3     | 2     | 3     | 2     |
| 9594   | 1     | 1     | 1     | 1     |
| 9596   | 1     | 2     | 2     | 1     |
| 9600   | 3     | 2     | 2     | 2     |
| 9602   | 1     | 2     | 1     | 1     |
| 9606   | 1     | 1     | 1     | 1     |
| 9608   | 3     | 3     | 3     | 3     |
| 9610   | 2     | 1     | 2     | 2     |
| 9612   | 5     | 3     | 3     | 3     |
| 9613   | 1     | 1     | 1     | 1     |
| 9614   | 4     | 5     | 5     | 1     |
| 9620   | 1     | 1     | 1     | 1     |
| 9628   | 1     | 1     | 1     | 1     |
| 9631   | 1     | 2     | 2     | 1     |
| 9632   | 1     | 3     | 3     | 1     |
| 9633   | 2     | 2     | 2     | 1     |
| 9639   |       |       |       |       |
| 9640   | 1     | 1     | 1     | 1     |
| 9642   | 6     | 1     | 2     | 3     |
| 9653   | 2     | 3     | 3     | 2     |
| 9658   | 2     | 1     | 2     | 1     |
| 9659   | 1     | 6     | 6     | 1     |
| 9661   | 1     | 1     | 1     | 1     |
| 9664   | 2     | 3     | 3     | 2     |
| 9665   | 1     | 2     | 2     | 2     |
| 9666   | 2     | 3     | 4     | 4     |
| 9667   | 3     | 3     | 4     | 3     |
| 9668   |       |       |       |       |
| 9670   | 3     | 1     | 2     | 2     |
| 9671   | 1     | 2     | 1     | 1     |
| 9681   | 1     | 1     | 2     | 1     |

| respid | Q39_3 | Q39_4 | Q39_5 | Q39_6 |
|--------|-------|-------|-------|-------|
| 9684   | 1     | 3     | 3     | 1     |
| 9685   | 2     | 3     | 2     | 3     |
| 9686   | 2     | 1     | 2     | 1     |
| 9688   | 2     | 1     | 3     | 1     |
| 9692   | 1     | 2     | 1     | 1     |
| 9693   | 3     | 3     | 4     | 3     |
| 9698   | 1     | 1     | 2     | 2     |
| 9699   | 2     | 2     | 2     | 1     |
| 9701   | 1     | 1     | 1     | 1     |
| 9702   | 1     | 1     | 1     | 1     |
| 9709   | 1     | 2     | 2     | 1     |
| 9713   |       |       |       |       |
| 9715   |       |       |       |       |
| 9721   | 1     | 1     | 1     | 1     |
| 9725   | 1     | 1     | 1     | 1     |
| 9729   | 3     | 3     | 3     | 3     |
| 9731   | 2     | 1     | 1     | 1     |
| 9736   | 1     | 2     | 2     | 1     |
| 9740   |       |       |       |       |
| 9741   | 1     | 1     | 1     | 1     |
| 9749   | 3     | 2     | 3     | 2     |
| 9750   | 2     | 2     | 2     | 2     |
| 9751   | 5     | 6     | 4     | 4     |
| 9753   | 2     | 2     | 2     | 1     |
| 9754   | 1     | 2     | 3     | 1     |
| 9756   | 3     | 3     | 3     | 3     |
| 9758   | 4     | 4     | 4     | 4     |
| 9759   | 1     | 2     | 2     | 1     |
| 9760   | 2     | 1     | 2     | 1     |
| 9761   |       |       |       |       |
| 9762   | 2     | 2     | 2     | 2     |
| 9764   | 1     | 1     | 1     | 1     |

| respid | Q39_3 | Q39_4 | Q39_5 | Q39_6 |
|--------|-------|-------|-------|-------|
| 9768   | 1     | 1     | 1     | 1     |
| 9769   | 2     | 3     | 3     | 2     |
| 9770   | 1     | 1     | 1     | 1     |
| 9771   | 1     | 1     | 3     | 1     |
| 9772   | 1     | 2     | 2     | 1     |
| 9773   | 2     | 2     | 2     | 1     |
| 9776   | 3     | 1     | 1     | 1     |
| 9786   | 2     | 1     | 1     | 1     |
| 9790   | 1     | 1     | 1     | 1     |
| 9791   | 1     | 1     | 1     | 1     |
| 9794   | 2     | 3     | 2     | 2     |
| 9797   | 1     | 2     | 2     | 1     |
| 9799   | 2     | 1     | 2     | 1     |
| 9804   | 1     | 2     | 2     | 1     |
| 9805   | 2     | 3     | 3     | 2     |
| 9806   | 1     | 1     | 2     | 1     |
| 9807   | 2     | 2     | 3     | 1     |
| 9813   | 2     | 2     | 3     | 1     |
| 9817   | 1     | 1     | 1     | 1     |
| 9823   | 2     | 1     | 1     | 1     |
| 9826   | 1     | 1     | 2     | 1     |
| 9830   | 2     | 2     | 2     | 1     |
| 9835   | 2     | 2     | 3     | 1     |
| 9836   | 1     | 2     | 3     | 1     |
| 9841   |       |       |       |       |
| 9842   | 1     | 1     | 1     | 1     |
| 9844   | 3     | 3     | 3     | 3     |
| 9847   | 1     | 2     | 2     | 1     |
| 9851   | 1     | 1     | 2     | 1     |
| 9852   | 2     | 2     | 2     | 2     |
| 9854   | 1     | 1     | 1     | 1     |
| 9855   | 1     | 1     | 1     | 1     |



| respid | Q39_3 | Q39_4 | Q39_5 | Q39_6 |
|--------|-------|-------|-------|-------|
| 9856   | 1     | 1     | 3     | 1     |
| 9862   | 1     | 1     | 1     | 1     |
| 9863   |       |       |       |       |
| 9866   | 1     | 3     | 3     | 1     |
| 9867   | 2     | 4     | 4     | 2     |
| 9868   | 3     | 4     | 5     | 5     |
| 9869   | 3     | 1     | 1     | 1     |
| 9878   | 1     | 1     | 2     | 2     |
| 9879   | 1     | 4     | 4     | 1     |
| 9881   | 1     | 1     | 1     | 1     |
| 9882   | 2     | 1     | 2     | 1     |
| 9884   | 1     | 1     | 2     | 1     |
| 9885   | 1     | 1     | 1     | 1     |
| 9888   | 1     | 1     | 1     | 1     |
| 9889   | 1     | 2     | 1     | 1     |
| 9894   | 3     | 4     | 4     | 3     |
| 9895   | 1     | 1     | 1     | 1     |
| 9896   | 5     | 6     | 6     | 6     |
| 9897   | 4     | 2     | 3     | 4     |
| 9905   | 1     | 1     | 1     | 1     |
| 9907   | 3     | 1     | 1     | 1     |
| 9908   | 1     | 1     | 1     | 1     |
| 9909   | 2     | 3     | 5     | 2     |
| 9910   | 6     | 5     | 5     | 6     |
| 9913   | 1     | 2     | 2     | 2     |
| 9914   | 1     | 1     | 1     | 1     |
| 9915   | 1     | 1     | 2     | 1     |
| 9916   | 1     | 1     | 1     | 1     |
| 9918   |       |       |       |       |
| 9919   | 2     | 3     | 3     | 2     |
| 9922   | 4     | 3     | 4     | 4     |
| 9930   | 1     | 1     | 1     | 1     |

| respid | Q39_3 | Q39_4 | Q39_5 | Q39_6 |
|--------|-------|-------|-------|-------|
| 9934   | 1     | 1     | 1     | 1     |
| 9936   | 2     | 2     | 3     | 2     |
| 9938   | 1     | 1     | 1     | 1     |
| 9940   | 1     | 1     | 1     | 1     |
| 9944   | 2     | 2     | 2     | 2     |
| 9945   | 1     | 1     | 1     | 1     |
| 9948   | 2     | 1     | 2     | 1     |
| 9949   | 4     | 4     | 5     | 3     |
| 9951   | 2     | 2     | 2     | 2     |
| 9952   | 3     | 2     | 3     | 2     |
| 9954   | 1     | 1     | 1     | 1     |
| 9955   | 1     | 1     | 1     | 1     |
| 9956   | 4     | 4     | 4     | 2     |
| 9957   | 3     | 3     | 3     | 3     |
| 9958   | 2     | 3     | 2     | 3     |
| 9959   | 1     | 3     | 4     | 2     |
| 9960   | 6     | 2     | 2     | 6     |
| 9961   | 2     | 1     | 2     | 1     |
| 9962   | 3     | 2     | 2     | 1     |
| 9969   | 1     | 1     | 2     | 1     |
| 9982   | 1     | 1     | 2     | 2     |
| 9984   | 1     | 2     | 3     | 1     |
| 9990   | 1     | 1     | 1     | 1     |
| 9992   | 2     | 2     | 1     | 2     |
| 9993   | 4     | 4     | 4     | 4     |
| 9997   | 1     | 1     | 1     | 1     |
| 9999   | 1     | 1     | 1     | 1     |
| 10000  | 2     | 1     | 1     | 3     |
| 10005  | 1     | 5     | 6     | 2     |
| 10014  | 1     | 1     | 2     | 1     |
| 10016  | 1     | 3     | 4     | 1     |
| 10017  | 1     | 1     | 2     | 1     |

| respid | Q39_3 | Q39_4 | Q39_5 | Q39_6 |
|--------|-------|-------|-------|-------|
| 10018  | 3     | 2     | 2     | 4     |
| 10021  | 1     | 1     | 2     | 1     |
| 10025  | 1     | 4     | 5     | 1     |
| 10027  | 1     | 1     | 2     | 1     |
| 10028  | 1     | 1     | 2     | 2     |
| 10031  | 2     | 1     | 2     | 2     |
| 10036  | 1     | 1     | 1     | 1     |
| 10037  | 2     | 2     | 2     | 1     |
| 10038  | 2     | 1     | 1     | 2     |
| 10039  |       |       |       |       |
| 10041  | 1     | 1     | 1     | 1     |
| 10045  | 2     | 2     | 6     | 2     |
| 10046  | 4     | 4     | 4     | 1     |
| 10047  | 2     | 1     | 2     | 1     |
| 10048  | 1     | 2     | 2     | 1     |
| 10049  | 1     | 1     | 2     | 1     |
| 10051  | 1     | 1     | 1     | 1     |
| 10052  | 1     | 2     | 4     | 2     |
| 10056  | 1     | 1     | 2     | 1     |
| 10061  | 1     | 1     | 2     | 1     |
| 10064  | 1     | 1     | 2     | 1     |
| 10066  | 1     | 1     | 1     | 1     |
| 10069  | 1     | 1     | 1     | 1     |
| 10071  | 1     | 1     | 2     | 1     |
| 10074  | 1     | 2     | 2     | 1     |
| 10079  | 1     | 1     | 2     | 1     |
| 10087  | 6     | 5     | 5     | 6     |
| 10095  | 1     | 1     | 1     | 1     |
| 10097  | 1     | 1     | 1     | 1     |
| 10100  | 2     | 3     | 3     | 1     |
| 10105  | 1     | 1     | 1     | 1     |
| 10107  | 3     | 3     | 3     | 2     |

| respid | Q39_3 | Q39_4 | Q39_5 | Q39_6 |
|--------|-------|-------|-------|-------|
| 10111  | 1     | 1     | 2     | 1     |
| 10116  | 1     | 2     | 3     | 1     |
| 10118  | 3     | 3     | 3     | 3     |
| 10123  |       |       |       |       |
| 10124  | 1     | 1     | 1     | 1     |
| 10130  | 2     | 1     | 1     | 1     |
| 10134  | 1     | 1     | 4     | 2     |
| 10135  | 1     | 2     | 2     | 1     |
| 10136  |       |       |       |       |
| 10141  | 1     | 2     | 3     | 1     |
| 10142  | 1     | 1     | 1     | 1     |
| 10143  | 1     | 1     | 1     | 1     |
| 10145  | 1     | 1     | 1     | 1     |
| 10149  | 2     | 2     | 2     | 2     |
| 10150  | 1     | 1     | 1     | 1     |
| 10151  | 1     | 1     | 1     | 1     |
| 10152  | 3     | 6     | 6     | 4     |
| 10153  | 1     | 1     | 1     | 1     |
| 10156  | 1     | 1     | 2     | 1     |
| 10160  | 2     | 3     | 3     | 2     |
| 10161  | 3     | 1     | 1     | 2     |
| 10167  | 4     | 6     | 2     | 1     |
| 10171  |       |       |       |       |
| 10172  | 1     | 1     | 1     | 1     |
| 10176  | 1     | 2     | 2     | 1     |
| 10177  | 1     | 3     | 3     | 1     |
| 10182  | 3     | 4     | 4     | 3     |
| 10184  | 1     | 1     | 1     | 1     |
| 10186  | 4     | 4     | 4     | 4     |
| 10189  | 2     | 1     | 2     | 1     |
| 10191  | 1     | 1     | 1     | 1     |
| 10192  | 1     | 3     | 4     | 1     |

| respid | Q39_3 | Q39_4 | Q39_5 | Q39_6 |
|--------|-------|-------|-------|-------|
| 10195  | 1     | 1     | 1     | 2     |
| 10199  |       |       |       |       |
| 10201  | 1     | 2     | 2     | 1     |
| 10213  | 1     | 1     | 2     | 1     |
| 10222  | 4     | 3     | 3     | 3     |
| 10224  |       |       |       |       |
| 10245  | 1     | 1     | 1     | 1     |
| 10254  | 1     | 1     | 2     | 1     |
| 10255  | 6     | 6     | 6     | 6     |
| 10257  | 1     | 1     | 2     | 1     |
| 10260  | 2     | 3     | 3     | 2     |
| 10261  | 1     | 2     | 3     | 1     |
| 10263  | 6     | 6     | 6     | 6     |
| 10264  | 2     | 1     | 4     | 2     |
| 10268  | 3     | 2     | 2     | 3     |
| 10269  | 2     | 4     | 4     | 1     |
| 10270  |       |       |       |       |
| 10282  | 1     | 1     | 1     | 1     |
| 10285  |       |       |       |       |
| 10288  | 1     | 1     | 1     | 1     |
| 10291  | 1     | 2     | 2     | 1     |
| 10292  | 1     | 1     | 1     | 1     |
| 10304  |       |       |       |       |
| 10305  | 1     | 2     | 2     | 1     |
| 10310  | 1     | 2     | 2     | 1     |
| 10324  | 2     | 1     | 1     | 1     |
| 10325  | 1     | 2     | 3     | 1     |
| 10326  | 1     | 4     | 4     | 1     |
| 10329  |       |       |       |       |
| 10332  | 1     | 1     | 1     | 1     |
| 10337  | 1     | 1     | 2     | 1     |
| 10341  | 1     | 1     | 2     | 1     |

| respid | Q39_3 | Q39_4 | Q39_5 | Q39_6 |
|--------|-------|-------|-------|-------|
| 10353  | 2     | 1     | 1     | 1     |
| 10354  |       |       |       |       |
| 10359  | 2     | 2     | 2     | 1     |
| 10360  | 1     | 1     | 2     | 1     |
| 10362  | 2     | 2     | 3     | 1     |
| 10364  | 1     | 1     | 2     | 1     |
| 10366  | 5     | 4     | 4     | 5     |
| 10367  | 1     | 1     | 1     | 1     |
| 10371  | 1     | 1     | 1     | 1     |
| 10374  | 1     | 1     | 2     | 1     |
| 10375  | 2     | 1     | 1     | 1     |
| 10376  | 1     | 1     | 1     | 1     |
| 10377  | 2     | 1     | 2     | 1     |
| 10378  | 3     | 3     | 4     | 4     |
| 10387  | 1     | 1     | 1     | 1     |
| 10396  | 4     | 4     | 5     | 5     |
| 10397  | 1     | 1     | 1     | 1     |
| 10399  | 2     | 2     | 3     | 3     |
| 10405  | 1     | 2     | 2     | 1     |
| 10406  | 1     | 1     | 1     | 1     |
| 10408  | 1     | 1     | 2     | 1     |
| 10409  |       |       |       |       |
| 10412  | 1     | 1     | 1     | 1     |
| 10413  | 1     | 1     | 1     | 1     |
| 10419  | 3     | 4     | 4     | 3     |
| 10423  | 5     | 4     | 4     | 4     |
| 10426  | 1     | 2     | 2     | 1     |
| 10446  | 1     | 2     | 2     | 1     |
| 10448  | 1     | 1     | 3     | 1     |
| 10450  | 1     | 1     | 1     | 1     |
| 10455  | 2     | 2     | 2     | 1     |
| 10460  | 1     | 1     | 1     | 1     |

| respid | Q39_3 | Q39_4 | Q39_5 | Q39_6 |
|--------|-------|-------|-------|-------|
| 10461  | 2     | 2     | 2     | 2     |
| 10471  | 1     | 1     | 1     | 1     |
| 10472  | 1     | 1     | 1     | 1     |
| 10491  | 5     | 4     | 4     | 4     |
| 10493  | 1     | 2     | 2     | 1     |
| 10498  | 1     | 1     | 2     | 1     |
| 10533  | 2     | 1     | 1     | 1     |
| 10539  | 1     | 1     | 2     | 1     |
| 10540  | 2     | 1     | 1     | 2     |
| 10557  | 3     | 4     | 5     | 4     |
| 10558  | 4     | 4     | 5     | 4     |
| 10559  | 4     | 6     | 6     | 4     |
| 10564  | 2     | 1     | 1     | 1     |
| 10570  |       |       |       |       |
| 10572  | 1     | 1     | 1     | 1     |
| 10576  | 1     | 2     | 2     | 1     |
| 10582  | 2     | 1     | 2     | 1     |
| 10593  | 1     | 1     | 2     | 1     |
| 10596  | 4     | 3     | 2     | 5     |
| 10615  |       |       |       |       |
| 10616  | 1     | 1     | 1     | 1     |
| 10623  | 4     | 2     | 4     | 4     |
| 10626  | 1     | 3     | 3     | 1     |
| 10627  | 4     | 5     | 4     | 5     |
| 10629  | 1     | 3     | 3     | 1     |
| 10632  | 3     | 3     | 4     | 4     |
| 10641  |       |       |       |       |
| 10648  | 4     | 1     | 1     | 4     |
| 10651  | 2     | 3     | 3     | 1     |
| 10654  | 1     | 1     | 1     | 1     |
| 10673  | 1     | 1     | 1     | 1     |
| 10675  | 1     | 2     | 2     | 1     |

| respid | Q39_3 | Q39_4 | Q39_5 | Q39_6 |
|--------|-------|-------|-------|-------|
| 10689  | 1     | 1     | 1     | 1     |
| 10692  | 1     | 1     | 1     | 1     |
| 10694  | 1     | 1     | 1     | 1     |
| 10695  | 1     | 1     | 1     | 1     |
| 10702  | 3     | 3     | 3     | 2     |
| 10703  | 5     | 5     | 5     | 5     |
| 10708  | 1     | 1     | 2     | 1     |
| 10719  | 1     | 2     | 2     | 1     |
| 10722  | 1     | 1     | 2     | 1     |
| 10723  | 1     | 2     | 2     | 2     |
| 10726  | 1     | 2     | 3     | 1     |
| 10727  | 1     | 1     | 1     | 2     |
| 10730  | 1     | 1     | 1     | 1     |
| 10731  |       |       |       |       |
| 10737  | 1     | 3     | 3     | 1     |
| 10743  | 1     | 2     | 2     | 1     |
| 10763  | 1     | 1     | 1     | 1     |
| 10777  |       |       |       |       |
| 10787  | 2     | 2     | 1     | 2     |
| 10798  | 5     | 4     | 5     | 5     |
| 10800  | 1     | 1     | 3     | 1     |
| 10802  | 4     | 4     | 4     | 4     |
| 10803  | 5     | 5     | 5     | 5     |
| 10808  | 1     | 2     | 2     | 1     |
| 10810  | 1     | 3     | 3     | 1     |
| 10819  | 1     | 2     | 2     | 1     |
| 10825  | 1     | 2     | 1     | 1     |
| 10827  | 2     | 3     | 3     | 2     |
| 10830  | 3     | 1     | 2     | 1     |
| 10847  | 1     | 1     | 1     | 1     |
| 10849  | 1     | 1     | 2     | 1     |
| 10852  | 1     | 2     | 2     | 1     |



| respid | Q39_3 | Q39_4 | Q39_5 | Q39_6 |
|--------|-------|-------|-------|-------|
| 10854  | 4     | 4     | 4     | 4     |
| 10857  | 1     | 1     | 1     | 1     |
| 10861  | 5     | 3     | 3     | 5     |
| 10862  |       |       |       |       |
| 10870  | 4     | 4     | 4     | 3     |
| 10873  | 1     | 1     | 4     | 1     |
| 10881  | 2     | 1     | 2     | 2     |
| 10893  |       |       |       |       |
| 10898  | 1     | 1     | 2     | 1     |
| 10899  | 6     | 4     | 5     | 3     |
| 10905  | 3     | 1     | 2     | 3     |
| 10910  |       |       |       |       |
| 10911  | 1     | 1     | 2     | 2     |
| 10912  | 1     | 1     | 1     | 1     |
| 10913  | 1     | 1     | 1     | 1     |
| 10918  |       |       |       |       |
| 10995  |       |       |       |       |
| 11002  | 1     | 3     | 3     | 1     |
| 11003  | 1     | 2     | 1     | 1     |
| 11005  | 1     | 1     | 1     | 1     |
| 11015  | 1     | 1     | 1     | 1     |
| 11016  | 6     | 6     | 6     | 6     |
| 11017  | 1     | 1     | 1     | 1     |
| 11020  | 5     | 5     | 5     | 5     |
| 11024  | 2     | 2     | 3     | 2     |
| 11026  | 4     | 5     | 5     | 4     |
| 11028  | 4     | 4     | 3     | 3     |
| 11029  | 5     | 5     | 5     | 6     |
| 11030  | 1     | 1     | 2     | 1     |
| 11031  | 1     | 2     | 2     | 1     |
| 11038  | 1     | 1     | 1     | 1     |
| 11051  | 1     | 1     | 2     | 1     |

| respid | Q39_3 | Q39_4 | Q39_5 | Q39_6 |
|--------|-------|-------|-------|-------|
| 11052  | 4     | 4     | 5     | 5     |
| 11053  | 1     | 1     | 2     | 1     |
| 11054  | 4     | 4     | 5     | 5     |
| 11063  | 1     | 4     | 4     | 1     |
| 11075  | 3     | 3     | 3     | 3     |
| 11083  | 5     | 2     | 2     | 4     |
| 11092  | 1     | 1     | 1     | 1     |
| 11118  | 1     | 1     | 1     | 1     |
| 11119  | 6     | 2     | 2     | 2     |
| 11134  | 4     | 5     | 5     | 5     |
| 11139  | 1     | 1     | 1     | 1     |
| 11154  | 1     | 1     | 1     | 1     |
| 11166  | 5     | 5     | 5     | 5     |
| 11168  |       |       |       |       |
| 11176  | 3     | 2     | 4     | 2     |
| 11183  | 4     | 5     | 5     | 2     |
| 11189  | 1     | 1     | 1     | 1     |
| 11196  | 5     | 4     | 4     | 4     |
| 11200  | 2     | 2     | 1     | 1     |
| 11201  | 1     | 2     | 1     | 1     |
| 11211  | 4     | 3     | 3     | 3     |
| 11218  | 1     | 1     | 1     | 1     |
| 11219  | 1     | 1     | 2     | 1     |
| 11221  | 2     | 2     | 2     | 2     |
| 11222  | 1     | 1     | 1     | 1     |
| 11230  | 3     | 4     | 4     | 4     |
| 11236  | 4     | 4     | 3     | 3     |
| 11237  | 1     | 3     | 4     | 1     |
| 11240  | 6     | 6     | 4     | 3     |
| 11244  | 4     | 3     | 3     | 4     |
| 11249  | 2     | 2     | 2     | 1     |
| 11252  | 4     | 3     | 3     | 4     |

| respid | Q39_3 | Q39_4 | Q39_5 | Q39_6 |
|--------|-------|-------|-------|-------|
| 11254  | 1     | 3     | 1     | 2     |
| 11255  | 4     | 2     | 3     | 2     |
| 11258  | 4     | 3     | 3     | 4     |
| 11260  | 1     | 1     | 1     | 1     |
| 11264  | 5     | 4     | 5     | 4     |
| 11266  | 5     | 4     | 5     | 5     |
| 11268  | 3     | 4     | 4     | 3     |
| 11269  | 4     | 1     | 1     | 1     |
| 11272  | 3     | 3     | 4     | 2     |
| 11273  | 1     | 1     | 1     | 1     |
| 11275  | 1     | 1     | 2     | 1     |
| 11276  | 4     | 2     | 2     | 2     |
| 11278  | 4     | 4     | 4     | 3     |
| 11288  |       |       |       |       |
| 11289  |       |       |       |       |
| 11291  | 1     | 1     | 2     | 1     |
| 11295  | 1     | 2     | 2     | 1     |
| 11297  | 1     | 1     | 2     | 1     |
| 11304  | 6     | 2     | 2     | 3     |
| 11305  | 1     | 2     | 2     | 1     |
| 11311  | 1     | 1     | 1     | 1     |
| 11313  | 1     | 1     | 2     | 1     |
| 11315  | 6     | 5     | 6     | 6     |
| 11316  | 6     | 5     | 6     | 6     |
| 11318  | 5     | 4     | 4     | 5     |
| 11323  | 1     | 1     | 2     | 1     |
| 11331  | 2     | 5     | 5     | 3     |
| 11333  | 1     | 1     | 2     | 1     |
| 11334  | 4     | 2     | 2     | 2     |
| 11340  | 5     | 4     | 5     | 5     |
| 11345  | 1     | 1     | 1     | 1     |
| 11354  | 1     | 1     | 1     | 1     |

| respid | Q39_3 | Q39_4 | Q39_5 | Q39_6 |
|--------|-------|-------|-------|-------|
| 11360  |       |       |       |       |
| 11361  | 1     | 2     | 3     | 3     |
| 11367  |       |       |       |       |
| 11370  |       |       |       |       |
| 11371  | 4     | 2     | 2     | 4     |
| 11372  | 4     | 3     | 4     | 4     |
| 11373  | 2     | 4     | 5     | 2     |
| 11382  | 1     | 1     | 2     | 1     |
| 11394  | 2     | 2     | 2     | 2     |
| 11395  | 4     | 3     | 4     | 2     |
| 11397  |       |       |       |       |
| 11402  | 3     | 6     | 4     | 2     |
| 11409  | 2     | 1     | 1     | 1     |
| 11410  | 3     | 2     | 2     | 2     |
| 11411  | 1     | 2     | 2     | 1     |
| 11418  | 1     | 2     | 2     | 1     |
| 11425  | 4     | 3     | 3     | 3     |
| 11429  | 1     | 1     | 1     | 1     |
| 11430  | 3     | 4     | 5     | 4     |
| 11431  | 4     | 1     | 1     | 2     |
| 11432  |       |       |       |       |
| 11433  | 1     | 3     | 2     | 4     |
| 11435  | 2     | 2     | 3     | 2     |
| 11436  | 3     | 2     | 2     | 2     |
| 11437  | 3     | 3     | 3     | 3     |
| 11439  |       |       |       |       |
| 11440  | 1     | 2     | 2     | 1     |
| 11447  | 1     | 1     | 1     | 1     |
| 11455  | 1     | 1     | 1     | 1     |
| 11456  | 3     | 4     | 3     | 3     |
| 11461  | 2     | 2     | 2     | 2     |
| 11463  | 6     | 6     | 5     | 6     |

| respid | Q39_3 | Q39_4 | Q39_5 | Q39_6 |
|--------|-------|-------|-------|-------|
| 11470  | 5     | 5     | 3     | 4     |
| 11472  |       |       |       |       |
| 11475  | 2     | 2     | 3     | 1     |
| 11476  | 3     | 3     | 2     | 3     |
| 11482  | 3     | 4     | 4     | 3     |
| 11501  | 4     | 3     | 3     | 3     |
| 11503  | 5     | 5     | 4     | 4     |
| 11505  | 1     | 2     | 2     | 1     |
| 11510  | 1     | 2     | 3     | 2     |
| 11519  |       |       |       |       |
| 11527  | 5     | 6     | 6     | 4     |
| 11529  | 4     | 5     | 5     | 4     |
| 11530  | 2     | 1     | 2     | 3     |
| 11536  | 2     | 5     | 5     | 5     |
| 11543  | 1     | 2     | 2     | 1     |
| 11548  | 2     | 4     | 5     | 2     |
| 11566  | 1     | 1     | 1     | 1     |
| 11570  | 4     | 4     | 3     | 4     |
| 11571  | 4     | 3     | 3     | 3     |
| 11578  |       |       |       |       |
| 11579  | 1     | 1     | 1     | 1     |
| 11581  | 6     | 6     | 5     | 6     |
| 11582  | 1     | 1     | 2     | 1     |
| 11583  | 6     | 5     | 5     | 6     |
| 11589  | 2     | 3     | 2     | 2     |
| 11590  | 1     | 1     | 1     | 1     |
| 11592  | 1     | 2     | 2     | 1     |
| 11596  |       |       |       |       |
| 11598  | 5     | 3     | 3     | 4     |
| 11602  | 4     | 3     | 4     | 4     |
| 11605  | 3     | 1     | 2     | 3     |
| 11618  | 2     | 4     | 2     | 3     |

| respid | Q39_3 | Q39_4 | Q39_5 | Q39_6 |
|--------|-------|-------|-------|-------|
| 11621  | 3     | 4     | 3     | 5     |
| 11630  | 3     | 2     | 3     | 3     |
| 11636  | 6     | 5     | 5     | 5     |
| 11640  | 4     | 4     | 5     | 5     |
| 11658  | 3     | 2     | 1     | 2     |
| 11665  | 1     | 6     | 6     | 1     |
| 11666  | 5     | 4     | 5     | 4     |
| 11667  | 4     | 3     | 4     | 5     |
| 11674  | 1     | 3     | 3     | 1     |
| 11680  | 1     | 1     | 2     | 1     |
| 11683  | 3     | 1     | 2     | 1     |
| 11688  | 3     | 3     | 2     | 2     |
| 11690  |       |       |       |       |
| 11694  |       |       |       |       |
| 11705  | 3     | 2     | 2     | 2     |
| 11720  | 2     | 4     | 3     | 2     |
| 11724  |       |       |       |       |
| 11738  | 2     | 2     | 2     | 2     |
| 11744  | 4     | 5     | 5     | 4     |
| 11745  | 1     | 6     | 6     | 2     |
| 11747  |       |       |       |       |
| 11755  | 2     | 2     | 3     | 3     |
| 11756  | 2     | 3     | 3     | 2     |
| 11772  | 2     | 1     | 1     | 2     |
| 11773  |       |       |       |       |
| 11778  | 4     | 5     | 5     | 3     |
| 11790  | 2     | 2     | 3     | 2     |
| 11794  |       |       |       |       |
| 11795  | 4     | 4     | 4     | 3     |
| 11799  | 4     | 3     | 4     | 3     |
| 11803  | 2     | 2     | 2     | 2     |
| 11806  | 6     | 5     | 6     | 5     |

| respid | Q39_3 | Q39_4 | Q39_5 | Q39_6 |
|--------|-------|-------|-------|-------|
| 11808  | 3     | 3     | 4     | 4     |
| 11810  |       |       |       |       |
| 11811  |       |       |       |       |
| 11812  | 3     | 4     | 5     | 5     |
| 11813  | 4     | 3     | 4     | 3     |
| 11821  | 3     | 3     | 3     | 4     |
| 11827  |       |       |       |       |
| 11831  | 4     | 5     | 4     | 5     |
| 11841  |       |       |       |       |
| 11872  | 2     | 1     | 2     | 1     |
| 11898  | 1     | 1     | 1     | 1     |
| 11902  | 5     | 4     | 5     | 4     |
| 11912  | 2     | 2     | 2     | 2     |
| 11926  | 1     | 2     | 1     | 1     |
| 11928  | 4     | 4     | 5     | 5     |
| 11932  | 3     | 1     | 1     | 2     |
| 11934  | 1     | 1     | 1     | 1     |
| 11941  | 4     | 3     | 3     | 4     |
| 11942  |       |       |       |       |
| 11943  | 4     | 4     | 4     | 4     |
| 11944  | 3     | 3     | 3     | 3     |
| 11955  |       |       |       |       |
| 11958  | 2     | 2     | 4     | 4     |
| 11968  | 4     | 1     | 2     | 3     |
| 11979  | 2     | 2     | 3     | 3     |
| 11988  |       |       |       |       |
| 11999  | 4     | 3     | 3     | 4     |
| 12002  | 1     | 2     | 2     | 1     |
| 12004  | 2     | 1     | 1     | 1     |
| 12008  | 1     | 1     | 1     | 1     |
| 12013  | 2     | 2     | 2     | 1     |
| 12018  | 6     | 6     | 5     | 6     |

| respid | Q39_3 | Q39_4 | Q39_5 | Q39_6 |
|--------|-------|-------|-------|-------|
| 12023  | 2     | 1     | 2     | 2     |
| 12027  | 5     | 5     | 6     | 5     |
| 12030  | 1     | 2     | 2     | 2     |
| 12031  | 5     | 2     | 2     | 2     |
| 12036  | 5     | 3     | 3     | 4     |
| 12037  | 4     | 4     | 5     | 5     |
| 12038  | 5     | 1     | 6     | 5     |
| 12039  | 1     | 1     | 1     | 1     |
| 12045  | 2     | 1     | 1     | 2     |
| 12046  | 3     | 2     | 3     | 2     |
| 12054  | 3     | 4     | 3     | 4     |
| 12055  | 2     | 3     | 2     | 2     |
| 12069  | 4     | 4     | 3     | 3     |
| 12070  | 3     | 3     | 4     | 3     |
| 12074  | 1     | 2     | 2     | 2     |
| 12075  | 4     | 3     | 4     | 4     |
| 12078  | 1     | 2     | 2     | 2     |
| 12089  | 1     | 2     | 2     | 2     |
| 12091  | 4     | 4     | 4     | 3     |
| 12092  | 4     | 4     | 4     | 4     |
| 12108  | 2     | 3     | 5     | 2     |
| 12111  | 5     | 6     | 6     | 3     |
| 12112  | 5     | 4     | 5     | 4     |
| 12126  |       |       |       |       |
| 12132  | 5     | 5     | 4     | 3     |
| 12150  | 4     | 5     | 5     | 4     |
| 12152  | 2     | 2     | 2     | 2     |
| 12154  | 1     | 3     | 3     | 2     |
| 12157  | 2     | 4     | 3     | 4     |
| 12165  | 1     | 2     | 2     | 1     |
| 12169  | 5     | 3     | 3     | 4     |
| 12182  | 5     | 5     | 4     | 4     |



| respid | Q39_3 | Q39_4 | Q39_5 | Q39_6 |
|--------|-------|-------|-------|-------|
| 12198  | 1     | 1     | 1     | 1     |
| 12199  |       |       |       |       |
| 12202  | 1     | 1     | 1     | 1     |
| 12207  | 1     | 2     | 3     | 1     |
| 12208  | 4     | 2     | 2     | 3     |
| 12210  | 3     | 3     | 3     | 3     |
| 12219  | 4     | 4     | 5     | 3     |
| 12224  | 1     | 2     | 2     | 1     |
| 12230  | 3     | 2     | 2     | 3     |
| 12238  | 3     | 3     | 2     | 3     |
| 12239  | 1     | 1     | 1     | 1     |
| 12243  | 2     | 2     | 2     | 2     |
| 12245  | 1     | 2     | 2     | 1     |
| 12246  | 5     | 5     | 5     | 4     |
| 12247  | 1     | 2     | 2     | 1     |
| 12248  | 1     | 1     | 1     | 1     |
| 12249  | 3     | 1     | 2     | 2     |
| 12258  | 4     | 4     | 5     | 5     |
| 12265  | 1     | 5     | 4     | 4     |
| 12269  | 1     | 1     | 1     | 1     |
| 12270  | 2     | 1     | 1     | 1     |
| 12279  | 1     | 2     | 1     | 1     |
| 12280  | 4     | 5     | 5     | 3     |
| 12282  | 2     | 1     | 1     | 1     |
| 12283  | 2     | 1     | 2     | 2     |
| 12287  | 1     | 1     | 1     | 1     |
| 12288  | 2     | 2     | 2     | 2     |
| 12290  | 1     | 1     | 1     | 1     |
| 12292  | 2     | 2     | 2     | 1     |
| 12294  | 1     | 1     | 1     | 1     |
| 12296  | 1     | 2     | 1     | 1     |
| 12307  | 1     | 3     | 3     | 1     |

| respid | Q39_3 | Q39_4 | Q39_5 | Q39_6 |
|--------|-------|-------|-------|-------|
| 12309  | 3     | 4     | 5     | 3     |
| 12312  | 2     | 1     | 2     | 1     |
| 12317  | 2     | 1     | 1     | 2     |
| 12319  | 2     | 2     | 2     | 2     |
| 12320  | 1     | 1     | 1     | 1     |
| 12322  | 2     | 1     | 1     | 1     |
| 12328  | 6     | 4     | 3     | 5     |
| 12331  | 6     | 5     | 4     | 5     |
| 12332  | 1     | 1     | 1     | 1     |
| 12334  | 4     | 1     | 2     | 1     |
| 12337  | 1     | 4     | 4     | 1     |
| 12338  | 1     | 1     | 1     | 1     |
| 12342  | 1     | 2     | 1     | 1     |
| 12349  | 1     | 1     | 1     | 1     |
| 12352  | 4     | 3     | 3     | 2     |
| 12355  | 3     | 2     | 2     | 2     |
| 12357  | 2     | 1     | 4     | 5     |
| 12358  | 1     | 1     | 2     | 1     |
| 12371  | 2     | 1     | 2     | 4     |
| 12372  | 1     | 1     | 1     | 1     |
| 12373  | 2     | 2     | 2     | 2     |
| 12379  | 1     | 1     | 1     | 1     |
| 12381  | 3     | 4     | 5     | 3     |
| 12383  | 1     | 1     | 2     | 1     |
| 12384  | 1     | 1     | 1     | 1     |
| 12386  | 1     | 1     | 1     | 1     |
| 12389  |       |       |       |       |
| 12392  | 1     | 1     | 1     | 1     |
| 12396  | 1     | 1     | 3     | 1     |
| 12397  | 1     | 2     | 2     | 1     |
| 12399  | 5     | 4     | 4     | 4     |
| 12400  | 3     | 5     | 6     | 3     |

| respid | Q39_3 | Q39_4 | Q39_5 | Q39_6 |
|--------|-------|-------|-------|-------|
| 12406  | 5     | 4     | 5     | 4     |
| 12407  | 1     | 2     | 2     | 1     |
| 12410  | 1     | 1     | 1     | 1     |
| 12413  | 4     | 2     | 4     | 2     |
| 12416  | 4     | 3     | 3     | 3     |
| 12419  | 4     | 2     | 3     | 3     |
| 12422  | 6     | 6     | 6     | 6     |
| 12423  | 1     | 1     | 1     | 1     |
| 12429  | 2     | 1     | 2     | 2     |
| 12434  | 5     | 4     | 4     | 5     |
| 12435  | 1     | 2     | 2     | 1     |
| 12436  | 1     | 3     | 2     | 4     |
| 12442  |       |       |       |       |
| 12449  | 4     | 2     | 2     | 4     |
| 12451  | 1     | 1     | 1     | 1     |
| 12456  | 2     | 5     | 1     | 2     |
| 12457  | 1     | 1     | 1     | 1     |
| 12458  | 1     | 2     | 2     | 1     |
| 12461  | 3     | 2     | 3     | 2     |
| 12462  | 1     | 2     | 1     | 1     |
| 12463  | 3     | 3     | 4     | 4     |
| 12466  | 1     | 1     | 1     | 1     |
| 12470  | 2     | 2     | 3     | 5     |
| 12471  | 2     | 2     | 1     | 3     |
| 12472  | 1     | 3     | 1     | 1     |
| 12478  | 3     | 3     | 3     | 2     |
| 12479  | 4     | 4     | 3     | 2     |
| 12481  | 1     | 1     | 1     | 1     |
| 12482  | 6     | 1     | 1     | 5     |
| 12483  |       |       |       |       |
| 12496  | 1     | 1     | 1     | 1     |
| 12497  | 1     | 2     | 2     | 1     |

| respid | Q39_3 | Q39_4 | Q39_5 | Q39_6 |
|--------|-------|-------|-------|-------|
| 12498  | 3     | 3     | 4     | 4     |
| 12500  | 1     | 2     | 3     | 3     |
| 12501  | 2     | 3     | 2     | 3     |
| 12502  | 2     | 2     | 2     | 2     |
| 12503  | 1     | 2     | 2     | 1     |
| 12505  | 2     | 3     | 3     | 2     |
| 12508  | 5     | 5     | 5     | 5     |
| 12509  | 2     | 2     | 3     | 2     |
| 12510  |       |       |       |       |
| 12512  | 1     | 3     | 3     | 1     |
| 12514  | 3     | 5     | 5     | 3     |
| 12515  | 1     | 2     | 2     | 4     |
| 12520  | 1     | 1     | 1     | 1     |
| 12522  | 1     | 1     | 1     | 1     |
| 12526  | 1     | 2     | 3     | 4     |
| 12527  |       |       |       |       |
| 12528  | 1     | 2     | 2     | 2     |
| 12530  | 3     | 3     | 4     | 3     |
| 12535  | 1     | 1     | 2     | 1     |
| 12539  | 1     | 2     | 2     | 1     |
| 12541  | 5     | 2     | 2     | 2     |
| 12542  | 4     | 2     | 2     | 2     |
| 12545  | 2     | 3     | 4     | 1     |
| 12547  | 1     | 3     | 4     | 4     |
| 12549  | 2     | 3     | 3     | 3     |
| 12550  | 1     | 1     | 1     | 1     |
| 12555  |       |       |       |       |
| 12557  | 2     | 2     | 3     | 2     |
| 12559  | 1     | 3     | 4     | 1     |
| 12561  | 4     | 3     | 3     | 4     |
| 12562  | 4     | 2     | 5     | 2     |
| 12563  | 1     | 1     | 1     | 1     |

| respid | Q39_3 | Q39_4 | Q39_5 | Q39_6 |
|--------|-------|-------|-------|-------|
| 12565  | 3     | 3     | 3     | 1     |
| 12566  |       |       |       |       |
| 12570  |       |       |       |       |
| 12571  | 1     | 1     | 1     | 1     |
| 12572  | 1     | 5     | 2     | 1     |
| 12578  |       |       |       |       |
| 12579  | 1     | 2     | 2     | 1     |
| 12581  | 1     | 4     | 4     | 1     |
| 12582  | 2     | 2     | 2     | 2     |
| 12585  | 6     | 6     | 5     | 5     |
| 12586  | 1     | 3     | 3     | 1     |
| 12588  | 3     | 4     | 5     | 4     |
| 12589  | 2     | 1     | 1     | 1     |
| 12590  | 1     | 1     | 1     | 1     |
| 12591  | 1     | 2     | 2     | 3     |
| 12593  | 2     | 3     | 3     | 3     |
| 12594  | 1     | 3     | 3     | 2     |
| 12599  | 3     | 2     | 2     | 3     |
| 12600  | 1     | 1     | 1     | 1     |
| 12602  | 3     | 4     | 5     | 3     |
| 12606  | 4     | 5     | 5     | 5     |
| 12607  |       |       |       |       |
| 12608  |       |       |       |       |
| 12610  | 1     | 2     | 1     | 5     |
| 12611  | 1     | 1     | 1     | 1     |
| 12613  | 6     | 6     | 6     | 6     |
| 12616  | 3     | 2     | 2     | 3     |
| 12617  | 2     | 2     | 2     | 1     |
| 12619  | 1     | 1     | 1     | 1     |
| 12622  |       |       |       |       |
| 12628  | 3     | 3     | 1     | 3     |
| 12631  | 3     | 3     | 3     | 2     |

| respid | Q39_3 | Q39_4 | Q39_5 | Q39_6 |
|--------|-------|-------|-------|-------|
| 12635  | 2     | 3     | 3     | 1     |
| 12638  | 1     | 1     | 1     | 1     |
| 12639  | 1     | 1     | 1     | 1     |
| 12640  | 1     | 1     | 1     | 1     |
| 12643  | 2     | 2     | 3     | 2     |
| 12646  | 5     | 6     | 6     | 5     |
| 12648  | 4     | 3     | 3     | 4     |
| 12650  | 1     | 2     | 2     | 3     |
| 12651  | 2     | 2     | 3     | 2     |
| 12658  | 3     | 2     | 3     | 2     |
| 12662  | 2     | 2     | 2     | 2     |
| 12663  | 2     | 3     | 3     | 2     |
| 12664  | 4     | 5     | 4     | 5     |
| 12669  | 6     | 6     | 6     | 5     |
| 12670  | 3     | 2     | 2     | 3     |
| 12673  |       |       |       |       |
| 12675  | 1     | 1     | 1     | 1     |
| 12677  | 4     | 2     | 2     | 4     |
| 12679  | 1     | 2     | 2     | 1     |
| 12682  | 4     | 5     | 4     | 3     |
| 12696  | 3     | 3     | 2     | 2     |
| 12697  | 3     | 2     | 2     | 3     |
| 12699  | 1     | 2     | 2     | 1     |
| 12700  | 2     | 1     | 3     | 2     |
| 12701  | 1     | 2     | 2     | 3     |
| 12702  | 3     | 2     | 2     | 3     |
| 12704  | 5     | 5     | 5     | 5     |
| 12705  | 1     | 2     | 2     | 1     |
| 12709  | 5     | 2     | 2     | 3     |
| 12710  | 2     | 1     | 1     | 2     |
| 12713  | 2     | 2     | 2     | 2     |
| 12716  | 1     | 2     | 3     | 3     |

| respid | Q39_3 | Q39_4 | Q39_5 | Q39_6 |
|--------|-------|-------|-------|-------|
| 12719  | 2     | 2     | 2     | 2     |
| 12720  | 3     | 1     | 1     | 2     |
| 12723  | 1     | 1     | 1     | 1     |
| 12726  | 2     | 1     | 1     | 3     |
| 12728  | 1     | 2     | 3     | 3     |
| 12729  | 2     | 2     | 1     | 2     |
| 12731  | 2     | 1     | 1     | 2     |
| 12732  | 2     | 2     | 3     | 4     |
| 12733  | 2     | 4     | 4     | 3     |
| 12736  | 1     | 1     | 1     | 1     |
| 12737  | 3     | 2     | 2     | 2     |
| 12739  | 3     | 4     | 5     | 5     |
| 12742  | 3     | 1     | 1     | 2     |
| 12743  | 5     | 5     | 6     | 6     |
| 12744  | 1     | 2     | 2     | 1     |
| 12747  | 1     | 2     | 3     | 3     |
| 12751  | 1     | 1     | 1     | 1     |
| 12754  | 3     | 2     | 2     | 3     |
| 12756  | 2     | 2     | 3     | 3     |
| 12757  | 3     | 2     | 2     | 3     |
| 12760  | 2     | 3     | 3     | 4     |
| 12761  | 3     | 2     | 2     | 2     |
| 12762  | 3     | 3     | 4     | 2     |
| 12766  | 1     | 1     | 1     | 1     |
| 12769  | 1     | 3     | 3     | 1     |
| 12770  | 4     | 4     | 3     | 3     |
| 12773  | 3     | 1     | 4     | 3     |
| 12780  | 2     | 3     | 2     | 1     |
| 12789  | 3     | 4     | 3     | 4     |
| 12792  | 4     | 4     | 4     | 4     |
| 12795  | 1     | 3     | 3     | 1     |
| 12804  | 6     | 4     | 5     | 2     |

| respid | Q39_3 | Q39_4 | Q39_5 | Q39_6 |
|--------|-------|-------|-------|-------|
| 12811  | 1     | 1     | 2     | 1     |
| 12813  | 4     | 3     | 3     | 3     |
| 12814  | 4     | 4     | 4     | 4     |
| 12815  | 1     | 3     | 3     | 1     |
| 12816  | 1     | 1     | 1     | 1     |
| 12817  | 1     | 1     | 1     | 1     |
| 12818  | 1     | 2     | 2     | 1     |
| 12819  | 3     | 3     | 3     | 3     |
| 12820  | 1     | 1     | 1     | 1     |
| 12821  | 1     | 1     | 2     | 1     |
| 12824  | 1     | 1     | 2     | 3     |
| 12827  | 2     | 1     | 2     | 2     |
| 12836  | 4     | 5     | 5     | 5     |
| 12837  | 1     | 2     | 2     | 1     |
| 12838  | 2     | 2     | 2     | 2     |
| 12845  | 1     | 1     | 1     | 1     |
| 12847  | 5     | 2     | 2     | 2     |
| 12849  | 4     | 4     | 4     | 5     |
| 12850  | 1     | 2     | 1     | 1     |
| 12852  | 1     | 1     | 1     | 1     |
| 12853  | 4     | 5     | 5     | 5     |
| 12854  | 1     | 1     | 1     | 1     |
| 12860  | 1     | 1     | 1     | 1     |
| 12861  | 1     | 2     | 2     | 1     |
| 12863  | 1     | 1     | 1     | 1     |
| 12865  | 1     | 2     | 2     | 1     |
| 12870  | 2     | 2     | 2     | 2     |
| 12871  | 1     | 1     | 1     | 1     |
| 12873  | 1     | 3     | 3     | 2     |
| 12877  | 1     | 1     | 2     | 1     |
| 12880  | 1     | 3     | 3     | 1     |
| 12881  | 1     | 2     | 2     | 1     |



| respid | Q39_3 | Q39_4 | Q39_5 | Q39_6 |
|--------|-------|-------|-------|-------|
| 12882  | 1     | 1     | 1     | 1     |
| 12883  | 2     | 3     | 3     | 2     |
| 12885  | 3     | 3     | 3     | 3     |
| 12887  | 2     | 2     | 2     | 2     |
| 12889  | 1     | 1     | 1     | 1     |
| 12890  | 1     | 2     | 3     | 1     |
| 12891  | 2     | 3     | 4     | 2     |
| 12892  | 4     | 5     | 4     | 5     |
| 12893  | 1     | 1     | 1     | 1     |
| 12895  | 2     | 1     | 1     | 1     |
| 12898  | 1     | 2     | 2     | 1     |
| 12907  | 4     | 5     | 5     | 5     |
| 12908  | 1     | 1     | 1     | 1     |
| 12909  |       |       |       |       |
| 12914  | 1     | 1     | 2     | 1     |
| 12915  | 2     | 5     | 6     | 1     |
| 12916  |       |       |       |       |
| 12921  | 1     | 1     | 2     | 1     |
| 12922  | 2     | 2     | 2     | 2     |
| 12923  | 5     | 3     | 3     | 3     |
| 12926  | 1     | 2     | 2     | 1     |
| 12927  | 1     | 1     | 2     | 1     |
| 12932  | 1     | 1     | 1     | 2     |
| 12936  | 1     | 1     | 1     | 1     |
| 12937  | 1     | 1     | 2     | 1     |
| 12938  | 6     | 4     | 5     | 5     |
| 12939  | 1     | 1     | 1     | 1     |
| 12940  | 3     | 4     | 3     | 3     |
| 12945  | 1     | 1     | 2     | 1     |
| 12946  | 4     | 3     | 3     | 6     |
| 12947  | 4     | 4     | 3     | 4     |
| 12948  | 4     | 4     | 4     | 4     |

| respid | Q39_3 | Q39_4 | Q39_5 | Q39_6 |
|--------|-------|-------|-------|-------|
| 12951  | 1     | 3     | 3     | 1     |
| 12952  | 1     | 1     | 1     | 1     |
| 12954  | 5     | 3     | 4     | 5     |
| 12960  | 2     | 2     | 2     | 2     |
| 12961  | 2     | 1     | 1     | 1     |
| 12962  | 1     | 1     | 1     | 1     |
| 12963  | 1     | 1     | 1     | 1     |
| 12964  | 2     | 1     | 1     | 1     |
| 12966  | 1     | 1     | 1     | 1     |
| 12967  | 5     | 1     | 1     | 5     |
| 12969  | 1     | 1     | 1     | 1     |
| 12970  | 1     | 2     | 2     | 1     |
| 12974  | 4     | 4     | 4     | 4     |
| 12979  |       |       |       |       |
| 12980  | 1     | 1     | 1     | 1     |
| 12983  | 1     | 1     | 1     | 1     |
| 12988  | 2     | 2     | 4     | 1     |
| 12994  | 2     | 2     | 2     | 1     |
| 12995  | 1     | 2     | 2     | 1     |
| 12996  | 1     | 1     | 1     | 1     |
| 12998  | 1     | 1     | 2     | 1     |
| 12999  | 1     | 1     | 2     | 2     |
| 13001  | 2     | 2     | 2     | 2     |
| 13005  | 1     | 1     | 1     | 1     |
| 13006  | 4     | 5     | 5     | 4     |
| 13007  | 2     | 1     | 1     | 1     |
| 13011  | 4     | 3     | 3     | 3     |
| 13012  | 1     | 1     | 1     | 1     |
| 13013  | 4     | 3     | 3     | 4     |
| 13016  | 1     | 1     | 1     | 1     |
| 13018  | 1     | 1     | 1     | 1     |
| 13020  |       |       |       |       |

| respid | Q39_3 | Q39_4 | Q39_5 | Q39_6 |
|--------|-------|-------|-------|-------|
| 13024  | 1     | 1     | 1     | 1     |
| 13025  | 1     | 1     | 1     | 1     |
| 13027  | 3     | 2     | 2     | 1     |
| 13031  | 2     | 3     | 3     | 3     |
| 13032  | 4     | 3     | 3     | 3     |
| 13034  | 1     | 1     | 2     | 1     |
| 13036  | 4     | 3     | 3     | 4     |
| 13037  | 1     | 1     | 1     | 1     |
| 13038  | 5     | 5     | 5     | 4     |
| 13039  | 1     | 1     | 1     | 1     |
| 13040  | 2     | 2     | 2     | 2     |
| 13041  | 1     | 1     | 3     | 1     |
| 13045  | 5     | 4     | 4     | 5     |
| 13046  | 1     | 2     | 2     | 1     |
| 13048  | 1     | 1     | 1     | 1     |
| 13051  | 1     | 1     | 1     | 1     |
| 13053  | 1     | 1     | 1     | 1     |
| 13055  | 2     | 3     | 3     | 2     |
| 13059  | 2     | 1     | 1     | 1     |
| 13068  | 1     | 1     | 1     | 1     |
| 13069  | 1     | 2     | 2     | 5     |
| 13076  | 2     | 3     | 4     | 2     |
| 13081  | 1     | 1     | 1     | 1     |
| 13082  | 1     | 3     | 4     | 1     |
| 13084  | 4     | 2     | 1     | 4     |
| 13085  | 1     | 4     | 4     | 1     |
| 13086  | 2     | 4     | 4     | 1     |
| 13093  | 2     | 2     | 2     | 2     |
| 13094  | 3     | 3     | 3     | 3     |
| 13097  | 1     | 1     | 2     | 1     |
| 13098  | 2     | 1     | 1     | 2     |
| 13099  | 1     | 1     | 1     | 1     |

| respid | Q39_3 | Q39_4 | Q39_5 | Q39_6 |
|--------|-------|-------|-------|-------|
| 13100  | 1     | 1     | 2     | 1     |
| 13101  |       |       |       |       |
| 13103  |       |       |       |       |
| 13105  | 2     | 1     | 1     | 1     |
| 13106  | 2     | 2     | 1     | 1     |
| 13107  | 2     | 2     | 2     | 1     |
| 13110  | 2     | 3     | 4     | 2     |
| 13118  | 1     | 2     | 2     | 1     |
| 13120  | 6     | 6     | 6     | 6     |
| 13130  | 1     | 1     | 1     | 1     |
| 13133  | 1     | 2     | 2     | 1     |
| 13134  | 2     | 1     | 1     | 2     |
| 13139  | 2     | 2     | 2     | 2     |
| 13142  | 1     | 1     | 2     | 1     |
| 13143  | 1     | 3     | 4     | 1     |
| 13145  | 1     | 2     | 2     | 1     |
| 13148  | 1     | 1     | 1     | 1     |
| 13149  | 1     | 1     | 1     | 1     |
| 13151  | 4     | 3     | 5     | 5     |
| 13153  | 1     | 1     | 1     | 2     |
| 13158  | 1     | 1     | 1     | 1     |
| 13160  | 2     | 2     | 2     | 2     |
| 13162  | 2     | 3     | 4     | 3     |
| 13169  | 1     | 1     | 1     | 1     |
| 13172  | 2     | 1     | 2     | 3     |
| 13173  | 1     | 2     | 2     | 1     |
| 13176  | 1     | 2     | 2     | 1     |
| 13179  | 1     | 1     | 1     | 1     |
| 13184  | 4     | 2     | 2     | 1     |
| 13185  | 3     | 2     | 2     | 3     |
| 13186  | 1     | 1     | 1     | 1     |
| 13188  | 2     | 3     | 2     | 2     |

| respid | Q39_3 | Q39_4 | Q39_5 | Q39_6 |
|--------|-------|-------|-------|-------|
| 13190  | 2     | 2     | 2     | 2     |
| 13192  | 2     | 1     | 1     | 1     |
| 13193  |       |       |       |       |
| 13201  | 3     | 2     | 2     | 2     |
| 13207  | 1     | 1     | 1     | 1     |
| 13208  |       |       |       |       |
| 13209  | 3     | 3     | 5     | 5     |
| 13212  | 2     | 1     | 1     | 1     |
| 13215  | 2     | 3     | 3     | 1     |
| 13218  | 1     | 5     | 5     | 2     |
| 13219  | 1     | 1     | 1     | 1     |
| 13224  | 3     | 2     | 2     | 2     |
| 13225  | 1     | 1     | 1     | 1     |
| 13226  | 1     | 1     | 1     | 1     |
| 13232  | 1     | 2     | 2     | 1     |
| 13237  | 4     | 1     | 1     | 1     |
| 13239  | 2     | 2     | 2     | 1     |
| 13241  | 2     | 1     | 1     | 1     |
| 13243  | 3     | 4     | 4     | 4     |
| 13247  | 3     | 2     | 4     | 4     |
| 13248  | 1     | 2     | 2     | 1     |
| 13251  | 1     | 1     | 1     | 1     |
| 13256  | 1     | 1     | 1     | 1     |
| 13260  | 1     | 1     | 2     | 1     |
| 13261  | 1     | 3     | 3     | 2     |
| 13264  | 1     | 1     | 1     | 1     |
| 13273  | 2     | 2     | 2     | 1     |
| 13274  | 1     | 1     | 2     | 1     |
| 13276  | 2     | 1     | 1     | 2     |
| 13278  |       |       |       |       |
| 13279  | 1     | 1     | 1     | 1     |
| 13282  | 1     | 1     | 1     | 1     |

| respid | Q39_3 | Q39_4 | Q39_5 | Q39_6 |
|--------|-------|-------|-------|-------|
| 13283  | 3     | 4     | 3     | 2     |
| 13285  | 1     | 1     | 2     | 1     |
| 13286  | 1     | 2     | 1     | 2     |
| 13299  | 1     | 1     | 1     | 1     |
| 13300  | 3     | 2     | 3     | 3     |
| 13301  |       |       |       |       |
| 13303  | 2     | 3     | 4     | 3     |
| 13304  | 1     | 1     | 2     | 1     |
| 13307  | 2     | 1     | 1     | 2     |
| 13308  | 1     | 1     | 1     | 1     |
| 13312  | 1     | 1     | 1     | 1     |
| 13313  | 1     | 1     | 1     | 1     |
| 13314  | 2     | 2     | 2     | 2     |
| 13318  | 4     | 4     | 3     | 3     |
| 13320  | 3     | 3     | 3     | 3     |
| 13322  | 2     | 2     | 3     | 3     |
| 13324  | 1     | 3     | 3     | 1     |
| 13325  | 2     | 3     | 3     | 2     |
| 13327  | 1     | 1     | 1     | 1     |
| 13330  | 1     | 2     | 2     | 1     |
| 13332  | 1     | 1     | 2     | 2     |
| 13333  | 1     | 2     | 2     | 1     |
| 13334  | 1     | 1     | 2     | 1     |
| 13351  | 2     | 3     | 1     | 1     |
| 13353  | 2     | 1     | 2     | 2     |
| 13354  | 1     | 2     | 1     | 1     |
| 13355  | 2     | 2     | 2     | 2     |
| 13358  | 1     | 1     | 1     | 1     |
| 13359  | 1     | 3     | 2     | 1     |
| 13360  | 3     | 4     | 4     | 3     |
| 13364  | 5     | 1     | 1     | 3     |
| 13365  | 1     | 4     | 5     | 2     |

| respid | Q39_3 | Q39_4 | Q39_5 | Q39_6 |
|--------|-------|-------|-------|-------|
| 13368  | 1     | 1     | 1     | 1     |
| 13370  | 1     | 1     | 1     | 1     |
| 13375  | 1     | 1     | 1     | 1     |
| 13384  | 1     | 1     | 2     | 1     |
| 13387  | 1     | 1     | 1     | 1     |
| 13395  | 4     | 2     | 2     | 3     |
| 13398  | 1     | 1     | 1     | 1     |
| 13404  | 1     | 1     | 2     | 1     |
| 13405  | 2     | 1     | 1     | 1     |
| 13408  |       |       |       |       |
| 13411  | 2     | 1     | 1     | 1     |
| 13413  | 1     | 1     | 1     | 1     |
| 13419  | 1     | 2     | 2     | 1     |
| 13420  | 1     | 1     | 1     | 1     |
| 13427  | 3     | 3     | 3     | 3     |
| 13441  | 4     | 4     | 4     | 4     |
| 13444  | 3     | 2     | 2     | 1     |
| 13456  | 1     | 1     | 1     | 1     |
| 13466  | 4     | 4     | 4     | 3     |
| 13468  | 1     | 1     | 2     | 1     |
| 13475  | 1     | 1     | 2     | 1     |
| 13484  | 2     | 2     | 2     | 1     |
| 13486  | 1     | 2     | 2     | 1     |
| 13487  | 1     | 2     | 2     | 1     |
| 13491  |       |       |       |       |
| 13496  | 2     | 2     | 1     | 1     |
| 13497  | 1     | 3     | 3     | 1     |
| 13498  | 1     | 4     | 3     | 1     |
| 13502  |       |       |       |       |
| 13503  | 2     | 2     | 3     | 3     |
| 13505  | 1     | 2     | 3     | 1     |
| 13509  | 1     | 2     | 2     | 1     |

| respid | Q39_3 | Q39_4 | Q39_5 | Q39_6 |
|--------|-------|-------|-------|-------|
| 13510  | 3     | 3     | 3     | 3     |
| 13518  | 1     | 3     | 2     | 3     |
| 13521  | 1     | 1     | 2     | 1     |
| 13523  | 5     | 2     | 4     | 2     |
| 13528  | 2     | 1     | 1     | 2     |
| 13531  | 1     | 1     | 1     | 1     |
| 13532  | 1     | 1     | 2     | 1     |
| 13533  | 2     | 1     | 1     | 1     |
| 13534  |       |       |       |       |
| 13535  | 1     | 2     | 2     | 1     |
| 13538  | 3     | 2     | 2     | 3     |
| 13540  | 1     | 3     | 2     | 2     |
| 13541  | 2     | 2     | 3     | 3     |
| 13542  | 1     | 2     | 2     | 1     |
| 13550  | 3     | 2     | 2     | 2     |
| 13553  | 1     | 2     | 2     | 1     |
| 13554  | 1     | 2     | 3     | 1     |
| 13555  | 4     | 3     | 3     | 4     |
| 13556  | 4     | 3     | 4     | 3     |
| 13563  | 5     | 3     | 3     | 2     |
| 13564  | 2     | 2     | 2     | 1     |
| 13567  |       |       |       |       |
| 13568  | 3     | 3     | 4     | 4     |
| 13570  |       |       |       |       |
| 13573  | 2     | 2     | 2     | 2     |
| 13575  | 5     | 4     | 4     | 6     |
| 13577  | 4     | 5     | 5     | 5     |
| 13580  | 5     | 5     | 4     | 4     |
| 13582  | 1     | 1     | 1     | 1     |
| 13584  | 5     | 5     | 5     | 4     |
| 13585  |       |       |       |       |
| 13586  | 4     | 4     | 4     | 3     |



| respid | Q39_3 | Q39_4 | Q39_5 | Q39_6 |
|--------|-------|-------|-------|-------|
| 13587  | 2     | 2     | 2     | 3     |
| 13592  | 3     | 3     | 4     | 3     |
| 13596  | 1     | 1     | 1     | 1     |
| 13597  | 1     | 3     | 3     | 1     |
| 13599  | 3     | 4     | 4     | 3     |
| 13601  | 1     | 1     | 2     | 1     |
| 13604  | 1     | 1     | 1     | 1     |
| 13608  | 2     | 4     | 4     | 3     |
| 13616  | 1     | 2     | 2     | 1     |
| 13618  | 3     | 3     | 3     | 3     |
| 13619  | 2     | 1     | 2     | 1     |
| 13626  |       |       |       |       |
| 13628  | 2     | 2     | 2     | 2     |
| 13640  | 4     | 3     | 4     | 4     |
| 13645  | 1     | 1     | 2     | 1     |
| 13648  |       |       |       |       |
| 13653  | 2     | 1     | 2     | 1     |
| 13655  | 1     | 1     | 1     | 1     |
| 13662  | 1     | 1     | 1     | 1     |
| 13670  | 4     | 2     | 2     | 2     |
| 13673  | 2     | 2     | 2     | 2     |
| 13674  | 2     | 2     | 2     | 2     |
| 13675  | 5     | 4     | 1     | 3     |
| 13678  | 2     | 2     | 3     | 3     |
| 13680  | 2     | 3     | 4     | 2     |
| 13681  | 1     | 2     | 2     | 1     |
| 13683  | 2     | 2     | 2     | 1     |
| 13684  | 1     | 1     | 1     | 1     |
| 13685  | 1     | 1     | 1     | 1     |
| 13687  |       |       |       |       |
| 13690  | 1     | 2     | 2     | 1     |
| 13700  | 3     | 4     | 5     | 6     |

| respid | Q39_3 | Q39_4 | Q39_5 | Q39_6 |
|--------|-------|-------|-------|-------|
| 13705  | 3     | 2     | 3     | 2     |
| 13710  | 1     | 1     | 1     | 1     |
| 13711  | 1     | 1     | 2     | 1     |
| 13713  | 1     | 1     | 1     | 1     |
| 13716  | 1     | 1     | 2     | 1     |
| 13721  | 2     | 2     | 2     | 1     |
| 13722  | 3     | 6     | 6     | 4     |
| 13723  | 6     | 5     | 5     | 6     |
| 13726  | 4     | 4     | 3     | 4     |
| 13728  | 2     | 2     | 2     | 2     |
| 13730  | 3     | 3     | 3     | 3     |
| 13734  | 1     | 1     | 2     | 1     |
| 13736  | 6     | 6     | 6     | 5     |
| 13737  | 2     | 2     | 2     | 2     |
| 13739  | 2     | 2     | 2     | 3     |
| 13742  |       |       |       |       |
| 13746  | 1     | 2     | 2     | 1     |
| 13747  | 2     | 2     | 1     | 2     |
| 13749  | 1     | 1     | 1     | 1     |
| 13751  | 1     | 3     | 3     | 1     |
| 13752  | 1     | 1     | 1     | 1     |
| 13756  | 2     | 1     | 2     | 2     |
| 13757  | 1     | 1     | 1     | 1     |
| 13767  | 4     | 5     | 5     | 4     |
| 13771  | 1     | 1     | 1     | 1     |
| 13772  | 4     | 6     | 6     | 3     |
| 13779  |       |       |       |       |
| 13782  | 1     | 1     | 2     | 1     |
| 13783  | 1     | 1     | 1     | 1     |
| 13785  | 1     | 1     | 2     | 1     |
| 13786  | 2     | 2     | 2     | 1     |
| 13792  | 4     | 5     | 5     | 5     |

| respid | Q39_3 | Q39_4 | Q39_5 | Q39_6 |
|--------|-------|-------|-------|-------|
| 13796  | 3     | 2     | 3     | 3     |
| 13798  | 2     | 2     | 2     | 2     |
| 13799  | 1     | 2     | 2     | 2     |
| 13804  | 1     | 1     | 1     | 1     |
| 13805  | 1     | 1     | 2     | 1     |
| 13810  | 4     | 4     | 4     | 4     |
| 13811  | 4     | 4     | 2     | 3     |
| 13819  | 6     | 6     | 6     | 6     |
| 13821  | 5     | 5     | 6     | 6     |
| 13824  | 3     | 3     | 4     | 4     |
| 13828  | 3     | 3     | 4     | 3     |
| 13829  | 1     | 2     | 2     | 3     |
| 13831  |       |       |       |       |
| 13833  | 2     | 2     | 2     | 2     |
| 13835  | 5     | 6     | 6     | 4     |
| 13838  |       |       |       |       |
| 13839  | 5     | 5     | 6     | 6     |
| 13845  |       |       |       |       |
| 13846  | 1     | 1     | 1     | 1     |
| 13853  | 3     | 3     | 3     | 3     |
| 13855  | 3     | 5     | 5     | 5     |
| 13858  | 5     | 2     | 2     | 2     |
| 13860  |       |       |       |       |
| 13865  | 4     | 5     | 5     | 6     |
| 13870  | 1     | 1     | 1     | 1     |
| 13872  | 6     | 5     | 5     | 6     |
| 13873  | 1     | 1     | 1     | 1     |
| 13874  |       |       |       |       |
| 13875  | 1     | 3     | 2     | 2     |
| 13881  |       |       |       |       |
| 13887  | 1     | 4     | 4     | 3     |
| 13888  | 4     | 3     | 3     | 2     |

| respid | Q39_3 | Q39_4 | Q39_5 | Q39_6 |
|--------|-------|-------|-------|-------|
| 13889  | 6     | 6     | 6     | 6     |
| 13895  | 4     | 6     | 6     | 3     |
| 13897  |       |       |       |       |
| 13898  | 2     | 2     | 2     | 2     |
| 13901  | 1     | 1     | 1     | 1     |
| 13902  | 4     | 5     | 5     | 6     |
| 13903  | 1     | 1     | 6     | 1     |
| 13905  | 3     | 1     | 2     | 1     |
| 13908  | 3     | 2     | 3     | 2     |
| 13909  | 1     | 1     | 1     | 1     |
| 13910  | 5     | 6     | 5     | 6     |
| 13911  |       |       |       |       |
| 13914  | 3     | 5     | 2     | 4     |
| 13920  | 3     | 3     | 2     | 1     |
| 13926  | 1     | 1     | 2     | 1     |
| 13929  | 1     | 2     | 2     | 1     |
| 13930  | 3     | 6     | 6     | 2     |
| 13931  |       |       |       |       |
| 13932  | 4     | 3     | 3     | 4     |
| 13934  | 1     | 2     | 2     | 1     |
| 13938  | 1     | 2     | 2     | 1     |
| 13942  | 1     | 1     | 1     | 1     |
| 13945  | 2     | 4     | 3     | 3     |
| 13947  | 5     | 5     | 5     | 5     |
| 13948  |       |       |       |       |
| 13959  | 1     | 1     | 1     | 1     |
| 13962  | 1     | 1     | 1     | 1     |
| 13963  | 6     | 1     | 1     | 6     |
| 13964  | 2     | 2     | 2     | 2     |
| 13966  | 2     | 3     | 2     | 2     |
| 13968  | 1     | 1     | 1     | 1     |
| 13971  | 2     | 1     | 2     | 2     |

| respid | Q39_3 | Q39_4 | Q39_5 | Q39_6 |
|--------|-------|-------|-------|-------|
| 13979  | 3     | 3     | 3     | 4     |
| 13980  | 3     | 2     | 2     | 2     |
| 13981  | 1     | 3     | 3     | 1     |
| 13982  | 1     | 2     | 1     | 1     |
| 13984  | 2     | 4     | 5     | 3     |
| 13989  | 1     | 1     | 1     | 1     |
| 13990  | 1     | 1     | 1     | 1     |
| 13992  | 4     | 4     | 4     | 5     |
| 13998  | 3     | 2     | 2     | 3     |
| 13999  | 2     | 2     | 3     | 2     |
| 14000  | 1     | 1     | 1     | 1     |
| 14003  | 1     | 1     | 1     | 1     |
| 14004  | 2     | 1     | 1     | 2     |
| 14006  | 1     | 2     | 2     | 2     |
| 14007  | 1     | 1     | 1     | 1     |
| 14008  |       |       |       |       |
| 14013  | 1     | 1     | 2     | 1     |
| 14015  | 1     | 1     | 1     | 1     |
| 14018  | 1     | 1     | 1     | 2     |
| 14021  | 2     | 1     | 2     | 2     |
| 14023  | 1     | 1     | 1     | 1     |
| 14024  | 3     | 6     | 6     | 5     |
| 14026  | 1     | 1     | 1     | 1     |
| 14030  | 2     | 2     | 2     | 1     |
| 14032  | 2     | 2     | 2     | 2     |
| 14040  |       |       |       |       |
| 14045  | 1     | 1     | 1     | 1     |
| 14048  | 2     | 3     | 3     | 2     |
| 14049  | 4     | 5     | 5     | 3     |
| 14050  | 1     | 2     | 2     | 1     |
| 14051  | 6     | 5     | 6     | 6     |
| 14052  | 2     | 2     | 1     | 1     |

| respid | Q39_3 | Q39_4 | Q39_5 | Q39_6 |
|--------|-------|-------|-------|-------|
| 14054  | 1     | 1     | 1     | 1     |
| 14055  |       |       |       |       |
| 14057  | 2     | 3     | 2     | 1     |
| 14058  | 1     | 1     | 1     | 1     |
| 14059  | 1     | 1     | 2     | 1     |
| 14060  | 2     | 1     | 1     | 2     |
| 14061  | 4     | 3     | 3     | 3     |
| 14071  | 1     | 2     | 2     | 1     |
| 14073  | 1     | 3     | 4     | 1     |
| 14074  | 1     | 5     | 5     | 1     |
| 14076  | 3     | 3     | 2     | 1     |
| 14080  | 1     | 1     | 1     | 1     |
| 14082  | 1     | 1     | 1     | 1     |
| 14083  | 2     | 2     | 1     | 1     |
| 14084  | 1     | 2     | 2     | 1     |
| 14085  |       |       |       |       |
| 14086  | 2     | 6     | 6     | 3     |
| 14088  | 1     | 1     | 2     | 1     |
| 14090  | 1     | 1     | 1     | 1     |
| 14092  | 1     | 1     | 1     | 1     |
| 14093  | 2     | 2     | 1     | 1     |
| 14096  | 1     | 1     | 1     | 1     |
| 14103  | 4     | 4     | 3     | 4     |
| 14105  | 1     | 1     | 1     | 1     |
| 14106  | 2     | 2     | 2     | 2     |
| 14107  | 1     | 3     | 2     | 1     |
| 14108  | 4     | 4     | 4     | 4     |
| 14112  | 1     | 2     | 1     | 1     |
| 14114  | 1     | 3     | 3     | 1     |
| 14115  | 1     | 1     | 2     | 2     |
| 14116  | 1     | 1     | 1     | 1     |
| 14117  | 1     | 1     | 1     | 1     |

| respid | Q39_3 | Q39_4 | Q39_5 | Q39_6 |
|--------|-------|-------|-------|-------|
| 14118  | 3     | 3     | 2     | 2     |
| 14119  | 2     | 1     | 2     | 1     |
| 14127  |       |       |       |       |
| 14129  | 1     | 2     | 2     | 1     |
| 14131  | 3     | 3     | 3     | 3     |
| 14132  | 1     | 2     | 1     | 1     |
| 14133  | 5     | 4     | 5     | 4     |
| 14134  | 3     | 1     | 2     | 2     |
| 14135  | 2     | 1     | 2     | 1     |
| 14136  | 1     | 6     | 6     | 1     |
| 14138  |       |       |       |       |
| 14139  |       |       |       |       |
| 14140  | 3     | 2     | 3     | 1     |
| 14141  | 1     | 1     | 1     | 1     |
| 14143  | 1     | 1     | 1     | 1     |
| 14146  | 1     | 1     | 1     | 1     |
| 14147  | 5     | 6     | 6     | 4     |
| 14148  | 2     | 1     | 1     | 1     |
| 14151  | 3     | 4     | 4     | 4     |
| 14152  | 2     | 2     | 4     | 3     |
| 14153  | 1     | 3     | 3     | 1     |
| 14154  | 1     | 1     | 1     | 1     |
| 14158  | 2     | 2     | 2     | 4     |
| 14159  | 2     | 1     | 3     | 3     |
| 14160  | 4     | 3     | 3     | 2     |
| 14161  | 3     | 2     | 2     | 4     |
| 14162  | 1     | 6     | 6     | 1     |
| 14165  | 3     | 3     | 3     | 4     |
| 14166  | 3     | 2     | 2     | 3     |
| 14167  | 2     | 3     | 3     | 2     |
| 14169  | 1     | 2     | 2     | 2     |
| 14170  | 2     | 1     | 1     | 1     |

| respid | Q39_3 | Q39_4 | Q39_5 | Q39_6 |
|--------|-------|-------|-------|-------|
| 14172  | 3     | 2     | 2     | 2     |
| 14173  |       |       |       |       |
| 14174  | 3     | 2     | 4     | 3     |
| 14175  | 1     | 2     | 3     | 1     |
| 14176  | 1     | 3     | 3     | 1     |
| 14178  | 1     | 2     | 2     | 1     |
| 14179  | 1     | 1     | 2     | 1     |
| 14180  | 3     | 2     | 4     | 3     |
| 14183  | 1     | 2     | 2     | 2     |
| 14185  | 2     | 1     | 1     | 1     |
| 14187  | 1     | 3     | 3     | 1     |
| 14189  | 1     | 1     | 1     | 1     |
| 14191  | 2     | 3     | 2     | 3     |
| 14192  |       |       |       |       |
| 14195  | 5     | 6     | 6     | 4     |
| 14197  | 1     | 3     | 3     | 1     |
| 14203  | 2     | 3     | 3     | 4     |
| 14204  | 1     | 2     | 2     | 1     |
| 14205  | 1     | 2     | 2     | 1     |
| 14208  | 1     | 1     | 1     | 1     |
| 14211  | 6     | 6     | 6     | 2     |
| 14214  | 1     | 1     | 1     | 1     |
| 14215  | 2     | 5     | 5     | 2     |
| 14216  | 4     | 4     | 4     | 4     |
| 14218  | 1     | 2     | 2     | 1     |
| 14220  | 1     | 1     | 2     | 1     |
| 14223  |       |       |       |       |
| 14225  | 2     | 3     | 3     | 2     |
| 14226  | 1     | 1     | 2     | 1     |
| 14228  | 1     | 3     | 2     | 2     |
| 14231  | 3     | 3     | 3     | 3     |
| 14233  | 2     | 2     | 2     | 2     |



| respid | Q39_3 | Q39_4 | Q39_5 | Q39_6 |
|--------|-------|-------|-------|-------|
| 14237  | 1     | 1     | 1     | 1     |
| 14238  | 3     | 2     | 2     | 3     |
| 14243  | 3     | 2     | 3     | 3     |
| 14245  | 2     | 1     | 1     | 2     |
| 14246  | 2     | 2     | 3     | 4     |
| 14248  | 6     | 6     | 6     | 6     |
| 14250  | 2     | 1     | 1     | 1     |
| 14253  | 2     | 1     | 1     | 1     |
| 14254  | 1     | 1     | 2     | 1     |
| 14255  | 1     | 1     | 1     | 1     |
| 14257  | 1     | 1     | 1     | 1     |
| 14258  | 1     | 1     | 1     | 1     |
| 14259  | 1     | 3     | 2     | 2     |
| 14260  |       |       |       |       |
| 14261  | 4     | 5     | 6     | 5     |
| 14263  | 4     | 3     | 4     | 4     |
| 14264  | 2     | 3     | 4     | 1     |
| 14266  | 4     | 3     | 3     | 4     |
| 14267  | 2     | 1     | 2     | 3     |
| 14268  | 1     | 1     | 1     | 1     |
| 14275  | 1     | 2     | 2     | 2     |
| 14278  | 1     | 1     | 1     | 1     |
| 14279  |       |       |       |       |
| 14280  |       |       |       |       |
| 14281  | 3     | 5     | 5     | 1     |
| 14282  | 2     | 1     | 2     | 2     |
| 14283  | 3     | 4     | 5     | 2     |
| 14286  | 1     | 1     | 1     | 1     |
| 14287  |       |       |       |       |
| 14288  | 3     | 3     | 3     | 2     |
| 14291  |       |       |       |       |
| 14292  |       |       |       |       |

| respid | Q39_3 | Q39_4 | Q39_5 | Q39_6 |
|--------|-------|-------|-------|-------|
| 14293  | 1     | 1     | 1     | 1     |
| 14304  | 6     | 5     | 4     | 5     |
| 14308  | 2     | 2     | 2     | 1     |
| 14313  | 1     | 1     | 1     | 1     |
| 14314  | 3     | 3     | 3     | 3     |
| 14316  | 1     | 1     | 1     | 1     |
| 14317  | 1     | 1     | 1     | 1     |
| 14318  | 3     | 6     | 6     | 5     |
| 14319  | 4     | 1     | 1     | 2     |
| 14320  | 1     | 2     | 2     | 1     |
| 14321  | 1     | 1     | 1     | 1     |
| 14322  | 4     | 4     | 4     | 4     |
| 14326  | 3     | 4     | 5     | 6     |
| 14327  | 5     | 5     | 4     | 5     |
| 14328  |       |       |       |       |
| 14330  | 1     | 2     | 2     | 1     |
| 14332  | 1     | 1     | 2     | 1     |
| 14334  | 1     | 1     | 1     | 1     |
| 14336  | 4     | 3     | 4     | 1     |
| 14337  | 1     | 2     | 2     | 1     |
| 14339  |       |       |       |       |
| 14340  | 2     | 6     | 6     | 3     |
| 14341  | 1     | 2     | 1     | 1     |
| 14344  | 2     | 1     | 1     | 1     |
| 14345  | 2     | 2     | 1     | 1     |
| 14346  |       |       |       |       |
| 14348  | 1     | 2     | 2     | 1     |
| 14349  | 1     | 1     | 1     | 1     |
| 14358  | 4     | 4     | 4     | 4     |
| 14360  | 1     | 1     | 1     | 1     |
| 14362  |       |       |       |       |
| 14366  | 2     | 1     | 1     | 2     |

| respid | Q39_3 | Q39_4 | Q39_5 | Q39_6 |
|--------|-------|-------|-------|-------|
| 14367  | 1     | 3     | 4     | 1     |
| 14369  | 2     | 4     | 4     | 2     |
| 14371  | 1     | 2     | 2     | 1     |
| 14372  | 1     | 1     | 1     | 1     |
| 14374  | 2     | 1     | 1     | 1     |
| 14376  | 1     | 3     | 2     | 1     |
| 14377  |       |       |       |       |
| 14378  | 1     | 2     | 1     | 1     |
| 14379  | 1     | 1     | 2     | 1     |
| 14381  | 3     | 2     | 3     | 2     |
| 14383  | 2     | 2     | 3     | 2     |
| 14384  | 2     | 5     | 4     | 3     |
| 14385  | 4     | 6     | 5     | 4     |
| 14386  | 4     | 4     | 4     | 4     |
| 14390  | 1     | 2     | 3     | 1     |
| 14391  | 1     | 2     | 2     | 1     |
| 14392  | 2     | 1     | 2     | 2     |
| 14393  | 3     | 6     | 6     | 4     |
| 14394  | 3     | 3     | 3     | 3     |
| 14395  |       |       |       |       |
| 14396  |       |       |       |       |
| 14397  | 1     | 1     | 2     | 2     |
| 14398  | 1     | 1     | 1     | 1     |
| 14399  | 1     | 2     | 1     | 1     |
| 14400  | 1     | 4     | 5     | 1     |
| 14403  | 1     | 1     | 1     | 1     |
| 14404  | 2     | 2     | 1     | 2     |
| 14405  | 1     | 1     | 2     | 1     |
| 14407  | 2     | 1     | 3     | 2     |
| 14408  | 5     | 3     | 4     | 2     |
| 14410  | 3     | 4     | 5     | 5     |
| 14415  | 1     | 1     | 2     | 1     |

| respid | Q39_3 | Q39_4 | Q39_5 | Q39_6 |
|--------|-------|-------|-------|-------|
| 14419  | 4     | 4     | 5     | 5     |
| 14420  |       |       |       |       |
| 14421  |       |       |       |       |
| 14423  | 1     | 2     | 2     | 1     |
| 14424  | 3     | 1     | 2     | 3     |
| 14425  | 1     | 2     | 2     | 1     |
| 14426  | 2     | 2     | 2     | 2     |
| 14427  | 1     | 1     | 2     | 1     |
| 14428  | 5     | 6     | 4     | 5     |
| 14431  | 2     | 2     | 2     | 2     |
| 14433  | 1     | 1     | 2     | 1     |
| 14434  | 1     | 2     | 2     | 1     |
| 14435  | 2     | 2     | 3     | 2     |
| 14436  | 5     | 3     | 3     | 2     |
| 14438  | 3     | 2     | 2     | 3     |
| 14442  | 5     | 5     | 5     | 4     |
| 14447  | 3     | 1     | 1     | 1     |
| 14448  | 2     | 1     | 2     | 2     |
| 14450  | 2     | 2     | 1     | 1     |
| 14451  | 1     | 1     | 1     | 1     |
| 14454  | 2     | 3     | 2     | 3     |
| 14455  | 2     | 1     | 1     | 1     |
| 14456  | 5     | 3     | 3     | 1     |
| 14457  | 2     | 4     | 5     | 5     |
| 14458  | 5     | 4     | 5     | 6     |
| 14459  |       |       |       |       |
| 14460  | 3     | 3     | 2     | 1     |
| 14464  | 2     | 2     | 2     | 2     |
| 14465  | 2     | 1     | 1     | 2     |
| 14466  | 1     | 2     | 2     | 2     |
| 14467  | 1     | 3     | 2     | 1     |
| 14470  | 2     | 2     | 3     | 3     |

| respid | Q39_3 | Q39_4 | Q39_5 | Q39_6 |
|--------|-------|-------|-------|-------|
| 14472  | 4     | 4     | 4     | 4     |
| 14473  | 1     | 1     | 1     | 1     |
| 14474  |       |       |       |       |
| 14477  | 2     | 2     | 2     | 2     |
| 14478  | 1     | 1     | 2     | 1     |
| 14479  |       |       |       |       |
| 14484  | 1     | 2     | 2     | 1     |
| 14485  |       |       |       |       |
| 14486  | 2     | 3     | 3     | 3     |
| 14487  | 1     | 1     | 1     | 1     |
| 14488  | 3     | 3     | 3     | 3     |
| 14491  | 3     | 2     | 2     | 3     |
| 14495  | 1     | 1     | 1     | 1     |
| 14500  | 1     | 2     | 2     | 1     |
| 14502  | 2     | 1     | 1     | 2     |
| 14504  | 3     | 2     | 3     | 3     |
| 14505  | 5     | 4     | 5     | 6     |
| 14507  | 1     | 2     | 3     | 1     |
| 14517  | 1     | 2     | 2     | 1     |
| 14518  | 1     | 2     | 2     | 1     |
| 14519  | 2     | 1     | 1     | 1     |
| 14521  | 3     | 3     | 2     | 3     |
| 14522  | 1     | 1     | 1     | 1     |
| 14526  | 1     | 1     | 1     | 1     |
| 14528  | 4     | 4     | 4     | 5     |
| 14529  | 1     | 1     | 1     | 1     |
| 14530  | 1     | 4     | 4     | 1     |
| 14531  | 5     | 6     | 5     | 6     |
| 14534  | 2     | 3     | 3     | 4     |
| 14538  | 4     | 1     | 1     | 2     |
| 14539  | 4     | 3     | 4     | 4     |
| 14545  | 2     | 1     | 2     | 2     |

| respid | Q39_3 | Q39_4 | Q39_5 | Q39_6 |
|--------|-------|-------|-------|-------|
| 14546  | 2     | 5     | 6     | 3     |
| 14551  | 1     | 1     | 2     | 1     |
| 14553  | 4     | 4     | 4     | 4     |
| 14557  |       |       |       |       |
| 14558  | 2     | 1     | 2     | 2     |
| 14559  | 2     | 3     | 4     | 3     |
| 14560  | 2     | 2     | 2     | 2     |
| 14563  | 2     | 2     | 2     | 2     |
| 14565  | 1     | 2     | 1     | 1     |
| 14571  | 5     | 5     | 6     | 6     |
| 14572  | 2     | 1     | 2     | 1     |
| 14573  | 3     | 2     | 2     | 3     |
| 14575  | 3     | 2     | 4     | 3     |
| 14576  | 3     | 3     | 3     | 2     |
| 14578  | 3     | 3     | 3     | 2     |
| 14579  | 1     | 1     | 2     | 1     |
| 14580  | 3     | 1     | 1     | 3     |
| 14582  | 1     | 2     | 2     | 1     |
| 14585  | 2     | 3     | 4     | 4     |
| 14588  | 1     | 1     | 1     | 1     |
| 14590  | 4     | 4     | 3     | 4     |
| 14592  | 3     | 3     | 3     | 3     |
| 14593  | 2     | 1     | 3     | 3     |
| 14595  | 1     | 2     | 3     | 2     |
| 14597  | 2     | 3     | 3     | 2     |
| 14600  | 1     | 2     | 2     | 1     |
| 14602  | 3     | 3     | 3     | 3     |
| 14604  | 1     | 2     | 2     | 1     |
| 14605  | 1     | 1     | 1     | 1     |
| 14609  | 3     | 3     | 3     | 3     |
| 14610  | 1     | 2     | 3     | 1     |
| 14611  | 2     | 1     | 1     | 1     |

| respid | Q39_3 | Q39_4 | Q39_5 | Q39_6 |
|--------|-------|-------|-------|-------|
| 14612  | 2     | 2     | 3     | 4     |
| 14614  | 4     | 3     | 4     | 3     |
| 14615  | 2     | 1     | 1     | 1     |
| 14618  | 5     | 4     | 5     | 5     |
| 14621  |       |       |       |       |
| 14624  | 1     | 1     | 1     | 1     |
| 14626  | 1     | 1     | 2     | 1     |
| 14627  | 4     | 4     | 4     | 4     |
| 14628  | 4     | 5     | 6     | 6     |
| 14631  | 2     | 1     | 3     | 2     |
| 14633  | 3     | 4     | 3     | 4     |
| 14642  | 4     | 3     | 3     | 3     |
| 14647  | 6     | 6     | 6     | 6     |
| 14658  | 2     | 2     | 1     | 2     |
| 14659  | 2     | 4     | 4     | 3     |
| 14660  | 1     | 2     | 2     | 2     |
| 14661  | 1     | 2     | 3     | 1     |
| 14662  | 4     | 5     | 5     | 6     |
| 14663  | 2     | 1     | 1     | 2     |
| 14670  | 1     | 1     | 2     | 1     |
| 14671  |       |       |       |       |
| 14672  | 3     | 4     | 4     | 3     |
| 14675  | 2     | 2     | 1     | 2     |
| 14676  | 2     | 1     | 2     | 1     |
| 14677  | 4     | 3     | 4     | 4     |
| 14678  | 2     | 1     | 2     | 3     |
| 14681  | 2     | 3     | 3     | 3     |
| 14684  | 6     | 6     | 6     | 6     |
| 14688  | 1     | 1     | 1     | 2     |
| 14690  | 3     | 2     | 3     | 3     |
| 14694  | 3     | 4     | 4     | 3     |
| 14696  | 2     | 1     | 2     | 2     |

| respid | Q39_3 | Q39_4 | Q39_5 | Q39_6 |
|--------|-------|-------|-------|-------|
| 14700  |       |       |       |       |
| 14701  | 3     | 3     | 3     | 3     |
| 14703  | 2     | 5     | 5     | 5     |
| 14707  | 4     | 1     | 5     | 2     |
| 14711  | 4     | 4     | 3     | 4     |
| 14714  | 2     | 1     | 1     | 1     |
| 14715  | 3     | 2     | 3     | 2     |
| 14716  | 1     | 1     | 2     | 1     |
| 14720  | 6     | 6     | 6     | 6     |
| 14725  | 1     | 1     | 1     | 1     |
| 14726  | 1     | 1     | 3     | 1     |
| 14734  | 2     | 1     | 2     | 1     |
| 14735  | 1     | 1     | 2     | 3     |
| 14736  | 2     | 3     | 3     | 3     |
| 14740  | 2     | 1     | 3     | 2     |
| 14745  | 3     | 1     | 2     | 3     |
| 14747  | 1     | 1     | 3     | 2     |
| 14750  | 4     | 3     | 3     | 4     |
| 14751  | 3     | 1     | 1     | 1     |
| 14753  | 2     | 1     | 1     | 2     |
| 14756  | 6     | 6     | 6     | 4     |
| 14780  | 1     | 5     | 4     | 3     |
| 14782  | 1     | 1     | 1     | 1     |
| 14800  | 4     | 4     | 5     | 3     |
| 14801  | 1     | 3     | 3     | 1     |
| 14802  | 2     | 3     | 3     | 2     |
| 14805  | 2     | 6     | 6     | 4     |
| 14811  | 3     | 3     | 2     | 2     |
| 14814  | 3     | 3     | 4     | 3     |
| 14822  | 2     | 1     | 3     | 4     |
| 14827  | 3     | 4     | 5     | 5     |
| 14828  | 4     | 4     | 5     | 5     |



| respid | Q39_3 | Q39_4 | Q39_5 | Q39_6 |
|--------|-------|-------|-------|-------|
| 14830  |       |       |       |       |
| 14832  | 2     | 2     | 2     | 1     |
| 14835  | 3     | 6     | 6     | 2     |
| 14841  |       |       |       |       |
| 14849  | 1     | 1     | 1     | 2     |
| 14850  |       |       |       |       |
| 14851  | 6     | 6     | 6     | 6     |
| 14856  | 5     | 5     | 5     | 4     |
| 14862  | 3     | 2     | 3     | 2     |
| 14863  | 1     | 2     | 2     | 1     |
| 14864  | 4     | 1     | 1     | 4     |
| 14866  | 2     | 2     | 2     | 1     |
| 14867  | 5     | 4     | 4     | 4     |
| 14868  | 1     | 1     | 1     | 1     |
| 14870  | 3     | 2     | 2     | 3     |
| 14873  |       |       |       |       |
| 14878  | 2     | 1     | 1     | 1     |
| 14879  |       |       |       |       |
| 14881  | 5     | 6     | 5     | 4     |
| 14888  | 4     | 5     | 6     | 4     |
| 14895  | 1     | 1     | 1     | 3     |
| 14900  | 4     | 5     | 6     | 6     |
| 14912  |       |       |       |       |
| 14922  | 2     | 3     | 2     | 1     |
| 14923  | 4     | 4     | 3     | 3     |
| 14924  | 2     | 3     | 5     | 2     |
| 14925  | 3     | 4     | 3     | 4     |
| 14926  | 1     | 2     | 2     | 3     |
| 14927  | 4     | 4     | 5     | 4     |
| 14930  | 1     | 1     | 1     | 1     |
| 14937  | 5     | 5     | 5     | 5     |
| 14938  | 4     | 4     | 5     | 6     |

| respid | Q39_3 | Q39_4 | Q39_5 | Q39_6 |
|--------|-------|-------|-------|-------|
| 14939  | 4     | 5     | 5     | 4     |
| 14942  |       |       |       |       |
| 14943  |       |       |       |       |
| 14953  | 1     | 4     | 4     | 3     |
| 14954  | 3     | 2     | 2     | 2     |
| 14955  | 4     | 3     | 2     | 2     |
| 14957  | 4     | 3     | 4     | 3     |
| 14958  | 5     | 5     | 6     | 5     |
| 14959  | 4     | 4     | 4     | 4     |
| 14961  |       |       |       |       |
| 14963  | 4     | 5     | 5     | 4     |
| 14964  | 4     | 4     | 3     | 3     |
| 14965  | 2     | 3     | 3     | 3     |
| 14967  | 3     | 4     | 4     | 5     |
| 14970  | 5     | 5     | 6     | 6     |
| 14972  | 2     | 3     | 3     | 2     |
| 14975  | 3     | 5     | 5     | 6     |
| 14977  | 3     | 2     | 2     | 3     |
| 14982  | 1     | 2     | 3     | 2     |
| 14985  | 3     | 2     | 2     | 3     |
| 14986  |       |       |       |       |
| 14987  |       |       |       |       |
| 14988  | 5     | 5     | 6     | 6     |
| 14989  | 5     | 6     | 6     | 4     |
| 14993  | 3     | 2     | 2     | 3     |
| 15001  | 3     | 2     | 2     | 3     |
| 15002  | 5     | 5     | 6     | 6     |
| 15006  | 3     | 4     | 4     | 3     |
| 15007  | 1     | 2     | 2     | 3     |
| 15014  | 4     | 4     | 4     | 4     |
| 15020  | 3     | 4     | 3     | 3     |
| 15021  | 4     | 5     | 4     | 3     |

| respid | Q39_3 | Q39_4 | Q39_5 | Q39_6 |
|--------|-------|-------|-------|-------|
| 15023  | 6     | 5     | 5     | 6     |
| 15030  | 3     | 2     | 2     | 2     |
| 15032  |       |       |       |       |
| 15033  | 3     | 3     | 3     | 3     |
| 15034  | 3     | 4     | 3     | 2     |
| 15035  | 1     | 1     | 1     | 4     |
| 15037  | 2     | 1     | 2     | 2     |
| 15039  | 5     | 5     | 4     | 4     |
| 15040  | 6     | 6     | 6     | 6     |
| 15042  | 1     | 1     | 1     | 4     |
| 15044  |       |       |       |       |
| 15045  | 2     | 1     | 1     | 1     |
| 15046  | 2     | 2     | 2     | 1     |
| 15052  | 2     | 3     | 3     | 2     |
| 15058  | 4     | 4     | 3     | 3     |
| 15063  | 3     | 4     | 4     | 3     |
| 15066  | 1     | 1     | 2     | 1     |
| 15069  | 1     | 1     | 2     | 1     |
| 15071  | 4     | 3     | 4     | 3     |
| 15076  | 3     | 2     | 2     | 3     |
| 15078  | 1     | 1     | 1     | 1     |
| 15087  | 2     | 5     | 5     | 4     |
| 15090  | 3     | 4     | 4     | 3     |
| 15091  | 4     | 4     | 3     | 3     |
| 15092  | 1     | 1     | 1     | 2     |
| 15096  | 2     | 2     | 1     | 1     |
| 15106  | 2     | 2     | 3     | 3     |
| 15108  |       |       |       |       |
| 15113  | 2     | 1     | 2     | 2     |
| 15116  |       |       |       |       |
| 15119  | 2     | 1     | 1     | 1     |
| 15120  | 3     | 2     | 3     | 4     |

| respid | Q39_3 | Q39_4 | Q39_5 | Q39_6 |
|--------|-------|-------|-------|-------|
| 15121  | 1     | 5     | 5     | 5     |
| 15123  |       |       |       |       |
| 15124  | 6     | 2     | 3     | 6     |
| 15128  | 1     | 2     | 1     | 1     |
| 15131  |       |       |       |       |
| 15136  | 3     | 3     | 3     | 2     |
| 15137  | 2     | 2     | 1     | 2     |
| 15141  | 1     | 1     | 1     | 4     |
| 15144  | 3     | 3     | 3     | 3     |
| 15147  | 2     | 3     | 3     | 2     |
| 15151  | 2     | 3     | 4     | 2     |
| 15154  | 3     | 2     | 2     | 3     |
| 15157  | 4     | 4     | 4     | 3     |
| 15164  | 4     | 5     | 5     | 4     |
| 15168  | 2     | 3     | 3     | 3     |
| 15169  | 2     | 2     | 1     | 2     |
| 15172  | 3     | 3     | 4     | 4     |
| 15177  | 4     | 4     | 5     | 5     |
| 15178  |       |       |       |       |
| 15180  | 2     | 3     | 2     | 3     |
| 15181  | 1     | 2     | 1     | 1     |
| 15182  | 3     | 4     | 4     | 4     |
| 15183  |       |       |       |       |
| 15188  | 4     | 4     | 4     | 4     |
| 15190  | 6     | 6     | 5     | 4     |
| 15195  |       |       |       |       |
| 15201  | 6     | 6     | 5     | 5     |
| 15203  | 4     | 4     | 4     | 5     |
| 15204  | 1     | 2     | 1     | 1     |
| 15207  |       |       |       |       |
| 15208  | 5     | 5     | 6     | 5     |
| 15209  | 1     | 1     | 1     | 3     |

| respid | Q39_3 | Q39_4 | Q39_5 | Q39_6 |
|--------|-------|-------|-------|-------|
| 15212  |       |       |       |       |
| 15213  | 2     | 2     | 3     | 2     |
| 15219  | 1     | 2     | 1     | 2     |
| 15220  | 1     | 4     | 4     | 4     |
| 15221  | 3     | 2     | 2     | 2     |
| 15223  | 2     | 3     | 2     | 3     |
| 15224  | 1     | 4     | 3     | 2     |
| 15225  | 1     | 1     | 2     | 1     |
| 15226  | 3     | 2     | 2     | 2     |
| 15230  | 3     | 2     | 2     | 3     |
| 15231  | 5     | 5     | 5     | 6     |
| 15232  | 3     | 2     | 2     | 1     |
| 15237  | 1     | 2     | 1     | 2     |
| 15239  | 3     | 3     | 3     | 2     |
| 15241  | 1     | 3     | 3     | 2     |
| 15242  | 3     | 1     | 2     | 2     |
| 15247  | 3     | 2     | 2     | 2     |
| 15248  |       |       |       |       |
| 15251  |       |       |       |       |
| 15257  |       |       |       |       |
| 15260  | 2     | 2     | 2     | 3     |
| 15261  | 3     | 5     | 4     | 5     |
| 15262  | 2     | 6     | 6     | 5     |
| 15263  | 5     | 5     | 5     | 4     |
| 15265  | 2     | 2     | 2     | 3     |
| 15266  | 1     | 4     | 5     | 1     |
| 15268  | 1     | 1     | 3     | 2     |
| 15269  | 3     | 3     | 2     | 3     |
| 15270  | 6     | 6     | 6     | 6     |
| 15273  | 2     | 3     | 2     | 2     |
| 15276  | 5     | 6     | 5     | 5     |
| 15277  | 3     | 2     | 2     | 1     |

| respid | Q39_3 | Q39_4 | Q39_5 | Q39_6 |
|--------|-------|-------|-------|-------|
| 15282  | 6     | 6     | 6     | 6     |
| 15284  | 2     | 5     | 5     | 4     |
| 15285  | 1     | 1     | 2     | 1     |
| 15286  | 6     | 5     | 5     | 5     |
| 15288  | 2     | 4     | 3     | 2     |
| 15292  | 6     | 5     | 5     | 6     |
| 15296  | 2     | 1     | 2     | 1     |
| 15297  | 1     | 2     | 2     | 3     |
| 15298  |       |       |       |       |
| 15301  | 1     | 2     | 2     | 1     |
| 15302  | 3     | 1     | 1     | 2     |
| 15305  | 1     | 1     | 1     | 3     |
| 15307  | 1     | 1     | 1     | 1     |
| 15308  | 1     | 2     | 2     | 1     |
| 15309  | 1     | 2     | 2     | 1     |
| 15311  | 2     | 2     | 2     | 1     |
| 15315  | 1     | 1     | 2     | 3     |
| 15316  | 2     | 2     | 2     | 1     |
| 15318  |       |       |       |       |
| 15321  | 6     | 5     | 5     | 6     |
| 15322  | 1     | 1     | 1     | 1     |
| 15324  | 1     | 1     | 1     | 1     |
| 15326  | 3     | 1     | 2     | 1     |
| 15327  | 1     | 1     | 2     | 1     |
| 15328  | 3     | 2     | 2     | 3     |
| 15330  | 2     | 3     | 3     | 3     |
| 15332  | 1     | 1     | 1     | 1     |
| 15333  |       |       |       |       |
| 15334  | 3     | 1     | 2     | 3     |
| 15336  | 4     | 6     | 5     | 5     |
| 15337  | 2     | 2     | 2     | 1     |
| 15338  | 3     | 2     | 2     | 2     |

| respid | Q39_3 | Q39_4 | Q39_5 | Q39_6 |
|--------|-------|-------|-------|-------|
| 15339  | 6     | 6     | 6     | 6     |
| 15341  | 1     | 1     | 1     | 1     |
| 15344  |       |       |       |       |
| 15345  | 2     | 1     | 1     | 1     |
| 15350  |       |       |       |       |
| 15351  | 2     | 1     | 2     | 2     |
| 15352  | 1     | 1     | 2     | 1     |
| 15372  | 2     | 1     | 2     | 1     |
| 15373  | 4     | 4     | 5     | 5     |
| 15376  | 1     | 1     | 1     | 1     |
| 15377  | 3     | 2     | 2     | 3     |
| 15382  | 1     | 1     | 3     | 2     |
| 15383  | 3     | 3     | 3     | 3     |
| 15385  | 4     | 5     | 5     | 4     |
| 15390  | 3     | 2     | 2     | 3     |
| 15399  |       |       |       |       |
| 15404  | 2     | 2     | 3     | 2     |
| 15410  | 1     | 1     | 1     | 1     |
| 15411  | 2     | 3     | 3     | 3     |
| 15412  | 2     | 1     | 2     | 3     |
| 15413  | 2     | 2     | 4     | 1     |
| 15414  | 3     | 2     | 2     | 2     |
| 15417  | 2     | 1     | 1     | 1     |
| 15418  | 2     | 3     | 3     | 2     |
| 15421  | 3     | 2     | 2     | 2     |
| 15423  | 2     | 1     | 3     | 2     |
| 15425  | 1     | 2     | 2     | 1     |
| 15426  | 4     | 6     | 5     | 6     |
| 15430  | 1     | 1     | 2     | 2     |
| 15431  | 5     | 4     | 5     | 4     |
| 15435  |       |       |       |       |
| 15436  |       |       |       |       |

| respid | Q39_3 | Q39_4 | Q39_5 | Q39_6 |
|--------|-------|-------|-------|-------|
| 15437  |       |       |       |       |
| 15438  | 1     | 1     | 1     | 1     |
| 15439  | 2     | 1     | 1     | 1     |
| 15441  | 5     | 4     | 5     | 6     |
| 15443  | 2     | 1     | 1     | 1     |
| 15446  | 1     | 1     | 2     | 2     |
| 15449  | 2     | 2     | 3     | 2     |
| 15451  | 5     | 5     | 5     | 5     |
| 15452  | 4     | 4     | 4     | 4     |
| 15454  | 2     | 1     | 1     | 1     |
| 15456  | 3     | 4     | 4     | 4     |
| 15457  |       |       |       |       |
| 15458  | 4     | 3     | 3     | 3     |
| 15462  | 5     | 3     | 2     | 5     |
| 15467  | 3     | 5     | 3     | 4     |
| 15470  | 4     | 1     | 1     | 3     |
| 15472  | 2     | 1     | 1     | 3     |
| 15476  | 1     | 2     | 1     | 1     |
| 15477  | 1     | 2     | 2     | 2     |
| 15488  | 3     | 2     | 1     | 4     |
| 15489  | 1     | 3     | 4     | 1     |
| 15490  | 3     | 2     | 2     | 3     |
| 15496  | 1     | 2     | 2     | 1     |
| 15497  | 3     | 2     | 4     | 3     |
| 15498  |       |       |       |       |
| 15509  | 4     | 4     | 3     | 4     |
| 15510  | 3     | 2     | 2     | 1     |
| 15516  | 1     | 5     | 6     | 1     |
| 15519  | 1     | 2     | 2     | 1     |
| 15520  | 3     | 2     | 2     | 3     |
| 15524  | 3     | 2     | 5     | 2     |
| 15525  | 1     | 1     | 1     | 1     |



| respid | Q39_3 | Q39_4 | Q39_5 | Q39_6 |
|--------|-------|-------|-------|-------|
| 15526  | 5     | 3     | 3     | 4     |
| 15531  | 5     | 1     | 2     | 3     |
| 15532  | 4     | 1     | 2     | 2     |
| 15534  | 5     | 5     | 5     | 5     |
| 15535  | 4     | 4     | 4     | 3     |
| 15539  | 2     | 3     | 3     | 2     |
| 15550  | 1     | 1     | 1     | 1     |
| 15556  | 3     | 2     | 2     | 1     |
| 15558  | 3     | 4     | 4     | 4     |
| 15565  | 1     | 1     | 1     | 1     |
| 15567  | 3     | 3     | 4     | 4     |
| 15568  | 2     | 3     | 3     | 3     |
| 15571  | 1     | 2     | 2     | 1     |
| 15573  | 1     | 1     | 1     | 1     |
| 15574  | 3     | 3     | 4     | 4     |
| 15576  | 1     | 3     | 3     | 1     |
| 15587  | 3     | 4     | 4     | 3     |
| 15588  | 4     | 4     | 4     | 1     |
| 15593  | 5     | 5     | 6     | 6     |
| 15597  | 1     | 1     | 2     | 1     |
| 15598  | 1     | 1     | 1     | 1     |
| 15599  | 3     | 2     | 2     | 2     |
| 15601  | 1     | 1     | 1     | 1     |
| 15604  | 1     | 1     | 1     | 1     |
| 15611  | 1     | 1     | 1     | 1     |
| 15613  | 1     | 1     | 2     | 1     |
| 15614  | 1     | 1     | 1     | 1     |
| 15617  | 2     | 2     | 3     | 3     |
| 15622  |       |       |       |       |
| 15623  | 1     | 1     | 1     | 1     |
| 15625  | 1     | 2     | 4     | 1     |
| 15627  |       |       |       |       |

| respid | Q39_3 | Q39_4 | Q39_5 | Q39_6 |
|--------|-------|-------|-------|-------|
| 15628  | 1     | 1     | 2     | 2     |
| 15633  | 2     | 2     | 1     | 1     |
| 15634  | 3     | 1     | 2     | 2     |
| 15637  | 3     | 1     | 2     | 2     |
| 15644  | 3     | 3     | 2     | 2     |
| 15645  | 2     | 3     | 3     | 1     |
| 15649  | 1     | 1     | 2     | 1     |
| 15650  | 1     | 1     | 1     | 1     |
| 15651  | 2     | 1     | 2     | 1     |
| 15657  | 4     | 6     | 6     | 5     |
| 15658  | 1     | 1     | 2     | 1     |
| 15660  | 4     | 3     | 4     | 3     |
| 15667  | 1     | 1     | 1     | 1     |
| 15671  | 1     | 1     | 1     | 1     |
| 15679  | 3     | 3     | 3     | 3     |
| 15712  | 1     | 1     | 1     | 1     |
| 15715  | 1     | 2     | 1     | 2     |
| 15749  | 1     | 1     | 1     | 1     |
| 15754  | 3     | 3     | 2     | 3     |
| 15756  | 1     | 1     | 1     | 6     |
| 15773  | 1     | 1     | 1     | 1     |
| 15774  | 1     | 2     | 2     | 1     |
| 15776  | 1     | 2     | 2     | 1     |
| 15777  | 4     | 4     | 5     | 4     |
| 15779  |       |       |       |       |
| 15780  | 3     | 3     | 2     | 4     |
| 15792  | 1     | 1     | 1     | 1     |
| 15793  | 5     | 4     | 5     | 4     |
| 15796  | 2     | 1     | 2     | 1     |
| 15798  | 1     | 1     | 1     | 1     |
| 15809  | 1     | 3     | 4     | 1     |
| 15810  | 6     | 6     | 6     | 6     |

| respid | Q39_3 | Q39_4 | Q39_5 | Q39_6 |
|--------|-------|-------|-------|-------|
| 15815  | 2     | 1     | 2     | 3     |
| 15816  | 2     | 1     | 1     | 3     |
| 15817  |       |       |       |       |
| 15821  | 4     | 3     | 4     | 4     |
| 15823  | 2     | 2     | 2     | 2     |
| 15834  | 2     | 1     | 3     | 4     |
| 15835  |       |       |       |       |
| 15836  | 1     | 1     | 1     | 1     |
| 15837  | 1     | 1     | 1     | 1     |
| 15839  | 3     | 1     | 3     | 2     |
| 15840  | 3     | 2     | 2     | 3     |
| 15844  | 1     | 2     | 2     | 1     |
| 15845  | 2     | 1     | 2     | 1     |
| 15847  | 5     | 5     | 4     | 4     |
| 15848  | 1     | 1     | 1     | 1     |
| 15849  | 2     | 1     | 2     | 3     |
| 15857  | 2     | 2     | 2     | 2     |
| 15858  | 1     | 1     | 1     | 3     |
| 15862  | 5     | 6     | 5     | 4     |
| 15866  | 3     | 2     | 2     | 3     |
| 15870  | 3     | 2     | 2     | 3     |
| 15871  | 1     | 2     | 2     | 1     |
| 15872  | 2     | 1     | 2     | 3     |
| 15873  | 1     | 1     | 1     | 1     |
| 15874  |       |       |       |       |
| 15875  | 3     | 4     | 4     | 5     |
| 15876  | 3     | 3     | 2     | 3     |
| 15882  | 4     | 4     | 4     | 4     |
| 15884  | 6     | 4     | 5     | 3     |
| 15890  | 4     | 3     | 2     | 3     |
| 15892  | 1     | 1     | 5     | 2     |
| 15908  | 2     | 1     | 2     | 4     |

| respid | Q39_3 | Q39_4 | Q39_5 | Q39_6 |
|--------|-------|-------|-------|-------|
| 15914  | 1     | 2     | 2     | 2     |
| 15932  | 3     | 3     | 3     | 3     |
| 15933  | 1     | 1     | 1     | 4     |
| 15938  | 1     | 1     | 1     | 1     |
| 15940  | 4     | 5     | 5     | 6     |
| 15945  | 3     | 2     | 2     | 3     |
| 15947  | 4     | 2     | 3     | 4     |
| 15950  | 3     | 2     | 2     | 1     |
| 15951  | 3     | 3     | 3     | 3     |
| 15952  | 3     | 3     | 4     | 4     |
| 15953  | 1     | 1     | 1     | 2     |
| 15954  | 3     | 1     | 3     | 3     |
| 15957  | 3     | 4     | 5     | 5     |
| 15965  | 3     | 3     | 4     | 4     |
| 15966  |       |       |       |       |
| 15967  | 3     | 1     | 2     | 4     |
| 15968  | 1     | 1     | 1     | 4     |
| 15970  | 2     | 1     | 1     | 1     |
| 15973  | 3     | 2     | 2     | 3     |
| 15974  | 3     | 2     | 2     | 3     |
| 15975  |       |       |       |       |
| 15980  | 5     | 6     | 6     | 6     |
| 15984  | 2     | 1     | 2     | 2     |
| 15985  | 2     | 3     | 4     | 3     |
| 15994  |       |       |       |       |
| 15995  | 1     | 1     | 2     | 1     |
| 16000  | 3     | 1     | 2     | 4     |
| 16004  | 3     | 2     | 2     | 3     |
| 16005  | 1     | 2     | 2     | 3     |
| 16006  |       |       |       |       |
| 16009  | 1     | 1     | 1     | 1     |
| 16017  | 1     | 1     | 1     | 1     |

| respid | Q39_3 | Q39_4 | Q39_5 | Q39_6 |
|--------|-------|-------|-------|-------|
| 16019  | 5     | 2     | 2     | 4     |
| 16021  | 1     | 3     | 3     | 1     |
| 16024  | 1     | 1     | 2     | 1     |
| 16026  | 2     | 3     | 3     | 2     |
| 16029  |       |       |       |       |
| 16031  | 2     | 5     | 5     | 2     |
| 16037  | 1     | 1     | 2     | 1     |
| 16043  | 1     | 1     | 1     | 1     |
| 16044  | 1     | 2     | 2     | 1     |
| 16047  | 2     | 1     | 1     | 1     |
| 16048  | 1     | 5     | 5     | 2     |
| 16049  | 1     | 1     | 1     | 1     |
| 16051  | 2     | 1     | 1     | 1     |
| 16053  | 2     | 3     | 3     | 2     |
| 16054  | 1     | 2     | 1     | 1     |
| 16069  | 1     | 1     | 1     | 1     |
| 16070  | 1     | 3     | 3     | 1     |
| 16074  |       |       |       |       |
| 16076  |       |       |       |       |
| 16078  |       |       |       |       |
| 16081  | 1     | 1     | 1     | 1     |
| 16085  |       |       |       |       |
| 16088  | 1     | 2     | 1     | 1     |
| 16091  | 6     | 4     | 4     | 5     |
| 16092  | 2     | 3     | 3     | 3     |
| 16093  | 1     | 1     | 3     | 1     |
| 16097  | 1     | 1     | 1     | 1     |
| 16100  | 2     | 1     | 1     | 1     |
| 16101  | 1     | 1     | 1     | 1     |
| 16105  |       |       |       |       |
| 16118  | 3     | 4     | 4     | 4     |
| 16129  | 1     | 1     | 1     | 1     |

| respid | Q39_3 | Q39_4 | Q39_5 | Q39_6 |
|--------|-------|-------|-------|-------|
| 16130  | 2     | 2     | 3     | 2     |
| 16131  | 3     | 3     | 3     | 3     |
| 16136  | 2     | 1     | 1     | 1     |
| 16137  | 1     | 1     | 1     | 1     |
| 16138  | 5     | 4     | 4     | 3     |
| 16139  | 3     | 3     | 3     | 3     |
| 16140  | 5     | 6     | 6     | 4     |
| 16145  | 2     | 2     | 2     | 3     |
| 16150  | 6     | 1     | 1     | 6     |
| 16151  | 1     | 2     | 2     | 1     |
| 16153  | 1     | 1     | 1     | 1     |
| 16164  | 1     | 2     | 2     | 1     |
| 16168  | 2     | 3     | 3     | 2     |
| 16173  | 1     | 2     | 3     | 2     |
| 16174  | 1     | 1     | 1     | 1     |
| 16177  | 3     | 1     | 1     | 3     |
| 16185  | 1     | 2     | 2     | 2     |
| 16189  | 4     | 1     | 2     | 1     |
| 16192  | 5     | 1     | 2     | 5     |
| 16193  | 1     | 1     | 1     | 1     |
| 16194  | 1     | 1     | 2     | 2     |
| 16196  |       |       |       |       |
| 16202  | 3     | 3     | 3     | 3     |
| 16205  | 3     | 4     | 5     | 3     |
| 16206  | 2     | 4     | 4     | 3     |
| 16208  |       |       |       |       |
| 16211  | 4     | 3     | 4     | 3     |
| 16212  | 1     | 1     | 1     | 1     |
| 16215  |       |       |       |       |
| 16217  | 1     | 2     | 2     | 1     |
| 16221  | 2     | 3     | 4     | 1     |
| 16226  | 4     | 5     | 5     | 2     |

| respid | Q39_3 | Q39_4 | Q39_5 | Q39_6 |
|--------|-------|-------|-------|-------|
| 16228  | 5     | 4     | 4     | 3     |
| 16229  | 1     | 1     | 1     | 1     |
| 16230  | 1     | 1     | 2     | 1     |
| 16231  | 4     | 2     | 2     | 4     |
| 16232  | 4     | 4     | 4     | 1     |
| 16234  | 4     | 5     | 5     | 2     |
| 16235  | 4     | 4     | 4     | 4     |
| 16236  | 1     | 1     | 2     | 1     |
| 16237  | 1     | 2     | 2     | 1     |
| 16238  | 3     | 2     | 3     | 1     |
| 16239  | 1     | 1     | 2     | 1     |
| 16243  | 3     | 1     | 1     | 1     |
| 16248  | 2     | 2     | 2     | 2     |
| 16249  | 1     | 1     | 2     | 1     |
| 16251  |       |       |       |       |
| 16263  | 1     | 1     | 1     | 1     |
| 16265  | 2     | 3     | 3     | 1     |
| 16269  | 1     | 1     | 1     | 1     |
| 16272  | 2     | 3     | 3     | 3     |
| 16273  |       |       |       |       |
| 16281  | 1     | 1     | 1     | 1     |
| 16282  | 1     | 1     | 1     | 1     |
| 16287  | 2     | 2     | 2     | 1     |
| 16290  | 1     | 1     | 2     | 1     |
| 16294  | 1     | 1     | 1     | 1     |
| 16295  | 1     | 2     | 2     | 1     |
| 16296  | 1     | 1     | 1     | 1     |
| 16299  | 5     | 6     | 6     | 5     |
| 16302  | 1     | 1     | 1     | 1     |
| 16303  | 1     | 3     | 3     | 1     |
| 16304  | 1     | 1     | 2     | 1     |
| 16306  | 3     | 1     | 1     | 2     |

| respid | Q39_3 | Q39_4 | Q39_5 | Q39_6 |
|--------|-------|-------|-------|-------|
| 16318  | 2     | 2     | 5     | 2     |
| 16320  | 2     | 2     | 2     | 1     |
| 16321  | 3     | 4     | 4     | 1     |
| 16322  | 1     | 3     | 3     | 1     |
| 16324  | 2     | 2     | 2     | 1     |
| 16326  | 1     | 1     | 3     | 1     |
| 16328  | 3     | 4     | 4     | 2     |
| 16336  | 3     | 4     | 3     | 2     |
| 16341  | 2     | 2     | 2     | 1     |
| 16342  | 1     | 1     | 1     | 1     |
| 16343  | 2     | 2     | 2     | 2     |
| 16345  | 1     | 3     | 4     | 6     |
| 16349  | 1     | 2     | 2     | 1     |
| 16355  | 1     | 2     | 2     | 1     |
| 16364  | 2     | 3     | 2     | 3     |
| 16374  | 2     | 1     | 1     | 1     |
| 16375  |       |       |       |       |
| 16376  | 3     | 3     | 3     | 3     |
| 16393  | 2     | 3     | 3     | 2     |
| 16394  | 2     | 3     | 3     | 2     |
| 16395  | 2     | 2     | 2     | 1     |
| 16397  | 2     | 2     | 2     | 2     |
| 16398  | 3     | 2     | 4     | 4     |
| 16402  | 1     | 1     | 1     | 1     |
| 16405  | 1     | 1     | 1     | 1     |
| 16416  | 2     | 2     | 2     | 2     |
| 16422  | 2     | 2     | 2     | 2     |
| 16429  | 1     | 1     | 1     | 1     |
| 16430  | 1     | 1     | 2     | 1     |
| 16432  | 3     | 2     | 2     | 2     |
| 16433  | 1     | 2     | 2     | 1     |
| 16434  |       |       |       |       |



| respid | Q39_3 | Q39_4 | Q39_5 | Q39_6 |
|--------|-------|-------|-------|-------|
| 16437  | 1     | 2     | 4     | 1     |
| 16439  | 1     | 1     | 1     | 1     |
| 16440  | 1     | 2     | 3     | 1     |
| 16441  | 2     | 2     | 2     | 1     |
| 16442  | 3     | 4     | 4     | 4     |
| 16450  | 1     | 1     | 1     | 1     |
| 16451  | 1     | 1     | 1     | 1     |
| 16452  | 2     | 1     | 3     | 1     |
| 16467  | 1     | 2     | 2     | 1     |
| 16468  |       |       |       |       |
| 16469  | 2     | 2     | 2     | 2     |
| 16470  |       |       |       |       |
| 16471  | 2     | 1     | 2     | 1     |
| 16473  | 3     | 3     | 3     | 3     |
| 16476  | 1     | 1     | 1     | 1     |
| 16478  | 2     | 2     | 2     | 1     |
| 16484  | 1     | 1     | 1     | 1     |
| 16499  | 4     | 3     | 3     | 3     |
| 16502  |       |       |       |       |
| 16505  | 1     | 1     | 1     | 1     |
| 16514  | 1     | 1     | 2     | 1     |
| 16515  | 2     | 2     | 3     | 2     |
| 16517  | 4     | 3     | 4     | 4     |
| 16518  | 1     | 2     | 2     | 1     |
| 16519  | 2     | 2     | 2     | 1     |
| 16525  | 1     | 2     | 2     | 1     |
| 16526  | 1     | 2     | 2     | 1     |
| 16530  | 1     | 1     | 1     | 1     |
| 16532  | 1     | 3     | 3     | 1     |
| 16536  | 1     | 2     | 2     | 1     |
| 16537  | 4     | 5     | 4     | 4     |
| 16541  | 4     | 6     | 6     | 5     |

| respid | Q39_3 | Q39_4 | Q39_5 | Q39_6 |
|--------|-------|-------|-------|-------|
| 16543  | 1     | 1     | 1     | 1     |
| 16544  | 2     | 2     | 2     | 2     |
| 16545  | 4     | 2     | 2     | 2     |
| 16546  | 1     | 2     | 1     | 1     |
| 16548  | 1     | 1     | 1     | 1     |
| 16552  | 3     | 2     | 3     | 2     |
| 16559  | 1     | 1     | 1     | 1     |
| 16564  | 1     | 2     | 2     | 6     |
| 16565  | 2     | 2     | 1     | 2     |
| 16567  | 4     | 2     | 2     | 2     |
| 16571  |       |       |       |       |
| 16572  | 2     | 1     | 2     | 2     |
| 16579  | 4     | 3     | 3     | 2     |
| 16588  | 6     | 5     | 6     | 6     |
| 16599  | 1     | 1     | 1     | 1     |
| 16605  | 1     | 2     | 2     | 1     |
| 16622  | 2     | 2     | 2     | 2     |
| 16635  | 2     | 2     | 2     | 2     |
| 16638  | 2     | 2     | 2     | 2     |
| 16652  | 1     | 2     | 4     | 1     |
| 16656  | 1     | 2     | 2     | 1     |
| 16671  |       |       |       |       |
| 16676  | 1     | 1     | 1     | 1     |
| 16678  | 2     | 2     | 2     | 2     |
| 16702  | 2     | 1     | 1     | 1     |
| 16705  | 1     | 2     | 3     | 1     |
| 16707  | 4     | 5     | 5     | 6     |
| 16711  | 2     | 2     | 2     | 2     |
| 16712  | 1     | 2     | 1     | 1     |
| 16716  |       |       |       |       |
| 16724  | 1     | 2     | 2     | 1     |
| 16727  | 2     | 2     | 2     | 2     |

| respid | Q39_3 | Q39_4 | Q39_5 | Q39_6 |
|--------|-------|-------|-------|-------|
| 16734  | 1     | 1     | 3     | 1     |
| 16740  | 1     | 1     | 2     | 1     |
| 16748  | 1     | 3     | 3     | 1     |
| 16759  | 1     | 1     | 1     | 1     |
| 16761  |       |       |       |       |
| 16763  | 1     | 1     | 1     | 1     |
| 16764  | 3     | 3     | 2     | 3     |
| 16766  | 1     | 1     | 1     | 1     |
| 16767  | 1     | 2     | 3     | 1     |
| 16776  | 2     | 1     | 1     | 1     |
| 16781  | 1     | 1     | 1     | 1     |
| 16793  | 2     | 2     | 2     | 2     |
| 16796  | 5     | 5     | 4     | 5     |
| 16810  | 1     | 1     | 1     | 1     |
| 16811  | 1     | 1     | 3     | 1     |
| 16813  |       |       |       |       |
| 16814  | 1     | 1     | 1     | 1     |
| 16831  | 1     | 4     | 4     | 1     |
| 16833  | 6     | 5     | 6     | 6     |
| 16839  | 2     | 2     | 2     | 1     |
| 16843  | 1     | 2     | 2     | 1     |
| 16860  |       |       |       |       |
| 16871  | 1     | 1     | 1     | 2     |
| 16881  | 2     | 3     | 3     | 2     |
| 16884  | 2     | 2     | 2     | 2     |
| 16891  | 1     | 3     | 3     | 1     |
| 16909  | 2     | 1     | 1     | 1     |
| 16911  |       |       |       |       |
| 16922  | 3     | 3     | 2     | 2     |
| 16935  | 2     | 3     | 2     | 2     |
| 16942  | 1     | 2     | 1     | 1     |
| 16950  |       |       |       |       |

| respid | Q39_3 | Q39_4 | Q39_5 | Q39_6 |
|--------|-------|-------|-------|-------|
| 16952  | 3     | 4     | 2     | 3     |
| 16963  | 1     | 2     | 2     | 1     |
| 16967  | 4     | 4     | 4     | 4     |
| 16970  | 1     | 3     | 3     | 1     |
| 16976  | 4     | 3     | 4     | 5     |
| 16982  | 1     | 2     | 1     | 1     |
| 16995  | 1     | 1     | 1     | 1     |
| 17004  | 2     | 2     | 2     | 1     |
| 17006  | 1     | 1     | 1     | 1     |
| 17009  | 1     | 1     | 1     | 1     |
| 17021  |       |       |       |       |
| 17040  | 1     | 2     | 2     | 1     |
| 17041  |       |       |       |       |
| 17044  | 4     | 2     | 2     | 3     |
| 17046  | 4     | 4     | 5     | 5     |
| 17052  | 1     | 2     | 2     | 1     |
| 17055  | 3     | 3     | 3     | 3     |
| 17108  | 3     | 3     | 3     | 3     |
| 17109  | 2     | 1     | 1     | 1     |
| 17113  |       |       |       |       |
| 17115  | 1     | 2     | 1     | 1     |
| 17132  |       |       |       |       |
| 17135  | 4     | 3     | 3     | 3     |
| 17138  | 2     | 1     | 1     | 2     |
| 17141  | 1     | 1     | 1     | 1     |
| 17143  | 1     | 3     | 2     | 1     |
| 17148  | 1     | 1     | 3     | 1     |
| 17151  | 1     | 2     | 2     | 1     |
| 17153  | 1     | 1     | 1     | 1     |
| 17154  | 1     | 2     | 2     | 2     |
| 17157  | 3     | 3     | 2     | 2     |
| 17160  | 1     | 1     | 1     | 1     |

| respid | Q39_3 | Q39_4 | Q39_5 | Q39_6 |
|--------|-------|-------|-------|-------|
| 17167  | 3     | 1     | 1     | 3     |
| 17169  | 1     | 1     | 1     | 1     |
| 17174  | 6     | 5     | 6     | 5     |
| 17179  | 1     | 1     | 1     | 1     |
| 17180  | 1     | 1     | 2     | 1     |
| 17182  | 1     | 1     | 1     | 1     |
| 17184  | 3     | 4     | 4     | 4     |
| 17186  | 2     | 1     | 1     | 1     |
| 17187  | 1     | 1     | 1     | 1     |
| 17192  | 3     | 2     | 2     | 1     |
| 17197  | 1     | 1     | 1     | 1     |
| 17217  | 1     | 2     | 2     | 1     |
| 17226  | 1     | 2     | 2     | 1     |
| 17228  | 2     | 3     | 2     | 2     |
| 17245  | 1     | 3     | 4     | 5     |
| 17247  |       |       |       |       |
| 17258  | 1     | 1     | 1     | 1     |
| 17259  | 2     | 1     | 2     | 2     |
| 17262  | 1     | 3     | 3     | 2     |
| 17265  | 2     | 2     | 2     | 1     |
| 17281  | 1     | 2     | 2     | 1     |
| 17282  | 4     | 5     | 5     | 5     |
| 17293  | 1     | 1     | 3     | 1     |
| 17306  | 3     | 3     | 3     | 2     |
| 17312  | 2     | 3     | 3     | 3     |
| 17318  | 2     | 2     | 2     | 2     |
| 17328  | 3     | 3     | 3     | 2     |
| 17343  | 1     | 1     | 1     | 1     |
| 17344  | 1     | 1     | 1     | 1     |
| 17348  | 2     | 1     | 2     | 1     |
| 17352  | 1     | 1     | 1     | 1     |
| 17355  | 1     | 2     | 2     | 1     |

| respid | Q39_3 | Q39_4 | Q39_5 | Q39_6 |
|--------|-------|-------|-------|-------|
| 17356  | 1     | 4     | 4     | 1     |
| 17359  | 1     | 1     | 2     | 1     |
| 17373  | 3     | 4     | 3     | 3     |
| 17381  | 1     | 2     | 2     | 2     |
| 17388  | 1     | 2     | 2     | 1     |
| 17394  | 3     | 4     | 4     | 3     |
| 17401  |       |       |       |       |
| 17403  | 1     | 3     | 3     | 1     |
| 17411  |       |       |       |       |
| 17423  | 2     | 1     | 2     | 1     |
| 17427  |       |       |       |       |
| 17433  | 1     | 1     | 1     | 1     |
| 17441  | 1     | 1     | 1     | 1     |
| 17442  | 1     | 3     | 3     | 1     |
| 17447  | 1     | 1     | 2     | 1     |
| 17458  | 1     | 1     | 1     | 1     |
| 17474  | 2     | 2     | 2     | 1     |
| 17475  | 3     | 3     | 3     | 3     |
| 17476  | 2     | 3     | 3     | 2     |
| 17480  | 1     | 1     | 1     | 1     |
| 17484  | 1     | 1     | 1     | 1     |
| 17490  | 1     | 1     | 2     | 1     |
| 17491  | 1     | 1     | 1     | 1     |
| 17500  | 1     | 1     | 2     | 1     |
| 17507  | 1     | 1     | 1     | 1     |
| 17517  | 5     | 1     | 1     | 5     |
| 17520  | 1     | 1     | 1     | 1     |
| 17521  | 1     | 1     | 1     | 1     |
| 17531  | 1     | 1     | 1     | 1     |
| 17540  | 2     | 2     | 2     | 2     |
| 17550  | 1     | 1     | 3     | 1     |
| 17551  | 1     | 1     | 1     | 1     |

| respid | Q39_3 | Q39_4 | Q39_5 | Q39_6 |
|--------|-------|-------|-------|-------|
| 17555  | 5     | 4     | 4     | 4     |
| 17556  | 2     | 1     | 1     | 1     |
| 17574  | 1     | 4     | 4     | 1     |
| 17575  | 1     | 2     | 2     | 1     |
| 17582  | 1     | 1     | 1     | 1     |
| 17587  |       |       |       |       |
| 17601  | 1     | 1     | 2     | 1     |
| 17607  | 2     | 3     | 3     | 2     |
| 17609  | 1     | 1     | 1     | 1     |
| 17611  | 1     | 1     | 1     | 1     |
| 17613  | 1     | 2     | 2     | 1     |
| 17615  | 1     | 1     | 1     | 1     |
| 17620  | 1     | 2     | 2     | 1     |
| 17624  | 3     | 3     | 2     | 3     |
| 17635  | 1     | 1     | 1     | 1     |
| 17643  | 1     | 2     | 1     | 1     |
| 17645  | 1     | 1     | 2     | 1     |
| 17646  | 1     | 1     | 1     | 1     |
| 17649  | 2     | 2     | 1     | 2     |
| 17658  | 1     | 2     | 3     | 1     |
| 17666  |       |       |       |       |
| 17670  | 1     | 1     | 2     | 1     |
| 17678  | 2     | 2     | 2     | 1     |
| 17679  | 2     | 2     | 2     | 2     |
| 17695  | 1     | 1     | 1     | 1     |
| 17697  | 1     | 4     | 5     | 1     |
| 17698  | 1     | 2     | 2     | 1     |
| 17723  | 2     | 1     | 1     | 2     |
| 17727  | 1     | 1     | 1     | 1     |
| 17734  | 1     | 1     | 1     | 1     |
| 17737  | 1     | 1     | 2     | 1     |
| 17748  | 1     | 3     | 4     | 1     |

| respid | Q39_3 | Q39_4 | Q39_5 | Q39_6 |
|--------|-------|-------|-------|-------|
| 17749  |       |       |       |       |
| 17754  | 2     | 5     | 4     | 2     |
| 17766  | 1     | 4     | 4     | 1     |
| 17777  | 1     | 2     | 2     | 1     |
| 17780  | 1     | 1     | 1     | 1     |
| 17788  | 1     | 1     | 1     | 1     |
| 17801  | 4     | 3     | 3     | 5     |
| 17803  | 1     | 1     | 1     | 1     |
| 17807  | 1     | 1     | 1     | 1     |
| 17808  | 1     | 1     | 1     | 1     |
| 17809  | 2     | 3     | 2     | 3     |
| 17821  | 6     | 3     | 3     | 4     |
| 17827  | 3     | 3     | 3     | 3     |
| 17834  | 3     | 3     | 3     | 2     |
| 17838  | 2     | 2     | 2     | 2     |
| 17842  | 1     | 1     | 1     | 1     |
| 17862  | 1     | 3     | 3     | 1     |
| 17863  | 3     | 2     | 2     | 2     |
| 17871  | 3     | 3     | 3     | 2     |
| 17872  | 1     | 1     | 1     | 1     |
| 17903  | 3     | 3     | 2     | 3     |
| 17906  | 1     | 1     | 1     | 1     |
| 17910  | 4     | 4     | 4     | 4     |
| 17922  | 1     | 2     | 3     | 1     |
| 17923  | 3     | 3     | 4     | 3     |
| 17925  | 2     | 2     | 2     | 2     |
| 17926  | 1     | 1     | 1     | 1     |
| 17937  | 1     | 1     | 1     | 1     |
| 17956  | 1     | 1     | 1     | 1     |
| 17958  | 1     | 1     | 1     | 1     |
| 17985  | 1     | 1     | 1     | 1     |
| 17989  | 1     | 4     | 4     | 1     |



| respid | Q39_3 | Q39_4 | Q39_5 | Q39_6 |
|--------|-------|-------|-------|-------|
| 17995  | 1     | 1     | 1     | 1     |
| 18000  | 1     | 2     | 2     | 1     |
| 18010  | 1     | 1     | 1     | 1     |
| 18015  | 1     | 1     | 2     | 1     |
| 18018  | 2     | 6     | 5     | 4     |
| 18031  | 1     | 1     | 1     | 1     |
| 18033  | 3     | 1     | 1     | 1     |
| 18036  | 1     | 1     | 2     | 1     |
| 18041  | 1     | 3     | 3     | 1     |
| 18068  |       |       |       |       |
| 18080  | 1     | 1     | 1     | 1     |
| 18081  | 2     | 2     | 2     | 2     |
| 18083  | 1     | 4     | 4     | 1     |
| 18113  | 4     | 4     | 4     | 4     |
| 18115  | 3     | 2     | 3     | 4     |
| 18117  | 6     | 6     | 6     | 6     |
| 18129  | 2     | 1     | 1     | 1     |
| 18132  | 2     | 2     | 2     | 2     |
| 18146  | 2     | 1     | 3     | 1     |
| 18147  | 6     | 5     | 5     | 6     |
| 18153  |       |       |       |       |
| 18154  | 2     | 3     | 4     | 2     |
| 18157  | 3     | 1     | 3     | 1     |
| 18166  | 1     | 3     | 3     | 1     |
| 18169  | 1     | 1     | 1     | 1     |
| 18171  | 2     | 1     | 3     | 2     |
| 18173  | 2     | 2     | 2     | 2     |
| 18204  | 1     | 1     | 2     | 1     |
| 18210  | 2     | 1     | 1     | 2     |
| 18212  |       |       |       |       |
| 18220  | 5     | 4     | 4     | 4     |
| 18221  | 1     | 1     | 1     | 1     |

| respid | Q39_3 | Q39_4 | Q39_5 | Q39_6 |
|--------|-------|-------|-------|-------|
| 18228  | 1     | 1     | 1     | 1     |
| 18231  | 1     | 1     | 1     | 1     |
| 18233  | 2     | 3     | 3     | 3     |
| 18235  | 1     | 1     | 1     | 1     |
| 18237  |       |       |       |       |
| 18250  | 1     | 1     | 2     | 2     |
| 18253  | 1     | 4     | 4     | 1     |
| 18264  | 1     | 1     | 1     | 1     |
| 18285  | 1     | 1     | 2     | 1     |
| 18287  |       |       |       |       |
| 18296  | 1     | 2     | 2     | 1     |
| 18299  | 1     | 1     | 2     | 2     |
| 18313  | 1     | 1     | 2     | 1     |
| 18321  | 2     | 2     | 2     | 1     |
| 18324  |       |       |       |       |
| 18329  | 2     | 2     | 2     | 2     |
| 18332  | 1     | 1     | 2     | 1     |
| 18339  | 5     | 3     | 3     | 3     |
| 18340  | 1     | 1     | 2     | 1     |
| 18348  | 1     | 2     | 2     | 2     |
| 18355  | 2     | 2     | 2     | 2     |
| 18360  | 1     | 2     | 3     | 2     |
| 18380  | 4     | 4     | 4     | 1     |
| 18403  | 4     | 3     | 3     | 3     |
| 18405  | 2     | 2     | 2     | 2     |
| 18409  | 2     | 1     | 2     | 2     |
| 18445  | 1     | 1     | 1     | 1     |
| 18458  | 1     | 2     | 2     | 1     |
| 18477  | 1     | 3     | 5     | 1     |
| 18481  | 2     | 1     | 2     | 1     |
| 18491  | 1     | 1     | 1     | 1     |
| 18492  | 1     | 2     | 2     | 1     |

| respid | Q39_3 | Q39_4 | Q39_5 | Q39_6 |
|--------|-------|-------|-------|-------|
| 18494  | 1     | 3     | 3     | 1     |
| 18495  | 1     | 1     | 1     | 1     |
| 18496  | 1     | 2     | 2     | 1     |
| 18507  | 3     | 4     | 4     | 4     |
| 18509  |       |       |       |       |
| 18510  | 1     | 1     | 2     | 1     |
| 18513  | 3     | 1     | 2     | 1     |
| 18525  |       |       |       |       |
| 18526  | 3     | 2     | 2     | 1     |
| 18527  | 1     | 2     | 2     | 1     |
| 18536  | 1     | 1     | 2     | 1     |
| 18540  | 1     | 2     | 2     | 1     |
| 18548  | 1     | 1     | 1     | 1     |
| 18550  |       |       |       |       |
| 18556  | 1     | 1     | 1     | 1     |
| 18561  |       |       |       |       |
| 18577  | 1     | 3     | 3     | 1     |
| 18580  | 1     | 1     | 1     | 1     |
| 18633  | 2     | 3     | 2     | 2     |
| 18635  | 1     | 2     | 2     | 1     |
| 18636  |       |       |       |       |
| 18645  | 4     | 4     | 3     | 3     |
| 18649  | 3     | 3     | 4     | 3     |
| 18664  | 1     | 1     | 1     | 1     |
| 18668  | 2     | 1     | 1     | 1     |
| 18682  | 5     | 4     | 4     | 5     |
| 18685  | 2     | 2     | 3     | 2     |
| 18688  | 2     | 2     | 2     | 1     |
| 18689  | 3     | 4     | 4     | 4     |
| 18693  | 6     | 6     | 6     | 6     |
| 18694  | 1     | 2     | 2     | 1     |
| 18705  | 1     | 1     | 1     | 1     |

| respid | Q39_3 | Q39_4 | Q39_5 | Q39_6 |
|--------|-------|-------|-------|-------|
| 18710  | 2     | 2     | 2     | 1     |
| 18715  | 5     | 4     | 5     | 4     |
| 18718  | 3     | 1     | 2     | 1     |
| 18727  | 1     | 1     | 2     | 1     |
| 18732  | 1     | 1     | 1     | 1     |
| 18735  | 1     | 1     | 2     | 1     |
| 18742  | 3     | 3     | 4     | 2     |
| 18745  | 1     | 2     | 2     | 1     |
| 18747  | 1     | 1     | 1     | 1     |
| 18750  | 1     | 1     | 1     | 1     |
| 18751  | 2     | 2     | 2     | 2     |
| 18753  | 3     | 3     | 3     | 1     |
| 18754  |       |       |       |       |
| 18759  | 1     | 1     | 1     | 1     |
| 18780  | 1     | 1     | 1     | 1     |
| 18782  | 1     | 1     | 2     | 1     |
| 18807  | 5     | 6     | 6     | 6     |
| 18815  | 1     | 2     | 2     | 1     |
| 18818  | 2     | 1     | 2     | 1     |
| 18820  | 1     | 2     | 2     | 1     |
| 18823  | 5     | 6     | 5     | 6     |
| 18825  | 1     | 1     | 1     | 1     |
| 18828  |       |       |       |       |
| 18832  | 3     | 3     | 3     | 3     |
| 18834  | 4     | 3     | 3     | 2     |
| 18835  | 4     | 4     | 4     | 3     |
| 18837  | 3     | 3     | 4     | 1     |
| 18842  | 1     | 2     | 2     | 1     |
| 18846  |       |       |       |       |
| 18855  | 3     | 2     | 2     | 2     |
| 18856  | 1     | 1     | 1     | 1     |
| 18887  | 1     | 2     | 2     | 1     |

| respid | Q39_3 | Q39_4 | Q39_5 | Q39_6 |
|--------|-------|-------|-------|-------|
| 18903  | 4     | 2     | 3     | 3     |
| 18906  | 2     | 1     | 2     | 2     |
| 18910  |       |       |       |       |
| 18919  | 2     | 1     | 2     | 1     |
| 18928  | 1     | 2     | 3     | 1     |
| 18931  | 6     | 3     | 3     | 3     |
| 18939  | 1     | 1     | 2     | 2     |
| 18946  | 2     | 2     | 2     | 2     |
| 18952  | 1     | 1     | 2     | 1     |
| 18954  | 1     | 1     | 1     | 2     |
| 18982  |       |       |       |       |
| 18986  | 1     | 1     | 1     | 1     |
| 18989  | 6     | 6     | 6     | 6     |
| 18990  | 1     | 2     | 2     | 1     |
| 18996  | 2     | 4     | 4     | 2     |
| 18998  | 1     | 1     | 1     | 1     |
| 19009  | 5     | 4     | 4     | 3     |
| 19010  | 1     | 1     | 1     | 1     |
| 19017  | 1     | 2     | 1     | 1     |
| 19018  | 1     | 1     | 1     | 1     |
| 19020  | 1     | 1     | 1     | 1     |
| 19027  | 1     | 1     | 1     | 2     |
| 19035  | 2     | 1     | 1     | 1     |
| 19037  | 4     | 3     | 3     | 4     |
| 19048  | 1     | 2     | 2     | 1     |
| 19051  | 2     | 2     | 3     | 2     |
| 19054  | 1     | 1     | 2     | 2     |
| 19057  | 1     | 1     | 1     | 1     |
| 19073  | 2     | 2     | 3     | 3     |
| 19075  | 1     | 1     | 1     | 1     |
| 19079  | 3     | 3     | 3     | 3     |
| 19087  | 2     | 1     | 1     | 1     |

| respid | Q39_3 | Q39_4 | Q39_5 | Q39_6 |
|--------|-------|-------|-------|-------|
| 19090  | 1     | 2     | 2     | 1     |
| 19093  | 1     | 1     | 1     | 1     |
| 19099  | 2     | 4     | 5     | 2     |
| 19100  | 4     | 1     | 1     | 1     |
| 19101  | 3     | 1     | 1     | 3     |
| 19105  | 1     | 1     | 1     | 1     |
| 19111  | 1     | 3     | 3     | 1     |
| 19112  | 1     | 1     | 1     | 1     |
| 19117  | 4     | 2     | 2     | 3     |
| 19122  | 1     | 1     | 1     | 1     |
| 19126  | 1     | 1     | 1     | 1     |
| 19127  | 1     | 1     | 1     | 1     |
| 19131  | 1     | 3     | 4     | 3     |
| 19134  | 1     | 1     | 1     | 1     |
| 19149  | 2     | 1     | 1     | 1     |
| 19151  | 3     | 1     | 1     | 2     |
| 19164  | 1     | 1     | 2     | 1     |
| 19166  | 2     | 3     | 3     | 2     |
| 19172  | 2     | 2     | 2     | 1     |
| 19173  | 2     | 2     | 2     | 2     |
| 19180  | 1     | 1     | 1     | 1     |
| 19185  | 2     | 2     | 1     | 2     |
| 19189  | 1     | 1     | 1     | 1     |
| 19191  |       |       |       |       |
| 19198  | 1     | 1     | 1     | 1     |
| 19203  | 1     | 1     | 1     | 1     |
| 19209  | 1     | 2     | 2     | 1     |
| 19210  |       |       |       |       |
| 19218  |       |       |       |       |
| 19220  |       |       |       |       |
| 19225  | 3     | 2     | 2     | 3     |
| 19227  | 1     | 1     | 1     | 1     |

| respid | Q39_3 | Q39_4 | Q39_5 | Q39_6 |
|--------|-------|-------|-------|-------|
| 19228  | 1     | 1     | 1     | 1     |
| 19243  | 1     | 3     | 3     | 2     |
| 19244  | 1     | 2     | 2     | 1     |
| 19246  | 1     | 2     | 2     | 1     |
| 19248  |       |       |       |       |
| 19249  | 1     | 1     | 3     | 1     |
| 19252  | 2     | 1     | 1     | 1     |
| 19255  | 3     | 4     | 5     | 1     |
| 19257  | 3     | 3     | 3     | 3     |
| 19274  |       |       |       |       |
| 19279  |       |       |       |       |
| 19291  | 1     | 1     | 1     | 1     |
| 19292  | 1     | 3     | 3     | 1     |
| 19308  | 3     | 3     | 3     | 3     |
| 19310  | 1     | 1     | 3     | 1     |
| 19311  | 4     | 3     | 4     | 5     |
| 19326  | 2     | 2     | 2     | 1     |
| 19327  |       |       |       |       |
| 19329  |       |       |       |       |
| 19330  | 4     | 3     | 4     | 4     |
| 19333  | 2     | 3     | 2     | 2     |
| 19336  | 1     | 1     | 2     | 1     |
| 19343  | 2     | 2     | 3     | 1     |
| 19348  | 1     | 1     | 1     | 1     |
| 19349  | 4     | 4     | 4     | 3     |
| 19352  | 4     | 5     | 5     | 3     |
| 19356  | 1     | 2     | 2     | 1     |
| 19357  | 3     | 3     | 2     | 2     |
| 19358  | 1     | 2     | 1     | 1     |
| 19367  | 2     | 2     | 3     | 2     |
| 19376  |       |       |       |       |
| 19377  | 1     | 2     | 2     | 1     |

| respid | Q39_3 | Q39_4 | Q39_5 | Q39_6 |
|--------|-------|-------|-------|-------|
| 19380  | 1     | 1     | 1     | 1     |
| 19384  | 1     | 1     | 2     | 1     |
| 19391  | 4     | 4     | 5     | 6     |
| 19397  |       |       |       |       |
| 19398  | 1     | 1     | 1     | 1     |
| 19401  |       |       |       |       |
| 19402  | 1     | 2     | 2     | 1     |
| 19403  |       |       |       |       |
| 19405  |       |       |       |       |
| 19407  | 1     | 1     | 1     | 1     |
| 19415  | 1     | 1     | 4     | 1     |
| 19420  |       |       |       |       |
| 19423  | 3     | 2     | 3     | 3     |
| 19424  | 4     | 2     | 5     | 3     |
| 19426  | 3     | 1     | 1     | 3     |
| 19429  | 1     | 1     | 1     | 1     |
| 19435  | 4     | 3     | 4     | 4     |
| 19441  | 3     | 2     | 2     | 2     |
| 19450  | 2     | 1     | 2     | 2     |
| 19456  | 3     | 2     | 3     | 2     |
| 19457  | 1     | 1     | 1     | 1     |
| 19463  | 3     | 1     | 2     | 1     |
| 19467  | 6     | 6     | 6     | 6     |
| 19468  | 1     | 1     | 2     | 1     |
| 19471  | 2     | 1     | 1     | 1     |
| 19473  | 5     | 2     | 5     | 4     |
| 19478  | 3     | 4     | 4     | 3     |
| 19480  |       |       |       |       |
| 19481  | 2     | 2     | 2     | 2     |
| 19484  | 1     | 1     | 2     | 1     |
| 19487  | 6     | 6     | 6     | 6     |
| 19491  | 4     | 1     | 1     | 2     |



| respid | Q39_3 | Q39_4 | Q39_5 | Q39_6 |
|--------|-------|-------|-------|-------|
| 19495  | 6     | 6     | 6     | 6     |
| 19498  | 2     | 2     | 2     | 2     |
| 19500  | 2     | 4     | 4     | 3     |
| 19501  | 3     | 4     | 5     | 3     |
| 19503  |       |       |       |       |
| 19506  | 1     | 1     | 1     | 1     |
| 19508  | 1     | 2     | 2     | 1     |
| 19509  | 1     | 2     | 2     | 1     |
| 19518  | 2     | 2     | 2     | 2     |
| 19520  | 3     | 3     | 2     | 2     |
| 19536  | 1     | 1     | 2     | 1     |
| 19538  | 4     | 4     | 4     | 5     |
| 19541  | 2     | 3     | 4     | 2     |
| 19548  | 3     | 3     | 3     | 3     |
| 19553  |       |       |       |       |
| 19556  | 1     | 1     | 1     | 1     |
| 19559  |       |       |       |       |
| 19561  | 2     | 4     | 4     | 3     |
| 19562  | 1     | 2     | 2     | 1     |
| 19564  | 1     | 2     | 2     | 1     |
| 19567  | 5     | 6     | 5     | 6     |
| 19571  | 3     | 3     | 3     | 2     |
| 19576  | 4     | 4     | 5     | 4     |
| 19578  | 1     | 1     | 1     | 1     |
| 19606  |       |       |       |       |
| 19607  |       |       |       |       |
| 19608  | 1     | 1     | 2     | 1     |
| 19612  | 4     | 4     | 5     | 5     |
| 19618  | 5     | 3     | 5     | 4     |
| 19621  | 5     | 5     | 5     | 5     |
| 19624  | 4     | 3     | 4     | 5     |
| 19630  |       |       |       |       |

| respid | Q39_3 | Q39_4 | Q39_5 | Q39_6 |
|--------|-------|-------|-------|-------|
| 19637  | 3     | 3     | 3     | 3     |
| 19639  | 1     | 2     | 1     | 1     |
| 19647  | 1     | 1     | 1     | 1     |
| 19648  | 5     | 3     | 4     | 4     |
| 19660  | 1     | 1     | 1     | 1     |
| 19662  | 5     | 5     | 4     | 4     |
| 19669  | 1     | 1     | 1     | 1     |
| 19680  | 1     | 1     | 1     | 1     |
| 19682  | 2     | 2     | 2     | 1     |
| 19686  | 1     | 1     | 1     | 1     |
| 19700  | 1     | 1     | 2     | 1     |
| 19701  | 1     | 1     | 1     | 1     |
| 19704  |       |       |       |       |
| 19706  | 2     | 1     | 2     | 2     |
| 19707  | 1     | 2     | 2     | 1     |
| 19717  | 3     | 5     | 5     | 3     |
| 19718  | 1     | 1     | 1     | 1     |
| 19721  | 3     | 2     | 3     | 2     |
| 19722  | 1     | 1     | 1     | 1     |
| 19729  |       |       |       |       |
| 19738  | 5     | 4     | 5     | 3     |
| 19741  | 1     | 2     | 3     | 1     |
| 19742  | 1     | 1     | 2     | 3     |
| 19747  | 1     | 1     | 1     | 1     |
| 19748  | 2     | 3     | 3     | 1     |
| 19749  | 1     | 1     | 1     | 1     |
| 19756  | 1     | 3     | 4     | 3     |
| 19771  | 2     | 2     | 2     | 2     |
| 19772  | 3     | 4     | 3     | 3     |
| 19775  | 1     | 1     | 1     | 1     |
| 19783  |       |       |       |       |
| 19787  | 1     | 1     | 1     | 1     |

| respid | Q39_3 | Q39_4 | Q39_5 | Q39_6 |
|--------|-------|-------|-------|-------|
| 19790  |       |       |       |       |
| 19797  | 1     | 1     | 4     | 1     |
| 19802  | 2     | 2     | 2     | 1     |
| 19808  | 1     | 2     | 1     | 1     |
| 19810  | 3     | 3     | 3     | 3     |
| 19811  | 1     | 2     | 2     | 1     |
| 19812  | 2     | 1     | 2     | 2     |
| 19821  | 1     | 2     | 2     | 2     |
| 19826  | 2     | 1     | 1     | 1     |
| 19827  | 1     | 2     | 2     | 1     |
| 19830  | 1     | 1     | 2     | 1     |
| 19834  | 1     | 4     | 3     | 1     |
| 19838  | 3     | 4     | 4     | 3     |
| 19843  |       |       |       |       |
| 19845  | 3     | 4     | 3     | 5     |
| 19846  | 3     | 4     | 4     | 2     |
| 19852  | 6     | 6     | 5     | 6     |
| 19855  | 2     | 3     | 3     | 2     |
| 19858  | 3     | 4     | 4     | 3     |
| 19861  | 5     | 3     | 3     | 4     |
| 19863  | 1     | 1     | 1     | 1     |
| 19868  | 2     | 2     | 2     | 2     |
| 19874  | 1     | 1     | 4     | 3     |
| 19876  |       |       |       |       |
| 19880  | 3     | 5     | 4     | 5     |
| 19885  | 1     | 2     | 2     | 1     |
| 19890  |       |       |       |       |
| 19894  |       |       |       |       |
| 19895  | 1     | 1     | 2     | 1     |
| 19897  | 1     | 2     | 2     | 1     |
| 19906  | 2     | 1     | 1     | 2     |
| 19908  | 1     | 1     | 1     | 1     |

| respid | Q39_3 | Q39_4 | Q39_5 | Q39_6 |
|--------|-------|-------|-------|-------|
| 19912  | 1     | 1     | 1     | 1     |
| 19913  | 1     | 1     | 3     | 1     |
| 19914  | 5     | 5     | 6     | 5     |
| 19918  | 1     | 4     | 5     | 4     |
| 19924  | 5     | 3     | 4     | 3     |
| 19936  |       |       |       |       |
| 19940  |       |       |       |       |
| 19945  | 2     | 1     | 2     | 1     |
| 19948  |       |       |       |       |
| 19959  | 1     | 1     | 1     | 1     |
| 19961  | 1     | 1     | 1     | 1     |
| 19962  | 2     | 4     | 4     | 1     |
| 19965  | 1     | 1     | 1     | 1     |
| 19966  | 2     | 2     | 2     | 2     |
| 19973  | 3     | 2     | 1     | 1     |
| 19981  | 1     | 2     | 2     | 1     |
| 19986  | 2     | 2     | 2     | 2     |
| 19989  | 1     | 1     | 1     | 1     |
| 19998  | 3     | 3     | 3     | 3     |
| 20001  | 1     | 1     | 2     | 1     |
| 20005  |       |       |       |       |
| 20013  | 5     | 4     | 5     | 4     |
| 20015  | 1     | 2     | 2     | 1     |
| 20017  | 3     | 1     | 1     | 1     |
| 20020  | 1     | 1     | 1     | 1     |
| 20021  | 1     | 1     | 1     | 1     |
| 20026  | 1     | 2     | 3     | 2     |
| 20028  | 1     | 1     | 2     | 1     |
| 20030  | 2     | 1     | 1     | 1     |
| 20031  |       |       |       |       |
| 20034  | 1     | 1     | 1     | 1     |
| 20035  |       |       |       |       |

| respid | Q39_3 | Q39_4 | Q39_5 | Q39_6 |
|--------|-------|-------|-------|-------|
| 20040  | 4     | 1     | 2     | 2     |
| 20045  | 4     | 5     | 6     | 6     |
| 20048  | 6     | 1     | 1     | 6     |
| 20053  | 2     | 2     | 2     | 2     |
| 20064  | 2     | 2     | 2     | 2     |
| 20071  | 1     | 2     | 2     | 1     |
| 20072  | 1     | 3     | 4     | 1     |
| 20076  | 1     | 1     | 1     | 1     |
| 20081  | 1     | 2     | 2     | 2     |
| 20082  | 2     | 2     | 2     | 3     |
| 20083  | 1     | 4     | 3     | 1     |
| 20088  | 1     | 3     | 2     | 1     |
| 20089  | 2     | 1     | 1     | 1     |
| 20099  | 2     | 1     | 2     | 2     |
| 20101  | 6     | 4     | 3     | 6     |
| 20102  | 2     | 1     | 1     | 1     |
| 20109  | 1     | 1     | 1     | 1     |
| 20118  | 1     | 1     | 2     | 1     |
| 20119  | 2     | 1     | 3     | 1     |
| 20124  |       |       |       |       |
| 20126  | 1     | 2     | 2     | 1     |
| 20130  |       |       |       |       |
| 20131  | 2     | 1     | 1     | 1     |
| 20134  | 5     | 3     | 3     | 4     |
| 20146  | 6     | 6     | 6     | 6     |
| 20152  |       |       |       |       |
| 20155  | 1     | 2     | 3     | 2     |
| 20156  |       |       |       |       |
| 20157  |       |       |       |       |
| 20164  | 1     | 1     | 1     | 1     |
| 20168  | 1     | 1     | 1     | 1     |
| 20173  | 2     | 3     | 1     | 2     |

| respid | Q39_3 | Q39_4 | Q39_5 | Q39_6 |
|--------|-------|-------|-------|-------|
| 20174  | 5     | 5     | 5     | 5     |
| 20175  | 6     | 6     | 6     | 5     |
| 20189  | 1     | 1     | 1     | 1     |
| 20190  | 1     | 1     | 3     | 1     |
| 20201  | 1     | 1     | 1     | 1     |
| 20202  | 1     | 1     | 1     | 1     |
| 20204  | 4     | 4     | 4     | 4     |
| 20206  | 2     | 2     | 3     | 2     |
| 20207  | 1     | 1     | 1     | 1     |
| 20212  | 1     | 1     | 3     | 1     |
| 20213  | 1     | 4     | 5     | 1     |
| 20217  | 1     | 1     | 2     | 1     |
| 20222  | 1     | 2     | 2     | 1     |
| 20227  |       |       |       |       |
| 20228  | 2     | 1     | 1     | 1     |
| 20238  | 1     | 1     | 1     | 1     |
| 20242  | 1     | 1     | 1     | 1     |
| 20246  | 1     | 1     | 1     | 1     |
| 20255  | 4     | 5     | 6     | 5     |
| 20256  | 2     | 2     | 3     | 1     |
| 20259  | 2     | 1     | 3     | 1     |
| 20262  | 1     | 1     | 1     | 1     |
| 20274  | 1     | 1     | 1     | 1     |
| 20283  | 4     | 4     | 5     | 4     |
| 20284  |       |       |       |       |
| 20291  | 5     | 2     | 2     | 4     |
| 20292  | 1     | 1     | 2     | 1     |
| 20293  | 1     | 1     | 1     | 1     |
| 20298  | 5     | 5     | 5     | 4     |
| 20301  |       |       |       |       |
| 20303  | 1     | 2     | 2     | 1     |
| 20309  |       |       |       |       |

| respid | Q39_3 | Q39_4 | Q39_5 | Q39_6 |
|--------|-------|-------|-------|-------|
| 20318  | 2     | 1     | 1     | 1     |
| 20324  | 1     | 3     | 3     | 1     |
| 20335  | 1     | 1     | 1     | 1     |
| 20336  | 2     | 1     | 1     | 1     |
| 20339  | 1     | 1     | 1     | 1     |
| 20348  | 2     | 2     | 4     | 2     |
| 20351  | 1     | 2     | 2     | 1     |
| 20353  | 1     | 2     | 2     | 1     |
| 20356  | 1     | 1     | 1     | 1     |
| 20357  |       |       |       |       |
| 20366  | 1     | 1     | 1     | 1     |
| 20369  | 6     | 5     | 6     | 5     |
| 20372  | 1     | 2     | 1     | 1     |
| 20375  | 1     | 2     | 2     | 1     |
| 20379  | 1     | 1     | 1     | 2     |
| 20380  | 1     | 2     | 1     | 1     |
| 20396  | 3     | 3     | 3     | 3     |
| 20398  | 2     | 3     | 3     | 3     |
| 20412  | 1     | 2     | 2     | 1     |
| 20415  | 1     | 2     | 2     | 1     |
| 20424  | 3     | 3     | 3     | 3     |
| 20434  | 1     | 1     | 1     | 1     |
| 20435  | 1     | 1     | 1     | 1     |
| 20440  | 1     | 1     | 1     | 1     |
| 20441  | 1     | 2     | 1     | 1     |
| 20445  | 1     | 1     | 1     | 1     |
| 20446  | 3     | 3     | 3     | 3     |
| 20450  | 1     | 2     | 2     | 1     |
| 20453  | 5     | 5     | 4     | 4     |
| 20458  | 1     | 1     | 1     | 1     |
| 20464  | 1     | 1     | 1     | 1     |
| 20471  | 1     | 1     | 1     | 1     |

| respid | Q39_3 | Q39_4 | Q39_5 | Q39_6 |
|--------|-------|-------|-------|-------|
| 20473  | 1     | 1     | 1     | 1     |
| 20474  | 1     | 2     | 2     | 1     |
| 20477  |       |       |       |       |
| 20479  | 6     | 1     | 1     | 6     |
| 20485  | 1     | 1     | 2     | 1     |
| 20487  | 1     | 2     | 1     | 1     |
| 20488  | 6     | 6     | 6     | 6     |
| 20494  | 1     | 3     | 4     | 1     |
| 20502  | 5     | 5     | 5     | 5     |
| 20503  | 1     | 4     | 4     | 1     |
| 20510  | 1     | 1     | 1     | 1     |
| 20512  |       |       |       |       |
| 20516  | 2     | 1     | 2     | 1     |
| 20522  | 2     | 2     | 3     | 1     |
| 20527  | 2     | 2     | 2     | 2     |
| 20529  | 3     | 3     | 3     | 2     |
| 20535  | 3     | 4     | 4     | 3     |
| 20543  | 4     | 2     | 2     | 2     |
| 20546  | 3     | 2     | 2     | 3     |
| 20548  | 1     | 1     | 1     | 1     |
| 20552  | 3     | 1     | 1     | 3     |
| 20556  | 1     | 3     | 3     | 2     |
| 20566  | 3     | 2     | 3     | 3     |
| 20576  | 1     | 2     | 1     | 2     |
| 20587  | 1     | 1     | 1     | 1     |
| 20589  | 1     | 1     | 1     | 1     |
| 20593  |       |       |       |       |
| 20594  | 2     | 1     | 2     | 2     |
| 20602  | 2     | 2     | 2     | 2     |
| 20607  |       |       |       |       |
| 20608  | 1     | 2     | 2     | 1     |
| 20611  | 1     | 1     | 1     | 1     |



| respid | Q39_3 | Q39_4 | Q39_5 | Q39_6 |
|--------|-------|-------|-------|-------|
| 20612  | 1     | 2     | 1     | 1     |
| 20615  | 2     | 3     | 3     | 2     |
| 20625  | 1     | 1     | 1     | 1     |
| 20630  | 2     | 2     | 2     | 1     |
| 20639  | 1     | 2     | 2     | 1     |
| 20643  | 1     | 1     | 1     | 1     |
| 20645  |       |       |       |       |
| 20647  | 1     | 2     | 2     | 3     |
| 20652  | 6     | 6     | 5     | 6     |
| 20661  | 2     | 1     | 1     | 1     |
| 20665  |       |       |       |       |
| 20679  | 1     | 1     | 1     | 1     |
| 20682  | 3     | 3     | 4     | 4     |
| 20683  |       |       |       |       |
| 20700  | 1     | 2     | 1     | 1     |
| 20702  | 2     | 6     | 6     | 2     |
| 20709  | 1     | 2     | 1     | 1     |
| 20715  | 3     | 3     | 3     | 3     |
| 20718  | 4     | 3     | 4     | 2     |
| 20722  | 1     | 1     | 1     | 1     |
| 20729  |       |       |       |       |
| 20732  |       |       |       |       |
| 20746  | 4     | 4     | 3     | 4     |
| 20747  |       |       |       |       |
| 20758  | 1     | 1     | 1     | 1     |
| 20767  | 6     | 3     | 2     | 4     |
| 20777  | 1     | 1     | 1     | 1     |
| 20778  | 1     | 1     | 1     | 1     |
| 20780  | 1     | 1     | 1     | 1     |
| 20800  | 1     | 2     | 2     | 1     |
| 20810  | 1     | 1     | 1     | 1     |
| 20814  | 1     | 2     | 2     | 1     |

| respid | Q39_3 | Q39_4 | Q39_5 | Q39_6 |
|--------|-------|-------|-------|-------|
| 20816  | 1     | 1     | 1     | 1     |
| 20832  | 4     | 4     | 4     | 4     |
| 20838  | 5     | 6     | 5     | 5     |
| 20841  | 3     | 2     | 3     | 2     |
| 20848  | 1     | 1     | 1     | 1     |
| 20850  |       |       |       |       |
| 20851  | 1     | 2     | 3     | 1     |
| 20861  | 1     | 2     | 3     | 1     |
| 20870  | 2     | 2     | 2     | 2     |
| 20880  | 1     | 1     | 1     | 1     |
| 20883  | 1     | 1     | 1     | 1     |
| 20894  | 1     | 1     | 2     | 1     |
| 20896  | 3     | 3     | 2     | 2     |
| 20901  | 3     | 3     | 3     | 3     |
| 20903  | 1     | 1     | 1     | 1     |
| 20909  |       |       |       |       |
| 20919  | 1     | 1     | 1     | 1     |
| 20925  | 1     | 1     | 1     | 1     |
| 20935  | 1     | 1     | 1     | 1     |
| 20939  | 2     | 1     | 2     | 2     |
| 20956  | 6     | 6     | 5     | 6     |
| 20970  | 1     | 3     | 4     | 1     |
| 20974  | 1     | 3     | 3     | 1     |
| 20975  | 1     | 1     | 1     | 1     |
| 20984  | 2     | 1     | 2     | 1     |
| 20988  |       |       |       |       |
| 20996  | 1     | 1     | 1     | 1     |
| 20998  | 1     | 2     | 2     | 1     |
| 21007  |       |       |       |       |
| 21008  |       |       |       |       |
| 21014  | 1     | 1     | 2     | 1     |
| 21020  | 1     | 1     | 1     | 1     |

| respid | Q39_3 | Q39_4 | Q39_5 | Q39_6 |
|--------|-------|-------|-------|-------|
| 21022  | 3     | 3     | 4     | 3     |
| 21024  |       |       |       |       |
| 21026  | 3     | 3     | 2     | 2     |
| 21027  | 1     | 1     | 1     | 1     |
| 21030  | 6     | 6     | 6     | 6     |
| 21032  | 2     | 3     | 3     | 3     |
| 21040  | 1     | 1     | 1     | 1     |
| 21045  | 1     | 2     | 2     | 1     |
| 21058  | 1     | 1     | 1     | 1     |
| 21064  | 1     | 2     | 2     | 1     |
| 21073  | 1     | 1     | 1     | 1     |
| 21086  | 4     | 3     | 4     | 4     |
| 21092  | 6     | 6     | 5     | 5     |
| 21096  | 3     | 4     | 3     | 3     |
| 21103  | 1     | 2     | 2     | 1     |
| 21120  | 4     | 5     | 4     | 4     |
| 21125  |       |       |       |       |
| 21126  | 1     | 1     | 1     | 1     |
| 21132  |       |       |       |       |
| 21139  | 2     | 2     | 2     | 2     |
| 21147  |       |       |       |       |
| 21148  | 1     | 2     | 1     | 1     |
| 21149  | 3     | 2     | 2     | 2     |
| 21164  | 2     | 2     | 2     | 2     |
| 21165  | 1     | 3     | 3     | 1     |
| 21171  | 5     | 5     | 4     | 5     |
| 21176  | 1     | 1     | 1     | 1     |
| 21187  | 1     | 3     | 3     | 1     |
| 21192  | 4     | 2     | 2     | 3     |
| 21198  | 1     | 1     | 1     | 1     |
| 21199  | 2     | 3     | 4     | 2     |
| 21206  | 2     | 3     | 3     | 2     |

| respid | Q39_3 | Q39_4 | Q39_5 | Q39_6 |
|--------|-------|-------|-------|-------|
| 21212  | 1     | 2     | 2     | 1     |
| 21216  | 1     | 1     | 1     | 1     |
| 21217  | 4     | 4     | 5     | 5     |
| 21228  | 4     | 5     | 3     | 3     |
| 21229  | 4     | 4     | 3     | 3     |
| 21230  | 1     | 3     | 3     | 2     |
| 21243  | 2     | 1     | 3     | 1     |
| 21247  | 2     | 2     | 3     | 2     |
| 21253  | 3     | 4     | 4     | 3     |
| 21264  | 2     | 2     | 2     | 2     |
| 21265  | 1     | 1     | 1     | 1     |
| 21273  | 1     | 2     | 3     | 4     |
| 21275  | 4     | 3     | 3     | 3     |
| 21278  | 4     | 4     | 3     | 3     |
| 21291  | 2     | 4     | 3     | 3     |
| 21298  | 1     | 1     | 2     | 1     |
| 21301  | 5     | 3     | 1     | 5     |
| 21312  | 5     | 5     | 5     | 5     |
| 21323  | 1     | 1     | 1     | 1     |
| 21325  | 2     | 2     | 2     | 2     |
| 21341  | 1     | 1     | 2     | 1     |
| 21349  | 3     | 5     | 5     | 3     |
| 21350  | 2     | 1     | 2     | 1     |
| 21354  | 4     | 5     | 5     | 4     |
| 21372  | 2     | 3     | 3     | 2     |
| 21373  | 3     | 1     | 2     | 2     |
| 21378  | 3     | 3     | 3     | 3     |
| 21393  |       |       |       |       |
| 21401  | 2     | 3     | 2     | 2     |
| 21405  | 1     | 1     | 1     | 1     |
| 21406  |       |       |       |       |
| 21407  | 2     | 3     | 3     | 2     |

| respid | Q39_3 | Q39_4 | Q39_5 | Q39_6 |
|--------|-------|-------|-------|-------|
| 21418  | 1     | 1     | 1     | 1     |
| 21420  | 2     | 2     | 2     | 1     |
| 21421  |       |       |       |       |
| 21446  | 3     | 4     | 4     | 3     |
| 21449  | 3     | 3     | 3     | 3     |
| 21452  | 1     | 1     | 1     | 1     |
| 21455  | 5     | 5     | 4     | 5     |
| 21469  | 1     | 1     | 1     | 1     |
| 21471  | 1     | 3     | 3     | 1     |
| 21472  | 1     | 2     | 2     | 1     |
| 21474  | 1     | 1     | 1     | 1     |
| 21479  | 1     | 2     | 1     | 1     |
| 21485  | 1     | 2     | 2     | 2     |
| 21512  |       |       |       |       |
| 21513  | 1     | 1     | 2     | 1     |
| 21514  | 4     | 3     | 3     | 4     |
| 21520  | 3     | 2     | 2     | 3     |
| 21539  | 1     | 3     | 3     | 1     |
| 21553  | 1     | 1     | 2     | 1     |
| 21560  | 2     | 2     | 2     | 2     |
| 21561  | 1     | 1     | 1     | 1     |
| 21563  | 2     | 4     | 5     | 1     |
| 21565  |       |       |       |       |
| 21582  | 1     | 2     | 2     | 1     |
| 21584  | 1     | 2     | 2     | 1     |
| 21585  | 2     | 2     | 3     | 3     |
| 21586  | 1     | 1     | 1     | 1     |
| 21587  | 2     | 2     | 4     | 2     |
| 21590  | 6     | 6     | 6     | 6     |
| 21601  | 2     | 2     | 2     | 2     |
| 21611  | 3     | 1     | 2     | 4     |
| 21612  | 2     | 1     | 2     | 1     |

| respid | Q39_3 | Q39_4 | Q39_5 | Q39_6 |
|--------|-------|-------|-------|-------|
| 21625  | 2     | 2     | 2     | 2     |
| 21633  |       |       |       |       |
| 21640  | 2     | 1     | 1     | 1     |
| 21647  | 1     | 1     | 1     | 2     |
| 21648  | 5     | 6     | 6     | 5     |
| 21656  | 1     | 2     | 2     | 1     |
| 21657  | 1     | 1     | 1     | 1     |
| 21658  | 5     | 5     | 6     | 6     |
| 21665  | 5     | 4     | 5     | 4     |
| 21666  | 2     | 3     | 3     | 3     |
| 21668  | 5     | 5     | 4     | 4     |
| 21673  | 1     | 4     | 4     | 3     |
| 21681  | 4     | 4     | 3     | 3     |
| 21682  | 1     | 1     | 1     | 1     |
| 21685  | 2     | 3     | 3     | 3     |
| 21692  | 2     | 2     | 2     | 2     |
| 21697  | 1     | 1     | 2     | 1     |
| 21711  | 1     | 1     | 1     | 1     |
| 21715  | 3     | 3     | 3     | 3     |
| 21726  | 1     | 2     | 2     | 1     |
| 21748  |       |       |       |       |
| 21761  | 1     | 1     | 1     | 1     |
| 21769  | 4     | 4     | 4     | 4     |
| 21774  | 2     | 3     | 3     | 2     |
| 21778  |       |       |       |       |
| 21785  | 2     | 3     | 3     | 2     |
| 21799  | 3     | 4     | 4     | 3     |
| 21820  | 6     | 6     | 6     | 6     |
| 21837  | 1     | 2     | 1     | 1     |
| 21845  | 5     | 4     | 5     | 4     |
| 21846  | 1     | 1     | 2     | 1     |
| 21849  | 3     | 1     | 1     | 3     |

| respid | Q39_3 | Q39_4 | Q39_5 | Q39_6 |
|--------|-------|-------|-------|-------|
| 21850  | 2     | 2     | 2     | 2     |
| 21855  | 1     | 1     | 1     | 1     |
| 21859  | 1     | 1     | 1     | 1     |
| 21861  | 1     | 1     | 1     | 1     |
| 21866  |       |       |       |       |
| 21873  | 3     | 2     | 1     | 1     |
| 21876  | 1     | 2     | 2     | 1     |
| 21882  |       |       |       |       |
| 21884  | 3     | 2     | 2     | 2     |
| 21887  | 2     | 1     | 1     | 2     |
| 21892  | 1     | 1     | 1     | 1     |
| 21907  | 1     | 1     | 4     | 1     |
| 21910  | 4     | 4     | 5     | 4     |
| 21912  | 2     | 3     | 3     | 2     |
| 21914  | 2     | 2     | 2     | 1     |
| 21925  | 1     | 1     | 2     | 1     |
| 21937  |       |       |       |       |
| 21938  | 2     | 2     | 2     | 2     |
| 21940  | 1     | 2     | 2     | 1     |
| 21942  | 1     | 2     | 2     | 1     |
| 21947  |       |       |       |       |
| 21948  | 1     | 2     | 2     | 2     |
| 21961  | 2     | 1     | 2     | 2     |
| 21977  | 3     | 4     | 4     | 3     |
| 21983  |       |       |       |       |
| 21986  | 3     | 4     | 3     | 3     |
| 21988  | 1     | 1     | 1     | 1     |
| 21996  | 1     | 3     | 3     | 1     |
| 21997  | 1     | 2     | 3     | 1     |
| 22005  | 1     | 2     | 2     | 2     |
| 22013  | 1     | 2     | 2     | 1     |
| 22018  |       |       |       |       |

| respid | Q39_3 | Q39_4 | Q39_5 | Q39_6 |
|--------|-------|-------|-------|-------|
| 22019  | 3     | 3     | 4     | 3     |
| 22071  | 1     | 1     | 1     | 1     |
| 22082  | 1     | 1     | 1     | 1     |
| 22085  | 1     | 1     | 2     | 1     |
| 22092  | 1     | 2     | 2     | 1     |
| 22097  | 1     | 2     | 2     | 1     |
| 22111  |       |       |       |       |
| 22118  | 1     | 2     | 2     | 1     |
| 22132  | 1     | 1     | 1     | 1     |
| 22133  | 1     | 1     | 1     | 1     |
| 22139  |       |       |       |       |
| 22142  | 6     | 6     | 6     | 6     |
| 22146  | 3     | 1     | 1     | 2     |
| 22181  |       |       |       |       |
| 22202  | 1     | 1     | 1     | 1     |
| 22214  |       |       |       |       |
| 22223  | 1     | 1     | 1     | 1     |
| 22227  | 2     | 3     | 2     | 2     |
| 22229  | 1     | 1     | 1     | 1     |
| 22239  | 3     | 5     | 6     | 2     |
| 22245  | 5     | 4     | 4     | 5     |
| 22256  | 1     | 1     | 1     | 1     |
| 22260  | 2     | 1     | 1     | 1     |
| 22298  | 2     | 2     | 2     | 2     |
| 22321  | 2     | 2     | 2     | 2     |
| 22340  |       |       |       |       |
| 22346  | 3     | 4     | 3     | 3     |
| 22356  | 1     | 1     | 2     | 1     |
| 22361  | 2     | 1     | 2     | 2     |
| 22364  | 1     | 1     | 1     | 1     |
| 22368  |       |       |       |       |
| 22374  | 5     | 2     | 3     | 4     |



| respid | Q39_3 | Q39_4 | Q39_5 | Q39_6 |
|--------|-------|-------|-------|-------|
| 22375  | 1     | 1     | 1     | 1     |
| 22377  | 1     | 1     | 2     | 2     |
| 22383  |       |       |       |       |
| 22387  | 3     | 3     | 4     | 4     |
| 22392  |       |       |       |       |
| 22393  | 1     | 2     | 2     | 1     |
| 22394  | 1     | 2     | 3     | 2     |
| 22395  |       |       |       |       |
| 22401  | 1     | 2     | 2     | 1     |
| 22407  |       |       |       |       |
| 22410  | 1     | 1     | 1     | 1     |
| 22418  | 1     | 1     | 2     | 1     |
| 22421  |       |       |       |       |
| 22423  |       |       |       |       |
| 22425  | 1     | 2     | 2     | 2     |
| 22427  | 1     | 2     | 1     | 1     |
| 22431  | 5     | 6     | 6     | 6     |
| 22435  | 1     | 2     | 2     | 1     |
| 22436  | 3     | 1     | 2     | 1     |
| 22442  |       |       |       |       |
| 22444  | 4     | 4     | 3     | 4     |
| 22445  | 5     | 4     | 4     | 3     |
| 22446  |       |       |       |       |
| 22448  | 5     | 3     | 3     | 4     |
| 22449  | 1     | 2     | 2     | 1     |
| 22450  | 2     | 2     | 2     | 2     |
| 22453  | 3     | 5     | 4     | 3     |
| 22465  | 3     | 2     | 3     | 3     |
| 22472  | 2     | 2     | 2     | 2     |
| 22475  | 4     | 3     | 5     | 4     |
| 22478  | 2     | 4     | 3     | 2     |
| 22491  | 1     | 1     | 2     | 1     |

| respid | Q39_3 | Q39_4 | Q39_5 | Q39_6 |
|--------|-------|-------|-------|-------|
| 22497  | 2     | 2     | 3     | 2     |
| 22498  | 2     | 1     | 1     | 2     |
| 22499  | 2     | 1     | 2     | 1     |
| 22503  | 1     | 1     | 1     | 1     |
| 22507  | 1     | 1     | 1     | 1     |
| 22513  | 4     | 3     | 3     | 2     |
| 22517  | 1     | 3     | 4     | 2     |
| 22524  | 4     | 3     | 4     | 4     |
| 22528  | 1     | 1     | 1     | 1     |
| 22544  | 3     | 3     | 3     | 3     |
| 22571  | 1     | 1     | 1     | 1     |
| 22576  | 3     | 2     | 3     | 3     |
| 22579  | 1     | 3     | 3     | 1     |
| 22583  | 3     | 3     | 3     | 3     |
| 22591  | 4     | 5     | 5     | 4     |
| 22592  | 3     | 3     | 3     | 3     |
| 22612  | 2     | 3     | 3     | 3     |
| 22613  | 2     | 2     | 2     | 3     |
| 22615  | 2     | 2     | 2     | 2     |
| 22621  | 1     | 1     | 1     | 1     |
| 22625  | 1     | 2     | 2     | 1     |
| 22628  | 1     | 1     | 1     | 1     |
| 22632  | 2     | 2     | 1     | 2     |
| 22639  |       |       |       |       |
| 22648  | 1     | 6     | 6     | 1     |
| 22649  | 1     | 2     | 4     | 2     |
| 22655  |       |       |       |       |
| 22659  |       |       |       |       |
| 22660  | 1     | 1     | 1     | 1     |
| 22666  | 2     | 2     | 2     | 2     |
| 22667  | 1     | 1     | 1     | 1     |
| 22670  |       |       |       |       |

| respid | Q39_3 | Q39_4 | Q39_5 | Q39_6 |
|--------|-------|-------|-------|-------|
| 22681  |       |       |       |       |
| 22683  | 1     | 1     | 2     | 1     |
| 22688  | 1     | 1     | 1     | 1     |
| 22695  | 2     | 1     | 2     | 2     |
| 22696  | 1     | 1     | 1     | 1     |
| 22705  | 3     | 4     | 4     | 2     |
| 22718  | 2     | 2     | 2     | 3     |
| 22720  | 1     | 2     | 3     | 2     |
| 22724  | 2     | 1     | 1     | 1     |
| 22728  | 1     | 1     | 1     | 1     |
| 22751  | 1     | 3     | 3     | 1     |
| 22782  | 3     | 6     | 6     | 3     |
| 22786  | 1     | 3     | 3     | 2     |
| 22788  | 1     | 2     | 2     | 1     |
| 22810  | 3     | 3     | 2     | 2     |
| 22816  | 1     | 1     | 2     | 1     |
| 22818  | 2     | 1     | 1     | 1     |
| 22854  |       |       |       |       |
| 22858  | 2     | 1     | 2     | 1     |
| 22862  | 1     | 1     | 1     | 1     |
| 22865  | 1     | 1     | 1     | 1     |
| 22868  | 1     | 1     | 2     | 1     |
| 22869  | 4     | 2     | 5     | 6     |
| 22873  | 1     | 1     | 1     | 1     |
| 22875  | 1     | 1     | 1     | 2     |
| 22876  | 1     | 1     | 1     | 1     |
| 22882  | 3     | 2     | 2     | 2     |
| 22884  | 4     | 3     | 4     | 4     |
| 22887  | 3     | 3     | 2     | 3     |
| 22888  | 1     | 2     | 2     | 1     |
| 22900  |       |       |       |       |
| 22901  |       |       |       |       |

| respid | Q39_3 | Q39_4 | Q39_5 | Q39_6 |
|--------|-------|-------|-------|-------|
| 22912  | 1     | 1     | 1     | 1     |
| 22913  | 1     | 2     | 1     | 1     |
| 22921  | 1     | 1     | 1     | 1     |
| 22925  | 1     | 1     | 1     | 1     |
| 22940  | 1     | 1     | 1     | 1     |
| 22941  | 1     | 2     | 3     | 1     |
| 22947  | 1     | 3     | 3     | 3     |
| 22948  |       |       |       |       |
| 22964  | 3     | 4     | 4     | 3     |
| 22966  | 1     | 1     | 1     | 2     |
| 22969  | 1     | 1     | 2     | 1     |
| 22971  |       |       |       |       |
| 22988  |       |       |       |       |
| 22990  |       |       |       |       |
| 23000  | 1     | 2     | 2     | 1     |
| 23016  |       |       |       |       |
| 23026  | 1     | 2     | 2     | 1     |
| 23035  | 1     | 1     | 1     | 1     |
| 23037  | 5     | 5     | 5     | 3     |
| 23044  | 3     | 3     | 3     | 3     |
| 23046  | 5     | 1     | 1     | 2     |
| 23047  | 2     | 1     | 1     | 1     |
| 23049  | 1     | 1     | 1     | 3     |
| 23055  | 1     | 1     | 2     | 1     |
| 23066  | 1     | 1     | 1     | 1     |
| 23075  | 1     | 1     | 1     | 1     |
| 23081  | 1     | 3     | 2     | 1     |
| 23087  | 4     | 4     | 6     | 3     |
| 23094  |       |       |       |       |
| 23099  |       |       |       |       |
| 23101  | 1     | 1     | 1     | 1     |
| 23105  |       |       |       |       |

| respid | Q39_3 | Q39_4 | Q39_5 | Q39_6 |
|--------|-------|-------|-------|-------|
| 23115  | 2     | 2     | 2     | 2     |
| 23121  | 1     | 3     | 1     | 1     |
| 23127  | 1     | 1     | 1     | 1     |
| 23131  | 2     | 2     | 2     | 2     |
| 23134  | 1     | 1     | 1     | 1     |
| 23145  | 1     | 2     | 2     | 1     |
| 23151  | 1     | 3     | 3     | 3     |
| 23161  | 2     | 2     | 2     | 1     |
| 23169  | 2     | 2     | 2     | 2     |
| 23173  | 1     | 1     | 2     | 2     |
| 23174  | 1     | 1     | 1     | 2     |
| 23186  | 6     | 6     | 5     | 5     |
| 23195  | 1     | 1     | 1     | 1     |
| 23197  | 3     | 2     | 3     | 3     |
| 23198  | 1     | 1     | 1     | 1     |
| 23203  |       |       |       |       |
| 23204  | 1     | 4     | 4     | 1     |
| 23212  | 1     | 2     | 2     | 1     |
| 23214  | 1     | 1     | 1     | 1     |
| 23221  | 1     | 1     | 1     | 2     |
| 23237  | 1     | 1     | 1     | 1     |
| 23251  | 1     | 1     | 1     | 1     |
| 23254  | 1     | 1     | 1     | 1     |
| 23262  | 2     | 2     | 2     | 2     |
| 23267  | 1     | 2     | 2     | 1     |
| 23268  | 2     | 5     | 5     | 1     |
| 23273  | 2     | 2     | 3     | 2     |
| 23278  | 2     | 1     | 1     | 1     |
| 23279  |       |       |       |       |
| 23281  | 3     | 1     | 1     | 2     |
| 23282  | 4     | 4     | 4     | 4     |
| 23283  | 5     | 2     | 2     | 2     |

| respid | Q39_3 | Q39_4 | Q39_5 | Q39_6 |
|--------|-------|-------|-------|-------|
| 23285  | 1     | 1     | 1     | 1     |
| 23305  | 3     | 4     | 4     | 1     |
| 23309  | 1     | 1     | 2     | 1     |
| 23310  | 1     | 1     | 3     | 1     |
| 23311  | 1     | 1     | 1     | 2     |
| 23312  | 4     | 4     | 4     | 4     |
| 23319  | 1     | 1     | 2     | 2     |
| 23320  | 2     | 1     | 2     | 1     |
| 23322  | 1     | 2     | 2     | 1     |
| 23334  | 3     | 2     | 3     | 3     |
| 23340  | 1     | 2     | 1     | 1     |
| 23346  | 1     | 1     | 1     | 1     |
| 23353  | 1     | 1     | 2     | 1     |
| 23363  | 4     | 3     | 3     | 4     |
| 23364  | 2     | 4     | 3     | 4     |
| 23376  |       |       |       |       |
| 23378  | 1     | 1     | 1     | 1     |
| 23382  |       |       |       |       |
| 23383  |       |       |       |       |
| 23390  | 1     | 1     | 1     | 1     |
| 23395  | 1     | 1     | 1     | 1     |
| 23398  | 2     | 3     | 4     | 4     |
| 23399  | 1     | 2     | 1     | 1     |
| 23406  | 1     | 3     | 1     | 1     |
| 23418  | 1     | 2     | 2     | 1     |
| 23427  | 1     | 2     | 3     | 1     |
| 23428  | 1     | 1     | 1     | 1     |
| 23435  | 2     | 2     | 2     | 2     |
| 23439  | 1     | 1     | 1     | 1     |
| 23440  |       |       |       |       |
| 23444  | 1     | 1     | 2     | 1     |
| 23445  | 1     | 1     | 1     | 1     |

| respid | Q39_3 | Q39_4 | Q39_5 | Q39_6 |
|--------|-------|-------|-------|-------|
| 23455  |       |       |       |       |
| 23467  | 1     | 3     | 3     | 2     |
| 23478  | 4     | 3     | 2     | 3     |
| 23492  | 2     | 2     | 2     | 1     |
| 23498  | 1     | 2     | 2     | 1     |
| 23511  | 1     | 3     | 4     | 1     |
| 23514  | 1     | 1     | 1     | 1     |
| 23515  | 1     | 1     | 2     | 1     |
| 23522  |       |       |       |       |
| 23524  |       |       |       |       |
| 23531  | 4     | 3     | 4     | 4     |
| 23532  | 1     | 1     | 1     | 1     |
| 23533  | 1     | 2     | 2     | 1     |
| 23534  | 2     | 2     | 1     | 2     |
| 23538  | 1     | 2     | 2     | 1     |
| 23539  | 2     | 2     | 1     | 2     |
| 23548  | 1     | 2     | 2     | 1     |
| 23553  |       |       |       |       |
| 23556  | 1     | 1     | 1     | 1     |
| 23563  | 1     | 3     | 3     | 2     |
| 23572  | 1     | 2     | 2     | 1     |
| 23575  | 1     | 1     | 1     | 1     |
| 23576  | 1     | 1     | 1     | 1     |
| 23577  | 1     | 2     | 1     | 1     |
| 23578  | 2     | 4     | 3     | 2     |
| 23587  | 4     | 2     | 1     | 2     |
| 23597  | 4     | 3     | 2     | 2     |
| 23598  | 1     | 2     | 3     | 2     |
| 23604  |       |       |       |       |
| 23617  | 1     | 2     | 2     | 1     |
| 23620  | 2     | 1     | 2     | 1     |
| 23621  |       |       |       |       |

| respid | Q39_3 | Q39_4 | Q39_5 | Q39_6 |
|--------|-------|-------|-------|-------|
| 23625  | 1     | 1     | 2     | 1     |
| 23629  | 1     | 1     | 1     | 1     |
| 23635  | 6     | 2     | 2     | 2     |
| 23636  | 1     | 2     | 2     | 1     |
| 23637  | 6     | 5     | 6     | 6     |
| 23638  | 1     | 1     | 1     | 1     |
| 23644  | 1     | 2     | 2     | 1     |
| 23645  | 2     | 2     | 2     | 1     |
| 23649  | 1     | 1     | 1     | 1     |
| 23654  | 1     | 1     | 2     | 1     |
| 23662  | 1     | 2     | 2     | 1     |
| 23664  | 1     | 1     | 2     | 1     |
| 23665  | 1     | 1     | 1     | 1     |
| 23666  | 2     | 2     | 2     | 2     |
| 23671  | 1     | 1     | 1     | 1     |
| 23672  | 1     | 1     | 1     | 1     |
| 23685  | 1     | 1     | 2     | 1     |
| 23686  | 2     | 3     | 3     | 1     |
| 23689  | 2     | 3     | 4     | 3     |
| 23690  | 2     | 3     | 3     | 2     |
| 23695  | 5     | 3     | 3     | 2     |
| 23700  | 1     | 1     | 1     | 1     |
| 23714  | 1     | 2     | 2     | 1     |
| 23719  | 1     | 2     | 1     | 1     |
| 23720  | 2     | 1     | 2     | 1     |
| 23721  | 2     | 1     | 2     | 2     |
| 23729  | 6     | 6     | 6     | 6     |
| 23730  | 1     | 1     | 1     | 1     |
| 23732  | 1     | 2     | 2     | 1     |
| 23736  | 1     | 2     | 1     | 1     |
| 23754  |       |       |       |       |
| 23756  | 1     | 1     | 1     | 1     |



| respid | Q39_3 | Q39_4 | Q39_5 | Q39_6 |
|--------|-------|-------|-------|-------|
| 23759  | 2     | 2     | 3     | 2     |
| 23761  | 3     | 2     | 2     | 2     |
| 23766  | 2     | 2     | 2     | 2     |
| 23768  | 5     | 4     | 4     | 4     |
| 23773  | 1     | 1     | 1     | 1     |
| 23781  |       |       |       |       |
| 23782  | 3     | 5     | 6     | 2     |
| 23787  | 2     | 1     | 2     | 2     |
| 23788  | 4     | 4     | 4     | 4     |
| 23790  |       |       |       |       |
| 23794  | 1     | 1     | 1     | 1     |
| 23795  | 2     | 2     | 3     | 2     |
| 23801  | 1     | 1     | 2     | 1     |
| 23806  | 2     | 1     | 1     | 2     |
| 23809  | 5     | 2     | 2     | 2     |
| 23813  | 1     | 3     | 3     | 1     |
| 23815  | 2     | 2     | 2     | 2     |
| 23821  | 1     | 1     | 1     | 1     |
| 23825  | 3     | 3     | 3     | 2     |
| 23826  | 1     | 1     | 1     | 1     |
| 23830  | 1     | 2     | 2     | 1     |
| 23833  | 2     | 1     | 1     | 1     |
| 23837  | 1     | 1     | 1     | 1     |
| 23848  | 6     | 6     | 6     | 6     |
| 23850  | 1     | 2     | 2     | 1     |
| 23870  | 1     | 2     | 1     | 1     |
| 23877  |       |       |       |       |
| 23880  | 2     | 2     | 3     | 1     |
| 23882  | 3     | 3     | 3     | 3     |
| 23888  |       |       |       |       |
| 23908  | 2     | 3     | 4     | 2     |
| 23914  | 2     | 2     | 2     | 2     |

| respid | Q39_3 | Q39_4 | Q39_5 | Q39_6 |
|--------|-------|-------|-------|-------|
| 23916  | 2     | 2     | 2     | 2     |
| 23922  | 2     | 2     | 2     | 2     |
| 23932  | 1     | 2     | 2     | 1     |
| 23934  |       |       |       |       |
| 23942  | 4     | 4     | 5     | 5     |
| 23945  | 1     | 1     | 1     | 1     |
| 23948  | 1     | 1     | 2     | 1     |
| 23955  | 3     | 3     | 3     | 3     |
| 23956  | 4     | 3     | 5     | 3     |
| 23978  | 1     | 2     | 2     | 1     |
| 23981  |       |       |       |       |
| 23982  | 1     | 1     | 1     | 1     |
| 23991  | 1     | 1     | 1     | 1     |
| 23994  | 1     | 1     | 2     | 1     |
| 23995  | 1     | 1     | 1     | 1     |
| 23999  | 2     | 1     | 1     | 1     |
| 24005  | 6     | 5     | 6     | 4     |
| 24018  | 1     | 1     | 1     | 1     |
| 24021  |       |       |       |       |
| 24035  |       |       |       |       |
| 24040  | 1     | 1     | 1     | 1     |
| 24043  |       |       |       |       |
| 24046  | 3     | 2     | 2     | 2     |
| 24047  | 2     | 2     | 2     | 2     |
| 24048  | 1     | 1     | 1     | 1     |
| 24062  | 3     | 2     | 2     | 3     |
| 24063  | 1     | 3     | 3     | 2     |
| 24066  | 1     | 1     | 1     | 1     |
| 24069  | 2     | 2     | 2     | 2     |
| 24070  | 1     | 1     | 1     | 1     |
| 24074  | 1     | 2     | 1     | 1     |
| 24080  | 1     | 1     | 1     | 1     |

| respid | Q39_3 | Q39_4 | Q39_5 | Q39_6 |
|--------|-------|-------|-------|-------|
| 24082  | 1     | 1     | 2     | 1     |
| 24088  | 1     | 2     | 2     | 1     |
| 24089  | 1     | 1     | 1     | 1     |
| 24091  | 1     | 2     | 2     | 1     |
| 24095  |       |       |       |       |
| 24100  | 3     | 3     | 4     | 2     |
| 24105  | 1     | 1     | 4     | 1     |
| 24107  | 4     | 5     | 5     | 4     |
| 24108  |       |       |       |       |
| 24113  | 3     | 3     | 3     | 3     |
| 24120  |       |       |       |       |
| 24122  | 4     | 5     | 5     | 3     |
| 24123  | 1     | 1     | 2     | 1     |
| 24125  | 3     | 3     | 3     | 3     |
| 24132  | 1     | 1     | 1     | 1     |
| 24139  | 1     | 1     | 1     | 1     |
| 24140  | 1     | 1     | 2     | 2     |
| 24143  | 4     | 6     | 6     | 5     |
| 24150  | 2     | 5     | 5     | 3     |
| 24153  |       |       |       |       |
| 24161  |       |       |       |       |
| 24168  | 4     | 3     | 3     | 2     |
| 24179  | 1     | 1     | 1     | 1     |
| 24182  | 3     | 3     | 4     | 3     |
| 24194  | 2     | 2     | 2     | 2     |
| 24206  |       |       |       |       |
| 24214  |       |       |       |       |
| 24215  | 3     | 3     | 5     | 3     |
| 24224  | 1     | 1     | 1     | 1     |
| 24225  | 1     | 1     | 1     | 1     |
| 24227  |       |       |       |       |
| 24229  | 1     | 1     | 2     | 1     |

| respid | Q39_3 | Q39_4 | Q39_5 | Q39_6 |
|--------|-------|-------|-------|-------|
| 24230  | 1     | 1     | 1     | 1     |
| 24232  | 3     | 4     | 4     | 3     |
| 24253  | 2     | 2     | 2     | 2     |
| 24267  | 2     | 1     | 1     | 1     |
| 24274  | 6     | 4     | 3     | 5     |
| 24275  | 2     | 2     | 2     | 2     |
| 24277  | 1     | 1     | 1     | 1     |
| 24280  | 3     | 3     | 3     | 1     |
| 24285  | 1     | 1     | 1     | 1     |
| 24293  |       |       |       |       |
| 24295  | 1     | 4     | 4     | 1     |
| 24299  |       |       |       |       |
| 24303  | 1     | 2     | 2     | 1     |
| 24308  | 2     | 2     | 2     | 2     |
| 24322  |       |       |       |       |
| 24325  |       |       |       |       |
| 24328  | 1     | 1     | 1     | 1     |
| 24334  | 1     | 2     | 3     | 1     |
| 24342  | 1     | 2     | 1     | 1     |
| 24343  | 3     | 3     | 2     | 3     |
| 24348  | 5     | 6     | 6     | 5     |
| 24352  | 5     | 5     | 5     | 3     |
| 24354  | 2     | 3     | 2     | 2     |
| 24357  | 1     | 2     | 2     | 1     |
| 24360  | 2     | 1     | 1     | 2     |
| 24369  | 5     | 5     | 5     | 5     |
| 24373  | 2     | 2     | 2     | 1     |
| 24398  | 5     | 4     | 4     | 4     |
| 24402  | 2     | 2     | 2     | 3     |
| 24405  | 1     | 1     | 1     | 1     |
| 24407  | 1     | 1     | 1     | 1     |
| 24413  | 1     | 2     | 1     | 1     |

| respid | Q39_3 | Q39_4 | Q39_5 | Q39_6 |
|--------|-------|-------|-------|-------|
| 24443  | 2     | 3     | 3     | 3     |
| 24451  |       |       |       |       |
| 24459  | 4     | 4     | 3     | 5     |
| 24465  | 1     | 1     | 2     | 1     |
| 24481  | 4     | 3     | 4     | 4     |
| 24482  | 1     | 1     | 1     | 1     |
| 24491  | 2     | 2     | 2     | 2     |
| 24495  | 1     | 2     | 2     | 1     |
| 24497  | 3     | 3     | 4     | 4     |
| 24511  | 4     | 5     | 5     | 3     |
| 24513  | 3     | 4     | 4     | 4     |
| 24516  | 2     | 2     | 3     | 2     |
| 24518  | 1     | 1     | 3     | 1     |
| 24524  | 1     | 1     | 1     | 1     |
| 24528  | 1     | 1     | 1     | 1     |
| 24531  | 4     | 6     | 6     | 5     |
| 24533  | 5     | 3     | 4     | 3     |
| 24547  | 1     | 1     | 1     | 1     |
| 24557  | 4     | 3     | 3     | 4     |
| 24559  | 5     | 6     | 5     | 5     |
| 24567  | 1     | 1     | 1     | 1     |
| 24568  |       |       |       |       |
| 24577  |       |       |       |       |
| 24581  | 1     | 2     | 2     | 1     |
| 24588  | 1     | 2     | 1     | 1     |
| 24604  | 5     | 4     | 4     | 5     |
| 24612  | 1     | 2     | 3     | 2     |
| 24621  | 4     | 3     | 5     | 4     |
| 24625  | 2     | 3     | 3     | 1     |
| 24627  | 1     | 2     | 2     | 1     |
| 24640  | 1     | 2     | 2     | 1     |
| 24644  | 1     | 1     | 1     | 1     |

| respid | Q39_3 | Q39_4 | Q39_5 | Q39_6 |
|--------|-------|-------|-------|-------|
| 24664  | 1     | 1     | 2     | 1     |
| 24669  | 4     | 3     | 3     | 4     |
| 24685  | 1     | 2     | 2     | 1     |
| 24687  | 2     | 3     | 3     | 2     |
| 24688  | 2     | 2     | 2     | 2     |
| 24691  | 3     | 3     | 3     | 4     |
| 24693  | 6     | 4     | 4     | 4     |
| 24706  |       |       |       |       |
| 24710  |       |       |       |       |
| 24717  | 1     | 1     | 2     | 1     |
| 24720  | 1     | 1     | 1     | 1     |
| 24731  | 3     | 2     | 2     | 3     |
| 24732  | 3     | 1     | 1     | 1     |
| 24733  |       |       |       |       |
| 24747  | 1     | 1     | 1     | 1     |
| 24750  | 6     | 5     | 6     | 6     |
| 24758  | 3     | 3     | 2     | 2     |
| 24760  | 1     | 2     | 2     | 1     |
| 24765  |       |       |       |       |
| 24772  | 2     | 2     | 2     | 1     |
| 24779  | 3     | 4     | 4     | 4     |
| 24794  | 1     | 1     | 1     | 1     |
| 24796  | 4     | 5     | 4     | 5     |
| 24797  | 1     | 1     | 1     | 1     |
| 24800  | 1     | 1     | 1     | 1     |
| 24813  | 2     | 4     | 4     | 2     |
| 24815  | 4     | 2     | 2     | 4     |
| 24821  | 1     | 2     | 2     | 1     |
| 24822  | 1     | 1     | 1     | 1     |
| 24831  | 2     | 2     | 1     | 1     |
| 24835  |       |       |       |       |
| 24843  | 4     | 4     | 3     | 2     |

| respid | Q39_3 | Q39_4 | Q39_5 | Q39_6 |
|--------|-------|-------|-------|-------|
| 24844  | 4     | 3     | 3     | 3     |
| 24860  |       |       |       |       |
| 24861  | 2     | 2     | 1     | 1     |
| 24865  | 4     | 3     | 3     | 4     |
| 24870  | 2     | 3     | 3     | 4     |
| 24887  | 1     | 1     | 1     | 1     |
| 24897  | 3     | 3     | 2     | 3     |
| 24902  | 3     | 1     | 3     | 3     |
| 24914  | 1     | 1     | 1     | 1     |
| 24921  | 4     | 3     | 3     | 4     |
| 24922  | 1     | 1     | 1     | 1     |
| 24924  |       |       |       |       |
| 24927  | 1     | 1     | 1     | 1     |
| 24936  | 1     | 2     | 2     | 1     |
| 24937  | 1     | 1     | 1     | 1     |
| 24942  | 1     | 1     | 3     | 1     |
| 24947  | 1     | 1     | 1     | 1     |
| 24953  | 1     | 2     | 2     | 1     |
| 24954  | 3     | 2     | 2     | 3     |
| 24960  | 5     | 6     | 6     | 5     |
| 24965  | 1     | 3     | 3     | 1     |
| 24975  | 1     | 1     | 1     | 1     |
| 24983  | 4     | 3     | 3     | 3     |
| 24985  | 1     | 1     | 1     | 1     |
| 24990  | 1     | 1     | 1     | 1     |
| 25000  | 1     | 1     | 1     | 1     |
| 25007  | 2     | 2     | 2     | 3     |
| 25008  | 1     | 1     | 1     | 1     |
| 25010  |       |       |       |       |
| 25016  | 3     | 2     | 2     | 3     |
| 25021  | 2     | 5     | 6     | 1     |
| 25040  |       |       |       |       |

| respid | Q39_3 | Q39_4 | Q39_5 | Q39_6 |
|--------|-------|-------|-------|-------|
| 25043  | 1     | 1     | 1     | 1     |
| 25055  | 1     | 1     | 1     | 1     |
| 25057  | 2     | 3     | 3     | 3     |
| 25060  | 2     | 3     | 2     | 2     |
| 25062  | 1     | 2     | 2     | 1     |
| 25064  | 4     | 3     | 4     | 4     |
| 25069  |       |       |       |       |
| 25077  | 1     | 1     | 1     | 1     |
| 25088  |       |       |       |       |
| 25093  | 2     | 3     | 3     | 2     |
| 25121  | 2     | 3     | 2     | 3     |
| 25140  | 4     | 3     | 3     | 4     |
| 25144  | 1     | 2     | 2     | 1     |
| 25149  | 3     | 3     | 3     | 2     |
| 25159  | 1     | 1     | 1     | 1     |
| 25191  | 3     | 3     | 3     | 2     |
| 25193  | 5     | 6     | 6     | 4     |
| 25202  | 4     | 3     | 3     | 3     |
| 25215  | 1     | 4     | 5     | 3     |
| 25229  | 3     | 3     | 3     | 3     |
| 25231  | 1     | 2     | 2     | 1     |
| 25236  | 1     | 2     | 2     | 1     |
| 25242  | 1     | 1     | 1     | 1     |
| 25252  | 1     | 1     | 1     | 1     |
| 25253  | 5     | 6     | 4     | 5     |
| 25256  | 4     | 3     | 3     | 4     |
| 25260  | 5     | 1     | 1     | 3     |
| 25261  | 1     | 2     | 2     | 1     |
| 25280  | 1     | 2     | 2     | 2     |
| 25282  | 2     | 2     | 2     | 2     |
| 25289  | 4     | 4     | 4     | 4     |
| 25303  | 1     | 1     | 1     | 1     |



| respid | Q39_3 | Q39_4 | Q39_5 | Q39_6 |
|--------|-------|-------|-------|-------|
| 25304  | 2     | 3     | 3     | 1     |
| 25309  | 2     | 2     | 2     | 2     |
| 25317  | 1     | 1     | 1     | 1     |
| 25318  | 5     | 5     | 4     | 4     |
| 25320  | 3     | 3     | 2     | 2     |
| 25324  | 4     | 3     | 3     | 3     |
| 25331  | 2     | 1     | 1     | 2     |
| 25340  | 1     | 2     | 2     | 1     |
| 25342  | 1     | 1     | 1     | 2     |
| 25350  | 1     | 1     | 1     | 1     |
| 25352  |       |       |       |       |
| 25358  | 1     | 1     | 1     | 1     |
| 25375  | 1     | 1     | 1     | 1     |
| 25386  | 1     | 1     | 1     | 1     |
| 25388  | 3     | 3     | 4     | 1     |
| 25390  | 3     | 1     | 2     | 2     |
| 25391  | 3     | 3     | 3     | 3     |
| 25400  | 4     | 3     | 3     | 3     |
| 25413  | 4     | 3     | 3     | 4     |
| 25424  | 1     | 2     | 2     | 2     |
| 25426  | 3     | 3     | 3     | 3     |
| 25430  | 1     | 1     | 1     | 1     |
| 25434  | 4     | 2     | 2     | 2     |
| 25439  | 4     | 3     | 4     | 4     |
| 25441  | 1     | 1     | 1     | 1     |
| 25445  | 1     | 1     | 2     | 1     |
| 25451  | 1     | 1     | 1     | 1     |
| 25469  | 4     | 3     | 3     | 3     |
| 25471  | 3     | 3     | 4     | 3     |
| 25476  | 4     | 3     | 3     | 2     |
| 25480  | 2     | 1     | 1     | 2     |
| 25482  | 1     | 2     | 2     | 1     |

| respid | Q39_3 | Q39_4 | Q39_5 | Q39_6 |
|--------|-------|-------|-------|-------|
| 25500  | 5     | 5     | 4     | 4     |
| 25516  | 1     | 1     | 1     | 1     |
| 25521  | 5     | 5     | 4     | 5     |
| 25525  | 1     | 2     | 2     | 1     |
| 25530  | 4     | 2     | 5     | 3     |
| 25555  | 5     | 4     | 5     | 3     |
| 25558  | 1     | 1     | 1     | 1     |
| 25561  | 4     | 5     | 4     | 3     |
| 25566  |       |       |       |       |
| 25571  | 2     | 3     | 2     | 2     |
| 25572  | 1     | 1     | 1     | 1     |
| 25574  |       |       |       |       |
| 25588  | 1     | 2     | 2     | 1     |
| 25591  | 3     | 4     | 2     | 3     |
| 25599  | 2     | 3     | 2     | 2     |
| 25604  | 2     | 1     | 6     | 1     |
| 25614  | 2     | 1     | 4     | 2     |
| 25634  | 3     | 4     | 3     | 2     |
| 25642  | 1     | 2     | 2     | 1     |
| 25647  | 1     | 2     | 2     | 1     |
| 25653  | 1     | 1     | 1     | 1     |
| 25654  | 1     | 5     | 6     | 1     |
| 25660  | 1     | 1     | 1     | 1     |
| 25664  | 1     | 1     | 2     | 1     |
| 25665  | 3     | 3     | 3     | 3     |
| 25672  | 2     | 2     | 2     | 2     |
| 25677  | 2     | 2     | 2     | 2     |
| 25685  | 3     | 2     | 2     | 3     |
| 25699  | 3     | 4     | 5     | 3     |
| 25703  | 2     | 2     | 2     | 2     |
| 25704  | 3     | 4     | 4     | 3     |
| 25705  | 2     | 2     | 1     | 1     |

| respid | Q39_3 | Q39_4 | Q39_5 | Q39_6 |
|--------|-------|-------|-------|-------|
| 25711  | 1     | 1     | 1     | 1     |
| 25727  | 1     | 4     | 5     | 1     |
| 25728  | 3     | 3     | 3     | 2     |
| 25733  | 6     | 3     | 4     | 3     |
| 25735  | 1     | 1     | 1     | 1     |
| 25736  | 1     | 4     | 4     | 1     |
| 25742  | 1     | 1     | 1     | 1     |
| 25750  | 2     | 2     | 2     | 2     |
| 25754  |       |       |       |       |
| 25776  | 4     | 4     | 4     | 4     |
| 25778  |       |       |       |       |
| 25796  | 1     | 1     | 2     | 1     |
| 25852  | 4     | 4     | 5     | 4     |
| 25858  | 1     | 1     | 1     | 1     |
| 25859  |       |       |       |       |
| 25886  | 4     | 4     | 4     | 4     |
| 25890  | 4     | 3     | 3     | 3     |
| 25897  | 1     | 1     | 1     | 1     |
| 25903  | 1     | 1     | 1     | 1     |
| 25905  | 2     | 3     | 3     | 2     |
| 25917  |       |       |       |       |
| 25918  | 1     | 1     | 2     | 1     |
| 25928  | 1     | 3     | 2     | 2     |
| 25930  |       |       |       |       |
| 25949  | 2     | 1     | 1     | 1     |
| 25955  | 1     | 1     | 1     | 1     |
| 25959  | 2     | 1     | 2     | 1     |
| 25964  | 1     | 2     | 3     | 1     |
| 25972  | 1     | 1     | 2     | 1     |
| 25999  | 5     | 4     | 5     | 4     |
| 26019  | 2     | 2     | 2     | 2     |
| 26025  | 3     | 2     | 2     | 1     |

| respid | Q39_3 | Q39_4 | Q39_5 | Q39_6 |
|--------|-------|-------|-------|-------|
| 26039  | 5     | 3     | 3     | 3     |
| 26055  | 1     | 2     | 2     | 1     |
| 26061  | 1     | 3     | 3     | 2     |
| 26076  | 2     | 2     | 2     | 1     |
| 26088  | 2     | 1     | 2     | 1     |
| 26094  |       |       |       |       |
| 26104  | 1     | 1     | 1     | 1     |
| 26131  | 1     | 1     | 1     | 1     |
| 26134  | 4     | 5     | 3     | 4     |
| 26160  | 1     | 1     | 1     | 1     |
| 26168  | 1     | 2     | 1     | 1     |
| 26170  |       |       |       |       |
| 26191  | 2     | 2     | 2     | 2     |
| 26192  |       |       |       |       |
| 26195  | 2     | 2     | 3     | 2     |
| 26198  | 1     | 1     | 3     | 1     |
| 26199  | 2     | 1     | 2     | 1     |
| 26201  |       |       |       |       |
| 26202  | 2     | 2     | 2     | 1     |
| 26226  | 2     | 2     | 2     | 2     |
| 26233  | 6     | 5     | 5     | 5     |
| 26236  | 1     | 1     | 1     | 1     |
| 26242  | 2     | 1     | 1     | 1     |
| 26244  | 1     | 1     | 1     | 1     |
| 26250  | 2     | 4     | 3     | 4     |
| 26266  | 1     | 1     | 1     | 2     |
| 26274  | 3     | 2     | 2     | 1     |
| 26286  | 2     | 2     | 2     | 2     |
| 26288  | 5     | 2     | 3     | 2     |
| 26295  |       |       |       |       |
| 26296  | 1     | 2     | 1     | 1     |
| 26297  |       |       |       |       |

| respid | Q39_3 | Q39_4 | Q39_5 | Q39_6 |
|--------|-------|-------|-------|-------|
| 26300  | 2     | 2     | 3     | 2     |
| 26317  | 1     | 1     | 1     | 1     |
| 26343  |       |       |       |       |
| 26367  | 1     | 2     | 2     | 1     |
| 26372  | 1     | 1     | 2     | 2     |
| 26403  | 2     | 3     | 3     | 2     |
| 26423  | 1     | 1     | 1     | 1     |
| 26430  | 1     | 1     | 1     | 1     |
| 26437  | 2     | 3     | 2     | 3     |
| 26457  |       |       |       |       |
| 26466  | 3     | 2     | 1     | 2     |
| 26467  | 4     | 5     | 4     | 4     |
| 26469  | 2     | 1     | 2     | 2     |
| 26494  | 1     | 1     | 2     | 1     |
| 26510  | 1     | 2     | 3     | 1     |
| 26519  | 1     | 1     | 1     | 1     |
| 26525  | 1     | 2     | 2     | 1     |
| 26529  |       |       |       |       |
| 26533  | 1     | 1     | 1     | 1     |
| 26556  | 1     | 2     | 5     | 1     |
| 26559  | 3     | 4     | 4     | 3     |
| 26565  | 6     | 4     | 5     | 4     |
| 26576  | 5     | 5     | 5     | 4     |
| 26601  |       |       |       |       |
| 26607  | 3     | 3     | 2     | 1     |
| 26611  | 1     | 2     | 1     | 1     |
| 26619  | 2     | 1     | 1     | 1     |
| 26631  | 1     | 2     | 2     | 1     |
| 26654  | 1     | 3     | 2     | 1     |
| 26656  | 2     | 2     | 2     | 2     |
| 26664  |       |       |       |       |
| 26667  | 1     | 4     | 4     | 2     |

| respid | Q39_3 | Q39_4 | Q39_5 | Q39_6 |
|--------|-------|-------|-------|-------|
| 26674  | 5     | 4     | 5     | 4     |
| 26678  | 2     | 2     | 2     | 2     |
| 26693  | 1     | 2     | 1     | 1     |
| 26696  | 4     | 5     | 5     | 4     |
| 26703  | 5     | 5     | 4     | 4     |
| 26705  | 3     | 3     | 3     | 3     |
| 26706  | 3     | 4     | 3     | 3     |
| 26716  | 1     | 1     | 5     | 1     |
| 26721  | 1     | 2     | 2     | 1     |
| 26730  | 2     | 1     | 2     | 1     |
| 26752  | 1     | 1     | 1     | 1     |
| 26755  | 1     | 1     | 1     | 1     |
| 26791  | 1     | 2     | 1     | 1     |
| 26804  | 2     | 2     | 2     | 2     |
| 26810  | 2     | 3     | 5     | 6     |
| 26813  | 1     | 2     | 2     | 3     |
| 26833  | 2     | 2     | 2     | 2     |
| 26880  | 2     | 2     | 3     | 2     |
| 26884  | 1     | 2     | 2     | 1     |
| 26885  | 2     | 1     | 2     | 2     |
| 26890  | 2     | 2     | 2     | 3     |
| 26937  | 2     | 1     | 1     | 1     |
| 26939  | 2     | 2     | 2     | 2     |
| 26941  |       |       |       |       |
| 26992  | 2     | 4     | 5     | 1     |
| 27037  | 5     | 2     | 2     | 2     |
| 27045  | 4     | 5     | 5     | 4     |
| 27053  | 6     | 6     | 6     | 6     |
| 27060  | 4     | 5     | 4     | 5     |
| 27076  | 1     | 3     | 3     | 1     |
| 27124  | 1     | 1     | 1     | 1     |
| 27125  | 2     | 2     | 2     | 2     |

| respid | Q39_3 | Q39_4 | Q39_5 | Q39_6 |
|--------|-------|-------|-------|-------|
| 27132  | 1     | 1     | 1     | 1     |
| 27166  | 1     | 1     | 1     | 1     |
| 27190  | 2     | 1     | 1     | 2     |
| 27199  | 1     | 2     | 2     | 2     |
| 27221  | 4     | 3     | 4     | 3     |
| 27233  | 1     | 3     | 3     | 1     |
| 27241  | 1     | 2     | 2     | 1     |
| 27244  | 1     | 1     | 1     | 1     |
| 27245  | 6     | 6     | 5     | 5     |
| 27246  | 3     | 1     | 2     | 2     |
| 27253  | 1     | 2     | 2     | 1     |
| 27255  | 3     | 3     | 4     | 4     |
| 27267  | 2     | 2     | 2     | 2     |
| 27283  | 2     | 2     | 2     | 1     |
| 27289  | 1     | 2     | 3     | 2     |
| 27302  | 3     | 3     | 3     | 2     |
| 27317  | 1     | 1     | 1     | 1     |
| 27319  | 1     | 2     | 1     | 1     |
| 27331  | 1     | 2     | 2     | 1     |
| 27333  | 2     | 4     | 4     | 1     |
| 27340  |       |       |       |       |
| 27362  | 5     | 2     | 5     | 5     |
| 27370  | 1     | 1     | 1     | 1     |
| 27379  | 1     | 2     | 1     | 1     |
| 27386  |       |       |       |       |
| 27398  | 1     | 1     | 1     | 1     |
| 27404  | 1     | 1     | 1     | 1     |
| 27408  | 2     | 1     | 2     | 1     |
| 27412  | 4     | 5     | 5     | 4     |
| 27426  | 3     | 3     | 3     | 2     |
| 27455  | 1     | 2     | 2     | 2     |
| 27464  | 2     | 4     | 4     | 4     |

| respid | Q39_3 | Q39_4 | Q39_5 | Q39_6 |
|--------|-------|-------|-------|-------|
| 27484  | 2     | 5     | 1     | 1     |
| 27493  | 6     | 5     | 5     | 4     |
| 27512  | 2     | 5     | 6     | 6     |
| 27525  | 4     | 2     | 3     | 3     |
| 27532  | 3     | 3     | 3     | 3     |
| 27539  | 1     | 1     | 1     | 1     |
| 27540  | 4     | 5     | 2     | 3     |
| 27552  | 6     | 6     | 6     | 4     |
| 27562  | 1     | 1     | 1     | 1     |
| 27568  | 1     | 1     | 1     | 1     |
| 27574  | 6     | 5     | 6     | 5     |
| 27575  | 2     | 2     | 1     | 1     |
| 27577  | 2     | 2     | 3     | 1     |
| 27589  | 5     | 3     | 3     | 4     |
| 27593  | 1     | 2     | 1     | 1     |
| 27594  | 4     | 4     | 4     | 4     |
| 27595  | 6     | 6     | 6     | 5     |
| 27598  | 1     | 1     | 1     | 1     |
| 27620  | 2     | 3     | 3     | 3     |
| 27621  | 3     | 4     | 3     | 3     |
| 27628  | 1     | 1     | 2     | 1     |
| 27633  | 1     | 2     | 2     | 1     |
| 27643  | 1     | 2     | 3     | 2     |
| 27644  | 4     | 4     | 4     | 3     |
| 27668  | 2     | 2     | 2     | 1     |
| 27681  | 2     | 2     | 2     | 2     |
| 27691  | 1     | 1     | 1     | 1     |
| 27693  | 4     | 4     | 3     | 3     |
| 27703  | 2     | 2     | 3     | 2     |
| 27708  | 2     | 3     | 3     | 2     |
| 27719  | 2     | 4     | 4     | 2     |
| 27720  | 1     | 1     | 1     | 1     |



| respid | Q39_3 | Q39_4 | Q39_5 | Q39_6 |
|--------|-------|-------|-------|-------|
| 27723  | 1     | 1     | 2     | 2     |
| 27725  | 1     | 4     | 4     | 1     |
| 27734  | 3     | 3     | 3     | 3     |
| 27744  | 1     | 2     | 2     | 1     |
| 27749  | 6     | 4     | 6     | 4     |
| 27762  | 3     | 2     | 2     | 3     |
| 27808  | 2     | 3     | 2     | 3     |
| 27810  | 4     | 5     | 4     | 6     |
| 27812  | 1     | 1     | 1     | 1     |
| 27815  |       |       |       |       |
| 27818  | 1     | 2     | 2     | 1     |
| 27823  | 1     | 1     | 1     | 1     |
| 27841  | 3     | 2     | 3     | 4     |
| 27843  |       |       |       |       |
| 27851  | 4     | 3     | 4     | 4     |
| 27858  | 1     | 1     | 2     | 1     |
| 27859  | 1     | 3     | 4     | 1     |
| 27869  | 1     | 1     | 1     | 1     |
| 27872  | 1     | 2     | 2     | 1     |
| 27873  | 1     | 1     | 1     | 1     |
| 27884  | 1     | 1     | 2     | 1     |
| 27904  | 2     | 2     | 2     | 2     |
| 27915  | 1     | 3     | 2     | 1     |
| 27918  | 2     | 2     | 2     | 2     |
| 27937  | 1     | 2     | 2     | 1     |
| 27943  | 3     | 3     | 4     | 4     |
| 27948  | 1     | 1     | 1     | 1     |
| 27971  | 4     | 4     | 5     | 4     |
| 27991  | 1     | 2     | 2     | 1     |
| 28000  | 1     | 2     | 2     | 1     |
| 28011  | 3     | 2     | 2     | 1     |
| 28022  | 2     | 3     | 3     | 2     |

| respid | Q39_3 | Q39_4 | Q39_5 | Q39_6 |
|--------|-------|-------|-------|-------|
| 28025  | 1     | 2     | 3     | 1     |
| 28041  | 1     | 1     | 2     | 1     |
| 28057  | 2     | 4     | 6     | 3     |
| 28080  |       |       |       |       |
| 28098  | 1     | 1     | 2     | 1     |
| 28104  | 1     | 3     | 3     | 2     |
| 28109  | 1     | 4     | 4     | 1     |
| 28129  | 1     | 2     | 3     | 6     |
| 28141  |       |       |       |       |
| 28143  | 1     | 2     | 2     | 1     |
| 28149  | 2     | 2     | 2     | 1     |
| 28151  | 3     | 3     | 3     | 3     |
| 28161  | 1     | 5     | 5     | 1     |
| 28169  | 1     | 2     | 2     | 1     |
| 28194  | 3     | 3     | 3     | 3     |
| 28197  |       |       |       |       |
| 28206  | 1     | 3     | 3     | 1     |
| 28218  | 1     | 1     | 2     | 1     |
| 28227  | 1     | 1     | 2     | 1     |
| 28235  | 6     | 3     | 3     | 4     |
| 28246  | 2     | 2     | 2     | 1     |
| 28259  | 6     | 5     | 5     | 5     |
| 28263  | 6     | 3     | 3     | 5     |
| 28267  | 6     | 5     | 5     | 5     |
| 28274  | 3     | 1     | 1     | 2     |
| 28278  | 1     | 1     | 1     | 1     |
| 28288  | 2     | 1     | 1     | 1     |
| 28308  |       |       |       |       |
| 28309  | 2     | 2     | 3     | 3     |
| 28323  | 3     | 3     | 3     | 2     |
| 28335  | 4     | 4     | 4     | 5     |
| 28354  | 4     | 3     | 5     | 5     |

| respid | Q39_3 | Q39_4 | Q39_5 | Q39_6 |
|--------|-------|-------|-------|-------|
| 28355  | 3     | 2     | 3     | 4     |
| 28356  | 1     | 2     | 3     | 2     |
| 28357  | 1     | 1     | 1     | 1     |
| 28363  | 1     | 1     | 1     | 1     |
| 28366  | 1     | 1     | 1     | 1     |
| 28372  | 4     | 3     | 3     | 3     |
| 28381  | 2     | 2     | 2     | 2     |
| 28388  | 4     | 3     | 3     | 4     |
| 28413  | 3     | 3     | 4     | 4     |
| 28421  | 3     | 3     | 3     | 3     |
| 28430  | 2     | 3     | 3     | 3     |
| 28439  | 4     | 4     | 5     | 5     |
| 28458  | 3     | 4     | 4     | 5     |
| 28461  | 1     | 1     | 1     | 1     |
| 28466  | 3     | 3     | 3     | 3     |
| 28492  | 1     | 2     | 2     | 1     |
| 28534  |       |       |       |       |
| 28537  | 4     | 3     | 4     | 4     |
| 28560  | 1     | 1     | 1     | 1     |
| 28566  | 1     | 1     | 1     | 1     |
| 28569  | 1     | 2     | 2     | 2     |
| 28584  | 2     | 2     | 2     | 1     |
| 28590  | 2     | 3     | 3     | 2     |
| 28596  |       |       |       |       |
| 28608  | 1     | 2     | 2     | 2     |
| 28631  | 3     | 4     | 2     | 3     |
| 28644  | 2     | 2     | 2     | 2     |
| 28646  | 2     | 1     | 1     | 2     |
| 28665  |       |       |       |       |
| 28686  | 1     | 1     | 1     | 1     |
| 28704  | 2     | 4     | 4     | 3     |
| 28719  | 1     | 2     | 1     | 1     |

| respid | Q39_3 | Q39_4 | Q39_5 | Q39_6 |
|--------|-------|-------|-------|-------|
| 28736  | 2     | 1     | 1     | 1     |
| 28739  | 3     | 2     | 3     | 3     |
| 28758  | 2     | 3     | 2     | 3     |
| 28761  | 4     | 4     | 5     | 4     |
| 28770  | 3     | 4     | 4     | 5     |
| 28774  | 1     | 1     | 1     | 1     |
| 28778  | 6     | 6     | 6     | 5     |
| 28783  | 2     | 1     | 2     | 3     |
| 28785  | 1     | 2     | 2     | 1     |
| 28797  | 2     | 2     | 3     | 4     |
| 28801  | 3     | 4     | 4     | 4     |
| 28821  |       |       |       |       |
| 28827  | 1     | 1     | 1     | 1     |
| 28828  | 1     | 1     | 3     | 1     |
| 28871  | 2     | 2     | 2     | 3     |
| 28876  | 1     | 3     | 2     | 1     |
| 28891  | 6     | 1     | 5     | 3     |
| 28898  |       |       |       |       |
| 28909  | 1     | 2     | 2     | 1     |
| 28930  | 3     | 3     | 2     | 2     |
| 28935  | 1     | 4     | 4     | 2     |
| 28964  | 1     | 1     | 1     | 1     |
| 28965  | 1     | 2     | 1     | 1     |
| 28967  | 5     | 6     | 6     | 5     |
| 28975  |       |       |       |       |
| 28982  | 2     | 2     | 1     | 1     |
| 28989  | 1     | 2     | 2     | 1     |
| 29003  | 1     | 4     | 4     | 4     |
| 29004  | 1     | 2     | 1     | 1     |
| 29007  | 1     | 2     | 3     | 2     |
| 29008  | 1     | 1     | 1     | 1     |
| 29011  | 4     | 4     | 2     | 4     |

| respid | Q39_3 | Q39_4 | Q39_5 | Q39_6 |
|--------|-------|-------|-------|-------|
| 29012  | 1     | 2     | 1     | 1     |
| 29014  |       |       |       |       |
| 29016  | 1     | 1     | 1     | 1     |
| 29018  | 2     | 6     | 6     | 2     |
| 29048  | 1     | 3     | 3     | 1     |
| 29184  | 1     | 1     | 2     | 1     |
| 29237  | 2     | 1     | 1     | 2     |
| 29252  | 5     | 1     | 1     | 4     |
| 29267  | 2     | 2     | 2     | 1     |
| 29276  |       |       |       |       |
| 29281  | 3     | 4     | 4     | 3     |
| 29285  | 1     | 1     | 1     | 1     |
| 29291  | 5     | 6     | 5     | 6     |
| 29304  | 2     | 2     | 2     | 2     |
| 29323  | 1     | 2     | 2     | 1     |
| 29330  | 4     | 3     | 5     | 4     |
| 29357  | 6     | 6     | 6     | 6     |
| 29416  | 1     | 1     | 2     | 1     |
| 29432  | 2     | 1     | 2     | 1     |
| 29482  | 1     | 2     | 2     | 2     |
| 29506  | 1     | 3     | 3     | 1     |
| 29509  | 3     | 1     | 1     | 3     |
| 29512  | 2     | 2     | 2     | 3     |
| 29519  | 1     | 2     | 2     | 1     |
| 29520  | 1     | 2     | 3     | 1     |
| 29521  | 4     | 3     | 3     | 2     |
| 29529  | 5     | 5     | 5     | 5     |
| 29532  | 1     | 1     | 1     | 1     |
| 29547  | 4     | 3     | 3     | 4     |
| 29551  | 2     | 2     | 1     | 1     |
| 29584  | 4     | 5     | 4     | 4     |
| 29591  | 4     | 3     | 3     | 3     |

| respid | Q39_3 | Q39_4 | Q39_5 | Q39_6 |
|--------|-------|-------|-------|-------|
| 29613  | 1     | 2     | 2     | 1     |
| 29615  | 1     | 1     | 1     | 3     |
| 29625  | 2     | 1     | 2     | 3     |
| 29660  | 2     | 1     | 2     | 2     |
| 29677  |       |       |       |       |
| 29700  | 1     | 1     | 2     | 2     |
| 29715  | 6     | 6     | 6     | 6     |
| 29720  |       |       |       |       |
| 29730  | 1     | 1     | 1     | 1     |
| 29734  | 3     | 1     | 1     | 3     |
| 29754  |       |       |       |       |
| 29771  | 1     | 2     | 3     | 1     |
| 29774  | 1     | 1     | 3     | 1     |
| 29783  | 1     | 4     | 4     | 1     |
| 29812  | 1     | 1     | 1     | 1     |
| 29813  | 1     | 1     | 1     | 1     |
| 29814  | 2     | 1     | 1     | 2     |
| 29820  | 2     | 2     | 2     | 2     |
| 29906  | 1     | 3     | 4     | 1     |
| 29907  | 4     | 3     | 3     | 2     |
| 29928  |       |       |       |       |
| 29932  | 1     | 2     | 2     | 1     |
| 29958  | 2     | 3     | 3     | 2     |
| 29982  | 1     | 2     | 2     | 1     |
| 29989  | 2     | 1     | 1     | 2     |
| 29994  | 1     | 1     | 1     | 1     |
| 30005  | 1     | 1     | 1     | 2     |
| 30077  | 1     | 2     | 2     | 1     |
| 30098  |       |       |       |       |
| 30107  | 1     | 2     | 2     | 1     |
| 30154  | 1     | 2     | 2     | 1     |
| 30159  | 1     | 1     | 1     | 1     |

| respid | Q39_3 | Q39_4 | Q39_5 | Q39_6 |
|--------|-------|-------|-------|-------|
| 30162  | 1     | 2     | 2     | 1     |
| 30163  |       |       |       |       |
| 30189  | 2     | 2     | 3     | 2     |
| 30230  | 1     | 2     | 2     | 1     |
| 30259  | 3     | 3     | 2     | 2     |
| 30284  | 1     | 2     | 2     | 1     |
| 30296  | 1     | 1     | 4     | 1     |
| 30330  | 1     | 2     | 3     | 2     |
| 30341  | 3     | 2     | 1     | 1     |
| 30352  | 3     | 3     | 4     | 4     |
| 30379  | 1     | 1     | 1     | 1     |
| 30424  | 2     | 2     | 1     | 1     |
| 30447  | 1     | 1     | 1     | 1     |
| 30477  | 5     | 5     | 4     | 4     |
| 30503  | 1     | 1     | 1     | 1     |
| 30515  | 5     | 6     | 3     | 3     |
| 30516  | 1     | 1     | 2     | 1     |
| 30623  | 2     | 2     | 3     | 2     |
| 30639  | 1     | 1     | 1     | 1     |
| 30670  | 1     | 2     | 2     | 1     |
| 30697  | 1     | 1     | 1     | 1     |
| 30735  | 2     | 1     | 2     | 1     |
| 30742  | 2     | 2     | 2     | 2     |
| 30751  | 4     | 3     | 3     | 4     |
| 30789  |       |       |       |       |
| 30867  | 2     | 2     | 2     | 3     |
| 30876  | 2     | 3     | 3     | 3     |
| 30877  | 1     | 1     | 1     | 1     |
| 30887  | 2     | 1     | 2     | 1     |
| 30891  | 4     | 4     | 5     | 4     |
| 31030  | 1     | 1     | 1     | 1     |
| 31059  | 1     | 3     | 3     | 3     |

| respid | Q39_3 | Q39_4 | Q39_5 | Q39_6 |
|--------|-------|-------|-------|-------|
| 31082  |       |       |       |       |
| 31106  | 1     | 1     | 2     | 1     |
| 31110  | 6     | 6     | 6     | 6     |
| 31265  | 6     | 6     | 6     | 6     |
| 31266  | 6     | 6     | 6     | 6     |
| 31267  | 6     | 6     | 6     | 6     |
| 31310  | 1     | 2     | 2     | 1     |
| 31325  | 1     | 2     | 1     | 1     |
| 31367  | 2     | 2     | 3     | 2     |
| 31389  | 1     | 1     | 1     | 1     |
| 31440  | 1     | 2     | 2     | 1     |
| 31465  | 1     | 2     | 2     | 1     |
| 31477  | 2     | 1     | 2     | 4     |
| 31491  | 1     | 2     | 2     | 2     |
| 31494  | 3     | 3     | 4     | 4     |
| 31509  | 6     | 5     | 5     | 1     |
| 31533  | 2     | 1     | 1     | 1     |
| 31547  | 1     | 2     | 2     | 1     |
| 31558  | 1     | 1     | 2     | 1     |
| 31579  | 2     | 2     | 2     | 1     |
| 31591  | 1     | 2     | 3     | 2     |
| 31596  | 2     | 3     | 3     | 3     |
| 31601  | 4     | 3     | 4     | 5     |
| 31605  | 1     | 1     | 2     | 2     |
| 31637  | 2     | 3     | 3     | 1     |
| 31646  | 1     | 2     | 2     | 1     |
| 31647  | 6     | 2     | 2     | 3     |
| 31650  | 1     | 2     | 1     | 1     |
| 31651  | 3     | 5     | 4     | 4     |
| 31657  | 1     | 2     | 1     | 1     |
| 31660  | 2     | 2     | 3     | 1     |
| 31661  | 2     | 3     | 3     | 2     |



| respid | Q39_3 | Q39_4 | Q39_5 | Q39_6 |
|--------|-------|-------|-------|-------|
| 31667  | 1     | 1     | 2     | 2     |
| 31674  | 3     | 2     | 2     | 2     |
| 31686  | 3     | 2     | 2     | 3     |
| 31693  |       |       |       |       |
| 31716  |       |       |       |       |
| 31818  | 1     | 1     | 1     | 1     |
| 31886  | 2     | 1     | 2     | 2     |
| 31945  | 3     | 4     | 5     | 4     |
| 31957  | 1     | 4     | 4     | 1     |
| 31966  | 1     | 3     | 3     | 1     |
| 31978  | 2     | 1     | 2     | 2     |
| 31999  | 3     | 4     | 4     | 5     |
| 32026  | 1     | 2     | 2     | 2     |
| 32033  | 1     | 2     | 2     | 1     |
| 32037  | 6     | 6     | 6     | 6     |
| 32038  | 6     | 6     | 6     | 6     |
| 32047  | 3     | 4     | 4     | 4     |
| 32053  |       |       |       |       |
| 32069  | 2     | 2     | 2     | 2     |
| 32081  | 3     | 2     | 3     | 2     |
| 32123  | 1     | 3     | 3     | 1     |
| 32130  | 1     | 3     | 2     | 2     |
| 32141  | 1     | 1     | 1     | 1     |
| 32158  |       |       |       |       |
| 32165  | 1     | 1     | 2     | 1     |
| 32180  | 1     | 1     | 1     | 1     |
| 32221  | 4     | 5     | 5     | 6     |
| 32292  | 1     | 2     | 1     | 1     |
| 32318  | 2     | 2     | 1     | 1     |
| 32346  | 1     | 1     | 2     | 2     |
| 32402  | 3     | 3     | 3     | 3     |
| 32422  | 1     | 2     | 2     | 1     |

| respid | Q39_3 | Q39_4 | Q39_5 | Q39_6 |
|--------|-------|-------|-------|-------|
| 32439  | 1     | 1     | 1     | 1     |
| 32507  | 3     | 3     | 3     | 3     |
| 32522  |       |       |       |       |
| 32535  |       |       |       |       |
| 32546  | 1     | 1     | 1     | 1     |
| 32553  | 1     | 2     | 1     | 1     |
| 32570  |       |       |       |       |
| 32592  | 2     | 1     | 1     | 2     |
| 32605  | 3     | 1     | 2     | 2     |
| 32630  | 3     | 3     | 3     | 4     |
| 32642  | 2     | 3     | 3     | 3     |
| 32646  | 1     | 2     | 2     | 1     |
| 32665  | 2     | 2     | 1     | 2     |
| 32677  | 1     | 2     | 2     | 1     |
| 32694  | 1     | 2     | 2     | 1     |
| 32698  | 1     | 5     | 5     | 1     |
| 32754  | 4     | 6     | 6     | 4     |
| 32799  | 3     | 3     | 3     | 2     |
| 32816  |       |       |       |       |
| 32819  | 2     | 3     | 3     | 2     |
| 32840  | 1     | 3     | 3     | 1     |
| 32861  | 1     | 2     | 3     | 2     |
| 32866  | 2     | 2     | 2     | 2     |
| 32889  | 4     | 3     | 3     | 4     |
| 32960  | 1     | 1     | 1     | 1     |
| 32965  | 1     | 2     | 2     | 1     |
| 32986  | 2     | 2     | 2     | 2     |
| 33005  | 3     | 4     | 3     | 3     |
| 33054  | 4     | 3     | 3     | 3     |
| 33072  | 4     | 5     | 5     | 3     |
| 33095  | 1     | 2     | 2     | 1     |
| 33099  | 3     | 2     | 2     | 2     |

| respid | Q39_3 | Q39_4 | Q39_5 | Q39_6 |
|--------|-------|-------|-------|-------|
| 33121  | 1     | 1     | 1     | 1     |
| 33152  | 2     | 2     | 3     | 2     |
| 33159  | 1     | 1     | 1     | 2     |
| 33189  | 1     | 1     | 1     | 1     |
| 33198  | 1     | 4     | 5     | 4     |
| 33202  | 4     | 5     | 3     | 3     |
| 33204  | 2     | 2     | 2     | 2     |
| 33224  | 1     | 2     | 2     | 1     |
| 33272  | 4     | 2     | 3     | 3     |
| 33294  | 1     | 1     | 1     | 1     |
| 33300  | 4     | 2     | 2     | 3     |
| 33314  | 3     | 4     | 4     | 3     |
| 33338  | 2     | 2     | 2     | 2     |
| 33350  | 5     | 5     | 5     | 5     |
| 33362  | 3     | 3     | 3     | 2     |
| 33368  |       |       |       |       |
| 33374  | 3     | 2     | 2     | 2     |
| 33380  | 4     | 5     | 5     | 6     |
| 33385  | 3     | 2     | 2     | 2     |
| 33402  | 3     | 2     | 4     | 3     |
| 33414  | 1     | 3     | 3     | 1     |
| 33439  | 2     | 2     | 3     | 3     |
| 33449  | 5     | 4     | 5     | 4     |
| 33533  | 2     | 1     | 2     | 1     |
| 33540  | 1     | 1     | 2     | 1     |
| 33556  | 1     | 2     | 2     | 2     |
| 33615  | 1     | 1     | 1     | 1     |
| 33694  | 3     | 4     | 3     | 2     |
| 33717  | 1     | 2     | 2     | 1     |
| 33729  | 1     | 1     | 1     | 1     |
| 33746  | 1     | 1     | 1     | 1     |
| 33764  | 2     | 1     | 3     | 1     |

| respid | Q39_3 | Q39_4 | Q39_5 | Q39_6 |
|--------|-------|-------|-------|-------|
| 33790  | 3     | 3     | 3     | 1     |
| 33868  | 4     | 3     | 5     | 5     |
| 33872  | 4     | 5     | 6     | 6     |
| 33883  | 1     | 1     | 1     | 1     |
| 33884  | 2     | 2     | 2     | 1     |
| 33900  | 1     | 3     | 3     | 1     |
| 33933  | 1     | 3     | 3     | 1     |
| 33949  | 1     | 1     | 1     | 1     |
| 34005  |       |       |       |       |
| 34016  |       |       |       |       |
| 34041  | 6     | 4     | 5     | 4     |
| 34053  | 1     | 2     | 3     | 1     |
| 34056  | 1     | 2     | 1     | 1     |
| 34093  | 2     | 2     | 3     | 3     |
| 34112  | 3     | 3     | 3     | 1     |
| 34136  | 5     | 5     | 5     | 5     |
| 34138  | 1     | 1     | 2     | 1     |
| 34139  | 3     | 3     | 4     | 4     |
| 34189  | 1     | 1     | 1     | 1     |
| 34239  | 1     | 2     | 2     | 1     |
| 34240  | 1     | 2     | 1     | 1     |
| 34241  | 1     | 2     | 2     | 1     |
| 34259  | 2     | 4     | 4     | 2     |
| 34303  | 3     | 3     | 4     | 4     |
| 34306  | 1     | 1     | 1     | 1     |
| 34395  | 1     | 3     | 2     | 1     |
| 34463  | 2     | 1     | 3     | 2     |
| 34466  | 3     | 4     | 3     | 2     |
| 34471  | 1     | 2     | 2     | 1     |
| 34489  | 4     | 3     | 4     | 4     |
| 34518  | 4     | 1     | 1     | 1     |
| 34542  | 3     | 3     | 3     | 3     |

| respid | Q39_3 | Q39_4 | Q39_5 | Q39_6 |
|--------|-------|-------|-------|-------|
| 34595  |       |       |       |       |
| 34604  | 1     | 2     | 1     | 1     |
| 34631  | 3     | 1     | 1     | 2     |
| 34665  | 1     | 2     | 2     | 1     |
| 34716  | 1     | 1     | 1     | 1     |
| 34729  | 3     | 3     | 3     | 3     |
| 34772  | 4     | 4     | 4     | 4     |
| 34800  | 2     | 3     | 3     | 2     |
| 34819  | 3     | 3     | 3     | 3     |
| 34829  | 5     | 5     | 6     | 4     |
| 34831  | 3     | 4     | 4     | 2     |
| 34839  | 1     | 2     | 2     | 1     |
| 34868  | 1     | 3     | 4     | 1     |
| 34869  | 1     | 2     | 1     | 1     |
| 34882  | 4     | 4     | 4     | 3     |
| 34895  | 5     | 5     | 5     | 6     |
| 34901  | 1     | 2     | 2     | 1     |
| 34904  | 2     | 2     | 3     | 2     |
| 34907  | 3     | 4     | 4     | 3     |
| 34914  | 1     | 2     | 2     | 1     |
| 34918  | 4     | 4     | 4     | 4     |
| 34924  | 1     | 1     | 1     | 1     |
| 34933  | 4     | 4     | 4     | 4     |
| 34938  | 2     | 2     | 2     | 1     |
| 34952  | 5     | 4     | 5     | 5     |
| 34959  | 1     | 2     | 2     | 1     |
| 34972  | 1     | 2     | 2     | 1     |
| 34973  | 3     | 4     | 4     | 2     |
| 34975  | 4     | 4     | 4     | 3     |
| 34977  | 3     | 2     | 3     | 3     |
| 34978  | 1     | 3     | 3     | 1     |
| 34980  | 3     | 3     | 3     | 3     |

| respid | Q39_3 | Q39_4 | Q39_5 | Q39_6 |
|--------|-------|-------|-------|-------|
| 34984  | 3     | 2     | 3     | 3     |
| 34986  | 4     | 3     | 4     | 4     |
| 34994  | 1     | 2     | 2     | 1     |
| 34996  | 4     | 3     | 4     | 3     |
| 35003  | 1     | 1     | 1     | 1     |
| 35014  | 1     | 1     | 1     | 1     |
| 35029  | 1     | 1     | 1     | 1     |
| 35030  | 3     | 4     | 4     | 3     |
| 35037  | 4     | 3     | 4     | 2     |
| 35043  |       |       |       |       |
| 35048  |       |       |       |       |
| 35055  | 1     | 2     | 1     | 2     |
| 35067  | 1     | 1     | 2     | 2     |
| 35072  | 2     | 1     | 2     | 2     |
| 35078  | 1     | 4     | 4     | 3     |
| 35084  | 2     | 1     | 1     | 1     |
| 35095  |       |       |       |       |
| 35096  |       |       |       |       |
| 35097  | 4     | 3     | 3     | 4     |
| 35098  | 2     | 2     | 3     | 3     |
| 35109  | 5     | 5     | 5     | 5     |
| 35114  | 1     | 1     | 1     | 1     |
| 35115  | 1     | 2     | 2     | 1     |
| 35124  | 4     | 3     | 3     | 4     |
| 35125  | 1     | 1     | 1     | 1     |
| 35141  |       |       |       |       |
| 35142  | 1     | 1     | 1     | 1     |
| 35145  |       |       |       |       |
| 35149  | 4     | 3     | 4     | 3     |
| 35159  | 1     | 1     | 1     | 1     |
| 35163  | 4     | 4     | 5     | 4     |
| 35174  | 3     | 3     | 3     | 3     |

| respid | Q39_3 | Q39_4 | Q39_5 | Q39_6 |
|--------|-------|-------|-------|-------|
| 35188  |       |       |       |       |
| 35189  | 1     | 4     | 5     | 1     |
| 35201  | 4     | 3     | 5     | 4     |
| 35215  | 1     | 1     | 1     | 1     |
| 35228  | 1     | 1     | 1     | 1     |
| 35235  | 2     | 1     | 2     | 2     |
| 35239  | 4     | 4     | 3     | 4     |
| 35243  | 1     | 1     | 1     | 1     |
| 35245  | 2     | 2     | 3     | 1     |
| 35259  |       |       |       |       |
| 35265  | 5     | 2     | 4     | 4     |
| 35272  | 2     | 2     | 2     | 2     |
| 35280  | 2     | 3     | 3     | 1     |
| 35298  | 1     | 1     | 1     | 1     |
| 35305  | 1     | 1     | 1     | 1     |
| 35306  | 4     | 5     | 4     | 4     |
| 35307  | 1     | 1     | 1     | 1     |
| 35311  | 1     | 1     | 1     | 1     |
| 35322  | 3     | 2     | 2     | 2     |
| 35323  | 1     | 1     | 1     | 1     |
| 35327  | 2     | 2     | 2     | 2     |
| 35366  | 1     | 1     | 1     | 1     |
| 35378  | 1     | 4     | 4     | 2     |
| 35389  | 2     | 2     | 2     | 2     |
| 35390  | 1     | 1     | 1     | 1     |
| 35395  | 2     | 2     | 2     | 3     |
| 35411  | 2     | 3     | 4     | 3     |
| 35423  | 1     | 1     | 1     | 1     |
| 35425  | 1     | 3     | 3     | 1     |
| 35434  | 2     | 1     | 1     | 3     |
| 35462  | 1     | 1     | 1     | 1     |
| 35478  | 3     | 3     | 3     | 3     |

| respid | Q39_3 | Q39_4 | Q39_5 | Q39_6 |
|--------|-------|-------|-------|-------|
| 35481  | 5     | 6     | 5     | 4     |
| 35498  | 2     | 2     | 2     | 1     |
| 35499  |       |       |       |       |
| 35502  | 2     | 3     | 4     | 4     |
| 35503  |       |       |       |       |
| 35504  |       |       |       |       |
| 35508  | 2     | 2     | 2     | 4     |
| 35513  | 2     | 2     | 2     | 2     |
| 35516  | 4     | 4     | 5     | 3     |
| 35519  | 2     | 3     | 4     | 3     |
| 35530  | 5     | 5     | 5     | 5     |
| 35533  | 4     | 3     | 3     | 3     |
| 35561  | 3     | 4     | 3     | 3     |
| 35565  | 1     | 1     | 2     | 1     |
| 35588  | 2     | 2     | 2     | 2     |
| 35598  | 1     | 1     | 1     | 1     |
| 35607  | 1     | 2     | 3     | 1     |
| 35638  | 3     | 3     | 3     | 3     |
| 35642  | 1     | 1     | 2     | 1     |
| 35643  | 2     | 3     | 3     | 2     |
| 35680  | 1     | 1     | 1     | 1     |
| 35697  | 1     | 2     | 2     | 1     |
| 35703  |       |       |       |       |
| 35709  | 5     | 3     | 3     | 3     |
| 35710  | 1     | 1     | 3     | 1     |
| 35721  | 5     | 1     | 2     | 3     |
| 35723  | 1     | 2     | 2     | 1     |
| 35736  | 3     | 3     | 3     | 2     |
| 35739  | 3     | 3     | 3     | 3     |
| 35745  | 4     | 4     | 5     | 2     |
| 35748  | 6     | 6     | 5     | 1     |
| 35750  | 3     | 2     | 2     | 1     |



| respid | Q39_3 | Q39_4 | Q39_5 | Q39_6 |
|--------|-------|-------|-------|-------|
| 35752  | 2     | 2     | 1     | 1     |
| 35773  | 4     | 1     | 1     | 2     |
| 35779  | 1     | 1     | 1     | 1     |
| 35791  | 1     | 1     | 1     | 1     |
| 35801  | 2     | 2     | 3     | 1     |
| 35802  | 1     | 1     | 1     | 1     |
| 35837  | 5     | 4     | 6     | 4     |
| 35853  | 1     | 1     | 2     | 1     |
| 35858  | 1     | 1     | 2     | 1     |
| 35860  | 5     | 3     | 3     | 4     |
| 35875  | 6     | 6     | 6     | 4     |
| 35883  | 1     | 1     | 1     | 1     |
| 35890  | 1     | 2     | 2     | 1     |
| 35898  | 1     | 1     | 2     | 1     |
| 35901  | 6     | 6     | 6     | 6     |
| 35914  | 3     | 2     | 3     | 2     |
| 35924  | 1     | 1     | 2     | 2     |
| 35950  | 3     | 3     | 4     | 3     |
| 35961  | 3     | 1     | 3     | 2     |
| 35966  | 2     | 1     | 1     | 2     |
| 35967  | 1     | 1     | 1     | 1     |
| 35971  | 1     | 1     | 1     | 1     |
| 35974  | 1     | 1     | 1     | 1     |
| 35983  | 5     | 5     | 5     | 4     |
| 35992  | 6     | 6     | 5     | 5     |
| 36010  | 1     | 2     | 2     | 1     |
| 36019  | 1     | 6     | 6     | 6     |
| 36029  | 3     | 4     | 4     | 3     |
| 36033  | 4     | 2     | 2     | 2     |
| 36042  | 1     | 2     | 1     | 1     |
| 36043  | 2     | 3     | 2     | 2     |
| 36048  | 3     | 1     | 1     | 3     |

| respid | Q39_3 | Q39_4 | Q39_5 | Q39_6 |
|--------|-------|-------|-------|-------|
| 36050  | 1     | 2     | 2     | 1     |
| 36062  | 1     | 3     | 3     | 1     |
| 36063  |       |       |       |       |
| 36092  | 1     | 3     | 3     | 2     |
| 36097  | 3     | 2     | 2     | 3     |
| 36108  | 1     | 1     | 1     | 1     |
| 36113  | 5     | 6     | 6     | 4     |
| 36117  | 1     | 1     | 1     | 1     |
| 36129  | 3     | 3     | 3     | 3     |
| 36144  | 1     | 1     | 1     | 1     |
| 36152  | 1     | 1     | 1     | 1     |
| 36154  | 3     | 5     | 4     | 5     |
| 36155  | 1     | 1     | 1     | 1     |
| 36167  | 1     | 1     | 1     | 1     |
| 36172  | 2     | 2     | 2     | 2     |
| 36173  | 2     | 2     | 2     | 2     |
| 36174  | 3     | 4     | 3     | 2     |
| 36182  | 2     | 1     | 1     | 1     |
| 36192  | 5     | 3     | 5     | 3     |
| 36195  | 4     | 4     | 4     | 4     |
| 36204  | 1     | 1     | 2     | 1     |
| 36205  | 1     | 1     | 1     | 1     |
| 36208  | 1     | 1     | 1     | 1     |
| 36216  | 3     | 2     | 2     | 3     |
| 36221  | 4     | 3     | 1     | 3     |
| 36244  | 1     | 1     | 1     | 1     |
| 36255  | 2     | 3     | 2     | 1     |
| 36259  | 1     | 1     | 1     | 1     |
| 36262  | 3     | 2     | 2     | 3     |
| 36268  | 1     | 1     | 1     | 1     |
| 36308  | 3     | 2     | 2     | 2     |
| 36324  | 1     | 3     | 3     | 1     |

| respid | Q39_3 | Q39_4 | Q39_5 | Q39_6 |
|--------|-------|-------|-------|-------|
| 36330  | 1     | 1     | 1     | 1     |
| 36331  | 2     | 3     | 4     | 1     |
| 36336  | 1     | 1     | 2     | 1     |
| 36337  | 2     | 2     | 2     | 2     |
| 36364  | 1     | 2     | 2     | 2     |
| 36365  | 2     | 3     | 5     | 4     |
| 36396  | 2     | 2     | 3     | 2     |
| 36403  | 1     | 1     | 2     | 1     |
| 36410  | 1     | 1     | 1     | 1     |
| 36413  | 1     | 1     | 1     | 1     |
| 36422  | 2     | 2     | 2     | 2     |
| 36424  | 3     | 5     | 5     | 3     |
| 36425  | 6     | 5     | 6     | 5     |
| 36432  | 3     | 3     | 3     | 3     |
| 36435  | 6     | 6     | 5     | 5     |
| 36446  | 5     | 5     | 5     | 5     |
| 36451  | 4     | 2     | 2     | 2     |
| 36453  | 5     | 2     | 2     | 4     |
| 36459  | 3     | 3     | 2     | 2     |
| 36464  | 3     | 3     | 2     | 3     |
| 36465  | 4     | 3     | 3     | 2     |
| 36466  |       |       |       |       |
| 36476  | 3     | 3     | 3     | 2     |
| 36487  | 1     | 3     | 3     | 1     |
| 36488  | 2     | 3     | 3     | 3     |
| 36500  |       |       |       |       |
| 36504  | 2     | 2     | 2     | 2     |
| 36513  | 2     | 1     | 2     | 1     |
| 36515  | 3     | 3     | 3     | 3     |
| 36521  | 5     | 4     | 4     | 4     |
| 36530  | 2     | 3     | 3     | 3     |
| 36556  | 2     | 4     | 5     | 2     |

| respid | Q39_3 | Q39_4 | Q39_5 | Q39_6 |
|--------|-------|-------|-------|-------|
| 36564  | 4     | 3     | 3     | 5     |
| 36584  | 4     | 4     | 3     | 3     |
| 36585  |       |       |       |       |
| 36586  |       |       |       |       |
| 36606  | 5     | 5     | 5     | 4     |
| 36615  | 1     | 2     | 3     | 1     |
| 36628  | 1     | 1     | 1     | 1     |
| 36630  | 2     | 2     | 2     | 1     |
| 36631  | 3     | 4     | 4     | 3     |
| 36636  | 1     | 1     | 1     | 1     |
| 36637  | 1     | 2     | 2     | 2     |
| 36651  | 5     | 4     | 4     | 4     |
| 36661  | 1     | 1     | 1     | 1     |
| 36670  | 2     | 2     | 2     | 1     |
| 36671  | 3     | 2     | 2     | 1     |
| 36688  |       |       |       |       |
| 36694  | 2     | 2     | 1     | 1     |
| 36696  |       |       |       |       |
| 36703  |       |       |       |       |
| 36719  | 6     | 5     | 6     | 6     |
| 36721  | 6     | 5     | 6     | 6     |
| 36740  | 1     | 1     | 1     | 1     |
| 36755  | 2     | 2     | 2     | 2     |
| 36765  | 2     | 2     | 2     | 2     |
| 36770  |       |       |       |       |
| 36773  | 2     | 3     | 2     | 2     |
| 36813  | 2     | 2     | 2     | 2     |
| 36819  | 2     | 2     | 2     | 2     |
| 36820  | 5     | 3     | 3     | 3     |
| 36821  | 1     | 1     | 1     | 1     |
| 36827  | 4     | 1     | 1     | 4     |
| 36835  | 1     | 3     | 3     | 1     |

| respid | Q39_3 | Q39_4 | Q39_5 | Q39_6 |
|--------|-------|-------|-------|-------|
| 36837  | 2     | 1     | 2     | 2     |
| 36849  | 1     | 2     | 2     | 1     |
| 36851  | 2     | 2     | 2     | 2     |
| 36868  | 3     | 5     | 4     | 4     |
| 36870  | 1     | 2     | 1     | 1     |
| 36871  |       |       |       |       |
| 36874  | 4     | 4     | 4     | 4     |
| 36878  | 3     | 3     | 2     | 3     |
| 36887  | 2     | 2     | 2     | 1     |
| 36889  | 3     | 2     | 2     | 1     |
| 36891  | 1     | 1     | 2     | 1     |
| 36903  | 4     | 3     | 3     | 4     |
| 36905  | 1     | 1     | 1     | 1     |
| 36913  | 1     | 2     | 1     | 1     |
| 36949  | 3     | 3     | 3     | 3     |
| 36954  | 3     | 3     | 4     | 3     |
| 36962  | 2     | 2     | 2     | 2     |
| 36965  | 2     | 2     | 2     | 2     |
| 36970  | 4     | 2     | 2     | 3     |
| 36979  | 2     | 3     | 4     | 3     |
| 36990  | 3     | 3     | 3     | 3     |
| 36991  | 3     | 1     | 1     | 1     |
| 36992  | 2     | 2     | 4     | 3     |
| 37015  |       |       |       |       |
| 37017  | 2     | 2     | 2     | 1     |
| 37020  |       |       |       |       |
| 37033  | 5     | 5     | 5     | 5     |
| 37041  | 2     | 1     | 1     | 1     |
| 37048  | 3     | 1     | 4     | 4     |
| 37050  | 1     | 2     | 2     | 1     |
| 37054  | 6     | 6     | 6     | 5     |
| 37057  | 4     | 4     | 3     | 2     |

| respid | Q39_3 | Q39_4 | Q39_5 | Q39_6 |
|--------|-------|-------|-------|-------|
| 37067  | 4     | 3     | 3     | 2     |
| 37074  | 1     | 1     | 1     | 1     |
| 37088  | 2     | 2     | 2     | 2     |
| 37090  | 3     | 4     | 3     | 2     |
| 37110  | 2     | 4     | 4     | 4     |
| 37122  | 4     | 1     | 2     | 5     |
| 37124  | 2     | 1     | 2     | 3     |
| 37126  |       |       |       |       |
| 37129  | 5     | 2     | 3     | 3     |
| 37130  | 1     | 2     | 2     | 3     |
| 37142  | 5     | 2     | 2     | 4     |
| 37160  | 1     | 2     | 3     | 4     |
| 37168  | 1     | 1     | 1     | 1     |
| 37169  | 3     | 3     | 3     | 3     |
| 37191  | 2     | 2     | 2     | 2     |
| 37197  | 5     | 4     | 3     | 3     |
| 37204  | 6     | 2     | 1     | 3     |
| 37213  | 4     | 3     | 4     | 5     |
| 37238  | 1     | 4     | 5     | 3     |
| 37242  | 2     | 3     | 3     | 2     |
| 37243  | 3     | 4     | 3     | 5     |
| 37275  | 4     | 2     | 4     | 3     |
| 37305  | 3     | 2     | 2     | 3     |
| 37357  | 4     | 4     | 5     | 5     |
| 37365  | 3     | 2     | 1     | 2     |
| 37370  |       |       |       |       |
| 37406  | 4     | 4     | 5     | 5     |
| 37410  | 5     | 5     | 5     | 3     |
| 37411  | 4     | 4     | 5     | 5     |
| 37427  | 4     | 4     | 3     | 2     |
| 37437  | 2     | 5     | 5     | 4     |
| 37440  | 1     | 2     | 2     | 1     |

| respid | Q39_3 | Q39_4 | Q39_5 | Q39_6 |
|--------|-------|-------|-------|-------|
| 37452  | 1     | 1     | 1     | 1     |
| 37465  | 2     | 2     | 3     | 4     |
| 37468  | 5     | 5     | 5     | 5     |
| 37469  | 1     | 2     | 2     | 1     |
| 37477  | 2     | 3     | 4     | 5     |
| 37509  | 1     | 1     | 1     | 1     |
| 37513  | 2     | 5     | 4     | 4     |
| 37534  | 4     | 4     | 4     | 4     |
| 37537  | 1     | 6     | 1     | 1     |
| 37560  | 3     | 4     | 5     | 2     |
| 37566  | 5     | 4     | 5     | 5     |
| 37572  | 3     | 3     | 4     | 1     |
| 37574  | 3     | 2     | 2     | 3     |
| 37575  | 4     | 4     | 6     | 5     |
| 37590  | 2     | 3     | 1     | 3     |
| 37593  | 2     | 3     | 4     | 1     |
| 37599  | 1     | 1     | 1     | 1     |
| 37641  | 1     | 2     | 2     | 1     |
| 37651  | 3     | 2     | 3     | 2     |
| 37670  | 1     | 1     | 2     | 1     |
| 37680  | 2     | 4     | 4     | 2     |
| 37690  | 5     | 6     | 6     | 3     |
| 37694  |       |       |       |       |
| 37705  | 2     | 2     | 3     | 3     |
| 37710  | 2     | 2     | 3     | 3     |
| 37719  | 6     | 4     | 5     | 6     |
| 37741  | 2     | 1     | 1     | 2     |
| 37752  | 1     | 1     | 2     | 1     |
| 37755  | 3     | 3     | 4     | 4     |
| 37757  | 1     | 1     | 1     | 1     |
| 37783  | 3     | 2     | 3     | 2     |
| 37793  | 4     | 5     | 5     | 4     |

| respid | Q39_3 | Q39_4 | Q39_5 | Q39_6 |
|--------|-------|-------|-------|-------|
| 37800  | 6     | 4     | 4     | 3     |
| 37801  | 1     | 6     | 6     | 6     |
| 37820  | 4     | 3     | 3     | 3     |
| 37826  | 3     | 2     | 3     | 3     |
| 37835  | 4     | 4     | 5     | 5     |
| 37839  | 5     | 4     | 6     | 5     |
| 37871  | 6     | 6     | 5     | 5     |
| 37876  | 4     | 3     | 2     | 3     |
| 37879  | 4     | 3     | 3     | 4     |
| 37894  | 1     | 2     | 1     | 2     |
| 37895  | 3     | 3     | 3     | 3     |
| 37901  | 4     | 2     | 1     | 3     |
| 37926  | 2     | 3     | 2     | 3     |
| 37937  | 3     | 4     | 4     | 3     |
| 37938  | 6     | 1     | 1     | 6     |
| 37959  | 1     | 3     | 3     | 1     |
| 37970  |       |       |       |       |
| 37972  | 4     | 5     | 4     | 3     |
| 37988  | 2     | 3     | 2     | 3     |
| 37989  | 3     | 4     | 3     | 5     |
| 38000  | 2     | 2     | 1     | 3     |
| 38028  | 5     | 6     | 6     | 6     |
| 38042  | 5     | 3     | 4     | 5     |
| 38052  | 1     | 3     | 4     | 1     |
| 38056  | 1     | 1     | 1     | 1     |
| 38106  | 4     | 3     | 3     | 3     |
| 38114  | 4     | 4     | 3     | 4     |
| 38134  | 1     | 2     | 3     | 1     |
| 38135  | 2     | 1     | 2     | 2     |
| 38139  | 4     | 4     | 5     | 5     |
| 38160  | 1     | 4     | 4     | 1     |
| 38164  | 3     | 4     | 4     | 4     |



| respid | Q39_3 | Q39_4 | Q39_5 | Q39_6 |
|--------|-------|-------|-------|-------|
| 38168  |       |       |       |       |
| 38173  | 1     | 1     | 1     | 1     |
| 38193  | 4     | 3     | 2     | 4     |
| 38204  | 1     | 1     | 2     | 1     |
| 38206  | 3     | 1     | 2     | 3     |
| 38233  | 6     | 6     | 6     | 6     |
| 38242  | 3     | 2     | 3     | 5     |
| 38245  | 3     | 3     | 2     | 3     |
| 38261  | 4     | 4     | 5     | 5     |
| 38288  | 2     | 3     | 3     | 2     |
| 38296  | 2     | 3     | 3     | 3     |
| 38299  | 4     | 3     | 2     | 1     |
| 38300  | 3     | 3     | 4     | 2     |
| 38303  | 1     | 2     | 3     | 1     |
| 38317  | 1     | 1     | 2     | 1     |
| 38328  | 4     | 5     | 5     | 4     |
| 38333  | 2     | 1     | 1     | 1     |
| 38336  | 1     | 2     | 2     | 1     |
| 38338  | 6     | 1     | 1     | 1     |
| 38342  | 3     | 3     | 3     | 2     |
| 38360  | 1     | 1     | 1     | 2     |
| 38362  | 2     | 3     | 2     | 2     |
| 38364  | 3     | 3     | 3     | 4     |
| 38402  | 2     | 1     | 1     | 2     |
| 38423  | 4     | 3     | 4     | 4     |
| 38424  | 2     | 2     | 3     | 4     |
| 38435  | 3     | 2     | 4     | 4     |
| 38450  | 1     | 1     | 1     | 6     |
| 38455  | 2     | 3     | 4     | 2     |
| 38467  | 4     | 3     | 5     | 4     |
| 38468  | 5     | 3     | 2     | 3     |
| 38472  | 4     | 3     | 3     | 4     |

| respid | Q39_3 | Q39_4 | Q39_5 | Q39_6 |
|--------|-------|-------|-------|-------|
| 38484  | 1     | 2     | 2     | 1     |
| 38498  | 2     | 2     | 1     | 1     |
| 38507  | 1     | 2     | 2     | 1     |
| 38511  | 2     | 2     | 2     | 1     |
| 38524  | 5     | 4     | 4     | 4     |
| 38526  | 2     | 3     | 2     | 2     |
| 38534  | 5     | 3     | 3     | 3     |
| 38536  | 2     | 1     | 2     | 2     |
| 38539  | 1     | 1     | 2     | 1     |
| 38547  | 1     | 1     | 1     | 1     |
| 38549  | 1     | 2     | 1     | 1     |
| 38575  | 4     | 3     | 4     | 5     |
| 38579  | 3     | 3     | 3     | 1     |
| 38585  | 1     | 1     | 1     | 1     |
| 38589  | 3     | 4     | 4     | 3     |
| 38595  | 5     | 5     | 6     | 4     |
| 38602  | 1     | 1     | 1     | 1     |
| 38603  | 2     | 5     | 5     | 2     |
| 38612  | 2     | 1     | 1     | 2     |
| 38621  | 5     | 4     | 4     | 4     |
| 38624  | 4     | 2     | 3     | 5     |
| 38636  |       |       |       |       |
| 38656  | 2     | 3     | 3     | 1     |
| 38668  | 1     | 2     | 1     | 1     |
| 38675  | 3     | 3     | 2     | 2     |
| 38676  | 1     | 1     | 2     | 1     |
| 38682  | 4     | 3     | 3     | 4     |
| 38689  | 1     | 2     | 2     | 1     |
| 38702  |       |       |       |       |
| 38704  | 5     | 6     | 6     | 5     |
| 38713  | 1     | 1     | 1     | 1     |
| 38718  | 5     | 2     | 3     | 5     |

| respid | Q39_3 | Q39_4 | Q39_5 | Q39_6 |
|--------|-------|-------|-------|-------|
| 38725  | 1     | 1     | 1     | 1     |
| 38730  | 6     | 4     | 5     | 4     |
| 38737  | 1     | 3     | 3     | 3     |
| 38738  | 4     | 4     | 3     | 3     |
| 38744  | 6     | 1     | 1     | 1     |
| 38746  | 1     | 1     | 1     | 1     |
| 38753  | 1     | 2     | 2     | 1     |
| 38756  | 2     | 3     | 2     | 3     |
| 38760  | 1     | 1     | 1     | 1     |
| 38762  | 2     | 3     | 3     | 4     |
| 38765  | 1     | 2     | 2     | 1     |
| 38769  | 2     | 4     | 3     | 4     |
| 38781  | 3     | 4     | 4     | 4     |
| 38786  | 1     | 2     | 1     | 1     |
| 38790  | 3     | 3     | 4     | 3     |
| 38793  | 2     | 3     | 4     | 2     |
| 38797  | 1     | 2     | 2     | 1     |
| 38802  | 2     | 3     | 2     | 3     |
| 38815  | 2     | 3     | 3     | 2     |
| 38826  | 4     | 5     | 5     | 5     |
| 38828  | 4     | 1     | 2     | 2     |
| 38829  | 4     | 4     | 4     | 4     |
| 38835  | 2     | 4     | 5     | 5     |
| 38842  | 3     | 5     | 5     | 6     |
| 38853  | 4     | 4     | 5     | 5     |
| 38855  | 5     | 5     | 5     | 4     |
| 38860  | 3     | 3     | 4     | 3     |
| 38869  | 4     | 2     | 2     | 2     |
| 38882  | 5     | 6     | 5     | 4     |
| 38897  | 1     | 3     | 4     | 3     |
| 38903  | 1     | 1     | 1     | 1     |
| 38910  | 4     | 4     | 4     | 4     |

| respid | Q39_3 | Q39_4 | Q39_5 | Q39_6 |
|--------|-------|-------|-------|-------|
| 38948  | 5     | 4     | 4     | 5     |
| 38949  | 4     | 5     | 5     | 3     |
| 38953  | 5     | 5     | 4     | 4     |
| 38989  | 5     | 5     | 5     | 4     |
| 38997  | 4     | 3     | 2     | 2     |
| 38999  | 3     | 2     | 2     | 3     |
| 39002  | 5     | 5     | 5     | 4     |
| 39003  | 5     | 3     | 4     | 3     |
| 39006  | 1     | 1     | 2     | 1     |
| 39014  |       |       |       |       |
| 39017  | 4     | 4     | 5     | 5     |
| 39018  | 4     | 5     | 4     | 5     |
| 39025  | 4     | 5     | 4     | 5     |
| 39031  | 5     | 5     | 5     | 4     |
| 39061  | 2     | 4     | 5     | 4     |
| 39131  | 5     | 4     | 5     | 3     |
| 39153  | 5     | 4     | 4     | 6     |
| 39194  | 6     | 6     | 6     | 6     |
| 39204  | 1     | 3     | 3     | 1     |
| 39208  | 4     | 4     | 5     | 2     |
| 39213  | 3     | 3     | 2     | 1     |
| 39231  | 2     | 1     | 2     | 2     |
| 39251  | 1     | 5     | 4     | 2     |
| 39257  | 1     | 3     | 4     | 2     |
| 39262  | 3     | 2     | 3     | 3     |
| 39269  | 1     | 5     | 4     | 5     |
| 39272  | 5     | 6     | 6     | 4     |
| 39280  | 4     | 5     | 4     | 3     |
| 39294  | 3     | 2     | 4     | 2     |
| 39297  | 5     | 4     | 6     | 4     |
| 39300  | 4     | 4     | 4     | 4     |
| 39307  | 3     | 5     | 2     | 2     |

| respid | Q39_3 | Q39_4 | Q39_5 | Q39_6 |
|--------|-------|-------|-------|-------|
| 39320  | 4     | 2     | 1     | 4     |
| 39333  | 1     | 1     | 2     | 1     |
| 39335  | 6     | 6     | 6     | 4     |
| 39339  | 2     | 2     | 1     | 2     |
| 39375  | 4     | 5     | 6     | 5     |
| 39377  | 6     | 6     | 6     | 6     |
| 39380  | 6     | 5     | 4     | 6     |
| 39425  | 1     | 2     | 2     | 1     |
| 39590  | 1     | 1     | 1     | 1     |
| 40529  | 1     | 1     | 1     | 1     |
| 40702  | 2     | 2     | 2     | 1     |
| 40788  | 1     | 1     | 1     | 1     |
| 40841  | 1     | 1     | 1     | 1     |
| 40965  | 1     | 1     | 1     | 1     |
| 41092  | 1     | 2     | 2     | 1     |
| 41534  |       |       |       |       |
| 41919  | 2     | 1     | 1     | 1     |
| 42110  | 4     | 4     | 3     | 3     |
| 42135  | 1     | 3     | 3     | 3     |
| 42142  | 1     | 1     | 1     | 1     |
| 42163  | 2     | 2     | 2     | 1     |
| 42164  | 1     | 1     | 1     | 1     |
| 42172  | 5     | 1     | 2     | 3     |
| 42177  | 2     | 1     | 1     | 1     |
| 42181  | 2     | 1     | 1     | 2     |
| 42193  | 5     | 2     | 3     | 4     |
| 42196  | 3     | 3     | 3     | 2     |
| 42202  | 4     | 4     | 4     | 4     |
| 42248  | 4     | 4     | 4     | 4     |
| 42283  | 1     | 2     | 2     | 1     |
| 42284  | 1     | 3     | 3     | 1     |
| 42323  |       |       |       |       |

| respid | Q39_3 | Q39_4 | Q39_5 | Q39_6 |
|--------|-------|-------|-------|-------|
| 42349  | 1     | 2     | 2     | 1     |
| 42351  |       |       |       |       |
| 42357  | 1     | 1     | 1     | 1     |
| 42366  |       |       |       |       |
| 42380  | 1     | 2     | 1     | 1     |
| 42414  | 5     | 5     | 5     | 5     |
| 42420  | 3     | 3     | 3     | 4     |
| 42454  |       |       |       |       |
| 42458  | 3     | 2     | 2     | 1     |
| 42461  | 1     | 1     | 1     | 1     |
| 42488  | 1     | 1     | 2     | 1     |
| 42511  | 6     | 6     | 6     | 6     |
| 42512  | 1     | 1     | 2     | 1     |
| 42530  | 4     | 5     | 6     | 3     |
| 42531  | 4     | 6     | 6     | 6     |
| 42533  | 1     | 6     | 6     | 1     |
| 42549  | 1     | 2     | 2     | 1     |
| 42550  | 3     | 3     | 4     | 4     |
| 42553  |       |       |       |       |
| 42562  | 2     | 2     | 3     | 4     |
| 42567  | 1     | 2     | 2     | 1     |
| 42589  | 2     | 2     | 2     | 2     |
| 42604  | 2     | 1     | 2     | 1     |
| 42618  | 2     | 2     | 2     | 2     |
| 42621  | 2     | 3     | 5     | 2     |
| 42627  | 2     | 2     | 2     | 2     |
| 42641  | 1     | 2     | 1     | 1     |
| 42655  | 2     | 3     | 3     | 3     |
| 42666  | 2     | 3     | 3     | 2     |
| 42667  | 4     | 5     | 4     | 4     |
| 42697  | 4     | 3     | 3     | 2     |
| 42703  | 1     | 1     | 1     | 1     |

| respid | Q39_3 | Q39_4 | Q39_5 | Q39_6 |
|--------|-------|-------|-------|-------|
| 42712  | 5     | 1     | 1     | 2     |
| 42731  | 4     | 4     | 2     | 3     |
| 42780  | 1     | 1     | 1     | 1     |
| 42785  | 2     | 2     | 2     | 2     |
| 42788  | 2     | 2     | 1     | 1     |
| 42802  | 3     | 3     | 3     | 3     |
| 42818  | 2     | 2     | 2     | 2     |
| 42821  | 1     | 5     | 5     | 1     |
| 42824  | 1     | 2     | 2     | 1     |
| 42831  | 1     | 3     | 3     | 1     |
| 42836  | 2     | 2     | 1     | 1     |
| 42864  | 2     | 3     | 3     | 2     |
| 42875  | 2     | 1     | 1     | 1     |
| 42891  | 6     | 6     | 6     | 6     |
| 42897  | 1     | 1     | 1     | 1     |
| 42900  | 4     | 2     | 2     | 3     |
| 42902  | 3     | 3     | 2     | 2     |
| 42921  | 1     | 2     | 2     | 1     |
| 42925  | 2     | 2     | 2     | 2     |
| 42944  |       |       |       |       |
| 42950  |       |       |       |       |
| 42963  | 1     | 1     | 2     | 1     |
| 42967  | 2     | 1     | 1     | 1     |
| 42985  | 2     | 1     | 2     | 1     |
| 42990  | 2     | 3     | 2     | 2     |
| 42996  | 1     | 3     | 3     | 1     |
| 43002  | 1     | 1     | 2     | 1     |
| 43004  | 1     | 1     | 1     | 1     |
| 43012  | 1     | 1     | 1     | 1     |
| 43027  | 4     | 4     | 3     | 3     |
| 43028  | 1     | 1     | 1     | 1     |
| 43029  | 2     | 1     | 2     | 3     |

| respid | Q39_3 | Q39_4 | Q39_5 | Q39_6 |
|--------|-------|-------|-------|-------|
| 43031  | 1     | 2     | 2     | 1     |
| 43042  | 1     | 1     | 1     | 1     |
| 43054  | 3     | 3     | 3     | 3     |
| 43058  | 1     | 2     | 1     | 1     |
| 43064  | 2     | 1     | 2     | 1     |
| 43069  | 4     | 1     | 1     | 3     |
| 43071  |       |       |       |       |
| 43072  | 1     | 1     | 2     | 1     |
| 43077  | 2     | 2     | 2     | 2     |
| 43078  | 3     | 4     | 4     | 4     |
| 43082  |       |       |       |       |
| 43092  | 1     | 1     | 1     | 1     |
| 43096  | 1     | 1     | 1     | 1     |
| 43109  |       |       |       |       |
| 43113  | 1     | 1     | 2     | 1     |
| 43123  | 2     | 2     | 2     | 2     |
| 43127  | 1     | 1     | 2     | 1     |
| 43128  | 2     | 3     | 4     | 1     |
| 43129  | 1     | 1     | 2     | 2     |
| 43133  | 3     | 4     | 5     | 4     |
| 43140  |       |       |       |       |
| 43143  | 3     | 4     | 5     | 4     |
| 43149  | 3     | 4     | 5     | 6     |
| 43150  | 4     | 5     | 6     | 5     |
| 43153  | 3     | 4     | 4     | 3     |
| 43170  | 1     | 1     | 1     | 1     |
| 43187  | 3     | 3     | 3     | 2     |
| 43188  | 4     | 2     | 2     | 5     |
| 43198  | 1     | 1     | 2     | 1     |
| 43208  | 1     | 1     | 1     | 1     |
| 43216  | 1     | 2     | 1     | 1     |
| 43222  | 4     | 5     | 6     | 5     |



| respid | Q39_3 | Q39_4 | Q39_5 | Q39_6 |
|--------|-------|-------|-------|-------|
| 43224  | 2     | 2     | 2     | 2     |
| 43230  | 4     | 5     | 6     | 5     |
| 43231  | 3     | 3     | 3     | 3     |
| 43265  | 4     | 5     | 4     | 3     |
| 43270  | 2     | 3     | 3     | 3     |
| 43283  | 4     | 4     | 5     | 5     |
| 43295  | 4     | 3     | 3     | 4     |
| 43297  | 1     | 2     | 2     | 1     |
| 43299  | 3     | 3     | 2     | 2     |
| 43307  | 1     | 2     | 2     | 1     |
| 43316  | 3     | 3     | 3     | 3     |
| 43318  | 3     | 3     | 4     | 4     |
| 43319  | 1     | 1     | 1     | 1     |
| 43324  | 4     | 3     | 4     | 3     |
| 43325  | 2     | 6     | 6     | 2     |
| 43327  | 1     | 1     | 2     | 1     |
| 43338  | 1     | 2     | 2     | 1     |
| 43342  | 3     | 4     | 4     | 1     |
| 43348  | 1     | 1     | 2     | 1     |
| 43395  | 4     | 5     | 4     | 4     |
| 43404  | 3     | 3     | 4     | 4     |
| 43406  | 2     | 2     | 3     | 2     |
| 43407  | 1     | 1     | 1     | 1     |
| 43411  | 1     | 1     | 1     | 1     |
| 43416  | 2     | 2     | 2     | 2     |
| 43428  | 1     | 2     | 1     | 2     |
| 43429  | 3     | 3     | 4     | 4     |
| 43432  | 1     | 1     | 2     | 1     |
| 43443  | 1     | 2     | 1     | 1     |
| 43455  |       |       |       |       |
| 43457  | 3     | 4     | 4     | 3     |
| 43458  | 1     | 2     | 3     | 1     |

| respid | Q39_3 | Q39_4 | Q39_5 | Q39_6 |
|--------|-------|-------|-------|-------|
| 43477  | 2     | 3     | 4     | 3     |
| 43520  | 3     | 3     | 3     | 3     |
| 43521  | 1     | 2     | 2     | 1     |
| 43550  | 1     | 1     | 1     | 1     |
| 43551  | 2     | 2     | 2     | 2     |
| 43554  | 3     | 2     | 4     | 3     |
| 43560  | 2     | 1     | 1     | 2     |
| 43569  | 1     | 1     | 1     | 1     |
| 43583  | 3     | 1     | 1     | 2     |
| 43590  | 2     | 3     | 3     | 2     |
| 43591  | 1     | 1     | 1     | 1     |
| 43595  |       |       |       |       |
| 43599  | 2     | 3     | 2     | 2     |
| 43606  | 2     | 2     | 2     | 1     |
| 43609  | 1     | 1     | 1     | 1     |
| 43629  | 1     | 1     | 1     | 1     |
| 43636  | 1     | 1     | 2     | 1     |
| 43661  | 1     | 1     | 1     | 1     |
| 43668  | 1     | 1     | 2     | 1     |
| 43672  |       |       |       |       |
| 43677  | 2     | 2     | 3     | 2     |
| 43683  | 1     | 3     | 3     | 1     |
| 43708  | 4     | 4     | 3     | 3     |
| 43713  | 2     | 2     | 3     | 2     |
| 43718  |       |       |       |       |
| 43725  | 1     | 1     | 1     | 1     |
| 43747  | 2     | 2     | 2     | 1     |
| 43755  | 1     | 2     | 2     | 1     |
| 43770  | 1     | 1     | 1     | 1     |
| 43775  | 2     | 4     | 3     | 3     |
| 43788  |       |       |       |       |
| 43790  | 3     | 4     | 4     | 4     |

| respid | Q39_3 | Q39_4 | Q39_5 | Q39_6 |
|--------|-------|-------|-------|-------|
| 43797  | 3     | 3     | 3     | 3     |
| 43798  | 4     | 3     | 4     | 3     |
| 43811  | 4     | 3     | 1     | 5     |
| 43819  | 3     | 4     | 4     | 4     |
| 43821  | 4     | 3     | 4     | 3     |
| 43822  | 1     | 2     | 2     | 1     |
| 43825  | 3     | 3     | 4     | 3     |
| 43826  | 3     | 3     | 3     | 2     |
| 43831  | 2     | 2     | 3     | 1     |
| 43836  | 4     | 4     | 4     | 4     |
| 43852  | 4     | 5     | 4     | 3     |
| 43857  | 1     | 4     | 4     | 1     |
| 43858  | 1     | 1     | 2     | 3     |
| 43859  | 3     | 4     | 4     | 4     |
| 43863  | 1     | 1     | 1     | 1     |
| 43868  | 4     | 3     | 4     | 3     |
| 43872  | 3     | 5     | 4     | 4     |
| 43874  | 4     | 3     | 3     | 4     |
| 43882  | 1     | 2     | 2     | 1     |
| 43886  |       |       |       |       |
| 43903  | 4     | 3     | 3     | 4     |
| 43929  | 1     | 2     | 1     | 1     |
| 43932  | 2     | 1     | 1     | 1     |
| 43936  | 1     | 2     | 2     | 1     |
| 43962  | 1     | 1     | 1     | 1     |
| 43964  | 1     | 1     | 1     | 1     |
| 43968  | 1     | 3     | 4     | 2     |
| 43979  | 3     | 2     | 2     | 3     |
| 44006  | 5     | 5     | 5     | 5     |
| 44009  | 6     | 2     | 1     | 2     |
| 44023  | 2     | 3     | 3     | 3     |
| 44035  | 4     | 3     | 3     | 4     |

| respid | Q39_3 | Q39_4 | Q39_5 | Q39_6 |
|--------|-------|-------|-------|-------|
| 44038  | 3     | 3     | 3     | 3     |
| 44039  | 3     | 4     | 3     | 4     |
| 44043  | 2     | 2     | 2     | 1     |
| 44048  | 4     | 4     | 4     | 4     |
| 44050  | 1     | 1     | 1     | 1     |
| 44051  | 2     | 3     | 3     | 4     |
| 44061  | 3     | 4     | 4     | 4     |
| 44063  | 3     | 4     | 4     | 4     |
| 44072  | 4     | 5     | 5     | 5     |
| 44075  | 3     | 3     | 4     | 4     |
| 44089  | 4     | 4     | 4     | 4     |
| 44090  | 3     | 5     | 6     | 4     |
| 44091  | 3     | 3     | 4     | 4     |
| 44092  | 1     | 1     | 3     | 1     |
| 44110  | 3     | 4     | 4     | 4     |
| 44112  | 3     | 4     | 3     | 4     |
| 44114  | 3     | 3     | 3     | 3     |
| 44143  | 3     | 3     | 3     | 3     |
| 44179  | 1     | 2     | 2     | 1     |
| 44234  | 1     | 2     | 1     | 1     |
| 44236  | 3     | 3     | 3     | 3     |
| 44239  | 4     | 5     | 6     | 5     |
| 44241  | 4     | 5     | 5     | 5     |
| 44253  |       |       |       |       |
| 44260  | 4     | 4     | 4     | 4     |
| 44261  | 3     | 4     | 4     | 4     |
| 44263  | 4     | 5     | 4     | 3     |
| 44264  | 1     | 1     | 2     | 1     |
| 44265  | 1     | 1     | 2     | 1     |
| 44267  | 4     | 5     | 4     | 4     |
| 44306  | 2     | 3     | 2     | 3     |
| 44309  | 4     | 4     | 3     | 3     |

| respid | Q39_3 | Q39_4 | Q39_5 | Q39_6 |
|--------|-------|-------|-------|-------|
| 44310  | 1     | 2     | 2     | 1     |
| 44361  | 2     | 1     | 1     | 1     |
| 44380  | 2     | 1     | 1     | 1     |
| 44386  | 1     | 1     | 1     | 1     |
| 44419  | 2     | 3     | 3     | 2     |
| 44426  | 2     | 3     | 3     | 1     |
| 44479  | 2     | 1     | 1     | 2     |
| 44484  | 1     | 1     | 1     | 1     |
| 44487  | 5     | 2     | 2     | 5     |
| 44509  | 1     | 1     | 1     | 1     |
| 44540  | 2     | 3     | 3     | 4     |
| 44551  | 2     | 2     | 2     | 2     |
| 44553  | 2     | 1     | 1     | 1     |
| 44650  | 1     | 2     | 2     | 1     |
| 44665  | 4     | 3     | 4     | 2     |
| 44779  | 1     | 2     | 2     | 1     |
| 44797  | 1     | 2     | 2     | 1     |
| 44807  | 1     | 2     | 2     | 1     |
| 44815  | 2     | 3     | 4     | 3     |
| 44836  | 1     | 1     | 1     | 1     |
| 44868  | 3     | 1     | 2     | 2     |
| 44927  | 2     | 3     | 3     | 3     |
| 44983  |       |       |       |       |
| 45040  | 1     | 2     | 3     | 1     |
| 45051  | 3     | 2     | 1     | 1     |
| 45067  | 1     | 3     | 3     | 1     |
| 45074  |       |       |       |       |
| 45115  | 2     | 3     | 4     | 1     |
| 45187  | 5     | 4     | 4     | 3     |
| 45221  | 6     | 3     | 3     | 3     |
| 45279  | 3     | 2     | 2     | 3     |
| 45308  | 1     | 2     | 2     | 3     |

| respid | Q39_3 | Q39_4 | Q39_5 | Q39_6 |
|--------|-------|-------|-------|-------|
| 45317  | 1     | 1     | 2     | 1     |
| 45379  | 4     | 1     | 1     | 2     |
| 45451  | 1     | 1     | 2     | 1     |
| 45472  | 4     | 5     | 4     | 4     |
| 45474  | 6     | 5     | 5     | 6     |
| 45544  | 5     | 5     | 4     | 4     |
| 45561  | 1     | 1     | 1     | 1     |
| 45596  | 1     | 2     | 2     | 1     |

| Instrum        | OAB-q SF                                                             | OAB-q SF                                                 | OAB-q SF                                                    | OAB-q SF                                                                              |
|----------------|----------------------------------------------------------------------|----------------------------------------------------------|-------------------------------------------------------------|---------------------------------------------------------------------------------------|
| Symptom        |                                                                      |                                                          |                                                             |                                                                                       |
| Type of RHRQoL | HRQoL                                                                | HRQoL                                                    | HRQoL                                                       | HRQoL                                                                                 |
| Descripti      | a. Caused you to plan “escape routes” to restrooms in public places? | b. Made you feel like there is something wrong with you? | c. Interfered with your ability to get a good night’s rest? | d. Made you frustrated or annoyed about the amount of time you spend in the restroom? |
| respid         | Q40_1                                                                | Q40_2                                                    | Q40_3                                                       | Q40_4                                                                                 |
| 241            | 1                                                                    | 1                                                        | 2                                                           | 1                                                                                     |
| 242            | 3                                                                    | 2                                                        | 1                                                           | 2                                                                                     |
| 243            | 2                                                                    | 2                                                        | 3                                                           | 2                                                                                     |
| 244            | 3                                                                    | 3                                                        | 3                                                           | 2                                                                                     |
| 245            | 1                                                                    | 2                                                        | 1                                                           | 1                                                                                     |
| 246            | 1                                                                    | 1                                                        | 2                                                           | 1                                                                                     |
| 247            | 1                                                                    | 1                                                        | 1                                                           | 1                                                                                     |
| 253            | 1                                                                    | 1                                                        | 2                                                           | 1                                                                                     |
| 256            | 1                                                                    | 2                                                        | 2                                                           | 2                                                                                     |
| 257            | 2                                                                    | 1                                                        | 2                                                           | 1                                                                                     |
| 258            | 1                                                                    | 1                                                        | 3                                                           | 2                                                                                     |
| 259            | 2                                                                    | 2                                                        | 1                                                           | 1                                                                                     |
| 263            | 1                                                                    | 1                                                        | 1                                                           | 2                                                                                     |
| 264            | 1                                                                    | 1                                                        | 2                                                           | 1                                                                                     |
| 265            | 4                                                                    | 3                                                        | 4                                                           | 3                                                                                     |
| 266            | 1                                                                    | 1                                                        | 1                                                           | 1                                                                                     |
| 268            | 1                                                                    | 1                                                        | 1                                                           | 1                                                                                     |
| 270            | 2                                                                    | 2                                                        | 2                                                           | 2                                                                                     |
| 272            | 2                                                                    | 1                                                        | 2                                                           | 1                                                                                     |
| 274            | 1                                                                    | 1                                                        | 1                                                           | 1                                                                                     |

| respid | Q40_1 | Q40_2 | Q40_3 | Q40_4 |
|--------|-------|-------|-------|-------|
| 275    |       |       |       |       |
| 276    | 1     | 1     | 1     | 1     |
| 277    | 1     | 1     | 1     | 1     |
| 279    | 2     | 2     | 2     | 3     |
| 286    | 5     | 3     | 2     | 2     |
| 290    | 2     | 1     | 2     | 2     |
| 291    | 1     | 1     | 1     | 1     |
| 295    |       |       |       |       |
| 297    | 1     | 1     | 2     | 1     |
| 299    | 1     | 2     | 3     | 1     |
| 300    | 1     | 2     | 3     | 2     |
| 303    | 1     | 2     | 1     | 1     |
| 304    | 1     | 1     | 1     | 1     |
| 306    | 5     | 2     | 1     | 1     |
| 307    | 6     | 1     | 2     | 1     |
| 312    | 5     | 5     | 5     | 5     |
| 315    | 2     | 2     | 1     | 2     |
| 317    | 1     | 1     | 1     | 1     |
| 322    | 1     | 2     | 2     | 2     |
| 335    | 2     | 2     | 2     | 2     |
| 374    | 2     | 2     | 2     | 2     |
| 378    | 1     | 1     | 1     | 1     |
| 380    | 2     | 2     | 1     | 1     |
| 382    | 1     | 3     | 2     | 1     |
| 384    | 1     | 2     | 2     | 3     |
| 385    | 3     | 3     | 2     | 2     |
| 395    | 1     | 2     | 1     | 1     |
| 396    |       |       |       |       |
| 398    |       |       |       |       |
| 402    | 3     | 3     | 3     | 3     |
| 414    | 1     | 1     | 1     | 1     |
| 415    | 1     | 1     | 1     | 1     |



| respid | Q40_1 | Q40_2 | Q40_3 | Q40_4 |
|--------|-------|-------|-------|-------|
| 416    | 2     | 1     | 1     | 1     |
| 420    | 2     | 2     | 3     | 3     |
| 421    | 1     | 1     | 1     | 1     |
| 422    | 1     | 1     | 1     | 1     |
| 423    | 1     | 2     | 1     | 1     |
| 424    | 1     | 1     | 1     | 1     |
| 425    | 3     | 4     | 3     | 2     |
| 428    | 2     | 2     | 2     | 2     |
| 429    | 1     | 1     | 1     | 1     |
| 431    | 1     | 1     | 1     | 1     |
| 437    | 2     | 1     | 2     | 1     |
| 438    | 1     | 1     | 1     | 1     |
| 441    | 1     | 1     | 3     | 1     |
| 444    | 1     | 1     | 1     | 1     |
| 448    | 1     | 1     | 1     | 1     |
| 449    | 1     | 1     | 1     | 1     |
| 457    | 3     | 3     | 3     | 2     |
| 460    | 1     | 1     | 1     | 1     |
| 469    | 2     | 2     | 1     | 3     |
| 471    | 1     | 1     | 3     | 1     |
| 473    | 3     | 4     | 3     | 4     |
| 476    | 2     | 2     | 2     | 1     |
| 479    | 1     | 1     | 1     | 1     |
| 485    | 1     | 1     | 1     | 1     |
| 488    | 3     | 2     | 5     | 4     |
| 494    | 4     | 1     | 2     | 1     |
| 496    | 1     | 1     | 1     | 1     |
| 501    |       |       |       |       |
| 502    | 3     | 3     | 3     | 2     |
| 503    | 1     | 2     | 3     | 1     |
| 506    | 1     | 2     | 1     | 1     |
| 514    | 3     | 2     | 3     | 2     |

| respid | Q40_1 | Q40_2 | Q40_3 | Q40_4 |
|--------|-------|-------|-------|-------|
| 515    | 2     | 2     | 1     | 2     |
| 516    | 1     | 1     | 1     | 1     |
| 519    | 1     | 1     | 1     | 1     |
| 522    |       |       |       |       |
| 525    | 1     | 1     | 1     | 1     |
| 528    | 1     | 1     | 1     | 1     |
| 532    | 2     | 2     | 1     | 1     |
| 536    | 3     | 3     | 2     | 2     |
| 539    | 3     | 1     | 1     | 1     |
| 540    | 1     | 2     | 1     | 1     |
| 547    | 4     | 3     | 2     | 3     |
| 551    | 1     | 1     | 1     | 1     |
| 554    | 2     | 3     | 2     | 1     |
| 558    | 2     | 1     | 1     | 2     |
| 563    | 1     | 1     | 1     | 1     |
| 564    | 2     | 2     | 2     | 2     |
| 565    | 2     | 1     | 2     | 1     |
| 567    | 1     | 1     | 1     | 1     |
| 569    | 1     | 1     | 1     | 1     |
| 572    | 1     | 1     | 1     | 1     |
| 574    | 1     | 2     | 2     | 1     |
| 583    | 3     | 3     | 3     | 2     |
| 589    | 1     | 1     | 1     | 1     |
| 592    | 1     | 1     | 1     | 1     |
| 593    |       |       |       |       |
| 594    | 2     | 4     | 4     | 4     |
| 597    | 1     | 1     | 1     | 1     |
| 601    | 3     | 2     | 2     | 1     |
| 607    | 1     | 2     | 1     | 1     |
| 610    | 1     | 1     | 1     | 1     |
| 612    | 4     | 2     | 2     | 1     |
| 627    | 1     | 1     | 1     | 1     |

| respid | Q40_1 | Q40_2 | Q40_3 | Q40_4 |
|--------|-------|-------|-------|-------|
| 631    | 1     | 1     | 1     | 1     |
| 633    | 1     | 1     | 2     | 1     |
| 636    | 1     | 2     | 2     | 1     |
| 656    | 6     | 1     | 1     | 1     |
| 659    | 1     | 1     | 1     | 1     |
| 670    | 1     | 1     | 1     | 1     |
| 672    | 2     | 3     | 1     | 1     |
| 673    | 2     | 2     | 1     | 1     |
| 675    | 1     | 1     | 1     | 1     |
| 676    | 3     | 2     | 2     | 3     |
| 679    | 2     | 3     | 3     | 2     |
| 683    | 1     | 2     | 1     | 1     |
| 684    | 2     | 2     | 1     | 1     |
| 690    | 2     | 1     | 1     | 1     |
| 701    | 2     | 5     | 5     | 5     |
| 709    | 1     | 2     | 2     | 1     |
| 719    | 1     | 1     | 1     | 1     |
| 726    | 1     | 1     | 2     | 1     |
| 730    | 1     | 1     | 2     | 1     |
| 731    | 1     | 1     | 2     | 1     |
| 732    | 1     | 1     | 1     | 1     |
| 733    | 1     | 1     | 1     | 1     |
| 735    | 1     | 1     | 1     | 1     |
| 738    | 1     | 1     | 2     | 1     |
| 740    | 1     | 1     | 1     | 1     |
| 742    | 1     | 1     | 1     | 1     |
| 744    | 1     | 1     | 1     | 1     |
| 749    | 3     | 2     | 2     | 1     |
| 751    | 3     | 1     | 2     | 1     |
| 752    | 2     | 2     | 5     | 2     |
| 753    | 1     | 2     | 3     | 2     |
| 755    | 2     | 1     | 2     | 1     |

| respid | Q40_1 | Q40_2 | Q40_3 | Q40_4 |
|--------|-------|-------|-------|-------|
| 756    |       |       |       |       |
| 759    | 1     | 1     | 1     | 1     |
| 760    | 2     | 1     | 2     | 1     |
| 763    | 1     | 1     | 1     | 1     |
| 764    | 1     | 1     | 1     | 1     |
| 765    | 3     | 2     | 1     | 1     |
| 766    | 1     | 1     | 1     | 1     |
| 767    | 1     | 1     | 1     | 1     |
| 771    | 1     | 3     | 3     | 2     |
| 773    | 1     | 1     | 2     | 1     |
| 774    | 2     | 2     | 2     | 1     |
| 775    | 1     | 2     | 3     | 2     |
| 776    | 1     | 1     | 2     | 1     |
| 778    | 1     | 2     | 2     | 1     |
| 780    | 1     | 1     | 3     | 1     |
| 781    | 1     | 1     | 1     | 1     |
| 782    | 3     | 2     | 4     | 4     |
| 783    | 1     | 2     | 3     | 2     |
| 786    | 5     | 5     | 4     | 5     |
| 788    |       |       |       |       |
| 792    | 1     | 1     | 1     | 1     |
| 794    | 5     | 4     | 4     | 4     |
| 795    | 1     | 1     | 1     | 1     |
| 799    | 1     | 2     | 2     | 2     |
| 800    | 1     | 1     | 1     | 1     |
| 801    | 1     | 1     | 5     | 1     |
| 804    | 1     | 1     | 2     | 1     |
| 806    | 1     | 1     | 1     | 1     |
| 807    | 1     | 1     | 2     | 1     |
| 808    | 3     | 4     | 4     | 4     |
| 809    | 1     | 1     | 1     | 1     |
| 811    | 1     | 1     | 1     | 1     |

| respid | Q40_1 | Q40_2 | Q40_3 | Q40_4 |
|--------|-------|-------|-------|-------|
| 812    | 1     | 1     | 4     | 1     |
| 815    | 1     | 1     | 1     | 1     |
| 817    | 1     | 1     | 1     | 1     |
| 818    | 2     | 1     | 2     | 1     |
| 819    | 1     | 2     | 2     | 1     |
| 821    | 1     | 2     | 1     | 2     |
| 824    | 1     | 2     | 5     | 3     |
| 825    | 1     | 1     | 1     | 1     |
| 828    | 1     | 1     | 2     | 1     |
| 832    | 2     | 2     | 2     | 3     |
| 834    | 2     | 1     | 2     | 2     |
| 835    | 2     | 4     | 4     | 3     |
| 836    | 1     | 1     | 1     | 1     |
| 837    | 1     | 1     | 1     | 1     |
| 840    | 1     | 3     | 2     | 1     |
| 841    | 1     | 1     | 1     | 1     |
| 845    | 1     | 1     | 1     | 1     |
| 846    | 1     | 1     | 1     | 1     |
| 849    | 1     | 1     | 1     | 1     |
| 852    | 1     | 1     | 1     | 1     |
| 854    | 1     | 2     | 2     | 2     |
| 856    | 1     | 1     | 1     | 1     |
| 858    | 1     | 1     | 1     | 1     |
| 859    | 1     | 2     | 1     | 1     |
| 861    | 3     | 2     | 2     | 1     |
| 863    | 1     | 1     | 1     | 1     |
| 864    | 1     | 2     | 4     | 3     |
| 866    | 1     | 1     | 1     | 1     |
| 869    | 1     | 1     | 1     | 1     |
| 870    | 3     | 2     | 2     | 1     |
| 871    | 3     | 2     | 2     | 2     |
| 873    | 1     | 3     | 1     | 3     |

| respid | Q40_1 | Q40_2 | Q40_3 | Q40_4 |
|--------|-------|-------|-------|-------|
| 879    | 3     | 4     | 5     | 5     |
| 880    | 1     | 1     | 1     | 1     |
| 881    | 2     | 2     | 3     | 3     |
| 882    | 1     | 1     | 2     | 1     |
| 885    |       |       |       |       |
| 886    | 3     | 2     | 2     | 2     |
| 887    | 3     | 3     | 3     | 3     |
| 888    | 1     | 1     | 1     | 1     |
| 889    | 1     | 3     | 2     | 2     |
| 890    | 1     | 1     | 1     | 1     |
| 900    |       |       |       |       |
| 901    | 1     | 2     | 1     | 1     |
| 902    | 1     | 1     | 4     | 1     |
| 903    | 1     | 1     | 1     | 1     |
| 906    | 1     | 2     | 5     | 2     |
| 907    | 2     | 2     | 2     | 2     |
| 908    | 1     | 2     | 2     | 1     |
| 910    | 1     | 1     | 2     | 1     |
| 911    | 1     | 2     | 1     | 2     |
| 912    | 2     | 1     | 2     | 1     |
| 915    |       |       |       |       |
| 923    | 5     | 4     | 5     | 5     |
| 925    | 1     | 1     | 1     | 1     |
| 926    | 1     | 1     | 1     | 1     |
| 929    |       |       |       |       |
| 932    | 2     | 1     | 1     | 3     |
| 933    | 1     | 2     | 2     | 3     |
| 934    | 1     | 1     | 2     | 1     |
| 938    | 1     | 2     | 2     | 2     |
| 941    |       |       |       |       |
| 942    | 4     | 1     | 2     | 1     |
| 943    |       |       |       |       |

| respid | Q40_1 | Q40_2 | Q40_3 | Q40_4 |
|--------|-------|-------|-------|-------|
| 945    | 1     | 1     | 1     | 1     |
| 946    |       |       |       |       |
| 947    | 1     | 1     | 1     | 1     |
| 948    | 1     | 1     | 1     | 1     |
| 949    | 1     | 1     | 1     | 1     |
| 952    | 1     | 1     | 1     | 1     |
| 956    | 1     | 1     | 1     | 1     |
| 957    | 1     | 1     | 1     | 1     |
| 959    | 2     | 1     | 1     | 1     |
| 961    | 1     | 1     | 2     | 1     |
| 962    | 4     | 4     | 4     | 4     |
| 965    | 1     | 2     | 2     | 3     |
| 967    | 1     | 1     | 2     | 1     |
| 969    | 1     | 1     | 2     | 1     |
| 970    |       |       |       |       |
| 973    | 1     | 1     | 1     | 2     |
| 974    | 1     | 1     | 2     | 1     |
| 975    | 2     | 2     | 2     | 2     |
| 976    | 1     | 2     | 2     | 1     |
| 977    | 1     | 1     | 1     | 2     |
| 979    | 1     | 1     | 1     | 1     |
| 981    | 1     | 2     | 1     | 1     |
| 983    | 1     | 1     | 1     | 1     |
| 987    | 2     | 2     | 2     | 2     |
| 991    |       |       |       |       |
| 992    | 1     | 1     | 1     | 1     |
| 993    | 2     | 2     | 2     | 2     |
| 994    | 1     | 1     | 5     | 2     |
| 995    | 3     | 3     | 4     | 3     |
| 998    | 2     | 2     | 2     | 2     |
| 1000   | 2     | 3     | 3     | 3     |
| 1001   | 1     | 1     | 3     | 2     |

| respid | Q40_1 | Q40_2 | Q40_3 | Q40_4 |
|--------|-------|-------|-------|-------|
| 1002   |       |       |       |       |
| 1004   | 2     | 1     | 1     | 2     |
| 1005   | 2     | 2     | 1     | 2     |
| 1006   | 1     | 2     | 4     | 2     |
| 1007   | 2     | 1     | 4     | 2     |
| 1009   |       |       |       |       |
| 1013   | 4     | 3     | 2     | 2     |
| 1015   | 2     | 1     | 2     | 1     |
| 1020   | 3     | 2     | 3     | 2     |
| 1022   | 3     | 3     | 3     | 3     |
| 1024   | 1     | 1     | 2     | 1     |
| 1025   |       |       |       |       |
| 1027   | 2     | 3     | 3     | 2     |
| 1031   | 1     | 1     | 1     | 1     |
| 1037   | 1     | 1     | 1     | 1     |
| 1039   | 1     | 1     | 1     | 1     |
| 1040   | 1     | 2     | 1     | 1     |
| 1056   | 4     | 2     | 3     | 3     |
| 1057   | 1     | 1     | 1     | 2     |
| 1062   | 1     | 1     | 1     | 1     |
| 1069   | 1     | 1     | 1     | 1     |
| 1070   | 1     | 1     | 1     | 1     |
| 1072   | 2     | 1     | 2     | 1     |
| 1076   | 2     | 2     | 1     | 1     |
| 1077   | 1     | 2     | 1     | 1     |
| 1078   | 1     | 1     | 1     | 1     |
| 1080   |       |       |       |       |
| 1094   | 3     | 3     | 3     | 3     |
| 1098   | 2     | 1     | 3     | 2     |
| 1099   | 2     | 1     | 1     | 1     |
| 1102   | 1     | 1     | 1     | 1     |
| 1110   | 1     | 1     | 1     | 1     |



| respid | Q40_1 | Q40_2 | Q40_3 | Q40_4 |
|--------|-------|-------|-------|-------|
| 1117   | 1     | 3     | 2     | 1     |
| 1119   |       |       |       |       |
| 1126   | 1     | 1     | 1     | 1     |
| 1127   | 1     | 1     | 1     | 1     |
| 1130   | 3     | 2     | 3     | 2     |
| 1131   | 1     | 1     | 1     | 1     |
| 1135   | 4     | 5     | 4     | 4     |
| 1138   | 3     | 2     | 2     | 2     |
| 1139   |       |       |       |       |
| 1140   | 3     | 2     | 2     | 3     |
| 1142   |       |       |       |       |
| 1143   |       |       |       |       |
| 1145   | 2     | 2     | 2     | 2     |
| 1149   |       |       |       |       |
| 1152   | 2     | 2     | 2     | 2     |
| 1160   | 1     | 2     | 4     | 2     |
| 1164   |       |       |       |       |
| 1165   | 2     | 2     | 2     | 2     |
| 1169   | 3     | 4     | 2     | 3     |
| 1170   | 1     | 1     | 2     | 1     |
| 1179   | 2     | 2     | 2     | 1     |
| 1180   | 1     | 1     | 1     | 1     |
| 1183   | 1     | 1     | 1     | 1     |
| 1187   | 1     | 1     | 1     | 1     |
| 1188   | 2     | 1     | 1     | 1     |
| 1193   | 3     | 1     | 1     | 1     |
| 1194   | 3     | 3     | 4     | 4     |
| 1197   | 1     | 1     | 1     | 1     |
| 1202   |       |       |       |       |
| 1204   | 4     | 3     | 1     | 5     |
| 1211   | 1     | 2     | 2     | 1     |
| 1224   | 1     | 1     | 3     | 2     |

| respid | Q40_1 | Q40_2 | Q40_3 | Q40_4 |
|--------|-------|-------|-------|-------|
| 1225   | 1     | 1     | 1     | 1     |
| 1230   | 1     | 1     | 1     | 1     |
| 1232   | 1     | 2     | 1     | 1     |
| 1233   | 1     | 3     | 3     | 2     |
| 1234   | 1     | 1     | 2     | 1     |
| 1235   | 2     | 2     | 3     | 2     |
| 1236   | 4     | 2     | 5     | 3     |
| 1237   | 2     | 1     | 2     | 1     |
| 1238   | 1     | 1     | 2     | 2     |
| 1239   | 6     | 1     | 2     | 1     |
| 1241   | 1     | 2     | 3     | 2     |
| 1242   | 1     | 1     | 1     | 1     |
| 1244   | 3     | 2     | 2     | 2     |
| 1245   | 1     | 1     | 1     | 1     |
| 1247   | 3     | 3     | 4     | 3     |
| 1248   | 2     | 1     | 1     | 1     |
| 1249   | 1     | 3     | 1     | 1     |
| 1250   | 1     | 1     | 1     | 1     |
| 1251   | 1     | 1     | 2     | 1     |
| 1252   | 1     | 1     | 1     | 1     |
| 1253   | 1     | 1     | 1     | 1     |
| 1254   | 4     | 4     | 5     | 5     |
| 1258   | 1     | 1     | 2     | 1     |
| 1260   | 2     | 2     | 2     | 1     |
| 1261   | 1     | 1     | 1     | 1     |
| 1262   | 1     | 1     | 1     | 1     |
| 1263   | 2     | 3     | 4     | 3     |
| 1264   | 1     | 1     | 1     | 1     |
| 1265   | 1     | 1     | 2     | 2     |
| 1266   | 2     | 1     | 1     | 1     |
| 1270   | 1     | 1     | 1     | 1     |
| 1272   | 4     | 3     | 3     | 3     |

| respid | Q40_1 | Q40_2 | Q40_3 | Q40_4 |
|--------|-------|-------|-------|-------|
| 1273   | 3     | 3     | 3     | 3     |
| 1276   | 1     | 2     | 2     | 2     |
| 1277   | 3     | 3     | 3     | 1     |
| 1278   | 1     | 1     | 2     | 1     |
| 1280   | 1     | 1     | 1     | 1     |
| 1281   | 3     | 2     | 2     | 2     |
| 1282   | 2     | 2     | 2     | 2     |
| 1283   | 1     | 1     | 1     | 1     |
| 1288   | 1     | 1     | 1     | 1     |
| 1289   | 3     | 2     | 1     | 1     |
| 1290   | 1     | 3     | 2     | 1     |
| 1291   |       |       |       |       |
| 1293   | 1     | 1     | 1     | 1     |
| 1294   | 1     | 2     | 2     | 1     |
| 1295   | 1     | 1     | 1     | 1     |
| 1296   | 3     | 3     | 3     | 2     |
| 1297   | 1     | 2     | 2     | 1     |
| 1298   | 2     | 2     | 3     | 1     |
| 1300   | 1     | 2     | 2     | 1     |
| 1302   | 1     | 1     | 1     | 1     |
| 1303   | 2     | 2     | 3     | 2     |
| 1304   | 1     | 2     | 2     | 1     |
| 1305   | 2     | 1     | 1     | 1     |
| 1307   | 1     | 1     | 2     | 1     |
| 1312   | 1     | 1     | 1     | 1     |
| 1313   | 1     | 1     | 1     | 1     |
| 1314   | 1     | 1     | 1     | 1     |
| 1317   | 1     | 1     | 2     | 1     |
| 1318   | 1     | 2     | 2     | 1     |
| 1319   | 1     | 1     | 1     | 1     |
| 1321   | 1     | 1     | 1     | 1     |
| 1324   | 3     | 4     | 3     | 3     |

| respid | Q40_1 | Q40_2 | Q40_3 | Q40_4 |
|--------|-------|-------|-------|-------|
| 1325   | 1     | 2     | 3     | 2     |
| 1326   | 1     | 1     | 1     | 1     |
| 1327   | 1     | 1     | 1     | 1     |
| 1329   | 1     | 1     | 3     | 3     |
| 1330   | 1     | 1     | 6     | 1     |
| 1331   | 5     | 1     | 2     | 1     |
| 1335   | 1     | 1     | 1     | 1     |
| 1337   | 1     | 1     | 1     | 1     |
| 1341   | 1     | 1     | 1     | 1     |
| 1342   | 1     | 1     | 1     | 1     |
| 1344   | 2     | 3     | 1     | 4     |
| 1345   | 1     | 2     | 1     | 2     |
| 1346   | 2     | 1     | 1     | 1     |
| 1350   | 3     | 3     | 3     | 2     |
| 1352   | 1     | 1     | 1     | 1     |
| 1353   | 2     | 2     | 2     | 2     |
| 1354   | 1     | 2     | 2     | 1     |
| 1355   | 1     | 1     | 2     | 1     |
| 1357   | 1     | 1     | 1     | 1     |
| 1360   |       |       |       |       |
| 1362   | 1     | 1     | 1     | 1     |
| 1363   | 1     | 1     | 2     | 1     |
| 1367   | 1     | 1     | 1     | 1     |
| 1369   | 1     | 1     | 3     | 1     |
| 1371   |       |       |       |       |
| 1372   |       |       |       |       |
| 1375   |       |       |       |       |
| 1377   | 2     | 1     | 2     | 1     |
| 1379   | 2     | 2     | 2     | 2     |
| 1380   | 6     | 4     | 1     | 1     |
| 1382   | 1     | 1     | 1     | 1     |
| 1383   | 1     | 1     | 2     | 1     |

| respid | Q40_1 | Q40_2 | Q40_3 | Q40_4 |
|--------|-------|-------|-------|-------|
| 1384   | 1     | 1     | 1     | 1     |
| 1385   | 5     | 1     | 2     | 1     |
| 1387   | 4     | 3     | 1     | 3     |
| 1388   | 1     | 1     | 3     | 1     |
| 1389   | 6     | 2     | 1     | 2     |
| 1390   | 2     | 1     | 1     | 1     |
| 1395   | 1     | 1     | 1     | 1     |
| 1396   | 1     | 1     | 2     | 1     |
| 1397   | 5     | 4     | 3     | 2     |
| 1398   | 1     | 1     | 1     | 1     |
| 1399   | 1     | 1     | 1     | 1     |
| 1403   | 2     | 1     | 1     | 1     |
| 1405   | 1     | 1     | 1     | 1     |
| 1406   | 3     | 3     | 3     | 1     |
| 1407   | 3     | 3     | 4     | 4     |
| 1408   | 1     | 1     | 4     | 1     |
| 1409   | 1     | 1     | 1     | 1     |
| 1410   | 2     | 3     | 3     | 3     |
| 1411   | 3     | 1     | 1     | 1     |
| 1412   | 1     | 1     | 1     | 1     |
| 1413   | 5     | 2     | 1     | 1     |
| 1414   | 1     | 2     | 1     | 1     |
| 1415   | 1     | 2     | 1     | 1     |
| 1416   | 1     | 1     | 2     | 1     |
| 1417   | 1     | 1     | 1     | 1     |
| 1418   | 1     | 1     | 1     | 1     |
| 1419   | 1     | 2     | 2     | 3     |
| 1420   | 2     | 2     | 1     | 1     |
| 1421   | 2     | 4     | 2     | 1     |
| 1422   | 1     | 1     | 1     | 1     |
| 1423   | 1     | 3     | 2     | 2     |
| 1424   | 5     | 6     | 5     | 4     |

| respid | Q40_1 | Q40_2 | Q40_3 | Q40_4 |
|--------|-------|-------|-------|-------|
| 1429   | 1     | 1     | 1     | 1     |
| 1430   | 1     | 2     | 2     | 1     |
| 1431   | 4     | 4     | 4     | 5     |
| 1433   | 3     | 2     | 2     | 2     |
| 1435   |       |       |       |       |
| 1436   | 1     | 1     | 1     | 1     |
| 1438   |       |       |       |       |
| 1439   | 1     | 1     | 1     | 1     |
| 1441   | 2     | 1     | 1     | 2     |
| 1442   | 1     | 1     | 1     | 1     |
| 1443   |       |       |       |       |
| 1444   | 1     | 1     | 1     | 1     |
| 1445   | 4     | 4     | 4     | 3     |
| 1446   | 1     | 2     | 2     | 1     |
| 1447   | 1     | 1     | 1     | 1     |
| 1449   | 3     | 3     | 2     | 1     |
| 1450   | 1     | 1     | 1     | 1     |
| 1451   | 4     | 4     | 3     | 1     |
| 1452   |       |       |       |       |
| 1453   | 3     | 2     | 3     | 3     |
| 1454   | 2     | 2     | 2     | 2     |
| 1456   | 1     | 1     | 1     | 1     |
| 1457   | 5     | 3     | 3     | 2     |
| 1459   | 3     | 3     | 3     | 3     |
| 1460   | 1     | 2     | 1     | 1     |
| 1463   | 1     | 1     | 1     | 1     |
| 1465   | 2     | 2     | 2     | 2     |
| 1467   | 1     | 1     | 2     | 1     |
| 1470   | 1     | 4     | 2     | 1     |
| 1471   | 2     | 3     | 5     | 3     |
| 1472   | 1     | 1     | 1     | 1     |
| 1474   | 1     | 2     | 1     | 1     |

| respid | Q40_1 | Q40_2 | Q40_3 | Q40_4 |
|--------|-------|-------|-------|-------|
| 1475   | 1     | 3     | 3     | 1     |
| 1477   | 1     | 1     | 1     | 1     |
| 1478   | 3     | 3     | 3     | 3     |
| 1480   |       |       |       |       |
| 1481   | 2     | 2     | 3     | 2     |
| 1483   | 1     | 1     | 1     | 1     |
| 1484   | 1     | 1     | 1     | 1     |
| 1485   | 2     | 1     | 1     | 1     |
| 1486   | 1     | 2     | 3     | 1     |
| 1487   | 3     | 3     | 3     | 2     |
| 1488   | 1     | 1     | 3     | 1     |
| 1489   | 4     | 4     | 3     | 2     |
| 1490   | 5     | 2     | 1     | 5     |
| 1491   | 3     | 2     | 3     | 2     |
| 1492   | 5     | 2     | 2     | 2     |
| 1494   | 1     | 1     | 1     | 1     |
| 1495   | 2     | 2     | 1     | 3     |
| 1496   | 1     | 1     | 2     | 1     |
| 1498   | 1     | 1     | 1     | 1     |
| 1499   | 3     | 1     | 2     | 2     |
| 1500   | 1     | 2     | 2     | 2     |
| 1501   | 1     | 1     | 1     | 1     |
| 1503   |       |       |       |       |
| 1504   | 2     | 1     | 2     | 1     |
| 1508   | 3     | 3     | 3     | 3     |
| 1509   | 2     | 1     | 2     | 2     |
| 1511   | 3     | 4     | 5     | 2     |
| 1512   | 1     | 1     | 2     | 1     |
| 1513   | 2     | 3     | 3     | 3     |
| 1515   | 2     | 1     | 1     | 1     |
| 1517   | 2     | 1     | 1     | 1     |
| 1518   | 1     | 2     | 2     | 1     |

| respid | Q40_1 | Q40_2 | Q40_3 | Q40_4 |
|--------|-------|-------|-------|-------|
| 1519   | 3     | 2     | 2     | 1     |
| 1520   | 1     | 1     | 1     | 1     |
| 1521   | 2     | 1     | 3     | 5     |
| 1522   | 1     | 1     | 1     | 1     |
| 1523   | 5     | 4     | 5     | 1     |
| 1524   | 1     | 2     | 2     | 1     |
| 1525   | 1     | 2     | 2     | 1     |
| 1526   | 2     | 2     | 6     | 2     |
| 1527   | 1     | 1     | 1     | 1     |
| 1534   | 1     | 1     | 1     | 1     |
| 1535   | 1     | 1     | 1     | 1     |
| 1536   | 3     | 3     | 3     | 2     |
| 1538   | 3     | 3     | 1     | 2     |
| 1539   | 1     | 1     | 1     | 1     |
| 1540   | 2     | 1     | 1     | 1     |
| 1541   | 1     | 1     | 2     | 1     |
| 1542   | 1     | 1     | 1     | 1     |
| 1543   | 2     | 2     | 3     | 2     |
| 1545   | 3     | 3     | 3     | 3     |
| 1546   | 1     | 1     | 1     | 1     |
| 1548   | 2     | 4     | 4     | 4     |
| 1549   |       |       |       |       |
| 1551   | 1     | 1     | 1     | 1     |
| 1552   | 1     | 1     | 3     | 1     |
| 1556   | 1     | 1     | 1     | 1     |
| 1557   |       |       |       |       |
| 1558   | 2     | 1     | 1     | 2     |
| 1561   | 6     | 1     | 1     | 1     |
| 1562   | 2     | 1     | 2     | 2     |
| 1563   | 1     | 1     | 1     | 1     |
| 1564   | 2     | 3     | 4     | 4     |
| 1565   |       |       |       |       |



| respid | Q40_1 | Q40_2 | Q40_3 | Q40_4 |
|--------|-------|-------|-------|-------|
| 1566   | 1     | 1     | 1     | 1     |
| 1567   | 1     | 2     | 2     | 1     |
| 1569   |       |       |       |       |
| 1570   | 3     | 2     | 1     | 1     |
| 1574   | 1     | 1     | 1     | 1     |
| 1575   | 1     | 1     | 1     | 1     |
| 1576   | 1     | 1     | 1     | 1     |
| 1577   | 3     | 3     | 3     | 3     |
| 1581   | 2     | 1     | 1     | 1     |
| 1583   | 3     | 2     | 3     | 2     |
| 1585   | 2     | 1     | 1     | 1     |
| 1586   | 1     | 1     | 1     | 1     |
| 1588   | 1     | 1     | 1     | 1     |
| 1590   | 1     | 1     | 1     | 1     |
| 1592   | 1     | 1     | 2     | 1     |
| 1594   | 1     | 2     | 2     | 1     |
| 1598   | 2     | 2     | 2     | 2     |
| 1599   | 2     | 1     | 5     | 1     |
| 1600   | 1     | 2     | 1     | 1     |
| 1602   | 1     | 1     | 1     | 1     |
| 1603   | 1     | 1     | 3     | 1     |
| 1604   | 2     | 2     | 2     | 2     |
| 1605   | 2     | 3     | 3     | 3     |
| 1606   | 1     | 1     | 2     | 1     |
| 1610   | 2     | 1     | 2     | 1     |
| 1611   | 1     | 1     | 2     | 1     |
| 1612   | 1     | 1     | 1     | 1     |
| 1613   | 1     | 3     | 2     | 2     |
| 1615   | 2     | 2     | 3     | 3     |
| 1616   | 1     | 1     | 2     | 1     |
| 1617   | 1     | 2     | 2     | 1     |
| 1618   | 1     | 2     | 3     | 1     |

| respid | Q40_1 | Q40_2 | Q40_3 | Q40_4 |
|--------|-------|-------|-------|-------|
| 1620   | 1     | 2     | 3     | 1     |
| 1621   | 3     | 3     | 2     | 2     |
| 1622   |       |       |       |       |
| 1623   | 1     | 1     | 1     | 1     |
| 1624   | 3     | 1     | 1     | 2     |
| 1625   | 1     | 1     | 1     | 1     |
| 1626   |       |       |       |       |
| 1627   | 1     | 1     | 1     | 1     |
| 1629   | 1     | 2     | 1     | 1     |
| 1630   | 1     | 1     | 1     | 1     |
| 1631   | 1     | 1     | 2     | 1     |
| 1634   | 2     | 2     | 2     | 2     |
| 1635   | 1     | 1     | 2     | 1     |
| 1636   |       |       |       |       |
| 1637   | 1     | 1     | 1     | 1     |
| 1640   | 1     | 2     | 1     | 1     |
| 1642   | 1     | 1     | 1     | 1     |
| 1643   | 5     | 3     | 3     | 4     |
| 1644   | 1     | 1     | 1     | 1     |
| 1645   | 3     | 1     | 1     | 1     |
| 1646   | 1     | 1     | 2     | 1     |
| 1647   | 1     | 1     | 2     | 1     |
| 1650   | 2     | 3     | 2     | 2     |
| 1654   | 1     | 1     | 1     | 1     |
| 1656   | 1     | 1     | 1     | 1     |
| 1657   | 5     | 5     | 5     | 5     |
| 1659   | 1     | 3     | 1     | 1     |
| 1662   | 2     | 3     | 3     | 3     |
| 1663   | 3     | 2     | 1     | 2     |
| 1664   | 1     | 1     | 1     | 1     |
| 1665   | 1     | 1     | 1     | 1     |
| 1667   | 1     | 1     | 1     | 1     |

| respid | Q40_1 | Q40_2 | Q40_3 | Q40_4 |
|--------|-------|-------|-------|-------|
| 1668   | 2     | 1     | 1     | 1     |
| 1670   | 1     | 1     | 1     | 1     |
| 1671   | 2     | 2     | 2     | 1     |
| 1673   | 1     | 2     | 2     | 1     |
| 1674   | 1     | 2     | 2     | 1     |
| 1676   | 2     | 2     | 2     | 1     |
| 1677   | 1     | 1     | 1     | 1     |
| 1678   | 1     | 1     | 2     | 1     |
| 1680   | 1     | 1     | 1     | 1     |
| 1681   | 2     | 2     | 2     | 1     |
| 1683   | 1     | 1     | 1     | 1     |
| 1685   | 1     | 2     | 2     | 1     |
| 1686   | 2     | 2     | 2     | 1     |
| 1690   | 1     | 1     | 2     | 1     |
| 1691   | 1     | 1     | 2     | 1     |
| 1692   | 2     | 1     | 2     | 2     |
| 1693   | 1     | 2     | 1     | 2     |
| 1695   | 2     | 2     | 2     | 1     |
| 1696   | 1     | 1     | 3     | 2     |
| 1698   | 1     | 2     | 1     | 1     |
| 1699   | 1     | 1     | 1     | 1     |
| 1701   | 2     | 1     | 2     | 2     |
| 1702   | 2     | 1     | 1     | 1     |
| 1703   |       |       |       |       |
| 1705   | 1     | 1     | 2     | 1     |
| 1706   | 1     | 1     | 1     | 1     |
| 1708   |       |       |       |       |
| 1711   | 2     | 2     | 2     | 2     |
| 1712   | 1     | 1     | 2     | 1     |
| 1713   | 1     | 1     | 2     | 1     |
| 1715   | 2     | 2     | 1     | 1     |
| 1717   | 1     | 1     | 1     | 1     |

| respid | Q40_1 | Q40_2 | Q40_3 | Q40_4 |
|--------|-------|-------|-------|-------|
| 1718   | 2     | 2     | 3     | 3     |
| 1719   | 1     | 1     | 1     | 1     |
| 1721   | 2     | 2     | 3     | 2     |
| 1722   | 1     | 1     | 1     | 1     |
| 1724   | 1     | 1     | 2     | 1     |
| 1725   | 1     | 1     | 1     | 1     |
| 1726   | 1     | 1     | 2     | 1     |
| 1727   | 1     | 1     | 1     | 1     |
| 1728   | 2     | 2     | 2     | 2     |
| 1731   | 1     | 2     | 5     | 2     |
| 1733   | 1     | 1     | 1     | 1     |
| 1734   | 1     | 2     | 1     | 1     |
| 1735   |       |       |       |       |
| 1736   | 4     | 1     | 2     | 1     |
| 1737   | 1     | 1     | 1     | 1     |
| 1738   | 1     | 2     | 3     | 2     |
| 1743   | 2     | 2     | 5     | 2     |
| 1755   | 3     | 4     | 5     | 4     |
| 1756   | 1     | 1     | 4     | 1     |
| 1757   | 1     | 1     | 2     | 1     |
| 1758   | 2     | 2     | 2     | 2     |
| 1759   | 1     | 2     | 1     | 1     |
| 1761   | 2     | 2     | 2     | 1     |
| 1762   | 2     | 1     | 2     | 2     |
| 1764   |       |       |       |       |
| 1767   | 4     | 3     | 2     | 2     |
| 1768   | 3     | 3     | 2     | 1     |
| 1769   | 1     | 1     | 2     | 1     |
| 1770   | 1     | 3     | 2     | 1     |
| 1771   | 2     | 1     | 2     | 2     |
| 1776   | 1     | 1     | 1     | 2     |
| 1777   | 2     | 2     | 2     | 2     |

| respid | Q40_1 | Q40_2 | Q40_3 | Q40_4 |
|--------|-------|-------|-------|-------|
| 1778   | 1     | 2     | 2     | 1     |
| 1779   | 2     | 2     | 1     | 1     |
| 1780   | 1     | 2     | 2     | 1     |
| 1781   |       |       |       |       |
| 1783   | 1     | 1     | 1     | 1     |
| 1784   | 4     | 3     | 3     | 3     |
| 1785   | 1     | 1     | 1     | 1     |
| 1788   | 2     | 2     | 2     | 2     |
| 1792   | 1     | 1     | 1     | 1     |
| 1794   | 2     | 1     | 1     | 1     |
| 1798   | 3     | 5     | 4     | 4     |
| 1799   | 2     | 1     | 2     | 2     |
| 1800   | 1     | 1     | 1     | 1     |
| 1804   | 2     | 2     | 3     | 2     |
| 1806   | 2     | 1     | 2     | 1     |
| 1807   | 1     | 1     | 1     | 1     |
| 1808   | 1     | 1     | 1     | 1     |
| 1809   | 1     | 1     | 2     | 1     |
| 1811   | 1     | 2     | 2     | 2     |
| 1812   | 1     | 2     | 4     | 1     |
| 1813   | 3     | 3     | 3     | 3     |
| 1814   | 1     | 1     | 2     | 1     |
| 1815   | 1     | 2     | 2     | 2     |
| 1817   | 1     | 1     | 2     | 1     |
| 1820   | 2     | 1     | 2     | 1     |
| 1821   | 1     | 2     | 1     | 1     |
| 1822   | 6     | 1     | 1     | 1     |
| 1823   | 1     | 1     | 1     | 1     |
| 1824   | 2     | 3     | 2     | 3     |
| 1826   |       |       |       |       |
| 1828   | 1     | 1     | 1     | 1     |
| 1829   | 1     | 1     | 1     | 1     |

| respid | Q40_1 | Q40_2 | Q40_3 | Q40_4 |
|--------|-------|-------|-------|-------|
| 1830   | 1     | 1     | 2     | 1     |
| 1831   | 1     | 1     | 2     | 1     |
| 1832   | 1     | 1     | 1     | 1     |
| 1836   | 1     | 1     | 4     | 1     |
| 1838   | 2     | 4     | 5     | 4     |
| 1839   | 3     | 2     | 4     | 3     |
| 1840   | 1     | 1     | 2     | 1     |
| 1841   | 3     | 2     | 3     | 3     |
| 1842   | 3     | 2     | 3     | 2     |
| 1843   | 1     | 2     | 2     | 2     |
| 1844   | 2     | 2     | 2     | 2     |
| 1845   | 1     | 1     | 1     | 1     |
| 1849   | 1     | 1     | 1     | 1     |
| 1850   | 1     | 2     | 1     | 1     |
| 1851   | 6     | 3     | 1     | 2     |
| 1852   |       |       |       |       |
| 1857   | 1     | 3     | 1     | 1     |
| 1858   | 1     | 1     | 1     | 1     |
| 1861   | 1     | 1     | 2     | 1     |
| 1862   | 1     | 1     | 1     | 1     |
| 1863   | 3     | 3     | 3     | 3     |
| 1864   | 3     | 2     | 2     | 2     |
| 1865   |       |       |       |       |
| 1867   | 1     | 1     | 1     | 1     |
| 1868   | 1     | 2     | 2     | 1     |
| 1869   | 4     | 1     | 1     | 1     |
| 1870   | 1     | 1     | 2     | 1     |
| 1871   | 4     | 3     | 3     | 4     |
| 1872   | 1     | 1     | 1     | 1     |
| 1873   | 2     | 2     | 1     | 1     |
| 1876   |       |       |       |       |
| 1877   |       |       |       |       |

| respid | Q40_1 | Q40_2 | Q40_3 | Q40_4 |
|--------|-------|-------|-------|-------|
| 1878   | 1     | 1     | 2     | 1     |
| 1879   | 1     | 2     | 1     | 1     |
| 1880   | 1     | 1     | 1     | 1     |
| 1881   | 1     | 1     | 1     | 1     |
| 1883   | 3     | 2     | 2     | 1     |
| 1886   | 1     | 1     | 1     | 1     |
| 1888   | 3     | 3     | 4     | 4     |
| 1889   | 2     | 2     | 3     | 2     |
| 1890   | 3     | 3     | 3     | 4     |
| 1891   | 1     | 1     | 1     | 1     |
| 1893   | 1     | 1     | 1     | 1     |
| 1894   | 2     | 2     | 1     | 1     |
| 1895   | 2     | 3     | 5     | 2     |
| 1896   | 1     | 2     | 1     | 1     |
| 1897   | 2     | 1     | 1     | 2     |
| 1898   | 5     | 4     | 5     | 5     |
| 1899   | 1     | 2     | 2     | 3     |
| 1900   |       |       |       |       |
| 1903   | 1     | 1     | 1     | 1     |
| 1906   | 2     | 2     | 1     | 1     |
| 1907   | 3     | 3     | 4     | 4     |
| 1908   | 2     | 3     | 2     | 1     |
| 1909   | 4     | 4     | 4     | 4     |
| 1910   | 1     | 1     | 1     | 1     |
| 1911   | 1     | 2     | 1     | 1     |
| 1912   |       |       |       |       |
| 1917   | 1     | 1     | 1     | 1     |
| 1918   | 1     | 2     | 2     | 1     |
| 1919   | 1     | 1     | 1     | 1     |
| 1922   |       |       |       |       |
| 1925   |       |       |       |       |
| 1926   | 3     | 2     | 1     | 1     |

| respid | Q40_1 | Q40_2 | Q40_3 | Q40_4 |
|--------|-------|-------|-------|-------|
| 1927   | 1     | 1     | 1     | 1     |
| 1928   |       |       |       |       |
| 1929   | 1     | 1     | 1     | 1     |
| 1934   | 1     | 1     | 1     | 1     |
| 1935   | 1     | 1     | 2     | 1     |
| 1936   | 2     | 3     | 1     | 1     |
| 1937   |       |       |       |       |
| 1938   |       |       |       |       |
| 1939   | 2     | 1     | 2     | 3     |
| 1940   | 1     | 3     | 1     | 1     |
| 1941   |       |       |       |       |
| 1948   |       |       |       |       |
| 1950   | 1     | 3     | 1     | 1     |
| 1955   | 2     | 2     | 3     | 3     |
| 1958   | 3     | 3     | 2     | 3     |
| 1960   | 1     | 1     | 2     | 1     |
| 1961   |       |       |       |       |
| 1962   | 1     | 1     | 1     | 1     |
| 1965   |       |       |       |       |
| 1966   | 1     | 1     | 1     | 1     |
| 1967   |       |       |       |       |
| 1968   | 3     | 2     | 2     | 1     |
| 1973   | 1     | 1     | 1     | 1     |
| 1974   | 6     | 5     | 6     | 3     |
| 1975   |       |       |       |       |
| 1977   | 1     | 1     | 2     | 1     |
| 1978   |       |       |       |       |
| 1979   | 3     | 3     | 3     | 3     |
| 1982   | 1     | 1     | 1     | 1     |
| 1983   | 1     | 2     | 1     | 1     |
| 1987   | 1     | 1     | 2     | 1     |
| 1988   | 2     | 1     | 2     | 1     |



| respid | Q40_1 | Q40_2 | Q40_3 | Q40_4 |
|--------|-------|-------|-------|-------|
| 1991   | 2     | 2     | 2     | 3     |
| 1992   | 1     | 1     | 1     | 1     |
| 1993   | 1     | 1     | 2     | 1     |
| 1994   | 3     | 3     | 2     | 3     |
| 1995   | 1     | 1     | 1     | 1     |
| 1996   | 1     | 1     | 1     | 1     |
| 1997   | 1     | 1     | 1     | 1     |
| 1998   | 1     | 1     | 1     | 1     |
| 1999   | 3     | 3     | 5     | 4     |
| 2000   | 2     | 3     | 3     | 4     |
| 2001   | 1     | 2     | 2     | 1     |
| 2002   | 1     | 1     | 1     | 1     |
| 2003   |       |       |       |       |
| 2004   | 1     | 1     | 1     | 1     |
| 2005   | 1     | 1     | 2     | 1     |
| 2007   | 2     | 3     | 4     | 3     |
| 2009   | 1     | 1     | 1     | 1     |
| 2010   |       |       |       |       |
| 2011   | 1     | 1     | 1     | 1     |
| 2013   | 1     | 1     | 1     | 1     |
| 2014   | 3     | 2     | 3     | 2     |
| 2017   | 2     | 1     | 3     | 1     |
| 2020   | 1     | 1     | 1     | 1     |
| 2023   | 2     | 3     | 3     | 1     |
| 2024   | 1     | 1     | 1     | 1     |
| 2029   | 1     | 1     | 1     | 1     |
| 2030   |       |       |       |       |
| 2031   | 1     | 3     | 3     | 1     |
| 2032   | 1     | 3     | 1     | 2     |
| 2033   |       |       |       |       |
| 2034   | 1     | 2     | 3     | 1     |
| 2036   | 2     | 3     | 3     | 3     |

| respid | Q40_1 | Q40_2 | Q40_3 | Q40_4 |
|--------|-------|-------|-------|-------|
| 2037   | 3     | 4     | 5     | 5     |
| 2038   | 1     | 1     | 1     | 1     |
| 2039   | 1     | 1     | 2     | 1     |
| 2040   |       |       |       |       |
| 2041   |       |       |       |       |
| 2042   | 1     | 1     | 1     | 1     |
| 2043   | 3     | 2     | 1     | 2     |
| 2051   | 1     | 1     | 1     | 1     |
| 2052   | 1     | 1     | 1     | 1     |
| 2053   | 1     | 1     | 1     | 1     |
| 2054   |       |       |       |       |
| 2055   | 2     | 1     | 1     | 1     |
| 2056   | 3     | 3     | 2     | 2     |
| 2057   | 3     | 1     | 2     | 1     |
| 2059   | 1     | 1     | 1     | 1     |
| 2063   | 2     | 1     | 2     | 1     |
| 2066   | 1     | 1     | 4     | 1     |
| 2068   | 1     | 1     | 2     | 1     |
| 2069   | 1     | 2     | 2     | 2     |
| 2070   |       |       |       |       |
| 2071   | 1     | 1     | 3     | 1     |
| 2073   |       |       |       |       |
| 2077   | 4     | 3     | 3     | 4     |
| 2079   |       |       |       |       |
| 2080   | 2     | 3     | 4     | 4     |
| 2081   | 4     | 3     | 3     | 5     |
| 2084   |       |       |       |       |
| 2085   | 1     | 1     | 1     | 1     |
| 2087   | 1     | 3     | 3     | 2     |
| 2089   | 1     | 1     | 1     | 1     |
| 2093   | 1     | 1     | 2     | 1     |
| 2094   | 1     | 1     | 1     | 1     |

| respid | Q40_1 | Q40_2 | Q40_3 | Q40_4 |
|--------|-------|-------|-------|-------|
| 2095   | 3     | 5     | 6     | 4     |
| 2097   | 1     | 1     | 1     | 1     |
| 2099   | 2     | 2     | 2     | 3     |
| 2100   | 2     | 2     | 1     | 2     |
| 2101   | 1     | 1     | 2     | 1     |
| 2103   | 1     | 1     | 1     | 1     |
| 2104   | 2     | 1     | 1     | 1     |
| 2106   | 1     | 3     | 1     | 1     |
| 2111   | 1     | 3     | 4     | 1     |
| 2113   | 1     | 1     | 1     | 1     |
| 2115   |       |       |       |       |
| 2119   | 1     | 2     | 3     | 2     |
| 2120   |       |       |       |       |
| 2123   |       |       |       |       |
| 2124   | 2     | 3     | 4     | 3     |
| 2130   |       |       |       |       |
| 2131   | 2     | 2     | 2     | 2     |
| 2133   | 2     | 3     | 3     | 4     |
| 2139   | 5     | 3     | 3     | 1     |
| 2141   |       |       |       |       |
| 2143   | 5     | 2     | 2     | 1     |
| 2144   | 1     | 1     | 2     | 1     |
| 2147   |       |       |       |       |
| 2151   | 1     | 1     | 1     | 1     |
| 2153   | 1     | 1     | 2     | 1     |
| 2154   | 2     | 1     | 1     | 1     |
| 2155   | 1     | 2     | 2     | 2     |
| 2159   | 1     | 1     | 1     | 1     |
| 2160   | 2     | 2     | 2     | 3     |
| 2161   | 1     | 1     | 1     | 1     |
| 2163   | 1     | 1     | 1     | 1     |
| 2164   | 1     | 1     | 1     | 1     |

| respid | Q40_1 | Q40_2 | Q40_3 | Q40_4 |
|--------|-------|-------|-------|-------|
| 2168   | 2     | 1     | 1     | 1     |
| 2169   | 3     | 2     | 2     | 2     |
| 2170   | 2     | 1     | 1     | 1     |
| 2171   | 1     | 2     | 2     | 1     |
| 2172   | 3     | 3     | 3     | 3     |
| 2173   | 1     | 1     | 1     | 1     |
| 2174   | 2     | 1     | 1     | 1     |
| 2175   | 1     | 3     | 1     | 2     |
| 2176   | 1     | 1     | 2     | 1     |
| 2177   | 5     | 4     | 4     | 3     |
| 2179   | 2     | 1     | 1     | 1     |
| 2181   | 1     | 1     | 1     | 1     |
| 2182   | 1     | 1     | 1     | 1     |
| 2183   | 3     | 3     | 4     | 3     |
| 2184   | 2     | 2     | 1     | 1     |
| 2185   |       |       |       |       |
| 2186   | 1     | 2     | 1     | 1     |
| 2187   | 1     | 3     | 1     | 1     |
| 2188   | 2     | 2     | 1     | 1     |
| 2189   |       |       |       |       |
| 2190   | 1     | 1     | 1     | 1     |
| 2193   | 3     | 1     | 2     | 1     |
| 2195   | 1     | 1     | 2     | 1     |
| 2198   | 1     | 1     | 2     | 1     |
| 2200   | 1     | 1     | 1     | 1     |
| 2205   | 3     | 3     | 4     | 3     |
| 2208   |       |       |       |       |
| 2209   | 2     | 2     | 3     | 2     |
| 2210   | 1     | 1     | 1     | 1     |
| 2211   | 1     | 2     | 2     | 1     |
| 2213   | 1     | 1     | 1     | 1     |
| 2214   | 1     | 1     | 3     | 1     |

| respid | Q40_1 | Q40_2 | Q40_3 | Q40_4 |
|--------|-------|-------|-------|-------|
| 2216   | 1     | 2     | 1     | 2     |
| 2220   | 2     | 2     | 2     | 1     |
| 2225   | 1     | 1     | 1     | 1     |
| 2227   | 1     | 2     | 1     | 2     |
| 2228   | 3     | 3     | 4     | 3     |
| 2229   | 1     | 1     | 1     | 1     |
| 2230   |       |       |       |       |
| 2236   |       |       |       |       |
| 2238   | 3     | 4     | 3     | 4     |
| 2239   | 2     | 2     | 3     | 3     |
| 2240   | 2     | 1     | 1     | 1     |
| 2241   | 1     | 1     | 3     | 1     |
| 2243   |       |       |       |       |
| 2245   | 1     | 1     | 2     | 1     |
| 2247   | 2     | 2     | 1     | 1     |
| 2248   | 1     | 1     | 1     | 1     |
| 2249   | 1     | 1     | 2     | 1     |
| 2254   | 3     | 3     | 3     | 1     |
| 2256   | 1     | 1     | 2     | 1     |
| 2259   | 1     | 1     | 1     | 1     |
| 2261   | 1     | 1     | 1     | 1     |
| 2262   | 1     | 2     | 1     | 1     |
| 2263   | 2     | 3     | 2     | 2     |
| 2264   | 3     | 3     | 3     | 3     |
| 2265   | 2     | 2     | 3     | 2     |
| 2270   | 6     | 2     | 1     | 1     |
| 2271   | 1     | 1     | 1     | 1     |
| 2272   | 1     | 1     | 1     | 1     |
| 2273   | 1     | 1     | 2     | 1     |
| 2274   | 1     | 1     | 1     | 1     |
| 2276   | 3     | 2     | 5     | 1     |
| 2277   | 1     | 1     | 2     | 2     |

| respid | Q40_1 | Q40_2 | Q40_3 | Q40_4 |
|--------|-------|-------|-------|-------|
| 2281   | 1     | 1     | 1     | 1     |
| 2288   | 1     | 1     | 1     | 1     |
| 2290   | 1     | 1     | 1     | 1     |
| 2294   | 2     | 2     | 2     | 2     |
| 2295   | 1     | 1     | 2     | 1     |
| 2296   | 1     | 1     | 1     | 1     |
| 2297   |       |       |       |       |
| 2298   | 1     | 1     | 1     | 1     |
| 2301   | 2     | 2     | 2     | 3     |
| 2302   | 2     | 2     | 3     | 3     |
| 2303   |       |       |       |       |
| 2305   | 1     | 1     | 1     | 1     |
| 2309   | 2     | 1     | 1     | 1     |
| 2310   | 1     | 1     | 1     | 1     |
| 2311   | 3     | 3     | 3     | 3     |
| 2313   | 2     | 2     | 3     | 3     |
| 2316   |       |       |       |       |
| 2317   | 1     | 1     | 1     | 1     |
| 2318   | 3     | 2     | 2     | 1     |
| 2319   | 1     | 1     | 5     | 1     |
| 2321   | 2     | 3     | 2     | 3     |
| 2324   | 1     | 1     | 2     | 1     |
| 2328   | 1     | 2     | 1     | 1     |
| 2329   |       |       |       |       |
| 2330   | 1     | 1     | 1     | 1     |
| 2333   | 1     | 1     | 2     | 1     |
| 2334   | 1     | 1     | 2     | 1     |
| 2338   | 1     | 1     | 1     | 1     |
| 2341   | 3     | 2     | 3     | 3     |
| 2342   | 3     | 3     | 2     | 1     |
| 2343   | 4     | 3     | 4     | 4     |
| 2346   | 1     | 1     | 1     | 1     |

| respid | Q40_1 | Q40_2 | Q40_3 | Q40_4 |
|--------|-------|-------|-------|-------|
| 2347   | 3     | 3     | 2     | 2     |
| 2348   | 2     | 2     | 2     | 2     |
| 2349   | 1     | 2     | 2     | 2     |
| 2350   | 1     | 1     | 1     | 1     |
| 2351   | 1     | 1     | 1     | 1     |
| 2352   | 1     | 1     | 1     | 1     |
| 2359   | 1     | 1     | 1     | 1     |
| 2362   |       |       |       |       |
| 2363   | 1     | 1     | 1     | 1     |
| 2365   | 1     | 1     | 2     | 1     |
| 2367   | 2     | 3     | 4     | 2     |
| 2368   | 1     | 1     | 1     | 1     |
| 2369   | 1     | 1     | 2     | 1     |
| 2372   |       |       |       |       |
| 2374   | 3     | 3     | 2     | 2     |
| 2376   | 1     | 1     | 1     | 1     |
| 2379   | 3     | 3     | 3     | 3     |
| 2380   | 1     | 1     | 1     | 1     |
| 2381   | 1     | 2     | 3     | 1     |
| 2382   | 2     | 2     | 2     | 1     |
| 2385   | 2     | 2     | 2     | 3     |
| 2387   | 1     | 3     | 4     | 2     |
| 2388   | 4     | 1     | 2     | 1     |
| 2389   | 2     | 1     | 3     | 1     |
| 2391   | 2     | 1     | 2     | 1     |
| 2392   | 1     | 2     | 2     | 1     |
| 2393   | 6     | 1     | 1     | 1     |
| 2394   | 5     | 3     | 2     | 4     |
| 2397   | 1     | 1     | 1     | 1     |
| 2398   | 2     | 2     | 2     | 2     |
| 2400   | 1     | 1     | 1     | 1     |
| 2402   | 1     | 1     | 1     | 1     |

| respid | Q40_1 | Q40_2 | Q40_3 | Q40_4 |
|--------|-------|-------|-------|-------|
| 2406   | 2     | 1     | 1     | 1     |
| 2408   | 1     | 2     | 2     | 1     |
| 2410   | 1     | 1     | 1     | 1     |
| 2411   | 3     | 4     | 2     | 2     |
| 2412   | 1     | 2     | 1     | 1     |
| 2414   | 2     | 1     | 2     | 2     |
| 2421   | 1     | 1     | 2     | 1     |
| 2423   | 2     | 2     | 2     | 1     |
| 2424   | 3     | 3     | 3     | 2     |
| 2425   | 1     | 2     | 1     | 1     |
| 2426   | 1     | 3     | 1     | 1     |
| 2429   | 1     | 1     | 3     | 3     |
| 2430   | 1     | 1     | 2     | 1     |
| 2432   | 1     | 1     | 2     | 1     |
| 2433   | 1     | 1     | 1     | 1     |
| 2434   | 1     | 1     | 2     | 1     |
| 2435   | 2     | 2     | 3     | 2     |
| 2436   | 2     | 1     | 1     | 1     |
| 2439   | 3     | 3     | 2     | 2     |
| 2440   | 1     | 1     | 1     | 1     |
| 2441   | 1     | 1     | 2     | 1     |
| 2446   | 1     | 1     | 1     | 1     |
| 2448   | 3     | 4     | 4     | 3     |
| 2449   | 1     | 1     | 1     | 1     |
| 2451   | 1     | 3     | 3     | 2     |
| 2452   | 1     | 1     | 1     | 1     |
| 2455   |       |       |       |       |
| 2457   | 1     | 2     | 2     | 2     |
| 2458   | 1     | 1     | 1     | 1     |
| 2459   | 1     | 1     | 1     | 1     |
| 2460   | 2     | 1     | 1     | 1     |
| 2462   | 3     | 3     | 3     | 3     |



| respid | Q40_1 | Q40_2 | Q40_3 | Q40_4 |
|--------|-------|-------|-------|-------|
| 2464   | 5     | 5     | 3     | 5     |
| 2465   | 2     | 2     | 2     | 2     |
| 2468   | 2     | 2     | 1     | 1     |
| 2469   |       |       |       |       |
| 2470   | 1     | 1     | 1     | 1     |
| 2471   | 3     | 3     | 3     | 3     |
| 2472   | 1     | 1     | 1     | 1     |
| 2474   | 2     | 1     | 3     | 1     |
| 2476   | 2     | 4     | 2     | 2     |
| 2478   | 1     | 2     | 2     | 1     |
| 2479   | 2     | 2     | 3     | 2     |
| 2480   | 1     | 1     | 2     | 1     |
| 2482   | 1     | 1     | 1     | 1     |
| 2486   | 5     | 1     | 3     | 4     |
| 2488   | 3     | 4     | 3     | 3     |
| 2489   | 1     | 1     | 1     | 1     |
| 2491   | 5     | 1     | 1     | 1     |
| 2495   | 1     | 2     | 1     | 1     |
| 2496   | 1     | 1     | 1     | 1     |
| 2498   | 2     | 2     | 2     | 2     |
| 2501   | 1     | 1     | 1     | 3     |
| 2502   | 4     | 3     | 3     | 3     |
| 2503   | 1     | 1     | 2     | 1     |
| 2504   | 1     | 1     | 1     | 1     |
| 2507   | 2     | 2     | 2     | 1     |
| 2509   | 1     | 2     | 2     | 1     |
| 2512   | 1     | 2     | 2     | 1     |
| 2514   | 1     | 1     | 1     | 1     |
| 2516   | 1     | 1     | 1     | 1     |
| 2517   | 1     | 1     | 1     | 1     |
| 2521   | 1     | 1     | 2     | 1     |
| 2522   | 1     | 1     | 1     | 1     |

| respid | Q40_1 | Q40_2 | Q40_3 | Q40_4 |
|--------|-------|-------|-------|-------|
| 2524   | 2     | 1     | 1     | 1     |
| 2525   | 1     | 1     | 1     | 1     |
| 2526   | 1     | 2     | 1     | 1     |
| 2527   | 1     | 1     | 1     | 1     |
| 2528   | 1     | 2     | 3     | 1     |
| 2531   |       |       |       |       |
| 2533   | 1     | 1     | 3     | 2     |
| 2535   | 1     | 1     | 2     | 2     |
| 2536   | 5     | 4     | 6     | 5     |
| 2539   | 1     | 1     | 1     | 1     |
| 2540   | 1     | 1     | 1     | 1     |
| 2543   | 1     | 1     | 1     | 1     |
| 2546   | 1     | 1     | 2     | 1     |
| 2547   | 1     | 1     | 3     | 2     |
| 2549   | 1     | 1     | 1     | 1     |
| 2553   | 1     | 1     | 1     | 1     |
| 2554   | 1     | 1     | 1     | 1     |
| 2555   | 1     | 2     | 2     | 1     |
| 2556   | 1     | 1     | 1     | 1     |
| 2557   | 1     | 1     | 1     | 1     |
| 2559   | 1     | 1     | 1     | 1     |
| 2560   | 4     | 4     | 5     | 4     |
| 2561   | 3     | 1     | 1     | 1     |
| 2566   | 2     | 2     | 2     | 1     |
| 2567   |       |       |       |       |
| 2570   | 1     | 1     | 1     | 1     |
| 2574   | 5     | 4     | 5     | 5     |
| 2578   | 1     | 1     | 1     | 1     |
| 2580   | 3     | 3     | 3     | 3     |
| 2590   | 1     | 1     | 1     | 1     |
| 2593   | 1     | 1     | 1     | 1     |
| 2594   | 1     | 1     | 2     | 1     |

| respid | Q40_1 | Q40_2 | Q40_3 | Q40_4 |
|--------|-------|-------|-------|-------|
| 2595   | 1     | 2     | 1     | 1     |
| 2596   | 1     | 1     | 1     | 1     |
| 2597   | 4     | 4     | 4     | 4     |
| 2598   | 2     | 2     | 2     | 2     |
| 2602   | 1     | 1     | 1     | 1     |
| 2605   | 3     | 4     | 4     | 1     |
| 2606   |       |       |       |       |
| 2607   | 3     | 2     | 2     | 3     |
| 2608   |       |       |       |       |
| 2609   | 1     | 1     | 1     | 1     |
| 2610   | 1     | 1     | 1     | 1     |
| 2614   |       |       |       |       |
| 2615   | 1     | 1     | 1     | 1     |
| 2616   | 1     | 1     | 2     | 1     |
| 2618   | 1     | 1     | 1     | 1     |
| 2630   | 3     | 4     | 4     | 4     |
| 2633   | 1     | 1     | 6     | 1     |
| 2637   | 1     | 1     | 1     | 1     |
| 2638   | 3     | 2     | 2     | 2     |
| 2641   | 1     | 2     | 2     | 2     |
| 2644   | 1     | 1     | 1     | 1     |
| 2645   | 1     | 1     | 3     | 1     |
| 2646   | 1     | 1     | 1     | 1     |
| 2648   | 1     | 1     | 1     | 1     |
| 2651   |       |       |       |       |
| 2652   | 2     | 3     | 4     | 3     |
| 2653   | 2     | 2     | 2     | 1     |
| 2656   |       |       |       |       |
| 2657   | 1     | 1     | 1     | 1     |
| 2658   | 2     | 2     | 1     | 1     |
| 2661   | 1     | 1     | 1     | 1     |
| 2663   | 1     | 1     | 2     | 1     |

| respid | Q40_1 | Q40_2 | Q40_3 | Q40_4 |
|--------|-------|-------|-------|-------|
| 2665   | 1     | 1     | 1     | 1     |
| 2670   | 1     | 1     | 2     | 1     |
| 2672   | 1     | 1     | 2     | 1     |
| 2673   |       |       |       |       |
| 2677   | 1     | 1     | 1     | 1     |
| 2686   | 4     | 3     | 4     | 5     |
| 2688   | 2     | 2     | 2     | 2     |
| 2689   | 1     | 2     | 2     | 2     |
| 2691   | 1     | 1     | 1     | 1     |
| 2695   | 1     | 4     | 2     | 3     |
| 2696   | 1     | 1     | 1     | 1     |
| 2697   |       |       |       |       |
| 2698   |       |       |       |       |
| 2703   | 1     | 1     | 1     | 1     |
| 2704   | 1     | 1     | 1     | 1     |
| 2706   | 4     | 3     | 2     | 2     |
| 2707   | 1     | 2     | 2     | 1     |
| 2710   | 1     | 1     | 1     | 1     |
| 2711   | 1     | 1     | 1     | 1     |
| 2712   | 1     | 1     | 1     | 1     |
| 2713   |       |       |       |       |
| 2721   |       |       |       |       |
| 2730   | 1     | 1     | 1     | 1     |
| 2731   | 3     | 1     | 1     | 1     |
| 2732   | 1     | 1     | 1     | 1     |
| 2733   | 1     | 1     | 1     | 2     |
| 2735   | 1     | 1     | 1     | 1     |
| 2736   | 1     | 2     | 1     | 1     |
| 2740   | 1     | 1     | 3     | 1     |
| 2741   | 1     | 1     | 1     | 1     |
| 2742   | 1     | 2     | 2     | 2     |
| 2743   | 1     | 1     | 2     | 2     |

| respid | Q40_1 | Q40_2 | Q40_3 | Q40_4 |
|--------|-------|-------|-------|-------|
| 2744   | 1     | 1     | 2     | 2     |
| 2745   | 4     | 3     | 3     | 3     |
| 2749   | 2     | 1     | 1     | 1     |
| 2751   | 1     | 1     | 2     | 1     |
| 2754   | 1     | 2     | 2     | 1     |
| 2755   | 4     | 3     | 2     | 2     |
| 2757   | 1     | 1     | 1     | 1     |
| 2758   | 2     | 2     | 3     | 2     |
| 2759   | 4     | 4     | 2     | 3     |
| 2761   | 1     | 1     | 1     | 1     |
| 2762   | 1     | 2     | 1     | 3     |
| 2763   | 1     | 1     | 1     | 1     |
| 2764   | 6     | 6     | 5     | 5     |
| 2765   | 3     | 2     | 4     | 2     |
| 2766   | 1     | 1     | 1     | 1     |
| 2767   | 6     | 6     | 5     | 1     |
| 2769   | 4     | 2     | 3     | 2     |
| 2770   | 2     | 4     | 2     | 2     |
| 2771   | 2     | 3     | 2     | 3     |
| 2774   | 2     | 2     | 3     | 2     |
| 2777   | 5     | 3     | 3     | 3     |
| 2778   | 1     | 1     | 2     | 1     |
| 2781   | 3     | 3     | 3     | 3     |
| 2782   | 2     | 2     | 2     | 2     |
| 2784   | 1     | 4     | 5     | 1     |
| 2785   | 3     | 3     | 3     | 2     |
| 2786   | 1     | 1     | 2     | 1     |
| 2787   | 3     | 1     | 1     | 1     |
| 2789   | 3     | 3     | 3     | 2     |
| 2790   | 2     | 1     | 2     | 2     |
| 2791   | 1     | 2     | 4     | 2     |
| 2793   | 1     | 3     | 4     | 4     |

| respid | Q40_1 | Q40_2 | Q40_3 | Q40_4 |
|--------|-------|-------|-------|-------|
| 2797   | 1     | 2     | 2     | 2     |
| 2798   | 1     | 1     | 1     | 1     |
| 2799   | 3     | 2     | 2     | 2     |
| 2801   | 1     | 2     | 1     | 2     |
| 2802   | 1     | 3     | 2     | 2     |
| 2803   | 2     | 1     | 3     | 2     |
| 2804   | 6     | 5     | 4     | 6     |
| 2807   | 1     | 1     | 1     | 1     |
| 2809   | 1     | 2     | 2     | 2     |
| 2810   | 6     | 3     | 5     | 3     |
| 2812   | 1     | 1     | 1     | 1     |
| 2814   | 1     | 1     | 1     | 1     |
| 2815   | 1     | 2     | 1     | 1     |
| 2816   | 1     | 2     | 1     | 1     |
| 2817   | 2     | 1     | 2     | 1     |
| 2819   | 2     | 2     | 1     | 1     |
| 2820   | 1     | 1     | 1     | 1     |
| 2821   | 3     | 3     | 4     | 3     |
| 2822   | 3     | 3     | 4     | 5     |
| 2823   | 1     | 3     | 1     | 1     |
| 2824   | 1     | 1     | 2     | 1     |
| 2825   | 3     | 2     | 2     | 1     |
| 2826   | 3     | 1     | 1     | 2     |
| 2827   | 1     | 1     | 1     | 1     |
| 2828   | 1     | 1     | 2     | 1     |
| 2829   | 3     | 3     | 3     | 3     |
| 2830   | 2     | 2     | 3     | 2     |
| 2831   | 1     | 1     | 3     | 1     |
| 2832   | 2     | 5     | 3     | 3     |
| 2833   | 1     | 1     | 1     | 1     |
| 2834   | 1     | 1     | 1     | 1     |
| 2835   | 1     | 2     | 6     | 5     |

| respid | Q40_1 | Q40_2 | Q40_3 | Q40_4 |
|--------|-------|-------|-------|-------|
| 2836   | 1     | 1     | 2     | 1     |
| 2837   | 1     | 1     | 3     | 2     |
| 2838   | 1     | 2     | 3     | 1     |
| 2844   | 3     | 4     | 5     | 5     |
| 2845   | 1     | 1     | 1     | 1     |
| 2847   | 6     | 5     | 5     | 5     |
| 2848   | 1     | 1     | 1     | 1     |
| 2849   | 2     | 2     | 2     | 2     |
| 2851   | 1     | 1     | 2     | 1     |
| 2852   | 1     | 1     | 1     | 1     |
| 2853   | 2     | 2     | 2     | 2     |
| 2854   | 1     | 1     | 1     | 1     |
| 2856   | 1     | 1     | 1     | 1     |
| 2857   | 3     | 2     | 2     | 1     |
| 2858   | 2     | 2     | 2     | 2     |
| 2859   | 3     | 2     | 6     | 2     |
| 2860   | 1     | 2     | 2     | 2     |
| 2861   | 3     | 3     | 3     | 3     |
| 2863   | 1     | 1     | 1     | 1     |
| 2864   | 3     | 2     | 1     | 1     |
| 2866   | 2     | 3     | 1     | 1     |
| 2872   | 1     | 2     | 1     | 1     |
| 2875   | 1     | 1     | 2     | 1     |
| 2879   |       |       |       |       |
| 2881   | 2     | 2     | 3     | 2     |
| 2882   | 1     | 1     | 1     | 1     |
| 2883   | 1     | 1     | 1     | 1     |
| 2884   | 3     | 3     | 3     | 3     |
| 2885   | 2     | 1     | 1     | 1     |
| 2887   | 1     | 1     | 1     | 1     |
| 2888   | 1     | 1     | 2     | 1     |
| 2890   | 1     | 1     | 2     | 1     |

| respid | Q40_1 | Q40_2 | Q40_3 | Q40_4 |
|--------|-------|-------|-------|-------|
| 2891   | 1     | 1     | 1     | 1     |
| 2892   |       |       |       |       |
| 2895   | 1     | 2     | 1     | 1     |
| 2899   | 2     | 1     | 2     | 1     |
| 2900   | 3     | 1     | 1     | 1     |
| 2902   | 6     | 6     | 6     | 6     |
| 2903   |       |       |       |       |
| 2904   | 1     | 1     | 2     | 1     |
| 2906   | 3     | 2     | 1     | 3     |
| 2908   | 1     | 1     | 1     | 1     |
| 2910   | 1     | 1     | 1     | 1     |
| 2917   | 4     | 3     | 3     | 4     |
| 2918   | 2     | 2     | 2     | 2     |
| 2919   | 1     | 1     | 1     | 1     |
| 2920   | 1     | 1     | 2     | 1     |
| 2921   | 5     | 4     | 4     | 5     |
| 2922   | 1     | 1     | 2     | 1     |
| 2923   |       |       |       |       |
| 2924   | 3     | 3     | 4     | 4     |
| 2926   | 1     | 1     | 3     | 1     |
| 2928   | 1     | 2     | 1     | 1     |
| 2930   |       |       |       |       |
| 2931   | 2     | 3     | 2     | 2     |
| 2933   | 1     | 1     | 1     | 1     |
| 2935   | 2     | 1     | 1     | 1     |
| 2936   |       |       |       |       |
| 2937   | 1     | 1     | 2     | 1     |
| 2938   | 1     | 1     | 2     | 1     |
| 2944   | 1     | 1     | 1     | 1     |
| 2945   | 1     | 1     | 1     | 1     |
| 2947   | 1     | 1     | 2     | 1     |
| 2949   | 1     | 1     | 1     | 1     |



| respid | Q40_1 | Q40_2 | Q40_3 | Q40_4 |
|--------|-------|-------|-------|-------|
| 2951   | 5     | 3     | 5     | 3     |
| 2952   | 2     | 2     | 2     | 1     |
| 2953   |       |       |       |       |
| 2955   | 1     | 1     | 1     | 1     |
| 2957   | 1     | 1     | 2     | 1     |
| 2958   | 1     | 1     | 1     | 1     |
| 2960   | 1     | 1     | 2     | 1     |
| 2963   | 1     | 1     | 2     | 1     |
| 2964   | 2     | 1     | 1     | 1     |
| 2967   |       |       |       |       |
| 2968   | 1     | 1     | 1     | 1     |
| 2971   | 2     | 4     | 4     | 4     |
| 2974   | 1     | 1     | 1     | 1     |
| 2975   | 1     | 1     | 1     | 1     |
| 2982   |       |       |       |       |
| 2983   |       |       |       |       |
| 2985   | 1     | 1     | 2     | 1     |
| 2986   | 5     | 4     | 3     | 4     |
| 2987   | 2     | 2     | 2     | 1     |
| 2988   | 2     | 1     | 2     | 1     |
| 2993   | 1     | 1     | 1     | 1     |
| 2996   | 1     | 1     | 1     | 1     |
| 2997   | 1     | 2     | 2     | 3     |
| 2998   | 1     | 1     | 1     | 1     |
| 3004   | 1     | 1     | 1     | 1     |
| 3007   | 3     | 1     | 2     | 1     |
| 3011   | 2     | 2     | 3     | 3     |
| 3012   | 2     | 1     | 3     | 1     |
| 3013   | 1     | 1     | 2     | 1     |
| 3014   |       |       |       |       |
| 3015   | 1     | 1     | 1     | 2     |
| 3016   |       |       |       |       |

| respid | Q40_1 | Q40_2 | Q40_3 | Q40_4 |
|--------|-------|-------|-------|-------|
| 3017   | 1     | 1     | 2     | 1     |
| 3020   | 3     | 3     | 2     | 3     |
| 3022   | 3     | 1     | 2     | 1     |
| 3023   | 2     | 1     | 1     | 1     |
| 3026   | 3     | 4     | 4     | 4     |
| 3038   | 2     | 3     | 3     | 2     |
| 3039   | 3     | 1     | 3     | 2     |
| 3040   | 1     | 1     | 1     | 1     |
| 3041   |       |       |       |       |
| 3042   | 2     | 3     | 2     | 3     |
| 3044   | 5     | 2     | 2     | 1     |
| 3050   | 2     | 1     | 2     | 2     |
| 3052   | 1     | 1     | 1     | 1     |
| 3056   | 4     | 4     | 5     | 5     |
| 3059   | 1     | 1     | 1     | 1     |
| 3060   | 1     | 3     | 2     | 1     |
| 3063   | 1     | 3     | 3     | 2     |
| 3065   | 1     | 1     | 2     | 1     |
| 3067   | 1     | 3     | 1     | 1     |
| 3068   |       |       |       |       |
| 3072   | 4     | 3     | 3     | 3     |
| 3074   | 3     | 1     | 1     | 1     |
| 3075   | 2     | 2     | 2     | 1     |
| 3076   | 1     | 2     | 1     | 1     |
| 3079   | 1     | 1     | 1     | 1     |
| 3082   | 2     | 3     | 3     | 4     |
| 3083   | 1     | 1     | 1     | 1     |
| 3084   | 1     | 1     | 1     | 1     |
| 3085   | 1     | 1     | 1     | 1     |
| 3090   | 1     | 1     | 1     | 1     |
| 3091   | 1     | 2     | 2     | 3     |
| 3092   | 1     | 1     | 1     | 1     |

| respid | Q40_1 | Q40_2 | Q40_3 | Q40_4 |
|--------|-------|-------|-------|-------|
| 3095   | 1     | 1     | 2     | 1     |
| 3096   | 5     | 6     | 6     | 5     |
| 3097   | 1     | 1     | 2     | 2     |
| 3099   | 5     | 5     | 5     | 5     |
| 3101   | 2     | 2     | 2     | 1     |
| 3103   | 1     | 1     | 1     | 1     |
| 3104   | 1     | 1     | 1     | 1     |
| 3105   |       |       |       |       |
| 3107   | 1     | 1     | 1     | 1     |
| 3108   | 3     | 4     | 5     | 4     |
| 3109   | 1     | 1     | 1     | 1     |
| 3116   | 1     | 1     | 2     | 2     |
| 3117   | 4     | 3     | 4     | 2     |
| 3119   | 1     | 1     | 1     | 1     |
| 3120   | 1     | 1     | 1     | 1     |
| 3130   | 2     | 3     | 2     | 2     |
| 3131   | 3     | 3     | 4     | 2     |
| 3133   | 1     | 1     | 1     | 1     |
| 3134   | 3     | 2     | 2     | 2     |
| 3135   | 3     | 1     | 2     | 1     |
| 3145   | 3     | 2     | 6     | 1     |
| 3147   | 1     | 1     | 1     | 1     |
| 3152   | 2     | 1     | 2     | 1     |
| 3155   | 5     | 3     | 6     | 4     |
| 3156   |       |       |       |       |
| 3157   | 2     | 3     | 3     | 2     |
| 3166   | 1     | 2     | 2     | 2     |
| 3169   | 2     | 3     | 2     | 2     |
| 3179   | 2     | 2     | 3     | 1     |
| 3181   | 1     | 2     | 2     | 1     |
| 3185   |       |       |       |       |
| 3190   | 1     | 1     | 1     | 1     |

| respid | Q40_1 | Q40_2 | Q40_3 | Q40_4 |
|--------|-------|-------|-------|-------|
| 3191   |       |       |       |       |
| 3192   | 1     | 1     | 1     | 1     |
| 3193   | 1     | 1     | 1     | 1     |
| 3195   | 1     | 1     | 1     | 1     |
| 3202   | 1     | 2     | 2     | 1     |
| 3204   | 2     | 1     | 1     | 1     |
| 3208   | 1     | 1     | 1     | 1     |
| 3212   | 1     | 2     | 1     | 2     |
| 3218   | 1     | 1     | 1     | 1     |
| 3219   | 1     | 1     | 1     | 1     |
| 3220   | 3     | 2     | 2     | 1     |
| 3221   | 1     | 3     | 1     | 2     |
| 3223   | 1     | 1     | 1     | 1     |
| 3231   | 2     | 2     | 2     | 1     |
| 3232   | 3     | 3     | 3     | 3     |
| 3234   | 2     | 2     | 1     | 2     |
| 3235   | 1     | 1     | 1     | 1     |
| 3237   | 1     | 1     | 1     | 1     |
| 3238   | 1     | 1     | 1     | 1     |
| 3240   | 1     | 6     | 1     | 1     |
| 3241   | 1     | 1     | 2     | 1     |
| 3243   | 1     | 2     | 2     | 2     |
| 3244   | 2     | 2     | 1     | 2     |
| 3247   | 2     | 1     | 1     | 1     |
| 3250   | 1     | 1     | 1     | 1     |
| 3251   | 5     | 5     | 5     | 4     |
| 3255   | 2     | 2     | 1     | 1     |
| 3256   | 1     | 1     | 1     | 1     |
| 3257   | 1     | 1     | 2     | 1     |
| 3258   |       |       |       |       |
| 3259   | 2     | 2     | 2     | 1     |
| 3260   | 1     | 1     | 2     | 1     |

| respid | Q40_1 | Q40_2 | Q40_3 | Q40_4 |
|--------|-------|-------|-------|-------|
| 3261   |       |       |       |       |
| 3262   | 3     | 2     | 3     | 2     |
| 3264   | 2     | 3     | 3     | 3     |
| 3265   | 1     | 1     | 1     | 1     |
| 3267   | 1     | 1     | 2     | 1     |
| 3268   | 1     | 1     | 1     | 1     |
| 3270   | 1     | 1     | 1     | 1     |
| 3271   | 1     | 1     | 1     | 1     |
| 3274   |       |       |       |       |
| 3276   | 1     | 1     | 1     | 1     |
| 3277   | 1     | 1     | 2     | 1     |
| 3279   | 1     | 1     | 1     | 1     |
| 3281   |       |       |       |       |
| 3283   | 3     | 4     | 5     | 1     |
| 3285   | 2     | 3     | 2     | 1     |
| 3286   | 2     | 1     | 1     | 1     |
| 3287   | 1     | 1     | 1     | 1     |
| 3289   | 1     | 1     | 2     | 1     |
| 3290   | 1     | 1     | 1     | 2     |
| 3291   | 1     | 1     | 1     | 1     |
| 3292   | 3     | 3     | 2     | 3     |
| 3293   | 5     | 3     | 3     | 3     |
| 3294   | 1     | 1     | 1     | 2     |
| 3296   | 3     | 2     | 2     | 1     |
| 3306   | 1     | 1     | 1     | 1     |
| 3307   | 3     | 2     | 4     | 2     |
| 3308   | 1     | 2     | 1     | 1     |
| 3312   | 1     | 1     | 1     | 1     |
| 3313   | 1     | 2     | 4     | 3     |
| 3316   | 1     | 1     | 1     | 1     |
| 3317   | 1     | 2     | 2     | 1     |
| 3320   | 1     | 1     | 2     | 1     |

| respid | Q40_1 | Q40_2 | Q40_3 | Q40_4 |
|--------|-------|-------|-------|-------|
| 3321   | 1     | 1     | 1     | 2     |
| 3322   | 2     | 1     | 1     | 1     |
| 3323   | 1     | 1     | 1     | 1     |
| 3325   |       |       |       |       |
| 3332   | 1     | 1     | 1     | 1     |
| 3334   | 1     | 1     | 1     | 1     |
| 3335   | 2     | 1     | 1     | 1     |
| 3341   | 2     | 1     | 1     | 1     |
| 3345   | 1     | 2     | 3     | 3     |
| 3346   | 1     | 1     | 1     | 1     |
| 3349   | 3     | 2     | 2     | 1     |
| 3351   | 1     | 1     | 2     | 1     |
| 3353   | 1     | 1     | 2     | 1     |
| 3354   | 3     | 3     | 1     | 1     |
| 3356   | 2     | 1     | 2     | 1     |
| 3357   | 1     | 1     | 2     | 1     |
| 3360   | 1     | 1     | 3     | 1     |
| 3361   | 1     | 1     | 1     | 1     |
| 3362   | 1     | 1     | 2     | 1     |
| 3363   |       |       |       |       |
| 3364   | 4     | 5     | 5     | 4     |
| 3368   | 1     | 1     | 2     | 1     |
| 3370   | 1     | 1     | 2     | 1     |
| 3371   | 1     | 1     | 1     | 1     |
| 3379   | 1     | 1     | 2     | 1     |
| 3380   | 1     | 2     | 2     | 2     |
| 3382   | 2     | 1     | 2     | 1     |
| 3384   | 2     | 3     | 2     | 3     |
| 3385   | 1     | 1     | 1     | 1     |
| 3388   | 1     | 1     | 2     | 1     |
| 3392   | 1     | 1     | 1     | 1     |
| 3393   | 1     | 1     | 1     | 1     |

| respid | Q40_1 | Q40_2 | Q40_3 | Q40_4 |
|--------|-------|-------|-------|-------|
| 3394   | 3     | 3     | 3     | 2     |
| 3395   | 5     | 5     | 1     | 1     |
| 3396   | 1     | 1     | 1     | 1     |
| 3397   | 1     | 1     | 3     | 1     |
| 3398   | 1     | 1     | 2     | 1     |
| 3399   | 3     | 3     | 3     | 3     |
| 3400   | 1     | 1     | 1     | 1     |
| 3401   | 4     | 4     | 5     | 5     |
| 3402   | 2     | 2     | 3     | 3     |
| 3403   | 2     | 2     | 2     | 2     |
| 3405   | 1     | 2     | 3     | 4     |
| 3407   | 2     | 3     | 3     | 2     |
| 3410   | 1     | 1     | 1     | 1     |
| 3411   | 1     | 1     | 1     | 1     |
| 3413   |       |       |       |       |
| 3414   | 1     | 2     | 1     | 1     |
| 3420   | 1     | 1     | 1     | 1     |
| 3421   | 4     | 5     | 5     | 5     |
| 3425   | 1     | 1     | 2     | 1     |
| 3426   | 2     | 3     | 1     | 2     |
| 3429   | 2     | 1     | 2     | 1     |
| 3430   | 3     | 4     | 3     | 2     |
| 3433   | 1     | 1     | 1     | 1     |
| 3434   | 4     | 3     | 3     | 4     |
| 3437   | 1     | 1     | 1     | 1     |
| 3439   | 2     | 3     | 4     | 2     |
| 3441   | 2     | 3     | 3     | 3     |
| 3442   | 1     | 2     | 2     | 2     |
| 3444   | 1     | 1     | 1     | 1     |
| 3445   | 2     | 3     | 2     | 1     |
| 3450   | 2     | 4     | 3     | 3     |
| 3452   | 2     | 2     | 5     | 1     |

| respid | Q40_1 | Q40_2 | Q40_3 | Q40_4 |
|--------|-------|-------|-------|-------|
| 3456   | 1     | 1     | 1     | 1     |
| 3459   |       |       |       |       |
| 3460   | 1     | 1     | 1     | 1     |
| 3461   | 4     | 1     | 2     | 2     |
| 3466   | 4     | 3     | 4     | 3     |
| 3471   | 2     | 2     | 3     | 1     |
| 3473   | 1     | 1     | 1     | 1     |
| 3475   | 3     | 4     | 3     | 3     |
| 3476   | 3     | 2     | 1     | 1     |
| 3477   | 3     | 2     | 3     | 3     |
| 3478   |       |       |       |       |
| 3479   | 1     | 1     | 2     | 1     |
| 3482   | 1     | 2     | 2     | 1     |
| 3483   | 1     | 1     | 1     | 1     |
| 3485   | 2     | 1     | 2     | 1     |
| 3489   |       |       |       |       |
| 3490   | 2     | 1     | 1     | 1     |
| 3491   | 4     | 3     | 4     | 4     |
| 3494   | 1     | 1     | 1     | 1     |
| 3495   | 3     | 3     | 2     | 2     |
| 3501   | 1     | 1     | 1     | 1     |
| 3506   | 1     | 1     | 3     | 1     |
| 3507   | 1     | 1     | 1     | 1     |
| 3517   | 1     | 1     | 2     | 1     |
| 3520   | 1     | 2     | 2     | 1     |
| 3521   | 2     | 1     | 2     | 1     |
| 3522   | 1     | 2     | 1     | 1     |
| 3524   | 1     | 1     | 1     | 1     |
| 3527   | 1     | 1     | 1     | 1     |
| 3528   | 1     | 1     | 1     | 1     |
| 3529   | 1     | 2     | 2     | 1     |
| 3536   | 1     | 1     | 2     | 1     |



| respid | Q40_1 | Q40_2 | Q40_3 | Q40_4 |
|--------|-------|-------|-------|-------|
| 3537   | 2     | 1     | 1     | 1     |
| 3538   | 1     | 2     | 1     | 1     |
| 3540   | 2     | 3     | 3     | 2     |
| 3545   | 1     | 1     | 1     | 1     |
| 3547   | 2     | 2     | 4     | 4     |
| 3554   | 1     | 2     | 1     | 1     |
| 3556   | 1     | 1     | 1     | 1     |
| 3557   | 1     | 1     | 1     | 1     |
| 3559   | 3     | 3     | 3     | 3     |
| 3560   | 1     | 1     | 4     | 2     |
| 3562   | 1     | 1     | 1     | 1     |
| 3564   | 1     | 2     | 2     | 3     |
| 3565   | 3     | 4     | 5     | 4     |
| 3568   | 3     | 3     | 3     | 3     |
| 3572   |       |       |       |       |
| 3578   |       |       |       |       |
| 3581   | 2     | 1     | 1     | 1     |
| 3583   | 1     | 1     | 2     | 2     |
| 3588   | 1     | 1     | 1     | 1     |
| 3591   | 1     | 1     | 3     | 1     |
| 3594   | 1     | 1     | 1     | 1     |
| 3595   | 2     | 2     | 2     | 2     |
| 3596   | 1     | 1     | 2     | 1     |
| 3597   | 1     | 3     | 1     | 3     |
| 3598   |       |       |       |       |
| 3600   | 3     | 2     | 3     | 2     |
| 3602   | 1     | 1     | 1     | 1     |
| 3604   | 1     | 1     | 1     | 1     |
| 3605   | 2     | 2     | 2     | 2     |
| 3606   | 1     | 1     | 1     | 1     |
| 3607   |       |       |       |       |
| 3610   | 1     | 1     | 1     | 1     |

| respid | Q40_1 | Q40_2 | Q40_3 | Q40_4 |
|--------|-------|-------|-------|-------|
| 3611   | 1     | 1     | 1     | 1     |
| 3612   | 2     | 1     | 2     | 1     |
| 3614   | 1     | 1     | 1     | 1     |
| 3616   | 1     | 1     | 1     | 1     |
| 3617   | 1     | 2     | 2     | 1     |
| 3618   |       |       |       |       |
| 3619   | 3     | 4     | 6     | 5     |
| 3621   | 1     | 4     | 3     | 3     |
| 3622   | 4     | 2     | 2     | 2     |
| 3624   | 1     | 1     | 2     | 1     |
| 3626   | 1     | 1     | 1     | 1     |
| 3629   | 1     | 1     | 1     | 1     |
| 3631   | 1     | 1     | 1     | 1     |
| 3632   | 1     | 1     | 1     | 1     |
| 3638   | 1     | 1     | 1     | 1     |
| 3640   | 1     | 1     | 1     | 1     |
| 3641   | 1     | 2     | 2     | 2     |
| 3645   | 2     | 2     | 4     | 3     |
| 3650   |       |       |       |       |
| 3653   | 2     | 3     | 4     | 2     |
| 3655   | 4     | 2     | 1     | 3     |
| 3657   | 1     | 2     | 2     | 1     |
| 3658   | 2     | 1     | 2     | 1     |
| 3659   | 1     | 1     | 1     | 1     |
| 3664   | 5     | 3     | 4     | 4     |
| 3665   | 1     | 1     | 1     | 1     |
| 3667   | 1     | 1     | 2     | 1     |
| 3668   | 3     | 3     | 4     | 4     |
| 3675   |       |       |       |       |
| 3678   |       |       |       |       |
| 3680   |       |       |       |       |
| 3684   | 2     | 4     | 4     | 3     |

| respid | Q40_1 | Q40_2 | Q40_3 | Q40_4 |
|--------|-------|-------|-------|-------|
| 3685   | 3     | 3     | 3     | 3     |
| 3687   | 1     | 1     | 4     | 1     |
| 3689   | 2     | 3     | 4     | 3     |
| 3690   | 5     | 5     | 3     | 5     |
| 3693   |       |       |       |       |
| 3694   | 1     | 1     | 1     | 1     |
| 3695   |       |       |       |       |
| 3700   | 1     | 1     | 1     | 1     |
| 3701   | 1     | 2     | 1     | 1     |
| 3703   | 5     | 1     | 2     | 2     |
| 3704   | 3     | 4     | 5     | 4     |
| 3705   |       |       |       |       |
| 3709   | 1     | 1     | 2     | 1     |
| 3710   | 1     | 3     | 4     | 3     |
| 3722   | 1     | 1     | 2     | 1     |
| 3725   | 1     | 1     | 1     | 1     |
| 3726   | 1     | 1     | 1     | 1     |
| 3727   | 1     | 1     | 1     | 1     |
| 3728   | 3     | 2     | 3     | 3     |
| 3729   | 1     | 1     | 1     | 1     |
| 3731   |       |       |       |       |
| 3738   | 1     | 1     | 1     | 1     |
| 3739   | 1     | 1     | 1     | 1     |
| 3740   | 1     | 1     | 1     | 1     |
| 3749   | 2     | 2     | 2     | 2     |
| 3758   | 3     | 3     | 3     | 4     |
| 3762   | 1     | 1     | 3     | 1     |
| 3765   | 1     | 1     | 1     | 1     |
| 3770   | 1     | 1     | 1     | 1     |
| 3771   |       |       |       |       |
| 3778   | 1     | 1     | 2     | 1     |
| 3779   | 2     | 2     | 2     | 2     |

| respid | Q40_1 | Q40_2 | Q40_3 | Q40_4 |
|--------|-------|-------|-------|-------|
| 3780   | 1     | 2     | 1     | 1     |
| 3782   | 1     | 1     | 1     | 1     |
| 3784   | 2     | 1     | 1     | 2     |
| 3787   | 1     | 1     | 1     | 1     |
| 3790   | 1     | 1     | 2     | 1     |
| 3791   | 1     | 1     | 1     | 1     |
| 3793   | 3     | 5     | 4     | 3     |
| 3795   | 1     | 1     | 1     | 1     |
| 3799   |       |       |       |       |
| 3801   | 3     | 4     | 4     | 3     |
| 3804   | 2     | 1     | 2     | 1     |
| 3809   | 3     | 1     | 1     | 2     |
| 3810   | 1     | 2     | 2     | 1     |
| 3813   | 2     | 1     | 2     | 2     |
| 3816   | 1     | 1     | 1     | 1     |
| 3820   | 1     | 1     | 2     | 1     |
| 3821   | 1     | 1     | 1     | 1     |
| 3823   | 3     | 2     | 5     | 4     |
| 3828   | 1     | 1     | 1     | 1     |
| 3829   | 3     | 2     | 1     | 1     |
| 3832   | 1     | 1     | 1     | 1     |
| 3835   | 1     | 1     | 1     | 1     |
| 3837   | 3     | 1     | 2     | 1     |
| 3838   | 3     | 3     | 1     | 2     |
| 3839   | 5     | 5     | 4     | 5     |
| 3840   |       |       |       |       |
| 3842   |       |       |       |       |
| 3843   | 6     | 1     | 2     | 1     |
| 3844   | 2     | 2     | 3     | 2     |
| 3850   | 2     | 2     | 2     | 2     |
| 3851   |       |       |       |       |
| 3856   | 1     | 3     | 3     | 2     |

| respid | Q40_1 | Q40_2 | Q40_3 | Q40_4 |
|--------|-------|-------|-------|-------|
| 3859   | 2     | 3     | 3     | 3     |
| 3860   | 1     | 1     | 1     | 1     |
| 3863   | 1     | 1     | 2     | 2     |
| 3866   | 1     | 1     | 1     | 1     |
| 3867   | 1     | 1     | 1     | 1     |
| 3870   | 6     | 1     | 2     | 1     |
| 3873   | 2     | 5     | 2     | 5     |
| 3875   | 1     | 1     | 1     | 1     |
| 3878   | 1     | 2     | 1     | 1     |
| 3881   | 1     | 1     | 1     | 1     |
| 3883   | 3     | 2     | 2     | 3     |
| 3884   | 3     | 2     | 2     | 2     |
| 3885   | 4     | 3     | 4     | 3     |
| 3886   | 3     | 4     | 3     | 3     |
| 3887   | 1     | 1     | 1     | 1     |
| 3888   |       |       |       |       |
| 3889   | 2     | 3     | 5     | 4     |
| 3890   | 1     | 1     | 1     | 1     |
| 3896   | 1     | 1     | 2     | 1     |
| 3902   | 5     | 5     | 6     | 5     |
| 3909   | 1     | 1     | 2     | 1     |
| 3912   | 2     | 1     | 2     | 2     |
| 3922   | 1     | 1     | 1     | 1     |
| 3928   | 3     | 1     | 2     | 1     |
| 3930   | 2     | 1     | 2     | 1     |
| 3931   | 3     | 4     | 4     | 4     |
| 3933   | 1     | 3     | 2     | 1     |
| 3935   | 1     | 1     | 1     | 1     |
| 3937   | 1     | 1     | 1     | 1     |
| 3939   | 5     | 2     | 2     | 1     |
| 3942   | 1     | 1     | 1     | 1     |
| 3943   | 2     | 2     | 2     | 3     |

| respid | Q40_1 | Q40_2 | Q40_3 | Q40_4 |
|--------|-------|-------|-------|-------|
| 3944   |       |       |       |       |
| 3945   | 1     | 1     | 1     | 1     |
| 3947   | 1     | 2     | 1     | 2     |
| 3948   | 2     | 3     | 2     | 2     |
| 3951   | 2     | 1     | 2     | 1     |
| 3959   | 1     | 1     | 1     | 1     |
| 3969   | 5     | 5     | 5     | 5     |
| 3973   | 1     | 1     | 2     | 1     |
| 3975   | 1     | 3     | 3     | 2     |
| 3976   | 1     | 1     | 1     | 1     |
| 3977   | 2     | 2     | 3     | 2     |
| 3978   | 1     | 1     | 1     | 1     |
| 3994   | 1     | 1     | 2     | 1     |
| 3995   | 2     | 2     | 5     | 2     |
| 3997   | 1     | 1     | 2     | 1     |
| 3998   | 1     | 1     | 1     | 1     |
| 3999   | 2     | 2     | 2     | 2     |
| 4002   | 2     | 2     | 3     | 2     |
| 4004   | 2     | 3     | 2     | 2     |
| 4005   |       |       |       |       |
| 4006   | 2     | 3     | 3     | 4     |
| 4008   | 1     | 1     | 1     | 1     |
| 4010   | 2     | 1     | 2     | 2     |
| 4011   | 2     | 2     | 3     | 4     |
| 4013   | 1     | 1     | 2     | 1     |
| 4014   | 1     | 1     | 2     | 1     |
| 4016   | 2     | 2     | 1     | 1     |
| 4017   | 1     | 1     | 3     | 1     |
| 4019   | 1     | 1     | 1     | 1     |
| 4021   |       |       |       |       |
| 4023   | 1     | 2     | 1     | 3     |
| 4024   | 1     | 1     | 1     | 1     |

| respid | Q40_1 | Q40_2 | Q40_3 | Q40_4 |
|--------|-------|-------|-------|-------|
| 4025   | 2     | 3     | 3     | 2     |
| 4027   | 1     | 1     | 1     | 1     |
| 4032   |       |       |       |       |
| 4034   | 2     | 1     | 1     | 1     |
| 4035   | 5     | 4     | 4     | 4     |
| 4037   | 1     | 2     | 2     | 3     |
| 4040   | 2     | 1     | 2     | 1     |
| 4041   | 1     | 1     | 2     | 1     |
| 4042   | 1     | 1     | 2     | 1     |
| 4043   | 1     | 6     | 1     | 1     |
| 4045   | 3     | 2     | 2     | 3     |
| 4046   | 1     | 3     | 4     | 1     |
| 4048   | 1     | 1     | 2     | 1     |
| 4049   | 1     | 1     | 3     | 1     |
| 4050   | 2     | 2     | 2     | 1     |
| 4052   | 1     | 2     | 2     | 1     |
| 4053   |       |       |       |       |
| 4060   | 1     | 1     | 1     | 1     |
| 4065   | 4     | 4     | 3     | 3     |
| 4066   | 1     | 1     | 2     | 2     |
| 4067   | 1     | 1     | 1     | 1     |
| 4068   | 3     | 3     | 3     | 3     |
| 4069   | 1     | 1     | 2     | 1     |
| 4070   | 1     | 1     | 1     | 1     |
| 4071   | 4     | 3     | 3     | 3     |
| 4072   | 2     | 1     | 2     | 1     |
| 4073   | 1     | 1     | 1     | 1     |
| 4074   | 2     | 1     | 1     | 1     |
| 4075   | 4     | 2     | 1     | 1     |
| 4078   | 2     | 1     | 1     | 1     |
| 4080   | 1     | 1     | 1     | 1     |
| 4081   |       |       |       |       |

| respid | Q40_1 | Q40_2 | Q40_3 | Q40_4 |
|--------|-------|-------|-------|-------|
| 4082   | 1     | 1     | 1     | 1     |
| 4083   | 3     | 2     | 2     | 2     |
| 4084   | 1     | 1     | 1     | 1     |
| 4086   |       |       |       |       |
| 4087   | 1     | 1     | 1     | 1     |
| 4088   | 2     | 2     | 5     | 5     |
| 4089   | 1     | 1     | 1     | 1     |
| 4090   | 5     | 2     | 2     | 2     |
| 4093   | 2     | 2     | 2     | 1     |
| 4094   | 1     | 1     | 1     | 1     |
| 4095   | 1     | 1     | 3     | 1     |
| 4096   |       |       |       |       |
| 4098   | 1     | 1     | 1     | 1     |
| 4103   | 2     | 3     | 2     | 2     |
| 4104   | 1     | 2     | 2     | 2     |
| 4107   | 1     | 1     | 1     | 1     |
| 4109   | 1     | 2     | 1     | 1     |
| 4110   | 1     | 3     | 5     | 1     |
| 4113   | 2     | 1     | 1     | 1     |
| 4114   | 1     | 1     | 1     | 1     |
| 4116   | 1     | 2     | 1     | 1     |
| 4119   | 1     | 1     | 2     | 1     |
| 4120   | 1     | 1     | 1     | 1     |
| 4121   | 2     | 1     | 1     | 1     |
| 4122   | 3     | 2     | 2     | 2     |
| 4124   | 2     | 2     | 2     | 1     |
| 4126   | 1     | 1     | 2     | 1     |
| 4127   | 5     | 5     | 5     | 5     |
| 4131   | 1     | 1     | 4     | 1     |
| 4134   | 2     | 1     | 1     | 1     |
| 4144   | 2     | 1     | 1     | 1     |
| 4145   | 1     | 1     | 1     | 1     |



| respid | Q40_1 | Q40_2 | Q40_3 | Q40_4 |
|--------|-------|-------|-------|-------|
| 4146   | 1     | 1     | 1     | 1     |
| 4147   | 1     | 1     | 1     | 1     |
| 4149   | 2     | 2     | 4     | 1     |
| 4150   |       |       |       |       |
| 4151   | 5     | 4     | 4     | 4     |
| 4153   | 1     | 1     | 1     | 1     |
| 4155   | 1     | 1     | 1     | 1     |
| 4157   | 1     | 2     | 2     | 1     |
| 4159   | 1     | 1     | 1     | 1     |
| 4160   | 1     | 1     | 1     | 1     |
| 4161   | 1     | 1     | 1     | 1     |
| 4163   | 2     | 1     | 3     | 1     |
| 4164   | 1     | 2     | 2     | 1     |
| 4165   | 1     | 2     | 2     | 1     |
| 4166   | 2     | 2     | 1     | 1     |
| 4167   | 1     | 1     | 1     | 1     |
| 4170   | 2     | 3     | 2     | 2     |
| 4172   | 5     | 1     | 1     | 1     |
| 4173   | 2     | 2     | 5     | 3     |
| 4180   | 2     | 1     | 2     | 2     |
| 4185   | 4     | 5     | 2     | 1     |
| 4187   | 1     | 1     | 1     | 1     |
| 4190   | 1     | 1     | 1     | 1     |
| 4191   | 3     | 3     | 3     | 4     |
| 4193   |       |       |       |       |
| 4194   | 1     | 1     | 1     | 1     |
| 4195   | 1     | 2     | 1     | 1     |
| 4196   |       |       |       |       |
| 4197   | 2     | 2     | 1     | 1     |
| 4198   | 1     | 1     | 2     | 1     |
| 4199   | 1     | 1     | 1     | 1     |
| 4205   | 1     | 1     | 2     | 1     |

| respid | Q40_1 | Q40_2 | Q40_3 | Q40_4 |
|--------|-------|-------|-------|-------|
| 4206   |       |       |       |       |
| 4207   | 1     | 2     | 2     | 2     |
| 4214   | 1     | 1     | 1     | 1     |
| 4215   | 1     | 1     | 1     | 1     |
| 4217   | 1     | 1     | 1     | 1     |
| 4219   | 1     | 1     | 1     | 1     |
| 4223   | 2     | 3     | 3     | 3     |
| 4226   | 3     | 1     | 1     | 1     |
| 4229   | 1     | 1     | 1     | 1     |
| 4230   | 2     | 1     | 2     | 1     |
| 4232   | 1     | 1     | 1     | 1     |
| 4233   | 1     | 1     | 1     | 1     |
| 4234   | 3     | 3     | 5     | 2     |
| 4235   | 2     | 2     | 2     | 2     |
| 4236   | 1     | 1     | 2     | 1     |
| 4237   | 1     | 1     | 1     | 1     |
| 4238   | 1     | 2     | 1     | 1     |
| 4240   | 1     | 1     | 1     | 1     |
| 4241   | 1     | 1     | 2     | 1     |
| 4247   | 2     | 1     | 1     | 1     |
| 4250   | 1     | 1     | 1     | 1     |
| 4251   | 2     | 2     | 2     | 2     |
| 4253   | 3     | 3     | 2     | 4     |
| 4254   | 1     | 1     | 2     | 1     |
| 4258   | 4     | 4     | 4     | 3     |
| 4260   | 1     | 1     | 1     | 1     |
| 4263   | 6     | 3     | 2     | 1     |
| 4265   | 1     | 1     | 1     | 1     |
| 4266   | 1     | 1     | 1     | 1     |
| 4267   | 2     | 1     | 2     | 1     |
| 4270   | 1     | 1     | 1     | 1     |
| 4273   | 1     | 1     | 1     | 1     |

| respid | Q40_1 | Q40_2 | Q40_3 | Q40_4 |
|--------|-------|-------|-------|-------|
| 4280   | 1     | 1     | 2     | 1     |
| 4281   | 1     | 1     | 1     | 1     |
| 4282   | 1     | 1     | 1     | 1     |
| 4283   |       |       |       |       |
| 4286   | 2     | 3     | 2     | 2     |
| 4287   | 1     | 1     | 1     | 1     |
| 4289   | 1     | 1     | 3     | 1     |
| 4290   | 5     | 4     | 3     | 4     |
| 4291   | 1     | 2     | 1     | 1     |
| 4292   | 1     | 2     | 2     | 1     |
| 4293   | 1     | 1     | 1     | 1     |
| 4294   | 3     | 4     | 2     | 2     |
| 4295   |       |       |       |       |
| 4296   | 3     | 3     | 3     | 3     |
| 4297   | 1     | 2     | 1     | 1     |
| 4298   | 1     | 1     | 1     | 1     |
| 4299   | 1     | 1     | 1     | 1     |
| 4300   | 1     | 1     | 1     | 1     |
| 4301   |       |       |       |       |
| 4302   | 1     | 1     | 1     | 1     |
| 4304   | 1     | 1     | 2     | 1     |
| 4305   | 1     | 2     | 2     | 2     |
| 4307   | 3     | 4     | 4     | 3     |
| 4308   | 1     | 1     | 1     | 1     |
| 4312   |       |       |       |       |
| 4314   | 3     | 3     | 2     | 2     |
| 4316   | 1     | 2     | 1     | 1     |
| 4317   | 3     | 5     | 3     | 4     |
| 4319   | 3     | 5     | 3     | 4     |
| 4323   | 1     | 1     | 2     | 2     |
| 4337   | 1     | 1     | 1     | 1     |
| 4341   | 2     | 2     | 3     | 2     |

| respid | Q40_1 | Q40_2 | Q40_3 | Q40_4 |
|--------|-------|-------|-------|-------|
| 4342   | 1     | 2     | 2     | 1     |
| 4344   | 3     | 2     | 2     | 1     |
| 4345   | 2     | 1     | 2     | 1     |
| 4346   | 4     | 4     | 4     | 4     |
| 4347   | 1     | 1     | 1     | 1     |
| 4350   |       |       |       |       |
| 4352   | 1     | 1     | 1     | 1     |
| 4353   |       |       |       |       |
| 4355   | 1     | 1     | 1     | 1     |
| 4356   | 1     | 2     | 1     | 1     |
| 4358   |       |       |       |       |
| 4359   | 1     | 1     | 1     | 1     |
| 4360   | 2     | 2     | 2     | 1     |
| 4361   | 3     | 5     | 5     | 5     |
| 4363   | 2     | 1     | 1     | 1     |
| 4364   | 1     | 3     | 1     | 1     |
| 4365   | 5     | 3     | 2     | 1     |
| 4367   | 2     | 1     | 1     | 5     |
| 4369   | 1     | 2     | 2     | 2     |
| 4373   | 5     | 3     | 3     | 2     |
| 4374   | 3     | 4     | 3     | 2     |
| 4375   |       |       |       |       |
| 4378   | 1     | 1     | 1     | 1     |
| 4379   | 2     | 2     | 2     | 1     |
| 4382   | 1     | 2     | 3     | 1     |
| 4383   |       |       |       |       |
| 4384   | 3     | 1     | 2     | 1     |
| 4385   | 2     | 1     | 2     | 2     |
| 4388   | 3     | 2     | 2     | 2     |
| 4389   | 2     | 1     | 1     | 1     |
| 4391   | 1     | 1     | 1     | 1     |
| 4392   | 1     | 1     | 1     | 1     |

| respid | Q40_1 | Q40_2 | Q40_3 | Q40_4 |
|--------|-------|-------|-------|-------|
| 4393   | 2     | 1     | 1     | 1     |
| 4395   | 1     | 1     | 2     | 1     |
| 4397   | 1     | 1     | 1     | 1     |
| 4398   | 1     | 1     | 1     | 1     |
| 4399   | 1     | 1     | 1     | 1     |
| 4400   |       |       |       |       |
| 4401   | 1     | 1     | 3     | 1     |
| 4402   | 1     | 1     | 1     | 1     |
| 4404   | 1     | 1     | 1     | 1     |
| 4405   |       |       |       |       |
| 4407   | 1     | 1     | 3     | 1     |
| 4408   | 5     | 2     | 4     | 2     |
| 4411   |       |       |       |       |
| 4420   | 1     | 2     | 1     | 1     |
| 4421   | 1     | 1     | 1     | 1     |
| 4424   | 5     | 4     | 6     | 5     |
| 4425   | 1     | 1     | 2     | 1     |
| 4427   | 1     | 1     | 1     | 1     |
| 4430   | 1     | 1     | 2     | 2     |
| 4431   | 2     | 2     | 2     | 1     |
| 4432   | 1     | 1     | 1     | 1     |
| 4436   | 2     | 1     | 2     | 1     |
| 4439   | 1     | 1     | 1     | 1     |
| 4451   | 4     | 2     | 2     | 2     |
| 4452   | 2     | 3     | 3     | 4     |
| 4458   | 1     | 1     | 1     | 1     |
| 4464   | 1     | 3     | 2     | 2     |
| 4465   | 3     | 2     | 1     | 1     |
| 4467   | 1     | 1     | 1     | 1     |
| 4470   | 2     | 4     | 3     | 2     |
| 4471   | 1     | 1     | 1     | 1     |
| 4472   | 2     | 1     | 3     | 1     |

| respid | Q40_1 | Q40_2 | Q40_3 | Q40_4 |
|--------|-------|-------|-------|-------|
| 4473   | 3     | 2     | 1     | 1     |
| 4475   | 1     | 1     | 2     | 1     |
| 4476   | 2     | 2     | 2     | 1     |
| 4478   | 1     | 1     | 1     | 1     |
| 4485   | 1     | 1     | 1     | 1     |
| 4486   | 1     | 1     | 2     | 1     |
| 4490   |       |       |       |       |
| 4502   |       |       |       |       |
| 4503   | 4     | 5     | 5     | 3     |
| 4504   | 1     | 1     | 1     | 1     |
| 4506   | 1     | 1     | 2     | 1     |
| 4508   | 1     | 1     | 2     | 1     |
| 4515   | 1     | 1     | 1     | 1     |
| 4516   | 4     | 3     | 4     | 3     |
| 4519   | 1     | 1     | 1     | 1     |
| 4523   | 2     | 2     | 1     | 2     |
| 4525   | 1     | 1     | 1     | 1     |
| 4526   | 1     | 1     | 1     | 1     |
| 4528   |       |       |       |       |
| 4530   | 1     | 1     | 1     | 1     |
| 4531   | 4     | 3     | 5     | 4     |
| 4532   | 1     | 1     | 1     | 1     |
| 4537   | 1     | 2     | 1     | 1     |
| 4538   | 1     | 1     | 1     | 1     |
| 4539   | 1     | 2     | 2     | 1     |
| 4541   | 1     | 4     | 1     | 1     |
| 4543   |       |       |       |       |
| 4544   | 1     | 1     | 1     | 1     |
| 4546   | 1     | 1     | 1     | 1     |
| 4547   | 1     | 1     | 2     | 1     |
| 4549   |       |       |       |       |
| 4550   | 2     | 2     | 2     | 2     |

| respid | Q40_1 | Q40_2 | Q40_3 | Q40_4 |
|--------|-------|-------|-------|-------|
| 4551   | 1     | 1     | 1     | 1     |
| 4554   | 1     | 1     | 1     | 1     |
| 4557   |       |       |       |       |
| 4565   | 1     | 1     | 2     | 1     |
| 4568   | 1     | 1     | 2     | 1     |
| 4569   | 1     | 1     | 1     | 1     |
| 4570   | 1     | 1     | 2     | 1     |
| 4572   | 1     | 1     | 2     | 1     |
| 4574   | 1     | 1     | 1     | 1     |
| 4576   | 2     | 1     | 6     | 2     |
| 4578   | 1     | 1     | 1     | 1     |
| 4579   |       |       |       |       |
| 4580   | 1     | 2     | 3     | 3     |
| 4581   |       |       |       |       |
| 4584   | 1     | 1     | 1     | 1     |
| 4586   | 2     | 2     | 2     | 2     |
| 4587   | 2     | 4     | 4     | 4     |
| 4590   | 1     | 1     | 1     | 1     |
| 4592   | 1     | 1     | 2     | 1     |
| 4593   | 3     | 1     | 1     | 1     |
| 4595   | 1     | 1     | 2     | 1     |
| 4597   | 1     | 1     | 1     | 1     |
| 4598   | 3     | 3     | 3     | 3     |
| 4599   | 1     | 3     | 3     | 1     |
| 4600   | 3     | 1     | 2     | 1     |
| 4601   | 2     | 2     | 2     | 2     |
| 4608   | 1     | 1     | 2     | 1     |
| 4609   | 1     | 1     | 2     | 1     |
| 4611   | 1     | 1     | 2     | 1     |
| 4612   | 2     | 2     | 4     | 2     |
| 4613   |       |       |       |       |
| 4616   | 2     | 2     | 4     | 2     |

| respid | Q40_1 | Q40_2 | Q40_3 | Q40_4 |
|--------|-------|-------|-------|-------|
| 4617   | 2     | 2     | 2     | 2     |
| 4620   | 1     | 2     | 3     | 2     |
| 4621   | 1     | 1     | 1     | 1     |
| 4622   | 2     | 2     | 2     | 2     |
| 4624   | 1     | 2     | 1     | 1     |
| 4625   | 1     | 2     | 2     | 2     |
| 4627   | 2     | 3     | 5     | 3     |
| 4628   | 3     | 3     | 3     | 3     |
| 4629   |       |       |       |       |
| 4630   | 3     | 3     | 2     | 2     |
| 4632   | 1     | 1     | 1     | 1     |
| 4634   | 2     | 2     | 2     | 2     |
| 4635   | 1     | 3     | 3     | 3     |
| 4636   | 1     | 1     | 1     | 1     |
| 4637   | 2     | 2     | 2     | 2     |
| 4638   | 3     | 3     | 3     | 3     |
| 4639   | 1     | 2     | 2     | 2     |
| 4641   | 1     | 1     | 1     | 1     |
| 4643   | 1     | 1     | 2     | 1     |
| 4645   | 1     | 2     | 1     | 1     |
| 4646   | 2     | 2     | 2     | 2     |
| 4647   |       |       |       |       |
| 4648   | 1     | 1     | 1     | 1     |
| 4649   | 1     | 2     | 1     | 1     |
| 4650   | 3     | 4     | 5     | 3     |
| 4651   | 1     | 2     | 2     | 1     |
| 4652   | 2     | 1     | 2     | 2     |
| 4653   |       |       |       |       |
| 4657   |       |       |       |       |
| 4660   | 1     | 4     | 4     | 5     |
| 4661   | 2     | 1     | 1     | 1     |
| 4662   | 3     | 2     | 2     | 1     |



| respid | Q40_1 | Q40_2 | Q40_3 | Q40_4 |
|--------|-------|-------|-------|-------|
| 4667   | 2     | 1     | 2     | 1     |
| 4669   | 1     | 1     | 1     | 1     |
| 4671   |       |       |       |       |
| 4672   | 1     | 3     | 4     | 2     |
| 4673   | 1     | 1     | 2     | 1     |
| 4677   |       |       |       |       |
| 4679   | 4     | 5     | 2     | 1     |
| 4683   | 1     | 1     | 1     | 1     |
| 4684   | 1     | 1     | 3     | 1     |
| 4685   | 2     | 2     | 2     | 1     |
| 4686   | 1     | 1     | 1     | 1     |
| 4687   | 1     | 1     | 1     | 1     |
| 4688   | 1     | 1     | 1     | 1     |
| 4691   | 1     | 1     | 1     | 1     |
| 4692   | 1     | 1     | 1     | 1     |
| 4694   | 2     | 2     | 3     | 3     |
| 4695   | 1     | 2     | 3     | 1     |
| 4696   | 1     | 1     | 1     | 1     |
| 4697   |       |       |       |       |
| 4698   | 3     | 3     | 4     | 4     |
| 4699   | 1     | 1     | 1     | 1     |
| 4701   |       |       |       |       |
| 4703   | 1     | 1     | 2     | 1     |
| 4704   | 5     | 4     | 5     | 5     |
| 4705   | 1     | 1     | 1     | 1     |
| 4706   | 1     | 1     | 1     | 1     |
| 4707   | 1     | 1     | 1     | 1     |
| 4708   | 1     | 1     | 1     | 1     |
| 4710   | 1     | 3     | 2     | 1     |
| 4711   | 3     | 3     | 4     | 3     |
| 4715   |       |       |       |       |
| 4716   | 1     | 2     | 1     | 1     |

| respid | Q40_1 | Q40_2 | Q40_3 | Q40_4 |
|--------|-------|-------|-------|-------|
| 4717   | 1     | 1     | 1     | 1     |
| 4718   | 2     | 2     | 3     | 2     |
| 4722   | 2     | 2     | 2     | 2     |
| 4727   | 2     | 3     | 2     | 2     |
| 4728   | 6     | 6     | 6     | 5     |
| 4729   | 2     | 1     | 1     | 1     |
| 4732   | 1     | 2     | 1     | 1     |
| 4733   | 1     | 1     | 1     | 1     |
| 4734   | 1     | 2     | 1     | 1     |
| 4735   | 1     | 1     | 1     | 1     |
| 4737   | 1     | 1     | 1     | 1     |
| 4738   | 1     | 1     | 1     | 1     |
| 4740   | 1     | 1     | 1     | 1     |
| 4741   | 3     | 3     | 2     | 2     |
| 4743   | 1     | 1     | 1     | 1     |
| 4746   | 1     | 2     | 1     | 1     |
| 4750   | 1     | 1     | 1     | 1     |
| 4752   | 1     | 1     | 1     | 1     |
| 4753   | 2     | 1     | 2     | 1     |
| 4754   | 3     | 3     | 4     | 4     |
| 4755   | 2     | 2     | 4     | 4     |
| 4758   | 5     | 2     | 3     | 2     |
| 4766   |       |       |       |       |
| 4767   | 1     | 1     | 2     | 1     |
| 4768   | 1     | 1     | 3     | 1     |
| 4769   | 4     | 4     | 4     | 3     |
| 4771   | 5     | 4     | 4     | 5     |
| 4772   | 1     | 2     | 1     | 1     |
| 4773   | 2     | 2     | 2     | 2     |
| 4774   | 1     | 2     | 2     | 1     |
| 4776   | 2     | 3     | 4     | 3     |
| 4777   | 1     | 1     | 2     | 1     |

| respid | Q40_1 | Q40_2 | Q40_3 | Q40_4 |
|--------|-------|-------|-------|-------|
| 4779   |       |       |       |       |
| 4780   | 2     | 1     | 1     | 1     |
| 4781   | 1     | 2     | 1     | 1     |
| 4783   | 5     | 4     | 3     | 3     |
| 4784   | 1     | 1     | 1     | 1     |
| 4785   | 1     | 1     | 2     | 1     |
| 4788   |       |       |       |       |
| 4789   | 1     | 5     | 3     | 2     |
| 4790   | 1     | 1     | 1     | 1     |
| 4791   |       |       |       |       |
| 4794   |       |       |       |       |
| 4795   | 6     | 1     | 1     | 1     |
| 4797   | 1     | 1     | 1     | 1     |
| 4802   | 4     | 3     | 3     | 2     |
| 4803   | 4     | 3     | 2     | 2     |
| 4804   |       |       |       |       |
| 4805   | 1     | 1     | 1     | 1     |
| 4807   |       |       |       |       |
| 4808   | 2     | 2     | 2     | 1     |
| 4809   | 4     | 3     | 5     | 5     |
| 4811   | 2     | 1     | 1     | 1     |
| 4817   |       |       |       |       |
| 4819   | 1     | 1     | 1     | 1     |
| 4820   |       |       |       |       |
| 4821   | 2     | 1     | 2     | 3     |
| 4822   | 1     | 1     | 1     | 1     |
| 4823   | 2     | 1     | 2     | 2     |
| 4825   | 1     | 1     | 1     | 1     |
| 4826   |       |       |       |       |
| 4830   | 1     | 1     | 1     | 1     |
| 4832   |       |       |       |       |
| 4838   | 2     | 2     | 2     | 2     |

| respid | Q40_1 | Q40_2 | Q40_3 | Q40_4 |
|--------|-------|-------|-------|-------|
| 4840   | 2     | 1     | 1     | 1     |
| 4841   |       |       |       |       |
| 4843   | 1     | 1     | 1     | 1     |
| 4845   | 1     | 2     | 2     | 3     |
| 4846   | 3     | 3     | 3     | 3     |
| 4848   | 2     | 1     | 1     | 1     |
| 4853   | 1     | 1     | 1     | 1     |
| 4854   | 1     | 1     | 1     | 1     |
| 4859   | 2     | 2     | 1     | 1     |
| 4861   |       |       |       |       |
| 4864   | 1     | 5     | 1     | 1     |
| 4867   |       |       |       |       |
| 4870   | 1     | 2     | 1     | 1     |
| 4872   | 2     | 2     | 1     | 2     |
| 4873   | 1     | 3     | 2     | 1     |
| 4874   | 1     | 1     | 1     | 1     |
| 4878   | 1     | 1     | 2     | 1     |
| 4880   | 1     | 1     | 1     | 1     |
| 4881   | 1     | 1     | 1     | 1     |
| 4882   | 4     | 3     | 3     | 3     |
| 4883   | 1     | 1     | 1     | 1     |
| 4885   | 1     | 1     | 1     | 1     |
| 4889   |       |       |       |       |
| 4890   |       |       |       |       |
| 4891   | 2     | 1     | 1     | 2     |
| 4894   | 1     | 2     | 1     | 1     |
| 4895   | 3     | 2     | 4     | 4     |
| 4896   | 1     | 1     | 1     | 1     |
| 4897   | 1     | 1     | 1     | 1     |
| 4898   | 3     | 3     | 2     | 2     |
| 4899   |       |       |       |       |
| 4900   | 1     | 3     | 4     | 1     |

| respid | Q40_1 | Q40_2 | Q40_3 | Q40_4 |
|--------|-------|-------|-------|-------|
| 4901   | 1     | 1     | 1     | 1     |
| 4903   | 1     | 2     | 2     | 1     |
| 4904   | 1     | 1     | 1     | 1     |
| 4908   | 1     | 1     | 1     | 1     |
| 4909   | 3     | 2     | 3     | 1     |
| 4913   | 1     | 1     | 1     | 3     |
| 4917   | 1     | 1     | 2     | 1     |
| 4918   | 2     | 2     | 3     | 2     |
| 4920   |       |       |       |       |
| 4921   | 1     | 1     | 2     | 1     |
| 4925   | 6     | 2     | 1     | 2     |
| 4926   | 1     | 1     | 1     | 1     |
| 4927   | 1     | 1     | 1     | 1     |
| 4928   | 1     | 1     | 2     | 1     |
| 4929   | 1     | 1     | 2     | 1     |
| 4930   | 4     | 4     | 4     | 4     |
| 4931   | 1     | 1     | 1     | 1     |
| 4932   | 3     | 4     | 4     | 3     |
| 4933   | 2     | 1     | 1     | 1     |
| 4934   | 1     | 1     | 1     | 1     |
| 5934   | 1     | 1     | 1     | 1     |
| 5935   | 2     | 3     | 3     | 2     |
| 5936   | 2     | 1     | 1     | 1     |
| 5938   |       |       |       |       |
| 5939   | 1     | 1     | 1     | 1     |
| 5940   | 1     | 3     | 1     | 2     |
| 5942   | 5     | 2     | 1     | 1     |
| 5944   | 1     | 1     | 2     | 1     |
| 5951   | 3     | 4     | 5     | 5     |
| 5952   | 1     | 1     | 2     | 2     |
| 5954   | 2     | 1     | 1     | 1     |
| 5956   | 1     | 1     | 2     | 1     |

| respid | Q40_1 | Q40_2 | Q40_3 | Q40_4 |
|--------|-------|-------|-------|-------|
| 5957   | 1     | 1     | 3     | 1     |
| 5958   | 2     | 2     | 2     | 2     |
| 5959   | 3     | 3     | 3     | 3     |
| 5960   | 1     | 1     | 2     | 1     |
| 5963   | 2     | 1     | 3     | 2     |
| 5966   | 2     | 1     | 1     | 2     |
| 5968   | 1     | 1     | 2     | 1     |
| 5974   | 1     | 1     | 2     | 1     |
| 5975   | 1     | 1     | 1     | 1     |
| 5976   | 3     | 2     | 2     | 3     |
| 5977   | 1     | 1     | 2     | 1     |
| 5978   | 3     | 3     | 3     | 3     |
| 5979   | 3     | 2     | 2     | 1     |
| 5983   | 1     | 1     | 1     | 1     |
| 5984   | 2     | 1     | 1     | 1     |
| 5990   | 1     | 1     | 1     | 1     |
| 5991   | 1     | 1     | 1     | 1     |
| 5992   |       |       |       |       |
| 5993   | 1     | 2     | 2     | 1     |
| 5994   | 1     | 1     | 1     | 1     |
| 5996   | 1     | 1     | 1     | 1     |
| 6001   | 3     | 3     | 3     | 3     |
| 6003   | 1     | 1     | 1     | 1     |
| 6004   | 1     | 3     | 2     | 2     |
| 6005   | 2     | 1     | 1     | 2     |
| 6006   | 1     | 1     | 1     | 1     |
| 6008   | 1     | 2     | 1     | 1     |
| 6009   | 1     | 2     | 3     | 1     |
| 6014   |       |       |       |       |
| 6016   | 2     | 2     | 2     | 2     |
| 6017   | 1     | 2     | 2     | 1     |
| 6018   | 3     | 2     | 2     | 2     |

| respid | Q40_1 | Q40_2 | Q40_3 | Q40_4 |
|--------|-------|-------|-------|-------|
| 6020   | 2     | 3     | 5     | 1     |
| 6021   |       |       |       |       |
| 6024   | 1     | 2     | 2     | 2     |
| 6025   | 1     | 1     | 2     | 1     |
| 6026   | 1     | 2     | 2     | 1     |
| 6032   | 2     | 1     | 3     | 2     |
| 6035   | 1     | 2     | 2     | 2     |
| 6038   | 1     | 1     | 1     | 2     |
| 6043   | 1     | 1     | 2     | 2     |
| 6044   | 1     | 2     | 2     | 1     |
| 6046   | 2     | 2     | 1     | 2     |
| 6047   | 1     | 1     | 2     | 1     |
| 6048   | 1     | 1     | 2     | 2     |
| 6050   | 4     | 3     | 4     | 2     |
| 6051   | 1     | 3     | 2     | 2     |
| 6053   | 1     | 1     | 1     | 1     |
| 6054   | 1     | 1     | 3     | 1     |
| 6056   | 1     | 1     | 1     | 1     |
| 6058   | 1     | 1     | 2     | 1     |
| 6060   | 1     | 1     | 1     | 1     |
| 6061   | 1     | 1     | 1     | 1     |
| 6062   | 1     | 2     | 2     | 2     |
| 6067   | 1     | 1     | 1     | 1     |
| 6070   | 1     | 1     | 2     | 1     |
| 6074   | 2     | 2     | 3     | 2     |
| 6076   | 1     | 1     | 2     | 1     |
| 6078   |       |       |       |       |
| 6081   | 1     | 1     | 1     | 1     |
| 6085   | 2     | 2     | 2     | 2     |
| 6088   |       |       |       |       |
| 6092   | 1     | 1     | 2     | 3     |
| 6095   | 1     | 1     | 1     | 1     |

| respid | Q40_1 | Q40_2 | Q40_3 | Q40_4 |
|--------|-------|-------|-------|-------|
| 6098   | 2     | 1     | 2     | 2     |
| 6101   |       |       |       |       |
| 6102   | 3     | 3     | 3     | 2     |
| 6105   | 1     | 2     | 2     | 1     |
| 6106   | 1     | 1     | 2     | 1     |
| 6107   | 1     | 1     | 1     | 1     |
| 6111   | 1     | 1     | 1     | 1     |
| 6112   | 1     | 1     | 2     | 1     |
| 6113   | 3     | 3     | 3     | 3     |
| 6115   | 1     | 1     | 1     | 1     |
| 6116   |       |       |       |       |
| 6117   | 2     | 3     | 4     | 4     |
| 6124   | 3     | 3     | 4     | 4     |
| 6125   | 1     | 1     | 2     | 1     |
| 6128   |       |       |       |       |
| 6133   | 2     | 2     | 1     | 1     |
| 6134   | 2     | 1     | 2     | 2     |
| 6135   | 1     | 1     | 1     | 1     |
| 6138   | 1     | 2     | 3     | 2     |
| 6140   | 1     | 1     | 1     | 1     |
| 6143   | 1     | 1     | 1     | 1     |
| 6147   | 2     | 2     | 4     | 2     |
| 6154   | 1     | 1     | 1     | 1     |
| 6162   |       |       |       |       |
| 6165   | 1     | 1     | 4     | 1     |
| 6166   | 2     | 2     | 3     | 3     |
| 6173   | 3     | 3     | 4     | 4     |
| 6180   | 2     | 2     | 2     | 2     |
| 6184   | 2     | 3     | 4     | 5     |
| 6185   | 1     | 2     | 1     | 1     |
| 6186   | 1     | 1     | 2     | 1     |
| 6188   | 1     | 1     | 2     | 1     |



| respid | Q40_1 | Q40_2 | Q40_3 | Q40_4 |
|--------|-------|-------|-------|-------|
| 6192   | 3     | 4     | 1     | 3     |
| 6194   |       |       |       |       |
| 6195   | 1     | 1     | 1     | 1     |
| 6196   | 3     | 2     | 3     | 2     |
| 6199   | 2     | 3     | 3     | 2     |
| 6200   |       |       |       |       |
| 6201   | 1     | 1     | 2     | 1     |
| 6202   | 1     | 1     | 3     | 1     |
| 6203   | 1     | 1     | 1     | 1     |
| 6205   | 1     | 1     | 1     | 1     |
| 6210   | 2     | 2     | 3     | 2     |
| 6212   | 1     | 1     | 2     | 1     |
| 6216   | 3     | 3     | 5     | 4     |
| 6218   | 1     | 4     | 4     | 4     |
| 6221   | 1     | 1     | 2     | 1     |
| 6224   | 1     | 1     | 1     | 1     |
| 6225   | 1     | 1     | 2     | 1     |
| 6227   | 3     | 1     | 1     | 1     |
| 6230   |       |       |       |       |
| 6231   | 1     | 1     | 2     | 1     |
| 6233   | 3     | 2     | 4     | 3     |
| 6234   | 2     | 1     | 2     | 1     |
| 6235   |       |       |       |       |
| 6237   |       |       |       |       |
| 6240   |       |       |       |       |
| 6248   | 2     | 1     | 1     | 1     |
| 6249   | 1     | 1     | 1     | 1     |
| 6252   | 1     | 2     | 2     | 2     |
| 6254   | 1     | 1     | 2     | 1     |
| 6269   | 2     | 2     | 3     | 2     |
| 6304   |       |       |       |       |
| 6334   | 5     | 3     | 3     | 3     |

| respid | Q40_1 | Q40_2 | Q40_3 | Q40_4 |
|--------|-------|-------|-------|-------|
| 6341   | 1     | 1     | 5     | 1     |
| 6350   | 2     | 3     | 2     | 3     |
| 6370   | 1     | 1     | 1     | 1     |
| 6384   | 1     | 1     | 1     | 1     |
| 6400   | 1     | 1     | 1     | 1     |
| 6418   |       |       |       |       |
| 6467   | 1     | 1     | 2     | 1     |
| 6469   | 1     | 1     | 1     | 1     |
| 6474   | 1     | 1     | 1     | 1     |
| 6475   |       |       |       |       |
| 6476   | 3     | 4     | 4     | 4     |
| 6477   | 1     | 1     | 2     | 1     |
| 6480   | 1     | 1     | 2     | 1     |
| 6481   | 4     | 3     | 3     | 4     |
| 6485   | 1     | 1     | 1     | 1     |
| 6488   | 2     | 3     | 2     | 3     |
| 6495   | 4     | 2     | 2     | 1     |
| 6499   | 3     | 2     | 3     | 3     |
| 6500   | 2     | 2     | 1     | 1     |
| 6504   | 2     | 2     | 1     | 2     |
| 6507   | 1     | 1     | 4     | 2     |
| 6512   | 1     | 2     | 2     | 2     |
| 6525   | 2     | 3     | 3     | 3     |
| 6532   | 1     | 1     | 2     | 2     |
| 6535   | 1     | 1     | 1     | 1     |
| 6546   | 1     | 1     | 1     | 1     |
| 6551   | 6     | 4     | 6     | 5     |
| 6556   | 2     | 2     | 2     | 2     |
| 6566   | 1     | 3     | 5     | 2     |
| 6569   |       |       |       |       |
| 6574   | 1     | 1     | 1     | 1     |
| 6576   | 1     | 1     | 3     | 1     |

| respid | Q40_1 | Q40_2 | Q40_3 | Q40_4 |
|--------|-------|-------|-------|-------|
| 6580   |       |       |       |       |
| 6584   |       |       |       |       |
| 6585   | 3     | 2     | 1     | 3     |
| 6589   | 1     | 1     | 1     | 1     |
| 6590   | 1     | 1     | 2     | 1     |
| 6598   | 1     | 1     | 1     | 1     |
| 6603   | 2     | 2     | 2     | 2     |
| 6618   | 1     | 2     | 3     | 1     |
| 6630   | 1     | 2     | 3     | 2     |
| 6636   | 4     | 4     | 4     | 4     |
| 6649   |       |       |       |       |
| 6675   | 1     | 1     | 1     | 1     |
| 6678   | 1     | 2     | 2     | 1     |
| 6681   | 1     | 1     | 1     | 1     |
| 6684   | 2     | 2     | 2     | 2     |
| 6688   |       |       |       |       |
| 6691   | 1     | 1     | 1     | 1     |
| 6694   | 3     | 3     | 3     | 3     |
| 6696   | 2     | 1     | 1     | 1     |
| 6720   | 3     | 4     | 3     | 4     |
| 6722   | 5     | 4     | 4     | 5     |
| 6724   | 1     | 1     | 1     | 1     |
| 6725   | 1     | 1     | 1     | 1     |
| 6727   | 1     | 1     | 1     | 1     |
| 6734   | 3     | 3     | 3     | 3     |
| 6739   | 3     | 3     | 6     | 3     |
| 6743   | 2     | 6     | 4     | 5     |
| 6749   | 1     | 1     | 1     | 1     |
| 6756   | 1     | 1     | 2     | 1     |
| 6764   | 1     | 2     | 1     | 1     |
| 6765   | 1     | 1     | 1     | 1     |
| 6768   | 1     | 1     | 1     | 1     |

| respid | Q40_1 | Q40_2 | Q40_3 | Q40_4 |
|--------|-------|-------|-------|-------|
| 6773   | 1     | 1     | 2     | 1     |
| 6775   | 1     | 2     | 2     | 1     |
| 6777   | 1     | 1     | 1     | 1     |
| 6779   | 1     | 1     | 1     | 1     |
| 6790   | 1     | 1     | 1     | 1     |
| 6797   |       |       |       |       |
| 6798   | 3     | 2     | 2     | 3     |
| 6808   |       |       |       |       |
| 6810   | 2     | 2     | 2     | 3     |
| 6811   | 3     | 3     | 3     | 3     |
| 6812   | 2     | 2     | 2     | 2     |
| 6814   | 1     | 1     | 2     | 1     |
| 6819   | 3     | 3     | 2     | 2     |
| 6820   | 2     | 3     | 4     | 3     |
| 6832   | 1     | 1     | 1     | 1     |
| 6854   | 1     | 2     | 2     | 1     |
| 6855   |       |       |       |       |
| 6857   | 1     | 1     | 2     | 1     |
| 6858   | 1     | 1     | 1     | 2     |
| 6859   | 1     | 1     | 2     | 1     |
| 6860   | 1     | 2     | 2     | 1     |
| 6862   | 1     | 1     | 1     | 2     |
| 6879   |       |       |       |       |
| 6893   | 1     | 1     | 1     | 1     |
| 6898   | 1     | 2     | 2     | 1     |
| 6902   | 3     | 2     | 4     | 4     |
| 6903   | 3     | 3     | 4     | 4     |
| 6907   | 4     | 3     | 4     | 3     |
| 6908   |       |       |       |       |
| 6912   |       |       |       |       |
| 6915   | 2     | 2     | 3     | 2     |
| 6916   | 2     | 3     | 1     | 1     |

| respid | Q40_1 | Q40_2 | Q40_3 | Q40_4 |
|--------|-------|-------|-------|-------|
| 6917   | 3     | 4     | 1     | 2     |
| 6923   | 2     | 2     | 1     | 1     |
| 6934   | 1     | 1     | 1     | 1     |
| 6937   |       |       |       |       |
| 6945   | 2     | 1     | 2     | 1     |
| 6954   | 2     | 2     | 1     | 1     |
| 6956   | 3     | 1     | 3     | 2     |
| 6958   | 1     | 1     | 2     | 1     |
| 6961   | 1     | 1     | 2     | 2     |
| 6963   | 1     | 2     | 2     | 1     |
| 6964   | 2     | 1     | 1     | 1     |
| 6976   |       |       |       |       |
| 6977   | 2     | 2     | 1     | 1     |
| 7000   | 2     | 3     | 3     | 2     |
| 7001   | 1     | 1     | 1     | 1     |
| 7005   | 3     | 1     | 1     | 1     |
| 7006   | 2     | 1     | 3     | 3     |
| 7008   | 3     | 2     | 4     | 5     |
| 7009   | 1     | 1     | 1     | 1     |
| 7019   | 1     | 1     | 1     | 1     |
| 7021   | 1     | 1     | 1     | 1     |
| 7026   | 3     | 3     | 2     | 2     |
| 7030   | 3     | 4     | 4     | 3     |
| 7034   |       |       |       |       |
| 7039   | 2     | 1     | 1     | 1     |
| 7041   | 1     | 1     | 1     | 1     |
| 7047   | 2     | 1     | 2     | 1     |
| 7051   | 1     | 1     | 1     | 2     |
| 7052   | 2     | 2     | 2     | 2     |
| 7059   | 1     | 1     | 2     | 1     |
| 7062   | 1     | 3     | 3     | 2     |
| 7065   | 1     | 1     | 1     | 1     |

| respid | Q40_1 | Q40_2 | Q40_3 | Q40_4 |
|--------|-------|-------|-------|-------|
| 7066   | 1     | 1     | 1     | 1     |
| 7069   | 1     | 1     | 1     | 1     |
| 7070   |       |       |       |       |
| 7073   |       |       |       |       |
| 7078   | 1     | 1     | 1     | 1     |
| 7083   | 3     | 3     | 3     | 3     |
| 7084   | 4     | 4     | 5     | 5     |
| 7085   | 1     | 1     | 1     | 1     |
| 7088   | 3     | 3     | 3     | 4     |
| 7090   | 1     | 2     | 3     | 2     |
| 7095   | 2     | 2     | 1     | 1     |
| 7100   |       |       |       |       |
| 7102   | 1     | 2     | 3     | 2     |
| 7103   | 1     | 1     | 1     | 1     |
| 7108   | 1     | 1     | 2     | 1     |
| 7109   | 1     | 1     | 1     | 1     |
| 7110   |       |       |       |       |
| 7112   |       |       |       |       |
| 7114   | 1     | 2     | 1     | 1     |
| 7116   | 1     | 1     | 2     | 1     |
| 7117   | 3     | 2     | 1     | 2     |
| 7118   | 3     | 3     | 5     | 4     |
| 7120   | 3     | 4     | 4     | 5     |
| 7124   | 1     | 1     | 2     | 1     |
| 7130   | 3     | 2     | 2     | 2     |
| 7135   | 1     | 1     | 1     | 1     |
| 7137   | 3     | 4     | 5     | 4     |
| 7140   | 1     | 1     | 1     | 1     |
| 7141   | 1     | 1     | 1     | 1     |
| 7148   | 1     | 1     | 1     | 1     |
| 7152   |       |       |       |       |
| 7154   | 1     | 2     | 5     | 1     |

| respid | Q40_1 | Q40_2 | Q40_3 | Q40_4 |
|--------|-------|-------|-------|-------|
| 7156   | 1     | 1     | 2     | 1     |
| 7158   | 3     | 2     | 2     | 1     |
| 7159   |       |       |       |       |
| 7161   |       |       |       |       |
| 7164   | 1     | 1     | 1     | 1     |
| 7166   |       |       |       |       |
| 7167   |       |       |       |       |
| 7168   |       |       |       |       |
| 7170   |       |       |       |       |
| 7171   | 1     | 1     | 2     | 1     |
| 7172   | 1     | 1     | 1     | 1     |
| 7173   | 2     | 3     | 3     | 2     |
| 7175   | 1     | 1     | 1     | 1     |
| 7176   | 2     | 2     | 2     | 2     |
| 7180   | 1     | 1     | 1     | 1     |
| 7183   | 1     | 2     | 2     | 1     |
| 7189   | 1     | 1     | 1     | 1     |
| 7193   | 1     | 1     | 2     | 1     |
| 7194   | 2     | 3     | 4     | 3     |
| 7195   | 1     | 1     | 1     | 1     |
| 7200   | 2     | 1     | 1     | 1     |
| 7201   | 3     | 3     | 3     | 3     |
| 7205   | 4     | 3     | 3     | 3     |
| 7207   | 1     | 1     | 2     | 1     |
| 7208   |       |       |       |       |
| 7210   | 1     | 1     | 3     | 1     |
| 7211   | 1     | 1     | 1     | 1     |
| 7217   | 2     | 2     | 2     | 2     |
| 7218   | 1     | 1     | 1     | 1     |
| 7220   |       |       |       |       |
| 7225   | 1     | 1     | 1     | 1     |
| 7228   | 1     | 1     | 2     | 1     |

| respid | Q40_1 | Q40_2 | Q40_3 | Q40_4 |
|--------|-------|-------|-------|-------|
| 7230   | 1     | 1     | 2     | 1     |
| 7233   | 1     | 1     | 1     | 1     |
| 7234   | 1     | 1     | 2     | 2     |
| 7235   |       |       |       |       |
| 7236   |       |       |       |       |
| 7241   | 1     | 1     | 1     | 1     |
| 7251   | 1     | 1     | 1     | 1     |
| 7253   | 1     | 1     | 1     | 1     |
| 7259   | 1     | 1     | 3     | 1     |
| 7260   | 1     | 2     | 1     | 1     |
| 7261   | 2     | 2     | 2     | 2     |
| 7263   | 3     | 1     | 3     | 1     |
| 7265   |       |       |       |       |
| 7268   | 1     | 1     | 1     | 1     |
| 7269   |       |       |       |       |
| 7271   | 3     | 3     | 4     | 3     |
| 7276   | 4     | 4     | 1     | 1     |
| 7280   | 1     | 2     | 2     | 1     |
| 7283   | 1     | 1     | 1     | 1     |
| 7284   | 1     | 2     | 1     | 1     |
| 7286   | 1     | 1     | 1     | 1     |
| 7287   |       |       |       |       |
| 7288   | 2     | 2     | 2     | 2     |
| 7294   | 1     | 2     | 1     | 1     |
| 7295   | 1     | 1     | 1     | 1     |
| 7296   | 3     | 3     | 3     | 3     |
| 7297   | 1     | 1     | 2     | 2     |
| 7299   | 1     | 1     | 1     | 1     |
| 7300   | 2     | 2     | 3     | 1     |
| 7301   | 1     | 1     | 2     | 1     |
| 7302   |       |       |       |       |
| 7306   | 1     | 1     | 1     | 1     |



| respid | Q40_1 | Q40_2 | Q40_3 | Q40_4 |
|--------|-------|-------|-------|-------|
| 7313   | 6     | 4     | 5     | 5     |
| 7315   | 2     | 3     | 2     | 1     |
| 7317   | 2     | 1     | 2     | 1     |
| 7321   | 3     | 2     | 2     | 2     |
| 7322   | 2     | 1     | 2     | 1     |
| 7323   | 3     | 3     | 3     | 4     |
| 7333   | 3     | 3     | 3     | 3     |
| 7335   | 1     | 3     | 2     | 1     |
| 7336   | 1     | 1     | 1     | 1     |
| 7337   | 1     | 1     | 2     | 1     |
| 7338   | 1     | 1     | 1     | 1     |
| 7340   | 1     | 1     | 1     | 1     |
| 7341   | 1     | 1     | 3     | 2     |
| 7342   | 1     | 1     | 1     | 1     |
| 7344   | 3     | 3     | 3     | 3     |
| 7346   | 2     | 3     | 2     | 1     |
| 7347   | 1     | 1     | 1     | 1     |
| 7349   | 2     | 4     | 4     | 1     |
| 7352   | 1     | 1     | 2     | 1     |
| 7353   | 1     | 2     | 3     | 1     |
| 7355   | 1     | 1     | 2     | 1     |
| 7356   |       |       |       |       |
| 7360   | 6     | 5     | 4     | 4     |
| 7371   | 6     | 1     | 2     | 1     |
| 7376   | 3     | 2     | 2     | 2     |
| 7379   | 2     | 2     | 3     | 2     |
| 7381   | 1     | 1     | 1     | 1     |
| 7386   | 2     | 3     | 2     | 1     |
| 7389   | 1     | 1     | 1     | 1     |
| 7390   | 4     | 4     | 3     | 4     |
| 7393   | 1     | 1     | 1     | 1     |
| 7394   | 1     | 1     | 1     | 1     |

| respid | Q40_1 | Q40_2 | Q40_3 | Q40_4 |
|--------|-------|-------|-------|-------|
| 7396   | 3     | 2     | 4     | 2     |
| 7400   | 2     | 3     | 3     | 3     |
| 7401   | 2     | 1     | 1     | 1     |
| 7403   | 1     | 1     | 2     | 1     |
| 7406   | 3     | 6     | 4     | 5     |
| 7409   | 1     | 1     | 2     | 1     |
| 7410   | 3     | 4     | 5     | 3     |
| 7412   | 3     | 4     | 5     | 4     |
| 7414   | 1     | 1     | 1     | 1     |
| 7415   | 4     | 2     | 3     | 2     |
| 7417   | 3     | 4     | 2     | 3     |
| 7421   | 4     | 4     | 3     | 3     |
| 7425   | 2     | 2     | 2     | 3     |
| 7430   | 3     | 1     | 3     | 2     |
| 7432   | 1     | 1     | 1     | 1     |
| 7433   | 2     | 2     | 2     | 2     |
| 7442   | 1     | 1     | 1     | 1     |
| 7445   | 1     | 1     | 2     | 1     |
| 7446   | 1     | 1     | 1     | 1     |
| 7449   |       |       |       |       |
| 7450   |       |       |       |       |
| 7451   | 2     | 2     | 2     | 2     |
| 7459   | 1     | 1     | 3     | 1     |
| 7462   | 6     | 2     | 2     | 1     |
| 7463   | 1     | 1     | 2     | 1     |
| 7469   |       |       |       |       |
| 7482   | 1     | 1     | 1     | 1     |
| 7484   | 2     | 2     | 2     | 2     |
| 7486   | 2     | 2     | 2     | 1     |
| 7496   | 1     | 1     | 1     | 1     |
| 7502   | 2     | 1     | 2     | 3     |
| 7504   | 3     | 2     | 3     | 2     |

| respid | Q40_1 | Q40_2 | Q40_3 | Q40_4 |
|--------|-------|-------|-------|-------|
| 7509   | 4     | 5     | 6     | 5     |
| 7513   | 1     | 4     | 5     | 5     |
| 7514   |       |       |       |       |
| 7520   | 1     | 1     | 1     | 1     |
| 7523   |       |       |       |       |
| 7526   | 3     | 4     | 3     | 4     |
| 7529   | 3     | 3     | 2     | 3     |
| 7534   |       |       |       |       |
| 7536   | 3     | 4     | 4     | 4     |
| 7540   | 1     | 2     | 2     | 1     |
| 7541   | 2     | 2     | 2     | 2     |
| 7542   |       |       |       |       |
| 7555   | 1     | 1     | 1     | 1     |
| 7566   | 2     | 2     | 2     | 2     |
| 7568   | 1     | 1     | 1     | 1     |
| 7570   | 2     | 3     | 2     | 3     |
| 7572   | 1     | 2     | 2     | 2     |
| 7573   | 3     | 2     | 5     | 3     |
| 7576   | 2     | 1     | 2     | 1     |
| 7577   | 1     | 2     | 6     | 2     |
| 7583   | 1     | 1     | 1     | 1     |
| 7584   | 1     | 1     | 1     | 1     |
| 7585   | 5     | 5     | 6     | 5     |
| 7586   | 2     | 3     | 5     | 4     |
| 7587   | 1     | 1     | 1     | 1     |
| 7588   | 1     | 1     | 1     | 1     |
| 7596   | 1     | 1     | 1     | 1     |
| 7599   | 1     | 1     | 1     | 1     |
| 7600   | 3     | 4     | 3     | 2     |
| 7602   | 1     | 1     | 1     | 1     |
| 7613   | 1     | 1     | 1     | 1     |
| 7620   | 1     | 2     | 2     | 1     |

| respid | Q40_1 | Q40_2 | Q40_3 | Q40_4 |
|--------|-------|-------|-------|-------|
| 7623   | 1     | 1     | 2     | 1     |
| 7635   | 1     | 1     | 2     | 1     |
| 7636   | 2     | 2     | 2     | 2     |
| 7643   | 2     | 2     | 2     | 2     |
| 7645   | 2     | 3     | 3     | 2     |
| 7649   | 3     | 3     | 4     | 4     |
| 7651   | 1     | 1     | 1     | 1     |
| 7652   | 4     | 5     | 5     | 4     |
| 7655   | 2     | 2     | 2     | 2     |
| 7657   | 1     | 1     | 1     | 1     |
| 7675   | 1     | 2     | 1     | 1     |
| 7676   | 3     | 4     | 4     | 3     |
| 7684   | 2     | 2     | 2     | 1     |
| 7693   | 4     | 2     | 1     | 2     |
| 7694   | 3     | 4     | 5     | 4     |
| 7695   | 6     | 2     | 1     | 1     |
| 7696   | 2     | 3     | 4     | 5     |
| 7698   | 1     | 1     | 1     | 2     |
| 7700   | 2     | 1     | 1     | 1     |
| 7701   | 1     | 1     | 1     | 1     |
| 7704   | 1     | 1     | 1     | 1     |
| 7709   | 6     | 1     | 2     | 1     |
| 7713   | 1     | 1     | 1     | 1     |
| 7714   | 1     | 1     | 1     | 1     |
| 7718   | 4     | 5     | 5     | 6     |
| 7720   | 1     | 1     | 2     | 1     |
| 7721   | 2     | 2     | 1     | 2     |
| 7722   | 1     | 1     | 1     | 1     |
| 7724   | 1     | 3     | 5     | 4     |
| 7728   |       |       |       |       |
| 7731   | 4     | 3     | 3     | 3     |
| 7735   | 1     | 1     | 1     | 1     |

| respid | Q40_1 | Q40_2 | Q40_3 | Q40_4 |
|--------|-------|-------|-------|-------|
| 7737   | 1     | 1     | 3     | 1     |
| 7741   | 4     | 2     | 2     | 3     |
| 7746   | 1     | 2     | 1     | 2     |
| 7747   | 2     | 1     | 1     | 1     |
| 7748   | 1     | 1     | 1     | 1     |
| 7750   | 1     | 1     | 1     | 1     |
| 7754   | 1     | 1     | 2     | 1     |
| 7755   | 2     | 2     | 2     | 1     |
| 7762   |       |       |       |       |
| 7764   | 1     | 1     | 1     | 1     |
| 7766   |       |       |       |       |
| 7768   | 3     | 2     | 2     | 2     |
| 7770   | 2     | 4     | 3     | 2     |
| 7771   | 1     | 1     | 1     | 1     |
| 7777   | 1     | 1     | 1     | 1     |
| 7778   |       |       |       |       |
| 7783   | 4     | 5     | 4     | 3     |
| 7789   | 3     | 1     | 1     | 2     |
| 7790   | 2     | 2     | 1     | 2     |
| 7795   | 3     | 2     | 3     | 3     |
| 7807   | 1     | 1     | 1     | 1     |
| 7808   | 2     | 3     | 4     | 2     |
| 7818   | 3     | 2     | 2     | 2     |
| 7820   |       |       |       |       |
| 7831   | 2     | 2     | 2     | 2     |
| 7832   | 1     | 1     | 1     | 1     |
| 7837   | 1     | 1     | 1     | 1     |
| 7841   | 3     | 3     | 3     | 3     |
| 7845   | 3     | 2     | 2     | 3     |
| 7853   | 1     | 1     | 2     | 1     |
| 7854   | 1     | 1     | 1     | 1     |
| 7862   | 4     | 4     | 4     | 4     |

| respid | Q40_1 | Q40_2 | Q40_3 | Q40_4 |
|--------|-------|-------|-------|-------|
| 7871   | 2     | 2     | 2     | 2     |
| 7875   | 1     | 2     | 2     | 2     |
| 7880   | 1     | 2     | 1     | 1     |
| 7881   | 1     | 1     | 3     | 2     |
| 7883   | 2     | 2     | 3     | 2     |
| 7896   | 1     | 1     | 2     | 1     |
| 7905   | 1     | 1     | 1     | 1     |
| 7919   | 2     | 1     | 1     | 2     |
| 7928   | 4     | 3     | 3     | 4     |
| 7929   | 1     | 1     | 1     | 1     |
| 7938   | 1     | 2     | 2     | 1     |
| 7940   | 1     | 2     | 1     | 1     |
| 7941   | 2     | 1     | 2     | 2     |
| 7952   |       |       |       |       |
| 7962   | 1     | 1     | 1     | 1     |
| 7968   | 1     | 1     | 1     | 1     |
| 7972   | 5     | 1     | 2     | 2     |
| 7983   | 3     | 4     | 3     | 3     |
| 7990   | 1     | 1     | 1     | 2     |
| 7993   | 1     | 1     | 1     | 1     |
| 8005   | 1     | 2     | 1     | 1     |
| 8008   |       |       |       |       |
| 8012   | 2     | 1     | 2     | 3     |
| 8021   | 1     | 1     | 1     | 1     |
| 8024   | 1     | 1     | 1     | 1     |
| 8043   | 1     | 1     | 1     | 1     |
| 8051   | 2     | 1     | 3     | 1     |
| 8056   | 2     | 2     | 2     | 1     |
| 8061   | 2     | 1     | 2     | 1     |
| 8066   |       |       |       |       |
| 8069   | 2     | 1     | 2     | 2     |
| 8071   | 1     | 1     | 1     | 1     |

| respid | Q40_1 | Q40_2 | Q40_3 | Q40_4 |
|--------|-------|-------|-------|-------|
| 8072   | 1     | 2     | 2     | 2     |
| 8076   | 1     | 1     | 2     | 1     |
| 8080   | 1     | 1     | 1     | 1     |
| 8083   | 2     | 2     | 2     | 1     |
| 8093   | 3     | 2     | 4     | 3     |
| 8095   | 2     | 2     | 3     | 2     |
| 8099   | 1     | 1     | 1     | 1     |
| 8100   | 2     | 1     | 2     | 1     |
| 8103   |       |       |       |       |
| 8104   | 4     | 2     | 4     | 1     |
| 8115   | 1     | 2     | 4     | 1     |
| 8121   | 1     | 1     | 2     | 1     |
| 8128   | 1     | 1     | 1     | 1     |
| 8130   | 2     | 2     | 2     | 3     |
| 8131   | 2     | 2     | 3     | 2     |
| 8133   | 2     | 2     | 1     | 1     |
| 8143   | 5     | 2     | 1     | 1     |
| 8144   | 3     | 2     | 2     | 2     |
| 8146   | 1     | 1     | 1     | 1     |
| 8148   |       |       |       |       |
| 8157   |       |       |       |       |
| 8164   |       |       |       |       |
| 8173   |       |       |       |       |
| 8176   | 1     | 1     | 1     | 1     |
| 8179   | 3     | 3     | 3     | 3     |
| 8181   |       |       |       |       |
| 8182   | 2     | 3     | 3     | 3     |
| 8196   | 1     | 1     | 1     | 1     |
| 8200   | 3     | 2     | 2     | 2     |
| 8203   | 1     | 1     | 2     | 1     |
| 8204   | 1     | 3     | 5     | 2     |
| 8206   | 2     | 2     | 1     | 1     |

| respid | Q40_1 | Q40_2 | Q40_3 | Q40_4 |
|--------|-------|-------|-------|-------|
| 8208   | 1     | 1     | 1     | 1     |
| 8212   | 1     | 1     | 2     | 3     |
| 8222   | 3     | 4     | 1     | 2     |
| 8223   | 1     | 1     | 2     | 1     |
| 8225   | 3     | 1     | 1     | 1     |
| 8226   | 1     | 1     | 1     | 2     |
| 8228   | 1     | 2     | 3     | 3     |
| 8229   | 1     | 1     | 1     | 1     |
| 8239   | 1     | 1     | 1     | 1     |
| 8246   | 1     | 1     | 1     | 1     |
| 8258   | 4     | 4     | 3     | 3     |
| 8260   | 3     | 1     | 3     | 1     |
| 8262   | 2     | 1     | 2     | 2     |
| 8263   | 2     | 2     | 2     | 2     |
| 8267   | 3     | 3     | 3     | 3     |
| 8271   | 3     | 4     | 4     | 4     |
| 8274   | 3     | 2     | 1     | 3     |
| 8275   | 2     | 2     | 2     | 2     |
| 8279   | 2     | 2     | 3     | 2     |
| 8285   | 3     | 4     | 5     | 4     |
| 8287   | 3     | 4     | 5     | 5     |
| 8289   | 3     | 3     | 3     | 2     |
| 8291   | 2     | 1     | 1     | 1     |
| 8299   | 3     | 2     | 2     | 2     |
| 8301   | 1     | 1     | 2     | 1     |
| 8302   | 1     | 1     | 1     | 1     |
| 8308   | 3     | 3     | 4     | 3     |
| 8313   | 2     | 2     | 3     | 2     |
| 8316   | 2     | 3     | 3     | 3     |
| 8317   | 1     | 1     | 1     | 1     |
| 8319   | 1     | 1     | 1     | 1     |
| 8323   | 2     | 3     | 1     | 3     |



| respid | Q40_1 | Q40_2 | Q40_3 | Q40_4 |
|--------|-------|-------|-------|-------|
| 8324   | 1     | 1     | 1     | 1     |
| 8327   | 3     | 4     | 4     | 5     |
| 8328   | 3     | 3     | 2     | 2     |
| 8342   | 4     | 3     | 1     | 2     |
| 8350   | 1     | 1     | 2     | 2     |
| 8352   | 1     | 1     | 1     | 1     |
| 8353   | 1     | 1     | 1     | 1     |
| 8356   | 1     | 1     | 1     | 1     |
| 8367   | 1     | 2     | 2     | 1     |
| 8373   | 1     | 1     | 1     | 1     |
| 8379   |       |       |       |       |
| 8382   | 1     | 1     | 3     | 3     |
| 8387   | 3     | 2     | 3     | 3     |
| 8409   | 3     | 2     | 1     | 1     |
| 8410   | 1     | 1     | 2     | 1     |
| 8412   | 2     | 2     | 3     | 2     |
| 8415   | 1     | 2     | 2     | 1     |
| 8417   | 2     | 1     | 2     | 1     |
| 8422   | 3     | 3     | 2     | 1     |
| 8430   | 3     | 3     | 2     | 2     |
| 8434   | 1     | 1     | 2     | 1     |
| 8436   |       |       |       |       |
| 8446   | 1     | 2     | 2     | 2     |
| 8447   | 1     | 1     | 2     | 1     |
| 8448   | 1     | 1     | 1     | 1     |
| 8455   | 1     | 2     | 2     | 2     |
| 8456   | 2     | 1     | 3     | 2     |
| 8459   | 1     | 2     | 1     | 1     |
| 8460   | 1     | 1     | 1     | 1     |
| 8464   | 3     | 4     | 4     | 3     |
| 8470   | 1     | 1     | 1     | 1     |
| 8473   | 2     | 1     | 2     | 1     |

| respid | Q40_1 | Q40_2 | Q40_3 | Q40_4 |
|--------|-------|-------|-------|-------|
| 8486   | 1     | 1     | 1     | 1     |
| 8487   | 1     | 2     | 2     | 1     |
| 8489   | 1     | 1     | 1     | 1     |
| 8494   | 1     | 1     | 1     | 1     |
| 8495   | 4     | 5     | 3     | 5     |
| 8497   | 2     | 1     | 2     | 2     |
| 8510   | 2     | 1     | 2     | 1     |
| 8515   | 2     | 2     | 4     | 2     |
| 8526   |       |       |       |       |
| 8530   |       |       |       |       |
| 8532   | 1     | 2     | 2     | 1     |
| 8533   |       |       |       |       |
| 8534   | 3     | 2     | 4     | 4     |
| 8572   | 2     | 2     | 2     | 3     |
| 8582   | 1     | 1     | 1     | 1     |
| 8584   | 1     | 1     | 1     | 1     |
| 8585   |       |       |       |       |
| 8586   |       |       |       |       |
| 8589   | 1     | 2     | 2     | 2     |
| 8593   | 1     | 1     | 1     | 1     |
| 8594   | 1     | 1     | 1     | 1     |
| 8601   | 3     | 2     | 1     | 1     |
| 8603   | 1     | 1     | 1     | 1     |
| 8604   |       |       |       |       |
| 8605   |       |       |       |       |
| 8607   | 2     | 2     | 2     | 2     |
| 8623   | 1     | 2     | 2     | 1     |
| 8626   | 3     | 2     | 2     | 3     |
| 8638   | 1     | 1     | 1     | 1     |
| 8640   | 2     | 3     | 1     | 1     |
| 8641   | 1     | 3     | 1     | 1     |
| 8643   | 1     | 1     | 3     | 1     |

| respid | Q40_1 | Q40_2 | Q40_3 | Q40_4 |
|--------|-------|-------|-------|-------|
| 8644   | 4     | 2     | 4     | 3     |
| 8646   | 1     | 1     | 1     | 1     |
| 8647   |       |       |       |       |
| 8649   | 1     | 2     | 4     | 1     |
| 8650   | 2     | 1     | 2     | 1     |
| 8658   | 1     | 1     | 1     | 1     |
| 8659   | 2     | 3     | 2     | 2     |
| 8669   | 1     | 3     | 4     | 1     |
| 8672   | 2     | 2     | 3     | 1     |
| 8673   | 2     | 1     | 3     | 2     |
| 8676   | 1     | 1     | 1     | 1     |
| 8677   |       |       |       |       |
| 8681   | 2     | 1     | 1     | 1     |
| 8688   | 1     | 1     | 1     | 1     |
| 8689   | 2     | 2     | 4     | 2     |
| 8690   | 1     | 3     | 1     | 3     |
| 8693   | 3     | 1     | 1     | 1     |
| 8694   | 2     | 2     | 2     | 2     |
| 8699   | 2     | 2     | 4     | 2     |
| 8700   |       |       |       |       |
| 8703   | 1     | 1     | 1     | 1     |
| 8704   | 1     | 1     | 1     | 1     |
| 8706   | 2     | 2     | 2     | 2     |
| 8709   | 1     | 2     | 1     | 1     |
| 8715   | 2     | 1     | 1     | 1     |
| 8728   | 4     | 4     | 3     | 2     |
| 8729   | 1     | 2     | 1     | 1     |
| 8730   | 2     | 1     | 1     | 2     |
| 8742   | 1     | 1     | 1     | 1     |
| 8748   | 1     | 1     | 1     | 1     |
| 8749   | 1     | 1     | 1     | 1     |
| 8750   | 1     | 1     | 1     | 1     |

| respid | Q40_1 | Q40_2 | Q40_3 | Q40_4 |
|--------|-------|-------|-------|-------|
| 8751   | 1     | 1     | 1     | 1     |
| 8752   | 1     | 2     | 2     | 1     |
| 8754   | 1     | 1     | 1     | 1     |
| 8757   | 2     | 2     | 2     | 2     |
| 8760   | 2     | 2     | 1     | 1     |
| 8761   | 1     | 1     | 1     | 1     |
| 8762   | 3     | 1     | 2     | 1     |
| 8763   | 1     | 1     | 2     | 1     |
| 8764   | 3     | 1     | 2     | 2     |
| 8765   | 1     | 1     | 1     | 1     |
| 8766   | 1     | 2     | 2     | 2     |
| 8767   | 4     | 2     | 3     | 1     |
| 8768   | 1     | 1     | 1     | 1     |
| 8770   | 1     | 1     | 1     | 1     |
| 8771   |       |       |       |       |
| 8773   | 1     | 1     | 1     | 1     |
| 8774   | 2     | 2     | 2     | 2     |
| 8776   | 1     | 1     | 1     | 1     |
| 8777   | 1     | 1     | 1     | 1     |
| 8778   | 1     | 1     | 2     | 2     |
| 8779   |       |       |       |       |
| 8784   | 2     | 2     | 2     | 2     |
| 8786   |       |       |       |       |
| 8787   | 1     | 1     | 2     | 1     |
| 8790   |       |       |       |       |
| 8791   | 3     | 4     | 4     | 6     |
| 8793   |       |       |       |       |
| 8795   | 1     | 2     | 2     | 1     |
| 8797   | 1     | 1     | 1     | 1     |
| 8801   | 3     | 3     | 3     | 3     |
| 8802   | 1     | 1     | 2     | 1     |
| 8807   |       |       |       |       |

| respid | Q40_1 | Q40_2 | Q40_3 | Q40_4 |
|--------|-------|-------|-------|-------|
| 8813   | 3     | 1     | 1     | 1     |
| 8817   | 1     | 1     | 1     | 1     |
| 8818   | 1     | 2     | 3     | 2     |
| 8821   | 5     | 1     | 1     | 1     |
| 8822   | 1     | 1     | 2     | 1     |
| 8823   | 1     | 1     | 1     | 2     |
| 8824   | 1     | 1     | 3     | 1     |
| 8825   | 1     | 1     | 2     | 1     |
| 8834   | 2     | 2     | 3     | 1     |
| 8840   | 4     | 4     | 3     | 3     |
| 8843   | 5     | 5     | 5     | 4     |
| 8846   | 2     | 2     | 1     | 1     |
| 8862   |       |       |       |       |
| 8866   | 1     | 1     | 1     | 1     |
| 8869   | 1     | 1     | 1     | 1     |
| 8872   | 1     | 2     | 3     | 3     |
| 8903   |       |       |       |       |
| 8909   |       |       |       |       |
| 8926   | 5     | 1     | 2     | 1     |
| 8936   | 1     | 1     | 2     | 1     |
| 8945   |       |       |       |       |
| 8954   | 1     | 1     | 1     | 1     |
| 8955   | 2     | 4     | 5     | 1     |
| 8958   | 1     | 1     | 1     | 1     |
| 8959   | 2     | 1     | 2     | 1     |
| 8960   | 1     | 1     | 1     | 1     |
| 8976   | 1     | 1     | 1     | 1     |
| 8977   | 1     | 1     | 2     | 2     |
| 8979   | 2     | 3     | 3     | 2     |
| 8985   |       |       |       |       |
| 8994   | 4     | 1     | 1     | 1     |
| 8997   | 3     | 3     | 3     | 3     |

| respid | Q40_1 | Q40_2 | Q40_3 | Q40_4 |
|--------|-------|-------|-------|-------|
| 9002   | 1     | 1     | 1     | 1     |
| 9005   | 1     | 2     | 4     | 3     |
| 9017   | 1     | 1     | 1     | 1     |
| 9018   | 1     | 1     | 1     | 1     |
| 9021   | 2     | 1     | 1     | 1     |
| 9029   | 4     | 5     | 4     | 3     |
| 9035   | 2     | 3     | 2     | 1     |
| 9038   | 1     | 1     | 1     | 1     |
| 9039   |       |       |       |       |
| 9040   | 1     | 1     | 1     | 1     |
| 9042   | 2     | 1     | 2     | 2     |
| 9043   | 1     | 1     | 1     | 1     |
| 9045   | 2     | 1     | 1     | 1     |
| 9051   | 1     | 1     | 1     | 1     |
| 9067   | 1     | 1     | 1     | 1     |
| 9069   | 1     | 2     | 2     | 1     |
| 9073   | 2     | 2     | 2     | 1     |
| 9084   | 1     | 2     | 2     | 2     |
| 9096   |       |       |       |       |
| 9100   | 1     | 1     | 1     | 1     |
| 9107   |       |       |       |       |
| 9110   | 1     | 1     | 1     | 1     |
| 9120   | 1     | 1     | 1     | 1     |
| 9122   | 4     | 3     | 3     | 2     |
| 9130   | 1     | 1     | 1     | 1     |
| 9134   | 3     | 3     | 3     | 3     |
| 9137   | 6     | 2     | 3     | 3     |
| 9139   | 1     | 1     | 1     | 1     |
| 9144   |       |       |       |       |
| 9157   | 3     | 3     | 2     | 1     |
| 9166   | 1     | 2     | 1     | 2     |
| 9177   | 5     | 4     | 6     | 3     |

| respid | Q40_1 | Q40_2 | Q40_3 | Q40_4 |
|--------|-------|-------|-------|-------|
| 9181   | 1     | 1     | 1     | 1     |
| 9183   | 2     | 3     | 2     | 3     |
| 9184   | 3     | 3     | 3     | 4     |
| 9188   |       |       |       |       |
| 9197   | 1     | 1     | 1     | 1     |
| 9200   | 3     | 2     | 4     | 3     |
| 9205   | 1     | 2     | 1     | 2     |
| 9207   | 1     | 1     | 2     | 1     |
| 9213   | 2     | 2     | 2     | 1     |
| 9216   | 3     | 3     | 4     | 3     |
| 9217   |       |       |       |       |
| 9218   | 1     | 1     | 1     | 1     |
| 9219   | 3     | 4     | 4     | 3     |
| 9220   |       |       |       |       |
| 9221   | 3     | 2     | 2     | 1     |
| 9223   | 5     | 4     | 4     | 4     |
| 9228   |       |       |       |       |
| 9230   | 2     | 2     | 2     | 2     |
| 9231   | 1     | 2     | 1     | 1     |
| 9233   | 2     | 1     | 2     | 1     |
| 9235   | 2     | 1     | 3     | 1     |
| 9237   | 1     | 1     | 1     | 1     |
| 9242   | 1     | 1     | 1     | 1     |
| 9250   |       |       |       |       |
| 9253   | 1     | 2     | 4     | 2     |
| 9257   | 1     | 1     | 1     | 1     |
| 9263   | 1     | 1     | 1     | 1     |
| 9267   | 2     | 2     | 2     | 2     |
| 9272   | 2     | 3     | 1     | 1     |
| 9279   |       |       |       |       |
| 9281   | 3     | 2     | 3     | 3     |
| 9285   | 1     | 1     | 1     | 1     |

| respid | Q40_1 | Q40_2 | Q40_3 | Q40_4 |
|--------|-------|-------|-------|-------|
| 9286   | 3     | 4     | 4     | 4     |
| 9294   | 2     | 2     | 2     | 1     |
| 9295   | 1     | 1     | 1     | 1     |
| 9297   | 2     | 2     | 1     | 1     |
| 9299   | 1     | 1     | 1     | 1     |
| 9309   | 2     | 3     | 1     | 2     |
| 9315   |       |       |       |       |
| 9320   | 2     | 1     | 1     | 1     |
| 9324   | 1     | 1     | 2     | 1     |
| 9326   | 1     | 1     | 1     | 1     |
| 9333   | 1     | 1     | 2     | 2     |
| 9334   | 4     | 4     | 3     | 3     |
| 9336   | 2     | 2     | 2     | 3     |
| 9337   | 1     | 1     | 2     | 1     |
| 9342   | 1     | 1     | 1     | 1     |
| 9347   | 2     | 2     | 2     | 1     |
| 9352   | 1     | 2     | 1     | 1     |
| 9355   | 1     | 1     | 1     | 1     |
| 9356   | 3     | 3     | 3     | 2     |
| 9359   | 1     | 1     | 3     | 2     |
| 9368   | 1     | 1     | 1     | 1     |
| 9375   | 4     | 3     | 2     | 2     |
| 9384   | 2     | 2     | 1     | 1     |
| 9388   | 1     | 3     | 2     | 2     |
| 9397   | 3     | 3     | 3     | 3     |
| 9400   | 1     | 1     | 1     | 1     |
| 9401   | 4     | 4     | 4     | 4     |
| 9402   |       |       |       |       |
| 9417   | 3     | 3     | 4     | 3     |
| 9424   | 1     | 1     | 1     | 1     |
| 9427   | 1     | 1     | 1     | 1     |
| 9429   | 2     | 2     | 2     | 1     |



| respid | Q40_1 | Q40_2 | Q40_3 | Q40_4 |
|--------|-------|-------|-------|-------|
| 9437   | 4     | 4     | 4     | 4     |
| 9442   | 2     | 3     | 2     | 2     |
| 9446   | 2     | 1     | 1     | 2     |
| 9447   | 1     | 1     | 1     | 1     |
| 9448   | 1     | 2     | 2     | 1     |
| 9449   | 2     | 3     | 4     | 3     |
| 9455   |       |       |       |       |
| 9459   | 2     | 2     | 3     | 3     |
| 9460   | 1     | 1     | 1     | 1     |
| 9461   | 1     | 2     | 1     | 1     |
| 9463   | 1     | 1     | 2     | 1     |
| 9464   | 2     | 2     | 2     | 2     |
| 9466   | 1     | 3     | 2     | 3     |
| 9477   | 1     | 1     | 1     | 1     |
| 9482   | 4     | 3     | 4     | 3     |
| 9486   | 1     | 2     | 2     | 2     |
| 9488   | 5     | 4     | 5     | 5     |
| 9489   | 2     | 1     | 1     | 1     |
| 9496   | 1     | 2     | 2     | 3     |
| 9499   | 2     | 2     | 2     | 2     |
| 9512   | 1     | 1     | 1     | 1     |
| 9514   | 1     | 1     | 1     | 1     |
| 9516   | 1     | 1     | 2     | 1     |
| 9517   | 2     | 3     | 2     | 3     |
| 9520   | 1     | 1     | 1     | 1     |
| 9527   | 1     | 1     | 1     | 1     |
| 9532   | 1     | 2     | 3     | 3     |
| 9533   | 1     | 1     | 1     | 1     |
| 9543   | 1     | 1     | 2     | 1     |
| 9550   | 1     | 2     | 1     | 1     |
| 9553   | 1     | 1     | 1     | 1     |
| 9555   | 2     | 3     | 2     | 1     |

| respid | Q40_1 | Q40_2 | Q40_3 | Q40_4 |
|--------|-------|-------|-------|-------|
| 9565   | 1     | 3     | 4     | 2     |
| 9583   | 2     | 2     | 2     | 2     |
| 9594   | 1     | 1     | 1     | 1     |
| 9596   | 1     | 2     | 2     | 1     |
| 9600   | 2     | 2     | 2     | 2     |
| 9602   | 1     | 1     | 1     | 1     |
| 9606   | 1     | 1     | 1     | 1     |
| 9608   | 2     | 2     | 2     | 2     |
| 9610   | 2     | 2     | 1     | 1     |
| 9612   | 1     | 1     | 1     | 1     |
| 9613   | 1     | 1     | 1     | 1     |
| 9614   | 2     | 3     | 3     | 1     |
| 9620   | 1     | 1     | 1     | 1     |
| 9628   | 1     | 1     | 1     | 1     |
| 9631   | 1     | 1     | 2     | 1     |
| 9632   | 1     | 2     | 2     | 2     |
| 9633   | 1     | 1     | 2     | 1     |
| 9639   |       |       |       |       |
| 9640   | 1     | 1     | 1     | 1     |
| 9642   | 2     | 1     | 1     | 1     |
| 9653   | 2     | 2     | 2     | 2     |
| 9658   | 1     | 1     | 1     | 1     |
| 9659   | 2     | 3     | 6     | 1     |
| 9661   | 2     | 1     | 1     | 1     |
| 9664   | 6     | 1     | 3     | 1     |
| 9665   | 1     | 2     | 2     | 1     |
| 9666   | 4     | 3     | 3     | 2     |
| 9667   | 3     | 2     | 2     | 2     |
| 9668   |       |       |       |       |
| 9670   | 1     | 1     | 2     | 1     |
| 9671   | 1     | 1     | 2     | 1     |
| 9681   | 1     | 1     | 1     | 1     |

| respid | Q40_1 | Q40_2 | Q40_3 | Q40_4 |
|--------|-------|-------|-------|-------|
| 9684   | 2     | 2     | 3     | 2     |
| 9685   | 2     | 3     | 1     | 2     |
| 9686   | 1     | 4     | 2     | 4     |
| 9688   | 1     | 3     | 2     | 1     |
| 9692   | 1     | 1     | 1     | 1     |
| 9693   | 2     | 2     | 4     | 2     |
| 9698   | 2     | 3     | 4     | 4     |
| 9699   | 1     | 1     | 1     | 1     |
| 9701   | 1     | 1     | 1     | 1     |
| 9702   | 1     | 1     | 1     | 1     |
| 9709   | 2     | 2     | 2     | 1     |
| 9713   |       |       |       |       |
| 9715   |       |       |       |       |
| 9721   | 1     | 1     | 1     | 1     |
| 9725   | 1     | 1     | 1     | 1     |
| 9729   | 2     | 2     | 3     | 3     |
| 9731   | 2     | 1     | 1     | 1     |
| 9736   | 2     | 2     | 2     | 2     |
| 9740   |       |       |       |       |
| 9741   | 1     | 1     | 1     | 1     |
| 9749   | 1     | 2     | 2     | 2     |
| 9750   | 3     | 3     | 3     | 3     |
| 9751   | 3     | 4     | 4     | 4     |
| 9753   | 1     | 1     | 2     | 1     |
| 9754   | 3     | 3     | 4     | 4     |
| 9756   | 3     | 3     | 3     | 3     |
| 9758   | 3     | 4     | 4     | 3     |
| 9759   | 1     | 2     | 2     | 1     |
| 9760   | 2     | 2     | 2     | 2     |
| 9761   |       |       |       |       |
| 9762   | 1     | 1     | 1     | 1     |
| 9764   | 1     | 1     | 1     | 1     |

| respid | Q40_1 | Q40_2 | Q40_3 | Q40_4 |
|--------|-------|-------|-------|-------|
| 9768   | 1     | 1     | 1     | 1     |
| 9769   | 1     | 2     | 3     | 3     |
| 9770   | 1     | 1     | 1     | 1     |
| 9771   | 1     | 1     | 2     | 1     |
| 9772   | 2     | 1     | 2     | 1     |
| 9773   | 2     | 2     | 2     | 2     |
| 9776   | 1     | 1     | 1     | 1     |
| 9786   | 1     | 2     | 1     | 1     |
| 9790   | 1     | 1     | 1     | 1     |
| 9791   | 1     | 1     | 1     | 1     |
| 9794   | 2     | 2     | 3     | 2     |
| 9797   | 1     | 1     | 2     | 1     |
| 9799   | 2     | 1     | 1     | 1     |
| 9804   | 1     | 1     | 1     | 1     |
| 9805   | 3     | 3     | 2     | 2     |
| 9806   | 1     | 1     | 2     | 1     |
| 9807   | 2     | 2     | 2     | 2     |
| 9813   | 1     | 1     | 2     | 1     |
| 9817   | 1     | 1     | 1     | 1     |
| 9823   | 1     | 1     | 1     | 1     |
| 9826   | 1     | 1     | 2     | 1     |
| 9830   | 3     | 2     | 2     | 1     |
| 9835   | 4     | 2     | 2     | 1     |
| 9836   | 1     | 1     | 1     | 1     |
| 9841   |       |       |       |       |
| 9842   | 1     | 1     | 1     | 1     |
| 9844   | 3     | 3     | 3     | 3     |
| 9847   | 1     | 1     | 3     | 1     |
| 9851   | 1     | 1     | 1     | 1     |
| 9852   | 3     | 2     | 2     | 1     |
| 9854   | 1     | 1     | 1     | 1     |
| 9855   | 1     | 1     | 1     | 1     |

| respid | Q40_1 | Q40_2 | Q40_3 | Q40_4 |
|--------|-------|-------|-------|-------|
| 9856   | 1     | 1     | 1     | 1     |
| 9862   | 1     | 1     | 1     | 1     |
| 9863   |       |       |       |       |
| 9866   | 1     | 2     | 2     | 1     |
| 9867   | 3     | 3     | 2     | 2     |
| 9868   | 5     | 4     | 5     | 4     |
| 9869   | 3     | 1     | 1     | 1     |
| 9878   | 2     | 2     | 1     | 1     |
| 9879   | 1     | 3     | 3     | 2     |
| 9881   | 2     | 2     | 1     | 3     |
| 9882   | 1     | 1     | 1     | 1     |
| 9884   | 1     | 1     | 1     | 1     |
| 9885   | 1     | 1     | 1     | 1     |
| 9888   | 2     | 1     | 2     | 1     |
| 9889   | 1     | 1     | 1     | 1     |
| 9894   | 4     | 4     | 4     | 3     |
| 9895   | 2     | 1     | 1     | 1     |
| 9896   | 5     | 4     | 4     | 5     |
| 9897   | 3     | 4     | 3     | 2     |
| 9905   | 3     | 3     | 1     | 1     |
| 9907   | 1     | 1     | 1     | 1     |
| 9908   | 1     | 2     | 1     | 1     |
| 9909   | 2     | 2     | 4     | 1     |
| 9910   | 5     | 4     | 3     | 3     |
| 9913   | 3     | 2     | 2     | 2     |
| 9914   | 3     | 2     | 1     | 1     |
| 9915   | 1     | 1     | 1     | 1     |
| 9916   | 1     | 1     | 1     | 1     |
| 9918   |       |       |       |       |
| 9919   | 3     | 3     | 3     | 2     |
| 9922   | 3     | 3     | 3     | 4     |
| 9930   | 1     | 1     | 1     | 1     |

| respid | Q40_1 | Q40_2 | Q40_3 | Q40_4 |
|--------|-------|-------|-------|-------|
| 9934   | 1     | 1     | 1     | 1     |
| 9936   | 2     | 3     | 2     | 2     |
| 9938   | 1     | 1     | 1     | 1     |
| 9940   | 1     | 1     | 1     | 1     |
| 9944   | 3     | 3     | 3     | 2     |
| 9945   | 1     | 1     | 1     | 1     |
| 9948   | 3     | 3     | 4     | 4     |
| 9949   | 2     | 3     | 3     | 4     |
| 9951   | 2     | 2     | 2     | 2     |
| 9952   | 2     | 2     | 2     | 3     |
| 9954   | 2     | 1     | 1     | 1     |
| 9955   | 1     | 1     | 1     | 1     |
| 9956   | 3     | 4     | 4     | 4     |
| 9957   | 3     | 3     | 3     | 3     |
| 9958   | 2     | 3     | 4     | 3     |
| 9959   | 3     | 2     | 4     | 3     |
| 9960   | 1     | 2     | 1     | 1     |
| 9961   | 2     | 2     | 2     | 1     |
| 9962   | 3     | 1     | 1     | 1     |
| 9969   | 2     | 3     | 1     | 2     |
| 9982   | 1     | 2     | 2     | 1     |
| 9984   | 2     | 2     | 2     | 2     |
| 9990   | 2     | 2     | 1     | 1     |
| 9992   | 3     | 3     | 3     | 2     |
| 9993   | 3     | 4     | 4     | 3     |
| 9997   | 1     | 1     | 1     | 1     |
| 9999   | 1     | 1     | 1     | 1     |
| 10000  | 1     | 1     | 1     | 1     |
| 10005  | 4     | 5     | 6     | 3     |
| 10014  | 1     | 1     | 1     | 1     |
| 10016  | 2     | 2     | 3     | 3     |
| 10017  | 1     | 1     | 1     | 1     |

| respid | Q40_1 | Q40_2 | Q40_3 | Q40_4 |
|--------|-------|-------|-------|-------|
| 10018  | 2     | 3     | 2     | 2     |
| 10021  | 1     | 1     | 1     | 1     |
| 10025  | 3     | 2     | 3     | 3     |
| 10027  | 1     | 1     | 1     | 1     |
| 10028  | 3     | 1     | 1     | 1     |
| 10031  | 1     | 2     | 1     | 3     |
| 10036  | 1     | 1     | 1     | 1     |
| 10037  | 2     | 1     | 2     | 1     |
| 10038  | 2     | 1     | 2     | 2     |
| 10039  |       |       |       |       |
| 10041  | 1     | 1     | 1     | 1     |
| 10045  | 5     | 5     | 5     | 3     |
| 10046  | 1     | 2     | 2     | 1     |
| 10047  | 2     | 2     | 2     | 2     |
| 10048  | 2     | 1     | 2     | 2     |
| 10049  | 1     | 2     | 2     | 1     |
| 10051  | 2     | 1     | 1     | 1     |
| 10052  | 2     | 2     | 4     | 3     |
| 10056  | 1     | 1     | 2     | 1     |
| 10061  | 1     | 2     | 2     | 2     |
| 10064  | 1     | 1     | 1     | 1     |
| 10066  | 1     | 1     | 1     | 1     |
| 10069  | 1     | 1     | 1     | 1     |
| 10071  | 1     | 1     | 1     | 1     |
| 10074  | 1     | 1     | 1     | 1     |
| 10079  | 1     | 2     | 1     | 1     |
| 10087  | 3     | 3     | 2     | 2     |
| 10095  | 1     | 2     | 1     | 2     |
| 10097  | 1     | 1     | 1     | 1     |
| 10100  | 1     | 2     | 2     | 1     |
| 10105  | 1     | 1     | 1     | 1     |
| 10107  | 3     | 3     | 2     | 2     |

| respid | Q40_1 | Q40_2 | Q40_3 | Q40_4 |
|--------|-------|-------|-------|-------|
| 10111  | 2     | 1     | 1     | 1     |
| 10116  | 1     | 1     | 1     | 1     |
| 10118  | 1     | 1     | 1     | 1     |
| 10123  |       |       |       |       |
| 10124  | 1     | 1     | 2     | 1     |
| 10130  | 1     | 2     | 1     | 2     |
| 10134  | 1     | 1     | 3     | 1     |
| 10135  | 1     | 1     | 2     | 1     |
| 10136  |       |       |       |       |
| 10141  | 2     | 3     | 3     | 3     |
| 10142  | 1     | 1     | 1     | 1     |
| 10143  | 1     | 1     | 1     | 1     |
| 10145  | 2     | 2     | 1     | 1     |
| 10149  | 3     | 1     | 2     | 3     |
| 10150  | 1     | 1     | 1     | 1     |
| 10151  | 1     | 1     | 1     | 1     |
| 10152  | 4     | 4     | 5     | 4     |
| 10153  | 1     | 1     | 1     | 1     |
| 10156  | 1     | 1     | 1     | 1     |
| 10160  | 1     | 1     | 2     | 1     |
| 10161  | 1     | 2     | 2     | 2     |
| 10167  | 4     | 3     | 2     | 2     |
| 10171  |       |       |       |       |
| 10172  | 1     | 1     | 1     | 1     |
| 10176  | 3     | 3     | 2     | 1     |
| 10177  | 4     | 3     | 4     | 2     |
| 10182  | 3     | 2     | 3     | 3     |
| 10184  | 1     | 1     | 1     | 1     |
| 10186  | 3     | 4     | 4     | 4     |
| 10189  | 1     | 2     | 2     | 1     |
| 10191  | 1     | 1     | 1     | 1     |
| 10192  | 2     | 1     | 3     | 1     |



| respid | Q40_1 | Q40_2 | Q40_3 | Q40_4 |
|--------|-------|-------|-------|-------|
| 10195  | 1     | 1     | 1     | 1     |
| 10199  |       |       |       |       |
| 10201  | 1     | 1     | 2     | 1     |
| 10213  | 1     | 1     | 1     | 1     |
| 10222  | 3     | 3     | 3     | 4     |
| 10224  |       |       |       |       |
| 10245  | 1     | 1     | 1     | 1     |
| 10254  | 1     | 2     | 1     | 1     |
| 10255  | 4     | 5     | 5     | 5     |
| 10257  | 1     | 1     | 3     | 1     |
| 10260  | 2     | 2     | 3     | 2     |
| 10261  | 2     | 3     | 3     | 3     |
| 10263  | 4     | 5     | 5     | 5     |
| 10264  | 4     | 2     | 3     | 1     |
| 10268  | 3     | 4     | 3     | 4     |
| 10269  | 1     | 3     | 4     | 3     |
| 10270  |       |       |       |       |
| 10282  | 1     | 1     | 1     | 1     |
| 10285  |       |       |       |       |
| 10288  | 6     | 1     | 1     | 1     |
| 10291  | 1     | 1     | 2     | 1     |
| 10292  | 1     | 1     | 1     | 1     |
| 10304  |       |       |       |       |
| 10305  | 1     | 1     | 1     | 1     |
| 10310  | 1     | 1     | 2     | 1     |
| 10324  | 1     | 1     | 1     | 1     |
| 10325  | 2     | 2     | 2     | 1     |
| 10326  | 1     | 2     | 3     | 1     |
| 10329  |       |       |       |       |
| 10332  | 1     | 1     | 1     | 1     |
| 10337  | 1     | 1     | 2     | 1     |
| 10341  | 1     | 1     | 1     | 1     |

| respid | Q40_1 | Q40_2 | Q40_3 | Q40_4 |
|--------|-------|-------|-------|-------|
| 10353  | 1     | 2     | 1     | 1     |
| 10354  |       |       |       |       |
| 10359  | 1     | 1     | 3     | 2     |
| 10360  | 1     | 1     | 1     | 1     |
| 10362  | 1     | 2     | 2     | 3     |
| 10364  | 2     | 1     | 1     | 1     |
| 10366  | 3     | 3     | 2     | 4     |
| 10367  | 2     | 2     | 2     | 1     |
| 10371  | 1     | 1     | 1     | 1     |
| 10374  | 3     | 2     | 1     | 1     |
| 10375  | 1     | 1     | 1     | 1     |
| 10376  | 1     | 1     | 1     | 1     |
| 10377  | 1     | 1     | 2     | 1     |
| 10378  | 2     | 2     | 2     | 2     |
| 10387  | 3     | 1     | 1     | 1     |
| 10396  | 4     | 4     | 5     | 5     |
| 10397  | 1     | 1     | 1     | 1     |
| 10399  | 2     | 3     | 3     | 2     |
| 10405  | 1     | 1     | 2     | 1     |
| 10406  | 1     | 2     | 1     | 1     |
| 10408  | 1     | 1     | 1     | 1     |
| 10409  |       |       |       |       |
| 10412  | 1     | 1     | 1     | 1     |
| 10413  | 1     | 1     | 1     | 1     |
| 10419  | 3     | 3     | 3     | 3     |
| 10423  | 4     | 3     | 4     | 4     |
| 10426  | 2     | 1     | 2     | 2     |
| 10446  | 1     | 2     | 2     | 1     |
| 10448  | 2     | 1     | 1     | 1     |
| 10450  | 1     | 2     | 2     | 1     |
| 10455  | 2     | 1     | 1     | 1     |
| 10460  | 1     | 1     | 1     | 1     |

| respid | Q40_1 | Q40_2 | Q40_3 | Q40_4 |
|--------|-------|-------|-------|-------|
| 10461  | 5     | 2     | 1     | 1     |
| 10471  | 1     | 1     | 1     | 1     |
| 10472  | 2     | 1     | 1     | 1     |
| 10491  | 3     | 3     | 4     | 4     |
| 10493  | 2     | 2     | 2     | 2     |
| 10498  | 1     | 1     | 2     | 1     |
| 10533  | 1     | 2     | 1     | 1     |
| 10539  | 1     | 1     | 2     | 1     |
| 10540  | 2     | 2     | 1     | 1     |
| 10557  | 2     | 2     | 3     | 2     |
| 10558  | 2     | 3     | 4     | 4     |
| 10559  | 4     | 5     | 6     | 6     |
| 10564  | 1     | 2     | 1     | 1     |
| 10570  |       |       |       |       |
| 10572  | 1     | 1     | 1     | 1     |
| 10576  | 1     | 2     | 2     | 1     |
| 10582  | 1     | 3     | 2     | 1     |
| 10593  | 1     | 1     | 1     | 1     |
| 10596  | 1     | 3     | 2     | 3     |
| 10615  |       |       |       |       |
| 10616  | 1     | 1     | 1     | 1     |
| 10623  | 1     | 1     | 1     | 1     |
| 10626  | 1     | 1     | 2     | 2     |
| 10627  | 4     | 4     | 4     | 4     |
| 10629  | 1     | 1     | 2     | 1     |
| 10632  | 2     | 2     | 2     | 2     |
| 10641  |       |       |       |       |
| 10648  | 3     | 3     | 2     | 2     |
| 10651  | 2     | 3     | 5     | 2     |
| 10654  | 1     | 1     | 1     | 1     |
| 10673  | 1     | 1     | 1     | 1     |
| 10675  | 1     | 1     | 1     | 1     |

| respid | Q40_1 | Q40_2 | Q40_3 | Q40_4 |
|--------|-------|-------|-------|-------|
| 10689  | 1     | 1     | 1     | 1     |
| 10692  | 1     | 1     | 1     | 1     |
| 10694  | 1     | 1     | 1     | 1     |
| 10695  | 1     | 1     | 1     | 1     |
| 10702  | 2     | 3     | 3     | 3     |
| 10703  | 4     | 4     | 4     | 4     |
| 10708  | 1     | 1     | 1     | 1     |
| 10719  | 2     | 1     | 2     | 1     |
| 10722  | 2     | 2     | 2     | 1     |
| 10723  | 2     | 1     | 2     | 1     |
| 10726  | 1     | 2     | 3     | 1     |
| 10727  | 1     | 1     | 1     | 1     |
| 10730  | 1     | 2     | 1     | 1     |
| 10731  |       |       |       |       |
| 10737  | 1     | 2     | 3     | 1     |
| 10743  | 1     | 2     | 4     | 2     |
| 10763  | 1     | 1     | 1     | 1     |
| 10777  |       |       |       |       |
| 10787  | 3     | 2     | 1     | 2     |
| 10798  | 4     | 4     | 4     | 4     |
| 10800  | 1     | 1     | 3     | 1     |
| 10802  | 4     | 4     | 4     | 4     |
| 10803  | 4     | 4     | 4     | 4     |
| 10808  | 1     | 1     | 2     | 2     |
| 10810  | 6     | 4     | 3     | 1     |
| 10819  | 1     | 1     | 2     | 1     |
| 10825  | 3     | 2     | 1     | 1     |
| 10827  | 2     | 3     | 3     | 3     |
| 10830  | 1     | 2     | 2     | 1     |
| 10847  | 1     | 1     | 1     | 1     |
| 10849  | 1     | 2     | 1     | 1     |
| 10852  | 1     | 1     | 2     | 1     |

| respid | Q40_1 | Q40_2 | Q40_3 | Q40_4 |
|--------|-------|-------|-------|-------|
| 10854  | 3     | 3     | 3     | 3     |
| 10857  | 1     | 1     | 1     | 1     |
| 10861  | 1     | 1     | 3     | 2     |
| 10862  |       |       |       |       |
| 10870  | 2     | 3     | 3     | 2     |
| 10873  | 1     | 2     | 1     | 2     |
| 10881  | 2     | 1     | 1     | 1     |
| 10893  |       |       |       |       |
| 10898  | 2     | 1     | 2     | 1     |
| 10899  | 3     | 2     | 4     | 2     |
| 10905  | 4     | 3     | 3     | 3     |
| 10910  |       |       |       |       |
| 10911  | 2     | 1     | 2     | 2     |
| 10912  | 1     | 1     | 1     | 1     |
| 10913  | 1     | 1     | 1     | 1     |
| 10918  |       |       |       |       |
| 10995  |       |       |       |       |
| 11002  | 1     | 2     | 2     | 2     |
| 11003  | 3     | 1     | 2     | 1     |
| 11005  | 1     | 1     | 1     | 1     |
| 11015  | 1     | 1     | 1     | 1     |
| 11016  | 1     | 1     | 1     | 1     |
| 11017  | 1     | 1     | 1     | 1     |
| 11020  | 2     | 2     | 2     | 2     |
| 11024  | 1     | 1     | 1     | 1     |
| 11026  | 3     | 3     | 3     | 3     |
| 11028  | 3     | 3     | 2     | 3     |
| 11029  | 5     | 5     | 5     | 5     |
| 11030  | 1     | 1     | 2     | 1     |
| 11031  | 1     | 2     | 2     | 1     |
| 11038  | 1     | 1     | 1     | 1     |
| 11051  | 1     | 1     | 1     | 1     |

| respid | Q40_1 | Q40_2 | Q40_3 | Q40_4 |
|--------|-------|-------|-------|-------|
| 11052  | 3     | 3     | 3     | 3     |
| 11053  | 1     | 1     | 2     | 1     |
| 11054  | 4     | 4     | 4     | 5     |
| 11063  | 3     | 2     | 1     | 1     |
| 11075  | 3     | 2     | 3     | 2     |
| 11083  | 1     | 1     | 2     | 1     |
| 11092  | 1     | 1     | 1     | 1     |
| 11118  | 1     | 1     | 1     | 1     |
| 11119  | 3     | 2     | 2     | 2     |
| 11134  | 3     | 3     | 3     | 3     |
| 11139  | 1     | 1     | 1     | 1     |
| 11154  | 1     | 1     | 1     | 1     |
| 11166  | 1     | 2     | 2     | 2     |
| 11168  |       |       |       |       |
| 11176  | 2     | 3     | 3     | 4     |
| 11183  | 3     | 4     | 4     | 3     |
| 11189  | 1     | 1     | 1     | 1     |
| 11196  | 3     | 4     | 4     | 3     |
| 11200  | 1     | 2     | 2     | 1     |
| 11201  | 1     | 1     | 5     | 1     |
| 11211  | 3     | 4     | 4     | 3     |
| 11218  | 1     | 1     | 1     | 1     |
| 11219  | 1     | 1     | 2     | 1     |
| 11221  | 2     | 2     | 2     | 2     |
| 11222  | 1     | 1     | 1     | 1     |
| 11230  | 4     | 3     | 3     | 4     |
| 11236  | 3     | 4     | 4     | 3     |
| 11237  | 2     | 1     | 2     | 1     |
| 11240  | 3     | 5     | 3     | 4     |
| 11244  | 3     | 4     | 4     | 4     |
| 11249  | 2     | 1     | 2     | 2     |
| 11252  | 3     | 4     | 4     | 3     |

| respid | Q40_1 | Q40_2 | Q40_3 | Q40_4 |
|--------|-------|-------|-------|-------|
| 11254  | 2     | 1     | 2     | 2     |
| 11255  | 2     | 3     | 3     | 2     |
| 11258  | 3     | 4     | 4     | 3     |
| 11260  | 1     | 1     | 1     | 1     |
| 11264  | 4     | 3     | 4     | 4     |
| 11266  | 5     | 2     | 3     | 3     |
| 11268  | 3     | 3     | 4     | 3     |
| 11269  | 6     | 2     | 1     | 2     |
| 11272  | 3     | 2     | 4     | 3     |
| 11273  | 2     | 1     | 1     | 1     |
| 11275  | 1     | 1     | 2     | 1     |
| 11276  | 1     | 3     | 2     | 1     |
| 11278  | 3     | 4     | 3     | 3     |
| 11288  |       |       |       |       |
| 11289  |       |       |       |       |
| 11291  | 1     | 1     | 1     | 1     |
| 11295  | 1     | 1     | 1     | 1     |
| 11297  | 1     | 1     | 2     | 1     |
| 11304  | 2     | 3     | 2     | 4     |
| 11305  | 1     | 1     | 2     | 1     |
| 11311  | 1     | 1     | 1     | 1     |
| 11313  | 1     | 1     | 1     | 1     |
| 11315  | 5     | 6     | 5     | 5     |
| 11316  | 5     | 5     | 5     | 6     |
| 11318  | 4     | 3     | 2     | 3     |
| 11323  | 1     | 1     | 1     | 1     |
| 11331  | 2     | 2     | 4     | 6     |
| 11333  | 2     | 2     | 2     | 2     |
| 11334  | 2     | 2     | 2     | 3     |
| 11340  | 5     | 4     | 5     | 4     |
| 11345  | 1     | 1     | 1     | 1     |
| 11354  | 1     | 2     | 1     | 1     |

| respid | Q40_1 | Q40_2 | Q40_3 | Q40_4 |
|--------|-------|-------|-------|-------|
| 11360  |       |       |       |       |
| 11361  | 2     | 2     | 1     | 1     |
| 11367  |       |       |       |       |
| 11370  |       |       |       |       |
| 11371  | 4     | 3     | 2     | 3     |
| 11372  | 4     | 4     | 4     | 4     |
| 11373  | 1     | 2     | 4     | 2     |
| 11382  | 1     | 1     | 1     | 1     |
| 11394  | 3     | 2     | 2     | 2     |
| 11395  | 3     | 3     | 2     | 4     |
| 11397  |       |       |       |       |
| 11402  | 1     | 1     | 5     | 1     |
| 11409  | 1     | 1     | 1     | 1     |
| 11410  | 1     | 1     | 1     | 2     |
| 11411  | 1     | 1     | 1     | 1     |
| 11418  | 2     | 1     | 1     | 1     |
| 11425  | 3     | 3     | 3     | 3     |
| 11429  | 1     | 1     | 1     | 1     |
| 11430  | 3     | 4     | 5     | 4     |
| 11431  | 3     | 4     | 2     | 4     |
| 11432  |       |       |       |       |
| 11433  | 2     | 3     | 3     | 1     |
| 11435  | 3     | 2     | 3     | 3     |
| 11436  | 2     | 2     | 2     | 3     |
| 11437  | 3     | 3     | 3     | 2     |
| 11439  |       |       |       |       |
| 11440  | 2     | 2     | 4     | 2     |
| 11447  | 1     | 1     | 1     | 1     |
| 11455  | 2     | 1     | 1     | 1     |
| 11456  | 3     | 3     | 3     | 4     |
| 11461  | 1     | 2     | 1     | 2     |
| 11463  | 4     | 3     | 2     | 2     |



| respid | Q40_1 | Q40_2 | Q40_3 | Q40_4 |
|--------|-------|-------|-------|-------|
| 11470  | 4     | 2     | 4     | 4     |
| 11472  |       |       |       |       |
| 11475  | 1     | 2     | 1     | 1     |
| 11476  | 3     | 3     | 2     | 3     |
| 11482  | 4     | 3     | 3     | 3     |
| 11501  | 3     | 2     | 4     | 3     |
| 11503  | 5     | 4     | 5     | 4     |
| 11505  | 2     | 2     | 2     | 1     |
| 11510  | 1     | 1     | 2     | 1     |
| 11519  |       |       |       |       |
| 11527  | 3     | 5     | 5     | 4     |
| 11529  | 3     | 4     | 4     | 3     |
| 11530  | 3     | 2     | 3     | 2     |
| 11536  | 4     | 5     | 5     | 3     |
| 11543  | 2     | 1     | 3     | 1     |
| 11548  | 3     | 2     | 2     | 3     |
| 11566  | 1     | 1     | 1     | 1     |
| 11570  | 3     | 4     | 3     | 3     |
| 11571  | 2     | 2     | 3     | 2     |
| 11578  |       |       |       |       |
| 11579  | 1     | 1     | 1     | 1     |
| 11581  | 3     | 4     | 4     | 3     |
| 11582  | 1     | 1     | 1     | 1     |
| 11583  | 1     | 1     | 1     | 1     |
| 11589  | 2     | 3     | 3     | 2     |
| 11590  | 1     | 1     | 1     | 1     |
| 11592  | 1     | 1     | 1     | 1     |
| 11596  |       |       |       |       |
| 11598  | 4     | 4     | 3     | 2     |
| 11602  | 3     | 2     | 3     | 2     |
| 11605  | 2     | 3     | 2     | 3     |
| 11618  | 2     | 3     | 2     | 2     |

| respid | Q40_1 | Q40_2 | Q40_3 | Q40_4 |
|--------|-------|-------|-------|-------|
| 11621  | 3     | 2     | 4     | 3     |
| 11630  | 2     | 2     | 3     | 3     |
| 11636  | 4     | 3     | 4     | 5     |
| 11640  | 4     | 5     | 5     | 6     |
| 11658  | 2     | 3     | 1     | 2     |
| 11665  | 2     | 3     | 5     | 4     |
| 11666  | 4     | 4     | 5     | 4     |
| 11667  | 2     | 3     | 4     | 3     |
| 11674  | 6     | 1     | 2     | 1     |
| 11680  | 1     | 2     | 1     | 1     |
| 11683  | 1     | 1     | 1     | 1     |
| 11688  | 2     | 3     | 3     | 3     |
| 11690  |       |       |       |       |
| 11694  |       |       |       |       |
| 11705  | 1     | 2     | 3     | 1     |
| 11720  | 2     | 1     | 3     | 2     |
| 11724  |       |       |       |       |
| 11738  | 2     | 2     | 2     | 1     |
| 11744  | 4     | 3     | 2     | 3     |
| 11745  | 3     | 3     | 2     | 6     |
| 11747  |       |       |       |       |
| 11755  | 2     | 2     | 3     | 3     |
| 11756  | 2     | 1     | 2     | 2     |
| 11772  | 1     | 1     | 3     | 2     |
| 11773  |       |       |       |       |
| 11778  | 3     | 4     | 4     | 3     |
| 11790  | 2     | 2     | 3     | 2     |
| 11794  |       |       |       |       |
| 11795  | 3     | 2     | 3     | 3     |
| 11799  | 2     | 1     | 2     | 3     |
| 11803  | 2     | 2     | 2     | 2     |
| 11806  | 3     | 4     | 5     | 4     |

| respid | Q40_1 | Q40_2 | Q40_3 | Q40_4 |
|--------|-------|-------|-------|-------|
| 11808  | 3     | 3     | 4     | 3     |
| 11810  |       |       |       |       |
| 11811  |       |       |       |       |
| 11812  | 3     | 3     | 4     | 3     |
| 11813  | 2     | 2     | 2     | 3     |
| 11821  | 2     | 3     | 3     | 3     |
| 11827  |       |       |       |       |
| 11831  | 4     | 4     | 5     | 5     |
| 11841  |       |       |       |       |
| 11872  | 2     | 3     | 2     | 2     |
| 11898  | 2     | 1     | 1     | 1     |
| 11902  | 4     | 4     | 5     | 3     |
| 11912  | 2     | 2     | 3     | 3     |
| 11926  | 1     | 2     | 1     | 1     |
| 11928  | 4     | 4     | 4     | 4     |
| 11932  | 2     | 2     | 2     | 2     |
| 11934  | 1     | 2     | 1     | 1     |
| 11941  | 4     | 5     | 5     | 4     |
| 11942  |       |       |       |       |
| 11943  | 3     | 3     | 2     | 3     |
| 11944  | 3     | 3     | 3     | 3     |
| 11955  |       |       |       |       |
| 11958  | 4     | 3     | 3     | 4     |
| 11968  | 2     | 3     | 2     | 3     |
| 11979  | 3     | 2     | 2     | 3     |
| 11988  |       |       |       |       |
| 11999  | 5     | 3     | 3     | 3     |
| 12002  | 1     | 1     | 1     | 1     |
| 12004  | 1     | 1     | 2     | 1     |
| 12008  | 1     | 1     | 1     | 1     |
| 12013  | 3     | 2     | 3     | 1     |
| 12018  | 2     | 2     | 2     | 2     |

| respid | Q40_1 | Q40_2 | Q40_3 | Q40_4 |
|--------|-------|-------|-------|-------|
| 12023  | 1     | 2     | 2     | 1     |
| 12027  | 4     | 3     | 4     | 4     |
| 12030  | 2     | 2     | 2     | 2     |
| 12031  | 2     | 2     | 2     | 1     |
| 12036  | 2     | 4     | 3     | 2     |
| 12037  | 3     | 3     | 3     | 2     |
| 12038  | 5     | 4     | 4     | 5     |
| 12039  | 1     | 1     | 1     | 1     |
| 12045  | 1     | 2     | 1     | 1     |
| 12046  | 2     | 3     | 1     | 3     |
| 12054  | 3     | 3     | 3     | 3     |
| 12055  | 2     | 2     | 3     | 2     |
| 12069  | 4     | 3     | 3     | 3     |
| 12070  | 3     | 5     | 4     | 3     |
| 12074  | 1     | 1     | 2     | 1     |
| 12075  | 2     | 2     | 3     | 3     |
| 12078  | 2     | 2     | 1     | 1     |
| 12089  | 2     | 1     | 2     | 2     |
| 12091  | 2     | 3     | 2     | 4     |
| 12092  | 4     | 4     | 4     | 3     |
| 12108  | 2     | 6     | 4     | 3     |
| 12111  | 3     | 3     | 5     | 5     |
| 12112  | 3     | 3     | 4     | 4     |
| 12126  |       |       |       |       |
| 12132  | 5     | 3     | 4     | 3     |
| 12150  | 3     | 3     | 4     | 4     |
| 12152  | 2     | 2     | 2     | 2     |
| 12154  | 3     | 3     | 1     | 1     |
| 12157  | 3     | 4     | 4     | 3     |
| 12165  | 1     | 1     | 2     | 1     |
| 12169  | 3     | 5     | 2     | 3     |
| 12182  | 5     | 4     | 4     | 5     |

| respid | Q40_1 | Q40_2 | Q40_3 | Q40_4 |
|--------|-------|-------|-------|-------|
| 12198  | 6     | 5     | 5     | 6     |
| 12199  |       |       |       |       |
| 12202  | 2     | 3     | 2     | 3     |
| 12207  | 2     | 2     | 2     | 1     |
| 12208  | 2     | 3     | 3     | 2     |
| 12210  | 1     | 1     | 1     | 1     |
| 12219  | 5     | 4     | 3     | 4     |
| 12224  | 6     | 1     | 1     | 1     |
| 12230  | 3     | 3     | 3     | 3     |
| 12238  | 1     | 1     | 2     | 2     |
| 12239  | 1     | 1     | 1     | 1     |
| 12243  | 1     | 1     | 1     | 1     |
| 12245  | 2     | 1     | 2     | 2     |
| 12246  | 4     | 3     | 4     | 4     |
| 12247  | 1     | 1     | 2     | 2     |
| 12248  | 1     | 1     | 1     | 1     |
| 12249  | 3     | 2     | 1     | 3     |
| 12258  | 3     | 3     | 4     | 4     |
| 12265  | 3     | 4     | 4     | 5     |
| 12269  | 2     | 1     | 1     | 1     |
| 12270  | 1     | 1     | 1     | 1     |
| 12279  | 2     | 1     | 1     | 1     |
| 12280  | 1     | 3     | 2     | 1     |
| 12282  | 4     | 3     | 1     | 2     |
| 12283  | 3     | 1     | 1     | 2     |
| 12287  | 1     | 1     | 1     | 1     |
| 12288  | 2     | 2     | 2     | 3     |
| 12290  | 1     | 2     | 1     | 1     |
| 12292  | 2     | 1     | 1     | 1     |
| 12294  | 1     | 1     | 1     | 1     |
| 12296  | 2     | 1     | 1     | 2     |
| 12307  | 2     | 1     | 3     | 1     |

| respid | Q40_1 | Q40_2 | Q40_3 | Q40_4 |
|--------|-------|-------|-------|-------|
| 12309  | 1     | 1     | 3     | 1     |
| 12312  | 3     | 2     | 2     | 2     |
| 12317  | 2     | 1     | 1     | 2     |
| 12319  | 1     | 1     | 1     | 1     |
| 12320  | 1     | 1     | 1     | 1     |
| 12322  | 1     | 1     | 1     | 1     |
| 12328  | 4     | 5     | 3     | 2     |
| 12331  | 5     | 5     | 6     | 6     |
| 12332  | 1     | 1     | 1     | 1     |
| 12334  | 1     | 1     | 1     | 1     |
| 12337  | 1     | 1     | 2     | 1     |
| 12338  | 1     | 1     | 1     | 1     |
| 12342  | 1     | 2     | 2     | 1     |
| 12349  | 1     | 1     | 1     | 1     |
| 12352  | 3     | 4     | 2     | 2     |
| 12355  | 2     | 2     | 2     | 1     |
| 12357  | 3     | 2     | 1     | 2     |
| 12358  | 1     | 1     | 3     | 1     |
| 12371  | 2     | 3     | 4     | 5     |
| 12372  | 1     | 1     | 1     | 1     |
| 12373  | 2     | 2     | 2     | 2     |
| 12379  | 1     | 1     | 1     | 1     |
| 12381  | 3     | 3     | 4     | 4     |
| 12383  | 1     | 1     | 2     | 1     |
| 12384  | 1     | 1     | 1     | 1     |
| 12386  | 1     | 1     | 2     | 1     |
| 12389  |       |       |       |       |
| 12392  | 3     | 1     | 1     | 1     |
| 12396  | 2     | 1     | 1     | 2     |
| 12397  | 2     | 1     | 2     | 1     |
| 12399  | 1     | 2     | 4     | 3     |
| 12400  | 4     | 4     | 5     | 4     |

| respid | Q40_1 | Q40_2 | Q40_3 | Q40_4 |
|--------|-------|-------|-------|-------|
| 12406  | 3     | 4     | 5     | 1     |
| 12407  | 1     | 2     | 2     | 1     |
| 12410  | 1     | 1     | 1     | 1     |
| 12413  | 1     | 1     | 2     | 1     |
| 12416  | 3     | 3     | 3     | 3     |
| 12419  | 1     | 2     | 2     | 1     |
| 12422  | 2     | 3     | 2     | 3     |
| 12423  | 2     | 1     | 1     | 1     |
| 12429  | 1     | 1     | 1     | 1     |
| 12434  | 3     | 4     | 5     | 4     |
| 12435  | 2     | 1     | 1     | 1     |
| 12436  | 2     | 3     | 3     | 2     |
| 12442  |       |       |       |       |
| 12449  | 2     | 3     | 4     | 3     |
| 12451  | 1     | 1     | 1     | 1     |
| 12456  | 2     | 1     | 1     | 2     |
| 12457  | 1     | 1     | 1     | 1     |
| 12458  | 3     | 1     | 2     | 2     |
| 12461  | 2     | 2     | 3     | 2     |
| 12462  | 1     | 2     | 2     | 1     |
| 12463  | 3     | 3     | 3     | 3     |
| 12466  | 2     | 1     | 1     | 1     |
| 12470  | 1     | 2     | 1     | 2     |
| 12471  | 2     | 2     | 2     | 2     |
| 12472  | 1     | 1     | 1     | 1     |
| 12478  | 2     | 3     | 2     | 2     |
| 12479  | 2     | 3     | 4     | 4     |
| 12481  | 1     | 1     | 1     | 1     |
| 12482  | 3     | 1     | 2     | 3     |
| 12483  |       |       |       |       |
| 12496  | 1     | 1     | 1     | 1     |
| 12497  | 3     | 2     | 2     | 1     |

| respid | Q40_1 | Q40_2 | Q40_3 | Q40_4 |
|--------|-------|-------|-------|-------|
| 12498  | 3     | 3     | 3     | 2     |
| 12500  | 1     | 2     | 4     | 1     |
| 12501  | 1     | 2     | 2     | 3     |
| 12502  | 1     | 1     | 1     | 2     |
| 12503  | 2     | 1     | 1     | 1     |
| 12505  | 4     | 2     | 3     | 2     |
| 12508  | 4     | 3     | 2     | 2     |
| 12509  | 2     | 2     | 3     | 2     |
| 12510  |       |       |       |       |
| 12512  | 4     | 2     | 3     | 3     |
| 12514  | 2     | 2     | 3     | 3     |
| 12515  | 3     | 2     | 1     | 2     |
| 12520  | 1     | 1     | 1     | 1     |
| 12522  | 2     | 1     | 1     | 1     |
| 12526  | 4     | 2     | 1     | 2     |
| 12527  |       |       |       |       |
| 12528  | 2     | 2     | 2     | 1     |
| 12530  | 3     | 4     | 3     | 4     |
| 12535  | 3     | 1     | 1     | 1     |
| 12539  | 1     | 1     | 2     | 1     |
| 12541  | 2     | 3     | 4     | 3     |
| 12542  | 1     | 1     | 1     | 1     |
| 12545  | 3     | 4     | 4     | 5     |
| 12547  | 4     | 3     | 2     | 1     |
| 12549  | 3     | 3     | 3     | 4     |
| 12550  | 2     | 1     | 1     | 1     |
| 12555  |       |       |       |       |
| 12557  | 4     | 2     | 2     | 2     |
| 12559  | 3     | 2     | 2     | 3     |
| 12561  | 2     | 3     | 3     | 3     |
| 12562  | 2     | 1     | 3     | 4     |
| 12563  | 1     | 1     | 1     | 1     |



| respid | Q40_1 | Q40_2 | Q40_3 | Q40_4 |
|--------|-------|-------|-------|-------|
| 12565  | 5     | 3     | 3     | 3     |
| 12566  |       |       |       |       |
| 12570  |       |       |       |       |
| 12571  | 1     | 1     | 1     | 1     |
| 12572  | 4     | 2     | 3     | 2     |
| 12578  |       |       |       |       |
| 12579  | 3     | 1     | 2     | 1     |
| 12581  | 1     | 1     | 3     | 2     |
| 12582  | 2     | 3     | 2     | 3     |
| 12585  | 3     | 2     | 2     | 1     |
| 12586  | 3     | 4     | 3     | 2     |
| 12588  | 5     | 4     | 3     | 4     |
| 12589  | 2     | 2     | 1     | 1     |
| 12590  | 1     | 1     | 1     | 1     |
| 12591  | 3     | 2     | 1     | 2     |
| 12593  | 2     | 2     | 2     | 3     |
| 12594  | 2     | 2     | 2     | 3     |
| 12599  | 2     | 3     | 4     | 3     |
| 12600  | 2     | 1     | 1     | 1     |
| 12602  | 3     | 3     | 4     | 4     |
| 12606  | 3     | 4     | 4     | 2     |
| 12607  |       |       |       |       |
| 12608  |       |       |       |       |
| 12610  | 4     | 3     | 2     | 1     |
| 12611  | 1     | 1     | 1     | 1     |
| 12613  | 6     | 5     | 4     | 3     |
| 12616  | 2     | 3     | 2     | 3     |
| 12617  | 3     | 3     | 3     | 3     |
| 12619  | 1     | 1     | 1     | 1     |
| 12622  |       |       |       |       |
| 12628  | 1     | 1     | 1     | 1     |
| 12631  | 2     | 3     | 3     | 2     |

| respid | Q40_1 | Q40_2 | Q40_3 | Q40_4 |
|--------|-------|-------|-------|-------|
| 12635  | 1     | 2     | 4     | 3     |
| 12638  | 1     | 1     | 1     | 1     |
| 12639  | 1     | 1     | 1     | 1     |
| 12640  | 1     | 1     | 1     | 1     |
| 12643  | 2     | 3     | 3     | 2     |
| 12646  | 4     | 5     | 5     | 4     |
| 12648  | 4     | 4     | 4     | 3     |
| 12650  | 1     | 2     | 3     | 3     |
| 12651  | 1     | 1     | 2     | 1     |
| 12658  | 3     | 2     | 2     | 3     |
| 12662  | 2     | 2     | 2     | 2     |
| 12663  | 1     | 2     | 2     | 1     |
| 12664  | 2     | 3     | 3     | 3     |
| 12669  | 6     | 5     | 6     | 6     |
| 12670  | 2     | 3     | 2     | 2     |
| 12673  |       |       |       |       |
| 12675  | 1     | 1     | 1     | 1     |
| 12677  | 2     | 2     | 3     | 2     |
| 12679  | 1     | 1     | 2     | 1     |
| 12682  | 1     | 2     | 2     | 3     |
| 12696  | 3     | 3     | 3     | 3     |
| 12697  | 2     | 1     | 2     | 2     |
| 12699  | 1     | 1     | 2     | 1     |
| 12700  | 4     | 1     | 1     | 1     |
| 12701  | 2     | 1     | 2     | 3     |
| 12702  | 2     | 2     | 3     | 2     |
| 12704  | 4     | 5     | 4     | 4     |
| 12705  | 1     | 1     | 2     | 1     |
| 12709  | 2     | 2     | 1     | 2     |
| 12710  | 1     | 2     | 3     | 2     |
| 12713  | 2     | 2     | 2     | 2     |
| 12716  | 3     | 1     | 1     | 2     |

| respid | Q40_1 | Q40_2 | Q40_3 | Q40_4 |
|--------|-------|-------|-------|-------|
| 12719  | 4     | 2     | 2     | 2     |
| 12720  | 1     | 3     | 2     | 2     |
| 12723  | 2     | 1     | 1     | 1     |
| 12726  | 2     | 3     | 3     | 1     |
| 12728  | 1     | 2     | 2     | 1     |
| 12729  | 2     | 1     | 2     | 1     |
| 12731  | 2     | 2     | 1     | 3     |
| 12732  | 3     | 2     | 2     | 1     |
| 12733  | 4     | 3     | 5     | 2     |
| 12736  | 1     | 1     | 1     | 1     |
| 12737  | 3     | 3     | 1     | 2     |
| 12739  | 3     | 2     | 3     | 4     |
| 12742  | 1     | 2     | 3     | 2     |
| 12743  | 6     | 6     | 5     | 6     |
| 12744  | 1     | 1     | 2     | 1     |
| 12747  | 3     | 2     | 1     | 2     |
| 12751  | 1     | 1     | 1     | 1     |
| 12754  | 1     | 2     | 1     | 3     |
| 12756  | 2     | 4     | 4     | 3     |
| 12757  | 1     | 1     | 2     | 2     |
| 12760  | 2     | 3     | 3     | 2     |
| 12761  | 2     | 1     | 3     | 1     |
| 12762  | 3     | 3     | 3     | 3     |
| 12766  | 3     | 1     | 1     | 2     |
| 12769  | 1     | 1     | 2     | 1     |
| 12770  | 3     | 4     | 2     | 4     |
| 12773  | 5     | 6     | 5     | 6     |
| 12780  | 2     | 1     | 3     | 4     |
| 12789  | 2     | 2     | 1     | 1     |
| 12792  | 4     | 4     | 4     | 4     |
| 12795  | 4     | 3     | 3     | 3     |
| 12804  | 6     | 3     | 2     | 2     |

| respid | Q40_1 | Q40_2 | Q40_3 | Q40_4 |
|--------|-------|-------|-------|-------|
| 12811  | 1     | 1     | 1     | 2     |
| 12813  | 3     | 3     | 4     | 3     |
| 12814  | 4     | 3     | 3     | 3     |
| 12815  | 2     | 3     | 3     | 1     |
| 12816  | 1     | 1     | 1     | 1     |
| 12817  | 1     | 2     | 1     | 1     |
| 12818  | 1     | 1     | 3     | 1     |
| 12819  | 6     | 1     | 1     | 1     |
| 12820  | 2     | 1     | 1     | 1     |
| 12821  | 1     | 1     | 1     | 1     |
| 12824  | 1     | 2     | 2     | 1     |
| 12827  | 3     | 2     | 3     | 2     |
| 12836  | 5     | 5     | 4     | 4     |
| 12837  | 1     | 1     | 1     | 1     |
| 12838  | 3     | 3     | 3     | 2     |
| 12845  | 1     | 1     | 1     | 1     |
| 12847  | 3     | 2     | 4     | 4     |
| 12849  | 4     | 4     | 4     | 4     |
| 12850  | 2     | 2     | 2     | 2     |
| 12852  | 1     | 1     | 1     | 1     |
| 12853  | 4     | 4     | 4     | 4     |
| 12854  | 1     | 1     | 1     | 1     |
| 12860  | 1     | 1     | 1     | 1     |
| 12861  | 1     | 1     | 1     | 1     |
| 12863  | 1     | 1     | 1     | 1     |
| 12865  | 1     | 1     | 1     | 1     |
| 12870  | 3     | 1     | 2     | 1     |
| 12871  | 1     | 2     | 3     | 1     |
| 12873  | 3     | 2     | 2     | 3     |
| 12877  | 2     | 2     | 2     | 1     |
| 12880  | 2     | 2     | 3     | 3     |
| 12881  | 1     | 1     | 1     | 1     |

| respid | Q40_1 | Q40_2 | Q40_3 | Q40_4 |
|--------|-------|-------|-------|-------|
| 12882  | 1     | 1     | 1     | 1     |
| 12883  | 2     | 1     | 1     | 1     |
| 12885  | 3     | 3     | 3     | 3     |
| 12887  | 3     | 2     | 2     | 1     |
| 12889  | 2     | 1     | 1     | 1     |
| 12890  | 5     | 1     | 4     | 4     |
| 12891  | 2     | 2     | 1     | 1     |
| 12892  | 4     | 4     | 4     | 3     |
| 12893  | 1     | 1     | 1     | 1     |
| 12895  | 2     | 2     | 1     | 1     |
| 12898  | 1     | 1     | 1     | 3     |
| 12907  | 3     | 2     | 2     | 3     |
| 12908  | 1     | 1     | 2     | 1     |
| 12909  |       |       |       |       |
| 12914  | 1     | 1     | 1     | 1     |
| 12915  | 3     | 4     | 5     | 3     |
| 12916  |       |       |       |       |
| 12921  | 1     | 2     | 1     | 1     |
| 12922  | 3     | 3     | 2     | 3     |
| 12923  | 4     | 2     | 3     | 3     |
| 12926  | 1     | 1     | 2     | 1     |
| 12927  | 1     | 1     | 1     | 1     |
| 12932  | 1     | 1     | 1     | 1     |
| 12936  | 1     | 1     | 1     | 1     |
| 12937  | 1     | 1     | 2     | 1     |
| 12938  | 3     | 4     | 5     | 5     |
| 12939  | 1     | 1     | 1     | 1     |
| 12940  | 2     | 3     | 3     | 2     |
| 12945  | 2     | 2     | 2     | 1     |
| 12946  | 2     | 2     | 2     | 1     |
| 12947  | 3     | 2     | 2     | 2     |
| 12948  | 5     | 5     | 5     | 5     |

| respid | Q40_1 | Q40_2 | Q40_3 | Q40_4 |
|--------|-------|-------|-------|-------|
| 12951  | 1     | 2     | 2     | 1     |
| 12952  | 1     | 1     | 1     | 1     |
| 12954  | 3     | 2     | 3     | 2     |
| 12960  | 3     | 1     | 2     | 2     |
| 12961  | 2     | 1     | 1     | 1     |
| 12962  | 1     | 1     | 1     | 1     |
| 12963  | 1     | 1     | 1     | 1     |
| 12964  | 1     | 1     | 1     | 1     |
| 12966  | 1     | 1     | 1     | 1     |
| 12967  | 5     | 2     | 3     | 1     |
| 12969  | 2     | 2     | 1     | 1     |
| 12970  | 3     | 2     | 2     | 2     |
| 12974  | 4     | 4     | 4     | 4     |
| 12979  |       |       |       |       |
| 12980  | 1     | 1     | 1     | 1     |
| 12983  | 1     | 1     | 1     | 1     |
| 12988  | 2     | 1     | 3     | 1     |
| 12994  | 1     | 1     | 2     | 1     |
| 12995  | 2     | 1     | 1     | 1     |
| 12996  | 1     | 1     | 1     | 1     |
| 12998  | 1     | 1     | 1     | 1     |
| 12999  | 1     | 1     | 2     | 1     |
| 13001  | 1     | 2     | 3     | 2     |
| 13005  | 2     | 2     | 3     | 2     |
| 13006  | 2     | 3     | 4     | 3     |
| 13007  | 2     | 2     | 2     | 2     |
| 13011  | 3     | 4     | 3     | 4     |
| 13012  | 1     | 1     | 1     | 1     |
| 13013  | 3     | 4     | 4     | 3     |
| 13016  | 1     | 1     | 1     | 1     |
| 13018  | 1     | 1     | 1     | 1     |
| 13020  |       |       |       |       |

| respid | Q40_1 | Q40_2 | Q40_3 | Q40_4 |
|--------|-------|-------|-------|-------|
| 13024  | 1     | 1     | 1     | 1     |
| 13025  | 1     | 1     | 1     | 1     |
| 13027  | 2     | 1     | 1     | 1     |
| 13031  | 1     | 1     | 1     | 1     |
| 13032  | 3     | 3     | 4     | 4     |
| 13034  | 1     | 1     | 2     | 1     |
| 13036  | 1     | 1     | 2     | 1     |
| 13037  | 1     | 1     | 1     | 1     |
| 13038  | 5     | 5     | 4     | 4     |
| 13039  | 1     | 1     | 1     | 1     |
| 13040  | 2     | 2     | 2     | 2     |
| 13041  | 4     | 3     | 2     | 2     |
| 13045  | 3     | 3     | 3     | 2     |
| 13046  | 1     | 1     | 2     | 1     |
| 13048  | 1     | 1     | 1     | 1     |
| 13051  | 3     | 2     | 1     | 1     |
| 13053  | 1     | 1     | 1     | 1     |
| 13055  | 3     | 4     | 4     | 5     |
| 13059  | 1     | 2     | 2     | 1     |
| 13068  | 1     | 1     | 1     | 1     |
| 13069  | 2     | 1     | 2     | 1     |
| 13076  | 3     | 2     | 2     | 2     |
| 13081  | 1     | 1     | 1     | 1     |
| 13082  | 2     | 2     | 3     | 3     |
| 13084  | 3     | 3     | 1     | 1     |
| 13085  | 3     | 2     | 4     | 1     |
| 13086  | 1     | 1     | 5     | 4     |
| 13093  | 2     | 3     | 3     | 2     |
| 13094  | 3     | 3     | 3     | 3     |
| 13097  | 1     | 1     | 1     | 1     |
| 13098  | 1     | 2     | 1     | 1     |
| 13099  | 2     | 3     | 1     | 2     |

| respid | Q40_1 | Q40_2 | Q40_3 | Q40_4 |
|--------|-------|-------|-------|-------|
| 13100  | 1     | 1     | 2     | 1     |
| 13101  |       |       |       |       |
| 13103  |       |       |       |       |
| 13105  | 1     | 1     | 1     | 1     |
| 13106  | 2     | 1     | 1     | 1     |
| 13107  | 3     | 2     | 1     | 1     |
| 13110  | 3     | 2     | 3     | 2     |
| 13118  | 2     | 1     | 2     | 1     |
| 13120  | 3     | 3     | 3     | 4     |
| 13130  | 1     | 1     | 1     | 1     |
| 13133  | 3     | 1     | 2     | 1     |
| 13134  | 1     | 1     | 1     | 1     |
| 13139  | 2     | 2     | 2     | 2     |
| 13142  | 2     | 1     | 1     | 1     |
| 13143  | 2     | 1     | 2     | 2     |
| 13145  | 2     | 2     | 3     | 2     |
| 13148  | 2     | 1     | 1     | 1     |
| 13149  | 1     | 1     | 1     | 1     |
| 13151  | 4     | 3     | 5     | 5     |
| 13153  | 1     | 1     | 1     | 1     |
| 13158  | 1     | 1     | 1     | 1     |
| 13160  | 2     | 2     | 2     | 2     |
| 13162  | 3     | 3     | 3     | 4     |
| 13169  | 2     | 1     | 1     | 1     |
| 13172  | 1     | 1     | 1     | 1     |
| 13173  | 1     | 1     | 2     | 1     |
| 13176  | 1     | 1     | 1     | 1     |
| 13179  | 1     | 1     | 1     | 1     |
| 13184  | 2     | 3     | 1     | 2     |
| 13185  | 2     | 2     | 1     | 3     |
| 13186  | 1     | 1     | 1     | 1     |
| 13188  | 2     | 2     | 3     | 2     |



| respid | Q40_1 | Q40_2 | Q40_3 | Q40_4 |
|--------|-------|-------|-------|-------|
| 13190  | 2     | 3     | 2     | 2     |
| 13192  | 1     | 1     | 1     | 1     |
| 13193  |       |       |       |       |
| 13201  | 1     | 2     | 3     | 2     |
| 13207  | 1     | 1     | 1     | 1     |
| 13208  |       |       |       |       |
| 13209  | 4     | 2     | 2     | 3     |
| 13212  | 2     | 1     | 1     | 1     |
| 13215  | 3     | 2     | 3     | 2     |
| 13218  | 2     | 3     | 5     | 2     |
| 13219  | 1     | 1     | 1     | 1     |
| 13224  | 2     | 3     | 1     | 3     |
| 13225  | 1     | 1     | 1     | 1     |
| 13226  | 1     | 1     | 1     | 1     |
| 13232  | 1     | 1     | 2     | 1     |
| 13237  | 2     | 4     | 1     | 1     |
| 13239  | 2     | 1     | 3     | 1     |
| 13241  | 1     | 2     | 2     | 1     |
| 13243  | 1     | 1     | 2     | 1     |
| 13247  | 2     | 3     | 4     | 5     |
| 13248  | 1     | 1     | 1     | 1     |
| 13251  | 5     | 1     | 1     | 1     |
| 13256  | 1     | 1     | 1     | 1     |
| 13260  | 2     | 2     | 2     | 1     |
| 13261  | 3     | 3     | 3     | 2     |
| 13264  | 1     | 1     | 1     | 1     |
| 13273  | 2     | 1     | 2     | 1     |
| 13274  | 1     | 1     | 1     | 1     |
| 13276  | 1     | 1     | 1     | 1     |
| 13278  |       |       |       |       |
| 13279  | 2     | 1     | 2     | 1     |
| 13282  | 1     | 1     | 1     | 1     |

| respid | Q40_1 | Q40_2 | Q40_3 | Q40_4 |
|--------|-------|-------|-------|-------|
| 13283  | 2     | 3     | 3     | 4     |
| 13285  | 1     | 1     | 2     | 1     |
| 13286  | 2     | 2     | 1     | 1     |
| 13299  | 1     | 1     | 1     | 1     |
| 13300  | 3     | 3     | 2     | 3     |
| 13301  |       |       |       |       |
| 13303  | 2     | 2     | 3     | 2     |
| 13304  | 5     | 2     | 1     | 1     |
| 13307  | 1     | 2     | 1     | 1     |
| 13308  | 1     | 1     | 2     | 1     |
| 13312  | 2     | 1     | 1     | 1     |
| 13313  | 1     | 1     | 1     | 1     |
| 13314  | 3     | 3     | 2     | 3     |
| 13318  | 2     | 3     | 3     | 3     |
| 13320  | 3     | 3     | 2     | 1     |
| 13322  | 3     | 2     | 3     | 3     |
| 13324  | 1     | 1     | 3     | 1     |
| 13325  | 3     | 2     | 2     | 2     |
| 13327  | 1     | 1     | 2     | 1     |
| 13330  | 1     | 1     | 2     | 1     |
| 13332  | 1     | 1     | 2     | 1     |
| 13333  | 1     | 1     | 1     | 1     |
| 13334  | 1     | 1     | 1     | 1     |
| 13351  | 1     | 2     | 3     | 2     |
| 13353  | 2     | 1     | 2     | 1     |
| 13354  | 1     | 1     | 1     | 1     |
| 13355  | 2     | 2     | 1     | 1     |
| 13358  | 1     | 1     | 1     | 1     |
| 13359  | 5     | 3     | 2     | 2     |
| 13360  | 3     | 3     | 4     | 3     |
| 13364  | 2     | 4     | 4     | 1     |
| 13365  | 2     | 2     | 6     | 5     |

| respid | Q40_1 | Q40_2 | Q40_3 | Q40_4 |
|--------|-------|-------|-------|-------|
| 13368  | 2     | 1     | 1     | 1     |
| 13370  | 2     | 1     | 1     | 1     |
| 13375  | 3     | 2     | 1     | 1     |
| 13384  | 6     | 1     | 1     | 1     |
| 13387  | 2     | 2     | 1     | 1     |
| 13395  | 3     | 2     | 2     | 2     |
| 13398  | 1     | 1     | 1     | 1     |
| 13404  | 2     | 1     | 1     | 1     |
| 13405  | 2     | 2     | 1     | 1     |
| 13408  |       |       |       |       |
| 13411  | 1     | 1     | 1     | 1     |
| 13413  | 1     | 1     | 1     | 1     |
| 13419  | 2     | 2     | 1     | 2     |
| 13420  | 1     | 1     | 1     | 1     |
| 13427  | 3     | 3     | 3     | 3     |
| 13441  | 5     | 4     | 3     | 4     |
| 13444  | 1     | 1     | 2     | 2     |
| 13456  | 1     | 1     | 1     | 1     |
| 13466  | 3     | 2     | 3     | 2     |
| 13468  | 2     | 1     | 1     | 1     |
| 13475  | 1     | 1     | 1     | 1     |
| 13484  | 2     | 2     | 2     | 1     |
| 13486  | 2     | 2     | 2     | 1     |
| 13487  | 2     | 2     | 2     | 3     |
| 13491  |       |       |       |       |
| 13496  | 1     | 1     | 2     | 1     |
| 13497  | 1     | 1     | 2     | 2     |
| 13498  | 3     | 1     | 4     | 1     |
| 13502  |       |       |       |       |
| 13503  | 2     | 3     | 2     | 3     |
| 13505  | 1     | 1     | 2     | 1     |
| 13509  | 1     | 1     | 1     | 1     |

| respid | Q40_1 | Q40_2 | Q40_3 | Q40_4 |
|--------|-------|-------|-------|-------|
| 13510  | 3     | 3     | 3     | 3     |
| 13518  | 2     | 4     | 3     | 5     |
| 13521  | 1     | 1     | 1     | 1     |
| 13523  | 5     | 4     | 3     | 2     |
| 13528  | 1     | 1     | 1     | 1     |
| 13531  | 1     | 1     | 1     | 1     |
| 13532  | 1     | 2     | 1     | 1     |
| 13533  | 1     | 1     | 1     | 1     |
| 13534  |       |       |       |       |
| 13535  | 1     | 1     | 2     | 1     |
| 13538  | 2     | 3     | 3     | 3     |
| 13540  | 2     | 2     | 3     | 1     |
| 13541  | 2     | 2     | 3     | 3     |
| 13542  | 2     | 2     | 2     | 2     |
| 13550  | 1     | 1     | 1     | 1     |
| 13553  | 2     | 1     | 3     | 2     |
| 13554  | 1     | 1     | 2     | 1     |
| 13555  | 4     | 4     | 3     | 3     |
| 13556  | 3     | 3     | 4     | 3     |
| 13563  | 4     | 2     | 2     | 1     |
| 13564  | 2     | 1     | 2     | 2     |
| 13567  |       |       |       |       |
| 13568  | 2     | 4     | 3     | 5     |
| 13570  |       |       |       |       |
| 13573  | 2     | 2     | 2     | 2     |
| 13575  | 3     | 3     | 3     | 2     |
| 13577  | 4     | 4     | 5     | 5     |
| 13580  | 5     | 4     | 5     | 4     |
| 13582  | 1     | 1     | 1     | 1     |
| 13584  | 3     | 4     | 4     | 5     |
| 13585  |       |       |       |       |
| 13586  | 2     | 2     | 1     | 1     |

| respid | Q40_1 | Q40_2 | Q40_3 | Q40_4 |
|--------|-------|-------|-------|-------|
| 13587  | 2     | 2     | 1     | 2     |
| 13592  | 4     | 4     | 4     | 3     |
| 13596  | 1     | 1     | 1     | 1     |
| 13597  | 1     | 2     | 3     | 2     |
| 13599  | 1     | 2     | 3     | 2     |
| 13601  | 2     | 1     | 1     | 1     |
| 13604  | 1     | 1     | 1     | 1     |
| 13608  | 1     | 2     | 1     | 1     |
| 13616  | 3     | 2     | 2     | 1     |
| 13618  | 2     | 2     | 3     | 2     |
| 13619  | 1     | 2     | 1     | 2     |
| 13626  |       |       |       |       |
| 13628  | 2     | 3     | 3     | 2     |
| 13640  | 3     | 2     | 3     | 2     |
| 13645  | 1     | 1     | 2     | 1     |
| 13648  |       |       |       |       |
| 13653  | 2     | 1     | 2     | 1     |
| 13655  | 1     | 1     | 1     | 1     |
| 13662  | 1     | 1     | 1     | 1     |
| 13670  | 3     | 2     | 2     | 2     |
| 13673  | 1     | 1     | 2     | 2     |
| 13674  | 5     | 2     | 2     | 2     |
| 13675  | 2     | 1     | 1     | 1     |
| 13678  | 2     | 2     | 2     | 3     |
| 13680  | 4     | 3     | 3     | 3     |
| 13681  | 1     | 1     | 1     | 1     |
| 13683  | 1     | 1     | 1     | 1     |
| 13684  | 2     | 2     | 1     | 2     |
| 13685  | 1     | 1     | 1     | 1     |
| 13687  |       |       |       |       |
| 13690  | 2     | 2     | 1     | 1     |
| 13700  | 3     | 4     | 4     | 3     |

| respid | Q40_1 | Q40_2 | Q40_3 | Q40_4 |
|--------|-------|-------|-------|-------|
| 13705  | 3     | 3     | 2     | 3     |
| 13710  | 1     | 1     | 1     | 1     |
| 13711  | 2     | 3     | 2     | 1     |
| 13713  | 1     | 1     | 1     | 1     |
| 13716  | 1     | 2     | 2     | 2     |
| 13721  | 2     | 2     | 2     | 2     |
| 13722  | 4     | 3     | 4     | 5     |
| 13723  | 3     | 3     | 3     | 3     |
| 13726  | 4     | 3     | 4     | 2     |
| 13728  | 2     | 2     | 2     | 2     |
| 13730  | 3     | 3     | 3     | 3     |
| 13734  | 4     | 3     | 2     | 2     |
| 13736  | 4     | 5     | 6     | 5     |
| 13737  | 1     | 1     | 2     | 2     |
| 13739  | 3     | 1     | 1     | 1     |
| 13742  |       |       |       |       |
| 13746  | 1     | 2     | 2     | 1     |
| 13747  | 3     | 3     | 2     | 2     |
| 13749  | 1     | 1     | 1     | 1     |
| 13751  | 3     | 2     | 3     | 1     |
| 13752  | 3     | 2     | 1     | 1     |
| 13756  | 2     | 1     | 2     | 1     |
| 13757  | 1     | 1     | 1     | 1     |
| 13767  | 3     | 3     | 3     | 3     |
| 13771  | 1     | 1     | 1     | 1     |
| 13772  | 5     | 5     | 6     | 5     |
| 13779  |       |       |       |       |
| 13782  | 1     | 1     | 1     | 1     |
| 13783  | 1     | 1     | 1     | 1     |
| 13785  | 2     | 2     | 2     | 1     |
| 13786  | 1     | 3     | 3     | 2     |
| 13792  | 3     | 4     | 4     | 4     |

| respid | Q40_1 | Q40_2 | Q40_3 | Q40_4 |
|--------|-------|-------|-------|-------|
| 13796  | 2     | 2     | 1     | 1     |
| 13798  | 2     | 2     | 2     | 2     |
| 13799  | 2     | 2     | 2     | 2     |
| 13804  | 1     | 1     | 1     | 1     |
| 13805  | 1     | 1     | 1     | 1     |
| 13810  | 3     | 3     | 3     | 3     |
| 13811  | 2     | 2     | 3     | 1     |
| 13819  | 5     | 5     | 5     | 5     |
| 13821  | 4     | 5     | 5     | 6     |
| 13824  | 3     | 4     | 3     | 2     |
| 13828  | 3     | 3     | 3     | 2     |
| 13829  | 1     | 4     | 3     | 5     |
| 13831  |       |       |       |       |
| 13833  | 1     | 2     | 2     | 1     |
| 13835  | 5     | 5     | 6     | 5     |
| 13838  |       |       |       |       |
| 13839  | 1     | 2     | 3     | 4     |
| 13845  |       |       |       |       |
| 13846  | 3     | 3     | 2     | 2     |
| 13853  | 2     | 3     | 3     | 3     |
| 13855  | 2     | 3     | 4     | 3     |
| 13858  | 4     | 5     | 3     | 3     |
| 13860  |       |       |       |       |
| 13865  | 3     | 4     | 5     | 5     |
| 13870  | 2     | 1     | 1     | 1     |
| 13872  | 3     | 5     | 5     | 4     |
| 13873  | 2     | 2     | 1     | 1     |
| 13874  |       |       |       |       |
| 13875  | 1     | 3     | 2     | 4     |
| 13881  |       |       |       |       |
| 13887  | 3     | 2     | 3     | 3     |
| 13888  | 3     | 2     | 2     | 1     |

| respid | Q40_1 | Q40_2 | Q40_3 | Q40_4 |
|--------|-------|-------|-------|-------|
| 13889  | 4     | 4     | 3     | 4     |
| 13895  | 6     | 5     | 6     | 5     |
| 13897  |       |       |       |       |
| 13898  | 2     | 3     | 2     | 2     |
| 13901  | 1     | 1     | 1     | 1     |
| 13902  | 6     | 6     | 5     | 6     |
| 13903  | 3     | 3     | 3     | 3     |
| 13905  | 1     | 2     | 3     | 2     |
| 13908  | 2     | 3     | 2     | 4     |
| 13909  | 1     | 1     | 1     | 1     |
| 13910  | 1     | 2     | 3     | 4     |
| 13911  |       |       |       |       |
| 13914  | 3     | 2     | 2     | 3     |
| 13920  | 2     | 3     | 2     | 3     |
| 13926  | 1     | 1     | 2     | 1     |
| 13929  | 1     | 2     | 2     | 2     |
| 13930  | 6     | 5     | 6     | 5     |
| 13931  |       |       |       |       |
| 13932  | 3     | 3     | 3     | 2     |
| 13934  | 2     | 3     | 2     | 2     |
| 13938  | 1     | 1     | 1     | 1     |
| 13942  | 1     | 1     | 1     | 1     |
| 13945  | 2     | 2     | 3     | 3     |
| 13947  | 2     | 5     | 5     | 5     |
| 13948  |       |       |       |       |
| 13959  | 1     | 1     | 1     | 1     |
| 13962  | 1     | 1     | 1     | 1     |
| 13963  | 1     | 1     | 1     | 1     |
| 13964  | 3     | 2     | 2     | 1     |
| 13966  | 1     | 3     | 2     | 3     |
| 13968  | 2     | 3     | 1     | 1     |
| 13971  | 1     | 1     | 1     | 1     |



| respid | Q40_1 | Q40_2 | Q40_3 | Q40_4 |
|--------|-------|-------|-------|-------|
| 13979  | 3     | 3     | 3     | 4     |
| 13980  | 3     | 2     | 2     | 2     |
| 13981  | 1     | 2     | 3     | 1     |
| 13982  | 1     | 2     | 1     | 1     |
| 13984  | 3     | 2     | 3     | 1     |
| 13989  | 1     | 1     | 1     | 1     |
| 13990  | 2     | 1     | 1     | 1     |
| 13992  | 3     | 3     | 6     | 3     |
| 13998  | 3     | 2     | 2     | 3     |
| 13999  | 2     | 3     | 2     | 3     |
| 14000  | 1     | 1     | 1     | 1     |
| 14003  | 2     | 3     | 1     | 1     |
| 14004  | 1     | 2     | 2     | 1     |
| 14006  | 1     | 1     | 1     | 1     |
| 14007  | 2     | 1     | 1     | 1     |
| 14008  |       |       |       |       |
| 14013  | 1     | 1     | 1     | 1     |
| 14015  | 2     | 2     | 2     | 1     |
| 14018  | 1     | 1     | 1     | 1     |
| 14021  | 2     | 2     | 1     | 2     |
| 14023  | 2     | 1     | 1     | 1     |
| 14024  | 5     | 6     | 6     | 4     |
| 14026  | 2     | 1     | 1     | 1     |
| 14030  | 3     | 2     | 2     | 3     |
| 14032  | 2     | 3     | 2     | 3     |
| 14040  |       |       |       |       |
| 14045  | 1     | 1     | 1     | 1     |
| 14048  | 2     | 2     | 3     | 2     |
| 14049  | 4     | 5     | 4     | 5     |
| 14050  | 1     | 1     | 1     | 1     |
| 14051  | 5     | 6     | 5     | 5     |
| 14052  | 1     | 2     | 1     | 1     |

| respid | Q40_1 | Q40_2 | Q40_3 | Q40_4 |
|--------|-------|-------|-------|-------|
| 14054  | 1     | 1     | 1     | 1     |
| 14055  |       |       |       |       |
| 14057  | 2     | 2     | 3     | 2     |
| 14058  | 1     | 1     | 2     | 1     |
| 14059  | 1     | 1     | 1     | 1     |
| 14060  | 2     | 2     | 1     | 1     |
| 14061  | 3     | 3     | 5     | 4     |
| 14071  | 1     | 1     | 1     | 1     |
| 14073  | 1     | 1     | 2     | 1     |
| 14074  | 3     | 3     | 5     | 3     |
| 14076  | 1     | 1     | 1     | 1     |
| 14080  | 1     | 1     | 1     | 1     |
| 14082  | 1     | 1     | 1     | 1     |
| 14083  | 1     | 1     | 1     | 2     |
| 14084  | 2     | 2     | 2     | 1     |
| 14085  |       |       |       |       |
| 14086  | 5     | 4     | 6     | 4     |
| 14088  | 1     | 2     | 2     | 1     |
| 14090  | 2     | 1     | 1     | 1     |
| 14092  | 1     | 1     | 2     | 1     |
| 14093  | 1     | 1     | 1     | 2     |
| 14096  | 1     | 1     | 1     | 1     |
| 14103  | 2     | 2     | 3     | 3     |
| 14105  | 1     | 1     | 1     | 1     |
| 14106  | 2     | 2     | 2     | 2     |
| 14107  | 2     | 1     | 2     | 1     |
| 14108  | 3     | 3     | 4     | 3     |
| 14112  | 2     | 1     | 1     | 2     |
| 14114  | 3     | 3     | 2     | 2     |
| 14115  | 2     | 1     | 1     | 2     |
| 14116  | 1     | 1     | 1     | 1     |
| 14117  | 1     | 2     | 1     | 1     |

| respid | Q40_1 | Q40_2 | Q40_3 | Q40_4 |
|--------|-------|-------|-------|-------|
| 14118  | 2     | 3     | 3     | 2     |
| 14119  | 2     | 2     | 2     | 1     |
| 14127  |       |       |       |       |
| 14129  | 2     | 2     | 2     | 2     |
| 14131  | 3     | 2     | 2     | 1     |
| 14132  | 1     | 1     | 1     | 1     |
| 14133  | 4     | 4     | 3     | 4     |
| 14134  | 2     | 1     | 1     | 1     |
| 14135  | 2     | 3     | 1     | 2     |
| 14136  | 5     | 2     | 6     | 2     |
| 14138  |       |       |       |       |
| 14139  |       |       |       |       |
| 14140  | 2     | 3     | 3     | 2     |
| 14141  | 1     | 1     | 1     | 1     |
| 14143  | 1     | 1     | 1     | 1     |
| 14146  | 1     | 1     | 1     | 1     |
| 14147  | 6     | 5     | 6     | 5     |
| 14148  | 3     | 2     | 1     | 1     |
| 14151  | 3     | 2     | 3     | 3     |
| 14152  | 2     | 2     | 3     | 2     |
| 14153  | 5     | 2     | 3     | 1     |
| 14154  | 2     | 2     | 1     | 2     |
| 14158  | 1     | 2     | 2     | 1     |
| 14159  | 1     | 3     | 2     | 3     |
| 14160  | 2     | 3     | 3     | 3     |
| 14161  | 2     | 3     | 2     | 3     |
| 14162  | 1     | 3     | 4     | 3     |
| 14165  | 3     | 4     | 2     | 2     |
| 14166  | 2     | 3     | 3     | 2     |
| 14167  | 1     | 1     | 3     | 1     |
| 14169  | 2     | 2     | 2     | 1     |
| 14170  | 1     | 1     | 1     | 1     |

| respid | Q40_1 | Q40_2 | Q40_3 | Q40_4 |
|--------|-------|-------|-------|-------|
| 14172  | 2     | 3     | 3     | 2     |
| 14173  |       |       |       |       |
| 14174  | 2     | 2     | 2     | 2     |
| 14175  | 1     | 2     | 2     | 1     |
| 14176  | 1     | 1     | 2     | 1     |
| 14178  | 2     | 1     | 2     | 2     |
| 14179  | 1     | 1     | 1     | 1     |
| 14180  | 2     | 3     | 3     | 2     |
| 14183  | 1     | 2     | 3     | 2     |
| 14185  | 2     | 1     | 1     | 1     |
| 14187  | 6     | 2     | 4     | 2     |
| 14189  | 1     | 1     | 1     | 1     |
| 14191  | 2     | 3     | 3     | 2     |
| 14192  |       |       |       |       |
| 14195  | 2     | 3     | 4     | 2     |
| 14197  | 4     | 1     | 2     | 1     |
| 14203  | 2     | 2     | 3     | 4     |
| 14204  | 1     | 1     | 1     | 1     |
| 14205  | 1     | 1     | 1     | 1     |
| 14208  | 1     | 1     | 1     | 1     |
| 14211  | 6     | 5     | 6     | 5     |
| 14214  | 1     | 1     | 1     | 1     |
| 14215  | 4     | 3     | 5     | 2     |
| 14216  | 3     | 4     | 4     | 4     |
| 14218  | 1     | 1     | 1     | 1     |
| 14220  | 2     | 1     | 2     | 1     |
| 14223  |       |       |       |       |
| 14225  | 2     | 2     | 3     | 4     |
| 14226  | 1     | 1     | 1     | 1     |
| 14228  | 1     | 2     | 3     | 1     |
| 14231  | 3     | 3     | 3     | 3     |
| 14233  | 3     | 3     | 2     | 2     |

| respid | Q40_1 | Q40_2 | Q40_3 | Q40_4 |
|--------|-------|-------|-------|-------|
| 14237  | 1     | 1     | 1     | 2     |
| 14238  | 2     | 2     | 3     | 3     |
| 14243  | 2     | 2     | 3     | 3     |
| 14245  | 1     | 1     | 1     | 1     |
| 14246  | 1     | 1     | 1     | 2     |
| 14248  | 6     | 6     | 6     | 6     |
| 14250  | 2     | 1     | 1     | 2     |
| 14253  | 1     | 2     | 1     | 1     |
| 14254  | 2     | 1     | 2     | 2     |
| 14255  | 1     | 2     | 1     | 1     |
| 14257  | 2     | 1     | 1     | 1     |
| 14258  | 1     | 1     | 1     | 1     |
| 14259  | 3     | 3     | 2     | 2     |
| 14260  |       |       |       |       |
| 14261  | 4     | 5     | 3     | 6     |
| 14263  | 1     | 3     | 3     | 3     |
| 14264  | 1     | 1     | 3     | 1     |
| 14266  | 3     | 4     | 5     | 3     |
| 14267  | 1     | 2     | 4     | 1     |
| 14268  | 1     | 2     | 1     | 1     |
| 14275  | 2     | 2     | 2     | 1     |
| 14278  | 3     | 2     | 2     | 2     |
| 14279  |       |       |       |       |
| 14280  |       |       |       |       |
| 14281  | 1     | 1     | 6     | 1     |
| 14282  | 1     | 2     | 1     | 3     |
| 14283  | 3     | 4     | 2     | 1     |
| 14286  | 1     | 1     | 1     | 1     |
| 14287  |       |       |       |       |
| 14288  | 2     | 2     | 2     | 3     |
| 14291  |       |       |       |       |
| 14292  |       |       |       |       |

| respid | Q40_1 | Q40_2 | Q40_3 | Q40_4 |
|--------|-------|-------|-------|-------|
| 14293  | 1     | 1     | 1     | 1     |
| 14304  | 5     | 4     | 3     | 4     |
| 14308  | 2     | 2     | 3     | 1     |
| 14313  | 3     | 2     | 1     | 2     |
| 14314  | 3     | 3     | 3     | 3     |
| 14316  | 1     | 1     | 1     | 1     |
| 14317  | 1     | 2     | 1     | 2     |
| 14318  | 4     | 3     | 4     | 4     |
| 14319  | 2     | 3     | 1     | 1     |
| 14320  | 1     | 2     | 1     | 2     |
| 14321  | 2     | 1     | 1     | 1     |
| 14322  | 3     | 3     | 4     | 4     |
| 14326  | 1     | 2     | 3     | 4     |
| 14327  | 5     | 6     | 4     | 5     |
| 14328  |       |       |       |       |
| 14330  | 1     | 1     | 1     | 1     |
| 14332  | 1     | 1     | 2     | 1     |
| 14334  | 1     | 3     | 1     | 1     |
| 14336  | 1     | 1     | 2     | 1     |
| 14337  | 2     | 2     | 2     | 2     |
| 14339  |       |       |       |       |
| 14340  | 4     | 3     | 6     | 4     |
| 14341  | 1     | 1     | 1     | 1     |
| 14344  | 1     | 2     | 1     | 1     |
| 14345  | 2     | 1     | 2     | 1     |
| 14346  |       |       |       |       |
| 14348  | 1     | 1     | 1     | 1     |
| 14349  | 2     | 2     | 1     | 2     |
| 14358  | 3     | 4     | 4     | 4     |
| 14360  | 1     | 1     | 1     | 1     |
| 14362  |       |       |       |       |
| 14366  | 2     | 1     | 1     | 2     |

| respid | Q40_1 | Q40_2 | Q40_3 | Q40_4 |
|--------|-------|-------|-------|-------|
| 14367  | 3     | 2     | 4     | 2     |
| 14369  | 3     | 3     | 2     | 2     |
| 14371  | 1     | 1     | 2     | 1     |
| 14372  | 1     | 1     | 1     | 1     |
| 14374  | 1     | 2     | 1     | 2     |
| 14376  | 2     | 2     | 2     | 2     |
| 14377  |       |       |       |       |
| 14378  | 2     | 1     | 1     | 1     |
| 14379  | 1     | 1     | 2     | 1     |
| 14381  | 2     | 1     | 3     | 1     |
| 14383  | 3     | 2     | 2     | 1     |
| 14384  | 4     | 3     | 5     | 4     |
| 14385  | 4     | 3     | 5     | 6     |
| 14386  | 4     | 3     | 3     | 3     |
| 14390  | 2     | 2     | 2     | 2     |
| 14391  | 1     | 1     | 2     | 1     |
| 14392  | 2     | 2     | 2     | 2     |
| 14393  | 5     | 6     | 5     | 2     |
| 14394  | 2     | 2     | 3     | 2     |
| 14395  |       |       |       |       |
| 14396  |       |       |       |       |
| 14397  | 1     | 1     | 2     | 2     |
| 14398  | 1     | 2     | 1     | 1     |
| 14399  | 1     | 1     | 1     | 1     |
| 14400  | 1     | 1     | 5     | 1     |
| 14403  | 1     | 1     | 1     | 1     |
| 14404  | 3     | 2     | 2     | 1     |
| 14405  | 1     | 1     | 1     | 1     |
| 14407  | 3     | 1     | 2     | 1     |
| 14408  | 3     | 5     | 4     | 3     |
| 14410  | 3     | 4     | 6     | 5     |
| 14415  | 1     | 1     | 2     | 1     |

| respid | Q40_1 | Q40_2 | Q40_3 | Q40_4 |
|--------|-------|-------|-------|-------|
| 14419  | 5     | 5     | 3     | 3     |
| 14420  |       |       |       |       |
| 14421  |       |       |       |       |
| 14423  | 1     | 1     | 1     | 2     |
| 14424  | 2     | 1     | 2     | 1     |
| 14425  | 1     | 1     | 2     | 1     |
| 14426  | 1     | 1     | 2     | 1     |
| 14427  | 2     | 1     | 1     | 1     |
| 14428  | 4     | 6     | 5     | 5     |
| 14431  | 2     | 3     | 2     | 3     |
| 14433  | 6     | 1     | 2     | 3     |
| 14434  | 2     | 1     | 2     | 1     |
| 14435  | 2     | 1     | 2     | 1     |
| 14436  | 3     | 3     | 2     | 3     |
| 14438  | 2     | 3     | 1     | 2     |
| 14442  | 3     | 3     | 4     | 4     |
| 14447  | 3     | 1     | 1     | 2     |
| 14448  | 3     | 2     | 1     | 2     |
| 14450  | 3     | 4     | 2     | 3     |
| 14451  | 1     | 2     | 1     | 1     |
| 14454  | 2     | 3     | 3     | 4     |
| 14455  | 1     | 1     | 1     | 1     |
| 14456  | 2     | 2     | 2     | 1     |
| 14457  | 3     | 4     | 4     | 5     |
| 14458  | 4     | 5     | 6     | 3     |
| 14459  |       |       |       |       |
| 14460  | 2     | 3     | 1     | 2     |
| 14464  | 2     | 2     | 2     | 2     |
| 14465  | 3     | 2     | 1     | 2     |
| 14466  | 1     | 1     | 2     | 1     |
| 14467  | 3     | 1     | 2     | 1     |
| 14470  | 2     | 1     | 2     | 1     |



| respid | Q40_1 | Q40_2 | Q40_3 | Q40_4 |
|--------|-------|-------|-------|-------|
| 14472  | 1     | 2     | 1     | 1     |
| 14473  | 1     | 1     | 1     | 1     |
| 14474  |       |       |       |       |
| 14477  | 2     | 3     | 2     | 3     |
| 14478  | 2     | 1     | 1     | 1     |
| 14479  |       |       |       |       |
| 14484  | 1     | 1     | 1     | 1     |
| 14485  |       |       |       |       |
| 14486  | 3     | 3     | 3     | 3     |
| 14487  | 1     | 2     | 1     | 2     |
| 14488  | 2     | 3     | 4     | 3     |
| 14491  | 3     | 2     | 2     | 3     |
| 14495  | 1     | 1     | 1     | 1     |
| 14500  | 2     | 3     | 3     | 2     |
| 14502  | 1     | 2     | 3     | 2     |
| 14504  | 2     | 3     | 2     | 2     |
| 14505  | 2     | 4     | 3     | 4     |
| 14507  | 1     | 1     | 1     | 1     |
| 14517  | 2     | 1     | 2     | 1     |
| 14518  | 2     | 2     | 2     | 1     |
| 14519  | 1     | 1     | 1     | 1     |
| 14521  | 2     | 3     | 3     | 2     |
| 14522  | 2     | 1     | 1     | 1     |
| 14526  | 1     | 1     | 1     | 1     |
| 14528  | 4     | 3     | 2     | 3     |
| 14529  | 1     | 1     | 1     | 1     |
| 14530  | 2     | 3     | 3     | 2     |
| 14531  | 5     | 4     | 5     | 4     |
| 14534  | 2     | 3     | 3     | 4     |
| 14538  | 2     | 1     | 3     | 1     |
| 14539  | 4     | 3     | 3     | 4     |
| 14545  | 2     | 1     | 1     | 1     |

| respid | Q40_1 | Q40_2 | Q40_3 | Q40_4 |
|--------|-------|-------|-------|-------|
| 14546  | 2     | 1     | 5     | 1     |
| 14551  | 1     | 1     | 2     | 1     |
| 14553  | 4     | 4     | 3     | 3     |
| 14557  |       |       |       |       |
| 14558  | 2     | 3     | 1     | 2     |
| 14559  | 2     | 3     | 3     | 2     |
| 14560  | 2     | 1     | 2     | 1     |
| 14563  | 1     | 1     | 2     | 1     |
| 14565  | 1     | 1     | 1     | 1     |
| 14571  | 1     | 2     | 3     | 4     |
| 14572  | 1     | 2     | 1     | 2     |
| 14573  | 2     | 3     | 2     | 2     |
| 14575  | 3     | 3     | 3     | 4     |
| 14576  | 2     | 2     | 3     | 2     |
| 14578  | 3     | 2     | 2     | 1     |
| 14579  | 1     | 1     | 1     | 1     |
| 14580  | 2     | 3     | 2     | 1     |
| 14582  | 3     | 2     | 2     | 1     |
| 14585  | 3     | 2     | 2     | 2     |
| 14588  | 1     | 1     | 1     | 1     |
| 14590  | 2     | 3     | 4     | 3     |
| 14592  | 2     | 4     | 5     | 4     |
| 14593  | 2     | 1     | 3     | 2     |
| 14595  | 3     | 3     | 2     | 2     |
| 14597  | 3     | 3     | 2     | 1     |
| 14600  | 3     | 2     | 1     | 1     |
| 14602  | 4     | 3     | 3     | 3     |
| 14604  | 2     | 1     | 2     | 2     |
| 14605  | 2     | 2     | 1     | 2     |
| 14609  | 2     | 3     | 2     | 3     |
| 14610  | 1     | 1     | 2     | 1     |
| 14611  | 2     | 2     | 1     | 1     |

| respid | Q40_1 | Q40_2 | Q40_3 | Q40_4 |
|--------|-------|-------|-------|-------|
| 14612  | 3     | 4     | 2     | 3     |
| 14614  | 3     | 4     | 4     | 3     |
| 14615  | 1     | 1     | 1     | 1     |
| 14618  | 3     | 4     | 3     | 5     |
| 14621  |       |       |       |       |
| 14624  | 3     | 1     | 1     | 1     |
| 14626  | 1     | 1     | 1     | 1     |
| 14627  | 3     | 3     | 2     | 2     |
| 14628  | 1     | 2     | 3     | 4     |
| 14631  | 2     | 3     | 1     | 2     |
| 14633  | 3     | 4     | 4     | 3     |
| 14642  | 3     | 2     | 3     | 3     |
| 14647  | 1     | 1     | 1     | 1     |
| 14658  | 2     | 1     | 1     | 3     |
| 14659  | 2     | 3     | 3     | 4     |
| 14660  | 2     | 3     | 3     | 2     |
| 14661  | 2     | 3     | 1     | 2     |
| 14662  | 2     | 4     | 3     | 4     |
| 14663  | 2     | 3     | 2     | 1     |
| 14670  | 1     | 2     | 1     | 2     |
| 14671  |       |       |       |       |
| 14672  | 2     | 3     | 2     | 2     |
| 14675  | 1     | 2     | 2     | 1     |
| 14676  | 1     | 2     | 2     | 1     |
| 14677  | 6     | 6     | 5     | 5     |
| 14678  | 1     | 2     | 1     | 3     |
| 14681  | 3     | 3     | 2     | 3     |
| 14684  | 1     | 1     | 1     | 1     |
| 14688  | 1     | 1     | 1     | 2     |
| 14690  | 1     | 2     | 2     | 3     |
| 14694  | 2     | 3     | 3     | 4     |
| 14696  | 1     | 2     | 2     | 1     |

| respid | Q40_1 | Q40_2 | Q40_3 | Q40_4 |
|--------|-------|-------|-------|-------|
| 14700  |       |       |       |       |
| 14701  | 3     | 3     | 3     | 3     |
| 14703  | 1     | 2     | 3     | 4     |
| 14707  | 2     | 4     | 3     | 3     |
| 14711  | 2     | 3     | 4     | 4     |
| 14714  | 1     | 1     | 2     | 1     |
| 14715  | 1     | 2     | 1     | 2     |
| 14716  | 1     | 1     | 1     | 1     |
| 14720  | 3     | 3     | 3     | 1     |
| 14725  | 4     | 4     | 4     | 4     |
| 14726  | 2     | 2     | 3     | 1     |
| 14734  | 1     | 2     | 3     | 1     |
| 14735  | 1     | 2     | 3     | 1     |
| 14736  | 2     | 3     | 2     | 3     |
| 14740  | 3     | 2     | 1     | 2     |
| 14745  | 2     | 1     | 3     | 1     |
| 14747  | 2     | 3     | 2     | 2     |
| 14750  | 2     | 3     | 3     | 3     |
| 14751  | 2     | 3     | 2     | 1     |
| 14753  | 1     | 2     | 3     | 1     |
| 14756  | 6     | 6     | 6     | 6     |
| 14780  | 3     | 2     | 4     | 3     |
| 14782  | 1     | 1     | 1     | 1     |
| 14800  | 3     | 5     | 2     | 2     |
| 14801  | 1     | 1     | 3     | 1     |
| 14802  | 2     | 2     | 3     | 4     |
| 14805  | 5     | 4     | 6     | 4     |
| 14811  | 2     | 3     | 3     | 3     |
| 14814  | 2     | 3     | 3     | 4     |
| 14822  | 1     | 2     | 2     | 4     |
| 14827  | 3     | 4     | 5     | 6     |
| 14828  | 4     | 4     | 4     | 3     |

| respid | Q40_1 | Q40_2 | Q40_3 | Q40_4 |
|--------|-------|-------|-------|-------|
| 14830  |       |       |       |       |
| 14832  | 2     | 2     | 3     | 3     |
| 14835  | 5     | 4     | 6     | 5     |
| 14841  |       |       |       |       |
| 14849  | 3     | 2     | 1     | 2     |
| 14850  |       |       |       |       |
| 14851  | 1     | 1     | 1     | 1     |
| 14856  | 3     | 3     | 3     | 4     |
| 14862  | 1     | 2     | 3     | 2     |
| 14863  | 1     | 1     | 2     | 1     |
| 14864  | 2     | 3     | 1     | 1     |
| 14866  | 2     | 1     | 2     | 1     |
| 14867  | 3     | 3     | 3     | 4     |
| 14868  | 2     | 1     | 1     | 1     |
| 14870  | 3     | 2     | 3     | 1     |
| 14873  |       |       |       |       |
| 14878  | 1     | 1     | 1     | 1     |
| 14879  |       |       |       |       |
| 14881  | 6     | 5     | 4     | 4     |
| 14888  | 4     | 3     | 4     | 3     |
| 14895  | 2     | 2     | 1     | 2     |
| 14900  | 2     | 3     | 3     | 4     |
| 14912  |       |       |       |       |
| 14922  | 2     | 2     | 3     | 1     |
| 14923  | 2     | 3     | 4     | 4     |
| 14924  | 3     | 4     | 3     | 4     |
| 14925  | 1     | 2     | 3     | 4     |
| 14926  | 1     | 3     | 2     | 3     |
| 14927  | 4     | 4     | 3     | 3     |
| 14930  | 1     | 1     | 2     | 3     |
| 14937  | 4     | 5     | 5     | 3     |
| 14938  | 2     | 2     | 3     | 4     |

| respid | Q40_1 | Q40_2 | Q40_3 | Q40_4 |
|--------|-------|-------|-------|-------|
| 14939  | 1     | 1     | 2     | 2     |
| 14942  |       |       |       |       |
| 14943  |       |       |       |       |
| 14953  | 4     | 2     | 5     | 3     |
| 14954  | 2     | 1     | 3     | 1     |
| 14955  | 3     | 4     | 4     | 3     |
| 14957  | 3     | 2     | 3     | 3     |
| 14958  | 6     | 5     | 5     | 5     |
| 14959  | 3     | 3     | 3     | 4     |
| 14961  |       |       |       |       |
| 14963  | 4     | 4     | 4     | 5     |
| 14964  | 2     | 1     | 1     | 1     |
| 14965  | 1     | 2     | 1     | 3     |
| 14967  | 1     | 2     | 3     | 4     |
| 14970  | 6     | 5     | 5     | 5     |
| 14972  | 2     | 3     | 3     | 2     |
| 14975  | 6     | 5     | 5     | 5     |
| 14977  | 2     | 1     | 3     | 2     |
| 14982  | 1     | 2     | 3     | 1     |
| 14985  | 2     | 3     | 3     | 2     |
| 14986  |       |       |       |       |
| 14987  |       |       |       |       |
| 14988  | 5     | 5     | 6     | 6     |
| 14989  | 3     | 5     | 6     | 4     |
| 14993  | 2     | 3     | 2     | 3     |
| 15001  | 2     | 3     | 3     | 2     |
| 15002  | 6     | 5     | 6     | 5     |
| 15006  | 2     | 2     | 3     | 3     |
| 15007  | 2     | 3     | 2     | 1     |
| 15014  | 1     | 2     | 3     | 3     |
| 15020  | 2     | 3     | 3     | 2     |
| 15021  | 5     | 4     | 4     | 3     |

| respid | Q40_1 | Q40_2 | Q40_3 | Q40_4 |
|--------|-------|-------|-------|-------|
| 15023  | 6     | 5     | 6     | 5     |
| 15030  | 1     | 3     | 2     | 1     |
| 15032  |       |       |       |       |
| 15033  | 3     | 3     | 3     | 3     |
| 15034  | 2     | 2     | 3     | 3     |
| 15035  | 3     | 2     | 1     | 2     |
| 15037  | 2     | 3     | 2     | 1     |
| 15039  | 4     | 4     | 4     | 5     |
| 15040  | 1     | 1     | 1     | 1     |
| 15042  | 5     | 3     | 1     | 4     |
| 15044  |       |       |       |       |
| 15045  | 1     | 2     | 1     | 1     |
| 15046  | 1     | 1     | 2     | 2     |
| 15052  | 2     | 3     | 2     | 3     |
| 15058  | 2     | 2     | 3     | 3     |
| 15063  | 4     | 4     | 4     | 5     |
| 15066  | 1     | 1     | 1     | 2     |
| 15069  | 1     | 2     | 1     | 1     |
| 15071  | 3     | 2     | 3     | 3     |
| 15076  | 3     | 4     | 4     | 5     |
| 15078  | 1     | 1     | 1     | 1     |
| 15087  | 5     | 4     | 5     | 4     |
| 15090  | 5     | 4     | 4     | 3     |
| 15091  | 3     | 3     | 2     | 3     |
| 15092  | 1     | 1     | 1     | 2     |
| 15096  | 1     | 2     | 2     | 3     |
| 15106  | 3     | 3     | 3     | 4     |
| 15108  |       |       |       |       |
| 15113  | 3     | 2     | 2     | 3     |
| 15116  |       |       |       |       |
| 15119  | 1     | 1     | 1     | 2     |
| 15120  | 2     | 3     | 3     | 3     |

| respid | Q40_1 | Q40_2 | Q40_3 | Q40_4 |
|--------|-------|-------|-------|-------|
| 15121  | 5     | 4     | 5     | 4     |
| 15123  |       |       |       |       |
| 15124  | 1     | 1     | 2     | 3     |
| 15128  | 2     | 1     | 1     | 1     |
| 15131  |       |       |       |       |
| 15136  | 3     | 3     | 2     | 3     |
| 15137  | 1     | 2     | 2     | 2     |
| 15141  | 4     | 3     | 1     | 3     |
| 15144  | 2     | 3     | 4     | 4     |
| 15147  | 3     | 2     | 2     | 2     |
| 15151  | 2     | 3     | 4     | 3     |
| 15154  | 3     | 4     | 5     | 4     |
| 15157  | 2     | 2     | 3     | 3     |
| 15164  | 3     | 3     | 4     | 4     |
| 15168  | 2     | 2     | 2     | 3     |
| 15169  | 1     | 2     | 1     | 1     |
| 15172  | 2     | 2     | 3     | 3     |
| 15177  | 4     | 4     | 4     | 4     |
| 15178  |       |       |       |       |
| 15180  | 1     | 2     | 1     | 2     |
| 15181  | 2     | 1     | 1     | 1     |
| 15182  | 5     | 3     | 4     | 4     |
| 15183  |       |       |       |       |
| 15188  | 2     | 3     | 3     | 4     |
| 15190  | 6     | 6     | 5     | 5     |
| 15195  |       |       |       |       |
| 15201  | 5     | 6     | 5     | 5     |
| 15203  | 2     | 3     | 3     | 2     |
| 15204  | 1     | 1     | 2     | 1     |
| 15207  |       |       |       |       |
| 15208  | 6     | 6     | 5     | 5     |
| 15209  | 3     | 2     | 1     | 2     |



| respid | Q40_1 | Q40_2 | Q40_3 | Q40_4 |
|--------|-------|-------|-------|-------|
| 15212  |       |       |       |       |
| 15213  | 2     | 3     | 3     | 5     |
| 15219  | 2     | 3     | 2     | 2     |
| 15220  | 5     | 4     | 3     | 3     |
| 15221  | 1     | 3     | 1     | 2     |
| 15223  | 1     | 2     | 2     | 2     |
| 15224  | 2     | 3     | 3     | 2     |
| 15225  | 2     | 1     | 1     | 2     |
| 15226  | 1     | 2     | 3     | 1     |
| 15230  | 1     | 2     | 1     | 3     |
| 15231  | 6     | 5     | 5     | 5     |
| 15232  | 2     | 1     | 1     | 2     |
| 15237  | 2     | 4     | 3     | 2     |
| 15239  | 1     | 2     | 3     | 2     |
| 15241  | 1     | 2     | 3     | 1     |
| 15242  | 2     | 3     | 3     | 3     |
| 15247  | 1     | 3     | 2     | 1     |
| 15248  |       |       |       |       |
| 15251  |       |       |       |       |
| 15257  |       |       |       |       |
| 15260  | 1     | 2     | 1     | 3     |
| 15261  | 4     | 5     | 3     | 4     |
| 15262  | 5     | 4     | 6     | 5     |
| 15263  | 5     | 2     | 2     | 1     |
| 15265  | 1     | 2     | 1     | 3     |
| 15266  | 1     | 2     | 5     | 1     |
| 15268  | 1     | 2     | 1     | 3     |
| 15269  | 3     | 2     | 1     | 1     |
| 15270  | 5     | 6     | 6     | 6     |
| 15273  | 3     | 2     | 2     | 2     |
| 15276  | 3     | 4     | 5     | 6     |
| 15277  | 1     | 2     | 3     | 2     |

| respid | Q40_1 | Q40_2 | Q40_3 | Q40_4 |
|--------|-------|-------|-------|-------|
| 15282  | 6     | 6     | 6     | 6     |
| 15284  | 6     | 4     | 4     | 4     |
| 15285  | 1     | 2     | 2     | 2     |
| 15286  | 4     | 4     | 5     | 6     |
| 15288  | 2     | 3     | 3     | 4     |
| 15292  | 5     | 4     | 6     | 5     |
| 15296  | 1     | 1     | 2     | 1     |
| 15297  | 3     | 2     | 2     | 2     |
| 15298  |       |       |       |       |
| 15301  | 2     | 2     | 2     | 2     |
| 15302  | 1     | 2     | 1     | 3     |
| 15305  | 3     | 2     | 1     | 2     |
| 15307  | 3     | 1     | 1     | 1     |
| 15308  | 1     | 1     | 2     | 2     |
| 15309  | 1     | 1     | 1     | 1     |
| 15311  | 1     | 1     | 2     | 1     |
| 15315  | 1     | 1     | 2     | 1     |
| 15316  | 2     | 1     | 2     | 1     |
| 15318  |       |       |       |       |
| 15321  | 5     | 5     | 6     | 6     |
| 15322  | 1     | 1     | 1     | 1     |
| 15324  | 3     | 2     | 1     | 1     |
| 15326  | 2     | 3     | 2     | 1     |
| 15327  | 1     | 1     | 1     | 1     |
| 15328  | 1     | 2     | 3     | 3     |
| 15330  | 2     | 2     | 3     | 3     |
| 15332  | 1     | 1     | 1     | 1     |
| 15333  |       |       |       |       |
| 15334  | 2     | 1     | 3     | 2     |
| 15336  | 5     | 6     | 4     | 4     |
| 15337  | 1     | 2     | 2     | 1     |
| 15338  | 1     | 2     | 3     | 4     |

| respid | Q40_1 | Q40_2 | Q40_3 | Q40_4 |
|--------|-------|-------|-------|-------|
| 15339  | 3     | 3     | 6     | 6     |
| 15341  | 6     | 1     | 1     | 1     |
| 15344  |       |       |       |       |
| 15345  | 1     | 2     | 1     | 1     |
| 15350  |       |       |       |       |
| 15351  | 2     | 3     | 2     | 1     |
| 15352  | 2     | 2     | 2     | 1     |
| 15372  | 1     | 3     | 2     | 3     |
| 15373  | 1     | 2     | 3     | 4     |
| 15376  | 1     | 1     | 1     | 1     |
| 15377  | 2     | 1     | 3     | 3     |
| 15382  | 3     | 1     | 2     | 3     |
| 15383  | 2     | 3     | 3     | 4     |
| 15385  | 4     | 4     | 4     | 4     |
| 15390  | 1     | 2     | 1     | 4     |
| 15399  |       |       |       |       |
| 15404  | 2     | 3     | 2     | 2     |
| 15410  | 1     | 1     | 1     | 1     |
| 15411  | 4     | 3     | 2     | 3     |
| 15412  | 2     | 2     | 1     | 3     |
| 15413  | 1     | 3     | 4     | 1     |
| 15414  | 1     | 2     | 3     | 1     |
| 15417  | 2     | 1     | 1     | 1     |
| 15418  | 3     | 2     | 2     | 1     |
| 15421  | 1     | 2     | 1     | 4     |
| 15423  | 3     | 1     | 2     | 1     |
| 15425  | 2     | 1     | 2     | 1     |
| 15426  | 5     | 6     | 4     | 5     |
| 15430  | 2     | 1     | 2     | 3     |
| 15431  | 3     | 3     | 4     | 4     |
| 15435  |       |       |       |       |
| 15436  |       |       |       |       |

| respid | Q40_1 | Q40_2 | Q40_3 | Q40_4 |
|--------|-------|-------|-------|-------|
| 15437  |       |       |       |       |
| 15438  | 1     | 1     | 1     | 1     |
| 15439  | 2     | 1     | 1     | 2     |
| 15441  | 4     | 5     | 6     | 6     |
| 15443  | 2     | 1     | 1     | 1     |
| 15446  | 1     | 2     | 1     | 3     |
| 15449  | 2     | 3     | 3     | 2     |
| 15451  | 4     | 4     | 4     | 3     |
| 15452  | 4     | 4     | 4     | 4     |
| 15454  | 1     | 2     | 1     | 1     |
| 15456  | 2     | 2     | 3     | 3     |
| 15457  |       |       |       |       |
| 15458  | 3     | 2     | 3     | 3     |
| 15462  | 5     | 5     | 4     | 4     |
| 15467  | 3     | 2     | 4     | 3     |
| 15470  | 3     | 3     | 2     | 3     |
| 15472  | 2     | 2     | 1     | 1     |
| 15476  | 4     | 3     | 2     | 2     |
| 15477  | 1     | 2     | 3     | 1     |
| 15488  | 3     | 2     | 2     | 1     |
| 15489  | 1     | 1     | 3     | 2     |
| 15490  | 2     | 1     | 3     | 1     |
| 15496  | 1     | 4     | 1     | 2     |
| 15497  | 2     | 2     | 3     | 3     |
| 15498  |       |       |       |       |
| 15509  | 4     | 4     | 5     | 5     |
| 15510  | 1     | 2     | 3     | 2     |
| 15516  | 1     | 1     | 4     | 3     |
| 15519  | 1     | 1     | 2     | 1     |
| 15520  | 1     | 2     | 3     | 1     |
| 15524  | 1     | 2     | 3     | 1     |
| 15525  | 1     | 1     | 1     | 1     |

| respid | Q40_1 | Q40_2 | Q40_3 | Q40_4 |
|--------|-------|-------|-------|-------|
| 15526  | 2     | 3     | 2     | 4     |
| 15531  | 2     | 3     | 4     | 4     |
| 15532  | 1     | 2     | 2     | 2     |
| 15534  | 4     | 5     | 5     | 5     |
| 15535  | 1     | 2     | 2     | 3     |
| 15539  | 3     | 1     | 2     | 2     |
| 15550  | 2     | 1     | 1     | 1     |
| 15556  | 1     | 2     | 3     | 2     |
| 15558  | 3     | 3     | 4     | 4     |
| 15565  | 1     | 2     | 1     | 1     |
| 15567  | 5     | 5     | 4     | 4     |
| 15568  | 2     | 2     | 2     | 3     |
| 15571  | 1     | 2     | 1     | 1     |
| 15573  | 1     | 1     | 1     | 1     |
| 15574  | 3     | 3     | 3     | 4     |
| 15576  | 1     | 1     | 2     | 1     |
| 15587  | 3     | 3     | 2     | 2     |
| 15588  | 3     | 3     | 4     | 4     |
| 15593  | 2     | 3     | 3     | 3     |
| 15597  | 1     | 1     | 1     | 1     |
| 15598  | 1     | 1     | 1     | 1     |
| 15599  | 1     | 2     | 2     | 1     |
| 15601  | 5     | 1     | 1     | 1     |
| 15604  | 2     | 2     | 2     | 2     |
| 15611  | 1     | 1     | 1     | 1     |
| 15613  | 1     | 1     | 2     | 1     |
| 15614  | 1     | 1     | 1     | 1     |
| 15617  | 2     | 3     | 3     | 3     |
| 15622  |       |       |       |       |
| 15623  | 2     | 1     | 1     | 2     |
| 15625  | 1     | 2     | 2     | 2     |
| 15627  |       |       |       |       |

| respid | Q40_1 | Q40_2 | Q40_3 | Q40_4 |
|--------|-------|-------|-------|-------|
| 15628  | 1     | 3     | 2     | 1     |
| 15633  | 2     | 2     | 2     | 2     |
| 15634  | 1     | 2     | 3     | 1     |
| 15637  | 1     | 3     | 2     | 1     |
| 15644  | 2     | 2     | 3     | 4     |
| 15645  | 6     | 1     | 2     | 1     |
| 15649  | 2     | 1     | 2     | 1     |
| 15650  | 1     | 1     | 1     | 1     |
| 15651  | 2     | 1     | 2     | 1     |
| 15657  | 6     | 5     | 6     | 5     |
| 15658  | 1     | 1     | 2     | 2     |
| 15660  | 3     | 3     | 4     | 4     |
| 15667  | 1     | 1     | 1     | 1     |
| 15671  | 1     | 1     | 1     | 1     |
| 15679  | 3     | 3     | 3     | 3     |
| 15712  | 2     | 3     | 3     | 2     |
| 15715  | 2     | 1     | 1     | 2     |
| 15749  | 1     | 1     | 1     | 1     |
| 15754  | 3     | 2     | 3     | 2     |
| 15756  | 4     | 3     | 1     | 3     |
| 15773  | 1     | 2     | 1     | 1     |
| 15774  | 1     | 1     | 2     | 1     |
| 15776  | 3     | 1     | 1     | 1     |
| 15777  | 4     | 4     | 5     | 5     |
| 15779  |       |       |       |       |
| 15780  | 2     | 2     | 3     | 3     |
| 15792  | 1     | 2     | 1     | 1     |
| 15793  | 4     | 4     | 4     | 5     |
| 15796  | 2     | 1     | 3     | 2     |
| 15798  | 1     | 1     | 1     | 1     |
| 15809  | 2     | 2     | 1     | 1     |
| 15810  | 1     | 1     | 1     | 1     |

| respid | Q40_1 | Q40_2 | Q40_3 | Q40_4 |
|--------|-------|-------|-------|-------|
| 15815  | 2     | 1     | 1     | 2     |
| 15816  | 1     | 3     | 2     | 1     |
| 15817  |       |       |       |       |
| 15821  | 4     | 4     | 4     | 5     |
| 15823  | 3     | 3     | 3     | 3     |
| 15834  | 4     | 3     | 2     | 3     |
| 15835  |       |       |       |       |
| 15836  | 2     | 1     | 1     | 1     |
| 15837  | 1     | 1     | 1     | 1     |
| 15839  | 3     | 4     | 2     | 3     |
| 15840  | 1     | 2     | 3     | 2     |
| 15844  | 1     | 1     | 1     | 1     |
| 15845  | 2     | 1     | 2     | 1     |
| 15847  | 3     | 3     | 4     | 4     |
| 15848  | 1     | 1     | 1     | 1     |
| 15849  | 2     | 1     | 4     | 2     |
| 15857  | 2     | 2     | 2     | 2     |
| 15858  | 3     | 2     | 1     | 2     |
| 15862  | 4     | 5     | 3     | 6     |
| 15866  | 2     | 1     | 2     | 3     |
| 15870  | 2     | 1     | 3     | 1     |
| 15871  | 2     | 1     | 2     | 1     |
| 15872  | 3     | 2     | 4     | 3     |
| 15873  | 1     | 1     | 1     | 1     |
| 15874  |       |       |       |       |
| 15875  | 1     | 3     | 2     | 4     |
| 15876  | 2     | 3     | 2     | 3     |
| 15882  | 3     | 3     | 3     | 3     |
| 15884  | 2     | 3     | 4     | 4     |
| 15890  | 3     | 4     | 3     | 4     |
| 15892  | 5     | 2     | 5     | 5     |
| 15908  | 2     | 3     | 3     | 4     |

| respid | Q40_1 | Q40_2 | Q40_3 | Q40_4 |
|--------|-------|-------|-------|-------|
| 15914  | 2     | 1     | 3     | 2     |
| 15932  | 3     | 3     | 3     | 3     |
| 15933  | 3     | 2     | 1     | 2     |
| 15938  | 1     | 1     | 1     | 1     |
| 15940  | 6     | 5     | 5     | 6     |
| 15945  | 2     | 1     | 3     | 2     |
| 15947  | 2     | 3     | 4     | 3     |
| 15950  | 2     | 1     | 3     | 1     |
| 15951  | 3     | 3     | 4     | 3     |
| 15952  | 4     | 4     | 5     | 5     |
| 15953  | 2     | 1     | 1     | 1     |
| 15954  | 4     | 3     | 3     | 3     |
| 15957  | 2     | 3     | 4     | 5     |
| 15965  | 2     | 2     | 3     | 3     |
| 15966  |       |       |       |       |
| 15967  | 2     | 4     | 3     | 2     |
| 15968  | 4     | 3     | 1     | 3     |
| 15970  | 2     | 1     | 1     | 1     |
| 15973  | 3     | 2     | 1     | 2     |
| 15974  | 2     | 1     | 3     | 1     |
| 15975  |       |       |       |       |
| 15980  | 6     | 5     | 5     | 6     |
| 15984  | 2     | 4     | 3     | 1     |
| 15985  | 3     | 2     | 3     | 3     |
| 15994  |       |       |       |       |
| 15995  | 3     | 1     | 1     | 2     |
| 16000  | 2     | 4     | 3     | 2     |
| 16004  | 1     | 2     | 2     | 3     |
| 16005  | 2     | 1     | 3     | 1     |
| 16006  |       |       |       |       |
| 16009  | 1     | 1     | 1     | 1     |
| 16017  | 1     | 1     | 1     | 1     |



| respid | Q40_1 | Q40_2 | Q40_3 | Q40_4 |
|--------|-------|-------|-------|-------|
| 16019  | 3     | 2     | 2     | 2     |
| 16021  | 1     | 2     | 3     | 1     |
| 16024  | 2     | 1     | 1     | 1     |
| 16026  | 3     | 2     | 2     | 2     |
| 16029  |       |       |       |       |
| 16031  | 2     | 2     | 5     | 3     |
| 16037  | 1     | 1     | 1     | 1     |
| 16043  | 1     | 1     | 1     | 1     |
| 16044  | 1     | 1     | 2     | 1     |
| 16047  | 1     | 2     | 1     | 1     |
| 16048  | 2     | 3     | 2     | 3     |
| 16049  | 1     | 1     | 1     | 1     |
| 16051  | 2     | 2     | 1     | 1     |
| 16053  | 2     | 2     | 3     | 1     |
| 16054  | 1     | 1     | 1     | 2     |
| 16069  | 1     | 2     | 1     | 1     |
| 16070  | 2     | 1     | 2     | 1     |
| 16074  |       |       |       |       |
| 16076  |       |       |       |       |
| 16078  |       |       |       |       |
| 16081  | 1     | 2     | 2     | 1     |
| 16085  |       |       |       |       |
| 16088  | 1     | 1     | 1     | 1     |
| 16091  | 5     | 5     | 3     | 3     |
| 16092  | 1     | 2     | 2     | 1     |
| 16093  | 1     | 2     | 2     | 1     |
| 16097  | 3     | 2     | 2     | 2     |
| 16100  | 2     | 1     | 1     | 2     |
| 16101  | 2     | 1     | 1     | 1     |
| 16105  |       |       |       |       |
| 16118  | 3     | 4     | 3     | 3     |
| 16129  | 1     | 1     | 2     | 1     |

| respid | Q40_1 | Q40_2 | Q40_3 | Q40_4 |
|--------|-------|-------|-------|-------|
| 16130  | 1     | 2     | 2     | 2     |
| 16131  | 3     | 3     | 3     | 3     |
| 16136  | 1     | 1     | 1     | 1     |
| 16137  | 1     | 1     | 1     | 1     |
| 16138  | 3     | 3     | 3     | 2     |
| 16139  | 3     | 2     | 2     | 3     |
| 16140  | 1     | 1     | 1     | 1     |
| 16145  | 3     | 2     | 2     | 2     |
| 16150  | 1     | 6     | 1     | 6     |
| 16151  | 2     | 1     | 1     | 1     |
| 16153  | 1     | 1     | 1     | 1     |
| 16164  | 1     | 1     | 3     | 2     |
| 16168  | 2     | 2     | 3     | 2     |
| 16173  | 1     | 2     | 2     | 1     |
| 16174  | 1     | 1     | 1     | 1     |
| 16177  | 2     | 2     | 1     | 1     |
| 16185  | 1     | 1     | 2     | 1     |
| 16189  | 1     | 2     | 1     | 1     |
| 16192  | 1     | 1     | 2     | 1     |
| 16193  | 1     | 1     | 1     | 1     |
| 16194  | 1     | 1     | 2     | 1     |
| 16196  |       |       |       |       |
| 16202  | 2     | 2     | 2     | 2     |
| 16205  | 2     | 3     | 3     | 4     |
| 16206  | 1     | 1     | 3     | 1     |
| 16208  |       |       |       |       |
| 16211  | 4     | 5     | 3     | 3     |
| 16212  | 1     | 1     | 1     | 1     |
| 16215  |       |       |       |       |
| 16217  | 2     | 1     | 1     | 1     |
| 16221  | 1     | 1     | 2     | 1     |
| 16226  | 2     | 4     | 4     | 3     |

| respid | Q40_1 | Q40_2 | Q40_3 | Q40_4 |
|--------|-------|-------|-------|-------|
| 16228  | 3     | 4     | 4     | 4     |
| 16229  | 1     | 1     | 1     | 1     |
| 16230  | 1     | 1     | 1     | 1     |
| 16231  | 1     | 4     | 3     | 2     |
| 16232  | 3     | 3     | 4     | 1     |
| 16234  | 1     | 1     | 3     | 3     |
| 16235  | 4     | 4     | 4     | 4     |
| 16236  | 1     | 1     | 1     | 1     |
| 16237  | 2     | 2     | 2     | 2     |
| 16238  | 2     | 2     | 1     | 1     |
| 16239  | 1     | 1     | 2     | 1     |
| 16243  | 3     | 1     | 2     | 1     |
| 16248  | 3     | 3     | 2     | 2     |
| 16249  | 1     | 1     | 1     | 1     |
| 16251  |       |       |       |       |
| 16263  | 1     | 1     | 1     | 1     |
| 16265  | 3     | 2     | 2     | 3     |
| 16269  | 1     | 1     | 1     | 1     |
| 16272  | 2     | 3     | 4     | 3     |
| 16273  |       |       |       |       |
| 16281  | 1     | 1     | 1     | 1     |
| 16282  | 1     | 1     | 1     | 1     |
| 16287  | 3     | 2     | 1     | 1     |
| 16290  | 1     | 1     | 2     | 1     |
| 16294  | 1     | 1     | 1     | 1     |
| 16295  | 1     | 1     | 3     | 1     |
| 16296  | 2     | 1     | 1     | 1     |
| 16299  | 5     | 4     | 5     | 4     |
| 16302  | 1     | 1     | 1     | 1     |
| 16303  | 1     | 1     | 3     | 1     |
| 16304  | 2     | 3     | 4     | 2     |
| 16306  | 1     | 1     | 1     | 1     |

| respid | Q40_1 | Q40_2 | Q40_3 | Q40_4 |
|--------|-------|-------|-------|-------|
| 16318  | 3     | 2     | 2     | 1     |
| 16320  | 2     | 2     | 2     | 1     |
| 16321  | 3     | 3     | 3     | 3     |
| 16322  | 1     | 2     | 2     | 1     |
| 16324  | 1     | 1     | 2     | 1     |
| 16326  | 1     | 3     | 3     | 1     |
| 16328  | 2     | 2     | 3     | 3     |
| 16336  | 2     | 2     | 3     | 2     |
| 16341  | 1     | 1     | 1     | 1     |
| 16342  | 1     | 1     | 1     | 1     |
| 16343  | 1     | 3     | 2     | 2     |
| 16345  | 2     | 3     | 3     | 5     |
| 16349  | 2     | 2     | 2     | 1     |
| 16355  | 1     | 1     | 1     | 1     |
| 16364  | 2     | 3     | 2     | 3     |
| 16374  | 1     | 1     | 1     | 1     |
| 16375  |       |       |       |       |
| 16376  | 2     | 2     | 2     | 3     |
| 16393  | 1     | 1     | 2     | 1     |
| 16394  | 1     | 2     | 2     | 1     |
| 16395  | 3     | 3     | 1     | 4     |
| 16397  | 2     | 3     | 4     | 3     |
| 16398  | 3     | 3     | 2     | 2     |
| 16402  | 1     | 1     | 2     | 1     |
| 16405  | 1     | 1     | 1     | 1     |
| 16416  | 3     | 3     | 3     | 2     |
| 16422  | 2     | 2     | 3     | 3     |
| 16429  | 2     | 1     | 1     | 1     |
| 16430  | 2     | 1     | 1     | 1     |
| 16432  | 2     | 3     | 3     | 3     |
| 16433  | 2     | 3     | 1     | 2     |
| 16434  |       |       |       |       |

| respid | Q40_1 | Q40_2 | Q40_3 | Q40_4 |
|--------|-------|-------|-------|-------|
| 16437  | 3     | 1     | 3     | 1     |
| 16439  | 1     | 1     | 1     | 1     |
| 16440  | 1     | 2     | 3     | 2     |
| 16441  | 1     | 1     | 2     | 1     |
| 16442  | 3     | 2     | 2     | 3     |
| 16450  | 3     | 1     | 1     | 1     |
| 16451  | 1     | 1     | 1     | 1     |
| 16452  | 2     | 2     | 3     | 2     |
| 16467  | 1     | 1     | 2     | 1     |
| 16468  |       |       |       |       |
| 16469  | 3     | 3     | 3     | 2     |
| 16470  |       |       |       |       |
| 16471  | 1     | 1     | 2     | 1     |
| 16473  | 1     | 1     | 1     | 1     |
| 16476  | 1     | 1     | 1     | 1     |
| 16478  | 1     | 1     | 2     | 1     |
| 16484  | 1     | 1     | 1     | 1     |
| 16499  | 1     | 1     | 1     | 1     |
| 16502  |       |       |       |       |
| 16505  | 1     | 1     | 1     | 1     |
| 16514  | 1     | 1     | 1     | 1     |
| 16515  | 2     | 2     | 2     | 2     |
| 16517  | 2     | 3     | 2     | 3     |
| 16518  | 1     | 1     | 2     | 1     |
| 16519  | 2     | 2     | 1     | 2     |
| 16525  | 3     | 1     | 1     | 1     |
| 16526  | 1     | 1     | 2     | 1     |
| 16530  | 2     | 1     | 1     | 1     |
| 16532  | 1     | 1     | 2     | 1     |
| 16536  | 1     | 1     | 1     | 1     |
| 16537  | 4     | 3     | 3     | 3     |
| 16541  | 4     | 4     | 5     | 5     |

| respid | Q40_1 | Q40_2 | Q40_3 | Q40_4 |
|--------|-------|-------|-------|-------|
| 16543  | 1     | 1     | 1     | 1     |
| 16544  | 2     | 2     | 2     | 2     |
| 16545  | 1     | 2     | 2     | 1     |
| 16546  | 3     | 2     | 2     | 1     |
| 16548  | 2     | 1     | 1     | 1     |
| 16552  | 2     | 4     | 1     | 4     |
| 16559  | 1     | 1     | 1     | 1     |
| 16564  | 5     | 5     | 3     | 2     |
| 16565  | 1     | 1     | 1     | 1     |
| 16567  | 2     | 2     | 2     | 1     |
| 16571  |       |       |       |       |
| 16572  | 2     | 2     | 1     | 2     |
| 16579  | 2     | 1     | 1     | 1     |
| 16588  | 2     | 6     | 5     | 5     |
| 16599  | 2     | 1     | 1     | 1     |
| 16605  | 1     | 1     | 2     | 1     |
| 16622  | 2     | 2     | 2     | 2     |
| 16635  | 2     | 2     | 2     | 2     |
| 16638  | 1     | 1     | 1     | 1     |
| 16652  | 1     | 2     | 2     | 2     |
| 16656  | 1     | 1     | 2     | 1     |
| 16671  |       |       |       |       |
| 16676  | 1     | 1     | 1     | 1     |
| 16678  | 2     | 2     | 2     | 2     |
| 16702  | 2     | 2     | 1     | 1     |
| 16705  | 1     | 2     | 2     | 1     |
| 16707  | 4     | 4     | 4     | 4     |
| 16711  | 3     | 2     | 2     | 2     |
| 16712  | 1     | 1     | 2     | 1     |
| 16716  |       |       |       |       |
| 16724  | 2     | 1     | 1     | 2     |
| 16727  | 2     | 2     | 2     | 2     |

| respid | Q40_1 | Q40_2 | Q40_3 | Q40_4 |
|--------|-------|-------|-------|-------|
| 16734  | 1     | 1     | 3     | 1     |
| 16740  | 1     | 1     | 1     | 1     |
| 16748  | 2     | 1     | 3     | 1     |
| 16759  | 1     | 1     | 1     | 1     |
| 16761  |       |       |       |       |
| 16763  | 2     | 2     | 1     | 1     |
| 16764  | 2     | 3     | 2     | 3     |
| 16766  | 3     | 1     | 1     | 1     |
| 16767  | 1     | 2     | 3     | 1     |
| 16776  | 1     | 1     | 1     | 1     |
| 16781  | 1     | 1     | 1     | 1     |
| 16793  | 2     | 2     | 2     | 2     |
| 16796  | 5     | 4     | 5     | 5     |
| 16810  | 2     | 1     | 1     | 1     |
| 16811  | 1     | 2     | 2     | 1     |
| 16813  |       |       |       |       |
| 16814  | 2     | 1     | 1     | 2     |
| 16831  | 1     | 3     | 3     | 2     |
| 16833  | 4     | 2     | 4     | 5     |
| 16839  | 2     | 1     | 1     | 1     |
| 16843  | 2     | 1     | 2     | 1     |
| 16860  |       |       |       |       |
| 16871  | 1     | 1     | 1     | 1     |
| 16881  | 2     | 3     | 3     | 2     |
| 16884  | 4     | 2     | 1     | 1     |
| 16891  | 3     | 2     | 2     | 2     |
| 16909  | 1     | 1     | 1     | 1     |
| 16911  |       |       |       |       |
| 16922  | 2     | 2     | 3     | 2     |
| 16935  | 4     | 4     | 4     | 3     |
| 16942  | 2     | 1     | 1     | 1     |
| 16950  |       |       |       |       |

| respid | Q40_1 | Q40_2 | Q40_3 | Q40_4 |
|--------|-------|-------|-------|-------|
| 16952  | 3     | 4     | 5     | 4     |
| 16963  | 1     | 1     | 2     | 1     |
| 16967  | 4     | 4     | 4     | 4     |
| 16970  | 2     | 3     | 3     | 1     |
| 16976  | 3     | 3     | 3     | 2     |
| 16982  | 1     | 1     | 1     | 1     |
| 16995  | 1     | 1     | 1     | 1     |
| 17004  | 2     | 2     | 2     | 2     |
| 17006  | 1     | 1     | 1     | 1     |
| 17009  | 1     | 1     | 1     | 2     |
| 17021  |       |       |       |       |
| 17040  | 1     | 2     | 4     | 2     |
| 17041  |       |       |       |       |
| 17044  | 2     | 2     | 2     | 2     |
| 17046  | 3     | 3     | 3     | 3     |
| 17052  | 2     | 2     | 2     | 1     |
| 17055  | 3     | 3     | 3     | 3     |
| 17108  | 1     | 1     | 2     | 3     |
| 17109  | 1     | 1     | 1     | 1     |
| 17113  |       |       |       |       |
| 17115  | 2     | 3     | 2     | 2     |
| 17132  |       |       |       |       |
| 17135  | 3     | 4     | 4     | 3     |
| 17138  | 1     | 2     | 2     | 1     |
| 17141  | 1     | 1     | 1     | 1     |
| 17143  | 2     | 2     | 1     | 1     |
| 17148  | 1     | 1     | 3     | 1     |
| 17151  | 1     | 2     | 1     | 2     |
| 17153  | 1     | 1     | 1     | 1     |
| 17154  | 1     | 1     | 2     | 2     |
| 17157  | 1     | 4     | 2     | 3     |
| 17160  | 2     | 1     | 1     | 1     |



| respid | Q40_1 | Q40_2 | Q40_3 | Q40_4 |
|--------|-------|-------|-------|-------|
| 17167  | 2     | 2     | 1     | 1     |
| 17169  | 3     | 2     | 1     | 1     |
| 17174  | 3     | 4     | 5     | 4     |
| 17179  | 1     | 1     | 1     | 1     |
| 17180  | 3     | 3     | 2     | 1     |
| 17182  | 1     | 1     | 1     | 1     |
| 17184  | 4     | 3     | 3     | 3     |
| 17186  | 1     | 1     | 1     | 1     |
| 17187  | 1     | 1     | 2     | 1     |
| 17192  | 3     | 4     | 3     | 3     |
| 17197  | 2     | 1     | 2     | 2     |
| 17217  | 1     | 1     | 1     | 1     |
| 17226  | 1     | 2     | 2     | 1     |
| 17228  | 2     | 3     | 3     | 2     |
| 17245  | 3     | 3     | 3     | 3     |
| 17247  |       |       |       |       |
| 17258  | 1     | 1     | 2     | 1     |
| 17259  | 2     | 3     | 2     | 2     |
| 17262  | 1     | 1     | 2     | 1     |
| 17265  | 1     | 2     | 1     | 1     |
| 17281  | 1     | 1     | 2     | 1     |
| 17282  | 2     | 3     | 2     | 3     |
| 17293  | 1     | 1     | 1     | 1     |
| 17306  | 2     | 3     | 2     | 2     |
| 17312  | 2     | 2     | 3     | 3     |
| 17318  | 2     | 2     | 2     | 2     |
| 17328  | 2     | 4     | 2     | 2     |
| 17343  | 1     | 1     | 1     | 1     |
| 17344  | 1     | 2     | 1     | 1     |
| 17348  | 1     | 2     | 1     | 1     |
| 17352  | 1     | 1     | 1     | 1     |
| 17355  | 2     | 1     | 2     | 1     |

| respid | Q40_1 | Q40_2 | Q40_3 | Q40_4 |
|--------|-------|-------|-------|-------|
| 17356  | 3     | 1     | 4     | 1     |
| 17359  | 1     | 1     | 2     | 1     |
| 17373  | 2     | 3     | 3     | 3     |
| 17381  | 2     | 2     | 2     | 1     |
| 17388  | 3     | 1     | 2     | 1     |
| 17394  | 3     | 2     | 4     | 2     |
| 17401  |       |       |       |       |
| 17403  | 1     | 1     | 3     | 1     |
| 17411  |       |       |       |       |
| 17423  | 2     | 1     | 1     | 2     |
| 17427  |       |       |       |       |
| 17433  | 2     | 1     | 1     | 1     |
| 17441  | 1     | 1     | 1     | 1     |
| 17442  | 1     | 1     | 3     | 1     |
| 17447  | 1     | 1     | 1     | 1     |
| 17458  | 2     | 1     | 1     | 1     |
| 17474  | 1     | 1     | 2     | 1     |
| 17475  | 2     | 2     | 2     | 2     |
| 17476  | 3     | 3     | 2     | 2     |
| 17480  | 1     | 1     | 1     | 1     |
| 17484  | 1     | 1     | 1     | 1     |
| 17490  | 1     | 1     | 1     | 1     |
| 17491  | 2     | 1     | 1     | 1     |
| 17500  | 2     | 1     | 2     | 1     |
| 17507  | 1     | 1     | 1     | 1     |
| 17517  | 2     | 1     | 1     | 1     |
| 17520  | 1     | 4     | 1     | 5     |
| 17521  | 1     | 1     | 1     | 1     |
| 17531  | 1     | 1     | 1     | 1     |
| 17540  | 2     | 3     | 2     | 2     |
| 17550  | 1     | 1     | 1     | 1     |
| 17551  | 2     | 1     | 1     | 1     |

| respid | Q40_1 | Q40_2 | Q40_3 | Q40_4 |
|--------|-------|-------|-------|-------|
| 17555  | 3     | 2     | 3     | 3     |
| 17556  | 1     | 1     | 1     | 2     |
| 17574  | 1     | 2     | 3     | 2     |
| 17575  | 2     | 1     | 3     | 1     |
| 17582  | 1     | 1     | 1     | 1     |
| 17587  |       |       |       |       |
| 17601  | 1     | 1     | 1     | 1     |
| 17607  | 3     | 4     | 4     | 3     |
| 17609  | 1     | 1     | 1     | 1     |
| 17611  | 1     | 1     | 1     | 1     |
| 17613  | 1     | 1     | 1     | 1     |
| 17615  | 2     | 1     | 1     | 1     |
| 17620  | 2     | 2     | 2     | 2     |
| 17624  | 3     | 3     | 2     | 2     |
| 17635  | 1     | 3     | 2     | 2     |
| 17643  | 1     | 1     | 1     | 1     |
| 17645  | 3     | 2     | 2     | 1     |
| 17646  | 1     | 1     | 1     | 1     |
| 17649  | 2     | 1     | 2     | 2     |
| 17658  | 1     | 2     | 2     | 1     |
| 17666  |       |       |       |       |
| 17670  | 3     | 1     | 2     | 1     |
| 17678  | 2     | 1     | 2     | 1     |
| 17679  | 2     | 2     | 2     | 3     |
| 17695  | 1     | 1     | 1     | 1     |
| 17697  | 4     | 3     | 5     | 1     |
| 17698  | 2     | 2     | 2     | 2     |
| 17723  | 3     | 2     | 1     | 2     |
| 17727  | 1     | 1     | 1     | 1     |
| 17734  | 1     | 1     | 1     | 1     |
| 17737  | 1     | 1     | 1     | 1     |
| 17748  | 1     | 2     | 3     | 2     |

| respid | Q40_1 | Q40_2 | Q40_3 | Q40_4 |
|--------|-------|-------|-------|-------|
| 17749  |       |       |       |       |
| 17754  | 2     | 4     | 5     | 3     |
| 17766  | 3     | 2     | 5     | 3     |
| 17777  | 1     | 1     | 1     | 1     |
| 17780  | 1     | 1     | 1     | 1     |
| 17788  | 1     | 1     | 1     | 1     |
| 17801  | 2     | 3     | 2     | 3     |
| 17803  | 1     | 1     | 1     | 1     |
| 17807  | 1     | 1     | 1     | 1     |
| 17808  | 1     | 1     | 1     | 1     |
| 17809  | 2     | 3     | 3     | 2     |
| 17821  | 2     | 1     | 2     | 1     |
| 17827  | 3     | 3     | 3     | 3     |
| 17834  | 2     | 2     | 3     | 3     |
| 17838  | 2     | 2     | 2     | 2     |
| 17842  | 1     | 1     | 1     | 1     |
| 17862  | 1     | 2     | 2     | 1     |
| 17863  | 1     | 3     | 3     | 1     |
| 17871  | 2     | 3     | 2     | 2     |
| 17872  | 1     | 1     | 1     | 1     |
| 17903  | 2     | 3     | 3     | 2     |
| 17906  | 1     | 2     | 1     | 2     |
| 17910  | 3     | 3     | 3     | 3     |
| 17922  | 1     | 1     | 3     | 1     |
| 17923  | 3     | 2     | 2     | 3     |
| 17925  | 2     | 2     | 2     | 2     |
| 17926  | 1     | 1     | 1     | 1     |
| 17937  | 1     | 1     | 1     | 1     |
| 17956  | 2     | 2     | 2     | 2     |
| 17958  | 1     | 2     | 1     | 2     |
| 17985  | 1     | 1     | 1     | 1     |
| 17989  | 1     | 3     | 3     | 1     |

| respid | Q40_1 | Q40_2 | Q40_3 | Q40_4 |
|--------|-------|-------|-------|-------|
| 17995  | 1     | 1     | 1     | 1     |
| 18000  | 2     | 1     | 2     | 1     |
| 18010  | 1     | 1     | 1     | 1     |
| 18015  | 1     | 1     | 1     | 1     |
| 18018  | 2     | 4     | 5     | 2     |
| 18031  | 1     | 2     | 1     | 1     |
| 18033  | 3     | 2     | 2     | 1     |
| 18036  | 2     | 2     | 1     | 1     |
| 18041  | 1     | 1     | 2     | 1     |
| 18068  |       |       |       |       |
| 18080  | 1     | 1     | 1     | 1     |
| 18081  | 3     | 3     | 3     | 2     |
| 18083  | 1     | 3     | 5     | 2     |
| 18113  | 3     | 3     | 3     | 2     |
| 18115  | 2     | 3     | 3     | 2     |
| 18117  | 5     | 5     | 5     | 5     |
| 18129  | 1     | 1     | 1     | 1     |
| 18132  | 3     | 1     | 2     | 2     |
| 18146  | 3     | 1     | 2     | 1     |
| 18147  | 4     | 5     | 6     | 3     |
| 18153  |       |       |       |       |
| 18154  | 2     | 3     | 3     | 2     |
| 18157  | 3     | 2     | 1     | 1     |
| 18166  | 1     | 1     | 3     | 1     |
| 18169  | 2     | 1     | 1     | 1     |
| 18171  | 2     | 1     | 2     | 2     |
| 18173  | 2     | 2     | 2     | 2     |
| 18204  | 1     | 1     | 1     | 1     |
| 18210  | 1     | 4     | 2     | 2     |
| 18212  |       |       |       |       |
| 18220  | 4     | 3     | 3     | 5     |
| 18221  | 1     | 1     | 1     | 1     |

| respid | Q40_1 | Q40_2 | Q40_3 | Q40_4 |
|--------|-------|-------|-------|-------|
| 18228  | 1     | 1     | 1     | 1     |
| 18231  | 1     | 1     | 1     | 1     |
| 18233  | 1     | 2     | 2     | 3     |
| 18235  | 2     | 2     | 1     | 1     |
| 18237  |       |       |       |       |
| 18250  | 1     | 1     | 2     | 1     |
| 18253  | 1     | 3     | 4     | 3     |
| 18264  | 1     | 1     | 1     | 1     |
| 18285  | 1     | 1     | 1     | 1     |
| 18287  |       |       |       |       |
| 18296  | 1     | 1     | 1     | 1     |
| 18299  | 2     | 2     | 2     | 2     |
| 18313  | 1     | 2     | 2     | 1     |
| 18321  | 2     | 1     | 2     | 2     |
| 18324  |       |       |       |       |
| 18329  | 1     | 1     | 1     | 1     |
| 18332  | 1     | 1     | 2     | 1     |
| 18339  | 4     | 4     | 4     | 4     |
| 18340  | 1     | 1     | 1     | 1     |
| 18348  | 2     | 1     | 1     | 1     |
| 18355  | 2     | 2     | 2     | 2     |
| 18360  | 2     | 2     | 3     | 1     |
| 18380  | 1     | 2     | 1     | 1     |
| 18403  | 1     | 2     | 3     | 1     |
| 18405  | 2     | 2     | 2     | 2     |
| 18409  | 2     | 2     | 2     | 2     |
| 18445  | 1     | 1     | 1     | 1     |
| 18458  | 3     | 3     | 2     | 2     |
| 18477  | 1     | 1     | 3     | 1     |
| 18481  | 1     | 1     | 2     | 1     |
| 18491  | 1     | 1     | 1     | 1     |
| 18492  | 1     | 1     | 1     | 1     |

| respid | Q40_1 | Q40_2 | Q40_3 | Q40_4 |
|--------|-------|-------|-------|-------|
| 18494  | 1     | 2     | 4     | 2     |
| 18495  | 1     | 1     | 1     | 1     |
| 18496  | 1     | 2     | 2     | 1     |
| 18507  | 1     | 2     | 2     | 2     |
| 18509  |       |       |       |       |
| 18510  | 1     | 2     | 2     | 1     |
| 18513  | 1     | 2     | 3     | 2     |
| 18525  |       |       |       |       |
| 18526  | 1     | 2     | 2     | 1     |
| 18527  | 2     | 1     | 2     | 1     |
| 18536  | 1     | 1     | 1     | 1     |
| 18540  | 1     | 1     | 1     | 1     |
| 18548  | 1     | 1     | 1     | 1     |
| 18550  |       |       |       |       |
| 18556  | 1     | 1     | 1     | 1     |
| 18561  |       |       |       |       |
| 18577  | 2     | 2     | 2     | 1     |
| 18580  | 2     | 1     | 1     | 1     |
| 18633  | 2     | 2     | 2     | 3     |
| 18635  | 2     | 2     | 2     | 2     |
| 18636  |       |       |       |       |
| 18645  | 4     | 5     | 4     | 4     |
| 18649  | 2     | 2     | 3     | 3     |
| 18664  | 1     | 1     | 1     | 1     |
| 18668  | 2     | 1     | 1     | 2     |
| 18682  | 4     | 4     | 4     | 4     |
| 18685  | 1     | 1     | 2     | 1     |
| 18688  | 2     | 2     | 2     | 2     |
| 18689  | 3     | 2     | 3     | 2     |
| 18693  | 6     | 6     | 6     | 6     |
| 18694  | 1     | 1     | 1     | 1     |
| 18705  | 1     | 1     | 1     | 1     |

| respid | Q40_1 | Q40_2 | Q40_3 | Q40_4 |
|--------|-------|-------|-------|-------|
| 18710  | 2     | 2     | 1     | 1     |
| 18715  | 6     | 5     | 4     | 3     |
| 18718  | 1     | 2     | 1     | 1     |
| 18727  | 1     | 2     | 3     | 1     |
| 18732  | 1     | 1     | 1     | 1     |
| 18735  | 2     | 4     | 2     | 1     |
| 18742  | 1     | 1     | 1     | 2     |
| 18745  | 1     | 1     | 1     | 1     |
| 18747  | 1     | 1     | 1     | 1     |
| 18750  | 2     | 1     | 1     | 1     |
| 18751  | 2     | 2     | 2     | 1     |
| 18753  | 1     | 1     | 2     | 2     |
| 18754  |       |       |       |       |
| 18759  | 1     | 1     | 1     | 1     |
| 18780  | 1     | 1     | 1     | 1     |
| 18782  | 1     | 1     | 3     | 3     |
| 18807  | 6     | 6     | 5     | 5     |
| 18815  | 1     | 1     | 2     | 1     |
| 18818  | 2     | 1     | 1     | 1     |
| 18820  | 1     | 1     | 1     | 1     |
| 18823  | 6     | 6     | 5     | 6     |
| 18825  | 2     | 1     | 1     | 1     |
| 18828  |       |       |       |       |
| 18832  | 1     | 2     | 3     | 2     |
| 18834  | 3     | 2     | 2     | 1     |
| 18835  | 5     | 5     | 5     | 5     |
| 18837  | 1     | 2     | 3     | 2     |
| 18842  | 1     | 1     | 1     | 1     |
| 18846  |       |       |       |       |
| 18855  | 2     | 3     | 3     | 2     |
| 18856  | 1     | 2     | 1     | 1     |
| 18887  | 1     | 2     | 2     | 2     |



| respid | Q40_1 | Q40_2 | Q40_3 | Q40_4 |
|--------|-------|-------|-------|-------|
| 18903  | 2     | 1     | 1     | 1     |
| 18906  | 2     | 3     | 2     | 1     |
| 18910  |       |       |       |       |
| 18919  | 1     | 1     | 2     | 1     |
| 18928  | 6     | 1     | 2     | 1     |
| 18931  | 3     | 4     | 4     | 3     |
| 18939  | 2     | 3     | 1     | 3     |
| 18946  | 1     | 1     | 1     | 1     |
| 18952  | 3     | 2     | 3     | 2     |
| 18954  | 1     | 1     | 1     | 1     |
| 18982  |       |       |       |       |
| 18986  | 2     | 2     | 3     | 2     |
| 18989  | 2     | 3     | 3     | 3     |
| 18990  | 2     | 2     | 2     | 1     |
| 18996  | 3     | 2     | 2     | 1     |
| 18998  | 1     | 1     | 1     | 1     |
| 19009  | 3     | 4     | 2     | 2     |
| 19010  | 6     | 1     | 1     | 1     |
| 19017  | 1     | 1     | 1     | 1     |
| 19018  | 1     | 1     | 1     | 1     |
| 19020  | 1     | 1     | 1     | 1     |
| 19027  | 2     | 3     | 2     | 2     |
| 19035  | 1     | 1     | 1     | 1     |
| 19037  | 2     | 3     | 3     | 2     |
| 19048  | 1     | 1     | 1     | 1     |
| 19051  | 2     | 3     | 3     | 2     |
| 19054  | 2     | 2     | 2     | 1     |
| 19057  | 1     | 1     | 1     | 1     |
| 19073  | 2     | 3     | 2     | 2     |
| 19075  | 1     | 1     | 1     | 1     |
| 19079  | 3     | 3     | 3     | 3     |
| 19087  | 1     | 1     | 1     | 1     |

| respid | Q40_1 | Q40_2 | Q40_3 | Q40_4 |
|--------|-------|-------|-------|-------|
| 19090  | 1     | 1     | 3     | 3     |
| 19093  | 1     | 1     | 1     | 1     |
| 19099  | 3     | 3     | 4     | 4     |
| 19100  | 1     | 2     | 2     | 1     |
| 19101  | 3     | 3     | 2     | 3     |
| 19105  | 1     | 2     | 1     | 1     |
| 19111  | 2     | 3     | 4     | 3     |
| 19112  | 1     | 1     | 1     | 1     |
| 19117  | 3     | 2     | 4     | 3     |
| 19122  | 1     | 1     | 1     | 1     |
| 19126  | 1     | 1     | 1     | 1     |
| 19127  | 1     | 1     | 1     | 1     |
| 19131  | 2     | 1     | 3     | 1     |
| 19134  | 1     | 1     | 1     | 1     |
| 19149  | 2     | 2     | 1     | 1     |
| 19151  | 2     | 1     | 2     | 2     |
| 19164  | 1     | 1     | 1     | 1     |
| 19166  | 1     | 1     | 2     | 1     |
| 19172  | 2     | 2     | 1     | 2     |
| 19173  | 3     | 3     | 3     | 3     |
| 19180  | 1     | 1     | 1     | 1     |
| 19185  | 2     | 2     | 2     | 2     |
| 19189  | 1     | 1     | 1     | 1     |
| 19191  |       |       |       |       |
| 19198  | 1     | 1     | 1     | 1     |
| 19203  | 2     | 1     | 1     | 1     |
| 19209  | 1     | 1     | 2     | 1     |
| 19210  |       |       |       |       |
| 19218  |       |       |       |       |
| 19220  |       |       |       |       |
| 19225  | 2     | 3     | 2     | 3     |
| 19227  | 1     | 1     | 1     | 1     |

| respid | Q40_1 | Q40_2 | Q40_3 | Q40_4 |
|--------|-------|-------|-------|-------|
| 19228  | 1     | 1     | 1     | 1     |
| 19243  | 2     | 1     | 3     | 2     |
| 19244  | 2     | 3     | 2     | 2     |
| 19246  | 1     | 1     | 1     | 1     |
| 19248  |       |       |       |       |
| 19249  | 1     | 1     | 2     | 1     |
| 19252  | 2     | 1     | 2     | 2     |
| 19255  | 1     | 2     | 4     | 3     |
| 19257  | 2     | 2     | 2     | 2     |
| 19274  |       |       |       |       |
| 19279  |       |       |       |       |
| 19291  | 2     | 1     | 1     | 1     |
| 19292  | 1     | 1     | 2     | 2     |
| 19308  | 3     | 3     | 3     | 2     |
| 19310  | 2     | 1     | 1     | 2     |
| 19311  | 1     | 1     | 1     | 1     |
| 19326  | 1     | 2     | 2     | 1     |
| 19327  |       |       |       |       |
| 19329  |       |       |       |       |
| 19330  | 3     | 3     | 4     | 3     |
| 19333  | 3     | 2     | 2     | 3     |
| 19336  | 1     | 1     | 1     | 1     |
| 19343  | 3     | 1     | 3     | 2     |
| 19348  | 2     | 1     | 1     | 1     |
| 19349  | 4     | 3     | 4     | 3     |
| 19352  | 3     | 5     | 5     | 3     |
| 19356  | 1     | 1     | 2     | 1     |
| 19357  | 1     | 2     | 1     | 1     |
| 19358  | 5     | 2     | 2     | 2     |
| 19367  | 2     | 2     | 2     | 2     |
| 19376  |       |       |       |       |
| 19377  | 1     | 1     | 1     | 1     |

| respid | Q40_1 | Q40_2 | Q40_3 | Q40_4 |
|--------|-------|-------|-------|-------|
| 19380  | 1     | 1     | 2     | 1     |
| 19384  | 1     | 1     | 1     | 1     |
| 19391  | 3     | 5     | 4     | 4     |
| 19397  |       |       |       |       |
| 19398  | 1     | 1     | 1     | 1     |
| 19401  |       |       |       |       |
| 19402  | 1     | 1     | 1     | 1     |
| 19403  |       |       |       |       |
| 19405  |       |       |       |       |
| 19407  | 1     | 1     | 1     | 1     |
| 19415  | 1     | 1     | 3     | 1     |
| 19420  |       |       |       |       |
| 19423  | 3     | 4     | 3     | 3     |
| 19424  | 2     | 1     | 4     | 4     |
| 19426  | 4     | 2     | 1     | 2     |
| 19429  | 1     | 1     | 1     | 1     |
| 19435  | 4     | 3     | 3     | 2     |
| 19441  | 1     | 2     | 2     | 1     |
| 19450  | 2     | 1     | 2     | 1     |
| 19456  | 2     | 2     | 2     | 2     |
| 19457  | 1     | 1     | 1     | 1     |
| 19463  | 3     | 3     | 2     | 3     |
| 19467  | 6     | 6     | 6     | 6     |
| 19468  | 1     | 1     | 1     | 1     |
| 19471  | 2     | 1     | 1     | 1     |
| 19473  | 2     | 3     | 2     | 1     |
| 19478  | 3     | 3     | 3     | 3     |
| 19480  |       |       |       |       |
| 19481  | 1     | 1     | 1     | 1     |
| 19484  | 1     | 1     | 1     | 1     |
| 19487  | 1     | 1     | 1     | 1     |
| 19491  | 4     | 3     | 1     | 3     |

| respid | Q40_1 | Q40_2 | Q40_3 | Q40_4 |
|--------|-------|-------|-------|-------|
| 19495  | 4     | 3     | 3     | 2     |
| 19498  | 2     | 3     | 3     | 2     |
| 19500  | 3     | 3     | 4     | 3     |
| 19501  | 3     | 3     | 5     | 3     |
| 19503  |       |       |       |       |
| 19506  | 1     | 1     | 1     | 1     |
| 19508  | 1     | 1     | 1     | 1     |
| 19509  | 2     | 2     | 3     | 1     |
| 19518  | 1     | 2     | 2     | 2     |
| 19520  | 2     | 2     | 2     | 2     |
| 19536  | 1     | 1     | 1     | 1     |
| 19538  | 3     | 2     | 2     | 2     |
| 19541  | 1     | 1     | 5     | 3     |
| 19548  | 3     | 3     | 3     | 3     |
| 19553  |       |       |       |       |
| 19556  | 1     | 1     | 1     | 1     |
| 19559  |       |       |       |       |
| 19561  | 3     | 4     | 4     | 3     |
| 19562  | 1     | 1     | 1     | 1     |
| 19564  | 1     | 2     | 2     | 1     |
| 19567  | 6     | 5     | 6     | 6     |
| 19571  | 2     | 2     | 3     | 2     |
| 19576  | 3     | 2     | 3     | 3     |
| 19578  | 1     | 1     | 1     | 1     |
| 19606  |       |       |       |       |
| 19607  |       |       |       |       |
| 19608  | 2     | 1     | 2     | 1     |
| 19612  | 4     | 4     | 5     | 5     |
| 19618  | 2     | 3     | 3     | 3     |
| 19621  | 2     | 3     | 3     | 1     |
| 19624  | 3     | 3     | 3     | 2     |
| 19630  |       |       |       |       |

| respid | Q40_1 | Q40_2 | Q40_3 | Q40_4 |
|--------|-------|-------|-------|-------|
| 19637  | 4     | 4     | 4     | 3     |
| 19639  | 1     | 1     | 2     | 1     |
| 19647  | 1     | 1     | 1     | 1     |
| 19648  | 4     | 3     | 4     | 3     |
| 19660  | 1     | 1     | 1     | 1     |
| 19662  | 3     | 3     | 4     | 4     |
| 19669  | 5     | 1     | 1     | 1     |
| 19680  | 1     | 1     | 1     | 1     |
| 19682  | 3     | 2     | 2     | 1     |
| 19686  | 1     | 1     | 1     | 1     |
| 19700  | 1     | 1     | 2     | 1     |
| 19701  | 1     | 1     | 1     | 1     |
| 19704  |       |       |       |       |
| 19706  | 2     | 3     | 2     | 1     |
| 19707  | 1     | 1     | 2     | 1     |
| 19717  | 4     | 3     | 5     | 3     |
| 19718  | 6     | 1     | 1     | 1     |
| 19721  | 2     | 2     | 3     | 2     |
| 19722  | 1     | 1     | 1     | 1     |
| 19729  |       |       |       |       |
| 19738  | 3     | 3     | 4     | 3     |
| 19741  | 1     | 1     | 3     | 2     |
| 19742  | 3     | 3     | 2     | 2     |
| 19747  | 1     | 1     | 1     | 1     |
| 19748  | 2     | 1     | 1     | 1     |
| 19749  | 1     | 1     | 2     | 1     |
| 19756  | 2     | 3     | 3     | 3     |
| 19771  | 2     | 2     | 1     | 1     |
| 19772  | 3     | 3     | 3     | 3     |
| 19775  | 1     | 1     | 1     | 1     |
| 19783  |       |       |       |       |
| 19787  | 1     | 1     | 1     | 1     |

| respid | Q40_1 | Q40_2 | Q40_3 | Q40_4 |
|--------|-------|-------|-------|-------|
| 19790  |       |       |       |       |
| 19797  | 1     | 2     | 3     | 3     |
| 19802  | 1     | 1     | 1     | 1     |
| 19808  | 1     | 1     | 1     | 2     |
| 19810  | 1     | 1     | 1     | 1     |
| 19811  | 5     | 1     | 2     | 1     |
| 19812  | 1     | 1     | 2     | 1     |
| 19821  | 2     | 2     | 2     | 3     |
| 19826  | 2     | 1     | 2     | 1     |
| 19827  | 1     | 1     | 2     | 1     |
| 19830  | 1     | 1     | 1     | 1     |
| 19834  | 1     | 1     | 2     | 1     |
| 19838  | 2     | 3     | 4     | 2     |
| 19843  |       |       |       |       |
| 19845  | 3     | 2     | 4     | 3     |
| 19846  | 2     | 1     | 1     | 1     |
| 19852  | 4     | 5     | 4     | 4     |
| 19855  | 1     | 1     | 2     | 1     |
| 19858  | 3     | 2     | 3     | 2     |
| 19861  | 3     | 4     | 2     | 3     |
| 19863  | 2     | 2     | 2     | 2     |
| 19868  | 2     | 2     | 2     | 2     |
| 19874  | 3     | 1     | 4     | 2     |
| 19876  |       |       |       |       |
| 19880  | 4     | 4     | 4     | 4     |
| 19885  | 3     | 3     | 3     | 3     |
| 19890  |       |       |       |       |
| 19894  |       |       |       |       |
| 19895  | 1     | 1     | 2     | 1     |
| 19897  | 2     | 1     | 2     | 1     |
| 19906  | 1     | 1     | 1     | 1     |
| 19908  | 1     | 1     | 1     | 1     |

| respid | Q40_1 | Q40_2 | Q40_3 | Q40_4 |
|--------|-------|-------|-------|-------|
| 19912  | 1     | 1     | 1     | 1     |
| 19913  | 2     | 1     | 2     | 2     |
| 19914  | 4     | 3     | 3     | 4     |
| 19918  | 2     | 3     | 2     | 3     |
| 19924  | 2     | 3     | 4     | 4     |
| 19936  |       |       |       |       |
| 19940  |       |       |       |       |
| 19945  | 1     | 1     | 1     | 1     |
| 19948  |       |       |       |       |
| 19959  | 1     | 1     | 1     | 1     |
| 19961  | 1     | 1     | 1     | 1     |
| 19962  | 1     | 1     | 3     | 2     |
| 19965  | 1     | 1     | 1     | 1     |
| 19966  | 2     | 2     | 2     | 2     |
| 19973  | 2     | 2     | 1     | 1     |
| 19981  | 3     | 1     | 2     | 1     |
| 19986  | 2     | 2     | 2     | 2     |
| 19989  | 1     | 1     | 1     | 1     |
| 19998  | 3     | 3     | 3     | 3     |
| 20001  | 5     | 6     | 5     | 5     |
| 20005  |       |       |       |       |
| 20013  | 4     | 5     | 4     | 5     |
| 20015  | 1     | 1     | 1     | 1     |
| 20017  | 3     | 4     | 2     | 3     |
| 20020  | 1     | 1     | 1     | 1     |
| 20021  | 1     | 1     | 1     | 1     |
| 20026  | 3     | 2     | 2     | 2     |
| 20028  | 2     | 1     | 1     | 1     |
| 20030  | 1     | 1     | 1     | 1     |
| 20031  |       |       |       |       |
| 20034  | 2     | 1     | 1     | 1     |
| 20035  |       |       |       |       |



| respid | Q40_1 | Q40_2 | Q40_3 | Q40_4 |
|--------|-------|-------|-------|-------|
| 20040  | 1     | 3     | 2     | 2     |
| 20045  | 1     | 2     | 3     | 4     |
| 20048  | 1     | 1     | 6     | 6     |
| 20053  | 2     | 1     | 1     | 1     |
| 20064  | 3     | 2     | 2     | 2     |
| 20071  | 2     | 3     | 1     | 2     |
| 20072  | 1     | 1     | 3     | 1     |
| 20076  | 1     | 1     | 1     | 1     |
| 20081  | 2     | 2     | 1     | 1     |
| 20082  | 2     | 2     | 3     | 3     |
| 20083  | 1     | 1     | 3     | 1     |
| 20088  | 2     | 2     | 2     | 1     |
| 20089  | 1     | 1     | 1     | 1     |
| 20099  | 1     | 2     | 1     | 2     |
| 20101  | 1     | 3     | 1     | 1     |
| 20102  | 1     | 1     | 1     | 2     |
| 20109  | 1     | 1     | 1     | 1     |
| 20118  | 1     | 1     | 1     | 1     |
| 20119  | 1     | 1     | 2     | 1     |
| 20124  |       |       |       |       |
| 20126  | 1     | 1     | 1     | 1     |
| 20130  |       |       |       |       |
| 20131  | 1     | 2     | 1     | 1     |
| 20134  | 2     | 3     | 4     | 2     |
| 20146  | 2     | 3     | 3     | 3     |
| 20152  |       |       |       |       |
| 20155  | 2     | 2     | 2     | 2     |
| 20156  |       |       |       |       |
| 20157  |       |       |       |       |
| 20164  | 1     | 1     | 1     | 1     |
| 20168  | 2     | 2     | 1     | 1     |
| 20173  | 5     | 3     | 4     | 4     |

| respid | Q40_1 | Q40_2 | Q40_3 | Q40_4 |
|--------|-------|-------|-------|-------|
| 20174  | 1     | 1     | 1     | 1     |
| 20175  | 4     | 4     | 5     | 5     |
| 20189  | 1     | 1     | 1     | 1     |
| 20190  | 1     | 1     | 2     | 1     |
| 20201  | 1     | 1     | 1     | 1     |
| 20202  | 1     | 1     | 1     | 1     |
| 20204  | 3     | 3     | 3     | 3     |
| 20206  | 2     | 1     | 2     | 2     |
| 20207  | 1     | 1     | 1     | 1     |
| 20212  | 1     | 2     | 3     | 2     |
| 20213  | 3     | 1     | 3     | 1     |
| 20217  | 1     | 1     | 2     | 2     |
| 20222  | 1     | 1     | 2     | 1     |
| 20227  |       |       |       |       |
| 20228  | 1     | 1     | 1     | 2     |
| 20238  | 1     | 1     | 1     | 1     |
| 20242  | 1     | 1     | 1     | 1     |
| 20246  | 1     | 1     | 1     | 1     |
| 20255  | 6     | 5     | 4     | 3     |
| 20256  | 2     | 1     | 2     | 1     |
| 20259  | 3     | 2     | 2     | 3     |
| 20262  | 1     | 1     | 1     | 1     |
| 20274  | 1     | 1     | 1     | 1     |
| 20283  | 4     | 3     | 4     | 4     |
| 20284  |       |       |       |       |
| 20291  | 3     | 1     | 2     | 2     |
| 20292  | 1     | 1     | 2     | 1     |
| 20293  | 4     | 2     | 2     | 2     |
| 20298  | 5     | 5     | 4     | 3     |
| 20301  |       |       |       |       |
| 20303  | 2     | 2     | 2     | 1     |
| 20309  |       |       |       |       |

| respid | Q40_1 | Q40_2 | Q40_3 | Q40_4 |
|--------|-------|-------|-------|-------|
| 20318  | 1     | 2     | 1     | 1     |
| 20324  | 1     | 1     | 1     | 1     |
| 20335  | 1     | 1     | 1     | 1     |
| 20336  | 1     | 1     | 2     | 1     |
| 20339  | 1     | 1     | 1     | 1     |
| 20348  | 1     | 1     | 2     | 1     |
| 20351  | 4     | 4     | 3     | 3     |
| 20353  | 1     | 2     | 2     | 2     |
| 20356  | 1     | 1     | 1     | 1     |
| 20357  |       |       |       |       |
| 20366  | 1     | 1     | 1     | 1     |
| 20369  | 5     | 4     | 5     | 4     |
| 20372  | 1     | 3     | 1     | 1     |
| 20375  | 1     | 1     | 2     | 1     |
| 20379  | 1     | 1     | 1     | 1     |
| 20380  | 2     | 2     | 2     | 2     |
| 20396  | 1     | 1     | 2     | 1     |
| 20398  | 2     | 2     | 3     | 2     |
| 20412  | 1     | 1     | 2     | 1     |
| 20415  | 2     | 1     | 2     | 1     |
| 20424  | 3     | 3     | 3     | 3     |
| 20434  | 1     | 1     | 1     | 1     |
| 20435  | 1     | 1     | 1     | 1     |
| 20440  | 1     | 1     | 1     | 1     |
| 20441  | 2     | 1     | 1     | 1     |
| 20445  | 1     | 1     | 1     | 1     |
| 20446  | 3     | 3     | 3     | 3     |
| 20450  | 1     | 1     | 2     | 1     |
| 20453  | 4     | 5     | 4     | 3     |
| 20458  | 1     | 1     | 1     | 2     |
| 20464  | 1     | 1     | 1     | 1     |
| 20471  | 1     | 3     | 1     | 1     |

| respid | Q40_1 | Q40_2 | Q40_3 | Q40_4 |
|--------|-------|-------|-------|-------|
| 20473  | 1     | 1     | 1     | 1     |
| 20474  | 1     | 1     | 2     | 1     |
| 20477  |       |       |       |       |
| 20479  | 2     | 4     | 3     | 1     |
| 20485  | 2     | 1     | 1     | 1     |
| 20487  | 1     | 1     | 2     | 1     |
| 20488  | 1     | 1     | 1     | 1     |
| 20494  | 1     | 1     | 3     | 1     |
| 20502  | 4     | 3     | 5     | 4     |
| 20503  | 1     | 5     | 5     | 4     |
| 20510  | 2     | 1     | 1     | 1     |
| 20512  |       |       |       |       |
| 20516  | 1     | 2     | 2     | 1     |
| 20522  | 1     | 1     | 3     | 1     |
| 20527  | 1     | 1     | 2     | 1     |
| 20529  | 2     | 2     | 3     | 3     |
| 20535  | 1     | 2     | 2     | 3     |
| 20543  | 1     | 1     | 1     | 1     |
| 20546  | 3     | 2     | 2     | 1     |
| 20548  | 1     | 1     | 1     | 1     |
| 20552  | 1     | 1     | 1     | 1     |
| 20556  | 3     | 2     | 4     | 3     |
| 20566  | 3     | 3     | 4     | 2     |
| 20576  | 2     | 1     | 2     | 2     |
| 20587  | 1     | 1     | 1     | 1     |
| 20589  | 1     | 1     | 1     | 1     |
| 20593  |       |       |       |       |
| 20594  | 2     | 2     | 2     | 2     |
| 20602  | 2     | 2     | 2     | 1     |
| 20607  |       |       |       |       |
| 20608  | 1     | 1     | 2     | 1     |
| 20611  | 1     | 2     | 1     | 1     |

| respid | Q40_1 | Q40_2 | Q40_3 | Q40_4 |
|--------|-------|-------|-------|-------|
| 20612  | 1     | 1     | 1     | 1     |
| 20615  | 1     | 2     | 3     | 3     |
| 20625  | 3     | 2     | 1     | 1     |
| 20630  | 2     | 2     | 1     | 2     |
| 20639  | 1     | 1     | 2     | 1     |
| 20643  | 1     | 1     | 1     | 1     |
| 20645  |       |       |       |       |
| 20647  | 1     | 1     | 1     | 1     |
| 20652  | 3     | 4     | 3     | 5     |
| 20661  | 1     | 1     | 1     | 1     |
| 20665  |       |       |       |       |
| 20679  | 6     | 1     | 1     | 1     |
| 20682  | 3     | 2     | 3     | 3     |
| 20683  |       |       |       |       |
| 20700  | 1     | 1     | 1     | 1     |
| 20702  | 3     | 3     | 6     | 5     |
| 20709  | 1     | 1     | 1     | 1     |
| 20715  | 3     | 3     | 3     | 3     |
| 20718  | 1     | 1     | 1     | 1     |
| 20722  | 1     | 1     | 1     | 1     |
| 20729  |       |       |       |       |
| 20732  |       |       |       |       |
| 20746  | 3     | 4     | 4     | 5     |
| 20747  |       |       |       |       |
| 20758  | 1     | 1     | 1     | 1     |
| 20767  | 3     | 3     | 2     | 3     |
| 20777  | 1     | 1     | 1     | 1     |
| 20778  | 3     | 1     | 1     | 1     |
| 20780  | 1     | 1     | 1     | 1     |
| 20800  | 3     | 1     | 2     | 2     |
| 20810  | 1     | 1     | 1     | 1     |
| 20814  | 1     | 1     | 1     | 2     |

| respid | Q40_1 | Q40_2 | Q40_3 | Q40_4 |
|--------|-------|-------|-------|-------|
| 20816  | 1     | 1     | 1     | 1     |
| 20832  | 3     | 3     | 3     | 3     |
| 20838  | 2     | 3     | 2     | 3     |
| 20841  | 3     | 2     | 3     | 3     |
| 20848  | 1     | 1     | 1     | 1     |
| 20850  |       |       |       |       |
| 20851  | 1     | 2     | 3     | 1     |
| 20861  | 3     | 1     | 2     | 2     |
| 20870  | 2     | 2     | 2     | 2     |
| 20880  | 1     | 1     | 1     | 1     |
| 20883  | 2     | 1     | 1     | 1     |
| 20894  | 2     | 1     | 2     | 1     |
| 20896  | 2     | 3     | 3     | 3     |
| 20901  | 3     | 3     | 4     | 4     |
| 20903  | 2     | 1     | 1     | 1     |
| 20909  |       |       |       |       |
| 20919  | 1     | 2     | 1     | 1     |
| 20925  | 1     | 1     | 1     | 1     |
| 20935  | 1     | 1     | 1     | 1     |
| 20939  | 3     | 2     | 3     | 2     |
| 20956  | 5     | 4     | 4     | 5     |
| 20970  | 3     | 4     | 3     | 4     |
| 20974  | 1     | 2     | 3     | 3     |
| 20975  | 1     | 1     | 1     | 1     |
| 20984  | 2     | 2     | 2     | 2     |
| 20988  |       |       |       |       |
| 20996  | 1     | 1     | 2     | 2     |
| 20998  | 1     | 2     | 2     | 1     |
| 21007  |       |       |       |       |
| 21008  |       |       |       |       |
| 21014  | 3     | 2     | 1     | 1     |
| 21020  | 1     | 1     | 1     | 1     |

| respid | Q40_1 | Q40_2 | Q40_3 | Q40_4 |
|--------|-------|-------|-------|-------|
| 21022  | 3     | 2     | 3     | 3     |
| 21024  |       |       |       |       |
| 21026  | 2     | 2     | 3     | 3     |
| 21027  | 3     | 1     | 1     | 3     |
| 21030  | 1     | 2     | 1     | 1     |
| 21032  | 3     | 3     | 3     | 3     |
| 21040  | 1     | 1     | 1     | 1     |
| 21045  | 1     | 1     | 2     | 1     |
| 21058  | 2     | 2     | 2     | 2     |
| 21064  | 1     | 1     | 2     | 1     |
| 21073  | 1     | 1     | 1     | 1     |
| 21086  | 3     | 4     | 4     | 3     |
| 21092  | 6     | 6     | 6     | 5     |
| 21096  | 3     | 3     | 4     | 3     |
| 21103  | 2     | 1     | 2     | 1     |
| 21120  | 3     | 2     | 3     | 4     |
| 21125  |       |       |       |       |
| 21126  | 1     | 1     | 1     | 1     |
| 21132  |       |       |       |       |
| 21139  | 3     | 3     | 2     | 2     |
| 21147  |       |       |       |       |
| 21148  | 2     | 2     | 1     | 1     |
| 21149  | 1     | 1     | 1     | 1     |
| 21164  | 1     | 2     | 2     | 1     |
| 21165  | 1     | 1     | 3     | 1     |
| 21171  | 4     | 3     | 4     | 2     |
| 21176  | 1     | 1     | 1     | 1     |
| 21187  | 2     | 2     | 3     | 2     |
| 21192  | 4     | 2     | 2     | 2     |
| 21198  | 1     | 1     | 1     | 1     |
| 21199  | 2     | 1     | 3     | 2     |
| 21206  | 3     | 3     | 2     | 4     |

| respid | Q40_1 | Q40_2 | Q40_3 | Q40_4 |
|--------|-------|-------|-------|-------|
| 21212  | 1     | 1     | 2     | 1     |
| 21216  | 2     | 1     | 1     | 1     |
| 21217  | 3     | 3     | 4     | 4     |
| 21228  | 4     | 3     | 3     | 4     |
| 21229  | 4     | 4     | 3     | 4     |
| 21230  | 1     | 2     | 1     | 1     |
| 21243  | 2     | 2     | 2     | 3     |
| 21247  | 2     | 2     | 2     | 1     |
| 21253  | 2     | 1     | 2     | 2     |
| 21264  | 2     | 2     | 2     | 2     |
| 21265  | 1     | 1     | 1     | 1     |
| 21273  | 3     | 2     | 2     | 3     |
| 21275  | 2     | 1     | 2     | 2     |
| 21278  | 3     | 3     | 4     | 4     |
| 21291  | 2     | 2     | 3     | 3     |
| 21298  | 1     | 1     | 2     | 1     |
| 21301  | 4     | 5     | 5     | 5     |
| 21312  | 3     | 3     | 3     | 3     |
| 21323  | 3     | 2     | 3     | 2     |
| 21325  | 2     | 2     | 2     | 2     |
| 21341  | 1     | 1     | 1     | 1     |
| 21349  | 3     | 3     | 4     | 3     |
| 21350  | 1     | 1     | 1     | 1     |
| 21354  | 4     | 4     | 5     | 5     |
| 21372  | 1     | 2     | 2     | 2     |
| 21373  | 1     | 1     | 2     | 1     |
| 21378  | 2     | 2     | 2     | 2     |
| 21393  |       |       |       |       |
| 21401  | 3     | 2     | 3     | 2     |
| 21405  | 1     | 1     | 1     | 1     |
| 21406  |       |       |       |       |
| 21407  | 3     | 2     | 2     | 2     |



| respid | Q40_1 | Q40_2 | Q40_3 | Q40_4 |
|--------|-------|-------|-------|-------|
| 21418  | 5     | 1     | 1     | 1     |
| 21420  | 2     | 1     | 2     | 1     |
| 21421  |       |       |       |       |
| 21446  | 3     | 2     | 3     | 3     |
| 21449  | 2     | 2     | 2     | 2     |
| 21452  | 1     | 1     | 1     | 1     |
| 21455  | 4     | 3     | 3     | 4     |
| 21469  | 1     | 1     | 1     | 1     |
| 21471  | 3     | 1     | 3     | 1     |
| 21472  | 2     | 1     | 2     | 1     |
| 21474  | 1     | 1     | 1     | 1     |
| 21479  | 1     | 1     | 2     | 1     |
| 21485  | 2     | 2     | 2     | 2     |
| 21512  |       |       |       |       |
| 21513  | 1     | 1     | 1     | 1     |
| 21514  | 3     | 3     | 3     | 2     |
| 21520  | 2     | 3     | 2     | 2     |
| 21539  | 1     | 1     | 3     | 1     |
| 21553  | 3     | 2     | 2     | 1     |
| 21560  | 2     | 2     | 2     | 2     |
| 21561  | 3     | 3     | 3     | 3     |
| 21563  | 1     | 1     | 4     | 2     |
| 21565  |       |       |       |       |
| 21582  | 1     | 1     | 2     | 1     |
| 21584  | 3     | 2     | 1     | 1     |
| 21585  | 3     | 3     | 3     | 3     |
| 21586  | 1     | 1     | 1     | 1     |
| 21587  | 2     | 2     | 2     | 2     |
| 21590  | 4     | 5     | 6     | 6     |
| 21601  | 2     | 2     | 2     | 2     |
| 21611  | 3     | 3     | 2     | 2     |
| 21612  | 1     | 1     | 2     | 1     |

| respid | Q40_1 | Q40_2 | Q40_3 | Q40_4 |
|--------|-------|-------|-------|-------|
| 21625  | 2     | 2     | 2     | 2     |
| 21633  |       |       |       |       |
| 21640  | 1     | 1     | 1     | 1     |
| 21647  | 1     | 1     | 1     | 1     |
| 21648  | 4     | 5     | 4     | 3     |
| 21656  | 1     | 1     | 1     | 1     |
| 21657  | 1     | 1     | 1     | 1     |
| 21658  | 3     | 4     | 3     | 4     |
| 21665  | 3     | 4     | 4     | 4     |
| 21666  | 5     | 4     | 2     | 4     |
| 21668  | 5     | 4     | 4     | 5     |
| 21673  | 2     | 2     | 2     | 2     |
| 21681  | 3     | 3     | 3     | 4     |
| 21682  | 2     | 2     | 1     | 1     |
| 21685  | 2     | 2     | 2     | 1     |
| 21692  | 3     | 3     | 2     | 1     |
| 21697  | 1     | 1     | 2     | 1     |
| 21711  | 1     | 1     | 1     | 1     |
| 21715  | 1     | 2     | 2     | 3     |
| 21726  | 1     | 1     | 1     | 1     |
| 21748  |       |       |       |       |
| 21761  | 1     | 1     | 1     | 1     |
| 21769  | 3     | 3     | 3     | 3     |
| 21774  | 2     | 3     | 2     | 4     |
| 21778  |       |       |       |       |
| 21785  | 3     | 3     | 3     | 3     |
| 21799  | 3     | 3     | 2     | 3     |
| 21820  | 4     | 5     | 5     | 4     |
| 21837  | 1     | 1     | 1     | 1     |
| 21845  | 4     | 3     | 3     | 4     |
| 21846  | 1     | 1     | 1     | 1     |
| 21849  | 4     | 3     | 1     | 3     |

| respid | Q40_1 | Q40_2 | Q40_3 | Q40_4 |
|--------|-------|-------|-------|-------|
| 21850  | 1     | 1     | 3     | 1     |
| 21855  | 1     | 1     | 1     | 1     |
| 21859  | 1     | 1     | 1     | 1     |
| 21861  | 1     | 3     | 2     | 4     |
| 21866  |       |       |       |       |
| 21873  | 1     | 2     | 3     | 3     |
| 21876  | 2     | 2     | 2     | 1     |
| 21882  |       |       |       |       |
| 21884  | 2     | 2     | 2     | 2     |
| 21887  | 2     | 2     | 2     | 2     |
| 21892  | 1     | 1     | 1     | 1     |
| 21907  | 3     | 2     | 3     | 2     |
| 21910  | 4     | 5     | 4     | 5     |
| 21912  | 3     | 4     | 3     | 2     |
| 21914  | 2     | 3     | 2     | 2     |
| 21925  | 1     | 1     | 1     | 1     |
| 21937  |       |       |       |       |
| 21938  | 2     | 3     | 2     | 2     |
| 21940  | 1     | 1     | 2     | 1     |
| 21942  | 1     | 1     | 2     | 1     |
| 21947  |       |       |       |       |
| 21948  | 3     | 3     | 3     | 1     |
| 21961  | 1     | 1     | 2     | 1     |
| 21977  | 3     | 4     | 5     | 4     |
| 21983  |       |       |       |       |
| 21986  | 3     | 3     | 2     | 2     |
| 21988  | 1     | 1     | 1     | 1     |
| 21996  | 1     | 1     | 1     | 1     |
| 21997  | 2     | 2     | 2     | 1     |
| 22005  | 2     | 2     | 2     | 2     |
| 22013  | 1     | 1     | 1     | 1     |
| 22018  |       |       |       |       |

| respid | Q40_1 | Q40_2 | Q40_3 | Q40_4 |
|--------|-------|-------|-------|-------|
| 22019  | 3     | 2     | 3     | 2     |
| 22071  | 1     | 1     | 1     | 1     |
| 22082  | 1     | 1     | 1     | 1     |
| 22085  | 1     | 1     | 2     | 1     |
| 22092  | 1     | 1     | 1     | 1     |
| 22097  | 1     | 1     | 1     | 1     |
| 22111  |       |       |       |       |
| 22118  | 1     | 1     | 1     | 1     |
| 22132  | 1     | 1     | 2     | 2     |
| 22133  | 1     | 1     | 1     | 1     |
| 22139  |       |       |       |       |
| 22142  | 4     | 3     | 3     | 4     |
| 22146  | 1     | 2     | 1     | 1     |
| 22181  |       |       |       |       |
| 22202  | 1     | 1     | 1     | 1     |
| 22214  |       |       |       |       |
| 22223  | 1     | 1     | 1     | 1     |
| 22227  | 2     | 2     | 2     | 1     |
| 22229  | 1     | 1     | 1     | 1     |
| 22239  | 4     | 3     | 4     | 3     |
| 22245  | 4     | 4     | 5     | 5     |
| 22256  | 1     | 1     | 1     | 1     |
| 22260  | 1     | 2     | 1     | 1     |
| 22298  | 2     | 2     | 3     | 2     |
| 22321  | 2     | 2     | 2     | 2     |
| 22340  |       |       |       |       |
| 22346  | 3     | 2     | 3     | 3     |
| 22356  | 1     | 1     | 2     | 1     |
| 22361  | 2     | 2     | 3     | 2     |
| 22364  | 1     | 1     | 1     | 1     |
| 22368  |       |       |       |       |
| 22374  | 2     | 3     | 4     | 3     |

| respid | Q40_1 | Q40_2 | Q40_3 | Q40_4 |
|--------|-------|-------|-------|-------|
| 22375  | 2     | 2     | 1     | 1     |
| 22377  | 2     | 2     | 2     | 2     |
| 22383  |       |       |       |       |
| 22387  | 1     | 3     | 4     | 4     |
| 22392  |       |       |       |       |
| 22393  | 1     | 2     | 2     | 1     |
| 22394  | 2     | 2     | 2     | 1     |
| 22395  |       |       |       |       |
| 22401  | 1     | 1     | 1     | 1     |
| 22407  |       |       |       |       |
| 22410  | 2     | 1     | 1     | 1     |
| 22418  | 1     | 1     | 2     | 1     |
| 22421  |       |       |       |       |
| 22423  |       |       |       |       |
| 22425  | 1     | 2     | 2     | 2     |
| 22427  | 1     | 1     | 1     | 1     |
| 22431  | 5     | 3     | 5     | 4     |
| 22435  | 1     | 1     | 1     | 1     |
| 22436  | 2     | 2     | 3     | 2     |
| 22442  |       |       |       |       |
| 22444  | 3     | 4     | 3     | 4     |
| 22445  | 3     | 2     | 4     | 3     |
| 22446  |       |       |       |       |
| 22448  | 1     | 2     | 3     | 3     |
| 22449  | 1     | 1     | 1     | 1     |
| 22450  | 1     | 2     | 1     | 2     |
| 22453  | 2     | 3     | 5     | 4     |
| 22465  | 1     | 2     | 2     | 1     |
| 22472  | 2     | 2     | 2     | 2     |
| 22475  | 4     | 5     | 4     | 3     |
| 22478  | 1     | 3     | 4     | 2     |
| 22491  | 1     | 1     | 1     | 1     |

| respid | Q40_1 | Q40_2 | Q40_3 | Q40_4 |
|--------|-------|-------|-------|-------|
| 22497  | 2     | 2     | 2     | 2     |
| 22498  | 1     | 2     | 1     | 2     |
| 22499  | 1     | 2     | 2     | 2     |
| 22503  | 1     | 1     | 1     | 1     |
| 22507  | 1     | 1     | 1     | 1     |
| 22513  | 1     | 3     | 4     | 3     |
| 22517  | 1     | 3     | 4     | 2     |
| 22524  | 4     | 4     | 5     | 5     |
| 22528  | 1     | 1     | 1     | 1     |
| 22544  | 2     | 2     | 2     | 2     |
| 22571  | 1     | 1     | 1     | 1     |
| 22576  | 2     | 2     | 2     | 3     |
| 22579  | 2     | 3     | 4     | 2     |
| 22583  | 2     | 3     | 2     | 1     |
| 22591  | 4     | 3     | 3     | 3     |
| 22592  | 2     | 2     | 2     | 2     |
| 22612  | 2     | 2     | 3     | 3     |
| 22613  | 2     | 3     | 3     | 2     |
| 22615  | 2     | 3     | 2     | 2     |
| 22621  | 1     | 2     | 1     | 1     |
| 22625  | 1     | 1     | 1     | 1     |
| 22628  | 1     | 1     | 1     | 1     |
| 22632  | 1     | 3     | 1     | 2     |
| 22639  |       |       |       |       |
| 22648  | 1     | 1     | 4     | 2     |
| 22649  | 3     | 5     | 6     | 1     |
| 22655  |       |       |       |       |
| 22659  |       |       |       |       |
| 22660  | 1     | 1     | 1     | 1     |
| 22666  | 3     | 3     | 2     | 2     |
| 22667  | 2     | 1     | 1     | 1     |
| 22670  |       |       |       |       |

| respid | Q40_1 | Q40_2 | Q40_3 | Q40_4 |
|--------|-------|-------|-------|-------|
| 22681  |       |       |       |       |
| 22683  | 1     | 1     | 2     | 1     |
| 22688  | 1     | 1     | 1     | 1     |
| 22695  | 4     | 2     | 2     | 3     |
| 22696  | 1     | 1     | 1     | 1     |
| 22705  | 5     | 3     | 5     | 3     |
| 22718  | 2     | 3     | 3     | 4     |
| 22720  | 1     | 1     | 2     | 2     |
| 22724  | 1     | 1     | 1     | 1     |
| 22728  | 1     | 1     | 1     | 1     |
| 22751  | 1     | 1     | 1     | 1     |
| 22782  | 2     | 6     | 6     | 6     |
| 22786  | 2     | 2     | 3     | 1     |
| 22788  | 1     | 1     | 2     | 1     |
| 22810  | 2     | 3     | 3     | 2     |
| 22816  | 1     | 1     | 1     | 1     |
| 22818  | 1     | 1     | 1     | 1     |
| 22854  |       |       |       |       |
| 22858  | 1     | 1     | 2     | 1     |
| 22862  | 1     | 1     | 2     | 1     |
| 22865  | 1     | 1     | 1     | 1     |
| 22868  | 1     | 1     | 2     | 2     |
| 22869  | 2     | 3     | 4     | 3     |
| 22873  | 1     | 1     | 1     | 1     |
| 22875  | 1     | 2     | 1     | 1     |
| 22876  | 1     | 1     | 1     | 1     |
| 22882  | 2     | 2     | 2     | 1     |
| 22884  | 2     | 3     | 3     | 2     |
| 22887  | 1     | 2     | 2     | 1     |
| 22888  | 1     | 1     | 2     | 1     |
| 22900  |       |       |       |       |
| 22901  |       |       |       |       |

| respid | Q40_1 | Q40_2 | Q40_3 | Q40_4 |
|--------|-------|-------|-------|-------|
| 22912  | 1     | 1     | 1     | 1     |
| 22913  | 2     | 1     | 1     | 1     |
| 22921  | 1     | 1     | 1     | 1     |
| 22925  | 1     | 1     | 1     | 1     |
| 22940  | 1     | 1     | 1     | 1     |
| 22941  | 1     | 1     | 2     | 1     |
| 22947  | 3     | 3     | 2     | 2     |
| 22948  |       |       |       |       |
| 22964  | 2     | 3     | 4     | 3     |
| 22966  | 1     | 1     | 1     | 1     |
| 22969  | 1     | 1     | 1     | 1     |
| 22971  |       |       |       |       |
| 22988  |       |       |       |       |
| 22990  |       |       |       |       |
| 23000  | 1     | 1     | 3     | 1     |
| 23016  |       |       |       |       |
| 23026  | 1     | 1     | 2     | 1     |
| 23035  | 1     | 1     | 1     | 1     |
| 23037  | 3     | 4     | 4     | 4     |
| 23044  | 2     | 2     | 3     | 3     |
| 23046  | 1     | 1     | 1     | 1     |
| 23047  | 1     | 1     | 1     | 1     |
| 23049  | 3     | 4     | 5     | 4     |
| 23055  | 1     | 1     | 1     | 1     |
| 23066  | 1     | 1     | 1     | 1     |
| 23075  | 1     | 1     | 1     | 1     |
| 23081  | 1     | 1     | 3     | 1     |
| 23087  | 2     | 3     | 2     | 2     |
| 23094  |       |       |       |       |
| 23099  |       |       |       |       |
| 23101  | 1     | 1     | 1     | 1     |
| 23105  |       |       |       |       |



| respid | Q40_1 | Q40_2 | Q40_3 | Q40_4 |
|--------|-------|-------|-------|-------|
| 23115  | 2     | 2     | 2     | 2     |
| 23121  | 1     | 1     | 2     | 1     |
| 23127  | 1     | 1     | 1     | 1     |
| 23131  | 2     | 2     | 2     | 2     |
| 23134  | 1     | 1     | 1     | 1     |
| 23145  | 5     | 1     | 1     | 1     |
| 23151  | 1     | 1     | 1     | 1     |
| 23161  | 2     | 3     | 1     | 1     |
| 23169  | 2     | 2     | 2     | 2     |
| 23173  | 2     | 1     | 1     | 1     |
| 23174  | 2     | 1     | 1     | 2     |
| 23186  | 2     | 3     | 4     | 5     |
| 23195  | 1     | 1     | 1     | 1     |
| 23197  | 3     | 2     | 3     | 3     |
| 23198  | 1     | 1     | 1     | 1     |
| 23203  |       |       |       |       |
| 23204  | 2     | 3     | 4     | 1     |
| 23212  | 2     | 1     | 2     | 2     |
| 23214  | 1     | 1     | 1     | 1     |
| 23221  | 2     | 2     | 1     | 1     |
| 23237  | 1     | 1     | 1     | 1     |
| 23251  | 2     | 1     | 2     | 1     |
| 23254  | 1     | 1     | 1     | 1     |
| 23262  | 1     | 2     | 2     | 2     |
| 23267  | 1     | 1     | 1     | 1     |
| 23268  | 1     | 5     | 6     | 4     |
| 23273  | 2     | 2     | 2     | 1     |
| 23278  | 1     | 1     | 1     | 1     |
| 23279  |       |       |       |       |
| 23281  | 4     | 3     | 3     | 3     |
| 23282  | 3     | 2     | 2     | 2     |
| 23283  | 2     | 4     | 2     | 3     |

| respid | Q40_1 | Q40_2 | Q40_3 | Q40_4 |
|--------|-------|-------|-------|-------|
| 23285  | 5     | 1     | 1     | 1     |
| 23305  | 1     | 1     | 3     | 2     |
| 23309  | 1     | 1     | 2     | 1     |
| 23310  | 1     | 1     | 2     | 1     |
| 23311  | 1     | 1     | 2     | 2     |
| 23312  | 2     | 2     | 2     | 3     |
| 23319  | 1     | 2     | 2     | 1     |
| 23320  | 1     | 1     | 2     | 1     |
| 23322  | 3     | 1     | 2     | 2     |
| 23334  | 2     | 1     | 3     | 2     |
| 23340  | 1     | 1     | 1     | 1     |
| 23346  | 1     | 1     | 1     | 1     |
| 23353  | 1     | 1     | 1     | 1     |
| 23363  | 3     | 4     | 4     | 3     |
| 23364  | 3     | 2     | 2     | 3     |
| 23376  |       |       |       |       |
| 23378  | 1     | 2     | 2     | 1     |
| 23382  |       |       |       |       |
| 23383  |       |       |       |       |
| 23390  | 1     | 1     | 1     | 1     |
| 23395  | 1     | 1     | 1     | 1     |
| 23398  | 2     | 3     | 3     | 3     |
| 23399  | 1     | 1     | 2     | 1     |
| 23406  | 2     | 2     | 3     | 1     |
| 23418  | 2     | 1     | 2     | 1     |
| 23427  | 1     | 1     | 3     | 1     |
| 23428  | 1     | 1     | 1     | 2     |
| 23435  | 2     | 2     | 2     | 2     |
| 23439  | 2     | 1     | 1     | 1     |
| 23440  |       |       |       |       |
| 23444  | 3     | 3     | 1     | 3     |
| 23445  | 1     | 1     | 1     | 1     |

| respid | Q40_1 | Q40_2 | Q40_3 | Q40_4 |
|--------|-------|-------|-------|-------|
| 23455  |       |       |       |       |
| 23467  | 3     | 2     | 3     | 2     |
| 23478  | 2     | 3     | 4     | 3     |
| 23492  | 3     | 2     | 3     | 1     |
| 23498  | 1     | 2     | 1     | 1     |
| 23511  | 2     | 2     | 2     | 1     |
| 23514  | 1     | 1     | 1     | 1     |
| 23515  | 2     | 1     | 1     | 1     |
| 23522  |       |       |       |       |
| 23524  |       |       |       |       |
| 23531  | 1     | 3     | 2     | 1     |
| 23532  | 1     | 1     | 1     | 1     |
| 23533  | 4     | 1     | 2     | 1     |
| 23534  | 1     | 1     | 2     | 2     |
| 23538  | 1     | 1     | 2     | 1     |
| 23539  | 2     | 2     | 3     | 4     |
| 23548  | 1     | 1     | 2     | 1     |
| 23553  |       |       |       |       |
| 23556  | 1     | 1     | 1     | 1     |
| 23563  | 3     | 2     | 4     | 3     |
| 23572  | 1     | 1     | 2     | 1     |
| 23575  | 1     | 1     | 1     | 1     |
| 23576  | 1     | 1     | 1     | 1     |
| 23577  | 1     | 1     | 1     | 1     |
| 23578  | 1     | 3     | 2     | 3     |
| 23587  | 3     | 2     | 1     | 1     |
| 23597  | 1     | 1     | 1     | 1     |
| 23598  | 2     | 2     | 2     | 2     |
| 23604  |       |       |       |       |
| 23617  | 1     | 2     | 2     | 1     |
| 23620  | 1     | 1     | 3     | 2     |
| 23621  |       |       |       |       |

| respid | Q40_1 | Q40_2 | Q40_3 | Q40_4 |
|--------|-------|-------|-------|-------|
| 23625  | 1     | 1     | 2     | 1     |
| 23629  | 1     | 1     | 1     | 1     |
| 23635  | 1     | 1     | 1     | 1     |
| 23636  | 1     | 1     | 2     | 1     |
| 23637  | 5     | 5     | 5     | 5     |
| 23638  | 1     | 1     | 1     | 1     |
| 23644  | 2     | 1     | 2     | 1     |
| 23645  | 1     | 2     | 2     | 2     |
| 23649  | 1     | 1     | 1     | 1     |
| 23654  | 1     | 2     | 2     | 1     |
| 23662  | 1     | 1     | 2     | 1     |
| 23664  | 1     | 1     | 2     | 1     |
| 23665  | 1     | 1     | 1     | 1     |
| 23666  | 1     | 1     | 2     | 1     |
| 23671  | 1     | 1     | 1     | 1     |
| 23672  | 1     | 1     | 1     | 1     |
| 23685  | 1     | 1     | 2     | 1     |
| 23686  | 2     | 1     | 3     | 2     |
| 23689  | 1     | 3     | 4     | 3     |
| 23690  | 2     | 2     | 3     | 2     |
| 23695  | 3     | 2     | 3     | 2     |
| 23700  | 1     | 1     | 1     | 1     |
| 23714  | 1     | 1     | 2     | 1     |
| 23719  | 2     | 2     | 2     | 3     |
| 23720  | 2     | 2     | 1     | 1     |
| 23721  | 2     | 1     | 2     | 2     |
| 23729  | 1     | 1     | 1     | 1     |
| 23730  | 1     | 1     | 1     | 1     |
| 23732  | 2     | 1     | 2     | 2     |
| 23736  | 1     | 1     | 1     | 2     |
| 23754  |       |       |       |       |
| 23756  | 1     | 1     | 1     | 1     |

| respid | Q40_1 | Q40_2 | Q40_3 | Q40_4 |
|--------|-------|-------|-------|-------|
| 23759  | 1     | 2     | 2     | 2     |
| 23761  | 2     | 1     | 2     | 2     |
| 23766  | 1     | 1     | 1     | 1     |
| 23768  | 3     | 3     | 4     | 4     |
| 23773  | 1     | 1     | 1     | 1     |
| 23781  |       |       |       |       |
| 23782  | 2     | 3     | 5     | 2     |
| 23787  | 2     | 3     | 2     | 1     |
| 23788  | 3     | 3     | 3     | 3     |
| 23790  |       |       |       |       |
| 23794  | 1     | 1     | 1     | 1     |
| 23795  | 2     | 3     | 3     | 3     |
| 23801  | 4     | 2     | 2     | 2     |
| 23806  | 2     | 2     | 1     | 1     |
| 23809  | 3     | 3     | 3     | 1     |
| 23813  | 1     | 1     | 2     | 2     |
| 23815  | 2     | 2     | 2     | 1     |
| 23821  | 1     | 1     | 1     | 1     |
| 23825  | 3     | 2     | 2     | 1     |
| 23826  | 2     | 2     | 1     | 1     |
| 23830  | 1     | 1     | 1     | 1     |
| 23833  | 1     | 2     | 1     | 1     |
| 23837  | 1     | 1     | 1     | 1     |
| 23848  | 6     | 6     | 6     | 6     |
| 23850  | 1     | 1     | 2     | 2     |
| 23870  | 1     | 1     | 1     | 1     |
| 23877  |       |       |       |       |
| 23880  | 1     | 2     | 2     | 1     |
| 23882  | 2     | 2     | 3     | 3     |
| 23888  |       |       |       |       |
| 23908  | 1     | 1     | 3     | 1     |
| 23914  | 1     | 1     | 2     | 2     |

| respid | Q40_1 | Q40_2 | Q40_3 | Q40_4 |
|--------|-------|-------|-------|-------|
| 23916  | 1     | 1     | 1     | 1     |
| 23922  | 3     | 2     | 3     | 3     |
| 23932  | 1     | 1     | 2     | 1     |
| 23934  |       |       |       |       |
| 23942  | 3     | 5     | 3     | 3     |
| 23945  | 1     | 1     | 1     | 1     |
| 23948  | 1     | 1     | 2     | 1     |
| 23955  | 1     | 1     | 1     | 1     |
| 23956  | 4     | 3     | 5     | 3     |
| 23978  | 1     | 1     | 1     | 1     |
| 23981  |       |       |       |       |
| 23982  | 1     | 1     | 1     | 1     |
| 23991  | 1     | 1     | 1     | 1     |
| 23994  | 1     | 2     | 1     | 1     |
| 23995  | 1     | 1     | 2     | 1     |
| 23999  | 1     | 2     | 1     | 1     |
| 24005  | 4     | 6     | 5     | 5     |
| 24018  | 1     | 1     | 1     | 1     |
| 24021  |       |       |       |       |
| 24035  |       |       |       |       |
| 24040  | 1     | 1     | 1     | 1     |
| 24043  |       |       |       |       |
| 24046  | 2     | 2     | 3     | 3     |
| 24047  | 2     | 2     | 2     | 2     |
| 24048  | 1     | 1     | 1     | 1     |
| 24062  | 2     | 2     | 2     | 3     |
| 24063  | 3     | 2     | 2     | 2     |
| 24066  | 1     | 1     | 1     | 1     |
| 24069  | 1     | 1     | 1     | 1     |
| 24070  | 1     | 1     | 1     | 1     |
| 24074  | 1     | 1     | 2     | 1     |
| 24080  | 1     | 1     | 1     | 1     |

| respid | Q40_1 | Q40_2 | Q40_3 | Q40_4 |
|--------|-------|-------|-------|-------|
| 24082  | 1     | 1     | 1     | 1     |
| 24088  | 1     | 1     | 2     | 1     |
| 24089  | 1     | 1     | 1     | 1     |
| 24091  | 1     | 1     | 3     | 1     |
| 24095  |       |       |       |       |
| 24100  | 2     | 3     | 5     | 2     |
| 24105  | 1     | 3     | 3     | 3     |
| 24107  | 4     | 4     | 3     | 4     |
| 24108  |       |       |       |       |
| 24113  | 1     | 1     | 1     | 1     |
| 24120  |       |       |       |       |
| 24122  | 4     | 4     | 4     | 3     |
| 24123  | 1     | 1     | 2     | 3     |
| 24125  | 2     | 2     | 2     | 2     |
| 24132  | 1     | 1     | 1     | 1     |
| 24139  | 1     | 2     | 2     | 2     |
| 24140  | 1     | 1     | 2     | 2     |
| 24143  | 6     | 6     | 5     | 4     |
| 24150  | 2     | 3     | 5     | 2     |
| 24153  |       |       |       |       |
| 24161  |       |       |       |       |
| 24168  | 2     | 2     | 2     | 1     |
| 24179  | 1     | 1     | 1     | 1     |
| 24182  | 3     | 4     | 4     | 2     |
| 24194  | 3     | 3     | 3     | 3     |
| 24206  |       |       |       |       |
| 24214  |       |       |       |       |
| 24215  | 3     | 4     | 3     | 2     |
| 24224  | 1     | 1     | 1     | 1     |
| 24225  | 2     | 1     | 1     | 2     |
| 24227  |       |       |       |       |
| 24229  | 2     | 1     | 2     | 2     |

| respid | Q40_1 | Q40_2 | Q40_3 | Q40_4 |
|--------|-------|-------|-------|-------|
| 24230  | 1     | 1     | 1     | 1     |
| 24232  | 3     | 4     | 2     | 3     |
| 24253  | 1     | 2     | 2     | 2     |
| 24267  | 1     | 2     | 1     | 1     |
| 24274  | 1     | 1     | 1     | 1     |
| 24275  | 1     | 1     | 1     | 1     |
| 24277  | 3     | 1     | 1     | 1     |
| 24280  | 1     | 2     | 2     | 3     |
| 24285  | 2     | 1     | 1     | 1     |
| 24293  |       |       |       |       |
| 24295  | 1     | 2     | 4     | 2     |
| 24299  |       |       |       |       |
| 24303  | 1     | 1     | 2     | 1     |
| 24308  | 2     | 3     | 2     | 2     |
| 24322  |       |       |       |       |
| 24325  |       |       |       |       |
| 24328  | 1     | 1     | 1     | 1     |
| 24334  | 1     | 1     | 2     | 1     |
| 24342  | 1     | 1     | 2     | 1     |
| 24343  | 2     | 3     | 2     | 2     |
| 24348  | 4     | 5     | 5     | 3     |
| 24352  | 2     | 2     | 3     | 3     |
| 24354  | 2     | 2     | 2     | 2     |
| 24357  | 2     | 1     | 2     | 1     |
| 24360  | 2     | 2     | 1     | 2     |
| 24369  | 4     | 4     | 4     | 4     |
| 24373  | 1     | 2     | 2     | 2     |
| 24398  | 3     | 4     | 4     | 4     |
| 24402  | 2     | 1     | 1     | 1     |
| 24405  | 1     | 1     | 1     | 1     |
| 24407  | 1     | 2     | 1     | 2     |
| 24413  | 1     | 1     | 1     | 1     |



| respid | Q40_1 | Q40_2 | Q40_3 | Q40_4 |
|--------|-------|-------|-------|-------|
| 24443  | 2     | 3     | 3     | 3     |
| 24451  |       |       |       |       |
| 24459  | 2     | 3     | 3     | 2     |
| 24465  | 2     | 1     | 2     | 1     |
| 24481  | 3     | 2     | 2     | 2     |
| 24482  | 1     | 1     | 1     | 1     |
| 24491  | 3     | 2     | 3     | 2     |
| 24495  | 1     | 1     | 1     | 1     |
| 24497  | 4     | 4     | 4     | 3     |
| 24511  | 1     | 1     | 2     | 1     |
| 24513  | 3     | 3     | 2     | 2     |
| 24516  | 2     | 3     | 3     | 3     |
| 24518  | 1     | 1     | 2     | 1     |
| 24524  | 1     | 1     | 1     | 1     |
| 24528  | 1     | 2     | 1     | 1     |
| 24531  | 3     | 4     | 5     | 4     |
| 24533  | 4     | 4     | 3     | 5     |
| 24547  | 1     | 1     | 1     | 1     |
| 24557  | 3     | 4     | 3     | 3     |
| 24559  | 2     | 5     | 5     | 5     |
| 24567  | 1     | 1     | 1     | 1     |
| 24568  |       |       |       |       |
| 24577  |       |       |       |       |
| 24581  | 2     | 2     | 1     | 1     |
| 24588  | 1     | 1     | 2     | 1     |
| 24604  | 5     | 5     | 4     | 3     |
| 24612  | 2     | 1     | 2     | 2     |
| 24621  | 4     | 5     | 5     | 6     |
| 24625  | 1     | 1     | 1     | 1     |
| 24627  | 1     | 3     | 2     | 1     |
| 24640  | 1     | 1     | 2     | 1     |
| 24644  | 1     | 1     | 1     | 1     |

| respid | Q40_1 | Q40_2 | Q40_3 | Q40_4 |
|--------|-------|-------|-------|-------|
| 24664  | 1     | 2     | 3     | 3     |
| 24669  | 2     | 1     | 1     | 2     |
| 24685  | 1     | 1     | 1     | 1     |
| 24687  | 2     | 2     | 3     | 2     |
| 24688  | 2     | 2     | 2     | 2     |
| 24691  | 3     | 4     | 4     | 3     |
| 24693  | 2     | 3     | 3     | 3     |
| 24706  |       |       |       |       |
| 24710  |       |       |       |       |
| 24717  | 1     | 1     | 1     | 1     |
| 24720  | 1     | 1     | 1     | 1     |
| 24731  | 2     | 3     | 3     | 2     |
| 24732  | 2     | 2     | 2     | 2     |
| 24733  |       |       |       |       |
| 24747  | 1     | 1     | 1     | 1     |
| 24750  | 4     | 3     | 3     | 2     |
| 24758  | 2     | 3     | 2     | 2     |
| 24760  | 1     | 1     | 1     | 1     |
| 24765  |       |       |       |       |
| 24772  | 2     | 1     | 2     | 1     |
| 24779  | 2     | 2     | 2     | 3     |
| 24794  | 1     | 1     | 1     | 1     |
| 24796  | 3     | 4     | 3     | 4     |
| 24797  | 1     | 1     | 1     | 1     |
| 24800  | 1     | 1     | 1     | 1     |
| 24813  | 4     | 4     | 4     | 3     |
| 24815  | 2     | 2     | 3     | 2     |
| 24821  | 1     | 1     | 1     | 1     |
| 24822  | 2     | 1     | 1     | 1     |
| 24831  | 1     | 1     | 1     | 2     |
| 24835  |       |       |       |       |
| 24843  | 4     | 4     | 4     | 3     |

| respid | Q40_1 | Q40_2 | Q40_3 | Q40_4 |
|--------|-------|-------|-------|-------|
| 24844  | 2     | 3     | 2     | 2     |
| 24860  |       |       |       |       |
| 24861  | 2     | 2     | 2     | 2     |
| 24865  | 3     | 4     | 3     | 3     |
| 24870  | 3     | 2     | 3     | 3     |
| 24887  | 1     | 1     | 1     | 1     |
| 24897  | 2     | 3     | 3     | 3     |
| 24902  | 1     | 3     | 3     | 3     |
| 24914  | 2     | 2     | 2     | 1     |
| 24921  | 2     | 2     | 2     | 2     |
| 24922  | 1     | 1     | 1     | 1     |
| 24924  |       |       |       |       |
| 24927  | 3     | 2     | 2     | 1     |
| 24936  | 1     | 1     | 2     | 1     |
| 24937  | 2     | 2     | 2     | 1     |
| 24942  | 2     | 2     | 3     | 3     |
| 24947  | 1     | 1     | 1     | 1     |
| 24953  | 2     | 2     | 2     | 2     |
| 24954  | 2     | 3     | 2     | 3     |
| 24960  | 4     | 4     | 5     | 5     |
| 24965  | 1     | 1     | 1     | 1     |
| 24975  | 1     | 1     | 2     | 1     |
| 24983  | 3     | 4     | 4     | 3     |
| 24985  | 1     | 1     | 1     | 1     |
| 24990  | 1     | 1     | 1     | 1     |
| 25000  | 1     | 1     | 1     | 1     |
| 25007  | 2     | 2     | 2     | 1     |
| 25008  | 1     | 1     | 1     | 1     |
| 25010  |       |       |       |       |
| 25016  | 2     | 2     | 1     | 1     |
| 25021  | 1     | 1     | 3     | 1     |
| 25040  |       |       |       |       |

| respid | Q40_1 | Q40_2 | Q40_3 | Q40_4 |
|--------|-------|-------|-------|-------|
| 25043  | 1     | 1     | 1     | 1     |
| 25055  | 1     | 1     | 1     | 1     |
| 25057  | 3     | 3     | 2     | 2     |
| 25060  | 2     | 3     | 2     | 2     |
| 25062  | 2     | 1     | 2     | 1     |
| 25064  | 3     | 3     | 4     | 3     |
| 25069  |       |       |       |       |
| 25077  | 1     | 1     | 1     | 1     |
| 25088  |       |       |       |       |
| 25093  | 2     | 3     | 3     | 3     |
| 25121  | 2     | 1     | 2     | 2     |
| 25140  | 3     | 4     | 4     | 3     |
| 25144  | 1     | 1     | 2     | 1     |
| 25149  | 2     | 2     | 3     | 3     |
| 25159  | 1     | 1     | 1     | 1     |
| 25191  | 2     | 2     | 2     | 2     |
| 25193  | 4     | 5     | 3     | 4     |
| 25202  | 4     | 3     | 3     | 4     |
| 25215  | 3     | 4     | 2     | 5     |
| 25229  | 3     | 3     | 3     | 3     |
| 25231  | 2     | 1     | 3     | 1     |
| 25236  | 1     | 1     | 1     | 1     |
| 25242  | 1     | 1     | 1     | 1     |
| 25252  | 1     | 1     | 1     | 1     |
| 25253  | 3     | 5     | 4     | 4     |
| 25256  | 3     | 4     | 4     | 3     |
| 25260  | 1     | 1     | 1     | 1     |
| 25261  | 1     | 1     | 2     | 1     |
| 25280  | 2     | 1     | 2     | 3     |
| 25282  | 2     | 2     | 2     | 2     |
| 25289  | 4     | 4     | 4     | 4     |
| 25303  | 1     | 1     | 1     | 1     |

| respid | Q40_1 | Q40_2 | Q40_3 | Q40_4 |
|--------|-------|-------|-------|-------|
| 25304  | 1     | 3     | 3     | 3     |
| 25309  | 2     | 2     | 3     | 3     |
| 25317  | 1     | 3     | 2     | 2     |
| 25318  | 4     | 4     | 4     | 4     |
| 25320  | 2     | 4     | 3     | 1     |
| 25324  | 3     | 4     | 4     | 3     |
| 25331  | 1     | 2     | 2     | 1     |
| 25340  | 1     | 1     | 2     | 2     |
| 25342  | 2     | 2     | 1     | 1     |
| 25350  | 1     | 1     | 1     | 1     |
| 25352  |       |       |       |       |
| 25358  | 1     | 1     | 1     | 1     |
| 25375  | 1     | 1     | 1     | 1     |
| 25386  | 1     | 1     | 1     | 1     |
| 25388  | 1     | 1     | 1     | 1     |
| 25390  | 1     | 2     | 1     | 2     |
| 25391  | 2     | 2     | 2     | 2     |
| 25400  | 3     | 2     | 2     | 2     |
| 25413  | 3     | 3     | 4     | 3     |
| 25424  | 1     | 2     | 2     | 1     |
| 25426  | 2     | 2     | 2     | 2     |
| 25430  | 2     | 1     | 1     | 1     |
| 25434  | 2     | 2     | 3     | 3     |
| 25439  | 4     | 3     | 3     | 4     |
| 25441  | 1     | 1     | 1     | 1     |
| 25445  | 1     | 1     | 1     | 1     |
| 25451  | 1     | 1     | 1     | 1     |
| 25469  | 3     | 4     | 3     | 3     |
| 25471  | 3     | 3     | 4     | 3     |
| 25476  | 2     | 3     | 3     | 3     |
| 25480  | 3     | 3     | 1     | 3     |
| 25482  | 3     | 2     | 2     | 3     |

| respid | Q40_1 | Q40_2 | Q40_3 | Q40_4 |
|--------|-------|-------|-------|-------|
| 25500  | 5     | 5     | 4     | 4     |
| 25516  | 1     | 1     | 1     | 1     |
| 25521  | 5     | 3     | 4     | 3     |
| 25525  | 1     | 2     | 2     | 1     |
| 25530  | 5     | 2     | 2     | 2     |
| 25555  | 3     | 4     | 3     | 4     |
| 25558  | 1     | 2     | 3     | 3     |
| 25561  | 3     | 4     | 4     | 2     |
| 25566  |       |       |       |       |
| 25571  | 2     | 2     | 3     | 2     |
| 25572  | 1     | 1     | 1     | 1     |
| 25574  |       |       |       |       |
| 25588  | 1     | 1     | 2     | 1     |
| 25591  | 3     | 3     | 2     | 3     |
| 25599  | 2     | 2     | 3     | 2     |
| 25604  | 1     | 1     | 1     | 1     |
| 25614  | 2     | 3     | 4     | 3     |
| 25634  | 2     | 3     | 4     | 3     |
| 25642  | 1     | 1     | 2     | 1     |
| 25647  | 3     | 3     | 2     | 2     |
| 25653  | 1     | 1     | 1     | 1     |
| 25654  | 1     | 2     | 5     | 3     |
| 25660  | 1     | 1     | 1     | 1     |
| 25664  | 1     | 1     | 2     | 1     |
| 25665  | 3     | 3     | 2     | 2     |
| 25672  | 3     | 3     | 4     | 3     |
| 25677  | 2     | 2     | 2     | 2     |
| 25685  | 1     | 2     | 1     | 1     |
| 25699  | 3     | 3     | 3     | 4     |
| 25703  | 1     | 1     | 2     | 1     |
| 25704  | 4     | 3     | 3     | 3     |
| 25705  | 2     | 3     | 3     | 2     |

| respid | Q40_1 | Q40_2 | Q40_3 | Q40_4 |
|--------|-------|-------|-------|-------|
| 25711  | 1     | 1     | 1     | 1     |
| 25727  | 2     | 2     | 3     | 2     |
| 25728  | 1     | 2     | 2     | 1     |
| 25733  | 3     | 3     | 3     | 2     |
| 25735  | 1     | 1     | 1     | 1     |
| 25736  | 1     | 1     | 3     | 1     |
| 25742  | 1     | 1     | 1     | 1     |
| 25750  | 1     | 1     | 1     | 1     |
| 25754  |       |       |       |       |
| 25776  | 2     | 3     | 3     | 3     |
| 25778  |       |       |       |       |
| 25796  | 1     | 1     | 2     | 2     |
| 25852  | 2     | 3     | 1     | 1     |
| 25858  | 1     | 1     | 1     | 1     |
| 25859  |       |       |       |       |
| 25886  | 4     | 3     | 4     | 4     |
| 25890  | 2     | 2     | 3     | 2     |
| 25897  | 1     | 1     | 1     | 1     |
| 25903  | 1     | 1     | 1     | 1     |
| 25905  | 3     | 2     | 4     | 4     |
| 25917  |       |       |       |       |
| 25918  | 1     | 1     | 2     | 1     |
| 25928  | 3     | 2     | 3     | 2     |
| 25930  |       |       |       |       |
| 25949  | 2     | 2     | 1     | 1     |
| 25955  | 1     | 1     | 1     | 1     |
| 25959  | 1     | 2     | 1     | 1     |
| 25964  | 2     | 2     | 2     | 1     |
| 25972  | 1     | 1     | 1     | 1     |
| 25999  | 3     | 3     | 4     | 3     |
| 26019  | 2     | 2     | 2     | 2     |
| 26025  | 1     | 1     | 2     | 1     |

| respid | Q40_1 | Q40_2 | Q40_3 | Q40_4 |
|--------|-------|-------|-------|-------|
| 26039  | 2     | 3     | 3     | 4     |
| 26055  | 1     | 1     | 2     | 1     |
| 26061  | 1     | 2     | 2     | 3     |
| 26076  | 1     | 1     | 2     | 1     |
| 26088  | 3     | 2     | 2     | 2     |
| 26094  |       |       |       |       |
| 26104  | 1     | 1     | 1     | 1     |
| 26131  | 6     | 6     | 6     | 6     |
| 26134  | 4     | 3     | 4     | 4     |
| 26160  | 1     | 1     | 1     | 1     |
| 26168  | 1     | 1     | 2     | 1     |
| 26170  |       |       |       |       |
| 26191  | 2     | 2     | 3     | 3     |
| 26192  |       |       |       |       |
| 26195  | 2     | 2     | 3     | 2     |
| 26198  | 1     | 1     | 3     | 1     |
| 26199  | 1     | 1     | 2     | 1     |
| 26201  |       |       |       |       |
| 26202  | 1     | 1     | 2     | 1     |
| 26226  | 6     | 2     | 2     | 1     |
| 26233  | 2     | 3     | 4     | 4     |
| 26236  | 1     | 1     | 1     | 1     |
| 26242  | 2     | 2     | 1     | 1     |
| 26244  | 1     | 1     | 1     | 1     |
| 26250  | 4     | 3     | 4     | 2     |
| 26266  | 1     | 1     | 1     | 2     |
| 26274  | 1     | 1     | 2     | 2     |
| 26286  | 2     | 2     | 2     | 2     |
| 26288  | 2     | 2     | 3     | 4     |
| 26295  |       |       |       |       |
| 26296  | 1     | 1     | 1     | 1     |
| 26297  |       |       |       |       |



| respid | Q40_1 | Q40_2 | Q40_3 | Q40_4 |
|--------|-------|-------|-------|-------|
| 26300  | 3     | 3     | 4     | 3     |
| 26317  | 1     | 1     | 1     | 1     |
| 26343  |       |       |       |       |
| 26367  | 1     | 4     | 2     | 5     |
| 26372  | 1     | 1     | 1     | 1     |
| 26403  | 3     | 3     | 3     | 3     |
| 26423  | 1     | 1     | 1     | 1     |
| 26430  | 1     | 1     | 1     | 1     |
| 26437  | 3     | 2     | 3     | 3     |
| 26457  |       |       |       |       |
| 26466  | 4     | 3     | 4     | 5     |
| 26467  | 4     | 4     | 4     | 2     |
| 26469  | 2     | 3     | 2     | 2     |
| 26494  | 1     | 1     | 1     | 1     |
| 26510  | 2     | 2     | 2     | 1     |
| 26519  | 1     | 1     | 1     | 1     |
| 26525  | 1     | 1     | 2     | 2     |
| 26529  |       |       |       |       |
| 26533  | 1     | 1     | 1     | 1     |
| 26556  | 1     | 1     | 1     | 1     |
| 26559  | 3     | 2     | 4     | 3     |
| 26565  | 4     | 4     | 3     | 5     |
| 26576  | 2     | 3     | 2     | 2     |
| 26601  |       |       |       |       |
| 26607  | 2     | 2     | 3     | 2     |
| 26611  | 2     | 1     | 2     | 2     |
| 26619  | 1     | 1     | 1     | 1     |
| 26631  | 1     | 1     | 1     | 1     |
| 26654  | 1     | 1     | 2     | 1     |
| 26656  | 1     | 2     | 2     | 2     |
| 26664  |       |       |       |       |
| 26667  | 1     | 1     | 3     | 1     |

| respid | Q40_1 | Q40_2 | Q40_3 | Q40_4 |
|--------|-------|-------|-------|-------|
| 26674  | 5     | 3     | 4     | 3     |
| 26678  | 2     | 2     | 2     | 2     |
| 26693  | 1     | 1     | 2     | 1     |
| 26696  | 4     | 4     | 5     | 6     |
| 26703  | 3     | 4     | 4     | 4     |
| 26705  | 3     | 3     | 3     | 3     |
| 26706  | 2     | 3     | 3     | 3     |
| 26716  | 3     | 2     | 4     | 4     |
| 26721  | 1     | 1     | 2     | 1     |
| 26730  | 3     | 2     | 3     | 2     |
| 26752  | 1     | 1     | 1     | 1     |
| 26755  | 1     | 1     | 1     | 1     |
| 26791  | 1     | 1     | 1     | 1     |
| 26804  | 2     | 2     | 2     | 2     |
| 26810  | 2     | 3     | 3     | 4     |
| 26813  | 2     | 3     | 2     | 3     |
| 26833  | 2     | 2     | 2     | 2     |
| 26880  | 3     | 3     | 2     | 1     |
| 26884  | 1     | 1     | 2     | 1     |
| 26885  | 1     | 1     | 2     | 2     |
| 26890  | 3     | 3     | 1     | 4     |
| 26937  | 1     | 2     | 2     | 2     |
| 26939  | 2     | 1     | 2     | 3     |
| 26941  |       |       |       |       |
| 26992  | 3     | 4     | 4     | 2     |
| 27037  | 1     | 1     | 2     | 2     |
| 27045  | 6     | 5     | 6     | 6     |
| 27053  | 5     | 3     | 4     | 3     |
| 27060  | 5     | 4     | 3     | 4     |
| 27076  | 1     | 2     | 2     | 1     |
| 27124  | 1     | 1     | 1     | 1     |
| 27125  | 1     | 1     | 1     | 1     |

| respid | Q40_1 | Q40_2 | Q40_3 | Q40_4 |
|--------|-------|-------|-------|-------|
| 27132  | 1     | 1     | 1     | 1     |
| 27166  | 1     | 1     | 1     | 1     |
| 27190  | 2     | 2     | 2     | 3     |
| 27199  | 2     | 1     | 2     | 2     |
| 27221  | 4     | 3     | 4     | 3     |
| 27233  | 1     | 1     | 3     | 1     |
| 27241  | 1     | 1     | 2     | 1     |
| 27244  | 1     | 2     | 2     | 1     |
| 27245  | 5     | 5     | 6     | 6     |
| 27246  | 2     | 1     | 2     | 2     |
| 27253  | 2     | 2     | 2     | 1     |
| 27255  | 3     | 4     | 4     | 3     |
| 27267  | 1     | 1     | 1     | 1     |
| 27283  | 4     | 3     | 2     | 3     |
| 27289  | 3     | 4     | 3     | 2     |
| 27302  | 2     | 1     | 1     | 1     |
| 27317  | 1     | 1     | 1     | 1     |
| 27319  | 1     | 1     | 1     | 1     |
| 27331  | 2     | 1     | 2     | 2     |
| 27333  | 1     | 1     | 2     | 1     |
| 27340  |       |       |       |       |
| 27362  | 4     | 5     | 2     | 3     |
| 27370  | 1     | 1     | 1     | 1     |
| 27379  | 1     | 2     | 3     | 1     |
| 27386  |       |       |       |       |
| 27398  | 2     | 1     | 1     | 1     |
| 27404  | 1     | 1     | 1     | 1     |
| 27408  | 1     | 1     | 2     | 1     |
| 27412  | 5     | 4     | 4     | 5     |
| 27426  | 3     | 2     | 2     | 2     |
| 27455  | 1     | 2     | 1     | 1     |
| 27464  | 3     | 3     | 3     | 4     |

| respid | Q40_1 | Q40_2 | Q40_3 | Q40_4 |
|--------|-------|-------|-------|-------|
| 27484  | 1     | 2     | 5     | 5     |
| 27493  | 4     | 4     | 4     | 4     |
| 27512  | 5     | 3     | 4     | 3     |
| 27525  | 2     | 3     | 3     | 3     |
| 27532  | 2     | 2     | 2     | 3     |
| 27539  | 1     | 1     | 1     | 1     |
| 27540  | 3     | 5     | 4     | 5     |
| 27552  | 3     | 3     | 4     | 3     |
| 27562  | 1     | 1     | 1     | 1     |
| 27568  | 1     | 1     | 1     | 1     |
| 27574  | 4     | 5     | 4     | 5     |
| 27575  | 1     | 1     | 1     | 1     |
| 27577  | 1     | 1     | 2     | 2     |
| 27589  | 1     | 1     | 1     | 1     |
| 27593  | 1     | 1     | 2     | 1     |
| 27594  | 3     | 3     | 3     | 4     |
| 27595  | 6     | 6     | 6     | 6     |
| 27598  | 1     | 1     | 1     | 1     |
| 27620  | 3     | 1     | 3     | 3     |
| 27621  | 3     | 3     | 4     | 3     |
| 27628  | 1     | 1     | 2     | 1     |
| 27633  | 3     | 2     | 2     | 2     |
| 27643  | 2     | 4     | 3     | 4     |
| 27644  | 3     | 3     | 4     | 4     |
| 27668  | 3     | 2     | 2     | 2     |
| 27681  | 2     | 2     | 2     | 2     |
| 27691  | 1     | 1     | 1     | 1     |
| 27693  | 3     | 3     | 2     | 3     |
| 27703  | 1     | 2     | 2     | 2     |
| 27708  | 4     | 3     | 3     | 2     |
| 27719  | 3     | 2     | 3     | 3     |
| 27720  | 1     | 1     | 1     | 1     |

| respid | Q40_1 | Q40_2 | Q40_3 | Q40_4 |
|--------|-------|-------|-------|-------|
| 27723  | 3     | 1     | 3     | 2     |
| 27725  | 1     | 1     | 3     | 1     |
| 27734  | 3     | 3     | 3     | 3     |
| 27744  | 1     | 1     | 2     | 1     |
| 27749  | 3     | 2     | 2     | 3     |
| 27762  | 3     | 3     | 3     | 2     |
| 27808  | 2     | 3     | 4     | 2     |
| 27810  | 3     | 5     | 5     | 5     |
| 27812  | 1     | 2     | 1     | 2     |
| 27815  |       |       |       |       |
| 27818  | 2     | 1     | 2     | 2     |
| 27823  | 1     | 1     | 1     | 1     |
| 27841  | 2     | 3     | 2     | 3     |
| 27843  |       |       |       |       |
| 27851  | 2     | 2     | 2     | 2     |
| 27858  | 1     | 1     | 1     | 1     |
| 27859  | 1     | 1     | 5     | 1     |
| 27869  | 1     | 1     | 1     | 1     |
| 27872  | 1     | 2     | 1     | 1     |
| 27873  | 1     | 1     | 1     | 1     |
| 27884  | 2     | 2     | 2     | 2     |
| 27904  | 2     | 2     | 2     | 2     |
| 27915  | 1     | 2     | 3     | 1     |
| 27918  | 2     | 2     | 2     | 2     |
| 27937  | 3     | 2     | 3     | 1     |
| 27943  | 3     | 3     | 3     | 4     |
| 27948  | 1     | 1     | 1     | 1     |
| 27971  | 3     | 2     | 3     | 2     |
| 27991  | 2     | 1     | 2     | 1     |
| 28000  | 1     | 1     | 1     | 1     |
| 28011  | 1     | 2     | 2     | 2     |
| 28022  | 1     | 1     | 5     | 1     |

| respid | Q40_1 | Q40_2 | Q40_3 | Q40_4 |
|--------|-------|-------|-------|-------|
| 28025  | 1     | 1     | 1     | 1     |
| 28041  | 1     | 1     | 1     | 1     |
| 28057  | 3     | 4     | 4     | 3     |
| 28080  |       |       |       |       |
| 28098  | 1     | 1     | 1     | 1     |
| 28104  | 2     | 3     | 3     | 1     |
| 28109  | 2     | 3     | 3     | 3     |
| 28129  | 1     | 1     | 1     | 1     |
| 28141  |       |       |       |       |
| 28143  | 1     | 1     | 2     | 1     |
| 28149  | 1     | 1     | 2     | 1     |
| 28151  | 3     | 3     | 3     | 3     |
| 28161  | 3     | 5     | 5     | 4     |
| 28169  | 1     | 1     | 2     | 1     |
| 28194  | 4     | 4     | 4     | 4     |
| 28197  |       |       |       |       |
| 28206  | 1     | 1     | 3     | 1     |
| 28218  | 1     | 1     | 1     | 1     |
| 28227  | 1     | 1     | 1     | 1     |
| 28235  | 4     | 2     | 3     | 3     |
| 28246  | 2     | 3     | 2     | 3     |
| 28259  | 4     | 4     | 5     | 5     |
| 28263  | 1     | 1     | 3     | 1     |
| 28267  | 3     | 2     | 5     | 4     |
| 28274  | 2     | 1     | 1     | 1     |
| 28278  | 1     | 1     | 1     | 1     |
| 28288  | 1     | 2     | 1     | 1     |
| 28308  |       |       |       |       |
| 28309  | 2     | 3     | 3     | 3     |
| 28323  | 1     | 2     | 3     | 2     |
| 28335  | 2     | 3     | 3     | 3     |
| 28354  | 3     | 3     | 4     | 4     |

| respid | Q40_1 | Q40_2 | Q40_3 | Q40_4 |
|--------|-------|-------|-------|-------|
| 28355  | 3     | 4     | 3     | 3     |
| 28356  | 2     | 3     | 2     | 2     |
| 28357  | 1     | 2     | 1     | 1     |
| 28363  | 1     | 1     | 1     | 1     |
| 28366  | 1     | 1     | 1     | 1     |
| 28372  | 3     | 3     | 4     | 4     |
| 28381  | 2     | 3     | 3     | 3     |
| 28388  | 1     | 2     | 3     | 2     |
| 28413  | 3     | 3     | 3     | 4     |
| 28421  | 3     | 3     | 2     | 2     |
| 28430  | 3     | 3     | 3     | 4     |
| 28439  | 3     | 3     | 4     | 4     |
| 28458  | 4     | 3     | 4     | 5     |
| 28461  | 1     | 1     | 2     | 2     |
| 28466  | 1     | 1     | 1     | 1     |
| 28492  | 2     | 1     | 2     | 2     |
| 28534  |       |       |       |       |
| 28537  | 2     | 3     | 2     | 3     |
| 28560  | 2     | 1     | 1     | 1     |
| 28566  | 1     | 1     | 1     | 1     |
| 28569  | 3     | 2     | 2     | 2     |
| 28584  | 1     | 1     | 1     | 1     |
| 28590  | 1     | 1     | 3     | 2     |
| 28596  |       |       |       |       |
| 28608  | 1     | 2     | 2     | 2     |
| 28631  | 2     | 3     | 4     | 3     |
| 28644  | 2     | 2     | 2     | 2     |
| 28646  | 1     | 1     | 1     | 1     |
| 28665  |       |       |       |       |
| 28686  | 1     | 1     | 1     | 1     |
| 28704  | 2     | 1     | 2     | 2     |
| 28719  | 2     | 2     | 2     | 2     |

| respid | Q40_1 | Q40_2 | Q40_3 | Q40_4 |
|--------|-------|-------|-------|-------|
| 28736  | 1     | 2     | 1     | 2     |
| 28739  | 3     | 3     | 2     | 3     |
| 28758  | 2     | 2     | 3     | 4     |
| 28761  | 3     | 2     | 3     | 4     |
| 28770  | 4     | 3     | 3     | 3     |
| 28774  | 1     | 1     | 1     | 1     |
| 28778  | 4     | 5     | 5     | 5     |
| 28783  | 3     | 2     | 3     | 2     |
| 28785  | 1     | 1     | 2     | 1     |
| 28797  | 3     | 4     | 4     | 2     |
| 28801  | 3     | 2     | 2     | 2     |
| 28821  |       |       |       |       |
| 28827  | 1     | 2     | 1     | 2     |
| 28828  | 1     | 1     | 1     | 1     |
| 28871  | 2     | 1     | 3     | 1     |
| 28876  | 1     | 2     | 3     | 1     |
| 28891  | 3     | 3     | 3     | 2     |
| 28898  |       |       |       |       |
| 28909  | 3     | 4     | 3     | 2     |
| 28930  | 1     | 1     | 1     | 2     |
| 28935  | 2     | 1     | 4     | 2     |
| 28964  | 1     | 1     | 1     | 1     |
| 28965  | 1     | 1     | 1     | 1     |
| 28967  | 6     | 5     | 6     | 6     |
| 28975  |       |       |       |       |
| 28982  | 1     | 1     | 2     | 1     |
| 28989  | 2     | 1     | 3     | 1     |
| 29003  | 4     | 3     | 4     | 3     |
| 29004  | 1     | 1     | 1     | 1     |
| 29007  | 1     | 2     | 2     | 2     |
| 29008  | 1     | 1     | 1     | 1     |
| 29011  | 2     | 1     | 3     | 3     |



| respid | Q40_1 | Q40_2 | Q40_3 | Q40_4 |
|--------|-------|-------|-------|-------|
| 29012  | 1     | 1     | 2     | 1     |
| 29014  |       |       |       |       |
| 29016  | 1     | 1     | 1     | 1     |
| 29018  | 5     | 3     | 2     | 3     |
| 29048  | 1     | 1     | 3     | 1     |
| 29184  | 1     | 1     | 2     | 1     |
| 29237  | 1     | 1     | 1     | 2     |
| 29252  | 5     | 2     | 1     | 1     |
| 29267  | 2     | 1     | 2     | 1     |
| 29276  |       |       |       |       |
| 29281  | 3     | 4     | 4     | 3     |
| 29285  | 1     | 1     | 1     | 1     |
| 29291  | 3     | 4     | 5     | 4     |
| 29304  | 2     | 2     | 2     | 2     |
| 29323  | 1     | 1     | 2     | 1     |
| 29330  | 2     | 3     | 3     | 4     |
| 29357  | 3     | 3     | 3     | 3     |
| 29416  | 2     | 1     | 1     | 1     |
| 29432  | 1     | 1     | 2     | 1     |
| 29482  | 2     | 3     | 3     | 2     |
| 29506  | 1     | 3     | 3     | 2     |
| 29509  | 1     | 2     | 1     | 1     |
| 29512  | 3     | 3     | 2     | 2     |
| 29519  | 1     | 3     | 2     | 1     |
| 29520  | 2     | 2     | 3     | 2     |
| 29521  | 2     | 3     | 4     | 3     |
| 29529  | 4     | 5     | 5     | 5     |
| 29532  | 1     | 1     | 1     | 1     |
| 29547  | 3     | 5     | 5     | 3     |
| 29551  | 2     | 2     | 2     | 2     |
| 29584  | 3     | 5     | 5     | 4     |
| 29591  | 3     | 2     | 3     | 3     |

| respid | Q40_1 | Q40_2 | Q40_3 | Q40_4 |
|--------|-------|-------|-------|-------|
| 29613  | 1     | 2     | 2     | 1     |
| 29615  | 2     | 3     | 3     | 3     |
| 29625  | 2     | 3     | 2     | 4     |
| 29660  | 2     | 1     | 2     | 1     |
| 29677  |       |       |       |       |
| 29700  | 2     | 3     | 2     | 2     |
| 29715  | 5     | 5     | 5     | 5     |
| 29720  |       |       |       |       |
| 29730  | 1     | 1     | 1     | 1     |
| 29734  | 3     | 3     | 3     | 3     |
| 29754  |       |       |       |       |
| 29771  | 1     | 1     | 4     | 1     |
| 29774  | 1     | 2     | 2     | 1     |
| 29783  | 1     | 1     | 2     | 1     |
| 29812  | 2     | 2     | 2     | 2     |
| 29813  | 2     | 1     | 1     | 2     |
| 29814  | 2     | 3     | 3     | 3     |
| 29820  | 1     | 2     | 2     | 2     |
| 29906  | 1     | 2     | 3     | 2     |
| 29907  | 3     | 3     | 3     | 2     |
| 29928  |       |       |       |       |
| 29932  | 3     | 2     | 2     | 1     |
| 29958  | 3     | 3     | 2     | 3     |
| 29982  | 1     | 1     | 2     | 1     |
| 29989  | 1     | 1     | 2     | 1     |
| 29994  | 2     | 2     | 2     | 2     |
| 30005  | 1     | 2     | 3     | 2     |
| 30077  | 1     | 1     | 2     | 1     |
| 30098  |       |       |       |       |
| 30107  | 2     | 1     | 2     | 1     |
| 30154  | 1     | 1     | 2     | 1     |
| 30159  | 1     | 1     | 1     | 1     |

| respid | Q40_1 | Q40_2 | Q40_3 | Q40_4 |
|--------|-------|-------|-------|-------|
| 30162  | 1     | 1     | 2     | 1     |
| 30163  |       |       |       |       |
| 30189  | 2     | 2     | 3     | 2     |
| 30230  | 3     | 1     | 1     | 1     |
| 30259  | 3     | 3     | 3     | 4     |
| 30284  | 1     | 2     | 2     | 1     |
| 30296  | 1     | 1     | 1     | 1     |
| 30330  | 2     | 3     | 3     | 1     |
| 30341  | 1     | 1     | 2     | 1     |
| 30352  | 2     | 2     | 3     | 3     |
| 30379  | 1     | 1     | 1     | 1     |
| 30424  | 1     | 1     | 1     | 1     |
| 30447  | 2     | 1     | 1     | 1     |
| 30477  | 3     | 3     | 2     | 3     |
| 30503  | 1     | 1     | 1     | 1     |
| 30515  | 3     | 2     | 3     | 3     |
| 30516  | 1     | 1     | 2     | 1     |
| 30623  | 2     | 3     | 3     | 2     |
| 30639  | 1     | 2     | 1     | 1     |
| 30670  | 1     | 1     | 2     | 1     |
| 30697  | 1     | 1     | 1     | 1     |
| 30735  | 2     | 1     | 2     | 1     |
| 30742  | 2     | 2     | 2     | 1     |
| 30751  | 4     | 3     | 3     | 4     |
| 30789  |       |       |       |       |
| 30867  | 3     | 3     | 3     | 3     |
| 30876  | 2     | 2     | 2     | 1     |
| 30877  | 1     | 1     | 1     | 1     |
| 30887  | 3     | 2     | 3     | 2     |
| 30891  | 2     | 3     | 2     | 3     |
| 31030  | 1     | 1     | 1     | 1     |
| 31059  | 2     | 3     | 3     | 2     |

| respid | Q40_1 | Q40_2 | Q40_3 | Q40_4 |
|--------|-------|-------|-------|-------|
| 31082  |       |       |       |       |
| 31106  | 1     | 1     | 2     | 1     |
| 31110  | 1     | 1     | 1     | 1     |
| 31265  | 3     | 3     | 3     | 4     |
| 31266  | 2     | 3     | 4     | 5     |
| 31267  | 2     | 3     | 4     | 4     |
| 31310  | 1     | 1     | 1     | 1     |
| 31325  | 1     | 1     | 1     | 2     |
| 31367  | 2     | 2     | 1     | 2     |
| 31389  | 1     | 1     | 1     | 1     |
| 31440  | 1     | 1     | 2     | 1     |
| 31465  | 1     | 1     | 2     | 1     |
| 31477  | 1     | 1     | 1     | 1     |
| 31491  | 1     | 2     | 1     | 1     |
| 31494  | 4     | 4     | 4     | 4     |
| 31509  | 1     | 4     | 5     | 3     |
| 31533  | 1     | 1     | 1     | 1     |
| 31547  | 2     | 1     | 2     | 1     |
| 31558  | 1     | 1     | 2     | 1     |
| 31579  | 2     | 2     | 2     | 3     |
| 31591  | 3     | 2     | 2     | 3     |
| 31596  | 2     | 2     | 2     | 2     |
| 31601  | 4     | 4     | 3     | 5     |
| 31605  | 2     | 1     | 1     | 2     |
| 31637  | 1     | 1     | 1     | 2     |
| 31646  | 1     | 1     | 2     | 1     |
| 31647  | 5     | 2     | 4     | 3     |
| 31650  | 1     | 1     | 2     | 1     |
| 31651  | 3     | 2     | 2     | 3     |
| 31657  | 1     | 1     | 1     | 1     |
| 31660  | 2     | 1     | 2     | 1     |
| 31661  | 3     | 3     | 4     | 2     |

| respid | Q40_1 | Q40_2 | Q40_3 | Q40_4 |
|--------|-------|-------|-------|-------|
| 31667  | 2     | 4     | 3     | 2     |
| 31674  | 4     | 2     | 2     | 3     |
| 31686  | 3     | 2     | 2     | 3     |
| 31693  |       |       |       |       |
| 31716  |       |       |       |       |
| 31818  | 1     | 2     | 2     | 1     |
| 31886  | 3     | 2     | 1     | 1     |
| 31945  | 4     | 4     | 4     | 3     |
| 31957  | 1     | 3     | 4     | 2     |
| 31966  | 1     | 2     | 3     | 3     |
| 31978  | 2     | 1     | 3     | 2     |
| 31999  | 1     | 3     | 3     | 2     |
| 32026  | 2     | 2     | 2     | 1     |
| 32033  | 2     | 1     | 1     | 2     |
| 32037  | 3     | 3     | 4     | 4     |
| 32038  | 2     | 3     | 4     | 4     |
| 32047  | 3     | 3     | 4     | 3     |
| 32053  |       |       |       |       |
| 32069  | 2     | 2     | 2     | 2     |
| 32081  | 2     | 3     | 2     | 3     |
| 32123  | 1     | 2     | 3     | 2     |
| 32130  | 2     | 2     | 3     | 2     |
| 32141  | 1     | 1     | 2     | 2     |
| 32158  |       |       |       |       |
| 32165  | 1     | 1     | 2     | 1     |
| 32180  | 1     | 1     | 1     | 1     |
| 32221  | 5     | 4     | 3     | 2     |
| 32292  | 1     | 1     | 1     | 1     |
| 32318  | 1     | 1     | 2     | 1     |
| 32346  | 2     | 1     | 2     | 1     |
| 32402  | 3     | 3     | 3     | 3     |
| 32422  | 1     | 2     | 2     | 1     |

| respid | Q40_1 | Q40_2 | Q40_3 | Q40_4 |
|--------|-------|-------|-------|-------|
| 32439  | 1     | 1     | 1     | 1     |
| 32507  | 3     | 3     | 3     | 3     |
| 32522  |       |       |       |       |
| 32535  |       |       |       |       |
| 32546  | 1     | 1     | 1     | 1     |
| 32553  | 2     | 1     | 1     | 2     |
| 32570  |       |       |       |       |
| 32592  | 1     | 2     | 1     | 1     |
| 32605  | 3     | 2     | 2     | 2     |
| 32630  | 2     | 2     | 3     | 3     |
| 32642  | 3     | 2     | 4     | 2     |
| 32646  | 1     | 1     | 1     | 1     |
| 32665  | 4     | 3     | 3     | 4     |
| 32677  | 1     | 1     | 2     | 1     |
| 32694  | 3     | 1     | 2     | 1     |
| 32698  | 3     | 3     | 5     | 2     |
| 32754  | 2     | 4     | 5     | 4     |
| 32799  | 2     | 3     | 3     | 2     |
| 32816  |       |       |       |       |
| 32819  | 2     | 2     | 2     | 2     |
| 32840  | 2     | 3     | 3     | 3     |
| 32861  | 2     | 2     | 3     | 2     |
| 32866  | 1     | 1     | 1     | 1     |
| 32889  | 2     | 4     | 4     | 4     |
| 32960  | 1     | 1     | 1     | 1     |
| 32965  | 1     | 1     | 2     | 2     |
| 32986  | 2     | 2     | 2     | 2     |
| 33005  | 4     | 3     | 3     | 4     |
| 33054  | 2     | 3     | 3     | 3     |
| 33072  | 2     | 3     | 4     | 3     |
| 33095  | 1     | 1     | 2     | 1     |
| 33099  | 3     | 2     | 1     | 2     |

| respid | Q40_1 | Q40_2 | Q40_3 | Q40_4 |
|--------|-------|-------|-------|-------|
| 33121  | 1     | 1     | 1     | 1     |
| 33152  | 1     | 2     | 3     | 2     |
| 33159  | 2     | 2     | 2     | 1     |
| 33189  | 1     | 1     | 1     | 1     |
| 33198  | 6     | 5     | 3     | 4     |
| 33202  | 5     | 4     | 3     | 5     |
| 33204  | 1     | 1     | 2     | 2     |
| 33224  | 1     | 1     | 2     | 1     |
| 33272  | 4     | 3     | 3     | 3     |
| 33294  | 1     | 1     | 1     | 1     |
| 33300  | 2     | 3     | 2     | 2     |
| 33314  | 4     | 3     | 3     | 2     |
| 33338  | 2     | 2     | 2     | 2     |
| 33350  | 3     | 4     | 4     | 4     |
| 33362  | 3     | 3     | 3     | 2     |
| 33368  |       |       |       |       |
| 33374  | 2     | 2     | 2     | 4     |
| 33380  | 4     | 4     | 5     | 4     |
| 33385  | 3     | 2     | 2     | 2     |
| 33402  | 2     | 3     | 3     | 4     |
| 33414  | 1     | 1     | 2     | 2     |
| 33439  | 2     | 3     | 2     | 2     |
| 33449  | 2     | 3     | 3     | 3     |
| 33533  | 2     | 2     | 1     | 1     |
| 33540  | 1     | 1     | 2     | 1     |
| 33556  | 2     | 1     | 2     | 2     |
| 33615  | 6     | 1     | 1     | 1     |
| 33694  | 3     | 3     | 3     | 3     |
| 33717  | 1     | 1     | 2     | 1     |
| 33729  | 2     | 2     | 1     | 1     |
| 33746  | 1     | 1     | 1     | 1     |
| 33764  | 3     | 2     | 1     | 2     |

| respid | Q40_1 | Q40_2 | Q40_3 | Q40_4 |
|--------|-------|-------|-------|-------|
| 33790  | 2     | 2     | 2     | 2     |
| 33868  | 6     | 3     | 6     | 2     |
| 33872  | 2     | 3     | 3     | 3     |
| 33883  | 1     | 1     | 1     | 1     |
| 33884  | 2     | 2     | 2     | 1     |
| 33900  | 3     | 1     | 2     | 2     |
| 33933  | 2     | 2     | 3     | 1     |
| 33949  | 1     | 1     | 1     | 1     |
| 34005  |       |       |       |       |
| 34016  |       |       |       |       |
| 34041  | 5     | 4     | 5     | 3     |
| 34053  | 1     | 1     | 1     | 1     |
| 34056  | 1     | 1     | 1     | 1     |
| 34093  | 1     | 1     | 1     | 1     |
| 34112  | 3     | 2     | 3     | 3     |
| 34136  | 4     | 4     | 5     | 3     |
| 34138  | 1     | 1     | 1     | 1     |
| 34139  | 3     | 3     | 4     | 3     |
| 34189  | 1     | 2     | 1     | 1     |
| 34239  | 1     | 2     | 2     | 1     |
| 34240  | 1     | 1     | 1     | 2     |
| 34241  | 1     | 1     | 1     | 1     |
| 34259  | 3     | 3     | 2     | 3     |
| 34303  | 2     | 3     | 4     | 5     |
| 34306  | 2     | 2     | 1     | 1     |
| 34395  | 1     | 3     | 3     | 2     |
| 34463  | 1     | 3     | 2     | 2     |
| 34466  | 1     | 2     | 3     | 4     |
| 34471  | 2     | 1     | 2     | 1     |
| 34489  | 3     | 2     | 3     | 3     |
| 34518  | 4     | 3     | 1     | 1     |
| 34542  | 3     | 3     | 2     | 3     |



| respid | Q40_1 | Q40_2 | Q40_3 | Q40_4 |
|--------|-------|-------|-------|-------|
| 34595  |       |       |       |       |
| 34604  | 2     | 1     | 3     | 2     |
| 34631  | 1     | 1     | 5     | 2     |
| 34665  | 1     | 1     | 2     | 1     |
| 34716  | 1     | 1     | 1     | 1     |
| 34729  | 1     | 1     | 1     | 1     |
| 34772  | 3     | 3     | 3     | 3     |
| 34800  | 1     | 1     | 3     | 1     |
| 34819  | 3     | 2     | 2     | 3     |
| 34829  | 2     | 3     | 3     | 3     |
| 34831  | 2     | 2     | 2     | 2     |
| 34839  | 2     | 3     | 2     | 1     |
| 34868  | 4     | 4     | 4     | 4     |
| 34869  | 1     | 1     | 1     | 1     |
| 34882  | 3     | 3     | 3     | 3     |
| 34895  | 5     | 2     | 5     | 5     |
| 34901  | 1     | 2     | 2     | 2     |
| 34904  | 3     | 2     | 3     | 2     |
| 34907  | 3     | 3     | 3     | 3     |
| 34914  | 2     | 2     | 2     | 1     |
| 34918  | 2     | 2     | 3     | 2     |
| 34924  | 1     | 1     | 1     | 1     |
| 34933  | 3     | 3     | 2     | 3     |
| 34938  | 1     | 1     | 1     | 1     |
| 34952  | 3     | 3     | 4     | 4     |
| 34959  | 1     | 2     | 3     | 2     |
| 34972  | 1     | 1     | 2     | 1     |
| 34973  | 3     | 3     | 3     | 2     |
| 34975  | 3     | 2     | 3     | 3     |
| 34977  | 2     | 2     | 3     | 3     |
| 34978  | 1     | 3     | 2     | 1     |
| 34980  | 2     | 2     | 2     | 2     |

| respid | Q40_1 | Q40_2 | Q40_3 | Q40_4 |
|--------|-------|-------|-------|-------|
| 34984  | 3     | 4     | 3     | 3     |
| 34986  | 3     | 4     | 3     | 4     |
| 34994  | 2     | 1     | 2     | 1     |
| 34996  | 3     | 4     | 3     | 3     |
| 35003  | 2     | 1     | 1     | 1     |
| 35014  | 1     | 1     | 1     | 1     |
| 35029  | 2     | 2     | 3     | 2     |
| 35030  | 4     | 3     | 4     | 3     |
| 35037  | 3     | 2     | 1     | 2     |
| 35043  |       |       |       |       |
| 35048  |       |       |       |       |
| 35055  | 3     | 2     | 2     | 2     |
| 35067  | 1     | 2     | 1     | 2     |
| 35072  | 1     | 2     | 2     | 1     |
| 35078  | 3     | 3     | 4     | 2     |
| 35084  | 2     | 2     | 1     | 1     |
| 35095  |       |       |       |       |
| 35096  |       |       |       |       |
| 35097  | 3     | 2     | 2     | 3     |
| 35098  | 3     | 3     | 2     | 2     |
| 35109  | 4     | 4     | 4     | 4     |
| 35114  | 1     | 1     | 1     | 1     |
| 35115  | 1     | 1     | 1     | 1     |
| 35124  | 3     | 2     | 2     | 3     |
| 35125  | 1     | 1     | 1     | 1     |
| 35141  |       |       |       |       |
| 35142  | 1     | 1     | 1     | 2     |
| 35145  |       |       |       |       |
| 35149  | 3     | 3     | 4     | 4     |
| 35159  | 1     | 1     | 1     | 1     |
| 35163  | 3     | 3     | 4     | 4     |
| 35174  | 2     | 2     | 2     | 2     |

| respid | Q40_1 | Q40_2 | Q40_3 | Q40_4 |
|--------|-------|-------|-------|-------|
| 35188  |       |       |       |       |
| 35189  | 2     | 3     | 4     | 5     |
| 35201  | 3     | 2     | 2     | 3     |
| 35215  | 2     | 1     | 1     | 1     |
| 35228  | 2     | 1     | 1     | 1     |
| 35235  | 2     | 1     | 1     | 1     |
| 35239  | 3     | 4     | 4     | 3     |
| 35243  | 2     | 3     | 2     | 2     |
| 35245  | 2     | 3     | 2     | 2     |
| 35259  |       |       |       |       |
| 35265  | 4     | 3     | 3     | 3     |
| 35272  | 2     | 2     | 2     | 2     |
| 35280  | 2     | 2     | 3     | 2     |
| 35298  | 4     | 1     | 1     | 1     |
| 35305  | 3     | 2     | 1     | 1     |
| 35306  | 3     | 2     | 2     | 4     |
| 35307  | 1     | 1     | 1     | 1     |
| 35311  | 1     | 1     | 1     | 1     |
| 35322  | 3     | 3     | 2     | 2     |
| 35323  | 1     | 1     | 1     | 1     |
| 35327  | 2     | 2     | 3     | 2     |
| 35366  | 2     | 2     | 2     | 2     |
| 35378  | 2     | 4     | 4     | 2     |
| 35389  | 2     | 2     | 2     | 2     |
| 35390  | 2     | 1     | 1     | 1     |
| 35395  | 3     | 4     | 3     | 3     |
| 35411  | 2     | 3     | 5     | 4     |
| 35423  | 2     | 1     | 1     | 1     |
| 35425  | 2     | 1     | 3     | 3     |
| 35434  | 1     | 2     | 2     | 1     |
| 35462  | 1     | 1     | 1     | 1     |
| 35478  | 3     | 3     | 3     | 3     |

| respid | Q40_1 | Q40_2 | Q40_3 | Q40_4 |
|--------|-------|-------|-------|-------|
| 35481  | 3     | 4     | 4     | 5     |
| 35498  | 3     | 1     | 1     | 2     |
| 35499  |       |       |       |       |
| 35502  | 2     | 3     | 3     | 2     |
| 35503  |       |       |       |       |
| 35504  |       |       |       |       |
| 35508  | 2     | 3     | 2     | 3     |
| 35513  | 2     | 2     | 2     | 2     |
| 35516  | 3     | 2     | 1     | 1     |
| 35519  | 2     | 2     | 4     | 3     |
| 35530  | 1     | 4     | 4     | 3     |
| 35533  | 3     | 4     | 4     | 3     |
| 35561  | 3     | 3     | 3     | 3     |
| 35565  | 1     | 1     | 1     | 1     |
| 35588  | 1     | 1     | 1     | 1     |
| 35598  | 1     | 1     | 1     | 1     |
| 35607  | 1     | 1     | 2     | 1     |
| 35638  | 1     | 1     | 1     | 1     |
| 35642  | 1     | 1     | 1     | 1     |
| 35643  | 3     | 2     | 3     | 3     |
| 35680  | 1     | 1     | 1     | 1     |
| 35697  | 2     | 1     | 2     | 2     |
| 35703  |       |       |       |       |
| 35709  | 3     | 2     | 4     | 3     |
| 35710  | 1     | 1     | 1     | 1     |
| 35721  | 4     | 4     | 4     | 5     |
| 35723  | 1     | 1     | 2     | 1     |
| 35736  | 2     | 2     | 3     | 3     |
| 35739  | 3     | 2     | 3     | 3     |
| 35745  | 2     | 2     | 4     | 1     |
| 35748  | 3     | 5     | 5     | 4     |
| 35750  | 1     | 1     | 2     | 2     |

| respid | Q40_1 | Q40_2 | Q40_3 | Q40_4 |
|--------|-------|-------|-------|-------|
| 35752  | 3     | 2     | 2     | 1     |
| 35773  | 2     | 2     | 2     | 1     |
| 35779  | 1     | 1     | 1     | 1     |
| 35791  | 1     | 1     | 1     | 1     |
| 35801  | 3     | 2     | 1     | 1     |
| 35802  | 1     | 1     | 1     | 1     |
| 35837  | 3     | 3     | 6     | 4     |
| 35853  | 3     | 2     | 2     | 1     |
| 35858  | 2     | 3     | 1     | 2     |
| 35860  | 3     | 4     | 4     | 4     |
| 35875  | 3     | 4     | 5     | 4     |
| 35883  | 2     | 1     | 1     | 3     |
| 35890  | 6     | 1     | 2     | 1     |
| 35898  | 1     | 1     | 1     | 1     |
| 35901  | 4     | 5     | 5     | 5     |
| 35914  | 3     | 2     | 3     | 3     |
| 35924  | 4     | 3     | 2     | 2     |
| 35950  | 2     | 3     | 4     | 3     |
| 35961  | 3     | 3     | 2     | 3     |
| 35966  | 2     | 2     | 1     | 1     |
| 35967  | 1     | 1     | 1     | 1     |
| 35971  | 1     | 1     | 1     | 1     |
| 35974  | 1     | 1     | 1     | 1     |
| 35983  | 4     | 4     | 4     | 4     |
| 35992  | 6     | 5     | 5     | 6     |
| 36010  | 2     | 1     | 2     | 3     |
| 36019  | 2     | 6     | 6     | 4     |
| 36029  | 2     | 2     | 4     | 2     |
| 36033  | 2     | 2     | 1     | 1     |
| 36042  | 1     | 1     | 2     | 1     |
| 36043  | 2     | 3     | 3     | 2     |
| 36048  | 3     | 4     | 4     | 3     |

| respid | Q40_1 | Q40_2 | Q40_3 | Q40_4 |
|--------|-------|-------|-------|-------|
| 36050  | 2     | 2     | 2     | 1     |
| 36062  | 2     | 1     | 3     | 3     |
| 36063  |       |       |       |       |
| 36092  | 2     | 4     | 3     | 3     |
| 36097  | 2     | 3     | 2     | 3     |
| 36108  | 1     | 1     | 1     | 1     |
| 36113  | 3     | 3     | 5     | 5     |
| 36117  | 1     | 1     | 1     | 1     |
| 36129  | 3     | 3     | 3     | 3     |
| 36144  | 1     | 1     | 1     | 1     |
| 36152  | 1     | 1     | 1     | 1     |
| 36154  | 3     | 4     | 4     | 2     |
| 36155  | 1     | 1     | 1     | 1     |
| 36167  | 1     | 1     | 1     | 1     |
| 36172  | 2     | 2     | 1     | 1     |
| 36173  | 2     | 2     | 2     | 2     |
| 36174  | 1     | 2     | 3     | 2     |
| 36182  | 1     | 2     | 1     | 1     |
| 36192  | 2     | 3     | 3     | 3     |
| 36195  | 3     | 3     | 4     | 4     |
| 36204  | 3     | 3     | 2     | 1     |
| 36205  | 1     | 2     | 1     | 1     |
| 36208  | 1     | 2     | 1     | 1     |
| 36216  | 2     | 3     | 2     | 3     |
| 36221  | 3     | 3     | 3     | 3     |
| 36244  | 1     | 1     | 1     | 1     |
| 36255  | 4     | 5     | 5     | 4     |
| 36259  | 1     | 1     | 2     | 1     |
| 36262  | 2     | 3     | 2     | 3     |
| 36268  | 1     | 1     | 1     | 1     |
| 36308  | 4     | 4     | 2     | 3     |
| 36324  | 5     | 2     | 3     | 2     |

| respid | Q40_1 | Q40_2 | Q40_3 | Q40_4 |
|--------|-------|-------|-------|-------|
| 36330  | 1     | 1     | 1     | 1     |
| 36331  | 1     | 2     | 4     | 1     |
| 36336  | 2     | 2     | 1     | 1     |
| 36337  | 3     | 2     | 2     | 2     |
| 36364  | 2     | 2     | 2     | 2     |
| 36365  | 3     | 2     | 3     | 3     |
| 36396  | 2     | 2     | 1     | 1     |
| 36403  | 1     | 1     | 2     | 1     |
| 36410  | 1     | 1     | 1     | 1     |
| 36413  | 1     | 1     | 1     | 1     |
| 36422  | 1     | 2     | 1     | 1     |
| 36424  | 2     | 2     | 5     | 3     |
| 36425  | 3     | 3     | 4     | 2     |
| 36432  | 2     | 2     | 2     | 2     |
| 36435  | 3     | 3     | 4     | 4     |
| 36446  | 3     | 4     | 3     | 3     |
| 36451  | 2     | 2     | 3     | 4     |
| 36453  | 3     | 2     | 5     | 4     |
| 36459  | 2     | 2     | 3     | 3     |
| 36464  | 3     | 3     | 3     | 2     |
| 36465  | 2     | 2     | 3     | 2     |
| 36466  |       |       |       |       |
| 36476  | 2     | 2     | 3     | 2     |
| 36487  | 1     | 2     | 3     | 2     |
| 36488  | 3     | 3     | 3     | 3     |
| 36500  |       |       |       |       |
| 36504  | 3     | 2     | 2     | 2     |
| 36513  | 2     | 3     | 2     | 3     |
| 36515  | 4     | 3     | 3     | 3     |
| 36521  | 4     | 4     | 3     | 4     |
| 36530  | 2     | 2     | 2     | 3     |
| 36556  | 2     | 3     | 4     | 4     |

| respid | Q40_1 | Q40_2 | Q40_3 | Q40_4 |
|--------|-------|-------|-------|-------|
| 36564  | 3     | 2     | 5     | 4     |
| 36584  | 1     | 1     | 1     | 1     |
| 36585  |       |       |       |       |
| 36586  |       |       |       |       |
| 36606  | 3     | 4     | 4     | 4     |
| 36615  | 1     | 1     | 2     | 1     |
| 36628  | 1     | 1     | 1     | 2     |
| 36630  | 2     | 2     | 3     | 2     |
| 36631  | 2     | 3     | 3     | 2     |
| 36636  | 1     | 1     | 1     | 1     |
| 36637  | 2     | 1     | 1     | 2     |
| 36651  | 3     | 2     | 3     | 2     |
| 36661  | 1     | 1     | 1     | 1     |
| 36670  | 3     | 3     | 2     | 2     |
| 36671  | 2     | 3     | 1     | 3     |
| 36688  |       |       |       |       |
| 36694  | 1     | 1     | 1     | 1     |
| 36696  |       |       |       |       |
| 36703  |       |       |       |       |
| 36719  | 3     | 4     | 3     | 3     |
| 36721  | 2     | 3     | 4     | 3     |
| 36740  | 5     | 5     | 5     | 5     |
| 36755  | 4     | 1     | 1     | 2     |
| 36765  | 2     | 2     | 2     | 2     |
| 36770  |       |       |       |       |
| 36773  | 2     | 3     | 2     | 2     |
| 36813  | 2     | 1     | 2     | 2     |
| 36819  | 3     | 3     | 4     | 3     |
| 36820  | 2     | 2     | 2     | 2     |
| 36821  | 1     | 1     | 1     | 1     |
| 36827  | 3     | 1     | 1     | 1     |
| 36835  | 1     | 1     | 1     | 1     |



| respid | Q40_1 | Q40_2 | Q40_3 | Q40_4 |
|--------|-------|-------|-------|-------|
| 36837  | 1     | 1     | 1     | 2     |
| 36849  | 2     | 3     | 2     | 2     |
| 36851  | 3     | 2     | 3     | 3     |
| 36868  | 3     | 4     | 3     | 4     |
| 36870  | 1     | 1     | 1     | 1     |
| 36871  |       |       |       |       |
| 36874  | 3     | 2     | 2     | 2     |
| 36878  | 2     | 3     | 3     | 2     |
| 36887  | 1     | 1     | 1     | 1     |
| 36889  | 1     | 2     | 1     | 2     |
| 36891  | 1     | 1     | 1     | 1     |
| 36903  | 3     | 2     | 3     | 2     |
| 36905  | 1     | 1     | 1     | 1     |
| 36913  | 1     | 1     | 1     | 2     |
| 36949  | 3     | 3     | 3     | 3     |
| 36954  | 3     | 3     | 3     | 3     |
| 36962  | 2     | 2     | 2     | 2     |
| 36965  | 2     | 2     | 3     | 2     |
| 36970  | 1     | 1     | 1     | 1     |
| 36979  | 2     | 2     | 3     | 3     |
| 36990  | 3     | 3     | 3     | 2     |
| 36991  | 1     | 1     | 2     | 1     |
| 36992  | 2     | 1     | 2     | 1     |
| 37015  |       |       |       |       |
| 37017  | 2     | 1     | 2     | 2     |
| 37020  |       |       |       |       |
| 37033  | 5     | 4     | 3     | 4     |
| 37041  | 1     | 1     | 1     | 1     |
| 37048  | 4     | 2     | 2     | 3     |
| 37050  | 2     | 1     | 1     | 1     |
| 37054  | 3     | 3     | 3     | 3     |
| 37057  | 2     | 3     | 4     | 2     |

| respid | Q40_1 | Q40_2 | Q40_3 | Q40_4 |
|--------|-------|-------|-------|-------|
| 37067  | 1     | 1     | 2     | 1     |
| 37074  | 1     | 1     | 1     | 1     |
| 37088  | 2     | 2     | 2     | 2     |
| 37090  | 3     | 4     | 3     | 2     |
| 37110  | 4     | 3     | 3     | 2     |
| 37122  | 2     | 1     | 2     | 1     |
| 37124  | 2     | 3     | 1     | 2     |
| 37126  |       |       |       |       |
| 37129  | 2     | 3     | 3     | 3     |
| 37130  | 2     | 2     | 2     | 1     |
| 37142  | 3     | 3     | 2     | 2     |
| 37160  | 2     | 2     | 3     | 2     |
| 37168  | 1     | 1     | 1     | 1     |
| 37169  | 3     | 3     | 3     | 3     |
| 37191  | 1     | 2     | 2     | 2     |
| 37197  | 2     | 3     | 3     | 4     |
| 37204  | 3     | 2     | 3     | 1     |
| 37213  | 5     | 6     | 4     | 6     |
| 37238  | 3     | 3     | 4     | 1     |
| 37242  | 2     | 3     | 3     | 3     |
| 37243  | 4     | 3     | 2     | 1     |
| 37275  | 1     | 1     | 3     | 3     |
| 37305  | 2     | 2     | 3     | 2     |
| 37357  | 3     | 2     | 3     | 4     |
| 37365  | 3     | 4     | 4     | 3     |
| 37370  |       |       |       |       |
| 37406  | 4     | 4     | 4     | 4     |
| 37410  | 2     | 3     | 2     | 2     |
| 37411  | 2     | 2     | 2     | 3     |
| 37427  | 3     | 4     | 5     | 4     |
| 37437  | 4     | 3     | 3     | 4     |
| 37440  | 1     | 2     | 2     | 2     |

| respid | Q40_1 | Q40_2 | Q40_3 | Q40_4 |
|--------|-------|-------|-------|-------|
| 37452  | 2     | 1     | 1     | 2     |
| 37465  | 5     | 4     | 3     | 4     |
| 37468  | 3     | 3     | 4     | 3     |
| 37469  | 4     | 2     | 2     | 1     |
| 37477  | 3     | 5     | 4     | 3     |
| 37509  | 1     | 1     | 1     | 1     |
| 37513  | 4     | 2     | 5     | 2     |
| 37534  | 3     | 3     | 3     | 3     |
| 37537  | 1     | 1     | 1     | 1     |
| 37560  | 4     | 3     | 3     | 4     |
| 37566  | 5     | 4     | 5     | 6     |
| 37572  | 3     | 1     | 3     | 2     |
| 37574  | 2     | 3     | 3     | 3     |
| 37575  | 3     | 2     | 3     | 2     |
| 37590  | 3     | 2     | 5     | 5     |
| 37593  | 1     | 1     | 2     | 2     |
| 37599  | 1     | 1     | 1     | 1     |
| 37641  | 1     | 1     | 2     | 1     |
| 37651  | 2     | 2     | 3     | 2     |
| 37670  | 5     | 2     | 1     | 1     |
| 37680  | 4     | 5     | 3     | 2     |
| 37690  | 2     | 3     | 5     | 2     |
| 37694  |       |       |       |       |
| 37705  | 3     | 2     | 2     | 1     |
| 37710  | 3     | 3     | 3     | 3     |
| 37719  | 2     | 4     | 4     | 4     |
| 37741  | 2     | 3     | 3     | 3     |
| 37752  | 3     | 1     | 1     | 1     |
| 37755  | 1     | 4     | 3     | 3     |
| 37757  | 1     | 1     | 1     | 1     |
| 37783  | 1     | 2     | 2     | 2     |
| 37793  | 5     | 5     | 4     | 4     |

| respid | Q40_1 | Q40_2 | Q40_3 | Q40_4 |
|--------|-------|-------|-------|-------|
| 37800  | 3     | 3     | 4     | 4     |
| 37801  | 1     | 1     | 1     | 1     |
| 37820  | 3     | 3     | 3     | 4     |
| 37826  | 3     | 2     | 3     | 3     |
| 37835  | 2     | 3     | 3     | 4     |
| 37839  | 4     | 5     | 3     | 5     |
| 37871  | 4     | 4     | 5     | 5     |
| 37876  | 2     | 4     | 3     | 4     |
| 37879  | 3     | 4     | 3     | 3     |
| 37894  | 2     | 1     | 2     | 1     |
| 37895  | 2     | 3     | 3     | 3     |
| 37901  | 4     | 2     | 2     | 2     |
| 37926  | 2     | 4     | 3     | 2     |
| 37937  | 1     | 2     | 2     | 3     |
| 37938  | 1     | 1     | 1     | 1     |
| 37959  | 3     | 2     | 3     | 1     |
| 37970  |       |       |       |       |
| 37972  | 2     | 3     | 4     | 3     |
| 37988  | 2     | 3     | 3     | 2     |
| 37989  | 3     | 4     | 4     | 5     |
| 38000  | 2     | 2     | 1     | 1     |
| 38028  | 4     | 4     | 5     | 5     |
| 38042  | 5     | 4     | 5     | 6     |
| 38052  | 1     | 2     | 3     | 2     |
| 38056  | 1     | 1     | 1     | 1     |
| 38106  | 3     | 4     | 4     | 3     |
| 38114  | 4     | 4     | 4     | 4     |
| 38134  | 1     | 1     | 2     | 1     |
| 38135  | 2     | 2     | 2     | 2     |
| 38139  | 1     | 2     | 3     | 3     |
| 38160  | 2     | 2     | 2     | 1     |
| 38164  | 2     | 2     | 1     | 1     |

| respid | Q40_1 | Q40_2 | Q40_3 | Q40_4 |
|--------|-------|-------|-------|-------|
| 38168  |       |       |       |       |
| 38173  | 2     | 2     | 1     | 1     |
| 38193  | 3     | 4     | 5     | 5     |
| 38204  | 1     | 1     | 1     | 1     |
| 38206  | 2     | 3     | 4     | 4     |
| 38233  | 5     | 3     | 4     | 5     |
| 38242  | 3     | 4     | 3     | 4     |
| 38245  | 1     | 2     | 2     | 2     |
| 38261  | 5     | 4     | 4     | 5     |
| 38288  | 2     | 1     | 2     | 2     |
| 38296  | 3     | 3     | 3     | 2     |
| 38299  | 2     | 3     | 3     | 2     |
| 38300  | 2     | 3     | 3     | 2     |
| 38303  | 1     | 2     | 2     | 1     |
| 38317  | 1     | 1     | 1     | 1     |
| 38328  | 4     | 4     | 5     | 4     |
| 38333  | 1     | 2     | 2     | 1     |
| 38336  | 1     | 1     | 1     | 1     |
| 38338  | 1     | 1     | 1     | 1     |
| 38342  | 3     | 3     | 3     | 2     |
| 38360  | 2     | 2     | 1     | 1     |
| 38362  | 1     | 3     | 3     | 2     |
| 38364  | 3     | 3     | 2     | 4     |
| 38402  | 1     | 2     | 2     | 1     |
| 38423  | 2     | 3     | 3     | 2     |
| 38424  | 3     | 3     | 3     | 3     |
| 38435  | 3     | 3     | 2     | 2     |
| 38450  | 1     | 1     | 1     | 1     |
| 38455  | 1     | 2     | 1     | 1     |
| 38467  | 1     | 3     | 5     | 4     |
| 38468  | 3     | 4     | 4     | 5     |
| 38472  | 3     | 4     | 4     | 4     |

| respid | Q40_1 | Q40_2 | Q40_3 | Q40_4 |
|--------|-------|-------|-------|-------|
| 38484  | 1     | 1     | 1     | 1     |
| 38498  | 1     | 1     | 2     | 1     |
| 38507  | 2     | 2     | 2     | 1     |
| 38511  | 1     | 3     | 2     | 1     |
| 38524  | 2     | 4     | 5     | 5     |
| 38526  | 3     | 2     | 2     | 2     |
| 38534  | 1     | 2     | 2     | 3     |
| 38536  | 2     | 2     | 2     | 2     |
| 38539  | 1     | 1     | 2     | 1     |
| 38547  | 1     | 1     | 1     | 1     |
| 38549  | 1     | 1     | 2     | 1     |
| 38575  | 4     | 5     | 3     | 5     |
| 38579  | 1     | 2     | 3     | 1     |
| 38585  | 1     | 1     | 1     | 1     |
| 38589  | 3     | 3     | 3     | 3     |
| 38595  | 3     | 4     | 5     | 2     |
| 38602  | 2     | 1     | 1     | 1     |
| 38603  | 4     | 3     | 4     | 4     |
| 38612  | 2     | 2     | 2     | 2     |
| 38621  | 4     | 4     | 4     | 5     |
| 38624  | 2     | 3     | 2     | 4     |
| 38636  |       |       |       |       |
| 38656  | 2     | 2     | 3     | 1     |
| 38668  | 1     | 1     | 1     | 1     |
| 38675  | 2     | 3     | 3     | 3     |
| 38676  | 2     | 1     | 2     | 1     |
| 38682  | 3     | 2     | 2     | 2     |
| 38689  | 1     | 1     | 2     | 1     |
| 38702  |       |       |       |       |
| 38704  | 4     | 4     | 4     | 5     |
| 38713  | 3     | 2     | 1     | 1     |
| 38718  | 2     | 3     | 2     | 3     |

| respid | Q40_1 | Q40_2 | Q40_3 | Q40_4 |
|--------|-------|-------|-------|-------|
| 38725  | 1     | 1     | 1     | 1     |
| 38730  | 5     | 4     | 3     | 4     |
| 38737  | 2     | 2     | 3     | 3     |
| 38738  | 3     | 4     | 3     | 4     |
| 38744  | 1     | 1     | 1     | 1     |
| 38746  | 1     | 2     | 1     | 1     |
| 38753  | 1     | 1     | 2     | 1     |
| 38756  | 2     | 2     | 3     | 3     |
| 38760  | 1     | 1     | 1     | 1     |
| 38762  | 3     | 4     | 4     | 4     |
| 38765  | 2     | 1     | 1     | 1     |
| 38769  | 2     | 3     | 3     | 2     |
| 38781  | 4     | 4     | 4     | 5     |
| 38786  | 6     | 2     | 2     | 2     |
| 38790  | 2     | 2     | 2     | 3     |
| 38793  | 1     | 1     | 1     | 1     |
| 38797  | 1     | 2     | 2     | 1     |
| 38802  | 2     | 3     | 2     | 3     |
| 38815  | 2     | 2     | 3     | 2     |
| 38826  | 3     | 4     | 4     | 4     |
| 38828  | 1     | 1     | 2     | 2     |
| 38829  | 3     | 3     | 3     | 3     |
| 38835  | 4     | 3     | 2     | 3     |
| 38842  | 3     | 3     | 4     | 5     |
| 38853  | 1     | 4     | 4     | 2     |
| 38855  | 4     | 4     | 5     | 5     |
| 38860  | 3     | 4     | 5     | 4     |
| 38869  | 3     | 3     | 4     | 2     |
| 38882  | 4     | 5     | 4     | 4     |
| 38897  | 2     | 3     | 3     | 2     |
| 38903  | 1     | 1     | 1     | 1     |
| 38910  | 4     | 3     | 4     | 4     |

| respid | Q40_1 | Q40_2 | Q40_3 | Q40_4 |
|--------|-------|-------|-------|-------|
| 38948  | 5     | 4     | 4     | 3     |
| 38949  | 3     | 2     | 4     | 2     |
| 38953  | 4     | 4     | 4     | 5     |
| 38989  | 4     | 3     | 5     | 5     |
| 38997  | 3     | 2     | 2     | 2     |
| 38999  | 2     | 3     | 1     | 1     |
| 39002  | 4     | 3     | 4     | 3     |
| 39003  | 3     | 3     | 2     | 2     |
| 39006  | 2     | 1     | 1     | 1     |
| 39014  |       |       |       |       |
| 39017  | 5     | 5     | 4     | 4     |
| 39018  | 5     | 4     | 5     | 4     |
| 39025  | 5     | 4     | 5     | 5     |
| 39031  | 3     | 4     | 4     | 2     |
| 39061  | 3     | 3     | 2     | 3     |
| 39131  | 3     | 3     | 3     | 1     |
| 39153  | 4     | 4     | 5     | 5     |
| 39194  | 1     | 2     | 1     | 3     |
| 39204  | 2     | 2     | 2     | 3     |
| 39208  | 2     | 3     | 4     | 2     |
| 39213  | 4     | 4     | 5     | 2     |
| 39231  | 2     | 2     | 2     | 2     |
| 39251  | 3     | 2     | 5     | 1     |
| 39257  | 5     | 2     | 5     | 1     |
| 39262  | 4     | 4     | 5     | 1     |
| 39269  | 5     | 2     | 5     | 5     |
| 39272  | 3     | 3     | 3     | 2     |
| 39280  | 5     | 4     | 6     | 4     |
| 39294  | 5     | 2     | 4     | 4     |
| 39297  | 4     | 5     | 4     | 5     |
| 39300  | 3     | 3     | 3     | 3     |
| 39307  | 5     | 2     | 5     | 4     |



| respid | Q40_1 | Q40_2 | Q40_3 | Q40_4 |
|--------|-------|-------|-------|-------|
| 39320  | 2     | 5     | 5     | 5     |
| 39333  | 2     | 2     | 1     | 1     |
| 39335  | 4     | 4     | 5     | 4     |
| 39339  | 2     | 2     | 3     | 2     |
| 39375  | 1     | 1     | 2     | 3     |
| 39377  | 1     | 6     | 1     | 1     |
| 39380  | 5     | 3     | 3     | 4     |
| 39425  | 1     | 1     | 2     | 1     |
| 39590  | 1     | 1     | 1     | 1     |
| 40529  | 1     | 1     | 1     | 1     |
| 40702  | 2     | 2     | 2     | 2     |
| 40788  | 1     | 1     | 1     | 1     |
| 40841  | 1     | 1     | 1     | 1     |
| 40965  | 1     | 1     | 1     | 1     |
| 41092  | 1     | 2     | 2     | 1     |
| 41534  |       |       |       |       |
| 41919  | 1     | 1     | 1     | 1     |
| 42110  | 3     | 3     | 3     | 4     |
| 42135  | 3     | 2     | 2     | 3     |
| 42142  | 1     | 1     | 2     | 1     |
| 42163  | 2     | 2     | 2     | 2     |
| 42164  | 3     | 3     | 1     | 1     |
| 42172  | 3     | 3     | 2     | 2     |
| 42177  | 1     | 1     | 1     | 1     |
| 42181  | 2     | 1     | 1     | 1     |
| 42193  | 2     | 3     | 3     | 3     |
| 42196  | 2     | 3     | 2     | 2     |
| 42202  | 3     | 3     | 3     | 3     |
| 42248  | 2     | 3     | 3     | 3     |
| 42283  | 3     | 2     | 2     | 1     |
| 42284  | 2     | 2     | 2     | 3     |
| 42323  |       |       |       |       |

| respid | Q40_1 | Q40_2 | Q40_3 | Q40_4 |
|--------|-------|-------|-------|-------|
| 42349  | 1     | 1     | 2     | 1     |
| 42351  |       |       |       |       |
| 42357  | 1     | 1     | 1     | 1     |
| 42366  |       |       |       |       |
| 42380  | 1     | 1     | 1     | 1     |
| 42414  | 2     | 2     | 2     | 2     |
| 42420  | 4     | 3     | 4     | 4     |
| 42454  |       |       |       |       |
| 42458  | 1     | 2     | 2     | 1     |
| 42461  | 1     | 1     | 1     | 1     |
| 42488  | 2     | 2     | 2     | 2     |
| 42511  | 1     | 1     | 1     | 1     |
| 42512  | 1     | 1     | 1     | 1     |
| 42530  | 3     | 2     | 6     | 5     |
| 42531  | 6     | 5     | 6     | 5     |
| 42533  | 1     | 4     | 5     | 1     |
| 42549  | 1     | 1     | 2     | 1     |
| 42550  | 2     | 3     | 4     | 5     |
| 42553  |       |       |       |       |
| 42562  | 3     | 2     | 3     | 3     |
| 42567  | 1     | 1     | 2     | 1     |
| 42589  | 2     | 2     | 2     | 2     |
| 42604  | 1     | 1     | 2     | 1     |
| 42618  | 3     | 2     | 2     | 2     |
| 42621  | 4     | 3     | 4     | 4     |
| 42627  | 1     | 1     | 1     | 1     |
| 42641  | 1     | 1     | 1     | 1     |
| 42655  | 3     | 3     | 3     | 3     |
| 42666  | 2     | 1     | 3     | 2     |
| 42667  | 3     | 4     | 4     | 5     |
| 42697  | 1     | 2     | 3     | 2     |
| 42703  | 1     | 1     | 1     | 1     |

| respid | Q40_1 | Q40_2 | Q40_3 | Q40_4 |
|--------|-------|-------|-------|-------|
| 42712  | 1     | 3     | 1     | 2     |
| 42731  | 2     | 3     | 2     | 2     |
| 42780  | 1     | 1     | 1     | 1     |
| 42785  | 3     | 2     | 2     | 2     |
| 42788  | 2     | 2     | 1     | 2     |
| 42802  | 2     | 2     | 3     | 3     |
| 42818  | 3     | 2     | 2     | 2     |
| 42821  | 2     | 3     | 5     | 2     |
| 42824  | 2     | 1     | 2     | 1     |
| 42831  | 2     | 2     | 3     | 2     |
| 42836  | 1     | 1     | 1     | 1     |
| 42864  | 3     | 2     | 3     | 2     |
| 42875  | 1     | 1     | 1     | 1     |
| 42891  | 5     | 5     | 5     | 5     |
| 42897  | 1     | 1     | 2     | 1     |
| 42900  | 4     | 2     | 2     | 1     |
| 42902  | 1     | 2     | 3     | 2     |
| 42921  | 1     | 1     | 2     | 1     |
| 42925  | 2     | 2     | 2     | 2     |
| 42944  |       |       |       |       |
| 42950  |       |       |       |       |
| 42963  | 2     | 1     | 2     | 1     |
| 42967  | 1     | 1     | 1     | 1     |
| 42985  | 1     | 1     | 1     | 1     |
| 42990  | 1     | 2     | 2     | 1     |
| 42996  | 1     | 2     | 4     | 4     |
| 43002  | 4     | 1     | 3     | 1     |
| 43004  | 1     | 4     | 1     | 1     |
| 43012  | 1     | 1     | 1     | 1     |
| 43027  | 3     | 4     | 3     | 4     |
| 43028  | 1     | 1     | 1     | 2     |
| 43029  | 3     | 1     | 2     | 1     |

| respid | Q40_1 | Q40_2 | Q40_3 | Q40_4 |
|--------|-------|-------|-------|-------|
| 43031  | 1     | 1     | 2     | 1     |
| 43042  | 1     | 1     | 1     | 1     |
| 43054  | 3     | 2     | 2     | 2     |
| 43058  | 1     | 1     | 1     | 1     |
| 43064  | 1     | 2     | 2     | 2     |
| 43069  | 1     | 2     | 2     | 3     |
| 43071  |       |       |       |       |
| 43072  | 1     | 1     | 1     | 1     |
| 43077  | 2     | 2     | 2     | 2     |
| 43078  | 3     | 3     | 3     | 4     |
| 43082  |       |       |       |       |
| 43092  | 2     | 1     | 1     | 1     |
| 43096  | 1     | 1     | 2     | 2     |
| 43109  |       |       |       |       |
| 43113  | 2     | 2     | 2     | 2     |
| 43123  | 2     | 2     | 2     | 1     |
| 43127  | 1     | 1     | 1     | 1     |
| 43128  | 1     | 1     | 3     | 1     |
| 43129  | 1     | 1     | 1     | 1     |
| 43133  | 3     | 4     | 4     | 5     |
| 43140  |       |       |       |       |
| 43143  | 1     | 2     | 3     | 4     |
| 43149  | 1     | 2     | 3     | 4     |
| 43150  | 2     | 3     | 2     | 3     |
| 43153  | 4     | 3     | 4     | 3     |
| 43170  | 1     | 1     | 1     | 1     |
| 43187  | 2     | 3     | 3     | 2     |
| 43188  | 3     | 3     | 2     | 3     |
| 43198  | 3     | 1     | 2     | 1     |
| 43208  | 1     | 1     | 1     | 1     |
| 43216  | 1     | 2     | 1     | 1     |
| 43222  | 2     | 3     | 2     | 3     |

| respid | Q40_1 | Q40_2 | Q40_3 | Q40_4 |
|--------|-------|-------|-------|-------|
| 43224  | 1     | 2     | 2     | 2     |
| 43230  | 2     | 3     | 4     | 5     |
| 43231  | 2     | 2     | 2     | 3     |
| 43265  | 2     | 3     | 4     | 5     |
| 43270  | 2     | 3     | 2     | 3     |
| 43283  | 2     | 3     | 4     | 5     |
| 43295  | 2     | 3     | 4     | 5     |
| 43297  | 1     | 1     | 1     | 1     |
| 43299  | 2     | 2     | 2     | 3     |
| 43307  | 3     | 3     | 2     | 2     |
| 43316  | 3     | 3     | 3     | 4     |
| 43318  | 2     | 3     | 3     | 4     |
| 43319  | 1     | 1     | 1     | 1     |
| 43324  | 2     | 3     | 2     | 3     |
| 43325  | 3     | 6     | 6     | 5     |
| 43327  | 1     | 1     | 1     | 2     |
| 43338  | 2     | 2     | 1     | 1     |
| 43342  | 1     | 1     | 4     | 1     |
| 43348  | 1     | 1     | 1     | 1     |
| 43395  | 2     | 3     | 4     | 4     |
| 43404  | 2     | 2     | 2     | 3     |
| 43406  | 1     | 1     | 2     | 1     |
| 43407  | 1     | 1     | 1     | 1     |
| 43411  | 1     | 1     | 1     | 1     |
| 43416  | 1     | 1     | 2     | 3     |
| 43428  | 1     | 1     | 1     | 1     |
| 43429  | 3     | 4     | 3     | 3     |
| 43432  | 1     | 1     | 2     | 1     |
| 43443  | 1     | 1     | 1     | 1     |
| 43455  |       |       |       |       |
| 43457  | 3     | 3     | 3     | 3     |
| 43458  | 1     | 2     | 1     | 1     |

| respid | Q40_1 | Q40_2 | Q40_3 | Q40_4 |
|--------|-------|-------|-------|-------|
| 43477  | 3     | 4     | 4     | 3     |
| 43520  | 1     | 1     | 1     | 2     |
| 43521  | 1     | 2     | 2     | 2     |
| 43550  | 1     | 1     | 2     | 1     |
| 43551  | 1     | 2     | 2     | 1     |
| 43554  | 3     | 4     | 3     | 2     |
| 43560  | 1     | 2     | 2     | 1     |
| 43569  | 1     | 1     | 1     | 1     |
| 43583  | 2     | 2     | 1     | 1     |
| 43590  | 2     | 3     | 3     | 3     |
| 43591  | 1     | 1     | 1     | 1     |
| 43595  |       |       |       |       |
| 43599  | 3     | 2     | 3     | 3     |
| 43606  | 1     | 1     | 2     | 1     |
| 43609  | 1     | 1     | 1     | 1     |
| 43629  | 1     | 1     | 1     | 1     |
| 43636  | 1     | 1     | 1     | 2     |
| 43661  | 5     | 1     | 1     | 1     |
| 43668  | 1     | 1     | 2     | 1     |
| 43672  |       |       |       |       |
| 43677  | 3     | 2     | 3     | 3     |
| 43683  | 1     | 2     | 3     | 1     |
| 43708  | 3     | 2     | 3     | 3     |
| 43713  | 1     | 1     | 1     | 1     |
| 43718  |       |       |       |       |
| 43725  | 1     | 1     | 1     | 1     |
| 43747  | 1     | 1     | 2     | 1     |
| 43755  | 1     | 1     | 2     | 1     |
| 43770  | 1     | 1     | 1     | 1     |
| 43775  | 3     | 2     | 3     | 3     |
| 43788  |       |       |       |       |
| 43790  | 3     | 3     | 3     | 4     |

| respid | Q40_1 | Q40_2 | Q40_3 | Q40_4 |
|--------|-------|-------|-------|-------|
| 43797  | 1     | 1     | 1     | 2     |
| 43798  | 2     | 3     | 4     | 3     |
| 43811  | 3     | 3     | 4     | 5     |
| 43819  | 3     | 3     | 4     | 4     |
| 43821  | 4     | 3     | 4     | 3     |
| 43822  | 1     | 1     | 1     | 1     |
| 43825  | 3     | 2     | 4     | 2     |
| 43826  | 1     | 2     | 2     | 1     |
| 43831  | 2     | 1     | 3     | 2     |
| 43836  | 2     | 3     | 4     | 5     |
| 43852  | 2     | 2     | 3     | 3     |
| 43857  | 2     | 2     | 4     | 3     |
| 43858  | 2     | 3     | 2     | 1     |
| 43859  | 3     | 3     | 3     | 4     |
| 43863  | 1     | 1     | 1     | 1     |
| 43868  | 2     | 3     | 4     | 5     |
| 43872  | 3     | 3     | 4     | 5     |
| 43874  | 3     | 3     | 3     | 4     |
| 43882  | 1     | 1     | 1     | 1     |
| 43886  |       |       |       |       |
| 43903  | 1     | 2     | 3     | 4     |
| 43929  | 3     | 2     | 2     | 1     |
| 43932  | 2     | 1     | 1     | 1     |
| 43936  | 1     | 1     | 3     | 1     |
| 43962  | 1     | 1     | 1     | 1     |
| 43964  | 1     | 1     | 1     | 1     |
| 43968  | 1     | 2     | 1     | 1     |
| 43979  | 3     | 2     | 3     | 2     |
| 44006  | 5     | 5     | 5     | 5     |
| 44009  | 2     | 1     | 1     | 2     |
| 44023  | 4     | 3     | 3     | 3     |
| 44035  | 2     | 3     | 3     | 4     |

| respid | Q40_1 | Q40_2 | Q40_3 | Q40_4 |
|--------|-------|-------|-------|-------|
| 44038  | 3     | 3     | 4     | 4     |
| 44039  | 2     | 3     | 4     | 5     |
| 44043  | 2     | 2     | 2     | 2     |
| 44048  | 2     | 3     | 4     | 5     |
| 44050  | 1     | 1     | 1     | 1     |
| 44051  | 2     | 2     | 3     | 3     |
| 44061  | 4     | 4     | 4     | 4     |
| 44063  | 3     | 3     | 4     | 4     |
| 44072  | 3     | 3     | 4     | 4     |
| 44075  | 2     | 3     | 4     | 4     |
| 44089  | 2     | 3     | 4     | 5     |
| 44090  | 3     | 4     | 5     | 4     |
| 44091  | 3     | 3     | 4     | 3     |
| 44092  | 2     | 2     | 2     | 2     |
| 44110  | 3     | 3     | 3     | 3     |
| 44112  | 2     | 3     | 4     | 5     |
| 44114  | 3     | 3     | 3     | 4     |
| 44143  | 3     | 3     | 3     | 3     |
| 44179  | 1     | 1     | 2     | 1     |
| 44234  | 1     | 1     | 1     | 1     |
| 44236  | 3     | 3     | 3     | 3     |
| 44239  | 2     | 3     | 4     | 5     |
| 44241  | 4     | 4     | 4     | 5     |
| 44253  |       |       |       |       |
| 44260  | 3     | 3     | 4     | 4     |
| 44261  | 2     | 3     | 4     | 5     |
| 44263  | 3     | 3     | 4     | 4     |
| 44264  | 1     | 1     | 2     | 1     |
| 44265  | 1     | 1     | 1     | 1     |
| 44267  | 2     | 3     | 4     | 5     |
| 44306  | 3     | 4     | 3     | 3     |
| 44309  | 2     | 3     | 3     | 3     |



| respid | Q40_1 | Q40_2 | Q40_3 | Q40_4 |
|--------|-------|-------|-------|-------|
| 44310  | 3     | 1     | 2     | 2     |
| 44361  | 3     | 3     | 3     | 3     |
| 44380  | 2     | 1     | 1     | 1     |
| 44386  | 1     | 1     | 1     | 1     |
| 44419  | 1     | 2     | 2     | 2     |
| 44426  | 1     | 1     | 2     | 1     |
| 44479  | 2     | 3     | 3     | 1     |
| 44484  | 1     | 1     | 1     | 1     |
| 44487  | 1     | 2     | 2     | 2     |
| 44509  | 1     | 1     | 1     | 1     |
| 44540  | 3     | 4     | 3     | 2     |
| 44551  | 2     | 2     | 2     | 2     |
| 44553  | 5     | 2     | 1     | 1     |
| 44650  | 3     | 1     | 2     | 1     |
| 44665  | 3     | 3     | 4     | 2     |
| 44779  | 1     | 1     | 1     | 1     |
| 44797  | 1     | 4     | 2     | 1     |
| 44807  | 1     | 1     | 1     | 1     |
| 44815  | 3     | 4     | 3     | 2     |
| 44836  | 1     | 1     | 1     | 1     |
| 44868  | 2     | 3     | 2     | 1     |
| 44927  | 2     | 2     | 1     | 2     |
| 44983  |       |       |       |       |
| 45040  | 3     | 1     | 1     | 1     |
| 45051  | 2     | 2     | 1     | 1     |
| 45067  | 1     | 1     | 3     | 2     |
| 45074  |       |       |       |       |
| 45115  | 1     | 1     | 3     | 1     |
| 45187  | 4     | 4     | 4     | 3     |
| 45221  | 4     | 4     | 4     | 4     |
| 45279  | 4     | 3     | 3     | 1     |
| 45308  | 2     | 2     | 2     | 1     |

| respid | Q40_1 | Q40_2 | Q40_3 | Q40_4 |
|--------|-------|-------|-------|-------|
| 45317  | 1     | 1     | 1     | 2     |
| 45379  | 2     | 3     | 3     | 2     |
| 45451  | 3     | 2     | 2     | 1     |
| 45472  | 4     | 5     | 5     | 4     |
| 45474  | 4     | 4     | 5     | 5     |
| 45544  | 6     | 6     | 6     | 5     |
| 45561  | 1     | 1     | 2     | 1     |
| 45596  | 1     | 1     | 2     | 1     |

| Instrum                                                                          |       | OAB-q SF                      | OAB-q SF                                                                      | OAB-q SF                                                    | OAB-q SF |
|----------------------------------------------------------------------------------|-------|-------------------------------|-------------------------------------------------------------------------------|-------------------------------------------------------------|----------|
| Symptom                                                                          |       |                               |                                                                               |                                                             |          |
| Type of RHRQoL                                                                   |       | HRQoL                         | HRQoL                                                                         | HRQoL                                                       | HRQoL    |
| e. Made you avoid activities away from restrooms (i.e., walks, running, hiking)? |       | f. Awakened you during sleep? | g. Caused you to decrease your physical activities (exercising, sports, etc.) | h. Caused you to have problems with your partner or spouse? |          |
| respid                                                                           | Q40_5 | Q40_6                         | Q40_7                                                                         | Q40_8                                                       |          |
| 241                                                                              | 1     | 2                             | 1                                                                             | 1                                                           |          |
| 242                                                                              | 1     | 2                             | 1                                                                             | 1                                                           |          |
| 243                                                                              | 2     | 2                             | 2                                                                             | 2                                                           |          |
| 244                                                                              | 1     | 3                             | 2                                                                             | 1                                                           |          |
| 245                                                                              | 1     | 1                             | 1                                                                             | 1                                                           |          |
| 246                                                                              | 1     | 2                             | 1                                                                             | 1                                                           |          |
| 247                                                                              | 1     | 2                             | 2                                                                             | 1                                                           |          |
| 253                                                                              | 1     | 2                             | 1                                                                             | 1                                                           |          |
| 256                                                                              | 2     | 2                             | 2                                                                             | 2                                                           |          |
| 257                                                                              | 1     | 2                             | 1                                                                             | 1                                                           |          |
| 258                                                                              | 2     | 2                             | 2                                                                             | 1                                                           |          |
| 259                                                                              | 2     | 1                             | 1                                                                             | 1                                                           |          |
| 263                                                                              | 1     | 1                             | 1                                                                             | 1                                                           |          |
| 264                                                                              | 1     | 2                             | 1                                                                             | 1                                                           |          |
| 265                                                                              | 3     | 3                             | 3                                                                             | 2                                                           |          |
| 266                                                                              | 1     | 1                             | 1                                                                             | 1                                                           |          |
| 268                                                                              | 1     | 1                             | 1                                                                             | 1                                                           |          |
| 270                                                                              | 3     | 1                             | 1                                                                             | 1                                                           |          |
| 272                                                                              | 1     | 2                             | 2                                                                             | 1                                                           |          |
| 274                                                                              | 1     | 2                             | 1                                                                             | 1                                                           |          |

| respid | Q40_5 | Q40_6 | Q40_7 | Q40_8 |
|--------|-------|-------|-------|-------|
| 275    |       |       |       |       |
| 276    | 1     | 1     | 1     | 1     |
| 277    | 1     | 1     | 1     | 1     |
| 279    | 2     | 2     | 2     | 2     |
| 286    | 2     | 2     | 1     | 1     |
| 290    | 2     | 1     | 2     | 1     |
| 291    | 1     | 2     | 1     | 1     |
| 295    |       |       |       |       |
| 297    | 1     | 2     | 1     | 1     |
| 299    | 2     | 4     | 3     | 1     |
| 300    | 1     | 2     | 3     | 2     |
| 303    | 1     | 1     | 1     | 1     |
| 304    | 1     | 1     | 1     | 1     |
| 306    | 1     | 1     | 1     | 1     |
| 307    | 1     | 2     | 1     | 1     |
| 312    | 5     | 5     | 5     | 4     |
| 315    | 1     | 1     | 1     | 1     |
| 317    | 1     | 1     | 1     | 1     |
| 322    | 2     | 2     | 2     | 2     |
| 335    | 2     | 2     | 2     | 1     |
| 374    | 2     | 2     | 3     | 2     |
| 378    | 1     | 1     | 1     | 1     |
| 380    | 2     | 2     | 2     | 1     |
| 382    | 1     | 2     | 1     | 1     |
| 384    | 2     | 2     | 1     | 1     |
| 385    | 2     | 3     | 1     | 1     |
| 395    | 1     | 1     | 1     | 1     |
| 396    |       |       |       |       |
| 398    |       |       |       |       |
| 402    | 3     | 3     | 3     | 3     |
| 414    | 1     | 1     | 1     | 2     |
| 415    | 1     | 1     | 1     | 1     |

| respid | Q40_5 | Q40_6 | Q40_7 | Q40_8 |
|--------|-------|-------|-------|-------|
| 416    | 1     | 1     | 1     | 1     |
| 420    | 1     | 2     | 1     | 1     |
| 421    | 1     | 2     | 1     | 1     |
| 422    | 1     | 1     | 1     | 1     |
| 423    | 1     | 2     | 1     | 1     |
| 424    | 1     | 1     | 1     | 1     |
| 425    | 1     | 2     | 1     | 2     |
| 428    | 2     | 1     | 1     | 1     |
| 429    | 1     | 2     | 1     | 1     |
| 431    | 1     | 1     | 1     | 1     |
| 437    | 1     | 2     | 1     | 1     |
| 438    | 1     | 1     | 1     | 1     |
| 441    | 1     | 3     | 1     | 1     |
| 444    | 1     | 1     | 1     | 1     |
| 448    | 1     | 1     | 1     | 1     |
| 449    | 1     | 2     | 1     | 1     |
| 457    | 3     | 3     | 2     | 2     |
| 460    | 1     | 1     | 1     | 1     |
| 469    | 2     | 1     | 2     | 2     |
| 471    | 1     | 3     | 1     | 1     |
| 473    | 4     | 4     | 2     | 2     |
| 476    | 1     | 2     | 1     | 2     |
| 479    | 1     | 1     | 1     | 1     |
| 485    | 1     | 1     | 1     | 1     |
| 488    | 3     | 6     | 2     | 1     |
| 494    | 1     | 3     | 1     | 1     |
| 496    | 1     | 1     | 1     | 1     |
| 501    |       |       |       |       |
| 502    | 2     | 3     | 3     | 2     |
| 503    | 1     | 3     | 1     | 1     |
| 506    | 1     | 1     | 1     | 1     |
| 514    | 2     | 3     | 2     | 1     |

| respid | Q40_5 | Q40_6 | Q40_7 | Q40_8 |
|--------|-------|-------|-------|-------|
| 515    | 1     | 2     | 1     | 1     |
| 516    | 1     | 1     | 1     | 1     |
| 519    | 1     | 1     | 1     | 1     |
| 522    |       |       |       |       |
| 525    | 1     | 1     | 1     | 1     |
| 528    | 1     | 2     | 1     | 1     |
| 532    | 1     | 1     | 1     | 1     |
| 536    | 1     | 2     | 2     | 2     |
| 539    | 2     | 4     | 1     | 1     |
| 540    | 1     | 2     | 1     | 1     |
| 547    | 4     | 4     | 2     | 1     |
| 551    | 1     | 1     | 1     | 1     |
| 554    | 3     | 4     | 1     | 1     |
| 558    | 1     | 1     | 2     | 2     |
| 563    | 1     | 2     | 1     | 1     |
| 564    | 2     | 2     | 2     | 2     |
| 565    | 1     | 2     | 1     | 1     |
| 567    | 1     | 1     | 1     | 1     |
| 569    | 1     | 2     | 1     | 1     |
| 572    | 1     | 1     | 1     | 1     |
| 574    | 1     | 2     | 1     | 1     |
| 583    | 2     | 2     | 2     | 3     |
| 589    | 1     | 2     | 1     | 1     |
| 592    | 1     | 1     | 1     | 1     |
| 593    |       |       |       |       |
| 594    | 3     | 3     | 4     | 2     |
| 597    | 1     | 2     | 1     | 1     |
| 601    | 4     | 4     | 3     | 1     |
| 607    | 1     | 2     | 1     | 1     |
| 610    | 1     | 1     | 1     | 1     |
| 612    | 2     | 2     | 1     | 1     |
| 627    | 1     | 1     | 1     | 1     |

| respid | Q40_5 | Q40_6 | Q40_7 | Q40_8 |
|--------|-------|-------|-------|-------|
| 631    | 1     | 1     | 1     | 1     |
| 633    | 1     | 2     | 1     | 1     |
| 636    | 1     | 2     | 1     | 1     |
| 656    | 1     | 2     | 1     | 1     |
| 659    | 1     | 2     | 1     | 1     |
| 670    | 1     | 1     | 1     | 1     |
| 672    | 1     | 1     | 1     | 1     |
| 673    | 2     | 2     | 1     | 1     |
| 675    | 1     | 1     | 1     | 1     |
| 676    | 2     | 2     | 3     | 3     |
| 679    | 1     | 3     | 2     | 1     |
| 683    | 1     | 1     | 1     | 1     |
| 684    | 1     | 1     | 1     | 1     |
| 690    | 1     | 1     | 1     | 1     |
| 701    | 4     | 4     | 3     | 4     |
| 709    | 1     | 2     | 1     | 1     |
| 719    | 1     | 2     | 1     | 1     |
| 726    | 1     | 2     | 1     | 1     |
| 730    | 1     | 3     | 1     | 1     |
| 731    | 1     | 2     | 1     | 1     |
| 732    | 1     | 1     | 1     | 1     |
| 733    | 1     | 1     | 1     | 1     |
| 735    | 1     | 1     | 1     | 1     |
| 738    | 1     | 2     | 1     | 1     |
| 740    | 1     | 2     | 1     | 1     |
| 742    | 1     | 1     | 1     | 1     |
| 744    | 1     | 2     | 1     | 1     |
| 749    | 1     | 2     | 1     | 2     |
| 751    | 1     | 3     | 1     | 1     |
| 752    | 1     | 5     | 1     | 1     |
| 753    | 1     | 3     | 1     | 1     |
| 755    | 2     | 2     | 1     | 1     |

| respid | Q40_5 | Q40_6 | Q40_7 | Q40_8 |
|--------|-------|-------|-------|-------|
| 756    |       |       |       |       |
| 759    | 1     | 1     | 1     | 1     |
| 760    | 2     | 2     | 2     | 1     |
| 763    | 1     | 1     | 1     | 1     |
| 764    | 1     | 2     | 1     | 1     |
| 765    | 1     | 1     | 1     | 1     |
| 766    | 1     | 2     | 1     | 1     |
| 767    | 2     | 1     | 1     | 1     |
| 771    | 1     | 3     | 1     | 1     |
| 773    | 1     | 3     | 1     | 1     |
| 774    | 2     | 2     | 1     | 1     |
| 775    | 2     | 2     | 2     | 1     |
| 776    | 1     | 2     | 1     | 1     |
| 778    | 1     | 2     | 1     | 1     |
| 780    | 1     | 3     | 1     | 1     |
| 781    | 1     | 1     | 1     | 1     |
| 782    | 4     | 5     | 4     | 3     |
| 783    | 2     | 3     | 2     | 1     |
| 786    | 4     | 5     | 5     | 4     |
| 788    |       |       |       |       |
| 792    | 1     | 1     | 1     | 1     |
| 794    | 2     | 4     | 2     | 2     |
| 795    | 1     | 2     | 1     | 1     |
| 799    | 1     | 2     | 1     | 1     |
| 800    | 1     | 1     | 1     | 1     |
| 801    | 1     | 5     | 1     | 1     |
| 804    | 1     | 2     | 1     | 1     |
| 806    | 1     | 1     | 1     | 1     |
| 807    | 1     | 2     | 1     | 1     |
| 808    | 4     | 4     | 3     | 3     |
| 809    | 1     | 1     | 1     | 1     |
| 811    | 1     | 1     | 1     | 1     |



| respid | Q40_5 | Q40_6 | Q40_7 | Q40_8 |
|--------|-------|-------|-------|-------|
| 812    | 1     | 4     | 1     | 1     |
| 815    | 1     | 1     | 1     | 1     |
| 817    | 1     | 1     | 1     | 1     |
| 818    | 1     | 2     | 1     | 1     |
| 819    | 1     | 2     | 1     | 1     |
| 821    | 1     | 1     | 1     | 1     |
| 824    | 2     | 5     | 1     | 2     |
| 825    | 1     | 2     | 2     | 1     |
| 828    | 1     | 2     | 1     | 1     |
| 832    | 3     | 2     | 2     | 2     |
| 834    | 2     | 2     | 2     | 1     |
| 835    | 3     | 4     | 2     | 2     |
| 836    | 1     | 2     | 1     | 1     |
| 837    | 1     | 1     | 1     | 1     |
| 840    | 1     | 2     | 1     | 1     |
| 841    | 1     | 1     | 1     | 1     |
| 845    | 1     | 1     | 1     | 1     |
| 846    | 1     | 2     | 1     | 1     |
| 849    | 1     | 2     | 1     | 1     |
| 852    | 1     | 2     | 1     | 2     |
| 854    | 2     | 2     | 2     | 2     |
| 856    | 1     | 1     | 1     | 1     |
| 858    | 1     | 1     | 1     | 1     |
| 859    | 1     | 2     | 1     | 1     |
| 861    | 1     | 2     | 1     | 1     |
| 863    | 1     | 1     | 1     | 1     |
| 864    | 2     | 4     | 3     | 3     |
| 866    | 1     | 1     | 1     | 1     |
| 869    | 1     | 2     | 1     | 1     |
| 870    | 1     | 2     | 2     | 1     |
| 871    | 1     | 2     | 3     | 2     |
| 873    | 1     | 2     | 1     | 1     |

| respid | Q40_5 | Q40_6 | Q40_7 | Q40_8 |
|--------|-------|-------|-------|-------|
| 879    | 4     | 3     | 2     | 2     |
| 880    | 1     | 2     | 1     | 1     |
| 881    | 3     | 4     | 2     | 2     |
| 882    | 1     | 3     | 1     | 1     |
| 885    |       |       |       |       |
| 886    | 2     | 2     | 2     | 1     |
| 887    | 3     | 4     | 3     | 3     |
| 888    | 1     | 1     | 1     | 1     |
| 889    | 1     | 2     | 1     | 1     |
| 890    | 1     | 1     | 1     | 1     |
| 900    |       |       |       |       |
| 901    | 1     | 2     | 1     | 1     |
| 902    | 2     | 4     | 1     | 1     |
| 903    | 1     | 1     | 1     | 1     |
| 906    | 1     | 5     | 1     | 1     |
| 907    | 1     | 2     | 1     | 1     |
| 908    | 2     | 2     | 2     | 1     |
| 910    | 1     | 2     | 1     | 1     |
| 911    | 1     | 1     | 1     | 1     |
| 912    | 1     | 2     | 1     | 1     |
| 915    |       |       |       |       |
| 923    | 3     | 5     | 4     | 5     |
| 925    | 1     | 1     | 1     | 1     |
| 926    | 1     | 2     | 1     | 1     |
| 929    |       |       |       |       |
| 932    | 1     | 1     | 1     | 1     |
| 933    | 1     | 2     | 1     | 1     |
| 934    | 1     | 3     | 1     | 1     |
| 938    | 1     | 3     | 2     | 1     |
| 941    |       |       |       |       |
| 942    | 1     | 2     | 1     | 1     |
| 943    |       |       |       |       |

| respid | Q40_5 | Q40_6 | Q40_7 | Q40_8 |
|--------|-------|-------|-------|-------|
| 945    | 1     | 2     | 1     | 1     |
| 946    |       |       |       |       |
| 947    | 1     | 1     | 1     | 1     |
| 948    | 1     | 2     | 1     | 1     |
| 949    | 1     | 1     | 1     | 1     |
| 952    | 1     | 2     | 1     | 1     |
| 956    | 1     | 1     | 1     | 1     |
| 957    | 1     | 1     | 1     | 1     |
| 959    | 1     | 1     | 1     | 1     |
| 961    | 1     | 2     | 1     | 1     |
| 962    | 3     | 3     | 4     | 4     |
| 965    | 1     | 3     | 1     | 1     |
| 967    | 1     | 1     | 1     | 1     |
| 969    | 1     | 2     | 1     | 1     |
| 970    |       |       |       |       |
| 973    | 1     | 2     | 1     | 1     |
| 974    | 1     | 2     | 1     | 1     |
| 975    | 2     | 2     | 2     | 2     |
| 976    | 2     | 2     | 1     | 1     |
| 977    | 1     | 1     | 1     | 2     |
| 979    | 1     | 1     | 1     | 1     |
| 981    | 1     | 1     | 1     | 1     |
| 983    | 1     | 1     | 1     | 1     |
| 987    | 1     | 3     | 1     | 1     |
| 991    |       |       |       |       |
| 992    | 1     | 1     | 1     | 1     |
| 993    | 2     | 2     | 2     | 2     |
| 994    | 1     | 4     | 2     | 1     |
| 995    | 3     | 4     | 2     | 1     |
| 998    | 2     | 2     | 2     | 2     |
| 1000   | 3     | 3     | 3     | 1     |
| 1001   | 1     | 4     | 1     | 1     |

| respid | Q40_5 | Q40_6 | Q40_7 | Q40_8 |
|--------|-------|-------|-------|-------|
| 1002   |       |       |       |       |
| 1004   | 1     | 2     | 1     | 1     |
| 1005   | 1     | 2     | 1     | 1     |
| 1006   | 1     | 4     | 2     | 1     |
| 1007   | 2     | 4     | 2     | 2     |
| 1009   |       |       |       |       |
| 1013   | 3     | 4     | 2     | 3     |
| 1015   | 1     | 1     | 1     | 1     |
| 1020   | 3     | 3     | 2     | 3     |
| 1022   | 3     | 3     | 3     | 3     |
| 1024   | 1     | 1     | 1     | 1     |
| 1025   |       |       |       |       |
| 1027   | 2     | 2     | 2     | 3     |
| 1031   | 1     | 2     | 1     | 1     |
| 1037   | 1     | 1     | 1     | 1     |
| 1039   | 1     | 2     | 1     | 1     |
| 1040   | 1     | 1     | 1     | 1     |
| 1056   | 3     | 3     | 3     | 3     |
| 1057   | 1     | 2     | 1     | 1     |
| 1062   | 1     | 3     | 1     | 1     |
| 1069   | 1     | 1     | 1     | 1     |
| 1070   | 1     | 1     | 1     | 1     |
| 1072   | 1     | 2     | 1     | 1     |
| 1076   | 1     | 1     | 1     | 1     |
| 1077   | 1     | 1     | 1     | 1     |
| 1078   | 1     | 2     | 1     | 1     |
| 1080   |       |       |       |       |
| 1094   | 1     | 3     | 2     | 2     |
| 1098   | 2     | 3     | 1     | 2     |
| 1099   | 5     | 2     | 1     | 1     |
| 1102   | 1     | 2     | 1     | 1     |
| 1110   | 1     | 1     | 1     | 1     |

| respid | Q40_5 | Q40_6 | Q40_7 | Q40_8 |
|--------|-------|-------|-------|-------|
| 1117   | 1     | 2     | 1     | 1     |
| 1119   |       |       |       |       |
| 1126   | 1     | 2     | 1     | 1     |
| 1127   | 1     | 1     | 1     | 1     |
| 1130   | 3     | 3     | 2     | 3     |
| 1131   | 1     | 1     | 1     | 1     |
| 1135   | 5     | 4     | 3     | 4     |
| 1138   | 2     | 3     | 2     | 2     |
| 1139   |       |       |       |       |
| 1140   | 4     | 3     | 4     | 2     |
| 1142   |       |       |       |       |
| 1143   |       |       |       |       |
| 1145   | 2     | 2     | 2     | 2     |
| 1149   |       |       |       |       |
| 1152   | 1     | 1     | 1     | 1     |
| 1160   | 2     | 1     | 1     | 1     |
| 1164   |       |       |       |       |
| 1165   | 2     | 2     | 2     | 2     |
| 1169   | 3     | 2     | 2     | 2     |
| 1170   | 1     | 2     | 1     | 1     |
| 1179   | 1     | 2     | 2     | 1     |
| 1180   | 1     | 1     | 1     | 1     |
| 1183   | 1     | 1     | 1     | 1     |
| 1187   | 1     | 1     | 1     | 1     |
| 1188   | 1     | 1     | 1     | 1     |
| 1193   | 1     | 1     | 1     | 1     |
| 1194   | 4     | 3     | 3     | 4     |
| 1197   | 1     | 1     | 1     | 1     |
| 1202   |       |       |       |       |
| 1204   | 3     | 5     | 3     | 5     |
| 1211   | 1     | 1     | 1     | 1     |
| 1224   | 1     | 3     | 1     | 1     |

| respid | Q40_5 | Q40_6 | Q40_7 | Q40_8 |
|--------|-------|-------|-------|-------|
| 1225   | 1     | 1     | 1     | 1     |
| 1230   | 1     | 1     | 1     | 1     |
| 1232   | 1     | 2     | 1     | 1     |
| 1233   | 3     | 3     | 3     | 3     |
| 1234   | 1     | 2     | 1     | 1     |
| 1235   | 2     | 2     | 2     | 1     |
| 1236   | 3     | 5     | 1     | 1     |
| 1237   | 1     | 2     | 1     | 1     |
| 1238   | 2     | 3     | 1     | 1     |
| 1239   | 1     | 2     | 1     | 1     |
| 1241   | 1     | 2     | 1     | 1     |
| 1242   | 1     | 1     | 1     | 1     |
| 1244   | 1     | 5     | 1     | 1     |
| 1245   | 1     | 1     | 1     | 1     |
| 1247   | 2     | 5     | 2     | 1     |
| 1248   | 1     | 2     | 1     | 1     |
| 1249   | 1     | 1     | 1     | 1     |
| 1250   | 1     | 1     | 1     | 1     |
| 1251   | 1     | 2     | 1     | 1     |
| 1252   | 1     | 1     | 1     | 1     |
| 1253   | 1     | 1     | 1     | 1     |
| 1254   | 4     | 6     | 3     | 3     |
| 1258   | 1     | 1     | 1     | 1     |
| 1260   | 2     | 2     | 1     | 3     |
| 1261   | 1     | 2     | 1     | 1     |
| 1262   | 1     | 2     | 1     | 1     |
| 1263   | 2     | 3     | 2     | 1     |
| 1264   | 1     | 2     | 1     | 1     |
| 1265   | 1     | 2     | 1     | 1     |
| 1266   | 1     | 2     | 1     | 1     |
| 1270   | 1     | 1     | 1     | 1     |
| 1272   | 2     | 3     | 2     | 1     |

| respid | Q40_5 | Q40_6 | Q40_7 | Q40_8 |
|--------|-------|-------|-------|-------|
| 1273   | 3     | 2     | 3     | 3     |
| 1276   | 1     | 2     | 1     | 1     |
| 1277   | 1     | 2     | 2     | 2     |
| 1278   | 1     | 2     | 1     | 1     |
| 1280   | 1     | 1     | 1     | 1     |
| 1281   | 2     | 2     | 1     | 2     |
| 1282   | 2     | 2     | 2     | 2     |
| 1283   | 1     | 1     | 1     | 1     |
| 1288   | 1     | 1     | 1     | 1     |
| 1289   | 1     | 1     | 1     | 1     |
| 1290   | 1     | 3     | 1     | 1     |
| 1291   |       |       |       |       |
| 1293   | 1     | 1     | 1     | 1     |
| 1294   | 1     | 2     | 1     | 1     |
| 1295   | 1     | 2     | 1     | 1     |
| 1296   | 2     | 4     | 1     | 1     |
| 1297   | 1     | 2     | 1     | 1     |
| 1298   | 1     | 3     | 1     | 1     |
| 1300   | 1     | 1     | 2     | 1     |
| 1302   | 1     | 1     | 1     | 1     |
| 1303   | 1     | 5     | 2     | 2     |
| 1304   | 1     | 2     | 1     | 1     |
| 1305   | 1     | 1     | 1     | 1     |
| 1307   | 1     | 2     | 1     | 1     |
| 1312   | 1     | 1     | 1     | 1     |
| 1313   | 1     | 1     | 1     | 1     |
| 1314   | 1     | 1     | 1     | 1     |
| 1317   | 1     | 2     | 1     | 1     |
| 1318   | 1     | 2     | 1     | 1     |
| 1319   | 1     | 1     | 1     | 1     |
| 1321   | 1     | 2     | 1     | 1     |
| 1324   | 2     | 4     | 3     | 2     |

| respid | Q40_5 | Q40_6 | Q40_7 | Q40_8 |
|--------|-------|-------|-------|-------|
| 1325   | 1     | 3     | 1     | 1     |
| 1326   | 1     | 1     | 1     | 1     |
| 1327   | 1     | 1     | 1     | 1     |
| 1329   | 2     | 3     | 1     | 2     |
| 1330   | 1     | 6     | 1     | 1     |
| 1331   | 1     | 2     | 1     | 1     |
| 1335   | 1     | 2     | 1     | 1     |
| 1337   | 1     | 2     | 1     | 1     |
| 1341   | 1     | 2     | 1     | 1     |
| 1342   | 1     | 1     | 1     | 1     |
| 1344   | 1     | 2     | 1     | 2     |
| 1345   | 2     | 2     | 1     | 1     |
| 1346   | 1     | 1     | 1     | 1     |
| 1350   | 2     | 3     | 3     | 2     |
| 1352   | 1     | 1     | 1     | 1     |
| 1353   | 1     | 2     | 1     | 1     |
| 1354   | 1     | 2     | 1     | 1     |
| 1355   | 1     | 2     | 1     | 1     |
| 1357   | 1     | 1     | 1     | 1     |
| 1360   |       |       |       |       |
| 1362   | 1     | 1     | 1     | 2     |
| 1363   | 1     | 2     | 1     | 1     |
| 1367   | 1     | 1     | 1     | 1     |
| 1369   | 1     | 3     | 1     | 1     |
| 1371   |       |       |       |       |
| 1372   |       |       |       |       |
| 1375   |       |       |       |       |
| 1377   | 2     | 1     | 2     | 1     |
| 1379   | 2     | 2     | 2     | 2     |
| 1380   | 1     | 3     | 1     | 1     |
| 1382   | 1     | 1     | 1     | 1     |
| 1383   | 1     | 2     | 1     | 1     |



| respid | Q40_5 | Q40_6 | Q40_7 | Q40_8 |
|--------|-------|-------|-------|-------|
| 1384   | 1     | 1     | 1     | 1     |
| 1385   | 1     | 2     | 1     | 1     |
| 1387   | 3     | 1     | 1     | 1     |
| 1388   | 1     | 3     | 1     | 1     |
| 1389   | 2     | 1     | 1     | 1     |
| 1390   | 1     | 2     | 1     | 1     |
| 1395   | 1     | 1     | 1     | 1     |
| 1396   | 1     | 2     | 1     | 1     |
| 1397   | 3     | 3     | 4     | 2     |
| 1398   | 1     | 1     | 1     | 1     |
| 1399   | 1     | 1     | 1     | 1     |
| 1403   | 1     | 1     | 1     | 1     |
| 1405   | 1     | 2     | 2     | 1     |
| 1406   | 5     | 5     | 5     | 1     |
| 1407   | 4     | 5     | 4     | 2     |
| 1408   | 1     | 4     | 1     | 1     |
| 1409   | 1     | 2     | 1     | 1     |
| 1410   | 4     | 4     | 4     | 3     |
| 1411   | 1     | 1     | 1     | 1     |
| 1412   | 1     | 1     | 1     | 1     |
| 1413   | 1     | 2     | 1     | 1     |
| 1414   | 1     | 2     | 1     | 1     |
| 1415   | 1     | 1     | 1     | 1     |
| 1416   | 1     | 1     | 1     | 1     |
| 1417   | 1     | 1     | 1     | 1     |
| 1418   | 1     | 2     | 1     | 1     |
| 1419   | 3     | 4     | 3     | 3     |
| 1420   | 1     | 1     | 1     | 1     |
| 1421   | 1     | 2     | 1     | 2     |
| 1422   | 1     | 1     | 1     | 1     |
| 1423   | 1     | 3     | 1     | 1     |
| 1424   | 3     | 3     | 2     | 3     |

| respid | Q40_5 | Q40_6 | Q40_7 | Q40_8 |
|--------|-------|-------|-------|-------|
| 1429   | 1     | 1     | 1     | 1     |
| 1430   | 1     | 2     | 1     | 1     |
| 1431   | 5     | 5     | 4     | 4     |
| 1433   | 2     | 3     | 2     | 3     |
| 1435   |       |       |       |       |
| 1436   | 1     | 1     | 1     | 1     |
| 1438   |       |       |       |       |
| 1439   | 1     | 3     | 1     | 1     |
| 1441   | 1     | 2     | 1     | 1     |
| 1442   | 1     | 1     | 1     | 1     |
| 1443   |       |       |       |       |
| 1444   | 1     | 1     | 1     | 1     |
| 1445   | 3     | 3     | 3     | 2     |
| 1446   | 1     | 2     | 1     | 1     |
| 1447   | 1     | 1     | 1     | 1     |
| 1449   | 2     | 2     | 2     | 1     |
| 1450   | 1     | 1     | 1     | 1     |
| 1451   | 1     | 3     | 1     | 1     |
| 1452   |       |       |       |       |
| 1453   | 3     | 4     | 2     | 3     |
| 1454   | 2     | 2     | 3     | 3     |
| 1456   | 1     | 1     | 1     | 1     |
| 1457   | 2     | 2     | 1     | 1     |
| 1459   | 3     | 3     | 3     | 3     |
| 1460   | 1     | 2     | 1     | 1     |
| 1463   | 1     | 1     | 1     | 1     |
| 1465   | 2     | 2     | 2     | 2     |
| 1467   | 1     | 2     | 2     | 1     |
| 1470   | 1     | 1     | 1     | 1     |
| 1471   | 2     | 4     | 2     | 2     |
| 1472   | 1     | 1     | 1     | 1     |
| 1474   | 2     | 1     | 1     | 1     |

| respid | Q40_5 | Q40_6 | Q40_7 | Q40_8 |
|--------|-------|-------|-------|-------|
| 1475   | 1     | 3     | 2     | 1     |
| 1477   | 1     | 2     | 1     | 1     |
| 1478   | 3     | 3     | 3     | 3     |
| 1480   |       |       |       |       |
| 1481   | 2     | 2     | 2     | 2     |
| 1483   | 1     | 1     | 1     | 1     |
| 1484   | 1     | 1     | 1     | 1     |
| 1485   | 1     | 1     | 1     | 1     |
| 1486   | 1     | 3     | 1     | 1     |
| 1487   | 2     | 3     | 3     | 3     |
| 1488   | 1     | 3     | 1     | 1     |
| 1489   | 1     | 3     | 2     | 1     |
| 1490   | 5     | 5     | 3     | 5     |
| 1491   | 4     | 3     | 3     | 2     |
| 1492   | 2     | 2     | 2     | 1     |
| 1494   | 1     | 1     | 1     | 1     |
| 1495   | 1     | 2     | 1     | 1     |
| 1496   | 1     | 2     | 1     | 1     |
| 1498   | 1     | 2     | 1     | 1     |
| 1499   | 1     | 1     | 2     | 1     |
| 1500   | 2     | 3     | 1     | 1     |
| 1501   | 1     | 1     | 1     | 1     |
| 1503   |       |       |       |       |
| 1504   | 1     | 2     | 1     | 1     |
| 1508   | 3     | 3     | 3     | 3     |
| 1509   | 2     | 5     | 2     | 1     |
| 1511   | 2     | 6     | 2     | 4     |
| 1512   | 1     | 2     | 1     | 1     |
| 1513   | 3     | 3     | 3     | 3     |
| 1515   | 1     | 2     | 2     | 1     |
| 1517   | 1     | 1     | 1     | 1     |
| 1518   | 1     | 2     | 1     | 1     |

| respid | Q40_5 | Q40_6 | Q40_7 | Q40_8 |
|--------|-------|-------|-------|-------|
| 1519   | 2     | 2     | 2     | 1     |
| 1520   | 1     | 2     | 1     | 1     |
| 1521   | 4     | 3     | 3     | 2     |
| 1522   | 1     | 1     | 1     | 1     |
| 1523   | 2     | 6     | 1     | 1     |
| 1524   | 1     | 2     | 1     | 1     |
| 1525   | 2     | 2     | 1     | 1     |
| 1526   | 2     | 6     | 2     | 2     |
| 1527   | 1     | 1     | 1     | 1     |
| 1534   | 1     | 1     | 1     | 1     |
| 1535   | 1     | 1     | 1     | 1     |
| 1536   | 1     | 2     | 1     | 2     |
| 1538   | 2     | 2     | 2     | 1     |
| 1539   | 1     | 1     | 1     | 1     |
| 1540   | 1     | 2     | 1     | 1     |
| 1541   | 1     | 2     | 1     | 1     |
| 1542   | 1     | 1     | 1     | 1     |
| 1543   | 2     | 2     | 2     | 1     |
| 1545   | 3     | 3     | 3     | 3     |
| 1546   | 1     | 1     | 1     | 1     |
| 1548   | 1     | 5     | 1     | 1     |
| 1549   |       |       |       |       |
| 1551   | 1     | 1     | 1     | 1     |
| 1552   | 1     | 4     | 1     | 1     |
| 1556   | 1     | 1     | 1     | 1     |
| 1557   |       |       |       |       |
| 1558   | 1     | 1     | 1     | 1     |
| 1561   | 1     | 1     | 1     | 1     |
| 1562   | 2     | 2     | 1     | 1     |
| 1563   | 1     | 1     | 1     | 1     |
| 1564   | 3     | 4     | 3     | 2     |
| 1565   |       |       |       |       |

| respid | Q40_5 | Q40_6 | Q40_7 | Q40_8 |
|--------|-------|-------|-------|-------|
| 1566   | 1     | 1     | 1     | 1     |
| 1567   | 1     | 2     | 1     | 1     |
| 1569   |       |       |       |       |
| 1570   | 1     | 1     | 1     | 1     |
| 1574   | 1     | 2     | 1     | 1     |
| 1575   | 1     | 1     | 1     | 1     |
| 1576   | 1     | 1     | 1     | 1     |
| 1577   | 2     | 2     | 2     | 2     |
| 1581   | 1     | 1     | 1     | 1     |
| 1583   | 2     | 3     | 1     | 1     |
| 1585   | 1     | 1     | 1     | 1     |
| 1586   | 1     | 2     | 1     | 1     |
| 1588   | 1     | 2     | 1     | 1     |
| 1590   | 1     | 1     | 1     | 1     |
| 1592   | 1     | 1     | 1     | 1     |
| 1594   | 1     | 2     | 1     | 1     |
| 1598   | 2     | 2     | 2     | 2     |
| 1599   | 1     | 4     | 1     | 2     |
| 1600   | 1     | 1     | 1     | 1     |
| 1602   | 1     | 1     | 1     | 1     |
| 1603   | 1     | 3     | 1     | 1     |
| 1604   | 2     | 2     | 2     | 2     |
| 1605   | 2     | 4     | 3     | 4     |
| 1606   | 1     | 2     | 1     | 1     |
| 1610   | 1     | 1     | 1     | 1     |
| 1611   | 1     | 2     | 1     | 1     |
| 1612   | 1     | 2     | 1     | 1     |
| 1613   | 1     | 2     | 2     | 2     |
| 1615   | 2     | 4     | 2     | 2     |
| 1616   | 1     | 2     | 1     | 1     |
| 1617   | 1     | 2     | 1     | 1     |
| 1618   | 1     | 3     | 1     | 1     |

| respid | Q40_5 | Q40_6 | Q40_7 | Q40_8 |
|--------|-------|-------|-------|-------|
| 1620   | 1     | 3     | 1     | 1     |
| 1621   | 1     | 3     | 1     | 1     |
| 1622   |       |       |       |       |
| 1623   | 1     | 1     | 1     | 1     |
| 1624   | 1     | 2     | 2     | 1     |
| 1625   | 1     | 1     | 1     | 1     |
| 1626   |       |       |       |       |
| 1627   | 1     | 2     | 1     | 1     |
| 1629   | 1     | 1     | 1     | 1     |
| 1630   | 1     | 1     | 1     | 1     |
| 1631   | 1     | 2     | 1     | 1     |
| 1634   | 2     | 2     | 2     | 1     |
| 1635   | 1     | 2     | 1     | 1     |
| 1636   |       |       |       |       |
| 1637   | 1     | 1     | 1     | 1     |
| 1640   | 1     | 1     | 1     | 1     |
| 1642   | 1     | 1     | 1     | 1     |
| 1643   | 3     | 3     | 2     | 1     |
| 1644   | 1     | 1     | 1     | 1     |
| 1645   | 1     | 1     | 2     | 1     |
| 1646   | 1     | 1     | 1     | 1     |
| 1647   | 1     | 2     | 1     | 1     |
| 1650   | 2     | 2     | 3     | 2     |
| 1654   | 1     | 2     | 1     | 1     |
| 1656   | 1     | 1     | 1     | 1     |
| 1657   | 1     | 5     | 1     | 1     |
| 1659   | 3     | 1     | 3     | 1     |
| 1662   | 2     | 2     | 2     | 3     |
| 1663   | 2     | 2     | 1     | 1     |
| 1664   | 1     | 1     | 1     | 1     |
| 1665   | 1     | 1     | 1     | 1     |
| 1667   | 1     | 1     | 1     | 1     |

| respid | Q40_5 | Q40_6 | Q40_7 | Q40_8 |
|--------|-------|-------|-------|-------|
| 1668   | 5     | 2     | 1     | 1     |
| 1670   | 1     | 2     | 1     | 1     |
| 1671   | 1     | 2     | 1     | 1     |
| 1673   | 1     | 1     | 1     | 1     |
| 1674   | 1     | 2     | 1     | 1     |
| 1676   | 1     | 2     | 1     | 1     |
| 1677   | 1     | 1     | 1     | 1     |
| 1678   | 1     | 2     | 1     | 1     |
| 1680   | 2     | 1     | 2     | 1     |
| 1681   | 1     | 2     | 1     | 1     |
| 1683   | 1     | 1     | 1     | 1     |
| 1685   | 2     | 2     | 2     | 1     |
| 1686   | 1     | 2     | 3     | 1     |
| 1690   | 1     | 3     | 1     | 1     |
| 1691   | 1     | 2     | 1     | 1     |
| 1692   | 3     | 2     | 2     | 1     |
| 1693   | 1     | 1     | 1     | 1     |
| 1695   | 1     | 2     | 1     | 1     |
| 1696   | 1     | 4     | 1     | 1     |
| 1698   | 1     | 1     | 1     | 1     |
| 1699   | 1     | 2     | 1     | 1     |
| 1701   | 3     | 3     | 4     | 5     |
| 1702   | 1     | 1     | 1     | 1     |
| 1703   |       |       |       |       |
| 1705   | 1     | 2     | 1     | 1     |
| 1706   | 1     | 2     | 1     | 1     |
| 1708   |       |       |       |       |
| 1711   | 2     | 2     | 2     | 2     |
| 1712   | 2     | 2     | 2     | 1     |
| 1713   | 1     | 2     | 1     | 1     |
| 1715   | 1     | 2     | 1     | 1     |
| 1717   | 1     | 1     | 1     | 1     |

| respid | Q40_5 | Q40_6 | Q40_7 | Q40_8 |
|--------|-------|-------|-------|-------|
| 1718   | 3     | 4     | 4     | 3     |
| 1719   | 1     | 1     | 1     | 1     |
| 1721   | 2     | 2     | 2     | 1     |
| 1722   | 1     | 2     | 1     | 1     |
| 1724   | 1     | 1     | 1     | 1     |
| 1725   | 1     | 1     | 1     | 1     |
| 1726   | 1     | 2     | 1     | 1     |
| 1727   | 1     | 1     | 1     | 1     |
| 1728   | 1     | 2     | 1     | 1     |
| 1731   | 3     | 4     | 2     | 1     |
| 1733   | 1     | 1     | 1     | 1     |
| 1734   | 1     | 1     | 1     | 1     |
| 1735   |       |       |       |       |
| 1736   | 1     | 2     | 1     | 1     |
| 1737   | 2     | 2     | 1     | 1     |
| 1738   | 2     | 3     | 1     | 1     |
| 1743   | 2     | 5     | 2     | 1     |
| 1755   | 4     | 3     | 3     | 4     |
| 1756   | 1     | 4     | 1     | 1     |
| 1757   | 1     | 2     | 1     | 1     |
| 1758   | 2     | 2     | 2     | 2     |
| 1759   | 1     | 2     | 1     | 1     |
| 1761   | 1     | 2     | 1     | 1     |
| 1762   | 1     | 2     | 1     | 1     |
| 1764   |       |       |       |       |
| 1767   | 4     | 2     | 2     | 1     |
| 1768   | 1     | 3     | 1     | 1     |
| 1769   | 1     | 1     | 1     | 1     |
| 1770   | 1     | 2     | 1     | 1     |
| 1771   | 2     | 2     | 1     | 1     |
| 1776   | 1     | 1     | 1     | 1     |
| 1777   | 2     | 2     | 2     | 2     |



| respid | Q40_5 | Q40_6 | Q40_7 | Q40_8 |
|--------|-------|-------|-------|-------|
| 1778   | 1     | 4     | 1     | 1     |
| 1779   | 2     | 1     | 1     | 1     |
| 1780   | 1     | 2     | 1     | 1     |
| 1781   |       |       |       |       |
| 1783   | 1     | 1     | 1     | 1     |
| 1784   | 4     | 4     | 3     | 2     |
| 1785   | 1     | 1     | 1     | 1     |
| 1788   | 2     | 2     | 2     | 2     |
| 1792   | 1     | 1     | 1     | 1     |
| 1794   | 1     | 1     | 1     | 1     |
| 1798   | 3     | 4     | 4     | 3     |
| 1799   | 2     | 2     | 1     | 1     |
| 1800   | 1     | 2     | 1     | 1     |
| 1804   | 2     | 2     | 2     | 2     |
| 1806   | 1     | 2     | 1     | 1     |
| 1807   | 1     | 1     | 1     | 1     |
| 1808   | 1     | 2     | 1     | 1     |
| 1809   | 1     | 2     | 1     | 1     |
| 1811   | 2     | 2     | 1     | 1     |
| 1812   | 1     | 4     | 1     | 2     |
| 1813   | 3     | 1     | 3     | 3     |
| 1814   | 1     | 2     | 1     | 1     |
| 1815   | 2     | 2     | 2     | 1     |
| 1817   | 1     | 3     | 1     | 1     |
| 1820   | 2     | 3     | 1     | 1     |
| 1821   | 1     | 2     | 1     | 1     |
| 1822   | 1     | 6     | 1     | 1     |
| 1823   | 1     | 2     | 1     | 1     |
| 1824   | 4     | 3     | 3     | 4     |
| 1826   |       |       |       |       |
| 1828   | 1     | 1     | 1     | 1     |
| 1829   | 1     | 1     | 1     | 1     |

| respid | Q40_5 | Q40_6 | Q40_7 | Q40_8 |
|--------|-------|-------|-------|-------|
| 1830   | 1     | 2     | 1     | 1     |
| 1831   | 1     | 2     | 1     | 1     |
| 1832   | 1     | 2     | 1     | 1     |
| 1836   | 1     | 3     | 2     | 1     |
| 1838   | 3     | 2     | 3     | 2     |
| 1839   | 4     | 4     | 3     | 1     |
| 1840   | 1     | 2     | 1     | 1     |
| 1841   | 3     | 4     | 3     | 2     |
| 1842   | 2     | 3     | 1     | 1     |
| 1843   | 1     | 2     | 1     | 1     |
| 1844   | 2     | 2     | 2     | 2     |
| 1845   | 1     | 1     | 1     | 1     |
| 1849   | 1     | 2     | 1     | 1     |
| 1850   | 1     | 1     | 1     | 1     |
| 1851   | 1     | 2     | 1     | 1     |
| 1852   |       |       |       |       |
| 1857   | 1     | 1     | 1     | 1     |
| 1858   | 1     | 1     | 1     | 1     |
| 1861   | 1     | 2     | 1     | 1     |
| 1862   | 1     | 1     | 1     | 1     |
| 1863   | 3     | 3     | 3     | 3     |
| 1864   | 2     | 2     | 2     | 1     |
| 1865   |       |       |       |       |
| 1867   | 1     | 1     | 1     | 3     |
| 1868   | 1     | 2     | 1     | 1     |
| 1869   | 1     | 1     | 1     | 1     |
| 1870   | 1     | 1     | 1     | 1     |
| 1871   | 5     | 4     | 3     | 1     |
| 1872   | 1     | 1     | 1     | 1     |
| 1873   | 1     | 2     | 1     | 1     |
| 1876   |       |       |       |       |
| 1877   |       |       |       |       |

| respid | Q40_5 | Q40_6 | Q40_7 | Q40_8 |
|--------|-------|-------|-------|-------|
| 1878   | 1     | 2     | 1     | 1     |
| 1879   | 1     | 2     | 1     | 1     |
| 1880   | 1     | 2     | 1     | 1     |
| 1881   | 1     | 2     | 1     | 1     |
| 1883   | 1     | 3     | 2     | 1     |
| 1886   | 1     | 1     | 1     | 1     |
| 1888   | 4     | 3     | 3     | 4     |
| 1889   | 1     | 3     | 2     | 2     |
| 1890   | 3     | 3     | 3     | 3     |
| 1891   | 1     | 1     | 1     | 1     |
| 1893   | 1     | 1     | 1     | 1     |
| 1894   | 1     | 1     | 1     | 2     |
| 1895   | 2     | 5     | 2     | 1     |
| 1896   | 1     | 1     | 1     | 1     |
| 1897   | 1     | 1     | 1     | 1     |
| 1898   | 6     | 6     | 5     | 5     |
| 1899   | 2     | 1     | 1     | 1     |
| 1900   |       |       |       |       |
| 1903   | 1     | 2     | 1     | 1     |
| 1906   | 1     | 2     | 1     | 1     |
| 1907   | 3     | 4     | 3     | 3     |
| 1908   | 1     | 1     | 1     | 1     |
| 1909   | 5     | 4     | 5     | 4     |
| 1910   | 1     | 1     | 1     | 1     |
| 1911   | 1     | 1     | 1     | 1     |
| 1912   |       |       |       |       |
| 1917   | 1     | 2     | 1     | 1     |
| 1918   | 2     | 2     | 1     | 1     |
| 1919   | 1     | 3     | 1     | 1     |
| 1922   |       |       |       |       |
| 1925   |       |       |       |       |
| 1926   | 1     | 1     | 1     | 1     |

| respid | Q40_5 | Q40_6 | Q40_7 | Q40_8 |
|--------|-------|-------|-------|-------|
| 1927   | 1     | 1     | 1     | 1     |
| 1928   |       |       |       |       |
| 1929   | 1     | 2     | 1     | 1     |
| 1934   | 1     | 1     | 1     | 1     |
| 1935   | 1     | 2     | 1     | 1     |
| 1936   | 2     | 1     | 2     | 1     |
| 1937   |       |       |       |       |
| 1938   |       |       |       |       |
| 1939   | 3     | 3     | 2     | 1     |
| 1940   | 1     | 1     | 1     | 1     |
| 1941   |       |       |       |       |
| 1948   |       |       |       |       |
| 1950   | 1     | 1     | 1     | 1     |
| 1955   | 2     | 3     | 2     | 2     |
| 1958   | 2     | 2     | 2     | 1     |
| 1960   | 1     | 2     | 1     | 1     |
| 1961   |       |       |       |       |
| 1962   | 1     | 1     | 1     | 1     |
| 1965   |       |       |       |       |
| 1966   | 1     | 1     | 1     | 1     |
| 1967   |       |       |       |       |
| 1968   | 1     | 2     | 1     | 1     |
| 1973   | 2     | 3     | 3     | 1     |
| 1974   | 2     | 6     | 2     | 4     |
| 1975   |       |       |       |       |
| 1977   | 1     | 2     | 1     | 1     |
| 1978   |       |       |       |       |
| 1979   | 3     | 3     | 3     | 3     |
| 1982   | 1     | 1     | 1     | 1     |
| 1983   | 1     | 1     | 1     | 2     |
| 1987   | 1     | 2     | 1     | 1     |
| 1988   | 1     | 3     | 3     | 1     |

| respid | Q40_5 | Q40_6 | Q40_7 | Q40_8 |
|--------|-------|-------|-------|-------|
| 1991   | 2     | 2     | 1     | 1     |
| 1992   | 1     | 1     | 1     | 1     |
| 1993   | 1     | 3     | 1     | 1     |
| 1994   | 2     | 3     | 3     | 2     |
| 1995   | 1     | 1     | 1     | 1     |
| 1996   | 1     | 1     | 1     | 1     |
| 1997   | 1     | 1     | 1     | 1     |
| 1998   | 1     | 1     | 1     | 1     |
| 1999   | 2     | 5     | 2     | 1     |
| 2000   | 2     | 2     | 3     | 3     |
| 2001   | 1     | 2     | 1     | 1     |
| 2002   | 1     | 1     | 1     | 1     |
| 2003   |       |       |       |       |
| 2004   | 1     | 2     | 1     | 1     |
| 2005   | 1     | 1     | 1     | 1     |
| 2007   | 2     | 3     | 3     | 3     |
| 2009   | 1     | 1     | 1     | 1     |
| 2010   |       |       |       |       |
| 2011   | 1     | 1     | 1     | 1     |
| 2013   | 1     | 2     | 1     | 1     |
| 2014   | 1     | 2     | 1     | 1     |
| 2017   | 2     | 3     | 1     | 1     |
| 2020   | 1     | 1     | 1     | 1     |
| 2023   | 1     | 3     | 2     | 1     |
| 2024   | 1     | 1     | 1     | 1     |
| 2029   | 1     | 1     | 1     | 1     |
| 2030   |       |       |       |       |
| 2031   | 1     | 3     | 1     | 1     |
| 2032   | 1     | 2     | 1     | 1     |
| 2033   |       |       |       |       |
| 2034   | 1     | 3     | 1     | 1     |
| 2036   | 2     | 2     | 1     | 3     |

| respid | Q40_5 | Q40_6 | Q40_7 | Q40_8 |
|--------|-------|-------|-------|-------|
| 2037   | 5     | 5     | 4     | 4     |
| 2038   | 1     | 2     | 1     | 1     |
| 2039   | 1     | 2     | 2     | 1     |
| 2040   |       |       |       |       |
| 2041   |       |       |       |       |
| 2042   | 1     | 1     | 1     | 1     |
| 2043   | 2     | 1     | 1     | 2     |
| 2051   | 1     | 1     | 1     | 1     |
| 2052   | 1     | 1     | 1     | 1     |
| 2053   | 1     | 1     | 1     | 1     |
| 2054   |       |       |       |       |
| 2055   | 2     | 2     | 1     | 1     |
| 2056   | 3     | 3     | 1     | 1     |
| 2057   | 1     | 2     | 1     | 1     |
| 2059   | 1     | 2     | 1     | 1     |
| 2063   | 1     | 2     | 1     | 1     |
| 2066   | 1     | 4     | 1     | 1     |
| 2068   | 1     | 2     | 1     | 1     |
| 2069   | 1     | 2     | 2     | 1     |
| 2070   |       |       |       |       |
| 2071   | 1     | 2     | 1     | 2     |
| 2073   |       |       |       |       |
| 2077   | 4     | 4     | 4     | 4     |
| 2079   |       |       |       |       |
| 2080   | 5     | 6     | 6     | 1     |
| 2081   | 3     | 4     | 3     | 5     |
| 2084   |       |       |       |       |
| 2085   | 1     | 1     | 1     | 1     |
| 2087   | 2     | 4     | 2     | 1     |
| 2089   | 1     | 2     | 1     | 1     |
| 2093   | 1     | 2     | 1     | 1     |
| 2094   | 1     | 2     | 1     | 1     |

| respid | Q40_5 | Q40_6 | Q40_7 | Q40_8 |
|--------|-------|-------|-------|-------|
| 2095   | 1     | 6     | 2     | 3     |
| 2097   | 1     | 1     | 1     | 1     |
| 2099   | 1     | 2     | 2     | 2     |
| 2100   | 2     | 2     | 2     | 2     |
| 2101   | 1     | 1     | 1     | 1     |
| 2103   | 1     | 1     | 1     | 1     |
| 2104   | 1     | 2     | 1     | 1     |
| 2106   | 1     | 1     | 1     | 1     |
| 2111   | 1     | 3     | 1     | 1     |
| 2113   | 1     | 1     | 1     | 1     |
| 2115   |       |       |       |       |
| 2119   | 3     | 3     | 1     | 1     |
| 2120   |       |       |       |       |
| 2123   |       |       |       |       |
| 2124   | 4     | 3     | 2     | 2     |
| 2130   |       |       |       |       |
| 2131   | 1     | 2     | 1     | 1     |
| 2133   | 3     | 3     | 2     | 2     |
| 2139   | 1     | 3     | 2     | 1     |
| 2141   |       |       |       |       |
| 2143   | 2     | 2     | 1     | 1     |
| 2144   | 1     | 2     | 1     | 1     |
| 2147   |       |       |       |       |
| 2151   | 1     | 1     | 1     | 1     |
| 2153   | 1     | 1     | 1     | 1     |
| 2154   | 1     | 2     | 1     | 1     |
| 2155   | 2     | 2     | 1     | 1     |
| 2159   | 1     | 1     | 1     | 1     |
| 2160   | 2     | 2     | 2     | 3     |
| 2161   | 1     | 1     | 1     | 1     |
| 2163   | 1     | 2     | 1     | 1     |
| 2164   | 1     | 1     | 1     | 1     |

| respid | Q40_5 | Q40_6 | Q40_7 | Q40_8 |
|--------|-------|-------|-------|-------|
| 2168   | 2     | 1     | 1     | 1     |
| 2169   | 2     | 2     | 2     | 2     |
| 2170   | 1     | 2     | 1     | 1     |
| 2171   | 2     | 2     | 1     | 1     |
| 2172   | 3     | 3     | 2     | 3     |
| 2173   | 1     | 1     | 1     | 1     |
| 2174   | 1     | 2     | 1     | 1     |
| 2175   | 1     | 1     | 2     | 1     |
| 2176   | 1     | 2     | 1     | 1     |
| 2177   | 4     | 4     | 4     | 5     |
| 2179   | 1     | 1     | 1     | 1     |
| 2181   | 1     | 1     | 1     | 1     |
| 2182   | 1     | 1     | 1     | 1     |
| 2183   | 3     | 3     | 3     | 2     |
| 2184   | 2     | 2     | 1     | 1     |
| 2185   |       |       |       |       |
| 2186   | 1     | 1     | 2     | 1     |
| 2187   | 1     | 2     | 1     | 1     |
| 2188   | 1     | 1     | 1     | 1     |
| 2189   |       |       |       |       |
| 2190   | 1     | 1     | 1     | 1     |
| 2193   | 1     | 2     | 1     | 1     |
| 2195   | 1     | 2     | 2     | 1     |
| 2198   | 1     | 2     | 1     | 1     |
| 2200   | 1     | 1     | 1     | 1     |
| 2205   | 3     | 4     | 4     | 3     |
| 2208   |       |       |       |       |
| 2209   | 2     | 3     | 2     | 2     |
| 2210   | 1     | 1     | 1     | 1     |
| 2211   | 1     | 2     | 1     | 1     |
| 2213   | 1     | 1     | 1     | 1     |
| 2214   | 1     | 2     | 1     | 1     |



| respid | Q40_5 | Q40_6 | Q40_7 | Q40_8 |
|--------|-------|-------|-------|-------|
| 2216   | 1     | 2     | 1     | 1     |
| 2220   | 2     | 2     | 1     | 1     |
| 2225   | 1     | 1     | 1     | 1     |
| 2227   | 1     | 1     | 1     | 1     |
| 2228   | 2     | 2     | 2     | 1     |
| 2229   | 1     | 2     | 1     | 1     |
| 2230   |       |       |       |       |
| 2236   |       |       |       |       |
| 2238   | 2     | 4     | 5     | 3     |
| 2239   | 1     | 3     | 1     | 1     |
| 2240   | 1     | 1     | 1     | 1     |
| 2241   | 1     | 3     | 2     | 1     |
| 2243   |       |       |       |       |
| 2245   | 1     | 2     | 1     | 1     |
| 2247   | 2     | 2     | 1     | 1     |
| 2248   | 1     | 1     | 1     | 1     |
| 2249   | 1     | 2     | 1     | 1     |
| 2254   | 1     | 3     | 1     | 1     |
| 2256   | 1     | 2     | 1     | 1     |
| 2259   | 1     | 2     | 1     | 1     |
| 2261   | 1     | 1     | 1     | 1     |
| 2262   | 1     | 1     | 1     | 1     |
| 2263   | 2     | 3     | 1     | 1     |
| 2264   | 3     | 3     | 3     | 2     |
| 2265   | 3     | 3     | 2     | 2     |
| 2270   | 1     | 1     | 1     | 1     |
| 2271   | 1     | 1     | 1     | 1     |
| 2272   | 1     | 1     | 1     | 1     |
| 2273   | 1     | 3     | 1     | 1     |
| 2274   | 1     | 4     | 1     | 1     |
| 2276   | 2     | 6     | 3     | 2     |
| 2277   | 2     | 2     | 2     | 1     |

| respid | Q40_5 | Q40_6 | Q40_7 | Q40_8 |
|--------|-------|-------|-------|-------|
| 2281   | 1     | 1     | 1     | 1     |
| 2288   | 1     | 1     | 1     | 2     |
| 2290   | 1     | 1     | 1     | 1     |
| 2294   | 2     | 2     | 3     | 2     |
| 2295   | 1     | 2     | 1     | 1     |
| 2296   | 1     | 2     | 1     | 1     |
| 2297   |       |       |       |       |
| 2298   | 1     | 1     | 1     | 1     |
| 2301   | 2     | 3     | 2     | 1     |
| 2302   | 2     | 2     | 2     | 2     |
| 2303   |       |       |       |       |
| 2305   | 1     | 1     | 1     | 1     |
| 2309   | 1     | 1     | 1     | 1     |
| 2310   | 1     | 1     | 1     | 1     |
| 2311   | 2     | 2     | 2     | 3     |
| 2313   | 2     | 4     | 3     | 3     |
| 2316   |       |       |       |       |
| 2317   | 1     | 2     | 1     | 1     |
| 2318   | 3     | 2     | 2     | 2     |
| 2319   | 1     | 5     | 5     | 1     |
| 2321   | 2     | 3     | 2     | 2     |
| 2324   | 1     | 1     | 1     | 1     |
| 2328   | 1     | 2     | 1     | 1     |
| 2329   |       |       |       |       |
| 2330   | 1     | 1     | 1     | 1     |
| 2333   | 1     | 2     | 2     | 2     |
| 2334   | 1     | 2     | 2     | 2     |
| 2338   | 1     | 1     | 1     | 1     |
| 2341   | 3     | 3     | 3     | 2     |
| 2342   | 1     | 3     | 1     | 2     |
| 2343   | 3     | 3     | 3     | 2     |
| 2346   | 1     | 2     | 1     | 1     |

| respid | Q40_5 | Q40_6 | Q40_7 | Q40_8 |
|--------|-------|-------|-------|-------|
| 2347   | 1     | 2     | 2     | 2     |
| 2348   | 2     | 2     | 2     | 2     |
| 2349   | 2     | 5     | 2     | 2     |
| 2350   | 1     | 1     | 1     | 1     |
| 2351   | 1     | 2     | 1     | 1     |
| 2352   | 1     | 1     | 1     | 1     |
| 2359   | 1     | 1     | 1     | 1     |
| 2362   |       |       |       |       |
| 2363   | 1     | 1     | 1     | 1     |
| 2365   | 2     | 2     | 1     | 1     |
| 2367   | 1     | 4     | 1     | 2     |
| 2368   | 1     | 1     | 1     | 1     |
| 2369   | 1     | 2     | 1     | 1     |
| 2372   |       |       |       |       |
| 2374   | 1     | 3     | 2     | 1     |
| 2376   | 1     | 1     | 1     | 1     |
| 2379   | 3     | 3     | 3     | 2     |
| 2380   | 1     | 1     | 1     | 1     |
| 2381   | 1     | 3     | 2     | 1     |
| 2382   | 1     | 2     | 1     | 1     |
| 2385   | 2     | 3     | 3     | 2     |
| 2387   | 1     | 4     | 1     | 1     |
| 2388   | 1     | 2     | 1     | 1     |
| 2389   | 1     | 1     | 1     | 1     |
| 2391   | 1     | 2     | 1     | 1     |
| 2392   | 1     | 2     | 1     | 1     |
| 2393   | 1     | 1     | 1     | 1     |
| 2394   | 5     | 2     | 2     | 3     |
| 2397   | 1     | 1     | 1     | 1     |
| 2398   | 2     | 2     | 2     | 2     |
| 2400   | 1     | 1     | 1     | 1     |
| 2402   | 1     | 1     | 1     | 2     |

| respid | Q40_5 | Q40_6 | Q40_7 | Q40_8 |
|--------|-------|-------|-------|-------|
| 2406   | 1     | 2     | 1     | 1     |
| 2408   | 1     | 2     | 1     | 1     |
| 2410   | 1     | 1     | 1     | 1     |
| 2411   | 4     | 3     | 2     | 2     |
| 2412   | 1     | 2     | 1     | 1     |
| 2414   | 2     | 2     | 2     | 2     |
| 2421   | 1     | 2     | 1     | 1     |
| 2423   | 1     | 2     | 1     | 1     |
| 2424   | 2     | 2     | 2     | 2     |
| 2425   | 1     | 2     | 1     | 1     |
| 2426   | 1     | 1     | 1     | 1     |
| 2429   | 3     | 3     | 2     | 1     |
| 2430   | 1     | 2     | 1     | 1     |
| 2432   | 1     | 1     | 1     | 1     |
| 2433   | 1     | 1     | 1     | 1     |
| 2434   | 1     | 2     | 1     | 1     |
| 2435   | 1     | 3     | 1     | 1     |
| 2436   | 1     | 1     | 1     | 1     |
| 2439   | 2     | 3     | 3     | 2     |
| 2440   | 1     | 1     | 1     | 1     |
| 2441   | 1     | 2     | 1     | 1     |
| 2446   | 1     | 1     | 1     | 1     |
| 2448   | 3     | 4     | 4     | 3     |
| 2449   | 1     | 2     | 1     | 1     |
| 2451   | 1     | 3     | 1     | 1     |
| 2452   | 1     | 2     | 1     | 1     |
| 2455   |       |       |       |       |
| 2457   | 1     | 3     | 1     | 1     |
| 2458   | 1     | 1     | 1     | 1     |
| 2459   | 1     | 1     | 1     | 1     |
| 2460   | 1     | 1     | 1     | 1     |
| 2462   | 3     | 3     | 3     | 3     |

| respid | Q40_5 | Q40_6 | Q40_7 | Q40_8 |
|--------|-------|-------|-------|-------|
| 2464   | 3     | 5     | 4     | 3     |
| 2465   | 2     | 2     | 2     | 2     |
| 2468   | 2     | 1     | 1     | 1     |
| 2469   |       |       |       |       |
| 2470   | 1     | 2     | 1     | 1     |
| 2471   | 3     | 4     | 3     | 2     |
| 2472   | 1     | 1     | 1     | 1     |
| 2474   | 1     | 3     | 2     | 1     |
| 2476   | 2     | 2     | 2     | 2     |
| 2478   | 1     | 2     | 1     | 1     |
| 2479   | 1     | 2     | 2     | 1     |
| 2480   | 1     | 2     | 1     | 1     |
| 2482   | 1     | 1     | 1     | 1     |
| 2486   | 4     | 3     | 2     | 1     |
| 2488   | 2     | 4     | 2     | 2     |
| 2489   | 1     | 2     | 1     | 1     |
| 2491   | 1     | 2     | 1     | 1     |
| 2495   | 1     | 1     | 1     | 1     |
| 2496   | 1     | 1     | 1     | 1     |
| 2498   | 2     | 2     | 1     | 1     |
| 2501   | 1     | 1     | 1     | 1     |
| 2502   | 4     | 4     | 4     | 3     |
| 2503   | 1     | 2     | 1     | 1     |
| 2504   | 1     | 2     | 1     | 1     |
| 2507   | 1     | 1     | 1     | 1     |
| 2509   | 1     | 2     | 1     | 1     |
| 2512   | 1     | 2     | 1     | 1     |
| 2514   | 2     | 2     | 2     | 1     |
| 2516   | 1     | 2     | 1     | 1     |
| 2517   | 1     | 1     | 1     | 1     |
| 2521   | 1     | 2     | 1     | 1     |
| 2522   | 1     | 1     | 1     | 1     |

| respid | Q40_5 | Q40_6 | Q40_7 | Q40_8 |
|--------|-------|-------|-------|-------|
| 2524   | 1     | 1     | 1     | 1     |
| 2525   | 1     | 1     | 1     | 1     |
| 2526   | 1     | 1     | 1     | 1     |
| 2527   | 1     | 1     | 1     | 1     |
| 2528   | 1     | 3     | 1     | 1     |
| 2531   |       |       |       |       |
| 2533   | 1     | 3     | 2     | 2     |
| 2535   | 1     | 2     | 2     | 2     |
| 2536   | 5     | 5     | 5     | 3     |
| 2539   | 1     | 1     | 1     | 1     |
| 2540   | 1     | 2     | 1     | 1     |
| 2543   | 1     | 1     | 1     | 1     |
| 2546   | 1     | 2     | 1     | 1     |
| 2547   | 1     | 3     | 1     | 1     |
| 2549   | 1     | 1     | 1     | 1     |
| 2553   | 1     | 1     | 1     | 2     |
| 2554   | 1     | 1     | 1     | 1     |
| 2555   | 1     | 2     | 1     | 1     |
| 2556   | 1     | 1     | 1     | 1     |
| 2557   | 1     | 1     | 1     | 1     |
| 2559   | 1     | 1     | 1     | 1     |
| 2560   | 4     | 4     | 5     | 4     |
| 2561   | 1     | 2     | 1     | 1     |
| 2566   | 1     | 2     | 2     | 1     |
| 2567   |       |       |       |       |
| 2570   | 1     | 1     | 1     | 1     |
| 2574   | 6     | 6     | 3     | 4     |
| 2578   | 1     | 1     | 1     | 1     |
| 2580   | 3     | 3     | 3     | 3     |
| 2590   | 1     | 1     | 1     | 1     |
| 2593   | 1     | 1     | 1     | 1     |
| 2594   | 1     | 2     | 1     | 1     |

| respid | Q40_5 | Q40_6 | Q40_7 | Q40_8 |
|--------|-------|-------|-------|-------|
| 2595   | 1     | 1     | 1     | 1     |
| 2596   | 1     | 1     | 1     | 1     |
| 2597   | 4     | 3     | 3     | 4     |
| 2598   | 1     | 2     | 1     | 1     |
| 2602   | 1     | 1     | 1     | 1     |
| 2605   | 3     | 4     | 4     | 3     |
| 2606   |       |       |       |       |
| 2607   | 3     | 2     | 2     | 1     |
| 2608   |       |       |       |       |
| 2609   | 1     | 1     | 1     | 1     |
| 2610   | 1     | 2     | 1     | 1     |
| 2614   |       |       |       |       |
| 2615   | 1     | 1     | 1     | 1     |
| 2616   | 1     | 2     | 1     | 1     |
| 2618   | 1     | 1     | 1     | 1     |
| 2630   | 4     | 3     | 3     | 3     |
| 2633   | 1     | 6     | 1     | 1     |
| 2637   | 1     | 1     | 1     | 1     |
| 2638   | 3     | 2     | 2     | 2     |
| 2641   | 2     | 2     | 1     | 1     |
| 2644   | 1     | 1     | 1     | 1     |
| 2645   | 1     | 3     | 1     | 1     |
| 2646   | 1     | 2     | 1     | 1     |
| 2648   | 1     | 1     | 1     | 1     |
| 2651   |       |       |       |       |
| 2652   | 2     | 4     | 3     | 4     |
| 2653   | 1     | 2     | 1     | 1     |
| 2656   |       |       |       |       |
| 2657   | 1     | 1     | 1     | 1     |
| 2658   | 1     | 1     | 1     | 2     |
| 2661   | 1     | 1     | 1     | 1     |
| 2663   | 1     | 2     | 1     | 1     |

| respid | Q40_5 | Q40_6 | Q40_7 | Q40_8 |
|--------|-------|-------|-------|-------|
| 2665   | 1     | 2     | 1     | 1     |
| 2670   | 1     | 2     | 1     | 1     |
| 2672   | 1     | 2     | 1     | 1     |
| 2673   |       |       |       |       |
| 2677   | 1     | 1     | 1     | 1     |
| 2686   | 4     | 4     | 3     | 5     |
| 2688   | 1     | 2     | 1     | 1     |
| 2689   | 2     | 2     | 2     | 2     |
| 2691   | 1     | 1     | 1     | 1     |
| 2695   | 1     | 3     | 1     | 1     |
| 2696   | 1     | 1     | 1     | 1     |
| 2697   |       |       |       |       |
| 2698   |       |       |       |       |
| 2703   | 1     | 2     | 1     | 1     |
| 2704   | 1     | 2     | 1     | 1     |
| 2706   | 3     | 3     | 2     | 1     |
| 2707   | 1     | 2     | 1     | 1     |
| 2710   | 1     | 1     | 1     | 1     |
| 2711   | 1     | 2     | 2     | 1     |
| 2712   | 1     | 1     | 1     | 1     |
| 2713   |       |       |       |       |
| 2721   |       |       |       |       |
| 2730   | 1     | 1     | 1     | 1     |
| 2731   | 1     | 1     | 1     | 1     |
| 2732   | 1     | 1     | 1     | 1     |
| 2733   | 2     | 2     | 2     | 2     |
| 2735   | 1     | 3     | 1     | 1     |
| 2736   | 1     | 2     | 1     | 1     |
| 2740   | 1     | 1     | 1     | 1     |
| 2741   | 2     | 1     | 1     | 1     |
| 2742   | 1     | 3     | 1     | 1     |
| 2743   | 1     | 2     | 1     | 1     |



| respid | Q40_5 | Q40_6 | Q40_7 | Q40_8 |
|--------|-------|-------|-------|-------|
| 2744   | 1     | 1     | 1     | 1     |
| 2745   | 4     | 3     | 3     | 3     |
| 2749   | 1     | 1     | 1     | 1     |
| 2751   | 1     | 2     | 1     | 1     |
| 2754   | 1     | 2     | 1     | 1     |
| 2755   | 2     | 1     | 2     | 2     |
| 2757   | 1     | 1     | 1     | 1     |
| 2758   | 1     | 3     | 2     | 1     |
| 2759   | 1     | 2     | 1     | 1     |
| 2761   | 1     | 1     | 1     | 1     |
| 2762   | 2     | 1     | 1     | 1     |
| 2763   | 1     | 2     | 1     | 1     |
| 2764   | 4     | 3     | 3     | 2     |
| 2765   | 2     | 3     | 1     | 1     |
| 2766   | 1     | 1     | 1     | 1     |
| 2767   | 1     | 3     | 3     | 1     |
| 2769   | 2     | 3     | 1     | 1     |
| 2770   | 1     | 2     | 1     | 4     |
| 2771   | 3     | 3     | 2     | 2     |
| 2774   | 1     | 3     | 2     | 2     |
| 2777   | 3     | 4     | 4     | 3     |
| 2778   | 1     | 2     | 1     | 1     |
| 2781   | 3     | 2     | 3     | 3     |
| 2782   | 2     | 2     | 2     | 2     |
| 2784   | 1     | 5     | 1     | 1     |
| 2785   | 1     | 3     | 1     | 1     |
| 2786   | 1     | 3     | 1     | 1     |
| 2787   | 1     | 1     | 1     | 1     |
| 2789   | 2     | 3     | 3     | 2     |
| 2790   | 2     | 2     | 2     | 1     |
| 2791   | 1     | 4     | 1     | 1     |
| 2793   | 2     | 4     | 1     | 1     |

| respid | Q40_5 | Q40_6 | Q40_7 | Q40_8 |
|--------|-------|-------|-------|-------|
| 2797   | 1     | 1     | 1     | 1     |
| 2798   | 1     | 2     | 1     | 1     |
| 2799   | 2     | 2     | 2     | 1     |
| 2801   | 1     | 1     | 1     | 1     |
| 2802   | 5     | 5     | 1     | 2     |
| 2803   | 1     | 3     | 2     | 1     |
| 2804   | 5     | 3     | 4     | 2     |
| 2807   | 1     | 1     | 1     | 1     |
| 2809   | 1     | 2     | 1     | 1     |
| 2810   | 2     | 5     | 2     | 1     |
| 2812   | 1     | 1     | 1     | 1     |
| 2814   | 1     | 1     | 1     | 1     |
| 2815   | 1     | 2     | 1     | 1     |
| 2816   | 1     | 1     | 1     | 1     |
| 2817   | 2     | 1     | 1     | 2     |
| 2819   | 1     | 2     | 1     | 1     |
| 2820   | 1     | 1     | 1     | 1     |
| 2821   | 3     | 4     | 2     | 1     |
| 2822   | 3     | 4     | 3     | 2     |
| 2823   | 1     | 1     | 1     | 1     |
| 2824   | 1     | 2     | 1     | 1     |
| 2825   | 2     | 2     | 1     | 1     |
| 2826   | 1     | 1     | 2     | 1     |
| 2827   | 1     | 1     | 1     | 1     |
| 2828   | 1     | 2     | 1     | 1     |
| 2829   | 3     | 3     | 3     | 3     |
| 2830   | 2     | 3     | 2     | 2     |
| 2831   | 1     | 3     | 1     | 1     |
| 2832   | 1     | 3     | 1     | 2     |
| 2833   | 1     | 1     | 1     | 1     |
| 2834   | 1     | 2     | 1     | 1     |
| 2835   | 3     | 5     | 4     | 3     |

| respid | Q40_5 | Q40_6 | Q40_7 | Q40_8 |
|--------|-------|-------|-------|-------|
| 2836   | 1     | 2     | 1     | 1     |
| 2837   | 2     | 3     | 1     | 1     |
| 2838   | 1     | 3     | 3     | 1     |
| 2844   | 5     | 6     | 5     | 2     |
| 2845   | 1     | 1     | 1     | 1     |
| 2847   | 6     | 6     | 6     | 5     |
| 2848   | 1     | 2     | 1     | 1     |
| 2849   | 1     | 2     | 1     | 1     |
| 2851   | 1     | 2     | 1     | 1     |
| 2852   | 1     | 1     | 2     | 1     |
| 2853   | 2     | 2     | 2     | 2     |
| 2854   | 1     | 1     | 1     | 1     |
| 2856   | 1     | 1     | 1     | 1     |
| 2857   | 1     | 2     | 1     | 1     |
| 2858   | 2     | 2     | 2     | 2     |
| 2859   | 2     | 6     | 2     | 2     |
| 2860   | 1     | 3     | 1     | 2     |
| 2861   | 3     | 4     | 3     | 3     |
| 2863   | 1     | 2     | 1     | 1     |
| 2864   | 1     | 1     | 1     | 1     |
| 2866   | 1     | 1     | 1     | 1     |
| 2872   | 1     | 1     | 1     | 1     |
| 2875   | 1     | 2     | 1     | 1     |
| 2879   |       |       |       |       |
| 2881   | 1     | 2     | 1     | 1     |
| 2882   | 1     | 1     | 1     | 1     |
| 2883   | 1     | 1     | 1     | 1     |
| 2884   | 3     | 3     | 2     | 2     |
| 2885   | 1     | 1     | 1     | 1     |
| 2887   | 1     | 1     | 1     | 1     |
| 2888   | 1     | 1     | 1     | 1     |
| 2890   | 1     | 2     | 1     | 1     |

| respid | Q40_5 | Q40_6 | Q40_7 | Q40_8 |
|--------|-------|-------|-------|-------|
| 2891   | 1     | 1     | 1     | 1     |
| 2892   |       |       |       |       |
| 2895   | 1     | 1     | 1     | 1     |
| 2899   | 1     | 2     | 1     | 1     |
| 2900   | 2     | 1     | 2     | 1     |
| 2902   | 6     | 6     | 6     | 3     |
| 2903   |       |       |       |       |
| 2904   | 1     | 2     | 1     | 1     |
| 2906   | 1     | 2     | 1     | 1     |
| 2908   | 1     | 1     | 1     | 1     |
| 2910   | 1     | 1     | 1     | 1     |
| 2917   | 3     | 3     | 3     | 3     |
| 2918   | 2     | 2     | 2     | 2     |
| 2919   | 1     | 1     | 1     | 1     |
| 2920   | 1     | 2     | 1     | 1     |
| 2921   | 4     | 4     | 4     | 4     |
| 2922   | 1     | 2     | 1     | 1     |
| 2923   |       |       |       |       |
| 2924   | 4     | 3     | 3     | 5     |
| 2926   | 1     | 3     | 1     | 1     |
| 2928   | 1     | 1     | 1     | 2     |
| 2930   |       |       |       |       |
| 2931   | 1     | 2     | 1     | 1     |
| 2933   | 1     | 2     | 1     | 1     |
| 2935   | 1     | 1     | 1     | 1     |
| 2936   |       |       |       |       |
| 2937   | 1     | 2     | 1     | 1     |
| 2938   | 1     | 2     | 1     | 1     |
| 2944   | 1     | 1     | 1     | 1     |
| 2945   | 1     | 1     | 1     | 1     |
| 2947   | 1     | 2     | 1     | 1     |
| 2949   | 1     | 1     | 1     | 1     |

| respid | Q40_5 | Q40_6 | Q40_7 | Q40_8 |
|--------|-------|-------|-------|-------|
| 2951   | 3     | 5     | 3     | 1     |
| 2952   | 1     | 2     | 1     | 1     |
| 2953   |       |       |       |       |
| 2955   | 1     | 1     | 1     | 1     |
| 2957   | 1     | 2     | 1     | 1     |
| 2958   | 1     | 1     | 1     | 1     |
| 2960   | 1     | 3     | 1     | 1     |
| 2963   | 1     | 2     | 1     | 1     |
| 2964   | 1     | 1     | 1     | 1     |
| 2967   |       |       |       |       |
| 2968   | 1     | 1     | 1     | 1     |
| 2971   | 3     | 4     | 3     | 3     |
| 2974   | 1     | 1     | 1     | 1     |
| 2975   | 1     | 2     | 1     | 1     |
| 2982   |       |       |       |       |
| 2983   |       |       |       |       |
| 2985   | 1     | 2     | 1     | 1     |
| 2986   | 4     | 3     | 3     | 4     |
| 2987   | 1     | 2     | 2     | 1     |
| 2988   | 1     | 2     | 1     | 1     |
| 2993   | 1     | 1     | 1     | 1     |
| 2996   | 1     | 1     | 1     | 1     |
| 2997   | 1     | 2     | 1     | 1     |
| 2998   | 1     | 3     | 1     | 1     |
| 3004   | 1     | 1     | 1     | 1     |
| 3007   | 1     | 2     | 2     | 2     |
| 3011   | 3     | 4     | 4     | 4     |
| 3012   | 1     | 3     | 1     | 1     |
| 3013   | 1     | 2     | 1     | 1     |
| 3014   |       |       |       |       |
| 3015   | 1     | 2     | 1     | 1     |
| 3016   |       |       |       |       |

| respid | Q40_5 | Q40_6 | Q40_7 | Q40_8 |
|--------|-------|-------|-------|-------|
| 3017   | 1     | 2     | 1     | 1     |
| 3020   | 2     | 3     | 3     | 2     |
| 3022   | 1     | 2     | 1     | 1     |
| 3023   | 1     | 1     | 1     | 1     |
| 3026   | 6     | 3     | 3     | 2     |
| 3038   | 1     | 2     | 3     | 3     |
| 3039   | 3     | 3     | 2     | 1     |
| 3040   | 1     | 1     | 1     | 1     |
| 3041   |       |       |       |       |
| 3042   | 2     | 2     | 2     | 2     |
| 3044   | 2     | 2     | 1     | 1     |
| 3050   | 2     | 2     | 2     | 2     |
| 3052   | 1     | 1     | 1     | 1     |
| 3056   | 3     | 3     | 3     | 3     |
| 3059   | 1     | 1     | 1     | 1     |
| 3060   | 1     | 2     | 1     | 1     |
| 3063   | 1     | 3     | 3     | 1     |
| 3065   | 1     | 2     | 1     | 1     |
| 3067   | 1     | 1     | 1     | 1     |
| 3068   |       |       |       |       |
| 3072   | 2     | 3     | 3     | 2     |
| 3074   | 1     | 1     | 1     | 1     |
| 3075   | 1     | 2     | 1     | 1     |
| 3076   | 1     | 2     | 1     | 1     |
| 3079   | 1     | 1     | 1     | 1     |
| 3082   | 4     | 3     | 3     | 2     |
| 3083   | 1     | 1     | 1     | 1     |
| 3084   | 1     | 2     | 1     | 1     |
| 3085   | 1     | 1     | 1     | 1     |
| 3090   | 1     | 1     | 1     | 1     |
| 3091   | 2     | 3     | 1     | 1     |
| 3092   | 1     | 1     | 1     | 1     |

| respid | Q40_5 | Q40_6 | Q40_7 | Q40_8 |
|--------|-------|-------|-------|-------|
| 3095   | 1     | 2     | 1     | 1     |
| 3096   | 5     | 6     | 5     | 5     |
| 3097   | 1     | 3     | 1     | 1     |
| 3099   | 5     | 5     | 5     | 5     |
| 3101   | 1     | 3     | 1     | 1     |
| 3103   | 1     | 1     | 1     | 1     |
| 3104   | 1     | 2     | 1     | 1     |
| 3105   |       |       |       |       |
| 3107   | 1     | 1     | 1     | 1     |
| 3108   | 3     | 5     | 3     | 4     |
| 3109   | 1     | 2     | 1     | 1     |
| 3116   | 1     | 2     | 1     | 1     |
| 3117   | 1     | 3     | 1     | 1     |
| 3119   | 1     | 2     | 1     | 1     |
| 3120   | 1     | 1     | 1     | 1     |
| 3130   | 3     | 3     | 1     | 1     |
| 3131   | 1     | 3     | 1     | 1     |
| 3133   | 1     | 2     | 1     | 1     |
| 3134   | 2     | 2     | 2     | 1     |
| 3135   | 2     | 2     | 2     | 1     |
| 3145   | 1     | 6     | 1     | 1     |
| 3147   | 1     | 1     | 1     | 1     |
| 3152   | 1     | 2     | 1     | 1     |
| 3155   | 6     | 4     | 5     | 2     |
| 3156   |       |       |       |       |
| 3157   | 2     | 2     | 2     | 3     |
| 3166   | 1     | 2     | 2     | 1     |
| 3169   | 3     | 4     | 3     | 2     |
| 3179   | 1     | 3     | 1     | 1     |
| 3181   | 3     | 2     | 1     | 1     |
| 3185   |       |       |       |       |
| 3190   | 1     | 1     | 1     | 1     |

| respid | Q40_5 | Q40_6 | Q40_7 | Q40_8 |
|--------|-------|-------|-------|-------|
| 3191   |       |       |       |       |
| 3192   | 1     | 2     | 1     | 1     |
| 3193   | 1     | 3     | 4     | 1     |
| 3195   | 1     | 1     | 1     | 1     |
| 3202   | 1     | 2     | 1     | 1     |
| 3204   | 1     | 1     | 1     | 1     |
| 3208   | 1     | 1     | 1     | 1     |
| 3212   | 1     | 1     | 1     | 1     |
| 3218   | 1     | 1     | 1     | 1     |
| 3219   | 1     | 2     | 1     | 1     |
| 3220   | 2     | 2     | 1     | 1     |
| 3221   | 1     | 1     | 1     | 1     |
| 3223   | 1     | 2     | 1     | 1     |
| 3231   | 1     | 2     | 1     | 1     |
| 3232   | 3     | 4     | 4     | 3     |
| 3234   | 2     | 1     | 2     | 2     |
| 3235   | 1     | 1     | 1     | 1     |
| 3237   | 1     | 1     | 1     | 1     |
| 3238   | 1     | 1     | 1     | 1     |
| 3240   | 1     | 5     | 1     | 1     |
| 3241   | 1     | 2     | 1     | 1     |
| 3243   | 1     | 2     | 1     | 1     |
| 3244   | 2     | 2     | 2     | 2     |
| 3247   | 1     | 1     | 1     | 1     |
| 3250   | 1     | 1     | 1     | 1     |
| 3251   | 4     | 4     | 4     | 4     |
| 3255   | 1     | 1     | 1     | 1     |
| 3256   | 1     | 1     | 1     | 1     |
| 3257   | 1     | 2     | 1     | 1     |
| 3258   |       |       |       |       |
| 3259   | 1     | 2     | 1     | 1     |
| 3260   | 1     | 1     | 1     | 1     |



| respid | Q40_5 | Q40_6 | Q40_7 | Q40_8 |
|--------|-------|-------|-------|-------|
| 3261   |       |       |       |       |
| 3262   | 3     | 3     | 2     | 2     |
| 3264   | 3     | 3     | 3     | 2     |
| 3265   | 1     | 1     | 1     | 1     |
| 3267   | 1     | 1     | 1     | 1     |
| 3268   | 1     | 3     | 2     | 1     |
| 3270   | 1     | 1     | 1     | 1     |
| 3271   | 1     | 2     | 1     | 1     |
| 3274   |       |       |       |       |
| 3276   | 1     | 1     | 1     | 1     |
| 3277   | 1     | 2     | 1     | 1     |
| 3279   | 1     | 2     | 1     | 1     |
| 3281   |       |       |       |       |
| 3283   | 2     | 3     | 1     | 2     |
| 3285   | 2     | 2     | 1     | 1     |
| 3286   | 1     | 2     | 1     | 1     |
| 3287   | 1     | 1     | 1     | 1     |
| 3289   | 1     | 2     | 1     | 1     |
| 3290   | 1     | 1     | 1     | 1     |
| 3291   | 1     | 1     | 1     | 1     |
| 3292   | 3     | 3     | 2     | 2     |
| 3293   | 4     | 3     | 5     | 5     |
| 3294   | 1     | 1     | 1     | 1     |
| 3296   | 3     | 2     | 1     | 1     |
| 3306   | 1     | 2     | 1     | 1     |
| 3307   | 3     | 3     | 4     | 5     |
| 3308   | 1     | 2     | 1     | 1     |
| 3312   | 1     | 1     | 1     | 1     |
| 3313   | 3     | 3     | 3     | 3     |
| 3316   | 1     | 1     | 1     | 1     |
| 3317   | 1     | 2     | 1     | 1     |
| 3320   | 1     | 2     | 1     | 1     |

| respid | Q40_5 | Q40_6 | Q40_7 | Q40_8 |
|--------|-------|-------|-------|-------|
| 3321   | 1     | 1     | 2     | 1     |
| 3322   | 1     | 1     | 1     | 1     |
| 3323   | 1     | 1     | 1     | 1     |
| 3325   |       |       |       |       |
| 3332   | 1     | 1     | 1     | 1     |
| 3334   | 1     | 1     | 1     | 1     |
| 3335   | 1     | 1     | 1     | 1     |
| 3341   | 2     | 2     | 1     | 1     |
| 3345   | 3     | 3     | 3     | 1     |
| 3346   | 1     | 2     | 1     | 2     |
| 3349   | 1     | 2     | 1     | 1     |
| 3351   | 1     | 2     | 1     | 1     |
| 3353   | 1     | 2     | 1     | 1     |
| 3354   | 1     | 1     | 1     | 1     |
| 3356   | 1     | 2     | 1     | 1     |
| 3357   | 1     | 2     | 1     | 1     |
| 3360   | 1     | 3     | 1     | 1     |
| 3361   | 1     | 2     | 1     | 1     |
| 3362   | 1     | 2     | 1     | 1     |
| 3363   |       |       |       |       |
| 3364   | 4     | 4     | 3     | 4     |
| 3368   | 1     | 2     | 1     | 1     |
| 3370   | 1     | 1     | 2     | 2     |
| 3371   | 1     | 2     | 1     | 1     |
| 3379   | 1     | 2     | 1     | 1     |
| 3380   | 1     | 1     | 1     | 1     |
| 3382   | 1     | 1     | 1     | 1     |
| 3384   | 2     | 3     | 2     | 2     |
| 3385   | 1     | 1     | 1     | 1     |
| 3388   | 1     | 2     | 1     | 1     |
| 3392   | 1     | 2     | 1     | 1     |
| 3393   | 1     | 1     | 1     | 1     |

| respid | Q40_5 | Q40_6 | Q40_7 | Q40_8 |
|--------|-------|-------|-------|-------|
| 3394   | 2     | 3     | 2     | 2     |
| 3395   | 2     | 5     | 2     | 1     |
| 3396   | 1     | 1     | 1     | 1     |
| 3397   | 1     | 3     | 1     | 1     |
| 3398   | 1     | 2     | 1     | 1     |
| 3399   | 3     | 3     | 3     | 3     |
| 3400   | 1     | 1     | 1     | 1     |
| 3401   | 5     | 4     | 4     | 5     |
| 3402   | 2     | 3     | 2     | 2     |
| 3403   | 2     | 2     | 2     | 2     |
| 3405   | 5     | 6     | 5     | 4     |
| 3407   | 3     | 2     | 3     | 3     |
| 3410   | 1     | 2     | 1     | 1     |
| 3411   | 1     | 2     | 1     | 1     |
| 3413   |       |       |       |       |
| 3414   | 1     | 1     | 1     | 1     |
| 3420   | 1     | 1     | 1     | 1     |
| 3421   | 5     | 5     | 2     | 1     |
| 3425   | 1     | 2     | 1     | 1     |
| 3426   | 3     | 2     | 3     | 4     |
| 3429   | 2     | 3     | 1     | 1     |
| 3430   | 3     | 4     | 4     | 3     |
| 3433   | 1     | 2     | 1     | 1     |
| 3434   | 2     | 3     | 3     | 2     |
| 3437   | 1     | 1     | 1     | 1     |
| 3439   | 3     | 3     | 3     | 2     |
| 3441   | 1     | 2     | 2     | 1     |
| 3442   | 1     | 2     | 1     | 1     |
| 3444   | 1     | 1     | 1     | 1     |
| 3445   | 2     | 2     | 2     | 2     |
| 3450   | 2     | 3     | 3     | 2     |
| 3452   | 1     | 5     | 3     | 1     |

| respid | Q40_5 | Q40_6 | Q40_7 | Q40_8 |
|--------|-------|-------|-------|-------|
| 3456   | 1     | 2     | 1     | 1     |
| 3459   |       |       |       |       |
| 3460   | 1     | 1     | 1     | 1     |
| 3461   | 5     | 2     | 2     | 1     |
| 3466   | 4     | 4     | 3     | 3     |
| 3471   | 1     | 3     | 1     | 1     |
| 3473   | 1     | 2     | 1     | 1     |
| 3475   | 4     | 3     | 3     | 4     |
| 3476   | 1     | 2     | 1     | 1     |
| 3477   | 3     | 3     | 2     | 1     |
| 3478   |       |       |       |       |
| 3479   | 1     | 2     | 1     | 1     |
| 3482   | 1     | 2     | 1     | 2     |
| 3483   | 1     | 1     | 1     | 1     |
| 3485   | 2     | 2     | 2     | 1     |
| 3489   |       |       |       |       |
| 3490   | 1     | 2     | 1     | 1     |
| 3491   | 3     | 4     | 3     | 2     |
| 3494   | 1     | 2     | 1     | 1     |
| 3495   | 3     | 3     | 2     | 1     |
| 3501   | 1     | 1     | 1     | 1     |
| 3506   | 1     | 3     | 1     | 1     |
| 3507   | 1     | 1     | 1     | 1     |
| 3517   | 1     | 2     | 1     | 1     |
| 3520   | 1     | 2     | 1     | 1     |
| 3521   | 1     | 2     | 1     | 1     |
| 3522   | 1     | 1     | 1     | 1     |
| 3524   | 1     | 1     | 1     | 1     |
| 3527   | 1     | 1     | 1     | 1     |
| 3528   | 1     | 1     | 1     | 1     |
| 3529   | 1     | 2     | 1     | 1     |
| 3536   | 1     | 2     | 1     | 1     |

| respid | Q40_5 | Q40_6 | Q40_7 | Q40_8 |
|--------|-------|-------|-------|-------|
| 3537   | 1     | 1     | 1     | 1     |
| 3538   | 1     | 2     | 1     | 1     |
| 3540   | 3     | 2     | 3     | 1     |
| 3545   | 1     | 2     | 1     | 1     |
| 3547   | 1     | 4     | 3     | 3     |
| 3554   | 1     | 1     | 1     | 1     |
| 3556   | 1     | 1     | 1     | 1     |
| 3557   | 1     | 2     | 1     | 1     |
| 3559   | 3     | 3     | 3     | 3     |
| 3560   | 2     | 4     | 2     | 1     |
| 3562   | 1     | 1     | 1     | 1     |
| 3564   | 2     | 3     | 2     | 1     |
| 3565   | 3     | 4     | 4     | 4     |
| 3568   | 3     | 3     | 3     | 3     |
| 3572   |       |       |       |       |
| 3578   |       |       |       |       |
| 3581   | 1     | 2     | 1     | 1     |
| 3583   | 2     | 3     | 1     | 1     |
| 3588   | 1     | 1     | 1     | 1     |
| 3591   | 1     | 3     | 1     | 1     |
| 3594   | 1     | 1     | 1     | 1     |
| 3595   | 1     | 2     | 1     | 1     |
| 3596   | 1     | 2     | 1     | 1     |
| 3597   | 1     | 1     | 1     | 1     |
| 3598   |       |       |       |       |
| 3600   | 2     | 3     | 1     | 1     |
| 3602   | 1     | 1     | 1     | 1     |
| 3604   | 1     | 1     | 1     | 1     |
| 3605   | 2     | 2     | 2     | 2     |
| 3606   | 1     | 1     | 1     | 1     |
| 3607   |       |       |       |       |
| 3610   | 1     | 2     | 1     | 1     |

| respid | Q40_5 | Q40_6 | Q40_7 | Q40_8 |
|--------|-------|-------|-------|-------|
| 3611   | 1     | 2     | 1     | 1     |
| 3612   | 1     | 2     | 1     | 1     |
| 3614   | 2     | 1     | 1     | 1     |
| 3616   | 1     | 1     | 1     | 1     |
| 3617   | 1     | 2     | 1     | 1     |
| 3618   |       |       |       |       |
| 3619   | 4     | 6     | 4     | 2     |
| 3621   | 1     | 3     | 1     | 1     |
| 3622   | 3     | 2     | 2     | 1     |
| 3624   | 1     | 2     | 1     | 1     |
| 3626   | 1     | 1     | 1     | 1     |
| 3629   | 1     | 1     | 1     | 1     |
| 3631   | 1     | 1     | 1     | 1     |
| 3632   | 1     | 2     | 1     | 1     |
| 3638   | 1     | 1     | 5     | 1     |
| 3640   | 1     | 1     | 2     | 1     |
| 3641   | 2     | 3     | 2     | 1     |
| 3645   | 2     | 3     | 2     | 2     |
| 3650   |       |       |       |       |
| 3653   | 3     | 4     | 2     | 1     |
| 3655   | 2     | 2     | 4     | 1     |
| 3657   | 1     | 2     | 2     | 1     |
| 3658   | 1     | 2     | 1     | 1     |
| 3659   | 1     | 1     | 1     | 1     |
| 3664   | 2     | 3     | 3     | 3     |
| 3665   | 1     | 2     | 1     | 1     |
| 3667   | 1     | 2     | 1     | 1     |
| 3668   | 5     | 5     | 4     | 4     |
| 3675   |       |       |       |       |
| 3678   |       |       |       |       |
| 3680   |       |       |       |       |
| 3684   | 2     | 4     | 1     | 2     |

| respid | Q40_5 | Q40_6 | Q40_7 | Q40_8 |
|--------|-------|-------|-------|-------|
| 3685   | 3     | 3     | 3     | 3     |
| 3687   | 1     | 4     | 1     | 3     |
| 3689   | 2     | 5     | 5     | 5     |
| 3690   | 3     | 6     | 2     | 2     |
| 3693   |       |       |       |       |
| 3694   | 1     | 2     | 1     | 1     |
| 3695   |       |       |       |       |
| 3700   | 1     | 2     | 1     | 1     |
| 3701   | 1     | 3     | 3     | 1     |
| 3703   | 1     | 2     | 1     | 1     |
| 3704   | 4     | 4     | 5     | 3     |
| 3705   |       |       |       |       |
| 3709   | 1     | 2     | 1     | 1     |
| 3710   | 1     | 4     | 2     | 1     |
| 3722   | 1     | 2     | 1     | 1     |
| 3725   | 1     | 1     | 1     | 1     |
| 3726   | 1     | 1     | 1     | 1     |
| 3727   | 1     | 2     | 1     | 1     |
| 3728   | 2     | 3     | 3     | 3     |
| 3729   | 1     | 2     | 1     | 1     |
| 3731   |       |       |       |       |
| 3738   | 1     | 1     | 1     | 1     |
| 3739   | 1     | 1     | 1     | 1     |
| 3740   | 1     | 2     | 1     | 1     |
| 3749   | 2     | 2     | 2     | 2     |
| 3758   | 3     | 4     | 4     | 3     |
| 3762   | 4     | 3     | 5     | 1     |
| 3765   | 1     | 1     | 1     | 1     |
| 3770   | 1     | 1     | 1     | 1     |
| 3771   |       |       |       |       |
| 3778   | 1     | 2     | 1     | 1     |
| 3779   | 2     | 2     | 2     | 2     |

| respid | Q40_5 | Q40_6 | Q40_7 | Q40_8 |
|--------|-------|-------|-------|-------|
| 3780   | 1     | 1     | 1     | 1     |
| 3782   | 1     | 2     | 1     | 1     |
| 3784   | 1     | 2     | 1     | 1     |
| 3787   | 1     | 1     | 1     | 1     |
| 3790   | 1     | 2     | 1     | 1     |
| 3791   | 1     | 1     | 1     | 1     |
| 3793   | 1     | 3     | 1     | 1     |
| 3795   | 1     | 1     | 1     | 1     |
| 3799   |       |       |       |       |
| 3801   | 3     | 3     | 2     | 1     |
| 3804   | 2     | 2     | 1     | 2     |
| 3809   | 3     | 2     | 1     | 1     |
| 3810   | 1     | 2     | 1     | 1     |
| 3813   | 2     | 3     | 1     | 1     |
| 3816   | 1     | 2     | 1     | 1     |
| 3820   | 1     | 2     | 1     | 1     |
| 3821   | 1     | 1     | 1     | 2     |
| 3823   | 4     | 5     | 2     | 2     |
| 3828   | 1     | 1     | 1     | 1     |
| 3829   | 1     | 1     | 1     | 1     |
| 3832   | 1     | 2     | 1     | 1     |
| 3835   | 1     | 2     | 1     | 1     |
| 3837   | 2     | 3     | 1     | 1     |
| 3838   | 1     | 1     | 1     | 1     |
| 3839   | 5     | 4     | 4     | 5     |
| 3840   |       |       |       |       |
| 3842   |       |       |       |       |
| 3843   | 1     | 2     | 1     | 1     |
| 3844   | 2     | 2     | 2     | 2     |
| 3850   | 2     | 2     | 2     | 2     |
| 3851   |       |       |       |       |
| 3856   | 2     | 3     | 1     | 1     |



| respid | Q40_5 | Q40_6 | Q40_7 | Q40_8 |
|--------|-------|-------|-------|-------|
| 3859   | 3     | 2     | 2     | 2     |
| 3860   | 1     | 2     | 1     | 1     |
| 3863   | 2     | 2     | 2     | 2     |
| 3866   | 1     | 2     | 1     | 1     |
| 3867   | 1     | 1     | 1     | 1     |
| 3870   | 6     | 2     | 1     | 1     |
| 3873   | 5     | 2     | 2     | 1     |
| 3875   | 1     | 1     | 1     | 1     |
| 3878   | 1     | 1     | 1     | 1     |
| 3881   | 1     | 1     | 1     | 1     |
| 3883   | 3     | 4     | 4     | 3     |
| 3884   | 1     | 2     | 2     | 2     |
| 3885   | 4     | 4     | 3     | 4     |
| 3886   | 2     | 3     | 3     | 4     |
| 3887   | 1     | 2     | 1     | 1     |
| 3888   |       |       |       |       |
| 3889   | 2     | 4     | 3     | 3     |
| 3890   | 1     | 1     | 1     | 1     |
| 3896   | 1     | 2     | 1     | 1     |
| 3902   | 5     | 6     | 4     | 1     |
| 3909   | 1     | 2     | 1     | 1     |
| 3912   | 2     | 2     | 1     | 2     |
| 3922   | 1     | 1     | 1     | 1     |
| 3928   | 1     | 2     | 1     | 1     |
| 3930   | 1     | 2     | 1     | 1     |
| 3931   | 3     | 4     | 4     | 4     |
| 3933   | 1     | 2     | 1     | 1     |
| 3935   | 1     | 2     | 1     | 1     |
| 3937   | 1     | 2     | 1     | 1     |
| 3939   | 1     | 2     | 1     | 1     |
| 3942   | 1     | 1     | 1     | 1     |
| 3943   | 3     | 3     | 3     | 3     |

| respid | Q40_5 | Q40_6 | Q40_7 | Q40_8 |
|--------|-------|-------|-------|-------|
| 3944   |       |       |       |       |
| 3945   | 1     | 1     | 1     | 1     |
| 3947   | 1     | 1     | 1     | 1     |
| 3948   | 1     | 1     | 2     | 1     |
| 3951   | 2     | 3     | 3     | 2     |
| 3959   | 1     | 2     | 1     | 1     |
| 3969   | 5     | 5     | 5     | 5     |
| 3973   | 1     | 2     | 1     | 1     |
| 3975   | 2     | 2     | 3     | 2     |
| 3976   | 1     | 1     | 1     | 1     |
| 3977   | 2     | 2     | 3     | 2     |
| 3978   | 1     | 1     | 1     | 1     |
| 3994   | 1     | 4     | 4     | 1     |
| 3995   | 1     | 6     | 1     | 1     |
| 3997   | 1     | 2     | 1     | 1     |
| 3998   | 1     | 1     | 1     | 1     |
| 3999   | 2     | 2     | 2     | 2     |
| 4002   | 2     | 3     | 2     | 1     |
| 4004   | 1     | 2     | 1     | 1     |
| 4005   |       |       |       |       |
| 4006   | 2     | 2     | 3     | 3     |
| 4008   | 1     | 1     | 1     | 1     |
| 4010   | 2     | 1     | 1     | 1     |
| 4011   | 3     | 3     | 3     | 2     |
| 4013   | 1     | 2     | 1     | 2     |
| 4014   | 1     | 1     | 1     | 1     |
| 4016   | 2     | 1     | 2     | 1     |
| 4017   | 1     | 3     | 1     | 1     |
| 4019   | 1     | 1     | 1     | 1     |
| 4021   |       |       |       |       |
| 4023   | 2     | 1     | 1     | 1     |
| 4024   | 1     | 1     | 1     | 1     |

| respid | Q40_5 | Q40_6 | Q40_7 | Q40_8 |
|--------|-------|-------|-------|-------|
| 4025   | 2     | 2     | 1     | 1     |
| 4027   | 1     | 1     | 1     | 1     |
| 4032   |       |       |       |       |
| 4034   | 1     | 1     | 1     | 1     |
| 4035   | 5     | 4     | 5     | 3     |
| 4037   | 2     | 2     | 1     | 1     |
| 4040   | 1     | 2     | 1     | 1     |
| 4041   | 1     | 2     | 1     | 1     |
| 4042   | 1     | 2     | 1     | 1     |
| 4043   | 1     | 1     | 1     | 1     |
| 4045   | 3     | 3     | 4     | 2     |
| 4046   | 1     | 4     | 1     | 1     |
| 4048   | 1     | 3     | 1     | 1     |
| 4049   | 4     | 3     | 3     | 1     |
| 4050   | 2     | 3     | 2     | 1     |
| 4052   | 1     | 2     | 1     | 1     |
| 4053   |       |       |       |       |
| 4060   | 1     | 1     | 1     | 1     |
| 4065   | 4     | 4     | 5     | 4     |
| 4066   | 1     | 1     | 2     | 1     |
| 4067   | 1     | 1     | 1     | 1     |
| 4068   | 3     | 3     | 3     | 3     |
| 4069   | 1     | 2     | 1     | 1     |
| 4070   | 1     | 1     | 1     | 1     |
| 4071   | 4     | 4     | 4     | 4     |
| 4072   | 1     | 2     | 1     | 1     |
| 4073   | 1     | 2     | 1     | 1     |
| 4074   | 1     | 1     | 1     | 1     |
| 4075   | 3     | 2     | 2     | 1     |
| 4078   | 1     | 1     | 1     | 1     |
| 4080   | 1     | 2     | 1     | 1     |
| 4081   |       |       |       |       |

| respid | Q40_5 | Q40_6 | Q40_7 | Q40_8 |
|--------|-------|-------|-------|-------|
| 4082   | 1     | 1     | 1     | 1     |
| 4083   | 3     | 2     | 2     | 1     |
| 4084   | 1     | 1     | 1     | 1     |
| 4086   |       |       |       |       |
| 4087   | 1     | 1     | 1     | 1     |
| 4088   | 5     | 5     | 5     | 5     |
| 4089   | 1     | 1     | 1     | 1     |
| 4090   | 2     | 2     | 2     | 1     |
| 4093   | 1     | 2     | 1     | 1     |
| 4094   | 1     | 1     | 1     | 1     |
| 4095   | 1     | 3     | 1     | 1     |
| 4096   |       |       |       |       |
| 4098   | 1     | 2     | 1     | 1     |
| 4103   | 2     | 3     | 2     | 3     |
| 4104   | 2     | 2     | 2     | 1     |
| 4107   | 1     | 1     | 1     | 1     |
| 4109   | 1     | 1     | 1     | 1     |
| 4110   | 1     | 5     | 1     | 1     |
| 4113   | 1     | 1     | 1     | 1     |
| 4114   | 1     | 1     | 1     | 1     |
| 4116   | 1     | 1     | 1     | 1     |
| 4119   | 1     | 2     | 1     | 1     |
| 4120   | 1     | 1     | 1     | 1     |
| 4121   | 1     | 2     | 1     | 1     |
| 4122   | 2     | 3     | 2     | 2     |
| 4124   | 1     | 2     | 2     | 1     |
| 4126   | 1     | 2     | 1     | 1     |
| 4127   | 5     | 5     | 5     | 5     |
| 4131   | 1     | 4     | 1     | 1     |
| 4134   | 2     | 1     | 1     | 1     |
| 4144   | 1     | 2     | 1     | 1     |
| 4145   | 1     | 1     | 1     | 1     |

| respid | Q40_5 | Q40_6 | Q40_7 | Q40_8 |
|--------|-------|-------|-------|-------|
| 4146   | 1     | 1     | 1     | 1     |
| 4147   | 1     | 1     | 1     | 2     |
| 4149   | 2     | 4     | 1     | 1     |
| 4150   |       |       |       |       |
| 4151   | 4     | 4     | 4     | 1     |
| 4153   | 1     | 1     | 1     | 1     |
| 4155   | 1     | 1     | 1     | 1     |
| 4157   | 1     | 2     | 1     | 1     |
| 4159   | 1     | 1     | 1     | 1     |
| 4160   | 1     | 2     | 1     | 1     |
| 4161   | 1     | 1     | 1     | 1     |
| 4163   | 1     | 3     | 1     | 2     |
| 4164   | 1     | 2     | 2     | 2     |
| 4165   | 1     | 2     | 1     | 1     |
| 4166   | 1     | 1     | 1     | 1     |
| 4167   | 1     | 1     | 1     | 1     |
| 4170   | 1     | 2     | 1     | 1     |
| 4172   | 1     | 1     | 1     | 1     |
| 4173   | 2     | 4     | 2     | 1     |
| 4180   | 2     | 2     | 2     | 2     |
| 4185   | 1     | 4     | 1     | 1     |
| 4187   | 1     | 2     | 1     | 1     |
| 4190   | 1     | 1     | 1     | 1     |
| 4191   | 4     | 3     | 5     | 2     |
| 4193   |       |       |       |       |
| 4194   | 1     | 2     | 1     | 1     |
| 4195   | 1     | 1     | 1     | 1     |
| 4196   |       |       |       |       |
| 4197   | 3     | 2     | 1     | 1     |
| 4198   | 1     | 2     | 1     | 1     |
| 4199   | 1     | 1     | 2     | 1     |
| 4205   | 1     | 2     | 2     | 1     |

| respid | Q40_5 | Q40_6 | Q40_7 | Q40_8 |
|--------|-------|-------|-------|-------|
| 4206   |       |       |       |       |
| 4207   | 1     | 2     | 2     | 1     |
| 4214   | 1     | 1     | 1     | 1     |
| 4215   | 1     | 2     | 1     | 1     |
| 4217   | 1     | 1     | 1     | 1     |
| 4219   | 1     | 2     | 1     | 1     |
| 4223   | 3     | 3     | 3     | 3     |
| 4226   | 1     | 2     | 1     | 1     |
| 4229   | 1     | 1     | 1     | 1     |
| 4230   | 1     | 2     | 1     | 1     |
| 4232   | 1     | 1     | 1     | 1     |
| 4233   | 1     | 1     | 1     | 1     |
| 4234   | 3     | 5     | 2     | 1     |
| 4235   | 2     | 2     | 2     | 2     |
| 4236   | 3     | 3     | 2     | 1     |
| 4237   | 1     | 1     | 1     | 1     |
| 4238   | 1     | 2     | 1     | 1     |
| 4240   | 1     | 1     | 1     | 1     |
| 4241   | 1     | 2     | 1     | 1     |
| 4247   | 1     | 1     | 1     | 1     |
| 4250   | 1     | 1     | 1     | 1     |
| 4251   | 2     | 2     | 2     | 1     |
| 4253   | 3     | 4     | 3     | 2     |
| 4254   | 1     | 2     | 1     | 1     |
| 4258   | 4     | 3     | 4     | 4     |
| 4260   | 1     | 2     | 1     | 1     |
| 4263   | 3     | 2     | 3     | 1     |
| 4265   | 1     | 1     | 1     | 1     |
| 4266   | 1     | 2     | 1     | 1     |
| 4267   | 1     | 2     | 1     | 1     |
| 4270   | 1     | 1     | 1     | 1     |
| 4273   | 1     | 1     | 1     | 1     |

| respid | Q40_5 | Q40_6 | Q40_7 | Q40_8 |
|--------|-------|-------|-------|-------|
| 4280   | 1     | 2     | 1     | 1     |
| 4281   | 1     | 1     | 1     | 1     |
| 4282   | 1     | 2     | 1     | 1     |
| 4283   |       |       |       |       |
| 4286   | 2     | 2     | 2     | 2     |
| 4287   | 1     | 1     | 1     | 1     |
| 4289   | 1     | 3     | 1     | 1     |
| 4290   | 5     | 6     | 5     | 4     |
| 4291   | 1     | 1     | 1     | 1     |
| 4292   | 1     | 2     | 1     | 1     |
| 4293   | 1     | 1     | 1     | 1     |
| 4294   | 3     | 3     | 3     | 1     |
| 4295   |       |       |       |       |
| 4296   | 3     | 3     | 3     | 3     |
| 4297   | 1     | 1     | 1     | 2     |
| 4298   | 1     | 1     | 1     | 1     |
| 4299   | 1     | 1     | 1     | 1     |
| 4300   | 1     | 1     | 1     | 1     |
| 4301   |       |       |       |       |
| 4302   | 1     | 1     | 1     | 1     |
| 4304   | 1     | 2     | 1     | 1     |
| 4305   | 2     | 2     | 1     | 1     |
| 4307   | 4     | 3     | 3     | 4     |
| 4308   | 1     | 1     | 1     | 1     |
| 4312   |       |       |       |       |
| 4314   | 1     | 1     | 1     | 1     |
| 4316   | 1     | 2     | 1     | 1     |
| 4317   | 3     | 4     | 5     | 3     |
| 4319   | 2     | 1     | 4     | 3     |
| 4323   | 4     | 4     | 2     | 2     |
| 4337   | 1     | 1     | 1     | 1     |
| 4341   | 3     | 2     | 4     | 2     |

| respid | Q40_5 | Q40_6 | Q40_7 | Q40_8 |
|--------|-------|-------|-------|-------|
| 4342   | 1     | 3     | 1     | 1     |
| 4344   | 1     | 2     | 1     | 1     |
| 4345   | 1     | 1     | 2     | 1     |
| 4346   | 3     | 3     | 3     | 3     |
| 4347   | 1     | 1     | 1     | 1     |
| 4350   |       |       |       |       |
| 4352   | 1     | 1     | 1     | 1     |
| 4353   |       |       |       |       |
| 4355   | 1     | 2     | 1     | 1     |
| 4356   | 1     | 1     | 1     | 1     |
| 4358   |       |       |       |       |
| 4359   | 1     | 1     | 1     | 1     |
| 4360   | 1     | 2     | 2     | 1     |
| 4361   | 5     | 5     | 4     | 3     |
| 4363   | 1     | 2     | 1     | 1     |
| 4364   | 2     | 1     | 2     | 1     |
| 4365   | 2     | 3     | 2     | 6     |
| 4367   | 3     | 3     | 3     | 4     |
| 4369   | 2     | 2     | 2     | 1     |
| 4373   | 2     | 3     | 2     | 2     |
| 4374   | 3     | 3     | 4     | 4     |
| 4375   |       |       |       |       |
| 4378   | 1     | 1     | 1     | 1     |
| 4379   | 1     | 2     | 2     | 1     |
| 4382   | 1     | 3     | 1     | 1     |
| 4383   |       |       |       |       |
| 4384   | 1     | 2     | 1     | 2     |
| 4385   | 1     | 1     | 2     | 2     |
| 4388   | 2     | 2     | 2     | 2     |
| 4389   | 2     | 1     | 1     | 1     |
| 4391   | 1     | 1     | 1     | 1     |
| 4392   | 1     | 1     | 1     | 1     |



| respid | Q40_5 | Q40_6 | Q40_7 | Q40_8 |
|--------|-------|-------|-------|-------|
| 4393   | 2     | 1     | 1     | 1     |
| 4395   | 1     | 2     | 1     | 1     |
| 4397   | 1     | 1     | 1     | 1     |
| 4398   | 1     | 1     | 1     | 1     |
| 4399   | 1     | 1     | 1     | 1     |
| 4400   |       |       |       |       |
| 4401   | 1     | 3     | 1     | 1     |
| 4402   | 1     | 1     | 1     | 1     |
| 4404   | 1     | 1     | 1     | 1     |
| 4405   |       |       |       |       |
| 4407   | 1     | 3     | 1     | 1     |
| 4408   | 2     | 4     | 1     | 2     |
| 4411   |       |       |       |       |
| 4420   | 1     | 1     | 2     | 1     |
| 4421   | 1     | 2     | 1     | 1     |
| 4424   | 3     | 4     | 5     | 4     |
| 4425   | 1     | 2     | 1     | 1     |
| 4427   | 1     | 1     | 1     | 1     |
| 4430   | 2     | 1     | 1     | 2     |
| 4431   | 1     | 2     | 2     | 2     |
| 4432   | 1     | 1     | 1     | 1     |
| 4436   | 1     | 2     | 1     | 1     |
| 4439   | 1     | 2     | 1     | 1     |
| 4451   | 2     | 2     | 2     | 1     |
| 4452   | 3     | 4     | 3     | 3     |
| 4458   | 1     | 1     | 1     | 1     |
| 4464   | 1     | 2     | 1     | 1     |
| 4465   | 1     | 2     | 1     | 1     |
| 4467   | 1     | 1     | 1     | 1     |
| 4470   | 1     | 3     | 1     | 1     |
| 4471   | 1     | 2     | 1     | 1     |
| 4472   | 1     | 3     | 1     | 2     |

| respid | Q40_5 | Q40_6 | Q40_7 | Q40_8 |
|--------|-------|-------|-------|-------|
| 4473   | 1     | 1     | 1     | 1     |
| 4475   | 1     | 2     | 1     | 1     |
| 4476   | 2     | 2     | 1     | 1     |
| 4478   | 1     | 2     | 1     | 1     |
| 4485   | 1     | 1     | 1     | 1     |
| 4486   | 1     | 2     | 1     | 1     |
| 4490   |       |       |       |       |
| 4502   |       |       |       |       |
| 4503   | 4     | 6     | 5     | 5     |
| 4504   | 1     | 1     | 1     | 1     |
| 4506   | 1     | 2     | 1     | 1     |
| 4508   | 1     | 2     | 1     | 1     |
| 4515   | 1     | 2     | 1     | 1     |
| 4516   | 5     | 4     | 1     | 1     |
| 4519   | 1     | 1     | 1     | 1     |
| 4523   | 1     | 2     | 2     | 1     |
| 4525   | 1     | 1     | 1     | 1     |
| 4526   | 1     | 1     | 1     | 1     |
| 4528   |       |       |       |       |
| 4530   | 1     | 1     | 1     | 1     |
| 4531   | 3     | 4     | 3     | 2     |
| 4532   | 1     | 1     | 1     | 1     |
| 4537   | 1     | 1     | 2     | 1     |
| 4538   | 1     | 3     | 1     | 1     |
| 4539   | 1     | 2     | 2     | 1     |
| 4541   | 1     | 1     | 1     | 1     |
| 4543   |       |       |       |       |
| 4544   | 1     | 1     | 1     | 1     |
| 4546   | 1     | 1     | 1     | 1     |
| 4547   | 1     | 2     | 1     | 1     |
| 4549   |       |       |       |       |
| 4550   | 2     | 2     | 2     | 2     |

| respid | Q40_5 | Q40_6 | Q40_7 | Q40_8 |
|--------|-------|-------|-------|-------|
| 4551   | 1     | 2     | 1     | 1     |
| 4554   | 1     | 1     | 1     | 1     |
| 4557   |       |       |       |       |
| 4565   | 1     | 2     | 1     | 1     |
| 4568   | 1     | 1     | 1     | 1     |
| 4569   | 1     | 2     | 1     | 1     |
| 4570   | 1     | 2     | 1     | 1     |
| 4572   | 1     | 2     | 1     | 1     |
| 4574   | 1     | 2     | 1     | 1     |
| 4576   | 1     | 6     | 1     | 1     |
| 4578   | 1     | 1     | 1     | 1     |
| 4579   |       |       |       |       |
| 4580   | 3     | 3     | 3     | 3     |
| 4581   |       |       |       |       |
| 4584   | 1     | 1     | 1     | 1     |
| 4586   | 2     | 2     | 2     | 2     |
| 4587   | 3     | 4     | 3     | 5     |
| 4590   | 1     | 1     | 1     | 1     |
| 4592   | 1     | 2     | 1     | 1     |
| 4593   | 1     | 1     | 1     | 1     |
| 4595   | 1     | 2     | 1     | 1     |
| 4597   | 1     | 1     | 1     | 1     |
| 4598   | 3     | 3     | 3     | 3     |
| 4599   | 1     | 3     | 1     | 1     |
| 4600   | 1     | 3     | 1     | 1     |
| 4601   | 2     | 2     | 2     | 2     |
| 4608   | 1     | 4     | 1     | 1     |
| 4609   | 1     | 2     | 1     | 1     |
| 4611   | 1     | 2     | 1     | 1     |
| 4612   | 2     | 3     | 2     | 2     |
| 4613   |       |       |       |       |
| 4616   | 2     | 4     | 3     | 1     |

| respid | Q40_5 | Q40_6 | Q40_7 | Q40_8 |
|--------|-------|-------|-------|-------|
| 4617   | 2     | 2     | 1     | 1     |
| 4620   | 1     | 3     | 2     | 3     |
| 4621   | 1     | 1     | 1     | 1     |
| 4622   | 2     | 2     | 2     | 2     |
| 4624   | 1     | 2     | 1     | 1     |
| 4625   | 2     | 2     | 2     | 1     |
| 4627   | 2     | 3     | 1     | 2     |
| 4628   | 3     | 3     | 3     | 3     |
| 4629   |       |       |       |       |
| 4630   | 2     | 3     | 2     | 2     |
| 4632   | 1     | 1     | 1     | 1     |
| 4634   | 2     | 2     | 2     | 2     |
| 4635   | 1     | 3     | 1     | 1     |
| 4636   | 1     | 2     | 1     | 1     |
| 4637   | 2     | 2     | 2     | 2     |
| 4638   | 3     | 3     | 2     | 2     |
| 4639   | 2     | 2     | 3     | 1     |
| 4641   | 1     | 1     | 1     | 1     |
| 4643   | 1     | 2     | 1     | 1     |
| 4645   | 1     | 1     | 1     | 1     |
| 4646   | 2     | 2     | 2     | 2     |
| 4647   |       |       |       |       |
| 4648   | 1     | 1     | 1     | 1     |
| 4649   | 1     | 1     | 1     | 1     |
| 4650   | 3     | 5     | 4     | 2     |
| 4651   | 1     | 2     | 1     | 1     |
| 4652   | 1     | 2     | 1     | 1     |
| 4653   |       |       |       |       |
| 4657   |       |       |       |       |
| 4660   | 2     | 2     | 2     | 2     |
| 4661   | 1     | 1     | 1     | 1     |
| 4662   | 2     | 2     | 1     | 1     |

| respid | Q40_5 | Q40_6 | Q40_7 | Q40_8 |
|--------|-------|-------|-------|-------|
| 4667   | 1     | 2     | 1     | 1     |
| 4669   | 1     | 1     | 1     | 1     |
| 4671   |       |       |       |       |
| 4672   | 1     | 4     | 1     | 1     |
| 4673   | 1     | 1     | 1     | 1     |
| 4677   |       |       |       |       |
| 4679   | 1     | 2     | 1     | 1     |
| 4683   | 1     | 1     | 1     | 1     |
| 4684   | 1     | 3     | 1     | 1     |
| 4685   | 1     | 2     | 1     | 1     |
| 4686   | 1     | 2     | 1     | 1     |
| 4687   | 1     | 1     | 1     | 1     |
| 4688   | 1     | 1     | 1     | 1     |
| 4691   | 1     | 1     | 1     | 1     |
| 4692   | 1     | 2     | 1     | 1     |
| 4694   | 3     | 3     | 3     | 3     |
| 4695   | 1     | 3     | 1     | 1     |
| 4696   | 2     | 2     | 1     | 1     |
| 4697   |       |       |       |       |
| 4698   | 3     | 3     | 3     | 3     |
| 4699   | 1     | 2     | 1     | 1     |
| 4701   |       |       |       |       |
| 4703   | 1     | 2     | 1     | 1     |
| 4704   | 5     | 5     | 4     | 5     |
| 4705   | 1     | 2     | 1     | 1     |
| 4706   | 1     | 1     | 1     | 1     |
| 4707   | 1     | 1     | 1     | 1     |
| 4708   | 1     | 2     | 1     | 1     |
| 4710   | 1     | 3     | 1     | 1     |
| 4711   | 3     | 4     | 3     | 3     |
| 4715   |       |       |       |       |
| 4716   | 1     | 1     | 1     | 1     |

| respid | Q40_5 | Q40_6 | Q40_7 | Q40_8 |
|--------|-------|-------|-------|-------|
| 4717   | 1     | 1     | 1     | 1     |
| 4718   | 2     | 2     | 2     | 2     |
| 4722   | 2     | 3     | 3     | 3     |
| 4727   | 2     | 2     | 2     | 2     |
| 4728   | 5     | 5     | 3     | 6     |
| 4729   | 1     | 1     | 1     | 1     |
| 4732   | 1     | 2     | 2     | 1     |
| 4733   | 1     | 1     | 1     | 1     |
| 4734   | 1     | 1     | 1     | 1     |
| 4735   | 1     | 1     | 1     | 1     |
| 4737   | 1     | 1     | 1     | 1     |
| 4738   | 1     | 2     | 1     | 1     |
| 4740   | 1     | 1     | 1     | 1     |
| 4741   | 2     | 3     | 2     | 2     |
| 4743   | 1     | 1     | 1     | 1     |
| 4746   | 1     | 1     | 1     | 1     |
| 4750   | 1     | 1     | 1     | 1     |
| 4752   | 1     | 1     | 1     | 1     |
| 4753   | 1     | 2     | 1     | 1     |
| 4754   | 4     | 6     | 2     | 1     |
| 4755   | 4     | 5     | 3     | 3     |
| 4758   | 2     | 3     | 2     | 2     |
| 4766   |       |       |       |       |
| 4767   | 2     | 2     | 2     | 2     |
| 4768   | 1     | 3     | 1     | 1     |
| 4769   | 3     | 3     | 2     | 2     |
| 4771   | 4     | 3     | 4     | 4     |
| 4772   | 2     | 1     | 1     | 1     |
| 4773   | 2     | 2     | 2     | 2     |
| 4774   | 1     | 2     | 2     | 1     |
| 4776   | 5     | 4     | 3     | 2     |
| 4777   | 1     | 1     | 1     | 1     |

| respid | Q40_5 | Q40_6 | Q40_7 | Q40_8 |
|--------|-------|-------|-------|-------|
| 4779   |       |       |       |       |
| 4780   | 1     | 2     | 1     | 1     |
| 4781   | 1     | 1     | 1     | 1     |
| 4783   | 5     | 4     | 4     | 1     |
| 4784   | 1     | 1     | 1     | 1     |
| 4785   | 1     | 3     | 1     | 1     |
| 4788   |       |       |       |       |
| 4789   | 2     | 3     | 2     | 2     |
| 4790   | 1     | 1     | 1     | 1     |
| 4791   |       |       |       |       |
| 4794   |       |       |       |       |
| 4795   | 1     | 1     | 1     | 1     |
| 4797   | 1     | 1     | 1     | 1     |
| 4802   | 3     | 3     | 2     | 1     |
| 4803   | 2     | 2     | 2     | 2     |
| 4804   |       |       |       |       |
| 4805   | 1     | 1     | 1     | 1     |
| 4807   |       |       |       |       |
| 4808   | 2     | 1     | 1     | 1     |
| 4809   | 4     | 5     | 3     | 4     |
| 4811   | 1     | 1     | 1     | 1     |
| 4817   |       |       |       |       |
| 4819   | 1     | 2     | 1     | 1     |
| 4820   |       |       |       |       |
| 4821   | 2     | 1     | 1     | 2     |
| 4822   | 1     | 1     | 1     | 1     |
| 4823   | 1     | 2     | 2     | 1     |
| 4825   | 1     | 1     | 1     | 1     |
| 4826   |       |       |       |       |
| 4830   | 1     | 1     | 1     | 1     |
| 4832   |       |       |       |       |
| 4838   | 1     | 3     | 2     | 1     |

| respid | Q40_5 | Q40_6 | Q40_7 | Q40_8 |
|--------|-------|-------|-------|-------|
| 4840   | 1     | 1     | 1     | 1     |
| 4841   |       |       |       |       |
| 4843   | 1     | 2     | 1     | 1     |
| 4845   | 2     | 1     | 3     | 1     |
| 4846   | 3     | 3     | 3     | 3     |
| 4848   | 2     | 2     | 1     | 1     |
| 4853   | 1     | 1     | 1     | 1     |
| 4854   | 1     | 1     | 1     | 1     |
| 4859   | 2     | 1     | 1     | 1     |
| 4861   |       |       |       |       |
| 4864   | 4     | 2     | 1     | 1     |
| 4867   |       |       |       |       |
| 4870   | 1     | 1     | 2     | 1     |
| 4872   | 1     | 2     | 1     | 2     |
| 4873   | 1     | 3     | 1     | 1     |
| 4874   | 1     | 2     | 1     | 1     |
| 4878   | 1     | 2     | 1     | 1     |
| 4880   | 1     | 1     | 1     | 1     |
| 4881   | 1     | 1     | 1     | 1     |
| 4882   | 4     | 4     | 4     | 3     |
| 4883   | 2     | 1     | 1     | 1     |
| 4885   | 1     | 1     | 1     | 1     |
| 4889   |       |       |       |       |
| 4890   |       |       |       |       |
| 4891   | 1     | 2     | 1     | 1     |
| 4894   | 1     | 1     | 1     | 1     |
| 4895   | 3     | 5     | 4     | 3     |
| 4896   | 1     | 1     | 1     | 1     |
| 4897   | 1     | 1     | 1     | 1     |
| 4898   | 2     | 2     | 2     | 1     |
| 4899   |       |       |       |       |
| 4900   | 1     | 2     | 1     | 1     |



| respid | Q40_5 | Q40_6 | Q40_7 | Q40_8 |
|--------|-------|-------|-------|-------|
| 4901   | 1     | 1     | 1     | 1     |
| 4903   | 1     | 1     | 1     | 1     |
| 4904   | 1     | 1     | 1     | 1     |
| 4908   | 1     | 1     | 1     | 1     |
| 4909   | 2     | 3     | 3     | 4     |
| 4913   | 1     | 1     | 1     | 1     |
| 4917   | 1     | 3     | 1     | 1     |
| 4918   | 1     | 4     | 1     | 1     |
| 4920   |       |       |       |       |
| 4921   | 1     | 1     | 1     | 1     |
| 4925   | 2     | 2     | 1     | 1     |
| 4926   | 1     | 1     | 1     | 1     |
| 4927   | 1     | 2     | 1     | 1     |
| 4928   | 1     | 1     | 1     | 1     |
| 4929   | 1     | 2     | 1     | 1     |
| 4930   | 4     | 4     | 4     | 4     |
| 4931   | 1     | 2     | 1     | 1     |
| 4932   | 4     | 4     | 2     | 3     |
| 4933   | 1     | 1     | 1     | 1     |
| 4934   | 1     | 1     | 1     | 1     |
| 5934   | 1     | 1     | 1     | 1     |
| 5935   | 2     | 2     | 1     | 1     |
| 5936   | 1     | 2     | 1     | 1     |
| 5938   |       |       |       |       |
| 5939   | 1     | 1     | 1     | 1     |
| 5940   | 1     | 1     | 1     | 2     |
| 5942   | 1     | 2     | 1     | 1     |
| 5944   | 1     | 2     | 2     | 1     |
| 5951   | 4     | 4     | 5     | 5     |
| 5952   | 1     | 1     | 1     | 1     |
| 5954   | 1     | 1     | 1     | 1     |
| 5956   | 1     | 2     | 1     | 1     |

| respid | Q40_5 | Q40_6 | Q40_7 | Q40_8 |
|--------|-------|-------|-------|-------|
| 5957   | 1     | 3     | 1     | 1     |
| 5958   | 2     | 2     | 2     | 2     |
| 5959   | 3     | 2     | 3     | 3     |
| 5960   | 1     | 2     | 1     | 1     |
| 5963   | 2     | 3     | 2     | 1     |
| 5966   | 2     | 2     | 1     | 1     |
| 5968   | 1     | 2     | 1     | 1     |
| 5974   | 1     | 2     | 1     | 1     |
| 5975   | 1     | 1     | 1     | 1     |
| 5976   | 4     | 3     | 3     | 2     |
| 5977   | 1     | 2     | 1     | 1     |
| 5978   | 3     | 3     | 3     | 2     |
| 5979   | 1     | 2     | 1     | 1     |
| 5983   | 1     | 2     | 1     | 1     |
| 5984   | 1     | 1     | 1     | 1     |
| 5990   | 1     | 1     | 1     | 1     |
| 5991   | 1     | 1     | 1     | 1     |
| 5992   |       |       |       |       |
| 5993   | 1     | 2     | 1     | 1     |
| 5994   | 1     | 1     | 1     | 1     |
| 5996   | 1     | 2     | 1     | 1     |
| 6001   | 4     | 4     | 3     | 3     |
| 6003   | 1     | 1     | 1     | 1     |
| 6004   | 1     | 2     | 1     | 1     |
| 6005   | 4     | 3     | 1     | 1     |
| 6006   | 1     | 1     | 1     | 1     |
| 6008   | 1     | 3     | 1     | 1     |
| 6009   | 1     | 3     | 1     | 1     |
| 6014   |       |       |       |       |
| 6016   | 2     | 2     | 2     | 2     |
| 6017   | 1     | 1     | 1     | 1     |
| 6018   | 2     | 2     | 2     | 1     |

| respid | Q40_5 | Q40_6 | Q40_7 | Q40_8 |
|--------|-------|-------|-------|-------|
| 6020   | 1     | 5     | 1     | 1     |
| 6021   |       |       |       |       |
| 6024   | 1     | 2     | 2     | 2     |
| 6025   | 1     | 2     | 1     | 1     |
| 6026   | 1     | 2     | 1     | 1     |
| 6032   | 1     | 3     | 1     | 2     |
| 6035   | 1     | 2     | 1     | 1     |
| 6038   | 1     | 2     | 1     | 1     |
| 6043   | 3     | 3     | 3     | 2     |
| 6044   | 1     | 2     | 1     | 1     |
| 6046   | 1     | 1     | 1     | 1     |
| 6047   | 1     | 2     | 1     | 1     |
| 6048   | 2     | 2     | 1     | 1     |
| 6050   | 1     | 3     | 1     | 1     |
| 6051   | 2     | 2     | 1     | 1     |
| 6053   | 1     | 2     | 1     | 1     |
| 6054   | 1     | 4     | 1     | 1     |
| 6056   | 1     | 1     | 1     | 1     |
| 6058   | 1     | 2     | 1     | 1     |
| 6060   | 1     | 2     | 1     | 1     |
| 6061   | 1     | 1     | 1     | 1     |
| 6062   | 2     | 2     | 2     | 1     |
| 6067   | 1     | 1     | 1     | 1     |
| 6070   | 1     | 3     | 1     | 1     |
| 6074   | 2     | 3     | 2     | 1     |
| 6076   | 1     | 2     | 1     | 1     |
| 6078   |       |       |       |       |
| 6081   | 1     | 2     | 1     | 1     |
| 6085   | 1     | 2     | 1     | 2     |
| 6088   |       |       |       |       |
| 6092   | 1     | 2     | 1     | 1     |
| 6095   | 1     | 2     | 1     | 1     |

| respid | Q40_5 | Q40_6 | Q40_7 | Q40_8 |
|--------|-------|-------|-------|-------|
| 6098   | 2     | 1     | 1     | 2     |
| 6101   |       |       |       |       |
| 6102   | 1     | 2     | 1     | 1     |
| 6105   | 1     | 3     | 1     | 1     |
| 6106   | 1     | 3     | 1     | 1     |
| 6107   | 1     | 2     | 1     | 1     |
| 6111   | 1     | 1     | 1     | 1     |
| 6112   | 1     | 2     | 1     | 1     |
| 6113   | 3     | 3     | 3     | 3     |
| 6115   | 1     | 1     | 1     | 1     |
| 6116   |       |       |       |       |
| 6117   | 2     | 4     | 4     | 3     |
| 6124   | 3     | 5     | 4     | 2     |
| 6125   | 1     | 2     | 1     | 1     |
| 6128   |       |       |       |       |
| 6133   | 2     | 1     | 2     | 2     |
| 6134   | 2     | 2     | 2     | 1     |
| 6135   | 1     | 1     | 1     | 1     |
| 6138   | 2     | 2     | 3     | 1     |
| 6140   | 1     | 1     | 1     | 1     |
| 6143   | 1     | 1     | 1     | 1     |
| 6147   | 3     | 4     | 2     | 2     |
| 6154   | 1     | 2     | 1     | 1     |
| 6162   |       |       |       |       |
| 6165   | 1     | 5     | 1     | 1     |
| 6166   | 2     | 2     | 2     | 3     |
| 6173   | 3     | 5     | 2     | 2     |
| 6180   | 2     | 2     | 1     | 1     |
| 6184   | 3     | 5     | 3     | 2     |
| 6185   | 1     | 1     | 1     | 2     |
| 6186   | 1     | 2     | 1     | 1     |
| 6188   | 1     | 2     | 1     | 1     |

| respid | Q40_5 | Q40_6 | Q40_7 | Q40_8 |
|--------|-------|-------|-------|-------|
| 6192   | 5     | 1     | 3     | 4     |
| 6194   |       |       |       |       |
| 6195   | 1     | 1     | 1     | 1     |
| 6196   | 2     | 2     | 1     | 1     |
| 6199   | 2     | 2     | 1     | 1     |
| 6200   |       |       |       |       |
| 6201   | 1     | 2     | 1     | 1     |
| 6202   | 1     | 3     | 1     | 1     |
| 6203   | 1     | 1     | 1     | 1     |
| 6205   | 1     | 1     | 1     | 1     |
| 6210   | 2     | 1     | 2     | 2     |
| 6212   | 1     | 2     | 1     | 1     |
| 6216   | 4     | 5     | 3     | 2     |
| 6218   | 2     | 5     | 4     | 5     |
| 6221   | 1     | 2     | 1     | 1     |
| 6224   | 1     | 1     | 1     | 1     |
| 6225   | 1     | 2     | 1     | 1     |
| 6227   | 1     | 1     | 1     | 1     |
| 6230   |       |       |       |       |
| 6231   | 1     | 2     | 1     | 1     |
| 6233   | 1     | 3     | 3     | 1     |
| 6234   | 1     | 3     | 1     | 1     |
| 6235   |       |       |       |       |
| 6237   |       |       |       |       |
| 6240   |       |       |       |       |
| 6248   | 1     | 1     | 1     | 1     |
| 6249   | 1     | 1     | 1     | 1     |
| 6252   | 2     | 2     | 1     | 1     |
| 6254   | 1     | 3     | 1     | 1     |
| 6269   | 2     | 2     | 2     | 2     |
| 6304   |       |       |       |       |
| 6334   | 3     | 3     | 3     | 3     |

| respid | Q40_5 | Q40_6 | Q40_7 | Q40_8 |
|--------|-------|-------|-------|-------|
| 6341   | 5     | 5     | 1     | 1     |
| 6350   | 2     | 2     | 3     | 2     |
| 6370   | 1     | 1     | 1     | 1     |
| 6384   | 1     | 1     | 1     | 1     |
| 6400   | 1     | 1     | 1     | 1     |
| 6418   |       |       |       |       |
| 6467   | 1     | 1     | 1     | 1     |
| 6469   | 1     | 2     | 1     | 1     |
| 6474   | 1     | 1     | 1     | 1     |
| 6475   |       |       |       |       |
| 6476   | 3     | 4     | 4     | 3     |
| 6477   | 1     | 3     | 1     | 1     |
| 6480   | 1     | 2     | 1     | 1     |
| 6481   | 3     | 5     | 4     | 3     |
| 6485   | 1     | 1     | 1     | 1     |
| 6488   | 2     | 3     | 3     | 3     |
| 6495   | 2     | 2     | 2     | 1     |
| 6499   | 1     | 3     | 1     | 1     |
| 6500   | 2     | 1     | 2     | 2     |
| 6504   | 2     | 2     | 2     | 1     |
| 6507   | 3     | 4     | 1     | 1     |
| 6512   | 1     | 2     | 1     | 1     |
| 6525   | 2     | 3     | 2     | 3     |
| 6532   | 1     | 2     | 1     | 1     |
| 6535   | 1     | 2     | 1     | 1     |
| 6546   | 1     | 1     | 1     | 1     |
| 6551   | 6     | 5     | 4     | 3     |
| 6556   | 2     | 2     | 2     | 2     |
| 6566   | 1     | 4     | 1     | 2     |
| 6569   |       |       |       |       |
| 6574   | 1     | 1     | 1     | 1     |
| 6576   | 2     | 3     | 1     | 1     |

| respid | Q40_5 | Q40_6 | Q40_7 | Q40_8 |
|--------|-------|-------|-------|-------|
| 6580   |       |       |       |       |
| 6584   |       |       |       |       |
| 6585   | 1     | 2     | 3     | 1     |
| 6589   | 1     | 1     | 1     | 1     |
| 6590   | 1     | 2     | 1     | 1     |
| 6598   | 1     | 1     | 1     | 1     |
| 6603   | 2     | 2     | 2     | 2     |
| 6618   | 1     | 2     | 1     | 2     |
| 6630   | 2     | 3     | 4     | 4     |
| 6636   | 4     | 4     | 4     | 4     |
| 6649   |       |       |       |       |
| 6675   | 1     | 2     | 1     | 1     |
| 6678   | 2     | 2     | 3     | 2     |
| 6681   | 1     | 1     | 1     | 1     |
| 6684   | 2     | 2     | 2     | 2     |
| 6688   |       |       |       |       |
| 6691   | 1     | 1     | 1     | 1     |
| 6694   | 3     | 3     | 3     | 3     |
| 6696   | 1     | 1     | 1     | 1     |
| 6720   | 3     | 4     | 3     | 4     |
| 6722   | 5     | 4     | 4     | 5     |
| 6724   | 1     | 2     | 1     | 1     |
| 6725   | 1     | 1     | 1     | 1     |
| 6727   | 1     | 2     | 1     | 1     |
| 6734   | 3     | 3     | 3     | 3     |
| 6739   | 3     | 5     | 1     | 3     |
| 6743   | 4     | 2     | 5     | 4     |
| 6749   | 1     | 1     | 1     | 1     |
| 6756   | 1     | 2     | 1     | 1     |
| 6764   | 1     | 2     | 1     | 1     |
| 6765   | 1     | 1     | 1     | 1     |
| 6768   | 1     | 1     | 1     | 1     |

| respid | Q40_5 | Q40_6 | Q40_7 | Q40_8 |
|--------|-------|-------|-------|-------|
| 6773   | 1     | 2     | 1     | 1     |
| 6775   | 1     | 2     | 1     | 1     |
| 6777   | 1     | 1     | 1     | 1     |
| 6779   | 1     | 1     | 1     | 1     |
| 6790   | 1     | 2     | 1     | 1     |
| 6797   |       |       |       |       |
| 6798   | 2     | 3     | 2     | 3     |
| 6808   |       |       |       |       |
| 6810   | 2     | 3     | 2     | 1     |
| 6811   | 3     | 3     | 3     | 3     |
| 6812   | 1     | 2     | 1     | 1     |
| 6814   | 1     | 2     | 1     | 1     |
| 6819   | 1     | 3     | 2     | 1     |
| 6820   | 2     | 3     | 4     | 3     |
| 6832   | 1     | 1     | 1     | 1     |
| 6854   | 1     | 4     | 4     | 1     |
| 6855   |       |       |       |       |
| 6857   | 1     | 1     | 1     | 1     |
| 6858   | 1     | 2     | 1     | 1     |
| 6859   | 1     | 2     | 1     | 1     |
| 6860   | 1     | 1     | 2     | 1     |
| 6862   | 1     | 2     | 1     | 1     |
| 6879   |       |       |       |       |
| 6893   | 1     | 1     | 1     | 1     |
| 6898   | 2     | 2     | 1     | 1     |
| 6902   | 4     | 3     | 2     | 2     |
| 6903   | 3     | 2     | 1     | 2     |
| 6907   | 4     | 3     | 4     | 3     |
| 6908   |       |       |       |       |
| 6912   |       |       |       |       |
| 6915   | 1     | 4     | 2     | 2     |
| 6916   | 3     | 1     | 2     | 1     |



| respid | Q40_5 | Q40_6 | Q40_7 | Q40_8 |
|--------|-------|-------|-------|-------|
| 6917   | 2     | 1     | 1     | 1     |
| 6923   | 1     | 2     | 1     | 1     |
| 6934   | 1     | 1     | 1     | 1     |
| 6937   |       |       |       |       |
| 6945   | 1     | 2     | 1     | 1     |
| 6954   | 1     | 1     | 1     | 1     |
| 6956   | 2     | 3     | 1     | 1     |
| 6958   | 1     | 2     | 1     | 1     |
| 6961   | 1     | 2     | 2     | 1     |
| 6963   | 1     | 2     | 1     | 1     |
| 6964   | 1     | 1     | 1     | 1     |
| 6976   |       |       |       |       |
| 6977   | 1     | 2     | 2     | 1     |
| 7000   | 1     | 3     | 4     | 3     |
| 7001   | 1     | 1     | 1     | 1     |
| 7005   | 1     | 2     | 1     | 1     |
| 7006   | 1     | 3     | 1     | 1     |
| 7008   | 5     | 2     | 2     | 1     |
| 7009   | 1     | 1     | 1     | 6     |
| 7019   | 1     | 1     | 1     | 1     |
| 7021   | 2     | 2     | 1     | 1     |
| 7026   | 3     | 3     | 2     | 1     |
| 7030   | 3     | 2     | 2     | 2     |
| 7034   |       |       |       |       |
| 7039   | 1     | 1     | 1     | 1     |
| 7041   | 1     | 1     | 1     | 1     |
| 7047   | 1     | 2     | 1     | 1     |
| 7051   | 2     | 2     | 2     | 1     |
| 7052   | 2     | 2     | 2     | 2     |
| 7059   | 3     | 3     | 2     | 1     |
| 7062   | 2     | 3     | 2     | 1     |
| 7065   | 1     | 1     | 1     | 1     |

| respid | Q40_5 | Q40_6 | Q40_7 | Q40_8 |
|--------|-------|-------|-------|-------|
| 7066   | 1     | 2     | 1     | 1     |
| 7069   | 2     | 1     | 1     | 1     |
| 7070   |       |       |       |       |
| 7073   |       |       |       |       |
| 7078   | 1     | 1     | 1     | 1     |
| 7083   | 2     | 4     | 2     | 2     |
| 7084   | 4     | 4     | 4     | 4     |
| 7085   | 1     | 2     | 1     | 1     |
| 7088   | 5     | 5     | 4     | 4     |
| 7090   | 1     | 4     | 3     | 4     |
| 7095   | 2     | 2     | 1     | 1     |
| 7100   |       |       |       |       |
| 7102   | 1     | 3     | 1     | 1     |
| 7103   | 1     | 2     | 1     | 1     |
| 7108   | 1     | 1     | 1     | 1     |
| 7109   | 1     | 1     | 1     | 1     |
| 7110   |       |       |       |       |
| 7112   |       |       |       |       |
| 7114   | 1     | 2     | 2     | 1     |
| 7116   | 1     | 1     | 1     | 1     |
| 7117   | 3     | 2     | 1     | 1     |
| 7118   | 4     | 4     | 3     | 3     |
| 7120   | 4     | 5     | 4     | 3     |
| 7124   | 1     | 2     | 1     | 1     |
| 7130   | 2     | 2     | 2     | 2     |
| 7135   | 1     | 1     | 1     | 1     |
| 7137   | 3     | 5     | 4     | 5     |
| 7140   | 1     | 1     | 1     | 1     |
| 7141   | 1     | 1     | 1     | 1     |
| 7148   | 1     | 1     | 1     | 1     |
| 7152   |       |       |       |       |
| 7154   | 1     | 5     | 3     | 1     |

| respid | Q40_5 | Q40_6 | Q40_7 | Q40_8 |
|--------|-------|-------|-------|-------|
| 7156   | 1     | 2     | 1     | 1     |
| 7158   | 3     | 1     | 2     | 1     |
| 7159   |       |       |       |       |
| 7161   |       |       |       |       |
| 7164   | 1     | 1     | 1     | 1     |
| 7166   |       |       |       |       |
| 7167   |       |       |       |       |
| 7168   |       |       |       |       |
| 7170   |       |       |       |       |
| 7171   | 1     | 2     | 1     | 1     |
| 7172   | 1     | 2     | 1     | 1     |
| 7173   | 2     | 3     | 2     | 1     |
| 7175   | 1     | 1     | 1     | 1     |
| 7176   | 2     | 2     | 2     | 2     |
| 7180   | 1     | 1     | 1     | 1     |
| 7183   | 1     | 2     | 1     | 1     |
| 7189   | 1     | 1     | 1     | 1     |
| 7193   | 1     | 1     | 1     | 1     |
| 7194   | 3     | 3     | 5     | 2     |
| 7195   | 1     | 2     | 1     | 1     |
| 7200   | 1     | 2     | 1     | 1     |
| 7201   | 3     | 3     | 3     | 2     |
| 7205   | 2     | 3     | 3     | 2     |
| 7207   | 1     | 2     | 1     | 1     |
| 7208   |       |       |       |       |
| 7210   | 1     | 3     | 1     | 1     |
| 7211   | 1     | 1     | 1     | 1     |
| 7217   | 2     | 3     | 3     | 2     |
| 7218   | 1     | 1     | 1     | 1     |
| 7220   |       |       |       |       |
| 7225   | 1     | 1     | 1     | 1     |
| 7228   | 1     | 2     | 1     | 1     |

| respid | Q40_5 | Q40_6 | Q40_7 | Q40_8 |
|--------|-------|-------|-------|-------|
| 7230   | 1     | 2     | 1     | 1     |
| 7233   | 1     | 1     | 1     | 1     |
| 7234   | 1     | 2     | 1     | 1     |
| 7235   |       |       |       |       |
| 7236   |       |       |       |       |
| 7241   | 1     | 2     | 1     | 1     |
| 7251   | 1     | 2     | 1     | 1     |
| 7253   | 1     | 1     | 1     | 1     |
| 7259   | 1     | 4     | 1     | 1     |
| 7260   | 1     | 1     | 1     | 1     |
| 7261   | 2     | 2     | 2     | 2     |
| 7263   | 1     | 3     | 1     | 1     |
| 7265   |       |       |       |       |
| 7268   | 1     | 1     | 1     | 1     |
| 7269   |       |       |       |       |
| 7271   | 3     | 2     | 3     | 4     |
| 7276   | 5     | 6     | 1     | 1     |
| 7280   | 1     | 2     | 1     | 1     |
| 7283   | 1     | 2     | 1     | 1     |
| 7284   | 1     | 1     | 1     | 1     |
| 7286   | 1     | 1     | 1     | 1     |
| 7287   |       |       |       |       |
| 7288   | 2     | 2     | 2     | 2     |
| 7294   | 1     | 1     | 1     | 1     |
| 7295   | 1     | 1     | 1     | 1     |
| 7296   | 3     | 4     | 4     | 4     |
| 7297   | 1     | 1     | 2     | 1     |
| 7299   | 1     | 1     | 2     | 1     |
| 7300   | 2     | 2     | 3     | 4     |
| 7301   | 1     | 2     | 1     | 2     |
| 7302   |       |       |       |       |
| 7306   | 1     | 1     | 1     | 1     |

| respid | Q40_5 | Q40_6 | Q40_7 | Q40_8 |
|--------|-------|-------|-------|-------|
| 7313   | 5     | 5     | 4     | 3     |
| 7315   | 2     | 3     | 2     | 1     |
| 7317   | 1     | 2     | 1     | 1     |
| 7321   | 1     | 2     | 1     | 1     |
| 7322   | 1     | 2     | 1     | 1     |
| 7323   | 4     | 3     | 3     | 2     |
| 7333   | 3     | 3     | 3     | 3     |
| 7335   | 3     | 1     | 3     | 1     |
| 7336   | 1     | 1     | 1     | 1     |
| 7337   | 1     | 2     | 2     | 1     |
| 7338   | 1     | 1     | 1     | 1     |
| 7340   | 1     | 1     | 1     | 1     |
| 7341   | 1     | 3     | 3     | 1     |
| 7342   | 1     | 1     | 1     | 1     |
| 7344   | 3     | 3     | 3     | 2     |
| 7346   | 1     | 3     | 2     | 1     |
| 7347   | 1     | 1     | 1     | 1     |
| 7349   | 2     | 2     | 2     | 2     |
| 7352   | 1     | 2     | 1     | 1     |
| 7353   | 1     | 3     | 1     | 2     |
| 7355   | 1     | 2     | 1     | 1     |
| 7356   |       |       |       |       |
| 7360   | 5     | 6     | 5     | 4     |
| 7371   | 2     | 2     | 1     | 1     |
| 7376   | 2     | 3     | 2     | 2     |
| 7379   | 2     | 2     | 2     | 2     |
| 7381   | 1     | 1     | 1     | 1     |
| 7386   | 1     | 2     | 2     | 1     |
| 7389   | 1     | 2     | 1     | 1     |
| 7390   | 3     | 3     | 2     | 3     |
| 7393   | 1     | 1     | 1     | 1     |
| 7394   | 2     | 1     | 1     | 1     |

| respid | Q40_5 | Q40_6 | Q40_7 | Q40_8 |
|--------|-------|-------|-------|-------|
| 7396   | 3     | 4     | 3     | 2     |
| 7400   | 3     | 3     | 3     | 2     |
| 7401   | 1     | 2     | 2     | 2     |
| 7403   | 1     | 2     | 1     | 1     |
| 7406   | 1     | 5     | 1     | 3     |
| 7409   | 1     | 1     | 2     | 1     |
| 7410   | 3     | 4     | 3     | 2     |
| 7412   | 3     | 4     | 4     | 5     |
| 7414   | 1     | 1     | 1     | 1     |
| 7415   | 3     | 2     | 3     | 2     |
| 7417   | 4     | 3     | 2     | 3     |
| 7421   | 3     | 2     | 2     | 3     |
| 7425   | 3     | 2     | 2     | 2     |
| 7430   | 2     | 2     | 1     | 1     |
| 7432   | 1     | 1     | 1     | 1     |
| 7433   | 1     | 3     | 2     | 3     |
| 7442   | 1     | 2     | 1     | 1     |
| 7445   | 1     | 2     | 1     | 1     |
| 7446   | 1     | 1     | 1     | 1     |
| 7449   |       |       |       |       |
| 7450   |       |       |       |       |
| 7451   | 2     | 2     | 2     | 2     |
| 7459   | 4     | 3     | 1     | 1     |
| 7462   | 1     | 2     | 2     | 1     |
| 7463   | 1     | 1     | 1     | 1     |
| 7469   |       |       |       |       |
| 7482   | 1     | 2     | 1     | 1     |
| 7484   | 2     | 3     | 2     | 2     |
| 7486   | 1     | 1     | 1     | 2     |
| 7496   | 1     | 1     | 1     | 1     |
| 7502   | 2     | 2     | 1     | 2     |
| 7504   | 2     | 3     | 2     | 1     |

| respid | Q40_5 | Q40_6 | Q40_7 | Q40_8 |
|--------|-------|-------|-------|-------|
| 7509   | 5     | 5     | 5     | 6     |
| 7513   | 5     | 5     | 4     | 4     |
| 7514   |       |       |       |       |
| 7520   | 1     | 1     | 1     | 1     |
| 7523   |       |       |       |       |
| 7526   | 3     | 4     | 1     | 1     |
| 7529   | 3     | 3     | 3     | 3     |
| 7534   |       |       |       |       |
| 7536   | 3     | 4     | 3     | 3     |
| 7540   | 1     | 2     | 1     | 1     |
| 7541   | 2     | 2     | 2     | 2     |
| 7542   |       |       |       |       |
| 7555   | 1     | 1     | 1     | 1     |
| 7566   | 2     | 2     | 2     | 2     |
| 7568   | 1     | 1     | 1     | 1     |
| 7570   | 4     | 3     | 2     | 3     |
| 7572   | 1     | 2     | 2     | 4     |
| 7573   | 2     | 5     | 3     | 2     |
| 7576   | 1     | 2     | 1     | 1     |
| 7577   | 2     | 6     | 1     | 1     |
| 7583   | 1     | 1     | 1     | 1     |
| 7584   | 1     | 1     | 1     | 1     |
| 7585   | 5     | 6     | 5     | 1     |
| 7586   | 4     | 3     | 1     | 1     |
| 7587   | 1     | 1     | 1     | 1     |
| 7588   | 1     | 2     | 1     | 1     |
| 7596   | 1     | 1     | 1     | 1     |
| 7599   | 1     | 1     | 1     | 1     |
| 7600   | 3     | 4     | 3     | 2     |
| 7602   | 1     | 1     | 1     | 1     |
| 7613   | 1     | 1     | 1     | 1     |
| 7620   | 1     | 2     | 1     | 1     |

| respid | Q40_5 | Q40_6 | Q40_7 | Q40_8 |
|--------|-------|-------|-------|-------|
| 7623   | 1     | 2     | 1     | 2     |
| 7635   | 1     | 2     | 1     | 1     |
| 7636   | 2     | 2     | 2     | 2     |
| 7643   | 2     | 2     | 2     | 2     |
| 7645   | 2     | 3     | 2     | 1     |
| 7649   | 4     | 4     | 4     | 3     |
| 7651   | 1     | 2     | 1     | 1     |
| 7652   | 3     | 5     | 3     | 5     |
| 7655   | 2     | 2     | 2     | 2     |
| 7657   | 1     | 1     | 1     | 1     |
| 7675   | 1     | 2     | 1     | 1     |
| 7676   | 4     | 4     | 2     | 1     |
| 7684   | 2     | 2     | 2     | 1     |
| 7693   | 3     | 3     | 1     | 1     |
| 7694   | 2     | 3     | 4     | 5     |
| 7695   | 6     | 5     | 1     | 1     |
| 7696   | 4     | 3     | 2     | 3     |
| 7698   | 2     | 1     | 1     | 1     |
| 7700   | 1     | 1     | 1     | 1     |
| 7701   | 1     | 1     | 1     | 1     |
| 7704   | 1     | 1     | 1     | 1     |
| 7709   | 1     | 2     | 1     | 1     |
| 7713   | 1     | 1     | 1     | 1     |
| 7714   | 1     | 1     | 1     | 1     |
| 7718   | 5     | 5     | 6     | 5     |
| 7720   | 1     | 2     | 1     | 1     |
| 7721   | 5     | 1     | 2     | 2     |
| 7722   | 1     | 1     | 1     | 1     |
| 7724   | 3     | 5     | 3     | 3     |
| 7728   |       |       |       |       |
| 7731   | 2     | 4     | 1     | 2     |
| 7735   | 1     | 1     | 1     | 1     |



| respid | Q40_5 | Q40_6 | Q40_7 | Q40_8 |
|--------|-------|-------|-------|-------|
| 7737   | 1     | 3     | 1     | 1     |
| 7741   | 4     | 1     | 3     | 1     |
| 7746   | 1     | 2     | 1     | 2     |
| 7747   | 2     | 2     | 1     | 1     |
| 7748   | 1     | 1     | 1     | 1     |
| 7750   | 1     | 2     | 1     | 1     |
| 7754   | 1     | 2     | 1     | 1     |
| 7755   | 1     | 2     | 1     | 1     |
| 7762   |       |       |       |       |
| 7764   | 1     | 1     | 1     | 1     |
| 7766   |       |       |       |       |
| 7768   | 2     | 2     | 2     | 1     |
| 7770   | 2     | 4     | 4     | 5     |
| 7771   | 1     | 1     | 1     | 1     |
| 7777   | 1     | 1     | 1     | 1     |
| 7778   |       |       |       |       |
| 7783   | 4     | 4     | 3     | 4     |
| 7789   | 1     | 2     | 1     | 1     |
| 7790   | 1     | 2     | 1     | 1     |
| 7795   | 2     | 3     | 2     | 2     |
| 7807   | 1     | 1     | 1     | 1     |
| 7808   | 1     | 4     | 1     | 2     |
| 7818   | 3     | 2     | 1     | 1     |
| 7820   |       |       |       |       |
| 7831   | 2     | 2     | 2     | 2     |
| 7832   | 1     | 2     | 1     | 1     |
| 7837   | 1     | 2     | 1     | 1     |
| 7841   | 4     | 4     | 2     | 2     |
| 7845   | 3     | 3     | 4     | 2     |
| 7853   | 1     | 2     | 1     | 1     |
| 7854   | 1     | 1     | 1     | 1     |
| 7862   | 4     | 4     | 4     | 3     |

| respid | Q40_5 | Q40_6 | Q40_7 | Q40_8 |
|--------|-------|-------|-------|-------|
| 7871   | 2     | 2     | 2     | 2     |
| 7875   | 1     | 3     | 2     | 2     |
| 7880   | 1     | 1     | 1     | 1     |
| 7881   | 2     | 4     | 1     | 1     |
| 7883   | 2     | 5     | 2     | 1     |
| 7896   | 1     | 2     | 1     | 1     |
| 7905   | 1     | 1     | 1     | 1     |
| 7919   | 2     | 2     | 2     | 1     |
| 7928   | 4     | 3     | 5     | 5     |
| 7929   | 1     | 1     | 1     | 1     |
| 7938   | 1     | 2     | 1     | 1     |
| 7940   | 2     | 1     | 1     | 2     |
| 7941   | 1     | 2     | 1     | 1     |
| 7952   |       |       |       |       |
| 7962   | 1     | 1     | 1     | 1     |
| 7968   | 1     | 1     | 1     | 1     |
| 7972   | 5     | 3     | 1     | 1     |
| 7983   | 3     | 4     | 3     | 3     |
| 7990   | 1     | 1     | 1     | 1     |
| 7993   | 1     | 2     | 1     | 1     |
| 8005   | 1     | 2     | 2     | 1     |
| 8008   |       |       |       |       |
| 8012   | 2     | 2     | 2     | 2     |
| 8021   | 1     | 1     | 1     | 1     |
| 8024   | 1     | 2     | 1     | 1     |
| 8043   | 1     | 1     | 1     | 1     |
| 8051   | 1     | 3     | 1     | 1     |
| 8056   | 2     | 2     | 1     | 1     |
| 8061   | 2     | 3     | 2     | 2     |
| 8066   |       |       |       |       |
| 8069   | 1     | 2     | 2     | 1     |
| 8071   | 1     | 1     | 1     | 1     |

| respid | Q40_5 | Q40_6 | Q40_7 | Q40_8 |
|--------|-------|-------|-------|-------|
| 8072   | 1     | 2     | 1     | 1     |
| 8076   | 1     | 2     | 1     | 1     |
| 8080   | 1     | 2     | 1     | 1     |
| 8083   | 1     | 2     | 1     | 1     |
| 8093   | 2     | 4     | 2     | 3     |
| 8095   | 2     | 3     | 2     | 2     |
| 8099   | 1     | 1     | 1     | 1     |
| 8100   | 1     | 2     | 2     | 2     |
| 8103   |       |       |       |       |
| 8104   | 1     | 2     | 1     | 2     |
| 8115   | 1     | 4     | 3     | 1     |
| 8121   | 1     | 2     | 1     | 1     |
| 8128   | 1     | 1     | 1     | 1     |
| 8130   | 2     | 3     | 1     | 1     |
| 8131   | 2     | 3     | 2     | 2     |
| 8133   | 1     | 1     | 1     | 1     |
| 8143   | 6     | 2     | 1     | 2     |
| 8144   | 1     | 2     | 1     | 1     |
| 8146   | 1     | 1     | 1     | 1     |
| 8148   |       |       |       |       |
| 8157   |       |       |       |       |
| 8164   |       |       |       |       |
| 8173   |       |       |       |       |
| 8176   | 1     | 1     | 1     | 1     |
| 8179   | 3     | 3     | 3     | 3     |
| 8181   |       |       |       |       |
| 8182   | 3     | 3     | 3     | 3     |
| 8196   | 1     | 1     | 1     | 1     |
| 8200   | 1     | 2     | 1     | 1     |
| 8203   | 1     | 1     | 1     | 1     |
| 8204   | 2     | 5     | 2     | 1     |
| 8206   | 2     | 2     | 1     | 1     |

| respid | Q40_5 | Q40_6 | Q40_7 | Q40_8 |
|--------|-------|-------|-------|-------|
| 8208   | 1     | 1     | 1     | 1     |
| 8212   | 4     | 5     | 1     | 1     |
| 8222   | 2     | 2     | 3     | 3     |
| 8223   | 1     | 1     | 1     | 1     |
| 8225   | 6     | 2     | 1     | 1     |
| 8226   | 2     | 2     | 2     | 1     |
| 8228   | 3     | 4     | 4     | 3     |
| 8229   | 1     | 1     | 1     | 1     |
| 8239   | 1     | 1     | 1     | 1     |
| 8246   | 2     | 3     | 1     | 1     |
| 8258   | 3     | 4     | 4     | 4     |
| 8260   | 2     | 3     | 2     | 2     |
| 8262   | 2     | 2     | 2     | 1     |
| 8263   | 2     | 2     | 2     | 2     |
| 8267   | 2     | 3     | 3     | 3     |
| 8271   | 3     | 4     | 4     | 4     |
| 8274   | 4     | 2     | 1     | 1     |
| 8275   | 3     | 3     | 3     | 3     |
| 8279   | 2     | 1     | 1     | 1     |
| 8285   | 4     | 5     | 4     | 2     |
| 8287   | 5     | 5     | 5     | 5     |
| 8289   | 2     | 3     | 1     | 2     |
| 8291   | 1     | 2     | 1     | 1     |
| 8299   | 2     | 2     | 3     | 2     |
| 8301   | 1     | 3     | 1     | 1     |
| 8302   | 1     | 1     | 1     | 1     |
| 8308   | 3     | 4     | 3     | 1     |
| 8313   | 1     | 3     | 1     | 1     |
| 8316   | 2     | 3     | 2     | 2     |
| 8317   | 1     | 1     | 1     | 1     |
| 8319   | 1     | 1     | 1     | 1     |
| 8323   | 2     | 2     | 1     | 1     |

| respid | Q40_5 | Q40_6 | Q40_7 | Q40_8 |
|--------|-------|-------|-------|-------|
| 8324   | 1     | 1     | 1     | 1     |
| 8327   | 3     | 3     | 4     | 4     |
| 8328   | 3     | 3     | 2     | 2     |
| 8342   | 1     | 2     | 3     | 1     |
| 8350   | 1     | 2     | 1     | 1     |
| 8352   | 1     | 1     | 1     | 1     |
| 8353   | 1     | 2     | 1     | 1     |
| 8356   | 1     | 1     | 1     | 1     |
| 8367   | 2     | 1     | 1     | 1     |
| 8373   | 1     | 2     | 1     | 1     |
| 8379   |       |       |       |       |
| 8382   | 2     | 2     | 2     | 2     |
| 8387   | 3     | 3     | 2     | 1     |
| 8409   | 1     | 3     | 1     | 1     |
| 8410   | 1     | 2     | 1     | 1     |
| 8412   | 2     | 2     | 2     | 2     |
| 8415   | 1     | 2     | 1     | 1     |
| 8417   | 1     | 2     | 1     | 1     |
| 8422   | 2     | 2     | 1     | 2     |
| 8430   | 2     | 2     | 2     | 1     |
| 8434   | 1     | 2     | 1     | 1     |
| 8436   |       |       |       |       |
| 8446   | 1     | 2     | 1     | 1     |
| 8447   | 1     | 2     | 1     | 1     |
| 8448   | 1     | 3     | 1     | 1     |
| 8455   | 1     | 2     | 1     | 3     |
| 8456   | 1     | 2     | 1     | 1     |
| 8459   | 1     | 1     | 1     | 1     |
| 8460   | 1     | 1     | 1     | 1     |
| 8464   | 4     | 3     | 3     | 4     |
| 8470   | 1     | 1     | 1     | 1     |
| 8473   | 1     | 2     | 1     | 1     |

| respid | Q40_5 | Q40_6 | Q40_7 | Q40_8 |
|--------|-------|-------|-------|-------|
| 8486   | 1     | 1     | 1     | 1     |
| 8487   | 1     | 2     | 1     | 2     |
| 8489   | 1     | 1     | 1     | 1     |
| 8494   | 1     | 1     | 1     | 1     |
| 8495   | 3     | 6     | 4     | 5     |
| 8497   | 2     | 2     | 2     | 2     |
| 8510   | 1     | 3     | 1     | 1     |
| 8515   | 3     | 2     | 3     | 2     |
| 8526   |       |       |       |       |
| 8530   |       |       |       |       |
| 8532   | 2     | 2     | 1     | 1     |
| 8533   |       |       |       |       |
| 8534   | 2     | 3     | 1     | 1     |
| 8572   | 3     | 3     | 2     | 2     |
| 8582   | 1     | 2     | 1     | 1     |
| 8584   | 1     | 1     | 1     | 1     |
| 8585   |       |       |       |       |
| 8586   |       |       |       |       |
| 8589   | 2     | 2     | 2     | 2     |
| 8593   | 1     | 1     | 1     | 1     |
| 8594   | 1     | 1     | 1     | 1     |
| 8601   | 1     | 1     | 1     | 1     |
| 8603   | 2     | 2     | 2     | 1     |
| 8604   |       |       |       |       |
| 8605   |       |       |       |       |
| 8607   | 2     | 2     | 2     | 2     |
| 8623   | 1     | 2     | 1     | 1     |
| 8626   | 2     | 3     | 2     | 2     |
| 8638   | 1     | 2     | 1     | 1     |
| 8640   | 1     | 2     | 1     | 3     |
| 8641   | 1     | 1     | 1     | 1     |
| 8643   | 1     | 3     | 1     | 1     |

| respid | Q40_5 | Q40_6 | Q40_7 | Q40_8 |
|--------|-------|-------|-------|-------|
| 8644   | 1     | 4     | 1     | 1     |
| 8646   | 1     | 1     | 1     | 1     |
| 8647   |       |       |       |       |
| 8649   | 1     | 4     | 1     | 1     |
| 8650   | 1     | 2     | 1     | 1     |
| 8658   | 1     | 2     | 1     | 1     |
| 8659   | 2     | 3     | 2     | 2     |
| 8669   | 1     | 4     | 1     | 1     |
| 8672   | 1     | 3     | 2     | 1     |
| 8673   | 1     | 3     | 1     | 1     |
| 8676   | 1     | 2     | 1     | 1     |
| 8677   |       |       |       |       |
| 8681   | 1     | 1     | 1     | 1     |
| 8688   | 1     | 1     | 1     | 1     |
| 8689   | 2     | 4     | 2     | 2     |
| 8690   | 1     | 1     | 1     | 1     |
| 8693   | 1     | 1     | 1     | 1     |
| 8694   | 2     | 2     | 2     | 2     |
| 8699   | 2     | 4     | 1     | 1     |
| 8700   |       |       |       |       |
| 8703   | 1     | 2     | 1     | 1     |
| 8704   | 1     | 2     | 1     | 1     |
| 8706   | 2     | 3     | 2     | 2     |
| 8709   | 1     | 1     | 1     | 1     |
| 8715   | 1     | 1     | 1     | 1     |
| 8728   | 2     | 3     | 2     | 1     |
| 8729   | 1     | 1     | 1     | 1     |
| 8730   | 1     | 1     | 1     | 1     |
| 8742   | 1     | 1     | 1     | 2     |
| 8748   | 1     | 1     | 1     | 1     |
| 8749   | 1     | 1     | 1     | 1     |
| 8750   | 1     | 1     | 1     | 1     |

| respid | Q40_5 | Q40_6 | Q40_7 | Q40_8 |
|--------|-------|-------|-------|-------|
| 8751   | 1     | 2     | 1     | 1     |
| 8752   | 1     | 2     | 1     | 2     |
| 8754   | 1     | 2     | 1     | 1     |
| 8757   | 1     | 2     | 1     | 1     |
| 8760   | 1     | 2     | 1     | 1     |
| 8761   | 1     | 1     | 1     | 1     |
| 8762   | 3     | 2     | 1     | 1     |
| 8763   | 1     | 3     | 1     | 1     |
| 8764   | 1     | 2     | 1     | 1     |
| 8765   | 1     | 1     | 1     | 1     |
| 8766   | 2     | 3     | 1     | 2     |
| 8767   | 2     | 3     | 3     | 1     |
| 8768   | 1     | 1     | 1     | 1     |
| 8770   | 1     | 1     | 1     | 1     |
| 8771   |       |       |       |       |
| 8773   | 1     | 1     | 1     | 1     |
| 8774   | 2     | 2     | 2     | 2     |
| 8776   | 1     | 1     | 1     | 1     |
| 8777   | 1     | 1     | 1     | 1     |
| 8778   | 1     | 2     | 2     | 1     |
| 8779   |       |       |       |       |
| 8784   | 2     | 2     | 2     | 1     |
| 8786   |       |       |       |       |
| 8787   | 1     | 2     | 1     | 1     |
| 8790   |       |       |       |       |
| 8791   | 5     | 5     | 4     | 4     |
| 8793   |       |       |       |       |
| 8795   | 2     | 2     | 1     | 1     |
| 8797   | 1     | 1     | 1     | 1     |
| 8801   | 3     | 2     | 2     | 2     |
| 8802   | 1     | 2     | 1     | 1     |
| 8807   |       |       |       |       |



| respid | Q40_5 | Q40_6 | Q40_7 | Q40_8 |
|--------|-------|-------|-------|-------|
| 8813   | 1     | 3     | 1     | 1     |
| 8817   | 1     | 2     | 1     | 1     |
| 8818   | 2     | 3     | 1     | 2     |
| 8821   | 1     | 2     | 1     | 1     |
| 8822   | 2     | 1     | 2     | 1     |
| 8823   | 1     | 1     | 1     | 1     |
| 8824   | 1     | 3     | 1     | 1     |
| 8825   | 1     | 2     | 1     | 1     |
| 8834   | 3     | 3     | 2     | 2     |
| 8840   | 3     | 4     | 3     | 3     |
| 8843   | 6     | 6     | 6     | 6     |
| 8846   | 1     | 1     | 1     | 1     |
| 8862   |       |       |       |       |
| 8866   | 1     | 1     | 1     | 1     |
| 8869   | 1     | 1     | 1     | 1     |
| 8872   | 3     | 4     | 5     | 2     |
| 8903   |       |       |       |       |
| 8909   |       |       |       |       |
| 8926   | 1     | 1     | 1     | 1     |
| 8936   | 1     | 2     | 1     | 1     |
| 8945   |       |       |       |       |
| 8954   | 1     | 2     | 1     | 1     |
| 8955   | 1     | 5     | 2     | 1     |
| 8958   | 1     | 1     | 1     | 1     |
| 8959   | 1     | 2     | 1     | 1     |
| 8960   | 1     | 1     | 1     | 1     |
| 8976   | 1     | 2     | 1     | 1     |
| 8977   | 1     | 2     | 1     | 1     |
| 8979   | 3     | 2     | 3     | 2     |
| 8985   |       |       |       |       |
| 8994   | 1     | 1     | 1     | 1     |
| 8997   | 3     | 3     | 3     | 3     |

| respid | Q40_5 | Q40_6 | Q40_7 | Q40_8 |
|--------|-------|-------|-------|-------|
| 9002   | 1     | 1     | 1     | 1     |
| 9005   | 3     | 4     | 4     | 2     |
| 9017   | 1     | 1     | 1     | 1     |
| 9018   | 5     | 1     | 1     | 1     |
| 9021   | 2     | 1     | 1     | 2     |
| 9029   | 4     | 5     | 4     | 5     |
| 9035   | 2     | 1     | 2     | 3     |
| 9038   | 1     | 1     | 1     | 1     |
| 9039   |       |       |       |       |
| 9040   | 1     | 1     | 1     | 1     |
| 9042   | 2     | 1     | 1     | 1     |
| 9043   | 1     | 2     | 1     | 1     |
| 9045   | 1     | 2     | 1     | 1     |
| 9051   | 1     | 1     | 1     | 1     |
| 9067   | 1     | 1     | 1     | 1     |
| 9069   | 1     | 3     | 1     | 1     |
| 9073   | 1     | 3     | 1     | 1     |
| 9084   | 2     | 2     | 2     | 2     |
| 9096   |       |       |       |       |
| 9100   | 1     | 1     | 1     | 1     |
| 9107   |       |       |       |       |
| 9110   | 1     | 1     | 1     | 1     |
| 9120   | 1     | 1     | 1     | 1     |
| 9122   | 2     | 3     | 3     | 1     |
| 9130   | 1     | 2     | 1     | 1     |
| 9134   | 3     | 3     | 2     | 3     |
| 9137   | 3     | 3     | 3     | 3     |
| 9139   | 1     | 2     | 1     | 1     |
| 9144   |       |       |       |       |
| 9157   | 2     | 2     | 3     | 1     |
| 9166   | 1     | 3     | 2     | 3     |
| 9177   | 3     | 5     | 1     | 2     |

| respid | Q40_5 | Q40_6 | Q40_7 | Q40_8 |
|--------|-------|-------|-------|-------|
| 9181   | 1     | 1     | 1     | 1     |
| 9183   | 3     | 3     | 3     | 2     |
| 9184   | 4     | 3     | 3     | 2     |
| 9188   |       |       |       |       |
| 9197   | 1     | 2     | 2     | 2     |
| 9200   | 3     | 2     | 2     | 2     |
| 9205   | 1     | 1     | 2     | 2     |
| 9207   | 1     | 2     | 1     | 1     |
| 9213   | 1     | 2     | 1     | 1     |
| 9216   | 3     | 2     | 2     | 2     |
| 9217   |       |       |       |       |
| 9218   | 1     | 1     | 1     | 1     |
| 9219   | 3     | 4     | 2     | 2     |
| 9220   |       |       |       |       |
| 9221   | 2     | 2     | 2     | 1     |
| 9223   | 5     | 5     | 4     | 5     |
| 9228   |       |       |       |       |
| 9230   | 2     | 2     | 2     | 2     |
| 9231   | 2     | 2     | 2     | 1     |
| 9233   | 2     | 1     | 1     | 1     |
| 9235   | 1     | 3     | 1     | 1     |
| 9237   | 1     | 2     | 2     | 1     |
| 9242   | 1     | 1     | 1     | 1     |
| 9250   |       |       |       |       |
| 9253   | 1     | 4     | 1     | 1     |
| 9257   | 1     | 1     | 1     | 1     |
| 9263   | 1     | 1     | 1     | 1     |
| 9267   | 1     | 1     | 1     | 2     |
| 9272   | 2     | 2     | 2     | 2     |
| 9279   |       |       |       |       |
| 9281   | 3     | 3     | 2     | 2     |
| 9285   | 1     | 1     | 1     | 1     |

| respid | Q40_5 | Q40_6 | Q40_7 | Q40_8 |
|--------|-------|-------|-------|-------|
| 9286   | 1     | 4     | 2     | 1     |
| 9294   | 1     | 2     | 1     | 1     |
| 9295   | 1     | 1     | 1     | 1     |
| 9297   | 1     | 2     | 2     | 1     |
| 9299   | 1     | 2     | 1     | 1     |
| 9309   | 2     | 3     | 1     | 1     |
| 9315   |       |       |       |       |
| 9320   | 1     | 1     | 1     | 1     |
| 9324   | 1     | 2     | 1     | 1     |
| 9326   | 1     | 1     | 1     | 1     |
| 9333   | 1     | 2     | 1     | 1     |
| 9334   | 3     | 3     | 4     | 3     |
| 9336   | 1     | 3     | 3     | 2     |
| 9337   | 1     | 2     | 1     | 1     |
| 9342   | 1     | 2     | 1     | 1     |
| 9347   | 1     | 2     | 1     | 1     |
| 9352   | 1     | 1     | 1     | 1     |
| 9355   | 1     | 1     | 1     | 1     |
| 9356   | 3     | 3     | 2     | 1     |
| 9359   | 1     | 2     | 1     | 1     |
| 9368   | 1     | 1     | 1     | 1     |
| 9375   | 2     | 2     | 2     | 1     |
| 9384   | 1     | 2     | 2     | 2     |
| 9388   | 2     | 2     | 1     | 1     |
| 9397   | 3     | 4     | 4     | 3     |
| 9400   | 1     | 1     | 1     | 1     |
| 9401   | 4     | 4     | 4     | 4     |
| 9402   |       |       |       |       |
| 9417   | 4     | 4     | 3     | 3     |
| 9424   | 1     | 2     | 1     | 1     |
| 9427   | 1     | 1     | 1     | 1     |
| 9429   | 1     | 2     | 1     | 1     |

| respid | Q40_5 | Q40_6 | Q40_7 | Q40_8 |
|--------|-------|-------|-------|-------|
| 9437   | 4     | 4     | 4     | 4     |
| 9442   | 2     | 3     | 3     | 3     |
| 9446   | 1     | 2     | 2     | 1     |
| 9447   | 1     | 1     | 1     | 1     |
| 9448   | 2     | 2     | 1     | 1     |
| 9449   | 5     | 4     | 1     | 3     |
| 9455   |       |       |       |       |
| 9459   | 3     | 2     | 2     | 3     |
| 9460   | 1     | 2     | 1     | 1     |
| 9461   | 1     | 1     | 1     | 2     |
| 9463   | 1     | 1     | 1     | 1     |
| 9464   | 2     | 2     | 2     | 3     |
| 9466   | 2     | 2     | 1     | 1     |
| 9477   | 1     | 1     | 1     | 1     |
| 9482   | 2     | 4     | 3     | 1     |
| 9486   | 2     | 1     | 1     | 2     |
| 9488   | 3     | 4     | 2     | 5     |
| 9489   | 1     | 1     | 1     | 1     |
| 9496   | 2     | 2     | 3     | 2     |
| 9499   | 2     | 2     | 2     | 2     |
| 9512   | 1     | 2     | 1     | 1     |
| 9514   | 1     | 1     | 1     | 1     |
| 9516   | 1     | 2     | 1     | 1     |
| 9517   | 2     | 2     | 3     | 3     |
| 9520   | 1     | 1     | 1     | 1     |
| 9527   | 1     | 2     | 1     | 1     |
| 9532   | 2     | 3     | 1     | 1     |
| 9533   | 1     | 1     | 1     | 1     |
| 9543   | 1     | 2     | 1     | 1     |
| 9550   | 2     | 3     | 1     | 2     |
| 9553   | 1     | 1     | 1     | 1     |
| 9555   | 1     | 3     | 2     | 1     |

| respid | Q40_5 | Q40_6 | Q40_7 | Q40_8 |
|--------|-------|-------|-------|-------|
| 9565   | 2     | 5     | 1     | 1     |
| 9583   | 2     | 2     | 2     | 2     |
| 9594   | 1     | 1     | 1     | 1     |
| 9596   | 1     | 2     | 1     | 1     |
| 9600   | 2     | 3     | 2     | 2     |
| 9602   | 1     | 1     | 1     | 1     |
| 9606   | 1     | 1     | 1     | 1     |
| 9608   | 2     | 4     | 4     | 2     |
| 9610   | 1     | 1     | 1     | 1     |
| 9612   | 1     | 1     | 1     | 1     |
| 9613   | 1     | 1     | 1     | 1     |
| 9614   | 1     | 3     | 1     | 1     |
| 9620   | 1     | 1     | 1     | 1     |
| 9628   | 1     | 1     | 1     | 1     |
| 9631   | 1     | 2     | 1     | 1     |
| 9632   | 1     | 1     | 2     | 1     |
| 9633   | 1     | 3     | 1     | 1     |
| 9639   |       |       |       |       |
| 9640   | 1     | 2     | 1     | 1     |
| 9642   | 1     | 2     | 1     | 1     |
| 9653   | 2     | 3     | 3     | 2     |
| 9658   | 1     | 2     | 1     | 1     |
| 9659   | 1     | 6     | 1     | 1     |
| 9661   | 1     | 1     | 1     | 1     |
| 9664   | 1     | 4     | 1     | 1     |
| 9665   | 1     | 2     | 1     | 1     |
| 9666   | 3     | 4     | 1     | 1     |
| 9667   | 1     | 2     | 2     | 2     |
| 9668   |       |       |       |       |
| 9670   | 1     | 2     | 1     | 1     |
| 9671   | 1     | 2     | 1     | 1     |
| 9681   | 1     | 1     | 1     | 1     |

| respid | Q40_5 | Q40_6 | Q40_7 | Q40_8 |
|--------|-------|-------|-------|-------|
| 9684   | 2     | 3     | 3     | 2     |
| 9685   | 1     | 1     | 3     | 2     |
| 9686   | 1     | 2     | 1     | 2     |
| 9688   | 1     | 2     | 1     | 1     |
| 9692   | 1     | 2     | 1     | 1     |
| 9693   | 5     | 4     | 5     | 3     |
| 9698   | 2     | 5     | 3     | 4     |
| 9699   | 1     | 2     | 2     | 1     |
| 9701   | 1     | 1     | 1     | 1     |
| 9702   | 1     | 1     | 1     | 1     |
| 9709   | 1     | 1     | 1     | 1     |
| 9713   |       |       |       |       |
| 9715   |       |       |       |       |
| 9721   | 1     | 1     | 1     | 1     |
| 9725   | 1     | 1     | 1     | 1     |
| 9729   | 3     | 3     | 3     | 3     |
| 9731   | 1     | 1     | 1     | 1     |
| 9736   | 1     | 2     | 1     | 1     |
| 9740   |       |       |       |       |
| 9741   | 1     | 1     | 1     | 1     |
| 9749   | 2     | 2     | 1     | 1     |
| 9750   | 3     | 3     | 3     | 3     |
| 9751   | 3     | 2     | 3     | 4     |
| 9753   | 1     | 2     | 1     | 1     |
| 9754   | 3     | 4     | 4     | 2     |
| 9756   | 3     | 3     | 2     | 3     |
| 9758   | 4     | 3     | 3     | 3     |
| 9759   | 1     | 2     | 1     | 1     |
| 9760   | 2     | 2     | 2     | 2     |
| 9761   |       |       |       |       |
| 9762   | 1     | 1     | 1     | 1     |
| 9764   | 1     | 1     | 1     | 1     |

| respid | Q40_5 | Q40_6 | Q40_7 | Q40_8 |
|--------|-------|-------|-------|-------|
| 9768   | 1     | 1     | 1     | 1     |
| 9769   | 3     | 3     | 2     | 1     |
| 9770   | 1     | 1     | 1     | 1     |
| 9771   | 1     | 2     | 1     | 1     |
| 9772   | 1     | 2     | 1     | 1     |
| 9773   | 1     | 2     | 1     | 1     |
| 9776   | 1     | 1     | 1     | 1     |
| 9786   | 1     | 1     | 1     | 1     |
| 9790   | 1     | 1     | 1     | 1     |
| 9791   | 1     | 1     | 1     | 1     |
| 9794   | 2     | 3     | 2     | 2     |
| 9797   | 1     | 2     | 1     | 1     |
| 9799   | 1     | 2     | 1     | 1     |
| 9804   | 1     | 1     | 1     | 1     |
| 9805   | 2     | 2     | 1     | 1     |
| 9806   | 1     | 2     | 1     | 1     |
| 9807   | 2     | 2     | 2     | 2     |
| 9813   | 1     | 2     | 1     | 1     |
| 9817   | 1     | 1     | 1     | 1     |
| 9823   | 1     | 1     | 1     | 1     |
| 9826   | 1     | 2     | 1     | 1     |
| 9830   | 2     | 2     | 1     | 1     |
| 9835   | 2     | 2     | 3     | 1     |
| 9836   | 1     | 2     | 1     | 1     |
| 9841   |       |       |       |       |
| 9842   | 1     | 1     | 1     | 1     |
| 9844   | 3     | 3     | 3     | 3     |
| 9847   | 4     | 2     | 1     | 1     |
| 9851   | 1     | 1     | 1     | 1     |
| 9852   | 2     | 2     | 2     | 2     |
| 9854   | 1     | 1     | 1     | 1     |
| 9855   | 1     | 1     | 1     | 1     |



| respid | Q40_5 | Q40_6 | Q40_7 | Q40_8 |
|--------|-------|-------|-------|-------|
| 9856   | 1     | 2     | 1     | 1     |
| 9862   | 1     | 1     | 1     | 1     |
| 9863   |       |       |       |       |
| 9866   | 1     | 2     | 1     | 1     |
| 9867   | 2     | 2     | 1     | 1     |
| 9868   | 2     | 5     | 2     | 2     |
| 9869   | 1     | 1     | 1     | 1     |
| 9878   | 1     | 2     | 1     | 1     |
| 9879   | 2     | 4     | 2     | 1     |
| 9881   | 1     | 2     | 2     | 2     |
| 9882   | 1     | 2     | 1     | 1     |
| 9884   | 1     | 1     | 1     | 1     |
| 9885   | 1     | 1     | 1     | 1     |
| 9888   | 1     | 2     | 1     | 1     |
| 9889   | 1     | 2     | 1     | 1     |
| 9894   | 2     | 4     | 2     | 2     |
| 9895   | 1     | 1     | 1     | 1     |
| 9896   | 4     | 4     | 5     | 4     |
| 9897   | 3     | 3     | 3     | 3     |
| 9905   | 1     | 1     | 1     | 2     |
| 9907   | 1     | 1     | 1     | 1     |
| 9908   | 1     | 2     | 2     | 1     |
| 9909   | 1     | 4     | 2     | 1     |
| 9910   | 3     | 3     | 2     | 1     |
| 9913   | 2     | 3     | 2     | 3     |
| 9914   | 1     | 1     | 2     | 1     |
| 9915   | 1     | 1     | 1     | 1     |
| 9916   | 1     | 1     | 1     | 1     |
| 9918   |       |       |       |       |
| 9919   | 2     | 3     | 2     | 3     |
| 9922   | 3     | 4     | 3     | 3     |
| 9930   | 1     | 1     | 1     | 1     |

| respid | Q40_5 | Q40_6 | Q40_7 | Q40_8 |
|--------|-------|-------|-------|-------|
| 9934   | 1     | 2     | 1     | 1     |
| 9936   | 1     | 2     | 3     | 1     |
| 9938   | 1     | 1     | 1     | 1     |
| 9940   | 1     | 1     | 1     | 1     |
| 9944   | 3     | 4     | 3     | 1     |
| 9945   | 1     | 1     | 1     | 1     |
| 9948   | 4     | 4     | 4     | 1     |
| 9949   | 4     | 4     | 4     | 3     |
| 9951   | 2     | 2     | 2     | 2     |
| 9952   | 2     | 2     | 1     | 3     |
| 9954   | 1     | 1     | 1     | 1     |
| 9955   | 1     | 1     | 1     | 1     |
| 9956   | 2     | 4     | 4     | 5     |
| 9957   | 3     | 3     | 3     | 3     |
| 9958   | 2     | 3     | 4     | 3     |
| 9959   | 2     | 4     | 3     | 1     |
| 9960   | 1     | 3     | 1     | 1     |
| 9961   | 1     | 1     | 1     | 2     |
| 9962   | 2     | 1     | 1     | 1     |
| 9969   | 1     | 2     | 1     | 1     |
| 9982   | 1     | 2     | 1     | 1     |
| 9984   | 2     | 2     | 1     | 1     |
| 9990   | 2     | 1     | 1     | 1     |
| 9992   | 1     | 1     | 2     | 2     |
| 9993   | 3     | 3     | 3     | 3     |
| 9997   | 1     | 1     | 1     | 1     |
| 9999   | 1     | 1     | 1     | 1     |
| 10000  | 1     | 1     | 1     | 1     |
| 10005  | 4     | 6     | 3     | 1     |
| 10014  | 1     | 1     | 1     | 1     |
| 10016  | 4     | 4     | 3     | 1     |
| 10017  | 1     | 1     | 1     | 1     |

| respid | Q40_5 | Q40_6 | Q40_7 | Q40_8 |
|--------|-------|-------|-------|-------|
| 10018  | 1     | 2     | 1     | 1     |
| 10021  | 2     | 1     | 1     | 1     |
| 10025  | 2     | 3     | 2     | 1     |
| 10027  | 1     | 1     | 1     | 1     |
| 10028  | 2     | 2     | 1     | 1     |
| 10031  | 1     | 2     | 1     | 1     |
| 10036  | 1     | 1     | 1     | 1     |
| 10037  | 1     | 2     | 1     | 1     |
| 10038  | 2     | 2     | 1     | 2     |
| 10039  |       |       |       |       |
| 10041  | 1     | 1     | 1     | 1     |
| 10045  | 3     | 6     | 2     | 2     |
| 10046  | 2     | 2     | 2     | 1     |
| 10047  | 3     | 3     | 3     | 2     |
| 10048  | 1     | 2     | 1     | 1     |
| 10049  | 1     | 2     | 1     | 1     |
| 10051  | 1     | 1     | 1     | 1     |
| 10052  | 2     | 4     | 1     | 2     |
| 10056  | 1     | 2     | 1     | 1     |
| 10061  | 1     | 2     | 1     | 1     |
| 10064  | 1     | 2     | 1     | 1     |
| 10066  | 1     | 1     | 1     | 1     |
| 10069  | 1     | 1     | 1     | 1     |
| 10071  | 1     | 1     | 1     | 1     |
| 10074  | 1     | 1     | 1     | 1     |
| 10079  | 1     | 1     | 1     | 1     |
| 10087  | 3     | 3     | 3     | 2     |
| 10095  | 1     | 1     | 1     | 1     |
| 10097  | 1     | 1     | 1     | 1     |
| 10100  | 2     | 3     | 2     | 1     |
| 10105  | 1     | 1     | 1     | 1     |
| 10107  | 2     | 2     | 2     | 1     |

| respid | Q40_5 | Q40_6 | Q40_7 | Q40_8 |
|--------|-------|-------|-------|-------|
| 10111  | 1     | 1     | 1     | 1     |
| 10116  | 1     | 2     | 1     | 1     |
| 10118  | 1     | 1     | 1     | 1     |
| 10123  |       |       |       |       |
| 10124  | 1     | 1     | 1     | 1     |
| 10130  | 1     | 1     | 1     | 1     |
| 10134  | 1     | 3     | 2     | 1     |
| 10135  | 1     | 2     | 1     | 1     |
| 10136  |       |       |       |       |
| 10141  | 1     | 3     | 2     | 2     |
| 10142  | 1     | 2     | 1     | 1     |
| 10143  | 1     | 1     | 1     | 1     |
| 10145  | 1     | 2     | 1     | 1     |
| 10149  | 3     | 3     | 3     | 1     |
| 10150  | 1     | 1     | 1     | 1     |
| 10151  | 1     | 2     | 1     | 1     |
| 10152  | 5     | 6     | 3     | 3     |
| 10153  | 1     | 1     | 1     | 1     |
| 10156  | 1     | 2     | 1     | 1     |
| 10160  | 1     | 2     | 1     | 1     |
| 10161  | 3     | 1     | 3     | 3     |
| 10167  | 2     | 3     | 3     | 1     |
| 10171  |       |       |       |       |
| 10172  | 1     | 1     | 1     | 1     |
| 10176  | 1     | 2     | 2     | 1     |
| 10177  | 1     | 4     | 1     | 1     |
| 10182  | 2     | 4     | 3     | 3     |
| 10184  | 1     | 1     | 1     | 1     |
| 10186  | 4     | 4     | 4     | 1     |
| 10189  | 1     | 2     | 1     | 1     |
| 10191  | 1     | 1     | 1     | 1     |
| 10192  | 1     | 2     | 1     | 1     |

| respid | Q40_5 | Q40_6 | Q40_7 | Q40_8 |
|--------|-------|-------|-------|-------|
| 10195  | 1     | 1     | 1     | 1     |
| 10199  |       |       |       |       |
| 10201  | 1     | 1     | 1     | 1     |
| 10213  | 1     | 1     | 1     | 1     |
| 10222  | 3     | 3     | 3     | 4     |
| 10224  |       |       |       |       |
| 10245  | 1     | 1     | 1     | 1     |
| 10254  | 1     | 2     | 1     | 1     |
| 10255  | 5     | 5     | 5     | 5     |
| 10257  | 1     | 2     | 1     | 1     |
| 10260  | 1     | 2     | 1     | 2     |
| 10261  | 2     | 3     | 2     | 1     |
| 10263  | 4     | 5     | 1     | 1     |
| 10264  | 1     | 2     | 2     | 3     |
| 10268  | 3     | 2     | 3     | 3     |
| 10269  | 3     | 4     | 2     | 2     |
| 10270  |       |       |       |       |
| 10282  | 1     | 1     | 1     | 1     |
| 10285  |       |       |       |       |
| 10288  | 1     | 2     | 1     | 1     |
| 10291  | 2     | 2     | 1     | 1     |
| 10292  | 1     | 2     | 1     | 1     |
| 10304  |       |       |       |       |
| 10305  | 2     | 2     | 2     | 1     |
| 10310  | 1     | 2     | 1     | 1     |
| 10324  | 1     | 1     | 1     | 1     |
| 10325  | 5     | 2     | 1     | 1     |
| 10326  | 1     | 3     | 1     | 2     |
| 10329  |       |       |       |       |
| 10332  | 1     | 1     | 1     | 1     |
| 10337  | 1     | 2     | 1     | 1     |
| 10341  | 1     | 2     | 1     | 1     |

| respid | Q40_5 | Q40_6 | Q40_7 | Q40_8 |
|--------|-------|-------|-------|-------|
| 10353  | 1     | 1     | 1     | 1     |
| 10354  |       |       |       |       |
| 10359  | 2     | 2     | 1     | 1     |
| 10360  | 1     | 1     | 1     | 1     |
| 10362  | 3     | 2     | 3     | 1     |
| 10364  | 1     | 2     | 1     | 1     |
| 10366  | 3     | 4     | 4     | 3     |
| 10367  | 1     | 2     | 2     | 1     |
| 10371  | 1     | 1     | 1     | 1     |
| 10374  | 1     | 2     | 1     | 1     |
| 10375  | 1     | 1     | 1     | 1     |
| 10376  | 1     | 1     | 1     | 1     |
| 10377  | 1     | 2     | 1     | 1     |
| 10378  | 2     | 2     | 2     | 2     |
| 10387  | 1     | 1     | 1     | 1     |
| 10396  | 4     | 4     | 4     | 4     |
| 10397  | 1     | 1     | 1     | 1     |
| 10399  | 2     | 2     | 2     | 3     |
| 10405  | 1     | 2     | 1     | 1     |
| 10406  | 1     | 2     | 1     | 2     |
| 10408  | 1     | 2     | 1     | 1     |
| 10409  |       |       |       |       |
| 10412  | 1     | 1     | 1     | 1     |
| 10413  | 1     | 1     | 1     | 1     |
| 10419  | 3     | 2     | 2     | 4     |
| 10423  | 5     | 4     | 3     | 5     |
| 10426  | 2     | 2     | 1     | 1     |
| 10446  | 1     | 1     | 1     | 1     |
| 10448  | 1     | 2     | 1     | 1     |
| 10450  | 1     | 2     | 1     | 1     |
| 10455  | 1     | 2     | 2     | 1     |
| 10460  | 1     | 1     | 1     | 1     |

| respid | Q40_5 | Q40_6 | Q40_7 | Q40_8 |
|--------|-------|-------|-------|-------|
| 10461  | 1     | 2     | 2     | 1     |
| 10471  | 1     | 1     | 1     | 1     |
| 10472  | 1     | 1     | 2     | 1     |
| 10491  | 4     | 5     | 5     | 5     |
| 10493  | 2     | 2     | 2     | 1     |
| 10498  | 1     | 2     | 1     | 1     |
| 10533  | 1     | 1     | 1     | 1     |
| 10539  | 1     | 1     | 1     | 1     |
| 10540  | 1     | 1     | 1     | 2     |
| 10557  | 2     | 3     | 2     | 2     |
| 10558  | 5     | 4     | 3     | 3     |
| 10559  | 6     | 6     | 5     | 1     |
| 10564  | 1     | 1     | 1     | 1     |
| 10570  |       |       |       |       |
| 10572  | 3     | 1     | 1     | 1     |
| 10576  | 1     | 2     | 1     | 1     |
| 10582  | 1     | 2     | 2     | 3     |
| 10593  | 1     | 1     | 1     | 1     |
| 10596  | 1     | 2     | 4     | 3     |
| 10615  |       |       |       |       |
| 10616  | 1     | 1     | 1     | 1     |
| 10623  | 1     | 1     | 1     | 1     |
| 10626  | 1     | 3     | 1     | 1     |
| 10627  | 4     | 4     | 5     | 5     |
| 10629  | 1     | 2     | 1     | 1     |
| 10632  | 2     | 3     | 3     | 3     |
| 10641  |       |       |       |       |
| 10648  | 2     | 1     | 2     | 2     |
| 10651  | 3     | 4     | 2     | 1     |
| 10654  | 1     | 1     | 1     | 1     |
| 10673  | 1     | 1     | 1     | 1     |
| 10675  | 2     | 1     | 1     | 1     |

| respid | Q40_5 | Q40_6 | Q40_7 | Q40_8 |
|--------|-------|-------|-------|-------|
| 10689  | 1     | 1     | 1     | 1     |
| 10692  | 1     | 1     | 1     | 1     |
| 10694  | 1     | 1     | 1     | 1     |
| 10695  | 1     | 1     | 1     | 1     |
| 10702  | 3     | 3     | 3     | 2     |
| 10703  | 4     | 4     | 4     | 4     |
| 10708  | 1     | 2     | 1     | 1     |
| 10719  | 1     | 2     | 1     | 1     |
| 10722  | 2     | 2     | 1     | 2     |
| 10723  | 1     | 2     | 1     | 1     |
| 10726  | 1     | 3     | 3     | 4     |
| 10727  | 1     | 2     | 1     | 1     |
| 10730  | 1     | 1     | 1     | 1     |
| 10731  |       |       |       |       |
| 10737  | 1     | 3     | 1     | 1     |
| 10743  | 2     | 4     | 2     | 1     |
| 10763  | 1     | 2     | 1     | 1     |
| 10777  |       |       |       |       |
| 10787  | 2     | 2     | 1     | 1     |
| 10798  | 4     | 5     | 5     | 5     |
| 10800  | 1     | 3     | 1     | 1     |
| 10802  | 4     | 4     | 4     | 4     |
| 10803  | 4     | 4     | 4     | 4     |
| 10808  | 1     | 2     | 2     | 1     |
| 10810  | 2     | 3     | 1     | 1     |
| 10819  | 1     | 2     | 1     | 1     |
| 10825  | 1     | 2     | 1     | 1     |
| 10827  | 2     | 4     | 3     | 2     |
| 10830  | 1     | 2     | 1     | 1     |
| 10847  | 1     | 1     | 1     | 1     |
| 10849  | 1     | 2     | 1     | 1     |
| 10852  | 1     | 1     | 1     | 1     |



| respid | Q40_5 | Q40_6 | Q40_7 | Q40_8 |
|--------|-------|-------|-------|-------|
| 10854  | 3     | 4     | 3     | 3     |
| 10857  | 1     | 1     | 1     | 1     |
| 10861  | 4     | 4     | 1     | 1     |
| 10862  |       |       |       |       |
| 10870  | 2     | 3     | 3     | 3     |
| 10873  | 1     | 2     | 1     | 1     |
| 10881  | 1     | 2     | 1     | 1     |
| 10893  |       |       |       |       |
| 10898  | 2     | 2     | 1     | 1     |
| 10899  | 3     | 4     | 2     | 3     |
| 10905  | 4     | 3     | 2     | 1     |
| 10910  |       |       |       |       |
| 10911  | 2     | 2     | 2     | 2     |
| 10912  | 1     | 1     | 1     | 1     |
| 10913  | 1     | 1     | 1     | 1     |
| 10918  |       |       |       |       |
| 10995  |       |       |       |       |
| 11002  | 1     | 2     | 1     | 1     |
| 11003  | 1     | 2     | 1     | 1     |
| 11005  | 1     | 1     | 1     | 1     |
| 11015  | 1     | 1     | 1     | 1     |
| 11016  | 1     | 1     | 1     | 1     |
| 11017  | 1     | 1     | 1     | 1     |
| 11020  | 2     | 3     | 3     | 3     |
| 11024  | 1     | 2     | 1     | 1     |
| 11026  | 3     | 3     | 2     | 2     |
| 11028  | 4     | 4     | 3     | 3     |
| 11029  | 5     | 5     | 6     | 6     |
| 11030  | 1     | 2     | 1     | 1     |
| 11031  | 1     | 1     | 1     | 1     |
| 11038  | 1     | 1     | 1     | 1     |
| 11051  | 1     | 2     | 1     | 1     |

| respid | Q40_5 | Q40_6 | Q40_7 | Q40_8 |
|--------|-------|-------|-------|-------|
| 11052  | 2     | 2     | 2     | 2     |
| 11053  | 1     | 1     | 1     | 1     |
| 11054  | 4     | 5     | 5     | 5     |
| 11063  | 1     | 2     | 1     | 1     |
| 11075  | 2     | 2     | 2     | 2     |
| 11083  | 1     | 2     | 1     | 1     |
| 11092  | 1     | 1     | 1     | 1     |
| 11118  | 1     | 1     | 1     | 1     |
| 11119  | 2     | 2     | 2     | 2     |
| 11134  | 3     | 3     | 3     | 3     |
| 11139  | 1     | 1     | 1     | 1     |
| 11154  | 1     | 1     | 1     | 1     |
| 11166  | 1     | 2     | 1     | 1     |
| 11168  |       |       |       |       |
| 11176  | 4     | 3     | 3     | 2     |
| 11183  | 3     | 4     | 4     | 2     |
| 11189  | 1     | 2     | 2     | 1     |
| 11196  | 3     | 3     | 3     | 4     |
| 11200  | 1     | 2     | 1     | 1     |
| 11201  | 2     | 2     | 1     | 1     |
| 11211  | 3     | 3     | 4     | 3     |
| 11218  | 2     | 1     | 1     | 1     |
| 11219  | 1     | 2     | 1     | 1     |
| 11221  | 2     | 2     | 2     | 2     |
| 11222  | 1     | 2     | 1     | 1     |
| 11230  | 4     | 4     | 3     | 4     |
| 11236  | 3     | 3     | 3     | 4     |
| 11237  | 1     | 3     | 1     | 1     |
| 11240  | 3     | 3     | 3     | 3     |
| 11244  | 3     | 3     | 3     | 4     |
| 11249  | 1     | 2     | 1     | 1     |
| 11252  | 3     | 3     | 4     | 4     |

| respid | Q40_5 | Q40_6 | Q40_7 | Q40_8 |
|--------|-------|-------|-------|-------|
| 11254  | 2     | 2     | 2     | 3     |
| 11255  | 3     | 3     | 3     | 1     |
| 11258  | 3     | 3     | 4     | 4     |
| 11260  | 1     | 1     | 1     | 1     |
| 11264  | 4     | 4     | 3     | 3     |
| 11266  | 5     | 4     | 4     | 2     |
| 11268  | 3     | 3     | 3     | 3     |
| 11269  | 1     | 1     | 1     | 1     |
| 11272  | 3     | 4     | 3     | 2     |
| 11273  | 1     | 1     | 1     | 1     |
| 11275  | 1     | 2     | 1     | 1     |
| 11276  | 1     | 1     | 2     | 1     |
| 11278  | 4     | 3     | 3     | 4     |
| 11288  |       |       |       |       |
| 11289  |       |       |       |       |
| 11291  | 1     | 1     | 1     | 1     |
| 11295  | 1     | 1     | 1     | 1     |
| 11297  | 1     | 2     | 1     | 1     |
| 11304  | 3     | 4     | 3     | 2     |
| 11305  | 1     | 2     | 1     | 1     |
| 11311  | 1     | 1     | 1     | 1     |
| 11313  | 1     | 2     | 1     | 1     |
| 11315  | 5     | 6     | 6     | 5     |
| 11316  | 6     | 6     | 5     | 5     |
| 11318  | 3     | 4     | 5     | 4     |
| 11323  | 1     | 1     | 1     | 1     |
| 11331  | 3     | 4     | 3     | 2     |
| 11333  | 1     | 2     | 2     | 1     |
| 11334  | 3     | 3     | 3     | 3     |
| 11340  | 4     | 5     | 5     | 4     |
| 11345  | 1     | 1     | 1     | 1     |
| 11354  | 1     | 1     | 1     | 2     |

| respid | Q40_5 | Q40_6 | Q40_7 | Q40_8 |
|--------|-------|-------|-------|-------|
| 11360  |       |       |       |       |
| 11361  | 2     | 2     | 3     | 3     |
| 11367  |       |       |       |       |
| 11370  |       |       |       |       |
| 11371  | 3     | 2     | 2     | 2     |
| 11372  | 4     | 5     | 5     | 4     |
| 11373  | 2     | 4     | 2     | 1     |
| 11382  | 1     | 2     | 1     | 1     |
| 11394  | 1     | 2     | 3     | 1     |
| 11395  | 2     | 4     | 4     | 2     |
| 11397  |       |       |       |       |
| 11402  | 1     | 5     | 1     | 1     |
| 11409  | 2     | 1     | 1     | 1     |
| 11410  | 1     | 2     | 1     | 1     |
| 11411  | 1     | 2     | 1     | 1     |
| 11418  | 1     | 2     | 1     | 1     |
| 11425  | 3     | 4     | 4     | 4     |
| 11429  | 1     | 2     | 1     | 1     |
| 11430  | 4     | 5     | 4     | 6     |
| 11431  | 3     | 3     | 4     | 3     |
| 11432  |       |       |       |       |
| 11433  | 1     | 1     | 2     | 1     |
| 11435  | 2     | 3     | 2     | 3     |
| 11436  | 3     | 2     | 2     | 3     |
| 11437  | 2     | 3     | 3     | 3     |
| 11439  |       |       |       |       |
| 11440  | 3     | 3     | 1     | 1     |
| 11447  | 1     | 1     | 1     | 1     |
| 11455  | 2     | 1     | 1     | 1     |
| 11456  | 4     | 3     | 3     | 3     |
| 11461  | 1     | 2     | 1     | 2     |
| 11463  | 2     | 2     | 2     | 3     |

| respid | Q40_5 | Q40_6 | Q40_7 | Q40_8 |
|--------|-------|-------|-------|-------|
| 11470  | 4     | 5     | 4     | 3     |
| 11472  |       |       |       |       |
| 11475  | 1     | 2     | 1     | 1     |
| 11476  | 2     | 2     | 3     | 2     |
| 11482  | 3     | 4     | 4     | 3     |
| 11501  | 3     | 3     | 3     | 4     |
| 11503  | 5     | 3     | 5     | 4     |
| 11505  | 1     | 2     | 1     | 1     |
| 11510  | 1     | 3     | 1     | 1     |
| 11519  |       |       |       |       |
| 11527  | 3     | 5     | 4     | 1     |
| 11529  | 3     | 4     | 4     | 4     |
| 11530  | 2     | 3     | 3     | 1     |
| 11536  | 4     | 5     | 5     | 5     |
| 11543  | 1     | 3     | 1     | 1     |
| 11548  | 3     | 4     | 2     | 2     |
| 11566  | 1     | 1     | 1     | 1     |
| 11570  | 4     | 4     | 3     | 3     |
| 11571  | 2     | 2     | 2     | 2     |
| 11578  |       |       |       |       |
| 11579  | 1     | 1     | 1     | 1     |
| 11581  | 2     | 3     | 3     | 4     |
| 11582  | 1     | 2     | 1     | 1     |
| 11583  | 1     | 1     | 1     | 1     |
| 11589  | 1     | 3     | 2     | 2     |
| 11590  | 1     | 1     | 1     | 1     |
| 11592  | 1     | 2     | 1     | 1     |
| 11596  |       |       |       |       |
| 11598  | 3     | 2     | 2     | 1     |
| 11602  | 2     | 2     | 3     | 3     |
| 11605  | 2     | 2     | 2     | 2     |
| 11618  | 3     | 3     | 2     | 2     |

| respid | Q40_5 | Q40_6 | Q40_7 | Q40_8 |
|--------|-------|-------|-------|-------|
| 11621  | 5     | 4     | 3     | 2     |
| 11630  | 2     | 3     | 4     | 2     |
| 11636  | 5     | 5     | 5     | 5     |
| 11640  | 6     | 6     | 4     | 3     |
| 11658  | 3     | 1     | 2     | 2     |
| 11665  | 3     | 6     | 3     | 1     |
| 11666  | 4     | 4     | 5     | 4     |
| 11667  | 2     | 3     | 5     | 6     |
| 11674  | 1     | 2     | 1     | 1     |
| 11680  | 1     | 2     | 1     | 1     |
| 11683  | 2     | 2     | 1     | 1     |
| 11688  | 2     | 3     | 4     | 3     |
| 11690  |       |       |       |       |
| 11694  |       |       |       |       |
| 11705  | 2     | 1     | 1     | 2     |
| 11720  | 3     | 4     | 4     | 3     |
| 11724  |       |       |       |       |
| 11738  | 1     | 2     | 1     | 1     |
| 11744  | 3     | 3     | 4     | 4     |
| 11745  | 2     | 6     | 2     | 1     |
| 11747  |       |       |       |       |
| 11755  | 2     | 2     | 1     | 1     |
| 11756  | 1     | 2     | 2     | 2     |
| 11772  | 2     | 3     | 1     | 1     |
| 11773  |       |       |       |       |
| 11778  | 2     | 4     | 3     | 4     |
| 11790  | 3     | 3     | 2     | 2     |
| 11794  |       |       |       |       |
| 11795  | 4     | 4     | 4     | 3     |
| 11799  | 4     | 3     | 2     | 3     |
| 11803  | 2     | 2     | 2     | 2     |
| 11806  | 5     | 4     | 5     | 4     |

| respid | Q40_5 | Q40_6 | Q40_7 | Q40_8 |
|--------|-------|-------|-------|-------|
| 11808  | 3     | 4     | 3     | 4     |
| 11810  |       |       |       |       |
| 11811  |       |       |       |       |
| 11812  | 2     | 3     | 4     | 4     |
| 11813  | 3     | 2     | 2     | 1     |
| 11821  | 3     | 2     | 3     | 3     |
| 11827  |       |       |       |       |
| 11831  | 5     | 4     | 4     | 4     |
| 11841  |       |       |       |       |
| 11872  | 2     | 2     | 2     | 2     |
| 11898  | 1     | 1     | 1     | 1     |
| 11902  | 6     | 5     | 5     | 1     |
| 11912  | 3     | 3     | 3     | 1     |
| 11926  | 1     | 1     | 1     | 2     |
| 11928  | 4     | 4     | 5     | 5     |
| 11932  | 2     | 2     | 1     | 2     |
| 11934  | 1     | 1     | 2     | 1     |
| 11941  | 4     | 5     | 5     | 4     |
| 11942  |       |       |       |       |
| 11943  | 3     | 3     | 3     | 3     |
| 11944  | 3     | 3     | 3     | 3     |
| 11955  |       |       |       |       |
| 11958  | 5     | 4     | 2     | 1     |
| 11968  | 2     | 3     | 4     | 3     |
| 11979  | 4     | 3     | 2     | 3     |
| 11988  |       |       |       |       |
| 11999  | 4     | 3     | 4     | 1     |
| 12002  | 1     | 2     | 1     | 1     |
| 12004  | 1     | 1     | 1     | 2     |
| 12008  | 1     | 1     | 1     | 1     |
| 12013  | 2     | 4     | 1     | 1     |
| 12018  | 2     | 4     | 2     | 2     |

| respid | Q40_5 | Q40_6 | Q40_7 | Q40_8 |
|--------|-------|-------|-------|-------|
| 12023  | 3     | 3     | 2     | 1     |
| 12027  | 3     | 4     | 4     | 2     |
| 12030  | 2     | 2     | 1     | 1     |
| 12031  | 1     | 2     | 2     | 1     |
| 12036  | 3     | 3     | 2     | 2     |
| 12037  | 2     | 2     | 2     | 3     |
| 12038  | 4     | 4     | 4     | 5     |
| 12039  | 1     | 1     | 1     | 1     |
| 12045  | 1     | 1     | 1     | 1     |
| 12046  | 2     | 3     | 3     | 2     |
| 12054  | 2     | 3     | 4     | 3     |
| 12055  | 2     | 2     | 3     | 3     |
| 12069  | 3     | 3     | 3     | 2     |
| 12070  | 3     | 3     | 5     | 3     |
| 12074  | 1     | 2     | 1     | 1     |
| 12075  | 3     | 2     | 3     | 1     |
| 12078  | 2     | 2     | 1     | 1     |
| 12089  | 3     | 2     | 2     | 1     |
| 12091  | 3     | 4     | 3     | 3     |
| 12092  | 4     | 4     | 4     | 2     |
| 12108  | 5     | 2     | 4     | 6     |
| 12111  | 3     | 5     | 4     | 2     |
| 12112  | 2     | 4     | 3     | 3     |
| 12126  |       |       |       |       |
| 12132  | 4     | 2     | 3     | 4     |
| 12150  | 3     | 4     | 3     | 3     |
| 12152  | 2     | 2     | 2     | 2     |
| 12154  | 2     | 3     | 1     | 2     |
| 12157  | 2     | 4     | 2     | 4     |
| 12165  | 1     | 1     | 1     | 1     |
| 12169  | 4     | 3     | 2     | 2     |
| 12182  | 5     | 4     | 4     | 3     |



| respid | Q40_5 | Q40_6 | Q40_7 | Q40_8 |
|--------|-------|-------|-------|-------|
| 12198  | 6     | 6     | 5     | 5     |
| 12199  |       |       |       |       |
| 12202  | 2     | 3     | 1     | 2     |
| 12207  | 1     | 2     | 1     | 1     |
| 12208  | 2     | 2     | 3     | 2     |
| 12210  | 1     | 1     | 1     | 1     |
| 12219  | 6     | 5     | 5     | 4     |
| 12224  | 1     | 2     | 2     | 1     |
| 12230  | 3     | 3     | 2     | 3     |
| 12238  | 1     | 2     | 2     | 2     |
| 12239  | 1     | 1     | 1     | 1     |
| 12243  | 1     | 1     | 1     | 1     |
| 12245  | 1     | 2     | 1     | 1     |
| 12246  | 5     | 5     | 4     | 4     |
| 12247  | 1     | 2     | 1     | 1     |
| 12248  | 1     | 1     | 1     | 1     |
| 12249  | 2     | 2     | 3     | 1     |
| 12258  | 3     | 2     | 3     | 3     |
| 12265  | 5     | 4     | 4     | 3     |
| 12269  | 1     | 1     | 1     | 1     |
| 12270  | 1     | 1     | 1     | 1     |
| 12279  | 2     | 2     | 3     | 2     |
| 12280  | 1     | 2     | 2     | 1     |
| 12282  | 5     | 1     | 2     | 1     |
| 12283  | 1     | 3     | 1     | 1     |
| 12287  | 1     | 1     | 1     | 1     |
| 12288  | 2     | 2     | 2     | 1     |
| 12290  | 1     | 1     | 1     | 1     |
| 12292  | 1     | 2     | 1     | 1     |
| 12294  | 1     | 1     | 1     | 1     |
| 12296  | 1     | 1     | 1     | 1     |
| 12307  | 2     | 3     | 1     | 1     |

| respid | Q40_5 | Q40_6 | Q40_7 | Q40_8 |
|--------|-------|-------|-------|-------|
| 12309  | 1     | 3     | 1     | 1     |
| 12312  | 2     | 2     | 1     | 1     |
| 12317  | 2     | 1     | 2     | 3     |
| 12319  | 1     | 1     | 1     | 1     |
| 12320  | 1     | 1     | 1     | 1     |
| 12322  | 1     | 1     | 1     | 1     |
| 12328  | 3     | 4     | 4     | 5     |
| 12331  | 5     | 6     | 6     | 6     |
| 12332  | 1     | 1     | 1     | 2     |
| 12334  | 1     | 1     | 4     | 1     |
| 12337  | 1     | 4     | 1     | 1     |
| 12338  | 1     | 1     | 1     | 1     |
| 12342  | 1     | 1     | 2     | 1     |
| 12349  | 1     | 1     | 1     | 1     |
| 12352  | 2     | 3     | 2     | 2     |
| 12355  | 1     | 2     | 1     | 1     |
| 12357  | 3     | 4     | 5     | 4     |
| 12358  | 1     | 2     | 3     | 1     |
| 12371  | 6     | 5     | 4     | 3     |
| 12372  | 1     | 1     | 1     | 1     |
| 12373  | 3     | 3     | 2     | 3     |
| 12379  | 1     | 1     | 1     | 1     |
| 12381  | 4     | 4     | 4     | 3     |
| 12383  | 1     | 2     | 1     | 1     |
| 12384  | 1     | 1     | 1     | 1     |
| 12386  | 1     | 1     | 1     | 1     |
| 12389  |       |       |       |       |
| 12392  | 1     | 1     | 1     | 1     |
| 12396  | 3     | 3     | 2     | 1     |
| 12397  | 1     | 3     | 1     | 1     |
| 12399  | 3     | 3     | 1     | 1     |
| 12400  | 3     | 5     | 4     | 4     |

| respid | Q40_5 | Q40_6 | Q40_7 | Q40_8 |
|--------|-------|-------|-------|-------|
| 12406  | 1     | 4     | 3     | 3     |
| 12407  | 1     | 2     | 1     | 1     |
| 12410  | 1     | 1     | 1     | 1     |
| 12413  | 1     | 2     | 1     | 1     |
| 12416  | 4     | 3     | 4     | 2     |
| 12419  | 1     | 2     | 1     | 1     |
| 12422  | 3     | 3     | 3     | 3     |
| 12423  | 1     | 2     | 1     | 1     |
| 12429  | 1     | 1     | 1     | 1     |
| 12434  | 5     | 4     | 5     | 5     |
| 12435  | 1     | 1     | 1     | 1     |
| 12436  | 1     | 1     | 2     | 3     |
| 12442  |       |       |       |       |
| 12449  | 3     | 4     | 3     | 4     |
| 12451  | 1     | 2     | 1     | 1     |
| 12456  | 3     | 3     | 6     | 2     |
| 12457  | 1     | 1     | 1     | 1     |
| 12458  | 1     | 2     | 1     | 1     |
| 12461  | 2     | 3     | 2     | 2     |
| 12462  | 1     | 2     | 2     | 1     |
| 12463  | 3     | 3     | 4     | 4     |
| 12466  | 1     | 2     | 1     | 1     |
| 12470  | 3     | 3     | 2     | 1     |
| 12471  | 2     | 3     | 1     | 1     |
| 12472  | 1     | 1     | 1     | 1     |
| 12478  | 2     | 2     | 2     | 1     |
| 12479  | 5     | 4     | 3     | 3     |
| 12481  | 1     | 1     | 1     | 1     |
| 12482  | 4     | 5     | 3     | 2     |
| 12483  |       |       |       |       |
| 12496  | 1     | 1     | 1     | 1     |
| 12497  | 1     | 2     | 1     | 1     |

| respid | Q40_5 | Q40_6 | Q40_7 | Q40_8 |
|--------|-------|-------|-------|-------|
| 12498  | 2     | 3     | 3     | 2     |
| 12500  | 3     | 2     | 1     | 2     |
| 12501  | 2     | 3     | 3     | 2     |
| 12502  | 1     | 2     | 1     | 1     |
| 12503  | 1     | 1     | 1     | 1     |
| 12505  | 2     | 3     | 1     | 1     |
| 12508  | 2     | 3     | 3     | 2     |
| 12509  | 2     | 3     | 2     | 2     |
| 12510  |       |       |       |       |
| 12512  | 2     | 3     | 2     | 2     |
| 12514  | 3     | 3     | 3     | 2     |
| 12515  | 4     | 5     | 4     | 2     |
| 12520  | 1     | 1     | 1     | 1     |
| 12522  | 1     | 1     | 1     | 1     |
| 12526  | 4     | 5     | 2     | 2     |
| 12527  |       |       |       |       |
| 12528  | 1     | 3     | 1     | 1     |
| 12530  | 3     | 2     | 3     | 4     |
| 12535  | 1     | 3     | 1     | 1     |
| 12539  | 1     | 2     | 1     | 1     |
| 12541  | 5     | 4     | 4     | 3     |
| 12542  | 1     | 1     | 1     | 1     |
| 12545  | 2     | 4     | 3     | 1     |
| 12547  | 2     | 2     | 3     | 5     |
| 12549  | 4     | 4     | 4     | 4     |
| 12550  | 1     | 1     | 1     | 1     |
| 12555  |       |       |       |       |
| 12557  | 2     | 2     | 1     | 1     |
| 12559  | 2     | 3     | 2     | 1     |
| 12561  | 4     | 3     | 3     | 3     |
| 12562  | 5     | 2     | 2     | 1     |
| 12563  | 1     | 1     | 1     | 1     |

| respid | Q40_5 | Q40_6 | Q40_7 | Q40_8 |
|--------|-------|-------|-------|-------|
| 12565  | 3     | 3     | 3     | 1     |
| 12566  |       |       |       |       |
| 12570  |       |       |       |       |
| 12571  | 1     | 2     | 1     | 1     |
| 12572  | 1     | 2     | 3     | 4     |
| 12578  |       |       |       |       |
| 12579  | 2     | 2     | 1     | 1     |
| 12581  | 1     | 3     | 1     | 1     |
| 12582  | 2     | 2     | 2     | 2     |
| 12585  | 1     | 2     | 2     | 2     |
| 12586  | 3     | 3     | 3     | 1     |
| 12588  | 3     | 2     | 3     | 4     |
| 12589  | 1     | 3     | 1     | 1     |
| 12590  | 1     | 1     | 1     | 1     |
| 12591  | 3     | 4     | 4     | 3     |
| 12593  | 3     | 3     | 3     | 3     |
| 12594  | 2     | 3     | 3     | 3     |
| 12599  | 3     | 4     | 3     | 4     |
| 12600  | 1     | 2     | 1     | 1     |
| 12602  | 3     | 5     | 3     | 2     |
| 12606  | 2     | 4     | 3     | 1     |
| 12607  |       |       |       |       |
| 12608  |       |       |       |       |
| 12610  | 2     | 3     | 3     | 2     |
| 12611  | 1     | 1     | 1     | 1     |
| 12613  | 5     | 4     | 4     | 2     |
| 12616  | 2     | 3     | 2     | 3     |
| 12617  | 3     | 3     | 3     | 3     |
| 12619  | 1     | 1     | 1     | 1     |
| 12622  |       |       |       |       |
| 12628  | 1     | 1     | 1     | 1     |
| 12631  | 2     | 3     | 2     | 1     |

| respid | Q40_5 | Q40_6 | Q40_7 | Q40_8 |
|--------|-------|-------|-------|-------|
| 12635  | 2     | 5     | 1     | 1     |
| 12638  | 1     | 1     | 1     | 1     |
| 12639  | 1     | 2     | 1     | 1     |
| 12640  | 1     | 2     | 1     | 1     |
| 12643  | 1     | 2     | 2     | 3     |
| 12646  | 5     | 5     | 3     | 3     |
| 12648  | 3     | 4     | 5     | 3     |
| 12650  | 2     | 3     | 2     | 1     |
| 12651  | 1     | 1     | 1     | 1     |
| 12658  | 2     | 3     | 3     | 3     |
| 12662  | 2     | 2     | 2     | 2     |
| 12663  | 2     | 2     | 3     | 2     |
| 12664  | 4     | 4     | 4     | 3     |
| 12669  | 6     | 6     | 2     | 1     |
| 12670  | 3     | 2     | 2     | 3     |
| 12673  |       |       |       |       |
| 12675  | 1     | 1     | 1     | 1     |
| 12677  | 3     | 4     | 2     | 4     |
| 12679  | 1     | 2     | 1     | 1     |
| 12682  | 3     | 2     | 1     | 2     |
| 12696  | 4     | 3     | 3     | 3     |
| 12697  | 4     | 2     | 1     | 4     |
| 12699  | 1     | 1     | 1     | 1     |
| 12700  | 1     | 1     | 2     | 1     |
| 12701  | 3     | 2     | 1     | 2     |
| 12702  | 4     | 2     | 3     | 2     |
| 12704  | 3     | 4     | 4     | 4     |
| 12705  | 1     | 2     | 1     | 1     |
| 12709  | 2     | 2     | 3     | 2     |
| 12710  | 3     | 3     | 2     | 1     |
| 12713  | 1     | 2     | 2     | 1     |
| 12716  | 3     | 3     | 2     | 3     |

| respid | Q40_5 | Q40_6 | Q40_7 | Q40_8 |
|--------|-------|-------|-------|-------|
| 12719  | 2     | 2     | 2     | 2     |
| 12720  | 3     | 1     | 3     | 3     |
| 12723  | 1     | 1     | 1     | 1     |
| 12726  | 3     | 1     | 2     | 1     |
| 12728  | 2     | 3     | 2     | 4     |
| 12729  | 1     | 2     | 2     | 1     |
| 12731  | 1     | 3     | 2     | 3     |
| 12732  | 2     | 3     | 3     | 4     |
| 12733  | 2     | 5     | 2     | 2     |
| 12736  | 1     | 1     | 1     | 1     |
| 12737  | 1     | 2     | 3     | 1     |
| 12739  | 5     | 4     | 3     | 2     |
| 12742  | 1     | 3     | 2     | 4     |
| 12743  | 6     | 6     | 5     | 5     |
| 12744  | 1     | 2     | 1     | 1     |
| 12747  | 2     | 3     | 2     | 1     |
| 12751  | 1     | 2     | 1     | 1     |
| 12754  | 3     | 3     | 2     | 1     |
| 12756  | 2     | 1     | 2     | 3     |
| 12757  | 2     | 1     | 1     | 3     |
| 12760  | 1     | 4     | 4     | 5     |
| 12761  | 2     | 1     | 3     | 3     |
| 12762  | 2     | 3     | 2     | 2     |
| 12766  | 2     | 3     | 2     | 2     |
| 12769  | 1     | 2     | 1     | 1     |
| 12770  | 3     | 2     | 3     | 2     |
| 12773  | 5     | 5     | 6     | 6     |
| 12780  | 1     | 2     | 3     | 4     |
| 12789  | 1     | 2     | 1     | 2     |
| 12792  | 4     | 4     | 4     | 4     |
| 12795  | 2     | 3     | 2     | 2     |
| 12804  | 3     | 4     | 2     | 3     |

| respid | Q40_5 | Q40_6 | Q40_7 | Q40_8 |
|--------|-------|-------|-------|-------|
| 12811  | 1     | 1     | 1     | 1     |
| 12813  | 3     | 3     | 3     | 2     |
| 12814  | 3     | 3     | 3     | 3     |
| 12815  | 2     | 3     | 1     | 1     |
| 12816  | 1     | 1     | 1     | 1     |
| 12817  | 1     | 1     | 1     | 1     |
| 12818  | 1     | 3     | 1     | 1     |
| 12819  | 1     | 1     | 1     | 1     |
| 12820  | 1     | 2     | 1     | 1     |
| 12821  | 1     | 2     | 1     | 1     |
| 12824  | 2     | 1     | 2     | 1     |
| 12827  | 1     | 2     | 3     | 2     |
| 12836  | 5     | 5     | 5     | 5     |
| 12837  | 1     | 1     | 2     | 2     |
| 12838  | 2     | 2     | 2     | 1     |
| 12845  | 1     | 1     | 1     | 1     |
| 12847  | 1     | 5     | 1     | 1     |
| 12849  | 4     | 4     | 4     | 5     |
| 12850  | 1     | 3     | 1     | 2     |
| 12852  | 1     | 1     | 1     | 1     |
| 12853  | 4     | 4     | 4     | 5     |
| 12854  | 1     | 1     | 1     | 1     |
| 12860  | 1     | 1     | 1     | 1     |
| 12861  | 1     | 1     | 1     | 1     |
| 12863  | 1     | 1     | 1     | 1     |
| 12865  | 1     | 2     | 1     | 1     |
| 12870  | 2     | 2     | 1     | 1     |
| 12871  | 1     | 1     | 1     | 1     |
| 12873  | 3     | 3     | 2     | 1     |
| 12877  | 1     | 1     | 1     | 1     |
| 12880  | 3     | 2     | 2     | 1     |
| 12881  | 1     | 1     | 1     | 1     |



| respid | Q40_5 | Q40_6 | Q40_7 | Q40_8 |
|--------|-------|-------|-------|-------|
| 12882  | 1     | 1     | 1     | 1     |
| 12883  | 1     | 3     | 1     | 1     |
| 12885  | 3     | 3     | 3     | 3     |
| 12887  | 2     | 2     | 1     | 1     |
| 12889  | 1     | 2     | 1     | 1     |
| 12890  | 1     | 4     | 1     | 1     |
| 12891  | 1     | 2     | 1     | 1     |
| 12892  | 3     | 3     | 4     | 3     |
| 12893  | 1     | 1     | 1     | 1     |
| 12895  | 1     | 2     | 2     | 2     |
| 12898  | 1     | 2     | 1     | 1     |
| 12907  | 3     | 3     | 3     | 2     |
| 12908  | 1     | 2     | 1     | 1     |
| 12909  |       |       |       |       |
| 12914  | 1     | 2     | 1     | 1     |
| 12915  | 3     | 5     | 2     | 2     |
| 12916  |       |       |       |       |
| 12921  | 2     | 1     | 1     | 1     |
| 12922  | 3     | 3     | 3     | 3     |
| 12923  | 2     | 4     | 3     | 2     |
| 12926  | 1     | 2     | 1     | 1     |
| 12927  | 1     | 1     | 1     | 1     |
| 12932  | 1     | 1     | 1     | 1     |
| 12936  | 1     | 1     | 1     | 1     |
| 12937  | 1     | 2     | 1     | 1     |
| 12938  | 4     | 5     | 4     | 2     |
| 12939  | 1     | 1     | 1     | 1     |
| 12940  | 3     | 3     | 2     | 3     |
| 12945  | 2     | 2     | 1     | 2     |
| 12946  | 2     | 2     | 1     | 1     |
| 12947  | 3     | 3     | 2     | 3     |
| 12948  | 5     | 5     | 5     | 5     |

| respid | Q40_5 | Q40_6 | Q40_7 | Q40_8 |
|--------|-------|-------|-------|-------|
| 12951  | 1     | 3     | 2     | 1     |
| 12952  | 1     | 1     | 1     | 1     |
| 12954  | 2     | 3     | 3     | 2     |
| 12960  | 1     | 2     | 1     | 1     |
| 12961  | 1     | 2     | 1     | 1     |
| 12962  | 1     | 2     | 1     | 1     |
| 12963  | 1     | 1     | 1     | 1     |
| 12964  | 1     | 1     | 1     | 1     |
| 12966  | 1     | 1     | 1     | 1     |
| 12967  | 2     | 1     | 2     | 3     |
| 12969  | 1     | 1     | 1     | 1     |
| 12970  | 2     | 2     | 1     | 1     |
| 12974  | 4     | 4     | 4     | 4     |
| 12979  |       |       |       |       |
| 12980  | 1     | 1     | 1     | 1     |
| 12983  | 1     | 1     | 1     | 1     |
| 12988  | 1     | 3     | 1     | 1     |
| 12994  | 1     | 2     | 1     | 1     |
| 12995  | 1     | 2     | 1     | 1     |
| 12996  | 1     | 1     | 1     | 1     |
| 12998  | 1     | 2     | 2     | 1     |
| 12999  | 2     | 2     | 1     | 1     |
| 13001  | 1     | 2     | 3     | 4     |
| 13005  | 2     | 1     | 1     | 1     |
| 13006  | 2     | 5     | 2     | 1     |
| 13007  | 2     | 2     | 2     | 1     |
| 13011  | 3     | 3     | 3     | 4     |
| 13012  | 1     | 1     | 1     | 1     |
| 13013  | 3     | 3     | 4     | 4     |
| 13016  | 1     | 3     | 1     | 1     |
| 13018  | 1     | 1     | 1     | 1     |
| 13020  |       |       |       |       |

| respid | Q40_5 | Q40_6 | Q40_7 | Q40_8 |
|--------|-------|-------|-------|-------|
| 13024  | 1     | 1     | 1     | 1     |
| 13025  | 1     | 1     | 1     | 1     |
| 13027  | 2     | 2     | 2     | 2     |
| 13031  | 1     | 1     | 1     | 1     |
| 13032  | 4     | 4     | 4     | 3     |
| 13034  | 1     | 2     | 1     | 1     |
| 13036  | 1     | 2     | 1     | 1     |
| 13037  | 1     | 1     | 1     | 1     |
| 13038  | 4     | 4     | 4     | 2     |
| 13039  | 1     | 1     | 1     | 1     |
| 13040  | 2     | 2     | 2     | 2     |
| 13041  | 4     | 4     | 5     | 1     |
| 13045  | 2     | 2     | 3     | 3     |
| 13046  | 1     | 2     | 1     | 1     |
| 13048  | 1     | 1     | 1     | 1     |
| 13051  | 2     | 1     | 1     | 2     |
| 13053  | 1     | 1     | 1     | 1     |
| 13055  | 3     | 3     | 3     | 3     |
| 13059  | 1     | 2     | 1     | 1     |
| 13068  | 1     | 2     | 1     | 1     |
| 13069  | 1     | 2     | 1     | 2     |
| 13076  | 2     | 3     | 1     | 1     |
| 13081  | 1     | 1     | 1     | 1     |
| 13082  | 3     | 3     | 3     | 1     |
| 13084  | 2     | 1     | 5     | 1     |
| 13085  | 1     | 4     | 2     | 1     |
| 13086  | 1     | 5     | 1     | 1     |
| 13093  | 2     | 3     | 3     | 2     |
| 13094  | 4     | 4     | 4     | 3     |
| 13097  | 1     | 1     | 1     | 1     |
| 13098  | 1     | 1     | 1     | 1     |
| 13099  | 2     | 2     | 1     | 1     |

| respid | Q40_5 | Q40_6 | Q40_7 | Q40_8 |
|--------|-------|-------|-------|-------|
| 13100  | 1     | 2     | 1     | 1     |
| 13101  |       |       |       |       |
| 13103  |       |       |       |       |
| 13105  | 1     | 1     | 1     | 1     |
| 13106  | 2     | 1     | 2     | 2     |
| 13107  | 1     | 2     | 1     | 1     |
| 13110  | 2     | 4     | 2     | 1     |
| 13118  | 1     | 2     | 1     | 1     |
| 13120  | 3     | 3     | 3     | 3     |
| 13130  | 1     | 3     | 1     | 1     |
| 13133  | 1     | 3     | 1     | 1     |
| 13134  | 1     | 1     | 1     | 1     |
| 13139  | 2     | 2     | 2     | 2     |
| 13142  | 1     | 2     | 1     | 1     |
| 13143  | 1     | 2     | 2     | 2     |
| 13145  | 2     | 3     | 2     | 2     |
| 13148  | 1     | 1     | 1     | 1     |
| 13149  | 1     | 1     | 1     | 1     |
| 13151  | 4     | 3     | 3     | 4     |
| 13153  | 1     | 1     | 2     | 1     |
| 13158  | 1     | 1     | 1     | 1     |
| 13160  | 2     | 2     | 2     | 2     |
| 13162  | 3     | 3     | 2     | 2     |
| 13169  | 1     | 1     | 1     | 1     |
| 13172  | 1     | 2     | 1     | 1     |
| 13173  | 1     | 1     | 1     | 1     |
| 13176  | 1     | 2     | 1     | 1     |
| 13179  | 1     | 1     | 1     | 1     |
| 13184  | 3     | 1     | 2     | 2     |
| 13185  | 3     | 1     | 3     | 3     |
| 13186  | 1     | 2     | 1     | 1     |
| 13188  | 2     | 2     | 3     | 2     |

| respid | Q40_5 | Q40_6 | Q40_7 | Q40_8 |
|--------|-------|-------|-------|-------|
| 13190  | 2     | 3     | 2     | 1     |
| 13192  | 1     | 1     | 1     | 1     |
| 13193  |       |       |       |       |
| 13201  | 2     | 3     | 2     | 2     |
| 13207  | 1     | 1     | 1     | 1     |
| 13208  |       |       |       |       |
| 13209  | 3     | 4     | 4     | 4     |
| 13212  | 1     | 2     | 1     | 1     |
| 13215  | 1     | 3     | 1     | 1     |
| 13218  | 3     | 5     | 3     | 3     |
| 13219  | 1     | 1     | 1     | 1     |
| 13224  | 2     | 3     | 2     | 2     |
| 13225  | 1     | 2     | 1     | 1     |
| 13226  | 1     | 1     | 1     | 1     |
| 13232  | 1     | 2     | 1     | 1     |
| 13237  | 2     | 1     | 2     | 1     |
| 13239  | 2     | 3     | 2     | 1     |
| 13241  | 2     | 2     | 2     | 2     |
| 13243  | 1     | 2     | 1     | 1     |
| 13247  | 3     | 4     | 3     | 2     |
| 13248  | 1     | 1     | 1     | 1     |
| 13251  | 1     | 2     | 1     | 1     |
| 13256  | 1     | 1     | 1     | 1     |
| 13260  | 1     | 2     | 1     | 1     |
| 13261  | 2     | 3     | 2     | 2     |
| 13264  | 1     | 1     | 2     | 1     |
| 13273  | 1     | 2     | 1     | 1     |
| 13274  | 1     | 1     | 1     | 1     |
| 13276  | 1     | 2     | 1     | 1     |
| 13278  |       |       |       |       |
| 13279  | 1     | 1     | 1     | 1     |
| 13282  | 1     | 1     | 1     | 1     |

| respid | Q40_5 | Q40_6 | Q40_7 | Q40_8 |
|--------|-------|-------|-------|-------|
| 13283  | 3     | 3     | 2     | 2     |
| 13285  | 1     | 2     | 1     | 1     |
| 13286  | 1     | 2     | 2     | 1     |
| 13299  | 1     | 1     | 1     | 1     |
| 13300  | 2     | 2     | 2     | 3     |
| 13301  |       |       |       |       |
| 13303  | 3     | 3     | 2     | 3     |
| 13304  | 1     | 2     | 1     | 1     |
| 13307  | 2     | 2     | 1     | 1     |
| 13308  | 1     | 1     | 1     | 1     |
| 13312  | 1     | 2     | 1     | 1     |
| 13313  | 1     | 1     | 1     | 1     |
| 13314  | 3     | 2     | 2     | 3     |
| 13318  | 3     | 3     | 3     | 3     |
| 13320  | 2     | 2     | 2     | 1     |
| 13322  | 2     | 2     | 3     | 3     |
| 13324  | 1     | 3     | 1     | 1     |
| 13325  | 1     | 2     | 2     | 1     |
| 13327  | 1     | 2     | 1     | 1     |
| 13330  | 1     | 2     | 1     | 1     |
| 13332  | 1     | 2     | 1     | 1     |
| 13333  | 1     | 2     | 1     | 1     |
| 13334  | 1     | 2     | 1     | 1     |
| 13351  | 1     | 3     | 4     | 2     |
| 13353  | 1     | 2     | 1     | 1     |
| 13354  | 1     | 1     | 1     | 1     |
| 13355  | 2     | 2     | 1     | 1     |
| 13358  | 1     | 1     | 1     | 1     |
| 13359  | 3     | 2     | 1     | 1     |
| 13360  | 3     | 4     | 3     | 4     |
| 13364  | 6     | 6     | 6     | 1     |
| 13365  | 3     | 5     | 3     | 2     |

| respid | Q40_5 | Q40_6 | Q40_7 | Q40_8 |
|--------|-------|-------|-------|-------|
| 13368  | 1     | 1     | 1     | 1     |
| 13370  | 1     | 2     | 1     | 1     |
| 13375  | 1     | 1     | 1     | 1     |
| 13384  | 1     | 2     | 1     | 1     |
| 13387  | 1     | 1     | 1     | 1     |
| 13395  | 2     | 2     | 1     | 1     |
| 13398  | 1     | 1     | 1     | 1     |
| 13404  | 1     | 1     | 1     | 1     |
| 13405  | 1     | 1     | 1     | 1     |
| 13408  |       |       |       |       |
| 13411  | 1     | 1     | 1     | 1     |
| 13413  | 2     | 2     | 2     | 2     |
| 13419  | 1     | 3     | 1     | 1     |
| 13420  | 1     | 1     | 1     | 1     |
| 13427  | 3     | 3     | 3     | 3     |
| 13441  | 4     | 6     | 5     | 3     |
| 13444  | 3     | 2     | 2     | 3     |
| 13456  | 1     | 1     | 1     | 1     |
| 13466  | 1     | 4     | 2     | 2     |
| 13468  | 1     | 2     | 1     | 1     |
| 13475  | 1     | 2     | 1     | 1     |
| 13484  | 1     | 2     | 1     | 1     |
| 13486  | 2     | 2     | 2     | 1     |
| 13487  | 2     | 2     | 2     | 2     |
| 13491  |       |       |       |       |
| 13496  | 1     | 1     | 1     | 2     |
| 13497  | 2     | 2     | 1     | 1     |
| 13498  | 1     | 3     | 1     | 1     |
| 13502  |       |       |       |       |
| 13503  | 3     | 3     | 3     | 3     |
| 13505  | 1     | 2     | 2     | 1     |
| 13509  | 1     | 2     | 1     | 1     |

| respid | Q40_5 | Q40_6 | Q40_7 | Q40_8 |
|--------|-------|-------|-------|-------|
| 13510  | 2     | 3     | 3     | 2     |
| 13518  | 3     | 2     | 4     | 5     |
| 13521  | 1     | 2     | 1     | 1     |
| 13523  | 2     | 2     | 1     | 2     |
| 13528  | 1     | 1     | 1     | 1     |
| 13531  | 1     | 1     | 1     | 1     |
| 13532  | 2     | 1     | 1     | 1     |
| 13533  | 1     | 2     | 1     | 1     |
| 13534  |       |       |       |       |
| 13535  | 1     | 2     | 1     | 1     |
| 13538  | 2     | 2     | 2     | 3     |
| 13540  | 1     | 3     | 2     | 1     |
| 13541  | 2     | 2     | 2     | 2     |
| 13542  | 2     | 2     | 1     | 1     |
| 13550  | 1     | 2     | 1     | 1     |
| 13553  | 1     | 3     | 1     | 1     |
| 13554  | 1     | 3     | 1     | 1     |
| 13555  | 3     | 4     | 4     | 4     |
| 13556  | 2     | 3     | 2     | 2     |
| 13563  | 3     | 2     | 2     | 1     |
| 13564  | 1     | 2     | 1     | 1     |
| 13567  |       |       |       |       |
| 13568  | 4     | 4     | 4     | 3     |
| 13570  |       |       |       |       |
| 13573  | 2     | 2     | 2     | 2     |
| 13575  | 2     | 3     | 2     | 3     |
| 13577  | 4     | 5     | 4     | 4     |
| 13580  | 4     | 3     | 4     | 5     |
| 13582  | 1     | 1     | 1     | 1     |
| 13584  | 5     | 5     | 4     | 4     |
| 13585  |       |       |       |       |
| 13586  | 2     | 2     | 2     | 2     |



| respid | Q40_5 | Q40_6 | Q40_7 | Q40_8 |
|--------|-------|-------|-------|-------|
| 13587  | 1     | 2     | 1     | 1     |
| 13592  | 3     | 3     | 3     | 3     |
| 13596  | 1     | 1     | 1     | 1     |
| 13597  | 1     | 3     | 1     | 1     |
| 13599  | 2     | 3     | 4     | 3     |
| 13601  | 1     | 1     | 1     | 1     |
| 13604  | 1     | 2     | 1     | 1     |
| 13608  | 1     | 2     | 1     | 2     |
| 13616  | 1     | 2     | 1     | 1     |
| 13618  | 2     | 2     | 2     | 3     |
| 13619  | 2     | 2     | 2     | 1     |
| 13626  |       |       |       |       |
| 13628  | 2     | 3     | 3     | 2     |
| 13640  | 3     | 4     | 2     | 2     |
| 13645  | 1     | 2     | 1     | 1     |
| 13648  |       |       |       |       |
| 13653  | 2     | 2     | 1     | 1     |
| 13655  | 1     | 1     | 1     | 1     |
| 13662  | 1     | 1     | 1     | 1     |
| 13670  | 3     | 2     | 2     | 2     |
| 13673  | 1     | 2     | 1     | 1     |
| 13674  | 1     | 3     | 1     | 1     |
| 13675  | 1     | 1     | 2     | 1     |
| 13678  | 3     | 2     | 2     | 2     |
| 13680  | 3     | 3     | 2     | 1     |
| 13681  | 1     | 2     | 1     | 1     |
| 13683  | 1     | 2     | 1     | 1     |
| 13684  | 1     | 2     | 2     | 1     |
| 13685  | 1     | 1     | 1     | 1     |
| 13687  |       |       |       |       |
| 13690  | 1     | 2     | 1     | 1     |
| 13700  | 5     | 4     | 3     | 5     |

| respid | Q40_5 | Q40_6 | Q40_7 | Q40_8 |
|--------|-------|-------|-------|-------|
| 13705  | 3     | 2     | 2     | 3     |
| 13710  | 1     | 1     | 1     | 1     |
| 13711  | 1     | 2     | 1     | 5     |
| 13713  | 1     | 1     | 1     | 1     |
| 13716  | 1     | 1     | 1     | 1     |
| 13721  | 2     | 2     | 2     | 2     |
| 13722  | 3     | 5     | 3     | 2     |
| 13723  | 2     | 2     | 2     | 3     |
| 13726  | 5     | 3     | 4     | 2     |
| 13728  | 2     | 2     | 2     | 2     |
| 13730  | 3     | 3     | 1     | 2     |
| 13734  | 2     | 2     | 1     | 2     |
| 13736  | 3     | 6     | 2     | 5     |
| 13737  | 1     | 1     | 2     | 1     |
| 13739  | 2     | 3     | 3     | 3     |
| 13742  |       |       |       |       |
| 13746  | 2     | 2     | 1     | 1     |
| 13747  | 1     | 1     | 1     | 1     |
| 13749  | 1     | 1     | 1     | 1     |
| 13751  | 2     | 3     | 1     | 3     |
| 13752  | 1     | 2     | 2     | 1     |
| 13756  | 2     | 2     | 1     | 1     |
| 13757  | 1     | 1     | 1     | 1     |
| 13767  | 3     | 3     | 3     | 3     |
| 13771  | 1     | 1     | 1     | 1     |
| 13772  | 4     | 6     | 3     | 5     |
| 13779  |       |       |       |       |
| 13782  | 1     | 2     | 1     | 1     |
| 13783  | 1     | 1     | 1     | 1     |
| 13785  | 1     | 2     | 1     | 1     |
| 13786  | 1     | 3     | 1     | 1     |
| 13792  | 2     | 3     | 2     | 3     |

| respid | Q40_5 | Q40_6 | Q40_7 | Q40_8 |
|--------|-------|-------|-------|-------|
| 13796  | 1     | 2     | 1     | 1     |
| 13798  | 2     | 2     | 1     | 1     |
| 13799  | 2     | 2     | 2     | 2     |
| 13804  | 1     | 1     | 1     | 1     |
| 13805  | 1     | 1     | 1     | 1     |
| 13810  | 3     | 3     | 3     | 3     |
| 13811  | 1     | 2     | 1     | 1     |
| 13819  | 5     | 5     | 5     | 5     |
| 13821  | 5     | 6     | 5     | 6     |
| 13824  | 4     | 2     | 4     | 2     |
| 13828  | 3     | 3     | 3     | 3     |
| 13829  | 6     | 5     | 6     | 5     |
| 13831  |       |       |       |       |
| 13833  | 1     | 1     | 2     | 2     |
| 13835  | 4     | 6     | 2     | 5     |
| 13838  |       |       |       |       |
| 13839  | 4     | 5     | 5     | 6     |
| 13845  |       |       |       |       |
| 13846  | 3     | 2     | 2     | 2     |
| 13853  | 2     | 2     | 3     | 3     |
| 13855  | 2     | 2     | 2     | 4     |
| 13858  | 2     | 4     | 1     | 1     |
| 13860  |       |       |       |       |
| 13865  | 6     | 5     | 6     | 5     |
| 13870  | 1     | 1     | 1     | 1     |
| 13872  | 3     | 5     | 4     | 3     |
| 13873  | 1     | 2     | 2     | 2     |
| 13874  |       |       |       |       |
| 13875  | 2     | 3     | 4     | 2     |
| 13881  |       |       |       |       |
| 13887  | 1     | 3     | 3     | 1     |
| 13888  | 2     | 2     | 1     | 2     |

| respid | Q40_5 | Q40_6 | Q40_7 | Q40_8 |
|--------|-------|-------|-------|-------|
| 13889  | 4     | 4     | 5     | 3     |
| 13895  | 3     | 6     | 1     | 5     |
| 13897  |       |       |       |       |
| 13898  | 2     | 2     | 2     | 2     |
| 13901  | 1     | 1     | 1     | 1     |
| 13902  | 6     | 5     | 5     | 6     |
| 13903  | 3     | 3     | 3     | 3     |
| 13905  | 3     | 2     | 3     | 2     |
| 13908  | 3     | 2     | 3     | 4     |
| 13909  | 1     | 1     | 1     | 1     |
| 13910  | 3     | 5     | 6     | 6     |
| 13911  |       |       |       |       |
| 13914  | 4     | 3     | 2     | 2     |
| 13920  | 4     | 3     | 3     | 2     |
| 13926  | 1     | 2     | 1     | 1     |
| 13929  | 3     | 1     | 2     | 2     |
| 13930  | 4     | 6     | 3     | 5     |
| 13931  |       |       |       |       |
| 13932  | 3     | 4     | 4     | 3     |
| 13934  | 1     | 3     | 2     | 2     |
| 13938  | 1     | 2     | 1     | 1     |
| 13942  | 1     | 1     | 1     | 1     |
| 13945  | 4     | 3     | 2     | 2     |
| 13947  | 5     | 5     | 2     | 3     |
| 13948  |       |       |       |       |
| 13959  | 1     | 1     | 1     | 1     |
| 13962  | 1     | 1     | 1     | 1     |
| 13963  | 1     | 3     | 3     | 1     |
| 13964  | 1     | 2     | 1     | 1     |
| 13966  | 1     | 2     | 3     | 1     |
| 13968  | 1     | 1     | 3     | 1     |
| 13971  | 2     | 1     | 1     | 1     |

| respid | Q40_5 | Q40_6 | Q40_7 | Q40_8 |
|--------|-------|-------|-------|-------|
| 13979  | 4     | 3     | 2     | 3     |
| 13980  | 3     | 3     | 2     | 2     |
| 13981  | 2     | 4     | 2     | 1     |
| 13982  | 1     | 1     | 1     | 1     |
| 13984  | 1     | 4     | 1     | 1     |
| 13989  | 1     | 1     | 1     | 1     |
| 13990  | 1     | 2     | 1     | 1     |
| 13992  | 4     | 6     | 4     | 2     |
| 13998  | 3     | 2     | 3     | 3     |
| 13999  | 2     | 4     | 3     | 3     |
| 14000  | 1     | 1     | 1     | 1     |
| 14003  | 1     | 2     | 1     | 1     |
| 14004  | 1     | 1     | 2     | 2     |
| 14006  | 1     | 2     | 1     | 1     |
| 14007  | 1     | 1     | 1     | 1     |
| 14008  |       |       |       |       |
| 14013  | 1     | 1     | 1     | 1     |
| 14015  | 1     | 1     | 1     | 1     |
| 14018  | 1     | 1     | 1     | 1     |
| 14021  | 1     | 2     | 1     | 2     |
| 14023  | 1     | 1     | 1     | 1     |
| 14024  | 3     | 6     | 3     | 3     |
| 14026  | 1     | 1     | 1     | 1     |
| 14030  | 1     | 2     | 2     | 1     |
| 14032  | 2     | 3     | 2     | 3     |
| 14040  |       |       |       |       |
| 14045  | 1     | 1     | 1     | 1     |
| 14048  | 2     | 3     | 2     | 3     |
| 14049  | 2     | 4     | 2     | 3     |
| 14050  | 1     | 2     | 1     | 1     |
| 14051  | 6     | 5     | 6     | 5     |
| 14052  | 2     | 2     | 1     | 1     |

| respid | Q40_5 | Q40_6 | Q40_7 | Q40_8 |
|--------|-------|-------|-------|-------|
| 14054  | 1     | 1     | 1     | 1     |
| 14055  |       |       |       |       |
| 14057  | 2     | 3     | 3     | 2     |
| 14058  | 1     | 2     | 1     | 1     |
| 14059  | 1     | 6     | 1     | 1     |
| 14060  | 2     | 1     | 1     | 2     |
| 14061  | 4     | 3     | 5     | 4     |
| 14071  | 2     | 2     | 1     | 1     |
| 14073  | 1     | 4     | 1     | 2     |
| 14074  | 3     | 5     | 3     | 1     |
| 14076  | 1     | 1     | 1     | 1     |
| 14080  | 1     | 1     | 1     | 1     |
| 14082  | 1     | 1     | 1     | 1     |
| 14083  | 1     | 1     | 1     | 2     |
| 14084  | 1     | 2     | 1     | 1     |
| 14085  |       |       |       |       |
| 14086  | 3     | 6     | 1     | 3     |
| 14088  | 1     | 1     | 1     | 1     |
| 14090  | 1     | 1     | 1     | 1     |
| 14092  | 1     | 2     | 1     | 1     |
| 14093  | 1     | 1     | 1     | 1     |
| 14096  | 1     | 1     | 1     | 1     |
| 14103  | 2     | 2     | 3     | 4     |
| 14105  | 1     | 1     | 1     | 1     |
| 14106  | 2     | 2     | 2     | 2     |
| 14107  | 3     | 3     | 3     | 4     |
| 14108  | 4     | 4     | 4     | 3     |
| 14112  | 1     | 2     | 1     | 1     |
| 14114  | 2     | 3     | 3     | 1     |
| 14115  | 1     | 1     | 1     | 1     |
| 14116  | 1     | 1     | 1     | 1     |
| 14117  | 1     | 1     | 1     | 1     |

| respid | Q40_5 | Q40_6 | Q40_7 | Q40_8 |
|--------|-------|-------|-------|-------|
| 14118  | 2     | 3     | 4     | 3     |
| 14119  | 1     | 1     | 1     | 1     |
| 14127  |       |       |       |       |
| 14129  | 2     | 3     | 2     | 2     |
| 14131  | 1     | 2     | 1     | 1     |
| 14132  | 1     | 2     | 1     | 1     |
| 14133  | 4     | 4     | 4     | 3     |
| 14134  | 1     | 2     | 1     | 1     |
| 14135  | 3     | 1     | 3     | 2     |
| 14136  | 3     | 6     | 1     | 1     |
| 14138  |       |       |       |       |
| 14139  |       |       |       |       |
| 14140  | 3     | 2     | 3     | 1     |
| 14141  | 1     | 1     | 1     | 1     |
| 14143  | 1     | 1     | 1     | 1     |
| 14146  | 1     | 1     | 1     | 1     |
| 14147  | 4     | 6     | 3     | 5     |
| 14148  | 2     | 1     | 1     | 1     |
| 14151  | 1     | 3     | 2     | 1     |
| 14152  | 2     | 3     | 4     | 2     |
| 14153  | 2     | 2     | 2     | 1     |
| 14154  | 1     | 1     | 1     | 1     |
| 14158  | 2     | 2     | 2     | 1     |
| 14159  | 2     | 3     | 2     | 3     |
| 14160  | 3     | 3     | 3     | 3     |
| 14161  | 2     | 2     | 3     | 2     |
| 14162  | 1     | 5     | 1     | 1     |
| 14165  | 4     | 3     | 4     | 4     |
| 14166  | 2     | 3     | 4     | 3     |
| 14167  | 1     | 3     | 1     | 1     |
| 14169  | 1     | 1     | 1     | 1     |
| 14170  | 1     | 1     | 1     | 1     |

| respid | Q40_5 | Q40_6 | Q40_7 | Q40_8 |
|--------|-------|-------|-------|-------|
| 14172  | 2     | 2     | 2     | 3     |
| 14173  |       |       |       |       |
| 14174  | 1     | 2     | 1     | 1     |
| 14175  | 1     | 2     | 1     | 1     |
| 14176  | 1     | 2     | 1     | 1     |
| 14178  | 1     | 1     | 2     | 2     |
| 14179  | 1     | 2     | 1     | 1     |
| 14180  | 2     | 3     | 3     | 2     |
| 14183  | 1     | 1     | 2     | 1     |
| 14185  | 1     | 2     | 2     | 2     |
| 14187  | 2     | 4     | 3     | 1     |
| 14189  | 1     | 1     | 1     | 1     |
| 14191  | 2     | 4     | 3     | 3     |
| 14192  |       |       |       |       |
| 14195  | 3     | 4     | 3     | 2     |
| 14197  | 1     | 2     | 1     | 1     |
| 14203  | 3     | 2     | 3     | 2     |
| 14204  | 1     | 2     | 1     | 1     |
| 14205  | 1     | 1     | 1     | 1     |
| 14208  | 1     | 1     | 1     | 1     |
| 14211  | 5     | 6     | 4     | 5     |
| 14214  | 1     | 1     | 1     | 1     |
| 14215  | 2     | 5     | 3     | 2     |
| 14216  | 3     | 3     | 3     | 3     |
| 14218  | 1     | 2     | 1     | 1     |
| 14220  | 1     | 1     | 1     | 1     |
| 14223  |       |       |       |       |
| 14225  | 3     | 2     | 3     | 4     |
| 14226  | 1     | 1     | 1     | 1     |
| 14228  | 2     | 2     | 2     | 1     |
| 14231  | 3     | 3     | 3     | 3     |
| 14233  | 2     | 2     | 1     | 1     |



| respid | Q40_5 | Q40_6 | Q40_7 | Q40_8 |
|--------|-------|-------|-------|-------|
| 14237  | 1     | 1     | 1     | 3     |
| 14238  | 2     | 3     | 2     | 3     |
| 14243  | 3     | 2     | 3     | 2     |
| 14245  | 2     | 1     | 1     | 1     |
| 14246  | 2     | 2     | 3     | 3     |
| 14248  | 6     | 6     | 6     | 6     |
| 14250  | 1     | 2     | 1     | 1     |
| 14253  | 1     | 2     | 1     | 1     |
| 14254  | 1     | 1     | 1     | 1     |
| 14255  | 1     | 1     | 1     | 1     |
| 14257  | 1     | 2     | 1     | 1     |
| 14258  | 1     | 1     | 1     | 1     |
| 14259  | 2     | 2     | 2     | 2     |
| 14260  |       |       |       |       |
| 14261  | 4     | 3     | 6     | 6     |
| 14263  | 3     | 2     | 2     | 2     |
| 14264  | 1     | 3     | 1     | 1     |
| 14266  | 3     | 2     | 3     | 5     |
| 14267  | 1     | 2     | 1     | 4     |
| 14268  | 1     | 1     | 1     | 1     |
| 14275  | 2     | 2     | 2     | 1     |
| 14278  | 2     | 2     | 3     | 1     |
| 14279  |       |       |       |       |
| 14280  |       |       |       |       |
| 14281  | 1     | 6     | 1     | 1     |
| 14282  | 3     | 2     | 3     | 2     |
| 14283  | 2     | 5     | 1     | 1     |
| 14286  | 1     | 2     | 1     | 1     |
| 14287  |       |       |       |       |
| 14288  | 2     | 2     | 2     | 1     |
| 14291  |       |       |       |       |
| 14292  |       |       |       |       |

| respid | Q40_5 | Q40_6 | Q40_7 | Q40_8 |
|--------|-------|-------|-------|-------|
| 14293  | 1     | 1     | 1     | 1     |
| 14304  | 5     | 6     | 5     | 4     |
| 14308  | 1     | 2     | 1     | 1     |
| 14313  | 1     | 4     | 3     | 3     |
| 14314  | 3     | 3     | 3     | 3     |
| 14316  | 1     | 1     | 1     | 1     |
| 14317  | 1     | 2     | 1     | 1     |
| 14318  | 3     | 3     | 4     | 4     |
| 14319  | 1     | 1     | 1     | 1     |
| 14320  | 1     | 2     | 3     | 3     |
| 14321  | 1     | 1     | 1     | 1     |
| 14322  | 4     | 3     | 4     | 4     |
| 14326  | 5     | 6     | 4     | 4     |
| 14327  | 6     | 5     | 4     | 4     |
| 14328  |       |       |       |       |
| 14330  | 1     | 2     | 1     | 1     |
| 14332  | 1     | 2     | 1     | 1     |
| 14334  | 1     | 1     | 1     | 1     |
| 14336  | 1     | 2     | 1     | 1     |
| 14337  | 2     | 2     | 2     | 2     |
| 14339  |       |       |       |       |
| 14340  | 2     | 6     | 1     | 2     |
| 14341  | 1     | 1     | 1     | 1     |
| 14344  | 1     | 2     | 1     | 1     |
| 14345  | 1     | 2     | 1     | 1     |
| 14346  |       |       |       |       |
| 14348  | 1     | 1     | 1     | 1     |
| 14349  | 1     | 1     | 1     | 1     |
| 14358  | 3     | 3     | 3     | 3     |
| 14360  | 1     | 1     | 1     | 1     |
| 14362  |       |       |       |       |
| 14366  | 1     | 2     | 1     | 1     |

| respid | Q40_5 | Q40_6 | Q40_7 | Q40_8 |
|--------|-------|-------|-------|-------|
| 14367  | 3     | 4     | 3     | 2     |
| 14369  | 1     | 3     | 3     | 2     |
| 14371  | 1     | 1     | 1     | 1     |
| 14372  | 1     | 2     | 1     | 1     |
| 14374  | 1     | 1     | 1     | 1     |
| 14376  | 2     | 1     | 1     | 2     |
| 14377  |       |       |       |       |
| 14378  | 1     | 2     | 1     | 1     |
| 14379  | 1     | 2     | 1     | 1     |
| 14381  | 2     | 3     | 1     | 2     |
| 14383  | 2     | 1     | 2     | 2     |
| 14384  | 2     | 5     | 1     | 2     |
| 14385  | 6     | 4     | 5     | 4     |
| 14386  | 3     | 3     | 4     | 4     |
| 14390  | 1     | 3     | 1     | 1     |
| 14391  | 1     | 1     | 1     | 1     |
| 14392  | 2     | 2     | 2     | 1     |
| 14393  | 2     | 4     | 3     | 1     |
| 14394  | 2     | 2     | 2     | 2     |
| 14395  |       |       |       |       |
| 14396  |       |       |       |       |
| 14397  | 1     | 2     | 1     | 2     |
| 14398  | 1     | 2     | 1     | 1     |
| 14399  | 1     | 3     | 3     | 1     |
| 14400  | 1     | 5     | 1     | 1     |
| 14403  | 1     | 2     | 1     | 1     |
| 14404  | 1     | 1     | 2     | 2     |
| 14405  | 2     | 2     | 1     | 1     |
| 14407  | 2     | 1     | 2     | 3     |
| 14408  | 4     | 5     | 2     | 2     |
| 14410  | 6     | 6     | 5     | 6     |
| 14415  | 1     | 2     | 1     | 1     |

| respid | Q40_5 | Q40_6 | Q40_7 | Q40_8 |
|--------|-------|-------|-------|-------|
| 14419  | 3     | 3     | 2     | 2     |
| 14420  |       |       |       |       |
| 14421  |       |       |       |       |
| 14423  | 1     | 1     | 1     | 1     |
| 14424  | 1     | 2     | 1     | 2     |
| 14425  | 1     | 2     | 1     | 1     |
| 14426  | 1     | 2     | 1     | 1     |
| 14427  | 1     | 3     | 1     | 1     |
| 14428  | 3     | 4     | 5     | 6     |
| 14431  | 2     | 3     | 2     | 3     |
| 14433  | 2     | 1     | 2     | 3     |
| 14434  | 1     | 2     | 1     | 1     |
| 14435  | 1     | 2     | 1     | 1     |
| 14436  | 3     | 2     | 3     | 2     |
| 14438  | 3     | 2     | 1     | 2     |
| 14442  | 3     | 5     | 4     | 4     |
| 14447  | 4     | 2     | 1     | 1     |
| 14448  | 3     | 2     | 1     | 2     |
| 14450  | 4     | 1     | 2     | 2     |
| 14451  | 1     | 1     | 1     | 1     |
| 14454  | 3     | 4     | 3     | 3     |
| 14455  | 1     | 1     | 1     | 1     |
| 14456  | 1     | 2     | 2     | 2     |
| 14457  | 5     | 6     | 5     | 6     |
| 14458  | 5     | 4     | 6     | 5     |
| 14459  |       |       |       |       |
| 14460  | 3     | 2     | 3     | 2     |
| 14464  | 3     | 2     | 3     | 2     |
| 14465  | 2     | 1     | 2     | 1     |
| 14466  | 1     | 1     | 1     | 2     |
| 14467  | 1     | 2     | 1     | 1     |
| 14470  | 1     | 2     | 1     | 1     |

| respid | Q40_5 | Q40_6 | Q40_7 | Q40_8 |
|--------|-------|-------|-------|-------|
| 14472  | 1     | 1     | 1     | 1     |
| 14473  | 1     | 1     | 1     | 1     |
| 14474  |       |       |       |       |
| 14477  | 3     | 3     | 3     | 2     |
| 14478  | 1     | 1     | 1     | 1     |
| 14479  |       |       |       |       |
| 14484  | 1     | 1     | 1     | 1     |
| 14485  |       |       |       |       |
| 14486  | 2     | 3     | 4     | 3     |
| 14487  | 2     | 3     | 2     | 1     |
| 14488  | 2     | 3     | 4     | 3     |
| 14491  | 3     | 2     | 2     | 1     |
| 14495  | 1     | 2     | 1     | 1     |
| 14500  | 2     | 3     | 2     | 1     |
| 14502  | 1     | 2     | 1     | 2     |
| 14504  | 2     | 2     | 2     | 3     |
| 14505  | 5     | 4     | 5     | 6     |
| 14507  | 1     | 3     | 1     | 1     |
| 14517  | 1     | 3     | 1     | 1     |
| 14518  | 1     | 1     | 1     | 1     |
| 14519  | 1     | 2     | 1     | 1     |
| 14521  | 3     | 2     | 3     | 3     |
| 14522  | 1     | 2     | 1     | 1     |
| 14526  | 1     | 1     | 1     | 1     |
| 14528  | 2     | 3     | 3     | 3     |
| 14529  | 1     | 1     | 1     | 1     |
| 14530  | 2     | 3     | 2     | 1     |
| 14531  | 5     | 4     | 5     | 4     |
| 14534  | 3     | 3     | 3     | 4     |
| 14538  | 2     | 3     | 2     | 1     |
| 14539  | 5     | 5     | 4     | 4     |
| 14545  | 2     | 2     | 1     | 2     |

| respid | Q40_5 | Q40_6 | Q40_7 | Q40_8 |
|--------|-------|-------|-------|-------|
| 14546  | 2     | 6     | 4     | 1     |
| 14551  | 1     | 2     | 1     | 1     |
| 14553  | 3     | 3     | 3     | 4     |
| 14557  |       |       |       |       |
| 14558  | 1     | 3     | 2     | 3     |
| 14559  | 3     | 4     | 3     | 3     |
| 14560  | 2     | 1     | 2     | 1     |
| 14563  | 1     | 2     | 1     | 1     |
| 14565  | 1     | 1     | 1     | 1     |
| 14571  | 5     | 6     | 5     | 6     |
| 14572  | 2     | 1     | 3     | 2     |
| 14573  | 2     | 2     | 2     | 2     |
| 14575  | 3     | 3     | 4     | 3     |
| 14576  | 3     | 3     | 2     | 3     |
| 14578  | 2     | 2     | 1     | 1     |
| 14579  | 1     | 1     | 1     | 1     |
| 14580  | 2     | 3     | 2     | 1     |
| 14582  | 1     | 2     | 1     | 1     |
| 14585  | 3     | 3     | 4     | 2     |
| 14588  | 1     | 1     | 1     | 1     |
| 14590  | 3     | 4     | 3     | 3     |
| 14592  | 4     | 3     | 3     | 2     |
| 14593  | 1     | 3     | 2     | 1     |
| 14595  | 3     | 3     | 2     | 2     |
| 14597  | 2     | 3     | 1     | 1     |
| 14600  | 1     | 2     | 1     | 1     |
| 14602  | 3     | 3     | 3     | 4     |
| 14604  | 1     | 2     | 1     | 2     |
| 14605  | 2     | 1     | 1     | 1     |
| 14609  | 3     | 2     | 2     | 2     |
| 14610  | 1     | 3     | 1     | 1     |
| 14611  | 1     | 1     | 1     | 1     |

| respid | Q40_5 | Q40_6 | Q40_7 | Q40_8 |
|--------|-------|-------|-------|-------|
| 14612  | 4     | 4     | 2     | 3     |
| 14614  | 4     | 2     | 3     | 4     |
| 14615  | 1     | 2     | 1     | 1     |
| 14618  | 3     | 4     | 5     | 3     |
| 14621  |       |       |       |       |
| 14624  | 1     | 1     | 1     | 1     |
| 14626  | 2     | 2     | 2     | 2     |
| 14627  | 2     | 2     | 3     | 1     |
| 14628  | 6     | 5     | 6     | 6     |
| 14631  | 2     | 1     | 3     | 1     |
| 14633  | 4     | 4     | 3     | 4     |
| 14642  | 3     | 4     | 4     | 3     |
| 14647  | 1     | 1     | 1     | 1     |
| 14658  | 2     | 2     | 1     | 3     |
| 14659  | 3     | 3     | 2     | 4     |
| 14660  | 1     | 2     | 2     | 3     |
| 14661  | 1     | 3     | 2     | 2     |
| 14662  | 5     | 4     | 5     | 4     |
| 14663  | 2     | 2     | 1     | 1     |
| 14670  | 1     | 3     | 1     | 2     |
| 14671  |       |       |       |       |
| 14672  | 3     | 2     | 3     | 2     |
| 14675  | 2     | 2     | 2     | 1     |
| 14676  | 2     | 1     | 4     | 2     |
| 14677  | 5     | 4     | 5     | 4     |
| 14678  | 3     | 2     | 1     | 3     |
| 14681  | 3     | 2     | 3     | 3     |
| 14684  | 1     | 1     | 1     | 1     |
| 14688  | 1     | 2     | 2     | 1     |
| 14690  | 3     | 2     | 3     | 2     |
| 14694  | 4     | 3     | 3     | 4     |
| 14696  | 1     | 1     | 1     | 2     |

| respid | Q40_5 | Q40_6 | Q40_7 | Q40_8 |
|--------|-------|-------|-------|-------|
| 14700  |       |       |       |       |
| 14701  | 3     | 3     | 1     | 1     |
| 14703  | 5     | 5     | 6     | 5     |
| 14707  | 1     | 1     | 1     | 2     |
| 14711  | 3     | 4     | 3     | 4     |
| 14714  | 1     | 1     | 2     | 2     |
| 14715  | 1     | 2     | 1     | 2     |
| 14716  | 1     | 2     | 1     | 1     |
| 14720  | 1     | 3     | 1     | 1     |
| 14725  | 4     | 4     | 4     | 4     |
| 14726  | 2     | 3     | 1     | 1     |
| 14734  | 3     | 1     | 2     | 1     |
| 14735  | 2     | 1     | 2     | 1     |
| 14736  | 2     | 3     | 3     | 3     |
| 14740  | 3     | 2     | 1     | 2     |
| 14745  | 2     | 1     | 3     | 3     |
| 14747  | 3     | 1     | 1     | 2     |
| 14750  | 3     | 2     | 3     | 2     |
| 14751  | 2     | 1     | 2     | 1     |
| 14753  | 3     | 2     | 1     | 2     |
| 14756  | 5     | 6     | 5     | 5     |
| 14780  | 1     | 3     | 1     | 1     |
| 14782  | 1     | 1     | 1     | 1     |
| 14800  | 4     | 3     | 4     | 3     |
| 14801  | 1     | 3     | 1     | 1     |
| 14802  | 2     | 2     | 3     | 4     |
| 14805  | 3     | 5     | 1     | 3     |
| 14811  | 3     | 4     | 4     | 4     |
| 14814  | 3     | 4     | 4     | 3     |
| 14822  | 3     | 2     | 1     | 2     |
| 14827  | 5     | 4     | 5     | 6     |
| 14828  | 3     | 4     | 4     | 4     |



| respid | Q40_5 | Q40_6 | Q40_7 | Q40_8 |
|--------|-------|-------|-------|-------|
| 14830  |       |       |       |       |
| 14832  | 2     | 3     | 2     | 3     |
| 14835  | 2     | 6     | 1     | 4     |
| 14841  |       |       |       |       |
| 14849  | 1     | 1     | 1     | 1     |
| 14850  |       |       |       |       |
| 14851  | 1     | 1     | 1     | 1     |
| 14856  | 5     | 5     | 4     | 4     |
| 14862  | 2     | 3     | 3     | 3     |
| 14863  | 1     | 2     | 1     | 1     |
| 14864  | 2     | 2     | 3     | 1     |
| 14866  | 3     | 2     | 1     | 1     |
| 14867  | 4     | 4     | 5     | 4     |
| 14868  | 1     | 1     | 1     | 1     |
| 14870  | 1     | 2     | 1     | 2     |
| 14873  |       |       |       |       |
| 14878  | 1     | 1     | 1     | 1     |
| 14879  |       |       |       |       |
| 14881  | 3     | 4     | 4     | 3     |
| 14888  | 3     | 5     | 5     | 6     |
| 14895  | 1     | 1     | 1     | 1     |
| 14900  | 4     | 5     | 5     | 6     |
| 14912  |       |       |       |       |
| 14922  | 2     | 2     | 3     | 3     |
| 14923  | 5     | 4     | 4     | 4     |
| 14924  | 3     | 4     | 3     | 3     |
| 14925  | 5     | 5     | 6     | 6     |
| 14926  | 1     | 3     | 1     | 2     |
| 14927  | 4     | 4     | 4     | 5     |
| 14930  | 3     | 3     | 4     | 4     |
| 14937  | 4     | 4     | 4     | 5     |
| 14938  | 4     | 4     | 5     | 3     |

| respid | Q40_5 | Q40_6 | Q40_7 | Q40_8 |
|--------|-------|-------|-------|-------|
| 14939  | 2     | 3     | 3     | 3     |
| 14942  |       |       |       |       |
| 14943  |       |       |       |       |
| 14953  | 1     | 5     | 1     | 3     |
| 14954  | 2     | 3     | 4     | 2     |
| 14955  | 2     | 3     | 3     | 2     |
| 14957  | 4     | 4     | 3     | 3     |
| 14958  | 6     | 6     | 6     | 5     |
| 14959  | 4     | 4     | 3     | 4     |
| 14961  |       |       |       |       |
| 14963  | 5     | 5     | 5     | 4     |
| 14964  | 1     | 1     | 1     | 1     |
| 14965  | 2     | 4     | 2     | 2     |
| 14967  | 5     | 5     | 5     | 4     |
| 14970  | 6     | 6     | 5     | 6     |
| 14972  | 2     | 4     | 3     | 3     |
| 14975  | 6     | 5     | 6     | 6     |
| 14977  | 1     | 3     | 1     | 2     |
| 14982  | 2     | 3     | 1     | 1     |
| 14985  | 2     | 4     | 3     | 2     |
| 14986  |       |       |       |       |
| 14987  |       |       |       |       |
| 14988  | 5     | 6     | 6     | 5     |
| 14989  | 2     | 5     | 3     | 1     |
| 14993  | 3     | 2     | 2     | 3     |
| 15001  | 2     | 3     | 2     | 2     |
| 15002  | 6     | 6     | 5     | 5     |
| 15006  | 2     | 4     | 2     | 3     |
| 15007  | 3     | 1     | 3     | 2     |
| 15014  | 3     | 4     | 4     | 4     |
| 15020  | 2     | 3     | 2     | 3     |
| 15021  | 4     | 4     | 3     | 4     |

| respid | Q40_5 | Q40_6 | Q40_7 | Q40_8 |
|--------|-------|-------|-------|-------|
| 15023  | 6     | 6     | 5     | 5     |
| 15030  | 3     | 1     | 2     | 2     |
| 15032  |       |       |       |       |
| 15033  | 3     | 3     | 3     | 3     |
| 15034  | 2     | 3     | 2     | 2     |
| 15035  | 1     | 1     | 1     | 1     |
| 15037  | 2     | 1     | 2     | 1     |
| 15039  | 5     | 4     | 5     | 4     |
| 15040  | 1     | 1     | 1     | 1     |
| 15042  | 2     | 1     | 1     | 2     |
| 15044  |       |       |       |       |
| 15045  | 1     | 1     | 1     | 1     |
| 15046  | 1     | 2     | 1     | 1     |
| 15052  | 3     | 2     | 2     | 1     |
| 15058  | 3     | 3     | 2     | 3     |
| 15063  | 5     | 3     | 3     | 5     |
| 15066  | 2     | 1     | 2     | 1     |
| 15069  | 1     | 1     | 2     | 2     |
| 15071  | 4     | 3     | 3     | 3     |
| 15076  | 5     | 4     | 4     | 5     |
| 15078  | 1     | 1     | 1     | 1     |
| 15087  | 2     | 5     | 1     | 2     |
| 15090  | 4     | 5     | 5     | 6     |
| 15091  | 3     | 2     | 2     | 3     |
| 15092  | 2     | 2     | 1     | 1     |
| 15096  | 3     | 2     | 2     | 1     |
| 15106  | 4     | 3     | 4     | 4     |
| 15108  |       |       |       |       |
| 15113  | 3     | 3     | 3     | 3     |
| 15116  |       |       |       |       |
| 15119  | 1     | 2     | 1     | 1     |
| 15120  | 2     | 2     | 3     | 3     |

| respid | Q40_5 | Q40_6 | Q40_7 | Q40_8 |
|--------|-------|-------|-------|-------|
| 15121  | 3     | 5     | 2     | 2     |
| 15123  |       |       |       |       |
| 15124  | 1     | 3     | 1     | 1     |
| 15128  | 2     | 1     | 1     | 1     |
| 15131  |       |       |       |       |
| 15136  | 2     | 3     | 2     | 2     |
| 15137  | 1     | 2     | 1     | 2     |
| 15141  | 1     | 1     | 1     | 1     |
| 15144  | 4     | 3     | 3     | 4     |
| 15147  | 2     | 3     | 2     | 3     |
| 15151  | 2     | 3     | 2     | 3     |
| 15154  | 2     | 2     | 3     | 4     |
| 15157  | 4     | 4     | 3     | 3     |
| 15164  | 4     | 4     | 3     | 3     |
| 15168  | 3     | 3     | 2     | 2     |
| 15169  | 2     | 1     | 2     | 2     |
| 15172  | 4     | 4     | 5     | 5     |
| 15177  | 4     | 3     | 3     | 3     |
| 15178  |       |       |       |       |
| 15180  | 2     | 2     | 3     | 3     |
| 15181  | 1     | 2     | 1     | 1     |
| 15182  | 2     | 4     | 1     | 2     |
| 15183  |       |       |       |       |
| 15188  | 4     | 3     | 4     | 3     |
| 15190  | 6     | 6     | 6     | 5     |
| 15195  |       |       |       |       |
| 15201  | 6     | 6     | 5     | 5     |
| 15203  | 3     | 2     | 2     | 3     |
| 15204  | 1     | 1     | 1     | 1     |
| 15207  |       |       |       |       |
| 15208  | 6     | 5     | 6     | 6     |
| 15209  | 1     | 1     | 1     | 1     |

| respid | Q40_5 | Q40_6 | Q40_7 | Q40_8 |
|--------|-------|-------|-------|-------|
| 15212  |       |       |       |       |
| 15213  | 2     | 3     | 3     | 4     |
| 15219  | 3     | 4     | 3     | 3     |
| 15220  | 2     | 3     | 1     | 2     |
| 15221  | 3     | 2     | 4     | 2     |
| 15223  | 3     | 3     | 3     | 3     |
| 15224  | 2     | 4     | 2     | 3     |
| 15225  | 1     | 1     | 1     | 1     |
| 15226  | 3     | 2     | 1     | 2     |
| 15230  | 4     | 3     | 1     | 1     |
| 15231  | 6     | 6     | 5     | 6     |
| 15232  | 2     | 2     | 1     | 2     |
| 15237  | 1     | 2     | 2     | 1     |
| 15239  | 3     | 2     | 3     | 1     |
| 15241  | 3     | 2     | 4     | 2     |
| 15242  | 2     | 3     | 3     | 2     |
| 15247  | 3     | 2     | 1     | 2     |
| 15248  |       |       |       |       |
| 15251  |       |       |       |       |
| 15257  |       |       |       |       |
| 15260  | 1     | 2     | 2     | 3     |
| 15261  | 5     | 5     | 6     | 4     |
| 15262  | 3     | 6     | 1     | 3     |
| 15263  | 2     | 2     | 3     | 3     |
| 15265  | 2     | 3     | 1     | 2     |
| 15266  | 1     | 6     | 1     | 1     |
| 15268  | 2     | 1     | 2     | 1     |
| 15269  | 1     | 3     | 1     | 1     |
| 15270  | 3     | 4     | 2     | 4     |
| 15273  | 3     | 3     | 3     | 2     |
| 15276  | 5     | 5     | 5     | 4     |
| 15277  | 1     | 2     | 3     | 2     |

| respid | Q40_5 | Q40_6 | Q40_7 | Q40_8 |
|--------|-------|-------|-------|-------|
| 15282  | 6     | 6     | 6     | 1     |
| 15284  | 3     | 4     | 1     | 3     |
| 15285  | 1     | 2     | 1     | 1     |
| 15286  | 5     | 5     | 6     | 6     |
| 15288  | 3     | 3     | 4     | 3     |
| 15292  | 4     | 3     | 4     | 3     |
| 15296  | 1     | 2     | 1     | 1     |
| 15297  | 3     | 2     | 1     | 1     |
| 15298  |       |       |       |       |
| 15301  | 2     | 2     | 2     | 2     |
| 15302  | 1     | 2     | 4     | 1     |
| 15305  | 1     | 1     | 1     | 1     |
| 15307  | 1     | 1     | 1     | 1     |
| 15308  | 3     | 1     | 3     | 1     |
| 15309  | 1     | 2     | 1     | 1     |
| 15311  | 1     | 2     | 1     | 1     |
| 15315  | 2     | 3     | 1     | 2     |
| 15316  | 1     | 2     | 1     | 1     |
| 15318  |       |       |       |       |
| 15321  | 5     | 5     | 4     | 5     |
| 15322  | 1     | 1     | 1     | 1     |
| 15324  | 1     | 2     | 1     | 1     |
| 15326  | 2     | 1     | 2     | 1     |
| 15327  | 1     | 2     | 1     | 1     |
| 15328  | 3     | 2     | 2     | 3     |
| 15330  | 2     | 3     | 3     | 1     |
| 15332  | 1     | 1     | 1     | 1     |
| 15333  |       |       |       |       |
| 15334  | 3     | 1     | 2     | 1     |
| 15336  | 5     | 5     | 6     | 5     |
| 15337  | 1     | 2     | 1     | 1     |
| 15338  | 2     | 3     | 2     | 4     |

| respid | Q40_5 | Q40_6 | Q40_7 | Q40_8 |
|--------|-------|-------|-------|-------|
| 15339  | 3     | 5     | 3     | 2     |
| 15341  | 1     | 2     | 1     | 1     |
| 15344  |       |       |       |       |
| 15345  | 1     | 1     | 1     | 1     |
| 15350  |       |       |       |       |
| 15351  | 2     | 1     | 3     | 1     |
| 15352  | 1     | 2     | 1     | 1     |
| 15372  | 1     | 1     | 1     | 2     |
| 15373  | 5     | 5     | 6     | 5     |
| 15376  | 1     | 2     | 1     | 1     |
| 15377  | 1     | 2     | 3     | 1     |
| 15382  | 1     | 2     | 3     | 1     |
| 15383  | 4     | 4     | 4     | 4     |
| 15385  | 5     | 5     | 4     | 4     |
| 15390  | 3     | 2     | 3     | 2     |
| 15399  |       |       |       |       |
| 15404  | 2     | 3     | 2     | 2     |
| 15410  | 1     | 2     | 1     | 1     |
| 15411  | 4     | 3     | 3     | 2     |
| 15412  | 1     | 3     | 2     | 1     |
| 15413  | 1     | 4     | 1     | 1     |
| 15414  | 2     | 3     | 3     | 1     |
| 15417  | 1     | 1     | 1     | 1     |
| 15418  | 2     | 2     | 3     | 3     |
| 15421  | 3     | 2     | 2     | 3     |
| 15423  | 2     | 1     | 2     | 1     |
| 15425  | 1     | 3     | 1     | 1     |
| 15426  | 5     | 4     | 6     | 5     |
| 15430  | 1     | 2     | 1     | 2     |
| 15431  | 5     | 5     | 5     | 5     |
| 15435  |       |       |       |       |
| 15436  |       |       |       |       |

| respid | Q40_5 | Q40_6 | Q40_7 | Q40_8 |
|--------|-------|-------|-------|-------|
| 15437  |       |       |       |       |
| 15438  | 1     | 1     | 1     | 1     |
| 15439  | 3     | 2     | 1     | 2     |
| 15441  | 5     | 5     | 5     | 6     |
| 15443  | 2     | 1     | 1     | 1     |
| 15446  | 2     | 1     | 2     | 1     |
| 15449  | 3     | 3     | 2     | 4     |
| 15451  | 4     | 5     | 5     | 4     |
| 15452  | 4     | 5     | 4     | 5     |
| 15454  | 1     | 1     | 1     | 1     |
| 15456  | 2     | 3     | 3     | 2     |
| 15457  |       |       |       |       |
| 15458  | 3     | 3     | 4     | 3     |
| 15462  | 4     | 3     | 3     | 4     |
| 15467  | 1     | 4     | 3     | 2     |
| 15470  | 2     | 2     | 2     | 1     |
| 15472  | 1     | 1     | 1     | 1     |
| 15476  | 3     | 2     | 2     | 2     |
| 15477  | 3     | 2     | 1     | 2     |
| 15488  | 2     | 2     | 1     | 1     |
| 15489  | 1     | 2     | 2     | 1     |
| 15490  | 2     | 2     | 1     | 3     |
| 15496  | 1     | 2     | 1     | 1     |
| 15497  | 1     | 3     | 1     | 1     |
| 15498  |       |       |       |       |
| 15509  | 3     | 3     | 3     | 4     |
| 15510  | 2     | 3     | 2     | 1     |
| 15516  | 1     | 2     | 1     | 1     |
| 15519  | 1     | 2     | 1     | 1     |
| 15520  | 3     | 2     | 4     | 2     |
| 15524  | 2     | 3     | 3     | 1     |
| 15525  | 1     | 1     | 1     | 1     |



| respid | Q40_5 | Q40_6 | Q40_7 | Q40_8 |
|--------|-------|-------|-------|-------|
| 15526  | 4     | 4     | 4     | 2     |
| 15531  | 2     | 3     | 5     | 5     |
| 15532  | 2     | 2     | 2     | 1     |
| 15534  | 4     | 5     | 5     | 5     |
| 15535  | 3     | 3     | 4     | 4     |
| 15539  | 1     | 2     | 1     | 1     |
| 15550  | 1     | 1     | 1     | 1     |
| 15556  | 1     | 3     | 2     | 1     |
| 15558  | 4     | 3     | 3     | 3     |
| 15565  | 1     | 2     | 1     | 1     |
| 15567  | 3     | 3     | 3     | 3     |
| 15568  | 3     | 3     | 4     | 4     |
| 15571  | 1     | 2     | 1     | 1     |
| 15573  | 1     | 1     | 1     | 1     |
| 15574  | 4     | 4     | 5     | 5     |
| 15576  | 1     | 3     | 2     | 1     |
| 15587  | 2     | 2     | 2     | 1     |
| 15588  | 4     | 5     | 4     | 2     |
| 15593  | 4     | 4     | 4     | 4     |
| 15597  | 1     | 2     | 1     | 1     |
| 15598  | 1     | 1     | 1     | 1     |
| 15599  | 1     | 4     | 1     | 1     |
| 15601  | 1     | 6     | 1     | 1     |
| 15604  | 2     | 2     | 2     | 2     |
| 15611  | 1     | 1     | 1     | 1     |
| 15613  | 1     | 2     | 1     | 1     |
| 15614  | 1     | 1     | 1     | 1     |
| 15617  | 2     | 3     | 3     | 3     |
| 15622  |       |       |       |       |
| 15623  | 1     | 1     | 1     | 1     |
| 15625  | 1     | 3     | 1     | 1     |
| 15627  |       |       |       |       |

| respid | Q40_5 | Q40_6 | Q40_7 | Q40_8 |
|--------|-------|-------|-------|-------|
| 15628  | 3     | 1     | 1     | 1     |
| 15633  | 2     | 2     | 3     | 3     |
| 15634  | 2     | 3     | 1     | 2     |
| 15637  | 3     | 1     | 1     | 2     |
| 15644  | 3     | 2     | 3     | 2     |
| 15645  | 1     | 2     | 1     | 1     |
| 15649  | 1     | 2     | 1     | 1     |
| 15650  | 1     | 1     | 1     | 1     |
| 15651  | 1     | 2     | 1     | 1     |
| 15657  | 4     | 6     | 3     | 2     |
| 15658  | 1     | 2     | 2     | 1     |
| 15660  | 3     | 3     | 2     | 2     |
| 15667  | 1     | 1     | 1     | 1     |
| 15671  | 1     | 3     | 1     | 1     |
| 15679  | 3     | 3     | 3     | 2     |
| 15712  | 3     | 4     | 3     | 3     |
| 15715  | 2     | 1     | 2     | 2     |
| 15749  | 1     | 2     | 4     | 1     |
| 15754  | 3     | 3     | 2     | 2     |
| 15756  | 1     | 1     | 1     | 1     |
| 15773  | 1     | 2     | 1     | 1     |
| 15774  | 1     | 2     | 1     | 1     |
| 15776  | 1     | 2     | 1     | 1     |
| 15777  | 3     | 3     | 4     | 4     |
| 15779  |       |       |       |       |
| 15780  | 4     | 3     | 3     | 2     |
| 15792  | 1     | 1     | 1     | 1     |
| 15793  | 5     | 3     | 3     | 4     |
| 15796  | 1     | 2     | 1     | 1     |
| 15798  | 1     | 1     | 1     | 1     |
| 15809  | 1     | 2     | 1     | 1     |
| 15810  | 1     | 1     | 1     | 1     |

| respid | Q40_5 | Q40_6 | Q40_7 | Q40_8 |
|--------|-------|-------|-------|-------|
| 15815  | 1     | 1     | 2     | 1     |
| 15816  | 3     | 2     | 3     | 1     |
| 15817  |       |       |       |       |
| 15821  | 5     | 4     | 4     | 3     |
| 15823  | 3     | 3     | 3     | 3     |
| 15834  | 2     | 1     | 3     | 2     |
| 15835  |       |       |       |       |
| 15836  | 1     | 1     | 1     | 1     |
| 15837  | 1     | 2     | 1     | 1     |
| 15839  | 2     | 1     | 4     | 2     |
| 15840  | 1     | 2     | 1     | 2     |
| 15844  | 1     | 2     | 1     | 1     |
| 15845  | 1     | 2     | 1     | 1     |
| 15847  | 3     | 3     | 4     | 4     |
| 15848  | 1     | 2     | 1     | 1     |
| 15849  | 3     | 1     | 4     | 2     |
| 15857  | 2     | 2     | 2     | 2     |
| 15858  | 1     | 1     | 1     | 1     |
| 15862  | 5     | 6     | 6     | 5     |
| 15866  | 2     | 1     | 3     | 2     |
| 15870  | 2     | 3     | 1     | 3     |
| 15871  | 1     | 2     | 1     | 1     |
| 15872  | 1     | 1     | 3     | 1     |
| 15873  | 1     | 1     | 1     | 1     |
| 15874  |       |       |       |       |
| 15875  | 4     | 4     | 4     | 5     |
| 15876  | 3     | 3     | 2     | 1     |
| 15882  | 3     | 3     | 4     | 4     |
| 15884  | 3     | 4     | 3     | 1     |
| 15890  | 2     | 3     | 1     | 4     |
| 15892  | 5     | 3     | 3     | 3     |
| 15908  | 3     | 2     | 4     | 3     |

| respid | Q40_5 | Q40_6 | Q40_7 | Q40_8 |
|--------|-------|-------|-------|-------|
| 15914  | 1     | 2     | 3     | 2     |
| 15932  | 4     | 3     | 3     | 3     |
| 15933  | 1     | 1     | 1     | 1     |
| 15938  | 1     | 1     | 1     | 1     |
| 15940  | 5     | 6     | 6     | 5     |
| 15945  | 1     | 2     | 3     | 1     |
| 15947  | 2     | 1     | 2     | 3     |
| 15950  | 2     | 1     | 2     | 3     |
| 15951  | 3     | 3     | 3     | 3     |
| 15952  | 5     | 6     | 6     | 6     |
| 15953  | 2     | 2     | 2     | 1     |
| 15954  | 3     | 3     | 3     | 3     |
| 15957  | 5     | 5     | 5     | 6     |
| 15965  | 3     | 4     | 4     | 4     |
| 15966  |       |       |       |       |
| 15967  | 4     | 4     | 3     | 2     |
| 15968  | 1     | 1     | 1     | 2     |
| 15970  | 1     | 2     | 1     | 1     |
| 15973  | 3     | 2     | 1     | 3     |
| 15974  | 4     | 2     | 2     | 1     |
| 15975  |       |       |       |       |
| 15980  | 6     | 6     | 5     | 5     |
| 15984  | 2     | 3     | 2     | 1     |
| 15985  | 4     | 3     | 2     | 3     |
| 15994  |       |       |       |       |
| 15995  | 1     | 1     | 1     | 1     |
| 16000  | 3     | 2     | 4     | 2     |
| 16004  | 2     | 1     | 3     | 2     |
| 16005  | 2     | 3     | 1     | 2     |
| 16006  |       |       |       |       |
| 16009  | 1     | 1     | 1     | 1     |
| 16017  | 1     | 1     | 1     | 1     |

| respid | Q40_5 | Q40_6 | Q40_7 | Q40_8 |
|--------|-------|-------|-------|-------|
| 16019  | 3     | 3     | 3     | 1     |
| 16021  | 1     | 3     | 1     | 1     |
| 16024  | 1     | 2     | 1     | 1     |
| 16026  | 2     | 2     | 1     | 1     |
| 16029  |       |       |       |       |
| 16031  | 2     | 4     | 2     | 1     |
| 16037  | 1     | 2     | 1     | 1     |
| 16043  | 1     | 1     | 1     | 1     |
| 16044  | 1     | 2     | 1     | 1     |
| 16047  | 2     | 2     | 1     | 1     |
| 16048  | 1     | 4     | 1     | 1     |
| 16049  | 1     | 2     | 2     | 1     |
| 16051  | 1     | 1     | 1     | 1     |
| 16053  | 2     | 3     | 2     | 1     |
| 16054  | 1     | 1     | 1     | 1     |
| 16069  | 1     | 1     | 1     | 1     |
| 16070  | 1     | 3     | 1     | 1     |
| 16074  |       |       |       |       |
| 16076  |       |       |       |       |
| 16078  |       |       |       |       |
| 16081  | 1     | 1     | 1     | 1     |
| 16085  |       |       |       |       |
| 16088  | 1     | 1     | 1     | 1     |
| 16091  | 2     | 2     | 1     | 1     |
| 16092  | 1     | 2     | 1     | 1     |
| 16093  | 1     | 2     | 1     | 1     |
| 16097  | 1     | 1     | 1     | 1     |
| 16100  | 1     | 1     | 2     | 1     |
| 16101  | 1     | 1     | 1     | 1     |
| 16105  |       |       |       |       |
| 16118  | 3     | 3     | 3     | 3     |
| 16129  | 1     | 2     | 1     | 1     |

| respid | Q40_5 | Q40_6 | Q40_7 | Q40_8 |
|--------|-------|-------|-------|-------|
| 16130  | 1     | 2     | 1     | 1     |
| 16131  | 4     | 4     | 4     | 4     |
| 16136  | 2     | 1     | 1     | 1     |
| 16137  | 1     | 2     | 1     | 1     |
| 16138  | 2     | 3     | 2     | 1     |
| 16139  | 3     | 3     | 3     | 3     |
| 16140  | 1     | 1     | 1     | 1     |
| 16145  | 2     | 3     | 2     | 1     |
| 16150  | 1     | 1     | 1     | 1     |
| 16151  | 1     | 2     | 3     | 1     |
| 16153  | 1     | 1     | 1     | 1     |
| 16164  | 1     | 2     | 1     | 1     |
| 16168  | 3     | 2     | 2     | 2     |
| 16173  | 1     | 2     | 1     | 1     |
| 16174  | 1     | 1     | 1     | 1     |
| 16177  | 1     | 2     | 1     | 1     |
| 16185  | 1     | 3     | 1     | 1     |
| 16189  | 1     | 1     | 1     | 1     |
| 16192  | 1     | 1     | 1     | 1     |
| 16193  | 1     | 1     | 1     | 1     |
| 16194  | 2     | 2     | 2     | 2     |
| 16196  |       |       |       |       |
| 16202  | 2     | 3     | 4     | 1     |
| 16205  | 2     | 3     | 2     | 3     |
| 16206  | 1     | 3     | 1     | 1     |
| 16208  |       |       |       |       |
| 16211  | 4     | 4     | 2     | 2     |
| 16212  | 1     | 1     | 2     | 1     |
| 16215  |       |       |       |       |
| 16217  | 1     | 2     | 2     | 1     |
| 16221  | 1     | 2     | 1     | 1     |
| 16226  | 1     | 5     | 2     | 1     |

| respid | Q40_5 | Q40_6 | Q40_7 | Q40_8 |
|--------|-------|-------|-------|-------|
| 16228  | 3     | 4     | 3     | 2     |
| 16229  | 1     | 2     | 1     | 1     |
| 16230  | 1     | 2     | 1     | 1     |
| 16231  | 3     | 3     | 3     | 2     |
| 16232  | 2     | 4     | 2     | 1     |
| 16234  | 1     | 3     | 1     | 1     |
| 16235  | 3     | 3     | 3     | 3     |
| 16236  | 1     | 1     | 1     | 1     |
| 16237  | 1     | 2     | 2     | 1     |
| 16238  | 1     | 2     | 1     | 2     |
| 16239  | 1     | 1     | 1     | 1     |
| 16243  | 1     | 1     | 1     | 1     |
| 16248  | 2     | 2     | 2     | 2     |
| 16249  | 1     | 2     | 1     | 1     |
| 16251  |       |       |       |       |
| 16263  | 1     | 1     | 1     | 1     |
| 16265  | 3     | 2     | 2     | 2     |
| 16269  | 1     | 2     | 1     | 1     |
| 16272  | 2     | 3     | 3     | 1     |
| 16273  |       |       |       |       |
| 16281  | 1     | 1     | 1     | 1     |
| 16282  | 1     | 2     | 1     | 1     |
| 16287  | 1     | 2     | 1     | 1     |
| 16290  | 1     | 2     | 1     | 1     |
| 16294  | 1     | 1     | 1     | 1     |
| 16295  | 1     | 3     | 1     | 1     |
| 16296  | 1     | 1     | 1     | 1     |
| 16299  | 4     | 5     | 5     | 4     |
| 16302  | 1     | 1     | 1     | 1     |
| 16303  | 1     | 6     | 6     | 1     |
| 16304  | 4     | 5     | 2     | 4     |
| 16306  | 1     | 1     | 1     | 1     |

| respid | Q40_5 | Q40_6 | Q40_7 | Q40_8 |
|--------|-------|-------|-------|-------|
| 16318  | 1     | 2     | 1     | 1     |
| 16320  | 1     | 2     | 2     | 2     |
| 16321  | 1     | 3     | 1     | 1     |
| 16322  | 1     | 2     | 1     | 1     |
| 16324  | 1     | 1     | 2     | 2     |
| 16326  | 1     | 2     | 1     | 1     |
| 16328  | 2     | 3     | 2     | 1     |
| 16336  | 3     | 4     | 2     | 2     |
| 16341  | 1     | 2     | 1     | 1     |
| 16342  | 1     | 1     | 1     | 1     |
| 16343  | 2     | 2     | 2     | 1     |
| 16345  | 1     | 2     | 2     | 4     |
| 16349  | 1     | 2     | 1     | 1     |
| 16355  | 1     | 1     | 1     | 1     |
| 16364  | 2     | 3     | 2     | 3     |
| 16374  | 1     | 1     | 1     | 1     |
| 16375  |       |       |       |       |
| 16376  | 3     | 3     | 3     | 2     |
| 16393  | 1     | 2     | 1     | 1     |
| 16394  | 1     | 2     | 1     | 1     |
| 16395  | 1     | 2     | 1     | 1     |
| 16397  | 5     | 5     | 5     | 2     |
| 16398  | 3     | 3     | 3     | 2     |
| 16402  | 1     | 1     | 1     | 1     |
| 16405  | 1     | 1     | 1     | 1     |
| 16416  | 3     | 3     | 2     | 3     |
| 16422  | 3     | 3     | 2     | 2     |
| 16429  | 1     | 1     | 1     | 1     |
| 16430  | 1     | 2     | 1     | 1     |
| 16432  | 3     | 2     | 2     | 2     |
| 16433  | 1     | 1     | 1     | 1     |
| 16434  |       |       |       |       |



| respid | Q40_5 | Q40_6 | Q40_7 | Q40_8 |
|--------|-------|-------|-------|-------|
| 16437  | 1     | 3     | 1     | 1     |
| 16439  | 1     | 1     | 1     | 1     |
| 16440  | 1     | 3     | 1     | 1     |
| 16441  | 1     | 2     | 1     | 1     |
| 16442  | 2     | 3     | 2     | 2     |
| 16450  | 1     | 2     | 1     | 1     |
| 16451  | 1     | 1     | 1     | 1     |
| 16452  | 1     | 3     | 1     | 1     |
| 16467  | 1     | 2     | 1     | 1     |
| 16468  |       |       |       |       |
| 16469  | 2     | 3     | 1     | 1     |
| 16470  |       |       |       |       |
| 16471  | 2     | 2     | 1     | 1     |
| 16473  | 1     | 1     | 1     | 1     |
| 16476  | 1     | 1     | 1     | 1     |
| 16478  | 1     | 2     | 1     | 1     |
| 16484  | 1     | 1     | 1     | 1     |
| 16499  | 1     | 1     | 1     | 1     |
| 16502  |       |       |       |       |
| 16505  | 1     | 1     | 1     | 1     |
| 16514  | 1     | 2     | 1     | 1     |
| 16515  | 2     | 3     | 2     | 3     |
| 16517  | 2     | 1     | 2     | 3     |
| 16518  | 1     | 2     | 1     | 1     |
| 16519  | 3     | 2     | 1     | 2     |
| 16525  | 1     | 5     | 3     | 2     |
| 16526  | 1     | 2     | 1     | 1     |
| 16530  | 1     | 1     | 1     | 1     |
| 16532  | 1     | 3     | 1     | 1     |
| 16536  | 1     | 2     | 1     | 1     |
| 16537  | 4     | 4     | 3     | 5     |
| 16541  | 4     | 4     | 3     | 1     |

| respid | Q40_5 | Q40_6 | Q40_7 | Q40_8 |
|--------|-------|-------|-------|-------|
| 16543  | 1     | 1     | 1     | 1     |
| 16544  | 2     | 2     | 2     | 2     |
| 16545  | 1     | 2     | 1     | 1     |
| 16546  | 2     | 2     | 2     | 2     |
| 16548  | 1     | 1     | 1     | 1     |
| 16552  | 1     | 1     | 1     | 1     |
| 16559  | 1     | 1     | 1     | 1     |
| 16564  | 2     | 3     | 3     | 1     |
| 16565  | 1     | 1     | 1     | 1     |
| 16567  | 2     | 2     | 2     | 2     |
| 16571  |       |       |       |       |
| 16572  | 2     | 2     | 2     | 1     |
| 16579  | 2     | 2     | 2     | 3     |
| 16588  | 5     | 5     | 4     | 4     |
| 16599  | 1     | 1     | 1     | 1     |
| 16605  | 1     | 2     | 1     | 1     |
| 16622  | 3     | 2     | 3     | 2     |
| 16635  | 2     | 2     | 2     | 2     |
| 16638  | 1     | 1     | 1     | 1     |
| 16652  | 1     | 2     | 1     | 1     |
| 16656  | 1     | 2     | 1     | 1     |
| 16671  |       |       |       |       |
| 16676  | 1     | 1     | 1     | 1     |
| 16678  | 2     | 2     | 2     | 2     |
| 16702  | 2     | 1     | 1     | 1     |
| 16705  | 1     | 2     | 1     | 1     |
| 16707  | 4     | 5     | 5     | 5     |
| 16711  | 2     | 2     | 2     | 2     |
| 16712  | 1     | 2     | 1     | 1     |
| 16716  |       |       |       |       |
| 16724  | 1     | 1     | 1     | 2     |
| 16727  | 2     | 2     | 2     | 2     |

| respid | Q40_5 | Q40_6 | Q40_7 | Q40_8 |
|--------|-------|-------|-------|-------|
| 16734  | 1     | 3     | 1     | 1     |
| 16740  | 1     | 2     | 1     | 1     |
| 16748  | 1     | 3     | 2     | 1     |
| 16759  | 1     | 1     | 1     | 1     |
| 16761  |       |       |       |       |
| 16763  | 1     | 2     | 1     | 1     |
| 16764  | 3     | 4     | 3     | 3     |
| 16766  | 1     | 1     | 1     | 1     |
| 16767  | 1     | 2     | 1     | 1     |
| 16776  | 1     | 1     | 2     | 1     |
| 16781  | 1     | 1     | 1     | 1     |
| 16793  | 2     | 2     | 2     | 2     |
| 16796  | 4     | 5     | 4     | 4     |
| 16810  | 1     | 1     | 1     | 1     |
| 16811  | 1     | 2     | 1     | 1     |
| 16813  |       |       |       |       |
| 16814  | 1     | 1     | 1     | 1     |
| 16831  | 1     | 3     | 1     | 1     |
| 16833  | 3     | 6     | 2     | 1     |
| 16839  | 1     | 2     | 1     | 1     |
| 16843  | 2     | 2     | 1     | 1     |
| 16860  |       |       |       |       |
| 16871  | 1     | 2     | 3     | 2     |
| 16881  | 2     | 3     | 2     | 2     |
| 16884  | 1     | 2     | 1     | 1     |
| 16891  | 2     | 2     | 2     | 1     |
| 16909  | 1     | 3     | 1     | 1     |
| 16911  |       |       |       |       |
| 16922  | 2     | 2     | 3     | 3     |
| 16935  | 3     | 5     | 3     | 3     |
| 16942  | 2     | 1     | 1     | 1     |
| 16950  |       |       |       |       |

| respid | Q40_5 | Q40_6 | Q40_7 | Q40_8 |
|--------|-------|-------|-------|-------|
| 16952  | 4     | 3     | 2     | 3     |
| 16963  | 1     | 2     | 1     | 1     |
| 16967  | 4     | 4     | 4     | 4     |
| 16970  | 2     | 3     | 1     | 1     |
| 16976  | 2     | 3     | 3     | 2     |
| 16982  | 1     | 1     | 1     | 1     |
| 16995  | 1     | 1     | 1     | 1     |
| 17004  | 1     | 2     | 1     | 1     |
| 17006  | 1     | 1     | 1     | 1     |
| 17009  | 1     | 2     | 1     | 1     |
| 17021  |       |       |       |       |
| 17040  | 2     | 3     | 1     | 1     |
| 17041  |       |       |       |       |
| 17044  | 1     | 2     | 1     | 1     |
| 17046  | 3     | 3     | 3     | 4     |
| 17052  | 1     | 2     | 2     | 1     |
| 17055  | 3     | 3     | 3     | 3     |
| 17108  | 3     | 3     | 3     | 3     |
| 17109  | 1     | 2     | 1     | 1     |
| 17113  |       |       |       |       |
| 17115  | 3     | 3     | 1     | 1     |
| 17132  |       |       |       |       |
| 17135  | 3     | 3     | 3     | 2     |
| 17138  | 1     | 1     | 1     | 2     |
| 17141  | 1     | 1     | 1     | 1     |
| 17143  | 2     | 2     | 1     | 1     |
| 17148  | 1     | 3     | 1     | 1     |
| 17151  | 1     | 2     | 1     | 1     |
| 17153  | 1     | 2     | 1     | 1     |
| 17154  | 1     | 2     | 2     | 1     |
| 17157  | 1     | 2     | 1     | 2     |
| 17160  | 1     | 1     | 1     | 1     |

| respid | Q40_5 | Q40_6 | Q40_7 | Q40_8 |
|--------|-------|-------|-------|-------|
| 17167  | 1     | 1     | 1     | 1     |
| 17169  | 1     | 1     | 1     | 1     |
| 17174  | 5     | 5     | 5     | 6     |
| 17179  | 1     | 1     | 1     | 1     |
| 17180  | 1     | 2     | 1     | 1     |
| 17182  | 1     | 1     | 1     | 1     |
| 17184  | 4     | 4     | 3     | 3     |
| 17186  | 1     | 1     | 1     | 1     |
| 17187  | 1     | 2     | 1     | 1     |
| 17192  | 1     | 3     | 1     | 3     |
| 17197  | 1     | 2     | 1     | 2     |
| 17217  | 1     | 2     | 1     | 1     |
| 17226  | 1     | 3     | 1     | 1     |
| 17228  | 1     | 2     | 1     | 1     |
| 17245  | 4     | 4     | 3     | 3     |
| 17247  |       |       |       |       |
| 17258  | 1     | 1     | 1     | 1     |
| 17259  | 2     | 3     | 2     | 2     |
| 17262  | 1     | 2     | 1     | 1     |
| 17265  | 1     | 2     | 1     | 1     |
| 17281  | 1     | 2     | 1     | 1     |
| 17282  | 2     | 3     | 2     | 2     |
| 17293  | 1     | 1     | 1     | 2     |
| 17306  | 3     | 2     | 2     | 2     |
| 17312  | 2     | 2     | 3     | 2     |
| 17318  | 2     | 2     | 2     | 2     |
| 17328  | 2     | 3     | 1     | 1     |
| 17343  | 1     | 1     | 1     | 1     |
| 17344  | 1     | 2     | 2     | 2     |
| 17348  | 1     | 1     | 1     | 1     |
| 17352  | 1     | 1     | 1     | 1     |
| 17355  | 1     | 2     | 1     | 1     |

| respid | Q40_5 | Q40_6 | Q40_7 | Q40_8 |
|--------|-------|-------|-------|-------|
| 17356  | 3     | 4     | 3     | 1     |
| 17359  | 1     | 3     | 1     | 1     |
| 17373  | 2     | 3     | 3     | 4     |
| 17381  | 2     | 2     | 1     | 1     |
| 17388  | 2     | 3     | 1     | 1     |
| 17394  | 2     | 4     | 2     | 2     |
| 17401  |       |       |       |       |
| 17403  | 1     | 3     | 1     | 1     |
| 17411  |       |       |       |       |
| 17423  | 1     | 1     | 2     | 2     |
| 17427  |       |       |       |       |
| 17433  | 1     | 1     | 1     | 1     |
| 17441  | 1     | 1     | 1     | 1     |
| 17442  | 1     | 3     | 1     | 1     |
| 17447  | 1     | 2     | 1     | 1     |
| 17458  | 1     | 1     | 1     | 1     |
| 17474  | 1     | 1     | 1     | 1     |
| 17475  | 3     | 3     | 3     | 3     |
| 17476  | 2     | 3     | 2     | 3     |
| 17480  | 1     | 1     | 1     | 1     |
| 17484  | 1     | 1     | 1     | 1     |
| 17490  | 1     | 1     | 1     | 1     |
| 17491  | 1     | 1     | 1     | 1     |
| 17500  | 1     | 2     | 1     | 1     |
| 17507  | 1     | 1     | 1     | 1     |
| 17517  | 1     | 2     | 1     | 1     |
| 17520  | 1     | 1     | 2     | 2     |
| 17521  | 1     | 1     | 1     | 1     |
| 17531  | 1     | 1     | 1     | 1     |
| 17540  | 2     | 3     | 2     | 2     |
| 17550  | 1     | 1     | 1     | 1     |
| 17551  | 1     | 1     | 1     | 1     |

| respid | Q40_5 | Q40_6 | Q40_7 | Q40_8 |
|--------|-------|-------|-------|-------|
| 17555  | 2     | 2     | 3     | 3     |
| 17556  | 2     | 1     | 2     | 2     |
| 17574  | 2     | 3     | 1     | 1     |
| 17575  | 1     | 3     | 1     | 1     |
| 17582  | 1     | 2     | 1     | 1     |
| 17587  |       |       |       |       |
| 17601  | 1     | 1     | 1     | 1     |
| 17607  | 4     | 4     | 4     | 4     |
| 17609  | 1     | 1     | 1     | 1     |
| 17611  | 1     | 1     | 1     | 1     |
| 17613  | 1     | 1     | 1     | 1     |
| 17615  | 1     | 1     | 1     | 1     |
| 17620  | 2     | 2     | 1     | 1     |
| 17624  | 2     | 2     | 1     | 1     |
| 17635  | 1     | 1     | 2     | 2     |
| 17643  | 1     | 2     | 1     | 1     |
| 17645  | 1     | 2     | 1     | 1     |
| 17646  | 1     | 1     | 1     | 1     |
| 17649  | 1     | 3     | 2     | 2     |
| 17658  | 1     | 2     | 1     | 1     |
| 17666  |       |       |       |       |
| 17670  | 1     | 2     | 1     | 1     |
| 17678  | 1     | 2     | 1     | 1     |
| 17679  | 2     | 2     | 2     | 3     |
| 17695  | 1     | 1     | 1     | 1     |
| 17697  | 1     | 3     | 1     | 1     |
| 17698  | 1     | 2     | 1     | 1     |
| 17723  | 3     | 3     | 2     | 3     |
| 17727  | 1     | 1     | 1     | 1     |
| 17734  | 1     | 1     | 2     | 1     |
| 17737  | 1     | 2     | 1     | 1     |
| 17748  | 1     | 2     | 1     | 1     |

| respid | Q40_5 | Q40_6 | Q40_7 | Q40_8 |
|--------|-------|-------|-------|-------|
| 17749  |       |       |       |       |
| 17754  | 4     | 2     | 3     | 3     |
| 17766  | 2     | 5     | 3     | 1     |
| 17777  | 1     | 2     | 1     | 1     |
| 17780  | 1     | 1     | 1     | 1     |
| 17788  | 1     | 1     | 1     | 1     |
| 17801  | 2     | 2     | 1     | 2     |
| 17803  | 1     | 1     | 1     | 1     |
| 17807  | 1     | 2     | 1     | 1     |
| 17808  | 1     | 1     | 1     | 1     |
| 17809  | 2     | 3     | 2     | 2     |
| 17821  | 1     | 3     | 1     | 1     |
| 17827  | 3     | 3     | 3     | 3     |
| 17834  | 3     | 4     | 4     | 2     |
| 17838  | 2     | 2     | 2     | 2     |
| 17842  | 1     | 2     | 1     | 1     |
| 17862  | 1     | 2     | 1     | 1     |
| 17863  | 2     | 1     | 1     | 1     |
| 17871  | 2     | 3     | 2     | 2     |
| 17872  | 1     | 1     | 1     | 1     |
| 17903  | 2     | 3     | 2     | 1     |
| 17906  | 1     | 1     | 1     | 1     |
| 17910  | 3     | 2     | 2     | 3     |
| 17922  | 1     | 3     | 1     | 1     |
| 17923  | 2     | 2     | 2     | 1     |
| 17925  | 1     | 1     | 1     | 2     |
| 17926  | 1     | 1     | 1     | 1     |
| 17937  | 1     | 1     | 1     | 1     |
| 17956  | 2     | 2     | 2     | 2     |
| 17958  | 1     | 2     | 1     | 1     |
| 17985  | 1     | 1     | 1     | 1     |
| 17989  | 1     | 4     | 1     | 1     |



| respid | Q40_5 | Q40_6 | Q40_7 | Q40_8 |
|--------|-------|-------|-------|-------|
| 17995  | 1     | 1     | 1     | 1     |
| 18000  | 1     | 2     | 1     | 1     |
| 18010  | 1     | 1     | 1     | 1     |
| 18015  | 1     | 2     | 1     | 1     |
| 18018  | 2     | 4     | 3     | 1     |
| 18031  | 1     | 1     | 1     | 2     |
| 18033  | 1     | 2     | 2     | 1     |
| 18036  | 1     | 2     | 1     | 1     |
| 18041  | 1     | 2     | 1     | 1     |
| 18068  |       |       |       |       |
| 18080  | 1     | 1     | 1     | 1     |
| 18081  | 3     | 3     | 4     | 3     |
| 18083  | 2     | 5     | 2     | 1     |
| 18113  | 2     | 3     | 2     | 2     |
| 18115  | 2     | 3     | 3     | 4     |
| 18117  | 5     | 5     | 5     | 5     |
| 18129  | 1     | 1     | 1     | 1     |
| 18132  | 2     | 4     | 2     | 1     |
| 18146  | 1     | 2     | 1     | 1     |
| 18147  | 3     | 5     | 3     | 3     |
| 18153  |       |       |       |       |
| 18154  | 2     | 3     | 2     | 2     |
| 18157  | 1     | 2     | 1     | 1     |
| 18166  | 1     | 3     | 1     | 1     |
| 18169  | 1     | 1     | 1     | 1     |
| 18171  | 1     | 2     | 1     | 1     |
| 18173  | 2     | 2     | 3     | 2     |
| 18204  | 1     | 2     | 1     | 1     |
| 18210  | 2     | 2     | 1     | 1     |
| 18212  |       |       |       |       |
| 18220  | 3     | 3     | 4     | 2     |
| 18221  | 1     | 1     | 1     | 1     |

| respid | Q40_5 | Q40_6 | Q40_7 | Q40_8 |
|--------|-------|-------|-------|-------|
| 18228  | 1     | 1     | 1     | 1     |
| 18231  | 1     | 1     | 1     | 1     |
| 18233  | 1     | 2     | 2     | 1     |
| 18235  | 1     | 2     | 1     | 1     |
| 18237  |       |       |       |       |
| 18250  | 1     | 2     | 1     | 2     |
| 18253  | 2     | 4     | 1     | 2     |
| 18264  | 1     | 2     | 1     | 1     |
| 18285  | 1     | 1     | 1     | 1     |
| 18287  |       |       |       |       |
| 18296  | 1     | 2     | 1     | 1     |
| 18299  | 2     | 2     | 2     | 2     |
| 18313  | 1     | 2     | 1     | 1     |
| 18321  | 1     | 2     | 1     | 1     |
| 18324  |       |       |       |       |
| 18329  | 1     | 2     | 1     | 1     |
| 18332  | 1     | 2     | 1     | 1     |
| 18339  | 4     | 4     | 2     | 2     |
| 18340  | 1     | 1     | 1     | 1     |
| 18348  | 1     | 2     | 1     | 2     |
| 18355  | 1     | 2     | 1     | 1     |
| 18360  | 1     | 3     | 2     | 1     |
| 18380  | 1     | 1     | 1     | 1     |
| 18403  | 2     | 3     | 2     | 1     |
| 18405  | 2     | 2     | 2     | 2     |
| 18409  | 2     | 2     | 2     | 3     |
| 18445  | 1     | 1     | 1     | 1     |
| 18458  | 2     | 2     | 1     | 1     |
| 18477  | 1     | 3     | 1     | 1     |
| 18481  | 1     | 2     | 1     | 1     |
| 18491  | 1     | 1     | 1     | 1     |
| 18492  | 1     | 2     | 1     | 1     |

| respid | Q40_5 | Q40_6 | Q40_7 | Q40_8 |
|--------|-------|-------|-------|-------|
| 18494  | 1     | 2     | 1     | 1     |
| 18495  | 1     | 1     | 1     | 1     |
| 18496  | 1     | 2     | 1     | 1     |
| 18507  | 2     | 2     | 3     | 3     |
| 18509  |       |       |       |       |
| 18510  | 1     | 2     | 1     | 1     |
| 18513  | 1     | 2     | 1     | 3     |
| 18525  |       |       |       |       |
| 18526  | 2     | 2     | 1     | 2     |
| 18527  | 1     | 3     | 2     | 1     |
| 18536  | 1     | 1     | 1     | 1     |
| 18540  | 1     | 2     | 1     | 1     |
| 18548  | 1     | 1     | 1     | 1     |
| 18550  |       |       |       |       |
| 18556  | 1     | 1     | 1     | 1     |
| 18561  |       |       |       |       |
| 18577  | 2     | 1     | 1     | 1     |
| 18580  | 1     | 2     | 1     | 1     |
| 18633  | 3     | 3     | 3     | 3     |
| 18635  | 3     | 2     | 2     | 3     |
| 18636  |       |       |       |       |
| 18645  | 3     | 4     | 4     | 4     |
| 18649  | 2     | 1     | 3     | 2     |
| 18664  | 1     | 1     | 1     | 1     |
| 18668  | 1     | 2     | 2     | 2     |
| 18682  | 3     | 4     | 3     | 3     |
| 18685  | 1     | 2     | 1     | 1     |
| 18688  | 2     | 2     | 2     | 2     |
| 18689  | 3     | 2     | 3     | 2     |
| 18693  | 6     | 6     | 6     | 6     |
| 18694  | 1     | 2     | 1     | 1     |
| 18705  | 1     | 1     | 1     | 1     |

| respid | Q40_5 | Q40_6 | Q40_7 | Q40_8 |
|--------|-------|-------|-------|-------|
| 18710  | 1     | 3     | 1     | 2     |
| 18715  | 4     | 4     | 3     | 3     |
| 18718  | 1     | 1     | 1     | 1     |
| 18727  | 1     | 3     | 1     | 1     |
| 18732  | 1     | 1     | 1     | 1     |
| 18735  | 1     | 2     | 1     | 1     |
| 18742  | 1     | 2     | 1     | 1     |
| 18745  | 1     | 2     | 1     | 1     |
| 18747  | 1     | 1     | 1     | 1     |
| 18750  | 1     | 1     | 1     | 1     |
| 18751  | 1     | 2     | 1     | 1     |
| 18753  | 2     | 2     | 2     | 1     |
| 18754  |       |       |       |       |
| 18759  | 2     | 1     | 2     | 1     |
| 18780  | 1     | 1     | 1     | 1     |
| 18782  | 2     | 3     | 3     | 1     |
| 18807  | 6     | 6     | 5     | 5     |
| 18815  | 1     | 2     | 1     | 1     |
| 18818  | 1     | 2     | 1     | 1     |
| 18820  | 1     | 2     | 1     | 1     |
| 18823  | 5     | 6     | 6     | 6     |
| 18825  | 1     | 1     | 1     | 1     |
| 18828  |       |       |       |       |
| 18832  | 2     | 3     | 2     | 1     |
| 18834  | 2     | 4     | 2     | 1     |
| 18835  | 4     | 4     | 4     | 5     |
| 18837  | 2     | 2     | 2     | 1     |
| 18842  | 1     | 2     | 1     | 1     |
| 18846  |       |       |       |       |
| 18855  | 2     | 3     | 3     | 2     |
| 18856  | 1     | 1     | 1     | 1     |
| 18887  | 1     | 2     | 1     | 1     |

| respid | Q40_5 | Q40_6 | Q40_7 | Q40_8 |
|--------|-------|-------|-------|-------|
| 18903  | 3     | 2     | 2     | 1     |
| 18906  | 2     | 3     | 1     | 2     |
| 18910  |       |       |       |       |
| 18919  | 1     | 2     | 1     | 1     |
| 18928  | 1     | 2     | 1     | 1     |
| 18931  | 3     | 4     | 3     | 3     |
| 18939  | 3     | 1     | 2     | 1     |
| 18946  | 1     | 1     | 2     | 1     |
| 18952  | 2     | 3     | 2     | 2     |
| 18954  | 1     | 1     | 1     | 1     |
| 18982  |       |       |       |       |
| 18986  | 3     | 2     | 1     | 1     |
| 18989  | 3     | 3     | 2     | 2     |
| 18990  | 1     | 1     | 1     | 1     |
| 18996  | 1     | 3     | 1     | 1     |
| 18998  | 1     | 2     | 1     | 1     |
| 19009  | 4     | 3     | 5     | 4     |
| 19010  | 2     | 1     | 1     | 2     |
| 19017  | 1     | 2     | 1     | 1     |
| 19018  | 1     | 1     | 1     | 1     |
| 19020  | 1     | 1     | 1     | 1     |
| 19027  | 1     | 1     | 2     | 2     |
| 19035  | 1     | 1     | 1     | 1     |
| 19037  | 2     | 2     | 3     | 2     |
| 19048  | 1     | 2     | 1     | 1     |
| 19051  | 1     | 2     | 2     | 2     |
| 19054  | 1     | 2     | 1     | 1     |
| 19057  | 1     | 1     | 1     | 1     |
| 19073  | 3     | 2     | 2     | 4     |
| 19075  | 1     | 1     | 1     | 1     |
| 19079  | 3     | 3     | 3     | 2     |
| 19087  | 1     | 1     | 1     | 1     |

| respid | Q40_5 | Q40_6 | Q40_7 | Q40_8 |
|--------|-------|-------|-------|-------|
| 19090  | 2     | 2     | 1     | 1     |
| 19093  | 1     | 1     | 1     | 1     |
| 19099  | 3     | 5     | 2     | 2     |
| 19100  | 2     | 2     | 2     | 1     |
| 19101  | 4     | 3     | 3     | 3     |
| 19105  | 1     | 1     | 1     | 1     |
| 19111  | 3     | 4     | 4     | 1     |
| 19112  | 1     | 1     | 1     | 1     |
| 19117  | 3     | 3     | 3     | 1     |
| 19122  | 1     | 1     | 1     | 1     |
| 19126  | 1     | 1     | 1     | 1     |
| 19127  | 1     | 1     | 1     | 1     |
| 19131  | 1     | 3     | 3     | 1     |
| 19134  | 1     | 1     | 1     | 1     |
| 19149  | 1     | 1     | 1     | 1     |
| 19151  | 3     | 2     | 2     | 1     |
| 19164  | 1     | 2     | 1     | 1     |
| 19166  | 1     | 2     | 1     | 1     |
| 19172  | 1     | 2     | 1     | 1     |
| 19173  | 3     | 2     | 2     | 2     |
| 19180  | 1     | 1     | 1     | 1     |
| 19185  | 2     | 3     | 1     | 1     |
| 19189  | 1     | 1     | 1     | 1     |
| 19191  |       |       |       |       |
| 19198  | 1     | 1     | 1     | 1     |
| 19203  | 1     | 1     | 1     | 1     |
| 19209  | 1     | 2     | 1     | 1     |
| 19210  |       |       |       |       |
| 19218  |       |       |       |       |
| 19220  |       |       |       |       |
| 19225  | 3     | 2     | 2     | 3     |
| 19227  | 1     | 1     | 1     | 1     |

| respid | Q40_5 | Q40_6 | Q40_7 | Q40_8 |
|--------|-------|-------|-------|-------|
| 19228  | 1     | 1     | 1     | 1     |
| 19243  | 1     | 2     | 1     | 1     |
| 19244  | 2     | 2     | 3     | 1     |
| 19246  | 1     | 2     | 1     | 1     |
| 19248  |       |       |       |       |
| 19249  | 2     | 3     | 1     | 1     |
| 19252  | 2     | 3     | 1     | 2     |
| 19255  | 3     | 2     | 1     | 1     |
| 19257  | 2     | 3     | 3     | 3     |
| 19274  |       |       |       |       |
| 19279  |       |       |       |       |
| 19291  | 1     | 1     | 1     | 1     |
| 19292  | 1     | 2     | 1     | 1     |
| 19308  | 3     | 3     | 3     | 3     |
| 19310  | 3     | 2     | 1     | 2     |
| 19311  | 1     | 1     | 1     | 1     |
| 19326  | 2     | 2     | 1     | 1     |
| 19327  |       |       |       |       |
| 19329  |       |       |       |       |
| 19330  | 3     | 4     | 3     | 4     |
| 19333  | 3     | 2     | 2     | 2     |
| 19336  | 1     | 1     | 1     | 1     |
| 19343  | 1     | 3     | 1     | 1     |
| 19348  | 1     | 2     | 1     | 1     |
| 19349  | 4     | 4     | 4     | 2     |
| 19352  | 2     | 5     | 2     | 2     |
| 19356  | 1     | 2     | 1     | 1     |
| 19357  | 1     | 2     | 2     | 1     |
| 19358  | 2     | 2     | 2     | 1     |
| 19367  | 2     | 2     | 2     | 2     |
| 19376  |       |       |       |       |
| 19377  | 1     | 2     | 1     | 1     |

| respid | Q40_5 | Q40_6 | Q40_7 | Q40_8 |
|--------|-------|-------|-------|-------|
| 19380  | 1     | 2     | 1     | 1     |
| 19384  | 2     | 1     | 1     | 1     |
| 19391  | 5     | 4     | 4     | 5     |
| 19397  |       |       |       |       |
| 19398  | 1     | 1     | 1     | 1     |
| 19401  |       |       |       |       |
| 19402  | 1     | 2     | 1     | 1     |
| 19403  |       |       |       |       |
| 19405  |       |       |       |       |
| 19407  | 1     | 1     | 1     | 1     |
| 19415  | 1     | 3     | 1     | 1     |
| 19420  |       |       |       |       |
| 19423  | 3     | 3     | 4     | 4     |
| 19424  | 3     | 2     | 2     | 2     |
| 19426  | 1     | 1     | 1     | 1     |
| 19429  | 1     | 1     | 1     | 1     |
| 19435  | 2     | 3     | 3     | 2     |
| 19441  | 1     | 2     | 1     | 1     |
| 19450  | 1     | 3     | 1     | 2     |
| 19456  | 1     | 3     | 2     | 2     |
| 19457  | 1     | 1     | 1     | 1     |
| 19463  | 3     | 2     | 2     | 1     |
| 19467  | 6     | 6     | 6     | 6     |
| 19468  | 1     | 2     | 2     | 1     |
| 19471  | 1     | 1     | 1     | 1     |
| 19473  | 2     | 3     | 3     | 2     |
| 19478  | 3     | 3     | 4     | 3     |
| 19480  |       |       |       |       |
| 19481  | 1     | 1     | 1     | 1     |
| 19484  | 1     | 3     | 1     | 1     |
| 19487  | 1     | 1     | 1     | 1     |
| 19491  | 3     | 1     | 2     | 1     |



| respid | Q40_5 | Q40_6 | Q40_7 | Q40_8 |
|--------|-------|-------|-------|-------|
| 19495  | 2     | 2     | 3     | 3     |
| 19498  | 2     | 4     | 3     | 3     |
| 19500  | 3     | 4     | 3     | 2     |
| 19501  | 3     | 5     | 2     | 2     |
| 19503  |       |       |       |       |
| 19506  | 1     | 1     | 1     | 1     |
| 19508  | 1     | 2     | 1     | 1     |
| 19509  | 1     | 3     | 1     | 1     |
| 19518  | 2     | 2     | 2     | 2     |
| 19520  | 2     | 2     | 3     | 2     |
| 19536  | 1     | 2     | 1     | 1     |
| 19538  | 3     | 2     | 2     | 1     |
| 19541  | 1     | 5     | 1     | 1     |
| 19548  | 3     | 3     | 3     | 3     |
| 19553  |       |       |       |       |
| 19556  | 1     | 1     | 1     | 1     |
| 19559  |       |       |       |       |
| 19561  | 3     | 5     | 3     | 2     |
| 19562  | 1     | 2     | 1     | 1     |
| 19564  | 1     | 2     | 1     | 1     |
| 19567  | 5     | 6     | 5     | 6     |
| 19571  | 2     | 3     | 3     | 2     |
| 19576  | 2     | 3     | 3     | 2     |
| 19578  | 1     | 1     | 1     | 1     |
| 19606  |       |       |       |       |
| 19607  |       |       |       |       |
| 19608  | 1     | 2     | 1     | 1     |
| 19612  | 4     | 4     | 3     | 3     |
| 19618  | 3     | 3     | 2     | 4     |
| 19621  | 1     | 2     | 1     | 1     |
| 19624  | 4     | 4     | 5     | 5     |
| 19630  |       |       |       |       |

| respid | Q40_5 | Q40_6 | Q40_7 | Q40_8 |
|--------|-------|-------|-------|-------|
| 19637  | 3     | 3     | 3     | 3     |
| 19639  | 1     | 1     | 1     | 1     |
| 19647  | 1     | 2     | 1     | 1     |
| 19648  | 3     | 2     | 2     | 4     |
| 19660  | 1     | 1     | 1     | 1     |
| 19662  | 5     | 4     | 5     | 4     |
| 19669  | 1     | 2     | 1     | 1     |
| 19680  | 1     | 2     | 1     | 1     |
| 19682  | 2     | 2     | 1     | 1     |
| 19686  | 1     | 1     | 1     | 1     |
| 19700  | 1     | 2     | 1     | 1     |
| 19701  | 1     | 1     | 1     | 1     |
| 19704  |       |       |       |       |
| 19706  | 2     | 2     | 3     | 3     |
| 19707  | 1     | 2     | 1     | 1     |
| 19717  | 3     | 5     | 2     | 1     |
| 19718  | 1     | 1     | 1     | 1     |
| 19721  | 2     | 2     | 2     | 1     |
| 19722  | 1     | 1     | 1     | 1     |
| 19729  |       |       |       |       |
| 19738  | 4     | 4     | 2     | 2     |
| 19741  | 1     | 3     | 1     | 1     |
| 19742  | 2     | 1     | 1     | 3     |
| 19747  | 1     | 3     | 1     | 1     |
| 19748  | 1     | 1     | 1     | 1     |
| 19749  | 1     | 2     | 1     | 1     |
| 19756  | 3     | 2     | 2     | 1     |
| 19771  | 1     | 1     | 1     | 1     |
| 19772  | 3     | 4     | 3     | 3     |
| 19775  | 1     | 1     | 1     | 1     |
| 19783  |       |       |       |       |
| 19787  | 1     | 1     | 1     | 1     |

| respid | Q40_5 | Q40_6 | Q40_7 | Q40_8 |
|--------|-------|-------|-------|-------|
| 19790  |       |       |       |       |
| 19797  | 3     | 4     | 1     | 1     |
| 19802  | 1     | 2     | 1     | 1     |
| 19808  | 1     | 2     | 1     | 1     |
| 19810  | 1     | 1     | 1     | 1     |
| 19811  | 1     | 2     | 1     | 1     |
| 19812  | 1     | 2     | 1     | 1     |
| 19821  | 3     | 3     | 2     | 2     |
| 19826  | 1     | 1     | 1     | 1     |
| 19827  | 1     | 2     | 1     | 1     |
| 19830  | 1     | 2     | 1     | 1     |
| 19834  | 1     | 4     | 1     | 1     |
| 19838  | 3     | 4     | 2     | 1     |
| 19843  |       |       |       |       |
| 19845  | 2     | 2     | 3     | 4     |
| 19846  | 1     | 1     | 2     | 1     |
| 19852  | 5     | 5     | 2     | 4     |
| 19855  | 1     | 2     | 1     | 1     |
| 19858  | 3     | 3     | 2     | 1     |
| 19861  | 3     | 3     | 3     | 2     |
| 19863  | 2     | 2     | 2     | 2     |
| 19868  | 2     | 2     | 2     | 2     |
| 19874  | 1     | 3     | 2     | 1     |
| 19876  |       |       |       |       |
| 19880  | 3     | 3     | 3     | 3     |
| 19885  | 3     | 3     | 3     | 3     |
| 19890  |       |       |       |       |
| 19894  |       |       |       |       |
| 19895  | 1     | 1     | 1     | 1     |
| 19897  | 1     | 3     | 2     | 1     |
| 19906  | 1     | 1     | 1     | 1     |
| 19908  | 1     | 1     | 1     | 1     |

| respid | Q40_5 | Q40_6 | Q40_7 | Q40_8 |
|--------|-------|-------|-------|-------|
| 19912  | 1     | 1     | 1     | 1     |
| 19913  | 1     | 2     | 1     | 1     |
| 19914  | 3     | 3     | 4     | 4     |
| 19918  | 4     | 3     | 4     | 3     |
| 19924  | 3     | 5     | 2     | 3     |
| 19936  |       |       |       |       |
| 19940  |       |       |       |       |
| 19945  | 1     | 2     | 1     | 1     |
| 19948  |       |       |       |       |
| 19959  | 1     | 1     | 1     | 1     |
| 19961  | 1     | 1     | 1     | 1     |
| 19962  | 1     | 3     | 1     | 1     |
| 19965  | 1     | 1     | 1     | 1     |
| 19966  | 2     | 2     | 2     | 2     |
| 19973  | 2     | 1     | 2     | 1     |
| 19981  | 1     | 2     | 1     | 1     |
| 19986  | 2     | 2     | 2     | 1     |
| 19989  | 1     | 2     | 1     | 1     |
| 19998  | 3     | 3     | 3     | 3     |
| 20001  | 6     | 5     | 5     | 6     |
| 20005  |       |       |       |       |
| 20013  | 4     | 5     | 4     | 5     |
| 20015  | 1     | 2     | 2     | 1     |
| 20017  | 1     | 2     | 1     | 1     |
| 20020  | 1     | 1     | 1     | 1     |
| 20021  | 1     | 1     | 1     | 1     |
| 20026  | 2     | 2     | 1     | 1     |
| 20028  | 1     | 2     | 1     | 1     |
| 20030  | 1     | 1     | 1     | 1     |
| 20031  |       |       |       |       |
| 20034  | 1     | 1     | 1     | 1     |
| 20035  |       |       |       |       |

| respid | Q40_5 | Q40_6 | Q40_7 | Q40_8 |
|--------|-------|-------|-------|-------|
| 20040  | 2     | 2     | 1     | 1     |
| 20045  | 5     | 6     | 2     | 2     |
| 20048  | 6     | 1     | 6     | 1     |
| 20053  | 1     | 1     | 1     | 1     |
| 20064  | 2     | 2     | 2     | 2     |
| 20071  | 1     | 2     | 1     | 1     |
| 20072  | 1     | 3     | 1     | 1     |
| 20076  | 1     | 1     | 1     | 1     |
| 20081  | 2     | 2     | 2     | 2     |
| 20082  | 2     | 2     | 2     | 2     |
| 20083  | 1     | 2     | 1     | 1     |
| 20088  | 2     | 2     | 1     | 2     |
| 20089  | 1     | 1     | 1     | 1     |
| 20099  | 1     | 2     | 1     | 2     |
| 20101  | 1     | 1     | 1     | 1     |
| 20102  | 3     | 2     | 1     | 1     |
| 20109  | 1     | 1     | 1     | 1     |
| 20118  | 1     | 2     | 1     | 1     |
| 20119  | 1     | 2     | 1     | 1     |
| 20124  |       |       |       |       |
| 20126  | 1     | 3     | 1     | 1     |
| 20130  |       |       |       |       |
| 20131  | 1     | 1     | 1     | 1     |
| 20134  | 3     | 3     | 2     | 3     |
| 20146  | 2     | 3     | 3     | 4     |
| 20152  |       |       |       |       |
| 20155  | 2     | 2     | 1     | 1     |
| 20156  |       |       |       |       |
| 20157  |       |       |       |       |
| 20164  | 1     | 1     | 1     | 1     |
| 20168  | 1     | 1     | 1     | 1     |
| 20173  | 3     | 4     | 4     | 3     |

| respid | Q40_5 | Q40_6 | Q40_7 | Q40_8 |
|--------|-------|-------|-------|-------|
| 20174  | 1     | 1     | 1     | 1     |
| 20175  | 3     | 4     | 3     | 1     |
| 20189  | 1     | 1     | 1     | 1     |
| 20190  | 1     | 2     | 1     | 1     |
| 20201  | 1     | 1     | 1     | 1     |
| 20202  | 1     | 1     | 1     | 1     |
| 20204  | 3     | 3     | 3     | 3     |
| 20206  | 3     | 2     | 1     | 1     |
| 20207  | 1     | 1     | 1     | 1     |
| 20212  | 1     | 1     | 1     | 1     |
| 20213  | 2     | 3     | 2     | 1     |
| 20217  | 1     | 2     | 1     | 1     |
| 20222  | 1     | 2     | 1     | 1     |
| 20227  |       |       |       |       |
| 20228  | 1     | 1     | 1     | 1     |
| 20238  | 1     | 1     | 1     | 1     |
| 20242  | 1     | 1     | 1     | 1     |
| 20246  | 1     | 1     | 1     | 1     |
| 20255  | 2     | 1     | 2     | 3     |
| 20256  | 2     | 2     | 2     | 2     |
| 20259  | 2     | 1     | 2     | 2     |
| 20262  | 1     | 1     | 1     | 1     |
| 20274  | 1     | 1     | 1     | 1     |
| 20283  | 4     | 3     | 3     | 1     |
| 20284  |       |       |       |       |
| 20291  | 2     | 2     | 1     | 1     |
| 20292  | 1     | 1     | 1     | 1     |
| 20293  | 2     | 2     | 2     | 2     |
| 20298  | 4     | 3     | 3     | 4     |
| 20301  |       |       |       |       |
| 20303  | 2     | 2     | 1     | 2     |
| 20309  |       |       |       |       |

| respid | Q40_5 | Q40_6 | Q40_7 | Q40_8 |
|--------|-------|-------|-------|-------|
| 20318  | 1     | 1     | 2     | 1     |
| 20324  | 1     | 1     | 1     | 1     |
| 20335  | 1     | 1     | 1     | 1     |
| 20336  | 1     | 2     | 1     | 1     |
| 20339  | 1     | 1     | 1     | 1     |
| 20348  | 1     | 2     | 1     | 1     |
| 20351  | 4     | 4     | 3     | 3     |
| 20353  | 2     | 2     | 1     | 1     |
| 20356  | 1     | 1     | 1     | 1     |
| 20357  |       |       |       |       |
| 20366  | 1     | 1     | 1     | 1     |
| 20369  | 5     | 4     | 5     | 3     |
| 20372  | 1     | 1     | 1     | 1     |
| 20375  | 1     | 1     | 2     | 1     |
| 20379  | 1     | 1     | 1     | 1     |
| 20380  | 1     | 2     | 1     | 2     |
| 20396  | 1     | 2     | 1     | 1     |
| 20398  | 2     | 3     | 2     | 2     |
| 20412  | 1     | 2     | 1     | 1     |
| 20415  | 1     | 2     | 1     | 1     |
| 20424  | 3     | 3     | 3     | 2     |
| 20434  | 1     | 2     | 1     | 1     |
| 20435  | 1     | 2     | 1     | 2     |
| 20440  | 1     | 1     | 1     | 1     |
| 20441  | 1     | 1     | 1     | 1     |
| 20445  | 1     | 2     | 1     | 1     |
| 20446  | 3     | 3     | 3     | 3     |
| 20450  | 1     | 2     | 1     | 1     |
| 20453  | 3     | 3     | 3     | 2     |
| 20458  | 2     | 2     | 2     | 2     |
| 20464  | 1     | 1     | 1     | 1     |
| 20471  | 1     | 3     | 1     | 1     |

| respid | Q40_5 | Q40_6 | Q40_7 | Q40_8 |
|--------|-------|-------|-------|-------|
| 20473  | 1     | 1     | 1     | 1     |
| 20474  | 1     | 1     | 1     | 1     |
| 20477  |       |       |       |       |
| 20479  | 5     | 4     | 1     | 1     |
| 20485  | 1     | 2     | 1     | 1     |
| 20487  | 1     | 1     | 1     | 1     |
| 20488  | 1     | 1     | 1     | 1     |
| 20494  | 1     | 1     | 1     | 1     |
| 20502  | 4     | 5     | 4     | 4     |
| 20503  | 4     | 4     | 2     | 1     |
| 20510  | 1     | 1     | 1     | 1     |
| 20512  |       |       |       |       |
| 20516  | 1     | 2     | 1     | 1     |
| 20522  | 2     | 3     | 2     | 2     |
| 20527  | 1     | 2     | 1     | 1     |
| 20529  | 2     | 2     | 2     | 3     |
| 20535  | 3     | 3     | 2     | 2     |
| 20543  | 1     | 2     | 1     | 1     |
| 20546  | 1     | 3     | 3     | 2     |
| 20548  | 1     | 1     | 1     | 1     |
| 20552  | 1     | 3     | 1     | 1     |
| 20556  | 3     | 4     | 2     | 1     |
| 20566  | 3     | 3     | 2     | 3     |
| 20576  | 1     | 2     | 2     | 1     |
| 20587  | 1     | 1     | 1     | 1     |
| 20589  | 1     | 1     | 1     | 1     |
| 20593  |       |       |       |       |
| 20594  | 2     | 2     | 2     | 2     |
| 20602  | 2     | 2     | 2     | 2     |
| 20607  |       |       |       |       |
| 20608  | 1     | 2     | 1     | 1     |
| 20611  | 1     | 1     | 1     | 1     |



| respid | Q40_5 | Q40_6 | Q40_7 | Q40_8 |
|--------|-------|-------|-------|-------|
| 20612  | 1     | 1     | 1     | 1     |
| 20615  | 2     | 2     | 1     | 1     |
| 20625  | 1     | 1     | 1     | 1     |
| 20630  | 2     | 2     | 2     | 1     |
| 20639  | 1     | 2     | 1     | 1     |
| 20643  | 1     | 1     | 1     | 1     |
| 20645  |       |       |       |       |
| 20647  | 2     | 1     | 1     | 1     |
| 20652  | 4     | 5     | 4     | 3     |
| 20661  | 1     | 1     | 1     | 1     |
| 20665  |       |       |       |       |
| 20679  | 1     | 1     | 1     | 1     |
| 20682  | 3     | 4     | 3     | 2     |
| 20683  |       |       |       |       |
| 20700  | 1     | 2     | 1     | 1     |
| 20702  | 1     | 6     | 1     | 1     |
| 20709  | 1     | 1     | 1     | 1     |
| 20715  | 3     | 3     | 3     | 3     |
| 20718  | 1     | 1     | 2     | 1     |
| 20722  | 1     | 1     | 1     | 1     |
| 20729  |       |       |       |       |
| 20732  |       |       |       |       |
| 20746  | 5     | 4     | 3     | 3     |
| 20747  |       |       |       |       |
| 20758  | 1     | 1     | 1     | 1     |
| 20767  | 2     | 2     | 2     | 2     |
| 20777  | 1     | 1     | 1     | 1     |
| 20778  | 1     | 1     | 1     | 1     |
| 20780  | 1     | 1     | 1     | 1     |
| 20800  | 2     | 2     | 1     | 1     |
| 20810  | 1     | 1     | 1     | 1     |
| 20814  | 2     | 2     | 1     | 1     |

| respid | Q40_5 | Q40_6 | Q40_7 | Q40_8 |
|--------|-------|-------|-------|-------|
| 20816  | 1     | 1     | 1     | 1     |
| 20832  | 3     | 3     | 3     | 3     |
| 20838  | 4     | 4     | 3     | 2     |
| 20841  | 4     | 2     | 2     | 2     |
| 20848  | 1     | 2     | 1     | 1     |
| 20850  |       |       |       |       |
| 20851  | 1     | 3     | 1     | 1     |
| 20861  | 1     | 1     | 1     | 1     |
| 20870  | 2     | 2     | 2     | 2     |
| 20880  | 1     | 1     | 1     | 1     |
| 20883  | 1     | 1     | 1     | 1     |
| 20894  | 1     | 1     | 1     | 1     |
| 20896  | 4     | 4     | 4     | 4     |
| 20901  | 3     | 2     | 3     | 3     |
| 20903  | 1     | 1     | 1     | 1     |
| 20909  |       |       |       |       |
| 20919  | 1     | 1     | 1     | 1     |
| 20925  | 1     | 1     | 1     | 1     |
| 20935  | 1     | 1     | 1     | 1     |
| 20939  | 1     | 3     | 1     | 1     |
| 20956  | 5     | 4     | 4     | 5     |
| 20970  | 2     | 2     | 1     | 2     |
| 20974  | 1     | 3     | 1     | 1     |
| 20975  | 1     | 1     | 1     | 1     |
| 20984  | 2     | 2     | 2     | 2     |
| 20988  |       |       |       |       |
| 20996  | 3     | 3     | 3     | 3     |
| 20998  | 1     | 2     | 1     | 1     |
| 21007  |       |       |       |       |
| 21008  |       |       |       |       |
| 21014  | 1     | 1     | 2     | 2     |
| 21020  | 1     | 2     | 1     | 1     |

| respid | Q40_5 | Q40_6 | Q40_7 | Q40_8 |
|--------|-------|-------|-------|-------|
| 21022  | 3     | 4     | 4     | 2     |
| 21024  |       |       |       |       |
| 21026  | 4     | 3     | 3     | 4     |
| 21027  | 1     | 1     | 1     | 1     |
| 21030  | 2     | 1     | 1     | 1     |
| 21032  | 3     | 4     | 4     | 4     |
| 21040  | 1     | 1     | 1     | 2     |
| 21045  | 1     | 2     | 1     | 1     |
| 21058  | 2     | 2     | 2     | 2     |
| 21064  | 1     | 2     | 1     | 1     |
| 21073  | 1     | 1     | 1     | 1     |
| 21086  | 2     | 2     | 2     | 3     |
| 21092  | 5     | 5     | 5     | 5     |
| 21096  | 2     | 4     | 5     | 3     |
| 21103  | 1     | 2     | 1     | 1     |
| 21120  | 3     | 3     | 2     | 2     |
| 21125  |       |       |       |       |
| 21126  | 1     | 1     | 1     | 1     |
| 21132  |       |       |       |       |
| 21139  | 2     | 3     | 3     | 2     |
| 21147  |       |       |       |       |
| 21148  | 1     | 1     | 1     | 1     |
| 21149  | 1     | 2     | 1     | 1     |
| 21164  | 1     | 1     | 2     | 1     |
| 21165  | 1     | 3     | 2     | 1     |
| 21171  | 3     | 3     | 4     | 3     |
| 21176  | 1     | 1     | 1     | 1     |
| 21187  | 2     | 3     | 2     | 3     |
| 21192  | 1     | 2     | 2     | 2     |
| 21198  | 1     | 1     | 1     | 1     |
| 21199  | 1     | 2     | 1     | 1     |
| 21206  | 4     | 4     | 2     | 2     |

| respid | Q40_5 | Q40_6 | Q40_7 | Q40_8 |
|--------|-------|-------|-------|-------|
| 21212  | 1     | 2     | 1     | 1     |
| 21216  | 1     | 2     | 1     | 1     |
| 21217  | 3     | 3     | 3     | 2     |
| 21228  | 5     | 4     | 3     | 3     |
| 21229  | 4     | 4     | 3     | 4     |
| 21230  | 1     | 2     | 1     | 1     |
| 21243  | 2     | 3     | 2     | 1     |
| 21247  | 1     | 2     | 2     | 1     |
| 21253  | 1     | 2     | 2     | 1     |
| 21264  | 2     | 2     | 2     | 2     |
| 21265  | 1     | 1     | 1     | 1     |
| 21273  | 1     | 2     | 1     | 1     |
| 21275  | 3     | 1     | 2     | 2     |
| 21278  | 4     | 3     | 3     | 4     |
| 21291  | 3     | 3     | 2     | 2     |
| 21298  | 1     | 2     | 1     | 1     |
| 21301  | 6     | 5     | 4     | 4     |
| 21312  | 2     | 3     | 3     | 3     |
| 21323  | 1     | 3     | 1     | 1     |
| 21325  | 2     | 2     | 2     | 2     |
| 21341  | 1     | 2     | 1     | 1     |
| 21349  | 3     | 4     | 2     | 1     |
| 21350  | 1     | 2     | 1     | 1     |
| 21354  | 5     | 5     | 5     | 4     |
| 21372  | 2     | 4     | 1     | 1     |
| 21373  | 2     | 2     | 3     | 2     |
| 21378  | 2     | 2     | 1     | 1     |
| 21393  |       |       |       |       |
| 21401  | 2     | 2     | 3     | 2     |
| 21405  | 1     | 1     | 1     | 1     |
| 21406  |       |       |       |       |
| 21407  | 3     | 2     | 2     | 2     |

| respid | Q40_5 | Q40_6 | Q40_7 | Q40_8 |
|--------|-------|-------|-------|-------|
| 21418  | 1     | 1     | 1     | 1     |
| 21420  | 1     | 2     | 2     | 1     |
| 21421  |       |       |       |       |
| 21446  | 3     | 4     | 3     | 1     |
| 21449  | 2     | 2     | 2     | 2     |
| 21452  | 1     | 1     | 1     | 1     |
| 21455  | 4     | 3     | 5     | 4     |
| 21469  | 1     | 1     | 1     | 1     |
| 21471  | 2     | 3     | 1     | 1     |
| 21472  | 2     | 2     | 1     | 1     |
| 21474  | 1     | 1     | 1     | 1     |
| 21479  | 1     | 1     | 1     | 1     |
| 21485  | 2     | 2     | 2     | 1     |
| 21512  |       |       |       |       |
| 21513  | 1     | 1     | 1     | 1     |
| 21514  | 2     | 2     | 3     | 3     |
| 21520  | 2     | 3     | 3     | 3     |
| 21539  | 1     | 3     | 1     | 1     |
| 21553  | 1     | 2     | 1     | 1     |
| 21560  | 2     | 2     | 2     | 2     |
| 21561  | 3     | 3     | 3     | 3     |
| 21563  | 1     | 4     | 3     | 2     |
| 21565  |       |       |       |       |
| 21582  | 1     | 2     | 1     | 1     |
| 21584  | 1     | 2     | 1     | 1     |
| 21585  | 4     | 3     | 3     | 2     |
| 21586  | 1     | 1     | 1     | 1     |
| 21587  | 2     | 3     | 2     | 2     |
| 21590  | 5     | 6     | 5     | 2     |
| 21601  | 2     | 2     | 2     | 2     |
| 21611  | 2     | 2     | 3     | 2     |
| 21612  | 1     | 2     | 1     | 1     |

| respid | Q40_5 | Q40_6 | Q40_7 | Q40_8 |
|--------|-------|-------|-------|-------|
| 21625  | 2     | 2     | 2     | 1     |
| 21633  |       |       |       |       |
| 21640  | 1     | 3     | 1     | 1     |
| 21647  | 1     | 1     | 1     | 1     |
| 21648  | 4     | 5     | 4     | 3     |
| 21656  | 1     | 2     | 1     | 1     |
| 21657  | 1     | 1     | 1     | 1     |
| 21658  | 3     | 3     | 4     | 3     |
| 21665  | 3     | 3     | 3     | 4     |
| 21666  | 2     | 3     | 3     | 4     |
| 21668  | 4     | 5     | 4     | 5     |
| 21673  | 2     | 2     | 1     | 2     |
| 21681  | 4     | 4     | 3     | 3     |
| 21682  | 1     | 1     | 1     | 1     |
| 21685  | 2     | 2     | 3     | 2     |
| 21692  | 2     | 3     | 2     | 2     |
| 21697  | 1     | 2     | 1     | 1     |
| 21711  | 1     | 1     | 1     | 1     |
| 21715  | 4     | 3     | 1     | 3     |
| 21726  | 1     | 2     | 1     | 1     |
| 21748  |       |       |       |       |
| 21761  | 1     | 1     | 1     | 1     |
| 21769  | 3     | 3     | 2     | 4     |
| 21774  | 3     | 4     | 3     | 3     |
| 21778  |       |       |       |       |
| 21785  | 2     | 2     | 2     | 3     |
| 21799  | 2     | 3     | 2     | 2     |
| 21820  | 5     | 5     | 4     | 4     |
| 21837  | 1     | 1     | 1     | 1     |
| 21845  | 4     | 3     | 5     | 2     |
| 21846  | 1     | 1     | 1     | 1     |
| 21849  | 3     | 2     | 1     | 1     |

| respid | Q40_5 | Q40_6 | Q40_7 | Q40_8 |
|--------|-------|-------|-------|-------|
| 21850  | 2     | 2     | 1     | 1     |
| 21855  | 1     | 1     | 1     | 1     |
| 21859  | 1     | 1     | 1     | 1     |
| 21861  | 3     | 2     | 1     | 1     |
| 21866  |       |       |       |       |
| 21873  | 2     | 2     | 1     | 1     |
| 21876  | 2     | 2     | 2     | 1     |
| 21882  |       |       |       |       |
| 21884  | 2     | 2     | 2     | 2     |
| 21887  | 2     | 2     | 2     | 2     |
| 21892  | 1     | 1     | 1     | 1     |
| 21907  | 2     | 3     | 2     | 2     |
| 21910  | 4     | 5     | 5     | 4     |
| 21912  | 3     | 4     | 4     | 3     |
| 21914  | 2     | 2     | 2     | 1     |
| 21925  | 1     | 2     | 1     | 1     |
| 21937  |       |       |       |       |
| 21938  | 2     | 2     | 2     | 1     |
| 21940  | 1     | 2     | 1     | 1     |
| 21942  | 1     | 2     | 1     | 1     |
| 21947  |       |       |       |       |
| 21948  | 2     | 3     | 2     | 3     |
| 21961  | 1     | 1     | 1     | 1     |
| 21977  | 2     | 3     | 4     | 3     |
| 21983  |       |       |       |       |
| 21986  | 3     | 3     | 2     | 2     |
| 21988  | 1     | 1     | 1     | 1     |
| 21996  | 1     | 4     | 1     | 1     |
| 21997  | 2     | 3     | 1     | 1     |
| 22005  | 2     | 2     | 2     | 2     |
| 22013  | 1     | 2     | 1     | 1     |
| 22018  |       |       |       |       |

| respid | Q40_5 | Q40_6 | Q40_7 | Q40_8 |
|--------|-------|-------|-------|-------|
| 22019  | 2     | 3     | 1     | 1     |
| 22071  | 1     | 1     | 1     | 1     |
| 22082  | 1     | 2     | 1     | 1     |
| 22085  | 1     | 2     | 1     | 1     |
| 22092  | 1     | 2     | 1     | 1     |
| 22097  | 1     | 1     | 1     | 1     |
| 22111  |       |       |       |       |
| 22118  | 1     | 2     | 1     | 1     |
| 22132  | 2     | 1     | 1     | 1     |
| 22133  | 1     | 1     | 1     | 1     |
| 22139  |       |       |       |       |
| 22142  | 4     | 4     | 4     | 5     |
| 22146  | 1     | 2     | 1     | 1     |
| 22181  |       |       |       |       |
| 22202  | 1     | 1     | 1     | 1     |
| 22214  |       |       |       |       |
| 22223  | 1     | 1     | 1     | 1     |
| 22227  | 2     | 2     | 1     | 2     |
| 22229  | 1     | 1     | 1     | 1     |
| 22239  | 4     | 4     | 4     | 3     |
| 22245  | 4     | 5     | 4     | 4     |
| 22256  | 1     | 2     | 1     | 1     |
| 22260  | 1     | 1     | 1     | 1     |
| 22298  | 2     | 3     | 2     | 2     |
| 22321  | 2     | 2     | 1     | 1     |
| 22340  |       |       |       |       |
| 22346  | 2     | 3     | 3     | 3     |
| 22356  | 1     | 2     | 1     | 1     |
| 22361  | 2     | 2     | 2     | 2     |
| 22364  | 1     | 2     | 1     | 1     |
| 22368  |       |       |       |       |
| 22374  | 4     | 3     | 2     | 3     |



| respid | Q40_5 | Q40_6 | Q40_7 | Q40_8 |
|--------|-------|-------|-------|-------|
| 22375  | 1     | 1     | 1     | 1     |
| 22377  | 2     | 2     | 1     | 2     |
| 22383  |       |       |       |       |
| 22387  | 4     | 4     | 4     | 3     |
| 22392  |       |       |       |       |
| 22393  | 1     | 2     | 1     | 1     |
| 22394  | 1     | 3     | 1     | 1     |
| 22395  |       |       |       |       |
| 22401  | 1     | 2     | 1     | 1     |
| 22407  |       |       |       |       |
| 22410  | 1     | 2     | 2     | 1     |
| 22418  | 1     | 2     | 1     | 1     |
| 22421  |       |       |       |       |
| 22423  |       |       |       |       |
| 22425  | 2     | 2     | 1     | 1     |
| 22427  | 1     | 1     | 1     | 1     |
| 22431  | 3     | 5     | 3     | 3     |
| 22435  | 1     | 1     | 1     | 1     |
| 22436  | 2     | 3     | 2     | 1     |
| 22442  |       |       |       |       |
| 22444  | 3     | 3     | 3     | 3     |
| 22445  | 2     | 4     | 2     | 2     |
| 22446  |       |       |       |       |
| 22448  | 2     | 1     | 2     | 2     |
| 22449  | 1     | 2     | 1     | 1     |
| 22450  | 1     | 2     | 2     | 1     |
| 22453  | 3     | 2     | 4     | 3     |
| 22465  | 1     | 2     | 1     | 1     |
| 22472  | 2     | 2     | 2     | 2     |
| 22475  | 3     | 3     | 3     | 3     |
| 22478  | 1     | 3     | 2     | 2     |
| 22491  | 1     | 1     | 1     | 1     |

| respid | Q40_5 | Q40_6 | Q40_7 | Q40_8 |
|--------|-------|-------|-------|-------|
| 22497  | 2     | 3     | 3     | 2     |
| 22498  | 1     | 1     | 1     | 1     |
| 22499  | 1     | 1     | 2     | 2     |
| 22503  | 1     | 1     | 1     | 1     |
| 22507  | 1     | 1     | 1     | 1     |
| 22513  | 3     | 4     | 2     | 1     |
| 22517  | 1     | 4     | 2     | 1     |
| 22524  | 5     | 4     | 4     | 3     |
| 22528  | 2     | 1     | 1     | 1     |
| 22544  | 2     | 2     | 2     | 2     |
| 22571  | 1     | 2     | 1     | 1     |
| 22576  | 3     | 3     | 2     | 2     |
| 22579  | 2     | 3     | 3     | 2     |
| 22583  | 2     | 3     | 2     | 1     |
| 22591  | 4     | 4     | 5     | 4     |
| 22592  | 2     | 2     | 2     | 2     |
| 22612  | 3     | 2     | 2     | 2     |
| 22613  | 2     | 3     | 3     | 3     |
| 22615  | 1     | 2     | 1     | 1     |
| 22621  | 2     | 1     | 1     | 1     |
| 22625  | 1     | 2     | 1     | 1     |
| 22628  | 1     | 1     | 1     | 1     |
| 22632  | 1     | 2     | 1     | 1     |
| 22639  |       |       |       |       |
| 22648  | 1     | 4     | 1     | 1     |
| 22649  | 2     | 5     | 4     | 1     |
| 22655  |       |       |       |       |
| 22659  |       |       |       |       |
| 22660  | 1     | 2     | 1     | 1     |
| 22666  | 2     | 2     | 2     | 3     |
| 22667  | 1     | 1     | 1     | 1     |
| 22670  |       |       |       |       |

| respid | Q40_5 | Q40_6 | Q40_7 | Q40_8 |
|--------|-------|-------|-------|-------|
| 22681  |       |       |       |       |
| 22683  | 2     | 2     | 1     | 1     |
| 22688  | 1     | 1     | 1     | 1     |
| 22695  | 2     | 3     | 3     | 2     |
| 22696  | 1     | 1     | 1     | 1     |
| 22705  | 1     | 5     | 2     | 2     |
| 22718  | 2     | 2     | 2     | 3     |
| 22720  | 1     | 2     | 1     | 1     |
| 22724  | 1     | 1     | 1     | 1     |
| 22728  | 1     | 1     | 1     | 1     |
| 22751  | 1     | 1     | 1     | 1     |
| 22782  | 6     | 6     | 6     | 3     |
| 22786  | 2     | 2     | 2     | 2     |
| 22788  | 1     | 2     | 1     | 1     |
| 22810  | 2     | 2     | 3     | 2     |
| 22816  | 1     | 2     | 1     | 1     |
| 22818  | 1     | 2     | 1     | 1     |
| 22854  |       |       |       |       |
| 22858  | 1     | 2     | 2     | 2     |
| 22862  | 1     | 2     | 1     | 1     |
| 22865  | 1     | 1     | 1     | 2     |
| 22868  | 1     | 2     | 1     | 1     |
| 22869  | 3     | 2     | 4     | 2     |
| 22873  | 1     | 1     | 1     | 1     |
| 22875  | 1     | 1     | 1     | 1     |
| 22876  | 1     | 1     | 1     | 1     |
| 22882  | 2     | 2     | 1     | 3     |
| 22884  | 2     | 3     | 2     | 2     |
| 22887  | 2     | 1     | 2     | 1     |
| 22888  | 1     | 2     | 1     | 1     |
| 22900  |       |       |       |       |
| 22901  |       |       |       |       |

| respid | Q40_5 | Q40_6 | Q40_7 | Q40_8 |
|--------|-------|-------|-------|-------|
| 22912  | 1     | 1     | 1     | 1     |
| 22913  | 1     | 1     | 1     | 1     |
| 22921  | 1     | 1     | 1     | 1     |
| 22925  | 1     | 1     | 1     | 1     |
| 22940  | 1     | 1     | 1     | 1     |
| 22941  | 1     | 3     | 3     | 1     |
| 22947  | 2     | 2     | 2     | 1     |
| 22948  |       |       |       |       |
| 22964  | 1     | 4     | 1     | 1     |
| 22966  | 1     | 1     | 1     | 1     |
| 22969  | 1     | 2     | 1     | 1     |
| 22971  |       |       |       |       |
| 22988  |       |       |       |       |
| 22990  |       |       |       |       |
| 23000  | 1     | 3     | 1     | 1     |
| 23016  |       |       |       |       |
| 23026  | 1     | 2     | 1     | 1     |
| 23035  | 1     | 2     | 1     | 1     |
| 23037  | 3     | 4     | 4     | 3     |
| 23044  | 3     | 3     | 2     | 3     |
| 23046  | 1     | 1     | 1     | 1     |
| 23047  | 1     | 1     | 1     | 1     |
| 23049  | 3     | 2     | 2     | 1     |
| 23055  | 1     | 1     | 1     | 1     |
| 23066  | 1     | 1     | 1     | 1     |
| 23075  | 1     | 2     | 1     | 1     |
| 23081  | 1     | 3     | 1     | 1     |
| 23087  | 2     | 1     | 3     | 3     |
| 23094  |       |       |       |       |
| 23099  |       |       |       |       |
| 23101  | 2     | 2     | 2     | 2     |
| 23105  |       |       |       |       |

| respid | Q40_5 | Q40_6 | Q40_7 | Q40_8 |
|--------|-------|-------|-------|-------|
| 23115  | 2     | 2     | 2     | 2     |
| 23121  | 1     | 3     | 1     | 1     |
| 23127  | 1     | 1     | 1     | 1     |
| 23131  | 2     | 2     | 2     | 2     |
| 23134  | 1     | 1     | 1     | 1     |
| 23145  | 1     | 2     | 1     | 1     |
| 23151  | 1     | 1     | 1     | 1     |
| 23161  | 3     | 2     | 2     | 1     |
| 23169  | 2     | 2     | 2     | 2     |
| 23173  | 1     | 1     | 1     | 1     |
| 23174  | 1     | 1     | 1     | 1     |
| 23186  | 4     | 4     | 5     | 4     |
| 23195  | 1     | 2     | 1     | 1     |
| 23197  | 3     | 2     | 2     | 3     |
| 23198  | 1     | 1     | 1     | 1     |
| 23203  |       |       |       |       |
| 23204  | 2     | 4     | 1     | 2     |
| 23212  | 1     | 2     | 1     | 1     |
| 23214  | 1     | 2     | 1     | 1     |
| 23221  | 1     | 2     | 1     | 2     |
| 23237  | 1     | 1     | 1     | 1     |
| 23251  | 1     | 1     | 1     | 1     |
| 23254  | 1     | 2     | 1     | 1     |
| 23262  | 1     | 1     | 1     | 2     |
| 23267  | 1     | 2     | 1     | 1     |
| 23268  | 2     | 6     | 2     | 3     |
| 23273  | 1     | 1     | 2     | 1     |
| 23278  | 1     | 1     | 1     | 1     |
| 23279  |       |       |       |       |
| 23281  | 3     | 3     | 3     | 3     |
| 23282  | 2     | 2     | 2     | 2     |
| 23283  | 3     | 2     | 3     | 4     |

| respid | Q40_5 | Q40_6 | Q40_7 | Q40_8 |
|--------|-------|-------|-------|-------|
| 23285  | 1     | 1     | 1     | 1     |
| 23305  | 3     | 4     | 4     | 1     |
| 23309  | 1     | 1     | 1     | 1     |
| 23310  | 1     | 3     | 1     | 1     |
| 23311  | 2     | 1     | 1     | 1     |
| 23312  | 2     | 3     | 3     | 3     |
| 23319  | 1     | 2     | 3     | 2     |
| 23320  | 1     | 2     | 1     | 1     |
| 23322  | 2     | 2     | 2     | 2     |
| 23334  | 2     | 3     | 3     | 2     |
| 23340  | 1     | 1     | 1     | 1     |
| 23346  | 1     | 1     | 1     | 1     |
| 23353  | 1     | 2     | 1     | 1     |
| 23363  | 3     | 4     | 3     | 3     |
| 23364  | 3     | 3     | 3     | 4     |
| 23376  |       |       |       |       |
| 23378  | 1     | 1     | 1     | 2     |
| 23382  |       |       |       |       |
| 23383  |       |       |       |       |
| 23390  | 1     | 1     | 1     | 1     |
| 23395  | 1     | 1     | 1     | 1     |
| 23398  | 3     | 3     | 3     | 3     |
| 23399  | 1     | 2     | 1     | 1     |
| 23406  | 1     | 2     | 1     | 1     |
| 23418  | 1     | 2     | 1     | 1     |
| 23427  | 1     | 3     | 1     | 1     |
| 23428  | 1     | 1     | 1     | 1     |
| 23435  | 2     | 2     | 1     | 1     |
| 23439  | 1     | 1     | 1     | 1     |
| 23440  |       |       |       |       |
| 23444  | 4     | 1     | 2     | 2     |
| 23445  | 1     | 1     | 1     | 1     |

| respid | Q40_5 | Q40_6 | Q40_7 | Q40_8 |
|--------|-------|-------|-------|-------|
| 23455  |       |       |       |       |
| 23467  | 2     | 3     | 1     | 2     |
| 23478  | 2     | 3     | 3     | 3     |
| 23492  | 2     | 3     | 1     | 2     |
| 23498  | 1     | 2     | 1     | 1     |
| 23511  | 1     | 4     | 1     | 1     |
| 23514  | 1     | 1     | 1     | 1     |
| 23515  | 1     | 2     | 1     | 1     |
| 23522  |       |       |       |       |
| 23524  |       |       |       |       |
| 23531  | 1     | 2     | 1     | 1     |
| 23532  | 1     | 1     | 1     | 1     |
| 23533  | 1     | 2     | 1     | 1     |
| 23534  | 2     | 1     | 1     | 2     |
| 23538  | 1     | 2     | 1     | 1     |
| 23539  | 3     | 1     | 1     | 3     |
| 23548  | 3     | 2     | 1     | 1     |
| 23553  |       |       |       |       |
| 23556  | 1     | 1     | 1     | 1     |
| 23563  | 3     | 4     | 3     | 3     |
| 23572  | 1     | 2     | 1     | 1     |
| 23575  | 1     | 1     | 1     | 1     |
| 23576  | 1     | 1     | 1     | 1     |
| 23577  | 1     | 1     | 1     | 1     |
| 23578  | 3     | 4     | 4     | 3     |
| 23587  | 2     | 2     | 2     | 1     |
| 23597  | 1     | 1     | 1     | 1     |
| 23598  | 2     | 3     | 2     | 2     |
| 23604  |       |       |       |       |
| 23617  | 3     | 2     | 2     | 1     |
| 23620  | 1     | 2     | 1     | 1     |
| 23621  |       |       |       |       |

| respid | Q40_5 | Q40_6 | Q40_7 | Q40_8 |
|--------|-------|-------|-------|-------|
| 23625  | 1     | 2     | 1     | 1     |
| 23629  | 1     | 1     | 1     | 1     |
| 23635  | 1     | 1     | 1     | 1     |
| 23636  | 1     | 2     | 1     | 1     |
| 23637  | 5     | 5     | 5     | 5     |
| 23638  | 1     | 1     | 1     | 1     |
| 23644  | 1     | 2     | 1     | 1     |
| 23645  | 2     | 2     | 2     | 1     |
| 23649  | 1     | 1     | 1     | 1     |
| 23654  | 2     | 2     | 1     | 1     |
| 23662  | 1     | 2     | 1     | 1     |
| 23664  | 1     | 2     | 1     | 1     |
| 23665  | 1     | 1     | 1     | 1     |
| 23666  | 1     | 2     | 1     | 1     |
| 23671  | 1     | 1     | 1     | 1     |
| 23672  | 1     | 1     | 1     | 1     |
| 23685  | 1     | 2     | 1     | 1     |
| 23686  | 3     | 3     | 2     | 2     |
| 23689  | 4     | 4     | 3     | 2     |
| 23690  | 2     | 3     | 1     | 2     |
| 23695  | 4     | 3     | 1     | 2     |
| 23700  | 1     | 1     | 1     | 1     |
| 23714  | 1     | 2     | 1     | 1     |
| 23719  | 1     | 2     | 1     | 1     |
| 23720  | 1     | 2     | 1     | 1     |
| 23721  | 3     | 2     | 2     | 1     |
| 23729  | 1     | 1     | 1     | 1     |
| 23730  | 1     | 1     | 1     | 1     |
| 23732  | 1     | 2     | 1     | 1     |
| 23736  | 2     | 2     | 1     | 1     |
| 23754  |       |       |       |       |
| 23756  | 1     | 1     | 1     | 1     |



| respid | Q40_5 | Q40_6 | Q40_7 | Q40_8 |
|--------|-------|-------|-------|-------|
| 23759  | 2     | 3     | 2     | 1     |
| 23761  | 1     | 2     | 1     | 1     |
| 23766  | 1     | 1     | 1     | 1     |
| 23768  | 4     | 3     | 3     | 3     |
| 23773  | 1     | 1     | 1     | 1     |
| 23781  |       |       |       |       |
| 23782  | 3     | 5     | 3     | 3     |
| 23787  | 2     | 2     | 3     | 2     |
| 23788  | 3     | 3     | 3     | 3     |
| 23790  |       |       |       |       |
| 23794  | 1     | 1     | 1     | 1     |
| 23795  | 1     | 4     | 3     | 2     |
| 23801  | 2     | 2     | 2     | 2     |
| 23806  | 2     | 2     | 1     | 1     |
| 23809  | 1     | 3     | 3     | 3     |
| 23813  | 1     | 2     | 1     | 1     |
| 23815  | 3     | 2     | 2     | 2     |
| 23821  | 1     | 1     | 1     | 1     |
| 23825  | 1     | 2     | 2     | 1     |
| 23826  | 1     | 1     | 1     | 1     |
| 23830  | 1     | 2     | 1     | 1     |
| 23833  | 1     | 1     | 1     | 1     |
| 23837  | 1     | 1     | 1     | 1     |
| 23848  | 6     | 6     | 6     | 6     |
| 23850  | 1     | 2     | 1     | 1     |
| 23870  | 1     | 2     | 1     | 1     |
| 23877  |       |       |       |       |
| 23880  | 1     | 2     | 1     | 1     |
| 23882  | 2     | 2     | 1     | 1     |
| 23888  |       |       |       |       |
| 23908  | 1     | 3     | 1     | 1     |
| 23914  | 1     | 2     | 1     | 1     |

| respid | Q40_5 | Q40_6 | Q40_7 | Q40_8 |
|--------|-------|-------|-------|-------|
| 23916  | 1     | 1     | 1     | 2     |
| 23922  | 3     | 2     | 3     | 2     |
| 23932  | 1     | 2     | 1     | 1     |
| 23934  |       |       |       |       |
| 23942  | 3     | 3     | 3     | 2     |
| 23945  | 1     | 1     | 1     | 1     |
| 23948  | 2     | 2     | 1     | 1     |
| 23955  | 1     | 1     | 1     | 1     |
| 23956  | 3     | 5     | 3     | 2     |
| 23978  | 1     | 1     | 1     | 1     |
| 23981  |       |       |       |       |
| 23982  | 1     | 1     | 1     | 1     |
| 23991  | 1     | 1     | 1     | 1     |
| 23994  | 1     | 1     | 2     | 1     |
| 23995  | 1     | 1     | 2     | 2     |
| 23999  | 1     | 1     | 1     | 1     |
| 24005  | 6     | 5     | 3     | 5     |
| 24018  | 1     | 1     | 1     | 1     |
| 24021  |       |       |       |       |
| 24035  |       |       |       |       |
| 24040  | 1     | 2     | 1     | 1     |
| 24043  |       |       |       |       |
| 24046  | 3     | 2     | 2     | 3     |
| 24047  | 1     | 2     | 1     | 2     |
| 24048  | 1     | 1     | 1     | 1     |
| 24062  | 3     | 2     | 3     | 2     |
| 24063  | 2     | 2     | 2     | 1     |
| 24066  | 1     | 1     | 1     | 1     |
| 24069  | 1     | 1     | 1     | 1     |
| 24070  | 1     | 1     | 1     | 1     |
| 24074  | 1     | 2     | 1     | 1     |
| 24080  | 1     | 1     | 1     | 1     |

| respid | Q40_5 | Q40_6 | Q40_7 | Q40_8 |
|--------|-------|-------|-------|-------|
| 24082  | 1     | 1     | 1     | 1     |
| 24088  | 1     | 2     | 1     | 1     |
| 24089  | 1     | 1     | 1     | 1     |
| 24091  | 1     | 2     | 1     | 1     |
| 24095  |       |       |       |       |
| 24100  | 4     | 5     | 2     | 1     |
| 24105  | 1     | 3     | 2     | 1     |
| 24107  | 4     | 4     | 5     | 3     |
| 24108  |       |       |       |       |
| 24113  | 1     | 3     | 1     | 1     |
| 24120  |       |       |       |       |
| 24122  | 3     | 5     | 4     | 3     |
| 24123  | 1     | 3     | 1     | 1     |
| 24125  | 3     | 3     | 3     | 3     |
| 24132  | 1     | 1     | 1     | 1     |
| 24139  | 1     | 2     | 1     | 1     |
| 24140  | 1     | 2     | 1     | 1     |
| 24143  | 1     | 5     | 1     | 1     |
| 24150  | 3     | 5     | 1     | 1     |
| 24153  |       |       |       |       |
| 24161  |       |       |       |       |
| 24168  | 1     | 2     | 1     | 1     |
| 24179  | 1     | 1     | 1     | 1     |
| 24182  | 3     | 4     | 3     | 3     |
| 24194  | 3     | 3     | 2     | 3     |
| 24206  |       |       |       |       |
| 24214  |       |       |       |       |
| 24215  | 3     | 4     | 4     | 3     |
| 24224  | 1     | 1     | 1     | 1     |
| 24225  | 1     | 1     | 1     | 1     |
| 24227  |       |       |       |       |
| 24229  | 1     | 2     | 1     | 2     |

| respid | Q40_5 | Q40_6 | Q40_7 | Q40_8 |
|--------|-------|-------|-------|-------|
| 24230  | 1     | 1     | 1     | 1     |
| 24232  | 4     | 3     | 3     | 2     |
| 24253  | 2     | 2     | 2     | 1     |
| 24267  | 1     | 1     | 2     | 1     |
| 24274  | 2     | 1     | 1     | 1     |
| 24275  | 1     | 1     | 1     | 1     |
| 24277  | 1     | 1     | 1     | 1     |
| 24280  | 1     | 3     | 1     | 1     |
| 24285  | 1     | 1     | 1     | 1     |
| 24293  |       |       |       |       |
| 24295  | 3     | 4     | 3     | 1     |
| 24299  |       |       |       |       |
| 24303  | 1     | 2     | 1     | 1     |
| 24308  | 3     | 3     | 2     | 2     |
| 24322  |       |       |       |       |
| 24325  |       |       |       |       |
| 24328  | 1     | 1     | 1     | 1     |
| 24334  | 1     | 2     | 1     | 1     |
| 24342  | 2     | 1     | 1     | 1     |
| 24343  | 3     | 2     | 3     | 3     |
| 24348  | 2     | 5     | 2     | 6     |
| 24352  | 3     | 3     | 3     | 1     |
| 24354  | 2     | 2     | 2     | 1     |
| 24357  | 1     | 1     | 1     | 1     |
| 24360  | 2     | 1     | 1     | 1     |
| 24369  | 2     | 4     | 4     | 4     |
| 24373  | 2     | 2     | 1     | 1     |
| 24398  | 3     | 4     | 3     | 4     |
| 24402  | 1     | 2     | 1     | 1     |
| 24405  | 1     | 2     | 1     | 1     |
| 24407  | 2     | 2     | 2     | 1     |
| 24413  | 1     | 1     | 1     | 1     |

| respid | Q40_5 | Q40_6 | Q40_7 | Q40_8 |
|--------|-------|-------|-------|-------|
| 24443  | 3     | 3     | 3     | 3     |
| 24451  |       |       |       |       |
| 24459  | 2     | 3     | 3     | 4     |
| 24465  | 1     | 2     | 1     | 1     |
| 24481  | 3     | 3     | 3     | 2     |
| 24482  | 1     | 1     | 1     | 1     |
| 24491  | 2     | 2     | 2     | 2     |
| 24495  | 1     | 1     | 1     | 1     |
| 24497  | 3     | 4     | 4     | 3     |
| 24511  | 1     | 2     | 1     | 1     |
| 24513  | 2     | 3     | 3     | 3     |
| 24516  | 2     | 3     | 3     | 2     |
| 24518  | 1     | 2     | 1     | 1     |
| 24524  | 1     | 2     | 1     | 1     |
| 24528  | 1     | 1     | 1     | 1     |
| 24531  | 3     | 4     | 2     | 1     |
| 24533  | 1     | 3     | 4     | 3     |
| 24547  | 1     | 2     | 1     | 1     |
| 24557  | 4     | 3     | 3     | 4     |
| 24559  | 6     | 5     | 6     | 5     |
| 24567  | 1     | 1     | 1     | 1     |
| 24568  |       |       |       |       |
| 24577  |       |       |       |       |
| 24581  | 1     | 2     | 1     | 1     |
| 24588  | 1     | 1     | 1     | 1     |
| 24604  | 5     | 5     | 3     | 1     |
| 24612  | 2     | 2     | 1     | 1     |
| 24621  | 4     | 5     | 5     | 6     |
| 24625  | 1     | 2     | 1     | 1     |
| 24627  | 1     | 2     | 1     | 1     |
| 24640  | 1     | 2     | 1     | 1     |
| 24644  | 1     | 1     | 1     | 1     |

| respid | Q40_5 | Q40_6 | Q40_7 | Q40_8 |
|--------|-------|-------|-------|-------|
| 24664  | 2     | 2     | 3     | 1     |
| 24669  | 3     | 2     | 2     | 2     |
| 24685  | 1     | 2     | 1     | 1     |
| 24687  | 2     | 3     | 2     | 2     |
| 24688  | 2     | 2     | 2     | 2     |
| 24691  | 3     | 3     | 4     | 3     |
| 24693  | 3     | 3     | 3     | 2     |
| 24706  |       |       |       |       |
| 24710  |       |       |       |       |
| 24717  | 1     | 2     | 1     | 1     |
| 24720  | 1     | 1     | 1     | 1     |
| 24731  | 3     | 2     | 3     | 2     |
| 24732  | 2     | 2     | 2     | 2     |
| 24733  |       |       |       |       |
| 24747  | 1     | 1     | 1     | 1     |
| 24750  | 3     | 4     | 3     | 2     |
| 24758  | 2     | 2     | 3     | 3     |
| 24760  | 1     | 2     | 1     | 1     |
| 24765  |       |       |       |       |
| 24772  | 1     | 2     | 1     | 1     |
| 24779  | 3     | 3     | 3     | 4     |
| 24794  | 1     | 1     | 1     | 1     |
| 24796  | 3     | 2     | 3     | 4     |
| 24797  | 1     | 1     | 1     | 1     |
| 24800  | 1     | 1     | 1     | 1     |
| 24813  | 4     | 4     | 3     | 2     |
| 24815  | 2     | 3     | 2     | 2     |
| 24821  | 1     | 1     | 1     | 1     |
| 24822  | 1     | 1     | 1     | 1     |
| 24831  | 1     | 1     | 1     | 1     |
| 24835  |       |       |       |       |
| 24843  | 3     | 4     | 4     | 4     |

| respid | Q40_5 | Q40_6 | Q40_7 | Q40_8 |
|--------|-------|-------|-------|-------|
| 24844  | 3     | 3     | 2     | 2     |
| 24860  |       |       |       |       |
| 24861  | 1     | 2     | 1     | 1     |
| 24865  | 3     | 4     | 3     | 3     |
| 24870  | 4     | 3     | 3     | 2     |
| 24887  | 1     | 1     | 1     | 1     |
| 24897  | 3     | 3     | 3     | 4     |
| 24902  | 1     | 3     | 1     | 1     |
| 24914  | 1     | 1     | 1     | 2     |
| 24921  | 3     | 2     | 2     | 2     |
| 24922  | 1     | 1     | 1     | 1     |
| 24924  |       |       |       |       |
| 24927  | 2     | 3     | 3     | 2     |
| 24936  | 1     | 2     | 1     | 1     |
| 24937  | 1     | 1     | 1     | 1     |
| 24942  | 3     | 3     | 3     | 3     |
| 24947  | 1     | 1     | 1     | 1     |
| 24953  | 2     | 2     | 2     | 2     |
| 24954  | 3     | 4     | 3     | 4     |
| 24960  | 4     | 5     | 4     | 3     |
| 24965  | 1     | 1     | 1     | 1     |
| 24975  | 1     | 1     | 1     | 1     |
| 24983  | 3     | 3     | 3     | 4     |
| 24985  | 1     | 1     | 1     | 1     |
| 24990  | 1     | 1     | 1     | 1     |
| 25000  | 1     | 1     | 1     | 1     |
| 25007  | 1     | 2     | 2     | 2     |
| 25008  | 1     | 1     | 1     | 1     |
| 25010  |       |       |       |       |
| 25016  | 1     | 2     | 1     | 2     |
| 25021  | 1     | 3     | 1     | 1     |
| 25040  |       |       |       |       |

| respid | Q40_5 | Q40_6 | Q40_7 | Q40_8 |
|--------|-------|-------|-------|-------|
| 25043  | 1     | 2     | 1     | 1     |
| 25055  | 1     | 1     | 1     | 1     |
| 25057  | 3     | 3     | 2     | 2     |
| 25060  | 1     | 2     | 3     | 3     |
| 25062  | 2     | 2     | 1     | 2     |
| 25064  | 3     | 3     | 4     | 4     |
| 25069  |       |       |       |       |
| 25077  | 1     | 1     | 1     | 1     |
| 25088  |       |       |       |       |
| 25093  | 2     | 2     | 2     | 3     |
| 25121  | 2     | 3     | 3     | 1     |
| 25140  | 3     | 3     | 4     | 4     |
| 25144  | 1     | 2     | 1     | 1     |
| 25149  | 3     | 2     | 2     | 2     |
| 25159  | 1     | 1     | 1     | 1     |
| 25191  | 1     | 2     | 1     | 1     |
| 25193  | 4     | 5     | 2     | 3     |
| 25202  | 4     | 3     | 4     | 4     |
| 25215  | 5     | 1     | 3     | 4     |
| 25229  | 3     | 3     | 3     | 3     |
| 25231  | 1     | 3     | 2     | 1     |
| 25236  | 1     | 2     | 1     | 1     |
| 25242  | 1     | 1     | 1     | 1     |
| 25252  | 1     | 1     | 1     | 1     |
| 25253  | 5     | 4     | 6     | 3     |
| 25256  | 3     | 3     | 4     | 4     |
| 25260  | 1     | 1     | 1     | 1     |
| 25261  | 1     | 2     | 1     | 1     |
| 25280  | 2     | 2     | 1     | 1     |
| 25282  | 1     | 1     | 2     | 2     |
| 25289  | 4     | 4     | 2     | 1     |
| 25303  | 1     | 1     | 1     | 1     |



| respid | Q40_5 | Q40_6 | Q40_7 | Q40_8 |
|--------|-------|-------|-------|-------|
| 25304  | 2     | 3     | 1     | 1     |
| 25309  | 2     | 2     | 2     | 1     |
| 25317  | 1     | 1     | 1     | 1     |
| 25318  | 5     | 4     | 4     | 4     |
| 25320  | 2     | 3     | 2     | 4     |
| 25324  | 3     | 3     | 3     | 4     |
| 25331  | 1     | 2     | 1     | 1     |
| 25340  | 1     | 2     | 1     | 1     |
| 25342  | 2     | 1     | 3     | 2     |
| 25350  | 1     | 1     | 1     | 1     |
| 25352  |       |       |       |       |
| 25358  | 1     | 1     | 1     | 1     |
| 25375  | 1     | 2     | 1     | 1     |
| 25386  | 1     | 1     | 1     | 1     |
| 25388  | 1     | 2     | 1     | 1     |
| 25390  | 2     | 1     | 1     | 1     |
| 25391  | 2     | 2     | 2     | 2     |
| 25400  | 2     | 2     | 1     | 1     |
| 25413  | 4     | 4     | 3     | 3     |
| 25424  | 2     | 2     | 1     | 1     |
| 25426  | 2     | 2     | 2     | 2     |
| 25430  | 1     | 2     | 1     | 1     |
| 25434  | 2     | 2     | 2     | 2     |
| 25439  | 4     | 4     | 3     | 3     |
| 25441  | 1     | 1     | 1     | 1     |
| 25445  | 1     | 1     | 1     | 1     |
| 25451  | 1     | 1     | 1     | 1     |
| 25469  | 3     | 4     | 4     | 3     |
| 25471  | 3     | 2     | 3     | 1     |
| 25476  | 4     | 3     | 2     | 3     |
| 25480  | 1     | 1     | 1     | 1     |
| 25482  | 2     | 2     | 3     | 2     |

| respid | Q40_5 | Q40_6 | Q40_7 | Q40_8 |
|--------|-------|-------|-------|-------|
| 25500  | 5     | 4     | 4     | 4     |
| 25516  | 1     | 2     | 1     | 1     |
| 25521  | 4     | 5     | 4     | 3     |
| 25525  | 1     | 2     | 1     | 1     |
| 25530  | 2     | 2     | 3     | 2     |
| 25555  | 3     | 4     | 3     | 2     |
| 25558  | 3     | 3     | 3     | 3     |
| 25561  | 4     | 2     | 3     | 3     |
| 25566  |       |       |       |       |
| 25571  | 2     | 1     | 2     | 1     |
| 25572  | 1     | 1     | 1     | 1     |
| 25574  |       |       |       |       |
| 25588  | 1     | 2     | 1     | 1     |
| 25591  | 3     | 2     | 3     | 2     |
| 25599  | 2     | 3     | 3     | 2     |
| 25604  | 1     | 1     | 1     | 1     |
| 25614  | 1     | 4     | 1     | 1     |
| 25634  | 3     | 2     | 3     | 4     |
| 25642  | 1     | 2     | 1     | 1     |
| 25647  | 3     | 3     | 2     | 3     |
| 25653  | 1     | 1     | 1     | 1     |
| 25654  | 2     | 4     | 2     | 1     |
| 25660  | 1     | 1     | 1     | 1     |
| 25664  | 1     | 2     | 1     | 1     |
| 25665  | 2     | 2     | 2     | 2     |
| 25672  | 3     | 3     | 3     | 3     |
| 25677  | 2     | 2     | 2     | 2     |
| 25685  | 1     | 1     | 1     | 3     |
| 25699  | 3     | 3     | 3     | 3     |
| 25703  | 2     | 2     | 2     | 2     |
| 25704  | 4     | 2     | 3     | 2     |
| 25705  | 1     | 2     | 2     | 3     |

| respid | Q40_5 | Q40_6 | Q40_7 | Q40_8 |
|--------|-------|-------|-------|-------|
| 25711  | 1     | 1     | 1     | 1     |
| 25727  | 2     | 3     | 2     | 6     |
| 25728  | 1     | 2     | 1     | 1     |
| 25733  | 2     | 3     | 2     | 2     |
| 25735  | 1     | 1     | 1     | 1     |
| 25736  | 1     | 3     | 1     | 1     |
| 25742  | 1     | 2     | 1     | 1     |
| 25750  | 1     | 1     | 1     | 1     |
| 25754  |       |       |       |       |
| 25776  | 3     | 2     | 2     | 2     |
| 25778  |       |       |       |       |
| 25796  | 2     | 2     | 2     | 2     |
| 25852  | 2     | 1     | 1     | 2     |
| 25858  | 1     | 2     | 1     | 1     |
| 25859  |       |       |       |       |
| 25886  | 3     | 4     | 3     | 3     |
| 25890  | 3     | 4     | 3     | 4     |
| 25897  | 1     | 1     | 1     | 1     |
| 25903  | 1     | 1     | 1     | 1     |
| 25905  | 3     | 3     | 4     | 4     |
| 25917  |       |       |       |       |
| 25918  | 1     | 2     | 1     | 1     |
| 25928  | 1     | 3     | 1     | 2     |
| 25930  |       |       |       |       |
| 25949  | 1     | 1     | 1     | 1     |
| 25955  | 1     | 1     | 1     | 1     |
| 25959  | 1     | 2     | 1     | 1     |
| 25964  | 1     | 2     | 1     | 1     |
| 25972  | 1     | 2     | 1     | 1     |
| 25999  | 4     | 3     | 4     | 3     |
| 26019  | 2     | 2     | 2     | 2     |
| 26025  | 1     | 2     | 1     | 1     |

| respid | Q40_5 | Q40_6 | Q40_7 | Q40_8 |
|--------|-------|-------|-------|-------|
| 26039  | 3     | 4     | 4     | 3     |
| 26055  | 1     | 2     | 1     | 1     |
| 26061  | 3     | 3     | 2     | 1     |
| 26076  | 1     | 2     | 2     | 2     |
| 26088  | 3     | 2     | 2     | 1     |
| 26094  |       |       |       |       |
| 26104  | 1     | 1     | 2     | 2     |
| 26131  | 6     | 6     | 6     | 6     |
| 26134  | 3     | 3     | 3     | 3     |
| 26160  | 1     | 1     | 1     | 1     |
| 26168  | 1     | 2     | 1     | 1     |
| 26170  |       |       |       |       |
| 26191  | 1     | 2     | 1     | 2     |
| 26192  |       |       |       |       |
| 26195  | 2     | 3     | 2     | 2     |
| 26198  | 1     | 3     | 1     | 1     |
| 26199  | 1     | 2     | 1     | 1     |
| 26201  |       |       |       |       |
| 26202  | 1     | 2     | 1     | 1     |
| 26226  | 1     | 2     | 1     | 1     |
| 26233  | 3     | 2     | 3     | 3     |
| 26236  | 1     | 1     | 1     | 1     |
| 26242  | 1     | 1     | 1     | 1     |
| 26244  | 1     | 1     | 1     | 1     |
| 26250  | 3     | 4     | 3     | 4     |
| 26266  | 1     | 1     | 1     | 1     |
| 26274  | 1     | 3     | 1     | 1     |
| 26286  | 2     | 2     | 2     | 2     |
| 26288  | 1     | 1     | 2     | 1     |
| 26295  |       |       |       |       |
| 26296  | 1     | 1     | 1     | 1     |
| 26297  |       |       |       |       |

| respid | Q40_5 | Q40_6 | Q40_7 | Q40_8 |
|--------|-------|-------|-------|-------|
| 26300  | 3     | 4     | 3     | 3     |
| 26317  | 1     | 1     | 1     | 1     |
| 26343  |       |       |       |       |
| 26367  | 1     | 3     | 1     | 1     |
| 26372  | 2     | 1     | 1     | 1     |
| 26403  | 3     | 3     | 3     | 2     |
| 26423  | 1     | 1     | 1     | 1     |
| 26430  | 1     | 1     | 1     | 1     |
| 26437  | 2     | 2     | 3     | 3     |
| 26457  |       |       |       |       |
| 26466  | 5     | 4     | 3     | 5     |
| 26467  | 2     | 3     | 3     | 2     |
| 26469  | 3     | 2     | 2     | 1     |
| 26494  | 1     | 2     | 1     | 1     |
| 26510  | 1     | 2     | 1     | 1     |
| 26519  | 1     | 1     | 1     | 1     |
| 26525  | 1     | 3     | 1     | 1     |
| 26529  |       |       |       |       |
| 26533  | 1     | 1     | 1     | 1     |
| 26556  | 1     | 3     | 1     | 1     |
| 26559  | 3     | 4     | 2     | 1     |
| 26565  | 3     | 4     | 3     | 4     |
| 26576  | 1     | 4     | 3     | 1     |
| 26601  |       |       |       |       |
| 26607  | 2     | 4     | 2     | 2     |
| 26611  | 1     | 2     | 1     | 2     |
| 26619  | 1     | 2     | 1     | 2     |
| 26631  | 1     | 2     | 1     | 1     |
| 26654  | 1     | 2     | 1     | 2     |
| 26656  | 2     | 2     | 2     | 2     |
| 26664  |       |       |       |       |
| 26667  | 1     | 4     | 1     | 1     |

| respid | Q40_5 | Q40_6 | Q40_7 | Q40_8 |
|--------|-------|-------|-------|-------|
| 26674  | 4     | 4     | 4     | 5     |
| 26678  | 2     | 2     | 2     | 2     |
| 26693  | 1     | 1     | 1     | 1     |
| 26696  | 5     | 4     | 4     | 4     |
| 26703  | 3     | 4     | 3     | 3     |
| 26705  | 3     | 2     | 3     | 3     |
| 26706  | 3     | 2     | 3     | 3     |
| 26716  | 3     | 3     | 3     | 2     |
| 26721  | 1     | 2     | 1     | 1     |
| 26730  | 1     | 3     | 1     | 1     |
| 26752  | 1     | 1     | 1     | 1     |
| 26755  | 1     | 2     | 1     | 1     |
| 26791  | 1     | 1     | 1     | 1     |
| 26804  | 2     | 2     | 2     | 2     |
| 26810  | 6     | 5     | 1     | 3     |
| 26813  | 2     | 3     | 2     | 3     |
| 26833  | 2     | 2     | 2     | 2     |
| 26880  | 2     | 2     | 1     | 2     |
| 26884  | 1     | 2     | 1     | 1     |
| 26885  | 1     | 1     | 1     | 2     |
| 26890  | 4     | 2     | 3     | 2     |
| 26937  | 1     | 1     | 1     | 2     |
| 26939  | 4     | 3     | 3     | 4     |
| 26941  |       |       |       |       |
| 26992  | 2     | 5     | 3     | 2     |
| 27037  | 1     | 1     | 1     | 1     |
| 27045  | 5     | 6     | 5     | 6     |
| 27053  | 4     | 6     | 5     | 1     |
| 27060  | 3     | 4     | 3     | 4     |
| 27076  | 1     | 3     | 2     | 1     |
| 27124  | 1     | 1     | 1     | 1     |
| 27125  | 1     | 1     | 1     | 1     |

| respid | Q40_5 | Q40_6 | Q40_7 | Q40_8 |
|--------|-------|-------|-------|-------|
| 27132  | 1     | 1     | 1     | 1     |
| 27166  | 1     | 1     | 1     | 1     |
| 27190  | 2     | 2     | 2     | 3     |
| 27199  | 2     | 2     | 3     | 1     |
| 27221  | 4     | 3     | 3     | 4     |
| 27233  | 1     | 4     | 1     | 1     |
| 27241  | 1     | 2     | 1     | 1     |
| 27244  | 1     | 1     | 1     | 1     |
| 27245  | 5     | 5     | 5     | 6     |
| 27246  | 2     | 2     | 1     | 1     |
| 27253  | 2     | 2     | 2     | 1     |
| 27255  | 3     | 3     | 4     | 4     |
| 27267  | 1     | 1     | 1     | 1     |
| 27283  | 4     | 2     | 2     | 2     |
| 27289  | 3     | 4     | 3     | 2     |
| 27302  | 1     | 2     | 1     | 1     |
| 27317  | 1     | 1     | 1     | 1     |
| 27319  | 1     | 2     | 1     | 1     |
| 27331  | 1     | 2     | 2     | 1     |
| 27333  | 1     | 3     | 1     | 1     |
| 27340  |       |       |       |       |
| 27362  | 3     | 2     | 4     | 3     |
| 27370  | 1     | 1     | 1     | 1     |
| 27379  | 2     | 2     | 1     | 1     |
| 27386  |       |       |       |       |
| 27398  | 5     | 1     | 1     | 1     |
| 27404  | 1     | 1     | 1     | 1     |
| 27408  | 1     | 2     | 1     | 1     |
| 27412  | 4     | 3     | 4     | 4     |
| 27426  | 2     | 2     | 2     | 2     |
| 27455  | 1     | 1     | 1     | 1     |
| 27464  | 3     | 3     | 3     | 2     |

| respid | Q40_5 | Q40_6 | Q40_7 | Q40_8 |
|--------|-------|-------|-------|-------|
| 27484  | 2     | 5     | 1     | 1     |
| 27493  | 4     | 2     | 3     | 1     |
| 27512  | 2     | 3     | 3     | 2     |
| 27525  | 3     | 3     | 3     | 3     |
| 27532  | 3     | 2     | 2     | 2     |
| 27539  | 1     | 1     | 1     | 1     |
| 27540  | 6     | 3     | 4     | 2     |
| 27552  | 4     | 5     | 3     | 3     |
| 27562  | 1     | 1     | 1     | 1     |
| 27568  | 1     | 2     | 1     | 1     |
| 27574  | 4     | 5     | 4     | 3     |
| 27575  | 1     | 1     | 1     | 1     |
| 27577  | 1     | 3     | 1     | 2     |
| 27589  | 1     | 1     | 1     | 1     |
| 27593  | 1     | 1     | 1     | 1     |
| 27594  | 4     | 4     | 4     | 4     |
| 27595  | 6     | 6     | 5     | 1     |
| 27598  | 1     | 1     | 2     | 1     |
| 27620  | 5     | 4     | 4     | 1     |
| 27621  | 3     | 3     | 4     | 4     |
| 27628  | 1     | 2     | 1     | 1     |
| 27633  | 1     | 1     | 1     | 1     |
| 27643  | 2     | 3     | 4     | 3     |
| 27644  | 4     | 3     | 3     | 4     |
| 27668  | 3     | 2     | 2     | 2     |
| 27681  | 2     | 2     | 1     | 1     |
| 27691  | 1     | 1     | 1     | 1     |
| 27693  | 2     | 2     | 3     | 3     |
| 27703  | 2     | 3     | 1     | 1     |
| 27708  | 2     | 3     | 2     | 2     |
| 27719  | 2     | 3     | 3     | 1     |
| 27720  | 1     | 2     | 1     | 1     |



| respid | Q40_5 | Q40_6 | Q40_7 | Q40_8 |
|--------|-------|-------|-------|-------|
| 27723  | 3     | 2     | 1     | 1     |
| 27725  | 1     | 3     | 1     | 1     |
| 27734  | 3     | 3     | 3     | 3     |
| 27744  | 1     | 1     | 2     | 3     |
| 27749  | 3     | 4     | 5     | 3     |
| 27762  | 2     | 3     | 3     | 2     |
| 27808  | 3     | 3     | 2     | 2     |
| 27810  | 4     | 5     | 4     | 6     |
| 27812  | 1     | 1     | 1     | 1     |
| 27815  |       |       |       |       |
| 27818  | 2     | 2     | 1     | 1     |
| 27823  | 1     | 1     | 1     | 1     |
| 27841  | 3     | 2     | 3     | 4     |
| 27843  |       |       |       |       |
| 27851  | 2     | 3     | 3     | 1     |
| 27858  | 1     | 1     | 1     | 1     |
| 27859  | 1     | 5     | 1     | 1     |
| 27869  | 1     | 1     | 1     | 1     |
| 27872  | 1     | 2     | 1     | 1     |
| 27873  | 1     | 1     | 1     | 1     |
| 27884  | 2     | 2     | 1     | 1     |
| 27904  | 2     | 2     | 2     | 3     |
| 27915  | 1     | 2     | 1     | 1     |
| 27918  | 2     | 3     | 2     | 2     |
| 27937  | 2     | 3     | 1     | 1     |
| 27943  | 4     | 4     | 4     | 4     |
| 27948  | 1     | 1     | 1     | 1     |
| 27971  | 1     | 3     | 2     | 2     |
| 27991  | 1     | 2     | 1     | 1     |
| 28000  | 1     | 2     | 1     | 1     |
| 28011  | 1     | 2     | 2     | 1     |
| 28022  | 2     | 3     | 1     | 4     |

| respid | Q40_5 | Q40_6 | Q40_7 | Q40_8 |
|--------|-------|-------|-------|-------|
| 28025  | 1     | 2     | 1     | 1     |
| 28041  | 1     | 2     | 1     | 1     |
| 28057  | 5     | 3     | 2     | 3     |
| 28080  |       |       |       |       |
| 28098  | 1     | 2     | 1     | 1     |
| 28104  | 2     | 4     | 2     | 1     |
| 28109  | 3     | 3     | 3     | 3     |
| 28129  | 1     | 1     | 1     | 1     |
| 28141  |       |       |       |       |
| 28143  | 1     | 2     | 1     | 1     |
| 28149  | 1     | 2     | 1     | 1     |
| 28151  | 3     | 3     | 3     | 3     |
| 28161  | 2     | 5     | 3     | 3     |
| 28169  | 1     | 2     | 1     | 1     |
| 28194  | 4     | 4     | 4     | 4     |
| 28197  |       |       |       |       |
| 28206  | 1     | 3     | 1     | 1     |
| 28218  | 1     | 1     | 1     | 1     |
| 28227  | 1     | 2     | 1     | 1     |
| 28235  | 3     | 3     | 3     | 3     |
| 28246  | 2     | 4     | 2     | 3     |
| 28259  | 5     | 3     | 4     | 4     |
| 28263  | 2     | 6     | 5     | 5     |
| 28267  | 4     | 3     | 3     | 3     |
| 28274  | 1     | 2     | 1     | 1     |
| 28278  | 1     | 1     | 1     | 1     |
| 28288  | 1     | 1     | 1     | 1     |
| 28308  |       |       |       |       |
| 28309  | 2     | 2     | 2     | 3     |
| 28323  | 1     | 3     | 1     | 1     |
| 28335  | 4     | 4     | 4     | 4     |
| 28354  | 4     | 4     | 3     | 3     |

| respid | Q40_5 | Q40_6 | Q40_7 | Q40_8 |
|--------|-------|-------|-------|-------|
| 28355  | 4     | 3     | 3     | 3     |
| 28356  | 3     | 3     | 2     | 5     |
| 28357  | 1     | 2     | 1     | 1     |
| 28363  | 1     | 1     | 1     | 1     |
| 28366  | 1     | 1     | 1     | 1     |
| 28372  | 3     | 3     | 3     | 4     |
| 28381  | 2     | 2     | 2     | 2     |
| 28388  | 2     | 2     | 1     | 2     |
| 28413  | 4     | 4     | 4     | 5     |
| 28421  | 2     | 2     | 2     | 3     |
| 28430  | 4     | 4     | 4     | 4     |
| 28439  | 4     | 4     | 5     | 5     |
| 28458  | 2     | 3     | 4     | 3     |
| 28461  | 3     | 3     | 2     | 3     |
| 28466  | 1     | 1     | 1     | 1     |
| 28492  | 1     | 2     | 1     | 1     |
| 28534  |       |       |       |       |
| 28537  | 3     | 2     | 3     | 4     |
| 28560  | 1     | 1     | 1     | 1     |
| 28566  | 1     | 1     | 1     | 1     |
| 28569  | 2     | 2     | 3     | 1     |
| 28584  | 1     | 1     | 2     | 2     |
| 28590  | 1     | 4     | 1     | 1     |
| 28596  |       |       |       |       |
| 28608  | 1     | 2     | 2     | 1     |
| 28631  | 1     | 2     | 4     | 3     |
| 28644  | 2     | 2     | 2     | 2     |
| 28646  | 1     | 1     | 1     | 1     |
| 28665  |       |       |       |       |
| 28686  | 1     | 1     | 1     | 1     |
| 28704  | 3     | 2     | 2     | 2     |
| 28719  | 1     | 1     | 1     | 1     |

| respid | Q40_5 | Q40_6 | Q40_7 | Q40_8 |
|--------|-------|-------|-------|-------|
| 28736  | 1     | 1     | 1     | 1     |
| 28739  | 3     | 2     | 3     | 3     |
| 28758  | 5     | 4     | 3     | 1     |
| 28761  | 3     | 2     | 3     | 3     |
| 28770  | 4     | 4     | 5     | 4     |
| 28774  | 1     | 1     | 1     | 1     |
| 28778  | 4     | 5     | 4     | 4     |
| 28783  | 2     | 3     | 2     | 2     |
| 28785  | 1     | 2     | 1     | 1     |
| 28797  | 2     | 1     | 3     | 2     |
| 28801  | 3     | 2     | 2     | 2     |
| 28821  |       |       |       |       |
| 28827  | 1     | 1     | 1     | 1     |
| 28828  | 1     | 3     | 1     | 1     |
| 28871  | 2     | 2     | 2     | 2     |
| 28876  | 1     | 3     | 2     | 1     |
| 28891  | 5     | 4     | 2     | 1     |
| 28898  |       |       |       |       |
| 28909  | 3     | 2     | 3     | 2     |
| 28930  | 1     | 2     | 1     | 1     |
| 28935  | 2     | 4     | 2     | 2     |
| 28964  | 1     | 1     | 1     | 1     |
| 28965  | 1     | 2     | 1     | 1     |
| 28967  | 5     | 6     | 6     | 5     |
| 28975  |       |       |       |       |
| 28982  | 2     | 2     | 1     | 1     |
| 28989  | 2     | 2     | 1     | 2     |
| 29003  | 2     | 4     | 2     | 2     |
| 29004  | 1     | 2     | 1     | 1     |
| 29007  | 1     | 2     | 1     | 1     |
| 29008  | 1     | 1     | 1     | 1     |
| 29011  | 4     | 3     | 2     | 2     |

| respid | Q40_5 | Q40_6 | Q40_7 | Q40_8 |
|--------|-------|-------|-------|-------|
| 29012  | 1     | 2     | 1     | 1     |
| 29014  |       |       |       |       |
| 29016  | 1     | 1     | 1     | 1     |
| 29018  | 1     | 6     | 1     | 1     |
| 29048  | 1     | 4     | 3     | 1     |
| 29184  | 1     | 2     | 1     | 1     |
| 29237  | 1     | 1     | 1     | 1     |
| 29252  | 2     | 2     | 1     | 1     |
| 29267  | 1     | 2     | 1     | 1     |
| 29276  |       |       |       |       |
| 29281  | 2     | 3     | 3     | 1     |
| 29285  | 1     | 1     | 1     | 1     |
| 29291  | 5     | 4     | 3     | 4     |
| 29304  | 2     | 2     | 2     | 2     |
| 29323  | 1     | 2     | 1     | 1     |
| 29330  | 2     | 4     | 1     | 1     |
| 29357  | 3     | 2     | 2     | 2     |
| 29416  | 1     | 2     | 2     | 1     |
| 29432  | 1     | 2     | 2     | 1     |
| 29482  | 1     | 2     | 3     | 1     |
| 29506  | 2     | 3     | 1     | 2     |
| 29509  | 1     | 1     | 1     | 1     |
| 29512  | 4     | 3     | 2     | 3     |
| 29519  | 1     | 2     | 1     | 1     |
| 29520  | 2     | 2     | 1     | 1     |
| 29521  | 2     | 2     | 2     | 1     |
| 29529  | 4     | 5     | 5     | 5     |
| 29532  | 1     | 1     | 1     | 1     |
| 29547  | 4     | 4     | 5     | 3     |
| 29551  | 2     | 2     | 2     | 2     |
| 29584  | 3     | 5     | 4     | 3     |
| 29591  | 2     | 3     | 3     | 3     |

| respid | Q40_5 | Q40_6 | Q40_7 | Q40_8 |
|--------|-------|-------|-------|-------|
| 29613  | 1     | 2     | 1     | 1     |
| 29615  | 3     | 3     | 3     | 3     |
| 29625  | 1     | 3     | 2     | 3     |
| 29660  | 2     | 1     | 2     | 1     |
| 29677  |       |       |       |       |
| 29700  | 3     | 4     | 3     | 2     |
| 29715  | 5     | 5     | 4     | 6     |
| 29720  |       |       |       |       |
| 29730  | 1     | 1     | 1     | 1     |
| 29734  | 3     | 2     | 3     | 3     |
| 29754  |       |       |       |       |
| 29771  | 1     | 4     | 1     | 1     |
| 29774  | 1     | 2     | 1     | 1     |
| 29783  | 1     | 4     | 1     | 1     |
| 29812  | 2     | 2     | 2     | 2     |
| 29813  | 1     | 1     | 1     | 1     |
| 29814  | 2     | 1     | 2     | 2     |
| 29820  | 2     | 2     | 2     | 2     |
| 29906  | 1     | 3     | 1     | 1     |
| 29907  | 3     | 2     | 2     | 2     |
| 29928  |       |       |       |       |
| 29932  | 1     | 3     | 2     | 1     |
| 29958  | 3     | 2     | 3     | 3     |
| 29982  | 1     | 2     | 1     | 1     |
| 29989  | 1     | 2     | 1     | 1     |
| 29994  | 2     | 1     | 2     | 1     |
| 30005  | 2     | 2     | 2     | 1     |
| 30077  | 1     | 2     | 1     | 1     |
| 30098  |       |       |       |       |
| 30107  | 2     | 2     | 1     | 1     |
| 30154  | 1     | 2     | 1     | 1     |
| 30159  | 1     | 1     | 1     | 1     |

| respid | Q40_5 | Q40_6 | Q40_7 | Q40_8 |
|--------|-------|-------|-------|-------|
| 30162  | 1     | 2     | 1     | 1     |
| 30163  |       |       |       |       |
| 30189  | 2     | 3     | 2     | 1     |
| 30230  | 1     | 2     | 1     | 1     |
| 30259  | 4     | 3     | 3     | 3     |
| 30284  | 1     | 2     | 1     | 1     |
| 30296  | 1     | 1     | 1     | 1     |
| 30330  | 1     | 1     | 3     | 2     |
| 30341  | 1     | 1     | 1     | 1     |
| 30352  | 4     | 5     | 6     | 2     |
| 30379  | 1     | 1     | 1     | 1     |
| 30424  | 1     | 1     | 1     | 1     |
| 30447  | 1     | 1     | 1     | 1     |
| 30477  | 3     | 2     | 3     | 3     |
| 30503  | 1     | 1     | 1     | 1     |
| 30515  | 5     | 2     | 2     | 3     |
| 30516  | 1     | 2     | 2     | 1     |
| 30623  | 3     | 4     | 4     | 3     |
| 30639  | 1     | 2     | 1     | 1     |
| 30670  | 1     | 2     | 1     | 1     |
| 30697  | 1     | 1     | 1     | 1     |
| 30735  | 1     | 2     | 1     | 1     |
| 30742  | 2     | 1     | 2     | 2     |
| 30751  | 3     | 3     | 4     | 2     |
| 30789  |       |       |       |       |
| 30867  | 4     | 4     | 4     | 4     |
| 30876  | 1     | 2     | 1     | 1     |
| 30877  | 1     | 2     | 1     | 1     |
| 30887  | 3     | 2     | 3     | 2     |
| 30891  | 3     | 2     | 3     | 2     |
| 31030  | 1     | 1     | 1     | 1     |
| 31059  | 2     | 3     | 3     | 2     |

| respid | Q40_5 | Q40_6 | Q40_7 | Q40_8 |
|--------|-------|-------|-------|-------|
| 31082  |       |       |       |       |
| 31106  | 1     | 1     | 1     | 1     |
| 31110  | 1     | 1     | 1     | 1     |
| 31265  | 4     | 4     | 3     | 3     |
| 31266  | 5     | 4     | 3     | 3     |
| 31267  | 3     | 2     | 3     | 3     |
| 31310  | 1     | 2     | 1     | 1     |
| 31325  | 2     | 1     | 1     | 1     |
| 31367  | 2     | 2     | 2     | 2     |
| 31389  | 2     | 1     | 1     | 1     |
| 31440  | 1     | 2     | 2     | 1     |
| 31465  | 1     | 2     | 1     | 1     |
| 31477  | 1     | 2     | 1     | 1     |
| 31491  | 1     | 2     | 1     | 1     |
| 31494  | 4     | 4     | 4     | 5     |
| 31509  | 3     | 5     | 3     | 4     |
| 31533  | 1     | 1     | 2     | 1     |
| 31547  | 2     | 2     | 2     | 1     |
| 31558  | 1     | 2     | 1     | 1     |
| 31579  | 1     | 2     | 1     | 1     |
| 31591  | 2     | 3     | 2     | 1     |
| 31596  | 2     | 2     | 2     | 3     |
| 31601  | 4     | 5     | 4     | 5     |
| 31605  | 2     | 1     | 1     | 2     |
| 31637  | 2     | 2     | 1     | 1     |
| 31646  | 1     | 2     | 1     | 1     |
| 31647  | 5     | 5     | 5     | 1     |
| 31650  | 1     | 2     | 1     | 1     |
| 31651  | 5     | 3     | 2     | 4     |
| 31657  | 1     | 2     | 1     | 1     |
| 31660  | 1     | 2     | 1     | 1     |
| 31661  | 2     | 1     | 4     | 1     |



| respid | Q40_5 | Q40_6 | Q40_7 | Q40_8 |
|--------|-------|-------|-------|-------|
| 31667  | 1     | 3     | 2     | 1     |
| 31674  | 5     | 1     | 1     | 3     |
| 31686  | 4     | 2     | 4     | 2     |
| 31693  |       |       |       |       |
| 31716  |       |       |       |       |
| 31818  | 1     | 2     | 2     | 2     |
| 31886  | 2     | 1     | 1     | 1     |
| 31945  | 3     | 5     | 4     | 3     |
| 31957  | 1     | 4     | 1     | 1     |
| 31966  | 2     | 3     | 2     | 2     |
| 31978  | 2     | 3     | 2     | 1     |
| 31999  | 1     | 3     | 1     | 1     |
| 32026  | 1     | 2     | 2     | 2     |
| 32033  | 1     | 2     | 1     | 2     |
| 32037  | 4     | 3     | 3     | 3     |
| 32038  | 3     | 3     | 3     | 4     |
| 32047  | 3     | 4     | 3     | 3     |
| 32053  |       |       |       |       |
| 32069  | 2     | 2     | 2     | 2     |
| 32081  | 2     | 3     | 3     | 2     |
| 32123  | 1     | 2     | 1     | 1     |
| 32130  | 3     | 2     | 1     | 2     |
| 32141  | 1     | 1     | 1     | 2     |
| 32158  |       |       |       |       |
| 32165  | 1     | 2     | 1     | 1     |
| 32180  | 1     | 2     | 1     | 1     |
| 32221  | 3     | 4     | 4     | 5     |
| 32292  | 1     | 2     | 1     | 1     |
| 32318  | 3     | 2     | 2     | 1     |
| 32346  | 1     | 2     | 1     | 1     |
| 32402  | 3     | 3     | 3     | 3     |
| 32422  | 1     | 2     | 1     | 1     |

| respid | Q40_5 | Q40_6 | Q40_7 | Q40_8 |
|--------|-------|-------|-------|-------|
| 32439  | 1     | 1     | 1     | 1     |
| 32507  | 3     | 3     | 3     | 3     |
| 32522  |       |       |       |       |
| 32535  |       |       |       |       |
| 32546  | 1     | 1     | 1     | 1     |
| 32553  | 2     | 2     | 1     | 1     |
| 32570  |       |       |       |       |
| 32592  | 1     | 1     | 1     | 1     |
| 32605  | 3     | 2     | 3     | 2     |
| 32630  | 2     | 2     | 2     | 1     |
| 32642  | 2     | 3     | 2     | 1     |
| 32646  | 1     | 1     | 1     | 1     |
| 32665  | 3     | 3     | 3     | 2     |
| 32677  | 1     | 1     | 1     | 1     |
| 32694  | 1     | 2     | 1     | 1     |
| 32698  | 2     | 5     | 1     | 1     |
| 32754  | 4     | 5     | 4     | 2     |
| 32799  | 2     | 3     | 4     | 4     |
| 32816  |       |       |       |       |
| 32819  | 2     | 3     | 2     | 2     |
| 32840  | 2     | 2     | 3     | 2     |
| 32861  | 1     | 3     | 1     | 2     |
| 32866  | 1     | 1     | 1     | 1     |
| 32889  | 5     | 5     | 6     | 3     |
| 32960  | 1     | 1     | 1     | 1     |
| 32965  | 1     | 2     | 1     | 1     |
| 32986  | 2     | 2     | 2     | 2     |
| 33005  | 4     | 3     | 2     | 2     |
| 33054  | 2     | 4     | 3     | 2     |
| 33072  | 2     | 5     | 3     | 1     |
| 33095  | 1     | 2     | 1     | 1     |
| 33099  | 3     | 4     | 1     | 2     |

| respid | Q40_5 | Q40_6 | Q40_7 | Q40_8 |
|--------|-------|-------|-------|-------|
| 33121  | 1     | 1     | 1     | 1     |
| 33152  | 1     | 3     | 2     | 1     |
| 33159  | 1     | 1     | 1     | 1     |
| 33189  | 1     | 1     | 1     | 1     |
| 33198  | 6     | 6     | 1     | 1     |
| 33202  | 2     | 3     | 4     | 5     |
| 33204  | 1     | 1     | 1     | 1     |
| 33224  | 1     | 2     | 1     | 1     |
| 33272  | 4     | 3     | 2     | 2     |
| 33294  | 1     | 1     | 1     | 1     |
| 33300  | 3     | 3     | 2     | 4     |
| 33314  | 2     | 3     | 2     | 2     |
| 33338  | 2     | 2     | 3     | 3     |
| 33350  | 3     | 3     | 3     | 4     |
| 33362  | 3     | 3     | 2     | 3     |
| 33368  |       |       |       |       |
| 33374  | 2     | 2     | 2     | 3     |
| 33380  | 5     | 5     | 4     | 6     |
| 33385  | 2     | 2     | 2     | 2     |
| 33402  | 2     | 3     | 4     | 3     |
| 33414  | 2     | 3     | 1     | 1     |
| 33439  | 3     | 3     | 2     | 1     |
| 33449  | 4     | 3     | 2     | 2     |
| 33533  | 1     | 1     | 1     | 1     |
| 33540  | 1     | 1     | 1     | 1     |
| 33556  | 2     | 4     | 2     | 1     |
| 33615  | 1     | 2     | 1     | 1     |
| 33694  | 3     | 3     | 3     | 4     |
| 33717  | 1     | 2     | 1     | 1     |
| 33729  | 1     | 3     | 1     | 1     |
| 33746  | 1     | 1     | 1     | 1     |
| 33764  | 1     | 2     | 1     | 1     |

| respid | Q40_5 | Q40_6 | Q40_7 | Q40_8 |
|--------|-------|-------|-------|-------|
| 33790  | 2     | 2     | 1     | 2     |
| 33868  | 4     | 5     | 6     | 6     |
| 33872  | 4     | 4     | 2     | 1     |
| 33883  | 1     | 1     | 1     | 1     |
| 33884  | 1     | 2     | 1     | 1     |
| 33900  | 3     | 2     | 1     | 1     |
| 33933  | 1     | 2     | 3     | 1     |
| 33949  | 1     | 1     | 1     | 1     |
| 34005  |       |       |       |       |
| 34016  |       |       |       |       |
| 34041  | 4     | 4     | 3     | 5     |
| 34053  | 1     | 2     | 1     | 1     |
| 34056  | 1     | 1     | 1     | 1     |
| 34093  | 1     | 1     | 1     | 1     |
| 34112  | 3     | 3     | 2     | 1     |
| 34136  | 3     | 3     | 4     | 4     |
| 34138  | 1     | 1     | 1     | 1     |
| 34139  | 3     | 3     | 2     | 4     |
| 34189  | 1     | 1     | 1     | 1     |
| 34239  | 2     | 2     | 2     | 1     |
| 34240  | 2     | 1     | 1     | 2     |
| 34241  | 1     | 2     | 1     | 1     |
| 34259  | 4     | 3     | 3     | 2     |
| 34303  | 6     | 5     | 4     | 3     |
| 34306  | 1     | 1     | 1     | 1     |
| 34395  | 2     | 3     | 2     | 1     |
| 34463  | 2     | 3     | 2     | 1     |
| 34466  | 5     | 6     | 5     | 4     |
| 34471  | 1     | 2     | 1     | 1     |
| 34489  | 4     | 4     | 3     | 2     |
| 34518  | 3     | 1     | 3     | 1     |
| 34542  | 3     | 2     | 3     | 3     |

| respid | Q40_5 | Q40_6 | Q40_7 | Q40_8 |
|--------|-------|-------|-------|-------|
| 34595  |       |       |       |       |
| 34604  | 2     | 1     | 2     | 2     |
| 34631  | 1     | 5     | 2     | 1     |
| 34665  | 1     | 2     | 1     | 1     |
| 34716  | 1     | 1     | 1     | 1     |
| 34729  | 1     | 1     | 1     | 1     |
| 34772  | 3     | 4     | 4     | 4     |
| 34800  | 1     | 3     | 1     | 1     |
| 34819  | 4     | 3     | 3     | 2     |
| 34829  | 2     | 2     | 3     | 3     |
| 34831  | 2     | 3     | 3     | 2     |
| 34839  | 1     | 3     | 1     | 1     |
| 34868  | 3     | 5     | 2     | 2     |
| 34869  | 1     | 2     | 1     | 1     |
| 34882  | 2     | 4     | 2     | 1     |
| 34895  | 5     | 5     | 5     | 3     |
| 34901  | 1     | 3     | 2     | 1     |
| 34904  | 3     | 3     | 2     | 3     |
| 34907  | 3     | 4     | 3     | 3     |
| 34914  | 1     | 2     | 1     | 1     |
| 34918  | 3     | 3     | 3     | 2     |
| 34924  | 1     | 1     | 1     | 1     |
| 34933  | 3     | 3     | 3     | 2     |
| 34938  | 1     | 2     | 1     | 1     |
| 34952  | 4     | 4     | 4     | 4     |
| 34959  | 2     | 2     | 1     | 1     |
| 34972  | 2     | 2     | 1     | 1     |
| 34973  | 2     | 2     | 2     | 2     |
| 34975  | 3     | 3     | 2     | 4     |
| 34977  | 2     | 2     | 2     | 3     |
| 34978  | 1     | 2     | 1     | 1     |
| 34980  | 2     | 2     | 2     | 2     |

| respid | Q40_5 | Q40_6 | Q40_7 | Q40_8 |
|--------|-------|-------|-------|-------|
| 34984  | 3     | 3     | 3     | 3     |
| 34986  | 4     | 4     | 4     | 2     |
| 34994  | 2     | 2     | 1     | 1     |
| 34996  | 3     | 3     | 3     | 2     |
| 35003  | 1     | 1     | 1     | 1     |
| 35014  | 1     | 1     | 1     | 1     |
| 35029  | 2     | 2     | 2     | 3     |
| 35030  | 4     | 4     | 2     | 1     |
| 35037  | 3     | 2     | 1     | 1     |
| 35043  |       |       |       |       |
| 35048  |       |       |       |       |
| 35055  | 2     | 2     | 2     | 1     |
| 35067  | 1     | 1     | 1     | 2     |
| 35072  | 1     | 2     | 1     | 1     |
| 35078  | 2     | 4     | 2     | 4     |
| 35084  | 1     | 1     | 1     | 1     |
| 35095  |       |       |       |       |
| 35096  |       |       |       |       |
| 35097  | 3     | 2     | 2     | 2     |
| 35098  | 2     | 2     | 3     | 3     |
| 35109  | 4     | 4     | 4     | 3     |
| 35114  | 1     | 1     | 1     | 1     |
| 35115  | 1     | 1     | 1     | 1     |
| 35124  | 4     | 3     | 2     | 3     |
| 35125  | 1     | 1     | 1     | 1     |
| 35141  |       |       |       |       |
| 35142  | 2     | 1     | 1     | 1     |
| 35145  |       |       |       |       |
| 35149  | 3     | 4     | 4     | 3     |
| 35159  | 1     | 1     | 1     | 1     |
| 35163  | 3     | 1     | 3     | 1     |
| 35174  | 2     | 2     | 2     | 2     |

| respid | Q40_5 | Q40_6 | Q40_7 | Q40_8 |
|--------|-------|-------|-------|-------|
| 35188  |       |       |       |       |
| 35189  | 4     | 5     | 4     | 2     |
| 35201  | 4     | 3     | 4     | 4     |
| 35215  | 1     | 1     | 1     | 1     |
| 35228  | 1     | 1     | 1     | 1     |
| 35235  | 2     | 2     | 2     | 2     |
| 35239  | 3     | 3     | 4     | 4     |
| 35243  | 2     | 2     | 1     | 1     |
| 35245  | 4     | 2     | 2     | 1     |
| 35259  |       |       |       |       |
| 35265  | 3     | 3     | 4     | 4     |
| 35272  | 2     | 2     | 2     | 2     |
| 35280  | 1     | 2     | 1     | 1     |
| 35298  | 1     | 1     | 1     | 1     |
| 35305  | 1     | 1     | 2     | 1     |
| 35306  | 4     | 3     | 3     | 3     |
| 35307  | 1     | 1     | 1     | 1     |
| 35311  | 1     | 1     | 1     | 1     |
| 35322  | 1     | 3     | 3     | 2     |
| 35323  | 1     | 1     | 2     | 2     |
| 35327  | 1     | 2     | 2     | 2     |
| 35366  | 1     | 1     | 1     | 2     |
| 35378  | 2     | 4     | 2     | 2     |
| 35389  | 1     | 2     | 1     | 1     |
| 35390  | 1     | 1     | 1     | 1     |
| 35395  | 2     | 3     | 2     | 2     |
| 35411  | 3     | 3     | 2     | 4     |
| 35423  | 1     | 1     | 1     | 1     |
| 35425  | 1     | 3     | 1     | 1     |
| 35434  | 1     | 2     | 2     | 1     |
| 35462  | 1     | 1     | 1     | 1     |
| 35478  | 3     | 3     | 3     | 3     |

| respid | Q40_5 | Q40_6 | Q40_7 | Q40_8 |
|--------|-------|-------|-------|-------|
| 35481  | 3     | 3     | 4     | 5     |
| 35498  | 1     | 1     | 1     | 1     |
| 35499  |       |       |       |       |
| 35502  | 2     | 2     | 3     | 1     |
| 35503  |       |       |       |       |
| 35504  |       |       |       |       |
| 35508  | 3     | 2     | 4     | 1     |
| 35513  | 2     | 2     | 2     | 2     |
| 35516  | 2     | 5     | 5     | 1     |
| 35519  | 4     | 4     | 4     | 1     |
| 35530  | 2     | 4     | 1     | 1     |
| 35533  | 3     | 3     | 3     | 3     |
| 35561  | 3     | 3     | 3     | 2     |
| 35565  | 1     | 1     | 1     | 1     |
| 35588  | 1     | 1     | 1     | 1     |
| 35598  | 1     | 1     | 1     | 1     |
| 35607  | 1     | 3     | 1     | 1     |
| 35638  | 1     | 1     | 1     | 1     |
| 35642  | 1     | 1     | 1     | 1     |
| 35643  | 3     | 2     | 2     | 2     |
| 35680  | 1     | 1     | 1     | 1     |
| 35697  | 2     | 2     | 1     | 1     |
| 35703  |       |       |       |       |
| 35709  | 4     | 4     | 5     | 3     |
| 35710  | 1     | 2     | 1     | 1     |
| 35721  | 4     | 4     | 4     | 1     |
| 35723  | 1     | 2     | 1     | 1     |
| 35736  | 3     | 2     | 2     | 2     |
| 35739  | 3     | 3     | 3     | 2     |
| 35745  | 1     | 5     | 1     | 1     |
| 35748  | 4     | 5     | 3     | 5     |
| 35750  | 2     | 2     | 1     | 1     |



| respid | Q40_5 | Q40_6 | Q40_7 | Q40_8 |
|--------|-------|-------|-------|-------|
| 35752  | 2     | 3     | 2     | 1     |
| 35773  | 2     | 2     | 3     | 2     |
| 35779  | 1     | 1     | 1     | 1     |
| 35791  | 1     | 2     | 1     | 1     |
| 35801  | 2     | 2     | 1     | 1     |
| 35802  | 1     | 1     | 1     | 1     |
| 35837  | 4     | 6     | 4     | 3     |
| 35853  | 1     | 2     | 2     | 2     |
| 35858  | 2     | 3     | 2     | 2     |
| 35860  | 4     | 4     | 4     | 1     |
| 35875  | 3     | 5     | 2     | 1     |
| 35883  | 1     | 1     | 1     | 1     |
| 35890  | 1     | 3     | 3     | 1     |
| 35898  | 1     | 1     | 1     | 1     |
| 35901  | 5     | 5     | 5     | 3     |
| 35914  | 4     | 3     | 2     | 3     |
| 35924  | 2     | 3     | 2     | 2     |
| 35950  | 2     | 4     | 3     | 1     |
| 35961  | 3     | 2     | 1     | 2     |
| 35966  | 1     | 2     | 1     | 1     |
| 35967  | 1     | 1     | 1     | 1     |
| 35971  | 1     | 1     | 1     | 1     |
| 35974  | 1     | 2     | 1     | 1     |
| 35983  | 4     | 4     | 4     | 3     |
| 35992  | 6     | 6     | 5     | 3     |
| 36010  | 2     | 1     | 1     | 2     |
| 36019  | 6     | 6     | 6     | 6     |
| 36029  | 2     | 4     | 2     | 2     |
| 36033  | 1     | 1     | 1     | 1     |
| 36042  | 1     | 2     | 1     | 1     |
| 36043  | 3     | 3     | 3     | 1     |
| 36048  | 3     | 3     | 6     | 1     |

| respid | Q40_5 | Q40_6 | Q40_7 | Q40_8 |
|--------|-------|-------|-------|-------|
| 36050  | 2     | 1     | 2     | 3     |
| 36062  | 2     | 3     | 1     | 1     |
| 36063  |       |       |       |       |
| 36092  | 3     | 3     | 3     | 3     |
| 36097  | 2     | 3     | 2     | 2     |
| 36108  | 1     | 1     | 1     | 1     |
| 36113  | 4     | 5     | 4     | 3     |
| 36117  | 1     | 2     | 1     | 1     |
| 36129  | 3     | 3     | 3     | 3     |
| 36144  | 1     | 1     | 1     | 1     |
| 36152  | 1     | 1     | 1     | 1     |
| 36154  | 5     | 4     | 3     | 4     |
| 36155  | 1     | 1     | 1     | 1     |
| 36167  | 1     | 1     | 1     | 1     |
| 36172  | 1     | 2     | 1     | 1     |
| 36173  | 2     | 3     | 2     | 2     |
| 36174  | 1     | 2     | 2     | 3     |
| 36182  | 1     | 2     | 1     | 1     |
| 36192  | 1     | 4     | 2     | 3     |
| 36195  | 3     | 3     | 4     | 3     |
| 36204  | 2     | 2     | 2     | 1     |
| 36205  | 1     | 1     | 1     | 1     |
| 36208  | 1     | 1     | 1     | 1     |
| 36216  | 2     | 3     | 3     | 2     |
| 36221  | 3     | 3     | 3     | 3     |
| 36244  | 1     | 1     | 1     | 1     |
| 36255  | 3     | 3     | 2     | 2     |
| 36259  | 1     | 2     | 1     | 1     |
| 36262  | 2     | 2     | 2     | 3     |
| 36268  | 1     | 1     | 1     | 1     |
| 36308  | 4     | 3     | 3     | 1     |
| 36324  | 5     | 3     | 1     | 1     |

| respid | Q40_5 | Q40_6 | Q40_7 | Q40_8 |
|--------|-------|-------|-------|-------|
| 36330  | 1     | 2     | 1     | 1     |
| 36331  | 2     | 5     | 3     | 1     |
| 36336  | 1     | 2     | 1     | 1     |
| 36337  | 2     | 2     | 2     | 1     |
| 36364  | 1     | 2     | 1     | 2     |
| 36365  | 4     | 4     | 3     | 3     |
| 36396  | 1     | 2     | 2     | 1     |
| 36403  | 1     | 2     | 1     | 1     |
| 36410  | 1     | 1     | 1     | 1     |
| 36413  | 2     | 2     | 2     | 1     |
| 36422  | 1     | 2     | 2     | 1     |
| 36424  | 3     | 5     | 3     | 2     |
| 36425  | 3     | 4     | 2     | 4     |
| 36432  | 2     | 2     | 2     | 2     |
| 36435  | 4     | 3     | 3     | 3     |
| 36446  | 3     | 4     | 3     | 3     |
| 36451  | 3     | 2     | 2     | 1     |
| 36453  | 2     | 4     | 5     | 3     |
| 36459  | 3     | 4     | 3     | 3     |
| 36464  | 3     | 2     | 2     | 3     |
| 36465  | 2     | 3     | 2     | 1     |
| 36466  |       |       |       |       |
| 36476  | 3     | 1     | 2     | 3     |
| 36487  | 3     | 3     | 1     | 1     |
| 36488  | 3     | 2     | 2     | 2     |
| 36500  |       |       |       |       |
| 36504  | 1     | 2     | 1     | 1     |
| 36513  | 1     | 1     | 2     | 2     |
| 36515  | 3     | 3     | 3     | 3     |
| 36521  | 2     | 4     | 3     | 4     |
| 36530  | 3     | 3     | 2     | 3     |
| 36556  | 3     | 4     | 2     | 1     |

| respid | Q40_5 | Q40_6 | Q40_7 | Q40_8 |
|--------|-------|-------|-------|-------|
| 36564  | 4     | 4     | 3     | 2     |
| 36584  | 1     | 1     | 1     | 1     |
| 36585  |       |       |       |       |
| 36586  |       |       |       |       |
| 36606  | 5     | 5     | 5     | 4     |
| 36615  | 1     | 2     | 1     | 1     |
| 36628  | 1     | 2     | 1     | 1     |
| 36630  | 2     | 2     | 2     | 2     |
| 36631  | 2     | 4     | 2     | 1     |
| 36636  | 1     | 1     | 1     | 1     |
| 36637  | 2     | 1     | 2     | 2     |
| 36651  | 3     | 2     | 3     | 3     |
| 36661  | 1     | 1     | 1     | 1     |
| 36670  | 2     | 2     | 3     | 2     |
| 36671  | 2     | 4     | 2     | 3     |
| 36688  |       |       |       |       |
| 36694  | 1     | 2     | 1     | 2     |
| 36696  |       |       |       |       |
| 36703  |       |       |       |       |
| 36719  | 3     | 4     | 4     | 4     |
| 36721  | 3     | 3     | 4     | 4     |
| 36740  | 5     | 5     | 5     | 5     |
| 36755  | 3     | 3     | 3     | 3     |
| 36765  | 3     | 3     | 2     | 2     |
| 36770  |       |       |       |       |
| 36773  | 2     | 2     | 3     | 3     |
| 36813  | 1     | 3     | 2     | 1     |
| 36819  | 4     | 4     | 3     | 3     |
| 36820  | 2     | 2     | 2     | 2     |
| 36821  | 1     | 1     | 1     | 1     |
| 36827  | 1     | 1     | 1     | 1     |
| 36835  | 1     | 3     | 1     | 1     |

| respid | Q40_5 | Q40_6 | Q40_7 | Q40_8 |
|--------|-------|-------|-------|-------|
| 36837  | 1     | 1     | 1     | 2     |
| 36849  | 2     | 2     | 1     | 1     |
| 36851  | 2     | 2     | 2     | 3     |
| 36868  | 3     | 3     | 4     | 3     |
| 36870  | 1     | 1     | 1     | 1     |
| 36871  |       |       |       |       |
| 36874  | 3     | 3     | 3     | 3     |
| 36878  | 4     | 3     | 2     | 3     |
| 36887  | 2     | 1     | 2     | 1     |
| 36889  | 3     | 2     | 1     | 3     |
| 36891  | 1     | 2     | 1     | 1     |
| 36903  | 3     | 2     | 2     | 1     |
| 36905  | 1     | 2     | 1     | 1     |
| 36913  | 2     | 1     | 2     | 1     |
| 36949  | 3     | 3     | 3     | 3     |
| 36954  | 2     | 3     | 3     | 2     |
| 36962  | 2     | 2     | 2     | 2     |
| 36965  | 2     | 3     | 2     | 1     |
| 36970  | 1     | 1     | 1     | 1     |
| 36979  | 2     | 3     | 2     | 2     |
| 36990  | 3     | 2     | 2     | 3     |
| 36991  | 1     | 2     | 1     | 1     |
| 36992  | 2     | 2     | 1     | 2     |
| 37015  |       |       |       |       |
| 37017  | 2     | 1     | 2     | 2     |
| 37020  |       |       |       |       |
| 37033  | 5     | 5     | 4     | 4     |
| 37041  | 1     | 1     | 1     | 1     |
| 37048  | 2     | 4     | 2     | 2     |
| 37050  | 1     | 2     | 1     | 1     |
| 37054  | 3     | 3     | 3     | 3     |
| 37057  | 4     | 4     | 4     | 2     |

| respid | Q40_5 | Q40_6 | Q40_7 | Q40_8 |
|--------|-------|-------|-------|-------|
| 37067  | 1     | 3     | 1     | 1     |
| 37074  | 1     | 1     | 1     | 2     |
| 37088  | 2     | 2     | 2     | 2     |
| 37090  | 3     | 4     | 5     | 4     |
| 37110  | 3     | 4     | 4     | 4     |
| 37122  | 2     | 1     | 1     | 1     |
| 37124  | 2     | 2     | 1     | 2     |
| 37126  |       |       |       |       |
| 37129  | 3     | 4     | 4     | 3     |
| 37130  | 6     | 2     | 2     | 1     |
| 37142  | 3     | 4     | 3     | 2     |
| 37160  | 2     | 3     | 2     | 2     |
| 37168  | 1     | 1     | 1     | 1     |
| 37169  | 3     | 3     | 3     | 3     |
| 37191  | 2     | 2     | 2     | 1     |
| 37197  | 5     | 5     | 5     | 6     |
| 37204  | 2     | 3     | 1     | 1     |
| 37213  | 5     | 4     | 4     | 5     |
| 37238  | 1     | 1     | 1     | 1     |
| 37242  | 3     | 2     | 2     | 3     |
| 37243  | 4     | 3     | 4     | 4     |
| 37275  | 2     | 3     | 2     | 3     |
| 37305  | 3     | 3     | 2     | 3     |
| 37357  | 4     | 5     | 5     | 4     |
| 37365  | 2     | 3     | 4     | 4     |
| 37370  |       |       |       |       |
| 37406  | 5     | 5     | 4     | 4     |
| 37410  | 1     | 2     | 3     | 3     |
| 37411  | 3     | 3     | 4     | 4     |
| 37427  | 3     | 4     | 3     | 2     |
| 37437  | 4     | 2     | 2     | 4     |
| 37440  | 1     | 2     | 1     | 1     |

| respid | Q40_5 | Q40_6 | Q40_7 | Q40_8 |
|--------|-------|-------|-------|-------|
| 37452  | 2     | 1     | 2     | 1     |
| 37465  | 5     | 4     | 3     | 5     |
| 37468  | 3     | 4     | 4     | 3     |
| 37469  | 2     | 3     | 2     | 1     |
| 37477  | 4     | 3     | 2     | 3     |
| 37509  | 1     | 1     | 1     | 1     |
| 37513  | 2     | 4     | 3     | 4     |
| 37534  | 3     | 3     | 3     | 3     |
| 37537  | 1     | 1     | 1     | 1     |
| 37560  | 3     | 4     | 3     | 2     |
| 37566  | 4     | 5     | 4     | 4     |
| 37572  | 2     | 2     | 4     | 3     |
| 37574  | 3     | 2     | 3     | 2     |
| 37575  | 3     | 5     | 2     | 3     |
| 37590  | 5     | 3     | 3     | 5     |
| 37593  | 1     | 3     | 1     | 1     |
| 37599  | 1     | 1     | 1     | 1     |
| 37641  | 1     | 2     | 1     | 1     |
| 37651  | 2     | 3     | 2     | 2     |
| 37670  | 1     | 2     | 1     | 1     |
| 37680  | 2     | 4     | 4     | 3     |
| 37690  | 2     | 5     | 2     | 2     |
| 37694  |       |       |       |       |
| 37705  | 1     | 1     | 1     | 1     |
| 37710  | 3     | 3     | 3     | 3     |
| 37719  | 4     | 3     | 3     | 2     |
| 37741  | 2     | 3     | 3     | 2     |
| 37752  | 2     | 1     | 1     | 2     |
| 37755  | 2     | 3     | 2     | 3     |
| 37757  | 1     | 2     | 1     | 1     |
| 37783  | 3     | 3     | 2     | 3     |
| 37793  | 5     | 5     | 5     | 4     |

| respid | Q40_5 | Q40_6 | Q40_7 | Q40_8 |
|--------|-------|-------|-------|-------|
| 37800  | 4     | 4     | 3     | 2     |
| 37801  | 1     | 1     | 1     | 3     |
| 37820  | 3     | 3     | 3     | 4     |
| 37826  | 2     | 3     | 3     | 1     |
| 37835  | 4     | 3     | 4     | 3     |
| 37839  | 6     | 4     | 5     | 5     |
| 37871  | 4     | 4     | 5     | 5     |
| 37876  | 3     | 5     | 4     | 4     |
| 37879  | 3     | 3     | 2     | 2     |
| 37894  | 1     | 2     | 2     | 1     |
| 37895  | 3     | 3     | 2     | 2     |
| 37901  | 2     | 5     | 2     | 1     |
| 37926  | 3     | 3     | 4     | 2     |
| 37937  | 2     | 3     | 2     | 2     |
| 37938  | 1     | 1     | 1     | 1     |
| 37959  | 1     | 3     | 1     | 1     |
| 37970  |       |       |       |       |
| 37972  | 3     | 4     | 4     | 3     |
| 37988  | 2     | 2     | 3     | 3     |
| 37989  | 4     | 3     | 4     | 3     |
| 38000  | 3     | 2     | 2     | 1     |
| 38028  | 5     | 5     | 4     | 4     |
| 38042  | 5     | 4     | 4     | 5     |
| 38052  | 1     | 3     | 1     | 1     |
| 38056  | 1     | 1     | 1     | 1     |
| 38106  | 4     | 4     | 3     | 3     |
| 38114  | 4     | 4     | 4     | 4     |
| 38134  | 1     | 3     | 1     | 1     |
| 38135  | 2     | 2     | 2     | 2     |
| 38139  | 2     | 3     | 3     | 3     |
| 38160  | 1     | 3     | 1     | 1     |
| 38164  | 1     | 2     | 2     | 3     |



| respid | Q40_5 | Q40_6 | Q40_7 | Q40_8 |
|--------|-------|-------|-------|-------|
| 38168  |       |       |       |       |
| 38173  | 1     | 1     | 1     | 1     |
| 38193  | 4     | 3     | 4     | 5     |
| 38204  | 1     | 2     | 1     | 1     |
| 38206  | 3     | 2     | 1     | 2     |
| 38233  | 2     | 5     | 4     | 4     |
| 38242  | 5     | 4     | 3     | 3     |
| 38245  | 3     | 3     | 2     | 2     |
| 38261  | 4     | 5     | 4     | 5     |
| 38288  | 1     | 2     | 1     | 2     |
| 38296  | 3     | 3     | 2     | 2     |
| 38299  | 2     | 1     | 1     | 2     |
| 38300  | 4     | 3     | 3     | 3     |
| 38303  | 1     | 3     | 1     | 1     |
| 38317  | 1     | 2     | 1     | 1     |
| 38328  | 4     | 5     | 5     | 3     |
| 38333  | 1     | 1     | 1     | 2     |
| 38336  | 1     | 1     | 2     | 1     |
| 38338  | 1     | 1     | 1     | 1     |
| 38342  | 4     | 3     | 4     | 1     |
| 38360  | 2     | 2     | 3     | 1     |
| 38362  | 2     | 3     | 3     | 2     |
| 38364  | 4     | 3     | 4     | 2     |
| 38402  | 1     | 1     | 1     | 2     |
| 38423  | 4     | 3     | 3     | 4     |
| 38424  | 3     | 3     | 3     | 3     |
| 38435  | 3     | 3     | 3     | 4     |
| 38450  | 1     | 1     | 1     | 1     |
| 38455  | 1     | 2     | 1     | 2     |
| 38467  | 3     | 4     | 2     | 1     |
| 38468  | 3     | 5     | 4     | 3     |
| 38472  | 3     | 3     | 4     | 3     |

| respid | Q40_5 | Q40_6 | Q40_7 | Q40_8 |
|--------|-------|-------|-------|-------|
| 38484  | 1     | 2     | 1     | 1     |
| 38498  | 1     | 2     | 1     | 2     |
| 38507  | 1     | 2     | 1     | 1     |
| 38511  | 1     | 2     | 3     | 1     |
| 38524  | 4     | 4     | 4     | 4     |
| 38526  | 2     | 3     | 3     | 2     |
| 38534  | 2     | 3     | 2     | 2     |
| 38536  | 2     | 2     | 2     | 2     |
| 38539  | 1     | 2     | 1     | 1     |
| 38547  | 1     | 1     | 1     | 1     |
| 38549  | 1     | 1     | 2     | 1     |
| 38575  | 4     | 5     | 4     | 6     |
| 38579  | 1     | 3     | 1     | 1     |
| 38585  | 1     | 1     | 2     | 1     |
| 38589  | 4     | 3     | 2     | 3     |
| 38595  | 5     | 3     | 4     | 2     |
| 38602  | 1     | 1     | 1     | 1     |
| 38603  | 2     | 3     | 4     | 2     |
| 38612  | 2     | 2     | 1     | 2     |
| 38621  | 5     | 4     | 4     | 5     |
| 38624  | 3     | 1     | 3     | 2     |
| 38636  |       |       |       |       |
| 38656  | 1     | 2     | 2     | 1     |
| 38668  | 1     | 2     | 2     | 1     |
| 38675  | 1     | 1     | 1     | 1     |
| 38676  | 1     | 1     | 1     | 2     |
| 38682  | 2     | 2     | 4     | 3     |
| 38689  | 1     | 2     | 1     | 1     |
| 38702  |       |       |       |       |
| 38704  | 5     | 5     | 4     | 4     |
| 38713  | 1     | 3     | 1     | 1     |
| 38718  | 3     | 3     | 2     | 3     |

| respid | Q40_5 | Q40_6 | Q40_7 | Q40_8 |
|--------|-------|-------|-------|-------|
| 38725  | 1     | 1     | 1     | 1     |
| 38730  | 6     | 4     | 6     | 4     |
| 38737  | 2     | 1     | 3     | 1     |
| 38738  | 4     | 4     | 3     | 3     |
| 38744  | 1     | 1     | 1     | 1     |
| 38746  | 1     | 1     | 1     | 1     |
| 38753  | 4     | 2     | 1     | 1     |
| 38756  | 2     | 3     | 3     | 2     |
| 38760  | 1     | 1     | 1     | 1     |
| 38762  | 3     | 4     | 2     | 2     |
| 38765  | 2     | 1     | 1     | 2     |
| 38769  | 2     | 2     | 2     | 4     |
| 38781  | 5     | 5     | 5     | 5     |
| 38786  | 2     | 2     | 2     | 1     |
| 38790  | 2     | 3     | 2     | 2     |
| 38793  | 1     | 1     | 1     | 1     |
| 38797  | 1     | 2     | 1     | 1     |
| 38802  | 3     | 2     | 2     | 3     |
| 38815  | 2     | 3     | 2     | 2     |
| 38826  | 3     | 3     | 4     | 3     |
| 38828  | 2     | 2     | 1     | 1     |
| 38829  | 3     | 3     | 4     | 4     |
| 38835  | 4     | 2     | 3     | 2     |
| 38842  | 4     | 2     | 6     | 5     |
| 38853  | 1     | 3     | 2     | 1     |
| 38855  | 4     | 4     | 4     | 5     |
| 38860  | 4     | 4     | 3     | 4     |
| 38869  | 2     | 3     | 2     | 3     |
| 38882  | 3     | 5     | 5     | 4     |
| 38897  | 2     | 3     | 1     | 1     |
| 38903  | 1     | 1     | 1     | 1     |
| 38910  | 4     | 3     | 3     | 4     |

| respid | Q40_5 | Q40_6 | Q40_7 | Q40_8 |
|--------|-------|-------|-------|-------|
| 38948  | 3     | 4     | 2     | 3     |
| 38949  | 1     | 5     | 3     | 1     |
| 38953  | 4     | 4     | 5     | 5     |
| 38989  | 3     | 5     | 4     | 1     |
| 38997  | 2     | 2     | 3     | 3     |
| 38999  | 1     | 2     | 1     | 1     |
| 39002  | 4     | 3     | 3     | 3     |
| 39003  | 4     | 3     | 4     | 4     |
| 39006  | 1     | 1     | 1     | 1     |
| 39014  |       |       |       |       |
| 39017  | 5     | 5     | 5     | 4     |
| 39018  | 5     | 4     | 5     | 4     |
| 39025  | 4     | 4     | 5     | 5     |
| 39031  | 2     | 3     | 5     | 6     |
| 39061  | 5     | 3     | 2     | 4     |
| 39131  | 1     | 2     | 1     | 1     |
| 39153  | 5     | 4     | 4     | 5     |
| 39194  | 4     | 5     | 6     | 5     |
| 39204  | 2     | 3     | 1     | 1     |
| 39208  | 2     | 4     | 1     | 1     |
| 39213  | 5     | 4     | 3     | 3     |
| 39231  | 1     | 2     | 2     | 2     |
| 39251  | 1     | 5     | 4     | 2     |
| 39257  | 5     | 5     | 4     | 5     |
| 39262  | 3     | 5     | 4     | 2     |
| 39269  | 4     | 5     | 4     | 2     |
| 39272  | 2     | 3     | 2     | 4     |
| 39280  | 5     | 4     | 5     | 4     |
| 39294  | 2     | 5     | 4     | 2     |
| 39297  | 5     | 3     | 6     | 4     |
| 39300  | 3     | 3     | 2     | 2     |
| 39307  | 3     | 5     | 4     | 2     |

| respid | Q40_5 | Q40_6 | Q40_7 | Q40_8 |
|--------|-------|-------|-------|-------|
| 39320  | 3     | 5     | 4     | 2     |
| 39333  | 2     | 3     | 2     | 1     |
| 39335  | 5     | 5     | 5     | 3     |
| 39339  | 1     | 2     | 1     | 2     |
| 39375  | 6     | 4     | 1     | 5     |
| 39377  | 1     | 1     | 1     | 1     |
| 39380  | 2     | 5     | 4     | 5     |
| 39425  | 1     | 2     | 1     | 1     |
| 39590  | 1     | 1     | 1     | 1     |
| 40529  | 1     | 2     | 1     | 1     |
| 40702  | 2     | 2     | 2     | 2     |
| 40788  | 1     | 1     | 1     | 1     |
| 40841  | 1     | 1     | 1     | 1     |
| 40965  | 1     | 1     | 1     | 1     |
| 41092  | 1     | 2     | 1     | 1     |
| 41534  |       |       |       |       |
| 41919  | 1     | 1     | 1     | 1     |
| 42110  | 4     | 4     | 4     | 3     |
| 42135  | 2     | 3     | 1     | 1     |
| 42142  | 1     | 2     | 1     | 1     |
| 42163  | 2     | 3     | 2     | 1     |
| 42164  | 1     | 1     | 3     | 1     |
| 42172  | 5     | 2     | 4     | 4     |
| 42177  | 1     | 1     | 1     | 1     |
| 42181  | 2     | 1     | 2     | 2     |
| 42193  | 2     | 2     | 3     | 4     |
| 42196  | 2     | 3     | 3     | 4     |
| 42202  | 3     | 3     | 3     | 3     |
| 42248  | 3     | 4     | 4     | 4     |
| 42283  | 1     | 2     | 1     | 1     |
| 42284  | 2     | 2     | 3     | 2     |
| 42323  |       |       |       |       |

| respid | Q40_5 | Q40_6 | Q40_7 | Q40_8 |
|--------|-------|-------|-------|-------|
| 42349  | 1     | 2     | 1     | 1     |
| 42351  |       |       |       |       |
| 42357  | 1     | 1     | 1     | 1     |
| 42366  |       |       |       |       |
| 42380  | 1     | 2     | 1     | 1     |
| 42414  | 2     | 2     | 2     | 2     |
| 42420  | 4     | 3     | 4     | 5     |
| 42454  |       |       |       |       |
| 42458  | 1     | 2     | 1     | 1     |
| 42461  | 1     | 2     | 1     | 1     |
| 42488  | 1     | 2     | 3     | 2     |
| 42511  | 1     | 1     | 1     | 1     |
| 42512  | 1     | 2     | 1     | 1     |
| 42530  | 5     | 6     | 4     | 3     |
| 42531  | 5     | 5     | 5     | 6     |
| 42533  | 2     | 5     | 1     | 1     |
| 42549  | 1     | 2     | 1     | 1     |
| 42550  | 5     | 4     | 4     | 2     |
| 42553  |       |       |       |       |
| 42562  | 3     | 4     | 3     | 3     |
| 42567  | 1     | 2     | 1     | 1     |
| 42589  | 2     | 2     | 2     | 2     |
| 42604  | 1     | 2     | 1     | 2     |
| 42618  | 3     | 2     | 2     | 3     |
| 42621  | 4     | 3     | 5     | 2     |
| 42627  | 1     | 1     | 1     | 1     |
| 42641  | 1     | 2     | 1     | 1     |
| 42655  | 3     | 3     | 3     | 3     |
| 42666  | 2     | 2     | 1     | 1     |
| 42667  | 3     | 4     | 2     | 3     |
| 42697  | 2     | 3     | 2     | 2     |
| 42703  | 1     | 1     | 1     | 1     |

| respid | Q40_5 | Q40_6 | Q40_7 | Q40_8 |
|--------|-------|-------|-------|-------|
| 42712  | 1     | 1     | 1     | 1     |
| 42731  | 1     | 2     | 1     | 1     |
| 42780  | 1     | 1     | 1     | 1     |
| 42785  | 2     | 2     | 2     | 2     |
| 42788  | 2     | 1     | 2     | 1     |
| 42802  | 4     | 3     | 3     | 2     |
| 42818  | 3     | 3     | 1     | 1     |
| 42821  | 1     | 4     | 1     | 1     |
| 42824  | 1     | 2     | 1     | 1     |
| 42831  | 3     | 3     | 1     | 1     |
| 42836  | 1     | 1     | 2     | 1     |
| 42864  | 3     | 3     | 2     | 2     |
| 42875  | 1     | 1     | 1     | 1     |
| 42891  | 6     | 6     | 5     | 5     |
| 42897  | 1     | 2     | 1     | 1     |
| 42900  | 4     | 3     | 4     | 1     |
| 42902  | 2     | 3     | 2     | 3     |
| 42921  | 1     | 2     | 1     | 1     |
| 42925  | 1     | 2     | 1     | 1     |
| 42944  |       |       |       |       |
| 42950  |       |       |       |       |
| 42963  | 1     | 2     | 1     | 1     |
| 42967  | 1     | 2     | 1     | 1     |
| 42985  | 1     | 2     | 1     | 1     |
| 42990  | 2     | 3     | 1     | 1     |
| 42996  | 1     | 4     | 3     | 2     |
| 43002  | 1     | 3     | 1     | 1     |
| 43004  | 2     | 1     | 1     | 3     |
| 43012  | 1     | 1     | 1     | 1     |
| 43027  | 4     | 3     | 3     | 3     |
| 43028  | 1     | 2     | 1     | 1     |
| 43029  | 3     | 2     | 1     | 1     |

| respid | Q40_5 | Q40_6 | Q40_7 | Q40_8 |
|--------|-------|-------|-------|-------|
| 43031  | 1     | 2     | 1     | 1     |
| 43042  | 1     | 1     | 1     | 1     |
| 43054  | 3     | 3     | 2     | 2     |
| 43058  | 1     | 2     | 1     | 1     |
| 43064  | 2     | 2     | 1     | 1     |
| 43069  | 2     | 3     | 3     | 3     |
| 43071  |       |       |       |       |
| 43072  | 1     | 2     | 1     | 1     |
| 43077  | 2     | 2     | 2     | 2     |
| 43078  | 4     | 4     | 3     | 3     |
| 43082  |       |       |       |       |
| 43092  | 1     | 1     | 1     | 1     |
| 43096  | 1     | 2     | 1     | 1     |
| 43109  |       |       |       |       |
| 43113  | 2     | 2     | 2     | 1     |
| 43123  | 1     | 2     | 2     | 1     |
| 43127  | 1     | 2     | 1     | 1     |
| 43128  | 1     | 3     | 1     | 1     |
| 43129  | 1     | 2     | 1     | 1     |
| 43133  | 3     | 4     | 4     | 5     |
| 43140  |       |       |       |       |
| 43143  | 5     | 4     | 3     | 3     |
| 43149  | 5     | 6     | 5     | 4     |
| 43150  | 4     | 5     | 4     | 3     |
| 43153  | 3     | 4     | 2     | 1     |
| 43170  | 1     | 1     | 1     | 1     |
| 43187  | 2     | 3     | 2     | 2     |
| 43188  | 2     | 2     | 2     | 2     |
| 43198  | 1     | 2     | 1     | 1     |
| 43208  | 1     | 1     | 1     | 1     |
| 43216  | 1     | 1     | 1     | 2     |
| 43222  | 4     | 3     | 4     | 4     |



| respid | Q40_5 | Q40_6 | Q40_7 | Q40_8 |
|--------|-------|-------|-------|-------|
| 43224  | 2     | 2     | 2     | 2     |
| 43230  | 4     | 3     | 2     | 1     |
| 43231  | 4     | 3     | 4     | 3     |
| 43265  | 4     | 3     | 4     | 5     |
| 43270  | 2     | 3     | 2     | 3     |
| 43283  | 6     | 5     | 4     | 3     |
| 43295  | 6     | 5     | 4     | 3     |
| 43297  | 1     | 2     | 1     | 1     |
| 43299  | 3     | 2     | 3     | 3     |
| 43307  | 3     | 2     | 3     | 1     |
| 43316  | 4     | 4     | 4     | 3     |
| 43318  | 4     | 4     | 5     | 4     |
| 43319  | 1     | 1     | 1     | 1     |
| 43324  | 3     | 3     | 2     | 2     |
| 43325  | 5     | 6     | 6     | 5     |
| 43327  | 2     | 1     | 2     | 1     |
| 43338  | 2     | 2     | 2     | 1     |
| 43342  | 1     | 4     | 1     | 1     |
| 43348  | 1     | 2     | 1     | 1     |
| 43395  | 4     | 3     | 3     | 3     |
| 43404  | 3     | 4     | 4     | 4     |
| 43406  | 1     | 3     | 1     | 1     |
| 43407  | 1     | 1     | 1     | 1     |
| 43411  | 1     | 1     | 1     | 1     |
| 43416  | 4     | 5     | 4     | 3     |
| 43428  | 1     | 1     | 1     | 1     |
| 43429  | 3     | 3     | 4     | 4     |
| 43432  | 1     | 2     | 1     | 1     |
| 43443  | 1     | 1     | 1     | 1     |
| 43455  |       |       |       |       |
| 43457  | 2     | 3     | 2     | 2     |
| 43458  | 1     | 2     | 1     | 1     |

| respid | Q40_5 | Q40_6 | Q40_7 | Q40_8 |
|--------|-------|-------|-------|-------|
| 43477  | 3     | 2     | 3     | 2     |
| 43520  | 1     | 2     | 1     | 1     |
| 43521  | 1     | 2     | 2     | 2     |
| 43550  | 1     | 2     | 1     | 1     |
| 43551  | 1     | 2     | 2     | 1     |
| 43554  | 3     | 4     | 2     | 2     |
| 43560  | 1     | 2     | 1     | 1     |
| 43569  | 1     | 2     | 1     | 1     |
| 43583  | 1     | 1     | 1     | 1     |
| 43590  | 3     | 3     | 2     | 2     |
| 43591  | 1     | 2     | 1     | 1     |
| 43595  |       |       |       |       |
| 43599  | 3     | 2     | 3     | 1     |
| 43606  | 1     | 2     | 1     | 1     |
| 43609  | 1     | 1     | 1     | 1     |
| 43629  | 1     | 1     | 1     | 1     |
| 43636  | 2     | 2     | 1     | 1     |
| 43661  | 1     | 1     | 1     | 1     |
| 43668  | 1     | 2     | 1     | 1     |
| 43672  |       |       |       |       |
| 43677  | 3     | 2     | 1     | 2     |
| 43683  | 1     | 3     | 1     | 1     |
| 43708  | 2     | 3     | 3     | 2     |
| 43713  | 1     | 2     | 1     | 1     |
| 43718  |       |       |       |       |
| 43725  | 1     | 2     | 1     | 1     |
| 43747  | 1     | 2     | 1     | 1     |
| 43755  | 1     | 2     | 1     | 1     |
| 43770  | 1     | 1     | 1     | 1     |
| 43775  | 2     | 4     | 2     | 3     |
| 43788  |       |       |       |       |
| 43790  | 4     | 4     | 4     | 5     |

| respid | Q40_5 | Q40_6 | Q40_7 | Q40_8 |
|--------|-------|-------|-------|-------|
| 43797  | 2     | 2     | 2     | 2     |
| 43798  | 4     | 5     | 4     | 3     |
| 43811  | 5     | 5     | 5     | 4     |
| 43819  | 3     | 3     | 4     | 4     |
| 43821  | 4     | 3     | 4     | 5     |
| 43822  | 1     | 1     | 1     | 1     |
| 43825  | 2     | 4     | 2     | 2     |
| 43826  | 1     | 2     | 1     | 2     |
| 43831  | 1     | 3     | 1     | 1     |
| 43836  | 6     | 5     | 4     | 3     |
| 43852  | 3     | 4     | 4     | 4     |
| 43857  | 3     | 4     | 3     | 1     |
| 43858  | 1     | 2     | 1     | 1     |
| 43859  | 4     | 4     | 4     | 3     |
| 43863  | 1     | 1     | 1     | 1     |
| 43868  | 4     | 3     | 4     | 5     |
| 43872  | 5     | 5     | 4     | 4     |
| 43874  | 4     | 4     | 5     | 5     |
| 43882  | 1     | 2     | 1     | 1     |
| 43886  |       |       |       |       |
| 43903  | 2     | 3     | 1     | 5     |
| 43929  | 1     | 2     | 1     | 1     |
| 43932  | 1     | 1     | 1     | 1     |
| 43936  | 1     | 4     | 1     | 1     |
| 43962  | 1     | 1     | 1     | 1     |
| 43964  | 1     | 1     | 1     | 1     |
| 43968  | 1     | 4     | 6     | 3     |
| 43979  | 3     | 4     | 2     | 2     |
| 44006  | 5     | 5     | 5     | 5     |
| 44009  | 3     | 2     | 1     | 1     |
| 44023  | 2     | 3     | 2     | 1     |
| 44035  | 4     | 4     | 4     | 3     |

| respid | Q40_5 | Q40_6 | Q40_7 | Q40_8 |
|--------|-------|-------|-------|-------|
| 44038  | 4     | 4     | 4     | 3     |
| 44039  | 6     | 5     | 4     | 3     |
| 44043  | 2     | 2     | 2     | 2     |
| 44048  | 4     | 5     | 4     | 5     |
| 44050  | 1     | 1     | 1     | 1     |
| 44051  | 3     | 3     | 4     | 4     |
| 44061  | 5     | 5     | 5     | 4     |
| 44063  | 4     | 5     | 5     | 5     |
| 44072  | 4     | 5     | 5     | 3     |
| 44075  | 4     | 5     | 5     | 5     |
| 44089  | 4     | 3     | 4     | 5     |
| 44090  | 4     | 5     | 4     | 5     |
| 44091  | 3     | 4     | 3     | 3     |
| 44092  | 2     | 3     | 2     | 1     |
| 44110  | 3     | 3     | 3     | 4     |
| 44112  | 4     | 3     | 4     | 5     |
| 44114  | 4     | 4     | 4     | 5     |
| 44143  | 3     | 3     | 3     | 3     |
| 44179  | 1     | 2     | 1     | 1     |
| 44234  | 1     | 1     | 1     | 1     |
| 44236  | 3     | 3     | 3     | 3     |
| 44239  | 6     | 5     | 4     | 3     |
| 44241  | 5     | 5     | 5     | 3     |
| 44253  |       |       |       |       |
| 44260  | 4     | 5     | 5     | 5     |
| 44261  | 3     | 4     | 5     | 4     |
| 44263  | 5     | 4     | 3     | 4     |
| 44264  | 1     | 2     | 1     | 1     |
| 44265  | 1     | 1     | 1     | 1     |
| 44267  | 6     | 5     | 3     | 3     |
| 44306  | 2     | 4     | 3     | 2     |
| 44309  | 2     | 2     | 2     | 2     |

| respid | Q40_5 | Q40_6 | Q40_7 | Q40_8 |
|--------|-------|-------|-------|-------|
| 44310  | 1     | 2     | 1     | 1     |
| 44361  | 3     | 3     | 3     | 3     |
| 44380  | 1     | 2     | 1     | 1     |
| 44386  | 1     | 1     | 1     | 1     |
| 44419  | 1     | 3     | 2     | 2     |
| 44426  | 2     | 2     | 1     | 1     |
| 44479  | 1     | 1     | 1     | 1     |
| 44484  | 1     | 1     | 1     | 1     |
| 44487  | 1     | 2     | 2     | 2     |
| 44509  | 1     | 2     | 1     | 1     |
| 44540  | 3     | 4     | 3     | 3     |
| 44551  | 2     | 2     | 2     | 2     |
| 44553  | 1     | 1     | 2     | 1     |
| 44650  | 1     | 2     | 1     | 1     |
| 44665  | 3     | 4     | 3     | 2     |
| 44779  | 1     | 2     | 1     | 1     |
| 44797  | 1     | 3     | 1     | 1     |
| 44807  | 1     | 3     | 1     | 1     |
| 44815  | 3     | 4     | 4     | 3     |
| 44836  | 1     | 2     | 1     | 1     |
| 44868  | 2     | 3     | 2     | 2     |
| 44927  | 2     | 2     | 2     | 2     |
| 44983  |       |       |       |       |
| 45040  | 2     | 3     | 1     | 1     |
| 45051  | 1     | 1     | 1     | 1     |
| 45067  | 1     | 3     | 1     | 1     |
| 45074  |       |       |       |       |
| 45115  | 1     | 3     | 1     | 1     |
| 45187  | 5     | 4     | 3     | 4     |
| 45221  | 4     | 4     | 4     | 4     |
| 45279  | 2     | 2     | 1     | 1     |
| 45308  | 2     | 2     | 2     | 2     |

| respid | Q40_5 | Q40_6 | Q40_7 | Q40_8 |
|--------|-------|-------|-------|-------|
| 45317  | 2     | 2     | 1     | 1     |
| 45379  | 3     | 3     | 3     | 2     |
| 45451  | 1     | 2     | 1     | 1     |
| 45472  | 5     | 5     | 3     | 3     |
| 45474  | 4     | 4     | 4     | 4     |
| 45544  | 6     | 6     | 5     | 6     |
| 45561  | 1     | 1     | 1     | 1     |
| 45596  | 1     | 2     | 1     | 2     |

| Instrum        | OAB-q SF                                                                                         | OAB-q SF                                                | OAB-q SF                                                  | OAB-q SF                     |
|----------------|--------------------------------------------------------------------------------------------------|---------------------------------------------------------|-----------------------------------------------------------|------------------------------|
| Symptom        |                                                                                                  |                                                         |                                                           |                              |
| Type of RHRQoL | HRQoL                                                                                            | HRQoL                                                   | HRQoL                                                     | HRQoL                        |
| Descripti      | i. Made you uncomfortable while traveling with others because of needing to stop for a restroom? | j. Affected your relationships with family and friends? | k. Interfered with getting the amount of sleep you needed | l. Caused you embarrassment? |
| respid         | Q40_9                                                                                            | Q40_10                                                  | Q40_11                                                    | Q40_12                       |
| 241            | 1                                                                                                | 1                                                       | 1                                                         | 1                            |
| 242            | 1                                                                                                | 1                                                       | 2                                                         | 1                            |
| 243            | 2                                                                                                | 2                                                       | 2                                                         | 2                            |
| 244            | 1                                                                                                | 1                                                       | 3                                                         | 4                            |
| 245            | 1                                                                                                | 1                                                       | 1                                                         | 1                            |
| 246            | 1                                                                                                | 1                                                       | 2                                                         | 1                            |
| 247            | 1                                                                                                | 1                                                       | 1                                                         | 1                            |
| 253            | 2                                                                                                | 1                                                       | 2                                                         | 1                            |
| 256            | 1                                                                                                | 1                                                       | 1                                                         | 1                            |
| 257            | 1                                                                                                | 1                                                       | 1                                                         | 1                            |
| 258            | 2                                                                                                | 1                                                       | 2                                                         | 1                            |
| 259            | 1                                                                                                | 1                                                       | 1                                                         | 1                            |
| 263            | 1                                                                                                | 1                                                       | 1                                                         | 1                            |
| 264            | 1                                                                                                | 1                                                       | 1                                                         | 1                            |
| 265            | 3                                                                                                | 3                                                       | 4                                                         | 4                            |
| 266            | 1                                                                                                | 1                                                       | 1                                                         | 1                            |
| 268            | 1                                                                                                | 1                                                       | 1                                                         | 1                            |
| 270            | 1                                                                                                | 1                                                       | 1                                                         | 1                            |
| 272            | 1                                                                                                | 1                                                       | 1                                                         | 1                            |
| 274            | 1                                                                                                | 1                                                       | 1                                                         | 1                            |

| respid | Q40_9 | Q40_10 | Q40_11 | Q40_12 |
|--------|-------|--------|--------|--------|
| 275    |       |        |        |        |
| 276    | 1     | 1      | 1      | 1      |
| 277    | 1     | 1      | 1      | 1      |
| 279    | 3     | 2      | 2      | 2      |
| 286    | 2     | 1      | 2      | 2      |
| 290    | 1     | 1      | 1      | 2      |
| 291    | 1     | 1      | 1      | 1      |
| 295    |       |        |        |        |
| 297    | 1     | 1      | 2      | 1      |
| 299    | 2     | 2      | 4      | 1      |
| 300    | 1     | 2      | 3      | 2      |
| 303    | 1     | 1      | 1      | 1      |
| 304    | 1     | 1      | 1      | 1      |
| 306    | 2     | 1      | 1      | 2      |
| 307    | 2     | 1      | 2      | 1      |
| 312    | 4     | 4      | 4      | 4      |
| 315    | 1     | 1      | 1      | 1      |
| 317    | 1     | 1      | 1      | 1      |
| 322    | 1     | 2      | 2      | 1      |
| 335    | 1     | 1      | 1      | 1      |
| 374    | 3     | 1      | 2      | 2      |
| 378    | 1     | 2      | 2      | 1      |
| 380    | 1     | 2      | 2      | 1      |
| 382    | 1     | 1      | 1      | 1      |
| 384    | 1     | 1      | 2      | 2      |
| 385    | 2     | 1      | 2      | 1      |
| 395    | 1     | 1      | 1      | 1      |
| 396    |       |        |        |        |
| 398    |       |        |        |        |
| 402    | 3     | 3      | 3      | 3      |
| 414    | 1     | 1      | 1      | 1      |
| 415    | 1     | 1      | 1      | 1      |



| respid | Q40_9 | Q40_10 | Q40_11 | Q40_12 |
|--------|-------|--------|--------|--------|
| 416    | 1     | 1      | 1      | 1      |
| 420    | 1     | 1      | 3      | 2      |
| 421    | 1     | 1      | 1      | 1      |
| 422    | 1     | 1      | 1      | 1      |
| 423    | 1     | 1      | 1      | 1      |
| 424    | 1     | 1      | 1      | 1      |
| 425    | 2     | 1      | 3      | 1      |
| 428    | 1     | 1      | 2      | 1      |
| 429    | 1     | 1      | 1      | 1      |
| 431    | 1     | 1      | 1      | 1      |
| 437    | 2     | 1      | 2      | 1      |
| 438    | 1     | 1      | 1      | 1      |
| 441    | 1     | 1      | 3      | 1      |
| 444    | 1     | 1      | 1      | 1      |
| 448    | 1     | 1      | 1      | 1      |
| 449    | 1     | 1      | 1      | 1      |
| 457    | 2     | 2      | 3      | 3      |
| 460    | 1     | 1      | 1      | 1      |
| 469    | 2     | 1      | 1      | 3      |
| 471    | 1     | 1      | 2      | 1      |
| 473    | 5     | 1      | 4      | 5      |
| 476    | 1     | 1      | 2      | 1      |
| 479    | 1     | 1      | 1      | 1      |
| 485    | 1     | 1      | 1      | 1      |
| 488    | 1     | 1      | 6      | 2      |
| 494    | 1     | 1      | 1      | 1      |
| 496    | 1     | 1      | 1      | 1      |
| 501    |       |        |        |        |
| 502    | 2     | 2      | 2      | 2      |
| 503    | 2     | 1      | 2      | 1      |
| 506    | 1     | 1      | 1      | 1      |
| 514    | 2     | 1      | 3      | 2      |

| respid | Q40_9 | Q40_10 | Q40_11 | Q40_12 |
|--------|-------|--------|--------|--------|
| 515    | 1     | 1      | 1      | 1      |
| 516    | 1     | 1      | 1      | 1      |
| 519    | 1     | 1      | 1      | 1      |
| 522    |       |        |        |        |
| 525    | 1     | 2      | 1      | 1      |
| 528    | 1     | 1      | 1      | 1      |
| 532    | 1     | 1      | 1      | 1      |
| 536    | 2     | 1      | 1      | 2      |
| 539    | 1     | 1      | 4      | 1      |
| 540    | 1     | 1      | 1      | 2      |
| 547    | 2     | 1      | 4      | 3      |
| 551    | 1     | 1      | 1      | 1      |
| 554    | 2     | 1      | 3      | 1      |
| 558    | 1     | 1      | 1      | 1      |
| 563    | 1     | 1      | 1      | 1      |
| 564    | 2     | 2      | 2      | 2      |
| 565    | 1     | 1      | 1      | 1      |
| 567    | 1     | 1      | 1      | 1      |
| 569    | 1     | 1      | 1      | 1      |
| 572    | 1     | 1      | 1      | 1      |
| 574    | 1     | 1      | 2      | 1      |
| 583    | 3     | 2      | 3      | 3      |
| 589    | 1     | 1      | 1      | 1      |
| 592    | 1     | 1      | 1      | 1      |
| 593    |       |        |        |        |
| 594    | 1     | 2      | 3      | 4      |
| 597    | 1     | 1      | 2      | 1      |
| 601    | 1     | 1      | 2      | 1      |
| 607    | 1     | 1      | 1      | 1      |
| 610    | 1     | 1      | 1      | 1      |
| 612    | 1     | 1      | 2      | 1      |
| 627    | 1     | 1      | 1      | 1      |

| respid | Q40_9 | Q40_10 | Q40_11 | Q40_12 |
|--------|-------|--------|--------|--------|
| 631    | 1     | 1      | 1      | 1      |
| 633    | 1     | 1      | 1      | 1      |
| 636    | 1     | 1      | 2      | 1      |
| 656    | 1     | 1      | 1      | 1      |
| 659    | 1     | 1      | 2      | 1      |
| 670    | 1     | 1      | 1      | 1      |
| 672    | 1     | 1      | 1      | 1      |
| 673    | 2     | 1      | 1      | 1      |
| 675    | 1     | 1      | 1      | 1      |
| 676    | 4     | 3      | 3      | 2      |
| 679    | 1     | 2      | 1      | 2      |
| 683    | 1     | 1      | 1      | 1      |
| 684    | 1     | 1      | 1      | 1      |
| 690    | 1     | 1      | 1      | 1      |
| 701    | 3     | 2      | 5      | 4      |
| 709    | 1     | 1      | 2      | 2      |
| 719    | 1     | 1      | 1      | 1      |
| 726    | 1     | 1      | 2      | 1      |
| 730    | 1     | 1      | 2      | 1      |
| 731    | 1     | 1      | 1      | 1      |
| 732    | 1     | 1      | 1      | 1      |
| 733    | 1     | 1      | 1      | 1      |
| 735    | 1     | 1      | 1      | 1      |
| 738    | 1     | 1      | 1      | 1      |
| 740    | 1     | 1      | 1      | 1      |
| 742    | 1     | 1      | 1      | 1      |
| 744    | 1     | 1      | 1      | 1      |
| 749    | 2     | 3      | 2      | 1      |
| 751    | 2     | 1      | 2      | 1      |
| 752    | 1     | 1      | 5      | 1      |
| 753    | 1     | 1      | 3      | 1      |
| 755    | 1     | 1      | 2      | 1      |

| respid | Q40_9 | Q40_10 | Q40_11 | Q40_12 |
|--------|-------|--------|--------|--------|
| 756    |       |        |        |        |
| 759    | 1     | 1      | 1      | 1      |
| 760    | 1     | 1      | 1      | 1      |
| 763    | 1     | 1      | 1      | 1      |
| 764    | 1     | 1      | 1      | 1      |
| 765    | 1     | 1      | 1      | 1      |
| 766    | 1     | 1      | 1      | 1      |
| 767    | 1     | 1      | 1      | 1      |
| 771    | 1     | 1      | 3      | 2      |
| 773    | 1     | 1      | 2      | 1      |
| 774    | 2     | 1      | 1      | 2      |
| 775    | 2     | 1      | 2      | 1      |
| 776    | 1     | 1      | 2      | 1      |
| 778    | 1     | 1      | 2      | 1      |
| 780    | 1     | 1      | 3      | 1      |
| 781    | 1     | 1      | 1      | 1      |
| 782    | 2     | 2      | 4      | 2      |
| 783    | 1     | 1      | 2      | 2      |
| 786    | 4     | 5      | 4      | 5      |
| 788    |       |        |        |        |
| 792    | 1     | 1      | 1      | 1      |
| 794    | 4     | 2      | 4      | 4      |
| 795    | 1     | 1      | 1      | 1      |
| 799    | 2     | 1      | 2      | 1      |
| 800    | 1     | 1      | 1      | 1      |
| 801    | 2     | 1      | 5      | 1      |
| 804    | 1     | 1      | 2      | 1      |
| 806    | 1     | 1      | 1      | 1      |
| 807    | 1     | 1      | 1      | 1      |
| 808    | 4     | 3      | 4      | 3      |
| 809    | 1     | 1      | 1      | 1      |
| 811    | 1     | 1      | 1      | 1      |

| respid | Q40_9 | Q40_10 | Q40_11 | Q40_12 |
|--------|-------|--------|--------|--------|
| 812    | 1     | 1      | 3      | 1      |
| 815    | 1     | 1      | 1      | 1      |
| 817    | 1     | 1      | 1      | 1      |
| 818    | 2     | 1      | 2      | 1      |
| 819    | 1     | 1      | 2      | 1      |
| 821    | 1     | 1      | 1      | 1      |
| 824    | 2     | 1      | 5      | 1      |
| 825    | 1     | 1      | 1      | 1      |
| 828    | 1     | 1      | 1      | 1      |
| 832    | 2     | 2      | 2      | 2      |
| 834    | 1     | 1      | 1      | 1      |
| 835    | 2     | 2      | 3      | 1      |
| 836    | 1     | 1      | 1      | 1      |
| 837    | 1     | 1      | 1      | 1      |
| 840    | 1     | 1      | 1      | 1      |
| 841    | 1     | 1      | 1      | 1      |
| 845    | 1     | 1      | 1      | 1      |
| 846    | 1     | 1      | 2      | 1      |
| 849    | 1     | 1      | 1      | 1      |
| 852    | 1     | 1      | 1      | 1      |
| 854    | 2     | 2      | 2      | 2      |
| 856    | 1     | 1      | 1      | 1      |
| 858    | 1     | 1      | 1      | 1      |
| 859    | 2     | 1      | 1      | 1      |
| 861    | 1     | 1      | 1      | 1      |
| 863    | 1     | 1      | 1      | 1      |
| 864    | 4     | 2      | 4      | 3      |
| 866    | 1     | 1      | 1      | 1      |
| 869    | 1     | 1      | 1      | 1      |
| 870    | 2     | 1      | 2      | 1      |
| 871    | 2     | 1      | 1      | 1      |
| 873    | 1     | 1      | 2      | 1      |

| respid | Q40_9 | Q40_10 | Q40_11 | Q40_12 |
|--------|-------|--------|--------|--------|
| 879    | 3     | 4      | 5      | 2      |
| 880    | 1     | 1      | 1      | 1      |
| 881    | 3     | 1      | 4      | 4      |
| 882    | 1     | 1      | 2      | 1      |
| 885    |       |        |        |        |
| 886    | 2     | 2      | 2      | 2      |
| 887    | 3     | 3      | 4      | 3      |
| 888    | 1     | 1      | 1      | 1      |
| 889    | 2     | 1      | 2      | 1      |
| 890    | 1     | 1      | 1      | 1      |
| 900    |       |        |        |        |
| 901    | 1     | 1      | 1      | 1      |
| 902    | 1     | 1      | 4      | 1      |
| 903    | 1     | 1      | 1      | 1      |
| 906    | 2     | 1      | 5      | 1      |
| 907    | 1     | 1      | 2      | 2      |
| 908    | 2     | 1      | 2      | 1      |
| 910    | 1     | 1      | 2      | 1      |
| 911    | 1     | 1      | 1      | 2      |
| 912    | 1     | 1      | 1      | 1      |
| 915    |       |        |        |        |
| 923    | 4     | 3      | 5      | 4      |
| 925    | 1     | 1      | 1      | 1      |
| 926    | 1     | 1      | 1      | 1      |
| 929    |       |        |        |        |
| 932    | 1     | 1      | 1      | 1      |
| 933    | 1     | 1      | 1      | 1      |
| 934    | 1     | 1      | 1      | 1      |
| 938    | 1     | 1      | 2      | 2      |
| 941    |       |        |        |        |
| 942    | 1     | 1      | 2      | 1      |
| 943    |       |        |        |        |

| respid | Q40_9 | Q40_10 | Q40_11 | Q40_12 |
|--------|-------|--------|--------|--------|
| 945    | 1     | 1      | 1      | 1      |
| 946    |       |        |        |        |
| 947    | 1     | 1      | 1      | 1      |
| 948    | 1     | 1      | 1      | 1      |
| 949    | 1     | 1      | 1      | 1      |
| 952    | 1     | 1      | 1      | 1      |
| 956    | 1     | 1      | 1      | 1      |
| 957    | 1     | 1      | 1      | 1      |
| 959    | 1     | 1      | 1      | 1      |
| 961    | 1     | 1      | 2      | 1      |
| 962    | 4     | 4      | 4      | 4      |
| 965    | 1     | 1      | 2      | 1      |
| 967    | 1     | 1      | 2      | 1      |
| 969    | 1     | 1      | 2      | 1      |
| 970    |       |        |        |        |
| 973    | 1     | 1      | 1      | 1      |
| 974    | 1     | 1      | 2      | 1      |
| 975    | 2     | 2      | 3      | 2      |
| 976    | 1     | 1      | 1      | 1      |
| 977    | 1     | 1      | 1      | 2      |
| 979    | 1     | 1      | 1      | 1      |
| 981    | 1     | 1      | 1      | 1      |
| 983    | 1     | 1      | 1      | 1      |
| 987    | 1     | 1      | 3      | 2      |
| 991    |       |        |        |        |
| 992    | 1     | 1      | 1      | 1      |
| 993    | 2     | 2      | 2      | 2      |
| 994    | 3     | 1      | 4      | 2      |
| 995    | 1     | 1      | 4      | 1      |
| 998    | 2     | 1      | 2      | 2      |
| 1000   | 2     | 2      | 2      | 2      |
| 1001   | 1     | 1      | 4      | 1      |

| respid | Q40_9 | Q40_10 | Q40_11 | Q40_12 |
|--------|-------|--------|--------|--------|
| 1002   |       |        |        |        |
| 1004   | 2     | 1      | 2      | 1      |
| 1005   | 1     | 2      | 2      | 1      |
| 1006   | 1     | 1      | 3      | 1      |
| 1007   | 2     | 2      | 2      | 2      |
| 1009   |       |        |        |        |
| 1013   | 3     | 2      | 2      | 3      |
| 1015   | 1     | 1      | 1      | 1      |
| 1020   | 2     | 2      | 3      | 2      |
| 1022   | 3     | 3      | 3      | 3      |
| 1024   | 1     | 1      | 2      | 1      |
| 1025   |       |        |        |        |
| 1027   | 2     | 2      | 2      | 2      |
| 1031   | 1     | 1      | 1      | 1      |
| 1037   | 1     | 1      | 1      | 1      |
| 1039   | 1     | 1      | 1      | 1      |
| 1040   | 1     | 1      | 1      | 1      |
| 1056   | 3     | 1      | 3      | 3      |
| 1057   | 1     | 1      | 1      | 1      |
| 1062   | 2     | 1      | 2      | 1      |
| 1069   | 1     | 1      | 1      | 1      |
| 1070   | 1     | 1      | 1      | 1      |
| 1072   | 1     | 1      | 1      | 1      |
| 1076   | 1     | 1      | 1      | 1      |
| 1077   | 1     | 1      | 2      | 1      |
| 1078   | 1     | 1      | 1      | 1      |
| 1080   |       |        |        |        |
| 1094   | 3     | 1      | 3      | 3      |
| 1098   | 2     | 2      | 2      | 3      |
| 1099   | 1     | 1      | 1      | 1      |
| 1102   | 1     | 1      | 2      | 1      |
| 1110   | 1     | 1      | 1      | 1      |



| respid | Q40_9 | Q40_10 | Q40_11 | Q40_12 |
|--------|-------|--------|--------|--------|
| 1117   | 1     | 1      | 2      | 2      |
| 1119   |       |        |        |        |
| 1126   | 2     | 1      | 1      | 2      |
| 1127   | 1     | 1      | 1      | 1      |
| 1130   | 2     | 3      | 2      | 3      |
| 1131   | 1     | 1      | 1      | 1      |
| 1135   | 4     | 4      | 5      | 5      |
| 1138   | 2     | 3      | 2      | 2      |
| 1139   |       |        |        |        |
| 1140   | 3     | 2      | 4      | 2      |
| 1142   |       |        |        |        |
| 1143   |       |        |        |        |
| 1145   | 2     | 2      | 2      | 2      |
| 1149   |       |        |        |        |
| 1152   | 1     | 1      | 1      | 1      |
| 1160   | 1     | 1      | 1      | 1      |
| 1164   |       |        |        |        |
| 1165   | 2     | 2      | 2      | 2      |
| 1169   | 3     | 1      | 1      | 4      |
| 1170   | 1     | 1      | 2      | 1      |
| 1179   | 1     | 1      | 2      | 1      |
| 1180   | 1     | 1      | 1      | 1      |
| 1183   | 1     | 1      | 1      | 1      |
| 1187   | 1     | 1      | 1      | 1      |
| 1188   | 1     | 1      | 1      | 1      |
| 1193   | 3     | 1      | 1      | 1      |
| 1194   | 4     | 2      | 2      | 3      |
| 1197   | 1     | 1      | 1      | 1      |
| 1202   |       |        |        |        |
| 1204   | 3     | 5      | 3      | 5      |
| 1211   | 1     | 1      | 2      | 1      |
| 1224   | 1     | 1      | 1      | 1      |

| respid | Q40_9 | Q40_10 | Q40_11 | Q40_12 |
|--------|-------|--------|--------|--------|
| 1225   | 1     | 1      | 1      | 1      |
| 1230   | 1     | 1      | 1      | 1      |
| 1232   | 1     | 1      | 1      | 1      |
| 1233   | 2     | 1      | 3      | 2      |
| 1234   | 1     | 1      | 1      | 1      |
| 1235   | 1     | 1      | 2      | 1      |
| 1236   | 1     | 1      | 5      | 1      |
| 1237   | 1     | 1      | 2      | 1      |
| 1238   | 1     | 1      | 2      | 1      |
| 1239   | 1     | 1      | 2      | 1      |
| 1241   | 1     | 1      | 2      | 1      |
| 1242   | 1     | 1      | 1      | 1      |
| 1244   | 1     | 1      | 2      | 1      |
| 1245   | 1     | 1      | 1      | 1      |
| 1247   | 2     | 1      | 5      | 1      |
| 1248   | 1     | 1      | 1      | 1      |
| 1249   | 1     | 1      | 1      | 1      |
| 1250   | 1     | 1      | 1      | 1      |
| 1251   | 1     | 1      | 2      | 1      |
| 1252   | 1     | 1      | 1      | 1      |
| 1253   | 1     | 1      | 1      | 1      |
| 1254   | 4     | 4      | 6      | 5      |
| 1258   | 1     | 1      | 1      | 1      |
| 1260   | 2     | 1      | 2      | 1      |
| 1261   | 1     | 1      | 1      | 1      |
| 1262   | 1     | 1      | 2      | 1      |
| 1263   | 2     | 1      | 3      | 2      |
| 1264   | 1     | 1      | 1      | 1      |
| 1265   | 2     | 1      | 2      | 1      |
| 1266   | 1     | 1      | 2      | 1      |
| 1270   | 1     | 1      | 1      | 1      |
| 1272   | 3     | 3      | 3      | 3      |

| respid | Q40_9 | Q40_10 | Q40_11 | Q40_12 |
|--------|-------|--------|--------|--------|
| 1273   | 3     | 3      | 3      | 3      |
| 1276   | 1     | 1      | 2      | 1      |
| 1277   | 1     | 1      | 2      | 2      |
| 1278   | 1     | 1      | 2      | 1      |
| 1280   | 1     | 1      | 1      | 1      |
| 1281   | 2     | 2      | 2      | 2      |
| 1282   | 2     | 2      | 3      | 2      |
| 1283   | 1     | 1      | 1      | 1      |
| 1288   | 1     | 1      | 1      | 1      |
| 1289   | 2     | 1      | 1      | 1      |
| 1290   | 1     | 1      | 1      | 2      |
| 1291   |       |        |        |        |
| 1293   | 1     | 1      | 1      | 1      |
| 1294   | 1     | 1      | 3      | 1      |
| 1295   | 1     | 1      | 2      | 1      |
| 1296   | 3     | 1      | 3      | 2      |
| 1297   | 1     | 1      | 2      | 1      |
| 1298   | 2     | 1      | 3      | 2      |
| 1300   | 1     | 1      | 2      | 2      |
| 1302   | 1     | 1      | 1      | 1      |
| 1303   | 2     | 1      | 2      | 2      |
| 1304   | 1     | 1      | 2      | 1      |
| 1305   | 1     | 1      | 1      | 1      |
| 1307   | 1     | 1      | 2      | 1      |
| 1312   | 1     | 1      | 1      | 1      |
| 1313   | 1     | 1      | 1      | 1      |
| 1314   | 1     | 1      | 1      | 1      |
| 1317   | 1     | 1      | 2      | 1      |
| 1318   | 1     | 1      | 2      | 1      |
| 1319   | 1     | 1      | 1      | 1      |
| 1321   | 1     | 1      | 1      | 1      |
| 1324   | 3     | 2      | 4      | 3      |

| respid | Q40_9 | Q40_10 | Q40_11 | Q40_12 |
|--------|-------|--------|--------|--------|
| 1325   | 1     | 1      | 2      | 1      |
| 1326   | 1     | 1      | 1      | 1      |
| 1327   | 1     | 1      | 1      | 1      |
| 1329   | 1     | 2      | 3      | 3      |
| 1330   | 1     | 1      | 6      | 1      |
| 1331   | 1     | 1      | 2      | 1      |
| 1335   | 1     | 1      | 2      | 1      |
| 1337   | 1     | 1      | 1      | 1      |
| 1341   | 1     | 1      | 1      | 1      |
| 1342   | 1     | 1      | 1      | 1      |
| 1344   | 1     | 1      | 1      | 2      |
| 1345   | 1     | 1      | 1      | 1      |
| 1346   | 1     | 1      | 1      | 1      |
| 1350   | 3     | 3      | 3      | 3      |
| 1352   | 1     | 1      | 1      | 1      |
| 1353   | 1     | 1      | 2      | 1      |
| 1354   | 1     | 1      | 2      | 1      |
| 1355   | 1     | 1      | 1      | 1      |
| 1357   | 1     | 1      | 1      | 1      |
| 1360   |       |        |        |        |
| 1362   | 2     | 1      | 1      | 1      |
| 1363   | 1     | 1      | 1      | 1      |
| 1367   | 1     | 1      | 1      | 1      |
| 1369   | 1     | 1      | 3      | 1      |
| 1371   |       |        |        |        |
| 1372   |       |        |        |        |
| 1375   |       |        |        |        |
| 1377   | 2     | 1      | 2      | 1      |
| 1379   | 2     | 2      | 2      | 2      |
| 1380   | 1     | 1      | 2      | 1      |
| 1382   | 1     | 1      | 1      | 1      |
| 1383   | 1     | 1      | 1      | 1      |

| respid | Q40_9 | Q40_10 | Q40_11 | Q40_12 |
|--------|-------|--------|--------|--------|
| 1384   | 1     | 1      | 1      | 1      |
| 1385   | 2     | 1      | 1      | 1      |
| 1387   | 2     | 1      | 1      | 1      |
| 1388   | 1     | 1      | 3      | 1      |
| 1389   | 2     | 1      | 1      | 6      |
| 1390   | 2     | 1      | 2      | 2      |
| 1395   | 1     | 1      | 1      | 1      |
| 1396   | 1     | 1      | 2      | 1      |
| 1397   | 3     | 2      | 2      | 4      |
| 1398   | 1     | 1      | 1      | 1      |
| 1399   | 1     | 1      | 1      | 1      |
| 1403   | 1     | 1      | 1      | 1      |
| 1405   | 1     | 1      | 1      | 1      |
| 1406   | 2     | 1      | 2      | 3      |
| 1407   | 4     | 2      | 3      | 4      |
| 1408   | 1     | 1      | 4      | 1      |
| 1409   | 1     | 1      | 1      | 1      |
| 1410   | 3     | 3      | 5      | 5      |
| 1411   | 1     | 1      | 1      | 1      |
| 1412   | 1     | 1      | 1      | 1      |
| 1413   | 2     | 1      | 1      | 1      |
| 1414   | 1     | 1      | 2      | 1      |
| 1415   | 1     | 1      | 1      | 1      |
| 1416   | 1     | 1      | 1      | 1      |
| 1417   | 1     | 1      | 1      | 1      |
| 1418   | 1     | 1      | 1      | 1      |
| 1419   | 2     | 3      | 4      | 4      |
| 1420   | 2     | 1      | 1      | 1      |
| 1421   | 1     | 2      | 2      | 2      |
| 1422   | 1     | 1      | 1      | 1      |
| 1423   | 1     | 1      | 2      | 1      |
| 1424   | 2     | 2      | 4      | 3      |

| respid | Q40_9 | Q40_10 | Q40_11 | Q40_12 |
|--------|-------|--------|--------|--------|
| 1429   | 1     | 1      | 1      | 1      |
| 1430   | 1     | 1      | 1      | 1      |
| 1431   | 4     | 5      | 3      | 5      |
| 1433   | 2     | 3      | 2      | 3      |
| 1435   |       |        |        |        |
| 1436   | 1     | 1      | 1      | 1      |
| 1438   |       |        |        |        |
| 1439   | 1     | 1      | 1      | 1      |
| 1441   | 1     | 1      | 1      | 1      |
| 1442   | 1     | 1      | 1      | 1      |
| 1443   |       |        |        |        |
| 1444   | 1     | 1      | 1      | 1      |
| 1445   | 2     | 2      | 4      | 4      |
| 1446   | 1     | 1      | 2      | 1      |
| 1447   | 1     | 1      | 1      | 1      |
| 1449   | 2     | 1      | 1      | 2      |
| 1450   | 1     | 1      | 1      | 1      |
| 1451   | 2     | 1      | 6      | 6      |
| 1452   |       |        |        |        |
| 1453   | 3     | 2      | 3      | 3      |
| 1454   | 2     | 2      | 2      | 3      |
| 1456   | 1     | 1      | 1      | 1      |
| 1457   | 3     | 1      | 2      | 1      |
| 1459   | 3     | 3      | 3      | 3      |
| 1460   | 1     | 1      | 1      | 1      |
| 1463   | 1     | 1      | 1      | 1      |
| 1465   | 2     | 2      | 2      | 2      |
| 1467   | 1     | 1      | 2      | 1      |
| 1470   | 1     | 1      | 1      | 1      |
| 1471   | 2     | 1      | 5      | 1      |
| 1472   | 1     | 1      | 1      | 1      |
| 1474   | 2     | 1      | 1      | 1      |

| respid | Q40_9 | Q40_10 | Q40_11 | Q40_12 |
|--------|-------|--------|--------|--------|
| 1475   | 1     | 1      | 3      | 1      |
| 1477   | 1     | 1      | 1      | 1      |
| 1478   | 3     | 3      | 3      | 3      |
| 1480   |       |        |        |        |
| 1481   | 2     | 2      | 3      | 2      |
| 1483   | 1     | 1      | 1      | 1      |
| 1484   | 1     | 1      | 1      | 1      |
| 1485   | 1     | 1      | 1      | 1      |
| 1486   | 1     | 1      | 2      | 1      |
| 1487   | 3     | 2      | 3      | 2      |
| 1488   | 1     | 1      | 1      | 1      |
| 1489   | 2     | 1      | 3      | 2      |
| 1490   | 2     | 5      | 5      | 4      |
| 1491   | 4     | 3      | 4      | 2      |
| 1492   | 2     | 1      | 1      | 1      |
| 1494   | 1     | 1      | 1      | 1      |
| 1495   | 1     | 1      | 1      | 2      |
| 1496   | 1     | 1      | 2      | 1      |
| 1498   | 1     | 1      | 1      | 1      |
| 1499   | 1     | 1      | 2      | 2      |
| 1500   | 2     | 1      | 2      | 1      |
| 1501   | 1     | 1      | 1      | 1      |
| 1503   |       |        |        |        |
| 1504   | 1     | 1      | 2      | 1      |
| 1508   | 3     | 3      | 3      | 3      |
| 1509   | 2     | 1      | 3      | 4      |
| 1511   | 2     | 1      | 6      | 3      |
| 1512   | 1     | 1      | 2      | 1      |
| 1513   | 2     | 2      | 3      | 3      |
| 1515   | 1     | 2      | 2      | 2      |
| 1517   | 2     | 1      | 1      | 1      |
| 1518   | 1     | 1      | 2      | 1      |

| respid | Q40_9 | Q40_10 | Q40_11 | Q40_12 |
|--------|-------|--------|--------|--------|
| 1519   | 1     | 1      | 2      | 1      |
| 1520   | 1     | 1      | 1      | 1      |
| 1521   | 4     | 3      | 4      | 5      |
| 1522   | 1     | 1      | 1      | 1      |
| 1523   | 5     | 1      | 6      | 6      |
| 1524   | 1     | 1      | 1      | 1      |
| 1525   | 1     | 1      | 2      | 1      |
| 1526   | 2     | 2      | 6      | 2      |
| 1527   | 1     | 1      | 1      | 1      |
| 1534   | 1     | 1      | 1      | 1      |
| 1535   | 1     | 1      | 1      | 1      |
| 1536   | 2     | 2      | 2      | 1      |
| 1538   | 1     | 1      | 1      | 2      |
| 1539   | 1     | 1      | 1      | 1      |
| 1540   | 1     | 1      | 1      | 1      |
| 1541   | 1     | 1      | 1      | 1      |
| 1542   | 1     | 1      | 1      | 1      |
| 1543   | 2     | 1      | 3      | 2      |
| 1545   | 3     | 3      | 3      | 3      |
| 1546   | 1     | 1      | 1      | 1      |
| 1548   | 4     | 1      | 6      | 1      |
| 1549   |       |        |        |        |
| 1551   | 1     | 1      | 1      | 1      |
| 1552   | 1     | 1      | 2      | 1      |
| 1556   | 1     | 1      | 1      | 1      |
| 1557   |       |        |        |        |
| 1558   | 1     | 1      | 1      | 1      |
| 1561   | 1     | 1      | 1      | 1      |
| 1562   | 1     | 1      | 1      | 2      |
| 1563   | 1     | 1      | 1      | 1      |
| 1564   | 3     | 2      | 4      | 4      |
| 1565   |       |        |        |        |



| respid | Q40_9 | Q40_10 | Q40_11 | Q40_12 |
|--------|-------|--------|--------|--------|
| 1566   | 1     | 1      | 1      | 1      |
| 1567   | 1     | 1      | 2      | 1      |
| 1569   |       |        |        |        |
| 1570   | 2     | 1      | 1      | 1      |
| 1574   | 1     | 1      | 1      | 1      |
| 1575   | 1     | 1      | 1      | 1      |
| 1576   | 1     | 1      | 1      | 1      |
| 1577   | 2     | 2      | 2      | 2      |
| 1581   | 2     | 1      | 1      | 1      |
| 1583   | 1     | 1      | 2      | 1      |
| 1585   | 1     | 1      | 1      | 1      |
| 1586   | 1     | 1      | 1      | 1      |
| 1588   | 1     | 1      | 1      | 1      |
| 1590   | 1     | 1      | 1      | 1      |
| 1592   | 1     | 1      | 1      | 1      |
| 1594   | 1     | 1      | 2      | 1      |
| 1598   | 2     | 2      | 2      | 2      |
| 1599   | 1     | 1      | 5      | 1      |
| 1600   | 2     | 1      | 1      | 2      |
| 1602   | 1     | 1      | 1      | 1      |
| 1603   | 1     | 1      | 3      | 1      |
| 1604   | 1     | 2      | 2      | 2      |
| 1605   | 2     | 3      | 3      | 3      |
| 1606   | 1     | 1      | 2      | 1      |
| 1610   | 1     | 1      | 1      | 1      |
| 1611   | 1     | 1      | 1      | 1      |
| 1612   | 1     | 1      | 1      | 1      |
| 1613   | 2     | 2      | 1      | 2      |
| 1615   | 2     | 2      | 3      | 2      |
| 1616   | 1     | 1      | 2      | 1      |
| 1617   | 1     | 1      | 2      | 1      |
| 1618   | 1     | 1      | 3      | 1      |

| respid | Q40_9 | Q40_10 | Q40_11 | Q40_12 |
|--------|-------|--------|--------|--------|
| 1620   | 1     | 1      | 3      | 1      |
| 1621   | 2     | 1      | 2      | 2      |
| 1622   |       |        |        |        |
| 1623   | 1     | 1      | 1      | 1      |
| 1624   | 1     | 1      | 1      | 2      |
| 1625   | 1     | 1      | 1      | 1      |
| 1626   |       |        |        |        |
| 1627   | 1     | 1      | 2      | 1      |
| 1629   | 1     | 1      | 1      | 1      |
| 1630   | 1     | 1      | 1      | 1      |
| 1631   | 1     | 1      | 2      | 1      |
| 1634   | 2     | 2      | 2      | 2      |
| 1635   | 1     | 1      | 1      | 1      |
| 1636   |       |        |        |        |
| 1637   | 1     | 1      | 1      | 1      |
| 1640   | 1     | 1      | 1      | 1      |
| 1642   | 1     | 1      | 1      | 1      |
| 1643   | 2     | 2      | 3      | 4      |
| 1644   | 1     | 1      | 1      | 1      |
| 1645   | 1     | 1      | 1      | 1      |
| 1646   | 1     | 1      | 1      | 1      |
| 1647   | 2     | 1      | 2      | 1      |
| 1650   | 2     | 2      | 2      | 2      |
| 1654   | 1     | 1      | 2      | 1      |
| 1656   | 1     | 1      | 1      | 1      |
| 1657   | 5     | 1      | 4      | 4      |
| 1659   | 2     | 1      | 1      | 3      |
| 1662   | 2     | 2      | 2      | 2      |
| 1663   | 2     | 1      | 2      | 1      |
| 1664   | 1     | 1      | 1      | 1      |
| 1665   | 1     | 1      | 1      | 1      |
| 1667   | 1     | 1      | 1      | 1      |

| respid | Q40_9 | Q40_10 | Q40_11 | Q40_12 |
|--------|-------|--------|--------|--------|
| 1668   | 1     | 1      | 1      | 1      |
| 1670   | 1     | 1      | 1      | 1      |
| 1671   | 1     | 1      | 1      | 1      |
| 1673   | 1     | 1      | 1      | 1      |
| 1674   | 1     | 1      | 1      | 1      |
| 1676   | 1     | 1      | 1      | 1      |
| 1677   | 1     | 1      | 1      | 1      |
| 1678   | 1     | 1      | 2      | 1      |
| 1680   | 1     | 1      | 1      | 2      |
| 1681   | 1     | 1      | 2      | 1      |
| 1683   | 1     | 1      | 1      | 1      |
| 1685   | 1     | 1      | 2      | 2      |
| 1686   | 1     | 1      | 2      | 2      |
| 1690   | 1     | 1      | 2      | 1      |
| 1691   | 1     | 1      | 1      | 1      |
| 1692   | 1     | 1      | 2      | 1      |
| 1693   | 1     | 1      | 1      | 1      |
| 1695   | 1     | 1      | 1      | 1      |
| 1696   | 1     | 1      | 3      | 1      |
| 1698   | 1     | 1      | 1      | 1      |
| 1699   | 1     | 1      | 1      | 1      |
| 1701   | 5     | 4      | 3      | 3      |
| 1702   | 1     | 1      | 1      | 1      |
| 1703   |       |        |        |        |
| 1705   | 1     | 1      | 2      | 1      |
| 1706   | 1     | 1      | 1      | 1      |
| 1708   |       |        |        |        |
| 1711   | 2     | 2      | 2      | 2      |
| 1712   | 1     | 1      | 1      | 1      |
| 1713   | 1     | 1      | 1      | 1      |
| 1715   | 1     | 1      | 1      | 1      |
| 1717   | 1     | 1      | 1      | 1      |

| respid | Q40_9 | Q40_10 | Q40_11 | Q40_12 |
|--------|-------|--------|--------|--------|
| 1718   | 2     | 2      | 4      | 2      |
| 1719   | 1     | 1      | 1      | 1      |
| 1721   | 1     | 1      | 2      | 1      |
| 1722   | 1     | 1      | 2      | 1      |
| 1724   | 1     | 1      | 2      | 1      |
| 1725   | 1     | 1      | 1      | 1      |
| 1726   | 2     | 1      | 1      | 1      |
| 1727   | 1     | 1      | 1      | 1      |
| 1728   | 1     | 1      | 2      | 1      |
| 1731   | 2     | 1      | 3      | 1      |
| 1733   | 1     | 1      | 1      | 1      |
| 1734   | 1     | 1      | 2      | 1      |
| 1735   |       |        |        |        |
| 1736   | 1     | 1      | 1      | 1      |
| 1737   | 1     | 1      | 1      | 1      |
| 1738   | 1     | 1      | 2      | 2      |
| 1743   | 2     | 1      | 5      | 1      |
| 1755   | 3     | 4      | 3      | 4      |
| 1756   | 3     | 1      | 4      | 1      |
| 1757   | 1     | 1      | 1      | 1      |
| 1758   | 2     | 2      | 2      | 2      |
| 1759   | 1     | 1      | 2      | 1      |
| 1761   | 2     | 1      | 2      | 1      |
| 1762   | 1     | 1      | 1      | 1      |
| 1764   |       |        |        |        |
| 1767   | 2     | 1      | 2      | 1      |
| 1768   | 2     | 1      | 4      | 2      |
| 1769   | 1     | 1      | 2      | 1      |
| 1770   | 1     | 1      | 2      | 1      |
| 1771   | 1     | 1      | 2      | 1      |
| 1776   | 2     | 1      | 1      | 1      |
| 1777   | 2     | 2      | 2      | 2      |

| respid | Q40_9 | Q40_10 | Q40_11 | Q40_12 |
|--------|-------|--------|--------|--------|
| 1778   | 2     | 1      | 3      | 2      |
| 1779   | 2     | 1      | 1      | 2      |
| 1780   | 1     | 1      | 2      | 1      |
| 1781   |       |        |        |        |
| 1783   | 1     | 1      | 1      | 1      |
| 1784   | 4     | 3      | 5      | 3      |
| 1785   | 1     | 1      | 1      | 1      |
| 1788   | 3     | 3      | 2      | 2      |
| 1792   | 2     | 1      | 1      | 1      |
| 1794   | 1     | 1      | 1      | 1      |
| 1798   | 2     | 2      | 4      | 4      |
| 1799   | 1     | 1      | 2      | 1      |
| 1800   | 1     | 1      | 1      | 1      |
| 1804   | 2     | 2      | 2      | 2      |
| 1806   | 1     | 1      | 2      | 1      |
| 1807   | 1     | 1      | 1      | 1      |
| 1808   | 1     | 1      | 1      | 1      |
| 1809   | 1     | 1      | 2      | 1      |
| 1811   | 1     | 1      | 2      | 1      |
| 1812   | 1     | 1      | 4      | 1      |
| 1813   | 3     | 3      | 3      | 3      |
| 1814   | 2     | 1      | 1      | 1      |
| 1815   | 1     | 1      | 2      | 1      |
| 1817   | 2     | 1      | 3      | 1      |
| 1820   | 1     | 1      | 2      | 1      |
| 1821   | 1     | 1      | 1      | 1      |
| 1822   | 1     | 1      | 1      | 1      |
| 1823   | 1     | 1      | 2      | 1      |
| 1824   | 2     | 2      | 3      | 2      |
| 1826   |       |        |        |        |
| 1828   | 1     | 1      | 1      | 1      |
| 1829   | 1     | 1      | 1      | 1      |

| respid | Q40_9 | Q40_10 | Q40_11 | Q40_12 |
|--------|-------|--------|--------|--------|
| 1830   | 1     | 1      | 2      | 1      |
| 1831   | 1     | 1      | 1      | 1      |
| 1832   | 1     | 1      | 1      | 1      |
| 1836   | 1     | 1      | 2      | 1      |
| 1838   | 4     | 1      | 5      | 4      |
| 1839   | 1     | 1      | 3      | 2      |
| 1840   | 1     | 1      | 1      | 1      |
| 1841   | 2     | 3      | 3      | 1      |
| 1842   | 2     | 1      | 3      | 2      |
| 1843   | 1     | 1      | 1      | 2      |
| 1844   | 2     | 2      | 2      | 2      |
| 1845   | 1     | 1      | 1      | 1      |
| 1849   | 1     | 1      | 1      | 1      |
| 1850   | 2     | 1      | 1      | 3      |
| 1851   | 2     | 1      | 1      | 2      |
| 1852   |       |        |        |        |
| 1857   | 1     | 1      | 1      | 3      |
| 1858   | 1     | 1      | 1      | 1      |
| 1861   | 1     | 1      | 1      | 1      |
| 1862   | 1     | 1      | 1      | 1      |
| 1863   | 3     | 3      | 3      | 3      |
| 1864   | 2     | 2      | 1      | 2      |
| 1865   |       |        |        |        |
| 1867   | 1     | 1      | 1      | 1      |
| 1868   | 1     | 1      | 2      | 1      |
| 1869   | 1     | 1      | 1      | 1      |
| 1870   | 1     | 1      | 1      | 1      |
| 1871   | 3     | 1      | 4      | 2      |
| 1872   | 1     | 1      | 1      | 1      |
| 1873   | 1     | 1      | 1      | 1      |
| 1876   |       |        |        |        |
| 1877   |       |        |        |        |

| respid | Q40_9 | Q40_10 | Q40_11 | Q40_12 |
|--------|-------|--------|--------|--------|
| 1878   | 1     | 1      | 2      | 1      |
| 1879   | 1     | 1      | 1      | 1      |
| 1880   | 1     | 1      | 1      | 1      |
| 1881   | 2     | 1      | 1      | 1      |
| 1883   | 3     | 1      | 2      | 3      |
| 1886   | 1     | 1      | 1      | 1      |
| 1888   | 4     | 4      | 4      | 4      |
| 1889   | 3     | 1      | 3      | 2      |
| 1890   | 3     | 3      | 3      | 3      |
| 1891   | 1     | 1      | 1      | 1      |
| 1893   | 1     | 1      | 1      | 1      |
| 1894   | 2     | 2      | 3      | 2      |
| 1895   | 2     | 1      | 5      | 2      |
| 1896   | 1     | 1      | 1      | 1      |
| 1897   | 1     | 1      | 1      | 1      |
| 1898   | 5     | 5      | 4      | 5      |
| 1899   | 1     | 1      | 2      | 1      |
| 1900   |       |        |        |        |
| 1903   | 1     | 1      | 1      | 1      |
| 1906   | 1     | 1      | 2      | 1      |
| 1907   | 4     | 3      | 4      | 3      |
| 1908   | 1     | 1      | 1      | 2      |
| 1909   | 4     | 1      | 5      | 3      |
| 1910   | 1     | 1      | 1      | 1      |
| 1911   | 1     | 1      | 1      | 1      |
| 1912   |       |        |        |        |
| 1917   | 1     | 1      | 1      | 1      |
| 1918   | 2     | 1      | 2      | 1      |
| 1919   | 1     | 1      | 1      | 1      |
| 1922   |       |        |        |        |
| 1925   |       |        |        |        |
| 1926   | 1     | 1      | 1      | 1      |

| respid | Q40_9 | Q40_10 | Q40_11 | Q40_12 |
|--------|-------|--------|--------|--------|
| 1927   | 1     | 1      | 1      | 1      |
| 1928   |       |        |        |        |
| 1929   | 1     | 1      | 1      | 1      |
| 1934   | 1     | 1      | 1      | 1      |
| 1935   | 1     | 1      | 2      | 1      |
| 1936   | 1     | 1      | 1      | 2      |
| 1937   |       |        |        |        |
| 1938   |       |        |        |        |
| 1939   | 2     | 1      | 2      | 3      |
| 1940   | 1     | 1      | 1      | 1      |
| 1941   |       |        |        |        |
| 1948   |       |        |        |        |
| 1950   | 1     | 1      | 1      | 2      |
| 1955   | 2     | 2      | 3      | 3      |
| 1958   | 2     | 2      | 1      | 2      |
| 1960   | 1     | 1      | 1      | 1      |
| 1961   |       |        |        |        |
| 1962   | 1     | 1      | 1      | 1      |
| 1965   |       |        |        |        |
| 1966   | 1     | 1      | 1      | 1      |
| 1967   |       |        |        |        |
| 1968   | 1     | 1      | 2      | 1      |
| 1973   | 1     | 2      | 1      | 1      |
| 1974   | 5     | 3      | 6      | 5      |
| 1975   |       |        |        |        |
| 1977   | 1     | 1      | 2      | 1      |
| 1978   |       |        |        |        |
| 1979   | 3     | 3      | 4      | 3      |
| 1982   | 2     | 1      | 1      | 1      |
| 1983   | 1     | 1      | 1      | 1      |
| 1987   | 1     | 1      | 2      | 1      |
| 1988   | 1     | 1      | 2      | 1      |



| respid | Q40_9 | Q40_10 | Q40_11 | Q40_12 |
|--------|-------|--------|--------|--------|
| 1991   | 2     | 1      | 2      | 1      |
| 1992   | 1     | 1      | 1      | 1      |
| 1993   | 1     | 1      | 3      | 1      |
| 1994   | 2     | 2      | 2      | 2      |
| 1995   | 1     | 1      | 1      | 1      |
| 1996   | 1     | 1      | 1      | 1      |
| 1997   | 1     | 1      | 1      | 1      |
| 1998   | 1     | 1      | 1      | 1      |
| 1999   | 2     | 1      | 5      | 2      |
| 2000   | 2     | 4      | 3      | 2      |
| 2001   | 1     | 1      | 2      | 1      |
| 2002   | 1     | 1      | 1      | 1      |
| 2003   |       |        |        |        |
| 2004   | 1     | 1      | 1      | 1      |
| 2005   | 1     | 1      | 1      | 1      |
| 2007   | 2     | 3      | 4      | 3      |
| 2009   | 1     | 1      | 1      | 1      |
| 2010   |       |        |        |        |
| 2011   | 1     | 1      | 1      | 1      |
| 2013   | 1     | 1      | 1      | 1      |
| 2014   | 1     | 1      | 2      | 1      |
| 2017   | 2     | 1      | 3      | 2      |
| 2020   | 1     | 1      | 1      | 1      |
| 2023   | 2     | 1      | 2      | 2      |
| 2024   | 1     | 1      | 1      | 1      |
| 2029   | 1     | 1      | 1      | 1      |
| 2030   |       |        |        |        |
| 2031   | 1     | 1      | 3      | 1      |
| 2032   | 2     | 1      | 1      | 3      |
| 2033   |       |        |        |        |
| 2034   | 1     | 1      | 1      | 1      |
| 2036   | 2     | 1      | 3      | 3      |

| respid | Q40_9 | Q40_10 | Q40_11 | Q40_12 |
|--------|-------|--------|--------|--------|
| 2037   | 5     | 5      | 5      | 6      |
| 2038   | 1     | 1      | 1      | 1      |
| 2039   | 1     | 1      | 2      | 1      |
| 2040   |       |        |        |        |
| 2041   |       |        |        |        |
| 2042   | 1     | 1      | 1      | 1      |
| 2043   | 3     | 1      | 2      | 1      |
| 2051   | 1     | 1      | 1      | 1      |
| 2052   | 1     | 1      | 1      | 1      |
| 2053   | 1     | 1      | 1      | 1      |
| 2054   |       |        |        |        |
| 2055   | 2     | 1      | 1      | 1      |
| 2056   | 1     | 2      | 2      | 2      |
| 2057   | 1     | 1      | 1      | 1      |
| 2059   | 1     | 1      | 1      | 1      |
| 2063   | 2     | 1      | 2      | 1      |
| 2066   | 1     | 1      | 1      | 1      |
| 2068   | 1     | 1      | 2      | 1      |
| 2069   | 1     | 1      | 2      | 2      |
| 2070   |       |        |        |        |
| 2071   | 1     | 1      | 1      | 1      |
| 2073   |       |        |        |        |
| 2077   | 3     | 3      | 4      | 4      |
| 2079   |       |        |        |        |
| 2080   | 2     | 2      | 2      | 3      |
| 2081   | 4     | 2      | 5      | 3      |
| 2084   |       |        |        |        |
| 2085   | 1     | 1      | 1      | 1      |
| 2087   | 1     | 1      | 3      | 1      |
| 2089   | 1     | 1      | 1      | 1      |
| 2093   | 1     | 1      | 1      | 1      |
| 2094   | 1     | 1      | 2      | 1      |

| respid | Q40_9 | Q40_10 | Q40_11 | Q40_12 |
|--------|-------|--------|--------|--------|
| 2095   | 1     | 1      | 5      | 3      |
| 2097   | 1     | 1      | 1      | 1      |
| 2099   | 3     | 3      | 1      | 1      |
| 2100   | 2     | 2      | 2      | 2      |
| 2101   | 1     | 1      | 1      | 1      |
| 2103   | 1     | 1      | 1      | 1      |
| 2104   | 1     | 1      | 2      | 1      |
| 2106   | 1     | 1      | 1      | 1      |
| 2111   | 1     | 1      | 3      | 1      |
| 2113   | 1     | 1      | 1      | 1      |
| 2115   |       |        |        |        |
| 2119   | 3     | 1      | 2      | 1      |
| 2120   |       |        |        |        |
| 2123   |       |        |        |        |
| 2124   | 2     | 1      | 4      | 3      |
| 2130   |       |        |        |        |
| 2131   | 1     | 1      | 1      | 1      |
| 2133   | 3     | 3      | 3      | 2      |
| 2139   | 2     | 1      | 1      | 1      |
| 2141   |       |        |        |        |
| 2143   | 2     | 1      | 1      | 2      |
| 2144   | 1     | 1      | 1      | 1      |
| 2147   |       |        |        |        |
| 2151   | 1     | 1      | 1      | 1      |
| 2153   | 1     | 1      | 1      | 1      |
| 2154   | 1     | 1      | 2      | 1      |
| 2155   | 1     | 1      | 1      | 2      |
| 2159   | 1     | 1      | 2      | 1      |
| 2160   | 2     | 2      | 3      | 3      |
| 2161   | 1     | 1      | 1      | 1      |
| 2163   | 1     | 1      | 2      | 1      |
| 2164   | 1     | 1      | 1      | 1      |

| respid | Q40_9 | Q40_10 | Q40_11 | Q40_12 |
|--------|-------|--------|--------|--------|
| 2168   | 2     | 2      | 1      | 1      |
| 2169   | 2     | 2      | 2      | 2      |
| 2170   | 1     | 1      | 1      | 1      |
| 2171   | 2     | 1      | 1      | 1      |
| 2172   | 3     | 3      | 5      | 3      |
| 2173   | 1     | 1      | 1      | 1      |
| 2174   | 1     | 1      | 1      | 1      |
| 2175   | 1     | 1      | 1      | 3      |
| 2176   | 1     | 1      | 1      | 1      |
| 2177   | 4     | 3      | 4      | 4      |
| 2179   | 1     | 1      | 1      | 1      |
| 2181   | 1     | 1      | 1      | 1      |
| 2182   | 1     | 1      | 1      | 1      |
| 2183   | 2     | 2      | 2      | 2      |
| 2184   | 2     | 1      | 2      | 2      |
| 2185   |       |        |        |        |
| 2186   | 1     | 2      | 1      | 1      |
| 2187   | 1     | 1      | 1      | 1      |
| 2188   | 1     | 1      | 1      | 1      |
| 2189   |       |        |        |        |
| 2190   | 1     | 1      | 1      | 1      |
| 2193   | 1     | 1      | 2      | 1      |
| 2195   | 1     | 1      | 1      | 1      |
| 2198   | 1     | 1      | 2      | 1      |
| 2200   | 1     | 1      | 1      | 1      |
| 2205   | 3     | 3      | 3      | 3      |
| 2208   |       |        |        |        |
| 2209   | 2     | 2      | 3      | 2      |
| 2210   | 1     | 1      | 1      | 1      |
| 2211   | 1     | 1      | 2      | 1      |
| 2213   | 1     | 1      | 1      | 1      |
| 2214   | 1     | 1      | 2      | 1      |

| respid | Q40_9 | Q40_10 | Q40_11 | Q40_12 |
|--------|-------|--------|--------|--------|
| 2216   | 1     | 1      | 1      | 1      |
| 2220   | 2     | 1      | 2      | 1      |
| 2225   | 1     | 1      | 1      | 1      |
| 2227   | 1     | 1      | 1      | 2      |
| 2228   | 2     | 2      | 2      | 2      |
| 2229   | 1     | 1      | 1      | 1      |
| 2230   |       |        |        |        |
| 2236   |       |        |        |        |
| 2238   | 2     | 2      | 4      | 3      |
| 2239   | 2     | 1      | 3      | 3      |
| 2240   | 1     | 1      | 1      | 1      |
| 2241   | 1     | 1      | 3      | 2      |
| 2243   |       |        |        |        |
| 2245   | 1     | 1      | 1      | 1      |
| 2247   | 2     | 2      | 1      | 1      |
| 2248   | 1     | 1      | 1      | 1      |
| 2249   | 1     | 1      | 2      | 1      |
| 2254   | 1     | 1      | 3      | 1      |
| 2256   | 1     | 1      | 2      | 1      |
| 2259   | 1     | 1      | 1      | 1      |
| 2261   | 1     | 1      | 1      | 1      |
| 2262   | 1     | 1      | 1      | 1      |
| 2263   | 3     | 2      | 2      | 2      |
| 2264   | 2     | 2      | 3      | 3      |
| 2265   | 2     | 2      | 3      | 3      |
| 2270   | 1     | 1      | 1      | 2      |
| 2271   | 1     | 1      | 1      | 1      |
| 2272   | 1     | 1      | 1      | 1      |
| 2273   | 1     | 1      | 2      | 1      |
| 2274   | 1     | 1      | 1      | 1      |
| 2276   | 2     | 3      | 6      | 1      |
| 2277   | 2     | 1      | 2      | 1      |

| respid | Q40_9 | Q40_10 | Q40_11 | Q40_12 |
|--------|-------|--------|--------|--------|
| 2281   | 1     | 1      | 1      | 1      |
| 2288   | 1     | 1      | 1      | 2      |
| 2290   | 1     | 1      | 1      | 1      |
| 2294   | 3     | 2      | 3      | 3      |
| 2295   | 1     | 1      | 2      | 1      |
| 2296   | 1     | 1      | 1      | 1      |
| 2297   |       |        |        |        |
| 2298   | 1     | 1      | 1      | 1      |
| 2301   | 2     | 2      | 3      | 1      |
| 2302   | 2     | 2      | 2      | 2      |
| 2303   |       |        |        |        |
| 2305   | 1     | 1      | 1      | 1      |
| 2309   | 1     | 1      | 1      | 1      |
| 2310   | 1     | 1      | 1      | 1      |
| 2311   | 1     | 1      | 2      | 1      |
| 2313   | 2     | 1      | 4      | 2      |
| 2316   |       |        |        |        |
| 2317   | 1     | 1      | 1      | 1      |
| 2318   | 1     | 1      | 2      | 2      |
| 2319   | 1     | 1      | 5      | 1      |
| 2321   | 2     | 1      | 2      | 4      |
| 2324   | 1     | 1      | 2      | 1      |
| 2328   | 1     | 1      | 1      | 2      |
| 2329   |       |        |        |        |
| 2330   | 1     | 1      | 1      | 2      |
| 2333   | 1     | 1      | 2      | 1      |
| 2334   | 2     | 2      | 2      | 2      |
| 2338   | 1     | 1      | 1      | 1      |
| 2341   | 3     | 3      | 3      | 1      |
| 2342   | 2     | 2      | 2      | 3      |
| 2343   | 3     | 3      | 4      | 4      |
| 2346   | 1     | 1      | 1      | 1      |

| respid | Q40_9 | Q40_10 | Q40_11 | Q40_12 |
|--------|-------|--------|--------|--------|
| 2347   | 2     | 1      | 2      | 1      |
| 2348   | 2     | 2      | 2      | 2      |
| 2349   | 2     | 2      | 5      | 2      |
| 2350   | 1     | 1      | 1      | 1      |
| 2351   | 1     | 1      | 1      | 1      |
| 2352   | 1     | 1      | 1      | 1      |
| 2359   | 2     | 1      | 1      | 1      |
| 2362   |       |        |        |        |
| 2363   | 1     | 1      | 1      | 1      |
| 2365   | 1     | 1      | 1      | 1      |
| 2367   | 3     | 1      | 4      | 2      |
| 2368   | 1     | 1      | 1      | 1      |
| 2369   | 1     | 1      | 2      | 1      |
| 2372   |       |        |        |        |
| 2374   | 1     | 1      | 2      | 1      |
| 2376   | 1     | 1      | 1      | 1      |
| 2379   | 3     | 2      | 4      | 2      |
| 2380   | 1     | 1      | 1      | 1      |
| 2381   | 1     | 1      | 3      | 1      |
| 2382   | 1     | 2      | 1      | 2      |
| 2385   | 2     | 3      | 2      | 2      |
| 2387   | 1     | 1      | 3      | 1      |
| 2388   | 1     | 1      | 2      | 1      |
| 2389   | 1     | 1      | 3      | 1      |
| 2391   | 1     | 1      | 2      | 1      |
| 2392   | 1     | 1      | 2      | 2      |
| 2393   | 1     | 1      | 1      | 1      |
| 2394   | 5     | 3      | 3      | 3      |
| 2397   | 1     | 1      | 1      | 1      |
| 2398   | 2     | 2      | 2      | 2      |
| 2400   | 1     | 1      | 1      | 1      |
| 2402   | 1     | 1      | 1      | 2      |

| respid | Q40_9 | Q40_10 | Q40_11 | Q40_12 |
|--------|-------|--------|--------|--------|
| 2406   | 1     | 1      | 1      | 1      |
| 2408   | 1     | 1      | 1      | 1      |
| 2410   | 1     | 1      | 1      | 1      |
| 2411   | 3     | 1      | 4      | 2      |
| 2412   | 1     | 1      | 2      | 1      |
| 2414   | 1     | 2      | 2      | 2      |
| 2421   | 1     | 1      | 2      | 1      |
| 2423   | 1     | 1      | 2      | 1      |
| 2424   | 2     | 2      | 2      | 2      |
| 2425   | 1     | 1      | 1      | 1      |
| 2426   | 1     | 1      | 1      | 1      |
| 2429   | 3     | 3      | 3      | 3      |
| 2430   | 1     | 1      | 2      | 1      |
| 2432   | 1     | 1      | 1      | 1      |
| 2433   | 1     | 1      | 1      | 1      |
| 2434   | 1     | 1      | 1      | 1      |
| 2435   | 1     | 1      | 2      | 1      |
| 2436   | 2     | 1      | 1      | 1      |
| 2439   | 3     | 3      | 2      | 2      |
| 2440   | 1     | 1      | 1      | 1      |
| 2441   | 1     | 1      | 1      | 1      |
| 2446   | 1     | 1      | 1      | 1      |
| 2448   | 3     | 3      | 4      | 4      |
| 2449   | 1     | 1      | 1      | 1      |
| 2451   | 1     | 1      | 3      | 1      |
| 2452   | 1     | 1      | 1      | 1      |
| 2455   |       |        |        |        |
| 2457   | 1     | 1      | 2      | 2      |
| 2458   | 1     | 1      | 1      | 1      |
| 2459   | 1     | 1      | 1      | 1      |
| 2460   | 1     | 1      | 1      | 1      |
| 2462   | 3     | 3      | 3      | 3      |



| respid | Q40_9 | Q40_10 | Q40_11 | Q40_12 |
|--------|-------|--------|--------|--------|
| 2464   | 5     | 4      | 3      | 4      |
| 2465   | 1     | 2      | 2      | 2      |
| 2468   | 1     | 2      | 1      | 1      |
| 2469   |       |        |        |        |
| 2470   | 2     | 1      | 1      | 1      |
| 2471   | 2     | 2      | 3      | 2      |
| 2472   | 1     | 1      | 1      | 1      |
| 2474   | 1     | 1      | 1      | 1      |
| 2476   | 2     | 2      | 2      | 3      |
| 2478   | 2     | 1      | 1      | 2      |
| 2479   | 2     | 2      | 2      | 1      |
| 2480   | 1     | 1      | 2      | 1      |
| 2482   | 1     | 1      | 1      | 1      |
| 2486   | 1     | 1      | 3      | 1      |
| 2488   | 3     | 1      | 4      | 1      |
| 2489   | 1     | 1      | 1      | 1      |
| 2491   | 1     | 1      | 1      | 1      |
| 2495   | 1     | 1      | 1      | 1      |
| 2496   | 1     | 1      | 1      | 1      |
| 2498   | 1     | 1      | 2      | 1      |
| 2501   | 1     | 1      | 1      | 2      |
| 2502   | 3     | 3      | 4      | 3      |
| 2503   | 2     | 1      | 2      | 1      |
| 2504   | 1     | 1      | 1      | 1      |
| 2507   | 1     | 1      | 1      | 1      |
| 2509   | 1     | 1      | 2      | 1      |
| 2512   | 1     | 1      | 2      | 1      |
| 2514   | 2     | 1      | 1      | 1      |
| 2516   | 2     | 1      | 2      | 1      |
| 2517   | 2     | 1      | 2      | 1      |
| 2521   | 2     | 1      | 2      | 1      |
| 2522   | 1     | 1      | 1      | 1      |

| respid | Q40_9 | Q40_10 | Q40_11 | Q40_12 |
|--------|-------|--------|--------|--------|
| 2524   | 1     | 1      | 1      | 1      |
| 2525   | 1     | 1      | 1      | 1      |
| 2526   | 1     | 1      | 1      | 2      |
| 2527   | 1     | 1      | 1      | 1      |
| 2528   | 1     | 1      | 2      | 1      |
| 2531   |       |        |        |        |
| 2533   | 2     | 1      | 3      | 2      |
| 2535   | 2     | 1      | 2      | 2      |
| 2536   | 4     | 5      | 6      | 5      |
| 2539   | 1     | 1      | 1      | 1      |
| 2540   | 1     | 1      | 1      | 1      |
| 2543   | 1     | 1      | 1      | 1      |
| 2546   | 1     | 1      | 2      | 1      |
| 2547   | 1     | 1      | 3      | 1      |
| 2549   | 1     | 1      | 1      | 1      |
| 2553   | 1     | 1      | 1      | 1      |
| 2554   | 1     | 1      | 1      | 1      |
| 2555   | 1     | 1      | 1      | 1      |
| 2556   | 1     | 1      | 1      | 1      |
| 2557   | 1     | 1      | 1      | 1      |
| 2559   | 1     | 1      | 1      | 1      |
| 2560   | 5     | 4      | 5      | 4      |
| 2561   | 2     | 1      | 1      | 1      |
| 2566   | 1     | 1      | 1      | 1      |
| 2567   |       |        |        |        |
| 2570   | 2     | 1      | 1      | 2      |
| 2574   | 5     | 4      | 6      | 4      |
| 2578   | 1     | 1      | 1      | 1      |
| 2580   | 3     | 3      | 3      | 3      |
| 2590   | 1     | 1      | 3      | 1      |
| 2593   | 1     | 1      | 1      | 1      |
| 2594   | 1     | 1      | 2      | 1      |

| respid | Q40_9 | Q40_10 | Q40_11 | Q40_12 |
|--------|-------|--------|--------|--------|
| 2595   | 1     | 1      | 1      | 1      |
| 2596   | 1     | 1      | 1      | 1      |
| 2597   | 4     | 4      | 4      | 4      |
| 2598   | 1     | 1      | 2      | 1      |
| 2602   | 1     | 1      | 1      | 1      |
| 2605   | 1     | 3      | 5      | 5      |
| 2606   |       |        |        |        |
| 2607   | 2     | 1      | 2      | 3      |
| 2608   |       |        |        |        |
| 2609   | 1     | 1      | 1      | 1      |
| 2610   | 1     | 1      | 1      | 1      |
| 2614   |       |        |        |        |
| 2615   | 1     | 1      | 1      | 1      |
| 2616   | 1     | 1      | 2      | 1      |
| 2618   | 1     | 1      | 1      | 1      |
| 2630   | 3     | 3      | 3      | 3      |
| 2633   | 1     | 1      | 6      | 1      |
| 2637   | 1     | 1      | 1      | 1      |
| 2638   | 1     | 1      | 1      | 2      |
| 2641   | 1     | 1      | 2      | 2      |
| 2644   | 1     | 1      | 1      | 1      |
| 2645   | 1     | 1      | 2      | 1      |
| 2646   | 1     | 1      | 1      | 1      |
| 2648   | 1     | 1      | 1      | 1      |
| 2651   |       |        |        |        |
| 2652   | 3     | 3      | 3      | 4      |
| 2653   | 1     | 1      | 2      | 1      |
| 2656   |       |        |        |        |
| 2657   | 1     | 1      | 1      | 1      |
| 2658   | 2     | 1      | 1      | 1      |
| 2661   | 1     | 1      | 1      | 1      |
| 2663   | 1     | 1      | 2      | 1      |

| respid | Q40_9 | Q40_10 | Q40_11 | Q40_12 |
|--------|-------|--------|--------|--------|
| 2665   | 1     | 1      | 2      | 1      |
| 2670   | 1     | 1      | 1      | 1      |
| 2672   | 1     | 1      | 1      | 1      |
| 2673   |       |        |        |        |
| 2677   | 1     | 1      | 1      | 2      |
| 2686   | 4     | 5      | 3      | 4      |
| 2688   | 2     | 1      | 2      | 2      |
| 2689   | 2     | 2      | 2      | 2      |
| 2691   | 1     | 1      | 1      | 1      |
| 2695   | 1     | 1      | 1      | 1      |
| 2696   | 1     | 1      | 1      | 1      |
| 2697   |       |        |        |        |
| 2698   |       |        |        |        |
| 2703   | 1     | 1      | 1      | 1      |
| 2704   | 1     | 1      | 1      | 1      |
| 2706   | 2     | 1      | 4      | 3      |
| 2707   | 2     | 1      | 2      | 2      |
| 2710   | 1     | 1      | 1      | 1      |
| 2711   | 1     | 1      | 1      | 1      |
| 2712   | 1     | 1      | 1      | 1      |
| 2713   |       |        |        |        |
| 2721   |       |        |        |        |
| 2730   | 1     | 1      | 1      | 1      |
| 2731   | 1     | 1      | 1      | 1      |
| 2732   | 1     | 1      | 1      | 1      |
| 2733   | 3     | 2      | 2      | 2      |
| 2735   | 1     | 1      | 1      | 1      |
| 2736   | 1     | 1      | 2      | 1      |
| 2740   | 1     | 1      | 2      | 1      |
| 2741   | 2     | 1      | 1      | 2      |
| 2742   | 1     | 1      | 3      | 3      |
| 2743   | 1     | 1      | 2      | 1      |

| respid | Q40_9 | Q40_10 | Q40_11 | Q40_12 |
|--------|-------|--------|--------|--------|
| 2744   | 2     | 1      | 1      | 1      |
| 2745   | 4     | 3      | 3      | 3      |
| 2749   | 1     | 1      | 1      | 1      |
| 2751   | 1     | 1      | 1      | 1      |
| 2754   | 1     | 1      | 2      | 1      |
| 2755   | 2     | 2      | 1      | 1      |
| 2757   | 1     | 1      | 1      | 1      |
| 2758   | 1     | 1      | 2      | 1      |
| 2759   | 1     | 1      | 3      | 1      |
| 2761   | 1     | 1      | 1      | 1      |
| 2762   | 3     | 1      | 1      | 2      |
| 2763   | 1     | 1      | 1      | 1      |
| 2764   | 3     | 1      | 4      | 3      |
| 2765   | 2     | 1      | 2      | 2      |
| 2766   | 1     | 1      | 1      | 1      |
| 2767   | 3     | 1      | 1      | 3      |
| 2769   | 1     | 1      | 1      | 1      |
| 2770   | 1     | 3      | 1      | 1      |
| 2771   | 2     | 1      | 2      | 2      |
| 2774   | 2     | 1      | 3      | 1      |
| 2777   | 3     | 2      | 3      | 3      |
| 2778   | 1     | 1      | 2      | 1      |
| 2781   | 2     | 2      | 2      | 3      |
| 2782   | 2     | 2      | 2      | 2      |
| 2784   | 1     | 1      | 5      | 1      |
| 2785   | 2     | 1      | 3      | 2      |
| 2786   | 1     | 1      | 1      | 1      |
| 2787   | 1     | 1      | 1      | 1      |
| 2789   | 2     | 2      | 2      | 2      |
| 2790   | 1     | 1      | 2      | 1      |
| 2791   | 1     | 1      | 4      | 1      |
| 2793   | 1     | 1      | 4      | 3      |

| respid | Q40_9 | Q40_10 | Q40_11 | Q40_12 |
|--------|-------|--------|--------|--------|
| 2797   | 1     | 1      | 1      | 1      |
| 2798   | 1     | 1      | 1      | 1      |
| 2799   | 1     | 1      | 2      | 1      |
| 2801   | 1     | 1      | 1      | 1      |
| 2802   | 2     | 1      | 2      | 3      |
| 2803   | 2     | 1      | 2      | 2      |
| 2804   | 3     | 3      | 5      | 4      |
| 2807   | 1     | 1      | 1      | 1      |
| 2809   | 2     | 1      | 2      | 1      |
| 2810   | 4     | 5      | 2      | 2      |
| 2812   | 1     | 1      | 1      | 1      |
| 2814   | 1     | 1      | 1      | 1      |
| 2815   | 1     | 1      | 2      | 1      |
| 2816   | 1     | 1      | 1      | 1      |
| 2817   | 1     | 2      | 1      | 1      |
| 2819   | 2     | 1      | 2      | 2      |
| 2820   | 1     | 1      | 1      | 1      |
| 2821   | 1     | 1      | 3      | 1      |
| 2822   | 2     | 2      | 4      | 2      |
| 2823   | 1     | 1      | 1      | 3      |
| 2824   | 1     | 1      | 2      | 1      |
| 2825   | 1     | 1      | 2      | 1      |
| 2826   | 1     | 1      | 1      | 1      |
| 2827   | 1     | 1      | 1      | 1      |
| 2828   | 1     | 1      | 1      | 1      |
| 2829   | 3     | 3      | 3      | 3      |
| 2830   | 2     | 2      | 2      | 2      |
| 2831   | 1     | 1      | 4      | 1      |
| 2832   | 1     | 1      | 2      | 3      |
| 2833   | 1     | 1      | 1      | 1      |
| 2834   | 1     | 1      | 1      | 1      |
| 2835   | 3     | 1      | 6      | 4      |

| respid | Q40_9 | Q40_10 | Q40_11 | Q40_12 |
|--------|-------|--------|--------|--------|
| 2836   | 1     | 1      | 2      | 1      |
| 2837   | 1     | 1      | 1      | 1      |
| 2838   | 1     | 1      | 4      | 1      |
| 2844   | 4     | 3      | 5      | 5      |
| 2845   | 1     | 1      | 1      | 1      |
| 2847   | 5     | 5      | 6      | 6      |
| 2848   | 1     | 1      | 1      | 1      |
| 2849   | 1     | 1      | 2      | 1      |
| 2851   | 1     | 1      | 1      | 1      |
| 2852   | 1     | 1      | 1      | 1      |
| 2853   | 2     | 2      | 2      | 2      |
| 2854   | 1     | 1      | 1      | 1      |
| 2856   | 1     | 1      | 1      | 1      |
| 2857   | 1     | 1      | 1      | 1      |
| 2858   | 2     | 1      | 2      | 1      |
| 2859   | 2     | 2      | 6      | 2      |
| 2860   | 1     | 1      | 3      | 2      |
| 2861   | 3     | 3      | 3      | 3      |
| 2863   | 1     | 1      | 1      | 1      |
| 2864   | 1     | 1      | 1      | 1      |
| 2866   | 1     | 1      | 1      | 2      |
| 2872   | 1     | 1      | 1      | 1      |
| 2875   | 1     | 1      | 2      | 1      |
| 2879   |       |        |        |        |
| 2881   | 1     | 1      | 2      | 1      |
| 2882   | 1     | 1      | 1      | 1      |
| 2883   | 1     | 1      | 1      | 1      |
| 2884   | 3     | 3      | 2      | 3      |
| 2885   | 2     | 1      | 1      | 1      |
| 2887   | 1     | 1      | 1      | 1      |
| 2888   | 1     | 1      | 1      | 1      |
| 2890   | 1     | 1      | 2      | 1      |

| respid | Q40_9 | Q40_10 | Q40_11 | Q40_12 |
|--------|-------|--------|--------|--------|
| 2891   | 1     | 1      | 1      | 1      |
| 2892   |       |        |        |        |
| 2895   | 1     | 1      | 1      | 1      |
| 2899   | 1     | 1      | 2      | 1      |
| 2900   | 1     | 1      | 1      | 1      |
| 2902   | 6     | 1      | 6      | 1      |
| 2903   |       |        |        |        |
| 2904   | 1     | 1      | 1      | 1      |
| 2906   | 2     | 1      | 1      | 1      |
| 2908   | 1     | 1      | 2      | 1      |
| 2910   | 1     | 1      | 1      | 1      |
| 2917   | 2     | 2      | 3      | 2      |
| 2918   | 2     | 2      | 2      | 2      |
| 2919   | 1     | 1      | 1      | 1      |
| 2920   | 1     | 1      | 2      | 1      |
| 2921   | 3     | 3      | 4      | 4      |
| 2922   | 1     | 1      | 1      | 1      |
| 2923   |       |        |        |        |
| 2924   | 5     | 4      | 4      | 4      |
| 2926   | 1     | 1      | 3      | 1      |
| 2928   | 1     | 2      | 1      | 1      |
| 2930   |       |        |        |        |
| 2931   | 2     | 1      | 2      | 1      |
| 2933   | 1     | 1      | 1      | 1      |
| 2935   | 1     | 1      | 1      | 1      |
| 2936   |       |        |        |        |
| 2937   | 1     | 1      | 2      | 1      |
| 2938   | 1     | 1      | 2      | 1      |
| 2944   | 1     | 1      | 1      | 1      |
| 2945   | 2     | 1      | 1      | 1      |
| 2947   | 1     | 1      | 1      | 1      |
| 2949   | 1     | 1      | 1      | 1      |



| respid | Q40_9 | Q40_10 | Q40_11 | Q40_12 |
|--------|-------|--------|--------|--------|
| 2951   | 3     | 1      | 5      | 1      |
| 2952   | 1     | 1      | 2      | 1      |
| 2953   |       |        |        |        |
| 2955   | 1     | 1      | 1      | 1      |
| 2957   | 1     | 1      | 2      | 1      |
| 2958   | 1     | 1      | 1      | 1      |
| 2960   | 1     | 1      | 2      | 1      |
| 2963   | 1     | 1      | 1      | 1      |
| 2964   | 2     | 2      | 1      | 1      |
| 2967   |       |        |        |        |
| 2968   | 1     | 1      | 1      | 1      |
| 2971   | 3     | 3      | 2      | 3      |
| 2974   | 1     | 1      | 1      | 1      |
| 2975   | 1     | 1      | 1      | 1      |
| 2982   |       |        |        |        |
| 2983   |       |        |        |        |
| 2985   | 1     | 1      | 1      | 1      |
| 2986   | 4     | 4      | 3      | 3      |
| 2987   | 2     | 1      | 1      | 2      |
| 2988   | 1     | 1      | 2      | 1      |
| 2993   | 1     | 1      | 1      | 1      |
| 2996   | 1     | 1      | 1      | 1      |
| 2997   | 1     | 1      | 1      | 1      |
| 2998   | 1     | 1      | 1      | 1      |
| 3004   | 1     | 1      | 1      | 1      |
| 3007   | 2     | 2      | 2      | 2      |
| 3011   | 3     | 3      | 2      | 2      |
| 3012   | 1     | 1      | 3      | 1      |
| 3013   | 1     | 1      | 1      | 1      |
| 3014   |       |        |        |        |
| 3015   | 1     | 1      | 3      | 1      |
| 3016   |       |        |        |        |

| respid | Q40_9 | Q40_10 | Q40_11 | Q40_12 |
|--------|-------|--------|--------|--------|
| 3017   | 1     | 1      | 2      | 1      |
| 3020   | 3     | 1      | 2      | 2      |
| 3022   | 1     | 1      | 2      | 1      |
| 3023   | 2     | 1      | 1      | 1      |
| 3026   | 2     | 3      | 3      | 3      |
| 3038   | 2     | 2      | 3      | 3      |
| 3039   | 3     | 2      | 3      | 2      |
| 3040   | 1     | 1      | 1      | 1      |
| 3041   |       |        |        |        |
| 3042   | 2     | 2      | 3      | 3      |
| 3044   | 1     | 1      | 2      | 1      |
| 3050   | 2     | 2      | 2      | 2      |
| 3052   | 2     | 1      | 1      | 1      |
| 3056   | 4     | 3      | 3      | 4      |
| 3059   | 1     | 1      | 1      | 1      |
| 3060   | 1     | 1      | 1      | 1      |
| 3063   | 2     | 2      | 2      | 2      |
| 3065   | 1     | 1      | 1      | 1      |
| 3067   | 1     | 1      | 1      | 1      |
| 3068   |       |        |        |        |
| 3072   | 3     | 2      | 2      | 3      |
| 3074   | 1     | 1      | 1      | 1      |
| 3075   | 2     | 1      | 2      | 2      |
| 3076   | 1     | 1      | 1      | 1      |
| 3079   | 1     | 1      | 1      | 1      |
| 3082   | 3     | 4      | 4      | 3      |
| 3083   | 1     | 1      | 1      | 1      |
| 3084   | 1     | 1      | 1      | 1      |
| 3085   | 1     | 1      | 1      | 1      |
| 3090   | 1     | 1      | 1      | 1      |
| 3091   | 2     | 2      | 2      | 3      |
| 3092   | 1     | 1      | 1      | 1      |

| respid | Q40_9 | Q40_10 | Q40_11 | Q40_12 |
|--------|-------|--------|--------|--------|
| 3095   | 1     | 1      | 1      | 1      |
| 3096   | 5     | 6      | 5      | 5      |
| 3097   | 1     | 1      | 2      | 2      |
| 3099   | 5     | 5      | 5      | 6      |
| 3101   | 1     | 1      | 3      | 1      |
| 3103   | 1     | 1      | 1      | 1      |
| 3104   | 1     | 1      | 2      | 1      |
| 3105   |       |        |        |        |
| 3107   | 1     | 1      | 1      | 1      |
| 3108   | 3     | 2      | 5      | 2      |
| 3109   | 1     | 1      | 1      | 1      |
| 3116   | 1     | 1      | 2      | 1      |
| 3117   | 1     | 1      | 2      | 1      |
| 3119   | 1     | 1      | 1      | 1      |
| 3120   | 1     | 1      | 1      | 1      |
| 3130   | 1     | 1      | 3      | 1      |
| 3131   | 2     | 1      | 2      | 2      |
| 3133   | 1     | 1      | 1      | 1      |
| 3134   | 2     | 2      | 2      | 2      |
| 3135   | 1     | 1      | 2      | 2      |
| 3145   | 1     | 1      | 6      | 1      |
| 3147   | 1     | 1      | 1      | 1      |
| 3152   | 1     | 1      | 2      | 1      |
| 3155   | 3     | 6      | 4      | 6      |
| 3156   |       |        |        |        |
| 3157   | 3     | 2      | 2      | 2      |
| 3166   | 1     | 1      | 2      | 2      |
| 3169   | 3     | 2      | 3      | 1      |
| 3179   | 1     | 1      | 3      | 2      |
| 3181   | 1     | 1      | 1      | 1      |
| 3185   |       |        |        |        |
| 3190   | 1     | 1      | 1      | 1      |

| respid | Q40_9 | Q40_10 | Q40_11 | Q40_12 |
|--------|-------|--------|--------|--------|
| 3191   |       |        |        |        |
| 3192   | 1     | 1      | 1      | 1      |
| 3193   | 1     | 1      | 1      | 1      |
| 3195   | 1     | 1      | 1      | 1      |
| 3202   | 1     | 1      | 2      | 1      |
| 3204   | 1     | 1      | 1      | 1      |
| 3208   | 1     | 1      | 1      | 1      |
| 3212   | 1     | 1      | 1      | 1      |
| 3218   | 1     | 1      | 1      | 1      |
| 3219   | 2     | 1      | 1      | 1      |
| 3220   | 2     | 1      | 2      | 1      |
| 3221   | 1     | 1      | 1      | 2      |
| 3223   | 1     | 1      | 1      | 1      |
| 3231   | 2     | 1      | 2      | 1      |
| 3232   | 3     | 3      | 3      | 3      |
| 3234   | 2     | 1      | 2      | 2      |
| 3235   | 1     | 1      | 1      | 1      |
| 3237   | 1     | 1      | 1      | 1      |
| 3238   | 1     | 1      | 1      | 1      |
| 3240   | 1     | 1      | 1      | 1      |
| 3241   | 1     | 1      | 2      | 1      |
| 3243   | 1     | 1      | 2      | 1      |
| 3244   | 1     | 1      | 2      | 2      |
| 3247   | 1     | 1      | 1      | 1      |
| 3250   | 1     | 1      | 1      | 1      |
| 3251   | 3     | 4      | 4      | 4      |
| 3255   | 1     | 1      | 1      | 1      |
| 3256   | 1     | 1      | 1      | 1      |
| 3257   | 1     | 1      | 2      | 1      |
| 3258   |       |        |        |        |
| 3259   | 1     | 1      | 2      | 1      |
| 3260   | 1     | 1      | 1      | 1      |

| respid | Q40_9 | Q40_10 | Q40_11 | Q40_12 |
|--------|-------|--------|--------|--------|
| 3261   |       |        |        |        |
| 3262   | 1     | 1      | 2      | 2      |
| 3264   | 2     | 2      | 3      | 2      |
| 3265   | 1     | 1      | 1      | 1      |
| 3267   | 1     | 1      | 1      | 1      |
| 3268   | 3     | 1      | 2      | 1      |
| 3270   | 1     | 1      | 1      | 1      |
| 3271   | 1     | 1      | 1      | 1      |
| 3274   |       |        |        |        |
| 3276   | 1     | 1      | 1      | 1      |
| 3277   | 2     | 1      | 2      | 3      |
| 3279   | 1     | 1      | 1      | 1      |
| 3281   |       |        |        |        |
| 3283   | 2     | 2      | 4      | 2      |
| 3285   | 1     | 1      | 2      | 2      |
| 3286   | 1     | 1      | 1      | 1      |
| 3287   | 1     | 1      | 1      | 1      |
| 3289   | 1     | 1      | 1      | 1      |
| 3290   | 1     | 1      | 1      | 1      |
| 3291   | 1     | 1      | 1      | 1      |
| 3292   | 3     | 4      | 4      | 4      |
| 3293   | 4     | 2      | 4      | 5      |
| 3294   | 2     | 1      | 1      | 1      |
| 3296   | 1     | 1      | 2      | 2      |
| 3306   | 1     | 1      | 1      | 1      |
| 3307   | 4     | 3      | 2      | 3      |
| 3308   | 1     | 1      | 1      | 1      |
| 3312   | 1     | 1      | 1      | 1      |
| 3313   | 3     | 3      | 3      | 3      |
| 3316   | 1     | 1      | 2      | 1      |
| 3317   | 1     | 1      | 1      | 1      |
| 3320   | 1     | 1      | 2      | 1      |

| respid | Q40_9 | Q40_10 | Q40_11 | Q40_12 |
|--------|-------|--------|--------|--------|
| 3321   | 1     | 1      | 1      | 1      |
| 3322   | 2     | 1      | 1      | 1      |
| 3323   | 1     | 1      | 1      | 1      |
| 3325   |       |        |        |        |
| 3332   | 1     | 1      | 1      | 1      |
| 3334   | 1     | 1      | 1      | 1      |
| 3335   | 1     | 1      | 1      | 1      |
| 3341   | 1     | 1      | 1      | 1      |
| 3345   | 3     | 1      | 1      | 3      |
| 3346   | 2     | 1      | 2      | 1      |
| 3349   | 1     | 1      | 2      | 1      |
| 3351   | 2     | 1      | 1      | 1      |
| 3353   | 1     | 1      | 1      | 1      |
| 3354   | 2     | 1      | 1      | 1      |
| 3356   | 1     | 1      | 2      | 1      |
| 3357   | 2     | 1      | 2      | 1      |
| 3360   | 2     | 1      | 3      | 1      |
| 3361   | 1     | 1      | 1      | 1      |
| 3362   | 1     | 1      | 2      | 1      |
| 3363   |       |        |        |        |
| 3364   | 4     | 5      | 5      | 4      |
| 3368   | 1     | 1      | 1      | 1      |
| 3370   | 1     | 1      | 1      | 1      |
| 3371   | 1     | 1      | 1      | 1      |
| 3379   | 1     | 1      | 2      | 1      |
| 3380   | 1     | 1      | 2      | 1      |
| 3382   | 1     | 1      | 1      | 1      |
| 3384   | 2     | 2      | 3      | 6      |
| 3385   | 1     | 1      | 1      | 1      |
| 3388   | 1     | 1      | 1      | 1      |
| 3392   | 1     | 1      | 1      | 1      |
| 3393   | 1     | 1      | 1      | 1      |

| respid | Q40_9 | Q40_10 | Q40_11 | Q40_12 |
|--------|-------|--------|--------|--------|
| 3394   | 3     | 2      | 3      | 3      |
| 3395   | 1     | 1      | 5      | 1      |
| 3396   | 1     | 1      | 1      | 1      |
| 3397   | 1     | 1      | 2      | 1      |
| 3398   | 1     | 1      | 1      | 1      |
| 3399   | 3     | 3      | 3      | 3      |
| 3400   | 1     | 1      | 1      | 1      |
| 3401   | 5     | 5      | 4      | 4      |
| 3402   | 3     | 2      | 3      | 3      |
| 3403   | 2     | 2      | 2      | 2      |
| 3405   | 3     | 2      | 1      | 2      |
| 3407   | 2     | 3      | 2      | 3      |
| 3410   | 1     | 1      | 1      | 1      |
| 3411   | 1     | 1      | 1      | 1      |
| 3413   |       |        |        |        |
| 3414   | 1     | 1      | 1      | 1      |
| 3420   | 1     | 1      | 1      | 1      |
| 3421   | 5     | 1      | 5      | 3      |
| 3425   | 1     | 1      | 1      | 1      |
| 3426   | 3     | 2      | 3      | 2      |
| 3429   | 1     | 1      | 3      | 1      |
| 3430   | 2     | 3      | 4      | 3      |
| 3433   | 1     | 1      | 1      | 1      |
| 3434   | 2     | 2      | 3      | 2      |
| 3437   | 1     | 1      | 1      | 1      |
| 3439   | 2     | 1      | 3      | 2      |
| 3441   | 2     | 2      | 2      | 2      |
| 3442   | 1     | 1      | 2      | 1      |
| 3444   | 1     | 1      | 1      | 1      |
| 3445   | 2     | 2      | 2      | 2      |
| 3450   | 1     | 2      | 2      | 3      |
| 3452   | 1     | 1      | 5      | 1      |

| respid | Q40_9 | Q40_10 | Q40_11 | Q40_12 |
|--------|-------|--------|--------|--------|
| 3456   | 1     | 1      | 1      | 1      |
| 3459   |       |        |        |        |
| 3460   | 1     | 1      | 1      | 1      |
| 3461   | 1     | 1      | 2      | 1      |
| 3466   | 4     | 3      | 5      | 5      |
| 3471   | 1     | 1      | 3      | 2      |
| 3473   | 1     | 1      | 1      | 1      |
| 3475   | 5     | 4      | 4      | 2      |
| 3476   | 1     | 1      | 1      | 1      |
| 3477   | 2     | 1      | 4      | 3      |
| 3478   |       |        |        |        |
| 3479   | 1     | 1      | 2      | 1      |
| 3482   | 1     | 1      | 2      | 1      |
| 3483   | 1     | 1      | 1      | 1      |
| 3485   | 1     | 1      | 1      | 2      |
| 3489   |       |        |        |        |
| 3490   | 2     | 1      | 1      | 1      |
| 3491   | 2     | 2      | 4      | 4      |
| 3494   | 1     | 1      | 1      | 1      |
| 3495   | 2     | 1      | 2      | 1      |
| 3501   | 1     | 1      | 1      | 1      |
| 3506   | 1     | 1      | 2      | 1      |
| 3507   | 1     | 1      | 1      | 1      |
| 3517   | 1     | 1      | 1      | 1      |
| 3520   | 2     | 1      | 1      | 1      |
| 3521   | 1     | 1      | 2      | 1      |
| 3522   | 1     | 1      | 1      | 1      |
| 3524   | 1     | 1      | 1      | 1      |
| 3527   | 1     | 1      | 1      | 1      |
| 3528   | 1     | 1      | 1      | 1      |
| 3529   | 1     | 1      | 2      | 1      |
| 3536   | 1     | 1      | 2      | 1      |



| respid | Q40_9 | Q40_10 | Q40_11 | Q40_12 |
|--------|-------|--------|--------|--------|
| 3537   | 1     | 1      | 1      | 1      |
| 3538   | 1     | 1      | 1      | 1      |
| 3540   | 2     | 3      | 2      | 3      |
| 3545   | 1     | 1      | 1      | 1      |
| 3547   | 2     | 3      | 4      | 2      |
| 3554   | 1     | 1      | 1      | 1      |
| 3556   | 1     | 1      | 1      | 1      |
| 3557   | 1     | 1      | 1      | 1      |
| 3559   | 3     | 3      | 3      | 3      |
| 3560   | 2     | 3      | 4      | 3      |
| 3562   | 1     | 1      | 1      | 1      |
| 3564   | 2     | 1      | 3      | 2      |
| 3565   | 4     | 3      | 5      | 3      |
| 3568   | 3     | 3      | 3      | 3      |
| 3572   |       |        |        |        |
| 3578   |       |        |        |        |
| 3581   | 1     | 1      | 1      | 1      |
| 3583   | 2     | 1      | 3      | 1      |
| 3588   | 1     | 1      | 1      | 1      |
| 3591   | 1     | 1      | 3      | 1      |
| 3594   | 1     | 1      | 1      | 1      |
| 3595   | 1     | 1      | 2      | 1      |
| 3596   | 1     | 1      | 2      | 1      |
| 3597   | 1     | 1      | 1      | 1      |
| 3598   |       |        |        |        |
| 3600   | 2     | 1      | 3      | 1      |
| 3602   | 1     | 1      | 1      | 1      |
| 3604   | 1     | 1      | 1      | 1      |
| 3605   | 2     | 2      | 2      | 2      |
| 3606   | 1     | 1      | 1      | 1      |
| 3607   |       |        |        |        |
| 3610   | 1     | 1      | 1      | 1      |

| respid | Q40_9 | Q40_10 | Q40_11 | Q40_12 |
|--------|-------|--------|--------|--------|
| 3611   | 1     | 1      | 1      | 1      |
| 3612   | 1     | 1      | 2      | 1      |
| 3614   | 2     | 1      | 1      | 1      |
| 3616   | 1     | 1      | 1      | 2      |
| 3617   | 1     | 1      | 1      | 1      |
| 3618   |       |        |        |        |
| 3619   | 3     | 2      | 5      | 3      |
| 3621   | 2     | 1      | 3      | 1      |
| 3622   | 3     | 1      | 2      | 2      |
| 3624   | 1     | 1      | 2      | 1      |
| 3626   | 1     | 1      | 1      | 1      |
| 3629   | 1     | 1      | 1      | 1      |
| 3631   | 1     | 1      | 1      | 1      |
| 3632   | 2     | 1      | 2      | 1      |
| 3638   | 1     | 1      | 1      | 1      |
| 3640   | 1     | 1      | 1      | 1      |
| 3641   | 1     | 1      | 2      | 2      |
| 3645   | 2     | 2      | 4      | 2      |
| 3650   |       |        |        |        |
| 3653   | 2     | 1      | 5      | 2      |
| 3655   | 2     | 3      | 3      | 2      |
| 3657   | 1     | 1      | 2      | 1      |
| 3658   | 1     | 1      | 1      | 1      |
| 3659   | 1     | 1      | 1      | 1      |
| 3664   | 2     | 3      | 4      | 2      |
| 3665   | 1     | 1      | 1      | 1      |
| 3667   | 1     | 1      | 1      | 1      |
| 3668   | 4     | 5      | 5      | 4      |
| 3675   |       |        |        |        |
| 3678   |       |        |        |        |
| 3680   |       |        |        |        |
| 3684   | 3     | 2      | 3      | 2      |

| respid | Q40_9 | Q40_10 | Q40_11 | Q40_12 |
|--------|-------|--------|--------|--------|
| 3685   | 3     | 3      | 3      | 3      |
| 3687   | 1     | 1      | 4      | 1      |
| 3689   | 3     | 4      | 5      | 5      |
| 3690   | 6     | 4      | 2      | 4      |
| 3693   |       |        |        |        |
| 3694   | 1     | 1      | 1      | 1      |
| 3695   |       |        |        |        |
| 3700   | 1     | 1      | 1      | 1      |
| 3701   | 1     | 1      | 3      | 1      |
| 3703   | 1     | 1      | 2      | 1      |
| 3704   | 5     | 4      | 4      | 5      |
| 3705   |       |        |        |        |
| 3709   | 1     | 1      | 1      | 1      |
| 3710   | 1     | 1      | 4      | 2      |
| 3722   | 1     | 1      | 1      | 1      |
| 3725   | 1     | 1      | 1      | 1      |
| 3726   | 1     | 1      | 1      | 1      |
| 3727   | 1     | 1      | 2      | 1      |
| 3728   | 2     | 3      | 3      | 3      |
| 3729   | 1     | 1      | 1      | 1      |
| 3731   |       |        |        |        |
| 3738   | 1     | 1      | 1      | 1      |
| 3739   | 1     | 1      | 1      | 1      |
| 3740   | 1     | 1      | 1      | 1      |
| 3749   | 2     | 2      | 2      | 2      |
| 3758   | 4     | 3      | 3      | 4      |
| 3762   | 1     | 1      | 3      | 1      |
| 3765   | 1     | 1      | 1      | 2      |
| 3770   | 1     | 1      | 1      | 1      |
| 3771   |       |        |        |        |
| 3778   | 1     | 1      | 2      | 1      |
| 3779   | 2     | 2      | 2      | 2      |

| respid | Q40_9 | Q40_10 | Q40_11 | Q40_12 |
|--------|-------|--------|--------|--------|
| 3780   | 1     | 1      | 1      | 1      |
| 3782   | 1     | 1      | 1      | 1      |
| 3784   | 1     | 1      | 1      | 1      |
| 3787   | 1     | 1      | 1      | 1      |
| 3790   | 1     | 1      | 2      | 1      |
| 3791   | 1     | 1      | 1      | 1      |
| 3793   | 1     | 1      | 3      | 3      |
| 3795   | 1     | 1      | 1      | 1      |
| 3799   |       |        |        |        |
| 3801   | 2     | 1      | 1      | 3      |
| 3804   | 2     | 1      | 2      | 1      |
| 3809   | 1     | 1      | 1      | 1      |
| 3810   | 1     | 1      | 2      | 2      |
| 3813   | 1     | 1      | 3      | 1      |
| 3816   | 1     | 1      | 1      | 1      |
| 3820   | 1     | 1      | 2      | 1      |
| 3821   | 2     | 2      | 3      | 3      |
| 3823   | 3     | 2      | 5      | 2      |
| 3828   | 1     | 1      | 1      | 1      |
| 3829   | 1     | 1      | 1      | 1      |
| 3832   | 1     | 1      | 1      | 1      |
| 3835   | 1     | 1      | 1      | 1      |
| 3837   | 1     | 1      | 2      | 1      |
| 3838   | 3     | 1      | 1      | 2      |
| 3839   | 5     | 4      | 5      | 5      |
| 3840   |       |        |        |        |
| 3842   |       |        |        |        |
| 3843   | 1     | 1      | 2      | 1      |
| 3844   | 2     | 2      | 2      | 2      |
| 3850   | 2     | 2      | 2      | 2      |
| 3851   |       |        |        |        |
| 3856   | 2     | 1      | 3      | 1      |

| respid | Q40_9 | Q40_10 | Q40_11 | Q40_12 |
|--------|-------|--------|--------|--------|
| 3859   | 3     | 3      | 2      | 2      |
| 3860   | 1     | 1      | 2      | 1      |
| 3863   | 2     | 2      | 2      | 2      |
| 3866   | 1     | 1      | 2      | 1      |
| 3867   | 1     | 1      | 1      | 1      |
| 3870   | 1     | 1      | 2      | 1      |
| 3873   | 2     | 1      | 2      | 1      |
| 3875   | 1     | 1      | 1      | 1      |
| 3878   | 2     | 1      | 1      | 1      |
| 3881   | 1     | 1      | 1      | 1      |
| 3883   | 3     | 2      | 4      | 4      |
| 3884   | 2     | 3      | 1      | 2      |
| 3885   | 3     | 4      | 4      | 3      |
| 3886   | 4     | 3      | 2      | 2      |
| 3887   | 1     | 1      | 1      | 1      |
| 3888   |       |        |        |        |
| 3889   | 3     | 3      | 5      | 4      |
| 3890   | 1     | 1      | 1      | 1      |
| 3896   | 1     | 1      | 1      | 1      |
| 3902   | 6     | 1      | 6      | 4      |
| 3909   | 1     | 1      | 2      | 1      |
| 3912   | 2     | 1      | 2      | 1      |
| 3922   | 1     | 1      | 1      | 1      |
| 3928   | 1     | 1      | 2      | 1      |
| 3930   | 1     | 1      | 2      | 1      |
| 3931   | 3     | 2      | 2      | 5      |
| 3933   | 1     | 1      | 2      | 1      |
| 3935   | 1     | 1      | 1      | 1      |
| 3937   | 2     | 1      | 2      | 3      |
| 3939   | 1     | 1      | 1      | 1      |
| 3942   | 1     | 1      | 1      | 1      |
| 3943   | 3     | 3      | 3      | 3      |

| respid | Q40_9 | Q40_10 | Q40_11 | Q40_12 |
|--------|-------|--------|--------|--------|
| 3944   |       |        |        |        |
| 3945   | 1     | 1      | 1      | 1      |
| 3947   | 1     | 1      | 1      | 1      |
| 3948   | 2     | 1      | 1      | 1      |
| 3951   | 2     | 1      | 2      | 1      |
| 3959   | 1     | 1      | 1      | 1      |
| 3969   | 5     | 5      | 5      | 6      |
| 3973   | 1     | 1      | 2      | 1      |
| 3975   | 2     | 3      | 2      | 2      |
| 3976   | 1     | 1      | 1      | 1      |
| 3977   | 2     | 2      | 2      | 2      |
| 3978   | 1     | 1      | 1      | 1      |
| 3994   | 1     | 1      | 3      | 1      |
| 3995   | 1     | 1      | 5      | 1      |
| 3997   | 1     | 1      | 1      | 1      |
| 3998   | 1     | 1      | 1      | 1      |
| 3999   | 2     | 2      | 2      | 2      |
| 4002   | 2     | 1      | 3      | 3      |
| 4004   | 1     | 1      | 2      | 2      |
| 4005   |       |        |        |        |
| 4006   | 2     | 2      | 3      | 3      |
| 4008   | 1     | 1      | 1      | 1      |
| 4010   | 1     | 1      | 2      | 1      |
| 4011   | 2     | 3      | 3      | 3      |
| 4013   | 2     | 1      | 2      | 1      |
| 4014   | 1     | 1      | 2      | 1      |
| 4016   | 1     | 1      | 1      | 1      |
| 4017   | 1     | 1      | 3      | 1      |
| 4019   | 1     | 1      | 1      | 1      |
| 4021   |       |        |        |        |
| 4023   | 2     | 1      | 1      | 1      |
| 4024   | 1     | 1      | 1      | 1      |

| respid | Q40_9 | Q40_10 | Q40_11 | Q40_12 |
|--------|-------|--------|--------|--------|
| 4025   | 1     | 1      | 1      | 2      |
| 4027   | 1     | 1      | 1      | 1      |
| 4032   |       |        |        |        |
| 4034   | 2     | 1      | 1      | 1      |
| 4035   | 4     | 3      | 3      | 3      |
| 4037   | 2     | 1      | 2      | 1      |
| 4040   | 1     | 1      | 2      | 1      |
| 4041   | 1     | 1      | 2      | 1      |
| 4042   | 1     | 1      | 1      | 1      |
| 4043   | 1     | 1      | 1      | 1      |
| 4045   | 2     | 2      | 3      | 2      |
| 4046   | 2     | 1      | 4      | 1      |
| 4048   | 1     | 1      | 2      | 1      |
| 4049   | 1     | 1      | 2      | 1      |
| 4050   | 1     | 1      | 2      | 2      |
| 4052   | 1     | 1      | 2      | 1      |
| 4053   |       |        |        |        |
| 4060   | 1     | 1      | 1      | 1      |
| 4065   | 4     | 4      | 3      | 3      |
| 4066   | 2     | 1      | 1      | 1      |
| 4067   | 1     | 1      | 1      | 1      |
| 4068   | 3     | 3      | 3      | 3      |
| 4069   | 1     | 1      | 2      | 1      |
| 4070   | 1     | 1      | 1      | 1      |
| 4071   | 3     | 3      | 3      | 4      |
| 4072   | 1     | 1      | 1      | 1      |
| 4073   | 1     | 1      | 1      | 1      |
| 4074   | 1     | 1      | 1      | 1      |
| 4075   | 2     | 1      | 1      | 2      |
| 4078   | 1     | 1      | 1      | 1      |
| 4080   | 1     | 1      | 1      | 1      |
| 4081   |       |        |        |        |

| respid | Q40_9 | Q40_10 | Q40_11 | Q40_12 |
|--------|-------|--------|--------|--------|
| 4082   | 1     | 1      | 1      | 1      |
| 4083   | 2     | 2      | 2      | 1      |
| 4084   | 1     | 1      | 1      | 1      |
| 4086   |       |        |        |        |
| 4087   | 1     | 1      | 1      | 1      |
| 4088   | 5     | 5      | 5      | 5      |
| 4089   | 1     | 1      | 1      | 1      |
| 4090   | 2     | 1      | 2      | 2      |
| 4093   | 1     | 1      | 1      | 1      |
| 4094   | 1     | 1      | 1      | 1      |
| 4095   | 1     | 1      | 3      | 1      |
| 4096   |       |        |        |        |
| 4098   | 1     | 1      | 1      | 1      |
| 4103   | 2     | 2      | 3      | 1      |
| 4104   | 1     | 2      | 2      | 2      |
| 4107   | 1     | 1      | 1      | 1      |
| 4109   | 1     | 1      | 1      | 1      |
| 4110   | 1     | 1      | 5      | 1      |
| 4113   | 1     | 1      | 1      | 1      |
| 4114   | 1     | 1      | 1      | 1      |
| 4116   | 1     | 1      | 1      | 1      |
| 4119   | 1     | 1      | 2      | 1      |
| 4120   | 1     | 1      | 1      | 1      |
| 4121   | 1     | 1      | 1      | 1      |
| 4122   | 2     | 2      | 2      | 2      |
| 4124   | 1     | 1      | 2      | 2      |
| 4126   | 1     | 1      | 1      | 1      |
| 4127   | 5     | 5      | 5      | 5      |
| 4131   | 1     | 1      | 4      | 1      |
| 4134   | 2     | 1      | 1      | 1      |
| 4144   | 1     | 1      | 1      | 1      |
| 4145   | 1     | 1      | 1      | 1      |



| respid | Q40_9 | Q40_10 | Q40_11 | Q40_12 |
|--------|-------|--------|--------|--------|
| 4146   | 1     | 1      | 1      | 1      |
| 4147   | 1     | 1      | 1      | 1      |
| 4149   | 1     | 1      | 5      | 1      |
| 4150   |       |        |        |        |
| 4151   | 4     | 1      | 5      | 3      |
| 4153   | 1     | 1      | 1      | 1      |
| 4155   | 1     | 1      | 1      | 1      |
| 4157   | 1     | 1      | 1      | 1      |
| 4159   | 1     | 1      | 1      | 1      |
| 4160   | 1     | 1      | 2      | 1      |
| 4161   | 1     | 1      | 1      | 1      |
| 4163   | 1     | 1      | 3      | 1      |
| 4164   | 3     | 3      | 2      | 1      |
| 4165   | 1     | 1      | 2      | 1      |
| 4166   | 1     | 1      | 1      | 1      |
| 4167   | 1     | 1      | 1      | 1      |
| 4170   | 2     | 1      | 2      | 1      |
| 4172   | 1     | 1      | 1      | 1      |
| 4173   | 1     | 1      | 4      | 1      |
| 4180   | 2     | 2      | 2      | 1      |
| 4185   | 1     | 1      | 2      | 1      |
| 4187   | 1     | 1      | 1      | 1      |
| 4190   | 1     | 1      | 1      | 1      |
| 4191   | 3     | 3      | 3      | 3      |
| 4193   |       |        |        |        |
| 4194   | 1     | 1      | 2      | 1      |
| 4195   | 1     | 1      | 1      | 1      |
| 4196   |       |        |        |        |
| 4197   | 1     | 1      | 1      | 1      |
| 4198   | 1     | 1      | 2      | 1      |
| 4199   | 1     | 1      | 1      | 1      |
| 4205   | 1     | 1      | 1      | 1      |

| respid | Q40_9 | Q40_10 | Q40_11 | Q40_12 |
|--------|-------|--------|--------|--------|
| 4206   |       |        |        |        |
| 4207   | 1     | 1      | 2      | 1      |
| 4214   | 1     | 1      | 1      | 1      |
| 4215   | 1     | 1      | 1      | 1      |
| 4217   | 1     | 1      | 1      | 1      |
| 4219   | 1     | 1      | 1      | 1      |
| 4223   | 3     | 3      | 3      | 3      |
| 4226   | 1     | 1      | 2      | 1      |
| 4229   | 1     | 1      | 1      | 1      |
| 4230   | 1     | 1      | 1      | 1      |
| 4232   | 1     | 1      | 1      | 1      |
| 4233   | 1     | 1      | 1      | 1      |
| 4234   | 2     | 1      | 5      | 1      |
| 4235   | 2     | 2      | 2      | 2      |
| 4236   | 2     | 1      | 2      | 1      |
| 4237   | 1     | 1      | 1      | 1      |
| 4238   | 1     | 1      | 1      | 1      |
| 4240   | 1     | 1      | 2      | 1      |
| 4241   | 1     | 1      | 1      | 1      |
| 4247   | 1     | 1      | 1      | 1      |
| 4250   | 1     | 1      | 1      | 1      |
| 4251   | 2     | 1      | 2      | 2      |
| 4253   | 3     | 1      | 2      | 3      |
| 4254   | 1     | 1      | 1      | 1      |
| 4258   | 4     | 3      | 5      | 4      |
| 4260   | 1     | 1      | 1      | 1      |
| 4263   | 1     | 1      | 1      | 2      |
| 4265   | 1     | 1      | 1      | 1      |
| 4266   | 1     | 1      | 1      | 1      |
| 4267   | 1     | 1      | 2      | 1      |
| 4270   | 1     | 1      | 1      | 1      |
| 4273   | 1     | 1      | 1      | 1      |

| respid | Q40_9 | Q40_10 | Q40_11 | Q40_12 |
|--------|-------|--------|--------|--------|
| 4280   | 1     | 1      | 1      | 1      |
| 4281   | 1     | 1      | 1      | 1      |
| 4282   | 1     | 1      | 1      | 1      |
| 4283   |       |        |        |        |
| 4286   | 2     | 2      | 2      | 2      |
| 4287   | 1     | 1      | 1      | 1      |
| 4289   | 1     | 1      | 4      | 1      |
| 4290   | 3     | 2      | 1      | 2      |
| 4291   | 1     | 1      | 1      | 2      |
| 4292   | 1     | 1      | 2      | 1      |
| 4293   | 1     | 1      | 1      | 1      |
| 4294   | 2     | 2      | 2      | 2      |
| 4295   |       |        |        |        |
| 4296   | 3     | 3      | 3      | 3      |
| 4297   | 1     | 1      | 1      | 1      |
| 4298   | 1     | 1      | 1      | 1      |
| 4299   | 2     | 1      | 1      | 1      |
| 4300   | 1     | 1      | 1      | 1      |
| 4301   |       |        |        |        |
| 4302   | 1     | 1      | 1      | 1      |
| 4304   | 1     | 1      | 2      | 1      |
| 4305   | 1     | 1      | 2      | 1      |
| 4307   | 3     | 2      | 3      | 4      |
| 4308   | 1     | 1      | 1      | 1      |
| 4312   |       |        |        |        |
| 4314   | 2     | 1      | 2      | 2      |
| 4316   | 1     | 1      | 1      | 1      |
| 4317   | 3     | 4      | 5      | 4      |
| 4319   | 5     | 4      | 2      | 3      |
| 4323   | 4     | 3      | 4      | 4      |
| 4337   | 1     | 1      | 1      | 1      |
| 4341   | 4     | 1      | 2      | 1      |

| respid | Q40_9 | Q40_10 | Q40_11 | Q40_12 |
|--------|-------|--------|--------|--------|
| 4342   | 1     | 1      | 2      | 1      |
| 4344   | 1     | 1      | 2      | 1      |
| 4345   | 1     | 1      | 1      | 1      |
| 4346   | 3     | 3      | 3      | 3      |
| 4347   | 1     | 1      | 1      | 1      |
| 4350   |       |        |        |        |
| 4352   | 1     | 1      | 1      | 1      |
| 4353   |       |        |        |        |
| 4355   | 1     | 1      | 1      | 1      |
| 4356   | 1     | 1      | 1      | 1      |
| 4358   |       |        |        |        |
| 4359   | 1     | 1      | 1      | 1      |
| 4360   | 1     | 1      | 2      | 1      |
| 4361   | 4     | 3      | 6      | 5      |
| 4363   | 1     | 1      | 1      | 1      |
| 4364   | 1     | 1      | 1      | 1      |
| 4365   | 2     | 1      | 2      | 1      |
| 4367   | 4     | 4      | 1      | 1      |
| 4369   | 2     | 1      | 2      | 2      |
| 4373   | 2     | 1      | 3      | 1      |
| 4374   | 3     | 3      | 4      | 4      |
| 4375   |       |        |        |        |
| 4378   | 1     | 1      | 1      | 1      |
| 4379   | 1     | 1      | 2      | 1      |
| 4382   | 1     | 1      | 1      | 1      |
| 4383   |       |        |        |        |
| 4384   | 2     | 2      | 2      | 1      |
| 4385   | 2     | 2      | 1      | 2      |
| 4388   | 2     | 3      | 3      | 1      |
| 4389   | 1     | 1      | 1      | 1      |
| 4391   | 1     | 1      | 1      | 1      |
| 4392   | 1     | 1      | 1      | 1      |

| respid | Q40_9 | Q40_10 | Q40_11 | Q40_12 |
|--------|-------|--------|--------|--------|
| 4393   | 1     | 1      | 1      | 1      |
| 4395   | 1     | 1      | 2      | 1      |
| 4397   | 1     | 1      | 1      | 1      |
| 4398   | 1     | 1      | 1      | 1      |
| 4399   | 1     | 1      | 1      | 1      |
| 4400   |       |        |        |        |
| 4401   | 1     | 1      | 3      | 1      |
| 4402   | 1     | 1      | 1      | 1      |
| 4404   | 2     | 1      | 1      | 1      |
| 4405   |       |        |        |        |
| 4407   | 1     | 1      | 3      | 1      |
| 4408   | 2     | 1      | 4      | 1      |
| 4411   |       |        |        |        |
| 4420   | 1     | 1      | 1      | 1      |
| 4421   | 1     | 1      | 1      | 1      |
| 4424   | 6     | 5      | 4      | 4      |
| 4425   | 1     | 1      | 2      | 1      |
| 4427   | 1     | 1      | 1      | 1      |
| 4430   | 2     | 2      | 2      | 1      |
| 4431   | 2     | 2      | 2      | 2      |
| 4432   | 1     | 1      | 1      | 1      |
| 4436   | 1     | 1      | 1      | 1      |
| 4439   | 1     | 1      | 1      | 1      |
| 4451   | 1     | 1      | 2      | 1      |
| 4452   | 4     | 2      | 3      | 4      |
| 4458   | 1     | 1      | 1      | 1      |
| 4464   | 1     | 1      | 2      | 1      |
| 4465   | 1     | 1      | 1      | 1      |
| 4467   | 1     | 1      | 1      | 1      |
| 4470   | 3     | 1      | 3      | 1      |
| 4471   | 2     | 1      | 1      | 1      |
| 4472   | 1     | 1      | 3      | 1      |

| respid | Q40_9 | Q40_10 | Q40_11 | Q40_12 |
|--------|-------|--------|--------|--------|
| 4473   | 1     | 1      | 1      | 1      |
| 4475   | 1     | 1      | 2      | 1      |
| 4476   | 2     | 1      | 1      | 2      |
| 4478   | 1     | 1      | 1      | 1      |
| 4485   | 1     | 1      | 1      | 1      |
| 4486   | 1     | 1      | 2      | 1      |
| 4490   |       |        |        |        |
| 4502   |       |        |        |        |
| 4503   | 3     | 4      | 6      | 5      |
| 4504   | 1     | 1      | 1      | 1      |
| 4506   | 2     | 1      | 2      | 1      |
| 4508   | 1     | 1      | 1      | 1      |
| 4515   | 1     | 1      | 1      | 1      |
| 4516   | 3     | 2      | 4      | 3      |
| 4519   | 1     | 1      | 1      | 1      |
| 4523   | 1     | 3      | 2      | 2      |
| 4525   | 2     | 1      | 1      | 1      |
| 4526   | 1     | 1      | 1      | 1      |
| 4528   |       |        |        |        |
| 4530   | 1     | 1      | 1      | 1      |
| 4531   | 3     | 4      | 3      | 3      |
| 4532   | 1     | 1      | 1      | 1      |
| 4537   | 1     | 1      | 1      | 2      |
| 4538   | 1     | 1      | 1      | 1      |
| 4539   | 1     | 1      | 2      | 2      |
| 4541   | 1     | 1      | 1      | 1      |
| 4543   |       |        |        |        |
| 4544   | 1     | 1      | 1      | 1      |
| 4546   | 1     | 1      | 1      | 1      |
| 4547   | 1     | 1      | 2      | 1      |
| 4549   |       |        |        |        |
| 4550   | 2     | 2      | 2      | 2      |

| respid | Q40_9 | Q40_10 | Q40_11 | Q40_12 |
|--------|-------|--------|--------|--------|
| 4551   | 1     | 1      | 1      | 1      |
| 4554   | 1     | 1      | 1      | 1      |
| 4557   |       |        |        |        |
| 4565   | 1     | 1      | 1      | 1      |
| 4568   | 1     | 1      | 1      | 1      |
| 4569   | 1     | 1      | 1      | 1      |
| 4570   | 1     | 1      | 2      | 1      |
| 4572   | 1     | 1      | 2      | 1      |
| 4574   | 1     | 1      | 1      | 1      |
| 4576   | 2     | 1      | 6      | 1      |
| 4578   | 1     | 1      | 1      | 1      |
| 4579   |       |        |        |        |
| 4580   | 3     | 1      | 3      | 3      |
| 4581   |       |        |        |        |
| 4584   | 1     | 1      | 1      | 1      |
| 4586   | 2     | 2      | 2      | 2      |
| 4587   | 4     | 3      | 4      | 3      |
| 4590   | 1     | 1      | 1      | 1      |
| 4592   | 1     | 1      | 1      | 1      |
| 4593   | 1     | 1      | 1      | 1      |
| 4595   | 1     | 1      | 2      | 1      |
| 4597   | 1     | 1      | 1      | 1      |
| 4598   | 3     | 3      | 3      | 3      |
| 4599   | 2     | 1      | 3      | 2      |
| 4600   | 2     | 1      | 1      | 1      |
| 4601   | 2     | 2      | 2      | 2      |
| 4608   | 1     | 1      | 4      | 1      |
| 4609   | 1     | 1      | 1      | 1      |
| 4611   | 2     | 1      | 2      | 1      |
| 4612   | 3     | 3      | 2      | 3      |
| 4613   |       |        |        |        |
| 4616   | 2     | 1      | 3      | 2      |

| respid | Q40_9 | Q40_10 | Q40_11 | Q40_12 |
|--------|-------|--------|--------|--------|
| 4617   | 1     | 2      | 1      | 1      |
| 4620   | 4     | 3      | 4      | 2      |
| 4621   | 1     | 1      | 1      | 1      |
| 4622   | 3     | 3      | 3      | 3      |
| 4624   | 1     | 1      | 1      | 1      |
| 4625   | 2     | 1      | 2      | 2      |
| 4627   | 2     | 1      | 3      | 3      |
| 4628   | 3     | 3      | 3      | 3      |
| 4629   |       |        |        |        |
| 4630   | 3     | 1      | 2      | 1      |
| 4632   | 1     | 1      | 1      | 1      |
| 4634   | 2     | 2      | 2      | 2      |
| 4635   | 3     | 1      | 3      | 1      |
| 4636   | 1     | 1      | 1      | 1      |
| 4637   | 2     | 2      | 2      | 2      |
| 4638   | 3     | 1      | 2      | 2      |
| 4639   | 2     | 1      | 3      | 1      |
| 4641   | 1     | 1      | 1      | 1      |
| 4643   | 1     | 1      | 2      | 1      |
| 4645   | 1     | 1      | 1      | 1      |
| 4646   | 2     | 2      | 2      | 1      |
| 4647   |       |        |        |        |
| 4648   | 1     | 1      | 1      | 1      |
| 4649   | 2     | 1      | 1      | 1      |
| 4650   | 3     | 3      | 5      | 2      |
| 4651   | 1     | 1      | 2      | 1      |
| 4652   | 2     | 1      | 1      | 1      |
| 4653   |       |        |        |        |
| 4657   |       |        |        |        |
| 4660   | 4     | 4      | 4      | 1      |
| 4661   | 1     | 1      | 1      | 1      |
| 4662   | 1     | 1      | 2      | 2      |



| respid | Q40_9 | Q40_10 | Q40_11 | Q40_12 |
|--------|-------|--------|--------|--------|
| 4667   | 1     | 1      | 2      | 1      |
| 4669   | 1     | 1      | 1      | 1      |
| 4671   |       |        |        |        |
| 4672   | 2     | 1      | 4      | 2      |
| 4673   | 1     | 1      | 2      | 1      |
| 4677   |       |        |        |        |
| 4679   | 1     | 1      | 2      | 1      |
| 4683   | 1     | 1      | 1      | 1      |
| 4684   | 1     | 1      | 2      | 1      |
| 4685   | 1     | 1      | 2      | 1      |
| 4686   | 1     | 1      | 1      | 1      |
| 4687   | 1     | 1      | 1      | 1      |
| 4688   | 1     | 1      | 1      | 1      |
| 4691   | 1     | 1      | 1      | 1      |
| 4692   | 1     | 1      | 1      | 1      |
| 4694   | 2     | 2      | 1      | 1      |
| 4695   | 1     | 1      | 3      | 1      |
| 4696   | 2     | 1      | 2      | 2      |
| 4697   |       |        |        |        |
| 4698   | 3     | 4      | 4      | 4      |
| 4699   | 1     | 1      | 1      | 1      |
| 4701   |       |        |        |        |
| 4703   | 1     | 1      | 1      | 1      |
| 4704   | 5     | 5      | 4      | 4      |
| 4705   | 1     | 1      | 1      | 1      |
| 4706   | 1     | 1      | 1      | 1      |
| 4707   | 1     | 1      | 1      | 1      |
| 4708   | 1     | 1      | 1      | 1      |
| 4710   | 1     | 1      | 2      | 1      |
| 4711   | 3     | 3      | 4      | 3      |
| 4715   |       |        |        |        |
| 4716   | 1     | 1      | 1      | 1      |

| respid | Q40_9 | Q40_10 | Q40_11 | Q40_12 |
|--------|-------|--------|--------|--------|
| 4717   | 1     | 1      | 1      | 1      |
| 4718   | 2     | 2      | 2      | 2      |
| 4722   | 3     | 3      | 3      | 3      |
| 4727   | 2     | 2      | 2      | 2      |
| 4728   | 5     | 5      | 6      | 4      |
| 4729   | 1     | 1      | 1      | 1      |
| 4732   | 1     | 1      | 2      | 1      |
| 4733   | 1     | 1      | 1      | 1      |
| 4734   | 1     | 1      | 1      | 1      |
| 4735   | 1     | 1      | 1      | 1      |
| 4737   | 1     | 1      | 1      | 1      |
| 4738   | 1     | 1      | 1      | 1      |
| 4740   | 1     | 1      | 1      | 1      |
| 4741   | 2     | 1      | 3      | 3      |
| 4743   | 1     | 1      | 1      | 1      |
| 4746   | 1     | 1      | 1      | 1      |
| 4750   | 1     | 1      | 1      | 1      |
| 4752   | 1     | 1      | 1      | 1      |
| 4753   | 1     | 1      | 1      | 1      |
| 4754   | 2     | 1      | 4      | 3      |
| 4755   | 2     | 2      | 5      | 2      |
| 4758   | 2     | 2      | 3      | 2      |
| 4766   |       |        |        |        |
| 4767   | 3     | 1      | 3      | 1      |
| 4768   | 1     | 1      | 3      | 1      |
| 4769   | 2     | 1      | 1      | 1      |
| 4771   | 5     | 4      | 3      | 4      |
| 4772   | 1     | 1      | 1      | 1      |
| 4773   | 2     | 2      | 2      | 2      |
| 4774   | 1     | 1      | 2      | 2      |
| 4776   | 3     | 3      | 2      | 3      |
| 4777   | 1     | 1      | 1      | 1      |

| respid | Q40_9 | Q40_10 | Q40_11 | Q40_12 |
|--------|-------|--------|--------|--------|
| 4779   |       |        |        |        |
| 4780   | 2     | 1      | 1      | 1      |
| 4781   | 1     | 1      | 1      | 1      |
| 4783   | 5     | 2      | 6      | 3      |
| 4784   | 1     | 1      | 1      | 1      |
| 4785   | 1     | 1      | 2      | 1      |
| 4788   |       |        |        |        |
| 4789   | 2     | 1      | 3      | 2      |
| 4790   | 1     | 1      | 1      | 1      |
| 4791   |       |        |        |        |
| 4794   |       |        |        |        |
| 4795   | 1     | 1      | 1      | 1      |
| 4797   | 1     | 1      | 1      | 1      |
| 4802   | 3     | 2      | 2      | 4      |
| 4803   | 3     | 1      | 1      | 2      |
| 4804   |       |        |        |        |
| 4805   | 1     | 1      | 1      | 1      |
| 4807   |       |        |        |        |
| 4808   | 1     | 1      | 2      | 1      |
| 4809   | 4     | 5      | 5      | 5      |
| 4811   | 1     | 1      | 1      | 1      |
| 4817   |       |        |        |        |
| 4819   | 1     | 1      | 1      | 1      |
| 4820   |       |        |        |        |
| 4821   | 3     | 3      | 2      | 1      |
| 4822   | 1     | 1      | 1      | 1      |
| 4823   | 1     | 1      | 2      | 2      |
| 4825   | 2     | 1      | 1      | 2      |
| 4826   |       |        |        |        |
| 4830   | 1     | 1      | 2      | 1      |
| 4832   |       |        |        |        |
| 4838   | 2     | 1      | 2      | 2      |

| respid | Q40_9 | Q40_10 | Q40_11 | Q40_12 |
|--------|-------|--------|--------|--------|
| 4840   | 2     | 1      | 1      | 1      |
| 4841   |       |        |        |        |
| 4843   | 1     | 1      | 1      | 1      |
| 4845   | 3     | 2      | 2      | 2      |
| 4846   | 3     | 3      | 3      | 3      |
| 4848   | 1     | 1      | 1      | 1      |
| 4853   | 1     | 1      | 1      | 1      |
| 4854   | 1     | 1      | 1      | 2      |
| 4859   | 2     | 2      | 1      | 3      |
| 4861   |       |        |        |        |
| 4864   | 1     | 1      | 2      | 3      |
| 4867   |       |        |        |        |
| 4870   | 1     | 1      | 1      | 1      |
| 4872   | 1     | 1      | 2      | 1      |
| 4873   | 1     | 1      | 3      | 1      |
| 4874   | 1     | 1      | 1      | 1      |
| 4878   | 1     | 1      | 1      | 1      |
| 4880   | 1     | 1      | 1      | 1      |
| 4881   | 1     | 1      | 1      | 1      |
| 4882   | 3     | 3      | 3      | 3      |
| 4883   | 1     | 1      | 1      | 1      |
| 4885   | 1     | 1      | 1      | 1      |
| 4889   |       |        |        |        |
| 4890   |       |        |        |        |
| 4891   | 1     | 1      | 1      | 1      |
| 4894   | 1     | 1      | 1      | 1      |
| 4895   | 3     | 4      | 4      | 4      |
| 4896   | 1     | 1      | 1      | 1      |
| 4897   | 1     | 1      | 1      | 1      |
| 4898   | 2     | 2      | 2      | 2      |
| 4899   |       |        |        |        |
| 4900   | 2     | 1      | 5      | 3      |

| respid | Q40_9 | Q40_10 | Q40_11 | Q40_12 |
|--------|-------|--------|--------|--------|
| 4901   | 1     | 1      | 1      | 1      |
| 4903   | 1     | 2      | 2      | 2      |
| 4904   | 1     | 1      | 1      | 1      |
| 4908   | 1     | 1      | 1      | 1      |
| 4909   | 3     | 4      | 3      | 2      |
| 4913   | 1     | 1      | 1      | 2      |
| 4917   | 1     | 1      | 4      | 1      |
| 4918   | 1     | 1      | 3      | 1      |
| 4920   |       |        |        |        |
| 4921   | 1     | 1      | 1      | 1      |
| 4925   | 1     | 1      | 1      | 1      |
| 4926   | 1     | 1      | 1      | 1      |
| 4927   | 1     | 1      | 1      | 1      |
| 4928   | 1     | 1      | 1      | 1      |
| 4929   | 1     | 1      | 1      | 1      |
| 4930   | 4     | 4      | 4      | 4      |
| 4931   | 1     | 1      | 1      | 1      |
| 4932   | 2     | 3      | 3      | 3      |
| 4933   | 1     | 1      | 1      | 1      |
| 4934   | 1     | 1      | 1      | 1      |
| 5934   | 1     | 1      | 1      | 1      |
| 5935   | 1     | 1      | 1      | 1      |
| 5936   | 1     | 1      | 1      | 1      |
| 5938   |       |        |        |        |
| 5939   | 1     | 1      | 1      | 1      |
| 5940   | 2     | 1      | 1      | 1      |
| 5942   | 1     | 1      | 2      | 1      |
| 5944   | 1     | 1      | 2      | 1      |
| 5951   | 4     | 5      | 6      | 5      |
| 5952   | 1     | 1      | 2      | 2      |
| 5954   | 1     | 1      | 1      | 1      |
| 5956   | 1     | 1      | 2      | 1      |

| respid | Q40_9 | Q40_10 | Q40_11 | Q40_12 |
|--------|-------|--------|--------|--------|
| 5957   | 1     | 1      | 2      | 1      |
| 5958   | 2     | 2      | 2      | 2      |
| 5959   | 3     | 3      | 2      | 2      |
| 5960   | 1     | 1      | 2      | 1      |
| 5963   | 1     | 1      | 2      | 1      |
| 5966   | 2     | 1      | 1      | 2      |
| 5968   | 1     | 1      | 2      | 1      |
| 5974   | 1     | 1      | 1      | 1      |
| 5975   | 1     | 1      | 1      | 1      |
| 5976   | 3     | 4      | 3      | 4      |
| 5977   | 1     | 1      | 2      | 1      |
| 5978   | 2     | 2      | 2      | 2      |
| 5979   | 1     | 1      | 1      | 1      |
| 5983   | 1     | 1      | 1      | 1      |
| 5984   | 1     | 1      | 1      | 1      |
| 5990   | 1     | 1      | 1      | 1      |
| 5991   | 1     | 1      | 1      | 1      |
| 5992   |       |        |        |        |
| 5993   | 1     | 1      | 2      | 1      |
| 5994   | 1     | 1      | 1      | 1      |
| 5996   | 1     | 1      | 1      | 1      |
| 6001   | 2     | 2      | 3      | 3      |
| 6003   | 1     | 1      | 1      | 1      |
| 6004   | 1     | 1      | 2      | 2      |
| 6005   | 3     | 1      | 3      | 1      |
| 6006   | 1     | 1      | 1      | 1      |
| 6008   | 1     | 1      | 2      | 1      |
| 6009   | 1     | 1      | 3      | 1      |
| 6014   |       |        |        |        |
| 6016   | 2     | 2      | 2      | 2      |
| 6017   | 1     | 1      | 1      | 1      |
| 6018   | 2     | 1      | 2      | 1      |

| respid | Q40_9 | Q40_10 | Q40_11 | Q40_12 |
|--------|-------|--------|--------|--------|
| 6020   | 2     | 1      | 5      | 2      |
| 6021   |       |        |        |        |
| 6024   | 2     | 1      | 1      | 1      |
| 6025   | 1     | 1      | 1      | 1      |
| 6026   | 1     | 1      | 2      | 1      |
| 6032   | 1     | 1      | 2      | 1      |
| 6035   | 1     | 1      | 2      | 1      |
| 6038   | 1     | 1      | 2      | 1      |
| 6043   | 2     | 2      | 3      | 1      |
| 6044   | 1     | 1      | 2      | 1      |
| 6046   | 1     | 1      | 1      | 1      |
| 6047   | 1     | 1      | 1      | 1      |
| 6048   | 2     | 1      | 2      | 1      |
| 6050   | 2     | 1      | 3      | 2      |
| 6051   | 1     | 1      | 1      | 1      |
| 6053   | 1     | 1      | 2      | 1      |
| 6054   | 1     | 1      | 3      | 1      |
| 6056   | 1     | 1      | 1      | 1      |
| 6058   | 1     | 1      | 2      | 2      |
| 6060   | 1     | 1      | 1      | 1      |
| 6061   | 1     | 1      | 1      | 1      |
| 6062   | 1     | 1      | 2      | 1      |
| 6067   | 1     | 1      | 1      | 1      |
| 6070   | 1     | 1      | 3      | 1      |
| 6074   | 2     | 1      | 2      | 1      |
| 6076   | 1     | 1      | 2      | 1      |
| 6078   |       |        |        |        |
| 6081   | 1     | 1      | 2      | 1      |
| 6085   | 1     | 1      | 2      | 2      |
| 6088   |       |        |        |        |
| 6092   | 1     | 1      | 2      | 2      |
| 6095   | 1     | 1      | 1      | 1      |

| respid | Q40_9 | Q40_10 | Q40_11 | Q40_12 |
|--------|-------|--------|--------|--------|
| 6098   | 2     | 2      | 2      | 1      |
| 6101   |       |        |        |        |
| 6102   | 2     | 1      | 2      | 1      |
| 6105   | 1     | 1      | 3      | 1      |
| 6106   | 2     | 1      | 2      | 1      |
| 6107   | 1     | 1      | 2      | 1      |
| 6111   | 1     | 1      | 1      | 1      |
| 6112   | 1     | 1      | 2      | 1      |
| 6113   | 3     | 3      | 4      | 3      |
| 6115   | 1     | 1      | 1      | 1      |
| 6116   |       |        |        |        |
| 6117   | 4     | 4      | 5      | 5      |
| 6124   | 3     | 2      | 4      | 4      |
| 6125   | 1     | 1      | 1      | 1      |
| 6128   |       |        |        |        |
| 6133   | 2     | 2      | 2      | 2      |
| 6134   | 2     | 1      | 2      | 1      |
| 6135   | 1     | 1      | 1      | 1      |
| 6138   | 2     | 1      | 3      | 3      |
| 6140   | 1     | 1      | 1      | 1      |
| 6143   | 1     | 1      | 1      | 1      |
| 6147   | 2     | 1      | 4      | 1      |
| 6154   | 2     | 1      | 1      | 1      |
| 6162   |       |        |        |        |
| 6165   | 1     | 1      | 5      | 1      |
| 6166   | 2     | 2      | 2      | 3      |
| 6173   | 2     | 1      | 5      | 1      |
| 6180   | 2     | 1      | 2      | 2      |
| 6184   | 4     | 1      | 5      | 2      |
| 6185   | 1     | 1      | 1      | 2      |
| 6186   | 1     | 1      | 1      | 1      |
| 6188   | 1     | 1      | 1      | 1      |



| respid | Q40_9 | Q40_10 | Q40_11 | Q40_12 |
|--------|-------|--------|--------|--------|
| 6192   | 3     | 2      | 1      | 4      |
| 6194   |       |        |        |        |
| 6195   | 1     | 1      | 1      | 1      |
| 6196   | 1     | 2      | 2      | 2      |
| 6199   | 1     | 1      | 2      | 2      |
| 6200   |       |        |        |        |
| 6201   | 1     | 1      | 1      | 1      |
| 6202   | 1     | 1      | 3      | 1      |
| 6203   | 1     | 1      | 1      | 1      |
| 6205   | 1     | 1      | 1      | 1      |
| 6210   | 1     | 2      | 3      | 2      |
| 6212   | 1     | 1      | 2      | 1      |
| 6216   | 2     | 2      | 5      | 3      |
| 6218   | 2     | 2      | 5      | 2      |
| 6221   | 1     | 1      | 2      | 1      |
| 6224   | 1     | 1      | 1      | 1      |
| 6225   | 1     | 1      | 2      | 1      |
| 6227   | 1     | 1      | 1      | 1      |
| 6230   |       |        |        |        |
| 6231   | 1     | 1      | 2      | 1      |
| 6233   | 3     | 1      | 1      | 3      |
| 6234   | 1     | 1      | 2      | 1      |
| 6235   |       |        |        |        |
| 6237   |       |        |        |        |
| 6240   |       |        |        |        |
| 6248   | 1     | 1      | 1      | 1      |
| 6249   | 1     | 1      | 1      | 1      |
| 6252   | 2     | 1      | 2      | 2      |
| 6254   | 1     | 1      | 3      | 1      |
| 6269   | 2     | 2      | 3      | 2      |
| 6304   |       |        |        |        |
| 6334   | 3     | 3      | 3      | 3      |

| respid | Q40_9 | Q40_10 | Q40_11 | Q40_12 |
|--------|-------|--------|--------|--------|
| 6341   | 5     | 1      | 5      | 3      |
| 6350   | 2     | 3      | 2      | 2      |
| 6370   | 1     | 1      | 1      | 1      |
| 6384   | 1     | 1      | 1      | 1      |
| 6400   | 1     | 1      | 1      | 1      |
| 6418   |       |        |        |        |
| 6467   | 1     | 1      | 1      | 1      |
| 6469   | 1     | 1      | 1      | 1      |
| 6474   | 1     | 1      | 1      | 1      |
| 6475   |       |        |        |        |
| 6476   | 3     | 4      | 3      | 3      |
| 6477   | 1     | 1      | 3      | 1      |
| 6480   | 1     | 1      | 2      | 1      |
| 6481   | 4     | 3      | 3      | 2      |
| 6485   | 1     | 1      | 1      | 1      |
| 6488   | 2     | 2      | 2      | 3      |
| 6495   | 1     | 1      | 1      | 1      |
| 6499   | 2     | 1      | 2      | 2      |
| 6500   | 1     | 2      | 1      | 2      |
| 6504   | 1     | 1      | 1      | 1      |
| 6507   | 3     | 1      | 3      | 1      |
| 6512   | 1     | 1      | 2      | 1      |
| 6525   | 3     | 2      | 3      | 2      |
| 6532   | 1     | 1      | 1      | 1      |
| 6535   | 1     | 1      | 1      | 1      |
| 6546   | 1     | 1      | 1      | 2      |
| 6551   | 5     | 2      | 6      | 5      |
| 6556   | 2     | 2      | 2      | 2      |
| 6566   | 2     | 1      | 5      | 2      |
| 6569   |       |        |        |        |
| 6574   | 1     | 1      | 1      | 1      |
| 6576   | 1     | 1      | 2      | 1      |

| respid | Q40_9 | Q40_10 | Q40_11 | Q40_12 |
|--------|-------|--------|--------|--------|
| 6580   |       |        |        |        |
| 6584   |       |        |        |        |
| 6585   | 3     | 1      | 1      | 2      |
| 6589   | 1     | 1      | 1      | 1      |
| 6590   | 1     | 1      | 2      | 1      |
| 6598   | 1     | 1      | 1      | 1      |
| 6603   | 2     | 2      | 2      | 2      |
| 6618   | 3     | 2      | 1      | 1      |
| 6630   | 3     | 3      | 5      | 6      |
| 6636   | 4     | 4      | 4      | 4      |
| 6649   |       |        |        |        |
| 6675   | 1     | 1      | 1      | 1      |
| 6678   | 2     | 1      | 1      | 1      |
| 6681   | 1     | 1      | 1      | 1      |
| 6684   | 2     | 2      | 2      | 2      |
| 6688   |       |        |        |        |
| 6691   | 1     | 1      | 1      | 1      |
| 6694   | 3     | 1      | 3      | 3      |
| 6696   | 1     | 1      | 1      | 1      |
| 6720   | 3     | 4      | 3      | 4      |
| 6722   | 4     | 5      | 5      | 4      |
| 6724   | 1     | 1      | 1      | 1      |
| 6725   | 1     | 1      | 1      | 1      |
| 6727   | 1     | 1      | 2      | 1      |
| 6734   | 3     | 3      | 3      | 3      |
| 6739   | 3     | 1      | 5      | 2      |
| 6743   | 5     | 2      | 4      | 6      |
| 6749   | 1     | 1      | 1      | 1      |
| 6756   | 1     | 1      | 1      | 1      |
| 6764   | 1     | 1      | 1      | 1      |
| 6765   | 1     | 1      | 1      | 1      |
| 6768   | 1     | 1      | 1      | 1      |

| respid | Q40_9 | Q40_10 | Q40_11 | Q40_12 |
|--------|-------|--------|--------|--------|
| 6773   | 1     | 1      | 1      | 1      |
| 6775   | 1     | 1      | 2      | 1      |
| 6777   | 1     | 1      | 1      | 1      |
| 6779   | 1     | 1      | 1      | 1      |
| 6790   | 1     | 1      | 1      | 3      |
| 6797   |       |        |        |        |
| 6798   | 3     | 3      | 1      | 2      |
| 6808   |       |        |        |        |
| 6810   | 1     | 1      | 2      | 2      |
| 6811   | 3     | 3      | 3      | 3      |
| 6812   | 1     | 1      | 2      | 1      |
| 6814   | 1     | 1      | 2      | 1      |
| 6819   | 2     | 1      | 3      | 3      |
| 6820   | 2     | 3      | 4      | 3      |
| 6832   | 1     | 1      | 1      | 1      |
| 6854   | 1     | 1      | 4      | 1      |
| 6855   |       |        |        |        |
| 6857   | 1     | 1      | 1      | 1      |
| 6858   | 1     | 1      | 1      | 1      |
| 6859   | 1     | 1      | 2      | 1      |
| 6860   | 2     | 1      | 2      | 1      |
| 6862   | 1     | 1      | 1      | 1      |
| 6879   |       |        |        |        |
| 6893   | 1     | 1      | 1      | 1      |
| 6898   | 1     | 1      | 2      | 1      |
| 6902   | 3     | 2      | 4      | 3      |
| 6903   | 3     | 2      | 4      | 3      |
| 6907   | 4     | 3      | 4      | 3      |
| 6908   |       |        |        |        |
| 6912   |       |        |        |        |
| 6915   | 1     | 1      | 4      | 2      |
| 6916   | 1     | 1      | 2      | 1      |

| respid | Q40_9 | Q40_10 | Q40_11 | Q40_12 |
|--------|-------|--------|--------|--------|
| 6917   | 2     | 1      | 1      | 1      |
| 6923   | 1     | 1      | 1      | 1      |
| 6934   | 2     | 1      | 1      | 1      |
| 6937   |       |        |        |        |
| 6945   | 1     | 1      | 1      | 1      |
| 6954   | 1     | 1      | 1      | 1      |
| 6956   | 1     | 1      | 3      | 2      |
| 6958   | 1     | 1      | 1      | 1      |
| 6961   | 1     | 1      | 2      | 1      |
| 6963   | 1     | 1      | 1      | 2      |
| 6964   | 1     | 1      | 1      | 1      |
| 6976   |       |        |        |        |
| 6977   | 1     | 1      | 2      | 1      |
| 7000   | 2     | 2      | 3      | 2      |
| 7001   | 1     | 1      | 1      | 1      |
| 7005   | 1     | 1      | 1      | 1      |
| 7006   | 1     | 1      | 2      | 1      |
| 7008   | 3     | 1      | 3      | 5      |
| 7009   | 1     | 1      | 1      | 1      |
| 7019   | 1     | 1      | 1      | 1      |
| 7021   | 2     | 1      | 2      | 1      |
| 7026   | 2     | 1      | 2      | 3      |
| 7030   | 2     | 3      | 3      | 2      |
| 7034   |       |        |        |        |
| 7039   | 1     | 1      | 1      | 2      |
| 7041   | 1     | 1      | 1      | 1      |
| 7047   | 1     | 1      | 2      | 1      |
| 7051   | 1     | 1      | 1      | 1      |
| 7052   | 2     | 2      | 2      | 2      |
| 7059   | 1     | 1      | 2      | 1      |
| 7062   | 1     | 1      | 3      | 2      |
| 7065   | 1     | 1      | 2      | 1      |

| respid | Q40_9 | Q40_10 | Q40_11 | Q40_12 |
|--------|-------|--------|--------|--------|
| 7066   | 1     | 1      | 1      | 1      |
| 7069   | 1     | 1      | 2      | 1      |
| 7070   |       |        |        |        |
| 7073   |       |        |        |        |
| 7078   | 1     | 1      | 1      | 1      |
| 7083   | 2     | 1      | 3      | 2      |
| 7084   | 4     | 3      | 4      | 4      |
| 7085   | 1     | 1      | 2      | 1      |
| 7088   | 3     | 4      | 3      | 4      |
| 7090   | 5     | 3      | 4      | 2      |
| 7095   | 2     | 1      | 2      | 1      |
| 7100   |       |        |        |        |
| 7102   | 1     | 1      | 2      | 1      |
| 7103   | 1     | 1      | 1      | 1      |
| 7108   | 1     | 1      | 1      | 1      |
| 7109   | 1     | 1      | 1      | 1      |
| 7110   |       |        |        |        |
| 7112   |       |        |        |        |
| 7114   | 1     | 1      | 2      | 1      |
| 7116   | 1     | 1      | 1      | 1      |
| 7117   | 3     | 2      | 2      | 1      |
| 7118   | 4     | 4      | 5      | 4      |
| 7120   | 5     | 3      | 4      | 5      |
| 7124   | 1     | 1      | 1      | 1      |
| 7130   | 2     | 2      | 2      | 1      |
| 7135   | 1     | 1      | 1      | 1      |
| 7137   | 4     | 5      | 3      | 3      |
| 7140   | 1     | 1      | 1      | 1      |
| 7141   | 1     | 1      | 1      | 1      |
| 7148   | 1     | 1      | 1      | 1      |
| 7152   |       |        |        |        |
| 7154   | 2     | 1      | 2      | 1      |

| respid | Q40_9 | Q40_10 | Q40_11 | Q40_12 |
|--------|-------|--------|--------|--------|
| 7156   | 1     | 2      | 1      | 1      |
| 7158   | 1     | 2      | 1      | 2      |
| 7159   |       |        |        |        |
| 7161   |       |        |        |        |
| 7164   | 1     | 1      | 1      | 1      |
| 7166   |       |        |        |        |
| 7167   |       |        |        |        |
| 7168   |       |        |        |        |
| 7170   |       |        |        |        |
| 7171   | 2     | 1      | 2      | 1      |
| 7172   | 1     | 1      | 1      | 1      |
| 7173   | 2     | 1      | 2      | 2      |
| 7175   | 1     | 1      | 1      | 1      |
| 7176   | 2     | 2      | 2      | 2      |
| 7180   | 1     | 1      | 1      | 1      |
| 7183   | 2     | 1      | 2      | 1      |
| 7189   | 1     | 1      | 1      | 1      |
| 7193   | 1     | 1      | 1      | 1      |
| 7194   | 2     | 3      | 2      | 3      |
| 7195   | 1     | 1      | 1      | 1      |
| 7200   | 1     | 1      | 1      | 1      |
| 7201   | 2     | 2      | 2      | 2      |
| 7205   | 3     | 4      | 4      | 5      |
| 7207   | 1     | 1      | 1      | 1      |
| 7208   |       |        |        |        |
| 7210   | 1     | 1      | 3      | 1      |
| 7211   | 1     | 1      | 1      | 1      |
| 7217   | 1     | 1      | 2      | 1      |
| 7218   | 1     | 1      | 1      | 1      |
| 7220   |       |        |        |        |
| 7225   | 1     | 1      | 1      | 1      |
| 7228   | 1     | 1      | 1      | 1      |

| respid | Q40_9 | Q40_10 | Q40_11 | Q40_12 |
|--------|-------|--------|--------|--------|
| 7230   | 1     | 1      | 1      | 1      |
| 7233   | 1     | 1      | 1      | 1      |
| 7234   | 1     | 1      | 2      | 1      |
| 7235   |       |        |        |        |
| 7236   |       |        |        |        |
| 7241   | 1     | 1      | 2      | 1      |
| 7251   | 1     | 1      | 1      | 1      |
| 7253   | 1     | 1      | 1      | 1      |
| 7259   | 1     | 1      | 3      | 1      |
| 7260   | 1     | 1      | 1      | 1      |
| 7261   | 2     | 2      | 2      | 2      |
| 7263   | 1     | 1      | 3      | 1      |
| 7265   |       |        |        |        |
| 7268   | 1     | 1      | 1      | 1      |
| 7269   |       |        |        |        |
| 7271   | 4     | 3      | 3      | 2      |
| 7276   | 2     | 1      | 3      | 6      |
| 7280   | 1     | 1      | 2      | 1      |
| 7283   | 1     | 1      | 1      | 1      |
| 7284   | 1     | 1      | 1      | 3      |
| 7286   | 1     | 1      | 1      | 1      |
| 7287   |       |        |        |        |
| 7288   | 2     | 2      | 2      | 2      |
| 7294   | 1     | 1      | 1      | 1      |
| 7295   | 1     | 1      | 1      | 1      |
| 7296   | 4     | 3      | 3      | 3      |
| 7297   | 1     | 1      | 1      | 1      |
| 7299   | 1     | 2      | 1      | 1      |
| 7300   | 3     | 4      | 3      | 4      |
| 7301   | 1     | 1      | 2      | 1      |
| 7302   |       |        |        |        |
| 7306   | 1     | 1      | 1      | 1      |



| respid | Q40_9 | Q40_10 | Q40_11 | Q40_12 |
|--------|-------|--------|--------|--------|
| 7313   | 4     | 3      | 5      | 5      |
| 7315   | 1     | 1      | 2      | 2      |
| 7317   | 1     | 1      | 1      | 2      |
| 7321   | 1     | 1      | 1      | 2      |
| 7322   | 1     | 1      | 1      | 1      |
| 7323   | 2     | 2      | 2      | 3      |
| 7333   | 3     | 3      | 3      | 3      |
| 7335   | 2     | 1      | 1      | 3      |
| 7336   | 1     | 1      | 1      | 1      |
| 7337   | 3     | 1      | 1      | 2      |
| 7338   | 1     | 1      | 1      | 1      |
| 7340   | 1     | 1      | 1      | 1      |
| 7341   | 2     | 1      | 3      | 2      |
| 7342   | 1     | 1      | 1      | 1      |
| 7344   | 3     | 3      | 3      | 2      |
| 7346   | 1     | 1      | 2      | 2      |
| 7347   | 1     | 1      | 1      | 1      |
| 7349   | 2     | 1      | 5      | 3      |
| 7352   | 2     | 1      | 2      | 1      |
| 7353   | 2     | 1      | 3      | 2      |
| 7355   | 1     | 1      | 2      | 1      |
| 7356   |       |        |        |        |
| 7360   | 5     | 4      | 5      | 5      |
| 7371   | 1     | 1      | 2      | 1      |
| 7376   | 2     | 3      | 2      | 3      |
| 7379   | 2     | 1      | 3      | 2      |
| 7381   | 1     | 1      | 1      | 1      |
| 7386   | 1     | 1      | 2      | 1      |
| 7389   | 2     | 1      | 1      | 1      |
| 7390   | 3     | 3      | 3      | 4      |
| 7393   | 1     | 1      | 2      | 1      |
| 7394   | 1     | 1      | 2      | 1      |

| respid | Q40_9 | Q40_10 | Q40_11 | Q40_12 |
|--------|-------|--------|--------|--------|
| 7396   | 3     | 3      | 4      | 3      |
| 7400   | 2     | 2      | 4      | 4      |
| 7401   | 1     | 1      | 1      | 2      |
| 7403   | 1     | 1      | 1      | 1      |
| 7406   | 2     | 2      | 6      | 6      |
| 7409   | 3     | 1      | 2      | 2      |
| 7410   | 4     | 2      | 5      | 5      |
| 7412   | 5     | 4      | 4      | 4      |
| 7414   | 1     | 1      | 1      | 1      |
| 7415   | 3     | 2      | 3      | 2      |
| 7417   | 4     | 3      | 2      | 3      |
| 7421   | 3     | 3      | 2      | 2      |
| 7425   | 2     | 2      | 2      | 2      |
| 7430   | 3     | 2      | 2      | 2      |
| 7432   | 1     | 1      | 1      | 1      |
| 7433   | 3     | 1      | 2      | 3      |
| 7442   | 1     | 2      | 1      | 1      |
| 7445   | 1     | 1      | 2      | 1      |
| 7446   | 1     | 1      | 1      | 1      |
| 7449   |       |        |        |        |
| 7450   |       |        |        |        |
| 7451   | 1     | 1      | 1      | 1      |
| 7459   | 1     | 1      | 1      | 1      |
| 7462   | 1     | 1      | 3      | 2      |
| 7463   | 1     | 1      | 1      | 1      |
| 7469   |       |        |        |        |
| 7482   | 1     | 1      | 1      | 1      |
| 7484   | 2     | 2      | 1      | 1      |
| 7486   | 2     | 2      | 2      | 2      |
| 7496   | 1     | 1      | 1      | 1      |
| 7502   | 2     | 1      | 2      | 3      |
| 7504   | 2     | 1      | 3      | 2      |

| respid | Q40_9 | Q40_10 | Q40_11 | Q40_12 |
|--------|-------|--------|--------|--------|
| 7509   | 5     | 5      | 4      | 6      |
| 7513   | 3     | 1      | 5      | 2      |
| 7514   |       |        |        |        |
| 7520   | 1     | 1      | 1      | 1      |
| 7523   |       |        |        |        |
| 7526   | 1     | 1      | 4      | 2      |
| 7529   | 3     | 2      | 2      | 3      |
| 7534   |       |        |        |        |
| 7536   | 3     | 2      | 4      | 3      |
| 7540   | 1     | 1      | 2      | 1      |
| 7541   | 2     | 2      | 2      | 2      |
| 7542   |       |        |        |        |
| 7555   | 1     | 1      | 1      | 1      |
| 7566   | 2     | 2      | 2      | 2      |
| 7568   | 1     | 1      | 1      | 1      |
| 7570   | 3     | 2      | 3      | 3      |
| 7572   | 3     | 2      | 1      | 2      |
| 7573   | 2     | 1      | 5      | 3      |
| 7576   | 1     | 1      | 2      | 1      |
| 7577   | 1     | 1      | 6      | 3      |
| 7583   | 1     | 1      | 1      | 1      |
| 7584   | 1     | 1      | 1      | 1      |
| 7585   | 6     | 1      | 6      | 5      |
| 7586   | 2     | 2      | 2      | 2      |
| 7587   | 1     | 1      | 1      | 1      |
| 7588   | 1     | 1      | 1      | 1      |
| 7596   | 1     | 1      | 1      | 1      |
| 7599   | 1     | 1      | 1      | 1      |
| 7600   | 3     | 4      | 3      | 3      |
| 7602   | 1     | 1      | 1      | 1      |
| 7613   | 1     | 1      | 1      | 1      |
| 7620   | 1     | 1      | 1      | 1      |

| respid | Q40_9 | Q40_10 | Q40_11 | Q40_12 |
|--------|-------|--------|--------|--------|
| 7623   | 1     | 1      | 2      | 1      |
| 7635   | 1     | 1      | 1      | 1      |
| 7636   | 2     | 2      | 2      | 2      |
| 7643   | 2     | 2      | 2      | 2      |
| 7645   | 2     | 1      | 3      | 2      |
| 7649   | 3     | 3      | 3      | 3      |
| 7651   | 1     | 1      | 2      | 1      |
| 7652   | 3     | 4      | 5      | 5      |
| 7655   | 2     | 2      | 2      | 2      |
| 7657   | 1     | 1      | 1      | 1      |
| 7675   | 1     | 1      | 1      | 1      |
| 7676   | 2     | 1      | 4      | 2      |
| 7684   | 2     | 1      | 2      | 2      |
| 7693   | 2     | 2      | 1      | 2      |
| 7694   | 4     | 3      | 2      | 3      |
| 7695   | 1     | 1      | 2      | 1      |
| 7696   | 4     | 5      | 4      | 3      |
| 7698   | 1     | 2      | 2      | 1      |
| 7700   | 1     | 1      | 2      | 1      |
| 7701   | 1     | 1      | 1      | 1      |
| 7704   | 1     | 1      | 1      | 1      |
| 7709   | 1     | 1      | 2      | 1      |
| 7713   | 1     | 1      | 1      | 1      |
| 7714   | 1     | 1      | 1      | 1      |
| 7718   | 4     | 5      | 6      | 6      |
| 7720   | 1     | 1      | 1      | 1      |
| 7721   | 2     | 2      | 1      | 2      |
| 7722   | 1     | 1      | 1      | 1      |
| 7724   | 3     | 1      | 5      | 3      |
| 7728   |       |        |        |        |
| 7731   | 1     | 2      | 4      | 3      |
| 7735   | 1     | 1      | 1      | 1      |

| respid | Q40_9 | Q40_10 | Q40_11 | Q40_12 |
|--------|-------|--------|--------|--------|
| 7737   | 1     | 1      | 2      | 1      |
| 7741   | 2     | 1      | 1      | 1      |
| 7746   | 1     | 1      | 1      | 1      |
| 7747   | 2     | 1      | 1      | 1      |
| 7748   | 1     | 1      | 1      | 1      |
| 7750   | 1     | 1      | 1      | 1      |
| 7754   | 1     | 1      | 2      | 1      |
| 7755   | 2     | 1      | 2      | 1      |
| 7762   |       |        |        |        |
| 7764   | 1     | 1      | 1      | 1      |
| 7766   |       |        |        |        |
| 7768   | 1     | 2      | 2      | 2      |
| 7770   | 3     | 2      | 3      | 4      |
| 7771   | 1     | 1      | 1      | 1      |
| 7777   | 1     | 1      | 1      | 1      |
| 7778   |       |        |        |        |
| 7783   | 4     | 3      | 4      | 3      |
| 7789   | 1     | 1      | 1      | 1      |
| 7790   | 1     | 1      | 1      | 1      |
| 7795   | 3     | 2      | 2      | 3      |
| 7807   | 1     | 1      | 1      | 1      |
| 7808   | 1     | 1      | 3      | 2      |
| 7818   | 3     | 1      | 1      | 2      |
| 7820   |       |        |        |        |
| 7831   | 2     | 1      | 2      | 1      |
| 7832   | 1     | 1      | 1      | 1      |
| 7837   | 1     | 1      | 1      | 1      |
| 7841   | 2     | 3      | 4      | 3      |
| 7845   | 3     | 3      | 3      | 4      |
| 7853   | 1     | 1      | 2      | 1      |
| 7854   | 1     | 1      | 1      | 1      |
| 7862   | 4     | 4      | 4      | 4      |

| respid | Q40_9 | Q40_10 | Q40_11 | Q40_12 |
|--------|-------|--------|--------|--------|
| 7871   | 2     | 2      | 2      | 2      |
| 7875   | 1     | 3      | 4      | 2      |
| 7880   | 1     | 1      | 2      | 3      |
| 7881   | 2     | 1      | 4      | 1      |
| 7883   | 1     | 1      | 2      | 2      |
| 7896   | 1     | 1      | 1      | 1      |
| 7905   | 1     | 1      | 1      | 1      |
| 7919   | 2     | 1      | 1      | 2      |
| 7928   | 3     | 3      | 4      | 3      |
| 7929   | 1     | 1      | 1      | 1      |
| 7938   | 1     | 1      | 2      | 1      |
| 7940   | 1     | 1      | 2      | 1      |
| 7941   | 1     | 1      | 2      | 1      |
| 7952   |       |        |        |        |
| 7962   | 1     | 1      | 1      | 1      |
| 7968   | 1     | 1      | 1      | 1      |
| 7972   | 1     | 1      | 3      | 1      |
| 7983   | 4     | 4      | 4      | 3      |
| 7990   | 1     | 1      | 1      | 1      |
| 7993   | 1     | 1      | 1      | 1      |
| 8005   | 2     | 1      | 1      | 2      |
| 8008   |       |        |        |        |
| 8012   | 2     | 2      | 3      | 1      |
| 8021   | 1     | 1      | 1      | 1      |
| 8024   | 1     | 1      | 1      | 1      |
| 8043   | 1     | 1      | 1      | 1      |
| 8051   | 1     | 1      | 3      | 1      |
| 8056   | 1     | 1      | 2      | 1      |
| 8061   | 1     | 2      | 1      | 3      |
| 8066   |       |        |        |        |
| 8069   | 1     | 2      | 2      | 2      |
| 8071   | 1     | 1      | 1      | 1      |

| respid | Q40_9 | Q40_10 | Q40_11 | Q40_12 |
|--------|-------|--------|--------|--------|
| 8072   | 1     | 1      | 1      | 1      |
| 8076   | 1     | 1      | 2      | 1      |
| 8080   | 1     | 1      | 2      | 1      |
| 8083   | 1     | 1      | 2      | 1      |
| 8093   | 2     | 1      | 4      | 2      |
| 8095   | 2     | 2      | 3      | 2      |
| 8099   | 1     | 1      | 1      | 1      |
| 8100   | 2     | 1      | 3      | 1      |
| 8103   |       |        |        |        |
| 8104   | 1     | 2      | 2      | 2      |
| 8115   | 2     | 1      | 4      | 1      |
| 8121   | 1     | 1      | 1      | 1      |
| 8128   | 1     | 1      | 1      | 1      |
| 8130   | 1     | 2      | 2      | 3      |
| 8131   | 2     | 1      | 3      | 2      |
| 8133   | 2     | 2      | 2      | 2      |
| 8143   | 1     | 1      | 1      | 1      |
| 8144   | 1     | 1      | 2      | 2      |
| 8146   | 1     | 1      | 1      | 1      |
| 8148   |       |        |        |        |
| 8157   |       |        |        |        |
| 8164   |       |        |        |        |
| 8173   |       |        |        |        |
| 8176   | 2     | 1      | 1      | 1      |
| 8179   | 3     | 3      | 3      | 3      |
| 8181   |       |        |        |        |
| 8182   | 3     | 2      | 2      | 2      |
| 8196   | 1     | 1      | 1      | 1      |
| 8200   | 1     | 1      | 2      | 1      |
| 8203   | 1     | 1      | 1      | 1      |
| 8204   | 1     | 1      | 6      | 1      |
| 8206   | 1     | 1      | 1      | 1      |

| respid | Q40_9 | Q40_10 | Q40_11 | Q40_12 |
|--------|-------|--------|--------|--------|
| 8208   | 1     | 1      | 1      | 1      |
| 8212   | 2     | 1      | 2      | 3      |
| 8222   | 3     | 3      | 2      | 3      |
| 8223   | 1     | 1      | 1      | 1      |
| 8225   | 1     | 1      | 1      | 1      |
| 8226   | 1     | 2      | 1      | 1      |
| 8228   | 3     | 3      | 3      | 2      |
| 8229   | 1     | 1      | 1      | 1      |
| 8239   | 1     | 1      | 1      | 1      |
| 8246   | 3     | 1      | 2      | 2      |
| 8258   | 3     | 3      | 3      | 2      |
| 8260   | 2     | 2      | 2      | 2      |
| 8262   | 3     | 1      | 3      | 2      |
| 8263   | 2     | 2      | 2      | 2      |
| 8267   | 2     | 2      | 3      | 3      |
| 8271   | 4     | 3      | 4      | 4      |
| 8274   | 2     | 1      | 1      | 1      |
| 8275   | 2     | 3      | 3      | 3      |
| 8279   | 1     | 1      | 1      | 1      |
| 8285   | 3     | 2      | 4      | 3      |
| 8287   | 6     | 6      | 6      | 6      |
| 8289   | 4     | 1      | 3      | 2      |
| 8291   | 1     | 1      | 1      | 1      |
| 8299   | 3     | 2      | 3      | 3      |
| 8301   | 1     | 1      | 3      | 1      |
| 8302   | 1     | 1      | 1      | 2      |
| 8308   | 3     | 1      | 4      | 1      |
| 8313   | 1     | 1      | 3      | 2      |
| 8316   | 2     | 2      | 3      | 3      |
| 8317   | 1     | 1      | 1      | 1      |
| 8319   | 1     | 1      | 1      | 1      |
| 8323   | 1     | 1      | 1      | 2      |



| respid | Q40_9 | Q40_10 | Q40_11 | Q40_12 |
|--------|-------|--------|--------|--------|
| 8324   | 1     | 1      | 1      | 1      |
| 8327   | 3     | 4      | 4      | 4      |
| 8328   | 3     | 2      | 2      | 2      |
| 8342   | 2     | 1      | 2      | 2      |
| 8350   | 1     | 1      | 2      | 2      |
| 8352   | 1     | 1      | 1      | 1      |
| 8353   | 1     | 1      | 1      | 1      |
| 8356   | 1     | 1      | 1      | 1      |
| 8367   | 1     | 1      | 2      | 1      |
| 8373   | 1     | 1      | 1      | 1      |
| 8379   |       |        |        |        |
| 8382   | 2     | 3      | 3      | 2      |
| 8387   | 2     | 1      | 4      | 3      |
| 8409   | 3     | 1      | 1      | 1      |
| 8410   | 1     | 1      | 1      | 1      |
| 8412   | 2     | 2      | 2      | 2      |
| 8415   | 1     | 1      | 2      | 1      |
| 8417   | 1     | 1      | 1      | 1      |
| 8422   | 1     | 1      | 2      | 1      |
| 8430   | 3     | 1      | 2      | 2      |
| 8434   | 1     | 1      | 2      | 1      |
| 8436   |       |        |        |        |
| 8446   | 2     | 1      | 2      | 2      |
| 8447   | 1     | 1      | 2      | 1      |
| 8448   | 1     | 1      | 1      | 1      |
| 8455   | 2     | 2      | 2      | 2      |
| 8456   | 1     | 1      | 2      | 1      |
| 8459   | 1     | 1      | 1      | 1      |
| 8460   | 1     | 1      | 1      | 1      |
| 8464   | 4     | 3      | 4      | 4      |
| 8470   | 1     | 1      | 1      | 1      |
| 8473   | 1     | 1      | 2      | 1      |

| respid | Q40_9 | Q40_10 | Q40_11 | Q40_12 |
|--------|-------|--------|--------|--------|
| 8486   | 1     | 1      | 1      | 1      |
| 8487   | 1     | 1      | 2      | 1      |
| 8489   | 1     | 1      | 1      | 1      |
| 8494   | 1     | 1      | 1      | 1      |
| 8495   | 4     | 3      | 3      | 4      |
| 8497   | 2     | 1      | 1      | 2      |
| 8510   | 1     | 1      | 3      | 1      |
| 8515   | 2     | 2      | 2      | 2      |
| 8526   |       |        |        |        |
| 8530   |       |        |        |        |
| 8532   | 2     | 1      | 2      | 1      |
| 8533   |       |        |        |        |
| 8534   | 2     | 1      | 3      | 2      |
| 8572   | 3     | 3      | 2      | 2      |
| 8582   | 1     | 1      | 1      | 1      |
| 8584   | 1     | 1      | 1      | 1      |
| 8585   |       |        |        |        |
| 8586   |       |        |        |        |
| 8589   | 2     | 1      | 1      | 1      |
| 8593   | 1     | 1      | 1      | 1      |
| 8594   | 1     | 1      | 1      | 1      |
| 8601   | 1     | 1      | 1      | 1      |
| 8603   | 2     | 1      | 1      | 1      |
| 8604   |       |        |        |        |
| 8605   |       |        |        |        |
| 8607   | 2     | 2      | 2      | 2      |
| 8623   | 1     | 1      | 2      | 1      |
| 8626   | 2     | 2      | 3      | 2      |
| 8638   | 1     | 1      | 1      | 1      |
| 8640   | 1     | 1      | 1      | 1      |
| 8641   | 1     | 1      | 1      | 1      |
| 8643   | 1     | 1      | 3      | 1      |

| respid | Q40_9 | Q40_10 | Q40_11 | Q40_12 |
|--------|-------|--------|--------|--------|
| 8644   | 2     | 1      | 4      | 2      |
| 8646   | 1     | 1      | 1      | 1      |
| 8647   |       |        |        |        |
| 8649   | 1     | 1      | 4      | 1      |
| 8650   | 2     | 1      | 2      | 1      |
| 8658   | 1     | 1      | 1      | 1      |
| 8659   | 2     | 1      | 2      | 1      |
| 8669   | 1     | 1      | 4      | 1      |
| 8672   | 1     | 1      | 1      | 1      |
| 8673   | 1     | 1      | 3      | 2      |
| 8676   | 1     | 1      | 1      | 1      |
| 8677   |       |        |        |        |
| 8681   | 1     | 1      | 1      | 1      |
| 8688   | 1     | 1      | 1      | 1      |
| 8689   | 2     | 2      | 4      | 2      |
| 8690   | 1     | 1      | 1      | 1      |
| 8693   | 1     | 1      | 1      | 1      |
| 8694   | 2     | 2      | 2      | 2      |
| 8699   | 2     | 1      | 4      | 1      |
| 8700   |       |        |        |        |
| 8703   | 1     | 1      | 1      | 1      |
| 8704   | 1     | 1      | 1      | 1      |
| 8706   | 3     | 2      | 3      | 3      |
| 8709   | 2     | 1      | 1      | 1      |
| 8715   | 1     | 1      | 1      | 1      |
| 8728   | 2     | 1      | 2      | 1      |
| 8729   | 1     | 1      | 1      | 1      |
| 8730   | 1     | 1      | 1      | 1      |
| 8742   | 2     | 2      | 1      | 1      |
| 8748   | 1     | 1      | 1      | 1      |
| 8749   | 2     | 1      | 1      | 1      |
| 8750   | 1     | 1      | 1      | 1      |

| respid | Q40_9 | Q40_10 | Q40_11 | Q40_12 |
|--------|-------|--------|--------|--------|
| 8751   | 1     | 1      | 1      | 1      |
| 8752   | 2     | 1      | 2      | 2      |
| 8754   | 1     | 1      | 1      | 1      |
| 8757   | 1     | 1      | 1      | 1      |
| 8760   | 1     | 1      | 1      | 1      |
| 8761   | 1     | 1      | 1      | 1      |
| 8762   | 1     | 1      | 2      | 1      |
| 8763   | 1     | 1      | 3      | 1      |
| 8764   | 2     | 1      | 2      | 1      |
| 8765   | 1     | 1      | 1      | 1      |
| 8766   | 2     | 1      | 2      | 2      |
| 8767   | 2     | 1      | 2      | 1      |
| 8768   | 1     | 1      | 1      | 1      |
| 8770   | 1     | 1      | 1      | 1      |
| 8771   |       |        |        |        |
| 8773   | 1     | 1      | 1      | 1      |
| 8774   | 2     | 2      | 2      | 2      |
| 8776   | 1     | 1      | 1      | 1      |
| 8777   | 1     | 1      | 1      | 1      |
| 8778   | 1     | 1      | 2      | 2      |
| 8779   |       |        |        |        |
| 8784   | 2     | 2      | 2      | 2      |
| 8786   |       |        |        |        |
| 8787   | 1     | 1      | 1      | 2      |
| 8790   |       |        |        |        |
| 8791   | 4     | 4      | 5      | 5      |
| 8793   |       |        |        |        |
| 8795   | 1     | 1      | 1      | 1      |
| 8797   | 1     | 1      | 1      | 1      |
| 8801   | 2     | 2      | 3      | 3      |
| 8802   | 2     | 1      | 1      | 1      |
| 8807   |       |        |        |        |

| respid | Q40_9 | Q40_10 | Q40_11 | Q40_12 |
|--------|-------|--------|--------|--------|
| 8813   | 1     | 1      | 3      | 1      |
| 8817   | 1     | 1      | 1      | 1      |
| 8818   | 2     | 2      | 3      | 2      |
| 8821   | 1     | 1      | 1      | 1      |
| 8822   | 2     | 1      | 1      | 2      |
| 8823   | 1     | 1      | 1      | 1      |
| 8824   | 1     | 1      | 3      | 1      |
| 8825   | 1     | 1      | 2      | 1      |
| 8834   | 3     | 2      | 2      | 3      |
| 8840   | 2     | 3      | 4      | 4      |
| 8843   | 6     | 6      | 6      | 6      |
| 8846   | 1     | 1      | 1      | 1      |
| 8862   |       |        |        |        |
| 8866   | 1     | 1      | 1      | 1      |
| 8869   | 2     | 1      | 1      | 1      |
| 8872   | 2     | 3      | 3      | 3      |
| 8903   |       |        |        |        |
| 8909   |       |        |        |        |
| 8926   | 1     | 1      | 1      | 1      |
| 8936   | 1     | 1      | 1      | 1      |
| 8945   |       |        |        |        |
| 8954   | 1     | 1      | 2      | 2      |
| 8955   | 1     | 2      | 4      | 3      |
| 8958   | 1     | 1      | 1      | 1      |
| 8959   | 1     | 1      | 1      | 1      |
| 8960   | 1     | 1      | 1      | 1      |
| 8976   | 2     | 1      | 2      | 1      |
| 8977   | 1     | 1      | 2      | 1      |
| 8979   | 3     | 2      | 3      | 2      |
| 8985   |       |        |        |        |
| 8994   | 1     | 1      | 1      | 1      |
| 8997   | 3     | 3      | 3      | 3      |

| respid | Q40_9 | Q40_10 | Q40_11 | Q40_12 |
|--------|-------|--------|--------|--------|
| 9002   | 1     | 1      | 1      | 1      |
| 9005   | 1     | 1      | 4      | 2      |
| 9017   | 1     | 1      | 1      | 1      |
| 9018   | 1     | 1      | 1      | 1      |
| 9021   | 1     | 2      | 1      | 2      |
| 9029   | 3     | 4      | 5      | 4      |
| 9035   | 2     | 2      | 1      | 1      |
| 9038   | 1     | 1      | 1      | 1      |
| 9039   |       |        |        |        |
| 9040   | 1     | 1      | 1      | 1      |
| 9042   | 1     | 1      | 2      | 2      |
| 9043   | 1     | 1      | 1      | 1      |
| 9045   | 1     | 1      | 2      | 1      |
| 9051   | 1     | 1      | 1      | 1      |
| 9067   | 1     | 1      | 1      | 1      |
| 9069   | 1     | 1      | 2      | 1      |
| 9073   | 1     | 2      | 2      | 2      |
| 9084   | 2     | 1      | 2      | 2      |
| 9096   |       |        |        |        |
| 9100   | 1     | 1      | 1      | 1      |
| 9107   |       |        |        |        |
| 9110   | 1     | 1      | 1      | 1      |
| 9120   | 1     | 1      | 1      | 1      |
| 9122   | 1     | 1      | 3      | 2      |
| 9130   | 1     | 1      | 1      | 1      |
| 9134   | 2     | 2      | 2      | 3      |
| 9137   | 2     | 3      | 3      | 3      |
| 9139   | 1     | 1      | 1      | 1      |
| 9144   |       |        |        |        |
| 9157   | 3     | 1      | 2      | 3      |
| 9166   | 3     | 1      | 3      | 2      |
| 9177   | 3     | 1      | 6      | 3      |

| respid | Q40_9 | Q40_10 | Q40_11 | Q40_12 |
|--------|-------|--------|--------|--------|
| 9181   | 1     | 1      | 1      | 1      |
| 9183   | 1     | 2      | 2      | 3      |
| 9184   | 3     | 3      | 4      | 4      |
| 9188   |       |        |        |        |
| 9197   | 2     | 1      | 1      | 1      |
| 9200   | 2     | 2      | 3      | 2      |
| 9205   | 2     | 1      | 1      | 1      |
| 9207   | 1     | 1      | 1      | 1      |
| 9213   | 1     | 1      | 2      | 1      |
| 9216   | 3     | 2      | 2      | 2      |
| 9217   |       |        |        |        |
| 9218   | 1     | 1      | 1      | 1      |
| 9219   | 3     | 1      | 4      | 3      |
| 9220   |       |        |        |        |
| 9221   | 2     | 1      | 2      | 2      |
| 9223   | 5     | 4      | 5      | 4      |
| 9228   |       |        |        |        |
| 9230   | 2     | 2      | 2      | 2      |
| 9231   | 1     | 1      | 1      | 1      |
| 9233   | 2     | 2      | 2      | 1      |
| 9235   | 1     | 1      | 3      | 1      |
| 9237   | 1     | 1      | 1      | 1      |
| 9242   | 1     | 1      | 1      | 1      |
| 9250   |       |        |        |        |
| 9253   | 1     | 1      | 4      | 3      |
| 9257   | 1     | 1      | 1      | 1      |
| 9263   | 1     | 1      | 1      | 1      |
| 9267   | 2     | 2      | 2      | 2      |
| 9272   | 3     | 1      | 2      | 1      |
| 9279   |       |        |        |        |
| 9281   | 2     | 2      | 2      | 3      |
| 9285   | 1     | 1      | 1      | 2      |

| respid | Q40_9 | Q40_10 | Q40_11 | Q40_12 |
|--------|-------|--------|--------|--------|
| 9286   | 2     | 1      | 5      | 2      |
| 9294   | 2     | 1      | 2      | 1      |
| 9295   | 1     | 1      | 1      | 1      |
| 9297   | 1     | 1      | 1      | 2      |
| 9299   | 1     | 1      | 2      | 1      |
| 9309   | 1     | 1      | 1      | 2      |
| 9315   |       |        |        |        |
| 9320   | 1     | 1      | 1      | 1      |
| 9324   | 1     | 1      | 1      | 1      |
| 9326   | 1     | 1      | 1      | 1      |
| 9333   | 1     | 1      | 2      | 1      |
| 9334   | 4     | 4      | 3      | 4      |
| 9336   | 2     | 1      | 2      | 2      |
| 9337   | 1     | 1      | 1      | 1      |
| 9342   | 1     | 1      | 1      | 1      |
| 9347   | 2     | 1      | 1      | 1      |
| 9352   | 1     | 1      | 1      | 1      |
| 9355   | 1     | 1      | 1      | 1      |
| 9356   | 2     | 1      | 3      | 1      |
| 9359   | 1     | 1      | 2      | 1      |
| 9368   | 1     | 1      | 1      | 1      |
| 9375   | 2     | 2      | 1      | 2      |
| 9384   | 2     | 2      | 1      | 1      |
| 9388   | 2     | 1      | 1      | 1      |
| 9397   | 2     | 3      | 4      | 5      |
| 9400   | 1     | 1      | 1      | 1      |
| 9401   | 4     | 4      | 4      | 4      |
| 9402   |       |        |        |        |
| 9417   | 4     | 4      | 3      | 4      |
| 9424   | 1     | 1      | 1      | 1      |
| 9427   | 1     | 1      | 1      | 1      |
| 9429   | 1     | 1      | 2      | 1      |



| respid | Q40_9 | Q40_10 | Q40_11 | Q40_12 |
|--------|-------|--------|--------|--------|
| 9437   | 4     | 4      | 4      | 4      |
| 9442   | 2     | 2      | 3      | 3      |
| 9446   | 1     | 1      | 1      | 2      |
| 9447   | 1     | 1      | 1      | 1      |
| 9448   | 2     | 1      | 2      | 1      |
| 9449   | 2     | 5      | 2      | 1      |
| 9455   |       |        |        |        |
| 9459   | 3     | 2      | 2      | 2      |
| 9460   | 1     | 1      | 1      | 1      |
| 9461   | 2     | 1      | 1      | 1      |
| 9463   | 1     | 1      | 1      | 1      |
| 9464   | 3     | 2      | 3      | 2      |
| 9466   | 2     | 1      | 2      | 3      |
| 9477   | 1     | 1      | 1      | 1      |
| 9482   | 2     | 2      | 4      | 4      |
| 9486   | 2     | 1      | 2      | 1      |
| 9488   | 3     | 4      | 5      | 5      |
| 9489   | 1     | 3      | 3      | 1      |
| 9496   | 3     | 3      | 2      | 2      |
| 9499   | 2     | 2      | 2      | 2      |
| 9512   | 1     | 1      | 2      | 1      |
| 9514   | 1     | 1      | 1      | 1      |
| 9516   | 1     | 1      | 1      | 1      |
| 9517   | 2     | 3      | 3      | 2      |
| 9520   | 1     | 1      | 1      | 1      |
| 9527   | 1     | 1      | 1      | 1      |
| 9532   | 2     | 1      | 3      | 2      |
| 9533   | 1     | 1      | 1      | 1      |
| 9543   | 1     | 1      | 3      | 1      |
| 9550   | 3     | 1      | 1      | 1      |
| 9553   | 1     | 1      | 1      | 1      |
| 9555   | 3     | 1      | 3      | 4      |

| respid | Q40_9 | Q40_10 | Q40_11 | Q40_12 |
|--------|-------|--------|--------|--------|
| 9565   | 1     | 1      | 5      | 1      |
| 9583   | 2     | 1      | 3      | 3      |
| 9594   | 1     | 1      | 1      | 1      |
| 9596   | 2     | 1      | 2      | 1      |
| 9600   | 2     | 2      | 2      | 2      |
| 9602   | 1     | 1      | 1      | 1      |
| 9606   | 1     | 1      | 1      | 1      |
| 9608   | 2     | 1      | 4      | 2      |
| 9610   | 2     | 1      | 2      | 2      |
| 9612   | 2     | 1      | 1      | 1      |
| 9613   | 1     | 1      | 1      | 1      |
| 9614   | 1     | 1      | 3      | 1      |
| 9620   | 1     | 1      | 1      | 1      |
| 9628   | 1     | 1      | 1      | 1      |
| 9631   | 1     | 1      | 2      | 1      |
| 9632   | 1     | 1      | 3      | 1      |
| 9633   | 1     | 1      | 2      | 2      |
| 9639   |       |        |        |        |
| 9640   | 1     | 1      | 1      | 1      |
| 9642   | 1     | 1      | 2      | 2      |
| 9653   | 2     | 3      | 3      | 2      |
| 9658   | 1     | 1      | 1      | 1      |
| 9659   | 1     | 1      | 6      | 1      |
| 9661   | 1     | 1      | 1      | 1      |
| 9664   | 1     | 1      | 3      | 1      |
| 9665   | 1     | 1      | 2      | 1      |
| 9666   | 2     | 1      | 4      | 2      |
| 9667   | 2     | 2      | 2      | 2      |
| 9668   |       |        |        |        |
| 9670   | 1     | 2      | 3      | 2      |
| 9671   | 1     | 1      | 1      | 1      |
| 9681   | 1     | 1      | 1      | 1      |

| respid | Q40_9 | Q40_10 | Q40_11 | Q40_12 |
|--------|-------|--------|--------|--------|
| 9684   | 2     | 1      | 2      | 1      |
| 9685   | 3     | 1      | 3      | 2      |
| 9686   | 3     | 1      | 2      | 3      |
| 9688   | 2     | 1      | 3      | 1      |
| 9692   | 1     | 1      | 1      | 1      |
| 9693   | 3     | 3      | 5      | 5      |
| 9698   | 2     | 4      | 3      | 2      |
| 9699   | 1     | 1      | 1      | 1      |
| 9701   | 1     | 1      | 1      | 1      |
| 9702   | 1     | 1      | 1      | 1      |
| 9709   | 1     | 1      | 1      | 1      |
| 9713   |       |        |        |        |
| 9715   |       |        |        |        |
| 9721   | 1     | 1      | 1      | 1      |
| 9725   | 1     | 1      | 1      | 1      |
| 9729   | 3     | 3      | 3      | 3      |
| 9731   | 1     | 1      | 1      | 1      |
| 9736   | 2     | 1      | 2      | 1      |
| 9740   |       |        |        |        |
| 9741   | 1     | 1      | 1      | 1      |
| 9749   | 1     | 1      | 2      | 1      |
| 9750   | 3     | 3      | 3      | 3      |
| 9751   | 4     | 3      | 3      | 2      |
| 9753   | 1     | 1      | 2      | 1      |
| 9754   | 3     | 4      | 4      | 4      |
| 9756   | 3     | 3      | 3      | 3      |
| 9758   | 3     | 4      | 4      | 3      |
| 9759   | 2     | 1      | 2      | 1      |
| 9760   | 2     | 2      | 2      | 2      |
| 9761   |       |        |        |        |
| 9762   | 1     | 1      | 1      | 1      |
| 9764   | 1     | 1      | 1      | 1      |

| respid | Q40_9 | Q40_10 | Q40_11 | Q40_12 |
|--------|-------|--------|--------|--------|
| 9768   | 1     | 1      | 1      | 1      |
| 9769   | 2     | 1      | 3      | 2      |
| 9770   | 1     | 1      | 1      | 1      |
| 9771   | 1     | 1      | 2      | 1      |
| 9772   | 1     | 1      | 2      | 1      |
| 9773   | 2     | 1      | 2      | 1      |
| 9776   | 1     | 1      | 1      | 1      |
| 9786   | 1     | 1      | 1      | 1      |
| 9790   | 1     | 1      | 1      | 1      |
| 9791   | 1     | 1      | 1      | 1      |
| 9794   | 2     | 2      | 2      | 2      |
| 9797   | 1     | 1      | 2      | 1      |
| 9799   | 1     | 1      | 1      | 1      |
| 9804   | 1     | 1      | 1      | 1      |
| 9805   | 3     | 3      | 4      | 2      |
| 9806   | 1     | 1      | 2      | 1      |
| 9807   | 2     | 2      | 2      | 2      |
| 9813   | 2     | 1      | 3      | 1      |
| 9817   | 1     | 1      | 1      | 1      |
| 9823   | 1     | 1      | 1      | 1      |
| 9826   | 1     | 1      | 1      | 1      |
| 9830   | 1     | 1      | 2      | 2      |
| 9835   | 2     | 1      | 2      | 2      |
| 9836   | 1     | 1      | 1      | 1      |
| 9841   |       |        |        |        |
| 9842   | 1     | 1      | 1      | 1      |
| 9844   | 3     | 3      | 3      | 3      |
| 9847   | 1     | 1      | 2      | 1      |
| 9851   | 1     | 1      | 1      | 1      |
| 9852   | 2     | 1      | 1      | 2      |
| 9854   | 1     | 1      | 1      | 1      |
| 9855   | 1     | 1      | 1      | 1      |

| respid | Q40_9 | Q40_10 | Q40_11 | Q40_12 |
|--------|-------|--------|--------|--------|
| 9856   | 1     | 1      | 1      | 2      |
| 9862   | 1     | 1      | 1      | 1      |
| 9863   |       |        |        |        |
| 9866   | 1     | 1      | 1      | 1      |
| 9867   | 1     | 1      | 1      | 1      |
| 9868   | 2     | 2      | 5      | 4      |
| 9869   | 2     | 1      | 1      | 1      |
| 9878   | 1     | 1      | 1      | 1      |
| 9879   | 2     | 1      | 4      | 2      |
| 9881   | 1     | 1      | 1      | 1      |
| 9882   | 1     | 1      | 1      | 1      |
| 9884   | 1     | 1      | 1      | 1      |
| 9885   | 1     | 1      | 1      | 1      |
| 9888   | 2     | 1      | 1      | 1      |
| 9889   | 1     | 1      | 1      | 1      |
| 9894   | 2     | 2      | 2      | 2      |
| 9895   | 1     | 1      | 1      | 1      |
| 9896   | 4     | 5      | 4      | 5      |
| 9897   | 3     | 2      | 3      | 3      |
| 9905   | 1     | 1      | 1      | 1      |
| 9907   | 1     | 1      | 1      | 1      |
| 9908   | 1     | 1      | 1      | 1      |
| 9909   | 1     | 1      | 4      | 2      |
| 9910   | 2     | 1      | 3      | 1      |
| 9913   | 2     | 2      | 3      | 2      |
| 9914   | 1     | 1      | 1      | 1      |
| 9915   | 1     | 1      | 1      | 3      |
| 9916   | 1     | 1      | 1      | 1      |
| 9918   |       |        |        |        |
| 9919   | 2     | 1      | 3      | 2      |
| 9922   | 2     | 3      | 3      | 2      |
| 9930   | 1     | 1      | 1      | 1      |

| respid | Q40_9 | Q40_10 | Q40_11 | Q40_12 |
|--------|-------|--------|--------|--------|
| 9934   | 1     | 1      | 1      | 1      |
| 9936   | 2     | 2      | 1      | 2      |
| 9938   | 2     | 1      | 1      | 1      |
| 9940   | 1     | 1      | 1      | 1      |
| 9944   | 1     | 1      | 3      | 3      |
| 9945   | 1     | 1      | 1      | 1      |
| 9948   | 2     | 1      | 3      | 3      |
| 9949   | 3     | 3      | 4      | 3      |
| 9951   | 2     | 2      | 2      | 2      |
| 9952   | 2     | 3      | 2      | 2      |
| 9954   | 1     | 1      | 1      | 1      |
| 9955   | 1     | 1      | 1      | 1      |
| 9956   | 4     | 3      | 4      | 4      |
| 9957   | 3     | 3      | 3      | 3      |
| 9958   | 2     | 3      | 4      | 3      |
| 9959   | 1     | 1      | 4      | 3      |
| 9960   | 1     | 1      | 2      | 1      |
| 9961   | 1     | 1      | 2      | 1      |
| 9962   | 1     | 1      | 1      | 2      |
| 9969   | 2     | 1      | 2      | 3      |
| 9982   | 2     | 1      | 1      | 2      |
| 9984   | 1     | 1      | 2      | 1      |
| 9990   | 2     | 1      | 1      | 1      |
| 9992   | 2     | 3      | 3      | 3      |
| 9993   | 3     | 3      | 3      | 3      |
| 9997   | 1     | 1      | 1      | 1      |
| 9999   | 1     | 1      | 1      | 1      |
| 10000  | 1     | 1      | 1      | 1      |
| 10005  | 2     | 1      | 5      | 2      |
| 10014  | 1     | 1      | 1      | 1      |
| 10016  | 3     | 3      | 4      | 1      |
| 10017  | 1     | 1      | 1      | 1      |

| respid | Q40_9 | Q40_10 | Q40_11 | Q40_12 |
|--------|-------|--------|--------|--------|
| 10018  | 2     | 1      | 1      | 3      |
| 10021  | 2     | 1      | 1      | 1      |
| 10025  | 2     | 3      | 3      | 1      |
| 10027  | 1     | 1      | 1      | 1      |
| 10028  | 1     | 1      | 1      | 1      |
| 10031  | 1     | 1      | 1      | 1      |
| 10036  | 1     | 1      | 1      | 2      |
| 10037  | 1     | 1      | 1      | 1      |
| 10038  | 2     | 1      | 2      | 2      |
| 10039  |       |        |        |        |
| 10041  | 1     | 1      | 1      | 1      |
| 10045  | 2     | 1      | 6      | 3      |
| 10046  | 2     | 1      | 2      | 2      |
| 10047  | 3     | 3      | 2      | 1      |
| 10048  | 1     | 1      | 2      | 1      |
| 10049  | 1     | 1      | 2      | 1      |
| 10051  | 1     | 1      | 1      | 1      |
| 10052  | 3     | 2      | 4      | 3      |
| 10056  | 1     | 1      | 1      | 1      |
| 10061  | 1     | 1      | 2      | 1      |
| 10064  | 1     | 1      | 1      | 1      |
| 10066  | 1     | 1      | 1      | 1      |
| 10069  | 1     | 1      | 1      | 1      |
| 10071  | 1     | 1      | 1      | 1      |
| 10074  | 1     | 1      | 1      | 1      |
| 10079  | 1     | 1      | 1      | 1      |
| 10087  | 2     | 1      | 2      | 1      |
| 10095  | 1     | 1      | 1      | 2      |
| 10097  | 1     | 1      | 1      | 1      |
| 10100  | 1     | 1      | 2      | 1      |
| 10105  | 1     | 1      | 1      | 1      |
| 10107  | 2     | 2      | 2      | 2      |

| respid | Q40_9 | Q40_10 | Q40_11 | Q40_12 |
|--------|-------|--------|--------|--------|
| 10111  | 1     | 1      | 1      | 1      |
| 10116  | 1     | 1      | 2      | 1      |
| 10118  | 1     | 1      | 1      | 1      |
| 10123  |       |        |        |        |
| 10124  | 1     | 1      | 1      | 1      |
| 10130  | 2     | 1      | 1      | 1      |
| 10134  | 1     | 1      | 3      | 1      |
| 10135  | 1     | 1      | 2      | 1      |
| 10136  |       |        |        |        |
| 10141  | 3     | 2      | 3      | 2      |
| 10142  | 1     | 1      | 1      | 1      |
| 10143  | 1     | 1      | 1      | 1      |
| 10145  | 1     | 1      | 1      | 1      |
| 10149  | 1     | 1      | 2      | 1      |
| 10150  | 1     | 1      | 1      | 1      |
| 10151  | 1     | 1      | 1      | 1      |
| 10152  | 2     | 2      | 6      | 2      |
| 10153  | 1     | 1      | 1      | 1      |
| 10156  | 1     | 1      | 1      | 1      |
| 10160  | 1     | 1      | 2      | 1      |
| 10161  | 2     | 2      | 2      | 2      |
| 10167  | 1     | 1      | 4      | 1      |
| 10171  |       |        |        |        |
| 10172  | 1     | 1      | 1      | 1      |
| 10176  | 1     | 1      | 2      | 1      |
| 10177  | 2     | 1      | 4      | 1      |
| 10182  | 3     | 2      | 3      | 3      |
| 10184  | 1     | 1      | 1      | 1      |
| 10186  | 4     | 4      | 4      | 4      |
| 10189  | 1     | 1      | 2      | 1      |
| 10191  | 1     | 1      | 1      | 1      |
| 10192  | 1     | 1      | 2      | 1      |



| respid | Q40_9 | Q40_10 | Q40_11 | Q40_12 |
|--------|-------|--------|--------|--------|
| 10195  | 1     | 1      | 1      | 1      |
| 10199  |       |        |        |        |
| 10201  | 1     | 1      | 1      | 1      |
| 10213  | 1     | 1      | 1      | 1      |
| 10222  | 3     | 3      | 3      | 4      |
| 10224  |       |        |        |        |
| 10245  | 1     | 1      | 1      | 1      |
| 10254  | 1     | 1      | 1      | 1      |
| 10255  | 5     | 5      | 5      | 5      |
| 10257  | 1     | 1      | 2      | 1      |
| 10260  | 1     | 1      | 2      | 1      |
| 10261  | 1     | 1      | 3      | 3      |
| 10263  | 3     | 5      | 5      | 5      |
| 10264  | 1     | 1      | 1      | 2      |
| 10268  | 3     | 3      | 2      | 3      |
| 10269  | 1     | 1      | 5      | 2      |
| 10270  |       |        |        |        |
| 10282  | 1     | 1      | 1      | 1      |
| 10285  |       |        |        |        |
| 10288  | 1     | 1      | 1      | 1      |
| 10291  | 1     | 1      | 2      | 1      |
| 10292  | 1     | 1      | 1      | 1      |
| 10304  |       |        |        |        |
| 10305  | 1     | 1      | 1      | 1      |
| 10310  | 1     | 1      | 1      | 1      |
| 10324  | 1     | 1      | 1      | 1      |
| 10325  | 2     | 1      | 1      | 1      |
| 10326  | 2     | 1      | 2      | 1      |
| 10329  |       |        |        |        |
| 10332  | 1     | 1      | 1      | 1      |
| 10337  | 1     | 1      | 2      | 1      |
| 10341  | 1     | 1      | 1      | 1      |

| respid | Q40_9 | Q40_10 | Q40_11 | Q40_12 |
|--------|-------|--------|--------|--------|
| 10353  | 1     | 1      | 1      | 1      |
| 10354  |       |        |        |        |
| 10359  | 1     | 2      | 2      | 2      |
| 10360  | 1     | 1      | 1      | 1      |
| 10362  | 3     | 3      | 2      | 2      |
| 10364  | 1     | 1      | 1      | 1      |
| 10366  | 4     | 3      | 4      | 2      |
| 10367  | 2     | 1      | 1      | 2      |
| 10371  | 1     | 1      | 1      | 1      |
| 10374  | 1     | 1      | 1      | 1      |
| 10375  | 1     | 1      | 1      | 1      |
| 10376  | 1     | 1      | 1      | 1      |
| 10377  | 1     | 1      | 1      | 1      |
| 10378  | 3     | 2      | 2      | 2      |
| 10387  | 1     | 1      | 1      | 1      |
| 10396  | 5     | 4      | 4      | 6      |
| 10397  | 1     | 1      | 1      | 1      |
| 10399  | 3     | 3      | 3      | 3      |
| 10405  | 1     | 1      | 1      | 1      |
| 10406  | 1     | 1      | 2      | 1      |
| 10408  | 1     | 1      | 1      | 1      |
| 10409  |       |        |        |        |
| 10412  | 1     | 1      | 1      | 1      |
| 10413  | 1     | 1      | 1      | 1      |
| 10419  | 3     | 4      | 3      | 3      |
| 10423  | 4     | 3      | 5      | 4      |
| 10426  | 2     | 1      | 2      | 1      |
| 10446  | 1     | 1      | 2      | 1      |
| 10448  | 1     | 1      | 1      | 1      |
| 10450  | 1     | 1      | 2      | 1      |
| 10455  | 1     | 1      | 1      | 1      |
| 10460  | 1     | 1      | 1      | 1      |

| respid | Q40_9 | Q40_10 | Q40_11 | Q40_12 |
|--------|-------|--------|--------|--------|
| 10461  | 1     | 1      | 1      | 1      |
| 10471  | 1     | 1      | 1      | 1      |
| 10472  | 1     | 1      | 1      | 1      |
| 10491  | 4     | 4      | 4      | 4      |
| 10493  | 1     | 1      | 2      | 2      |
| 10498  | 1     | 1      | 1      | 1      |
| 10533  | 1     | 1      | 1      | 1      |
| 10539  | 1     | 1      | 2      | 1      |
| 10540  | 2     | 2      | 1      | 1      |
| 10557  | 2     | 3      | 2      | 2      |
| 10558  | 4     | 5      | 4      | 4      |
| 10559  | 6     | 1      | 6      | 3      |
| 10564  | 1     | 1      | 1      | 2      |
| 10570  |       |        |        |        |
| 10572  | 1     | 1      | 1      | 1      |
| 10576  | 1     | 1      | 1      | 1      |
| 10582  | 2     | 2      | 1      | 2      |
| 10593  | 1     | 1      | 2      | 1      |
| 10596  | 2     | 1      | 2      | 3      |
| 10615  |       |        |        |        |
| 10616  | 1     | 1      | 1      | 1      |
| 10623  | 1     | 1      | 1      | 2      |
| 10626  | 1     | 1      | 3      | 1      |
| 10627  | 5     | 5      | 5      | 5      |
| 10629  | 1     | 1      | 2      | 1      |
| 10632  | 3     | 3      | 3      | 3      |
| 10641  |       |        |        |        |
| 10648  | 2     | 2      | 2      | 3      |
| 10651  | 2     | 2      | 5      | 2      |
| 10654  | 1     | 1      | 1      | 1      |
| 10673  | 1     | 1      | 1      | 1      |
| 10675  | 2     | 1      | 2      | 1      |

| respid | Q40_9 | Q40_10 | Q40_11 | Q40_12 |
|--------|-------|--------|--------|--------|
| 10689  | 1     | 1      | 1      | 1      |
| 10692  | 1     | 1      | 1      | 2      |
| 10694  | 1     | 1      | 1      | 1      |
| 10695  | 1     | 1      | 1      | 1      |
| 10702  | 2     | 3      | 3      | 3      |
| 10703  | 4     | 4      | 4      | 4      |
| 10708  | 1     | 1      | 1      | 1      |
| 10719  | 1     | 1      | 2      | 1      |
| 10722  | 2     | 1      | 1      | 1      |
| 10723  | 2     | 1      | 2      | 2      |
| 10726  | 3     | 1      | 2      | 2      |
| 10727  | 1     | 1      | 2      | 1      |
| 10730  | 1     | 1      | 1      | 1      |
| 10731  |       |        |        |        |
| 10737  | 1     | 1      | 3      | 1      |
| 10743  | 2     | 1      | 4      | 1      |
| 10763  | 1     | 1      | 1      | 1      |
| 10777  |       |        |        |        |
| 10787  | 2     | 2      | 1      | 2      |
| 10798  | 5     | 5      | 5      | 5      |
| 10800  | 2     | 1      | 2      | 1      |
| 10802  | 4     | 5      | 5      | 5      |
| 10803  | 4     | 4      | 4      | 4      |
| 10808  | 1     | 1      | 2      | 1      |
| 10810  | 1     | 1      | 3      | 1      |
| 10819  | 1     | 1      | 1      | 1      |
| 10825  | 1     | 1      | 1      | 1      |
| 10827  | 3     | 2      | 3      | 2      |
| 10830  | 2     | 1      | 3      | 1      |
| 10847  | 1     | 1      | 1      | 1      |
| 10849  | 3     | 1      | 1      | 1      |
| 10852  | 1     | 1      | 1      | 1      |

| respid | Q40_9 | Q40_10 | Q40_11 | Q40_12 |
|--------|-------|--------|--------|--------|
| 10854  | 3     | 3      | 3      | 3      |
| 10857  | 1     | 1      | 1      | 1      |
| 10861  | 3     | 1      | 3      | 3      |
| 10862  |       |        |        |        |
| 10870  | 3     | 3      | 2      | 2      |
| 10873  | 3     | 1      | 1      | 1      |
| 10881  | 1     | 1      | 1      | 1      |
| 10893  |       |        |        |        |
| 10898  | 2     | 1      | 1      | 1      |
| 10899  | 2     | 1      | 3      | 2      |
| 10905  | 2     | 1      | 2      | 3      |
| 10910  |       |        |        |        |
| 10911  | 1     | 1      | 2      | 2      |
| 10912  | 1     | 1      | 1      | 1      |
| 10913  | 1     | 1      | 1      | 1      |
| 10918  |       |        |        |        |
| 10995  |       |        |        |        |
| 11002  | 2     | 1      | 2      | 2      |
| 11003  | 1     | 1      | 1      | 1      |
| 11005  | 1     | 1      | 1      | 1      |
| 11015  | 1     | 1      | 1      | 1      |
| 11016  | 1     | 1      | 1      | 1      |
| 11017  | 1     | 1      | 1      | 1      |
| 11020  | 3     | 3      | 3      | 4      |
| 11024  | 1     | 1      | 2      | 1      |
| 11026  | 3     | 2      | 3      | 3      |
| 11028  | 2     | 3      | 3      | 2      |
| 11029  | 6     | 6      | 6      | 6      |
| 11030  | 1     | 1      | 2      | 1      |
| 11031  | 1     | 1      | 2      | 1      |
| 11038  | 1     | 1      | 1      | 1      |
| 11051  | 1     | 1      | 1      | 1      |

| respid | Q40_9 | Q40_10 | Q40_11 | Q40_12 |
|--------|-------|--------|--------|--------|
| 11052  | 2     | 2      | 2      | 3      |
| 11053  | 1     | 1      | 1      | 1      |
| 11054  | 5     | 5      | 5      | 6      |
| 11063  | 1     | 1      | 2      | 1      |
| 11075  | 2     | 2      | 2      | 2      |
| 11083  | 2     | 1      | 3      | 3      |
| 11092  | 1     | 1      | 1      | 1      |
| 11118  | 1     | 1      | 1      | 1      |
| 11119  | 3     | 1      | 2      | 2      |
| 11134  | 3     | 3      | 3      | 3      |
| 11139  | 1     | 1      | 1      | 1      |
| 11154  | 1     | 1      | 1      | 1      |
| 11166  | 1     | 1      | 2      | 2      |
| 11168  |       |        |        |        |
| 11176  | 2     | 2      | 3      | 3      |
| 11183  | 3     | 4      | 3      | 4      |
| 11189  | 1     | 1      | 2      | 1      |
| 11196  | 4     | 4      | 3      | 4      |
| 11200  | 2     | 1      | 2      | 1      |
| 11201  | 1     | 1      | 2      | 1      |
| 11211  | 3     | 3      | 4      | 4      |
| 11218  | 1     | 1      | 1      | 1      |
| 11219  | 1     | 1      | 2      | 1      |
| 11221  | 2     | 2      | 2      | 2      |
| 11222  | 1     | 1      | 1      | 1      |
| 11230  | 4     | 4      | 3      | 4      |
| 11236  | 4     | 3      | 4      | 3      |
| 11237  | 2     | 1      | 2      | 1      |
| 11240  | 2     | 3      | 5      | 2      |
| 11244  | 3     | 4      | 4      | 4      |
| 11249  | 2     | 2      | 2      | 2      |
| 11252  | 4     | 3      | 4      | 4      |

| respid | Q40_9 | Q40_10 | Q40_11 | Q40_12 |
|--------|-------|--------|--------|--------|
| 11254  | 2     | 1      | 2      | 2      |
| 11255  | 2     | 1      | 3      | 3      |
| 11258  | 4     | 3      | 3      | 3      |
| 11260  | 1     | 1      | 1      | 1      |
| 11264  | 3     | 2      | 3      | 3      |
| 11266  | 4     | 1      | 3      | 3      |
| 11268  | 2     | 2      | 4      | 2      |
| 11269  | 1     | 1      | 1      | 1      |
| 11272  | 3     | 2      | 3      | 2      |
| 11273  | 1     | 1      | 1      | 1      |
| 11275  | 1     | 1      | 2      | 1      |
| 11276  | 1     | 1      | 1      | 3      |
| 11278  | 3     | 3      | 3      | 4      |
| 11288  |       |        |        |        |
| 11289  |       |        |        |        |
| 11291  | 1     | 1      | 1      | 1      |
| 11295  | 1     | 1      | 1      | 1      |
| 11297  | 1     | 1      | 1      | 1      |
| 11304  | 4     | 3      | 2      | 4      |
| 11305  | 1     | 1      | 2      | 1      |
| 11311  | 1     | 1      | 1      | 1      |
| 11313  | 1     | 1      | 1      | 2      |
| 11315  | 5     | 5      | 6      | 6      |
| 11316  | 5     | 6      | 6      | 6      |
| 11318  | 3     | 4      | 5      | 4      |
| 11323  | 1     | 1      | 1      | 1      |
| 11331  | 3     | 1      | 3      | 3      |
| 11333  | 2     | 1      | 3      | 1      |
| 11334  | 2     | 2      | 2      | 3      |
| 11340  | 4     | 4      | 4      | 5      |
| 11345  | 1     | 1      | 2      | 1      |
| 11354  | 2     | 1      | 1      | 1      |

| respid | Q40_9 | Q40_10 | Q40_11 | Q40_12 |
|--------|-------|--------|--------|--------|
| 11360  |       |        |        |        |
| 11361  | 2     | 2      | 2      | 3      |
| 11367  |       |        |        |        |
| 11370  |       |        |        |        |
| 11371  | 2     | 2      | 3      | 3      |
| 11372  | 4     | 3      | 3      | 3      |
| 11373  | 1     | 1      | 5      | 2      |
| 11382  | 1     | 1      | 1      | 1      |
| 11394  | 2     | 1      | 2      | 1      |
| 11395  | 2     | 4      | 3      | 3      |
| 11397  |       |        |        |        |
| 11402  | 1     | 1      | 5      | 1      |
| 11409  | 1     | 1      | 2      | 2      |
| 11410  | 1     | 2      | 2      | 1      |
| 11411  | 1     | 1      | 1      | 1      |
| 11418  | 1     | 1      | 1      | 1      |
| 11425  | 3     | 3      | 3      | 3      |
| 11429  | 1     | 1      | 1      | 1      |
| 11430  | 5     | 5      | 5      | 4      |
| 11431  | 4     | 3      | 1      | 4      |
| 11432  |       |        |        |        |
| 11433  | 1     | 1      | 3      | 1      |
| 11435  | 3     | 2      | 3      | 3      |
| 11436  | 2     | 3      | 2      | 2      |
| 11437  | 2     | 2      | 2      | 2      |
| 11439  |       |        |        |        |
| 11440  | 2     | 1      | 3      | 1      |
| 11447  | 1     | 1      | 1      | 1      |
| 11455  | 1     | 1      | 2      | 1      |
| 11456  | 3     | 3      | 4      | 4      |
| 11461  | 1     | 2      | 1      | 2      |
| 11463  | 3     | 3      | 3      | 2      |



| respid | Q40_9 | Q40_10 | Q40_11 | Q40_12 |
|--------|-------|--------|--------|--------|
| 11470  | 3     | 3      | 5      | 4      |
| 11472  |       |        |        |        |
| 11475  | 1     | 1      | 1      | 1      |
| 11476  | 2     | 3      | 2      | 2      |
| 11482  | 3     | 3      | 3      | 3      |
| 11501  | 3     | 2      | 3      | 3      |
| 11503  | 4     | 5      | 5      | 4      |
| 11505  | 2     | 1      | 1      | 1      |
| 11510  | 1     | 1      | 3      | 1      |
| 11519  |       |        |        |        |
| 11527  | 2     | 1      | 5      | 2      |
| 11529  | 3     | 3      | 3      | 4      |
| 11530  | 3     | 3      | 2      | 2      |
| 11536  | 5     | 4      | 5      | 4      |
| 11543  | 1     | 1      | 2      | 1      |
| 11548  | 3     | 1      | 4      | 2      |
| 11566  | 1     | 1      | 1      | 1      |
| 11570  | 4     | 4      | 3      | 3      |
| 11571  | 2     | 2      | 2      | 2      |
| 11578  |       |        |        |        |
| 11579  | 1     | 1      | 1      | 1      |
| 11581  | 4     | 5      | 5      | 4      |
| 11582  | 1     | 1      | 2      | 1      |
| 11583  | 1     | 1      | 1      | 1      |
| 11589  | 3     | 3      | 3      | 3      |
| 11590  | 1     | 1      | 1      | 1      |
| 11592  | 1     | 1      | 1      | 1      |
| 11596  |       |        |        |        |
| 11598  | 1     | 1      | 2      | 2      |
| 11602  | 2     | 3      | 2      | 3      |
| 11605  | 1     | 1      | 2      | 4      |
| 11618  | 3     | 3      | 2      | 2      |

| respid | Q40_9 | Q40_10 | Q40_11 | Q40_12 |
|--------|-------|--------|--------|--------|
| 11621  | 3     | 5      | 4      | 5      |
| 11630  | 2     | 2      | 1      | 1      |
| 11636  | 4     | 3      | 4      | 4      |
| 11640  | 5     | 3      | 6      | 6      |
| 11658  | 1     | 3      | 2      | 2      |
| 11665  | 4     | 1      | 6      | 4      |
| 11666  | 5     | 4      | 4      | 5      |
| 11667  | 4     | 5      | 4      | 3      |
| 11674  | 1     | 1      | 1      | 1      |
| 11680  | 1     | 1      | 2      | 1      |
| 11683  | 1     | 1      | 1      | 1      |
| 11688  | 3     | 2      | 3      | 4      |
| 11690  |       |        |        |        |
| 11694  |       |        |        |        |
| 11705  | 3     | 2      | 1      | 2      |
| 11720  | 4     | 4      | 3      | 4      |
| 11724  |       |        |        |        |
| 11738  | 2     | 1      | 2      | 1      |
| 11744  | 3     | 4      | 4      | 3      |
| 11745  | 4     | 2      | 6      | 5      |
| 11747  |       |        |        |        |
| 11755  | 2     | 2      | 3      | 3      |
| 11756  | 2     | 1      | 2      | 2      |
| 11772  | 1     | 1      | 3      | 2      |
| 11773  |       |        |        |        |
| 11778  | 4     | 2      | 4      | 5      |
| 11790  | 4     | 3      | 2      | 3      |
| 11794  |       |        |        |        |
| 11795  | 4     | 5      | 4      | 4      |
| 11799  | 4     | 3      | 4      | 2      |
| 11803  | 2     | 2      | 2      | 2      |
| 11806  | 5     | 4      | 3      | 5      |

| respid | Q40_9 | Q40_10 | Q40_11 | Q40_12 |
|--------|-------|--------|--------|--------|
| 11808  | 3     | 3      | 2      | 3      |
| 11810  |       |        |        |        |
| 11811  |       |        |        |        |
| 11812  | 2     | 3      | 4      | 2      |
| 11813  | 3     | 1      | 3      | 2      |
| 11821  | 2     | 2      | 3      | 3      |
| 11827  |       |        |        |        |
| 11831  | 4     | 3      | 4      | 4      |
| 11841  |       |        |        |        |
| 11872  | 1     | 1      | 2      | 2      |
| 11898  | 1     | 1      | 1      | 1      |
| 11902  | 4     | 2      | 4      | 3      |
| 11912  | 2     | 1      | 3      | 3      |
| 11926  | 1     | 1      | 1      | 1      |
| 11928  | 5     | 5      | 5      | 5      |
| 11932  | 2     | 1      | 2      | 2      |
| 11934  | 1     | 1      | 1      | 1      |
| 11941  | 4     | 3      | 4      | 5      |
| 11942  |       |        |        |        |
| 11943  | 3     | 3      | 3      | 3      |
| 11944  | 3     | 3      | 3      | 3      |
| 11955  |       |        |        |        |
| 11958  | 1     | 1      | 4      | 3      |
| 11968  | 3     | 2      | 3      | 2      |
| 11979  | 3     | 4      | 2      | 2      |
| 11988  |       |        |        |        |
| 11999  | 2     | 1      | 1      | 2      |
| 12002  | 1     | 1      | 1      | 1      |
| 12004  | 1     | 1      | 1      | 1      |
| 12008  | 1     | 1      | 1      | 1      |
| 12013  | 3     | 1      | 3      | 2      |
| 12018  | 2     | 1      | 2      | 2      |

| respid | Q40_9 | Q40_10 | Q40_11 | Q40_12 |
|--------|-------|--------|--------|--------|
| 12023  | 1     | 1      | 1      | 1      |
| 12027  | 3     | 3      | 4      | 4      |
| 12030  | 1     | 1      | 1      | 1      |
| 12031  | 1     | 1      | 1      | 1      |
| 12036  | 3     | 1      | 2      | 3      |
| 12037  | 3     | 3      | 2      | 2      |
| 12038  | 5     | 4      | 4      | 4      |
| 12039  | 1     | 1      | 1      | 1      |
| 12045  | 1     | 1      | 1      | 3      |
| 12046  | 3     | 2      | 3      | 2      |
| 12054  | 3     | 3      | 4      | 3      |
| 12055  | 2     | 2      | 2      | 2      |
| 12069  | 2     | 2      | 2      | 2      |
| 12070  | 4     | 3      | 5      | 4      |
| 12074  | 1     | 1      | 1      | 1      |
| 12075  | 2     | 2      | 3      | 3      |
| 12078  | 2     | 2      | 1      | 1      |
| 12089  | 2     | 1      | 2      | 1      |
| 12091  | 2     | 2      | 3      | 2      |
| 12092  | 3     | 2      | 3      | 4      |
| 12108  | 1     | 3      | 4      | 3      |
| 12111  | 3     | 3      | 5      | 4      |
| 12112  | 2     | 4      | 3      | 3      |
| 12126  |       |        |        |        |
| 12132  | 3     | 3      | 2      | 3      |
| 12150  | 3     | 3      | 4      | 4      |
| 12152  | 2     | 2      | 2      | 2      |
| 12154  | 2     | 1      | 2      | 1      |
| 12157  | 3     | 3      | 2      | 4      |
| 12165  | 1     | 1      | 1      | 1      |
| 12169  | 3     | 5      | 3      | 4      |
| 12182  | 4     | 5      | 4      | 4      |

| respid | Q40_9 | Q40_10 | Q40_11 | Q40_12 |
|--------|-------|--------|--------|--------|
| 12198  | 6     | 6      | 6      | 5      |
| 12199  |       |        |        |        |
| 12202  | 3     | 2      | 3      | 2      |
| 12207  | 1     | 1      | 2      | 1      |
| 12208  | 2     | 2      | 3      | 4      |
| 12210  | 1     | 1      | 1      | 1      |
| 12219  | 3     | 4      | 4      | 5      |
| 12224  | 1     | 1      | 2      | 1      |
| 12230  | 3     | 3      | 2      | 3      |
| 12238  | 2     | 1      | 1      | 1      |
| 12239  | 1     | 1      | 1      | 1      |
| 12243  | 1     | 1      | 1      | 1      |
| 12245  | 3     | 1      | 2      | 1      |
| 12246  | 3     | 4      | 5      | 5      |
| 12247  | 1     | 1      | 2      | 1      |
| 12248  | 1     | 1      | 1      | 1      |
| 12249  | 2     | 1      | 1      | 2      |
| 12258  | 2     | 2      | 2      | 4      |
| 12265  | 4     | 4      | 5      | 5      |
| 12269  | 1     | 1      | 1      | 1      |
| 12270  | 2     | 1      | 1      | 1      |
| 12279  | 2     | 2      | 2      | 1      |
| 12280  | 1     | 1      | 2      | 2      |
| 12282  | 2     | 1      | 1      | 2      |
| 12283  | 1     | 1      | 2      | 1      |
| 12287  | 1     | 1      | 1      | 1      |
| 12288  | 2     | 1      | 2      | 2      |
| 12290  | 1     | 1      | 1      | 1      |
| 12292  | 1     | 1      | 1      | 1      |
| 12294  | 1     | 1      | 1      | 1      |
| 12296  | 2     | 1      | 1      | 1      |
| 12307  | 1     | 1      | 3      | 1      |

| respid | Q40_9 | Q40_10 | Q40_11 | Q40_12 |
|--------|-------|--------|--------|--------|
| 12309  | 1     | 1      | 3      | 1      |
| 12312  | 2     | 1      | 2      | 1      |
| 12317  | 2     | 1      | 4      | 3      |
| 12319  | 1     | 1      | 1      | 1      |
| 12320  | 1     | 1      | 1      | 1      |
| 12322  | 1     | 1      | 1      | 1      |
| 12328  | 5     | 5      | 4      | 3      |
| 12331  | 5     | 6      | 6      | 6      |
| 12332  | 1     | 1      | 1      | 2      |
| 12334  | 1     | 1      | 1      | 2      |
| 12337  | 1     | 1      | 3      | 1      |
| 12338  | 1     | 1      | 1      | 1      |
| 12342  | 1     | 2      | 1      | 1      |
| 12349  | 1     | 1      | 1      | 1      |
| 12352  | 2     | 2      | 2      | 3      |
| 12355  | 1     | 1      | 2      | 1      |
| 12357  | 4     | 5      | 5      | 4      |
| 12358  | 1     | 1      | 2      | 1      |
| 12371  | 2     | 2      | 3      | 4      |
| 12372  | 1     | 1      | 1      | 1      |
| 12373  | 3     | 1      | 3      | 3      |
| 12379  | 1     | 1      | 1      | 1      |
| 12381  | 3     | 2      | 4      | 3      |
| 12383  | 1     | 1      | 1      | 1      |
| 12384  | 1     | 1      | 1      | 1      |
| 12386  | 1     | 1      | 2      | 1      |
| 12389  |       |        |        |        |
| 12392  | 1     | 1      | 1      | 1      |
| 12396  | 2     | 2      | 1      | 2      |
| 12397  | 1     | 1      | 2      | 1      |
| 12399  | 3     | 1      | 4      | 4      |
| 12400  | 5     | 4      | 4      | 4      |

| respid | Q40_9 | Q40_10 | Q40_11 | Q40_12 |
|--------|-------|--------|--------|--------|
| 12406  | 1     | 1      | 5      | 1      |
| 12407  | 1     | 1      | 2      | 1      |
| 12410  | 1     | 1      | 1      | 1      |
| 12413  | 2     | 1      | 1      | 1      |
| 12416  | 3     | 1      | 2      | 3      |
| 12419  | 1     | 1      | 2      | 2      |
| 12422  | 2     | 2      | 3      | 3      |
| 12423  | 2     | 1      | 1      | 1      |
| 12429  | 1     | 1      | 2      | 2      |
| 12434  | 5     | 4      | 5      | 5      |
| 12435  | 1     | 1      | 1      | 1      |
| 12436  | 3     | 4      | 4      | 3      |
| 12442  |       |        |        |        |
| 12449  | 2     | 3      | 4      | 3      |
| 12451  | 1     | 1      | 1      | 1      |
| 12456  | 1     | 2      | 2      | 1      |
| 12457  | 1     | 1      | 1      | 1      |
| 12458  | 1     | 1      | 1      | 1      |
| 12461  | 3     | 2      | 2      | 3      |
| 12462  | 1     | 2      | 2      | 2      |
| 12463  | 4     | 4      | 3      | 3      |
| 12466  | 1     | 1      | 2      | 1      |
| 12470  | 2     | 5      | 3      | 2      |
| 12471  | 1     | 2      | 2      | 1      |
| 12472  | 1     | 1      | 1      | 1      |
| 12478  | 3     | 1      | 2      | 2      |
| 12479  | 2     | 3      | 4      | 4      |
| 12481  | 1     | 1      | 1      | 1      |
| 12482  | 1     | 2      | 1      | 2      |
| 12483  |       |        |        |        |
| 12496  | 1     | 1      | 1      | 1      |
| 12497  | 1     | 1      | 2      | 1      |

| respid | Q40_9 | Q40_10 | Q40_11 | Q40_12 |
|--------|-------|--------|--------|--------|
| 12498  | 3     | 2      | 3      | 3      |
| 12500  | 3     | 3      | 2      | 1      |
| 12501  | 3     | 3      | 2      | 3      |
| 12502  | 1     | 1      | 2      | 1      |
| 12503  | 1     | 1      | 1      | 1      |
| 12505  | 3     | 1      | 2      | 1      |
| 12508  | 2     | 1      | 2      | 4      |
| 12509  | 2     | 2      | 3      | 2      |
| 12510  |       |        |        |        |
| 12512  | 3     | 2      | 2      | 3      |
| 12514  | 3     | 3      | 3      | 3      |
| 12515  | 2     | 1      | 2      | 3      |
| 12520  | 1     | 1      | 1      | 1      |
| 12522  | 1     | 1      | 1      | 1      |
| 12526  | 1     | 2      | 3      | 3      |
| 12527  |       |        |        |        |
| 12528  | 1     | 1      | 2      | 1      |
| 12530  | 3     | 2      | 3      | 4      |
| 12535  | 1     | 1      | 1      | 1      |
| 12539  | 1     | 1      | 1      | 1      |
| 12541  | 3     | 4      | 4      | 5      |
| 12542  | 1     | 1      | 1      | 1      |
| 12545  | 2     | 1      | 3      | 2      |
| 12547  | 4     | 3      | 2      | 2      |
| 12549  | 4     | 4      | 4      | 3      |
| 12550  | 1     | 1      | 1      | 1      |
| 12555  |       |        |        |        |
| 12557  | 2     | 1      | 2      | 2      |
| 12559  | 1     | 1      | 2      | 1      |
| 12561  | 4     | 3      | 4      | 3      |
| 12562  | 2     | 3      | 3      | 2      |
| 12563  | 1     | 1      | 1      | 1      |



| respid | Q40_9 | Q40_10 | Q40_11 | Q40_12 |
|--------|-------|--------|--------|--------|
| 12565  | 2     | 1      | 3      | 3      |
| 12566  |       |        |        |        |
| 12570  |       |        |        |        |
| 12571  | 1     | 1      | 1      | 1      |
| 12572  | 5     | 4      | 2      | 2      |
| 12578  |       |        |        |        |
| 12579  | 1     | 1      | 2      | 1      |
| 12581  | 1     | 1      | 3      | 1      |
| 12582  | 2     | 2      | 2      | 2      |
| 12585  | 3     | 4      | 3      | 2      |
| 12586  | 2     | 1      | 2      | 2      |
| 12588  | 3     | 2      | 2      | 3      |
| 12589  | 1     | 1      | 2      | 1      |
| 12590  | 1     | 1      | 1      | 1      |
| 12591  | 2     | 1      | 2      | 2      |
| 12593  | 3     | 3      | 2      | 2      |
| 12594  | 3     | 4      | 4      | 3      |
| 12599  | 2     | 3      | 3      | 4      |
| 12600  | 1     | 1      | 1      | 1      |
| 12602  | 2     | 2      | 4      | 2      |
| 12606  | 3     | 2      | 3      | 2      |
| 12607  |       |        |        |        |
| 12608  |       |        |        |        |
| 12610  | 1     | 2      | 3      | 4      |
| 12611  | 1     | 1      | 1      | 1      |
| 12613  | 2     | 2      | 3      | 4      |
| 12616  | 2     | 4      | 3      | 2      |
| 12617  | 3     | 3      | 3      | 3      |
| 12619  | 1     | 1      | 1      | 1      |
| 12622  |       |        |        |        |
| 12628  | 1     | 1      | 1      | 1      |
| 12631  | 1     | 1      | 1      | 2      |

| respid | Q40_9 | Q40_10 | Q40_11 | Q40_12 |
|--------|-------|--------|--------|--------|
| 12635  | 3     | 2      | 2      | 2      |
| 12638  | 1     | 1      | 1      | 1      |
| 12639  | 1     | 1      | 1      | 1      |
| 12640  | 1     | 1      | 1      | 1      |
| 12643  | 1     | 2      | 2      | 2      |
| 12646  | 4     | 3      | 5      | 6      |
| 12648  | 4     | 3      | 3      | 5      |
| 12650  | 2     | 3      | 4      | 3      |
| 12651  | 1     | 1      | 1      | 1      |
| 12658  | 2     | 2      | 2      | 3      |
| 12662  | 2     | 2      | 2      | 2      |
| 12663  | 1     | 2      | 3      | 3      |
| 12664  | 3     | 4      | 4      | 4      |
| 12669  | 6     | 1      | 6      | 4      |
| 12670  | 2     | 4      | 3      | 4      |
| 12673  |       |        |        |        |
| 12675  | 1     | 1      | 1      | 1      |
| 12677  | 3     | 4      | 3      | 4      |
| 12679  | 1     | 1      | 2      | 1      |
| 12682  | 3     | 3      | 4      | 3      |
| 12696  | 3     | 4      | 3      | 3      |
| 12697  | 2     | 2      | 2      | 3      |
| 12699  | 1     | 1      | 2      | 1      |
| 12700  | 2     | 1      | 1      | 1      |
| 12701  | 3     | 4      | 3      | 2      |
| 12702  | 4     | 2      | 2      | 3      |
| 12704  | 4     | 3      | 5      | 4      |
| 12705  | 2     | 1      | 2      | 1      |
| 12709  | 3     | 3      | 3      | 2      |
| 12710  | 2     | 3      | 2      | 3      |
| 12713  | 1     | 1      | 1      | 2      |
| 12716  | 1     | 2      | 3      | 3      |

| respid | Q40_9 | Q40_10 | Q40_11 | Q40_12 |
|--------|-------|--------|--------|--------|
| 12719  | 2     | 2      | 2      | 2      |
| 12720  | 2     | 1      | 3      | 2      |
| 12723  | 1     | 1      | 1      | 1      |
| 12726  | 2     | 3      | 2      | 3      |
| 12728  | 3     | 2      | 1      | 2      |
| 12729  | 1     | 1      | 1      | 1      |
| 12731  | 2     | 3      | 3      | 2      |
| 12732  | 4     | 3      | 4      | 3      |
| 12733  | 2     | 2      | 5      | 4      |
| 12736  | 1     | 1      | 1      | 1      |
| 12737  | 3     | 1      | 2      | 1      |
| 12739  | 1     | 2      | 3      | 3      |
| 12742  | 2     | 3      | 2      | 2      |
| 12743  | 6     | 5      | 6      | 6      |
| 12744  | 1     | 1      | 1      | 1      |
| 12747  | 2     | 3      | 4      | 3      |
| 12751  | 1     | 1      | 1      | 1      |
| 12754  | 3     | 2      | 2      | 3      |
| 12756  | 4     | 4      | 3      | 3      |
| 12757  | 2     | 1      | 3      | 1      |
| 12760  | 4     | 3      | 3      | 2      |
| 12761  | 1     | 2      | 1      | 3      |
| 12762  | 2     | 1      | 2      | 2      |
| 12766  | 3     | 2      | 2      | 2      |
| 12769  | 1     | 1      | 2      | 1      |
| 12770  | 4     | 3      | 3      | 2      |
| 12773  | 6     | 5      | 5      | 6      |
| 12780  | 1     | 2      | 3      | 2      |
| 12789  | 1     | 1      | 2      | 1      |
| 12792  | 4     | 4      | 4      | 4      |
| 12795  | 2     | 1      | 3      | 2      |
| 12804  | 4     | 3      | 4      | 4      |

| respid | Q40_9 | Q40_10 | Q40_11 | Q40_12 |
|--------|-------|--------|--------|--------|
| 12811  | 1     | 1      | 1      | 1      |
| 12813  | 3     | 2      | 3      | 2      |
| 12814  | 3     | 3      | 3      | 3      |
| 12815  | 2     | 1      | 2      | 1      |
| 12816  | 1     | 1      | 1      | 1      |
| 12817  | 1     | 1      | 1      | 1      |
| 12818  | 1     | 1      | 1      | 1      |
| 12819  | 1     | 1      | 1      | 1      |
| 12820  | 1     | 1      | 1      | 1      |
| 12821  | 1     | 1      | 1      | 1      |
| 12824  | 1     | 1      | 1      | 1      |
| 12827  | 1     | 3      | 2      | 2      |
| 12836  | 5     | 5      | 5      | 5      |
| 12837  | 2     | 1      | 1      | 1      |
| 12838  | 2     | 2      | 2      | 2      |
| 12845  | 1     | 1      | 1      | 1      |
| 12847  | 1     | 1      | 5      | 5      |
| 12849  | 5     | 5      | 5      | 5      |
| 12850  | 1     | 2      | 2      | 1      |
| 12852  | 1     | 1      | 1      | 1      |
| 12853  | 5     | 5      | 5      | 5      |
| 12854  | 1     | 1      | 1      | 1      |
| 12860  | 1     | 1      | 1      | 1      |
| 12861  | 1     | 1      | 1      | 1      |
| 12863  | 1     | 1      | 1      | 1      |
| 12865  | 1     | 1      | 1      | 1      |
| 12870  | 1     | 1      | 2      | 1      |
| 12871  | 1     | 1      | 1      | 1      |
| 12873  | 3     | 1      | 2      | 2      |
| 12877  | 1     | 1      | 1      | 1      |
| 12880  | 1     | 1      | 1      | 1      |
| 12881  | 1     | 1      | 1      | 1      |

| respid | Q40_9 | Q40_10 | Q40_11 | Q40_12 |
|--------|-------|--------|--------|--------|
| 12882  | 1     | 1      | 1      | 1      |
| 12883  | 1     | 1      | 3      | 1      |
| 12885  | 3     | 3      | 3      | 3      |
| 12887  | 2     | 1      | 2      | 1      |
| 12889  | 1     | 1      | 1      | 1      |
| 12890  | 1     | 1      | 4      | 1      |
| 12891  | 2     | 1      | 2      | 1      |
| 12892  | 3     | 4      | 3      | 3      |
| 12893  | 1     | 1      | 1      | 1      |
| 12895  | 2     | 2      | 2      | 2      |
| 12898  | 1     | 1      | 1      | 1      |
| 12907  | 2     | 2      | 3      | 2      |
| 12908  | 1     | 1      | 1      | 1      |
| 12909  |       |        |        |        |
| 12914  | 1     | 1      | 1      | 1      |
| 12915  | 3     | 2      | 4      | 1      |
| 12916  |       |        |        |        |
| 12921  | 2     | 1      | 1      | 1      |
| 12922  | 3     | 5      | 5      | 5      |
| 12923  | 5     | 2      | 5      | 3      |
| 12926  | 1     | 1      | 1      | 1      |
| 12927  | 1     | 1      | 1      | 1      |
| 12932  | 1     | 1      | 1      | 1      |
| 12936  | 1     | 1      | 1      | 1      |
| 12937  | 1     | 1      | 1      | 1      |
| 12938  | 3     | 1      | 5      | 4      |
| 12939  | 1     | 1      | 1      | 1      |
| 12940  | 2     | 3      | 3      | 2      |
| 12945  | 1     | 1      | 2      | 1      |
| 12946  | 2     | 1      | 1      | 1      |
| 12947  | 3     | 3      | 2      | 2      |
| 12948  | 5     | 5      | 5      | 5      |

| respid | Q40_9 | Q40_10 | Q40_11 | Q40_12 |
|--------|-------|--------|--------|--------|
| 12951  | 2     | 1      | 3      | 1      |
| 12952  | 1     | 1      | 1      | 1      |
| 12954  | 2     | 1      | 2      | 2      |
| 12960  | 1     | 1      | 1      | 1      |
| 12961  | 1     | 1      | 1      | 1      |
| 12962  | 1     | 1      | 1      | 1      |
| 12963  | 1     | 1      | 1      | 1      |
| 12964  | 1     | 1      | 1      | 1      |
| 12966  | 1     | 1      | 1      | 1      |
| 12967  | 1     | 1      | 1      | 3      |
| 12969  | 1     | 1      | 1      | 2      |
| 12970  | 1     | 1      | 2      | 3      |
| 12974  | 4     | 4      | 4      | 4      |
| 12979  |       |        |        |        |
| 12980  | 1     | 1      | 1      | 1      |
| 12983  | 1     | 1      | 1      | 1      |
| 12988  | 2     | 1      | 2      | 1      |
| 12994  | 1     | 1      | 1      | 1      |
| 12995  | 1     | 1      | 2      | 1      |
| 12996  | 1     | 1      | 1      | 1      |
| 12998  | 1     | 1      | 1      | 1      |
| 12999  | 2     | 1      | 1      | 1      |
| 13001  | 3     | 2      | 1      | 1      |
| 13005  | 1     | 1      | 1      | 1      |
| 13006  | 3     | 1      | 5      | 4      |
| 13007  | 1     | 1      | 1      | 1      |
| 13011  | 4     | 4      | 4      | 4      |
| 13012  | 1     | 1      | 1      | 1      |
| 13013  | 3     | 4      | 4      | 3      |
| 13016  | 1     | 1      | 1      | 1      |
| 13018  | 1     | 1      | 1      | 1      |
| 13020  |       |        |        |        |

| respid | Q40_9 | Q40_10 | Q40_11 | Q40_12 |
|--------|-------|--------|--------|--------|
| 13024  | 1     | 1      | 1      | 1      |
| 13025  | 1     | 1      | 1      | 1      |
| 13027  | 2     | 1      | 1      | 1      |
| 13031  | 1     | 1      | 1      | 1      |
| 13032  | 3     | 3      | 4      | 3      |
| 13034  | 1     | 1      | 2      | 1      |
| 13036  | 1     | 1      | 2      | 2      |
| 13037  | 1     | 1      | 1      | 1      |
| 13038  | 3     | 3      | 4      | 3      |
| 13039  | 1     | 1      | 1      | 1      |
| 13040  | 2     | 2      | 2      | 2      |
| 13041  | 2     | 1      | 1      | 1      |
| 13045  | 3     | 3      | 2      | 2      |
| 13046  | 1     | 1      | 2      | 1      |
| 13048  | 1     | 1      | 1      | 1      |
| 13051  | 2     | 1      | 2      | 1      |
| 13053  | 1     | 1      | 1      | 1      |
| 13055  | 5     | 4      | 4      | 3      |
| 13059  | 1     | 1      | 2      | 1      |
| 13068  | 1     | 1      | 1      | 1      |
| 13069  | 1     | 1      | 2      | 1      |
| 13076  | 2     | 1      | 2      | 2      |
| 13081  | 1     | 1      | 1      | 1      |
| 13082  | 2     | 1      | 3      | 1      |
| 13084  | 2     | 1      | 1      | 3      |
| 13085  | 2     | 2      | 4      | 3      |
| 13086  | 1     | 1      | 4      | 1      |
| 13093  | 2     | 2      | 2      | 2      |
| 13094  | 3     | 3      | 3      | 3      |
| 13097  | 1     | 1      | 1      | 1      |
| 13098  | 1     | 1      | 1      | 1      |
| 13099  | 2     | 1      | 1      | 1      |

| respid | Q40_9 | Q40_10 | Q40_11 | Q40_12 |
|--------|-------|--------|--------|--------|
| 13100  | 1     | 1      | 1      | 1      |
| 13101  |       |        |        |        |
| 13103  |       |        |        |        |
| 13105  | 2     | 1      | 1      | 1      |
| 13106  | 1     | 2      | 2      | 1      |
| 13107  | 2     | 1      | 1      | 2      |
| 13110  | 1     | 1      | 3      | 2      |
| 13118  | 2     | 1      | 1      | 1      |
| 13120  | 4     | 3      | 5      | 5      |
| 13130  | 1     | 1      | 1      | 1      |
| 13133  | 1     | 1      | 2      | 1      |
| 13134  | 1     | 1      | 1      | 1      |
| 13139  | 2     | 2      | 2      | 2      |
| 13142  | 1     | 1      | 1      | 1      |
| 13143  | 1     | 2      | 2      | 2      |
| 13145  | 2     | 1      | 3      | 2      |
| 13148  | 1     | 1      | 1      | 1      |
| 13149  | 1     | 1      | 1      | 1      |
| 13151  | 5     | 3      | 4      | 4      |
| 13153  | 1     | 1      | 1      | 2      |
| 13158  | 1     | 1      | 1      | 1      |
| 13160  | 2     | 2      | 2      | 2      |
| 13162  | 1     | 1      | 2      | 3      |
| 13169  | 1     | 1      | 1      | 1      |
| 13172  | 2     | 1      | 1      | 1      |
| 13173  | 1     | 1      | 1      | 1      |
| 13176  | 1     | 1      | 1      | 1      |
| 13179  | 1     | 1      | 1      | 1      |
| 13184  | 4     | 1      | 5      | 3      |
| 13185  | 2     | 2      | 3      | 2      |
| 13186  | 1     | 1      | 1      | 1      |
| 13188  | 2     | 2      | 2      | 3      |



| respid | Q40_9 | Q40_10 | Q40_11 | Q40_12 |
|--------|-------|--------|--------|--------|
| 13190  | 1     | 1      | 2      | 1      |
| 13192  | 2     | 1      | 1      | 2      |
| 13193  |       |        |        |        |
| 13201  | 3     | 2      | 3      | 3      |
| 13207  | 1     | 1      | 1      | 1      |
| 13208  |       |        |        |        |
| 13209  | 4     | 4      | 4      | 4      |
| 13212  | 1     | 1      | 1      | 1      |
| 13215  | 1     | 1      | 2      | 1      |
| 13218  | 3     | 3      | 5      | 2      |
| 13219  | 1     | 1      | 1      | 1      |
| 13224  | 3     | 1      | 2      | 2      |
| 13225  | 1     | 1      | 1      | 1      |
| 13226  | 1     | 1      | 1      | 1      |
| 13232  | 1     | 1      | 2      | 1      |
| 13237  | 1     | 1      | 1      | 3      |
| 13239  | 2     | 1      | 3      | 1      |
| 13241  | 1     | 1      | 1      | 1      |
| 13243  | 1     | 1      | 2      | 1      |
| 13247  | 3     | 5      | 3      | 4      |
| 13248  | 1     | 1      | 1      | 1      |
| 13251  | 1     | 1      | 1      | 1      |
| 13256  | 1     | 1      | 1      | 1      |
| 13260  | 1     | 1      | 1      | 1      |
| 13261  | 2     | 1      | 3      | 1      |
| 13264  | 1     | 1      | 1      | 1      |
| 13273  | 2     | 1      | 1      | 1      |
| 13274  | 1     | 1      | 1      | 1      |
| 13276  | 1     | 1      | 1      | 1      |
| 13278  |       |        |        |        |
| 13279  | 1     | 1      | 1      | 1      |
| 13282  | 1     | 1      | 1      | 1      |

| respid | Q40_9 | Q40_10 | Q40_11 | Q40_12 |
|--------|-------|--------|--------|--------|
| 13283  | 3     | 3      | 4      | 4      |
| 13285  | 1     | 1      | 1      | 1      |
| 13286  | 2     | 1      | 1      | 1      |
| 13299  | 1     | 1      | 1      | 1      |
| 13300  | 2     | 2      | 3      | 3      |
| 13301  |       |        |        |        |
| 13303  | 2     | 2      | 3      | 3      |
| 13304  | 1     | 1      | 1      | 1      |
| 13307  | 1     | 1      | 2      | 1      |
| 13308  | 1     | 1      | 1      | 1      |
| 13312  | 1     | 1      | 1      | 1      |
| 13313  | 1     | 1      | 1      | 1      |
| 13314  | 2     | 2      | 2      | 2      |
| 13318  | 3     | 2      | 3      | 3      |
| 13320  | 1     | 1      | 1      | 1      |
| 13322  | 2     | 2      | 2      | 2      |
| 13324  | 1     | 1      | 3      | 1      |
| 13325  | 2     | 1      | 2      | 1      |
| 13327  | 1     | 1      | 1      | 1      |
| 13330  | 1     | 1      | 1      | 1      |
| 13332  | 1     | 1      | 2      | 1      |
| 13333  | 1     | 1      | 1      | 1      |
| 13334  | 1     | 1      | 1      | 1      |
| 13351  | 1     | 1      | 1      | 2      |
| 13353  | 1     | 1      | 1      | 1      |
| 13354  | 1     | 1      | 1      | 1      |
| 13355  | 1     | 1      | 1      | 2      |
| 13358  | 1     | 1      | 1      | 1      |
| 13359  | 3     | 1      | 1      | 1      |
| 13360  | 4     | 3      | 3      | 4      |
| 13364  | 5     | 1      | 2      | 1      |
| 13365  | 3     | 3      | 6      | 1      |

| respid | Q40_9 | Q40_10 | Q40_11 | Q40_12 |
|--------|-------|--------|--------|--------|
| 13368  | 1     | 1      | 1      | 1      |
| 13370  | 1     | 1      | 1      | 1      |
| 13375  | 1     | 1      | 1      | 1      |
| 13384  | 1     | 1      | 2      | 1      |
| 13387  | 2     | 1      | 1      | 1      |
| 13395  | 2     | 1      | 2      | 1      |
| 13398  | 1     | 1      | 1      | 1      |
| 13404  | 1     | 1      | 1      | 1      |
| 13405  | 2     | 1      | 1      | 1      |
| 13408  |       |        |        |        |
| 13411  | 1     | 1      | 1      | 1      |
| 13413  | 1     | 1      | 1      | 1      |
| 13419  | 2     | 1      | 1      | 1      |
| 13420  | 1     | 1      | 1      | 1      |
| 13427  | 3     | 3      | 3      | 3      |
| 13441  | 3     | 5      | 5      | 5      |
| 13444  | 3     | 2      | 2      | 3      |
| 13456  | 1     | 1      | 1      | 1      |
| 13466  | 3     | 2      | 3      | 2      |
| 13468  | 1     | 1      | 1      | 1      |
| 13475  | 1     | 1      | 1      | 1      |
| 13484  | 1     | 1      | 2      | 1      |
| 13486  | 2     | 1      | 2      | 1      |
| 13487  | 2     | 1      | 1      | 1      |
| 13491  |       |        |        |        |
| 13496  | 1     | 1      | 2      | 1      |
| 13497  | 1     | 1      | 2      | 1      |
| 13498  | 1     | 1      | 3      | 1      |
| 13502  |       |        |        |        |
| 13503  | 3     | 3      | 2      | 3      |
| 13505  | 1     | 1      | 2      | 1      |
| 13509  | 1     | 1      | 1      | 1      |

| respid | Q40_9 | Q40_10 | Q40_11 | Q40_12 |
|--------|-------|--------|--------|--------|
| 13510  | 2     | 3      | 3      | 2      |
| 13518  | 3     | 2      | 2      | 3      |
| 13521  | 1     | 1      | 1      | 1      |
| 13523  | 2     | 1      | 3      | 1      |
| 13528  | 1     | 1      | 1      | 1      |
| 13531  | 1     | 1      | 1      | 1      |
| 13532  | 1     | 1      | 1      | 1      |
| 13533  | 1     | 1      | 1      | 1      |
| 13534  |       |        |        |        |
| 13535  | 1     | 1      | 2      | 1      |
| 13538  | 2     | 3      | 3      | 2      |
| 13540  | 2     | 1      | 2      | 1      |
| 13541  | 2     | 3      | 3      | 2      |
| 13542  | 1     | 1      | 1      | 1      |
| 13550  | 1     | 1      | 2      | 1      |
| 13553  | 2     | 1      | 2      | 1      |
| 13554  | 1     | 1      | 2      | 1      |
| 13555  | 3     | 3      | 4      | 4      |
| 13556  | 1     | 1      | 2      | 3      |
| 13563  | 2     | 1      | 2      | 3      |
| 13564  | 1     | 1      | 2      | 2      |
| 13567  |       |        |        |        |
| 13568  | 3     | 4      | 4      | 5      |
| 13570  |       |        |        |        |
| 13573  | 2     | 2      | 2      | 2      |
| 13575  | 3     | 2      | 4      | 3      |
| 13577  | 5     | 5      | 5      | 4      |
| 13580  | 5     | 4      | 4      | 3      |
| 13582  | 1     | 1      | 1      | 1      |
| 13584  | 5     | 5      | 4      | 5      |
| 13585  |       |        |        |        |
| 13586  | 2     | 2      | 2      | 2      |

| respid | Q40_9 | Q40_10 | Q40_11 | Q40_12 |
|--------|-------|--------|--------|--------|
| 13587  | 2     | 1      | 2      | 1      |
| 13592  | 4     | 3      | 4      | 4      |
| 13596  | 1     | 1      | 1      | 1      |
| 13597  | 1     | 1      | 2      | 1      |
| 13599  | 2     | 1      | 3      | 1      |
| 13601  | 1     | 1      | 1      | 1      |
| 13604  | 2     | 2      | 1      | 1      |
| 13608  | 2     | 1      | 2      | 2      |
| 13616  | 1     | 1      | 1      | 1      |
| 13618  | 3     | 3      | 2      | 2      |
| 13619  | 1     | 1      | 1      | 1      |
| 13626  |       |        |        |        |
| 13628  | 2     | 1      | 2      | 2      |
| 13640  | 3     | 3      | 3      | 2      |
| 13645  | 2     | 1      | 2      | 2      |
| 13648  |       |        |        |        |
| 13653  | 1     | 1      | 2      | 2      |
| 13655  | 1     | 1      | 1      | 1      |
| 13662  | 2     | 1      | 1      | 1      |
| 13670  | 3     | 3      | 2      | 3      |
| 13673  | 1     | 1      | 2      | 1      |
| 13674  | 2     | 1      | 2      | 1      |
| 13675  | 1     | 1      | 2      | 1      |
| 13678  | 2     | 3      | 2      | 3      |
| 13680  | 1     | 1      | 3      | 1      |
| 13681  | 1     | 1      | 1      | 1      |
| 13683  | 1     | 1      | 1      | 1      |
| 13684  | 2     | 1      | 1      | 2      |
| 13685  | 1     | 1      | 3      | 1      |
| 13687  |       |        |        |        |
| 13690  | 1     | 1      | 1      | 1      |
| 13700  | 3     | 3      | 6      | 3      |

| respid | Q40_9 | Q40_10 | Q40_11 | Q40_12 |
|--------|-------|--------|--------|--------|
| 13705  | 3     | 2      | 2      | 3      |
| 13710  | 1     | 1      | 1      | 1      |
| 13711  | 1     | 3      | 1      | 2      |
| 13713  | 1     | 1      | 1      | 1      |
| 13716  | 2     | 2      | 1      | 2      |
| 13721  | 2     | 2      | 2      | 2      |
| 13722  | 2     | 1      | 5      | 5      |
| 13723  | 3     | 3      | 2      | 2      |
| 13726  | 3     | 5      | 2      | 4      |
| 13728  | 2     | 2      | 2      | 2      |
| 13730  | 3     | 3      | 3      | 3      |
| 13734  | 2     | 1      | 2      | 1      |
| 13736  | 4     | 4      | 6      | 5      |
| 13737  | 1     | 2      | 2      | 2      |
| 13739  | 1     | 3      | 3      | 3      |
| 13742  |       |        |        |        |
| 13746  | 1     | 1      | 2      | 2      |
| 13747  | 1     | 1      | 1      | 1      |
| 13749  | 1     | 1      | 1      | 1      |
| 13751  | 2     | 2      | 3      | 2      |
| 13752  | 2     | 1      | 1      | 1      |
| 13756  | 1     | 1      | 2      | 1      |
| 13757  | 1     | 1      | 1      | 1      |
| 13767  | 3     | 1      | 2      | 2      |
| 13771  | 1     | 1      | 1      | 1      |
| 13772  | 5     | 5      | 6      | 5      |
| 13779  |       |        |        |        |
| 13782  | 1     | 1      | 1      | 1      |
| 13783  | 1     | 1      | 1      | 1      |
| 13785  | 1     | 1      | 2      | 1      |
| 13786  | 1     | 1      | 4      | 2      |
| 13792  | 2     | 2      | 4      | 3      |

| respid | Q40_9 | Q40_10 | Q40_11 | Q40_12 |
|--------|-------|--------|--------|--------|
| 13796  | 1     | 2      | 2      | 2      |
| 13798  | 1     | 2      | 2      | 1      |
| 13799  | 2     | 2      | 2      | 2      |
| 13804  | 1     | 1      | 1      | 1      |
| 13805  | 1     | 1      | 1      | 1      |
| 13810  | 3     | 2      | 3      | 4      |
| 13811  | 1     | 1      | 2      | 2      |
| 13819  | 5     | 5      | 5      | 5      |
| 13821  | 5     | 6      | 5      | 6      |
| 13824  | 4     | 3      | 4      | 3      |
| 13828  | 3     | 2      | 2      | 2      |
| 13829  | 6     | 5      | 6      | 5      |
| 13831  |       |        |        |        |
| 13833  | 1     | 2      | 2      | 2      |
| 13835  | 4     | 3      | 6      | 4      |
| 13838  |       |        |        |        |
| 13839  | 6     | 6      | 6      | 5      |
| 13845  |       |        |        |        |
| 13846  | 2     | 2      | 2      | 2      |
| 13853  | 3     | 3      | 2      | 2      |
| 13855  | 2     | 3      | 4      | 5      |
| 13858  | 3     | 1      | 2      | 2      |
| 13860  |       |        |        |        |
| 13865  | 6     | 5      | 6      | 5      |
| 13870  | 1     | 1      | 1      | 1      |
| 13872  | 4     | 3      | 5      | 6      |
| 13873  | 2     | 2      | 3      | 3      |
| 13874  |       |        |        |        |
| 13875  | 4     | 2      | 5      | 4      |
| 13881  |       |        |        |        |
| 13887  | 3     | 1      | 2      | 1      |
| 13888  | 1     | 1      | 2      | 2      |

| respid | Q40_9 | Q40_10 | Q40_11 | Q40_12 |
|--------|-------|--------|--------|--------|
| 13889  | 2     | 2      | 4      | 3      |
| 13895  | 4     | 3      | 6      | 4      |
| 13897  |       |        |        |        |
| 13898  | 2     | 2      | 2      | 2      |
| 13901  | 1     | 1      | 1      | 1      |
| 13902  | 6     | 6      | 5      | 6      |
| 13903  | 3     | 3      | 3      | 3      |
| 13905  | 2     | 1      | 1      | 2      |
| 13908  | 3     | 2      | 3      | 2      |
| 13909  | 1     | 1      | 1      | 1      |
| 13910  | 6     | 5      | 6      | 6      |
| 13911  |       |        |        |        |
| 13914  | 3     | 2      | 1      | 2      |
| 13920  | 2     | 3      | 4      | 3      |
| 13926  | 1     | 1      | 1      | 1      |
| 13929  | 3     | 1      | 2      | 2      |
| 13930  | 4     | 4      | 6      | 5      |
| 13931  |       |        |        |        |
| 13932  | 3     | 3      | 3      | 2      |
| 13934  | 3     | 3      | 2      | 1      |
| 13938  | 1     | 1      | 1      | 1      |
| 13942  | 1     | 1      | 1      | 1      |
| 13945  | 3     | 3      | 2      | 2      |
| 13947  | 3     | 2      | 5      | 4      |
| 13948  |       |        |        |        |
| 13959  | 1     | 1      | 1      | 1      |
| 13962  | 1     | 1      | 1      | 1      |
| 13963  | 1     | 1      | 1      | 1      |
| 13964  | 1     | 1      | 2      | 1      |
| 13966  | 1     | 2      | 2      | 4      |
| 13968  | 2     | 2      | 1      | 1      |
| 13971  | 1     | 2      | 2      | 1      |



| respid | Q40_9 | Q40_10 | Q40_11 | Q40_12 |
|--------|-------|--------|--------|--------|
| 13979  | 3     | 3      | 3      | 3      |
| 13980  | 3     | 2      | 3      | 2      |
| 13981  | 2     | 1      | 3      | 2      |
| 13982  | 1     | 1      | 1      | 1      |
| 13984  | 1     | 1      | 3      | 1      |
| 13989  | 1     | 1      | 1      | 1      |
| 13990  | 1     | 1      | 1      | 1      |
| 13992  | 5     | 3      | 6      | 2      |
| 13998  | 2     | 2      | 3      | 3      |
| 13999  | 2     | 2      | 1      | 2      |
| 14000  | 1     | 1      | 1      | 1      |
| 14003  | 1     | 1      | 1      | 1      |
| 14004  | 1     | 1      | 2      | 2      |
| 14006  | 1     | 1      | 2      | 1      |
| 14007  | 1     | 1      | 1      | 1      |
| 14008  |       |        |        |        |
| 14013  | 1     | 1      | 1      | 1      |
| 14015  | 1     | 1      | 1      | 1      |
| 14018  | 1     | 1      | 1      | 1      |
| 14021  | 1     | 2      | 1      | 1      |
| 14023  | 1     | 1      | 1      | 1      |
| 14024  | 2     | 2      | 6      | 4      |
| 14026  | 1     | 1      | 1      | 1      |
| 14030  | 1     | 1      | 2      | 3      |
| 14032  | 2     | 3      | 2      | 3      |
| 14040  |       |        |        |        |
| 14045  | 1     | 1      | 1      | 1      |
| 14048  | 2     | 2      | 3      | 3      |
| 14049  | 3     | 3      | 5      | 4      |
| 14050  | 1     | 1      | 1      | 1      |
| 14051  | 6     | 5      | 6      | 5      |
| 14052  | 2     | 1      | 1      | 2      |

| respid | Q40_9 | Q40_10 | Q40_11 | Q40_12 |
|--------|-------|--------|--------|--------|
| 14054  | 1     | 1      | 1      | 1      |
| 14055  |       |        |        |        |
| 14057  | 2     | 3      | 3      | 2      |
| 14058  | 1     | 1      | 1      | 1      |
| 14059  | 1     | 1      | 1      | 1      |
| 14060  | 2     | 1      | 1      | 2      |
| 14061  | 5     | 3      | 4      | 4      |
| 14071  | 1     | 1      | 1      | 1      |
| 14073  | 1     | 1      | 3      | 1      |
| 14074  | 3     | 1      | 5      | 3      |
| 14076  | 1     | 1      | 2      | 2      |
| 14080  | 1     | 1      | 1      | 1      |
| 14082  | 1     | 1      | 1      | 1      |
| 14083  | 1     | 1      | 1      | 1      |
| 14084  | 1     | 1      | 2      | 2      |
| 14085  |       |        |        |        |
| 14086  | 3     | 3      | 6      | 4      |
| 14088  | 1     | 1      | 1      | 1      |
| 14090  | 1     | 1      | 1      | 1      |
| 14092  | 1     | 1      | 1      | 1      |
| 14093  | 1     | 1      | 1      | 1      |
| 14096  | 1     | 1      | 1      | 1      |
| 14103  | 3     | 3      | 2      | 2      |
| 14105  | 1     | 1      | 1      | 1      |
| 14106  | 2     | 2      | 2      | 2      |
| 14107  | 2     | 1      | 2      | 3      |
| 14108  | 4     | 4      | 4      | 3      |
| 14112  | 2     | 1      | 2      | 1      |
| 14114  | 2     | 1      | 3      | 2      |
| 14115  | 2     | 1      | 1      | 1      |
| 14116  | 1     | 1      | 1      | 1      |
| 14117  | 1     | 1      | 1      | 1      |

| respid | Q40_9 | Q40_10 | Q40_11 | Q40_12 |
|--------|-------|--------|--------|--------|
| 14118  | 3     | 2      | 2      | 3      |
| 14119  | 1     | 1      | 2      | 1      |
| 14127  |       |        |        |        |
| 14129  | 2     | 1      | 3      | 2      |
| 14131  | 2     | 1      | 2      | 1      |
| 14132  | 1     | 1      | 2      | 1      |
| 14133  | 3     | 4      | 3      | 4      |
| 14134  | 2     | 1      | 2      | 1      |
| 14135  | 1     | 3      | 2      | 1      |
| 14136  | 2     | 1      | 6      | 1      |
| 14138  |       |        |        |        |
| 14139  |       |        |        |        |
| 14140  | 1     | 2      | 3      | 2      |
| 14141  | 1     | 1      | 1      | 1      |
| 14143  | 1     | 1      | 1      | 1      |
| 14146  | 1     | 1      | 1      | 1      |
| 14147  | 5     | 4      | 6      | 5      |
| 14148  | 2     | 1      | 1      | 1      |
| 14151  | 1     | 1      | 3      | 3      |
| 14152  | 2     | 3      | 3      | 2      |
| 14153  | 2     | 1      | 2      | 1      |
| 14154  | 2     | 1      | 1      | 1      |
| 14158  | 1     | 1      | 2      | 2      |
| 14159  | 1     | 2      | 4      | 2      |
| 14160  | 3     | 1      | 4      | 1      |
| 14161  | 2     | 3      | 3      | 2      |
| 14162  | 1     | 1      | 5      | 1      |
| 14165  | 2     | 2      | 2      | 2      |
| 14166  | 2     | 2      | 3      | 3      |
| 14167  | 1     | 1      | 3      | 1      |
| 14169  | 2     | 2      | 2      | 2      |
| 14170  | 1     | 1      | 1      | 1      |

| respid | Q40_9 | Q40_10 | Q40_11 | Q40_12 |
|--------|-------|--------|--------|--------|
| 14172  | 3     | 3      | 3      | 3      |
| 14173  |       |        |        |        |
| 14174  | 1     | 1      | 2      | 1      |
| 14175  | 1     | 1      | 2      | 1      |
| 14176  | 1     | 1      | 2      | 1      |
| 14178  | 1     | 2      | 1      | 2      |
| 14179  | 1     | 1      | 1      | 1      |
| 14180  | 2     | 4      | 3      | 3      |
| 14183  | 3     | 2      | 2      | 3      |
| 14185  | 1     | 1      | 1      | 1      |
| 14187  | 2     | 1      | 2      | 1      |
| 14189  | 1     | 1      | 1      | 1      |
| 14191  | 2     | 2      | 3      | 4      |
| 14192  |       |        |        |        |
| 14195  | 2     | 2      | 5      | 3      |
| 14197  | 1     | 1      | 2      | 1      |
| 14203  | 2     | 3      | 3      | 2      |
| 14204  | 1     | 1      | 2      | 1      |
| 14205  | 1     | 1      | 1      | 1      |
| 14208  | 1     | 1      | 1      | 1      |
| 14211  | 4     | 4      | 6      | 5      |
| 14214  | 1     | 1      | 1      | 1      |
| 14215  | 2     | 2      | 5      | 2      |
| 14216  | 3     | 2      | 3      | 3      |
| 14218  | 1     | 1      | 1      | 1      |
| 14220  | 1     | 1      | 1      | 1      |
| 14223  |       |        |        |        |
| 14225  | 3     | 3      | 4      | 3      |
| 14226  | 1     | 1      | 1      | 1      |
| 14228  | 3     | 2      | 4      | 1      |
| 14231  | 3     | 2      | 2      | 2      |
| 14233  | 1     | 1      | 1      | 1      |

| respid | Q40_9 | Q40_10 | Q40_11 | Q40_12 |
|--------|-------|--------|--------|--------|
| 14237  | 2     | 1      | 2      | 1      |
| 14238  | 2     | 3      | 2      | 3      |
| 14243  | 3     | 2      | 3      | 2      |
| 14245  | 2     | 1      | 1      | 1      |
| 14246  | 2     | 1      | 2      | 2      |
| 14248  | 6     | 6      | 6      | 6      |
| 14250  | 1     | 2      | 1      | 2      |
| 14253  | 1     | 1      | 1      | 1      |
| 14254  | 1     | 1      | 1      | 1      |
| 14255  | 1     | 1      | 1      | 1      |
| 14257  | 1     | 1      | 1      | 1      |
| 14258  | 1     | 1      | 1      | 1      |
| 14259  | 3     | 2      | 2      | 1      |
| 14260  |       |        |        |        |
| 14261  | 5     | 4      | 3      | 4      |
| 14263  | 3     | 2      | 4      | 4      |
| 14264  | 1     | 1      | 2      | 1      |
| 14266  | 3     | 4      | 4      | 4      |
| 14267  | 3     | 2      | 2      | 1      |
| 14268  | 1     | 1      | 1      | 1      |
| 14275  | 3     | 2      | 2      | 1      |
| 14278  | 2     | 1      | 2      | 2      |
| 14279  |       |        |        |        |
| 14280  |       |        |        |        |
| 14281  | 1     | 1      | 6      | 1      |
| 14282  | 2     | 2      | 1      | 2      |
| 14283  | 3     | 1      | 5      | 5      |
| 14286  | 1     | 1      | 1      | 1      |
| 14287  |       |        |        |        |
| 14288  | 3     | 2      | 2      | 3      |
| 14291  |       |        |        |        |
| 14292  |       |        |        |        |

| respid | Q40_9 | Q40_10 | Q40_11 | Q40_12 |
|--------|-------|--------|--------|--------|
| 14293  | 1     | 1      | 1      | 1      |
| 14304  | 3     | 6      | 3      | 5      |
| 14308  | 1     | 1      | 2      | 1      |
| 14313  | 3     | 1      | 1      | 1      |
| 14314  | 3     | 3      | 3      | 3      |
| 14316  | 1     | 1      | 1      | 1      |
| 14317  | 1     | 2      | 1      | 1      |
| 14318  | 3     | 4      | 3      | 4      |
| 14319  | 1     | 1      | 2      | 2      |
| 14320  | 4     | 3      | 2      | 3      |
| 14321  | 1     | 1      | 1      | 1      |
| 14322  | 3     | 3      | 3      | 4      |
| 14326  | 3     | 2      | 1      | 5      |
| 14327  | 5     | 6      | 5      | 5      |
| 14328  |       |        |        |        |
| 14330  | 2     | 1      | 1      | 1      |
| 14332  | 1     | 1      | 2      | 1      |
| 14334  | 1     | 1      | 1      | 1      |
| 14336  | 1     | 1      | 1      | 1      |
| 14337  | 2     | 2      | 2      | 2      |
| 14339  |       |        |        |        |
| 14340  | 4     | 2      | 6      | 4      |
| 14341  | 1     | 1      | 1      | 2      |
| 14344  | 2     | 1      | 1      | 2      |
| 14345  | 1     | 1      | 2      | 1      |
| 14346  |       |        |        |        |
| 14348  | 1     | 1      | 1      | 1      |
| 14349  | 1     | 1      | 1      | 1      |
| 14358  | 4     | 4      | 3      | 3      |
| 14360  | 1     | 1      | 1      | 1      |
| 14362  |       |        |        |        |
| 14366  | 1     | 2      | 1      | 1      |

| respid | Q40_9 | Q40_10 | Q40_11 | Q40_12 |
|--------|-------|--------|--------|--------|
| 14367  | 4     | 2      | 4      | 3      |
| 14369  | 2     | 3      | 2      | 2      |
| 14371  | 1     | 1      | 2      | 1      |
| 14372  | 1     | 1      | 2      | 1      |
| 14374  | 1     | 1      | 1      | 1      |
| 14376  | 1     | 2      | 2      | 3      |
| 14377  |       |        |        |        |
| 14378  | 1     | 1      | 1      | 1      |
| 14379  | 1     | 1      | 1      | 1      |
| 14381  | 1     | 2      | 3      | 2      |
| 14383  | 2     | 2      | 2      | 3      |
| 14384  | 3     | 2      | 4      | 3      |
| 14385  | 5     | 6      | 4      | 4      |
| 14386  | 4     | 3      | 4      | 3      |
| 14390  | 2     | 1      | 1      | 1      |
| 14391  | 1     | 1      | 1      | 1      |
| 14392  | 2     | 2      | 2      | 2      |
| 14393  | 1     | 2      | 5      | 2      |
| 14394  | 2     | 2      | 2      | 3      |
| 14395  |       |        |        |        |
| 14396  |       |        |        |        |
| 14397  | 1     | 1      | 2      | 1      |
| 14398  | 1     | 1      | 1      | 1      |
| 14399  | 1     | 1      | 1      | 1      |
| 14400  | 1     | 1      | 1      | 1      |
| 14403  | 1     | 1      | 1      | 1      |
| 14404  | 2     | 2      | 2      | 1      |
| 14405  | 1     | 1      | 1      | 1      |
| 14407  | 2     | 3      | 1      | 2      |
| 14408  | 3     | 1      | 4      | 4      |
| 14410  | 5     | 6      | 5      | 5      |
| 14415  | 1     | 1      | 2      | 1      |

| respid | Q40_9 | Q40_10 | Q40_11 | Q40_12 |
|--------|-------|--------|--------|--------|
| 14419  | 3     | 1      | 2      | 2      |
| 14420  |       |        |        |        |
| 14421  |       |        |        |        |
| 14423  | 1     | 1      | 1      | 1      |
| 14424  | 1     | 2      | 1      | 2      |
| 14425  | 1     | 1      | 1      | 1      |
| 14426  | 1     | 1      | 1      | 1      |
| 14427  | 1     | 1      | 1      | 1      |
| 14428  | 5     | 4      | 5      | 6      |
| 14431  | 2     | 3      | 2      | 3      |
| 14433  | 4     | 3      | 1      | 3      |
| 14434  | 1     | 1      | 2      | 1      |
| 14435  | 2     | 1      | 1      | 1      |
| 14436  | 3     | 3      | 3      | 3      |
| 14438  | 3     | 2      | 3      | 1      |
| 14442  | 4     | 4      | 5      | 4      |
| 14447  | 1     | 1      | 2      | 1      |
| 14448  | 3     | 2      | 1      | 3      |
| 14450  | 3     | 2      | 1      | 3      |
| 14451  | 1     | 1      | 1      | 1      |
| 14454  | 4     | 4      | 3      | 4      |
| 14455  | 1     | 1      | 1      | 2      |
| 14456  | 2     | 2      | 2      | 3      |
| 14457  | 5     | 6      | 5      | 5      |
| 14458  | 4     | 3      | 5      | 6      |
| 14459  |       |        |        |        |
| 14460  | 1     | 2      | 3      | 2      |
| 14464  | 2     | 2      | 2      | 2      |
| 14465  | 2     | 1      | 2      | 1      |
| 14466  | 1     | 1      | 1      | 2      |
| 14467  | 1     | 1      | 1      | 1      |
| 14470  | 1     | 1      | 2      | 1      |



| respid | Q40_9 | Q40_10 | Q40_11 | Q40_12 |
|--------|-------|--------|--------|--------|
| 14472  | 1     | 1      | 1      | 1      |
| 14473  | 1     | 1      | 1      | 1      |
| 14474  |       |        |        |        |
| 14477  | 3     | 2      | 2      | 2      |
| 14478  | 1     | 1      | 1      | 1      |
| 14479  |       |        |        |        |
| 14484  | 1     | 1      | 1      | 1      |
| 14485  |       |        |        |        |
| 14486  | 2     | 2      | 3      | 3      |
| 14487  | 1     | 3      | 2      | 1      |
| 14488  | 2     | 3      | 4      | 3      |
| 14491  | 2     | 1      | 2      | 3      |
| 14495  | 1     | 1      | 2      | 1      |
| 14500  | 2     | 1      | 2      | 2      |
| 14502  | 1     | 2      | 2      | 1      |
| 14504  | 3     | 3      | 2      | 3      |
| 14505  | 5     | 6      | 5      | 6      |
| 14507  | 1     | 1      | 3      | 1      |
| 14517  | 1     | 1      | 2      | 1      |
| 14518  | 2     | 1      | 2      | 1      |
| 14519  | 1     | 1      | 1      | 2      |
| 14521  | 2     | 2      | 3      | 2      |
| 14522  | 1     | 1      | 1      | 1      |
| 14526  | 1     | 1      | 1      | 1      |
| 14528  | 2     | 2      | 3      | 3      |
| 14529  | 1     | 1      | 1      | 1      |
| 14530  | 3     | 2      | 2      | 2      |
| 14531  | 5     | 4      | 5      | 4      |
| 14534  | 2     | 3      | 3      | 4      |
| 14538  | 2     | 1      | 3      | 2      |
| 14539  | 3     | 3      | 4      | 4      |
| 14545  | 2     | 1      | 1      | 1      |

| respid | Q40_9 | Q40_10 | Q40_11 | Q40_12 |
|--------|-------|--------|--------|--------|
| 14546  | 2     | 3      | 5      | 3      |
| 14551  | 1     | 1      | 1      | 1      |
| 14553  | 3     | 3      | 3      | 3      |
| 14557  |       |        |        |        |
| 14558  | 1     | 3      | 2      | 1      |
| 14559  | 2     | 3      | 3      | 2      |
| 14560  | 2     | 1      | 2      | 1      |
| 14563  | 1     | 1      | 2      | 1      |
| 14565  | 1     | 1      | 1      | 1      |
| 14571  | 5     | 6      | 5      | 6      |
| 14572  | 1     | 1      | 3      | 2      |
| 14573  | 2     | 2      | 3      | 2      |
| 14575  | 4     | 4      | 5      | 3      |
| 14576  | 3     | 3      | 2      | 2      |
| 14578  | 1     | 1      | 2      | 1      |
| 14579  | 1     | 1      | 1      | 1      |
| 14580  | 2     | 1      | 3      | 1      |
| 14582  | 1     | 1      | 2      | 1      |
| 14585  | 3     | 3      | 2      | 2      |
| 14588  | 1     | 1      | 1      | 1      |
| 14590  | 4     | 3      | 3      | 4      |
| 14592  | 3     | 3      | 4      | 5      |
| 14593  | 2     | 1      | 3      | 2      |
| 14595  | 3     | 1      | 3      | 2      |
| 14597  | 2     | 1      | 1      | 1      |
| 14600  | 1     | 1      | 1      | 1      |
| 14602  | 3     | 3      | 4      | 4      |
| 14604  | 1     | 1      | 2      | 1      |
| 14605  | 1     | 1      | 1      | 1      |
| 14609  | 3     | 2      | 3      | 3      |
| 14610  | 1     | 1      | 2      | 1      |
| 14611  | 1     | 1      | 1      | 1      |

| respid | Q40_9 | Q40_10 | Q40_11 | Q40_12 |
|--------|-------|--------|--------|--------|
| 14612  | 1     | 3      | 4      | 2      |
| 14614  | 3     | 4      | 3      | 4      |
| 14615  | 1     | 1      | 1      | 1      |
| 14618  | 5     | 4      | 3      | 4      |
| 14621  |       |        |        |        |
| 14624  | 2     | 1      | 1      | 2      |
| 14626  | 1     | 1      | 2      | 2      |
| 14627  | 1     | 1      | 2      | 3      |
| 14628  | 6     | 5      | 6      | 5      |
| 14631  | 2     | 1      | 2      | 1      |
| 14633  | 4     | 3      | 4      | 4      |
| 14642  | 4     | 3      | 4      | 4      |
| 14647  | 1     | 1      | 1      | 1      |
| 14658  | 2     | 2      | 1      | 2      |
| 14659  | 3     | 2      | 2      | 3      |
| 14660  | 3     | 3      | 2      | 3      |
| 14661  | 1     | 3      | 2      | 1      |
| 14662  | 5     | 5      | 6      | 6      |
| 14663  | 3     | 1      | 2      | 1      |
| 14670  | 1     | 2      | 3      | 1      |
| 14671  |       |        |        |        |
| 14672  | 3     | 3      | 4      | 3      |
| 14675  | 2     | 1      | 2      | 2      |
| 14676  | 3     | 2      | 4      | 1      |
| 14677  | 5     | 4      | 5      | 5      |
| 14678  | 2     | 3      | 1      | 2      |
| 14681  | 3     | 2      | 3      | 3      |
| 14684  | 1     | 1      | 1      | 1      |
| 14688  | 1     | 2      | 2      | 2      |
| 14690  | 3     | 2      | 2      | 2      |
| 14694  | 3     | 3      | 4      | 4      |
| 14696  | 1     | 2      | 1      | 1      |

| respid | Q40_9 | Q40_10 | Q40_11 | Q40_12 |
|--------|-------|--------|--------|--------|
| 14700  |       |        |        |        |
| 14701  | 3     | 3      | 3      | 3      |
| 14703  | 6     | 5      | 6      | 5      |
| 14707  | 1     | 3      | 1      | 3      |
| 14711  | 3     | 4      | 3      | 3      |
| 14714  | 1     | 1      | 1      | 1      |
| 14715  | 3     | 3      | 4      | 4      |
| 14716  | 1     | 1      | 1      | 1      |
| 14720  | 1     | 1      | 3      | 1      |
| 14725  | 4     | 4      | 4      | 4      |
| 14726  | 1     | 1      | 3      | 1      |
| 14734  | 2     | 2      | 1      | 2      |
| 14735  | 2     | 1      | 2      | 1      |
| 14736  | 2     | 3      | 3      | 2      |
| 14740  | 1     | 1      | 2      | 1      |
| 14745  | 1     | 2      | 2      | 1      |
| 14747  | 1     | 1      | 2      | 3      |
| 14750  | 2     | 3      | 3      | 3      |
| 14751  | 2     | 3      | 1      | 2      |
| 14753  | 1     | 2      | 3      | 1      |
| 14756  | 4     | 3      | 6      | 5      |
| 14780  | 2     | 1      | 3      | 2      |
| 14782  | 1     | 1      | 1      | 1      |
| 14800  | 4     | 5      | 6      | 3      |
| 14801  | 1     | 1      | 3      | 1      |
| 14802  | 4     | 3      | 4      | 3      |
| 14805  | 4     | 2      | 6      | 4      |
| 14811  | 4     | 4      | 3      | 4      |
| 14814  | 4     | 4      | 3      | 2      |
| 14822  | 3     | 2      | 3      | 3      |
| 14827  | 5     | 4      | 5      | 5      |
| 14828  | 5     | 4      | 4      | 3      |

| respid | Q40_9 | Q40_10 | Q40_11 | Q40_12 |
|--------|-------|--------|--------|--------|
| 14830  |       |        |        |        |
| 14832  | 2     | 3      | 3      | 2      |
| 14835  | 4     | 2      | 6      | 4      |
| 14841  |       |        |        |        |
| 14849  | 2     | 1      | 1      | 2      |
| 14850  |       |        |        |        |
| 14851  | 1     | 1      | 1      | 1      |
| 14856  | 4     | 4      | 3      | 3      |
| 14862  | 3     | 2      | 3      | 2      |
| 14863  | 1     | 1      | 2      | 1      |
| 14864  | 2     | 1      | 1      | 1      |
| 14866  | 1     | 1      | 2      | 1      |
| 14867  | 3     | 3      | 4      | 4      |
| 14868  | 1     | 1      | 1      | 1      |
| 14870  | 1     | 1      | 3      | 3      |
| 14873  |       |        |        |        |
| 14878  | 1     | 1      | 1      | 1      |
| 14879  |       |        |        |        |
| 14881  | 4     | 5      | 5      | 4      |
| 14888  | 6     | 5      | 5      | 6      |
| 14895  | 2     | 1      | 1      | 2      |
| 14900  | 5     | 5      | 6      | 6      |
| 14912  |       |        |        |        |
| 14922  | 2     | 2      | 1      | 2      |
| 14923  | 5     | 5      | 3      | 3      |
| 14924  | 4     | 3      | 3      | 4      |
| 14925  | 5     | 6      | 5      | 6      |
| 14926  | 3     | 2      | 3      | 2      |
| 14927  | 4     | 4      | 5      | 5      |
| 14930  | 3     | 3      | 2      | 2      |
| 14937  | 5     | 4      | 4      | 4      |
| 14938  | 5     | 5      | 4      | 5      |

| respid | Q40_9 | Q40_10 | Q40_11 | Q40_12 |
|--------|-------|--------|--------|--------|
| 14939  | 4     | 4      | 4      | 5      |
| 14942  |       |        |        |        |
| 14943  |       |        |        |        |
| 14953  | 3     | 2      | 4      | 3      |
| 14954  | 1     | 3      | 2      | 1      |
| 14955  | 1     | 2      | 3      | 4      |
| 14957  | 4     | 2      | 3      | 3      |
| 14958  | 6     | 6      | 5      | 6      |
| 14959  | 4     | 5      | 4      | 4      |
| 14961  |       |        |        |        |
| 14963  | 4     | 4      | 5      | 5      |
| 14964  | 2     | 1      | 1      | 1      |
| 14965  | 2     | 1      | 2      | 3      |
| 14967  | 5     | 4      | 5      | 4      |
| 14970  | 6     | 5      | 5      | 6      |
| 14972  | 2     | 3      | 3      | 2      |
| 14975  | 5     | 6      | 6      | 5      |
| 14977  | 4     | 2      | 2      | 4      |
| 14982  | 2     | 1      | 2      | 1      |
| 14985  | 3     | 4      | 3      | 3      |
| 14986  |       |        |        |        |
| 14987  |       |        |        |        |
| 14988  | 6     | 6      | 5      | 5      |
| 14989  | 3     | 2      | 6      | 4      |
| 14993  | 3     | 2      | 4      | 3      |
| 15001  | 2     | 3      | 3      | 2      |
| 15002  | 6     | 6      | 5      | 5      |
| 15006  | 2     | 2      | 3      | 3      |
| 15007  | 1     | 3      | 2      | 2      |
| 15014  | 5     | 5      | 5      | 5      |
| 15020  | 2     | 2      | 3      | 3      |
| 15021  | 4     | 5      | 4      | 3      |

| respid | Q40_9 | Q40_10 | Q40_11 | Q40_12 |
|--------|-------|--------|--------|--------|
| 15023  | 6     | 5      | 5      | 6      |
| 15030  | 1     | 3      | 1      | 2      |
| 15032  |       |        |        |        |
| 15033  | 3     | 3      | 3      | 3      |
| 15034  | 4     | 3      | 2      | 3      |
| 15035  | 3     | 1      | 1      | 3      |
| 15037  | 2     | 1      | 3      | 1      |
| 15039  | 5     | 5      | 4      | 4      |
| 15040  | 1     | 1      | 1      | 1      |
| 15042  | 3     | 2      | 1      | 3      |
| 15044  |       |        |        |        |
| 15045  | 1     | 1      | 1      | 1      |
| 15046  | 1     | 2      | 1      | 2      |
| 15052  | 2     | 3      | 2      | 3      |
| 15058  | 4     | 4      | 3      | 3      |
| 15063  | 5     | 5      | 4      | 4      |
| 15066  | 2     | 1      | 2      | 2      |
| 15069  | 3     | 3      | 1      | 2      |
| 15071  | 3     | 2      | 4      | 3      |
| 15076  | 3     | 4      | 4      | 3      |
| 15078  | 1     | 1      | 1      | 1      |
| 15087  | 4     | 2      | 4      | 3      |
| 15090  | 5     | 5      | 4      | 4      |
| 15091  | 3     | 2      | 2      | 3      |
| 15092  | 2     | 1      | 1      | 2      |
| 15096  | 2     | 1      | 2      | 1      |
| 15106  | 3     | 3      | 4      | 4      |
| 15108  |       |        |        |        |
| 15113  | 4     | 4      | 3      | 3      |
| 15116  |       |        |        |        |
| 15119  | 2     | 1      | 2      | 1      |
| 15120  | 2     | 3      | 3      | 2      |

| respid | Q40_9 | Q40_10 | Q40_11 | Q40_12 |
|--------|-------|--------|--------|--------|
| 15121  | 4     | 2      | 4      | 4      |
| 15123  |       |        |        |        |
| 15124  | 1     | 1      | 2      | 1      |
| 15128  | 2     | 1      | 1      | 1      |
| 15131  |       |        |        |        |
| 15136  | 3     | 3      | 2      | 2      |
| 15137  | 2     | 1      | 2      | 2      |
| 15141  | 2     | 1      | 1      | 2      |
| 15144  | 4     | 3      | 3      | 2      |
| 15147  | 2     | 3      | 2      | 2      |
| 15151  | 2     | 2      | 3      | 3      |
| 15154  | 5     | 4      | 4      | 2      |
| 15157  | 2     | 3      | 3      | 3      |
| 15164  | 3     | 2      | 4      | 2      |
| 15168  | 3     | 3      | 3      | 3      |
| 15169  | 1     | 2      | 2      | 2      |
| 15172  | 5     | 5      | 6      | 6      |
| 15177  | 4     | 4      | 4      | 4      |
| 15178  |       |        |        |        |
| 15180  | 3     | 2      | 2      | 3      |
| 15181  | 1     | 1      | 1      | 1      |
| 15182  | 3     | 2      | 4      | 4      |
| 15183  |       |        |        |        |
| 15188  | 3     | 4      | 4      | 4      |
| 15190  | 5     | 6      | 5      | 6      |
| 15195  |       |        |        |        |
| 15201  | 6     | 6      | 5      | 6      |
| 15203  | 4     | 4      | 4      | 3      |
| 15204  | 1     | 1      | 1      | 1      |
| 15207  |       |        |        |        |
| 15208  | 5     | 5      | 6      | 6      |
| 15209  | 2     | 1      | 1      | 2      |



| respid | Q40_9 | Q40_10 | Q40_11 | Q40_12 |
|--------|-------|--------|--------|--------|
| 15212  |       |        |        |        |
| 15213  | 3     | 5      | 2      | 2      |
| 15219  | 1     | 2      | 2      | 3      |
| 15220  | 3     | 1      | 3      | 3      |
| 15221  | 3     | 2      | 3      | 1      |
| 15223  | 3     | 2      | 2      | 3      |
| 15224  | 3     | 2      | 3      | 2      |
| 15225  | 1     | 1      | 1      | 1      |
| 15226  | 3     | 2      | 1      | 2      |
| 15230  | 2     | 3      | 1      | 2      |
| 15231  | 5     | 6      | 5      | 6      |
| 15232  | 2     | 1      | 1      | 2      |
| 15237  | 1     | 2      | 2      | 1      |
| 15239  | 2     | 3      | 1      | 2      |
| 15241  | 2     | 1      | 3      | 2      |
| 15242  | 3     | 1      | 3      | 3      |
| 15247  | 3     | 1      | 2      | 3      |
| 15248  |       |        |        |        |
| 15251  |       |        |        |        |
| 15257  |       |        |        |        |
| 15260  | 2     | 1      | 3      | 2      |
| 15261  | 5     | 4      | 5      | 4      |
| 15262  | 4     | 2      | 6      | 4      |
| 15263  | 5     | 4      | 4      | 3      |
| 15265  | 1     | 3      | 2      | 1      |
| 15266  | 1     | 1      | 5      | 1      |
| 15268  | 2     | 1      | 3      | 2      |
| 15269  | 3     | 1      | 1      | 1      |
| 15270  | 5     | 5      | 6      | 5      |
| 15273  | 2     | 2      | 2      | 3      |
| 15276  | 5     | 5      | 6      | 6      |
| 15277  | 1     | 2      | 3      | 2      |

| respid | Q40_9 | Q40_10 | Q40_11 | Q40_12 |
|--------|-------|--------|--------|--------|
| 15282  | 1     | 1      | 6      | 6      |
| 15284  | 3     | 3      | 4      | 3      |
| 15285  | 1     | 1      | 2      | 1      |
| 15286  | 5     | 5      | 6      | 5      |
| 15288  | 3     | 4      | 3      | 4      |
| 15292  | 4     | 5      | 5      | 4      |
| 15296  | 1     | 1      | 2      | 1      |
| 15297  | 2     | 1      | 2      | 1      |
| 15298  |       |        |        |        |
| 15301  | 2     | 1      | 2      | 1      |
| 15302  | 2     | 1      | 3      | 2      |
| 15305  | 2     | 1      | 1      | 2      |
| 15307  | 1     | 1      | 1      | 1      |
| 15308  | 2     | 2      | 2      | 2      |
| 15309  | 1     | 1      | 1      | 1      |
| 15311  | 1     | 1      | 2      | 1      |
| 15315  | 1     | 2      | 1      | 2      |
| 15316  | 1     | 1      | 2      | 2      |
| 15318  |       |        |        |        |
| 15321  | 6     | 6      | 5      | 4      |
| 15322  | 1     | 1      | 1      | 1      |
| 15324  | 2     | 1      | 1      | 1      |
| 15326  | 3     | 2      | 1      | 1      |
| 15327  | 1     | 1      | 1      | 1      |
| 15328  | 3     | 2      | 2      | 3      |
| 15330  | 2     | 1      | 2      | 2      |
| 15332  | 1     | 1      | 1      | 1      |
| 15333  |       |        |        |        |
| 15334  | 2     | 1      | 3      | 1      |
| 15336  | 4     | 5      | 5      | 6      |
| 15337  | 1     | 1      | 2      | 2      |
| 15338  | 2     | 3      | 2      | 1      |

| respid | Q40_9 | Q40_10 | Q40_11 | Q40_12 |
|--------|-------|--------|--------|--------|
| 15339  | 3     | 2      | 6      | 2      |
| 15341  | 1     | 1      | 1      | 1      |
| 15344  |       |        |        |        |
| 15345  | 2     | 1      | 1      | 2      |
| 15350  |       |        |        |        |
| 15351  | 2     | 1      | 1      | 2      |
| 15352  | 1     | 1      | 1      | 1      |
| 15372  | 1     | 2      | 1      | 3      |
| 15373  | 6     | 5      | 6      | 5      |
| 15376  | 1     | 1      | 2      | 1      |
| 15377  | 2     | 4      | 2      | 2      |
| 15382  | 2     | 1      | 2      | 3      |
| 15383  | 3     | 3      | 4      | 4      |
| 15385  | 5     | 5      | 4      | 5      |
| 15390  | 1     | 2      | 3      | 2      |
| 15399  |       |        |        |        |
| 15404  | 2     | 3      | 3      | 2      |
| 15410  | 1     | 1      | 1      | 1      |
| 15411  | 3     | 4      | 3      | 3      |
| 15412  | 2     | 1      | 2      | 3      |
| 15413  | 3     | 1      | 4      | 1      |
| 15414  | 2     | 2      | 3      | 2      |
| 15417  | 1     | 1      | 1      | 2      |
| 15418  | 2     | 2      | 2      | 1      |
| 15421  | 2     | 2      | 4      | 2      |
| 15423  | 2     | 1      | 2      | 1      |
| 15425  | 1     | 1      | 2      | 1      |
| 15426  | 6     | 6      | 5      | 6      |
| 15430  | 1     | 2      | 1      | 3      |
| 15431  | 4     | 4      | 4      | 5      |
| 15435  |       |        |        |        |
| 15436  |       |        |        |        |

| respid | Q40_9 | Q40_10 | Q40_11 | Q40_12 |
|--------|-------|--------|--------|--------|
| 15437  |       |        |        |        |
| 15438  | 1     | 1      | 1      | 1      |
| 15439  | 1     | 2      | 2      | 1      |
| 15441  | 5     | 6      | 5      | 6      |
| 15443  | 2     | 1      | 1      | 1      |
| 15446  | 1     | 2      | 3      | 2      |
| 15449  | 3     | 3      | 2      | 2      |
| 15451  | 4     | 5      | 5      | 5      |
| 15452  | 4     | 4      | 4      | 4      |
| 15454  | 1     | 1      | 1      | 1      |
| 15456  | 3     | 2      | 2      | 2      |
| 15457  |       |        |        |        |
| 15458  | 2     | 3      | 3      | 2      |
| 15462  | 4     | 2      | 2      | 2      |
| 15467  | 3     | 2      | 5      | 5      |
| 15470  | 4     | 2      | 1      | 3      |
| 15472  | 1     | 1      | 1      | 2      |
| 15476  | 3     | 1      | 2      | 2      |
| 15477  | 1     | 2      | 3      | 2      |
| 15488  | 1     | 1      | 2      | 1      |
| 15489  | 1     | 1      | 3      | 1      |
| 15490  | 2     | 1      | 3      | 2      |
| 15496  | 1     | 1      | 2      | 2      |
| 15497  | 2     | 1      | 3      | 2      |
| 15498  |       |        |        |        |
| 15509  | 4     | 5      | 5      | 5      |
| 15510  | 2     | 3      | 1      | 2      |
| 15516  | 1     | 1      | 4      | 1      |
| 15519  | 1     | 1      | 2      | 1      |
| 15520  | 3     | 2      | 1      | 2      |
| 15524  | 1     | 1      | 3      | 1      |
| 15525  | 1     | 1      | 1      | 1      |

| respid | Q40_9 | Q40_10 | Q40_11 | Q40_12 |
|--------|-------|--------|--------|--------|
| 15526  | 2     | 3      | 3      | 4      |
| 15531  | 4     | 6      | 4      | 4      |
| 15532  | 2     | 1      | 2      | 1      |
| 15534  | 5     | 5      | 5      | 5      |
| 15535  | 4     | 5      | 5      | 5      |
| 15539  | 2     | 1      | 3      | 3      |
| 15550  | 1     | 1      | 1      | 1      |
| 15556  | 3     | 2      | 1      | 2      |
| 15558  | 4     | 4      | 4      | 4      |
| 15565  | 1     | 2      | 2      | 1      |
| 15567  | 4     | 4      | 4      | 4      |
| 15568  | 4     | 4      | 3      | 3      |
| 15571  | 1     | 1      | 2      | 1      |
| 15573  | 1     | 1      | 1      | 1      |
| 15574  | 5     | 5      | 4      | 4      |
| 15576  | 2     | 1      | 2      | 2      |
| 15587  | 1     | 1      | 2      | 3      |
| 15588  | 3     | 1      | 4      | 2      |
| 15593  | 4     | 3      | 5      | 4      |
| 15597  | 1     | 1      | 1      | 1      |
| 15598  | 1     | 1      | 1      | 1      |
| 15599  | 1     | 1      | 2      | 2      |
| 15601  | 1     | 1      | 1      | 1      |
| 15604  | 2     | 2      | 2      | 2      |
| 15611  | 1     | 1      | 1      | 1      |
| 15613  | 1     | 1      | 1      | 1      |
| 15614  | 1     | 1      | 1      | 1      |
| 15617  | 3     | 2      | 2      | 2      |
| 15622  |       |        |        |        |
| 15623  | 2     | 1      | 1      | 2      |
| 15625  | 1     | 1      | 3      | 1      |
| 15627  |       |        |        |        |

| respid | Q40_9 | Q40_10 | Q40_11 | Q40_12 |
|--------|-------|--------|--------|--------|
| 15628  | 2     | 1      | 2      | 1      |
| 15633  | 2     | 2      | 2      | 2      |
| 15634  | 1     | 2      | 3      | 1      |
| 15637  | 1     | 2      | 2      | 3      |
| 15644  | 2     | 3      | 4      | 3      |
| 15645  | 2     | 1      | 2      | 1      |
| 15649  | 1     | 1      | 2      | 1      |
| 15650  | 1     | 1      | 1      | 1      |
| 15651  | 1     | 1      | 2      | 1      |
| 15657  | 4     | 1      | 6      | 4      |
| 15658  | 2     | 1      | 2      | 1      |
| 15660  | 3     | 3      | 2      | 3      |
| 15667  | 1     | 1      | 1      | 1      |
| 15671  | 1     | 1      | 2      | 1      |
| 15679  | 3     | 2      | 2      | 3      |
| 15712  | 2     | 4      | 3      | 2      |
| 15715  | 2     | 2      | 2      | 1      |
| 15749  | 1     | 1      | 1      | 4      |
| 15754  | 3     | 2      | 4      | 2      |
| 15756  | 3     | 1      | 1      | 3      |
| 15773  | 1     | 1      | 1      | 1      |
| 15774  | 1     | 1      | 1      | 1      |
| 15776  | 2     | 1      | 1      | 1      |
| 15777  | 4     | 5      | 4      | 4      |
| 15779  |       |        |        |        |
| 15780  | 2     | 3      | 3      | 2      |
| 15792  | 1     | 1      | 1      | 1      |
| 15793  | 4     | 5      | 3      | 3      |
| 15796  | 2     | 1      | 2      | 1      |
| 15798  | 1     | 1      | 1      | 1      |
| 15809  | 1     | 1      | 2      | 1      |
| 15810  | 1     | 1      | 1      | 1      |

| respid | Q40_9 | Q40_10 | Q40_11 | Q40_12 |
|--------|-------|--------|--------|--------|
| 15815  | 3     | 1      | 1      | 1      |
| 15816  | 2     | 1      | 2      | 1      |
| 15817  |       |        |        |        |
| 15821  | 4     | 4      | 5      | 4      |
| 15823  | 3     | 3      | 3      | 3      |
| 15834  | 4     | 3      | 2      | 1      |
| 15835  |       |        |        |        |
| 15836  | 1     | 1      | 1      | 1      |
| 15837  | 1     | 1      | 1      | 1      |
| 15839  | 3     | 1      | 3      | 1      |
| 15840  | 3     | 2      | 1      | 2      |
| 15844  | 2     | 1      | 2      | 1      |
| 15845  | 1     | 1      | 1      | 1      |
| 15847  | 5     | 5      | 3      | 3      |
| 15848  | 1     | 1      | 1      | 1      |
| 15849  | 3     | 2      | 1      | 4      |
| 15857  | 2     | 2      | 2      | 2      |
| 15858  | 3     | 1      | 1      | 2      |
| 15862  | 6     | 4      | 4      | 3      |
| 15866  | 1     | 3      | 2      | 1      |
| 15870  | 2     | 1      | 3      | 2      |
| 15871  | 1     | 1      | 1      | 1      |
| 15872  | 2     | 3      | 2      | 1      |
| 15873  | 1     | 1      | 1      | 1      |
| 15874  |       |        |        |        |
| 15875  | 5     | 6      | 5      | 4      |
| 15876  | 1     | 3      | 4      | 3      |
| 15882  | 3     | 3      | 3      | 3      |
| 15884  | 2     | 1      | 4      | 3      |
| 15890  | 3     | 2      | 3      | 2      |
| 15892  | 5     | 2      | 5      | 5      |
| 15908  | 1     | 3      | 2      | 3      |

| respid | Q40_9 | Q40_10 | Q40_11 | Q40_12 |
|--------|-------|--------|--------|--------|
| 15914  | 3     | 2      | 1      | 3      |
| 15932  | 4     | 3      | 3      | 4      |
| 15933  | 2     | 1      | 1      | 2      |
| 15938  | 1     | 1      | 1      | 1      |
| 15940  | 6     | 6      | 5      | 5      |
| 15945  | 2     | 3      | 1      | 2      |
| 15947  | 2     | 4      | 2      | 3      |
| 15950  | 1     | 2      | 1      | 3      |
| 15951  | 4     | 3      | 3      | 3      |
| 15952  | 5     | 4      | 4      | 4      |
| 15953  | 1     | 1      | 2      | 1      |
| 15954  | 3     | 2      | 2      | 3      |
| 15957  | 5     | 6      | 5      | 5      |
| 15965  | 4     | 3      | 3      | 3      |
| 15966  |       |        |        |        |
| 15967  | 1     | 2      | 3      | 4      |
| 15968  | 2     | 2      | 1      | 3      |
| 15970  | 1     | 1      | 1      | 1      |
| 15973  | 2     | 1      | 2      | 3      |
| 15974  | 2     | 3      | 2      | 4      |
| 15975  |       |        |        |        |
| 15980  | 6     | 5      | 6      | 5      |
| 15984  | 4     | 3      | 2      | 1      |
| 15985  | 4     | 3      | 3      | 2      |
| 15994  |       |        |        |        |
| 15995  | 1     | 1      | 2      | 1      |
| 16000  | 3     | 1      | 2      | 4      |
| 16004  | 1     | 2      | 2      | 3      |
| 16005  | 4     | 2      | 1      | 3      |
| 16006  |       |        |        |        |
| 16009  | 1     | 1      | 1      | 1      |
| 16017  | 1     | 1      | 1      | 1      |



| respid | Q40_9 | Q40_10 | Q40_11 | Q40_12 |
|--------|-------|--------|--------|--------|
| 16019  | 3     | 1      | 3      | 3      |
| 16021  | 1     | 1      | 2      | 1      |
| 16024  | 1     | 1      | 1      | 1      |
| 16026  | 1     | 1      | 2      | 1      |
| 16029  |       |        |        |        |
| 16031  | 1     | 1      | 4      | 3      |
| 16037  | 1     | 1      | 1      | 1      |
| 16043  | 1     | 1      | 1      | 1      |
| 16044  | 1     | 1      | 1      | 1      |
| 16047  | 1     | 1      | 2      | 1      |
| 16048  | 1     | 1      | 3      | 2      |
| 16049  | 1     | 1      | 1      | 1      |
| 16051  | 1     | 1      | 1      | 1      |
| 16053  | 1     | 1      | 3      | 1      |
| 16054  | 1     | 1      | 1      | 1      |
| 16069  | 1     | 1      | 1      | 1      |
| 16070  | 1     | 1      | 2      | 1      |
| 16074  |       |        |        |        |
| 16076  |       |        |        |        |
| 16078  |       |        |        |        |
| 16081  | 1     | 1      | 1      | 1      |
| 16085  |       |        |        |        |
| 16088  | 1     | 1      | 2      | 2      |
| 16091  | 2     | 1      | 3      | 2      |
| 16092  | 1     | 1      | 1      | 1      |
| 16093  | 2     | 1      | 2      | 1      |
| 16097  | 1     | 2      | 2      | 1      |
| 16100  | 1     | 1      | 1      | 1      |
| 16101  | 1     | 1      | 1      | 1      |
| 16105  |       |        |        |        |
| 16118  | 3     | 3      | 3      | 4      |
| 16129  | 1     | 1      | 1      | 1      |

| respid | Q40_9 | Q40_10 | Q40_11 | Q40_12 |
|--------|-------|--------|--------|--------|
| 16130  | 1     | 1      | 2      | 1      |
| 16131  | 4     | 4      | 4      | 4      |
| 16136  | 1     | 1      | 1      | 1      |
| 16137  | 1     | 1      | 1      | 1      |
| 16138  | 2     | 1      | 3      | 3      |
| 16139  | 3     | 3      | 2      | 2      |
| 16140  | 1     | 1      | 1      | 1      |
| 16145  | 2     | 1      | 2      | 2      |
| 16150  | 6     | 1      | 1      | 1      |
| 16151  | 1     | 1      | 1      | 1      |
| 16153  | 1     | 1      | 1      | 1      |
| 16164  | 1     | 1      | 2      | 1      |
| 16168  | 2     | 2      | 2      | 3      |
| 16173  | 1     | 1      | 2      | 1      |
| 16174  | 1     | 1      | 1      | 1      |
| 16177  | 2     | 1      | 1      | 1      |
| 16185  | 1     | 1      | 2      | 1      |
| 16189  | 1     | 1      | 1      | 2      |
| 16192  | 2     | 3      | 1      | 5      |
| 16193  | 2     | 1      | 1      | 1      |
| 16194  | 2     | 2      | 1      | 1      |
| 16196  |       |        |        |        |
| 16202  | 3     | 1      | 3      | 3      |
| 16205  | 2     | 2      | 3      | 2      |
| 16206  | 1     | 1      | 1      | 1      |
| 16208  |       |        |        |        |
| 16211  | 2     | 3      | 4      | 3      |
| 16212  | 1     | 1      | 1      | 1      |
| 16215  |       |        |        |        |
| 16217  | 2     | 1      | 1      | 1      |
| 16221  | 1     | 1      | 3      | 1      |
| 16226  | 1     | 1      | 4      | 2      |

| respid | Q40_9 | Q40_10 | Q40_11 | Q40_12 |
|--------|-------|--------|--------|--------|
| 16228  | 4     | 4      | 3      | 3      |
| 16229  | 1     | 1      | 1      | 1      |
| 16230  | 1     | 1      | 1      | 1      |
| 16231  | 4     | 3      | 2      | 3      |
| 16232  | 1     | 1      | 4      | 1      |
| 16234  | 1     | 1      | 3      | 1      |
| 16235  | 3     | 3      | 4      | 4      |
| 16236  | 1     | 1      | 1      | 1      |
| 16237  | 2     | 1      | 3      | 1      |
| 16238  | 1     | 1      | 2      | 2      |
| 16239  | 1     | 1      | 1      | 1      |
| 16243  | 1     | 1      | 1      | 2      |
| 16248  | 2     | 2      | 2      | 2      |
| 16249  | 1     | 1      | 1      | 1      |
| 16251  |       |        |        |        |
| 16263  | 1     | 1      | 1      | 1      |
| 16265  | 2     | 3      | 3      | 2      |
| 16269  | 1     | 1      | 2      | 1      |
| 16272  | 1     | 1      | 3      | 3      |
| 16273  |       |        |        |        |
| 16281  | 1     | 1      | 1      | 1      |
| 16282  | 1     | 1      | 1      | 1      |
| 16287  | 1     | 1      | 2      | 1      |
| 16290  | 1     | 1      | 2      | 2      |
| 16294  | 1     | 1      | 1      | 1      |
| 16295  | 1     | 1      | 2      | 1      |
| 16296  | 1     | 1      | 1      | 1      |
| 16299  | 4     | 3      | 5      | 4      |
| 16302  | 1     | 1      | 1      | 1      |
| 16303  | 1     | 1      | 6      | 1      |
| 16304  | 5     | 3      | 4      | 1      |
| 16306  | 1     | 1      | 1      | 1      |

| respid | Q40_9 | Q40_10 | Q40_11 | Q40_12 |
|--------|-------|--------|--------|--------|
| 16318  | 1     | 1      | 2      | 1      |
| 16320  | 2     | 1      | 2      | 1      |
| 16321  | 2     | 1      | 3      | 2      |
| 16322  | 1     | 1      | 2      | 1      |
| 16324  | 2     | 2      | 2      | 3      |
| 16326  | 1     | 1      | 1      | 1      |
| 16328  | 2     | 1      | 2      | 2      |
| 16336  | 2     | 2      | 3      | 2      |
| 16341  | 1     | 1      | 1      | 1      |
| 16342  | 1     | 1      | 1      | 1      |
| 16343  | 1     | 1      | 2      | 1      |
| 16345  | 4     | 6      | 5      | 2      |
| 16349  | 1     | 1      | 2      | 1      |
| 16355  | 1     | 1      | 1      | 1      |
| 16364  | 2     | 3      | 3      | 3      |
| 16374  | 1     | 1      | 1      | 1      |
| 16375  |       |        |        |        |
| 16376  | 3     | 3      | 2      | 3      |
| 16393  | 1     | 1      | 2      | 1      |
| 16394  | 1     | 2      | 2      | 2      |
| 16395  | 1     | 1      | 2      | 2      |
| 16397  | 2     | 5      | 4      | 2      |
| 16398  | 3     | 2      | 3      | 3      |
| 16402  | 1     | 1      | 1      | 1      |
| 16405  | 1     | 1      | 1      | 1      |
| 16416  | 2     | 3      | 3      | 2      |
| 16422  | 2     | 2      | 2      | 2      |
| 16429  | 1     | 1      | 1      | 1      |
| 16430  | 1     | 1      | 1      | 1      |
| 16432  | 3     | 3      | 2      | 2      |
| 16433  | 1     | 1      | 1      | 1      |
| 16434  |       |        |        |        |

| respid | Q40_9 | Q40_10 | Q40_11 | Q40_12 |
|--------|-------|--------|--------|--------|
| 16437  | 1     | 1      | 2      | 1      |
| 16439  | 1     | 1      | 1      | 1      |
| 16440  | 1     | 1      | 3      | 1      |
| 16441  | 1     | 1      | 1      | 1      |
| 16442  | 2     | 2      | 3      | 4      |
| 16450  | 1     | 1      | 1      | 1      |
| 16451  | 1     | 1      | 1      | 1      |
| 16452  | 2     | 1      | 3      | 2      |
| 16467  | 1     | 1      | 1      | 1      |
| 16468  |       |        |        |        |
| 16469  | 1     | 1      | 3      | 1      |
| 16470  |       |        |        |        |
| 16471  | 1     | 1      | 1      | 1      |
| 16473  | 1     | 1      | 1      | 1      |
| 16476  | 1     | 1      | 1      | 1      |
| 16478  | 1     | 1      | 1      | 1      |
| 16484  | 1     | 1      | 1      | 1      |
| 16499  | 1     | 1      | 1      | 1      |
| 16502  |       |        |        |        |
| 16505  | 1     | 1      | 1      | 1      |
| 16514  | 1     | 1      | 2      | 1      |
| 16515  | 2     | 2      | 3      | 2      |
| 16517  | 5     | 4      | 3      | 4      |
| 16518  | 1     | 1      | 2      | 1      |
| 16519  | 1     | 1      | 1      | 2      |
| 16525  | 3     | 2      | 2      | 1      |
| 16526  | 1     | 1      | 2      | 1      |
| 16530  | 1     | 1      | 1      | 1      |
| 16532  | 1     | 1      | 3      | 1      |
| 16536  | 1     | 1      | 1      | 1      |
| 16537  | 4     | 4      | 3      | 3      |
| 16541  | 2     | 1      | 6      | 3      |

| respid | Q40_9 | Q40_10 | Q40_11 | Q40_12 |
|--------|-------|--------|--------|--------|
| 16543  | 1     | 1      | 1      | 1      |
| 16544  | 2     | 2      | 2      | 2      |
| 16545  | 1     | 1      | 1      | 1      |
| 16546  | 2     | 1      | 2      | 1      |
| 16548  | 1     | 1      | 1      | 1      |
| 16552  | 2     | 3      | 1      | 5      |
| 16559  | 1     | 1      | 1      | 1      |
| 16564  | 3     | 2      | 2      | 3      |
| 16565  | 1     | 1      | 1      | 1      |
| 16567  | 2     | 2      | 2      | 2      |
| 16571  |       |        |        |        |
| 16572  | 2     | 1      | 2      | 1      |
| 16579  | 2     | 2      | 2      | 1      |
| 16588  | 4     | 4      | 6      | 6      |
| 16599  | 1     | 1      | 1      | 1      |
| 16605  | 1     | 1      | 2      | 1      |
| 16622  | 2     | 2      | 1      | 3      |
| 16635  | 2     | 2      | 2      | 2      |
| 16638  | 1     | 1      | 1      | 1      |
| 16652  | 1     | 1      | 1      | 1      |
| 16656  | 1     | 1      | 1      | 1      |
| 16671  |       |        |        |        |
| 16676  | 1     | 1      | 1      | 1      |
| 16678  | 2     | 2      | 2      | 2      |
| 16702  | 2     | 1      | 1      | 1      |
| 16705  | 1     | 1      | 2      | 1      |
| 16707  | 5     | 3      | 5      | 4      |
| 16711  | 2     | 2      | 2      | 2      |
| 16712  | 1     | 1      | 1      | 1      |
| 16716  |       |        |        |        |
| 16724  | 1     | 2      | 1      | 1      |
| 16727  | 2     | 2      | 2      | 2      |

| respid | Q40_9 | Q40_10 | Q40_11 | Q40_12 |
|--------|-------|--------|--------|--------|
| 16734  | 1     | 1      | 3      | 1      |
| 16740  | 1     | 1      | 1      | 1      |
| 16748  | 1     | 1      | 3      | 1      |
| 16759  | 1     | 1      | 1      | 1      |
| 16761  |       |        |        |        |
| 16763  | 1     | 1      | 1      | 3      |
| 16764  | 4     | 3      | 2      | 3      |
| 16766  | 1     | 1      | 1      | 1      |
| 16767  | 1     | 1      | 2      | 1      |
| 16776  | 1     | 1      | 1      | 1      |
| 16781  | 1     | 1      | 1      | 1      |
| 16793  | 2     | 2      | 2      | 2      |
| 16796  | 4     | 3      | 5      | 5      |
| 16810  | 1     | 1      | 1      | 1      |
| 16811  | 2     | 1      | 2      | 1      |
| 16813  |       |        |        |        |
| 16814  | 1     | 1      | 1      | 1      |
| 16831  | 1     | 1      | 3      | 1      |
| 16833  | 1     | 1      | 6      | 1      |
| 16839  | 2     | 1      | 1      | 1      |
| 16843  | 2     | 1      | 2      | 1      |
| 16860  |       |        |        |        |
| 16871  | 2     | 1      | 1      | 1      |
| 16881  | 2     | 2      | 3      | 3      |
| 16884  | 1     | 1      | 1      | 1      |
| 16891  | 2     | 1      | 2      | 2      |
| 16909  | 1     | 1      | 1      | 1      |
| 16911  |       |        |        |        |
| 16922  | 2     | 2      | 3      | 1      |
| 16935  | 3     | 2      | 3      | 3      |
| 16942  | 1     | 2      | 2      | 1      |
| 16950  |       |        |        |        |

| respid | Q40_9 | Q40_10 | Q40_11 | Q40_12 |
|--------|-------|--------|--------|--------|
| 16952  | 5     | 5      | 4      | 3      |
| 16963  | 1     | 1      | 2      | 1      |
| 16967  | 4     | 4      | 4      | 4      |
| 16970  | 2     | 1      | 3      | 1      |
| 16976  | 2     | 2      | 3      | 2      |
| 16982  | 1     | 1      | 1      | 1      |
| 16995  | 1     | 1      | 1      | 1      |
| 17004  | 1     | 1      | 1      | 2      |
| 17006  | 1     | 1      | 1      | 1      |
| 17009  | 1     | 1      | 1      | 1      |
| 17021  |       |        |        |        |
| 17040  | 2     | 1      | 3      | 1      |
| 17041  |       |        |        |        |
| 17044  | 1     | 1      | 2      | 1      |
| 17046  | 4     | 3      | 3      | 3      |
| 17052  | 1     | 1      | 2      | 1      |
| 17055  | 3     | 3      | 3      | 3      |
| 17108  | 3     | 2      | 2      | 3      |
| 17109  | 1     | 1      | 1      | 1      |
| 17113  |       |        |        |        |
| 17115  | 3     | 1      | 2      | 3      |
| 17132  |       |        |        |        |
| 17135  | 2     | 2      | 3      | 2      |
| 17138  | 2     | 2      | 1      | 1      |
| 17141  | 1     | 1      | 1      | 1      |
| 17143  | 1     | 1      | 1      | 2      |
| 17148  | 1     | 1      | 1      | 1      |
| 17151  | 2     | 1      | 1      | 1      |
| 17153  | 1     | 1      | 1      | 1      |
| 17154  | 1     | 1      | 2      | 2      |
| 17157  | 1     | 1      | 1      | 2      |
| 17160  | 1     | 1      | 1      | 1      |



| respid | Q40_9 | Q40_10 | Q40_11 | Q40_12 |
|--------|-------|--------|--------|--------|
| 17167  | 1     | 1      | 1      | 2      |
| 17169  | 2     | 1      | 1      | 1      |
| 17174  | 5     | 5      | 5      | 5      |
| 17179  | 1     | 1      | 1      | 1      |
| 17180  | 1     | 1      | 2      | 1      |
| 17182  | 1     | 1      | 1      | 1      |
| 17184  | 2     | 3      | 3      | 3      |
| 17186  | 1     | 1      | 1      | 1      |
| 17187  | 1     | 1      | 2      | 1      |
| 17192  | 1     | 1      | 2      | 1      |
| 17197  | 2     | 2      | 1      | 1      |
| 17217  | 1     | 1      | 1      | 1      |
| 17226  | 1     | 1      | 3      | 1      |
| 17228  | 1     | 1      | 3      | 2      |
| 17245  | 4     | 2      | 2      | 3      |
| 17247  |       |        |        |        |
| 17258  | 1     | 1      | 2      | 1      |
| 17259  | 2     | 2      | 3      | 2      |
| 17262  | 1     | 1      | 2      | 1      |
| 17265  | 1     | 1      | 1      | 1      |
| 17281  | 1     | 1      | 2      | 1      |
| 17282  | 2     | 2      | 2      | 2      |
| 17293  | 1     | 2      | 2      | 1      |
| 17306  | 2     | 3      | 3      | 2      |
| 17312  | 3     | 2      | 2      | 1      |
| 17318  | 2     | 2      | 2      | 2      |
| 17328  | 2     | 1      | 1      | 3      |
| 17343  | 1     | 1      | 1      | 1      |
| 17344  | 1     | 2      | 3      | 2      |
| 17348  | 1     | 1      | 1      | 1      |
| 17352  | 1     | 1      | 1      | 1      |
| 17355  | 2     | 1      | 2      | 1      |

| respid | Q40_9 | Q40_10 | Q40_11 | Q40_12 |
|--------|-------|--------|--------|--------|
| 17356  | 2     | 1      | 4      | 1      |
| 17359  | 1     | 1      | 2      | 1      |
| 17373  | 3     | 3      | 3      | 2      |
| 17381  | 2     | 1      | 2      | 2      |
| 17388  | 2     | 1      | 2      | 1      |
| 17394  | 3     | 2      | 4      | 2      |
| 17401  |       |        |        |        |
| 17403  | 1     | 1      | 3      | 1      |
| 17411  |       |        |        |        |
| 17423  | 1     | 1      | 1      | 2      |
| 17427  |       |        |        |        |
| 17433  | 1     | 1      | 1      | 1      |
| 17441  | 1     | 1      | 1      | 1      |
| 17442  | 1     | 1      | 3      | 1      |
| 17447  | 1     | 1      | 1      | 1      |
| 17458  | 1     | 1      | 1      | 1      |
| 17474  | 1     | 1      | 2      | 1      |
| 17475  | 3     | 3      | 3      | 3      |
| 17476  | 3     | 2      | 2      | 2      |
| 17480  | 1     | 1      | 1      | 1      |
| 17484  | 1     | 1      | 1      | 1      |
| 17490  | 1     | 1      | 1      | 1      |
| 17491  | 1     | 1      | 1      | 1      |
| 17500  | 1     | 1      | 1      | 1      |
| 17507  | 1     | 1      | 1      | 1      |
| 17517  | 1     | 1      | 1      | 1      |
| 17520  | 1     | 1      | 1      | 5      |
| 17521  | 1     | 1      | 1      | 1      |
| 17531  | 1     | 1      | 1      | 1      |
| 17540  | 3     | 2      | 2      | 2      |
| 17550  | 1     | 1      | 1      | 1      |
| 17551  | 1     | 1      | 1      | 1      |

| respid | Q40_9 | Q40_10 | Q40_11 | Q40_12 |
|--------|-------|--------|--------|--------|
| 17555  | 2     | 2      | 4      | 3      |
| 17556  | 2     | 1      | 1      | 1      |
| 17574  | 1     | 1      | 3      | 1      |
| 17575  | 1     | 1      | 2      | 1      |
| 17582  | 1     | 1      | 1      | 1      |
| 17587  |       |        |        |        |
| 17601  | 1     | 1      | 1      | 1      |
| 17607  | 3     | 4      | 4      | 4      |
| 17609  | 1     | 1      | 1      | 1      |
| 17611  | 1     | 1      | 1      | 1      |
| 17613  | 1     | 1      | 1      | 1      |
| 17615  | 1     | 1      | 1      | 1      |
| 17620  | 1     | 1      | 1      | 1      |
| 17624  | 1     | 1      | 1      | 1      |
| 17635  | 1     | 1      | 1      | 1      |
| 17643  | 2     | 1      | 1      | 1      |
| 17645  | 2     | 2      | 2      | 1      |
| 17646  | 1     | 1      | 1      | 1      |
| 17649  | 1     | 3      | 2      | 2      |
| 17658  | 2     | 1      | 2      | 1      |
| 17666  |       |        |        |        |
| 17670  | 1     | 1      | 2      | 1      |
| 17678  | 1     | 1      | 2      | 1      |
| 17679  | 2     | 2      | 2      | 2      |
| 17695  | 1     | 1      | 1      | 1      |
| 17697  | 3     | 1      | 5      | 2      |
| 17698  | 2     | 1      | 1      | 1      |
| 17723  | 3     | 2      | 3      | 2      |
| 17727  | 1     | 1      | 1      | 1      |
| 17734  | 1     | 1      | 1      | 1      |
| 17737  | 1     | 1      | 1      | 1      |
| 17748  | 1     | 1      | 3      | 1      |

| respid | Q40_9 | Q40_10 | Q40_11 | Q40_12 |
|--------|-------|--------|--------|--------|
| 17749  |       |        |        |        |
| 17754  | 4     | 3      | 5      | 4      |
| 17766  | 2     | 1      | 5      | 1      |
| 17777  | 1     | 1      | 1      | 1      |
| 17780  | 1     | 1      | 1      | 1      |
| 17788  | 1     | 1      | 1      | 1      |
| 17801  | 3     | 1      | 2      | 1      |
| 17803  | 1     | 1      | 1      | 1      |
| 17807  | 1     | 1      | 1      | 1      |
| 17808  | 1     | 1      | 1      | 1      |
| 17809  | 3     | 2      | 3      | 3      |
| 17821  | 2     | 1      | 2      | 1      |
| 17827  | 3     | 3      | 3      | 3      |
| 17834  | 4     | 5      | 3      | 3      |
| 17838  | 2     | 2      | 2      | 2      |
| 17842  | 1     | 1      | 1      | 1      |
| 17862  | 1     | 1      | 2      | 1      |
| 17863  | 1     | 1      | 1      | 2      |
| 17871  | 2     | 1      | 2      | 1      |
| 17872  | 1     | 1      | 1      | 1      |
| 17903  | 2     | 3      | 2      | 2      |
| 17906  | 1     | 1      | 1      | 1      |
| 17910  | 3     | 3      | 3      | 2      |
| 17922  | 1     | 1      | 3      | 1      |
| 17923  | 2     | 1      | 2      | 3      |
| 17925  | 2     | 2      | 1      | 2      |
| 17926  | 1     | 1      | 1      | 1      |
| 17937  | 1     | 1      | 1      | 1      |
| 17956  | 2     | 2      | 2      | 2      |
| 17958  | 1     | 1      | 1      | 1      |
| 17985  | 1     | 1      | 1      | 1      |
| 17989  | 1     | 1      | 3      | 1      |

| respid | Q40_9 | Q40_10 | Q40_11 | Q40_12 |
|--------|-------|--------|--------|--------|
| 17995  | 1     | 1      | 1      | 1      |
| 18000  | 1     | 1      | 2      | 1      |
| 18010  | 1     | 1      | 1      | 1      |
| 18015  | 1     | 1      | 1      | 1      |
| 18018  | 3     | 1      | 5      | 2      |
| 18031  | 1     | 1      | 1      | 1      |
| 18033  | 1     | 1      | 1      | 1      |
| 18036  | 2     | 1      | 1      | 1      |
| 18041  | 1     | 1      | 2      | 1      |
| 18068  |       |        |        |        |
| 18080  | 1     | 1      | 1      | 1      |
| 18081  | 3     | 3      | 4      | 3      |
| 18083  | 2     | 2      | 5      | 1      |
| 18113  | 2     | 2      | 3      | 2      |
| 18115  | 2     | 2      | 2      | 2      |
| 18117  | 5     | 5      | 5      | 5      |
| 18129  | 1     | 1      | 1      | 1      |
| 18132  | 1     | 1      | 3      | 2      |
| 18146  | 1     | 1      | 1      | 1      |
| 18147  | 3     | 3      | 6      | 4      |
| 18153  |       |        |        |        |
| 18154  | 2     | 2      | 3      | 1      |
| 18157  | 1     | 1      | 1      | 2      |
| 18166  | 1     | 1      | 3      | 1      |
| 18169  | 1     | 1      | 1      | 1      |
| 18171  | 2     | 1      | 1      | 1      |
| 18173  | 2     | 2      | 3      | 2      |
| 18204  | 1     | 1      | 1      | 1      |
| 18210  | 1     | 2      | 2      | 2      |
| 18212  |       |        |        |        |
| 18220  | 2     | 2      | 3      | 3      |
| 18221  | 1     | 1      | 1      | 1      |

| respid | Q40_9 | Q40_10 | Q40_11 | Q40_12 |
|--------|-------|--------|--------|--------|
| 18228  | 1     | 1      | 1      | 1      |
| 18231  | 1     | 1      | 1      | 1      |
| 18233  | 1     | 1      | 2      | 1      |
| 18235  | 2     | 2      | 1      | 1      |
| 18237  |       |        |        |        |
| 18250  | 2     | 1      | 1      | 1      |
| 18253  | 1     | 1      | 2      | 1      |
| 18264  | 1     | 1      | 1      | 1      |
| 18285  | 1     | 1      | 1      | 1      |
| 18287  |       |        |        |        |
| 18296  | 1     | 1      | 1      | 1      |
| 18299  | 2     | 2      | 2      | 2      |
| 18313  | 1     | 1      | 2      | 1      |
| 18321  | 1     | 1      | 2      | 1      |
| 18324  |       |        |        |        |
| 18329  | 1     | 1      | 1      | 1      |
| 18332  | 2     | 1      | 1      | 1      |
| 18339  | 5     | 2      | 4      | 4      |
| 18340  | 1     | 1      | 1      | 1      |
| 18348  | 2     | 2      | 2      | 2      |
| 18355  | 1     | 1      | 1      | 1      |
| 18360  | 1     | 1      | 2      | 1      |
| 18380  | 2     | 1      | 1      | 1      |
| 18403  | 1     | 1      | 2      | 1      |
| 18405  | 2     | 2      | 2      | 2      |
| 18409  | 2     | 1      | 2      | 1      |
| 18445  | 1     | 1      | 1      | 1      |
| 18458  | 1     | 1      | 2      | 1      |
| 18477  | 1     | 1      | 3      | 1      |
| 18481  | 1     | 1      | 2      | 1      |
| 18491  | 1     | 1      | 1      | 1      |
| 18492  | 1     | 1      | 1      | 1      |

| respid | Q40_9 | Q40_10 | Q40_11 | Q40_12 |
|--------|-------|--------|--------|--------|
| 18494  | 2     | 1      | 3      | 1      |
| 18495  | 1     | 1      | 1      | 1      |
| 18496  | 1     | 1      | 2      | 1      |
| 18507  | 3     | 3      | 3      | 3      |
| 18509  |       |        |        |        |
| 18510  | 1     | 1      | 1      | 1      |
| 18513  | 2     | 1      | 3      | 2      |
| 18525  |       |        |        |        |
| 18526  | 2     | 1      | 2      | 2      |
| 18527  | 2     | 1      | 2      | 1      |
| 18536  | 1     | 1      | 2      | 2      |
| 18540  | 1     | 1      | 1      | 1      |
| 18548  | 1     | 1      | 1      | 1      |
| 18550  |       |        |        |        |
| 18556  | 1     | 1      | 1      | 1      |
| 18561  |       |        |        |        |
| 18577  | 2     | 2      | 2      | 1      |
| 18580  | 1     | 1      | 1      | 1      |
| 18633  | 3     | 3      | 2      | 3      |
| 18635  | 2     | 1      | 2      | 1      |
| 18636  |       |        |        |        |
| 18645  | 2     | 4      | 5      | 5      |
| 18649  | 2     | 2      | 2      | 2      |
| 18664  | 1     | 1      | 1      | 1      |
| 18668  | 2     | 1      | 2      | 2      |
| 18682  | 4     | 3      | 4      | 4      |
| 18685  | 1     | 1      | 2      | 2      |
| 18688  | 2     | 2      | 2      | 2      |
| 18689  | 3     | 2      | 3      | 2      |
| 18693  | 6     | 6      | 6      | 6      |
| 18694  | 1     | 1      | 1      | 1      |
| 18705  | 1     | 1      | 1      | 1      |

| respid | Q40_9 | Q40_10 | Q40_11 | Q40_12 |
|--------|-------|--------|--------|--------|
| 18710  | 1     | 1      | 2      | 1      |
| 18715  | 4     | 5      | 5      | 4      |
| 18718  | 1     | 1      | 2      | 1      |
| 18727  | 1     | 1      | 3      | 1      |
| 18732  | 1     | 1      | 1      | 1      |
| 18735  | 2     | 1      | 1      | 2      |
| 18742  | 1     | 1      | 2      | 1      |
| 18745  | 1     | 1      | 2      | 1      |
| 18747  | 1     | 1      | 1      | 1      |
| 18750  | 1     | 1      | 1      | 1      |
| 18751  | 1     | 1      | 2      | 1      |
| 18753  | 1     | 1      | 2      | 1      |
| 18754  |       |        |        |        |
| 18759  | 1     | 1      | 1      | 1      |
| 18780  | 1     | 1      | 1      | 1      |
| 18782  | 3     | 1      | 2      | 1      |
| 18807  | 6     | 6      | 6      | 5      |
| 18815  | 1     | 1      | 2      | 1      |
| 18818  | 1     | 1      | 1      | 1      |
| 18820  | 1     | 1      | 1      | 1      |
| 18823  | 5     | 6      | 6      | 6      |
| 18825  | 1     | 1      | 1      | 1      |
| 18828  |       |        |        |        |
| 18832  | 1     | 1      | 3      | 1      |
| 18834  | 2     | 1      | 2      | 1      |
| 18835  | 5     | 4      | 5      | 4      |
| 18837  | 1     | 1      | 2      | 1      |
| 18842  | 1     | 1      | 1      | 1      |
| 18846  |       |        |        |        |
| 18855  | 2     | 1      | 3      | 2      |
| 18856  | 1     | 1      | 1      | 1      |
| 18887  | 1     | 1      | 2      | 1      |



| respid | Q40_9 | Q40_10 | Q40_11 | Q40_12 |
|--------|-------|--------|--------|--------|
| 18903  | 1     | 2      | 1      | 2      |
| 18906  | 2     | 2      | 1      | 3      |
| 18910  |       |        |        |        |
| 18919  | 1     | 1      | 1      | 1      |
| 18928  | 1     | 1      | 2      | 1      |
| 18931  | 4     | 3      | 5      | 4      |
| 18939  | 1     | 2      | 2      | 1      |
| 18946  | 1     | 1      | 1      | 1      |
| 18952  | 3     | 2      | 3      | 2      |
| 18954  | 1     | 1      | 1      | 1      |
| 18982  |       |        |        |        |
| 18986  | 3     | 1      | 3      | 2      |
| 18989  | 3     | 3      | 2      | 2      |
| 18990  | 2     | 1      | 1      | 1      |
| 18996  | 2     | 1      | 3      | 3      |
| 18998  | 1     | 1      | 1      | 1      |
| 19009  | 4     | 6      | 5      | 2      |
| 19010  | 1     | 2      | 1      | 1      |
| 19017  | 1     | 1      | 2      | 1      |
| 19018  | 1     | 1      | 1      | 1      |
| 19020  | 1     | 1      | 1      | 1      |
| 19027  | 2     | 2      | 2      | 2      |
| 19035  | 2     | 1      | 1      | 1      |
| 19037  | 2     | 3      | 3      | 2      |
| 19048  | 1     | 1      | 1      | 1      |
| 19051  | 3     | 2      | 3      | 2      |
| 19054  | 1     | 1      | 2      | 2      |
| 19057  | 1     | 1      | 1      | 1      |
| 19073  | 3     | 2      | 2      | 3      |
| 19075  | 1     | 1      | 1      | 1      |
| 19079  | 3     | 3      | 3      | 3      |
| 19087  | 1     | 1      | 1      | 1      |

| respid | Q40_9 | Q40_10 | Q40_11 | Q40_12 |
|--------|-------|--------|--------|--------|
| 19090  | 3     | 1      | 2      | 2      |
| 19093  | 1     | 1      | 1      | 1      |
| 19099  | 4     | 2      | 5      | 3      |
| 19100  | 1     | 2      | 1      | 3      |
| 19101  | 2     | 2      | 3      | 3      |
| 19105  | 1     | 1      | 1      | 1      |
| 19111  | 3     | 1      | 3      | 4      |
| 19112  | 1     | 1      | 1      | 1      |
| 19117  | 2     | 1      | 3      | 4      |
| 19122  | 1     | 1      | 1      | 1      |
| 19126  | 1     | 1      | 1      | 1      |
| 19127  | 1     | 1      | 1      | 1      |
| 19131  | 2     | 1      | 4      | 1      |
| 19134  | 1     | 1      | 1      | 1      |
| 19149  | 1     | 1      | 1      | 2      |
| 19151  | 2     | 3      | 2      | 2      |
| 19164  | 1     | 1      | 1      | 1      |
| 19166  | 2     | 1      | 2      | 1      |
| 19172  | 2     | 1      | 2      | 2      |
| 19173  | 3     | 2      | 3      | 3      |
| 19180  | 1     | 1      | 1      | 1      |
| 19185  | 3     | 1      | 4      | 2      |
| 19189  | 1     | 1      | 1      | 1      |
| 19191  |       |        |        |        |
| 19198  | 1     | 1      | 1      | 1      |
| 19203  | 1     | 1      | 1      | 1      |
| 19209  | 1     | 1      | 2      | 1      |
| 19210  |       |        |        |        |
| 19218  |       |        |        |        |
| 19220  |       |        |        |        |
| 19225  | 3     | 2      | 3      | 3      |
| 19227  | 1     | 1      | 1      | 1      |

| respid | Q40_9 | Q40_10 | Q40_11 | Q40_12 |
|--------|-------|--------|--------|--------|
| 19228  | 1     | 1      | 1      | 1      |
| 19243  | 2     | 1      | 2      | 1      |
| 19244  | 2     | 1      | 2      | 2      |
| 19246  | 1     | 1      | 1      | 1      |
| 19248  |       |        |        |        |
| 19249  | 1     | 1      | 1      | 1      |
| 19252  | 3     | 3      | 2      | 1      |
| 19255  | 1     | 3      | 2      | 2      |
| 19257  | 3     | 3      | 3      | 2      |
| 19274  |       |        |        |        |
| 19279  |       |        |        |        |
| 19291  | 1     | 1      | 1      | 1      |
| 19292  | 3     | 1      | 3      | 2      |
| 19308  | 3     | 3      | 2      | 3      |
| 19310  | 1     | 1      | 2      | 1      |
| 19311  | 1     | 1      | 1      | 1      |
| 19326  | 3     | 1      | 2      | 1      |
| 19327  |       |        |        |        |
| 19329  |       |        |        |        |
| 19330  | 4     | 4      | 3      | 4      |
| 19333  | 3     | 2      | 2      | 2      |
| 19336  | 1     | 1      | 1      | 1      |
| 19343  | 1     | 1      | 3      | 1      |
| 19348  | 1     | 1      | 1      | 1      |
| 19349  | 4     | 3      | 4      | 4      |
| 19352  | 2     | 1      | 5      | 3      |
| 19356  | 1     | 1      | 2      | 1      |
| 19357  | 1     | 1      | 1      | 1      |
| 19358  | 1     | 1      | 2      | 1      |
| 19367  | 2     | 2      | 2      | 2      |
| 19376  |       |        |        |        |
| 19377  | 1     | 1      | 1      | 1      |

| respid | Q40_9 | Q40_10 | Q40_11 | Q40_12 |
|--------|-------|--------|--------|--------|
| 19380  | 1     | 1      | 1      | 1      |
| 19384  | 1     | 1      | 1      | 1      |
| 19391  | 4     | 2      | 3      | 4      |
| 19397  |       |        |        |        |
| 19398  | 1     | 1      | 1      | 1      |
| 19401  |       |        |        |        |
| 19402  | 1     | 1      | 2      | 1      |
| 19403  |       |        |        |        |
| 19405  |       |        |        |        |
| 19407  | 1     | 1      | 1      | 1      |
| 19415  | 1     | 1      | 1      | 1      |
| 19420  |       |        |        |        |
| 19423  | 3     | 2      | 4      | 3      |
| 19424  | 2     | 2      | 4      | 2      |
| 19426  | 1     | 1      | 1      | 2      |
| 19429  | 1     | 1      | 1      | 1      |
| 19435  | 1     | 2      | 3      | 3      |
| 19441  | 1     | 1      | 2      | 2      |
| 19450  | 1     | 2      | 2      | 1      |
| 19456  | 2     | 2      | 3      | 2      |
| 19457  | 1     | 1      | 1      | 1      |
| 19463  | 2     | 1      | 2      | 2      |
| 19467  | 6     | 6      | 6      | 6      |
| 19468  | 1     | 1      | 1      | 1      |
| 19471  | 1     | 1      | 1      | 1      |
| 19473  | 3     | 3      | 1      | 1      |
| 19478  | 3     | 3      | 3      | 2      |
| 19480  |       |        |        |        |
| 19481  | 1     | 1      | 1      | 1      |
| 19484  | 1     | 1      | 1      | 1      |
| 19487  | 1     | 1      | 1      | 1      |
| 19491  | 4     | 1      | 1      | 4      |

| respid | Q40_9 | Q40_10 | Q40_11 | Q40_12 |
|--------|-------|--------|--------|--------|
| 19495  | 3     | 3      | 2      | 2      |
| 19498  | 3     | 3      | 4      | 4      |
| 19500  | 3     | 2      | 4      | 4      |
| 19501  | 3     | 2      | 5      | 4      |
| 19503  |       |        |        |        |
| 19506  | 1     | 1      | 1      | 1      |
| 19508  | 1     | 1      | 1      | 1      |
| 19509  | 1     | 1      | 2      | 1      |
| 19518  | 2     | 2      | 2      | 2      |
| 19520  | 2     | 2      | 2      | 3      |
| 19536  | 1     | 1      | 1      | 1      |
| 19538  | 2     | 1      | 2      | 3      |
| 19541  | 2     | 1      | 5      | 2      |
| 19548  | 3     | 3      | 3      | 3      |
| 19553  |       |        |        |        |
| 19556  | 1     | 1      | 1      | 1      |
| 19559  |       |        |        |        |
| 19561  | 2     | 2      | 4      | 2      |
| 19562  | 1     | 1      | 1      | 1      |
| 19564  | 1     | 1      | 1      | 1      |
| 19567  | 5     | 6      | 6      | 5      |
| 19571  | 2     | 2      | 3      | 3      |
| 19576  | 3     | 3      | 2      | 3      |
| 19578  | 1     | 1      | 1      | 1      |
| 19606  |       |        |        |        |
| 19607  |       |        |        |        |
| 19608  | 1     | 1      | 2      | 1      |
| 19612  | 4     | 4      | 5      | 5      |
| 19618  | 3     | 2      | 3      | 4      |
| 19621  | 3     | 1      | 1      | 1      |
| 19624  | 4     | 4      | 3      | 4      |
| 19630  |       |        |        |        |

| respid | Q40_9 | Q40_10 | Q40_11 | Q40_12 |
|--------|-------|--------|--------|--------|
| 19637  | 3     | 3      | 3      | 3      |
| 19639  | 1     | 1      | 2      | 1      |
| 19647  | 1     | 1      | 1      | 1      |
| 19648  | 4     | 4      | 4      | 5      |
| 19660  | 1     | 1      | 1      | 1      |
| 19662  | 4     | 3      | 3      | 3      |
| 19669  | 1     | 1      | 1      | 1      |
| 19680  | 1     | 1      | 1      | 1      |
| 19682  | 2     | 1      | 2      | 2      |
| 19686  | 1     | 1      | 1      | 1      |
| 19700  | 1     | 1      | 2      | 1      |
| 19701  | 1     | 1      | 1      | 1      |
| 19704  |       |        |        |        |
| 19706  | 2     | 2      | 2      | 2      |
| 19707  | 1     | 1      | 2      | 1      |
| 19717  | 3     | 1      | 5      | 3      |
| 19718  | 1     | 1      | 1      | 1      |
| 19721  | 2     | 2      | 2      | 2      |
| 19722  | 1     | 1      | 1      | 1      |
| 19729  |       |        |        |        |
| 19738  | 3     | 2      | 4      | 3      |
| 19741  | 2     | 1      | 3      | 1      |
| 19742  | 3     | 2      | 2      | 1      |
| 19747  | 1     | 1      | 3      | 1      |
| 19748  | 1     | 1      | 1      | 1      |
| 19749  | 1     | 1      | 1      | 1      |
| 19756  | 2     | 2      | 2      | 3      |
| 19771  | 1     | 1      | 1      | 1      |
| 19772  | 3     | 3      | 3      | 3      |
| 19775  | 1     | 1      | 1      | 1      |
| 19783  |       |        |        |        |
| 19787  | 1     | 1      | 1      | 1      |

| respid | Q40_9 | Q40_10 | Q40_11 | Q40_12 |
|--------|-------|--------|--------|--------|
| 19790  |       |        |        |        |
| 19797  | 2     | 4      | 4      | 1      |
| 19802  | 1     | 1      | 1      | 1      |
| 19808  | 2     | 1      | 1      | 1      |
| 19810  | 1     | 1      | 1      | 1      |
| 19811  | 1     | 1      | 2      | 1      |
| 19812  | 1     | 1      | 1      | 1      |
| 19821  | 2     | 2      | 2      | 2      |
| 19826  | 1     | 1      | 1      | 1      |
| 19827  | 1     | 1      | 2      | 1      |
| 19830  | 1     | 1      | 1      | 1      |
| 19834  | 1     | 1      | 3      | 1      |
| 19838  | 2     | 1      | 4      | 3      |
| 19843  |       |        |        |        |
| 19845  | 2     | 2      | 3      | 2      |
| 19846  | 2     | 1      | 1      | 1      |
| 19852  | 5     | 4      | 3      | 6      |
| 19855  | 1     | 1      | 2      | 1      |
| 19858  | 3     | 2      | 3      | 4      |
| 19861  | 3     | 2      | 2      | 2      |
| 19863  | 2     | 2      | 2      | 2      |
| 19868  | 2     | 2      | 2      | 2      |
| 19874  | 2     | 1      | 2      | 1      |
| 19876  |       |        |        |        |
| 19880  | 3     | 3      | 3      | 5      |
| 19885  | 3     | 3      | 3      | 3      |
| 19890  |       |        |        |        |
| 19894  |       |        |        |        |
| 19895  | 1     | 1      | 1      | 1      |
| 19897  | 3     | 1      | 2      | 1      |
| 19906  | 1     | 1      | 1      | 1      |
| 19908  | 1     | 1      | 1      | 1      |

| respid | Q40_9 | Q40_10 | Q40_11 | Q40_12 |
|--------|-------|--------|--------|--------|
| 19912  | 1     | 1      | 1      | 1      |
| 19913  | 1     | 1      | 2      | 1      |
| 19914  | 3     | 2      | 4      | 2      |
| 19918  | 4     | 3      | 4      | 4      |
| 19924  | 3     | 2      | 4      | 4      |
| 19936  |       |        |        |        |
| 19940  |       |        |        |        |
| 19945  | 1     | 1      | 1      | 1      |
| 19948  |       |        |        |        |
| 19959  | 1     | 1      | 1      | 1      |
| 19961  | 1     | 1      | 1      | 1      |
| 19962  | 1     | 1      | 2      | 1      |
| 19965  | 1     | 1      | 1      | 1      |
| 19966  | 2     | 2      | 3      | 2      |
| 19973  | 2     | 1      | 2      | 2      |
| 19981  | 1     | 2      | 2      | 1      |
| 19986  | 2     | 2      | 2      | 1      |
| 19989  | 1     | 1      | 1      | 1      |
| 19998  | 3     | 3      | 3      | 3      |
| 20001  | 5     | 5      | 5      | 6      |
| 20005  |       |        |        |        |
| 20013  | 4     | 5      | 4      | 5      |
| 20015  | 1     | 1      | 1      | 1      |
| 20017  | 2     | 1      | 1      | 3      |
| 20020  | 1     | 1      | 1      | 1      |
| 20021  | 1     | 1      | 1      | 1      |
| 20026  | 3     | 1      | 2      | 2      |
| 20028  | 2     | 1      | 1      | 2      |
| 20030  | 1     | 1      | 1      | 2      |
| 20031  |       |        |        |        |
| 20034  | 1     | 1      | 1      | 1      |
| 20035  |       |        |        |        |



| respid | Q40_9 | Q40_10 | Q40_11 | Q40_12 |
|--------|-------|--------|--------|--------|
| 20040  | 2     | 1      | 2      | 3      |
| 20045  | 3     | 4      | 5      | 1      |
| 20048  | 6     | 1      | 6      | 1      |
| 20053  | 1     | 1      | 1      | 1      |
| 20064  | 3     | 2      | 2      | 3      |
| 20071  | 2     | 1      | 1      | 1      |
| 20072  | 1     | 1      | 4      | 1      |
| 20076  | 1     | 1      | 1      | 1      |
| 20081  | 1     | 1      | 2      | 2      |
| 20082  | 2     | 2      | 2      | 2      |
| 20083  | 1     | 1      | 2      | 1      |
| 20088  | 2     | 2      | 2      | 1      |
| 20089  | 1     | 1      | 1      | 1      |
| 20099  | 1     | 2      | 1      | 2      |
| 20101  | 1     | 1      | 1      | 1      |
| 20102  | 1     | 1      | 2      | 1      |
| 20109  | 1     | 1      | 1      | 1      |
| 20118  | 2     | 1      | 1      | 1      |
| 20119  | 1     | 1      | 1      | 1      |
| 20124  |       |        |        |        |
| 20126  | 1     | 1      | 1      | 1      |
| 20130  |       |        |        |        |
| 20131  | 1     | 1      | 1      | 2      |
| 20134  | 4     | 3      | 2      | 3      |
| 20146  | 4     | 3      | 3      | 3      |
| 20152  |       |        |        |        |
| 20155  | 2     | 1      | 2      | 1      |
| 20156  |       |        |        |        |
| 20157  |       |        |        |        |
| 20164  | 1     | 1      | 1      | 1      |
| 20168  | 1     | 1      | 1      | 1      |
| 20173  | 5     | 2      | 5      | 3      |

| respid | Q40_9 | Q40_10 | Q40_11 | Q40_12 |
|--------|-------|--------|--------|--------|
| 20174  | 1     | 1      | 1      | 1      |
| 20175  | 2     | 1      | 5      | 2      |
| 20189  | 1     | 1      | 1      | 1      |
| 20190  | 1     | 1      | 2      | 1      |
| 20201  | 1     | 1      | 1      | 1      |
| 20202  | 1     | 1      | 1      | 1      |
| 20204  | 3     | 3      | 3      | 3      |
| 20206  | 1     | 1      | 2      | 1      |
| 20207  | 1     | 1      | 1      | 1      |
| 20212  | 2     | 2      | 3      | 2      |
| 20213  | 2     | 1      | 2      | 1      |
| 20217  | 1     | 1      | 1      | 1      |
| 20222  | 1     | 1      | 2      | 1      |
| 20227  |       |        |        |        |
| 20228  | 1     | 1      | 1      | 1      |
| 20238  | 1     | 1      | 1      | 1      |
| 20242  | 1     | 1      | 1      | 1      |
| 20246  | 1     | 1      | 1      | 1      |
| 20255  | 4     | 5      | 6      | 5      |
| 20256  | 2     | 2      | 2      | 2      |
| 20259  | 2     | 3      | 3      | 2      |
| 20262  | 1     | 1      | 1      | 1      |
| 20274  | 1     | 1      | 1      | 1      |
| 20283  | 4     | 3      | 4      | 4      |
| 20284  |       |        |        |        |
| 20291  | 2     | 1      | 1      | 2      |
| 20292  | 1     | 1      | 1      | 1      |
| 20293  | 2     | 1      | 2      | 2      |
| 20298  | 5     | 3      | 3      | 4      |
| 20301  |       |        |        |        |
| 20303  | 2     | 1      | 2      | 1      |
| 20309  |       |        |        |        |

| respid | Q40_9 | Q40_10 | Q40_11 | Q40_12 |
|--------|-------|--------|--------|--------|
| 20318  | 1     | 1      | 1      | 1      |
| 20324  | 1     | 1      | 1      | 1      |
| 20335  | 1     | 1      | 1      | 1      |
| 20336  | 1     | 1      | 1      | 1      |
| 20339  | 1     | 1      | 1      | 1      |
| 20348  | 1     | 1      | 2      | 1      |
| 20351  | 4     | 4      | 3      | 3      |
| 20353  | 2     | 2      | 2      | 2      |
| 20356  | 1     | 1      | 1      | 1      |
| 20357  |       |        |        |        |
| 20366  | 1     | 1      | 1      | 1      |
| 20369  | 4     | 5      | 5      | 4      |
| 20372  | 1     | 1      | 1      | 1      |
| 20375  | 1     | 1      | 1      | 1      |
| 20379  | 1     | 1      | 1      | 1      |
| 20380  | 2     | 1      | 3      | 3      |
| 20396  | 1     | 1      | 2      | 1      |
| 20398  | 2     | 2      | 3      | 2      |
| 20412  | 1     | 1      | 1      | 1      |
| 20415  | 1     | 1      | 2      | 1      |
| 20424  | 3     | 3      | 3      | 3      |
| 20434  | 1     | 1      | 1      | 1      |
| 20435  | 1     | 1      | 1      | 1      |
| 20440  | 1     | 1      | 1      | 1      |
| 20441  | 1     | 1      | 1      | 1      |
| 20445  | 1     | 1      | 1      | 1      |
| 20446  | 3     | 3      | 3      | 3      |
| 20450  | 1     | 1      | 2      | 1      |
| 20453  | 2     | 2      | 3      | 4      |
| 20458  | 2     | 2      | 2      | 2      |
| 20464  | 1     | 1      | 1      | 1      |
| 20471  | 1     | 1      | 3      | 1      |

| respid | Q40_9 | Q40_10 | Q40_11 | Q40_12 |
|--------|-------|--------|--------|--------|
| 20473  | 1     | 1      | 1      | 1      |
| 20474  | 1     | 1      | 1      | 1      |
| 20477  |       |        |        |        |
| 20479  | 1     | 1      | 1      | 6      |
| 20485  | 1     | 1      | 1      | 1      |
| 20487  | 1     | 1      | 1      | 1      |
| 20488  | 1     | 1      | 1      | 1      |
| 20494  | 1     | 1      | 3      | 1      |
| 20502  | 3     | 4      | 5      | 4      |
| 20503  | 2     | 1      | 4      | 1      |
| 20510  | 1     | 1      | 1      | 1      |
| 20512  |       |        |        |        |
| 20516  | 1     | 1      | 1      | 1      |
| 20522  | 2     | 1      | 2      | 1      |
| 20527  | 1     | 1      | 1      | 1      |
| 20529  | 3     | 3      | 3      | 3      |
| 20535  | 2     | 3      | 3      | 3      |
| 20543  | 1     | 1      | 1      | 1      |
| 20546  | 3     | 1      | 2      | 2      |
| 20548  | 1     | 1      | 1      | 1      |
| 20552  | 1     | 1      | 1      | 1      |
| 20556  | 1     | 2      | 4      | 3      |
| 20566  | 4     | 3      | 2      | 3      |
| 20576  | 1     | 2      | 2      | 1      |
| 20587  | 1     | 1      | 1      | 1      |
| 20589  | 1     | 1      | 1      | 1      |
| 20593  |       |        |        |        |
| 20594  | 2     | 2      | 2      | 2      |
| 20602  | 2     | 1      | 2      | 2      |
| 20607  |       |        |        |        |
| 20608  | 1     | 1      | 1      | 1      |
| 20611  | 1     | 1      | 1      | 1      |

| respid | Q40_9 | Q40_10 | Q40_11 | Q40_12 |
|--------|-------|--------|--------|--------|
| 20612  | 1     | 1      | 1      | 1      |
| 20615  | 1     | 1      | 3      | 2      |
| 20625  | 1     | 1      | 1      | 1      |
| 20630  | 2     | 2      | 2      | 1      |
| 20639  | 1     | 1      | 2      | 1      |
| 20643  | 1     | 1      | 1      | 1      |
| 20645  |       |        |        |        |
| 20647  | 1     | 1      | 2      | 1      |
| 20652  | 3     | 5      | 4      | 3      |
| 20661  | 1     | 1      | 1      | 1      |
| 20665  |       |        |        |        |
| 20679  | 1     | 1      | 1      | 1      |
| 20682  | 2     | 2      | 3      | 4      |
| 20683  |       |        |        |        |
| 20700  | 1     | 1      | 1      | 1      |
| 20702  | 2     | 1      | 5      | 1      |
| 20709  | 1     | 1      | 1      | 1      |
| 20715  | 3     | 3      | 3      | 3      |
| 20718  | 2     | 1      | 1      | 2      |
| 20722  | 1     | 1      | 1      | 1      |
| 20729  |       |        |        |        |
| 20732  |       |        |        |        |
| 20746  | 4     | 4      | 5      | 3      |
| 20747  |       |        |        |        |
| 20758  | 1     | 1      | 1      | 1      |
| 20767  | 2     | 1      | 3      | 3      |
| 20777  | 1     | 1      | 1      | 1      |
| 20778  | 1     | 1      | 1      | 1      |
| 20780  | 1     | 1      | 1      | 1      |
| 20800  | 2     | 1      | 2      | 1      |
| 20810  | 1     | 1      | 1      | 1      |
| 20814  | 1     | 1      | 2      | 1      |

| respid | Q40_9 | Q40_10 | Q40_11 | Q40_12 |
|--------|-------|--------|--------|--------|
| 20816  | 1     | 1      | 1      | 1      |
| 20832  | 3     | 3      | 3      | 3      |
| 20838  | 3     | 3      | 2      | 3      |
| 20841  | 3     | 2      | 2      | 3      |
| 20848  | 1     | 1      | 1      | 1      |
| 20850  |       |        |        |        |
| 20851  | 1     | 1      | 2      | 1      |
| 20861  | 1     | 1      | 2      | 2      |
| 20870  | 2     | 3      | 2      | 2      |
| 20880  | 1     | 1      | 1      | 1      |
| 20883  | 1     | 1      | 1      | 1      |
| 20894  | 1     | 1      | 1      | 1      |
| 20896  | 3     | 3      | 3      | 4      |
| 20901  | 3     | 4      | 3      | 3      |
| 20903  | 1     | 1      | 1      | 1      |
| 20909  |       |        |        |        |
| 20919  | 1     | 1      | 1      | 1      |
| 20925  | 1     | 1      | 1      | 1      |
| 20935  | 1     | 1      | 1      | 1      |
| 20939  | 3     | 1      | 2      | 1      |
| 20956  | 5     | 5      | 4      | 5      |
| 20970  | 2     | 2      | 3      | 2      |
| 20974  | 1     | 1      | 3      | 1      |
| 20975  | 1     | 1      | 1      | 1      |
| 20984  | 2     | 2      | 2      | 2      |
| 20988  |       |        |        |        |
| 20996  | 2     | 2      | 1      | 1      |
| 20998  | 1     | 1      | 2      | 1      |
| 21007  |       |        |        |        |
| 21008  |       |        |        |        |
| 21014  | 2     | 1      | 1      | 1      |
| 21020  | 1     | 1      | 1      | 1      |

| respid | Q40_9 | Q40_10 | Q40_11 | Q40_12 |
|--------|-------|--------|--------|--------|
| 21022  | 3     | 2      | 2      | 3      |
| 21024  |       |        |        |        |
| 21026  | 2     | 3      | 3      | 2      |
| 21027  | 1     | 1      | 1      | 1      |
| 21030  | 1     | 1      | 1      | 1      |
| 21032  | 4     | 4      | 4      | 3      |
| 21040  | 2     | 2      | 2      | 2      |
| 21045  | 1     | 1      | 1      | 1      |
| 21058  | 2     | 2      | 2      | 2      |
| 21064  | 1     | 1      | 1      | 1      |
| 21073  | 1     | 1      | 1      | 1      |
| 21086  | 3     | 4      | 4      | 3      |
| 21092  | 5     | 5      | 6      | 6      |
| 21096  | 3     | 4      | 2      | 3      |
| 21103  | 1     | 1      | 2      | 1      |
| 21120  | 4     | 4      | 3      | 3      |
| 21125  |       |        |        |        |
| 21126  | 1     | 1      | 1      | 1      |
| 21132  |       |        |        |        |
| 21139  | 2     | 2      | 2      | 2      |
| 21147  |       |        |        |        |
| 21148  | 1     | 1      | 1      | 1      |
| 21149  | 1     | 1      | 1      | 1      |
| 21164  | 1     | 1      | 1      | 1      |
| 21165  | 1     | 1      | 3      | 1      |
| 21171  | 2     | 3      | 4      | 3      |
| 21176  | 1     | 1      | 1      | 1      |
| 21187  | 3     | 3      | 3      | 1      |
| 21192  | 2     | 1      | 2      | 3      |
| 21198  | 1     | 1      | 1      | 1      |
| 21199  | 1     | 1      | 2      | 1      |
| 21206  | 3     | 4      | 4      | 4      |

| respid | Q40_9 | Q40_10 | Q40_11 | Q40_12 |
|--------|-------|--------|--------|--------|
| 21212  | 1     | 1      | 2      | 1      |
| 21216  | 1     | 1      | 1      | 1      |
| 21217  | 2     | 2      | 3      | 3      |
| 21228  | 2     | 3      | 4      | 3      |
| 21229  | 4     | 4      | 3      | 4      |
| 21230  | 1     | 1      | 1      | 1      |
| 21243  | 3     | 2      | 2      | 2      |
| 21247  | 3     | 1      | 2      | 3      |
| 21253  | 2     | 2      | 1      | 2      |
| 21264  | 2     | 2      | 2      | 2      |
| 21265  | 1     | 1      | 1      | 1      |
| 21273  | 3     | 1      | 2      | 2      |
| 21275  | 1     | 3      | 2      | 2      |
| 21278  | 3     | 3      | 3      | 3      |
| 21291  | 2     | 2      | 3      | 2      |
| 21298  | 2     | 1      | 1      | 1      |
| 21301  | 5     | 5      | 4      | 5      |
| 21312  | 3     | 3      | 3      | 4      |
| 21323  | 3     | 1      | 1      | 1      |
| 21325  | 2     | 2      | 2      | 1      |
| 21341  | 1     | 1      | 1      | 1      |
| 21349  | 2     | 1      | 4      | 2      |
| 21350  | 1     | 1      | 1      | 1      |
| 21354  | 5     | 4      | 5      | 4      |
| 21372  | 2     | 1      | 2      | 2      |
| 21373  | 1     | 2      | 3      | 3      |
| 21378  | 1     | 1      | 2      | 2      |
| 21393  |       |        |        |        |
| 21401  | 2     | 2      | 3      | 3      |
| 21405  | 1     | 1      | 1      | 1      |
| 21406  |       |        |        |        |
| 21407  | 3     | 3      | 2      | 3      |



| respid | Q40_9 | Q40_10 | Q40_11 | Q40_12 |
|--------|-------|--------|--------|--------|
| 21418  | 1     | 1      | 1      | 1      |
| 21420  | 1     | 1      | 1      | 1      |
| 21421  |       |        |        |        |
| 21446  | 1     | 1      | 3      | 2      |
| 21449  | 2     | 2      | 2      | 2      |
| 21452  | 1     | 1      | 1      | 1      |
| 21455  | 4     | 5      | 4      | 6      |
| 21469  | 1     | 1      | 1      | 1      |
| 21471  | 1     | 1      | 3      | 1      |
| 21472  | 1     | 1      | 1      | 1      |
| 21474  | 1     | 1      | 1      | 1      |
| 21479  | 1     | 1      | 1      | 2      |
| 21485  | 1     | 1      | 1      | 1      |
| 21512  |       |        |        |        |
| 21513  | 1     | 1      | 1      | 1      |
| 21514  | 3     | 4      | 4      | 3      |
| 21520  | 2     | 2      | 3      | 3      |
| 21539  | 1     | 1      | 3      | 1      |
| 21553  | 1     | 1      | 1      | 1      |
| 21560  | 2     | 2      | 2      | 2      |
| 21561  | 3     | 3      | 3      | 3      |
| 21563  | 1     | 1      | 4      | 2      |
| 21565  |       |        |        |        |
| 21582  | 1     | 1      | 2      | 1      |
| 21584  | 4     | 1      | 1      | 1      |
| 21585  | 2     | 2      | 3      | 3      |
| 21586  | 1     | 1      | 1      | 1      |
| 21587  | 3     | 2      | 3      | 2      |
| 21590  | 4     | 2      | 6      | 5      |
| 21601  | 2     | 2      | 2      | 2      |
| 21611  | 2     | 1      | 2      | 3      |
| 21612  | 1     | 1      | 1      | 1      |

| respid | Q40_9 | Q40_10 | Q40_11 | Q40_12 |
|--------|-------|--------|--------|--------|
| 21625  | 2     | 1      | 2      | 2      |
| 21633  |       |        |        |        |
| 21640  | 2     | 1      | 1      | 1      |
| 21647  | 1     | 1      | 1      | 1      |
| 21648  | 4     | 5      | 4      | 3      |
| 21656  | 1     | 1      | 1      | 1      |
| 21657  | 1     | 1      | 1      | 1      |
| 21658  | 3     | 2      | 4      | 4      |
| 21665  | 3     | 3      | 4      | 3      |
| 21666  | 3     | 4      | 5      | 3      |
| 21668  | 4     | 5      | 4      | 4      |
| 21673  | 2     | 2      | 2      | 2      |
| 21681  | 2     | 2      | 2      | 3      |
| 21682  | 1     | 1      | 1      | 1      |
| 21685  | 3     | 1      | 3      | 1      |
| 21692  | 2     | 1      | 3      | 1      |
| 21697  | 1     | 1      | 1      | 1      |
| 21711  | 1     | 1      | 1      | 1      |
| 21715  | 3     | 4      | 3      | 3      |
| 21726  | 1     | 1      | 3      | 1      |
| 21748  |       |        |        |        |
| 21761  | 1     | 1      | 1      | 1      |
| 21769  | 3     | 3      | 4      | 3      |
| 21774  | 2     | 3      | 4      | 3      |
| 21778  |       |        |        |        |
| 21785  | 3     | 3      | 2      | 2      |
| 21799  | 3     | 3      | 2      | 2      |
| 21820  | 5     | 4      | 5      | 5      |
| 21837  | 1     | 1      | 1      | 1      |
| 21845  | 4     | 4      | 3      | 4      |
| 21846  | 1     | 1      | 1      | 1      |
| 21849  | 2     | 1      | 1      | 4      |

| respid | Q40_9 | Q40_10 | Q40_11 | Q40_12 |
|--------|-------|--------|--------|--------|
| 21850  | 1     | 1      | 2      | 1      |
| 21855  | 1     | 1      | 1      | 1      |
| 21859  | 1     | 1      | 1      | 1      |
| 21861  | 1     | 1      | 1      | 1      |
| 21866  |       |        |        |        |
| 21873  | 1     | 1      | 2      | 2      |
| 21876  | 3     | 1      | 2      | 2      |
| 21882  |       |        |        |        |
| 21884  | 2     | 2      | 3      | 3      |
| 21887  | 2     | 2      | 2      | 2      |
| 21892  | 1     | 1      | 1      | 1      |
| 21907  | 2     | 2      | 2      | 2      |
| 21910  | 4     | 4      | 5      | 5      |
| 21912  | 3     | 2      | 2      | 2      |
| 21914  | 1     | 1      | 2      | 2      |
| 21925  | 1     | 1      | 1      | 1      |
| 21937  |       |        |        |        |
| 21938  | 2     | 1      | 1      | 2      |
| 21940  | 1     | 1      | 2      | 1      |
| 21942  | 1     | 1      | 1      | 1      |
| 21947  |       |        |        |        |
| 21948  | 3     | 1      | 1      | 2      |
| 21961  | 1     | 1      | 1      | 1      |
| 21977  | 5     | 4      | 5      | 3      |
| 21983  |       |        |        |        |
| 21986  | 3     | 3      | 3      | 2      |
| 21988  | 1     | 1      | 1      | 1      |
| 21996  | 2     | 1      | 1      | 1      |
| 21997  | 2     | 1      | 2      | 2      |
| 22005  | 2     | 2      | 2      | 2      |
| 22013  | 1     | 1      | 1      | 1      |
| 22018  |       |        |        |        |

| respid | Q40_9 | Q40_10 | Q40_11 | Q40_12 |
|--------|-------|--------|--------|--------|
| 22019  | 1     | 1      | 2      | 1      |
| 22071  | 1     | 1      | 1      | 1      |
| 22082  | 1     | 1      | 1      | 1      |
| 22085  | 1     | 1      | 1      | 1      |
| 22092  | 1     | 1      | 1      | 1      |
| 22097  | 1     | 1      | 2      | 1      |
| 22111  |       |        |        |        |
| 22118  | 1     | 1      | 1      | 1      |
| 22132  | 1     | 2      | 2      | 1      |
| 22133  | 1     | 1      | 1      | 1      |
| 22139  |       |        |        |        |
| 22142  | 5     | 4      | 4      | 3      |
| 22146  | 1     | 1      | 1      | 1      |
| 22181  |       |        |        |        |
| 22202  | 1     | 1      | 1      | 1      |
| 22214  |       |        |        |        |
| 22223  | 1     | 1      | 1      | 1      |
| 22227  | 1     | 2      | 1      | 1      |
| 22229  | 1     | 1      | 1      | 1      |
| 22239  | 4     | 3      | 3      | 4      |
| 22245  | 5     | 4      | 5      | 5      |
| 22256  | 1     | 1      | 1      | 1      |
| 22260  | 1     | 1      | 1      | 2      |
| 22298  | 2     | 2      | 3      | 2      |
| 22321  | 1     | 1      | 2      | 1      |
| 22340  |       |        |        |        |
| 22346  | 2     | 3      | 4      | 4      |
| 22356  | 1     | 1      | 1      | 1      |
| 22361  | 2     | 2      | 3      | 2      |
| 22364  | 1     | 1      | 1      | 1      |
| 22368  |       |        |        |        |
| 22374  | 3     | 4      | 5      | 4      |

| respid | Q40_9 | Q40_10 | Q40_11 | Q40_12 |
|--------|-------|--------|--------|--------|
| 22375  | 1     | 1      | 1      | 1      |
| 22377  | 1     | 1      | 1      | 1      |
| 22383  |       |        |        |        |
| 22387  | 4     | 4      | 4      | 4      |
| 22392  |       |        |        |        |
| 22393  | 1     | 1      | 2      | 1      |
| 22394  | 1     | 1      | 2      | 1      |
| 22395  |       |        |        |        |
| 22401  | 1     | 1      | 2      | 1      |
| 22407  |       |        |        |        |
| 22410  | 1     | 1      | 1      | 1      |
| 22418  | 1     | 1      | 2      | 1      |
| 22421  |       |        |        |        |
| 22423  |       |        |        |        |
| 22425  | 2     | 1      | 2      | 1      |
| 22427  | 1     | 1      | 1      | 1      |
| 22431  | 3     | 3      | 6      | 4      |
| 22435  | 1     | 1      | 1      | 1      |
| 22436  | 2     | 1      | 3      | 3      |
| 22442  |       |        |        |        |
| 22444  | 3     | 4      | 4      | 4      |
| 22445  | 2     | 3      | 5      | 3      |
| 22446  |       |        |        |        |
| 22448  | 2     | 3      | 3      | 3      |
| 22449  | 1     | 1      | 1      | 1      |
| 22450  | 1     | 2      | 2      | 3      |
| 22453  | 3     | 4      | 3      | 4      |
| 22465  | 1     | 1      | 2      | 1      |
| 22472  | 2     | 2      | 2      | 2      |
| 22475  | 4     | 2      | 4      | 2      |
| 22478  | 2     | 1      | 4      | 3      |
| 22491  | 1     | 1      | 2      | 1      |

| respid | Q40_9 | Q40_10 | Q40_11 | Q40_12 |
|--------|-------|--------|--------|--------|
| 22497  | 2     | 2      | 2      | 2      |
| 22498  | 1     | 1      | 1      | 1      |
| 22499  | 1     | 1      | 1      | 2      |
| 22503  | 1     | 2      | 1      | 2      |
| 22507  | 1     | 1      | 1      | 1      |
| 22513  | 2     | 1      | 3      | 4      |
| 22517  | 3     | 1      | 4      | 2      |
| 22524  | 3     | 3      | 3      | 3      |
| 22528  | 1     | 1      | 1      | 1      |
| 22544  | 2     | 2      | 2      | 2      |
| 22571  | 1     | 1      | 1      | 1      |
| 22576  | 2     | 3      | 3      | 3      |
| 22579  | 2     | 2      | 2      | 2      |
| 22583  | 3     | 1      | 2      | 2      |
| 22591  | 4     | 3      | 4      | 4      |
| 22592  | 2     | 2      | 2      | 2      |
| 22612  | 3     | 3      | 2      | 2      |
| 22613  | 2     | 2      | 1      | 2      |
| 22615  | 1     | 1      | 1      | 1      |
| 22621  | 2     | 1      | 1      | 2      |
| 22625  | 1     | 1      | 1      | 1      |
| 22628  | 1     | 1      | 1      | 1      |
| 22632  | 2     | 1      | 1      | 2      |
| 22639  |       |        |        |        |
| 22648  | 1     | 1      | 4      | 1      |
| 22649  | 2     | 1      | 2      | 3      |
| 22655  |       |        |        |        |
| 22659  |       |        |        |        |
| 22660  | 1     | 1      | 1      | 1      |
| 22666  | 2     | 3      | 2      | 2      |
| 22667  | 1     | 1      | 1      | 1      |
| 22670  |       |        |        |        |

| respid | Q40_9 | Q40_10 | Q40_11 | Q40_12 |
|--------|-------|--------|--------|--------|
| 22681  |       |        |        |        |
| 22683  | 2     | 1      | 1      | 1      |
| 22688  | 1     | 1      | 1      | 1      |
| 22695  | 2     | 2      | 2      | 3      |
| 22696  | 1     | 1      | 1      | 1      |
| 22705  | 2     | 1      | 5      | 1      |
| 22718  | 3     | 3      | 2      | 4      |
| 22720  | 1     | 1      | 2      | 1      |
| 22724  | 1     | 1      | 1      | 1      |
| 22728  | 1     | 1      | 1      | 1      |
| 22751  | 1     | 1      | 1      | 1      |
| 22782  | 3     | 4      | 6      | 6      |
| 22786  | 2     | 2      | 2      | 2      |
| 22788  | 1     | 1      | 2      | 1      |
| 22810  | 3     | 3      | 2      | 2      |
| 22816  | 1     | 1      | 1      | 1      |
| 22818  | 2     | 1      | 1      | 1      |
| 22854  |       |        |        |        |
| 22858  | 2     | 2      | 2      | 1      |
| 22862  | 1     | 1      | 2      | 1      |
| 22865  | 1     | 1      | 1      | 1      |
| 22868  | 1     | 1      | 2      | 1      |
| 22869  | 3     | 1      | 3      | 2      |
| 22873  | 1     | 1      | 1      | 1      |
| 22875  | 1     | 1      | 1      | 1      |
| 22876  | 1     | 1      | 1      | 1      |
| 22882  | 3     | 2      | 2      | 2      |
| 22884  | 3     | 2      | 4      | 3      |
| 22887  | 1     | 2      | 2      | 2      |
| 22888  | 1     | 1      | 1      | 1      |
| 22900  |       |        |        |        |
| 22901  |       |        |        |        |

| respid | Q40_9 | Q40_10 | Q40_11 | Q40_12 |
|--------|-------|--------|--------|--------|
| 22912  | 1     | 1      | 1      | 1      |
| 22913  | 1     | 1      | 1      | 1      |
| 22921  | 1     | 1      | 1      | 1      |
| 22925  | 1     | 1      | 1      | 1      |
| 22940  | 1     | 1      | 1      | 1      |
| 22941  | 1     | 1      | 3      | 1      |
| 22947  | 2     | 1      | 2      | 1      |
| 22948  |       |        |        |        |
| 22964  | 2     | 1      | 3      | 1      |
| 22966  | 1     | 1      | 1      | 1      |
| 22969  | 1     | 1      | 1      | 1      |
| 22971  |       |        |        |        |
| 22988  |       |        |        |        |
| 22990  |       |        |        |        |
| 23000  | 1     | 1      | 3      | 1      |
| 23016  |       |        |        |        |
| 23026  | 1     | 1      | 2      | 1      |
| 23035  | 1     | 1      | 1      | 1      |
| 23037  | 3     | 3      | 4      | 4      |
| 23044  | 3     | 2      | 3      | 3      |
| 23046  | 1     | 1      | 1      | 1      |
| 23047  | 1     | 1      | 1      | 1      |
| 23049  | 2     | 3      | 4      | 1      |
| 23055  | 1     | 1      | 1      | 1      |
| 23066  | 1     | 1      | 1      | 1      |
| 23075  | 1     | 1      | 1      | 1      |
| 23081  | 1     | 1      | 2      | 1      |
| 23087  | 2     | 2      | 1      | 1      |
| 23094  |       |        |        |        |
| 23099  |       |        |        |        |
| 23101  | 1     | 1      | 1      | 2      |
| 23105  |       |        |        |        |



| respid | Q40_9 | Q40_10 | Q40_11 | Q40_12 |
|--------|-------|--------|--------|--------|
| 23115  | 2     | 1      | 2      | 2      |
| 23121  | 1     | 1      | 1      | 1      |
| 23127  | 1     | 1      | 1      | 1      |
| 23131  | 2     | 2      | 2      | 2      |
| 23134  | 1     | 1      | 1      | 1      |
| 23145  | 1     | 1      | 2      | 1      |
| 23151  | 1     | 1      | 1      | 1      |
| 23161  | 3     | 2      | 2      | 3      |
| 23169  | 2     | 2      | 2      | 2      |
| 23173  | 1     | 1      | 1      | 1      |
| 23174  | 1     | 1      | 1      | 2      |
| 23186  | 5     | 3      | 4      | 4      |
| 23195  | 1     | 1      | 1      | 1      |
| 23197  | 3     | 2      | 2      | 2      |
| 23198  | 1     | 1      | 1      | 1      |
| 23203  |       |        |        |        |
| 23204  | 3     | 1      | 4      | 3      |
| 23212  | 1     | 1      | 2      | 1      |
| 23214  | 1     | 1      | 1      | 1      |
| 23221  | 1     | 1      | 1      | 1      |
| 23237  | 1     | 1      | 1      | 1      |
| 23251  | 1     | 1      | 1      | 1      |
| 23254  | 1     | 1      | 1      | 1      |
| 23262  | 2     | 2      | 1      | 1      |
| 23267  | 1     | 1      | 1      | 1      |
| 23268  | 3     | 2      | 6      | 4      |
| 23273  | 2     | 1      | 1      | 2      |
| 23278  | 1     | 1      | 1      | 1      |
| 23279  |       |        |        |        |
| 23281  | 3     | 3      | 3      | 3      |
| 23282  | 2     | 2      | 2      | 2      |
| 23283  | 3     | 2      | 2      | 3      |

| respid | Q40_9 | Q40_10 | Q40_11 | Q40_12 |
|--------|-------|--------|--------|--------|
| 23285  | 1     | 1      | 1      | 1      |
| 23305  | 2     | 1      | 4      | 2      |
| 23309  | 1     | 1      | 1      | 1      |
| 23310  | 2     | 1      | 1      | 1      |
| 23311  | 1     | 1      | 1      | 1      |
| 23312  | 3     | 2      | 3      | 2      |
| 23319  | 1     | 1      | 2      | 1      |
| 23320  | 1     | 1      | 2      | 1      |
| 23322  | 2     | 2      | 2      | 2      |
| 23334  | 2     | 1      | 2      | 2      |
| 23340  | 1     | 1      | 1      | 1      |
| 23346  | 1     | 1      | 1      | 1      |
| 23353  | 1     | 1      | 2      | 1      |
| 23363  | 4     | 3      | 3      | 4      |
| 23364  | 3     | 4      | 3      | 3      |
| 23376  |       |        |        |        |
| 23378  | 1     | 1      | 1      | 1      |
| 23382  |       |        |        |        |
| 23383  |       |        |        |        |
| 23390  | 1     | 1      | 1      | 1      |
| 23395  | 1     | 1      | 1      | 1      |
| 23398  | 3     | 3      | 3      | 3      |
| 23399  | 1     | 1      | 1      | 1      |
| 23406  | 1     | 1      | 2      | 1      |
| 23418  | 2     | 1      | 2      | 1      |
| 23427  | 1     | 1      | 1      | 1      |
| 23428  | 1     | 1      | 1      | 1      |
| 23435  | 2     | 1      | 2      | 2      |
| 23439  | 1     | 1      | 2      | 1      |
| 23440  |       |        |        |        |
| 23444  | 2     | 1      | 1      | 3      |
| 23445  | 1     | 1      | 1      | 1      |

| respid | Q40_9 | Q40_10 | Q40_11 | Q40_12 |
|--------|-------|--------|--------|--------|
| 23455  |       |        |        |        |
| 23467  | 2     | 2      | 3      | 2      |
| 23478  | 2     | 1      | 1      | 1      |
| 23492  | 3     | 1      | 3      | 2      |
| 23498  | 1     | 1      | 1      | 1      |
| 23511  | 1     | 1      | 3      | 1      |
| 23514  | 1     | 1      | 1      | 1      |
| 23515  | 1     | 1      | 1      | 1      |
| 23522  |       |        |        |        |
| 23524  |       |        |        |        |
| 23531  | 1     | 1      | 4      | 1      |
| 23532  | 1     | 1      | 1      | 1      |
| 23533  | 1     | 1      | 1      | 1      |
| 23534  | 1     | 1      | 2      | 1      |
| 23538  | 1     | 1      | 1      | 1      |
| 23539  | 2     | 2      | 2      | 2      |
| 23548  | 2     | 1      | 2      | 1      |
| 23553  |       |        |        |        |
| 23556  | 1     | 1      | 1      | 1      |
| 23563  | 4     | 4      | 4      | 4      |
| 23572  | 1     | 1      | 2      | 1      |
| 23575  | 1     | 1      | 1      | 1      |
| 23576  | 1     | 1      | 1      | 1      |
| 23577  | 1     | 1      | 1      | 1      |
| 23578  | 2     | 1      | 2      | 2      |
| 23587  | 1     | 2      | 1      | 2      |
| 23597  | 1     | 1      | 1      | 1      |
| 23598  | 1     | 1      | 2      | 2      |
| 23604  |       |        |        |        |
| 23617  | 2     | 1      | 2      | 1      |
| 23620  | 1     | 1      | 1      | 1      |
| 23621  |       |        |        |        |

| respid | Q40_9 | Q40_10 | Q40_11 | Q40_12 |
|--------|-------|--------|--------|--------|
| 23625  | 1     | 1      | 1      | 1      |
| 23629  | 1     | 1      | 1      | 1      |
| 23635  | 1     | 1      | 1      | 1      |
| 23636  | 1     | 1      | 1      | 1      |
| 23637  | 5     | 5      | 5      | 5      |
| 23638  | 1     | 1      | 1      | 1      |
| 23644  | 1     | 1      | 1      | 1      |
| 23645  | 1     | 1      | 2      | 2      |
| 23649  | 1     | 1      | 1      | 1      |
| 23654  | 1     | 2      | 1      | 1      |
| 23662  | 1     | 1      | 2      | 1      |
| 23664  | 1     | 1      | 2      | 1      |
| 23665  | 1     | 1      | 1      | 1      |
| 23666  | 1     | 1      | 2      | 1      |
| 23671  | 1     | 1      | 1      | 1      |
| 23672  | 1     | 1      | 1      | 1      |
| 23685  | 1     | 1      | 2      | 1      |
| 23686  | 2     | 1      | 3      | 1      |
| 23689  | 2     | 2      | 3      | 3      |
| 23690  | 1     | 1      | 3      | 2      |
| 23695  | 3     | 1      | 3      | 2      |
| 23700  | 1     | 1      | 1      | 1      |
| 23714  | 1     | 1      | 2      | 1      |
| 23719  | 1     | 1      | 2      | 1      |
| 23720  | 1     | 1      | 1      | 1      |
| 23721  | 2     | 2      | 3      | 3      |
| 23729  | 1     | 1      | 1      | 1      |
| 23730  | 1     | 1      | 1      | 1      |
| 23732  | 1     | 1      | 2      | 1      |
| 23736  | 1     | 1      | 1      | 1      |
| 23754  |       |        |        |        |
| 23756  | 1     | 1      | 1      | 1      |

| respid | Q40_9 | Q40_10 | Q40_11 | Q40_12 |
|--------|-------|--------|--------|--------|
| 23759  | 2     | 1      | 2      | 2      |
| 23761  | 1     | 1      | 1      | 1      |
| 23766  | 1     | 1      | 1      | 1      |
| 23768  | 2     | 2      | 2      | 3      |
| 23773  | 1     | 1      | 1      | 1      |
| 23781  |       |        |        |        |
| 23782  | 2     | 1      | 5      | 1      |
| 23787  | 2     | 3      | 3      | 2      |
| 23788  | 3     | 3      | 3      | 3      |
| 23790  |       |        |        |        |
| 23794  | 1     | 1      | 1      | 1      |
| 23795  | 3     | 2      | 2      | 2      |
| 23801  | 2     | 2      | 2      | 2      |
| 23806  | 1     | 1      | 1      | 1      |
| 23809  | 3     | 1      | 3      | 3      |
| 23813  | 2     | 1      | 2      | 1      |
| 23815  | 2     | 1      | 2      | 1      |
| 23821  | 1     | 1      | 1      | 1      |
| 23825  | 2     | 1      | 1      | 3      |
| 23826  | 1     | 1      | 1      | 2      |
| 23830  | 1     | 1      | 1      | 1      |
| 23833  | 1     | 1      | 1      | 1      |
| 23837  | 1     | 1      | 1      | 1      |
| 23848  | 6     | 6      | 6      | 6      |
| 23850  | 1     | 1      | 1      | 1      |
| 23870  | 1     | 1      | 1      | 1      |
| 23877  |       |        |        |        |
| 23880  | 1     | 1      | 2      | 1      |
| 23882  | 2     | 2      | 2      | 2      |
| 23888  |       |        |        |        |
| 23908  | 2     | 1      | 3      | 1      |
| 23914  | 1     | 1      | 2      | 1      |

| respid | Q40_9 | Q40_10 | Q40_11 | Q40_12 |
|--------|-------|--------|--------|--------|
| 23916  | 1     | 1      | 1      | 1      |
| 23922  | 3     | 3      | 2      | 3      |
| 23932  | 1     | 1      | 2      | 1      |
| 23934  |       |        |        |        |
| 23942  | 3     | 2      | 3      | 5      |
| 23945  | 1     | 1      | 1      | 1      |
| 23948  | 1     | 1      | 2      | 1      |
| 23955  | 1     | 1      | 1      | 1      |
| 23956  | 2     | 1      | 6      | 3      |
| 23978  | 1     | 1      | 2      | 1      |
| 23981  |       |        |        |        |
| 23982  | 1     | 1      | 1      | 1      |
| 23991  | 1     | 1      | 1      | 1      |
| 23994  | 1     | 1      | 1      | 1      |
| 23995  | 1     | 1      | 1      | 1      |
| 23999  | 2     | 1      | 1      | 1      |
| 24005  | 6     | 6      | 4      | 5      |
| 24018  | 1     | 1      | 1      | 1      |
| 24021  |       |        |        |        |
| 24035  |       |        |        |        |
| 24040  | 1     | 1      | 1      | 1      |
| 24043  |       |        |        |        |
| 24046  | 3     | 3      | 2      | 2      |
| 24047  | 2     | 2      | 1      | 2      |
| 24048  | 1     | 1      | 1      | 1      |
| 24062  | 2     | 1      | 2      | 2      |
| 24063  | 1     | 1      | 2      | 2      |
| 24066  | 1     | 1      | 1      | 1      |
| 24069  | 1     | 1      | 1      | 1      |
| 24070  | 1     | 1      | 1      | 1      |
| 24074  | 1     | 1      | 1      | 1      |
| 24080  | 1     | 1      | 1      | 1      |

| respid | Q40_9 | Q40_10 | Q40_11 | Q40_12 |
|--------|-------|--------|--------|--------|
| 24082  | 1     | 1      | 2      | 1      |
| 24088  | 1     | 1      | 1      | 1      |
| 24089  | 1     | 1      | 1      | 1      |
| 24091  | 1     | 1      | 2      | 1      |
| 24095  |       |        |        |        |
| 24100  | 2     | 1      | 5      | 3      |
| 24105  | 1     | 1      | 3      | 2      |
| 24107  | 4     | 4      | 5      | 5      |
| 24108  |       |        |        |        |
| 24113  | 2     | 1      | 2      | 2      |
| 24120  |       |        |        |        |
| 24122  | 3     | 3      | 3      | 3      |
| 24123  | 1     | 1      | 3      | 1      |
| 24125  | 3     | 3      | 3      | 2      |
| 24132  | 1     | 1      | 1      | 1      |
| 24139  | 1     | 1      | 2      | 1      |
| 24140  | 2     | 1      | 2      | 1      |
| 24143  | 5     | 1      | 5      | 3      |
| 24150  | 2     | 1      | 5      | 3      |
| 24153  |       |        |        |        |
| 24161  |       |        |        |        |
| 24168  | 1     | 1      | 2      | 2      |
| 24179  | 1     | 1      | 1      | 1      |
| 24182  | 4     | 1      | 4      | 2      |
| 24194  | 3     | 3      | 3      | 3      |
| 24206  |       |        |        |        |
| 24214  |       |        |        |        |
| 24215  | 3     | 2      | 2      | 2      |
| 24224  | 1     | 1      | 1      | 1      |
| 24225  | 1     | 1      | 1      | 1      |
| 24227  |       |        |        |        |
| 24229  | 1     | 1      | 1      | 1      |

| respid | Q40_9 | Q40_10 | Q40_11 | Q40_12 |
|--------|-------|--------|--------|--------|
| 24230  | 1     | 1      | 1      | 1      |
| 24232  | 4     | 3      | 3      | 2      |
| 24253  | 1     | 1      | 1      | 1      |
| 24267  | 1     | 1      | 1      | 1      |
| 24274  | 1     | 1      | 1      | 2      |
| 24275  | 1     | 1      | 1      | 1      |
| 24277  | 1     | 1      | 1      | 1      |
| 24280  | 1     | 1      | 3      | 3      |
| 24285  | 1     | 1      | 1      | 1      |
| 24293  |       |        |        |        |
| 24295  | 2     | 1      | 3      | 2      |
| 24299  |       |        |        |        |
| 24303  | 1     | 1      | 2      | 1      |
| 24308  | 3     | 1      | 2      | 2      |
| 24322  |       |        |        |        |
| 24325  |       |        |        |        |
| 24328  | 1     | 1      | 1      | 1      |
| 24334  | 1     | 1      | 1      | 1      |
| 24342  | 2     | 1      | 1      | 1      |
| 24343  | 2     | 2      | 3      | 3      |
| 24348  | 3     | 2      | 5      | 3      |
| 24352  | 2     | 1      | 3      | 1      |
| 24354  | 2     | 1      | 2      | 2      |
| 24357  | 1     | 1      | 1      | 1      |
| 24360  | 2     | 1      | 1      | 1      |
| 24369  | 4     | 4      | 4      | 4      |
| 24373  | 2     | 1      | 2      | 2      |
| 24398  | 4     | 4      | 5      | 5      |
| 24402  | 1     | 1      | 2      | 1      |
| 24405  | 1     | 1      | 2      | 1      |
| 24407  | 1     | 2      | 2      | 2      |
| 24413  | 1     | 1      | 1      | 1      |



| respid | Q40_9 | Q40_10 | Q40_11 | Q40_12 |
|--------|-------|--------|--------|--------|
| 24443  | 3     | 3      | 2      | 2      |
| 24451  |       |        |        |        |
| 24459  | 4     | 3      | 3      | 3      |
| 24465  | 1     | 1      | 1      | 1      |
| 24481  | 2     | 3      | 2      | 3      |
| 24482  | 1     | 1      | 1      | 1      |
| 24491  | 1     | 1      | 2      | 2      |
| 24495  | 1     | 1      | 1      | 1      |
| 24497  | 4     | 5      | 4      | 4      |
| 24511  | 1     | 1      | 1      | 1      |
| 24513  | 2     | 2      | 2      | 3      |
| 24516  | 2     | 2      | 3      | 3      |
| 24518  | 2     | 1      | 2      | 1      |
| 24524  | 1     | 1      | 1      | 1      |
| 24528  | 1     | 1      | 1      | 1      |
| 24531  | 3     | 1      | 4      | 2      |
| 24533  | 4     | 1      | 3      | 3      |
| 24547  | 1     | 1      | 1      | 1      |
| 24557  | 4     | 3      | 3      | 3      |
| 24559  | 5     | 5      | 6      | 6      |
| 24567  | 1     | 1      | 1      | 1      |
| 24568  |       |        |        |        |
| 24577  |       |        |        |        |
| 24581  | 1     | 1      | 2      | 2      |
| 24588  | 1     | 1      | 1      | 1      |
| 24604  | 4     | 2      | 2      | 5      |
| 24612  | 2     | 1      | 1      | 1      |
| 24621  | 4     | 5      | 5      | 4      |
| 24625  | 2     | 1      | 3      | 1      |
| 24627  | 1     | 1      | 2      | 1      |
| 24640  | 1     | 1      | 2      | 1      |
| 24644  | 1     | 1      | 1      | 1      |

| respid | Q40_9 | Q40_10 | Q40_11 | Q40_12 |
|--------|-------|--------|--------|--------|
| 24664  | 2     | 2      | 2      | 1      |
| 24669  | 1     | 2      | 2      | 2      |
| 24685  | 1     | 1      | 1      | 1      |
| 24687  | 2     | 2      | 3      | 2      |
| 24688  | 2     | 2      | 2      | 2      |
| 24691  | 3     | 3      | 4      | 4      |
| 24693  | 2     | 2      | 2      | 2      |
| 24706  |       |        |        |        |
| 24710  |       |        |        |        |
| 24717  | 1     | 1      | 2      | 1      |
| 24720  | 1     | 1      | 1      | 1      |
| 24731  | 3     | 3      | 3      | 2      |
| 24732  | 2     | 2      | 2      | 2      |
| 24733  |       |        |        |        |
| 24747  | 1     | 1      | 1      | 1      |
| 24750  | 3     | 2      | 3      | 3      |
| 24758  | 2     | 2      | 2      | 2      |
| 24760  | 1     | 1      | 2      | 1      |
| 24765  |       |        |        |        |
| 24772  | 1     | 1      | 2      | 1      |
| 24779  | 4     | 4      | 4      | 3      |
| 24794  | 1     | 1      | 1      | 1      |
| 24796  | 3     | 2      | 3      | 4      |
| 24797  | 1     | 1      | 1      | 1      |
| 24800  | 1     | 1      | 1      | 1      |
| 24813  | 3     | 2      | 3      | 3      |
| 24815  | 2     | 1      | 2      | 2      |
| 24821  | 1     | 1      | 1      | 1      |
| 24822  | 1     | 1      | 1      | 1      |
| 24831  | 1     | 2      | 1      | 2      |
| 24835  |       |        |        |        |
| 24843  | 3     | 5      | 3      | 2      |

| respid | Q40_9 | Q40_10 | Q40_11 | Q40_12 |
|--------|-------|--------|--------|--------|
| 24844  | 4     | 3      | 2      | 3      |
| 24860  |       |        |        |        |
| 24861  | 1     | 1      | 2      | 1      |
| 24865  | 4     | 4      | 3      | 3      |
| 24870  | 3     | 4      | 3      | 3      |
| 24887  | 1     | 1      | 1      | 1      |
| 24897  | 3     | 3      | 4      | 4      |
| 24902  | 3     | 1      | 3      | 3      |
| 24914  | 1     | 1      | 2      | 1      |
| 24921  | 3     | 2      | 2      | 2      |
| 24922  | 1     | 1      | 1      | 1      |
| 24924  |       |        |        |        |
| 24927  | 1     | 2      | 2      | 3      |
| 24936  | 1     | 1      | 2      | 1      |
| 24937  | 1     | 1      | 1      | 1      |
| 24942  | 3     | 2      | 3      | 2      |
| 24947  | 1     | 1      | 1      | 1      |
| 24953  | 2     | 2      | 2      | 2      |
| 24954  | 3     | 2      | 3      | 3      |
| 24960  | 3     | 3      | 5      | 4      |
| 24965  | 1     | 1      | 1      | 1      |
| 24975  | 1     | 1      | 1      | 1      |
| 24983  | 3     | 3      | 3      | 4      |
| 24985  | 1     | 1      | 1      | 1      |
| 24990  | 1     | 1      | 1      | 1      |
| 25000  | 1     | 1      | 1      | 1      |
| 25007  | 2     | 1      | 1      | 2      |
| 25008  | 1     | 1      | 1      | 1      |
| 25010  |       |        |        |        |
| 25016  | 2     | 1      | 2      | 3      |
| 25021  | 1     | 1      | 3      | 1      |
| 25040  |       |        |        |        |

| respid | Q40_9 | Q40_10 | Q40_11 | Q40_12 |
|--------|-------|--------|--------|--------|
| 25043  | 1     | 1      | 1      | 2      |
| 25055  | 1     | 1      | 1      | 1      |
| 25057  | 2     | 3      | 3      | 2      |
| 25060  | 3     | 2      | 2      | 1      |
| 25062  | 2     | 1      | 1      | 2      |
| 25064  | 3     | 3      | 3      | 4      |
| 25069  |       |        |        |        |
| 25077  | 1     | 1      | 1      | 1      |
| 25088  |       |        |        |        |
| 25093  | 3     | 3      | 2      | 3      |
| 25121  | 1     | 2      | 3      | 2      |
| 25140  | 3     | 3      | 3      | 3      |
| 25144  | 1     | 1      | 1      | 1      |
| 25149  | 3     | 2      | 2      | 2      |
| 25159  | 1     | 1      | 1      | 1      |
| 25191  | 1     | 1      | 2      | 1      |
| 25193  | 4     | 4      | 5      | 3      |
| 25202  | 3     | 3      | 3      | 3      |
| 25215  | 2     | 3      | 5      | 5      |
| 25229  | 3     | 3      | 3      | 3      |
| 25231  | 2     | 2      | 3      | 1      |
| 25236  | 1     | 1      | 1      | 1      |
| 25242  | 1     | 1      | 1      | 1      |
| 25252  | 1     | 1      | 1      | 1      |
| 25253  | 4     | 4      | 6      | 6      |
| 25256  | 4     | 3      | 4      | 3      |
| 25260  | 1     | 1      | 1      | 2      |
| 25261  | 1     | 2      | 2      | 1      |
| 25280  | 2     | 1      | 1      | 3      |
| 25282  | 1     | 2      | 2      | 2      |
| 25289  | 3     | 3      | 3      | 4      |
| 25303  | 1     | 1      | 1      | 1      |

| respid | Q40_9 | Q40_10 | Q40_11 | Q40_12 |
|--------|-------|--------|--------|--------|
| 25304  | 2     | 1      | 3      | 1      |
| 25309  | 1     | 2      | 2      | 3      |
| 25317  | 1     | 2      | 1      | 1      |
| 25318  | 5     | 5      | 5      | 4      |
| 25320  | 3     | 4      | 4      | 3      |
| 25324  | 3     | 4      | 4      | 3      |
| 25331  | 1     | 1      | 1      | 1      |
| 25340  | 1     | 1      | 2      | 1      |
| 25342  | 2     | 1      | 2      | 2      |
| 25350  | 1     | 1      | 1      | 1      |
| 25352  |       |        |        |        |
| 25358  | 1     | 1      | 1      | 1      |
| 25375  | 1     | 1      | 1      | 1      |
| 25386  | 1     | 1      | 1      | 1      |
| 25388  | 1     | 1      | 2      | 2      |
| 25390  | 1     | 1      | 1      | 2      |
| 25391  | 2     | 2      | 2      | 2      |
| 25400  | 2     | 1      | 3      | 2      |
| 25413  | 3     | 4      | 4      | 3      |
| 25424  | 1     | 1      | 2      | 1      |
| 25426  | 2     | 2      | 2      | 2      |
| 25430  | 1     | 1      | 1      | 1      |
| 25434  | 1     | 1      | 2      | 2      |
| 25439  | 3     | 3      | 4      | 4      |
| 25441  | 1     | 1      | 1      | 1      |
| 25445  | 1     | 1      | 1      | 1      |
| 25451  | 1     | 1      | 1      | 1      |
| 25469  | 3     | 3      | 4      | 3      |
| 25471  | 2     | 2      | 3      | 3      |
| 25476  | 4     | 3      | 4      | 4      |
| 25480  | 1     | 1      | 1      | 1      |
| 25482  | 1     | 2      | 2      | 1      |

| respid | Q40_9 | Q40_10 | Q40_11 | Q40_12 |
|--------|-------|--------|--------|--------|
| 25500  | 5     | 5      | 5      | 4      |
| 25516  | 1     | 1      | 1      | 1      |
| 25521  | 4     | 5      | 4      | 3      |
| 25525  | 2     | 1      | 2      | 1      |
| 25530  | 2     | 2      | 3      | 3      |
| 25555  | 2     | 1      | 3      | 3      |
| 25558  | 3     | 3      | 3      | 3      |
| 25561  | 2     | 2      | 3      | 2      |
| 25566  |       |        |        |        |
| 25571  | 2     | 2      | 2      | 2      |
| 25572  | 1     | 1      | 1      | 1      |
| 25574  |       |        |        |        |
| 25588  | 1     | 1      | 1      | 1      |
| 25591  | 3     | 3      | 2      | 3      |
| 25599  | 3     | 2      | 3      | 2      |
| 25604  | 1     | 1      | 1      | 1      |
| 25614  | 2     | 2      | 4      | 3      |
| 25634  | 3     | 4      | 4      | 3      |
| 25642  | 1     | 1      | 2      | 1      |
| 25647  | 3     | 2      | 2      | 3      |
| 25653  | 1     | 1      | 2      | 1      |
| 25654  | 2     | 1      | 6      | 2      |
| 25660  | 1     | 1      | 1      | 1      |
| 25664  | 1     | 1      | 1      | 1      |
| 25665  | 2     | 2      | 2      | 2      |
| 25672  | 3     | 3      | 3      | 3      |
| 25677  | 2     | 2      | 2      | 2      |
| 25685  | 1     | 1      | 1      | 2      |
| 25699  | 3     | 3      | 5      | 3      |
| 25703  | 2     | 2      | 2      | 1      |
| 25704  | 3     | 4      | 3      | 2      |
| 25705  | 3     | 1      | 2      | 3      |

| respid | Q40_9 | Q40_10 | Q40_11 | Q40_12 |
|--------|-------|--------|--------|--------|
| 25711  | 1     | 1      | 1      | 1      |
| 25727  | 2     | 2      | 3      | 2      |
| 25728  | 1     | 1      | 2      | 1      |
| 25733  | 3     | 2      | 3      | 3      |
| 25735  | 1     | 1      | 1      | 1      |
| 25736  | 1     | 1      | 1      | 1      |
| 25742  | 1     | 1      | 1      | 1      |
| 25750  | 1     | 1      | 1      | 1      |
| 25754  |       |        |        |        |
| 25776  | 3     | 3      | 2      | 2      |
| 25778  |       |        |        |        |
| 25796  | 2     | 2      | 2      | 2      |
| 25852  | 2     | 1      | 2      | 2      |
| 25858  | 1     | 1      | 1      | 1      |
| 25859  |       |        |        |        |
| 25886  | 3     | 3      | 3      | 3      |
| 25890  | 3     | 1      | 3      | 4      |
| 25897  | 1     | 1      | 1      | 1      |
| 25903  | 1     | 1      | 1      | 1      |
| 25905  | 2     | 3      | 4      | 3      |
| 25917  |       |        |        |        |
| 25918  | 1     | 1      | 1      | 1      |
| 25928  | 2     | 2      | 2      | 2      |
| 25930  |       |        |        |        |
| 25949  | 1     | 1      | 1      | 1      |
| 25955  | 1     | 1      | 1      | 1      |
| 25959  | 1     | 1      | 1      | 1      |
| 25964  | 2     | 1      | 2      | 1      |
| 25972  | 1     | 1      | 1      | 1      |
| 25999  | 4     | 3      | 4      | 3      |
| 26019  | 2     | 2      | 2      | 2      |
| 26025  | 1     | 1      | 1      | 2      |

| respid | Q40_9 | Q40_10 | Q40_11 | Q40_12 |
|--------|-------|--------|--------|--------|
| 26039  | 4     | 2      | 4      | 3      |
| 26055  | 1     | 1      | 2      | 1      |
| 26061  | 2     | 1      | 3      | 2      |
| 26076  | 1     | 1      | 2      | 1      |
| 26088  | 3     | 1      | 2      | 2      |
| 26094  |       |        |        |        |
| 26104  | 2     | 2      | 2      | 2      |
| 26131  | 6     | 6      | 6      | 6      |
| 26134  | 2     | 1      | 4      | 3      |
| 26160  | 1     | 1      | 1      | 1      |
| 26168  | 1     | 1      | 1      | 1      |
| 26170  |       |        |        |        |
| 26191  | 2     | 2      | 2      | 2      |
| 26192  |       |        |        |        |
| 26195  | 3     | 2      | 2      | 3      |
| 26198  | 1     | 1      | 2      | 1      |
| 26199  | 2     | 2      | 1      | 1      |
| 26201  |       |        |        |        |
| 26202  | 2     | 1      | 2      | 1      |
| 26226  | 1     | 1      | 1      | 1      |
| 26233  | 2     | 3      | 2      | 3      |
| 26236  | 1     | 1      | 1      | 1      |
| 26242  | 1     | 1      | 1      | 1      |
| 26244  | 1     | 1      | 1      | 1      |
| 26250  | 3     | 4      | 3      | 4      |
| 26266  | 1     | 1      | 2      | 1      |
| 26274  | 1     | 1      | 2      | 1      |
| 26286  | 2     | 2      | 2      | 2      |
| 26288  | 2     | 1      | 2      | 2      |
| 26295  |       |        |        |        |
| 26296  | 1     | 1      | 1      | 1      |
| 26297  |       |        |        |        |



| respid | Q40_9 | Q40_10 | Q40_11 | Q40_12 |
|--------|-------|--------|--------|--------|
| 26300  | 3     | 3      | 3      | 3      |
| 26317  | 1     | 1      | 1      | 1      |
| 26343  |       |        |        |        |
| 26367  | 1     | 1      | 3      | 1      |
| 26372  | 2     | 1      | 1      | 1      |
| 26403  | 3     | 3      | 5      | 3      |
| 26423  | 1     | 1      | 1      | 1      |
| 26430  | 1     | 1      | 1      | 1      |
| 26437  | 2     | 3      | 1      | 1      |
| 26457  |       |        |        |        |
| 26466  | 4     | 5      | 4      | 3      |
| 26467  | 3     | 2      | 3      | 2      |
| 26469  | 2     | 2      | 1      | 2      |
| 26494  | 1     | 1      | 1      | 1      |
| 26510  | 1     | 1      | 2      | 1      |
| 26519  | 1     | 1      | 1      | 1      |
| 26525  | 1     | 1      | 3      | 1      |
| 26529  |       |        |        |        |
| 26533  | 1     | 1      | 1      | 1      |
| 26556  | 1     | 1      | 1      | 1      |
| 26559  | 3     | 1      | 4      | 2      |
| 26565  | 3     | 5      | 5      | 4      |
| 26576  | 3     | 1      | 4      | 2      |
| 26601  |       |        |        |        |
| 26607  | 3     | 2      | 4      | 2      |
| 26611  | 2     | 1      | 2      | 1      |
| 26619  | 1     | 1      | 1      | 1      |
| 26631  | 1     | 1      | 1      | 1      |
| 26654  | 1     | 1      | 3      | 1      |
| 26656  | 2     | 2      | 2      | 2      |
| 26664  |       |        |        |        |
| 26667  | 1     | 1      | 3      | 1      |

| respid | Q40_9 | Q40_10 | Q40_11 | Q40_12 |
|--------|-------|--------|--------|--------|
| 26674  | 5     | 4      | 3      | 4      |
| 26678  | 2     | 2      | 2      | 2      |
| 26693  | 1     | 1      | 1      | 1      |
| 26696  | 4     | 4      | 5      | 6      |
| 26703  | 4     | 3      | 4      | 3      |
| 26705  | 2     | 2      | 2      | 2      |
| 26706  | 2     | 2      | 3      | 2      |
| 26716  | 4     | 1      | 5      | 3      |
| 26721  | 2     | 1      | 2      | 1      |
| 26730  | 1     | 1      | 3      | 1      |
| 26752  | 1     | 1      | 1      | 1      |
| 26755  | 1     | 1      | 1      | 1      |
| 26791  | 1     | 1      | 1      | 1      |
| 26804  | 2     | 2      | 2      | 2      |
| 26810  | 2     | 4      | 5      | 4      |
| 26813  | 4     | 3      | 4      | 3      |
| 26833  | 2     | 2      | 2      | 2      |
| 26880  | 2     | 3      | 3      | 2      |
| 26884  | 1     | 1      | 2      | 1      |
| 26885  | 1     | 1      | 1      | 1      |
| 26890  | 2     | 3      | 2      | 2      |
| 26937  | 2     | 1      | 1      | 2      |
| 26939  | 4     | 2      | 3      | 4      |
| 26941  |       |        |        |        |
| 26992  | 3     | 1      | 2      | 3      |
| 27037  | 1     | 1      | 2      | 1      |
| 27045  | 6     | 5      | 6      | 4      |
| 27053  | 4     | 1      | 5      | 5      |
| 27060  | 3     | 2      | 3      | 2      |
| 27076  | 1     | 1      | 2      | 1      |
| 27124  | 2     | 1      | 1      | 1      |
| 27125  | 1     | 1      | 1      | 1      |

| respid | Q40_9 | Q40_10 | Q40_11 | Q40_12 |
|--------|-------|--------|--------|--------|
| 27132  | 1     | 1      | 1      | 1      |
| 27166  | 1     | 1      | 1      | 1      |
| 27190  | 3     | 2      | 1      | 2      |
| 27199  | 2     | 1      | 3      | 2      |
| 27221  | 3     | 4      | 3      | 4      |
| 27233  | 3     | 1      | 3      | 1      |
| 27241  | 1     | 1      | 1      | 1      |
| 27244  | 1     | 1      | 1      | 1      |
| 27245  | 6     | 5      | 5      | 5      |
| 27246  | 2     | 1      | 2      | 2      |
| 27253  | 1     | 1      | 2      | 1      |
| 27255  | 3     | 3      | 3      | 4      |
| 27267  | 1     | 1      | 1      | 1      |
| 27283  | 3     | 1      | 2      | 2      |
| 27289  | 4     | 5      | 4      | 3      |
| 27302  | 1     | 1      | 1      | 1      |
| 27317  | 1     | 1      | 1      | 1      |
| 27319  | 1     | 1      | 1      | 1      |
| 27331  | 2     | 2      | 2      | 2      |
| 27333  | 1     | 1      | 3      | 1      |
| 27340  |       |        |        |        |
| 27362  | 3     | 4      | 4      | 2      |
| 27370  | 1     | 1      | 1      | 1      |
| 27379  | 1     | 1      | 1      | 1      |
| 27386  |       |        |        |        |
| 27398  | 1     | 1      | 1      | 1      |
| 27404  | 1     | 1      | 1      | 1      |
| 27408  | 1     | 1      | 1      | 1      |
| 27412  | 4     | 4      | 5      | 4      |
| 27426  | 2     | 2      | 2      | 3      |
| 27455  | 1     | 1      | 1      | 1      |
| 27464  | 3     | 3      | 4      | 3      |

| respid | Q40_9 | Q40_10 | Q40_11 | Q40_12 |
|--------|-------|--------|--------|--------|
| 27484  | 1     | 1      | 2      | 2      |
| 27493  | 3     | 2      | 6      | 6      |
| 27512  | 2     | 1      | 2      | 2      |
| 27525  | 3     | 3      | 3      | 4      |
| 27532  | 2     | 2      | 2      | 3      |
| 27539  | 1     | 1      | 1      | 1      |
| 27540  | 4     | 3      | 5      | 3      |
| 27552  | 4     | 2      | 5      | 3      |
| 27562  | 1     | 1      | 1      | 1      |
| 27568  | 1     | 1      | 1      | 1      |
| 27574  | 4     | 4      | 5      | 4      |
| 27575  | 1     | 1      | 1      | 1      |
| 27577  | 1     | 1      | 3      | 1      |
| 27589  | 1     | 1      | 1      | 1      |
| 27593  | 1     | 1      | 2      | 1      |
| 27594  | 4     | 4      | 4      | 3      |
| 27595  | 6     | 1      | 6      | 4      |
| 27598  | 1     | 1      | 1      | 1      |
| 27620  | 3     | 3      | 4      | 2      |
| 27621  | 3     | 3      | 3      | 4      |
| 27628  | 1     | 1      | 2      | 1      |
| 27633  | 1     | 1      | 2      | 2      |
| 27643  | 3     | 2      | 4      | 3      |
| 27644  | 4     | 3      | 4      | 4      |
| 27668  | 3     | 2      | 3      | 2      |
| 27681  | 2     | 1      | 2      | 2      |
| 27691  | 1     | 1      | 1      | 1      |
| 27693  | 2     | 3      | 2      | 3      |
| 27703  | 3     | 1      | 2      | 2      |
| 27708  | 2     | 1      | 3      | 2      |
| 27719  | 2     | 1      | 2      | 1      |
| 27720  | 1     | 1      | 1      | 1      |

| respid | Q40_9 | Q40_10 | Q40_11 | Q40_12 |
|--------|-------|--------|--------|--------|
| 27723  | 1     | 1      | 2      | 2      |
| 27725  | 2     | 1      | 2      | 1      |
| 27734  | 3     | 3      | 3      | 3      |
| 27744  | 1     | 1      | 3      | 1      |
| 27749  | 2     | 3      | 4      | 2      |
| 27762  | 2     | 3      | 2      | 3      |
| 27808  | 2     | 2      | 3      | 2      |
| 27810  | 5     | 3      | 4      | 5      |
| 27812  | 1     | 1      | 1      | 2      |
| 27815  |       |        |        |        |
| 27818  | 1     | 1      | 1      | 1      |
| 27823  | 1     | 1      | 1      | 1      |
| 27841  | 3     | 3      | 4      | 3      |
| 27843  |       |        |        |        |
| 27851  | 2     | 1      | 3      | 2      |
| 27858  | 1     | 1      | 1      | 1      |
| 27859  | 1     | 1      | 5      | 1      |
| 27869  | 1     | 1      | 1      | 1      |
| 27872  | 1     | 1      | 1      | 1      |
| 27873  | 1     | 1      | 1      | 1      |
| 27884  | 2     | 1      | 2      | 1      |
| 27904  | 2     | 2      | 2      | 3      |
| 27915  | 1     | 1      | 3      | 1      |
| 27918  | 2     | 2      | 2      | 2      |
| 27937  | 1     | 1      | 2      | 1      |
| 27943  | 3     | 3      | 3      | 3      |
| 27948  | 1     | 1      | 1      | 1      |
| 27971  | 1     | 2      | 3      | 2      |
| 27991  | 1     | 1      | 1      | 1      |
| 28000  | 1     | 1      | 1      | 1      |
| 28011  | 2     | 1      | 2      | 2      |
| 28022  | 1     | 2      | 2      | 6      |

| respid | Q40_9 | Q40_10 | Q40_11 | Q40_12 |
|--------|-------|--------|--------|--------|
| 28025  | 1     | 1      | 1      | 1      |
| 28041  | 1     | 1      | 1      | 1      |
| 28057  | 2     | 3      | 3      | 5      |
| 28080  |       |        |        |        |
| 28098  | 1     | 1      | 1      | 1      |
| 28104  | 1     | 1      | 4      | 2      |
| 28109  | 3     | 3      | 3      | 3      |
| 28129  | 1     | 1      | 1      | 1      |
| 28141  |       |        |        |        |
| 28143  | 2     | 1      | 2      | 1      |
| 28149  | 1     | 1      | 1      | 1      |
| 28151  | 3     | 3      | 3      | 3      |
| 28161  | 3     | 2      | 5      | 6      |
| 28169  | 1     | 1      | 2      | 1      |
| 28194  | 4     | 4      | 4      | 4      |
| 28197  |       |        |        |        |
| 28206  | 1     | 1      | 2      | 1      |
| 28218  | 1     | 1      | 1      | 1      |
| 28227  | 1     | 1      | 1      | 1      |
| 28235  | 2     | 2      | 3      | 3      |
| 28246  | 3     | 4      | 2      | 3      |
| 28259  | 5     | 3      | 5      | 4      |
| 28263  | 4     | 5      | 4      | 5      |
| 28267  | 3     | 4      | 5      | 5      |
| 28274  | 1     | 1      | 1      | 1      |
| 28278  | 1     | 1      | 1      | 1      |
| 28288  | 2     | 1      | 1      | 1      |
| 28308  |       |        |        |        |
| 28309  | 3     | 3      | 4      | 3      |
| 28323  | 1     | 1      | 3      | 1      |
| 28335  | 5     | 5      | 5      | 5      |
| 28354  | 4     | 4      | 5      | 5      |

| respid | Q40_9 | Q40_10 | Q40_11 | Q40_12 |
|--------|-------|--------|--------|--------|
| 28355  | 4     | 3      | 3      | 3      |
| 28356  | 2     | 1      | 2      | 1      |
| 28357  | 1     | 1      | 1      | 1      |
| 28363  | 1     | 1      | 1      | 1      |
| 28366  | 1     | 1      | 1      | 1      |
| 28372  | 4     | 3      | 4      | 3      |
| 28381  | 3     | 2      | 3      | 2      |
| 28388  | 2     | 2      | 2      | 3      |
| 28413  | 5     | 5      | 4      | 4      |
| 28421  | 3     | 3      | 2      | 2      |
| 28430  | 3     | 3      | 3      | 4      |
| 28439  | 5     | 4      | 4      | 3      |
| 28458  | 2     | 3      | 4      | 5      |
| 28461  | 2     | 2      | 3      | 3      |
| 28466  | 1     | 1      | 1      | 1      |
| 28492  | 1     | 1      | 2      | 1      |
| 28534  |       |        |        |        |
| 28537  | 3     | 2      | 3      | 2      |
| 28560  | 1     | 1      | 1      | 1      |
| 28566  | 1     | 1      | 1      | 1      |
| 28569  | 2     | 1      | 2      | 2      |
| 28584  | 1     | 1      | 1      | 1      |
| 28590  | 1     | 1      | 4      | 1      |
| 28596  |       |        |        |        |
| 28608  | 1     | 1      | 2      | 2      |
| 28631  | 5     | 4      | 3      | 5      |
| 28644  | 2     | 2      | 2      | 2      |
| 28646  | 1     | 1      | 1      | 1      |
| 28665  |       |        |        |        |
| 28686  | 1     | 1      | 1      | 1      |
| 28704  | 1     | 2      | 3      | 3      |
| 28719  | 1     | 1      | 2      | 1      |

| respid | Q40_9 | Q40_10 | Q40_11 | Q40_12 |
|--------|-------|--------|--------|--------|
| 28736  | 1     | 1      | 1      | 1      |
| 28739  | 2     | 3      | 3      | 3      |
| 28758  | 4     | 1      | 2      | 3      |
| 28761  | 3     | 4      | 4      | 3      |
| 28770  | 3     | 4      | 3      | 4      |
| 28774  | 1     | 1      | 1      | 1      |
| 28778  | 5     | 3      | 5      | 5      |
| 28783  | 2     | 2      | 3      | 2      |
| 28785  | 1     | 1      | 1      | 1      |
| 28797  | 3     | 4      | 3      | 2      |
| 28801  | 2     | 2      | 2      | 2      |
| 28821  |       |        |        |        |
| 28827  | 1     | 1      | 1      | 1      |
| 28828  | 1     | 1      | 2      | 1      |
| 28871  | 2     | 2      | 2      | 2      |
| 28876  | 1     | 1      | 2      | 1      |
| 28891  | 5     | 1      | 4      | 3      |
| 28898  |       |        |        |        |
| 28909  | 3     | 2      | 3      | 2      |
| 28930  | 2     | 1      | 1      | 1      |
| 28935  | 2     | 2      | 4      | 1      |
| 28964  | 1     | 1      | 1      | 1      |
| 28965  | 1     | 1      | 1      | 1      |
| 28967  | 5     | 6      | 5      | 6      |
| 28975  |       |        |        |        |
| 28982  | 2     | 1      | 1      | 2      |
| 28989  | 3     | 2      | 3      | 1      |
| 29003  | 3     | 1      | 4      | 2      |
| 29004  | 1     | 1      | 1      | 1      |
| 29007  | 1     | 1      | 2      | 1      |
| 29008  | 1     | 1      | 1      | 1      |
| 29011  | 3     | 1      | 2      | 3      |



| respid | Q40_9 | Q40_10 | Q40_11 | Q40_12 |
|--------|-------|--------|--------|--------|
| 29012  | 1     | 1      | 2      | 1      |
| 29014  |       |        |        |        |
| 29016  | 1     | 1      | 1      | 1      |
| 29018  | 3     | 1      | 6      | 3      |
| 29048  | 1     | 1      | 3      | 1      |
| 29184  | 1     | 1      | 1      | 1      |
| 29237  | 1     | 1      | 1      | 2      |
| 29252  | 2     | 1      | 2      | 2      |
| 29267  | 1     | 1      | 2      | 1      |
| 29276  |       |        |        |        |
| 29281  | 1     | 1      | 3      | 3      |
| 29285  | 1     | 1      | 1      | 1      |
| 29291  | 5     | 4      | 3      | 4      |
| 29304  | 2     | 2      | 2      | 2      |
| 29323  | 1     | 1      | 2      | 1      |
| 29330  | 3     | 1      | 4      | 1      |
| 29357  | 3     | 3      | 3      | 2      |
| 29416  | 3     | 2      | 2      | 2      |
| 29432  | 1     | 1      | 1      | 2      |
| 29482  | 2     | 3      | 3      | 2      |
| 29506  | 2     | 1      | 3      | 2      |
| 29509  | 1     | 1      | 1      | 1      |
| 29512  | 3     | 2      | 2      | 3      |
| 29519  | 2     | 1      | 2      | 1      |
| 29520  | 3     | 2      | 3      | 2      |
| 29521  | 2     | 3      | 3      | 3      |
| 29529  | 4     | 5      | 5      | 4      |
| 29532  | 1     | 1      | 1      | 1      |
| 29547  | 3     | 3      | 3      | 4      |
| 29551  | 2     | 2      | 2      | 2      |
| 29584  | 3     | 4      | 5      | 5      |
| 29591  | 3     | 3      | 3      | 3      |

| respid | Q40_9 | Q40_10 | Q40_11 | Q40_12 |
|--------|-------|--------|--------|--------|
| 29613  | 1     | 1      | 1      | 1      |
| 29615  | 2     | 2      | 2      | 4      |
| 29625  | 3     | 2      | 2      | 2      |
| 29660  | 1     | 3      | 2      | 1      |
| 29677  |       |        |        |        |
| 29700  | 2     | 3      | 1      | 1      |
| 29715  | 5     | 4      | 4      | 6      |
| 29720  |       |        |        |        |
| 29730  | 1     | 1      | 1      | 1      |
| 29734  | 3     | 3      | 3      | 3      |
| 29754  |       |        |        |        |
| 29771  | 1     | 1      | 4      | 1      |
| 29774  | 2     | 1      | 2      | 1      |
| 29783  | 1     | 1      | 3      | 1      |
| 29812  | 2     | 2      | 2      | 2      |
| 29813  | 1     | 2      | 2      | 1      |
| 29814  | 3     | 3      | 3      | 3      |
| 29820  | 2     | 2      | 2      | 3      |
| 29906  | 1     | 1      | 3      | 1      |
| 29907  | 1     | 1      | 2      | 3      |
| 29928  |       |        |        |        |
| 29932  | 2     | 1      | 2      | 2      |
| 29958  | 3     | 2      | 3      | 2      |
| 29982  | 2     | 1      | 1      | 1      |
| 29989  | 1     | 1      | 1      | 1      |
| 29994  | 1     | 1      | 1      | 2      |
| 30005  | 2     | 2      | 1      | 1      |
| 30077  | 1     | 1      | 2      | 1      |
| 30098  |       |        |        |        |
| 30107  | 2     | 1      | 2      | 1      |
| 30154  | 1     | 1      | 2      | 1      |
| 30159  | 1     | 1      | 1      | 1      |

| respid | Q40_9 | Q40_10 | Q40_11 | Q40_12 |
|--------|-------|--------|--------|--------|
| 30162  | 1     | 1      | 2      | 1      |
| 30163  |       |        |        |        |
| 30189  | 2     | 1      | 2      | 2      |
| 30230  | 1     | 1      | 1      | 1      |
| 30259  | 3     | 3      | 2      | 2      |
| 30284  | 1     | 1      | 2      | 1      |
| 30296  | 1     | 1      | 1      | 1      |
| 30330  | 2     | 3      | 2      | 3      |
| 30341  | 1     | 1      | 1      | 1      |
| 30352  | 1     | 3      | 3      | 4      |
| 30379  | 1     | 1      | 1      | 1      |
| 30424  | 1     | 1      | 1      | 1      |
| 30447  | 1     | 1      | 1      | 1      |
| 30477  | 3     | 2      | 2      | 2      |
| 30503  | 1     | 1      | 1      | 1      |
| 30515  | 5     | 2      | 3      | 3      |
| 30516  | 2     | 1      | 2      | 1      |
| 30623  | 3     | 4      | 3      | 3      |
| 30639  | 1     | 1      | 2      | 1      |
| 30670  | 1     | 1      | 2      | 1      |
| 30697  | 1     | 1      | 1      | 1      |
| 30735  | 1     | 1      | 1      | 1      |
| 30742  | 2     | 1      | 2      | 1      |
| 30751  | 3     | 3      | 4      | 4      |
| 30789  |       |        |        |        |
| 30867  | 4     | 3      | 3      | 4      |
| 30876  | 2     | 1      | 1      | 1      |
| 30877  | 1     | 1      | 1      | 1      |
| 30887  | 3     | 2      | 3      | 2      |
| 30891  | 2     | 3      | 2      | 3      |
| 31030  | 1     | 1      | 1      | 1      |
| 31059  | 2     | 3      | 4      | 2      |

| respid | Q40_9 | Q40_10 | Q40_11 | Q40_12 |
|--------|-------|--------|--------|--------|
| 31082  |       |        |        |        |
| 31106  | 1     | 1      | 1      | 1      |
| 31110  | 1     | 1      | 1      | 1      |
| 31265  | 3     | 4      | 4      | 4      |
| 31266  | 3     | 4      | 4      | 4      |
| 31267  | 4     | 5      | 4      | 3      |
| 31310  | 1     | 1      | 1      | 1      |
| 31325  | 2     | 1      | 1      | 1      |
| 31367  | 1     | 2      | 2      | 2      |
| 31389  | 1     | 1      | 1      | 1      |
| 31440  | 1     | 1      | 2      | 1      |
| 31465  | 1     | 1      | 2      | 1      |
| 31477  | 1     | 1      | 2      | 1      |
| 31491  | 1     | 1      | 1      | 1      |
| 31494  | 5     | 5      | 5      | 5      |
| 31509  | 3     | 3      | 5      | 5      |
| 31533  | 1     | 1      | 1      | 1      |
| 31547  | 2     | 1      | 2      | 1      |
| 31558  | 1     | 1      | 1      | 1      |
| 31579  | 2     | 1      | 1      | 2      |
| 31591  | 2     | 1      | 3      | 3      |
| 31596  | 3     | 3      | 3      | 3      |
| 31601  | 4     | 5      | 5      | 5      |
| 31605  | 2     | 2      | 1      | 2      |
| 31637  | 1     | 1      | 2      | 2      |
| 31646  | 2     | 1      | 1      | 1      |
| 31647  | 5     | 3      | 5      | 5      |
| 31650  | 1     | 1      | 1      | 1      |
| 31651  | 4     | 3      | 2      | 5      |
| 31657  | 1     | 1      | 1      | 1      |
| 31660  | 1     | 1      | 2      | 1      |
| 31661  | 5     | 1      | 3      | 3      |

| respid | Q40_9 | Q40_10 | Q40_11 | Q40_12 |
|--------|-------|--------|--------|--------|
| 31667  | 2     | 3      | 1      | 3      |
| 31674  | 2     | 2      | 2      | 3      |
| 31686  | 3     | 2      | 2      | 3      |
| 31693  |       |        |        |        |
| 31716  |       |        |        |        |
| 31818  | 1     | 2      | 1      | 1      |
| 31886  | 1     | 1      | 1      | 2      |
| 31945  | 4     | 3      | 5      | 3      |
| 31957  | 1     | 1      | 4      | 1      |
| 31966  | 2     | 2      | 2      | 1      |
| 31978  | 2     | 1      | 3      | 2      |
| 31999  | 1     | 1      | 3      | 2      |
| 32026  | 2     | 1      | 2      | 2      |
| 32033  | 1     | 1      | 1      | 2      |
| 32037  | 4     | 4      | 4      | 3      |
| 32038  | 4     | 4      | 3      | 3      |
| 32047  | 3     | 3      | 3      | 3      |
| 32053  |       |        |        |        |
| 32069  | 2     | 2      | 2      | 2      |
| 32081  | 2     | 3      | 2      | 3      |
| 32123  | 2     | 1      | 2      | 2      |
| 32130  | 1     | 1      | 2      | 3      |
| 32141  | 1     | 1      | 1      | 1      |
| 32158  |       |        |        |        |
| 32165  | 1     | 1      | 1      | 1      |
| 32180  | 1     | 1      | 1      | 1      |
| 32221  | 3     | 2      | 3      | 2      |
| 32292  | 1     | 1      | 2      | 1      |
| 32318  | 1     | 1      | 2      | 1      |
| 32346  | 1     | 1      | 2      | 1      |
| 32402  | 3     | 3      | 3      | 3      |
| 32422  | 1     | 1      | 2      | 1      |

| respid | Q40_9 | Q40_10 | Q40_11 | Q40_12 |
|--------|-------|--------|--------|--------|
| 32439  | 1     | 1      | 1      | 1      |
| 32507  | 3     | 3      | 3      | 3      |
| 32522  |       |        |        |        |
| 32535  |       |        |        |        |
| 32546  | 1     | 1      | 1      | 1      |
| 32553  | 2     | 1      | 2      | 1      |
| 32570  |       |        |        |        |
| 32592  | 1     | 1      | 1      | 2      |
| 32605  | 3     | 2      | 2      | 2      |
| 32630  | 1     | 2      | 2      | 2      |
| 32642  | 2     | 2      | 3      | 3      |
| 32646  | 1     | 1      | 1      | 1      |
| 32665  | 3     | 3      | 3      | 3      |
| 32677  | 1     | 1      | 1      | 1      |
| 32694  | 1     | 1      | 2      | 1      |
| 32698  | 2     | 2      | 5      | 1      |
| 32754  | 2     | 2      | 5      | 4      |
| 32799  | 3     | 2      | 3      | 4      |
| 32816  |       |        |        |        |
| 32819  | 3     | 2      | 3      | 2      |
| 32840  | 2     | 2      | 3      | 3      |
| 32861  | 2     | 1      | 2      | 2      |
| 32866  | 1     | 1      | 1      | 1      |
| 32889  | 3     | 2      | 4      | 5      |
| 32960  | 1     | 1      | 1      | 1      |
| 32965  | 2     | 1      | 2      | 1      |
| 32986  | 2     | 2      | 2      | 2      |
| 33005  | 3     | 3      | 2      | 4      |
| 33054  | 3     | 2      | 3      | 3      |
| 33072  | 2     | 1      | 5      | 3      |
| 33095  | 1     | 1      | 2      | 1      |
| 33099  | 2     | 1      | 1      | 1      |

| respid | Q40_9 | Q40_10 | Q40_11 | Q40_12 |
|--------|-------|--------|--------|--------|
| 33121  | 1     | 1      | 1      | 1      |
| 33152  | 1     | 1      | 3      | 2      |
| 33159  | 1     | 1      | 1      | 2      |
| 33189  | 1     | 1      | 1      | 1      |
| 33198  | 3     | 1      | 3      | 4      |
| 33202  | 6     | 4      | 3      | 4      |
| 33204  | 1     | 1      | 1      | 1      |
| 33224  | 1     | 1      | 2      | 1      |
| 33272  | 2     | 1      | 2      | 2      |
| 33294  | 1     | 1      | 1      | 1      |
| 33300  | 3     | 2      | 2      | 3      |
| 33314  | 3     | 2      | 3      | 2      |
| 33338  | 3     | 2      | 2      | 3      |
| 33350  | 4     | 4      | 3      | 3      |
| 33362  | 3     | 2      | 3      | 2      |
| 33368  |       |        |        |        |
| 33374  | 2     | 3      | 2      | 2      |
| 33380  | 5     | 6      | 5      | 4      |
| 33385  | 2     | 2      | 2      | 2      |
| 33402  | 2     | 1      | 3      | 3      |
| 33414  | 1     | 1      | 2      | 1      |
| 33439  | 2     | 2      | 3      | 2      |
| 33449  | 3     | 3      | 3      | 2      |
| 33533  | 1     | 1      | 2      | 1      |
| 33540  | 1     | 1      | 2      | 1      |
| 33556  | 2     | 2      | 4      | 2      |
| 33615  | 1     | 1      | 2      | 1      |
| 33694  | 4     | 3      | 3      | 3      |
| 33717  | 1     | 1      | 1      | 1      |
| 33729  | 2     | 1      | 2      | 1      |
| 33746  | 1     | 1      | 1      | 1      |
| 33764  | 1     | 1      | 1      | 1      |

| respid | Q40_9 | Q40_10 | Q40_11 | Q40_12 |
|--------|-------|--------|--------|--------|
| 33790  | 2     | 1      | 2      | 2      |
| 33868  | 4     | 5      | 2      | 3      |
| 33872  | 2     | 1      | 3      | 5      |
| 33883  | 1     | 1      | 1      | 1      |
| 33884  | 1     | 1      | 1      | 1      |
| 33900  | 2     | 1      | 2      | 1      |
| 33933  | 1     | 1      | 3      | 1      |
| 33949  | 1     | 1      | 1      | 1      |
| 34005  |       |        |        |        |
| 34016  |       |        |        |        |
| 34041  | 5     | 4      | 4      | 3      |
| 34053  | 2     | 1      | 2      | 1      |
| 34056  | 1     | 1      | 1      | 1      |
| 34093  | 1     | 1      | 1      | 1      |
| 34112  | 2     | 1      | 3      | 2      |
| 34136  | 3     | 4      | 4      | 3      |
| 34138  | 1     | 1      | 1      | 1      |
| 34139  | 2     | 4      | 3      | 3      |
| 34189  | 1     | 1      | 1      | 2      |
| 34239  | 2     | 1      | 2      | 2      |
| 34240  | 1     | 2      | 1      | 1      |
| 34241  | 1     | 1      | 1      | 1      |
| 34259  | 4     | 3      | 5      | 4      |
| 34303  | 4     | 4      | 3      | 2      |
| 34306  | 1     | 1      | 1      | 1      |
| 34395  | 1     | 1      | 2      | 1      |
| 34463  | 2     | 2      | 3      | 3      |
| 34466  | 3     | 3      | 2      | 1      |
| 34471  | 2     | 1      | 1      | 1      |
| 34489  | 2     | 2      | 3      | 3      |
| 34518  | 1     | 1      | 1      | 1      |
| 34542  | 2     | 3      | 3      | 2      |



| respid | Q40_9 | Q40_10 | Q40_11 | Q40_12 |
|--------|-------|--------|--------|--------|
| 34595  |       |        |        |        |
| 34604  | 1     | 1      | 1      | 1      |
| 34631  | 1     | 1      | 5      | 1      |
| 34665  | 1     | 1      | 2      | 1      |
| 34716  | 1     | 1      | 1      | 1      |
| 34729  | 1     | 1      | 1      | 1      |
| 34772  | 4     | 3      | 4      | 4      |
| 34800  | 2     | 1      | 3      | 2      |
| 34819  | 2     | 3      | 3      | 2      |
| 34829  | 2     | 3      | 3      | 2      |
| 34831  | 3     | 2      | 4      | 3      |
| 34839  | 1     | 1      | 3      | 1      |
| 34868  | 2     | 2      | 4      | 2      |
| 34869  | 1     | 1      | 1      | 1      |
| 34882  | 3     | 1      | 4      | 4      |
| 34895  | 5     | 3      | 5      | 5      |
| 34901  | 1     | 1      | 1      | 1      |
| 34904  | 3     | 2      | 2      | 3      |
| 34907  | 3     | 3      | 4      | 3      |
| 34914  | 1     | 1      | 2      | 1      |
| 34918  | 2     | 2      | 3      | 3      |
| 34924  | 1     | 1      | 1      | 1      |
| 34933  | 3     | 3      | 3      | 2      |
| 34938  | 1     | 1      | 1      | 1      |
| 34952  | 3     | 3      | 4      | 3      |
| 34959  | 1     | 1      | 2      | 1      |
| 34972  | 3     | 1      | 2      | 1      |
| 34973  | 3     | 3      | 3      | 3      |
| 34975  | 3     | 2      | 4      | 3      |
| 34977  | 2     | 1      | 2      | 1      |
| 34978  | 1     | 1      | 2      | 1      |
| 34980  | 2     | 2      | 2      | 2      |

| respid | Q40_9 | Q40_10 | Q40_11 | Q40_12 |
|--------|-------|--------|--------|--------|
| 34984  | 3     | 3      | 3      | 3      |
| 34986  | 3     | 3      | 4      | 2      |
| 34994  | 1     | 1      | 2      | 1      |
| 34996  | 3     | 1      | 3      | 2      |
| 35003  | 1     | 1      | 1      | 1      |
| 35014  | 1     | 1      | 1      | 1      |
| 35029  | 2     | 2      | 3      | 2      |
| 35030  | 3     | 2      | 3      | 4      |
| 35037  | 2     | 1      | 3      | 1      |
| 35043  |       |        |        |        |
| 35048  |       |        |        |        |
| 35055  | 3     | 1      | 2      | 3      |
| 35067  | 2     | 2      | 1      | 2      |
| 35072  | 1     | 1      | 2      | 1      |
| 35078  | 1     | 1      | 4      | 1      |
| 35084  | 1     | 1      | 1      | 1      |
| 35095  |       |        |        |        |
| 35096  |       |        |        |        |
| 35097  | 3     | 2      | 3      | 3      |
| 35098  | 3     | 2      | 2      | 2      |
| 35109  | 5     | 2      | 5      | 5      |
| 35114  | 1     | 1      | 1      | 1      |
| 35115  | 1     | 1      | 2      | 1      |
| 35124  | 3     | 2      | 3      | 3      |
| 35125  | 1     | 1      | 1      | 1      |
| 35141  |       |        |        |        |
| 35142  | 1     | 1      | 1      | 1      |
| 35145  |       |        |        |        |
| 35149  | 3     | 2      | 4      | 4      |
| 35159  | 1     | 1      | 2      | 1      |
| 35163  | 2     | 2      | 4      | 5      |
| 35174  | 2     | 2      | 2      | 2      |

| respid | Q40_9 | Q40_10 | Q40_11 | Q40_12 |
|--------|-------|--------|--------|--------|
| 35188  |       |        |        |        |
| 35189  | 5     | 2      | 5      | 4      |
| 35201  | 5     | 4      | 3      | 3      |
| 35215  | 1     | 1      | 2      | 1      |
| 35228  | 1     | 1      | 1      | 1      |
| 35235  | 2     | 1      | 1      | 2      |
| 35239  | 5     | 4      | 4      | 3      |
| 35243  | 1     | 1      | 2      | 1      |
| 35245  | 3     | 2      | 4      | 3      |
| 35259  |       |        |        |        |
| 35265  | 3     | 4      | 3      | 3      |
| 35272  | 2     | 2      | 2      | 2      |
| 35280  | 2     | 1      | 3      | 2      |
| 35298  | 1     | 1      | 1      | 1      |
| 35305  | 1     | 1      | 1      | 1      |
| 35306  | 3     | 2      | 2      | 3      |
| 35307  | 1     | 1      | 1      | 1      |
| 35311  | 1     | 1      | 1      | 1      |
| 35322  | 2     | 1      | 2      | 1      |
| 35323  | 2     | 2      | 2      | 2      |
| 35327  | 2     | 3      | 3      | 2      |
| 35366  | 2     | 1      | 1      | 1      |
| 35378  | 3     | 3      | 3      | 3      |
| 35389  | 2     | 1      | 2      | 2      |
| 35390  | 1     | 1      | 1      | 1      |
| 35395  | 4     | 4      | 3      | 2      |
| 35411  | 3     | 5      | 4      | 3      |
| 35423  | 1     | 1      | 1      | 1      |
| 35425  | 1     | 1      | 3      | 1      |
| 35434  | 1     | 1      | 1      | 1      |
| 35462  | 1     | 1      | 1      | 1      |
| 35478  | 3     | 3      | 3      | 3      |

| respid | Q40_9 | Q40_10 | Q40_11 | Q40_12 |
|--------|-------|--------|--------|--------|
| 35481  | 4     | 3      | 4      | 4      |
| 35498  | 2     | 1      | 1      | 3      |
| 35499  |       |        |        |        |
| 35502  | 2     | 2      | 2      | 3      |
| 35503  |       |        |        |        |
| 35504  |       |        |        |        |
| 35508  | 2     | 1      | 2      | 3      |
| 35513  | 2     | 2      | 2      | 2      |
| 35516  | 2     | 1      | 2      | 4      |
| 35519  | 3     | 1      | 4      | 4      |
| 35530  | 2     | 1      | 4      | 1      |
| 35533  | 3     | 3      | 3      | 3      |
| 35561  | 2     | 3      | 2      | 3      |
| 35565  | 1     | 1      | 1      | 1      |
| 35588  | 1     | 1      | 1      | 1      |
| 35598  | 1     | 1      | 1      | 1      |
| 35607  | 1     | 1      | 2      | 1      |
| 35638  | 1     | 1      | 1      | 1      |
| 35642  | 1     | 1      | 1      | 1      |
| 35643  | 3     | 2      | 3      | 3      |
| 35680  | 1     | 1      | 1      | 1      |
| 35697  | 2     | 1      | 1      | 1      |
| 35703  |       |        |        |        |
| 35709  | 4     | 3      | 4      | 4      |
| 35710  | 1     | 1      | 2      | 1      |
| 35721  | 5     | 1      | 3      | 6      |
| 35723  | 1     | 1      | 2      | 1      |
| 35736  | 2     | 2      | 3      | 3      |
| 35739  | 2     | 2      | 2      | 2      |
| 35745  | 2     | 1      | 5      | 2      |
| 35748  | 4     | 3      | 5      | 6      |
| 35750  | 2     | 1      | 1      | 1      |

| respid | Q40_9 | Q40_10 | Q40_11 | Q40_12 |
|--------|-------|--------|--------|--------|
| 35752  | 2     | 1      | 2      | 2      |
| 35773  | 2     | 3      | 2      | 2      |
| 35779  | 1     | 1      | 1      | 1      |
| 35791  | 1     | 1      | 1      | 1      |
| 35801  | 2     | 1      | 2      | 2      |
| 35802  | 1     | 1      | 1      | 1      |
| 35837  | 4     | 1      | 5      | 4      |
| 35853  | 2     | 2      | 2      | 2      |
| 35858  | 3     | 2      | 2      | 3      |
| 35860  | 3     | 3      | 5      | 4      |
| 35875  | 2     | 1      | 5      | 1      |
| 35883  | 1     | 1      | 2      | 3      |
| 35890  | 1     | 1      | 2      | 1      |
| 35898  | 1     | 1      | 1      | 2      |
| 35901  | 3     | 4      | 4      | 4      |
| 35914  | 2     | 3      | 3      | 2      |
| 35924  | 3     | 4      | 2      | 2      |
| 35950  | 1     | 1      | 4      | 4      |
| 35961  | 3     | 2      | 2      | 2      |
| 35966  | 1     | 1      | 1      | 2      |
| 35967  | 1     | 1      | 1      | 1      |
| 35971  | 1     | 1      | 1      | 1      |
| 35974  | 1     | 1      | 1      | 1      |
| 35983  | 3     | 3      | 3      | 4      |
| 35992  | 4     | 2      | 6      | 5      |
| 36010  | 2     | 1      | 2      | 1      |
| 36019  | 6     | 6      | 6      | 6      |
| 36029  | 2     | 3      | 2      | 3      |
| 36033  | 1     | 1      | 1      | 1      |
| 36042  | 1     | 1      | 1      | 1      |
| 36043  | 2     | 3      | 2      | 2      |
| 36048  | 2     | 2      | 3      | 3      |

| respid | Q40_9 | Q40_10 | Q40_11 | Q40_12 |
|--------|-------|--------|--------|--------|
| 36050  | 2     | 2      | 1      | 1      |
| 36062  | 2     | 1      | 3      | 1      |
| 36063  |       |        |        |        |
| 36092  | 3     | 3      | 3      | 3      |
| 36097  | 1     | 3      | 2      | 3      |
| 36108  | 1     | 1      | 1      | 1      |
| 36113  | 3     | 3      | 5      | 4      |
| 36117  | 1     | 1      | 1      | 1      |
| 36129  | 3     | 3      | 3      | 3      |
| 36144  | 1     | 1      | 1      | 1      |
| 36152  | 1     | 1      | 1      | 1      |
| 36154  | 4     | 2      | 4      | 5      |
| 36155  | 1     | 1      | 1      | 1      |
| 36167  | 1     | 1      | 1      | 1      |
| 36172  | 1     | 1      | 2      | 1      |
| 36173  | 2     | 2      | 3      | 2      |
| 36174  | 2     | 2      | 3      | 3      |
| 36182  | 2     | 1      | 1      | 1      |
| 36192  | 1     | 2      | 4      | 3      |
| 36195  | 2     | 3      | 3      | 3      |
| 36204  | 2     | 1      | 2      | 1      |
| 36205  | 1     | 1      | 1      | 1      |
| 36208  | 1     | 1      | 1      | 1      |
| 36216  | 3     | 1      | 2      | 3      |
| 36221  | 3     | 3      | 3      | 3      |
| 36244  | 1     | 1      | 1      | 1      |
| 36255  | 3     | 4      | 3      | 2      |
| 36259  | 1     | 1      | 2      | 1      |
| 36262  | 3     | 3      | 2      | 3      |
| 36268  | 1     | 1      | 1      | 1      |
| 36308  | 2     | 1      | 2      | 3      |
| 36324  | 2     | 1      | 3      | 1      |

| respid | Q40_9 | Q40_10 | Q40_11 | Q40_12 |
|--------|-------|--------|--------|--------|
| 36330  | 1     | 1      | 1      | 1      |
| 36331  | 1     | 1      | 4      | 1      |
| 36336  | 1     | 1      | 1      | 1      |
| 36337  | 2     | 1      | 2      | 1      |
| 36364  | 1     | 2      | 1      | 2      |
| 36365  | 3     | 4      | 3      | 4      |
| 36396  | 1     | 1      | 1      | 2      |
| 36403  | 1     | 1      | 1      | 1      |
| 36410  | 1     | 1      | 1      | 1      |
| 36413  | 1     | 1      | 1      | 1      |
| 36422  | 1     | 1      | 2      | 1      |
| 36424  | 2     | 2      | 5      | 3      |
| 36425  | 3     | 2      | 4      | 2      |
| 36432  | 2     | 2      | 2      | 2      |
| 36435  | 3     | 3      | 4      | 4      |
| 36446  | 3     | 4      | 3      | 3      |
| 36451  | 1     | 1      | 2      | 5      |
| 36453  | 4     | 5      | 3      | 2      |
| 36459  | 2     | 2      | 3      | 3      |
| 36464  | 3     | 2      | 2      | 2      |
| 36465  | 2     | 3      | 2      | 3      |
| 36466  |       |        |        |        |
| 36476  | 2     | 2      | 3      | 1      |
| 36487  | 1     | 1      | 3      | 2      |
| 36488  | 2     | 2      | 2      | 3      |
| 36500  |       |        |        |        |
| 36504  | 2     | 1      | 2      | 2      |
| 36513  | 2     | 2      | 2      | 2      |
| 36515  | 3     | 4      | 3      | 3      |
| 36521  | 3     | 2      | 3      | 3      |
| 36530  | 3     | 3      | 2      | 3      |
| 36556  | 2     | 1      | 4      | 2      |

| respid | Q40_9 | Q40_10 | Q40_11 | Q40_12 |
|--------|-------|--------|--------|--------|
| 36564  | 5     | 5      | 3      | 4      |
| 36584  | 1     | 1      | 1      | 1      |
| 36585  |       |        |        |        |
| 36586  |       |        |        |        |
| 36606  | 3     | 3      | 4      | 4      |
| 36615  | 1     | 1      | 2      | 1      |
| 36628  | 1     | 1      | 1      | 1      |
| 36630  | 2     | 1      | 3      | 2      |
| 36631  | 2     | 2      | 4      | 2      |
| 36636  | 1     | 1      | 1      | 1      |
| 36637  | 2     | 1      | 2      | 1      |
| 36651  | 3     | 2      | 3      | 3      |
| 36661  | 1     | 1      | 1      | 1      |
| 36670  | 2     | 2      | 2      | 1      |
| 36671  | 2     | 1      | 1      | 2      |
| 36688  |       |        |        |        |
| 36694  | 1     | 2      | 1      | 2      |
| 36696  |       |        |        |        |
| 36703  |       |        |        |        |
| 36719  | 3     | 3      | 3      | 4      |
| 36721  | 4     | 3      | 3      | 3      |
| 36740  | 5     | 5      | 5      | 5      |
| 36755  | 3     | 1      | 2      | 1      |
| 36765  | 3     | 2      | 2      | 4      |
| 36770  |       |        |        |        |
| 36773  | 2     | 2      | 2      | 2      |
| 36813  | 1     | 1      | 2      | 2      |
| 36819  | 3     | 3      | 3      | 4      |
| 36820  | 2     | 2      | 2      | 2      |
| 36821  | 1     | 1      | 1      | 1      |
| 36827  | 3     | 1      | 1      | 3      |
| 36835  | 1     | 1      | 2      | 2      |



| respid | Q40_9 | Q40_10 | Q40_11 | Q40_12 |
|--------|-------|--------|--------|--------|
| 36837  | 1     | 2      | 1      | 2      |
| 36849  | 1     | 1      | 2      | 1      |
| 36851  | 3     | 2      | 2      | 2      |
| 36868  | 4     | 3      | 4      | 3      |
| 36870  | 1     | 1      | 1      | 1      |
| 36871  |       |        |        |        |
| 36874  | 3     | 3      | 3      | 3      |
| 36878  | 4     | 3      | 2      | 3      |
| 36887  | 1     | 1      | 1      | 1      |
| 36889  | 1     | 3      | 1      | 2      |
| 36891  | 1     | 1      | 1      | 1      |
| 36903  | 4     | 1      | 3      | 2      |
| 36905  | 1     | 1      | 2      | 1      |
| 36913  | 1     | 1      | 1      | 2      |
| 36949  | 3     | 3      | 3      | 3      |
| 36954  | 2     | 3      | 3      | 3      |
| 36962  | 2     | 2      | 2      | 2      |
| 36965  | 2     | 1      | 2      | 1      |
| 36970  | 1     | 1      | 1      | 1      |
| 36979  | 2     | 3      | 2      | 2      |
| 36990  | 3     | 2      | 2      | 2      |
| 36991  | 1     | 1      | 2      | 1      |
| 36992  | 1     | 1      | 2      | 2      |
| 37015  |       |        |        |        |
| 37017  | 1     | 2      | 2      | 2      |
| 37020  |       |        |        |        |
| 37033  | 5     | 5      | 4      | 5      |
| 37041  | 1     | 1      | 1      | 1      |
| 37048  | 1     | 1      | 2      | 3      |
| 37050  | 1     | 1      | 1      | 1      |
| 37054  | 3     | 3      | 3      | 3      |
| 37057  | 3     | 1      | 3      | 3      |

| respid | Q40_9 | Q40_10 | Q40_11 | Q40_12 |
|--------|-------|--------|--------|--------|
| 37067  | 2     | 1      | 2      | 1      |
| 37074  | 1     | 1      | 2      | 1      |
| 37088  | 1     | 1      | 2      | 2      |
| 37090  | 3     | 2      | 3      | 4      |
| 37110  | 3     | 4      | 4      | 4      |
| 37122  | 1     | 1      | 2      | 1      |
| 37124  | 2     | 2      | 3      | 1      |
| 37126  |       |        |        |        |
| 37129  | 3     | 3      | 3      | 3      |
| 37130  | 1     | 1      | 2      | 2      |
| 37142  | 2     | 2      | 4      | 2      |
| 37160  | 2     | 2      | 2      | 2      |
| 37168  | 1     | 1      | 1      | 1      |
| 37169  | 3     | 3      | 3      | 3      |
| 37191  | 1     | 1      | 2      | 1      |
| 37197  | 5     | 5      | 4      | 5      |
| 37204  | 2     | 1      | 1      | 1      |
| 37213  | 6     | 4      | 5      | 4      |
| 37238  | 2     | 1      | 4      | 1      |
| 37242  | 2     | 2      | 3      | 3      |
| 37243  | 4     | 3      | 2      | 4      |
| 37275  | 1     | 2      | 1      | 1      |
| 37305  | 2     | 2      | 3      | 3      |
| 37357  | 4     | 3      | 3      | 4      |
| 37365  | 3     | 4      | 3      | 2      |
| 37370  |       |        |        |        |
| 37406  | 5     | 5      | 4      | 4      |
| 37410  | 4     | 5      | 3      | 4      |
| 37411  | 4     | 3      | 3      | 3      |
| 37427  | 5     | 3      | 3      | 4      |
| 37437  | 3     | 4      | 4      | 1      |
| 37440  | 1     | 1      | 1      | 2      |

| respid | Q40_9 | Q40_10 | Q40_11 | Q40_12 |
|--------|-------|--------|--------|--------|
| 37452  | 1     | 1      | 2      | 1      |
| 37465  | 4     | 5      | 4      | 3      |
| 37468  | 5     | 2      | 6      | 2      |
| 37469  | 2     | 2      | 1      | 1      |
| 37477  | 4     | 5      | 3      | 2      |
| 37509  | 1     | 1      | 1      | 1      |
| 37513  | 3     | 2      | 3      | 4      |
| 37534  | 3     | 3      | 3      | 3      |
| 37537  | 1     | 1      | 1      | 1      |
| 37560  | 3     | 4      | 4      | 3      |
| 37566  | 5     | 5      | 6      | 4      |
| 37572  | 2     | 1      | 1      | 1      |
| 37574  | 3     | 1      | 2      | 3      |
| 37575  | 2     | 3      | 5      | 3      |
| 37590  | 4     | 4      | 2      | 2      |
| 37593  | 1     | 1      | 2      | 1      |
| 37599  | 1     | 1      | 1      | 1      |
| 37641  | 1     | 1      | 2      | 1      |
| 37651  | 3     | 2      | 2      | 3      |
| 37670  | 2     | 1      | 2      | 2      |
| 37680  | 2     | 5      | 4      | 3      |
| 37690  | 2     | 2      | 5      | 2      |
| 37694  |       |        |        |        |
| 37705  | 1     | 1      | 1      | 1      |
| 37710  | 4     | 4      | 4      | 4      |
| 37719  | 3     | 1      | 4      | 4      |
| 37741  | 3     | 2      | 2      | 3      |
| 37752  | 1     | 1      | 2      | 1      |
| 37755  | 1     | 3      | 3      | 2      |
| 37757  | 1     | 1      | 1      | 1      |
| 37783  | 3     | 3      | 2      | 3      |
| 37793  | 4     | 5      | 5      | 5      |

| respid | Q40_9 | Q40_10 | Q40_11 | Q40_12 |
|--------|-------|--------|--------|--------|
| 37800  | 5     | 2      | 5      | 4      |
| 37801  | 1     | 1      | 1      | 1      |
| 37820  | 4     | 3      | 3      | 4      |
| 37826  | 2     | 1      | 3      | 2      |
| 37835  | 4     | 3      | 3      | 4      |
| 37839  | 4     | 5      | 4      | 5      |
| 37871  | 4     | 4      | 5      | 5      |
| 37876  | 3     | 2      | 1      | 2      |
| 37879  | 4     | 1      | 3      | 4      |
| 37894  | 1     | 2      | 2      | 2      |
| 37895  | 3     | 3      | 3      | 2      |
| 37901  | 3     | 1      | 4      | 1      |
| 37926  | 1     | 2      | 3      | 4      |
| 37937  | 3     | 3      | 3      | 2      |
| 37938  | 1     | 1      | 1      | 1      |
| 37959  | 1     | 1      | 2      | 1      |
| 37970  |       |        |        |        |
| 37972  | 3     | 2      | 3      | 4      |
| 37988  | 2     | 3      | 2      | 3      |
| 37989  | 4     | 3      | 5      | 5      |
| 38000  | 2     | 1      | 2      | 3      |
| 38028  | 5     | 5      | 5      | 4      |
| 38042  | 4     | 5      | 3      | 4      |
| 38052  | 1     | 2      | 2      | 2      |
| 38056  | 1     | 1      | 1      | 1      |
| 38106  | 4     | 4      | 3      | 3      |
| 38114  | 4     | 3      | 3      | 4      |
| 38134  | 1     | 1      | 3      | 1      |
| 38135  | 2     | 2      | 2      | 2      |
| 38139  | 3     | 3      | 2      | 3      |
| 38160  | 1     | 1      | 3      | 1      |
| 38164  | 3     | 2      | 2      | 2      |

| respid | Q40_9 | Q40_10 | Q40_11 | Q40_12 |
|--------|-------|--------|--------|--------|
| 38168  |       |        |        |        |
| 38173  | 1     | 1      | 1      | 1      |
| 38193  | 4     | 5      | 4      | 3      |
| 38204  | 1     | 1      | 2      | 1      |
| 38206  | 3     | 3      | 4      | 3      |
| 38233  | 3     | 2      | 6      | 4      |
| 38242  | 4     | 5      | 5      | 4      |
| 38245  | 1     | 1      | 1      | 2      |
| 38261  | 3     | 4      | 4      | 5      |
| 38288  | 2     | 1      | 3      | 2      |
| 38296  | 2     | 3      | 3      | 2      |
| 38299  | 3     | 2      | 1      | 3      |
| 38300  | 4     | 2      | 3      | 3      |
| 38303  | 1     | 1      | 2      | 1      |
| 38317  | 1     | 1      | 1      | 1      |
| 38328  | 4     | 3      | 5      | 4      |
| 38333  | 1     | 1      | 1      | 2      |
| 38336  | 1     | 2      | 2      | 1      |
| 38338  | 1     | 1      | 1      | 1      |
| 38342  | 2     | 1      | 2      | 2      |
| 38360  | 1     | 1      | 1      | 1      |
| 38362  | 2     | 3      | 2      | 2      |
| 38364  | 4     | 4      | 5      | 6      |
| 38402  | 2     | 2      | 2      | 2      |
| 38423  | 3     | 3      | 3      | 2      |
| 38424  | 3     | 3      | 3      | 3      |
| 38435  | 4     | 4      | 3      | 3      |
| 38450  | 1     | 1      | 1      | 1      |
| 38455  | 1     | 1      | 1      | 1      |
| 38467  | 1     | 1      | 5      | 1      |
| 38468  | 2     | 3      | 3      | 3      |
| 38472  | 3     | 4      | 4      | 3      |

| respid | Q40_9 | Q40_10 | Q40_11 | Q40_12 |
|--------|-------|--------|--------|--------|
| 38484  | 1     | 1      | 2      | 1      |
| 38498  | 1     | 1      | 2      | 2      |
| 38507  | 1     | 1      | 1      | 1      |
| 38511  | 1     | 1      | 2      | 1      |
| 38524  | 4     | 4      | 5      | 4      |
| 38526  | 3     | 2      | 3      | 2      |
| 38534  | 3     | 1      | 3      | 2      |
| 38536  | 2     | 2      | 2      | 2      |
| 38539  | 1     | 1      | 1      | 1      |
| 38547  | 1     | 1      | 1      | 1      |
| 38549  | 1     | 1      | 2      | 1      |
| 38575  | 5     | 3      | 4      | 3      |
| 38579  | 1     | 1      | 3      | 1      |
| 38585  | 2     | 2      | 2      | 1      |
| 38589  | 3     | 3      | 2      | 3      |
| 38595  | 4     | 3      | 3      | 2      |
| 38602  | 1     | 1      | 2      | 1      |
| 38603  | 2     | 1      | 4      | 2      |
| 38612  | 1     | 2      | 2      | 2      |
| 38621  | 5     | 5      | 4      | 4      |
| 38624  | 5     | 3      | 2      | 3      |
| 38636  |       |        |        |        |
| 38656  | 1     | 1      | 2      | 1      |
| 38668  | 1     | 2      | 1      | 1      |
| 38675  | 2     | 2      | 1      | 1      |
| 38676  | 2     | 2      | 1      | 1      |
| 38682  | 5     | 4      | 2      | 3      |
| 38689  | 1     | 1      | 2      | 1      |
| 38702  |       |        |        |        |
| 38704  | 4     | 4      | 5      | 5      |
| 38713  | 1     | 1      | 1      | 1      |
| 38718  | 3     | 1      | 2      | 2      |

| respid | Q40_9 | Q40_10 | Q40_11 | Q40_12 |
|--------|-------|--------|--------|--------|
| 38725  | 1     | 1      | 1      | 1      |
| 38730  | 4     | 4      | 5      | 5      |
| 38737  | 2     | 4      | 4      | 3      |
| 38738  | 3     | 3      | 3      | 3      |
| 38744  | 1     | 1      | 1      | 1      |
| 38746  | 1     | 1      | 1      | 1      |
| 38753  | 1     | 1      | 2      | 1      |
| 38756  | 2     | 3      | 3      | 3      |
| 38760  | 2     | 1      | 1      | 1      |
| 38762  | 5     | 4      | 4      | 3      |
| 38765  | 2     | 1      | 1      | 1      |
| 38769  | 2     | 3      | 2      | 3      |
| 38781  | 4     | 5      | 5      | 5      |
| 38786  | 1     | 1      | 1      | 1      |
| 38790  | 3     | 3      | 3      | 4      |
| 38793  | 1     | 1      | 1      | 1      |
| 38797  | 1     | 1      | 2      | 1      |
| 38802  | 3     | 2      | 3      | 2      |
| 38815  | 2     | 2      | 3      | 2      |
| 38826  | 3     | 3      | 3      | 4      |
| 38828  | 1     | 1      | 1      | 1      |
| 38829  | 4     | 4      | 4      | 4      |
| 38835  | 3     | 3      | 2      | 3      |
| 38842  | 4     | 4      | 5      | 4      |
| 38853  | 1     | 1      | 2      | 2      |
| 38855  | 5     | 5      | 4      | 4      |
| 38860  | 2     | 4      | 3      | 4      |
| 38869  | 2     | 1      | 4      | 2      |
| 38882  | 6     | 5      | 3      | 4      |
| 38897  | 2     | 1      | 2      | 1      |
| 38903  | 1     | 1      | 1      | 1      |
| 38910  | 3     | 3      | 3      | 3      |

| respid | Q40_9 | Q40_10 | Q40_11 | Q40_12 |
|--------|-------|--------|--------|--------|
| 38948  | 4     | 3      | 3      | 4      |
| 38949  | 3     | 2      | 5      | 3      |
| 38953  | 4     | 4      | 5      | 5      |
| 38989  | 3     | 4      | 5      | 4      |
| 38997  | 3     | 2      | 2      | 3      |
| 38999  | 1     | 1      | 1      | 1      |
| 39002  | 4     | 4      | 4      | 3      |
| 39003  | 5     | 4      | 4      | 5      |
| 39006  | 1     | 1      | 1      | 1      |
| 39014  |       |        |        |        |
| 39017  | 4     | 5      | 5      | 5      |
| 39018  | 5     | 4      | 5      | 4      |
| 39025  | 4     | 5      | 5      | 4      |
| 39031  | 4     | 5      | 5      | 3      |
| 39061  | 4     | 3      | 5      | 3      |
| 39131  | 1     | 1      | 2      | 1      |
| 39153  | 5     | 4      | 4      | 5      |
| 39194  | 4     | 3      | 2      | 1      |
| 39204  | 2     | 2      | 2      | 2      |
| 39208  | 2     | 1      | 3      | 3      |
| 39213  | 1     | 3      | 5      | 4      |
| 39231  | 1     | 1      | 2      | 2      |
| 39251  | 1     | 4      | 3      | 5      |
| 39257  | 4     | 4      | 3      | 5      |
| 39262  | 5     | 2      | 3      | 2      |
| 39269  | 4     | 4      | 3      | 5      |
| 39272  | 3     | 3      | 2      | 2      |
| 39280  | 5     | 6      | 6      | 5      |
| 39294  | 5     | 4      | 2      | 3      |
| 39297  | 5     | 4      | 3      | 5      |
| 39300  | 3     | 2      | 5      | 5      |
| 39307  | 5     | 4      | 3      | 5      |



| respid | Q40_9 | Q40_10 | Q40_11 | Q40_12 |
|--------|-------|--------|--------|--------|
| 39320  | 5     | 2      | 3      | 1      |
| 39333  | 1     | 1      | 1      | 1      |
| 39335  | 4     | 3      | 4      | 4      |
| 39339  | 3     | 3      | 2      | 2      |
| 39375  | 3     | 4      | 3      | 3      |
| 39377  | 1     | 1      | 1      | 6      |
| 39380  | 4     | 2      | 2      | 5      |
| 39425  | 1     | 1      | 2      | 1      |
| 39590  | 1     | 1      | 1      | 1      |
| 40529  | 1     | 1      | 1      | 1      |
| 40702  | 2     | 2      | 2      | 1      |
| 40788  | 1     | 1      | 1      | 1      |
| 40841  | 1     | 1      | 1      | 1      |
| 40965  | 1     | 1      | 1      | 1      |
| 41092  | 1     | 1      | 1      | 1      |
| 41534  |       |        |        |        |
| 41919  | 1     | 1      | 1      | 1      |
| 42110  | 3     | 3      | 4      | 4      |
| 42135  | 2     | 1      | 2      | 1      |
| 42142  | 1     | 1      | 1      | 1      |
| 42163  | 2     | 1      | 3      | 1      |
| 42164  | 1     | 1      | 1      | 1      |
| 42172  | 5     | 2      | 2      | 5      |
| 42177  | 1     | 1      | 1      | 1      |
| 42181  | 2     | 1      | 3      | 2      |
| 42193  | 4     | 3      | 3      | 2      |
| 42196  | 2     | 2      | 3      | 2      |
| 42202  | 2     | 3      | 4      | 3      |
| 42248  | 3     | 2      | 4      | 3      |
| 42283  | 1     | 1      | 1      | 1      |
| 42284  | 2     | 2      | 2      | 2      |
| 42323  |       |        |        |        |

| respid | Q40_9 | Q40_10 | Q40_11 | Q40_12 |
|--------|-------|--------|--------|--------|
| 42349  | 1     | 1      | 2      | 1      |
| 42351  |       |        |        |        |
| 42357  | 1     | 1      | 1      | 1      |
| 42366  |       |        |        |        |
| 42380  | 1     | 1      | 1      | 1      |
| 42414  | 2     | 2      | 2      | 2      |
| 42420  | 5     | 4      | 4      | 4      |
| 42454  |       |        |        |        |
| 42458  | 1     | 1      | 2      | 1      |
| 42461  | 1     | 1      | 1      | 1      |
| 42488  | 3     | 2      | 2      | 2      |
| 42511  | 1     | 1      | 1      | 1      |
| 42512  | 1     | 1      | 1      | 1      |
| 42530  | 6     | 2      | 6      | 4      |
| 42531  | 6     | 3      | 6      | 6      |
| 42533  | 2     | 1      | 6      | 1      |
| 42549  | 1     | 1      | 2      | 1      |
| 42550  | 4     | 3      | 3      | 4      |
| 42553  |       |        |        |        |
| 42562  | 2     | 3      | 2      | 3      |
| 42567  | 1     | 1      | 1      | 1      |
| 42589  | 2     | 2      | 2      | 2      |
| 42604  | 1     | 1      | 1      | 1      |
| 42618  | 2     | 2      | 2      | 3      |
| 42621  | 4     | 4      | 3      | 4      |
| 42627  | 1     | 1      | 1      | 1      |
| 42641  | 1     | 1      | 1      | 1      |
| 42655  | 3     | 3      | 3      | 3      |
| 42666  | 1     | 1      | 1      | 1      |
| 42667  | 4     | 3      | 5      | 4      |
| 42697  | 1     | 1      | 2      | 1      |
| 42703  | 1     | 1      | 1      | 1      |

| respid | Q40_9 | Q40_10 | Q40_11 | Q40_12 |
|--------|-------|--------|--------|--------|
| 42712  | 2     | 1      | 1      | 3      |
| 42731  | 2     | 1      | 2      | 3      |
| 42780  | 1     | 1      | 1      | 1      |
| 42785  | 2     | 2      | 2      | 2      |
| 42788  | 1     | 3      | 2      | 2      |
| 42802  | 2     | 3      | 2      | 3      |
| 42818  | 3     | 2      | 2      | 3      |
| 42821  | 1     | 1      | 5      | 1      |
| 42824  | 1     | 1      | 2      | 1      |
| 42831  | 3     | 1      | 2      | 1      |
| 42836  | 1     | 1      | 2      | 1      |
| 42864  | 3     | 1      | 2      | 1      |
| 42875  | 1     | 1      | 1      | 1      |
| 42891  | 5     | 5      | 5      | 5      |
| 42897  | 1     | 1      | 2      | 1      |
| 42900  | 2     | 1      | 3      | 1      |
| 42902  | 4     | 4      | 3      | 2      |
| 42921  | 1     | 1      | 2      | 2      |
| 42925  | 2     | 1      | 1      | 1      |
| 42944  |       |        |        |        |
| 42950  |       |        |        |        |
| 42963  | 1     | 1      | 1      | 1      |
| 42967  | 1     | 1      | 1      | 1      |
| 42985  | 1     | 1      | 2      | 1      |
| 42990  | 2     | 1      | 1      | 1      |
| 42996  | 3     | 1      | 4      | 3      |
| 43002  | 2     | 1      | 2      | 1      |
| 43004  | 1     | 1      | 1      | 3      |
| 43012  | 1     | 1      | 1      | 1      |
| 43027  | 4     | 4      | 4      | 4      |
| 43028  | 1     | 1      | 1      | 1      |
| 43029  | 1     | 1      | 2      | 2      |

| respid | Q40_9 | Q40_10 | Q40_11 | Q40_12 |
|--------|-------|--------|--------|--------|
| 43031  | 1     | 1      | 2      | 1      |
| 43042  | 1     | 1      | 1      | 1      |
| 43054  | 2     | 2      | 2      | 2      |
| 43058  | 1     | 1      | 1      | 1      |
| 43064  | 2     | 2      | 2      | 1      |
| 43069  | 3     | 2      | 2      | 3      |
| 43071  |       |        |        |        |
| 43072  | 1     | 1      | 1      | 1      |
| 43077  | 2     | 2      | 2      | 2      |
| 43078  | 3     | 4      | 4      | 4      |
| 43082  |       |        |        |        |
| 43092  | 1     | 1      | 1      | 1      |
| 43096  | 1     | 1      | 1      | 1      |
| 43109  |       |        |        |        |
| 43113  | 2     | 1      | 2      | 2      |
| 43123  | 1     | 1      | 2      | 2      |
| 43127  | 1     | 1      | 2      | 1      |
| 43128  | 1     | 1      | 3      | 2      |
| 43129  | 1     | 1      | 1      | 1      |
| 43133  | 3     | 4      | 5      | 4      |
| 43140  |       |        |        |        |
| 43143  | 3     | 4      | 4      | 4      |
| 43149  | 4     | 5      | 6      | 5      |
| 43150  | 2     | 3      | 4      | 5      |
| 43153  | 3     | 2      | 4      | 2      |
| 43170  | 1     | 1      | 1      | 1      |
| 43187  | 2     | 2      | 3      | 2      |
| 43188  | 3     | 2      | 2      | 4      |
| 43198  | 1     | 1      | 2      | 1      |
| 43208  | 1     | 1      | 1      | 1      |
| 43216  | 1     | 1      | 1      | 1      |
| 43222  | 5     | 3      | 2      | 3      |

| respid | Q40_9 | Q40_10 | Q40_11 | Q40_12 |
|--------|-------|--------|--------|--------|
| 43224  | 2     | 2      | 2      | 2      |
| 43230  | 2     | 3      | 4      | 5      |
| 43231  | 3     | 3      | 3      | 3      |
| 43265  | 6     | 5      | 4      | 3      |
| 43270  | 2     | 3      | 4      | 3      |
| 43283  | 3     | 3      | 4      | 3      |
| 43295  | 3     | 2      | 3      | 4      |
| 43297  | 1     | 1      | 1      | 1      |
| 43299  | 3     | 3      | 3      | 3      |
| 43307  | 2     | 1      | 2      | 2      |
| 43316  | 3     | 2      | 2      | 2      |
| 43318  | 4     | 3      | 4      | 3      |
| 43319  | 1     | 1      | 1      | 1      |
| 43324  | 3     | 3      | 4      | 4      |
| 43325  | 6     | 6      | 6      | 6      |
| 43327  | 2     | 1      | 1      | 1      |
| 43338  | 1     | 1      | 2      | 1      |
| 43342  | 1     | 1      | 4      | 1      |
| 43348  | 1     | 1      | 1      | 1      |
| 43395  | 3     | 4      | 4      | 4      |
| 43404  | 3     | 3      | 4      | 4      |
| 43406  | 1     | 1      | 3      | 1      |
| 43407  | 1     | 1      | 1      | 1      |
| 43411  | 1     | 1      | 1      | 1      |
| 43416  | 3     | 3      | 3      | 3      |
| 43428  | 1     | 1      | 1      | 1      |
| 43429  | 4     | 4      | 3      | 4      |
| 43432  | 2     | 1      | 2      | 1      |
| 43443  | 1     | 1      | 1      | 1      |
| 43455  |       |        |        |        |
| 43457  | 2     | 2      | 3      | 2      |
| 43458  | 1     | 1      | 1      | 1      |

| respid | Q40_9 | Q40_10 | Q40_11 | Q40_12 |
|--------|-------|--------|--------|--------|
| 43477  | 2     | 2      | 3      | 4      |
| 43520  | 2     | 1      | 1      | 1      |
| 43521  | 1     | 1      | 2      | 1      |
| 43550  | 1     | 1      | 1      | 1      |
| 43551  | 1     | 1      | 1      | 1      |
| 43554  | 3     | 2      | 4      | 3      |
| 43560  | 1     | 1      | 2      | 1      |
| 43569  | 1     | 1      | 1      | 1      |
| 43583  | 1     | 1      | 1      | 2      |
| 43590  | 2     | 3      | 3      | 3      |
| 43591  | 1     | 1      | 1      | 1      |
| 43595  |       |        |        |        |
| 43599  | 2     | 2      | 2      | 2      |
| 43606  | 1     | 1      | 2      | 1      |
| 43609  | 1     | 1      | 1      | 1      |
| 43629  | 1     | 1      | 1      | 1      |
| 43636  | 1     | 1      | 1      | 1      |
| 43661  | 1     | 1      | 1      | 1      |
| 43668  | 1     | 1      | 2      | 1      |
| 43672  |       |        |        |        |
| 43677  | 3     | 3      | 2      | 3      |
| 43683  | 3     | 1      | 2      | 2      |
| 43708  | 3     | 3      | 3      | 2      |
| 43713  | 1     | 1      | 1      | 1      |
| 43718  |       |        |        |        |
| 43725  | 1     | 1      | 1      | 1      |
| 43747  | 1     | 1      | 2      | 1      |
| 43755  | 1     | 1      | 1      | 1      |
| 43770  | 1     | 1      | 1      | 1      |
| 43775  | 2     | 3      | 2      | 3      |
| 43788  |       |        |        |        |
| 43790  | 5     | 5      | 5      | 5      |

| respid | Q40_9 | Q40_10 | Q40_11 | Q40_12 |
|--------|-------|--------|--------|--------|
| 43797  | 3     | 3      | 3      | 3      |
| 43798  | 4     | 3      | 3      | 4      |
| 43811  | 4     | 5      | 5      | 5      |
| 43819  | 4     | 4      | 4      | 4      |
| 43821  | 4     | 3      | 4      | 5      |
| 43822  | 1     | 1      | 1      | 1      |
| 43825  | 3     | 2      | 5      | 3      |
| 43826  | 1     | 1      | 2      | 1      |
| 43831  | 2     | 1      | 3      | 1      |
| 43836  | 3     | 3      | 4      | 4      |
| 43852  | 3     | 3      | 4      | 4      |
| 43857  | 4     | 1      | 4      | 4      |
| 43858  | 1     | 1      | 1      | 1      |
| 43859  | 3     | 4      | 4      | 4      |
| 43863  | 1     | 1      | 1      | 1      |
| 43868  | 4     | 3      | 4      | 5      |
| 43872  | 4     | 3      | 3      | 3      |
| 43874  | 4     | 3      | 3      | 2      |
| 43882  | 1     | 1      | 1      | 1      |
| 43886  |       |        |        |        |
| 43903  | 3     | 2      | 3      | 2      |
| 43929  | 1     | 1      | 1      | 1      |
| 43932  | 1     | 1      | 1      | 1      |
| 43936  | 1     | 1      | 1      | 1      |
| 43962  | 1     | 1      | 1      | 1      |
| 43964  | 1     | 1      | 1      | 1      |
| 43968  | 2     | 2      | 3      | 2      |
| 43979  | 2     | 3      | 4      | 3      |
| 44006  | 5     | 5      | 5      | 5      |
| 44009  | 1     | 1      | 3      | 5      |
| 44023  | 2     | 1      | 3      | 1      |
| 44035  | 4     | 3      | 4      | 3      |

| respid | Q40_9 | Q40_10 | Q40_11 | Q40_12 |
|--------|-------|--------|--------|--------|
| 44038  | 4     | 3      | 4      | 4      |
| 44039  | 3     | 3      | 3      | 3      |
| 44043  | 2     | 2      | 2      | 2      |
| 44048  | 4     | 4      | 4      | 5      |
| 44050  | 1     | 1      | 1      | 1      |
| 44051  | 4     | 3      | 3      | 3      |
| 44061  | 4     | 4      | 4      | 4      |
| 44063  | 5     | 4      | 4      | 3      |
| 44072  | 4     | 5      | 4      | 4      |
| 44075  | 4     | 4      | 4      | 3      |
| 44089  | 4     | 3      | 4      | 5      |
| 44090  | 5     | 4      | 4      | 5      |
| 44091  | 4     | 4      | 3      | 4      |
| 44092  | 2     | 1      | 3      | 1      |
| 44110  | 4     | 4      | 4      | 4      |
| 44112  | 4     | 3      | 2      | 3      |
| 44114  | 5     | 5      | 5      | 5      |
| 44143  | 3     | 3      | 3      | 3      |
| 44179  | 1     | 1      | 1      | 1      |
| 44234  | 1     | 1      | 1      | 1      |
| 44236  | 3     | 3      | 3      | 3      |
| 44239  | 2     | 3      | 4      | 5      |
| 44241  | 4     | 5      | 5      | 4      |
| 44253  |       |        |        |        |
| 44260  | 5     | 5      | 4      | 4      |
| 44261  | 4     | 4      | 4      | 4      |
| 44263  | 5     | 4      | 3      | 4      |
| 44264  | 1     | 1      | 2      | 1      |
| 44265  | 1     | 1      | 1      | 1      |
| 44267  | 4     | 4      | 4      | 4      |
| 44306  | 2     | 2      | 3      | 2      |
| 44309  | 3     | 3      | 3      | 2      |



| respid | Q40_9 | Q40_10 | Q40_11 | Q40_12 |
|--------|-------|--------|--------|--------|
| 44310  | 2     | 1      | 1      | 1      |
| 44361  | 3     | 3      | 3      | 3      |
| 44380  | 2     | 1      | 1      | 1      |
| 44386  | 1     | 1      | 1      | 1      |
| 44419  | 2     | 2      | 3      | 1      |
| 44426  | 1     | 1      | 2      | 1      |
| 44479  | 1     | 2      | 2      | 2      |
| 44484  | 1     | 1      | 1      | 1      |
| 44487  | 2     | 2      | 2      | 2      |
| 44509  | 1     | 1      | 1      | 1      |
| 44540  | 2     | 3      | 4      | 4      |
| 44551  | 2     | 2      | 3      | 2      |
| 44553  | 1     | 1      | 1      | 1      |
| 44650  | 1     | 1      | 1      | 1      |
| 44665  | 2     | 3      | 4      | 3      |
| 44779  | 1     | 1      | 1      | 1      |
| 44797  | 1     | 1      | 1      | 1      |
| 44807  | 1     | 1      | 1      | 1      |
| 44815  | 2     | 3      | 2      | 3      |
| 44836  | 1     | 1      | 1      | 1      |
| 44868  | 3     | 1      | 2      | 3      |
| 44927  | 2     | 2      | 2      | 2      |
| 44983  |       |        |        |        |
| 45040  | 3     | 1      | 1      | 2      |
| 45051  | 1     | 1      | 1      | 2      |
| 45067  | 1     | 1      | 3      | 1      |
| 45074  |       |        |        |        |
| 45115  | 1     | 1      | 3      | 1      |
| 45187  | 3     | 2      | 4      | 3      |
| 45221  | 4     | 4      | 4      | 4      |
| 45279  | 2     | 1      | 2      | 2      |
| 45308  | 2     | 2      | 2      | 2      |

| respid | Q40_9 | Q40_10 | Q40_11 | Q40_12 |
|--------|-------|--------|--------|--------|
| 45317  | 1     | 1      | 1      | 1      |
| 45379  | 3     | 4      | 3      | 2      |
| 45451  | 1     | 1      | 2      | 1      |
| 45472  | 4     | 4      | 5      | 5      |
| 45474  | 4     | 5      | 5      | 5      |
| 45544  | 6     | 6      | 5      | 6      |
| 45561  | 1     | 1      | 1      | 1      |
| 45596  | 1     | 1      | 2      | 1      |

**InstrumOAB-q SF**

**HC Seeking & Tx**

**HC Seeking & Tx**

**HC Seeking & Tx**

**Symptom**

**Type of RHRQoL**

|                  |                                                                                                    |                                     |                                              |                                                          |
|------------------|----------------------------------------------------------------------------------------------------|-------------------------------------|----------------------------------------------|----------------------------------------------------------|
| <b>Descripti</b> | m. Caused you to locate the closest restroom as soon as you arrive at a place you have never been? | How many times seen HC professional | Visited HC professional for urinary symptoms | How many times seen HC professional for urinary symptoms |
|------------------|----------------------------------------------------------------------------------------------------|-------------------------------------|----------------------------------------------|----------------------------------------------------------|

| respid | Q40_13 | Q41_1 | Q42 | Q42b_1 |
|--------|--------|-------|-----|--------|
| 241    | 1      | 0     | 2   |        |
| 242    | 2      | 3     | 1   | 3      |
| 243    | 3      | 1     | 2   |        |
| 244    | 1      | 2     | 2   |        |
| 245    | 1      | 2     | 2   |        |
| 246    | 1      | 2     | 2   |        |
| 247    | 1      | 0     | 2   |        |
| 253    | 1      | 3     | 2   |        |
| 256    | 1      | 4     | 2   |        |
| 257    | 2      | 5     | 2   |        |
| 258    | 2      | 4     | 2   |        |
| 259    | 1      | 3     | 2   |        |
| 263    | 1      | 0     | 2   |        |
| 264    | 1      | 2     | 2   |        |
| 265    | 4      | 1     | 2   |        |
| 266    | 1      | 3     | 2   |        |
| 268    | 1      | 2     | 2   |        |
| 270    | 2      | 2     | 2   |        |
| 272    | 2      | 4     | 1   | 1      |
| 274    | 1      | 0     | 2   |        |

| respid | Q40_13 | Q41_1 | Q42 | Q42b_1 |
|--------|--------|-------|-----|--------|
| 275    |        |       |     |        |
| 276    | 1      | 0     | 2   |        |
| 277    | 1      | 3     | 2   |        |
| 279    | 2      | 5     | 2   |        |
| 286    | 5      | 0     | 2   |        |
| 290    | 2      | 0     | 2   |        |
| 291    | 1      | 0     | 2   |        |
| 295    |        |       |     |        |
| 297    | 1      | 4     | 2   |        |
| 299    | 2      | 0     | 2   |        |
| 300    | 1      | 2     | 1   | 2      |
| 303    | 1      | 4     | 2   |        |
| 304    | 1      | 5     | 2   |        |
| 306    | 2      | 0     | 2   |        |
| 307    | 6      | 0     | 2   |        |
| 312    | 4      | 5     | 2   |        |
| 315    | 2      | 0     | 2   |        |
| 317    | 1      | 0     | 2   |        |
| 322    | 2      | 0     | 2   |        |
| 335    | 1      | 1     | 2   |        |
| 374    | 3      | 4     | 2   |        |
| 378    | 1      | 0     | 2   |        |
| 380    | 2      | 3     | 2   |        |
| 382    | 1      | 2     | 2   |        |
| 384    | 1      | 3     | 2   |        |
| 385    | 2      | 10    | 2   |        |
| 395    | 1      | 3     | 2   |        |
| 396    |        |       |     |        |
| 398    |        |       |     |        |
| 402    | 3      | 5     | 2   |        |
| 414    | 1      | 0     | 2   |        |
| 415    | 1      | 3     | 2   |        |

| respid | Q40_13 | Q41_1 | Q42 | Q42b_1 |
|--------|--------|-------|-----|--------|
| 416    | 1      | 1     | 2   |        |
| 420    | 2      | 6     | 2   |        |
| 421    | 1      | 5     | 1   | 2      |
| 422    | 1      | 10    | 2   |        |
| 423    | 1      | 1     | 2   |        |
| 424    | 1      | 2     | 2   |        |
| 425    | 2      | 2     | 2   |        |
| 428    | 1      | 0     | 2   |        |
| 429    | 1      | 10    | 2   |        |
| 431    | 1      | 5     | 2   |        |
| 437    | 2      | 1     | 2   |        |
| 438    | 1      | 4     | 1   | 1      |
| 441    | 1      | 4     | 2   |        |
| 444    | 1      | 0     | 2   |        |
| 448    | 1      | 12    | 2   |        |
| 449    | 1      | 12    | 2   |        |
| 457    | 3      | 30    | 2   |        |
| 460    | 1      | 20    | 2   |        |
| 469    | 2      | 1     | 2   |        |
| 471    | 5      | 20    | 2   |        |
| 473    | 5      | 12    | 2   |        |
| 476    | 2      | 0     | 2   |        |
| 479    | 1      | 3     | 2   |        |
| 485    | 1      | 1     | 2   |        |
| 488    | 4      | 8     | 2   |        |
| 494    | 3      | 5     | 2   |        |
| 496    | 1      | 3     | 2   |        |
| 501    |        |       |     |        |
| 502    | 2      | 0     | 2   |        |
| 503    | 1      | 0     | 2   |        |
| 506    | 1      | 0     | 2   |        |
| 514    | 3      | 5     | 2   |        |

| respid | Q40_13 | Q41_1 | Q42 | Q42b_1 |
|--------|--------|-------|-----|--------|
| 515    | 1      | 0     | 2   |        |
| 516    | 1      | 4     | 2   |        |
| 519    | 1      | 0     | 2   |        |
| 522    |        |       |     |        |
| 525    | 2      | 2     | 1   | 1      |
| 528    | 1      | 2     | 2   |        |
| 532    | 1      | 0     | 2   |        |
| 536    | 2      | 8     | 2   |        |
| 539    | 3      | 3     | 2   |        |
| 540    | 1      | 2     | 2   |        |
| 547    | 4      | 0     | 2   |        |
| 551    | 1      | 0     | 2   |        |
| 554    | 6      | 3     | 2   |        |
| 558    | 1      | 0     | 2   |        |
| 563    | 1      | 0     | 2   |        |
| 564    | 2      | 2     | 2   |        |
| 565    | 1      | 0     | 2   |        |
| 567    | 1      | 0     | 2   |        |
| 569    | 1      | 0     | 2   |        |
| 572    | 1      | 0     | 2   |        |
| 574    | 1      | 0     | 2   |        |
| 583    | 2      | 4     | 1   | 1      |
| 589    | 1      | 0     | 2   |        |
| 592    | 1      | 20    | 2   |        |
| 593    |        |       |     |        |
| 594    | 4      | 1     | 2   |        |
| 597    | 1      | 15    | 2   |        |
| 601    | 4      | 0     | 2   |        |
| 607    | 1      | 4     | 2   |        |
| 610    | 1      | 10    | 2   |        |
| 612    | 3      | 6     | 1   | 4      |
| 627    | 1      | 0     | 2   |        |

| respid | Q40_13 | Q41_1 | Q42 | Q42b_1 |
|--------|--------|-------|-----|--------|
| 631    | 1      | 0     | 2   |        |
| 633    | 1      | 15    | 2   |        |
| 636    | 1      | 1     | 2   |        |
| 656    | 1      | 0     | 2   |        |
| 659    | 1      | 1     | 2   |        |
| 670    | 3      | 50    | 2   |        |
| 672    | 1      | 1     | 1   | 1      |
| 673    | 1      | 0     | 2   |        |
| 675    | 1      | 1     | 2   |        |
| 676    | 3      | 12    | 2   |        |
| 679    | 2      | 0     | 2   |        |
| 683    | 1      | 0     | 2   |        |
| 684    | 2      | 4     | 2   |        |
| 690    | 2      | 1     | 2   |        |
| 701    | 3      | 3     | 2   |        |
| 709    | 1      | 5     | 1   | 1      |
| 719    | 1      | 2     | 2   |        |
| 726    | 1      | 0     | 2   |        |
| 730    | 1      | 1     | 2   |        |
| 731    | 1      | 1     | 2   |        |
| 732    | 1      | 0     | 2   |        |
| 733    | 1      | 0     | 2   |        |
| 735    | 1      | 0     | 2   |        |
| 738    | 1      | 5     | 2   |        |
| 740    | 1      | 2     | 2   |        |
| 742    | 1      | 3     | 2   |        |
| 744    | 1      | 2     | 2   |        |
| 749    | 1      | 1     | 2   |        |
| 751    | 2      | 0     | 2   |        |
| 752    | 2      | 0     | 2   |        |
| 753    | 2      | 0     | 2   |        |
| 755    | 1      | 1     | 2   |        |

| respid | Q40_13 | Q41_1 | Q42 | Q42b_1 |
|--------|--------|-------|-----|--------|
| 756    |        |       |     |        |
| 759    | 1      | 10    | 2   |        |
| 760    | 1      | 0     | 2   |        |
| 763    | 1      | 0     | 2   |        |
| 764    | 1      | 0     | 2   |        |
| 765    | 1      | 0     | 2   |        |
| 766    | 2      | 1     | 2   |        |
| 767    | 1      | 1     | 2   |        |
| 771    | 4      | 2     | 1   | 1      |
| 773    | 1      | 2     | 2   |        |
| 774    | 2      | 0     | 2   |        |
| 775    | 2      | 52    | 1   | 2      |
| 776    | 1      | 3     | 2   |        |
| 778    | 1      | 5     | 1   | 1      |
| 780    | 1      | 2     | 2   |        |
| 781    | 1      | 0     | 2   |        |
| 782    | 4      | 1     | 1   | 1      |
| 783    | 2      | 5     | 2   |        |
| 786    | 5      | 3     | 1   | 2      |
| 788    |        |       |     |        |
| 792    | 1      | 0     | 2   |        |
| 794    | 5      | 2     | 1   | 2      |
| 795    | 1      | 0     | 2   |        |
| 799    | 2      | 2     | 2   |        |
| 800    | 1      | 0     | 2   |        |
| 801    | 3      | 1     | 2   |        |
| 804    | 1      | 0     | 2   |        |
| 806    | 1      | 3     | 2   |        |
| 807    | 2      | 0     | 2   |        |
| 808    | 3      | 4     | 1   | 4      |
| 809    | 1      | 0     | 2   |        |
| 811    | 1      | 0     | 2   |        |



| respid | Q40_13 | Q41_1 | Q42 | Q42b_1 |
|--------|--------|-------|-----|--------|
| 812    | 1      | 1     | 2   |        |
| 815    | 1      | 0     | 2   |        |
| 817    | 1      | 0     | 2   |        |
| 818    | 2      | 0     | 2   |        |
| 819    | 1      | 3     | 2   |        |
| 821    | 2      | 0     | 2   |        |
| 824    | 2      | 1     | 2   |        |
| 825    | 2      | 0     | 2   |        |
| 828    | 1      | 0     | 2   |        |
| 832    | 2      | 0     | 2   |        |
| 834    | 2      | 0     | 2   |        |
| 835    | 2      | 1     | 1   | 1      |
| 836    | 1      | 2     | 2   |        |
| 837    | 1      | 0     | 2   |        |
| 840    | 2      | 0     | 2   |        |
| 841    | 1      | 5     | 2   |        |
| 845    | 1      | 3     | 2   |        |
| 846    | 1      | 0     | 2   |        |
| 849    | 1      | 1     | 2   |        |
| 852    | 1      | 0     | 2   |        |
| 854    | 2      | 5     | 2   |        |
| 856    | 1      | 12    | 2   |        |
| 858    | 1      | 0     | 2   |        |
| 859    | 2      | 5     | 2   |        |
| 861    | 2      | 0     | 2   |        |
| 863    | 1      | 0     | 2   |        |
| 864    | 3      | 0     | 2   |        |
| 866    | 1      | 0     | 2   |        |
| 869    | 1      | 0     | 2   |        |
| 870    | 3      | 2     | 2   |        |
| 871    | 2      | 1     | 2   |        |
| 873    | 1      | 2     | 2   |        |

| respid | Q40_13 | Q41_1 | Q42 | Q42b_1 |
|--------|--------|-------|-----|--------|
| 879    | 3      | 0     | 2   |        |
| 880    | 2      | 0     | 2   |        |
| 881    | 3      | 2     | 2   |        |
| 882    | 1      | 24    | 2   |        |
| 885    |        |       |     |        |
| 886    | 2      | 0     | 2   |        |
| 887    | 3      | 3     | 1   | 3      |
| 888    | 1      | 4     | 2   |        |
| 889    | 3      | 1     | 1   | 1      |
| 890    | 1      | 0     | 2   |        |
| 900    |        |       |     |        |
| 901    | 5      | 0     | 2   |        |
| 902    | 2      | 4     | 2   |        |
| 903    | 1      | 0     | 2   |        |
| 906    | 5      | 1     | 2   |        |
| 907    | 3      | 0     | 2   |        |
| 908    | 2      | 0     | 2   |        |
| 910    | 1      | 0     | 2   |        |
| 911    | 1      | 2     | 1   | 0      |
| 912    | 1      | 2     | 2   |        |
| 915    |        |       |     |        |
| 923    | 4      | 24    | 2   |        |
| 925    | 1      | 0     | 2   |        |
| 926    | 1      | 0     | 2   |        |
| 929    |        |       |     |        |
| 932    | 1      | 13    | 2   |        |
| 933    | 1      | 0     | 2   |        |
| 934    | 1      | 0     | 2   |        |
| 938    | 1      | 1     | 2   |        |
| 941    |        |       |     |        |
| 942    | 1      | 2     | 2   |        |
| 943    |        |       |     |        |

| respid | Q40_13 | Q41_1 | Q42 | Q42b_1 |
|--------|--------|-------|-----|--------|
| 945    | 1      | 0     | 2   |        |
| 946    |        |       |     |        |
| 947    | 1      | 1     | 2   |        |
| 948    | 1      | 12    | 2   |        |
| 949    | 1      | 0     | 2   |        |
| 952    | 1      | 0     | 2   |        |
| 956    | 1      | 6     | 2   |        |
| 957    | 1      | 0     | 2   |        |
| 959    | 2      | 2     | 2   |        |
| 961    | 1      | 2     | 2   |        |
| 962    | 4      | 4     | 1   | 1      |
| 965    | 1      | 15    | 2   |        |
| 967    | 1      | 3     | 2   |        |
| 969    | 1      | 0     | 2   |        |
| 970    |        |       |     |        |
| 973    | 1      | 0     | 2   |        |
| 974    | 1      | 2     | 2   |        |
| 975    | 2      | 6     | 2   |        |
| 976    | 1      | 2     | 2   |        |
| 977    | 1      | 1     | 2   |        |
| 979    | 1      | 0     | 2   |        |
| 981    | 1      | 0     | 2   |        |
| 983    | 1      | 0     | 2   |        |
| 987    | 2      | 2     | 2   |        |
| 991    |        |       |     |        |
| 992    | 1      | 0     | 2   |        |
| 993    | 2      | 0     | 2   |        |
| 994    | 3      | 0     | 2   |        |
| 995    | 2      | 4     | 1   | 4      |
| 998    | 1      | 1     | 2   |        |
| 1000   | 3      | 12    | 1   | 1      |
| 1001   | 2      | 0     | 2   |        |

| respid | Q40_13 | Q41_1 | Q42 | Q42b_1 |
|--------|--------|-------|-----|--------|
| 1002   |        |       |     |        |
| 1004   | 2      | 0     | 2   |        |
| 1005   | 2      | 4     | 2   |        |
| 1006   | 1      | 12    | 2   |        |
| 1007   | 2      | 0     | 2   |        |
| 1009   |        |       |     |        |
| 1013   | 4      | 2     | 2   |        |
| 1015   | 1      | 1     | 2   |        |
| 1020   | 3      | 2     | 1   | 2      |
| 1022   | 3      | 3     | 2   |        |
| 1024   | 1      | 0     | 2   |        |
| 1025   |        |       |     |        |
| 1027   | 3      | 0     | 2   |        |
| 1031   | 1      | 4     | 2   |        |
| 1037   | 1      | 0     | 2   |        |
| 1039   | 1      | 0     | 2   |        |
| 1040   | 1      | 1     | 2   |        |
| 1056   | 3      | 12    | 2   |        |
| 1057   | 1      | 2     | 2   |        |
| 1062   | 2      | 1     | 2   |        |
| 1069   | 1      | 0     | 2   |        |
| 1070   | 1      | 0     | 2   |        |
| 1072   | 2      | 0     | 2   |        |
| 1076   | 1      | 0     | 2   |        |
| 1077   | 1      | 1     | 2   |        |
| 1078   | 2      | 1     | 2   |        |
| 1080   |        |       |     |        |
| 1094   | 3      | 0     | 2   |        |
| 1098   | 2      | 3     | 2   |        |
| 1099   | 2      | 0     | 2   |        |
| 1102   | 1      | 4     | 2   |        |
| 1110   | 1      | 0     | 2   |        |

| respid | Q40_13 | Q41_1 | Q42 | Q42b_1 |
|--------|--------|-------|-----|--------|
| 1117   | 2      | 1     | 2   |        |
| 1119   |        |       |     |        |
| 1126   | 1      | 0     | 2   |        |
| 1127   | 1      | 0     | 2   |        |
| 1130   | 2      | 1     | 2   |        |
| 1131   | 1      | 1     | 2   |        |
| 1135   | 5      | 6     | 1   | 4      |
| 1138   | 2      | 3     | 1   | 1      |
| 1139   |        |       |     |        |
| 1140   | 3      | 0     | 2   |        |
| 1142   |        |       |     |        |
| 1143   |        |       |     |        |
| 1145   | 2      | 1     | 2   |        |
| 1149   |        |       |     |        |
| 1152   | 2      | 1     | 2   |        |
| 1160   | 1      | 0     | 2   |        |
| 1164   |        |       |     |        |
| 1165   | 2      | 0     | 2   |        |
| 1169   | 4      | 12    | 2   |        |
| 1170   | 1      | 2     | 2   |        |
| 1179   | 2      | 6     | 2   |        |
| 1180   | 1      | 0     | 2   |        |
| 1183   | 1      | 0     | 2   |        |
| 1187   | 1      | 0     | 2   |        |
| 1188   | 1      | 20    | 2   |        |
| 1193   | 1      | 2     | 2   |        |
| 1194   | 3      | 0     | 2   |        |
| 1197   | 1      | 0     | 2   |        |
| 1202   |        |       |     |        |
| 1204   | 6      | 4     | 1   | 2      |
| 1211   | 1      | 5     | 2   |        |
| 1224   | 1      | 24    | 2   |        |

| respid | Q40_13 | Q41_1 | Q42 | Q42b_1 |
|--------|--------|-------|-----|--------|
| 1225   | 1      | 1     | 2   |        |
| 1230   | 1      | 0     | 2   |        |
| 1232   | 1      | 10    | 2   |        |
| 1233   | 1      | 6     | 1   | 2      |
| 1234   | 1      | 2     | 2   |        |
| 1235   | 1      | 20    | 1   | 6      |
| 1236   | 3      | 3     | 2   |        |
| 1237   | 2      | 2     | 2   |        |
| 1238   | 2      | 11    | 2   |        |
| 1239   | 2      | 2     | 2   |        |
| 1241   | 1      | 1     | 1   | 1      |
| 1242   | 1      | 0     | 2   |        |
| 1244   | 3      | 6     | 2   |        |
| 1245   | 1      | 12    | 2   |        |
| 1247   | 2      | 4     | 1   | 4      |
| 1248   | 1      | 3     | 2   |        |
| 1249   | 1      | 0     | 2   |        |
| 1250   | 1      | 3     | 2   |        |
| 1251   | 1      | 2     | 2   |        |
| 1252   | 1      | 5     | 2   |        |
| 1253   | 1      | 4     | 2   |        |
| 1254   | 6      | 0     | 2   |        |
| 1258   | 1      | 4     | 2   |        |
| 1260   | 2      | 1     | 2   |        |
| 1261   | 1      | 0     | 2   |        |
| 1262   | 1      | 5     | 2   |        |
| 1263   | 2      | 4     | 1   | 4      |
| 1264   | 1      | 1     | 1   | 1      |
| 1265   | 2      | 25    | 1   | 6      |
| 1266   | 1      | 1     | 2   |        |
| 1270   | 1      | 0     | 2   |        |
| 1272   | 3      | 0     | 2   |        |

| respid | Q40_13 | Q41_1 | Q42 | Q42b_1 |
|--------|--------|-------|-----|--------|
| 1273   | 3      | 15    | 2   |        |
| 1276   | 1      | 1     | 2   |        |
| 1277   | 3      | 1     | 2   |        |
| 1278   | 1      | 1     | 2   |        |
| 1280   | 1      | 0     | 2   |        |
| 1281   | 2      | 2     | 2   |        |
| 1282   | 2      | 0     | 2   |        |
| 1283   | 1      | 3     | 2   |        |
| 1288   | 2      | 0     | 2   |        |
| 1289   | 2      | 0     | 2   |        |
| 1290   | 1      | 2     | 1   | 2      |
| 1291   |        |       |     |        |
| 1293   | 1      | 0     | 2   |        |
| 1294   | 1      | 2     | 2   |        |
| 1295   | 1      | 6     | 2   |        |
| 1296   | 4      | 6     | 2   |        |
| 1297   | 1      | 0     | 2   |        |
| 1298   | 2      | 0     | 2   |        |
| 1300   | 1      | 20    | 2   |        |
| 1302   | 1      | 0     | 2   |        |
| 1303   | 3      | 0     | 2   |        |
| 1304   | 1      | 0     | 2   |        |
| 1305   | 1      | 2     | 2   |        |
| 1307   | 1      | 0     | 2   |        |
| 1312   | 1      | 6     | 2   |        |
| 1313   | 1      | 12    | 2   |        |
| 1314   | 1      | 1     | 2   |        |
| 1317   | 1      | 2     | 2   |        |
| 1318   | 1      | 1     | 2   |        |
| 1319   | 1      | 0     | 2   |        |
| 1321   | 1      | 0     | 2   |        |
| 1324   | 3      | 4     | 2   |        |

| respid | Q40_13 | Q41_1 | Q42 | Q42b_1 |
|--------|--------|-------|-----|--------|
| 1325   | 2      | 0     | 2   |        |
| 1326   | 1      | 0     | 2   |        |
| 1327   | 1      | 0     | 2   |        |
| 1329   | 3      | 1     | 2   |        |
| 1330   | 1      | 30    | 2   |        |
| 1331   | 4      | 20    | 2   |        |
| 1335   | 1      | 0     | 2   |        |
| 1337   | 1      | 2     | 2   |        |
| 1341   | 1      | 2     | 2   |        |
| 1342   | 1      | 0     | 2   |        |
| 1344   | 3      | 0     | 2   |        |
| 1345   | 1      | 0     | 2   |        |
| 1346   | 1      | 4     | 2   |        |
| 1350   | 3      | 0     | 2   |        |
| 1352   | 1      | 0     | 2   |        |
| 1353   | 2      | 0     | 2   |        |
| 1354   | 1      | 0     | 2   |        |
| 1355   | 1      | 4     | 2   |        |
| 1357   | 1      | 5     | 2   |        |
| 1360   |        |       |     |        |
| 1362   | 2      | 7     | 2   |        |
| 1363   | 2      | 0     | 2   |        |
| 1367   | 1      | 50    | 2   |        |
| 1369   | 1      | 5     | 2   |        |
| 1371   |        |       |     |        |
| 1372   |        |       |     |        |
| 1375   |        |       |     |        |
| 1377   | 2      | 2     | 2   |        |
| 1379   | 2      | 2     | 2   |        |
| 1380   | 1      | 30    | 2   |        |
| 1382   | 1      | 0     | 2   |        |
| 1383   | 1      | 0     | 2   |        |



| respid | Q40_13 | Q41_1 | Q42 | Q42b_1 |
|--------|--------|-------|-----|--------|
| 1384   | 1      | 2     | 2   |        |
| 1385   | 5      | 5     | 1   | 1      |
| 1387   | 2      | 2     | 2   |        |
| 1388   | 1      | 0     | 2   |        |
| 1389   | 6      | 0     | 2   |        |
| 1390   | 2      | 4     | 2   |        |
| 1395   | 1      | 1     | 2   |        |
| 1396   | 1      | 0     | 2   |        |
| 1397   | 5      | 12    | 2   |        |
| 1398   | 1      | 0     | 2   |        |
| 1399   | 1      | 5     | 2   |        |
| 1403   | 1      | 0     | 2   |        |
| 1405   | 1      | 1     | 2   |        |
| 1406   | 2      | 3     | 2   |        |
| 1407   | 4      | 0     | 2   |        |
| 1408   | 1      | 5     | 2   |        |
| 1409   | 1      | 0     | 2   |        |
| 1410   | 5      | 3     | 2   |        |
| 1411   | 1      | 3     | 2   |        |
| 1412   | 1      | 2     | 2   |        |
| 1413   | 5      | 10    | 2   |        |
| 1414   | 1      | 0     | 2   |        |
| 1415   | 1      | 10    | 2   |        |
| 1416   | 2      | 1     | 2   |        |
| 1417   | 1      | 0     | 2   |        |
| 1418   | 1      | 1     | 2   |        |
| 1419   | 4      | 2     | 2   |        |
| 1420   | 2      | 4     | 2   |        |
| 1421   | 2      | 2     | 1   | 0      |
| 1422   | 1      | 3     | 2   |        |
| 1423   | 1      | 1     | 2   |        |
| 1424   | 5      | 50    | 1   | 10     |

| respid | Q40_13 | Q41_1 | Q42 | Q42b_1 |
|--------|--------|-------|-----|--------|
| 1429   | 1      | 1     | 2   |        |
| 1430   | 1      | 5     | 2   |        |
| 1431   | 3      | 1     | 2   |        |
| 1433   | 2      | 3     | 2   |        |
| 1435   |        |       |     |        |
| 1436   | 1      | 0     | 2   |        |
| 1438   |        |       |     |        |
| 1439   | 1      | 25    | 2   |        |
| 1441   | 1      | 6     | 2   |        |
| 1442   | 1      | 3     | 2   |        |
| 1443   |        |       |     |        |
| 1444   | 1      | 3     | 2   |        |
| 1445   | 4      | 0     | 2   |        |
| 1446   | 5      | 20    | 2   |        |
| 1447   | 1      | 5     | 2   |        |
| 1449   | 2      | 10    | 2   |        |
| 1450   | 1      | 0     | 2   |        |
| 1451   | 4      | 0     | 2   |        |
| 1452   |        |       |     |        |
| 1453   | 2      | 2     | 1   | 2      |
| 1454   | 2      | 3     | 2   |        |
| 1456   | 1      | 1     | 2   |        |
| 1457   | 3      | 7     | 1   | 2      |
| 1459   | 3      | 0     | 2   |        |
| 1460   | 1      | 1     | 2   |        |
| 1463   | 1      | 4     | 2   |        |
| 1465   | 2      | 1     | 2   |        |
| 1467   | 1      | 0     | 2   |        |
| 1470   | 1      | 4     | 1   | 1      |
| 1471   | 1      | 3     | 1   | 1      |
| 1472   | 1      | 0     | 2   |        |
| 1474   | 3      | 0     | 2   |        |

| respid | Q40_13 | Q41_1 | Q42 | Q42b_1 |
|--------|--------|-------|-----|--------|
| 1475   | 1      | 0     | 2   |        |
| 1477   | 1      | 0     | 2   |        |
| 1478   | 3      | 1     | 2   |        |
| 1480   |        |       |     |        |
| 1481   | 2      | 2     | 1   | 2      |
| 1483   | 1      | 0     | 2   |        |
| 1484   | 1      | 2     | 2   |        |
| 1485   | 1      | 0     | 2   |        |
| 1486   | 1      | 12    | 2   |        |
| 1487   | 3      | 0     | 2   |        |
| 1488   | 1      | 0     | 2   |        |
| 1489   | 2      | 0     | 2   |        |
| 1490   | 5      | 0     | 2   |        |
| 1491   | 2      | 1     | 1   | 1      |
| 1492   | 5      | 1     | 2   |        |
| 1494   | 1      | 0     | 2   |        |
| 1495   | 2      | 3     | 1   | 3      |
| 1496   | 1      | 12    | 2   |        |
| 1498   | 1      | 0     | 2   |        |
| 1499   | 2      | 2     | 2   |        |
| 1500   | 2      | 6     | 2   |        |
| 1501   | 1      | 30    | 2   |        |
| 1503   |        |       |     |        |
| 1504   | 1      | 0     | 2   |        |
| 1508   | 3      | 0     | 2   |        |
| 1509   | 3      | 2     | 2   |        |
| 1511   | 5      | 0     | 2   |        |
| 1512   | 1      | 10    | 2   |        |
| 1513   | 3      | 1     | 2   |        |
| 1515   | 2      | 0     | 2   |        |
| 1517   | 1      | 4     | 2   |        |
| 1518   | 1      | 2     | 2   |        |

| respid | Q40_13 | Q41_1 | Q42 | Q42b_1 |
|--------|--------|-------|-----|--------|
| 1519   | 3      | 15    | 2   |        |
| 1520   | 1      | 6     | 2   |        |
| 1521   | 3      | 2     | 2   |        |
| 1522   | 1      | 1     | 2   |        |
| 1523   | 6      | 2     | 2   |        |
| 1524   | 1      | 2     | 2   |        |
| 1525   | 1      | 0     | 2   |        |
| 1526   | 2      | 3     | 2   |        |
| 1527   | 1      | 40    | 2   |        |
| 1534   | 1      | 4     | 2   |        |
| 1535   | 1      | 7     | 2   |        |
| 1536   | 3      | 20    | 2   |        |
| 1538   | 2      | 3     | 2   |        |
| 1539   | 1      | 3     | 2   |        |
| 1540   | 2      | 5     | 2   |        |
| 1541   | 1      | 15    | 2   |        |
| 1542   | 1      | 3     | 2   |        |
| 1543   | 2      | 0     | 2   |        |
| 1545   | 3      | 2     | 1   | 1      |
| 1546   | 1      | 2     | 2   |        |
| 1548   | 3      | 10    | 2   |        |
| 1549   |        |       |     |        |
| 1551   | 1      | 0     | 2   |        |
| 1552   | 1      | 3     | 2   |        |
| 1556   | 1      | 1     | 2   |        |
| 1557   |        |       |     |        |
| 1558   | 1      | 0     | 2   |        |
| 1561   | 1      | 0     | 2   |        |
| 1562   | 2      | 0     | 2   |        |
| 1563   | 1      | 0     | 2   |        |
| 1564   | 3      | 1     | 1   | 1      |
| 1565   |        |       |     |        |

| respid | Q40_13 | Q41_1 | Q42 | Q42b_1 |
|--------|--------|-------|-----|--------|
| 1566   | 1      | 0     | 2   |        |
| 1567   | 2      | 0     | 2   |        |
| 1569   |        |       |     |        |
| 1570   | 1      | 0     | 2   |        |
| 1574   | 1      | 0     | 2   |        |
| 1575   | 1      | 10    | 2   |        |
| 1576   | 1      | 0     | 2   |        |
| 1577   | 2      | 0     | 2   |        |
| 1581   | 2      | 0     | 2   |        |
| 1583   | 2      | 25    | 1   | 5      |
| 1585   | 1      | 1     | 2   |        |
| 1586   | 1      | 12    | 2   |        |
| 1588   | 1      | 4     | 2   |        |
| 1590   | 1      | 0     | 2   |        |
| 1592   | 1      | 2     | 2   |        |
| 1594   | 1      | 10    | 2   |        |
| 1598   | 2      | 24    | 2   |        |
| 1599   | 1      | 7     | 2   |        |
| 1600   | 2      | 0     | 2   |        |
| 1602   | 1      | 0     | 2   |        |
| 1603   | 1      | 6     | 2   |        |
| 1604   | 2      | 1     | 1   | 1      |
| 1605   | 3      | 6     | 1   | 6      |
| 1606   | 1      | 2     | 2   |        |
| 1610   | 1      | 3     | 2   |        |
| 1611   | 1      | 2     | 2   |        |
| 1612   | 1      | 2     | 2   |        |
| 1613   | 2      | 3     | 1   | 0      |
| 1615   | 2      | 8     | 2   |        |
| 1616   | 1      | 0     | 2   |        |
| 1617   | 1      | 0     | 2   |        |
| 1618   | 1      | 0     | 2   |        |

| respid | Q40_13 | Q41_1 | Q42 | Q42b_1 |
|--------|--------|-------|-----|--------|
| 1620   | 1      | 0     | 2   |        |
| 1621   | 3      | 12    | 2   |        |
| 1622   |        |       |     |        |
| 1623   | 1      | 0     | 2   |        |
| 1624   | 1      | 0     | 2   |        |
| 1625   | 1      | 0     | 2   |        |
| 1626   |        |       |     |        |
| 1627   | 1      | 0     | 2   |        |
| 1629   | 1      | 15    | 2   |        |
| 1630   | 1      | 1     | 2   |        |
| 1631   | 1      | 0     | 2   |        |
| 1634   | 2      | 2     | 2   |        |
| 1635   | 1      | 2     | 2   |        |
| 1636   |        |       |     |        |
| 1637   | 1      | 2     | 2   |        |
| 1640   | 1      | 1     | 2   |        |
| 1642   | 1      | 2     | 2   |        |
| 1643   | 3      | 3     | 1   | 3      |
| 1644   | 1      | 3     | 2   |        |
| 1645   | 1      | 12    | 2   |        |
| 1646   | 1      | 20    | 2   |        |
| 1647   | 1      | 2     | 2   |        |
| 1650   | 2      | 1     | 2   |        |
| 1654   | 2      | 2     | 2   |        |
| 1656   | 1      | 0     | 2   |        |
| 1657   | 5      | 2     | 1   | 1      |
| 1659   | 3      | 6     | 2   |        |
| 1662   | 3      | 2     | 2   |        |
| 1663   | 5      | 2     | 2   |        |
| 1664   | 1      | 0     | 2   |        |
| 1665   | 1      | 1     | 2   |        |
| 1667   | 1      | 0     | 2   |        |

| respid | Q40_13 | Q41_1 | Q42 | Q42b_1 |
|--------|--------|-------|-----|--------|
| 1668   | 1      | 0     | 2   |        |
| 1670   | 1      | 3     | 2   |        |
| 1671   | 2      | 6     | 2   |        |
| 1673   | 1      | 2     | 2   |        |
| 1674   | 1      | 2     | 2   |        |
| 1676   | 2      | 0     | 2   |        |
| 1677   | 1      | 2     | 2   |        |
| 1678   | 1      | 3     | 2   |        |
| 1680   | 1      | 0     | 2   |        |
| 1681   | 2      | 10    | 2   |        |
| 1683   | 1      | 0     | 2   |        |
| 1685   | 1      | 2     | 2   |        |
| 1686   | 1      | 2     | 2   |        |
| 1690   | 2      | 5     | 2   |        |
| 1691   | 1      | 0     | 2   |        |
| 1692   | 3      | 9     | 2   |        |
| 1693   | 1      | 1     | 2   |        |
| 1695   | 1      | 0     | 2   |        |
| 1696   | 1      | 0     | 2   |        |
| 1698   | 1      | 1     | 2   |        |
| 1699   | 1      | 1     | 2   |        |
| 1701   | 4      | 2     | 2   |        |
| 1702   | 1      | 2     | 2   |        |
| 1703   |        |       |     |        |
| 1705   | 1      | 0     | 2   |        |
| 1706   | 1      | 10    | 2   |        |
| 1708   |        |       |     |        |
| 1711   | 2      | 1     | 2   |        |
| 1712   | 2      | 4     | 2   |        |
| 1713   | 1      | 3     | 2   |        |
| 1715   | 1      | 0     | 2   |        |
| 1717   | 1      | 1     | 2   |        |

| respid | Q40_13 | Q41_1 | Q42 | Q42b_1 |
|--------|--------|-------|-----|--------|
| 1718   | 3      | 8     | 2   |        |
| 1719   | 1      | 6     | 2   |        |
| 1721   | 2      | 0     | 2   |        |
| 1722   | 1      | 1     | 1   | 1      |
| 1724   | 1      | 0     | 2   |        |
| 1725   | 1      | 0     | 2   |        |
| 1726   | 2      | 1     | 2   |        |
| 1727   | 1      | 0     | 2   |        |
| 1728   | 2      | 2     | 2   |        |
| 1731   | 2      | 2     | 2   |        |
| 1733   | 1      | 0     | 2   |        |
| 1734   | 1      | 6     | 2   |        |
| 1735   |        |       |     |        |
| 1736   | 1      | 0     | 2   |        |
| 1737   | 2      | 0     | 2   |        |
| 1738   | 2      | 1     | 2   |        |
| 1743   | 4      | 0     | 2   |        |
| 1755   | 3      | 5     | 1   | 2      |
| 1756   | 3      | 8     | 1   | 2      |
| 1757   | 2      | 2     | 2   |        |
| 1758   | 2      | 0     | 2   |        |
| 1759   | 1      | 2     | 2   |        |
| 1761   | 2      | 12    | 2   |        |
| 1762   | 2      | 0     | 2   |        |
| 1764   |        |       |     |        |
| 1767   | 4      | 30    | 2   |        |
| 1768   | 2      | 10    | 2   |        |
| 1769   | 1      | 2     | 2   |        |
| 1770   | 1      | 10    | 2   |        |
| 1771   | 2      | 6     | 2   |        |
| 1776   | 1      | 0     | 2   |        |
| 1777   | 3      | 0     | 2   |        |



| respid | Q40_13 | Q41_1 | Q42 | Q42b_1 |
|--------|--------|-------|-----|--------|
| 1778   | 3      | 3     | 2   |        |
| 1779   | 1      | 3     | 2   |        |
| 1780   | 1      | 12    | 2   |        |
| 1781   |        |       |     |        |
| 1783   | 1      | 0     | 2   |        |
| 1784   | 3      | 5     | 1   | 3      |
| 1785   | 1      | 3     | 2   |        |
| 1788   | 1      | 0     | 2   |        |
| 1792   | 2      | 0     | 2   |        |
| 1794   | 1      | 6     | 2   |        |
| 1798   | 3      | 10    | 1   | 2      |
| 1799   | 1      | 0     | 2   |        |
| 1800   | 1      | 0     | 2   |        |
| 1804   | 2      | 0     | 2   |        |
| 1806   | 2      | 12    | 2   |        |
| 1807   | 1      | 1     | 2   |        |
| 1808   | 1      | 2     | 2   |        |
| 1809   | 1      | 0     | 2   |        |
| 1811   | 2      | 0     | 2   |        |
| 1812   | 2      | 5     | 2   |        |
| 1813   | 3      | 0     | 2   |        |
| 1814   | 2      | 0     | 2   |        |
| 1815   | 3      | 0     | 2   |        |
| 1817   | 2      | 0     | 2   |        |
| 1820   | 1      | 0     | 2   |        |
| 1821   | 1      | 0     | 2   |        |
| 1822   | 1      | 0     | 2   |        |
| 1823   | 1      | 0     | 2   |        |
| 1824   | 2      | 1     | 2   |        |
| 1826   |        |       |     |        |
| 1828   | 1      | 6     | 2   |        |
| 1829   | 1      | 0     | 2   |        |

| respid | Q40_13 | Q41_1 | Q42 | Q42b_1 |
|--------|--------|-------|-----|--------|
| 1830   | 1      | 0     | 2   |        |
| 1831   | 1      | 0     | 2   |        |
| 1832   | 1      | 12    | 2   |        |
| 1836   | 2      | 10    | 2   |        |
| 1838   | 3      | 0     | 2   |        |
| 1839   | 4      | 8     | 1   | 6      |
| 1840   | 1      | 2     | 2   |        |
| 1841   | 1      | 0     | 2   |        |
| 1842   | 2      | 2     | 1   | 2      |
| 1843   | 1      | 3     | 2   |        |
| 1844   | 2      | 2     | 2   |        |
| 1845   | 1      | 20    | 2   |        |
| 1849   | 1      | 0     | 2   |        |
| 1850   | 2      | 2     | 2   |        |
| 1851   | 2      | 0     | 2   |        |
| 1852   |        |       |     |        |
| 1857   | 1      | 0     | 2   |        |
| 1858   | 1      | 12    | 2   |        |
| 1861   | 1      | 0     | 2   |        |
| 1862   | 1      | 0     | 2   |        |
| 1863   | 3      | 0     | 2   |        |
| 1864   | 2      | 9     | 2   |        |
| 1865   |        |       |     |        |
| 1867   | 1      | 0     | 2   |        |
| 1868   | 2      | 6     | 2   |        |
| 1869   | 1      | 0     | 2   |        |
| 1870   | 1      | 0     | 2   |        |
| 1871   | 4      | 0     | 2   |        |
| 1872   | 1      | 0     | 2   |        |
| 1873   | 1      | 3     | 2   |        |
| 1876   |        |       |     |        |
| 1877   |        |       |     |        |

| respid | Q40_13 | Q41_1 | Q42 | Q42b_1 |
|--------|--------|-------|-----|--------|
| 1878   | 1      | 10    | 2   |        |
| 1879   | 1      | 6     | 2   |        |
| 1880   | 1      | 6     | 2   |        |
| 1881   | 2      | 2     | 2   |        |
| 1883   | 4      | 3     | 2   |        |
| 1886   | 1      | 1     | 2   |        |
| 1888   | 4      | 3     | 1   | 3      |
| 1889   | 3      | 6     | 1   | 6      |
| 1890   | 3      | 0     | 2   |        |
| 1891   | 1      | 1     | 2   |        |
| 1893   | 1      | 0     | 2   |        |
| 1894   | 4      | 0     | 2   |        |
| 1895   | 2      | 2     | 2   |        |
| 1896   | 1      | 3     | 2   |        |
| 1897   | 1      | 2     | 2   |        |
| 1898   | 5      | 9     | 2   |        |
| 1899   | 2      | 15    | 2   |        |
| 1900   |        |       |     |        |
| 1903   | 1      | 0     | 2   |        |
| 1906   | 1      | 0     | 2   |        |
| 1907   | 3      | 6     | 1   | 6      |
| 1908   | 1      | 0     | 2   |        |
| 1909   | 5      | 30    | 2   |        |
| 1910   | 1      | 0     | 2   |        |
| 1911   | 1      | 0     | 2   |        |
| 1912   |        |       |     |        |
| 1917   | 1      | 0     | 2   |        |
| 1918   | 2      | 0     | 2   |        |
| 1919   | 1      | 0     | 2   |        |
| 1922   |        |       |     |        |
| 1925   |        |       |     |        |
| 1926   | 1      | 2     | 2   |        |

| respid | Q40_13 | Q41_1 | Q42 | Q42b_1 |
|--------|--------|-------|-----|--------|
| 1927   | 1      | 0     | 2   |        |
| 1928   |        |       |     |        |
| 1929   | 1      | 0     | 2   |        |
| 1934   | 1      | 0     | 2   |        |
| 1935   | 1      | 0     | 2   |        |
| 1936   | 1      | 4     | 2   |        |
| 1937   |        |       |     |        |
| 1938   |        |       |     |        |
| 1939   | 2      | 1     | 2   |        |
| 1940   | 1      | 5     | 2   |        |
| 1941   |        |       |     |        |
| 1948   |        |       |     |        |
| 1950   | 1      | 0     | 2   |        |
| 1955   | 2      | 0     | 2   |        |
| 1958   | 2      | 2     | 2   |        |
| 1960   | 1      | 1     | 2   |        |
| 1961   |        |       |     |        |
| 1962   | 1      | 1     | 2   |        |
| 1965   |        |       |     |        |
| 1966   | 1      | 0     | 2   |        |
| 1967   |        |       |     |        |
| 1968   | 2      | 1     | 1   | 0      |
| 1973   | 1      | 0     | 2   |        |
| 1974   | 6      | 4     | 2   |        |
| 1975   |        |       |     |        |
| 1977   | 1      | 9     | 1   | 1      |
| 1978   |        |       |     |        |
| 1979   | 3      | 0     | 2   |        |
| 1982   | 1      | 0     | 2   |        |
| 1983   | 1      | 0     | 2   |        |
| 1987   | 1      | 12    | 1   | 11     |
| 1988   | 3      | 0     | 2   |        |

| respid | Q40_13 | Q41_1 | Q42 | Q42b_1 |
|--------|--------|-------|-----|--------|
| 1991   | 2      | 1     | 2   |        |
| 1992   | 1      | 0     | 2   |        |
| 1993   | 1      | 5     | 2   |        |
| 1994   | 3      | 3     | 2   |        |
| 1995   | 1      | 3     | 2   |        |
| 1996   | 1      | 1     | 2   |        |
| 1997   | 1      | 0     | 2   |        |
| 1998   | 1      | 0     | 2   |        |
| 1999   | 3      | 15    | 1   | 3      |
| 2000   | 2      | 3     | 1   | 1      |
| 2001   | 1      | 0     | 2   |        |
| 2002   | 1      | 2     | 2   |        |
| 2003   |        |       |     |        |
| 2004   | 1      | 0     | 2   |        |
| 2005   | 1      | 3     | 2   |        |
| 2007   | 2      | 2     | 1   | 1      |
| 2009   | 1      | 10    | 2   |        |
| 2010   |        |       |     |        |
| 2011   | 2      | 0     | 2   |        |
| 2013   | 1      | 0     | 2   |        |
| 2014   | 2      | 12    | 2   |        |
| 2017   | 2      | 1     | 2   |        |
| 2020   | 1      | 0     | 2   |        |
| 2023   | 1      | 3     | 2   |        |
| 2024   | 1      | 0     | 2   |        |
| 2029   | 1      | 0     | 2   |        |
| 2030   |        |       |     |        |
| 2031   | 1      | 4     | 2   |        |
| 2032   | 1      | 36    | 1   | 15     |
| 2033   |        |       |     |        |
| 2034   | 1      | 0     | 2   |        |
| 2036   | 2      | 0     | 2   |        |

| respid | Q40_13 | Q41_1 | Q42 | Q42b_1 |
|--------|--------|-------|-----|--------|
| 2037   | 6      | 20    | 1   | 4      |
| 2038   | 1      | 3     | 2   |        |
| 2039   | 1      | 3     | 2   |        |
| 2040   |        |       |     |        |
| 2041   |        |       |     |        |
| 2042   | 1      | 0     | 2   |        |
| 2043   | 3      | 0     | 2   |        |
| 2051   | 1      | 2     | 2   |        |
| 2052   | 1      | 2     | 2   |        |
| 2053   | 1      | 0     | 2   |        |
| 2054   |        |       |     |        |
| 2055   | 1      | 0     | 2   |        |
| 2056   | 2      | 3     | 2   |        |
| 2057   | 2      | 1     | 2   |        |
| 2059   | 1      | 0     | 2   |        |
| 2063   | 2      | 0     | 2   |        |
| 2066   | 1      | 2     | 2   |        |
| 2068   | 1      | 2     | 2   |        |
| 2069   | 2      | 10    | 2   |        |
| 2070   |        |       |     |        |
| 2071   | 1      | 0     | 2   |        |
| 2073   |        |       |     |        |
| 2077   | 4      | 5     | 2   |        |
| 2079   |        |       |     |        |
| 2080   | 6      | 0     | 2   |        |
| 2081   | 5      | 2     | 1   | 2      |
| 2084   |        |       |     |        |
| 2085   | 1      | 1     | 2   |        |
| 2087   | 1      | 6     | 2   |        |
| 2089   | 2      | 1     | 1   | 1      |
| 2093   | 1      | 0     | 2   |        |
| 2094   | 1      | 7     | 2   |        |

| respid | Q40_13 | Q41_1 | Q42 | Q42b_1 |
|--------|--------|-------|-----|--------|
| 2095   | 2      | 2     | 1   | 1      |
| 2097   | 1      | 1     | 2   |        |
| 2099   | 1      | 0     | 2   |        |
| 2100   | 2      | 0     | 2   |        |
| 2101   | 1      | 2     | 2   |        |
| 2103   | 1      | 0     | 2   |        |
| 2104   | 3      | 0     | 2   |        |
| 2106   | 1      | 0     | 2   |        |
| 2111   | 1      | 3     | 2   |        |
| 2113   | 1      | 0     | 2   |        |
| 2115   |        |       |     |        |
| 2119   | 2      | 10    | 2   |        |
| 2120   |        |       |     |        |
| 2123   |        |       |     |        |
| 2124   | 3      | 0     | 2   |        |
| 2130   |        |       |     |        |
| 2131   | 2      | 0     | 2   |        |
| 2133   | 3      | 1     | 1   | 1      |
| 2139   | 4      | 18    | 2   |        |
| 2141   |        |       |     |        |
| 2143   | 2      | 0     | 2   |        |
| 2144   | 1      | 3     | 2   |        |
| 2147   |        |       |     |        |
| 2151   | 1      | 0     | 2   |        |
| 2153   | 1      | 0     | 2   |        |
| 2154   | 1      | 0     | 2   |        |
| 2155   | 1      | 5     | 2   |        |
| 2159   | 1      | 0     | 2   |        |
| 2160   | 2      | 4     | 1   | 1      |
| 2161   | 1      | 0     | 2   |        |
| 2163   | 1      | 0     | 2   |        |
| 2164   | 1      | 0     | 2   |        |

| respid | Q40_13 | Q41_1 | Q42 | Q42b_1 |
|--------|--------|-------|-----|--------|
| 2168   | 1      | 1     | 2   |        |
| 2169   | 2      | 8     | 2   |        |
| 2170   | 1      | 0     | 2   |        |
| 2171   | 1      | 3     | 2   |        |
| 2172   | 3      | 2     | 2   |        |
| 2173   | 1      | 0     | 2   |        |
| 2174   | 1      | 0     | 2   |        |
| 2175   | 2      | 3     | 2   |        |
| 2176   | 1      | 5     | 2   |        |
| 2177   | 5      | 4     | 1   | 3      |
| 2179   | 1      | 4     | 2   |        |
| 2181   | 1      | 0     | 2   |        |
| 2182   | 1      | 12    | 2   |        |
| 2183   | 2      | 3     | 2   |        |
| 2184   | 1      | 2     | 2   |        |
| 2185   |        |       |     |        |
| 2186   | 1      | 0     | 2   |        |
| 2187   | 1      | 3     | 2   |        |
| 2188   | 1      | 10    | 1   | 5      |
| 2189   |        |       |     |        |
| 2190   | 1      | 0     | 2   |        |
| 2193   | 2      | 3     | 2   |        |
| 2195   | 1      | 0     | 2   |        |
| 2198   | 1      | 0     | 2   |        |
| 2200   | 1      | 1     | 1   | 0      |
| 2205   | 3      | 2     | 2   |        |
| 2208   |        |       |     |        |
| 2209   | 3      | 6     | 2   |        |
| 2210   | 1      | 12    | 2   |        |
| 2211   | 1      | 6     | 2   |        |
| 2213   | 1      | 1     | 2   |        |
| 2214   | 2      | 3     | 2   |        |



| respid | Q40_13 | Q41_1 | Q42 | Q42b_1 |
|--------|--------|-------|-----|--------|
| 2216   | 1      | 30    | 2   |        |
| 2220   | 2      | 1     | 2   |        |
| 2225   | 1      | 0     | 2   |        |
| 2227   | 1      | 0     | 2   |        |
| 2228   | 2      | 3     | 2   |        |
| 2229   | 1      | 1     | 2   |        |
| 2230   |        |       |     |        |
| 2236   |        |       |     |        |
| 2238   | 2      | 11    | 1   | 8      |
| 2239   | 2      | 0     | 2   |        |
| 2240   | 1      | 1     | 2   |        |
| 2241   | 2      | 2     | 2   |        |
| 2243   |        |       |     |        |
| 2245   | 1      | 20    | 2   |        |
| 2247   | 1      | 2     | 2   |        |
| 2248   | 1      | 5     | 2   |        |
| 2249   | 1      | 2     | 2   |        |
| 2254   | 3      | 20    | 2   |        |
| 2256   | 1      | 0     | 2   |        |
| 2259   | 1      | 3     | 2   |        |
| 2261   | 1      | 4     | 2   |        |
| 2262   | 1      | 1     | 1   | 1      |
| 2263   | 3      | 2     | 2   |        |
| 2264   | 2      | 0     | 2   |        |
| 2265   | 2      | 0     | 2   |        |
| 2270   | 2      | 0     | 2   |        |
| 2271   | 1      | 7     | 2   |        |
| 2272   | 1      | 1     | 2   |        |
| 2273   | 1      | 2     | 2   |        |
| 2274   | 1      | 1     | 2   |        |
| 2276   | 3      | 3     | 2   |        |
| 2277   | 2      | 2     | 2   |        |

| respid | Q40_13 | Q41_1 | Q42 | Q42b_1 |
|--------|--------|-------|-----|--------|
| 2281   | 1      | 0     | 2   |        |
| 2288   | 1      | 0     | 2   |        |
| 2290   | 1      | 20    | 2   |        |
| 2294   | 2      | 5     | 1   | 3      |
| 2295   | 2      | 2     | 2   |        |
| 2296   | 1      | 12    | 2   |        |
| 2297   |        |       |     |        |
| 2298   | 1      | 2     | 2   |        |
| 2301   | 2      | 0     | 2   |        |
| 2302   | 2      | 2     | 2   |        |
| 2303   |        |       |     |        |
| 2305   | 1      | 10    | 2   |        |
| 2309   | 1      | 2     | 2   |        |
| 2310   | 1      | 2     | 2   |        |
| 2311   | 2      | 1     | 1   | 0      |
| 2313   | 2      | 7     | 1   | 1      |
| 2316   |        |       |     |        |
| 2317   | 1      | 4     | 2   |        |
| 2318   | 3      | 5     | 2   |        |
| 2319   | 1      | 1     | 1   | 1      |
| 2321   | 2      | 0     | 2   |        |
| 2324   | 1      | 0     | 2   |        |
| 2328   | 1      | 4     | 2   |        |
| 2329   |        |       |     |        |
| 2330   | 1      | 3     | 2   |        |
| 2333   | 2      | 12    | 2   |        |
| 2334   | 1      | 8     | 2   |        |
| 2338   | 1      | 2     | 2   |        |
| 2341   | 3      | 0     | 2   |        |
| 2342   | 2      | 0     | 2   |        |
| 2343   | 3      | 3     | 1   | 1      |
| 2346   | 1      | 0     | 2   |        |

| respid | Q40_13 | Q41_1 | Q42 | Q42b_1 |
|--------|--------|-------|-----|--------|
| 2347   | 2      | 2     | 2   |        |
| 2348   | 2      | 0     | 2   |        |
| 2349   | 2      | 6     | 1   | 0      |
| 2350   | 1      | 5     | 2   |        |
| 2351   | 1      | 0     | 2   |        |
| 2352   | 1      | 20    | 1   | 6      |
| 2359   | 1      | 1     | 2   |        |
| 2362   |        |       |     |        |
| 2363   | 1      | 0     | 2   |        |
| 2365   | 1      | 0     | 2   |        |
| 2367   | 2      | 3     | 2   |        |
| 2368   | 1      | 0     | 2   |        |
| 2369   | 1      | 4     | 2   |        |
| 2372   |        |       |     |        |
| 2374   | 2      | 8     | 2   |        |
| 2376   | 1      | 0     | 2   |        |
| 2379   | 3      | 5     | 2   |        |
| 2380   | 1      | 12    | 2   |        |
| 2381   | 1      | 12    | 2   |        |
| 2382   | 2      | 4     | 2   |        |
| 2385   | 2      | 1     | 2   |        |
| 2387   | 2      | 12    | 2   |        |
| 2388   | 1      | 1     | 1   | 1      |
| 2389   | 1      | 1     | 2   |        |
| 2391   | 2      | 3     | 2   |        |
| 2392   | 1      | 5     | 2   |        |
| 2393   | 1      | 0     | 2   |        |
| 2394   | 2      | 10    | 2   |        |
| 2397   | 1      | 0     | 2   |        |
| 2398   | 2      | 0     | 2   |        |
| 2400   | 1      | 2     | 2   |        |
| 2402   | 1      | 0     | 2   |        |

| respid | Q40_13 | Q41_1 | Q42 | Q42b_1 |
|--------|--------|-------|-----|--------|
| 2406   | 1      | 0     | 2   |        |
| 2408   | 1      | 6     | 2   |        |
| 2410   | 1      | 10    | 2   |        |
| 2411   | 1      | 2     | 2   |        |
| 2412   | 1      | 0     | 2   |        |
| 2414   | 2      | 3     | 1   | 3      |
| 2421   | 2      | 0     | 2   |        |
| 2423   | 2      | 6     | 2   |        |
| 2424   | 3      | 2     | 2   |        |
| 2425   | 1      | 0     | 2   |        |
| 2426   | 1      | 6     | 1   | 3      |
| 2429   | 3      | 3     | 1   | 3      |
| 2430   | 1      | 1     | 2   |        |
| 2432   | 1      | 7     | 2   |        |
| 2433   | 1      | 6     | 2   |        |
| 2434   | 1      | 0     | 2   |        |
| 2435   | 2      | 0     | 2   |        |
| 2436   | 2      | 0     | 2   |        |
| 2439   | 3      | 2     | 2   |        |
| 2440   | 1      | 20    | 2   |        |
| 2441   | 1      | 0     | 2   |        |
| 2446   | 2      | 2     | 2   |        |
| 2448   | 3      | 4     | 1   | 1      |
| 2449   | 1      | 0     | 2   |        |
| 2451   | 1      | 6     | 1   | 3      |
| 2452   | 1      | 2     | 2   |        |
| 2455   |        |       |     |        |
| 2457   | 1      | 6     | 2   |        |
| 2458   | 1      | 0     | 2   |        |
| 2459   | 1      | 0     | 2   |        |
| 2460   | 1      | 1     | 2   |        |
| 2462   | 3      | 2     | 2   |        |

| respid | Q40_13 | Q41_1 | Q42 | Q42b_1 |
|--------|--------|-------|-----|--------|
| 2464   | 5      | 20    | 2   |        |
| 2465   | 2      | 1     | 2   |        |
| 2468   | 1      | 2     | 2   |        |
| 2469   |        |       |     |        |
| 2470   | 4      | 12    | 2   |        |
| 2471   | 2      | 12    | 1   | 2      |
| 2472   | 1      | 3     | 2   |        |
| 2474   | 1      | 5     | 2   |        |
| 2476   | 5      | 2     | 2   |        |
| 2478   | 2      | 0     | 2   |        |
| 2479   | 1      | 3     | 2   |        |
| 2480   | 1      | 0     | 2   |        |
| 2482   | 1      | 1     | 2   |        |
| 2486   | 1      | 2     | 1   | 2      |
| 2488   | 2      | 8     | 2   |        |
| 2489   | 2      | 1     | 2   |        |
| 2491   | 1      | 1     | 2   |        |
| 2495   | 1      | 0     | 2   |        |
| 2496   | 1      | 4     | 2   |        |
| 2498   | 2      | 0     | 2   |        |
| 2501   | 1      | 0     | 2   |        |
| 2502   | 3      | 0     | 2   |        |
| 2503   | 1      | 1     | 2   |        |
| 2504   | 1      | 0     | 2   |        |
| 2507   | 1      | 1     | 2   |        |
| 2509   | 1      | 1     | 2   |        |
| 2512   | 1      | 5     | 2   |        |
| 2514   | 1      | 3     | 2   |        |
| 2516   | 2      | 6     | 2   |        |
| 2517   | 1      | 3     | 2   |        |
| 2521   | 1      | 16    | 2   |        |
| 2522   | 1      | 0     | 2   |        |

| respid | Q40_13 | Q41_1 | Q42 | Q42b_1 |
|--------|--------|-------|-----|--------|
| 2524   | 1      | 12    | 2   |        |
| 2525   | 2      | 2     | 2   |        |
| 2526   | 1      | 0     | 2   |        |
| 2527   | 1      | 0     | 2   |        |
| 2528   | 1      | 2     | 2   |        |
| 2531   |        |       |     |        |
| 2533   | 2      | 1     | 2   |        |
| 2535   | 2      | 2     | 2   |        |
| 2536   | 6      | 0     | 2   |        |
| 2539   | 1      | 0     | 2   |        |
| 2540   | 1      | 0     | 2   |        |
| 2543   | 1      | 0     | 2   |        |
| 2546   | 1      | 0     | 2   |        |
| 2547   | 1      | 0     | 2   |        |
| 2549   | 1      | 0     | 2   |        |
| 2553   | 1      | 1     | 2   |        |
| 2554   | 1      | 0     | 2   |        |
| 2555   | 1      | 2     | 2   |        |
| 2556   | 1      | 1     | 2   |        |
| 2557   | 1      | 0     | 2   |        |
| 2559   | 1      | 0     | 2   |        |
| 2560   | 4      | 5     | 1   | 3      |
| 2561   | 2      | 0     | 2   |        |
| 2566   | 2      | 1     | 2   |        |
| 2567   |        |       |     |        |
| 2570   | 2      | 0     | 2   |        |
| 2574   | 6      | 3     | 2   |        |
| 2578   | 1      | 0     | 2   |        |
| 2580   | 3      | 2     | 2   |        |
| 2590   | 1      | 40    | 2   |        |
| 2593   | 1      | 0     | 2   |        |
| 2594   | 4      | 3     | 2   |        |

| respid | Q40_13 | Q41_1 | Q42 | Q42b_1 |
|--------|--------|-------|-----|--------|
| 2595   | 2      | 0     | 2   |        |
| 2596   | 1      | 0     | 2   |        |
| 2597   | 4      | 2     | 1   | 2      |
| 2598   | 1      | 0     | 2   |        |
| 2602   | 1      | 0     | 2   |        |
| 2605   | 4      | 20    | 1   | 8      |
| 2606   |        |       |     |        |
| 2607   | 2      | 2     | 2   |        |
| 2608   |        |       |     |        |
| 2609   | 1      | 0     | 2   |        |
| 2610   | 1      | 10    | 1   | 1      |
| 2614   |        |       |     |        |
| 2615   | 1      | 0     | 2   |        |
| 2616   | 1      | 0     | 2   |        |
| 2618   | 1      | 0     | 2   |        |
| 2630   | 4      | 5     | 2   |        |
| 2633   | 1      | 12    | 2   |        |
| 2637   | 1      | 5     | 2   |        |
| 2638   | 1      | 0     | 2   |        |
| 2641   | 1      | 0     | 2   |        |
| 2644   | 1      | 0     | 2   |        |
| 2645   | 1      | 0     | 1   | 0      |
| 2646   | 1      | 2     | 2   |        |
| 2648   | 1      | 0     | 2   |        |
| 2651   |        |       |     |        |
| 2652   | 3      | 3     | 2   |        |
| 2653   | 1      | 12    | 2   |        |
| 2656   |        |       |     |        |
| 2657   | 1      | 0     | 2   |        |
| 2658   | 2      | 0     | 2   |        |
| 2661   | 1      | 3     | 2   |        |
| 2663   | 1      | 0     | 2   |        |

| respid | Q40_13 | Q41_1 | Q42 | Q42b_1 |
|--------|--------|-------|-----|--------|
| 2665   | 2      | 1     | 2   |        |
| 2670   | 1      | 6     | 2   |        |
| 2672   | 1      | 1     | 2   |        |
| 2673   |        |       |     |        |
| 2677   | 1      | 0     | 2   |        |
| 2686   | 5      | 4     | 1   | 2      |
| 2688   | 2      | 2     | 2   |        |
| 2689   | 2      | 1     | 2   |        |
| 2691   | 1      | 0     | 2   |        |
| 2695   | 1      | 20    | 2   |        |
| 2696   | 1      | 0     | 2   |        |
| 2697   |        |       |     |        |
| 2698   |        |       |     |        |
| 2703   | 1      | 0     | 2   |        |
| 2704   | 1      | 0     | 2   |        |
| 2706   | 5      | 1     | 2   |        |
| 2707   | 2      | 3     | 1   | 2      |
| 2710   | 1      | 0     | 2   |        |
| 2711   | 1      | 0     | 2   |        |
| 2712   | 1      | 0     | 2   |        |
| 2713   |        |       |     |        |
| 2721   |        |       |     |        |
| 2730   | 1      | 0     | 2   |        |
| 2731   | 1      | 0     | 2   |        |
| 2732   | 1      | 2     | 2   |        |
| 2733   | 3      | 1     | 2   |        |
| 2735   | 1      | 3     | 2   |        |
| 2736   | 1      | 1     | 2   |        |
| 2740   | 1      | 2     | 2   |        |
| 2741   | 2      | 2     | 2   |        |
| 2742   | 1      | 1     | 1   | 1      |
| 2743   | 1      | 5     | 2   |        |



| respid | Q40_13 | Q41_1 | Q42 | Q42b_1 |
|--------|--------|-------|-----|--------|
| 2744   | 1      | 0     | 2   |        |
| 2745   | 3      | 1     | 2   |        |
| 2749   | 1      | 0     | 2   |        |
| 2751   | 1      | 0     | 2   |        |
| 2754   | 1      | 0     | 2   |        |
| 2755   | 3      | 0     | 2   |        |
| 2757   | 1      | 0     | 2   |        |
| 2758   | 2      | 24    | 2   |        |
| 2759   | 4      | 0     | 2   |        |
| 2761   | 1      | 0     | 2   |        |
| 2762   | 2      | 0     | 2   |        |
| 2763   | 1      | 1     | 2   |        |
| 2764   | 6      | 20    | 2   |        |
| 2765   | 2      | 5     | 2   |        |
| 2766   | 1      | 12    | 2   |        |
| 2767   | 6      | 1     | 2   |        |
| 2769   | 2      | 2     | 2   |        |
| 2770   | 2      | 15    | 2   |        |
| 2771   | 2      | 15    | 2   |        |
| 2774   | 2      | 0     | 2   |        |
| 2777   | 4      | 10    | 2   |        |
| 2778   | 1      | 0     | 2   |        |
| 2781   | 3      | 1     | 2   |        |
| 2782   | 2      | 0     | 2   |        |
| 2784   | 1      | 0     | 2   |        |
| 2785   | 3      | 5     | 2   |        |
| 2786   | 2      | 6     | 2   |        |
| 2787   | 3      | 0     | 2   |        |
| 2789   | 2      | 2     | 1   | 1      |
| 2790   | 2      | 0     | 2   |        |
| 2791   | 2      | 12    | 2   |        |
| 2793   | 1      | 0     | 2   |        |

| respid | Q40_13 | Q41_1 | Q42 | Q42b_1 |
|--------|--------|-------|-----|--------|
| 2797   | 1      | 2     | 2   |        |
| 2798   | 1      | 3     | 2   |        |
| 2799   | 2      | 1     | 2   |        |
| 2801   | 1      | 3     | 2   |        |
| 2802   | 2      | 0     | 2   |        |
| 2803   | 2      | 5     | 2   |        |
| 2804   | 6      | 4     | 2   |        |
| 2807   | 1      | 2     | 2   |        |
| 2809   | 1      | 3     | 2   |        |
| 2810   | 6      | 2     | 2   |        |
| 2812   | 1      | 0     | 2   |        |
| 2814   | 1      | 0     | 2   |        |
| 2815   | 1      | 12    | 2   |        |
| 2816   | 1      | 4     | 2   |        |
| 2817   | 1      | 1     | 2   |        |
| 2819   | 2      | 5     | 2   |        |
| 2820   | 1      | 1     | 2   |        |
| 2821   | 3      | 0     | 2   |        |
| 2822   | 2      | 5     | 2   |        |
| 2823   | 1      | 2     | 2   |        |
| 2824   | 1      | 4     | 2   |        |
| 2825   | 2      | 2     | 2   |        |
| 2826   | 2      | 6     | 2   |        |
| 2827   | 1      | 0     | 2   |        |
| 2828   | 1      | 3     | 2   |        |
| 2829   | 3      | 0     | 2   |        |
| 2830   | 2      | 2     | 2   |        |
| 2831   | 1      | 1     | 2   |        |
| 2832   | 2      | 0     | 2   |        |
| 2833   | 1      | 10    | 2   |        |
| 2834   | 1      | 0     | 2   |        |
| 2835   | 4      | 2     | 1   | 1      |

| respid | Q40_13 | Q41_1 | Q42 | Q42b_1 |
|--------|--------|-------|-----|--------|
| 2836   | 1      | 1     | 2   |        |
| 2837   | 2      | 6     | 2   |        |
| 2838   | 2      | 2     | 2   |        |
| 2844   | 5      | 2     | 2   |        |
| 2845   | 1      | 25    | 2   |        |
| 2847   | 6      | 3     | 2   |        |
| 2848   | 1      | 5     | 2   |        |
| 2849   | 1      | 20    | 2   |        |
| 2851   | 1      | 0     | 2   |        |
| 2852   | 1      | 8     | 2   |        |
| 2853   | 2      | 1     | 2   |        |
| 2854   | 1      | 20    | 2   |        |
| 2856   | 1      | 10    | 2   |        |
| 2857   | 2      | 6     | 2   |        |
| 2858   | 2      | 2     | 2   |        |
| 2859   | 2      | 0     | 2   |        |
| 2860   | 1      | 35    | 2   |        |
| 2861   | 3      | 12    | 1   | 4      |
| 2863   | 1      | 3     | 2   |        |
| 2864   | 2      | 0     | 2   |        |
| 2866   | 1      | 1     | 1   | 1      |
| 2872   | 1      | 1     | 2   |        |
| 2875   | 1      | 3     | 2   |        |
| 2879   |        |       |     |        |
| 2881   | 2      | 6     | 2   |        |
| 2882   | 1      | 0     | 2   |        |
| 2883   | 1      | 2     | 2   |        |
| 2884   | 2      | 2     | 2   |        |
| 2885   | 3      | 1     | 2   |        |
| 2887   | 1      | 0     | 2   |        |
| 2888   | 1      | 0     | 2   |        |
| 2890   | 1      | 20    | 2   |        |

| respid | Q40_13 | Q41_1 | Q42 | Q42b_1 |
|--------|--------|-------|-----|--------|
| 2891   | 1      | 2     | 1   | 1      |
| 2892   |        |       |     |        |
| 2895   | 1      | 0     | 2   |        |
| 2899   | 2      | 6     | 2   |        |
| 2900   | 1      | 1     | 2   |        |
| 2902   | 6      | 0     | 2   |        |
| 2903   |        |       |     |        |
| 2904   | 1      | 3     | 2   |        |
| 2906   | 2      | 2     | 2   |        |
| 2908   | 1      | 0     | 2   |        |
| 2910   | 1      | 0     | 2   |        |
| 2917   | 4      | 5     | 2   |        |
| 2918   | 2      | 1     | 2   |        |
| 2919   | 1      | 0     | 2   |        |
| 2920   | 1      | 0     | 2   |        |
| 2921   | 3      | 2     | 2   |        |
| 2922   | 1      | 1     | 2   |        |
| 2923   |        |       |     |        |
| 2924   | 3      | 5     | 1   | 2      |
| 2926   | 2      | 6     | 2   |        |
| 2928   | 1      | 1     | 2   |        |
| 2930   |        |       |     |        |
| 2931   | 4      | 4     | 2   |        |
| 2933   | 2      | 0     | 2   |        |
| 2935   | 1      | 0     | 2   |        |
| 2936   |        |       |     |        |
| 2937   | 1      | 2     | 2   |        |
| 2938   | 1      | 5     | 2   |        |
| 2944   | 1      | 0     | 2   |        |
| 2945   | 2      | 1     | 1   | 1      |
| 2947   | 1      | 0     | 2   |        |
| 2949   | 1      | 3     | 2   |        |

| respid | Q40_13 | Q41_1 | Q42 | Q42b_1 |
|--------|--------|-------|-----|--------|
| 2951   | 4      | 12    | 1   | 2      |
| 2952   | 1      | 5     | 2   |        |
| 2953   |        |       |     |        |
| 2955   | 1      | 4     | 2   |        |
| 2957   | 2      | 4     | 2   |        |
| 2958   | 1      | 0     | 2   |        |
| 2960   | 2      | 0     | 2   |        |
| 2963   | 2      | 0     | 2   |        |
| 2964   | 2      | 0     | 2   |        |
| 2967   |        |       |     |        |
| 2968   | 1      | 0     | 2   |        |
| 2971   | 2      | 0     | 2   |        |
| 2974   | 1      | 0     | 2   |        |
| 2975   | 2      | 1     | 2   |        |
| 2982   |        |       |     |        |
| 2983   |        |       |     |        |
| 2985   | 1      | 0     | 2   |        |
| 2986   | 4      | 6     | 2   |        |
| 2987   | 2      | 0     | 2   |        |
| 2988   | 2      | 12    | 2   |        |
| 2993   | 1      | 1     | 2   |        |
| 2996   | 1      | 0     | 2   |        |
| 2997   | 1      | 0     | 2   |        |
| 2998   | 1      | 0     | 2   |        |
| 3004   | 1      | 0     | 2   |        |
| 3007   | 2      | 12    | 2   |        |
| 3011   | 3      | 3     | 1   | 3      |
| 3012   | 2      | 3     | 2   |        |
| 3013   | 1      | 1     | 2   |        |
| 3014   |        |       |     |        |
| 3015   | 2      | 0     | 2   |        |
| 3016   |        |       |     |        |

| respid | Q40_13 | Q41_1 | Q42 | Q42b_1 |
|--------|--------|-------|-----|--------|
| 3017   | 1      | 0     | 2   |        |
| 3020   | 2      | 0     | 2   |        |
| 3022   | 1      | 0     | 2   |        |
| 3023   | 1      | 0     | 2   |        |
| 3026   | 3      | 1     | 2   |        |
| 3038   | 2      | 4     | 1   | 3      |
| 3039   | 3      | 3     | 2   |        |
| 3040   | 1      | 1     | 2   |        |
| 3041   |        |       |     |        |
| 3042   | 3      | 1     | 2   |        |
| 3044   | 2      | 0     | 2   |        |
| 3050   | 2      | 1     | 2   |        |
| 3052   | 1      | 0     | 2   |        |
| 3056   | 4      | 4     | 1   | 1      |
| 3059   | 1      | 0     | 2   |        |
| 3060   | 1      | 6     | 2   |        |
| 3063   | 2      | 0     | 2   |        |
| 3065   | 1      | 8     | 2   |        |
| 3067   | 1      | 0     | 2   |        |
| 3068   |        |       |     |        |
| 3072   | 2      | 0     | 2   |        |
| 3074   | 1      | 0     | 2   |        |
| 3075   | 2      | 2     | 2   |        |
| 3076   | 1      | 6     | 2   |        |
| 3079   | 2      | 4     | 2   |        |
| 3082   | 3      | 5     | 1   | 3      |
| 3083   | 1      | 2     | 2   |        |
| 3084   | 1      | 2     | 2   |        |
| 3085   | 1      | 0     | 2   |        |
| 3090   | 1      | 0     | 2   |        |
| 3091   | 2      | 0     | 2   |        |
| 3092   | 1      | 1     | 2   |        |

| respid | Q40_13 | Q41_1 | Q42 | Q42b_1 |
|--------|--------|-------|-----|--------|
| 3095   | 1      | 4     | 2   |        |
| 3096   | 5      | 3     | 1   | 2      |
| 3097   | 1      | 4     | 2   |        |
| 3099   | 6      | 4     | 1   | 2      |
| 3101   | 3      | 2     | 2   |        |
| 3103   | 1      | 2     | 2   |        |
| 3104   | 1      | 6     | 2   |        |
| 3105   |        |       |     |        |
| 3107   | 1      | 15    | 2   |        |
| 3108   | 3      | 1     | 2   |        |
| 3109   | 1      | 0     | 2   |        |
| 3116   | 1      | 0     | 2   |        |
| 3117   | 4      | 0     | 2   |        |
| 3119   | 1      | 0     | 2   |        |
| 3120   | 1      | 12    | 2   |        |
| 3130   | 1      | 0     | 2   |        |
| 3131   | 2      | 2     | 1   | 2      |
| 3133   | 1      | 3     | 2   |        |
| 3134   | 2      | 0     | 2   |        |
| 3135   | 2      | 6     | 2   |        |
| 3145   | 3      | 10    | 2   |        |
| 3147   | 1      | 10    | 2   |        |
| 3152   | 1      | 2     | 2   |        |
| 3155   | 5      | 2     | 1   | 2      |
| 3156   |        |       |     |        |
| 3157   | 2      | 1     | 2   |        |
| 3166   | 1      | 3     | 2   |        |
| 3169   | 2      | 1     | 1   | 1      |
| 3179   | 2      | 12    | 2   |        |
| 3181   | 1      | 0     | 2   |        |
| 3185   |        |       |     |        |
| 3190   | 1      | 12    | 2   |        |

| respid | Q40_13 | Q41_1 | Q42 | Q42b_1 |
|--------|--------|-------|-----|--------|
| 3191   |        |       |     |        |
| 3192   | 1      | 2     | 2   |        |
| 3193   | 3      | 2     | 2   |        |
| 3195   | 1      | 0     | 2   |        |
| 3202   | 1      | 2     | 2   |        |
| 3204   | 1      | 0     | 2   |        |
| 3208   | 1      | 2     | 2   |        |
| 3212   | 1      | 0     | 2   |        |
| 3218   | 1      | 12    | 2   |        |
| 3219   | 3      | 0     | 2   |        |
| 3220   | 3      | 0     | 2   |        |
| 3221   | 1      | 3     | 2   |        |
| 3223   | 1      | 0     | 2   |        |
| 3231   | 2      | 10    | 1   | 1      |
| 3232   | 4      | 2     | 1   | 1      |
| 3234   | 2      | 0     | 2   |        |
| 3235   | 1      | 0     | 2   |        |
| 3237   | 1      | 3     | 2   |        |
| 3238   | 1      | 0     | 2   |        |
| 3240   | 1      | 2     | 2   |        |
| 3241   | 2      | 0     | 2   |        |
| 3243   | 1      | 3     | 2   |        |
| 3244   | 2      | 1     | 2   |        |
| 3247   | 1      | 3     | 2   |        |
| 3250   | 1      | 0     | 2   |        |
| 3251   | 4      | 0     | 2   |        |
| 3255   | 1      | 2     | 2   |        |
| 3256   | 1      | 10    | 2   |        |
| 3257   | 1      | 0     | 2   |        |
| 3258   |        |       |     |        |
| 3259   | 1      | 8     | 2   |        |
| 3260   | 2      | 0     | 2   |        |



| respid | Q40_13 | Q41_1 | Q42 | Q42b_1 |
|--------|--------|-------|-----|--------|
| 3261   |        |       |     |        |
| 3262   | 2      | 3     | 2   |        |
| 3264   | 3      | 2     | 1   | 2      |
| 3265   | 1      | 0     | 2   |        |
| 3267   | 1      | 2     | 2   |        |
| 3268   | 2      | 0     | 2   |        |
| 3270   | 1      | 5     | 2   |        |
| 3271   | 1      | 0     | 2   |        |
| 3274   |        |       |     |        |
| 3276   | 1      | 2     | 2   |        |
| 3277   | 6      | 2     | 2   |        |
| 3279   | 1      | 0     | 2   |        |
| 3281   |        |       |     |        |
| 3283   | 3      | 1     | 2   |        |
| 3285   | 2      | 1     | 2   |        |
| 3286   | 3      | 0     | 2   |        |
| 3287   | 1      | 0     | 2   |        |
| 3289   | 1      | 0     | 2   |        |
| 3290   | 1      | 0     | 2   |        |
| 3291   | 2      | 8     | 2   |        |
| 3292   | 3      | 12    | 1   | 10     |
| 3293   | 4      | 7     | 1   | 3      |
| 3294   | 2      | 3     | 2   |        |
| 3296   | 2      | 1     | 2   |        |
| 3306   | 1      | 0     | 2   |        |
| 3307   | 4      | 3     | 1   | 2      |
| 3308   | 1      | 1     | 2   |        |
| 3312   | 1      | 8     | 2   |        |
| 3313   | 3      | 5     | 2   |        |
| 3316   | 1      | 1     | 2   |        |
| 3317   | 1      | 1     | 1   | 1      |
| 3320   | 1      | 6     | 2   |        |

| respid | Q40_13 | Q41_1 | Q42 | Q42b_1 |
|--------|--------|-------|-----|--------|
| 3321   | 2      | 7     | 2   |        |
| 3322   | 1      | 0     | 2   |        |
| 3323   | 1      | 0     | 2   |        |
| 3325   |        |       |     |        |
| 3332   | 1      | 0     | 2   |        |
| 3334   | 1      | 0     | 2   |        |
| 3335   | 1      | 10    | 2   |        |
| 3341   | 2      | 5     | 2   |        |
| 3345   | 3      | 1     | 2   |        |
| 3346   | 1      | 1     | 2   |        |
| 3349   | 2      | 0     | 2   |        |
| 3351   | 2      | 0     | 2   |        |
| 3353   | 1      | 0     | 2   |        |
| 3354   | 2      | 3     | 2   |        |
| 3356   | 2      | 5     | 2   |        |
| 3357   | 2      | 0     | 2   |        |
| 3360   | 1      | 0     | 2   |        |
| 3361   | 1      | 5     | 2   |        |
| 3362   | 1      | 12    | 2   |        |
| 3363   |        |       |     |        |
| 3364   | 5      | 7     | 1   | 6      |
| 3368   | 1      | 0     | 2   |        |
| 3370   | 1      | 2     | 2   |        |
| 3371   | 1      | 0     | 2   |        |
| 3379   | 2      | 1     | 1   | 1      |
| 3380   | 1      | 0     | 2   |        |
| 3382   | 1      | 0     | 2   |        |
| 3384   | 3      | 1     | 2   |        |
| 3385   | 1      | 0     | 2   |        |
| 3388   | 1      | 0     | 2   |        |
| 3392   | 1      | 0     | 2   |        |
| 3393   | 1      | 0     | 2   |        |

| respid | Q40_13 | Q41_1 | Q42 | Q42b_1 |
|--------|--------|-------|-----|--------|
| 3394   | 3      | 1     | 2   |        |
| 3395   | 5      | 1     | 2   |        |
| 3396   | 1      | 0     | 2   |        |
| 3397   | 1      | 1     | 2   |        |
| 3398   | 1      | 1     | 2   |        |
| 3399   | 3      | 0     | 2   |        |
| 3400   | 1      | 0     | 2   |        |
| 3401   | 5      | 7     | 1   | 6      |
| 3402   | 2      | 0     | 2   |        |
| 3403   | 2      | 3     | 2   |        |
| 3405   | 3      | 1     | 2   |        |
| 3407   | 3      | 1     | 1   | 1      |
| 3410   | 1      | 0     | 2   |        |
| 3411   | 1      | 3     | 2   |        |
| 3413   |        |       |     |        |
| 3414   | 1      | 0     | 2   |        |
| 3420   | 1      | 0     | 2   |        |
| 3421   | 5      | 8     | 1   | 3      |
| 3425   | 1      | 0     | 2   |        |
| 3426   | 3      | 2     | 1   | 2      |
| 3429   | 2      | 48    | 2   |        |
| 3430   | 3      | 5     | 1   | 5      |
| 3433   | 1      | 6     | 2   |        |
| 3434   | 4      | 5     | 1   | 3      |
| 3437   | 1      | 4     | 2   |        |
| 3439   | 1      | 5     | 1   | 5      |
| 3441   | 2      | 5     | 2   |        |
| 3442   | 1      | 0     | 2   |        |
| 3444   | 1      | 2     | 2   |        |
| 3445   | 3      | 1     | 2   |        |
| 3450   | 2      | 8     | 2   |        |
| 3452   | 3      | 0     | 2   |        |

| respid | Q40_13 | Q41_1 | Q42 | Q42b_1 |
|--------|--------|-------|-----|--------|
| 3456   | 1      | 0     | 2   |        |
| 3459   |        |       |     |        |
| 3460   | 1      | 0     | 2   |        |
| 3461   | 1      | 2     | 2   |        |
| 3466   | 4      | 8     | 2   |        |
| 3471   | 1      | 0     | 2   |        |
| 3473   | 1      | 8     | 2   |        |
| 3475   | 4      | 3     | 2   |        |
| 3476   | 2      | 18    | 2   |        |
| 3477   | 3      | 2     | 2   |        |
| 3478   |        |       |     |        |
| 3479   | 1      | 0     | 2   |        |
| 3482   | 1      | 3     | 2   |        |
| 3483   | 1      | 0     | 2   |        |
| 3485   | 2      | 0     | 2   |        |
| 3489   |        |       |     |        |
| 3490   | 2      | 6     | 1   | 3      |
| 3491   | 5      | 1     | 1   | 1      |
| 3494   | 1      | 15    | 2   |        |
| 3495   | 3      | 2     | 1   | 2      |
| 3501   | 1      | 0     | 2   |        |
| 3506   | 1      | 6     | 2   |        |
| 3507   | 1      | 10    | 2   |        |
| 3517   | 1      | 5     | 2   |        |
| 3520   | 2      | 3     | 2   |        |
| 3521   | 2      | 6     | 2   |        |
| 3522   | 1      | 15    | 2   |        |
| 3524   | 1      | 0     | 2   |        |
| 3527   | 1      | 0     | 2   |        |
| 3528   | 1      | 0     | 2   |        |
| 3529   | 1      | 2     | 2   |        |
| 3536   | 1      | 5     | 2   |        |

| respid | Q40_13 | Q41_1 | Q42 | Q42b_1 |
|--------|--------|-------|-----|--------|
| 3537   | 3      | 2     | 2   |        |
| 3538   | 2      | 4     | 2   |        |
| 3540   | 2      | 2     | 1   | 1      |
| 3545   | 1      | 12    | 2   |        |
| 3547   | 1      | 30    | 1   | 3      |
| 3554   | 1      | 0     | 2   |        |
| 3556   | 1      | 1     | 2   |        |
| 3557   | 1      | 1     | 1   | 1      |
| 3559   | 3      | 2     | 2   |        |
| 3560   | 2      | 4     | 2   |        |
| 3562   | 1      | 1     | 2   |        |
| 3564   | 3      | 10    | 1   | 2      |
| 3565   | 3      | 4     | 1   | 2      |
| 3568   | 3      | 2     | 1   | 1      |
| 3572   |        |       |     |        |
| 3578   |        |       |     |        |
| 3581   | 1      | 2     | 2   |        |
| 3583   | 2      | 46    | 2   |        |
| 3588   | 1      | 3     | 2   |        |
| 3591   | 1      | 0     | 2   |        |
| 3594   | 1      | 1     | 2   |        |
| 3595   | 1      | 0     | 2   |        |
| 3596   | 1      | 5     | 2   |        |
| 3597   | 1      | 0     | 2   |        |
| 3598   |        |       |     |        |
| 3600   | 2      | 4     | 2   |        |
| 3602   | 1      | 2     | 2   |        |
| 3604   | 1      | 0     | 2   |        |
| 3605   | 2      | 0     | 2   |        |
| 3606   | 1      | 0     | 2   |        |
| 3607   |        |       |     |        |
| 3610   | 1      | 0     | 2   |        |

| respid | Q40_13 | Q41_1 | Q42 | Q42b_1 |
|--------|--------|-------|-----|--------|
| 3611   | 1      | 0     | 2   |        |
| 3612   | 2      | 5     | 2   |        |
| 3614   | 2      | 0     | 2   |        |
| 3616   | 1      | 0     | 2   |        |
| 3617   | 1      | 1     | 2   |        |
| 3618   |        |       |     |        |
| 3619   | 5      | 1     | 2   |        |
| 3621   | 2      | 2     | 2   |        |
| 3622   | 2      | 0     | 2   |        |
| 3624   | 1      | 1     | 2   |        |
| 3626   | 1      | 0     | 2   |        |
| 3629   | 1      | 0     | 2   |        |
| 3631   | 1      | 0     | 2   |        |
| 3632   | 2      | 0     | 2   |        |
| 3638   | 1      | 0     | 2   |        |
| 3640   | 1      | 5     | 2   |        |
| 3641   | 2      | 1     | 1   | 1      |
| 3645   | 3      | 10    | 2   |        |
| 3650   |        |       |     |        |
| 3653   | 2      | 4     | 1   | 1      |
| 3655   | 4      | 0     | 2   |        |
| 3657   | 2      | 4     | 1   | 1      |
| 3658   | 1      | 3     | 2   |        |
| 3659   | 1      | 0     | 2   |        |
| 3664   | 3      | 8     | 1   | 6      |
| 3665   | 1      | 5     | 2   |        |
| 3667   | 1      | 4     | 2   |        |
| 3668   | 5      | 7     | 1   | 6      |
| 3675   |        |       |     |        |
| 3678   |        |       |     |        |
| 3680   |        |       |     |        |
| 3684   | 2      | 2     | 1   | 1      |

| respid | Q40_13 | Q41_1 | Q42 | Q42b_1 |
|--------|--------|-------|-----|--------|
| 3685   | 3      | 2     | 2   |        |
| 3687   | 1      | 0     | 2   |        |
| 3689   | 5      | 6     | 1   | 3      |
| 3690   | 3      | 1     | 2   |        |
| 3693   |        |       |     |        |
| 3694   | 1      | 0     | 2   |        |
| 3695   |        |       |     |        |
| 3700   | 1      | 0     | 2   |        |
| 3701   | 1      | 4     | 2   |        |
| 3703   | 1      | 2     | 2   |        |
| 3704   | 4      | 3     | 1   | 2      |
| 3705   |        |       |     |        |
| 3709   | 1      | 0     | 2   |        |
| 3710   | 3      | 3     | 2   |        |
| 3722   | 1      | 5     | 2   |        |
| 3725   | 1      | 0     | 2   |        |
| 3726   | 1      | 6     | 2   |        |
| 3727   | 1      | 2     | 2   |        |
| 3728   | 2      | 1     | 2   |        |
| 3729   | 1      | 2     | 2   |        |
| 3731   |        |       |     |        |
| 3738   | 1      | 0     | 2   |        |
| 3739   | 1      | 0     | 2   |        |
| 3740   | 1      | 1     | 2   |        |
| 3749   | 2      | 2     | 2   |        |
| 3758   | 4      | 6     | 2   |        |
| 3762   | 2      | 1     | 2   |        |
| 3765   | 1      | 6     | 1   | 0      |
| 3770   | 1      | 0     | 2   |        |
| 3771   |        |       |     |        |
| 3778   | 1      | 0     | 2   |        |
| 3779   | 2      | 1     | 2   |        |

| respid | Q40_13 | Q41_1 | Q42 | Q42b_1 |
|--------|--------|-------|-----|--------|
| 3780   | 1      | 4     | 2   |        |
| 3782   | 2      | 10    | 2   |        |
| 3784   | 1      | 0     | 2   |        |
| 3787   | 2      | 0     | 2   |        |
| 3790   | 1      | 0     | 2   |        |
| 3791   | 1      | 14    | 2   |        |
| 3793   | 4      | 0     | 2   |        |
| 3795   | 1      | 0     | 2   |        |
| 3799   |        |       |     |        |
| 3801   | 4      | 2     | 2   |        |
| 3804   | 2      | 2     | 2   |        |
| 3809   | 4      | 0     | 2   |        |
| 3810   | 1      | 2     | 2   |        |
| 3813   | 3      | 0     | 2   |        |
| 3816   | 1      | 10    | 1   | 2      |
| 3820   | 1      | 3     | 2   |        |
| 3821   | 2      | 0     | 2   |        |
| 3823   | 4      | 10    | 2   |        |
| 3828   | 1      | 0     | 2   |        |
| 3829   | 1      | 10    | 2   |        |
| 3832   | 1      | 2     | 2   |        |
| 3835   | 1      | 5     | 2   |        |
| 3837   | 4      | 1     | 2   |        |
| 3838   | 3      | 0     | 2   |        |
| 3839   | 4      | 32    | 1   | 20     |
| 3840   |        |       |     |        |
| 3842   |        |       |     |        |
| 3843   | 1      | 1     | 2   |        |
| 3844   | 2      | 0     | 1   | 0      |
| 3850   | 2      | 0     | 2   |        |
| 3851   |        |       |     |        |
| 3856   | 2      | 0     | 2   |        |



| respid | Q40_13 | Q41_1 | Q42 | Q42b_1 |
|--------|--------|-------|-----|--------|
| 3859   | 2      | 0     | 2   |        |
| 3860   | 1      | 6     | 2   |        |
| 3863   | 2      | 1     | 2   |        |
| 3866   | 1      | 0     | 2   |        |
| 3867   | 1      | 0     | 2   |        |
| 3870   | 1      | 1     | 2   |        |
| 3873   | 5      | 2     | 2   |        |
| 3875   | 1      | 0     | 2   |        |
| 3878   | 2      | 0     | 2   |        |
| 3881   | 1      | 2     | 2   |        |
| 3883   | 3      | 4     | 1   | 2      |
| 3884   | 1      | 7     | 2   |        |
| 3885   | 4      | 8     | 1   | 6      |
| 3886   | 3      | 2     | 1   | 2      |
| 3887   | 1      | 0     | 2   |        |
| 3888   |        |       |     |        |
| 3889   | 3      | 5     | 1   | 2      |
| 3890   | 1      | 10    | 1   | 1      |
| 3896   | 1      | 4     | 2   |        |
| 3902   | 6      | 9     | 1   | 3      |
| 3909   | 1      | 0     | 2   |        |
| 3912   | 2      | 1     | 2   |        |
| 3922   | 1      | 1     | 2   |        |
| 3928   | 3      | 3     | 2   |        |
| 3930   | 2      | 1     | 2   |        |
| 3931   | 4      | 3     | 2   |        |
| 3933   | 1      | 4     | 2   |        |
| 3935   | 1      | 5     | 2   |        |
| 3937   | 1      | 2     | 2   |        |
| 3939   | 3      | 0     | 2   |        |
| 3942   | 1      | 2     | 2   |        |
| 3943   | 3      | 0     | 2   |        |

| respid | Q40_13 | Q41_1 | Q42 | Q42b_1 |
|--------|--------|-------|-----|--------|
| 3944   |        |       |     |        |
| 3945   | 1      | 12    | 2   |        |
| 3947   | 1      | 1     | 2   |        |
| 3948   | 2      | 2     | 2   |        |
| 3951   | 2      | 30    | 2   |        |
| 3959   | 2      | 0     | 2   |        |
| 3969   | 5      | 15    | 1   | 3      |
| 3973   | 1      | 0     | 2   |        |
| 3975   | 2      | 1     | 1   | 1      |
| 3976   | 1      | 1     | 2   |        |
| 3977   | 2      | 0     | 2   |        |
| 3978   | 2      | 0     | 2   |        |
| 3994   | 1      | 0     | 2   |        |
| 3995   | 1      | 0     | 2   |        |
| 3997   | 2      | 1     | 2   |        |
| 3998   | 1      | 2     | 2   |        |
| 3999   | 2      | 5     | 1   | 0      |
| 4002   | 2      | 1     | 1   | 1      |
| 4004   | 2      | 0     | 2   |        |
| 4005   |        |       |     |        |
| 4006   | 2      | 2     | 2   |        |
| 4008   | 1      | 3     | 2   |        |
| 4010   | 1      | 0     | 2   |        |
| 4011   | 3      | 3     | 2   |        |
| 4013   | 1      | 3     | 2   |        |
| 4014   | 1      | 0     | 2   |        |
| 4016   | 2      | 7     | 2   |        |
| 4017   | 1      | 0     | 2   |        |
| 4019   | 1      | 0     | 2   |        |
| 4021   |        |       |     |        |
| 4023   | 1      | 0     | 2   |        |
| 4024   | 1      | 6     | 2   |        |

| respid | Q40_13 | Q41_1 | Q42 | Q42b_1 |
|--------|--------|-------|-----|--------|
| 4025   | 1      | 2     | 2   |        |
| 4027   | 1      | 0     | 2   |        |
| 4032   |        |       |     |        |
| 4034   | 2      | 4     | 2   |        |
| 4035   | 3      | 0     | 2   |        |
| 4037   | 1      | 6     | 2   |        |
| 4040   | 1      | 4     | 2   |        |
| 4041   | 1      | 0     | 2   |        |
| 4042   | 1      | 0     | 2   |        |
| 4043   | 1      | 0     | 2   |        |
| 4045   | 3      | 0     | 2   |        |
| 4046   | 1      | 2     | 2   |        |
| 4048   | 1      | 10    | 2   |        |
| 4049   | 3      | 2     | 2   |        |
| 4050   | 2      | 10    | 2   |        |
| 4052   | 1      | 5     | 2   |        |
| 4053   |        |       |     |        |
| 4060   | 1      | 1     | 2   |        |
| 4065   | 3      | 5     | 2   |        |
| 4066   | 1      | 0     | 2   |        |
| 4067   | 1      | 2     | 2   |        |
| 4068   | 3      | 0     | 2   |        |
| 4069   | 1      | 0     | 2   |        |
| 4070   | 1      | 0     | 2   |        |
| 4071   | 3      | 1     | 2   |        |
| 4072   | 1      | 1     | 2   |        |
| 4073   | 1      | 3     | 2   |        |
| 4074   | 1      | 2     | 2   |        |
| 4075   | 2      | 0     | 2   |        |
| 4078   | 1      | 5     | 2   |        |
| 4080   | 1      | 12    | 2   |        |
| 4081   |        |       |     |        |

| respid | Q40_13 | Q41_1 | Q42 | Q42b_1 |
|--------|--------|-------|-----|--------|
| 4082   | 1      | 2     | 2   |        |
| 4083   | 2      | 2     | 1   | 2      |
| 4084   | 1      | 0     | 2   |        |
| 4086   |        |       |     |        |
| 4087   | 1      | 0     | 2   |        |
| 4088   | 4      | 2     | 2   |        |
| 4089   | 1      | 0     | 2   |        |
| 4090   | 2      | 0     | 2   |        |
| 4093   | 6      | 3     | 2   |        |
| 4094   | 1      | 2     | 2   |        |
| 4095   | 1      | 0     | 2   |        |
| 4096   |        |       |     |        |
| 4098   | 1      | 0     | 2   |        |
| 4103   | 2      | 0     | 2   |        |
| 4104   | 1      | 3     | 2   |        |
| 4107   | 1      | 0     | 2   |        |
| 4109   | 1      | 1     | 1   | 1      |
| 4110   | 1      | 0     | 2   |        |
| 4113   | 1      | 0     | 2   |        |
| 4114   | 1      | 1     | 2   |        |
| 4116   | 1      | 4     | 1   | 4      |
| 4119   | 1      | 0     | 2   |        |
| 4120   | 1      | 0     | 2   |        |
| 4121   | 1      | 0     | 2   |        |
| 4122   | 2      | 2     | 1   | 2      |
| 4124   | 1      | 5     | 2   |        |
| 4126   | 1      | 0     | 2   |        |
| 4127   | 5      | 12    | 2   |        |
| 4131   | 1      | 0     | 2   |        |
| 4134   | 1      | 5     | 2   |        |
| 4144   | 1      | 0     | 2   |        |
| 4145   | 1      | 12    | 2   |        |

| respid | Q40_13 | Q41_1 | Q42 | Q42b_1 |
|--------|--------|-------|-----|--------|
| 4146   | 1      | 1     | 2   |        |
| 4147   | 1      | 1     | 2   |        |
| 4149   | 2      | 6     | 2   |        |
| 4150   |        |       |     |        |
| 4151   | 4      | 3     | 2   |        |
| 4153   | 1      | 3     | 2   |        |
| 4155   | 1      | 0     | 2   |        |
| 4157   | 1      | 0     | 2   |        |
| 4159   | 1      | 3     | 2   |        |
| 4160   | 1      | 1     | 2   |        |
| 4161   | 1      | 5     | 2   |        |
| 4163   | 1      | 2     | 2   |        |
| 4164   | 1      | 5     | 2   |        |
| 4165   | 1      | 1     | 2   |        |
| 4166   | 1      | 2     | 1   | 1      |
| 4167   | 1      | 3     | 2   |        |
| 4170   | 3      | 2     | 2   |        |
| 4172   | 5      | 0     | 2   |        |
| 4173   | 2      | 0     | 2   |        |
| 4180   | 2      | 1     | 2   |        |
| 4185   | 2      | 2     | 2   |        |
| 4187   | 1      | 0     | 2   |        |
| 4190   | 1      | 2     | 2   |        |
| 4191   | 3      | 3     | 2   |        |
| 4193   |        |       |     |        |
| 4194   | 1      | 2     | 2   |        |
| 4195   | 1      | 7     | 2   |        |
| 4196   |        |       |     |        |
| 4197   | 2      | 0     | 2   |        |
| 4198   | 1      | 0     | 2   |        |
| 4199   | 1      | 2     | 2   |        |
| 4205   | 1      | 2     | 2   |        |

| respid | Q40_13 | Q41_1 | Q42 | Q42b_1 |
|--------|--------|-------|-----|--------|
| 4206   |        |       |     |        |
| 4207   | 2      | 10    | 2   |        |
| 4214   | 1      | 1     | 2   |        |
| 4215   | 1      | 2     | 2   |        |
| 4217   | 1      | 6     | 2   |        |
| 4219   | 1      | 3     | 2   |        |
| 4223   | 3      | 5     | 2   |        |
| 4226   | 1      | 4     | 2   |        |
| 4229   | 1      | 5     | 2   |        |
| 4230   | 2      | 0     | 2   |        |
| 4232   | 2      | 0     | 2   |        |
| 4233   | 1      | 1     | 2   |        |
| 4234   | 2      | 0     | 2   |        |
| 4235   | 2      | 0     | 2   |        |
| 4236   | 3      | 3     | 2   |        |
| 4237   | 2      | 0     | 2   |        |
| 4238   | 1      | 1     | 2   |        |
| 4240   | 1      | 1     | 2   |        |
| 4241   | 1      | 0     | 2   |        |
| 4247   | 1      | 1     | 2   |        |
| 4250   | 1      | 2     | 2   |        |
| 4251   | 2      | 0     | 2   |        |
| 4253   | 4      | 2     | 1   | 2      |
| 4254   | 1      | 5     | 2   |        |
| 4258   | 5      | 5     | 1   | 2      |
| 4260   | 1      | 0     | 2   |        |
| 4263   | 6      | 50    | 2   |        |
| 4265   | 1      | 1     | 2   |        |
| 4266   | 1      | 0     | 2   |        |
| 4267   | 1      | 0     | 2   |        |
| 4270   | 1      | 0     | 2   |        |
| 4273   | 1      | 1     | 2   |        |

| respid | Q40_13 | Q41_1 | Q42 | Q42b_1 |
|--------|--------|-------|-----|--------|
| 4280   | 1      | 0     | 2   |        |
| 4281   | 1      | 0     | 2   |        |
| 4282   | 1      | 10    | 2   |        |
| 4283   |        |       |     |        |
| 4286   | 3      | 0     | 2   |        |
| 4287   | 1      | 0     | 2   |        |
| 4289   | 1      | 0     | 2   |        |
| 4290   | 3      | 0     | 2   |        |
| 4291   | 1      | 5     | 2   |        |
| 4292   | 1      | 10    | 2   |        |
| 4293   | 1      | 0     | 2   |        |
| 4294   | 3      | 6     | 2   |        |
| 4295   |        |       |     |        |
| 4296   | 3      | 0     | 2   |        |
| 4297   | 1      | 4     | 2   |        |
| 4298   | 1      | 0     | 2   |        |
| 4299   | 1      | 100   | 2   |        |
| 4300   | 1      | 0     | 2   |        |
| 4301   |        |       |     |        |
| 4302   | 1      | 0     | 2   |        |
| 4304   | 2      | 3     | 2   |        |
| 4305   | 1      | 0     | 2   |        |
| 4307   | 4      | 10    | 2   |        |
| 4308   | 1      | 5     | 2   |        |
| 4312   |        |       |     |        |
| 4314   | 3      | 5     | 2   |        |
| 4316   | 1      | 0     | 2   |        |
| 4317   | 5      | 2     | 2   |        |
| 4319   | 5      | 1     | 2   |        |
| 4323   | 4      | 5     | 1   | 1      |
| 4337   | 1      | 1     | 2   |        |
| 4341   | 4      | 5     | 2   |        |

| respid | Q40_13 | Q41_1 | Q42 | Q42b_1 |
|--------|--------|-------|-----|--------|
| 4342   | 1      | 5     | 2   |        |
| 4344   | 1      | 12    | 2   |        |
| 4345   | 3      | 0     | 2   |        |
| 4346   | 3      | 2     | 2   |        |
| 4347   | 1      | 0     | 2   |        |
| 4350   |        |       |     |        |
| 4352   | 1      | 0     | 2   |        |
| 4353   |        |       |     |        |
| 4355   | 1      | 2     | 2   |        |
| 4356   | 1      | 10    | 2   |        |
| 4358   |        |       |     |        |
| 4359   | 1      | 0     | 2   |        |
| 4360   | 2      | 5     | 2   |        |
| 4361   | 4      | 1     | 1   | 1      |
| 4363   | 2      | 0     | 2   |        |
| 4364   | 1      | 0     | 2   |        |
| 4365   | 1      | 5     | 1   | 5      |
| 4367   | 1      | 0     | 2   |        |
| 4369   | 2      | 0     | 2   |        |
| 4373   | 3      | 4     | 1   | 2      |
| 4374   | 5      | 3     | 1   | 1      |
| 4375   |        |       |     |        |
| 4378   | 1      | 0     | 1   | 0      |
| 4379   | 2      | 3     | 2   |        |
| 4382   | 1      | 10    | 2   |        |
| 4383   |        |       |     |        |
| 4384   | 3      | 0     | 2   |        |
| 4385   | 1      | 0     | 2   |        |
| 4388   | 2      | 2     | 2   |        |
| 4389   | 1      | 7     | 2   |        |
| 4391   | 1      | 0     | 2   |        |
| 4392   | 1      | 3     | 2   |        |



| respid | Q40_13 | Q41_1 | Q42 | Q42b_1 |
|--------|--------|-------|-----|--------|
| 4393   | 3      | 10    | 2   |        |
| 4395   | 1      | 5     | 2   |        |
| 4397   | 1      | 3     | 2   |        |
| 4398   | 1      | 0     | 2   |        |
| 4399   | 1      | 1     | 2   |        |
| 4400   |        |       |     |        |
| 4401   | 1      | 0     | 2   |        |
| 4402   | 1      | 0     | 2   |        |
| 4404   | 1      | 5     | 1   | 1      |
| 4405   |        |       |     |        |
| 4407   | 1      | 5     | 2   |        |
| 4408   | 4      | 0     | 2   |        |
| 4411   |        |       |     |        |
| 4420   | 2      | 0     | 2   |        |
| 4421   | 1      | 1     | 2   |        |
| 4424   | 5      | 4     | 1   | 3      |
| 4425   | 1      | 1     | 2   |        |
| 4427   | 1      | 0     | 2   |        |
| 4430   | 1      | 1     | 2   |        |
| 4431   | 2      | 2     | 2   |        |
| 4432   | 1      | 0     | 2   |        |
| 4436   | 1      | 0     | 2   |        |
| 4439   | 1      | 6     | 2   |        |
| 4451   | 2      | 5     | 2   |        |
| 4452   | 3      | 5     | 2   |        |
| 4458   | 1      | 0     | 2   |        |
| 4464   | 1      | 0     | 2   |        |
| 4465   | 2      | 0     | 2   |        |
| 4467   | 1      | 0     | 2   |        |
| 4470   | 3      | 90    | 2   |        |
| 4471   | 1      | 2     | 2   |        |
| 4472   | 1      | 12    | 2   |        |

| respid | Q40_13 | Q41_1 | Q42 | Q42b_1 |
|--------|--------|-------|-----|--------|
| 4473   | 2      | 10    | 2   |        |
| 4475   | 1      | 3     | 2   |        |
| 4476   | 1      | 0     | 2   |        |
| 4478   | 1      | 5     | 2   |        |
| 4485   | 1      | 2     | 2   |        |
| 4486   | 1      | 1     | 2   |        |
| 4490   |        |       |     |        |
| 4502   |        |       |     |        |
| 4503   | 4      | 0     | 2   |        |
| 4504   | 1      | 0     | 2   |        |
| 4506   | 3      | 0     | 2   |        |
| 4508   | 1      | 0     | 2   |        |
| 4515   | 2      | 2     | 2   |        |
| 4516   | 3      | 0     | 2   |        |
| 4519   | 1      | 0     | 2   |        |
| 4523   | 2      | 1     | 2   |        |
| 4525   | 1      | 0     | 2   |        |
| 4526   | 1      | 5     | 2   |        |
| 4528   |        |       |     |        |
| 4530   | 1      | 0     | 2   |        |
| 4531   | 2      | 4     | 1   | 1      |
| 4532   | 1      | 0     | 2   |        |
| 4537   | 1      | 1     | 2   |        |
| 4538   | 1      | 0     | 2   |        |
| 4539   | 1      | 0     | 2   |        |
| 4541   | 1      | 12    | 2   |        |
| 4543   |        |       |     |        |
| 4544   | 1      | 1     | 2   |        |
| 4546   | 1      | 0     | 2   |        |
| 4547   | 1      | 4     | 2   |        |
| 4549   |        |       |     |        |
| 4550   | 2      | 0     | 2   |        |

| respid | Q40_13 | Q41_1 | Q42 | Q42b_1 |
|--------|--------|-------|-----|--------|
| 4551   | 1      | 4     | 2   |        |
| 4554   | 1      | 0     | 2   |        |
| 4557   |        |       |     |        |
| 4565   | 1      | 2     | 2   |        |
| 4568   | 1      | 1     | 2   |        |
| 4569   | 2      | 0     | 2   |        |
| 4570   | 1      | 0     | 2   |        |
| 4572   | 1      | 0     | 2   |        |
| 4574   | 1      | 5     | 2   |        |
| 4576   | 2      | 1     | 2   |        |
| 4578   | 1      | 2     | 2   |        |
| 4579   |        |       |     |        |
| 4580   | 4      | 1     | 2   |        |
| 4581   |        |       |     |        |
| 4584   | 1      | 4     | 2   |        |
| 4586   | 2      | 0     | 2   |        |
| 4587   | 3      | 8     | 2   |        |
| 4590   | 1      | 15    | 2   |        |
| 4592   | 1      | 0     | 2   |        |
| 4593   | 1      | 1     | 2   |        |
| 4595   | 1      | 2     | 2   |        |
| 4597   | 1      | 1     | 2   |        |
| 4598   | 3      | 3     | 2   |        |
| 4599   | 1      | 0     | 2   |        |
| 4600   | 3      | 20    | 2   |        |
| 4601   | 2      | 0     | 2   |        |
| 4608   | 1      | 5     | 2   |        |
| 4609   | 1      | 5     | 2   |        |
| 4611   | 2      | 2     | 2   |        |
| 4612   | 2      | 0     | 2   |        |
| 4613   |        |       |     |        |
| 4616   | 1      | 1     | 2   |        |

| respid | Q40_13 | Q41_1 | Q42 | Q42b_1 |
|--------|--------|-------|-----|--------|
| 4617   | 2      | 3     | 2   |        |
| 4620   | 1      | 0     | 2   |        |
| 4621   | 1      | 15    | 2   |        |
| 4622   | 3      | 20    | 2   |        |
| 4624   | 1      | 6     | 2   |        |
| 4625   | 2      | 1     | 2   |        |
| 4627   | 3      | 2     | 2   |        |
| 4628   | 3      | 0     | 2   |        |
| 4629   |        |       |     |        |
| 4630   | 2      | 1     | 1   | 1      |
| 4632   | 1      | 0     | 2   |        |
| 4634   | 2      | 0     | 2   |        |
| 4635   | 3      | 16    | 2   |        |
| 4636   | 1      | 3     | 2   |        |
| 4637   | 2      | 1     | 2   |        |
| 4638   | 3      | 0     | 2   |        |
| 4639   | 2      | 6     | 2   |        |
| 4641   | 2      | 0     | 2   |        |
| 4643   | 1      | 0     | 2   |        |
| 4645   | 2      | 0     | 2   |        |
| 4646   | 2      | 1     | 2   |        |
| 4647   |        |       |     |        |
| 4648   | 1      | 0     | 2   |        |
| 4649   | 1      | 3     | 2   |        |
| 4650   | 2      | 0     | 2   |        |
| 4651   | 1      | 0     | 2   |        |
| 4652   | 1      | 0     | 2   |        |
| 4653   |        |       |     |        |
| 4657   |        |       |     |        |
| 4660   | 5      | 2     | 2   |        |
| 4661   | 1      | 0     | 2   |        |
| 4662   | 2      | 8     | 2   |        |

| respid | Q40_13 | Q41_1 | Q42 | Q42b_1 |
|--------|--------|-------|-----|--------|
| 4667   | 2      | 3     | 2   |        |
| 4669   | 1      | 0     | 2   |        |
| 4671   |        |       |     |        |
| 4672   | 1      | 3     | 2   |        |
| 4673   | 1      | 0     | 2   |        |
| 4677   |        |       |     |        |
| 4679   | 4      | 0     | 2   |        |
| 4683   | 1      | 3     | 2   |        |
| 4684   | 1      | 0     | 2   |        |
| 4685   | 1      | 0     | 2   |        |
| 4686   | 1      | 1     | 2   |        |
| 4687   | 1      | 2     | 2   |        |
| 4688   | 1      | 0     | 2   |        |
| 4691   | 1      | 3     | 2   |        |
| 4692   | 1      | 0     | 2   |        |
| 4694   | 1      | 3     | 2   |        |
| 4695   | 2      | 0     | 2   |        |
| 4696   | 2      | 16    | 2   |        |
| 4697   |        |       |     |        |
| 4698   | 4      | 2     | 1   | 2      |
| 4699   | 1      | 2     | 2   |        |
| 4701   |        |       |     |        |
| 4703   | 3      | 0     | 2   |        |
| 4704   | 4      | 12    | 1   | 12     |
| 4705   | 1      | 0     | 2   |        |
| 4706   | 1      | 0     | 2   |        |
| 4707   | 1      | 0     | 2   |        |
| 4708   | 1      | 4     | 2   |        |
| 4710   | 1      | 0     | 2   |        |
| 4711   | 3      | 2     | 1   | 2      |
| 4715   |        |       |     |        |
| 4716   | 1      | 6     | 2   |        |

| respid | Q40_13 | Q41_1 | Q42 | Q42b_1 |
|--------|--------|-------|-----|--------|
| 4717   | 1      | 6     | 1   | 3      |
| 4718   | 2      | 1     | 2   |        |
| 4722   | 3      | 10    | 1   | 2      |
| 4727   | 2      | 15    | 2   |        |
| 4728   | 5      | 6     | 1   | 6      |
| 4729   | 1      | 0     | 2   |        |
| 4732   | 1      | 0     | 2   |        |
| 4733   | 1      | 5     | 2   |        |
| 4734   | 1      | 0     | 2   |        |
| 4735   | 1      | 5     | 2   |        |
| 4737   | 1      | 0     | 2   |        |
| 4738   | 1      | 10    | 2   |        |
| 4740   | 1      | 5     | 2   |        |
| 4741   | 2      | 0     | 2   |        |
| 4743   | 1      | 0     | 2   |        |
| 4746   | 1      | 6     | 1   | 2      |
| 4750   | 1      | 12    | 2   |        |
| 4752   | 1      | 8     | 2   |        |
| 4753   | 2      | 4     | 2   |        |
| 4754   | 5      | 1     | 2   |        |
| 4755   | 2      | 5     | 2   |        |
| 4758   | 3      | 0     | 2   |        |
| 4766   |        |       |     |        |
| 4767   | 1      | 1     | 1   | 1      |
| 4768   | 3      | 4     | 1   | 4      |
| 4769   | 4      | 2     | 1   | 2      |
| 4771   | 4      | 0     | 2   |        |
| 4772   | 3      | 1     | 1   | 1      |
| 4773   | 2      | 0     | 2   |        |
| 4774   | 1      | 2     | 2   |        |
| 4776   | 4      | 4     | 2   |        |
| 4777   | 1      | 0     | 2   |        |

| respid | Q40_13 | Q41_1 | Q42 | Q42b_1 |
|--------|--------|-------|-----|--------|
| 4779   |        |       |     |        |
| 4780   | 2      | 0     | 2   |        |
| 4781   | 1      | 0     | 2   |        |
| 4783   | 5      | 0     | 2   |        |
| 4784   | 1      | 0     | 2   |        |
| 4785   | 1      | 0     | 2   |        |
| 4788   |        |       |     |        |
| 4789   | 1      | 10    | 2   |        |
| 4790   | 1      | 0     | 2   |        |
| 4791   |        |       |     |        |
| 4794   |        |       |     |        |
| 4795   | 1      | 10    | 2   |        |
| 4797   | 1      | 0     | 2   |        |
| 4802   | 4      | 2     | 2   |        |
| 4803   | 3      | 0     | 2   |        |
| 4804   |        |       |     |        |
| 4805   | 1      | 5     | 2   |        |
| 4807   |        |       |     |        |
| 4808   | 1      | 0     | 2   |        |
| 4809   | 5      | 2     | 1   | 1      |
| 4811   | 1      | 0     | 2   |        |
| 4817   |        |       |     |        |
| 4819   | 1      | 3     | 2   |        |
| 4820   |        |       |     |        |
| 4821   | 1      | 2     | 2   |        |
| 4822   | 1      | 1     | 1   | 1      |
| 4823   | 2      | 2     | 2   |        |
| 4825   | 2      | 0     | 2   |        |
| 4826   |        |       |     |        |
| 4830   | 1      | 2     | 2   |        |
| 4832   |        |       |     |        |
| 4838   | 2      | 3     | 1   | 2      |

| respid | Q40_13 | Q41_1 | Q42 | Q42b_1 |
|--------|--------|-------|-----|--------|
| 4840   | 2      | 1     | 1   | 1      |
| 4841   |        |       |     |        |
| 4843   | 1      | 0     | 2   |        |
| 4845   | 3      | 0     | 2   |        |
| 4846   | 3      | 0     | 2   |        |
| 4848   | 1      | 0     | 2   |        |
| 4853   | 1      | 1     | 2   |        |
| 4854   | 1      | 1     | 2   |        |
| 4859   | 2      | 0     | 2   |        |
| 4861   |        |       |     |        |
| 4864   | 2      | 0     | 2   |        |
| 4867   |        |       |     |        |
| 4870   | 1      | 0     | 2   |        |
| 4872   | 2      | 20    | 2   |        |
| 4873   | 1      | 8     | 2   |        |
| 4874   | 2      | 3     | 2   |        |
| 4878   | 1      | 0     | 2   |        |
| 4880   | 1      | 2     | 2   |        |
| 4881   | 1      | 15    | 2   |        |
| 4882   | 3      | 10    | 1   | 2      |
| 4883   | 1      | 5     | 2   |        |
| 4885   | 1      | 0     | 2   |        |
| 4889   |        |       |     |        |
| 4890   |        |       |     |        |
| 4891   | 2      | 12    | 2   |        |
| 4894   | 1      | 1     | 2   |        |
| 4895   | 3      | 4     | 1   | 4      |
| 4896   | 1      | 0     | 2   |        |
| 4897   | 1      | 0     | 2   |        |
| 4898   | 2      | 30    | 2   |        |
| 4899   |        |       |     |        |
| 4900   | 3      | 0     | 2   |        |



| respid | Q40_13 | Q41_1 | Q42 | Q42b_1 |
|--------|--------|-------|-----|--------|
| 4901   | 1      | 0     | 2   |        |
| 4903   | 2      | 0     | 2   |        |
| 4904   | 1      | 0     | 2   |        |
| 4908   | 1      | 0     | 2   |        |
| 4909   | 3      | 1     | 2   |        |
| 4913   | 1      | 0     | 2   |        |
| 4917   | 1      | 0     | 2   |        |
| 4918   | 2      | 0     | 2   |        |
| 4920   |        |       |     |        |
| 4921   | 1      | 10    | 2   |        |
| 4925   | 6      | 0     | 2   |        |
| 4926   | 1      | 2     | 2   |        |
| 4927   | 2      | 3     | 2   |        |
| 4928   | 1      | 0     | 2   |        |
| 4929   | 2      | 0     | 2   |        |
| 4930   | 4      | 10    | 1   | 0      |
| 4931   | 1      | 0     | 2   |        |
| 4932   | 3      | 5     | 1   | 3      |
| 4933   | 1      | 1     | 2   |        |
| 4934   | 1      | 3     | 2   |        |
| 5934   | 1      | 0     | 2   |        |
| 5935   | 1      | 3     | 1   | 1      |
| 5936   | 1      | 6     | 2   |        |
| 5938   |        |       |     |        |
| 5939   | 1      | 0     | 2   |        |
| 5940   | 1      | 3     | 1   | 1      |
| 5942   | 2      | 0     | 2   |        |
| 5944   | 1      | 12    | 1   | 3      |
| 5951   | 4      | 2     | 1   | 1      |
| 5952   | 1      | 12    | 2   |        |
| 5954   | 1      | 0     | 2   |        |
| 5956   | 1      | 0     | 2   |        |

| respid | Q40_13 | Q41_1 | Q42 | Q42b_1 |
|--------|--------|-------|-----|--------|
| 5957   | 1      | 4     | 2   |        |
| 5958   | 2      | 1     | 1   | 0      |
| 5959   | 2      | 3     | 2   |        |
| 5960   | 1      | 0     | 2   |        |
| 5963   | 1      | 0     | 2   |        |
| 5966   | 2      | 1     | 2   |        |
| 5968   | 1      | 2     | 2   |        |
| 5974   | 1      | 0     | 2   |        |
| 5975   | 1      | 1     | 1   | 1      |
| 5976   | 3      | 1     | 2   |        |
| 5977   | 1      | 0     | 2   |        |
| 5978   | 2      | 1     | 2   |        |
| 5979   | 2      | 0     | 2   |        |
| 5983   | 1      | 0     | 2   |        |
| 5984   | 2      | 20    | 2   |        |
| 5990   | 1      | 0     | 2   |        |
| 5991   | 1      | 0     | 2   |        |
| 5992   |        |       |     |        |
| 5993   | 1      | 0     | 2   |        |
| 5994   | 1      | 0     | 2   |        |
| 5996   | 1      | 0     | 2   |        |
| 6001   | 3      | 4     | 1   | 4      |
| 6003   | 1      | 0     | 2   |        |
| 6004   | 2      | 0     | 2   |        |
| 6005   | 3      | 1     | 1   | 0      |
| 6006   | 1      | 0     | 2   |        |
| 6008   | 1      | 5     | 2   |        |
| 6009   | 1      | 3     | 2   |        |
| 6014   |        |       |     |        |
| 6016   | 2      | 12    | 2   |        |
| 6017   | 1      | 0     | 2   |        |
| 6018   | 2      | 0     | 2   |        |

| respid | Q40_13 | Q41_1 | Q42 | Q42b_1 |
|--------|--------|-------|-----|--------|
| 6020   | 2      | 2     | 2   |        |
| 6021   |        |       |     |        |
| 6024   | 1      | 0     | 2   |        |
| 6025   | 1      | 5     | 2   |        |
| 6026   | 1      | 0     | 2   |        |
| 6032   | 3      | 3     | 2   |        |
| 6035   | 1      | 5     | 2   |        |
| 6038   | 1      | 0     | 2   |        |
| 6043   | 2      | 0     | 2   |        |
| 6044   | 1      | 0     | 1   | 0      |
| 6046   | 2      | 0     | 2   |        |
| 6047   | 1      | 2     | 2   |        |
| 6048   | 2      | 2     | 2   |        |
| 6050   | 2      | 12    | 1   | 1      |
| 6051   | 2      | 0     | 2   |        |
| 6053   | 1      | 0     | 2   |        |
| 6054   | 1      | 0     | 2   |        |
| 6056   | 1      | 3     | 2   |        |
| 6058   | 1      | 0     | 2   |        |
| 6060   | 1      | 0     | 2   |        |
| 6061   | 1      | 0     | 2   |        |
| 6062   | 2      | 0     | 2   |        |
| 6067   | 1      | 2     | 2   |        |
| 6070   | 2      | 0     | 2   |        |
| 6074   | 3      | 0     | 2   |        |
| 6076   | 1      | 0     | 2   |        |
| 6078   |        |       |     |        |
| 6081   | 1      | 0     | 2   |        |
| 6085   | 1      | 1     | 2   |        |
| 6088   |        |       |     |        |
| 6092   | 1      | 0     | 2   |        |
| 6095   | 1      | 0     | 2   |        |

| respid | Q40_13 | Q41_1 | Q42 | Q42b_1 |
|--------|--------|-------|-----|--------|
| 6098   | 1      | 1     | 2   |        |
| 6101   |        |       |     |        |
| 6102   | 2      | 2     | 2   |        |
| 6105   | 1      | 0     | 2   |        |
| 6106   | 1      | 1     | 2   |        |
| 6107   | 1      | 1     | 1   | 1      |
| 6111   | 1      | 5     | 2   |        |
| 6112   | 1      | 4     | 2   |        |
| 6113   | 3      | 3     | 1   | 1      |
| 6115   | 1      | 0     | 2   |        |
| 6116   |        |       |     |        |
| 6117   | 3      | 8     | 1   | 4      |
| 6124   | 3      | 3     | 2   |        |
| 6125   | 1      | 3     | 2   |        |
| 6128   |        |       |     |        |
| 6133   | 2      | 0     | 2   |        |
| 6134   | 2      | 1     | 2   |        |
| 6135   | 1      | 1     | 1   | 1      |
| 6138   | 2      | 0     | 2   |        |
| 6140   | 1      | 0     | 2   |        |
| 6143   | 1      | 0     | 2   |        |
| 6147   | 4      | 0     | 2   |        |
| 6154   | 2      | 1     | 2   |        |
| 6162   |        |       |     |        |
| 6165   | 1      | 12    | 1   | 2      |
| 6166   | 2      | 5     | 2   |        |
| 6173   | 4      | 0     | 1   | 0      |
| 6180   | 3      | 3     | 2   |        |
| 6184   | 4      | 5     | 2   |        |
| 6185   | 1      | 0     | 2   |        |
| 6186   | 1      | 0     | 2   |        |
| 6188   | 1      | 2     | 2   |        |

| respid | Q40_13 | Q41_1 | Q42 | Q42b_1 |
|--------|--------|-------|-----|--------|
| 6192   | 4      | 2     | 2   |        |
| 6194   |        |       |     |        |
| 6195   | 1      | 0     | 2   |        |
| 6196   | 2      | 0     | 2   |        |
| 6199   | 1      | 0     | 2   |        |
| 6200   |        |       |     |        |
| 6201   | 1      | 0     | 2   |        |
| 6202   | 1      | 0     | 2   |        |
| 6203   | 1      | 0     | 2   |        |
| 6205   | 1      | 0     | 2   |        |
| 6210   | 2      | 1     | 1   | 1      |
| 6212   | 1      | 1     | 2   |        |
| 6216   | 3      | 10    | 2   |        |
| 6218   | 2      | 6     | 2   |        |
| 6221   | 1      | 0     | 2   |        |
| 6224   | 1      | 0     | 2   |        |
| 6225   | 1      | 0     | 2   |        |
| 6227   | 1      | 0     | 2   |        |
| 6230   |        |       |     |        |
| 6231   | 1      | 0     | 2   |        |
| 6233   | 3      | 0     | 2   |        |
| 6234   | 1      | 1     | 2   |        |
| 6235   |        |       |     |        |
| 6237   |        |       |     |        |
| 6240   |        |       |     |        |
| 6248   | 2      | 0     | 2   |        |
| 6249   | 1      | 0     | 2   |        |
| 6252   | 2      | 0     | 2   |        |
| 6254   | 1      | 0     | 2   |        |
| 6269   | 2      | 2     | 2   |        |
| 6304   |        |       |     |        |
| 6334   | 3      | 10    | 1   | 6      |

| respid | Q40_13 | Q41_1 | Q42 | Q42b_1 |
|--------|--------|-------|-----|--------|
| 6341   | 5      | 0     | 2   |        |
| 6350   | 2      | 2     | 1   | 1      |
| 6370   | 1      | 0     | 2   |        |
| 6384   | 1      | 0     | 2   |        |
| 6400   | 1      | 0     | 2   |        |
| 6418   |        |       |     |        |
| 6467   | 1      | 2     | 2   |        |
| 6469   | 1      | 0     | 2   |        |
| 6474   | 1      | 0     | 2   |        |
| 6475   |        |       |     |        |
| 6476   | 4      | 0     | 2   |        |
| 6477   | 1      | 0     | 2   |        |
| 6480   | 1      | 0     | 2   |        |
| 6481   | 3      | 2     | 1   | 1      |
| 6485   | 1      | 7     | 2   |        |
| 6488   | 3      | 2     | 1   | 2      |
| 6495   | 1      | 0     | 2   |        |
| 6499   | 1      | 0     | 2   |        |
| 6500   | 2      | 0     | 2   |        |
| 6504   | 1      | 0     | 2   |        |
| 6507   | 4      | 0     | 2   |        |
| 6512   | 1      | 12    | 2   |        |
| 6525   | 3      | 4     | 2   |        |
| 6532   | 2      | 2     | 2   |        |
| 6535   | 1      | 0     | 2   |        |
| 6546   | 1      | 0     | 2   |        |
| 6551   | 5      | 4     | 2   |        |
| 6556   | 2      | 0     | 1   | 0      |
| 6566   | 2      | 0     | 1   | 0      |
| 6569   |        |       |     |        |
| 6574   | 1      | 0     | 2   |        |
| 6576   | 2      | 2     | 2   |        |

| respid | Q40_13 | Q41_1 | Q42 | Q42b_1 |
|--------|--------|-------|-----|--------|
| 6580   |        |       |     |        |
| 6584   |        |       |     |        |
| 6585   | 3      | 0     | 2   |        |
| 6589   | 1      | 0     | 2   |        |
| 6590   | 1      | 0     | 2   |        |
| 6598   | 1      | 0     | 2   |        |
| 6603   | 2      | 1     | 1   | 1      |
| 6618   | 2      | 3     | 2   |        |
| 6630   | 5      | 0     | 1   | 0      |
| 6636   | 4      | 2     | 2   |        |
| 6649   |        |       |     |        |
| 6675   | 1      | 12    | 2   |        |
| 6678   | 1      | 0     | 2   |        |
| 6681   | 1      | 0     | 2   |        |
| 6684   | 2      | 2     | 1   | 2      |
| 6688   |        |       |     |        |
| 6691   | 1      | 1     | 2   |        |
| 6694   | 3      | 0     | 2   |        |
| 6696   | 1      | 0     | 2   |        |
| 6720   | 3      | 12    | 1   | 12     |
| 6722   | 5      | 4     | 1   | 2      |
| 6724   | 1      | 1     | 2   |        |
| 6725   | 1      | 0     | 2   |        |
| 6727   | 1      | 0     | 2   |        |
| 6734   | 3      | 0     | 2   |        |
| 6739   | 5      | 2     | 2   |        |
| 6743   | 4      | 6     | 1   | 6      |
| 6749   | 1      | 0     | 2   |        |
| 6756   | 1      | 8     | 2   |        |
| 6764   | 1      | 2     | 2   |        |
| 6765   | 1      | 0     | 2   |        |
| 6768   | 1      | 0     | 2   |        |

| respid | Q40_13 | Q41_1 | Q42 | Q42b_1 |
|--------|--------|-------|-----|--------|
| 6773   | 1      | 1     | 2   |        |
| 6775   | 1      | 1     | 2   |        |
| 6777   | 1      | 0     | 2   |        |
| 6779   | 2      | 0     | 2   |        |
| 6790   | 1      | 0     | 2   |        |
| 6797   |        |       |     |        |
| 6798   | 2      | 10    | 2   |        |
| 6808   |        |       |     |        |
| 6810   | 2      | 2     | 2   |        |
| 6811   | 3      | 0     | 2   |        |
| 6812   | 1      | 0     | 2   |        |
| 6814   | 1      | 6     | 2   |        |
| 6819   | 2      | 0     | 2   |        |
| 6820   | 2      | 0     | 2   |        |
| 6832   | 1      | 0     | 2   |        |
| 6854   | 1      | 0     | 2   |        |
| 6855   |        |       |     |        |
| 6857   | 1      | 0     | 2   |        |
| 6858   | 1      | 1     | 2   |        |
| 6859   | 1      | 0     | 2   |        |
| 6860   | 1      | 3     | 2   |        |
| 6862   | 1      | 0     | 2   |        |
| 6879   |        |       |     |        |
| 6893   | 1      | 0     | 2   |        |
| 6898   | 1      | 1     | 1   | 1      |
| 6902   | 2      | 3     | 1   | 1      |
| 6903   | 4      | 20    | 1   | 15     |
| 6907   | 4      | 9     | 1   | 6      |
| 6908   |        |       |     |        |
| 6912   |        |       |     |        |
| 6915   | 2      | 3     | 2   |        |
| 6916   | 1      | 2     | 2   |        |



| respid | Q40_13 | Q41_1 | Q42 | Q42b_1 |
|--------|--------|-------|-----|--------|
| 6917   | 4      | 4     | 2   |        |
| 6923   | 1      | 5     | 2   |        |
| 6934   | 1      | 3     | 2   |        |
| 6937   |        |       |     |        |
| 6945   | 1      | 0     | 2   |        |
| 6954   | 1      | 3     | 2   |        |
| 6956   | 2      | 3     | 2   |        |
| 6958   | 1      | 0     | 2   |        |
| 6961   | 1      | 2     | 2   |        |
| 6963   | 2      | 4     | 2   |        |
| 6964   | 1      | 0     | 2   |        |
| 6976   |        |       |     |        |
| 6977   | 1      | 0     | 2   |        |
| 7000   | 3      | 6     | 1   | 3      |
| 7001   | 1      | 1     | 2   |        |
| 7005   | 1      | 0     | 2   |        |
| 7006   | 1      | 0     | 2   |        |
| 7008   | 6      | 0     | 2   |        |
| 7009   | 1      | 0     | 2   |        |
| 7019   | 2      | 0     | 2   |        |
| 7021   | 1      | 0     | 2   |        |
| 7026   | 3      | 1     | 2   |        |
| 7030   | 2      | 2     | 1   | 1      |
| 7034   |        |       |     |        |
| 7039   | 1      | 0     | 2   |        |
| 7041   | 1      | 0     | 2   |        |
| 7047   | 1      | 0     | 2   |        |
| 7051   | 1      | 0     | 2   |        |
| 7052   | 2      | 1     | 2   |        |
| 7059   | 1      | 1     | 2   |        |
| 7062   | 2      | 0     | 2   |        |
| 7065   | 1      | 10    | 2   |        |

| respid | Q40_13 | Q41_1 | Q42 | Q42b_1 |
|--------|--------|-------|-----|--------|
| 7066   | 2      | 0     | 2   |        |
| 7069   | 1      | 0     | 2   |        |
| 7070   |        |       |     |        |
| 7073   |        |       |     |        |
| 7078   | 1      | 0     | 2   |        |
| 7083   | 2      | 4     | 1   | 2      |
| 7084   | 6      | 0     | 2   |        |
| 7085   | 1      | 1     | 2   |        |
| 7088   | 3      | 10    | 1   | 6      |
| 7090   | 1      | 5     | 1   | 2      |
| 7095   | 2      | 2     | 2   |        |
| 7100   |        |       |     |        |
| 7102   | 2      | 4     | 2   |        |
| 7103   | 1      | 0     | 2   |        |
| 7108   | 1      | 0     | 2   |        |
| 7109   | 1      | 0     | 2   |        |
| 7110   |        |       |     |        |
| 7112   |        |       |     |        |
| 7114   | 1      | 0     | 2   |        |
| 7116   | 1      | 0     | 2   |        |
| 7117   | 2      | 12    | 1   | 2      |
| 7118   | 4      | 2     | 1   | 2      |
| 7120   | 5      | 3     | 1   | 2      |
| 7124   | 1      | 0     | 2   |        |
| 7130   | 2      | 0     | 2   |        |
| 7135   | 1      | 0     | 2   |        |
| 7137   | 4      | 5     | 1   | 3      |
| 7140   | 1      | 0     | 2   |        |
| 7141   | 1      | 0     | 2   |        |
| 7148   | 1      | 0     | 2   |        |
| 7152   |        |       |     |        |
| 7154   | 2      | 6     | 2   |        |

| respid | Q40_13 | Q41_1 | Q42 | Q42b_1 |
|--------|--------|-------|-----|--------|
| 7156   | 1      | 2     | 2   |        |
| 7158   | 1      | 2     | 2   |        |
| 7159   |        |       |     |        |
| 7161   |        |       |     |        |
| 7164   | 1      | 1     | 2   |        |
| 7166   |        |       |     |        |
| 7167   |        |       |     |        |
| 7168   |        |       |     |        |
| 7170   |        |       |     |        |
| 7171   | 1      | 0     | 2   |        |
| 7172   | 1      | 0     | 2   |        |
| 7173   | 2      | 1     | 2   |        |
| 7175   | 1      | 1     | 2   |        |
| 7176   | 2      | 0     | 2   |        |
| 7180   | 1      | 0     | 2   |        |
| 7183   | 1      | 0     | 2   |        |
| 7189   | 1      | 1     | 2   |        |
| 7193   | 1      | 1     | 2   |        |
| 7194   | 2      | 1     | 1   | 1      |
| 7195   | 1      | 0     | 2   |        |
| 7200   | 2      | 2     | 1   | 2      |
| 7201   | 2      | 0     | 2   |        |
| 7205   | 4      | 3     | 2   |        |
| 7207   | 1      | 0     | 2   |        |
| 7208   |        |       |     |        |
| 7210   | 3      | 0     | 2   |        |
| 7211   | 1      | 0     | 2   |        |
| 7217   | 2      | 2     | 1   | 2      |
| 7218   | 1      | 1     | 2   |        |
| 7220   |        |       |     |        |
| 7225   | 1      | 0     | 2   |        |
| 7228   | 1      | 0     | 2   |        |

| respid | Q40_13 | Q41_1 | Q42 | Q42b_1 |
|--------|--------|-------|-----|--------|
| 7230   | 1      | 0     | 2   |        |
| 7233   | 1      | 4     | 2   |        |
| 7234   | 1      | 0     | 2   |        |
| 7235   |        |       |     |        |
| 7236   |        |       |     |        |
| 7241   | 1      | 2     | 2   |        |
| 7251   | 1      | 0     | 2   |        |
| 7253   | 1      | 0     | 2   |        |
| 7259   | 1      | 3     | 2   |        |
| 7260   | 2      | 1     | 2   |        |
| 7261   | 2      | 0     | 2   |        |
| 7263   | 1      | 0     | 2   |        |
| 7265   |        |       |     |        |
| 7268   | 1      | 0     | 2   |        |
| 7269   |        |       |     |        |
| 7271   | 3      | 2     | 1   | 2      |
| 7276   | 5      | 1     | 1   | 1      |
| 7280   | 1      | 0     | 2   |        |
| 7283   | 1      | 0     | 2   |        |
| 7284   | 1      | 2     | 1   | 1      |
| 7286   | 1      | 1     | 2   |        |
| 7287   |        |       |     |        |
| 7288   | 2      | 0     | 2   |        |
| 7294   | 2      | 0     | 2   |        |
| 7295   | 1      | 0     | 2   |        |
| 7296   | 3      | 0     | 2   |        |
| 7297   | 2      | 0     | 2   |        |
| 7299   | 1      | 1     | 2   |        |
| 7300   | 2      | 1     | 1   | 0      |
| 7301   | 1      | 0     | 2   |        |
| 7302   |        |       |     |        |
| 7306   | 1      | 2     | 2   |        |

| respid | Q40_13 | Q41_1 | Q42 | Q42b_1 |
|--------|--------|-------|-----|--------|
| 7313   | 6      | 4     | 1   | 1      |
| 7315   | 2      | 1     | 2   |        |
| 7317   | 2      | 0     | 2   |        |
| 7321   | 2      | 0     | 2   |        |
| 7322   | 1      | 3     | 2   |        |
| 7323   | 1      | 3     | 2   |        |
| 7333   | 3      | 0     | 2   |        |
| 7335   | 2      | 0     | 2   |        |
| 7336   | 1      | 0     | 2   |        |
| 7337   | 2      | 0     | 2   |        |
| 7338   | 1      | 0     | 2   |        |
| 7340   | 1      | 0     | 2   |        |
| 7341   | 3      | 2     | 2   |        |
| 7342   | 1      | 0     | 2   |        |
| 7344   | 3      | 0     | 2   |        |
| 7346   | 1      | 1     | 2   |        |
| 7347   | 1      | 0     | 2   |        |
| 7349   | 3      | 4     | 1   | 2      |
| 7352   | 2      | 0     | 2   |        |
| 7353   | 1      | 0     | 2   |        |
| 7355   | 1      | 10    | 2   |        |
| 7356   |        |       |     |        |
| 7360   | 6      | 6     | 1   | 3      |
| 7371   | 2      | 2     | 2   |        |
| 7376   | 3      | 1     | 1   | 1      |
| 7379   | 2      | 0     | 2   |        |
| 7381   | 1      | 0     | 2   |        |
| 7386   | 2      | 1     | 1   | 1      |
| 7389   | 1      | 2     | 2   |        |
| 7390   | 3      | 10    | 1   | 3      |
| 7393   | 1      | 0     | 2   |        |
| 7394   | 1      | 0     | 2   |        |

| respid | Q40_13 | Q41_1 | Q42 | Q42b_1 |
|--------|--------|-------|-----|--------|
| 7396   | 3      | 3     | 2   |        |
| 7400   | 4      | 2     | 2   |        |
| 7401   | 1      | 2     | 2   |        |
| 7403   | 1      | 0     | 2   |        |
| 7406   | 2      | 1     | 2   |        |
| 7409   | 1      | 1     | 1   | 1      |
| 7410   | 4      | 4     | 1   | 1      |
| 7412   | 4      | 1     | 2   |        |
| 7414   | 1      | 0     | 2   |        |
| 7415   | 3      | 0     | 2   |        |
| 7417   | 4      | 2     | 1   | 1      |
| 7421   | 3      | 2     | 1   | 1      |
| 7425   | 2      | 1     | 2   |        |
| 7430   | 3      | 0     | 2   |        |
| 7432   | 1      | 0     | 2   |        |
| 7433   | 2      | 6     | 1   | 2      |
| 7442   | 1      | 0     | 2   |        |
| 7445   | 1      | 0     | 2   |        |
| 7446   | 1      | 20    | 2   |        |
| 7449   |        |       |     |        |
| 7450   |        |       |     |        |
| 7451   | 1      | 0     | 2   |        |
| 7459   | 1      | 5     | 2   |        |
| 7462   | 1      | 0     | 2   |        |
| 7463   | 1      | 1     | 2   |        |
| 7469   |        |       |     |        |
| 7482   | 1      | 0     | 2   |        |
| 7484   | 2      | 3     | 2   |        |
| 7486   | 2      | 0     | 2   |        |
| 7496   | 1      | 0     | 2   |        |
| 7502   | 2      | 0     | 2   |        |
| 7504   | 3      | 2     | 2   |        |

| respid | Q40_13 | Q41_1 | Q42 | Q42b_1 |
|--------|--------|-------|-----|--------|
| 7509   | 6      | 5     | 1   | 2      |
| 7513   | 3      | 0     | 2   |        |
| 7514   |        |       |     |        |
| 7520   | 1      | 3     | 2   |        |
| 7523   |        |       |     |        |
| 7526   | 4      | 1     | 2   |        |
| 7529   | 3      | 5     | 2   |        |
| 7534   |        |       |     |        |
| 7536   | 3      | 2     | 2   |        |
| 7540   | 1      | 0     | 2   |        |
| 7541   | 2      | 0     | 2   |        |
| 7542   |        |       |     |        |
| 7555   | 1      | 0     | 2   |        |
| 7566   | 2      | 5     | 1   | 3      |
| 7568   | 1      | 3     | 2   |        |
| 7570   | 3      | 3     | 1   | 2      |
| 7572   | 3      | 1     | 2   |        |
| 7573   | 3      | 6     | 1   | 3      |
| 7576   | 1      | 0     | 2   |        |
| 7577   | 2      | 0     | 2   |        |
| 7583   | 1      | 1     | 2   |        |
| 7584   | 1      | 0     | 2   |        |
| 7585   | 6      | 5     | 1   | 3      |
| 7586   | 2      | 0     | 2   |        |
| 7587   | 1      | 0     | 2   |        |
| 7588   | 1      | 0     | 2   |        |
| 7596   | 1      | 4     | 2   |        |
| 7599   | 1      | 1     | 2   |        |
| 7600   | 2      | 6     | 1   | 5      |
| 7602   | 1      | 12    | 2   |        |
| 7613   | 1      | 0     | 2   |        |
| 7620   | 1      | 0     | 2   |        |

| respid | Q40_13 | Q41_1 | Q42 | Q42b_1 |
|--------|--------|-------|-----|--------|
| 7623   | 1      | 0     | 2   |        |
| 7635   | 1      | 0     | 2   |        |
| 7636   | 2      | 0     | 2   |        |
| 7643   | 2      | 2     | 1   | 1      |
| 7645   | 4      | 0     | 2   |        |
| 7649   | 3      | 7     | 1   | 7      |
| 7651   | 1      | 0     | 2   |        |
| 7652   | 4      | 11    | 1   | 2      |
| 7655   | 2      | 1     | 2   |        |
| 7657   | 1      | 0     | 2   |        |
| 7675   | 1      | 0     | 2   |        |
| 7676   | 3      | 3     | 2   |        |
| 7684   | 2      | 2     | 2   |        |
| 7693   | 2      | 3     | 2   |        |
| 7694   | 4      | 2     | 1   | 1      |
| 7695   | 2      | 0     | 2   |        |
| 7696   | 2      | 1     | 1   | 1      |
| 7698   | 1      | 1     | 2   |        |
| 7700   | 1      | 0     | 2   |        |
| 7701   | 1      | 0     | 2   |        |
| 7704   | 1      | 15    | 2   |        |
| 7709   | 1      | 1     | 2   |        |
| 7713   | 1      | 2     | 2   |        |
| 7714   | 1      | 0     | 2   |        |
| 7718   | 5      | 30    | 1   | 12     |
| 7720   | 1      | 3     | 2   |        |
| 7721   | 2      | 0     | 2   |        |
| 7722   | 1      | 2     | 2   |        |
| 7724   | 2      | 2     | 2   |        |
| 7728   |        |       |     |        |
| 7731   | 2      | 0     | 2   |        |
| 7735   | 1      | 0     | 2   |        |



| respid | Q40_13 | Q41_1 | Q42 | Q42b_1 |
|--------|--------|-------|-----|--------|
| 7737   | 1      | 0     | 2   |        |
| 7741   | 3      | 1     | 2   |        |
| 7746   | 1      | 6     | 2   |        |
| 7747   | 2      | 2     | 2   |        |
| 7748   | 1      | 0     | 2   |        |
| 7750   | 1      | 0     | 2   |        |
| 7754   | 1      | 0     | 2   |        |
| 7755   | 1      | 12    | 2   |        |
| 7762   |        |       |     |        |
| 7764   | 1      | 1     | 1   | 1      |
| 7766   |        |       |     |        |
| 7768   | 2      | 0     | 2   |        |
| 7770   | 2      | 2     | 1   | 1      |
| 7771   | 1      | 0     | 2   |        |
| 7777   | 1      | 0     | 2   |        |
| 7778   |        |       |     |        |
| 7783   | 4      | 4     | 1   | 3      |
| 7789   | 2      | 2     | 2   |        |
| 7790   | 1      | 3     | 2   |        |
| 7795   | 2      | 1     | 2   |        |
| 7807   | 1      | 0     | 2   |        |
| 7808   | 3      | 1     | 2   |        |
| 7818   | 2      | 3     | 2   |        |
| 7820   |        |       |     |        |
| 7831   | 1      | 1     | 2   |        |
| 7832   | 2      | 0     | 2   |        |
| 7837   | 1      | 0     | 2   |        |
| 7841   | 2      | 1     | 2   |        |
| 7845   | 3      | 2     | 1   | 1      |
| 7853   | 1      | 1     | 2   |        |
| 7854   | 1      | 0     | 2   |        |
| 7862   | 4      | 0     | 2   |        |

| respid | Q40_13 | Q41_1 | Q42 | Q42b_1 |
|--------|--------|-------|-----|--------|
| 7871   | 2      | 0     | 2   |        |
| 7875   | 2      | 0     | 2   |        |
| 7880   | 2      | 12    | 1   | 3      |
| 7881   | 1      | 2     | 2   |        |
| 7883   | 2      | 1     | 2   |        |
| 7896   | 1      | 5     | 2   |        |
| 7905   | 1      | 0     | 2   |        |
| 7919   | 2      | 0     | 2   |        |
| 7928   | 4      | 5     | 1   | 5      |
| 7929   | 1      | 0     | 2   |        |
| 7938   | 1      | 1     | 2   |        |
| 7940   | 1      | 3     | 2   |        |
| 7941   | 1      | 2     | 2   |        |
| 7952   |        |       |     |        |
| 7962   | 1      | 0     | 2   |        |
| 7968   | 1      | 3     | 2   |        |
| 7972   | 1      | 3     | 2   |        |
| 7983   | 4      | 2     | 2   |        |
| 7990   | 1      | 1     | 2   |        |
| 7993   | 1      | 1     | 2   |        |
| 8005   | 1      | 0     | 2   |        |
| 8008   |        |       |     |        |
| 8012   | 2      | 2     | 1   | 1      |
| 8021   | 1      | 0     | 1   | 0      |
| 8024   | 1      | 2     | 2   |        |
| 8043   | 1      | 0     | 2   |        |
| 8051   | 2      | 10    | 2   |        |
| 8056   | 1      | 0     | 2   |        |
| 8061   | 1      | 0     | 2   |        |
| 8066   |        |       |     |        |
| 8069   | 2      | 2     | 1   | 1      |
| 8071   | 1      | 5     | 2   |        |

| respid | Q40_13 | Q41_1 | Q42 | Q42b_1 |
|--------|--------|-------|-----|--------|
| 8072   | 2      | 0     | 2   |        |
| 8076   | 2      | 0     | 2   |        |
| 8080   | 1      | 3     | 2   |        |
| 8083   | 1      | 1     | 2   |        |
| 8093   | 3      | 3     | 1   | 3      |
| 8095   | 2      | 1     | 2   |        |
| 8099   | 1      | 0     | 2   |        |
| 8100   | 1      | 1     | 2   |        |
| 8103   |        |       |     |        |
| 8104   | 2      | 5     | 2   |        |
| 8115   | 2      | 6     | 2   |        |
| 8121   | 1      | 0     | 2   |        |
| 8128   | 1      | 0     | 2   |        |
| 8130   | 3      | 0     | 2   |        |
| 8131   | 2      | 2     | 1   | 1      |
| 8133   | 2      | 2     | 2   |        |
| 8143   | 1      | 3     | 2   |        |
| 8144   | 1      | 1     | 2   |        |
| 8146   | 1      | 1     | 2   |        |
| 8148   |        |       |     |        |
| 8157   |        |       |     |        |
| 8164   |        |       |     |        |
| 8173   |        |       |     |        |
| 8176   | 1      | 0     | 2   |        |
| 8179   | 3      | 0     | 2   |        |
| 8181   |        |       |     |        |
| 8182   | 3      | 0     | 2   |        |
| 8196   | 1      | 2     | 2   |        |
| 8200   | 2      | 0     | 2   |        |
| 8203   | 1      | 0     | 2   |        |
| 8204   | 2      | 1     | 2   |        |
| 8206   | 1      | 0     | 2   |        |

| respid | Q40_13 | Q41_1 | Q42 | Q42b_1 |
|--------|--------|-------|-----|--------|
| 8208   | 1      | 0     | 2   |        |
| 8212   | 2      | 1     | 2   |        |
| 8222   | 3      | 2     | 2   |        |
| 8223   | 1      | 0     | 2   |        |
| 8225   | 1      | 0     | 2   |        |
| 8226   | 1      | 1     | 2   |        |
| 8228   | 2      | 0     | 2   |        |
| 8229   | 1      | 0     | 2   |        |
| 8239   | 1      | 1     | 2   |        |
| 8246   | 2      | 50    | 1   | 12     |
| 8258   | 3      | 3     | 2   |        |
| 8260   | 2      | 0     | 2   |        |
| 8262   | 2      | 0     | 2   |        |
| 8263   | 2      | 0     | 2   |        |
| 8267   | 3      | 0     | 2   |        |
| 8271   | 4      | 1     | 1   | 1      |
| 8274   | 2      | 0     | 2   |        |
| 8275   | 4      | 2     | 2   |        |
| 8279   | 1      | 0     | 2   |        |
| 8285   | 4      | 6     | 1   | 2      |
| 8287   | 6      | 15    | 1   | 10     |
| 8289   | 3      | 12    | 2   |        |
| 8291   | 1      | 0     | 2   |        |
| 8299   | 3      | 2     | 2   |        |
| 8301   | 1      | 0     | 2   |        |
| 8302   | 1      | 3     | 2   |        |
| 8308   | 4      | 1     | 2   |        |
| 8313   | 2      | 1     | 2   |        |
| 8316   | 2      | 0     | 2   |        |
| 8317   | 1      | 1     | 2   |        |
| 8319   | 1      | 0     | 2   |        |
| 8323   | 2      | 2     | 2   |        |

| respid | Q40_13 | Q41_1 | Q42 | Q42b_1 |
|--------|--------|-------|-----|--------|
| 8324   | 1      | 1     | 2   |        |
| 8327   | 3      | 1     | 2   |        |
| 8328   | 3      | 3     | 2   |        |
| 8342   | 2      | 1     | 2   |        |
| 8350   | 1      | 2     | 2   |        |
| 8352   | 1      | 3     | 2   |        |
| 8353   | 1      | 0     | 2   |        |
| 8356   | 1      | 0     | 2   |        |
| 8367   | 1      | 1     | 2   |        |
| 8373   | 1      | 0     | 2   |        |
| 8379   |        |       |     |        |
| 8382   | 2      | 0     | 2   |        |
| 8387   | 3      | 5     | 2   |        |
| 8409   | 2      | 1     | 2   |        |
| 8410   | 1      | 0     | 2   |        |
| 8412   | 2      | 0     | 2   |        |
| 8415   | 1      | 0     | 2   |        |
| 8417   | 1      | 0     | 2   |        |
| 8422   | 1      | 3     | 2   |        |
| 8430   | 3      | 0     | 2   |        |
| 8434   | 1      | 0     | 2   |        |
| 8436   |        |       |     |        |
| 8446   | 2      | 3     | 2   |        |
| 8447   | 1      | 0     | 2   |        |
| 8448   | 1      | 2     | 2   |        |
| 8455   | 2      | 0     | 2   |        |
| 8456   | 3      | 7     | 2   |        |
| 8459   | 2      | 3     | 2   |        |
| 8460   | 1      | 0     | 2   |        |
| 8464   | 4      | 2     | 1   | 1      |
| 8470   | 1      | 0     | 2   |        |
| 8473   | 1      | 0     | 2   |        |

| respid | Q40_13 | Q41_1 | Q42 | Q42b_1 |
|--------|--------|-------|-----|--------|
| 8486   | 1      | 0     | 2   |        |
| 8487   | 1      | 2     | 2   |        |
| 8489   | 1      | 0     | 2   |        |
| 8494   | 1      | 2     | 2   |        |
| 8495   | 5      | 12    | 1   | 12     |
| 8497   | 2      | 0     | 2   |        |
| 8510   | 2      | 3     | 2   |        |
| 8515   | 2      | 2     | 2   |        |
| 8526   |        |       |     |        |
| 8530   |        |       |     |        |
| 8532   | 2      | 3     | 2   |        |
| 8533   |        |       |     |        |
| 8534   | 2      | 2     | 2   |        |
| 8572   | 3      | 4     | 2   |        |
| 8582   | 1      | 0     | 2   |        |
| 8584   | 2      | 12    | 2   |        |
| 8585   |        |       |     |        |
| 8586   |        |       |     |        |
| 8589   | 1      | 1     | 2   |        |
| 8593   | 1      | 9     | 2   |        |
| 8594   | 1      | 0     | 2   |        |
| 8601   | 1      | 0     | 2   |        |
| 8603   | 2      | 0     | 2   |        |
| 8604   |        |       |     |        |
| 8605   |        |       |     |        |
| 8607   | 2      | 0     | 2   |        |
| 8623   | 1      | 1     | 2   |        |
| 8626   | 1      | 3     | 1   | 1      |
| 8638   | 1      | 0     | 2   |        |
| 8640   | 1      | 1     | 2   |        |
| 8641   | 1      | 6     | 2   |        |
| 8643   | 1      | 0     | 2   |        |

| respid | Q40_13 | Q41_1 | Q42 | Q42b_1 |
|--------|--------|-------|-----|--------|
| 8644   | 2      | 1     | 2   |        |
| 8646   | 1      | 0     | 2   |        |
| 8647   |        |       |     |        |
| 8649   | 1      | 3     | 2   |        |
| 8650   | 1      | 3     | 2   |        |
| 8658   | 1      | 0     | 2   |        |
| 8659   | 2      | 0     | 2   |        |
| 8669   | 1      | 0     | 2   |        |
| 8672   | 1      | 0     | 2   |        |
| 8673   | 2      | 2     | 2   |        |
| 8676   | 1      | 0     | 2   |        |
| 8677   |        |       |     |        |
| 8681   | 1      | 0     | 2   |        |
| 8688   | 1      | 1     | 2   |        |
| 8689   | 2      | 0     | 2   |        |
| 8690   | 1      | 0     | 2   |        |
| 8693   | 1      | 0     | 2   |        |
| 8694   | 2      | 0     | 2   |        |
| 8699   | 2      | 3     | 1   | 1      |
| 8700   |        |       |     |        |
| 8703   | 1      | 0     | 2   |        |
| 8704   | 1      | 1     | 2   |        |
| 8706   | 2      | 2     | 1   | 2      |
| 8709   | 1      | 2     | 2   |        |
| 8715   | 1      | 1     | 2   |        |
| 8728   | 5      | 0     | 2   |        |
| 8729   | 1      | 1     | 2   |        |
| 8730   | 2      | 1     | 2   |        |
| 8742   | 2      | 0     | 2   |        |
| 8748   | 1      | 0     | 2   |        |
| 8749   | 1      | 1     | 2   |        |
| 8750   | 1      | 0     | 2   |        |

| respid | Q40_13 | Q41_1 | Q42 | Q42b_1 |
|--------|--------|-------|-----|--------|
| 8751   | 1      | 0     | 2   |        |
| 8752   | 2      | 0     | 2   |        |
| 8754   | 1      | 1     | 2   |        |
| 8757   | 1      | 3     | 2   |        |
| 8760   | 1      | 10    | 2   |        |
| 8761   | 1      | 0     | 2   |        |
| 8762   | 2      | 6     | 2   |        |
| 8763   | 2      | 0     | 2   |        |
| 8764   | 2      | 0     | 2   |        |
| 8765   | 1      | 1     | 2   |        |
| 8766   | 2      | 0     | 2   |        |
| 8767   | 5      | 0     | 2   |        |
| 8768   | 1      | 0     | 2   |        |
| 8770   | 1      | 0     | 2   |        |
| 8771   |        |       |     |        |
| 8773   | 1      | 10    | 2   |        |
| 8774   | 2      | 3     | 2   |        |
| 8776   | 1      | 0     | 2   |        |
| 8777   | 1      | 4     | 2   |        |
| 8778   | 2      | 3     | 2   |        |
| 8779   |        |       |     |        |
| 8784   | 2      | 1     | 2   |        |
| 8786   |        |       |     |        |
| 8787   | 1      | 0     | 2   |        |
| 8790   |        |       |     |        |
| 8791   | 5      | 0     | 2   |        |
| 8793   |        |       |     |        |
| 8795   | 1      | 2     | 2   |        |
| 8797   | 1      | 0     | 2   |        |
| 8801   | 3      | 1     | 2   |        |
| 8802   | 1      | 0     | 2   |        |
| 8807   |        |       |     |        |



| respid | Q40_13 | Q41_1 | Q42 | Q42b_1 |
|--------|--------|-------|-----|--------|
| 8813   | 1      | 0     | 2   |        |
| 8817   | 1      | 3     | 2   |        |
| 8818   | 2      | 1     | 2   |        |
| 8821   | 1      | 0     | 2   |        |
| 8822   | 1      | 2     | 2   |        |
| 8823   | 1      | 0     | 2   |        |
| 8824   | 1      | 0     | 2   |        |
| 8825   | 1      | 4     | 2   |        |
| 8834   | 4      | 2     | 1   | 2      |
| 8840   | 3      | 3     | 1   | 3      |
| 8843   | 6      | 10    | 1   | 10     |
| 8846   | 1      | 0     | 2   |        |
| 8862   |        |       |     |        |
| 8866   | 1      | 24    | 2   |        |
| 8869   | 1      | 2     | 2   |        |
| 8872   | 2      | 1     | 1   | 1      |
| 8903   |        |       |     |        |
| 8909   |        |       |     |        |
| 8926   | 1      | 0     | 2   |        |
| 8936   | 1      | 1     | 2   |        |
| 8945   |        |       |     |        |
| 8954   | 2      | 4     | 2   |        |
| 8955   | 2      | 2     | 1   | 2      |
| 8958   | 1      | 3     | 2   |        |
| 8959   | 1      | 0     | 2   |        |
| 8960   | 1      | 0     | 2   |        |
| 8976   | 2      | 0     | 2   |        |
| 8977   | 1      | 0     | 1   | 0      |
| 8979   | 3      | 1     | 1   | 1      |
| 8985   |        |       |     |        |
| 8994   | 1      | 0     | 2   |        |
| 8997   | 3      | 0     | 2   |        |

| respid | Q40_13 | Q41_1 | Q42 | Q42b_1 |
|--------|--------|-------|-----|--------|
| 9002   | 1      | 0     | 2   |        |
| 9005   | 2      | 5     | 2   |        |
| 9017   | 1      | 0     | 2   |        |
| 9018   | 1      | 0     | 2   |        |
| 9021   | 1      | 1     | 2   |        |
| 9029   | 5      | 5     | 1   | 2      |
| 9035   | 2      | 2     | 2   |        |
| 9038   | 1      | 0     | 2   |        |
| 9039   |        |       |     |        |
| 9040   | 1      | 1     | 1   | 1      |
| 9042   | 1      | 0     | 2   |        |
| 9043   | 1      | 1     | 2   |        |
| 9045   | 2      | 2     | 2   |        |
| 9051   | 1      | 0     | 2   |        |
| 9067   | 1      | 0     | 2   |        |
| 9069   | 1      | 0     | 2   |        |
| 9073   | 2      | 10    | 2   |        |
| 9084   | 2      | 2     | 1   | 1      |
| 9096   |        |       |     |        |
| 9100   | 1      | 1     | 2   |        |
| 9107   |        |       |     |        |
| 9110   | 1      | 0     | 2   |        |
| 9120   | 1      | 0     | 2   |        |
| 9122   | 2      | 5     | 1   | 1      |
| 9130   | 1      | 0     | 2   |        |
| 9134   | 3      | 5     | 1   | 2      |
| 9137   | 3      | 0     | 2   |        |
| 9139   | 1      | 1     | 1   | 1      |
| 9144   |        |       |     |        |
| 9157   | 2      | 0     | 2   |        |
| 9166   | 2      | 1     | 2   |        |
| 9177   | 4      | 0     | 2   |        |

| respid | Q40_13 | Q41_1 | Q42 | Q42b_1 |
|--------|--------|-------|-----|--------|
| 9181   | 1      | 0     | 2   |        |
| 9183   | 3      | 0     | 2   |        |
| 9184   | 4      | 4     | 2   |        |
| 9188   |        |       |     |        |
| 9197   | 1      | 1     | 2   |        |
| 9200   | 2      | 0     | 2   |        |
| 9205   | 1      | 3     | 1   | 2      |
| 9207   | 1      | 1     | 2   |        |
| 9213   | 1      | 0     | 2   |        |
| 9216   | 2      | 3     | 1   | 1      |
| 9217   |        |       |     |        |
| 9218   | 1      | 2     | 2   |        |
| 9219   | 3      | 3     | 1   | 3      |
| 9220   |        |       |     |        |
| 9221   | 1      | 0     | 2   |        |
| 9223   | 4      | 5     | 1   | 4      |
| 9228   |        |       |     |        |
| 9230   | 2      | 0     | 2   |        |
| 9231   | 1      | 1     | 2   |        |
| 9233   | 2      | 2     | 2   |        |
| 9235   | 1      | 0     | 2   |        |
| 9237   | 1      | 1     | 2   |        |
| 9242   | 2      | 2     | 2   |        |
| 9250   |        |       |     |        |
| 9253   | 3      | 1     | 1   | 1      |
| 9257   | 1      | 0     | 2   |        |
| 9263   | 1      | 5     | 2   |        |
| 9267   | 1      | 3     | 2   |        |
| 9272   | 2      | 0     | 2   |        |
| 9279   |        |       |     |        |
| 9281   | 3      | 0     | 2   |        |
| 9285   | 1      | 0     | 2   |        |

| respid | Q40_13 | Q41_1 | Q42 | Q42b_1 |
|--------|--------|-------|-----|--------|
| 9286   | 2      | 2     | 1   | 1      |
| 9294   | 2      | 1     | 2   |        |
| 9295   | 1      | 15    | 2   |        |
| 9297   | 2      | 8     | 2   |        |
| 9299   | 1      | 1     | 2   |        |
| 9309   | 3      | 0     | 2   |        |
| 9315   |        |       |     |        |
| 9320   | 2      | 4     | 2   |        |
| 9324   | 1      | 0     | 2   |        |
| 9326   | 1      | 1     | 2   |        |
| 9333   | 1      | 2     | 2   |        |
| 9334   | 4      | 2     | 1   | 2      |
| 9336   | 2      | 2     | 1   | 2      |
| 9337   | 1      | 0     | 2   |        |
| 9342   | 1      | 0     | 2   |        |
| 9347   | 1      | 0     | 2   |        |
| 9352   | 1      | 0     | 2   |        |
| 9355   | 1      | 0     | 2   |        |
| 9356   | 3      | 0     | 2   |        |
| 9359   | 1      | 6     | 1   | 1      |
| 9368   | 1      | 0     | 2   |        |
| 9375   | 2      | 6     | 2   |        |
| 9384   | 2      | 0     | 2   |        |
| 9388   | 2      | 5     | 2   |        |
| 9397   | 5      | 2     | 1   | 2      |
| 9400   | 1      | 1     | 2   |        |
| 9401   | 4      | 2     | 1   | 2      |
| 9402   |        |       |     |        |
| 9417   | 3      | 2     | 1   | 2      |
| 9424   | 1      | 0     | 2   |        |
| 9427   | 1      | 1     | 2   |        |
| 9429   | 2      | 1     | 2   |        |

| respid | Q40_13 | Q41_1 | Q42 | Q42b_1 |
|--------|--------|-------|-----|--------|
| 9437   | 4      | 2     | 1   | 2      |
| 9442   | 2      | 1     | 1   | 1      |
| 9446   | 1      | 1     | 2   |        |
| 9447   | 1      | 10    | 2   |        |
| 9448   | 2      | 0     | 2   |        |
| 9449   | 4      | 4     | 2   |        |
| 9455   |        |       |     |        |
| 9459   | 2      | 2     | 2   |        |
| 9460   | 1      | 0     | 2   |        |
| 9461   | 2      | 0     | 2   |        |
| 9463   | 2      | 0     | 1   | 0      |
| 9464   | 2      | 2     | 2   |        |
| 9466   | 2      | 1     | 2   |        |
| 9477   | 1      | 0     | 2   |        |
| 9482   | 3      | 6     | 1   | 4      |
| 9486   | 1      | 0     | 2   |        |
| 9488   | 3      | 20    | 1   | 13     |
| 9489   | 1      | 5     | 2   |        |
| 9496   | 2      | 3     | 2   |        |
| 9499   | 3      | 0     | 2   |        |
| 9512   | 1      | 0     | 2   |        |
| 9514   | 1      | 0     | 2   |        |
| 9516   | 1      | 1     | 2   |        |
| 9517   | 2      | 7     | 1   | 5      |
| 9520   | 1      | 1     | 2   |        |
| 9527   | 1      | 0     | 2   |        |
| 9532   | 3      | 2     | 1   | 2      |
| 9533   | 1      | 0     | 2   |        |
| 9543   | 1      | 0     | 2   |        |
| 9550   | 2      | 0     | 2   |        |
| 9553   | 1      | 0     | 2   |        |
| 9555   | 3      | 0     | 2   |        |

| respid | Q40_13 | Q41_1 | Q42 | Q42b_1 |
|--------|--------|-------|-----|--------|
| 9565   | 3      | 0     | 2   |        |
| 9583   | 2      | 0     | 2   |        |
| 9594   | 1      | 0     | 2   |        |
| 9596   | 1      | 12    | 2   |        |
| 9600   | 2      | 10    | 2   |        |
| 9602   | 1      | 3     | 2   |        |
| 9606   | 1      | 0     | 2   |        |
| 9608   | 2      | 0     | 2   |        |
| 9610   | 2      | 2     | 1   | 2      |
| 9612   | 1      | 0     | 2   |        |
| 9613   | 1      | 0     | 2   |        |
| 9614   | 1      | 0     | 2   |        |
| 9620   | 2      | 0     | 2   |        |
| 9628   | 1      | 1     | 2   |        |
| 9631   | 1      | 3     | 2   |        |
| 9632   | 1      | 0     | 2   |        |
| 9633   | 1      | 2     | 2   |        |
| 9639   |        |       |     |        |
| 9640   | 2      | 1     | 2   |        |
| 9642   | 1      | 0     | 2   |        |
| 9653   | 2      | 2     | 1   | 2      |
| 9658   | 1      | 0     | 2   |        |
| 9659   | 2      | 2     | 2   |        |
| 9661   | 2      | 1     | 2   |        |
| 9664   | 2      | 0     | 2   |        |
| 9665   | 1      | 1     | 2   |        |
| 9666   | 4      | 10    | 1   | 3      |
| 9667   | 2      | 2     | 2   |        |
| 9668   |        |       |     |        |
| 9670   | 2      | 0     | 2   |        |
| 9671   | 1      | 0     | 2   |        |
| 9681   | 1      | 2     | 2   |        |

| respid | Q40_13 | Q41_1 | Q42 | Q42b_1 |
|--------|--------|-------|-----|--------|
| 9684   | 4      | 0     | 2   |        |
| 9685   | 2      | 1     | 2   |        |
| 9686   | 2      | 12    | 1   | 3      |
| 9688   | 3      | 20    | 1   | 12     |
| 9692   | 1      | 2     | 2   |        |
| 9693   | 3      | 10    | 1   | 4      |
| 9698   | 4      | 5     | 1   | 1      |
| 9699   | 1      | 0     | 2   |        |
| 9701   | 1      | 0     | 2   |        |
| 9702   | 1      | 1     | 2   |        |
| 9709   | 1      | 0     | 2   |        |
| 9713   |        |       |     |        |
| 9715   |        |       |     |        |
| 9721   | 1      | 0     | 2   |        |
| 9725   | 1      | 4     | 2   |        |
| 9729   | 3      | 1     | 2   |        |
| 9731   | 2      | 2     | 2   |        |
| 9736   | 2      | 2     | 2   |        |
| 9740   |        |       |     |        |
| 9741   | 1      | 0     | 2   |        |
| 9749   | 1      | 3     | 1   | 1      |
| 9750   | 3      | 0     | 2   |        |
| 9751   | 3      | 5     | 1   | 2      |
| 9753   | 1      | 0     | 2   |        |
| 9754   | 4      | 2     | 1   | 2      |
| 9756   | 3      | 0     | 2   |        |
| 9758   | 3      | 8     | 1   | 6      |
| 9759   | 2      | 0     | 2   |        |
| 9760   | 2      | 0     | 2   |        |
| 9761   |        |       |     |        |
| 9762   | 1      | 3     | 2   |        |
| 9764   | 1      | 0     | 2   |        |

| respid | Q40_13 | Q41_1 | Q42 | Q42b_1 |
|--------|--------|-------|-----|--------|
| 9768   | 1      | 5     | 2   |        |
| 9769   | 4      | 3     | 1   | 3      |
| 9770   | 1      | 0     | 2   |        |
| 9771   | 1      | 4     | 1   | 4      |
| 9772   | 3      | 0     | 2   |        |
| 9773   | 2      | 2     | 2   |        |
| 9776   | 1      | 0     | 2   |        |
| 9786   | 2      | 4     | 1   | 4      |
| 9790   | 1      | 0     | 2   |        |
| 9791   | 1      | 0     | 2   |        |
| 9794   | 2      | 6     | 2   |        |
| 9797   | 3      | 2     | 2   |        |
| 9799   | 1      | 0     | 2   |        |
| 9804   | 2      | 6     | 2   |        |
| 9805   | 2      | 2     | 2   |        |
| 9806   | 1      | 0     | 2   |        |
| 9807   | 2      | 0     | 2   |        |
| 9813   | 2      | 0     | 2   |        |
| 9817   | 1      | 2     | 2   |        |
| 9823   | 1      | 0     | 2   |        |
| 9826   | 1      | 1     | 2   |        |
| 9830   | 2      | 0     | 2   |        |
| 9835   | 4      | 3     | 1   | 3      |
| 9836   | 1      | 0     | 2   |        |
| 9841   |        |       |     |        |
| 9842   | 1      | 0     | 2   |        |
| 9844   | 3      | 0     | 2   |        |
| 9847   | 1      | 0     | 2   |        |
| 9851   | 1      | 0     | 2   |        |
| 9852   | 3      | 0     | 2   |        |
| 9854   | 1      | 0     | 2   |        |
| 9855   | 1      | 0     | 2   |        |



| respid | Q40_13 | Q41_1 | Q42 | Q42b_1 |
|--------|--------|-------|-----|--------|
| 9856   | 1      | 2     | 2   |        |
| 9862   | 1      | 0     | 2   |        |
| 9863   |        |       |     |        |
| 9866   | 2      | 0     | 2   |        |
| 9867   | 2      | 50    | 2   |        |
| 9868   | 4      | 12    | 1   | 12     |
| 9869   | 3      | 3     | 2   |        |
| 9878   | 2      | 2     | 2   |        |
| 9879   | 2      | 30    | 1   | 2      |
| 9881   | 3      | 30    | 2   |        |
| 9882   | 1      | 5     | 2   |        |
| 9884   | 1      | 4     | 2   |        |
| 9885   | 1      | 0     | 2   |        |
| 9888   | 1      | 0     | 2   |        |
| 9889   | 1      | 1     | 2   |        |
| 9894   | 3      | 4     | 2   |        |
| 9895   | 1      | 0     | 2   |        |
| 9896   | 5      | 2     | 1   | 2      |
| 9897   | 4      | 3     | 1   | 3      |
| 9905   | 2      | 0     | 2   |        |
| 9907   | 1      | 0     | 2   |        |
| 9908   | 1      | 2     | 2   |        |
| 9909   | 2      | 0     | 2   |        |
| 9910   | 3      | 1     | 2   |        |
| 9913   | 2      | 0     | 2   |        |
| 9914   | 2      | 2     | 2   |        |
| 9915   | 1      | 5     | 2   |        |
| 9916   | 1      | 0     | 2   |        |
| 9918   |        |       |     |        |
| 9919   | 3      | 2     | 2   |        |
| 9922   | 3      | 1     | 1   | 1      |
| 9930   | 1      | 0     | 2   |        |

| respid | Q40_13 | Q41_1 | Q42 | Q42b_1 |
|--------|--------|-------|-----|--------|
| 9934   | 1      | 2     | 2   |        |
| 9936   | 2      | 2     | 2   |        |
| 9938   | 1      | 0     | 2   |        |
| 9940   | 1      | 1     | 2   |        |
| 9944   | 2      | 0     | 2   |        |
| 9945   | 1      | 0     | 2   |        |
| 9948   | 5      | 2     | 2   |        |
| 9949   | 3      | 2     | 2   |        |
| 9951   | 2      | 1     | 1   | 1      |
| 9952   | 2      | 1     | 2   |        |
| 9954   | 1      | 0     | 2   |        |
| 9955   | 1      | 1     | 2   |        |
| 9956   | 4      | 2     | 1   | 1      |
| 9957   | 3      | 0     | 2   |        |
| 9958   | 2      | 1     | 2   |        |
| 9959   | 2      | 3     | 1   | 2      |
| 9960   | 1      | 5     | 2   |        |
| 9961   | 2      | 0     | 2   |        |
| 9962   | 2      | 0     | 2   |        |
| 9969   | 1      | 3     | 1   | 1      |
| 9982   | 3      | 0     | 2   |        |
| 9984   | 1      | 0     | 2   |        |
| 9990   | 2      | 1     | 1   | 1      |
| 9992   | 2      | 2     | 1   | 2      |
| 9993   | 3      | 2     | 1   | 2      |
| 9997   | 1      | 1     | 2   |        |
| 9999   | 1      | 0     | 2   |        |
| 10000  | 1      | 0     | 2   |        |
| 10005  | 5      | 5     | 2   |        |
| 10014  | 1      | 1     | 2   |        |
| 10016  | 4      | 14    | 1   | 10     |
| 10017  | 1      | 24    | 2   |        |

| respid | Q40_13 | Q41_1 | Q42 | Q42b_1 |
|--------|--------|-------|-----|--------|
| 10018  | 3      | 0     | 1   | 0      |
| 10021  | 1      | 0     | 2   |        |
| 10025  | 4      | 1     | 2   |        |
| 10027  | 1      | 1     | 2   |        |
| 10028  | 1      | 4     | 2   |        |
| 10031  | 1      | 0     | 2   |        |
| 10036  | 1      | 10    | 2   |        |
| 10037  | 2      | 5     | 2   |        |
| 10038  | 2      | 3     | 2   |        |
| 10039  |        |       |     |        |
| 10041  | 1      | 2     | 2   |        |
| 10045  | 6      | 0     | 2   |        |
| 10046  | 2      | 12    | 2   |        |
| 10047  | 2      | 2     | 2   |        |
| 10048  | 2      | 2     | 2   |        |
| 10049  | 2      | 0     | 2   |        |
| 10051  | 1      | 0     | 2   |        |
| 10052  | 3      | 3     | 1   | 2      |
| 10056  | 1      | 0     | 2   |        |
| 10061  | 1      | 0     | 2   |        |
| 10064  | 1      | 0     | 2   |        |
| 10066  | 1      | 0     | 2   |        |
| 10069  | 1      | 0     | 2   |        |
| 10071  | 1      | 0     | 2   |        |
| 10074  | 1      | 1     | 2   |        |
| 10079  | 1      | 12    | 2   |        |
| 10087  | 2      | 0     | 2   |        |
| 10095  | 1      | 2     | 2   |        |
| 10097  | 1      | 4     | 1   | 0      |
| 10100  | 2      | 2     | 1   | 2      |
| 10105  | 1      | 3     | 2   |        |
| 10107  | 3      | 12    | 1   | 1      |

| respid | Q40_13 | Q41_1 | Q42 | Q42b_1 |
|--------|--------|-------|-----|--------|
| 10111  | 1      | 1     | 2   |        |
| 10116  | 1      | 2     | 2   |        |
| 10118  | 1      | 0     | 2   |        |
| 10123  |        |       |     |        |
| 10124  | 1      | 3     | 2   |        |
| 10130  | 3      | 4     | 2   |        |
| 10134  | 1      | 0     | 2   |        |
| 10135  | 1      | 0     | 2   |        |
| 10136  |        |       |     |        |
| 10141  | 3      | 2     | 2   |        |
| 10142  | 1      | 0     | 2   |        |
| 10143  | 1      | 0     | 2   |        |
| 10145  | 2      | 3     | 2   |        |
| 10149  | 1      | 2     | 2   |        |
| 10150  | 1      | 12    | 1   | 12     |
| 10151  | 1      | 20    | 2   |        |
| 10152  | 3      | 4     | 1   | 2      |
| 10153  | 1      | 0     | 2   |        |
| 10156  | 1      | 0     | 2   |        |
| 10160  | 1      | 18    | 2   |        |
| 10161  | 2      | 2     | 2   |        |
| 10167  | 2      | 5     | 1   | 3      |
| 10171  |        |       |     |        |
| 10172  | 1      | 0     | 2   |        |
| 10176  | 1      | 1     | 1   | 1      |
| 10177  | 1      | 0     | 2   |        |
| 10182  | 3      | 6     | 2   |        |
| 10184  | 1      | 0     | 2   |        |
| 10186  | 4      | 0     | 2   |        |
| 10189  | 1      | 0     | 2   |        |
| 10191  | 1      | 0     | 2   |        |
| 10192  | 2      | 0     | 2   |        |

| respid | Q40_13 | Q41_1 | Q42 | Q42b_1 |
|--------|--------|-------|-----|--------|
| 10195  | 1      | 3     | 1   | 1      |
| 10199  |        |       |     |        |
| 10201  | 1      | 24    | 2   |        |
| 10213  | 1      | 0     | 2   |        |
| 10222  | 4      | 4     | 1   | 1      |
| 10224  |        |       |     |        |
| 10245  | 1      | 0     | 2   |        |
| 10254  | 1      | 6     | 2   |        |
| 10255  | 5      | 0     | 2   |        |
| 10257  | 1      | 4     | 2   |        |
| 10260  | 3      | 12    | 2   |        |
| 10261  | 4      | 3     | 1   | 1      |
| 10263  | 5      | 0     | 2   |        |
| 10264  | 3      | 3     | 2   |        |
| 10268  | 2      | 3     | 2   |        |
| 10269  | 4      | 1     | 1   | 1      |
| 10270  |        |       |     |        |
| 10282  | 1      | 0     | 2   |        |
| 10285  |        |       |     |        |
| 10288  | 2      | 4     | 2   |        |
| 10291  | 1      | 0     | 2   |        |
| 10292  | 1      | 1     | 2   |        |
| 10304  |        |       |     |        |
| 10305  | 1      | 0     | 2   |        |
| 10310  | 1      | 0     | 2   |        |
| 10324  | 1      | 2     | 2   |        |
| 10325  | 2      | 0     | 2   |        |
| 10326  | 1      | 2     | 2   |        |
| 10329  |        |       |     |        |
| 10332  | 1      | 0     | 2   |        |
| 10337  | 1      | 1     | 2   |        |
| 10341  | 1      | 4     | 2   |        |

| respid | Q40_13 | Q41_1 | Q42 | Q42b_1 |
|--------|--------|-------|-----|--------|
| 10353  | 2      | 7     | 2   |        |
| 10354  |        |       |     |        |
| 10359  | 2      | 0     | 2   |        |
| 10360  | 1      | 0     | 2   |        |
| 10362  | 1      | 0     | 2   |        |
| 10364  | 1      | 12    | 2   |        |
| 10366  | 3      | 5     | 1   | 2      |
| 10367  | 1      | 2     | 2   |        |
| 10371  | 1      | 0     | 2   |        |
| 10374  | 4      | 2     | 2   |        |
| 10375  | 1      | 0     | 2   |        |
| 10376  | 1      | 0     | 2   |        |
| 10377  | 1      | 0     | 2   |        |
| 10378  | 3      | 0     | 2   |        |
| 10387  | 1      | 0     | 2   |        |
| 10396  | 4      | 5     | 1   | 2      |
| 10397  | 1      | 2     | 2   |        |
| 10399  | 3      | 0     | 2   |        |
| 10405  | 1      | 0     | 2   |        |
| 10406  | 2      | 1     | 2   |        |
| 10408  | 1      | 0     | 2   |        |
| 10409  |        |       |     |        |
| 10412  | 1      | 0     | 2   |        |
| 10413  | 1      | 0     | 2   |        |
| 10419  | 3      | 15    | 2   |        |
| 10423  | 4      | 3     | 1   | 2      |
| 10426  | 1      | 0     | 2   |        |
| 10446  | 1      | 2     | 2   |        |
| 10448  | 2      | 4     | 2   |        |
| 10450  | 1      | 0     | 2   |        |
| 10455  | 1      | 0     | 2   |        |
| 10460  | 1      | 0     | 2   |        |

| respid | Q40_13 | Q41_1 | Q42 | Q42b_1 |
|--------|--------|-------|-----|--------|
| 10461  | 2      | 0     | 2   |        |
| 10471  | 1      | 3     | 2   |        |
| 10472  | 1      | 3     | 2   |        |
| 10491  | 4      | 20    | 1   | 6      |
| 10493  | 2      | 0     | 2   |        |
| 10498  | 1      | 1     | 2   |        |
| 10533  | 1      | 2     | 2   |        |
| 10539  | 1      | 0     | 2   |        |
| 10540  | 1      | 2     | 1   | 0      |
| 10557  | 2      | 0     | 2   |        |
| 10558  | 3      | 3     | 1   | 2      |
| 10559  | 6      | 3     | 1   | 2      |
| 10564  | 1      | 0     | 2   |        |
| 10570  |        |       |     |        |
| 10572  | 1      | 1     | 2   |        |
| 10576  | 1      | 1     | 2   |        |
| 10582  | 2      | 5     | 1   | 2      |
| 10593  | 1      | 0     | 2   |        |
| 10596  | 2      | 1     | 2   |        |
| 10615  |        |       |     |        |
| 10616  | 1      | 2     | 2   |        |
| 10623  | 3      | 2     | 2   |        |
| 10626  | 3      | 0     | 2   |        |
| 10627  | 5      | 2     | 2   |        |
| 10629  | 1      | 3     | 2   |        |
| 10632  | 3      | 2     | 2   |        |
| 10641  |        |       |     |        |
| 10648  | 3      | 5     | 2   |        |
| 10651  | 1      | 2     | 1   | 1      |
| 10654  | 1      | 0     | 2   |        |
| 10673  | 1      | 0     | 2   |        |
| 10675  | 1      | 0     | 2   |        |

| respid | Q40_13 | Q41_1 | Q42 | Q42b_1 |
|--------|--------|-------|-----|--------|
| 10689  | 1      | 4     | 1   | 4      |
| 10692  | 1      | 0     | 2   |        |
| 10694  | 1      | 0     | 2   |        |
| 10695  | 1      | 0     | 2   |        |
| 10702  | 3      | 5     | 2   |        |
| 10703  | 4      | 1     | 2   |        |
| 10708  | 1      | 0     | 2   |        |
| 10719  | 1      | 3     | 2   |        |
| 10722  | 2      | 0     | 2   |        |
| 10723  | 2      | 5     | 2   |        |
| 10726  | 4      | 1     | 2   |        |
| 10727  | 1      | 0     | 2   |        |
| 10730  | 1      | 2     | 2   |        |
| 10731  |        |       |     |        |
| 10737  | 1      | 0     | 2   |        |
| 10743  | 2      | 0     | 2   |        |
| 10763  | 1      | 2     | 2   |        |
| 10777  |        |       |     |        |
| 10787  | 2      | 0     | 2   |        |
| 10798  | 5      | 3     | 2   |        |
| 10800  | 1      | 5     | 2   |        |
| 10802  | 5      | 6     | 2   |        |
| 10803  | 4      | 2     | 1   | 2      |
| 10808  | 2      | 1     | 2   |        |
| 10810  | 2      | 0     | 2   |        |
| 10819  | 1      | 4     | 2   |        |
| 10825  | 1      | 1     | 2   |        |
| 10827  | 3      | 5     | 2   |        |
| 10830  | 4      | 2     | 2   |        |
| 10847  | 1      | 0     | 2   |        |
| 10849  | 1      | 0     | 2   |        |
| 10852  | 1      | 0     | 2   |        |



| respid | Q40_13 | Q41_1 | Q42 | Q42b_1 |
|--------|--------|-------|-----|--------|
| 10854  | 3      | 10    | 1   | 2      |
| 10857  | 1      | 1     | 2   |        |
| 10861  | 3      | 0     | 2   |        |
| 10862  |        |       |     |        |
| 10870  | 3      | 1     | 2   |        |
| 10873  | 1      | 1     | 2   |        |
| 10881  | 3      | 2     | 2   |        |
| 10893  |        |       |     |        |
| 10898  | 1      | 0     | 2   |        |
| 10899  | 4      | 1     | 2   |        |
| 10905  | 4      | 0     | 2   |        |
| 10910  |        |       |     |        |
| 10911  | 1      | 1     | 1   | 1      |
| 10912  | 1      | 0     | 2   |        |
| 10913  | 1      | 9     | 2   |        |
| 10918  |        |       |     |        |
| 10995  |        |       |     |        |
| 11002  | 2      | 8     | 2   |        |
| 11003  | 1      | 0     | 2   |        |
| 11005  | 1      | 12    | 2   |        |
| 11015  | 1      | 2     | 1   | 1      |
| 11016  | 1      | 3     | 2   |        |
| 11017  | 1      | 0     | 2   |        |
| 11020  | 4      | 2     | 2   |        |
| 11024  | 1      | 0     | 2   |        |
| 11026  | 2      | 0     | 2   |        |
| 11028  | 3      | 0     | 2   |        |
| 11029  | 6      | 3     | 2   |        |
| 11030  | 2      | 1     | 2   |        |
| 11031  | 1      | 2     | 2   |        |
| 11038  | 1      | 0     | 2   |        |
| 11051  | 1      | 2     | 2   |        |

| respid | Q40_13 | Q41_1 | Q42 | Q42b_1 |
|--------|--------|-------|-----|--------|
| 11052  | 3      | 3     | 2   |        |
| 11053  | 1      | 5     | 2   |        |
| 11054  | 6      | 4     | 2   |        |
| 11063  | 1      | 1     | 1   | 1      |
| 11075  | 2      | 2     | 1   | 1      |
| 11083  | 1      | 1     | 2   |        |
| 11092  | 1      | 0     | 2   |        |
| 11118  | 1      | 5     | 2   |        |
| 11119  | 3      | 3     | 1   | 1      |
| 11134  | 3      | 0     | 2   |        |
| 11139  | 1      | 0     | 2   |        |
| 11154  | 1      | 0     | 2   |        |
| 11166  | 1      | 0     | 2   |        |
| 11168  |        |       |     |        |
| 11176  | 2      | 3     | 1   | 3      |
| 11183  | 3      | 1     | 1   | 1      |
| 11189  | 1      | 0     | 2   |        |
| 11196  | 4      | 2     | 1   | 2      |
| 11200  | 1      | 0     | 2   |        |
| 11201  | 2      | 0     | 2   |        |
| 11211  | 3      | 2     | 1   | 2      |
| 11218  | 1      | 0     | 2   |        |
| 11219  | 1      | 0     | 2   |        |
| 11221  | 2      | 0     | 2   |        |
| 11222  | 1      | 1     | 2   |        |
| 11230  | 4      | 2     | 1   | 2      |
| 11236  | 4      | 2     | 1   | 2      |
| 11237  | 2      | 12    | 2   |        |
| 11240  | 4      | 6     | 2   |        |
| 11244  | 3      | 2     | 1   | 2      |
| 11249  | 2      | 0     | 2   |        |
| 11252  | 3      | 2     | 1   | 2      |

| respid | Q40_13 | Q41_1 | Q42 | Q42b_1 |
|--------|--------|-------|-----|--------|
| 11254  | 2      | 1     | 2   |        |
| 11255  | 3      | 2     | 1   | 2      |
| 11258  | 4      | 2     | 1   | 2      |
| 11260  | 1      | 1     | 2   |        |
| 11264  | 4      | 8     | 1   | 1      |
| 11266  | 5      | 2     | 2   |        |
| 11268  | 3      | 3     | 1   | 1      |
| 11269  | 1      | 0     | 2   |        |
| 11272  | 2      | 2     | 1   | 2      |
| 11273  | 1      | 0     | 2   |        |
| 11275  | 1      | 0     | 2   |        |
| 11276  | 1      | 0     | 2   |        |
| 11278  | 3      | 3     | 1   | 1      |
| 11288  |        |       |     |        |
| 11289  |        |       |     |        |
| 11291  | 1      | 1     | 2   |        |
| 11295  | 1      | 2     | 2   |        |
| 11297  | 1      | 0     | 2   |        |
| 11304  | 4      | 3     | 2   |        |
| 11305  | 1      | 0     | 2   |        |
| 11311  | 1      | 0     | 2   |        |
| 11313  | 1      | 0     | 2   |        |
| 11315  | 6      | 0     | 1   | 0      |
| 11316  | 5      | 0     | 1   | 0      |
| 11318  | 4      | 3     | 1   | 2      |
| 11323  | 1      | 1     | 2   |        |
| 11331  | 4      | 0     | 2   |        |
| 11333  | 2      | 0     | 2   |        |
| 11334  | 3      | 1     | 2   |        |
| 11340  | 5      | 5     | 1   | 4      |
| 11345  | 1      | 1     | 2   |        |
| 11354  | 1      | 0     | 2   |        |

| respid | Q40_13 | Q41_1 | Q42 | Q42b_1 |
|--------|--------|-------|-----|--------|
| 11360  |        |       |     |        |
| 11361  | 3      | 2     | 2   |        |
| 11367  |        |       |     |        |
| 11370  |        |       |     |        |
| 11371  | 3      | 2     | 1   | 1      |
| 11372  | 4      | 4     | 2   |        |
| 11373  | 2      | 0     | 2   |        |
| 11382  | 1      | 0     | 2   |        |
| 11394  | 3      | 1     | 2   |        |
| 11395  | 4      | 12    | 1   | 5      |
| 11397  |        |       |     |        |
| 11402  | 1      | 3     | 1   | 3      |
| 11409  | 1      | 2     | 2   |        |
| 11410  | 1      | 0     | 2   |        |
| 11411  | 1      | 0     | 2   |        |
| 11418  | 1      | 0     | 2   |        |
| 11425  | 3      | 3     | 2   |        |
| 11429  | 1      | 0     | 2   |        |
| 11430  | 5      | 5     | 1   | 4      |
| 11431  | 4      | 4     | 1   | 1      |
| 11432  |        |       |     |        |
| 11433  | 1      | 0     | 2   |        |
| 11435  | 3      | 0     | 2   |        |
| 11436  | 2      | 1     | 2   |        |
| 11437  | 2      | 4     | 1   | 4      |
| 11439  |        |       |     |        |
| 11440  | 4      | 0     | 2   |        |
| 11447  | 1      | 0     | 2   |        |
| 11455  | 1      | 0     | 2   |        |
| 11456  | 3      | 3     | 2   |        |
| 11461  | 1      | 0     | 2   |        |
| 11463  | 2      | 3     | 1   | 1      |

| respid | Q40_13 | Q41_1 | Q42 | Q42b_1 |
|--------|--------|-------|-----|--------|
| 11470  | 2      | 2     | 1   | 2      |
| 11472  |        |       |     |        |
| 11475  | 1      | 0     | 2   |        |
| 11476  | 2      | 2     | 1   | 1      |
| 11482  | 3      | 3     | 2   |        |
| 11501  | 3      | 3     | 1   | 3      |
| 11503  | 5      | 3     | 2   |        |
| 11505  | 1      | 1     | 2   |        |
| 11510  | 1      | 0     | 2   |        |
| 11519  |        |       |     |        |
| 11527  | 2      | 5     | 1   | 2      |
| 11529  | 4      | 6     | 1   | 2      |
| 11530  | 2      | 3     | 2   |        |
| 11536  | 5      | 2     | 1   | 2      |
| 11543  | 1      | 0     | 2   |        |
| 11548  | 3      | 0     | 2   |        |
| 11566  | 1      | 2     | 2   |        |
| 11570  | 3      | 2     | 2   |        |
| 11571  | 2      | 1     | 2   |        |
| 11578  |        |       |     |        |
| 11579  | 1      | 0     | 2   |        |
| 11581  | 3      | 2     | 1   | 2      |
| 11582  | 1      | 2     | 1   | 1      |
| 11583  | 1      | 1     | 2   |        |
| 11589  | 3      | 0     | 2   |        |
| 11590  | 1      | 0     | 2   |        |
| 11592  | 1      | 0     | 2   |        |
| 11596  |        |       |     |        |
| 11598  | 3      | 2     | 2   |        |
| 11602  | 3      | 0     | 2   |        |
| 11605  | 3      | 2     | 1   | 1      |
| 11618  | 1      | 20    | 1   | 8      |

| respid | Q40_13 | Q41_1 | Q42 | Q42b_1 |
|--------|--------|-------|-----|--------|
| 11621  | 4      | 1     | 2   |        |
| 11630  | 1      | 3     | 1   | 2      |
| 11636  | 5      | 3     | 1   | 2      |
| 11640  | 5      | 18    | 1   | 12     |
| 11658  | 1      | 1     | 2   |        |
| 11665  | 3      | 2     | 2   |        |
| 11666  | 5      | 6     | 1   | 1      |
| 11667  | 2      | 1     | 1   | 1      |
| 11674  | 1      | 1     | 2   |        |
| 11680  | 1      | 0     | 2   |        |
| 11683  | 2      | 0     | 2   |        |
| 11688  | 3      | 5     | 1   | 2      |
| 11690  |        |       |     |        |
| 11694  |        |       |     |        |
| 11705  | 2      | 1     | 2   |        |
| 11720  | 5      | 2     | 1   | 2      |
| 11724  |        |       |     |        |
| 11738  | 2      | 0     | 2   |        |
| 11744  | 3      | 2     | 1   | 1      |
| 11745  | 4      | 1     | 2   |        |
| 11747  |        |       |     |        |
| 11755  | 2      | 6     | 1   | 2      |
| 11756  | 2      | 2     | 2   |        |
| 11772  | 1      | 4     | 2   |        |
| 11773  |        |       |     |        |
| 11778  | 3      | 4     | 1   | 2      |
| 11790  | 3      | 2     | 2   |        |
| 11794  |        |       |     |        |
| 11795  | 3      | 7     | 2   |        |
| 11799  | 3      | 1     | 1   | 1      |
| 11803  | 2      | 0     | 2   |        |
| 11806  | 4      | 15    | 1   | 9      |

| respid | Q40_13 | Q41_1 | Q42 | Q42b_1 |
|--------|--------|-------|-----|--------|
| 11808  | 4      | 2     | 1   | 2      |
| 11810  |        |       |     |        |
| 11811  |        |       |     |        |
| 11812  | 3      | 3     | 1   | 2      |
| 11813  | 2      | 3     | 1   | 1      |
| 11821  | 3      | 3     | 1   | 3      |
| 11827  |        |       |     |        |
| 11831  | 4      | 2     | 1   | 1      |
| 11841  |        |       |     |        |
| 11872  | 2      | 0     | 2   |        |
| 11898  | 1      | 0     | 2   |        |
| 11902  | 4      | 5     | 1   | 1      |
| 11912  | 2      | 2     | 2   |        |
| 11926  | 1      | 0     | 2   |        |
| 11928  | 5      | 3     | 2   |        |
| 11932  | 3      | 3     | 2   |        |
| 11934  | 1      | 0     | 2   |        |
| 11941  | 4      | 5     | 1   | 2      |
| 11942  |        |       |     |        |
| 11943  | 3      | 0     | 2   |        |
| 11944  | 3      | 10    | 1   | 3      |
| 11955  |        |       |     |        |
| 11958  | 5      | 0     | 2   |        |
| 11968  | 3      | 3     | 1   | 2      |
| 11979  | 3      | 2     | 1   | 2      |
| 11988  |        |       |     |        |
| 11999  | 5      | 1     | 2   |        |
| 12002  | 1      | 2     | 2   |        |
| 12004  | 2      | 0     | 2   |        |
| 12008  | 1      | 0     | 2   |        |
| 12013  | 4      | 16    | 2   |        |
| 12018  | 3      | 1     | 2   |        |

| respid | Q40_13 | Q41_1 | Q42 | Q42b_1 |
|--------|--------|-------|-----|--------|
| 12023  | 1      | 5     | 2   |        |
| 12027  | 3      | 2     | 2   |        |
| 12030  | 1      | 1     | 2   |        |
| 12031  | 3      | 1     | 1   | 0      |
| 12036  | 3      | 1     | 1   | 1      |
| 12037  | 2      | 1     | 1   | 1      |
| 12038  | 4      | 0     | 2   |        |
| 12039  | 1      | 1     | 2   |        |
| 12045  | 3      | 2     | 2   |        |
| 12046  | 2      | 0     | 2   |        |
| 12054  | 3      | 8     | 1   | 6      |
| 12055  | 2      | 1     | 2   |        |
| 12069  | 2      | 3     | 2   |        |
| 12070  | 4      | 3     | 2   |        |
| 12074  | 1      | 0     | 2   |        |
| 12075  | 2      | 3     | 1   | 1      |
| 12078  | 1      | 5     | 1   | 1      |
| 12089  | 2      | 5     | 2   |        |
| 12091  | 3      | 5     | 1   | 3      |
| 12092  | 5      | 8     | 1   | 2      |
| 12108  | 4      | 7     | 1   | 7      |
| 12111  | 4      | 4     | 1   | 2      |
| 12112  | 3      | 4     | 1   | 3      |
| 12126  |        |       |     |        |
| 12132  | 4      | 6     | 1   | 5      |
| 12150  | 4      | 4     | 2   |        |
| 12152  | 2      | 0     | 2   |        |
| 12154  | 2      | 0     | 2   |        |
| 12157  | 3      | 5     | 1   | 4      |
| 12165  | 1      | 0     | 2   |        |
| 12169  | 4      | 0     | 2   |        |
| 12182  | 5      | 1     | 2   |        |



| respid | Q40_13 | Q41_1 | Q42 | Q42b_1 |
|--------|--------|-------|-----|--------|
| 12198  | 6      | 0     | 2   |        |
| 12199  |        |       |     |        |
| 12202  | 3      | 1     | 2   |        |
| 12207  | 1      | 2     | 2   |        |
| 12208  | 3      | 2     | 1   | 2      |
| 12210  | 1      | 0     | 2   |        |
| 12219  | 5      | 1     | 2   |        |
| 12224  | 2      | 1     | 2   |        |
| 12230  | 3      | 2     | 1   | 1      |
| 12238  | 1      | 1     | 2   |        |
| 12239  | 1      | 1     | 2   |        |
| 12243  | 1      | 5     | 2   |        |
| 12245  | 2      | 0     | 2   |        |
| 12246  | 5      | 1     | 2   |        |
| 12247  | 1      | 12    | 2   |        |
| 12248  | 1      | 0     | 2   |        |
| 12249  | 2      | 2     | 2   |        |
| 12258  | 4      | 4     | 1   | 1      |
| 12265  | 4      | 0     | 2   |        |
| 12269  | 1      | 2     | 2   |        |
| 12270  | 2      | 0     | 2   |        |
| 12279  | 1      | 0     | 2   |        |
| 12280  | 2      | 0     | 2   |        |
| 12282  | 4      | 0     | 2   |        |
| 12283  | 3      | 1     | 2   |        |
| 12287  | 1      | 0     | 2   |        |
| 12288  | 2      | 1     | 1   | 1      |
| 12290  | 1      | 2     | 2   |        |
| 12292  | 2      | 3     | 2   |        |
| 12294  | 1      | 0     | 2   |        |
| 12296  | 2      | 0     | 2   |        |
| 12307  | 2      | 4     | 2   |        |

| respid | Q40_13 | Q41_1 | Q42 | Q42b_1 |
|--------|--------|-------|-----|--------|
| 12309  | 1      | 0     | 2   |        |
| 12312  | 2      | 8     | 2   |        |
| 12317  | 1      | 2     | 2   |        |
| 12319  | 1      | 0     | 2   |        |
| 12320  | 1      | 4     | 2   |        |
| 12322  | 1      | 3     | 2   |        |
| 12328  | 3      | 3     | 1   | 1      |
| 12331  | 5      | 25    | 1   | 17     |
| 12332  | 1      | 0     | 2   |        |
| 12334  | 1      | 20    | 2   |        |
| 12337  | 1      | 5     | 2   |        |
| 12338  | 1      | 3     | 2   |        |
| 12342  | 1      | 3     | 1   | 3      |
| 12349  | 1      | 1     | 1   | 1      |
| 12352  | 3      | 4     | 2   |        |
| 12355  | 2      | 2     | 2   |        |
| 12357  | 3      | 3     | 2   |        |
| 12358  | 1      | 2     | 2   |        |
| 12371  | 4      | 2     | 2   |        |
| 12372  | 1      | 2     | 2   |        |
| 12373  | 2      | 1     | 2   |        |
| 12379  | 1      | 0     | 2   |        |
| 12381  | 4      | 3     | 2   |        |
| 12383  | 1      | 5     | 2   |        |
| 12384  | 1      | 5     | 2   |        |
| 12386  | 1      | 0     | 2   |        |
| 12389  |        |       |     |        |
| 12392  | 1      | 2     | 2   |        |
| 12396  | 2      | 0     | 2   |        |
| 12397  | 3      | 12    | 2   |        |
| 12399  | 4      | 3     | 2   |        |
| 12400  | 4      | 3     | 2   |        |

| respid | Q40_13 | Q41_1 | Q42 | Q42b_1 |
|--------|--------|-------|-----|--------|
| 12406  | 2      | 6     | 2   |        |
| 12407  | 1      | 3     | 2   |        |
| 12410  | 1      | 0     | 2   |        |
| 12413  | 1      | 3     | 2   |        |
| 12416  | 5      | 12    | 2   |        |
| 12419  | 1      | 1     | 1   | 1      |
| 12422  | 3      | 5     | 1   | 5      |
| 12423  | 2      | 1     | 1   | 1      |
| 12429  | 2      | 0     | 2   |        |
| 12434  | 3      | 2     | 1   | 2      |
| 12435  | 1      | 12    | 2   |        |
| 12436  | 3      | 3     | 2   |        |
| 12442  |        |       |     |        |
| 12449  | 2      | 2     | 2   |        |
| 12451  | 1      | 0     | 2   |        |
| 12456  | 2      | 3     | 2   |        |
| 12457  | 1      | 0     | 2   |        |
| 12458  | 1      | 0     | 2   |        |
| 12461  | 2      | 1     | 2   |        |
| 12462  | 1      | 0     | 2   |        |
| 12463  | 3      | 0     | 2   |        |
| 12466  | 2      | 0     | 2   |        |
| 12470  | 2      | 2     | 2   |        |
| 12471  | 2      | 1     | 2   |        |
| 12472  | 1      | 0     | 2   |        |
| 12478  | 2      | 4     | 2   |        |
| 12479  | 3      | 2     | 1   | 1      |
| 12481  | 1      | 0     | 2   |        |
| 12482  | 2      | 2     | 2   |        |
| 12483  |        |       |     |        |
| 12496  | 1      | 3     | 2   |        |
| 12497  | 2      | 5     | 2   |        |

| respid | Q40_13 | Q41_1 | Q42 | Q42b_1 |
|--------|--------|-------|-----|--------|
| 12498  | 3      | 2     | 1   | 2      |
| 12500  | 2      | 3     | 2   |        |
| 12501  | 3      | 6     | 1   | 2      |
| 12502  | 1      | 5     | 2   |        |
| 12503  | 1      | 0     | 2   |        |
| 12505  | 3      | 13    | 2   |        |
| 12508  | 3      | 15    | 2   |        |
| 12509  | 2      | 2     | 2   |        |
| 12510  |        |       |     |        |
| 12512  | 3      | 0     | 2   |        |
| 12514  | 2      | 4     | 2   |        |
| 12515  | 3      | 2     | 1   | 1      |
| 12520  | 1      | 0     | 2   |        |
| 12522  | 1      | 1     | 2   |        |
| 12526  | 2      | 3     | 1   | 1      |
| 12527  |        |       |     |        |
| 12528  | 1      | 2     | 2   |        |
| 12530  | 3      | 0     | 2   |        |
| 12535  | 3      | 5     | 2   |        |
| 12539  | 1      | 0     | 2   |        |
| 12541  | 5      | 2     | 1   | 1      |
| 12542  | 1      | 0     | 2   |        |
| 12545  | 3      | 2     | 2   |        |
| 12547  | 1      | 2     | 2   |        |
| 12549  | 3      | 0     | 2   |        |
| 12550  | 1      | 1     | 2   |        |
| 12555  |        |       |     |        |
| 12557  | 2      | 8     | 2   |        |
| 12559  | 2      | 2     | 2   |        |
| 12561  | 3      | 2     | 2   |        |
| 12562  | 2      | 1     | 2   |        |
| 12563  | 1      | 2     | 2   |        |

| respid | Q40_13 | Q41_1 | Q42 | Q42b_1 |
|--------|--------|-------|-----|--------|
| 12565  | 4      | 15    | 2   |        |
| 12566  |        |       |     |        |
| 12570  |        |       |     |        |
| 12571  | 1      | 0     | 2   |        |
| 12572  | 1      | 2     | 2   |        |
| 12578  |        |       |     |        |
| 12579  | 2      | 2     | 2   |        |
| 12581  | 1      | 5     | 2   |        |
| 12582  | 2      | 0     | 2   |        |
| 12585  | 2      | 2     | 2   |        |
| 12586  | 2      | 0     | 2   |        |
| 12588  | 2      | 10    | 2   |        |
| 12589  | 2      | 6     | 2   |        |
| 12590  | 1      | 0     | 2   |        |
| 12591  | 3      | 3     | 2   |        |
| 12593  | 3      | 2     | 2   |        |
| 12594  | 3      | 8     | 2   |        |
| 12599  | 3      | 1     | 2   |        |
| 12600  | 2      | 5     | 2   |        |
| 12602  | 3      | 2     | 1   | 1      |
| 12606  | 4      | 2     | 2   |        |
| 12607  |        |       |     |        |
| 12608  |        |       |     |        |
| 12610  | 4      | 3     | 1   | 1      |
| 12611  | 1      | 0     | 2   |        |
| 12613  | 5      | 7     | 1   | 4      |
| 12616  | 3      | 1     | 2   |        |
| 12617  | 3      | 6     | 2   |        |
| 12619  | 1      | 3     | 2   |        |
| 12622  |        |       |     |        |
| 12628  | 1      | 0     | 2   |        |
| 12631  | 2      | 5     | 2   |        |

| respid | Q40_13 | Q41_1 | Q42 | Q42b_1 |
|--------|--------|-------|-----|--------|
| 12635  | 4      | 2     | 2   |        |
| 12638  | 1      | 0     | 2   |        |
| 12639  | 1      | 3     | 2   |        |
| 12640  | 1      | 3     | 2   |        |
| 12643  | 1      | 0     | 2   |        |
| 12646  | 5      | 2     | 1   | 2      |
| 12648  | 4      | 4     | 1   | 2      |
| 12650  | 2      | 2     | 2   |        |
| 12651  | 1      | 3     | 2   |        |
| 12658  | 3      | 1     | 2   |        |
| 12662  | 2      | 0     | 2   |        |
| 12663  | 2      | 3     | 2   |        |
| 12664  | 4      | 0     | 2   |        |
| 12669  | 6      | 8     | 1   | 3      |
| 12670  | 3      | 2     | 2   |        |
| 12673  |        |       |     |        |
| 12675  | 1      | 12    | 1   | 1      |
| 12677  | 3      | 2     | 2   |        |
| 12679  | 1      | 4     | 2   |        |
| 12682  | 2      | 4     | 2   |        |
| 12696  | 3      | 0     | 2   |        |
| 12697  | 4      | 4     | 2   |        |
| 12699  | 1      | 2     | 2   |        |
| 12700  | 2      | 0     | 2   |        |
| 12701  | 2      | 2     | 2   |        |
| 12702  | 2      | 5     | 2   |        |
| 12704  | 4      | 2     | 2   |        |
| 12705  | 1      | 30    | 2   |        |
| 12709  | 3      | 0     | 2   |        |
| 12710  | 2      | 5     | 2   |        |
| 12713  | 2      | 1     | 2   |        |
| 12716  | 4      | 3     | 2   |        |

| respid | Q40_13 | Q41_1 | Q42 | Q42b_1 |
|--------|--------|-------|-----|--------|
| 12719  | 3      | 1     | 2   |        |
| 12720  | 2      | 5     | 2   |        |
| 12723  | 1      | 3     | 2   |        |
| 12726  | 4      | 3     | 2   |        |
| 12728  | 2      | 3     | 2   |        |
| 12729  | 1      | 3     | 2   |        |
| 12731  | 2      | 3     | 2   |        |
| 12732  | 2      | 2     | 2   |        |
| 12733  | 5      | 0     | 2   |        |
| 12736  | 1      | 0     | 2   |        |
| 12737  | 3      | 3     | 2   |        |
| 12739  | 4      | 4     | 1   | 1      |
| 12742  | 3      | 3     | 2   |        |
| 12743  | 6      | 5     | 1   | 5      |
| 12744  | 1      | 3     | 2   |        |
| 12747  | 3      | 3     | 2   |        |
| 12751  | 1      | 2     | 2   |        |
| 12754  | 2      | 2     | 2   |        |
| 12756  | 2      | 1     | 2   |        |
| 12757  | 2      | 5     | 2   |        |
| 12760  | 3      | 1     | 2   |        |
| 12761  | 2      | 3     | 2   |        |
| 12762  | 3      | 2     | 2   |        |
| 12766  | 2      | 2     | 2   |        |
| 12769  | 1      | 0     | 2   |        |
| 12770  | 2      | 5     | 1   | 4      |
| 12773  | 6      | 22    | 2   |        |
| 12780  | 1      | 1     | 1   | 1      |
| 12789  | 1      | 0     | 2   |        |
| 12792  | 4      | 4     | 1   | 4      |
| 12795  | 3      | 0     | 2   |        |
| 12804  | 3      | 3     | 1   | 3      |

| respid | Q40_13 | Q41_1 | Q42 | Q42b_1 |
|--------|--------|-------|-----|--------|
| 12811  | 1      | 2     | 2   |        |
| 12813  | 3      | 5     | 2   |        |
| 12814  | 3      | 0     | 2   |        |
| 12815  | 1      | 0     | 2   |        |
| 12816  | 2      | 0     | 2   |        |
| 12817  | 1      | 1     | 2   |        |
| 12818  | 1      | 4     | 2   |        |
| 12819  | 1      | 0     | 2   |        |
| 12820  | 1      | 0     | 2   |        |
| 12821  | 1      | 0     | 2   |        |
| 12824  | 1      | 4     | 2   |        |
| 12827  | 2      | 1     | 1   | 1      |
| 12836  | 5      | 0     | 2   |        |
| 12837  | 1      | 0     | 2   |        |
| 12838  | 2      | 5     | 2   |        |
| 12845  | 1      | 5     | 2   |        |
| 12847  | 5      | 10    | 2   |        |
| 12849  | 5      | 5     | 2   |        |
| 12850  | 2      | 6     | 2   |        |
| 12852  | 1      | 0     | 2   |        |
| 12853  | 5      | 4     | 2   |        |
| 12854  | 1      | 1     | 1   | 1      |
| 12860  | 1      | 0     | 2   |        |
| 12861  | 1      | 0     | 2   |        |
| 12863  | 1      | 0     | 2   |        |
| 12865  | 1      | 0     | 2   |        |
| 12870  | 2      | 1     | 1   | 1      |
| 12871  | 1      | 0     | 2   |        |
| 12873  | 2      | 2     | 2   |        |
| 12877  | 1      | 2     | 2   |        |
| 12880  | 2      | 1     | 2   |        |
| 12881  | 1      | 1     | 2   |        |



| respid | Q40_13 | Q41_1 | Q42 | Q42b_1 |
|--------|--------|-------|-----|--------|
| 12882  | 1      | 2     | 2   |        |
| 12883  | 1      | 7     | 2   |        |
| 12885  | 3      | 0     | 2   |        |
| 12887  | 1      | 2     | 2   |        |
| 12889  | 2      | 0     | 2   |        |
| 12890  | 2      | 1     | 2   |        |
| 12891  | 2      | 6     | 2   |        |
| 12892  | 3      | 6     | 1   | 5      |
| 12893  | 1      | 0     | 2   |        |
| 12895  | 2      | 1     | 1   | 1      |
| 12898  | 1      | 1     | 2   |        |
| 12907  | 3      | 2     | 1   | 1      |
| 12908  | 1      | 30    | 2   |        |
| 12909  |        |       |     |        |
| 12914  | 1      | 20    | 2   |        |
| 12915  | 3      | 10    | 2   |        |
| 12916  |        |       |     |        |
| 12921  | 1      | 1     | 2   |        |
| 12922  | 4      | 0     | 2   |        |
| 12923  | 3      | 4     | 1   | 2      |
| 12926  | 1      | 2     | 2   |        |
| 12927  | 1      | 0     | 2   |        |
| 12932  | 1      | 0     | 2   |        |
| 12936  | 1      | 0     | 2   |        |
| 12937  | 1      | 2     | 2   |        |
| 12938  | 4      | 10    | 1   | 3      |
| 12939  | 1      | 0     | 2   |        |
| 12940  | 3      | 4     | 1   | 4      |
| 12945  | 2      | 0     | 1   | 0      |
| 12946  | 2      | 1     | 1   | 1      |
| 12947  | 3      | 2     | 1   | 2      |
| 12948  | 5      | 5     | 1   | 5      |

| respid | Q40_13 | Q41_1 | Q42 | Q42b_1 |
|--------|--------|-------|-----|--------|
| 12951  | 2      | 2     | 1   | 1      |
| 12952  | 1      | 3     | 2   |        |
| 12954  | 2      | 5     | 2   |        |
| 12960  | 1      | 1     | 2   |        |
| 12961  | 1      | 2     | 2   |        |
| 12962  | 1      | 0     | 2   |        |
| 12963  | 1      | 0     | 2   |        |
| 12964  | 1      | 5     | 2   |        |
| 12966  | 1      | 1     | 2   |        |
| 12967  | 2      | 0     | 2   |        |
| 12969  | 2      | 3     | 2   |        |
| 12970  | 3      | 2     | 2   |        |
| 12974  | 4      | 5     | 1   | 5      |
| 12979  |        |       |     |        |
| 12980  | 1      | 0     | 2   |        |
| 12983  | 1      | 1     | 2   |        |
| 12988  | 2      | 0     | 2   |        |
| 12994  | 1      | 5     | 2   |        |
| 12995  | 1      | 2     | 2   |        |
| 12996  | 1      | 15    | 2   |        |
| 12998  | 1      | 4     | 2   |        |
| 12999  | 1      | 0     | 2   |        |
| 13001  | 2      | 1     | 1   | 1      |
| 13005  | 1      | 0     | 2   |        |
| 13006  | 4      | 6     | 2   |        |
| 13007  | 1      | 8     | 2   |        |
| 13011  | 4      | 0     | 2   |        |
| 13012  | 1      | 0     | 2   |        |
| 13013  | 4      | 2     | 1   | 2      |
| 13016  | 1      | 0     | 2   |        |
| 13018  | 1      | 3     | 2   |        |
| 13020  |        |       |     |        |

| respid | Q40_13 | Q41_1 | Q42 | Q42b_1 |
|--------|--------|-------|-----|--------|
| 13024  | 1      | 0     | 2   |        |
| 13025  | 1      | 0     | 2   |        |
| 13027  | 2      | 0     | 2   |        |
| 13031  | 1      | 1     | 2   |        |
| 13032  | 5      | 2     | 1   | 2      |
| 13034  | 1      | 6     | 2   |        |
| 13036  | 3      | 2     | 2   |        |
| 13037  | 1      | 6     | 2   |        |
| 13038  | 4      | 2     | 1   | 2      |
| 13039  | 1      | 0     | 2   |        |
| 13040  | 2      | 3     | 2   |        |
| 13041  | 2      | 1     | 2   |        |
| 13045  | 3      | 2     | 2   |        |
| 13046  | 1      | 3     | 2   |        |
| 13048  | 1      | 2     | 2   |        |
| 13051  | 2      | 2     | 2   |        |
| 13053  | 1      | 0     | 2   |        |
| 13055  | 3      | 0     | 2   |        |
| 13059  | 1      | 0     | 2   |        |
| 13068  | 1      | 3     | 2   |        |
| 13069  | 2      | 9     | 2   |        |
| 13076  | 3      | 3     | 2   |        |
| 13081  | 1      | 0     | 2   |        |
| 13082  | 1      | 2     | 2   |        |
| 13084  | 2      | 2     | 2   |        |
| 13085  | 3      | 13    | 2   |        |
| 13086  | 1      | 0     | 2   |        |
| 13093  | 2      | 1     | 2   |        |
| 13094  | 3      | 2     | 2   |        |
| 13097  | 1      | 1     | 2   |        |
| 13098  | 1      | 0     | 2   |        |
| 13099  | 2      | 24    | 2   |        |

| respid | Q40_13 | Q41_1 | Q42 | Q42b_1 |
|--------|--------|-------|-----|--------|
| 13100  | 1      | 6     | 2   |        |
| 13101  |        |       |     |        |
| 13103  |        |       |     |        |
| 13105  | 1      | 0     | 2   |        |
| 13106  | 1      | 20    | 2   |        |
| 13107  | 2      | 5     | 2   |        |
| 13110  | 2      | 2     | 2   |        |
| 13118  | 2      | 0     | 2   |        |
| 13120  | 5      | 3     | 2   |        |
| 13130  | 1      | 50    | 2   |        |
| 13133  | 3      | 1     | 2   |        |
| 13134  | 1      | 4     | 2   |        |
| 13139  | 2      | 2     | 2   |        |
| 13142  | 1      | 0     | 2   |        |
| 13143  | 2      | 0     | 2   |        |
| 13145  | 2      | 0     | 2   |        |
| 13148  | 1      | 5     | 2   |        |
| 13149  | 1      | 0     | 2   |        |
| 13151  | 3      | 12    | 1   | 5      |
| 13153  | 1      | 2     | 2   |        |
| 13158  | 1      | 8     | 2   |        |
| 13160  | 2      | 4     | 2   |        |
| 13162  | 4      | 4     | 1   | 2      |
| 13169  | 1      | 0     | 2   |        |
| 13172  | 1      | 3     | 2   |        |
| 13173  | 1      | 0     | 2   |        |
| 13176  | 1      | 5     | 2   |        |
| 13179  | 1      | 0     | 2   |        |
| 13184  | 4      | 0     | 2   |        |
| 13185  | 3      | 5     | 2   |        |
| 13186  | 1      | 0     | 2   |        |
| 13188  | 2      | 3     | 2   |        |

| respid | Q40_13 | Q41_1 | Q42 | Q42b_1 |
|--------|--------|-------|-----|--------|
| 13190  | 2      | 3     | 1   | 3      |
| 13192  | 1      | 2     | 2   |        |
| 13193  |        |       |     |        |
| 13201  | 3      | 2     | 2   |        |
| 13207  | 1      | 5     | 2   |        |
| 13208  |        |       |     |        |
| 13209  | 4      | 1     | 1   | 1      |
| 13212  | 2      | 2     | 2   |        |
| 13215  | 2      | 1     | 2   |        |
| 13218  | 2      | 20    | 1   | 1      |
| 13219  | 1      | 0     | 2   |        |
| 13224  | 1      | 3     | 2   |        |
| 13225  | 1      | 0     | 2   |        |
| 13226  | 1      | 6     | 2   |        |
| 13232  | 1      | 0     | 2   |        |
| 13237  | 2      | 0     | 2   |        |
| 13239  | 3      | 0     | 2   |        |
| 13241  | 1      | 3     | 2   |        |
| 13243  | 1      | 0     | 2   |        |
| 13247  | 6      | 0     | 2   |        |
| 13248  | 1      | 10    | 2   |        |
| 13251  | 2      | 5     | 2   |        |
| 13256  | 1      | 0     | 2   |        |
| 13260  | 2      | 1     | 2   |        |
| 13261  | 2      | 2     | 2   |        |
| 13264  | 1      | 0     | 2   |        |
| 13273  | 1      | 6     | 2   |        |
| 13274  | 1      | 0     | 2   |        |
| 13276  | 1      | 20    | 2   |        |
| 13278  |        |       |     |        |
| 13279  | 1      | 3     | 2   |        |
| 13282  | 1      | 0     | 2   |        |

| respid | Q40_13 | Q41_1 | Q42 | Q42b_1 |
|--------|--------|-------|-----|--------|
| 13283  | 3      | 4     | 1   | 1      |
| 13285  | 1      | 5     | 2   |        |
| 13286  | 2      | 0     | 2   |        |
| 13299  | 1      | 1     | 2   |        |
| 13300  | 3      | 5     | 2   |        |
| 13301  |        |       |     |        |
| 13303  | 2      | 12    | 2   |        |
| 13304  | 2      | 10    | 2   |        |
| 13307  | 1      | 3     | 2   |        |
| 13308  | 1      | 2     | 2   |        |
| 13312  | 1      | 10    | 2   |        |
| 13313  | 1      | 2     | 2   |        |
| 13314  | 3      | 5     | 2   |        |
| 13318  | 3      | 0     | 2   |        |
| 13320  | 1      | 6     | 2   |        |
| 13322  | 2      | 2     | 1   | 1      |
| 13324  | 1      | 5     | 2   |        |
| 13325  | 2      | 10    | 1   | 1      |
| 13327  | 1      | 5     | 2   |        |
| 13330  | 1      | 0     | 2   |        |
| 13332  | 1      | 12    | 2   |        |
| 13333  | 1      | 0     | 2   |        |
| 13334  | 1      | 0     | 2   |        |
| 13351  | 2      | 2     | 1   | 2      |
| 13353  | 1      | 2     | 2   |        |
| 13354  | 1      | 12    | 2   |        |
| 13355  | 2      | 3     | 2   |        |
| 13358  | 1      | 2     | 2   |        |
| 13359  | 5      | 3     | 2   |        |
| 13360  | 4      | 5     | 2   |        |
| 13364  | 6      | 0     | 2   |        |
| 13365  | 3      | 4     | 2   |        |

| respid | Q40_13 | Q41_1 | Q42 | Q42b_1 |
|--------|--------|-------|-----|--------|
| 13368  | 1      | 0     | 2   |        |
| 13370  | 1      | 3     | 2   |        |
| 13375  | 1      | 0     | 2   |        |
| 13384  | 2      | 0     | 2   |        |
| 13387  | 2      | 1     | 1   | 1      |
| 13395  | 2      | 8     | 2   |        |
| 13398  | 1      | 1     | 2   |        |
| 13404  | 2      | 1     | 2   |        |
| 13405  | 2      | 2     | 2   |        |
| 13408  |        |       |     |        |
| 13411  | 1      | 30    | 1   | 2      |
| 13413  | 1      | 0     | 2   |        |
| 13419  | 1      | 0     | 2   |        |
| 13420  | 1      | 0     | 2   |        |
| 13427  | 3      | 1     | 1   | 1      |
| 13441  | 5      | 20    | 2   |        |
| 13444  | 1      | 12    | 2   |        |
| 13456  | 1      | 0     | 2   |        |
| 13466  | 2      | 4     | 2   |        |
| 13468  | 1      | 2     | 2   |        |
| 13475  | 1      | 0     | 2   |        |
| 13484  | 1      | 0     | 2   |        |
| 13486  | 2      | 1     | 2   |        |
| 13487  | 1      | 15    | 2   |        |
| 13491  |        |       |     |        |
| 13496  | 1      | 8     | 1   | 2      |
| 13497  | 1      | 0     | 2   |        |
| 13498  | 2      | 25    | 2   |        |
| 13502  |        |       |     |        |
| 13503  | 3      | 4     | 1   | 2      |
| 13505  | 1      | 12    | 2   |        |
| 13509  | 1      | 2     | 2   |        |

| respid | Q40_13 | Q41_1 | Q42 | Q42b_1 |
|--------|--------|-------|-----|--------|
| 13510  | 3      | 2     | 2   |        |
| 13518  | 2      | 4     | 1   | 2      |
| 13521  | 1      | 2     | 2   |        |
| 13523  | 2      | 2     | 1   | 1      |
| 13528  | 1      | 2     | 2   |        |
| 13531  | 1      | 0     | 2   |        |
| 13532  | 1      | 0     | 2   |        |
| 13533  | 1      | 1     | 2   |        |
| 13534  |        |       |     |        |
| 13535  | 1      | 2     | 2   |        |
| 13538  | 2      | 2     | 1   | 2      |
| 13540  | 2      | 10    | 2   |        |
| 13541  | 2      | 1     | 2   |        |
| 13542  | 2      | 6     | 2   |        |
| 13550  | 1      | 2     | 2   |        |
| 13553  | 3      | 30    | 2   |        |
| 13554  | 1      | 25    | 2   |        |
| 13555  | 3      | 3     | 2   |        |
| 13556  | 1      | 5     | 2   |        |
| 13563  | 4      | 5     | 2   |        |
| 13564  | 3      | 0     | 2   |        |
| 13567  |        |       |     |        |
| 13568  | 4      | 7     | 2   |        |
| 13570  |        |       |     |        |
| 13573  | 2      | 0     | 2   |        |
| 13575  | 3      | 3     | 2   |        |
| 13577  | 5      | 7     | 2   |        |
| 13580  | 5      | 7     | 1   | 6      |
| 13582  | 1      | 2     | 2   |        |
| 13584  | 5      | 7     | 2   |        |
| 13585  |        |       |     |        |
| 13586  | 2      | 3     | 2   |        |



| respid | Q40_13 | Q41_1 | Q42 | Q42b_1 |
|--------|--------|-------|-----|--------|
| 13587  | 1      | 4     | 2   |        |
| 13592  | 5      | 7     | 2   |        |
| 13596  | 1      | 0     | 2   |        |
| 13597  | 1      | 5     | 2   |        |
| 13599  | 3      | 10    | 2   |        |
| 13601  | 2      | 1     | 2   |        |
| 13604  | 1      | 0     | 2   |        |
| 13608  | 2      | 0     | 2   |        |
| 13616  | 2      | 0     | 2   |        |
| 13618  | 2      | 2     | 1   | 2      |
| 13619  | 2      | 0     | 2   |        |
| 13626  |        |       |     |        |
| 13628  | 2      | 2     | 1   | 1      |
| 13640  | 3      | 1     | 2   |        |
| 13645  | 2      | 0     | 2   |        |
| 13648  |        |       |     |        |
| 13653  | 1      | 2     | 2   |        |
| 13655  | 1      | 0     | 2   |        |
| 13662  | 2      | 15    | 2   |        |
| 13670  | 3      | 10    | 2   |        |
| 13673  | 2      | 15    | 2   |        |
| 13674  | 2      | 0     | 2   |        |
| 13675  | 1      | 0     | 2   |        |
| 13678  | 3      | 5     | 1   | 5      |
| 13680  | 3      | 1     | 1   | 1      |
| 13681  | 1      | 0     | 2   |        |
| 13683  | 1      | 5     | 2   |        |
| 13684  | 2      | 0     | 2   |        |
| 13685  | 1      | 0     | 2   |        |
| 13687  |        |       |     |        |
| 13690  | 2      | 2     | 2   |        |
| 13700  | 5      | 1     | 1   | 1      |

| respid | Q40_13 | Q41_1 | Q42 | Q42b_1 |
|--------|--------|-------|-----|--------|
| 13705  | 3      | 0     | 2   |        |
| 13710  | 1      | 0     | 2   |        |
| 13711  | 1      | 0     | 2   |        |
| 13713  | 1      | 0     | 2   |        |
| 13716  | 2      | 0     | 2   |        |
| 13721  | 2      | 3     | 2   |        |
| 13722  | 5      | 0     | 2   |        |
| 13723  | 2      | 2     | 1   | 1      |
| 13726  | 3      | 6     | 1   | 2      |
| 13728  | 2      | 2     | 2   |        |
| 13730  | 3      | 5     | 2   |        |
| 13734  | 1      | 1     | 2   |        |
| 13736  | 5      | 2     | 2   |        |
| 13737  | 2      | 0     | 2   |        |
| 13739  | 3      | 0     | 2   |        |
| 13742  |        |       |     |        |
| 13746  | 1      | 5     | 2   |        |
| 13747  | 2      | 0     | 2   |        |
| 13749  | 1      | 0     | 2   |        |
| 13751  | 3      | 1     | 2   |        |
| 13752  | 3      | 12    | 2   |        |
| 13756  | 2      | 5     | 2   |        |
| 13757  | 1      | 0     | 2   |        |
| 13767  | 2      | 1     | 1   | 0      |
| 13771  | 1      | 0     | 2   |        |
| 13772  | 6      | 3     | 2   |        |
| 13779  |        |       |     |        |
| 13782  | 1      | 0     | 2   |        |
| 13783  | 1      | 0     | 2   |        |
| 13785  | 2      | 3     | 2   |        |
| 13786  | 1      | 0     | 2   |        |
| 13792  | 2      | 5     | 1   | 5      |

| respid | Q40_13 | Q41_1 | Q42 | Q42b_1 |
|--------|--------|-------|-----|--------|
| 13796  | 2      | 0     | 2   |        |
| 13798  | 1      | 1     | 2   |        |
| 13799  | 2      | 0     | 2   |        |
| 13804  | 1      | 0     | 2   |        |
| 13805  | 1      | 0     | 2   |        |
| 13810  | 3      | 20    | 2   |        |
| 13811  | 1      | 4     | 2   |        |
| 13819  | 5      | 0     | 2   |        |
| 13821  | 5      | 10    | 1   | 4      |
| 13824  | 4      | 0     | 2   |        |
| 13828  | 2      | 0     | 2   |        |
| 13829  | 6      | 14    | 1   | 7      |
| 13831  |        |       |     |        |
| 13833  | 2      | 1     | 2   |        |
| 13835  | 6      | 2     | 2   |        |
| 13838  |        |       |     |        |
| 13839  | 3      | 9     | 1   | 4      |
| 13845  |        |       |     |        |
| 13846  | 2      | 12    | 2   |        |
| 13853  | 2      | 3     | 1   | 2      |
| 13855  | 5      | 2     | 1   | 2      |
| 13858  | 1      | 2     | 1   | 2      |
| 13860  |        |       |     |        |
| 13865  | 5      | 8     | 1   | 5      |
| 13870  | 1      | 1     | 2   |        |
| 13872  | 4      | 6     | 1   | 3      |
| 13873  | 2      | 0     | 2   |        |
| 13874  |        |       |     |        |
| 13875  | 5      | 2     | 1   | 2      |
| 13881  |        |       |     |        |
| 13887  | 4      | 0     | 2   |        |
| 13888  | 1      | 3     | 1   | 2      |

| respid | Q40_13 | Q41_1 | Q42 | Q42b_1 |
|--------|--------|-------|-----|--------|
| 13889  | 4      | 20    | 1   | 10     |
| 13895  | 6      | 3     | 2   |        |
| 13897  |        |       |     |        |
| 13898  | 2      | 2     | 2   |        |
| 13901  | 1      | 0     | 2   |        |
| 13902  | 5      | 10    | 1   | 8      |
| 13903  | 3      | 0     | 2   |        |
| 13905  | 3      | 2     | 1   | 2      |
| 13908  | 3      | 15    | 1   | 10     |
| 13909  | 1      | 1     | 1   | 0      |
| 13910  | 4      | 14    | 1   | 12     |
| 13911  |        |       |     |        |
| 13914  | 2      | 30    | 1   | 8      |
| 13920  | 2      | 30    | 1   | 12     |
| 13926  | 1      | 2     | 2   |        |
| 13929  | 3      | 2     | 1   | 2      |
| 13930  | 6      | 4     | 1   | 2      |
| 13931  |        |       |     |        |
| 13932  | 2      | 4     | 2   |        |
| 13934  | 2      | 28    | 1   | 11     |
| 13938  | 1      | 4     | 2   |        |
| 13942  | 1      | 2     | 2   |        |
| 13945  | 3      | 25    | 1   | 13     |
| 13947  | 3      | 0     | 2   |        |
| 13948  |        |       |     |        |
| 13959  | 1      | 2     | 2   |        |
| 13962  | 1      | 0     | 2   |        |
| 13963  | 2      | 0     | 2   |        |
| 13964  | 3      | 1     | 2   |        |
| 13966  | 1      | 2     | 1   | 2      |
| 13968  | 4      | 0     | 2   |        |
| 13971  | 1      | 0     | 2   |        |

| respid | Q40_13 | Q41_1 | Q42 | Q42b_1 |
|--------|--------|-------|-----|--------|
| 13979  | 3      | 2     | 1   | 1      |
| 13980  | 2      | 3     | 1   | 2      |
| 13981  | 2      | 12    | 2   |        |
| 13982  | 1      | 6     | 2   |        |
| 13984  | 3      | 1     | 2   |        |
| 13989  | 1      | 4     | 2   |        |
| 13990  | 2      | 1     | 2   |        |
| 13992  | 5      | 50    | 2   |        |
| 13998  | 2      | 0     | 2   |        |
| 13999  | 2      | 16    | 1   | 8      |
| 14000  | 1      | 0     | 2   |        |
| 14003  | 2      | 6     | 2   |        |
| 14004  | 1      | 0     | 2   |        |
| 14006  | 1      | 4     | 2   |        |
| 14007  | 1      | 0     | 2   |        |
| 14008  |        |       |     |        |
| 14013  | 2      | 4     | 2   |        |
| 14015  | 1      | 1     | 2   |        |
| 14018  | 1      | 9     | 2   |        |
| 14021  | 2      | 2     | 1   | 2      |
| 14023  | 1      | 5     | 2   |        |
| 14024  | 6      | 0     | 2   |        |
| 14026  | 1      | 0     | 2   |        |
| 14030  | 2      | 6     | 2   |        |
| 14032  | 2      | 6     | 1   | 2      |
| 14040  |        |       |     |        |
| 14045  | 1      | 0     | 2   |        |
| 14048  | 2      | 18    | 1   | 3      |
| 14049  | 4      | 2     | 1   | 1      |
| 14050  | 1      | 5     | 2   |        |
| 14051  | 5      | 5     | 1   | 1      |
| 14052  | 1      | 0     | 2   |        |

| respid | Q40_13 | Q41_1 | Q42 | Q42b_1 |
|--------|--------|-------|-----|--------|
| 14054  | 1      | 3     | 2   |        |
| 14055  |        |       |     |        |
| 14057  | 2      | 0     | 2   |        |
| 14058  | 1      | 3     | 2   |        |
| 14059  | 1      | 2     | 2   |        |
| 14060  | 2      | 0     | 2   |        |
| 14061  | 3      | 0     | 2   |        |
| 14071  | 1      | 2     | 2   |        |
| 14073  | 1      | 5     | 2   |        |
| 14074  | 4      | 5     | 1   | 0      |
| 14076  | 1      | 3     | 2   |        |
| 14080  | 1      | 4     | 2   |        |
| 14082  | 1      | 0     | 2   |        |
| 14083  | 1      | 4     | 2   |        |
| 14084  | 2      | 6     | 2   |        |
| 14085  |        |       |     |        |
| 14086  | 5      | 3     | 2   |        |
| 14088  | 1      | 0     | 2   |        |
| 14090  | 2      | 0     | 2   |        |
| 14092  | 1      | 6     | 2   |        |
| 14093  | 1      | 0     | 2   |        |
| 14096  | 1      | 6     | 2   |        |
| 14103  | 3      | 17    | 1   | 4      |
| 14105  | 1      | 0     | 2   |        |
| 14106  | 2      | 1     | 2   |        |
| 14107  | 2      | 2     | 1   | 2      |
| 14108  | 3      | 20    | 1   | 6      |
| 14112  | 2      | 2     | 1   | 1      |
| 14114  | 4      | 2     | 2   |        |
| 14115  | 1      | 0     | 2   |        |
| 14116  | 1      | 1     | 2   |        |
| 14117  | 1      | 0     | 2   |        |

| respid | Q40_13 | Q41_1 | Q42 | Q42b_1 |
|--------|--------|-------|-----|--------|
| 14118  | 3      | 17    | 1   | 4      |
| 14119  | 1      | 1     | 2   |        |
| 14127  |        |       |     |        |
| 14129  | 3      | 12    | 2   |        |
| 14131  | 2      | 7     | 2   |        |
| 14132  | 1      | 2     | 2   |        |
| 14133  | 4      | 18    | 1   | 8      |
| 14134  | 1      | 12    | 2   |        |
| 14135  | 2      | 17    | 1   | 4      |
| 14136  | 5      | 0     | 2   |        |
| 14138  |        |       |     |        |
| 14139  |        |       |     |        |
| 14140  | 3      | 1     | 2   |        |
| 14141  | 1      | 6     | 2   |        |
| 14143  | 1      | 10    | 2   |        |
| 14146  | 1      | 0     | 2   |        |
| 14147  | 6      | 6     | 1   | 2      |
| 14148  | 2      | 20    | 2   |        |
| 14151  | 2      | 15    | 2   |        |
| 14152  | 2      | 17    | 1   | 3      |
| 14153  | 2      | 20    | 2   |        |
| 14154  | 2      | 0     | 2   |        |
| 14158  | 1      | 3     | 1   | 1      |
| 14159  | 3      | 2     | 1   | 2      |
| 14160  | 2      | 1     | 1   | 1      |
| 14161  | 4      | 15    | 1   | 4      |
| 14162  | 2      | 12    | 1   | 3      |
| 14165  | 2      | 12    | 1   | 1      |
| 14166  | 2      | 19    | 1   | 3      |
| 14167  | 1      | 0     | 2   |        |
| 14169  | 2      | 2     | 2   |        |
| 14170  | 1      | 5     | 2   |        |

| respid | Q40_13 | Q41_1 | Q42 | Q42b_1 |
|--------|--------|-------|-----|--------|
| 14172  | 3      | 1     | 2   |        |
| 14173  |        |       |     |        |
| 14174  | 2      | 8     | 2   |        |
| 14175  | 1      | 6     | 2   |        |
| 14176  | 1      | 1     | 2   |        |
| 14178  | 1      | 5     | 2   |        |
| 14179  | 1      | 0     | 2   |        |
| 14180  | 2      | 35    | 1   | 6      |
| 14183  | 4      | 2     | 1   | 2      |
| 14185  | 1      | 0     | 2   |        |
| 14187  | 5      | 10    | 2   |        |
| 14189  | 1      | 15    | 2   |        |
| 14191  | 3      | 28    | 1   | 5      |
| 14192  |        |       |     |        |
| 14195  | 4      | 5     | 2   |        |
| 14197  | 2      | 3     | 2   |        |
| 14203  | 2      | 18    | 1   | 2      |
| 14204  | 1      | 2     | 2   |        |
| 14205  | 1      | 100   | 2   |        |
| 14208  | 1      | 2     | 2   |        |
| 14211  | 6      | 7     | 1   | 3      |
| 14214  | 1      | 6     | 2   |        |
| 14215  | 3      | 3     | 2   |        |
| 14216  | 3      | 5     | 1   | 2      |
| 14218  | 1      | 5     | 2   |        |
| 14220  | 1      | 0     | 2   |        |
| 14223  |        |       |     |        |
| 14225  | 3      | 18    | 1   | 3      |
| 14226  | 1      | 12    | 2   |        |
| 14228  | 2      | 2     | 1   | 2      |
| 14231  | 3      | 1     | 2   |        |
| 14233  | 1      | 0     | 2   |        |



| respid | Q40_13 | Q41_1 | Q42 | Q42b_1 |
|--------|--------|-------|-----|--------|
| 14237  | 1      | 3     | 2   |        |
| 14238  | 2      | 26    | 2   |        |
| 14243  | 3      | 12    | 2   |        |
| 14245  | 1      | 0     | 2   |        |
| 14246  | 2      | 1     | 2   |        |
| 14248  | 6      | 1     | 2   |        |
| 14250  | 1      | 1     | 2   |        |
| 14253  | 1      | 9     | 2   |        |
| 14254  | 1      | 0     | 2   |        |
| 14255  | 1      | 3     | 2   |        |
| 14257  | 1      | 3     | 2   |        |
| 14258  | 1      | 0     | 2   |        |
| 14259  | 3      | 12    | 2   |        |
| 14260  |        |       |     |        |
| 14261  | 5      | 5     | 1   | 5      |
| 14263  | 3      | 12    | 2   |        |
| 14264  | 1      | 0     | 2   |        |
| 14266  | 3      | 1     | 2   |        |
| 14267  | 1      | 1     | 2   |        |
| 14268  | 1      | 0     | 2   |        |
| 14275  | 1      | 2     | 2   |        |
| 14278  | 2      | 15    | 2   |        |
| 14279  |        |       |     |        |
| 14280  |        |       |     |        |
| 14281  | 1      | 10    | 2   |        |
| 14282  | 1      | 2     | 1   | 2      |
| 14283  | 2      | 0     | 2   |        |
| 14286  | 1      | 30    | 2   |        |
| 14287  |        |       |     |        |
| 14288  | 2      | 6     | 2   |        |
| 14291  |        |       |     |        |
| 14292  |        |       |     |        |

| respid | Q40_13 | Q41_1 | Q42 | Q42b_1 |
|--------|--------|-------|-----|--------|
| 14293  | 1      | 0     | 2   |        |
| 14304  | 4      | 5     | 1   | 3      |
| 14308  | 2      | 12    | 2   |        |
| 14313  | 1      | 2     | 2   |        |
| 14314  | 3      | 12    | 1   | 12     |
| 14316  | 1      | 5     | 2   |        |
| 14317  | 2      | 1     | 2   |        |
| 14318  | 4      | 3     | 2   |        |
| 14319  | 2      | 1     | 2   |        |
| 14320  | 3      | 2     | 1   | 2      |
| 14321  | 2      | 5     | 2   |        |
| 14322  | 3      | 18    | 1   | 6      |
| 14326  | 6      | 1     | 2   |        |
| 14327  | 4      | 6     | 1   | 3      |
| 14328  |        |       |     |        |
| 14330  | 1      | 0     | 2   |        |
| 14332  | 2      | 1     | 2   |        |
| 14334  | 1      | 1     | 2   |        |
| 14336  | 1      | 0     | 2   |        |
| 14337  | 2      | 2     | 2   |        |
| 14339  |        |       |     |        |
| 14340  | 4      | 2     | 2   |        |
| 14341  | 1      | 2     | 1   | 2      |
| 14344  | 1      | 0     | 2   |        |
| 14345  | 1      | 10    | 2   |        |
| 14346  |        |       |     |        |
| 14348  | 1      | 0     | 2   |        |
| 14349  | 1      | 5     | 2   |        |
| 14358  | 4      | 16    | 1   | 6      |
| 14360  | 1      | 12    | 2   |        |
| 14362  |        |       |     |        |
| 14366  | 2      | 2     | 2   |        |

| respid | Q40_13 | Q41_1 | Q42 | Q42b_1 |
|--------|--------|-------|-----|--------|
| 14367  | 4      | 12    | 1   | 3      |
| 14369  | 4      | 1     | 2   |        |
| 14371  | 1      | 3     | 2   |        |
| 14372  | 1      | 4     | 2   |        |
| 14374  | 1      | 5     | 2   |        |
| 14376  | 2      | 5     | 2   |        |
| 14377  |        |       |     |        |
| 14378  | 1      | 1     | 2   |        |
| 14379  | 1      | 2     | 2   |        |
| 14381  | 2      | 0     | 2   |        |
| 14383  | 2      | 0     | 2   |        |
| 14384  | 3      | 1     | 2   |        |
| 14385  | 3      | 5     | 1   | 4      |
| 14386  | 4      | 1     | 2   |        |
| 14390  | 3      | 7     | 2   |        |
| 14391  | 1      | 0     | 2   |        |
| 14392  | 2      | 2     | 2   |        |
| 14393  | 4      | 14    | 1   | 4      |
| 14394  | 2      | 1     | 2   |        |
| 14395  |        |       |     |        |
| 14396  |        |       |     |        |
| 14397  | 1      | 4     | 1   | 4      |
| 14398  | 3      | 0     | 2   |        |
| 14399  | 2      | 1     | 2   |        |
| 14400  | 1      | 20    | 2   |        |
| 14403  | 1      | 5     | 2   |        |
| 14404  | 1      | 6     | 2   |        |
| 14405  | 2      | 0     | 2   |        |
| 14407  | 3      | 0     | 2   |        |
| 14408  | 4      | 6     | 1   | 2      |
| 14410  | 5      | 9     | 1   | 8      |
| 14415  | 1      | 12    | 2   |        |

| respid | Q40_13 | Q41_1 | Q42 | Q42b_1 |
|--------|--------|-------|-----|--------|
| 14419  | 6      | 15    | 1   | 15     |
| 14420  |        |       |     |        |
| 14421  |        |       |     |        |
| 14423  | 1      | 4     | 2   |        |
| 14424  | 1      | 0     | 2   |        |
| 14425  | 1      | 2     | 2   |        |
| 14426  | 1      | 2     | 2   |        |
| 14427  | 1      | 3     | 2   |        |
| 14428  | 4      | 6     | 1   | 4      |
| 14431  | 2      | 4     | 2   |        |
| 14433  | 4      | 2     | 2   |        |
| 14434  | 1      | 4     | 2   |        |
| 14435  | 2      | 1     | 2   |        |
| 14436  | 3      | 20    | 2   |        |
| 14438  | 2      | 0     | 2   |        |
| 14442  | 4      | 10    | 1   | 6      |
| 14447  | 2      | 20    | 2   |        |
| 14448  | 2      | 0     | 2   |        |
| 14450  | 2      | 10    | 2   |        |
| 14451  | 2      | 2     | 2   |        |
| 14454  | 3      | 3     | 1   | 2      |
| 14455  | 1      | 3     | 2   |        |
| 14456  | 3      | 6     | 2   |        |
| 14457  | 4      | 5     | 1   | 2      |
| 14458  | 5      | 4     | 1   | 2      |
| 14459  |        |       |     |        |
| 14460  | 2      | 0     | 2   |        |
| 14464  | 2      | 2     | 2   |        |
| 14465  | 2      | 2     | 2   |        |
| 14466  | 2      | 10    | 1   | 2      |
| 14467  | 2      | 100   | 2   |        |
| 14470  | 1      | 15    | 2   |        |

| respid | Q40_13 | Q41_1 | Q42 | Q42b_1 |
|--------|--------|-------|-----|--------|
| 14472  | 1      | 0     | 2   |        |
| 14473  | 1      | 0     | 2   |        |
| 14474  |        |       |     |        |
| 14477  | 5      | 1     | 2   |        |
| 14478  | 1      | 4     | 2   |        |
| 14479  |        |       |     |        |
| 14484  | 1      | 1     | 2   |        |
| 14485  |        |       |     |        |
| 14486  | 2      | 1     | 2   |        |
| 14487  | 2      | 0     | 2   |        |
| 14488  | 2      | 4     | 1   | 4      |
| 14491  | 3      | 3     | 2   |        |
| 14495  | 1      | 0     | 2   |        |
| 14500  | 3      | 3     | 2   |        |
| 14502  | 2      | 0     | 2   |        |
| 14504  | 3      | 5     | 1   | 3      |
| 14505  | 5      | 4     | 1   | 2      |
| 14507  | 1      | 1     | 2   |        |
| 14517  | 3      | 1     | 2   |        |
| 14518  | 1      | 5     | 2   |        |
| 14519  | 1      | 5     | 2   |        |
| 14521  | 3      | 10    | 1   | 2      |
| 14522  | 1      | 0     | 2   |        |
| 14526  | 1      | 3     | 2   |        |
| 14528  | 3      | 2     | 1   | 1      |
| 14529  | 1      | 10    | 2   |        |
| 14530  | 2      | 1     | 2   |        |
| 14531  | 5      | 5     | 1   | 4      |
| 14534  | 3      | 5     | 1   | 2      |
| 14538  | 1      | 0     | 2   |        |
| 14539  | 3      | 2     | 2   |        |
| 14545  | 2      | 1     | 2   |        |

| respid | Q40_13 | Q41_1 | Q42 | Q42b_1 |
|--------|--------|-------|-----|--------|
| 14546  | 4      | 1     | 2   |        |
| 14551  | 1      | 14    | 2   |        |
| 14553  | 4      | 18    | 1   | 6      |
| 14557  |        |       |     |        |
| 14558  | 2      | 0     | 2   |        |
| 14559  | 3      | 10    | 1   | 2      |
| 14560  | 2      | 6     | 2   |        |
| 14563  | 1      | 2     | 2   |        |
| 14565  | 1      | 2     | 2   |        |
| 14571  | 5      | 5     | 1   | 2      |
| 14572  | 1      | 0     | 2   |        |
| 14573  | 2      | 3     | 2   |        |
| 14575  | 4      | 0     | 2   |        |
| 14576  | 3      | 12    | 1   | 2      |
| 14578  | 2      | 1     | 2   |        |
| 14579  | 1      | 0     | 2   |        |
| 14580  | 2      | 0     | 2   |        |
| 14582  | 2      | 0     | 2   |        |
| 14585  | 2      | 3     | 2   |        |
| 14588  | 1      | 0     | 2   |        |
| 14590  | 4      | 6     | 1   | 2      |
| 14592  | 3      | 5     | 1   | 3      |
| 14593  | 1      | 0     | 2   |        |
| 14595  | 2      | 1     | 2   |        |
| 14597  | 3      | 10    | 2   |        |
| 14600  | 2      | 6     | 2   |        |
| 14602  | 3      | 16    | 1   | 8      |
| 14604  | 1      | 1     | 2   |        |
| 14605  | 1      | 0     | 2   |        |
| 14609  | 2      | 3     | 2   |        |
| 14610  | 1      | 5     | 2   |        |
| 14611  | 2      | 0     | 2   |        |

| respid | Q40_13 | Q41_1 | Q42 | Q42b_1 |
|--------|--------|-------|-----|--------|
| 14612  | 3      | 0     | 2   |        |
| 14614  | 3      | 6     | 2   |        |
| 14615  | 1      | 20    | 2   |        |
| 14618  | 4      | 12    | 1   | 3      |
| 14621  |        |       |     |        |
| 14624  | 2      | 8     | 2   |        |
| 14626  | 2      | 1     | 2   |        |
| 14627  | 3      | 15    | 2   |        |
| 14628  | 6      | 14    | 1   | 5      |
| 14631  | 2      | 0     | 2   |        |
| 14633  | 4      | 6     | 1   | 2      |
| 14642  | 3      | 2     | 1   | 1      |
| 14647  | 1      | 0     | 2   |        |
| 14658  | 3      | 5     | 2   |        |
| 14659  | 4      | 12    | 1   | 2      |
| 14660  | 2      | 1     | 1   | 1      |
| 14661  | 2      | 3     | 1   | 1      |
| 14662  | 5      | 5     | 1   | 2      |
| 14663  | 1      | 4     | 2   |        |
| 14670  | 2      | 2     | 1   | 1      |
| 14671  |        |       |     |        |
| 14672  | 3      | 5     | 1   | 2      |
| 14675  | 2      | 1     | 1   | 1      |
| 14676  | 3      | 0     | 2   |        |
| 14677  | 6      | 8     | 1   | 4      |
| 14678  | 2      | 0     | 2   |        |
| 14681  | 3      | 6     | 1   | 3      |
| 14684  | 1      | 1     | 2   |        |
| 14688  | 1      | 3     | 2   |        |
| 14690  | 3      | 2     | 1   | 2      |
| 14694  | 3      | 6     | 1   | 2      |
| 14696  | 2      | 1     | 1   | 1      |

| respid | Q40_13 | Q41_1 | Q42 | Q42b_1 |
|--------|--------|-------|-----|--------|
| 14700  |        |       |     |        |
| 14701  | 3      | 0     | 2   |        |
| 14703  | 5      | 7     | 1   | 4      |
| 14707  | 2      | 1     | 2   |        |
| 14711  | 4      | 7     | 1   | 3      |
| 14714  | 1      | 5     | 2   |        |
| 14715  | 3      | 6     | 1   | 2      |
| 14716  | 1      | 12    | 2   |        |
| 14720  | 3      | 6     | 2   |        |
| 14725  | 4      | 0     | 2   |        |
| 14726  | 3      | 6     | 2   |        |
| 14734  | 1      | 0     | 2   |        |
| 14735  | 1      | 0     | 2   |        |
| 14736  | 3      | 12    | 1   | 2      |
| 14740  | 2      | 0     | 2   |        |
| 14745  | 2      | 5     | 1   | 3      |
| 14747  | 2      | 4     | 2   |        |
| 14750  | 2      | 6     | 1   | 2      |
| 14751  | 1      | 3     | 1   | 1      |
| 14753  | 2      | 0     | 2   |        |
| 14756  | 6      | 6     | 1   | 2      |
| 14780  | 3      | 2     | 2   |        |
| 14782  | 1      | 0     | 2   |        |
| 14800  | 6      | 3     | 1   | 2      |
| 14801  | 1      | 1     | 2   |        |
| 14802  | 3      | 5     | 1   | 4      |
| 14805  | 5      | 5     | 2   |        |
| 14811  | 4      | 5     | 1   | 4      |
| 14814  | 3      | 2     | 1   | 1      |
| 14822  | 2      | 5     | 1   | 3      |
| 14827  | 6      | 2     | 1   | 2      |
| 14828  | 4      | 8     | 1   | 5      |



| respid | Q40_13 | Q41_1 | Q42 | Q42b_1 |
|--------|--------|-------|-----|--------|
| 14830  |        |       |     |        |
| 14832  | 2      | 4     | 1   | 2      |
| 14835  | 5      | 4     | 2   |        |
| 14841  |        |       |     |        |
| 14849  | 3      | 0     | 2   |        |
| 14850  |        |       |     |        |
| 14851  | 1      | 2     | 2   |        |
| 14856  | 4      | 8     | 1   | 8      |
| 14862  | 3      | 2     | 2   |        |
| 14863  | 1      | 0     | 2   |        |
| 14864  | 2      | 0     | 2   |        |
| 14866  | 2      | 0     | 2   |        |
| 14867  | 4      | 7     | 1   | 7      |
| 14868  | 1      | 1     | 2   |        |
| 14870  | 1      | 1     | 2   |        |
| 14873  |        |       |     |        |
| 14878  | 1      | 12    | 2   |        |
| 14879  |        |       |     |        |
| 14881  | 3      | 3     | 2   |        |
| 14888  | 6      | 5     | 1   | 2      |
| 14895  | 2      | 0     | 2   |        |
| 14900  | 5      | 1     | 1   | 0      |
| 14912  |        |       |     |        |
| 14922  | 3      | 5     | 2   |        |
| 14923  | 6      | 3     | 1   | 1      |
| 14924  | 4      | 0     | 2   |        |
| 14925  | 6      | 10    | 1   | 3      |
| 14926  | 3      | 3     | 2   |        |
| 14927  | 4      | 7     | 1   | 7      |
| 14930  | 2      | 0     | 2   |        |
| 14937  | 5      | 6     | 1   | 4      |
| 14938  | 6      | 6     | 1   | 3      |

| respid | Q40_13 | Q41_1 | Q42 | Q42b_1 |
|--------|--------|-------|-----|--------|
| 14939  | 5      | 20    | 1   | 20     |
| 14942  |        |       |     |        |
| 14943  |        |       |     |        |
| 14953  | 4      | 2     | 2   |        |
| 14954  | 3      | 2     | 2   |        |
| 14955  | 3      | 3     | 1   | 2      |
| 14957  | 3      | 5     | 1   | 3      |
| 14958  | 6      | 6     | 1   | 5      |
| 14959  | 3      | 10    | 1   | 6      |
| 14961  |        |       |     |        |
| 14963  | 4      | 8     | 1   | 2      |
| 14964  | 1      | 4     | 2   |        |
| 14965  | 2      | 5     | 2   |        |
| 14967  | 5      | 2     | 1   | 1      |
| 14970  | 6      | 5     | 1   | 3      |
| 14972  | 3      | 17    | 1   | 4      |
| 14975  | 5      | 5     | 1   | 2      |
| 14977  | 1      | 4     | 2   |        |
| 14982  | 1      | 0     | 2   |        |
| 14985  | 2      | 13    | 1   | 3      |
| 14986  |        |       |     |        |
| 14987  |        |       |     |        |
| 14988  | 6      | 6     | 1   | 3      |
| 14989  | 6      | 4     | 2   |        |
| 14993  | 3      | 20    | 1   | 2      |
| 15001  | 2      | 4     | 2   |        |
| 15002  | 5      | 2     | 2   |        |
| 15006  | 2      | 23    | 2   |        |
| 15007  | 1      | 3     | 2   |        |
| 15014  | 4      | 10    | 1   | 10     |
| 15020  | 2      | 27    | 1   | 3      |
| 15021  | 4      | 3     | 2   |        |

| respid | Q40_13 | Q41_1 | Q42 | Q42b_1 |
|--------|--------|-------|-----|--------|
| 15023  | 6      | 6     | 1   | 1      |
| 15030  | 1      | 3     | 2   |        |
| 15032  |        |       |     |        |
| 15033  | 3      | 3     | 2   |        |
| 15034  | 3      | 17    | 1   | 1      |
| 15035  | 3      | 0     | 2   |        |
| 15037  | 2      | 0     | 2   |        |
| 15039  | 5      | 8     | 1   | 3      |
| 15040  | 1      | 0     | 2   |        |
| 15042  | 5      | 1     | 2   |        |
| 15044  |        |       |     |        |
| 15045  | 1      | 0     | 2   |        |
| 15046  | 1      | 1     | 1   | 1      |
| 15052  | 3      | 8     | 1   | 2      |
| 15058  | 3      | 2     | 1   | 2      |
| 15063  | 3      | 12    | 1   | 4      |
| 15066  | 1      | 2     | 1   | 2      |
| 15069  | 2      | 1     | 2   |        |
| 15071  | 3      | 1     | 1   | 1      |
| 15076  | 4      | 7     | 1   | 6      |
| 15078  | 1      | 0     | 2   |        |
| 15087  | 5      | 4     | 2   |        |
| 15090  | 3      | 4     | 2   |        |
| 15091  | 3      | 3     | 1   | 3      |
| 15092  | 2      | 1     | 2   |        |
| 15096  | 2      | 2     | 1   | 2      |
| 15106  | 5      | 7     | 1   | 6      |
| 15108  |        |       |     |        |
| 15113  | 2      | 1     | 1   | 1      |
| 15116  |        |       |     |        |
| 15119  | 2      | 3     | 1   | 1      |
| 15120  | 2      | 2     | 1   | 2      |

| respid | Q40_13 | Q41_1 | Q42 | Q42b_1 |
|--------|--------|-------|-----|--------|
| 15121  | 5      | 0     | 2   |        |
| 15123  |        |       |     |        |
| 15124  | 1      | 0     | 2   |        |
| 15128  | 1      | 2     | 2   |        |
| 15131  |        |       |     |        |
| 15136  | 2      | 3     | 1   | 3      |
| 15137  | 1      | 1     | 1   | 1      |
| 15141  | 4      | 0     | 2   |        |
| 15144  | 3      | 1     | 1   | 1      |
| 15147  | 3      | 0     | 2   |        |
| 15151  | 4      | 14    | 1   | 6      |
| 15154  | 5      | 8     | 1   | 5      |
| 15157  | 2      | 1     | 2   |        |
| 15164  | 2      | 10    | 1   | 10     |
| 15168  | 3      | 10    | 2   |        |
| 15169  | 1      | 1     | 1   | 1      |
| 15172  | 6      | 15    | 1   | 15     |
| 15177  | 4      | 7     | 2   |        |
| 15178  |        |       |     |        |
| 15180  | 3      | 5     | 2   |        |
| 15181  | 1      | 1     | 2   |        |
| 15182  | 5      | 2     | 2   |        |
| 15183  |        |       |     |        |
| 15188  | 4      | 1     | 2   |        |
| 15190  | 6      | 2     | 2   |        |
| 15195  |        |       |     |        |
| 15201  | 6      | 2     | 2   |        |
| 15203  | 3      | 1     | 2   |        |
| 15204  | 1      | 0     | 2   |        |
| 15207  |        |       |     |        |
| 15208  | 5      | 5     | 1   | 3      |
| 15209  | 2      | 0     | 2   |        |

| respid | Q40_13 | Q41_1 | Q42 | Q42b_1 |
|--------|--------|-------|-----|--------|
| 15212  |        |       |     |        |
| 15213  | 3      | 22    | 1   | 2      |
| 15219  | 3      | 32    | 1   | 3      |
| 15220  | 4      | 1     | 2   |        |
| 15221  | 2      | 4     | 2   |        |
| 15223  | 4      | 2     | 1   | 2      |
| 15224  | 4      | 29    | 1   | 3      |
| 15225  | 1      | 0     | 2   |        |
| 15226  | 3      | 3     | 2   |        |
| 15230  | 3      | 5     | 2   |        |
| 15231  | 5      | 5     | 2   |        |
| 15232  | 2      | 0     | 2   |        |
| 15237  | 2      | 0     | 2   |        |
| 15239  | 3      | 3     | 2   |        |
| 15241  | 2      | 6     | 2   |        |
| 15242  | 2      | 23    | 2   |        |
| 15247  | 2      | 4     | 2   |        |
| 15248  |        |       |     |        |
| 15251  |        |       |     |        |
| 15257  |        |       |     |        |
| 15260  | 2      | 2     | 2   |        |
| 15261  | 3      | 3     | 1   | 3      |
| 15262  | 5      | 5     | 2   |        |
| 15263  | 5      | 2     | 1   | 1      |
| 15265  | 2      | 3     | 2   |        |
| 15266  | 3      | 10    | 2   |        |
| 15268  | 1      | 5     | 1   | 2      |
| 15269  | 3      | 8     | 2   |        |
| 15270  | 5      | 2     | 1   | 2      |
| 15273  | 3      | 4     | 1   | 2      |
| 15276  | 5      | 3     | 1   | 2      |
| 15277  | 1      | 4     | 2   |        |

| respid | Q40_13 | Q41_1 | Q42 | Q42b_1 |
|--------|--------|-------|-----|--------|
| 15282  | 6      | 0     | 2   |        |
| 15284  | 5      | 3     | 2   |        |
| 15285  | 2      | 0     | 2   |        |
| 15286  | 6      | 5     | 1   | 1      |
| 15288  | 4      | 7     | 1   | 3      |
| 15292  | 5      | 3     | 1   | 3      |
| 15296  | 1      | 1     | 2   |        |
| 15297  | 3      | 0     | 2   |        |
| 15298  |        |       |     |        |
| 15301  | 2      | 0     | 2   |        |
| 15302  | 1      | 0     | 2   |        |
| 15305  | 2      | 0     | 2   |        |
| 15307  | 1      | 0     | 2   |        |
| 15308  | 1      | 1     | 2   |        |
| 15309  | 1      | 3     | 2   |        |
| 15311  | 1      | 0     | 2   |        |
| 15315  | 2      | 4     | 2   |        |
| 15316  | 1      | 2     | 2   |        |
| 15318  |        |       |     |        |
| 15321  | 5      | 3     | 2   |        |
| 15322  | 1      | 12    | 2   |        |
| 15324  | 2      | 1     | 2   |        |
| 15326  | 2      | 3     | 1   | 3      |
| 15327  | 1      | 15    | 2   |        |
| 15328  | 3      | 1     | 2   |        |
| 15330  | 2      | 2     | 2   |        |
| 15332  | 1      | 2     | 2   |        |
| 15333  |        |       |     |        |
| 15334  | 2      | 0     | 2   |        |
| 15336  | 5      | 3     | 1   | 2      |
| 15337  | 1      | 0     | 2   |        |
| 15338  | 3      | 4     | 2   |        |

| respid | Q40_13 | Q41_1 | Q42 | Q42b_1 |
|--------|--------|-------|-----|--------|
| 15339  | 5      | 1     | 2   |        |
| 15341  | 1      | 2     | 2   |        |
| 15344  |        |       |     |        |
| 15345  | 2      | 2     | 2   |        |
| 15350  |        |       |     |        |
| 15351  | 1      | 3     | 1   | 1      |
| 15352  | 1      | 0     | 2   |        |
| 15372  | 2      | 2     | 1   | 2      |
| 15373  | 5      | 6     | 1   | 2      |
| 15376  | 1      | 20    | 2   |        |
| 15377  | 3      | 3     | 2   |        |
| 15382  | 1      | 2     | 1   | 2      |
| 15383  | 4      | 1     | 1   | 1      |
| 15385  | 4      | 0     | 2   |        |
| 15390  | 2      | 6     | 2   |        |
| 15399  |        |       |     |        |
| 15404  | 2      | 1     | 2   |        |
| 15410  | 1      | 1     | 2   |        |
| 15411  | 2      | 10    | 1   | 1      |
| 15412  | 2      | 5     | 2   |        |
| 15413  | 3      | 20    | 1   | 13     |
| 15414  | 2      | 3     | 2   |        |
| 15417  | 1      | 8     | 2   |        |
| 15418  | 2      | 40    | 2   |        |
| 15421  | 3      | 2     | 2   |        |
| 15423  | 1      | 2     | 1   | 1      |
| 15425  | 1      | 5     | 2   |        |
| 15426  | 5      | 3     | 1   | 2      |
| 15430  | 1      | 0     | 2   |        |
| 15431  | 4      | 2     | 2   |        |
| 15435  |        |       |     |        |
| 15436  |        |       |     |        |

| respid | Q40_13 | Q41_1 | Q42 | Q42b_1 |
|--------|--------|-------|-----|--------|
| 15437  |        |       |     |        |
| 15438  | 1      | 0     | 2   |        |
| 15439  | 2      | 0     | 2   |        |
| 15441  | 5      | 3     | 1   | 3      |
| 15443  | 1      | 20    | 2   |        |
| 15446  | 1      | 0     | 2   |        |
| 15449  | 4      | 12    | 1   | 3      |
| 15451  | 5      | 3     | 2   |        |
| 15452  | 4      | 4     | 2   |        |
| 15454  | 1      | 0     | 2   |        |
| 15456  | 1      | 0     | 2   |        |
| 15457  |        |       |     |        |
| 15458  | 2      | 0     | 2   |        |
| 15462  | 4      | 5     | 2   |        |
| 15467  | 4      | 6     | 1   | 4      |
| 15470  | 3      | 3     | 1   | 1      |
| 15472  | 1      | 1     | 2   |        |
| 15476  | 2      | 2     | 2   |        |
| 15477  | 2      | 3     | 2   |        |
| 15488  | 2      | 0     | 2   |        |
| 15489  | 2      | 2     | 2   |        |
| 15490  | 2      | 3     | 2   |        |
| 15496  | 2      | 0     | 2   |        |
| 15497  | 2      | 1     | 2   |        |
| 15498  |        |       |     |        |
| 15509  | 4      | 8     | 1   | 5      |
| 15510  | 2      | 4     | 2   |        |
| 15516  | 1      | 12    | 2   |        |
| 15519  | 1      | 0     | 2   |        |
| 15520  | 3      | 4     | 2   |        |
| 15524  | 2      | 9     | 1   | 0      |
| 15525  | 2      | 3     | 2   |        |



| respid | Q40_13 | Q41_1 | Q42 | Q42b_1 |
|--------|--------|-------|-----|--------|
| 15526  | 3      | 1     | 1   | 1      |
| 15531  | 1      | 2     | 1   | 2      |
| 15532  | 2      | 0     | 2   |        |
| 15534  | 5      | 10    | 1   | 9      |
| 15535  | 4      | 15    | 1   | 15     |
| 15539  | 2      | 0     | 2   |        |
| 15550  | 1      | 3     | 2   |        |
| 15556  | 2      | 3     | 2   |        |
| 15558  | 3      | 15    | 1   | 15     |
| 15565  | 1      | 4     | 2   |        |
| 15567  | 3      | 5     | 1   | 2      |
| 15568  | 3      | 15    | 1   | 15     |
| 15571  | 1      | 0     | 2   |        |
| 15573  | 1      | 0     | 2   |        |
| 15574  | 4      | 15    | 1   | 15     |
| 15576  | 2      | 12    | 2   |        |
| 15587  | 3      | 5     | 2   |        |
| 15588  | 3      | 5     | 1   | 1      |
| 15593  | 4      | 15    | 2   |        |
| 15597  | 1      | 0     | 2   |        |
| 15598  | 1      | 1     | 2   |        |
| 15599  | 1      | 0     | 2   |        |
| 15601  | 3      | 14    | 2   |        |
| 15604  | 2      | 0     | 2   |        |
| 15611  | 1      | 4     | 2   |        |
| 15613  | 1      | 4     | 2   |        |
| 15614  | 1      | 0     | 2   |        |
| 15617  | 3      | 10    | 2   |        |
| 15622  |        |       |     |        |
| 15623  | 2      | 0     | 2   |        |
| 15625  | 1      | 12    | 2   |        |
| 15627  |        |       |     |        |

| respid | Q40_13 | Q41_1 | Q42 | Q42b_1 |
|--------|--------|-------|-----|--------|
| 15628  | 3      | 0     | 2   |        |
| 15633  | 2      | 0     | 2   |        |
| 15634  | 1      | 0     | 2   |        |
| 15637  | 1      | 0     | 2   |        |
| 15644  | 2      | 16    | 2   |        |
| 15645  | 2      | 0     | 2   |        |
| 15649  | 1      | 1     | 2   |        |
| 15650  | 1      | 8     | 2   |        |
| 15651  | 2      | 0     | 2   |        |
| 15657  | 6      | 6     | 1   | 2      |
| 15658  | 1      | 0     | 2   |        |
| 15660  | 3      | 30    | 1   | 6      |
| 15667  | 1      | 0     | 2   |        |
| 15671  | 1      | 3     | 2   |        |
| 15679  | 3      | 10    | 2   |        |
| 15712  | 1      | 1     | 2   |        |
| 15715  | 2      | 3     | 2   |        |
| 15749  | 1      | 1     | 2   |        |
| 15754  | 4      | 22    | 1   | 2      |
| 15756  | 2      | 1     | 2   |        |
| 15773  | 1      | 0     | 2   |        |
| 15774  | 1      | 2     | 2   |        |
| 15776  | 3      | 4     | 2   |        |
| 15777  | 5      | 9     | 1   | 8      |
| 15779  |        |       |     |        |
| 15780  | 3      | 30    | 1   | 4      |
| 15792  | 2      | 2     | 2   |        |
| 15793  | 3      | 7     | 1   | 5      |
| 15796  | 2      | 3     | 1   | 1      |
| 15798  | 1      | 0     | 2   |        |
| 15809  | 2      | 21    | 2   |        |
| 15810  | 1      | 2     | 2   |        |

| respid | Q40_13 | Q41_1 | Q42 | Q42b_1 |
|--------|--------|-------|-----|--------|
| 15815  | 1      | 0     | 2   |        |
| 15816  | 2      | 3     | 2   |        |
| 15817  |        |       |     |        |
| 15821  | 4      | 7     | 1   | 5      |
| 15823  | 3      | 0     | 2   |        |
| 15834  | 2      | 3     | 1   | 1      |
| 15835  |        |       |     |        |
| 15836  | 1      | 0     | 2   |        |
| 15837  | 1      | 12    | 2   |        |
| 15839  | 2      | 2     | 2   |        |
| 15840  | 3      | 4     | 2   |        |
| 15844  | 1      | 3     | 2   |        |
| 15845  | 1      | 20    | 2   |        |
| 15847  | 4      | 9     | 1   | 7      |
| 15848  | 1      | 12    | 2   |        |
| 15849  | 3      | 2     | 1   | 1      |
| 15857  | 2      | 0     | 2   |        |
| 15858  | 2      | 0     | 2   |        |
| 15862  | 4      | 3     | 1   | 2      |
| 15866  | 2      | 2     | 2   |        |
| 15870  | 2      | 4     | 2   |        |
| 15871  | 3      | 1     | 2   |        |
| 15872  | 3      | 3     | 1   | 1      |
| 15873  | 1      | 2     | 2   |        |
| 15874  |        |       |     |        |
| 15875  | 4      | 4     | 2   |        |
| 15876  | 3      | 6     | 2   |        |
| 15882  | 3      | 15    | 1   | 7      |
| 15884  | 2      | 10    | 1   | 3      |
| 15890  | 4      | 4     | 1   | 2      |
| 15892  | 3      | 1     | 1   | 1      |
| 15908  | 2      | 1     | 1   | 1      |

| respid | Q40_13 | Q41_1 | Q42 | Q42b_1 |
|--------|--------|-------|-----|--------|
| 15914  | 2      | 3     | 2   |        |
| 15932  | 4      | 0     | 2   |        |
| 15933  | 1      | 0     | 2   |        |
| 15938  | 1      | 0     | 2   |        |
| 15940  | 6      | 5     | 2   |        |
| 15945  | 3      | 5     | 2   |        |
| 15947  | 4      | 2     | 2   |        |
| 15950  | 2      | 3     | 2   |        |
| 15951  | 3      | 2     | 1   | 1      |
| 15952  | 4      | 8     | 1   | 4      |
| 15953  | 3      | 1     | 1   | 1      |
| 15954  | 4      | 0     | 2   |        |
| 15957  | 4      | 1     | 2   |        |
| 15965  | 3      | 10    | 1   | 10     |
| 15966  |        |       |     |        |
| 15967  | 2      | 3     | 1   | 1      |
| 15968  | 3      | 0     | 2   |        |
| 15970  | 2      | 0     | 2   |        |
| 15973  | 2      | 4     | 2   |        |
| 15974  | 3      | 5     | 2   |        |
| 15975  |        |       |     |        |
| 15980  | 6      | 5     | 1   | 1      |
| 15984  | 2      | 2     | 2   |        |
| 15985  | 3      | 9     | 1   | 2      |
| 15994  |        |       |     |        |
| 15995  | 1      | 10    | 2   |        |
| 16000  | 3      | 5     | 2   |        |
| 16004  | 2      | 2     | 2   |        |
| 16005  | 2      | 4     | 2   |        |
| 16006  |        |       |     |        |
| 16009  | 1      | 0     | 2   |        |
| 16017  | 1      | 3     | 2   |        |

| respid | Q40_13 | Q41_1 | Q42 | Q42b_1 |
|--------|--------|-------|-----|--------|
| 16019  | 3      | 4     | 2   |        |
| 16021  | 1      | 1     | 1   | 1      |
| 16024  | 2      | 0     | 2   |        |
| 16026  | 1      | 5     | 2   |        |
| 16029  |        |       |     |        |
| 16031  | 3      | 15    | 2   |        |
| 16037  | 1      | 0     | 2   |        |
| 16043  | 1      | 0     | 2   |        |
| 16044  | 1      | 1     | 2   |        |
| 16047  | 1      | 0     | 2   |        |
| 16048  | 1      | 8     | 2   |        |
| 16049  | 1      | 1     | 2   |        |
| 16051  | 1      | 3     | 2   |        |
| 16053  | 1      | 20    | 1   | 2      |
| 16054  | 1      | 1     | 2   |        |
| 16069  | 1      | 1     | 2   |        |
| 16070  | 1      | 10    | 2   |        |
| 16074  |        |       |     |        |
| 16076  |        |       |     |        |
| 16078  |        |       |     |        |
| 16081  | 1      | 0     | 2   |        |
| 16085  |        |       |     |        |
| 16088  | 1      | 1     | 2   |        |
| 16091  | 2      | 0     | 2   |        |
| 16092  | 1      | 0     | 2   |        |
| 16093  | 2      | 0     | 2   |        |
| 16097  | 3      | 1     | 2   |        |
| 16100  | 2      | 0     | 2   |        |
| 16101  | 1      | 0     | 2   |        |
| 16105  |        |       |     |        |
| 16118  | 3      | 5     | 1   | 4      |
| 16129  | 1      | 6     | 2   |        |

| respid | Q40_13 | Q41_1 | Q42 | Q42b_1 |
|--------|--------|-------|-----|--------|
| 16130  | 2      | 4     | 1   | 4      |
| 16131  | 4      | 0     | 2   |        |
| 16136  | 1      | 0     | 2   |        |
| 16137  | 1      | 4     | 2   |        |
| 16138  | 2      | 2     | 2   |        |
| 16139  | 2      | 3     | 2   |        |
| 16140  | 1      | 0     | 2   |        |
| 16145  | 2      | 3     | 1   | 1      |
| 16150  | 6      | 50    | 2   |        |
| 16151  | 2      | 0     | 2   |        |
| 16153  | 1      | 0     | 2   |        |
| 16164  | 1      | 2     | 2   |        |
| 16168  | 2      | 4     | 1   | 1      |
| 16173  | 1      | 2     | 2   |        |
| 16174  | 1      | 0     | 2   |        |
| 16177  | 1      | 0     | 2   |        |
| 16185  | 1      | 4     | 2   |        |
| 16189  | 2      | 1     | 2   |        |
| 16192  | 1      | 0     | 2   |        |
| 16193  | 2      | 30    | 2   |        |
| 16194  | 1      | 3     | 2   |        |
| 16196  |        |       |     |        |
| 16202  | 3      | 12    | 1   | 12     |
| 16205  | 3      | 3     | 2   |        |
| 16206  | 2      | 0     | 2   |        |
| 16208  |        |       |     |        |
| 16211  | 4      | 2     | 2   |        |
| 16212  | 1      | 0     | 2   |        |
| 16215  |        |       |     |        |
| 16217  | 2      | 4     | 2   |        |
| 16221  | 1      | 2     | 2   |        |
| 16226  | 2      | 4     | 1   | 1      |

| respid | Q40_13 | Q41_1 | Q42 | Q42b_1 |
|--------|--------|-------|-----|--------|
| 16228  | 3      | 1     | 2   |        |
| 16229  | 1      | 1     | 2   |        |
| 16230  | 1      | 2     | 2   |        |
| 16231  | 3      | 50    | 2   |        |
| 16232  | 2      | 10    | 2   |        |
| 16234  | 3      | 4     | 2   |        |
| 16235  | 4      | 2     | 1   | 1      |
| 16236  | 1      | 14    | 2   |        |
| 16237  | 1      | 2     | 1   | 2      |
| 16238  | 1      | 3     | 1   | 3      |
| 16239  | 1      | 6     | 2   |        |
| 16243  | 1      | 0     | 2   |        |
| 16248  | 2      | 20    | 2   |        |
| 16249  | 1      | 6     | 2   |        |
| 16251  |        |       |     |        |
| 16263  | 1      | 0     | 2   |        |
| 16265  | 2      | 2     | 2   |        |
| 16269  | 1      | 3     | 2   |        |
| 16272  | 2      | 30    | 2   |        |
| 16273  |        |       |     |        |
| 16281  | 1      | 0     | 2   |        |
| 16282  | 1      | 0     | 2   |        |
| 16287  | 1      | 3     | 2   |        |
| 16290  | 1      | 10    | 2   |        |
| 16294  | 1      | 0     | 2   |        |
| 16295  | 1      | 5     | 2   |        |
| 16296  | 1      | 0     | 2   |        |
| 16299  | 5      | 6     | 1   | 2      |
| 16302  | 1      | 0     | 2   |        |
| 16303  | 1      | 3     | 2   |        |
| 16304  | 3      | 2     | 2   |        |
| 16306  | 1      | 0     | 2   |        |

| respid | Q40_13 | Q41_1 | Q42 | Q42b_1 |
|--------|--------|-------|-----|--------|
| 16318  | 2      | 1     | 2   |        |
| 16320  | 2      | 4     | 2   |        |
| 16321  | 2      | 4     | 1   | 1      |
| 16322  | 1      | 0     | 2   |        |
| 16324  | 3      | 0     | 2   |        |
| 16326  | 1      | 0     | 2   |        |
| 16328  | 2      | 4     | 2   |        |
| 16336  | 2      | 3     | 1   | 3      |
| 16341  | 2      | 5     | 2   |        |
| 16342  | 1      | 3     | 2   |        |
| 16343  | 2      | 10    | 2   |        |
| 16345  | 5      | 0     | 2   |        |
| 16349  | 2      | 5     | 2   |        |
| 16355  | 1      | 0     | 2   |        |
| 16364  | 2      | 2     | 1   | 2      |
| 16374  | 1      | 2     | 2   |        |
| 16375  |        |       |     |        |
| 16376  | 3      | 5     | 1   | 5      |
| 16393  | 1      | 0     | 2   |        |
| 16394  | 1      | 0     | 2   |        |
| 16395  | 1      | 0     | 2   |        |
| 16397  | 4      | 2     | 2   |        |
| 16398  | 3      | 6     | 1   | 6      |
| 16402  | 1      | 20    | 2   |        |
| 16405  | 1      | 0     | 2   |        |
| 16416  | 3      | 0     | 2   |        |
| 16422  | 3      | 1     | 2   |        |
| 16429  | 1      | 2     | 2   |        |
| 16430  | 1      | 0     | 2   |        |
| 16432  | 2      | 1     | 2   |        |
| 16433  | 1      | 0     | 2   |        |
| 16434  |        |       |     |        |



| respid | Q40_13 | Q41_1 | Q42 | Q42b_1 |
|--------|--------|-------|-----|--------|
| 16437  | 2      | 0     | 2   |        |
| 16439  | 1      | 2     | 2   |        |
| 16440  | 1      | 3     | 2   |        |
| 16441  | 1      | 5     | 2   |        |
| 16442  | 3      | 1     | 2   |        |
| 16450  | 2      | 6     | 2   |        |
| 16451  | 1      | 1     | 2   |        |
| 16452  | 2      | 12    | 2   |        |
| 16467  | 1      | 5     | 2   |        |
| 16468  |        |       |     |        |
| 16469  | 2      | 10    | 2   |        |
| 16470  |        |       |     |        |
| 16471  | 2      | 0     | 2   |        |
| 16473  | 1      | 2     | 2   |        |
| 16476  | 1      | 10    | 2   |        |
| 16478  | 1      | 0     | 2   |        |
| 16484  | 1      | 0     | 2   |        |
| 16499  | 1      | 1     | 1   | 1      |
| 16502  |        |       |     |        |
| 16505  | 3      | 2     | 2   |        |
| 16514  | 1      | 4     | 2   |        |
| 16515  | 2      | 2     | 2   |        |
| 16517  | 3      | 5     | 1   | 4      |
| 16518  | 1      | 0     | 2   |        |
| 16519  | 2      | 1     | 2   |        |
| 16525  | 3      | 10    | 2   |        |
| 16526  | 1      | 1     | 2   |        |
| 16530  | 1      | 4     | 2   |        |
| 16532  | 1      | 3     | 2   |        |
| 16536  | 1      | 6     | 2   |        |
| 16537  | 4      | 0     | 2   |        |
| 16541  | 4      | 2     | 2   |        |

| respid | Q40_13 | Q41_1 | Q42 | Q42b_1 |
|--------|--------|-------|-----|--------|
| 16543  | 2      | 0     | 2   |        |
| 16544  | 2      | 1     | 2   |        |
| 16545  | 1      | 6     | 2   |        |
| 16546  | 2      | 2     | 2   |        |
| 16548  | 2      | 2     | 2   |        |
| 16552  | 2      | 0     | 2   |        |
| 16559  | 1      | 10    | 2   |        |
| 16564  | 4      | 20    | 2   |        |
| 16565  | 1      | 0     | 1   | 0      |
| 16567  | 2      | 6     | 2   |        |
| 16571  |        |       |     |        |
| 16572  | 3      | 4     | 1   | 2      |
| 16579  | 1      | 1     | 2   |        |
| 16588  | 6      | 12    | 1   | 8      |
| 16599  | 2      | 0     | 2   |        |
| 16605  | 1      | 2     | 2   |        |
| 16622  | 2      | 0     | 2   |        |
| 16635  | 2      | 3     | 1   | 1      |
| 16638  | 1      | 0     | 2   |        |
| 16652  | 1      | 1     | 1   | 1      |
| 16656  | 1      | 0     | 2   |        |
| 16671  |        |       |     |        |
| 16676  | 1      | 0     | 2   |        |
| 16678  | 2      | 0     | 2   |        |
| 16702  | 2      | 0     | 2   |        |
| 16705  | 1      | 5     | 2   |        |
| 16707  | 3      | 10    | 1   | 10     |
| 16711  | 2      | 0     | 2   |        |
| 16712  | 1      | 2     | 2   |        |
| 16716  |        |       |     |        |
| 16724  | 2      | 5     | 2   |        |
| 16727  | 2      | 1     | 1   | 1      |

| respid | Q40_13 | Q41_1 | Q42 | Q42b_1 |
|--------|--------|-------|-----|--------|
| 16734  | 1      | 0     | 2   |        |
| 16740  | 1      | 0     | 2   |        |
| 16748  | 3      | 2     | 2   |        |
| 16759  | 1      | 2     | 2   |        |
| 16761  |        |       |     |        |
| 16763  | 1      | 0     | 2   |        |
| 16764  | 3      | 6     | 1   | 4      |
| 16766  | 1      | 0     | 2   |        |
| 16767  | 1      | 0     | 2   |        |
| 16776  | 1      | 0     | 2   |        |
| 16781  | 1      | 10    | 2   |        |
| 16793  | 2      | 0     | 2   |        |
| 16796  | 4      | 4     | 1   | 2      |
| 16810  | 1      | 2     | 2   |        |
| 16811  | 1      | 2     | 2   |        |
| 16813  |        |       |     |        |
| 16814  | 2      | 4     | 2   |        |
| 16831  | 1      | 0     | 2   |        |
| 16833  | 5      | 10    | 1   | 1      |
| 16839  | 1      | 6     | 2   |        |
| 16843  | 1      | 4     | 2   |        |
| 16860  |        |       |     |        |
| 16871  | 1      | 0     | 2   |        |
| 16881  | 2      | 10    | 2   |        |
| 16884  | 3      | 0     | 2   |        |
| 16891  | 2      | 1     | 2   |        |
| 16909  | 1      | 3     | 2   |        |
| 16911  |        |       |     |        |
| 16922  | 2      | 12    | 1   | 6      |
| 16935  | 3      | 2     | 2   |        |
| 16942  | 1      | 0     | 2   |        |
| 16950  |        |       |     |        |

| respid | Q40_13 | Q41_1 | Q42 | Q42b_1 |
|--------|--------|-------|-----|--------|
| 16952  | 5      | 3     | 1   | 2      |
| 16963  | 1      | 1     | 2   |        |
| 16967  | 4      | 1     | 1   | 1      |
| 16970  | 2      | 2     | 2   |        |
| 16976  | 3      | 1     | 1   | 1      |
| 16982  | 1      | 12    | 2   |        |
| 16995  | 1      | 6     | 2   |        |
| 17004  | 3      | 0     | 2   |        |
| 17006  | 1      | 0     | 2   |        |
| 17009  | 1      | 24    | 1   | 2      |
| 17021  |        |       |     |        |
| 17040  | 1      | 20    | 2   |        |
| 17041  |        |       |     |        |
| 17044  | 2      | 12    | 2   |        |
| 17046  | 4      | 1     | 1   | 1      |
| 17052  | 2      | 14    | 2   |        |
| 17055  | 3      | 0     | 2   |        |
| 17108  | 2      | 60    | 2   |        |
| 17109  | 1      | 3     | 2   |        |
| 17113  |        |       |     |        |
| 17115  | 3      | 0     | 2   |        |
| 17132  |        |       |     |        |
| 17135  | 3      | 10    | 1   | 5      |
| 17138  | 1      | 4     | 2   |        |
| 17141  | 1      | 3     | 2   |        |
| 17143  | 3      | 2     | 2   |        |
| 17148  | 1      | 6     | 2   |        |
| 17151  | 1      | 10    | 2   |        |
| 17153  | 1      | 2     | 2   |        |
| 17154  | 1      | 3     | 2   |        |
| 17157  | 1      | 0     | 2   |        |
| 17160  | 2      | 3     | 2   |        |

| respid | Q40_13 | Q41_1 | Q42 | Q42b_1 |
|--------|--------|-------|-----|--------|
| 17167  | 1      | 2     | 2   |        |
| 17169  | 2      | 6     | 2   |        |
| 17174  | 6      | 2     | 1   | 1      |
| 17179  | 1      | 2     | 2   |        |
| 17180  | 3      | 0     | 2   |        |
| 17182  | 1      | 0     | 2   |        |
| 17184  | 3      | 3     | 2   |        |
| 17186  | 1      | 0     | 2   |        |
| 17187  | 1      | 0     | 2   |        |
| 17192  | 2      | 14    | 2   |        |
| 17197  | 2      | 12    | 2   |        |
| 17217  | 1      | 0     | 2   |        |
| 17226  | 1      | 10    | 2   |        |
| 17228  | 3      | 2     | 2   |        |
| 17245  | 2      | 1     | 2   |        |
| 17247  |        |       |     |        |
| 17258  | 1      | 0     | 2   |        |
| 17259  | 2      | 2     | 2   |        |
| 17262  | 1      | 0     | 2   |        |
| 17265  | 1      | 0     | 2   |        |
| 17281  | 1      | 3     | 2   |        |
| 17282  | 2      | 5     | 2   |        |
| 17293  | 1      | 0     | 2   |        |
| 17306  | 3      | 24    | 2   |        |
| 17312  | 1      | 3     | 2   |        |
| 17318  | 2      | 2     | 2   |        |
| 17328  | 2      | 5     | 1   | 1      |
| 17343  | 1      | 5     | 2   |        |
| 17344  | 2      | 0     | 2   |        |
| 17348  | 1      | 0     | 2   |        |
| 17352  | 1      | 4     | 1   | 2      |
| 17355  | 1      | 0     | 2   |        |

| respid | Q40_13 | Q41_1 | Q42 | Q42b_1 |
|--------|--------|-------|-----|--------|
| 17356  | 3      | 0     | 2   |        |
| 17359  | 1      | 7     | 2   |        |
| 17373  | 3      | 2     | 2   |        |
| 17381  | 2      | 0     | 2   |        |
| 17388  | 2      | 3     | 2   |        |
| 17394  | 2      | 1     | 1   | 1      |
| 17401  |        |       |     |        |
| 17403  | 1      | 0     | 2   |        |
| 17411  |        |       |     |        |
| 17423  | 1      | 3     | 2   |        |
| 17427  |        |       |     |        |
| 17433  | 1      | 3     | 2   |        |
| 17441  | 1      | 5     | 2   |        |
| 17442  | 1      | 0     | 2   |        |
| 17447  | 1      | 6     | 2   |        |
| 17458  | 1      | 0     | 2   |        |
| 17474  | 1      | 0     | 2   |        |
| 17475  | 3      | 1     | 2   |        |
| 17476  | 2      | 9     | 2   |        |
| 17480  | 1      | 0     | 2   |        |
| 17484  | 1      | 6     | 2   |        |
| 17490  | 1      | 1     | 2   |        |
| 17491  | 1      | 0     | 2   |        |
| 17500  | 1      | 0     | 2   |        |
| 17507  | 1      | 1     | 2   |        |
| 17517  | 1      | 4     | 2   |        |
| 17520  | 1      | 2     | 2   |        |
| 17521  | 1      | 2     | 2   |        |
| 17531  | 1      | 0     | 2   |        |
| 17540  | 2      | 0     | 2   |        |
| 17550  | 1      | 0     | 2   |        |
| 17551  | 1      | 2     | 2   |        |

| respid | Q40_13 | Q41_1 | Q42 | Q42b_1 |
|--------|--------|-------|-----|--------|
| 17555  | 3      | 5     | 1   | 3      |
| 17556  | 1      | 3     | 1   | 1      |
| 17574  | 2      | 3     | 2   |        |
| 17575  | 1      | 2     | 2   |        |
| 17582  | 1      | 1     | 2   |        |
| 17587  |        |       |     |        |
| 17601  | 1      | 12    | 2   |        |
| 17607  | 3      | 6     | 1   | 3      |
| 17609  | 1      | 3     | 2   |        |
| 17611  | 1      | 0     | 2   |        |
| 17613  | 1      | 0     | 2   |        |
| 17615  | 1      | 7     | 2   |        |
| 17620  | 2      | 2     | 2   |        |
| 17624  | 2      | 0     | 2   |        |
| 17635  | 1      | 12    | 2   |        |
| 17643  | 1      | 0     | 2   |        |
| 17645  | 2      | 0     | 2   |        |
| 17646  | 1      | 0     | 2   |        |
| 17649  | 1      | 2     | 2   |        |
| 17658  | 1      | 1     | 2   |        |
| 17666  |        |       |     |        |
| 17670  | 2      | 0     | 2   |        |
| 17678  | 1      | 0     | 2   |        |
| 17679  | 2      | 1     | 1   | 1      |
| 17695  | 1      | 1     | 2   |        |
| 17697  | 2      | 0     | 2   |        |
| 17698  | 2      | 6     | 2   |        |
| 17723  | 3      | 1     | 1   | 1      |
| 17727  | 1      | 4     | 2   |        |
| 17734  | 1      | 1     | 2   |        |
| 17737  | 1      | 2     | 2   |        |
| 17748  | 1      | 2     | 2   |        |

| respid | Q40_13 | Q41_1 | Q42 | Q42b_1 |
|--------|--------|-------|-----|--------|
| 17749  |        |       |     |        |
| 17754  | 4      | 6     | 2   |        |
| 17766  | 3      | 12    | 2   |        |
| 17777  | 1      | 6     | 2   |        |
| 17780  | 1      | 10    | 2   |        |
| 17788  | 1      | 6     | 2   |        |
| 17801  | 2      | 1     | 2   |        |
| 17803  | 1      | 1     | 2   |        |
| 17807  | 1      | 0     | 2   |        |
| 17808  | 1      | 0     | 2   |        |
| 17809  | 2      | 0     | 2   |        |
| 17821  | 1      | 3     | 2   |        |
| 17827  | 3      | 1     | 1   | 1      |
| 17834  | 5      | 1     | 2   |        |
| 17838  | 2      | 0     | 2   |        |
| 17842  | 1      | 0     | 2   |        |
| 17862  | 1      | 3     | 2   |        |
| 17863  | 1      | 0     | 2   |        |
| 17871  | 2      | 0     | 2   |        |
| 17872  | 1      | 0     | 2   |        |
| 17903  | 2      | 3     | 1   | 2      |
| 17906  | 1      | 12    | 2   |        |
| 17910  | 2      | 3     | 1   | 3      |
| 17922  | 2      | 0     | 2   |        |
| 17923  | 3      | 0     | 2   |        |
| 17925  | 2      | 2     | 2   |        |
| 17926  | 1      | 0     | 2   |        |
| 17937  | 1      | 0     | 2   |        |
| 17956  | 2      | 0     | 2   |        |
| 17958  | 1      | 1     | 2   |        |
| 17985  | 1      | 0     | 2   |        |
| 17989  | 1      | 5     | 2   |        |



| respid | Q40_13 | Q41_1 | Q42 | Q42b_1 |
|--------|--------|-------|-----|--------|
| 17995  | 1      | 1     | 2   |        |
| 18000  | 2      | 5     | 2   |        |
| 18010  | 1      | 6     | 2   |        |
| 18015  | 1      | 12    | 2   |        |
| 18018  | 3      | 0     | 2   |        |
| 18031  | 1      | 20    | 2   |        |
| 18033  | 1      | 2     | 2   |        |
| 18036  | 2      | 0     | 2   |        |
| 18041  | 1      | 0     | 2   |        |
| 18068  |        |       |     |        |
| 18080  | 1      | 2     | 2   |        |
| 18081  | 3      | 3     | 2   |        |
| 18083  | 4      | 4     | 2   |        |
| 18113  | 2      | 6     | 2   |        |
| 18115  | 2      | 0     | 2   |        |
| 18117  | 5      | 3     | 2   |        |
| 18129  | 1      | 3     | 2   |        |
| 18132  | 2      | 6     | 2   |        |
| 18146  | 2      | 12    | 2   |        |
| 18147  | 5      | 6     | 2   |        |
| 18153  |        |       |     |        |
| 18154  | 1      | 2     | 2   |        |
| 18157  | 1      | 0     | 2   |        |
| 18166  | 1      | 10    | 1   | 4      |
| 18169  | 1      | 2     | 2   |        |
| 18171  | 2      | 5     | 2   |        |
| 18173  | 2      | 1     | 1   | 0      |
| 18204  | 1      | 5     | 2   |        |
| 18210  | 2      | 2     | 1   | 2      |
| 18212  |        |       |     |        |
| 18220  | 4      | 10    | 1   | 3      |
| 18221  | 1      | 12    | 2   |        |

| respid | Q40_13 | Q41_1 | Q42 | Q42b_1 |
|--------|--------|-------|-----|--------|
| 18228  | 1      | 10    | 2   |        |
| 18231  | 1      | 0     | 2   |        |
| 18233  | 1      | 6     | 1   | 6      |
| 18235  | 2      | 1     | 2   |        |
| 18237  |        |       |     |        |
| 18250  | 1      | 1     | 2   |        |
| 18253  | 2      | 0     | 2   |        |
| 18264  | 1      | 10    | 2   |        |
| 18285  | 1      | 12    | 2   |        |
| 18287  |        |       |     |        |
| 18296  | 1      | 3     | 2   |        |
| 18299  | 2      | 2     | 1   | 1      |
| 18313  | 1      | 2     | 1   | 2      |
| 18321  | 1      | 0     | 2   |        |
| 18324  |        |       |     |        |
| 18329  | 1      | 1     | 2   |        |
| 18332  | 1      | 0     | 2   |        |
| 18339  | 4      | 2     | 1   | 2      |
| 18340  | 1      | 0     | 2   |        |
| 18348  | 1      | 1     | 2   |        |
| 18355  | 1      | 6     | 2   |        |
| 18360  | 2      | 12    | 2   |        |
| 18380  | 1      | 1     | 2   |        |
| 18403  | 2      | 0     | 2   |        |
| 18405  | 2      | 0     | 2   |        |
| 18409  | 3      | 0     | 2   |        |
| 18445  | 1      | 0     | 2   |        |
| 18458  | 1      | 3     | 2   |        |
| 18477  | 3      | 1     | 2   |        |
| 18481  | 1      | 3     | 2   |        |
| 18491  | 1      | 0     | 2   |        |
| 18492  | 1      | 0     | 2   |        |

| respid | Q40_13 | Q41_1 | Q42 | Q42b_1 |
|--------|--------|-------|-----|--------|
| 18494  | 1      | 10    | 2   |        |
| 18495  | 1      | 12    | 2   |        |
| 18496  | 1      | 20    | 2   |        |
| 18507  | 3      | 1     | 1   | 1      |
| 18509  |        |       |     |        |
| 18510  | 1      | 0     | 2   |        |
| 18513  | 2      | 0     | 2   |        |
| 18525  |        |       |     |        |
| 18526  | 3      | 0     | 2   |        |
| 18527  | 2      | 14    | 2   |        |
| 18536  | 2      | 1     | 2   |        |
| 18540  | 1      | 10    | 2   |        |
| 18548  | 1      | 1     | 2   |        |
| 18550  |        |       |     |        |
| 18556  | 1      | 6     | 2   |        |
| 18561  |        |       |     |        |
| 18577  | 2      | 5     | 1   | 5      |
| 18580  | 1      | 0     | 2   |        |
| 18633  | 2      | 3     | 2   |        |
| 18635  | 2      | 0     | 2   |        |
| 18636  |        |       |     |        |
| 18645  | 4      | 1     | 1   | 1      |
| 18649  | 2      | 0     | 2   |        |
| 18664  | 1      | 0     | 2   |        |
| 18668  | 2      | 1     | 2   |        |
| 18682  | 4      | 4     | 1   | 4      |
| 18685  | 2      | 0     | 2   |        |
| 18688  | 2      | 0     | 2   |        |
| 18689  | 3      | 10    | 1   | 4      |
| 18693  | 6      | 4     | 2   |        |
| 18694  | 1      | 12    | 2   |        |
| 18705  | 1      | 2     | 2   |        |

| respid | Q40_13 | Q41_1 | Q42 | Q42b_1 |
|--------|--------|-------|-----|--------|
| 18710  | 1      | 0     | 2   |        |
| 18715  | 3      | 12    | 1   | 3      |
| 18718  | 1      | 2     | 2   |        |
| 18727  | 1      | 0     | 2   |        |
| 18732  | 1      | 0     | 2   |        |
| 18735  | 1      | 4     | 2   |        |
| 18742  | 1      | 0     | 2   |        |
| 18745  | 1      | 4     | 2   |        |
| 18747  | 1      | 0     | 2   |        |
| 18750  | 1      | 8     | 2   |        |
| 18751  | 2      | 4     | 2   |        |
| 18753  | 2      | 0     | 2   |        |
| 18754  |        |       |     |        |
| 18759  | 1      | 1     | 2   |        |
| 18780  | 1      | 2     | 2   |        |
| 18782  | 3      | 0     | 2   |        |
| 18807  | 5      | 5     | 1   | 1      |
| 18815  | 1      | 0     | 2   |        |
| 18818  | 3      | 4     | 2   |        |
| 18820  | 1      | 4     | 2   |        |
| 18823  | 5      | 10    | 1   | 5      |
| 18825  | 1      | 8     | 2   |        |
| 18828  |        |       |     |        |
| 18832  | 1      | 20    | 2   |        |
| 18834  | 2      | 5     | 2   |        |
| 18835  | 4      | 10    | 1   | 8      |
| 18837  | 1      | 0     | 2   |        |
| 18842  | 1      | 0     | 2   |        |
| 18846  |        |       |     |        |
| 18855  | 2      | 0     | 2   |        |
| 18856  | 3      | 0     | 2   |        |
| 18887  | 1      | 12    | 1   | 12     |

| respid | Q40_13 | Q41_1 | Q42 | Q42b_1 |
|--------|--------|-------|-----|--------|
| 18903  | 2      | 1     | 1   | 1      |
| 18906  | 2      | 2     | 2   |        |
| 18910  |        |       |     |        |
| 18919  | 1      | 7     | 2   |        |
| 18928  | 1      | 5     | 1   | 2      |
| 18931  | 3      | 2     | 2   |        |
| 18939  | 2      | 3     | 2   |        |
| 18946  | 2      | 0     | 2   |        |
| 18952  | 3      | 2     | 2   |        |
| 18954  | 2      | 1     | 2   |        |
| 18982  |        |       |     |        |
| 18986  | 3      | 5     | 2   |        |
| 18989  | 2      | 2     | 2   |        |
| 18990  | 1      | 0     | 2   |        |
| 18996  | 3      | 0     | 2   |        |
| 18998  | 1      | 1     | 2   |        |
| 19009  | 3      | 0     | 2   |        |
| 19010  | 1      | 1     | 2   |        |
| 19017  | 1      | 0     | 2   |        |
| 19018  | 1      | 1     | 2   |        |
| 19020  | 1      | 0     | 2   |        |
| 19027  | 3      | 12    | 2   |        |
| 19035  | 1      | 1     | 2   |        |
| 19037  | 2      | 0     | 2   |        |
| 19048  | 1      | 0     | 2   |        |
| 19051  | 2      | 3     | 1   | 1      |
| 19054  | 2      | 1     | 2   |        |
| 19057  | 1      | 0     | 2   |        |
| 19073  | 3      | 2     | 2   |        |
| 19075  | 1      | 0     | 2   |        |
| 19079  | 3      | 5     | 2   |        |
| 19087  | 1      | 0     | 2   |        |

| respid | Q40_13 | Q41_1 | Q42 | Q42b_1 |
|--------|--------|-------|-----|--------|
| 19090  | 4      | 0     | 2   |        |
| 19093  | 1      | 1     | 2   |        |
| 19099  | 3      | 1     | 2   |        |
| 19100  | 1      | 3     | 2   |        |
| 19101  | 3      | 2     | 2   |        |
| 19105  | 1      | 6     | 2   |        |
| 19111  | 1      | 1     | 2   |        |
| 19112  | 1      | 0     | 2   |        |
| 19117  | 3      | 4     | 1   | 3      |
| 19122  | 1      | 2     | 2   |        |
| 19126  | 1      | 0     | 2   |        |
| 19127  | 1      | 4     | 2   |        |
| 19131  | 1      | 20    | 2   |        |
| 19134  | 1      | 0     | 2   |        |
| 19149  | 1      | 0     | 2   |        |
| 19151  | 1      | 3     | 1   | 2      |
| 19164  | 1      | 0     | 2   |        |
| 19166  | 1      | 0     | 2   |        |
| 19172  | 2      | 0     | 2   |        |
| 19173  | 3      | 2     | 2   |        |
| 19180  | 1      | 0     | 2   |        |
| 19185  | 3      | 2     | 1   | 1      |
| 19189  | 1      | 2     | 2   |        |
| 19191  |        |       |     |        |
| 19198  | 1      | 11    | 2   |        |
| 19203  | 1      | 0     | 2   |        |
| 19209  | 1      | 0     | 2   |        |
| 19210  |        |       |     |        |
| 19218  |        |       |     |        |
| 19220  |        |       |     |        |
| 19225  | 3      | 0     | 2   |        |
| 19227  | 1      | 0     | 2   |        |

| respid | Q40_13 | Q41_1 | Q42 | Q42b_1 |
|--------|--------|-------|-----|--------|
| 19228  | 1      | 0     | 2   |        |
| 19243  | 2      | 2     | 2   |        |
| 19244  | 3      | 1     | 1   | 1      |
| 19246  | 1      | 1     | 2   |        |
| 19248  |        |       |     |        |
| 19249  | 3      | 0     | 2   |        |
| 19252  | 2      | 3     | 1   | 1      |
| 19255  | 3      | 2     | 2   |        |
| 19257  | 2      | 0     | 2   |        |
| 19274  |        |       |     |        |
| 19279  |        |       |     |        |
| 19291  | 1      | 0     | 2   |        |
| 19292  | 2      | 0     | 2   |        |
| 19308  | 2      | 0     | 2   |        |
| 19310  | 1      | 0     | 2   |        |
| 19311  | 1      | 0     | 2   |        |
| 19326  | 2      | 1     | 2   |        |
| 19327  |        |       |     |        |
| 19329  |        |       |     |        |
| 19330  | 3      | 2     | 1   | 1      |
| 19333  | 2      | 2     | 1   | 1      |
| 19336  | 1      | 4     | 2   |        |
| 19343  | 2      | 2     | 2   |        |
| 19348  | 1      | 0     | 2   |        |
| 19349  | 3      | 5     | 1   | 2      |
| 19352  | 3      | 2     | 2   |        |
| 19356  | 1      | 1     | 2   |        |
| 19357  | 1      | 0     | 2   |        |
| 19358  | 1      | 0     | 2   |        |
| 19367  | 2      | 0     | 2   |        |
| 19376  |        |       |     |        |
| 19377  | 1      | 5     | 2   |        |

| respid | Q40_13 | Q41_1 | Q42 | Q42b_1 |
|--------|--------|-------|-----|--------|
| 19380  | 1      | 0     | 2   |        |
| 19384  | 1      | 1     | 2   |        |
| 19391  | 5      | 1     | 1   | 1      |
| 19397  |        |       |     |        |
| 19398  | 1      | 0     | 2   |        |
| 19401  |        |       |     |        |
| 19402  | 1      | 0     | 2   |        |
| 19403  |        |       |     |        |
| 19405  |        |       |     |        |
| 19407  | 1      | 0     | 2   |        |
| 19415  | 1      | 0     | 2   |        |
| 19420  |        |       |     |        |
| 19423  | 3      | 5     | 1   | 4      |
| 19424  | 2      | 0     | 2   |        |
| 19426  | 2      | 4     | 2   |        |
| 19429  | 1      | 0     | 2   |        |
| 19435  | 2      | 5     | 1   | 2      |
| 19441  | 2      | 0     | 2   |        |
| 19450  | 1      | 0     | 2   |        |
| 19456  | 1      | 12    | 1   | 2      |
| 19457  | 1      | 2     | 2   |        |
| 19463  | 2      | 0     | 2   |        |
| 19467  | 6      | 0     | 2   |        |
| 19468  | 1      | 0     | 2   |        |
| 19471  | 2      | 0     | 2   |        |
| 19473  | 1      | 0     | 2   |        |
| 19478  | 3      | 6     | 1   | 2      |
| 19480  |        |       |     |        |
| 19481  | 1      | 0     | 2   |        |
| 19484  | 1      | 1     | 2   |        |
| 19487  | 1      | 0     | 2   |        |
| 19491  | 3      | 2     | 1   | 2      |



| respid | Q40_13 | Q41_1 | Q42 | Q42b_1 |
|--------|--------|-------|-----|--------|
| 19495  | 3      | 1     | 1   | 1      |
| 19498  | 3      | 2     | 2   |        |
| 19500  | 3      | 3     | 2   |        |
| 19501  | 4      | 2     | 1   | 1      |
| 19503  |        |       |     |        |
| 19506  | 1      | 0     | 2   |        |
| 19508  | 1      | 1     | 2   |        |
| 19509  | 2      | 12    | 2   |        |
| 19518  | 2      | 0     | 2   |        |
| 19520  | 2      | 1     | 2   |        |
| 19536  | 1      | 3     | 2   |        |
| 19538  | 2      | 1     | 1   | 1      |
| 19541  | 2      | 1     | 2   |        |
| 19548  | 3      | 0     | 2   |        |
| 19553  |        |       |     |        |
| 19556  | 1      | 0     | 2   |        |
| 19559  |        |       |     |        |
| 19561  | 4      | 5     | 1   | 2      |
| 19562  | 1      | 5     | 2   |        |
| 19564  | 1      | 2     | 2   |        |
| 19567  | 6      | 6     | 1   | 4      |
| 19571  | 2      | 2     | 1   | 1      |
| 19576  | 3      | 2     | 2   |        |
| 19578  | 1      | 1     | 2   |        |
| 19606  |        |       |     |        |
| 19607  |        |       |     |        |
| 19608  | 1      | 0     | 2   |        |
| 19612  | 4      | 3     | 1   | 2      |
| 19618  | 3      | 0     | 2   |        |
| 19621  | 1      | 1     | 2   |        |
| 19624  | 3      | 3     | 1   | 3      |
| 19630  |        |       |     |        |

| respid | Q40_13 | Q41_1 | Q42 | Q42b_1 |
|--------|--------|-------|-----|--------|
| 19637  | 3      | 0     | 2   |        |
| 19639  | 1      | 0     | 2   |        |
| 19647  | 1      | 3     | 2   |        |
| 19648  | 4      | 5     | 1   | 2      |
| 19660  | 1      | 0     | 2   |        |
| 19662  | 3      | 1     | 1   | 1      |
| 19669  | 1      | 0     | 2   |        |
| 19680  | 1      | 0     | 2   |        |
| 19682  | 1      | 0     | 2   |        |
| 19686  | 1      | 0     | 2   |        |
| 19700  | 1      | 0     | 2   |        |
| 19701  | 1      | 1     | 2   |        |
| 19704  |        |       |     |        |
| 19706  | 2      | 1     | 2   |        |
| 19707  | 1      | 0     | 2   |        |
| 19717  | 4      | 1     | 2   |        |
| 19718  | 1      | 1     | 2   |        |
| 19721  | 2      | 6     | 2   |        |
| 19722  | 1      | 0     | 2   |        |
| 19729  |        |       |     |        |
| 19738  | 3      | 1     | 2   |        |
| 19741  | 2      | 0     | 2   |        |
| 19742  | 3      | 2     | 2   |        |
| 19747  | 1      | 1     | 2   |        |
| 19748  | 1      | 2     | 2   |        |
| 19749  | 1      | 0     | 2   |        |
| 19756  | 3      | 0     | 2   |        |
| 19771  | 1      | 0     | 2   |        |
| 19772  | 3      | 3     | 1   | 2      |
| 19775  | 1      | 0     | 2   |        |
| 19783  |        |       |     |        |
| 19787  | 1      | 2     | 2   |        |

| respid | Q40_13 | Q41_1 | Q42 | Q42b_1 |
|--------|--------|-------|-----|--------|
| 19790  |        |       |     |        |
| 19797  | 3      | 0     | 2   |        |
| 19802  | 1      | 0     | 2   |        |
| 19808  | 2      | 12    | 2   |        |
| 19810  | 1      | 0     | 2   |        |
| 19811  | 1      | 0     | 2   |        |
| 19812  | 1      | 3     | 2   |        |
| 19821  | 2      | 0     | 2   |        |
| 19826  | 1      | 1     | 2   |        |
| 19827  | 1      | 3     | 2   |        |
| 19830  | 1      | 2     | 2   |        |
| 19834  | 1      | 0     | 2   |        |
| 19838  | 2      | 0     | 2   |        |
| 19843  |        |       |     |        |
| 19845  | 4      | 3     | 2   |        |
| 19846  | 1      | 4     | 2   |        |
| 19852  | 5      | 2     | 1   | 2      |
| 19855  | 1      | 0     | 2   |        |
| 19858  | 3      | 3     | 2   |        |
| 19861  | 3      | 20    | 1   | 1      |
| 19863  | 2      | 0     | 2   |        |
| 19868  | 2      | 2     | 2   |        |
| 19874  | 3      | 0     | 2   |        |
| 19876  |        |       |     |        |
| 19880  | 3      | 3     | 1   | 2      |
| 19885  | 3      | 1     | 2   |        |
| 19890  |        |       |     |        |
| 19894  |        |       |     |        |
| 19895  | 1      | 0     | 2   |        |
| 19897  | 4      | 14    | 2   |        |
| 19906  | 1      | 2     | 2   |        |
| 19908  | 1      | 1     | 2   |        |

| respid | Q40_13 | Q41_1 | Q42 | Q42b_1 |
|--------|--------|-------|-----|--------|
| 19912  | 1      | 0     | 2   |        |
| 19913  | 1      | 0     | 2   |        |
| 19914  | 3      | 2     | 2   |        |
| 19918  | 3      | 2     | 1   | 2      |
| 19924  | 3      | 1     | 1   | 1      |
| 19936  |        |       |     |        |
| 19940  |        |       |     |        |
| 19945  | 1      | 3     | 2   |        |
| 19948  |        |       |     |        |
| 19959  | 1      | 0     | 2   |        |
| 19961  | 1      | 1     | 2   |        |
| 19962  | 2      | 0     | 2   |        |
| 19965  | 1      | 0     | 2   |        |
| 19966  | 2      | 1     | 2   |        |
| 19973  | 3      | 1     | 2   |        |
| 19981  | 4      | 6     | 2   |        |
| 19986  | 2      | 0     | 2   |        |
| 19989  | 1      | 0     | 2   |        |
| 19998  | 3      | 0     | 2   |        |
| 20001  | 5      | 2     | 2   |        |
| 20005  |        |       |     |        |
| 20013  | 4      | 2     | 2   |        |
| 20015  | 1      | 0     | 2   |        |
| 20017  | 4      | 12    | 2   |        |
| 20020  | 1      | 0     | 2   |        |
| 20021  | 1      | 0     | 2   |        |
| 20026  | 4      | 0     | 2   |        |
| 20028  | 1      | 0     | 2   |        |
| 20030  | 1      | 1     | 2   |        |
| 20031  |        |       |     |        |
| 20034  | 1      | 0     | 2   |        |
| 20035  |        |       |     |        |

| respid | Q40_13 | Q41_1 | Q42 | Q42b_1 |
|--------|--------|-------|-----|--------|
| 20040  | 2      | 4     | 1   | 1      |
| 20045  | 6      | 1     | 1   | 1      |
| 20048  | 1      | 0     | 2   |        |
| 20053  | 2      | 20    | 2   |        |
| 20064  | 3      | 2     | 2   |        |
| 20071  | 1      | 0     | 2   |        |
| 20072  | 1      | 0     | 2   |        |
| 20076  | 1      | 0     | 2   |        |
| 20081  | 2      | 12    | 2   |        |
| 20082  | 2      | 2     | 1   | 1      |
| 20083  | 1      | 20    | 2   |        |
| 20088  | 2      | 0     | 2   |        |
| 20089  | 1      | 2     | 2   |        |
| 20099  | 1      | 0     | 2   |        |
| 20101  | 1      | 0     | 2   |        |
| 20102  | 4      | 0     | 2   |        |
| 20109  | 1      | 1     | 2   |        |
| 20118  | 1      | 3     | 2   |        |
| 20119  | 1      | 1     | 2   |        |
| 20124  |        |       |     |        |
| 20126  | 1      | 0     | 2   |        |
| 20130  |        |       |     |        |
| 20131  | 1      | 1     | 2   |        |
| 20134  | 1      | 3     | 2   |        |
| 20146  | 4      | 0     | 2   |        |
| 20152  |        |       |     |        |
| 20155  | 2      | 1     | 2   |        |
| 20156  |        |       |     |        |
| 20157  |        |       |     |        |
| 20164  | 1      | 0     | 2   |        |
| 20168  | 1      | 0     | 2   |        |
| 20173  | 4      | 2     | 2   |        |

| respid | Q40_13 | Q41_1 | Q42 | Q42b_1 |
|--------|--------|-------|-----|--------|
| 20174  | 1      | 0     | 2   |        |
| 20175  | 3      | 5     | 1   | 3      |
| 20189  | 1      | 0     | 2   |        |
| 20190  | 1      | 3     | 2   |        |
| 20201  | 1      | 0     | 2   |        |
| 20202  | 1      | 1     | 2   |        |
| 20204  | 3      | 3     | 2   |        |
| 20206  | 1      | 0     | 2   |        |
| 20207  | 1      | 0     | 2   |        |
| 20212  | 2      | 0     | 2   |        |
| 20213  | 2      | 0     | 2   |        |
| 20217  | 1      | 0     | 2   |        |
| 20222  | 3      | 2     | 2   |        |
| 20227  |        |       |     |        |
| 20228  | 2      | 0     | 2   |        |
| 20238  | 1      | 2     | 2   |        |
| 20242  | 1      | 0     | 2   |        |
| 20246  | 1      | 0     | 2   |        |
| 20255  | 4      | 1     | 1   | 1      |
| 20256  | 2      | 1     | 1   | 1      |
| 20259  | 2      | 2     | 1   | 1      |
| 20262  | 1      | 1     | 2   |        |
| 20274  | 2      | 0     | 2   |        |
| 20283  | 4      | 4     | 2   |        |
| 20284  |        |       |     |        |
| 20291  | 2      | 1     | 2   |        |
| 20292  | 1      | 0     | 2   |        |
| 20293  | 4      | 1     | 2   |        |
| 20298  | 4      | 3     | 2   |        |
| 20301  |        |       |     |        |
| 20303  | 2      | 1     | 1   | 1      |
| 20309  |        |       |     |        |

| respid | Q40_13 | Q41_1 | Q42 | Q42b_1 |
|--------|--------|-------|-----|--------|
| 20318  | 1      | 0     | 2   |        |
| 20324  | 1      | 1     | 2   |        |
| 20335  | 1      | 0     | 2   |        |
| 20336  | 1      | 6     | 2   |        |
| 20339  | 1      | 2     | 1   | 1      |
| 20348  | 1      | 8     | 2   |        |
| 20351  | 3      | 2     | 2   |        |
| 20353  | 2      | 0     | 2   |        |
| 20356  | 1      | 3     | 2   |        |
| 20357  |        |       |     |        |
| 20366  | 1      | 1     | 2   |        |
| 20369  | 4      | 3     | 1   | 2      |
| 20372  | 1      | 4     | 2   |        |
| 20375  | 1      | 0     | 2   |        |
| 20379  | 1      | 10    | 2   |        |
| 20380  | 1      | 1     | 2   |        |
| 20396  | 2      | 0     | 2   |        |
| 20398  | 2      | 5     | 2   |        |
| 20412  | 1      | 2     | 2   |        |
| 20415  | 1      | 8     | 2   |        |
| 20424  | 3      | 1     | 2   |        |
| 20434  | 1      | 8     | 2   |        |
| 20435  | 1      | 2     | 2   |        |
| 20440  | 1      | 5     | 2   |        |
| 20441  | 1      | 0     | 2   |        |
| 20445  | 1      | 0     | 2   |        |
| 20446  | 3      | 0     | 1   | 0      |
| 20450  | 1      | 2     | 2   |        |
| 20453  | 3      | 0     | 2   |        |
| 20458  | 2      | 1     | 2   |        |
| 20464  | 1      | 4     | 2   |        |
| 20471  | 1      | 20    | 2   |        |

| respid | Q40_13 | Q41_1 | Q42 | Q42b_1 |
|--------|--------|-------|-----|--------|
| 20473  | 1      | 0     | 2   |        |
| 20474  | 1      | 1     | 2   |        |
| 20477  |        |       |     |        |
| 20479  | 4      | 0     | 2   |        |
| 20485  | 1      | 2     | 2   |        |
| 20487  | 1      | 0     | 2   |        |
| 20488  | 1      | 1     | 2   |        |
| 20494  | 1      | 5     | 1   | 0      |
| 20502  | 4      | 4     | 1   | 3      |
| 20503  | 3      | 0     | 2   |        |
| 20510  | 1      | 1     | 2   |        |
| 20512  |        |       |     |        |
| 20516  | 1      | 0     | 2   |        |
| 20522  | 5      | 24    | 1   | 6      |
| 20527  | 1      | 0     | 2   |        |
| 20529  | 3      | 5     | 2   |        |
| 20535  | 2      | 0     | 2   |        |
| 20543  | 1      | 0     | 2   |        |
| 20546  | 1      | 0     | 2   |        |
| 20548  | 1      | 6     | 2   |        |
| 20552  | 3      | 1     | 2   |        |
| 20556  | 3      | 5     | 2   |        |
| 20566  | 3      | 3     | 2   |        |
| 20576  | 2      | 2     | 2   |        |
| 20587  | 1      | 0     | 2   |        |
| 20589  | 1      | 0     | 2   |        |
| 20593  |        |       |     |        |
| 20594  | 2      | 0     | 2   |        |
| 20602  | 2      | 2     | 2   |        |
| 20607  |        |       |     |        |
| 20608  | 1      | 1     | 2   |        |
| 20611  | 1      | 0     | 2   |        |



| respid | Q40_13 | Q41_1 | Q42 | Q42b_1 |
|--------|--------|-------|-----|--------|
| 20612  | 1      | 0     | 2   |        |
| 20615  | 2      | 0     | 2   |        |
| 20625  | 1      | 1     | 1   | 1      |
| 20630  | 2      | 1     | 2   |        |
| 20639  | 1      | 0     | 2   |        |
| 20643  | 1      | 0     | 2   |        |
| 20645  |        |       |     |        |
| 20647  | 1      | 0     | 2   |        |
| 20652  | 4      | 0     | 2   |        |
| 20661  | 1      | 0     | 2   |        |
| 20665  |        |       |     |        |
| 20679  | 1      | 0     | 2   |        |
| 20682  | 3      | 2     | 1   | 1      |
| 20683  |        |       |     |        |
| 20700  | 1      | 0     | 2   |        |
| 20702  | 2      | 15    | 2   |        |
| 20709  | 1      | 1     | 2   |        |
| 20715  | 3      | 1     | 2   |        |
| 20718  | 2      | 0     | 2   |        |
| 20722  | 1      | 0     | 2   |        |
| 20729  |        |       |     |        |
| 20732  |        |       |     |        |
| 20746  | 4      | 2     | 1   | 1      |
| 20747  |        |       |     |        |
| 20758  | 1      | 0     | 2   |        |
| 20767  | 3      | 2     | 1   | 1      |
| 20777  | 1      | 1     | 2   |        |
| 20778  | 1      | 2     | 2   |        |
| 20780  | 1      | 0     | 2   |        |
| 20800  | 1      | 2     | 2   |        |
| 20810  | 1      | 1     | 2   |        |
| 20814  | 1      | 0     | 2   |        |

| respid | Q40_13 | Q41_1 | Q42 | Q42b_1 |
|--------|--------|-------|-----|--------|
| 20816  | 1      | 2     | 2   |        |
| 20832  | 3      | 1     | 2   |        |
| 20838  | 3      | 3     | 2   |        |
| 20841  | 3      | 12    | 1   | 2      |
| 20848  | 1      | 0     | 2   |        |
| 20850  |        |       |     |        |
| 20851  | 1      | 2     | 2   |        |
| 20861  | 2      | 0     | 2   |        |
| 20870  | 2      | 2     | 2   |        |
| 20880  | 1      | 3     | 2   |        |
| 20883  | 2      | 6     | 2   |        |
| 20894  | 2      | 15    | 2   |        |
| 20896  | 4      | 10    | 1   | 2      |
| 20901  | 3      | 2     | 1   | 1      |
| 20903  | 1      | 0     | 2   |        |
| 20909  |        |       |     |        |
| 20919  | 1      | 1     | 2   |        |
| 20925  | 1      | 0     | 2   |        |
| 20935  | 1      | 3     | 2   |        |
| 20939  | 3      | 4     | 1   | 1      |
| 20956  | 4      | 30    | 1   | 20     |
| 20970  | 2      | 0     | 2   |        |
| 20974  | 1      | 0     | 2   |        |
| 20975  | 1      | 0     | 2   |        |
| 20984  | 2      | 1     | 1   | 1      |
| 20988  |        |       |     |        |
| 20996  | 1      | 10    | 2   |        |
| 20998  | 1      | 3     | 2   |        |
| 21007  |        |       |     |        |
| 21008  |        |       |     |        |
| 21014  | 1      | 3     | 2   |        |
| 21020  | 1      | 0     | 2   |        |

| respid | Q40_13 | Q41_1 | Q42 | Q42b_1 |
|--------|--------|-------|-----|--------|
| 21022  | 3      | 2     | 2   |        |
| 21024  |        |       |     |        |
| 21026  | 2      | 0     | 2   |        |
| 21027  | 1      | 0     | 2   |        |
| 21030  | 1      | 1     | 2   |        |
| 21032  | 3      | 1     | 2   |        |
| 21040  | 2      | 1     | 2   |        |
| 21045  | 1      | 2     | 2   |        |
| 21058  | 2      | 0     | 2   |        |
| 21064  | 1      | 3     | 2   |        |
| 21073  | 1      | 0     | 2   |        |
| 21086  | 3      | 1     | 2   |        |
| 21092  | 6      | 10    | 1   | 10     |
| 21096  | 3      | 15    | 1   | 5      |
| 21103  | 1      | 3     | 2   |        |
| 21120  | 2      | 3     | 2   |        |
| 21125  |        |       |     |        |
| 21126  | 1      | 0     | 2   |        |
| 21132  |        |       |     |        |
| 21139  | 2      | 2     | 1   | 1      |
| 21147  |        |       |     |        |
| 21148  | 1      | 15    | 2   |        |
| 21149  | 1      | 3     | 2   |        |
| 21164  | 1      | 0     | 2   |        |
| 21165  | 1      | 0     | 2   |        |
| 21171  | 3      | 1     | 2   |        |
| 21176  | 1      | 0     | 2   |        |
| 21187  | 2      | 2     | 1   | 1      |
| 21192  | 3      | 4     | 2   |        |
| 21198  | 1      | 0     | 2   |        |
| 21199  | 1      | 2     | 2   |        |
| 21206  | 3      | 0     | 2   |        |

| respid | Q40_13 | Q41_1 | Q42 | Q42b_1 |
|--------|--------|-------|-----|--------|
| 21212  | 1      | 5     | 2   |        |
| 21216  | 1      | 0     | 2   |        |
| 21217  | 3      | 4     | 1   | 4      |
| 21228  | 2      | 1     | 2   |        |
| 21229  | 4      | 0     | 2   |        |
| 21230  | 1      | 0     | 2   |        |
| 21243  | 4      | 0     | 2   |        |
| 21247  | 3      | 0     | 2   |        |
| 21253  | 1      | 2     | 1   | 2      |
| 21264  | 2      | 2     | 1   | 2      |
| 21265  | 1      | 0     | 2   |        |
| 21273  | 3      | 2     | 2   |        |
| 21275  | 1      | 0     | 2   |        |
| 21278  | 3      | 0     | 2   |        |
| 21291  | 3      | 0     | 2   |        |
| 21298  | 1      | 2     | 2   |        |
| 21301  | 6      | 2     | 2   |        |
| 21312  | 4      | 1     | 2   |        |
| 21323  | 3      | 4     | 1   | 4      |
| 21325  | 2      | 0     | 2   |        |
| 21341  | 1      | 2     | 2   |        |
| 21349  | 3      | 2     | 2   |        |
| 21350  | 1      | 3     | 1   | 1      |
| 21354  | 4      | 3     | 2   |        |
| 21372  | 4      | 3     | 1   | 3      |
| 21373  | 3      | 1     | 2   |        |
| 21378  | 2      | 6     | 2   |        |
| 21393  |        |       |     |        |
| 21401  | 2      | 1     | 2   |        |
| 21405  | 1      | 0     | 2   |        |
| 21406  |        |       |     |        |
| 21407  | 2      | 0     | 2   |        |

| respid | Q40_13 | Q41_1 | Q42 | Q42b_1 |
|--------|--------|-------|-----|--------|
| 21418  | 1      | 0     | 2   |        |
| 21420  | 2      | 0     | 2   |        |
| 21421  |        |       |     |        |
| 21446  | 2      | 0     | 2   |        |
| 21449  | 2      | 1     | 1   | 1      |
| 21452  | 1      | 0     | 2   |        |
| 21455  | 5      | 2     | 1   | 1      |
| 21469  | 1      | 1     | 2   |        |
| 21471  | 2      | 0     | 2   |        |
| 21472  | 2      | 1     | 2   |        |
| 21474  | 1      | 5     | 2   |        |
| 21479  | 1      | 0     | 2   |        |
| 21485  | 2      | 1     | 1   | 1      |
| 21512  |        |       |     |        |
| 21513  | 1      | 0     | 2   |        |
| 21514  | 3      | 2     | 2   |        |
| 21520  | 3      | 3     | 2   |        |
| 21539  | 1      | 12    | 2   |        |
| 21553  | 3      | 24    | 2   |        |
| 21560  | 2      | 1     | 2   |        |
| 21561  | 3      | 1     | 2   |        |
| 21563  | 2      | 0     | 2   |        |
| 21565  |        |       |     |        |
| 21582  | 1      | 0     | 2   |        |
| 21584  | 1      | 1     | 2   |        |
| 21585  | 3      | 2     | 2   |        |
| 21586  | 1      | 0     | 2   |        |
| 21587  | 2      | 0     | 2   |        |
| 21590  | 5      | 5     | 1   | 2      |
| 21601  | 2      | 1     | 1   | 1      |
| 21611  | 2      | 2     | 1   | 2      |
| 21612  | 1      | 12    | 2   |        |

| respid | Q40_13 | Q41_1 | Q42 | Q42b_1 |
|--------|--------|-------|-----|--------|
| 21625  | 2      | 1     | 2   |        |
| 21633  |        |       |     |        |
| 21640  | 1      | 0     | 2   |        |
| 21647  | 1      | 1     | 2   |        |
| 21648  | 4      | 3     | 1   | 2      |
| 21656  | 1      | 2     | 2   |        |
| 21657  | 1      | 0     | 2   |        |
| 21658  | 4      | 6     | 1   | 4      |
| 21665  | 4      | 2     | 2   |        |
| 21666  | 5      | 3     | 1   | 3      |
| 21668  | 5      | 3     | 1   | 3      |
| 21673  | 2      | 8     | 2   |        |
| 21681  | 3      | 2     | 2   |        |
| 21682  | 1      | 0     | 2   |        |
| 21685  | 1      | 0     | 2   |        |
| 21692  | 2      | 0     | 2   |        |
| 21697  | 1      | 0     | 2   |        |
| 21711  | 1      | 0     | 2   |        |
| 21715  | 3      | 6     | 1   | 6      |
| 21726  | 2      | 2     | 2   |        |
| 21748  |        |       |     |        |
| 21761  | 1      | 1     | 2   |        |
| 21769  | 3      | 2     | 2   |        |
| 21774  | 3      | 6     | 1   | 1      |
| 21778  |        |       |     |        |
| 21785  | 3      | 2     | 2   |        |
| 21799  | 2      | 0     | 2   |        |
| 21820  | 4      | 10    | 1   | 10     |
| 21837  | 1      | 3     | 2   |        |
| 21845  | 4      | 6     | 1   | 3      |
| 21846  | 1      | 0     | 2   |        |
| 21849  | 4      | 1     | 2   |        |

| respid | Q40_13 | Q41_1 | Q42 | Q42b_1 |
|--------|--------|-------|-----|--------|
| 21850  | 1      | 5     | 2   |        |
| 21855  | 1      | 0     | 2   |        |
| 21859  | 1      | 2     | 1   | 1      |
| 21861  | 1      | 0     | 2   |        |
| 21866  |        |       |     |        |
| 21873  | 2      | 3     | 2   |        |
| 21876  | 3      | 12    | 1   | 1      |
| 21882  |        |       |     |        |
| 21884  | 2      | 12    | 2   |        |
| 21887  | 2      | 1     | 2   |        |
| 21892  | 1      | 0     | 2   |        |
| 21907  | 2      | 5     | 1   | 2      |
| 21910  | 5      | 4     | 1   | 2      |
| 21912  | 3      | 5     | 1   | 3      |
| 21914  | 2      | 1     | 2   |        |
| 21925  | 1      | 0     | 2   |        |
| 21937  |        |       |     |        |
| 21938  | 2      | 4     | 1   | 2      |
| 21940  | 1      | 3     | 2   |        |
| 21942  | 1      | 0     | 2   |        |
| 21947  |        |       |     |        |
| 21948  | 2      | 2     | 2   |        |
| 21961  | 1      | 6     | 2   |        |
| 21977  | 3      | 6     | 1   | 5      |
| 21983  |        |       |     |        |
| 21986  | 2      | 4     | 1   | 3      |
| 21988  | 1      | 0     | 2   |        |
| 21996  | 3      | 2     | 2   |        |
| 21997  | 3      | 2     | 2   |        |
| 22005  | 2      | 1     | 2   |        |
| 22013  | 1      | 0     | 2   |        |
| 22018  |        |       |     |        |

| respid | Q40_13 | Q41_1 | Q42 | Q42b_1 |
|--------|--------|-------|-----|--------|
| 22019  | 2      | 1     | 2   |        |
| 22071  | 1      | 1     | 2   |        |
| 22082  | 1      | 0     | 2   |        |
| 22085  | 1      | 0     | 2   |        |
| 22092  | 1      | 1     | 2   |        |
| 22097  | 1      | 0     | 2   |        |
| 22111  |        |       |     |        |
| 22118  | 1      | 1     | 2   |        |
| 22132  | 1      | 0     | 2   |        |
| 22133  | 1      | 0     | 2   |        |
| 22139  |        |       |     |        |
| 22142  | 3      | 5     | 1   | 5      |
| 22146  | 1      | 1     | 1   | 1      |
| 22181  |        |       |     |        |
| 22202  | 1      | 0     | 2   |        |
| 22214  |        |       |     |        |
| 22223  | 1      | 0     | 2   |        |
| 22227  | 2      | 0     | 2   |        |
| 22229  | 1      | 0     | 2   |        |
| 22239  | 4      | 1     | 2   |        |
| 22245  | 4      | 4     | 1   | 2      |
| 22256  | 1      | 0     | 2   |        |
| 22260  | 2      | 3     | 2   |        |
| 22298  | 2      | 2     | 2   |        |
| 22321  | 1      | 0     | 2   |        |
| 22340  |        |       |     |        |
| 22346  | 4      | 2     | 2   |        |
| 22356  | 1      | 0     | 2   |        |
| 22361  | 2      | 0     | 2   |        |
| 22364  | 1      | 0     | 2   |        |
| 22368  |        |       |     |        |
| 22374  | 3      | 4     | 1   | 3      |



| respid | Q40_13 | Q41_1 | Q42 | Q42b_1 |
|--------|--------|-------|-----|--------|
| 22375  | 1      | 3     | 2   |        |
| 22377  | 2      | 0     | 2   |        |
| 22383  |        |       |     |        |
| 22387  | 4      | 5     | 2   |        |
| 22392  |        |       |     |        |
| 22393  | 1      | 1     | 2   |        |
| 22394  | 1      | 0     | 2   |        |
| 22395  |        |       |     |        |
| 22401  | 1      | 10    | 2   |        |
| 22407  |        |       |     |        |
| 22410  | 1      | 2     | 2   |        |
| 22418  | 1      | 2     | 2   |        |
| 22421  |        |       |     |        |
| 22423  |        |       |     |        |
| 22425  | 2      | 1     | 2   |        |
| 22427  | 1      | 2     | 2   |        |
| 22431  | 4      | 3     | 1   | 2      |
| 22435  | 1      | 0     | 2   |        |
| 22436  | 2      | 0     | 2   |        |
| 22442  |        |       |     |        |
| 22444  | 4      | 1     | 1   | 1      |
| 22445  | 4      | 2     | 2   |        |
| 22446  |        |       |     |        |
| 22448  | 2      | 12    | 1   | 2      |
| 22449  | 1      | 1     | 2   |        |
| 22450  | 2      | 1     | 2   |        |
| 22453  | 3      | 4     | 1   | 2      |
| 22465  | 1      | 20    | 2   |        |
| 22472  | 2      | 1     | 2   |        |
| 22475  | 3      | 1     | 1   | 1      |
| 22478  | 1      | 0     | 2   |        |
| 22491  | 1      | 0     | 2   |        |

| respid | Q40_13 | Q41_1 | Q42 | Q42b_1 |
|--------|--------|-------|-----|--------|
| 22497  | 2      | 2     | 2   |        |
| 22498  | 2      | 2     | 1   | 2      |
| 22499  | 1      | 0     | 2   |        |
| 22503  | 1      | 3     | 2   |        |
| 22507  | 1      | 0     | 2   |        |
| 22513  | 2      | 4     | 2   |        |
| 22517  | 2      | 1     | 2   |        |
| 22524  | 3      | 5     | 1   | 2      |
| 22528  | 1      | 12    | 2   |        |
| 22544  | 2      | 0     | 2   |        |
| 22571  | 1      | 0     | 2   |        |
| 22576  | 2      | 1     | 2   |        |
| 22579  | 2      | 1     | 2   |        |
| 22583  | 3      | 10    | 1   | 1      |
| 22591  | 3      | 2     | 1   | 2      |
| 22592  | 2      | 0     | 2   |        |
| 22612  | 2      | 0     | 2   |        |
| 22613  | 3      | 1     | 2   |        |
| 22615  | 1      | 1     | 2   |        |
| 22621  | 1      | 0     | 2   |        |
| 22625  | 1      | 0     | 2   |        |
| 22628  | 1      | 20    | 1   | 0      |
| 22632  | 2      | 5     | 2   |        |
| 22639  |        |       |     |        |
| 22648  | 1      | 3     | 2   |        |
| 22649  | 4      | 0     | 2   |        |
| 22655  |        |       |     |        |
| 22659  |        |       |     |        |
| 22660  | 1      | 1     | 2   |        |
| 22666  | 2      | 2     | 2   |        |
| 22667  | 2      | 3     | 2   |        |
| 22670  |        |       |     |        |

| respid | Q40_13 | Q41_1 | Q42 | Q42b_1 |
|--------|--------|-------|-----|--------|
| 22681  |        |       |     |        |
| 22683  | 1      | 0     | 2   |        |
| 22688  | 1      | 10    | 2   |        |
| 22695  | 3      | 0     | 2   |        |
| 22696  | 1      | 1     | 2   |        |
| 22705  | 3      | 10    | 1   | 5      |
| 22718  | 3      | 6     | 1   | 2      |
| 22720  | 1      | 0     | 2   |        |
| 22724  | 1      | 10    | 2   |        |
| 22728  | 1      | 0     | 2   |        |
| 22751  | 1      | 1     | 2   |        |
| 22782  | 5      | 5     | 1   | 1      |
| 22786  | 2      | 5     | 2   |        |
| 22788  | 1      | 2     | 2   |        |
| 22810  | 3      | 0     | 2   |        |
| 22816  | 1      | 0     | 2   |        |
| 22818  | 1      | 6     | 2   |        |
| 22854  |        |       |     |        |
| 22858  | 2      | 0     | 2   |        |
| 22862  | 1      | 2     | 2   |        |
| 22865  | 1      | 0     | 2   |        |
| 22868  | 2      | 2     | 2   |        |
| 22869  | 3      | 1     | 1   | 1      |
| 22873  | 1      | 1     | 2   |        |
| 22875  | 1      | 0     | 2   |        |
| 22876  | 1      | 2     | 2   |        |
| 22882  | 1      | 1     | 2   |        |
| 22884  | 3      | 2     | 1   | 1      |
| 22887  | 2      | 0     | 2   |        |
| 22888  | 1      | 1     | 2   |        |
| 22900  |        |       |     |        |
| 22901  |        |       |     |        |

| respid | Q40_13 | Q41_1 | Q42 | Q42b_1 |
|--------|--------|-------|-----|--------|
| 22912  | 1      | 3     | 2   |        |
| 22913  | 2      | 0     | 2   |        |
| 22921  | 1      | 0     | 2   |        |
| 22925  | 1      | 0     | 2   |        |
| 22940  | 1      | 1     | 2   |        |
| 22941  | 1      | 0     | 2   |        |
| 22947  | 2      | 18    | 2   |        |
| 22948  |        |       |     |        |
| 22964  | 1      | 0     | 2   |        |
| 22966  | 1      | 0     | 2   |        |
| 22969  | 1      | 1     | 2   |        |
| 22971  |        |       |     |        |
| 22988  |        |       |     |        |
| 22990  |        |       |     |        |
| 23000  | 1      | 0     | 2   |        |
| 23016  |        |       |     |        |
| 23026  | 1      | 0     | 2   |        |
| 23035  | 1      | 0     | 2   |        |
| 23037  | 4      | 5     | 2   |        |
| 23044  | 3      | 0     | 2   |        |
| 23046  | 1      | 0     | 2   |        |
| 23047  | 1      | 1     | 2   |        |
| 23049  | 3      | 1     | 2   |        |
| 23055  | 1      | 0     | 2   |        |
| 23066  | 1      | 0     | 2   |        |
| 23075  | 1      | 0     | 2   |        |
| 23081  | 1      | 0     | 2   |        |
| 23087  | 2      | 0     | 2   |        |
| 23094  |        |       |     |        |
| 23099  |        |       |     |        |
| 23101  | 2      | 1     | 2   |        |
| 23105  |        |       |     |        |

| respid | Q40_13 | Q41_1 | Q42 | Q42b_1 |
|--------|--------|-------|-----|--------|
| 23115  | 2      | 0     | 2   |        |
| 23121  | 1      | 0     | 2   |        |
| 23127  | 1      | 0     | 2   |        |
| 23131  | 2      | 0     | 2   |        |
| 23134  | 1      | 0     | 2   |        |
| 23145  | 1      | 0     | 2   |        |
| 23151  | 1      | 0     | 2   |        |
| 23161  | 1      | 2     | 1   | 1      |
| 23169  | 2      | 2     | 2   |        |
| 23173  | 1      | 0     | 2   |        |
| 23174  | 1      | 0     | 2   |        |
| 23186  | 3      | 8     | 1   | 3      |
| 23195  | 1      | 0     | 2   |        |
| 23197  | 3      | 1     | 2   |        |
| 23198  | 1      | 0     | 2   |        |
| 23203  |        |       |     |        |
| 23204  | 4      | 18    | 1   | 2      |
| 23212  | 1      | 1     | 2   |        |
| 23214  | 1      | 0     | 2   |        |
| 23221  | 2      | 2     | 1   | 1      |
| 23237  | 1      | 0     | 2   |        |
| 23251  | 1      | 1     | 2   |        |
| 23254  | 1      | 0     | 2   |        |
| 23262  | 1      | 0     | 2   |        |
| 23267  | 1      | 0     | 2   |        |
| 23268  | 2      | 1     | 1   | 1      |
| 23273  | 2      | 0     | 2   |        |
| 23278  | 1      | 1     | 2   |        |
| 23279  |        |       |     |        |
| 23281  | 3      | 1     | 2   |        |
| 23282  | 2      | 0     | 2   |        |
| 23283  | 4      | 0     | 2   |        |

| respid | Q40_13 | Q41_1 | Q42 | Q42b_1 |
|--------|--------|-------|-----|--------|
| 23285  | 1      | 0     | 2   |        |
| 23305  | 4      | 15    | 1   | 3      |
| 23309  | 1      | 0     | 2   |        |
| 23310  | 1      | 1     | 2   |        |
| 23311  | 1      | 10    | 2   |        |
| 23312  | 3      | 0     | 2   |        |
| 23319  | 1      | 0     | 2   |        |
| 23320  | 1      | 0     | 2   |        |
| 23322  | 2      | 5     | 2   |        |
| 23334  | 2      | 1     | 1   | 1      |
| 23340  | 1      | 1     | 2   |        |
| 23346  | 1      | 0     | 2   |        |
| 23353  | 1      | 0     | 2   |        |
| 23363  | 4      | 5     | 1   | 1      |
| 23364  | 3      | 6     | 1   | 6      |
| 23376  |        |       |     |        |
| 23378  | 1      | 0     | 2   |        |
| 23382  |        |       |     |        |
| 23383  |        |       |     |        |
| 23390  | 1      | 0     | 2   |        |
| 23395  | 1      | 0     | 2   |        |
| 23398  | 3      | 2     | 1   | 1      |
| 23399  | 1      | 0     | 2   |        |
| 23406  | 1      | 0     | 2   |        |
| 23418  | 1      | 1     | 2   |        |
| 23427  | 1      | 0     | 2   |        |
| 23428  | 1      | 10    | 2   |        |
| 23435  | 2      | 2     | 1   | 1      |
| 23439  | 1      | 0     | 2   |        |
| 23440  |        |       |     |        |
| 23444  | 3      | 0     | 2   |        |
| 23445  | 1      | 0     | 2   |        |

| respid | Q40_13 | Q41_1 | Q42 | Q42b_1 |
|--------|--------|-------|-----|--------|
| 23455  |        |       |     |        |
| 23467  | 2      | 1     | 2   |        |
| 23478  | 2      | 0     | 2   |        |
| 23492  | 3      | 1     | 2   |        |
| 23498  | 1      | 5     | 2   |        |
| 23511  | 2      | 3     | 2   |        |
| 23514  | 1      | 0     | 2   |        |
| 23515  | 2      | 1     | 2   |        |
| 23522  |        |       |     |        |
| 23524  |        |       |     |        |
| 23531  | 3      | 0     | 2   |        |
| 23532  | 1      | 2     | 2   |        |
| 23533  | 1      | 0     | 2   |        |
| 23534  | 2      | 2     | 2   |        |
| 23538  | 1      | 5     | 2   |        |
| 23539  | 2      | 0     | 2   |        |
| 23548  | 1      | 0     | 2   |        |
| 23553  |        |       |     |        |
| 23556  | 1      | 0     | 2   |        |
| 23563  | 4      | 1     | 1   | 1      |
| 23572  | 1      | 0     | 2   |        |
| 23575  | 1      | 0     | 2   |        |
| 23576  | 1      | 0     | 2   |        |
| 23577  | 1      | 0     | 2   |        |
| 23578  | 2      | 0     | 2   |        |
| 23587  | 2      | 3     | 2   |        |
| 23597  | 1      | 3     | 2   |        |
| 23598  | 2      | 2     | 2   |        |
| 23604  |        |       |     |        |
| 23617  | 2      | 5     | 2   |        |
| 23620  | 1      | 2     | 2   |        |
| 23621  |        |       |     |        |

| respid | Q40_13 | Q41_1 | Q42 | Q42b_1 |
|--------|--------|-------|-----|--------|
| 23625  | 1      | 4     | 2   |        |
| 23629  | 1      | 2     | 2   |        |
| 23635  | 1      | 0     | 2   |        |
| 23636  | 1      | 0     | 2   |        |
| 23637  | 5      | 1     | 1   | 1      |
| 23638  | 1      | 0     | 2   |        |
| 23644  | 1      | 2     | 2   |        |
| 23645  | 2      | 0     | 2   |        |
| 23649  | 1      | 1     | 1   | 1      |
| 23654  | 2      | 6     | 2   |        |
| 23662  | 1      | 0     | 2   |        |
| 23664  | 1      | 2     | 2   |        |
| 23665  | 1      | 0     | 2   |        |
| 23666  | 1      | 0     | 2   |        |
| 23671  | 1      | 0     | 2   |        |
| 23672  | 1      | 0     | 2   |        |
| 23685  | 2      | 12    | 2   |        |
| 23686  | 2      | 0     | 2   |        |
| 23689  | 4      | 10    | 2   |        |
| 23690  | 2      | 0     | 2   |        |
| 23695  | 6      | 6     | 1   | 2      |
| 23700  | 1      | 0     | 2   |        |
| 23714  | 1      | 3     | 2   |        |
| 23719  | 1      | 6     | 2   |        |
| 23720  | 1      | 0     | 2   |        |
| 23721  | 2      | 1     | 2   |        |
| 23729  | 1      | 0     | 2   |        |
| 23730  | 1      | 0     | 2   |        |
| 23732  | 1      | 0     | 2   |        |
| 23736  | 1      | 0     | 2   |        |
| 23754  |        |       |     |        |
| 23756  | 1      | 0     | 2   |        |



| respid | Q40_13 | Q41_1 | Q42 | Q42b_1 |
|--------|--------|-------|-----|--------|
| 23759  | 1      | 3     | 1   | 2      |
| 23761  | 2      | 0     | 2   |        |
| 23766  | 1      | 1     | 2   |        |
| 23768  | 3      | 8     | 1   | 5      |
| 23773  | 1      | 0     | 2   |        |
| 23781  |        |       |     |        |
| 23782  | 3      | 6     | 1   | 4      |
| 23787  | 1      | 2     | 2   |        |
| 23788  | 3      | 8     | 2   |        |
| 23790  |        |       |     |        |
| 23794  | 1      | 0     | 2   |        |
| 23795  | 4      | 4     | 2   |        |
| 23801  | 2      | 1     | 2   |        |
| 23806  | 1      | 2     | 2   |        |
| 23809  | 3      | 5     | 1   | 1      |
| 23813  | 1      | 0     | 2   |        |
| 23815  | 2      | 0     | 2   |        |
| 23821  | 1      | 0     | 2   |        |
| 23825  | 2      | 0     | 2   |        |
| 23826  | 2      | 0     | 2   |        |
| 23830  | 1      | 0     | 2   |        |
| 23833  | 1      | 5     | 2   |        |
| 23837  | 1      | 0     | 2   |        |
| 23848  | 6      | 2     | 2   |        |
| 23850  | 1      | 0     | 2   |        |
| 23870  | 1      | 4     | 2   |        |
| 23877  |        |       |     |        |
| 23880  | 1      | 3     | 2   |        |
| 23882  | 2      | 3     | 2   |        |
| 23888  |        |       |     |        |
| 23908  | 3      | 0     | 2   |        |
| 23914  | 2      | 1     | 2   |        |

| respid | Q40_13 | Q41_1 | Q42 | Q42b_1 |
|--------|--------|-------|-----|--------|
| 23916  | 1      | 0     | 2   |        |
| 23922  | 2      | 2     | 2   |        |
| 23932  | 1      | 1     | 2   |        |
| 23934  |        |       |     |        |
| 23942  | 6      | 2     | 1   | 2      |
| 23945  | 1      | 0     | 2   |        |
| 23948  | 2      | 0     | 2   |        |
| 23955  | 1      | 0     | 2   |        |
| 23956  | 3      | 2     | 1   | 2      |
| 23978  | 1      | 0     | 2   |        |
| 23981  |        |       |     |        |
| 23982  | 1      | 20    | 2   |        |
| 23991  | 1      | 2     | 2   |        |
| 23994  | 1      | 1     | 1   | 1      |
| 23995  | 2      | 2     | 2   |        |
| 23999  | 2      | 2     | 1   | 2      |
| 24005  | 5      | 6     | 1   | 3      |
| 24018  | 1      | 0     | 2   |        |
| 24021  |        |       |     |        |
| 24035  |        |       |     |        |
| 24040  | 1      | 2     | 2   |        |
| 24043  |        |       |     |        |
| 24046  | 2      | 1     | 2   |        |
| 24047  | 2      | 2     | 1   | 2      |
| 24048  | 1      | 0     | 2   |        |
| 24062  | 2      | 2     | 2   |        |
| 24063  | 3      | 1     | 2   |        |
| 24066  | 1      | 2     | 2   |        |
| 24069  | 1      | 0     | 2   |        |
| 24070  | 1      | 0     | 2   |        |
| 24074  | 1      | 1     | 2   |        |
| 24080  | 1      | 0     | 2   |        |

| respid | Q40_13 | Q41_1 | Q42 | Q42b_1 |
|--------|--------|-------|-----|--------|
| 24082  | 1      | 2     | 2   |        |
| 24088  | 1      | 0     | 2   |        |
| 24089  | 1      | 5     | 2   |        |
| 24091  | 1      | 2     | 2   |        |
| 24095  |        |       |     |        |
| 24100  | 2      | 2     | 2   |        |
| 24105  | 3      | 2     | 1   | 2      |
| 24107  | 4      | 3     | 2   |        |
| 24108  |        |       |     |        |
| 24113  | 1      | 0     | 2   |        |
| 24120  |        |       |     |        |
| 24122  | 3      | 1     | 1   | 1      |
| 24123  | 1      | 0     | 2   |        |
| 24125  | 2      | 2     | 1   | 1      |
| 24132  | 1      | 0     | 2   |        |
| 24139  | 1      | 1     | 2   |        |
| 24140  | 1      | 1     | 2   |        |
| 24143  | 3      | 1     | 2   |        |
| 24150  | 3      | 0     | 2   |        |
| 24153  |        |       |     |        |
| 24161  |        |       |     |        |
| 24168  | 1      | 2     | 2   |        |
| 24179  | 1      | 0     | 2   |        |
| 24182  | 3      | 1     | 1   | 1      |
| 24194  | 3      | 0     | 2   |        |
| 24206  |        |       |     |        |
| 24214  |        |       |     |        |
| 24215  | 3      | 1     | 2   |        |
| 24224  | 1      | 0     | 2   |        |
| 24225  | 1      | 0     | 2   |        |
| 24227  |        |       |     |        |
| 24229  | 2      | 1     | 2   |        |

| respid | Q40_13 | Q41_1 | Q42 | Q42b_1 |
|--------|--------|-------|-----|--------|
| 24230  | 1      | 0     | 2   |        |
| 24232  | 3      | 2     | 2   |        |
| 24253  | 1      | 0     | 2   |        |
| 24267  | 1      | 2     | 2   |        |
| 24274  | 1      | 0     | 2   |        |
| 24275  | 1      | 0     | 2   |        |
| 24277  | 3      | 0     | 2   |        |
| 24280  | 1      | 0     | 2   |        |
| 24285  | 1      | 0     | 2   |        |
| 24293  |        |       |     |        |
| 24295  | 4      | 6     | 2   |        |
| 24299  |        |       |     |        |
| 24303  | 1      | 2     | 2   |        |
| 24308  | 2      | 2     | 2   |        |
| 24322  |        |       |     |        |
| 24325  |        |       |     |        |
| 24328  | 1      | 1     | 2   |        |
| 24334  | 1      | 0     | 2   |        |
| 24342  | 1      | 1     | 2   |        |
| 24343  | 2      | 1     | 1   | 1      |
| 24348  | 6      | 4     | 2   |        |
| 24352  | 3      | 4     | 2   |        |
| 24354  | 2      | 2     | 1   | 2      |
| 24357  | 2      | 0     | 2   |        |
| 24360  | 2      | 5     | 1   | 1      |
| 24369  | 4      | 4     | 2   |        |
| 24373  | 2      | 1     | 2   |        |
| 24398  | 5      | 12    | 1   | 6      |
| 24402  | 2      | 5     | 2   |        |
| 24405  | 1      | 0     | 2   |        |
| 24407  | 2      | 2     | 2   |        |
| 24413  | 1      | 1     | 2   |        |

| respid | Q40_13 | Q41_1 | Q42 | Q42b_1 |
|--------|--------|-------|-----|--------|
| 24443  | 3      | 2     | 1   | 1      |
| 24451  |        |       |     |        |
| 24459  | 4      | 5     | 1   | 2      |
| 24465  | 1      | 1     | 2   |        |
| 24481  | 2      | 1     | 2   |        |
| 24482  | 1      | 0     | 2   |        |
| 24491  | 2      | 2     | 2   |        |
| 24495  | 1      | 0     | 2   |        |
| 24497  | 4      | 2     | 2   |        |
| 24511  | 1      | 0     | 2   |        |
| 24513  | 3      | 1     | 2   |        |
| 24516  | 2      | 1     | 1   | 1      |
| 24518  | 1      | 0     | 2   |        |
| 24524  | 1      | 2     | 2   |        |
| 24528  | 2      | 0     | 2   |        |
| 24531  | 3      | 7     | 1   | 3      |
| 24533  | 4      | 3     | 1   | 1      |
| 24547  | 1      | 5     | 2   |        |
| 24557  | 4      | 2     | 1   | 2      |
| 24559  | 5      | 0     | 1   | 0      |
| 24567  | 1      | 0     | 2   |        |
| 24568  |        |       |     |        |
| 24577  |        |       |     |        |
| 24581  | 1      | 1     | 2   |        |
| 24588  | 1      | 1     | 2   |        |
| 24604  | 5      | 0     | 2   |        |
| 24612  | 1      | 2     | 2   |        |
| 24621  | 5      | 4     | 1   | 2      |
| 24625  | 1      | 1     | 2   |        |
| 24627  | 1      | 2     | 2   |        |
| 24640  | 3      | 0     | 2   |        |
| 24644  | 1      | 0     | 2   |        |

| respid | Q40_13 | Q41_1 | Q42 | Q42b_1 |
|--------|--------|-------|-----|--------|
| 24664  | 2      | 3     | 1   | 1      |
| 24669  | 3      | 0     | 2   |        |
| 24685  | 1      | 2     | 2   |        |
| 24687  | 2      | 1     | 2   |        |
| 24688  | 2      | 0     | 2   |        |
| 24691  | 3      | 2     | 1   | 2      |
| 24693  | 2      | 1     | 2   |        |
| 24706  |        |       |     |        |
| 24710  |        |       |     |        |
| 24717  | 1      | 0     | 2   |        |
| 24720  | 1      | 0     | 2   |        |
| 24731  | 3      | 6     | 1   | 1      |
| 24732  | 2      | 0     | 2   |        |
| 24733  |        |       |     |        |
| 24747  | 1      | 3     | 2   |        |
| 24750  | 4      | 8     | 1   | 4      |
| 24758  | 2      | 3     | 2   |        |
| 24760  | 1      | 0     | 2   |        |
| 24765  |        |       |     |        |
| 24772  | 1      | 5     | 2   |        |
| 24779  | 3      | 0     | 2   |        |
| 24794  | 1      | 0     | 2   |        |
| 24796  | 3      | 8     | 1   | 8      |
| 24797  | 1      | 0     | 2   |        |
| 24800  | 1      | 1     | 2   |        |
| 24813  | 4      | 0     | 2   |        |
| 24815  | 2      | 0     | 2   |        |
| 24821  | 1      | 3     | 2   |        |
| 24822  | 1      | 1     | 2   |        |
| 24831  | 1      | 2     | 2   |        |
| 24835  |        |       |     |        |
| 24843  | 3      | 1     | 1   | 1      |

| respid | Q40_13 | Q41_1 | Q42 | Q42b_1 |
|--------|--------|-------|-----|--------|
| 24844  | 3      | 2     | 1   | 1      |
| 24860  |        |       |     |        |
| 24861  | 1      | 0     | 2   |        |
| 24865  | 3      | 2     | 1   | 2      |
| 24870  | 2      | 0     | 2   |        |
| 24887  | 1      | 0     | 2   |        |
| 24897  | 3      | 0     | 2   |        |
| 24902  | 3      | 3     | 2   |        |
| 24914  | 1      | 20    | 2   |        |
| 24921  | 2      | 2     | 2   |        |
| 24922  | 1      | 1     | 2   |        |
| 24924  |        |       |     |        |
| 24927  | 2      | 2     | 2   |        |
| 24936  | 1      | 0     | 2   |        |
| 24937  | 1      | 0     | 2   |        |
| 24942  | 3      | 3     | 2   |        |
| 24947  | 1      | 1     | 2   |        |
| 24953  | 1      | 5     | 2   |        |
| 24954  | 2      | 10    | 1   | 3      |
| 24960  | 4      | 2     | 1   | 2      |
| 24965  | 1      | 0     | 2   |        |
| 24975  | 1      | 0     | 2   |        |
| 24983  | 3      | 2     | 1   | 2      |
| 24985  | 1      | 0     | 2   |        |
| 24990  | 1      | 6     | 2   |        |
| 25000  | 1      | 0     | 2   |        |
| 25007  | 2      | 0     | 2   |        |
| 25008  | 1      | 0     | 2   |        |
| 25010  |        |       |     |        |
| 25016  | 2      | 1     | 1   | 1      |
| 25021  | 1      | 12    | 2   |        |
| 25040  |        |       |     |        |

| respid | Q40_13 | Q41_1 | Q42 | Q42b_1 |
|--------|--------|-------|-----|--------|
| 25043  | 1      | 1     | 2   |        |
| 25055  | 1      | 5     | 2   |        |
| 25057  | 2      | 0     | 2   |        |
| 25060  | 3      | 3     | 2   |        |
| 25062  | 2      | 4     | 2   |        |
| 25064  | 3      | 2     | 1   | 2      |
| 25069  |        |       |     |        |
| 25077  | 1      | 0     | 2   |        |
| 25088  |        |       |     |        |
| 25093  | 2      | 3     | 1   | 2      |
| 25121  | 2      | 5     | 2   |        |
| 25140  | 3      | 2     | 1   | 2      |
| 25144  | 1      | 5     | 2   |        |
| 25149  | 3      | 12    | 1   | 4      |
| 25159  | 1      | 0     | 2   |        |
| 25191  | 1      | 2     | 2   |        |
| 25193  | 4      | 0     | 2   |        |
| 25202  | 4      | 2     | 1   | 2      |
| 25215  | 4      | 2     | 1   | 2      |
| 25229  | 3      | 12    | 2   |        |
| 25231  | 3      | 1     | 2   |        |
| 25236  | 1      | 0     | 2   |        |
| 25242  | 1      | 0     | 2   |        |
| 25252  | 1      | 1     | 2   |        |
| 25253  | 3      | 4     | 1   | 2      |
| 25256  | 4      | 2     | 1   | 2      |
| 25260  | 1      | 0     | 2   |        |
| 25261  | 1      | 2     | 2   |        |
| 25280  | 2      | 3     | 2   |        |
| 25282  | 1      | 2     | 2   |        |
| 25289  | 4      | 1     | 2   |        |
| 25303  | 1      | 1     | 2   |        |



| respid | Q40_13 | Q41_1 | Q42 | Q42b_1 |
|--------|--------|-------|-----|--------|
| 25304  | 3      | 0     | 2   |        |
| 25309  | 2      | 0     | 2   |        |
| 25317  | 1      | 2     | 2   |        |
| 25318  | 4      | 5     | 1   | 5      |
| 25320  | 3      | 10    | 2   |        |
| 25324  | 3      | 2     | 1   | 2      |
| 25331  | 2      | 0     | 2   |        |
| 25340  | 1      | 5     | 2   |        |
| 25342  | 1      | 0     | 2   |        |
| 25350  | 1      | 3     | 2   |        |
| 25352  |        |       |     |        |
| 25358  | 1      | 1     | 2   |        |
| 25375  | 1      | 1     | 2   |        |
| 25386  | 1      | 1     | 2   |        |
| 25388  | 2      | 0     | 2   |        |
| 25390  | 1      | 0     | 2   |        |
| 25391  | 2      | 0     | 2   |        |
| 25400  | 2      | 0     | 2   |        |
| 25413  | 4      | 2     | 1   | 2      |
| 25424  | 1      | 1     | 1   | 1      |
| 25426  | 2      | 4     | 2   |        |
| 25430  | 1      | 0     | 2   |        |
| 25434  | 2      | 2     | 2   |        |
| 25439  | 3      | 3     | 2   |        |
| 25441  | 1      | 0     | 2   |        |
| 25445  | 1      | 0     | 2   |        |
| 25451  | 1      | 0     | 2   |        |
| 25469  | 3      | 2     | 1   | 2      |
| 25471  | 3      | 2     | 1   | 2      |
| 25476  | 2      | 5     | 2   |        |
| 25480  | 1      | 2     | 2   |        |
| 25482  | 2      | 1     | 2   |        |

| respid | Q40_13 | Q41_1 | Q42 | Q42b_1 |
|--------|--------|-------|-----|--------|
| 25500  | 4      | 3     | 1   | 3      |
| 25516  | 1      | 2     | 2   |        |
| 25521  | 4      | 3     | 1   | 2      |
| 25525  | 1      | 0     | 2   |        |
| 25530  | 3      | 3     | 1   | 3      |
| 25555  | 3      | 1     | 1   | 1      |
| 25558  | 3      | 5     | 2   |        |
| 25561  | 2      | 2     | 2   |        |
| 25566  |        |       |     |        |
| 25571  | 2      | 2     | 2   |        |
| 25572  | 1      | 3     | 2   |        |
| 25574  |        |       |     |        |
| 25588  | 1      | 0     | 2   |        |
| 25591  | 2      | 1     | 2   |        |
| 25599  | 2      | 0     | 2   |        |
| 25604  | 1      | 0     | 2   |        |
| 25614  | 2      | 1     | 1   | 1      |
| 25634  | 2      | 3     | 1   | 2      |
| 25642  | 1      | 0     | 2   |        |
| 25647  | 2      | 2     | 2   |        |
| 25653  | 1      | 0     | 2   |        |
| 25654  | 2      | 0     | 2   |        |
| 25660  | 1      | 0     | 2   |        |
| 25664  | 1      | 0     | 2   |        |
| 25665  | 2      | 2     | 2   |        |
| 25672  | 3      | 0     | 2   |        |
| 25677  | 2      | 0     | 2   |        |
| 25685  | 1      | 28    | 2   |        |
| 25699  | 3      | 3     | 1   | 2      |
| 25703  | 1      | 0     | 2   |        |
| 25704  | 3      | 0     | 2   |        |
| 25705  | 3      | 0     | 2   |        |

| respid | Q40_13 | Q41_1 | Q42 | Q42b_1 |
|--------|--------|-------|-----|--------|
| 25711  | 1      | 0     | 2   |        |
| 25727  | 2      | 1     | 1   | 1      |
| 25728  | 2      | 1     | 2   |        |
| 25733  | 3      | 2     | 2   |        |
| 25735  | 1      | 0     | 2   |        |
| 25736  | 1      | 0     | 2   |        |
| 25742  | 1      | 0     | 2   |        |
| 25750  | 1      | 1     | 2   |        |
| 25754  |        |       |     |        |
| 25776  | 2      | 5     | 1   | 2      |
| 25778  |        |       |     |        |
| 25796  | 2      | 0     | 2   |        |
| 25852  | 1      | 3     | 2   |        |
| 25858  | 1      | 0     | 2   |        |
| 25859  |        |       |     |        |
| 25886  | 3      | 2     | 2   |        |
| 25890  | 3      | 6     | 1   | 1      |
| 25897  | 1      | 0     | 2   |        |
| 25903  | 1      | 0     | 2   |        |
| 25905  | 3      | 5     | 2   |        |
| 25917  |        |       |     |        |
| 25918  | 1      | 2     | 2   |        |
| 25928  | 1      | 0     | 2   |        |
| 25930  |        |       |     |        |
| 25949  | 2      | 0     | 2   |        |
| 25955  | 1      | 3     | 2   |        |
| 25959  | 1      | 0     | 2   |        |
| 25964  | 2      | 10    | 2   |        |
| 25972  | 1      | 0     | 2   |        |
| 25999  | 3      | 4     | 1   | 2      |
| 26019  | 2      | 0     | 2   |        |
| 26025  | 1      | 1     | 1   | 1      |

| respid | Q40_13 | Q41_1 | Q42 | Q42b_1 |
|--------|--------|-------|-----|--------|
| 26039  | 3      | 2     | 1   | 2      |
| 26055  | 1      | 1     | 2   |        |
| 26061  | 3      | 0     | 2   |        |
| 26076  | 1      | 0     | 2   |        |
| 26088  | 2      | 0     | 2   |        |
| 26094  |        |       |     |        |
| 26104  | 2      | 1     | 2   |        |
| 26131  | 6      | 3     | 2   |        |
| 26134  | 3      | 0     | 2   |        |
| 26160  | 1      | 3     | 2   |        |
| 26168  | 1      | 0     | 2   |        |
| 26170  |        |       |     |        |
| 26191  | 2      | 0     | 2   |        |
| 26192  |        |       |     |        |
| 26195  | 2      | 1     | 2   |        |
| 26198  | 1      | 0     | 2   |        |
| 26199  | 2      | 4     | 2   |        |
| 26201  |        |       |     |        |
| 26202  | 1      | 10    | 2   |        |
| 26226  | 2      | 5     | 2   |        |
| 26233  | 2      | 1     | 2   |        |
| 26236  | 1      | 4     | 2   |        |
| 26242  | 2      | 0     | 2   |        |
| 26244  | 1      | 5     | 2   |        |
| 26250  | 3      | 7     | 2   |        |
| 26266  | 1      | 0     | 2   |        |
| 26274  | 1      | 3     | 2   |        |
| 26286  | 2      | 20    | 2   |        |
| 26288  | 2      | 1     | 2   |        |
| 26295  |        |       |     |        |
| 26296  | 1      | 1     | 2   |        |
| 26297  |        |       |     |        |

| respid | Q40_13 | Q41_1 | Q42 | Q42b_1 |
|--------|--------|-------|-----|--------|
| 26300  | 3      | 1     | 2   |        |
| 26317  | 1      | 0     | 2   |        |
| 26343  |        |       |     |        |
| 26367  | 1      | 10    | 2   |        |
| 26372  | 1      | 2     | 2   |        |
| 26403  | 3      | 1     | 2   |        |
| 26423  | 1      | 0     | 2   |        |
| 26430  | 1      | 0     | 2   |        |
| 26437  | 2      | 4     | 1   | 2      |
| 26457  |        |       |     |        |
| 26466  | 5      | 0     | 2   |        |
| 26467  | 3      | 1     | 1   | 1      |
| 26469  | 2      | 0     | 2   |        |
| 26494  | 1      | 0     | 2   |        |
| 26510  | 2      | 0     | 2   |        |
| 26519  | 1      | 0     | 2   |        |
| 26525  | 1      | 5     | 2   |        |
| 26529  |        |       |     |        |
| 26533  | 1      | 0     | 2   |        |
| 26556  | 1      | 0     | 2   |        |
| 26559  | 3      | 2     | 2   |        |
| 26565  | 3      | 5     | 1   | 2      |
| 26576  | 3      | 0     | 2   |        |
| 26601  |        |       |     |        |
| 26607  | 3      | 4     | 2   |        |
| 26611  | 2      | 1     | 2   |        |
| 26619  | 1      | 2     | 2   |        |
| 26631  | 1      | 6     | 2   |        |
| 26654  | 1      | 1     | 2   |        |
| 26656  | 2      | 2     | 2   |        |
| 26664  |        |       |     |        |
| 26667  | 3      | 0     | 2   |        |

| respid | Q40_13 | Q41_1 | Q42 | Q42b_1 |
|--------|--------|-------|-----|--------|
| 26674  | 4      | 18    | 1   | 12     |
| 26678  | 2      | 1     | 2   |        |
| 26693  | 1      | 0     | 2   |        |
| 26696  | 5      | 2     | 2   |        |
| 26703  | 3      | 5     | 1   | 5      |
| 26705  | 2      | 0     | 2   |        |
| 26706  | 3      | 1     | 1   | 1      |
| 26716  | 3      | 0     | 2   |        |
| 26721  | 1      | 0     | 2   |        |
| 26730  | 3      | 0     | 2   |        |
| 26752  | 1      | 1     | 2   |        |
| 26755  | 1      | 0     | 2   |        |
| 26791  | 1      | 1     | 2   |        |
| 26804  | 2      | 10    | 2   |        |
| 26810  | 6      | 5     | 2   |        |
| 26813  | 3      | 2     | 1   | 1      |
| 26833  | 2      | 1     | 1   | 1      |
| 26880  | 1      | 0     | 2   |        |
| 26884  | 1      | 1     | 2   |        |
| 26885  | 2      | 2     | 2   |        |
| 26890  | 3      | 19    | 1   | 3      |
| 26937  | 2      | 1     | 2   |        |
| 26939  | 4      | 5     | 1   | 1      |
| 26941  |        |       |     |        |
| 26992  | 3      | 6     | 2   |        |
| 27037  | 2      | 0     | 2   |        |
| 27045  | 5      | 3     | 1   | 3      |
| 27053  | 5      | 2     | 2   |        |
| 27060  | 2      | 3     | 1   | 3      |
| 27076  | 1      | 2     | 1   | 1      |
| 27124  | 1      | 3     | 2   |        |
| 27125  | 1      | 1     | 2   |        |

| respid | Q40_13 | Q41_1 | Q42 | Q42b_1 |
|--------|--------|-------|-----|--------|
| 27132  | 1      | 0     | 2   |        |
| 27166  | 1      | 4     | 2   |        |
| 27190  | 2      | 1     | 1   | 1      |
| 27199  | 2      | 12    | 2   |        |
| 27221  | 4      | 3     | 1   | 3      |
| 27233  | 3      | 0     | 2   |        |
| 27241  | 1      | 2     | 2   |        |
| 27244  | 1      | 12    | 2   |        |
| 27245  | 6      | 5     | 2   |        |
| 27246  | 2      | 0     | 2   |        |
| 27253  | 2      | 1     | 2   |        |
| 27255  | 4      | 7     | 1   | 4      |
| 27267  | 1      | 0     | 2   |        |
| 27283  | 3      | 2     | 2   |        |
| 27289  | 4      | 4     | 2   |        |
| 27302  | 1      | 1     | 2   |        |
| 27317  | 1      | 0     | 2   |        |
| 27319  | 1      | 2     | 2   |        |
| 27331  | 2      | 1     | 2   |        |
| 27333  | 1      | 1     | 2   |        |
| 27340  |        |       |     |        |
| 27362  | 2      | 6     | 1   | 6      |
| 27370  | 1      | 12    | 2   |        |
| 27379  | 1      | 5     | 2   |        |
| 27386  |        |       |     |        |
| 27398  | 1      | 0     | 2   |        |
| 27404  | 1      | 5     | 2   |        |
| 27408  | 1      | 10    | 2   |        |
| 27412  | 3      | 2     | 2   |        |
| 27426  | 3      | 5     | 1   | 2      |
| 27455  | 1      | 1     | 2   |        |
| 27464  | 3      | 5     | 1   | 4      |

| respid | Q40_13 | Q41_1 | Q42 | Q42b_1 |
|--------|--------|-------|-----|--------|
| 27484  | 2      | 2     | 1   | 1      |
| 27493  | 6      | 8     | 2   |        |
| 27512  | 3      | 5     | 1   | 3      |
| 27525  | 3      | 0     | 2   |        |
| 27532  | 2      | 2     | 1   | 1      |
| 27539  | 1      | 0     | 2   |        |
| 27540  | 3      | 2     | 2   |        |
| 27552  | 3      | 2     | 2   |        |
| 27562  | 1      | 0     | 2   |        |
| 27568  | 1      | 0     | 2   |        |
| 27574  | 4      | 4     | 1   | 3      |
| 27575  | 1      | 0     | 2   |        |
| 27577  | 1      | 3     | 2   |        |
| 27589  | 1      | 1     | 2   |        |
| 27593  | 1      | 3     | 2   |        |
| 27594  | 4      | 3     | 2   |        |
| 27595  | 6      | 9     | 1   | 4      |
| 27598  | 1      | 5     | 2   |        |
| 27620  | 3      | 1     | 2   |        |
| 27621  | 3      | 0     | 2   |        |
| 27628  | 1      | 0     | 2   |        |
| 27633  | 1      | 2     | 2   |        |
| 27643  | 4      | 7     | 2   |        |
| 27644  | 3      | 1     | 1   | 1      |
| 27668  | 2      | 0     | 2   |        |
| 27681  | 3      | 0     | 2   |        |
| 27691  | 1      | 0     | 2   |        |
| 27693  | 3      | 1     | 2   |        |
| 27703  | 4      | 24    | 1   | 6      |
| 27708  | 4      | 0     | 2   |        |
| 27719  | 3      | 0     | 2   |        |
| 27720  | 1      | 1     | 2   |        |



| respid | Q40_13 | Q41_1 | Q42 | Q42b_1 |
|--------|--------|-------|-----|--------|
| 27723  | 2      | 6     | 1   | 1      |
| 27725  | 1      | 0     | 2   |        |
| 27734  | 3      | 2     | 2   |        |
| 27744  | 1      | 2     | 2   |        |
| 27749  | 5      | 6     | 1   | 3      |
| 27762  | 2      | 0     | 2   |        |
| 27808  | 3      | 2     | 1   | 1      |
| 27810  | 6      | 10    | 1   | 3      |
| 27812  | 2      | 2     | 2   |        |
| 27815  |        |       |     |        |
| 27818  | 1      | 0     | 2   |        |
| 27823  | 1      | 12    | 2   |        |
| 27841  | 2      | 3     | 1   | 1      |
| 27843  |        |       |     |        |
| 27851  | 2      | 6     | 2   |        |
| 27858  | 2      | 0     | 2   |        |
| 27859  | 1      | 10    | 2   |        |
| 27869  | 1      | 2     | 2   |        |
| 27872  | 1      | 0     | 2   |        |
| 27873  | 2      | 0     | 2   |        |
| 27884  | 2      | 0     | 2   |        |
| 27904  | 3      | 0     | 2   |        |
| 27915  | 1      | 1     | 2   |        |
| 27918  | 2      | 0     | 2   |        |
| 27937  | 2      | 2     | 2   |        |
| 27943  | 3      | 1     | 2   |        |
| 27948  | 1      | 0     | 2   |        |
| 27971  | 3      | 1     | 2   |        |
| 27991  | 1      | 0     | 2   |        |
| 28000  | 2      | 12    | 2   |        |
| 28011  | 2      | 1     | 2   |        |
| 28022  | 1      | 6     | 2   |        |

| respid | Q40_13 | Q41_1 | Q42 | Q42b_1 |
|--------|--------|-------|-----|--------|
| 28025  | 1      | 3     | 2   |        |
| 28041  | 1      | 8     | 2   |        |
| 28057  | 4      | 5     | 1   | 1      |
| 28080  |        |       |     |        |
| 28098  | 1      | 0     | 2   |        |
| 28104  | 1      | 3     | 2   |        |
| 28109  | 2      | 3     | 1   | 3      |
| 28129  | 1      | 0     | 2   |        |
| 28141  |        |       |     |        |
| 28143  | 1      | 2     | 2   |        |
| 28149  | 1      | 0     | 2   |        |
| 28151  | 3      | 1     | 1   | 1      |
| 28161  | 2      | 3     | 2   |        |
| 28169  | 1      | 5     | 2   |        |
| 28194  | 4      | 0     | 2   |        |
| 28197  |        |       |     |        |
| 28206  | 1      | 4     | 2   |        |
| 28218  | 1      | 0     | 2   |        |
| 28227  | 1      | 6     | 2   |        |
| 28235  | 4      | 5     | 2   |        |
| 28246  | 3      | 24    | 2   |        |
| 28259  | 4      | 2     | 2   |        |
| 28263  | 3      | 1     | 2   |        |
| 28267  | 4      | 2     | 1   | 1      |
| 28274  | 1      | 2     | 2   |        |
| 28278  | 1      | 0     | 2   |        |
| 28288  | 2      | 0     | 2   |        |
| 28308  |        |       |     |        |
| 28309  | 3      | 0     | 2   |        |
| 28323  | 1      | 20    | 2   |        |
| 28335  | 5      | 7     | 2   |        |
| 28354  | 4      | 7     | 2   |        |

| respid | Q40_13 | Q41_1 | Q42 | Q42b_1 |
|--------|--------|-------|-----|--------|
| 28355  | 4      | 2     | 2   |        |
| 28356  | 2      | 3     | 2   |        |
| 28357  | 1      | 1     | 1   | 1      |
| 28363  | 1      | 2     | 2   |        |
| 28366  | 1      | 3     | 2   |        |
| 28372  | 3      | 5     | 1   | 3      |
| 28381  | 2      | 0     | 2   |        |
| 28388  | 2      | 0     | 2   |        |
| 28413  | 4      | 7     | 2   |        |
| 28421  | 3      | 0     | 2   |        |
| 28430  | 4      | 7     | 2   |        |
| 28439  | 4      | 7     | 2   |        |
| 28458  | 4      | 8     | 1   | 5      |
| 28461  | 4      | 0     | 2   |        |
| 28466  | 1      | 0     | 2   |        |
| 28492  | 1      | 0     | 2   |        |
| 28534  |        |       |     |        |
| 28537  | 3      | 2     | 2   |        |
| 28560  | 1      | 0     | 2   |        |
| 28566  | 1      | 2     | 2   |        |
| 28569  | 2      | 1     | 2   |        |
| 28584  | 2      | 1     | 2   |        |
| 28590  | 2      | 2     | 2   |        |
| 28596  |        |       |     |        |
| 28608  | 1      | 3     | 1   | 1      |
| 28631  | 2      | 3     | 1   | 3      |
| 28644  | 2      | 5     | 2   |        |
| 28646  | 1      | 6     | 2   |        |
| 28665  |        |       |     |        |
| 28686  | 1      | 1     | 2   |        |
| 28704  | 2      | 1     | 2   |        |
| 28719  | 1      | 2     | 2   |        |

| respid | Q40_13 | Q41_1 | Q42 | Q42b_1 |
|--------|--------|-------|-----|--------|
| 28736  | 1      | 4     | 1   | 2      |
| 28739  | 2      | 0     | 2   |        |
| 28758  | 2      | 0     | 2   |        |
| 28761  | 3      | 3     | 1   | 3      |
| 28770  | 5      | 5     | 1   | 4      |
| 28774  | 1      | 3     | 2   |        |
| 28778  | 4      | 9     | 1   | 4      |
| 28783  | 3      | 0     | 2   |        |
| 28785  | 2      | 0     | 2   |        |
| 28797  | 4      | 3     | 1   | 3      |
| 28801  | 2      | 3     | 1   | 2      |
| 28821  |        |       |     |        |
| 28827  | 1      | 6     | 1   | 3      |
| 28828  | 1      | 10    | 2   |        |
| 28871  | 2      | 0     | 2   |        |
| 28876  | 1      | 2     | 2   |        |
| 28891  | 6      | 4     | 2   |        |
| 28898  |        |       |     |        |
| 28909  | 2      | 0     | 2   |        |
| 28930  | 1      | 8     | 1   | 1      |
| 28935  | 2      | 0     | 2   |        |
| 28964  | 1      | 2     | 2   |        |
| 28965  | 1      | 0     | 2   |        |
| 28967  | 6      | 2     | 2   |        |
| 28975  |        |       |     |        |
| 28982  | 2      | 2     | 2   |        |
| 28989  | 1      | 3     | 2   |        |
| 29003  | 3      | 0     | 2   |        |
| 29004  | 1      | 4     | 2   |        |
| 29007  | 1      | 5     | 2   |        |
| 29008  | 1      | 0     | 2   |        |
| 29011  | 3      | 12    | 1   | 8      |

| respid | Q40_13 | Q41_1 | Q42 | Q42b_1 |
|--------|--------|-------|-----|--------|
| 29012  | 2      | 0     | 2   |        |
| 29014  |        |       |     |        |
| 29016  | 2      | 0     | 2   |        |
| 29018  | 6      | 3     | 1   | 2      |
| 29048  | 1      | 2     | 2   |        |
| 29184  | 1      | 0     | 2   |        |
| 29237  | 1      | 0     | 2   |        |
| 29252  | 2      | 3     | 2   |        |
| 29267  | 1      | 0     | 2   |        |
| 29276  |        |       |     |        |
| 29281  | 3      | 0     | 2   |        |
| 29285  | 1      | 1     | 2   |        |
| 29291  | 5      | 3     | 1   | 2      |
| 29304  | 2      | 0     | 2   |        |
| 29323  | 1      | 3     | 2   |        |
| 29330  | 2      | 3     | 1   | 1      |
| 29357  | 2      | 1     | 1   | 1      |
| 29416  | 3      | 10    | 2   |        |
| 29432  | 1      | 2     | 2   |        |
| 29482  | 3      | 3     | 2   |        |
| 29506  | 2      | 24    | 2   |        |
| 29509  | 1      | 3     | 1   | 1      |
| 29512  | 2      | 4     | 2   |        |
| 29519  | 2      | 2     | 2   |        |
| 29520  | 2      | 0     | 2   |        |
| 29521  | 2      | 5     | 2   |        |
| 29529  | 5      | 3     | 2   |        |
| 29532  | 1      | 1     | 2   |        |
| 29547  | 3      | 0     | 2   |        |
| 29551  | 2      | 1     | 2   |        |
| 29584  | 4      | 2     | 1   | 2      |
| 29591  | 3      | 2     | 2   |        |

| respid | Q40_13 | Q41_1 | Q42 | Q42b_1 |
|--------|--------|-------|-----|--------|
| 29613  | 1      | 3     | 2   |        |
| 29615  | 2      | 3     | 2   |        |
| 29625  | 2      | 1     | 1   | 1      |
| 29660  | 2      | 3     | 2   |        |
| 29677  |        |       |     |        |
| 29700  | 2      | 2     | 2   |        |
| 29715  | 6      | 10    | 1   | 1      |
| 29720  |        |       |     |        |
| 29730  | 1      | 1     | 2   |        |
| 29734  | 3      | 2     | 2   |        |
| 29754  |        |       |     |        |
| 29771  | 1      | 6     | 2   |        |
| 29774  | 2      | 0     | 2   |        |
| 29783  | 1      | 0     | 2   |        |
| 29812  | 2      | 5     | 2   |        |
| 29813  | 1      | 1     | 2   |        |
| 29814  | 3      | 4     | 2   |        |
| 29820  | 2      | 0     | 2   |        |
| 29906  | 1      | 0     | 2   |        |
| 29907  | 2      | 3     | 2   |        |
| 29928  |        |       |     |        |
| 29932  | 2      | 2     | 1   | 2      |
| 29958  | 3      | 10    | 1   | 2      |
| 29982  | 1      | 0     | 2   |        |
| 29989  | 1      | 0     | 2   |        |
| 29994  | 2      | 1     | 2   |        |
| 30005  | 2      | 0     | 2   |        |
| 30077  | 1      | 0     | 2   |        |
| 30098  |        |       |     |        |
| 30107  | 2      | 3     | 1   | 1      |
| 30154  | 2      | 0     | 2   |        |
| 30159  | 1      | 0     | 2   |        |

| respid | Q40_13 | Q41_1 | Q42 | Q42b_1 |
|--------|--------|-------|-----|--------|
| 30162  | 1      | 0     | 2   |        |
| 30163  |        |       |     |        |
| 30189  | 2      | 0     | 2   |        |
| 30230  | 1      | 0     | 2   |        |
| 30259  | 2      | 2     | 2   |        |
| 30284  | 1      | 0     | 2   |        |
| 30296  | 1      | 0     | 2   |        |
| 30330  | 2      | 3     | 1   | 1      |
| 30341  | 1      | 0     | 2   |        |
| 30352  | 3      | 5     | 1   | 2      |
| 30379  | 1      | 1     | 2   |        |
| 30424  | 1      | 2     | 2   |        |
| 30447  | 1      | 0     | 2   |        |
| 30477  | 3      | 5     | 1   | 5      |
| 30503  | 1      | 3     | 2   |        |
| 30515  | 3      | 5     | 1   | 5      |
| 30516  | 2      | 0     | 2   |        |
| 30623  | 4      | 6     | 2   |        |
| 30639  | 1      | 0     | 2   |        |
| 30670  | 1      | 0     | 2   |        |
| 30697  | 1      | 0     | 2   |        |
| 30735  | 2      | 1     | 2   |        |
| 30742  | 1      | 25    | 2   |        |
| 30751  | 4      | 3     | 1   | 2      |
| 30789  |        |       |     |        |
| 30867  | 4      | 7     | 2   |        |
| 30876  | 1      | 0     | 2   |        |
| 30877  | 1      | 2     | 2   |        |
| 30887  | 3      | 1     | 2   |        |
| 30891  | 2      | 6     | 1   | 2      |
| 31030  | 1      | 3     | 2   |        |
| 31059  | 3      | 0     | 2   |        |

| respid | Q40_13 | Q41_1 | Q42 | Q42b_1 |
|--------|--------|-------|-----|--------|
| 31082  |        |       |     |        |
| 31106  | 1      | 0     | 2   |        |
| 31110  | 1      | 3     | 2   |        |
| 31265  | 3      | 1     | 1   | 1      |
| 31266  | 3      | 1     | 1   | 1      |
| 31267  | 3      | 1     | 1   | 1      |
| 31310  | 1      | 0     | 2   |        |
| 31325  | 1      | 3     | 2   |        |
| 31367  | 2      | 1     | 2   |        |
| 31389  | 1      | 0     | 2   |        |
| 31440  | 1      | 4     | 2   |        |
| 31465  | 1      | 5     | 2   |        |
| 31477  | 1      | 3     | 2   |        |
| 31491  | 2      | 4     | 2   |        |
| 31494  | 4      | 0     | 2   |        |
| 31509  | 3      | 5     | 2   |        |
| 31533  | 1      | 2     | 2   |        |
| 31547  | 2      | 6     | 2   |        |
| 31558  | 1      | 0     | 2   |        |
| 31579  | 5      | 5     | 2   |        |
| 31591  | 2      | 1     | 2   |        |
| 31596  | 3      | 0     | 2   |        |
| 31601  | 4      | 10    | 1   | 6      |
| 31605  | 1      | 0     | 2   |        |
| 31637  | 1      | 2     | 2   |        |
| 31646  | 2      | 0     | 2   |        |
| 31647  | 5      | 3     | 2   |        |
| 31650  | 1      | 0     | 2   |        |
| 31651  | 4      | 2     | 2   |        |
| 31657  | 1      | 2     | 2   |        |
| 31660  | 1      | 1     | 1   | 1      |
| 31661  | 4      | 1     | 2   |        |



| respid | Q40_13 | Q41_1 | Q42 | Q42b_1 |
|--------|--------|-------|-----|--------|
| 31667  | 3      | 2     | 2   |        |
| 31674  | 3      | 1     | 2   |        |
| 31686  | 3      | 10    | 2   |        |
| 31693  |        |       |     |        |
| 31716  |        |       |     |        |
| 31818  | 1      | 0     | 2   |        |
| 31886  | 1      | 2     | 2   |        |
| 31945  | 4      | 11    | 1   | 9      |
| 31957  | 2      | 6     | 2   |        |
| 31966  | 2      | 2     | 2   |        |
| 31978  | 2      | 0     | 2   |        |
| 31999  | 5      | 10    | 2   |        |
| 32026  | 2      | 1     | 2   |        |
| 32033  | 1      | 0     | 2   |        |
| 32037  | 3      | 1     | 1   | 1      |
| 32038  | 3      | 1     | 1   | 1      |
| 32047  | 3      | 1     | 1   | 1      |
| 32053  |        |       |     |        |
| 32069  | 2      | 0     | 2   |        |
| 32081  | 3      | 5     | 1   | 2      |
| 32123  | 2      | 0     | 2   |        |
| 32130  | 2      | 0     | 2   |        |
| 32141  | 1      | 0     | 2   |        |
| 32158  |        |       |     |        |
| 32165  | 1      | 3     | 2   |        |
| 32180  | 1      | 0     | 2   |        |
| 32221  | 1      | 0     | 2   |        |
| 32292  | 1      | 1     | 2   |        |
| 32318  | 1      | 1     | 2   |        |
| 32346  | 1      | 0     | 2   |        |
| 32402  | 3      | 2     | 1   | 2      |
| 32422  | 1      | 2     | 2   |        |

| respid | Q40_13 | Q41_1 | Q42 | Q42b_1 |
|--------|--------|-------|-----|--------|
| 32439  | 1      | 0     | 2   |        |
| 32507  | 3      | 0     | 2   |        |
| 32522  |        |       |     |        |
| 32535  |        |       |     |        |
| 32546  | 1      | 0     | 2   |        |
| 32553  | 1      | 0     | 2   |        |
| 32570  |        |       |     |        |
| 32592  | 1      | 1     | 2   |        |
| 32605  | 4      | 50    | 1   | 2      |
| 32630  | 2      | 2     | 1   | 1      |
| 32642  | 2      | 2     | 2   |        |
| 32646  | 1      | 0     | 2   |        |
| 32665  | 4      | 0     | 2   |        |
| 32677  | 1      | 0     | 2   |        |
| 32694  | 3      | 0     | 2   |        |
| 32698  | 3      | 0     | 2   |        |
| 32754  | 3      | 10    | 2   |        |
| 32799  | 3      | 1     | 2   |        |
| 32816  |        |       |     |        |
| 32819  | 2      | 2     | 1   | 2      |
| 32840  | 3      | 6     | 1   | 1      |
| 32861  | 1      | 5     | 2   |        |
| 32866  | 1      | 0     | 2   |        |
| 32889  | 5      | 5     | 1   | 3      |
| 32960  | 2      | 0     | 2   |        |
| 32965  | 2      | 3     | 2   |        |
| 32986  | 2      | 2     | 2   |        |
| 33005  | 3      | 2     | 2   |        |
| 33054  | 3      | 6     | 2   |        |
| 33072  | 2      | 2     | 2   |        |
| 33095  | 1      | 0     | 2   |        |
| 33099  | 2      | 3     | 2   |        |

| respid | Q40_13 | Q41_1 | Q42 | Q42b_1 |
|--------|--------|-------|-----|--------|
| 33121  | 1      | 0     | 2   |        |
| 33152  | 1      | 2     | 2   |        |
| 33159  | 2      | 2     | 2   |        |
| 33189  | 1      | 1     | 2   |        |
| 33198  | 6      | 2     | 1   | 1      |
| 33202  | 5      | 12    | 2   |        |
| 33204  | 1      | 0     | 2   |        |
| 33224  | 1      | 2     | 2   |        |
| 33272  | 2      | 2     | 1   | 1      |
| 33294  | 1      | 0     | 2   |        |
| 33300  | 3      | 0     | 2   |        |
| 33314  | 3      | 15    | 1   | 10     |
| 33338  | 3      | 4     | 2   |        |
| 33350  | 4      | 6     | 1   | 6      |
| 33362  | 3      | 3     | 1   | 2      |
| 33368  |        |       |     |        |
| 33374  | 2      | 5     | 2   |        |
| 33380  | 4      | 9     | 1   | 5      |
| 33385  | 2      | 6     | 1   | 3      |
| 33402  | 3      | 3     | 1   | 2      |
| 33414  | 2      | 0     | 2   |        |
| 33439  | 3      | 2     | 1   | 2      |
| 33449  | 3      | 2     | 1   | 1      |
| 33533  | 1      | 6     | 2   |        |
| 33540  | 1      | 0     | 2   |        |
| 33556  | 2      | 20    | 2   |        |
| 33615  | 1      | 2     | 2   |        |
| 33694  | 3      | 4     | 1   | 1      |
| 33717  | 1      | 5     | 2   |        |
| 33729  | 2      | 6     | 2   |        |
| 33746  | 1      | 2     | 2   |        |
| 33764  | 1      | 2     | 2   |        |

| respid | Q40_13 | Q41_1 | Q42 | Q42b_1 |
|--------|--------|-------|-----|--------|
| 33790  | 3      | 0     | 2   |        |
| 33868  | 3      | 2     | 2   |        |
| 33872  | 6      | 1     | 1   | 1      |
| 33883  | 1      | 2     | 2   |        |
| 33884  | 1      | 0     | 2   |        |
| 33900  | 2      | 0     | 2   |        |
| 33933  | 1      | 5     | 2   |        |
| 33949  | 1      | 6     | 2   |        |
| 34005  |        |       |     |        |
| 34016  |        |       |     |        |
| 34041  | 5      | 0     | 2   |        |
| 34053  | 1      | 0     | 2   |        |
| 34056  | 1      | 0     | 2   |        |
| 34093  | 1      | 5     | 2   |        |
| 34112  | 2      | 4     | 2   |        |
| 34136  | 4      | 2     | 1   | 2      |
| 34138  | 3      | 0     | 2   |        |
| 34139  | 2      | 15    | 1   | 2      |
| 34189  | 1      | 2     | 2   |        |
| 34239  | 2      | 1     | 2   |        |
| 34240  | 2      | 2     | 2   |        |
| 34241  | 1      | 5     | 2   |        |
| 34259  | 3      | 3     | 1   | 1      |
| 34303  | 2      | 2     | 1   | 1      |
| 34306  | 1      | 1     | 1   | 0      |
| 34395  | 2      | 0     | 2   |        |
| 34463  | 2      | 2     | 2   |        |
| 34466  | 2      | 1     | 1   | 1      |
| 34471  | 1      | 12    | 2   |        |
| 34489  | 3      | 2     | 1   | 2      |
| 34518  | 3      | 30    | 2   |        |
| 34542  | 3      | 2     | 2   |        |

| respid | Q40_13 | Q41_1 | Q42 | Q42b_1 |
|--------|--------|-------|-----|--------|
| 34595  |        |       |     |        |
| 34604  | 2      | 20    | 2   |        |
| 34631  | 1      | 12    | 2   |        |
| 34665  | 1      | 2     | 2   |        |
| 34716  | 1      | 6     | 2   |        |
| 34729  | 1      | 0     | 2   |        |
| 34772  | 4      | 10    | 1   | 2      |
| 34800  | 3      | 0     | 2   |        |
| 34819  | 2      | 1     | 2   |        |
| 34829  | 3      | 8     | 1   | 3      |
| 34831  | 3      | 3     | 1   | 2      |
| 34839  | 1      | 0     | 2   |        |
| 34868  | 3      | 0     | 2   |        |
| 34869  | 1      | 1     | 2   |        |
| 34882  | 2      | 2     | 2   |        |
| 34895  | 5      | 4     | 1   | 2      |
| 34901  | 2      | 2     | 2   |        |
| 34904  | 3      | 10    | 1   | 1      |
| 34907  | 3      | 6     | 2   |        |
| 34914  | 1      | 20    | 2   |        |
| 34918  | 3      | 3     | 1   | 2      |
| 34924  | 1      | 1     | 2   |        |
| 34933  | 3      | 0     | 2   |        |
| 34938  | 1      | 0     | 2   |        |
| 34952  | 4      | 2     | 1   | 2      |
| 34959  | 3      | 1     | 1   | 1      |
| 34972  | 2      | 1     | 2   |        |
| 34973  | 3      | 3     | 2   |        |
| 34975  | 3      | 2     | 1   | 1      |
| 34977  | 1      | 2     | 2   |        |
| 34978  | 1      | 5     | 2   |        |
| 34980  | 2      | 0     | 2   |        |

| respid | Q40_13 | Q41_1 | Q42 | Q42b_1 |
|--------|--------|-------|-----|--------|
| 34984  | 3      | 3     | 1   | 1      |
| 34986  | 3      | 3     | 1   | 1      |
| 34994  | 1      | 0     | 2   |        |
| 34996  | 3      | 1     | 2   |        |
| 35003  | 1      | 2     | 2   |        |
| 35014  | 1      | 1     | 2   |        |
| 35029  | 2      | 2     | 2   |        |
| 35030  | 3      | 5     | 2   |        |
| 35037  | 3      | 3     | 2   |        |
| 35043  |        |       |     |        |
| 35048  |        |       |     |        |
| 35055  | 2      | 0     | 2   |        |
| 35067  | 1      | 5     | 2   |        |
| 35072  | 1      | 2     | 2   |        |
| 35078  | 3      | 1     | 1   | 1      |
| 35084  | 1      | 1     | 2   |        |
| 35095  |        |       |     |        |
| 35096  |        |       |     |        |
| 35097  | 2      | 3     | 2   |        |
| 35098  | 3      | 0     | 2   |        |
| 35109  | 5      | 10    | 1   | 10     |
| 35114  | 1      | 3     | 2   |        |
| 35115  | 1      | 0     | 2   |        |
| 35124  | 2      | 0     | 2   |        |
| 35125  | 1      | 0     | 2   |        |
| 35141  |        |       |     |        |
| 35142  | 1      | 0     | 2   |        |
| 35145  |        |       |     |        |
| 35149  | 4      | 5     | 2   |        |
| 35159  | 1      | 1     | 2   |        |
| 35163  | 2      | 5     | 1   | 3      |
| 35174  | 2      | 4     | 1   | 1      |

| respid | Q40_13 | Q41_1 | Q42 | Q42b_1 |
|--------|--------|-------|-----|--------|
| 35188  |        |       |     |        |
| 35189  | 5      | 10    | 1   | 2      |
| 35201  | 3      | 10    | 1   | 2      |
| 35215  | 1      | 0     | 2   |        |
| 35228  | 2      | 0     | 2   |        |
| 35235  | 2      | 3     | 2   |        |
| 35239  | 4      | 3     | 1   | 1      |
| 35243  | 1      | 2     | 2   |        |
| 35245  | 4      | 6     | 2   |        |
| 35259  |        |       |     |        |
| 35265  | 4      | 0     | 2   |        |
| 35272  | 2      | 3     | 2   |        |
| 35280  | 3      | 2     | 2   |        |
| 35298  | 1      | 0     | 2   |        |
| 35305  | 1      | 2     | 2   |        |
| 35306  | 3      | 0     | 2   |        |
| 35307  | 1      | 1     | 2   |        |
| 35311  | 1      | 3     | 2   |        |
| 35322  | 2      | 6     | 2   |        |
| 35323  | 2      | 3     | 2   |        |
| 35327  | 2      | 3     | 2   |        |
| 35366  | 1      | 1     | 2   |        |
| 35378  | 3      | 0     | 2   |        |
| 35389  | 2      | 1     | 2   |        |
| 35390  | 1      | 1     | 2   |        |
| 35395  | 2      | 3     | 2   |        |
| 35411  | 3      | 1     | 2   |        |
| 35423  | 1      | 0     | 2   |        |
| 35425  | 1      | 0     | 2   |        |
| 35434  | 1      | 2     | 2   |        |
| 35462  | 1      | 2     | 2   |        |
| 35478  | 3      | 2     | 1   | 2      |

| respid | Q40_13 | Q41_1 | Q42 | Q42b_1 |
|--------|--------|-------|-----|--------|
| 35481  | 3      | 20    | 1   | 5      |
| 35498  | 3      | 1     | 2   |        |
| 35499  |        |       |     |        |
| 35502  | 4      | 2     | 2   |        |
| 35503  |        |       |     |        |
| 35504  |        |       |     |        |
| 35508  | 3      | 4     | 1   | 2      |
| 35513  | 2      | 2     | 2   |        |
| 35516  | 3      | 3     | 2   |        |
| 35519  | 3      | 3     | 2   |        |
| 35530  | 2      | 4     | 2   |        |
| 35533  | 3      | 50    | 1   | 2      |
| 35561  | 3      | 12    | 1   | 2      |
| 35565  | 1      | 0     | 2   |        |
| 35588  | 1      | 0     | 2   |        |
| 35598  | 1      | 0     | 2   |        |
| 35607  | 1      | 3     | 2   |        |
| 35638  | 1      | 0     | 2   |        |
| 35642  | 1      | 0     | 2   |        |
| 35643  | 3      | 3     | 2   |        |
| 35680  | 1      | 0     | 2   |        |
| 35697  | 2      | 1     | 2   |        |
| 35703  |        |       |     |        |
| 35709  | 4      | 2     | 1   | 2      |
| 35710  | 1      | 0     | 2   |        |
| 35721  | 5      | 0     | 2   |        |
| 35723  | 1      | 0     | 2   |        |
| 35736  | 3      | 10    | 2   |        |
| 35739  | 1      | 2     | 2   |        |
| 35745  | 2      | 4     | 2   |        |
| 35748  | 3      | 2     | 2   |        |
| 35750  | 1      | 10    | 2   |        |



| respid | Q40_13 | Q41_1 | Q42 | Q42b_1 |
|--------|--------|-------|-----|--------|
| 35752  | 3      | 4     | 1   | 2      |
| 35773  | 1      | 2     | 2   |        |
| 35779  | 1      | 0     | 2   |        |
| 35791  | 1      | 0     | 2   |        |
| 35801  | 2      | 2     | 2   |        |
| 35802  | 1      | 6     | 2   |        |
| 35837  | 5      | 3     | 1   | 1      |
| 35853  | 2      | 0     | 2   |        |
| 35858  | 2      | 3     | 2   |        |
| 35860  | 5      | 2     | 2   |        |
| 35875  | 3      | 7     | 1   | 3      |
| 35883  | 1      | 1     | 2   |        |
| 35890  | 1      | 2     | 2   |        |
| 35898  | 1      | 10    | 2   |        |
| 35901  | 4      | 5     | 1   | 2      |
| 35914  | 2      | 3     | 2   |        |
| 35924  | 3      | 1     | 2   |        |
| 35950  | 3      | 3     | 2   |        |
| 35961  | 3      | 0     | 2   |        |
| 35966  | 2      | 3     | 2   |        |
| 35967  | 1      | 2     | 2   |        |
| 35971  | 1      | 1     | 2   |        |
| 35974  | 1      | 1     | 2   |        |
| 35983  | 4      | 6     | 1   | 3      |
| 35992  | 5      | 2     | 1   | 2      |
| 36010  | 2      | 0     | 2   |        |
| 36019  | 6      | 0     | 2   |        |
| 36029  | 2      | 2     | 2   |        |
| 36033  | 1      | 1     | 2   |        |
| 36042  | 1      | 2     | 2   |        |
| 36043  | 3      | 5     | 2   |        |
| 36048  | 2      | 1     | 1   | 1      |

| respid | Q40_13 | Q41_1 | Q42 | Q42b_1 |
|--------|--------|-------|-----|--------|
| 36050  | 1      | 3     | 2   |        |
| 36062  | 2      | 1     | 2   |        |
| 36063  |        |       |     |        |
| 36092  | 3      | 2     | 2   |        |
| 36097  | 2      | 1     | 1   | 1      |
| 36108  | 1      | 3     | 2   |        |
| 36113  | 4      | 3     | 1   | 2      |
| 36117  | 2      | 0     | 2   |        |
| 36129  | 3      | 5     | 1   | 1      |
| 36144  | 1      | 2     | 2   |        |
| 36152  | 1      | 1     | 2   |        |
| 36154  | 3      | 1     | 2   |        |
| 36155  | 1      | 1     | 1   | 1      |
| 36167  | 1      | 4     | 2   |        |
| 36172  | 1      | 1     | 2   |        |
| 36173  | 2      | 0     | 2   |        |
| 36174  | 2      | 2     | 2   |        |
| 36182  | 2      | 2     | 2   |        |
| 36192  | 3      | 4     | 2   |        |
| 36195  | 3      | 4     | 2   |        |
| 36204  | 2      | 0     | 2   |        |
| 36205  | 1      | 2     | 2   |        |
| 36208  | 1      | 1     | 2   |        |
| 36216  | 2      | 2     | 1   | 1      |
| 36221  | 3      | 2     | 1   | 2      |
| 36244  | 1      | 4     | 2   |        |
| 36255  | 2      | 3     | 2   |        |
| 36259  | 1      | 1     | 2   |        |
| 36262  | 3      | 2     | 1   | 1      |
| 36268  | 1      | 1     | 2   |        |
| 36308  | 4      | 1     | 2   |        |
| 36324  | 3      | 2     | 2   |        |

| respid | Q40_13 | Q41_1 | Q42 | Q42b_1 |
|--------|--------|-------|-----|--------|
| 36330  | 1      | 0     | 2   |        |
| 36331  | 3      | 6     | 2   |        |
| 36336  | 1      | 1     | 2   |        |
| 36337  | 1      | 0     | 2   |        |
| 36364  | 1      | 1     | 2   |        |
| 36365  | 3      | 2     | 1   | 2      |
| 36396  | 1      | 1     | 1   | 1      |
| 36403  | 1      | 2     | 2   |        |
| 36410  | 1      | 10    | 2   |        |
| 36413  | 1      | 3     | 2   |        |
| 36422  | 2      | 0     | 2   |        |
| 36424  | 3      | 2     | 1   | 1      |
| 36425  | 3      | 5     | 1   | 3      |
| 36432  | 2      | 0     | 2   |        |
| 36435  | 4      | 5     | 1   | 5      |
| 36446  | 4      | 20    | 1   | 2      |
| 36451  | 3      | 3     | 2   |        |
| 36453  | 3      | 2     | 2   |        |
| 36459  | 3      | 5     | 1   | 1      |
| 36464  | 3      | 3     | 2   |        |
| 36465  | 2      | 6     | 1   | 2      |
| 36466  |        |       |     |        |
| 36476  | 2      | 1     | 2   |        |
| 36487  | 1      | 3     | 2   |        |
| 36488  | 3      | 0     | 2   |        |
| 36500  |        |       |     |        |
| 36504  | 2      | 0     | 2   |        |
| 36513  | 2      | 3     | 2   |        |
| 36515  | 3      | 8     | 2   |        |
| 36521  | 3      | 0     | 2   |        |
| 36530  | 3      | 2     | 1   | 1      |
| 36556  | 2      | 2     | 2   |        |

| respid | Q40_13 | Q41_1 | Q42 | Q42b_1 |
|--------|--------|-------|-----|--------|
| 36564  | 6      | 20    | 1   | 4      |
| 36584  | 1      | 0     | 2   |        |
| 36585  |        |       |     |        |
| 36586  |        |       |     |        |
| 36606  | 4      | 3     | 1   | 0      |
| 36615  | 1      | 0     | 2   |        |
| 36628  | 1      | 12    | 2   |        |
| 36630  | 2      | 0     | 2   |        |
| 36631  | 2      | 2     | 2   |        |
| 36636  | 1      | 1     | 2   |        |
| 36637  | 1      | 0     | 2   |        |
| 36651  | 3      | 5     | 1   | 2      |
| 36661  | 1      | 1     | 2   |        |
| 36670  | 1      | 1     | 1   | 1      |
| 36671  | 1      | 5     | 1   | 1      |
| 36688  |        |       |     |        |
| 36694  | 2      | 1     | 2   |        |
| 36696  |        |       |     |        |
| 36703  |        |       |     |        |
| 36719  | 4      | 1     | 1   | 1      |
| 36721  | 4      | 1     | 1   | 1      |
| 36740  | 5      | 3     | 2   |        |
| 36755  | 2      | 0     | 2   |        |
| 36765  | 2      | 3     | 1   | 1      |
| 36770  |        |       |     |        |
| 36773  | 2      | 3     | 2   |        |
| 36813  | 2      | 6     | 2   |        |
| 36819  | 3      | 4     | 2   |        |
| 36820  | 2      | 3     | 2   |        |
| 36821  | 1      | 0     | 2   |        |
| 36827  | 3      | 0     | 2   |        |
| 36835  | 2      | 0     | 2   |        |

| respid | Q40_13 | Q41_1 | Q42 | Q42b_1 |
|--------|--------|-------|-----|--------|
| 36837  | 1      | 2     | 2   |        |
| 36849  | 2      | 6     | 2   |        |
| 36851  | 2      | 15    | 2   |        |
| 36868  | 4      | 3     | 2   |        |
| 36870  | 1      | 1     | 2   |        |
| 36871  |        |       |     |        |
| 36874  | 3      | 3     | 1   | 2      |
| 36878  | 4      | 1     | 2   |        |
| 36887  | 2      | 2     | 2   |        |
| 36889  | 2      | 0     | 2   |        |
| 36891  | 1      | 4     | 2   |        |
| 36903  | 2      | 5     | 1   | 2      |
| 36905  | 1      | 7     | 2   |        |
| 36913  | 1      | 2     | 2   |        |
| 36949  | 3      | 2     | 2   |        |
| 36954  | 3      | 2     | 1   | 1      |
| 36962  | 2      | 1     | 1   | 1      |
| 36965  | 2      | 1     | 2   |        |
| 36970  | 1      | 0     | 2   |        |
| 36979  | 3      | 8     | 2   |        |
| 36990  | 2      | 3     | 1   | 2      |
| 36991  | 2      | 3     | 2   |        |
| 36992  | 1      | 5     | 2   |        |
| 37015  |        |       |     |        |
| 37017  | 2      | 3     | 2   |        |
| 37020  |        |       |     |        |
| 37033  | 4      | 3     | 2   |        |
| 37041  | 1      | 1     | 2   |        |
| 37048  | 4      | 0     | 2   |        |
| 37050  | 1      | 0     | 2   |        |
| 37054  | 3      | 3     | 1   | 1      |
| 37057  | 3      | 0     | 2   |        |

| respid | Q40_13 | Q41_1 | Q42 | Q42b_1 |
|--------|--------|-------|-----|--------|
| 37067  | 1      | 10    | 2   |        |
| 37074  | 1      | 0     | 2   |        |
| 37088  | 1      | 2     | 1   | 2      |
| 37090  | 5      | 10    | 1   | 5      |
| 37110  | 4      | 3     | 1   | 1      |
| 37122  | 1      | 3     | 2   |        |
| 37124  | 2      | 2     | 1   | 2      |
| 37126  |        |       |     |        |
| 37129  | 3      | 2     | 2   |        |
| 37130  | 2      | 0     | 2   |        |
| 37142  | 3      | 3     | 1   | 2      |
| 37160  | 2      | 5     | 1   | 5      |
| 37168  | 1      | 5     | 2   |        |
| 37169  | 3      | 6     | 1   | 3      |
| 37191  | 2      | 5     | 1   | 2      |
| 37197  | 4      | 3     | 1   | 2      |
| 37204  | 3      | 0     | 2   |        |
| 37213  | 5      | 5     | 1   | 2      |
| 37238  | 3      | 12    | 2   |        |
| 37242  | 3      | 3     | 1   | 2      |
| 37243  | 3      | 4     | 1   | 1      |
| 37275  | 2      | 2     | 1   | 2      |
| 37305  | 3      | 4     | 1   | 2      |
| 37357  | 4      | 3     | 1   | 2      |
| 37365  | 3      | 5     | 1   | 3      |
| 37370  |        |       |     |        |
| 37406  | 5      | 0     | 1   | 0      |
| 37410  | 4      | 8     | 1   | 5      |
| 37411  | 2      | 10    | 1   | 10     |
| 37427  | 5      | 4     | 1   | 2      |
| 37437  | 1      | 2     | 1   | 1      |
| 37440  | 1      | 6     | 2   |        |

| respid | Q40_13 | Q41_1 | Q42 | Q42b_1 |
|--------|--------|-------|-----|--------|
| 37452  | 2      | 5     | 2   |        |
| 37465  | 5      | 6     | 1   | 3      |
| 37468  | 4      | 8     | 1   | 2      |
| 37469  | 2      | 3     | 2   |        |
| 37477  | 3      | 3     | 1   | 1      |
| 37509  | 1      | 0     | 2   |        |
| 37513  | 2      | 1     | 1   | 1      |
| 37534  | 3      | 3     | 2   |        |
| 37537  | 1      | 2     | 2   |        |
| 37560  | 3      | 5     | 1   | 2      |
| 37566  | 5      | 4     | 1   | 3      |
| 37572  | 3      | 4     | 2   |        |
| 37574  | 4      | 2     | 2   |        |
| 37575  | 3      | 2     | 1   | 1      |
| 37590  | 3      | 3     | 1   | 1      |
| 37593  | 1      | 10    | 2   |        |
| 37599  | 1      | 0     | 2   |        |
| 37641  | 1      | 7     | 2   |        |
| 37651  | 2      | 1     | 2   |        |
| 37670  | 1      | 2     | 2   |        |
| 37680  | 3      | 1     | 1   | 1      |
| 37690  | 2      | 1     | 1   | 1      |
| 37694  |        |       |     |        |
| 37705  | 2      | 0     | 2   |        |
| 37710  | 3      | 1     | 2   |        |
| 37719  | 4      | 2     | 1   | 2      |
| 37741  | 3      | 3     | 2   |        |
| 37752  | 1      | 2     | 1   | 1      |
| 37755  | 2      | 5     | 2   |        |
| 37757  | 1      | 3     | 2   |        |
| 37783  | 2      | 2     | 2   |        |
| 37793  | 4      | 2     | 1   | 2      |

| respid | Q40_13 | Q41_1 | Q42 | Q42b_1 |
|--------|--------|-------|-----|--------|
| 37800  | 4      | 2     | 1   | 2      |
| 37801  | 1      | 0     | 2   |        |
| 37820  | 4      | 10    | 1   | 5      |
| 37826  | 3      | 2     | 2   |        |
| 37835  | 4      | 4     | 1   | 1      |
| 37839  | 4      | 3     | 1   | 3      |
| 37871  | 5      | 3     | 1   | 3      |
| 37876  | 3      | 3     | 1   | 1      |
| 37879  | 4      | 3     | 1   | 3      |
| 37894  | 1      | 3     | 2   |        |
| 37895  | 3      | 6     | 1   | 4      |
| 37901  | 3      | 5     | 1   | 4      |
| 37926  | 3      | 2     | 1   | 1      |
| 37937  | 2      | 4     | 1   | 1      |
| 37938  | 1      | 0     | 2   |        |
| 37959  | 2      | 45    | 2   |        |
| 37970  |        |       |     |        |
| 37972  | 4      | 0     | 2   |        |
| 37988  | 2      | 2     | 2   |        |
| 37989  | 4      | 3     | 1   | 1      |
| 38000  | 2      | 0     | 2   |        |
| 38028  | 4      | 4     | 1   | 4      |
| 38042  | 4      | 6     | 1   | 4      |
| 38052  | 2      | 2     | 2   |        |
| 38056  | 1      | 0     | 2   |        |
| 38106  | 4      | 4     | 1   | 2      |
| 38114  | 4      | 5     | 1   | 5      |
| 38134  | 1      | 1     | 2   |        |
| 38135  | 2      | 10    | 2   |        |
| 38139  | 3      | 5     | 2   |        |
| 38160  | 1      | 8     | 2   |        |
| 38164  | 2      | 3     | 2   |        |



| respid | Q40_13 | Q41_1 | Q42 | Q42b_1 |
|--------|--------|-------|-----|--------|
| 38168  |        |       |     |        |
| 38173  | 1      | 1     | 2   |        |
| 38193  | 4      | 5     | 1   | 3      |
| 38204  | 1      | 0     | 2   |        |
| 38206  | 2      | 2     | 1   | 1      |
| 38233  | 5      | 9     | 2   |        |
| 38242  | 3      | 10    | 1   | 6      |
| 38245  | 1      | 2     | 2   |        |
| 38261  | 4      | 10    | 1   | 5      |
| 38288  | 2      | 2     | 2   |        |
| 38296  | 2      | 4     | 1   | 4      |
| 38299  | 2      | 2     | 1   | 1      |
| 38300  | 2      | 3     | 1   | 2      |
| 38303  | 1      | 6     | 2   |        |
| 38317  | 1      | 0     | 1   | 0      |
| 38328  | 4      | 3     | 2   |        |
| 38333  | 2      | 0     | 2   |        |
| 38336  | 1      | 0     | 2   |        |
| 38338  | 1      | 0     | 2   |        |
| 38342  | 2      | 0     | 2   |        |
| 38360  | 1      | 0     | 2   |        |
| 38362  | 3      | 5     | 1   | 2      |
| 38364  | 5      | 3     | 2   |        |
| 38402  | 2      | 10    | 2   |        |
| 38423  | 3      | 3     | 1   | 2      |
| 38424  | 3      | 1     | 1   | 1      |
| 38435  | 2      | 3     | 1   | 2      |
| 38450  | 1      | 0     | 2   |        |
| 38455  | 1      | 1     | 2   |        |
| 38467  | 2      | 3     | 2   |        |
| 38468  | 3      | 10    | 1   | 3      |
| 38472  | 4      | 2     | 2   |        |

| respid | Q40_13 | Q41_1 | Q42 | Q42b_1 |
|--------|--------|-------|-----|--------|
| 38484  | 1      | 0     | 2   |        |
| 38498  | 2      | 4     | 2   |        |
| 38507  | 1      | 10    | 2   |        |
| 38511  | 2      | 0     | 2   |        |
| 38524  | 4      | 10    | 1   | 10     |
| 38526  | 2      | 0     | 2   |        |
| 38534  | 2      | 3     | 1   | 3      |
| 38536  | 2      | 3     | 2   |        |
| 38539  | 1      | 4     | 2   |        |
| 38547  | 1      | 1     | 2   |        |
| 38549  | 1      | 2     | 2   |        |
| 38575  | 5      | 6     | 1   | 4      |
| 38579  | 1      | 1     | 2   |        |
| 38585  | 1      | 1     | 2   |        |
| 38589  | 3      | 2     | 1   | 2      |
| 38595  | 3      | 4     | 1   | 3      |
| 38602  | 1      | 1     | 2   |        |
| 38603  | 3      | 2     | 2   |        |
| 38612  | 2      | 3     | 2   |        |
| 38621  | 4      | 4     | 1   | 1      |
| 38624  | 4      | 8     | 1   | 5      |
| 38636  |        |       |     |        |
| 38656  | 1      | 0     | 2   |        |
| 38668  | 1      | 2     | 2   |        |
| 38675  | 1      | 0     | 2   |        |
| 38676  | 1      | 3     | 2   |        |
| 38682  | 4      | 5     | 2   |        |
| 38689  | 1      | 2     | 2   |        |
| 38702  |        |       |     |        |
| 38704  | 5      | 1     | 1   | 1      |
| 38713  | 1      | 0     | 2   |        |
| 38718  | 2      | 2     | 1   | 2      |

| respid | Q40_13 | Q41_1 | Q42 | Q42b_1 |
|--------|--------|-------|-----|--------|
| 38725  | 1      | 1     | 2   |        |
| 38730  | 4      | 8     | 1   | 5      |
| 38737  | 2      | 2     | 1   | 1      |
| 38738  | 3      | 5     | 1   | 5      |
| 38744  | 1      | 0     | 2   |        |
| 38746  | 1      | 1     | 1   | 1      |
| 38753  | 1      | 4     | 2   |        |
| 38756  | 2      | 5     | 1   | 5      |
| 38760  | 1      | 1     | 2   |        |
| 38762  | 3      | 5     | 1   | 3      |
| 38765  | 1      | 0     | 2   |        |
| 38769  | 3      | 4     | 2   |        |
| 38781  | 4      | 7     | 1   | 5      |
| 38786  | 1      | 0     | 2   |        |
| 38790  | 2      | 2     | 2   |        |
| 38793  | 2      | 3     | 2   |        |
| 38797  | 1      | 0     | 2   |        |
| 38802  | 3      | 2     | 1   | 2      |
| 38815  | 2      | 8     | 1   | 1      |
| 38826  | 3      | 3     | 1   | 3      |
| 38828  | 1      | 3     | 2   |        |
| 38829  | 4      | 10    | 1   | 9      |
| 38835  | 2      | 4     | 1   | 3      |
| 38842  | 5      | 6     | 1   | 4      |
| 38853  | 1      | 0     | 2   |        |
| 38855  | 5      | 2     | 1   | 2      |
| 38860  | 3      | 2     | 1   | 2      |
| 38869  | 3      | 2     | 1   | 1      |
| 38882  | 4      | 5     | 1   | 3      |
| 38897  | 2      | 0     | 2   |        |
| 38903  | 1      | 1     | 2   |        |
| 38910  | 4      | 4     | 1   | 4      |

| respid | Q40_13 | Q41_1 | Q42 | Q42b_1 |
|--------|--------|-------|-----|--------|
| 38948  | 5      | 3     | 1   | 3      |
| 38949  | 4      | 3     | 1   | 1      |
| 38953  | 5      | 3     | 1   | 2      |
| 38989  | 5      | 8     | 1   | 8      |
| 38997  | 4      | 4     | 1   | 2      |
| 38999  | 2      | 0     | 2   |        |
| 39002  | 3      | 5     | 1   | 5      |
| 39003  | 3      | 6     | 1   | 3      |
| 39006  | 1      | 3     | 2   |        |
| 39014  |        |       |     |        |
| 39017  | 4      | 6     | 1   | 3      |
| 39018  | 5      | 2     | 2   |        |
| 39025  | 5      | 8     | 1   | 8      |
| 39031  | 4      | 4     | 1   | 3      |
| 39061  | 3      | 7     | 1   | 6      |
| 39131  | 2      | 0     | 2   |        |
| 39153  | 5      | 30    | 1   | 11     |
| 39194  | 2      | 11    | 1   | 5      |
| 39204  | 2      | 3     | 1   | 2      |
| 39208  | 2      | 8     | 2   |        |
| 39213  | 3      | 1     | 2   |        |
| 39231  | 2      | 2     | 1   | 1      |
| 39251  | 2      | 1     | 2   |        |
| 39257  | 5      | 4     | 1   | 2      |
| 39262  | 4      | 3     | 1   | 2      |
| 39269  | 5      | 4     | 1   | 3      |
| 39272  | 3      | 2     | 1   | 2      |
| 39280  | 4      | 13    | 1   | 5      |
| 39294  | 3      | 2     | 1   | 2      |
| 39297  | 4      | 10    | 1   | 6      |
| 39300  | 5      | 2     | 2   |        |
| 39307  | 4      | 3     | 1   | 1      |

| respid | Q40_13 | Q41_1 | Q42 | Q42b_1 |
|--------|--------|-------|-----|--------|
| 39320  | 2      | 2     | 1   | 1      |
| 39333  | 4      | 2     | 2   |        |
| 39335  | 5      | 5     | 1   | 1      |
| 39339  | 2      | 2     | 2   |        |
| 39375  | 4      | 1     | 1   | 1      |
| 39377  | 1      | 0     | 2   |        |
| 39380  | 4      | 4     | 1   | 2      |
| 39425  | 2      | 1     | 2   |        |
| 39590  | 1      | 1     | 2   |        |
| 40529  | 1      | 3     | 2   |        |
| 40702  | 2      | 0     | 2   |        |
| 40788  | 1      | 2     | 2   |        |
| 40841  | 1      | 0     | 2   |        |
| 40965  | 1      | 0     | 2   |        |
| 41092  | 1      | 3     | 2   |        |
| 41534  |        |       |     |        |
| 41919  | 1      | 0     | 2   |        |
| 42110  | 4      | 0     | 2   |        |
| 42135  | 2      | 1     | 1   | 1      |
| 42142  | 1      | 0     | 2   |        |
| 42163  | 3      | 12    | 2   |        |
| 42164  | 1      | 3     | 2   |        |
| 42172  | 5      | 3     | 1   | 1      |
| 42177  | 1      | 0     | 2   |        |
| 42181  | 2      | 1     | 2   |        |
| 42193  | 4      | 6     | 2   |        |
| 42196  | 2      | 3     | 2   |        |
| 42202  | 3      | 3     | 1   | 3      |
| 42248  | 3      | 3     | 1   | 3      |
| 42283  | 1      | 2     | 2   |        |
| 42284  | 3      | 2     | 2   |        |
| 42323  |        |       |     |        |

| respid | Q40_13 | Q41_1 | Q42 | Q42b_1 |
|--------|--------|-------|-----|--------|
| 42349  | 1      | 0     | 2   |        |
| 42351  |        |       |     |        |
| 42357  | 1      | 0     | 2   |        |
| 42366  |        |       |     |        |
| 42380  | 1      | 2     | 2   |        |
| 42414  | 2      | 2     | 1   | 2      |
| 42420  | 4      | 5     | 1   | 3      |
| 42454  |        |       |     |        |
| 42458  | 1      | 0     | 2   |        |
| 42461  | 1      | 1     | 1   | 0      |
| 42488  | 3      | 0     | 2   |        |
| 42511  | 1      | 1     | 2   |        |
| 42512  | 1      | 3     | 2   |        |
| 42530  | 5      | 30    | 1   | 3      |
| 42531  | 5      | 8     | 1   | 3      |
| 42533  | 5      | 0     | 2   |        |
| 42549  | 1      | 0     | 2   |        |
| 42550  | 4      | 20    | 2   |        |
| 42553  |        |       |     |        |
| 42562  | 4      | 10    | 1   | 5      |
| 42567  | 1      | 0     | 2   |        |
| 42589  | 2      | 2     | 2   |        |
| 42604  | 1      | 3     | 2   |        |
| 42618  | 2      | 2     | 2   |        |
| 42621  | 4      | 3     | 2   |        |
| 42627  | 1      | 4     | 2   |        |
| 42641  | 1      | 3     | 2   |        |
| 42655  | 3      | 3     | 1   | 2      |
| 42666  | 2      | 2     | 2   |        |
| 42667  | 4      | 3     | 2   |        |
| 42697  | 1      | 1     | 1   | 1      |
| 42703  | 1      | 3     | 2   |        |

| respid | Q40_13 | Q41_1 | Q42 | Q42b_1 |
|--------|--------|-------|-----|--------|
| 42712  | 3      | 1     | 2   |        |
| 42731  | 2      | 10    | 2   |        |
| 42780  | 1      | 1     | 2   |        |
| 42785  | 4      | 1     | 2   |        |
| 42788  | 1      | 1     | 2   |        |
| 42802  | 2      | 1     | 2   |        |
| 42818  | 3      | 3     | 2   |        |
| 42821  | 1      | 0     | 2   |        |
| 42824  | 1      | 2     | 2   |        |
| 42831  | 2      | 1     | 2   |        |
| 42836  | 1      | 1     | 2   |        |
| 42864  | 3      | 10    | 2   |        |
| 42875  | 1      | 3     | 1   | 1      |
| 42891  | 5      | 5     | 2   |        |
| 42897  | 1      | 1     | 2   |        |
| 42900  | 2      | 3     | 1   | 2      |
| 42902  | 2      | 8     | 1   | 4      |
| 42921  | 1      | 0     | 2   |        |
| 42925  | 1      | 3     | 2   |        |
| 42944  |        |       |     |        |
| 42950  |        |       |     |        |
| 42963  | 1      | 1     | 2   |        |
| 42967  | 1      | 5     | 2   |        |
| 42985  | 2      | 2     | 2   |        |
| 42990  | 1      | 12    | 2   |        |
| 42996  | 2      | 0     | 2   |        |
| 43002  | 3      | 5     | 2   |        |
| 43004  | 1      | 0     | 2   |        |
| 43012  | 1      | 1     | 2   |        |
| 43027  | 4      | 3     | 2   |        |
| 43028  | 1      | 20    | 2   |        |
| 43029  | 2      | 1     | 2   |        |

| respid | Q40_13 | Q41_1 | Q42 | Q42b_1 |
|--------|--------|-------|-----|--------|
| 43031  | 1      | 5     | 2   |        |
| 43042  | 1      | 0     | 1   | 0      |
| 43054  | 2      | 2     | 1   | 1      |
| 43058  | 1      | 0     | 2   |        |
| 43064  | 2      | 3     | 1   | 2      |
| 43069  | 4      | 2     | 2   |        |
| 43071  |        |       |     |        |
| 43072  | 1      | 2     | 2   |        |
| 43077  | 2      | 2     | 2   |        |
| 43078  | 4      | 2     | 1   | 1      |
| 43082  |        |       |     |        |
| 43092  | 1      | 3     | 2   |        |
| 43096  | 1      | 0     | 2   |        |
| 43109  |        |       |     |        |
| 43113  | 2      | 1     | 2   |        |
| 43123  | 2      | 0     | 2   |        |
| 43127  | 1      | 3     | 2   |        |
| 43128  | 1      | 0     | 2   |        |
| 43129  | 1      | 0     | 2   |        |
| 43133  | 3      | 3     | 1   | 1      |
| 43140  |        |       |     |        |
| 43143  | 5      | 3     | 1   | 2      |
| 43149  | 4      | 3     | 1   | 2      |
| 43150  | 4      | 3     | 1   | 3      |
| 43153  | 3      | 8     | 1   | 3      |
| 43170  | 1      | 24    | 2   |        |
| 43187  | 3      | 5     | 1   | 3      |
| 43188  | 3      | 0     | 2   |        |
| 43198  | 1      | 2     | 2   |        |
| 43208  | 1      | 1     | 2   |        |
| 43216  | 1      | 0     | 2   |        |
| 43222  | 4      | 3     | 1   | 1      |



| respid | Q40_13 | Q41_1 | Q42 | Q42b_1 |
|--------|--------|-------|-----|--------|
| 43224  | 2      | 0     | 2   |        |
| 43230  | 6      | 3     | 1   | 2      |
| 43231  | 4      | 3     | 2   |        |
| 43265  | 4      | 2     | 1   | 2      |
| 43270  | 3      | 2     | 1   | 1      |
| 43283  | 3      | 1     | 1   | 1      |
| 43295  | 4      | 3     | 1   | 1      |
| 43297  | 2      | 0     | 2   |        |
| 43299  | 3      | 1     | 2   |        |
| 43307  | 3      | 0     | 2   |        |
| 43316  | 3      | 3     | 1   | 1      |
| 43318  | 4      | 2     | 1   | 1      |
| 43319  | 1      | 1     | 2   |        |
| 43324  | 4      | 2     | 1   | 2      |
| 43325  | 6      | 12    | 1   | 2      |
| 43327  | 2      | 0     | 2   |        |
| 43338  | 1      | 1     | 2   |        |
| 43342  | 1      | 2     | 2   |        |
| 43348  | 1      | 4     | 2   |        |
| 43395  | 4      | 3     | 1   | 1      |
| 43404  | 4      | 3     | 1   | 1      |
| 43406  | 1      | 4     | 2   |        |
| 43407  | 1      | 0     | 2   |        |
| 43411  | 1      | 0     | 2   |        |
| 43416  | 4      | 2     | 1   | 1      |
| 43428  | 1      | 0     | 2   |        |
| 43429  | 4      | 5     | 2   |        |
| 43432  | 1      | 0     | 2   |        |
| 43443  | 1      | 0     | 2   |        |
| 43455  |        |       |     |        |
| 43457  | 2      | 2     | 2   |        |
| 43458  | 1      | 5     | 2   |        |

| respid | Q40_13 | Q41_1 | Q42 | Q42b_1 |
|--------|--------|-------|-----|--------|
| 43477  | 3      | 7     | 1   | 3      |
| 43520  | 1      | 5     | 2   |        |
| 43521  | 2      | 0     | 2   |        |
| 43550  | 1      | 1     | 2   |        |
| 43551  | 1      | 2     | 2   |        |
| 43554  | 3      | 5     | 1   | 2      |
| 43560  | 1      | 7     | 2   |        |
| 43569  | 1      | 12    | 2   |        |
| 43583  | 1      | 3     | 2   |        |
| 43590  | 2      | 2     | 1   | 2      |
| 43591  | 1      | 2     | 2   |        |
| 43595  |        |       |     |        |
| 43599  | 2      | 3     | 2   |        |
| 43606  | 1      | 0     | 2   |        |
| 43609  | 1      | 0     | 2   |        |
| 43629  | 1      | 12    | 2   |        |
| 43636  | 1      | 0     | 2   |        |
| 43661  | 3      | 0     | 2   |        |
| 43668  | 1      | 3     | 2   |        |
| 43672  |        |       |     |        |
| 43677  | 2      | 6     | 1   | 2      |
| 43683  | 4      | 0     | 2   |        |
| 43708  | 3      | 1     | 2   |        |
| 43713  | 1      | 0     | 2   |        |
| 43718  |        |       |     |        |
| 43725  | 1      | 5     | 2   |        |
| 43747  | 2      | 5     | 2   |        |
| 43755  | 1      | 0     | 2   |        |
| 43770  | 1      | 0     | 2   |        |
| 43775  | 3      | 4     | 1   | 2      |
| 43788  |        |       |     |        |
| 43790  | 5      | 3     | 1   | 1      |

| respid | Q40_13 | Q41_1 | Q42 | Q42b_1 |
|--------|--------|-------|-----|--------|
| 43797  | 3      | 3     | 1   | 1      |
| 43798  | 4      | 2     | 1   | 2      |
| 43811  | 5      | 3     | 2   |        |
| 43819  | 4      | 2     | 1   | 1      |
| 43821  | 4      | 3     | 1   | 1      |
| 43822  | 1      | 0     | 2   |        |
| 43825  | 3      | 2     | 1   | 1      |
| 43826  | 2      | 6     | 2   |        |
| 43831  | 3      | 6     | 2   |        |
| 43836  | 4      | 1     | 2   |        |
| 43852  | 4      | 3     | 2   |        |
| 43857  | 4      | 3     | 2   |        |
| 43858  | 1      | 1     | 2   |        |
| 43859  | 4      | 3     | 2   |        |
| 43863  | 1      | 1     | 2   |        |
| 43868  | 4      | 2     | 2   |        |
| 43872  | 3      | 2     | 2   |        |
| 43874  | 3      | 2     | 2   |        |
| 43882  | 1      | 7     | 2   |        |
| 43886  |        |       |     |        |
| 43903  | 3      | 10    | 2   |        |
| 43929  | 1      | 2     | 2   |        |
| 43932  | 1      | 2     | 2   |        |
| 43936  | 1      | 5     | 2   |        |
| 43962  | 1      | 1     | 2   |        |
| 43964  | 1      | 1     | 2   |        |
| 43968  | 2      | 10    | 2   |        |
| 43979  | 2      | 4     | 1   | 1      |
| 44006  | 5      | 2     | 1   | 2      |
| 44009  | 2      | 3     | 1   | 3      |
| 44023  | 3      | 0     | 2   |        |
| 44035  | 4      | 2     | 2   |        |

| respid | Q40_13 | Q41_1 | Q42 | Q42b_1 |
|--------|--------|-------|-----|--------|
| 44038  | 4      | 2     | 2   |        |
| 44039  | 4      | 2     | 2   |        |
| 44043  | 2      | 3     | 2   |        |
| 44048  | 5      | 2     | 2   |        |
| 44050  | 1      | 1     | 2   |        |
| 44051  | 3      | 2     | 2   |        |
| 44061  | 4      | 2     | 1   | 1      |
| 44063  | 3      | 3     | 2   |        |
| 44072  | 4      | 2     | 2   |        |
| 44075  | 3      | 3     | 2   |        |
| 44089  | 4      | 2     | 1   | 2      |
| 44090  | 4      | 3     | 1   | 3      |
| 44091  | 5      | 2     | 2   |        |
| 44092  | 2      | 0     | 2   |        |
| 44110  | 4      | 2     | 2   |        |
| 44112  | 4      | 2     | 2   |        |
| 44114  | 5      | 3     | 2   |        |
| 44143  | 3      | 0     | 2   |        |
| 44179  | 2      | 10    | 2   |        |
| 44234  | 1      | 2     | 2   |        |
| 44236  | 3      | 1     | 2   |        |
| 44239  | 6      | 3     | 1   | 2      |
| 44241  | 4      | 3     | 2   |        |
| 44253  |        |       |     |        |
| 44260  | 4      | 3     | 2   |        |
| 44261  | 5      | 2     | 2   |        |
| 44263  | 4      | 3     | 2   |        |
| 44264  | 1      | 0     | 2   |        |
| 44265  | 1      | 1     | 2   |        |
| 44267  | 3      | 2     | 2   |        |
| 44306  | 3      | 5     | 1   | 2      |
| 44309  | 2      | 5     | 1   | 3      |

| respid | Q40_13 | Q41_1 | Q42 | Q42b_1 |
|--------|--------|-------|-----|--------|
| 44310  | 2      | 50    | 2   |        |
| 44361  | 3      | 3     | 1   | 1      |
| 44380  | 3      | 13    | 2   |        |
| 44386  | 1      | 1     | 2   |        |
| 44419  | 1      | 0     | 2   |        |
| 44426  | 1      | 3     | 2   |        |
| 44479  | 1      | 0     | 2   |        |
| 44484  | 1      | 1     | 2   |        |
| 44487  | 1      | 2     | 2   |        |
| 44509  | 1      | 2     | 2   |        |
| 44540  | 3      | 3     | 1   | 1      |
| 44551  | 2      | 0     | 2   |        |
| 44553  | 1      | 0     | 2   |        |
| 44650  | 2      | 0     | 1   | 0      |
| 44665  | 3      | 6     | 1   | 2      |
| 44779  | 1      | 0     | 2   |        |
| 44797  | 1      | 2     | 2   |        |
| 44807  | 1      | 2     | 2   |        |
| 44815  | 3      | 8     | 1   | 1      |
| 44836  | 1      | 0     | 2   |        |
| 44868  | 2      | 1     | 1   | 1      |
| 44927  | 2      | 0     | 2   |        |
| 44983  |        |       |     |        |
| 45040  | 3      | 5     | 2   |        |
| 45051  | 1      | 1     | 2   |        |
| 45067  | 1      | 13    | 2   |        |
| 45074  |        |       |     |        |
| 45115  | 1      | 0     | 2   |        |
| 45187  | 3      | 3     | 1   | 1      |
| 45221  | 4      | 6     | 1   | 4      |
| 45279  | 2      | 6     | 2   |        |
| 45308  | 2      | 2     | 2   |        |

| respid | Q40_13 | Q41_1 | Q42 | Q42b_1 |
|--------|--------|-------|-----|--------|
| 45317  | 2      | 0     | 2   |        |
| 45379  | 2      | 2     | 2   |        |
| 45451  | 2      | 2     | 2   |        |
| 45472  | 4      | 10    | 1   | 5      |
| 45474  | 4      | 8     | 1   | 5      |
| 45544  | 6      | 2     | 1   | 1      |
| 45561  | 1      | 12    | 2   |        |
| 45596  | 1      | 0     | 2   |        |

| Instrum   |       | HC Seeking & Tx                     |       | HC Seeking & Tx                     |  | HC Seeking & Tx                                                                                      |   |
|-----------|-------|-------------------------------------|-------|-------------------------------------|--|------------------------------------------------------------------------------------------------------|---|
| Symptom   |       | Taking these treatments/precautions |       | Taking these treatments/precautions |  | Taking these treatments/precautions                                                                  |   |
| Type of R |       |                                     |       |                                     |  |                                                                                                      |   |
| Descripti |       | Prescription medications            |       | Surgery                             |  | Physical therapy: exercise or training recommended by a healthcare professional                      |   |
|           |       |                                     |       |                                     |  | Self-treatment: herbal remedies or over the counter medicines, exercise recommended by friend/family |   |
| respid    | Q43_1 | Q43_2                               | Q43_3 | Q43_4                               |  |                                                                                                      |   |
| 241       | 0     | 0                                   | 0     | 0                                   |  |                                                                                                      | 0 |
| 242       | 1     | 0                                   | 0     | 0                                   |  |                                                                                                      | 0 |
| 243       | 0     | 0                                   | 0     | 0                                   |  |                                                                                                      | 0 |
| 244       | 0     | 0                                   | 0     | 0                                   |  |                                                                                                      | 0 |
| 245       | 0     | 0                                   | 1     | 1                                   |  |                                                                                                      | 1 |
| 246       | 0     | 0                                   | 0     | 0                                   |  |                                                                                                      | 0 |
| 247       | 0     | 0                                   | 0     | 0                                   |  |                                                                                                      | 0 |
| 253       | 0     | 0                                   | 0     | 0                                   |  |                                                                                                      | 0 |
| 256       | 1     | 0                                   | 0     | 0                                   |  |                                                                                                      | 0 |
| 257       | 0     | 0                                   | 0     | 0                                   |  |                                                                                                      | 1 |
| 258       | 0     | 0                                   | 0     | 0                                   |  |                                                                                                      | 0 |
| 259       | 0     | 0                                   | 0     | 0                                   |  |                                                                                                      | 0 |
| 263       | 0     | 0                                   | 0     | 0                                   |  |                                                                                                      | 0 |
| 264       | 0     | 0                                   | 0     | 0                                   |  |                                                                                                      | 0 |
| 265       | 0     | 0                                   | 0     | 0                                   |  |                                                                                                      | 0 |
| 266       | 0     | 0                                   | 0     | 0                                   |  |                                                                                                      | 0 |
| 268       | 0     | 0                                   | 1     | 1                                   |  |                                                                                                      | 0 |
| 270       | 0     | 0                                   | 0     | 0                                   |  |                                                                                                      | 0 |
| 272       | 0     | 0                                   | 0     | 0                                   |  |                                                                                                      | 0 |
| 274       | 0     | 0                                   | 0     | 0                                   |  |                                                                                                      | 0 |

| respid | Q43_1 | Q43_2 | Q43_3 | Q43_4 |
|--------|-------|-------|-------|-------|
| 275    |       |       |       |       |
| 276    | 0     | 0     | 0     | 0     |
| 277    | 0     | 0     | 0     | 0     |
| 279    | 0     | 0     | 0     | 0     |
| 286    | 0     | 0     | 0     | 0     |
| 290    | 0     | 0     | 0     | 0     |
| 291    | 0     | 0     | 0     | 0     |
| 295    |       |       |       |       |
| 297    | 0     | 0     | 0     | 0     |
| 299    | 0     | 0     | 0     | 0     |
| 300    | 1     | 0     | 0     | 0     |
| 303    | 0     | 0     | 0     | 0     |
| 304    | 1     | 0     | 0     | 0     |
| 306    | 0     | 0     | 0     | 0     |
| 307    | 0     | 0     | 0     | 0     |
| 312    | 0     | 0     | 0     | 0     |
| 315    | 0     | 0     | 0     | 0     |
| 317    | 0     | 0     | 0     | 0     |
| 322    | 0     | 0     | 0     | 0     |
| 335    | 0     | 0     | 0     | 0     |
| 374    | 0     | 0     | 0     | 0     |
| 378    | 0     | 0     | 0     | 0     |
| 380    | 0     | 0     | 0     | 0     |
| 382    | 0     | 0     | 0     | 0     |
| 384    | 0     | 0     | 0     | 0     |
| 385    | 1     | 0     | 1     | 1     |
| 395    | 0     | 0     | 0     | 0     |
| 396    |       |       |       |       |
| 398    |       |       |       |       |
| 402    | 0     | 0     | 0     | 0     |
| 414    | 0     | 0     | 0     | 0     |
| 415    | 1     | 0     | 0     | 0     |



| respid | Q43_1 | Q43_2 | Q43_3 | Q43_4 |
|--------|-------|-------|-------|-------|
| 416    | 0     | 0     | 0     | 0     |
| 420    | 0     | 0     | 0     | 0     |
| 421    | 1     | 0     | 0     | 0     |
| 422    | 1     | 0     | 0     | 0     |
| 423    | 0     | 0     | 0     | 0     |
| 424    | 0     | 0     | 0     | 0     |
| 425    | 1     | 0     | 0     | 1     |
| 428    | 0     | 0     | 0     | 0     |
| 429    | 0     | 0     | 0     | 0     |
| 431    | 0     | 0     | 0     | 0     |
| 437    | 1     | 0     | 0     | 0     |
| 438    | 1     | 0     | 0     | 0     |
| 441    | 0     | 0     | 0     | 0     |
| 444    | 0     | 0     | 0     | 0     |
| 448    | 0     | 0     | 0     | 0     |
| 449    | 0     | 0     | 0     | 0     |
| 457    | 0     | 0     | 0     | 0     |
| 460    | 0     | 0     | 0     | 0     |
| 469    | 0     | 0     | 0     | 0     |
| 471    | 0     | 0     | 0     | 1     |
| 473    | 1     | 0     | 0     | 0     |
| 476    | 0     | 0     | 0     | 0     |
| 479    | 0     | 0     | 0     | 0     |
| 485    | 0     | 0     | 0     | 0     |
| 488    | 1     | 0     | 0     | 0     |
| 494    | 0     | 0     | 0     | 0     |
| 496    | 0     | 0     | 0     | 0     |
| 501    |       |       |       |       |
| 502    | 0     | 0     | 0     | 0     |
| 503    | 0     | 0     | 0     | 0     |
| 506    | 0     | 0     | 0     | 0     |
| 514    | 0     | 0     | 1     | 1     |

| respid | Q43_1 | Q43_2 | Q43_3 | Q43_4 |
|--------|-------|-------|-------|-------|
| 515    | 0     | 0     | 0     | 0     |
| 516    | 0     | 0     | 0     | 0     |
| 519    | 0     | 0     | 0     | 0     |
| 522    |       |       |       |       |
| 525    | 1     | 0     | 0     | 0     |
| 528    | 0     | 0     | 0     | 0     |
| 532    | 0     | 0     | 0     | 0     |
| 536    | 1     | 1     | 1     | 0     |
| 539    | 0     | 0     | 0     | 0     |
| 540    | 0     | 0     | 0     | 0     |
| 547    | 0     | 0     | 0     | 0     |
| 551    | 0     | 0     | 0     | 0     |
| 554    | 1     | 0     | 0     | 0     |
| 558    | 0     | 0     | 0     | 0     |
| 563    | 0     | 0     | 0     | 0     |
| 564    | 0     | 0     | 0     | 0     |
| 565    | 0     | 0     | 0     | 0     |
| 567    | 0     | 0     | 0     | 0     |
| 569    | 0     | 0     | 1     | 0     |
| 572    | 0     | 0     | 0     | 0     |
| 574    | 0     | 0     | 0     | 0     |
| 583    | 0     | 0     | 1     | 0     |
| 589    | 0     | 0     | 0     | 0     |
| 592    | 1     | 1     | 1     | 0     |
| 593    |       |       |       |       |
| 594    | 1     | 0     | 0     | 0     |
| 597    | 0     | 0     | 0     | 0     |
| 601    | 0     | 0     | 0     | 0     |
| 607    | 0     | 0     | 0     | 0     |
| 610    | 0     | 0     | 0     | 0     |
| 612    | 1     | 0     | 0     | 0     |
| 627    | 0     | 0     | 0     | 0     |

| respid | Q43_1 | Q43_2 | Q43_3 | Q43_4 |
|--------|-------|-------|-------|-------|
| 631    | 0     | 0     | 0     | 0     |
| 633    | 0     | 0     | 0     | 0     |
| 636    | 0     | 0     | 0     | 0     |
| 656    | 0     | 0     | 0     | 0     |
| 659    | 0     | 0     | 0     | 0     |
| 670    | 1     | 0     | 0     | 0     |
| 672    | 1     | 0     | 0     | 0     |
| 673    | 0     | 0     | 0     | 0     |
| 675    | 0     | 0     | 0     | 0     |
| 676    | 0     | 0     | 0     | 1     |
| 679    | 0     | 0     | 0     | 0     |
| 683    | 0     | 0     | 0     | 0     |
| 684    | 1     | 0     | 0     | 0     |
| 690    | 0     | 0     | 0     | 0     |
| 701    | 0     | 0     | 0     | 0     |
| 709    | 0     | 0     | 0     | 1     |
| 719    | 0     | 0     | 0     | 0     |
| 726    | 0     | 0     | 0     | 0     |
| 730    | 0     | 0     | 0     | 0     |
| 731    | 0     | 0     | 0     | 0     |
| 732    | 0     | 0     | 0     | 0     |
| 733    | 0     | 0     | 0     | 0     |
| 735    | 0     | 0     | 0     | 0     |
| 738    | 1     | 0     | 0     | 0     |
| 740    | 0     | 0     | 0     | 0     |
| 742    | 0     | 0     | 0     | 0     |
| 744    | 0     | 0     | 0     | 0     |
| 749    | 0     | 0     | 0     | 1     |
| 751    | 0     | 0     | 0     | 0     |
| 752    | 0     | 0     | 0     | 0     |
| 753    | 0     | 0     | 0     | 0     |
| 755    | 0     | 0     | 0     | 1     |

| respid | Q43_1 | Q43_2 | Q43_3 | Q43_4 |
|--------|-------|-------|-------|-------|
| 756    |       |       |       |       |
| 759    | 1     | 0     | 0     | 0     |
| 760    | 0     | 0     | 1     | 1     |
| 763    | 0     | 0     | 0     | 0     |
| 764    | 0     | 0     | 0     | 0     |
| 765    | 0     | 0     | 0     | 0     |
| 766    | 0     | 0     | 0     | 0     |
| 767    | 0     | 0     | 0     | 0     |
| 771    | 0     | 0     | 0     | 0     |
| 773    | 0     | 0     | 0     | 0     |
| 774    | 0     | 0     | 0     | 0     |
| 775    | 1     | 0     | 0     | 0     |
| 776    | 0     | 0     | 0     | 0     |
| 778    | 0     | 0     | 0     | 1     |
| 780    | 0     | 0     | 0     | 0     |
| 781    | 0     | 0     | 0     | 0     |
| 782    | 0     | 0     | 0     | 1     |
| 783    | 0     | 0     | 0     | 0     |
| 786    | 1     | 0     | 0     | 0     |
| 788    |       |       |       |       |
| 792    | 0     | 0     | 0     | 0     |
| 794    | 0     | 0     | 0     | 1     |
| 795    | 0     | 0     | 0     | 0     |
| 799    | 0     | 0     | 0     | 0     |
| 800    | 0     | 0     | 0     | 0     |
| 801    | 0     | 0     | 0     | 0     |
| 804    | 0     | 0     | 0     | 0     |
| 806    | 0     | 0     | 0     | 0     |
| 807    | 0     | 0     | 0     | 0     |
| 808    | 1     | 0     | 0     | 0     |
| 809    | 0     | 0     | 0     | 0     |
| 811    | 0     | 0     | 0     | 0     |

| respid | Q43_1 | Q43_2 | Q43_3 | Q43_4 |
|--------|-------|-------|-------|-------|
| 812    | 0     | 0     | 0     | 0     |
| 815    | 0     | 0     | 0     | 0     |
| 817    | 0     | 0     | 0     | 0     |
| 818    | 0     | 0     | 0     | 0     |
| 819    | 0     | 0     | 0     | 0     |
| 821    | 0     | 0     | 0     | 0     |
| 824    | 0     | 0     | 0     | 0     |
| 825    | 0     | 0     | 0     | 0     |
| 828    | 0     | 0     | 0     | 0     |
| 832    | 0     | 0     | 0     | 0     |
| 834    | 0     | 0     | 0     | 0     |
| 835    | 1     | 0     | 1     | 0     |
| 836    | 0     | 0     | 0     | 0     |
| 837    | 0     | 0     | 0     | 0     |
| 840    | 0     | 0     | 0     | 0     |
| 841    | 0     | 0     | 0     | 0     |
| 845    | 0     | 0     | 0     | 0     |
| 846    | 0     | 0     | 0     | 0     |
| 849    | 0     | 0     | 0     | 0     |
| 852    | 0     | 0     | 0     | 0     |
| 854    | 0     | 0     | 0     | 0     |
| 856    | 0     | 0     | 0     | 0     |
| 858    | 0     | 0     | 0     | 0     |
| 859    | 0     | 0     | 0     | 0     |
| 861    | 0     | 0     | 0     | 0     |
| 863    | 0     | 0     | 0     | 0     |
| 864    | 0     | 0     | 0     | 0     |
| 866    | 0     | 0     | 0     | 0     |
| 869    | 0     | 0     | 0     | 0     |
| 870    | 0     | 0     | 0     | 0     |
| 871    | 0     | 0     | 0     | 0     |
| 873    | 0     | 0     | 0     | 0     |

| respid | Q43_1 | Q43_2 | Q43_3 | Q43_4 |
|--------|-------|-------|-------|-------|
| 879    | 0     | 0     | 0     | 0     |
| 880    | 0     | 0     | 0     | 0     |
| 881    | 0     | 0     | 0     | 0     |
| 882    | 0     | 0     | 0     | 0     |
| 885    |       |       |       |       |
| 886    | 0     | 0     | 0     | 0     |
| 887    | 1     | 0     | 1     | 1     |
| 888    | 0     | 0     | 0     | 0     |
| 889    | 1     | 0     | 0     | 0     |
| 890    | 0     | 0     | 0     | 0     |
| 900    |       |       |       |       |
| 901    | 0     | 0     | 0     | 0     |
| 902    | 1     | 0     | 0     | 0     |
| 903    | 0     | 0     | 0     | 0     |
| 906    | 0     | 0     | 0     | 0     |
| 907    | 0     | 0     | 1     | 0     |
| 908    | 0     | 0     | 0     | 0     |
| 910    | 0     | 0     | 0     | 0     |
| 911    | 1     | 0     | 0     | 0     |
| 912    | 1     | 0     | 0     | 0     |
| 915    |       |       |       |       |
| 923    | 1     | 0     | 0     | 1     |
| 925    | 0     | 0     | 0     | 0     |
| 926    | 0     | 0     | 0     | 0     |
| 929    |       |       |       |       |
| 932    | 1     | 0     | 0     | 0     |
| 933    | 0     | 0     | 0     | 0     |
| 934    | 0     | 0     | 0     | 0     |
| 938    | 0     | 0     | 0     | 1     |
| 941    |       |       |       |       |
| 942    | 0     | 0     | 0     | 0     |
| 943    |       |       |       |       |

| respid | Q43_1 | Q43_2 | Q43_3 | Q43_4 |
|--------|-------|-------|-------|-------|
| 945    | 0     | 0     | 0     | 0     |
| 946    |       |       |       |       |
| 947    | 0     | 0     | 0     | 0     |
| 948    | 1     | 0     | 0     | 0     |
| 949    | 0     | 0     | 0     | 0     |
| 952    | 0     | 0     | 0     | 0     |
| 956    | 0     | 0     | 0     | 0     |
| 957    | 0     | 0     | 0     | 0     |
| 959    | 0     | 0     | 0     | 0     |
| 961    | 0     | 0     | 0     | 0     |
| 962    | 1     | 0     | 0     | 0     |
| 965    | 0     | 0     | 0     | 0     |
| 967    | 0     | 0     | 0     | 0     |
| 969    | 0     | 0     | 0     | 0     |
| 970    |       |       |       |       |
| 973    | 0     | 0     | 0     | 0     |
| 974    | 0     | 0     | 0     | 0     |
| 975    | 0     | 0     | 0     | 0     |
| 976    | 0     | 0     | 0     | 0     |
| 977    | 0     | 0     | 0     | 0     |
| 979    | 0     | 0     | 0     | 0     |
| 981    | 0     | 0     | 0     | 0     |
| 983    | 0     | 0     | 0     | 0     |
| 987    | 0     | 0     | 0     | 0     |
| 991    |       |       |       |       |
| 992    | 0     | 0     | 0     | 0     |
| 993    | 0     | 0     | 0     | 0     |
| 994    | 0     | 0     | 0     | 0     |
| 995    | 1     | 0     | 1     | 0     |
| 998    | 0     | 0     | 0     | 0     |
| 1000   | 0     | 0     | 1     | 0     |
| 1001   | 0     | 0     | 0     | 1     |

| respid | Q43_1 | Q43_2 | Q43_3 | Q43_4 |
|--------|-------|-------|-------|-------|
| 1002   |       |       |       |       |
| 1004   | 0     | 0     | 0     | 0     |
| 1005   | 0     | 0     | 0     | 0     |
| 1006   | 0     | 0     | 0     | 0     |
| 1007   | 0     | 0     | 0     | 0     |
| 1009   |       |       |       |       |
| 1013   | 0     | 0     | 1     | 1     |
| 1015   | 0     | 0     | 0     | 1     |
| 1020   | 0     | 0     | 1     | 0     |
| 1022   | 0     | 0     | 0     | 0     |
| 1024   | 0     | 0     | 0     | 0     |
| 1025   |       |       |       |       |
| 1027   | 0     | 0     | 0     | 0     |
| 1031   | 0     | 0     | 0     | 0     |
| 1037   | 0     | 0     | 0     | 0     |
| 1039   | 0     | 0     | 0     | 0     |
| 1040   | 0     | 0     | 0     | 0     |
| 1056   | 0     | 0     | 0     | 0     |
| 1057   | 0     | 0     | 0     | 0     |
| 1062   | 0     | 0     | 0     | 0     |
| 1069   | 0     | 0     | 0     | 0     |
| 1070   | 0     | 0     | 0     | 0     |
| 1072   | 0     | 0     | 0     | 0     |
| 1076   | 0     | 0     | 0     | 0     |
| 1077   | 0     | 0     | 0     | 0     |
| 1078   | 0     | 0     | 0     | 0     |
| 1080   |       |       |       |       |
| 1094   | 0     | 0     | 0     | 0     |
| 1098   | 1     | 0     | 0     | 1     |
| 1099   | 0     | 0     | 0     | 0     |
| 1102   | 0     | 0     | 0     | 0     |
| 1110   | 0     | 0     | 0     | 0     |



| respid | Q43_1 | Q43_2 | Q43_3 | Q43_4 |
|--------|-------|-------|-------|-------|
| 1117   | 0     | 0     | 0     | 0     |
| 1119   |       |       |       |       |
| 1126   | 0     | 0     | 0     | 1     |
| 1127   | 0     | 0     | 0     | 0     |
| 1130   | 0     | 0     | 0     | 0     |
| 1131   | 0     | 0     | 0     | 0     |
| 1135   | 1     | 0     | 1     | 1     |
| 1138   | 0     | 0     | 1     | 0     |
| 1139   |       |       |       |       |
| 1140   | 0     | 0     | 0     | 0     |
| 1142   |       |       |       |       |
| 1143   |       |       |       |       |
| 1145   | 0     | 0     | 0     | 0     |
| 1149   |       |       |       |       |
| 1152   | 0     | 0     | 0     | 0     |
| 1160   | 0     | 0     | 0     | 0     |
| 1164   |       |       |       |       |
| 1165   | 0     | 0     | 1     | 0     |
| 1169   | 0     | 0     | 0     | 0     |
| 1170   | 0     | 0     | 0     | 0     |
| 1179   | 0     | 0     | 0     | 0     |
| 1180   | 0     | 0     | 0     | 0     |
| 1183   | 0     | 0     | 0     | 0     |
| 1187   | 0     | 0     | 0     | 0     |
| 1188   | 0     | 0     | 0     | 1     |
| 1193   | 1     | 0     | 0     | 0     |
| 1194   | 0     | 0     | 1     | 1     |
| 1197   | 0     | 0     | 0     | 0     |
| 1202   |       |       |       |       |
| 1204   | 1     | 0     | 1     | 0     |
| 1211   | 0     | 0     | 0     | 1     |
| 1224   | 0     | 0     | 0     | 0     |

| respid | Q43_1 | Q43_2 | Q43_3 | Q43_4 |
|--------|-------|-------|-------|-------|
| 1225   | 0     | 0     | 0     | 0     |
| 1230   | 0     | 0     | 0     | 0     |
| 1232   | 1     | 0     | 0     | 0     |
| 1233   | 0     | 0     | 0     | 1     |
| 1234   | 0     | 0     | 0     | 1     |
| 1235   | 1     | 0     | 0     | 0     |
| 1236   | 0     | 0     | 0     | 0     |
| 1237   | 0     | 0     | 0     | 0     |
| 1238   | 0     | 0     | 0     | 0     |
| 1239   | 0     | 0     | 0     | 0     |
| 1241   | 1     | 0     | 0     | 0     |
| 1242   | 0     | 0     | 0     | 0     |
| 1244   | 0     | 0     | 0     | 0     |
| 1245   | 0     | 0     | 0     | 0     |
| 1247   | 1     | 0     | 1     | 0     |
| 1248   | 0     | 0     | 0     | 0     |
| 1249   | 0     | 0     | 0     | 0     |
| 1250   | 0     | 0     | 0     | 0     |
| 1251   | 0     | 0     | 0     | 0     |
| 1252   | 0     | 0     | 0     | 0     |
| 1253   | 0     | 0     | 0     | 0     |
| 1254   | 1     | 0     | 0     | 0     |
| 1258   | 1     | 0     | 0     | 1     |
| 1260   | 0     | 0     | 0     | 0     |
| 1261   | 0     | 0     | 0     | 0     |
| 1262   | 0     | 0     | 0     | 0     |
| 1263   | 1     | 0     | 0     | 0     |
| 1264   | 0     | 0     | 0     | 1     |
| 1265   | 1     | 0     | 0     | 1     |
| 1266   | 0     | 0     | 0     | 0     |
| 1270   | 1     | 0     | 0     | 0     |
| 1272   | 0     | 0     | 0     | 0     |

| respid | Q43_1 | Q43_2 | Q43_3 | Q43_4 |
|--------|-------|-------|-------|-------|
| 1273   | 1     | 0     | 0     | 0     |
| 1276   | 0     | 0     | 0     | 1     |
| 1277   | 0     | 0     | 0     | 0     |
| 1278   | 0     | 0     | 0     | 0     |
| 1280   | 0     | 0     | 0     | 0     |
| 1281   | 0     | 0     | 0     | 0     |
| 1282   | 0     | 0     | 0     | 0     |
| 1283   | 1     | 0     | 0     | 0     |
| 1288   | 0     | 0     | 0     | 0     |
| 1289   | 0     | 0     | 0     | 0     |
| 1290   | 0     | 0     | 0     | 0     |
| 1291   |       |       |       |       |
| 1293   | 0     | 0     | 0     | 0     |
| 1294   | 0     | 0     | 0     | 0     |
| 1295   | 0     | 0     | 0     | 0     |
| 1296   | 0     | 0     | 0     | 0     |
| 1297   | 0     | 0     | 0     | 0     |
| 1298   | 0     | 0     | 0     | 0     |
| 1300   | 1     | 0     | 1     | 1     |
| 1302   | 0     | 0     | 0     | 0     |
| 1303   | 0     | 0     | 0     | 0     |
| 1304   | 0     | 0     | 0     | 0     |
| 1305   | 0     | 0     | 0     | 0     |
| 1307   | 0     | 0     | 0     | 0     |
| 1312   | 1     | 0     | 0     | 0     |
| 1313   | 1     | 0     | 0     | 0     |
| 1314   | 0     | 0     | 0     | 0     |
| 1317   | 0     | 0     | 0     | 0     |
| 1318   | 0     | 0     | 0     | 0     |
| 1319   | 0     | 0     | 0     | 0     |
| 1321   | 0     | 0     | 0     | 0     |
| 1324   | 0     | 0     | 0     | 0     |

| respid | Q43_1 | Q43_2 | Q43_3 | Q43_4 |
|--------|-------|-------|-------|-------|
| 1325   | 0     | 0     | 0     | 0     |
| 1326   | 0     | 0     | 0     | 0     |
| 1327   | 0     | 0     | 0     | 0     |
| 1329   | 0     | 0     | 0     | 1     |
| 1330   | 0     | 0     | 0     | 0     |
| 1331   | 0     | 0     | 0     | 0     |
| 1335   | 0     | 0     | 0     | 0     |
| 1337   | 0     | 0     | 0     | 0     |
| 1341   | 0     | 0     | 0     | 0     |
| 1342   | 0     | 0     | 0     | 0     |
| 1344   | 0     | 0     | 0     | 0     |
| 1345   | 0     | 0     | 0     | 0     |
| 1346   | 0     | 0     | 0     | 0     |
| 1350   | 0     | 0     | 0     | 0     |
| 1352   | 0     | 0     | 0     | 0     |
| 1353   | 0     | 0     | 0     | 0     |
| 1354   | 0     | 0     | 0     | 0     |
| 1355   | 1     | 0     | 0     | 0     |
| 1357   | 1     | 0     | 0     | 0     |
| 1360   |       |       |       |       |
| 1362   | 0     | 0     | 0     | 1     |
| 1363   | 0     | 0     | 0     | 0     |
| 1367   | 0     | 0     | 0     | 0     |
| 1369   | 0     | 0     | 0     | 0     |
| 1371   |       |       |       |       |
| 1372   |       |       |       |       |
| 1375   |       |       |       |       |
| 1377   | 0     | 0     | 0     | 0     |
| 1379   | 1     | 0     | 0     | 0     |
| 1380   | 0     | 0     | 1     | 1     |
| 1382   | 0     | 0     | 0     | 0     |
| 1383   | 0     | 0     | 0     | 0     |

| respid | Q43_1 | Q43_2 | Q43_3 | Q43_4 |
|--------|-------|-------|-------|-------|
| 1384   | 0     | 0     | 0     | 0     |
| 1385   | 1     | 0     | 1     | 0     |
| 1387   | 0     | 0     | 0     | 0     |
| 1388   | 0     | 0     | 0     | 0     |
| 1389   | 0     | 0     | 0     | 0     |
| 1390   | 1     | 0     | 1     | 0     |
| 1395   | 0     | 0     | 0     | 0     |
| 1396   | 0     | 0     | 0     | 0     |
| 1397   | 0     | 0     | 0     | 0     |
| 1398   | 0     | 0     | 0     | 0     |
| 1399   | 0     | 0     | 0     | 0     |
| 1403   | 0     | 0     | 0     | 0     |
| 1405   | 0     | 0     | 0     | 0     |
| 1406   | 0     | 0     | 0     | 1     |
| 1407   | 0     | 0     | 0     | 0     |
| 1408   | 0     | 0     | 0     | 0     |
| 1409   | 0     | 0     | 0     | 0     |
| 1410   | 0     | 0     | 0     | 0     |
| 1411   | 0     | 0     | 0     | 0     |
| 1412   | 0     | 0     | 0     | 0     |
| 1413   | 0     | 0     | 0     | 0     |
| 1414   | 0     | 0     | 0     | 0     |
| 1415   | 1     | 0     | 0     | 0     |
| 1416   | 0     | 0     | 0     | 0     |
| 1417   | 0     | 0     | 0     | 0     |
| 1418   | 0     | 0     | 0     | 0     |
| 1419   | 0     | 0     | 0     | 1     |
| 1420   | 1     | 0     | 0     | 0     |
| 1421   | 0     | 0     | 0     | 1     |
| 1422   | 0     | 0     | 0     | 0     |
| 1423   | 0     | 0     | 0     | 0     |
| 1424   | 1     | 0     | 0     | 0     |

| respid | Q43_1 | Q43_2 | Q43_3 | Q43_4 |
|--------|-------|-------|-------|-------|
| 1429   | 0     | 0     | 0     | 0     |
| 1430   | 1     | 0     | 0     | 0     |
| 1431   | 0     | 0     | 0     | 0     |
| 1433   | 0     | 0     | 0     | 0     |
| 1435   |       |       |       |       |
| 1436   | 0     | 0     | 0     | 0     |
| 1438   |       |       |       |       |
| 1439   | 1     | 0     | 1     | 0     |
| 1441   | 0     | 0     | 0     | 0     |
| 1442   | 0     | 0     | 0     | 0     |
| 1443   |       |       |       |       |
| 1444   | 0     | 0     | 0     | 0     |
| 1445   | 0     | 0     | 0     | 0     |
| 1446   | 0     | 0     | 0     | 1     |
| 1447   | 0     | 0     | 0     | 0     |
| 1449   | 1     | 0     | 0     | 0     |
| 1450   | 0     | 0     | 0     | 0     |
| 1451   | 0     | 0     | 0     | 0     |
| 1452   |       |       |       |       |
| 1453   | 0     | 0     | 1     | 1     |
| 1454   | 0     | 0     | 0     | 0     |
| 1456   | 1     | 0     | 0     | 0     |
| 1457   | 1     | 0     | 0     | 0     |
| 1459   | 0     | 0     | 0     | 0     |
| 1460   | 0     | 0     | 0     | 0     |
| 1463   | 0     | 0     | 0     | 0     |
| 1465   | 1     | 0     | 0     | 0     |
| 1467   | 0     | 0     | 0     | 0     |
| 1470   | 0     | 0     | 0     | 0     |
| 1471   | 0     | 0     | 0     | 1     |
| 1472   | 0     | 0     | 0     | 0     |
| 1474   | 0     | 0     | 0     | 0     |

| respid | Q43_1 | Q43_2 | Q43_3 | Q43_4 |
|--------|-------|-------|-------|-------|
| 1475   | 0     | 0     | 0     | 1     |
| 1477   | 1     | 0     | 0     | 0     |
| 1478   | 1     | 0     | 0     | 1     |
| 1480   |       |       |       |       |
| 1481   | 1     | 0     | 0     | 1     |
| 1483   | 0     | 0     | 0     | 0     |
| 1484   | 0     | 0     | 0     | 0     |
| 1485   | 0     | 0     | 0     | 0     |
| 1486   | 1     | 0     | 0     | 0     |
| 1487   | 0     | 0     | 0     | 0     |
| 1488   | 1     | 0     | 0     | 1     |
| 1489   | 0     | 0     | 0     | 0     |
| 1490   | 0     | 0     | 0     | 0     |
| 1491   | 0     | 0     | 0     | 0     |
| 1492   | 0     | 0     | 0     | 0     |
| 1494   | 0     | 0     | 0     | 0     |
| 1495   | 1     | 0     | 0     | 0     |
| 1496   | 0     | 0     | 0     | 0     |
| 1498   | 0     | 0     | 0     | 0     |
| 1499   | 1     | 0     | 0     | 1     |
| 1500   | 1     | 0     | 0     | 0     |
| 1501   | 0     | 0     | 0     | 0     |
| 1503   |       |       |       |       |
| 1504   | 0     | 0     | 0     | 0     |
| 1508   | 0     | 0     | 0     | 0     |
| 1509   | 0     | 0     | 0     | 0     |
| 1511   | 0     | 0     | 0     | 0     |
| 1512   | 0     | 0     | 0     | 0     |
| 1513   | 0     | 0     | 0     | 0     |
| 1515   | 0     | 0     | 0     | 0     |
| 1517   | 0     | 0     | 0     | 0     |
| 1518   | 0     | 0     | 0     | 0     |

| respid | Q43_1 | Q43_2 | Q43_3 | Q43_4 |
|--------|-------|-------|-------|-------|
| 1519   | 0     | 0     | 0     | 0     |
| 1520   | 1     | 0     | 0     | 0     |
| 1521   | 0     | 0     | 1     | 0     |
| 1522   | 0     | 0     | 0     | 0     |
| 1523   | 0     | 0     | 0     | 0     |
| 1524   | 0     | 0     | 0     | 0     |
| 1525   | 0     | 0     | 0     | 0     |
| 1526   | 0     | 0     | 0     | 0     |
| 1527   | 1     | 1     | 0     | 0     |
| 1534   | 0     | 0     | 1     | 0     |
| 1535   | 1     | 0     | 0     | 0     |
| 1536   | 0     | 0     | 1     | 0     |
| 1538   | 0     | 0     | 0     | 0     |
| 1539   | 0     | 0     | 0     | 0     |
| 1540   | 0     | 0     | 0     | 0     |
| 1541   | 0     | 0     | 0     | 0     |
| 1542   | 0     | 0     | 0     | 0     |
| 1543   | 0     | 0     | 0     | 0     |
| 1545   | 1     | 0     | 0     | 0     |
| 1546   | 0     | 0     | 0     | 0     |
| 1548   | 0     | 0     | 0     | 0     |
| 1549   |       |       |       |       |
| 1551   | 0     | 0     | 0     | 0     |
| 1552   | 0     | 0     | 0     | 1     |
| 1556   | 0     | 0     | 0     | 0     |
| 1557   |       |       |       |       |
| 1558   | 0     | 0     | 0     | 0     |
| 1561   | 0     | 0     | 0     | 0     |
| 1562   | 0     | 0     | 0     | 0     |
| 1563   | 0     | 0     | 0     | 0     |
| 1564   | 0     | 0     | 0     | 0     |
| 1565   |       |       |       |       |



| respid | Q43_1 | Q43_2 | Q43_3 | Q43_4 |
|--------|-------|-------|-------|-------|
| 1566   | 0     | 0     | 0     | 0     |
| 1567   | 0     | 0     | 0     | 1     |
| 1569   |       |       |       |       |
| 1570   | 0     | 0     | 0     | 0     |
| 1574   | 0     | 0     | 0     | 0     |
| 1575   | 0     | 0     | 0     | 0     |
| 1576   | 0     | 0     | 0     | 0     |
| 1577   | 0     | 0     | 0     | 0     |
| 1581   | 0     | 0     | 0     | 0     |
| 1583   | 1     | 0     | 0     | 0     |
| 1585   | 0     | 0     | 0     | 0     |
| 1586   | 1     | 0     | 0     | 0     |
| 1588   | 1     | 0     | 0     | 0     |
| 1590   | 0     | 0     | 0     | 0     |
| 1592   | 0     | 0     | 0     | 0     |
| 1594   | 1     | 0     | 1     | 0     |
| 1598   | 0     | 0     | 0     | 1     |
| 1599   | 1     | 0     | 0     | 0     |
| 1600   | 0     | 0     | 0     | 0     |
| 1602   | 0     | 0     | 0     | 0     |
| 1603   | 0     | 0     | 0     | 0     |
| 1604   | 0     | 0     | 0     | 0     |
| 1605   | 1     | 0     | 0     | 0     |
| 1606   | 1     | 0     | 0     | 0     |
| 1610   | 0     | 0     | 0     | 0     |
| 1611   | 0     | 0     | 0     | 0     |
| 1612   | 0     | 0     | 0     | 0     |
| 1613   | 1     | 1     | 1     | 1     |
| 1615   | 0     | 0     | 0     | 0     |
| 1616   | 0     | 0     | 0     | 0     |
| 1617   | 0     | 0     | 0     | 0     |
| 1618   | 0     | 0     | 0     | 0     |

| respid | Q43_1 | Q43_2 | Q43_3 | Q43_4 |
|--------|-------|-------|-------|-------|
| 1620   | 0     | 0     | 0     | 0     |
| 1621   | 1     | 0     | 1     | 0     |
| 1622   |       |       |       |       |
| 1623   | 0     | 0     | 0     | 0     |
| 1624   | 0     | 0     | 0     | 0     |
| 1625   | 0     | 0     | 0     | 0     |
| 1626   |       |       |       |       |
| 1627   | 0     | 0     | 0     | 0     |
| 1629   | 0     | 0     | 0     | 0     |
| 1630   | 0     | 0     | 0     | 0     |
| 1631   | 0     | 0     | 0     | 0     |
| 1634   | 0     | 0     | 0     | 0     |
| 1635   | 0     | 0     | 0     | 0     |
| 1636   |       |       |       |       |
| 1637   | 0     | 0     | 0     | 0     |
| 1640   | 0     | 0     | 0     | 0     |
| 1642   | 0     | 0     | 0     | 0     |
| 1643   | 1     | 0     | 0     | 1     |
| 1644   | 0     | 0     | 0     | 0     |
| 1645   | 1     | 0     | 0     | 0     |
| 1646   | 1     | 0     | 0     | 0     |
| 1647   | 0     | 0     | 0     | 0     |
| 1650   | 0     | 0     | 0     | 1     |
| 1654   | 0     | 0     | 0     | 0     |
| 1656   | 0     | 0     | 0     | 0     |
| 1657   | 1     | 0     | 0     | 0     |
| 1659   | 0     | 0     | 1     | 1     |
| 1662   | 0     | 0     | 0     | 0     |
| 1663   | 0     | 0     | 0     | 0     |
| 1664   | 0     | 0     | 0     | 0     |
| 1665   | 1     | 0     | 0     | 0     |
| 1667   | 0     | 0     | 0     | 0     |

| respid | Q43_1 | Q43_2 | Q43_3 | Q43_4 |
|--------|-------|-------|-------|-------|
| 1668   | 0     | 0     | 0     | 0     |
| 1670   | 1     | 0     | 0     | 0     |
| 1671   | 0     | 0     | 0     | 0     |
| 1673   | 0     | 0     | 0     | 0     |
| 1674   | 1     | 0     | 0     | 0     |
| 1676   | 0     | 0     | 0     | 0     |
| 1677   | 0     | 0     | 0     | 0     |
| 1678   | 0     | 0     | 0     | 0     |
| 1680   | 0     | 0     | 0     | 0     |
| 1681   | 1     | 0     | 0     | 1     |
| 1683   | 0     | 0     | 0     | 0     |
| 1685   | 0     | 0     | 0     | 0     |
| 1686   | 0     | 0     | 0     | 0     |
| 1690   | 0     | 0     | 0     | 0     |
| 1691   | 0     | 0     | 0     | 0     |
| 1692   | 0     | 0     | 0     | 0     |
| 1693   | 0     | 0     | 0     | 0     |
| 1695   | 0     | 0     | 0     | 0     |
| 1696   | 1     | 0     | 0     | 0     |
| 1698   | 0     | 0     | 0     | 0     |
| 1699   | 0     | 0     | 0     | 0     |
| 1701   | 0     | 0     | 0     | 0     |
| 1702   | 0     | 0     | 0     | 0     |
| 1703   |       |       |       |       |
| 1705   | 0     | 0     | 0     | 0     |
| 1706   | 0     | 0     | 0     | 0     |
| 1708   |       |       |       |       |
| 1711   | 0     | 0     | 0     | 0     |
| 1712   | 0     | 0     | 0     | 0     |
| 1713   | 0     | 0     | 0     | 0     |
| 1715   | 0     | 0     | 0     | 0     |
| 1717   | 0     | 0     | 0     | 0     |

| respid | Q43_1 | Q43_2 | Q43_3 | Q43_4 |
|--------|-------|-------|-------|-------|
| 1718   | 0     | 0     | 0     | 0     |
| 1719   | 1     | 0     | 0     | 0     |
| 1721   | 0     | 0     | 0     | 0     |
| 1722   | 1     | 0     | 0     | 0     |
| 1724   | 0     | 0     | 0     | 0     |
| 1725   | 0     | 0     | 0     | 0     |
| 1726   | 0     | 0     | 0     | 0     |
| 1727   | 0     | 0     | 0     | 0     |
| 1728   | 0     | 0     | 0     | 0     |
| 1731   | 0     | 0     | 0     | 0     |
| 1733   | 0     | 0     | 0     | 1     |
| 1734   | 0     | 0     | 0     | 0     |
| 1735   |       |       |       |       |
| 1736   | 0     | 0     | 0     | 0     |
| 1737   | 0     | 0     | 0     | 0     |
| 1738   | 0     | 0     | 0     | 0     |
| 1743   | 0     | 0     | 0     | 0     |
| 1755   | 1     | 0     | 1     | 0     |
| 1756   | 1     | 0     | 0     | 0     |
| 1757   | 0     | 0     | 0     | 0     |
| 1758   | 0     | 0     | 0     | 1     |
| 1759   | 0     | 0     | 0     | 1     |
| 1761   | 0     | 0     | 0     | 0     |
| 1762   | 0     | 0     | 0     | 0     |
| 1764   |       |       |       |       |
| 1767   | 1     | 0     | 1     | 1     |
| 1768   | 0     | 0     | 0     | 0     |
| 1769   | 0     | 0     | 0     | 0     |
| 1770   | 0     | 0     | 0     | 1     |
| 1771   | 0     | 0     | 0     | 1     |
| 1776   | 0     | 0     | 0     | 0     |
| 1777   | 0     | 0     | 0     | 0     |

| respid | Q43_1 | Q43_2 | Q43_3 | Q43_4 |
|--------|-------|-------|-------|-------|
| 1778   | 0     | 0     | 0     | 1     |
| 1779   | 0     | 0     | 0     | 0     |
| 1780   | 1     | 0     | 0     | 0     |
| 1781   |       |       |       |       |
| 1783   | 0     | 0     | 0     | 0     |
| 1784   | 0     | 0     | 1     | 1     |
| 1785   | 1     | 0     | 0     | 0     |
| 1788   | 0     | 1     | 0     | 0     |
| 1792   | 0     | 0     | 0     | 0     |
| 1794   | 1     | 0     | 0     | 0     |
| 1798   | 1     | 0     | 0     | 0     |
| 1799   | 0     | 0     | 0     | 0     |
| 1800   | 0     | 0     | 0     | 0     |
| 1804   | 0     | 0     | 0     | 0     |
| 1806   | 0     | 0     | 0     | 0     |
| 1807   | 0     | 0     | 0     | 0     |
| 1808   | 0     | 0     | 0     | 0     |
| 1809   | 0     | 0     | 0     | 0     |
| 1811   | 0     | 0     | 0     | 0     |
| 1812   | 1     | 0     | 0     | 0     |
| 1813   | 0     | 0     | 0     | 0     |
| 1814   | 0     | 0     | 0     | 0     |
| 1815   | 0     | 0     | 0     | 0     |
| 1817   | 0     | 0     | 0     | 0     |
| 1820   | 0     | 0     | 0     | 0     |
| 1821   | 0     | 0     | 0     | 0     |
| 1822   | 0     | 0     | 0     | 0     |
| 1823   | 0     | 0     | 0     | 0     |
| 1824   | 0     | 0     | 0     | 0     |
| 1826   |       |       |       |       |
| 1828   | 0     | 0     | 0     | 0     |
| 1829   | 0     | 0     | 0     | 0     |

| respid | Q43_1 | Q43_2 | Q43_3 | Q43_4 |
|--------|-------|-------|-------|-------|
| 1830   | 0     | 0     | 0     | 0     |
| 1831   | 0     | 0     | 0     | 0     |
| 1832   | 0     | 0     | 0     | 0     |
| 1836   | 0     | 0     | 0     | 0     |
| 1838   | 0     | 0     | 0     | 1     |
| 1839   | 1     | 0     | 0     | 0     |
| 1840   | 0     | 0     | 0     | 0     |
| 1841   | 0     | 0     | 0     | 0     |
| 1842   | 1     | 0     | 0     | 0     |
| 1843   | 1     | 0     | 1     | 0     |
| 1844   | 0     | 0     | 0     | 0     |
| 1845   | 0     | 0     | 0     | 0     |
| 1849   | 0     | 0     | 0     | 0     |
| 1850   | 0     | 0     | 0     | 0     |
| 1851   | 0     | 0     | 0     | 0     |
| 1852   |       |       |       |       |
| 1857   | 0     | 0     | 0     | 0     |
| 1858   | 0     | 0     | 0     | 0     |
| 1861   | 0     | 0     | 0     | 0     |
| 1862   | 0     | 0     | 0     | 0     |
| 1863   | 0     | 0     | 0     | 0     |
| 1864   | 0     | 0     | 0     | 0     |
| 1865   |       |       |       |       |
| 1867   | 0     | 0     | 0     | 0     |
| 1868   | 1     | 0     | 1     | 0     |
| 1869   | 0     | 0     | 0     | 0     |
| 1870   | 0     | 0     | 0     | 0     |
| 1871   | 0     | 0     | 0     | 0     |
| 1872   | 0     | 0     | 0     | 0     |
| 1873   | 0     | 0     | 0     | 0     |
| 1876   |       |       |       |       |
| 1877   |       |       |       |       |

| respid | Q43_1 | Q43_2 | Q43_3 | Q43_4 |
|--------|-------|-------|-------|-------|
| 1878   | 0     | 0     | 0     | 0     |
| 1879   | 0     | 0     | 0     | 0     |
| 1880   | 0     | 0     | 0     | 0     |
| 1881   | 0     | 0     | 1     | 0     |
| 1883   | 0     | 0     | 0     | 0     |
| 1886   | 0     | 0     | 0     | 0     |
| 1888   | 1     | 0     | 0     | 0     |
| 1889   | 1     | 0     | 0     | 0     |
| 1890   | 0     | 0     | 0     | 0     |
| 1891   | 0     | 0     | 0     | 0     |
| 1893   | 0     | 0     | 0     | 0     |
| 1894   | 0     | 0     | 0     | 0     |
| 1895   | 0     | 0     | 0     | 0     |
| 1896   | 0     | 0     | 0     | 0     |
| 1897   | 1     | 0     | 0     | 0     |
| 1898   | 0     | 0     | 0     | 0     |
| 1899   | 0     | 0     | 0     | 0     |
| 1900   |       |       |       |       |
| 1903   | 0     | 0     | 1     | 0     |
| 1906   | 0     | 0     | 0     | 0     |
| 1907   | 1     | 0     | 0     | 1     |
| 1908   | 0     | 0     | 0     | 0     |
| 1909   | 0     | 0     | 0     | 0     |
| 1910   | 0     | 0     | 0     | 0     |
| 1911   | 0     | 0     | 0     | 0     |
| 1912   |       |       |       |       |
| 1917   | 0     | 0     | 0     | 0     |
| 1918   | 0     | 0     | 0     | 0     |
| 1919   | 0     | 0     | 0     | 0     |
| 1922   |       |       |       |       |
| 1925   |       |       |       |       |
| 1926   | 0     | 0     | 0     | 0     |

| respid | Q43_1 | Q43_2 | Q43_3 | Q43_4 |
|--------|-------|-------|-------|-------|
| 1927   | 0     | 0     | 0     | 0     |
| 1928   |       |       |       |       |
| 1929   | 0     | 0     | 0     | 0     |
| 1934   | 0     | 0     | 0     | 0     |
| 1935   | 0     | 0     | 0     | 0     |
| 1936   | 0     | 0     | 0     | 0     |
| 1937   |       |       |       |       |
| 1938   |       |       |       |       |
| 1939   | 0     | 0     | 0     | 0     |
| 1940   | 1     | 0     | 0     | 0     |
| 1941   |       |       |       |       |
| 1948   |       |       |       |       |
| 1950   | 0     | 0     | 0     | 0     |
| 1955   | 0     | 0     | 0     | 0     |
| 1958   | 0     | 0     | 0     | 0     |
| 1960   | 0     | 0     | 0     | 0     |
| 1961   |       |       |       |       |
| 1962   | 0     | 0     | 0     | 0     |
| 1965   |       |       |       |       |
| 1966   | 0     | 0     | 0     | 0     |
| 1967   |       |       |       |       |
| 1968   | 1     | 0     | 0     | 0     |
| 1973   | 0     | 0     | 0     | 0     |
| 1974   | 0     | 0     | 0     | 0     |
| 1975   |       |       |       |       |
| 1977   | 0     | 0     | 0     | 0     |
| 1978   |       |       |       |       |
| 1979   | 0     | 0     | 0     | 0     |
| 1982   | 0     | 0     | 0     | 0     |
| 1983   | 0     | 0     | 0     | 0     |
| 1987   | 1     | 0     | 0     | 0     |
| 1988   | 0     | 0     | 0     | 0     |



| respid | Q43_1 | Q43_2 | Q43_3 | Q43_4 |
|--------|-------|-------|-------|-------|
| 1991   | 0     | 0     | 0     | 1     |
| 1992   | 0     | 0     | 0     | 0     |
| 1993   | 0     | 0     | 0     | 0     |
| 1994   | 1     | 0     | 0     | 0     |
| 1995   | 0     | 0     | 0     | 0     |
| 1996   | 0     | 0     | 0     | 0     |
| 1997   | 0     | 0     | 0     | 0     |
| 1998   | 0     | 0     | 0     | 0     |
| 1999   | 1     | 0     | 0     | 0     |
| 2000   | 1     | 0     | 0     | 0     |
| 2001   | 0     | 0     | 0     | 0     |
| 2002   | 0     | 0     | 0     | 0     |
| 2003   |       |       |       |       |
| 2004   | 0     | 0     | 0     | 0     |
| 2005   | 1     | 0     | 0     | 0     |
| 2007   | 1     | 0     | 1     | 0     |
| 2009   | 1     | 0     | 1     | 0     |
| 2010   |       |       |       |       |
| 2011   | 0     | 0     | 0     | 0     |
| 2013   | 0     | 0     | 0     | 0     |
| 2014   | 1     | 0     | 0     | 0     |
| 2017   | 0     | 0     | 0     | 0     |
| 2020   | 0     | 0     | 0     | 0     |
| 2023   | 0     | 0     | 0     | 1     |
| 2024   | 0     | 0     | 0     | 0     |
| 2029   | 0     | 0     | 0     | 0     |
| 2030   |       |       |       |       |
| 2031   | 1     | 0     | 0     | 0     |
| 2032   | 1     | 0     | 0     | 0     |
| 2033   |       |       |       |       |
| 2034   | 0     | 0     | 0     | 0     |
| 2036   | 0     | 0     | 0     | 0     |

| respid | Q43_1 | Q43_2 | Q43_3 | Q43_4 |
|--------|-------|-------|-------|-------|
| 2037   | 0     | 0     | 0     | 1     |
| 2038   | 0     | 0     | 0     | 0     |
| 2039   | 1     | 0     | 0     | 0     |
| 2040   |       |       |       |       |
| 2041   |       |       |       |       |
| 2042   | 0     | 0     | 0     | 0     |
| 2043   | 0     | 0     | 0     | 1     |
| 2051   | 1     | 0     | 0     | 0     |
| 2052   | 0     | 0     | 0     | 0     |
| 2053   | 0     | 0     | 0     | 0     |
| 2054   |       |       |       |       |
| 2055   | 0     | 0     | 0     | 0     |
| 2056   | 1     | 0     | 0     | 0     |
| 2057   | 0     | 0     | 0     | 1     |
| 2059   | 0     | 0     | 0     | 0     |
| 2063   | 0     | 0     | 0     | 0     |
| 2066   | 0     | 0     | 0     | 0     |
| 2068   | 0     | 0     | 0     | 0     |
| 2069   | 0     | 0     | 0     | 0     |
| 2070   |       |       |       |       |
| 2071   | 0     | 0     | 0     | 0     |
| 2073   |       |       |       |       |
| 2077   | 1     | 0     | 1     | 1     |
| 2079   |       |       |       |       |
| 2080   | 0     | 0     | 0     | 0     |
| 2081   | 1     | 0     | 0     | 0     |
| 2084   |       |       |       |       |
| 2085   | 0     | 0     | 0     | 0     |
| 2087   | 1     | 0     | 1     | 0     |
| 2089   | 0     | 0     | 0     | 0     |
| 2093   | 0     | 0     | 0     | 0     |
| 2094   | 0     | 0     | 0     | 1     |

| respid | Q43_1 | Q43_2 | Q43_3 | Q43_4 |
|--------|-------|-------|-------|-------|
| 2095   | 1     | 0     | 0     | 0     |
| 2097   | 1     | 0     | 0     | 0     |
| 2099   | 1     | 0     | 0     | 0     |
| 2100   | 0     | 0     | 0     | 0     |
| 2101   | 0     | 0     | 0     | 0     |
| 2103   | 0     | 0     | 0     | 0     |
| 2104   | 0     | 0     | 0     | 0     |
| 2106   | 0     | 0     | 0     | 0     |
| 2111   | 0     | 0     | 0     | 0     |
| 2113   | 0     | 0     | 0     | 0     |
| 2115   |       |       |       |       |
| 2119   | 1     | 0     | 0     | 0     |
| 2120   |       |       |       |       |
| 2123   |       |       |       |       |
| 2124   | 0     | 0     | 0     | 1     |
| 2130   |       |       |       |       |
| 2131   | 0     | 0     | 0     | 0     |
| 2133   | 0     | 0     | 0     | 1     |
| 2139   | 1     | 0     | 0     | 0     |
| 2141   |       |       |       |       |
| 2143   | 0     | 0     | 0     | 0     |
| 2144   | 0     | 0     | 0     | 0     |
| 2147   |       |       |       |       |
| 2151   | 0     | 0     | 0     | 0     |
| 2153   | 0     | 0     | 0     | 0     |
| 2154   | 0     | 0     | 0     | 0     |
| 2155   | 1     | 0     | 0     | 0     |
| 2159   | 0     | 0     | 0     | 0     |
| 2160   | 1     | 0     | 0     | 0     |
| 2161   | 0     | 0     | 0     | 0     |
| 2163   | 0     | 0     | 0     | 0     |
| 2164   | 0     | 0     | 0     | 0     |

| respid | Q43_1 | Q43_2 | Q43_3 | Q43_4 |
|--------|-------|-------|-------|-------|
| 2168   | 0     | 0     | 0     | 0     |
| 2169   | 1     | 0     | 0     | 0     |
| 2170   | 0     | 0     | 0     | 0     |
| 2171   | 0     | 0     | 0     | 0     |
| 2172   | 0     | 0     | 0     | 0     |
| 2173   | 0     | 0     | 0     | 0     |
| 2174   | 0     | 0     | 0     | 0     |
| 2175   | 0     | 0     | 0     | 1     |
| 2176   | 0     | 0     | 0     | 0     |
| 2177   | 1     | 0     | 1     | 1     |
| 2179   | 0     | 0     | 0     | 0     |
| 2181   | 0     | 0     | 0     | 0     |
| 2182   | 0     | 0     | 0     | 0     |
| 2183   | 0     | 0     | 0     | 0     |
| 2184   | 1     | 0     | 0     | 1     |
| 2185   |       |       |       |       |
| 2186   | 0     | 0     | 0     | 0     |
| 2187   | 0     | 0     | 0     | 0     |
| 2188   | 1     | 0     | 0     | 0     |
| 2189   |       |       |       |       |
| 2190   | 0     | 0     | 0     | 0     |
| 2193   | 0     | 0     | 0     | 0     |
| 2195   | 0     | 0     | 0     | 0     |
| 2198   | 0     | 0     | 0     | 0     |
| 2200   | 0     | 0     | 0     | 0     |
| 2205   | 0     | 0     | 0     | 0     |
| 2208   |       |       |       |       |
| 2209   | 1     | 0     | 0     | 0     |
| 2210   | 0     | 0     | 0     | 0     |
| 2211   | 0     | 0     | 0     | 0     |
| 2213   | 0     | 0     | 0     | 0     |
| 2214   | 0     | 0     | 0     | 0     |

| respid | Q43_1 | Q43_2 | Q43_3 | Q43_4 |
|--------|-------|-------|-------|-------|
| 2216   | 0     | 0     | 0     | 0     |
| 2220   | 0     | 0     | 1     | 0     |
| 2225   | 0     | 0     | 0     | 0     |
| 2227   | 0     | 0     | 0     | 0     |
| 2228   | 1     | 0     | 0     | 0     |
| 2229   | 0     | 0     | 0     | 0     |
| 2230   |       |       |       |       |
| 2236   |       |       |       |       |
| 2238   | 1     | 0     | 1     | 0     |
| 2239   | 0     | 0     | 0     | 1     |
| 2240   | 0     | 0     | 0     | 0     |
| 2241   | 0     | 0     | 0     | 0     |
| 2243   |       |       |       |       |
| 2245   | 0     | 0     | 0     | 0     |
| 2247   | 0     | 0     | 0     | 0     |
| 2248   | 0     | 0     | 0     | 0     |
| 2249   | 0     | 0     | 0     | 0     |
| 2254   | 0     | 0     | 0     | 0     |
| 2256   | 0     | 0     | 0     | 0     |
| 2259   | 1     | 0     | 0     | 0     |
| 2261   | 0     | 0     | 0     | 0     |
| 2262   | 1     | 0     | 0     | 0     |
| 2263   | 0     | 0     | 0     | 0     |
| 2264   | 0     | 0     | 0     | 0     |
| 2265   | 0     | 0     | 0     | 0     |
| 2270   | 0     | 0     | 1     | 1     |
| 2271   | 0     | 0     | 0     | 0     |
| 2272   | 0     | 0     | 0     | 0     |
| 2273   | 0     | 0     | 0     | 0     |
| 2274   | 0     | 0     | 0     | 0     |
| 2276   | 0     | 0     | 1     | 1     |
| 2277   | 0     | 0     | 1     | 0     |

| respid | Q43_1 | Q43_2 | Q43_3 | Q43_4 |
|--------|-------|-------|-------|-------|
| 2281   | 0     | 0     | 0     | 0     |
| 2288   | 0     | 0     | 0     | 0     |
| 2290   | 0     | 0     | 0     | 0     |
| 2294   | 1     | 0     | 1     | 0     |
| 2295   | 0     | 0     | 0     | 0     |
| 2296   | 1     | 0     | 0     | 0     |
| 2297   |       |       |       |       |
| 2298   | 0     | 0     | 0     | 0     |
| 2301   | 0     | 0     | 0     | 0     |
| 2302   | 0     | 0     | 0     | 1     |
| 2303   |       |       |       |       |
| 2305   | 0     | 0     | 0     | 0     |
| 2309   | 0     | 0     | 0     | 0     |
| 2310   | 1     | 0     | 0     | 0     |
| 2311   | 0     | 0     | 0     | 0     |
| 2313   | 1     | 0     | 0     | 0     |
| 2316   |       |       |       |       |
| 2317   | 0     | 0     | 0     | 0     |
| 2318   | 0     | 0     | 0     | 1     |
| 2319   | 1     | 0     | 0     | 0     |
| 2321   | 0     | 0     | 0     | 0     |
| 2324   | 0     | 0     | 0     | 0     |
| 2328   | 0     | 0     | 0     | 0     |
| 2329   |       |       |       |       |
| 2330   | 0     | 0     | 0     | 0     |
| 2333   | 1     | 0     | 0     | 0     |
| 2334   | 1     | 0     | 0     | 0     |
| 2338   | 0     | 0     | 0     | 0     |
| 2341   | 0     | 0     | 0     | 0     |
| 2342   | 0     | 0     | 0     | 0     |
| 2343   | 0     | 0     | 1     | 1     |
| 2346   | 0     | 0     | 0     | 0     |

| respid | Q43_1 | Q43_2 | Q43_3 | Q43_4 |
|--------|-------|-------|-------|-------|
| 2347   | 1     | 0     | 0     | 0     |
| 2348   | 0     | 0     | 0     | 0     |
| 2349   | 0     | 0     | 0     | 0     |
| 2350   | 1     | 0     | 0     | 0     |
| 2351   | 0     | 0     | 0     | 0     |
| 2352   | 1     | 0     | 0     | 0     |
| 2359   | 0     | 0     | 0     | 0     |
| 2362   |       |       |       |       |
| 2363   | 0     | 0     | 0     | 0     |
| 2365   | 0     | 0     | 0     | 0     |
| 2367   | 0     | 0     | 0     | 0     |
| 2368   | 0     | 0     | 0     | 0     |
| 2369   | 1     | 0     | 0     | 0     |
| 2372   |       |       |       |       |
| 2374   | 1     | 0     | 0     | 0     |
| 2376   | 0     | 0     | 0     | 0     |
| 2379   | 0     | 0     | 0     | 0     |
| 2380   | 1     | 0     | 0     | 0     |
| 2381   | 0     | 0     | 1     | 0     |
| 2382   | 0     | 0     | 0     | 0     |
| 2385   | 0     | 0     | 0     | 0     |
| 2387   | 1     | 0     | 0     | 0     |
| 2388   | 0     | 0     | 0     | 0     |
| 2389   | 0     | 0     | 0     | 0     |
| 2391   | 0     | 0     | 0     | 0     |
| 2392   | 0     | 0     | 0     | 0     |
| 2393   | 0     | 0     | 0     | 0     |
| 2394   | 0     | 0     | 0     | 0     |
| 2397   | 0     | 0     | 0     | 0     |
| 2398   | 0     | 0     | 0     | 0     |
| 2400   | 0     | 0     | 0     | 0     |
| 2402   | 0     | 0     | 0     | 0     |

| respid | Q43_1 | Q43_2 | Q43_3 | Q43_4 |
|--------|-------|-------|-------|-------|
| 2406   | 0     | 0     | 0     | 0     |
| 2408   | 0     | 0     | 0     | 0     |
| 2410   | 1     | 1     | 0     | 0     |
| 2411   | 0     | 0     | 0     | 1     |
| 2412   | 0     | 0     | 0     | 0     |
| 2414   | 1     | 0     | 0     | 0     |
| 2421   | 0     | 0     | 0     | 0     |
| 2423   | 0     | 0     | 0     | 0     |
| 2424   | 0     | 0     | 0     | 0     |
| 2425   | 0     | 0     | 0     | 0     |
| 2426   | 1     | 0     | 0     | 0     |
| 2429   | 1     | 0     | 0     | 0     |
| 2430   | 0     | 0     | 1     | 0     |
| 2432   | 0     | 0     | 0     | 0     |
| 2433   | 0     | 0     | 0     | 0     |
| 2434   | 0     | 0     | 0     | 0     |
| 2435   | 0     | 0     | 0     | 0     |
| 2436   | 0     | 0     | 0     | 0     |
| 2439   | 0     | 0     | 0     | 0     |
| 2440   | 0     | 0     | 0     | 0     |
| 2441   | 0     | 0     | 0     | 0     |
| 2446   | 0     | 0     | 0     | 1     |
| 2448   | 0     | 0     | 1     | 1     |
| 2449   | 0     | 0     | 0     | 0     |
| 2451   | 1     | 0     | 0     | 0     |
| 2452   | 1     | 0     | 0     | 0     |
| 2455   |       |       |       |       |
| 2457   | 0     | 0     | 0     | 0     |
| 2458   | 0     | 0     | 0     | 0     |
| 2459   | 0     | 0     | 0     | 0     |
| 2460   | 0     | 0     | 0     | 0     |
| 2462   | 1     | 0     | 0     | 0     |



| respid | Q43_1 | Q43_2 | Q43_3 | Q43_4 |
|--------|-------|-------|-------|-------|
| 2464   | 1     | 1     | 1     | 0     |
| 2465   | 0     | 0     | 0     | 0     |
| 2468   | 0     | 0     | 0     | 0     |
| 2469   |       |       |       |       |
| 2470   | 0     | 0     | 0     | 0     |
| 2471   | 1     | 0     | 0     | 1     |
| 2472   | 1     | 0     | 0     | 0     |
| 2474   | 0     | 0     | 0     | 0     |
| 2476   | 0     | 0     | 0     | 1     |
| 2478   | 0     | 0     | 0     | 0     |
| 2479   | 0     | 0     | 0     | 0     |
| 2480   | 0     | 0     | 0     | 0     |
| 2482   | 0     | 0     | 0     | 0     |
| 2486   | 1     | 0     | 0     | 1     |
| 2488   | 1     | 0     | 0     | 0     |
| 2489   | 0     | 0     | 0     | 0     |
| 2491   | 0     | 0     | 0     | 1     |
| 2495   | 0     | 0     | 0     | 1     |
| 2496   | 1     | 0     | 0     | 0     |
| 2498   | 0     | 0     | 0     | 1     |
| 2501   | 0     | 0     | 0     | 0     |
| 2502   | 0     | 0     | 0     | 0     |
| 2503   | 1     | 0     | 0     | 0     |
| 2504   | 0     | 0     | 0     | 0     |
| 2507   | 0     | 0     | 0     | 0     |
| 2509   | 0     | 0     | 0     | 0     |
| 2512   | 0     | 0     | 0     | 0     |
| 2514   | 0     | 0     | 0     | 0     |
| 2516   | 1     | 0     | 0     | 0     |
| 2517   | 0     | 0     | 0     | 0     |
| 2521   | 1     | 0     | 1     | 0     |
| 2522   | 0     | 0     | 0     | 0     |

| respid | Q43_1 | Q43_2 | Q43_3 | Q43_4 |
|--------|-------|-------|-------|-------|
| 2524   | 0     | 0     | 0     | 0     |
| 2525   | 0     | 0     | 0     | 0     |
| 2526   | 0     | 0     | 0     | 1     |
| 2527   | 0     | 0     | 0     | 0     |
| 2528   | 0     | 0     | 0     | 0     |
| 2531   |       |       |       |       |
| 2533   | 1     | 0     | 0     | 0     |
| 2535   | 0     | 0     | 0     | 0     |
| 2536   | 0     | 0     | 0     | 0     |
| 2539   | 0     | 0     | 0     | 0     |
| 2540   | 0     | 0     | 0     | 0     |
| 2543   | 0     | 0     | 0     | 0     |
| 2546   | 0     | 0     | 0     | 0     |
| 2547   | 0     | 0     | 0     | 0     |
| 2549   | 0     | 0     | 0     | 0     |
| 2553   | 0     | 0     | 0     | 0     |
| 2554   | 0     | 0     | 0     | 0     |
| 2555   | 0     | 0     | 0     | 0     |
| 2556   | 0     | 0     | 0     | 0     |
| 2557   | 0     | 0     | 0     | 0     |
| 2559   | 0     | 0     | 0     | 0     |
| 2560   | 1     | 0     | 0     | 0     |
| 2561   | 0     | 0     | 0     | 0     |
| 2566   | 1     | 0     | 0     | 0     |
| 2567   |       |       |       |       |
| 2570   | 0     | 0     | 1     | 1     |
| 2574   | 1     | 0     | 0     | 0     |
| 2578   | 0     | 0     | 0     | 0     |
| 2580   | 0     | 0     | 0     | 0     |
| 2590   | 1     | 0     | 0     | 1     |
| 2593   | 0     | 0     | 0     | 0     |
| 2594   | 1     | 0     | 0     | 0     |

| respid | Q43_1 | Q43_2 | Q43_3 | Q43_4 |
|--------|-------|-------|-------|-------|
| 2595   | 0     | 0     | 0     | 0     |
| 2596   | 0     | 0     | 0     | 0     |
| 2597   | 0     | 0     | 0     | 0     |
| 2598   | 0     | 0     | 0     | 0     |
| 2602   | 0     | 0     | 0     | 0     |
| 2605   | 1     | 0     | 0     | 0     |
| 2606   |       |       |       |       |
| 2607   | 0     | 0     | 0     | 0     |
| 2608   |       |       |       |       |
| 2609   | 0     | 0     | 0     | 0     |
| 2610   | 0     | 0     | 0     | 0     |
| 2614   |       |       |       |       |
| 2615   | 0     | 0     | 0     | 0     |
| 2616   | 1     | 0     | 0     | 0     |
| 2618   | 0     | 0     | 0     | 0     |
| 2630   | 0     | 0     | 0     | 0     |
| 2633   | 0     | 0     | 0     | 0     |
| 2637   | 1     | 0     | 0     | 0     |
| 2638   | 0     | 0     | 0     | 0     |
| 2641   | 0     | 0     | 0     | 0     |
| 2644   | 0     | 0     | 0     | 0     |
| 2645   | 0     | 0     | 0     | 0     |
| 2646   | 0     | 0     | 0     | 0     |
| 2648   | 0     | 0     | 0     | 0     |
| 2651   |       |       |       |       |
| 2652   | 0     | 0     | 0     | 0     |
| 2653   | 1     | 0     | 0     | 0     |
| 2656   |       |       |       |       |
| 2657   | 0     | 0     | 0     | 0     |
| 2658   | 0     | 0     | 0     | 0     |
| 2661   | 0     | 0     | 0     | 0     |
| 2663   | 0     | 0     | 1     | 0     |

| respid | Q43_1 | Q43_2 | Q43_3 | Q43_4 |
|--------|-------|-------|-------|-------|
| 2665   | 0     | 0     | 0     | 0     |
| 2670   | 1     | 0     | 0     | 0     |
| 2672   | 0     | 0     | 0     | 0     |
| 2673   |       |       |       |       |
| 2677   | 0     | 0     | 0     | 0     |
| 2686   | 1     | 0     | 1     | 0     |
| 2688   | 0     | 0     | 0     | 0     |
| 2689   | 0     | 0     | 0     | 0     |
| 2691   | 0     | 0     | 0     | 0     |
| 2695   | 0     | 0     | 0     | 0     |
| 2696   | 0     | 0     | 0     | 0     |
| 2697   |       |       |       |       |
| 2698   |       |       |       |       |
| 2703   | 0     | 0     | 0     | 0     |
| 2704   | 0     | 0     | 0     | 0     |
| 2706   | 0     | 0     | 0     | 0     |
| 2707   | 1     | 0     | 0     | 0     |
| 2710   | 0     | 0     | 0     | 0     |
| 2711   | 0     | 0     | 0     | 0     |
| 2712   | 0     | 0     | 0     | 0     |
| 2713   |       |       |       |       |
| 2721   |       |       |       |       |
| 2730   | 0     | 0     | 0     | 0     |
| 2731   | 0     | 0     | 0     | 0     |
| 2732   | 0     | 0     | 0     | 0     |
| 2733   | 0     | 0     | 0     | 0     |
| 2735   | 0     | 0     | 0     | 0     |
| 2736   | 0     | 0     | 0     | 0     |
| 2740   | 0     | 0     | 0     | 0     |
| 2741   | 0     | 0     | 0     | 1     |
| 2742   | 0     | 0     | 0     | 1     |
| 2743   | 1     | 0     | 0     | 0     |

| respid | Q43_1 | Q43_2 | Q43_3 | Q43_4 |
|--------|-------|-------|-------|-------|
| 2744   | 0     | 0     | 0     | 0     |
| 2745   | 1     | 0     | 0     | 0     |
| 2749   | 0     | 0     | 0     | 0     |
| 2751   | 0     | 0     | 0     | 0     |
| 2754   | 0     | 0     | 0     | 0     |
| 2755   | 0     | 0     | 0     | 0     |
| 2757   | 0     | 0     | 0     | 0     |
| 2758   | 0     | 0     | 0     | 0     |
| 2759   | 0     | 0     | 0     | 0     |
| 2761   | 0     | 0     | 0     | 0     |
| 2762   | 0     | 0     | 0     | 0     |
| 2763   | 0     | 0     | 0     | 0     |
| 2764   | 0     | 0     | 0     | 0     |
| 2765   | 0     | 0     | 0     | 0     |
| 2766   | 1     | 0     | 0     | 0     |
| 2767   | 0     | 0     | 0     | 0     |
| 2769   | 0     | 0     | 0     | 1     |
| 2770   | 0     | 0     | 0     | 0     |
| 2771   | 1     | 0     | 0     | 0     |
| 2774   | 0     | 0     | 0     | 1     |
| 2777   | 0     | 0     | 0     | 0     |
| 2778   | 0     | 0     | 0     | 0     |
| 2781   | 0     | 0     | 0     | 0     |
| 2782   | 0     | 0     | 0     | 1     |
| 2784   | 0     | 0     | 0     | 0     |
| 2785   | 0     | 0     | 0     | 0     |
| 2786   | 0     | 0     | 0     | 1     |
| 2787   | 0     | 0     | 0     | 0     |
| 2789   | 0     | 0     | 0     | 1     |
| 2790   | 0     | 0     | 0     | 0     |
| 2791   | 1     | 0     | 0     | 0     |
| 2793   | 0     | 0     | 0     | 0     |

| respid | Q43_1 | Q43_2 | Q43_3 | Q43_4 |
|--------|-------|-------|-------|-------|
| 2797   | 0     | 0     | 0     | 0     |
| 2798   | 0     | 0     | 0     | 0     |
| 2799   | 0     | 0     | 0     | 1     |
| 2801   | 1     | 0     | 0     | 0     |
| 2802   | 0     | 0     | 0     | 0     |
| 2803   | 0     | 0     | 0     | 0     |
| 2804   | 1     | 0     | 0     | 0     |
| 2807   | 0     | 0     | 0     | 0     |
| 2809   | 0     | 0     | 0     | 0     |
| 2810   | 0     | 0     | 0     | 0     |
| 2812   | 0     | 0     | 0     | 0     |
| 2814   | 0     | 0     | 0     | 0     |
| 2815   | 1     | 0     | 0     | 1     |
| 2816   | 0     | 0     | 0     | 0     |
| 2817   | 1     | 0     | 0     | 0     |
| 2819   | 0     | 0     | 0     | 0     |
| 2820   | 0     | 0     | 0     | 0     |
| 2821   | 0     | 0     | 0     | 0     |
| 2822   | 0     | 0     | 0     | 0     |
| 2823   | 0     | 0     | 0     | 0     |
| 2824   | 0     | 0     | 0     | 1     |
| 2825   | 0     | 0     | 0     | 0     |
| 2826   | 0     | 0     | 1     | 0     |
| 2827   | 0     | 0     | 0     | 0     |
| 2828   | 1     | 0     | 0     | 0     |
| 2829   | 0     | 0     | 0     | 0     |
| 2830   | 0     | 0     | 0     | 0     |
| 2831   | 0     | 0     | 0     | 0     |
| 2832   | 0     | 0     | 0     | 0     |
| 2833   | 0     | 0     | 0     | 0     |
| 2834   | 0     | 0     | 0     | 0     |
| 2835   | 0     | 1     | 0     | 0     |

| respid | Q43_1 | Q43_2 | Q43_3 | Q43_4 |
|--------|-------|-------|-------|-------|
| 2836   | 0     | 0     | 0     | 0     |
| 2837   | 1     | 0     | 1     | 0     |
| 2838   | 0     | 0     | 0     | 0     |
| 2844   | 0     | 0     | 0     | 0     |
| 2845   | 1     | 0     | 1     | 0     |
| 2847   | 0     | 0     | 0     | 0     |
| 2848   | 0     | 0     | 0     | 0     |
| 2849   | 0     | 0     | 0     | 0     |
| 2851   | 0     | 0     | 0     | 0     |
| 2852   | 0     | 0     | 0     | 0     |
| 2853   | 1     | 0     | 0     | 1     |
| 2854   | 1     | 0     | 0     | 0     |
| 2856   | 0     | 0     | 0     | 1     |
| 2857   | 1     | 0     | 0     | 0     |
| 2858   | 1     | 0     | 0     | 0     |
| 2859   | 0     | 0     | 0     | 0     |
| 2860   | 1     | 1     | 0     | 0     |
| 2861   | 1     | 0     | 0     | 0     |
| 2863   | 0     | 0     | 0     | 0     |
| 2864   | 0     | 0     | 0     | 0     |
| 2866   | 1     | 0     | 0     | 0     |
| 2872   | 0     | 0     | 0     | 0     |
| 2875   | 0     | 0     | 0     | 0     |
| 2879   |       |       |       |       |
| 2881   | 0     | 0     | 0     | 1     |
| 2882   | 0     | 0     | 0     | 0     |
| 2883   | 0     | 0     | 0     | 0     |
| 2884   | 0     | 0     | 0     | 0     |
| 2885   | 0     | 0     | 0     | 0     |
| 2887   | 0     | 0     | 0     | 0     |
| 2888   | 1     | 0     | 0     | 0     |
| 2890   | 0     | 0     | 1     | 0     |

| respid | Q43_1 | Q43_2 | Q43_3 | Q43_4 |
|--------|-------|-------|-------|-------|
| 2891   | 1     | 0     | 0     | 0     |
| 2892   |       |       |       |       |
| 2895   | 0     | 0     | 0     | 0     |
| 2899   | 0     | 0     | 0     | 0     |
| 2900   | 0     | 0     | 0     | 0     |
| 2902   | 0     | 0     | 0     | 0     |
| 2903   |       |       |       |       |
| 2904   | 0     | 0     | 0     | 0     |
| 2906   | 0     | 0     | 0     | 0     |
| 2908   | 0     | 0     | 0     | 0     |
| 2910   | 0     | 0     | 0     | 0     |
| 2917   | 0     | 0     | 0     | 0     |
| 2918   | 0     | 0     | 0     | 0     |
| 2919   | 0     | 0     | 0     | 0     |
| 2920   | 0     | 0     | 0     | 0     |
| 2921   | 0     | 0     | 0     | 0     |
| 2922   | 0     | 0     | 0     | 0     |
| 2923   |       |       |       |       |
| 2924   | 1     | 0     | 0     | 0     |
| 2926   | 1     | 0     | 0     | 1     |
| 2928   | 0     | 0     | 0     | 0     |
| 2930   |       |       |       |       |
| 2931   | 0     | 0     | 0     | 0     |
| 2933   | 0     | 0     | 0     | 0     |
| 2935   | 0     | 0     | 0     | 0     |
| 2936   |       |       |       |       |
| 2937   | 1     | 0     | 0     | 0     |
| 2938   | 0     | 0     | 1     | 1     |
| 2944   | 0     | 0     | 0     | 0     |
| 2945   | 1     | 0     | 0     | 0     |
| 2947   | 1     | 0     | 0     | 0     |
| 2949   | 0     | 0     | 0     | 0     |



| respid | Q43_1 | Q43_2 | Q43_3 | Q43_4 |
|--------|-------|-------|-------|-------|
| 2951   | 1     | 0     | 0     | 0     |
| 2952   | 1     | 0     | 0     | 1     |
| 2953   |       |       |       |       |
| 2955   | 1     | 0     | 0     | 0     |
| 2957   | 1     | 0     | 0     | 0     |
| 2958   | 0     | 0     | 0     | 0     |
| 2960   | 0     | 0     | 0     | 0     |
| 2963   | 0     | 0     | 0     | 0     |
| 2964   | 0     | 0     | 0     | 0     |
| 2967   |       |       |       |       |
| 2968   | 0     | 0     | 0     | 0     |
| 2971   | 0     | 0     | 0     | 0     |
| 2974   | 0     | 0     | 0     | 0     |
| 2975   | 0     | 0     | 0     | 0     |
| 2982   |       |       |       |       |
| 2983   |       |       |       |       |
| 2985   | 0     | 0     | 0     | 0     |
| 2986   | 1     | 0     | 0     | 0     |
| 2987   | 0     | 0     | 0     | 0     |
| 2988   | 1     | 0     | 1     | 1     |
| 2993   | 0     | 0     | 0     | 0     |
| 2996   | 0     | 0     | 0     | 0     |
| 2997   | 0     | 0     | 0     | 0     |
| 2998   | 0     | 0     | 0     | 0     |
| 3004   | 0     | 0     | 0     | 0     |
| 3007   | 1     | 0     | 0     | 0     |
| 3011   | 0     | 1     | 0     | 0     |
| 3012   | 0     | 0     | 0     | 0     |
| 3013   | 0     | 0     | 0     | 0     |
| 3014   |       |       |       |       |
| 3015   | 0     | 0     | 0     | 0     |
| 3016   |       |       |       |       |

| respid | Q43_1 | Q43_2 | Q43_3 | Q43_4 |
|--------|-------|-------|-------|-------|
| 3017   | 0     | 0     | 0     | 0     |
| 3020   | 0     | 0     | 0     | 0     |
| 3022   | 0     | 0     | 0     | 0     |
| 3023   | 0     | 0     | 0     | 0     |
| 3026   | 0     | 0     | 0     | 0     |
| 3038   | 1     | 0     | 0     | 0     |
| 3039   | 1     | 0     | 0     | 1     |
| 3040   | 0     | 0     | 0     | 0     |
| 3041   |       |       |       |       |
| 3042   | 0     | 0     | 1     | 0     |
| 3044   | 0     | 0     | 0     | 0     |
| 3050   | 0     | 0     | 1     | 0     |
| 3052   | 0     | 0     | 0     | 0     |
| 3056   | 0     | 0     | 1     | 1     |
| 3059   | 0     | 0     | 0     | 0     |
| 3060   | 0     | 0     | 0     | 0     |
| 3063   | 0     | 0     | 0     | 0     |
| 3065   | 1     | 0     | 0     | 0     |
| 3067   | 0     | 0     | 0     | 0     |
| 3068   |       |       |       |       |
| 3072   | 0     | 0     | 0     | 0     |
| 3074   | 0     | 0     | 0     | 0     |
| 3075   | 0     | 0     | 0     | 0     |
| 3076   | 0     | 0     | 0     | 0     |
| 3079   | 0     | 0     | 0     | 0     |
| 3082   | 1     | 1     | 0     | 0     |
| 3083   | 0     | 0     | 0     | 0     |
| 3084   | 1     | 0     | 0     | 0     |
| 3085   | 0     | 0     | 0     | 0     |
| 3090   | 0     | 0     | 0     | 0     |
| 3091   | 0     | 0     | 0     | 0     |
| 3092   | 0     | 0     | 0     | 0     |

| respid | Q43_1 | Q43_2 | Q43_3 | Q43_4 |
|--------|-------|-------|-------|-------|
| 3095   | 0     | 0     | 0     | 0     |
| 3096   | 1     | 0     | 0     | 1     |
| 3097   | 0     | 0     | 0     | 0     |
| 3099   | 0     | 0     | 0     | 1     |
| 3101   | 1     | 0     | 0     | 0     |
| 3103   | 0     | 0     | 0     | 0     |
| 3104   | 0     | 0     | 0     | 0     |
| 3105   |       |       |       |       |
| 3107   | 0     | 0     | 0     | 1     |
| 3108   | 0     | 0     | 0     | 0     |
| 3109   | 0     | 0     | 0     | 0     |
| 3116   | 0     | 0     | 0     | 0     |
| 3117   | 0     | 0     | 0     | 0     |
| 3119   | 0     | 0     | 0     | 0     |
| 3120   | 0     | 0     | 0     | 0     |
| 3130   | 0     | 0     | 0     | 0     |
| 3131   | 1     | 0     | 0     | 0     |
| 3133   | 1     | 0     | 0     | 0     |
| 3134   | 0     | 0     | 0     | 0     |
| 3135   | 0     | 0     | 0     | 0     |
| 3145   | 1     | 0     | 0     | 0     |
| 3147   | 0     | 0     | 0     | 0     |
| 3152   | 0     | 0     | 0     | 1     |
| 3155   | 0     | 0     | 1     | 1     |
| 3156   |       |       |       |       |
| 3157   | 1     | 0     | 0     | 0     |
| 3166   | 0     | 0     | 0     | 1     |
| 3169   | 0     | 0     | 0     | 0     |
| 3179   | 0     | 0     | 0     | 0     |
| 3181   | 0     | 0     | 0     | 0     |
| 3185   |       |       |       |       |
| 3190   | 0     | 0     | 0     | 0     |

| respid | Q43_1 | Q43_2 | Q43_3 | Q43_4 |
|--------|-------|-------|-------|-------|
| 3191   |       |       |       |       |
| 3192   | 1     | 0     | 0     | 0     |
| 3193   | 0     | 0     | 0     | 0     |
| 3195   | 0     | 0     | 0     | 0     |
| 3202   | 1     | 0     | 0     | 0     |
| 3204   | 0     | 0     | 0     | 0     |
| 3208   | 0     | 0     | 0     | 0     |
| 3212   | 0     | 0     | 0     | 0     |
| 3218   | 0     | 0     | 0     | 0     |
| 3219   | 0     | 0     | 0     | 0     |
| 3220   | 0     | 0     | 0     | 0     |
| 3221   | 0     | 0     | 0     | 0     |
| 3223   | 0     | 0     | 0     | 0     |
| 3231   | 0     | 0     | 0     | 0     |
| 3232   | 1     | 0     | 0     | 0     |
| 3234   | 1     | 0     | 1     | 0     |
| 3235   | 0     | 0     | 0     | 0     |
| 3237   | 1     | 0     | 0     | 0     |
| 3238   | 0     | 0     | 0     | 0     |
| 3240   | 0     | 0     | 0     | 0     |
| 3241   | 0     | 0     | 0     | 0     |
| 3243   | 0     | 0     | 0     | 0     |
| 3244   | 0     | 0     | 0     | 0     |
| 3247   | 0     | 0     | 0     | 0     |
| 3250   | 0     | 0     | 0     | 0     |
| 3251   | 0     | 0     | 0     | 0     |
| 3255   | 0     | 0     | 0     | 0     |
| 3256   | 0     | 0     | 0     | 0     |
| 3257   | 0     | 0     | 0     | 0     |
| 3258   |       |       |       |       |
| 3259   | 0     | 0     | 0     | 0     |
| 3260   | 0     | 0     | 0     | 0     |

| respid | Q43_1 | Q43_2 | Q43_3 | Q43_4 |
|--------|-------|-------|-------|-------|
| 3261   |       |       |       |       |
| 3262   | 0     | 0     | 0     | 0     |
| 3264   | 1     | 0     | 0     | 0     |
| 3265   | 0     | 0     | 0     | 0     |
| 3267   | 0     | 0     | 0     | 0     |
| 3268   | 0     | 0     | 0     | 0     |
| 3270   | 0     | 0     | 0     | 0     |
| 3271   | 0     | 0     | 0     | 0     |
| 3274   |       |       |       |       |
| 3276   | 0     | 0     | 0     | 0     |
| 3277   | 1     | 0     | 0     | 0     |
| 3279   | 0     | 0     | 0     | 0     |
| 3281   |       |       |       |       |
| 3283   | 0     | 0     | 0     | 0     |
| 3285   | 0     | 0     | 1     | 0     |
| 3286   | 0     | 0     | 0     | 0     |
| 3287   | 0     | 0     | 0     | 0     |
| 3289   | 0     | 0     | 0     | 0     |
| 3290   | 0     | 0     | 0     | 0     |
| 3291   | 1     | 0     | 0     | 1     |
| 3292   | 1     | 0     | 1     | 1     |
| 3293   | 0     | 0     | 1     | 0     |
| 3294   | 1     | 0     | 1     | 0     |
| 3296   | 0     | 0     | 0     | 0     |
| 3306   | 0     | 0     | 0     | 0     |
| 3307   | 1     | 0     | 0     | 1     |
| 3308   | 0     | 0     | 0     | 0     |
| 3312   | 1     | 0     | 0     | 0     |
| 3313   | 1     | 0     | 0     | 0     |
| 3316   | 0     | 0     | 0     | 0     |
| 3317   | 1     | 0     | 0     | 0     |
| 3320   | 1     | 0     | 0     | 0     |

| respid | Q43_1 | Q43_2 | Q43_3 | Q43_4 |
|--------|-------|-------|-------|-------|
| 3321   | 1     | 0     | 0     | 1     |
| 3322   | 0     | 0     | 0     | 0     |
| 3323   | 0     | 0     | 0     | 0     |
| 3325   |       |       |       |       |
| 3332   | 0     | 0     | 0     | 0     |
| 3334   | 0     | 0     | 0     | 0     |
| 3335   | 1     | 0     | 0     | 0     |
| 3341   | 0     | 0     | 0     | 0     |
| 3345   | 0     | 0     | 0     | 0     |
| 3346   | 0     | 0     | 0     | 0     |
| 3349   | 0     | 0     | 0     | 1     |
| 3351   | 0     | 0     | 0     | 0     |
| 3353   | 0     | 0     | 0     | 0     |
| 3354   | 0     | 0     | 1     | 0     |
| 3356   | 0     | 0     | 0     | 0     |
| 3357   | 0     | 0     | 0     | 0     |
| 3360   | 0     | 0     | 0     | 0     |
| 3361   | 1     | 0     | 1     | 1     |
| 3362   | 0     | 0     | 0     | 0     |
| 3363   |       |       |       |       |
| 3364   | 0     | 0     | 1     | 0     |
| 3368   | 0     | 0     | 0     | 0     |
| 3370   | 1     | 0     | 0     | 0     |
| 3371   | 0     | 0     | 0     | 0     |
| 3379   | 0     | 0     | 0     | 0     |
| 3380   | 1     | 0     | 0     | 1     |
| 3382   | 0     | 0     | 0     | 0     |
| 3384   | 1     | 0     | 0     | 0     |
| 3385   | 0     | 0     | 0     | 0     |
| 3388   | 0     | 0     | 0     | 0     |
| 3392   | 0     | 0     | 0     | 0     |
| 3393   | 0     | 0     | 0     | 0     |

| respid | Q43_1 | Q43_2 | Q43_3 | Q43_4 |
|--------|-------|-------|-------|-------|
| 3394   | 0     | 0     | 0     | 0     |
| 3395   | 0     | 0     | 0     | 0     |
| 3396   | 0     | 0     | 0     | 0     |
| 3397   | 1     | 0     | 0     | 0     |
| 3398   | 0     | 0     | 0     | 0     |
| 3399   | 1     | 0     | 0     | 0     |
| 3400   | 0     | 0     | 0     | 0     |
| 3401   | 0     | 1     | 0     | 0     |
| 3402   | 0     | 0     | 0     | 0     |
| 3403   | 0     | 0     | 0     | 1     |
| 3405   | 1     | 0     | 1     | 0     |
| 3407   | 1     | 0     | 0     | 0     |
| 3410   | 0     | 0     | 0     | 0     |
| 3411   | 0     | 0     | 0     | 0     |
| 3413   |       |       |       |       |
| 3414   | 0     | 0     | 0     | 0     |
| 3420   | 0     | 0     | 0     | 0     |
| 3421   | 0     | 0     | 1     | 0     |
| 3425   | 0     | 0     | 0     | 0     |
| 3426   | 0     | 0     | 0     | 0     |
| 3429   | 1     | 0     | 1     | 1     |
| 3430   | 1     | 0     | 1     | 0     |
| 3433   | 0     | 0     | 0     | 0     |
| 3434   | 1     | 0     | 1     | 1     |
| 3437   | 0     | 0     | 0     | 0     |
| 3439   | 1     | 0     | 0     | 0     |
| 3441   | 1     | 0     | 0     | 1     |
| 3442   | 0     | 0     | 0     | 0     |
| 3444   | 0     | 0     | 0     | 0     |
| 3445   | 0     | 0     | 0     | 0     |
| 3450   | 0     | 0     | 0     | 0     |
| 3452   | 0     | 0     | 0     | 0     |

| respid | Q43_1 | Q43_2 | Q43_3 | Q43_4 |
|--------|-------|-------|-------|-------|
| 3456   | 0     | 0     | 0     | 0     |
| 3459   |       |       |       |       |
| 3460   | 0     | 0     | 0     | 0     |
| 3461   | 0     | 0     | 0     | 0     |
| 3466   | 0     | 0     | 0     | 0     |
| 3471   | 0     | 0     | 0     | 0     |
| 3473   | 0     | 0     | 0     | 0     |
| 3475   | 1     | 0     | 0     | 0     |
| 3476   | 1     | 0     | 0     | 0     |
| 3477   | 0     | 0     | 0     | 1     |
| 3478   |       |       |       |       |
| 3479   | 0     | 0     | 0     | 0     |
| 3482   | 0     | 0     | 0     | 0     |
| 3483   | 0     | 0     | 0     | 0     |
| 3485   | 0     | 0     | 0     | 0     |
| 3489   |       |       |       |       |
| 3490   | 1     | 0     | 0     | 0     |
| 3491   | 0     | 0     | 1     | 0     |
| 3494   | 0     | 0     | 0     | 0     |
| 3495   | 1     | 0     | 0     | 0     |
| 3501   | 0     | 0     | 0     | 0     |
| 3506   | 0     | 0     | 0     | 0     |
| 3507   | 1     | 0     | 1     | 0     |
| 3517   | 0     | 0     | 0     | 0     |
| 3520   | 0     | 0     | 0     | 0     |
| 3521   | 0     | 0     | 0     | 0     |
| 3522   | 0     | 0     | 0     | 0     |
| 3524   | 0     | 0     | 0     | 0     |
| 3527   | 0     | 0     | 0     | 0     |
| 3528   | 0     | 0     | 0     | 0     |
| 3529   | 0     | 0     | 0     | 0     |
| 3536   | 1     | 0     | 0     | 1     |



| respid | Q43_1 | Q43_2 | Q43_3 | Q43_4 |
|--------|-------|-------|-------|-------|
| 3537   | 0     | 0     | 0     | 0     |
| 3538   | 1     | 0     | 0     | 0     |
| 3540   | 0     | 0     | 0     | 0     |
| 3545   | 1     | 0     | 0     | 0     |
| 3547   | 0     | 0     | 0     | 1     |
| 3554   | 0     | 0     | 0     | 0     |
| 3556   | 0     | 0     | 0     | 0     |
| 3557   | 0     | 1     | 0     | 0     |
| 3559   | 0     | 0     | 1     | 0     |
| 3560   | 0     | 0     | 0     | 0     |
| 3562   | 0     | 0     | 0     | 0     |
| 3564   | 1     | 0     | 0     | 1     |
| 3565   | 1     | 0     | 0     | 0     |
| 3568   | 0     | 0     | 1     | 1     |
| 3572   |       |       |       |       |
| 3578   |       |       |       |       |
| 3581   | 0     | 0     | 0     | 0     |
| 3583   | 0     | 0     | 0     | 0     |
| 3588   | 0     | 0     | 0     | 0     |
| 3591   | 0     | 0     | 0     | 0     |
| 3594   | 0     | 0     | 0     | 0     |
| 3595   | 0     | 0     | 0     | 0     |
| 3596   | 1     | 0     | 0     | 1     |
| 3597   | 0     | 0     | 0     | 0     |
| 3598   |       |       |       |       |
| 3600   | 0     | 0     | 0     | 0     |
| 3602   | 0     | 0     | 0     | 1     |
| 3604   | 0     | 0     | 0     | 0     |
| 3605   | 0     | 0     | 0     | 0     |
| 3606   | 0     | 0     | 0     | 0     |
| 3607   |       |       |       |       |
| 3610   | 0     | 0     | 0     | 0     |

| respid | Q43_1 | Q43_2 | Q43_3 | Q43_4 |
|--------|-------|-------|-------|-------|
| 3611   | 0     | 0     | 0     | 0     |
| 3612   | 0     | 0     | 0     | 0     |
| 3614   | 0     | 0     | 0     | 0     |
| 3616   | 0     | 0     | 0     | 0     |
| 3617   | 0     | 0     | 0     | 0     |
| 3618   |       |       |       |       |
| 3619   | 0     | 0     | 0     | 0     |
| 3621   | 0     | 0     | 0     | 0     |
| 3622   | 0     | 0     | 0     | 0     |
| 3624   | 0     | 0     | 0     | 0     |
| 3626   | 0     | 0     | 0     | 0     |
| 3629   | 0     | 0     | 0     | 0     |
| 3631   | 0     | 0     | 0     | 0     |
| 3632   | 0     | 0     | 0     | 0     |
| 3638   | 0     | 0     | 0     | 0     |
| 3640   | 0     | 0     | 0     | 1     |
| 3641   | 1     | 0     | 0     | 0     |
| 3645   | 0     | 0     | 0     | 0     |
| 3650   |       |       |       |       |
| 3653   | 0     | 0     | 0     | 1     |
| 3655   | 0     | 0     | 0     | 0     |
| 3657   | 0     | 0     | 0     | 0     |
| 3658   | 0     | 0     | 0     | 0     |
| 3659   | 0     | 0     | 0     | 0     |
| 3664   | 1     | 0     | 0     | 1     |
| 3665   | 1     | 0     | 0     | 0     |
| 3667   | 0     | 0     | 0     | 0     |
| 3668   | 0     | 0     | 1     | 1     |
| 3675   |       |       |       |       |
| 3678   |       |       |       |       |
| 3680   |       |       |       |       |
| 3684   | 0     | 0     | 1     | 1     |

| respid | Q43_1 | Q43_2 | Q43_3 | Q43_4 |
|--------|-------|-------|-------|-------|
| 3685   | 0     | 0     | 0     | 0     |
| 3687   | 0     | 0     | 0     | 0     |
| 3689   | 1     | 0     | 1     | 1     |
| 3690   | 0     | 0     | 0     | 0     |
| 3693   |       |       |       |       |
| 3694   | 0     | 0     | 0     | 0     |
| 3695   |       |       |       |       |
| 3700   | 0     | 0     | 0     | 0     |
| 3701   | 0     | 0     | 0     | 1     |
| 3703   | 0     | 0     | 0     | 0     |
| 3704   | 1     | 0     | 0     | 0     |
| 3705   |       |       |       |       |
| 3709   | 0     | 0     | 0     | 0     |
| 3710   | 0     | 0     | 1     | 0     |
| 3722   | 1     | 0     | 0     | 0     |
| 3725   | 0     | 0     | 0     | 0     |
| 3726   | 0     | 0     | 0     | 0     |
| 3727   | 0     | 0     | 0     | 0     |
| 3728   | 0     | 0     | 0     | 0     |
| 3729   | 0     | 0     | 0     | 0     |
| 3731   |       |       |       |       |
| 3738   | 0     | 0     | 0     | 0     |
| 3739   | 0     | 0     | 0     | 0     |
| 3740   | 0     | 0     | 0     | 0     |
| 3749   | 0     | 0     | 0     | 0     |
| 3758   | 1     | 0     | 0     | 0     |
| 3762   | 0     | 0     | 0     | 0     |
| 3765   | 0     | 0     | 0     | 1     |
| 3770   | 0     | 0     | 0     | 0     |
| 3771   |       |       |       |       |
| 3778   | 0     | 0     | 0     | 0     |
| 3779   | 0     | 0     | 0     | 0     |

| respid | Q43_1 | Q43_2 | Q43_3 | Q43_4 |
|--------|-------|-------|-------|-------|
| 3780   | 0     | 0     | 0     | 0     |
| 3782   | 1     | 0     | 0     | 0     |
| 3784   | 0     | 0     | 0     | 0     |
| 3787   | 0     | 0     | 0     | 0     |
| 3790   | 0     | 0     | 0     | 0     |
| 3791   | 1     | 0     | 0     | 0     |
| 3793   | 0     | 0     | 0     | 0     |
| 3795   | 0     | 0     | 0     | 0     |
| 3799   |       |       |       |       |
| 3801   | 0     | 0     | 0     | 0     |
| 3804   | 0     | 0     | 0     | 0     |
| 3809   | 0     | 0     | 0     | 0     |
| 3810   | 0     | 0     | 0     | 0     |
| 3813   | 0     | 0     | 0     | 1     |
| 3816   | 0     | 0     | 0     | 0     |
| 3820   | 0     | 0     | 0     | 0     |
| 3821   | 0     | 0     | 0     | 0     |
| 3823   | 1     | 0     | 0     | 1     |
| 3828   | 0     | 0     | 1     | 0     |
| 3829   | 0     | 0     | 0     | 0     |
| 3832   | 0     | 0     | 0     | 0     |
| 3835   | 1     | 0     | 1     | 0     |
| 3837   | 0     | 0     | 0     | 0     |
| 3838   | 0     | 0     | 0     | 0     |
| 3839   | 1     | 0     | 0     | 1     |
| 3840   |       |       |       |       |
| 3842   |       |       |       |       |
| 3843   | 0     | 0     | 0     | 0     |
| 3844   | 0     | 0     | 0     | 1     |
| 3850   | 0     | 0     | 0     | 0     |
| 3851   |       |       |       |       |
| 3856   | 0     | 0     | 0     | 0     |

| respid | Q43_1 | Q43_2 | Q43_3 | Q43_4 |
|--------|-------|-------|-------|-------|
| 3859   | 0     | 0     | 1     | 0     |
| 3860   | 1     | 0     | 0     | 0     |
| 3863   | 0     | 0     | 0     | 0     |
| 3866   | 0     | 0     | 0     | 0     |
| 3867   | 0     | 0     | 0     | 0     |
| 3870   | 0     | 0     | 0     | 0     |
| 3873   | 0     | 0     | 0     | 0     |
| 3875   | 0     | 0     | 0     | 0     |
| 3878   | 0     | 0     | 0     | 0     |
| 3881   | 0     | 0     | 0     | 0     |
| 3883   | 1     | 0     | 1     | 0     |
| 3884   | 1     | 0     | 0     | 0     |
| 3885   | 1     | 0     | 1     | 1     |
| 3886   | 1     | 0     | 0     | 0     |
| 3887   | 0     | 0     | 0     | 0     |
| 3888   |       |       |       |       |
| 3889   | 1     | 0     | 1     | 0     |
| 3890   | 0     | 0     | 0     | 0     |
| 3896   | 0     | 0     | 0     | 0     |
| 3902   | 1     | 0     | 1     | 1     |
| 3909   | 0     | 0     | 0     | 0     |
| 3912   | 0     | 0     | 0     | 0     |
| 3922   | 0     | 0     | 0     | 0     |
| 3928   | 0     | 0     | 0     | 0     |
| 3930   | 0     | 0     | 0     | 0     |
| 3931   | 0     | 0     | 0     | 0     |
| 3933   | 0     | 0     | 0     | 0     |
| 3935   | 0     | 0     | 0     | 1     |
| 3937   | 1     | 0     | 0     | 0     |
| 3939   | 0     | 0     | 0     | 0     |
| 3942   | 1     | 0     | 0     | 0     |
| 3943   | 0     | 0     | 0     | 0     |

| respid | Q43_1 | Q43_2 | Q43_3 | Q43_4 |
|--------|-------|-------|-------|-------|
| 3944   |       |       |       |       |
| 3945   | 0     | 0     | 0     | 0     |
| 3947   | 0     | 0     | 0     | 0     |
| 3948   | 0     | 0     | 0     | 0     |
| 3951   | 1     | 0     | 1     | 1     |
| 3959   | 0     | 0     | 0     | 0     |
| 3969   | 0     | 0     | 0     | 0     |
| 3973   | 0     | 0     | 0     | 0     |
| 3975   | 1     | 0     | 0     | 0     |
| 3976   | 0     | 0     | 0     | 0     |
| 3977   | 0     | 0     | 0     | 0     |
| 3978   | 0     | 0     | 0     | 0     |
| 3994   | 0     | 0     | 0     | 0     |
| 3995   | 0     | 0     | 0     | 1     |
| 3997   | 0     | 0     | 0     | 0     |
| 3998   | 0     | 0     | 0     | 0     |
| 3999   | 1     | 0     | 0     | 0     |
| 4002   | 0     | 0     | 0     | 1     |
| 4004   | 0     | 0     | 0     | 0     |
| 4005   |       |       |       |       |
| 4006   | 0     | 0     | 0     | 1     |
| 4008   | 0     | 0     | 0     | 0     |
| 4010   | 0     | 0     | 0     | 0     |
| 4011   | 0     | 0     | 0     | 0     |
| 4013   | 1     | 0     | 0     | 0     |
| 4014   | 0     | 0     | 0     | 0     |
| 4016   | 0     | 0     | 0     | 0     |
| 4017   | 1     | 0     | 0     | 1     |
| 4019   | 0     | 0     | 0     | 0     |
| 4021   |       |       |       |       |
| 4023   | 0     | 0     | 0     | 0     |
| 4024   | 1     | 1     | 0     | 0     |

| respid | Q43_1 | Q43_2 | Q43_3 | Q43_4 |
|--------|-------|-------|-------|-------|
| 4025   | 0     | 0     | 0     | 0     |
| 4027   | 0     | 0     | 0     | 0     |
| 4032   |       |       |       |       |
| 4034   | 0     | 0     | 0     | 0     |
| 4035   | 0     | 0     | 0     | 0     |
| 4037   | 1     | 0     | 0     | 0     |
| 4040   | 0     | 0     | 0     | 0     |
| 4041   | 0     | 0     | 0     | 0     |
| 4042   | 0     | 0     | 0     | 0     |
| 4043   | 0     | 0     | 0     | 0     |
| 4045   | 0     | 0     | 0     | 0     |
| 4046   | 0     | 0     | 0     | 0     |
| 4048   | 0     | 0     | 0     | 0     |
| 4049   | 0     | 0     | 0     | 0     |
| 4050   | 0     | 0     | 0     | 0     |
| 4052   | 0     | 0     | 0     | 1     |
| 4053   |       |       |       |       |
| 4060   | 0     | 1     | 0     | 0     |
| 4065   | 1     | 0     | 1     | 1     |
| 4066   | 0     | 0     | 0     | 0     |
| 4067   | 0     | 0     | 0     | 0     |
| 4068   | 0     | 0     | 0     | 0     |
| 4069   | 0     | 0     | 0     | 0     |
| 4070   | 0     | 0     | 0     | 0     |
| 4071   | 0     | 0     | 0     | 0     |
| 4072   | 0     | 0     | 0     | 0     |
| 4073   | 0     | 0     | 0     | 0     |
| 4074   | 0     | 0     | 0     | 0     |
| 4075   | 0     | 0     | 0     | 0     |
| 4078   | 1     | 0     | 0     | 0     |
| 4080   | 0     | 0     | 0     | 0     |
| 4081   |       |       |       |       |

| respid | Q43_1 | Q43_2 | Q43_3 | Q43_4 |
|--------|-------|-------|-------|-------|
| 4082   | 0     | 0     | 0     | 0     |
| 4083   | 1     | 0     | 0     | 0     |
| 4084   | 0     | 0     | 0     | 0     |
| 4086   |       |       |       |       |
| 4087   | 0     | 0     | 0     | 0     |
| 4088   | 0     | 0     | 0     | 0     |
| 4089   | 0     | 0     | 0     | 0     |
| 4090   | 0     | 0     | 0     | 0     |
| 4093   | 1     | 0     | 0     | 0     |
| 4094   | 0     | 0     | 0     | 0     |
| 4095   | 0     | 0     | 0     | 0     |
| 4096   |       |       |       |       |
| 4098   | 0     | 0     | 0     | 0     |
| 4103   | 0     | 0     | 0     | 0     |
| 4104   | 0     | 0     | 0     | 1     |
| 4107   | 0     | 0     | 0     | 0     |
| 4109   | 0     | 0     | 0     | 0     |
| 4110   | 0     | 0     | 0     | 0     |
| 4113   | 0     | 0     | 0     | 0     |
| 4114   | 0     | 0     | 0     | 0     |
| 4116   | 1     | 0     | 0     | 0     |
| 4119   | 0     | 0     | 0     | 0     |
| 4120   | 0     | 0     | 0     | 0     |
| 4121   | 0     | 0     | 0     | 0     |
| 4122   | 1     | 0     | 0     | 0     |
| 4124   | 0     | 0     | 0     | 0     |
| 4126   | 0     | 0     | 0     | 0     |
| 4127   | 0     | 0     | 0     | 0     |
| 4131   | 0     | 0     | 0     | 0     |
| 4134   | 0     | 0     | 0     | 0     |
| 4144   | 0     | 0     | 0     | 0     |
| 4145   | 1     | 0     | 0     | 0     |



| respid | Q43_1 | Q43_2 | Q43_3 | Q43_4 |
|--------|-------|-------|-------|-------|
| 4146   | 0     | 0     | 0     | 0     |
| 4147   | 0     | 0     | 0     | 0     |
| 4149   | 1     | 0     | 0     | 0     |
| 4150   |       |       |       |       |
| 4151   | 0     | 0     | 0     | 0     |
| 4153   | 0     | 0     | 0     | 0     |
| 4155   | 0     | 0     | 0     | 0     |
| 4157   | 0     | 0     | 0     | 0     |
| 4159   | 0     | 0     | 0     | 0     |
| 4160   | 0     | 0     | 0     | 0     |
| 4161   | 0     | 0     | 0     | 0     |
| 4163   | 1     | 0     | 0     | 0     |
| 4164   | 0     | 0     | 0     | 0     |
| 4165   | 0     | 0     | 0     | 0     |
| 4166   | 1     | 0     | 0     | 0     |
| 4167   | 0     | 0     | 0     | 0     |
| 4170   | 0     | 0     | 0     | 0     |
| 4172   | 0     | 0     | 0     | 0     |
| 4173   | 0     | 0     | 0     | 1     |
| 4180   | 0     | 0     | 0     | 0     |
| 4185   | 0     | 0     | 0     | 0     |
| 4187   | 0     | 0     | 0     | 0     |
| 4190   | 1     | 0     | 0     | 0     |
| 4191   | 0     | 0     | 0     | 0     |
| 4193   |       |       |       |       |
| 4194   | 0     | 0     | 0     | 0     |
| 4195   | 0     | 0     | 0     | 0     |
| 4196   |       |       |       |       |
| 4197   | 0     | 0     | 0     | 0     |
| 4198   | 0     | 0     | 0     | 0     |
| 4199   | 0     | 0     | 0     | 1     |
| 4205   | 0     | 0     | 0     | 0     |

| respid | Q43_1 | Q43_2 | Q43_3 | Q43_4 |
|--------|-------|-------|-------|-------|
| 4206   |       |       |       |       |
| 4207   | 1     | 0     | 0     | 0     |
| 4214   | 0     | 0     | 0     | 0     |
| 4215   | 0     | 0     | 0     | 0     |
| 4217   | 0     | 0     | 0     | 0     |
| 4219   | 0     | 0     | 0     | 0     |
| 4223   | 0     | 0     | 0     | 0     |
| 4226   | 1     | 0     | 0     | 0     |
| 4229   | 0     | 0     | 0     | 0     |
| 4230   | 0     | 0     | 0     | 0     |
| 4232   | 0     | 0     | 0     | 0     |
| 4233   | 0     | 0     | 0     | 0     |
| 4234   | 0     | 0     | 0     | 0     |
| 4235   | 0     | 0     | 0     | 0     |
| 4236   | 0     | 0     | 0     | 0     |
| 4237   | 0     | 0     | 0     | 0     |
| 4238   | 0     | 0     | 0     | 1     |
| 4240   | 0     | 0     | 0     | 0     |
| 4241   | 0     | 0     | 0     | 0     |
| 4247   | 0     | 0     | 0     | 0     |
| 4250   | 0     | 0     | 0     | 0     |
| 4251   | 0     | 0     | 0     | 0     |
| 4253   | 1     | 0     | 0     | 1     |
| 4254   | 0     | 0     | 0     | 0     |
| 4258   | 0     | 0     | 0     | 1     |
| 4260   | 0     | 0     | 0     | 0     |
| 4263   | 0     | 0     | 0     | 0     |
| 4265   | 0     | 0     | 0     | 0     |
| 4266   | 1     | 0     | 0     | 0     |
| 4267   | 0     | 0     | 0     | 0     |
| 4270   | 0     | 0     | 0     | 0     |
| 4273   | 0     | 0     | 0     | 0     |

| respid | Q43_1 | Q43_2 | Q43_3 | Q43_4 |
|--------|-------|-------|-------|-------|
| 4280   | 0     | 0     | 0     | 0     |
| 4281   | 0     | 0     | 0     | 0     |
| 4282   | 1     | 0     | 0     | 0     |
| 4283   |       |       |       |       |
| 4286   | 0     | 0     | 0     | 0     |
| 4287   | 0     | 0     | 0     | 0     |
| 4289   | 0     | 0     | 0     | 0     |
| 4290   | 0     | 0     | 0     | 0     |
| 4291   | 0     | 0     | 0     | 0     |
| 4292   | 1     | 0     | 0     | 0     |
| 4293   | 0     | 0     | 0     | 0     |
| 4294   | 0     | 0     | 0     | 1     |
| 4295   |       |       |       |       |
| 4296   | 0     | 0     | 0     | 0     |
| 4297   | 1     | 0     | 0     | 0     |
| 4298   | 0     | 0     | 0     | 0     |
| 4299   | 0     | 0     | 0     | 0     |
| 4300   | 0     | 0     | 0     | 0     |
| 4301   |       |       |       |       |
| 4302   | 0     | 0     | 0     | 0     |
| 4304   | 0     | 0     | 0     | 0     |
| 4305   | 0     | 0     | 0     | 0     |
| 4307   | 1     | 0     | 0     | 1     |
| 4308   | 0     | 0     | 0     | 0     |
| 4312   |       |       |       |       |
| 4314   | 0     | 0     | 0     | 0     |
| 4316   | 0     | 0     | 0     | 0     |
| 4317   | 0     | 0     | 0     | 0     |
| 4319   | 0     | 0     | 0     | 0     |
| 4323   | 0     | 0     | 0     | 0     |
| 4337   | 0     | 0     | 0     | 0     |
| 4341   | 0     | 0     | 1     | 0     |

| respid | Q43_1 | Q43_2 | Q43_3 | Q43_4 |
|--------|-------|-------|-------|-------|
| 4342   | 1     | 0     | 0     | 0     |
| 4344   | 0     | 0     | 0     | 0     |
| 4345   | 0     | 0     | 0     | 0     |
| 4346   | 0     | 0     | 0     | 0     |
| 4347   | 0     | 0     | 0     | 0     |
| 4350   |       |       |       |       |
| 4352   | 0     | 0     | 0     | 0     |
| 4353   |       |       |       |       |
| 4355   | 0     | 0     | 0     | 0     |
| 4356   | 0     | 0     | 0     | 0     |
| 4358   |       |       |       |       |
| 4359   | 0     | 0     | 0     | 0     |
| 4360   | 0     | 0     | 0     | 0     |
| 4361   | 0     | 0     | 0     | 0     |
| 4363   | 0     | 0     | 0     | 0     |
| 4364   | 0     | 0     | 0     | 0     |
| 4365   | 1     | 0     | 0     | 0     |
| 4367   | 0     | 0     | 0     | 0     |
| 4369   | 0     | 0     | 0     | 1     |
| 4373   | 1     | 0     | 0     | 0     |
| 4374   | 0     | 0     | 0     | 0     |
| 4375   |       |       |       |       |
| 4378   | 0     | 0     | 0     | 0     |
| 4379   | 0     | 0     | 0     | 0     |
| 4382   | 0     | 0     | 0     | 0     |
| 4383   |       |       |       |       |
| 4384   | 0     | 0     | 0     | 0     |
| 4385   | 0     | 0     | 0     | 0     |
| 4388   | 0     | 0     | 0     | 0     |
| 4389   | 0     | 0     | 0     | 0     |
| 4391   | 0     | 0     | 0     | 0     |
| 4392   | 0     | 0     | 0     | 0     |

| respid | Q43_1 | Q43_2 | Q43_3 | Q43_4 |
|--------|-------|-------|-------|-------|
| 4393   | 0     | 0     | 0     | 0     |
| 4395   | 0     | 0     | 0     | 0     |
| 4397   | 0     | 0     | 0     | 0     |
| 4398   | 0     | 0     | 0     | 0     |
| 4399   | 1     | 0     | 0     | 0     |
| 4400   |       |       |       |       |
| 4401   | 0     | 0     | 0     | 0     |
| 4402   | 0     | 0     | 0     | 0     |
| 4404   | 1     | 0     | 0     | 0     |
| 4405   |       |       |       |       |
| 4407   | 0     | 0     | 0     | 0     |
| 4408   | 0     | 0     | 0     | 0     |
| 4411   |       |       |       |       |
| 4420   | 0     | 0     | 0     | 0     |
| 4421   | 0     | 0     | 0     | 0     |
| 4424   | 0     | 0     | 1     | 1     |
| 4425   | 0     | 0     | 0     | 1     |
| 4427   | 0     | 0     | 0     | 0     |
| 4430   | 0     | 0     | 0     | 0     |
| 4431   | 0     | 0     | 0     | 0     |
| 4432   | 0     | 0     | 0     | 0     |
| 4436   | 0     | 0     | 0     | 0     |
| 4439   | 0     | 0     | 0     | 0     |
| 4451   | 0     | 0     | 0     | 0     |
| 4452   | 0     | 0     | 1     | 1     |
| 4458   | 0     | 0     | 0     | 0     |
| 4464   | 0     | 0     | 0     | 0     |
| 4465   | 0     | 0     | 0     | 0     |
| 4467   | 0     | 0     | 0     | 0     |
| 4470   | 1     | 1     | 1     | 0     |
| 4471   | 0     | 0     | 0     | 0     |
| 4472   | 1     | 0     | 0     | 0     |

| respid | Q43_1 | Q43_2 | Q43_3 | Q43_4 |
|--------|-------|-------|-------|-------|
| 4473   | 0     | 0     | 0     | 0     |
| 4475   | 0     | 0     | 0     | 0     |
| 4476   | 0     | 0     | 0     | 0     |
| 4478   | 0     | 0     | 0     | 0     |
| 4485   | 0     | 0     | 0     | 0     |
| 4486   | 0     | 0     | 0     | 0     |
| 4490   |       |       |       |       |
| 4502   |       |       |       |       |
| 4503   | 0     | 0     | 0     | 0     |
| 4504   | 0     | 0     | 0     | 0     |
| 4506   | 0     | 0     | 0     | 0     |
| 4508   | 0     | 0     | 0     | 0     |
| 4515   | 0     | 0     | 0     | 0     |
| 4516   | 0     | 0     | 0     | 0     |
| 4519   | 0     | 0     | 0     | 0     |
| 4523   | 1     | 0     | 0     | 0     |
| 4525   | 0     | 0     | 0     | 0     |
| 4526   | 1     | 0     | 0     | 0     |
| 4528   |       |       |       |       |
| 4530   | 0     | 0     | 0     | 0     |
| 4531   | 1     | 0     | 1     | 1     |
| 4532   | 0     | 0     | 0     | 0     |
| 4537   | 1     | 0     | 0     | 0     |
| 4538   | 0     | 0     | 0     | 0     |
| 4539   | 0     | 0     | 0     | 0     |
| 4541   | 0     | 0     | 0     | 0     |
| 4543   |       |       |       |       |
| 4544   | 0     | 0     | 0     | 0     |
| 4546   | 0     | 0     | 0     | 0     |
| 4547   | 1     | 0     | 0     | 0     |
| 4549   |       |       |       |       |
| 4550   | 1     | 0     | 0     | 0     |

| respid | Q43_1 | Q43_2 | Q43_3 | Q43_4 |
|--------|-------|-------|-------|-------|
| 4551   | 0     | 0     | 0     | 0     |
| 4554   | 0     | 0     | 0     | 0     |
| 4557   |       |       |       |       |
| 4565   | 0     | 0     | 0     | 0     |
| 4568   | 0     | 0     | 0     | 0     |
| 4569   | 0     | 0     | 0     | 0     |
| 4570   | 0     | 0     | 0     | 0     |
| 4572   | 0     | 0     | 0     | 0     |
| 4574   | 0     | 0     | 0     | 0     |
| 4576   | 0     | 0     | 0     | 0     |
| 4578   | 0     | 0     | 0     | 0     |
| 4579   |       |       |       |       |
| 4580   | 0     | 0     | 0     | 0     |
| 4581   |       |       |       |       |
| 4584   | 1     | 1     | 1     | 0     |
| 4586   | 0     | 0     | 0     | 0     |
| 4587   | 1     | 0     | 0     | 0     |
| 4590   | 1     | 0     | 0     | 0     |
| 4592   | 0     | 0     | 0     | 0     |
| 4593   | 0     | 0     | 0     | 0     |
| 4595   | 0     | 0     | 0     | 0     |
| 4597   | 1     | 0     | 0     | 0     |
| 4598   | 0     | 0     | 1     | 0     |
| 4599   | 0     | 0     | 0     | 0     |
| 4600   | 0     | 0     | 0     | 0     |
| 4601   | 1     | 0     | 0     | 0     |
| 4608   | 0     | 0     | 0     | 0     |
| 4609   | 0     | 0     | 0     | 0     |
| 4611   | 0     | 0     | 0     | 0     |
| 4612   | 0     | 0     | 0     | 0     |
| 4613   |       |       |       |       |
| 4616   | 1     | 0     | 0     | 0     |

| respid | Q43_1 | Q43_2 | Q43_3 | Q43_4 |
|--------|-------|-------|-------|-------|
| 4617   | 0     | 0     | 0     | 0     |
| 4620   | 0     | 0     | 0     | 0     |
| 4621   | 1     | 0     | 0     | 0     |
| 4622   | 0     | 0     | 0     | 0     |
| 4624   | 0     | 0     | 0     | 0     |
| 4625   | 0     | 0     | 0     | 0     |
| 4627   | 0     | 0     | 0     | 0     |
| 4628   | 0     | 0     | 0     | 0     |
| 4629   |       |       |       |       |
| 4630   | 1     | 0     | 0     | 0     |
| 4632   | 0     | 0     | 0     | 0     |
| 4634   | 0     | 0     | 0     | 0     |
| 4635   | 0     | 0     | 0     | 0     |
| 4636   | 0     | 0     | 0     | 0     |
| 4637   | 0     | 0     | 0     | 0     |
| 4638   | 0     | 0     | 0     | 1     |
| 4639   | 1     | 0     | 0     | 1     |
| 4641   | 0     | 0     | 0     | 0     |
| 4643   | 0     | 0     | 0     | 0     |
| 4645   | 0     | 0     | 0     | 0     |
| 4646   | 0     | 0     | 0     | 0     |
| 4647   |       |       |       |       |
| 4648   | 0     | 0     | 0     | 0     |
| 4649   | 0     | 0     | 0     | 0     |
| 4650   | 0     | 0     | 0     | 0     |
| 4651   | 0     | 0     | 0     | 0     |
| 4652   | 0     | 0     | 0     | 0     |
| 4653   |       |       |       |       |
| 4657   |       |       |       |       |
| 4660   | 0     | 0     | 0     | 0     |
| 4661   | 0     | 0     | 0     | 0     |
| 4662   | 0     | 0     | 0     | 0     |



| respid | Q43_1 | Q43_2 | Q43_3 | Q43_4 |
|--------|-------|-------|-------|-------|
| 4667   | 1     | 0     | 1     | 1     |
| 4669   | 0     | 0     | 0     | 0     |
| 4671   |       |       |       |       |
| 4672   | 0     | 0     | 0     | 0     |
| 4673   | 0     | 0     | 0     | 0     |
| 4677   |       |       |       |       |
| 4679   | 0     | 0     | 0     | 0     |
| 4683   | 1     | 0     | 1     | 0     |
| 4684   | 0     | 0     | 0     | 0     |
| 4685   | 0     | 0     | 0     | 0     |
| 4686   | 0     | 0     | 0     | 1     |
| 4687   | 0     | 0     | 0     | 0     |
| 4688   | 0     | 0     | 0     | 0     |
| 4691   | 0     | 0     | 0     | 0     |
| 4692   | 0     | 0     | 0     | 0     |
| 4694   | 0     | 0     | 0     | 0     |
| 4695   | 0     | 0     | 0     | 0     |
| 4696   | 1     | 0     | 0     | 0     |
| 4697   |       |       |       |       |
| 4698   | 0     | 0     | 1     | 0     |
| 4699   | 1     | 0     | 0     | 0     |
| 4701   |       |       |       |       |
| 4703   | 0     | 0     | 0     | 0     |
| 4704   | 1     | 1     | 0     | 0     |
| 4705   | 0     | 0     | 0     | 0     |
| 4706   | 0     | 0     | 0     | 0     |
| 4707   | 0     | 0     | 0     | 0     |
| 4708   | 0     | 0     | 0     | 0     |
| 4710   | 0     | 0     | 0     | 0     |
| 4711   | 1     | 0     | 1     | 0     |
| 4715   |       |       |       |       |
| 4716   | 0     | 0     | 0     | 0     |

| respid | Q43_1 | Q43_2 | Q43_3 | Q43_4 |
|--------|-------|-------|-------|-------|
| 4717   | 1     | 0     | 0     | 0     |
| 4718   | 0     | 0     | 0     | 0     |
| 4722   | 1     | 0     | 1     | 1     |
| 4727   | 0     | 0     | 0     | 1     |
| 4728   | 1     | 0     | 0     | 1     |
| 4729   | 0     | 0     | 0     | 0     |
| 4732   | 0     | 0     | 0     | 0     |
| 4733   | 0     | 0     | 0     | 0     |
| 4734   | 0     | 0     | 0     | 0     |
| 4735   | 1     | 0     | 0     | 0     |
| 4737   | 0     | 0     | 0     | 0     |
| 4738   | 1     | 0     | 0     | 1     |
| 4740   | 0     | 0     | 0     | 0     |
| 4741   | 0     | 0     | 0     | 0     |
| 4743   | 0     | 0     | 0     | 0     |
| 4746   | 1     | 0     | 0     | 0     |
| 4750   | 1     | 0     | 0     | 1     |
| 4752   | 1     | 0     | 0     | 0     |
| 4753   | 0     | 0     | 0     | 0     |
| 4754   | 0     | 0     | 0     | 0     |
| 4755   | 0     | 0     | 0     | 1     |
| 4758   | 0     | 0     | 0     | 1     |
| 4766   |       |       |       |       |
| 4767   | 1     | 0     | 0     | 0     |
| 4768   | 1     | 0     | 0     | 0     |
| 4769   | 1     | 0     | 0     | 0     |
| 4771   | 0     | 0     | 0     | 0     |
| 4772   | 1     | 0     | 0     | 0     |
| 4773   | 0     | 0     | 0     | 0     |
| 4774   | 0     | 0     | 0     | 0     |
| 4776   | 0     | 0     | 0     | 0     |
| 4777   | 0     | 0     | 0     | 0     |

| respid | Q43_1 | Q43_2 | Q43_3 | Q43_4 |
|--------|-------|-------|-------|-------|
| 4779   |       |       |       |       |
| 4780   | 0     | 0     | 0     | 0     |
| 4781   | 0     | 0     | 0     | 0     |
| 4783   | 0     | 0     | 0     | 1     |
| 4784   | 0     | 0     | 0     | 0     |
| 4785   | 0     | 0     | 0     | 0     |
| 4788   |       |       |       |       |
| 4789   | 0     | 0     | 0     | 0     |
| 4790   | 0     | 0     | 0     | 0     |
| 4791   |       |       |       |       |
| 4794   |       |       |       |       |
| 4795   | 0     | 0     | 0     | 0     |
| 4797   | 0     | 0     | 0     | 0     |
| 4802   | 0     | 0     | 0     | 0     |
| 4803   | 0     | 0     | 0     | 0     |
| 4804   |       |       |       |       |
| 4805   | 0     | 0     | 0     | 0     |
| 4807   |       |       |       |       |
| 4808   | 0     | 0     | 0     | 0     |
| 4809   | 0     | 0     | 1     | 0     |
| 4811   | 0     | 0     | 0     | 0     |
| 4817   |       |       |       |       |
| 4819   | 0     | 0     | 0     | 0     |
| 4820   |       |       |       |       |
| 4821   | 0     | 0     | 1     | 0     |
| 4822   | 0     | 0     | 0     | 1     |
| 4823   | 0     | 0     | 0     | 0     |
| 4825   | 0     | 0     | 0     | 0     |
| 4826   |       |       |       |       |
| 4830   | 0     | 0     | 0     | 0     |
| 4832   |       |       |       |       |
| 4838   | 0     | 0     | 0     | 1     |

| respid | Q43_1 | Q43_2 | Q43_3 | Q43_4 |
|--------|-------|-------|-------|-------|
| 4840   | 0     | 0     | 0     | 0     |
| 4841   |       |       |       |       |
| 4843   | 0     | 0     | 0     | 0     |
| 4845   | 0     | 0     | 0     | 0     |
| 4846   | 0     | 0     | 0     | 0     |
| 4848   | 0     | 0     | 0     | 0     |
| 4853   | 0     | 0     | 0     | 0     |
| 4854   | 0     | 0     | 0     | 0     |
| 4859   | 0     | 0     | 0     | 0     |
| 4861   |       |       |       |       |
| 4864   | 1     | 0     | 0     | 1     |
| 4867   |       |       |       |       |
| 4870   | 0     | 0     | 0     | 0     |
| 4872   | 0     | 0     | 0     | 1     |
| 4873   | 0     | 0     | 0     | 0     |
| 4874   | 1     | 0     | 1     | 1     |
| 4878   | 0     | 0     | 0     | 0     |
| 4880   | 0     | 0     | 0     | 0     |
| 4881   | 0     | 0     | 0     | 0     |
| 4882   | 0     | 0     | 0     | 0     |
| 4883   | 0     | 0     | 0     | 0     |
| 4885   | 0     | 0     | 0     | 1     |
| 4889   |       |       |       |       |
| 4890   |       |       |       |       |
| 4891   | 0     | 0     | 0     | 0     |
| 4894   | 0     | 0     | 0     | 0     |
| 4895   | 1     | 0     | 0     | 0     |
| 4896   | 0     | 0     | 0     | 0     |
| 4897   | 0     | 0     | 0     | 0     |
| 4898   | 1     | 0     | 0     | 0     |
| 4899   |       |       |       |       |
| 4900   | 1     | 0     | 0     | 0     |

| respid | Q43_1 | Q43_2 | Q43_3 | Q43_4 |
|--------|-------|-------|-------|-------|
| 4901   | 0     | 0     | 0     | 0     |
| 4903   | 0     | 0     | 0     | 0     |
| 4904   | 0     | 0     | 0     | 0     |
| 4908   | 0     | 0     | 0     | 0     |
| 4909   | 0     | 0     | 0     | 1     |
| 4913   | 0     | 0     | 0     | 0     |
| 4917   | 0     | 0     | 0     | 0     |
| 4918   | 0     | 0     | 0     | 0     |
| 4920   |       |       |       |       |
| 4921   | 1     | 0     | 0     | 0     |
| 4925   | 0     | 0     | 0     | 0     |
| 4926   | 0     | 0     | 0     | 0     |
| 4927   | 0     | 0     | 0     | 0     |
| 4928   | 0     | 0     | 0     | 0     |
| 4929   | 0     | 0     | 0     | 0     |
| 4930   | 0     | 0     | 0     | 0     |
| 4931   | 0     | 0     | 0     | 0     |
| 4932   | 1     | 0     | 0     | 1     |
| 4933   | 0     | 0     | 0     | 0     |
| 4934   | 1     | 0     | 0     | 0     |
| 5934   | 0     | 0     | 0     | 0     |
| 5935   | 0     | 0     | 1     | 0     |
| 5936   | 0     | 0     | 0     | 0     |
| 5938   |       |       |       |       |
| 5939   | 0     | 0     | 0     | 0     |
| 5940   | 1     | 0     | 0     | 0     |
| 5942   | 0     | 0     | 0     | 0     |
| 5944   | 1     | 1     | 0     | 0     |
| 5951   | 1     | 0     | 0     | 1     |
| 5952   | 0     | 0     | 0     | 0     |
| 5954   | 0     | 0     | 0     | 0     |
| 5956   | 0     | 0     | 0     | 0     |

| respid | Q43_1 | Q43_2 | Q43_3 | Q43_4 |
|--------|-------|-------|-------|-------|
| 5957   | 1     | 0     | 0     | 0     |
| 5958   | 0     | 0     | 0     | 1     |
| 5959   | 0     | 0     | 0     | 0     |
| 5960   | 0     | 0     | 0     | 0     |
| 5963   | 0     | 0     | 0     | 0     |
| 5966   | 0     | 0     | 0     | 1     |
| 5968   | 0     | 0     | 0     | 0     |
| 5974   | 0     | 0     | 0     | 0     |
| 5975   | 0     | 0     | 0     | 0     |
| 5976   | 0     | 0     | 0     | 0     |
| 5977   | 0     | 0     | 0     | 0     |
| 5978   | 0     | 0     | 0     | 0     |
| 5979   | 0     | 0     | 0     | 0     |
| 5983   | 0     | 0     | 0     | 0     |
| 5984   | 1     | 0     | 0     | 0     |
| 5990   | 0     | 0     | 0     | 0     |
| 5991   | 0     | 0     | 0     | 0     |
| 5992   |       |       |       |       |
| 5993   | 0     | 0     | 0     | 0     |
| 5994   | 0     | 0     | 0     | 0     |
| 5996   | 0     | 0     | 0     | 0     |
| 6001   | 1     | 0     | 0     | 0     |
| 6003   | 0     | 0     | 0     | 0     |
| 6004   | 0     | 0     | 0     | 0     |
| 6005   | 0     | 0     | 0     | 0     |
| 6006   | 0     | 0     | 0     | 0     |
| 6008   | 1     | 0     | 0     | 0     |
| 6009   | 0     | 0     | 0     | 0     |
| 6014   |       |       |       |       |
| 6016   | 0     | 1     | 0     | 0     |
| 6017   | 0     | 0     | 0     | 0     |
| 6018   | 0     | 0     | 0     | 0     |

| respid | Q43_1 | Q43_2 | Q43_3 | Q43_4 |
|--------|-------|-------|-------|-------|
| 6020   | 0     | 0     | 0     | 0     |
| 6021   |       |       |       |       |
| 6024   | 0     | 0     | 0     | 0     |
| 6025   | 1     | 0     | 0     | 0     |
| 6026   | 0     | 0     | 0     | 0     |
| 6032   | 0     | 0     | 0     | 0     |
| 6035   | 0     | 0     | 0     | 0     |
| 6038   | 0     | 0     | 0     | 0     |
| 6043   | 0     | 0     | 0     | 0     |
| 6044   | 0     | 0     | 0     | 0     |
| 6046   | 0     | 0     | 0     | 0     |
| 6047   | 0     | 0     | 0     | 0     |
| 6048   | 0     | 0     | 0     | 0     |
| 6050   | 0     | 0     | 1     | 0     |
| 6051   | 0     | 0     | 0     | 0     |
| 6053   | 0     | 0     | 0     | 0     |
| 6054   | 0     | 0     | 0     | 0     |
| 6056   | 0     | 0     | 0     | 0     |
| 6058   | 0     | 0     | 0     | 0     |
| 6060   | 0     | 0     | 0     | 0     |
| 6061   | 0     | 0     | 0     | 0     |
| 6062   | 0     | 0     | 0     | 0     |
| 6067   | 1     | 0     | 0     | 0     |
| 6070   | 0     | 0     | 0     | 0     |
| 6074   | 0     | 0     | 0     | 0     |
| 6076   | 0     | 0     | 0     | 0     |
| 6078   |       |       |       |       |
| 6081   | 0     | 0     | 0     | 0     |
| 6085   | 0     | 0     | 0     | 0     |
| 6088   |       |       |       |       |
| 6092   | 0     | 0     | 0     | 0     |
| 6095   | 0     | 0     | 0     | 0     |

| respid | Q43_1 | Q43_2 | Q43_3 | Q43_4 |
|--------|-------|-------|-------|-------|
| 6098   | 0     | 0     | 0     | 0     |
| 6101   |       |       |       |       |
| 6102   | 0     | 0     | 0     | 0     |
| 6105   | 0     | 0     | 0     | 0     |
| 6106   | 0     | 0     | 0     | 0     |
| 6107   | 1     | 0     | 0     | 0     |
| 6111   | 1     | 0     | 0     | 0     |
| 6112   | 1     | 0     | 0     | 0     |
| 6113   | 1     | 0     | 1     | 0     |
| 6115   | 0     | 0     | 0     | 0     |
| 6116   |       |       |       |       |
| 6117   | 0     | 0     | 1     | 0     |
| 6124   | 0     | 0     | 0     | 0     |
| 6125   | 0     | 0     | 0     | 0     |
| 6128   |       |       |       |       |
| 6133   | 0     | 0     | 0     | 0     |
| 6134   | 0     | 0     | 0     | 0     |
| 6135   | 0     | 0     | 1     | 1     |
| 6138   | 0     | 0     | 1     | 0     |
| 6140   | 0     | 0     | 0     | 0     |
| 6143   | 0     | 0     | 0     | 0     |
| 6147   | 0     | 0     | 0     | 0     |
| 6154   | 0     | 0     | 0     | 0     |
| 6162   |       |       |       |       |
| 6165   | 1     | 0     | 1     | 0     |
| 6166   | 1     | 0     | 0     | 0     |
| 6173   | 0     | 0     | 0     | 0     |
| 6180   | 0     | 0     | 0     | 1     |
| 6184   | 0     | 0     | 0     | 1     |
| 6185   | 0     | 0     | 0     | 0     |
| 6186   | 0     | 0     | 0     | 0     |
| 6188   | 0     | 0     | 0     | 0     |



| respid | Q43_1 | Q43_2 | Q43_3 | Q43_4 |
|--------|-------|-------|-------|-------|
| 6192   | 0     | 0     | 0     | 1     |
| 6194   |       |       |       |       |
| 6195   | 0     | 0     | 0     | 0     |
| 6196   | 0     | 0     | 0     | 0     |
| 6199   | 0     | 0     | 0     | 0     |
| 6200   |       |       |       |       |
| 6201   | 0     | 0     | 0     | 0     |
| 6202   | 0     | 0     | 0     | 0     |
| 6203   | 0     | 0     | 0     | 0     |
| 6205   | 0     | 0     | 0     | 0     |
| 6210   | 1     | 0     | 0     | 0     |
| 6212   | 0     | 0     | 0     | 0     |
| 6216   | 0     | 0     | 0     | 0     |
| 6218   | 0     | 0     | 0     | 0     |
| 6221   | 0     | 0     | 0     | 0     |
| 6224   | 0     | 0     | 0     | 0     |
| 6225   | 0     | 0     | 0     | 0     |
| 6227   | 0     | 0     | 0     | 0     |
| 6230   |       |       |       |       |
| 6231   | 0     | 0     | 0     | 0     |
| 6233   | 0     | 0     | 0     | 0     |
| 6234   | 0     | 0     | 0     | 0     |
| 6235   |       |       |       |       |
| 6237   |       |       |       |       |
| 6240   |       |       |       |       |
| 6248   | 0     | 0     | 0     | 0     |
| 6249   | 0     | 0     | 0     | 0     |
| 6252   | 0     | 0     | 0     | 0     |
| 6254   | 0     | 0     | 0     | 0     |
| 6269   | 0     | 0     | 0     | 1     |
| 6304   |       |       |       |       |
| 6334   | 1     | 0     | 1     | 1     |

| respid | Q43_1 | Q43_2 | Q43_3 | Q43_4 |
|--------|-------|-------|-------|-------|
| 6341   | 0     | 0     | 0     | 0     |
| 6350   | 1     | 0     | 1     | 0     |
| 6370   | 0     | 0     | 0     | 0     |
| 6384   | 0     | 0     | 0     | 0     |
| 6400   | 0     | 0     | 0     | 0     |
| 6418   |       |       |       |       |
| 6467   | 0     | 0     | 0     | 0     |
| 6469   | 0     | 0     | 0     | 0     |
| 6474   | 0     | 0     | 0     | 0     |
| 6475   |       |       |       |       |
| 6476   | 0     | 0     | 0     | 0     |
| 6477   | 0     | 0     | 0     | 0     |
| 6480   | 0     | 0     | 0     | 0     |
| 6481   | 1     | 0     | 1     | 0     |
| 6485   | 0     | 0     | 0     | 0     |
| 6488   | 1     | 0     | 0     | 0     |
| 6495   | 0     | 0     | 0     | 0     |
| 6499   | 0     | 0     | 0     | 0     |
| 6500   | 0     | 0     | 0     | 0     |
| 6504   | 0     | 0     | 0     | 0     |
| 6507   | 0     | 0     | 0     | 0     |
| 6512   | 1     | 0     | 0     | 1     |
| 6525   | 1     | 0     | 0     | 0     |
| 6532   | 1     | 0     | 0     | 0     |
| 6535   | 0     | 0     | 0     | 0     |
| 6546   | 0     | 0     | 0     | 0     |
| 6551   | 0     | 0     | 1     | 1     |
| 6556   | 1     | 0     | 0     | 0     |
| 6566   | 1     | 0     | 0     | 0     |
| 6569   |       |       |       |       |
| 6574   | 0     | 0     | 0     | 0     |
| 6576   | 0     | 0     | 0     | 0     |

| respid | Q43_1 | Q43_2 | Q43_3 | Q43_4 |
|--------|-------|-------|-------|-------|
| 6580   |       |       |       |       |
| 6584   |       |       |       |       |
| 6585   | 0     | 0     | 0     | 0     |
| 6589   | 0     | 0     | 0     | 0     |
| 6590   | 0     | 0     | 0     | 0     |
| 6598   | 0     | 0     | 0     | 0     |
| 6603   | 1     | 0     | 0     | 0     |
| 6618   | 0     | 0     | 0     | 0     |
| 6630   | 1     | 0     | 0     | 0     |
| 6636   | 0     | 0     | 0     | 0     |
| 6649   |       |       |       |       |
| 6675   | 1     | 0     | 0     | 0     |
| 6678   | 0     | 0     | 0     | 0     |
| 6681   | 0     | 0     | 0     | 0     |
| 6684   | 1     | 0     | 1     | 1     |
| 6688   |       |       |       |       |
| 6691   | 0     | 0     | 0     | 0     |
| 6694   | 0     | 0     | 0     | 1     |
| 6696   | 0     | 0     | 0     | 0     |
| 6720   | 1     | 0     | 1     | 1     |
| 6722   | 1     | 0     | 1     | 1     |
| 6724   | 0     | 0     | 0     | 0     |
| 6725   | 0     | 0     | 0     | 0     |
| 6727   | 0     | 0     | 0     | 0     |
| 6734   | 0     | 0     | 0     | 1     |
| 6739   | 0     | 0     | 0     | 0     |
| 6743   | 1     | 1     | 1     | 1     |
| 6749   | 0     | 0     | 0     | 0     |
| 6756   | 0     | 0     | 0     | 0     |
| 6764   | 0     | 0     | 0     | 0     |
| 6765   | 0     | 0     | 0     | 0     |
| 6768   | 0     | 0     | 0     | 0     |

| respid | Q43_1 | Q43_2 | Q43_3 | Q43_4 |
|--------|-------|-------|-------|-------|
| 6773   | 0     | 0     | 0     | 0     |
| 6775   | 0     | 0     | 0     | 0     |
| 6777   | 1     | 0     | 0     | 0     |
| 6779   | 0     | 0     | 0     | 0     |
| 6790   | 0     | 0     | 0     | 1     |
| 6797   |       |       |       |       |
| 6798   | 0     | 0     | 0     | 0     |
| 6808   |       |       |       |       |
| 6810   | 0     | 0     | 0     | 0     |
| 6811   | 0     | 0     | 0     | 0     |
| 6812   | 0     | 0     | 0     | 0     |
| 6814   | 1     | 0     | 0     | 0     |
| 6819   | 0     | 0     | 0     | 0     |
| 6820   | 0     | 0     | 0     | 0     |
| 6832   | 0     | 0     | 0     | 0     |
| 6854   | 0     | 0     | 0     | 0     |
| 6855   |       |       |       |       |
| 6857   | 0     | 0     | 0     | 0     |
| 6858   | 0     | 0     | 0     | 0     |
| 6859   | 0     | 0     | 0     | 1     |
| 6860   | 0     | 0     | 0     | 0     |
| 6862   | 0     | 0     | 0     | 0     |
| 6879   |       |       |       |       |
| 6893   | 0     | 0     | 0     | 0     |
| 6898   | 1     | 0     | 0     | 0     |
| 6902   | 0     | 0     | 1     | 1     |
| 6903   | 1     | 0     | 1     | 1     |
| 6907   | 1     | 0     | 1     | 0     |
| 6908   |       |       |       |       |
| 6912   |       |       |       |       |
| 6915   | 0     | 0     | 0     | 0     |
| 6916   | 0     | 0     | 0     | 0     |

| respid | Q43_1 | Q43_2 | Q43_3 | Q43_4 |
|--------|-------|-------|-------|-------|
| 6917   | 1     | 0     | 0     | 0     |
| 6923   | 0     | 0     | 1     | 0     |
| 6934   | 0     | 0     | 0     | 0     |
| 6937   |       |       |       |       |
| 6945   | 0     | 0     | 0     | 0     |
| 6954   | 0     | 0     | 0     | 0     |
| 6956   | 1     | 0     | 0     | 1     |
| 6958   | 0     | 0     | 0     | 0     |
| 6961   | 0     | 0     | 0     | 0     |
| 6963   | 0     | 0     | 0     | 0     |
| 6964   | 0     | 0     | 0     | 0     |
| 6976   |       |       |       |       |
| 6977   | 0     | 0     | 0     | 0     |
| 7000   | 0     | 0     | 0     | 1     |
| 7001   | 0     | 0     | 0     | 0     |
| 7005   | 0     | 0     | 0     | 0     |
| 7006   | 0     | 0     | 0     | 0     |
| 7008   | 0     | 0     | 0     | 0     |
| 7009   | 0     | 0     | 0     | 0     |
| 7019   | 0     | 0     | 0     | 0     |
| 7021   | 0     | 0     | 0     | 0     |
| 7026   | 0     | 0     | 0     | 1     |
| 7030   | 1     | 0     | 0     | 1     |
| 7034   |       |       |       |       |
| 7039   | 0     | 0     | 0     | 0     |
| 7041   | 0     | 0     | 0     | 0     |
| 7047   | 0     | 0     | 0     | 0     |
| 7051   | 0     | 0     | 0     | 0     |
| 7052   | 0     | 0     | 0     | 0     |
| 7059   | 1     | 0     | 0     | 0     |
| 7062   | 0     | 0     | 0     | 0     |
| 7065   | 0     | 0     | 0     | 0     |

| respid | Q43_1 | Q43_2 | Q43_3 | Q43_4 |
|--------|-------|-------|-------|-------|
| 7066   | 0     | 0     | 0     | 0     |
| 7069   | 0     | 0     | 0     | 0     |
| 7070   |       |       |       |       |
| 7073   |       |       |       |       |
| 7078   | 0     | 0     | 0     | 0     |
| 7083   | 1     | 0     | 0     | 0     |
| 7084   | 0     | 0     | 1     | 0     |
| 7085   | 0     | 0     | 0     | 0     |
| 7088   | 1     | 0     | 0     | 0     |
| 7090   | 0     | 0     | 1     | 0     |
| 7095   | 0     | 0     | 0     | 0     |
| 7100   |       |       |       |       |
| 7102   | 1     | 0     | 0     | 0     |
| 7103   | 0     | 0     | 0     | 0     |
| 7108   | 0     | 0     | 0     | 0     |
| 7109   | 0     | 0     | 0     | 0     |
| 7110   |       |       |       |       |
| 7112   |       |       |       |       |
| 7114   | 0     | 0     | 0     | 0     |
| 7116   | 0     | 0     | 0     | 0     |
| 7117   | 0     | 0     | 0     | 0     |
| 7118   | 1     | 0     | 1     | 0     |
| 7120   | 0     | 0     | 1     | 1     |
| 7124   | 0     | 0     | 0     | 0     |
| 7130   | 0     | 0     | 0     | 0     |
| 7135   | 0     | 0     | 0     | 0     |
| 7137   | 1     | 0     | 1     | 0     |
| 7140   | 0     | 0     | 0     | 0     |
| 7141   | 0     | 0     | 0     | 0     |
| 7148   | 0     | 0     | 0     | 0     |
| 7152   |       |       |       |       |
| 7154   | 0     | 0     | 0     | 0     |

| respid | Q43_1 | Q43_2 | Q43_3 | Q43_4 |
|--------|-------|-------|-------|-------|
| 7156   | 0     | 0     | 0     | 0     |
| 7158   | 0     | 0     | 0     | 0     |
| 7159   |       |       |       |       |
| 7161   |       |       |       |       |
| 7164   | 0     | 0     | 0     | 0     |
| 7166   |       |       |       |       |
| 7167   |       |       |       |       |
| 7168   |       |       |       |       |
| 7170   |       |       |       |       |
| 7171   | 0     | 0     | 0     | 0     |
| 7172   | 0     | 0     | 0     | 0     |
| 7173   | 0     | 0     | 0     | 0     |
| 7175   | 0     | 0     | 0     | 0     |
| 7176   | 0     | 0     | 0     | 0     |
| 7180   | 0     | 0     | 0     | 0     |
| 7183   | 0     | 0     | 0     | 0     |
| 7189   | 1     | 1     | 0     | 0     |
| 7193   | 1     | 0     | 0     | 0     |
| 7194   | 1     | 0     | 0     | 0     |
| 7195   | 0     | 0     | 0     | 0     |
| 7200   | 1     | 0     | 0     | 0     |
| 7201   | 0     | 0     | 0     | 0     |
| 7205   | 1     | 0     | 0     | 0     |
| 7207   | 0     | 0     | 0     | 0     |
| 7208   |       |       |       |       |
| 7210   | 0     | 0     | 0     | 0     |
| 7211   | 0     | 0     | 0     | 0     |
| 7217   | 0     | 0     | 0     | 0     |
| 7218   | 0     | 0     | 0     | 0     |
| 7220   |       |       |       |       |
| 7225   | 0     | 0     | 0     | 0     |
| 7228   | 0     | 0     | 0     | 0     |

| respid | Q43_1 | Q43_2 | Q43_3 | Q43_4 |
|--------|-------|-------|-------|-------|
| 7230   | 0     | 0     | 0     | 0     |
| 7233   | 1     | 0     | 0     | 0     |
| 7234   | 0     | 0     | 0     | 0     |
| 7235   |       |       |       |       |
| 7236   |       |       |       |       |
| 7241   | 1     | 0     | 0     | 1     |
| 7251   | 0     | 0     | 0     | 0     |
| 7253   | 0     | 0     | 0     | 0     |
| 7259   | 0     | 0     | 0     | 1     |
| 7260   | 0     | 0     | 0     | 0     |
| 7261   | 0     | 0     | 0     | 0     |
| 7263   | 0     | 0     | 0     | 0     |
| 7265   |       |       |       |       |
| 7268   | 0     | 0     | 0     | 0     |
| 7269   |       |       |       |       |
| 7271   | 0     | 0     | 1     | 1     |
| 7276   | 1     | 0     | 1     | 1     |
| 7280   | 0     | 0     | 0     | 0     |
| 7283   | 0     | 0     | 0     | 0     |
| 7284   | 1     | 0     | 0     | 0     |
| 7286   | 0     | 0     | 0     | 1     |
| 7287   |       |       |       |       |
| 7288   | 0     | 0     | 0     | 0     |
| 7294   | 0     | 0     | 0     | 0     |
| 7295   | 0     | 0     | 0     | 0     |
| 7296   | 0     | 0     | 0     | 0     |
| 7297   | 0     | 0     | 0     | 0     |
| 7299   | 1     | 0     | 0     | 0     |
| 7300   | 1     | 0     | 0     | 0     |
| 7301   | 0     | 0     | 0     | 0     |
| 7302   |       |       |       |       |
| 7306   | 0     | 0     | 0     | 0     |



| respid | Q43_1 | Q43_2 | Q43_3 | Q43_4 |
|--------|-------|-------|-------|-------|
| 7313   | 1     | 0     | 1     | 0     |
| 7315   | 0     | 0     | 0     | 1     |
| 7317   | 0     | 0     | 0     | 0     |
| 7321   | 0     | 0     | 0     | 0     |
| 7322   | 0     | 0     | 0     | 0     |
| 7323   | 1     | 0     | 0     | 1     |
| 7333   | 0     | 0     | 0     | 1     |
| 7335   | 0     | 0     | 1     | 0     |
| 7336   | 0     | 0     | 0     | 0     |
| 7337   | 0     | 0     | 0     | 0     |
| 7338   | 0     | 0     | 0     | 0     |
| 7340   | 0     | 0     | 0     | 0     |
| 7341   | 1     | 0     | 0     | 0     |
| 7342   | 0     | 0     | 0     | 0     |
| 7344   | 0     | 0     | 0     | 0     |
| 7346   | 0     | 0     | 0     | 0     |
| 7347   | 0     | 0     | 0     | 0     |
| 7349   | 1     | 0     | 0     | 0     |
| 7352   | 0     | 0     | 0     | 0     |
| 7353   | 0     | 0     | 0     | 0     |
| 7355   | 1     | 0     | 0     | 0     |
| 7356   |       |       |       |       |
| 7360   | 1     | 0     | 1     | 1     |
| 7371   | 0     | 0     | 0     | 0     |
| 7376   | 0     | 0     | 0     | 1     |
| 7379   | 0     | 0     | 0     | 0     |
| 7381   | 0     | 0     | 0     | 0     |
| 7386   | 1     | 1     | 1     | 0     |
| 7389   | 0     | 0     | 0     | 0     |
| 7390   | 1     | 0     | 0     | 0     |
| 7393   | 0     | 0     | 0     | 0     |
| 7394   | 0     | 0     | 0     | 0     |

| respid | Q43_1 | Q43_2 | Q43_3 | Q43_4 |
|--------|-------|-------|-------|-------|
| 7396   | 0     | 0     | 0     | 0     |
| 7400   | 0     | 0     | 0     | 1     |
| 7401   | 1     | 0     | 0     | 0     |
| 7403   | 0     | 0     | 0     | 0     |
| 7406   | 0     | 0     | 0     | 1     |
| 7409   | 0     | 0     | 1     | 0     |
| 7410   | 0     | 0     | 1     | 0     |
| 7412   | 0     | 0     | 1     | 0     |
| 7414   | 0     | 0     | 0     | 0     |
| 7415   | 0     | 0     | 0     | 0     |
| 7417   | 0     | 0     | 1     | 0     |
| 7421   | 1     | 0     | 1     | 1     |
| 7425   | 0     | 0     | 0     | 1     |
| 7430   | 0     | 0     | 0     | 1     |
| 7432   | 0     | 0     | 0     | 0     |
| 7433   | 1     | 0     | 0     | 0     |
| 7442   | 0     | 0     | 0     | 0     |
| 7445   | 0     | 0     | 0     | 0     |
| 7446   | 0     | 0     | 0     | 0     |
| 7449   |       |       |       |       |
| 7450   |       |       |       |       |
| 7451   | 0     | 0     | 0     | 0     |
| 7459   | 0     | 0     | 0     | 0     |
| 7462   | 0     | 0     | 0     | 0     |
| 7463   | 0     | 0     | 0     | 0     |
| 7469   |       |       |       |       |
| 7482   | 0     | 0     | 0     | 0     |
| 7484   | 0     | 0     | 0     | 0     |
| 7486   | 0     | 0     | 0     | 0     |
| 7496   | 0     | 0     | 0     | 0     |
| 7502   | 0     | 0     | 0     | 0     |
| 7504   | 0     | 0     | 0     | 0     |

| respid | Q43_1 | Q43_2 | Q43_3 | Q43_4 |
|--------|-------|-------|-------|-------|
| 7509   | 0     | 0     | 0     | 0     |
| 7513   | 0     | 0     | 0     | 0     |
| 7514   |       |       |       |       |
| 7520   | 0     | 0     | 0     | 0     |
| 7523   |       |       |       |       |
| 7526   | 0     | 0     | 0     | 0     |
| 7529   | 0     | 0     | 0     | 0     |
| 7534   |       |       |       |       |
| 7536   | 0     | 0     | 0     | 1     |
| 7540   | 0     | 0     | 0     | 1     |
| 7541   | 0     | 0     | 0     | 0     |
| 7542   |       |       |       |       |
| 7555   | 0     | 0     | 0     | 0     |
| 7566   | 1     | 0     | 0     | 0     |
| 7568   | 0     | 0     | 0     | 0     |
| 7570   | 1     | 0     | 0     | 1     |
| 7572   | 0     | 0     | 0     | 0     |
| 7573   | 1     | 0     | 0     | 1     |
| 7576   | 0     | 0     | 0     | 0     |
| 7577   | 0     | 0     | 0     | 0     |
| 7583   | 0     | 0     | 0     | 0     |
| 7584   | 0     | 0     | 0     | 0     |
| 7585   | 0     | 0     | 1     | 1     |
| 7586   | 0     | 0     | 0     | 0     |
| 7587   | 0     | 0     | 0     | 0     |
| 7588   | 0     | 0     | 0     | 0     |
| 7596   | 0     | 0     | 0     | 0     |
| 7599   | 0     | 0     | 0     | 0     |
| 7600   | 1     | 1     | 0     | 0     |
| 7602   | 0     | 0     | 0     | 0     |
| 7613   | 0     | 0     | 0     | 0     |
| 7620   | 0     | 0     | 0     | 0     |

| respid | Q43_1 | Q43_2 | Q43_3 | Q43_4 |
|--------|-------|-------|-------|-------|
| 7623   | 0     | 0     | 0     | 0     |
| 7635   | 0     | 0     | 0     | 0     |
| 7636   | 1     | 0     | 0     | 0     |
| 7643   | 1     | 0     | 1     | 0     |
| 7645   | 0     | 0     | 0     | 1     |
| 7649   | 0     | 0     | 1     | 0     |
| 7651   | 0     | 0     | 0     | 0     |
| 7652   | 1     | 0     | 0     | 0     |
| 7655   | 0     | 0     | 0     | 0     |
| 7657   | 0     | 0     | 0     | 0     |
| 7675   | 0     | 0     | 0     | 0     |
| 7676   | 0     | 0     | 0     | 0     |
| 7684   | 0     | 0     | 0     | 0     |
| 7693   | 0     | 0     | 0     | 1     |
| 7694   | 1     | 0     | 0     | 0     |
| 7695   | 0     | 0     | 0     | 0     |
| 7696   | 1     | 0     | 0     | 0     |
| 7698   | 1     | 0     | 0     | 0     |
| 7700   | 0     | 0     | 0     | 0     |
| 7701   | 0     | 0     | 0     | 0     |
| 7704   | 0     | 0     | 0     | 0     |
| 7709   | 0     | 0     | 0     | 0     |
| 7713   | 0     | 0     | 0     | 0     |
| 7714   | 0     | 0     | 0     | 0     |
| 7718   | 1     | 0     | 0     | 0     |
| 7720   | 0     | 0     | 0     | 0     |
| 7721   | 0     | 0     | 0     | 1     |
| 7722   | 1     | 0     | 0     | 0     |
| 7724   | 0     | 0     | 0     | 0     |
| 7728   |       |       |       |       |
| 7731   | 0     | 0     | 0     | 0     |
| 7735   | 0     | 0     | 0     | 0     |

| respid | Q43_1 | Q43_2 | Q43_3 | Q43_4 |
|--------|-------|-------|-------|-------|
| 7737   | 0     | 0     | 0     | 0     |
| 7741   | 0     | 0     | 0     | 0     |
| 7746   | 0     | 0     | 0     | 0     |
| 7747   | 0     | 0     | 0     | 0     |
| 7748   | 0     | 0     | 0     | 0     |
| 7750   | 0     | 0     | 0     | 0     |
| 7754   | 0     | 0     | 0     | 0     |
| 7755   | 1     | 0     | 1     | 1     |
| 7762   |       |       |       |       |
| 7764   | 1     | 0     | 0     | 0     |
| 7766   |       |       |       |       |
| 7768   | 0     | 0     | 0     | 0     |
| 7770   | 1     | 0     | 0     | 1     |
| 7771   | 0     | 0     | 0     | 0     |
| 7777   | 0     | 0     | 0     | 0     |
| 7778   |       |       |       |       |
| 7783   | 1     | 0     | 1     | 1     |
| 7789   | 0     | 0     | 0     | 0     |
| 7790   | 0     | 0     | 0     | 0     |
| 7795   | 0     | 0     | 0     | 0     |
| 7807   | 0     | 0     | 0     | 0     |
| 7808   | 1     | 0     | 0     | 0     |
| 7818   | 0     | 0     | 0     | 0     |
| 7820   |       |       |       |       |
| 7831   | 1     | 0     | 0     | 0     |
| 7832   | 0     | 0     | 0     | 0     |
| 7837   | 0     | 0     | 0     | 0     |
| 7841   | 0     | 0     | 1     | 1     |
| 7845   | 1     | 0     | 0     | 0     |
| 7853   | 0     | 0     | 0     | 0     |
| 7854   | 0     | 0     | 0     | 0     |
| 7862   | 0     | 0     | 0     | 0     |

| respid | Q43_1 | Q43_2 | Q43_3 | Q43_4 |
|--------|-------|-------|-------|-------|
| 7871   | 0     | 0     | 0     | 0     |
| 7875   | 0     | 0     | 0     | 0     |
| 7880   | 1     | 0     | 0     | 0     |
| 7881   | 0     | 0     | 0     | 0     |
| 7883   | 0     | 0     | 0     | 0     |
| 7896   | 1     | 0     | 0     | 0     |
| 7905   | 0     | 0     | 0     | 0     |
| 7919   | 0     | 0     | 0     | 0     |
| 7928   | 1     | 0     | 1     | 1     |
| 7929   | 0     | 0     | 0     | 0     |
| 7938   | 0     | 0     | 0     | 1     |
| 7940   | 0     | 0     | 0     | 0     |
| 7941   | 0     | 0     | 0     | 1     |
| 7952   |       |       |       |       |
| 7962   | 0     | 0     | 0     | 0     |
| 7968   | 0     | 0     | 0     | 0     |
| 7972   | 0     | 0     | 0     | 0     |
| 7983   | 0     | 0     | 0     | 0     |
| 7990   | 0     | 0     | 0     | 0     |
| 7993   | 0     | 0     | 0     | 1     |
| 8005   | 0     | 0     | 0     | 0     |
| 8008   |       |       |       |       |
| 8012   | 1     | 0     | 0     | 0     |
| 8021   | 0     | 0     | 0     | 0     |
| 8024   | 1     | 0     | 0     | 0     |
| 8043   | 0     | 0     | 0     | 0     |
| 8051   | 1     | 0     | 0     | 0     |
| 8056   | 0     | 0     | 0     | 0     |
| 8061   | 0     | 0     | 0     | 0     |
| 8066   |       |       |       |       |
| 8069   | 0     | 0     | 1     | 0     |
| 8071   | 0     | 0     | 0     | 0     |

| respid | Q43_1 | Q43_2 | Q43_3 | Q43_4 |
|--------|-------|-------|-------|-------|
| 8072   | 0     | 0     | 0     | 0     |
| 8076   | 0     | 0     | 0     | 0     |
| 8080   | 0     | 0     | 0     | 0     |
| 8083   | 0     | 0     | 0     | 1     |
| 8093   | 1     | 0     | 1     | 1     |
| 8095   | 0     | 0     | 1     | 0     |
| 8099   | 0     | 0     | 0     | 0     |
| 8100   | 0     | 0     | 0     | 0     |
| 8103   |       |       |       |       |
| 8104   | 0     | 0     | 0     | 0     |
| 8115   | 1     | 0     | 0     | 0     |
| 8121   | 0     | 0     | 0     | 0     |
| 8128   | 0     | 0     | 0     | 0     |
| 8130   | 0     | 0     | 0     | 0     |
| 8131   | 1     | 0     | 0     | 1     |
| 8133   | 1     | 0     | 0     | 0     |
| 8143   | 0     | 0     | 0     | 1     |
| 8144   | 0     | 0     | 0     | 0     |
| 8146   | 0     | 0     | 0     | 0     |
| 8148   |       |       |       |       |
| 8157   |       |       |       |       |
| 8164   |       |       |       |       |
| 8173   |       |       |       |       |
| 8176   | 0     | 0     | 0     | 0     |
| 8179   | 0     | 0     | 0     | 0     |
| 8181   |       |       |       |       |
| 8182   | 0     | 0     | 0     | 0     |
| 8196   | 1     | 0     | 0     | 0     |
| 8200   | 0     | 0     | 0     | 0     |
| 8203   | 0     | 0     | 0     | 0     |
| 8204   | 0     | 0     | 0     | 0     |
| 8206   | 0     | 0     | 0     | 0     |

| respid | Q43_1 | Q43_2 | Q43_3 | Q43_4 |
|--------|-------|-------|-------|-------|
| 8208   | 0     | 0     | 0     | 0     |
| 8212   | 0     | 0     | 0     | 0     |
| 8222   | 0     | 0     | 0     | 0     |
| 8223   | 0     | 0     | 0     | 0     |
| 8225   | 0     | 0     | 0     | 0     |
| 8226   | 0     | 0     | 0     | 0     |
| 8228   | 0     | 0     | 0     | 0     |
| 8229   | 0     | 0     | 0     | 0     |
| 8239   | 1     | 0     | 0     | 0     |
| 8246   | 1     | 0     | 0     | 0     |
| 8258   | 0     | 0     | 1     | 1     |
| 8260   | 0     | 0     | 0     | 0     |
| 8262   | 0     | 0     | 0     | 1     |
| 8263   | 0     | 0     | 0     | 0     |
| 8267   | 0     | 0     | 1     | 0     |
| 8271   | 0     | 0     | 1     | 1     |
| 8274   | 0     | 0     | 0     | 0     |
| 8275   | 0     | 0     | 0     | 1     |
| 8279   | 0     | 0     | 0     | 0     |
| 8285   | 1     | 0     | 1     | 1     |
| 8287   | 1     | 1     | 1     | 0     |
| 8289   | 0     | 0     | 0     | 0     |
| 8291   | 0     | 0     | 0     | 0     |
| 8299   | 0     | 0     | 0     | 0     |
| 8301   | 1     | 0     | 0     | 0     |
| 8302   | 0     | 0     | 0     | 0     |
| 8308   | 0     | 0     | 0     | 1     |
| 8313   | 0     | 0     | 0     | 0     |
| 8316   | 0     | 0     | 1     | 0     |
| 8317   | 0     | 0     | 0     | 0     |
| 8319   | 0     | 0     | 0     | 0     |
| 8323   | 0     | 0     | 0     | 0     |



| respid | Q43_1 | Q43_2 | Q43_3 | Q43_4 |
|--------|-------|-------|-------|-------|
| 8324   | 0     | 0     | 0     | 0     |
| 8327   | 0     | 0     | 0     | 0     |
| 8328   | 0     | 0     | 0     | 0     |
| 8342   | 0     | 0     | 0     | 1     |
| 8350   | 0     | 0     | 0     | 1     |
| 8352   | 0     | 0     | 0     | 0     |
| 8353   | 0     | 0     | 0     | 0     |
| 8356   | 0     | 0     | 0     | 0     |
| 8367   | 0     | 0     | 0     | 1     |
| 8373   | 0     | 0     | 0     | 0     |
| 8379   |       |       |       |       |
| 8382   | 0     | 0     | 0     | 0     |
| 8387   | 0     | 0     | 0     | 1     |
| 8409   | 1     | 0     | 0     | 0     |
| 8410   | 0     | 0     | 0     | 0     |
| 8412   | 0     | 0     | 0     | 0     |
| 8415   | 0     | 0     | 0     | 1     |
| 8417   | 0     | 0     | 0     | 0     |
| 8422   | 0     | 0     | 0     | 1     |
| 8430   | 0     | 0     | 0     | 0     |
| 8434   | 0     | 0     | 0     | 0     |
| 8436   |       |       |       |       |
| 8446   | 1     | 0     | 0     | 1     |
| 8447   | 0     | 0     | 0     | 0     |
| 8448   | 0     | 0     | 0     | 0     |
| 8455   | 0     | 0     | 0     | 0     |
| 8456   | 0     | 0     | 0     | 0     |
| 8459   | 1     | 0     | 1     | 0     |
| 8460   | 0     | 0     | 0     | 0     |
| 8464   | 0     | 0     | 1     | 1     |
| 8470   | 0     | 0     | 0     | 0     |
| 8473   | 0     | 0     | 0     | 0     |

| respid | Q43_1 | Q43_2 | Q43_3 | Q43_4 |
|--------|-------|-------|-------|-------|
| 8486   | 0     | 0     | 0     | 0     |
| 8487   | 0     | 0     | 0     | 0     |
| 8489   | 0     | 0     | 0     | 0     |
| 8494   | 0     | 0     | 0     | 1     |
| 8495   | 1     | 0     | 1     | 1     |
| 8497   | 0     | 0     | 0     | 0     |
| 8510   | 0     | 0     | 0     | 0     |
| 8515   | 0     | 0     | 0     | 0     |
| 8526   |       |       |       |       |
| 8530   |       |       |       |       |
| 8532   | 0     | 0     | 0     | 0     |
| 8533   |       |       |       |       |
| 8534   | 1     | 0     | 0     | 0     |
| 8572   | 1     | 0     | 0     | 0     |
| 8582   | 0     | 0     | 0     | 0     |
| 8584   | 1     | 0     | 0     | 0     |
| 8585   |       |       |       |       |
| 8586   |       |       |       |       |
| 8589   | 0     | 0     | 0     | 0     |
| 8593   | 0     | 0     | 0     | 0     |
| 8594   | 0     | 0     | 0     | 0     |
| 8601   | 0     | 0     | 0     | 0     |
| 8603   | 0     | 0     | 0     | 0     |
| 8604   |       |       |       |       |
| 8605   |       |       |       |       |
| 8607   | 0     | 0     | 0     | 0     |
| 8623   | 0     | 0     | 0     | 0     |
| 8626   | 0     | 0     | 0     | 0     |
| 8638   | 0     | 0     | 0     | 0     |
| 8640   | 0     | 0     | 0     | 1     |
| 8641   | 1     | 0     | 0     | 0     |
| 8643   | 0     | 0     | 0     | 0     |

| respid | Q43_1 | Q43_2 | Q43_3 | Q43_4 |
|--------|-------|-------|-------|-------|
| 8644   | 0     | 0     | 0     | 1     |
| 8646   | 0     | 0     | 0     | 0     |
| 8647   |       |       |       |       |
| 8649   | 1     | 0     | 0     | 0     |
| 8650   | 0     | 0     | 0     | 0     |
| 8658   | 0     | 0     | 0     | 0     |
| 8659   | 0     | 0     | 0     | 0     |
| 8669   | 0     | 0     | 0     | 0     |
| 8672   | 0     | 0     | 1     | 1     |
| 8673   | 0     | 0     | 0     | 0     |
| 8676   | 0     | 0     | 0     | 0     |
| 8677   |       |       |       |       |
| 8681   | 0     | 0     | 0     | 0     |
| 8688   | 0     | 0     | 0     | 0     |
| 8689   | 0     | 0     | 0     | 0     |
| 8690   | 0     | 0     | 0     | 0     |
| 8693   | 0     | 0     | 0     | 0     |
| 8694   | 0     | 0     | 0     | 1     |
| 8699   | 0     | 0     | 1     | 1     |
| 8700   |       |       |       |       |
| 8703   | 0     | 0     | 0     | 0     |
| 8704   | 0     | 0     | 0     | 0     |
| 8706   | 1     | 0     | 0     | 0     |
| 8709   | 0     | 0     | 0     | 0     |
| 8715   | 0     | 0     | 0     | 0     |
| 8728   | 0     | 0     | 0     | 0     |
| 8729   | 0     | 0     | 0     | 0     |
| 8730   | 0     | 0     | 0     | 0     |
| 8742   | 0     | 0     | 0     | 0     |
| 8748   | 0     | 0     | 0     | 1     |
| 8749   | 0     | 0     | 0     | 0     |
| 8750   | 0     | 0     | 0     | 0     |

| respid | Q43_1 | Q43_2 | Q43_3 | Q43_4 |
|--------|-------|-------|-------|-------|
| 8751   | 0     | 0     | 0     | 0     |
| 8752   | 0     | 0     | 0     | 0     |
| 8754   | 0     | 0     | 0     | 0     |
| 8757   | 0     | 0     | 0     | 0     |
| 8760   | 0     | 0     | 0     | 0     |
| 8761   | 0     | 0     | 0     | 0     |
| 8762   | 0     | 0     | 0     | 0     |
| 8763   | 1     | 0     | 0     | 0     |
| 8764   | 0     | 0     | 0     | 0     |
| 8765   | 0     | 0     | 0     | 0     |
| 8766   | 0     | 0     | 0     | 0     |
| 8767   | 0     | 0     | 0     | 0     |
| 8768   | 0     | 0     | 0     | 0     |
| 8770   | 0     | 0     | 0     | 0     |
| 8771   |       |       |       |       |
| 8773   | 1     | 0     | 0     | 0     |
| 8774   | 0     | 0     | 0     | 1     |
| 8776   | 0     | 0     | 0     | 0     |
| 8777   | 0     | 0     | 0     | 0     |
| 8778   | 0     | 0     | 0     | 0     |
| 8779   |       |       |       |       |
| 8784   | 0     | 0     | 0     | 1     |
| 8786   |       |       |       |       |
| 8787   | 0     | 0     | 0     | 0     |
| 8790   |       |       |       |       |
| 8791   | 0     | 0     | 0     | 0     |
| 8793   |       |       |       |       |
| 8795   | 0     | 0     | 0     | 0     |
| 8797   | 0     | 0     | 0     | 0     |
| 8801   | 0     | 0     | 0     | 0     |
| 8802   | 0     | 0     | 0     | 0     |
| 8807   |       |       |       |       |

| respid | Q43_1 | Q43_2 | Q43_3 | Q43_4 |
|--------|-------|-------|-------|-------|
| 8813   | 0     | 0     | 0     | 0     |
| 8817   | 0     | 0     | 0     | 0     |
| 8818   | 0     | 0     | 0     | 0     |
| 8821   | 0     | 0     | 0     | 0     |
| 8822   | 0     | 0     | 0     | 0     |
| 8823   | 0     | 0     | 0     | 0     |
| 8824   | 1     | 0     | 0     | 1     |
| 8825   | 1     | 0     | 0     | 0     |
| 8834   | 0     | 0     | 0     | 1     |
| 8840   | 1     | 1     | 0     | 0     |
| 8843   | 1     | 1     | 0     | 0     |
| 8846   | 0     | 0     | 0     | 0     |
| 8862   |       |       |       |       |
| 8866   | 1     | 0     | 0     | 1     |
| 8869   | 0     | 0     | 0     | 0     |
| 8872   | 1     | 0     | 0     | 1     |
| 8903   |       |       |       |       |
| 8909   |       |       |       |       |
| 8926   | 0     | 0     | 0     | 0     |
| 8936   | 0     | 0     | 0     | 0     |
| 8945   |       |       |       |       |
| 8954   | 1     | 0     | 0     | 0     |
| 8955   | 0     | 0     | 1     | 1     |
| 8958   | 0     | 0     | 0     | 1     |
| 8959   | 0     | 0     | 0     | 0     |
| 8960   | 0     | 0     | 0     | 0     |
| 8976   | 0     | 0     | 0     | 0     |
| 8977   | 1     | 0     | 0     | 0     |
| 8979   | 0     | 0     | 1     | 0     |
| 8985   |       |       |       |       |
| 8994   | 0     | 0     | 0     | 0     |
| 8997   | 0     | 0     | 0     | 0     |

| respid | Q43_1 | Q43_2 | Q43_3 | Q43_4 |
|--------|-------|-------|-------|-------|
| 9002   | 0     | 0     | 0     | 0     |
| 9005   | 0     | 0     | 1     | 0     |
| 9017   | 0     | 0     | 0     | 0     |
| 9018   | 0     | 0     | 0     | 0     |
| 9021   | 0     | 0     | 0     | 0     |
| 9029   | 1     | 0     | 1     | 0     |
| 9035   | 0     | 0     | 0     | 0     |
| 9038   | 0     | 0     | 0     | 0     |
| 9039   |       |       |       |       |
| 9040   | 1     | 0     | 0     | 0     |
| 9042   | 0     | 0     | 0     | 0     |
| 9043   | 0     | 0     | 0     | 0     |
| 9045   | 0     | 0     | 0     | 0     |
| 9051   | 0     | 0     | 0     | 0     |
| 9067   | 0     | 0     | 0     | 0     |
| 9069   | 0     | 0     | 0     | 0     |
| 9073   | 0     | 0     | 0     | 0     |
| 9084   | 0     | 0     | 0     | 1     |
| 9096   |       |       |       |       |
| 9100   | 1     | 0     | 0     | 0     |
| 9107   |       |       |       |       |
| 9110   | 0     | 0     | 0     | 0     |
| 9120   | 0     | 0     | 0     | 0     |
| 9122   | 1     | 0     | 0     | 0     |
| 9130   | 0     | 0     | 0     | 0     |
| 9134   | 0     | 0     | 1     | 1     |
| 9137   | 1     | 0     | 0     | 1     |
| 9139   | 0     | 0     | 0     | 0     |
| 9144   |       |       |       |       |
| 9157   | 0     | 0     | 0     | 0     |
| 9166   | 0     | 0     | 0     | 0     |
| 9177   | 0     | 0     | 0     | 0     |

| respid | Q43_1 | Q43_2 | Q43_3 | Q43_4 |
|--------|-------|-------|-------|-------|
| 9181   | 0     | 0     | 0     | 0     |
| 9183   | 0     | 0     | 0     | 0     |
| 9184   | 0     | 0     | 0     | 0     |
| 9188   |       |       |       |       |
| 9197   | 0     | 0     | 0     | 0     |
| 9200   | 0     | 0     | 0     | 0     |
| 9205   | 1     | 0     | 1     | 1     |
| 9207   | 0     | 0     | 0     | 0     |
| 9213   | 0     | 0     | 0     | 0     |
| 9216   | 0     | 0     | 0     | 1     |
| 9217   |       |       |       |       |
| 9218   | 0     | 0     | 0     | 0     |
| 9219   | 1     | 0     | 0     | 0     |
| 9220   |       |       |       |       |
| 9221   | 0     | 0     | 0     | 1     |
| 9223   | 1     | 0     | 1     | 1     |
| 9228   |       |       |       |       |
| 9230   | 0     | 0     | 0     | 0     |
| 9231   | 0     | 0     | 0     | 0     |
| 9233   | 1     | 0     | 1     | 0     |
| 9235   | 0     | 0     | 0     | 0     |
| 9237   | 0     | 0     | 0     | 0     |
| 9242   | 0     | 0     | 0     | 0     |
| 9250   |       |       |       |       |
| 9253   | 0     | 0     | 0     | 0     |
| 9257   | 0     | 0     | 0     | 0     |
| 9263   | 0     | 0     | 0     | 0     |
| 9267   | 0     | 0     | 0     | 0     |
| 9272   | 0     | 0     | 0     | 0     |
| 9279   |       |       |       |       |
| 9281   | 0     | 0     | 0     | 0     |
| 9285   | 0     | 0     | 0     | 0     |

| respid | Q43_1 | Q43_2 | Q43_3 | Q43_4 |
|--------|-------|-------|-------|-------|
| 9286   | 1     | 0     | 0     | 0     |
| 9294   | 0     | 0     | 0     | 0     |
| 9295   | 0     | 0     | 0     | 0     |
| 9297   | 0     | 0     | 0     | 1     |
| 9299   | 0     | 0     | 0     | 0     |
| 9309   | 0     | 0     | 0     | 0     |
| 9315   |       |       |       |       |
| 9320   | 0     | 0     | 0     | 0     |
| 9324   | 0     | 0     | 0     | 0     |
| 9326   | 0     | 0     | 0     | 0     |
| 9333   | 0     | 0     | 0     | 0     |
| 9334   | 1     | 0     | 1     | 1     |
| 9336   | 1     | 0     | 1     | 0     |
| 9337   | 0     | 0     | 0     | 0     |
| 9342   | 0     | 0     | 0     | 0     |
| 9347   | 0     | 0     | 0     | 0     |
| 9352   | 0     | 0     | 0     | 0     |
| 9355   | 0     | 0     | 0     | 0     |
| 9356   | 0     | 0     | 0     | 0     |
| 9359   | 1     | 0     | 0     | 0     |
| 9368   | 0     | 0     | 0     | 0     |
| 9375   | 0     | 0     | 0     | 0     |
| 9384   | 0     | 0     | 0     | 0     |
| 9388   | 1     | 0     | 1     | 1     |
| 9397   | 0     | 0     | 0     | 1     |
| 9400   | 0     | 0     | 0     | 0     |
| 9401   | 1     | 0     | 0     | 0     |
| 9402   |       |       |       |       |
| 9417   | 1     | 0     | 0     | 1     |
| 9424   | 0     | 0     | 0     | 0     |
| 9427   | 0     | 0     | 0     | 0     |
| 9429   | 0     | 0     | 0     | 0     |



| respid | Q43_1 | Q43_2 | Q43_3 | Q43_4 |
|--------|-------|-------|-------|-------|
| 9437   | 1     | 0     | 0     | 0     |
| 9442   | 1     | 0     | 0     | 0     |
| 9446   | 1     | 0     | 0     | 0     |
| 9447   | 0     | 0     | 0     | 0     |
| 9448   | 0     | 0     | 0     | 0     |
| 9449   | 1     | 0     | 0     | 1     |
| 9455   |       |       |       |       |
| 9459   | 0     | 0     | 0     | 1     |
| 9460   | 0     | 0     | 0     | 0     |
| 9461   | 0     | 0     | 0     | 0     |
| 9463   | 0     | 0     | 0     | 0     |
| 9464   | 0     | 0     | 0     | 1     |
| 9466   | 0     | 0     | 0     | 0     |
| 9477   | 1     | 0     | 0     | 0     |
| 9482   | 1     | 0     | 1     | 0     |
| 9486   | 0     | 0     | 0     | 0     |
| 9488   | 1     | 0     | 0     | 0     |
| 9489   | 0     | 0     | 0     | 0     |
| 9496   | 0     | 1     | 0     | 1     |
| 9499   | 0     | 0     | 0     | 0     |
| 9512   | 0     | 0     | 0     | 0     |
| 9514   | 0     | 0     | 0     | 0     |
| 9516   | 0     | 0     | 0     | 0     |
| 9517   | 1     | 0     | 0     | 1     |
| 9520   | 1     | 0     | 0     | 0     |
| 9527   | 0     | 0     | 0     | 0     |
| 9532   | 1     | 0     | 0     | 0     |
| 9533   | 0     | 0     | 0     | 0     |
| 9543   | 0     | 0     | 0     | 0     |
| 9550   | 0     | 0     | 0     | 0     |
| 9553   | 0     | 0     | 0     | 0     |
| 9555   | 0     | 0     | 0     | 0     |

| respid | Q43_1 | Q43_2 | Q43_3 | Q43_4 |
|--------|-------|-------|-------|-------|
| 9565   | 0     | 0     | 0     | 0     |
| 9583   | 0     | 0     | 0     | 0     |
| 9594   | 0     | 0     | 0     | 0     |
| 9596   | 1     | 0     | 0     | 0     |
| 9600   | 0     | 0     | 0     | 0     |
| 9602   | 0     | 0     | 0     | 0     |
| 9606   | 0     | 0     | 0     | 0     |
| 9608   | 0     | 0     | 0     | 0     |
| 9610   | 1     | 0     | 0     | 0     |
| 9612   | 0     | 0     | 0     | 0     |
| 9613   | 0     | 0     | 0     | 0     |
| 9614   | 0     | 0     | 0     | 0     |
| 9620   | 0     | 0     | 0     | 0     |
| 9628   | 0     | 0     | 0     | 0     |
| 9631   | 1     | 0     | 0     | 0     |
| 9632   | 0     | 0     | 0     | 0     |
| 9633   | 0     | 0     | 0     | 0     |
| 9639   |       |       |       |       |
| 9640   | 0     | 0     | 0     | 1     |
| 9642   | 0     | 0     | 0     | 0     |
| 9653   | 1     | 0     | 0     | 0     |
| 9658   | 0     | 0     | 0     | 0     |
| 9659   | 0     | 0     | 0     | 0     |
| 9661   | 0     | 0     | 1     | 1     |
| 9664   | 0     | 0     | 0     | 0     |
| 9665   | 0     | 0     | 1     | 0     |
| 9666   | 1     | 0     | 0     | 0     |
| 9667   | 0     | 0     | 0     | 1     |
| 9668   |       |       |       |       |
| 9670   | 0     | 0     | 0     | 1     |
| 9671   | 0     | 0     | 0     | 0     |
| 9681   | 0     | 0     | 0     | 0     |

| respid | Q43_1 | Q43_2 | Q43_3 | Q43_4 |
|--------|-------|-------|-------|-------|
| 9684   | 0     | 0     | 0     | 0     |
| 9685   | 0     | 0     | 0     | 0     |
| 9686   | 1     | 0     | 0     | 0     |
| 9688   | 1     | 0     | 0     | 0     |
| 9692   | 0     | 0     | 1     | 0     |
| 9693   | 0     | 0     | 1     | 0     |
| 9698   | 0     | 0     | 1     | 0     |
| 9699   | 0     | 0     | 1     | 0     |
| 9701   | 0     | 0     | 0     | 0     |
| 9702   | 0     | 0     | 0     | 0     |
| 9709   | 0     | 0     | 0     | 0     |
| 9713   |       |       |       |       |
| 9715   |       |       |       |       |
| 9721   | 0     | 0     | 0     | 0     |
| 9725   | 1     | 0     | 0     | 0     |
| 9729   | 0     | 0     | 0     | 1     |
| 9731   | 0     | 0     | 0     | 0     |
| 9736   | 0     | 0     | 0     | 0     |
| 9740   |       |       |       |       |
| 9741   | 0     | 0     | 0     | 0     |
| 9749   | 1     | 0     | 1     | 0     |
| 9750   | 0     | 0     | 0     | 0     |
| 9751   | 1     | 0     | 1     | 1     |
| 9753   | 0     | 0     | 0     | 0     |
| 9754   | 1     | 0     | 0     | 0     |
| 9756   | 0     | 0     | 0     | 0     |
| 9758   | 1     | 0     | 1     | 1     |
| 9759   | 0     | 0     | 0     | 0     |
| 9760   | 0     | 0     | 0     | 0     |
| 9761   |       |       |       |       |
| 9762   | 0     | 0     | 0     | 0     |
| 9764   | 0     | 0     | 0     | 0     |

| respid | Q43_1 | Q43_2 | Q43_3 | Q43_4 |
|--------|-------|-------|-------|-------|
| 9768   | 0     | 0     | 0     | 0     |
| 9769   | 0     | 0     | 0     | 1     |
| 9770   | 1     | 0     | 0     | 0     |
| 9771   | 1     | 0     | 0     | 0     |
| 9772   | 0     | 0     | 0     | 0     |
| 9773   | 0     | 0     | 1     | 0     |
| 9776   | 0     | 0     | 0     | 0     |
| 9786   | 1     | 0     | 0     | 0     |
| 9790   | 0     | 0     | 0     | 0     |
| 9791   | 0     | 0     | 0     | 0     |
| 9794   | 0     | 0     | 1     | 0     |
| 9797   | 0     | 0     | 0     | 0     |
| 9799   | 0     | 0     | 0     | 0     |
| 9804   | 0     | 0     | 0     | 0     |
| 9805   | 0     | 0     | 0     | 0     |
| 9806   | 0     | 0     | 0     | 0     |
| 9807   | 0     | 0     | 0     | 0     |
| 9813   | 0     | 0     | 0     | 0     |
| 9817   | 0     | 0     | 0     | 0     |
| 9823   | 0     | 0     | 0     | 0     |
| 9826   | 0     | 0     | 0     | 0     |
| 9830   | 0     | 0     | 0     | 0     |
| 9835   | 0     | 1     | 0     | 0     |
| 9836   | 0     | 0     | 0     | 0     |
| 9841   |       |       |       |       |
| 9842   | 0     | 0     | 0     | 0     |
| 9844   | 0     | 0     | 0     | 0     |
| 9847   | 0     | 0     | 0     | 0     |
| 9851   | 0     | 0     | 0     | 0     |
| 9852   | 0     | 0     | 0     | 0     |
| 9854   | 0     | 0     | 0     | 0     |
| 9855   | 0     | 0     | 0     | 0     |

| respid | Q43_1 | Q43_2 | Q43_3 | Q43_4 |
|--------|-------|-------|-------|-------|
| 9856   | 0     | 0     | 0     | 0     |
| 9862   | 0     | 0     | 0     | 0     |
| 9863   |       |       |       |       |
| 9866   | 0     | 0     | 0     | 0     |
| 9867   | 1     | 0     | 0     | 1     |
| 9868   | 1     | 0     | 0     | 0     |
| 9869   | 0     | 0     | 0     | 0     |
| 9878   | 1     | 0     | 0     | 0     |
| 9879   | 1     | 0     | 0     | 0     |
| 9881   | 0     | 0     | 0     | 0     |
| 9882   | 0     | 0     | 0     | 0     |
| 9884   | 1     | 0     | 0     | 0     |
| 9885   | 0     | 0     | 0     | 0     |
| 9888   | 0     | 0     | 0     | 0     |
| 9889   | 0     | 0     | 0     | 0     |
| 9894   | 1     | 0     | 0     | 0     |
| 9895   | 0     | 0     | 0     | 0     |
| 9896   | 0     | 0     | 1     | 1     |
| 9897   | 1     | 0     | 1     | 0     |
| 9905   | 0     | 0     | 0     | 0     |
| 9907   | 0     | 0     | 0     | 0     |
| 9908   | 0     | 0     | 0     | 0     |
| 9909   | 0     | 0     | 0     | 0     |
| 9910   | 0     | 0     | 0     | 0     |
| 9913   | 0     | 0     | 0     | 0     |
| 9914   | 0     | 0     | 0     | 0     |
| 9915   | 0     | 0     | 0     | 0     |
| 9916   | 0     | 0     | 0     | 0     |
| 9918   |       |       |       |       |
| 9919   | 0     | 0     | 0     | 0     |
| 9922   | 1     | 0     | 0     | 0     |
| 9930   | 0     | 0     | 0     | 0     |

| respid | Q43_1 | Q43_2 | Q43_3 | Q43_4 |
|--------|-------|-------|-------|-------|
| 9934   | 1     | 0     | 0     | 0     |
| 9936   | 0     | 0     | 0     | 1     |
| 9938   | 0     | 0     | 0     | 0     |
| 9940   | 1     | 0     | 0     | 0     |
| 9944   | 0     | 0     | 0     | 0     |
| 9945   | 0     | 0     | 0     | 0     |
| 9948   | 0     | 0     | 0     | 0     |
| 9949   | 0     | 0     | 0     | 0     |
| 9951   | 1     | 0     | 0     | 0     |
| 9952   | 0     | 0     | 0     | 1     |
| 9954   | 1     | 0     | 0     | 0     |
| 9955   | 0     | 0     | 0     | 0     |
| 9956   | 1     | 0     | 0     | 1     |
| 9957   | 0     | 0     | 0     | 0     |
| 9958   | 0     | 0     | 0     | 0     |
| 9959   | 1     | 0     | 1     | 0     |
| 9960   | 1     | 0     | 0     | 0     |
| 9961   | 0     | 0     | 0     | 0     |
| 9962   | 0     | 0     | 0     | 0     |
| 9969   | 0     | 0     | 0     | 1     |
| 9982   | 0     | 0     | 1     | 1     |
| 9984   | 0     | 0     | 0     | 0     |
| 9990   | 0     | 0     | 0     | 0     |
| 9992   | 0     | 0     | 1     | 1     |
| 9993   | 1     | 0     | 0     | 0     |
| 9997   | 0     | 0     | 0     | 0     |
| 9999   | 0     | 0     | 0     | 0     |
| 10000  | 1     | 0     | 0     | 0     |
| 10005  | 0     | 0     | 0     | 0     |
| 10014  | 0     | 0     | 0     | 0     |
| 10016  | 1     | 0     | 1     | 0     |
| 10017  | 1     | 0     | 0     | 0     |

| respid | Q43_1 | Q43_2 | Q43_3 | Q43_4 |
|--------|-------|-------|-------|-------|
| 10018  | 1     | 0     | 0     | 0     |
| 10021  | 0     | 0     | 0     | 0     |
| 10025  | 0     | 0     | 0     | 0     |
| 10027  | 1     | 0     | 0     | 0     |
| 10028  | 0     | 0     | 0     | 0     |
| 10031  | 0     | 0     | 0     | 0     |
| 10036  | 1     | 0     | 1     | 1     |
| 10037  | 0     | 0     | 0     | 0     |
| 10038  | 0     | 0     | 0     | 0     |
| 10039  |       |       |       |       |
| 10041  | 0     | 0     | 0     | 0     |
| 10045  | 0     | 0     | 0     | 0     |
| 10046  | 1     | 0     | 0     | 0     |
| 10047  | 1     | 0     | 0     | 0     |
| 10048  | 0     | 0     | 0     | 1     |
| 10049  | 0     | 0     | 0     | 0     |
| 10051  | 0     | 0     | 0     | 0     |
| 10052  | 0     | 1     | 0     | 0     |
| 10056  | 0     | 0     | 0     | 0     |
| 10061  | 0     | 0     | 0     | 0     |
| 10064  | 0     | 0     | 0     | 0     |
| 10066  | 0     | 0     | 0     | 0     |
| 10069  | 0     | 0     | 0     | 0     |
| 10071  | 0     | 0     | 0     | 1     |
| 10074  | 0     | 0     | 0     | 0     |
| 10079  | 1     | 0     | 0     | 0     |
| 10087  | 0     | 0     | 0     | 1     |
| 10095  | 0     | 0     | 0     | 0     |
| 10097  | 1     | 0     | 0     | 0     |
| 10100  | 0     | 0     | 0     | 0     |
| 10105  | 0     | 0     | 0     | 0     |
| 10107  | 1     | 0     | 0     | 0     |

| respid | Q43_1 | Q43_2 | Q43_3 | Q43_4 |
|--------|-------|-------|-------|-------|
| 10111  | 0     | 0     | 0     | 0     |
| 10116  | 0     | 0     | 0     | 0     |
| 10118  | 0     | 0     | 0     | 0     |
| 10123  |       |       |       |       |
| 10124  | 0     | 0     | 0     | 0     |
| 10130  | 0     | 0     | 0     | 0     |
| 10134  | 0     | 0     | 0     | 0     |
| 10135  | 0     | 0     | 0     | 0     |
| 10136  |       |       |       |       |
| 10141  | 0     | 0     | 0     | 0     |
| 10142  | 0     | 0     | 0     | 0     |
| 10143  | 0     | 0     | 0     | 0     |
| 10145  | 1     | 0     | 0     | 0     |
| 10149  | 0     | 0     | 0     | 0     |
| 10150  | 1     | 0     | 0     | 0     |
| 10151  | 1     | 0     | 0     | 0     |
| 10152  | 0     | 0     | 0     | 0     |
| 10153  | 0     | 0     | 0     | 0     |
| 10156  | 0     | 0     | 0     | 0     |
| 10160  | 1     | 0     | 1     | 1     |
| 10161  | 0     | 0     | 0     | 0     |
| 10167  | 1     | 0     | 1     | 0     |
| 10171  |       |       |       |       |
| 10172  | 0     | 0     | 0     | 0     |
| 10176  | 0     | 0     | 0     | 1     |
| 10177  | 0     | 0     | 0     | 0     |
| 10182  | 0     | 0     | 0     | 1     |
| 10184  | 1     | 0     | 0     | 0     |
| 10186  | 0     | 0     | 0     | 0     |
| 10189  | 0     | 0     | 0     | 0     |
| 10191  | 0     | 0     | 0     | 0     |
| 10192  | 0     | 0     | 0     | 0     |



| respid | Q43_1 | Q43_2 | Q43_3 | Q43_4 |
|--------|-------|-------|-------|-------|
| 10195  | 1     | 0     | 0     | 0     |
| 10199  |       |       |       |       |
| 10201  | 1     | 0     | 0     | 0     |
| 10213  | 0     | 0     | 0     | 0     |
| 10222  | 1     | 0     | 0     | 0     |
| 10224  |       |       |       |       |
| 10245  | 0     | 0     | 0     | 0     |
| 10254  | 1     | 0     | 0     | 1     |
| 10255  | 0     | 0     | 0     | 1     |
| 10257  | 0     | 0     | 0     | 0     |
| 10260  | 1     | 0     | 0     | 0     |
| 10261  | 0     | 0     | 0     | 0     |
| 10263  | 0     | 0     | 0     | 1     |
| 10264  | 0     | 0     | 0     | 0     |
| 10268  | 0     | 0     | 0     | 1     |
| 10269  | 0     | 0     | 0     | 1     |
| 10270  |       |       |       |       |
| 10282  | 0     | 0     | 0     | 0     |
| 10285  |       |       |       |       |
| 10288  | 0     | 0     | 0     | 0     |
| 10291  | 0     | 0     | 0     | 0     |
| 10292  | 0     | 0     | 0     | 0     |
| 10304  |       |       |       |       |
| 10305  | 0     | 0     | 0     | 0     |
| 10310  | 0     | 0     | 0     | 0     |
| 10324  | 0     | 0     | 0     | 0     |
| 10325  | 0     | 0     | 0     | 0     |
| 10326  | 0     | 0     | 0     | 0     |
| 10329  |       |       |       |       |
| 10332  | 1     | 0     | 0     | 0     |
| 10337  | 0     | 0     | 0     | 0     |
| 10341  | 1     | 0     | 0     | 0     |

| respid | Q43_1 | Q43_2 | Q43_3 | Q43_4 |
|--------|-------|-------|-------|-------|
| 10353  | 0     | 0     | 0     | 0     |
| 10354  |       |       |       |       |
| 10359  | 0     | 0     | 1     | 1     |
| 10360  | 0     | 0     | 0     | 0     |
| 10362  | 1     | 0     | 0     | 0     |
| 10364  | 1     | 0     | 0     | 0     |
| 10366  | 0     | 0     | 1     | 0     |
| 10367  | 0     | 0     | 0     | 0     |
| 10371  | 0     | 0     | 0     | 0     |
| 10374  | 0     | 0     | 1     | 0     |
| 10375  | 0     | 0     | 0     | 0     |
| 10376  | 0     | 0     | 0     | 0     |
| 10377  | 0     | 0     | 0     | 0     |
| 10378  | 0     | 0     | 0     | 0     |
| 10387  | 0     | 0     | 0     | 0     |
| 10396  | 1     | 0     | 1     | 0     |
| 10397  | 1     | 1     | 0     | 0     |
| 10399  | 0     | 0     | 1     | 0     |
| 10405  | 0     | 0     | 0     | 0     |
| 10406  | 0     | 0     | 0     | 0     |
| 10408  | 0     | 0     | 0     | 0     |
| 10409  |       |       |       |       |
| 10412  | 0     | 0     | 0     | 0     |
| 10413  | 0     | 0     | 0     | 0     |
| 10419  | 1     | 0     | 0     | 1     |
| 10423  | 1     | 0     | 0     | 0     |
| 10426  | 0     | 0     | 0     | 0     |
| 10446  | 0     | 0     | 0     | 0     |
| 10448  | 0     | 0     | 0     | 0     |
| 10450  | 0     | 0     | 0     | 0     |
| 10455  | 0     | 0     | 0     | 0     |
| 10460  | 0     | 0     | 0     | 0     |

| respid | Q43_1 | Q43_2 | Q43_3 | Q43_4 |
|--------|-------|-------|-------|-------|
| 10461  | 0     | 0     | 0     | 0     |
| 10471  | 1     | 0     | 0     | 0     |
| 10472  | 0     | 0     | 0     | 0     |
| 10491  | 1     | 0     | 1     | 1     |
| 10493  | 0     | 0     | 0     | 0     |
| 10498  | 0     | 0     | 0     | 0     |
| 10533  | 0     | 0     | 0     | 0     |
| 10539  | 0     | 0     | 0     | 0     |
| 10540  | 0     | 0     | 0     | 0     |
| 10557  | 0     | 0     | 0     | 0     |
| 10558  | 1     | 0     | 1     | 1     |
| 10559  | 1     | 0     | 0     | 0     |
| 10564  | 0     | 0     | 0     | 0     |
| 10570  |       |       |       |       |
| 10572  | 0     | 0     | 0     | 0     |
| 10576  | 0     | 0     | 0     | 0     |
| 10582  | 0     | 0     | 1     | 0     |
| 10593  | 0     | 0     | 0     | 0     |
| 10596  | 0     | 0     | 0     | 0     |
| 10615  |       |       |       |       |
| 10616  | 0     | 0     | 0     | 0     |
| 10623  | 0     | 0     | 0     | 0     |
| 10626  | 0     | 0     | 0     | 0     |
| 10627  | 0     | 0     | 1     | 1     |
| 10629  | 0     | 0     | 0     | 0     |
| 10632  | 0     | 0     | 0     | 0     |
| 10641  |       |       |       |       |
| 10648  | 0     | 0     | 0     | 0     |
| 10651  | 1     | 0     | 0     | 0     |
| 10654  | 0     | 0     | 0     | 0     |
| 10673  | 0     | 0     | 0     | 0     |
| 10675  | 0     | 0     | 0     | 0     |

| respid | Q43_1 | Q43_2 | Q43_3 | Q43_4 |
|--------|-------|-------|-------|-------|
| 10689  | 0     | 0     | 0     | 0     |
| 10692  | 0     | 0     | 0     | 0     |
| 10694  | 0     | 0     | 0     | 0     |
| 10695  | 0     | 0     | 0     | 0     |
| 10702  | 0     | 0     | 0     | 0     |
| 10703  | 1     | 0     | 0     | 0     |
| 10708  | 0     | 0     | 0     | 0     |
| 10719  | 1     | 0     | 1     | 1     |
| 10722  | 0     | 0     | 0     | 0     |
| 10723  | 1     | 0     | 0     | 0     |
| 10726  | 1     | 0     | 0     | 1     |
| 10727  | 0     | 0     | 0     | 0     |
| 10730  | 0     | 0     | 0     | 0     |
| 10731  |       |       |       |       |
| 10737  | 0     | 0     | 0     | 0     |
| 10743  | 0     | 0     | 0     | 0     |
| 10763  | 0     | 0     | 0     | 0     |
| 10777  |       |       |       |       |
| 10787  | 0     | 0     | 0     | 0     |
| 10798  | 0     | 0     | 1     | 0     |
| 10800  | 0     | 0     | 0     | 0     |
| 10802  | 0     | 0     | 1     | 1     |
| 10803  | 1     | 0     | 0     | 0     |
| 10808  | 0     | 0     | 0     | 0     |
| 10810  | 0     | 0     | 0     | 0     |
| 10819  | 1     | 0     | 0     | 0     |
| 10825  | 1     | 0     | 1     | 0     |
| 10827  | 0     | 0     | 1     | 0     |
| 10830  | 1     | 0     | 0     | 1     |
| 10847  | 0     | 0     | 0     | 0     |
| 10849  | 0     | 0     | 0     | 0     |
| 10852  | 0     | 0     | 0     | 0     |

| respid | Q43_1 | Q43_2 | Q43_3 | Q43_4 |
|--------|-------|-------|-------|-------|
| 10854  | 1     | 0     | 0     | 0     |
| 10857  | 0     | 0     | 0     | 0     |
| 10861  | 0     | 0     | 0     | 0     |
| 10862  |       |       |       |       |
| 10870  | 0     | 0     | 0     | 0     |
| 10873  | 0     | 0     | 0     | 0     |
| 10881  | 0     | 0     | 0     | 0     |
| 10893  |       |       |       |       |
| 10898  | 0     | 0     | 0     | 0     |
| 10899  | 0     | 0     | 0     | 0     |
| 10905  | 0     | 0     | 0     | 0     |
| 10910  |       |       |       |       |
| 10911  | 0     | 0     | 0     | 1     |
| 10912  | 0     | 0     | 0     | 0     |
| 10913  | 1     | 0     | 0     | 1     |
| 10918  |       |       |       |       |
| 10995  |       |       |       |       |
| 11002  | 0     | 0     | 0     | 1     |
| 11003  | 0     | 0     | 0     | 0     |
| 11005  | 0     | 0     | 0     | 0     |
| 11015  | 1     | 0     | 1     | 0     |
| 11016  | 0     | 0     | 0     | 0     |
| 11017  | 0     | 0     | 0     | 0     |
| 11020  | 0     | 1     | 0     | 0     |
| 11024  | 0     | 0     | 0     | 0     |
| 11026  | 0     | 0     | 0     | 0     |
| 11028  | 0     | 0     | 0     | 0     |
| 11029  | 0     | 0     | 0     | 0     |
| 11030  | 0     | 0     | 0     | 0     |
| 11031  | 0     | 0     | 0     | 0     |
| 11038  | 0     | 0     | 0     | 0     |
| 11051  | 0     | 0     | 0     | 0     |

| respid | Q43_1 | Q43_2 | Q43_3 | Q43_4 |
|--------|-------|-------|-------|-------|
| 11052  | 0     | 0     | 1     | 0     |
| 11053  | 0     | 0     | 0     | 0     |
| 11054  | 0     | 0     | 0     | 1     |
| 11063  | 1     | 0     | 0     | 0     |
| 11075  | 1     | 0     | 0     | 0     |
| 11083  | 0     | 0     | 0     | 0     |
| 11092  | 0     | 0     | 0     | 0     |
| 11118  | 1     | 0     | 0     | 0     |
| 11119  | 1     | 0     | 0     | 0     |
| 11134  | 0     | 0     | 0     | 0     |
| 11139  | 0     | 0     | 0     | 0     |
| 11154  | 0     | 0     | 0     | 0     |
| 11166  | 0     | 0     | 0     | 1     |
| 11168  |       |       |       |       |
| 11176  | 1     | 0     | 0     | 0     |
| 11183  | 1     | 0     | 0     | 1     |
| 11189  | 0     | 0     | 0     | 0     |
| 11196  | 1     | 0     | 0     | 0     |
| 11200  | 0     | 0     | 0     | 0     |
| 11201  | 0     | 0     | 0     | 0     |
| 11211  | 1     | 0     | 0     | 0     |
| 11218  | 0     | 0     | 0     | 0     |
| 11219  | 0     | 0     | 0     | 0     |
| 11221  | 0     | 0     | 0     | 0     |
| 11222  | 0     | 0     | 0     | 0     |
| 11230  | 1     | 0     | 0     | 0     |
| 11236  | 1     | 0     | 0     | 0     |
| 11237  | 1     | 0     | 0     | 0     |
| 11240  | 1     | 0     | 0     | 1     |
| 11244  | 1     | 0     | 0     | 0     |
| 11249  | 0     | 0     | 0     | 0     |
| 11252  | 1     | 0     | 0     | 0     |

| respid | Q43_1 | Q43_2 | Q43_3 | Q43_4 |
|--------|-------|-------|-------|-------|
| 11254  | 0     | 0     | 0     | 0     |
| 11255  | 1     | 0     | 0     | 0     |
| 11258  | 1     | 0     | 0     | 0     |
| 11260  | 0     | 0     | 0     | 0     |
| 11264  | 0     | 0     | 0     | 1     |
| 11266  | 0     | 0     | 0     | 0     |
| 11268  | 1     | 0     | 1     | 0     |
| 11269  | 0     | 0     | 0     | 0     |
| 11272  | 0     | 0     | 0     | 0     |
| 11273  | 0     | 0     | 0     | 0     |
| 11275  | 0     | 0     | 0     | 0     |
| 11276  | 0     | 0     | 1     | 0     |
| 11278  | 0     | 0     | 1     | 1     |
| 11288  |       |       |       |       |
| 11289  |       |       |       |       |
| 11291  | 0     | 0     | 0     | 0     |
| 11295  | 0     | 0     | 0     | 0     |
| 11297  | 0     | 0     | 0     | 0     |
| 11304  | 0     | 0     | 1     | 1     |
| 11305  | 0     | 0     | 0     | 0     |
| 11311  | 0     | 0     | 0     | 0     |
| 11313  | 0     | 0     | 0     | 0     |
| 11315  | 1     | 0     | 0     | 0     |
| 11316  | 1     | 0     | 0     | 0     |
| 11318  | 1     | 0     | 0     | 0     |
| 11323  | 0     | 0     | 0     | 0     |
| 11331  | 0     | 0     | 0     | 0     |
| 11333  | 0     | 0     | 0     | 0     |
| 11334  | 0     | 0     | 0     | 1     |
| 11340  | 0     | 0     | 0     | 1     |
| 11345  | 0     | 0     | 0     | 0     |
| 11354  | 0     | 0     | 0     | 0     |

| respid | Q43_1 | Q43_2 | Q43_3 | Q43_4 |
|--------|-------|-------|-------|-------|
| 11360  |       |       |       |       |
| 11361  | 0     | 0     | 0     | 1     |
| 11367  |       |       |       |       |
| 11370  |       |       |       |       |
| 11371  | 0     | 0     | 1     | 0     |
| 11372  | 0     | 0     | 0     | 0     |
| 11373  | 0     | 0     | 0     | 1     |
| 11382  | 0     | 0     | 0     | 0     |
| 11394  | 0     | 0     | 0     | 1     |
| 11395  | 0     | 1     | 1     | 0     |
| 11397  |       |       |       |       |
| 11402  | 1     | 0     | 0     | 0     |
| 11409  | 0     | 0     | 0     | 0     |
| 11410  | 0     | 0     | 0     | 0     |
| 11411  | 0     | 0     | 0     | 0     |
| 11418  | 0     | 0     | 0     | 0     |
| 11425  | 0     | 0     | 0     | 0     |
| 11429  | 0     | 0     | 0     | 0     |
| 11430  | 1     | 0     | 1     | 0     |
| 11431  | 1     | 0     | 0     | 1     |
| 11432  |       |       |       |       |
| 11433  | 0     | 0     | 0     | 0     |
| 11435  | 0     | 0     | 0     | 0     |
| 11436  | 0     | 0     | 0     | 0     |
| 11437  | 1     | 0     | 1     | 0     |
| 11439  |       |       |       |       |
| 11440  | 0     | 0     | 1     | 0     |
| 11447  | 0     | 0     | 0     | 0     |
| 11455  | 0     | 0     | 0     | 0     |
| 11456  | 0     | 0     | 0     | 0     |
| 11461  | 0     | 0     | 0     | 0     |
| 11463  | 0     | 0     | 1     | 1     |



| respid | Q43_1 | Q43_2 | Q43_3 | Q43_4 |
|--------|-------|-------|-------|-------|
| 11470  | 0     | 0     | 0     | 1     |
| 11472  |       |       |       |       |
| 11475  | 0     | 0     | 0     | 0     |
| 11476  | 1     | 0     | 0     | 1     |
| 11482  | 0     | 0     | 0     | 0     |
| 11501  | 0     | 0     | 0     | 0     |
| 11503  | 0     | 0     | 1     | 0     |
| 11505  | 0     | 0     | 0     | 0     |
| 11510  | 0     | 0     | 0     | 0     |
| 11519  |       |       |       |       |
| 11527  | 1     | 0     | 1     | 1     |
| 11529  | 1     | 0     | 1     | 0     |
| 11530  | 0     | 0     | 0     | 0     |
| 11536  | 1     | 0     | 0     | 0     |
| 11543  | 0     | 0     | 0     | 0     |
| 11548  | 0     | 0     | 0     | 0     |
| 11566  | 1     | 0     | 0     | 0     |
| 11570  | 0     | 0     | 0     | 0     |
| 11571  | 0     | 0     | 0     | 0     |
| 11578  |       |       |       |       |
| 11579  | 0     | 0     | 0     | 0     |
| 11581  | 1     | 0     | 1     | 1     |
| 11582  | 1     | 0     | 0     | 0     |
| 11583  | 0     | 0     | 0     | 0     |
| 11589  | 1     | 0     | 0     | 0     |
| 11590  | 0     | 0     | 0     | 0     |
| 11592  | 0     | 0     | 0     | 0     |
| 11596  |       |       |       |       |
| 11598  | 0     | 0     | 0     | 1     |
| 11602  | 0     | 0     | 0     | 0     |
| 11605  | 1     | 0     | 1     | 0     |
| 11618  | 1     | 0     | 1     | 1     |

| respid | Q43_1 | Q43_2 | Q43_3 | Q43_4 |
|--------|-------|-------|-------|-------|
| 11621  | 0     | 0     | 0     | 0     |
| 11630  | 1     | 0     | 1     | 1     |
| 11636  | 1     | 0     | 0     | 0     |
| 11640  | 1     | 0     | 0     | 0     |
| 11658  | 0     | 0     | 0     | 0     |
| 11665  | 0     | 0     | 0     | 0     |
| 11666  | 0     | 0     | 1     | 0     |
| 11667  | 0     | 0     | 1     | 0     |
| 11674  | 0     | 0     | 0     | 0     |
| 11680  | 0     | 0     | 0     | 0     |
| 11683  | 0     | 0     | 0     | 0     |
| 11688  | 1     | 0     | 0     | 0     |
| 11690  |       |       |       |       |
| 11694  |       |       |       |       |
| 11705  | 1     | 0     | 0     | 0     |
| 11720  | 0     | 0     | 1     | 0     |
| 11724  |       |       |       |       |
| 11738  | 0     | 0     | 0     | 0     |
| 11744  | 1     | 0     | 0     | 0     |
| 11745  | 0     | 0     | 0     | 0     |
| 11747  |       |       |       |       |
| 11755  | 1     | 0     | 0     | 0     |
| 11756  | 1     | 0     | 0     | 0     |
| 11772  | 0     | 0     | 0     | 1     |
| 11773  |       |       |       |       |
| 11778  | 1     | 0     | 0     | 0     |
| 11790  | 0     | 0     | 0     | 0     |
| 11794  |       |       |       |       |
| 11795  | 0     | 0     | 0     | 0     |
| 11799  | 0     | 0     | 0     | 0     |
| 11803  | 0     | 0     | 0     | 0     |
| 11806  | 1     | 0     | 0     | 0     |

| respid | Q43_1 | Q43_2 | Q43_3 | Q43_4 |
|--------|-------|-------|-------|-------|
| 11808  | 1     | 1     | 0     | 0     |
| 11810  |       |       |       |       |
| 11811  |       |       |       |       |
| 11812  | 1     | 0     | 0     | 1     |
| 11813  | 0     | 0     | 1     | 1     |
| 11821  | 1     | 0     | 1     | 1     |
| 11827  |       |       |       |       |
| 11831  | 0     | 0     | 0     | 1     |
| 11841  |       |       |       |       |
| 11872  | 0     | 0     | 0     | 0     |
| 11898  | 0     | 0     | 0     | 0     |
| 11902  | 1     | 0     | 0     | 1     |
| 11912  | 0     | 0     | 0     | 0     |
| 11926  | 0     | 0     | 0     | 0     |
| 11928  | 0     | 0     | 0     | 1     |
| 11932  | 0     | 0     | 0     | 0     |
| 11934  | 0     | 0     | 0     | 0     |
| 11941  | 1     | 0     | 0     | 0     |
| 11942  |       |       |       |       |
| 11943  | 0     | 0     | 0     | 0     |
| 11944  | 1     | 0     | 0     | 0     |
| 11955  |       |       |       |       |
| 11958  | 0     | 0     | 0     | 0     |
| 11968  | 0     | 0     | 1     | 1     |
| 11979  | 1     | 0     | 0     | 0     |
| 11988  |       |       |       |       |
| 11999  | 1     | 0     | 0     | 0     |
| 12002  | 0     | 0     | 0     | 0     |
| 12004  | 0     | 0     | 0     | 0     |
| 12008  | 0     | 0     | 0     | 0     |
| 12013  | 0     | 0     | 0     | 0     |
| 12018  | 0     | 0     | 1     | 1     |

| respid | Q43_1 | Q43_2 | Q43_3 | Q43_4 |
|--------|-------|-------|-------|-------|
| 12023  | 1     | 0     | 0     | 0     |
| 12027  | 0     | 0     | 1     | 0     |
| 12030  | 0     | 0     | 0     | 1     |
| 12031  | 0     | 0     | 0     | 1     |
| 12036  | 1     | 0     | 0     | 0     |
| 12037  | 1     | 0     | 0     | 0     |
| 12038  | 0     | 0     | 0     | 0     |
| 12039  | 0     | 0     | 0     | 0     |
| 12045  | 1     | 0     | 1     | 1     |
| 12046  | 0     | 0     | 0     | 0     |
| 12054  | 1     | 0     | 1     | 1     |
| 12055  | 0     | 0     | 0     | 0     |
| 12069  | 1     | 0     | 0     | 0     |
| 12070  | 0     | 0     | 0     | 1     |
| 12074  | 0     | 0     | 0     | 0     |
| 12075  | 0     | 0     | 1     | 1     |
| 12078  | 1     | 0     | 0     | 0     |
| 12089  | 0     | 0     | 0     | 0     |
| 12091  | 1     | 0     | 0     | 0     |
| 12092  | 0     | 0     | 0     | 1     |
| 12108  | 0     | 0     | 0     | 1     |
| 12111  | 1     | 0     | 1     | 0     |
| 12112  | 1     | 0     | 0     | 1     |
| 12126  |       |       |       |       |
| 12132  | 1     | 0     | 1     | 0     |
| 12150  | 0     | 0     | 0     | 1     |
| 12152  | 0     | 0     | 0     | 0     |
| 12154  | 0     | 0     | 0     | 0     |
| 12157  | 1     | 0     | 0     | 0     |
| 12165  | 0     | 0     | 0     | 0     |
| 12169  | 0     | 0     | 0     | 1     |
| 12182  | 0     | 0     | 0     | 0     |

| respid | Q43_1 | Q43_2 | Q43_3 | Q43_4 |
|--------|-------|-------|-------|-------|
| 12198  | 0     | 0     | 0     | 0     |
| 12199  |       |       |       |       |
| 12202  | 0     | 0     | 0     | 0     |
| 12207  | 0     | 0     | 0     | 0     |
| 12208  | 0     | 0     | 1     | 0     |
| 12210  | 0     | 0     | 0     | 0     |
| 12219  | 0     | 0     | 0     | 0     |
| 12224  | 0     | 0     | 0     | 0     |
| 12230  | 1     | 0     | 1     | 0     |
| 12238  | 1     | 0     | 0     | 0     |
| 12239  | 0     | 0     | 0     | 0     |
| 12243  | 1     | 0     | 0     | 0     |
| 12245  | 0     | 0     | 0     | 0     |
| 12246  | 0     | 0     | 0     | 0     |
| 12247  | 1     | 0     | 0     | 0     |
| 12248  | 1     | 0     | 0     | 0     |
| 12249  | 0     | 0     | 0     | 0     |
| 12258  | 0     | 0     | 1     | 1     |
| 12265  | 0     | 0     | 0     | 0     |
| 12269  | 0     | 0     | 1     | 0     |
| 12270  | 1     | 0     | 1     | 1     |
| 12279  | 0     | 0     | 0     | 0     |
| 12280  | 0     | 0     | 0     | 0     |
| 12282  | 0     | 0     | 0     | 0     |
| 12283  | 0     | 0     | 0     | 0     |
| 12287  | 0     | 0     | 0     | 0     |
| 12288  | 0     | 0     | 1     | 1     |
| 12290  | 0     | 0     | 0     | 0     |
| 12292  | 0     | 0     | 0     | 0     |
| 12294  | 0     | 0     | 0     | 0     |
| 12296  | 0     | 0     | 0     | 0     |
| 12307  | 0     | 0     | 0     | 0     |

| respid | Q43_1 | Q43_2 | Q43_3 | Q43_4 |
|--------|-------|-------|-------|-------|
| 12309  | 0     | 0     | 0     | 0     |
| 12312  | 1     | 0     | 0     | 0     |
| 12317  | 0     | 0     | 0     | 0     |
| 12319  | 1     | 0     | 0     | 0     |
| 12320  | 0     | 0     | 0     | 0     |
| 12322  | 0     | 0     | 0     | 0     |
| 12328  | 0     | 0     | 0     | 0     |
| 12331  | 1     | 0     | 1     | 0     |
| 12332  | 0     | 0     | 0     | 0     |
| 12334  | 0     | 0     | 0     | 0     |
| 12337  | 0     | 0     | 0     | 1     |
| 12338  | 0     | 0     | 0     | 1     |
| 12342  | 0     | 0     | 1     | 0     |
| 12349  | 0     | 0     | 0     | 0     |
| 12352  | 0     | 0     | 0     | 0     |
| 12355  | 0     | 0     | 1     | 1     |
| 12357  | 0     | 0     | 0     | 1     |
| 12358  | 0     | 0     | 0     | 0     |
| 12371  | 0     | 0     | 0     | 0     |
| 12372  | 0     | 0     | 0     | 0     |
| 12373  | 0     | 0     | 0     | 0     |
| 12379  | 0     | 0     | 0     | 0     |
| 12381  | 0     | 0     | 0     | 0     |
| 12383  | 0     | 0     | 0     | 0     |
| 12384  | 1     | 0     | 0     | 0     |
| 12386  | 1     | 0     | 0     | 0     |
| 12389  |       |       |       |       |
| 12392  | 1     | 0     | 0     | 0     |
| 12396  | 0     | 0     | 0     | 0     |
| 12397  | 1     | 0     | 1     | 0     |
| 12399  | 0     | 0     | 0     | 0     |
| 12400  | 0     | 0     | 0     | 0     |

| respid | Q43_1 | Q43_2 | Q43_3 | Q43_4 |
|--------|-------|-------|-------|-------|
| 12406  | 1     | 0     | 0     | 0     |
| 12407  | 0     | 0     | 0     | 0     |
| 12410  | 0     | 0     | 0     | 0     |
| 12413  | 0     | 0     | 0     | 0     |
| 12416  | 0     | 0     | 0     | 0     |
| 12419  | 0     | 0     | 0     | 0     |
| 12422  | 1     | 0     | 1     | 1     |
| 12423  | 1     | 0     | 0     | 0     |
| 12429  | 0     | 0     | 0     | 0     |
| 12434  | 0     | 0     | 0     | 1     |
| 12435  | 1     | 0     | 0     | 0     |
| 12436  | 0     | 0     | 0     | 0     |
| 12442  |       |       |       |       |
| 12449  | 0     | 0     | 0     | 0     |
| 12451  | 0     | 0     | 0     | 0     |
| 12456  | 0     | 0     | 0     | 0     |
| 12457  | 0     | 0     | 0     | 0     |
| 12458  | 0     | 0     | 0     | 0     |
| 12461  | 1     | 0     | 0     | 0     |
| 12462  | 0     | 0     | 0     | 0     |
| 12463  | 0     | 0     | 1     | 0     |
| 12466  | 0     | 0     | 0     | 0     |
| 12470  | 0     | 0     | 0     | 1     |
| 12471  | 0     | 0     | 0     | 0     |
| 12472  | 0     | 0     | 0     | 0     |
| 12478  | 0     | 0     | 0     | 0     |
| 12479  | 1     | 0     | 1     | 1     |
| 12481  | 0     | 0     | 0     | 0     |
| 12482  | 0     | 0     | 0     | 0     |
| 12483  |       |       |       |       |
| 12496  | 0     | 0     | 0     | 0     |
| 12497  | 0     | 0     | 0     | 0     |

| respid | Q43_1 | Q43_2 | Q43_3 | Q43_4 |
|--------|-------|-------|-------|-------|
| 12498  | 1     | 0     | 1     | 0     |
| 12500  | 0     | 0     | 0     | 0     |
| 12501  | 1     | 0     | 0     | 0     |
| 12502  | 0     | 0     | 0     | 0     |
| 12503  | 0     | 0     | 0     | 0     |
| 12505  | 1     | 0     | 0     | 0     |
| 12508  | 0     | 0     | 1     | 0     |
| 12509  | 0     | 0     | 1     | 1     |
| 12510  |       |       |       |       |
| 12512  | 0     | 0     | 0     | 0     |
| 12514  | 0     | 0     | 0     | 1     |
| 12515  | 0     | 0     | 1     | 1     |
| 12520  | 0     | 0     | 0     | 0     |
| 12522  | 0     | 0     | 0     | 0     |
| 12526  | 0     | 0     | 0     | 0     |
| 12527  |       |       |       |       |
| 12528  | 0     | 0     | 0     | 0     |
| 12530  | 0     | 0     | 0     | 0     |
| 12535  | 0     | 0     | 0     | 0     |
| 12539  | 0     | 0     | 0     | 0     |
| 12541  | 1     | 0     | 0     | 0     |
| 12542  | 0     | 0     | 0     | 0     |
| 12545  | 0     | 0     | 0     | 0     |
| 12547  | 0     | 0     | 0     | 0     |
| 12549  | 0     | 0     | 0     | 0     |
| 12550  | 0     | 0     | 0     | 0     |
| 12555  |       |       |       |       |
| 12557  | 1     | 1     | 1     | 1     |
| 12559  | 0     | 0     | 0     | 0     |
| 12561  | 0     | 0     | 0     | 0     |
| 12562  | 0     | 0     | 0     | 0     |
| 12563  | 0     | 0     | 0     | 0     |



| respid | Q43_1 | Q43_2 | Q43_3 | Q43_4 |
|--------|-------|-------|-------|-------|
| 12565  | 1     | 0     | 0     | 0     |
| 12566  |       |       |       |       |
| 12570  |       |       |       |       |
| 12571  | 0     | 0     | 0     | 0     |
| 12572  | 0     | 0     | 0     | 0     |
| 12578  |       |       |       |       |
| 12579  | 0     | 0     | 0     | 0     |
| 12581  | 0     | 0     | 0     | 0     |
| 12582  | 0     | 0     | 0     | 0     |
| 12585  | 1     | 0     | 0     | 1     |
| 12586  | 0     | 0     | 0     | 1     |
| 12588  | 0     | 0     | 0     | 0     |
| 12589  | 0     | 0     | 0     | 1     |
| 12590  | 0     | 0     | 0     | 0     |
| 12591  | 0     | 0     | 0     | 0     |
| 12593  | 0     | 1     | 0     | 1     |
| 12594  | 0     | 0     | 0     | 0     |
| 12599  | 0     | 0     | 0     | 0     |
| 12600  | 0     | 0     | 0     | 0     |
| 12602  | 1     | 0     | 0     | 0     |
| 12606  | 0     | 0     | 0     | 0     |
| 12607  |       |       |       |       |
| 12608  |       |       |       |       |
| 12610  | 0     | 0     | 1     | 0     |
| 12611  | 0     | 0     | 0     | 0     |
| 12613  | 1     | 0     | 0     | 1     |
| 12616  | 0     | 0     | 0     | 0     |
| 12617  | 1     | 0     | 0     | 0     |
| 12619  | 0     | 0     | 0     | 0     |
| 12622  |       |       |       |       |
| 12628  | 0     | 0     | 0     | 1     |
| 12631  | 1     | 0     | 0     | 0     |

| respid | Q43_1 | Q43_2 | Q43_3 | Q43_4 |
|--------|-------|-------|-------|-------|
| 12635  | 0     | 0     | 0     | 0     |
| 12638  | 0     | 0     | 0     | 0     |
| 12639  | 0     | 0     | 0     | 0     |
| 12640  | 0     | 0     | 0     | 0     |
| 12643  | 1     | 0     | 1     | 1     |
| 12646  | 1     | 0     | 1     | 0     |
| 12648  | 1     | 1     | 1     | 1     |
| 12650  | 0     | 0     | 0     | 0     |
| 12651  | 1     | 0     | 0     | 0     |
| 12658  | 0     | 0     | 0     | 0     |
| 12662  | 0     | 0     | 0     | 0     |
| 12663  | 0     | 0     | 0     | 1     |
| 12664  | 1     | 0     | 1     | 1     |
| 12669  | 1     | 0     | 1     | 1     |
| 12670  | 0     | 0     | 0     | 0     |
| 12673  |       |       |       |       |
| 12675  | 0     | 0     | 0     | 0     |
| 12677  | 0     | 0     | 0     | 0     |
| 12679  | 1     | 0     | 0     | 0     |
| 12682  | 0     | 0     | 0     | 0     |
| 12696  | 0     | 0     | 0     | 0     |
| 12697  | 0     | 0     | 0     | 0     |
| 12699  | 0     | 0     | 0     | 0     |
| 12700  | 0     | 0     | 0     | 0     |
| 12701  | 0     | 0     | 0     | 0     |
| 12702  | 0     | 0     | 0     | 0     |
| 12704  | 1     | 0     | 0     | 0     |
| 12705  | 1     | 0     | 0     | 0     |
| 12709  | 0     | 0     | 1     | 1     |
| 12710  | 0     | 0     | 0     | 0     |
| 12713  | 0     | 0     | 0     | 0     |
| 12716  | 0     | 0     | 0     | 1     |

| respid | Q43_1 | Q43_2 | Q43_3 | Q43_4 |
|--------|-------|-------|-------|-------|
| 12719  | 1     | 0     | 0     | 0     |
| 12720  | 0     | 0     | 0     | 0     |
| 12723  | 0     | 0     | 0     | 0     |
| 12726  | 0     | 0     | 0     | 0     |
| 12728  | 0     | 0     | 0     | 1     |
| 12729  | 0     | 0     | 0     | 0     |
| 12731  | 0     | 0     | 0     | 0     |
| 12732  | 0     | 0     | 0     | 0     |
| 12733  | 0     | 0     | 0     | 0     |
| 12736  | 0     | 0     | 0     | 0     |
| 12737  | 0     | 0     | 0     | 0     |
| 12739  | 0     | 0     | 0     | 1     |
| 12742  | 0     | 0     | 0     | 0     |
| 12743  | 1     | 0     | 1     | 0     |
| 12744  | 0     | 0     | 0     | 0     |
| 12747  | 0     | 0     | 0     | 0     |
| 12751  | 0     | 0     | 0     | 0     |
| 12754  | 0     | 0     | 0     | 0     |
| 12756  | 0     | 0     | 0     | 0     |
| 12757  | 0     | 0     | 0     | 0     |
| 12760  | 0     | 0     | 0     | 0     |
| 12761  | 0     | 0     | 0     | 0     |
| 12762  | 0     | 0     | 0     | 1     |
| 12766  | 0     | 0     | 0     | 0     |
| 12769  | 0     | 0     | 0     | 0     |
| 12770  | 1     | 0     | 0     | 0     |
| 12773  | 0     | 0     | 0     | 1     |
| 12780  | 0     | 0     | 1     | 0     |
| 12789  | 1     | 0     | 0     | 0     |
| 12792  | 1     | 0     | 1     | 1     |
| 12795  | 0     | 0     | 0     | 0     |
| 12804  | 1     | 0     | 0     | 0     |

| respid | Q43_1 | Q43_2 | Q43_3 | Q43_4 |
|--------|-------|-------|-------|-------|
| 12811  | 0     | 0     | 0     | 0     |
| 12813  | 0     | 0     | 0     | 0     |
| 12814  | 0     | 0     | 0     | 0     |
| 12815  | 0     | 0     | 0     | 0     |
| 12816  | 0     | 0     | 0     | 0     |
| 12817  | 0     | 0     | 0     | 0     |
| 12818  | 1     | 0     | 0     | 1     |
| 12819  | 0     | 0     | 0     | 0     |
| 12820  | 0     | 0     | 0     | 0     |
| 12821  | 0     | 0     | 0     | 0     |
| 12824  | 0     | 0     | 0     | 1     |
| 12827  | 1     | 0     | 0     | 1     |
| 12836  | 1     | 0     | 0     | 0     |
| 12837  | 0     | 0     | 0     | 0     |
| 12838  | 0     | 0     | 0     | 0     |
| 12845  | 0     | 0     | 0     | 0     |
| 12847  | 1     | 0     | 1     | 0     |
| 12849  | 0     | 0     | 0     | 1     |
| 12850  | 1     | 0     | 0     | 0     |
| 12852  | 0     | 0     | 0     | 0     |
| 12853  | 0     | 0     | 0     | 1     |
| 12854  | 0     | 0     | 0     | 0     |
| 12860  | 0     | 0     | 0     | 0     |
| 12861  | 0     | 0     | 0     | 0     |
| 12863  | 0     | 0     | 0     | 0     |
| 12865  | 0     | 0     | 0     | 0     |
| 12870  | 0     | 0     | 0     | 0     |
| 12871  | 0     | 0     | 0     | 0     |
| 12873  | 0     | 0     | 1     | 0     |
| 12877  | 0     | 0     | 0     | 0     |
| 12880  | 0     | 0     | 0     | 0     |
| 12881  | 1     | 0     | 1     | 0     |

| respid | Q43_1 | Q43_2 | Q43_3 | Q43_4 |
|--------|-------|-------|-------|-------|
| 12882  | 0     | 0     | 0     | 0     |
| 12883  | 1     | 0     | 0     | 0     |
| 12885  | 0     | 0     | 0     | 0     |
| 12887  | 0     | 0     | 0     | 0     |
| 12889  | 0     | 0     | 0     | 0     |
| 12890  | 0     | 0     | 0     | 0     |
| 12891  | 0     | 0     | 0     | 0     |
| 12892  | 1     | 0     | 0     | 1     |
| 12893  | 0     | 0     | 0     | 0     |
| 12895  | 0     | 0     | 0     | 0     |
| 12898  | 0     | 0     | 0     | 0     |
| 12907  | 0     | 0     | 0     | 0     |
| 12908  | 1     | 0     | 1     | 0     |
| 12909  |       |       |       |       |
| 12914  | 1     | 0     | 0     | 0     |
| 12915  | 1     | 0     | 1     | 0     |
| 12916  |       |       |       |       |
| 12921  | 0     | 0     | 0     | 0     |
| 12922  | 0     | 0     | 0     | 0     |
| 12923  | 1     | 0     | 0     | 0     |
| 12926  | 0     | 0     | 0     | 0     |
| 12927  | 0     | 0     | 0     | 0     |
| 12932  | 0     | 0     | 0     | 0     |
| 12936  | 0     | 0     | 0     | 0     |
| 12937  | 1     | 0     | 0     | 0     |
| 12938  | 1     | 0     | 0     | 0     |
| 12939  | 0     | 0     | 0     | 0     |
| 12940  | 0     | 0     | 1     | 0     |
| 12945  | 0     | 0     | 0     | 0     |
| 12946  | 0     | 0     | 0     | 1     |
| 12947  | 1     | 0     | 0     | 0     |
| 12948  | 1     | 0     | 0     | 0     |

| respid | Q43_1 | Q43_2 | Q43_3 | Q43_4 |
|--------|-------|-------|-------|-------|
| 12951  | 1     | 0     | 0     | 0     |
| 12952  | 0     | 0     | 0     | 0     |
| 12954  | 0     | 0     | 0     | 0     |
| 12960  | 0     | 0     | 0     | 0     |
| 12961  | 0     | 0     | 0     | 0     |
| 12962  | 0     | 0     | 0     | 0     |
| 12963  | 0     | 0     | 0     | 0     |
| 12964  | 0     | 0     | 0     | 0     |
| 12966  | 0     | 0     | 1     | 1     |
| 12967  | 0     | 0     | 0     | 0     |
| 12969  | 0     | 0     | 0     | 0     |
| 12970  | 0     | 0     | 0     | 0     |
| 12974  | 1     | 0     | 0     | 0     |
| 12979  |       |       |       |       |
| 12980  | 0     | 0     | 0     | 0     |
| 12983  | 0     | 0     | 0     | 0     |
| 12988  | 0     | 0     | 0     | 0     |
| 12994  | 0     | 0     | 0     | 0     |
| 12995  | 1     | 0     | 0     | 0     |
| 12996  | 0     | 0     | 0     | 0     |
| 12998  | 0     | 0     | 0     | 0     |
| 12999  | 0     | 0     | 0     | 0     |
| 13001  | 0     | 0     | 0     | 1     |
| 13005  | 0     | 0     | 0     | 0     |
| 13006  | 0     | 0     | 0     | 0     |
| 13007  | 0     | 0     | 0     | 0     |
| 13011  | 0     | 0     | 0     | 0     |
| 13012  | 0     | 0     | 0     | 0     |
| 13013  | 1     | 0     | 0     | 0     |
| 13016  | 0     | 0     | 0     | 0     |
| 13018  | 0     | 0     | 0     | 0     |
| 13020  |       |       |       |       |

| respid | Q43_1 | Q43_2 | Q43_3 | Q43_4 |
|--------|-------|-------|-------|-------|
| 13024  | 0     | 0     | 0     | 0     |
| 13025  | 0     | 0     | 0     | 0     |
| 13027  | 0     | 0     | 0     | 0     |
| 13031  | 0     | 0     | 0     | 0     |
| 13032  | 1     | 0     | 0     | 0     |
| 13034  | 0     | 0     | 0     | 0     |
| 13036  | 1     | 0     | 1     | 1     |
| 13037  | 1     | 0     | 0     | 0     |
| 13038  | 1     | 0     | 0     | 0     |
| 13039  | 0     | 0     | 0     | 0     |
| 13040  | 0     | 0     | 0     | 0     |
| 13041  | 0     | 0     | 0     | 0     |
| 13045  | 1     | 0     | 0     | 0     |
| 13046  | 1     | 0     | 0     | 0     |
| 13048  | 0     | 0     | 0     | 0     |
| 13051  | 0     | 0     | 0     | 1     |
| 13053  | 0     | 0     | 0     | 0     |
| 13055  | 0     | 0     | 0     | 0     |
| 13059  | 0     | 0     | 0     | 0     |
| 13068  | 1     | 0     | 1     | 0     |
| 13069  | 0     | 0     | 0     | 0     |
| 13076  | 0     | 0     | 0     | 0     |
| 13081  | 0     | 0     | 0     | 0     |
| 13082  | 0     | 0     | 0     | 0     |
| 13084  | 0     | 0     | 0     | 0     |
| 13085  | 0     | 0     | 0     | 0     |
| 13086  | 0     | 0     | 0     | 0     |
| 13093  | 1     | 0     | 0     | 0     |
| 13094  | 0     | 0     | 0     | 0     |
| 13097  | 0     | 0     | 0     | 0     |
| 13098  | 0     | 0     | 0     | 0     |
| 13099  | 0     | 0     | 0     | 0     |

| respid | Q43_1 | Q43_2 | Q43_3 | Q43_4 |
|--------|-------|-------|-------|-------|
| 13100  | 1     | 0     | 0     | 0     |
| 13101  |       |       |       |       |
| 13103  |       |       |       |       |
| 13105  | 0     | 0     | 0     | 0     |
| 13106  | 0     | 0     | 1     | 1     |
| 13107  | 0     | 0     | 0     | 0     |
| 13110  | 0     | 0     | 0     | 1     |
| 13118  | 0     | 0     | 0     | 0     |
| 13120  | 1     | 0     | 0     | 0     |
| 13130  | 1     | 0     | 0     | 0     |
| 13133  | 0     | 0     | 0     | 0     |
| 13134  | 0     | 0     | 0     | 0     |
| 13139  | 0     | 0     | 0     | 0     |
| 13142  | 0     | 0     | 0     | 0     |
| 13143  | 0     | 0     | 0     | 0     |
| 13145  | 0     | 0     | 0     | 0     |
| 13148  | 1     | 0     | 0     | 1     |
| 13149  | 0     | 0     | 0     | 0     |
| 13151  | 1     | 0     | 0     | 1     |
| 13153  | 0     | 0     | 0     | 0     |
| 13158  | 0     | 0     | 0     | 0     |
| 13160  | 1     | 1     | 1     | 1     |
| 13162  | 0     | 0     | 1     | 0     |
| 13169  | 0     | 0     | 0     | 0     |
| 13172  | 0     | 0     | 0     | 0     |
| 13173  | 0     | 0     | 0     | 0     |
| 13176  | 1     | 0     | 0     | 0     |
| 13179  | 0     | 0     | 0     | 0     |
| 13184  | 0     | 0     | 0     | 0     |
| 13185  | 0     | 0     | 0     | 0     |
| 13186  | 0     | 0     | 0     | 0     |
| 13188  | 0     | 0     | 0     | 1     |



| respid | Q43_1 | Q43_2 | Q43_3 | Q43_4 |
|--------|-------|-------|-------|-------|
| 13190  | 0     | 0     | 0     | 1     |
| 13192  | 0     | 0     | 0     | 0     |
| 13193  |       |       |       |       |
| 13201  | 0     | 0     | 0     | 0     |
| 13207  | 0     | 0     | 0     | 0     |
| 13208  |       |       |       |       |
| 13209  | 0     | 0     | 0     | 1     |
| 13212  | 0     | 0     | 0     | 0     |
| 13215  | 0     | 0     | 0     | 0     |
| 13218  | 1     | 0     | 0     | 0     |
| 13219  | 0     | 0     | 0     | 0     |
| 13224  | 0     | 0     | 0     | 0     |
| 13225  | 0     | 0     | 0     | 0     |
| 13226  | 1     | 0     | 0     | 0     |
| 13232  | 0     | 0     | 0     | 0     |
| 13237  | 0     | 0     | 0     | 0     |
| 13239  | 0     | 0     | 0     | 0     |
| 13241  | 0     | 0     | 0     | 0     |
| 13243  | 0     | 0     | 0     | 0     |
| 13247  | 1     | 0     | 0     | 1     |
| 13248  | 1     | 0     | 0     | 0     |
| 13251  | 0     | 0     | 0     | 0     |
| 13256  | 0     | 0     | 0     | 0     |
| 13260  | 0     | 0     | 0     | 0     |
| 13261  | 0     | 0     | 0     | 0     |
| 13264  | 0     | 0     | 0     | 0     |
| 13273  | 0     | 0     | 0     | 0     |
| 13274  | 0     | 0     | 0     | 0     |
| 13276  | 0     | 0     | 0     | 0     |
| 13278  |       |       |       |       |
| 13279  | 0     | 0     | 0     | 0     |
| 13282  | 0     | 0     | 0     | 0     |

| respid | Q43_1 | Q43_2 | Q43_3 | Q43_4 |
|--------|-------|-------|-------|-------|
| 13283  | 0     | 0     | 0     | 0     |
| 13285  | 0     | 0     | 0     | 0     |
| 13286  | 0     | 0     | 0     | 0     |
| 13299  | 0     | 0     | 0     | 0     |
| 13300  | 0     | 0     | 0     | 0     |
| 13301  |       |       |       |       |
| 13303  | 0     | 0     | 0     | 0     |
| 13304  | 0     | 0     | 0     | 1     |
| 13307  | 0     | 0     | 0     | 0     |
| 13308  | 0     | 0     | 0     | 0     |
| 13312  | 0     | 0     | 0     | 0     |
| 13313  | 0     | 0     | 0     | 0     |
| 13314  | 1     | 0     | 0     | 0     |
| 13318  | 0     | 0     | 0     | 0     |
| 13320  | 1     | 0     | 1     | 1     |
| 13322  | 1     | 0     | 0     | 0     |
| 13324  | 0     | 0     | 0     | 0     |
| 13325  | 1     | 0     | 0     | 0     |
| 13327  | 0     | 0     | 0     | 0     |
| 13330  | 0     | 0     | 0     | 0     |
| 13332  | 0     | 0     | 0     | 0     |
| 13333  | 0     | 0     | 0     | 0     |
| 13334  | 0     | 0     | 0     | 0     |
| 13351  | 1     | 0     | 1     | 0     |
| 13353  | 0     | 0     | 0     | 1     |
| 13354  | 0     | 0     | 0     | 0     |
| 13355  | 0     | 0     | 0     | 0     |
| 13358  | 0     | 0     | 0     | 0     |
| 13359  | 0     | 0     | 0     | 0     |
| 13360  | 0     | 0     | 0     | 0     |
| 13364  | 0     | 0     | 0     | 0     |
| 13365  | 1     | 0     | 0     | 0     |

| respid | Q43_1 | Q43_2 | Q43_3 | Q43_4 |
|--------|-------|-------|-------|-------|
| 13368  | 0     | 0     | 0     | 0     |
| 13370  | 0     | 0     | 0     | 0     |
| 13375  | 0     | 0     | 0     | 0     |
| 13384  | 0     | 0     | 0     | 0     |
| 13387  | 1     | 0     | 0     | 0     |
| 13395  | 0     | 0     | 0     | 0     |
| 13398  | 0     | 0     | 0     | 0     |
| 13404  | 0     | 0     | 0     | 0     |
| 13405  | 0     | 0     | 0     | 0     |
| 13408  |       |       |       |       |
| 13411  | 0     | 0     | 0     | 0     |
| 13413  | 0     | 0     | 0     | 0     |
| 13419  | 0     | 0     | 0     | 0     |
| 13420  | 0     | 0     | 0     | 0     |
| 13427  | 0     | 0     | 0     | 0     |
| 13441  | 0     | 0     | 0     | 0     |
| 13444  | 0     | 0     | 0     | 0     |
| 13456  | 0     | 0     | 0     | 0     |
| 13466  | 0     | 0     | 0     | 0     |
| 13468  | 0     | 0     | 0     | 0     |
| 13475  | 0     | 0     | 0     | 0     |
| 13484  | 0     | 0     | 0     | 0     |
| 13486  | 0     | 0     | 0     | 0     |
| 13487  | 0     | 0     | 0     | 0     |
| 13491  |       |       |       |       |
| 13496  | 1     | 0     | 0     | 1     |
| 13497  | 0     | 0     | 0     | 0     |
| 13498  | 1     | 0     | 0     | 0     |
| 13502  |       |       |       |       |
| 13503  | 1     | 0     | 0     | 0     |
| 13505  | 1     | 0     | 0     | 0     |
| 13509  | 1     | 0     | 0     | 0     |

| respid | Q43_1 | Q43_2 | Q43_3 | Q43_4 |
|--------|-------|-------|-------|-------|
| 13510  | 0     | 0     | 0     | 0     |
| 13518  | 1     | 0     | 0     | 0     |
| 13521  | 0     | 0     | 0     | 0     |
| 13523  | 1     | 0     | 0     | 0     |
| 13528  | 0     | 0     | 0     | 0     |
| 13531  | 0     | 0     | 0     | 0     |
| 13532  | 0     | 0     | 0     | 0     |
| 13533  | 1     | 0     | 0     | 0     |
| 13534  |       |       |       |       |
| 13535  | 0     | 0     | 0     | 0     |
| 13538  | 0     | 0     | 0     | 1     |
| 13540  | 1     | 0     | 0     | 0     |
| 13541  | 0     | 0     | 0     | 0     |
| 13542  | 1     | 0     | 0     | 0     |
| 13550  | 0     | 0     | 0     | 0     |
| 13553  | 0     | 0     | 0     | 0     |
| 13554  | 0     | 0     | 0     | 0     |
| 13555  | 0     | 0     | 0     | 1     |
| 13556  | 0     | 0     | 0     | 0     |
| 13563  | 0     | 0     | 0     | 1     |
| 13564  | 0     | 0     | 0     | 0     |
| 13567  |       |       |       |       |
| 13568  | 0     | 0     | 1     | 1     |
| 13570  |       |       |       |       |
| 13573  | 0     | 0     | 0     | 0     |
| 13575  | 0     | 0     | 0     | 0     |
| 13577  | 0     | 0     | 0     | 1     |
| 13580  | 0     | 0     | 0     | 1     |
| 13582  | 0     | 0     | 0     | 0     |
| 13584  | 0     | 0     | 0     | 1     |
| 13585  |       |       |       |       |
| 13586  | 0     | 0     | 0     | 0     |

| respid | Q43_1 | Q43_2 | Q43_3 | Q43_4 |
|--------|-------|-------|-------|-------|
| 13587  | 0     | 0     | 0     | 0     |
| 13592  | 0     | 0     | 1     | 0     |
| 13596  | 0     | 0     | 0     | 0     |
| 13597  | 0     | 0     | 0     | 1     |
| 13599  | 0     | 0     | 0     | 0     |
| 13601  | 0     | 0     | 0     | 0     |
| 13604  | 0     | 0     | 0     | 0     |
| 13608  | 0     | 0     | 0     | 0     |
| 13616  | 0     | 0     | 0     | 0     |
| 13618  | 1     | 0     | 0     | 1     |
| 13619  | 0     | 0     | 0     | 1     |
| 13626  |       |       |       |       |
| 13628  | 1     | 0     | 1     | 1     |
| 13640  | 0     | 0     | 0     | 0     |
| 13645  | 0     | 0     | 0     | 0     |
| 13648  |       |       |       |       |
| 13653  | 0     | 0     | 1     | 0     |
| 13655  | 0     | 0     | 0     | 0     |
| 13662  | 0     | 0     | 0     | 0     |
| 13670  | 1     | 0     | 1     | 1     |
| 13673  | 1     | 0     | 0     | 0     |
| 13674  | 0     | 0     | 0     | 0     |
| 13675  | 0     | 0     | 0     | 0     |
| 13678  | 1     | 0     | 1     | 1     |
| 13680  | 0     | 0     | 0     | 1     |
| 13681  | 0     | 0     | 0     | 0     |
| 13683  | 1     | 0     | 0     | 0     |
| 13684  | 0     | 0     | 0     | 0     |
| 13685  | 0     | 0     | 0     | 0     |
| 13687  |       |       |       |       |
| 13690  | 0     | 0     | 0     | 0     |
| 13700  | 0     | 0     | 0     | 0     |

| respid | Q43_1 | Q43_2 | Q43_3 | Q43_4 |
|--------|-------|-------|-------|-------|
| 13705  | 1     | 0     | 0     | 0     |
| 13710  | 0     | 0     | 0     | 0     |
| 13711  | 0     | 0     | 0     | 1     |
| 13713  | 0     | 0     | 0     | 0     |
| 13716  | 0     | 0     | 0     | 0     |
| 13721  | 0     | 0     | 0     | 0     |
| 13722  | 0     | 0     | 0     | 0     |
| 13723  | 0     | 0     | 1     | 1     |
| 13726  | 1     | 0     | 1     | 0     |
| 13728  | 0     | 0     | 0     | 0     |
| 13730  | 0     | 0     | 0     | 0     |
| 13734  | 0     | 0     | 0     | 0     |
| 13736  | 0     | 0     | 0     | 1     |
| 13737  | 0     | 0     | 0     | 0     |
| 13739  | 0     | 0     | 0     | 0     |
| 13742  |       |       |       |       |
| 13746  | 0     | 0     | 0     | 0     |
| 13747  | 0     | 0     | 0     | 0     |
| 13749  | 0     | 0     | 0     | 0     |
| 13751  | 1     | 0     | 0     | 1     |
| 13752  | 0     | 0     | 0     | 0     |
| 13756  | 1     | 0     | 0     | 0     |
| 13757  | 0     | 0     | 0     | 0     |
| 13767  | 0     | 0     | 0     | 0     |
| 13771  | 0     | 0     | 0     | 0     |
| 13772  | 0     | 0     | 0     | 1     |
| 13779  |       |       |       |       |
| 13782  | 0     | 0     | 0     | 0     |
| 13783  | 0     | 0     | 0     | 0     |
| 13785  | 1     | 0     | 0     | 0     |
| 13786  | 0     | 0     | 0     | 1     |
| 13792  | 1     | 0     | 0     | 1     |

| respid | Q43_1 | Q43_2 | Q43_3 | Q43_4 |
|--------|-------|-------|-------|-------|
| 13796  | 0     | 0     | 0     | 0     |
| 13798  | 1     | 0     | 0     | 0     |
| 13799  | 0     | 0     | 0     | 0     |
| 13804  | 0     | 0     | 0     | 0     |
| 13805  | 0     | 0     | 0     | 0     |
| 13810  | 0     | 0     | 0     | 1     |
| 13811  | 1     | 0     | 0     | 0     |
| 13819  | 0     | 0     | 0     | 0     |
| 13821  | 1     | 0     | 1     | 0     |
| 13824  | 0     | 0     | 0     | 0     |
| 13828  | 0     | 0     | 0     | 0     |
| 13829  | 1     | 0     | 1     | 0     |
| 13831  |       |       |       |       |
| 13833  | 1     | 0     | 0     | 0     |
| 13835  | 0     | 0     | 0     | 1     |
| 13838  |       |       |       |       |
| 13839  | 0     | 0     | 0     | 0     |
| 13845  |       |       |       |       |
| 13846  | 0     | 0     | 0     | 0     |
| 13853  | 1     | 0     | 0     | 0     |
| 13855  | 1     | 0     | 0     | 0     |
| 13858  | 1     | 0     | 1     | 0     |
| 13860  |       |       |       |       |
| 13865  | 0     | 0     | 0     | 1     |
| 13870  | 0     | 0     | 0     | 0     |
| 13872  | 0     | 0     | 0     | 0     |
| 13873  | 0     | 0     | 0     | 0     |
| 13874  |       |       |       |       |
| 13875  | 0     | 0     | 1     | 0     |
| 13881  |       |       |       |       |
| 13887  | 0     | 0     | 0     | 0     |
| 13888  | 0     | 0     | 1     | 1     |

| respid | Q43_1 | Q43_2 | Q43_3 | Q43_4 |
|--------|-------|-------|-------|-------|
| 13889  | 1     | 0     | 0     | 1     |
| 13895  | 0     | 0     | 0     | 0     |
| 13897  |       |       |       |       |
| 13898  | 0     | 0     | 0     | 0     |
| 13901  | 0     | 0     | 0     | 0     |
| 13902  | 0     | 0     | 1     | 0     |
| 13903  | 0     | 0     | 0     | 0     |
| 13905  | 0     | 0     | 1     | 0     |
| 13908  | 0     | 0     | 0     | 0     |
| 13909  | 0     | 0     | 0     | 0     |
| 13910  | 0     | 0     | 1     | 0     |
| 13911  |       |       |       |       |
| 13914  | 0     | 0     | 0     | 0     |
| 13920  | 0     | 0     | 1     | 1     |
| 13926  | 0     | 0     | 0     | 0     |
| 13929  | 0     | 0     | 0     | 1     |
| 13930  | 1     | 0     | 1     | 1     |
| 13931  |       |       |       |       |
| 13932  | 0     | 0     | 0     | 0     |
| 13934  | 0     | 0     | 1     | 1     |
| 13938  | 0     | 0     | 0     | 0     |
| 13942  | 0     | 0     | 0     | 0     |
| 13945  | 0     | 0     | 1     | 1     |
| 13947  | 0     | 0     | 0     | 0     |
| 13948  |       |       |       |       |
| 13959  | 1     | 0     | 0     | 0     |
| 13962  | 0     | 0     | 0     | 0     |
| 13963  | 0     | 0     | 0     | 0     |
| 13964  | 0     | 0     | 0     | 0     |
| 13966  | 0     | 0     | 1     | 0     |
| 13968  | 0     | 0     | 0     | 0     |
| 13971  | 0     | 0     | 0     | 0     |



| respid | Q43_1 | Q43_2 | Q43_3 | Q43_4 |
|--------|-------|-------|-------|-------|
| 13979  | 0     | 0     | 1     | 0     |
| 13980  | 0     | 0     | 0     | 0     |
| 13981  | 0     | 0     | 0     | 0     |
| 13982  | 0     | 0     | 0     | 0     |
| 13984  | 0     | 0     | 0     | 0     |
| 13989  | 0     | 0     | 0     | 0     |
| 13990  | 0     | 0     | 0     | 0     |
| 13992  | 1     | 1     | 0     | 0     |
| 13998  | 0     | 0     | 0     | 0     |
| 13999  | 1     | 0     | 1     | 0     |
| 14000  | 0     | 0     | 0     | 0     |
| 14003  | 0     | 0     | 0     | 0     |
| 14004  | 1     | 0     | 0     | 0     |
| 14006  | 0     | 0     | 0     | 0     |
| 14007  | 0     | 0     | 0     | 0     |
| 14008  |       |       |       |       |
| 14013  | 0     | 0     | 0     | 0     |
| 14015  | 0     | 0     | 0     | 0     |
| 14018  | 0     | 0     | 0     | 0     |
| 14021  | 0     | 0     | 0     | 0     |
| 14023  | 0     | 0     | 0     | 0     |
| 14024  | 0     | 0     | 0     | 0     |
| 14026  | 0     | 0     | 0     | 0     |
| 14030  | 1     | 0     | 0     | 0     |
| 14032  | 1     | 0     | 1     | 0     |
| 14040  |       |       |       |       |
| 14045  | 0     | 0     | 0     | 0     |
| 14048  | 1     | 0     | 1     | 0     |
| 14049  | 1     | 0     | 0     | 0     |
| 14050  | 0     | 0     | 0     | 0     |
| 14051  | 0     | 0     | 0     | 1     |
| 14052  | 0     | 0     | 0     | 0     |

| respid | Q43_1 | Q43_2 | Q43_3 | Q43_4 |
|--------|-------|-------|-------|-------|
| 14054  | 1     | 0     | 0     | 0     |
| 14055  |       |       |       |       |
| 14057  | 0     | 0     | 0     | 0     |
| 14058  | 0     | 0     | 0     | 0     |
| 14059  | 0     | 0     | 0     | 0     |
| 14060  | 0     | 0     | 0     | 0     |
| 14061  | 0     | 0     | 0     | 0     |
| 14071  | 1     | 0     | 0     | 0     |
| 14073  | 1     | 1     | 0     | 0     |
| 14074  | 0     | 0     | 0     | 0     |
| 14076  | 0     | 0     | 0     | 0     |
| 14080  | 0     | 0     | 0     | 0     |
| 14082  | 0     | 0     | 0     | 0     |
| 14083  | 0     | 0     | 0     | 0     |
| 14084  | 0     | 0     | 0     | 0     |
| 14085  |       |       |       |       |
| 14086  | 0     | 0     | 0     | 0     |
| 14088  | 0     | 0     | 0     | 0     |
| 14090  | 0     | 0     | 0     | 0     |
| 14092  | 1     | 0     | 0     | 0     |
| 14093  | 0     | 0     | 0     | 0     |
| 14096  | 0     | 0     | 0     | 0     |
| 14103  | 1     | 0     | 1     | 1     |
| 14105  | 0     | 0     | 0     | 0     |
| 14106  | 0     | 0     | 0     | 0     |
| 14107  | 0     | 0     | 1     | 0     |
| 14108  | 1     | 0     | 0     | 1     |
| 14112  | 0     | 0     | 0     | 0     |
| 14114  | 1     | 0     | 0     | 0     |
| 14115  | 0     | 0     | 0     | 0     |
| 14116  | 0     | 0     | 0     | 0     |
| 14117  | 0     | 0     | 0     | 0     |

| respid | Q43_1 | Q43_2 | Q43_3 | Q43_4 |
|--------|-------|-------|-------|-------|
| 14118  | 1     | 0     | 0     | 0     |
| 14119  | 0     | 0     | 0     | 0     |
| 14127  |       |       |       |       |
| 14129  | 0     | 0     | 0     | 0     |
| 14131  | 1     | 0     | 1     | 0     |
| 14132  | 0     | 0     | 0     | 0     |
| 14133  | 1     | 0     | 0     | 1     |
| 14134  | 0     | 0     | 0     | 0     |
| 14135  | 1     | 0     | 0     | 1     |
| 14136  | 0     | 0     | 0     | 0     |
| 14138  |       |       |       |       |
| 14139  |       |       |       |       |
| 14140  | 0     | 0     | 0     | 0     |
| 14141  | 0     | 0     | 1     | 0     |
| 14143  | 1     | 0     | 1     | 0     |
| 14146  | 0     | 0     | 0     | 0     |
| 14147  | 1     | 0     | 1     | 0     |
| 14148  | 1     | 0     | 1     | 0     |
| 14151  | 0     | 0     | 1     | 1     |
| 14152  | 1     | 0     | 0     | 1     |
| 14153  | 1     | 0     | 1     | 0     |
| 14154  | 0     | 0     | 0     | 0     |
| 14158  | 1     | 0     | 0     | 0     |
| 14159  | 0     | 0     | 1     | 0     |
| 14160  | 0     | 0     | 0     | 1     |
| 14161  | 1     | 0     | 0     | 0     |
| 14162  | 1     | 0     | 0     | 0     |
| 14165  | 0     | 0     | 0     | 0     |
| 14166  | 1     | 0     | 0     | 0     |
| 14167  | 0     | 0     | 0     | 0     |
| 14169  | 0     | 0     | 0     | 0     |
| 14170  | 0     | 0     | 1     | 0     |

| respid | Q43_1 | Q43_2 | Q43_3 | Q43_4 |
|--------|-------|-------|-------|-------|
| 14172  | 0     | 0     | 0     | 0     |
| 14173  |       |       |       |       |
| 14174  | 0     | 0     | 0     | 0     |
| 14175  | 0     | 0     | 0     | 0     |
| 14176  | 0     | 0     | 0     | 0     |
| 14178  | 0     | 0     | 0     | 0     |
| 14179  | 0     | 0     | 0     | 0     |
| 14180  | 1     | 0     | 1     | 0     |
| 14183  | 0     | 0     | 1     | 0     |
| 14185  | 0     | 0     | 0     | 0     |
| 14187  | 0     | 0     | 0     | 0     |
| 14189  | 0     | 0     | 0     | 0     |
| 14191  | 1     | 0     | 1     | 0     |
| 14192  |       |       |       |       |
| 14195  | 0     | 0     | 0     | 0     |
| 14197  | 0     | 0     | 0     | 0     |
| 14203  | 1     | 0     | 1     | 0     |
| 14204  | 0     | 0     | 0     | 0     |
| 14205  | 1     | 1     | 1     | 0     |
| 14208  | 0     | 0     | 0     | 0     |
| 14211  | 1     | 0     | 1     | 0     |
| 14214  | 0     | 0     | 0     | 0     |
| 14215  | 0     | 0     | 0     | 0     |
| 14216  | 0     | 0     | 1     | 0     |
| 14218  | 0     | 0     | 0     | 0     |
| 14220  | 0     | 0     | 0     | 0     |
| 14223  |       |       |       |       |
| 14225  | 1     | 0     | 0     | 0     |
| 14226  | 0     | 0     | 1     | 0     |
| 14228  | 0     | 0     | 1     | 0     |
| 14231  | 1     | 0     | 0     | 0     |
| 14233  | 0     | 0     | 0     | 0     |

| respid | Q43_1 | Q43_2 | Q43_3 | Q43_4 |
|--------|-------|-------|-------|-------|
| 14237  | 0     | 0     | 0     | 0     |
| 14238  | 1     | 0     | 0     | 0     |
| 14243  | 1     | 1     | 0     | 0     |
| 14245  | 0     | 0     | 0     | 0     |
| 14246  | 0     | 0     | 1     | 0     |
| 14248  | 0     | 0     | 0     | 0     |
| 14250  | 1     | 0     | 0     | 0     |
| 14253  | 0     | 0     | 0     | 0     |
| 14254  | 0     | 0     | 0     | 0     |
| 14255  | 0     | 0     | 0     | 0     |
| 14257  | 0     | 0     | 0     | 0     |
| 14258  | 0     | 0     | 0     | 0     |
| 14259  | 0     | 0     | 0     | 0     |
| 14260  |       |       |       |       |
| 14261  | 1     | 0     | 1     | 0     |
| 14263  | 0     | 0     | 0     | 0     |
| 14264  | 0     | 0     | 0     | 0     |
| 14266  | 0     | 0     | 0     | 1     |
| 14267  | 0     | 0     | 1     | 0     |
| 14268  | 0     | 0     | 0     | 0     |
| 14275  | 1     | 0     | 0     | 0     |
| 14278  | 0     | 0     | 0     | 0     |
| 14279  |       |       |       |       |
| 14280  |       |       |       |       |
| 14281  | 0     | 0     | 0     | 0     |
| 14282  | 0     | 0     | 0     | 0     |
| 14283  | 0     | 0     | 0     | 0     |
| 14286  | 1     | 0     | 0     | 0     |
| 14287  |       |       |       |       |
| 14288  | 0     | 0     | 0     | 0     |
| 14291  |       |       |       |       |
| 14292  |       |       |       |       |

| respid | Q43_1 | Q43_2 | Q43_3 | Q43_4 |
|--------|-------|-------|-------|-------|
| 14293  | 0     | 0     | 0     | 0     |
| 14304  | 0     | 0     | 0     | 1     |
| 14308  | 0     | 0     | 0     | 0     |
| 14313  | 0     | 0     | 0     | 0     |
| 14314  | 1     | 0     | 0     | 0     |
| 14316  | 0     | 0     | 0     | 0     |
| 14317  | 0     | 0     | 0     | 0     |
| 14318  | 0     | 0     | 0     | 0     |
| 14319  | 0     | 0     | 0     | 0     |
| 14320  | 0     | 0     | 0     | 1     |
| 14321  | 0     | 0     | 0     | 0     |
| 14322  | 1     | 0     | 1     | 0     |
| 14326  | 1     | 0     | 0     | 0     |
| 14327  | 0     | 0     | 1     | 1     |
| 14328  |       |       |       |       |
| 14330  | 0     | 0     | 0     | 0     |
| 14332  | 0     | 0     | 0     | 0     |
| 14334  | 0     | 0     | 0     | 0     |
| 14336  | 0     | 0     | 0     | 0     |
| 14337  | 0     | 0     | 0     | 0     |
| 14339  |       |       |       |       |
| 14340  | 0     | 0     | 0     | 0     |
| 14341  | 0     | 0     | 1     | 0     |
| 14344  | 0     | 0     | 0     | 0     |
| 14345  | 0     | 0     | 0     | 0     |
| 14346  |       |       |       |       |
| 14348  | 0     | 0     | 0     | 0     |
| 14349  | 0     | 0     | 0     | 0     |
| 14358  | 1     | 0     | 0     | 1     |
| 14360  | 0     | 0     | 0     | 0     |
| 14362  |       |       |       |       |
| 14366  | 0     | 0     | 0     | 0     |

| respid | Q43_1 | Q43_2 | Q43_3 | Q43_4 |
|--------|-------|-------|-------|-------|
| 14367  | 1     | 0     | 0     | 1     |
| 14369  | 0     | 0     | 0     | 0     |
| 14371  | 0     | 0     | 0     | 0     |
| 14372  | 1     | 0     | 0     | 0     |
| 14374  | 0     | 0     | 0     | 0     |
| 14376  | 0     | 0     | 0     | 0     |
| 14377  |       |       |       |       |
| 14378  | 0     | 0     | 0     | 0     |
| 14379  | 0     | 0     | 0     | 0     |
| 14381  | 0     | 0     | 0     | 0     |
| 14383  | 0     | 0     | 0     | 0     |
| 14384  | 0     | 0     | 0     | 0     |
| 14385  | 0     | 0     | 0     | 1     |
| 14386  | 0     | 0     | 0     | 0     |
| 14390  | 0     | 0     | 0     | 0     |
| 14391  | 0     | 0     | 0     | 0     |
| 14392  | 1     | 0     | 0     | 0     |
| 14393  | 1     | 0     | 1     | 0     |
| 14394  | 0     | 0     | 0     | 1     |
| 14395  |       |       |       |       |
| 14396  |       |       |       |       |
| 14397  | 1     | 0     | 0     | 0     |
| 14398  | 0     | 0     | 0     | 0     |
| 14399  | 0     | 0     | 0     | 0     |
| 14400  | 0     | 0     | 0     | 0     |
| 14403  | 0     | 0     | 0     | 0     |
| 14404  | 1     | 0     | 0     | 0     |
| 14405  | 0     | 0     | 0     | 0     |
| 14407  | 0     | 0     | 0     | 1     |
| 14408  | 1     | 0     | 1     | 1     |
| 14410  | 0     | 0     | 0     | 1     |
| 14415  | 1     | 0     | 0     | 0     |

| respid | Q43_1 | Q43_2 | Q43_3 | Q43_4 |
|--------|-------|-------|-------|-------|
| 14419  | 1     | 1     | 0     | 0     |
| 14420  |       |       |       |       |
| 14421  |       |       |       |       |
| 14423  | 0     | 0     | 0     | 0     |
| 14424  | 0     | 0     | 0     | 0     |
| 14425  | 0     | 0     | 0     | 0     |
| 14426  | 0     | 0     | 0     | 0     |
| 14427  | 0     | 0     | 0     | 0     |
| 14428  | 0     | 0     | 1     | 0     |
| 14431  | 1     | 0     | 0     | 0     |
| 14433  | 1     | 1     | 0     | 0     |
| 14434  | 0     | 0     | 0     | 0     |
| 14435  | 0     | 0     | 0     | 0     |
| 14436  | 0     | 0     | 0     | 0     |
| 14438  | 0     | 0     | 0     | 0     |
| 14442  | 1     | 0     | 0     | 0     |
| 14447  | 0     | 0     | 0     | 0     |
| 14448  | 0     | 0     | 0     | 0     |
| 14450  | 0     | 0     | 0     | 0     |
| 14451  | 0     | 0     | 0     | 0     |
| 14454  | 1     | 0     | 0     | 0     |
| 14455  | 0     | 0     | 0     | 0     |
| 14456  | 0     | 0     | 0     | 0     |
| 14457  | 0     | 0     | 1     | 0     |
| 14458  | 0     | 0     | 0     | 0     |
| 14459  |       |       |       |       |
| 14460  | 0     | 0     | 1     | 1     |
| 14464  | 0     | 0     | 0     | 0     |
| 14465  | 0     | 0     | 0     | 0     |
| 14466  | 1     | 0     | 0     | 0     |
| 14467  | 0     | 0     | 0     | 0     |
| 14470  | 1     | 0     | 0     | 0     |



| respid | Q43_1 | Q43_2 | Q43_3 | Q43_4 |
|--------|-------|-------|-------|-------|
| 14472  | 0     | 0     | 0     | 0     |
| 14473  | 0     | 0     | 0     | 0     |
| 14474  |       |       |       |       |
| 14477  | 0     | 0     | 0     | 0     |
| 14478  | 0     | 0     | 0     | 0     |
| 14479  |       |       |       |       |
| 14484  | 0     | 0     | 0     | 0     |
| 14485  |       |       |       |       |
| 14486  | 0     | 0     | 0     | 0     |
| 14487  | 0     | 0     | 0     | 0     |
| 14488  | 0     | 0     | 1     | 1     |
| 14491  | 0     | 0     | 0     | 0     |
| 14495  | 0     | 0     | 0     | 0     |
| 14500  | 0     | 0     | 0     | 0     |
| 14502  | 0     | 0     | 0     | 0     |
| 14504  | 1     | 0     | 0     | 0     |
| 14505  | 0     | 0     | 0     | 1     |
| 14507  | 0     | 0     | 0     | 0     |
| 14517  | 0     | 0     | 1     | 0     |
| 14518  | 0     | 0     | 0     | 0     |
| 14519  | 0     | 0     | 0     | 0     |
| 14521  | 0     | 0     | 1     | 1     |
| 14522  | 0     | 0     | 0     | 0     |
| 14526  | 0     | 0     | 0     | 0     |
| 14528  | 0     | 0     | 0     | 1     |
| 14529  | 0     | 0     | 0     | 0     |
| 14530  | 1     | 0     | 0     | 0     |
| 14531  | 1     | 0     | 0     | 0     |
| 14534  | 1     | 0     | 0     | 0     |
| 14538  | 0     | 0     | 0     | 1     |
| 14539  | 0     | 0     | 0     | 0     |
| 14545  | 0     | 0     | 0     | 0     |

| respid | Q43_1 | Q43_2 | Q43_3 | Q43_4 |
|--------|-------|-------|-------|-------|
| 14546  | 0     | 0     | 0     | 0     |
| 14551  | 0     | 0     | 0     | 0     |
| 14553  | 1     | 0     | 1     | 0     |
| 14557  |       |       |       |       |
| 14558  | 0     | 0     | 0     | 0     |
| 14559  | 0     | 0     | 1     | 0     |
| 14560  | 0     | 0     | 0     | 0     |
| 14563  | 0     | 0     | 0     | 0     |
| 14565  | 0     | 0     | 0     | 0     |
| 14571  | 0     | 0     | 1     | 1     |
| 14572  | 0     | 0     | 0     | 0     |
| 14573  | 0     | 0     | 0     | 0     |
| 14575  | 0     | 0     | 0     | 0     |
| 14576  | 0     | 0     | 0     | 1     |
| 14578  | 0     | 0     | 0     | 0     |
| 14579  | 0     | 0     | 0     | 0     |
| 14580  | 0     | 0     | 0     | 0     |
| 14582  | 0     | 0     | 0     | 0     |
| 14585  | 0     | 0     | 0     | 0     |
| 14588  | 0     | 0     | 0     | 0     |
| 14590  | 1     | 0     | 0     | 0     |
| 14592  | 1     | 0     | 0     | 1     |
| 14593  | 0     | 0     | 0     | 0     |
| 14595  | 0     | 0     | 0     | 0     |
| 14597  | 0     | 0     | 0     | 0     |
| 14600  | 1     | 0     | 0     | 0     |
| 14602  | 1     | 0     | 0     | 0     |
| 14604  | 0     | 0     | 0     | 0     |
| 14605  | 0     | 0     | 0     | 0     |
| 14609  | 1     | 0     | 0     | 0     |
| 14610  | 1     | 0     | 0     | 0     |
| 14611  | 0     | 0     | 0     | 0     |

| respid | Q43_1 | Q43_2 | Q43_3 | Q43_4 |
|--------|-------|-------|-------|-------|
| 14612  | 0     | 0     | 0     | 0     |
| 14614  | 0     | 0     | 0     | 0     |
| 14615  | 0     | 0     | 0     | 0     |
| 14618  | 1     | 0     | 1     | 0     |
| 14621  |       |       |       |       |
| 14624  | 1     | 0     | 1     | 1     |
| 14626  | 0     | 0     | 0     | 0     |
| 14627  | 1     | 0     | 0     | 0     |
| 14628  | 0     | 0     | 1     | 0     |
| 14631  | 0     | 0     | 0     | 0     |
| 14633  | 0     | 0     | 0     | 0     |
| 14642  | 1     | 0     | 0     | 0     |
| 14647  | 0     | 0     | 0     | 0     |
| 14658  | 0     | 0     | 0     | 0     |
| 14659  | 0     | 0     | 1     | 1     |
| 14660  | 0     | 0     | 0     | 0     |
| 14661  | 1     | 0     | 0     | 0     |
| 14662  | 0     | 0     | 1     | 0     |
| 14663  | 1     | 0     | 0     | 0     |
| 14670  | 1     | 0     | 0     | 0     |
| 14671  |       |       |       |       |
| 14672  | 1     | 0     | 0     | 0     |
| 14675  | 0     | 0     | 0     | 0     |
| 14676  | 1     | 0     | 0     | 0     |
| 14677  | 0     | 0     | 1     | 0     |
| 14678  | 0     | 0     | 0     | 0     |
| 14681  | 0     | 0     | 0     | 1     |
| 14684  | 0     | 0     | 0     | 0     |
| 14688  | 0     | 0     | 0     | 0     |
| 14690  | 1     | 0     | 0     | 0     |
| 14694  | 1     | 0     | 0     | 0     |
| 14696  | 1     | 0     | 0     | 0     |

| respid | Q43_1 | Q43_2 | Q43_3 | Q43_4 |
|--------|-------|-------|-------|-------|
| 14700  |       |       |       |       |
| 14701  | 0     | 0     | 0     | 0     |
| 14703  | 0     | 0     | 0     | 1     |
| 14707  | 0     | 0     | 0     | 0     |
| 14711  | 1     | 0     | 0     | 0     |
| 14714  | 0     | 0     | 0     | 0     |
| 14715  | 0     | 0     | 1     | 0     |
| 14716  | 0     | 0     | 0     | 0     |
| 14720  | 0     | 0     | 0     | 0     |
| 14725  | 0     | 0     | 0     | 0     |
| 14726  | 0     | 0     | 0     | 0     |
| 14734  | 0     | 0     | 0     | 0     |
| 14735  | 0     | 0     | 1     | 0     |
| 14736  | 0     | 0     | 0     | 1     |
| 14740  | 0     | 0     | 0     | 0     |
| 14745  | 1     | 0     | 1     | 0     |
| 14747  | 0     | 0     | 1     | 0     |
| 14750  | 1     | 0     | 0     | 0     |
| 14751  | 1     | 0     | 0     | 0     |
| 14753  | 0     | 0     | 0     | 0     |
| 14756  | 1     | 0     | 1     | 1     |
| 14780  | 0     | 0     | 0     | 0     |
| 14782  | 0     | 0     | 0     | 0     |
| 14800  | 0     | 0     | 0     | 1     |
| 14801  | 0     | 0     | 0     | 0     |
| 14802  | 0     | 0     | 0     | 0     |
| 14805  | 0     | 0     | 0     | 0     |
| 14811  | 1     | 0     | 0     | 0     |
| 14814  | 1     | 0     | 0     | 0     |
| 14822  | 0     | 0     | 1     | 0     |
| 14827  | 0     | 0     | 1     | 0     |
| 14828  | 0     | 0     | 0     | 1     |

| respid | Q43_1 | Q43_2 | Q43_3 | Q43_4 |
|--------|-------|-------|-------|-------|
| 14830  |       |       |       |       |
| 14832  | 0     | 0     | 0     | 1     |
| 14835  | 0     | 0     | 0     | 0     |
| 14841  |       |       |       |       |
| 14849  | 0     | 0     | 0     | 0     |
| 14850  |       |       |       |       |
| 14851  | 0     | 0     | 0     | 0     |
| 14856  | 0     | 0     | 1     | 1     |
| 14862  | 0     | 1     | 1     | 0     |
| 14863  | 0     | 0     | 0     | 0     |
| 14864  | 0     | 0     | 0     | 0     |
| 14866  | 0     | 0     | 0     | 0     |
| 14867  | 0     | 0     | 1     | 0     |
| 14868  | 0     | 0     | 0     | 1     |
| 14870  | 0     | 0     | 0     | 0     |
| 14873  |       |       |       |       |
| 14878  | 0     | 0     | 0     | 0     |
| 14879  |       |       |       |       |
| 14881  | 0     | 0     | 0     | 0     |
| 14888  | 1     | 0     | 0     | 0     |
| 14895  | 0     | 0     | 0     | 0     |
| 14900  | 1     | 0     | 0     | 0     |
| 14912  |       |       |       |       |
| 14922  | 0     | 0     | 1     | 0     |
| 14923  | 1     | 0     | 0     | 0     |
| 14924  | 1     | 0     | 0     | 0     |
| 14925  | 0     | 0     | 1     | 0     |
| 14926  | 0     | 0     | 0     | 0     |
| 14927  | 0     | 0     | 1     | 1     |
| 14930  | 0     | 0     | 0     | 1     |
| 14937  | 0     | 0     | 0     | 0     |
| 14938  | 0     | 0     | 1     | 0     |

| respid | Q43_1 | Q43_2 | Q43_3 | Q43_4 |
|--------|-------|-------|-------|-------|
| 14939  | 1     | 0     | 1     | 0     |
| 14942  |       |       |       |       |
| 14943  |       |       |       |       |
| 14953  | 0     | 0     | 0     | 0     |
| 14954  | 0     | 0     | 0     | 0     |
| 14955  | 0     | 1     | 0     | 1     |
| 14957  | 1     | 0     | 0     | 0     |
| 14958  | 1     | 0     | 0     | 0     |
| 14959  | 0     | 0     | 0     | 1     |
| 14961  |       |       |       |       |
| 14963  | 1     | 0     | 0     | 0     |
| 14964  | 0     | 0     | 0     | 0     |
| 14965  | 0     | 0     | 0     | 0     |
| 14967  | 1     | 0     | 0     | 0     |
| 14970  | 0     | 0     | 1     | 0     |
| 14972  | 1     | 0     | 1     | 0     |
| 14975  | 1     | 0     | 0     | 0     |
| 14977  | 0     | 0     | 0     | 0     |
| 14982  | 1     | 0     | 0     | 0     |
| 14985  | 1     | 0     | 0     | 0     |
| 14986  |       |       |       |       |
| 14987  |       |       |       |       |
| 14988  | 1     | 0     | 0     | 1     |
| 14989  | 0     | 0     | 0     | 0     |
| 14993  | 1     | 0     | 1     | 0     |
| 15001  | 0     | 0     | 0     | 0     |
| 15002  | 0     | 1     | 0     | 0     |
| 15006  | 0     | 0     | 0     | 0     |
| 15007  | 0     | 0     | 0     | 0     |
| 15014  | 1     | 0     | 1     | 1     |
| 15020  | 1     | 0     | 1     | 0     |
| 15021  | 0     | 0     | 0     | 1     |

| respid | Q43_1 | Q43_2 | Q43_3 | Q43_4 |
|--------|-------|-------|-------|-------|
| 15023  | 1     | 0     | 0     | 1     |
| 15030  | 0     | 0     | 0     | 0     |
| 15032  |       |       |       |       |
| 15033  | 1     | 0     | 0     | 0     |
| 15034  | 0     | 1     | 0     | 1     |
| 15035  | 0     | 0     | 0     | 0     |
| 15037  | 0     | 0     | 0     | 0     |
| 15039  | 0     | 0     | 0     | 0     |
| 15040  | 0     | 0     | 0     | 0     |
| 15042  | 0     | 0     | 0     | 0     |
| 15044  |       |       |       |       |
| 15045  | 0     | 0     | 0     | 0     |
| 15046  | 0     | 0     | 1     | 0     |
| 15052  | 0     | 0     | 1     | 0     |
| 15058  | 1     | 0     | 0     | 0     |
| 15063  | 0     | 0     | 0     | 1     |
| 15066  | 0     | 0     | 1     | 0     |
| 15069  | 0     | 0     | 0     | 1     |
| 15071  | 1     | 0     | 1     | 1     |
| 15076  | 0     | 0     | 0     | 1     |
| 15078  | 0     | 0     | 0     | 0     |
| 15087  | 0     | 0     | 0     | 0     |
| 15090  | 0     | 0     | 0     | 0     |
| 15091  | 1     | 1     | 0     | 0     |
| 15092  | 0     | 0     | 0     | 0     |
| 15096  | 1     | 0     | 1     | 0     |
| 15106  | 0     | 0     | 0     | 0     |
| 15108  |       |       |       |       |
| 15113  | 1     | 0     | 0     | 0     |
| 15116  |       |       |       |       |
| 15119  | 0     | 0     | 1     | 0     |
| 15120  | 0     | 1     | 1     | 0     |

| respid | Q43_1 | Q43_2 | Q43_3 | Q43_4 |
|--------|-------|-------|-------|-------|
| 15121  | 0     | 0     | 0     | 0     |
| 15123  |       |       |       |       |
| 15124  | 0     | 0     | 0     | 0     |
| 15128  | 0     | 0     | 0     | 0     |
| 15131  |       |       |       |       |
| 15136  | 0     | 0     | 1     | 1     |
| 15137  | 0     | 0     | 0     | 0     |
| 15141  | 0     | 0     | 0     | 0     |
| 15144  | 1     | 0     | 0     | 0     |
| 15147  | 0     | 0     | 1     | 0     |
| 15151  | 0     | 0     | 0     | 0     |
| 15154  | 0     | 0     | 1     | 1     |
| 15157  | 1     | 0     | 0     | 0     |
| 15164  | 1     | 1     | 1     | 1     |
| 15168  | 1     | 0     | 0     | 0     |
| 15169  | 0     | 0     | 0     | 0     |
| 15172  | 1     | 0     | 0     | 1     |
| 15177  | 0     | 0     | 1     | 0     |
| 15178  |       |       |       |       |
| 15180  | 0     | 0     | 1     | 0     |
| 15181  | 0     | 0     | 0     | 0     |
| 15182  | 0     | 0     | 0     | 0     |
| 15183  |       |       |       |       |
| 15188  | 0     | 0     | 0     | 1     |
| 15190  | 0     | 1     | 0     | 0     |
| 15195  |       |       |       |       |
| 15201  | 0     | 1     | 0     | 1     |
| 15203  | 1     | 0     | 0     | 0     |
| 15204  | 0     | 0     | 0     | 0     |
| 15207  |       |       |       |       |
| 15208  | 0     | 0     | 1     | 0     |
| 15209  | 0     | 0     | 0     | 0     |



| respid | Q43_1 | Q43_2 | Q43_3 | Q43_4 |
|--------|-------|-------|-------|-------|
| 15212  |       |       |       |       |
| 15213  | 1     | 0     | 0     | 1     |
| 15219  | 1     | 0     | 0     | 0     |
| 15220  | 0     | 0     | 0     | 0     |
| 15221  | 0     | 0     | 0     | 0     |
| 15223  | 0     | 0     | 1     | 0     |
| 15224  | 1     | 0     | 0     | 1     |
| 15225  | 0     | 0     | 0     | 0     |
| 15226  | 0     | 0     | 0     | 0     |
| 15230  | 0     | 0     | 0     | 0     |
| 15231  | 1     | 0     | 1     | 0     |
| 15232  | 0     | 0     | 0     | 0     |
| 15237  | 0     | 0     | 0     | 0     |
| 15239  | 0     | 0     | 0     | 0     |
| 15241  | 0     | 0     | 0     | 0     |
| 15242  | 1     | 0     | 1     | 1     |
| 15247  | 0     | 0     | 0     | 0     |
| 15248  |       |       |       |       |
| 15251  |       |       |       |       |
| 15257  |       |       |       |       |
| 15260  | 0     | 0     | 0     | 0     |
| 15261  | 0     | 0     | 0     | 1     |
| 15262  | 0     | 0     | 0     | 1     |
| 15263  | 1     | 0     | 0     | 0     |
| 15265  | 0     | 0     | 0     | 0     |
| 15266  | 1     | 0     | 0     | 0     |
| 15268  | 1     | 0     | 1     | 0     |
| 15269  | 0     | 0     | 0     | 0     |
| 15270  | 0     | 0     | 0     | 1     |
| 15273  | 0     | 0     | 0     | 1     |
| 15276  | 0     | 0     | 0     | 1     |
| 15277  | 0     | 0     | 0     | 0     |

| respid | Q43_1 | Q43_2 | Q43_3 | Q43_4 |
|--------|-------|-------|-------|-------|
| 15282  | 0     | 0     | 0     | 0     |
| 15284  | 0     | 0     | 0     | 1     |
| 15285  | 0     | 0     | 0     | 0     |
| 15286  | 0     | 1     | 0     | 0     |
| 15288  | 1     | 0     | 0     | 0     |
| 15292  | 0     | 0     | 0     | 0     |
| 15296  | 0     | 0     | 0     | 0     |
| 15297  | 0     | 0     | 0     | 0     |
| 15298  |       |       |       |       |
| 15301  | 0     | 0     | 0     | 0     |
| 15302  | 0     | 0     | 0     | 0     |
| 15305  | 0     | 0     | 0     | 0     |
| 15307  | 0     | 0     | 0     | 0     |
| 15308  | 0     | 0     | 0     | 1     |
| 15309  | 1     | 0     | 1     | 0     |
| 15311  | 0     | 0     | 0     | 0     |
| 15315  | 1     | 0     | 1     | 0     |
| 15316  | 1     | 0     | 0     | 0     |
| 15318  |       |       |       |       |
| 15321  | 0     | 0     | 0     | 0     |
| 15322  | 1     | 0     | 0     | 0     |
| 15324  | 0     | 0     | 0     | 0     |
| 15326  | 1     | 0     | 0     | 0     |
| 15327  | 1     | 0     | 0     | 0     |
| 15328  | 1     | 0     | 0     | 0     |
| 15330  | 0     | 0     | 0     | 0     |
| 15332  | 1     | 0     | 0     | 0     |
| 15333  |       |       |       |       |
| 15334  | 0     | 0     | 0     | 1     |
| 15336  | 0     | 0     | 0     | 0     |
| 15337  | 0     | 0     | 0     | 0     |
| 15338  | 0     | 0     | 0     | 0     |

| respid | Q43_1 | Q43_2 | Q43_3 | Q43_4 |
|--------|-------|-------|-------|-------|
| 15339  | 0     | 0     | 0     | 0     |
| 15341  | 0     | 0     | 0     | 0     |
| 15344  |       |       |       |       |
| 15345  | 0     | 0     | 0     | 0     |
| 15350  |       |       |       |       |
| 15351  | 1     | 0     | 0     | 0     |
| 15352  | 0     | 0     | 0     | 0     |
| 15372  | 0     | 0     | 1     | 0     |
| 15373  | 0     | 0     | 0     | 1     |
| 15376  | 0     | 0     | 0     | 0     |
| 15377  | 0     | 0     | 0     | 0     |
| 15382  | 1     | 0     | 0     | 0     |
| 15383  | 0     | 0     | 1     | 0     |
| 15385  | 0     | 0     | 1     | 0     |
| 15390  | 0     | 0     | 0     | 0     |
| 15399  |       |       |       |       |
| 15404  | 0     | 0     | 0     | 0     |
| 15410  | 0     | 0     | 0     | 0     |
| 15411  | 0     | 0     | 0     | 1     |
| 15412  | 0     | 0     | 0     | 1     |
| 15413  | 1     | 0     | 0     | 0     |
| 15414  | 0     | 0     | 0     | 0     |
| 15417  | 0     | 0     | 0     | 0     |
| 15418  | 1     | 0     | 1     | 0     |
| 15421  | 0     | 0     | 0     | 0     |
| 15423  | 1     | 0     | 0     | 0     |
| 15425  | 0     | 0     | 0     | 1     |
| 15426  | 0     | 0     | 1     | 0     |
| 15430  | 0     | 0     | 0     | 0     |
| 15431  | 0     | 0     | 1     | 0     |
| 15435  |       |       |       |       |
| 15436  |       |       |       |       |

| respid | Q43_1 | Q43_2 | Q43_3 | Q43_4 |
|--------|-------|-------|-------|-------|
| 15437  |       |       |       |       |
| 15438  | 0     | 0     | 0     | 0     |
| 15439  | 0     | 0     | 1     | 0     |
| 15441  | 0     | 0     | 0     | 0     |
| 15443  | 1     | 0     | 1     | 0     |
| 15446  | 0     | 0     | 0     | 0     |
| 15449  | 0     | 0     | 0     | 0     |
| 15451  | 0     | 0     | 0     | 0     |
| 15452  | 0     | 0     | 1     | 1     |
| 15454  | 0     | 0     | 0     | 0     |
| 15456  | 0     | 0     | 0     | 1     |
| 15457  |       |       |       |       |
| 15458  | 1     | 0     | 0     | 0     |
| 15462  | 1     | 0     | 0     | 0     |
| 15467  | 0     | 0     | 1     | 1     |
| 15470  | 1     | 0     | 0     | 1     |
| 15472  | 0     | 0     | 0     | 0     |
| 15476  | 0     | 0     | 0     | 0     |
| 15477  | 0     | 0     | 0     | 0     |
| 15488  | 0     | 0     | 0     | 0     |
| 15489  | 0     | 0     | 0     | 0     |
| 15490  | 0     | 0     | 0     | 0     |
| 15496  | 0     | 0     | 0     | 0     |
| 15497  | 0     | 0     | 0     | 1     |
| 15498  |       |       |       |       |
| 15509  | 1     | 0     | 1     | 0     |
| 15510  | 0     | 0     | 0     | 0     |
| 15516  | 0     | 0     | 0     | 0     |
| 15519  | 0     | 0     | 0     | 0     |
| 15520  | 0     | 0     | 0     | 0     |
| 15524  | 0     | 0     | 0     | 0     |
| 15525  | 0     | 0     | 1     | 1     |

| respid | Q43_1 | Q43_2 | Q43_3 | Q43_4 |
|--------|-------|-------|-------|-------|
| 15526  | 0     | 0     | 0     | 0     |
| 15531  | 1     | 0     | 0     | 0     |
| 15532  | 0     | 0     | 0     | 0     |
| 15534  | 1     | 0     | 1     | 1     |
| 15535  | 1     | 0     | 1     | 1     |
| 15539  | 0     | 0     | 0     | 0     |
| 15550  | 0     | 0     | 0     | 0     |
| 15556  | 0     | 0     | 0     | 0     |
| 15558  | 1     | 1     | 1     | 0     |
| 15565  | 0     | 0     | 0     | 0     |
| 15567  | 1     | 0     | 0     | 1     |
| 15568  | 1     | 1     | 1     | 0     |
| 15571  | 0     | 0     | 0     | 0     |
| 15573  | 0     | 0     | 0     | 0     |
| 15574  | 1     | 0     | 1     | 0     |
| 15576  | 0     | 0     | 0     | 0     |
| 15587  | 1     | 0     | 0     | 0     |
| 15588  | 1     | 0     | 0     | 1     |
| 15593  | 0     | 0     | 0     | 0     |
| 15597  | 0     | 0     | 0     | 0     |
| 15598  | 1     | 0     | 0     | 0     |
| 15599  | 0     | 0     | 0     | 0     |
| 15601  | 0     | 0     | 0     | 0     |
| 15604  | 0     | 0     | 0     | 0     |
| 15611  | 1     | 0     | 0     | 0     |
| 15613  | 1     | 0     | 0     | 0     |
| 15614  | 0     | 0     | 0     | 0     |
| 15617  | 1     | 0     | 0     | 0     |
| 15622  |       |       |       |       |
| 15623  | 0     | 0     | 0     | 0     |
| 15625  | 0     | 0     | 0     | 0     |
| 15627  |       |       |       |       |

| respid | Q43_1 | Q43_2 | Q43_3 | Q43_4 |
|--------|-------|-------|-------|-------|
| 15628  | 0     | 0     | 1     | 0     |
| 15633  | 0     | 0     | 0     | 0     |
| 15634  | 0     | 0     | 0     | 0     |
| 15637  | 0     | 0     | 0     | 0     |
| 15644  | 0     | 0     | 0     | 0     |
| 15645  | 0     | 0     | 0     | 0     |
| 15649  | 0     | 0     | 0     | 0     |
| 15650  | 0     | 0     | 0     | 0     |
| 15651  | 0     | 0     | 0     | 0     |
| 15657  | 1     | 0     | 1     | 0     |
| 15658  | 0     | 0     | 0     | 0     |
| 15660  | 1     | 0     | 1     | 0     |
| 15667  | 0     | 0     | 0     | 0     |
| 15671  | 0     | 0     | 0     | 0     |
| 15679  | 0     | 0     | 0     | 0     |
| 15712  | 0     | 0     | 0     | 0     |
| 15715  | 0     | 0     | 0     | 0     |
| 15749  | 0     | 0     | 0     | 0     |
| 15754  | 0     | 0     | 0     | 1     |
| 15756  | 0     | 0     | 0     | 0     |
| 15773  | 0     | 0     | 0     | 0     |
| 15774  | 0     | 0     | 0     | 0     |
| 15776  | 0     | 0     | 0     | 0     |
| 15777  | 0     | 0     | 1     | 0     |
| 15779  |       |       |       |       |
| 15780  | 1     | 0     | 1     | 0     |
| 15792  | 0     | 0     | 0     | 0     |
| 15793  | 1     | 0     | 0     | 0     |
| 15796  | 1     | 0     | 0     | 0     |
| 15798  | 0     | 0     | 0     | 0     |
| 15809  | 0     | 0     | 0     | 0     |
| 15810  | 0     | 0     | 0     | 0     |

| respid | Q43_1 | Q43_2 | Q43_3 | Q43_4 |
|--------|-------|-------|-------|-------|
| 15815  | 0     | 0     | 0     | 0     |
| 15816  | 1     | 0     | 0     | 0     |
| 15817  |       |       |       |       |
| 15821  | 0     | 0     | 1     | 0     |
| 15823  | 0     | 0     | 0     | 1     |
| 15834  | 0     | 1     | 0     | 0     |
| 15835  |       |       |       |       |
| 15836  | 0     | 0     | 0     | 1     |
| 15837  | 0     | 0     | 0     | 0     |
| 15839  | 1     | 0     | 0     | 0     |
| 15840  | 0     | 0     | 0     | 0     |
| 15844  | 0     | 0     | 0     | 0     |
| 15845  | 1     | 0     | 0     | 0     |
| 15847  | 1     | 0     | 0     | 0     |
| 15848  | 1     | 1     | 0     | 0     |
| 15849  | 0     | 0     | 0     | 0     |
| 15857  | 0     | 0     | 0     | 1     |
| 15858  | 0     | 0     | 0     | 0     |
| 15862  | 0     | 0     | 0     | 0     |
| 15866  | 0     | 0     | 0     | 0     |
| 15870  | 0     | 0     | 0     | 0     |
| 15871  | 0     | 0     | 0     | 0     |
| 15872  | 1     | 0     | 0     | 0     |
| 15873  | 0     | 0     | 0     | 0     |
| 15874  |       |       |       |       |
| 15875  | 1     | 0     | 1     | 0     |
| 15876  | 0     | 0     | 1     | 0     |
| 15882  | 1     | 0     | 0     | 0     |
| 15884  | 0     | 0     | 1     | 1     |
| 15890  | 1     | 0     | 0     | 0     |
| 15892  | 0     | 0     | 1     | 0     |
| 15908  | 1     | 0     | 0     | 0     |

| respid | Q43_1 | Q43_2 | Q43_3 | Q43_4 |
|--------|-------|-------|-------|-------|
| 15914  | 0     | 0     | 0     | 0     |
| 15932  | 0     | 0     | 0     | 0     |
| 15933  | 0     | 0     | 0     | 0     |
| 15938  | 0     | 0     | 0     | 0     |
| 15940  | 1     | 0     | 1     | 0     |
| 15945  | 0     | 0     | 0     | 0     |
| 15947  | 0     | 0     | 0     | 0     |
| 15950  | 0     | 0     | 0     | 0     |
| 15951  | 1     | 0     | 1     | 1     |
| 15952  | 1     | 0     | 0     | 0     |
| 15953  | 0     | 0     | 0     | 0     |
| 15954  | 0     | 0     | 0     | 0     |
| 15957  | 0     | 0     | 0     | 1     |
| 15965  | 1     | 0     | 1     | 0     |
| 15966  |       |       |       |       |
| 15967  | 1     | 0     | 0     | 0     |
| 15968  | 0     | 0     | 0     | 0     |
| 15970  | 0     | 0     | 0     | 0     |
| 15973  | 0     | 0     | 0     | 0     |
| 15974  | 0     | 0     | 0     | 0     |
| 15975  |       |       |       |       |
| 15980  | 1     | 0     | 1     | 0     |
| 15984  | 0     | 0     | 1     | 1     |
| 15985  | 0     | 0     | 1     | 0     |
| 15994  |       |       |       |       |
| 15995  | 0     | 0     | 0     | 0     |
| 16000  | 0     | 0     | 1     | 0     |
| 16004  | 0     | 0     | 0     | 0     |
| 16005  | 0     | 0     | 0     | 0     |
| 16006  |       |       |       |       |
| 16009  | 0     | 0     | 0     | 0     |
| 16017  | 0     | 0     | 0     | 0     |



| respid | Q43_1 | Q43_2 | Q43_3 | Q43_4 |
|--------|-------|-------|-------|-------|
| 16019  | 0     | 0     | 0     | 0     |
| 16021  | 0     | 0     | 0     | 0     |
| 16024  | 0     | 0     | 0     | 0     |
| 16026  | 0     | 0     | 1     | 1     |
| 16029  |       |       |       |       |
| 16031  | 1     | 0     | 0     | 0     |
| 16037  | 0     | 0     | 0     | 0     |
| 16043  | 1     | 0     | 0     | 0     |
| 16044  | 0     | 0     | 0     | 0     |
| 16047  | 0     | 0     | 0     | 1     |
| 16048  | 1     | 0     | 0     | 0     |
| 16049  | 0     | 0     | 0     | 0     |
| 16051  | 0     | 0     | 0     | 0     |
| 16053  | 1     | 0     | 0     | 0     |
| 16054  | 0     | 0     | 0     | 1     |
| 16069  | 0     | 0     | 0     | 0     |
| 16070  | 0     | 0     | 0     | 0     |
| 16074  |       |       |       |       |
| 16076  |       |       |       |       |
| 16078  |       |       |       |       |
| 16081  | 0     | 0     | 0     | 0     |
| 16085  |       |       |       |       |
| 16088  | 1     | 0     | 0     | 0     |
| 16091  | 0     | 0     | 0     | 0     |
| 16092  | 0     | 0     | 0     | 0     |
| 16093  | 0     | 0     | 0     | 0     |
| 16097  | 0     | 0     | 0     | 0     |
| 16100  | 0     | 0     | 0     | 0     |
| 16101  | 0     | 0     | 0     | 0     |
| 16105  |       |       |       |       |
| 16118  | 0     | 1     | 1     | 0     |
| 16129  | 0     | 0     | 0     | 0     |

| respid | Q43_1 | Q43_2 | Q43_3 | Q43_4 |
|--------|-------|-------|-------|-------|
| 16130  | 1     | 0     | 0     | 0     |
| 16131  | 0     | 0     | 0     | 0     |
| 16136  | 0     | 0     | 0     | 0     |
| 16137  | 1     | 0     | 0     | 1     |
| 16138  | 0     | 0     | 0     | 0     |
| 16139  | 0     | 0     | 0     | 0     |
| 16140  | 0     | 0     | 0     | 0     |
| 16145  | 0     | 0     | 1     | 0     |
| 16150  | 0     | 0     | 0     | 0     |
| 16151  | 0     | 0     | 0     | 0     |
| 16153  | 0     | 0     | 0     | 0     |
| 16164  | 1     | 0     | 0     | 1     |
| 16168  | 0     | 0     | 1     | 1     |
| 16173  | 0     | 0     | 0     | 0     |
| 16174  | 0     | 0     | 0     | 0     |
| 16177  | 0     | 0     | 0     | 0     |
| 16185  | 1     | 0     | 0     | 0     |
| 16189  | 1     | 0     | 0     | 0     |
| 16192  | 0     | 0     | 0     | 0     |
| 16193  | 0     | 0     | 0     | 0     |
| 16194  | 0     | 0     | 0     | 0     |
| 16196  |       |       |       |       |
| 16202  | 0     | 0     | 1     | 0     |
| 16205  | 0     | 0     | 0     | 0     |
| 16206  | 0     | 0     | 0     | 0     |
| 16208  |       |       |       |       |
| 16211  | 0     | 0     | 1     | 1     |
| 16212  | 0     | 0     | 0     | 0     |
| 16215  |       |       |       |       |
| 16217  | 0     | 0     | 0     | 0     |
| 16221  | 1     | 0     | 0     | 0     |
| 16226  | 1     | 0     | 0     | 0     |

| respid | Q43_1 | Q43_2 | Q43_3 | Q43_4 |
|--------|-------|-------|-------|-------|
| 16228  | 0     | 0     | 1     | 1     |
| 16229  | 0     | 0     | 0     | 0     |
| 16230  | 0     | 0     | 0     | 0     |
| 16231  | 1     | 0     | 1     | 0     |
| 16232  | 1     | 0     | 1     | 1     |
| 16234  | 0     | 0     | 0     | 0     |
| 16235  | 1     | 0     | 0     | 0     |
| 16236  | 1     | 0     | 0     | 0     |
| 16237  | 0     | 0     | 0     | 1     |
| 16238  | 0     | 0     | 1     | 1     |
| 16239  | 1     | 0     | 0     | 0     |
| 16243  | 0     | 0     | 0     | 0     |
| 16248  | 0     | 0     | 0     | 0     |
| 16249  | 1     | 0     | 0     | 0     |
| 16251  |       |       |       |       |
| 16263  | 0     | 0     | 0     | 0     |
| 16265  | 1     | 0     | 0     | 0     |
| 16269  | 0     | 0     | 0     | 0     |
| 16272  | 0     | 0     | 0     | 0     |
| 16273  |       |       |       |       |
| 16281  | 0     | 0     | 0     | 0     |
| 16282  | 0     | 0     | 0     | 0     |
| 16287  | 0     | 0     | 0     | 0     |
| 16290  | 0     | 0     | 0     | 0     |
| 16294  | 0     | 0     | 0     | 0     |
| 16295  | 0     | 0     | 0     | 0     |
| 16296  | 0     | 0     | 0     | 0     |
| 16299  | 1     | 0     | 0     | 0     |
| 16302  | 0     | 0     | 0     | 0     |
| 16303  | 1     | 0     | 0     | 0     |
| 16304  | 0     | 0     | 1     | 0     |
| 16306  | 0     | 0     | 0     | 0     |

| respid | Q43_1 | Q43_2 | Q43_3 | Q43_4 |
|--------|-------|-------|-------|-------|
| 16318  | 0     | 0     | 0     | 0     |
| 16320  | 0     | 0     | 0     | 1     |
| 16321  | 0     | 0     | 0     | 0     |
| 16322  | 0     | 0     | 0     | 0     |
| 16324  | 0     | 0     | 0     | 0     |
| 16326  | 0     | 0     | 0     | 0     |
| 16328  | 1     | 0     | 0     | 0     |
| 16336  | 1     | 0     | 0     | 0     |
| 16341  | 1     | 0     | 0     | 0     |
| 16342  | 0     | 0     | 0     | 0     |
| 16343  | 0     | 0     | 0     | 0     |
| 16345  | 1     | 0     | 0     | 0     |
| 16349  | 0     | 0     | 0     | 0     |
| 16355  | 0     | 0     | 0     | 0     |
| 16364  | 1     | 0     | 0     | 0     |
| 16374  | 0     | 0     | 0     | 0     |
| 16375  |       |       |       |       |
| 16376  | 1     | 1     | 0     | 0     |
| 16393  | 0     | 0     | 0     | 0     |
| 16394  | 0     | 0     | 0     | 0     |
| 16395  | 0     | 0     | 0     | 0     |
| 16397  | 1     | 0     | 0     | 0     |
| 16398  | 1     | 0     | 1     | 1     |
| 16402  | 0     | 0     | 0     | 0     |
| 16405  | 0     | 0     | 0     | 0     |
| 16416  | 0     | 0     | 0     | 0     |
| 16422  | 0     | 0     | 0     | 0     |
| 16429  | 0     | 0     | 0     | 0     |
| 16430  | 0     | 0     | 0     | 0     |
| 16432  | 0     | 0     | 0     | 0     |
| 16433  | 0     | 0     | 0     | 0     |
| 16434  |       |       |       |       |

| respid | Q43_1 | Q43_2 | Q43_3 | Q43_4 |
|--------|-------|-------|-------|-------|
| 16437  | 0     | 0     | 0     | 0     |
| 16439  | 0     | 0     | 0     | 0     |
| 16440  | 0     | 0     | 0     | 0     |
| 16441  | 1     | 0     | 1     | 0     |
| 16442  | 0     | 0     | 0     | 0     |
| 16450  | 0     | 0     | 0     | 0     |
| 16451  | 0     | 0     | 0     | 0     |
| 16452  | 0     | 0     | 0     | 0     |
| 16467  | 0     | 0     | 0     | 0     |
| 16468  |       |       |       |       |
| 16469  | 0     | 0     | 0     | 0     |
| 16470  |       |       |       |       |
| 16471  | 0     | 0     | 0     | 0     |
| 16473  | 0     | 0     | 0     | 0     |
| 16476  | 0     | 0     | 0     | 0     |
| 16478  | 0     | 0     | 0     | 0     |
| 16484  | 0     | 0     | 0     | 0     |
| 16499  | 1     | 0     | 0     | 0     |
| 16502  |       |       |       |       |
| 16505  | 0     | 0     | 0     | 0     |
| 16514  | 0     | 0     | 0     | 0     |
| 16515  | 0     | 0     | 0     | 0     |
| 16517  | 0     | 0     | 0     | 0     |
| 16518  | 0     | 0     | 0     | 0     |
| 16519  | 0     | 0     | 0     | 0     |
| 16525  | 0     | 0     | 0     | 0     |
| 16526  | 0     | 0     | 0     | 1     |
| 16530  | 0     | 0     | 0     | 0     |
| 16532  | 0     | 0     | 0     | 0     |
| 16536  | 1     | 0     | 0     | 0     |
| 16537  | 0     | 0     | 0     | 0     |
| 16541  | 0     | 0     | 0     | 1     |

| respid | Q43_1 | Q43_2 | Q43_3 | Q43_4 |
|--------|-------|-------|-------|-------|
| 16543  | 0     | 0     | 0     | 0     |
| 16544  | 0     | 0     | 0     | 0     |
| 16545  | 0     | 0     | 0     | 0     |
| 16546  | 0     | 0     | 0     | 0     |
| 16548  | 0     | 0     | 0     | 0     |
| 16552  | 0     | 0     | 0     | 0     |
| 16559  | 0     | 0     | 0     | 0     |
| 16564  | 1     | 0     | 0     | 1     |
| 16565  | 0     | 0     | 1     | 0     |
| 16567  | 0     | 0     | 0     | 1     |
| 16571  |       |       |       |       |
| 16572  | 1     | 0     | 0     | 1     |
| 16579  | 0     | 0     | 0     | 0     |
| 16588  | 1     | 0     | 1     | 1     |
| 16599  | 0     | 0     | 0     | 0     |
| 16605  | 1     | 0     | 0     | 0     |
| 16622  | 0     | 0     | 0     | 0     |
| 16635  | 1     | 0     | 0     | 0     |
| 16638  | 0     | 0     | 0     | 0     |
| 16652  | 1     | 0     | 0     | 0     |
| 16656  | 0     | 0     | 0     | 0     |
| 16671  |       |       |       |       |
| 16676  | 0     | 0     | 0     | 0     |
| 16678  | 0     | 0     | 1     | 0     |
| 16702  | 0     | 0     | 0     | 0     |
| 16705  | 0     | 0     | 1     | 1     |
| 16707  | 0     | 1     | 1     | 0     |
| 16711  | 0     | 0     | 0     | 0     |
| 16712  | 1     | 0     | 0     | 0     |
| 16716  |       |       |       |       |
| 16724  | 0     | 0     | 0     | 0     |
| 16727  | 0     | 0     | 1     | 0     |

| respid | Q43_1 | Q43_2 | Q43_3 | Q43_4 |
|--------|-------|-------|-------|-------|
| 16734  | 0     | 0     | 0     | 0     |
| 16740  | 0     | 0     | 0     | 0     |
| 16748  | 0     | 0     | 0     | 0     |
| 16759  | 0     | 0     | 0     | 0     |
| 16761  |       |       |       |       |
| 16763  | 0     | 0     | 0     | 0     |
| 16764  | 1     | 0     | 0     | 1     |
| 16766  | 0     | 0     | 0     | 0     |
| 16767  | 0     | 0     | 0     | 0     |
| 16776  | 0     | 0     | 0     | 0     |
| 16781  | 1     | 0     | 0     | 0     |
| 16793  | 0     | 0     | 0     | 0     |
| 16796  | 1     | 0     | 0     | 0     |
| 16810  | 0     | 0     | 0     | 0     |
| 16811  | 0     | 0     | 0     | 0     |
| 16813  |       |       |       |       |
| 16814  | 1     | 0     | 0     | 0     |
| 16831  | 0     | 0     | 0     | 0     |
| 16833  | 0     | 0     | 1     | 0     |
| 16839  | 0     | 0     | 0     | 0     |
| 16843  | 0     | 0     | 0     | 0     |
| 16860  |       |       |       |       |
| 16871  | 0     | 0     | 0     | 0     |
| 16881  | 0     | 0     | 0     | 0     |
| 16884  | 0     | 0     | 0     | 0     |
| 16891  | 0     | 0     | 0     | 1     |
| 16909  | 0     | 0     | 0     | 0     |
| 16911  |       |       |       |       |
| 16922  | 1     | 0     | 0     | 0     |
| 16935  | 1     | 0     | 0     | 0     |
| 16942  | 0     | 0     | 0     | 0     |
| 16950  |       |       |       |       |

| respid | Q43_1 | Q43_2 | Q43_3 | Q43_4 |
|--------|-------|-------|-------|-------|
| 16952  | 1     | 0     | 0     | 0     |
| 16963  | 0     | 0     | 0     | 0     |
| 16967  | 1     | 0     | 1     | 0     |
| 16970  | 1     | 0     | 0     | 0     |
| 16976  | 1     | 0     | 1     | 0     |
| 16982  | 1     | 0     | 0     | 0     |
| 16995  | 0     | 0     | 0     | 0     |
| 17004  | 1     | 0     | 0     | 0     |
| 17006  | 0     | 0     | 0     | 0     |
| 17009  | 0     | 0     | 0     | 0     |
| 17021  |       |       |       |       |
| 17040  | 1     | 0     | 1     | 1     |
| 17041  |       |       |       |       |
| 17044  | 0     | 0     | 0     | 0     |
| 17046  | 1     | 0     | 0     | 0     |
| 17052  | 0     | 0     | 0     | 0     |
| 17055  | 0     | 0     | 0     | 0     |
| 17108  | 1     | 0     | 0     | 1     |
| 17109  | 1     | 0     | 0     | 1     |
| 17113  |       |       |       |       |
| 17115  | 0     | 0     | 0     | 0     |
| 17132  |       |       |       |       |
| 17135  | 1     | 0     | 1     | 0     |
| 17138  | 1     | 0     | 0     | 0     |
| 17141  | 0     | 0     | 0     | 0     |
| 17143  | 0     | 0     | 0     | 1     |
| 17148  | 1     | 0     | 0     | 0     |
| 17151  | 0     | 0     | 0     | 0     |
| 17153  | 0     | 0     | 0     | 0     |
| 17154  | 1     | 0     | 0     | 0     |
| 17157  | 0     | 0     | 0     | 0     |
| 17160  | 0     | 0     | 0     | 0     |



| respid | Q43_1 | Q43_2 | Q43_3 | Q43_4 |
|--------|-------|-------|-------|-------|
| 17167  | 0     | 0     | 0     | 0     |
| 17169  | 1     | 0     | 0     | 0     |
| 17174  | 1     | 0     | 1     | 1     |
| 17179  | 0     | 0     | 0     | 0     |
| 17180  | 0     | 0     | 0     | 0     |
| 17182  | 0     | 0     | 0     | 0     |
| 17184  | 1     | 0     | 0     | 0     |
| 17186  | 0     | 0     | 0     | 0     |
| 17187  | 0     | 0     | 0     | 0     |
| 17192  | 0     | 0     | 0     | 0     |
| 17197  | 1     | 0     | 0     | 0     |
| 17217  | 0     | 0     | 0     | 0     |
| 17226  | 0     | 0     | 0     | 1     |
| 17228  | 0     | 0     | 0     | 0     |
| 17245  | 0     | 0     | 0     | 0     |
| 17247  |       |       |       |       |
| 17258  | 0     | 0     | 0     | 0     |
| 17259  | 0     | 0     | 0     | 0     |
| 17262  | 0     | 0     | 0     | 0     |
| 17265  | 0     | 0     | 0     | 0     |
| 17281  | 1     | 0     | 0     | 1     |
| 17282  | 0     | 0     | 1     | 1     |
| 17293  | 0     | 0     | 0     | 0     |
| 17306  | 0     | 0     | 0     | 1     |
| 17312  | 0     | 0     | 0     | 0     |
| 17318  | 0     | 0     | 0     | 1     |
| 17328  | 1     | 0     | 0     | 1     |
| 17343  | 0     | 0     | 0     | 0     |
| 17344  | 0     | 0     | 0     | 0     |
| 17348  | 0     | 0     | 0     | 0     |
| 17352  | 1     | 0     | 0     | 0     |
| 17355  | 0     | 0     | 0     | 0     |

| respid | Q43_1 | Q43_2 | Q43_3 | Q43_4 |
|--------|-------|-------|-------|-------|
| 17356  | 0     | 0     | 0     | 0     |
| 17359  | 1     | 0     | 0     | 0     |
| 17373  | 0     | 0     | 0     | 0     |
| 17381  | 0     | 0     | 0     | 0     |
| 17388  | 0     | 0     | 0     | 0     |
| 17394  | 1     | 0     | 0     | 0     |
| 17401  |       |       |       |       |
| 17403  | 0     | 0     | 0     | 0     |
| 17411  |       |       |       |       |
| 17423  | 0     | 0     | 0     | 0     |
| 17427  |       |       |       |       |
| 17433  | 1     | 1     | 0     | 1     |
| 17441  | 0     | 0     | 0     | 0     |
| 17442  | 0     | 0     | 0     | 0     |
| 17447  | 1     | 0     | 0     | 0     |
| 17458  | 0     | 0     | 0     | 0     |
| 17474  | 0     | 0     | 0     | 0     |
| 17475  | 0     | 0     | 0     | 0     |
| 17476  | 0     | 0     | 0     | 0     |
| 17480  | 0     | 0     | 0     | 0     |
| 17484  | 0     | 0     | 0     | 0     |
| 17490  | 0     | 0     | 0     | 0     |
| 17491  | 0     | 0     | 0     | 0     |
| 17500  | 0     | 0     | 0     | 0     |
| 17507  | 0     | 0     | 0     | 0     |
| 17517  | 1     | 0     | 0     | 0     |
| 17520  | 0     | 0     | 0     | 0     |
| 17521  | 0     | 0     | 0     | 0     |
| 17531  | 0     | 0     | 0     | 0     |
| 17540  | 0     | 0     | 0     | 0     |
| 17550  | 0     | 0     | 0     | 0     |
| 17551  | 0     | 0     | 0     | 0     |

| respid | Q43_1 | Q43_2 | Q43_3 | Q43_4 |
|--------|-------|-------|-------|-------|
| 17555  | 1     | 0     | 1     | 0     |
| 17556  | 1     | 0     | 1     | 1     |
| 17574  | 1     | 0     | 0     | 1     |
| 17575  | 0     | 0     | 0     | 0     |
| 17582  | 0     | 0     | 0     | 0     |
| 17587  |       |       |       |       |
| 17601  | 0     | 0     | 0     | 0     |
| 17607  | 1     | 0     | 1     | 0     |
| 17609  | 0     | 0     | 0     | 0     |
| 17611  | 0     | 0     | 0     | 0     |
| 17613  | 0     | 0     | 0     | 0     |
| 17615  | 1     | 0     | 0     | 0     |
| 17620  | 0     | 0     | 0     | 0     |
| 17624  | 0     | 0     | 0     | 0     |
| 17635  | 0     | 0     | 0     | 0     |
| 17643  | 0     | 0     | 0     | 0     |
| 17645  | 0     | 0     | 0     | 1     |
| 17646  | 0     | 0     | 0     | 0     |
| 17649  | 0     | 0     | 0     | 0     |
| 17658  | 0     | 0     | 0     | 0     |
| 17666  |       |       |       |       |
| 17670  | 0     | 0     | 0     | 0     |
| 17678  | 0     | 0     | 0     | 0     |
| 17679  | 1     | 0     | 1     | 1     |
| 17695  | 0     | 0     | 0     | 0     |
| 17697  | 0     | 0     | 0     | 0     |
| 17698  | 1     | 0     | 0     | 0     |
| 17723  | 1     | 0     | 0     | 0     |
| 17727  | 0     | 0     | 0     | 0     |
| 17734  | 0     | 0     | 0     | 0     |
| 17737  | 0     | 0     | 0     | 0     |
| 17748  | 0     | 0     | 0     | 0     |

| respid | Q43_1 | Q43_2 | Q43_3 | Q43_4 |
|--------|-------|-------|-------|-------|
| 17749  |       |       |       |       |
| 17754  | 0     | 0     | 0     | 0     |
| 17766  | 1     | 0     | 0     | 0     |
| 17777  | 1     | 0     | 0     | 0     |
| 17780  | 1     | 0     | 0     | 0     |
| 17788  | 1     | 0     | 0     | 0     |
| 17801  | 0     | 0     | 0     | 0     |
| 17803  | 0     | 0     | 0     | 0     |
| 17807  | 0     | 0     | 0     | 0     |
| 17808  | 0     | 0     | 0     | 0     |
| 17809  | 0     | 0     | 0     | 0     |
| 17821  | 0     | 0     | 0     | 0     |
| 17827  | 0     | 0     | 0     | 0     |
| 17834  | 0     | 0     | 0     | 1     |
| 17838  | 0     | 0     | 0     | 0     |
| 17842  | 0     | 0     | 0     | 0     |
| 17862  | 1     | 0     | 0     | 0     |
| 17863  | 0     | 0     | 0     | 0     |
| 17871  | 0     | 0     | 0     | 0     |
| 17872  | 0     | 0     | 0     | 0     |
| 17903  | 1     | 0     | 0     | 0     |
| 17906  | 0     | 0     | 0     | 0     |
| 17910  | 1     | 0     | 1     | 0     |
| 17922  | 0     | 0     | 0     | 0     |
| 17923  | 0     | 0     | 0     | 0     |
| 17925  | 0     | 0     | 0     | 0     |
| 17926  | 0     | 0     | 0     | 0     |
| 17937  | 0     | 0     | 0     | 0     |
| 17956  | 0     | 0     | 0     | 0     |
| 17958  | 0     | 0     | 0     | 0     |
| 17985  | 0     | 0     | 0     | 0     |
| 17989  | 0     | 0     | 0     | 1     |

| respid | Q43_1 | Q43_2 | Q43_3 | Q43_4 |
|--------|-------|-------|-------|-------|
| 17995  | 0     | 0     | 0     | 0     |
| 18000  | 0     | 0     | 0     | 1     |
| 18010  | 0     | 0     | 0     | 0     |
| 18015  | 0     | 0     | 0     | 0     |
| 18018  | 0     | 0     | 0     | 0     |
| 18031  | 1     | 0     | 0     | 1     |
| 18033  | 0     | 0     | 0     | 0     |
| 18036  | 0     | 0     | 0     | 0     |
| 18041  | 0     | 0     | 0     | 0     |
| 18068  |       |       |       |       |
| 18080  | 1     | 0     | 0     | 0     |
| 18081  | 0     | 0     | 0     | 0     |
| 18083  | 0     | 0     | 0     | 0     |
| 18113  | 0     | 0     | 0     | 0     |
| 18115  | 0     | 0     | 0     | 0     |
| 18117  | 0     | 0     | 0     | 0     |
| 18129  | 0     | 0     | 0     | 0     |
| 18132  | 0     | 0     | 0     | 1     |
| 18146  | 1     | 0     | 0     | 0     |
| 18147  | 1     | 0     | 0     | 0     |
| 18153  |       |       |       |       |
| 18154  | 0     | 0     | 0     | 0     |
| 18157  | 0     | 0     | 0     | 0     |
| 18166  | 1     | 0     | 0     | 0     |
| 18169  | 0     | 0     | 0     | 0     |
| 18171  | 1     | 0     | 0     | 0     |
| 18173  | 1     | 0     | 0     | 0     |
| 18204  | 1     | 0     | 0     | 0     |
| 18210  | 1     | 0     | 0     | 0     |
| 18212  |       |       |       |       |
| 18220  | 1     | 0     | 0     | 0     |
| 18221  | 0     | 0     | 0     | 0     |

| respid | Q43_1 | Q43_2 | Q43_3 | Q43_4 |
|--------|-------|-------|-------|-------|
| 18228  | 0     | 0     | 0     | 0     |
| 18231  | 0     | 0     | 0     | 0     |
| 18233  | 0     | 0     | 0     | 0     |
| 18235  | 0     | 0     | 0     | 0     |
| 18237  |       |       |       |       |
| 18250  | 0     | 0     | 0     | 0     |
| 18253  | 0     | 0     | 0     | 1     |
| 18264  | 1     | 0     | 1     | 0     |
| 18285  | 1     | 0     | 1     | 1     |
| 18287  |       |       |       |       |
| 18296  | 0     | 0     | 0     | 0     |
| 18299  | 0     | 0     | 1     | 0     |
| 18313  | 1     | 0     | 0     | 0     |
| 18321  | 1     | 0     | 0     | 1     |
| 18324  |       |       |       |       |
| 18329  | 1     | 0     | 0     | 0     |
| 18332  | 0     | 0     | 0     | 0     |
| 18339  | 0     | 0     | 0     | 1     |
| 18340  | 0     | 0     | 0     | 0     |
| 18348  | 0     | 0     | 0     | 0     |
| 18355  | 1     | 0     | 0     | 0     |
| 18360  | 1     | 0     | 0     | 0     |
| 18380  | 0     | 0     | 0     | 0     |
| 18403  | 0     | 0     | 0     | 0     |
| 18405  | 0     | 0     | 0     | 0     |
| 18409  | 0     | 0     | 0     | 0     |
| 18445  | 0     | 0     | 0     | 0     |
| 18458  | 0     | 0     | 0     | 1     |
| 18477  | 0     | 0     | 0     | 0     |
| 18481  | 0     | 0     | 0     | 0     |
| 18491  | 0     | 0     | 0     | 0     |
| 18492  | 0     | 0     | 0     | 0     |

| respid | Q43_1 | Q43_2 | Q43_3 | Q43_4 |
|--------|-------|-------|-------|-------|
| 18494  | 0     | 0     | 0     | 0     |
| 18495  | 1     | 0     | 0     | 0     |
| 18496  | 1     | 0     | 0     | 0     |
| 18507  | 0     | 0     | 1     | 0     |
| 18509  |       |       |       |       |
| 18510  | 0     | 0     | 0     | 0     |
| 18513  | 0     | 0     | 0     | 0     |
| 18525  |       |       |       |       |
| 18526  | 0     | 0     | 0     | 0     |
| 18527  | 1     | 1     | 1     | 1     |
| 18536  | 0     | 0     | 0     | 0     |
| 18540  | 0     | 0     | 0     | 0     |
| 18548  | 0     | 0     | 0     | 0     |
| 18550  |       |       |       |       |
| 18556  | 1     | 1     | 1     | 1     |
| 18561  |       |       |       |       |
| 18577  | 1     | 0     | 0     | 0     |
| 18580  | 0     | 0     | 0     | 0     |
| 18633  | 0     | 0     | 0     | 1     |
| 18635  | 0     | 0     | 0     | 0     |
| 18636  |       |       |       |       |
| 18645  | 0     | 0     | 1     | 0     |
| 18649  | 0     | 0     | 1     | 0     |
| 18664  | 0     | 0     | 0     | 0     |
| 18668  | 0     | 0     | 0     | 0     |
| 18682  | 1     | 0     | 0     | 0     |
| 18685  | 0     | 0     | 0     | 0     |
| 18688  | 0     | 0     | 0     | 0     |
| 18689  | 0     | 0     | 1     | 1     |
| 18693  | 0     | 0     | 0     | 0     |
| 18694  | 0     | 0     | 0     | 0     |
| 18705  | 0     | 0     | 0     | 0     |

| respid | Q43_1 | Q43_2 | Q43_3 | Q43_4 |
|--------|-------|-------|-------|-------|
| 18710  | 0     | 0     | 0     | 1     |
| 18715  | 1     | 0     | 0     | 0     |
| 18718  | 1     | 0     | 0     | 1     |
| 18727  | 0     | 0     | 0     | 0     |
| 18732  | 0     | 0     | 0     | 0     |
| 18735  | 1     | 0     | 0     | 0     |
| 18742  | 0     | 0     | 0     | 0     |
| 18745  | 0     | 0     | 0     | 0     |
| 18747  | 0     | 0     | 0     | 0     |
| 18750  | 0     | 0     | 0     | 0     |
| 18751  | 0     | 0     | 0     | 0     |
| 18753  | 0     | 0     | 0     | 1     |
| 18754  |       |       |       |       |
| 18759  | 1     | 0     | 0     | 0     |
| 18780  | 0     | 0     | 0     | 0     |
| 18782  | 0     | 0     | 0     | 0     |
| 18807  | 1     | 0     | 0     | 1     |
| 18815  | 0     | 0     | 0     | 0     |
| 18818  | 0     | 0     | 0     | 0     |
| 18820  | 1     | 0     | 0     | 0     |
| 18823  | 1     | 0     | 1     | 0     |
| 18825  | 1     | 0     | 0     | 0     |
| 18828  |       |       |       |       |
| 18832  | 0     | 0     | 0     | 0     |
| 18834  | 1     | 0     | 1     | 0     |
| 18835  | 1     | 0     | 1     | 1     |
| 18837  | 0     | 0     | 0     | 0     |
| 18842  | 0     | 0     | 0     | 0     |
| 18846  |       |       |       |       |
| 18855  | 0     | 0     | 0     | 0     |
| 18856  | 0     | 0     | 0     | 0     |
| 18887  | 1     | 0     | 0     | 0     |



| respid | Q43_1 | Q43_2 | Q43_3 | Q43_4 |
|--------|-------|-------|-------|-------|
| 18903  | 1     | 0     | 0     | 0     |
| 18906  | 1     | 0     | 1     | 0     |
| 18910  |       |       |       |       |
| 18919  | 1     | 0     | 0     | 0     |
| 18928  | 0     | 0     | 0     | 0     |
| 18931  | 0     | 0     | 0     | 1     |
| 18939  | 0     | 0     | 0     | 0     |
| 18946  | 0     | 0     | 0     | 0     |
| 18952  | 0     | 0     | 0     | 0     |
| 18954  | 0     | 0     | 0     | 0     |
| 18982  |       |       |       |       |
| 18986  | 0     | 0     | 0     | 0     |
| 18989  | 0     | 0     | 1     | 1     |
| 18990  | 0     | 0     | 0     | 0     |
| 18996  | 0     | 0     | 0     | 0     |
| 18998  | 0     | 0     | 0     | 0     |
| 19009  | 1     | 0     | 0     | 0     |
| 19010  | 0     | 0     | 0     | 0     |
| 19017  | 0     | 0     | 0     | 0     |
| 19018  | 0     | 0     | 0     | 0     |
| 19020  | 0     | 0     | 0     | 0     |
| 19027  | 0     | 0     | 0     | 0     |
| 19035  | 0     | 0     | 0     | 0     |
| 19037  | 0     | 0     | 0     | 0     |
| 19048  | 0     | 0     | 0     | 0     |
| 19051  | 1     | 0     | 1     | 0     |
| 19054  | 0     | 0     | 0     | 0     |
| 19057  | 0     | 0     | 0     | 0     |
| 19073  | 0     | 0     | 1     | 1     |
| 19075  | 0     | 0     | 0     | 0     |
| 19079  | 0     | 0     | 0     | 1     |
| 19087  | 0     | 0     | 0     | 0     |

| respid | Q43_1 | Q43_2 | Q43_3 | Q43_4 |
|--------|-------|-------|-------|-------|
| 19090  | 0     | 0     | 0     | 0     |
| 19093  | 0     | 0     | 0     | 0     |
| 19099  | 0     | 0     | 0     | 1     |
| 19100  | 0     | 0     | 0     | 0     |
| 19101  | 0     | 0     | 0     | 0     |
| 19105  | 0     | 0     | 0     | 0     |
| 19111  | 0     | 0     | 0     | 0     |
| 19112  | 0     | 0     | 0     | 0     |
| 19117  | 1     | 0     | 1     | 1     |
| 19122  | 0     | 0     | 0     | 0     |
| 19126  | 0     | 0     | 0     | 0     |
| 19127  | 1     | 0     | 0     | 0     |
| 19131  | 1     | 0     | 0     | 0     |
| 19134  | 0     | 0     | 0     | 0     |
| 19149  | 0     | 0     | 0     | 0     |
| 19151  | 1     | 0     | 1     | 0     |
| 19164  | 0     | 0     | 0     | 0     |
| 19166  | 0     | 0     | 0     | 0     |
| 19172  | 0     | 0     | 0     | 0     |
| 19173  | 0     | 0     | 1     | 1     |
| 19180  | 0     | 0     | 0     | 0     |
| 19185  | 0     | 0     | 0     | 1     |
| 19189  | 0     | 0     | 0     | 0     |
| 19191  |       |       |       |       |
| 19198  | 1     | 0     | 0     | 0     |
| 19203  | 0     | 0     | 0     | 0     |
| 19209  | 0     | 0     | 0     | 0     |
| 19210  |       |       |       |       |
| 19218  |       |       |       |       |
| 19220  |       |       |       |       |
| 19225  | 0     | 0     | 0     | 0     |
| 19227  | 0     | 0     | 0     | 0     |

| respid | Q43_1 | Q43_2 | Q43_3 | Q43_4 |
|--------|-------|-------|-------|-------|
| 19228  | 0     | 0     | 0     | 0     |
| 19243  | 0     | 0     | 0     | 0     |
| 19244  | 0     | 1     | 0     | 0     |
| 19246  | 0     | 0     | 0     | 0     |
| 19248  |       |       |       |       |
| 19249  | 0     | 0     | 0     | 0     |
| 19252  | 1     | 0     | 0     | 0     |
| 19255  | 1     | 0     | 0     | 0     |
| 19257  | 0     | 0     | 0     | 0     |
| 19274  |       |       |       |       |
| 19279  |       |       |       |       |
| 19291  | 0     | 0     | 0     | 0     |
| 19292  | 0     | 0     | 0     | 0     |
| 19308  | 0     | 0     | 0     | 0     |
| 19310  | 0     | 0     | 0     | 1     |
| 19311  | 0     | 0     | 0     | 0     |
| 19326  | 0     | 0     | 0     | 0     |
| 19327  |       |       |       |       |
| 19329  |       |       |       |       |
| 19330  | 0     | 0     | 1     | 0     |
| 19333  | 0     | 0     | 0     | 1     |
| 19336  | 0     | 0     | 0     | 0     |
| 19343  | 0     | 0     | 0     | 0     |
| 19348  | 0     | 0     | 0     | 0     |
| 19349  | 1     | 0     | 0     | 1     |
| 19352  | 0     | 0     | 0     | 1     |
| 19356  | 0     | 0     | 0     | 0     |
| 19357  | 0     | 0     | 0     | 0     |
| 19358  | 0     | 0     | 0     | 0     |
| 19367  | 0     | 0     | 0     | 0     |
| 19376  |       |       |       |       |
| 19377  | 0     | 0     | 0     | 0     |

| respid | Q43_1 | Q43_2 | Q43_3 | Q43_4 |
|--------|-------|-------|-------|-------|
| 19380  | 0     | 0     | 0     | 0     |
| 19384  | 0     | 0     | 0     | 0     |
| 19391  | 1     | 0     | 0     | 0     |
| 19397  |       |       |       |       |
| 19398  | 0     | 0     | 0     | 0     |
| 19401  |       |       |       |       |
| 19402  | 0     | 0     | 0     | 0     |
| 19403  |       |       |       |       |
| 19405  |       |       |       |       |
| 19407  | 0     | 0     | 0     | 0     |
| 19415  | 0     | 0     | 0     | 0     |
| 19420  |       |       |       |       |
| 19423  | 1     | 0     | 0     | 1     |
| 19424  | 0     | 0     | 0     | 0     |
| 19426  | 0     | 0     | 0     | 0     |
| 19429  | 0     | 0     | 0     | 0     |
| 19435  | 1     | 0     | 1     | 0     |
| 19441  | 0     | 0     | 0     | 0     |
| 19450  | 0     | 0     | 0     | 0     |
| 19456  | 1     | 0     | 0     | 0     |
| 19457  | 0     | 0     | 0     | 0     |
| 19463  | 0     | 0     | 0     | 0     |
| 19467  | 0     | 0     | 0     | 0     |
| 19468  | 0     | 0     | 0     | 0     |
| 19471  | 0     | 0     | 0     | 0     |
| 19473  | 0     | 0     | 0     | 0     |
| 19478  | 1     | 0     | 1     | 1     |
| 19480  |       |       |       |       |
| 19481  | 0     | 0     | 0     | 0     |
| 19484  | 0     | 0     | 0     | 0     |
| 19487  | 0     | 0     | 0     | 0     |
| 19491  | 0     | 0     | 0     | 1     |

| respid | Q43_1 | Q43_2 | Q43_3 | Q43_4 |
|--------|-------|-------|-------|-------|
| 19495  | 0     | 0     | 1     | 1     |
| 19498  | 0     | 0     | 0     | 0     |
| 19500  | 0     | 0     | 0     | 1     |
| 19501  | 0     | 0     | 0     | 0     |
| 19503  |       |       |       |       |
| 19506  | 0     | 0     | 0     | 0     |
| 19508  | 0     | 0     | 0     | 0     |
| 19509  | 0     | 0     | 0     | 0     |
| 19518  | 0     | 0     | 0     | 0     |
| 19520  | 0     | 0     | 0     | 0     |
| 19536  | 0     | 0     | 0     | 0     |
| 19538  | 0     | 0     | 0     | 0     |
| 19541  | 0     | 0     | 0     | 0     |
| 19548  | 0     | 0     | 0     | 0     |
| 19553  |       |       |       |       |
| 19556  | 0     | 0     | 0     | 0     |
| 19559  |       |       |       |       |
| 19561  | 0     | 0     | 0     | 1     |
| 19562  | 1     | 0     | 0     | 0     |
| 19564  | 0     | 0     | 0     | 0     |
| 19567  | 1     | 0     | 0     | 1     |
| 19571  | 1     | 0     | 0     | 1     |
| 19576  | 0     | 0     | 0     | 1     |
| 19578  | 0     | 0     | 0     | 0     |
| 19606  |       |       |       |       |
| 19607  |       |       |       |       |
| 19608  | 0     | 0     | 0     | 0     |
| 19612  | 0     | 0     | 1     | 0     |
| 19618  | 0     | 0     | 0     | 1     |
| 19621  | 1     | 0     | 0     | 0     |
| 19624  | 0     | 0     | 0     | 1     |
| 19630  |       |       |       |       |

| respid | Q43_1 | Q43_2 | Q43_3 | Q43_4 |
|--------|-------|-------|-------|-------|
| 19637  | 0     | 0     | 0     | 0     |
| 19639  | 0     | 0     | 0     | 0     |
| 19647  | 0     | 0     | 0     | 0     |
| 19648  | 0     | 0     | 1     | 0     |
| 19660  | 0     | 0     | 0     | 0     |
| 19662  | 0     | 0     | 0     | 0     |
| 19669  | 0     | 0     | 0     | 0     |
| 19680  | 0     | 0     | 0     | 0     |
| 19682  | 0     | 0     | 0     | 0     |
| 19686  | 0     | 0     | 0     | 0     |
| 19700  | 0     | 0     | 0     | 0     |
| 19701  | 0     | 0     | 0     | 0     |
| 19704  |       |       |       |       |
| 19706  | 0     | 0     | 0     | 1     |
| 19707  | 0     | 0     | 0     | 0     |
| 19717  | 0     | 0     | 0     | 0     |
| 19718  | 0     | 0     | 0     | 0     |
| 19721  | 0     | 0     | 0     | 0     |
| 19722  | 0     | 0     | 0     | 0     |
| 19729  |       |       |       |       |
| 19738  | 0     | 0     | 0     | 0     |
| 19741  | 0     | 0     | 0     | 0     |
| 19742  | 0     | 0     | 0     | 1     |
| 19747  | 1     | 0     | 0     | 0     |
| 19748  | 0     | 0     | 0     | 0     |
| 19749  | 0     | 0     | 0     | 0     |
| 19756  | 0     | 0     | 0     | 0     |
| 19771  | 0     | 0     | 0     | 0     |
| 19772  | 0     | 0     | 0     | 1     |
| 19775  | 0     | 0     | 0     | 0     |
| 19783  |       |       |       |       |
| 19787  | 0     | 0     | 0     | 0     |

| respid | Q43_1 | Q43_2 | Q43_3 | Q43_4 |
|--------|-------|-------|-------|-------|
| 19790  |       |       |       |       |
| 19797  | 0     | 0     | 0     | 0     |
| 19802  | 0     | 0     | 0     | 0     |
| 19808  | 0     | 0     | 0     | 0     |
| 19810  | 0     | 0     | 0     | 0     |
| 19811  | 0     | 0     | 0     | 0     |
| 19812  | 0     | 0     | 0     | 0     |
| 19821  | 0     | 0     | 0     | 0     |
| 19826  | 0     | 0     | 0     | 0     |
| 19827  | 1     | 0     | 0     | 0     |
| 19830  | 0     | 0     | 0     | 0     |
| 19834  | 0     | 0     | 0     | 0     |
| 19838  | 1     | 0     | 0     | 1     |
| 19843  |       |       |       |       |
| 19845  | 0     | 0     | 0     | 1     |
| 19846  | 1     | 0     | 1     | 0     |
| 19852  | 0     | 0     | 1     | 0     |
| 19855  | 0     | 0     | 0     | 0     |
| 19858  | 0     | 0     | 0     | 1     |
| 19861  | 1     | 0     | 0     | 0     |
| 19863  | 0     | 0     | 0     | 0     |
| 19868  | 1     | 0     | 0     | 0     |
| 19874  | 0     | 0     | 0     | 0     |
| 19876  |       |       |       |       |
| 19880  | 0     | 0     | 1     | 1     |
| 19885  | 0     | 0     | 0     | 0     |
| 19890  |       |       |       |       |
| 19894  |       |       |       |       |
| 19895  | 0     | 0     | 0     | 0     |
| 19897  | 0     | 0     | 0     | 0     |
| 19906  | 0     | 0     | 0     | 0     |
| 19908  | 0     | 0     | 0     | 0     |

| respid | Q43_1 | Q43_2 | Q43_3 | Q43_4 |
|--------|-------|-------|-------|-------|
| 19912  | 0     | 0     | 0     | 0     |
| 19913  | 0     | 0     | 0     | 0     |
| 19914  | 0     | 0     | 0     | 0     |
| 19918  | 1     | 0     | 1     | 1     |
| 19924  | 0     | 0     | 0     | 0     |
| 19936  |       |       |       |       |
| 19940  |       |       |       |       |
| 19945  | 0     | 0     | 0     | 0     |
| 19948  |       |       |       |       |
| 19959  | 0     | 0     | 0     | 0     |
| 19961  | 1     | 0     | 0     | 0     |
| 19962  | 0     | 0     | 0     | 0     |
| 19965  | 0     | 0     | 0     | 0     |
| 19966  | 1     | 0     | 0     | 0     |
| 19973  | 0     | 0     | 1     | 1     |
| 19981  | 1     | 0     | 0     | 0     |
| 19986  | 0     | 0     | 0     | 0     |
| 19989  | 0     | 0     | 0     | 0     |
| 19998  | 0     | 0     | 0     | 0     |
| 20001  | 1     | 0     | 0     | 0     |
| 20005  |       |       |       |       |
| 20013  | 1     | 0     | 0     | 1     |
| 20015  | 0     | 0     | 0     | 0     |
| 20017  | 0     | 0     | 0     | 0     |
| 20020  | 0     | 0     | 0     | 0     |
| 20021  | 0     | 0     | 0     | 0     |
| 20026  | 0     | 0     | 0     | 0     |
| 20028  | 0     | 0     | 0     | 0     |
| 20030  | 0     | 0     | 0     | 0     |
| 20031  |       |       |       |       |
| 20034  | 0     | 0     | 0     | 0     |
| 20035  |       |       |       |       |



| respid | Q43_1 | Q43_2 | Q43_3 | Q43_4 |
|--------|-------|-------|-------|-------|
| 20040  | 0     | 0     | 0     | 0     |
| 20045  | 1     | 0     | 0     | 0     |
| 20048  | 0     | 0     | 0     | 0     |
| 20053  | 0     | 0     | 0     | 0     |
| 20064  | 0     | 0     | 0     | 0     |
| 20071  | 0     | 0     | 0     | 0     |
| 20072  | 0     | 0     | 0     | 0     |
| 20076  | 0     | 0     | 0     | 0     |
| 20081  | 0     | 0     | 0     | 0     |
| 20082  | 0     | 0     | 1     | 0     |
| 20083  | 1     | 0     | 0     | 1     |
| 20088  | 0     | 0     | 0     | 0     |
| 20089  | 1     | 0     | 1     | 1     |
| 20099  | 0     | 0     | 0     | 0     |
| 20101  | 0     | 0     | 0     | 0     |
| 20102  | 0     | 0     | 0     | 0     |
| 20109  | 1     | 0     | 0     | 1     |
| 20118  | 0     | 0     | 0     | 0     |
| 20119  | 0     | 0     | 0     | 0     |
| 20124  |       |       |       |       |
| 20126  | 0     | 0     | 0     | 0     |
| 20130  |       |       |       |       |
| 20131  | 0     | 0     | 0     | 0     |
| 20134  | 0     | 0     | 0     | 0     |
| 20146  | 0     | 0     | 0     | 0     |
| 20152  |       |       |       |       |
| 20155  | 0     | 0     | 0     | 0     |
| 20156  |       |       |       |       |
| 20157  |       |       |       |       |
| 20164  | 0     | 0     | 0     | 0     |
| 20168  | 0     | 0     | 0     | 0     |
| 20173  | 0     | 0     | 0     | 0     |

| respid | Q43_1 | Q43_2 | Q43_3 | Q43_4 |
|--------|-------|-------|-------|-------|
| 20174  | 0     | 0     | 0     | 0     |
| 20175  | 1     | 0     | 0     | 1     |
| 20189  | 0     | 0     | 0     | 0     |
| 20190  | 0     | 0     | 0     | 0     |
| 20201  | 0     | 0     | 0     | 0     |
| 20202  | 0     | 0     | 0     | 0     |
| 20204  | 0     | 0     | 0     | 0     |
| 20206  | 0     | 0     | 0     | 0     |
| 20207  | 0     | 0     | 0     | 0     |
| 20212  | 0     | 0     | 0     | 0     |
| 20213  | 0     | 0     | 0     | 0     |
| 20217  | 0     | 0     | 0     | 0     |
| 20222  | 1     | 0     | 0     | 1     |
| 20227  |       |       |       |       |
| 20228  | 0     | 0     | 0     | 0     |
| 20238  | 0     | 0     | 0     | 0     |
| 20242  | 0     | 0     | 0     | 0     |
| 20246  | 0     | 0     | 0     | 0     |
| 20255  | 0     | 0     | 1     | 0     |
| 20256  | 1     | 0     | 0     | 0     |
| 20259  | 1     | 0     | 0     | 1     |
| 20262  | 0     | 0     | 0     | 0     |
| 20274  | 1     | 0     | 0     | 0     |
| 20283  | 1     | 0     | 0     | 0     |
| 20284  |       |       |       |       |
| 20291  | 1     | 0     | 0     | 0     |
| 20292  | 0     | 0     | 0     | 0     |
| 20293  | 0     | 0     | 0     | 0     |
| 20298  | 0     | 0     | 0     | 0     |
| 20301  |       |       |       |       |
| 20303  | 0     | 0     | 0     | 0     |
| 20309  |       |       |       |       |

| respid | Q43_1 | Q43_2 | Q43_3 | Q43_4 |
|--------|-------|-------|-------|-------|
| 20318  | 0     | 0     | 0     | 0     |
| 20324  | 0     | 0     | 0     | 0     |
| 20335  | 0     | 0     | 0     | 0     |
| 20336  | 0     | 0     | 0     | 1     |
| 20339  | 0     | 0     | 1     | 0     |
| 20348  | 0     | 0     | 0     | 0     |
| 20351  | 0     | 0     | 0     | 0     |
| 20353  | 0     | 0     | 0     | 0     |
| 20356  | 1     | 0     | 0     | 0     |
| 20357  |       |       |       |       |
| 20366  | 0     | 0     | 0     | 0     |
| 20369  | 0     | 0     | 1     | 0     |
| 20372  | 1     | 0     | 0     | 0     |
| 20375  | 0     | 0     | 0     | 0     |
| 20379  | 0     | 0     | 0     | 0     |
| 20380  | 0     | 0     | 0     | 0     |
| 20396  | 0     | 0     | 0     | 0     |
| 20398  | 1     | 0     | 0     | 0     |
| 20412  | 0     | 0     | 0     | 0     |
| 20415  | 0     | 0     | 0     | 0     |
| 20424  | 1     | 0     | 0     | 0     |
| 20434  | 0     | 0     | 0     | 0     |
| 20435  | 0     | 0     | 0     | 0     |
| 20440  | 1     | 0     | 0     | 0     |
| 20441  | 0     | 0     | 0     | 0     |
| 20445  | 0     | 0     | 0     | 0     |
| 20446  | 1     | 1     | 0     | 0     |
| 20450  | 0     | 0     | 0     | 0     |
| 20453  | 0     | 0     | 0     | 0     |
| 20458  | 0     | 0     | 0     | 0     |
| 20464  | 1     | 0     | 0     | 0     |
| 20471  | 0     | 0     | 0     | 0     |

| respid | Q43_1 | Q43_2 | Q43_3 | Q43_4 |
|--------|-------|-------|-------|-------|
| 20473  | 1     | 0     | 0     | 0     |
| 20474  | 1     | 0     | 0     | 0     |
| 20477  |       |       |       |       |
| 20479  | 0     | 0     | 0     | 0     |
| 20485  | 0     | 0     | 0     | 0     |
| 20487  | 0     | 0     | 0     | 0     |
| 20488  | 0     | 0     | 0     | 0     |
| 20494  | 0     | 0     | 0     | 0     |
| 20502  | 1     | 0     | 1     | 1     |
| 20503  | 0     | 0     | 0     | 0     |
| 20510  | 0     | 0     | 0     | 1     |
| 20512  |       |       |       |       |
| 20516  | 0     | 0     | 0     | 0     |
| 20522  | 0     | 0     | 0     | 0     |
| 20527  | 0     | 0     | 0     | 0     |
| 20529  | 0     | 0     | 0     | 0     |
| 20535  | 0     | 0     | 0     | 0     |
| 20543  | 0     | 0     | 0     | 0     |
| 20546  | 0     | 0     | 0     | 0     |
| 20548  | 1     | 0     | 0     | 0     |
| 20552  | 0     | 0     | 0     | 0     |
| 20556  | 0     | 0     | 0     | 0     |
| 20566  | 0     | 0     | 0     | 0     |
| 20576  | 0     | 0     | 0     | 1     |
| 20587  | 0     | 0     | 0     | 0     |
| 20589  | 0     | 0     | 0     | 0     |
| 20593  |       |       |       |       |
| 20594  | 0     | 0     | 0     | 0     |
| 20602  | 0     | 0     | 1     | 0     |
| 20607  |       |       |       |       |
| 20608  | 0     | 0     | 0     | 0     |
| 20611  | 0     | 0     | 0     | 1     |

| respid | Q43_1 | Q43_2 | Q43_3 | Q43_4 |
|--------|-------|-------|-------|-------|
| 20612  | 0     | 0     | 0     | 0     |
| 20615  | 0     | 0     | 0     | 0     |
| 20625  | 0     | 0     | 1     | 0     |
| 20630  | 0     | 0     | 0     | 1     |
| 20639  | 0     | 0     | 0     | 0     |
| 20643  | 0     | 0     | 0     | 0     |
| 20645  |       |       |       |       |
| 20647  | 0     | 0     | 0     | 0     |
| 20652  | 1     | 0     | 0     | 1     |
| 20661  | 0     | 0     | 0     | 0     |
| 20665  |       |       |       |       |
| 20679  | 0     | 0     | 0     | 0     |
| 20682  | 1     | 0     | 0     | 1     |
| 20683  |       |       |       |       |
| 20700  | 0     | 0     | 0     | 0     |
| 20702  | 1     | 0     | 0     | 1     |
| 20709  | 1     | 0     | 0     | 0     |
| 20715  | 1     | 0     | 0     | 0     |
| 20718  | 0     | 0     | 0     | 0     |
| 20722  | 0     | 0     | 0     | 0     |
| 20729  |       |       |       |       |
| 20732  |       |       |       |       |
| 20746  | 1     | 0     | 1     | 0     |
| 20747  |       |       |       |       |
| 20758  | 0     | 0     | 0     | 0     |
| 20767  | 0     | 0     | 0     | 1     |
| 20777  | 0     | 0     | 0     | 0     |
| 20778  | 0     | 0     | 0     | 0     |
| 20780  | 0     | 0     | 0     | 0     |
| 20800  | 0     | 0     | 0     | 0     |
| 20810  | 0     | 0     | 0     | 0     |
| 20814  | 0     | 0     | 0     | 0     |

| respid | Q43_1 | Q43_2 | Q43_3 | Q43_4 |
|--------|-------|-------|-------|-------|
| 20816  | 0     | 0     | 0     | 1     |
| 20832  | 0     | 0     | 0     | 1     |
| 20838  | 1     | 0     | 1     | 1     |
| 20841  | 1     | 0     | 0     | 0     |
| 20848  | 0     | 0     | 0     | 0     |
| 20850  |       |       |       |       |
| 20851  | 0     | 0     | 0     | 0     |
| 20861  | 0     | 0     | 0     | 1     |
| 20870  | 0     | 0     | 0     | 0     |
| 20880  | 1     | 0     | 0     | 0     |
| 20883  | 0     | 0     | 0     | 0     |
| 20894  | 1     | 0     | 0     | 0     |
| 20896  | 1     | 0     | 1     | 0     |
| 20901  | 1     | 0     | 0     | 0     |
| 20903  | 0     | 0     | 0     | 0     |
| 20909  |       |       |       |       |
| 20919  | 0     | 0     | 0     | 0     |
| 20925  | 0     | 0     | 0     | 0     |
| 20935  | 1     | 0     | 0     | 0     |
| 20939  | 0     | 0     | 1     | 0     |
| 20956  | 1     | 0     | 0     | 0     |
| 20970  | 0     | 0     | 0     | 0     |
| 20974  | 0     | 0     | 0     | 0     |
| 20975  | 0     | 0     | 0     | 0     |
| 20984  | 1     | 0     | 0     | 0     |
| 20988  |       |       |       |       |
| 20996  | 0     | 0     | 0     | 0     |
| 20998  | 0     | 0     | 0     | 0     |
| 21007  |       |       |       |       |
| 21008  |       |       |       |       |
| 21014  | 0     | 0     | 0     | 0     |
| 21020  | 0     | 0     | 0     | 0     |

| respid | Q43_1 | Q43_2 | Q43_3 | Q43_4 |
|--------|-------|-------|-------|-------|
| 21022  | 0     | 0     | 1     | 1     |
| 21024  |       |       |       |       |
| 21026  | 1     | 0     | 0     | 1     |
| 21027  | 0     | 0     | 0     | 0     |
| 21030  | 0     | 0     | 0     | 0     |
| 21032  | 0     | 0     | 1     | 1     |
| 21040  | 0     | 0     | 0     | 0     |
| 21045  | 0     | 0     | 0     | 0     |
| 21058  | 0     | 0     | 0     | 0     |
| 21064  | 0     | 0     | 0     | 0     |
| 21073  | 0     | 0     | 0     | 0     |
| 21086  | 0     | 0     | 1     | 1     |
| 21092  | 1     | 0     | 1     | 1     |
| 21096  | 1     | 0     | 1     | 0     |
| 21103  | 1     | 0     | 0     | 0     |
| 21120  | 0     | 0     | 0     | 0     |
| 21125  |       |       |       |       |
| 21126  | 0     | 0     | 0     | 0     |
| 21132  |       |       |       |       |
| 21139  | 1     | 1     | 0     | 0     |
| 21147  |       |       |       |       |
| 21148  | 0     | 0     | 0     | 0     |
| 21149  | 1     | 0     | 0     | 0     |
| 21164  | 0     | 0     | 0     | 0     |
| 21165  | 0     | 0     | 0     | 0     |
| 21171  | 0     | 0     | 1     | 1     |
| 21176  | 0     | 0     | 0     | 0     |
| 21187  | 1     | 0     | 1     | 1     |
| 21192  | 0     | 0     | 0     | 0     |
| 21198  | 0     | 0     | 0     | 0     |
| 21199  | 0     | 0     | 0     | 1     |
| 21206  | 0     | 0     | 0     | 1     |

| respid | Q43_1 | Q43_2 | Q43_3 | Q43_4 |
|--------|-------|-------|-------|-------|
| 21212  | 0     | 0     | 0     | 0     |
| 21216  | 0     | 0     | 0     | 0     |
| 21217  | 1     | 0     | 1     | 1     |
| 21228  | 0     | 0     | 0     | 0     |
| 21229  | 0     | 0     | 0     | 0     |
| 21230  | 0     | 0     | 0     | 0     |
| 21243  | 0     | 1     | 0     | 1     |
| 21247  | 0     | 0     | 0     | 0     |
| 21253  | 0     | 0     | 0     | 1     |
| 21264  | 0     | 0     | 1     | 0     |
| 21265  | 0     | 0     | 0     | 0     |
| 21273  | 1     | 0     | 0     | 0     |
| 21275  | 0     | 0     | 0     | 0     |
| 21278  | 0     | 0     | 0     | 0     |
| 21291  | 0     | 0     | 0     | 0     |
| 21298  | 0     | 0     | 0     | 1     |
| 21301  | 0     | 0     | 1     | 0     |
| 21312  | 0     | 0     | 0     | 0     |
| 21323  | 1     | 0     | 0     | 0     |
| 21325  | 0     | 0     | 0     | 0     |
| 21341  | 0     | 0     | 0     | 0     |
| 21349  | 0     | 0     | 0     | 1     |
| 21350  | 1     | 0     | 0     | 0     |
| 21354  | 0     | 0     | 0     | 1     |
| 21372  | 1     | 1     | 0     | 1     |
| 21373  | 0     | 0     | 1     | 1     |
| 21378  | 0     | 0     | 0     | 1     |
| 21393  |       |       |       |       |
| 21401  | 0     | 0     | 0     | 1     |
| 21405  | 1     | 0     | 0     | 0     |
| 21406  |       |       |       |       |
| 21407  | 0     | 0     | 0     | 0     |



| respid | Q43_1 | Q43_2 | Q43_3 | Q43_4 |
|--------|-------|-------|-------|-------|
| 21418  | 0     | 0     | 0     | 0     |
| 21420  | 1     | 0     | 0     | 0     |
| 21421  |       |       |       |       |
| 21446  | 0     | 0     | 0     | 0     |
| 21449  | 1     | 0     | 0     | 0     |
| 21452  | 0     | 0     | 0     | 0     |
| 21455  | 0     | 0     | 1     | 0     |
| 21469  | 0     | 0     | 0     | 0     |
| 21471  | 0     | 0     | 0     | 0     |
| 21472  | 0     | 0     | 0     | 0     |
| 21474  | 0     | 0     | 0     | 0     |
| 21479  | 0     | 0     | 0     | 0     |
| 21485  | 0     | 0     | 0     | 0     |
| 21512  |       |       |       |       |
| 21513  | 0     | 0     | 0     | 0     |
| 21514  | 0     | 0     | 0     | 0     |
| 21520  | 0     | 0     | 0     | 0     |
| 21539  | 1     | 0     | 0     | 1     |
| 21553  | 0     | 0     | 0     | 0     |
| 21560  | 0     | 0     | 0     | 0     |
| 21561  | 0     | 0     | 0     | 0     |
| 21563  | 0     | 0     | 0     | 0     |
| 21565  |       |       |       |       |
| 21582  | 0     | 0     | 0     | 0     |
| 21584  | 0     | 0     | 0     | 0     |
| 21585  | 0     | 0     | 0     | 0     |
| 21586  | 0     | 0     | 0     | 0     |
| 21587  | 0     | 0     | 0     | 0     |
| 21590  | 0     | 0     | 0     | 1     |
| 21601  | 0     | 0     | 0     | 0     |
| 21611  | 0     | 0     | 1     | 0     |
| 21612  | 1     | 0     | 0     | 0     |

| respid | Q43_1 | Q43_2 | Q43_3 | Q43_4 |
|--------|-------|-------|-------|-------|
| 21625  | 0     | 0     | 0     | 1     |
| 21633  |       |       |       |       |
| 21640  | 0     | 0     | 0     | 0     |
| 21647  | 0     | 0     | 0     | 0     |
| 21648  | 0     | 0     | 1     | 1     |
| 21656  | 1     | 0     | 0     | 0     |
| 21657  | 1     | 0     | 0     | 0     |
| 21658  | 1     | 0     | 1     | 1     |
| 21665  | 0     | 0     | 0     | 1     |
| 21666  | 1     | 0     | 0     | 0     |
| 21668  | 1     | 0     | 1     | 1     |
| 21673  | 0     | 0     | 0     | 0     |
| 21681  | 0     | 0     | 0     | 0     |
| 21682  | 0     | 0     | 0     | 0     |
| 21685  | 0     | 0     | 0     | 0     |
| 21692  | 0     | 0     | 0     | 0     |
| 21697  | 0     | 0     | 0     | 0     |
| 21711  | 0     | 0     | 0     | 0     |
| 21715  | 1     | 0     | 0     | 0     |
| 21726  | 0     | 0     | 0     | 0     |
| 21748  |       |       |       |       |
| 21761  | 0     | 0     | 0     | 0     |
| 21769  | 0     | 0     | 0     | 1     |
| 21774  | 0     | 0     | 0     | 1     |
| 21778  |       |       |       |       |
| 21785  | 0     | 0     | 0     | 0     |
| 21799  | 0     | 0     | 0     | 0     |
| 21820  | 1     | 0     | 0     | 0     |
| 21837  | 1     | 0     | 0     | 0     |
| 21845  | 1     | 0     | 1     | 0     |
| 21846  | 0     | 0     | 0     | 0     |
| 21849  | 0     | 0     | 0     | 0     |

| respid | Q43_1 | Q43_2 | Q43_3 | Q43_4 |
|--------|-------|-------|-------|-------|
| 21850  | 0     | 0     | 0     | 0     |
| 21855  | 0     | 0     | 0     | 0     |
| 21859  | 0     | 0     | 0     | 0     |
| 21861  | 0     | 0     | 0     | 0     |
| 21866  |       |       |       |       |
| 21873  | 0     | 0     | 0     | 0     |
| 21876  | 0     | 0     | 0     | 0     |
| 21882  |       |       |       |       |
| 21884  | 1     | 0     | 0     | 0     |
| 21887  | 0     | 0     | 0     | 0     |
| 21892  | 0     | 0     | 0     | 0     |
| 21907  | 1     | 0     | 0     | 0     |
| 21910  | 1     | 0     | 0     | 0     |
| 21912  | 1     | 0     | 1     | 0     |
| 21914  | 0     | 0     | 0     | 1     |
| 21925  | 0     | 0     | 0     | 0     |
| 21937  |       |       |       |       |
| 21938  | 0     | 1     | 0     | 0     |
| 21940  | 0     | 0     | 1     | 0     |
| 21942  | 0     | 0     | 0     | 0     |
| 21947  |       |       |       |       |
| 21948  | 0     | 0     | 0     | 0     |
| 21961  | 0     | 0     | 0     | 0     |
| 21977  | 1     | 0     | 1     | 0     |
| 21983  |       |       |       |       |
| 21986  | 0     | 0     | 0     | 1     |
| 21988  | 0     | 0     | 0     | 0     |
| 21996  | 0     | 0     | 0     | 0     |
| 21997  | 0     | 0     | 0     | 0     |
| 22005  | 0     | 0     | 0     | 0     |
| 22013  | 0     | 0     | 0     | 0     |
| 22018  |       |       |       |       |

| respid | Q43_1 | Q43_2 | Q43_3 | Q43_4 |
|--------|-------|-------|-------|-------|
| 22019  | 1     | 0     | 0     | 0     |
| 22071  | 0     | 0     | 1     | 0     |
| 22082  | 0     | 0     | 0     | 0     |
| 22085  | 0     | 0     | 0     | 0     |
| 22092  | 0     | 0     | 0     | 0     |
| 22097  | 0     | 0     | 0     | 0     |
| 22111  |       |       |       |       |
| 22118  | 0     | 0     | 0     | 0     |
| 22132  | 0     | 0     | 0     | 0     |
| 22133  | 0     | 0     | 0     | 0     |
| 22139  |       |       |       |       |
| 22142  | 1     | 0     | 0     | 0     |
| 22146  | 0     | 0     | 0     | 0     |
| 22181  |       |       |       |       |
| 22202  | 0     | 0     | 0     | 0     |
| 22214  |       |       |       |       |
| 22223  | 0     | 0     | 0     | 0     |
| 22227  | 0     | 0     | 1     | 0     |
| 22229  | 0     | 0     | 0     | 0     |
| 22239  | 0     | 0     | 0     | 0     |
| 22245  | 1     | 0     | 0     | 0     |
| 22256  | 0     | 0     | 0     | 0     |
| 22260  | 1     | 0     | 1     | 0     |
| 22298  | 0     | 0     | 0     | 0     |
| 22321  | 0     | 0     | 0     | 0     |
| 22340  |       |       |       |       |
| 22346  | 1     | 0     | 0     | 0     |
| 22356  | 0     | 0     | 0     | 1     |
| 22361  | 0     | 0     | 0     | 0     |
| 22364  | 0     | 0     | 0     | 0     |
| 22368  |       |       |       |       |
| 22374  | 0     | 0     | 1     | 0     |

| respid | Q43_1 | Q43_2 | Q43_3 | Q43_4 |
|--------|-------|-------|-------|-------|
| 22375  | 0     | 0     | 0     | 0     |
| 22377  | 0     | 0     | 0     | 0     |
| 22383  |       |       |       |       |
| 22387  | 0     | 0     | 0     | 0     |
| 22392  |       |       |       |       |
| 22393  | 0     | 0     | 0     | 0     |
| 22394  | 0     | 0     | 0     | 0     |
| 22395  |       |       |       |       |
| 22401  | 0     | 0     | 0     | 0     |
| 22407  |       |       |       |       |
| 22410  | 1     | 0     | 1     | 0     |
| 22418  | 0     | 0     | 0     | 0     |
| 22421  |       |       |       |       |
| 22423  |       |       |       |       |
| 22425  | 0     | 0     | 0     | 0     |
| 22427  | 0     | 0     | 0     | 0     |
| 22431  | 1     | 0     | 0     | 1     |
| 22435  | 0     | 0     | 0     | 0     |
| 22436  | 0     | 0     | 0     | 0     |
| 22442  |       |       |       |       |
| 22444  | 0     | 0     | 1     | 0     |
| 22445  | 0     | 0     | 0     | 0     |
| 22446  |       |       |       |       |
| 22448  | 0     | 1     | 0     | 0     |
| 22449  | 0     | 0     | 0     | 0     |
| 22450  | 0     | 0     | 0     | 0     |
| 22453  | 0     | 0     | 1     | 0     |
| 22465  | 0     | 0     | 0     | 0     |
| 22472  | 1     | 0     | 0     | 0     |
| 22475  | 0     | 0     | 1     | 0     |
| 22478  | 0     | 0     | 0     | 1     |
| 22491  | 0     | 0     | 0     | 0     |

| respid | Q43_1 | Q43_2 | Q43_3 | Q43_4 |
|--------|-------|-------|-------|-------|
| 22497  | 0     | 0     | 0     | 0     |
| 22498  | 0     | 0     | 0     | 1     |
| 22499  | 0     | 0     | 0     | 0     |
| 22503  | 0     | 0     | 0     | 0     |
| 22507  | 0     | 0     | 0     | 0     |
| 22513  | 0     | 0     | 0     | 0     |
| 22517  | 0     | 0     | 0     | 1     |
| 22524  | 1     | 0     | 0     | 0     |
| 22528  | 0     | 0     | 0     | 0     |
| 22544  | 0     | 0     | 0     | 1     |
| 22571  | 0     | 0     | 0     | 0     |
| 22576  | 0     | 0     | 0     | 1     |
| 22579  | 0     | 0     | 0     | 0     |
| 22583  | 0     | 0     | 0     | 1     |
| 22591  | 1     | 0     | 1     | 0     |
| 22592  | 0     | 0     | 0     | 0     |
| 22612  | 1     | 0     | 0     | 0     |
| 22613  | 0     | 0     | 0     | 1     |
| 22615  | 0     | 0     | 0     | 0     |
| 22621  | 0     | 0     | 0     | 0     |
| 22625  | 0     | 0     | 0     | 0     |
| 22628  | 0     | 0     | 0     | 0     |
| 22632  | 0     | 0     | 0     | 0     |
| 22639  |       |       |       |       |
| 22648  | 0     | 0     | 0     | 0     |
| 22649  | 0     | 0     | 0     | 0     |
| 22655  |       |       |       |       |
| 22659  |       |       |       |       |
| 22660  | 0     | 0     | 0     | 0     |
| 22666  | 0     | 0     | 0     | 0     |
| 22667  | 1     | 0     | 0     | 0     |
| 22670  |       |       |       |       |

| respid | Q43_1 | Q43_2 | Q43_3 | Q43_4 |
|--------|-------|-------|-------|-------|
| 22681  |       |       |       |       |
| 22683  | 0     | 0     | 0     | 0     |
| 22688  | 1     | 0     | 0     | 0     |
| 22695  | 0     | 0     | 0     | 0     |
| 22696  | 0     | 0     | 0     | 0     |
| 22705  | 0     | 0     | 0     | 0     |
| 22718  | 1     | 0     | 1     | 0     |
| 22720  | 0     | 0     | 0     | 0     |
| 22724  | 1     | 1     | 0     | 0     |
| 22728  | 0     | 0     | 0     | 0     |
| 22751  | 0     | 0     | 0     | 0     |
| 22782  | 1     | 0     | 1     | 1     |
| 22786  | 0     | 0     | 0     | 0     |
| 22788  | 0     | 0     | 0     | 0     |
| 22810  | 0     | 0     | 1     | 0     |
| 22816  | 0     | 0     | 0     | 0     |
| 22818  | 0     | 0     | 0     | 0     |
| 22854  |       |       |       |       |
| 22858  | 0     | 0     | 0     | 0     |
| 22862  | 0     | 0     | 0     | 0     |
| 22865  | 0     | 0     | 0     | 0     |
| 22868  | 0     | 0     | 1     | 0     |
| 22869  | 1     | 0     | 1     | 1     |
| 22873  | 0     | 0     | 0     | 0     |
| 22875  | 0     | 0     | 0     | 0     |
| 22876  | 0     | 0     | 0     | 0     |
| 22882  | 0     | 0     | 0     | 0     |
| 22884  | 0     | 0     | 1     | 0     |
| 22887  | 0     | 0     | 0     | 0     |
| 22888  | 0     | 0     | 0     | 0     |
| 22900  |       |       |       |       |
| 22901  |       |       |       |       |

| respid | Q43_1 | Q43_2 | Q43_3 | Q43_4 |
|--------|-------|-------|-------|-------|
| 22912  | 0     | 0     | 0     | 0     |
| 22913  | 0     | 0     | 0     | 0     |
| 22921  | 0     | 0     | 0     | 0     |
| 22925  | 0     | 0     | 0     | 0     |
| 22940  | 0     | 0     | 0     | 0     |
| 22941  | 0     | 0     | 0     | 0     |
| 22947  | 1     | 0     | 0     | 0     |
| 22948  |       |       |       |       |
| 22964  | 0     | 0     | 0     | 0     |
| 22966  | 0     | 0     | 0     | 0     |
| 22969  | 1     | 0     | 0     | 0     |
| 22971  |       |       |       |       |
| 22988  |       |       |       |       |
| 22990  |       |       |       |       |
| 23000  | 0     | 0     | 0     | 0     |
| 23016  |       |       |       |       |
| 23026  | 0     | 0     | 0     | 0     |
| 23035  | 0     | 0     | 0     | 0     |
| 23037  | 0     | 0     | 0     | 0     |
| 23044  | 0     | 0     | 0     | 0     |
| 23046  | 0     | 0     | 0     | 0     |
| 23047  | 0     | 0     | 0     | 0     |
| 23049  | 0     | 0     | 0     | 0     |
| 23055  | 0     | 0     | 0     | 0     |
| 23066  | 0     | 0     | 0     | 0     |
| 23075  | 0     | 0     | 0     | 0     |
| 23081  | 0     | 0     | 0     | 0     |
| 23087  | 0     | 0     | 0     | 0     |
| 23094  |       |       |       |       |
| 23099  |       |       |       |       |
| 23101  | 0     | 0     | 0     | 1     |
| 23105  |       |       |       |       |



| respid | Q43_1 | Q43_2 | Q43_3 | Q43_4 |
|--------|-------|-------|-------|-------|
| 23115  | 0     | 0     | 0     | 0     |
| 23121  | 0     | 0     | 0     | 0     |
| 23127  | 0     | 0     | 0     | 0     |
| 23131  | 0     | 0     | 0     | 0     |
| 23134  | 0     | 0     | 0     | 0     |
| 23145  | 0     | 0     | 0     | 0     |
| 23151  | 0     | 0     | 0     | 0     |
| 23161  | 1     | 0     | 1     | 0     |
| 23169  | 0     | 0     | 0     | 0     |
| 23173  | 0     | 0     | 0     | 0     |
| 23174  | 0     | 0     | 0     | 0     |
| 23186  | 1     | 0     | 1     | 0     |
| 23195  | 0     | 0     | 0     | 0     |
| 23197  | 0     | 0     | 0     | 0     |
| 23198  | 0     | 0     | 0     | 0     |
| 23203  |       |       |       |       |
| 23204  | 1     | 0     | 0     | 0     |
| 23212  | 0     | 0     | 0     | 0     |
| 23214  | 0     | 0     | 0     | 0     |
| 23221  | 1     | 0     | 1     | 1     |
| 23237  | 0     | 0     | 0     | 0     |
| 23251  | 0     | 0     | 0     | 1     |
| 23254  | 0     | 0     | 0     | 0     |
| 23262  | 0     | 0     | 0     | 0     |
| 23267  | 0     | 0     | 0     | 0     |
| 23268  | 0     | 0     | 0     | 1     |
| 23273  | 0     | 0     | 0     | 0     |
| 23278  | 0     | 0     | 0     | 0     |
| 23279  |       |       |       |       |
| 23281  | 1     | 0     | 0     | 0     |
| 23282  | 1     | 0     | 0     | 0     |
| 23283  | 0     | 0     | 0     | 1     |

| respid | Q43_1 | Q43_2 | Q43_3 | Q43_4 |
|--------|-------|-------|-------|-------|
| 23285  | 0     | 0     | 0     | 0     |
| 23305  | 0     | 1     | 0     | 0     |
| 23309  | 0     | 0     | 0     | 0     |
| 23310  | 0     | 0     | 0     | 0     |
| 23311  | 0     | 0     | 0     | 0     |
| 23312  | 0     | 0     | 0     | 0     |
| 23319  | 0     | 0     | 0     | 0     |
| 23320  | 0     | 0     | 0     | 0     |
| 23322  | 1     | 0     | 0     | 0     |
| 23334  | 1     | 0     | 0     | 0     |
| 23340  | 1     | 0     | 0     | 0     |
| 23346  | 0     | 0     | 0     | 0     |
| 23353  | 0     | 0     | 0     | 0     |
| 23363  | 0     | 0     | 1     | 0     |
| 23364  | 0     | 0     | 1     | 0     |
| 23376  |       |       |       |       |
| 23378  | 0     | 0     | 0     | 0     |
| 23382  |       |       |       |       |
| 23383  |       |       |       |       |
| 23390  | 0     | 0     | 0     | 0     |
| 23395  | 0     | 0     | 0     | 0     |
| 23398  | 1     | 0     | 0     | 0     |
| 23399  | 0     | 0     | 0     | 0     |
| 23406  | 0     | 0     | 0     | 0     |
| 23418  | 0     | 0     | 0     | 0     |
| 23427  | 0     | 0     | 0     | 0     |
| 23428  | 0     | 0     | 0     | 0     |
| 23435  | 0     | 0     | 0     | 0     |
| 23439  | 0     | 0     | 0     | 0     |
| 23440  |       |       |       |       |
| 23444  | 0     | 0     | 0     | 0     |
| 23445  | 0     | 0     | 0     | 0     |

| respid | Q43_1 | Q43_2 | Q43_3 | Q43_4 |
|--------|-------|-------|-------|-------|
| 23455  |       |       |       |       |
| 23467  | 0     | 0     | 0     | 1     |
| 23478  | 0     | 0     | 0     | 0     |
| 23492  | 0     | 0     | 0     | 0     |
| 23498  | 0     | 0     | 0     | 0     |
| 23511  | 0     | 0     | 0     | 0     |
| 23514  | 0     | 0     | 0     | 0     |
| 23515  | 1     | 0     | 0     | 0     |
| 23522  |       |       |       |       |
| 23524  |       |       |       |       |
| 23531  | 0     | 0     | 0     | 0     |
| 23532  | 0     | 0     | 0     | 0     |
| 23533  | 0     | 0     | 0     | 0     |
| 23534  | 0     | 0     | 0     | 0     |
| 23538  | 0     | 0     | 0     | 0     |
| 23539  | 0     | 0     | 0     | 1     |
| 23548  | 0     | 0     | 0     | 0     |
| 23553  |       |       |       |       |
| 23556  | 0     | 0     | 0     | 0     |
| 23563  | 0     | 0     | 0     | 1     |
| 23572  | 0     | 0     | 0     | 0     |
| 23575  | 0     | 0     | 0     | 0     |
| 23576  | 0     | 0     | 0     | 0     |
| 23577  | 0     | 0     | 0     | 0     |
| 23578  | 0     | 0     | 0     | 0     |
| 23587  | 0     | 0     | 1     | 1     |
| 23597  | 0     | 0     | 0     | 0     |
| 23598  | 0     | 0     | 0     | 0     |
| 23604  |       |       |       |       |
| 23617  | 0     | 0     | 0     | 0     |
| 23620  | 1     | 0     | 1     | 0     |
| 23621  |       |       |       |       |

| respid | Q43_1 | Q43_2 | Q43_3 | Q43_4 |
|--------|-------|-------|-------|-------|
| 23625  | 1     | 0     | 0     | 0     |
| 23629  | 0     | 0     | 0     | 0     |
| 23635  | 0     | 0     | 0     | 0     |
| 23636  | 0     | 0     | 0     | 0     |
| 23637  | 1     | 0     | 0     | 0     |
| 23638  | 0     | 0     | 0     | 0     |
| 23644  | 0     | 0     | 0     | 0     |
| 23645  | 0     | 0     | 0     | 0     |
| 23649  | 0     | 1     | 0     | 0     |
| 23654  | 1     | 0     | 0     | 0     |
| 23662  | 0     | 0     | 0     | 0     |
| 23664  | 1     | 0     | 0     | 0     |
| 23665  | 0     | 0     | 0     | 0     |
| 23666  | 0     | 0     | 0     | 0     |
| 23671  | 0     | 0     | 0     | 0     |
| 23672  | 0     | 0     | 0     | 0     |
| 23685  | 0     | 0     | 0     | 0     |
| 23686  | 0     | 0     | 0     | 1     |
| 23689  | 0     | 0     | 0     | 0     |
| 23690  | 0     | 0     | 0     | 1     |
| 23695  | 0     | 0     | 1     | 0     |
| 23700  | 0     | 0     | 0     | 0     |
| 23714  | 0     | 0     | 0     | 1     |
| 23719  | 0     | 0     | 1     | 0     |
| 23720  | 0     | 0     | 0     | 0     |
| 23721  | 0     | 0     | 0     | 0     |
| 23729  | 0     | 0     | 0     | 0     |
| 23730  | 0     | 0     | 0     | 0     |
| 23732  | 0     | 0     | 0     | 0     |
| 23736  | 0     | 0     | 0     | 0     |
| 23754  |       |       |       |       |
| 23756  | 0     | 0     | 0     | 0     |

| respid | Q43_1 | Q43_2 | Q43_3 | Q43_4 |
|--------|-------|-------|-------|-------|
| 23759  | 0     | 0     | 1     | 1     |
| 23761  | 0     | 0     | 0     | 0     |
| 23766  | 0     | 0     | 0     | 0     |
| 23768  | 1     | 1     | 1     | 0     |
| 23773  | 0     | 0     | 0     | 0     |
| 23781  |       |       |       |       |
| 23782  | 1     | 0     | 0     | 0     |
| 23787  | 0     | 0     | 0     | 0     |
| 23788  | 0     | 0     | 0     | 0     |
| 23790  |       |       |       |       |
| 23794  | 0     | 0     | 0     | 0     |
| 23795  | 0     | 0     | 0     | 0     |
| 23801  | 0     | 0     | 0     | 0     |
| 23806  | 0     | 0     | 0     | 0     |
| 23809  | 1     | 0     | 0     | 0     |
| 23813  | 0     | 0     | 0     | 0     |
| 23815  | 0     | 0     | 0     | 0     |
| 23821  | 0     | 0     | 0     | 0     |
| 23825  | 0     | 0     | 0     | 0     |
| 23826  | 0     | 0     | 0     | 0     |
| 23830  | 0     | 0     | 0     | 0     |
| 23833  | 0     | 0     | 0     | 0     |
| 23837  | 0     | 0     | 0     | 0     |
| 23848  | 0     | 0     | 0     | 0     |
| 23850  | 0     | 0     | 0     | 0     |
| 23870  | 0     | 0     | 0     | 0     |
| 23877  |       |       |       |       |
| 23880  | 0     | 0     | 0     | 0     |
| 23882  | 0     | 0     | 0     | 0     |
| 23888  |       |       |       |       |
| 23908  | 0     | 0     | 0     | 0     |
| 23914  | 0     | 0     | 0     | 0     |

| respid | Q43_1 | Q43_2 | Q43_3 | Q43_4 |
|--------|-------|-------|-------|-------|
| 23916  | 0     | 0     | 0     | 0     |
| 23922  | 0     | 0     | 1     | 1     |
| 23932  | 1     | 0     | 0     | 0     |
| 23934  |       |       |       |       |
| 23942  | 0     | 0     | 1     | 1     |
| 23945  | 0     | 0     | 0     | 0     |
| 23948  | 0     | 0     | 0     | 0     |
| 23955  | 1     | 0     | 0     | 0     |
| 23956  | 0     | 0     | 1     | 1     |
| 23978  | 0     | 0     | 0     | 0     |
| 23981  |       |       |       |       |
| 23982  | 1     | 1     | 0     | 0     |
| 23991  | 0     | 0     | 0     | 0     |
| 23994  | 1     | 0     | 0     | 0     |
| 23995  | 0     | 0     | 0     | 0     |
| 23999  | 1     | 0     | 1     | 0     |
| 24005  | 0     | 0     | 1     | 0     |
| 24018  | 0     | 0     | 0     | 0     |
| 24021  |       |       |       |       |
| 24035  |       |       |       |       |
| 24040  | 1     | 0     | 0     | 1     |
| 24043  |       |       |       |       |
| 24046  | 0     | 0     | 0     | 0     |
| 24047  | 1     | 0     | 1     | 1     |
| 24048  | 0     | 0     | 0     | 0     |
| 24062  | 1     | 0     | 0     | 0     |
| 24063  | 0     | 0     | 0     | 0     |
| 24066  | 0     | 0     | 0     | 0     |
| 24069  | 0     | 0     | 0     | 0     |
| 24070  | 0     | 0     | 0     | 0     |
| 24074  | 1     | 0     | 0     | 0     |
| 24080  | 0     | 0     | 0     | 0     |

| respid | Q43_1 | Q43_2 | Q43_3 | Q43_4 |
|--------|-------|-------|-------|-------|
| 24082  | 1     | 0     | 0     | 0     |
| 24088  | 0     | 0     | 0     | 0     |
| 24089  | 0     | 0     | 0     | 0     |
| 24091  | 0     | 0     | 0     | 0     |
| 24095  |       |       |       |       |
| 24100  | 1     | 0     | 0     | 0     |
| 24105  | 1     | 0     | 0     | 0     |
| 24107  | 0     | 0     | 0     | 0     |
| 24108  |       |       |       |       |
| 24113  | 0     | 0     | 0     | 0     |
| 24120  |       |       |       |       |
| 24122  | 0     | 0     | 0     | 0     |
| 24123  | 0     | 0     | 0     | 0     |
| 24125  | 1     | 0     | 0     | 1     |
| 24132  | 0     | 0     | 0     | 0     |
| 24139  | 0     | 0     | 0     | 0     |
| 24140  | 0     | 0     | 0     | 0     |
| 24143  | 0     | 0     | 0     | 0     |
| 24150  | 0     | 0     | 0     | 1     |
| 24153  |       |       |       |       |
| 24161  |       |       |       |       |
| 24168  | 0     | 0     | 0     | 0     |
| 24179  | 0     | 0     | 0     | 0     |
| 24182  | 1     | 0     | 0     | 0     |
| 24194  | 0     | 0     | 0     | 0     |
| 24206  |       |       |       |       |
| 24214  |       |       |       |       |
| 24215  | 0     | 0     | 0     | 1     |
| 24224  | 0     | 0     | 0     | 0     |
| 24225  | 0     | 0     | 0     | 0     |
| 24227  |       |       |       |       |
| 24229  | 0     | 0     | 0     | 0     |

| respid | Q43_1 | Q43_2 | Q43_3 | Q43_4 |
|--------|-------|-------|-------|-------|
| 24230  | 0     | 0     | 0     | 0     |
| 24232  | 0     | 0     | 0     | 0     |
| 24253  | 0     | 0     | 0     | 0     |
| 24267  | 0     | 0     | 1     | 0     |
| 24274  | 0     | 0     | 0     | 0     |
| 24275  | 0     | 0     | 0     | 0     |
| 24277  | 0     | 0     | 0     | 0     |
| 24280  | 0     | 0     | 0     | 0     |
| 24285  | 0     | 0     | 0     | 0     |
| 24293  |       |       |       |       |
| 24295  | 0     | 0     | 0     | 0     |
| 24299  |       |       |       |       |
| 24303  | 0     | 0     | 0     | 0     |
| 24308  | 0     | 0     | 0     | 0     |
| 24322  |       |       |       |       |
| 24325  |       |       |       |       |
| 24328  | 0     | 0     | 0     | 0     |
| 24334  | 0     | 0     | 0     | 0     |
| 24342  | 0     | 0     | 0     | 1     |
| 24343  | 1     | 0     | 1     | 1     |
| 24348  | 0     | 0     | 0     | 0     |
| 24352  | 0     | 0     | 1     | 0     |
| 24354  | 0     | 0     | 1     | 1     |
| 24357  | 0     | 0     | 0     | 0     |
| 24360  | 1     | 0     | 0     | 0     |
| 24369  | 0     | 0     | 0     | 0     |
| 24373  | 0     | 0     | 0     | 0     |
| 24398  | 1     | 0     | 1     | 0     |
| 24402  | 0     | 0     | 0     | 0     |
| 24405  | 0     | 0     | 0     | 0     |
| 24407  | 1     | 0     | 0     | 0     |
| 24413  | 0     | 0     | 0     | 0     |



| respid | Q43_1 | Q43_2 | Q43_3 | Q43_4 |
|--------|-------|-------|-------|-------|
| 24443  | 0     | 0     | 1     | 1     |
| 24451  |       |       |       |       |
| 24459  | 0     | 0     | 0     | 1     |
| 24465  | 1     | 0     | 0     | 0     |
| 24481  | 1     | 0     | 0     | 0     |
| 24482  | 0     | 0     | 0     | 0     |
| 24491  | 0     | 0     | 0     | 0     |
| 24495  | 0     | 0     | 0     | 0     |
| 24497  | 0     | 0     | 1     | 0     |
| 24511  | 0     | 0     | 0     | 0     |
| 24513  | 0     | 0     | 0     | 0     |
| 24516  | 0     | 0     | 0     | 0     |
| 24518  | 0     | 0     | 0     | 0     |
| 24524  | 0     | 0     | 0     | 0     |
| 24528  | 0     | 0     | 0     | 0     |
| 24531  | 1     | 0     | 0     | 1     |
| 24533  | 0     | 0     | 0     | 1     |
| 24547  | 0     | 0     | 0     | 0     |
| 24557  | 1     | 0     | 0     | 0     |
| 24559  | 0     | 0     | 0     | 1     |
| 24567  | 0     | 0     | 0     | 0     |
| 24568  |       |       |       |       |
| 24577  |       |       |       |       |
| 24581  | 1     | 0     | 0     | 0     |
| 24588  | 0     | 0     | 0     | 0     |
| 24604  | 0     | 0     | 0     | 0     |
| 24612  | 0     | 0     | 0     | 1     |
| 24621  | 1     | 0     | 1     | 0     |
| 24625  | 0     | 0     | 0     | 0     |
| 24627  | 0     | 0     | 0     | 1     |
| 24640  | 0     | 0     | 0     | 0     |
| 24644  | 0     | 0     | 0     | 0     |

| respid | Q43_1 | Q43_2 | Q43_3 | Q43_4 |
|--------|-------|-------|-------|-------|
| 24664  | 1     | 0     | 0     | 1     |
| 24669  | 0     | 0     | 0     | 0     |
| 24685  | 0     | 0     | 0     | 0     |
| 24687  | 0     | 0     | 0     | 0     |
| 24688  | 0     | 0     | 0     | 0     |
| 24691  | 1     | 0     | 0     | 0     |
| 24693  | 0     | 0     | 1     | 0     |
| 24706  |       |       |       |       |
| 24710  |       |       |       |       |
| 24717  | 0     | 0     | 0     | 0     |
| 24720  | 0     | 0     | 0     | 0     |
| 24731  | 1     | 0     | 0     | 0     |
| 24732  | 1     | 0     | 0     | 0     |
| 24733  |       |       |       |       |
| 24747  | 1     | 0     | 0     | 0     |
| 24750  | 0     | 0     | 1     | 1     |
| 24758  | 0     | 0     | 0     | 0     |
| 24760  | 0     | 0     | 0     | 0     |
| 24765  |       |       |       |       |
| 24772  | 1     | 0     | 0     | 0     |
| 24779  | 0     | 0     | 0     | 0     |
| 24794  | 0     | 0     | 0     | 0     |
| 24796  | 1     | 0     | 1     | 1     |
| 24797  | 0     | 0     | 0     | 0     |
| 24800  | 0     | 0     | 0     | 0     |
| 24813  | 0     | 0     | 0     | 0     |
| 24815  | 0     | 0     | 0     | 0     |
| 24821  | 0     | 0     | 0     | 0     |
| 24822  | 0     | 0     | 0     | 0     |
| 24831  | 1     | 0     | 0     | 0     |
| 24835  |       |       |       |       |
| 24843  | 1     | 0     | 0     | 0     |

| respid | Q43_1 | Q43_2 | Q43_3 | Q43_4 |
|--------|-------|-------|-------|-------|
| 24844  | 0     | 0     | 1     | 0     |
| 24860  |       |       |       |       |
| 24861  | 0     | 0     | 0     | 0     |
| 24865  | 1     | 0     | 0     | 0     |
| 24870  | 0     | 0     | 0     | 0     |
| 24887  | 0     | 0     | 0     | 0     |
| 24897  | 0     | 0     | 1     | 1     |
| 24902  | 1     | 0     | 0     | 0     |
| 24914  | 0     | 0     | 0     | 0     |
| 24921  | 0     | 0     | 0     | 0     |
| 24922  | 0     | 0     | 0     | 0     |
| 24924  |       |       |       |       |
| 24927  | 0     | 0     | 0     | 0     |
| 24936  | 0     | 0     | 0     | 0     |
| 24937  | 0     | 0     | 0     | 0     |
| 24942  | 1     | 0     | 0     | 0     |
| 24947  | 0     | 0     | 0     | 0     |
| 24953  | 0     | 0     | 0     | 0     |
| 24954  | 0     | 0     | 0     | 1     |
| 24960  | 1     | 0     | 1     | 0     |
| 24965  | 0     | 0     | 0     | 0     |
| 24975  | 0     | 0     | 0     | 0     |
| 24983  | 1     | 0     | 0     | 0     |
| 24985  | 0     | 0     | 0     | 0     |
| 24990  | 0     | 0     | 0     | 0     |
| 25000  | 0     | 0     | 0     | 0     |
| 25007  | 0     | 0     | 0     | 0     |
| 25008  | 0     | 0     | 0     | 0     |
| 25010  |       |       |       |       |
| 25016  | 0     | 0     | 1     | 0     |
| 25021  | 0     | 0     | 0     | 0     |
| 25040  |       |       |       |       |

| respid | Q43_1 | Q43_2 | Q43_3 | Q43_4 |
|--------|-------|-------|-------|-------|
| 25043  | 0     | 0     | 0     | 0     |
| 25055  | 0     | 0     | 0     | 0     |
| 25057  | 0     | 0     | 0     | 0     |
| 25060  | 1     | 0     | 0     | 0     |
| 25062  | 0     | 0     | 0     | 0     |
| 25064  | 1     | 0     | 0     | 0     |
| 25069  |       |       |       |       |
| 25077  | 0     | 0     | 0     | 0     |
| 25088  |       |       |       |       |
| 25093  | 1     | 0     | 0     | 1     |
| 25121  | 0     | 0     | 0     | 0     |
| 25140  | 1     | 0     | 0     | 0     |
| 25144  | 0     | 0     | 0     | 0     |
| 25149  | 1     | 0     | 0     | 0     |
| 25159  | 0     | 0     | 0     | 0     |
| 25191  | 0     | 0     | 0     | 0     |
| 25193  | 0     | 0     | 0     | 1     |
| 25202  | 1     | 0     | 0     | 0     |
| 25215  | 1     | 0     | 0     | 0     |
| 25229  | 1     | 0     | 0     | 0     |
| 25231  | 0     | 0     | 0     | 1     |
| 25236  | 0     | 0     | 0     | 0     |
| 25242  | 0     | 0     | 0     | 0     |
| 25252  | 0     | 0     | 0     | 0     |
| 25253  | 1     | 0     | 1     | 1     |
| 25256  | 1     | 0     | 0     | 0     |
| 25260  | 0     | 0     | 0     | 0     |
| 25261  | 0     | 0     | 0     | 0     |
| 25280  | 0     | 0     | 1     | 1     |
| 25282  | 0     | 0     | 0     | 0     |
| 25289  | 0     | 0     | 0     | 0     |
| 25303  | 0     | 0     | 0     | 0     |

| respid | Q43_1 | Q43_2 | Q43_3 | Q43_4 |
|--------|-------|-------|-------|-------|
| 25304  | 1     | 0     | 1     | 0     |
| 25309  | 0     | 0     | 0     | 0     |
| 25317  | 1     | 0     | 0     | 0     |
| 25318  | 1     | 0     | 1     | 1     |
| 25320  | 0     | 0     | 0     | 0     |
| 25324  | 1     | 0     | 0     | 0     |
| 25331  | 0     | 0     | 0     | 0     |
| 25340  | 0     | 0     | 0     | 0     |
| 25342  | 0     | 0     | 0     | 0     |
| 25350  | 0     | 0     | 0     | 0     |
| 25352  |       |       |       |       |
| 25358  | 0     | 0     | 0     | 0     |
| 25375  | 0     | 0     | 0     | 0     |
| 25386  | 0     | 0     | 0     | 0     |
| 25388  | 0     | 0     | 0     | 0     |
| 25390  | 0     | 0     | 0     | 0     |
| 25391  | 0     | 0     | 0     | 0     |
| 25400  | 0     | 0     | 0     | 0     |
| 25413  | 1     | 0     | 0     | 0     |
| 25424  | 0     | 0     | 1     | 1     |
| 25426  | 0     | 0     | 0     | 0     |
| 25430  | 0     | 0     | 0     | 0     |
| 25434  | 1     | 0     | 0     | 0     |
| 25439  | 0     | 0     | 0     | 0     |
| 25441  | 0     | 0     | 0     | 0     |
| 25445  | 0     | 0     | 0     | 0     |
| 25451  | 0     | 0     | 0     | 0     |
| 25469  | 1     | 0     | 0     | 0     |
| 25471  | 1     | 0     | 1     | 0     |
| 25476  | 0     | 0     | 0     | 0     |
| 25480  | 0     | 0     | 0     | 1     |
| 25482  | 1     | 0     | 1     | 0     |

| respid | Q43_1 | Q43_2 | Q43_3 | Q43_4 |
|--------|-------|-------|-------|-------|
| 25500  | 1     | 1     | 1     | 1     |
| 25516  | 0     | 0     | 0     | 0     |
| 25521  | 1     | 0     | 1     | 1     |
| 25525  | 0     | 0     | 0     | 0     |
| 25530  | 1     | 0     | 0     | 0     |
| 25555  | 0     | 0     | 1     | 0     |
| 25558  | 1     | 0     | 1     | 0     |
| 25561  | 0     | 0     | 0     | 1     |
| 25566  |       |       |       |       |
| 25571  | 1     | 0     | 0     | 0     |
| 25572  | 0     | 0     | 0     | 0     |
| 25574  |       |       |       |       |
| 25588  | 0     | 0     | 0     | 0     |
| 25591  | 0     | 0     | 0     | 0     |
| 25599  | 0     | 0     | 1     | 1     |
| 25604  | 0     | 0     | 0     | 0     |
| 25614  | 0     | 1     | 0     | 0     |
| 25634  | 1     | 0     | 0     | 1     |
| 25642  | 0     | 0     | 0     | 0     |
| 25647  | 0     | 0     | 0     | 0     |
| 25653  | 0     | 0     | 0     | 0     |
| 25654  | 0     | 0     | 0     | 0     |
| 25660  | 0     | 0     | 0     | 0     |
| 25664  | 0     | 0     | 0     | 0     |
| 25665  | 0     | 0     | 0     | 0     |
| 25672  | 0     | 0     | 0     | 1     |
| 25677  | 0     | 0     | 0     | 0     |
| 25685  | 0     | 0     | 0     | 0     |
| 25699  | 0     | 0     | 1     | 0     |
| 25703  | 0     | 0     | 0     | 0     |
| 25704  | 0     | 0     | 0     | 1     |
| 25705  | 0     | 0     | 0     | 0     |

| respid | Q43_1 | Q43_2 | Q43_3 | Q43_4 |
|--------|-------|-------|-------|-------|
| 25711  | 0     | 0     | 0     | 0     |
| 25727  | 0     | 0     | 0     | 1     |
| 25728  | 0     | 0     | 0     | 0     |
| 25733  | 0     | 0     | 0     | 0     |
| 25735  | 0     | 0     | 0     | 0     |
| 25736  | 0     | 0     | 0     | 0     |
| 25742  | 0     | 0     | 0     | 0     |
| 25750  | 0     | 0     | 0     | 0     |
| 25754  |       |       |       |       |
| 25776  | 1     | 0     | 0     | 0     |
| 25778  |       |       |       |       |
| 25796  | 0     | 0     | 0     | 0     |
| 25852  | 0     | 0     | 0     | 0     |
| 25858  | 0     | 0     | 0     | 0     |
| 25859  |       |       |       |       |
| 25886  | 1     | 0     | 0     | 0     |
| 25890  | 0     | 0     | 1     | 1     |
| 25897  | 0     | 0     | 0     | 0     |
| 25903  | 0     | 0     | 0     | 0     |
| 25905  | 0     | 0     | 0     | 0     |
| 25917  |       |       |       |       |
| 25918  | 0     | 0     | 0     | 0     |
| 25928  | 0     | 0     | 0     | 0     |
| 25930  |       |       |       |       |
| 25949  | 0     | 0     | 0     | 0     |
| 25955  | 0     | 0     | 0     | 0     |
| 25959  | 0     | 0     | 0     | 0     |
| 25964  | 0     | 0     | 1     | 0     |
| 25972  | 0     | 0     | 0     | 0     |
| 25999  | 1     | 0     | 0     | 1     |
| 26019  | 0     | 0     | 0     | 0     |
| 26025  | 0     | 0     | 0     | 0     |

| respid | Q43_1 | Q43_2 | Q43_3 | Q43_4 |
|--------|-------|-------|-------|-------|
| 26039  | 1     | 0     | 1     | 1     |
| 26055  | 1     | 0     | 0     | 0     |
| 26061  | 0     | 0     | 0     | 0     |
| 26076  | 0     | 0     | 0     | 0     |
| 26088  | 0     | 0     | 0     | 0     |
| 26094  |       |       |       |       |
| 26104  | 0     | 0     | 0     | 0     |
| 26131  | 0     | 0     | 0     | 0     |
| 26134  | 1     | 0     | 0     | 0     |
| 26160  | 0     | 0     | 0     | 0     |
| 26168  | 0     | 0     | 0     | 0     |
| 26170  |       |       |       |       |
| 26191  | 0     | 0     | 0     | 0     |
| 26192  |       |       |       |       |
| 26195  | 1     | 0     | 0     | 0     |
| 26198  | 0     | 0     | 0     | 0     |
| 26199  | 0     | 0     | 0     | 0     |
| 26201  |       |       |       |       |
| 26202  | 0     | 0     | 0     | 0     |
| 26226  | 0     | 0     | 0     | 1     |
| 26233  | 0     | 0     | 0     | 0     |
| 26236  | 0     | 0     | 0     | 0     |
| 26242  | 0     | 0     | 0     | 0     |
| 26244  | 1     | 1     | 0     | 0     |
| 26250  | 0     | 0     | 0     | 0     |
| 26266  | 0     | 0     | 0     | 0     |
| 26274  | 0     | 0     | 0     | 0     |
| 26286  | 1     | 0     | 1     | 1     |
| 26288  | 1     | 0     | 0     | 0     |
| 26295  |       |       |       |       |
| 26296  | 0     | 0     | 0     | 0     |
| 26297  |       |       |       |       |



| respid | Q43_1 | Q43_2 | Q43_3 | Q43_4 |
|--------|-------|-------|-------|-------|
| 26300  | 0     | 0     | 0     | 0     |
| 26317  | 0     | 0     | 0     | 0     |
| 26343  |       |       |       |       |
| 26367  | 0     | 0     | 1     | 1     |
| 26372  | 1     | 0     | 0     | 1     |
| 26403  | 0     | 0     | 0     | 0     |
| 26423  | 0     | 0     | 0     | 0     |
| 26430  | 0     | 0     | 0     | 0     |
| 26437  | 1     | 0     | 0     | 1     |
| 26457  |       |       |       |       |
| 26466  | 0     | 0     | 1     | 0     |
| 26467  | 1     | 0     | 0     | 0     |
| 26469  | 0     | 0     | 0     | 0     |
| 26494  | 0     | 0     | 0     | 0     |
| 26510  | 0     | 0     | 0     | 0     |
| 26519  | 0     | 0     | 0     | 0     |
| 26525  | 1     | 0     | 0     | 1     |
| 26529  |       |       |       |       |
| 26533  | 0     | 0     | 0     | 0     |
| 26556  | 0     | 0     | 0     | 0     |
| 26559  | 0     | 0     | 0     | 0     |
| 26565  | 1     | 0     | 1     | 0     |
| 26576  | 0     | 0     | 0     | 0     |
| 26601  |       |       |       |       |
| 26607  | 1     | 0     | 0     | 0     |
| 26611  | 0     | 0     | 0     | 0     |
| 26619  | 0     | 0     | 0     | 0     |
| 26631  | 0     | 0     | 0     | 0     |
| 26654  | 0     | 0     | 0     | 0     |
| 26656  | 0     | 0     | 0     | 0     |
| 26664  |       |       |       |       |
| 26667  | 0     | 0     | 0     | 0     |

| respid | Q43_1 | Q43_2 | Q43_3 | Q43_4 |
|--------|-------|-------|-------|-------|
| 26674  | 1     | 0     | 0     | 0     |
| 26678  | 1     | 0     | 1     | 0     |
| 26693  | 0     | 0     | 0     | 0     |
| 26696  | 1     | 0     | 0     | 0     |
| 26703  | 1     | 0     | 0     | 1     |
| 26705  | 0     | 0     | 0     | 0     |
| 26706  | 0     | 0     | 0     | 1     |
| 26716  | 0     | 0     | 0     | 0     |
| 26721  | 0     | 0     | 0     | 0     |
| 26730  | 0     | 0     | 0     | 0     |
| 26752  | 0     | 0     | 0     | 0     |
| 26755  | 1     | 0     | 0     | 0     |
| 26791  | 0     | 0     | 0     | 0     |
| 26804  | 0     | 0     | 0     | 0     |
| 26810  | 1     | 0     | 0     | 0     |
| 26813  | 1     | 0     | 0     | 0     |
| 26833  | 0     | 1     | 0     | 0     |
| 26880  | 0     | 0     | 0     | 0     |
| 26884  | 0     | 0     | 0     | 0     |
| 26885  | 0     | 0     | 0     | 0     |
| 26890  | 1     | 0     | 0     | 0     |
| 26937  | 1     | 0     | 0     | 0     |
| 26939  | 0     | 0     | 1     | 0     |
| 26941  |       |       |       |       |
| 26992  | 1     | 0     | 0     | 0     |
| 27037  | 0     | 0     | 0     | 1     |
| 27045  | 1     | 0     | 0     | 0     |
| 27053  | 0     | 0     | 0     | 0     |
| 27060  | 1     | 0     | 0     | 0     |
| 27076  | 0     | 0     | 1     | 1     |
| 27124  | 0     | 0     | 0     | 0     |
| 27125  | 0     | 0     | 0     | 0     |

| respid | Q43_1 | Q43_2 | Q43_3 | Q43_4 |
|--------|-------|-------|-------|-------|
| 27132  | 0     | 0     | 0     | 0     |
| 27166  | 0     | 0     | 0     | 0     |
| 27190  | 1     | 0     | 1     | 1     |
| 27199  | 1     | 0     | 0     | 1     |
| 27221  | 1     | 0     | 0     | 0     |
| 27233  | 0     | 0     | 0     | 1     |
| 27241  | 0     | 0     | 0     | 1     |
| 27244  | 0     | 0     | 0     | 0     |
| 27245  | 0     | 0     | 0     | 1     |
| 27246  | 0     | 0     | 0     | 0     |
| 27253  | 0     | 0     | 0     | 0     |
| 27255  | 1     | 0     | 1     | 0     |
| 27267  | 1     | 0     | 0     | 0     |
| 27283  | 1     | 0     | 0     | 0     |
| 27289  | 1     | 0     | 0     | 0     |
| 27302  | 0     | 0     | 0     | 0     |
| 27317  | 0     | 0     | 0     | 0     |
| 27319  | 0     | 0     | 0     | 0     |
| 27331  | 0     | 0     | 0     | 0     |
| 27333  | 0     | 0     | 0     | 0     |
| 27340  |       |       |       |       |
| 27362  | 0     | 1     | 1     | 1     |
| 27370  | 1     | 0     | 0     | 0     |
| 27379  | 0     | 0     | 0     | 0     |
| 27386  |       |       |       |       |
| 27398  | 0     | 0     | 0     | 0     |
| 27404  | 0     | 0     | 0     | 0     |
| 27408  | 0     | 0     | 0     | 0     |
| 27412  | 0     | 0     | 0     | 0     |
| 27426  | 0     | 0     | 1     | 0     |
| 27455  | 1     | 0     | 0     | 0     |
| 27464  | 1     | 0     | 0     | 0     |

| respid | Q43_1 | Q43_2 | Q43_3 | Q43_4 |
|--------|-------|-------|-------|-------|
| 27484  | 0     | 0     | 0     | 1     |
| 27493  | 0     | 0     | 0     | 0     |
| 27512  | 0     | 0     | 0     | 1     |
| 27525  | 0     | 0     | 1     | 0     |
| 27532  | 1     | 0     | 1     | 0     |
| 27539  | 0     | 0     | 0     | 0     |
| 27540  | 0     | 0     | 0     | 0     |
| 27552  | 0     | 0     | 0     | 1     |
| 27562  | 0     | 0     | 0     | 0     |
| 27568  | 0     | 0     | 0     | 0     |
| 27574  | 1     | 0     | 1     | 1     |
| 27575  | 0     | 0     | 0     | 1     |
| 27577  | 0     | 0     | 0     | 0     |
| 27589  | 1     | 0     | 0     | 0     |
| 27593  | 0     | 0     | 0     | 0     |
| 27594  | 1     | 0     | 0     | 0     |
| 27595  | 1     | 0     | 1     | 1     |
| 27598  | 0     | 0     | 0     | 0     |
| 27620  | 1     | 0     | 0     | 1     |
| 27621  | 0     | 0     | 0     | 1     |
| 27628  | 0     | 0     | 0     | 0     |
| 27633  | 0     | 0     | 0     | 1     |
| 27643  | 0     | 0     | 0     | 0     |
| 27644  | 0     | 0     | 0     | 0     |
| 27668  | 0     | 0     | 0     | 0     |
| 27681  | 0     | 0     | 0     | 1     |
| 27691  | 0     | 0     | 0     | 0     |
| 27693  | 0     | 0     | 0     | 0     |
| 27703  | 1     | 0     | 0     | 0     |
| 27708  | 1     | 1     | 1     | 1     |
| 27719  | 0     | 0     | 0     | 0     |
| 27720  | 0     | 0     | 0     | 0     |

| respid | Q43_1 | Q43_2 | Q43_3 | Q43_4 |
|--------|-------|-------|-------|-------|
| 27723  | 0     | 0     | 0     | 0     |
| 27725  | 0     | 0     | 0     | 0     |
| 27734  | 0     | 0     | 0     | 0     |
| 27744  | 0     | 0     | 0     | 0     |
| 27749  | 0     | 0     | 1     | 0     |
| 27762  | 0     | 0     | 0     | 0     |
| 27808  | 0     | 0     | 1     | 1     |
| 27810  | 1     | 0     | 1     | 0     |
| 27812  | 0     | 0     | 0     | 0     |
| 27815  |       |       |       |       |
| 27818  | 0     | 0     | 0     | 0     |
| 27823  | 0     | 0     | 0     | 0     |
| 27841  | 1     | 0     | 0     | 0     |
| 27843  |       |       |       |       |
| 27851  | 0     | 0     | 0     | 0     |
| 27858  | 0     | 0     | 0     | 0     |
| 27859  | 1     | 0     | 0     | 0     |
| 27869  | 0     | 0     | 0     | 0     |
| 27872  | 0     | 0     | 0     | 0     |
| 27873  | 0     | 0     | 0     | 0     |
| 27884  | 0     | 0     | 0     | 0     |
| 27904  | 0     | 0     | 0     | 0     |
| 27915  | 0     | 0     | 0     | 0     |
| 27918  | 0     | 0     | 0     | 0     |
| 27937  | 0     | 0     | 1     | 1     |
| 27943  | 0     | 0     | 0     | 0     |
| 27948  | 0     | 0     | 0     | 0     |
| 27971  | 0     | 0     | 0     | 0     |
| 27991  | 0     | 0     | 0     | 0     |
| 28000  | 0     | 0     | 0     | 0     |
| 28011  | 0     | 0     | 1     | 0     |
| 28022  | 0     | 0     | 0     | 0     |

| respid | Q43_1 | Q43_2 | Q43_3 | Q43_4 |
|--------|-------|-------|-------|-------|
| 28025  | 0     | 0     | 0     | 0     |
| 28041  | 0     | 0     | 0     | 0     |
| 28057  | 0     | 0     | 1     | 0     |
| 28080  |       |       |       |       |
| 28098  | 0     | 0     | 0     | 0     |
| 28104  | 0     | 0     | 0     | 0     |
| 28109  | 1     | 0     | 0     | 0     |
| 28129  | 0     | 0     | 0     | 1     |
| 28141  |       |       |       |       |
| 28143  | 0     | 0     | 0     | 0     |
| 28149  | 0     | 0     | 0     | 0     |
| 28151  | 0     | 0     | 0     | 1     |
| 28161  | 0     | 0     | 0     | 0     |
| 28169  | 0     | 0     | 0     | 0     |
| 28194  | 0     | 0     | 0     | 1     |
| 28197  |       |       |       |       |
| 28206  | 0     | 0     | 0     | 0     |
| 28218  | 0     | 0     | 0     | 0     |
| 28227  | 0     | 0     | 0     | 0     |
| 28235  | 1     | 0     | 1     | 1     |
| 28246  | 0     | 0     | 0     | 0     |
| 28259  | 0     | 0     | 0     | 1     |
| 28263  | 1     | 0     | 0     | 0     |
| 28267  | 0     | 0     | 0     | 1     |
| 28274  | 0     | 0     | 0     | 0     |
| 28278  | 0     | 0     | 0     | 0     |
| 28288  | 0     | 0     | 0     | 0     |
| 28308  |       |       |       |       |
| 28309  | 0     | 0     | 0     | 1     |
| 28323  | 0     | 0     | 1     | 1     |
| 28335  | 0     | 0     | 0     | 1     |
| 28354  | 0     | 0     | 1     | 0     |

| respid | Q43_1 | Q43_2 | Q43_3 | Q43_4 |
|--------|-------|-------|-------|-------|
| 28355  | 0     | 0     | 0     | 0     |
| 28356  | 0     | 0     | 0     | 1     |
| 28357  | 1     | 0     | 0     | 0     |
| 28363  | 0     | 0     | 0     | 0     |
| 28366  | 0     | 0     | 0     | 0     |
| 28372  | 1     | 0     | 1     | 1     |
| 28381  | 0     | 0     | 0     | 0     |
| 28388  | 0     | 0     | 0     | 0     |
| 28413  | 0     | 0     | 0     | 1     |
| 28421  | 0     | 0     | 0     | 0     |
| 28430  | 0     | 0     | 1     | 0     |
| 28439  | 0     | 0     | 1     | 0     |
| 28458  | 0     | 0     | 1     | 1     |
| 28461  | 0     | 0     | 0     | 0     |
| 28466  | 0     | 0     | 0     | 0     |
| 28492  | 0     | 0     | 0     | 0     |
| 28534  |       |       |       |       |
| 28537  | 1     | 0     | 0     | 0     |
| 28560  | 0     | 0     | 0     | 0     |
| 28566  | 0     | 0     | 0     | 0     |
| 28569  | 0     | 0     | 0     | 0     |
| 28584  | 1     | 0     | 0     | 0     |
| 28590  | 0     | 0     | 0     | 0     |
| 28596  |       |       |       |       |
| 28608  | 1     | 0     | 1     | 1     |
| 28631  | 0     | 0     | 1     | 1     |
| 28644  | 0     | 0     | 0     | 0     |
| 28646  | 0     | 0     | 0     | 0     |
| 28665  |       |       |       |       |
| 28686  | 0     | 0     | 0     | 0     |
| 28704  | 0     | 0     | 0     | 1     |
| 28719  | 0     | 0     | 0     | 0     |

| respid | Q43_1 | Q43_2 | Q43_3 | Q43_4 |
|--------|-------|-------|-------|-------|
| 28736  | 1     | 0     | 0     | 0     |
| 28739  | 0     | 0     | 0     | 0     |
| 28758  | 0     | 0     | 0     | 0     |
| 28761  | 1     | 0     | 0     | 1     |
| 28770  | 1     | 0     | 1     | 0     |
| 28774  | 0     | 0     | 0     | 0     |
| 28778  | 1     | 0     | 1     | 0     |
| 28783  | 0     | 0     | 0     | 1     |
| 28785  | 1     | 0     | 0     | 0     |
| 28797  | 1     | 0     | 1     | 0     |
| 28801  | 1     | 0     | 1     | 1     |
| 28821  |       |       |       |       |
| 28827  | 1     | 0     | 0     | 0     |
| 28828  | 0     | 0     | 0     | 0     |
| 28871  | 0     | 0     | 0     | 0     |
| 28876  | 0     | 0     | 0     | 0     |
| 28891  | 0     | 0     | 0     | 1     |
| 28898  |       |       |       |       |
| 28909  | 0     | 0     | 0     | 0     |
| 28930  | 1     | 0     | 0     | 0     |
| 28935  | 0     | 0     | 0     | 0     |
| 28964  | 0     | 0     | 0     | 0     |
| 28965  | 0     | 0     | 0     | 0     |
| 28967  | 0     | 0     | 0     | 1     |
| 28975  |       |       |       |       |
| 28982  | 0     | 0     | 0     | 0     |
| 28989  | 0     | 0     | 0     | 0     |
| 29003  | 0     | 0     | 0     | 0     |
| 29004  | 0     | 0     | 0     | 0     |
| 29007  | 0     | 0     | 0     | 0     |
| 29008  | 0     | 0     | 0     | 0     |
| 29011  | 0     | 1     | 1     | 1     |



| respid | Q43_1 | Q43_2 | Q43_3 | Q43_4 |
|--------|-------|-------|-------|-------|
| 29012  | 0     | 0     | 0     | 0     |
| 29014  |       |       |       |       |
| 29016  | 0     | 0     | 0     | 0     |
| 29018  | 1     | 0     | 1     | 1     |
| 29048  | 0     | 0     | 0     | 0     |
| 29184  | 0     | 0     | 0     | 0     |
| 29237  | 0     | 0     | 0     | 0     |
| 29252  | 0     | 0     | 0     | 0     |
| 29267  | 0     | 0     | 0     | 0     |
| 29276  |       |       |       |       |
| 29281  | 0     | 0     | 0     | 0     |
| 29285  | 1     | 0     | 0     | 0     |
| 29291  | 0     | 0     | 1     | 0     |
| 29304  | 0     | 0     | 0     | 0     |
| 29323  | 0     | 0     | 0     | 0     |
| 29330  | 1     | 0     | 1     | 1     |
| 29357  | 0     | 0     | 0     | 0     |
| 29416  | 1     | 0     | 1     | 1     |
| 29432  | 0     | 0     | 0     | 0     |
| 29482  | 1     | 0     | 1     | 0     |
| 29506  | 0     | 0     | 0     | 0     |
| 29509  | 1     | 0     | 0     | 0     |
| 29512  | 1     | 1     | 1     | 0     |
| 29519  | 0     | 0     | 0     | 0     |
| 29520  | 0     | 0     | 0     | 0     |
| 29521  | 0     | 1     | 0     | 1     |
| 29529  | 0     | 0     | 1     | 0     |
| 29532  | 0     | 0     | 0     | 0     |
| 29547  | 0     | 0     | 0     | 0     |
| 29551  | 0     | 0     | 0     | 1     |
| 29584  | 1     | 0     | 0     | 0     |
| 29591  | 0     | 0     | 0     | 0     |

| respid | Q43_1 | Q43_2 | Q43_3 | Q43_4 |
|--------|-------|-------|-------|-------|
| 29613  | 0     | 0     | 0     | 0     |
| 29615  | 0     | 0     | 0     | 0     |
| 29625  | 1     | 0     | 0     | 0     |
| 29660  | 0     | 0     | 1     | 0     |
| 29677  |       |       |       |       |
| 29700  | 0     | 0     | 0     | 0     |
| 29715  | 1     | 0     | 0     | 0     |
| 29720  |       |       |       |       |
| 29730  | 0     | 0     | 0     | 0     |
| 29734  | 0     | 0     | 0     | 0     |
| 29754  |       |       |       |       |
| 29771  | 0     | 0     | 0     | 0     |
| 29774  | 0     | 0     | 0     | 0     |
| 29783  | 0     | 0     | 0     | 0     |
| 29812  | 0     | 0     | 0     | 0     |
| 29813  | 1     | 0     | 0     | 0     |
| 29814  | 0     | 0     | 0     | 0     |
| 29820  | 0     | 0     | 0     | 1     |
| 29906  | 0     | 0     | 0     | 1     |
| 29907  | 0     | 0     | 0     | 0     |
| 29928  |       |       |       |       |
| 29932  | 1     | 0     | 0     | 0     |
| 29958  | 1     | 0     | 0     | 0     |
| 29982  | 0     | 0     | 0     | 1     |
| 29989  | 0     | 0     | 0     | 0     |
| 29994  | 0     | 0     | 0     | 0     |
| 30005  | 0     | 0     | 1     | 1     |
| 30077  | 0     | 0     | 0     | 0     |
| 30098  |       |       |       |       |
| 30107  | 1     | 0     | 0     | 0     |
| 30154  | 0     | 0     | 0     | 0     |
| 30159  | 1     | 0     | 0     | 0     |

| respid | Q43_1 | Q43_2 | Q43_3 | Q43_4 |
|--------|-------|-------|-------|-------|
| 30162  | 0     | 0     | 0     | 0     |
| 30163  |       |       |       |       |
| 30189  | 0     | 0     | 0     | 0     |
| 30230  | 0     | 0     | 0     | 0     |
| 30259  | 0     | 0     | 1     | 1     |
| 30284  | 0     | 0     | 0     | 0     |
| 30296  | 0     | 0     | 0     | 0     |
| 30330  | 1     | 0     | 0     | 0     |
| 30341  | 0     | 0     | 0     | 0     |
| 30352  | 0     | 0     | 1     | 0     |
| 30379  | 0     | 0     | 0     | 0     |
| 30424  | 0     | 0     | 0     | 0     |
| 30447  | 0     | 0     | 0     | 0     |
| 30477  | 1     | 0     | 1     | 1     |
| 30503  | 0     | 0     | 0     | 0     |
| 30515  | 1     | 0     | 0     | 0     |
| 30516  | 0     | 0     | 0     | 0     |
| 30623  | 0     | 0     | 0     | 1     |
| 30639  | 1     | 0     | 0     | 0     |
| 30670  | 0     | 0     | 0     | 0     |
| 30697  | 0     | 0     | 0     | 0     |
| 30735  | 0     | 0     | 0     | 1     |
| 30742  | 0     | 0     | 0     | 0     |
| 30751  | 1     | 0     | 0     | 1     |
| 30789  |       |       |       |       |
| 30867  | 0     | 0     | 0     | 1     |
| 30876  | 0     | 0     | 0     | 0     |
| 30877  | 0     | 0     | 0     | 0     |
| 30887  | 0     | 0     | 0     | 0     |
| 30891  | 0     | 0     | 0     | 1     |
| 31030  | 0     | 0     | 0     | 0     |
| 31059  | 0     | 0     | 0     | 0     |

| respid | Q43_1 | Q43_2 | Q43_3 | Q43_4 |
|--------|-------|-------|-------|-------|
| 31082  |       |       |       |       |
| 31106  | 0     | 0     | 0     | 0     |
| 31110  | 0     | 0     | 0     | 0     |
| 31265  | 0     | 0     | 0     | 0     |
| 31266  | 0     | 0     | 0     | 0     |
| 31267  | 0     | 0     | 0     | 0     |
| 31310  | 0     | 0     | 0     | 0     |
| 31325  | 0     | 0     | 0     | 0     |
| 31367  | 0     | 0     | 0     | 0     |
| 31389  | 0     | 0     | 0     | 0     |
| 31440  | 0     | 0     | 0     | 0     |
| 31465  | 0     | 0     | 0     | 0     |
| 31477  | 0     | 0     | 0     | 0     |
| 31491  | 0     | 0     | 0     | 0     |
| 31494  | 0     | 0     | 0     | 1     |
| 31509  | 0     | 0     | 0     | 1     |
| 31533  | 0     | 0     | 0     | 0     |
| 31547  | 1     | 0     | 0     | 0     |
| 31558  | 0     | 0     | 0     | 0     |
| 31579  | 0     | 0     | 0     | 0     |
| 31591  | 0     | 0     | 0     | 1     |
| 31596  | 0     | 0     | 0     | 0     |
| 31601  | 1     | 0     | 0     | 0     |
| 31605  | 0     | 0     | 0     | 0     |
| 31637  | 0     | 0     | 0     | 0     |
| 31646  | 0     | 0     | 0     | 0     |
| 31647  | 1     | 0     | 0     | 1     |
| 31650  | 0     | 0     | 0     | 0     |
| 31651  | 1     | 0     | 0     | 0     |
| 31657  | 0     | 0     | 0     | 0     |
| 31660  | 1     | 0     | 0     | 0     |
| 31661  | 1     | 0     | 0     | 1     |

| respid | Q43_1 | Q43_2 | Q43_3 | Q43_4 |
|--------|-------|-------|-------|-------|
| 31667  | 1     | 0     | 0     | 0     |
| 31674  | 0     | 0     | 0     | 0     |
| 31686  | 0     | 0     | 0     | 1     |
| 31693  |       |       |       |       |
| 31716  |       |       |       |       |
| 31818  | 0     | 0     | 0     | 0     |
| 31886  | 0     | 0     | 0     | 0     |
| 31945  | 1     | 0     | 0     | 0     |
| 31957  | 0     | 0     | 0     | 0     |
| 31966  | 0     | 0     | 0     | 0     |
| 31978  | 0     | 0     | 0     | 0     |
| 31999  | 1     | 1     | 1     | 1     |
| 32026  | 1     | 0     | 0     | 0     |
| 32033  | 0     | 0     | 0     | 0     |
| 32037  | 0     | 0     | 0     | 0     |
| 32038  | 0     | 0     | 0     | 0     |
| 32047  | 1     | 0     | 1     | 0     |
| 32053  |       |       |       |       |
| 32069  | 0     | 0     | 0     | 0     |
| 32081  | 1     | 0     | 1     | 0     |
| 32123  | 0     | 0     | 0     | 0     |
| 32130  | 0     | 0     | 0     | 0     |
| 32141  | 0     | 0     | 1     | 0     |
| 32158  |       |       |       |       |
| 32165  | 0     | 0     | 0     | 0     |
| 32180  | 0     | 0     | 0     | 0     |
| 32221  | 1     | 0     | 0     | 0     |
| 32292  | 0     | 0     | 0     | 0     |
| 32318  | 0     | 0     | 0     | 0     |
| 32346  | 0     | 0     | 0     | 0     |
| 32402  | 0     | 0     | 0     | 1     |
| 32422  | 0     | 0     | 0     | 0     |

| respid | Q43_1 | Q43_2 | Q43_3 | Q43_4 |
|--------|-------|-------|-------|-------|
| 32439  | 0     | 0     | 0     | 0     |
| 32507  | 0     | 0     | 0     | 0     |
| 32522  |       |       |       |       |
| 32535  |       |       |       |       |
| 32546  | 0     | 0     | 0     | 0     |
| 32553  | 0     | 0     | 0     | 0     |
| 32570  |       |       |       |       |
| 32592  | 1     | 0     | 0     | 0     |
| 32605  | 1     | 0     | 1     | 0     |
| 32630  | 0     | 0     | 0     | 1     |
| 32642  | 1     | 0     | 0     | 0     |
| 32646  | 0     | 0     | 0     | 0     |
| 32665  | 0     | 0     | 0     | 1     |
| 32677  | 0     | 0     | 0     | 0     |
| 32694  | 0     | 0     | 0     | 0     |
| 32698  | 0     | 0     | 0     | 0     |
| 32754  | 1     | 1     | 0     | 0     |
| 32799  | 1     | 0     | 1     | 1     |
| 32816  |       |       |       |       |
| 32819  | 1     | 0     | 1     | 1     |
| 32840  | 1     | 0     | 0     | 0     |
| 32861  | 0     | 0     | 0     | 0     |
| 32866  | 0     | 0     | 0     | 0     |
| 32889  | 1     | 0     | 1     | 1     |
| 32960  | 0     | 0     | 0     | 0     |
| 32965  | 0     | 0     | 0     | 0     |
| 32986  | 0     | 0     | 0     | 1     |
| 33005  | 1     | 0     | 0     | 0     |
| 33054  | 1     | 0     | 0     | 0     |
| 33072  | 0     | 0     | 0     | 1     |
| 33095  | 0     | 0     | 0     | 0     |
| 33099  | 1     | 0     | 0     | 0     |

| respid | Q43_1 | Q43_2 | Q43_3 | Q43_4 |
|--------|-------|-------|-------|-------|
| 33121  | 0     | 0     | 0     | 0     |
| 33152  | 0     | 0     | 0     | 1     |
| 33159  | 0     | 0     | 0     | 0     |
| 33189  | 1     | 0     | 0     | 0     |
| 33198  | 1     | 0     | 1     | 0     |
| 33202  | 1     | 0     | 0     | 0     |
| 33204  | 0     | 0     | 0     | 0     |
| 33224  | 0     | 0     | 0     | 0     |
| 33272  | 1     | 0     | 0     | 0     |
| 33294  | 0     | 0     | 0     | 0     |
| 33300  | 0     | 0     | 0     | 0     |
| 33314  | 1     | 0     | 0     | 1     |
| 33338  | 0     | 0     | 0     | 0     |
| 33350  | 1     | 0     | 0     | 0     |
| 33362  | 1     | 0     | 0     | 0     |
| 33368  |       |       |       |       |
| 33374  | 0     | 0     | 0     | 1     |
| 33380  | 1     | 0     | 1     | 1     |
| 33385  | 1     | 0     | 0     | 0     |
| 33402  | 1     | 0     | 1     | 0     |
| 33414  | 0     | 0     | 0     | 0     |
| 33439  | 1     | 0     | 0     | 0     |
| 33449  | 0     | 0     | 1     | 1     |
| 33533  | 1     | 0     | 1     | 0     |
| 33540  | 0     | 0     | 0     | 0     |
| 33556  | 1     | 0     | 1     | 1     |
| 33615  | 0     | 0     | 0     | 0     |
| 33694  | 0     | 0     | 0     | 0     |
| 33717  | 0     | 0     | 0     | 1     |
| 33729  | 1     | 0     | 0     | 0     |
| 33746  | 0     | 0     | 0     | 0     |
| 33764  | 0     | 0     | 0     | 0     |

| respid | Q43_1 | Q43_2 | Q43_3 | Q43_4 |
|--------|-------|-------|-------|-------|
| 33790  | 0     | 0     | 0     | 0     |
| 33868  | 0     | 0     | 0     | 0     |
| 33872  | 1     | 0     | 1     | 0     |
| 33883  | 0     | 0     | 0     | 0     |
| 33884  | 0     | 0     | 0     | 0     |
| 33900  | 0     | 0     | 0     | 0     |
| 33933  | 0     | 0     | 0     | 0     |
| 33949  | 1     | 0     | 0     | 0     |
| 34005  |       |       |       |       |
| 34016  |       |       |       |       |
| 34041  | 0     | 0     | 0     | 0     |
| 34053  | 0     | 0     | 0     | 0     |
| 34056  | 0     | 0     | 0     | 0     |
| 34093  | 1     | 0     | 0     | 0     |
| 34112  | 0     | 0     | 0     | 0     |
| 34136  | 1     | 0     | 1     | 0     |
| 34138  | 0     | 0     | 0     | 0     |
| 34139  | 0     | 0     | 0     | 0     |
| 34189  | 1     | 0     | 0     | 0     |
| 34239  | 0     | 0     | 0     | 0     |
| 34240  | 0     | 0     | 0     | 0     |
| 34241  | 0     | 0     | 0     | 0     |
| 34259  | 0     | 0     | 0     | 1     |
| 34303  | 1     | 0     | 0     | 0     |
| 34306  | 0     | 0     | 0     | 0     |
| 34395  | 1     | 0     | 0     | 0     |
| 34463  | 0     | 0     | 1     | 1     |
| 34466  | 1     | 0     | 0     | 0     |
| 34471  | 0     | 0     | 0     | 0     |
| 34489  | 1     | 0     | 0     | 0     |
| 34518  | 1     | 0     | 1     | 1     |
| 34542  | 0     | 0     | 0     | 0     |



| respid | Q43_1 | Q43_2 | Q43_3 | Q43_4 |
|--------|-------|-------|-------|-------|
| 34595  |       |       |       |       |
| 34604  | 1     | 0     | 1     | 0     |
| 34631  | 1     | 0     | 0     | 0     |
| 34665  | 1     | 0     | 0     | 0     |
| 34716  | 0     | 0     | 0     | 0     |
| 34729  | 0     | 0     | 0     | 0     |
| 34772  | 1     | 0     | 1     | 1     |
| 34800  | 0     | 0     | 0     | 0     |
| 34819  | 1     | 1     | 0     | 0     |
| 34829  | 0     | 0     | 0     | 1     |
| 34831  | 1     | 0     | 0     | 1     |
| 34839  | 1     | 0     | 0     | 0     |
| 34868  | 0     | 0     | 0     | 0     |
| 34869  | 0     | 0     | 0     | 0     |
| 34882  | 1     | 0     | 0     | 0     |
| 34895  | 0     | 0     | 1     | 1     |
| 34901  | 0     | 0     | 0     | 0     |
| 34904  | 1     | 0     | 0     | 0     |
| 34907  | 1     | 0     | 0     | 0     |
| 34914  | 0     | 0     | 0     | 0     |
| 34918  | 0     | 0     | 1     | 1     |
| 34924  | 0     | 0     | 0     | 0     |
| 34933  | 0     | 0     | 0     | 0     |
| 34938  | 0     | 0     | 0     | 0     |
| 34952  | 1     | 0     | 0     | 0     |
| 34959  | 0     | 0     | 0     | 1     |
| 34972  | 0     | 0     | 0     | 0     |
| 34973  | 0     | 0     | 0     | 0     |
| 34975  | 1     | 0     | 0     | 1     |
| 34977  | 0     | 0     | 0     | 1     |
| 34978  | 1     | 0     | 0     | 0     |
| 34980  | 0     | 0     | 0     | 0     |

| respid | Q43_1 | Q43_2 | Q43_3 | Q43_4 |
|--------|-------|-------|-------|-------|
| 34984  | 1     | 0     | 0     | 0     |
| 34986  | 1     | 0     | 1     | 0     |
| 34994  | 0     | 0     | 0     | 0     |
| 34996  | 0     | 0     | 0     | 1     |
| 35003  | 0     | 0     | 0     | 0     |
| 35014  | 0     | 0     | 0     | 0     |
| 35029  | 0     | 0     | 0     | 1     |
| 35030  | 0     | 0     | 0     | 0     |
| 35037  | 0     | 0     | 0     | 0     |
| 35043  |       |       |       |       |
| 35048  |       |       |       |       |
| 35055  | 0     | 0     | 0     | 0     |
| 35067  | 0     | 0     | 0     | 0     |
| 35072  | 0     | 0     | 0     | 0     |
| 35078  | 1     | 0     | 0     | 0     |
| 35084  | 0     | 0     | 0     | 1     |
| 35095  |       |       |       |       |
| 35096  |       |       |       |       |
| 35097  | 1     | 0     | 1     | 0     |
| 35098  | 0     | 0     | 0     | 0     |
| 35109  | 1     | 0     | 1     | 0     |
| 35114  | 0     | 0     | 0     | 0     |
| 35115  | 0     | 0     | 0     | 0     |
| 35124  | 0     | 0     | 0     | 0     |
| 35125  | 0     | 0     | 0     | 0     |
| 35141  |       |       |       |       |
| 35142  | 0     | 0     | 0     | 0     |
| 35145  |       |       |       |       |
| 35149  | 0     | 0     | 0     | 0     |
| 35159  | 0     | 0     | 0     | 1     |
| 35163  | 1     | 0     | 0     | 0     |
| 35174  | 0     | 0     | 1     | 1     |

| respid | Q43_1 | Q43_2 | Q43_3 | Q43_4 |
|--------|-------|-------|-------|-------|
| 35188  |       |       |       |       |
| 35189  | 1     | 0     | 0     | 0     |
| 35201  | 1     | 0     | 0     | 1     |
| 35215  | 0     | 0     | 0     | 0     |
| 35228  | 0     | 0     | 0     | 0     |
| 35235  | 0     | 0     | 0     | 0     |
| 35239  | 0     | 0     | 1     | 0     |
| 35243  | 0     | 0     | 0     | 0     |
| 35245  | 0     | 0     | 0     | 0     |
| 35259  |       |       |       |       |
| 35265  | 0     | 0     | 0     | 0     |
| 35272  | 0     | 0     | 1     | 0     |
| 35280  | 0     | 0     | 0     | 1     |
| 35298  | 0     | 0     | 0     | 0     |
| 35305  | 1     | 0     | 0     | 0     |
| 35306  | 0     | 0     | 0     | 0     |
| 35307  | 0     | 0     | 0     | 0     |
| 35311  | 1     | 0     | 0     | 0     |
| 35322  | 0     | 0     | 1     | 1     |
| 35323  | 1     | 1     | 0     | 0     |
| 35327  | 1     | 0     | 1     | 1     |
| 35366  | 1     | 0     | 0     | 0     |
| 35378  | 0     | 0     | 0     | 0     |
| 35389  | 0     | 0     | 0     | 0     |
| 35390  | 1     | 0     | 0     | 0     |
| 35395  | 0     | 0     | 0     | 1     |
| 35411  | 0     | 0     | 0     | 1     |
| 35423  | 0     | 0     | 0     | 0     |
| 35425  | 0     | 0     | 0     | 0     |
| 35434  | 1     | 0     | 1     | 0     |
| 35462  | 1     | 0     | 0     | 0     |
| 35478  | 1     | 0     | 1     | 1     |

| respid | Q43_1 | Q43_2 | Q43_3 | Q43_4 |
|--------|-------|-------|-------|-------|
| 35481  | 0     | 0     | 1     | 1     |
| 35498  | 0     | 0     | 0     | 0     |
| 35499  |       |       |       |       |
| 35502  | 0     | 0     | 0     | 1     |
| 35503  |       |       |       |       |
| 35504  |       |       |       |       |
| 35508  | 1     | 0     | 0     | 1     |
| 35513  | 1     | 0     | 0     | 0     |
| 35516  | 0     | 0     | 0     | 0     |
| 35519  | 1     | 0     | 0     | 0     |
| 35530  | 0     | 0     | 0     | 0     |
| 35533  | 1     | 0     | 0     | 0     |
| 35561  | 1     | 0     | 0     | 0     |
| 35565  | 0     | 0     | 0     | 0     |
| 35588  | 0     | 0     | 0     | 0     |
| 35598  | 0     | 0     | 0     | 0     |
| 35607  | 1     | 0     | 0     | 0     |
| 35638  | 0     | 0     | 0     | 0     |
| 35642  | 0     | 0     | 0     | 0     |
| 35643  | 0     | 0     | 0     | 0     |
| 35680  | 0     | 0     | 0     | 0     |
| 35697  | 0     | 0     | 0     | 1     |
| 35703  |       |       |       |       |
| 35709  | 0     | 0     | 1     | 0     |
| 35710  | 0     | 0     | 0     | 0     |
| 35721  | 1     | 0     | 1     | 1     |
| 35723  | 0     | 0     | 0     | 0     |
| 35736  | 1     | 0     | 0     | 1     |
| 35739  | 1     | 0     | 1     | 1     |
| 35745  | 0     | 0     | 0     | 0     |
| 35748  | 0     | 0     | 0     | 1     |
| 35750  | 0     | 0     | 0     | 0     |

| respid | Q43_1 | Q43_2 | Q43_3 | Q43_4 |
|--------|-------|-------|-------|-------|
| 35752  | 1     | 0     | 1     | 1     |
| 35773  | 0     | 0     | 0     | 0     |
| 35779  | 0     | 0     | 0     | 0     |
| 35791  | 0     | 0     | 0     | 0     |
| 35801  | 1     | 0     | 0     | 0     |
| 35802  | 0     | 0     | 0     | 0     |
| 35837  | 1     | 0     | 0     | 0     |
| 35853  | 0     | 0     | 0     | 0     |
| 35858  | 1     | 0     | 0     | 1     |
| 35860  | 0     | 0     | 0     | 0     |
| 35875  | 1     | 0     | 1     | 1     |
| 35883  | 0     | 0     | 0     | 0     |
| 35890  | 1     | 0     | 0     | 0     |
| 35898  | 1     | 0     | 0     | 0     |
| 35901  | 1     | 0     | 1     | 0     |
| 35914  | 0     | 0     | 0     | 0     |
| 35924  | 0     | 0     | 0     | 0     |
| 35950  | 0     | 0     | 0     | 1     |
| 35961  | 0     | 0     | 0     | 0     |
| 35966  | 0     | 0     | 0     | 0     |
| 35967  | 0     | 0     | 0     | 0     |
| 35971  | 0     | 0     | 0     | 0     |
| 35974  | 0     | 0     | 1     | 0     |
| 35983  | 1     | 0     | 0     | 0     |
| 35992  | 1     | 0     | 0     | 0     |
| 36010  | 0     | 0     | 0     | 0     |
| 36019  | 0     | 0     | 0     | 1     |
| 36029  | 0     | 0     | 0     | 0     |
| 36033  | 0     | 0     | 0     | 0     |
| 36042  | 0     | 0     | 0     | 0     |
| 36043  | 1     | 0     | 1     | 0     |
| 36048  | 1     | 0     | 0     | 1     |

| respid | Q43_1 | Q43_2 | Q43_3 | Q43_4 |
|--------|-------|-------|-------|-------|
| 36050  | 1     | 0     | 0     | 1     |
| 36062  | 0     | 0     | 0     | 0     |
| 36063  |       |       |       |       |
| 36092  | 0     | 0     | 0     | 0     |
| 36097  | 0     | 0     | 1     | 0     |
| 36108  | 0     | 0     | 0     | 0     |
| 36113  | 1     | 0     | 1     | 0     |
| 36117  | 0     | 0     | 0     | 0     |
| 36129  | 1     | 0     | 1     | 1     |
| 36144  | 1     | 0     | 0     | 0     |
| 36152  | 1     | 0     | 0     | 1     |
| 36154  | 0     | 1     | 0     | 1     |
| 36155  | 1     | 0     | 0     | 1     |
| 36167  | 0     | 0     | 0     | 0     |
| 36172  | 0     | 0     | 0     | 0     |
| 36173  | 0     | 0     | 0     | 0     |
| 36174  | 0     | 0     | 0     | 1     |
| 36182  | 0     | 0     | 1     | 1     |
| 36192  | 1     | 0     | 0     | 0     |
| 36195  | 0     | 0     | 0     | 0     |
| 36204  | 0     | 0     | 0     | 0     |
| 36205  | 0     | 0     | 0     | 0     |
| 36208  | 0     | 0     | 0     | 0     |
| 36216  | 1     | 0     | 0     | 0     |
| 36221  | 0     | 0     | 0     | 0     |
| 36244  | 0     | 0     | 0     | 0     |
| 36255  | 0     | 0     | 1     | 0     |
| 36259  | 0     | 0     | 0     | 0     |
| 36262  | 0     | 0     | 1     | 1     |
| 36268  | 0     | 0     | 0     | 0     |
| 36308  | 0     | 0     | 0     | 0     |
| 36324  | 0     | 0     | 0     | 0     |

| respid | Q43_1 | Q43_2 | Q43_3 | Q43_4 |
|--------|-------|-------|-------|-------|
| 36330  | 0     | 0     | 0     | 0     |
| 36331  | 1     | 0     | 0     | 0     |
| 36336  | 0     | 0     | 1     | 0     |
| 36337  | 0     | 0     | 0     | 0     |
| 36364  | 0     | 0     | 0     | 0     |
| 36365  | 0     | 0     | 1     | 1     |
| 36396  | 1     | 0     | 0     | 0     |
| 36403  | 0     | 0     | 0     | 0     |
| 36410  | 0     | 0     | 0     | 0     |
| 36413  | 0     | 0     | 0     | 0     |
| 36422  | 0     | 0     | 0     | 0     |
| 36424  | 0     | 0     | 1     | 0     |
| 36425  | 1     | 0     | 1     | 0     |
| 36432  | 0     | 0     | 0     | 0     |
| 36435  | 1     | 0     | 1     | 1     |
| 36446  | 1     | 0     | 0     | 0     |
| 36451  | 1     | 0     | 0     | 0     |
| 36453  | 0     | 0     | 0     | 1     |
| 36459  | 0     | 0     | 1     | 1     |
| 36464  | 0     | 0     | 1     | 1     |
| 36465  | 0     | 0     | 0     | 1     |
| 36466  |       |       |       |       |
| 36476  | 0     | 0     | 1     | 1     |
| 36487  | 0     | 0     | 0     | 0     |
| 36488  | 0     | 0     | 0     | 0     |
| 36500  |       |       |       |       |
| 36504  | 0     | 0     | 0     | 0     |
| 36513  | 1     | 0     | 0     | 0     |
| 36515  | 1     | 0     | 1     | 1     |
| 36521  | 1     | 0     | 0     | 0     |
| 36530  | 0     | 0     | 1     | 1     |
| 36556  | 0     | 0     | 0     | 1     |

| respid | Q43_1 | Q43_2 | Q43_3 | Q43_4 |
|--------|-------|-------|-------|-------|
| 36564  | 0     | 0     | 0     | 1     |
| 36584  | 0     | 0     | 0     | 0     |
| 36585  |       |       |       |       |
| 36586  |       |       |       |       |
| 36606  | 0     | 0     | 0     | 1     |
| 36615  | 0     | 0     | 0     | 0     |
| 36628  | 1     | 0     | 0     | 0     |
| 36630  | 0     | 0     | 0     | 0     |
| 36631  | 0     | 0     | 0     | 1     |
| 36636  | 1     | 0     | 0     | 0     |
| 36637  | 0     | 0     | 0     | 0     |
| 36651  | 1     | 0     | 1     | 1     |
| 36661  | 0     | 0     | 0     | 0     |
| 36670  | 1     | 0     | 0     | 0     |
| 36671  | 0     | 0     | 1     | 1     |
| 36688  |       |       |       |       |
| 36694  | 0     | 0     | 0     | 0     |
| 36696  |       |       |       |       |
| 36703  |       |       |       |       |
| 36719  | 0     | 0     | 0     | 0     |
| 36721  | 0     | 0     | 1     | 0     |
| 36740  | 0     | 0     | 0     | 0     |
| 36755  | 0     | 0     | 0     | 0     |
| 36765  | 0     | 0     | 0     | 0     |
| 36770  |       |       |       |       |
| 36773  | 1     | 0     | 0     | 0     |
| 36813  | 0     | 0     | 0     | 0     |
| 36819  | 0     | 0     | 0     | 0     |
| 36820  | 0     | 0     | 0     | 0     |
| 36821  | 0     | 0     | 0     | 0     |
| 36827  | 0     | 0     | 0     | 0     |
| 36835  | 0     | 0     | 0     | 0     |



| respid | Q43_1 | Q43_2 | Q43_3 | Q43_4 |
|--------|-------|-------|-------|-------|
| 36837  | 1     | 0     | 0     | 0     |
| 36849  | 0     | 0     | 0     | 0     |
| 36851  | 1     | 0     | 0     | 0     |
| 36868  | 0     | 0     | 0     | 0     |
| 36870  | 1     | 0     | 0     | 0     |
| 36871  |       |       |       |       |
| 36874  | 1     | 0     | 0     | 0     |
| 36878  | 0     | 0     | 0     | 0     |
| 36887  | 1     | 0     | 0     | 0     |
| 36889  | 0     | 0     | 0     | 0     |
| 36891  | 0     | 0     | 0     | 1     |
| 36903  | 1     | 0     | 1     | 0     |
| 36905  | 1     | 1     | 0     | 0     |
| 36913  | 0     | 0     | 0     | 0     |
| 36949  | 0     | 0     | 0     | 0     |
| 36954  | 0     | 0     | 1     | 1     |
| 36962  | 1     | 0     | 1     | 0     |
| 36965  | 0     | 0     | 0     | 1     |
| 36970  | 0     | 0     | 0     | 0     |
| 36979  | 1     | 0     | 0     | 1     |
| 36990  | 1     | 0     | 0     | 0     |
| 36991  | 1     | 0     | 0     | 0     |
| 36992  | 0     | 0     | 0     | 0     |
| 37015  |       |       |       |       |
| 37017  | 0     | 0     | 0     | 0     |
| 37020  |       |       |       |       |
| 37033  | 1     | 0     | 1     | 0     |
| 37041  | 1     | 0     | 0     | 0     |
| 37048  | 0     | 0     | 0     | 1     |
| 37050  | 0     | 0     | 0     | 0     |
| 37054  | 1     | 0     | 0     | 0     |
| 37057  | 0     | 0     | 0     | 0     |

| respid | Q43_1 | Q43_2 | Q43_3 | Q43_4 |
|--------|-------|-------|-------|-------|
| 37067  | 1     | 0     | 0     | 1     |
| 37074  | 0     | 0     | 0     | 0     |
| 37088  | 1     | 0     | 0     | 0     |
| 37090  | 1     | 0     | 1     | 0     |
| 37110  | 0     | 0     | 1     | 0     |
| 37122  | 0     | 0     | 0     | 1     |
| 37124  | 0     | 0     | 1     | 0     |
| 37126  |       |       |       |       |
| 37129  | 0     | 0     | 1     | 0     |
| 37130  | 0     | 0     | 0     | 1     |
| 37142  | 1     | 0     | 1     | 0     |
| 37160  | 0     | 0     | 0     | 1     |
| 37168  | 0     | 0     | 0     | 1     |
| 37169  | 0     | 0     | 0     | 0     |
| 37191  | 1     | 0     | 0     | 0     |
| 37197  | 1     | 0     | 0     | 1     |
| 37204  | 0     | 0     | 0     | 0     |
| 37213  | 0     | 1     | 1     | 0     |
| 37238  | 0     | 0     | 0     | 1     |
| 37242  | 1     | 0     | 1     | 1     |
| 37243  | 1     | 0     | 1     | 1     |
| 37275  | 1     | 0     | 0     | 0     |
| 37305  | 1     | 0     | 1     | 0     |
| 37357  | 0     | 1     | 0     | 1     |
| 37365  | 0     | 0     | 1     | 1     |
| 37370  |       |       |       |       |
| 37406  | 0     | 0     | 1     | 0     |
| 37410  | 0     | 0     | 0     | 0     |
| 37411  | 0     | 0     | 1     | 1     |
| 37427  | 1     | 0     | 1     | 1     |
| 37437  | 1     | 0     | 0     | 0     |
| 37440  | 0     | 0     | 0     | 0     |

| respid | Q43_1 | Q43_2 | Q43_3 | Q43_4 |
|--------|-------|-------|-------|-------|
| 37452  | 1     | 0     | 0     | 0     |
| 37465  | 1     | 0     | 0     | 0     |
| 37468  | 1     | 0     | 0     | 0     |
| 37469  | 0     | 0     | 0     | 0     |
| 37477  | 1     | 0     | 1     | 1     |
| 37509  | 0     | 0     | 0     | 0     |
| 37513  | 1     | 0     | 0     | 1     |
| 37534  | 0     | 0     | 1     | 0     |
| 37537  | 0     | 0     | 0     | 0     |
| 37560  | 0     | 0     | 1     | 1     |
| 37566  | 1     | 0     | 0     | 0     |
| 37572  | 0     | 0     | 0     | 0     |
| 37574  | 0     | 0     | 0     | 0     |
| 37575  | 1     | 0     | 0     | 0     |
| 37590  | 1     | 0     | 1     | 0     |
| 37593  | 0     | 0     | 0     | 0     |
| 37599  | 0     | 0     | 0     | 0     |
| 37641  | 0     | 0     | 0     | 0     |
| 37651  | 1     | 0     | 0     | 0     |
| 37670  | 0     | 0     | 0     | 0     |
| 37680  | 1     | 0     | 0     | 0     |
| 37690  | 0     | 0     | 0     | 1     |
| 37694  |       |       |       |       |
| 37705  | 0     | 0     | 0     | 0     |
| 37710  | 0     | 0     | 1     | 1     |
| 37719  | 1     | 0     | 0     | 1     |
| 37741  | 1     | 1     | 0     | 0     |
| 37752  | 0     | 0     | 0     | 0     |
| 37755  | 1     | 0     | 0     | 0     |
| 37757  | 1     | 0     | 0     | 0     |
| 37783  | 1     | 0     | 1     | 1     |
| 37793  | 0     | 0     | 0     | 1     |

| respid | Q43_1 | Q43_2 | Q43_3 | Q43_4 |
|--------|-------|-------|-------|-------|
| 37800  | 0     | 0     | 0     | 1     |
| 37801  | 0     | 0     | 0     | 0     |
| 37820  | 1     | 0     | 1     | 0     |
| 37826  | 0     | 0     | 1     | 0     |
| 37835  | 0     | 0     | 0     | 1     |
| 37839  | 0     | 0     | 1     | 0     |
| 37871  | 0     | 0     | 0     | 1     |
| 37876  | 0     | 0     | 1     | 1     |
| 37879  | 1     | 0     | 0     | 1     |
| 37894  | 0     | 0     | 0     | 0     |
| 37895  | 0     | 0     | 0     | 0     |
| 37901  | 1     | 0     | 1     | 0     |
| 37926  | 1     | 0     | 1     | 0     |
| 37937  | 0     | 0     | 0     | 1     |
| 37938  | 0     | 0     | 0     | 0     |
| 37959  | 1     | 0     | 0     | 0     |
| 37970  |       |       |       |       |
| 37972  | 0     | 0     | 0     | 0     |
| 37988  | 0     | 0     | 0     | 0     |
| 37989  | 1     | 0     | 1     | 1     |
| 38000  | 1     | 0     | 0     | 0     |
| 38028  | 0     | 0     | 1     | 0     |
| 38042  | 0     | 0     | 1     | 0     |
| 38052  | 0     | 0     | 0     | 1     |
| 38056  | 0     | 0     | 0     | 0     |
| 38106  | 1     | 0     | 0     | 1     |
| 38114  | 0     | 0     | 0     | 0     |
| 38134  | 0     | 0     | 0     | 0     |
| 38135  | 1     | 0     | 0     | 0     |
| 38139  | 0     | 0     | 1     | 0     |
| 38160  | 0     | 0     | 0     | 1     |
| 38164  | 0     | 0     | 1     | 0     |

| respid | Q43_1 | Q43_2 | Q43_3 | Q43_4 |
|--------|-------|-------|-------|-------|
| 38168  |       |       |       |       |
| 38173  | 0     | 1     | 1     | 0     |
| 38193  | 1     | 0     | 1     | 0     |
| 38204  | 0     | 0     | 0     | 0     |
| 38206  | 1     | 0     | 0     | 0     |
| 38233  | 1     | 0     | 0     | 1     |
| 38242  | 1     | 0     | 1     | 0     |
| 38245  | 0     | 0     | 1     | 1     |
| 38261  | 1     | 0     | 0     | 0     |
| 38288  | 0     | 0     | 0     | 0     |
| 38296  | 0     | 0     | 1     | 0     |
| 38299  | 0     | 0     | 1     | 0     |
| 38300  | 0     | 0     | 0     | 0     |
| 38303  | 0     | 0     | 0     | 1     |
| 38317  | 0     | 0     | 0     | 0     |
| 38328  | 0     | 0     | 0     | 1     |
| 38333  | 0     | 0     | 0     | 0     |
| 38336  | 0     | 0     | 0     | 0     |
| 38338  | 0     | 0     | 0     | 0     |
| 38342  | 0     | 0     | 0     | 0     |
| 38360  | 0     | 0     | 0     | 0     |
| 38362  | 1     | 0     | 0     | 1     |
| 38364  | 1     | 0     | 0     | 0     |
| 38402  | 1     | 0     | 0     | 0     |
| 38423  | 0     | 0     | 1     | 0     |
| 38424  | 1     | 0     | 0     | 0     |
| 38435  | 0     | 0     | 1     | 0     |
| 38450  | 0     | 0     | 0     | 0     |
| 38455  | 0     | 0     | 1     | 0     |
| 38467  | 0     | 0     | 0     | 1     |
| 38468  | 1     | 0     | 0     | 1     |
| 38472  | 0     | 0     | 0     | 0     |

| respid | Q43_1 | Q43_2 | Q43_3 | Q43_4 |
|--------|-------|-------|-------|-------|
| 38484  | 0     | 0     | 0     | 0     |
| 38498  | 1     | 0     | 1     | 0     |
| 38507  | 0     | 0     | 0     | 0     |
| 38511  | 0     | 0     | 0     | 0     |
| 38524  | 1     | 0     | 1     | 0     |
| 38526  | 0     | 0     | 0     | 0     |
| 38534  | 1     | 0     | 0     | 0     |
| 38536  | 0     | 0     | 0     | 1     |
| 38539  | 1     | 0     | 0     | 0     |
| 38547  | 0     | 0     | 0     | 0     |
| 38549  | 0     | 0     | 0     | 0     |
| 38575  | 0     | 0     | 1     | 0     |
| 38579  | 0     | 0     | 0     | 1     |
| 38585  | 0     | 0     | 0     | 0     |
| 38589  | 1     | 0     | 0     | 0     |
| 38595  | 0     | 0     | 0     | 0     |
| 38602  | 0     | 0     | 0     | 1     |
| 38603  | 0     | 0     | 0     | 0     |
| 38612  | 1     | 0     | 0     | 0     |
| 38621  | 0     | 0     | 1     | 0     |
| 38624  | 0     | 0     | 1     | 0     |
| 38636  |       |       |       |       |
| 38656  | 0     | 0     | 0     | 0     |
| 38668  | 0     | 0     | 0     | 0     |
| 38675  | 0     | 0     | 0     | 0     |
| 38676  | 0     | 0     | 0     | 1     |
| 38682  | 0     | 0     | 0     | 1     |
| 38689  | 0     | 0     | 0     | 0     |
| 38702  |       |       |       |       |
| 38704  | 0     | 0     | 0     | 1     |
| 38713  | 0     | 0     | 0     | 0     |
| 38718  | 0     | 0     | 1     | 0     |

| respid | Q43_1 | Q43_2 | Q43_3 | Q43_4 |
|--------|-------|-------|-------|-------|
| 38725  | 0     | 0     | 0     | 0     |
| 38730  | 1     | 0     | 1     | 1     |
| 38737  | 1     | 0     | 0     | 0     |
| 38738  | 1     | 0     | 1     | 0     |
| 38744  | 0     | 0     | 0     | 0     |
| 38746  | 0     | 0     | 0     | 0     |
| 38753  | 1     | 0     | 0     | 0     |
| 38756  | 0     | 0     | 0     | 1     |
| 38760  | 0     | 0     | 0     | 0     |
| 38762  | 0     | 0     | 1     | 1     |
| 38765  | 0     | 0     | 0     | 0     |
| 38769  | 0     | 0     | 0     | 0     |
| 38781  | 0     | 0     | 1     | 1     |
| 38786  | 0     | 0     | 0     | 0     |
| 38790  | 0     | 0     | 0     | 0     |
| 38793  | 1     | 0     | 0     | 0     |
| 38797  | 0     | 0     | 0     | 0     |
| 38802  | 0     | 0     | 0     | 0     |
| 38815  | 0     | 0     | 0     | 0     |
| 38826  | 1     | 0     | 1     | 0     |
| 38828  | 0     | 0     | 0     | 0     |
| 38829  | 1     | 0     | 0     | 0     |
| 38835  | 1     | 0     | 1     | 0     |
| 38842  | 0     | 0     | 1     | 0     |
| 38853  | 0     | 0     | 0     | 0     |
| 38855  | 0     | 0     | 0     | 1     |
| 38860  | 1     | 0     | 1     | 0     |
| 38869  | 1     | 0     | 1     | 0     |
| 38882  | 0     | 0     | 1     | 0     |
| 38897  | 0     | 0     | 0     | 0     |
| 38903  | 0     | 0     | 0     | 0     |
| 38910  | 1     | 0     | 1     | 0     |

| respid | Q43_1 | Q43_2 | Q43_3 | Q43_4 |
|--------|-------|-------|-------|-------|
| 38948  | 0     | 0     | 0     | 0     |
| 38949  | 0     | 0     | 0     | 1     |
| 38953  | 0     | 0     | 1     | 1     |
| 38989  | 1     | 0     | 0     | 1     |
| 38997  | 1     | 0     | 1     | 0     |
| 38999  | 0     | 0     | 0     | 0     |
| 39002  | 1     | 0     | 1     | 0     |
| 39003  | 0     | 0     | 1     | 1     |
| 39006  | 0     | 0     | 0     | 0     |
| 39014  |       |       |       |       |
| 39017  | 0     | 0     | 1     | 1     |
| 39018  | 1     | 0     | 0     | 0     |
| 39025  | 1     | 1     | 1     | 0     |
| 39031  | 1     | 0     | 1     | 1     |
| 39061  | 0     | 1     | 1     | 0     |
| 39131  | 0     | 0     | 0     | 0     |
| 39153  | 1     | 0     | 0     | 1     |
| 39194  | 1     | 0     | 0     | 0     |
| 39204  | 1     | 0     | 0     | 0     |
| 39208  | 0     | 0     | 0     | 0     |
| 39213  | 1     | 0     | 0     | 0     |
| 39231  | 1     | 0     | 0     | 0     |
| 39251  | 1     | 0     | 0     | 0     |
| 39257  | 1     | 0     | 0     | 0     |
| 39262  | 1     | 0     | 1     | 0     |
| 39269  | 1     | 0     | 1     | 1     |
| 39272  | 1     | 0     | 0     | 0     |
| 39280  | 1     | 0     | 1     | 0     |
| 39294  | 1     | 0     | 0     | 1     |
| 39297  | 0     | 0     | 1     | 0     |
| 39300  | 0     | 0     | 0     | 1     |
| 39307  | 1     | 0     | 0     | 0     |



| respid | Q43_1 | Q43_2 | Q43_3 | Q43_4 |
|--------|-------|-------|-------|-------|
| 39320  | 1     | 0     | 0     | 1     |
| 39333  | 0     | 0     | 0     | 0     |
| 39335  | 0     | 0     | 1     | 1     |
| 39339  | 1     | 0     | 0     | 0     |
| 39375  | 1     | 0     | 0     | 0     |
| 39377  | 0     | 0     | 0     | 0     |
| 39380  | 1     | 0     | 0     | 0     |
| 39425  | 0     | 0     | 0     | 0     |
| 39590  | 0     | 0     | 0     | 0     |
| 40529  | 0     | 0     | 0     | 0     |
| 40702  | 0     | 0     | 0     | 0     |
| 40788  | 0     | 0     | 0     | 0     |
| 40841  | 0     | 0     | 0     | 0     |
| 40965  | 0     | 0     | 0     | 0     |
| 41092  | 1     | 0     | 0     | 0     |
| 41534  |       |       |       |       |
| 41919  | 0     | 0     | 0     | 0     |
| 42110  | 1     | 0     | 0     | 0     |
| 42135  | 1     | 0     | 0     | 0     |
| 42142  | 0     | 0     | 0     | 0     |
| 42163  | 1     | 0     | 0     | 0     |
| 42164  | 1     | 0     | 1     | 1     |
| 42172  | 1     | 0     | 1     | 1     |
| 42177  | 0     | 0     | 0     | 0     |
| 42181  | 0     | 0     | 0     | 0     |
| 42193  | 1     | 0     | 0     | 1     |
| 42196  | 1     | 0     | 0     | 0     |
| 42202  | 0     | 0     | 0     | 0     |
| 42248  | 1     | 0     | 0     | 1     |
| 42283  | 0     | 0     | 0     | 0     |
| 42284  | 1     | 1     | 1     | 1     |
| 42323  |       |       |       |       |

| respid | Q43_1 | Q43_2 | Q43_3 | Q43_4 |
|--------|-------|-------|-------|-------|
| 42349  | 0     | 0     | 0     | 0     |
| 42351  |       |       |       |       |
| 42357  | 0     | 0     | 0     | 0     |
| 42366  |       |       |       |       |
| 42380  | 0     | 0     | 0     | 0     |
| 42414  | 1     | 0     | 1     | 1     |
| 42420  | 1     | 0     | 1     | 0     |
| 42454  |       |       |       |       |
| 42458  | 0     | 0     | 0     | 0     |
| 42461  | 0     | 0     | 0     | 0     |
| 42488  | 0     | 0     | 0     | 1     |
| 42511  | 0     | 0     | 0     | 0     |
| 42512  | 0     | 0     | 0     | 0     |
| 42530  | 1     | 0     | 0     | 1     |
| 42531  | 0     | 0     | 1     | 0     |
| 42533  | 0     | 0     | 0     | 0     |
| 42549  | 0     | 0     | 0     | 0     |
| 42550  | 0     | 0     | 0     | 1     |
| 42553  |       |       |       |       |
| 42562  | 1     | 0     | 1     | 0     |
| 42567  | 0     | 0     | 0     | 0     |
| 42589  | 0     | 0     | 0     | 0     |
| 42604  | 0     | 0     | 0     | 0     |
| 42618  | 0     | 0     | 0     | 0     |
| 42621  | 0     | 0     | 0     | 0     |
| 42627  | 0     | 0     | 0     | 0     |
| 42641  | 0     | 1     | 1     | 1     |
| 42655  | 1     | 0     | 0     | 0     |
| 42666  | 0     | 0     | 0     | 0     |
| 42667  | 0     | 0     | 0     | 0     |
| 42697  | 1     | 0     | 0     | 0     |
| 42703  | 0     | 0     | 0     | 0     |

| respid | Q43_1 | Q43_2 | Q43_3 | Q43_4 |
|--------|-------|-------|-------|-------|
| 42712  | 0     | 0     | 0     | 1     |
| 42731  | 1     | 0     | 1     | 0     |
| 42780  | 0     | 0     | 0     | 0     |
| 42785  | 0     | 0     | 0     | 0     |
| 42788  | 0     | 0     | 0     | 0     |
| 42802  | 0     | 0     | 0     | 1     |
| 42818  | 1     | 0     | 0     | 0     |
| 42821  | 0     | 0     | 0     | 0     |
| 42824  | 1     | 0     | 1     | 0     |
| 42831  | 0     | 0     | 0     | 1     |
| 42836  | 0     | 0     | 0     | 0     |
| 42864  | 1     | 0     | 1     | 1     |
| 42875  | 0     | 0     | 1     | 0     |
| 42891  | 0     | 0     | 0     | 0     |
| 42897  | 0     | 0     | 0     | 0     |
| 42900  | 0     | 0     | 0     | 1     |
| 42902  | 0     | 0     | 1     | 1     |
| 42921  | 0     | 0     | 0     | 0     |
| 42925  | 0     | 0     | 1     | 0     |
| 42944  |       |       |       |       |
| 42950  |       |       |       |       |
| 42963  | 0     | 0     | 0     | 0     |
| 42967  | 1     | 0     | 0     | 0     |
| 42985  | 1     | 0     | 0     | 0     |
| 42990  | 1     | 0     | 0     | 1     |
| 42996  | 0     | 0     | 0     | 0     |
| 43002  | 1     | 0     | 1     | 1     |
| 43004  | 0     | 0     | 0     | 0     |
| 43012  | 1     | 1     | 0     | 0     |
| 43027  | 1     | 0     | 1     | 0     |
| 43028  | 0     | 0     | 0     | 0     |
| 43029  | 1     | 0     | 0     | 0     |

| respid | Q43_1 | Q43_2 | Q43_3 | Q43_4 |
|--------|-------|-------|-------|-------|
| 43031  | 0     | 0     | 0     | 0     |
| 43042  | 0     | 0     | 0     | 0     |
| 43054  | 0     | 0     | 0     | 0     |
| 43058  | 0     | 0     | 0     | 0     |
| 43064  | 1     | 0     | 0     | 0     |
| 43069  | 0     | 0     | 0     | 0     |
| 43071  |       |       |       |       |
| 43072  | 1     | 0     | 0     | 0     |
| 43077  | 0     | 0     | 0     | 1     |
| 43078  | 0     | 0     | 0     | 1     |
| 43082  |       |       |       |       |
| 43092  | 0     | 0     | 0     | 0     |
| 43096  | 0     | 0     | 0     | 0     |
| 43109  |       |       |       |       |
| 43113  | 0     | 0     | 0     | 0     |
| 43123  | 0     | 0     | 0     | 0     |
| 43127  | 0     | 0     | 0     | 0     |
| 43128  | 0     | 0     | 0     | 0     |
| 43129  | 0     | 0     | 0     | 0     |
| 43133  | 0     | 0     | 1     | 0     |
| 43140  |       |       |       |       |
| 43143  | 0     | 0     | 0     | 1     |
| 43149  | 0     | 0     | 0     | 1     |
| 43150  | 0     | 0     | 0     | 1     |
| 43153  | 1     | 0     | 1     | 1     |
| 43170  | 1     | 0     | 0     | 0     |
| 43187  | 1     | 0     | 0     | 0     |
| 43188  | 0     | 0     | 0     | 0     |
| 43198  | 0     | 0     | 0     | 0     |
| 43208  | 0     | 0     | 0     | 0     |
| 43216  | 0     | 0     | 0     | 0     |
| 43222  | 0     | 0     | 1     | 0     |

| respid | Q43_1 | Q43_2 | Q43_3 | Q43_4 |
|--------|-------|-------|-------|-------|
| 43224  | 0     | 0     | 0     | 0     |
| 43230  | 0     | 0     | 1     | 0     |
| 43231  | 0     | 0     | 1     | 0     |
| 43265  | 0     | 0     | 1     | 0     |
| 43270  | 0     | 0     | 1     | 1     |
| 43283  | 0     | 0     | 1     | 0     |
| 43295  | 0     | 0     | 1     | 0     |
| 43297  | 0     | 0     | 0     | 0     |
| 43299  | 0     | 0     | 0     | 0     |
| 43307  | 1     | 0     | 0     | 0     |
| 43316  | 0     | 0     | 1     | 1     |
| 43318  | 0     | 0     | 1     | 0     |
| 43319  | 0     | 0     | 0     | 0     |
| 43324  | 0     | 0     | 1     | 0     |
| 43325  | 1     | 0     | 0     | 0     |
| 43327  | 0     | 0     | 0     | 0     |
| 43338  | 0     | 0     | 0     | 0     |
| 43342  | 0     | 0     | 0     | 0     |
| 43348  | 0     | 0     | 0     | 1     |
| 43395  | 0     | 0     | 1     | 1     |
| 43404  | 0     | 0     | 1     | 1     |
| 43406  | 0     | 0     | 0     | 0     |
| 43407  | 0     | 0     | 0     | 0     |
| 43411  | 0     | 0     | 0     | 0     |
| 43416  | 0     | 0     | 1     | 1     |
| 43428  | 0     | 0     | 0     | 1     |
| 43429  | 1     | 0     | 0     | 0     |
| 43432  | 0     | 0     | 0     | 0     |
| 43443  | 0     | 0     | 0     | 0     |
| 43455  |       |       |       |       |
| 43457  | 0     | 0     | 1     | 0     |
| 43458  | 0     | 0     | 0     | 0     |

| respid | Q43_1 | Q43_2 | Q43_3 | Q43_4 |
|--------|-------|-------|-------|-------|
| 43477  | 1     | 0     | 1     | 0     |
| 43520  | 1     | 0     | 0     | 0     |
| 43521  | 0     | 0     | 0     | 0     |
| 43550  | 0     | 0     | 0     | 0     |
| 43551  | 1     | 0     | 1     | 0     |
| 43554  | 1     | 0     | 0     | 1     |
| 43560  | 1     | 0     | 0     | 0     |
| 43569  | 1     | 0     | 0     | 0     |
| 43583  | 0     | 0     | 1     | 1     |
| 43590  | 1     | 0     | 0     | 0     |
| 43591  | 1     | 0     | 1     | 1     |
| 43595  |       |       |       |       |
| 43599  | 0     | 0     | 0     | 0     |
| 43606  | 0     | 0     | 0     | 0     |
| 43609  | 0     | 0     | 0     | 0     |
| 43629  | 0     | 0     | 0     | 0     |
| 43636  | 0     | 0     | 0     | 0     |
| 43661  | 0     | 0     | 0     | 0     |
| 43668  | 0     | 0     | 0     | 0     |
| 43672  |       |       |       |       |
| 43677  | 1     | 0     | 0     | 1     |
| 43683  | 0     | 0     | 0     | 0     |
| 43708  | 1     | 0     | 0     | 1     |
| 43713  | 0     | 0     | 0     | 0     |
| 43718  |       |       |       |       |
| 43725  | 0     | 0     | 0     | 0     |
| 43747  | 0     | 0     | 0     | 0     |
| 43755  | 0     | 0     | 0     | 0     |
| 43770  | 0     | 0     | 0     | 0     |
| 43775  | 1     | 0     | 0     | 1     |
| 43788  |       |       |       |       |
| 43790  | 0     | 0     | 1     | 1     |

| respid | Q43_1 | Q43_2 | Q43_3 | Q43_4 |
|--------|-------|-------|-------|-------|
| 43797  | 0     | 0     | 1     | 1     |
| 43798  | 0     | 1     | 1     | 1     |
| 43811  | 0     | 0     | 1     | 1     |
| 43819  | 0     | 1     | 1     | 1     |
| 43821  | 0     | 0     | 1     | 1     |
| 43822  | 0     | 0     | 0     | 0     |
| 43825  | 0     | 0     | 1     | 1     |
| 43826  | 1     | 0     | 0     | 0     |
| 43831  | 1     | 0     | 0     | 0     |
| 43836  | 0     | 0     | 1     | 1     |
| 43852  | 0     | 0     | 1     | 0     |
| 43857  | 0     | 0     | 0     | 0     |
| 43858  | 0     | 0     | 0     | 0     |
| 43859  | 0     | 0     | 0     | 1     |
| 43863  | 0     | 0     | 0     | 0     |
| 43868  | 0     | 0     | 0     | 1     |
| 43872  | 0     | 0     | 1     | 0     |
| 43874  | 0     | 0     | 0     | 1     |
| 43882  | 0     | 0     | 1     | 0     |
| 43886  |       |       |       |       |
| 43903  | 0     | 0     | 0     | 0     |
| 43929  | 0     | 0     | 0     | 0     |
| 43932  | 0     | 0     | 0     | 0     |
| 43936  | 0     | 0     | 0     | 0     |
| 43962  | 1     | 0     | 0     | 0     |
| 43964  | 0     | 0     | 0     | 0     |
| 43968  | 0     | 0     | 0     | 0     |
| 43979  | 1     | 0     | 0     | 1     |
| 44006  | 1     | 0     | 0     | 1     |
| 44009  | 0     | 0     | 1     | 0     |
| 44023  | 0     | 0     | 0     | 0     |
| 44035  | 0     | 0     | 1     | 0     |

| respid | Q43_1 | Q43_2 | Q43_3 | Q43_4 |
|--------|-------|-------|-------|-------|
| 44038  | 0     | 0     | 0     | 1     |
| 44039  | 0     | 0     | 1     | 1     |
| 44043  | 1     | 0     | 0     | 0     |
| 44048  | 0     | 0     | 1     | 1     |
| 44050  | 0     | 0     | 0     | 0     |
| 44051  | 0     | 0     | 0     | 1     |
| 44061  | 0     | 0     | 1     | 1     |
| 44063  | 0     | 0     | 1     | 0     |
| 44072  | 0     | 0     | 0     | 1     |
| 44075  | 0     | 0     | 1     | 0     |
| 44089  | 0     | 0     | 0     | 1     |
| 44090  | 1     | 0     | 1     | 1     |
| 44091  | 0     | 0     | 1     | 0     |
| 44092  | 0     | 0     | 0     | 0     |
| 44110  | 0     | 0     | 0     | 1     |
| 44112  | 0     | 0     | 1     | 1     |
| 44114  | 0     | 0     | 1     | 1     |
| 44143  | 0     | 0     | 0     | 0     |
| 44179  | 1     | 0     | 0     | 0     |
| 44234  | 0     | 0     | 0     | 0     |
| 44236  | 0     | 0     | 0     | 0     |
| 44239  | 0     | 0     | 1     | 1     |
| 44241  | 0     | 0     | 1     | 0     |
| 44253  |       |       |       |       |
| 44260  | 0     | 0     | 0     | 1     |
| 44261  | 0     | 0     | 0     | 1     |
| 44263  | 0     | 0     | 0     | 1     |
| 44264  | 0     | 0     | 0     | 0     |
| 44265  | 0     | 0     | 0     | 0     |
| 44267  | 0     | 0     | 0     | 1     |
| 44306  | 1     | 0     | 1     | 0     |
| 44309  | 0     | 0     | 1     | 0     |



| respid | Q43_1 | Q43_2 | Q43_3 | Q43_4 |
|--------|-------|-------|-------|-------|
| 44310  | 0     | 0     | 0     | 0     |
| 44361  | 1     | 0     | 1     | 0     |
| 44380  | 0     | 0     | 0     | 0     |
| 44386  | 0     | 0     | 0     | 0     |
| 44419  | 0     | 0     | 0     | 0     |
| 44426  | 0     | 0     | 0     | 0     |
| 44479  | 0     | 0     | 0     | 0     |
| 44484  | 0     | 0     | 0     | 0     |
| 44487  | 1     | 0     | 1     | 0     |
| 44509  | 0     | 0     | 0     | 0     |
| 44540  | 1     | 0     | 1     | 0     |
| 44551  | 0     | 0     | 0     | 0     |
| 44553  | 0     | 0     | 0     | 0     |
| 44650  | 0     | 0     | 0     | 0     |
| 44665  | 1     | 0     | 1     | 1     |
| 44779  | 0     | 0     | 0     | 0     |
| 44797  | 0     | 1     | 0     | 0     |
| 44807  | 0     | 0     | 0     | 0     |
| 44815  | 1     | 0     | 0     | 0     |
| 44836  | 0     | 0     | 0     | 0     |
| 44868  | 1     | 0     | 0     | 0     |
| 44927  | 0     | 0     | 0     | 0     |
| 44983  |       |       |       |       |
| 45040  | 0     | 0     | 0     | 0     |
| 45051  | 1     | 0     | 0     | 0     |
| 45067  | 0     | 0     | 1     | 0     |
| 45074  |       |       |       |       |
| 45115  | 0     | 0     | 0     | 1     |
| 45187  | 1     | 0     | 1     | 1     |
| 45221  | 1     | 0     | 1     | 0     |
| 45279  | 0     | 0     | 0     | 0     |
| 45308  | 1     | 0     | 0     | 0     |

| respid | Q43_1 | Q43_2 | Q43_3 | Q43_4 |
|--------|-------|-------|-------|-------|
| 45317  | 0     | 0     | 0     | 0     |
| 45379  | 0     | 0     | 0     | 0     |
| 45451  | 0     | 0     | 0     | 0     |
| 45472  | 1     | 0     | 1     | 0     |
| 45474  | 0     | 0     | 0     | 1     |
| 45544  | 1     | 0     | 0     | 0     |
| 45561  | 1     | 0     | 0     | 0     |
| 45596  | 0     | 0     | 0     | 0     |

| Instrum   |       | HC Seeking & Tx                     | HC Seeking & Tx                     | HC Seeking & Tx                     | HC Seeking & Tx                            |
|-----------|-------|-------------------------------------|-------------------------------------|-------------------------------------|--------------------------------------------|
| Symptom   |       | Taking these treatments/precautions | Taking these treatments/precautions | Taking these treatments/precautions | Taking these treatments/precautions        |
| Type of R |       |                                     |                                     |                                     |                                            |
| Descripti |       | Limiting intake of fluids           | Limiting intake of caffeine         | Limiting intake of alcohol          | Not drinking after a certain time in night |
| respid    | Q43_5 | Q43_6                               | Q43_7                               | Q43_8                               |                                            |
| 241       | 0     | 0                                   | 0                                   | 0                                   |                                            |
| 242       | 0     | 0                                   | 0                                   | 0                                   |                                            |
| 243       | 1     | 0                                   | 0                                   | 0                                   | 1                                          |
| 244       | 0     | 0                                   | 1                                   | 1                                   | 1                                          |
| 245       | 0     | 0                                   | 0                                   | 0                                   | 0                                          |
| 246       | 0     | 0                                   | 0                                   | 0                                   | 0                                          |
| 247       | 0     | 0                                   | 0                                   | 0                                   | 0                                          |
| 253       | 0     | 0                                   | 0                                   | 0                                   | 0                                          |
| 256       | 0     | 0                                   | 0                                   | 0                                   | 0                                          |
| 257       | 0     | 0                                   | 0                                   | 0                                   | 0                                          |
| 258       | 0     | 0                                   | 0                                   | 0                                   | 0                                          |
| 259       | 0     | 0                                   | 0                                   | 0                                   | 0                                          |
| 263       | 0     | 0                                   | 0                                   | 0                                   | 0                                          |
| 264       | 0     | 0                                   | 0                                   | 0                                   | 0                                          |
| 265       | 0     | 0                                   | 0                                   | 0                                   | 0                                          |
| 266       | 0     | 0                                   | 0                                   | 0                                   | 0                                          |
| 268       | 0     | 0                                   | 0                                   | 0                                   | 0                                          |
| 270       | 0     | 0                                   | 0                                   | 0                                   | 0                                          |
| 272       | 0     | 0                                   | 0                                   | 0                                   | 0                                          |
| 274       | 0     | 0                                   | 1                                   | 0                                   | 0                                          |

| respid | Q43_5 | Q43_6 | Q43_7 | Q43_8 |
|--------|-------|-------|-------|-------|
| 275    |       |       |       |       |
| 276    | 0     | 0     | 0     | 0     |
| 277    | 0     | 0     | 0     | 0     |
| 279    | 0     | 1     | 1     | 0     |
| 286    | 0     | 0     | 0     | 0     |
| 290    | 0     | 0     | 0     | 0     |
| 291    | 0     | 0     | 0     | 0     |
| 295    |       |       |       |       |
| 297    | 0     | 0     | 0     | 0     |
| 299    | 0     | 0     | 0     | 0     |
| 300    | 0     | 0     | 0     | 0     |
| 303    | 0     | 0     | 0     | 0     |
| 304    | 0     | 0     | 0     | 0     |
| 306    | 0     | 0     | 0     | 0     |
| 307    | 0     | 0     | 0     | 0     |
| 312    | 1     | 1     | 0     | 1     |
| 315    | 0     | 0     | 0     | 0     |
| 317    | 0     | 0     | 0     | 0     |
| 322    | 1     | 0     | 1     | 0     |
| 335    | 0     | 0     | 0     | 0     |
| 374    | 0     | 1     | 1     | 1     |
| 378    | 0     | 1     | 0     | 0     |
| 380    | 0     | 0     | 0     | 0     |
| 382    | 0     | 0     | 0     | 0     |
| 384    | 0     | 1     | 0     | 1     |
| 385    | 1     | 0     | 0     | 0     |
| 395    | 0     | 0     | 0     | 0     |
| 396    |       |       |       |       |
| 398    |       |       |       |       |
| 402    | 1     | 1     | 0     | 1     |
| 414    | 1     | 1     | 1     | 0     |
| 415    | 0     | 0     | 0     | 0     |

| respid | Q43_5 | Q43_6 | Q43_7 | Q43_8 |
|--------|-------|-------|-------|-------|
| 416    | 0     | 0     | 0     | 0     |
| 420    | 1     | 0     | 1     | 0     |
| 421    | 0     | 0     | 0     | 0     |
| 422    | 0     | 0     | 0     | 0     |
| 423    | 0     | 0     | 0     | 0     |
| 424    | 0     | 0     | 0     | 0     |
| 425    | 0     | 0     | 0     | 0     |
| 428    | 0     | 0     | 0     | 0     |
| 429    | 0     | 0     | 0     | 0     |
| 431    | 0     | 0     | 0     | 0     |
| 437    | 0     | 0     | 0     | 1     |
| 438    | 0     | 0     | 0     | 0     |
| 441    | 0     | 1     | 0     | 1     |
| 444    | 0     | 0     | 0     | 0     |
| 448    | 0     | 0     | 0     | 0     |
| 449    | 0     | 0     | 0     | 1     |
| 457    | 0     | 0     | 1     | 0     |
| 460    | 0     | 0     | 0     | 0     |
| 469    | 0     | 0     | 0     | 0     |
| 471    | 0     | 0     | 0     | 1     |
| 473    | 0     | 0     | 0     | 0     |
| 476    | 0     | 0     | 1     | 1     |
| 479    | 0     | 0     | 0     | 0     |
| 485    | 0     | 0     | 0     | 0     |
| 488    | 0     | 0     | 0     | 1     |
| 494    | 0     | 0     | 0     | 0     |
| 496    | 0     | 0     | 0     | 0     |
| 501    |       |       |       |       |
| 502    | 0     | 0     | 0     | 0     |
| 503    | 0     | 0     | 0     | 1     |
| 506    | 0     | 0     | 0     | 0     |
| 514    | 0     | 0     | 1     | 1     |

| respid | Q43_5 | Q43_6 | Q43_7 | Q43_8 |
|--------|-------|-------|-------|-------|
| 515    | 0     | 0     | 0     | 0     |
| 516    | 0     | 0     | 0     | 0     |
| 519    | 0     | 0     | 0     | 0     |
| 522    |       |       |       |       |
| 525    | 0     | 0     | 0     | 0     |
| 528    | 0     | 0     | 0     | 0     |
| 532    | 0     | 0     | 0     | 0     |
| 536    | 0     | 0     | 0     | 0     |
| 539    | 0     | 0     | 0     | 0     |
| 540    | 0     | 0     | 0     | 0     |
| 547    | 0     | 0     | 0     | 0     |
| 551    | 0     | 0     | 0     | 0     |
| 554    | 0     | 0     | 0     | 0     |
| 558    | 0     | 0     | 0     | 0     |
| 563    | 0     | 0     | 0     | 0     |
| 564    | 0     | 0     | 0     | 0     |
| 565    | 0     | 0     | 0     | 0     |
| 567    | 0     | 0     | 0     | 0     |
| 569    | 0     | 0     | 0     | 1     |
| 572    | 0     | 0     | 0     | 0     |
| 574    | 0     | 0     | 0     | 0     |
| 583    | 0     | 0     | 0     | 0     |
| 589    | 0     | 0     | 0     | 0     |
| 592    | 0     | 0     | 1     | 0     |
| 593    |       |       |       |       |
| 594    | 1     | 0     | 1     | 0     |
| 597    | 0     | 0     | 1     | 0     |
| 601    | 0     | 0     | 0     | 0     |
| 607    | 0     | 0     | 0     | 0     |
| 610    | 0     | 0     | 0     | 0     |
| 612    | 0     | 0     | 0     | 0     |
| 627    | 0     | 0     | 0     | 0     |

| respid | Q43_5 | Q43_6 | Q43_7 | Q43_8 |
|--------|-------|-------|-------|-------|
| 631    | 0     | 0     | 0     | 0     |
| 633    | 0     | 1     | 0     | 0     |
| 636    | 0     | 0     | 1     | 0     |
| 656    | 0     | 0     | 0     | 0     |
| 659    | 0     | 0     | 0     | 0     |
| 670    | 0     | 0     | 0     | 0     |
| 672    | 0     | 0     | 0     | 0     |
| 673    | 0     | 1     | 1     | 1     |
| 675    | 0     | 0     | 0     | 0     |
| 676    | 0     | 0     | 0     | 0     |
| 679    | 0     | 0     | 0     | 0     |
| 683    | 0     | 0     | 0     | 0     |
| 684    | 0     | 0     | 0     | 0     |
| 690    | 0     | 0     | 0     | 0     |
| 701    | 0     | 0     | 0     | 0     |
| 709    | 0     | 0     | 0     | 0     |
| 719    | 0     | 0     | 0     | 0     |
| 726    | 0     | 0     | 0     | 0     |
| 730    | 0     | 0     | 0     | 0     |
| 731    | 0     | 0     | 0     | 0     |
| 732    | 0     | 0     | 0     | 0     |
| 733    | 0     | 0     | 0     | 0     |
| 735    | 0     | 0     | 0     | 0     |
| 738    | 0     | 1     | 1     | 0     |
| 740    | 1     | 1     | 0     | 0     |
| 742    | 0     | 0     | 0     | 0     |
| 744    | 0     | 0     | 0     | 0     |
| 749    | 0     | 0     | 0     | 0     |
| 751    | 0     | 0     | 0     | 0     |
| 752    | 0     | 0     | 0     | 0     |
| 753    | 0     | 0     | 0     | 0     |
| 755    | 0     | 0     | 0     | 0     |

| respid | Q43_5 | Q43_6 | Q43_7 | Q43_8 |
|--------|-------|-------|-------|-------|
| 756    |       |       |       |       |
| 759    | 0     | 0     | 0     | 0     |
| 760    | 0     | 0     | 0     | 1     |
| 763    | 0     | 0     | 0     | 0     |
| 764    | 1     | 0     | 0     | 0     |
| 765    | 0     | 0     | 0     | 0     |
| 766    | 0     | 0     | 0     | 0     |
| 767    | 0     | 0     | 0     | 0     |
| 771    | 0     | 0     | 0     | 0     |
| 773    | 0     | 0     | 0     | 0     |
| 774    | 0     | 0     | 1     | 0     |
| 775    | 0     | 0     | 0     | 0     |
| 776    | 0     | 0     | 0     | 0     |
| 778    | 1     | 0     | 0     | 0     |
| 780    | 1     | 0     | 0     | 0     |
| 781    | 0     | 0     | 0     | 0     |
| 782    | 1     | 1     | 0     | 1     |
| 783    | 0     | 0     | 0     | 0     |
| 786    | 0     | 0     | 0     | 0     |
| 788    |       |       |       |       |
| 792    | 0     | 0     | 0     | 0     |
| 794    | 0     | 0     | 0     | 0     |
| 795    | 0     | 0     | 0     | 0     |
| 799    | 1     | 0     | 0     | 0     |
| 800    | 0     | 0     | 0     | 0     |
| 801    | 0     | 0     | 0     | 0     |
| 804    | 0     | 0     | 0     | 0     |
| 806    | 0     | 0     | 0     | 0     |
| 807    | 0     | 0     | 0     | 0     |
| 808    | 0     | 0     | 0     | 0     |
| 809    | 0     | 0     | 0     | 0     |
| 811    | 0     | 0     | 0     | 0     |



| respid | Q43_5 | Q43_6 | Q43_7 | Q43_8 |
|--------|-------|-------|-------|-------|
| 812    | 0     | 0     | 0     | 0     |
| 815    | 0     | 0     | 0     | 0     |
| 817    | 0     | 0     | 0     | 0     |
| 818    | 0     | 0     | 0     | 0     |
| 819    | 0     | 0     | 0     | 0     |
| 821    | 0     | 0     | 0     | 0     |
| 824    | 0     | 0     | 0     | 0     |
| 825    | 0     | 0     | 0     | 0     |
| 828    | 0     | 0     | 0     | 0     |
| 832    | 0     | 0     | 0     | 0     |
| 834    | 0     | 0     | 0     | 0     |
| 835    | 1     | 0     | 0     | 0     |
| 836    | 0     | 0     | 0     | 0     |
| 837    | 0     | 0     | 0     | 0     |
| 840    | 0     | 0     | 0     | 0     |
| 841    | 0     | 0     | 0     | 0     |
| 845    | 0     | 0     | 0     | 0     |
| 846    | 0     | 0     | 0     | 0     |
| 849    | 0     | 0     | 0     | 0     |
| 852    | 0     | 0     | 0     | 0     |
| 854    | 0     | 0     | 0     | 0     |
| 856    | 0     | 0     | 0     | 0     |
| 858    | 0     | 0     | 0     | 0     |
| 859    | 0     | 0     | 0     | 0     |
| 861    | 1     | 0     | 0     | 0     |
| 863    | 0     | 0     | 0     | 0     |
| 864    | 0     | 0     | 0     | 0     |
| 866    | 0     | 0     | 0     | 0     |
| 869    | 0     | 0     | 0     | 0     |
| 870    | 1     | 0     | 0     | 0     |
| 871    | 0     | 0     | 0     | 0     |
| 873    | 0     | 0     | 0     | 0     |

| respid | Q43_5 | Q43_6 | Q43_7 | Q43_8 |
|--------|-------|-------|-------|-------|
| 879    | 0     | 0     | 0     | 0     |
| 880    | 0     | 0     | 0     | 0     |
| 881    | 0     | 0     | 0     | 0     |
| 882    | 0     | 0     | 0     | 0     |
| 885    |       |       |       |       |
| 886    | 0     | 0     | 0     | 0     |
| 887    | 1     | 0     | 0     | 1     |
| 888    | 0     | 0     | 0     | 0     |
| 889    | 0     | 0     | 0     | 0     |
| 890    | 0     | 0     | 0     | 0     |
| 900    |       |       |       |       |
| 901    | 0     | 0     | 0     | 1     |
| 902    | 0     | 0     | 0     | 0     |
| 903    | 0     | 0     | 0     | 0     |
| 906    | 1     | 1     | 0     | 0     |
| 907    | 0     | 0     | 0     | 0     |
| 908    | 1     | 1     | 0     | 0     |
| 910    | 0     | 0     | 0     | 0     |
| 911    | 0     | 0     | 0     | 0     |
| 912    | 0     | 0     | 0     | 0     |
| 915    |       |       |       |       |
| 923    | 0     | 0     | 0     | 0     |
| 925    | 0     | 0     | 0     | 0     |
| 926    | 0     | 0     | 0     | 0     |
| 929    |       |       |       |       |
| 932    | 1     | 1     | 0     | 0     |
| 933    | 0     | 0     | 0     | 0     |
| 934    | 0     | 0     | 0     | 0     |
| 938    | 0     | 0     | 0     | 0     |
| 941    |       |       |       |       |
| 942    | 0     | 0     | 0     | 0     |
| 943    |       |       |       |       |

| respid | Q43_5 | Q43_6 | Q43_7 | Q43_8 |
|--------|-------|-------|-------|-------|
| 945    | 1     | 0     | 0     | 0     |
| 946    |       |       |       |       |
| 947    | 0     | 0     | 0     | 0     |
| 948    | 0     | 0     | 0     | 0     |
| 949    | 0     | 0     | 0     | 0     |
| 952    | 0     | 0     | 0     | 0     |
| 956    | 0     | 0     | 0     | 0     |
| 957    | 0     | 0     | 0     | 0     |
| 959    | 0     | 0     | 0     | 0     |
| 961    | 1     | 1     | 0     | 0     |
| 962    | 0     | 0     | 1     | 0     |
| 965    | 0     | 0     | 0     | 0     |
| 967    | 0     | 0     | 0     | 0     |
| 969    | 0     | 0     | 0     | 0     |
| 970    |       |       |       |       |
| 973    | 0     | 0     | 0     | 0     |
| 974    | 0     | 0     | 0     | 0     |
| 975    | 0     | 0     | 0     | 0     |
| 976    | 0     | 0     | 0     | 0     |
| 977    | 0     | 0     | 0     | 0     |
| 979    | 0     | 0     | 0     | 0     |
| 981    | 0     | 0     | 0     | 0     |
| 983    | 0     | 0     | 0     | 0     |
| 987    | 0     | 0     | 0     | 0     |
| 991    |       |       |       |       |
| 992    | 0     | 0     | 0     | 0     |
| 993    | 0     | 0     | 0     | 0     |
| 994    | 1     | 0     | 1     | 0     |
| 995    | 0     | 0     | 0     | 1     |
| 998    | 0     | 0     | 0     | 0     |
| 1000   | 1     | 0     | 0     | 0     |
| 1001   | 0     | 0     | 0     | 0     |

| respid | Q43_5 | Q43_6 | Q43_7 | Q43_8 |
|--------|-------|-------|-------|-------|
| 1002   |       |       |       |       |
| 1004   | 0     | 0     | 0     | 0     |
| 1005   | 1     | 0     | 0     | 1     |
| 1006   | 0     | 0     | 0     | 0     |
| 1007   | 0     | 0     | 0     | 0     |
| 1009   |       |       |       |       |
| 1013   | 0     | 0     | 1     | 0     |
| 1015   | 0     | 0     | 0     | 0     |
| 1020   | 0     | 0     | 0     | 0     |
| 1022   | 0     | 0     | 0     | 0     |
| 1024   | 0     | 0     | 0     | 0     |
| 1025   |       |       |       |       |
| 1027   | 0     | 0     | 0     | 0     |
| 1031   | 0     | 0     | 0     | 0     |
| 1037   | 0     | 0     | 0     | 0     |
| 1039   | 0     | 0     | 0     | 0     |
| 1040   | 0     | 0     | 0     | 0     |
| 1056   | 1     | 0     | 0     | 0     |
| 1057   | 0     | 0     | 0     | 0     |
| 1062   | 0     | 0     | 0     | 0     |
| 1069   | 0     | 0     | 0     | 0     |
| 1070   | 0     | 0     | 0     | 0     |
| 1072   | 0     | 0     | 0     | 0     |
| 1076   | 0     | 0     | 0     | 0     |
| 1077   | 0     | 0     | 0     | 0     |
| 1078   | 0     | 0     | 0     | 0     |
| 1080   |       |       |       |       |
| 1094   | 0     | 0     | 0     | 0     |
| 1098   | 0     | 0     | 0     | 0     |
| 1099   | 0     | 0     | 0     | 0     |
| 1102   | 0     | 0     | 0     | 0     |
| 1110   | 0     | 0     | 0     | 0     |

| respid | Q43_5 | Q43_6 | Q43_7 | Q43_8 |
|--------|-------|-------|-------|-------|
| 1117   | 0     | 0     | 0     | 0     |
| 1119   |       |       |       |       |
| 1126   | 0     | 0     | 0     | 0     |
| 1127   | 0     | 0     | 0     | 0     |
| 1130   | 0     | 0     | 0     | 0     |
| 1131   | 0     | 0     | 0     | 0     |
| 1135   | 1     | 0     | 1     | 1     |
| 1138   | 0     | 0     | 0     | 0     |
| 1139   |       |       |       |       |
| 1140   | 0     | 0     | 0     | 0     |
| 1142   |       |       |       |       |
| 1143   |       |       |       |       |
| 1145   | 0     | 0     | 0     | 0     |
| 1149   |       |       |       |       |
| 1152   | 0     | 0     | 0     | 0     |
| 1160   | 0     | 0     | 0     | 0     |
| 1164   |       |       |       |       |
| 1165   | 0     | 0     | 0     | 0     |
| 1169   | 1     | 1     | 0     | 0     |
| 1170   | 0     | 0     | 0     | 0     |
| 1179   | 0     | 0     | 0     | 0     |
| 1180   | 0     | 0     | 0     | 0     |
| 1183   | 0     | 0     | 0     | 0     |
| 1187   | 0     | 0     | 0     | 0     |
| 1188   | 0     | 0     | 0     | 0     |
| 1193   | 0     | 0     | 0     | 0     |
| 1194   | 0     | 0     | 0     | 0     |
| 1197   | 0     | 0     | 0     | 0     |
| 1202   |       |       |       |       |
| 1204   | 1     | 0     | 0     | 0     |
| 1211   | 0     | 0     | 1     | 0     |
| 1224   | 0     | 0     | 0     | 0     |

| respid | Q43_5 | Q43_6 | Q43_7 | Q43_8 |
|--------|-------|-------|-------|-------|
| 1225   | 0     | 0     | 0     | 0     |
| 1230   | 0     | 0     | 0     | 0     |
| 1232   | 0     | 1     | 0     | 0     |
| 1233   | 0     | 1     | 1     | 0     |
| 1234   | 1     | 0     | 0     | 0     |
| 1235   | 0     | 0     | 0     | 0     |
| 1236   | 1     | 0     | 0     | 0     |
| 1237   | 0     | 0     | 0     | 0     |
| 1238   | 0     | 0     | 0     | 0     |
| 1239   | 0     | 0     | 0     | 0     |
| 1241   | 1     | 0     | 0     | 0     |
| 1242   | 0     | 0     | 0     | 0     |
| 1244   | 1     | 1     | 0     | 0     |
| 1245   | 0     | 0     | 0     | 0     |
| 1247   | 0     | 0     | 0     | 0     |
| 1248   | 0     | 0     | 0     | 0     |
| 1249   | 0     | 0     | 0     | 0     |
| 1250   | 0     | 0     | 0     | 0     |
| 1251   | 0     | 0     | 0     | 0     |
| 1252   | 0     | 0     | 0     | 0     |
| 1253   | 0     | 0     | 0     | 0     |
| 1254   | 0     | 0     | 1     | 0     |
| 1258   | 0     | 0     | 0     | 0     |
| 1260   | 0     | 0     | 0     | 0     |
| 1261   | 0     | 0     | 0     | 0     |
| 1262   | 0     | 0     | 0     | 0     |
| 1263   | 1     | 1     | 0     | 0     |
| 1264   | 0     | 0     | 0     | 0     |
| 1265   | 0     | 0     | 0     | 0     |
| 1266   | 0     | 0     | 0     | 1     |
| 1270   | 0     | 0     | 0     | 0     |
| 1272   | 1     | 0     | 0     | 0     |

| respid | Q43_5 | Q43_6 | Q43_7 | Q43_8 |
|--------|-------|-------|-------|-------|
| 1273   | 0     | 0     | 0     | 0     |
| 1276   | 0     | 1     | 0     | 0     |
| 1277   | 0     | 0     | 0     | 0     |
| 1278   | 0     | 0     | 0     | 0     |
| 1280   | 0     | 0     | 0     | 0     |
| 1281   | 0     | 0     | 0     | 0     |
| 1282   | 0     | 0     | 0     | 0     |
| 1283   | 0     | 0     | 0     | 0     |
| 1288   | 0     | 0     | 0     | 0     |
| 1289   | 0     | 0     | 0     | 0     |
| 1290   | 0     | 0     | 0     | 0     |
| 1291   |       |       |       |       |
| 1293   | 0     | 0     | 0     | 0     |
| 1294   | 0     | 0     | 0     | 0     |
| 1295   | 0     | 0     | 0     | 0     |
| 1296   | 0     | 0     | 0     | 0     |
| 1297   | 0     | 0     | 0     | 0     |
| 1298   | 0     | 0     | 1     | 0     |
| 1300   | 0     | 0     | 0     | 0     |
| 1302   | 0     | 0     | 0     | 0     |
| 1303   | 1     | 0     | 0     | 0     |
| 1304   | 0     | 0     | 0     | 0     |
| 1305   | 0     | 0     | 0     | 0     |
| 1307   | 0     | 0     | 0     | 0     |
| 1312   | 0     | 0     | 0     | 0     |
| 1313   | 0     | 0     | 0     | 0     |
| 1314   | 0     | 0     | 0     | 0     |
| 1317   | 0     | 0     | 0     | 0     |
| 1318   | 0     | 0     | 0     | 0     |
| 1319   | 0     | 0     | 0     | 0     |
| 1321   | 0     | 0     | 0     | 0     |
| 1324   | 1     | 1     | 0     | 1     |

| respid | Q43_5 | Q43_6 | Q43_7 | Q43_8 |
|--------|-------|-------|-------|-------|
| 1325   | 0     | 0     | 0     | 0     |
| 1326   | 0     | 0     | 0     | 0     |
| 1327   | 0     | 0     | 0     | 0     |
| 1329   | 1     | 1     | 1     | 1     |
| 1330   | 0     | 0     | 0     | 0     |
| 1331   | 0     | 0     | 0     | 0     |
| 1335   | 0     | 0     | 0     | 0     |
| 1337   | 0     | 0     | 0     | 0     |
| 1341   | 0     | 0     | 0     | 0     |
| 1342   | 0     | 0     | 0     | 0     |
| 1344   | 0     | 0     | 0     | 0     |
| 1345   | 0     | 0     | 0     | 0     |
| 1346   | 0     | 0     | 0     | 0     |
| 1350   | 1     | 1     | 0     | 1     |
| 1352   | 0     | 0     | 0     | 0     |
| 1353   | 0     | 1     | 1     | 1     |
| 1354   | 0     | 0     | 0     | 0     |
| 1355   | 0     | 0     | 1     | 0     |
| 1357   | 0     | 0     | 0     | 0     |
| 1360   |       |       |       |       |
| 1362   | 0     | 0     | 0     | 0     |
| 1363   | 0     | 0     | 0     | 0     |
| 1367   | 0     | 0     | 0     | 0     |
| 1369   | 0     | 0     | 0     | 0     |
| 1371   |       |       |       |       |
| 1372   |       |       |       |       |
| 1375   |       |       |       |       |
| 1377   | 0     | 1     | 1     | 1     |
| 1379   | 0     | 0     | 0     | 0     |
| 1380   | 0     | 1     | 1     | 0     |
| 1382   | 0     | 0     | 0     | 0     |
| 1383   | 0     | 0     | 0     | 0     |



| respid | Q43_5 | Q43_6 | Q43_7 | Q43_8 |
|--------|-------|-------|-------|-------|
| 1384   | 0     | 0     | 0     | 0     |
| 1385   | 1     | 0     | 0     | 0     |
| 1387   | 0     | 0     | 0     | 0     |
| 1388   | 0     | 0     | 0     | 0     |
| 1389   | 0     | 0     | 0     | 0     |
| 1390   | 0     | 0     | 0     | 0     |
| 1395   | 0     | 0     | 0     | 0     |
| 1396   | 0     | 0     | 0     | 0     |
| 1397   | 0     | 0     | 0     | 0     |
| 1398   | 0     | 0     | 0     | 0     |
| 1399   | 0     | 0     | 0     | 0     |
| 1403   | 0     | 0     | 0     | 0     |
| 1405   | 0     | 0     | 0     | 0     |
| 1406   | 0     | 0     | 1     | 0     |
| 1407   | 0     | 0     | 0     | 0     |
| 1408   | 0     | 0     | 0     | 0     |
| 1409   | 0     | 0     | 0     | 0     |
| 1410   | 0     | 0     | 0     | 0     |
| 1411   | 0     | 0     | 0     | 0     |
| 1412   | 0     | 0     | 0     | 0     |
| 1413   | 0     | 0     | 0     | 0     |
| 1414   | 0     | 0     | 0     | 0     |
| 1415   | 0     | 0     | 0     | 0     |
| 1416   | 0     | 0     | 0     | 0     |
| 1417   | 0     | 0     | 0     | 0     |
| 1418   | 0     | 0     | 0     | 0     |
| 1419   | 0     | 0     | 0     | 0     |
| 1420   | 0     | 0     | 0     | 0     |
| 1421   | 0     | 0     | 0     | 0     |
| 1422   | 0     | 0     | 0     | 0     |
| 1423   | 0     | 0     | 0     | 0     |
| 1424   | 0     | 1     | 0     | 1     |

| respid | Q43_5 | Q43_6 | Q43_7 | Q43_8 |
|--------|-------|-------|-------|-------|
| 1429   | 0     | 0     | 0     | 0     |
| 1430   | 0     | 0     | 0     | 0     |
| 1431   | 0     | 0     | 0     | 0     |
| 1433   | 0     | 0     | 0     | 0     |
| 1435   |       |       |       |       |
| 1436   | 0     | 0     | 0     | 0     |
| 1438   |       |       |       |       |
| 1439   | 0     | 0     | 0     | 0     |
| 1441   | 0     | 0     | 0     | 0     |
| 1442   | 0     | 0     | 0     | 0     |
| 1443   |       |       |       |       |
| 1444   | 0     | 0     | 0     | 0     |
| 1445   | 0     | 0     | 0     | 0     |
| 1446   | 0     | 1     | 0     | 0     |
| 1447   | 0     | 0     | 0     | 0     |
| 1449   | 0     | 0     | 0     | 0     |
| 1450   | 0     | 0     | 0     | 0     |
| 1451   | 0     | 0     | 0     | 0     |
| 1452   |       |       |       |       |
| 1453   | 1     | 0     | 0     | 0     |
| 1454   | 0     | 0     | 0     | 0     |
| 1456   | 0     | 0     | 0     | 0     |
| 1457   | 0     | 1     | 1     | 0     |
| 1459   | 0     | 0     | 0     | 0     |
| 1460   | 0     | 0     | 0     | 0     |
| 1463   | 0     | 0     | 0     | 0     |
| 1465   | 1     | 0     | 0     | 0     |
| 1467   | 0     | 0     | 0     | 0     |
| 1470   | 0     | 0     | 0     | 0     |
| 1471   | 1     | 0     | 0     | 0     |
| 1472   | 0     | 0     | 0     | 0     |
| 1474   | 0     | 0     | 0     | 0     |

| respid | Q43_5 | Q43_6 | Q43_7 | Q43_8 |
|--------|-------|-------|-------|-------|
| 1475   | 1     | 0     | 0     | 0     |
| 1477   | 0     | 0     | 0     | 0     |
| 1478   | 0     | 1     | 0     | 0     |
| 1480   |       |       |       |       |
| 1481   | 0     | 0     | 0     | 0     |
| 1483   | 0     | 0     | 0     | 0     |
| 1484   | 0     | 0     | 0     | 0     |
| 1485   | 0     | 0     | 0     | 0     |
| 1486   | 0     | 0     | 0     | 0     |
| 1487   | 0     | 0     | 0     | 0     |
| 1488   | 0     | 0     | 0     | 0     |
| 1489   | 0     | 0     | 0     | 0     |
| 1490   | 1     | 0     | 1     | 0     |
| 1491   | 0     | 0     | 1     | 1     |
| 1492   | 0     | 0     | 0     | 0     |
| 1494   | 0     | 0     | 0     | 0     |
| 1495   | 0     | 0     | 0     | 0     |
| 1496   | 0     | 0     | 0     | 0     |
| 1498   | 0     | 0     | 0     | 0     |
| 1499   | 0     | 1     | 0     | 0     |
| 1500   | 0     | 0     | 0     | 0     |
| 1501   | 0     | 0     | 0     | 0     |
| 1503   |       |       |       |       |
| 1504   | 0     | 0     | 0     | 0     |
| 1508   | 0     | 0     | 0     | 0     |
| 1509   | 0     | 0     | 0     | 0     |
| 1511   | 1     | 1     | 0     | 0     |
| 1512   | 0     | 0     | 0     | 0     |
| 1513   | 0     | 0     | 0     | 0     |
| 1515   | 0     | 0     | 0     | 0     |
| 1517   | 0     | 0     | 0     | 0     |
| 1518   | 0     | 0     | 0     | 1     |

| respid | Q43_5 | Q43_6 | Q43_7 | Q43_8 |
|--------|-------|-------|-------|-------|
| 1519   | 0     | 1     | 0     | 0     |
| 1520   | 0     | 0     | 0     | 0     |
| 1521   | 0     | 0     | 1     | 0     |
| 1522   | 0     | 0     | 0     | 0     |
| 1523   | 0     | 0     | 0     | 0     |
| 1524   | 0     | 0     | 0     | 0     |
| 1525   | 0     | 0     | 0     | 0     |
| 1526   | 1     | 1     | 1     | 1     |
| 1527   | 0     | 0     | 0     | 0     |
| 1534   | 0     | 0     | 1     | 0     |
| 1535   | 0     | 0     | 0     | 0     |
| 1536   | 0     | 1     | 0     | 0     |
| 1538   | 0     | 0     | 0     | 0     |
| 1539   | 0     | 0     | 0     | 0     |
| 1540   | 0     | 0     | 0     | 0     |
| 1541   | 0     | 0     | 0     | 0     |
| 1542   | 0     | 0     | 0     | 0     |
| 1543   | 1     | 0     | 0     | 0     |
| 1545   | 0     | 0     | 0     | 0     |
| 1546   | 0     | 0     | 0     | 0     |
| 1548   | 0     | 0     | 1     | 1     |
| 1549   |       |       |       |       |
| 1551   | 0     | 0     | 0     | 0     |
| 1552   | 0     | 0     | 0     | 0     |
| 1556   | 0     | 0     | 0     | 0     |
| 1557   |       |       |       |       |
| 1558   | 0     | 0     | 0     | 0     |
| 1561   | 0     | 0     | 0     | 0     |
| 1562   | 0     | 0     | 0     | 0     |
| 1563   | 0     | 0     | 0     | 0     |
| 1564   | 1     | 1     | 1     | 1     |
| 1565   |       |       |       |       |

| respid | Q43_5 | Q43_6 | Q43_7 | Q43_8 |
|--------|-------|-------|-------|-------|
| 1566   | 0     | 0     | 0     | 0     |
| 1567   | 0     | 1     | 1     | 1     |
| 1569   |       |       |       |       |
| 1570   | 0     | 0     | 0     | 0     |
| 1574   | 0     | 0     | 0     | 0     |
| 1575   | 0     | 0     | 0     | 0     |
| 1576   | 0     | 0     | 0     | 0     |
| 1577   | 0     | 0     | 0     | 0     |
| 1581   | 0     | 0     | 0     | 0     |
| 1583   | 0     | 0     | 0     | 0     |
| 1585   | 0     | 0     | 0     | 0     |
| 1586   | 0     | 0     | 0     | 0     |
| 1588   | 0     | 0     | 0     | 0     |
| 1590   | 0     | 0     | 0     | 0     |
| 1592   | 0     | 0     | 0     | 0     |
| 1594   | 0     | 0     | 0     | 0     |
| 1598   | 1     | 0     | 0     | 0     |
| 1599   | 0     | 0     | 0     | 0     |
| 1600   | 0     | 0     | 0     | 1     |
| 1602   | 0     | 0     | 0     | 0     |
| 1603   | 0     | 0     | 0     | 0     |
| 1604   | 0     | 0     | 0     | 0     |
| 1605   | 0     | 0     | 0     | 0     |
| 1606   | 0     | 0     | 0     | 0     |
| 1610   | 0     | 0     | 0     | 0     |
| 1611   | 0     | 0     | 0     | 0     |
| 1612   | 0     | 0     | 0     | 0     |
| 1613   | 1     | 0     | 0     | 1     |
| 1615   | 0     | 0     | 0     | 0     |
| 1616   | 0     | 0     | 0     | 0     |
| 1617   | 0     | 0     | 0     | 0     |
| 1618   | 0     | 0     | 0     | 0     |

| respid | Q43_5 | Q43_6 | Q43_7 | Q43_8 |
|--------|-------|-------|-------|-------|
| 1620   | 0     | 0     | 0     | 0     |
| 1621   | 0     | 0     | 0     | 0     |
| 1622   |       |       |       |       |
| 1623   | 0     | 0     | 0     | 0     |
| 1624   | 0     | 0     | 0     | 0     |
| 1625   | 0     | 0     | 0     | 0     |
| 1626   |       |       |       |       |
| 1627   | 0     | 0     | 0     | 0     |
| 1629   | 0     | 0     | 0     | 0     |
| 1630   | 0     | 0     | 0     | 0     |
| 1631   | 0     | 0     | 0     | 0     |
| 1634   | 1     | 0     | 0     | 0     |
| 1635   | 0     | 0     | 0     | 0     |
| 1636   |       |       |       |       |
| 1637   | 0     | 0     | 0     | 0     |
| 1640   | 0     | 0     | 0     | 0     |
| 1642   | 0     | 0     | 0     | 0     |
| 1643   | 0     | 0     | 0     | 0     |
| 1644   | 0     | 0     | 0     | 0     |
| 1645   | 0     | 1     | 0     | 0     |
| 1646   | 0     | 0     | 0     | 0     |
| 1647   | 0     | 0     | 0     | 0     |
| 1650   | 0     | 0     | 0     | 0     |
| 1654   | 1     | 0     | 0     | 0     |
| 1656   | 0     | 0     | 0     | 0     |
| 1657   | 0     | 0     | 0     | 0     |
| 1659   | 0     | 1     | 1     | 1     |
| 1662   | 1     | 1     | 0     | 0     |
| 1663   | 0     | 0     | 0     | 0     |
| 1664   | 0     | 0     | 0     | 0     |
| 1665   | 0     | 0     | 0     | 0     |
| 1667   | 0     | 0     | 0     | 0     |

| respid | Q43_5 | Q43_6 | Q43_7 | Q43_8 |
|--------|-------|-------|-------|-------|
| 1668   | 0     | 0     | 0     | 0     |
| 1670   | 0     | 0     | 0     | 0     |
| 1671   | 0     | 0     | 0     | 0     |
| 1673   | 0     | 0     | 0     | 0     |
| 1674   | 0     | 0     | 0     | 0     |
| 1676   | 0     | 0     | 0     | 0     |
| 1677   | 0     | 0     | 0     | 0     |
| 1678   | 0     | 0     | 0     | 0     |
| 1680   | 0     | 0     | 0     | 0     |
| 1681   | 0     | 0     | 0     | 0     |
| 1683   | 0     | 0     | 0     | 0     |
| 1685   | 0     | 0     | 0     | 0     |
| 1686   | 0     | 0     | 0     | 0     |
| 1690   | 0     | 0     | 0     | 0     |
| 1691   | 0     | 0     | 0     | 0     |
| 1692   | 0     | 0     | 0     | 0     |
| 1693   | 0     | 0     | 0     | 0     |
| 1695   | 0     | 0     | 0     | 0     |
| 1696   | 0     | 0     | 0     | 0     |
| 1698   | 0     | 0     | 0     | 0     |
| 1699   | 0     | 0     | 0     | 0     |
| 1701   | 1     | 1     | 1     | 0     |
| 1702   | 0     | 0     | 0     | 0     |
| 1703   |       |       |       |       |
| 1705   | 0     | 0     | 0     | 0     |
| 1706   | 0     | 0     | 0     | 0     |
| 1708   |       |       |       |       |
| 1711   | 0     | 0     | 0     | 0     |
| 1712   | 1     | 0     | 0     | 0     |
| 1713   | 0     | 0     | 0     | 0     |
| 1715   | 0     | 0     | 0     | 0     |
| 1717   | 0     | 0     | 0     | 0     |

| respid | Q43_5 | Q43_6 | Q43_7 | Q43_8 |
|--------|-------|-------|-------|-------|
| 1718   | 0     | 0     | 0     | 0     |
| 1719   | 0     | 0     | 0     | 0     |
| 1721   | 0     | 0     | 0     | 0     |
| 1722   | 0     | 0     | 0     | 0     |
| 1724   | 0     | 0     | 0     | 0     |
| 1725   | 0     | 0     | 0     | 0     |
| 1726   | 1     | 0     | 0     | 0     |
| 1727   | 0     | 0     | 0     | 0     |
| 1728   | 0     | 0     | 0     | 0     |
| 1731   | 1     | 0     | 0     | 0     |
| 1733   | 1     | 0     | 0     | 1     |
| 1734   | 0     | 0     | 0     | 0     |
| 1735   |       |       |       |       |
| 1736   | 0     | 0     | 0     | 0     |
| 1737   | 0     | 0     | 0     | 0     |
| 1738   | 0     | 0     | 0     | 0     |
| 1743   | 0     | 0     | 0     | 0     |
| 1755   | 1     | 1     | 1     | 1     |
| 1756   | 0     | 0     | 0     | 0     |
| 1757   | 0     | 0     | 0     | 0     |
| 1758   | 1     | 0     | 0     | 1     |
| 1759   | 0     | 0     | 0     | 0     |
| 1761   | 1     | 0     | 0     | 0     |
| 1762   | 1     | 0     | 0     | 0     |
| 1764   |       |       |       |       |
| 1767   | 1     | 1     | 1     | 1     |
| 1768   | 0     | 0     | 0     | 0     |
| 1769   | 0     | 0     | 0     | 0     |
| 1770   | 0     | 0     | 0     | 0     |
| 1771   | 1     | 0     | 0     | 0     |
| 1776   | 0     | 0     | 0     | 0     |
| 1777   | 0     | 0     | 0     | 0     |



| respid | Q43_5 | Q43_6 | Q43_7 | Q43_8 |
|--------|-------|-------|-------|-------|
| 1778   | 0     | 0     | 0     | 0     |
| 1779   | 0     | 0     | 0     | 0     |
| 1780   | 0     | 0     | 0     | 0     |
| 1781   |       |       |       |       |
| 1783   | 0     | 0     | 0     | 0     |
| 1784   | 0     | 1     | 1     | 1     |
| 1785   | 0     | 0     | 0     | 0     |
| 1788   | 1     | 0     | 0     | 0     |
| 1792   | 0     | 0     | 0     | 0     |
| 1794   | 0     | 1     | 1     | 1     |
| 1798   | 0     | 0     | 0     | 1     |
| 1799   | 0     | 0     | 0     | 0     |
| 1800   | 0     | 0     | 0     | 0     |
| 1804   | 0     | 0     | 0     | 0     |
| 1806   | 0     | 0     | 0     | 0     |
| 1807   | 0     | 0     | 0     | 0     |
| 1808   | 0     | 0     | 0     | 0     |
| 1809   | 0     | 0     | 0     | 0     |
| 1811   | 1     | 0     | 0     | 0     |
| 1812   | 0     | 0     | 0     | 0     |
| 1813   | 0     | 0     | 0     | 0     |
| 1814   | 1     | 0     | 0     | 0     |
| 1815   | 1     | 0     | 0     | 0     |
| 1817   | 0     | 0     | 0     | 0     |
| 1820   | 0     | 0     | 0     | 0     |
| 1821   | 0     | 0     | 0     | 0     |
| 1822   | 0     | 0     | 0     | 1     |
| 1823   | 0     | 0     | 0     | 0     |
| 1824   | 0     | 0     | 0     | 0     |
| 1826   |       |       |       |       |
| 1828   | 0     | 0     | 0     | 0     |
| 1829   | 0     | 0     | 0     | 0     |

| respid | Q43_5 | Q43_6 | Q43_7 | Q43_8 |
|--------|-------|-------|-------|-------|
| 1830   | 0     | 0     | 0     | 0     |
| 1831   | 0     | 0     | 0     | 0     |
| 1832   | 0     | 0     | 0     | 0     |
| 1836   | 0     | 0     | 0     | 0     |
| 1838   | 1     | 0     | 1     | 0     |
| 1839   | 1     | 0     | 1     | 1     |
| 1840   | 0     | 0     | 0     | 0     |
| 1841   | 0     | 0     | 0     | 0     |
| 1842   | 0     | 1     | 0     | 1     |
| 1843   | 0     | 1     | 1     | 0     |
| 1844   | 1     | 1     | 0     | 0     |
| 1845   | 0     | 0     | 0     | 0     |
| 1849   | 0     | 0     | 0     | 0     |
| 1850   | 1     | 0     | 0     | 0     |
| 1851   | 0     | 0     | 0     | 0     |
| 1852   |       |       |       |       |
| 1857   | 0     | 0     | 0     | 0     |
| 1858   | 0     | 0     | 0     | 0     |
| 1861   | 0     | 0     | 0     | 0     |
| 1862   | 0     | 0     | 0     | 0     |
| 1863   | 0     | 0     | 0     | 0     |
| 1864   | 0     | 0     | 0     | 0     |
| 1865   |       |       |       |       |
| 1867   | 0     | 0     | 0     | 0     |
| 1868   | 0     | 0     | 0     | 0     |
| 1869   | 0     | 1     | 1     | 0     |
| 1870   | 0     | 0     | 0     | 0     |
| 1871   | 0     | 0     | 0     | 0     |
| 1872   | 0     | 0     | 0     | 0     |
| 1873   | 0     | 0     | 0     | 0     |
| 1876   |       |       |       |       |
| 1877   |       |       |       |       |

| respid | Q43_5 | Q43_6 | Q43_7 | Q43_8 |
|--------|-------|-------|-------|-------|
| 1878   | 0     | 0     | 0     | 0     |
| 1879   | 0     | 0     | 0     | 0     |
| 1880   | 0     | 0     | 0     | 0     |
| 1881   | 0     | 0     | 0     | 0     |
| 1883   | 0     | 0     | 0     | 0     |
| 1886   | 0     | 0     | 0     | 0     |
| 1888   | 1     | 0     | 0     | 0     |
| 1889   | 1     | 0     | 0     | 1     |
| 1890   | 0     | 0     | 0     | 0     |
| 1891   | 0     | 0     | 0     | 0     |
| 1893   | 0     | 0     | 0     | 0     |
| 1894   | 0     | 0     | 0     | 0     |
| 1895   | 1     | 1     | 1     | 1     |
| 1896   | 0     | 0     | 0     | 0     |
| 1897   | 0     | 0     | 0     | 0     |
| 1898   | 0     | 0     | 0     | 0     |
| 1899   | 0     | 0     | 0     | 0     |
| 1900   |       |       |       |       |
| 1903   | 0     | 0     | 0     | 0     |
| 1906   | 0     | 0     | 0     | 0     |
| 1907   | 0     | 0     | 0     | 0     |
| 1908   | 1     | 0     | 0     | 0     |
| 1909   | 1     | 0     | 0     | 0     |
| 1910   | 0     | 0     | 0     | 0     |
| 1911   | 0     | 0     | 0     | 0     |
| 1912   |       |       |       |       |
| 1917   | 0     | 0     | 0     | 0     |
| 1918   | 0     | 0     | 0     | 0     |
| 1919   | 0     | 0     | 0     | 0     |
| 1922   |       |       |       |       |
| 1925   |       |       |       |       |
| 1926   | 0     | 0     | 0     | 0     |

| respid | Q43_5 | Q43_6 | Q43_7 | Q43_8 |
|--------|-------|-------|-------|-------|
| 1927   | 0     | 0     | 0     | 0     |
| 1928   |       |       |       |       |
| 1929   | 0     | 0     | 0     | 0     |
| 1934   | 0     | 0     | 0     | 0     |
| 1935   | 0     | 0     | 0     | 0     |
| 1936   | 0     | 0     | 0     | 0     |
| 1937   |       |       |       |       |
| 1938   |       |       |       |       |
| 1939   | 0     | 0     | 0     | 0     |
| 1940   | 0     | 0     | 0     | 0     |
| 1941   |       |       |       |       |
| 1948   |       |       |       |       |
| 1950   | 0     | 0     | 0     | 0     |
| 1955   | 1     | 1     | 0     | 1     |
| 1958   | 0     | 0     | 0     | 0     |
| 1960   | 0     | 0     | 0     | 0     |
| 1961   |       |       |       |       |
| 1962   | 0     | 0     | 0     | 0     |
| 1965   |       |       |       |       |
| 1966   | 0     | 0     | 0     | 0     |
| 1967   |       |       |       |       |
| 1968   | 1     | 0     | 0     | 0     |
| 1973   | 0     | 0     | 0     | 0     |
| 1974   | 1     | 0     | 0     | 0     |
| 1975   |       |       |       |       |
| 1977   | 0     | 0     | 0     | 1     |
| 1978   |       |       |       |       |
| 1979   | 0     | 1     | 0     | 0     |
| 1982   | 0     | 0     | 0     | 0     |
| 1983   | 0     | 0     | 0     | 0     |
| 1987   | 0     | 0     | 0     | 0     |
| 1988   | 0     | 0     | 0     | 0     |

| respid | Q43_5 | Q43_6 | Q43_7 | Q43_8 |
|--------|-------|-------|-------|-------|
| 1991   | 0     | 0     | 0     | 0     |
| 1992   | 0     | 0     | 0     | 0     |
| 1993   | 0     | 0     | 0     | 0     |
| 1994   | 0     | 0     | 0     | 0     |
| 1995   | 0     | 0     | 0     | 0     |
| 1996   | 0     | 0     | 0     | 0     |
| 1997   | 0     | 0     | 0     | 0     |
| 1998   | 0     | 0     | 0     | 0     |
| 1999   | 1     | 1     | 1     | 1     |
| 2000   | 0     | 1     | 1     | 0     |
| 2001   | 0     | 0     | 0     | 0     |
| 2002   | 0     | 0     | 0     | 0     |
| 2003   |       |       |       |       |
| 2004   | 0     | 0     | 0     | 0     |
| 2005   | 0     | 0     | 0     | 0     |
| 2007   | 1     | 0     | 0     | 0     |
| 2009   | 0     | 0     | 0     | 0     |
| 2010   |       |       |       |       |
| 2011   | 0     | 0     | 0     | 0     |
| 2013   | 0     | 0     | 0     | 0     |
| 2014   | 0     | 0     | 0     | 0     |
| 2017   | 1     | 0     | 0     | 1     |
| 2020   | 0     | 0     | 0     | 0     |
| 2023   | 1     | 0     | 0     | 0     |
| 2024   | 0     | 0     | 0     | 0     |
| 2029   | 0     | 0     | 0     | 0     |
| 2030   |       |       |       |       |
| 2031   | 0     | 0     | 0     | 0     |
| 2032   | 0     | 0     | 0     | 0     |
| 2033   |       |       |       |       |
| 2034   | 0     | 0     | 0     | 0     |
| 2036   | 1     | 0     | 1     | 1     |

| respid | Q43_5 | Q43_6 | Q43_7 | Q43_8 |
|--------|-------|-------|-------|-------|
| 2037   | 1     | 1     | 0     | 1     |
| 2038   | 0     | 0     | 0     | 0     |
| 2039   | 0     | 0     | 1     | 0     |
| 2040   |       |       |       |       |
| 2041   |       |       |       |       |
| 2042   | 0     | 0     | 0     | 0     |
| 2043   | 0     | 0     | 0     | 0     |
| 2051   | 0     | 0     | 0     | 0     |
| 2052   | 0     | 0     | 0     | 0     |
| 2053   | 0     | 0     | 0     | 0     |
| 2054   |       |       |       |       |
| 2055   | 0     | 0     | 0     | 0     |
| 2056   | 1     | 0     | 0     | 1     |
| 2057   | 1     | 0     | 0     | 0     |
| 2059   | 0     | 0     | 0     | 0     |
| 2063   | 0     | 0     | 0     | 0     |
| 2066   | 1     | 0     | 0     | 0     |
| 2068   | 0     | 0     | 0     | 0     |
| 2069   | 0     | 0     | 0     | 0     |
| 2070   |       |       |       |       |
| 2071   | 0     | 0     | 0     | 0     |
| 2073   |       |       |       |       |
| 2077   | 0     | 0     | 0     | 0     |
| 2079   |       |       |       |       |
| 2080   | 0     | 0     | 0     | 0     |
| 2081   | 0     | 0     | 0     | 1     |
| 2084   |       |       |       |       |
| 2085   | 0     | 0     | 0     | 0     |
| 2087   | 0     | 0     | 0     | 0     |
| 2089   | 0     | 0     | 0     | 0     |
| 2093   | 0     | 0     | 0     | 0     |
| 2094   | 0     | 0     | 0     | 0     |

| respid | Q43_5 | Q43_6 | Q43_7 | Q43_8 |
|--------|-------|-------|-------|-------|
| 2095   | 0     | 0     | 0     | 0     |
| 2097   | 0     | 0     | 0     | 0     |
| 2099   | 0     | 0     | 0     | 0     |
| 2100   | 0     | 0     | 0     | 0     |
| 2101   | 0     | 0     | 0     | 0     |
| 2103   | 0     | 0     | 0     | 0     |
| 2104   | 0     | 0     | 0     | 0     |
| 2106   | 0     | 0     | 0     | 0     |
| 2111   | 0     | 0     | 0     | 0     |
| 2113   | 0     | 0     | 0     | 0     |
| 2115   |       |       |       |       |
| 2119   | 0     | 0     | 0     | 0     |
| 2120   |       |       |       |       |
| 2123   |       |       |       |       |
| 2124   | 1     | 0     | 1     | 0     |
| 2130   |       |       |       |       |
| 2131   | 1     | 1     | 0     | 1     |
| 2133   | 0     | 0     | 0     | 0     |
| 2139   | 0     | 0     | 0     | 0     |
| 2141   |       |       |       |       |
| 2143   | 1     | 0     | 1     | 0     |
| 2144   | 0     | 0     | 0     | 0     |
| 2147   |       |       |       |       |
| 2151   | 0     | 0     | 0     | 0     |
| 2153   | 0     | 0     | 0     | 0     |
| 2154   | 0     | 0     | 0     | 0     |
| 2155   | 0     | 1     | 0     | 0     |
| 2159   | 0     | 0     | 0     | 0     |
| 2160   | 1     | 0     | 0     | 0     |
| 2161   | 0     | 0     | 0     | 0     |
| 2163   | 0     | 0     | 0     | 0     |
| 2164   | 0     | 0     | 0     | 0     |

| respid | Q43_5 | Q43_6 | Q43_7 | Q43_8 |
|--------|-------|-------|-------|-------|
| 2168   | 0     | 0     | 0     | 0     |
| 2169   | 0     | 0     | 0     | 0     |
| 2170   | 0     | 0     | 0     | 0     |
| 2171   | 0     | 0     | 0     | 0     |
| 2172   | 0     | 0     | 0     | 0     |
| 2173   | 0     | 0     | 0     | 0     |
| 2174   | 0     | 0     | 0     | 0     |
| 2175   | 0     | 0     | 1     | 0     |
| 2176   | 1     | 0     | 0     | 0     |
| 2177   | 1     | 1     | 1     | 1     |
| 2179   | 0     | 1     | 0     | 0     |
| 2181   | 0     | 0     | 0     | 0     |
| 2182   | 0     | 0     | 0     | 0     |
| 2183   | 0     | 0     | 1     | 1     |
| 2184   | 0     | 0     | 0     | 0     |
| 2185   |       |       |       |       |
| 2186   | 0     | 0     | 0     | 0     |
| 2187   | 0     | 0     | 0     | 0     |
| 2188   | 0     | 0     | 0     | 0     |
| 2189   |       |       |       |       |
| 2190   | 0     | 0     | 0     | 0     |
| 2193   | 0     | 0     | 0     | 0     |
| 2195   | 0     | 0     | 0     | 0     |
| 2198   | 0     | 0     | 0     | 0     |
| 2200   | 0     | 0     | 0     | 0     |
| 2205   | 0     | 0     | 0     | 0     |
| 2208   |       |       |       |       |
| 2209   | 0     | 0     | 0     | 0     |
| 2210   | 0     | 0     | 0     | 0     |
| 2211   | 0     | 0     | 0     | 0     |
| 2213   | 0     | 0     | 0     | 0     |
| 2214   | 0     | 0     | 0     | 1     |



| respid | Q43_5 | Q43_6 | Q43_7 | Q43_8 |
|--------|-------|-------|-------|-------|
| 2216   | 0     | 0     | 0     | 0     |
| 2220   | 0     | 0     | 0     | 0     |
| 2225   | 0     | 0     | 0     | 0     |
| 2227   | 0     | 0     | 0     | 0     |
| 2228   | 0     | 0     | 1     | 0     |
| 2229   | 0     | 0     | 0     | 0     |
| 2230   |       |       |       |       |
| 2236   |       |       |       |       |
| 2238   | 0     | 1     | 1     | 0     |
| 2239   | 0     | 0     | 1     | 1     |
| 2240   | 0     | 0     | 0     | 0     |
| 2241   | 1     | 0     | 0     | 0     |
| 2243   |       |       |       |       |
| 2245   | 0     | 0     | 0     | 0     |
| 2247   | 0     | 0     | 0     | 1     |
| 2248   | 0     | 0     | 0     | 0     |
| 2249   | 0     | 0     | 0     | 0     |
| 2254   | 0     | 0     | 0     | 1     |
| 2256   | 1     | 0     | 0     | 0     |
| 2259   | 0     | 0     | 0     | 0     |
| 2261   | 0     | 0     | 0     | 0     |
| 2262   | 0     | 0     | 0     | 0     |
| 2263   | 1     | 0     | 1     | 1     |
| 2264   | 0     | 0     | 0     | 0     |
| 2265   | 0     | 0     | 0     | 0     |
| 2270   | 0     | 0     | 0     | 0     |
| 2271   | 0     | 0     | 0     | 0     |
| 2272   | 0     | 0     | 0     | 0     |
| 2273   | 0     | 0     | 0     | 0     |
| 2274   | 0     | 0     | 0     | 0     |
| 2276   | 0     | 1     | 0     | 0     |
| 2277   | 0     | 0     | 0     | 0     |

| respid | Q43_5 | Q43_6 | Q43_7 | Q43_8 |
|--------|-------|-------|-------|-------|
| 2281   | 0     | 0     | 0     | 0     |
| 2288   | 0     | 0     | 0     | 0     |
| 2290   | 0     | 0     | 0     | 0     |
| 2294   | 0     | 0     | 0     | 0     |
| 2295   | 1     | 0     | 0     | 0     |
| 2296   | 0     | 0     | 0     | 0     |
| 2297   |       |       |       |       |
| 2298   | 0     | 0     | 0     | 0     |
| 2301   | 0     | 0     | 0     | 0     |
| 2302   | 1     | 0     | 0     | 0     |
| 2303   |       |       |       |       |
| 2305   | 0     | 0     | 0     | 0     |
| 2309   | 0     | 0     | 0     | 0     |
| 2310   | 0     | 0     | 0     | 0     |
| 2311   | 1     | 1     | 0     | 1     |
| 2313   | 0     | 0     | 0     | 0     |
| 2316   |       |       |       |       |
| 2317   | 0     | 0     | 0     | 0     |
| 2318   | 0     | 0     | 0     | 0     |
| 2319   | 0     | 0     | 0     | 0     |
| 2321   | 0     | 0     | 0     | 0     |
| 2324   | 0     | 0     | 0     | 0     |
| 2328   | 0     | 0     | 0     | 0     |
| 2329   |       |       |       |       |
| 2330   | 0     | 0     | 0     | 0     |
| 2333   | 0     | 0     | 0     | 0     |
| 2334   | 0     | 0     | 0     | 0     |
| 2338   | 0     | 0     | 0     | 0     |
| 2341   | 1     | 0     | 0     | 0     |
| 2342   | 0     | 0     | 0     | 0     |
| 2343   | 1     | 0     | 0     | 0     |
| 2346   | 0     | 0     | 0     | 0     |

| respid | Q43_5 | Q43_6 | Q43_7 | Q43_8 |
|--------|-------|-------|-------|-------|
| 2347   | 0     | 0     | 1     | 0     |
| 2348   | 0     | 0     | 0     | 0     |
| 2349   | 1     | 1     | 0     | 1     |
| 2350   | 0     | 0     | 0     | 0     |
| 2351   | 0     | 0     | 0     | 0     |
| 2352   | 0     | 0     | 0     | 0     |
| 2359   | 0     | 0     | 0     | 0     |
| 2362   |       |       |       |       |
| 2363   | 1     | 0     | 0     | 0     |
| 2365   | 0     | 0     | 0     | 0     |
| 2367   | 1     | 0     | 0     | 0     |
| 2368   | 0     | 0     | 0     | 0     |
| 2369   | 0     | 1     | 1     | 0     |
| 2372   |       |       |       |       |
| 2374   | 1     | 0     | 0     | 1     |
| 2376   | 0     | 0     | 0     | 0     |
| 2379   | 0     | 0     | 0     | 0     |
| 2380   | 0     | 0     | 0     | 0     |
| 2381   | 1     | 0     | 0     | 0     |
| 2382   | 0     | 0     | 0     | 0     |
| 2385   | 0     | 0     | 0     | 0     |
| 2387   | 1     | 1     | 0     | 0     |
| 2388   | 0     | 0     | 0     | 1     |
| 2389   | 0     | 0     | 0     | 0     |
| 2391   | 0     | 0     | 0     | 0     |
| 2392   | 0     | 0     | 0     | 0     |
| 2393   | 0     | 0     | 0     | 0     |
| 2394   | 0     | 0     | 0     | 0     |
| 2397   | 0     | 0     | 0     | 0     |
| 2398   | 0     | 0     | 0     | 0     |
| 2400   | 0     | 0     | 0     | 0     |
| 2402   | 0     | 0     | 0     | 0     |

| respid | Q43_5 | Q43_6 | Q43_7 | Q43_8 |
|--------|-------|-------|-------|-------|
| 2406   | 0     | 0     | 0     | 0     |
| 2408   | 0     | 0     | 0     | 0     |
| 2410   | 0     | 0     | 0     | 0     |
| 2411   | 0     | 0     | 0     | 0     |
| 2412   | 0     | 0     | 0     | 0     |
| 2414   | 0     | 0     | 0     | 0     |
| 2421   | 1     | 0     | 0     | 0     |
| 2423   | 0     | 0     | 0     | 0     |
| 2424   | 0     | 0     | 0     | 0     |
| 2425   | 0     | 0     | 0     | 0     |
| 2426   | 0     | 0     | 0     | 0     |
| 2429   | 0     | 0     | 0     | 0     |
| 2430   | 1     | 0     | 0     | 0     |
| 2432   | 0     | 0     | 0     | 0     |
| 2433   | 0     | 0     | 0     | 0     |
| 2434   | 0     | 0     | 0     | 0     |
| 2435   | 1     | 0     | 0     | 0     |
| 2436   | 0     | 0     | 0     | 0     |
| 2439   | 0     | 0     | 0     | 0     |
| 2440   | 0     | 0     | 0     | 0     |
| 2441   | 0     | 0     | 0     | 0     |
| 2446   | 0     | 0     | 0     | 0     |
| 2448   | 1     | 0     | 0     | 0     |
| 2449   | 0     | 0     | 0     | 0     |
| 2451   | 1     | 0     | 0     | 0     |
| 2452   | 0     | 0     | 0     | 0     |
| 2455   |       |       |       |       |
| 2457   | 0     | 0     | 0     | 0     |
| 2458   | 0     | 0     | 0     | 0     |
| 2459   | 0     | 0     | 0     | 0     |
| 2460   | 0     | 0     | 0     | 0     |
| 2462   | 0     | 0     | 0     | 0     |

| respid | Q43_5 | Q43_6 | Q43_7 | Q43_8 |
|--------|-------|-------|-------|-------|
| 2464   | 0     | 0     | 0     | 0     |
| 2465   | 0     | 0     | 0     | 0     |
| 2468   | 1     | 0     | 0     | 1     |
| 2469   |       |       |       |       |
| 2470   | 1     | 1     | 0     | 0     |
| 2471   | 1     | 1     | 0     | 0     |
| 2472   | 0     | 0     | 1     | 0     |
| 2474   | 0     | 0     | 0     | 0     |
| 2476   | 1     | 0     | 0     | 0     |
| 2478   | 0     | 0     | 0     | 0     |
| 2479   | 1     | 0     | 0     | 0     |
| 2480   | 0     | 0     | 0     | 0     |
| 2482   | 0     | 0     | 0     | 0     |
| 2486   | 1     | 0     | 0     | 0     |
| 2488   | 0     | 0     | 1     | 0     |
| 2489   | 0     | 0     | 0     | 0     |
| 2491   | 0     | 0     | 0     | 0     |
| 2495   | 0     | 0     | 0     | 0     |
| 2496   | 0     | 0     | 0     | 0     |
| 2498   | 0     | 0     | 0     | 0     |
| 2501   | 0     | 0     | 0     | 0     |
| 2502   | 0     | 0     | 0     | 0     |
| 2503   | 0     | 0     | 0     | 0     |
| 2504   | 0     | 0     | 0     | 0     |
| 2507   | 0     | 0     | 0     | 0     |
| 2509   | 1     | 0     | 0     | 0     |
| 2512   | 0     | 0     | 0     | 0     |
| 2514   | 0     | 0     | 0     | 0     |
| 2516   | 0     | 0     | 0     | 0     |
| 2517   | 0     | 0     | 0     | 0     |
| 2521   | 0     | 0     | 0     | 0     |
| 2522   | 0     | 0     | 0     | 0     |

| respid | Q43_5 | Q43_6 | Q43_7 | Q43_8 |
|--------|-------|-------|-------|-------|
| 2524   | 0     | 0     | 0     | 0     |
| 2525   | 0     | 0     | 0     | 0     |
| 2526   | 0     | 0     | 0     | 0     |
| 2527   | 0     | 0     | 0     | 0     |
| 2528   | 0     | 0     | 0     | 0     |
| 2531   |       |       |       |       |
| 2533   | 0     | 0     | 0     | 0     |
| 2535   | 0     | 0     | 0     | 0     |
| 2536   | 1     | 0     | 0     | 1     |
| 2539   | 0     | 0     | 0     | 0     |
| 2540   | 0     | 0     | 0     | 0     |
| 2543   | 0     | 0     | 0     | 0     |
| 2546   | 0     | 0     | 0     | 0     |
| 2547   | 0     | 0     | 0     | 0     |
| 2549   | 0     | 0     | 0     | 0     |
| 2553   | 0     | 0     | 0     | 1     |
| 2554   | 0     | 0     | 0     | 0     |
| 2555   | 0     | 0     | 0     | 0     |
| 2556   | 0     | 0     | 0     | 0     |
| 2557   | 0     | 0     | 0     | 0     |
| 2559   | 0     | 0     | 0     | 0     |
| 2560   | 0     | 1     | 1     | 0     |
| 2561   | 0     | 0     | 0     | 0     |
| 2566   | 0     | 0     | 0     | 0     |
| 2567   |       |       |       |       |
| 2570   | 1     | 0     | 0     | 0     |
| 2574   | 1     | 0     | 1     | 0     |
| 2578   | 0     | 0     | 0     | 0     |
| 2580   | 0     | 0     | 0     | 0     |
| 2590   | 0     | 0     | 0     | 0     |
| 2593   | 0     | 0     | 0     | 0     |
| 2594   | 0     | 0     | 0     | 0     |

| respid | Q43_5 | Q43_6 | Q43_7 | Q43_8 |
|--------|-------|-------|-------|-------|
| 2595   | 0     | 0     | 0     | 0     |
| 2596   | 0     | 0     | 0     | 0     |
| 2597   | 0     | 1     | 1     | 0     |
| 2598   | 0     | 0     | 0     | 0     |
| 2602   | 0     | 0     | 0     | 0     |
| 2605   | 0     | 0     | 1     | 1     |
| 2606   |       |       |       |       |
| 2607   | 1     | 0     | 0     | 0     |
| 2608   |       |       |       |       |
| 2609   | 0     | 0     | 0     | 0     |
| 2610   | 0     | 0     | 0     | 0     |
| 2614   |       |       |       |       |
| 2615   | 0     | 0     | 0     | 0     |
| 2616   | 0     | 0     | 0     | 0     |
| 2618   | 0     | 0     | 0     | 0     |
| 2630   | 0     | 0     | 0     | 0     |
| 2633   | 0     | 0     | 0     | 0     |
| 2637   | 0     | 0     | 0     | 0     |
| 2638   | 0     | 0     | 0     | 0     |
| 2641   | 1     | 0     | 0     | 0     |
| 2644   | 0     | 0     | 0     | 0     |
| 2645   | 0     | 0     | 0     | 0     |
| 2646   | 0     | 0     | 0     | 0     |
| 2648   | 0     | 0     | 0     | 0     |
| 2651   |       |       |       |       |
| 2652   | 0     | 0     | 0     | 0     |
| 2653   | 0     | 0     | 0     | 0     |
| 2656   |       |       |       |       |
| 2657   | 0     | 0     | 0     | 0     |
| 2658   | 0     | 0     | 0     | 0     |
| 2661   | 0     | 0     | 0     | 0     |
| 2663   | 0     | 0     | 0     | 0     |

| respid | Q43_5 | Q43_6 | Q43_7 | Q43_8 |
|--------|-------|-------|-------|-------|
| 2665   | 0     | 0     | 0     | 0     |
| 2670   | 0     | 0     | 0     | 0     |
| 2672   | 0     | 0     | 0     | 0     |
| 2673   |       |       |       |       |
| 2677   | 0     | 0     | 0     | 0     |
| 2686   | 1     | 0     | 0     | 0     |
| 2688   | 1     | 0     | 0     | 0     |
| 2689   | 0     | 0     | 0     | 0     |
| 2691   | 0     | 0     | 0     | 0     |
| 2695   | 0     | 0     | 0     | 0     |
| 2696   | 0     | 0     | 0     | 0     |
| 2697   |       |       |       |       |
| 2698   |       |       |       |       |
| 2703   | 0     | 0     | 0     | 0     |
| 2704   | 0     | 0     | 0     | 0     |
| 2706   | 1     | 0     | 1     | 0     |
| 2707   | 0     | 0     | 0     | 0     |
| 2710   | 0     | 0     | 0     | 0     |
| 2711   | 0     | 0     | 0     | 0     |
| 2712   | 0     | 0     | 0     | 0     |
| 2713   |       |       |       |       |
| 2721   |       |       |       |       |
| 2730   | 0     | 0     | 0     | 0     |
| 2731   | 0     | 0     | 0     | 0     |
| 2732   | 0     | 0     | 0     | 0     |
| 2733   | 0     | 0     | 0     | 0     |
| 2735   | 0     | 0     | 0     | 0     |
| 2736   | 0     | 0     | 0     | 0     |
| 2740   | 0     | 0     | 0     | 0     |
| 2741   | 1     | 0     | 0     | 0     |
| 2742   | 0     | 0     | 0     | 0     |
| 2743   | 0     | 0     | 0     | 0     |



| respid | Q43_5 | Q43_6 | Q43_7 | Q43_8 |
|--------|-------|-------|-------|-------|
| 2744   | 0     | 0     | 0     | 0     |
| 2745   | 0     | 0     | 0     | 0     |
| 2749   | 0     | 0     | 0     | 0     |
| 2751   | 0     | 0     | 0     | 0     |
| 2754   | 1     | 0     | 0     | 0     |
| 2755   | 0     | 0     | 0     | 0     |
| 2757   | 0     | 0     | 0     | 0     |
| 2758   | 0     | 0     | 0     | 0     |
| 2759   | 0     | 0     | 0     | 0     |
| 2761   | 0     | 0     | 0     | 0     |
| 2762   | 0     | 0     | 0     | 0     |
| 2763   | 0     | 0     | 0     | 0     |
| 2764   | 1     | 0     | 0     | 0     |
| 2765   | 0     | 0     | 0     | 0     |
| 2766   | 0     | 0     | 0     | 0     |
| 2767   | 0     | 0     | 1     | 0     |
| 2769   | 0     | 0     | 0     | 1     |
| 2770   | 0     | 0     | 0     | 0     |
| 2771   | 0     | 0     | 0     | 0     |
| 2774   | 1     | 0     | 0     | 0     |
| 2777   | 1     | 1     | 1     | 1     |
| 2778   | 0     | 0     | 0     | 0     |
| 2781   | 0     | 0     | 0     | 1     |
| 2782   | 0     | 0     | 0     | 0     |
| 2784   | 1     | 1     | 1     | 1     |
| 2785   | 0     | 0     | 0     | 0     |
| 2786   | 0     | 0     | 0     | 0     |
| 2787   | 0     | 0     | 0     | 0     |
| 2789   | 1     | 0     | 0     | 0     |
| 2790   | 1     | 0     | 0     | 0     |
| 2791   | 0     | 1     | 0     | 1     |
| 2793   | 0     | 0     | 0     | 0     |

| respid | Q43_5 | Q43_6 | Q43_7 | Q43_8 |
|--------|-------|-------|-------|-------|
| 2797   | 0     | 0     | 0     | 0     |
| 2798   | 0     | 0     | 0     | 0     |
| 2799   | 0     | 0     | 0     | 0     |
| 2801   | 0     | 0     | 1     | 0     |
| 2802   | 0     | 0     | 0     | 0     |
| 2803   | 0     | 0     | 0     | 0     |
| 2804   | 0     | 0     | 0     | 0     |
| 2807   | 0     | 0     | 0     | 0     |
| 2809   | 0     | 0     | 0     | 0     |
| 2810   | 1     | 1     | 0     | 1     |
| 2812   | 0     | 0     | 0     | 0     |
| 2814   | 0     | 0     | 0     | 0     |
| 2815   | 0     | 0     | 0     | 0     |
| 2816   | 0     | 0     | 0     | 0     |
| 2817   | 0     | 0     | 0     | 0     |
| 2819   | 0     | 0     | 0     | 0     |
| 2820   | 0     | 0     | 0     | 0     |
| 2821   | 0     | 0     | 0     | 0     |
| 2822   | 1     | 0     | 0     | 0     |
| 2823   | 0     | 0     | 0     | 0     |
| 2824   | 0     | 0     | 1     | 0     |
| 2825   | 0     | 0     | 1     | 0     |
| 2826   | 0     | 0     | 0     | 0     |
| 2827   | 0     | 0     | 0     | 0     |
| 2828   | 0     | 0     | 0     | 0     |
| 2829   | 0     | 0     | 0     | 0     |
| 2830   | 0     | 1     | 1     | 0     |
| 2831   | 0     | 0     | 0     | 0     |
| 2832   | 0     | 0     | 0     | 0     |
| 2833   | 0     | 0     | 0     | 0     |
| 2834   | 0     | 0     | 0     | 0     |
| 2835   | 1     | 0     | 1     | 0     |

| respid | Q43_5 | Q43_6 | Q43_7 | Q43_8 |
|--------|-------|-------|-------|-------|
| 2836   | 0     | 0     | 0     | 0     |
| 2837   | 0     | 0     | 0     | 0     |
| 2838   | 0     | 0     | 0     | 0     |
| 2844   | 0     | 0     | 0     | 1     |
| 2845   | 0     | 0     | 0     | 0     |
| 2847   | 0     | 0     | 0     | 0     |
| 2848   | 0     | 0     | 0     | 0     |
| 2849   | 0     | 0     | 0     | 0     |
| 2851   | 0     | 0     | 0     | 0     |
| 2852   | 0     | 0     | 0     | 0     |
| 2853   | 0     | 1     | 0     | 0     |
| 2854   | 0     | 0     | 0     | 0     |
| 2856   | 0     | 0     | 0     | 0     |
| 2857   | 0     | 0     | 0     | 0     |
| 2858   | 0     | 0     | 1     | 0     |
| 2859   | 1     | 1     | 1     | 1     |
| 2860   | 0     | 0     | 0     | 0     |
| 2861   | 0     | 1     | 1     | 0     |
| 2863   | 0     | 0     | 0     | 0     |
| 2864   | 0     | 0     | 0     | 0     |
| 2866   | 0     | 0     | 0     | 0     |
| 2872   | 0     | 0     | 0     | 0     |
| 2875   | 0     | 0     | 0     | 0     |
| 2879   |       |       |       |       |
| 2881   | 0     | 0     | 0     | 0     |
| 2882   | 0     | 0     | 0     | 0     |
| 2883   | 0     | 0     | 0     | 0     |
| 2884   | 0     | 1     | 1     | 0     |
| 2885   | 0     | 0     | 0     | 0     |
| 2887   | 0     | 0     | 0     | 0     |
| 2888   | 0     | 0     | 0     | 0     |
| 2890   | 0     | 0     | 0     | 0     |

| respid | Q43_5 | Q43_6 | Q43_7 | Q43_8 |
|--------|-------|-------|-------|-------|
| 2891   | 0     | 0     | 0     | 0     |
| 2892   |       |       |       |       |
| 2895   | 0     | 0     | 0     | 0     |
| 2899   | 0     | 0     | 0     | 0     |
| 2900   | 0     | 0     | 0     | 0     |
| 2902   | 1     | 0     | 0     | 0     |
| 2903   |       |       |       |       |
| 2904   | 0     | 0     | 0     | 0     |
| 2906   | 0     | 0     | 0     | 0     |
| 2908   | 0     | 0     | 0     | 0     |
| 2910   | 0     | 0     | 0     | 0     |
| 2917   | 1     | 1     | 0     | 1     |
| 2918   | 0     | 0     | 0     | 0     |
| 2919   | 0     | 0     | 0     | 0     |
| 2920   | 0     | 0     | 0     | 0     |
| 2921   | 0     | 0     | 0     | 0     |
| 2922   | 0     | 0     | 0     | 0     |
| 2923   |       |       |       |       |
| 2924   | 0     | 0     | 0     | 0     |
| 2926   | 0     | 0     | 0     | 0     |
| 2928   | 0     | 0     | 0     | 0     |
| 2930   |       |       |       |       |
| 2931   | 0     | 0     | 0     | 0     |
| 2933   | 0     | 0     | 0     | 0     |
| 2935   | 0     | 0     | 0     | 0     |
| 2936   |       |       |       |       |
| 2937   | 0     | 0     | 0     | 0     |
| 2938   | 0     | 0     | 0     | 0     |
| 2944   | 0     | 0     | 0     | 0     |
| 2945   | 0     | 0     | 0     | 0     |
| 2947   | 0     | 0     | 0     | 0     |
| 2949   | 0     | 0     | 0     | 0     |

| respid | Q43_5 | Q43_6 | Q43_7 | Q43_8 |
|--------|-------|-------|-------|-------|
| 2951   | 0     | 0     | 0     | 1     |
| 2952   | 0     | 0     | 0     | 0     |
| 2953   |       |       |       |       |
| 2955   | 0     | 0     | 0     | 0     |
| 2957   | 0     | 0     | 0     | 0     |
| 2958   | 0     | 0     | 0     | 0     |
| 2960   | 1     | 0     | 0     | 0     |
| 2963   | 0     | 0     | 0     | 0     |
| 2964   | 0     | 0     | 0     | 0     |
| 2967   |       |       |       |       |
| 2968   | 0     | 0     | 0     | 0     |
| 2971   | 0     | 0     | 0     | 0     |
| 2974   | 0     | 0     | 0     | 0     |
| 2975   | 0     | 0     | 0     | 0     |
| 2982   |       |       |       |       |
| 2983   |       |       |       |       |
| 2985   | 0     | 0     | 0     | 0     |
| 2986   | 1     | 0     | 1     | 0     |
| 2987   | 0     | 0     | 0     | 0     |
| 2988   | 0     | 0     | 0     | 0     |
| 2993   | 0     | 0     | 0     | 0     |
| 2996   | 0     | 0     | 0     | 0     |
| 2997   | 0     | 0     | 0     | 0     |
| 2998   | 0     | 0     | 0     | 0     |
| 3004   | 0     | 0     | 0     | 0     |
| 3007   | 0     | 0     | 0     | 0     |
| 3011   | 1     | 0     | 0     | 0     |
| 3012   | 0     | 0     | 0     | 0     |
| 3013   | 0     | 0     | 0     | 0     |
| 3014   |       |       |       |       |
| 3015   | 0     | 0     | 0     | 0     |
| 3016   |       |       |       |       |

| respid | Q43_5 | Q43_6 | Q43_7 | Q43_8 |
|--------|-------|-------|-------|-------|
| 3017   | 0     | 0     | 0     | 0     |
| 3020   | 0     | 0     | 0     | 0     |
| 3022   | 0     | 0     | 0     | 0     |
| 3023   | 0     | 0     | 0     | 0     |
| 3026   | 1     | 0     | 0     | 0     |
| 3038   | 0     | 0     | 0     | 0     |
| 3039   | 0     | 1     | 1     | 1     |
| 3040   | 0     | 0     | 0     | 0     |
| 3041   |       |       |       |       |
| 3042   | 0     | 1     | 0     | 0     |
| 3044   | 0     | 0     | 0     | 0     |
| 3050   | 0     | 0     | 0     | 0     |
| 3052   | 0     | 0     | 0     | 0     |
| 3056   | 1     | 0     | 0     | 0     |
| 3059   | 0     | 0     | 0     | 0     |
| 3060   | 0     | 0     | 0     | 0     |
| 3063   | 0     | 0     | 0     | 0     |
| 3065   | 0     | 0     | 0     | 0     |
| 3067   | 0     | 1     | 0     | 0     |
| 3068   |       |       |       |       |
| 3072   | 0     | 0     | 0     | 0     |
| 3074   | 0     | 0     | 0     | 0     |
| 3075   | 0     | 0     | 0     | 0     |
| 3076   | 0     | 0     | 0     | 0     |
| 3079   | 0     | 0     | 0     | 0     |
| 3082   | 0     | 1     | 0     | 1     |
| 3083   | 0     | 0     | 0     | 0     |
| 3084   | 0     | 0     | 0     | 0     |
| 3085   | 0     | 0     | 0     | 0     |
| 3090   | 0     | 0     | 0     | 0     |
| 3091   | 1     | 0     | 0     | 0     |
| 3092   | 0     | 0     | 0     | 0     |

| respid | Q43_5 | Q43_6 | Q43_7 | Q43_8 |
|--------|-------|-------|-------|-------|
| 3095   | 0     | 0     | 0     | 0     |
| 3096   | 1     | 1     | 0     | 1     |
| 3097   | 0     | 0     | 0     | 0     |
| 3099   | 1     | 0     | 0     | 0     |
| 3101   | 0     | 1     | 0     | 1     |
| 3103   | 0     | 0     | 0     | 0     |
| 3104   | 0     | 0     | 0     | 0     |
| 3105   |       |       |       |       |
| 3107   | 0     | 1     | 1     | 0     |
| 3108   | 0     | 0     | 0     | 0     |
| 3109   | 1     | 0     | 0     | 0     |
| 3116   | 1     | 0     | 0     | 0     |
| 3117   | 1     | 0     | 0     | 0     |
| 3119   | 0     | 0     | 0     | 0     |
| 3120   | 0     | 0     | 0     | 0     |
| 3130   | 0     | 0     | 0     | 0     |
| 3131   | 0     | 0     | 0     | 0     |
| 3133   | 0     | 0     | 0     | 0     |
| 3134   | 0     | 0     | 0     | 0     |
| 3135   | 0     | 0     | 0     | 0     |
| 3145   | 0     | 0     | 0     | 0     |
| 3147   | 0     | 0     | 0     | 0     |
| 3152   | 0     | 0     | 0     | 0     |
| 3155   | 0     | 0     | 1     | 1     |
| 3156   |       |       |       |       |
| 3157   | 0     | 1     | 1     | 0     |
| 3166   | 1     | 0     | 0     | 0     |
| 3169   | 0     | 0     | 0     | 1     |
| 3179   | 0     | 0     | 0     | 0     |
| 3181   | 0     | 0     | 0     | 0     |
| 3185   |       |       |       |       |
| 3190   | 0     | 0     | 0     | 0     |

| respid | Q43_5 | Q43_6 | Q43_7 | Q43_8 |
|--------|-------|-------|-------|-------|
| 3191   |       |       |       |       |
| 3192   | 0     | 0     | 0     | 0     |
| 3193   | 0     | 0     | 0     | 0     |
| 3195   | 0     | 0     | 0     | 0     |
| 3202   | 1     | 0     | 0     | 0     |
| 3204   | 0     | 0     | 0     | 0     |
| 3208   | 0     | 0     | 0     | 0     |
| 3212   | 0     | 0     | 0     | 0     |
| 3218   | 0     | 0     | 0     | 0     |
| 3219   | 1     | 0     | 0     | 0     |
| 3220   | 0     | 0     | 0     | 0     |
| 3221   | 0     | 0     | 1     | 0     |
| 3223   | 0     | 0     | 0     | 0     |
| 3231   | 0     | 0     | 0     | 0     |
| 3232   | 1     | 1     | 0     | 0     |
| 3234   | 0     | 0     | 0     | 0     |
| 3235   | 0     | 0     | 0     | 0     |
| 3237   | 0     | 0     | 0     | 0     |
| 3238   | 0     | 0     | 0     | 0     |
| 3240   | 0     | 0     | 0     | 0     |
| 3241   | 0     | 0     | 0     | 0     |
| 3243   | 0     | 0     | 0     | 1     |
| 3244   | 0     | 0     | 0     | 0     |
| 3247   | 0     | 0     | 0     | 0     |
| 3250   | 0     | 0     | 0     | 0     |
| 3251   | 1     | 0     | 1     | 1     |
| 3255   | 0     | 0     | 0     | 0     |
| 3256   | 0     | 0     | 0     | 0     |
| 3257   | 0     | 0     | 0     | 0     |
| 3258   |       |       |       |       |
| 3259   | 0     | 0     | 0     | 0     |
| 3260   | 0     | 0     | 0     | 0     |



| respid | Q43_5 | Q43_6 | Q43_7 | Q43_8 |
|--------|-------|-------|-------|-------|
| 3261   |       |       |       |       |
| 3262   | 0     | 0     | 0     | 0     |
| 3264   | 0     | 0     | 0     | 0     |
| 3265   | 0     | 0     | 0     | 0     |
| 3267   | 0     | 0     | 0     | 0     |
| 3268   | 1     | 1     | 0     | 0     |
| 3270   | 0     | 0     | 0     | 0     |
| 3271   | 0     | 0     | 0     | 0     |
| 3274   |       |       |       |       |
| 3276   | 0     | 0     | 0     | 0     |
| 3277   | 0     | 0     | 0     | 0     |
| 3279   | 0     | 0     | 0     | 0     |
| 3281   |       |       |       |       |
| 3283   | 1     | 0     | 0     | 0     |
| 3285   | 0     | 0     | 0     | 0     |
| 3286   | 0     | 0     | 0     | 0     |
| 3287   | 0     | 0     | 0     | 0     |
| 3289   | 0     | 0     | 0     | 0     |
| 3290   | 0     | 0     | 0     | 0     |
| 3291   | 1     | 0     | 1     | 0     |
| 3292   | 1     | 0     | 0     | 0     |
| 3293   | 1     | 0     | 1     | 0     |
| 3294   | 0     | 0     | 0     | 0     |
| 3296   | 0     | 0     | 0     | 0     |
| 3306   | 0     | 0     | 0     | 0     |
| 3307   | 0     | 1     | 1     | 1     |
| 3308   | 0     | 0     | 0     | 0     |
| 3312   | 0     | 0     | 0     | 0     |
| 3313   | 0     | 0     | 0     | 0     |
| 3316   | 0     | 0     | 0     | 0     |
| 3317   | 0     | 0     | 0     | 0     |
| 3320   | 0     | 0     | 0     | 0     |

| respid | Q43_5 | Q43_6 | Q43_7 | Q43_8 |
|--------|-------|-------|-------|-------|
| 3321   | 0     | 0     | 1     | 0     |
| 3322   | 0     | 0     | 0     | 0     |
| 3323   | 0     | 0     | 0     | 0     |
| 3325   |       |       |       |       |
| 3332   | 0     | 0     | 0     | 0     |
| 3334   | 0     | 0     | 0     | 0     |
| 3335   | 0     | 0     | 0     | 0     |
| 3341   | 0     | 0     | 0     | 0     |
| 3345   | 0     | 0     | 0     | 0     |
| 3346   | 0     | 0     | 0     | 0     |
| 3349   | 0     | 0     | 1     | 0     |
| 3351   | 0     | 0     | 0     | 0     |
| 3353   | 0     | 0     | 0     | 0     |
| 3354   | 0     | 1     | 1     | 0     |
| 3356   | 0     | 0     | 0     | 0     |
| 3357   | 0     | 0     | 0     | 0     |
| 3360   | 1     | 0     | 0     | 0     |
| 3361   | 0     | 0     | 0     | 0     |
| 3362   | 0     | 0     | 0     | 0     |
| 3363   |       |       |       |       |
| 3364   | 1     | 1     | 0     | 0     |
| 3368   | 0     | 0     | 0     | 0     |
| 3370   | 0     | 0     | 0     | 0     |
| 3371   | 0     | 0     | 0     | 0     |
| 3379   | 1     | 0     | 0     | 0     |
| 3380   | 0     | 0     | 0     | 0     |
| 3382   | 0     | 0     | 0     | 0     |
| 3384   | 0     | 0     | 0     | 0     |
| 3385   | 0     | 0     | 0     | 0     |
| 3388   | 0     | 0     | 0     | 0     |
| 3392   | 0     | 0     | 0     | 0     |
| 3393   | 0     | 0     | 0     | 0     |

| respid | Q43_5 | Q43_6 | Q43_7 | Q43_8 |
|--------|-------|-------|-------|-------|
| 3394   | 0     | 0     | 0     | 1     |
| 3395   | 0     | 0     | 0     | 0     |
| 3396   | 0     | 0     | 0     | 0     |
| 3397   | 0     | 0     | 0     | 0     |
| 3398   | 0     | 0     | 0     | 0     |
| 3399   | 0     | 0     | 0     | 0     |
| 3400   | 0     | 0     | 0     | 0     |
| 3401   | 1     | 1     | 0     | 0     |
| 3402   | 0     | 1     | 1     | 1     |
| 3403   | 0     | 0     | 0     | 1     |
| 3405   | 1     | 0     | 1     | 0     |
| 3407   | 0     | 0     | 0     | 0     |
| 3410   | 0     | 0     | 0     | 0     |
| 3411   | 0     | 0     | 0     | 0     |
| 3413   |       |       |       |       |
| 3414   | 0     | 0     | 0     | 0     |
| 3420   | 0     | 0     | 0     | 0     |
| 3421   | 0     | 0     | 1     | 1     |
| 3425   | 0     | 0     | 0     | 0     |
| 3426   | 0     | 0     | 1     | 0     |
| 3429   | 0     | 0     | 0     | 0     |
| 3430   | 1     | 1     | 0     | 0     |
| 3433   | 0     | 0     | 0     | 0     |
| 3434   | 1     | 0     | 0     | 0     |
| 3437   | 0     | 0     | 0     | 0     |
| 3439   | 0     | 0     | 0     | 0     |
| 3441   | 0     | 0     | 0     | 0     |
| 3442   | 0     | 0     | 0     | 0     |
| 3444   | 0     | 0     | 0     | 0     |
| 3445   | 0     | 0     | 0     | 0     |
| 3450   | 1     | 1     | 1     | 0     |
| 3452   | 0     | 0     | 0     | 0     |

| respid | Q43_5 | Q43_6 | Q43_7 | Q43_8 |
|--------|-------|-------|-------|-------|
| 3456   | 0     | 0     | 0     | 0     |
| 3459   |       |       |       |       |
| 3460   | 0     | 0     | 0     | 0     |
| 3461   | 0     | 0     | 0     | 0     |
| 3466   | 0     | 0     | 0     | 0     |
| 3471   | 0     | 0     | 0     | 0     |
| 3473   | 0     | 0     | 0     | 0     |
| 3475   | 0     | 1     | 1     | 0     |
| 3476   | 0     | 0     | 0     | 0     |
| 3477   | 1     | 0     | 0     | 0     |
| 3478   |       |       |       |       |
| 3479   | 0     | 0     | 0     | 0     |
| 3482   | 0     | 0     | 0     | 0     |
| 3483   | 0     | 0     | 0     | 0     |
| 3485   | 0     | 0     | 1     | 0     |
| 3489   |       |       |       |       |
| 3490   | 0     | 0     | 0     | 0     |
| 3491   | 1     | 1     | 0     | 1     |
| 3494   | 0     | 0     | 0     | 0     |
| 3495   | 0     | 0     | 0     | 0     |
| 3501   | 0     | 0     | 0     | 0     |
| 3506   | 0     | 0     | 0     | 0     |
| 3507   | 0     | 0     | 0     | 0     |
| 3517   | 0     | 0     | 0     | 0     |
| 3520   | 0     | 0     | 0     | 0     |
| 3521   | 0     | 1     | 0     | 0     |
| 3522   | 0     | 0     | 0     | 0     |
| 3524   | 0     | 0     | 0     | 0     |
| 3527   | 0     | 0     | 0     | 0     |
| 3528   | 0     | 0     | 0     | 0     |
| 3529   | 0     | 0     | 0     | 0     |
| 3536   | 0     | 0     | 1     | 0     |

| respid | Q43_5 | Q43_6 | Q43_7 | Q43_8 |
|--------|-------|-------|-------|-------|
| 3537   | 0     | 0     | 0     | 0     |
| 3538   | 0     | 0     | 0     | 0     |
| 3540   | 1     | 0     | 1     | 0     |
| 3545   | 0     | 0     | 0     | 0     |
| 3547   | 0     | 0     | 0     | 0     |
| 3554   | 0     | 0     | 0     | 0     |
| 3556   | 0     | 0     | 0     | 0     |
| 3557   | 0     | 0     | 0     | 0     |
| 3559   | 0     | 0     | 0     | 0     |
| 3560   | 0     | 0     | 0     | 1     |
| 3562   | 0     | 0     | 0     | 0     |
| 3564   | 0     | 0     | 1     | 0     |
| 3565   | 0     | 0     | 0     | 0     |
| 3568   | 1     | 1     | 1     | 1     |
| 3572   |       |       |       |       |
| 3578   |       |       |       |       |
| 3581   | 0     | 0     | 0     | 0     |
| 3583   | 1     | 0     | 0     | 0     |
| 3588   | 0     | 0     | 0     | 0     |
| 3591   | 0     | 0     | 0     | 0     |
| 3594   | 0     | 0     | 0     | 0     |
| 3595   | 0     | 0     | 0     | 0     |
| 3596   | 0     | 0     | 1     | 0     |
| 3597   | 0     | 0     | 0     | 0     |
| 3598   |       |       |       |       |
| 3600   | 0     | 0     | 0     | 0     |
| 3602   | 0     | 0     | 0     | 0     |
| 3604   | 0     | 0     | 0     | 0     |
| 3605   | 0     | 0     | 0     | 0     |
| 3606   | 0     | 0     | 0     | 0     |
| 3607   |       |       |       |       |
| 3610   | 0     | 0     | 0     | 0     |

| respid | Q43_5 | Q43_6 | Q43_7 | Q43_8 |
|--------|-------|-------|-------|-------|
| 3611   | 0     | 0     | 0     | 0     |
| 3612   | 0     | 0     | 0     | 0     |
| 3614   | 0     | 0     | 0     | 0     |
| 3616   | 0     | 0     | 0     | 0     |
| 3617   | 0     | 0     | 0     | 1     |
| 3618   |       |       |       |       |
| 3619   | 1     | 1     | 1     | 0     |
| 3621   | 0     | 0     | 1     | 0     |
| 3622   | 0     | 0     | 0     | 0     |
| 3624   | 1     | 0     | 0     | 0     |
| 3626   | 0     | 0     | 0     | 0     |
| 3629   | 0     | 0     | 0     | 0     |
| 3631   | 0     | 0     | 0     | 0     |
| 3632   | 0     | 0     | 0     | 0     |
| 3638   | 0     | 0     | 0     | 0     |
| 3640   | 0     | 0     | 0     | 0     |
| 3641   | 0     | 0     | 0     | 1     |
| 3645   | 0     | 0     | 0     | 0     |
| 3650   |       |       |       |       |
| 3653   | 0     | 1     | 1     | 1     |
| 3655   | 1     | 1     | 1     | 0     |
| 3657   | 0     | 0     | 0     | 0     |
| 3658   | 0     | 0     | 0     | 0     |
| 3659   | 0     | 0     | 0     | 0     |
| 3664   | 1     | 0     | 1     | 1     |
| 3665   | 0     | 0     | 0     | 0     |
| 3667   | 0     | 0     | 0     | 0     |
| 3668   | 0     | 0     | 0     | 0     |
| 3675   |       |       |       |       |
| 3678   |       |       |       |       |
| 3680   |       |       |       |       |
| 3684   | 0     | 1     | 1     | 1     |

| respid | Q43_5 | Q43_6 | Q43_7 | Q43_8 |
|--------|-------|-------|-------|-------|
| 3685   | 0     | 0     | 0     | 0     |
| 3687   | 1     | 0     | 0     | 0     |
| 3689   | 0     | 0     | 0     | 0     |
| 3690   | 0     | 0     | 0     | 0     |
| 3693   |       |       |       |       |
| 3694   | 0     | 0     | 0     | 0     |
| 3695   |       |       |       |       |
| 3700   | 0     | 0     | 0     | 0     |
| 3701   | 1     | 0     | 0     | 0     |
| 3703   | 1     | 0     | 0     | 1     |
| 3704   | 0     | 0     | 0     | 0     |
| 3705   |       |       |       |       |
| 3709   | 0     | 0     | 0     | 0     |
| 3710   | 1     | 0     | 0     | 0     |
| 3722   | 0     | 0     | 0     | 0     |
| 3725   | 0     | 0     | 0     | 0     |
| 3726   | 0     | 0     | 0     | 0     |
| 3727   | 0     | 0     | 0     | 0     |
| 3728   | 0     | 1     | 1     | 0     |
| 3729   | 0     | 0     | 0     | 0     |
| 3731   |       |       |       |       |
| 3738   | 0     | 0     | 0     | 0     |
| 3739   | 0     | 0     | 0     | 0     |
| 3740   | 0     | 0     | 0     | 0     |
| 3749   | 1     | 0     | 0     | 0     |
| 3758   | 0     | 0     | 0     | 0     |
| 3762   | 0     | 0     | 0     | 0     |
| 3765   | 0     | 0     | 0     | 0     |
| 3770   | 0     | 0     | 0     | 0     |
| 3771   |       |       |       |       |
| 3778   | 1     | 0     | 0     | 0     |
| 3779   | 0     | 0     | 0     | 0     |

| respid | Q43_5 | Q43_6 | Q43_7 | Q43_8 |
|--------|-------|-------|-------|-------|
| 3780   | 0     | 0     | 0     | 0     |
| 3782   | 0     | 0     | 0     | 0     |
| 3784   | 1     | 0     | 0     | 0     |
| 3787   | 0     | 0     | 0     | 0     |
| 3790   | 0     | 0     | 0     | 0     |
| 3791   | 0     | 0     | 0     | 0     |
| 3793   | 0     | 1     | 1     | 0     |
| 3795   | 0     | 0     | 0     | 0     |
| 3799   |       |       |       |       |
| 3801   | 0     | 0     | 0     | 0     |
| 3804   | 0     | 0     | 0     | 0     |
| 3809   | 0     | 0     | 0     | 0     |
| 3810   | 1     | 0     | 0     | 0     |
| 3813   | 1     | 0     | 0     | 0     |
| 3816   | 0     | 0     | 0     | 0     |
| 3820   | 0     | 0     | 0     | 0     |
| 3821   | 0     | 0     | 0     | 0     |
| 3823   | 0     | 0     | 0     | 0     |
| 3828   | 0     | 0     | 0     | 0     |
| 3829   | 0     | 0     | 0     | 0     |
| 3832   | 0     | 0     | 0     | 0     |
| 3835   | 0     | 0     | 0     | 0     |
| 3837   | 0     | 1     | 1     | 1     |
| 3838   | 1     | 0     | 0     | 0     |
| 3839   | 1     | 0     | 1     | 0     |
| 3840   |       |       |       |       |
| 3842   |       |       |       |       |
| 3843   | 0     | 0     | 0     | 0     |
| 3844   | 1     | 1     | 0     | 0     |
| 3850   | 0     | 0     | 0     | 0     |
| 3851   |       |       |       |       |
| 3856   | 0     | 0     | 0     | 0     |



| respid | Q43_5 | Q43_6 | Q43_7 | Q43_8 |
|--------|-------|-------|-------|-------|
| 3859   | 0     | 0     | 0     | 0     |
| 3860   | 0     | 0     | 0     | 0     |
| 3863   | 0     | 0     | 0     | 0     |
| 3866   | 0     | 0     | 0     | 0     |
| 3867   | 0     | 0     | 0     | 0     |
| 3870   | 0     | 0     | 0     | 0     |
| 3873   | 1     | 1     | 0     | 0     |
| 3875   | 0     | 0     | 0     | 0     |
| 3878   | 0     | 0     | 0     | 0     |
| 3881   | 0     | 0     | 0     | 0     |
| 3883   | 1     | 1     | 1     | 1     |
| 3884   | 0     | 0     | 0     | 0     |
| 3885   | 1     | 1     | 1     | 1     |
| 3886   | 0     | 0     | 0     | 0     |
| 3887   | 0     | 0     | 0     | 0     |
| 3888   |       |       |       |       |
| 3889   | 1     | 0     | 0     | 0     |
| 3890   | 0     | 0     | 0     | 0     |
| 3896   | 0     | 0     | 0     | 0     |
| 3902   | 1     | 1     | 1     | 1     |
| 3909   | 0     | 0     | 0     | 0     |
| 3912   | 0     | 0     | 0     | 0     |
| 3922   | 0     | 0     | 0     | 0     |
| 3928   | 0     | 1     | 0     | 0     |
| 3930   | 0     | 0     | 0     | 0     |
| 3931   | 0     | 0     | 0     | 0     |
| 3933   | 0     | 0     | 0     | 0     |
| 3935   | 0     | 0     | 0     | 0     |
| 3937   | 0     | 0     | 0     | 0     |
| 3939   | 0     | 0     | 0     | 0     |
| 3942   | 0     | 0     | 0     | 0     |
| 3943   | 0     | 0     | 0     | 0     |

| respid | Q43_5 | Q43_6 | Q43_7 | Q43_8 |
|--------|-------|-------|-------|-------|
| 3944   |       |       |       |       |
| 3945   | 0     | 0     | 0     | 0     |
| 3947   | 0     | 0     | 0     | 0     |
| 3948   | 0     | 0     | 0     | 0     |
| 3951   | 0     | 0     | 0     | 0     |
| 3959   | 0     | 0     | 0     | 0     |
| 3969   | 0     | 0     | 1     | 0     |
| 3973   | 0     | 0     | 0     | 0     |
| 3975   | 0     | 0     | 0     | 0     |
| 3976   | 0     | 0     | 0     | 0     |
| 3977   | 0     | 1     | 1     | 1     |
| 3978   | 0     | 0     | 0     | 0     |
| 3994   | 1     | 0     | 0     | 0     |
| 3995   | 0     | 0     | 0     | 0     |
| 3997   | 0     | 0     | 0     | 0     |
| 3998   | 0     | 0     | 0     | 0     |
| 3999   | 0     | 0     | 0     | 0     |
| 4002   | 0     | 1     | 0     | 1     |
| 4004   | 0     | 0     | 0     | 0     |
| 4005   |       |       |       |       |
| 4006   | 0     | 1     | 0     | 0     |
| 4008   | 0     | 0     | 0     | 0     |
| 4010   | 0     | 0     | 0     | 0     |
| 4011   | 1     | 0     | 0     | 0     |
| 4013   | 0     | 0     | 0     | 0     |
| 4014   | 0     | 0     | 0     | 0     |
| 4016   | 1     | 0     | 1     | 0     |
| 4017   | 0     | 0     | 0     | 0     |
| 4019   | 0     | 0     | 0     | 0     |
| 4021   |       |       |       |       |
| 4023   | 0     | 0     | 0     | 0     |
| 4024   | 0     | 0     | 0     | 0     |

| respid | Q43_5 | Q43_6 | Q43_7 | Q43_8 |
|--------|-------|-------|-------|-------|
| 4025   | 0     | 0     | 0     | 0     |
| 4027   | 0     | 0     | 0     | 0     |
| 4032   |       |       |       |       |
| 4034   | 0     | 0     | 0     | 0     |
| 4035   | 0     | 0     | 0     | 0     |
| 4037   | 0     | 0     | 0     | 0     |
| 4040   | 0     | 0     | 0     | 0     |
| 4041   | 0     | 0     | 0     | 0     |
| 4042   | 0     | 0     | 0     | 0     |
| 4043   | 0     | 0     | 0     | 0     |
| 4045   | 0     | 0     | 0     | 0     |
| 4046   | 0     | 0     | 0     | 0     |
| 4048   | 0     | 0     | 0     | 0     |
| 4049   | 0     | 1     | 0     | 1     |
| 4050   | 0     | 1     | 1     | 1     |
| 4052   | 0     | 0     | 1     | 0     |
| 4053   |       |       |       |       |
| 4060   | 0     | 0     | 0     | 0     |
| 4065   | 0     | 0     | 0     | 1     |
| 4066   | 0     | 0     | 0     | 0     |
| 4067   | 0     | 0     | 0     | 0     |
| 4068   | 0     | 0     | 0     | 0     |
| 4069   | 0     | 0     | 0     | 0     |
| 4070   | 0     | 0     | 0     | 0     |
| 4071   | 0     | 0     | 0     | 0     |
| 4072   | 0     | 0     | 0     | 0     |
| 4073   | 0     | 0     | 0     | 0     |
| 4074   | 0     | 0     | 0     | 0     |
| 4075   | 0     | 0     | 0     | 0     |
| 4078   | 0     | 0     | 0     | 0     |
| 4080   | 0     | 0     | 0     | 0     |
| 4081   |       |       |       |       |

| respid | Q43_5 | Q43_6 | Q43_7 | Q43_8 |
|--------|-------|-------|-------|-------|
| 4082   | 0     | 0     | 0     | 0     |
| 4083   | 0     | 0     | 0     | 0     |
| 4084   | 0     | 0     | 0     | 0     |
| 4086   |       |       |       |       |
| 4087   | 0     | 0     | 0     | 0     |
| 4088   | 0     | 0     | 0     | 0     |
| 4089   | 0     | 0     | 0     | 0     |
| 4090   | 0     | 0     | 0     | 0     |
| 4093   | 0     | 0     | 0     | 0     |
| 4094   | 0     | 0     | 0     | 0     |
| 4095   | 0     | 0     | 0     | 0     |
| 4096   |       |       |       |       |
| 4098   | 0     | 0     | 0     | 0     |
| 4103   | 0     | 0     | 0     | 0     |
| 4104   | 0     | 0     | 0     | 0     |
| 4107   | 0     | 0     | 0     | 0     |
| 4109   | 1     | 0     | 0     | 0     |
| 4110   | 0     | 0     | 0     | 0     |
| 4113   | 0     | 0     | 0     | 0     |
| 4114   | 0     | 0     | 0     | 0     |
| 4116   | 0     | 0     | 0     | 0     |
| 4119   | 0     | 0     | 0     | 0     |
| 4120   | 0     | 0     | 0     | 0     |
| 4121   | 1     | 0     | 0     | 0     |
| 4122   | 0     | 0     | 0     | 0     |
| 4124   | 0     | 0     | 0     | 0     |
| 4126   | 0     | 0     | 0     | 0     |
| 4127   | 0     | 0     | 0     | 0     |
| 4131   | 0     | 0     | 0     | 0     |
| 4134   | 0     | 0     | 0     | 0     |
| 4144   | 0     | 0     | 0     | 0     |
| 4145   | 0     | 0     | 0     | 0     |

| respid | Q43_5 | Q43_6 | Q43_7 | Q43_8 |
|--------|-------|-------|-------|-------|
| 4146   | 0     | 0     | 0     | 0     |
| 4147   | 0     | 0     | 0     | 0     |
| 4149   | 0     | 0     | 1     | 0     |
| 4150   |       |       |       |       |
| 4151   | 1     | 0     | 0     | 1     |
| 4153   | 0     | 0     | 0     | 0     |
| 4155   | 0     | 0     | 0     | 0     |
| 4157   | 0     | 0     | 0     | 0     |
| 4159   | 0     | 0     | 0     | 0     |
| 4160   | 0     | 0     | 0     | 0     |
| 4161   | 0     | 0     | 0     | 0     |
| 4163   | 0     | 0     | 0     | 0     |
| 4164   | 1     | 1     | 0     | 0     |
| 4165   | 0     | 0     | 0     | 0     |
| 4166   | 0     | 0     | 0     | 0     |
| 4167   | 0     | 0     | 0     | 0     |
| 4170   | 0     | 0     | 0     | 0     |
| 4172   | 0     | 0     | 0     | 0     |
| 4173   | 0     | 0     | 1     | 1     |
| 4180   | 0     | 0     | 0     | 0     |
| 4185   | 0     | 0     | 0     | 0     |
| 4187   | 0     | 0     | 0     | 0     |
| 4190   | 0     | 0     | 0     | 0     |
| 4191   | 0     | 0     | 0     | 0     |
| 4193   |       |       |       |       |
| 4194   | 0     | 0     | 0     | 0     |
| 4195   | 0     | 0     | 0     | 0     |
| 4196   |       |       |       |       |
| 4197   | 0     | 0     | 0     | 0     |
| 4198   | 0     | 0     | 0     | 0     |
| 4199   | 0     | 0     | 0     | 0     |
| 4205   | 0     | 0     | 0     | 0     |

| respid | Q43_5 | Q43_6 | Q43_7 | Q43_8 |
|--------|-------|-------|-------|-------|
| 4206   |       |       |       |       |
| 4207   | 0     | 0     | 0     | 0     |
| 4214   | 0     | 0     | 0     | 0     |
| 4215   | 0     | 0     | 0     | 0     |
| 4217   | 0     | 0     | 0     | 0     |
| 4219   | 0     | 0     | 0     | 0     |
| 4223   | 0     | 0     | 0     | 1     |
| 4226   | 0     | 0     | 0     | 0     |
| 4229   | 0     | 0     | 0     | 0     |
| 4230   | 0     | 0     | 0     | 0     |
| 4232   | 0     | 0     | 0     | 0     |
| 4233   | 0     | 0     | 0     | 0     |
| 4234   | 0     | 0     | 0     | 0     |
| 4235   | 0     | 0     | 0     | 0     |
| 4236   | 0     | 0     | 0     | 0     |
| 4237   | 0     | 0     | 0     | 0     |
| 4238   | 0     | 1     | 0     | 0     |
| 4240   | 1     | 0     | 0     | 0     |
| 4241   | 0     | 0     | 0     | 0     |
| 4247   | 0     | 0     | 0     | 0     |
| 4250   | 0     | 0     | 0     | 0     |
| 4251   | 0     | 0     | 0     | 0     |
| 4253   | 0     | 0     | 0     | 1     |
| 4254   | 0     | 0     | 0     | 0     |
| 4258   | 1     | 1     | 1     | 0     |
| 4260   | 0     | 0     | 0     | 0     |
| 4263   | 0     | 0     | 0     | 0     |
| 4265   | 0     | 0     | 0     | 0     |
| 4266   | 0     | 0     | 0     | 0     |
| 4267   | 1     | 0     | 0     | 0     |
| 4270   | 0     | 0     | 0     | 0     |
| 4273   | 0     | 0     | 0     | 0     |

| respid | Q43_5 | Q43_6 | Q43_7 | Q43_8 |
|--------|-------|-------|-------|-------|
| 4280   | 0     | 0     | 0     | 0     |
| 4281   | 0     | 0     | 0     | 0     |
| 4282   | 0     | 1     | 1     | 0     |
| 4283   |       |       |       |       |
| 4286   | 0     | 0     | 0     | 0     |
| 4287   | 0     | 0     | 0     | 0     |
| 4289   | 0     | 0     | 0     | 0     |
| 4290   | 0     | 0     | 0     | 0     |
| 4291   | 0     | 0     | 0     | 0     |
| 4292   | 0     | 0     | 0     | 0     |
| 4293   | 0     | 0     | 0     | 0     |
| 4294   | 0     | 0     | 0     | 1     |
| 4295   |       |       |       |       |
| 4296   | 0     | 0     | 0     | 0     |
| 4297   | 0     | 0     | 0     | 0     |
| 4298   | 0     | 0     | 0     | 0     |
| 4299   | 0     | 0     | 0     | 0     |
| 4300   | 0     | 0     | 0     | 0     |
| 4301   |       |       |       |       |
| 4302   | 0     | 0     | 0     | 0     |
| 4304   | 0     | 0     | 0     | 0     |
| 4305   | 0     | 0     | 0     | 0     |
| 4307   | 0     | 0     | 1     | 0     |
| 4308   | 0     | 0     | 0     | 0     |
| 4312   |       |       |       |       |
| 4314   | 0     | 0     | 0     | 0     |
| 4316   | 0     | 0     | 0     | 0     |
| 4317   | 0     | 1     | 1     | 0     |
| 4319   | 0     | 0     | 0     | 0     |
| 4323   | 0     | 0     | 0     | 0     |
| 4337   | 0     | 0     | 0     | 0     |
| 4341   | 0     | 1     | 1     | 0     |

| respid | Q43_5 | Q43_6 | Q43_7 | Q43_8 |
|--------|-------|-------|-------|-------|
| 4342   | 0     | 0     | 0     | 0     |
| 4344   | 0     | 0     | 0     | 0     |
| 4345   | 0     | 0     | 0     | 0     |
| 4346   | 0     | 0     | 0     | 0     |
| 4347   | 0     | 0     | 0     | 0     |
| 4350   |       |       |       |       |
| 4352   | 0     | 0     | 0     | 0     |
| 4353   |       |       |       |       |
| 4355   | 0     | 0     | 0     | 0     |
| 4356   | 0     | 0     | 0     | 0     |
| 4358   |       |       |       |       |
| 4359   | 0     | 0     | 0     | 0     |
| 4360   | 0     | 0     | 0     | 0     |
| 4361   | 0     | 0     | 1     | 0     |
| 4363   | 0     | 0     | 0     | 1     |
| 4364   | 0     | 0     | 0     | 0     |
| 4365   | 0     | 0     | 1     | 0     |
| 4367   | 0     | 0     | 0     | 0     |
| 4369   | 1     | 1     | 0     | 0     |
| 4373   | 0     | 0     | 0     | 0     |
| 4374   | 0     | 0     | 0     | 0     |
| 4375   |       |       |       |       |
| 4378   | 0     | 0     | 0     | 0     |
| 4379   | 0     | 0     | 0     | 0     |
| 4382   | 0     | 0     | 0     | 0     |
| 4383   |       |       |       |       |
| 4384   | 0     | 0     | 0     | 0     |
| 4385   | 0     | 0     | 0     | 0     |
| 4388   | 0     | 0     | 1     | 0     |
| 4389   | 0     | 0     | 0     | 0     |
| 4391   | 0     | 0     | 0     | 0     |
| 4392   | 0     | 0     | 0     | 0     |



| respid | Q43_5 | Q43_6 | Q43_7 | Q43_8 |
|--------|-------|-------|-------|-------|
| 4393   | 0     | 0     | 0     | 0     |
| 4395   | 0     | 0     | 0     | 1     |
| 4397   | 0     | 0     | 0     | 0     |
| 4398   | 0     | 0     | 0     | 0     |
| 4399   | 0     | 0     | 0     | 0     |
| 4400   |       |       |       |       |
| 4401   | 0     | 0     | 0     | 0     |
| 4402   | 0     | 0     | 0     | 0     |
| 4404   | 0     | 0     | 0     | 0     |
| 4405   |       |       |       |       |
| 4407   | 0     | 0     | 0     | 0     |
| 4408   | 0     | 0     | 0     | 0     |
| 4411   |       |       |       |       |
| 4420   | 0     | 0     | 0     | 0     |
| 4421   | 0     | 0     | 0     | 0     |
| 4424   | 0     | 0     | 1     | 1     |
| 4425   | 0     | 0     | 0     | 0     |
| 4427   | 0     | 0     | 0     | 0     |
| 4430   | 0     | 0     | 0     | 0     |
| 4431   | 0     | 0     | 0     | 0     |
| 4432   | 0     | 0     | 0     | 0     |
| 4436   | 0     | 0     | 0     | 0     |
| 4439   | 0     | 0     | 0     | 0     |
| 4451   | 0     | 0     | 0     | 0     |
| 4452   | 1     | 0     | 1     | 0     |
| 4458   | 0     | 0     | 0     | 0     |
| 4464   | 0     | 0     | 0     | 1     |
| 4465   | 0     | 0     | 0     | 0     |
| 4467   | 0     | 0     | 0     | 0     |
| 4470   | 0     | 0     | 1     | 0     |
| 4471   | 0     | 0     | 0     | 0     |
| 4472   | 0     | 0     | 0     | 0     |

| respid | Q43_5 | Q43_6 | Q43_7 | Q43_8 |
|--------|-------|-------|-------|-------|
| 4473   | 0     | 0     | 0     | 0     |
| 4475   | 0     | 0     | 0     | 0     |
| 4476   | 0     | 0     | 0     | 0     |
| 4478   | 0     | 0     | 0     | 0     |
| 4485   | 0     | 0     | 0     | 0     |
| 4486   | 0     | 0     | 0     | 0     |
| 4490   |       |       |       |       |
| 4502   |       |       |       |       |
| 4503   | 0     | 0     | 0     | 0     |
| 4504   | 0     | 0     | 0     | 0     |
| 4506   | 0     | 0     | 0     | 0     |
| 4508   | 0     | 0     | 0     | 0     |
| 4515   | 0     | 0     | 0     | 0     |
| 4516   | 1     | 0     | 0     | 1     |
| 4519   | 0     | 0     | 0     | 0     |
| 4523   | 0     | 0     | 0     | 0     |
| 4525   | 0     | 0     | 0     | 0     |
| 4526   | 0     | 0     | 0     | 0     |
| 4528   |       |       |       |       |
| 4530   | 0     | 0     | 0     | 0     |
| 4531   | 1     | 0     | 0     | 0     |
| 4532   | 0     | 0     | 0     | 0     |
| 4537   | 0     | 0     | 0     | 0     |
| 4538   | 0     | 0     | 0     | 0     |
| 4539   | 0     | 0     | 0     | 0     |
| 4541   | 0     | 0     | 0     | 0     |
| 4543   |       |       |       |       |
| 4544   | 0     | 0     | 0     | 0     |
| 4546   | 1     | 1     | 1     | 0     |
| 4547   | 0     | 1     | 0     | 0     |
| 4549   |       |       |       |       |
| 4550   | 0     | 0     | 0     | 0     |

| respid | Q43_5 | Q43_6 | Q43_7 | Q43_8 |
|--------|-------|-------|-------|-------|
| 4551   | 0     | 0     | 0     | 0     |
| 4554   | 0     | 0     | 0     | 0     |
| 4557   |       |       |       |       |
| 4565   | 0     | 0     | 0     | 0     |
| 4568   | 0     | 0     | 0     | 0     |
| 4569   | 0     | 0     | 0     | 0     |
| 4570   | 0     | 0     | 0     | 0     |
| 4572   | 0     | 0     | 0     | 0     |
| 4574   | 0     | 0     | 1     | 0     |
| 4576   | 0     | 0     | 0     | 1     |
| 4578   | 0     | 0     | 0     | 0     |
| 4579   |       |       |       |       |
| 4580   | 0     | 0     | 0     | 0     |
| 4581   |       |       |       |       |
| 4584   | 0     | 0     | 0     | 0     |
| 4586   | 0     | 0     | 0     | 0     |
| 4587   | 0     | 0     | 0     | 0     |
| 4590   | 0     | 0     | 0     | 0     |
| 4592   | 0     | 0     | 0     | 0     |
| 4593   | 0     | 0     | 0     | 0     |
| 4595   | 0     | 0     | 0     | 0     |
| 4597   | 0     | 0     | 0     | 0     |
| 4598   | 0     | 0     | 0     | 0     |
| 4599   | 0     | 0     | 0     | 0     |
| 4600   | 0     | 0     | 0     | 0     |
| 4601   | 0     | 0     | 0     | 0     |
| 4608   | 0     | 0     | 0     | 0     |
| 4609   | 0     | 0     | 0     | 0     |
| 4611   | 0     | 0     | 0     | 0     |
| 4612   | 1     | 1     | 0     | 0     |
| 4613   |       |       |       |       |
| 4616   | 0     | 0     | 0     | 0     |

| respid | Q43_5 | Q43_6 | Q43_7 | Q43_8 |
|--------|-------|-------|-------|-------|
| 4617   | 0     | 0     | 0     | 0     |
| 4620   | 0     | 0     | 0     | 0     |
| 4621   | 0     | 0     | 0     | 0     |
| 4622   | 0     | 0     | 1     | 0     |
| 4624   | 0     | 0     | 0     | 0     |
| 4625   | 1     | 1     | 0     | 0     |
| 4627   | 1     | 0     | 0     | 0     |
| 4628   | 0     | 0     | 0     | 0     |
| 4629   |       |       |       |       |
| 4630   | 0     | 0     | 0     | 0     |
| 4632   | 0     | 0     | 0     | 0     |
| 4634   | 0     | 0     | 0     | 0     |
| 4635   | 0     | 0     | 0     | 0     |
| 4636   | 0     | 0     | 0     | 0     |
| 4637   | 0     | 0     | 0     | 0     |
| 4638   | 0     | 1     | 1     | 1     |
| 4639   | 0     | 0     | 0     | 0     |
| 4641   | 0     | 0     | 0     | 0     |
| 4643   | 0     | 0     | 0     | 0     |
| 4645   | 0     | 0     | 0     | 0     |
| 4646   | 0     | 1     | 0     | 0     |
| 4647   |       |       |       |       |
| 4648   | 0     | 0     | 0     | 0     |
| 4649   | 0     | 0     | 0     | 0     |
| 4650   | 0     | 0     | 0     | 0     |
| 4651   | 0     | 0     | 0     | 0     |
| 4652   | 0     | 0     | 0     | 0     |
| 4653   |       |       |       |       |
| 4657   |       |       |       |       |
| 4660   | 0     | 0     | 0     | 0     |
| 4661   | 0     | 0     | 0     | 0     |
| 4662   | 0     | 0     | 0     | 0     |

| respid | Q43_5 | Q43_6 | Q43_7 | Q43_8 |
|--------|-------|-------|-------|-------|
| 4667   | 0     | 0     | 0     | 0     |
| 4669   | 0     | 0     | 0     | 0     |
| 4671   |       |       |       |       |
| 4672   | 1     | 1     | 1     | 1     |
| 4673   | 0     | 0     | 0     | 0     |
| 4677   |       |       |       |       |
| 4679   | 0     | 0     | 0     | 1     |
| 4683   | 0     | 0     | 0     | 0     |
| 4684   | 0     | 0     | 0     | 0     |
| 4685   | 0     | 0     | 0     | 0     |
| 4686   | 0     | 0     | 0     | 0     |
| 4687   | 0     | 0     | 0     | 0     |
| 4688   | 0     | 0     | 0     | 0     |
| 4691   | 0     | 0     | 0     | 0     |
| 4692   | 0     | 0     | 0     | 0     |
| 4694   | 0     | 0     | 0     | 0     |
| 4695   | 0     | 0     | 0     | 0     |
| 4696   | 0     | 0     | 0     | 0     |
| 4697   |       |       |       |       |
| 4698   | 0     | 0     | 0     | 0     |
| 4699   | 0     | 0     | 0     | 0     |
| 4701   |       |       |       |       |
| 4703   | 0     | 0     | 0     | 0     |
| 4704   | 1     | 0     | 0     | 0     |
| 4705   | 0     | 0     | 0     | 0     |
| 4706   | 0     | 0     | 0     | 0     |
| 4707   | 0     | 0     | 0     | 0     |
| 4708   | 0     | 0     | 0     | 0     |
| 4710   | 0     | 0     | 0     | 0     |
| 4711   | 1     | 0     | 0     | 1     |
| 4715   |       |       |       |       |
| 4716   | 0     | 0     | 0     | 0     |

| respid | Q43_5 | Q43_6 | Q43_7 | Q43_8 |
|--------|-------|-------|-------|-------|
| 4717   | 0     | 0     | 0     | 0     |
| 4718   | 0     | 0     | 0     | 0     |
| 4722   | 0     | 0     | 0     | 0     |
| 4727   | 0     | 0     | 1     | 1     |
| 4728   | 1     | 0     | 1     | 1     |
| 4729   | 0     | 0     | 0     | 0     |
| 4732   | 0     | 0     | 0     | 0     |
| 4733   | 0     | 0     | 0     | 0     |
| 4734   | 0     | 0     | 0     | 0     |
| 4735   | 0     | 0     | 0     | 0     |
| 4737   | 0     | 0     | 1     | 0     |
| 4738   | 0     | 0     | 1     | 0     |
| 4740   | 0     | 0     | 0     | 0     |
| 4741   | 0     | 0     | 0     | 0     |
| 4743   | 0     | 0     | 0     | 0     |
| 4746   | 0     | 0     | 0     | 0     |
| 4750   | 0     | 1     | 0     | 0     |
| 4752   | 0     | 0     | 0     | 0     |
| 4753   | 0     | 1     | 0     | 0     |
| 4754   | 0     | 0     | 0     | 0     |
| 4755   | 0     | 1     | 0     | 1     |
| 4758   | 0     | 0     | 0     | 0     |
| 4766   |       |       |       |       |
| 4767   | 1     | 0     | 0     | 0     |
| 4768   | 0     | 0     | 0     | 0     |
| 4769   | 0     | 0     | 0     | 0     |
| 4771   | 0     | 0     | 0     | 0     |
| 4772   | 0     | 0     | 0     | 0     |
| 4773   | 0     | 0     | 0     | 0     |
| 4774   | 0     | 0     | 0     | 0     |
| 4776   | 0     | 0     | 0     | 0     |
| 4777   | 0     | 0     | 0     | 0     |

| respid | Q43_5 | Q43_6 | Q43_7 | Q43_8 |
|--------|-------|-------|-------|-------|
| 4779   |       |       |       |       |
| 4780   | 0     | 0     | 0     | 0     |
| 4781   | 0     | 0     | 0     | 0     |
| 4783   | 1     | 1     | 1     | 1     |
| 4784   | 0     | 0     | 0     | 0     |
| 4785   | 0     | 0     | 0     | 0     |
| 4788   |       |       |       |       |
| 4789   | 0     | 0     | 0     | 0     |
| 4790   | 0     | 0     | 0     | 0     |
| 4791   |       |       |       |       |
| 4794   |       |       |       |       |
| 4795   | 0     | 0     | 0     | 0     |
| 4797   | 0     | 0     | 0     | 0     |
| 4802   | 0     | 1     | 1     | 0     |
| 4803   | 0     | 0     | 0     | 0     |
| 4804   |       |       |       |       |
| 4805   | 0     | 0     | 0     | 0     |
| 4807   |       |       |       |       |
| 4808   | 1     | 0     | 0     | 0     |
| 4809   | 0     | 0     | 0     | 0     |
| 4811   | 0     | 0     | 0     | 0     |
| 4817   |       |       |       |       |
| 4819   | 0     | 1     | 0     | 1     |
| 4820   |       |       |       |       |
| 4821   | 0     | 0     | 1     | 0     |
| 4822   | 0     | 0     | 0     | 0     |
| 4823   | 0     | 0     | 0     | 0     |
| 4825   | 0     | 0     | 0     | 0     |
| 4826   |       |       |       |       |
| 4830   | 0     | 0     | 0     | 0     |
| 4832   |       |       |       |       |
| 4838   | 0     | 0     | 0     | 0     |

| respid | Q43_5 | Q43_6 | Q43_7 | Q43_8 |
|--------|-------|-------|-------|-------|
| 4840   | 0     | 0     | 0     | 0     |
| 4841   |       |       |       |       |
| 4843   | 0     | 0     | 0     | 0     |
| 4845   | 0     | 0     | 0     | 0     |
| 4846   | 0     | 0     | 0     | 0     |
| 4848   | 0     | 0     | 0     | 0     |
| 4853   | 0     | 0     | 0     | 0     |
| 4854   | 0     | 0     | 0     | 0     |
| 4859   | 0     | 0     | 0     | 0     |
| 4861   |       |       |       |       |
| 4864   | 0     | 0     | 0     | 0     |
| 4867   |       |       |       |       |
| 4870   | 0     | 0     | 0     | 0     |
| 4872   | 0     | 0     | 1     | 0     |
| 4873   | 0     | 0     | 0     | 0     |
| 4874   | 0     | 0     | 0     | 0     |
| 4878   | 0     | 0     | 0     | 0     |
| 4880   | 0     | 0     | 0     | 0     |
| 4881   | 0     | 0     | 0     | 0     |
| 4882   | 0     | 1     | 0     | 0     |
| 4883   | 0     | 0     | 0     | 0     |
| 4885   | 0     | 0     | 0     | 0     |
| 4889   |       |       |       |       |
| 4890   |       |       |       |       |
| 4891   | 0     | 0     | 0     | 0     |
| 4894   | 0     | 0     | 0     | 0     |
| 4895   | 1     | 1     | 1     | 0     |
| 4896   | 0     | 0     | 0     | 0     |
| 4897   | 0     | 0     | 0     | 0     |
| 4898   | 0     | 0     | 0     | 0     |
| 4899   |       |       |       |       |
| 4900   | 0     | 0     | 0     | 0     |



| respid | Q43_5 | Q43_6 | Q43_7 | Q43_8 |
|--------|-------|-------|-------|-------|
| 4901   | 0     | 0     | 0     | 0     |
| 4903   | 0     | 0     | 0     | 1     |
| 4904   | 0     | 0     | 0     | 0     |
| 4908   | 0     | 0     | 0     | 0     |
| 4909   | 0     | 0     | 0     | 0     |
| 4913   | 0     | 0     | 0     | 0     |
| 4917   | 0     | 0     | 0     | 0     |
| 4918   | 0     | 0     | 0     | 0     |
| 4920   |       |       |       |       |
| 4921   | 0     | 0     | 0     | 0     |
| 4925   | 0     | 0     | 0     | 0     |
| 4926   | 0     | 0     | 0     | 0     |
| 4927   | 0     | 0     | 0     | 0     |
| 4928   | 0     | 0     | 0     | 0     |
| 4929   | 0     | 0     | 0     | 0     |
| 4930   | 0     | 0     | 0     | 0     |
| 4931   | 0     | 0     | 0     | 0     |
| 4932   | 1     | 0     | 0     | 0     |
| 4933   | 0     | 0     | 0     | 0     |
| 4934   | 0     | 0     | 0     | 0     |
| 5934   | 0     | 0     | 0     | 0     |
| 5935   | 0     | 0     | 0     | 0     |
| 5936   | 0     | 0     | 0     | 0     |
| 5938   |       |       |       |       |
| 5939   | 0     | 0     | 0     | 0     |
| 5940   | 0     | 0     | 0     | 0     |
| 5942   | 0     | 0     | 0     | 0     |
| 5944   | 0     | 0     | 0     | 0     |
| 5951   | 0     | 0     | 0     | 0     |
| 5952   | 0     | 0     | 0     | 0     |
| 5954   | 0     | 0     | 0     | 0     |
| 5956   | 0     | 0     | 0     | 0     |

| respid | Q43_5 | Q43_6 | Q43_7 | Q43_8 |
|--------|-------|-------|-------|-------|
| 5957   | 0     | 0     | 0     | 0     |
| 5958   | 0     | 0     | 0     | 0     |
| 5959   | 0     | 0     | 0     | 1     |
| 5960   | 0     | 0     | 0     | 0     |
| 5963   | 0     | 0     | 0     | 0     |
| 5966   | 0     | 0     | 0     | 0     |
| 5968   | 0     | 0     | 0     | 0     |
| 5974   | 0     | 0     | 0     | 0     |
| 5975   | 0     | 0     | 1     | 0     |
| 5976   | 0     | 0     | 0     | 0     |
| 5977   | 0     | 0     | 0     | 0     |
| 5978   | 0     | 0     | 0     | 0     |
| 5979   | 0     | 0     | 0     | 0     |
| 5983   | 0     | 0     | 0     | 0     |
| 5984   | 0     | 0     | 0     | 0     |
| 5990   | 0     | 0     | 0     | 0     |
| 5991   | 0     | 0     | 0     | 0     |
| 5992   |       |       |       |       |
| 5993   | 0     | 0     | 0     | 1     |
| 5994   | 0     | 0     | 0     | 0     |
| 5996   | 0     | 0     | 0     | 0     |
| 6001   | 1     | 0     | 0     | 0     |
| 6003   | 0     | 0     | 0     | 0     |
| 6004   | 0     | 0     | 0     | 0     |
| 6005   | 0     | 1     | 0     | 1     |
| 6006   | 0     | 0     | 0     | 0     |
| 6008   | 0     | 0     | 0     | 0     |
| 6009   | 0     | 1     | 0     | 0     |
| 6014   |       |       |       |       |
| 6016   | 0     | 0     | 0     | 0     |
| 6017   | 0     | 0     | 0     | 0     |
| 6018   | 0     | 0     | 0     | 0     |

| respid | Q43_5 | Q43_6 | Q43_7 | Q43_8 |
|--------|-------|-------|-------|-------|
| 6020   | 0     | 0     | 0     | 0     |
| 6021   |       |       |       |       |
| 6024   | 0     | 0     | 0     | 0     |
| 6025   | 0     | 0     | 0     | 0     |
| 6026   | 0     | 0     | 0     | 0     |
| 6032   | 1     | 1     | 0     | 1     |
| 6035   | 1     | 0     | 0     | 0     |
| 6038   | 0     | 0     | 0     | 0     |
| 6043   | 0     | 0     | 0     | 0     |
| 6044   | 0     | 0     | 0     | 0     |
| 6046   | 0     | 0     | 0     | 0     |
| 6047   | 0     | 0     | 0     | 0     |
| 6048   | 0     | 0     | 0     | 0     |
| 6050   | 0     | 0     | 0     | 0     |
| 6051   | 0     | 0     | 0     | 0     |
| 6053   | 0     | 0     | 0     | 0     |
| 6054   | 1     | 0     | 0     | 0     |
| 6056   | 0     | 0     | 0     | 0     |
| 6058   | 0     | 0     | 0     | 0     |
| 6060   | 0     | 0     | 0     | 0     |
| 6061   | 0     | 0     | 0     | 0     |
| 6062   | 0     | 0     | 0     | 0     |
| 6067   | 0     | 0     | 0     | 0     |
| 6070   | 0     | 0     | 0     | 0     |
| 6074   | 0     | 0     | 0     | 0     |
| 6076   | 0     | 0     | 0     | 0     |
| 6078   |       |       |       |       |
| 6081   | 0     | 0     | 0     | 0     |
| 6085   | 0     | 0     | 0     | 0     |
| 6088   |       |       |       |       |
| 6092   | 0     | 0     | 0     | 0     |
| 6095   | 0     | 0     | 0     | 0     |

| respid | Q43_5 | Q43_6 | Q43_7 | Q43_8 |
|--------|-------|-------|-------|-------|
| 6098   | 0     | 0     | 0     | 0     |
| 6101   |       |       |       |       |
| 6102   | 1     | 1     | 0     | 0     |
| 6105   | 0     | 0     | 0     | 0     |
| 6106   | 0     | 0     | 0     | 0     |
| 6107   | 0     | 0     | 0     | 0     |
| 6111   | 0     | 0     | 0     | 0     |
| 6112   | 0     | 0     | 0     | 0     |
| 6113   | 1     | 0     | 0     | 1     |
| 6115   | 0     | 0     | 0     | 0     |
| 6116   |       |       |       |       |
| 6117   | 1     | 0     | 0     | 0     |
| 6124   | 0     | 1     | 0     | 1     |
| 6125   | 0     | 0     | 0     | 0     |
| 6128   |       |       |       |       |
| 6133   | 0     | 0     | 0     | 0     |
| 6134   | 1     | 0     | 0     | 0     |
| 6135   | 1     | 0     | 0     | 0     |
| 6138   | 0     | 0     | 0     | 0     |
| 6140   | 0     | 0     | 0     | 0     |
| 6143   | 0     | 0     | 0     | 0     |
| 6147   | 1     | 0     | 0     | 0     |
| 6154   | 0     | 0     | 0     | 0     |
| 6162   |       |       |       |       |
| 6165   | 1     | 0     | 1     | 0     |
| 6166   | 1     | 0     | 0     | 1     |
| 6173   | 1     | 0     | 0     | 0     |
| 6180   | 1     | 0     | 1     | 0     |
| 6184   | 1     | 1     | 0     | 0     |
| 6185   | 0     | 0     | 0     | 0     |
| 6186   | 0     | 0     | 0     | 0     |
| 6188   | 0     | 0     | 0     | 0     |

| respid | Q43_5 | Q43_6 | Q43_7 | Q43_8 |
|--------|-------|-------|-------|-------|
| 6192   | 1     | 0     | 0     | 0     |
| 6194   |       |       |       |       |
| 6195   | 0     | 0     | 0     | 0     |
| 6196   | 0     | 0     | 0     | 0     |
| 6199   | 1     | 0     | 0     | 0     |
| 6200   |       |       |       |       |
| 6201   | 0     | 0     | 0     | 0     |
| 6202   | 0     | 0     | 0     | 0     |
| 6203   | 0     | 0     | 0     | 0     |
| 6205   | 0     | 0     | 0     | 0     |
| 6210   | 1     | 1     | 0     | 0     |
| 6212   | 1     | 0     | 0     | 0     |
| 6216   | 1     | 0     | 0     | 0     |
| 6218   | 0     | 0     | 0     | 0     |
| 6221   | 1     | 0     | 0     | 0     |
| 6224   | 0     | 0     | 0     | 0     |
| 6225   | 0     | 0     | 0     | 0     |
| 6227   | 0     | 0     | 0     | 0     |
| 6230   |       |       |       |       |
| 6231   | 0     | 0     | 0     | 0     |
| 6233   | 1     | 0     | 0     | 0     |
| 6234   | 1     | 0     | 0     | 0     |
| 6235   |       |       |       |       |
| 6237   |       |       |       |       |
| 6240   |       |       |       |       |
| 6248   | 1     | 1     | 0     | 0     |
| 6249   | 0     | 0     | 0     | 0     |
| 6252   | 1     | 1     | 0     | 0     |
| 6254   | 0     | 0     | 0     | 0     |
| 6269   | 0     | 0     | 0     | 0     |
| 6304   |       |       |       |       |
| 6334   | 1     | 1     | 1     | 1     |

| respid | Q43_5 | Q43_6 | Q43_7 | Q43_8 |
|--------|-------|-------|-------|-------|
| 6341   | 0     | 0     | 0     | 0     |
| 6350   | 0     | 0     | 0     | 0     |
| 6370   | 0     | 0     | 0     | 0     |
| 6384   | 0     | 0     | 0     | 0     |
| 6400   | 0     | 0     | 0     | 0     |
| 6418   |       |       |       |       |
| 6467   | 0     | 0     | 0     | 0     |
| 6469   | 0     | 0     | 0     | 0     |
| 6474   | 0     | 0     | 0     | 0     |
| 6475   |       |       |       |       |
| 6476   | 0     | 0     | 0     | 0     |
| 6477   | 0     | 0     | 0     | 0     |
| 6480   | 0     | 0     | 0     | 0     |
| 6481   | 0     | 0     | 0     | 0     |
| 6485   | 0     | 0     | 0     | 0     |
| 6488   | 0     | 0     | 0     | 0     |
| 6495   | 0     | 0     | 0     | 0     |
| 6499   | 1     | 0     | 0     | 0     |
| 6500   | 0     | 0     | 0     | 0     |
| 6504   | 0     | 0     | 0     | 0     |
| 6507   | 0     | 0     | 0     | 0     |
| 6512   | 0     | 0     | 0     | 0     |
| 6525   | 0     | 0     | 0     | 0     |
| 6532   | 0     | 0     | 0     | 0     |
| 6535   | 0     | 0     | 0     | 0     |
| 6546   | 0     | 0     | 0     | 0     |
| 6551   | 1     | 1     | 0     | 0     |
| 6556   | 0     | 0     | 0     | 0     |
| 6566   | 0     | 0     | 0     | 0     |
| 6569   |       |       |       |       |
| 6574   | 0     | 0     | 0     | 0     |
| 6576   | 0     | 0     | 0     | 0     |

| respid | Q43_5 | Q43_6 | Q43_7 | Q43_8 |
|--------|-------|-------|-------|-------|
| 6580   |       |       |       |       |
| 6584   |       |       |       |       |
| 6585   | 0     | 0     | 0     | 0     |
| 6589   | 0     | 0     | 0     | 0     |
| 6590   | 0     | 0     | 0     | 0     |
| 6598   | 0     | 0     | 0     | 0     |
| 6603   | 0     | 0     | 0     | 0     |
| 6618   | 0     | 0     | 0     | 0     |
| 6630   | 0     | 0     | 0     | 0     |
| 6636   | 0     | 0     | 0     | 0     |
| 6649   |       |       |       |       |
| 6675   | 0     | 0     | 0     | 0     |
| 6678   | 0     | 0     | 0     | 0     |
| 6681   | 0     | 0     | 0     | 0     |
| 6684   | 0     | 0     | 0     | 1     |
| 6688   |       |       |       |       |
| 6691   | 0     | 0     | 0     | 0     |
| 6694   | 1     | 0     | 0     | 0     |
| 6696   | 0     | 0     | 0     | 0     |
| 6720   | 0     | 1     | 1     | 0     |
| 6722   | 0     | 0     | 0     | 0     |
| 6724   | 0     | 0     | 0     | 0     |
| 6725   | 0     | 0     | 0     | 0     |
| 6727   | 0     | 0     | 0     | 0     |
| 6734   | 1     | 0     | 0     | 0     |
| 6739   | 0     | 0     | 0     | 0     |
| 6743   | 0     | 1     | 1     | 1     |
| 6749   | 0     | 0     | 0     | 0     |
| 6756   | 0     | 0     | 0     | 0     |
| 6764   | 0     | 0     | 0     | 0     |
| 6765   | 0     | 0     | 0     | 0     |
| 6768   | 0     | 0     | 0     | 0     |

| respid | Q43_5 | Q43_6 | Q43_7 | Q43_8 |
|--------|-------|-------|-------|-------|
| 6773   | 0     | 0     | 0     | 0     |
| 6775   | 1     | 0     | 0     | 0     |
| 6777   | 0     | 0     | 0     | 0     |
| 6779   | 0     | 0     | 0     | 0     |
| 6790   | 0     | 0     | 0     | 0     |
| 6797   |       |       |       |       |
| 6798   | 0     | 0     | 0     | 0     |
| 6808   |       |       |       |       |
| 6810   | 0     | 0     | 0     | 0     |
| 6811   | 1     | 0     | 0     | 0     |
| 6812   | 0     | 0     | 0     | 0     |
| 6814   | 0     | 0     | 1     | 0     |
| 6819   | 0     | 0     | 0     | 0     |
| 6820   | 0     | 0     | 0     | 0     |
| 6832   | 0     | 0     | 0     | 0     |
| 6854   | 0     | 0     | 0     | 0     |
| 6855   |       |       |       |       |
| 6857   | 0     | 0     | 0     | 0     |
| 6858   | 0     | 0     | 0     | 0     |
| 6859   | 0     | 0     | 0     | 0     |
| 6860   | 0     | 0     | 0     | 0     |
| 6862   | 0     | 0     | 0     | 0     |
| 6879   |       |       |       |       |
| 6893   | 0     | 0     | 0     | 0     |
| 6898   | 0     | 0     | 0     | 0     |
| 6902   | 1     | 0     | 0     | 0     |
| 6903   | 1     | 0     | 1     | 1     |
| 6907   | 0     | 0     | 0     | 0     |
| 6908   |       |       |       |       |
| 6912   |       |       |       |       |
| 6915   | 1     | 1     | 1     | 1     |
| 6916   | 0     | 0     | 0     | 0     |



| respid | Q43_5 | Q43_6 | Q43_7 | Q43_8 |
|--------|-------|-------|-------|-------|
| 6917   | 0     | 1     | 0     | 0     |
| 6923   | 0     | 0     | 0     | 1     |
| 6934   | 0     | 0     | 0     | 0     |
| 6937   |       |       |       |       |
| 6945   | 0     | 0     | 0     | 0     |
| 6954   | 0     | 0     | 0     | 0     |
| 6956   | 0     | 0     | 0     | 0     |
| 6958   | 0     | 0     | 0     | 1     |
| 6961   | 0     | 0     | 0     | 0     |
| 6963   | 0     | 0     | 0     | 0     |
| 6964   | 0     | 0     | 0     | 0     |
| 6976   |       |       |       |       |
| 6977   | 0     | 0     | 0     | 0     |
| 7000   | 0     | 0     | 0     | 1     |
| 7001   | 0     | 0     | 0     | 0     |
| 7005   | 0     | 0     | 0     | 0     |
| 7006   | 0     | 0     | 0     | 0     |
| 7008   | 1     | 0     | 0     | 1     |
| 7009   | 0     | 0     | 0     | 0     |
| 7019   | 0     | 0     | 0     | 0     |
| 7021   | 0     | 0     | 0     | 0     |
| 7026   | 0     | 0     | 0     | 0     |
| 7030   | 0     | 0     | 0     | 0     |
| 7034   |       |       |       |       |
| 7039   | 0     | 0     | 0     | 0     |
| 7041   | 0     | 0     | 0     | 0     |
| 7047   | 0     | 0     | 0     | 0     |
| 7051   | 0     | 0     | 0     | 0     |
| 7052   | 0     | 0     | 0     | 0     |
| 7059   | 0     | 0     | 0     | 0     |
| 7062   | 0     | 0     | 0     | 0     |
| 7065   | 1     | 0     | 0     | 0     |

| respid | Q43_5 | Q43_6 | Q43_7 | Q43_8 |
|--------|-------|-------|-------|-------|
| 7066   | 0     | 0     | 0     | 0     |
| 7069   | 0     | 0     | 0     | 0     |
| 7070   |       |       |       |       |
| 7073   |       |       |       |       |
| 7078   | 0     | 0     | 0     | 0     |
| 7083   | 0     | 0     | 0     | 0     |
| 7084   | 1     | 0     | 0     | 1     |
| 7085   | 0     | 0     | 0     | 0     |
| 7088   | 0     | 0     | 0     | 0     |
| 7090   | 0     | 0     | 0     | 0     |
| 7095   | 0     | 0     | 0     | 0     |
| 7100   |       |       |       |       |
| 7102   | 0     | 0     | 0     | 0     |
| 7103   | 0     | 1     | 0     | 0     |
| 7108   | 0     | 0     | 0     | 0     |
| 7109   | 0     | 0     | 0     | 0     |
| 7110   |       |       |       |       |
| 7112   |       |       |       |       |
| 7114   | 0     | 0     | 0     | 0     |
| 7116   | 0     | 0     | 0     | 0     |
| 7117   | 1     | 0     | 0     | 1     |
| 7118   | 0     | 0     | 0     | 1     |
| 7120   | 1     | 0     | 0     | 1     |
| 7124   | 0     | 0     | 0     | 0     |
| 7130   | 0     | 0     | 0     | 0     |
| 7135   | 0     | 0     | 0     | 0     |
| 7137   | 0     | 1     | 0     | 0     |
| 7140   | 0     | 0     | 0     | 0     |
| 7141   | 0     | 0     | 0     | 0     |
| 7148   | 0     | 0     | 0     | 0     |
| 7152   |       |       |       |       |
| 7154   | 0     | 0     | 0     | 0     |

| respid | Q43_5 | Q43_6 | Q43_7 | Q43_8 |
|--------|-------|-------|-------|-------|
| 7156   | 0     | 0     | 0     | 0     |
| 7158   | 0     | 0     | 0     | 0     |
| 7159   |       |       |       |       |
| 7161   |       |       |       |       |
| 7164   | 0     | 0     | 0     | 0     |
| 7166   |       |       |       |       |
| 7167   |       |       |       |       |
| 7168   |       |       |       |       |
| 7170   |       |       |       |       |
| 7171   | 0     | 0     | 0     | 0     |
| 7172   | 0     | 0     | 0     | 0     |
| 7173   | 1     | 0     | 0     | 0     |
| 7175   | 0     | 0     | 0     | 0     |
| 7176   | 0     | 0     | 0     | 0     |
| 7180   | 0     | 0     | 0     | 0     |
| 7183   | 0     | 0     | 0     | 0     |
| 7189   | 0     | 0     | 0     | 0     |
| 7193   | 0     | 0     | 0     | 0     |
| 7194   | 1     | 0     | 0     | 0     |
| 7195   | 0     | 0     | 0     | 0     |
| 7200   | 0     | 0     | 0     | 0     |
| 7201   | 0     | 0     | 0     | 0     |
| 7205   | 1     | 1     | 0     | 0     |
| 7207   | 0     | 0     | 0     | 0     |
| 7208   |       |       |       |       |
| 7210   | 0     | 0     | 0     | 0     |
| 7211   | 0     | 0     | 0     | 0     |
| 7217   | 1     | 0     | 0     | 0     |
| 7218   | 0     | 0     | 0     | 0     |
| 7220   |       |       |       |       |
| 7225   | 0     | 0     | 0     | 0     |
| 7228   | 1     | 0     | 0     | 0     |

| respid | Q43_5 | Q43_6 | Q43_7 | Q43_8 |
|--------|-------|-------|-------|-------|
| 7230   | 1     | 0     | 0     | 0     |
| 7233   | 0     | 0     | 0     | 0     |
| 7234   | 0     | 0     | 0     | 0     |
| 7235   |       |       |       |       |
| 7236   |       |       |       |       |
| 7241   | 0     | 0     | 0     | 0     |
| 7251   | 0     | 0     | 0     | 0     |
| 7253   | 0     | 0     | 0     | 0     |
| 7259   | 0     | 0     | 0     | 0     |
| 7260   | 0     | 0     | 0     | 0     |
| 7261   | 0     | 0     | 0     | 0     |
| 7263   | 0     | 0     | 0     | 0     |
| 7265   |       |       |       |       |
| 7268   | 0     | 0     | 0     | 0     |
| 7269   |       |       |       |       |
| 7271   | 0     | 1     | 0     | 0     |
| 7276   | 0     | 0     | 0     | 0     |
| 7280   | 0     | 0     | 0     | 0     |
| 7283   | 0     | 0     | 0     | 0     |
| 7284   | 0     | 0     | 0     | 0     |
| 7286   | 0     | 0     | 0     | 0     |
| 7287   |       |       |       |       |
| 7288   | 0     | 0     | 0     | 0     |
| 7294   | 0     | 0     | 0     | 0     |
| 7295   | 0     | 0     | 0     | 0     |
| 7296   | 1     | 0     | 0     | 0     |
| 7297   | 0     | 0     | 0     | 0     |
| 7299   | 0     | 0     | 0     | 0     |
| 7300   | 0     | 0     | 0     | 0     |
| 7301   | 1     | 0     | 0     | 0     |
| 7302   |       |       |       |       |
| 7306   | 0     | 0     | 0     | 0     |

| respid | Q43_5 | Q43_6 | Q43_7 | Q43_8 |
|--------|-------|-------|-------|-------|
| 7313   | 1     | 0     | 0     | 0     |
| 7315   | 1     | 1     | 0     | 0     |
| 7317   | 0     | 0     | 0     | 0     |
| 7321   | 0     | 0     | 0     | 0     |
| 7322   | 1     | 1     | 0     | 0     |
| 7323   | 1     | 0     | 1     | 0     |
| 7333   | 1     | 0     | 0     | 0     |
| 7335   | 0     | 0     | 0     | 0     |
| 7336   | 0     | 1     | 0     | 0     |
| 7337   | 0     | 0     | 0     | 0     |
| 7338   | 0     | 0     | 0     | 0     |
| 7340   | 0     | 0     | 0     | 0     |
| 7341   | 0     | 0     | 0     | 0     |
| 7342   | 0     | 0     | 0     | 0     |
| 7344   | 0     | 0     | 0     | 0     |
| 7346   | 1     | 0     | 1     | 1     |
| 7347   | 0     | 0     | 0     | 0     |
| 7349   | 1     | 1     | 0     | 0     |
| 7352   | 0     | 0     | 0     | 0     |
| 7353   | 0     | 0     | 0     | 0     |
| 7355   | 0     | 0     | 0     | 0     |
| 7356   |       |       |       |       |
| 7360   | 1     | 1     | 0     | 0     |
| 7371   | 0     | 0     | 0     | 0     |
| 7376   | 0     | 0     | 0     | 0     |
| 7379   | 1     | 0     | 0     | 0     |
| 7381   | 0     | 0     | 0     | 0     |
| 7386   | 0     | 0     | 0     | 0     |
| 7389   | 1     | 0     | 0     | 0     |
| 7390   | 1     | 0     | 1     | 0     |
| 7393   | 0     | 0     | 0     | 0     |
| 7394   | 0     | 0     | 0     | 0     |

| respid | Q43_5 | Q43_6 | Q43_7 | Q43_8 |
|--------|-------|-------|-------|-------|
| 7396   | 1     | 1     | 1     | 1     |
| 7400   | 1     | 0     | 0     | 0     |
| 7401   | 0     | 0     | 0     | 1     |
| 7403   | 0     | 1     | 0     | 0     |
| 7406   | 0     | 0     | 0     | 0     |
| 7409   | 0     | 0     | 0     | 0     |
| 7410   | 1     | 0     | 1     | 1     |
| 7412   | 0     | 1     | 0     | 0     |
| 7414   | 0     | 0     | 0     | 0     |
| 7415   | 1     | 0     | 0     | 0     |
| 7417   | 0     | 1     | 1     | 0     |
| 7421   | 1     | 0     | 0     | 0     |
| 7425   | 0     | 0     | 0     | 0     |
| 7430   | 0     | 0     | 1     | 0     |
| 7432   | 0     | 0     | 0     | 0     |
| 7433   | 0     | 0     | 0     | 0     |
| 7442   | 0     | 0     | 1     | 0     |
| 7445   | 0     | 0     | 0     | 0     |
| 7446   | 0     | 0     | 0     | 0     |
| 7449   |       |       |       |       |
| 7450   |       |       |       |       |
| 7451   | 0     | 0     | 0     | 0     |
| 7459   | 0     | 0     | 0     | 0     |
| 7462   | 0     | 0     | 0     | 0     |
| 7463   | 0     | 0     | 0     | 0     |
| 7469   |       |       |       |       |
| 7482   | 0     | 0     | 0     | 0     |
| 7484   | 1     | 0     | 0     | 1     |
| 7486   | 0     | 1     | 1     | 0     |
| 7496   | 0     | 0     | 0     | 0     |
| 7502   | 0     | 0     | 0     | 0     |
| 7504   | 1     | 0     | 0     | 0     |

| respid | Q43_5 | Q43_6 | Q43_7 | Q43_8 |
|--------|-------|-------|-------|-------|
| 7509   | 1     | 1     | 1     | 1     |
| 7513   | 0     | 0     | 0     | 0     |
| 7514   |       |       |       |       |
| 7520   | 0     | 0     | 0     | 0     |
| 7523   |       |       |       |       |
| 7526   | 0     | 0     | 0     | 0     |
| 7529   | 0     | 0     | 0     | 0     |
| 7534   |       |       |       |       |
| 7536   | 1     | 0     | 0     | 0     |
| 7540   | 0     | 1     | 1     | 0     |
| 7541   | 1     | 0     | 0     | 0     |
| 7542   |       |       |       |       |
| 7555   | 0     | 0     | 0     | 0     |
| 7566   | 0     | 0     | 0     | 0     |
| 7568   | 0     | 0     | 0     | 0     |
| 7570   | 0     | 1     | 0     | 0     |
| 7572   | 0     | 0     | 0     | 0     |
| 7573   | 1     | 0     | 0     | 0     |
| 7576   | 0     | 0     | 0     | 0     |
| 7577   | 1     | 0     | 0     | 0     |
| 7583   | 0     | 0     | 0     | 0     |
| 7584   | 0     | 0     | 0     | 0     |
| 7585   | 0     | 0     | 0     | 1     |
| 7586   | 0     | 0     | 0     | 0     |
| 7587   | 0     | 0     | 0     | 0     |
| 7588   | 0     | 0     | 0     | 0     |
| 7596   | 0     | 0     | 0     | 0     |
| 7599   | 0     | 0     | 0     | 0     |
| 7600   | 0     | 0     | 0     | 0     |
| 7602   | 0     | 0     | 0     | 0     |
| 7613   | 0     | 0     | 0     | 0     |
| 7620   | 0     | 0     | 0     | 1     |

| respid | Q43_5 | Q43_6 | Q43_7 | Q43_8 |
|--------|-------|-------|-------|-------|
| 7623   | 0     | 0     | 0     | 0     |
| 7635   | 0     | 0     | 0     | 0     |
| 7636   | 0     | 0     | 0     | 0     |
| 7643   | 0     | 0     | 0     | 0     |
| 7645   | 1     | 0     | 0     | 0     |
| 7649   | 0     | 1     | 1     | 0     |
| 7651   | 0     | 0     | 0     | 0     |
| 7652   | 0     | 0     | 0     | 0     |
| 7655   | 0     | 0     | 0     | 0     |
| 7657   | 0     | 0     | 0     | 0     |
| 7675   | 0     | 0     | 0     | 0     |
| 7676   | 0     | 0     | 1     | 1     |
| 7684   | 0     | 0     | 0     | 0     |
| 7693   | 0     | 0     | 1     | 0     |
| 7694   | 0     | 0     | 0     | 0     |
| 7695   | 0     | 0     | 0     | 0     |
| 7696   | 0     | 0     | 0     | 0     |
| 7698   | 0     | 0     | 0     | 0     |
| 7700   | 0     | 0     | 0     | 0     |
| 7701   | 0     | 0     | 0     | 0     |
| 7704   | 0     | 0     | 0     | 0     |
| 7709   | 0     | 0     | 0     | 0     |
| 7713   | 0     | 0     | 0     | 0     |
| 7714   | 0     | 0     | 0     | 0     |
| 7718   | 1     | 0     | 1     | 0     |
| 7720   | 0     | 0     | 0     | 0     |
| 7721   | 1     | 0     | 0     | 0     |
| 7722   | 0     | 0     | 0     | 0     |
| 7724   | 1     | 0     | 0     | 0     |
| 7728   |       |       |       |       |
| 7731   | 0     | 0     | 0     | 0     |
| 7735   | 0     | 0     | 0     | 0     |



| respid | Q43_5 | Q43_6 | Q43_7 | Q43_8 |
|--------|-------|-------|-------|-------|
| 7737   | 0     | 0     | 0     | 0     |
| 7741   | 0     | 0     | 0     | 0     |
| 7746   | 0     | 0     | 0     | 0     |
| 7747   | 0     | 0     | 0     | 0     |
| 7748   | 0     | 0     | 0     | 0     |
| 7750   | 0     | 0     | 0     | 0     |
| 7754   | 0     | 0     | 0     | 0     |
| 7755   | 0     | 0     | 0     | 0     |
| 7762   |       |       |       |       |
| 7764   | 0     | 0     | 0     | 0     |
| 7766   |       |       |       |       |
| 7768   | 0     | 0     | 0     | 0     |
| 7770   | 0     | 0     | 0     | 1     |
| 7771   | 0     | 0     | 0     | 0     |
| 7777   | 0     | 0     | 0     | 0     |
| 7778   |       |       |       |       |
| 7783   | 1     | 1     | 1     | 1     |
| 7789   | 0     | 0     | 0     | 0     |
| 7790   | 0     | 0     | 0     | 0     |
| 7795   | 0     | 0     | 0     | 0     |
| 7807   | 0     | 0     | 0     | 0     |
| 7808   | 1     | 1     | 0     | 0     |
| 7818   | 0     | 0     | 0     | 0     |
| 7820   |       |       |       |       |
| 7831   | 0     | 0     | 0     | 0     |
| 7832   | 1     | 0     | 0     | 0     |
| 7837   | 1     | 0     | 0     | 0     |
| 7841   | 1     | 1     | 1     | 0     |
| 7845   | 1     | 0     | 0     | 0     |
| 7853   | 1     | 0     | 0     | 0     |
| 7854   | 0     | 0     | 0     | 0     |
| 7862   | 0     | 0     | 0     | 0     |

| respid | Q43_5 | Q43_6 | Q43_7 | Q43_8 |
|--------|-------|-------|-------|-------|
| 7871   | 0     | 0     | 0     | 0     |
| 7875   | 0     | 0     | 0     | 0     |
| 7880   | 0     | 0     | 0     | 0     |
| 7881   | 0     | 0     | 0     | 0     |
| 7883   | 0     | 0     | 1     | 1     |
| 7896   | 0     | 0     | 0     | 0     |
| 7905   | 0     | 0     | 0     | 0     |
| 7919   | 0     | 0     | 0     | 0     |
| 7928   | 1     | 0     | 0     | 1     |
| 7929   | 0     | 0     | 0     | 0     |
| 7938   | 1     | 0     | 1     | 0     |
| 7940   | 0     | 0     | 0     | 0     |
| 7941   | 0     | 0     | 1     | 1     |
| 7952   |       |       |       |       |
| 7962   | 0     | 0     | 0     | 0     |
| 7968   | 0     | 0     | 0     | 0     |
| 7972   | 0     | 0     | 0     | 0     |
| 7983   | 1     | 0     | 1     | 0     |
| 7990   | 0     | 0     | 0     | 0     |
| 7993   | 0     | 0     | 0     | 0     |
| 8005   | 0     | 0     | 0     | 0     |
| 8008   |       |       |       |       |
| 8012   | 0     | 0     | 0     | 0     |
| 8021   | 0     | 0     | 0     | 0     |
| 8024   | 0     | 0     | 0     | 0     |
| 8043   | 0     | 0     | 0     | 0     |
| 8051   | 0     | 0     | 0     | 0     |
| 8056   | 0     | 0     | 0     | 0     |
| 8061   | 1     | 0     | 0     | 0     |
| 8066   |       |       |       |       |
| 8069   | 0     | 0     | 0     | 0     |
| 8071   | 0     | 0     | 0     | 0     |

| respid | Q43_5 | Q43_6 | Q43_7 | Q43_8 |
|--------|-------|-------|-------|-------|
| 8072   | 0     | 0     | 0     | 0     |
| 8076   | 0     | 0     | 0     | 0     |
| 8080   | 0     | 0     | 0     | 1     |
| 8083   | 1     | 0     | 1     | 1     |
| 8093   | 1     | 1     | 1     | 1     |
| 8095   | 1     | 0     | 0     | 1     |
| 8099   | 0     | 0     | 0     | 0     |
| 8100   | 0     | 0     | 0     | 0     |
| 8103   |       |       |       |       |
| 8104   | 0     | 1     | 1     | 1     |
| 8115   | 0     | 0     | 0     | 0     |
| 8121   | 0     | 0     | 0     | 0     |
| 8128   | 0     | 0     | 0     | 0     |
| 8130   | 0     | 0     | 0     | 0     |
| 8131   | 0     | 0     | 0     | 0     |
| 8133   | 0     | 0     | 0     | 0     |
| 8143   | 0     | 0     | 0     | 0     |
| 8144   | 0     | 0     | 0     | 0     |
| 8146   | 0     | 0     | 0     | 0     |
| 8148   |       |       |       |       |
| 8157   |       |       |       |       |
| 8164   |       |       |       |       |
| 8173   |       |       |       |       |
| 8176   | 0     | 0     | 0     | 0     |
| 8179   | 0     | 0     | 0     | 0     |
| 8181   |       |       |       |       |
| 8182   | 0     | 0     | 0     | 0     |
| 8196   | 0     | 0     | 0     | 0     |
| 8200   | 0     | 0     | 0     | 0     |
| 8203   | 0     | 0     | 0     | 0     |
| 8204   | 0     | 0     | 0     | 0     |
| 8206   | 0     | 0     | 0     | 0     |

| respid | Q43_5 | Q43_6 | Q43_7 | Q43_8 |
|--------|-------|-------|-------|-------|
| 8208   | 0     | 0     | 0     | 0     |
| 8212   | 0     | 0     | 0     | 0     |
| 8222   | 0     | 1     | 0     | 0     |
| 8223   | 0     | 0     | 0     | 0     |
| 8225   | 0     | 0     | 0     | 0     |
| 8226   | 0     | 0     | 0     | 0     |
| 8228   | 1     | 0     | 0     | 0     |
| 8229   | 0     | 0     | 0     | 0     |
| 8239   | 0     | 0     | 0     | 0     |
| 8246   | 0     | 0     | 0     | 0     |
| 8258   | 0     | 0     | 0     | 0     |
| 8260   | 0     | 0     | 0     | 0     |
| 8262   | 0     | 0     | 1     | 0     |
| 8263   | 0     | 0     | 0     | 0     |
| 8267   | 0     | 0     | 0     | 0     |
| 8271   | 0     | 0     | 0     | 0     |
| 8274   | 0     | 0     | 0     | 0     |
| 8275   | 1     | 0     | 0     | 0     |
| 8279   | 0     | 0     | 0     | 0     |
| 8285   | 1     | 1     | 1     | 1     |
| 8287   | 0     | 0     | 0     | 0     |
| 8289   | 0     | 0     | 0     | 0     |
| 8291   | 0     | 0     | 0     | 0     |
| 8299   | 1     | 0     | 1     | 0     |
| 8301   | 1     | 1     | 0     | 0     |
| 8302   | 0     | 0     | 0     | 0     |
| 8308   | 0     | 0     | 1     | 0     |
| 8313   | 1     | 0     | 1     | 1     |
| 8316   | 0     | 0     | 0     | 0     |
| 8317   | 0     | 0     | 0     | 0     |
| 8319   | 0     | 0     | 0     | 0     |
| 8323   | 0     | 0     | 0     | 0     |

| respid | Q43_5 | Q43_6 | Q43_7 | Q43_8 |
|--------|-------|-------|-------|-------|
| 8324   | 0     | 0     | 0     | 0     |
| 8327   | 0     | 0     | 0     | 0     |
| 8328   | 0     | 0     | 0     | 0     |
| 8342   | 0     | 0     | 0     | 0     |
| 8350   | 0     | 0     | 0     | 0     |
| 8352   | 0     | 0     | 0     | 0     |
| 8353   | 0     | 0     | 0     | 0     |
| 8356   | 0     | 0     | 0     | 0     |
| 8367   | 1     | 0     | 1     | 0     |
| 8373   | 0     | 0     | 0     | 0     |
| 8379   |       |       |       |       |
| 8382   | 0     | 0     | 0     | 0     |
| 8387   | 1     | 0     | 0     | 0     |
| 8409   | 0     | 0     | 0     | 0     |
| 8410   | 0     | 0     | 0     | 0     |
| 8412   | 1     | 0     | 0     | 0     |
| 8415   | 0     | 0     | 0     | 0     |
| 8417   | 0     | 0     | 0     | 0     |
| 8422   | 0     | 0     | 0     | 0     |
| 8430   | 0     | 1     | 0     | 0     |
| 8434   | 1     | 0     | 0     | 0     |
| 8436   |       |       |       |       |
| 8446   | 1     | 1     | 1     | 0     |
| 8447   | 1     | 0     | 0     | 0     |
| 8448   | 0     | 0     | 0     | 0     |
| 8455   | 0     | 0     | 0     | 0     |
| 8456   | 0     | 0     | 0     | 0     |
| 8459   | 0     | 0     | 0     | 0     |
| 8460   | 0     | 0     | 0     | 0     |
| 8464   | 0     | 0     | 0     | 0     |
| 8470   | 1     | 0     | 0     | 0     |
| 8473   | 0     | 0     | 0     | 0     |

| respid | Q43_5 | Q43_6 | Q43_7 | Q43_8 |
|--------|-------|-------|-------|-------|
| 8486   | 0     | 0     | 0     | 0     |
| 8487   | 0     | 0     | 0     | 0     |
| 8489   | 0     | 0     | 0     | 0     |
| 8494   | 1     | 0     | 1     | 0     |
| 8495   | 0     | 1     | 1     | 1     |
| 8497   | 0     | 0     | 0     | 1     |
| 8510   | 0     | 0     | 0     | 0     |
| 8515   | 1     | 0     | 0     | 0     |
| 8526   |       |       |       |       |
| 8530   |       |       |       |       |
| 8532   | 0     | 0     | 0     | 0     |
| 8533   |       |       |       |       |
| 8534   | 0     | 0     | 1     | 1     |
| 8572   | 0     | 0     | 0     | 0     |
| 8582   | 0     | 0     | 0     | 0     |
| 8584   | 0     | 0     | 0     | 0     |
| 8585   |       |       |       |       |
| 8586   |       |       |       |       |
| 8589   | 1     | 0     | 1     | 0     |
| 8593   | 0     | 0     | 0     | 0     |
| 8594   | 0     | 0     | 0     | 0     |
| 8601   | 1     | 0     | 0     | 0     |
| 8603   | 0     | 0     | 0     | 0     |
| 8604   |       |       |       |       |
| 8605   |       |       |       |       |
| 8607   | 0     | 0     | 0     | 0     |
| 8623   | 0     | 0     | 0     | 0     |
| 8626   | 1     | 0     | 1     | 0     |
| 8638   | 0     | 0     | 0     | 0     |
| 8640   | 1     | 0     | 0     | 0     |
| 8641   | 0     | 0     | 0     | 0     |
| 8643   | 0     | 0     | 0     | 0     |

| respid | Q43_5 | Q43_6 | Q43_7 | Q43_8 |
|--------|-------|-------|-------|-------|
| 8644   | 0     | 1     | 1     | 0     |
| 8646   | 0     | 0     | 0     | 0     |
| 8647   |       |       |       |       |
| 8649   | 0     | 0     | 0     | 0     |
| 8650   | 1     | 0     | 0     | 0     |
| 8658   | 0     | 0     | 0     | 0     |
| 8659   | 0     | 0     | 0     | 0     |
| 8669   | 0     | 0     | 0     | 0     |
| 8672   | 0     | 0     | 0     | 0     |
| 8673   | 1     | 1     | 0     | 0     |
| 8676   | 0     | 0     | 0     | 0     |
| 8677   |       |       |       |       |
| 8681   | 0     | 0     | 0     | 0     |
| 8688   | 0     | 0     | 1     | 1     |
| 8689   | 1     | 1     | 1     | 1     |
| 8690   | 0     | 0     | 0     | 0     |
| 8693   | 0     | 0     | 0     | 0     |
| 8694   | 0     | 0     | 0     | 0     |
| 8699   | 1     | 1     | 0     | 0     |
| 8700   |       |       |       |       |
| 8703   | 0     | 0     | 0     | 0     |
| 8704   | 0     | 0     | 0     | 0     |
| 8706   | 0     | 0     | 0     | 0     |
| 8709   | 0     | 0     | 0     | 1     |
| 8715   | 0     | 0     | 0     | 0     |
| 8728   | 0     | 0     | 0     | 0     |
| 8729   | 0     | 0     | 0     | 0     |
| 8730   | 1     | 0     | 0     | 0     |
| 8742   | 0     | 0     | 0     | 0     |
| 8748   | 0     | 0     | 0     | 0     |
| 8749   | 0     | 0     | 1     | 1     |
| 8750   | 0     | 0     | 0     | 0     |

| respid | Q43_5 | Q43_6 | Q43_7 | Q43_8 |
|--------|-------|-------|-------|-------|
| 8751   | 0     | 0     | 0     | 0     |
| 8752   | 0     | 0     | 0     | 0     |
| 8754   | 0     | 0     | 0     | 0     |
| 8757   | 0     | 0     | 0     | 0     |
| 8760   | 0     | 0     | 0     | 0     |
| 8761   | 0     | 0     | 0     | 0     |
| 8762   | 0     | 0     | 0     | 0     |
| 8763   | 0     | 0     | 0     | 0     |
| 8764   | 0     | 0     | 0     | 0     |
| 8765   | 0     | 0     | 0     | 0     |
| 8766   | 0     | 0     | 0     | 0     |
| 8767   | 1     | 0     | 0     | 0     |
| 8768   | 0     | 0     | 0     | 0     |
| 8770   | 0     | 0     | 0     | 0     |
| 8771   |       |       |       |       |
| 8773   | 0     | 0     | 0     | 0     |
| 8774   | 0     | 0     | 0     | 0     |
| 8776   | 0     | 0     | 0     | 0     |
| 8777   | 0     | 0     | 0     | 0     |
| 8778   | 0     | 0     | 0     | 0     |
| 8779   |       |       |       |       |
| 8784   | 0     | 0     | 0     | 0     |
| 8786   |       |       |       |       |
| 8787   | 0     | 0     | 0     | 0     |
| 8790   |       |       |       |       |
| 8791   | 1     | 1     | 1     | 0     |
| 8793   |       |       |       |       |
| 8795   | 0     | 0     | 0     | 0     |
| 8797   | 0     | 0     | 0     | 0     |
| 8801   | 0     | 0     | 0     | 0     |
| 8802   | 0     | 0     | 0     | 0     |
| 8807   |       |       |       |       |



| respid | Q43_5 | Q43_6 | Q43_7 | Q43_8 |
|--------|-------|-------|-------|-------|
| 8813   | 0     | 0     | 0     | 0     |
| 8817   | 0     | 0     | 0     | 0     |
| 8818   | 1     | 0     | 0     | 1     |
| 8821   | 0     | 0     | 0     | 0     |
| 8822   | 0     | 0     | 0     | 0     |
| 8823   | 0     | 0     | 0     | 0     |
| 8824   | 0     | 0     | 0     | 0     |
| 8825   | 0     | 0     | 0     | 0     |
| 8834   | 0     | 0     | 0     | 0     |
| 8840   | 0     | 0     | 0     | 0     |
| 8843   | 0     | 0     | 0     | 0     |
| 8846   | 0     | 0     | 0     | 0     |
| 8862   |       |       |       |       |
| 8866   | 0     | 1     | 1     | 0     |
| 8869   | 0     | 0     | 1     | 0     |
| 8872   | 0     | 0     | 0     | 0     |
| 8903   |       |       |       |       |
| 8909   |       |       |       |       |
| 8926   | 1     | 0     | 0     | 0     |
| 8936   | 0     | 0     | 0     | 0     |
| 8945   |       |       |       |       |
| 8954   | 0     | 0     | 0     | 0     |
| 8955   | 0     | 0     | 0     | 1     |
| 8958   | 1     | 1     | 1     | 1     |
| 8959   | 0     | 0     | 0     | 0     |
| 8960   | 0     | 0     | 0     | 0     |
| 8976   | 0     | 0     | 0     | 0     |
| 8977   | 0     | 0     | 0     | 0     |
| 8979   | 0     | 0     | 0     | 0     |
| 8985   |       |       |       |       |
| 8994   | 0     | 0     | 0     | 0     |
| 8997   | 0     | 0     | 0     | 0     |

| respid | Q43_5 | Q43_6 | Q43_7 | Q43_8 |
|--------|-------|-------|-------|-------|
| 9002   | 0     | 0     | 0     | 0     |
| 9005   | 1     | 1     | 1     | 0     |
| 9017   | 0     | 0     | 0     | 0     |
| 9018   | 0     | 0     | 0     | 0     |
| 9021   | 0     | 0     | 0     | 0     |
| 9029   | 1     | 0     | 0     | 0     |
| 9035   | 0     | 0     | 0     | 0     |
| 9038   | 0     | 0     | 1     | 0     |
| 9039   |       |       |       |       |
| 9040   | 0     | 0     | 0     | 0     |
| 9042   | 0     | 0     | 0     | 0     |
| 9043   | 0     | 0     | 0     | 0     |
| 9045   | 0     | 0     | 0     | 0     |
| 9051   | 0     | 0     | 0     | 0     |
| 9067   | 0     | 0     | 0     | 0     |
| 9069   | 0     | 0     | 0     | 0     |
| 9073   | 0     | 0     | 0     | 0     |
| 9084   | 0     | 0     | 0     | 0     |
| 9096   |       |       |       |       |
| 9100   | 0     | 0     | 0     | 0     |
| 9107   |       |       |       |       |
| 9110   | 0     | 0     | 0     | 0     |
| 9120   | 0     | 0     | 0     | 0     |
| 9122   | 0     | 0     | 0     | 0     |
| 9130   | 0     | 0     | 0     | 0     |
| 9134   | 0     | 0     | 0     | 0     |
| 9137   | 1     | 1     | 0     | 0     |
| 9139   | 0     | 0     | 0     | 0     |
| 9144   |       |       |       |       |
| 9157   | 0     | 0     | 0     | 0     |
| 9166   | 1     | 0     | 0     | 0     |
| 9177   | 1     | 0     | 0     | 0     |

| respid | Q43_5 | Q43_6 | Q43_7 | Q43_8 |
|--------|-------|-------|-------|-------|
| 9181   | 0     | 0     | 0     | 0     |
| 9183   | 0     | 0     | 0     | 0     |
| 9184   | 0     | 0     | 0     | 0     |
| 9188   |       |       |       |       |
| 9197   | 0     | 0     | 0     | 0     |
| 9200   | 0     | 0     | 0     | 0     |
| 9205   | 0     | 1     | 0     | 0     |
| 9207   | 0     | 0     | 0     | 0     |
| 9213   | 0     | 0     | 0     | 0     |
| 9216   | 1     | 0     | 0     | 0     |
| 9217   |       |       |       |       |
| 9218   | 0     | 0     | 0     | 0     |
| 9219   | 1     | 0     | 1     | 0     |
| 9220   |       |       |       |       |
| 9221   | 1     | 0     | 0     | 1     |
| 9223   | 1     | 1     | 1     | 0     |
| 9228   |       |       |       |       |
| 9230   | 0     | 0     | 0     | 0     |
| 9231   | 1     | 0     | 0     | 0     |
| 9233   | 0     | 0     | 0     | 0     |
| 9235   | 0     | 0     | 0     | 0     |
| 9237   | 0     | 0     | 0     | 0     |
| 9242   | 0     | 0     | 0     | 0     |
| 9250   |       |       |       |       |
| 9253   | 0     | 0     | 0     | 0     |
| 9257   | 0     | 0     | 0     | 0     |
| 9263   | 0     | 0     | 0     | 0     |
| 9267   | 0     | 0     | 0     | 0     |
| 9272   | 1     | 0     | 0     | 0     |
| 9279   |       |       |       |       |
| 9281   | 0     | 0     | 0     | 0     |
| 9285   | 0     | 0     | 0     | 0     |

| respid | Q43_5 | Q43_6 | Q43_7 | Q43_8 |
|--------|-------|-------|-------|-------|
| 9286   | 0     | 0     | 0     | 0     |
| 9294   | 0     | 0     | 0     | 0     |
| 9295   | 0     | 0     | 0     | 0     |
| 9297   | 1     | 0     | 0     | 0     |
| 9299   | 0     | 0     | 0     | 0     |
| 9309   | 0     | 0     | 0     | 0     |
| 9315   |       |       |       |       |
| 9320   | 0     | 0     | 0     | 0     |
| 9324   | 0     | 0     | 0     | 0     |
| 9326   | 0     | 0     | 0     | 0     |
| 9333   | 0     | 0     | 0     | 0     |
| 9334   | 0     | 0     | 0     | 0     |
| 9336   | 0     | 0     | 0     | 0     |
| 9337   | 0     | 0     | 0     | 0     |
| 9342   | 0     | 0     | 0     | 0     |
| 9347   | 0     | 0     | 0     | 0     |
| 9352   | 0     | 0     | 0     | 0     |
| 9355   | 0     | 0     | 0     | 0     |
| 9356   | 0     | 0     | 0     | 0     |
| 9359   | 0     | 0     | 0     | 0     |
| 9368   | 0     | 0     | 0     | 0     |
| 9375   | 0     | 0     | 0     | 1     |
| 9384   | 0     | 0     | 0     | 0     |
| 9388   | 0     | 0     | 0     | 0     |
| 9397   | 0     | 0     | 0     | 0     |
| 9400   | 0     | 0     | 0     | 0     |
| 9401   | 1     | 0     | 0     | 0     |
| 9402   |       |       |       |       |
| 9417   | 0     | 0     | 0     | 0     |
| 9424   | 0     | 0     | 0     | 0     |
| 9427   | 0     | 0     | 0     | 0     |
| 9429   | 0     | 0     | 0     | 0     |

| respid | Q43_5 | Q43_6 | Q43_7 | Q43_8 |
|--------|-------|-------|-------|-------|
| 9437   | 0     | 0     | 0     | 0     |
| 9442   | 1     | 0     | 0     | 1     |
| 9446   | 0     | 0     | 0     | 0     |
| 9447   | 0     | 0     | 0     | 0     |
| 9448   | 0     | 0     | 0     | 0     |
| 9449   | 0     | 0     | 0     | 0     |
| 9455   |       |       |       |       |
| 9459   | 1     | 0     | 0     | 0     |
| 9460   | 0     | 0     | 0     | 0     |
| 9461   | 1     | 0     | 0     | 0     |
| 9463   | 0     | 0     | 0     | 0     |
| 9464   | 0     | 0     | 1     | 1     |
| 9466   | 0     | 0     | 0     | 0     |
| 9477   | 0     | 0     | 0     | 0     |
| 9482   | 0     | 0     | 0     | 1     |
| 9486   | 0     | 0     | 0     | 0     |
| 9488   | 0     | 0     | 0     | 0     |
| 9489   | 0     | 0     | 0     | 0     |
| 9496   | 0     | 0     | 0     | 0     |
| 9499   | 0     | 0     | 0     | 0     |
| 9512   | 0     | 1     | 0     | 0     |
| 9514   | 0     | 0     | 0     | 0     |
| 9516   | 0     | 0     | 0     | 0     |
| 9517   | 0     | 0     | 0     | 0     |
| 9520   | 0     | 0     | 0     | 0     |
| 9527   | 0     | 0     | 0     | 0     |
| 9532   | 1     | 0     | 0     | 0     |
| 9533   | 0     | 0     | 0     | 0     |
| 9543   | 0     | 0     | 0     | 0     |
| 9550   | 0     | 0     | 0     | 0     |
| 9553   | 0     | 0     | 0     | 0     |
| 9555   | 0     | 0     | 0     | 0     |

| respid | Q43_5 | Q43_6 | Q43_7 | Q43_8 |
|--------|-------|-------|-------|-------|
| 9565   | 0     | 0     | 0     | 0     |
| 9583   | 0     | 0     | 0     | 0     |
| 9594   | 0     | 0     | 0     | 0     |
| 9596   | 0     | 0     | 1     | 0     |
| 9600   | 0     | 0     | 0     | 0     |
| 9602   | 0     | 0     | 0     | 0     |
| 9606   | 0     | 0     | 0     | 0     |
| 9608   | 1     | 0     | 0     | 0     |
| 9610   | 1     | 0     | 0     | 0     |
| 9612   | 0     | 0     | 0     | 0     |
| 9613   | 0     | 0     | 0     | 0     |
| 9614   | 0     | 0     | 0     | 0     |
| 9620   | 0     | 0     | 0     | 0     |
| 9628   | 0     | 0     | 0     | 0     |
| 9631   | 0     | 0     | 0     | 0     |
| 9632   | 0     | 0     | 0     | 0     |
| 9633   | 1     | 0     | 0     | 0     |
| 9639   |       |       |       |       |
| 9640   | 0     | 0     | 0     | 0     |
| 9642   | 0     | 0     | 0     | 0     |
| 9653   | 0     | 0     | 0     | 0     |
| 9658   | 0     | 0     | 0     | 0     |
| 9659   | 0     | 0     | 0     | 0     |
| 9661   | 0     | 0     | 0     | 0     |
| 9664   | 0     | 0     | 0     | 0     |
| 9665   | 1     | 1     | 0     | 0     |
| 9666   | 0     | 0     | 0     | 0     |
| 9667   | 1     | 0     | 0     | 1     |
| 9668   |       |       |       |       |
| 9670   | 1     | 0     | 1     | 0     |
| 9671   | 1     | 0     | 0     | 0     |
| 9681   | 0     | 0     | 0     | 0     |

| respid | Q43_5 | Q43_6 | Q43_7 | Q43_8 |
|--------|-------|-------|-------|-------|
| 9684   | 0     | 0     | 0     | 0     |
| 9685   | 0     | 0     | 0     | 1     |
| 9686   | 0     | 0     | 0     | 0     |
| 9688   | 0     | 0     | 0     | 0     |
| 9692   | 0     | 0     | 0     | 0     |
| 9693   | 0     | 0     | 0     | 0     |
| 9698   | 0     | 0     | 0     | 0     |
| 9699   | 1     | 0     | 0     | 0     |
| 9701   | 0     | 0     | 0     | 0     |
| 9702   | 0     | 0     | 0     | 0     |
| 9709   | 0     | 0     | 0     | 0     |
| 9713   |       |       |       |       |
| 9715   |       |       |       |       |
| 9721   | 0     | 0     | 0     | 0     |
| 9725   | 0     | 0     | 0     | 0     |
| 9729   | 1     | 0     | 0     | 0     |
| 9731   | 0     | 0     | 0     | 0     |
| 9736   | 0     | 0     | 0     | 0     |
| 9740   |       |       |       |       |
| 9741   | 0     | 0     | 0     | 0     |
| 9749   | 1     | 0     | 0     | 0     |
| 9750   | 0     | 0     | 0     | 0     |
| 9751   | 1     | 1     | 0     | 1     |
| 9753   | 1     | 0     | 0     | 0     |
| 9754   | 0     | 0     | 0     | 0     |
| 9756   | 0     | 0     | 0     | 0     |
| 9758   | 1     | 0     | 0     | 0     |
| 9759   | 0     | 0     | 0     | 0     |
| 9760   | 0     | 0     | 0     | 0     |
| 9761   |       |       |       |       |
| 9762   | 0     | 0     | 0     | 0     |
| 9764   | 0     | 0     | 0     | 0     |

| respid | Q43_5 | Q43_6 | Q43_7 | Q43_8 |
|--------|-------|-------|-------|-------|
| 9768   | 0     | 0     | 0     | 0     |
| 9769   | 0     | 0     | 0     | 0     |
| 9770   | 0     | 0     | 0     | 0     |
| 9771   | 0     | 0     | 0     | 0     |
| 9772   | 0     | 0     | 0     | 0     |
| 9773   | 1     | 0     | 0     | 0     |
| 9776   | 0     | 0     | 0     | 0     |
| 9786   | 0     | 0     | 0     | 0     |
| 9790   | 0     | 0     | 0     | 0     |
| 9791   | 0     | 0     | 0     | 0     |
| 9794   | 0     | 0     | 0     | 0     |
| 9797   | 0     | 0     | 0     | 0     |
| 9799   | 0     | 0     | 0     | 0     |
| 9804   | 0     | 0     | 0     | 0     |
| 9805   | 0     | 0     | 0     | 0     |
| 9806   | 0     | 0     | 0     | 0     |
| 9807   | 0     | 0     | 0     | 0     |
| 9813   | 0     | 0     | 0     | 0     |
| 9817   | 0     | 0     | 0     | 0     |
| 9823   | 0     | 0     | 0     | 0     |
| 9826   | 0     | 0     | 0     | 0     |
| 9830   | 0     | 0     | 0     | 0     |
| 9835   | 0     | 0     | 0     | 0     |
| 9836   | 0     | 0     | 0     | 0     |
| 9841   |       |       |       |       |
| 9842   | 0     | 0     | 0     | 0     |
| 9844   | 0     | 0     | 0     | 0     |
| 9847   | 0     | 0     | 0     | 0     |
| 9851   | 0     | 0     | 0     | 0     |
| 9852   | 0     | 0     | 0     | 0     |
| 9854   | 0     | 0     | 0     | 0     |
| 9855   | 1     | 0     | 0     | 0     |



| respid | Q43_5 | Q43_6 | Q43_7 | Q43_8 |
|--------|-------|-------|-------|-------|
| 9856   | 0     | 0     | 0     | 0     |
| 9862   | 0     | 0     | 0     | 0     |
| 9863   |       |       |       |       |
| 9866   | 0     | 0     | 0     | 0     |
| 9867   | 0     | 0     | 1     | 1     |
| 9868   | 1     | 0     | 0     | 1     |
| 9869   | 0     | 0     | 0     | 0     |
| 9878   | 0     | 0     | 0     | 0     |
| 9879   | 0     | 0     | 0     | 0     |
| 9881   | 0     | 0     | 0     | 0     |
| 9882   | 0     | 0     | 0     | 0     |
| 9884   | 0     | 0     | 0     | 0     |
| 9885   | 0     | 0     | 0     | 0     |
| 9888   | 0     | 0     | 0     | 0     |
| 9889   | 0     | 0     | 0     | 0     |
| 9894   | 0     | 0     | 0     | 0     |
| 9895   | 0     | 0     | 0     | 0     |
| 9896   | 0     | 0     | 0     | 0     |
| 9897   | 0     | 0     | 0     | 0     |
| 9905   | 0     | 0     | 0     | 0     |
| 9907   | 0     | 0     | 0     | 0     |
| 9908   | 0     | 0     | 1     | 0     |
| 9909   | 1     | 0     | 0     | 0     |
| 9910   | 0     | 0     | 0     | 0     |
| 9913   | 0     | 0     | 0     | 0     |
| 9914   | 0     | 0     | 0     | 0     |
| 9915   | 0     | 0     | 0     | 0     |
| 9916   | 0     | 0     | 0     | 0     |
| 9918   |       |       |       |       |
| 9919   | 0     | 1     | 1     | 0     |
| 9922   | 0     | 0     | 0     | 0     |
| 9930   | 0     | 0     | 0     | 0     |

| respid | Q43_5 | Q43_6 | Q43_7 | Q43_8 |
|--------|-------|-------|-------|-------|
| 9934   | 0     | 0     | 0     | 0     |
| 9936   | 0     | 0     | 0     | 0     |
| 9938   | 0     | 0     | 0     | 0     |
| 9940   | 0     | 0     | 0     | 0     |
| 9944   | 0     | 0     | 0     | 0     |
| 9945   | 0     | 0     | 0     | 0     |
| 9948   | 0     | 0     | 0     | 0     |
| 9949   | 0     | 0     | 0     | 0     |
| 9951   | 0     | 0     | 0     | 0     |
| 9952   | 0     | 0     | 0     | 0     |
| 9954   | 0     | 0     | 0     | 0     |
| 9955   | 0     | 0     | 0     | 0     |
| 9956   | 0     | 0     | 0     | 0     |
| 9957   | 0     | 0     | 0     | 0     |
| 9958   | 0     | 0     | 0     | 0     |
| 9959   | 1     | 0     | 0     | 0     |
| 9960   | 0     | 0     | 0     | 0     |
| 9961   | 0     | 0     | 0     | 0     |
| 9962   | 0     | 0     | 0     | 0     |
| 9969   | 0     | 0     | 0     | 0     |
| 9982   | 0     | 0     | 0     | 0     |
| 9984   | 0     | 0     | 0     | 0     |
| 9990   | 0     | 0     | 0     | 0     |
| 9992   | 0     | 0     | 0     | 0     |
| 9993   | 0     | 0     | 0     | 0     |
| 9997   | 0     | 0     | 0     | 0     |
| 9999   | 0     | 0     | 0     | 0     |
| 10000  | 0     | 0     | 0     | 0     |
| 10005  | 0     | 0     | 0     | 0     |
| 10014  | 0     | 0     | 0     | 0     |
| 10016  | 0     | 0     | 0     | 0     |
| 10017  | 0     | 0     | 0     | 0     |

| respid | Q43_5 | Q43_6 | Q43_7 | Q43_8 |
|--------|-------|-------|-------|-------|
| 10018  | 0     | 0     | 0     | 0     |
| 10021  | 0     | 0     | 0     | 0     |
| 10025  | 1     | 1     | 1     | 0     |
| 10027  | 0     | 0     | 0     | 0     |
| 10028  | 0     | 0     | 0     | 0     |
| 10031  | 0     | 0     | 0     | 0     |
| 10036  | 0     | 0     | 0     | 0     |
| 10037  | 0     | 0     | 0     | 0     |
| 10038  | 1     | 0     | 1     | 0     |
| 10039  |       |       |       |       |
| 10041  | 1     | 0     | 0     | 0     |
| 10045  | 1     | 0     | 0     | 0     |
| 10046  | 0     | 0     | 0     | 0     |
| 10047  | 1     | 0     | 0     | 1     |
| 10048  | 1     | 0     | 0     | 0     |
| 10049  | 0     | 0     | 0     | 0     |
| 10051  | 0     | 0     | 0     | 0     |
| 10052  | 1     | 1     | 1     | 1     |
| 10056  | 0     | 0     | 0     | 0     |
| 10061  | 0     | 0     | 0     | 0     |
| 10064  | 0     | 0     | 0     | 0     |
| 10066  | 0     | 0     | 0     | 0     |
| 10069  | 0     | 0     | 0     | 0     |
| 10071  | 0     | 0     | 0     | 0     |
| 10074  | 0     | 0     | 0     | 0     |
| 10079  | 0     | 0     | 0     | 0     |
| 10087  | 1     | 0     | 0     | 0     |
| 10095  | 0     | 0     | 0     | 0     |
| 10097  | 0     | 0     | 0     | 0     |
| 10100  | 0     | 0     | 0     | 0     |
| 10105  | 0     | 0     | 0     | 0     |
| 10107  | 0     | 0     | 0     | 0     |

| respid | Q43_5 | Q43_6 | Q43_7 | Q43_8 |
|--------|-------|-------|-------|-------|
| 10111  | 0     | 0     | 0     | 0     |
| 10116  | 0     | 0     | 0     | 0     |
| 10118  | 0     | 0     | 0     | 0     |
| 10123  |       |       |       |       |
| 10124  | 0     | 0     | 0     | 0     |
| 10130  | 0     | 0     | 0     | 0     |
| 10134  | 0     | 0     | 0     | 0     |
| 10135  | 0     | 0     | 0     | 0     |
| 10136  |       |       |       |       |
| 10141  | 0     | 0     | 0     | 0     |
| 10142  | 0     | 0     | 0     | 0     |
| 10143  | 0     | 0     | 0     | 0     |
| 10145  | 0     | 0     | 0     | 0     |
| 10149  | 1     | 1     | 1     | 1     |
| 10150  | 0     | 0     | 0     | 0     |
| 10151  | 0     | 0     | 0     | 0     |
| 10152  | 0     | 0     | 0     | 1     |
| 10153  | 0     | 0     | 0     | 0     |
| 10156  | 0     | 0     | 0     | 0     |
| 10160  | 0     | 0     | 0     | 0     |
| 10161  | 0     | 0     | 0     | 0     |
| 10167  | 0     | 0     | 0     | 0     |
| 10171  |       |       |       |       |
| 10172  | 0     | 0     | 0     | 0     |
| 10176  | 0     | 1     | 1     | 1     |
| 10177  | 1     | 0     | 0     | 0     |
| 10182  | 0     | 0     | 0     | 1     |
| 10184  | 0     | 0     | 0     | 0     |
| 10186  | 1     | 1     | 0     | 1     |
| 10189  | 0     | 0     | 0     | 0     |
| 10191  | 0     | 0     | 0     | 0     |
| 10192  | 0     | 0     | 0     | 0     |

| respid | Q43_5 | Q43_6 | Q43_7 | Q43_8 |
|--------|-------|-------|-------|-------|
| 10195  | 0     | 0     | 0     | 0     |
| 10199  |       |       |       |       |
| 10201  | 0     | 0     | 0     | 0     |
| 10213  | 0     | 0     | 0     | 0     |
| 10222  | 0     | 0     | 0     | 0     |
| 10224  |       |       |       |       |
| 10245  | 0     | 0     | 0     | 0     |
| 10254  | 0     | 0     | 0     | 0     |
| 10255  | 1     | 0     | 1     | 1     |
| 10257  | 1     | 1     | 1     | 0     |
| 10260  | 0     | 0     | 1     | 0     |
| 10261  | 0     | 0     | 0     | 0     |
| 10263  | 0     | 0     | 0     | 0     |
| 10264  | 0     | 0     | 0     | 0     |
| 10268  | 1     | 0     | 1     | 0     |
| 10269  | 0     | 0     | 0     | 0     |
| 10270  |       |       |       |       |
| 10282  | 0     | 0     | 0     | 0     |
| 10285  |       |       |       |       |
| 10288  | 0     | 1     | 1     | 1     |
| 10291  | 0     | 0     | 0     | 0     |
| 10292  | 0     | 0     | 0     | 0     |
| 10304  |       |       |       |       |
| 10305  | 1     | 0     | 0     | 0     |
| 10310  | 0     | 0     | 0     | 0     |
| 10324  | 0     | 0     | 0     | 0     |
| 10325  | 0     | 0     | 0     | 0     |
| 10326  | 0     | 0     | 0     | 0     |
| 10329  |       |       |       |       |
| 10332  | 0     | 0     | 0     | 0     |
| 10337  | 0     | 0     | 0     | 0     |
| 10341  | 0     | 0     | 0     | 0     |

| respid | Q43_5 | Q43_6 | Q43_7 | Q43_8 |
|--------|-------|-------|-------|-------|
| 10353  | 0     | 0     | 0     | 0     |
| 10354  |       |       |       |       |
| 10359  | 0     | 0     | 0     | 1     |
| 10360  | 0     | 0     | 0     | 0     |
| 10362  | 0     | 0     | 0     | 0     |
| 10364  | 0     | 1     | 0     | 0     |
| 10366  | 0     | 0     | 0     | 0     |
| 10367  | 0     | 0     | 0     | 0     |
| 10371  | 0     | 0     | 0     | 0     |
| 10374  | 0     | 0     | 0     | 0     |
| 10375  | 0     | 0     | 0     | 0     |
| 10376  | 0     | 0     | 0     | 0     |
| 10377  | 0     | 0     | 0     | 0     |
| 10378  | 0     | 1     | 1     | 0     |
| 10387  | 0     | 0     | 0     | 0     |
| 10396  | 0     | 0     | 0     | 0     |
| 10397  | 0     | 0     | 0     | 0     |
| 10399  | 0     | 0     | 0     | 0     |
| 10405  | 0     | 0     | 0     | 0     |
| 10406  | 0     | 0     | 0     | 0     |
| 10408  | 0     | 0     | 0     | 0     |
| 10409  |       |       |       |       |
| 10412  | 0     | 0     | 0     | 0     |
| 10413  | 0     | 0     | 0     | 0     |
| 10419  | 0     | 1     | 1     | 1     |
| 10423  | 0     | 0     | 0     | 0     |
| 10426  | 0     | 0     | 0     | 0     |
| 10446  | 0     | 0     | 0     | 0     |
| 10448  | 0     | 0     | 0     | 0     |
| 10450  | 0     | 0     | 0     | 0     |
| 10455  | 0     | 0     | 0     | 0     |
| 10460  | 0     | 0     | 0     | 0     |

| respid | Q43_5 | Q43_6 | Q43_7 | Q43_8 |
|--------|-------|-------|-------|-------|
| 10461  | 0     | 0     | 0     | 0     |
| 10471  | 0     | 0     | 0     | 0     |
| 10472  | 0     | 0     | 0     | 0     |
| 10491  | 1     | 0     | 1     | 1     |
| 10493  | 0     | 0     | 0     | 0     |
| 10498  | 0     | 0     | 0     | 0     |
| 10533  | 0     | 0     | 0     | 0     |
| 10539  | 0     | 0     | 0     | 0     |
| 10540  | 0     | 0     | 0     | 0     |
| 10557  | 0     | 0     | 0     | 0     |
| 10558  | 0     | 0     | 0     | 0     |
| 10559  | 1     | 0     | 0     | 0     |
| 10564  | 0     | 1     | 0     | 0     |
| 10570  |       |       |       |       |
| 10572  | 0     | 0     | 0     | 0     |
| 10576  | 0     | 0     | 0     | 0     |
| 10582  | 0     | 0     | 0     | 0     |
| 10593  | 0     | 0     | 0     | 0     |
| 10596  | 0     | 0     | 0     | 0     |
| 10615  |       |       |       |       |
| 10616  | 0     | 0     | 0     | 0     |
| 10623  | 0     | 0     | 0     | 0     |
| 10626  | 1     | 1     | 0     | 0     |
| 10627  | 0     | 0     | 0     | 0     |
| 10629  | 0     | 0     | 1     | 1     |
| 10632  | 1     | 0     | 0     | 0     |
| 10641  |       |       |       |       |
| 10648  | 0     | 0     | 0     | 0     |
| 10651  | 0     | 0     | 0     | 0     |
| 10654  | 0     | 0     | 0     | 0     |
| 10673  | 0     | 0     | 0     | 0     |
| 10675  | 0     | 0     | 0     | 0     |

| respid | Q43_5 | Q43_6 | Q43_7 | Q43_8 |
|--------|-------|-------|-------|-------|
| 10689  | 0     | 0     | 0     | 0     |
| 10692  | 0     | 0     | 0     | 0     |
| 10694  | 0     | 0     | 0     | 0     |
| 10695  | 0     | 0     | 0     | 0     |
| 10702  | 0     | 0     | 0     | 0     |
| 10703  | 0     | 0     | 0     | 0     |
| 10708  | 0     | 0     | 0     | 0     |
| 10719  | 0     | 0     | 0     | 0     |
| 10722  | 0     | 0     | 0     | 0     |
| 10723  | 0     | 0     | 0     | 1     |
| 10726  | 0     | 0     | 0     | 0     |
| 10727  | 0     | 0     | 0     | 0     |
| 10730  | 0     | 0     | 0     | 0     |
| 10731  |       |       |       |       |
| 10737  | 0     | 0     | 0     | 0     |
| 10743  | 1     | 0     | 0     | 0     |
| 10763  | 0     | 0     | 0     | 0     |
| 10777  |       |       |       |       |
| 10787  | 0     | 0     | 0     | 0     |
| 10798  | 0     | 0     | 0     | 0     |
| 10800  | 0     | 0     | 0     | 0     |
| 10802  | 1     | 1     | 0     | 0     |
| 10803  | 0     | 0     | 0     | 0     |
| 10808  | 0     | 0     | 0     | 0     |
| 10810  | 0     | 0     | 0     | 0     |
| 10819  | 0     | 0     | 0     | 0     |
| 10825  | 0     | 0     | 0     | 0     |
| 10827  | 1     | 0     | 0     | 1     |
| 10830  | 0     | 0     | 1     | 1     |
| 10847  | 0     | 0     | 0     | 0     |
| 10849  | 0     | 0     | 0     | 0     |
| 10852  | 0     | 0     | 0     | 0     |



| respid | Q43_5 | Q43_6 | Q43_7 | Q43_8 |
|--------|-------|-------|-------|-------|
| 10854  | 0     | 0     | 0     | 0     |
| 10857  | 0     | 0     | 0     | 0     |
| 10861  | 1     | 0     | 0     | 0     |
| 10862  |       |       |       |       |
| 10870  | 1     | 0     | 1     | 0     |
| 10873  | 0     | 0     | 0     | 0     |
| 10881  | 1     | 0     | 0     | 0     |
| 10893  |       |       |       |       |
| 10898  | 1     | 0     | 0     | 0     |
| 10899  | 0     | 0     | 0     | 0     |
| 10905  | 0     | 0     | 0     | 0     |
| 10910  |       |       |       |       |
| 10911  | 1     | 0     | 0     | 0     |
| 10912  | 0     | 0     | 0     | 0     |
| 10913  | 0     | 0     | 0     | 0     |
| 10918  |       |       |       |       |
| 10995  |       |       |       |       |
| 11002  | 1     | 0     | 0     | 0     |
| 11003  | 0     | 0     | 0     | 0     |
| 11005  | 0     | 0     | 0     | 0     |
| 11015  | 0     | 0     | 0     | 0     |
| 11016  | 0     | 0     | 0     | 0     |
| 11017  | 0     | 0     | 0     | 0     |
| 11020  | 0     | 0     | 0     | 0     |
| 11024  | 1     | 0     | 0     | 0     |
| 11026  | 1     | 0     | 0     | 0     |
| 11028  | 0     | 0     | 0     | 0     |
| 11029  | 0     | 1     | 0     | 0     |
| 11030  | 0     | 0     | 0     | 0     |
| 11031  | 0     | 0     | 0     | 0     |
| 11038  | 0     | 0     | 0     | 0     |
| 11051  | 0     | 0     | 0     | 0     |

| respid | Q43_5 | Q43_6 | Q43_7 | Q43_8 |
|--------|-------|-------|-------|-------|
| 11052  | 0     | 0     | 0     | 0     |
| 11053  | 0     | 0     | 0     | 0     |
| 11054  | 0     | 0     | 0     | 0     |
| 11063  | 0     | 0     | 0     | 0     |
| 11075  | 1     | 0     | 1     | 0     |
| 11083  | 1     | 0     | 0     | 0     |
| 11092  | 0     | 0     | 0     | 0     |
| 11118  | 0     | 0     | 0     | 0     |
| 11119  | 0     | 0     | 0     | 0     |
| 11134  | 0     | 0     | 0     | 0     |
| 11139  | 0     | 0     | 0     | 0     |
| 11154  | 0     | 0     | 0     | 0     |
| 11166  | 0     | 0     | 0     | 0     |
| 11168  |       |       |       |       |
| 11176  | 0     | 0     | 0     | 0     |
| 11183  | 0     | 0     | 0     | 0     |
| 11189  | 0     | 0     | 0     | 0     |
| 11196  | 1     | 0     | 0     | 0     |
| 11200  | 0     | 0     | 0     | 0     |
| 11201  | 0     | 0     | 0     | 0     |
| 11211  | 1     | 0     | 0     | 0     |
| 11218  | 0     | 0     | 0     | 0     |
| 11219  | 0     | 0     | 0     | 0     |
| 11221  | 0     | 0     | 0     | 0     |
| 11222  | 0     | 0     | 0     | 0     |
| 11230  | 1     | 0     | 0     | 0     |
| 11236  | 1     | 0     | 0     | 0     |
| 11237  | 0     | 0     | 0     | 0     |
| 11240  | 0     | 0     | 0     | 0     |
| 11244  | 1     | 0     | 0     | 0     |
| 11249  | 1     | 0     | 0     | 0     |
| 11252  | 1     | 0     | 0     | 0     |

| respid | Q43_5 | Q43_6 | Q43_7 | Q43_8 |
|--------|-------|-------|-------|-------|
| 11254  | 1     | 0     | 0     | 0     |
| 11255  | 0     | 0     | 0     | 0     |
| 11258  | 1     | 0     | 0     | 0     |
| 11260  | 0     | 0     | 0     | 0     |
| 11264  | 1     | 1     | 1     | 0     |
| 11266  | 0     | 1     | 1     | 1     |
| 11268  | 0     | 0     | 0     | 1     |
| 11269  | 0     | 0     | 0     | 0     |
| 11272  | 1     | 0     | 0     | 0     |
| 11273  | 0     | 0     | 0     | 0     |
| 11275  | 1     | 0     | 0     | 0     |
| 11276  | 0     | 0     | 0     | 0     |
| 11278  | 1     | 0     | 0     | 0     |
| 11288  |       |       |       |       |
| 11289  |       |       |       |       |
| 11291  | 0     | 0     | 0     | 0     |
| 11295  | 0     | 0     | 0     | 0     |
| 11297  | 0     | 0     | 0     | 0     |
| 11304  | 1     | 0     | 1     | 1     |
| 11305  | 0     | 0     | 0     | 0     |
| 11311  | 0     | 0     | 0     | 0     |
| 11313  | 0     | 0     | 0     | 0     |
| 11315  | 0     | 0     | 0     | 0     |
| 11316  | 0     | 0     | 0     | 0     |
| 11318  | 1     | 1     | 1     | 0     |
| 11323  | 0     | 0     | 0     | 0     |
| 11331  | 1     | 1     | 1     | 0     |
| 11333  | 0     | 0     | 0     | 0     |
| 11334  | 0     | 0     | 0     | 0     |
| 11340  | 1     | 0     | 1     | 0     |
| 11345  | 0     | 0     | 1     | 0     |
| 11354  | 0     | 0     | 0     | 0     |

| respid | Q43_5 | Q43_6 | Q43_7 | Q43_8 |
|--------|-------|-------|-------|-------|
| 11360  |       |       |       |       |
| 11361  | 0     | 1     | 1     | 0     |
| 11367  |       |       |       |       |
| 11370  |       |       |       |       |
| 11371  | 1     | 0     | 0     | 1     |
| 11372  | 1     | 0     | 1     | 0     |
| 11373  | 0     | 0     | 0     | 0     |
| 11382  | 0     | 0     | 0     | 0     |
| 11394  | 0     | 0     | 0     | 0     |
| 11395  | 1     | 0     | 0     | 0     |
| 11397  |       |       |       |       |
| 11402  | 0     | 0     | 0     | 0     |
| 11409  | 1     | 0     | 0     | 0     |
| 11410  | 0     | 0     | 0     | 0     |
| 11411  | 0     | 0     | 0     | 0     |
| 11418  | 0     | 0     | 0     | 0     |
| 11425  | 1     | 0     | 0     | 0     |
| 11429  | 0     | 0     | 0     | 0     |
| 11430  | 0     | 0     | 0     | 0     |
| 11431  | 0     | 1     | 0     | 0     |
| 11432  |       |       |       |       |
| 11433  | 0     | 0     | 0     | 0     |
| 11435  | 0     | 0     | 0     | 0     |
| 11436  | 1     | 0     | 0     | 0     |
| 11437  | 0     | 0     | 0     | 0     |
| 11439  |       |       |       |       |
| 11440  | 0     | 0     | 0     | 0     |
| 11447  | 0     | 0     | 0     | 0     |
| 11455  | 0     | 0     | 0     | 0     |
| 11456  | 1     | 0     | 0     | 0     |
| 11461  | 0     | 0     | 0     | 1     |
| 11463  | 0     | 0     | 1     | 1     |

| respid | Q43_5 | Q43_6 | Q43_7 | Q43_8 |
|--------|-------|-------|-------|-------|
| 11470  | 0     | 0     | 1     | 0     |
| 11472  |       |       |       |       |
| 11475  | 0     | 0     | 0     | 0     |
| 11476  | 0     | 0     | 0     | 0     |
| 11482  | 1     | 0     | 0     | 0     |
| 11501  | 1     | 0     | 0     | 1     |
| 11503  | 1     | 0     | 1     | 0     |
| 11505  | 0     | 0     | 0     | 0     |
| 11510  | 1     | 0     | 0     | 0     |
| 11519  |       |       |       |       |
| 11527  | 0     | 0     | 0     | 0     |
| 11529  | 1     | 0     | 0     | 0     |
| 11530  | 0     | 0     | 0     | 0     |
| 11536  | 1     | 0     | 0     | 0     |
| 11543  | 0     | 0     | 0     | 0     |
| 11548  | 0     | 0     | 0     | 0     |
| 11566  | 0     | 0     | 0     | 0     |
| 11570  | 0     | 0     | 0     | 0     |
| 11571  | 0     | 0     | 0     | 0     |
| 11578  |       |       |       |       |
| 11579  | 0     | 0     | 0     | 0     |
| 11581  | 0     | 0     | 0     | 0     |
| 11582  | 0     | 0     | 0     | 0     |
| 11583  | 0     | 0     | 0     | 0     |
| 11589  | 1     | 0     | 0     | 0     |
| 11590  | 0     | 0     | 0     | 0     |
| 11592  | 0     | 0     | 0     | 0     |
| 11596  |       |       |       |       |
| 11598  | 0     | 0     | 0     | 0     |
| 11602  | 0     | 0     | 0     | 0     |
| 11605  | 1     | 0     | 0     | 1     |
| 11618  | 0     | 0     | 0     | 0     |

| respid | Q43_5 | Q43_6 | Q43_7 | Q43_8 |
|--------|-------|-------|-------|-------|
| 11621  | 1     | 0     | 0     | 0     |
| 11630  | 0     | 0     | 0     | 1     |
| 11636  | 0     | 0     | 0     | 0     |
| 11640  | 1     | 0     | 0     | 0     |
| 11658  | 0     | 0     | 0     | 0     |
| 11665  | 1     | 0     | 0     | 0     |
| 11666  | 0     | 0     | 0     | 1     |
| 11667  | 0     | 0     | 0     | 0     |
| 11674  | 0     | 0     | 0     | 0     |
| 11680  | 0     | 0     | 0     | 0     |
| 11683  | 0     | 0     | 0     | 0     |
| 11688  | 1     | 0     | 0     | 0     |
| 11690  |       |       |       |       |
| 11694  |       |       |       |       |
| 11705  | 0     | 0     | 0     | 0     |
| 11720  | 0     | 0     | 0     | 0     |
| 11724  |       |       |       |       |
| 11738  | 0     | 0     | 0     | 0     |
| 11744  | 0     | 0     | 0     | 0     |
| 11745  | 1     | 0     | 0     | 0     |
| 11747  |       |       |       |       |
| 11755  | 1     | 0     | 1     | 1     |
| 11756  | 0     | 0     | 0     | 0     |
| 11772  | 1     | 0     | 0     | 0     |
| 11773  |       |       |       |       |
| 11778  | 1     | 0     | 0     | 0     |
| 11790  | 1     | 0     | 0     | 0     |
| 11794  |       |       |       |       |
| 11795  | 0     | 0     | 0     | 1     |
| 11799  | 1     | 0     | 0     | 0     |
| 11803  | 0     | 0     | 0     | 0     |
| 11806  | 0     | 0     | 0     | 0     |

| respid | Q43_5 | Q43_6 | Q43_7 | Q43_8 |
|--------|-------|-------|-------|-------|
| 11808  | 0     | 0     | 0     | 0     |
| 11810  |       |       |       |       |
| 11811  |       |       |       |       |
| 11812  | 0     | 0     | 0     | 0     |
| 11813  | 0     | 0     | 0     | 0     |
| 11821  | 0     | 0     | 0     | 0     |
| 11827  |       |       |       |       |
| 11831  | 1     | 1     | 0     | 0     |
| 11841  |       |       |       |       |
| 11872  | 1     | 0     | 0     | 0     |
| 11898  | 0     | 0     | 0     | 0     |
| 11902  | 1     | 0     | 0     | 0     |
| 11912  | 0     | 0     | 0     | 0     |
| 11926  | 0     | 0     | 0     | 0     |
| 11928  | 0     | 0     | 0     | 0     |
| 11932  | 1     | 1     | 1     | 1     |
| 11934  | 0     | 0     | 0     | 0     |
| 11941  | 0     | 0     | 0     | 0     |
| 11942  |       |       |       |       |
| 11943  | 1     | 1     | 0     | 1     |
| 11944  | 0     | 0     | 0     | 0     |
| 11955  |       |       |       |       |
| 11958  | 0     | 0     | 0     | 0     |
| 11968  | 1     | 0     | 0     | 0     |
| 11979  | 0     | 0     | 0     | 1     |
| 11988  |       |       |       |       |
| 11999  | 1     | 0     | 0     | 0     |
| 12002  | 0     | 0     | 0     | 0     |
| 12004  | 0     | 0     | 0     | 0     |
| 12008  | 0     | 0     | 0     | 0     |
| 12013  | 0     | 0     | 0     | 0     |
| 12018  | 0     | 1     | 1     | 1     |

| respid | Q43_5 | Q43_6 | Q43_7 | Q43_8 |
|--------|-------|-------|-------|-------|
| 12023  | 1     | 0     | 0     | 0     |
| 12027  | 1     | 0     | 0     | 0     |
| 12030  | 0     | 0     | 0     | 0     |
| 12031  | 0     | 0     | 0     | 0     |
| 12036  | 0     | 0     | 0     | 0     |
| 12037  | 1     | 0     | 1     | 1     |
| 12038  | 0     | 0     | 0     | 0     |
| 12039  | 0     | 0     | 0     | 0     |
| 12045  | 0     | 0     | 0     | 0     |
| 12046  | 0     | 0     | 0     | 0     |
| 12054  | 0     | 1     | 1     | 1     |
| 12055  | 1     | 1     | 0     | 0     |
| 12069  | 0     | 0     | 0     | 0     |
| 12070  | 1     | 0     | 0     | 1     |
| 12074  | 0     | 0     | 0     | 0     |
| 12075  | 1     | 0     | 0     | 0     |
| 12078  | 0     | 0     | 0     | 0     |
| 12089  | 0     | 0     | 0     | 0     |
| 12091  | 0     | 0     | 0     | 0     |
| 12092  | 1     | 0     | 0     | 0     |
| 12108  | 0     | 0     | 0     | 0     |
| 12111  | 1     | 0     | 1     | 1     |
| 12112  | 0     | 0     | 0     | 0     |
| 12126  |       |       |       |       |
| 12132  | 0     | 0     | 0     | 0     |
| 12150  | 1     | 0     | 0     | 0     |
| 12152  | 0     | 0     | 0     | 0     |
| 12154  | 0     | 0     | 0     | 0     |
| 12157  | 0     | 0     | 0     | 0     |
| 12165  | 0     | 0     | 0     | 0     |
| 12169  | 1     | 0     | 1     | 1     |
| 12182  | 1     | 0     | 0     | 0     |



| respid | Q43_5 | Q43_6 | Q43_7 | Q43_8 |
|--------|-------|-------|-------|-------|
| 12198  | 0     | 0     | 0     | 0     |
| 12199  |       |       |       |       |
| 12202  | 1     | 0     | 1     | 0     |
| 12207  | 0     | 0     | 0     | 0     |
| 12208  | 0     | 0     | 1     | 1     |
| 12210  | 0     | 0     | 0     | 0     |
| 12219  | 0     | 0     | 0     | 0     |
| 12224  | 0     | 0     | 0     | 0     |
| 12230  | 0     | 0     | 0     | 0     |
| 12238  | 0     | 0     | 0     | 0     |
| 12239  | 0     | 0     | 0     | 0     |
| 12243  | 0     | 0     | 0     | 0     |
| 12245  | 0     | 0     | 0     | 0     |
| 12246  | 0     | 0     | 0     | 0     |
| 12247  | 0     | 0     | 0     | 0     |
| 12248  | 0     | 0     | 0     | 0     |
| 12249  | 0     | 0     | 0     | 0     |
| 12258  | 0     | 0     | 0     | 0     |
| 12265  | 0     | 0     | 0     | 0     |
| 12269  | 1     | 0     | 0     | 0     |
| 12270  | 0     | 0     | 0     | 0     |
| 12279  | 0     | 0     | 0     | 0     |
| 12280  | 0     | 0     | 0     | 0     |
| 12282  | 0     | 0     | 0     | 0     |
| 12283  | 0     | 0     | 0     | 0     |
| 12287  | 0     | 0     | 0     | 0     |
| 12288  | 0     | 0     | 0     | 0     |
| 12290  | 0     | 0     | 0     | 0     |
| 12292  | 0     | 0     | 0     | 0     |
| 12294  | 0     | 0     | 0     | 0     |
| 12296  | 0     | 0     | 0     | 0     |
| 12307  | 0     | 0     | 0     | 0     |

| respid | Q43_5 | Q43_6 | Q43_7 | Q43_8 |
|--------|-------|-------|-------|-------|
| 12309  | 0     | 0     | 0     | 0     |
| 12312  | 1     | 0     | 1     | 0     |
| 12317  | 0     | 0     | 0     | 0     |
| 12319  | 0     | 0     | 0     | 0     |
| 12320  | 0     | 0     | 0     | 0     |
| 12322  | 0     | 0     | 0     | 0     |
| 12328  | 1     | 0     | 0     | 0     |
| 12331  | 1     | 1     | 1     | 1     |
| 12332  | 0     | 0     | 0     | 0     |
| 12334  | 0     | 0     | 0     | 0     |
| 12337  | 0     | 0     | 0     | 0     |
| 12338  | 0     | 0     | 0     | 0     |
| 12342  | 0     | 0     | 1     | 0     |
| 12349  | 0     | 0     | 0     | 0     |
| 12352  | 0     | 0     | 0     | 1     |
| 12355  | 0     | 0     | 0     | 0     |
| 12357  | 0     | 0     | 0     | 0     |
| 12358  | 0     | 0     | 0     | 0     |
| 12371  | 1     | 0     | 0     | 0     |
| 12372  | 0     | 0     | 0     | 0     |
| 12373  | 0     | 0     | 0     | 0     |
| 12379  | 0     | 0     | 0     | 0     |
| 12381  | 1     | 1     | 0     | 0     |
| 12383  | 0     | 0     | 0     | 0     |
| 12384  | 0     | 0     | 0     | 0     |
| 12386  | 0     | 0     | 0     | 0     |
| 12389  |       |       |       |       |
| 12392  | 0     | 0     | 0     | 0     |
| 12396  | 0     | 0     | 0     | 0     |
| 12397  | 0     | 0     | 0     | 0     |
| 12399  | 0     | 1     | 0     | 0     |
| 12400  | 0     | 0     | 0     | 0     |

| respid | Q43_5 | Q43_6 | Q43_7 | Q43_8 |
|--------|-------|-------|-------|-------|
| 12406  | 0     | 0     | 0     | 0     |
| 12407  | 0     | 0     | 0     | 0     |
| 12410  | 0     | 0     | 0     | 0     |
| 12413  | 0     | 0     | 0     | 0     |
| 12416  | 0     | 0     | 0     | 0     |
| 12419  | 0     | 0     | 0     | 0     |
| 12422  | 0     | 0     | 0     | 0     |
| 12423  | 0     | 0     | 0     | 0     |
| 12429  | 0     | 0     | 0     | 0     |
| 12434  | 1     | 1     | 1     | 1     |
| 12435  | 0     | 0     | 0     | 0     |
| 12436  | 1     | 1     | 0     | 0     |
| 12442  |       |       |       |       |
| 12449  | 0     | 0     | 0     | 0     |
| 12451  | 0     | 0     | 0     | 0     |
| 12456  | 0     | 0     | 0     | 0     |
| 12457  | 0     | 0     | 0     | 0     |
| 12458  | 0     | 0     | 0     | 0     |
| 12461  | 0     | 0     | 0     | 0     |
| 12462  | 0     | 0     | 0     | 0     |
| 12463  | 1     | 0     | 0     | 0     |
| 12466  | 0     | 0     | 1     | 0     |
| 12470  | 1     | 0     | 0     | 0     |
| 12471  | 0     | 0     | 0     | 0     |
| 12472  | 0     | 0     | 0     | 0     |
| 12478  | 1     | 0     | 0     | 0     |
| 12479  | 0     | 0     | 0     | 0     |
| 12481  | 0     | 0     | 0     | 0     |
| 12482  | 0     | 0     | 0     | 0     |
| 12483  |       |       |       |       |
| 12496  | 0     | 0     | 0     | 0     |
| 12497  | 0     | 0     | 0     | 0     |

| respid | Q43_5 | Q43_6 | Q43_7 | Q43_8 |
|--------|-------|-------|-------|-------|
| 12498  | 1     | 1     | 1     | 1     |
| 12500  | 1     | 0     | 0     | 0     |
| 12501  | 0     | 0     | 0     | 0     |
| 12502  | 0     | 0     | 0     | 1     |
| 12503  | 0     | 0     | 0     | 0     |
| 12505  | 0     | 0     | 0     | 0     |
| 12508  | 0     | 1     | 1     | 1     |
| 12509  | 0     | 0     | 0     | 0     |
| 12510  |       |       |       |       |
| 12512  | 0     | 0     | 0     | 0     |
| 12514  | 1     | 1     | 1     | 1     |
| 12515  | 0     | 0     | 0     | 0     |
| 12520  | 0     | 0     | 0     | 0     |
| 12522  | 0     | 0     | 0     | 0     |
| 12526  | 1     | 0     | 0     | 0     |
| 12527  |       |       |       |       |
| 12528  | 0     | 0     | 0     | 0     |
| 12530  | 0     | 0     | 0     | 0     |
| 12535  | 0     | 0     | 0     | 0     |
| 12539  | 0     | 0     | 0     | 0     |
| 12541  | 0     | 0     | 0     | 0     |
| 12542  | 0     | 0     | 0     | 0     |
| 12545  | 0     | 0     | 0     | 0     |
| 12547  | 0     | 0     | 0     | 0     |
| 12549  | 0     | 0     | 0     | 0     |
| 12550  | 0     | 0     | 0     | 0     |
| 12555  |       |       |       |       |
| 12557  | 0     | 0     | 0     | 0     |
| 12559  | 0     | 0     | 0     | 0     |
| 12561  | 0     | 0     | 0     | 0     |
| 12562  | 0     | 0     | 0     | 0     |
| 12563  | 0     | 0     | 0     | 0     |

| respid | Q43_5 | Q43_6 | Q43_7 | Q43_8 |
|--------|-------|-------|-------|-------|
| 12565  | 0     | 0     | 0     | 0     |
| 12566  |       |       |       |       |
| 12570  |       |       |       |       |
| 12571  | 0     | 0     | 0     | 0     |
| 12572  | 0     | 0     | 0     | 0     |
| 12578  |       |       |       |       |
| 12579  | 0     | 1     | 0     | 1     |
| 12581  | 0     | 0     | 0     | 0     |
| 12582  | 0     | 0     | 0     | 0     |
| 12585  | 0     | 0     | 0     | 0     |
| 12586  | 1     | 0     | 0     | 0     |
| 12588  | 0     | 1     | 1     | 0     |
| 12589  | 0     | 1     | 0     | 0     |
| 12590  | 0     | 0     | 0     | 0     |
| 12591  | 1     | 1     | 0     | 0     |
| 12593  | 0     | 0     | 0     | 0     |
| 12594  | 0     | 0     | 0     | 0     |
| 12599  | 0     | 0     | 0     | 0     |
| 12600  | 0     | 0     | 0     | 0     |
| 12602  | 1     | 0     | 1     | 1     |
| 12606  | 0     | 0     | 0     | 1     |
| 12607  |       |       |       |       |
| 12608  |       |       |       |       |
| 12610  | 0     | 0     | 0     | 0     |
| 12611  | 0     | 0     | 0     | 0     |
| 12613  | 0     | 1     | 0     | 0     |
| 12616  | 0     | 0     | 0     | 0     |
| 12617  | 0     | 0     | 0     | 0     |
| 12619  | 0     | 0     | 0     | 0     |
| 12622  |       |       |       |       |
| 12628  | 1     | 0     | 0     | 0     |
| 12631  | 0     | 0     | 0     | 0     |

| respid | Q43_5 | Q43_6 | Q43_7 | Q43_8 |
|--------|-------|-------|-------|-------|
| 12635  | 0     | 0     | 0     | 0     |
| 12638  | 0     | 0     | 0     | 0     |
| 12639  | 0     | 0     | 0     | 0     |
| 12640  | 0     | 0     | 0     | 0     |
| 12643  | 1     | 0     | 0     | 0     |
| 12646  | 0     | 0     | 0     | 0     |
| 12648  | 0     | 0     | 0     | 0     |
| 12650  | 0     | 0     | 1     | 0     |
| 12651  | 0     | 0     | 0     | 0     |
| 12658  | 1     | 1     | 1     | 0     |
| 12662  | 0     | 0     | 0     | 0     |
| 12663  | 1     | 0     | 0     | 0     |
| 12664  | 1     | 0     | 0     | 0     |
| 12669  | 0     | 1     | 1     | 1     |
| 12670  | 0     | 0     | 0     | 0     |
| 12673  |       |       |       |       |
| 12675  | 0     | 0     | 0     | 0     |
| 12677  | 0     | 0     | 0     | 0     |
| 12679  | 0     | 0     | 0     | 0     |
| 12682  | 0     | 0     | 0     | 0     |
| 12696  | 0     | 0     | 0     | 0     |
| 12697  | 0     | 0     | 0     | 0     |
| 12699  | 0     | 0     | 0     | 1     |
| 12700  | 1     | 0     | 0     | 0     |
| 12701  | 0     | 0     | 0     | 0     |
| 12702  | 0     | 0     | 0     | 0     |
| 12704  | 1     | 0     | 0     | 1     |
| 12705  | 0     | 0     | 0     | 0     |
| 12709  | 0     | 0     | 0     | 0     |
| 12710  | 0     | 0     | 0     | 0     |
| 12713  | 0     | 0     | 0     | 0     |
| 12716  | 1     | 0     | 0     | 0     |

| respid | Q43_5 | Q43_6 | Q43_7 | Q43_8 |
|--------|-------|-------|-------|-------|
| 12719  | 1     | 0     | 0     | 0     |
| 12720  | 0     | 0     | 0     | 0     |
| 12723  | 0     | 0     | 0     | 0     |
| 12726  | 0     | 0     | 0     | 0     |
| 12728  | 0     | 0     | 0     | 0     |
| 12729  | 0     | 0     | 0     | 0     |
| 12731  | 0     | 0     | 0     | 0     |
| 12732  | 0     | 0     | 0     | 0     |
| 12733  | 1     | 0     | 0     | 0     |
| 12736  | 0     | 0     | 0     | 0     |
| 12737  | 0     | 0     | 0     | 0     |
| 12739  | 1     | 0     | 0     | 0     |
| 12742  | 0     | 0     | 0     | 0     |
| 12743  | 1     | 0     | 0     | 1     |
| 12744  | 0     | 0     | 0     | 0     |
| 12747  | 0     | 0     | 0     | 0     |
| 12751  | 0     | 0     | 0     | 0     |
| 12754  | 0     | 0     | 0     | 0     |
| 12756  | 0     | 0     | 0     | 0     |
| 12757  | 0     | 0     | 0     | 0     |
| 12760  | 0     | 0     | 0     | 0     |
| 12761  | 0     | 0     | 0     | 0     |
| 12762  | 1     | 0     | 0     | 1     |
| 12766  | 0     | 0     | 0     | 0     |
| 12769  | 0     | 0     | 0     | 0     |
| 12770  | 0     | 0     | 0     | 0     |
| 12773  | 1     | 0     | 0     | 0     |
| 12780  | 1     | 0     | 0     | 0     |
| 12789  | 1     | 0     | 0     | 0     |
| 12792  | 1     | 0     | 0     | 1     |
| 12795  | 0     | 0     | 1     | 1     |
| 12804  | 0     | 0     | 0     | 0     |

| respid | Q43_5 | Q43_6 | Q43_7 | Q43_8 |
|--------|-------|-------|-------|-------|
| 12811  | 0     | 0     | 0     | 0     |
| 12813  | 0     | 1     | 0     | 1     |
| 12814  | 0     | 0     | 0     | 0     |
| 12815  | 0     | 0     | 0     | 0     |
| 12816  | 0     | 0     | 0     | 0     |
| 12817  | 0     | 0     | 0     | 0     |
| 12818  | 0     | 0     | 0     | 0     |
| 12819  | 0     | 0     | 0     | 0     |
| 12820  | 0     | 0     | 0     | 0     |
| 12821  | 0     | 0     | 0     | 0     |
| 12824  | 0     | 1     | 0     | 0     |
| 12827  | 0     | 0     | 0     | 0     |
| 12836  | 0     | 0     | 1     | 1     |
| 12837  | 0     | 0     | 0     | 0     |
| 12838  | 0     | 0     | 0     | 1     |
| 12845  | 0     | 0     | 0     | 0     |
| 12847  | 0     | 0     | 0     | 0     |
| 12849  | 0     | 0     | 0     | 0     |
| 12850  | 0     | 0     | 0     | 0     |
| 12852  | 0     | 0     | 0     | 0     |
| 12853  | 0     | 0     | 0     | 0     |
| 12854  | 0     | 0     | 0     | 0     |
| 12860  | 0     | 0     | 0     | 0     |
| 12861  | 0     | 0     | 0     | 0     |
| 12863  | 0     | 0     | 0     | 0     |
| 12865  | 0     | 0     | 0     | 0     |
| 12870  | 0     | 0     | 0     | 0     |
| 12871  | 0     | 0     | 0     | 0     |
| 12873  | 0     | 0     | 0     | 0     |
| 12877  | 0     | 0     | 1     | 0     |
| 12880  | 0     | 0     | 0     | 0     |
| 12881  | 0     | 0     | 0     | 0     |



| respid | Q43_5 | Q43_6 | Q43_7 | Q43_8 |
|--------|-------|-------|-------|-------|
| 12882  | 0     | 0     | 0     | 0     |
| 12883  | 0     | 0     | 0     | 0     |
| 12885  | 0     | 0     | 0     | 0     |
| 12887  | 1     | 1     | 1     | 1     |
| 12889  | 0     | 0     | 0     | 0     |
| 12890  | 0     | 0     | 0     | 0     |
| 12891  | 1     | 0     | 0     | 1     |
| 12892  | 1     | 0     | 0     | 0     |
| 12893  | 0     | 0     | 0     | 0     |
| 12895  | 1     | 0     | 0     | 0     |
| 12898  | 0     | 0     | 0     | 0     |
| 12907  | 1     | 0     | 0     | 0     |
| 12908  | 0     | 0     | 0     | 0     |
| 12909  |       |       |       |       |
| 12914  | 0     | 0     | 0     | 0     |
| 12915  | 0     | 0     | 1     | 0     |
| 12916  |       |       |       |       |
| 12921  | 0     | 0     | 0     | 0     |
| 12922  | 0     | 0     | 0     | 0     |
| 12923  | 1     | 0     | 1     | 0     |
| 12926  | 1     | 0     | 1     | 1     |
| 12927  | 0     | 0     | 0     | 0     |
| 12932  | 0     | 0     | 0     | 0     |
| 12936  | 0     | 0     | 0     | 0     |
| 12937  | 0     | 0     | 0     | 0     |
| 12938  | 1     | 0     | 0     | 0     |
| 12939  | 0     | 0     | 0     | 0     |
| 12940  | 0     | 0     | 0     | 1     |
| 12945  | 1     | 0     | 0     | 0     |
| 12946  | 0     | 0     | 0     | 0     |
| 12947  | 0     | 0     | 0     | 1     |
| 12948  | 1     | 1     | 0     | 0     |

| respid | Q43_5 | Q43_6 | Q43_7 | Q43_8 |
|--------|-------|-------|-------|-------|
| 12951  | 0     | 0     | 0     | 0     |
| 12952  | 0     | 0     | 0     | 0     |
| 12954  | 1     | 1     | 1     | 1     |
| 12960  | 0     | 0     | 0     | 0     |
| 12961  | 0     | 0     | 0     | 0     |
| 12962  | 0     | 0     | 0     | 0     |
| 12963  | 0     | 0     | 0     | 0     |
| 12964  | 0     | 0     | 0     | 0     |
| 12966  | 0     | 0     | 1     | 0     |
| 12967  | 0     | 0     | 0     | 0     |
| 12969  | 0     | 0     | 0     | 0     |
| 12970  | 0     | 0     | 0     | 0     |
| 12974  | 1     | 1     | 0     | 0     |
| 12979  |       |       |       |       |
| 12980  | 0     | 0     | 0     | 0     |
| 12983  | 0     | 0     | 0     | 0     |
| 12988  | 0     | 1     | 0     | 0     |
| 12994  | 0     | 0     | 0     | 0     |
| 12995  | 0     | 0     | 0     | 0     |
| 12996  | 0     | 0     | 0     | 0     |
| 12998  | 0     | 0     | 0     | 0     |
| 12999  | 0     | 0     | 0     | 0     |
| 13001  | 0     | 0     | 0     | 0     |
| 13005  | 0     | 0     | 0     | 0     |
| 13006  | 1     | 0     | 0     | 0     |
| 13007  | 0     | 0     | 0     | 0     |
| 13011  | 0     | 0     | 0     | 0     |
| 13012  | 0     | 0     | 0     | 0     |
| 13013  | 1     | 0     | 0     | 0     |
| 13016  | 0     | 0     | 0     | 0     |
| 13018  | 0     | 0     | 0     | 0     |
| 13020  |       |       |       |       |

| respid | Q43_5 | Q43_6 | Q43_7 | Q43_8 |
|--------|-------|-------|-------|-------|
| 13024  | 0     | 0     | 0     | 0     |
| 13025  | 0     | 0     | 0     | 0     |
| 13027  | 0     | 0     | 0     | 0     |
| 13031  | 0     | 0     | 0     | 0     |
| 13032  | 0     | 1     | 0     | 1     |
| 13034  | 0     | 0     | 0     | 1     |
| 13036  | 0     | 0     | 0     | 0     |
| 13037  | 0     | 0     | 0     | 0     |
| 13038  | 0     | 0     | 0     | 0     |
| 13039  | 0     | 0     | 0     | 0     |
| 13040  | 0     | 0     | 0     | 0     |
| 13041  | 0     | 0     | 0     | 0     |
| 13045  | 0     | 0     | 0     | 0     |
| 13046  | 0     | 0     | 0     | 0     |
| 13048  | 0     | 0     | 0     | 0     |
| 13051  | 0     | 0     | 0     | 0     |
| 13053  | 0     | 0     | 0     | 0     |
| 13055  | 1     | 0     | 0     | 1     |
| 13059  | 0     | 0     | 0     | 0     |
| 13068  | 0     | 0     | 0     | 0     |
| 13069  | 0     | 0     | 0     | 0     |
| 13076  | 0     | 0     | 1     | 1     |
| 13081  | 0     | 0     | 0     | 0     |
| 13082  | 0     | 0     | 0     | 1     |
| 13084  | 0     | 1     | 0     | 0     |
| 13085  | 0     | 0     | 0     | 0     |
| 13086  | 0     | 0     | 0     | 0     |
| 13093  | 1     | 0     | 1     | 0     |
| 13094  | 0     | 1     | 0     | 0     |
| 13097  | 0     | 0     | 0     | 0     |
| 13098  | 0     | 1     | 0     | 1     |
| 13099  | 0     | 0     | 0     | 0     |

| respid | Q43_5 | Q43_6 | Q43_7 | Q43_8 |
|--------|-------|-------|-------|-------|
| 13100  | 0     | 0     | 0     | 0     |
| 13101  |       |       |       |       |
| 13103  |       |       |       |       |
| 13105  | 0     | 0     | 0     | 0     |
| 13106  | 0     | 0     | 0     | 0     |
| 13107  | 0     | 0     | 0     | 0     |
| 13110  | 1     | 1     | 0     | 0     |
| 13118  | 0     | 0     | 0     | 0     |
| 13120  | 0     | 0     | 0     | 0     |
| 13130  | 0     | 0     | 0     | 0     |
| 13133  | 0     | 0     | 0     | 0     |
| 13134  | 0     | 0     | 0     | 0     |
| 13139  | 0     | 0     | 0     | 0     |
| 13142  | 0     | 0     | 0     | 0     |
| 13143  | 0     | 0     | 0     | 0     |
| 13145  | 0     | 0     | 0     | 0     |
| 13148  | 0     | 0     | 1     | 0     |
| 13149  | 0     | 0     | 0     | 0     |
| 13151  | 0     | 0     | 1     | 1     |
| 13153  | 0     | 0     | 0     | 0     |
| 13158  | 0     | 0     | 0     | 0     |
| 13160  | 1     | 1     | 1     | 1     |
| 13162  | 0     | 0     | 0     | 0     |
| 13169  | 0     | 0     | 0     | 0     |
| 13172  | 0     | 0     | 0     | 0     |
| 13173  | 0     | 0     | 0     | 0     |
| 13176  | 0     | 0     | 0     | 0     |
| 13179  | 0     | 0     | 0     | 0     |
| 13184  | 0     | 0     | 0     | 0     |
| 13185  | 0     | 0     | 0     | 0     |
| 13186  | 0     | 0     | 0     | 0     |
| 13188  | 1     | 0     | 0     | 1     |

| respid | Q43_5 | Q43_6 | Q43_7 | Q43_8 |
|--------|-------|-------|-------|-------|
| 13190  | 0     | 1     | 1     | 0     |
| 13192  | 0     | 0     | 0     | 0     |
| 13193  |       |       |       |       |
| 13201  | 0     | 0     | 0     | 0     |
| 13207  | 0     | 0     | 0     | 0     |
| 13208  |       |       |       |       |
| 13209  | 0     | 0     | 0     | 0     |
| 13212  | 0     | 0     | 0     | 0     |
| 13215  | 0     | 0     | 0     | 0     |
| 13218  | 0     | 0     | 0     | 0     |
| 13219  | 0     | 0     | 0     | 0     |
| 13224  | 0     | 0     | 0     | 0     |
| 13225  | 0     | 0     | 0     | 0     |
| 13226  | 0     | 0     | 0     | 0     |
| 13232  | 0     | 0     | 0     | 0     |
| 13237  | 0     | 0     | 0     | 0     |
| 13239  | 1     | 0     | 0     | 0     |
| 13241  | 0     | 0     | 0     | 0     |
| 13243  | 0     | 0     | 0     | 0     |
| 13247  | 0     | 0     | 0     | 0     |
| 13248  | 0     | 0     | 0     | 0     |
| 13251  | 0     | 0     | 0     | 0     |
| 13256  | 0     | 0     | 0     | 0     |
| 13260  | 0     | 0     | 0     | 0     |
| 13261  | 0     | 0     | 0     | 0     |
| 13264  | 0     | 0     | 0     | 0     |
| 13273  | 0     | 0     | 0     | 0     |
| 13274  | 0     | 0     | 0     | 0     |
| 13276  | 0     | 0     | 0     | 0     |
| 13278  |       |       |       |       |
| 13279  | 0     | 0     | 0     | 0     |
| 13282  | 0     | 0     | 0     | 0     |

| respid | Q43_5 | Q43_6 | Q43_7 | Q43_8 |
|--------|-------|-------|-------|-------|
| 13283  | 0     | 0     | 0     | 1     |
| 13285  | 0     | 1     | 0     | 0     |
| 13286  | 0     | 0     | 0     | 0     |
| 13299  | 0     | 0     | 0     | 0     |
| 13300  | 1     | 0     | 0     | 0     |
| 13301  |       |       |       |       |
| 13303  | 0     | 0     | 0     | 0     |
| 13304  | 0     | 0     | 0     | 0     |
| 13307  | 0     | 0     | 0     | 0     |
| 13308  | 0     | 0     | 0     | 0     |
| 13312  | 0     | 0     | 0     | 0     |
| 13313  | 0     | 0     | 0     | 0     |
| 13314  | 0     | 0     | 0     | 0     |
| 13318  | 0     | 0     | 0     | 0     |
| 13320  | 0     | 0     | 0     | 0     |
| 13322  | 0     | 0     | 0     | 0     |
| 13324  | 0     | 1     | 0     | 0     |
| 13325  | 0     | 0     | 0     | 0     |
| 13327  | 0     | 0     | 0     | 0     |
| 13330  | 0     | 0     | 0     | 0     |
| 13332  | 0     | 0     | 0     | 0     |
| 13333  | 0     | 0     | 0     | 0     |
| 13334  | 0     | 0     | 0     | 0     |
| 13351  | 0     | 0     | 1     | 0     |
| 13353  | 0     | 0     | 0     | 0     |
| 13354  | 0     | 0     | 0     | 0     |
| 13355  | 0     | 0     | 0     | 0     |
| 13358  | 0     | 0     | 0     | 0     |
| 13359  | 0     | 0     | 0     | 0     |
| 13360  | 0     | 0     | 0     | 0     |
| 13364  | 0     | 0     | 0     | 0     |
| 13365  | 0     | 0     | 0     | 0     |

| respid | Q43_5 | Q43_6 | Q43_7 | Q43_8 |
|--------|-------|-------|-------|-------|
| 13368  | 0     | 0     | 0     | 0     |
| 13370  | 0     | 0     | 0     | 0     |
| 13375  | 0     | 0     | 0     | 0     |
| 13384  | 1     | 0     | 0     | 0     |
| 13387  | 0     | 0     | 0     | 0     |
| 13395  | 0     | 0     | 0     | 0     |
| 13398  | 0     | 0     | 0     | 0     |
| 13404  | 0     | 0     | 0     | 0     |
| 13405  | 0     | 0     | 0     | 0     |
| 13408  |       |       |       |       |
| 13411  | 0     | 0     | 0     | 0     |
| 13413  | 0     | 0     | 0     | 0     |
| 13419  | 0     | 0     | 0     | 0     |
| 13420  | 0     | 0     | 0     | 0     |
| 13427  | 0     | 0     | 0     | 0     |
| 13441  | 0     | 0     | 0     | 0     |
| 13444  | 0     | 0     | 0     | 0     |
| 13456  | 0     | 0     | 0     | 0     |
| 13466  | 0     | 0     | 0     | 0     |
| 13468  | 0     | 0     | 0     | 0     |
| 13475  | 0     | 0     | 0     | 0     |
| 13484  | 0     | 0     | 0     | 0     |
| 13486  | 0     | 0     | 0     | 0     |
| 13487  | 0     | 1     | 0     | 0     |
| 13491  |       |       |       |       |
| 13496  | 0     | 0     | 0     | 0     |
| 13497  | 0     | 0     | 0     | 0     |
| 13498  | 0     | 0     | 0     | 0     |
| 13502  |       |       |       |       |
| 13503  | 0     | 0     | 1     | 1     |
| 13505  | 0     | 1     | 0     | 0     |
| 13509  | 0     | 0     | 0     | 0     |

| respid | Q43_5 | Q43_6 | Q43_7 | Q43_8 |
|--------|-------|-------|-------|-------|
| 13510  | 0     | 0     | 0     | 0     |
| 13518  | 0     | 0     | 0     | 0     |
| 13521  | 0     | 0     | 0     | 0     |
| 13523  | 0     | 0     | 0     | 1     |
| 13528  | 0     | 0     | 0     | 0     |
| 13531  | 0     | 0     | 0     | 0     |
| 13532  | 0     | 0     | 0     | 0     |
| 13533  | 0     | 0     | 0     | 0     |
| 13534  |       |       |       |       |
| 13535  | 0     | 0     | 0     | 0     |
| 13538  | 0     | 1     | 0     | 0     |
| 13540  | 0     | 0     | 0     | 0     |
| 13541  | 0     | 0     | 0     | 0     |
| 13542  | 0     | 0     | 0     | 0     |
| 13550  | 0     | 0     | 0     | 0     |
| 13553  | 0     | 0     | 0     | 0     |
| 13554  | 0     | 0     | 0     | 0     |
| 13555  | 1     | 0     | 0     | 0     |
| 13556  | 1     | 0     | 1     | 0     |
| 13563  | 1     | 0     | 1     | 1     |
| 13564  | 1     | 1     | 0     | 1     |
| 13567  |       |       |       |       |
| 13568  | 0     | 0     | 0     | 0     |
| 13570  |       |       |       |       |
| 13573  | 0     | 0     | 0     | 0     |
| 13575  | 0     | 0     | 0     | 0     |
| 13577  | 1     | 0     | 0     | 0     |
| 13580  | 0     | 0     | 0     | 0     |
| 13582  | 0     | 0     | 0     | 0     |
| 13584  | 1     | 0     | 0     | 0     |
| 13585  |       |       |       |       |
| 13586  | 0     | 0     | 0     | 0     |



| respid | Q43_5 | Q43_6 | Q43_7 | Q43_8 |
|--------|-------|-------|-------|-------|
| 13587  | 0     | 1     | 1     | 1     |
| 13592  | 0     | 0     | 0     | 0     |
| 13596  | 0     | 0     | 0     | 0     |
| 13597  | 0     | 1     | 1     | 0     |
| 13599  | 0     | 0     | 0     | 0     |
| 13601  | 0     | 0     | 0     | 1     |
| 13604  | 0     | 0     | 0     | 0     |
| 13608  | 0     | 0     | 0     | 0     |
| 13616  | 0     | 0     | 0     | 0     |
| 13618  | 0     | 0     | 0     | 0     |
| 13619  | 0     | 0     | 0     | 0     |
| 13626  |       |       |       |       |
| 13628  | 1     | 0     | 0     | 1     |
| 13640  | 0     | 0     | 0     | 0     |
| 13645  | 0     | 0     | 0     | 0     |
| 13648  |       |       |       |       |
| 13653  | 0     | 0     | 0     | 0     |
| 13655  | 0     | 0     | 0     | 0     |
| 13662  | 0     | 0     | 0     | 0     |
| 13670  | 1     | 1     | 1     | 1     |
| 13673  | 0     | 0     | 1     | 0     |
| 13674  | 0     | 0     | 0     | 0     |
| 13675  | 0     | 0     | 0     | 0     |
| 13678  | 0     | 0     | 0     | 0     |
| 13680  | 0     | 0     | 0     | 0     |
| 13681  | 0     | 0     | 0     | 0     |
| 13683  | 0     | 0     | 0     | 0     |
| 13684  | 0     | 0     | 0     | 0     |
| 13685  | 0     | 0     | 0     | 0     |
| 13687  |       |       |       |       |
| 13690  | 0     | 0     | 0     | 0     |
| 13700  | 1     | 0     | 1     | 0     |

| respid | Q43_5 | Q43_6 | Q43_7 | Q43_8 |
|--------|-------|-------|-------|-------|
| 13705  | 0     | 0     | 0     | 0     |
| 13710  | 0     | 0     | 0     | 0     |
| 13711  | 0     | 0     | 0     | 0     |
| 13713  | 0     | 0     | 0     | 0     |
| 13716  | 0     | 0     | 0     | 0     |
| 13721  | 0     | 0     | 0     | 0     |
| 13722  | 0     | 0     | 0     | 0     |
| 13723  | 1     | 0     | 0     | 1     |
| 13726  | 1     | 1     | 0     | 0     |
| 13728  | 0     | 0     | 1     | 0     |
| 13730  | 0     | 0     | 0     | 0     |
| 13734  | 0     | 0     | 1     | 0     |
| 13736  | 0     | 0     | 1     | 1     |
| 13737  | 0     | 0     | 0     | 0     |
| 13739  | 0     | 0     | 0     | 0     |
| 13742  |       |       |       |       |
| 13746  | 0     | 0     | 0     | 0     |
| 13747  | 0     | 0     | 0     | 0     |
| 13749  | 0     | 0     | 0     | 0     |
| 13751  | 0     | 0     | 0     | 0     |
| 13752  | 0     | 0     | 0     | 0     |
| 13756  | 0     | 0     | 0     | 0     |
| 13757  | 0     | 0     | 0     | 0     |
| 13767  | 0     | 0     | 0     | 0     |
| 13771  | 0     | 0     | 0     | 0     |
| 13772  | 1     | 0     | 1     | 1     |
| 13779  |       |       |       |       |
| 13782  | 0     | 0     | 0     | 0     |
| 13783  | 0     | 0     | 0     | 0     |
| 13785  | 0     | 0     | 0     | 0     |
| 13786  | 1     | 0     | 0     | 0     |
| 13792  | 0     | 0     | 1     | 0     |

| respid | Q43_5 | Q43_6 | Q43_7 | Q43_8 |
|--------|-------|-------|-------|-------|
| 13796  | 0     | 0     | 0     | 1     |
| 13798  | 0     | 0     | 0     | 0     |
| 13799  | 0     | 0     | 0     | 0     |
| 13804  | 0     | 0     | 0     | 0     |
| 13805  | 0     | 0     | 0     | 0     |
| 13810  | 1     | 0     | 0     | 0     |
| 13811  | 0     | 0     | 0     | 0     |
| 13819  | 0     | 0     | 0     | 0     |
| 13821  | 1     | 0     | 0     | 0     |
| 13824  | 0     | 0     | 0     | 0     |
| 13828  | 0     | 0     | 0     | 0     |
| 13829  | 0     | 1     | 0     | 0     |
| 13831  |       |       |       |       |
| 13833  | 0     | 0     | 0     | 0     |
| 13835  | 1     | 1     | 0     | 1     |
| 13838  |       |       |       |       |
| 13839  | 1     | 0     | 0     | 0     |
| 13845  |       |       |       |       |
| 13846  | 0     | 0     | 0     | 0     |
| 13853  | 0     | 0     | 0     | 0     |
| 13855  | 0     | 0     | 0     | 0     |
| 13858  | 0     | 0     | 0     | 0     |
| 13860  |       |       |       |       |
| 13865  | 0     | 1     | 0     | 0     |
| 13870  | 0     | 0     | 0     | 0     |
| 13872  | 1     | 0     | 0     | 0     |
| 13873  | 0     | 1     | 1     | 1     |
| 13874  |       |       |       |       |
| 13875  | 0     | 0     | 0     | 0     |
| 13881  |       |       |       |       |
| 13887  | 0     | 0     | 0     | 0     |
| 13888  | 1     | 1     | 1     | 1     |

| respid | Q43_5 | Q43_6 | Q43_7 | Q43_8 |
|--------|-------|-------|-------|-------|
| 13889  | 1     | 0     | 0     | 0     |
| 13895  | 1     | 1     | 1     | 1     |
| 13897  |       |       |       |       |
| 13898  | 0     | 0     | 0     | 0     |
| 13901  | 0     | 0     | 0     | 0     |
| 13902  | 0     | 1     | 0     | 0     |
| 13903  | 0     | 0     | 0     | 0     |
| 13905  | 0     | 0     | 0     | 0     |
| 13908  | 0     | 1     | 0     | 1     |
| 13909  | 0     | 0     | 0     | 0     |
| 13910  | 0     | 1     | 0     | 0     |
| 13911  |       |       |       |       |
| 13914  | 1     | 1     | 0     | 0     |
| 13920  | 0     | 0     | 0     | 0     |
| 13926  | 0     | 0     | 0     | 0     |
| 13929  | 0     | 0     | 0     | 0     |
| 13930  | 1     | 1     | 1     | 1     |
| 13931  |       |       |       |       |
| 13932  | 0     | 0     | 0     | 0     |
| 13934  | 0     | 0     | 0     | 0     |
| 13938  | 0     | 0     | 0     | 0     |
| 13942  | 0     | 0     | 0     | 0     |
| 13945  | 0     | 0     | 0     | 0     |
| 13947  | 0     | 0     | 0     | 0     |
| 13948  |       |       |       |       |
| 13959  | 0     | 0     | 0     | 0     |
| 13962  | 0     | 0     | 0     | 0     |
| 13963  | 0     | 0     | 0     | 0     |
| 13964  | 0     | 0     | 0     | 0     |
| 13966  | 0     | 0     | 0     | 0     |
| 13968  | 0     | 0     | 0     | 1     |
| 13971  | 0     | 0     | 0     | 0     |

| respid | Q43_5 | Q43_6 | Q43_7 | Q43_8 |
|--------|-------|-------|-------|-------|
| 13979  | 0     | 0     | 0     | 0     |
| 13980  | 1     | 1     | 0     | 1     |
| 13981  | 0     | 0     | 0     | 0     |
| 13982  | 0     | 0     | 0     | 0     |
| 13984  | 0     | 0     | 0     | 0     |
| 13989  | 0     | 0     | 0     | 0     |
| 13990  | 0     | 0     | 0     | 0     |
| 13992  | 0     | 1     | 0     | 1     |
| 13998  | 0     | 0     | 0     | 0     |
| 13999  | 0     | 0     | 0     | 0     |
| 14000  | 0     | 0     | 0     | 0     |
| 14003  | 0     | 0     | 0     | 0     |
| 14004  | 0     | 0     | 0     | 0     |
| 14006  | 0     | 0     | 0     | 0     |
| 14007  | 0     | 0     | 0     | 0     |
| 14008  |       |       |       |       |
| 14013  | 0     | 0     | 0     | 0     |
| 14015  | 0     | 0     | 0     | 0     |
| 14018  | 0     | 0     | 0     | 0     |
| 14021  | 0     | 0     | 0     | 0     |
| 14023  | 0     | 0     | 0     | 0     |
| 14024  | 0     | 0     | 0     | 0     |
| 14026  | 0     | 0     | 0     | 0     |
| 14030  | 0     | 0     | 0     | 0     |
| 14032  | 0     | 0     | 0     | 0     |
| 14040  |       |       |       |       |
| 14045  | 0     | 0     | 0     | 0     |
| 14048  | 0     | 0     | 0     | 0     |
| 14049  | 0     | 0     | 1     | 0     |
| 14050  | 0     | 0     | 0     | 0     |
| 14051  | 1     | 0     | 0     | 0     |
| 14052  | 0     | 0     | 0     | 1     |

| respid | Q43_5 | Q43_6 | Q43_7 | Q43_8 |
|--------|-------|-------|-------|-------|
| 14054  | 0     | 0     | 0     | 0     |
| 14055  |       |       |       |       |
| 14057  | 1     | 1     | 0     | 0     |
| 14058  | 0     | 0     | 0     | 0     |
| 14059  | 0     | 0     | 0     | 0     |
| 14060  | 0     | 0     | 0     | 0     |
| 14061  | 0     | 0     | 0     | 0     |
| 14071  | 0     | 0     | 0     | 0     |
| 14073  | 0     | 1     | 1     | 0     |
| 14074  | 1     | 1     | 0     | 1     |
| 14076  | 0     | 0     | 0     | 0     |
| 14080  | 0     | 0     | 0     | 0     |
| 14082  | 0     | 0     | 0     | 0     |
| 14083  | 0     | 0     | 0     | 0     |
| 14084  | 0     | 0     | 0     | 0     |
| 14085  |       |       |       |       |
| 14086  | 1     | 1     | 1     | 1     |
| 14088  | 0     | 0     | 0     | 0     |
| 14090  | 0     | 0     | 0     | 0     |
| 14092  | 0     | 0     | 0     | 0     |
| 14093  | 0     | 0     | 0     | 0     |
| 14096  | 0     | 0     | 0     | 0     |
| 14103  | 0     | 0     | 0     | 0     |
| 14105  | 0     | 0     | 0     | 0     |
| 14106  | 0     | 0     | 0     | 0     |
| 14107  | 0     | 0     | 0     | 0     |
| 14108  | 1     | 0     | 0     | 0     |
| 14112  | 0     | 0     | 0     | 1     |
| 14114  | 0     | 0     | 0     | 0     |
| 14115  | 0     | 1     | 0     | 0     |
| 14116  | 0     | 0     | 0     | 0     |
| 14117  | 0     | 0     | 0     | 0     |

| respid | Q43_5 | Q43_6 | Q43_7 | Q43_8 |
|--------|-------|-------|-------|-------|
| 14118  | 0     | 0     | 0     | 0     |
| 14119  | 0     | 0     | 0     | 0     |
| 14127  |       |       |       |       |
| 14129  | 0     | 0     | 0     | 0     |
| 14131  | 0     | 0     | 0     | 0     |
| 14132  | 0     | 0     | 0     | 0     |
| 14133  | 1     | 0     | 0     | 1     |
| 14134  | 0     | 0     | 0     | 0     |
| 14135  | 0     | 0     | 0     | 0     |
| 14136  | 0     | 0     | 0     | 0     |
| 14138  |       |       |       |       |
| 14139  |       |       |       |       |
| 14140  | 0     | 0     | 0     | 0     |
| 14141  | 0     | 0     | 0     | 0     |
| 14143  | 0     | 0     | 0     | 0     |
| 14146  | 0     | 0     | 0     | 0     |
| 14147  | 1     | 1     | 1     | 1     |
| 14148  | 0     | 1     | 0     | 0     |
| 14151  | 1     | 1     | 1     | 1     |
| 14152  | 0     | 0     | 0     | 0     |
| 14153  | 0     | 0     | 0     | 0     |
| 14154  | 0     | 0     | 0     | 0     |
| 14158  | 0     | 0     | 0     | 0     |
| 14159  | 0     | 0     | 0     | 0     |
| 14160  | 0     | 0     | 1     | 1     |
| 14161  | 0     | 0     | 1     | 0     |
| 14162  | 0     | 0     | 0     | 0     |
| 14165  | 0     | 0     | 0     | 0     |
| 14166  | 0     | 0     | 0     | 0     |
| 14167  | 0     | 0     | 0     | 0     |
| 14169  | 0     | 0     | 0     | 0     |
| 14170  | 0     | 1     | 0     | 0     |

| respid | Q43_5 | Q43_6 | Q43_7 | Q43_8 |
|--------|-------|-------|-------|-------|
| 14172  | 0     | 0     | 0     | 0     |
| 14173  |       |       |       |       |
| 14174  | 1     | 0     | 1     | 1     |
| 14175  | 0     | 0     | 0     | 0     |
| 14176  | 0     | 0     | 0     | 0     |
| 14178  | 0     | 0     | 0     | 0     |
| 14179  | 0     | 0     | 0     | 0     |
| 14180  | 0     | 0     | 0     | 0     |
| 14183  | 0     | 0     | 0     | 0     |
| 14185  | 0     | 0     | 0     | 0     |
| 14187  | 0     | 0     | 0     | 0     |
| 14189  | 0     | 0     | 0     | 0     |
| 14191  | 0     | 0     | 0     | 0     |
| 14192  |       |       |       |       |
| 14195  | 0     | 0     | 0     | 0     |
| 14197  | 0     | 0     | 0     | 0     |
| 14203  | 0     | 0     | 1     | 0     |
| 14204  | 0     | 0     | 0     | 0     |
| 14205  | 0     | 0     | 0     | 0     |
| 14208  | 0     | 0     | 0     | 0     |
| 14211  | 1     | 1     | 1     | 1     |
| 14214  | 0     | 0     | 0     | 0     |
| 14215  | 0     | 0     | 0     | 1     |
| 14216  | 0     | 0     | 1     | 1     |
| 14218  | 0     | 0     | 0     | 0     |
| 14220  | 0     | 0     | 0     | 0     |
| 14223  |       |       |       |       |
| 14225  | 0     | 0     | 0     | 0     |
| 14226  | 0     | 0     | 0     | 0     |
| 14228  | 0     | 0     | 0     | 0     |
| 14231  | 0     | 0     | 0     | 0     |
| 14233  | 0     | 0     | 0     | 0     |



| respid | Q43_5 | Q43_6 | Q43_7 | Q43_8 |
|--------|-------|-------|-------|-------|
| 14237  | 0     | 0     | 0     | 0     |
| 14238  | 0     | 0     | 0     | 0     |
| 14243  | 0     | 0     | 0     | 0     |
| 14245  | 0     | 0     | 0     | 0     |
| 14246  | 0     | 0     | 0     | 0     |
| 14248  | 0     | 0     | 0     | 0     |
| 14250  | 0     | 0     | 0     | 0     |
| 14253  | 0     | 0     | 0     | 0     |
| 14254  | 0     | 0     | 0     | 0     |
| 14255  | 0     | 0     | 0     | 0     |
| 14257  | 0     | 0     | 0     | 0     |
| 14258  | 0     | 0     | 0     | 0     |
| 14259  | 0     | 1     | 1     | 0     |
| 14260  |       |       |       |       |
| 14261  | 1     | 1     | 0     | 0     |
| 14263  | 1     | 0     | 0     | 0     |
| 14264  | 1     | 0     | 0     | 1     |
| 14266  | 0     | 1     | 0     | 0     |
| 14267  | 0     | 0     | 0     | 0     |
| 14268  | 0     | 0     | 0     | 0     |
| 14275  | 0     | 0     | 0     | 0     |
| 14278  | 0     | 0     | 0     | 0     |
| 14279  |       |       |       |       |
| 14280  |       |       |       |       |
| 14281  | 0     | 0     | 0     | 0     |
| 14282  | 1     | 0     | 0     | 0     |
| 14283  | 0     | 0     | 0     | 1     |
| 14286  | 0     | 0     | 0     | 0     |
| 14287  |       |       |       |       |
| 14288  | 1     | 0     | 0     | 0     |
| 14291  |       |       |       |       |
| 14292  |       |       |       |       |

| respid | Q43_5 | Q43_6 | Q43_7 | Q43_8 |
|--------|-------|-------|-------|-------|
| 14293  | 0     | 0     | 0     | 0     |
| 14304  | 1     | 1     | 0     | 0     |
| 14308  | 0     | 0     | 0     | 0     |
| 14313  | 0     | 0     | 0     | 0     |
| 14314  | 0     | 0     | 0     | 0     |
| 14316  | 0     | 0     | 0     | 0     |
| 14317  | 0     | 0     | 0     | 0     |
| 14318  | 1     | 1     | 0     | 1     |
| 14319  | 0     | 0     | 0     | 0     |
| 14320  | 0     | 0     | 0     | 0     |
| 14321  | 0     | 0     | 0     | 0     |
| 14322  | 1     | 1     | 0     | 0     |
| 14326  | 0     | 0     | 0     | 0     |
| 14327  | 0     | 1     | 0     | 0     |
| 14328  |       |       |       |       |
| 14330  | 0     | 0     | 0     | 0     |
| 14332  | 0     | 1     | 0     | 0     |
| 14334  | 0     | 0     | 0     | 0     |
| 14336  | 0     | 0     | 0     | 1     |
| 14337  | 0     | 0     | 0     | 0     |
| 14339  |       |       |       |       |
| 14340  | 1     | 1     | 1     | 1     |
| 14341  | 0     | 0     | 0     | 0     |
| 14344  | 0     | 0     | 0     | 0     |
| 14345  | 0     | 0     | 0     | 0     |
| 14346  |       |       |       |       |
| 14348  | 0     | 0     | 0     | 0     |
| 14349  | 0     | 0     | 0     | 0     |
| 14358  | 1     | 0     | 0     | 0     |
| 14360  | 0     | 0     | 0     | 0     |
| 14362  |       |       |       |       |
| 14366  | 0     | 0     | 0     | 0     |

| respid | Q43_5 | Q43_6 | Q43_7 | Q43_8 |
|--------|-------|-------|-------|-------|
| 14367  | 0     | 1     | 1     | 0     |
| 14369  | 1     | 0     | 1     | 1     |
| 14371  | 0     | 0     | 0     | 0     |
| 14372  | 0     | 0     | 0     | 0     |
| 14374  | 0     | 0     | 0     | 0     |
| 14376  | 1     | 1     | 1     | 1     |
| 14377  |       |       |       |       |
| 14378  | 0     | 0     | 0     | 0     |
| 14379  | 0     | 0     | 0     | 0     |
| 14381  | 0     | 0     | 0     | 0     |
| 14383  | 0     | 0     | 0     | 0     |
| 14384  | 1     | 0     | 0     | 0     |
| 14385  | 1     | 1     | 0     | 0     |
| 14386  | 0     | 0     | 0     | 1     |
| 14390  | 0     | 0     | 0     | 0     |
| 14391  | 0     | 0     | 0     | 0     |
| 14392  | 0     | 0     | 0     | 0     |
| 14393  | 0     | 1     | 1     | 1     |
| 14394  | 0     | 0     | 0     | 0     |
| 14395  |       |       |       |       |
| 14396  |       |       |       |       |
| 14397  | 0     | 0     | 0     | 0     |
| 14398  | 0     | 1     | 1     | 1     |
| 14399  | 0     | 0     | 1     | 0     |
| 14400  | 0     | 0     | 0     | 0     |
| 14403  | 0     | 0     | 0     | 0     |
| 14404  | 0     | 0     | 0     | 0     |
| 14405  | 0     | 0     | 0     | 0     |
| 14407  | 0     | 0     | 0     | 0     |
| 14408  | 0     | 0     | 0     | 0     |
| 14410  | 1     | 0     | 0     | 0     |
| 14415  | 0     | 0     | 0     | 0     |

| respid | Q43_5 | Q43_6 | Q43_7 | Q43_8 |
|--------|-------|-------|-------|-------|
| 14419  | 0     | 0     | 0     | 0     |
| 14420  |       |       |       |       |
| 14421  |       |       |       |       |
| 14423  | 0     | 0     | 0     | 0     |
| 14424  | 0     | 0     | 0     | 0     |
| 14425  | 0     | 0     | 0     | 0     |
| 14426  | 0     | 0     | 0     | 0     |
| 14427  | 0     | 0     | 0     | 0     |
| 14428  | 1     | 0     | 1     | 0     |
| 14431  | 1     | 0     | 0     | 0     |
| 14433  | 0     | 0     | 0     | 0     |
| 14434  | 0     | 0     | 0     | 0     |
| 14435  | 0     | 0     | 0     | 0     |
| 14436  | 0     | 0     | 0     | 0     |
| 14438  | 0     | 0     | 0     | 0     |
| 14442  | 0     | 0     | 0     | 0     |
| 14447  | 0     | 0     | 0     | 0     |
| 14448  | 0     | 0     | 0     | 0     |
| 14450  | 0     | 0     | 0     | 1     |
| 14451  | 0     | 0     | 0     | 0     |
| 14454  | 0     | 0     | 0     | 0     |
| 14455  | 0     | 0     | 0     | 0     |
| 14456  | 1     | 1     | 0     | 0     |
| 14457  | 1     | 0     | 0     | 0     |
| 14458  | 1     | 0     | 1     | 1     |
| 14459  |       |       |       |       |
| 14460  | 0     | 0     | 0     | 0     |
| 14464  | 0     | 0     | 0     | 0     |
| 14465  | 0     | 0     | 0     | 0     |
| 14466  | 0     | 0     | 0     | 0     |
| 14467  | 0     | 0     | 0     | 0     |
| 14470  | 0     | 0     | 0     | 0     |

| respid | Q43_5 | Q43_6 | Q43_7 | Q43_8 |
|--------|-------|-------|-------|-------|
| 14472  | 0     | 0     | 0     | 0     |
| 14473  | 0     | 0     | 0     | 0     |
| 14474  |       |       |       |       |
| 14477  | 1     | 0     | 0     | 0     |
| 14478  | 0     | 0     | 0     | 0     |
| 14479  |       |       |       |       |
| 14484  | 0     | 0     | 0     | 0     |
| 14485  |       |       |       |       |
| 14486  | 0     | 0     | 0     | 0     |
| 14487  | 0     | 0     | 0     | 0     |
| 14488  | 0     | 0     | 0     | 1     |
| 14491  | 0     | 0     | 0     | 0     |
| 14495  | 0     | 0     | 0     | 0     |
| 14500  | 0     | 0     | 0     | 0     |
| 14502  | 0     | 0     | 0     | 0     |
| 14504  | 0     | 0     | 0     | 0     |
| 14505  | 1     | 0     | 0     | 0     |
| 14507  | 0     | 0     | 0     | 0     |
| 14517  | 0     | 0     | 1     | 0     |
| 14518  | 0     | 0     | 0     | 0     |
| 14519  | 0     | 0     | 0     | 0     |
| 14521  | 1     | 1     | 0     | 1     |
| 14522  | 0     | 0     | 0     | 0     |
| 14526  | 0     | 0     | 0     | 0     |
| 14528  | 0     | 0     | 0     | 0     |
| 14529  | 0     | 0     | 0     | 0     |
| 14530  | 1     | 1     | 1     | 1     |
| 14531  | 0     | 0     | 0     | 0     |
| 14534  | 0     | 0     | 0     | 0     |
| 14538  | 0     | 0     | 0     | 0     |
| 14539  | 0     | 0     | 0     | 0     |
| 14545  | 0     | 0     | 0     | 0     |

| respid | Q43_5 | Q43_6 | Q43_7 | Q43_8 |
|--------|-------|-------|-------|-------|
| 14546  | 0     | 0     | 0     | 0     |
| 14551  | 0     | 0     | 0     | 0     |
| 14553  | 1     | 0     | 0     | 0     |
| 14557  |       |       |       |       |
| 14558  | 0     | 0     | 0     | 0     |
| 14559  | 1     | 1     | 0     | 1     |
| 14560  | 0     | 0     | 0     | 0     |
| 14563  | 0     | 0     | 0     | 0     |
| 14565  | 0     | 0     | 0     | 0     |
| 14571  | 0     | 0     | 0     | 0     |
| 14572  | 0     | 0     | 0     | 0     |
| 14573  | 1     | 0     | 0     | 0     |
| 14575  | 0     | 0     | 0     | 0     |
| 14576  | 1     | 1     | 0     | 0     |
| 14578  | 0     | 0     | 0     | 0     |
| 14579  | 0     | 0     | 0     | 0     |
| 14580  | 0     | 0     | 0     | 0     |
| 14582  | 0     | 0     | 0     | 0     |
| 14585  | 1     | 0     | 0     | 1     |
| 14588  | 0     | 0     | 0     | 0     |
| 14590  | 0     | 0     | 0     | 0     |
| 14592  | 1     | 0     | 0     | 0     |
| 14593  | 0     | 0     | 0     | 0     |
| 14595  | 0     | 0     | 0     | 1     |
| 14597  | 0     | 0     | 0     | 0     |
| 14600  | 0     | 0     | 0     | 0     |
| 14602  | 1     | 1     | 0     | 0     |
| 14604  | 0     | 0     | 0     | 0     |
| 14605  | 0     | 0     | 0     | 0     |
| 14609  | 0     | 0     | 0     | 0     |
| 14610  | 0     | 0     | 0     | 0     |
| 14611  | 0     | 0     | 0     | 0     |

| respid | Q43_5 | Q43_6 | Q43_7 | Q43_8 |
|--------|-------|-------|-------|-------|
| 14612  | 0     | 0     | 0     | 0     |
| 14614  | 1     | 1     | 0     | 0     |
| 14615  | 0     | 0     | 0     | 0     |
| 14618  | 1     | 0     | 0     | 0     |
| 14621  |       |       |       |       |
| 14624  | 0     | 0     | 0     | 0     |
| 14626  | 0     | 0     | 0     | 0     |
| 14627  | 0     | 0     | 0     | 0     |
| 14628  | 1     | 0     | 0     | 0     |
| 14631  | 0     | 0     | 0     | 0     |
| 14633  | 1     | 0     | 1     | 1     |
| 14642  | 0     | 0     | 0     | 0     |
| 14647  | 0     | 0     | 0     | 0     |
| 14658  | 0     | 0     | 0     | 0     |
| 14659  | 1     | 1     | 0     | 0     |
| 14660  | 0     | 0     | 0     | 0     |
| 14661  | 0     | 0     | 0     | 0     |
| 14662  | 1     | 0     | 0     | 0     |
| 14663  | 0     | 0     | 0     | 0     |
| 14670  | 1     | 0     | 0     | 0     |
| 14671  |       |       |       |       |
| 14672  | 0     | 0     | 0     | 0     |
| 14675  | 0     | 0     | 0     | 0     |
| 14676  | 0     | 0     | 0     | 0     |
| 14677  | 1     | 0     | 0     | 0     |
| 14678  | 0     | 0     | 0     | 0     |
| 14681  | 1     | 1     | 1     | 0     |
| 14684  | 0     | 0     | 0     | 0     |
| 14688  | 0     | 0     | 0     | 0     |
| 14690  | 0     | 0     | 0     | 0     |
| 14694  | 0     | 0     | 0     | 0     |
| 14696  | 0     | 0     | 0     | 1     |

| respid | Q43_5 | Q43_6 | Q43_7 | Q43_8 |
|--------|-------|-------|-------|-------|
| 14700  |       |       |       |       |
| 14701  | 0     | 0     | 0     | 0     |
| 14703  | 0     | 1     | 0     | 0     |
| 14707  | 0     | 0     | 0     | 0     |
| 14711  | 0     | 0     | 0     | 0     |
| 14714  | 0     | 0     | 0     | 0     |
| 14715  | 1     | 0     | 0     | 0     |
| 14716  | 0     | 0     | 0     | 0     |
| 14720  | 0     | 0     | 0     | 0     |
| 14725  | 0     | 0     | 0     | 0     |
| 14726  | 0     | 0     | 0     | 0     |
| 14734  | 0     | 0     | 0     | 0     |
| 14735  | 0     | 1     | 1     | 1     |
| 14736  | 0     | 1     | 1     | 0     |
| 14740  | 0     | 0     | 0     | 0     |
| 14745  | 0     | 0     | 0     | 0     |
| 14747  | 0     | 0     | 0     | 0     |
| 14750  | 0     | 0     | 0     | 0     |
| 14751  | 0     | 0     | 0     | 0     |
| 14753  | 0     | 0     | 0     | 0     |
| 14756  | 1     | 1     | 1     | 1     |
| 14780  | 1     | 0     | 0     | 0     |
| 14782  | 0     | 0     | 0     | 0     |
| 14800  | 0     | 1     | 1     | 0     |
| 14801  | 0     | 0     | 0     | 0     |
| 14802  | 1     | 1     | 1     | 0     |
| 14805  | 1     | 0     | 0     | 1     |
| 14811  | 0     | 1     | 0     | 0     |
| 14814  | 1     | 0     | 0     | 0     |
| 14822  | 1     | 0     | 0     | 0     |
| 14827  | 1     | 1     | 0     | 0     |
| 14828  | 0     | 1     | 0     | 0     |



| respid | Q43_5 | Q43_6 | Q43_7 | Q43_8 |
|--------|-------|-------|-------|-------|
| 14830  |       |       |       |       |
| 14832  | 1     | 0     | 1     | 1     |
| 14835  | 1     | 0     | 0     | 1     |
| 14841  |       |       |       |       |
| 14849  | 1     | 0     | 0     | 0     |
| 14850  |       |       |       |       |
| 14851  | 0     | 0     | 0     | 0     |
| 14856  | 1     | 0     | 0     | 0     |
| 14862  | 0     | 0     | 0     | 0     |
| 14863  | 0     | 0     | 0     | 0     |
| 14864  | 0     | 0     | 0     | 0     |
| 14866  | 0     | 0     | 0     | 0     |
| 14867  | 1     | 0     | 0     | 0     |
| 14868  | 0     | 0     | 0     | 0     |
| 14870  | 0     | 0     | 0     | 0     |
| 14873  |       |       |       |       |
| 14878  | 0     | 0     | 0     | 0     |
| 14879  |       |       |       |       |
| 14881  | 1     | 0     | 0     | 0     |
| 14888  | 1     | 0     | 0     | 0     |
| 14895  | 1     | 0     | 0     | 1     |
| 14900  | 1     | 0     | 1     | 0     |
| 14912  |       |       |       |       |
| 14922  | 0     | 0     | 0     | 0     |
| 14923  | 1     | 1     | 0     | 0     |
| 14924  | 0     | 0     | 0     | 0     |
| 14925  | 1     | 0     | 0     | 0     |
| 14926  | 0     | 0     | 0     | 0     |
| 14927  | 0     | 0     | 0     | 0     |
| 14930  | 0     | 0     | 0     | 0     |
| 14937  | 1     | 1     | 1     | 0     |
| 14938  | 0     | 1     | 0     | 0     |

| respid | Q43_5 | Q43_6 | Q43_7 | Q43_8 |
|--------|-------|-------|-------|-------|
| 14939  | 1     | 1     | 0     | 0     |
| 14942  |       |       |       |       |
| 14943  |       |       |       |       |
| 14953  | 1     | 0     | 1     | 1     |
| 14954  | 0     | 0     | 0     | 0     |
| 14955  | 0     | 0     | 0     | 1     |
| 14957  | 1     | 0     | 0     | 0     |
| 14958  | 1     | 0     | 1     | 0     |
| 14959  | 0     | 0     | 0     | 0     |
| 14961  |       |       |       |       |
| 14963  | 1     | 0     | 1     | 0     |
| 14964  | 0     | 0     | 0     | 0     |
| 14965  | 0     | 0     | 0     | 0     |
| 14967  | 1     | 0     | 1     | 0     |
| 14970  | 0     | 0     | 1     | 0     |
| 14972  | 0     | 0     | 0     | 0     |
| 14975  | 1     | 0     | 0     | 1     |
| 14977  | 0     | 0     | 0     | 0     |
| 14982  | 0     | 0     | 0     | 0     |
| 14985  | 0     | 0     | 0     | 0     |
| 14986  |       |       |       |       |
| 14987  |       |       |       |       |
| 14988  | 0     | 1     | 0     | 0     |
| 14989  | 1     | 0     | 0     | 0     |
| 14993  | 0     | 0     | 0     | 0     |
| 15001  | 0     | 0     | 0     | 0     |
| 15002  | 0     | 1     | 0     | 0     |
| 15006  | 0     | 0     | 0     | 0     |
| 15007  | 0     | 0     | 0     | 0     |
| 15014  | 0     | 0     | 0     | 0     |
| 15020  | 0     | 0     | 0     | 0     |
| 15021  | 0     | 0     | 0     | 0     |

| respid | Q43_5 | Q43_6 | Q43_7 | Q43_8 |
|--------|-------|-------|-------|-------|
| 15023  | 1     | 0     | 0     | 0     |
| 15030  | 0     | 0     | 0     | 0     |
| 15032  |       |       |       |       |
| 15033  | 0     | 0     | 0     | 0     |
| 15034  | 0     | 0     | 0     | 0     |
| 15035  | 1     | 0     | 0     | 1     |
| 15037  | 0     | 0     | 0     | 0     |
| 15039  | 1     | 0     | 1     | 0     |
| 15040  | 0     | 0     | 0     | 0     |
| 15042  | 1     | 0     | 1     | 1     |
| 15044  |       |       |       |       |
| 15045  | 0     | 0     | 0     | 0     |
| 15046  | 0     | 0     | 0     | 0     |
| 15052  | 1     | 0     | 0     | 0     |
| 15058  | 0     | 1     | 0     | 0     |
| 15063  | 0     | 1     | 1     | 0     |
| 15066  | 0     | 0     | 0     | 1     |
| 15069  | 0     | 0     | 0     | 0     |
| 15071  | 0     | 0     | 0     | 1     |
| 15076  | 0     | 0     | 0     | 0     |
| 15078  | 0     | 0     | 0     | 0     |
| 15087  | 1     | 0     | 0     | 1     |
| 15090  | 0     | 0     | 0     | 0     |
| 15091  | 0     | 0     | 0     | 0     |
| 15092  | 0     | 0     | 0     | 0     |
| 15096  | 0     | 0     | 0     | 0     |
| 15106  | 1     | 0     | 1     | 0     |
| 15108  |       |       |       |       |
| 15113  | 0     | 0     | 0     | 0     |
| 15116  |       |       |       |       |
| 15119  | 0     | 0     | 0     | 0     |
| 15120  | 0     | 0     | 0     | 0     |

| respid | Q43_5 | Q43_6 | Q43_7 | Q43_8 |
|--------|-------|-------|-------|-------|
| 15121  | 1     | 0     | 1     | 1     |
| 15123  |       |       |       |       |
| 15124  | 0     | 0     | 0     | 0     |
| 15128  | 0     | 0     | 0     | 0     |
| 15131  |       |       |       |       |
| 15136  | 0     | 0     | 0     | 0     |
| 15137  | 1     | 0     | 0     | 0     |
| 15141  | 1     | 0     | 0     | 0     |
| 15144  | 0     | 0     | 0     | 0     |
| 15147  | 0     | 0     | 0     | 0     |
| 15151  | 1     | 1     | 0     | 0     |
| 15154  | 1     | 1     | 1     | 0     |
| 15157  | 0     | 0     | 0     | 0     |
| 15164  | 0     | 0     | 1     | 0     |
| 15168  | 0     | 0     | 0     | 0     |
| 15169  | 0     | 0     | 0     | 0     |
| 15172  | 0     | 0     | 0     | 0     |
| 15177  | 0     | 0     | 0     | 0     |
| 15178  |       |       |       |       |
| 15180  | 0     | 0     | 0     | 0     |
| 15181  | 0     | 0     | 0     | 0     |
| 15182  | 1     | 0     | 0     | 1     |
| 15183  |       |       |       |       |
| 15188  | 0     | 0     | 0     | 0     |
| 15190  | 0     | 1     | 0     | 0     |
| 15195  |       |       |       |       |
| 15201  | 0     | 0     | 0     | 1     |
| 15203  | 0     | 1     | 0     | 0     |
| 15204  | 0     | 0     | 0     | 0     |
| 15207  |       |       |       |       |
| 15208  | 0     | 1     | 0     | 1     |
| 15209  | 1     | 0     | 0     | 0     |

| respid | Q43_5 | Q43_6 | Q43_7 | Q43_8 |
|--------|-------|-------|-------|-------|
| 15212  |       |       |       |       |
| 15213  | 0     | 0     | 0     | 0     |
| 15219  | 0     | 0     | 0     | 0     |
| 15220  | 0     | 0     | 1     | 1     |
| 15221  | 0     | 0     | 0     | 0     |
| 15223  | 0     | 0     | 0     | 0     |
| 15224  | 0     | 0     | 0     | 0     |
| 15225  | 0     | 0     | 0     | 0     |
| 15226  | 0     | 0     | 0     | 0     |
| 15230  | 0     | 0     | 0     | 0     |
| 15231  | 1     | 0     | 0     | 0     |
| 15232  | 0     | 0     | 0     | 0     |
| 15237  | 0     | 0     | 0     | 0     |
| 15239  | 0     | 0     | 0     | 0     |
| 15241  | 0     | 0     | 0     | 0     |
| 15242  | 0     | 0     | 1     | 0     |
| 15247  | 0     | 0     | 0     | 0     |
| 15248  |       |       |       |       |
| 15251  |       |       |       |       |
| 15257  |       |       |       |       |
| 15260  | 0     | 0     | 0     | 0     |
| 15261  | 0     | 1     | 1     | 0     |
| 15262  | 1     | 1     | 1     | 1     |
| 15263  | 0     | 0     | 0     | 0     |
| 15265  | 0     | 0     | 0     | 0     |
| 15266  | 0     | 0     | 0     | 0     |
| 15268  | 0     | 0     | 0     | 0     |
| 15269  | 0     | 0     | 0     | 0     |
| 15270  | 0     | 1     | 1     | 0     |
| 15273  | 0     | 0     | 0     | 0     |
| 15276  | 0     | 1     | 0     | 0     |
| 15277  | 0     | 0     | 0     | 0     |

| respid | Q43_5 | Q43_6 | Q43_7 | Q43_8 |
|--------|-------|-------|-------|-------|
| 15282  | 0     | 0     | 0     | 0     |
| 15284  | 1     | 1     | 1     | 0     |
| 15285  | 0     | 0     | 0     | 0     |
| 15286  | 0     | 0     | 1     | 1     |
| 15288  | 0     | 0     | 0     | 0     |
| 15292  | 1     | 1     | 0     | 0     |
| 15296  | 0     | 0     | 0     | 0     |
| 15297  | 0     | 0     | 0     | 0     |
| 15298  |       |       |       |       |
| 15301  | 0     | 0     | 0     | 0     |
| 15302  | 0     | 0     | 0     | 0     |
| 15305  | 1     | 0     | 0     | 0     |
| 15307  | 0     | 0     | 0     | 0     |
| 15308  | 0     | 0     | 0     | 0     |
| 15309  | 0     | 0     | 0     | 0     |
| 15311  | 0     | 0     | 0     | 0     |
| 15315  | 0     | 0     | 0     | 0     |
| 15316  | 0     | 0     | 0     | 0     |
| 15318  |       |       |       |       |
| 15321  | 1     | 0     | 1     | 0     |
| 15322  | 0     | 0     | 0     | 0     |
| 15324  | 0     | 0     | 0     | 0     |
| 15326  | 0     | 0     | 1     | 1     |
| 15327  | 0     | 0     | 0     | 0     |
| 15328  | 0     | 0     | 0     | 0     |
| 15330  | 0     | 0     | 0     | 0     |
| 15332  | 0     | 0     | 0     | 0     |
| 15333  |       |       |       |       |
| 15334  | 0     | 0     | 0     | 0     |
| 15336  | 0     | 1     | 1     | 0     |
| 15337  | 0     | 0     | 0     | 0     |
| 15338  | 0     | 0     | 0     | 0     |

| respid | Q43_5 | Q43_6 | Q43_7 | Q43_8 |
|--------|-------|-------|-------|-------|
| 15339  | 1     | 0     | 0     | 0     |
| 15341  | 0     | 0     | 0     | 0     |
| 15344  |       |       |       |       |
| 15345  | 0     | 0     | 0     | 0     |
| 15350  |       |       |       |       |
| 15351  | 0     | 0     | 0     | 0     |
| 15352  | 0     | 0     | 0     | 0     |
| 15372  | 0     | 0     | 0     | 0     |
| 15373  | 0     | 1     | 1     | 0     |
| 15376  | 0     | 0     | 0     | 0     |
| 15377  | 0     | 0     | 0     | 0     |
| 15382  | 0     | 0     | 0     | 0     |
| 15383  | 0     | 1     | 0     | 0     |
| 15385  | 0     | 0     | 0     | 0     |
| 15390  | 0     | 0     | 0     | 0     |
| 15399  |       |       |       |       |
| 15404  | 0     | 0     | 0     | 0     |
| 15410  | 0     | 0     | 0     | 0     |
| 15411  | 0     | 1     | 0     | 1     |
| 15412  | 1     | 0     | 0     | 0     |
| 15413  | 0     | 0     | 0     | 0     |
| 15414  | 0     | 0     | 0     | 0     |
| 15417  | 0     | 0     | 0     | 0     |
| 15418  | 0     | 0     | 0     | 0     |
| 15421  | 0     | 0     | 0     | 0     |
| 15423  | 0     | 0     | 0     | 0     |
| 15425  | 0     | 0     | 0     | 1     |
| 15426  | 0     | 1     | 1     | 0     |
| 15430  | 0     | 0     | 0     | 0     |
| 15431  | 0     | 0     | 0     | 0     |
| 15435  |       |       |       |       |
| 15436  |       |       |       |       |

| respid | Q43_5 | Q43_6 | Q43_7 | Q43_8 |
|--------|-------|-------|-------|-------|
| 15437  |       |       |       |       |
| 15438  | 0     | 0     | 0     | 0     |
| 15439  | 0     | 0     | 0     | 0     |
| 15441  | 1     | 1     | 0     | 0     |
| 15443  | 0     | 0     | 1     | 1     |
| 15446  | 0     | 0     | 0     | 0     |
| 15449  | 1     | 0     | 0     | 0     |
| 15451  | 1     | 1     | 1     | 1     |
| 15452  | 0     | 0     | 0     | 0     |
| 15454  | 0     | 0     | 0     | 0     |
| 15456  | 0     | 0     | 0     | 0     |
| 15457  |       |       |       |       |
| 15458  | 0     | 0     | 0     | 0     |
| 15462  | 0     | 0     | 1     | 0     |
| 15467  | 1     | 0     | 0     | 0     |
| 15470  | 1     | 0     | 0     | 0     |
| 15472  | 0     | 0     | 0     | 0     |
| 15476  | 0     | 0     | 0     | 0     |
| 15477  | 0     | 0     | 0     | 0     |
| 15488  | 0     | 0     | 0     | 0     |
| 15489  | 0     | 0     | 0     | 0     |
| 15490  | 0     | 0     | 0     | 0     |
| 15496  | 0     | 0     | 0     | 0     |
| 15497  | 0     | 0     | 0     | 0     |
| 15498  |       |       |       |       |
| 15509  | 0     | 1     | 0     | 0     |
| 15510  | 0     | 0     | 0     | 0     |
| 15516  | 0     | 0     | 0     | 0     |
| 15519  | 0     | 0     | 0     | 0     |
| 15520  | 0     | 0     | 0     | 0     |
| 15524  | 1     | 0     | 0     | 1     |
| 15525  | 0     | 0     | 1     | 0     |



| respid | Q43_5 | Q43_6 | Q43_7 | Q43_8 |
|--------|-------|-------|-------|-------|
| 15526  | 0     | 0     | 0     | 1     |
| 15531  | 0     | 0     | 0     | 0     |
| 15532  | 0     | 0     | 0     | 0     |
| 15534  | 0     | 1     | 1     | 1     |
| 15535  | 0     | 0     | 0     | 0     |
| 15539  | 1     | 0     | 0     | 0     |
| 15550  | 0     | 0     | 0     | 0     |
| 15556  | 0     | 0     | 0     | 0     |
| 15558  | 0     | 0     | 0     | 0     |
| 15565  | 0     | 0     | 0     | 0     |
| 15567  | 0     | 0     | 1     | 0     |
| 15568  | 0     | 0     | 0     | 0     |
| 15571  | 0     | 0     | 0     | 0     |
| 15573  | 0     | 0     | 0     | 0     |
| 15574  | 0     | 0     | 0     | 0     |
| 15576  | 1     | 0     | 0     | 1     |
| 15587  | 0     | 0     | 0     | 0     |
| 15588  | 0     | 0     | 0     | 0     |
| 15593  | 1     | 0     | 1     | 0     |
| 15597  | 0     | 0     | 0     | 0     |
| 15598  | 0     | 0     | 0     | 0     |
| 15599  | 0     | 0     | 0     | 0     |
| 15601  | 0     | 0     | 0     | 0     |
| 15604  | 0     | 0     | 0     | 0     |
| 15611  | 0     | 0     | 0     | 0     |
| 15613  | 0     | 0     | 0     | 0     |
| 15614  | 0     | 0     | 0     | 0     |
| 15617  | 0     | 1     | 0     | 0     |
| 15622  |       |       |       |       |
| 15623  | 0     | 0     | 0     | 0     |
| 15625  | 0     | 0     | 0     | 0     |
| 15627  |       |       |       |       |

| respid | Q43_5 | Q43_6 | Q43_7 | Q43_8 |
|--------|-------|-------|-------|-------|
| 15628  | 0     | 0     | 0     | 0     |
| 15633  | 0     | 0     | 0     | 0     |
| 15634  | 0     | 0     | 0     | 0     |
| 15637  | 0     | 0     | 0     | 0     |
| 15644  | 0     | 0     | 0     | 0     |
| 15645  | 0     | 0     | 0     | 0     |
| 15649  | 0     | 0     | 0     | 0     |
| 15650  | 0     | 0     | 0     | 0     |
| 15651  | 0     | 0     | 0     | 0     |
| 15657  | 0     | 0     | 0     | 1     |
| 15658  | 0     | 0     | 0     | 0     |
| 15660  | 0     | 0     | 0     | 0     |
| 15667  | 0     | 0     | 0     | 0     |
| 15671  | 0     | 0     | 0     | 0     |
| 15679  | 0     | 0     | 0     | 0     |
| 15712  | 0     | 0     | 0     | 0     |
| 15715  | 0     | 0     | 0     | 0     |
| 15749  | 0     | 0     | 0     | 0     |
| 15754  | 0     | 0     | 0     | 0     |
| 15756  | 1     | 0     | 0     | 1     |
| 15773  | 0     | 0     | 0     | 0     |
| 15774  | 0     | 0     | 0     | 0     |
| 15776  | 0     | 0     | 0     | 0     |
| 15777  | 1     | 0     | 1     | 0     |
| 15779  |       |       |       |       |
| 15780  | 0     | 0     | 0     | 0     |
| 15792  | 0     | 0     | 0     | 0     |
| 15793  | 0     | 1     | 1     | 0     |
| 15796  | 0     | 0     | 0     | 0     |
| 15798  | 0     | 0     | 0     | 0     |
| 15809  | 0     | 0     | 0     | 0     |
| 15810  | 0     | 0     | 0     | 0     |

| respid | Q43_5 | Q43_6 | Q43_7 | Q43_8 |
|--------|-------|-------|-------|-------|
| 15815  | 0     | 0     | 0     | 0     |
| 15816  | 0     | 0     | 0     | 0     |
| 15817  |       |       |       |       |
| 15821  | 0     | 1     | 0     | 0     |
| 15823  | 1     | 1     | 0     | 0     |
| 15834  | 0     | 0     | 0     | 0     |
| 15835  |       |       |       |       |
| 15836  | 0     | 1     | 0     | 0     |
| 15837  | 0     | 0     | 0     | 0     |
| 15839  | 0     | 0     | 0     | 0     |
| 15840  | 0     | 0     | 0     | 0     |
| 15844  | 0     | 0     | 0     | 0     |
| 15845  | 0     | 0     | 0     | 0     |
| 15847  | 0     | 1     | 0     | 0     |
| 15848  | 0     | 0     | 1     | 0     |
| 15849  | 0     | 0     | 1     | 1     |
| 15857  | 1     | 1     | 0     | 0     |
| 15858  | 1     | 0     | 0     | 0     |
| 15862  | 1     | 1     | 0     | 0     |
| 15866  | 0     | 0     | 0     | 0     |
| 15870  | 0     | 0     | 0     | 0     |
| 15871  | 0     | 0     | 0     | 0     |
| 15872  | 0     | 0     | 0     | 0     |
| 15873  | 0     | 0     | 0     | 0     |
| 15874  |       |       |       |       |
| 15875  | 0     | 0     | 0     | 0     |
| 15876  | 0     | 1     | 0     | 1     |
| 15882  | 1     | 0     | 0     | 0     |
| 15884  | 1     | 0     | 0     | 0     |
| 15890  | 0     | 0     | 0     | 0     |
| 15892  | 0     | 0     | 0     | 0     |
| 15908  | 0     | 0     | 0     | 0     |

| respid | Q43_5 | Q43_6 | Q43_7 | Q43_8 |
|--------|-------|-------|-------|-------|
| 15914  | 0     | 0     | 0     | 0     |
| 15932  | 0     | 0     | 0     | 0     |
| 15933  | 1     | 0     | 0     | 0     |
| 15938  | 0     | 0     | 0     | 0     |
| 15940  | 0     | 0     | 1     | 0     |
| 15945  | 0     | 0     | 0     | 0     |
| 15947  | 0     | 0     | 0     | 0     |
| 15950  | 0     | 0     | 0     | 0     |
| 15951  | 1     | 0     | 0     | 0     |
| 15952  | 0     | 0     | 1     | 0     |
| 15953  | 0     | 0     | 0     | 0     |
| 15954  | 1     | 0     | 0     | 0     |
| 15957  | 0     | 0     | 0     | 0     |
| 15965  | 0     | 0     | 0     | 0     |
| 15966  |       |       |       |       |
| 15967  | 0     | 0     | 0     | 0     |
| 15968  | 1     | 0     | 0     | 1     |
| 15970  | 0     | 0     | 0     | 0     |
| 15973  | 0     | 0     | 0     | 0     |
| 15974  | 0     | 0     | 0     | 0     |
| 15975  |       |       |       |       |
| 15980  | 0     | 1     | 0     | 0     |
| 15984  | 0     | 0     | 0     | 0     |
| 15985  | 0     | 1     | 1     | 0     |
| 15994  |       |       |       |       |
| 15995  | 0     | 0     | 0     | 0     |
| 16000  | 0     | 0     | 0     | 0     |
| 16004  | 0     | 0     | 0     | 0     |
| 16005  | 0     | 0     | 0     | 0     |
| 16006  |       |       |       |       |
| 16009  | 0     | 0     | 0     | 0     |
| 16017  | 0     | 0     | 0     | 0     |

| respid | Q43_5 | Q43_6 | Q43_7 | Q43_8 |
|--------|-------|-------|-------|-------|
| 16019  | 0     | 0     | 0     | 0     |
| 16021  | 0     | 0     | 0     | 0     |
| 16024  | 0     | 0     | 0     | 0     |
| 16026  | 0     | 0     | 0     | 0     |
| 16029  |       |       |       |       |
| 16031  | 0     | 0     | 0     | 0     |
| 16037  | 0     | 0     | 0     | 0     |
| 16043  | 0     | 0     | 0     | 0     |
| 16044  | 0     | 0     | 0     | 0     |
| 16047  | 0     | 0     | 0     | 0     |
| 16048  | 0     | 0     | 0     | 0     |
| 16049  | 0     | 0     | 0     | 0     |
| 16051  | 0     | 0     | 0     | 0     |
| 16053  | 0     | 0     | 1     | 0     |
| 16054  | 1     | 0     | 0     | 0     |
| 16069  | 0     | 0     | 0     | 0     |
| 16070  | 0     | 0     | 0     | 0     |
| 16074  |       |       |       |       |
| 16076  |       |       |       |       |
| 16078  |       |       |       |       |
| 16081  | 0     | 0     | 0     | 0     |
| 16085  |       |       |       |       |
| 16088  | 0     | 0     | 0     | 0     |
| 16091  | 0     | 0     | 0     | 1     |
| 16092  | 0     | 0     | 0     | 0     |
| 16093  | 0     | 0     | 0     | 0     |
| 16097  | 0     | 0     | 0     | 0     |
| 16100  | 0     | 0     | 0     | 0     |
| 16101  | 0     | 0     | 0     | 0     |
| 16105  |       |       |       |       |
| 16118  | 0     | 0     | 0     | 0     |
| 16129  | 0     | 0     | 0     | 0     |

| respid | Q43_5 | Q43_6 | Q43_7 | Q43_8 |
|--------|-------|-------|-------|-------|
| 16130  | 0     | 0     | 0     | 0     |
| 16131  | 1     | 0     | 0     | 0     |
| 16136  | 0     | 0     | 0     | 0     |
| 16137  | 0     | 0     | 0     | 0     |
| 16138  | 0     | 0     | 0     | 0     |
| 16139  | 0     | 0     | 0     | 0     |
| 16140  | 0     | 0     | 0     | 0     |
| 16145  | 0     | 0     | 0     | 0     |
| 16150  | 0     | 0     | 1     | 0     |
| 16151  | 0     | 0     | 0     | 0     |
| 16153  | 0     | 0     | 0     | 0     |
| 16164  | 0     | 0     | 0     | 0     |
| 16168  | 1     | 0     | 0     | 0     |
| 16173  | 0     | 0     | 0     | 1     |
| 16174  | 0     | 0     | 0     | 0     |
| 16177  | 0     | 0     | 0     | 0     |
| 16185  | 0     | 0     | 0     | 0     |
| 16189  | 0     | 0     | 0     | 0     |
| 16192  | 0     | 0     | 0     | 0     |
| 16193  | 0     | 0     | 0     | 0     |
| 16194  | 0     | 0     | 0     | 0     |
| 16196  |       |       |       |       |
| 16202  | 0     | 1     | 0     | 0     |
| 16205  | 1     | 1     | 1     | 1     |
| 16206  | 0     | 0     | 0     | 0     |
| 16208  |       |       |       |       |
| 16211  | 0     | 0     | 1     | 0     |
| 16212  | 0     | 0     | 0     | 0     |
| 16215  |       |       |       |       |
| 16217  | 0     | 0     | 0     | 0     |
| 16221  | 0     | 0     | 0     | 0     |
| 16226  | 0     | 0     | 0     | 0     |

| respid | Q43_5 | Q43_6 | Q43_7 | Q43_8 |
|--------|-------|-------|-------|-------|
| 16228  | 1     | 0     | 0     | 0     |
| 16229  | 0     | 0     | 0     | 0     |
| 16230  | 0     | 0     | 0     | 0     |
| 16231  | 0     | 0     | 0     | 0     |
| 16232  | 0     | 0     | 0     | 0     |
| 16234  | 0     | 0     | 1     | 0     |
| 16235  | 0     | 0     | 0     | 0     |
| 16236  | 0     | 0     | 0     | 0     |
| 16237  | 0     | 0     | 1     | 1     |
| 16238  | 0     | 0     | 0     | 0     |
| 16239  | 0     | 0     | 0     | 0     |
| 16243  | 0     | 0     | 0     | 0     |
| 16248  | 0     | 0     | 0     | 0     |
| 16249  | 0     | 0     | 0     | 0     |
| 16251  |       |       |       |       |
| 16263  | 0     | 0     | 0     | 0     |
| 16265  | 0     | 0     | 0     | 1     |
| 16269  | 0     | 0     | 0     | 0     |
| 16272  | 0     | 0     | 0     | 0     |
| 16273  |       |       |       |       |
| 16281  | 0     | 0     | 0     | 0     |
| 16282  | 0     | 0     | 0     | 0     |
| 16287  | 0     | 0     | 0     | 0     |
| 16290  | 0     | 0     | 0     | 0     |
| 16294  | 0     | 0     | 0     | 0     |
| 16295  | 0     | 0     | 0     | 0     |
| 16296  | 0     | 0     | 0     | 0     |
| 16299  | 0     | 0     | 0     | 0     |
| 16302  | 0     | 0     | 0     | 0     |
| 16303  | 0     | 0     | 0     | 0     |
| 16304  | 0     | 0     | 0     | 0     |
| 16306  | 0     | 0     | 0     | 0     |

| respid | Q43_5 | Q43_6 | Q43_7 | Q43_8 |
|--------|-------|-------|-------|-------|
| 16318  | 1     | 1     | 1     | 0     |
| 16320  | 0     | 0     | 0     | 0     |
| 16321  | 0     | 0     | 0     | 0     |
| 16322  | 0     | 0     | 0     | 0     |
| 16324  | 0     | 0     | 0     | 0     |
| 16326  | 0     | 0     | 1     | 0     |
| 16328  | 0     | 0     | 0     | 0     |
| 16336  | 1     | 0     | 0     | 0     |
| 16341  | 0     | 0     | 0     | 0     |
| 16342  | 0     | 0     | 0     | 0     |
| 16343  | 0     | 0     | 0     | 0     |
| 16345  | 0     | 0     | 1     | 0     |
| 16349  | 0     | 0     | 1     | 0     |
| 16355  | 0     | 0     | 0     | 0     |
| 16364  | 0     | 0     | 0     | 0     |
| 16374  | 0     | 0     | 0     | 0     |
| 16375  |       |       |       |       |
| 16376  | 1     | 0     | 1     | 1     |
| 16393  | 0     | 0     | 0     | 0     |
| 16394  | 1     | 0     | 0     | 0     |
| 16395  | 0     | 0     | 0     | 0     |
| 16397  | 0     | 0     | 0     | 0     |
| 16398  | 1     | 0     | 0     | 1     |
| 16402  | 0     | 0     | 0     | 0     |
| 16405  | 0     | 0     | 0     | 0     |
| 16416  | 0     | 0     | 0     | 0     |
| 16422  | 1     | 0     | 0     | 0     |
| 16429  | 0     | 0     | 0     | 0     |
| 16430  | 0     | 0     | 0     | 0     |
| 16432  | 1     | 0     | 0     | 0     |
| 16433  | 0     | 0     | 0     | 0     |
| 16434  |       |       |       |       |



| respid | Q43_5 | Q43_6 | Q43_7 | Q43_8 |
|--------|-------|-------|-------|-------|
| 16437  | 0     | 0     | 0     | 0     |
| 16439  | 0     | 0     | 0     | 0     |
| 16440  | 0     | 0     | 0     | 0     |
| 16441  | 0     | 0     | 0     | 0     |
| 16442  | 0     | 0     | 0     | 0     |
| 16450  | 0     | 0     | 0     | 0     |
| 16451  | 0     | 0     | 0     | 0     |
| 16452  | 1     | 0     | 0     | 0     |
| 16467  | 0     | 0     | 0     | 0     |
| 16468  |       |       |       |       |
| 16469  | 0     | 0     | 0     | 0     |
| 16470  |       |       |       |       |
| 16471  | 0     | 0     | 0     | 0     |
| 16473  | 0     | 0     | 0     | 0     |
| 16476  | 0     | 0     | 1     | 0     |
| 16478  | 0     | 0     | 0     | 0     |
| 16484  | 0     | 0     | 0     | 0     |
| 16499  | 0     | 0     | 0     | 0     |
| 16502  |       |       |       |       |
| 16505  | 0     | 0     | 0     | 0     |
| 16514  | 0     | 0     | 0     | 0     |
| 16515  | 1     | 1     | 0     | 0     |
| 16517  | 0     | 0     | 0     | 0     |
| 16518  | 0     | 0     | 0     | 0     |
| 16519  | 0     | 0     | 0     | 0     |
| 16525  | 0     | 0     | 0     | 0     |
| 16526  | 1     | 1     | 1     | 1     |
| 16530  | 0     | 0     | 0     | 0     |
| 16532  | 0     | 0     | 0     | 0     |
| 16536  | 0     | 0     | 0     | 0     |
| 16537  | 1     | 0     | 0     | 1     |
| 16541  | 0     | 0     | 0     | 0     |

| respid | Q43_5 | Q43_6 | Q43_7 | Q43_8 |
|--------|-------|-------|-------|-------|
| 16543  | 0     | 0     | 0     | 0     |
| 16544  | 0     | 0     | 0     | 0     |
| 16545  | 0     | 0     | 0     | 0     |
| 16546  | 1     | 0     | 0     | 0     |
| 16548  | 0     | 0     | 0     | 0     |
| 16552  | 0     | 0     | 0     | 0     |
| 16559  | 0     | 0     | 0     | 0     |
| 16564  | 0     | 0     | 0     | 0     |
| 16565  | 0     | 0     | 0     | 0     |
| 16567  | 0     | 0     | 0     | 0     |
| 16571  |       |       |       |       |
| 16572  | 0     | 0     | 1     | 0     |
| 16579  | 0     | 0     | 0     | 0     |
| 16588  | 1     | 0     | 0     | 0     |
| 16599  | 0     | 0     | 0     | 0     |
| 16605  | 0     | 0     | 0     | 0     |
| 16622  | 0     | 0     | 0     | 0     |
| 16635  | 1     | 0     | 0     | 0     |
| 16638  | 0     | 0     | 0     | 0     |
| 16652  | 0     | 0     | 0     | 0     |
| 16656  | 0     | 0     | 0     | 0     |
| 16671  |       |       |       |       |
| 16676  | 0     | 0     | 0     | 0     |
| 16678  | 0     | 0     | 0     | 0     |
| 16702  | 0     | 1     | 1     | 0     |
| 16705  | 0     | 1     | 0     | 0     |
| 16707  | 1     | 1     | 1     | 0     |
| 16711  | 0     | 0     | 0     | 1     |
| 16712  | 0     | 0     | 0     | 0     |
| 16716  |       |       |       |       |
| 16724  | 0     | 0     | 0     | 0     |
| 16727  | 1     | 0     | 0     | 0     |

| respid | Q43_5 | Q43_6 | Q43_7 | Q43_8 |
|--------|-------|-------|-------|-------|
| 16734  | 1     | 1     | 0     | 0     |
| 16740  | 0     | 0     | 0     | 0     |
| 16748  | 0     | 0     | 0     | 0     |
| 16759  | 0     | 0     | 0     | 0     |
| 16761  |       |       |       |       |
| 16763  | 0     | 0     | 0     | 0     |
| 16764  | 0     | 1     | 1     | 1     |
| 16766  | 0     | 0     | 0     | 0     |
| 16767  | 0     | 0     | 0     | 0     |
| 16776  | 0     | 0     | 0     | 0     |
| 16781  | 0     | 0     | 0     | 0     |
| 16793  | 0     | 0     | 0     | 0     |
| 16796  | 1     | 1     | 1     | 0     |
| 16810  | 0     | 0     | 0     | 0     |
| 16811  | 0     | 1     | 0     | 1     |
| 16813  |       |       |       |       |
| 16814  | 0     | 0     | 0     | 0     |
| 16831  | 0     | 0     | 0     | 1     |
| 16833  | 0     | 0     | 0     | 0     |
| 16839  | 0     | 0     | 0     | 0     |
| 16843  | 0     | 1     | 0     | 0     |
| 16860  |       |       |       |       |
| 16871  | 0     | 0     | 0     | 0     |
| 16881  | 1     | 1     | 0     | 0     |
| 16884  | 0     | 0     | 0     | 0     |
| 16891  | 0     | 1     | 0     | 0     |
| 16909  | 0     | 0     | 0     | 0     |
| 16911  |       |       |       |       |
| 16922  | 0     | 0     | 0     | 0     |
| 16935  | 0     | 0     | 0     | 1     |
| 16942  | 0     | 0     | 0     | 0     |
| 16950  |       |       |       |       |

| respid | Q43_5 | Q43_6 | Q43_7 | Q43_8 |
|--------|-------|-------|-------|-------|
| 16952  | 0     | 0     | 0     | 0     |
| 16963  | 0     | 0     | 0     | 0     |
| 16967  | 0     | 0     | 0     | 0     |
| 16970  | 0     | 0     | 0     | 0     |
| 16976  | 0     | 1     | 1     | 1     |
| 16982  | 0     | 0     | 0     | 0     |
| 16995  | 0     | 0     | 0     | 0     |
| 17004  | 0     | 0     | 0     | 0     |
| 17006  | 0     | 0     | 0     | 0     |
| 17009  | 0     | 0     | 0     | 0     |
| 17021  |       |       |       |       |
| 17040  | 0     | 0     | 0     | 0     |
| 17041  |       |       |       |       |
| 17044  | 0     | 0     | 0     | 0     |
| 17046  | 0     | 0     | 0     | 0     |
| 17052  | 0     | 0     | 0     | 1     |
| 17055  | 0     | 0     | 0     | 0     |
| 17108  | 1     | 0     | 0     | 0     |
| 17109  | 0     | 0     | 0     | 0     |
| 17113  |       |       |       |       |
| 17115  | 0     | 0     | 0     | 0     |
| 17132  |       |       |       |       |
| 17135  | 1     | 1     | 0     | 1     |
| 17138  | 0     | 0     | 0     | 0     |
| 17141  | 0     | 0     | 0     | 0     |
| 17143  | 0     | 1     | 0     | 0     |
| 17148  | 0     | 0     | 0     | 0     |
| 17151  | 0     | 0     | 0     | 0     |
| 17153  | 0     | 0     | 0     | 0     |
| 17154  | 0     | 0     | 0     | 0     |
| 17157  | 0     | 0     | 0     | 0     |
| 17160  | 0     | 0     | 0     | 0     |

| respid | Q43_5 | Q43_6 | Q43_7 | Q43_8 |
|--------|-------|-------|-------|-------|
| 17167  | 0     | 0     | 1     | 0     |
| 17169  | 0     | 1     | 1     | 0     |
| 17174  | 0     | 1     | 1     | 0     |
| 17179  | 0     | 0     | 0     | 0     |
| 17180  | 0     | 0     | 0     | 0     |
| 17182  | 0     | 0     | 0     | 0     |
| 17184  | 0     | 0     | 0     | 0     |
| 17186  | 0     | 0     | 0     | 0     |
| 17187  | 0     | 0     | 0     | 0     |
| 17192  | 0     | 0     | 0     | 0     |
| 17197  | 0     | 0     | 0     | 0     |
| 17217  | 0     | 0     | 0     | 0     |
| 17226  | 0     | 0     | 0     | 0     |
| 17228  | 0     | 0     | 0     | 0     |
| 17245  | 0     | 0     | 0     | 0     |
| 17247  |       |       |       |       |
| 17258  | 0     | 0     | 0     | 0     |
| 17259  | 1     | 0     | 0     | 0     |
| 17262  | 0     | 0     | 0     | 0     |
| 17265  | 0     | 0     | 0     | 1     |
| 17281  | 0     | 1     | 1     | 0     |
| 17282  | 0     | 0     | 0     | 0     |
| 17293  | 0     | 0     | 0     | 0     |
| 17306  | 0     | 0     | 0     | 0     |
| 17312  | 0     | 0     | 0     | 0     |
| 17318  | 0     | 0     | 0     | 0     |
| 17328  | 1     | 1     | 0     | 1     |
| 17343  | 0     | 0     | 1     | 0     |
| 17344  | 0     | 0     | 0     | 0     |
| 17348  | 0     | 0     | 0     | 0     |
| 17352  | 0     | 0     | 0     | 0     |
| 17355  | 1     | 0     | 0     | 0     |

| respid | Q43_5 | Q43_6 | Q43_7 | Q43_8 |
|--------|-------|-------|-------|-------|
| 17356  | 0     | 0     | 0     | 0     |
| 17359  | 0     | 0     | 0     | 0     |
| 17373  | 0     | 1     | 1     | 1     |
| 17381  | 0     | 0     | 0     | 0     |
| 17388  | 0     | 0     | 0     | 0     |
| 17394  | 0     | 0     | 0     | 0     |
| 17401  |       |       |       |       |
| 17403  | 0     | 0     | 0     | 0     |
| 17411  |       |       |       |       |
| 17423  | 0     | 0     | 0     | 0     |
| 17427  |       |       |       |       |
| 17433  | 0     | 0     | 0     | 0     |
| 17441  | 0     | 0     | 0     | 0     |
| 17442  | 0     | 0     | 0     | 0     |
| 17447  | 0     | 0     | 0     | 0     |
| 17458  | 0     | 0     | 0     | 0     |
| 17474  | 0     | 0     | 0     | 0     |
| 17475  | 0     | 0     | 0     | 0     |
| 17476  | 1     | 0     | 0     | 0     |
| 17480  | 0     | 0     | 0     | 0     |
| 17484  | 0     | 0     | 0     | 0     |
| 17490  | 0     | 0     | 0     | 0     |
| 17491  | 0     | 0     | 0     | 0     |
| 17500  | 0     | 0     | 0     | 0     |
| 17507  | 0     | 0     | 0     | 0     |
| 17517  | 0     | 1     | 1     | 0     |
| 17520  | 0     | 0     | 0     | 0     |
| 17521  | 0     | 0     | 0     | 0     |
| 17531  | 0     | 0     | 0     | 0     |
| 17540  | 0     | 0     | 0     | 0     |
| 17550  | 0     | 0     | 0     | 0     |
| 17551  | 0     | 0     | 0     | 0     |

| respid | Q43_5 | Q43_6 | Q43_7 | Q43_8 |
|--------|-------|-------|-------|-------|
| 17555  | 1     | 0     | 1     | 0     |
| 17556  | 0     | 0     | 0     | 0     |
| 17574  | 0     | 0     | 0     | 0     |
| 17575  | 0     | 0     | 0     | 0     |
| 17582  | 0     | 0     | 0     | 0     |
| 17587  |       |       |       |       |
| 17601  | 0     | 0     | 0     | 0     |
| 17607  | 1     | 1     | 1     | 1     |
| 17609  | 0     | 0     | 0     | 0     |
| 17611  | 0     | 0     | 0     | 0     |
| 17613  | 0     | 0     | 0     | 0     |
| 17615  | 0     | 0     | 0     | 0     |
| 17620  | 0     | 0     | 0     | 0     |
| 17624  | 0     | 0     | 0     | 0     |
| 17635  | 0     | 0     | 0     | 0     |
| 17643  | 0     | 0     | 0     | 0     |
| 17645  | 1     | 0     | 0     | 0     |
| 17646  | 0     | 0     | 0     | 0     |
| 17649  | 0     | 0     | 0     | 0     |
| 17658  | 0     | 0     | 0     | 0     |
| 17666  |       |       |       |       |
| 17670  | 0     | 0     | 0     | 0     |
| 17678  | 0     | 0     | 0     | 0     |
| 17679  | 0     | 0     | 0     | 0     |
| 17695  | 0     | 0     | 0     | 0     |
| 17697  | 0     | 0     | 0     | 0     |
| 17698  | 0     | 1     | 0     | 1     |
| 17723  | 0     | 0     | 0     | 0     |
| 17727  | 0     | 0     | 0     | 0     |
| 17734  | 0     | 0     | 0     | 0     |
| 17737  | 0     | 0     | 0     | 0     |
| 17748  | 0     | 0     | 0     | 0     |

| respid | Q43_5 | Q43_6 | Q43_7 | Q43_8 |
|--------|-------|-------|-------|-------|
| 17749  |       |       |       |       |
| 17754  | 0     | 0     | 1     | 0     |
| 17766  | 0     | 0     | 0     | 0     |
| 17777  | 0     | 0     | 0     | 0     |
| 17780  | 0     | 0     | 0     | 0     |
| 17788  | 0     | 0     | 0     | 0     |
| 17801  | 0     | 0     | 0     | 0     |
| 17803  | 0     | 0     | 0     | 0     |
| 17807  | 0     | 0     | 0     | 0     |
| 17808  | 0     | 0     | 0     | 0     |
| 17809  | 0     | 0     | 0     | 0     |
| 17821  | 0     | 0     | 0     | 0     |
| 17827  | 0     | 0     | 0     | 0     |
| 17834  | 0     | 0     | 0     | 0     |
| 17838  | 0     | 0     | 0     | 0     |
| 17842  | 0     | 0     | 0     | 0     |
| 17862  | 0     | 0     | 0     | 0     |
| 17863  | 0     | 0     | 0     | 0     |
| 17871  | 0     | 0     | 0     | 0     |
| 17872  | 0     | 0     | 0     | 0     |
| 17903  | 0     | 1     | 1     | 0     |
| 17906  | 0     | 0     | 0     | 0     |
| 17910  | 1     | 0     | 0     | 0     |
| 17922  | 0     | 0     | 0     | 0     |
| 17923  | 0     | 1     | 1     | 0     |
| 17925  | 0     | 0     | 0     | 0     |
| 17926  | 0     | 0     | 0     | 0     |
| 17937  | 0     | 0     | 0     | 0     |
| 17956  | 0     | 0     | 0     | 0     |
| 17958  | 0     | 0     | 0     | 0     |
| 17985  | 0     | 0     | 0     | 0     |
| 17989  | 0     | 0     | 0     | 0     |



| respid | Q43_5 | Q43_6 | Q43_7 | Q43_8 |
|--------|-------|-------|-------|-------|
| 17995  | 0     | 0     | 0     | 0     |
| 18000  | 1     | 0     | 0     | 0     |
| 18010  | 0     | 0     | 0     | 0     |
| 18015  | 0     | 0     | 0     | 0     |
| 18018  | 1     | 0     | 0     | 0     |
| 18031  | 0     | 0     | 0     | 0     |
| 18033  | 0     | 0     | 0     | 0     |
| 18036  | 0     | 0     | 0     | 0     |
| 18041  | 0     | 0     | 0     | 0     |
| 18068  |       |       |       |       |
| 18080  | 0     | 0     | 0     | 0     |
| 18081  | 0     | 0     | 0     | 0     |
| 18083  | 0     | 0     | 0     | 0     |
| 18113  | 0     | 0     | 0     | 0     |
| 18115  | 0     | 0     | 0     | 0     |
| 18117  | 1     | 1     | 0     | 1     |
| 18129  | 0     | 0     | 0     | 0     |
| 18132  | 0     | 0     | 0     | 1     |
| 18146  | 0     | 0     | 0     | 0     |
| 18147  | 0     | 0     | 1     | 1     |
| 18153  |       |       |       |       |
| 18154  | 0     | 0     | 0     | 0     |
| 18157  | 0     | 0     | 0     | 0     |
| 18166  | 0     | 0     | 0     | 0     |
| 18169  | 0     | 0     | 0     | 0     |
| 18171  | 0     | 0     | 0     | 0     |
| 18173  | 0     | 0     | 0     | 0     |
| 18204  | 0     | 0     | 0     | 0     |
| 18210  | 0     | 0     | 0     | 0     |
| 18212  |       |       |       |       |
| 18220  | 1     | 1     | 1     | 1     |
| 18221  | 0     | 0     | 0     | 0     |

| respid | Q43_5 | Q43_6 | Q43_7 | Q43_8 |
|--------|-------|-------|-------|-------|
| 18228  | 0     | 0     | 0     | 0     |
| 18231  | 0     | 0     | 0     | 0     |
| 18233  | 0     | 1     | 1     | 1     |
| 18235  | 0     | 0     | 0     | 0     |
| 18237  |       |       |       |       |
| 18250  | 0     | 0     | 0     | 0     |
| 18253  | 1     | 0     | 0     | 0     |
| 18264  | 0     | 0     | 0     | 0     |
| 18285  | 0     | 0     | 0     | 0     |
| 18287  |       |       |       |       |
| 18296  | 0     | 0     | 0     | 0     |
| 18299  | 0     | 0     | 0     | 0     |
| 18313  | 1     | 0     | 0     | 0     |
| 18321  | 0     | 1     | 0     | 0     |
| 18324  |       |       |       |       |
| 18329  | 0     | 0     | 0     | 0     |
| 18332  | 0     | 0     | 0     | 0     |
| 18339  | 1     | 0     | 0     | 1     |
| 18340  | 0     | 0     | 0     | 0     |
| 18348  | 0     | 0     | 0     | 0     |
| 18355  | 0     | 0     | 0     | 0     |
| 18360  | 0     | 0     | 0     | 0     |
| 18380  | 0     | 0     | 0     | 0     |
| 18403  | 0     | 0     | 0     | 0     |
| 18405  | 0     | 0     | 0     | 0     |
| 18409  | 0     | 0     | 0     | 0     |
| 18445  | 0     | 0     | 0     | 0     |
| 18458  | 0     | 0     | 0     | 0     |
| 18477  | 0     | 0     | 0     | 0     |
| 18481  | 0     | 0     | 0     | 0     |
| 18491  | 0     | 0     | 0     | 0     |
| 18492  | 0     | 0     | 0     | 0     |

| respid | Q43_5 | Q43_6 | Q43_7 | Q43_8 |
|--------|-------|-------|-------|-------|
| 18494  | 1     | 0     | 0     | 0     |
| 18495  | 0     | 0     | 0     | 0     |
| 18496  | 0     | 0     | 0     | 0     |
| 18507  | 0     | 0     | 0     | 0     |
| 18509  |       |       |       |       |
| 18510  | 0     | 0     | 0     | 0     |
| 18513  | 0     | 0     | 0     | 0     |
| 18525  |       |       |       |       |
| 18526  | 0     | 0     | 0     | 0     |
| 18527  | 0     | 1     | 0     | 1     |
| 18536  | 0     | 0     | 0     | 0     |
| 18540  | 0     | 0     | 0     | 0     |
| 18548  | 0     | 0     | 0     | 0     |
| 18550  |       |       |       |       |
| 18556  | 0     | 0     | 0     | 1     |
| 18561  |       |       |       |       |
| 18577  | 0     | 1     | 0     | 1     |
| 18580  | 0     | 0     | 0     | 0     |
| 18633  | 1     | 1     | 0     | 0     |
| 18635  | 1     | 0     | 0     | 0     |
| 18636  |       |       |       |       |
| 18645  | 1     | 1     | 0     | 0     |
| 18649  | 0     | 0     | 0     | 0     |
| 18664  | 0     | 0     | 0     | 0     |
| 18668  | 0     | 0     | 0     | 0     |
| 18682  | 1     | 0     | 0     | 0     |
| 18685  | 0     | 0     | 0     | 0     |
| 18688  | 0     | 0     | 0     | 0     |
| 18689  | 1     | 1     | 0     | 0     |
| 18693  | 0     | 0     | 1     | 0     |
| 18694  | 0     | 0     | 0     | 0     |
| 18705  | 0     | 0     | 0     | 0     |

| respid | Q43_5 | Q43_6 | Q43_7 | Q43_8 |
|--------|-------|-------|-------|-------|
| 18710  | 0     | 0     | 0     | 0     |
| 18715  | 0     | 0     | 0     | 0     |
| 18718  | 0     | 0     | 1     | 1     |
| 18727  | 1     | 0     | 0     | 0     |
| 18732  | 0     | 0     | 0     | 0     |
| 18735  | 0     | 0     | 0     | 0     |
| 18742  | 0     | 0     | 0     | 0     |
| 18745  | 0     | 0     | 0     | 0     |
| 18747  | 0     | 0     | 0     | 0     |
| 18750  | 0     | 0     | 0     | 0     |
| 18751  | 0     | 1     | 1     | 0     |
| 18753  | 0     | 0     | 0     | 0     |
| 18754  |       |       |       |       |
| 18759  | 0     | 0     | 0     | 0     |
| 18780  | 0     | 0     | 0     | 0     |
| 18782  | 0     | 0     | 0     | 0     |
| 18807  | 1     | 0     | 0     | 0     |
| 18815  | 0     | 0     | 0     | 0     |
| 18818  | 0     | 0     | 0     | 0     |
| 18820  | 0     | 0     | 0     | 0     |
| 18823  | 0     | 0     | 0     | 0     |
| 18825  | 0     | 0     | 0     | 0     |
| 18828  |       |       |       |       |
| 18832  | 0     | 0     | 0     | 0     |
| 18834  | 0     | 0     | 0     | 0     |
| 18835  | 1     | 0     | 0     | 0     |
| 18837  | 0     | 0     | 0     | 0     |
| 18842  | 0     | 0     | 0     | 0     |
| 18846  |       |       |       |       |
| 18855  | 0     | 0     | 0     | 0     |
| 18856  | 0     | 0     | 0     | 0     |
| 18887  | 0     | 0     | 1     | 0     |

| respid | Q43_5 | Q43_6 | Q43_7 | Q43_8 |
|--------|-------|-------|-------|-------|
| 18903  | 0     | 0     | 0     | 0     |
| 18906  | 0     | 0     | 0     | 0     |
| 18910  |       |       |       |       |
| 18919  | 0     | 0     | 1     | 0     |
| 18928  | 0     | 0     | 0     | 0     |
| 18931  | 1     | 0     | 0     | 0     |
| 18939  | 0     | 0     | 0     | 0     |
| 18946  | 0     | 0     | 0     | 0     |
| 18952  | 1     | 1     | 0     | 1     |
| 18954  | 0     | 0     | 0     | 0     |
| 18982  |       |       |       |       |
| 18986  | 1     | 0     | 0     | 0     |
| 18989  | 1     | 0     | 0     | 0     |
| 18990  | 0     | 0     | 0     | 1     |
| 18996  | 0     | 0     | 0     | 0     |
| 18998  | 0     | 0     | 0     | 0     |
| 19009  | 0     | 0     | 0     | 0     |
| 19010  | 0     | 0     | 0     | 0     |
| 19017  | 0     | 0     | 0     | 0     |
| 19018  | 0     | 0     | 0     | 0     |
| 19020  | 0     | 0     | 0     | 0     |
| 19027  | 1     | 0     | 0     | 1     |
| 19035  | 0     | 0     | 0     | 0     |
| 19037  | 0     | 0     | 0     | 0     |
| 19048  | 0     | 0     | 0     | 0     |
| 19051  | 0     | 0     | 0     | 0     |
| 19054  | 0     | 0     | 0     | 0     |
| 19057  | 0     | 0     | 0     | 0     |
| 19073  | 1     | 0     | 0     | 0     |
| 19075  | 0     | 0     | 0     | 0     |
| 19079  | 0     | 0     | 1     | 0     |
| 19087  | 0     | 0     | 0     | 0     |

| respid | Q43_5 | Q43_6 | Q43_7 | Q43_8 |
|--------|-------|-------|-------|-------|
| 19090  | 0     | 0     | 0     | 0     |
| 19093  | 0     | 0     | 0     | 0     |
| 19099  | 0     | 1     | 0     | 0     |
| 19100  | 0     | 0     | 0     | 0     |
| 19101  | 0     | 0     | 0     | 0     |
| 19105  | 0     | 0     | 0     | 0     |
| 19111  | 1     | 0     | 1     | 0     |
| 19112  | 0     | 0     | 0     | 0     |
| 19117  | 0     | 0     | 1     | 1     |
| 19122  | 0     | 0     | 0     | 0     |
| 19126  | 0     | 0     | 0     | 0     |
| 19127  | 0     | 0     | 0     | 0     |
| 19131  | 0     | 0     | 1     | 0     |
| 19134  | 0     | 0     | 0     | 0     |
| 19149  | 0     | 0     | 0     | 0     |
| 19151  | 1     | 1     | 0     | 0     |
| 19164  | 0     | 0     | 0     | 0     |
| 19166  | 0     | 0     | 0     | 0     |
| 19172  | 0     | 0     | 0     | 0     |
| 19173  | 0     | 0     | 0     | 0     |
| 19180  | 0     | 0     | 0     | 0     |
| 19185  | 1     | 0     | 0     | 1     |
| 19189  | 0     | 0     | 0     | 0     |
| 19191  |       |       |       |       |
| 19198  | 0     | 0     | 0     | 0     |
| 19203  | 0     | 0     | 0     | 0     |
| 19209  | 0     | 0     | 0     | 0     |
| 19210  |       |       |       |       |
| 19218  |       |       |       |       |
| 19220  |       |       |       |       |
| 19225  | 0     | 0     | 0     | 0     |
| 19227  | 0     | 0     | 0     | 0     |

| respid | Q43_5 | Q43_6 | Q43_7 | Q43_8 |
|--------|-------|-------|-------|-------|
| 19228  | 0     | 0     | 0     | 0     |
| 19243  | 0     | 0     | 0     | 0     |
| 19244  | 0     | 0     | 0     | 0     |
| 19246  | 0     | 0     | 0     | 0     |
| 19248  |       |       |       |       |
| 19249  | 0     | 0     | 0     | 0     |
| 19252  | 0     | 0     | 0     | 0     |
| 19255  | 0     | 0     | 0     | 0     |
| 19257  | 0     | 0     | 0     | 0     |
| 19274  |       |       |       |       |
| 19279  |       |       |       |       |
| 19291  | 0     | 0     | 0     | 0     |
| 19292  | 0     | 1     | 0     | 0     |
| 19308  | 0     | 0     | 0     | 0     |
| 19310  | 0     | 1     | 1     | 0     |
| 19311  | 0     | 0     | 0     | 0     |
| 19326  | 0     | 0     | 0     | 0     |
| 19327  |       |       |       |       |
| 19329  |       |       |       |       |
| 19330  | 1     | 0     | 0     | 0     |
| 19333  | 0     | 0     | 0     | 0     |
| 19336  | 0     | 1     | 1     | 1     |
| 19343  | 1     | 0     | 0     | 0     |
| 19348  | 0     | 1     | 0     | 0     |
| 19349  | 0     | 0     | 0     | 0     |
| 19352  | 1     | 0     | 0     | 1     |
| 19356  | 0     | 0     | 0     | 0     |
| 19357  | 0     | 0     | 0     | 0     |
| 19358  | 0     | 0     | 0     | 0     |
| 19367  | 0     | 0     | 0     | 0     |
| 19376  |       |       |       |       |
| 19377  | 0     | 0     | 0     | 0     |

| respid | Q43_5 | Q43_6 | Q43_7 | Q43_8 |
|--------|-------|-------|-------|-------|
| 19380  | 0     | 0     | 0     | 0     |
| 19384  | 0     | 0     | 0     | 0     |
| 19391  | 0     | 0     | 0     | 0     |
| 19397  |       |       |       |       |
| 19398  | 0     | 0     | 0     | 0     |
| 19401  |       |       |       |       |
| 19402  | 0     | 0     | 0     | 0     |
| 19403  |       |       |       |       |
| 19405  |       |       |       |       |
| 19407  | 0     | 0     | 0     | 0     |
| 19415  | 0     | 0     | 0     | 0     |
| 19420  |       |       |       |       |
| 19423  | 1     | 1     | 1     | 0     |
| 19424  | 0     | 0     | 0     | 0     |
| 19426  | 0     | 0     | 0     | 0     |
| 19429  | 0     | 0     | 0     | 0     |
| 19435  | 0     | 1     | 0     | 0     |
| 19441  | 0     | 1     | 1     | 0     |
| 19450  | 0     | 0     | 0     | 0     |
| 19456  | 0     | 0     | 0     | 0     |
| 19457  | 0     | 0     | 0     | 0     |
| 19463  | 0     | 0     | 0     | 0     |
| 19467  | 0     | 0     | 0     | 0     |
| 19468  | 0     | 0     | 0     | 0     |
| 19471  | 0     | 0     | 0     | 0     |
| 19473  | 0     | 0     | 0     | 0     |
| 19478  | 0     | 1     | 1     | 1     |
| 19480  |       |       |       |       |
| 19481  | 0     | 0     | 0     | 0     |
| 19484  | 0     | 0     | 0     | 0     |
| 19487  | 0     | 0     | 0     | 0     |
| 19491  | 0     | 0     | 0     | 0     |



| respid | Q43_5 | Q43_6 | Q43_7 | Q43_8 |
|--------|-------|-------|-------|-------|
| 19495  | 1     | 0     | 0     | 0     |
| 19498  | 1     | 1     | 0     | 0     |
| 19500  | 1     | 0     | 1     | 0     |
| 19501  | 1     | 0     | 0     | 0     |
| 19503  |       |       |       |       |
| 19506  | 0     | 0     | 0     | 0     |
| 19508  | 0     | 0     | 0     | 0     |
| 19509  | 0     | 0     | 0     | 0     |
| 19518  | 0     | 0     | 0     | 0     |
| 19520  | 0     | 0     | 0     | 0     |
| 19536  | 0     | 0     | 0     | 0     |
| 19538  | 1     | 0     | 0     | 0     |
| 19541  | 0     | 0     | 0     | 0     |
| 19548  | 0     | 0     | 0     | 0     |
| 19553  |       |       |       |       |
| 19556  | 0     | 0     | 0     | 0     |
| 19559  |       |       |       |       |
| 19561  | 0     | 0     | 0     | 0     |
| 19562  | 0     | 0     | 0     | 0     |
| 19564  | 0     | 0     | 0     | 0     |
| 19567  | 1     | 0     | 1     | 1     |
| 19571  | 1     | 0     | 0     | 1     |
| 19576  | 1     | 0     | 0     | 0     |
| 19578  | 0     | 0     | 0     | 0     |
| 19606  |       |       |       |       |
| 19607  |       |       |       |       |
| 19608  | 1     | 0     | 0     | 0     |
| 19612  | 1     | 0     | 0     | 0     |
| 19618  | 0     | 0     | 0     | 0     |
| 19621  | 0     | 0     | 0     | 0     |
| 19624  | 0     | 0     | 1     | 0     |
| 19630  |       |       |       |       |

| respid | Q43_5 | Q43_6 | Q43_7 | Q43_8 |
|--------|-------|-------|-------|-------|
| 19637  | 0     | 0     | 0     | 0     |
| 19639  | 0     | 0     | 0     | 0     |
| 19647  | 0     | 0     | 0     | 0     |
| 19648  | 0     | 1     | 1     | 0     |
| 19660  | 0     | 0     | 0     | 0     |
| 19662  | 1     | 0     | 0     | 0     |
| 19669  | 0     | 0     | 0     | 0     |
| 19680  | 0     | 0     | 0     | 0     |
| 19682  | 0     | 0     | 0     | 0     |
| 19686  | 0     | 0     | 0     | 0     |
| 19700  | 1     | 0     | 0     | 0     |
| 19701  | 0     | 0     | 0     | 0     |
| 19704  |       |       |       |       |
| 19706  | 0     | 1     | 1     | 0     |
| 19707  | 0     | 0     | 0     | 0     |
| 19717  | 1     | 0     | 0     | 0     |
| 19718  | 0     | 0     | 0     | 0     |
| 19721  | 0     | 0     | 0     | 0     |
| 19722  | 0     | 0     | 0     | 0     |
| 19729  |       |       |       |       |
| 19738  | 1     | 0     | 0     | 0     |
| 19741  | 0     | 0     | 0     | 0     |
| 19742  | 0     | 0     | 0     | 0     |
| 19747  | 0     | 0     | 0     | 0     |
| 19748  | 0     | 0     | 0     | 0     |
| 19749  | 0     | 0     | 0     | 0     |
| 19756  | 1     | 0     | 0     | 0     |
| 19771  | 0     | 0     | 0     | 0     |
| 19772  | 1     | 0     | 0     | 0     |
| 19775  | 0     | 0     | 0     | 0     |
| 19783  |       |       |       |       |
| 19787  | 0     | 0     | 0     | 0     |

| respid | Q43_5 | Q43_6 | Q43_7 | Q43_8 |
|--------|-------|-------|-------|-------|
| 19790  |       |       |       |       |
| 19797  | 0     | 0     | 0     | 0     |
| 19802  | 0     | 0     | 0     | 0     |
| 19808  | 0     | 0     | 0     | 0     |
| 19810  | 0     | 0     | 0     | 0     |
| 19811  | 0     | 0     | 0     | 0     |
| 19812  | 0     | 0     | 0     | 0     |
| 19821  | 0     | 0     | 0     | 0     |
| 19826  | 0     | 0     | 0     | 0     |
| 19827  | 0     | 0     | 0     | 0     |
| 19830  | 0     | 0     | 0     | 0     |
| 19834  | 0     | 0     | 0     | 0     |
| 19838  | 0     | 0     | 0     | 0     |
| 19843  |       |       |       |       |
| 19845  | 0     | 0     | 0     | 0     |
| 19846  | 0     | 1     | 0     | 0     |
| 19852  | 1     | 0     | 0     | 1     |
| 19855  | 0     | 0     | 0     | 0     |
| 19858  | 1     | 0     | 1     | 1     |
| 19861  | 1     | 1     | 0     | 1     |
| 19863  | 0     | 0     | 0     | 0     |
| 19868  | 0     | 0     | 0     | 0     |
| 19874  | 0     | 0     | 0     | 0     |
| 19876  |       |       |       |       |
| 19880  | 0     | 0     | 0     | 0     |
| 19885  | 0     | 0     | 0     | 0     |
| 19890  |       |       |       |       |
| 19894  |       |       |       |       |
| 19895  | 0     | 0     | 0     | 0     |
| 19897  | 0     | 0     | 0     | 0     |
| 19906  | 0     | 0     | 0     | 0     |
| 19908  | 0     | 0     | 0     | 0     |

| respid | Q43_5 | Q43_6 | Q43_7 | Q43_8 |
|--------|-------|-------|-------|-------|
| 19912  | 0     | 0     | 0     | 0     |
| 19913  | 0     | 0     | 0     | 0     |
| 19914  | 0     | 0     | 0     | 0     |
| 19918  | 0     | 0     | 0     | 1     |
| 19924  | 1     | 0     | 0     | 0     |
| 19936  |       |       |       |       |
| 19940  |       |       |       |       |
| 19945  | 0     | 0     | 0     | 0     |
| 19948  |       |       |       |       |
| 19959  | 0     | 0     | 0     | 0     |
| 19961  | 0     | 0     | 0     | 0     |
| 19962  | 0     | 0     | 0     | 0     |
| 19965  | 0     | 0     | 0     | 0     |
| 19966  | 0     | 0     | 0     | 0     |
| 19973  | 0     | 0     | 0     | 0     |
| 19981  | 0     | 0     | 0     | 0     |
| 19986  | 0     | 0     | 0     | 0     |
| 19989  | 0     | 0     | 0     | 0     |
| 19998  | 0     | 0     | 0     | 0     |
| 20001  | 0     | 0     | 0     | 0     |
| 20005  |       |       |       |       |
| 20013  | 1     | 0     | 0     | 0     |
| 20015  | 0     | 0     | 0     | 0     |
| 20017  | 0     | 0     | 0     | 0     |
| 20020  | 0     | 0     | 0     | 0     |
| 20021  | 0     | 0     | 0     | 0     |
| 20026  | 0     | 0     | 0     | 0     |
| 20028  | 0     | 0     | 0     | 0     |
| 20030  | 0     | 0     | 0     | 0     |
| 20031  |       |       |       |       |
| 20034  | 0     | 0     | 0     | 0     |
| 20035  |       |       |       |       |

| respid | Q43_5 | Q43_6 | Q43_7 | Q43_8 |
|--------|-------|-------|-------|-------|
| 20040  | 0     | 0     | 0     | 0     |
| 20045  | 0     | 0     | 0     | 0     |
| 20048  | 0     | 0     | 0     | 0     |
| 20053  | 0     | 0     | 0     | 0     |
| 20064  | 1     | 0     | 0     | 0     |
| 20071  | 0     | 0     | 0     | 0     |
| 20072  | 0     | 0     | 0     | 0     |
| 20076  | 0     | 0     | 0     | 0     |
| 20081  | 0     | 0     | 0     | 0     |
| 20082  | 1     | 1     | 0     | 0     |
| 20083  | 0     | 0     | 0     | 0     |
| 20088  | 0     | 0     | 0     | 0     |
| 20089  | 1     | 1     | 1     | 1     |
| 20099  | 0     | 0     | 0     | 0     |
| 20101  | 0     | 0     | 0     | 0     |
| 20102  | 0     | 0     | 0     | 0     |
| 20109  | 0     | 0     | 0     | 0     |
| 20118  | 0     | 0     | 0     | 0     |
| 20119  | 0     | 0     | 0     | 0     |
| 20124  |       |       |       |       |
| 20126  | 0     | 0     | 0     | 0     |
| 20130  |       |       |       |       |
| 20131  | 0     | 0     | 0     | 0     |
| 20134  | 1     | 0     | 0     | 0     |
| 20146  | 0     | 0     | 0     | 0     |
| 20152  |       |       |       |       |
| 20155  | 1     | 0     | 0     | 0     |
| 20156  |       |       |       |       |
| 20157  |       |       |       |       |
| 20164  | 0     | 0     | 0     | 0     |
| 20168  | 0     | 0     | 0     | 0     |
| 20173  | 0     | 0     | 0     | 0     |

| respid | Q43_5 | Q43_6 | Q43_7 | Q43_8 |
|--------|-------|-------|-------|-------|
| 20174  | 0     | 0     | 0     | 0     |
| 20175  | 0     | 0     | 0     | 0     |
| 20189  | 0     | 0     | 0     | 0     |
| 20190  | 0     | 0     | 0     | 0     |
| 20201  | 0     | 0     | 0     | 0     |
| 20202  | 0     | 0     | 0     | 0     |
| 20204  | 0     | 0     | 0     | 0     |
| 20206  | 0     | 0     | 0     | 0     |
| 20207  | 0     | 0     | 0     | 0     |
| 20212  | 1     | 0     | 0     | 0     |
| 20213  | 1     | 0     | 0     | 0     |
| 20217  | 0     | 0     | 0     | 0     |
| 20222  | 1     | 0     | 1     | 1     |
| 20227  |       |       |       |       |
| 20228  | 0     | 0     | 0     | 0     |
| 20238  | 0     | 0     | 0     | 0     |
| 20242  | 0     | 0     | 0     | 0     |
| 20246  | 0     | 0     | 0     | 0     |
| 20255  | 0     | 0     | 0     | 0     |
| 20256  | 0     | 1     | 1     | 1     |
| 20259  | 0     | 0     | 0     | 0     |
| 20262  | 0     | 0     | 0     | 0     |
| 20274  | 0     | 0     | 0     | 0     |
| 20283  | 0     | 1     | 0     | 0     |
| 20284  |       |       |       |       |
| 20291  | 0     | 0     | 0     | 0     |
| 20292  | 0     | 0     | 0     | 0     |
| 20293  | 0     | 0     | 0     | 0     |
| 20298  | 0     | 0     | 0     | 0     |
| 20301  |       |       |       |       |
| 20303  | 0     | 0     | 0     | 0     |
| 20309  |       |       |       |       |

| respid | Q43_5 | Q43_6 | Q43_7 | Q43_8 |
|--------|-------|-------|-------|-------|
| 20318  | 0     | 0     | 0     | 0     |
| 20324  | 0     | 0     | 0     | 0     |
| 20335  | 0     | 0     | 0     | 0     |
| 20336  | 0     | 0     | 0     | 0     |
| 20339  | 1     | 0     | 0     | 0     |
| 20348  | 0     | 0     | 0     | 0     |
| 20351  | 0     | 0     | 0     | 0     |
| 20353  | 0     | 0     | 0     | 0     |
| 20356  | 0     | 0     | 0     | 0     |
| 20357  |       |       |       |       |
| 20366  | 0     | 0     | 0     | 0     |
| 20369  | 0     | 0     | 0     | 0     |
| 20372  | 0     | 0     | 0     | 0     |
| 20375  | 0     | 0     | 0     | 0     |
| 20379  | 0     | 1     | 0     | 0     |
| 20380  | 0     | 0     | 0     | 0     |
| 20396  | 0     | 0     | 0     | 0     |
| 20398  | 0     | 0     | 0     | 0     |
| 20412  | 0     | 0     | 0     | 0     |
| 20415  | 0     | 0     | 0     | 0     |
| 20424  | 0     | 0     | 0     | 0     |
| 20434  | 0     | 0     | 0     | 0     |
| 20435  | 0     | 0     | 1     | 0     |
| 20440  | 0     | 0     | 0     | 0     |
| 20441  | 0     | 0     | 0     | 0     |
| 20445  | 0     | 0     | 0     | 0     |
| 20446  | 0     | 0     | 0     | 0     |
| 20450  | 0     | 0     | 0     | 0     |
| 20453  | 0     | 0     | 0     | 0     |
| 20458  | 0     | 0     | 0     | 0     |
| 20464  | 0     | 0     | 0     | 0     |
| 20471  | 0     | 0     | 0     | 0     |

| respid | Q43_5 | Q43_6 | Q43_7 | Q43_8 |
|--------|-------|-------|-------|-------|
| 20473  | 1     | 0     | 0     | 0     |
| 20474  | 0     | 0     | 0     | 0     |
| 20477  |       |       |       |       |
| 20479  | 1     | 1     | 0     | 0     |
| 20485  | 0     | 0     | 0     | 0     |
| 20487  | 0     | 0     | 0     | 0     |
| 20488  | 0     | 0     | 0     | 0     |
| 20494  | 0     | 0     | 0     | 0     |
| 20502  | 1     | 0     | 1     | 1     |
| 20503  | 0     | 0     | 0     | 0     |
| 20510  | 0     | 0     | 0     | 0     |
| 20512  |       |       |       |       |
| 20516  | 0     | 0     | 0     | 0     |
| 20522  | 0     | 0     | 0     | 0     |
| 20527  | 0     | 0     | 0     | 0     |
| 20529  | 0     | 0     | 1     | 1     |
| 20535  | 0     | 0     | 0     | 0     |
| 20543  | 0     | 0     | 0     | 0     |
| 20546  | 0     | 0     | 0     | 1     |
| 20548  | 0     | 0     | 0     | 0     |
| 20552  | 0     | 0     | 0     | 0     |
| 20556  | 1     | 0     | 0     | 0     |
| 20566  | 1     | 0     | 1     | 0     |
| 20576  | 1     | 0     | 0     | 0     |
| 20587  | 0     | 0     | 0     | 0     |
| 20589  | 0     | 0     | 0     | 0     |
| 20593  |       |       |       |       |
| 20594  | 0     | 0     | 0     | 0     |
| 20602  | 1     | 0     | 0     | 0     |
| 20607  |       |       |       |       |
| 20608  | 0     | 0     | 0     | 0     |
| 20611  | 0     | 0     | 0     | 0     |



| respid | Q43_5 | Q43_6 | Q43_7 | Q43_8 |
|--------|-------|-------|-------|-------|
| 20612  | 0     | 0     | 0     | 0     |
| 20615  | 0     | 0     | 0     | 0     |
| 20625  | 0     | 1     | 1     | 0     |
| 20630  | 0     | 0     | 0     | 0     |
| 20639  | 0     | 0     | 0     | 0     |
| 20643  | 0     | 0     | 0     | 0     |
| 20645  |       |       |       |       |
| 20647  | 0     | 0     | 0     | 0     |
| 20652  | 1     | 0     | 0     | 0     |
| 20661  | 0     | 0     | 0     | 0     |
| 20665  |       |       |       |       |
| 20679  | 0     | 0     | 0     | 0     |
| 20682  | 0     | 0     | 0     | 0     |
| 20683  |       |       |       |       |
| 20700  | 0     | 0     | 0     | 0     |
| 20702  | 1     | 0     | 0     | 1     |
| 20709  | 0     | 0     | 0     | 0     |
| 20715  | 0     | 0     | 0     | 0     |
| 20718  | 0     | 0     | 0     | 0     |
| 20722  | 0     | 0     | 0     | 0     |
| 20729  |       |       |       |       |
| 20732  |       |       |       |       |
| 20746  | 0     | 1     | 0     | 0     |
| 20747  |       |       |       |       |
| 20758  | 0     | 0     | 0     | 0     |
| 20767  | 0     | 0     | 0     | 0     |
| 20777  | 0     | 0     | 0     | 0     |
| 20778  | 0     | 0     | 0     | 0     |
| 20780  | 0     | 0     | 0     | 0     |
| 20800  | 0     | 0     | 0     | 0     |
| 20810  | 0     | 0     | 0     | 0     |
| 20814  | 0     | 0     | 0     | 0     |

| respid | Q43_5 | Q43_6 | Q43_7 | Q43_8 |
|--------|-------|-------|-------|-------|
| 20816  | 0     | 0     | 0     | 0     |
| 20832  | 1     | 0     | 0     | 0     |
| 20838  | 0     | 0     | 0     | 0     |
| 20841  | 1     | 0     | 0     | 0     |
| 20848  | 0     | 0     | 0     | 0     |
| 20850  |       |       |       |       |
| 20851  | 1     | 0     | 0     | 0     |
| 20861  | 1     | 0     | 1     | 0     |
| 20870  | 0     | 0     | 0     | 0     |
| 20880  | 0     | 0     | 0     | 0     |
| 20883  | 0     | 0     | 0     | 0     |
| 20894  | 0     | 0     | 0     | 0     |
| 20896  | 0     | 0     | 0     | 0     |
| 20901  | 0     | 0     | 0     | 0     |
| 20903  | 0     | 0     | 0     | 0     |
| 20909  |       |       |       |       |
| 20919  | 0     | 0     | 0     | 0     |
| 20925  | 0     | 0     | 0     | 0     |
| 20935  | 0     | 1     | 1     | 0     |
| 20939  | 0     | 0     | 0     | 0     |
| 20956  | 1     | 0     | 1     | 0     |
| 20970  | 1     | 0     | 0     | 0     |
| 20974  | 0     | 0     | 0     | 0     |
| 20975  | 0     | 0     | 0     | 0     |
| 20984  | 0     | 0     | 0     | 0     |
| 20988  |       |       |       |       |
| 20996  | 0     | 0     | 0     | 0     |
| 20998  | 0     | 0     | 0     | 0     |
| 21007  |       |       |       |       |
| 21008  |       |       |       |       |
| 21014  | 0     | 0     | 0     | 0     |
| 21020  | 0     | 0     | 0     | 0     |

| respid | Q43_5 | Q43_6 | Q43_7 | Q43_8 |
|--------|-------|-------|-------|-------|
| 21022  | 1     | 0     | 0     | 0     |
| 21024  |       |       |       |       |
| 21026  | 0     | 0     | 0     | 0     |
| 21027  | 0     | 0     | 0     | 0     |
| 21030  | 0     | 0     | 0     | 0     |
| 21032  | 0     | 0     | 0     | 0     |
| 21040  | 0     | 0     | 0     | 0     |
| 21045  | 0     | 0     | 0     | 0     |
| 21058  | 0     | 0     | 0     | 0     |
| 21064  | 0     | 0     | 0     | 0     |
| 21073  | 0     | 0     | 0     | 0     |
| 21086  | 0     | 0     | 0     | 0     |
| 21092  | 1     | 0     | 1     | 1     |
| 21096  | 1     | 0     | 0     | 1     |
| 21103  | 0     | 0     | 1     | 0     |
| 21120  | 1     | 0     | 0     | 0     |
| 21125  |       |       |       |       |
| 21126  | 0     | 0     | 0     | 0     |
| 21132  |       |       |       |       |
| 21139  | 1     | 0     | 1     | 0     |
| 21147  |       |       |       |       |
| 21148  | 0     | 0     | 0     | 0     |
| 21149  | 1     | 0     | 0     | 0     |
| 21164  | 0     | 0     | 0     | 0     |
| 21165  | 0     | 0     | 0     | 0     |
| 21171  | 1     | 0     | 0     | 0     |
| 21176  | 0     | 0     | 0     | 0     |
| 21187  | 0     | 0     | 0     | 0     |
| 21192  | 1     | 0     | 0     | 1     |
| 21198  | 0     | 0     | 0     | 0     |
| 21199  | 1     | 0     | 0     | 0     |
| 21206  | 0     | 0     | 0     | 0     |

| respid | Q43_5 | Q43_6 | Q43_7 | Q43_8 |
|--------|-------|-------|-------|-------|
| 21212  | 0     | 0     | 0     | 0     |
| 21216  | 0     | 0     | 0     | 0     |
| 21217  | 0     | 0     | 0     | 0     |
| 21228  | 0     | 0     | 0     | 0     |
| 21229  | 1     | 0     | 0     | 0     |
| 21230  | 0     | 0     | 0     | 0     |
| 21243  | 0     | 0     | 0     | 0     |
| 21247  | 1     | 0     | 0     | 0     |
| 21253  | 1     | 1     | 0     | 1     |
| 21264  | 0     | 0     | 0     | 0     |
| 21265  | 0     | 0     | 0     | 0     |
| 21273  | 0     | 0     | 0     | 0     |
| 21275  | 1     | 0     | 0     | 0     |
| 21278  | 0     | 0     | 0     | 0     |
| 21291  | 1     | 0     | 0     | 0     |
| 21298  | 0     | 0     | 0     | 0     |
| 21301  | 0     | 0     | 1     | 1     |
| 21312  | 0     | 0     | 0     | 0     |
| 21323  | 0     | 0     | 0     | 0     |
| 21325  | 0     | 0     | 0     | 0     |
| 21341  | 0     | 0     | 0     | 0     |
| 21349  | 1     | 0     | 0     | 0     |
| 21350  | 1     | 0     | 0     | 0     |
| 21354  | 0     | 0     | 0     | 0     |
| 21372  | 0     | 0     | 0     | 0     |
| 21373  | 0     | 0     | 0     | 0     |
| 21378  | 0     | 0     | 0     | 0     |
| 21393  |       |       |       |       |
| 21401  | 0     | 0     | 0     | 0     |
| 21405  | 0     | 0     | 0     | 0     |
| 21406  |       |       |       |       |
| 21407  | 0     | 0     | 0     | 0     |

| respid | Q43_5 | Q43_6 | Q43_7 | Q43_8 |
|--------|-------|-------|-------|-------|
| 21418  | 0     | 0     | 0     | 0     |
| 21420  | 0     | 0     | 0     | 0     |
| 21421  |       |       |       |       |
| 21446  | 1     | 0     | 0     | 0     |
| 21449  | 0     | 0     | 0     | 0     |
| 21452  | 0     | 0     | 0     | 0     |
| 21455  | 1     | 0     | 0     | 0     |
| 21469  | 0     | 0     | 0     | 0     |
| 21471  | 1     | 0     | 0     | 0     |
| 21472  | 0     | 0     | 0     | 0     |
| 21474  | 0     | 0     | 0     | 0     |
| 21479  | 0     | 0     | 0     | 0     |
| 21485  | 0     | 0     | 0     | 0     |
| 21512  |       |       |       |       |
| 21513  | 0     | 0     | 0     | 0     |
| 21514  | 1     | 0     | 0     | 0     |
| 21520  | 1     | 1     | 1     | 1     |
| 21539  | 1     | 1     | 1     | 0     |
| 21553  | 0     | 0     | 0     | 0     |
| 21560  | 0     | 0     | 0     | 0     |
| 21561  | 0     | 0     | 0     | 0     |
| 21563  | 0     | 1     | 0     | 0     |
| 21565  |       |       |       |       |
| 21582  | 0     | 0     | 0     | 0     |
| 21584  | 0     | 0     | 0     | 0     |
| 21585  | 1     | 0     | 0     | 0     |
| 21586  | 0     | 0     | 0     | 0     |
| 21587  | 0     | 0     | 0     | 0     |
| 21590  | 1     | 0     | 0     | 0     |
| 21601  | 1     | 0     | 0     | 0     |
| 21611  | 0     | 1     | 0     | 0     |
| 21612  | 0     | 0     | 0     | 0     |

| respid | Q43_5 | Q43_6 | Q43_7 | Q43_8 |
|--------|-------|-------|-------|-------|
| 21625  | 0     | 0     | 0     | 0     |
| 21633  |       |       |       |       |
| 21640  | 1     | 0     | 0     | 0     |
| 21647  | 0     | 0     | 0     | 0     |
| 21648  | 0     | 0     | 0     | 0     |
| 21656  | 0     | 0     | 0     | 0     |
| 21657  | 0     | 0     | 0     | 0     |
| 21658  | 0     | 1     | 1     | 1     |
| 21665  | 0     | 0     | 0     | 0     |
| 21666  | 1     | 1     | 0     | 0     |
| 21668  | 0     | 0     | 0     | 0     |
| 21673  | 1     | 0     | 0     | 0     |
| 21681  | 1     | 0     | 0     | 0     |
| 21682  | 0     | 0     | 0     | 0     |
| 21685  | 0     | 0     | 0     | 0     |
| 21692  | 0     | 0     | 0     | 0     |
| 21697  | 0     | 0     | 0     | 0     |
| 21711  | 0     | 0     | 0     | 0     |
| 21715  | 0     | 0     | 0     | 0     |
| 21726  | 0     | 0     | 0     | 0     |
| 21748  |       |       |       |       |
| 21761  | 0     | 0     | 0     | 0     |
| 21769  | 1     | 0     | 0     | 1     |
| 21774  | 0     | 1     | 0     | 1     |
| 21778  |       |       |       |       |
| 21785  | 1     | 0     | 0     | 0     |
| 21799  | 1     | 0     | 0     | 1     |
| 21820  | 0     | 0     | 0     | 1     |
| 21837  | 0     | 0     | 0     | 0     |
| 21845  | 0     | 1     | 0     | 0     |
| 21846  | 0     | 0     | 0     | 0     |
| 21849  | 1     | 0     | 0     | 0     |

| respid | Q43_5 | Q43_6 | Q43_7 | Q43_8 |
|--------|-------|-------|-------|-------|
| 21850  | 0     | 0     | 0     | 0     |
| 21855  | 0     | 0     | 0     | 0     |
| 21859  | 0     | 0     | 0     | 0     |
| 21861  | 0     | 0     | 1     | 0     |
| 21866  |       |       |       |       |
| 21873  | 0     | 0     | 0     | 0     |
| 21876  | 0     | 0     | 0     | 1     |
| 21882  |       |       |       |       |
| 21884  | 0     | 0     | 0     | 0     |
| 21887  | 0     | 0     | 0     | 0     |
| 21892  | 0     | 0     | 0     | 0     |
| 21907  | 0     | 0     | 0     | 0     |
| 21910  | 1     | 0     | 1     | 1     |
| 21912  | 1     | 0     | 0     | 0     |
| 21914  | 1     | 0     | 0     | 0     |
| 21925  | 0     | 0     | 0     | 0     |
| 21937  |       |       |       |       |
| 21938  | 0     | 1     | 1     | 0     |
| 21940  | 0     | 0     | 0     | 0     |
| 21942  | 0     | 0     | 0     | 0     |
| 21947  |       |       |       |       |
| 21948  | 0     | 0     | 0     | 0     |
| 21961  | 0     | 0     | 0     | 0     |
| 21977  | 0     | 0     | 0     | 0     |
| 21983  |       |       |       |       |
| 21986  | 1     | 0     | 1     | 1     |
| 21988  | 0     | 0     | 0     | 0     |
| 21996  | 1     | 0     | 0     | 0     |
| 21997  | 0     | 0     | 0     | 0     |
| 22005  | 0     | 0     | 0     | 0     |
| 22013  | 0     | 0     | 0     | 0     |
| 22018  |       |       |       |       |

| respid | Q43_5 | Q43_6 | Q43_7 | Q43_8 |
|--------|-------|-------|-------|-------|
| 22019  | 0     | 0     | 0     | 0     |
| 22071  | 0     | 0     | 0     | 0     |
| 22082  | 0     | 0     | 0     | 0     |
| 22085  | 1     | 0     | 0     | 0     |
| 22092  | 0     | 0     | 0     | 0     |
| 22097  | 0     | 0     | 0     | 0     |
| 22111  |       |       |       |       |
| 22118  | 0     | 0     | 0     | 0     |
| 22132  | 0     | 0     | 0     | 0     |
| 22133  | 0     | 0     | 0     | 0     |
| 22139  |       |       |       |       |
| 22142  | 0     | 0     | 0     | 0     |
| 22146  | 0     | 0     | 0     | 0     |
| 22181  |       |       |       |       |
| 22202  | 0     | 0     | 0     | 0     |
| 22214  |       |       |       |       |
| 22223  | 0     | 0     | 0     | 0     |
| 22227  | 1     | 1     | 0     | 0     |
| 22229  | 0     | 0     | 0     | 0     |
| 22239  | 0     | 0     | 0     | 0     |
| 22245  | 1     | 0     | 1     | 1     |
| 22256  | 0     | 0     | 0     | 0     |
| 22260  | 0     | 0     | 0     | 0     |
| 22298  | 1     | 0     | 0     | 0     |
| 22321  | 0     | 0     | 0     | 0     |
| 22340  |       |       |       |       |
| 22346  | 0     | 0     | 0     | 0     |
| 22356  | 1     | 0     | 0     | 0     |
| 22361  | 0     | 0     | 0     | 0     |
| 22364  | 0     | 0     | 0     | 0     |
| 22368  |       |       |       |       |
| 22374  | 0     | 0     | 0     | 0     |



| respid | Q43_5 | Q43_6 | Q43_7 | Q43_8 |
|--------|-------|-------|-------|-------|
| 22375  | 0     | 0     | 0     | 0     |
| 22377  | 0     | 0     | 0     | 0     |
| 22383  |       |       |       |       |
| 22387  | 1     | 1     | 1     | 0     |
| 22392  |       |       |       |       |
| 22393  | 0     | 0     | 0     | 0     |
| 22394  | 0     | 0     | 0     | 0     |
| 22395  |       |       |       |       |
| 22401  | 0     | 0     | 0     | 0     |
| 22407  |       |       |       |       |
| 22410  | 0     | 0     | 0     | 0     |
| 22418  | 0     | 0     | 0     | 0     |
| 22421  |       |       |       |       |
| 22423  |       |       |       |       |
| 22425  | 1     | 0     | 0     | 0     |
| 22427  | 0     | 0     | 0     | 0     |
| 22431  | 1     | 1     | 0     | 1     |
| 22435  | 1     | 0     | 0     | 1     |
| 22436  | 1     | 0     | 0     | 0     |
| 22442  |       |       |       |       |
| 22444  | 0     | 0     | 0     | 0     |
| 22445  | 0     | 0     | 0     | 0     |
| 22446  |       |       |       |       |
| 22448  | 0     | 0     | 0     | 0     |
| 22449  | 0     | 0     | 0     | 0     |
| 22450  | 0     | 0     | 0     | 0     |
| 22453  | 1     | 1     | 1     | 0     |
| 22465  | 0     | 0     | 0     | 0     |
| 22472  | 0     | 0     | 0     | 0     |
| 22475  | 1     | 0     | 0     | 1     |
| 22478  | 1     | 0     | 0     | 0     |
| 22491  | 0     | 0     | 0     | 0     |

| respid | Q43_5 | Q43_6 | Q43_7 | Q43_8 |
|--------|-------|-------|-------|-------|
| 22497  | 1     | 0     | 0     | 0     |
| 22498  | 0     | 0     | 0     | 0     |
| 22499  | 0     | 0     | 0     | 0     |
| 22503  | 0     | 0     | 0     | 0     |
| 22507  | 0     | 0     | 0     | 0     |
| 22513  | 1     | 0     | 0     | 0     |
| 22517  | 0     | 1     | 0     | 0     |
| 22524  | 1     | 0     | 0     | 0     |
| 22528  | 0     | 0     | 0     | 0     |
| 22544  | 0     | 0     | 0     | 0     |
| 22571  | 0     | 0     | 0     | 0     |
| 22576  | 0     | 0     | 0     | 0     |
| 22579  | 1     | 0     | 0     | 0     |
| 22583  | 0     | 0     | 0     | 0     |
| 22591  | 0     | 0     | 0     | 0     |
| 22592  | 0     | 0     | 0     | 0     |
| 22612  | 0     | 0     | 0     | 0     |
| 22613  | 0     | 0     | 0     | 0     |
| 22615  | 0     | 0     | 0     | 1     |
| 22621  | 0     | 0     | 0     | 0     |
| 22625  | 0     | 0     | 0     | 0     |
| 22628  | 0     | 0     | 0     | 0     |
| 22632  | 0     | 0     | 0     | 0     |
| 22639  |       |       |       |       |
| 22648  | 0     | 0     | 0     | 0     |
| 22649  | 1     | 0     | 0     | 1     |
| 22655  |       |       |       |       |
| 22659  |       |       |       |       |
| 22660  | 0     | 0     | 0     | 0     |
| 22666  | 0     | 0     | 0     | 0     |
| 22667  | 0     | 0     | 0     | 0     |
| 22670  |       |       |       |       |

| respid | Q43_5 | Q43_6 | Q43_7 | Q43_8 |
|--------|-------|-------|-------|-------|
| 22681  |       |       |       |       |
| 22683  | 0     | 0     | 0     | 0     |
| 22688  | 0     | 0     | 0     | 0     |
| 22695  | 1     | 0     | 0     | 0     |
| 22696  | 0     | 0     | 0     | 0     |
| 22705  | 0     | 0     | 1     | 0     |
| 22718  | 1     | 0     | 0     | 0     |
| 22720  | 0     | 0     | 0     | 0     |
| 22724  | 0     | 0     | 0     | 0     |
| 22728  | 0     | 0     | 0     | 0     |
| 22751  | 0     | 0     | 0     | 0     |
| 22782  | 0     | 0     | 0     | 0     |
| 22786  | 1     | 0     | 0     | 0     |
| 22788  | 0     | 0     | 0     | 0     |
| 22810  | 1     | 1     | 0     | 0     |
| 22816  | 0     | 0     | 0     | 0     |
| 22818  | 0     | 0     | 0     | 0     |
| 22854  |       |       |       |       |
| 22858  | 0     | 0     | 0     | 0     |
| 22862  | 0     | 0     | 0     | 0     |
| 22865  | 0     | 0     | 0     | 0     |
| 22868  | 0     | 0     | 0     | 0     |
| 22869  | 1     | 1     | 1     | 1     |
| 22873  | 0     | 0     | 0     | 0     |
| 22875  | 0     | 0     | 0     | 0     |
| 22876  | 0     | 0     | 0     | 0     |
| 22882  | 0     | 0     | 0     | 0     |
| 22884  | 1     | 0     | 0     | 0     |
| 22887  | 0     | 0     | 0     | 0     |
| 22888  | 0     | 0     | 0     | 0     |
| 22900  |       |       |       |       |
| 22901  |       |       |       |       |

| respid | Q43_5 | Q43_6 | Q43_7 | Q43_8 |
|--------|-------|-------|-------|-------|
| 22912  | 0     | 0     | 0     | 0     |
| 22913  | 0     | 0     | 0     | 0     |
| 22921  | 0     | 0     | 0     | 0     |
| 22925  | 0     | 0     | 0     | 0     |
| 22940  | 0     | 0     | 0     | 0     |
| 22941  | 0     | 0     | 0     | 0     |
| 22947  | 0     | 0     | 0     | 0     |
| 22948  |       |       |       |       |
| 22964  | 1     | 1     | 0     | 0     |
| 22966  | 0     | 0     | 0     | 0     |
| 22969  | 0     | 0     | 0     | 0     |
| 22971  |       |       |       |       |
| 22988  |       |       |       |       |
| 22990  |       |       |       |       |
| 23000  | 0     | 0     | 0     | 0     |
| 23016  |       |       |       |       |
| 23026  | 0     | 1     | 1     | 1     |
| 23035  | 0     | 0     | 0     | 0     |
| 23037  | 1     | 0     | 0     | 0     |
| 23044  | 0     | 0     | 0     | 0     |
| 23046  | 0     | 0     | 0     | 0     |
| 23047  | 0     | 0     | 0     | 0     |
| 23049  | 0     | 0     | 0     | 0     |
| 23055  | 0     | 0     | 0     | 0     |
| 23066  | 0     | 0     | 0     | 0     |
| 23075  | 0     | 0     | 0     | 0     |
| 23081  | 1     | 1     | 1     | 1     |
| 23087  | 0     | 0     | 0     | 0     |
| 23094  |       |       |       |       |
| 23099  |       |       |       |       |
| 23101  | 0     | 1     | 0     | 0     |
| 23105  |       |       |       |       |

| respid | Q43_5 | Q43_6 | Q43_7 | Q43_8 |
|--------|-------|-------|-------|-------|
| 23115  | 0     | 0     | 0     | 0     |
| 23121  | 0     | 0     | 0     | 0     |
| 23127  | 0     | 0     | 0     | 0     |
| 23131  | 0     | 0     | 0     | 0     |
| 23134  | 0     | 0     | 0     | 0     |
| 23145  | 0     | 0     | 0     | 0     |
| 23151  | 0     | 0     | 0     | 0     |
| 23161  | 0     | 0     | 0     | 0     |
| 23169  | 0     | 0     | 0     | 0     |
| 23173  | 0     | 0     | 0     | 0     |
| 23174  | 0     | 0     | 0     | 0     |
| 23186  | 0     | 0     | 0     | 0     |
| 23195  | 0     | 0     | 0     | 0     |
| 23197  | 0     | 0     | 0     | 0     |
| 23198  | 0     | 0     | 0     | 0     |
| 23203  |       |       |       |       |
| 23204  | 1     | 0     | 0     | 0     |
| 23212  | 0     | 0     | 0     | 0     |
| 23214  | 0     | 0     | 0     | 0     |
| 23221  | 0     | 0     | 0     | 0     |
| 23237  | 0     | 0     | 0     | 0     |
| 23251  | 0     | 0     | 0     | 0     |
| 23254  | 0     | 0     | 0     | 0     |
| 23262  | 0     | 0     | 0     | 0     |
| 23267  | 0     | 0     | 0     | 0     |
| 23268  | 1     | 0     | 0     | 1     |
| 23273  | 0     | 0     | 0     | 0     |
| 23278  | 0     | 0     | 0     | 0     |
| 23279  |       |       |       |       |
| 23281  | 0     | 0     | 0     | 0     |
| 23282  | 0     | 0     | 0     | 0     |
| 23283  | 0     | 0     | 0     | 0     |

| respid | Q43_5 | Q43_6 | Q43_7 | Q43_8 |
|--------|-------|-------|-------|-------|
| 23285  | 0     | 0     | 0     | 0     |
| 23305  | 1     | 0     | 0     | 0     |
| 23309  | 0     | 0     | 0     | 0     |
| 23310  | 0     | 0     | 0     | 0     |
| 23311  | 1     | 0     | 0     | 0     |
| 23312  | 0     | 0     | 0     | 0     |
| 23319  | 1     | 1     | 0     | 0     |
| 23320  | 0     | 0     | 0     | 0     |
| 23322  | 0     | 0     | 0     | 0     |
| 23334  | 0     | 0     | 0     | 0     |
| 23340  | 0     | 0     | 0     | 0     |
| 23346  | 0     | 0     | 0     | 0     |
| 23353  | 0     | 0     | 0     | 0     |
| 23363  | 0     | 0     | 0     | 0     |
| 23364  | 0     | 0     | 0     | 1     |
| 23376  |       |       |       |       |
| 23378  | 0     | 0     | 0     | 0     |
| 23382  |       |       |       |       |
| 23383  |       |       |       |       |
| 23390  | 0     | 0     | 0     | 0     |
| 23395  | 0     | 0     | 0     | 0     |
| 23398  | 0     | 0     | 0     | 0     |
| 23399  | 0     | 0     | 0     | 0     |
| 23406  | 1     | 0     | 0     | 0     |
| 23418  | 0     | 0     | 0     | 0     |
| 23427  | 0     | 0     | 0     | 0     |
| 23428  | 0     | 0     | 0     | 0     |
| 23435  | 1     | 0     | 1     | 0     |
| 23439  | 0     | 0     | 0     | 0     |
| 23440  |       |       |       |       |
| 23444  | 1     | 1     | 0     | 0     |
| 23445  | 0     | 0     | 0     | 0     |

| respid | Q43_5 | Q43_6 | Q43_7 | Q43_8 |
|--------|-------|-------|-------|-------|
| 23455  |       |       |       |       |
| 23467  | 0     | 0     | 0     | 0     |
| 23478  | 1     | 0     | 0     | 0     |
| 23492  | 1     | 0     | 1     | 0     |
| 23498  | 0     | 0     | 0     | 0     |
| 23511  | 0     | 0     | 0     | 0     |
| 23514  | 0     | 0     | 0     | 0     |
| 23515  | 0     | 0     | 0     | 1     |
| 23522  |       |       |       |       |
| 23524  |       |       |       |       |
| 23531  | 0     | 0     | 0     | 0     |
| 23532  | 0     | 0     | 0     | 0     |
| 23533  | 0     | 0     | 0     | 0     |
| 23534  | 0     | 0     | 0     | 0     |
| 23538  | 0     | 0     | 0     | 0     |
| 23539  | 0     | 0     | 0     | 0     |
| 23548  | 0     | 0     | 0     | 0     |
| 23553  |       |       |       |       |
| 23556  | 0     | 0     | 0     | 0     |
| 23563  | 0     | 0     | 0     | 0     |
| 23572  | 0     | 0     | 0     | 0     |
| 23575  | 0     | 0     | 0     | 0     |
| 23576  | 0     | 0     | 0     | 0     |
| 23577  | 0     | 0     | 0     | 0     |
| 23578  | 0     | 0     | 0     | 0     |
| 23587  | 0     | 0     | 0     | 0     |
| 23597  | 0     | 0     | 0     | 0     |
| 23598  | 0     | 0     | 0     | 0     |
| 23604  |       |       |       |       |
| 23617  | 0     | 0     | 0     | 0     |
| 23620  | 0     | 0     | 0     | 0     |
| 23621  |       |       |       |       |

| respid | Q43_5 | Q43_6 | Q43_7 | Q43_8 |
|--------|-------|-------|-------|-------|
| 23625  | 0     | 0     | 0     | 0     |
| 23629  | 0     | 0     | 0     | 0     |
| 23635  | 0     | 0     | 0     | 0     |
| 23636  | 0     | 0     | 0     | 0     |
| 23637  | 1     | 0     | 0     | 0     |
| 23638  | 0     | 0     | 0     | 0     |
| 23644  | 0     | 0     | 0     | 0     |
| 23645  | 1     | 1     | 1     | 1     |
| 23649  | 0     | 0     | 0     | 0     |
| 23654  | 0     | 0     | 0     | 0     |
| 23662  | 0     | 0     | 0     | 0     |
| 23664  | 0     | 0     | 0     | 0     |
| 23665  | 0     | 0     | 0     | 0     |
| 23666  | 0     | 0     | 0     | 0     |
| 23671  | 0     | 0     | 0     | 0     |
| 23672  | 0     | 0     | 0     | 0     |
| 23685  | 0     | 0     | 0     | 0     |
| 23686  | 0     | 0     | 0     | 0     |
| 23689  | 1     | 0     | 0     | 0     |
| 23690  | 0     | 0     | 1     | 1     |
| 23695  | 1     | 1     | 0     | 0     |
| 23700  | 0     | 0     | 0     | 0     |
| 23714  | 0     | 0     | 0     | 0     |
| 23719  | 0     | 1     | 0     | 0     |
| 23720  | 1     | 0     | 0     | 0     |
| 23721  | 0     | 0     | 0     | 0     |
| 23729  | 0     | 0     | 0     | 0     |
| 23730  | 0     | 0     | 0     | 0     |
| 23732  | 0     | 0     | 0     | 0     |
| 23736  | 0     | 0     | 0     | 0     |
| 23754  |       |       |       |       |
| 23756  | 1     | 0     | 0     | 0     |



| respid | Q43_5 | Q43_6 | Q43_7 | Q43_8 |
|--------|-------|-------|-------|-------|
| 23759  | 1     | 0     | 0     | 0     |
| 23761  | 0     | 0     | 0     | 0     |
| 23766  | 0     | 0     | 0     | 0     |
| 23768  | 1     | 0     | 0     | 0     |
| 23773  | 0     | 0     | 0     | 0     |
| 23781  |       |       |       |       |
| 23782  | 1     | 0     | 0     | 0     |
| 23787  | 0     | 0     | 0     | 0     |
| 23788  | 0     | 0     | 0     | 0     |
| 23790  |       |       |       |       |
| 23794  | 0     | 0     | 0     | 0     |
| 23795  | 0     | 0     | 0     | 0     |
| 23801  | 0     | 0     | 0     | 0     |
| 23806  | 0     | 0     | 0     | 0     |
| 23809  | 1     | 0     | 1     | 1     |
| 23813  | 0     | 0     | 0     | 0     |
| 23815  | 0     | 0     | 0     | 0     |
| 23821  | 0     | 0     | 0     | 0     |
| 23825  | 0     | 0     | 0     | 0     |
| 23826  | 0     | 0     | 0     | 0     |
| 23830  | 0     | 0     | 0     | 0     |
| 23833  | 0     | 0     | 0     | 0     |
| 23837  | 0     | 0     | 0     | 0     |
| 23848  | 0     | 0     | 0     | 0     |
| 23850  | 0     | 0     | 0     | 0     |
| 23870  | 0     | 0     | 0     | 0     |
| 23877  |       |       |       |       |
| 23880  | 0     | 0     | 0     | 0     |
| 23882  | 0     | 0     | 0     | 0     |
| 23888  |       |       |       |       |
| 23908  | 0     | 0     | 0     | 0     |
| 23914  | 0     | 0     | 0     | 0     |

| respid | Q43_5 | Q43_6 | Q43_7 | Q43_8 |
|--------|-------|-------|-------|-------|
| 23916  | 0     | 0     | 0     | 0     |
| 23922  | 0     | 0     | 1     | 0     |
| 23932  | 1     | 0     | 0     | 0     |
| 23934  |       |       |       |       |
| 23942  | 1     | 0     | 0     | 0     |
| 23945  | 0     | 0     | 0     | 0     |
| 23948  | 0     | 0     | 0     | 0     |
| 23955  | 0     | 0     | 0     | 0     |
| 23956  | 0     | 1     | 1     | 0     |
| 23978  | 0     | 0     | 0     | 0     |
| 23981  |       |       |       |       |
| 23982  | 0     | 0     | 0     | 0     |
| 23991  | 0     | 0     | 0     | 0     |
| 23994  | 0     | 0     | 0     | 0     |
| 23995  | 0     | 0     | 0     | 0     |
| 23999  | 1     | 0     | 0     | 0     |
| 24005  | 1     | 0     | 1     | 0     |
| 24018  | 0     | 0     | 0     | 0     |
| 24021  |       |       |       |       |
| 24035  |       |       |       |       |
| 24040  | 0     | 0     | 0     | 0     |
| 24043  |       |       |       |       |
| 24046  | 1     | 0     | 0     | 0     |
| 24047  | 0     | 0     | 0     | 0     |
| 24048  | 0     | 0     | 0     | 0     |
| 24062  | 0     | 0     | 0     | 0     |
| 24063  | 0     | 0     | 0     | 0     |
| 24066  | 0     | 0     | 0     | 0     |
| 24069  | 0     | 0     | 0     | 0     |
| 24070  | 0     | 0     | 0     | 0     |
| 24074  | 0     | 0     | 0     | 0     |
| 24080  | 0     | 0     | 0     | 0     |

| respid | Q43_5 | Q43_6 | Q43_7 | Q43_8 |
|--------|-------|-------|-------|-------|
| 24082  | 0     | 0     | 0     | 0     |
| 24088  | 0     | 0     | 0     | 0     |
| 24089  | 0     | 0     | 0     | 0     |
| 24091  | 0     | 0     | 0     | 0     |
| 24095  |       |       |       |       |
| 24100  | 1     | 0     | 0     | 0     |
| 24105  | 0     | 0     | 0     | 0     |
| 24107  | 0     | 0     | 0     | 0     |
| 24108  |       |       |       |       |
| 24113  | 0     | 0     | 0     | 0     |
| 24120  |       |       |       |       |
| 24122  | 1     | 0     | 0     | 1     |
| 24123  | 0     | 0     | 0     | 0     |
| 24125  | 0     | 0     | 0     | 0     |
| 24132  | 0     | 0     | 0     | 0     |
| 24139  | 0     | 0     | 0     | 0     |
| 24140  | 0     | 0     | 0     | 0     |
| 24143  | 0     | 0     | 0     | 1     |
| 24150  | 1     | 0     | 0     | 0     |
| 24153  |       |       |       |       |
| 24161  |       |       |       |       |
| 24168  | 0     | 0     | 0     | 0     |
| 24179  | 0     | 0     | 0     | 0     |
| 24182  | 0     | 0     | 0     | 0     |
| 24194  | 0     | 0     | 0     | 0     |
| 24206  |       |       |       |       |
| 24214  |       |       |       |       |
| 24215  | 1     | 0     | 0     | 0     |
| 24224  | 0     | 0     | 0     | 0     |
| 24225  | 0     | 0     | 0     | 0     |
| 24227  |       |       |       |       |
| 24229  | 0     | 0     | 0     | 0     |

| respid | Q43_5 | Q43_6 | Q43_7 | Q43_8 |
|--------|-------|-------|-------|-------|
| 24230  | 0     | 0     | 0     | 0     |
| 24232  | 1     | 0     | 0     | 0     |
| 24253  | 0     | 0     | 0     | 0     |
| 24267  | 0     | 0     | 1     | 0     |
| 24274  | 0     | 0     | 0     | 0     |
| 24275  | 0     | 0     | 0     | 0     |
| 24277  | 0     | 0     | 0     | 0     |
| 24280  | 1     | 0     | 0     | 0     |
| 24285  | 0     | 0     | 0     | 0     |
| 24293  |       |       |       |       |
| 24295  | 1     | 0     | 0     | 0     |
| 24299  |       |       |       |       |
| 24303  | 0     | 0     | 0     | 0     |
| 24308  | 1     | 1     | 0     | 0     |
| 24322  |       |       |       |       |
| 24325  |       |       |       |       |
| 24328  | 0     | 0     | 0     | 0     |
| 24334  | 0     | 0     | 0     | 0     |
| 24342  | 1     | 0     | 0     | 0     |
| 24343  | 0     | 0     | 0     | 0     |
| 24348  | 0     | 0     | 0     | 0     |
| 24352  | 0     | 0     | 0     | 0     |
| 24354  | 0     | 0     | 1     | 0     |
| 24357  | 0     | 0     | 0     | 0     |
| 24360  | 1     | 0     | 1     | 1     |
| 24369  | 0     | 0     | 0     | 0     |
| 24373  | 1     | 0     | 0     | 0     |
| 24398  | 1     | 0     | 0     | 0     |
| 24402  | 0     | 0     | 0     | 0     |
| 24405  | 0     | 0     | 0     | 0     |
| 24407  | 0     | 0     | 0     | 0     |
| 24413  | 0     | 0     | 0     | 0     |

| respid | Q43_5 | Q43_6 | Q43_7 | Q43_8 |
|--------|-------|-------|-------|-------|
| 24443  | 0     | 0     | 0     | 0     |
| 24451  |       |       |       |       |
| 24459  | 0     | 0     | 0     | 1     |
| 24465  | 0     | 0     | 0     | 0     |
| 24481  | 1     | 0     | 0     | 1     |
| 24482  | 0     | 0     | 0     | 0     |
| 24491  | 1     | 0     | 0     | 0     |
| 24495  | 0     | 0     | 0     | 0     |
| 24497  | 1     | 1     | 1     | 1     |
| 24511  | 0     | 0     | 0     | 0     |
| 24513  | 1     | 0     | 0     | 0     |
| 24516  | 1     | 0     | 0     | 0     |
| 24518  | 0     | 0     | 0     | 0     |
| 24524  | 0     | 0     | 0     | 0     |
| 24528  | 0     | 0     | 0     | 0     |
| 24531  | 0     | 1     | 0     | 0     |
| 24533  | 1     | 0     | 1     | 1     |
| 24547  | 0     | 0     | 0     | 0     |
| 24557  | 0     | 0     | 0     | 0     |
| 24559  | 1     | 0     | 0     | 0     |
| 24567  | 0     | 0     | 0     | 0     |
| 24568  |       |       |       |       |
| 24577  |       |       |       |       |
| 24581  | 0     | 0     | 1     | 0     |
| 24588  | 0     | 0     | 0     | 0     |
| 24604  | 0     | 0     | 0     | 0     |
| 24612  | 1     | 0     | 1     | 0     |
| 24621  | 0     | 0     | 0     | 0     |
| 24625  | 0     | 0     | 0     | 0     |
| 24627  | 1     | 0     | 0     | 0     |
| 24640  | 0     | 0     | 0     | 0     |
| 24644  | 0     | 0     | 0     | 0     |

| respid | Q43_5 | Q43_6 | Q43_7 | Q43_8 |
|--------|-------|-------|-------|-------|
| 24664  | 1     | 1     | 1     | 0     |
| 24669  | 0     | 0     | 0     | 0     |
| 24685  | 0     | 0     | 0     | 0     |
| 24687  | 0     | 0     | 0     | 1     |
| 24688  | 0     | 0     | 0     | 0     |
| 24691  | 0     | 0     | 0     | 0     |
| 24693  | 0     | 0     | 0     | 0     |
| 24706  |       |       |       |       |
| 24710  |       |       |       |       |
| 24717  | 0     | 0     | 0     | 0     |
| 24720  | 0     | 0     | 0     | 0     |
| 24731  | 1     | 0     | 0     | 0     |
| 24732  | 0     | 0     | 0     | 0     |
| 24733  |       |       |       |       |
| 24747  | 0     | 0     | 0     | 0     |
| 24750  | 0     | 1     | 1     | 1     |
| 24758  | 1     | 0     | 0     | 0     |
| 24760  | 0     | 0     | 0     | 0     |
| 24765  |       |       |       |       |
| 24772  | 0     | 0     | 0     | 0     |
| 24779  | 0     | 1     | 1     | 0     |
| 24794  | 0     | 0     | 0     | 0     |
| 24796  | 0     | 0     | 0     | 0     |
| 24797  | 0     | 0     | 0     | 0     |
| 24800  | 0     | 0     | 0     | 0     |
| 24813  | 0     | 0     | 0     | 0     |
| 24815  | 0     | 0     | 0     | 0     |
| 24821  | 0     | 0     | 0     | 0     |
| 24822  | 0     | 0     | 0     | 0     |
| 24831  | 0     | 0     | 0     | 0     |
| 24835  |       |       |       |       |
| 24843  | 1     | 0     | 0     | 0     |

| respid | Q43_5 | Q43_6 | Q43_7 | Q43_8 |
|--------|-------|-------|-------|-------|
| 24844  | 1     | 0     | 0     | 0     |
| 24860  |       |       |       |       |
| 24861  | 0     | 0     | 0     | 0     |
| 24865  | 0     | 0     | 0     | 0     |
| 24870  | 0     | 0     | 0     | 0     |
| 24887  | 0     | 0     | 0     | 0     |
| 24897  | 0     | 0     | 0     | 0     |
| 24902  | 0     | 0     | 0     | 0     |
| 24914  | 1     | 0     | 0     | 0     |
| 24921  | 0     | 0     | 0     | 0     |
| 24922  | 0     | 0     | 0     | 0     |
| 24924  |       |       |       |       |
| 24927  | 0     | 0     | 0     | 0     |
| 24936  | 0     | 0     | 0     | 0     |
| 24937  | 0     | 0     | 0     | 0     |
| 24942  | 0     | 0     | 0     | 0     |
| 24947  | 0     | 0     | 0     | 0     |
| 24953  | 0     | 0     | 0     | 0     |
| 24954  | 0     | 1     | 0     | 1     |
| 24960  | 1     | 0     | 1     | 1     |
| 24965  | 0     | 0     | 0     | 0     |
| 24975  | 0     | 0     | 0     | 0     |
| 24983  | 0     | 0     | 0     | 0     |
| 24985  | 0     | 0     | 0     | 0     |
| 24990  | 0     | 0     | 0     | 0     |
| 25000  | 0     | 0     | 0     | 0     |
| 25007  | 0     | 0     | 0     | 0     |
| 25008  | 0     | 0     | 0     | 0     |
| 25010  |       |       |       |       |
| 25016  | 0     | 0     | 0     | 0     |
| 25021  | 0     | 0     | 0     | 0     |
| 25040  |       |       |       |       |

| respid | Q43_5 | Q43_6 | Q43_7 | Q43_8 |
|--------|-------|-------|-------|-------|
| 25043  | 0     | 0     | 0     | 0     |
| 25055  | 0     | 0     | 0     | 0     |
| 25057  | 0     | 0     | 1     | 1     |
| 25060  | 0     | 0     | 0     | 0     |
| 25062  | 0     | 0     | 0     | 0     |
| 25064  | 1     | 1     | 0     | 1     |
| 25069  |       |       |       |       |
| 25077  | 0     | 0     | 0     | 0     |
| 25088  |       |       |       |       |
| 25093  | 1     | 1     | 1     | 1     |
| 25121  | 0     | 0     | 0     | 0     |
| 25140  | 0     | 0     | 0     | 0     |
| 25144  | 0     | 0     | 0     | 0     |
| 25149  | 0     | 0     | 0     | 0     |
| 25159  | 0     | 0     | 0     | 0     |
| 25191  | 0     | 0     | 0     | 0     |
| 25193  | 1     | 0     | 0     | 0     |
| 25202  | 0     | 0     | 0     | 0     |
| 25215  | 0     | 0     | 0     | 0     |
| 25229  | 0     | 0     | 0     | 0     |
| 25231  | 0     | 0     | 0     | 0     |
| 25236  | 0     | 0     | 0     | 0     |
| 25242  | 0     | 0     | 0     | 0     |
| 25252  | 0     | 0     | 0     | 0     |
| 25253  | 1     | 0     | 0     | 0     |
| 25256  | 0     | 0     | 0     | 0     |
| 25260  | 0     | 0     | 0     | 0     |
| 25261  | 0     | 0     | 0     | 0     |
| 25280  | 0     | 1     | 0     | 0     |
| 25282  | 1     | 0     | 1     | 1     |
| 25289  | 0     | 1     | 0     | 0     |
| 25303  | 0     | 0     | 0     | 0     |



| respid | Q43_5 | Q43_6 | Q43_7 | Q43_8 |
|--------|-------|-------|-------|-------|
| 25304  | 0     | 0     | 0     | 0     |
| 25309  | 0     | 0     | 0     | 0     |
| 25317  | 0     | 0     | 0     | 0     |
| 25318  | 1     | 1     | 1     | 1     |
| 25320  | 0     | 0     | 0     | 0     |
| 25324  | 0     | 0     | 0     | 0     |
| 25331  | 0     | 0     | 0     | 0     |
| 25340  | 0     | 0     | 0     | 0     |
| 25342  | 0     | 0     | 0     | 0     |
| 25350  | 0     | 0     | 0     | 0     |
| 25352  |       |       |       |       |
| 25358  | 0     | 0     | 0     | 0     |
| 25375  | 0     | 0     | 0     | 0     |
| 25386  | 0     | 0     | 0     | 0     |
| 25388  | 0     | 0     | 0     | 0     |
| 25390  | 0     | 0     | 0     | 0     |
| 25391  | 0     | 0     | 0     | 0     |
| 25400  | 1     | 0     | 0     | 0     |
| 25413  | 0     | 0     | 0     | 0     |
| 25424  | 0     | 0     | 0     | 0     |
| 25426  | 1     | 0     | 0     | 0     |
| 25430  | 0     | 0     | 0     | 0     |
| 25434  | 0     | 0     | 0     | 1     |
| 25439  | 0     | 0     | 0     | 0     |
| 25441  | 0     | 0     | 0     | 0     |
| 25445  | 0     | 0     | 0     | 0     |
| 25451  | 0     | 0     | 0     | 0     |
| 25469  | 0     | 0     | 0     | 0     |
| 25471  | 1     | 0     | 0     | 0     |
| 25476  | 0     | 0     | 0     | 0     |
| 25480  | 0     | 0     | 0     | 0     |
| 25482  | 1     | 0     | 0     | 0     |

| respid | Q43_5 | Q43_6 | Q43_7 | Q43_8 |
|--------|-------|-------|-------|-------|
| 25500  | 0     | 1     | 1     | 1     |
| 25516  | 0     | 0     | 0     | 0     |
| 25521  | 0     | 0     | 0     | 0     |
| 25525  | 1     | 0     | 0     | 0     |
| 25530  | 0     | 0     | 0     | 0     |
| 25555  | 0     | 0     | 1     | 1     |
| 25558  | 0     | 0     | 0     | 0     |
| 25561  | 0     | 0     | 0     | 0     |
| 25566  |       |       |       |       |
| 25571  | 1     | 0     | 0     | 0     |
| 25572  | 0     | 0     | 0     | 0     |
| 25574  |       |       |       |       |
| 25588  | 0     | 0     | 0     | 0     |
| 25591  | 1     | 0     | 0     | 0     |
| 25599  | 1     | 1     | 0     | 0     |
| 25604  | 0     | 0     | 0     | 0     |
| 25614  | 0     | 0     | 0     | 0     |
| 25634  | 1     | 0     | 0     | 1     |
| 25642  | 0     | 0     | 0     | 0     |
| 25647  | 0     | 0     | 0     | 0     |
| 25653  | 0     | 0     | 0     | 0     |
| 25654  | 0     | 0     | 0     | 0     |
| 25660  | 0     | 0     | 0     | 0     |
| 25664  | 0     | 0     | 0     | 0     |
| 25665  | 0     | 0     | 0     | 0     |
| 25672  | 0     | 0     | 0     | 0     |
| 25677  | 0     | 0     | 1     | 0     |
| 25685  | 0     | 0     | 0     | 0     |
| 25699  | 1     | 1     | 0     | 1     |
| 25703  | 0     | 0     | 0     | 0     |
| 25704  | 0     | 0     | 0     | 0     |
| 25705  | 0     | 0     | 0     | 0     |

| respid | Q43_5 | Q43_6 | Q43_7 | Q43_8 |
|--------|-------|-------|-------|-------|
| 25711  | 0     | 0     | 0     | 0     |
| 25727  | 0     | 0     | 0     | 0     |
| 25728  | 0     | 0     | 0     | 0     |
| 25733  | 1     | 1     | 1     | 1     |
| 25735  | 0     | 0     | 0     | 0     |
| 25736  | 0     | 0     | 0     | 0     |
| 25742  | 0     | 0     | 0     | 0     |
| 25750  | 0     | 0     | 0     | 0     |
| 25754  |       |       |       |       |
| 25776  | 0     | 0     | 0     | 1     |
| 25778  |       |       |       |       |
| 25796  | 0     | 0     | 0     | 0     |
| 25852  | 1     | 0     | 0     | 1     |
| 25858  | 0     | 0     | 0     | 0     |
| 25859  |       |       |       |       |
| 25886  | 1     | 0     | 0     | 0     |
| 25890  | 0     | 0     | 1     | 1     |
| 25897  | 0     | 0     | 0     | 0     |
| 25903  | 0     | 0     | 0     | 0     |
| 25905  | 0     | 0     | 0     | 0     |
| 25917  |       |       |       |       |
| 25918  | 0     | 0     | 0     | 0     |
| 25928  | 0     | 0     | 0     | 0     |
| 25930  |       |       |       |       |
| 25949  | 0     | 0     | 0     | 0     |
| 25955  | 0     | 0     | 0     | 0     |
| 25959  | 0     | 0     | 0     | 0     |
| 25964  | 0     | 0     | 0     | 0     |
| 25972  | 0     | 0     | 0     | 0     |
| 25999  | 0     | 0     | 0     | 0     |
| 26019  | 0     | 0     | 0     | 0     |
| 26025  | 0     | 0     | 0     | 0     |

| respid | Q43_5 | Q43_6 | Q43_7 | Q43_8 |
|--------|-------|-------|-------|-------|
| 26039  | 0     | 1     | 1     | 1     |
| 26055  | 0     | 0     | 0     | 0     |
| 26061  | 0     | 0     | 0     | 0     |
| 26076  | 0     | 0     | 0     | 0     |
| 26088  | 0     | 0     | 0     | 0     |
| 26094  |       |       |       |       |
| 26104  | 0     | 0     | 0     | 0     |
| 26131  | 0     | 0     | 0     | 0     |
| 26134  | 0     | 0     | 0     | 0     |
| 26160  | 0     | 0     | 0     | 0     |
| 26168  | 0     | 0     | 0     | 0     |
| 26170  |       |       |       |       |
| 26191  | 0     | 0     | 0     | 0     |
| 26192  |       |       |       |       |
| 26195  | 0     | 1     | 0     | 0     |
| 26198  | 0     | 0     | 0     | 0     |
| 26199  | 0     | 0     | 0     | 0     |
| 26201  |       |       |       |       |
| 26202  | 0     | 0     | 0     | 0     |
| 26226  | 0     | 0     | 0     | 0     |
| 26233  | 1     | 0     | 0     | 0     |
| 26236  | 0     | 0     | 0     | 0     |
| 26242  | 1     | 0     | 0     | 0     |
| 26244  | 0     | 0     | 0     | 0     |
| 26250  | 0     | 0     | 0     | 0     |
| 26266  | 1     | 0     | 0     | 0     |
| 26274  | 0     | 0     | 0     | 0     |
| 26286  | 0     | 1     | 0     | 0     |
| 26288  | 1     | 0     | 0     | 0     |
| 26295  |       |       |       |       |
| 26296  | 0     | 0     | 0     | 0     |
| 26297  |       |       |       |       |

| respid | Q43_5 | Q43_6 | Q43_7 | Q43_8 |
|--------|-------|-------|-------|-------|
| 26300  | 0     | 0     | 0     | 1     |
| 26317  | 0     | 0     | 0     | 0     |
| 26343  |       |       |       |       |
| 26367  | 0     | 0     | 0     | 0     |
| 26372  | 1     | 0     | 0     | 0     |
| 26403  | 0     | 0     | 0     | 0     |
| 26423  | 0     | 0     | 0     | 0     |
| 26430  | 0     | 0     | 0     | 0     |
| 26437  | 0     | 0     | 0     | 0     |
| 26457  |       |       |       |       |
| 26466  | 0     | 1     | 0     | 0     |
| 26467  | 0     | 0     | 0     | 0     |
| 26469  | 1     | 0     | 0     | 0     |
| 26494  | 0     | 0     | 0     | 0     |
| 26510  | 1     | 0     | 0     | 0     |
| 26519  | 0     | 0     | 0     | 0     |
| 26525  | 0     | 0     | 0     | 0     |
| 26529  |       |       |       |       |
| 26533  | 0     | 0     | 0     | 0     |
| 26556  | 0     | 0     | 0     | 0     |
| 26559  | 1     | 0     | 0     | 0     |
| 26565  | 0     | 0     | 0     | 0     |
| 26576  | 0     | 0     | 0     | 0     |
| 26601  |       |       |       |       |
| 26607  | 1     | 0     | 0     | 0     |
| 26611  | 0     | 0     | 0     | 0     |
| 26619  | 0     | 0     | 0     | 0     |
| 26631  | 0     | 0     | 0     | 0     |
| 26654  | 0     | 0     | 0     | 0     |
| 26656  | 0     | 0     | 0     | 0     |
| 26664  |       |       |       |       |
| 26667  | 0     | 0     | 0     | 0     |

| respid | Q43_5 | Q43_6 | Q43_7 | Q43_8 |
|--------|-------|-------|-------|-------|
| 26674  | 1     | 0     | 0     | 1     |
| 26678  | 1     | 0     | 0     | 0     |
| 26693  | 0     | 0     | 0     | 0     |
| 26696  | 1     | 0     | 0     | 0     |
| 26703  | 1     | 0     | 0     | 1     |
| 26705  | 0     | 0     | 0     | 0     |
| 26706  | 0     | 0     | 0     | 0     |
| 26716  | 0     | 0     | 0     | 0     |
| 26721  | 1     | 0     | 0     | 0     |
| 26730  | 0     | 0     | 0     | 0     |
| 26752  | 0     | 0     | 0     | 0     |
| 26755  | 0     | 0     | 0     | 0     |
| 26791  | 0     | 0     | 0     | 0     |
| 26804  | 0     | 0     | 0     | 0     |
| 26810  | 0     | 0     | 0     | 0     |
| 26813  | 0     | 0     | 1     | 0     |
| 26833  | 1     | 1     | 0     | 0     |
| 26880  | 0     | 0     | 0     | 0     |
| 26884  | 0     | 0     | 0     | 0     |
| 26885  | 0     | 0     | 0     | 0     |
| 26890  | 1     | 0     | 0     | 0     |
| 26937  | 0     | 0     | 0     | 0     |
| 26939  | 0     | 0     | 0     | 0     |
| 26941  |       |       |       |       |
| 26992  | 1     | 0     | 0     | 0     |
| 27037  | 0     | 0     | 0     | 0     |
| 27045  | 1     | 0     | 0     | 0     |
| 27053  | 0     | 0     | 0     | 0     |
| 27060  | 1     | 0     | 0     | 0     |
| 27076  | 1     | 0     | 0     | 0     |
| 27124  | 0     | 0     | 0     | 0     |
| 27125  | 0     | 0     | 0     | 0     |

| respid | Q43_5 | Q43_6 | Q43_7 | Q43_8 |
|--------|-------|-------|-------|-------|
| 27132  | 0     | 0     | 0     | 0     |
| 27166  | 0     | 0     | 0     | 0     |
| 27190  | 0     | 1     | 0     | 0     |
| 27199  | 1     | 0     | 1     | 1     |
| 27221  | 1     | 0     | 0     | 0     |
| 27233  | 1     | 0     | 0     | 0     |
| 27241  | 0     | 0     | 0     | 0     |
| 27244  | 0     | 0     | 0     | 0     |
| 27245  | 1     | 1     | 1     | 1     |
| 27246  | 0     | 0     | 0     | 0     |
| 27253  | 0     | 0     | 0     | 0     |
| 27255  | 1     | 0     | 0     | 0     |
| 27267  | 0     | 0     | 0     | 0     |
| 27283  | 0     | 0     | 0     | 0     |
| 27289  | 0     | 0     | 0     | 0     |
| 27302  | 0     | 0     | 0     | 0     |
| 27317  | 0     | 0     | 0     | 0     |
| 27319  | 0     | 0     | 0     | 0     |
| 27331  | 0     | 0     | 0     | 0     |
| 27333  | 1     | 0     | 0     | 0     |
| 27340  |       |       |       |       |
| 27362  | 0     | 0     | 1     | 1     |
| 27370  | 0     | 0     | 0     | 0     |
| 27379  | 0     | 0     | 0     | 0     |
| 27386  |       |       |       |       |
| 27398  | 0     | 0     | 0     | 0     |
| 27404  | 0     | 0     | 0     | 0     |
| 27408  | 0     | 0     | 0     | 0     |
| 27412  | 0     | 0     | 0     | 0     |
| 27426  | 1     | 0     | 0     | 0     |
| 27455  | 0     | 0     | 0     | 0     |
| 27464  | 0     | 0     | 0     | 0     |

| respid | Q43_5 | Q43_6 | Q43_7 | Q43_8 |
|--------|-------|-------|-------|-------|
| 27484  | 0     | 0     | 0     | 0     |
| 27493  | 1     | 0     | 0     | 0     |
| 27512  | 1     | 0     | 0     | 1     |
| 27525  | 1     | 0     | 0     | 1     |
| 27532  | 1     | 0     | 0     | 0     |
| 27539  | 0     | 0     | 0     | 0     |
| 27540  | 0     | 0     | 0     | 0     |
| 27552  | 1     | 0     | 0     | 1     |
| 27562  | 0     | 0     | 0     | 0     |
| 27568  | 0     | 0     | 0     | 0     |
| 27574  | 1     | 0     | 1     | 1     |
| 27575  | 0     | 0     | 0     | 0     |
| 27577  | 1     | 1     | 0     | 0     |
| 27589  | 0     | 0     | 0     | 0     |
| 27593  | 0     | 0     | 0     | 0     |
| 27594  | 0     | 0     | 0     | 0     |
| 27595  | 0     | 1     | 1     | 1     |
| 27598  | 0     | 0     | 0     | 0     |
| 27620  | 0     | 0     | 0     | 0     |
| 27621  | 0     | 0     | 1     | 1     |
| 27628  | 0     | 0     | 0     | 1     |
| 27633  | 0     | 0     | 0     | 0     |
| 27643  | 0     | 0     | 0     | 0     |
| 27644  | 0     | 0     | 0     | 0     |
| 27668  | 0     | 0     | 0     | 0     |
| 27681  | 0     | 0     | 0     | 0     |
| 27691  | 0     | 0     | 0     | 0     |
| 27693  | 1     | 0     | 0     | 0     |
| 27703  | 0     | 0     | 0     | 0     |
| 27708  | 0     | 1     | 1     | 0     |
| 27719  | 0     | 0     | 0     | 0     |
| 27720  | 0     | 0     | 0     | 0     |



| respid | Q43_5 | Q43_6 | Q43_7 | Q43_8 |
|--------|-------|-------|-------|-------|
| 27723  | 1     | 0     | 0     | 0     |
| 27725  | 0     | 0     | 0     | 0     |
| 27734  | 0     | 0     | 0     | 0     |
| 27744  | 0     | 0     | 0     | 0     |
| 27749  | 0     | 0     | 0     | 1     |
| 27762  | 0     | 0     | 0     | 0     |
| 27808  | 0     | 0     | 0     | 0     |
| 27810  | 0     | 0     | 1     | 1     |
| 27812  | 1     | 1     | 0     | 0     |
| 27815  |       |       |       |       |
| 27818  | 0     | 0     | 0     | 0     |
| 27823  | 0     | 0     | 0     | 0     |
| 27841  | 0     | 0     | 0     | 0     |
| 27843  |       |       |       |       |
| 27851  | 0     | 0     | 0     | 0     |
| 27858  | 0     | 0     | 0     | 0     |
| 27859  | 0     | 0     | 0     | 0     |
| 27869  | 0     | 0     | 0     | 0     |
| 27872  | 0     | 0     | 0     | 0     |
| 27873  | 0     | 0     | 0     | 0     |
| 27884  | 0     | 0     | 0     | 0     |
| 27904  | 0     | 0     | 0     | 0     |
| 27915  | 0     | 0     | 0     | 0     |
| 27918  | 1     | 1     | 0     | 0     |
| 27937  | 1     | 1     | 1     | 0     |
| 27943  | 0     | 0     | 0     | 0     |
| 27948  | 0     | 0     | 0     | 0     |
| 27971  | 1     | 0     | 0     | 0     |
| 27991  | 0     | 0     | 0     | 0     |
| 28000  | 0     | 0     | 0     | 0     |
| 28011  | 0     | 0     | 0     | 0     |
| 28022  | 0     | 0     | 0     | 0     |

| respid | Q43_5 | Q43_6 | Q43_7 | Q43_8 |
|--------|-------|-------|-------|-------|
| 28025  | 0     | 0     | 0     | 0     |
| 28041  | 0     | 0     | 0     | 0     |
| 28057  | 1     | 0     | 0     | 1     |
| 28080  |       |       |       |       |
| 28098  | 0     | 0     | 0     | 0     |
| 28104  | 0     | 0     | 0     | 0     |
| 28109  | 0     | 0     | 0     | 0     |
| 28129  | 0     | 0     | 0     | 0     |
| 28141  |       |       |       |       |
| 28143  | 0     | 0     | 0     | 0     |
| 28149  | 0     | 0     | 0     | 0     |
| 28151  | 1     | 0     | 0     | 0     |
| 28161  | 1     | 0     | 0     | 0     |
| 28169  | 0     | 0     | 0     | 0     |
| 28194  | 1     | 0     | 0     | 0     |
| 28197  |       |       |       |       |
| 28206  | 1     | 0     | 0     | 0     |
| 28218  | 0     | 0     | 0     | 0     |
| 28227  | 0     | 0     | 0     | 0     |
| 28235  | 1     | 0     | 0     | 0     |
| 28246  | 0     | 0     | 0     | 0     |
| 28259  | 1     | 1     | 0     | 0     |
| 28263  | 0     | 0     | 0     | 0     |
| 28267  | 1     | 0     | 0     | 1     |
| 28274  | 0     | 0     | 0     | 0     |
| 28278  | 0     | 0     | 0     | 0     |
| 28288  | 0     | 0     | 0     | 0     |
| 28308  |       |       |       |       |
| 28309  | 1     | 0     | 0     | 0     |
| 28323  | 0     | 0     | 0     | 0     |
| 28335  | 0     | 0     | 0     | 0     |
| 28354  | 0     | 0     | 0     | 0     |

| respid | Q43_5 | Q43_6 | Q43_7 | Q43_8 |
|--------|-------|-------|-------|-------|
| 28355  | 1     | 0     | 1     | 1     |
| 28356  | 0     | 0     | 0     | 0     |
| 28357  | 0     | 0     | 1     | 0     |
| 28363  | 0     | 0     | 0     | 0     |
| 28366  | 0     | 0     | 0     | 0     |
| 28372  | 1     | 0     | 0     | 1     |
| 28381  | 0     | 0     | 0     | 0     |
| 28388  | 0     | 0     | 0     | 0     |
| 28413  | 0     | 0     | 0     | 0     |
| 28421  | 0     | 0     | 0     | 0     |
| 28430  | 0     | 0     | 0     | 0     |
| 28439  | 0     | 0     | 0     | 0     |
| 28458  | 0     | 1     | 1     | 0     |
| 28461  | 0     | 0     | 0     | 0     |
| 28466  | 0     | 0     | 0     | 0     |
| 28492  | 0     | 0     | 0     | 0     |
| 28534  |       |       |       |       |
| 28537  | 0     | 0     | 0     | 0     |
| 28560  | 0     | 0     | 0     | 0     |
| 28566  | 0     | 0     | 0     | 0     |
| 28569  | 0     | 0     | 0     | 0     |
| 28584  | 0     | 0     | 0     | 0     |
| 28590  | 0     | 0     | 1     | 1     |
| 28596  |       |       |       |       |
| 28608  | 1     | 0     | 0     | 0     |
| 28631  | 1     | 1     | 0     | 0     |
| 28644  | 0     | 0     | 0     | 0     |
| 28646  | 0     | 0     | 0     | 0     |
| 28665  |       |       |       |       |
| 28686  | 0     | 0     | 0     | 0     |
| 28704  | 0     | 0     | 0     | 0     |
| 28719  | 0     | 0     | 0     | 0     |

| respid | Q43_5 | Q43_6 | Q43_7 | Q43_8 |
|--------|-------|-------|-------|-------|
| 28736  | 0     | 0     | 0     | 0     |
| 28739  | 0     | 0     | 0     | 0     |
| 28758  | 1     | 0     | 0     | 0     |
| 28761  | 0     | 0     | 0     | 0     |
| 28770  | 0     | 1     | 0     | 1     |
| 28774  | 0     | 0     | 0     | 0     |
| 28778  | 1     | 1     | 1     | 1     |
| 28783  | 0     | 0     | 0     | 0     |
| 28785  | 0     | 0     | 0     | 0     |
| 28797  | 0     | 0     | 1     | 1     |
| 28801  | 0     | 0     | 0     | 0     |
| 28821  |       |       |       |       |
| 28827  | 0     | 0     | 0     | 0     |
| 28828  | 0     | 0     | 0     | 0     |
| 28871  | 0     | 0     | 0     | 0     |
| 28876  | 0     | 0     | 0     | 0     |
| 28891  | 1     | 0     | 0     | 1     |
| 28898  |       |       |       |       |
| 28909  | 0     | 0     | 0     | 0     |
| 28930  | 1     | 0     | 0     | 0     |
| 28935  | 1     | 0     | 0     | 0     |
| 28964  | 0     | 0     | 0     | 0     |
| 28965  | 0     | 0     | 0     | 0     |
| 28967  | 1     | 0     | 0     | 1     |
| 28975  |       |       |       |       |
| 28982  | 0     | 0     | 0     | 0     |
| 28989  | 1     | 0     | 1     | 0     |
| 29003  | 1     | 0     | 0     | 0     |
| 29004  | 0     | 0     | 0     | 0     |
| 29007  | 0     | 0     | 0     | 0     |
| 29008  | 0     | 0     | 0     | 0     |
| 29011  | 1     | 0     | 1     | 1     |

| respid | Q43_5 | Q43_6 | Q43_7 | Q43_8 |
|--------|-------|-------|-------|-------|
| 29012  | 1     | 0     | 0     | 0     |
| 29014  |       |       |       |       |
| 29016  | 0     | 0     | 0     | 0     |
| 29018  | 1     | 1     | 0     | 0     |
| 29048  | 1     | 1     | 0     | 0     |
| 29184  | 0     | 0     | 0     | 0     |
| 29237  | 0     | 0     | 0     | 0     |
| 29252  | 0     | 0     | 0     | 0     |
| 29267  | 0     | 0     | 0     | 0     |
| 29276  |       |       |       |       |
| 29281  | 1     | 0     | 0     | 0     |
| 29285  | 0     | 0     | 0     | 0     |
| 29291  | 1     | 0     | 0     | 0     |
| 29304  | 0     | 0     | 0     | 0     |
| 29323  | 0     | 0     | 0     | 0     |
| 29330  | 1     | 0     | 1     | 1     |
| 29357  | 1     | 1     | 1     | 0     |
| 29416  | 0     | 1     | 1     | 0     |
| 29432  | 0     | 0     | 0     | 0     |
| 29482  | 1     | 0     | 0     | 0     |
| 29506  | 1     | 0     | 1     | 0     |
| 29509  | 0     | 0     | 0     | 0     |
| 29512  | 0     | 0     | 0     | 0     |
| 29519  | 0     | 0     | 0     | 0     |
| 29520  | 1     | 0     | 0     | 0     |
| 29521  | 1     | 0     | 0     | 0     |
| 29529  | 1     | 1     | 1     | 1     |
| 29532  | 0     | 0     | 0     | 0     |
| 29547  | 1     | 0     | 0     | 0     |
| 29551  | 0     | 0     | 0     | 0     |
| 29584  | 1     | 0     | 0     | 1     |
| 29591  | 0     | 0     | 0     | 0     |

| respid | Q43_5 | Q43_6 | Q43_7 | Q43_8 |
|--------|-------|-------|-------|-------|
| 29613  | 0     | 0     | 0     | 0     |
| 29615  | 0     | 0     | 0     | 0     |
| 29625  | 0     | 0     | 0     | 0     |
| 29660  | 0     | 0     | 1     | 0     |
| 29677  |       |       |       |       |
| 29700  | 0     | 0     | 0     | 0     |
| 29715  | 0     | 0     | 0     | 0     |
| 29720  |       |       |       |       |
| 29730  | 0     | 0     | 0     | 0     |
| 29734  | 0     | 0     | 0     | 0     |
| 29754  |       |       |       |       |
| 29771  | 0     | 1     | 0     | 0     |
| 29774  | 0     | 0     | 0     | 0     |
| 29783  | 0     | 0     | 0     | 0     |
| 29812  | 1     | 0     | 0     | 0     |
| 29813  | 0     | 0     | 0     | 0     |
| 29814  | 0     | 0     | 0     | 0     |
| 29820  | 0     | 0     | 0     | 0     |
| 29906  | 1     | 0     | 0     | 0     |
| 29907  | 0     | 0     | 0     | 0     |
| 29928  |       |       |       |       |
| 29932  | 0     | 1     | 1     | 0     |
| 29958  | 0     | 0     | 0     | 0     |
| 29982  | 0     | 0     | 0     | 0     |
| 29989  | 0     | 0     | 0     | 0     |
| 29994  | 0     | 0     | 0     | 0     |
| 30005  | 0     | 0     | 0     | 0     |
| 30077  | 0     | 0     | 0     | 0     |
| 30098  |       |       |       |       |
| 30107  | 0     | 0     | 0     | 0     |
| 30154  | 1     | 0     | 0     | 0     |
| 30159  | 0     | 0     | 0     | 0     |

| respid | Q43_5 | Q43_6 | Q43_7 | Q43_8 |
|--------|-------|-------|-------|-------|
| 30162  | 0     | 0     | 0     | 0     |
| 30163  |       |       |       |       |
| 30189  | 1     | 0     | 0     | 0     |
| 30230  | 0     | 0     | 0     | 0     |
| 30259  | 0     | 0     | 0     | 0     |
| 30284  | 0     | 0     | 0     | 0     |
| 30296  | 0     | 0     | 0     | 0     |
| 30330  | 1     | 0     | 0     | 0     |
| 30341  | 0     | 0     | 0     | 0     |
| 30352  | 0     | 0     | 0     | 0     |
| 30379  | 0     | 0     | 0     | 0     |
| 30424  | 0     | 0     | 0     | 0     |
| 30447  | 0     | 0     | 0     | 0     |
| 30477  | 1     | 1     | 1     | 1     |
| 30503  | 1     | 0     | 0     | 0     |
| 30515  | 1     | 0     | 0     | 0     |
| 30516  | 0     | 0     | 0     | 0     |
| 30623  | 0     | 1     | 0     | 1     |
| 30639  | 0     | 0     | 0     | 0     |
| 30670  | 1     | 0     | 0     | 0     |
| 30697  | 0     | 0     | 0     | 0     |
| 30735  | 1     | 1     | 0     | 0     |
| 30742  | 0     | 0     | 0     | 0     |
| 30751  | 1     | 0     | 0     | 0     |
| 30789  |       |       |       |       |
| 30867  | 0     | 0     | 0     | 0     |
| 30876  | 0     | 0     | 0     | 0     |
| 30877  | 0     | 0     | 0     | 0     |
| 30887  | 0     | 0     | 0     | 0     |
| 30891  | 0     | 0     | 1     | 1     |
| 31030  | 0     | 0     | 0     | 0     |
| 31059  | 0     | 0     | 0     | 0     |

| respid | Q43_5 | Q43_6 | Q43_7 | Q43_8 |
|--------|-------|-------|-------|-------|
| 31082  |       |       |       |       |
| 31106  | 0     | 0     | 0     | 0     |
| 31110  | 0     | 0     | 0     | 0     |
| 31265  | 0     | 0     | 0     | 1     |
| 31266  | 1     | 1     | 0     | 0     |
| 31267  | 1     | 0     | 0     | 0     |
| 31310  | 0     | 0     | 0     | 0     |
| 31325  | 0     | 0     | 0     | 0     |
| 31367  | 0     | 0     | 0     | 0     |
| 31389  | 0     | 0     | 0     | 0     |
| 31440  | 0     | 0     | 0     | 0     |
| 31465  | 0     | 0     | 0     | 0     |
| 31477  | 0     | 0     | 0     | 0     |
| 31491  | 0     | 0     | 0     | 0     |
| 31494  | 1     | 0     | 0     | 0     |
| 31509  | 1     | 1     | 0     | 0     |
| 31533  | 0     | 0     | 1     | 0     |
| 31547  | 0     | 0     | 0     | 0     |
| 31558  | 0     | 0     | 0     | 0     |
| 31579  | 0     | 0     | 0     | 0     |
| 31591  | 0     | 0     | 0     | 0     |
| 31596  | 0     | 0     | 0     | 0     |
| 31601  | 1     | 1     | 1     | 1     |
| 31605  | 0     | 0     | 0     | 0     |
| 31637  | 0     | 0     | 0     | 0     |
| 31646  | 0     | 0     | 0     | 0     |
| 31647  | 1     | 1     | 0     | 0     |
| 31650  | 0     | 0     | 0     | 0     |
| 31651  | 0     | 0     | 0     | 0     |
| 31657  | 0     | 0     | 1     | 0     |
| 31660  | 0     | 0     | 0     | 0     |
| 31661  | 0     | 0     | 0     | 0     |



| respid | Q43_5 | Q43_6 | Q43_7 | Q43_8 |
|--------|-------|-------|-------|-------|
| 31667  | 0     | 0     | 0     | 0     |
| 31674  | 0     | 0     | 1     | 0     |
| 31686  | 1     | 0     | 0     | 0     |
| 31693  |       |       |       |       |
| 31716  |       |       |       |       |
| 31818  | 0     | 0     | 0     | 0     |
| 31886  | 0     | 0     | 0     | 0     |
| 31945  | 1     | 0     | 1     | 1     |
| 31957  | 1     | 0     | 0     | 0     |
| 31966  | 1     | 0     | 1     | 0     |
| 31978  | 0     | 0     | 0     | 0     |
| 31999  | 0     | 0     | 0     | 0     |
| 32026  | 1     | 0     | 0     | 0     |
| 32033  | 0     | 0     | 0     | 0     |
| 32037  | 1     | 0     | 0     | 0     |
| 32038  | 1     | 0     | 0     | 0     |
| 32047  | 0     | 0     | 0     | 0     |
| 32053  |       |       |       |       |
| 32069  | 0     | 0     | 0     | 0     |
| 32081  | 0     | 0     | 0     | 0     |
| 32123  | 0     | 0     | 0     | 0     |
| 32130  | 0     | 0     | 0     | 0     |
| 32141  | 1     | 0     | 0     | 1     |
| 32158  |       |       |       |       |
| 32165  | 0     | 0     | 0     | 0     |
| 32180  | 0     | 0     | 0     | 0     |
| 32221  | 1     | 0     | 0     | 0     |
| 32292  | 0     | 0     | 0     | 0     |
| 32318  | 0     | 0     | 0     | 0     |
| 32346  | 0     | 0     | 0     | 0     |
| 32402  | 0     | 0     | 0     | 0     |
| 32422  | 0     | 0     | 0     | 0     |

| respid | Q43_5 | Q43_6 | Q43_7 | Q43_8 |
|--------|-------|-------|-------|-------|
| 32439  | 0     | 0     | 0     | 0     |
| 32507  | 0     | 0     | 0     | 0     |
| 32522  |       |       |       |       |
| 32535  |       |       |       |       |
| 32546  | 0     | 0     | 0     | 0     |
| 32553  | 0     | 0     | 0     | 0     |
| 32570  |       |       |       |       |
| 32592  | 0     | 0     | 0     | 0     |
| 32605  | 1     | 1     | 0     | 0     |
| 32630  | 0     | 1     | 0     | 0     |
| 32642  | 1     | 1     | 1     | 0     |
| 32646  | 0     | 0     | 0     | 0     |
| 32665  | 0     | 0     | 0     | 0     |
| 32677  | 0     | 0     | 0     | 0     |
| 32694  | 0     | 0     | 0     | 0     |
| 32698  | 1     | 0     | 0     | 0     |
| 32754  | 0     | 0     | 0     | 0     |
| 32799  | 1     | 0     | 0     | 1     |
| 32816  |       |       |       |       |
| 32819  | 0     | 0     | 0     | 0     |
| 32840  | 0     | 0     | 0     | 0     |
| 32861  | 0     | 0     | 0     | 0     |
| 32866  | 0     | 0     | 0     | 0     |
| 32889  | 0     | 0     | 0     | 0     |
| 32960  | 0     | 0     | 0     | 0     |
| 32965  | 0     | 0     | 0     | 0     |
| 32986  | 0     | 0     | 0     | 0     |
| 33005  | 1     | 0     | 0     | 0     |
| 33054  | 0     | 0     | 0     | 0     |
| 33072  | 1     | 0     | 0     | 0     |
| 33095  | 0     | 0     | 0     | 0     |
| 33099  | 1     | 0     | 0     | 0     |

| respid | Q43_5 | Q43_6 | Q43_7 | Q43_8 |
|--------|-------|-------|-------|-------|
| 33121  | 0     | 0     | 0     | 0     |
| 33152  | 1     | 0     | 0     | 0     |
| 33159  | 0     | 0     | 0     | 1     |
| 33189  | 0     | 0     | 0     | 0     |
| 33198  | 0     | 0     | 1     | 0     |
| 33202  | 0     | 0     | 0     | 0     |
| 33204  | 0     | 0     | 0     | 0     |
| 33224  | 0     | 0     | 0     | 0     |
| 33272  | 1     | 0     | 0     | 0     |
| 33294  | 0     | 0     | 0     | 0     |
| 33300  | 0     | 0     | 0     | 0     |
| 33314  | 0     | 0     | 1     | 1     |
| 33338  | 0     | 0     | 0     | 0     |
| 33350  | 0     | 0     | 0     | 0     |
| 33362  | 0     | 0     | 0     | 0     |
| 33368  |       |       |       |       |
| 33374  | 0     | 0     | 0     | 0     |
| 33380  | 0     | 0     | 0     | 1     |
| 33385  | 1     | 0     | 0     | 0     |
| 33402  | 1     | 0     | 0     | 1     |
| 33414  | 0     | 0     | 0     | 0     |
| 33439  | 1     | 0     | 1     | 0     |
| 33449  | 0     | 0     | 0     | 0     |
| 33533  | 0     | 0     | 0     | 0     |
| 33540  | 0     | 0     | 0     | 0     |
| 33556  | 0     | 0     | 1     | 0     |
| 33615  | 0     | 0     | 0     | 0     |
| 33694  | 1     | 1     | 0     | 0     |
| 33717  | 0     | 0     | 1     | 0     |
| 33729  | 0     | 0     | 0     | 0     |
| 33746  | 0     | 0     | 0     | 0     |
| 33764  | 0     | 0     | 0     | 0     |

| respid | Q43_5 | Q43_6 | Q43_7 | Q43_8 |
|--------|-------|-------|-------|-------|
| 33790  | 1     | 0     | 0     | 0     |
| 33868  | 0     | 0     | 0     | 0     |
| 33872  | 0     | 0     | 0     | 0     |
| 33883  | 0     | 0     | 0     | 0     |
| 33884  | 0     | 0     | 0     | 0     |
| 33900  | 1     | 1     | 1     | 1     |
| 33933  | 0     | 1     | 1     | 0     |
| 33949  | 0     | 0     | 0     | 0     |
| 34005  |       |       |       |       |
| 34016  |       |       |       |       |
| 34041  | 0     | 0     | 0     | 0     |
| 34053  | 1     | 0     | 0     | 0     |
| 34056  | 0     | 0     | 0     | 0     |
| 34093  | 0     | 0     | 0     | 0     |
| 34112  | 1     | 1     | 1     | 0     |
| 34136  | 0     | 0     | 0     | 1     |
| 34138  | 0     | 0     | 0     | 0     |
| 34139  | 0     | 0     | 0     | 1     |
| 34189  | 0     | 0     | 0     | 0     |
| 34239  | 1     | 0     | 0     | 0     |
| 34240  | 0     | 0     | 0     | 0     |
| 34241  | 0     | 0     | 0     | 0     |
| 34259  | 1     | 0     | 1     | 0     |
| 34303  | 0     | 0     | 0     | 0     |
| 34306  | 0     | 0     | 0     | 0     |
| 34395  | 0     | 0     | 0     | 0     |
| 34463  | 0     | 1     | 1     | 1     |
| 34466  | 0     | 0     | 0     | 0     |
| 34471  | 0     | 0     | 0     | 0     |
| 34489  | 1     | 0     | 0     | 0     |
| 34518  | 0     | 0     | 0     | 0     |
| 34542  | 0     | 0     | 0     | 0     |

| respid | Q43_5 | Q43_6 | Q43_7 | Q43_8 |
|--------|-------|-------|-------|-------|
| 34595  |       |       |       |       |
| 34604  | 0     | 0     | 0     | 0     |
| 34631  | 1     | 0     | 0     | 0     |
| 34665  | 0     | 0     | 0     | 0     |
| 34716  | 0     | 0     | 0     | 0     |
| 34729  | 0     | 0     | 0     | 0     |
| 34772  | 0     | 0     | 0     | 0     |
| 34800  | 0     | 0     | 0     | 0     |
| 34819  | 0     | 0     | 0     | 0     |
| 34829  | 1     | 0     | 1     | 0     |
| 34831  | 1     | 0     | 0     | 0     |
| 34839  | 0     | 0     | 0     | 0     |
| 34868  | 0     | 0     | 0     | 0     |
| 34869  | 0     | 0     | 0     | 0     |
| 34882  | 1     | 0     | 0     | 0     |
| 34895  | 1     | 0     | 1     | 1     |
| 34901  | 0     | 0     | 0     | 0     |
| 34904  | 1     | 0     | 0     | 0     |
| 34907  | 0     | 0     | 0     | 0     |
| 34914  | 0     | 0     | 0     | 0     |
| 34918  | 1     | 0     | 1     | 0     |
| 34924  | 0     | 0     | 0     | 0     |
| 34933  | 0     | 0     | 0     | 0     |
| 34938  | 0     | 0     | 0     | 0     |
| 34952  | 0     | 0     | 1     | 0     |
| 34959  | 0     | 0     | 0     | 0     |
| 34972  | 0     | 0     | 0     | 0     |
| 34973  | 1     | 1     | 0     | 0     |
| 34975  | 1     | 0     | 1     | 1     |
| 34977  | 1     | 1     | 1     | 1     |
| 34978  | 0     | 0     | 0     | 0     |
| 34980  | 0     | 0     | 0     | 0     |

| respid | Q43_5 | Q43_6 | Q43_7 | Q43_8 |
|--------|-------|-------|-------|-------|
| 34984  | 0     | 0     | 0     | 0     |
| 34986  | 0     | 1     | 0     | 0     |
| 34994  | 0     | 0     | 0     | 0     |
| 34996  | 1     | 0     | 0     | 1     |
| 35003  | 0     | 0     | 0     | 0     |
| 35014  | 0     | 0     | 0     | 0     |
| 35029  | 1     | 0     | 0     | 0     |
| 35030  | 0     | 0     | 0     | 0     |
| 35037  | 1     | 0     | 0     | 0     |
| 35043  |       |       |       |       |
| 35048  |       |       |       |       |
| 35055  | 0     | 0     | 0     | 0     |
| 35067  | 0     | 0     | 0     | 0     |
| 35072  | 0     | 0     | 0     | 0     |
| 35078  | 0     | 0     | 0     | 0     |
| 35084  | 0     | 0     | 0     | 0     |
| 35095  |       |       |       |       |
| 35096  |       |       |       |       |
| 35097  | 0     | 0     | 0     | 0     |
| 35098  | 0     | 0     | 0     | 0     |
| 35109  | 1     | 0     | 0     | 0     |
| 35114  | 0     | 0     | 0     | 0     |
| 35115  | 0     | 0     | 0     | 0     |
| 35124  | 0     | 0     | 0     | 0     |
| 35125  | 0     | 0     | 0     | 0     |
| 35141  |       |       |       |       |
| 35142  | 0     | 0     | 0     | 0     |
| 35145  |       |       |       |       |
| 35149  | 0     | 0     | 0     | 0     |
| 35159  | 1     | 0     | 0     | 0     |
| 35163  | 1     | 0     | 0     | 0     |
| 35174  | 1     | 0     | 0     | 0     |

| respid | Q43_5 | Q43_6 | Q43_7 | Q43_8 |
|--------|-------|-------|-------|-------|
| 35188  |       |       |       |       |
| 35189  | 1     | 0     | 0     | 0     |
| 35201  | 0     | 0     | 0     | 0     |
| 35215  | 0     | 0     | 0     | 0     |
| 35228  | 0     | 0     | 0     | 0     |
| 35235  | 1     | 0     | 0     | 0     |
| 35239  | 0     | 0     | 0     | 0     |
| 35243  | 0     | 0     | 0     | 0     |
| 35245  | 0     | 0     | 0     | 0     |
| 35259  |       |       |       |       |
| 35265  | 0     | 0     | 0     | 0     |
| 35272  | 1     | 1     | 0     | 0     |
| 35280  | 1     | 0     | 0     | 0     |
| 35298  | 0     | 0     | 0     | 0     |
| 35305  | 0     | 0     | 0     | 0     |
| 35306  | 0     | 0     | 1     | 1     |
| 35307  | 0     | 0     | 0     | 0     |
| 35311  | 0     | 0     | 0     | 0     |
| 35322  | 0     | 0     | 0     | 0     |
| 35323  | 0     | 0     | 0     | 0     |
| 35327  | 0     | 0     | 0     | 0     |
| 35366  | 1     | 0     | 0     | 0     |
| 35378  | 0     | 0     | 0     | 0     |
| 35389  | 1     | 0     | 0     | 0     |
| 35390  | 0     | 0     | 0     | 0     |
| 35395  | 0     | 0     | 1     | 0     |
| 35411  | 0     | 0     | 0     | 0     |
| 35423  | 0     | 0     | 0     | 0     |
| 35425  | 0     | 0     | 0     | 0     |
| 35434  | 0     | 0     | 0     | 0     |
| 35462  | 0     | 0     | 0     | 0     |
| 35478  | 1     | 1     | 1     | 1     |

| respid | Q43_5 | Q43_6 | Q43_7 | Q43_8 |
|--------|-------|-------|-------|-------|
| 35481  | 1     | 0     | 1     | 0     |
| 35498  | 0     | 0     | 0     | 0     |
| 35499  |       |       |       |       |
| 35502  | 0     | 0     | 0     | 0     |
| 35503  |       |       |       |       |
| 35504  |       |       |       |       |
| 35508  | 1     | 0     | 0     | 0     |
| 35513  | 0     | 0     | 0     | 0     |
| 35516  | 0     | 0     | 0     | 0     |
| 35519  | 0     | 0     | 0     | 0     |
| 35530  | 0     | 0     | 0     | 1     |
| 35533  | 0     | 0     | 0     | 0     |
| 35561  | 0     | 0     | 0     | 0     |
| 35565  | 0     | 0     | 0     | 0     |
| 35588  | 0     | 0     | 0     | 0     |
| 35598  | 0     | 0     | 0     | 0     |
| 35607  | 0     | 0     | 1     | 0     |
| 35638  | 0     | 0     | 0     | 0     |
| 35642  | 0     | 0     | 0     | 0     |
| 35643  | 0     | 0     | 0     | 0     |
| 35680  | 0     | 0     | 0     | 0     |
| 35697  | 0     | 0     | 0     | 0     |
| 35703  |       |       |       |       |
| 35709  | 0     | 0     | 0     | 0     |
| 35710  | 0     | 0     | 0     | 0     |
| 35721  | 1     | 0     | 0     | 1     |
| 35723  | 1     | 0     | 0     | 0     |
| 35736  | 0     | 0     | 0     | 0     |
| 35739  | 0     | 0     | 0     | 0     |
| 35745  | 1     | 0     | 0     | 0     |
| 35748  | 1     | 0     | 1     | 1     |
| 35750  | 0     | 0     | 0     | 0     |



| respid | Q43_5 | Q43_6 | Q43_7 | Q43_8 |
|--------|-------|-------|-------|-------|
| 35752  | 0     | 0     | 0     | 0     |
| 35773  | 1     | 0     | 0     | 0     |
| 35779  | 0     | 0     | 0     | 0     |
| 35791  | 1     | 0     | 0     | 1     |
| 35801  | 0     | 0     | 0     | 0     |
| 35802  | 0     | 0     | 0     | 0     |
| 35837  | 0     | 0     | 0     | 0     |
| 35853  | 0     | 0     | 0     | 0     |
| 35858  | 0     | 0     | 0     | 1     |
| 35860  | 1     | 0     | 0     | 0     |
| 35875  | 0     | 0     | 0     | 0     |
| 35883  | 0     | 0     | 0     | 0     |
| 35890  | 0     | 0     | 0     | 0     |
| 35898  | 0     | 1     | 1     | 0     |
| 35901  | 1     | 0     | 0     | 0     |
| 35914  | 0     | 0     | 0     | 0     |
| 35924  | 0     | 0     | 0     | 0     |
| 35950  | 0     | 0     | 1     | 1     |
| 35961  | 0     | 0     | 0     | 0     |
| 35966  | 0     | 0     | 0     | 0     |
| 35967  | 0     | 0     | 0     | 0     |
| 35971  | 0     | 0     | 0     | 0     |
| 35974  | 0     | 0     | 0     | 0     |
| 35983  | 0     | 0     | 0     | 0     |
| 35992  | 0     | 0     | 0     | 0     |
| 36010  | 0     | 0     | 0     | 0     |
| 36019  | 0     | 0     | 0     | 0     |
| 36029  | 1     | 0     | 0     | 0     |
| 36033  | 0     | 0     | 0     | 0     |
| 36042  | 0     | 0     | 0     | 0     |
| 36043  | 0     | 0     | 0     | 0     |
| 36048  | 0     | 0     | 0     | 0     |

| respid | Q43_5 | Q43_6 | Q43_7 | Q43_8 |
|--------|-------|-------|-------|-------|
| 36050  | 0     | 0     | 1     | 0     |
| 36062  | 1     | 0     | 0     | 0     |
| 36063  |       |       |       |       |
| 36092  | 0     | 0     | 0     | 0     |
| 36097  | 1     | 0     | 0     | 0     |
| 36108  | 0     | 0     | 0     | 0     |
| 36113  | 1     | 0     | 1     | 1     |
| 36117  | 1     | 1     | 0     | 1     |
| 36129  | 1     | 0     | 0     | 0     |
| 36144  | 0     | 0     | 0     | 0     |
| 36152  | 0     | 0     | 0     | 0     |
| 36154  | 0     | 0     | 0     | 0     |
| 36155  | 1     | 0     | 0     | 0     |
| 36167  | 0     | 0     | 0     | 0     |
| 36172  | 1     | 0     | 1     | 1     |
| 36173  | 0     | 0     | 0     | 0     |
| 36174  | 1     | 0     | 0     | 0     |
| 36182  | 0     | 0     | 0     | 0     |
| 36192  | 0     | 0     | 0     | 0     |
| 36195  | 0     | 0     | 0     | 0     |
| 36204  | 0     | 0     | 0     | 0     |
| 36205  | 0     | 0     | 0     | 0     |
| 36208  | 0     | 0     | 0     | 0     |
| 36216  | 0     | 0     | 0     | 0     |
| 36221  | 0     | 0     | 0     | 0     |
| 36244  | 0     | 0     | 0     | 0     |
| 36255  | 0     | 1     | 1     | 0     |
| 36259  | 0     | 0     | 0     | 0     |
| 36262  | 0     | 0     | 0     | 0     |
| 36268  | 0     | 0     | 0     | 0     |
| 36308  | 1     | 0     | 0     | 1     |
| 36324  | 0     | 0     | 0     | 0     |

| respid | Q43_5 | Q43_6 | Q43_7 | Q43_8 |
|--------|-------|-------|-------|-------|
| 36330  | 0     | 0     | 0     | 0     |
| 36331  | 1     | 0     | 0     | 0     |
| 36336  | 0     | 0     | 0     | 0     |
| 36337  | 0     | 0     | 0     | 0     |
| 36364  | 0     | 0     | 0     | 0     |
| 36365  | 0     | 0     | 1     | 1     |
| 36396  | 0     | 0     | 0     | 0     |
| 36403  | 0     | 0     | 0     | 0     |
| 36410  | 0     | 0     | 0     | 0     |
| 36413  | 0     | 0     | 0     | 0     |
| 36422  | 1     | 0     | 0     | 0     |
| 36424  | 1     | 0     | 0     | 0     |
| 36425  | 0     | 0     | 0     | 0     |
| 36432  | 0     | 0     | 0     | 0     |
| 36435  | 0     | 0     | 0     | 1     |
| 36446  | 0     | 0     | 0     | 0     |
| 36451  | 0     | 0     | 0     | 0     |
| 36453  | 0     | 1     | 1     | 1     |
| 36459  | 0     | 0     | 0     | 0     |
| 36464  | 1     | 0     | 0     | 0     |
| 36465  | 0     | 0     | 0     | 0     |
| 36466  |       |       |       |       |
| 36476  | 0     | 0     | 0     | 0     |
| 36487  | 1     | 0     | 0     | 0     |
| 36488  | 0     | 0     | 0     | 0     |
| 36500  |       |       |       |       |
| 36504  | 0     | 0     | 0     | 0     |
| 36513  | 0     | 0     | 0     | 0     |
| 36515  | 1     | 0     | 0     | 1     |
| 36521  | 0     | 0     | 0     | 0     |
| 36530  | 0     | 0     | 0     | 0     |
| 36556  | 1     | 0     | 0     | 0     |

| respid | Q43_5 | Q43_6 | Q43_7 | Q43_8 |
|--------|-------|-------|-------|-------|
| 36564  | 0     | 1     | 1     | 0     |
| 36584  | 0     | 0     | 0     | 0     |
| 36585  |       |       |       |       |
| 36586  |       |       |       |       |
| 36606  | 1     | 1     | 0     | 0     |
| 36615  | 0     | 0     | 0     | 0     |
| 36628  | 0     | 0     | 0     | 0     |
| 36630  | 0     | 0     | 0     | 0     |
| 36631  | 0     | 0     | 1     | 0     |
| 36636  | 0     | 0     | 0     | 0     |
| 36637  | 0     | 0     | 0     | 0     |
| 36651  | 0     | 0     | 0     | 0     |
| 36661  | 0     | 0     | 0     | 1     |
| 36670  | 1     | 0     | 0     | 0     |
| 36671  | 0     | 0     | 0     | 0     |
| 36688  |       |       |       |       |
| 36694  | 0     | 0     | 0     | 0     |
| 36696  |       |       |       |       |
| 36703  |       |       |       |       |
| 36719  | 1     | 0     | 0     | 0     |
| 36721  | 0     | 0     | 0     | 0     |
| 36740  | 0     | 0     | 0     | 0     |
| 36755  | 0     | 0     | 0     | 0     |
| 36765  | 0     | 0     | 0     | 0     |
| 36770  |       |       |       |       |
| 36773  | 0     | 0     | 0     | 0     |
| 36813  | 1     | 0     | 0     | 1     |
| 36819  | 1     | 0     | 0     | 0     |
| 36820  | 1     | 0     | 0     | 0     |
| 36821  | 0     | 0     | 0     | 0     |
| 36827  | 0     | 0     | 0     | 0     |
| 36835  | 0     | 0     | 0     | 0     |

| respid | Q43_5 | Q43_6 | Q43_7 | Q43_8 |
|--------|-------|-------|-------|-------|
| 36837  | 0     | 0     | 0     | 0     |
| 36849  | 0     | 0     | 0     | 0     |
| 36851  | 0     | 0     | 0     | 0     |
| 36868  | 0     | 0     | 0     | 0     |
| 36870  | 0     | 0     | 0     | 0     |
| 36871  |       |       |       |       |
| 36874  | 0     | 0     | 0     | 0     |
| 36878  | 0     | 0     | 0     | 1     |
| 36887  | 0     | 0     | 0     | 0     |
| 36889  | 0     | 0     | 0     | 0     |
| 36891  | 0     | 0     | 1     | 0     |
| 36903  | 0     | 0     | 0     | 0     |
| 36905  | 0     | 0     | 0     | 0     |
| 36913  | 0     | 0     | 0     | 0     |
| 36949  | 0     | 0     | 0     | 0     |
| 36954  | 0     | 0     | 0     | 0     |
| 36962  | 0     | 1     | 0     | 0     |
| 36965  | 0     | 0     | 0     | 0     |
| 36970  | 0     | 0     | 0     | 0     |
| 36979  | 0     | 0     | 0     | 0     |
| 36990  | 1     | 1     | 1     | 1     |
| 36991  | 0     | 0     | 0     | 0     |
| 36992  | 0     | 0     | 0     | 0     |
| 37015  |       |       |       |       |
| 37017  | 0     | 0     | 0     | 0     |
| 37020  |       |       |       |       |
| 37033  | 0     | 0     | 0     | 0     |
| 37041  | 0     | 0     | 0     | 0     |
| 37048  | 1     | 0     | 0     | 1     |
| 37050  | 0     | 0     | 0     | 0     |
| 37054  | 0     | 0     | 0     | 0     |
| 37057  | 1     | 0     | 0     | 0     |

| respid | Q43_5 | Q43_6 | Q43_7 | Q43_8 |
|--------|-------|-------|-------|-------|
| 37067  | 0     | 0     | 0     | 0     |
| 37074  | 0     | 0     | 0     | 0     |
| 37088  | 0     | 0     | 0     | 0     |
| 37090  | 1     | 0     | 1     | 1     |
| 37110  | 0     | 0     | 0     | 0     |
| 37122  | 0     | 0     | 0     | 1     |
| 37124  | 1     | 0     | 0     | 0     |
| 37126  |       |       |       |       |
| 37129  | 0     | 0     | 0     | 0     |
| 37130  | 0     | 0     | 0     | 0     |
| 37142  | 1     | 0     | 0     | 1     |
| 37160  | 0     | 0     | 0     | 0     |
| 37168  | 0     | 0     | 0     | 0     |
| 37169  | 0     | 0     | 0     | 0     |
| 37191  | 0     | 0     | 0     | 0     |
| 37197  | 0     | 1     | 0     | 0     |
| 37204  | 0     | 0     | 0     | 0     |
| 37213  | 0     | 0     | 0     | 1     |
| 37238  | 1     | 0     | 0     | 1     |
| 37242  | 0     | 0     | 0     | 0     |
| 37243  | 0     | 0     | 0     | 0     |
| 37275  | 0     | 0     | 0     | 1     |
| 37305  | 0     | 0     | 0     | 0     |
| 37357  | 0     | 1     | 0     | 0     |
| 37365  | 0     | 1     | 0     | 0     |
| 37370  |       |       |       |       |
| 37406  | 0     | 0     | 0     | 0     |
| 37410  | 0     | 0     | 0     | 0     |
| 37411  | 0     | 0     | 0     | 0     |
| 37427  | 1     | 0     | 0     | 0     |
| 37437  | 0     | 0     | 0     | 0     |
| 37440  | 0     | 0     | 0     | 0     |

| respid | Q43_5 | Q43_6 | Q43_7 | Q43_8 |
|--------|-------|-------|-------|-------|
| 37452  | 0     | 0     | 0     | 0     |
| 37465  | 0     | 0     | 0     | 0     |
| 37468  | 0     | 0     | 0     | 0     |
| 37469  | 0     | 0     | 0     | 0     |
| 37477  | 0     | 0     | 0     | 0     |
| 37509  | 0     | 0     | 0     | 0     |
| 37513  | 0     | 0     | 0     | 0     |
| 37534  | 0     | 0     | 0     | 0     |
| 37537  | 0     | 0     | 0     | 0     |
| 37560  | 0     | 1     | 0     | 0     |
| 37566  | 0     | 0     | 0     | 0     |
| 37572  | 1     | 0     | 0     | 0     |
| 37574  | 1     | 0     | 0     | 0     |
| 37575  | 0     | 0     | 0     | 0     |
| 37590  | 0     | 0     | 0     | 0     |
| 37593  | 0     | 0     | 0     | 0     |
| 37599  | 0     | 0     | 0     | 0     |
| 37641  | 1     | 0     | 0     | 0     |
| 37651  | 0     | 0     | 0     | 1     |
| 37670  | 0     | 0     | 0     | 0     |
| 37680  | 0     | 0     | 0     | 0     |
| 37690  | 0     | 0     | 0     | 0     |
| 37694  |       |       |       |       |
| 37705  | 0     | 0     | 0     | 0     |
| 37710  | 1     | 0     | 0     | 0     |
| 37719  | 1     | 0     | 0     | 0     |
| 37741  | 1     | 0     | 0     | 0     |
| 37752  | 0     | 0     | 0     | 0     |
| 37755  | 0     | 0     | 0     | 0     |
| 37757  | 0     | 0     | 0     | 0     |
| 37783  | 0     | 0     | 0     | 0     |
| 37793  | 0     | 0     | 0     | 0     |

| respid | Q43_5 | Q43_6 | Q43_7 | Q43_8 |
|--------|-------|-------|-------|-------|
| 37800  | 1     | 0     | 0     | 0     |
| 37801  | 0     | 0     | 0     | 0     |
| 37820  | 0     | 0     | 0     | 0     |
| 37826  | 1     | 0     | 0     | 0     |
| 37835  | 0     | 0     | 0     | 0     |
| 37839  | 0     | 0     | 0     | 0     |
| 37871  | 1     | 0     | 0     | 0     |
| 37876  | 0     | 0     | 0     | 0     |
| 37879  | 1     | 0     | 0     | 0     |
| 37894  | 0     | 0     | 0     | 0     |
| 37895  | 1     | 0     | 0     | 0     |
| 37901  | 1     | 0     | 0     | 0     |
| 37926  | 0     | 1     | 0     | 0     |
| 37937  | 0     | 1     | 0     | 0     |
| 37938  | 0     | 0     | 0     | 0     |
| 37959  | 0     | 0     | 0     | 0     |
| 37970  |       |       |       |       |
| 37972  | 0     | 0     | 0     | 0     |
| 37988  | 0     | 0     | 0     | 1     |
| 37989  | 1     | 0     | 0     | 0     |
| 38000  | 0     | 0     | 0     | 0     |
| 38028  | 0     | 0     | 0     | 0     |
| 38042  | 0     | 0     | 0     | 0     |
| 38052  | 0     | 0     | 0     | 0     |
| 38056  | 0     | 0     | 0     | 0     |
| 38106  | 1     | 1     | 0     | 0     |
| 38114  | 0     | 0     | 0     | 1     |
| 38134  | 0     | 0     | 0     | 0     |
| 38135  | 0     | 0     | 0     | 0     |
| 38139  | 0     | 0     | 0     | 0     |
| 38160  | 0     | 0     | 0     | 1     |
| 38164  | 0     | 0     | 0     | 0     |



| respid | Q43_5 | Q43_6 | Q43_7 | Q43_8 |
|--------|-------|-------|-------|-------|
| 38168  |       |       |       |       |
| 38173  | 0     | 0     | 0     | 0     |
| 38193  | 1     | 0     | 0     | 0     |
| 38204  | 0     | 0     | 0     | 0     |
| 38206  | 0     | 1     | 0     | 0     |
| 38233  | 1     | 1     | 1     | 1     |
| 38242  | 0     | 0     | 0     | 1     |
| 38245  | 0     | 0     | 0     | 0     |
| 38261  | 0     | 0     | 0     | 1     |
| 38288  | 0     | 0     | 0     | 0     |
| 38296  | 1     | 0     | 0     | 0     |
| 38299  | 1     | 1     | 0     | 0     |
| 38300  | 0     | 0     | 0     | 1     |
| 38303  | 0     | 0     | 0     | 1     |
| 38317  | 0     | 0     | 0     | 0     |
| 38328  | 0     | 0     | 0     | 0     |
| 38333  | 0     | 0     | 0     | 0     |
| 38336  | 0     | 0     | 0     | 0     |
| 38338  | 0     | 0     | 0     | 0     |
| 38342  | 0     | 0     | 0     | 0     |
| 38360  | 0     | 0     | 0     | 0     |
| 38362  | 0     | 0     | 1     | 1     |
| 38364  | 0     | 0     | 0     | 0     |
| 38402  | 0     | 0     | 0     | 0     |
| 38423  | 1     | 0     | 0     | 0     |
| 38424  | 0     | 0     | 0     | 0     |
| 38435  | 0     | 0     | 0     | 0     |
| 38450  | 0     | 0     | 0     | 0     |
| 38455  | 0     | 0     | 0     | 0     |
| 38467  | 0     | 0     | 0     | 0     |
| 38468  | 1     | 1     | 1     | 0     |
| 38472  | 0     | 1     | 0     | 0     |

| respid | Q43_5 | Q43_6 | Q43_7 | Q43_8 |
|--------|-------|-------|-------|-------|
| 38484  | 0     | 0     | 0     | 0     |
| 38498  | 1     | 1     | 1     | 1     |
| 38507  | 0     | 0     | 0     | 0     |
| 38511  | 0     | 0     | 0     | 0     |
| 38524  | 1     | 1     | 1     | 1     |
| 38526  | 0     | 0     | 0     | 0     |
| 38534  | 0     | 0     | 0     | 0     |
| 38536  | 0     | 0     | 0     | 0     |
| 38539  | 0     | 0     | 0     | 0     |
| 38547  | 0     | 0     | 0     | 0     |
| 38549  | 0     | 1     | 0     | 0     |
| 38575  | 0     | 0     | 0     | 1     |
| 38579  | 0     | 0     | 0     | 0     |
| 38585  | 0     | 0     | 0     | 0     |
| 38589  | 1     | 0     | 0     | 0     |
| 38595  | 1     | 1     | 1     | 0     |
| 38602  | 0     | 0     | 0     | 0     |
| 38603  | 1     | 0     | 0     | 0     |
| 38612  | 0     | 0     | 0     | 0     |
| 38621  | 0     | 0     | 0     | 0     |
| 38624  | 0     | 0     | 0     | 0     |
| 38636  |       |       |       |       |
| 38656  | 1     | 0     | 0     | 0     |
| 38668  | 0     | 0     | 0     | 0     |
| 38675  | 0     | 0     | 0     | 0     |
| 38676  | 0     | 0     | 0     | 0     |
| 38682  | 1     | 0     | 0     | 0     |
| 38689  | 0     | 0     | 0     | 0     |
| 38702  |       |       |       |       |
| 38704  | 0     | 0     | 0     | 0     |
| 38713  | 0     | 0     | 0     | 0     |
| 38718  | 0     | 0     | 1     | 1     |

| respid | Q43_5 | Q43_6 | Q43_7 | Q43_8 |
|--------|-------|-------|-------|-------|
| 38725  | 0     | 0     | 0     | 0     |
| 38730  | 0     | 0     | 0     | 1     |
| 38737  | 1     | 1     | 1     | 0     |
| 38738  | 1     | 0     | 0     | 0     |
| 38744  | 0     | 0     | 0     | 0     |
| 38746  | 0     | 0     | 0     | 0     |
| 38753  | 0     | 0     | 0     | 0     |
| 38756  | 0     | 0     | 0     | 0     |
| 38760  | 0     | 0     | 0     | 0     |
| 38762  | 0     | 1     | 0     | 0     |
| 38765  | 0     | 0     | 0     | 0     |
| 38769  | 0     | 0     | 0     | 0     |
| 38781  | 0     | 0     | 0     | 0     |
| 38786  | 0     | 0     | 0     | 0     |
| 38790  | 1     | 0     | 0     | 0     |
| 38793  | 0     | 0     | 0     | 0     |
| 38797  | 0     | 0     | 0     | 0     |
| 38802  | 0     | 0     | 0     | 0     |
| 38815  | 0     | 0     | 0     | 0     |
| 38826  | 1     | 0     | 0     | 0     |
| 38828  | 0     | 0     | 0     | 0     |
| 38829  | 0     | 0     | 0     | 0     |
| 38835  | 1     | 0     | 0     | 0     |
| 38842  | 1     | 1     | 0     | 0     |
| 38853  | 0     | 0     | 0     | 0     |
| 38855  | 0     | 1     | 0     | 0     |
| 38860  | 0     | 0     | 0     | 0     |
| 38869  | 1     | 0     | 0     | 0     |
| 38882  | 0     | 1     | 1     | 0     |
| 38897  | 0     | 0     | 0     | 0     |
| 38903  | 0     | 1     | 0     | 0     |
| 38910  | 1     | 0     | 0     | 0     |

| respid | Q43_5 | Q43_6 | Q43_7 | Q43_8 |
|--------|-------|-------|-------|-------|
| 38948  | 1     | 1     | 1     | 0     |
| 38949  | 1     | 0     | 0     | 0     |
| 38953  | 0     | 0     | 0     | 0     |
| 38989  | 1     | 0     | 0     | 0     |
| 38997  | 0     | 0     | 0     | 0     |
| 38999  | 1     | 0     | 0     | 0     |
| 39002  | 1     | 0     | 0     | 0     |
| 39003  | 1     | 0     | 0     | 0     |
| 39006  | 0     | 0     | 0     | 0     |
| 39014  |       |       |       |       |
| 39017  | 0     | 0     | 0     | 0     |
| 39018  | 0     | 0     | 0     | 0     |
| 39025  | 1     | 0     | 0     | 0     |
| 39031  | 0     | 0     | 0     | 0     |
| 39061  | 0     | 0     | 0     | 0     |
| 39131  | 0     | 0     | 0     | 1     |
| 39153  | 0     | 0     | 0     | 1     |
| 39194  | 0     | 0     | 0     | 0     |
| 39204  | 0     | 0     | 1     | 0     |
| 39208  | 1     | 0     | 0     | 0     |
| 39213  | 0     | 0     | 0     | 0     |
| 39231  | 0     | 0     | 0     | 0     |
| 39251  | 0     | 0     | 0     | 0     |
| 39257  | 0     | 0     | 0     | 0     |
| 39262  | 0     | 0     | 0     | 0     |
| 39269  | 0     | 0     | 0     | 0     |
| 39272  | 0     | 0     | 0     | 0     |
| 39280  | 0     | 0     | 0     | 0     |
| 39294  | 0     | 0     | 0     | 0     |
| 39297  | 0     | 0     | 0     | 0     |
| 39300  | 0     | 0     | 0     | 0     |
| 39307  | 0     | 0     | 0     | 0     |

| respid | Q43_5 | Q43_6 | Q43_7 | Q43_8 |
|--------|-------|-------|-------|-------|
| 39320  | 0     | 0     | 0     | 0     |
| 39333  | 0     | 0     | 0     | 0     |
| 39335  | 1     | 0     | 0     | 0     |
| 39339  | 0     | 0     | 0     | 0     |
| 39375  | 0     | 0     | 0     | 0     |
| 39377  | 0     | 0     | 0     | 0     |
| 39380  | 0     | 0     | 0     | 0     |
| 39425  | 0     | 0     | 0     | 0     |
| 39590  | 0     | 0     | 0     | 0     |
| 40529  | 0     | 0     | 0     | 0     |
| 40702  | 0     | 0     | 0     | 0     |
| 40788  | 0     | 0     | 0     | 0     |
| 40841  | 0     | 0     | 0     | 0     |
| 40965  | 0     | 0     | 0     | 0     |
| 41092  | 0     | 0     | 0     | 0     |
| 41534  |       |       |       |       |
| 41919  | 0     | 0     | 0     | 0     |
| 42110  | 0     | 0     | 0     | 0     |
| 42135  | 0     | 0     | 0     | 0     |
| 42142  | 0     | 0     | 0     | 0     |
| 42163  | 1     | 0     | 0     | 0     |
| 42164  | 0     | 0     | 0     | 0     |
| 42172  | 1     | 0     | 0     | 0     |
| 42177  | 0     | 0     | 0     | 0     |
| 42181  | 0     | 0     | 0     | 0     |
| 42193  | 0     | 0     | 0     | 0     |
| 42196  | 1     | 0     | 0     | 0     |
| 42202  | 0     | 0     | 0     | 0     |
| 42248  | 0     | 0     | 1     | 0     |
| 42283  | 1     | 0     | 0     | 0     |
| 42284  | 1     | 0     | 0     | 0     |
| 42323  |       |       |       |       |

| respid | Q43_5 | Q43_6 | Q43_7 | Q43_8 |
|--------|-------|-------|-------|-------|
| 42349  | 1     | 0     | 0     | 0     |
| 42351  |       |       |       |       |
| 42357  | 0     | 0     | 0     | 0     |
| 42366  |       |       |       |       |
| 42380  | 0     | 0     | 0     | 0     |
| 42414  | 0     | 0     | 0     | 0     |
| 42420  | 0     | 1     | 0     | 1     |
| 42454  |       |       |       |       |
| 42458  | 1     | 0     | 0     | 0     |
| 42461  | 1     | 0     | 1     | 0     |
| 42488  | 1     | 0     | 0     | 0     |
| 42511  | 0     | 0     | 0     | 0     |
| 42512  | 0     | 0     | 0     | 0     |
| 42530  | 1     | 0     | 0     | 1     |
| 42531  | 0     | 1     | 1     | 1     |
| 42533  | 1     | 0     | 0     | 0     |
| 42549  | 0     | 0     | 0     | 0     |
| 42550  | 0     | 0     | 0     | 0     |
| 42553  |       |       |       |       |
| 42562  | 0     | 0     | 0     | 0     |
| 42567  | 0     | 0     | 0     | 0     |
| 42589  | 0     | 0     | 0     | 0     |
| 42604  | 0     | 0     | 0     | 0     |
| 42618  | 0     | 0     | 0     | 0     |
| 42621  | 0     | 0     | 0     | 0     |
| 42627  | 0     | 0     | 0     | 0     |
| 42641  | 0     | 0     | 1     | 0     |
| 42655  | 1     | 0     | 1     | 0     |
| 42666  | 0     | 0     | 0     | 0     |
| 42667  | 0     | 0     | 0     | 0     |
| 42697  | 0     | 0     | 0     | 0     |
| 42703  | 0     | 0     | 0     | 0     |

| respid | Q43_5 | Q43_6 | Q43_7 | Q43_8 |
|--------|-------|-------|-------|-------|
| 42712  | 1     | 0     | 0     | 0     |
| 42731  | 0     | 0     | 1     | 0     |
| 42780  | 0     | 0     | 0     | 0     |
| 42785  | 1     | 0     | 0     | 0     |
| 42788  | 0     | 0     | 0     | 0     |
| 42802  | 0     | 0     | 0     | 1     |
| 42818  | 1     | 0     | 0     | 0     |
| 42821  | 0     | 0     | 0     | 0     |
| 42824  | 0     | 0     | 0     | 0     |
| 42831  | 1     | 0     | 0     | 0     |
| 42836  | 1     | 0     | 0     | 0     |
| 42864  | 0     | 0     | 0     | 0     |
| 42875  | 0     | 0     | 0     | 0     |
| 42891  | 1     | 1     | 1     | 1     |
| 42897  | 0     | 0     | 0     | 0     |
| 42900  | 0     | 0     | 0     | 0     |
| 42902  | 0     | 0     | 0     | 0     |
| 42921  | 1     | 0     | 0     | 0     |
| 42925  | 0     | 0     | 0     | 0     |
| 42944  |       |       |       |       |
| 42950  |       |       |       |       |
| 42963  | 0     | 0     | 0     | 0     |
| 42967  | 0     | 0     | 0     | 0     |
| 42985  | 0     | 0     | 0     | 0     |
| 42990  | 0     | 0     | 0     | 0     |
| 42996  | 0     | 0     | 0     | 0     |
| 43002  | 0     | 0     | 0     | 0     |
| 43004  | 0     | 0     | 0     | 0     |
| 43012  | 0     | 0     | 0     | 0     |
| 43027  | 1     | 0     | 1     | 0     |
| 43028  | 0     | 0     | 0     | 0     |
| 43029  | 1     | 0     | 0     | 0     |

| respid | Q43_5 | Q43_6 | Q43_7 | Q43_8 |
|--------|-------|-------|-------|-------|
| 43031  | 0     | 0     | 0     | 0     |
| 43042  | 0     | 0     | 0     | 0     |
| 43054  | 0     | 0     | 0     | 0     |
| 43058  | 0     | 0     | 0     | 0     |
| 43064  | 0     | 0     | 0     | 1     |
| 43069  | 0     | 0     | 0     | 0     |
| 43071  |       |       |       |       |
| 43072  | 0     | 0     | 0     | 0     |
| 43077  | 0     | 0     | 0     | 0     |
| 43078  | 0     | 0     | 0     | 0     |
| 43082  |       |       |       |       |
| 43092  | 0     | 0     | 1     | 1     |
| 43096  | 0     | 0     | 0     | 0     |
| 43109  |       |       |       |       |
| 43113  | 0     | 0     | 0     | 0     |
| 43123  | 1     | 0     | 0     | 0     |
| 43127  | 0     | 0     | 0     | 0     |
| 43128  | 1     | 0     | 0     | 0     |
| 43129  | 0     | 0     | 0     | 0     |
| 43133  | 1     | 1     | 1     | 1     |
| 43140  |       |       |       |       |
| 43143  | 0     | 1     | 0     | 1     |
| 43149  | 0     | 0     | 0     | 0     |
| 43150  | 0     | 0     | 0     | 0     |
| 43153  | 1     | 0     | 0     | 0     |
| 43170  | 0     | 0     | 0     | 0     |
| 43187  | 0     | 1     | 1     | 0     |
| 43188  | 1     | 0     | 0     | 0     |
| 43198  | 1     | 0     | 0     | 0     |
| 43208  | 0     | 0     | 0     | 0     |
| 43216  | 0     | 0     | 0     | 0     |
| 43222  | 0     | 0     | 0     | 0     |



| respid | Q43_5 | Q43_6 | Q43_7 | Q43_8 |
|--------|-------|-------|-------|-------|
| 43224  | 0     | 0     | 0     | 0     |
| 43230  | 0     | 0     | 0     | 0     |
| 43231  | 0     | 0     | 0     | 0     |
| 43265  | 0     | 0     | 0     | 0     |
| 43270  | 0     | 0     | 0     | 0     |
| 43283  | 0     | 0     | 0     | 0     |
| 43295  | 0     | 0     | 0     | 0     |
| 43297  | 0     | 0     | 0     | 0     |
| 43299  | 0     | 1     | 0     | 0     |
| 43307  | 0     | 0     | 0     | 0     |
| 43316  | 0     | 0     | 0     | 0     |
| 43318  | 0     | 0     | 0     | 0     |
| 43319  | 0     | 0     | 0     | 0     |
| 43324  | 0     | 0     | 0     | 0     |
| 43325  | 1     | 0     | 0     | 0     |
| 43327  | 0     | 0     | 0     | 0     |
| 43338  | 0     | 0     | 0     | 0     |
| 43342  | 0     | 0     | 0     | 0     |
| 43348  | 0     | 0     | 0     | 0     |
| 43395  | 1     | 0     | 0     | 0     |
| 43404  | 1     | 0     | 0     | 0     |
| 43406  | 0     | 0     | 0     | 0     |
| 43407  | 0     | 0     | 0     | 0     |
| 43411  | 0     | 0     | 0     | 0     |
| 43416  | 0     | 0     | 0     | 0     |
| 43428  | 0     | 0     | 0     | 0     |
| 43429  | 1     | 1     | 1     | 1     |
| 43432  | 1     | 0     | 0     | 1     |
| 43443  | 0     | 0     | 0     | 0     |
| 43455  |       |       |       |       |
| 43457  | 0     | 0     | 1     | 0     |
| 43458  | 0     | 0     | 0     | 0     |

| respid | Q43_5 | Q43_6 | Q43_7 | Q43_8 |
|--------|-------|-------|-------|-------|
| 43477  | 1     | 0     | 1     | 0     |
| 43520  | 0     | 1     | 0     | 0     |
| 43521  | 0     | 0     | 0     | 0     |
| 43550  | 0     | 0     | 0     | 0     |
| 43551  | 0     | 0     | 0     | 0     |
| 43554  | 1     | 0     | 1     | 0     |
| 43560  | 0     | 0     | 1     | 0     |
| 43569  | 0     | 0     | 0     | 0     |
| 43583  | 0     | 0     | 0     | 0     |
| 43590  | 0     | 0     | 0     | 0     |
| 43591  | 0     | 0     | 1     | 0     |
| 43595  |       |       |       |       |
| 43599  | 1     | 0     | 0     | 0     |
| 43606  | 0     | 0     | 0     | 0     |
| 43609  | 0     | 0     | 0     | 0     |
| 43629  | 0     | 0     | 0     | 0     |
| 43636  | 1     | 1     | 0     | 0     |
| 43661  | 0     | 0     | 0     | 0     |
| 43668  | 0     | 0     | 0     | 0     |
| 43672  |       |       |       |       |
| 43677  | 0     | 0     | 0     | 0     |
| 43683  | 0     | 0     | 0     | 0     |
| 43708  | 0     | 0     | 0     | 0     |
| 43713  | 0     | 0     | 0     | 0     |
| 43718  |       |       |       |       |
| 43725  | 0     | 0     | 0     | 0     |
| 43747  | 1     | 0     | 0     | 0     |
| 43755  | 0     | 0     | 0     | 0     |
| 43770  | 0     | 0     | 0     | 0     |
| 43775  | 0     | 0     | 0     | 0     |
| 43788  |       |       |       |       |
| 43790  | 0     | 0     | 0     | 0     |

| respid | Q43_5 | Q43_6 | Q43_7 | Q43_8 |
|--------|-------|-------|-------|-------|
| 43797  | 0     | 0     | 0     | 0     |
| 43798  | 0     | 0     | 0     | 0     |
| 43811  | 1     | 1     | 0     | 0     |
| 43819  | 0     | 0     | 0     | 0     |
| 43821  | 0     | 0     | 0     | 0     |
| 43822  | 0     | 0     | 0     | 0     |
| 43825  | 0     | 0     | 0     | 0     |
| 43826  | 0     | 0     | 0     | 0     |
| 43831  | 0     | 1     | 0     | 0     |
| 43836  | 0     | 0     | 0     | 0     |
| 43852  | 0     | 0     | 0     | 0     |
| 43857  | 1     | 0     | 0     | 0     |
| 43858  | 0     | 0     | 0     | 0     |
| 43859  | 0     | 0     | 0     | 0     |
| 43863  | 0     | 0     | 0     | 0     |
| 43868  | 0     | 0     | 0     | 0     |
| 43872  | 0     | 0     | 0     | 0     |
| 43874  | 0     | 0     | 0     | 0     |
| 43882  | 1     | 1     | 1     | 1     |
| 43886  |       |       |       |       |
| 43903  | 1     | 0     | 0     | 1     |
| 43929  | 0     | 0     | 0     | 0     |
| 43932  | 1     | 0     | 0     | 0     |
| 43936  | 0     | 0     | 0     | 0     |
| 43962  | 0     | 0     | 0     | 0     |
| 43964  | 0     | 0     | 0     | 0     |
| 43968  | 0     | 0     | 0     | 0     |
| 43979  | 0     | 0     | 0     | 0     |
| 44006  | 1     | 1     | 1     | 1     |
| 44009  | 0     | 0     | 0     | 0     |
| 44023  | 0     | 0     | 0     | 1     |
| 44035  | 0     | 0     | 0     | 0     |

| respid | Q43_5 | Q43_6 | Q43_7 | Q43_8 |
|--------|-------|-------|-------|-------|
| 44038  | 1     | 0     | 0     | 0     |
| 44039  | 0     | 0     | 0     | 0     |
| 44043  | 0     | 0     | 0     | 0     |
| 44048  | 0     | 0     | 0     | 0     |
| 44050  | 0     | 0     | 0     | 0     |
| 44051  | 0     | 0     | 0     | 0     |
| 44061  | 0     | 0     | 0     | 0     |
| 44063  | 0     | 0     | 0     | 0     |
| 44072  | 0     | 0     | 0     | 0     |
| 44075  | 0     | 0     | 0     | 0     |
| 44089  | 0     | 0     | 0     | 0     |
| 44090  | 1     | 0     | 1     | 1     |
| 44091  | 0     | 0     | 0     | 0     |
| 44092  | 0     | 0     | 0     | 0     |
| 44110  | 0     | 0     | 0     | 0     |
| 44112  | 0     | 0     | 0     | 0     |
| 44114  | 0     | 0     | 0     | 0     |
| 44143  | 0     | 0     | 0     | 0     |
| 44179  | 0     | 0     | 0     | 0     |
| 44234  | 0     | 0     | 0     | 0     |
| 44236  | 0     | 0     | 0     | 0     |
| 44239  | 0     | 0     | 0     | 0     |
| 44241  | 0     | 0     | 0     | 0     |
| 44253  |       |       |       |       |
| 44260  | 0     | 0     | 0     | 0     |
| 44261  | 0     | 0     | 0     | 0     |
| 44263  | 0     | 0     | 0     | 0     |
| 44264  | 0     | 0     | 0     | 0     |
| 44265  | 0     | 0     | 0     | 0     |
| 44267  | 0     | 0     | 0     | 0     |
| 44306  | 0     | 0     | 0     | 0     |
| 44309  | 1     | 0     | 0     | 0     |

| respid | Q43_5 | Q43_6 | Q43_7 | Q43_8 |
|--------|-------|-------|-------|-------|
| 44310  | 0     | 0     | 0     | 0     |
| 44361  | 0     | 0     | 0     | 0     |
| 44380  | 0     | 0     | 0     | 0     |
| 44386  | 0     | 0     | 0     | 0     |
| 44419  | 1     | 1     | 0     | 0     |
| 44426  | 0     | 0     | 0     | 0     |
| 44479  | 0     | 0     | 0     | 0     |
| 44484  | 0     | 0     | 0     | 0     |
| 44487  | 0     | 0     | 0     | 0     |
| 44509  | 0     | 0     | 0     | 0     |
| 44540  | 0     | 0     | 0     | 0     |
| 44551  | 1     | 1     | 0     | 0     |
| 44553  | 0     | 0     | 1     | 0     |
| 44650  | 0     | 0     | 0     | 0     |
| 44665  | 1     | 0     | 0     | 0     |
| 44779  | 0     | 0     | 0     | 0     |
| 44797  | 0     | 0     | 0     | 0     |
| 44807  | 0     | 0     | 0     | 0     |
| 44815  | 1     | 0     | 0     | 0     |
| 44836  | 0     | 0     | 0     | 0     |
| 44868  | 0     | 0     | 0     | 0     |
| 44927  | 1     | 0     | 0     | 0     |
| 44983  |       |       |       |       |
| 45040  | 1     | 0     | 0     | 0     |
| 45051  | 0     | 0     | 0     | 0     |
| 45067  | 0     | 1     | 1     | 0     |
| 45074  |       |       |       |       |
| 45115  | 0     | 0     | 0     | 1     |
| 45187  | 1     | 1     | 0     | 0     |
| 45221  | 1     | 0     | 1     | 1     |
| 45279  | 0     | 0     | 0     | 0     |
| 45308  | 0     | 0     | 0     | 0     |

| respid | Q43_5 | Q43_6 | Q43_7 | Q43_8 |
|--------|-------|-------|-------|-------|
| 45317  | 0     | 0     | 0     | 0     |
| 45379  | 0     | 0     | 0     | 0     |
| 45451  | 0     | 0     | 0     | 0     |
| 45472  | 1     | 0     | 1     | 1     |
| 45474  | 1     | 0     | 1     | 1     |
| 45544  | 0     | 0     | 0     | 0     |
| 45561  | 0     | 0     | 0     | 0     |
| 45596  | 0     | 0     | 0     | 1     |

| Instrum | HC Seeking & Tx                     | HC Seeking & Tx                     | HC Seeking & Tx | WLQ (8-Item) | WLQ (8-Item) | WLQ (8-Item) | WLQ (8-Item) | WLQ (8-Item) |
|---------|-------------------------------------|-------------------------------------|-----------------|--------------|--------------|--------------|--------------|--------------|
| Symptom | Taking these treatments/precautions | Taking these treatments/precautions |                 |              |              |              |              |              |

Type of R

|           |              |                                                                                             |                                          |
|-----------|--------------|---------------------------------------------------------------------------------------------|------------------------------------------|
| Descripti | Wearing pads | None of the above/No treatment (Do not allow other selections if this response is selected) | How satisfied are you with the treatment |
|-----------|--------------|---------------------------------------------------------------------------------------------|------------------------------------------|

| respid | Q43_9 | Q43_99 | Q44_1 | Q46x1a | Q46x1b | Q46x2a | Q46x2b | Q46x3 |
|--------|-------|--------|-------|--------|--------|--------|--------|-------|
| 241    | 0     | 1      |       | 5      | 5      | 2      | 1      | 5     |
| 242    | 0     | 0      | 3     | 6      | 6      | 6      | 6      | 6     |
| 243    | 0     | 0      | 2     | 4      | 4      | 4      | 4      | 4     |
| 244    | 0     | 0      | 2     | 4      | 5      | 2      | 1      | 5     |
| 245    | 0     | 0      | 4     | 5      | 5      | 1      | 1      | 5     |
| 246    | 0     | 1      |       | 4      | 4      | 2      | 2      | 4     |
| 247    | 0     | 1      |       | 5      | 5      | 1      | 1      | 4     |
| 253    | 0     | 1      |       | 6      | 6      | 6      | 6      | 6     |
| 256    | 0     | 0      | 2     | 4      | 4      | 1      | 1      | 4     |
| 257    | 0     | 0      | 3     | 4      | 6      | 1      | 1      | 4     |
| 258    | 0     | 1      |       | 4      | 4      | 2      | 2      | 4     |
| 259    | 0     | 1      |       | 5      | 5      | 5      | 5      | 5     |
| 263    | 0     | 1      |       | 5      | 5      | 2      | 2      | 5     |
| 264    | 0     | 1      |       | 4      | 5      | 1      | 1      | 4     |
| 265    | 0     | 1      |       | 3      | 3      | 4      | 3      | 3     |
| 266    | 0     | 1      |       | 6      | 6      | 6      | 6      | 6     |
| 268    | 0     | 0      | 3     | 6      | 6      | 4      | 4      | 4     |
| 270    | 0     | 1      |       | 4      | 4      | 5      | 5      | 4     |
| 272    | 0     | 1      |       | 5      | 5      | 5      | 5      | 5     |
| 274    | 0     | 0      | 3     | 5      | 5      | 1      | 1      | 5     |

| respid | Q43_9 | Q43_99 | Q44_1 | Q46x1a | Q46x1b | Q46x2a | Q46x2b | Q46x3 |
|--------|-------|--------|-------|--------|--------|--------|--------|-------|
| 275    |       |        |       |        |        |        |        |       |
| 276    | 0     | 1      |       | 5      | 5      | 5      | 5      | 5     |
| 277    | 0     | 1      |       | 4      | 4      | 1      | 1      | 4     |
| 279    | 0     | 0      | 2     | 4      | 4      | 4      | 4      | 4     |
| 286    | 0     | 1      |       | 4      | 5      | 5      | 5      | 5     |
| 290    | 0     | 1      |       | 4      | 4      | 4      | 4      | 4     |
| 291    | 0     | 1      |       | 6      | 6      | 6      | 6      | 6     |
| 295    |       |        |       |        |        |        |        |       |
| 297    | 0     | 1      |       | 6      | 6      | 3      | 2      | 6     |
| 299    | 0     | 1      |       | 5      | 5      | 1      | 2      | 4     |
| 300    | 0     | 0      | 3     | 4      | 4      | 2      | 2      | 4     |
| 303    | 0     | 1      |       | 6      | 6      | 6      | 6      | 5     |
| 304    | 0     | 0      | 3     | 5      | 5      | 1      | 1      | 5     |
| 306    | 0     | 1      |       | 5      | 5      | 1      | 1      | 5     |
| 307    | 0     | 1      |       | 5      | 5      | 1      | 1      | 5     |
| 312    | 1     | 0      | 3     | 4      | 4      | 4      | 4      | 4     |
| 315    | 0     | 1      |       | 6      | 6      | 6      | 6      | 6     |
| 317    | 0     | 1      |       | 4      | 5      | 1      | 1      | 4     |
| 322    | 0     | 0      | 3     | 2      | 1      | 4      | 3      | 4     |
| 335    | 0     | 1      |       | 4      | 5      | 5      | 5      | 4     |
| 374    | 0     | 0      | 2     | 4      | 4      | 4      | 4      | 4     |
| 378    | 0     | 0      | 3     | 6      | 6      | 6      | 6      | 6     |
| 380    | 0     | 1      |       | 4      | 4      | 4      | 4      | 4     |
| 382    | 0     | 1      |       | 4      | 5      | 5      | 5      | 5     |
| 384    | 0     | 0      | 3     | 4      | 4      | 2      | 2      | 4     |
| 385    | 0     | 0      | 2     | 4      | 4      | 1      | 1      | 4     |
| 395    | 0     | 1      |       | 5      | 5      | 5      | 5      | 5     |
| 396    |       |        |       |        |        |        |        |       |
| 398    |       |        |       |        |        |        |        |       |
| 402    | 0     | 0      | 3     | 4      | 4      | 4      | 4      | 4     |
| 414    | 0     | 0      | 2     | 5      | 5      | 1      | 1      | 6     |
| 415    | 0     | 0      | 5     | 5      | 5      | 5      | 5      | 5     |



| respid | Q43_9 | Q43_99 | Q44_1 | Q46x1a | Q46x1b | Q46x2a | Q46x2b | Q46x3 |
|--------|-------|--------|-------|--------|--------|--------|--------|-------|
| 416    | 0     | 1      |       | 5      | 5      | 4      | 4      | 6     |
| 420    | 0     | 0      | 3     | 4      | 4      | 5      | 5      | 4     |
| 421    | 0     | 0      | 3     | 5      | 5      | 1      | 1      | 5     |
| 422    | 0     | 0      | 5     | 5      | 5      | 1      | 1      | 5     |
| 423    | 0     | 1      |       | 6      | 6      | 5      | 5      | 5     |
| 424    | 0     | 1      |       | 5      | 5      | 5      | 5      | 5     |
| 425    | 0     | 0      | 3     | 4      | 4      | 2      | 2      | 4     |
| 428    | 0     | 1      |       | 5      | 5      | 1      | 1      | 5     |
| 429    | 0     | 1      |       | 5      | 5      | 1      | 2      | 4     |
| 431    | 0     | 1      |       | 5      | 5      | 5      | 5      | 5     |
| 437    | 0     | 0      | 4     | 5      | 5      | 1      | 1      | 5     |
| 438    | 0     | 0      | 3     | 6      | 6      | 6      | 6      | 6     |
| 441    | 0     | 0      | 3     | 4      | 5      | 2      | 1      | 5     |
| 444    | 0     | 1      |       | 4      | 4      | 2      | 2      | 5     |
| 448    | 0     | 1      |       | 5      | 5      | 5      | 5      | 5     |
| 449    | 0     | 0      | 2     | 5      | 5      | 5      | 5      | 5     |
| 457    | 0     | 0      | 3     | 4      | 4      | 2      | 2      | 3     |
| 460    | 0     | 1      |       | 6      | 6      | 6      | 6      | 6     |
| 469    | 0     | 1      |       | 4      | 4      | 4      | 4      | 4     |
| 471    | 0     | 0      | 3     | 5      | 5      | 5      | 5      | 5     |
| 473    | 0     | 0      | 3     | 4      | 4      | 2      | 2      | 4     |
| 476    | 0     | 0      | 3     | 5      | 5      | 2      | 2      | 4     |
| 479    | 0     | 1      |       | 6      | 6      | 6      | 6      | 6     |
| 485    | 0     | 1      |       | 5      | 5      | 1      | 1      | 5     |
| 488    | 0     | 0      | 3     | 5      | 5      | 1      | 1      | 5     |
| 494    | 0     | 1      |       | 6      | 4      | 5      | 5      | 4     |
| 496    | 0     | 1      |       | 5      | 5      | 2      | 2      | 5     |
| 501    |       |        |       |        |        |        |        |       |
| 502    | 0     | 1      |       | 4      | 3      | 3      | 3      | 4     |
| 503    | 0     | 0      | 3     | 5      | 5      | 1      | 1      | 5     |
| 506    | 0     | 1      |       | 5      | 5      | 5      | 5      | 5     |
| 514    | 0     | 0      | 3     | 3      | 4      | 2      | 2      | 4     |

| respid | Q43_9 | Q43_99 | Q44_1 | Q46x1a | Q46x1b | Q46x2a | Q46x2b | Q46x3 |
|--------|-------|--------|-------|--------|--------|--------|--------|-------|
| 515    | 0     | 1      |       | 4      | 4      | 1      | 1      | 4     |
| 516    | 0     | 1      |       | 6      | 6      | 6      | 6      | 6     |
| 519    | 0     | 1      |       | 5      | 5      | 5      | 5      | 5     |
| 522    |       |        |       |        |        |        |        |       |
| 525    | 0     | 0      | 3     | 6      | 6      | 5      | 5      | 5     |
| 528    | 0     | 1      |       | 5      | 5      | 1      | 1      | 5     |
| 532    | 0     | 1      |       | 5      | 6      | 1      | 1      | 5     |
| 536    | 0     | 0      | 1     | 4      | 4      | 2      | 2      | 4     |
| 539    | 0     | 1      |       | 6      | 6      | 6      | 6      | 6     |
| 540    | 0     | 1      |       | 6      | 6      | 6      | 6      | 6     |
| 547    | 0     | 1      |       | 5      | 5      | 1      | 1      | 5     |
| 551    | 0     | 1      |       | 4      | 4      | 1      | 1      | 5     |
| 554    | 0     | 0      | 4     | 6      | 6      | 6      | 6      | 6     |
| 558    | 0     | 1      |       | 6      | 6      | 6      | 6      | 6     |
| 563    | 0     | 1      |       | 5      | 5      | 1      | 1      | 5     |
| 564    | 0     | 1      |       | 4      | 4      | 4      | 4      | 4     |
| 565    | 0     | 1      |       | 4      | 5      | 6      | 2      | 4     |
| 567    | 0     | 1      |       | 6      | 6      | 1      | 1      | 6     |
| 569    | 0     | 0      | 3     | 5      | 6      | 1      | 1      | 5     |
| 572    | 0     | 1      |       | 5      | 4      | 5      | 5      | 5     |
| 574    | 0     | 1      |       | 5      | 5      | 5      | 5      | 5     |
| 583    | 0     | 0      | 3     | 4      | 4      | 5      | 4      | 4     |
| 589    | 0     | 1      |       | 5      | 5      | 1      | 1      | 5     |
| 592    | 0     | 0      | 4     | 6      | 6      | 5      | 5      | 5     |
| 593    |       |        |       |        |        |        |        |       |
| 594    | 0     | 0      | 2     | 4      | 3      | 3      | 4      | 3     |
| 597    | 0     | 0      | 4     | 5      | 5      | 5      | 4      | 5     |
| 601    | 0     | 1      |       | 3      | 3      | 2      | 2      | 6     |
| 607    | 0     | 1      |       | 4      | 5      | 2      | 2      | 4     |
| 610    | 0     | 1      |       | 5      | 4      | 5      | 5      | 5     |
| 612    | 0     | 0      | 2     | 4      | 6      | 6      | 6      | 6     |
| 627    | 0     | 1      |       | 6      | 6      | 5      | 5      | 5     |

| respid | Q43_9 | Q43_99 | Q44_1 | Q46x1a | Q46x1b | Q46x2a | Q46x2b | Q46x3 |
|--------|-------|--------|-------|--------|--------|--------|--------|-------|
| 631    | 0     | 1      |       | 6      | 6      | 6      | 6      | 6     |
| 633    | 0     | 0      | 3     | 6      | 6      | 6      | 6      | 6     |
| 636    | 0     | 0      | 3     | 4      | 4      | 5      | 5      | 5     |
| 656    | 0     | 1      |       | 5      | 5      | 5      | 5      | 5     |
| 659    | 0     | 1      |       | 6      | 6      | 6      | 6      | 6     |
| 670    | 0     | 0      | 3     | 6      | 6      | 6      | 6      | 6     |
| 672    | 0     | 0      | 3     | 4      | 4      | 3      | 2      | 3     |
| 673    | 0     | 0      | 3     | 5      | 5      | 5      | 5      | 6     |
| 675    | 0     | 1      |       | 6      | 6      | 6      | 6      | 6     |
| 676    | 0     | 0      | 2     | 3      | 3      | 3      | 3      | 3     |
| 679    | 0     | 1      |       | 4      | 5      | 2      | 2      | 4     |
| 683    | 0     | 1      |       | 6      | 6      | 6      | 6      | 6     |
| 684    | 0     | 0      | 4     | 5      | 5      | 1      | 1      | 5     |
| 690    | 0     | 1      |       | 5      | 5      | 1      | 2      | 5     |
| 701    | 0     | 1      |       | 3      | 4      | 1      | 1      | 4     |
| 709    | 0     | 0      | 2     | 4      | 5      | 1      | 1      | 5     |
| 719    | 0     | 1      |       | 5      | 5      | 2      | 2      | 4     |
| 726    | 0     | 1      |       | 5      | 5      | 5      | 5      | 5     |
| 730    | 0     | 1      |       | 6      | 6      | 5      | 5      | 5     |
| 731    | 0     | 1      |       | 5      | 5      | 5      | 5      | 5     |
| 732    | 0     | 1      |       | 5      | 5      | 2      | 4      | 5     |
| 733    | 0     | 1      |       | 6      | 6      | 6      | 5      | 5     |
| 735    | 0     | 1      |       | 6      | 6      | 1      | 2      | 6     |
| 738    | 0     | 0      | 3     | 5      | 6      | 2      | 2      | 5     |
| 740    | 0     | 0      | 5     | 5      | 6      | 5      | 5      | 5     |
| 742    | 0     | 1      |       | 5      | 5      | 1      | 1      | 5     |
| 744    | 0     | 1      |       | 5      | 5      | 1      | 1      | 5     |
| 749    | 0     | 0      | 4     | 4      | 4      | 4      | 4      | 4     |
| 751    | 0     | 1      |       | 5      | 5      | 1      | 2      | 4     |
| 752    | 0     | 1      |       | 4      | 5      | 2      | 2      | 4     |
| 753    | 0     | 1      |       | 5      | 5      | 4      | 4      | 4     |
| 755    | 0     | 0      | 3     | 4      | 5      | 2      | 2      | 4     |

| respid | Q43_9 | Q43_99 | Q44_1 | Q46x1a | Q46x1b | Q46x2a | Q46x2b | Q46x3 |
|--------|-------|--------|-------|--------|--------|--------|--------|-------|
| 756    |       |        |       |        |        |        |        |       |
| 759    | 0     | 0      | 2     | 5      | 5      | 4      | 3      | 3     |
| 760    | 0     | 0      | 4     | 4      | 4      | 5      | 5      | 4     |
| 763    | 0     | 1      |       | 5      | 5      | 5      | 5      | 5     |
| 764    | 0     | 0      | 4     | 5      | 5      | 2      | 2      | 4     |
| 765    | 0     | 1      |       | 6      | 5      | 1      | 2      | 5     |
| 766    | 0     | 1      |       | 5      | 5      | 5      | 5      | 4     |
| 767    | 0     | 1      |       | 4      | 5      | 3      | 3      | 4     |
| 771    | 0     | 1      |       | 4      | 4      | 1      | 1      | 4     |
| 773    | 0     | 1      |       | 5      | 5      | 2      | 2      | 4     |
| 774    | 0     | 0      | 3     | 5      | 5      | 1      | 3      | 5     |
| 775    | 0     | 0      | 3     | 5      | 5      | 1      | 1      | 4     |
| 776    | 0     | 1      |       | 5      | 5      | 4      | 4      | 4     |
| 778    | 0     | 0      | 2     | 5      | 5      | 4      | 5      | 4     |
| 780    | 0     | 0      | 3     | 5      | 5      | 4      | 5      | 5     |
| 781    | 0     | 1      |       | 5      | 5      | 1      | 1      | 5     |
| 782    | 0     | 0      | 3     | 4      | 4      | 1      | 1      | 4     |
| 783    | 0     | 1      |       | 6      | 6      | 6      | 6      | 6     |
| 786    | 0     | 0      | 2     | 3      | 4      | 4      | 4      | 4     |
| 788    |       |        |       |        |        |        |        |       |
| 792    | 0     | 1      |       | 6      | 6      | 5      | 5      | 5     |
| 794    | 0     | 0      | 2     | 4      | 4      | 2      | 2      | 3     |
| 795    | 0     | 1      |       | 6      | 6      | 6      | 6      | 6     |
| 799    | 0     | 0      | 4     | 4      | 4      | 1      | 1      | 5     |
| 800    | 0     | 1      |       | 6      | 6      | 4      | 2      | 6     |
| 801    | 0     | 1      |       | 6      | 6      | 3      | 3      | 5     |
| 804    | 0     | 1      |       | 5      | 5      | 1      | 1      | 5     |
| 806    | 0     | 1      |       | 5      | 5      | 1      | 1      | 5     |
| 807    | 0     | 1      |       | 5      | 5      | 2      | 1      | 5     |
| 808    | 0     | 0      | 3     | 4      | 4      | 5      | 5      | 5     |
| 809    | 0     | 1      |       | 6      | 6      | 6      | 6      | 6     |
| 811    | 0     | 1      |       | 5      | 5      | 5      | 5      | 5     |

| respid | Q43_9 | Q43_99 | Q44_1 | Q46x1a | Q46x1b | Q46x2a | Q46x2b | Q46x3 |
|--------|-------|--------|-------|--------|--------|--------|--------|-------|
| 812    | 0     | 1      |       | 5      | 5      | 2      | 2      | 4     |
| 815    | 0     | 1      |       | 5      | 5      | 6      | 6      | 5     |
| 817    | 0     | 1      |       | 5      | 5      | 3      | 3      | 4     |
| 818    | 0     | 1      |       | 5      | 5      | 2      | 2      | 5     |
| 819    | 0     | 1      |       | 5      | 5      | 5      | 5      | 5     |
| 821    | 0     | 1      |       | 4      | 4      | 4      | 3      | 4     |
| 824    | 0     | 1      |       | 5      | 5      | 1      | 1      | 5     |
| 825    | 0     | 1      |       | 6      | 6      | 6      | 6      | 6     |
| 828    | 0     | 1      |       | 6      | 6      | 6      | 6      | 5     |
| 832    | 0     | 1      |       | 6      | 6      | 6      | 6      | 6     |
| 834    | 0     | 1      |       | 4      | 4      | 3      | 2      | 4     |
| 835    | 0     | 0      | 3     | 4      | 4      | 4      | 4      | 4     |
| 836    | 0     | 1      |       | 5      | 5      | 5      | 5      | 5     |
| 837    | 0     | 1      |       | 6      | 6      | 3      | 3      | 6     |
| 840    | 0     | 1      |       | 5      | 5      | 4      | 5      | 5     |
| 841    | 0     | 1      |       | 5      | 5      | 2      | 5      | 4     |
| 845    | 0     | 1      |       | 6      | 6      | 5      | 5      | 5     |
| 846    | 0     | 1      |       | 6      | 6      | 1      | 1      | 5     |
| 849    | 0     | 1      |       | 5      | 5      | 3      | 4      | 5     |
| 852    | 0     | 1      |       | 5      | 5      | 5      | 5      | 5     |
| 854    | 0     | 1      |       | 5      | 5      | 2      | 3      | 5     |
| 856    | 0     | 1      |       | 5      | 5      | 1      | 1      | 5     |
| 858    | 0     | 1      |       | 5      | 5      | 5      | 5      | 5     |
| 859    | 0     | 1      |       | 5      | 5      | 1      | 1      | 5     |
| 861    | 0     | 0      | 4     | 5      | 5      | 1      | 2      | 4     |
| 863    | 0     | 1      |       | 5      | 5      | 1      | 6      | 5     |
| 864    | 0     | 1      |       | 4      | 5      | 5      | 5      | 4     |
| 866    | 0     | 1      |       | 5      | 5      | 5      | 5      | 5     |
| 869    | 0     | 1      |       | 5      | 5      | 5      | 5      | 5     |
| 870    | 0     | 0      | 3     | 5      | 5      | 5      | 5      | 4     |
| 871    | 0     | 1      |       | 5      | 5      | 5      | 5      | 5     |
| 873    | 0     | 1      |       | 4      | 5      | 2      | 4      | 5     |

| respid | Q43_9 | Q43_99 | Q44_1 | Q46x1a | Q46x1b | Q46x2a | Q46x2b | Q46x3 |
|--------|-------|--------|-------|--------|--------|--------|--------|-------|
| 879    | 0     | 1      |       | 5      | 3      | 5      | 4      | 4     |
| 880    | 0     | 1      |       | 5      | 5      | 1      | 1      | 5     |
| 881    | 0     | 1      |       | 4      | 4      | 2      | 2      | 4     |
| 882    | 0     | 1      |       | 6      | 6      | 6      | 6      | 6     |
| 885    |       |        |       |        |        |        |        |       |
| 886    | 0     | 1      |       | 4      | 4      | 2      | 2      | 5     |
| 887    | 0     | 0      | 3     | 4      | 4      | 4      | 4      | 4     |
| 888    | 0     | 1      |       | 6      | 6      | 6      | 6      | 6     |
| 889    | 0     | 0      | 3     | 4      | 4      | 5      | 5      | 4     |
| 890    | 0     | 1      |       | 5      | 5      | 5      | 5      | 5     |
| 900    |       |        |       |        |        |        |        |       |
| 901    | 0     | 0      | 3     | 5      | 5      | 5      | 5      | 5     |
| 902    | 0     | 0      | 3     | 5      | 5      | 5      | 5      | 5     |
| 903    | 0     | 1      |       | 5      | 5      | 5      | 5      | 5     |
| 906    | 0     | 0      | 4     | 5      | 5      | 5      | 4      | 4     |
| 907    | 0     | 0      | 2     | 6      | 6      | 6      | 6      | 6     |
| 908    | 0     | 0      | 3     | 5      | 5      | 5      | 5      | 5     |
| 910    | 0     | 1      |       | 5      | 5      | 1      | 1      | 5     |
| 911    | 0     | 0      | 3     | 5      | 5      | 2      | 2      | 5     |
| 912    | 0     | 0      | 3     | 5      | 5      | 5      | 5      | 5     |
| 915    |       |        |       |        |        |        |        |       |
| 923    | 0     | 0      | 2     | 4      | 3      | 2      | 2      | 3     |
| 925    | 0     | 1      |       | 5      | 5      | 1      | 1      | 5     |
| 926    | 0     | 1      |       | 5      | 5      | 1      | 5      | 5     |
| 929    |       |        |       |        |        |        |        |       |
| 932    | 0     | 0      | 5     | 4      | 6      | 4      | 5      | 6     |
| 933    | 0     | 1      |       | 5      | 5      | 2      | 2      | 5     |
| 934    | 0     | 1      |       | 5      | 5      | 5      | 5      | 5     |
| 938    | 0     | 0      | 2     | 4      | 4      | 3      | 2      | 3     |
| 941    |       |        |       |        |        |        |        |       |
| 942    | 0     | 1      |       | 5      | 4      | 1      | 1      | 4     |
| 943    |       |        |       |        |        |        |        |       |

| respid | Q43_9 | Q43_99 | Q44_1 | Q46x1a | Q46x1b | Q46x2a | Q46x2b | Q46x3 |
|--------|-------|--------|-------|--------|--------|--------|--------|-------|
| 945    | 0     | 0      | 3     | 5      | 5      | 1      | 1      | 5     |
| 946    |       |        |       |        |        |        |        |       |
| 947    | 0     | 1      |       | 6      | 6      | 6      | 6      | 6     |
| 948    | 0     | 0      | 4     | 5      | 5      | 5      | 5      | 5     |
| 949    | 0     | 1      |       | 5      | 5      | 5      | 5      | 4     |
| 952    | 0     | 1      |       | 6      | 6      | 6      | 6      | 6     |
| 956    | 0     | 1      |       | 4      | 4      | 2      | 2      | 4     |
| 957    | 0     | 1      |       | 5      | 5      | 1      | 6      | 5     |
| 959    | 0     | 1      |       | 6      | 6      | 6      | 6      | 6     |
| 961    | 0     | 0      | 3     | 5      | 5      | 5      | 5      | 5     |
| 962    | 0     | 0      | 2     | 4      | 4      | 5      | 3      | 4     |
| 965    | 0     | 1      |       | 5      | 5      | 5      | 6      | 5     |
| 967    | 0     | 1      |       | 6      | 6      | 6      | 6      | 6     |
| 969    | 0     | 1      |       | 4      | 4      | 5      | 5      | 5     |
| 970    |       |        |       |        |        |        |        |       |
| 973    | 0     | 1      |       | 5      | 5      | 5      | 5      | 5     |
| 974    | 0     | 1      |       | 6      | 5      | 2      | 2      | 5     |
| 975    | 0     | 1      |       | 5      | 4      | 3      | 2      | 4     |
| 976    | 0     | 1      |       | 5      | 5      | 2      | 2      | 4     |
| 977    | 0     | 1      |       | 5      | 5      | 4      | 4      | 4     |
| 979    | 0     | 1      |       | 5      | 5      | 2      | 2      | 4     |
| 981    | 0     | 1      |       | 5      | 5      | 5      | 5      | 4     |
| 983    | 0     | 1      |       | 2      | 5      | 1      | 1      | 4     |
| 987    | 0     | 1      |       | 4      | 4      | 4      | 4      | 4     |
| 991    |       |        |       |        |        |        |        |       |
| 992    | 0     | 1      |       | 5      | 5      | 1      | 1      | 5     |
| 993    | 0     | 1      |       | 5      | 5      | 5      | 5      | 5     |
| 994    | 1     | 0      | 0     | 4      | 4      | 1      | 2      | 6     |
| 995    | 0     | 0      | 4     | 6      | 6      | 1      | 1      | 6     |
| 998    | 1     | 0      | 2     | 4      | 4      | 2      | 2      | 4     |
| 1000   | 0     | 0      | 3     | 1      | 1      | 4      | 4      | 4     |
| 1001   | 0     | 0      | 3     | 6      | 6      | 6      | 6      | 6     |

| respid | Q43_9 | Q43_99 | Q44_1 | Q46x1a | Q46x1b | Q46x2a | Q46x2b | Q46x3 |
|--------|-------|--------|-------|--------|--------|--------|--------|-------|
| 1002   |       |        |       |        |        |        |        |       |
| 1004   | 0     | 1      |       | 4      | 4      | 2      | 2      | 4     |
| 1005   | 0     | 0      | 3     | 5      | 5      | 6      | 6      | 5     |
| 1006   | 0     | 1      |       | 5      | 5      | 1      | 1      | 5     |
| 1007   | 0     | 1      |       | 6      | 5      | 4      | 3      | 4     |
| 1009   |       |        |       |        |        |        |        |       |
| 1013   | 0     | 0      | 3     | 2      | 2      | 3      | 3      | 3     |
| 1015   | 0     | 0      | 4     | 6      | 6      | 6      | 6      | 6     |
| 1020   | 0     | 0      | 3     | 4      | 4      | 4      | 4      | 4     |
| 1022   | 0     | 1      |       | 4      | 4      | 2      | 2      | 4     |
| 1024   | 0     | 1      |       | 5      | 5      | 5      | 5      | 6     |
| 1025   |       |        |       |        |        |        |        |       |
| 1027   | 0     | 1      |       | 5      | 5      | 6      | 6      | 5     |
| 1031   | 0     | 1      |       | 5      | 5      | 1      | 1      | 5     |
| 1037   | 0     | 1      |       | 5      | 5      | 1      | 1      | 5     |
| 1039   | 0     | 1      |       | 5      | 5      | 1      | 1      | 5     |
| 1040   | 0     | 1      |       | 5      | 5      | 1      | 2      | 4     |
| 1056   | 0     | 0      | 2     | 4      | 5      | 5      | 5      | 4     |
| 1057   | 0     | 1      |       | 6      | 6      | 6      | 6      | 6     |
| 1062   | 0     | 1      |       | 6      | 6      | 6      | 6      | 6     |
| 1069   | 0     | 1      |       | 5      | 5      | 5      | 5      | 5     |
| 1070   | 0     | 1      |       | 5      | 5      | 5      | 5      | 5     |
| 1072   | 0     | 1      |       | 5      | 5      | 2      | 2      | 4     |
| 1076   | 0     | 1      |       | 5      | 5      | 2      | 3      | 5     |
| 1077   | 0     | 1      |       | 6      | 6      | 4      | 4      | 4     |
| 1078   | 0     | 1      |       | 5      | 5      | 1      | 1      | 5     |
| 1080   |       |        |       |        |        |        |        |       |
| 1094   | 0     | 1      |       | 4      | 4      | 4      | 4      | 4     |
| 1098   | 0     | 0      | 3     | 5      | 5      | 4      | 3      | 4     |
| 1099   | 0     | 1      |       | 5      | 5      | 1      | 1      | 5     |
| 1102   | 0     | 1      |       | 5      | 5      | 1      | 1      | 5     |
| 1110   | 0     | 1      |       | 5      | 5      | 5      | 5      | 5     |



| respid | Q43_9 | Q43_99 | Q44_1 | Q46x1a | Q46x1b | Q46x2a | Q46x2b | Q46x3 |
|--------|-------|--------|-------|--------|--------|--------|--------|-------|
| 1117   | 0     | 1      |       | 5      | 5      | 2      | 2      | 4     |
| 1119   |       |        |       |        |        |        |        |       |
| 1126   | 0     | 0      | 3     | 5      | 5      | 5      | 5      | 5     |
| 1127   | 0     | 1      |       | 5      | 5      | 2      | 2      | 5     |
| 1130   | 0     | 1      |       | 5      | 5      | 2      | 2      | 5     |
| 1131   | 0     | 1      |       | 6      | 6      | 5      | 6      | 5     |
| 1135   | 0     | 0      | 2     | 3      | 3      | 3      | 4      | 3     |
| 1138   | 0     | 0      | 3     | 5      | 4      | 4      | 4      | 4     |
| 1139   |       |        |       |        |        |        |        |       |
| 1140   | 0     | 1      |       | 5      | 5      | 5      | 5      | 5     |
| 1142   |       |        |       |        |        |        |        |       |
| 1143   |       |        |       |        |        |        |        |       |
| 1145   | 0     | 1      |       | 5      | 4      | 5      | 5      | 4     |
| 1149   |       |        |       |        |        |        |        |       |
| 1152   | 0     | 1      |       | 6      | 6      | 2      | 1      | 4     |
| 1160   | 0     | 1      |       | 5      | 5      | 5      | 5      | 5     |
| 1164   |       |        |       |        |        |        |        |       |
| 1165   | 0     | 0      | 3     | 5      | 5      | 1      | 1      | 5     |
| 1169   | 0     | 0      | 2     | 4      | 4      | 1      | 1      | 4     |
| 1170   | 0     | 1      |       | 5      | 5      | 1      | 6      | 5     |
| 1179   | 0     | 1      |       | 4      | 5      | 4      | 4      | 4     |
| 1180   | 0     | 1      |       | 6      | 6      | 6      | 6      | 6     |
| 1183   | 0     | 1      |       | 6      | 6      | 5      | 5      | 6     |
| 1187   | 0     | 1      |       | 5      | 5      | 5      | 5      | 5     |
| 1188   | 0     | 0      | 3     | 6      | 6      | 4      | 2      | 4     |
| 1193   | 0     | 0      | 2     | 5      | 5      | 3      | 3      | 4     |
| 1194   | 0     | 0      | 4     | 4      | 4      | 2      | 3      | 2     |
| 1197   | 0     | 1      |       | 4      | 4      | 4      | 4      | 4     |
| 1202   |       |        |       |        |        |        |        |       |
| 1204   | 0     | 0      | 3     | 3      | 3      | 3      | 3      | 3     |
| 1211   | 0     | 0      | 3     | 5      | 5      | 1      | 1      | 5     |
| 1224   | 0     | 1      |       | 6      | 6      | 6      | 6      | 6     |

| respid | Q43_9 | Q43_99 | Q44_1 | Q46x1a | Q46x1b | Q46x2a | Q46x2b | Q46x3 |
|--------|-------|--------|-------|--------|--------|--------|--------|-------|
| 1225   | 0     | 1      |       | 5      | 5      | 3      | 3      | 4     |
| 1230   | 0     | 1      |       | 6      | 6      | 3      | 4      | 5     |
| 1232   | 0     | 0      | 2     | 6      | 6      | 6      | 6      | 6     |
| 1233   | 0     | 0      | 3     | 4      | 4      | 1      | 1      | 4     |
| 1234   | 0     | 0      | 4     | 4      | 6      | 4      | 4      | 4     |
| 1235   | 0     | 0      | 3     | 4      | 4      | 6      | 6      | 6     |
| 1236   | 0     | 0      | 3     | 4      | 6      | 1      | 1      | 6     |
| 1237   | 0     | 1      |       | 4      | 4      | 4      | 4      | 4     |
| 1238   | 0     | 1      |       | 4      | 5      | 3      | 2      | 4     |
| 1239   | 0     | 1      |       | 5      | 5      | 5      | 5      | 5     |
| 1241   | 0     | 0      | 4     | 5      | 5      | 5      | 5      | 5     |
| 1242   | 0     | 1      |       | 6      | 6      | 6      | 6      | 6     |
| 1244   | 0     | 0      | 3     | 4      | 5      | 2      | 2      | 4     |
| 1245   | 0     | 1      |       | 5      | 5      | 1      | 1      | 5     |
| 1247   | 0     | 0      | 3     | 6      | 6      | 1      | 6      | 6     |
| 1248   | 0     | 1      |       | 6      | 6      | 6      | 6      | 6     |
| 1249   | 0     | 1      |       | 3      | 4      | 2      | 2      | 3     |
| 1250   | 0     | 1      |       | 5      | 5      | 5      | 5      | 5     |
| 1251   | 0     | 1      |       | 6      | 6      | 5      | 5      | 5     |
| 1252   | 0     | 1      |       | 6      | 6      | 6      | 6      | 6     |
| 1253   | 0     | 1      |       | 6      | 6      | 5      | 5      | 5     |
| 1254   | 0     | 0      | 2     | 3      | 4      | 3      | 3      | 4     |
| 1258   | 0     | 0      | 4     | 6      | 6      | 6      | 6      | 6     |
| 1260   | 0     | 1      |       | 6      | 6      | 1      | 1      | 4     |
| 1261   | 0     | 1      |       | 6      | 6      | 6      | 6      | 6     |
| 1262   | 0     | 1      |       | 4      | 4      | 6      | 6      | 4     |
| 1263   | 0     | 0      | 3     | 6      | 6      | 2      | 2      | 4     |
| 1264   | 0     | 0      | 3     | 6      | 6      | 1      | 1      | 5     |
| 1265   | 0     | 0      | 3     | 4      | 4      | 2      | 2      | 2     |
| 1266   | 0     | 0      | 4     | 5      | 5      | 4      | 5      | 4     |
| 1270   | 0     | 0      | 3     | 6      | 6      | 5      | 5      | 4     |
| 1272   | 1     | 0      | 2     | 6      | 6      | 6      | 6      | 6     |

| respid | Q43_9 | Q43_99 | Q44_1 | Q46x1a | Q46x1b | Q46x2a | Q46x2b | Q46x3 |
|--------|-------|--------|-------|--------|--------|--------|--------|-------|
| 1273   | 0     | 0      | 3     | 3      | 4      | 1      | 1      | 5     |
| 1276   | 0     | 0      | 3     | 5      | 5      | 5      | 1      | 5     |
| 1277   | 0     | 1      |       | 5      | 5      | 1      | 2      | 6     |
| 1278   | 0     | 1      |       | 5      | 6      | 1      | 1      | 5     |
| 1280   | 0     | 1      |       | 5      | 5      | 5      | 5      | 5     |
| 1281   | 0     | 1      |       | 6      | 6      | 6      | 6      | 6     |
| 1282   | 0     | 1      |       | 4      | 4      | 4      | 4      | 4     |
| 1283   | 0     | 0      | 3     | 5      | 5      | 5      | 1      | 5     |
| 1288   | 0     | 1      |       | 5      | 5      | 5      | 5      | 5     |
| 1289   | 0     | 1      |       | 6      | 6      | 6      | 6      | 6     |
| 1290   | 0     | 1      |       | 5      | 5      | 4      | 4      | 4     |
| 1291   |       |        |       |        |        |        |        |       |
| 1293   | 0     | 1      |       | 5      | 5      | 5      | 5      | 5     |
| 1294   | 0     | 1      |       | 4      | 5      | 2      | 2      | 5     |
| 1295   | 0     | 1      |       | 5      | 5      | 1      | 1      | 4     |
| 1296   | 0     | 1      |       | 4      | 4      | 1      | 1      | 5     |
| 1297   | 0     | 1      |       | 6      | 6      | 1      | 1      | 4     |
| 1298   | 0     | 0      | 2     | 4      | 5      | 1      | 1      | 4     |
| 1300   | 0     | 0      | 2     | 4      | 4      | 2      | 2      | 4     |
| 1302   | 0     | 1      |       | 5      | 5      | 1      | 1      | 5     |
| 1303   | 0     | 0      | 5     | 5      | 5      | 4      | 4      | 5     |
| 1304   | 0     | 1      |       | 6      | 6      | 6      | 6      | 6     |
| 1305   | 0     | 1      |       | 5      | 5      | 5      | 5      | 5     |
| 1307   | 0     | 1      |       | 5      | 5      | 1      | 1      | 5     |
| 1312   | 0     | 0      | 3     | 4      | 4      | 6      | 6      | 4     |
| 1313   | 0     | 0      | 3     | 3      | 5      | 5      | 5      | 3     |
| 1314   | 0     | 1      |       | 5      | 5      | 1      | 1      | 5     |
| 1317   | 0     | 1      |       | 6      | 6      | 6      | 2      | 6     |
| 1318   | 0     | 1      |       | 5      | 5      | 5      | 5      | 5     |
| 1319   | 0     | 1      |       | 6      | 6      | 6      | 6      | 6     |
| 1321   | 0     | 1      |       | 5      | 5      | 1      | 1      | 5     |
| 1324   | 0     | 0      | 2     | 3      | 3      | 2      | 3      | 4     |

| respid | Q43_9 | Q43_99 | Q44_1 | Q46x1a | Q46x1b | Q46x2a | Q46x2b | Q46x3 |
|--------|-------|--------|-------|--------|--------|--------|--------|-------|
| 1325   | 0     | 1      |       | 5      | 5      | 5      | 5      | 4     |
| 1326   | 0     | 1      |       | 5      | 5      | 3      | 4      | 5     |
| 1327   | 0     | 1      |       | 5      | 5      | 1      | 1      | 5     |
| 1329   | 0     | 0      | 3     | 3      | 3      | 4      | 3      | 3     |
| 1330   | 0     | 1      |       | 6      | 6      | 6      | 6      | 4     |
| 1331   | 0     | 1      |       | 6      | 6      | 6      | 6      | 5     |
| 1335   | 0     | 1      |       | 4      | 5      | 2      | 3      | 3     |
| 1337   | 0     | 1      |       | 5      | 5      | 1      | 1      | 5     |
| 1341   | 0     | 1      |       | 5      | 5      | 1      | 1      | 4     |
| 1342   | 0     | 1      |       | 6      | 6      | 6      | 6      | 6     |
| 1344   | 0     | 1      |       | 4      | 4      | 5      | 4      | 5     |
| 1345   | 0     | 1      |       | 4      | 5      | 2      | 2      | 5     |
| 1346   | 0     | 1      |       | 5      | 5      | 5      | 5      | 5     |
| 1350   | 0     | 0      | 3     | 4      | 3      | 2      | 2      | 4     |
| 1352   | 0     | 1      |       | 5      | 5      | 5      | 5      | 5     |
| 1353   | 0     | 0      | 3     | 4      | 4      | 2      | 2      | 4     |
| 1354   | 0     | 1      |       | 5      | 5      | 5      | 5      | 5     |
| 1355   | 0     | 0      | 4     | 5      | 5      | 1      | 1      | 5     |
| 1357   | 0     | 0      | 4     | 5      | 5      | 5      | 5      | 5     |
| 1360   |       |        |       |        |        |        |        |       |
| 1362   | 0     | 0      | 4     | 5      | 5      | 5      | 5      | 5     |
| 1363   | 0     | 1      |       | 5      | 5      | 1      | 1      | 5     |
| 1367   | 0     | 1      |       | 5      | 1      | 2      | 3      | 4     |
| 1369   | 0     | 1      |       | 4      | 4      | 5      | 5      | 4     |
| 1371   |       |        |       |        |        |        |        |       |
| 1372   |       |        |       |        |        |        |        |       |
| 1375   |       |        |       |        |        |        |        |       |
| 1377   | 0     | 0      | 4     | 4      | 5      | 4      | 4      | 5     |
| 1379   | 0     | 0      | 3     | 3      | 3      | 3      | 3      | 3     |
| 1380   | 0     | 0      | 3     | 6      | 6      | 4      | 3      | 4     |
| 1382   | 0     | 1      |       | 6      | 6      | 6      | 6      | 6     |
| 1383   | 0     | 1      |       | 5      | 5      | 2      | 2      | 5     |

| respid | Q43_9 | Q43_99 | Q44_1 | Q46x1a | Q46x1b | Q46x2a | Q46x2b | Q46x3 |
|--------|-------|--------|-------|--------|--------|--------|--------|-------|
| 1384   | 0     | 1      |       | 5      | 5      | 2      | 5      | 5     |
| 1385   | 0     | 0      | 5     | 6      | 5      | 1      | 1      | 5     |
| 1387   | 0     | 1      |       | 5      | 5      | 5      | 5      | 5     |
| 1388   | 0     | 1      |       | 4      | 4      | 5      | 5      | 5     |
| 1389   | 0     | 1      |       | 4      | 5      | 1      | 1      | 4     |
| 1390   | 0     | 0      | 2     | 2      | 4      | 2      | 2      | 3     |
| 1395   | 0     | 1      |       | 6      | 5      | 6      | 5      | 5     |
| 1396   | 0     | 1      |       | 5      | 5      | 2      | 2      | 4     |
| 1397   | 0     | 1      |       | 4      | 4      | 3      | 3      | 4     |
| 1398   | 0     | 1      |       | 5      | 5      | 5      | 5      | 5     |
| 1399   | 0     | 1      |       | 5      | 5      | 5      | 5      | 5     |
| 1403   | 0     | 1      |       | 4      | 5      | 4      | 4      | 4     |
| 1405   | 0     | 1      |       | 5      | 5      | 1      | 1      | 5     |
| 1406   | 0     | 0      | 2     | 4      | 5      | 1      | 1      | 5     |
| 1407   | 1     | 0      | 2     | 3      | 3      | 3      | 4      | 4     |
| 1408   | 0     | 1      |       | 5      | 5      | 2      | 2      | 5     |
| 1409   | 0     | 1      |       | 5      | 5      | 1      | 6      | 5     |
| 1410   | 0     | 1      |       | 6      | 6      | 6      | 6      | 6     |
| 1411   | 0     | 1      |       | 6      | 6      | 1      | 1      | 5     |
| 1412   | 0     | 1      |       | 5      | 4      | 5      | 5      | 4     |
| 1413   | 0     | 1      |       | 6      | 6      | 1      | 1      | 5     |
| 1414   | 0     | 1      |       | 6      | 6      | 6      | 6      | 6     |
| 1415   | 0     | 0      | 4     | 4      | 4      | 1      | 1      | 5     |
| 1416   | 0     | 1      |       | 4      | 4      | 2      | 2      | 4     |
| 1417   | 0     | 1      |       | 6      | 6      | 5      | 5      | 5     |
| 1418   | 0     | 1      |       | 5      | 5      | 5      | 5      | 4     |
| 1419   | 0     | 0      | 0     | 5      | 5      | 3      | 5      | 3     |
| 1420   | 0     | 0      | 2     | 5      | 5      | 6      | 6      | 6     |
| 1421   | 0     | 0      | 3     | 4      | 4      | 4      | 2      | 4     |
| 1422   | 0     | 1      |       | 5      | 5      | 4      | 4      | 5     |
| 1423   | 0     | 1      |       | 3      | 4      | 4      | 4      | 4     |
| 1424   | 0     | 0      | 3     | 4      | 4      | 1      | 3      | 4     |

| respid | Q43_9 | Q43_99 | Q44_1 | Q46x1a | Q46x1b | Q46x2a | Q46x2b | Q46x3 |
|--------|-------|--------|-------|--------|--------|--------|--------|-------|
| 1429   | 0     | 1      |       | 4      | 6      | 6      | 6      | 5     |
| 1430   | 0     | 0      | 4     | 5      | 5      | 5      | 5      | 5     |
| 1431   | 0     | 1      |       | 3      | 4      | 2      | 4      | 2     |
| 1433   | 0     | 1      |       | 4      | 3      | 3      | 2      | 4     |
| 1435   |       |        |       |        |        |        |        |       |
| 1436   | 0     | 1      |       | 5      | 5      | 1      | 1      | 5     |
| 1438   |       |        |       |        |        |        |        |       |
| 1439   | 0     | 0      | 3     | 4      | 5      | 1      | 1      | 4     |
| 1441   | 0     | 1      |       | 5      | 5      | 5      | 5      | 5     |
| 1442   | 0     | 1      |       | 5      | 5      | 1      | 1      | 5     |
| 1443   |       |        |       |        |        |        |        |       |
| 1444   | 0     | 1      |       | 6      | 5      | 5      | 5      | 5     |
| 1445   | 0     | 1      |       | 3      | 3      | 3      | 3      | 4     |
| 1446   | 0     | 0      | 3     | 6      | 6      | 6      | 6      | 6     |
| 1447   | 0     | 1      |       | 6      | 6      | 6      | 6      | 6     |
| 1449   | 0     | 0      | 3     | 6      | 6      | 6      | 6      | 6     |
| 1450   | 0     | 1      |       | 6      | 6      | 6      | 6      | 6     |
| 1451   | 0     | 1      |       | 6      | 6      | 1      | 2      | 5     |
| 1452   |       |        |       |        |        |        |        |       |
| 1453   | 0     | 0      | 3     | 3      | 3      | 3      | 3      | 3     |
| 1454   | 0     | 1      |       | 4      | 4      | 4      | 4      | 4     |
| 1456   | 0     | 0      | 4     | 4      | 4      | 5      | 5      | 4     |
| 1457   | 0     | 0      | 3     | 5      | 5      | 1      | 1      | 4     |
| 1459   | 0     | 1      |       | 4      | 4      | 5      | 5      | 5     |
| 1460   | 0     | 1      |       | 5      | 5      | 1      | 1      | 5     |
| 1463   | 0     | 1      |       | 6      | 6      | 2      | 6      | 5     |
| 1465   | 0     | 0      | 3     | 3      | 2      | 3      | 3      | 5     |
| 1467   | 0     | 1      |       | 5      | 5      | 2      | 2      | 5     |
| 1470   | 0     | 1      |       | 4      | 4      | 2      | 2      | 4     |
| 1471   | 0     | 0      | 2     | 4      | 4      | 3      | 3      | 3     |
| 1472   | 0     | 1      |       | 5      | 5      | 6      | 6      | 5     |
| 1474   | 0     | 1      |       | 5      | 4      | 1      | 1      | 4     |

| respid | Q43_9 | Q43_99 | Q44_1 | Q46x1a | Q46x1b | Q46x2a | Q46x2b | Q46x3 |
|--------|-------|--------|-------|--------|--------|--------|--------|-------|
| 1475   | 0     | 0      | 2     | 4      | 4      | 4      | 4      | 4     |
| 1477   | 0     | 0      | 4     | 5      | 5      | 1      | 1      | 5     |
| 1478   | 0     | 0      | 2     | 2      | 2      | 3      | 4      | 2     |
| 1480   |       |        |       |        |        |        |        |       |
| 1481   | 0     | 0      | 3     | 4      | 4      | 4      | 4      | 4     |
| 1483   | 0     | 1      |       | 5      | 5      | 1      | 1      | 5     |
| 1484   | 0     | 1      |       | 5      | 5      | 5      | 5      | 5     |
| 1485   | 0     | 1      |       | 5      | 5      | 1      | 1      | 4     |
| 1486   | 0     | 0      | 3     | 5      | 5      | 5      | 5      | 5     |
| 1487   | 0     | 1      |       | 4      | 4      | 2      | 2      | 4     |
| 1488   | 0     | 0      | 3     | 5      | 5      | 5      | 5      | 5     |
| 1489   | 0     | 1      |       | 5      | 5      | 2      | 2      | 5     |
| 1490   | 0     | 0      | 3     | 4      | 4      | 4      | 4      | 4     |
| 1491   | 0     | 0      | 3     | 2      | 2      | 3      | 3      | 2     |
| 1492   | 0     | 1      |       | 6      | 6      | 1      | 1      | 5     |
| 1494   | 0     | 1      |       | 6      | 6      | 4      | 6      | 6     |
| 1495   | 0     | 0      | 3     | 4      | 6      | 5      | 5      | 5     |
| 1496   | 0     | 1      |       | 5      | 5      | 1      | 1      | 5     |
| 1498   | 0     | 1      |       | 5      | 5      | 5      | 5      | 5     |
| 1499   | 0     | 0      | 3     | 5      | 5      | 2      | 2      | 4     |
| 1500   | 0     | 0      | 3     | 6      | 6      | 6      | 6      | 6     |
| 1501   | 0     | 1      |       | 5      | 5      | 5      | 5      | 5     |
| 1503   |       |        |       |        |        |        |        |       |
| 1504   | 0     | 1      |       | 6      | 6      | 6      | 6      | 6     |
| 1508   | 0     | 1      |       | 5      | 5      | 5      | 5      | 5     |
| 1509   | 0     | 1      |       | 5      | 5      | 4      | 4      | 5     |
| 1511   | 0     | 0      | 2     | 5      | 4      | 2      | 2      | 5     |
| 1512   | 0     | 1      |       | 4      | 5      | 5      | 5      | 5     |
| 1513   | 0     | 1      |       | 6      | 6      | 6      | 6      | 6     |
| 1515   | 0     | 1      |       | 4      | 4      | 6      | 5      | 5     |
| 1517   | 0     | 1      |       | 4      | 5      | 5      | 5      | 5     |
| 1518   | 0     | 0      | 3     | 6      | 6      | 6      | 5      | 5     |

| respid | Q43_9 | Q43_99 | Q44_1 | Q46x1a | Q46x1b | Q46x2a | Q46x2b | Q46x3 |
|--------|-------|--------|-------|--------|--------|--------|--------|-------|
| 1519   | 1     | 0      | 2     | 4      | 4      | 4      | 4      | 4     |
| 1520   | 0     | 0      | 3     | 4      | 5      | 2      | 2      | 5     |
| 1521   | 0     | 0      | 2     | 3      | 3      | 3      | 3      | 4     |
| 1522   | 0     | 1      |       | 4      | 5      | 1      | 1      | 5     |
| 1523   | 0     | 1      |       | 5      | 5      | 1      | 1      | 4     |
| 1524   | 0     | 1      |       | 4      | 4      | 1      | 1      | 4     |
| 1525   | 0     | 1      |       | 5      | 5      | 1      | 1      | 5     |
| 1526   | 0     | 0      | 2     | 4      | 4      | 2      | 2      | 4     |
| 1527   | 0     | 0      | 3     | 5      | 6      | 5      | 5      | 6     |
| 1534   | 0     | 0      | 4     | 6      | 6      | 2      | 2      | 5     |
| 1535   | 0     | 0      | 3     | 5      | 5      | 5      | 5      | 5     |
| 1536   | 0     | 0      | 3     | 4      | 4      | 1      | 2      | 4     |
| 1538   | 1     | 0      | 2     | 4      | 5      | 5      | 5      | 4     |
| 1539   | 0     | 1      |       | 5      | 5      | 1      | 1      | 5     |
| 1540   | 0     | 1      |       | 5      | 5      | 1      | 1      | 5     |
| 1541   | 0     | 1      |       | 5      | 5      | 5      | 5      | 5     |
| 1542   | 0     | 1      |       | 6      | 6      | 6      | 6      | 6     |
| 1543   | 0     | 0      | 3     | 5      | 5      | 5      | 5      | 5     |
| 1545   | 0     | 0      | 3     | 5      | 5      | 5      | 5      | 5     |
| 1546   | 0     | 1      |       | 5      | 5      | 5      | 5      | 5     |
| 1548   | 0     | 0      | 2     | 6      | 6      | 6      | 6      | 6     |
| 1549   |       |        |       |        |        |        |        |       |
| 1551   | 0     | 1      |       | 5      | 6      | 6      | 6      | 5     |
| 1552   | 0     | 0      | 3     | 4      | 4      | 2      | 1      | 3     |
| 1556   | 0     | 1      |       | 5      | 5      | 5      | 5      | 5     |
| 1557   |       |        |       |        |        |        |        |       |
| 1558   | 0     | 1      |       | 5      | 5      | 3      | 3      | 5     |
| 1561   | 0     | 1      |       | 6      | 6      | 1      | 1      | 5     |
| 1562   | 0     | 1      |       | 6      | 6      | 6      | 6      | 6     |
| 1563   | 0     | 1      |       | 5      | 5      | 5      | 5      | 5     |
| 1564   | 1     | 0      | 2     | 4      | 4      | 3      | 3      | 4     |
| 1565   |       |        |       |        |        |        |        |       |



| respid | Q43_9 | Q43_99 | Q44_1 | Q46x1a | Q46x1b | Q46x2a | Q46x2b | Q46x3 |
|--------|-------|--------|-------|--------|--------|--------|--------|-------|
| 1566   | 0     | 1      |       | 5      | 5      | 5      | 5      | 5     |
| 1567   | 0     | 0      | 4     | 5      | 5      | 5      | 5      | 5     |
| 1569   |       |        |       |        |        |        |        |       |
| 1570   | 0     | 1      |       | 6      | 6      | 6      | 6      | 6     |
| 1574   | 0     | 1      |       | 5      | 5      | 2      | 2      | 5     |
| 1575   | 0     | 1      |       | 5      | 5      | 5      | 5      | 5     |
| 1576   | 0     | 1      |       | 5      | 5      | 5      | 5      | 5     |
| 1577   | 0     | 1      |       | 6      | 6      | 5      | 5      | 5     |
| 1581   | 0     | 1      |       | 6      | 5      | 5      | 5      | 5     |
| 1583   | 0     | 0      | 3     | 6      | 6      | 6      | 6      | 6     |
| 1585   | 0     | 1      |       | 5      | 5      | 4      | 5      | 5     |
| 1586   | 0     | 0      | 2     | 6      | 6      | 6      | 3      | 4     |
| 1588   | 0     | 0      | 4     | 5      | 5      | 1      | 1      | 5     |
| 1590   | 0     | 1      |       | 5      | 5      | 2      | 2      | 5     |
| 1592   | 0     | 1      |       | 5      | 5      | 5      | 5      | 5     |
| 1594   | 0     | 0      | 2     | 4      | 4      | 5      | 5      | 4     |
| 1598   | 0     | 0      | 3     | 4      | 4      | 4      | 4      | 4     |
| 1599   | 0     | 0      | 4     | 5      | 5      | 1      | 5      | 5     |
| 1600   | 0     | 0      | 4     | 5      | 5      | 1      | 1      | 5     |
| 1602   | 0     | 1      |       | 5      | 5      | 5      | 5      | 5     |
| 1603   | 0     | 1      |       | 5      | 5      | 5      | 5      | 5     |
| 1604   | 0     | 1      |       | 5      | 5      | 1      | 1      | 5     |
| 1605   | 0     | 0      | 3     | 6      | 6      | 6      | 6      | 6     |
| 1606   | 0     | 0      | 3     | 5      | 5      | 1      | 1      | 5     |
| 1610   | 0     | 1      |       | 5      | 5      | 5      | 5      | 5     |
| 1611   | 0     | 1      |       | 5      | 5      | 5      | 5      | 5     |
| 1612   | 0     | 1      |       | 5      | 5      | 2      | 2      | 5     |
| 1613   | 0     | 0      | 3     | 4      | 4      | 1      | 4      | 4     |
| 1615   | 0     | 1      |       | 4      | 4      | 3      | 3      | 3     |
| 1616   | 0     | 1      |       | 5      | 5      | 3      | 3      | 4     |
| 1617   | 0     | 1      |       | 5      | 5      | 5      | 5      | 5     |
| 1618   | 0     | 1      |       | 4      | 4      | 1      | 1      | 5     |

| respid | Q43_9 | Q43_99 | Q44_1 | Q46x1a | Q46x1b | Q46x2a | Q46x2b | Q46x3 |
|--------|-------|--------|-------|--------|--------|--------|--------|-------|
| 1620   | 0     | 1      |       | 4      | 5      | 5      | 6      | 6     |
| 1621   | 0     | 0      | 3     | 4      | 4      | 6      | 2      | 4     |
| 1622   |       |        |       |        |        |        |        |       |
| 1623   | 0     | 1      |       | 6      | 6      | 6      | 6      | 5     |
| 1624   | 0     | 1      |       | 5      | 5      | 5      | 5      | 5     |
| 1625   | 0     | 1      |       | 5      | 5      | 5      | 5      | 5     |
| 1626   |       |        |       |        |        |        |        |       |
| 1627   | 0     | 1      |       | 5      | 5      | 1      | 1      | 5     |
| 1629   | 0     | 1      |       | 4      | 3      | 1      | 1      | 4     |
| 1630   | 0     | 1      |       | 5      | 5      | 5      | 5      | 5     |
| 1631   | 0     | 1      |       | 5      | 5      | 1      | 1      | 5     |
| 1634   | 0     | 0      | 4     | 5      | 5      | 5      | 5      | 5     |
| 1635   | 0     | 1      |       | 5      | 5      | 2      | 2      | 5     |
| 1636   |       |        |       |        |        |        |        |       |
| 1637   | 0     | 1      |       | 6      | 5      | 2      | 5      | 5     |
| 1640   | 0     | 1      |       | 5      | 5      | 6      | 6      | 6     |
| 1642   | 0     | 1      |       | 6      | 6      | 6      | 6      | 6     |
| 1643   | 1     | 0      | 2     | 4      | 4      | 6      | 6      | 6     |
| 1644   | 0     | 1      |       | 5      | 5      | 5      | 5      | 5     |
| 1645   | 0     | 0      | 3     | 6      | 6      | 6      | 6      | 4     |
| 1646   | 0     | 0      | 4     | 6      | 6      | 6      | 6      | 6     |
| 1647   | 0     | 1      |       | 4      | 4      | 1      | 1      | 5     |
| 1650   | 0     | 0      | 3     | 4      | 4      | 3      | 3      | 4     |
| 1654   | 0     | 0      | 3     | 4      | 4      | 4      | 6      | 4     |
| 1656   | 0     | 1      |       | 6      | 6      | 2      | 2      | 5     |
| 1657   | 0     | 0      | 2     | 5      | 5      | 5      | 5      | 5     |
| 1659   | 0     | 0      | 3     | 5      | 4      | 2      | 2      | 4     |
| 1662   | 0     | 0      | 3     | 4      | 4      | 4      | 4      | 4     |
| 1663   | 0     | 1      |       | 6      | 6      | 2      | 1      | 5     |
| 1664   | 0     | 1      |       | 5      | 5      | 1      | 1      | 6     |
| 1665   | 0     | 0      | 4     | 6      | 6      | 6      | 6      | 6     |
| 1667   | 0     | 1      |       | 5      | 5      | 2      | 2      | 4     |

| respid | Q43_9 | Q43_99 | Q44_1 | Q46x1a | Q46x1b | Q46x2a | Q46x2b | Q46x3 |
|--------|-------|--------|-------|--------|--------|--------|--------|-------|
| 1668   | 0     | 1      |       | 5      | 5      | 4      | 3      | 5     |
| 1670   | 0     | 0      | 4     | 5      | 5      | 5      | 5      | 5     |
| 1671   | 0     | 1      |       | 6      | 6      | 6      | 6      | 6     |
| 1673   | 0     | 1      |       | 5      | 5      | 2      | 2      | 4     |
| 1674   | 0     | 0      | 4     | 4      | 4      | 5      | 5      | 4     |
| 1676   | 0     | 1      |       | 5      | 6      | 5      | 5      | 5     |
| 1677   | 0     | 1      |       | 5      | 5      | 5      | 1      | 5     |
| 1678   | 0     | 1      |       | 4      | 5      | 2      | 2      | 4     |
| 1680   | 0     | 1      |       | 5      | 5      | 1      | 1      | 5     |
| 1681   | 0     | 0      | 3     | 4      | 5      | 1      | 1      | 4     |
| 1683   | 0     | 1      |       | 5      | 5      | 5      | 5      | 5     |
| 1685   | 0     | 1      |       | 4      | 4      | 2      | 2      | 5     |
| 1686   | 1     | 0      | 3     | 5      | 5      | 5      | 4      | 4     |
| 1690   | 0     | 1      |       | 5      | 5      | 1      | 1      | 4     |
| 1691   | 0     | 1      |       | 5      | 5      | 5      | 5      | 5     |
| 1692   | 0     | 1      |       | 4      | 4      | 6      | 6      | 4     |
| 1693   | 0     | 1      |       | 5      | 5      | 1      | 1      | 4     |
| 1695   | 0     | 1      |       | 5      | 5      | 1      | 1      | 5     |
| 1696   | 0     | 0      | 3     | 5      | 5      | 1      | 1      | 5     |
| 1698   | 0     | 1      |       | 6      | 6      | 1      | 1      | 5     |
| 1699   | 0     | 1      |       | 5      | 5      | 5      | 5      | 5     |
| 1701   | 0     | 0      | 2     | 3      | 3      | 3      | 3      | 3     |
| 1702   | 0     | 1      |       | 6      | 6      | 6      | 6      | 6     |
| 1703   |       |        |       |        |        |        |        |       |
| 1705   | 0     | 1      |       | 6      | 6      | 5      | 5      | 5     |
| 1706   | 0     | 1      |       | 6      | 6      | 6      | 6      | 6     |
| 1708   |       |        |       |        |        |        |        |       |
| 1711   | 0     | 1      |       | 5      | 4      | 5      | 5      | 5     |
| 1712   | 0     | 0      | 3     | 5      | 5      | 5      | 5      | 5     |
| 1713   | 0     | 1      |       | 6      | 6      | 1      | 1      | 5     |
| 1715   | 0     | 1      |       | 5      | 5      | 5      | 5      | 5     |
| 1717   | 0     | 1      |       | 5      | 5      | 1      | 1      | 5     |

| respid | Q43_9 | Q43_99 | Q44_1 | Q46x1a | Q46x1b | Q46x2a | Q46x2b | Q46x3 |
|--------|-------|--------|-------|--------|--------|--------|--------|-------|
| 1718   | 0     | 1      |       | 6      | 6      | 6      | 6      | 6     |
| 1719   | 0     | 0      | 3     | 6      | 6      | 6      | 6      | 6     |
| 1721   | 0     | 1      |       | 6      | 6      | 6      | 6      | 6     |
| 1722   | 0     | 0      | 5     | 4      | 4      | 5      | 5      | 4     |
| 1724   | 0     | 1      |       | 5      | 5      | 2      | 2      | 6     |
| 1725   | 0     | 1      |       | 5      | 5      | 4      | 4      | 5     |
| 1726   | 0     | 0      | 3     | 6      | 6      | 6      | 6      | 5     |
| 1727   | 0     | 1      |       | 5      | 5      | 1      | 1      | 5     |
| 1728   | 0     | 1      |       | 5      | 5      | 5      | 4      | 5     |
| 1731   | 0     | 0      | 3     | 4      | 4      | 3      | 3      | 4     |
| 1733   | 0     | 0      | 4     | 5      | 5      | 5      | 5      | 5     |
| 1734   | 0     | 1      |       | 5      | 5      | 5      | 5      | 4     |
| 1735   |       |        |       |        |        |        |        |       |
| 1736   | 0     | 1      |       | 5      | 5      | 4      | 4      | 4     |
| 1737   | 0     | 1      |       | 6      | 6      | 6      | 6      | 6     |
| 1738   | 0     | 1      |       | 6      | 6      | 6      | 6      | 6     |
| 1743   | 0     | 1      |       | 4      | 4      | 5      | 5      | 5     |
| 1755   | 0     | 0      | 3     | 3      | 3      | 4      | 3      | 4     |
| 1756   | 0     | 0      | 3     | 6      | 6      | 6      | 6      | 6     |
| 1757   | 0     | 1      |       | 5      | 5      | 5      | 5      | 5     |
| 1758   | 0     | 0      | 2     | 4      | 4      | 4      | 4      | 4     |
| 1759   | 0     | 0      | 3     | 4      | 4      | 1      | 2      | 5     |
| 1761   | 0     | 0      | 3     | 4      | 6      | 1      | 2      | 4     |
| 1762   | 0     | 0      | 3     | 4      | 4      | 2      | 2      | 4     |
| 1764   |       |        |       |        |        |        |        |       |
| 1767   | 0     | 0      | 3     | 4      | 4      | 4      | 2      | 4     |
| 1768   | 0     | 1      |       | 4      | 4      | 2      | 2      | 4     |
| 1769   | 0     | 1      |       | 5      | 5      | 4      | 4      | 4     |
| 1770   | 0     | 0      | 1     | 5      | 5      | 1      | 1      | 5     |
| 1771   | 0     | 0      | 3     | 4      | 5      | 2      | 2      | 3     |
| 1776   | 0     | 1      |       | 4      | 4      | 3      | 4      | 3     |
| 1777   | 0     | 1      |       | 4      | 5      | 5      | 5      | 5     |

| respid | Q43_9 | Q43_99 | Q44_1 | Q46x1a | Q46x1b | Q46x2a | Q46x2b | Q46x3 |
|--------|-------|--------|-------|--------|--------|--------|--------|-------|
| 1778   | 0     | 0      | 2     | 4      | 5      | 1      | 1      | 4     |
| 1779   | 0     | 1      |       | 4      | 5      | 2      | 2      | 4     |
| 1780   | 0     | 0      | 3     | 5      | 5      | 5      | 1      | 5     |
| 1781   |       |        |       |        |        |        |        |       |
| 1783   | 0     | 1      |       | 4      | 5      | 5      | 5      | 5     |
| 1784   | 0     | 0      | 3     | 3      | 3      | 2      | 3      | 2     |
| 1785   | 0     | 0      | 3     | 5      | 5      | 2      | 2      | 4     |
| 1788   | 0     | 0      | 2     | 4      | 4      | 4      | 4      | 4     |
| 1792   | 0     | 1      |       | 5      | 5      | 2      | 1      | 5     |
| 1794   | 0     | 0      | 5     | 5      | 5      | 1      | 1      | 5     |
| 1798   | 1     | 0      | 2     | 3      | 4      | 3      | 3      | 4     |
| 1799   | 0     | 1      |       | 4      | 4      | 2      | 2      | 4     |
| 1800   | 0     | 1      |       | 6      | 6      | 6      | 6      | 6     |
| 1804   | 0     | 1      |       | 4      | 4      | 4      | 4      | 4     |
| 1806   | 0     | 1      |       | 5      | 6      | 6      | 6      | 6     |
| 1807   | 0     | 1      |       | 5      | 5      | 5      | 5      | 5     |
| 1808   | 0     | 1      |       | 5      | 5      | 1      | 1      | 5     |
| 1809   | 0     | 1      |       | 5      | 5      | 5      | 5      | 5     |
| 1811   | 0     | 0      | 3     | 6      | 6      | 4      | 6      | 4     |
| 1812   | 0     | 0      | 4     | 5      | 6      | 5      | 5      | 4     |
| 1813   | 0     | 1      |       | 6      | 6      | 6      | 6      | 6     |
| 1814   | 0     | 0      | 3     | 5      | 5      | 5      | 5      | 5     |
| 1815   | 0     | 0      | 3     | 5      | 6      | 2      | 6      | 6     |
| 1817   | 0     | 1      |       | 5      | 5      | 2      | 2      | 3     |
| 1820   | 0     | 1      |       | 5      | 5      | 1      | 1      | 4     |
| 1821   | 0     | 1      |       | 6      | 5      | 5      | 5      | 5     |
| 1822   | 0     | 0      | 4     | 5      | 5      | 5      | 5      | 4     |
| 1823   | 0     | 1      |       | 4      | 4      | 3      | 3      | 3     |
| 1824   | 0     | 1      |       | 5      | 5      | 5      | 5      | 5     |
| 1826   |       |        |       |        |        |        |        |       |
| 1828   | 0     | 1      |       | 5      | 5      | 1      | 1      | 5     |
| 1829   | 0     | 1      |       | 5      | 5      | 5      | 5      | 5     |

| respid | Q43_9 | Q43_99 | Q44_1 | Q46x1a | Q46x1b | Q46x2a | Q46x2b | Q46x3 |
|--------|-------|--------|-------|--------|--------|--------|--------|-------|
| 1830   | 0     | 1      |       | 5      | 5      | 1      | 1      | 6     |
| 1831   | 0     | 1      |       | 6      | 6      | 5      | 5      | 5     |
| 1832   | 0     | 1      |       | 4      | 4      | 2      | 2      | 4     |
| 1836   | 0     | 1      |       | 4      | 6      | 4      | 4      | 4     |
| 1838   | 0     | 0      | 3     | 4      | 4      | 2      | 2      | 4     |
| 1839   | 0     | 0      | 3     | 5      | 4      | 6      | 5      | 4     |
| 1840   | 0     | 1      |       | 4      | 4      | 4      | 4      | 4     |
| 1841   | 0     | 1      |       | 6      | 5      | 6      | 6      | 5     |
| 1842   | 0     | 0      | 3     | 4      | 4      | 4      | 4      | 4     |
| 1843   | 0     | 0      | 3     | 4      | 5      | 1      | 2      | 5     |
| 1844   | 0     | 0      | 2     | 4      | 4      | 4      | 4      | 4     |
| 1845   | 0     | 1      |       | 5      | 5      | 5      | 5      | 5     |
| 1849   | 0     | 1      |       | 5      | 5      | 1      | 1      | 4     |
| 1850   | 0     | 0      | 3     | 5      | 5      | 5      | 5      | 4     |
| 1851   | 0     | 1      |       | 5      | 5      | 1      | 1      | 4     |
| 1852   |       |        |       |        |        |        |        |       |
| 1857   | 0     | 1      |       | 6      | 6      | 6      | 6      | 6     |
| 1858   | 0     | 1      |       | 6      | 6      | 6      | 6      | 6     |
| 1861   | 0     | 1      |       | 5      | 5      | 5      | 5      | 5     |
| 1862   | 0     | 1      |       | 5      | 5      | 5      | 5      | 5     |
| 1863   | 0     | 1      |       | 6      | 6      | 4      | 6      | 4     |
| 1864   | 0     | 1      |       | 5      | 5      | 5      | 5      | 5     |
| 1865   |       |        |       |        |        |        |        |       |
| 1867   | 0     | 1      |       | 6      | 6      | 6      | 6      | 6     |
| 1868   | 0     | 0      | 3     | 5      | 5      | 5      | 2      | 5     |
| 1869   | 0     | 0      | 3     | 4      | 4      | 1      | 2      | 4     |
| 1870   | 0     | 1      |       | 6      | 6      | 6      | 6      | 6     |
| 1871   | 0     | 1      |       | 6      | 6      | 6      | 6      | 6     |
| 1872   | 0     | 1      |       | 5      | 5      | 5      | 5      | 5     |
| 1873   | 0     | 1      |       | 6      | 6      | 4      | 4      | 6     |
| 1876   |       |        |       |        |        |        |        |       |
| 1877   |       |        |       |        |        |        |        |       |

| respid | Q43_9 | Q43_99 | Q44_1 | Q46x1a | Q46x1b | Q46x2a | Q46x2b | Q46x3 |
|--------|-------|--------|-------|--------|--------|--------|--------|-------|
| 1878   | 0     | 1      |       | 4      | 5      | 1      | 1      | 4     |
| 1879   | 0     | 1      |       | 5      | 5      | 5      | 5      | 5     |
| 1880   | 0     | 1      |       | 5      | 5      | 4      | 4      | 4     |
| 1881   | 0     | 0      | 4     | 5      | 5      | 5      | 5      | 5     |
| 1883   | 0     | 1      |       | 4      | 6      | 2      | 6      | 4     |
| 1886   | 0     | 1      |       | 6      | 6      | 1      | 1      | 5     |
| 1888   | 0     | 0      | 4     | 4      | 2      | 3      | 3      | 3     |
| 1889   | 1     | 0      | 3     | 5      | 4      | 4      | 4      | 4     |
| 1890   | 0     | 1      |       | 4      | 4      | 4      | 4      | 4     |
| 1891   | 0     | 1      |       | 6      | 6      | 6      | 6      | 6     |
| 1893   | 0     | 1      |       | 5      | 5      | 5      | 5      | 5     |
| 1894   | 0     | 1      |       | 6      | 6      | 5      | 5      | 5     |
| 1895   | 0     | 0      | 3     | 5      | 5      | 2      | 2      | 4     |
| 1896   | 0     | 1      |       | 5      | 5      | 4      | 4      | 5     |
| 1897   | 0     | 0      | 3     | 6      | 6      | 6      | 6      | 6     |
| 1898   | 0     | 1      |       | 2      | 2      | 5      | 4      | 2     |
| 1899   | 0     | 1      |       | 4      | 4      | 3      | 2      | 3     |
| 1900   |       |        |       |        |        |        |        |       |
| 1903   | 0     | 0      | 4     | 5      | 5      | 5      | 5      | 5     |
| 1906   | 0     | 1      |       | 5      | 5      | 5      | 5      | 5     |
| 1907   | 0     | 0      | 3     | 4      | 4      | 4      | 4      | 4     |
| 1908   | 0     | 0      | 1     | 4      | 4      | 1      | 1      | 4     |
| 1909   | 1     | 0      | 2     | 6      | 6      | 2      | 2      | 4     |
| 1910   | 0     | 1      |       | 6      | 6      | 6      | 6      | 6     |
| 1911   | 0     | 1      |       | 5      | 5      | 5      | 5      | 5     |
| 1912   |       |        |       |        |        |        |        |       |
| 1917   | 0     | 1      |       | 6      | 6      | 5      | 5      | 5     |
| 1918   | 0     | 1      |       | 4      | 1      | 1      | 1      | 5     |
| 1919   | 0     | 1      |       | 6      | 6      | 6      | 6      | 5     |
| 1922   |       |        |       |        |        |        |        |       |
| 1925   |       |        |       |        |        |        |        |       |
| 1926   | 0     | 1      |       | 4      | 4      | 2      | 2      | 4     |

| respid | Q43_9 | Q43_99 | Q44_1 | Q46x1a | Q46x1b | Q46x2a | Q46x2b | Q46x3 |
|--------|-------|--------|-------|--------|--------|--------|--------|-------|
| 1927   | 0     | 1      |       | 5      | 5      | 5      | 5      | 5     |
| 1928   |       |        |       |        |        |        |        |       |
| 1929   | 0     | 1      |       | 5      | 5      | 5      | 5      | 5     |
| 1934   | 0     | 1      |       | 6      | 6      | 6      | 6      | 6     |
| 1935   | 0     | 1      |       | 5      | 5      | 5      | 5      | 5     |
| 1936   | 0     | 1      |       | 4      | 4      | 1      | 1      | 3     |
| 1937   |       |        |       |        |        |        |        |       |
| 1938   |       |        |       |        |        |        |        |       |
| 1939   | 0     | 1      |       | 6      | 6      | 6      | 6      | 6     |
| 1940   | 0     | 0      | 4     | 5      | 5      | 5      | 5      | 4     |
| 1941   |       |        |       |        |        |        |        |       |
| 1948   |       |        |       |        |        |        |        |       |
| 1950   | 0     | 1      |       | 6      | 6      | 5      | 5      | 5     |
| 1955   | 0     | 0      | 2     | 4      | 5      | 2      | 2      | 4     |
| 1958   | 0     | 1      |       | 5      | 5      | 5      | 5      | 5     |
| 1960   | 0     | 1      |       | 5      | 5      | 1      | 1      | 5     |
| 1961   |       |        |       |        |        |        |        |       |
| 1962   | 0     | 1      |       | 6      | 6      | 6      | 6      | 6     |
| 1965   |       |        |       |        |        |        |        |       |
| 1966   | 0     | 1      |       | 5      | 5      | 5      | 5      | 5     |
| 1967   |       |        |       |        |        |        |        |       |
| 1968   | 0     | 0      | 4     | 4      | 5      | 1      | 2      | 4     |
| 1973   | 0     | 1      |       | 4      | 4      | 4      | 4      | 4     |
| 1974   | 0     | 0      | 2     | 3      | 3      | 2      | 2      | 4     |
| 1975   |       |        |       |        |        |        |        |       |
| 1977   | 0     | 0      | 3     | 5      | 5      | 1      | 1      | 5     |
| 1978   |       |        |       |        |        |        |        |       |
| 1979   | 0     | 0      | 3     | 3      | 3      | 3      | 3      | 3     |
| 1982   | 0     | 1      |       | 6      | 6      | 1      | 1      | 5     |
| 1983   | 0     | 1      |       | 5      | 5      | 5      | 5      | 5     |
| 1987   | 0     | 0      | 4     | 5      | 5      | 1      | 1      | 5     |
| 1988   | 0     | 1      |       | 4      | 4      | 2      | 2      | 4     |



| respid | Q43_9 | Q43_99 | Q44_1 | Q46x1a | Q46x1b | Q46x2a | Q46x2b | Q46x3 |
|--------|-------|--------|-------|--------|--------|--------|--------|-------|
| 1991   | 0     | 0      | 3     | 6      | 6      | 6      | 6      | 6     |
| 1992   | 0     | 1      |       | 5      | 5      | 5      | 5      | 5     |
| 1993   | 0     | 1      |       | 3      | 4      | 4      | 4      | 4     |
| 1994   | 0     | 0      | 2     | 2      | 3      | 3      | 4      | 3     |
| 1995   | 0     | 1      |       | 5      | 5      | 6      | 6      | 6     |
| 1996   | 0     | 1      |       | 6      | 6      | 6      | 6      | 6     |
| 1997   | 0     | 1      |       | 6      | 6      | 6      | 6      | 6     |
| 1998   | 0     | 1      |       | 6      | 6      | 1      | 1      | 5     |
| 1999   | 0     | 0      | 2     | 4      | 4      | 4      | 4      | 4     |
| 2000   | 0     | 0      | 3     | 3      | 2      | 4      | 5      | 4     |
| 2001   | 0     | 1      |       | 5      | 5      | 1      | 1      | 4     |
| 2002   | 0     | 1      |       | 6      | 6      | 6      | 6      | 6     |
| 2003   |       |        |       |        |        |        |        |       |
| 2004   | 0     | 1      |       | 5      | 5      | 6      | 6      | 5     |
| 2005   | 0     | 0      | 3     | 5      | 5      | 1      | 1      | 5     |
| 2007   | 0     | 0      | 4     | 4      | 4      | 4      | 4      | 5     |
| 2009   | 0     | 0      | 4     | 6      | 6      | 6      | 6      | 6     |
| 2010   |       |        |       |        |        |        |        |       |
| 2011   | 0     | 1      |       | 5      | 5      | 5      | 5      | 5     |
| 2013   | 0     | 1      |       | 6      | 6      | 2      | 1      | 5     |
| 2014   | 0     | 0      | 3     | 5      | 5      | 5      | 5      | 4     |
| 2017   | 0     | 0      | 2     | 4      | 5      | 2      | 2      | 5     |
| 2020   | 0     | 1      |       | 6      | 6      | 6      | 6      | 5     |
| 2023   | 0     | 0      | 3     | 4      | 4      | 2      | 2      | 4     |
| 2024   | 0     | 1      |       | 6      | 6      | 6      | 6      | 6     |
| 2029   | 0     | 1      |       | 6      | 6      | 6      | 6      | 6     |
| 2030   |       |        |       |        |        |        |        |       |
| 2031   | 0     | 0      | 3     | 3      | 2      | 2      | 3      | 4     |
| 2032   | 0     | 0      | 2     | 4      | 4      | 4      | 4      | 4     |
| 2033   |       |        |       |        |        |        |        |       |
| 2034   | 0     | 1      |       | 5      | 5      | 1      | 1      | 5     |
| 2036   | 0     | 0      | 3     | 6      | 6      | 6      | 6      | 6     |

| respid | Q43_9 | Q43_99 | Q44_1 | Q46x1a | Q46x1b | Q46x2a | Q46x2b | Q46x3 |
|--------|-------|--------|-------|--------|--------|--------|--------|-------|
| 2037   | 0     | 0      | 3     | 3      | 3      | 2      | 3      | 2     |
| 2038   | 0     | 1      |       | 5      | 5      | 5      | 3      | 5     |
| 2039   | 0     | 0      | 3     | 6      | 6      | 4      | 4      | 5     |
| 2040   |       |        |       |        |        |        |        |       |
| 2041   |       |        |       |        |        |        |        |       |
| 2042   | 0     | 1      |       | 5      | 5      | 2      | 2      | 5     |
| 2043   | 0     | 0      | 4     | 5      | 5      | 5      | 5      | 4     |
| 2051   | 0     | 0      | 3     | 3      | 2      | 1      | 1      | 4     |
| 2052   | 0     | 1      |       | 5      | 5      | 2      | 2      | 5     |
| 2053   | 0     | 1      |       | 5      | 5      | 5      | 5      | 5     |
| 2054   |       |        |       |        |        |        |        |       |
| 2055   | 0     | 1      |       | 5      | 5      | 5      | 5      | 5     |
| 2056   | 0     | 0      | 3     | 6      | 6      | 6      | 6      | 6     |
| 2057   | 0     | 0      | 4     | 5      | 5      | 1      | 1      | 4     |
| 2059   | 0     | 1      |       | 5      | 5      | 5      | 5      | 5     |
| 2063   | 0     | 1      |       | 6      | 6      | 6      | 6      | 6     |
| 2066   | 0     | 0      | 3     | 5      | 5      | 5      | 5      | 6     |
| 2068   | 0     | 1      |       | 5      | 5      | 5      | 5      | 4     |
| 2069   | 0     | 1      |       | 5      | 5      | 1      | 1      | 5     |
| 2070   |       |        |       |        |        |        |        |       |
| 2071   | 0     | 1      |       | 1      | 1      | 2      | 1      | 5     |
| 2073   |       |        |       |        |        |        |        |       |
| 2077   | 0     | 0      | 2     | 5      | 5      | 5      | 5      | 5     |
| 2079   |       |        |       |        |        |        |        |       |
| 2080   | 0     | 1      |       | 6      | 6      | 5      | 1      | 6     |
| 2081   | 0     | 0      | 2     | 4      | 4      | 4      | 4      | 4     |
| 2084   |       |        |       |        |        |        |        |       |
| 2085   | 0     | 1      |       | 5      | 5      | 5      | 5      | 5     |
| 2087   | 0     | 0      | 3     | 6      | 6      | 6      | 6      | 6     |
| 2089   | 0     | 1      |       | 6      | 6      | 6      | 6      | 6     |
| 2093   | 0     | 1      |       | 5      | 4      | 2      | 2      | 4     |
| 2094   | 0     | 0      | 4     | 5      | 5      | 5      | 5      | 5     |

| respid | Q43_9 | Q43_99 | Q44_1 | Q46x1a | Q46x1b | Q46x2a | Q46x2b | Q46x3 |
|--------|-------|--------|-------|--------|--------|--------|--------|-------|
| 2095   | 0     | 0      | 2     | 5      | 5      | 2      | 2      | 5     |
| 2097   | 0     | 0      | 4     | 5      | 5      | 1      | 1      | 5     |
| 2099   | 0     | 0      | 3     | 4      | 4      | 5      | 5      | 5     |
| 2100   | 0     | 1      |       | 4      | 4      | 2      | 2      | 4     |
| 2101   | 0     | 1      |       | 4      | 5      | 5      | 2      | 5     |
| 2103   | 0     | 1      |       | 5      | 5      | 5      | 5      | 5     |
| 2104   | 0     | 1      |       | 6      | 6      | 6      | 6      | 6     |
| 2106   | 0     | 1      |       | 6      | 6      | 6      | 6      | 6     |
| 2111   | 0     | 1      |       | 4      | 5      | 1      | 1      | 4     |
| 2113   | 0     | 1      |       | 6      | 6      | 6      | 6      | 5     |
| 2115   |       |        |       |        |        |        |        |       |
| 2119   | 0     | 0      | 3     | 4      | 5      | 2      | 3      | 4     |
| 2120   |       |        |       |        |        |        |        |       |
| 2123   |       |        |       |        |        |        |        |       |
| 2124   | 0     | 0      | 3     | 4      | 4      | 2      | 2      | 4     |
| 2130   |       |        |       |        |        |        |        |       |
| 2131   | 0     | 0      | 3     | 4      | 5      | 4      | 4      | 4     |
| 2133   | 0     | 0      | 3     | 4      | 4      | 4      | 4      | 4     |
| 2139   | 0     | 0      | 3     | 4      | 6      | 6      | 6      | 6     |
| 2141   |       |        |       |        |        |        |        |       |
| 2143   | 0     | 0      | 3     | 5      | 5      | 1      | 1      | 5     |
| 2144   | 0     | 1      |       | 5      | 5      | 5      | 5      | 5     |
| 2147   |       |        |       |        |        |        |        |       |
| 2151   | 0     | 1      |       | 5      | 5      | 5      | 5      | 5     |
| 2153   | 0     | 1      |       | 6      | 6      | 6      | 6      | 6     |
| 2154   | 0     | 1      |       | 5      | 5      | 2      | 2      | 5     |
| 2155   | 0     | 0      | 3     | 5      | 5      | 2      | 2      | 4     |
| 2159   | 0     | 1      |       | 5      | 5      | 1      | 1      | 3     |
| 2160   | 0     | 0      | 1     | 5      | 4      | 4      | 4      | 4     |
| 2161   | 0     | 1      |       | 6      | 6      | 6      | 6      | 6     |
| 2163   | 0     | 1      |       | 5      | 4      | 5      | 4      | 6     |
| 2164   | 0     | 1      |       | 6      | 6      | 6      | 6      | 6     |

| respid | Q43_9 | Q43_99 | Q44_1 | Q46x1a | Q46x1b | Q46x2a | Q46x2b | Q46x3 |
|--------|-------|--------|-------|--------|--------|--------|--------|-------|
| 2168   | 0     | 1      |       | 5      | 5      | 5      | 5      | 5     |
| 2169   | 0     | 0      | 3     | 4      | 4      | 4      | 4      | 3     |
| 2170   | 0     | 1      |       | 4      | 4      | 5      | 4      | 4     |
| 2171   | 0     | 1      |       | 4      | 4      | 4      | 4      | 4     |
| 2172   | 0     | 1      |       | 4      | 4      | 3      | 3      | 3     |
| 2173   | 0     | 1      |       | 5      | 5      | 1      | 1      | 5     |
| 2174   | 0     | 1      |       | 6      | 6      | 5      | 5      | 5     |
| 2175   | 0     | 0      | 3     | 3      | 5      | 1      | 1      | 4     |
| 2176   | 0     | 0      | 3     | 4      | 5      | 2      | 2      | 4     |
| 2177   | 1     | 0      | 3     | 4      | 3      | 3      | 3      | 4     |
| 2179   | 0     | 0      | 5     | 6      | 6      | 1      | 1      | 6     |
| 2181   | 0     | 1      |       | 5      | 5      | 5      | 5      | 5     |
| 2182   | 0     | 1      |       | 5      | 5      | 1      | 1      | 5     |
| 2183   | 0     | 0      | 2     | 3      | 3      | 3      | 3      | 3     |
| 2184   | 0     | 0      | 3     | 4      | 4      | 4      | 4      | 4     |
| 2185   |       |        |       |        |        |        |        |       |
| 2186   | 0     | 1      |       | 6      | 6      | 6      | 6      | 6     |
| 2187   | 0     | 1      |       | 5      | 5      | 1      | 1      | 4     |
| 2188   | 0     | 0      | 4     | 5      | 5      | 1      | 1      | 5     |
| 2189   |       |        |       |        |        |        |        |       |
| 2190   | 0     | 1      |       | 6      | 6      | 5      | 5      | 5     |
| 2193   | 0     | 1      |       | 4      | 6      | 1      | 1      | 4     |
| 2195   | 0     | 1      |       | 5      | 5      | 1      | 1      | 4     |
| 2198   | 0     | 1      |       | 6      | 6      | 6      | 6      | 6     |
| 2200   | 0     | 1      |       | 5      | 5      | 1      | 1      | 5     |
| 2205   | 0     | 1      |       | 4      | 4      | 4      | 4      | 4     |
| 2208   |       |        |       |        |        |        |        |       |
| 2209   | 0     | 0      | 3     | 4      | 4      | 5      | 4      | 4     |
| 2210   | 0     | 1      |       | 3      | 3      | 2      | 2      | 3     |
| 2211   | 0     | 1      |       | 5      | 5      | 5      | 5      | 5     |
| 2213   | 0     | 1      |       | 5      | 5      | 1      | 1      | 5     |
| 2214   | 0     | 0      | 3     | 3      | 4      | 1      | 2      | 3     |

| respid | Q43_9 | Q43_99 | Q44_1 | Q46x1a | Q46x1b | Q46x2a | Q46x2b | Q46x3 |
|--------|-------|--------|-------|--------|--------|--------|--------|-------|
| 2216   | 0     | 1      |       | 5      | 5      | 2      | 4      | 5     |
| 2220   | 0     | 0      | 4     | 5      | 5      | 5      | 5      | 5     |
| 2225   | 0     | 1      |       | 6      | 6      | 1      | 1      | 5     |
| 2227   | 0     | 1      |       | 5      | 5      | 1      | 1      | 5     |
| 2228   | 0     | 0      | 3     | 4      | 4      | 4      | 4      | 4     |
| 2229   | 0     | 1      |       | 5      | 5      | 5      | 5      | 5     |
| 2230   |       |        |       |        |        |        |        |       |
| 2236   |       |        |       |        |        |        |        |       |
| 2238   | 1     | 0      | 2     | 3      | 3      | 4      | 2      | 3     |
| 2239   | 0     | 0      | 3     | 5      | 5      | 1      | 1      | 5     |
| 2240   | 0     | 1      |       | 6      | 5      | 6      | 6      | 5     |
| 2241   | 0     | 0      | 3     | 5      | 5      | 2      | 2      | 5     |
| 2243   |       |        |       |        |        |        |        |       |
| 2245   | 0     | 1      |       | 2      | 5      | 3      | 3      | 3     |
| 2247   | 0     | 0      | 2     | 4      | 4      | 4      | 4      | 4     |
| 2248   | 0     | 1      |       | 5      | 5      | 5      | 5      | 5     |
| 2249   | 0     | 1      |       | 6      | 6      | 6      | 6      | 6     |
| 2254   | 0     | 0      | 3     | 3      | 6      | 3      | 1      | 5     |
| 2256   | 0     | 0      | 3     | 6      | 6      | 5      | 5      | 5     |
| 2259   | 0     | 0      | 5     | 5      | 5      | 5      | 5      | 5     |
| 2261   | 0     | 1      |       | 5      | 5      | 5      | 5      | 6     |
| 2262   | 0     | 0      | 3     | 6      | 6      | 6      | 6      | 6     |
| 2263   | 0     | 0      | 1     | 4      | 4      | 4      | 4      | 3     |
| 2264   | 0     | 1      |       | 6      | 6      | 2      | 2      | 4     |
| 2265   | 0     | 1      |       | 6      | 6      | 6      | 6      | 6     |
| 2270   | 0     | 0      | 4     | 5      | 5      | 1      | 2      | 4     |
| 2271   | 0     | 1      |       | 5      | 5      | 5      | 5      | 5     |
| 2272   | 0     | 1      |       | 6      | 6      | 1      | 1      | 4     |
| 2273   | 0     | 1      |       | 5      | 5      | 5      | 5      | 5     |
| 2274   | 0     | 1      |       | 5      | 6      | 5      | 5      | 5     |
| 2276   | 0     | 0      | 3     | 4      | 3      | 3      | 4      | 4     |
| 2277   | 0     | 0      | 3     | 5      | 5      | 1      | 1      | 6     |

| respid | Q43_9 | Q43_99 | Q44_1 | Q46x1a | Q46x1b | Q46x2a | Q46x2b | Q46x3 |
|--------|-------|--------|-------|--------|--------|--------|--------|-------|
| 2281   | 0     | 1      |       | 5      | 5      | 5      | 5      | 5     |
| 2288   | 0     | 1      |       | 5      | 5      | 5      | 5      | 6     |
| 2290   | 0     | 1      |       | 6      | 6      | 6      | 6      | 6     |
| 2294   | 0     | 0      | 4     | 4      | 4      | 4      | 3      | 4     |
| 2295   | 0     | 0      | 4     | 5      | 5      | 1      | 1      | 5     |
| 2296   | 0     | 0      | 3     | 4      | 4      | 4      | 4      | 4     |
| 2297   |       |        |       |        |        |        |        |       |
| 2298   | 0     | 1      |       | 5      | 5      | 1      | 1      | 5     |
| 2301   | 0     | 1      |       | 4      | 4      | 2      | 2      | 4     |
| 2302   | 0     | 0      | 3     | 4      | 4      | 4      | 4      | 4     |
| 2303   |       |        |       |        |        |        |        |       |
| 2305   | 0     | 1      |       | 5      | 5      | 5      | 5      | 5     |
| 2309   | 0     | 1      |       | 5      | 5      | 1      | 1      | 4     |
| 2310   | 0     | 0      | 5     | 6      | 6      | 1      | 1      | 5     |
| 2311   | 0     | 0      | 3     | 5      | 5      | 1      | 1      | 4     |
| 2313   | 0     | 0      | 2     | 4      | 4      | 4      | 4      | 4     |
| 2316   |       |        |       |        |        |        |        |       |
| 2317   | 0     | 1      |       | 5      | 5      | 2      | 2      | 4     |
| 2318   | 0     | 0      | 3     | 6      | 6      | 6      | 6      | 6     |
| 2319   | 0     | 0      | 3     | 5      | 5      | 5      | 5      | 5     |
| 2321   | 0     | 1      |       | 5      | 4      | 4      | 4      | 4     |
| 2324   | 0     | 1      |       | 6      | 6      | 5      | 5      | 5     |
| 2328   | 0     | 1      |       | 5      | 5      | 1      | 2      | 5     |
| 2329   |       |        |       |        |        |        |        |       |
| 2330   | 0     | 1      |       | 6      | 6      | 5      | 5      | 5     |
| 2333   | 0     | 0      | 2     | 3      | 3      | 3      | 4      | 5     |
| 2334   | 0     | 0      | 3     | 4      | 4      | 2      | 3      | 4     |
| 2338   | 0     | 1      |       | 5      | 5      | 5      | 5      | 5     |
| 2341   | 0     | 0      | 2     | 4      | 4      | 4      | 4      | 4     |
| 2342   | 0     | 1      |       | 3      | 4      | 2      | 2      | 4     |
| 2343   | 0     | 0      | 2     | 4      | 4      | 5      | 5      | 4     |
| 2346   | 0     | 1      |       | 6      | 6      | 6      | 6      | 6     |

| respid | Q43_9 | Q43_99 | Q44_1 | Q46x1a | Q46x1b | Q46x2a | Q46x2b | Q46x3 |
|--------|-------|--------|-------|--------|--------|--------|--------|-------|
| 2347   | 0     | 0      | 3     | 4      | 4      | 4      | 2      | 4     |
| 2348   | 0     | 1      |       | 4      | 5      | 2      | 2      | 5     |
| 2349   | 0     | 0      | 3     | 6      | 6      | 6      | 6      | 6     |
| 2350   | 0     | 0      | 3     | 5      | 5      | 1      | 1      | 5     |
| 2351   | 0     | 1      |       | 5      | 5      | 5      | 5      | 5     |
| 2352   | 0     | 0      | 3     | 6      | 5      | 6      | 6      | 5     |
| 2359   | 0     | 1      |       | 5      | 5      | 1      | 1      | 5     |
| 2362   |       |        |       |        |        |        |        |       |
| 2363   | 0     | 0      | 5     | 5      | 5      | 5      | 5      | 5     |
| 2365   | 0     | 1      |       | 5      | 5      | 5      | 5      | 5     |
| 2367   | 0     | 0      | 2     | 4      | 3      | 4      | 3      | 4     |
| 2368   | 0     | 1      |       | 5      | 5      | 5      | 5      | 5     |
| 2369   | 0     | 0      | 3     | 5      | 5      | 5      | 5      | 5     |
| 2372   |       |        |       |        |        |        |        |       |
| 2374   | 0     | 0      | 3     | 4      | 4      | 2      | 2      | 4     |
| 2376   | 0     | 1      |       | 5      | 5      | 5      | 5      | 5     |
| 2379   | 0     | 1      |       | 5      | 5      | 1      | 1      | 5     |
| 2380   | 0     | 0      | 4     | 6      | 6      | 6      | 6      | 6     |
| 2381   | 0     | 0      | 2     | 4      | 4      | 4      | 3      | 3     |
| 2382   | 0     | 1      |       | 4      | 5      | 2      | 2      | 6     |
| 2385   | 0     | 1      |       | 5      | 5      | 2      | 2      | 4     |
| 2387   | 0     | 0      | 3     | 5      | 5      | 5      | 5      | 4     |
| 2388   | 0     | 0      | 4     | 5      | 5      | 3      | 3      | 5     |
| 2389   | 0     | 1      |       | 6      | 6      | 5      | 5      | 5     |
| 2391   | 0     | 1      |       | 4      | 6      | 6      | 1      | 4     |
| 2392   | 0     | 1      |       | 3      | 4      | 2      | 2      | 3     |
| 2393   | 0     | 1      |       | 5      | 5      | 5      | 5      | 5     |
| 2394   | 0     | 1      |       | 3      | 4      | 3      | 4      | 4     |
| 2397   | 0     | 1      |       | 5      | 5      | 5      | 5      | 5     |
| 2398   | 0     | 1      |       | 6      | 6      | 6      | 6      | 6     |
| 2400   | 0     | 1      |       | 4      | 4      | 5      | 3      | 3     |
| 2402   | 0     | 1      |       | 5      | 5      | 5      | 5      | 5     |

| respid | Q43_9 | Q43_99 | Q44_1 | Q46x1a | Q46x1b | Q46x2a | Q46x2b | Q46x3 |
|--------|-------|--------|-------|--------|--------|--------|--------|-------|
| 2406   | 0     | 1      |       | 5      | 5      | 1      | 2      | 5     |
| 2408   | 0     | 1      |       | 5      | 5      | 3      | 3      | 4     |
| 2410   | 0     | 0      | 4     | 5      | 5      | 1      | 1      | 5     |
| 2411   | 0     | 0      | 2     | 4      | 4      | 3      | 4      | 3     |
| 2412   | 0     | 1      |       | 6      | 6      | 6      | 6      | 5     |
| 2414   | 0     | 0      | 3     | 2      | 2      | 2      | 2      | 3     |
| 2421   | 0     | 0      | 4     | 6      | 5      | 3      | 3      | 3     |
| 2423   | 0     | 1      |       | 4      | 5      | 2      | 3      | 5     |
| 2424   | 0     | 1      |       | 5      | 5      | 5      | 5      | 5     |
| 2425   | 0     | 1      |       | 5      | 5      | 1      | 1      | 5     |
| 2426   | 0     | 0      | 3     | 5      | 5      | 1      | 2      | 5     |
| 2429   | 0     | 0      | 2     | 4      | 4      | 4      | 4      | 4     |
| 2430   | 0     | 0      | 4     | 5      | 5      | 2      | 2      | 5     |
| 2432   | 0     | 1      |       | 5      | 5      | 5      | 5      | 5     |
| 2433   | 0     | 1      |       | 5      | 6      | 1      | 6      | 5     |
| 2434   | 0     | 1      |       | 5      | 5      | 1      | 1      | 4     |
| 2435   | 0     | 0      | 3     | 6      | 6      | 6      | 6      | 5     |
| 2436   | 0     | 1      |       | 4      | 5      | 6      | 1      | 5     |
| 2439   | 0     | 1      |       | 4      | 4      | 4      | 3      | 4     |
| 2440   | 0     | 1      |       | 4      | 5      | 5      | 4      | 4     |
| 2441   | 0     | 1      |       | 6      | 6      | 6      | 5      | 5     |
| 2446   | 0     | 0      | 3     | 5      | 5      | 2      | 1      | 4     |
| 2448   | 0     | 0      | 2     | 5      | 4      | 4      | 4      | 4     |
| 2449   | 0     | 1      |       | 6      | 6      | 1      | 1      | 5     |
| 2451   | 0     | 0      | 4     | 5      | 5      | 2      | 2      | 5     |
| 2452   | 0     | 0      | 3     | 6      | 6      | 6      | 6      | 6     |
| 2455   |       |        |       |        |        |        |        |       |
| 2457   | 0     | 1      |       | 6      | 6      | 6      | 6      | 6     |
| 2458   | 0     | 1      |       | 5      | 5      | 5      | 5      | 5     |
| 2459   | 0     | 1      |       | 5      | 5      | 1      | 1      | 5     |
| 2460   | 0     | 1      |       | 5      | 5      | 1      | 2      | 4     |
| 2462   | 1     | 0      | 2     | 3      | 2      | 3      | 3      | 2     |



| respid | Q43_9 | Q43_99 | Q44_1 | Q46x1a | Q46x1b | Q46x2a | Q46x2b | Q46x3 |
|--------|-------|--------|-------|--------|--------|--------|--------|-------|
| 2464   | 0     | 0      | 3     | 3      | 4      | 3      | 3      | 4     |
| 2465   | 0     | 1      |       | 6      | 3      | 5      | 5      | 4     |
| 2468   | 0     | 0      | 3     | 5      | 4      | 4      | 5      | 4     |
| 2469   |       |        |       |        |        |        |        |       |
| 2470   | 0     | 0      | 4     | 6      | 6      | 1      | 1      | 4     |
| 2471   | 0     | 0      | 2     | 3      | 3      | 3      | 3      | 3     |
| 2472   | 0     | 0      | 5     | 4      | 4      | 1      | 1      | 4     |
| 2474   | 0     | 1      |       | 4      | 6      | 6      | 6      | 6     |
| 2476   | 0     | 0      | 2     | 4      | 4      | 2      | 2      | 4     |
| 2478   | 0     | 1      |       | 5      | 5      | 2      | 2      | 4     |
| 2479   | 0     | 0      | 3     | 5      | 4      | 5      | 5      | 5     |
| 2480   | 0     | 1      |       | 5      | 5      | 1      | 1      | 5     |
| 2482   | 0     | 1      |       | 6      | 6      | 6      | 6      | 5     |
| 2486   | 0     | 0      | 3     | 4      | 4      | 1      | 1      | 5     |
| 2488   | 0     | 0      | 3     | 3      | 3      | 2      | 1      | 4     |
| 2489   | 0     | 1      |       | 6      | 6      | 6      | 6      | 6     |
| 2491   | 0     | 0      | 5     | 5      | 5      | 1      | 1      | 5     |
| 2495   | 0     | 0      | 3     | 5      | 5      | 5      | 5      | 4     |
| 2496   | 0     | 0      | 3     | 5      | 5      | 6      | 5      | 5     |
| 2498   | 1     | 0      | 3     | 4      | 4      | 6      | 6      | 5     |
| 2501   | 0     | 1      |       | 6      | 6      | 6      | 6      | 6     |
| 2502   | 0     | 1      |       | 6      | 6      | 5      | 5      | 5     |
| 2503   | 0     | 0      | 4     | 5      | 5      | 2      | 2      | 5     |
| 2504   | 0     | 1      |       | 5      | 5      | 5      | 5      | 5     |
| 2507   | 0     | 1      |       | 5      | 5      | 1      | 1      | 5     |
| 2509   | 0     | 0      | 2     | 5      | 5      | 5      | 5      | 5     |
| 2512   | 0     | 1      |       | 4      | 4      | 2      | 2      | 4     |
| 2514   | 0     | 1      |       | 4      | 5      | 5      | 5      | 4     |
| 2516   | 0     | 0      | 4     | 5      | 5      | 5      | 5      | 5     |
| 2517   | 0     | 1      |       | 4      | 5      | 5      | 5      | 5     |
| 2521   | 0     | 0      | 4     | 6      | 6      | 6      | 6      | 6     |
| 2522   | 0     | 1      |       | 4      | 4      | 5      | 5      | 5     |

| respid | Q43_9 | Q43_99 | Q44_1 | Q46x1a | Q46x1b | Q46x2a | Q46x2b | Q46x3 |
|--------|-------|--------|-------|--------|--------|--------|--------|-------|
| 2524   | 0     | 1      |       | 6      | 6      | 5      | 5      | 5     |
| 2525   | 0     | 1      |       | 5      | 5      | 2      | 2      | 5     |
| 2526   | 0     | 0      | 3     | 5      | 5      | 5      | 5      | 5     |
| 2527   | 0     | 1      |       | 2      | 2      | 2      | 2      | 5     |
| 2528   | 0     | 1      |       | 5      | 5      | 1      | 1      | 5     |
| 2531   |       |        |       |        |        |        |        |       |
| 2533   | 0     | 0      | 2     | 4      | 4      | 2      | 3      | 4     |
| 2535   | 0     | 1      |       | 5      | 5      | 5      | 5      | 5     |
| 2536   | 0     | 0      | 2     | 4      | 4      | 2      | 2      | 4     |
| 2539   | 0     | 1      |       | 6      | 6      | 6      | 6      | 5     |
| 2540   | 0     | 1      |       | 5      | 5      | 1      | 1      | 5     |
| 2543   | 0     | 1      |       | 5      | 5      | 5      | 5      | 5     |
| 2546   | 0     | 1      |       | 6      | 6      | 6      | 6      | 6     |
| 2547   | 0     | 1      |       | 5      | 5      | 1      | 1      | 5     |
| 2549   | 0     | 1      |       | 5      | 5      | 2      | 1      | 5     |
| 2553   | 0     | 0      | 4     | 4      | 5      | 1      | 2      | 4     |
| 2554   | 0     | 1      |       | 5      | 5      | 1      | 1      | 5     |
| 2555   | 0     | 1      |       | 6      | 6      | 5      | 5      | 5     |
| 2556   | 0     | 1      |       | 6      | 6      | 6      | 6      | 6     |
| 2557   | 0     | 1      |       | 4      | 4      | 4      | 4      | 4     |
| 2559   | 0     | 1      |       | 5      | 5      | 5      | 5      | 5     |
| 2560   | 0     | 0      | 4     | 3      | 3      | 3      | 4      | 3     |
| 2561   | 0     | 1      |       | 4      | 4      | 1      | 2      | 4     |
| 2566   | 0     | 0      | 3     | 5      | 5      | 6      | 5      | 5     |
| 2567   |       |        |       |        |        |        |        |       |
| 2570   | 0     | 0      | 3     | 5      | 4      | 1      | 1      | 4     |
| 2574   | 0     | 0      | 3     | 2      | 3      | 3      | 3      | 3     |
| 2578   | 0     | 1      |       | 5      | 5      | 5      | 5      | 5     |
| 2580   | 0     | 1      |       | 5      | 5      | 5      | 5      | 5     |
| 2590   | 0     | 0      | 3     | 4      | 6      | 1      | 1      | 5     |
| 2593   | 0     | 1      |       | 4      | 5      | 2      | 2      | 4     |
| 2594   | 0     | 0      | 3     | 5      | 4      | 2      | 4      | 4     |

| respid | Q43_9 | Q43_99 | Q44_1 | Q46x1a | Q46x1b | Q46x2a | Q46x2b | Q46x3 |
|--------|-------|--------|-------|--------|--------|--------|--------|-------|
| 2595   | 0     | 1      |       | 5      | 5      | 5      | 5      | 4     |
| 2596   | 0     | 1      |       | 6      | 6      | 6      | 6      | 6     |
| 2597   | 0     | 0      | 3     | 3      | 2      | 4      | 2      | 3     |
| 2598   | 0     | 1      |       | 5      | 5      | 5      | 5      | 5     |
| 2602   | 0     | 1      |       | 5      | 5      | 5      | 5      | 5     |
| 2605   | 0     | 0      | 3     | 4      | 4      | 3      | 4      | 4     |
| 2606   |       |        |       |        |        |        |        |       |
| 2607   | 0     | 0      | 3     | 4      | 4      | 4      | 2      | 4     |
| 2608   |       |        |       |        |        |        |        |       |
| 2609   | 0     | 1      |       | 5      | 5      | 1      | 3      | 3     |
| 2610   | 0     | 1      |       | 5      | 5      | 5      | 5      | 5     |
| 2614   |       |        |       |        |        |        |        |       |
| 2615   | 0     | 1      |       | 5      | 5      | 5      | 5      | 5     |
| 2616   | 0     | 0      | 4     | 5      | 5      | 5      | 5      | 5     |
| 2618   | 0     | 1      |       | 6      | 6      | 6      | 6      | 6     |
| 2630   | 0     | 1      |       | 4      | 4      | 4      | 3      | 3     |
| 2633   | 0     | 1      |       | 5      | 5      | 5      | 5      | 5     |
| 2637   | 0     | 0      | 4     | 5      | 5      | 5      | 5      | 5     |
| 2638   | 0     | 1      |       | 6      | 6      | 1      | 2      | 5     |
| 2641   | 0     | 0      | 3     | 5      | 5      | 5      | 1      | 5     |
| 2644   | 0     | 1      |       | 5      | 5      | 1      | 1      | 5     |
| 2645   | 0     | 1      |       | 6      | 6      | 6      | 6      | 6     |
| 2646   | 0     | 1      |       | 5      | 5      | 4      | 4      | 4     |
| 2648   | 0     | 1      |       | 5      | 5      | 5      | 5      | 5     |
| 2651   |       |        |       |        |        |        |        |       |
| 2652   | 0     | 1      |       | 4      | 5      | 4      | 4      | 4     |
| 2653   | 0     | 0      | 3     | 5      | 5      | 5      | 5      | 4     |
| 2656   |       |        |       |        |        |        |        |       |
| 2657   | 0     | 1      |       | 4      | 5      | 5      | 4      | 5     |
| 2658   | 0     | 1      |       | 4      | 5      | 3      | 3      | 5     |
| 2661   | 0     | 1      |       | 6      | 6      | 6      | 6      | 6     |
| 2663   | 0     | 0      | 4     | 5      | 5      | 5      | 5      | 5     |

| respid | Q43_9 | Q43_99 | Q44_1 | Q46x1a | Q46x1b | Q46x2a | Q46x2b | Q46x3 |
|--------|-------|--------|-------|--------|--------|--------|--------|-------|
| 2665   | 0     | 1      |       | 6      | 6      | 6      | 6      | 4     |
| 2670   | 0     | 0      | 2     | 6      | 6      | 6      | 6      | 6     |
| 2672   | 0     | 1      |       | 5      | 5      | 5      | 5      | 5     |
| 2673   |       |        |       |        |        |        |        |       |
| 2677   | 0     | 1      |       | 5      | 5      | 5      | 5      | 5     |
| 2686   | 0     | 0      | 3     | 6      | 6      | 4      | 4      | 4     |
| 2688   | 0     | 0      | 2     | 5      | 5      | 5      | 6      | 4     |
| 2689   | 0     | 1      |       | 5      | 5      | 1      | 1      | 4     |
| 2691   | 0     | 1      |       | 5      | 5      | 5      | 5      | 5     |
| 2695   | 0     | 1      |       | 5      | 5      | 1      | 1      | 5     |
| 2696   | 0     | 1      |       | 6      | 6      | 6      | 6      | 6     |
| 2697   |       |        |       |        |        |        |        |       |
| 2698   |       |        |       |        |        |        |        |       |
| 2703   | 0     | 1      |       | 6      | 6      | 6      | 2      | 6     |
| 2704   | 0     | 1      |       | 5      | 5      | 2      | 2      | 5     |
| 2706   | 0     | 0      | 2     | 4      | 4      | 4      | 4      | 6     |
| 2707   | 0     | 0      | 3     | 6      | 6      | 5      | 5      | 5     |
| 2710   | 0     | 1      |       | 5      | 5      | 5      | 5      | 5     |
| 2711   | 0     | 1      |       | 5      | 5      | 2      | 4      | 3     |
| 2712   | 0     | 1      |       | 5      | 4      | 2      | 2      | 4     |
| 2713   |       |        |       |        |        |        |        |       |
| 2721   |       |        |       |        |        |        |        |       |
| 2730   | 0     | 1      |       | 5      | 5      | 4      | 2      | 4     |
| 2731   | 0     | 1      |       | 6      | 6      | 6      | 6      | 6     |
| 2732   | 0     | 1      |       | 5      | 5      | 1      | 1      | 5     |
| 2733   | 0     | 1      |       | 5      | 5      | 5      | 5      | 4     |
| 2735   | 0     | 1      |       | 4      | 4      | 1      | 1      | 4     |
| 2736   | 0     | 1      |       | 4      | 3      | 4      | 4      | 4     |
| 2740   | 0     | 1      |       | 5      | 5      | 5      | 5      | 4     |
| 2741   | 0     | 0      | 5     | 5      | 5      | 2      | 2      | 4     |
| 2742   | 0     | 0      | 3     | 2      | 2      | 3      | 3      | 2     |
| 2743   | 0     | 0      | 4     | 5      | 4      | 2      | 2      | 4     |

| respid | Q43_9 | Q43_99 | Q44_1 | Q46x1a | Q46x1b | Q46x2a | Q46x2b | Q46x3 |
|--------|-------|--------|-------|--------|--------|--------|--------|-------|
| 2744   | 0     | 1      |       | 5      | 5      | 5      | 5      | 5     |
| 2745   | 0     | 0      | 3     | 4      | 4      | 4      | 4      | 4     |
| 2749   | 0     | 1      |       | 6      | 6      | 6      | 6      | 6     |
| 2751   | 0     | 1      |       | 4      | 4      | 1      | 4      | 4     |
| 2754   | 0     | 0      | 3     | 5      | 5      | 1      | 1      | 5     |
| 2755   | 0     | 1      |       | 4      | 3      | 3      | 3      | 4     |
| 2757   | 0     | 1      |       | 6      | 6      | 6      | 6      | 6     |
| 2758   | 0     | 1      |       | 5      | 5      | 2      | 2      | 5     |
| 2759   | 0     | 1      |       | 5      | 5      | 5      | 5      | 5     |
| 2761   | 0     | 1      |       | 6      | 6      | 6      | 6      | 6     |
| 2762   | 0     | 1      |       | 5      | 5      | 1      | 1      | 4     |
| 2763   | 0     | 1      |       | 6      | 6      | 6      | 6      | 6     |
| 2764   | 0     | 0      | 1     | 4      | 2      | 2      | 3      | 3     |
| 2765   | 0     | 1      |       | 4      | 4      | 5      | 5      | 4     |
| 2766   | 0     | 0      | 4     | 5      | 5      | 5      | 5      | 5     |
| 2767   | 0     | 0      | 3     | 3      | 5      | 1      | 1      | 5     |
| 2769   | 0     | 0      | 2     | 4      | 3      | 5      | 5      | 4     |
| 2770   | 0     | 1      |       | 4      | 4      | 2      | 2      | 4     |
| 2771   | 0     | 0      | 3     | 2      | 6      | 2      | 2      | 2     |
| 2774   | 0     | 0      | 3     | 5      | 5      | 5      | 5      | 5     |
| 2777   | 0     | 0      | 2     | 4      | 3      | 2      | 2      | 4     |
| 2778   | 0     | 1      |       | 6      | 4      | 6      | 6      | 6     |
| 2781   | 0     | 0      | 3     | 5      | 5      | 5      | 5      | 5     |
| 2782   | 0     | 0      | 3     | 4      | 4      | 2      | 2      | 4     |
| 2784   | 0     | 0      | 2     | 6      | 6      | 6      | 6      | 6     |
| 2785   | 0     | 1      |       | 5      | 5      | 2      | 2      | 4     |
| 2786   | 0     | 0      | 3     | 5      | 5      | 5      | 4      | 5     |
| 2787   | 0     | 1      |       | 5      | 5      | 1      | 1      | 5     |
| 2789   | 0     | 0      | 3     | 4      | 4      | 4      | 4      | 4     |
| 2790   | 0     | 0      | 2     | 5      | 4      | 2      | 2      | 5     |
| 2791   | 0     | 0      | 3     | 6      | 6      | 6      | 6      | 5     |
| 2793   | 0     | 1      |       | 4      | 4      | 2      | 2      | 3     |

| respid | Q43_9 | Q43_99 | Q44_1 | Q46x1a | Q46x1b | Q46x2a | Q46x2b | Q46x3 |
|--------|-------|--------|-------|--------|--------|--------|--------|-------|
| 2797   | 0     | 1      |       | 4      | 4      | 2      | 2      | 3     |
| 2798   | 0     | 1      |       | 5      | 5      | 1      | 1      | 5     |
| 2799   | 0     | 0      | 3     | 5      | 4      | 1      | 1      | 4     |
| 2801   | 0     | 0      | 3     | 4      | 4      | 2      | 2      | 4     |
| 2802   | 0     | 1      |       | 6      | 6      | 6      | 6      | 6     |
| 2803   | 0     | 1      |       | 4      | 4      | 2      | 2      | 4     |
| 2804   | 0     | 0      | 3     | 4      | 3      | 6      | 3      | 6     |
| 2807   | 0     | 1      |       | 5      | 5      | 5      | 5      | 5     |
| 2809   | 0     | 1      |       | 6      | 6      | 6      | 6      | 5     |
| 2810   | 0     | 0      | 2     | 4      | 4      | 1      | 2      | 4     |
| 2812   | 0     | 1      |       | 5      | 5      | 2      | 2      | 5     |
| 2814   | 0     | 1      |       | 5      | 5      | 1      | 1      | 5     |
| 2815   | 0     | 0      | 3     | 4      | 3      | 1      | 2      | 4     |
| 2816   | 0     | 1      |       | 3      | 3      | 1      | 2      | 4     |
| 2817   | 0     | 0      | 4     | 4      | 4      | 2      | 2      | 4     |
| 2819   | 0     | 1      |       | 4      | 4      | 4      | 4      | 4     |
| 2820   | 0     | 1      |       | 5      | 5      | 5      | 5      | 5     |
| 2821   | 0     | 1      |       | 6      | 6      | 5      | 4      | 3     |
| 2822   | 0     | 0      | 2     | 2      | 4      | 2      | 2      | 3     |
| 2823   | 0     | 1      |       | 6      | 6      | 6      | 6      | 6     |
| 2824   | 0     | 0      | 2     | 4      | 4      | 1      | 1      | 5     |
| 2825   | 0     | 0      | 3     | 5      | 5      | 2      | 2      | 4     |
| 2826   | 0     | 0      | 3     | 5      | 4      | 1      | 1      | 4     |
| 2827   | 0     | 1      |       | 5      | 5      | 5      | 5      | 5     |
| 2828   | 0     | 0      | 3     | 5      | 5      | 1      | 1      | 5     |
| 2829   | 0     | 1      |       | 6      | 6      | 6      | 6      | 6     |
| 2830   | 0     | 0      | 2     | 4      | 4      | 4      | 4      | 4     |
| 2831   | 0     | 1      |       | 5      | 4      | 1      | 1      | 4     |
| 2832   | 0     | 1      |       | 4      | 5      | 1      | 2      | 4     |
| 2833   | 0     | 1      |       | 6      | 6      | 1      | 6      | 5     |
| 2834   | 0     | 1      |       | 5      | 5      | 1      | 1      | 5     |
| 2835   | 0     | 0      | 2     | 3      | 2      | 2      | 4      | 4     |

| respid | Q43_9 | Q43_99 | Q44_1 | Q46x1a | Q46x1b | Q46x2a | Q46x2b | Q46x3 |
|--------|-------|--------|-------|--------|--------|--------|--------|-------|
| 2836   | 0     | 1      |       | 6      | 6      | 1      | 1      | 4     |
| 2837   | 0     | 0      | 4     | 6      | 5      | 5      | 5      | 5     |
| 2838   | 0     | 1      |       | 3      | 5      | 1      | 1      | 3     |
| 2844   | 0     | 0      | 2     | 6      | 6      | 2      | 3      | 3     |
| 2845   | 0     | 0      | 3     | 5      | 5      | 5      | 5      | 5     |
| 2847   | 0     | 1      |       | 6      | 6      | 6      | 6      | 6     |
| 2848   | 0     | 1      |       | 5      | 5      | 2      | 2      | 4     |
| 2849   | 0     | 1      |       | 5      | 5      | 1      | 1      | 4     |
| 2851   | 0     | 1      |       | 5      | 5      | 4      | 5      | 5     |
| 2852   | 0     | 1      |       | 4      | 4      | 2      | 2      | 4     |
| 2853   | 0     | 0      | 3     | 3      | 3      | 3      | 3      | 3     |
| 2854   | 0     | 0      | 2     | 5      | 5      | 1      | 1      | 5     |
| 2856   | 0     | 0      | 3     | 4      | 5      | 4      | 3      | 3     |
| 2857   | 0     | 0      | 3     | 4      | 5      | 1      | 1      | 5     |
| 2858   | 0     | 0      | 3     | 4      | 4      | 4      | 4      | 4     |
| 2859   | 0     | 0      | 2     | 4      | 4      | 5      | 5      | 4     |
| 2860   | 0     | 0      | 2     | 6      | 6      | 1      | 1      | 5     |
| 2861   | 1     | 0      | 2     | 3      | 3      | 3      | 3      | 3     |
| 2863   | 0     | 1      |       | 5      | 5      | 5      | 5      | 5     |
| 2864   | 0     | 1      |       | 6      | 6      | 1      | 1      | 6     |
| 2866   | 0     | 0      | 3     | 5      | 4      | 2      | 2      | 5     |
| 2872   | 0     | 1      |       | 6      | 6      | 6      | 6      | 6     |
| 2875   | 0     | 1      |       | 5      | 5      | 2      | 2      | 5     |
| 2879   |       |        |       |        |        |        |        |       |
| 2881   | 0     | 0      | 3     | 4      | 5      | 1      | 1      | 4     |
| 2882   | 0     | 1      |       | 5      | 5      | 1      | 1      | 5     |
| 2883   | 0     | 1      |       | 5      | 5      | 5      | 5      | 5     |
| 2884   | 0     | 0      | 2     | 3      | 3      | 4      | 4      | 4     |
| 2885   | 0     | 1      |       | 5      | 5      | 1      | 1      | 5     |
| 2887   | 0     | 1      |       | 6      | 5      | 5      | 5      | 5     |
| 2888   | 0     | 0      | 0     | 5      | 5      | 2      | 2      | 5     |
| 2890   | 0     | 0      | 3     | 5      | 5      | 1      | 1      | 4     |

| respid | Q43_9 | Q43_99 | Q44_1 | Q46x1a | Q46x1b | Q46x2a | Q46x2b | Q46x3 |
|--------|-------|--------|-------|--------|--------|--------|--------|-------|
| 2891   | 0     | 0      | 4     | 5      | 5      | 2      | 4      | 4     |
| 2892   |       |        |       |        |        |        |        |       |
| 2895   | 0     | 1      |       | 4      | 5      | 2      | 2      | 4     |
| 2899   | 0     | 1      |       | 4      | 4      | 1      | 1      | 4     |
| 2900   | 0     | 1      |       | 5      | 6      | 5      | 5      | 5     |
| 2902   | 0     | 0      | 0     | 3      | 4      | 1      | 2      | 4     |
| 2903   |       |        |       |        |        |        |        |       |
| 2904   | 0     | 1      |       | 5      | 5      | 1      | 1      | 5     |
| 2906   | 0     | 1      |       | 5      | 5      | 2      | 2      | 4     |
| 2908   | 0     | 1      |       | 6      | 6      | 6      | 6      | 6     |
| 2910   | 0     | 1      |       | 5      | 5      | 5      | 5      | 5     |
| 2917   | 0     | 0      | 1     | 2      | 3      | 3      | 3      | 3     |
| 2918   | 0     | 1      |       | 6      | 6      | 6      | 6      | 4     |
| 2919   | 0     | 1      |       | 5      | 5      | 1      | 1      | 5     |
| 2920   | 0     | 1      |       | 6      | 6      | 6      | 6      | 6     |
| 2921   | 0     | 1      |       | 4      | 4      | 4      | 3      | 4     |
| 2922   | 0     | 1      |       | 6      | 6      | 1      | 1      | 4     |
| 2923   |       |        |       |        |        |        |        |       |
| 2924   | 0     | 0      | 3     | 4      | 3      | 3      | 3      | 3     |
| 2926   | 0     | 0      | 2     | 5      | 5      | 5      | 5      | 5     |
| 2928   | 0     | 1      |       | 6      | 6      | 6      | 6      | 6     |
| 2930   |       |        |       |        |        |        |        |       |
| 2931   | 0     | 1      |       | 4      | 4      | 2      | 2      | 5     |
| 2933   | 0     | 1      |       | 5      | 5      | 5      | 5      | 6     |
| 2935   | 0     | 1      |       | 5      | 5      | 2      | 1      | 4     |
| 2936   |       |        |       |        |        |        |        |       |
| 2937   | 0     | 0      | 3     | 4      | 5      | 5      | 5      | 4     |
| 2938   | 0     | 0      | 4     | 5      | 5      | 5      | 1      | 5     |
| 2944   | 0     | 1      |       | 5      | 5      | 4      | 5      | 5     |
| 2945   | 0     | 0      | 5     | 5      | 5      | 6      | 6      | 5     |
| 2947   | 0     | 0      | 3     | 6      | 6      | 3      | 3      | 3     |
| 2949   | 0     | 1      |       | 6      | 6      | 6      | 6      | 5     |



| respid | Q43_9 | Q43_99 | Q44_1 | Q46x1a | Q46x1b | Q46x2a | Q46x2b | Q46x3 |
|--------|-------|--------|-------|--------|--------|--------|--------|-------|
| 2951   | 0     | 0      | 3     | 4      | 4      | 4      | 4      | 4     |
| 2952   | 0     | 0      | 3     | 3      | 3      | 4      | 4      | 4     |
| 2953   |       |        |       |        |        |        |        |       |
| 2955   | 0     | 0      | 4     | 5      | 5      | 1      | 1      | 5     |
| 2957   | 0     | 0      | 5     | 5      | 5      | 1      | 1      | 5     |
| 2958   | 0     | 1      |       | 5      | 4      | 2      | 3      | 4     |
| 2960   | 0     | 0      | 3     | 5      | 5      | 6      | 6      | 5     |
| 2963   | 0     | 1      |       | 5      | 5      | 1      | 1      | 5     |
| 2964   | 0     | 1      |       | 6      | 6      | 6      | 6      | 6     |
| 2967   |       |        |       |        |        |        |        |       |
| 2968   | 0     | 1      |       | 6      | 6      | 6      | 6      | 6     |
| 2971   | 0     | 1      |       | 4      | 5      | 2      | 2      | 4     |
| 2974   | 0     | 1      |       | 3      | 4      | 1      | 1      | 5     |
| 2975   | 0     | 1      |       | 5      | 5      | 6      | 6      | 5     |
| 2982   |       |        |       |        |        |        |        |       |
| 2983   |       |        |       |        |        |        |        |       |
| 2985   | 0     | 1      |       | 6      | 6      | 1      | 1      | 5     |
| 2986   | 0     | 0      | 2     | 3      | 3      | 2      | 4      | 2     |
| 2987   | 0     | 1      |       | 6      | 6      | 6      | 6      | 6     |
| 2988   | 0     | 0      | 3     | 4      | 5      | 2      | 2      | 4     |
| 2993   | 0     | 1      |       | 5      | 5      | 5      | 5      | 5     |
| 2996   | 0     | 1      |       | 5      | 5      | 5      | 5      | 5     |
| 2997   | 0     | 1      |       | 6      | 6      | 5      | 5      | 5     |
| 2998   | 0     | 1      |       | 5      | 5      | 5      | 5      | 5     |
| 3004   | 0     | 1      |       | 5      | 5      | 6      | 6      | 5     |
| 3007   | 0     | 0      | 3     | 4      | 5      | 2      | 3      | 3     |
| 3011   | 0     | 0      | 1     | 3      | 3      | 4      | 3      | 3     |
| 3012   | 0     | 1      |       | 5      | 5      | 4      | 5      | 5     |
| 3013   | 0     | 1      |       | 4      | 5      | 5      | 5      | 5     |
| 3014   |       |        |       |        |        |        |        |       |
| 3015   | 0     | 1      |       | 5      | 5      | 2      | 2      | 4     |
| 3016   |       |        |       |        |        |        |        |       |

| respid | Q43_9 | Q43_99 | Q44_1 | Q46x1a | Q46x1b | Q46x2a | Q46x2b | Q46x3 |
|--------|-------|--------|-------|--------|--------|--------|--------|-------|
| 3017   | 0     | 1      |       | 4      | 5      | 1      | 1      | 4     |
| 3020   | 0     | 1      |       | 5      | 4      | 2      | 2      | 4     |
| 3022   | 0     | 1      |       | 5      | 5      | 5      | 5      | 5     |
| 3023   | 0     | 1      |       | 5      | 5      | 1      | 1      | 5     |
| 3026   | 0     | 0      | 1     | 3      | 3      | 1      | 1      | 4     |
| 3038   | 0     | 0      | 3     | 4      | 4      | 4      | 4      | 4     |
| 3039   | 0     | 0      | 3     | 4      | 4      | 3      | 4      | 3     |
| 3040   | 0     | 1      |       | 5      | 5      | 5      | 5      | 4     |
| 3041   |       |        |       |        |        |        |        |       |
| 3042   | 0     | 0      | 2     | 3      | 4      | 4      | 4      | 3     |
| 3044   | 0     | 1      |       | 6      | 6      | 6      | 6      | 6     |
| 3050   | 0     | 0      | 4     | 5      | 5      | 5      | 5      | 5     |
| 3052   | 0     | 1      |       | 5      | 5      | 1      | 1      | 5     |
| 3056   | 0     | 0      | 2     | 4      | 4      | 4      | 4      | 4     |
| 3059   | 0     | 1      |       | 6      | 6      | 5      | 5      | 5     |
| 3060   | 0     | 1      |       | 5      | 5      | 6      | 5      | 5     |
| 3063   | 0     | 1      |       | 5      | 3      | 5      | 4      | 4     |
| 3065   | 0     | 0      | 4     | 4      | 4      | 5      | 5      | 5     |
| 3067   | 0     | 0      | 2     | 4      | 3      | 2      | 4      | 5     |
| 3068   |       |        |       |        |        |        |        |       |
| 3072   | 0     | 1      |       | 6      | 6      | 5      | 5      | 5     |
| 3074   | 0     | 1      |       | 6      | 6      | 6      | 6      | 6     |
| 3075   | 0     | 1      |       | 5      | 5      | 1      | 1      | 5     |
| 3076   | 0     | 1      |       | 5      | 5      | 5      | 5      | 5     |
| 3079   | 0     | 1      |       | 5      | 5      | 2      | 2      | 5     |
| 3082   | 0     | 0      | 3     | 2      | 3      | 2      | 2      | 2     |
| 3083   | 0     | 1      |       | 5      | 5      | 3      | 1      | 5     |
| 3084   | 0     | 0      | 4     | 5      | 5      | 1      | 1      | 6     |
| 3085   | 0     | 1      |       | 6      | 6      | 6      | 6      | 6     |
| 3090   | 0     | 1      |       | 5      | 5      | 1      | 1      | 5     |
| 3091   | 0     | 0      | 3     | 4      | 5      | 2      | 1      | 4     |
| 3092   | 0     | 1      |       | 6      | 6      | 6      | 6      | 6     |

| respid | Q43_9 | Q43_99 | Q44_1 | Q46x1a | Q46x1b | Q46x2a | Q46x2b | Q46x3 |
|--------|-------|--------|-------|--------|--------|--------|--------|-------|
| 3095   | 0     | 1      |       | 5      | 4      | 1      | 1      | 5     |
| 3096   | 1     | 0      | 2     | 2      | 3      | 2      | 3      | 2     |
| 3097   | 0     | 1      |       | 5      | 5      | 5      | 5      | 5     |
| 3099   | 0     | 0      | 4     | 2      | 2      | 3      | 2      | 2     |
| 3101   | 0     | 0      | 3     | 4      | 6      | 4      | 4      | 5     |
| 3103   | 0     | 1      |       | 5      | 5      | 5      | 5      | 5     |
| 3104   | 0     | 1      |       | 3      | 3      | 3      | 4      | 4     |
| 3105   |       |        |       |        |        |        |        |       |
| 3107   | 0     | 0      | 3     | 3      | 1      | 1      | 1      | 1     |
| 3108   | 0     | 1      |       | 4      | 5      | 1      | 1      | 5     |
| 3109   | 0     | 0      | 4     | 5      | 5      | 5      | 5      | 5     |
| 3116   | 0     | 0      | 3     | 6      | 6      | 6      | 6      | 6     |
| 3117   | 0     | 0      | 2     | 5      | 5      | 3      | 3      | 3     |
| 3119   | 0     | 1      |       | 5      | 5      | 5      | 5      | 5     |
| 3120   | 0     | 1      |       | 6      | 6      | 6      | 6      | 6     |
| 3130   | 0     | 1      |       | 6      | 6      | 5      | 5      | 6     |
| 3131   | 0     | 0      | 3     | 6      | 6      | 6      | 6      | 6     |
| 3133   | 0     | 0      | 3     | 5      | 5      | 5      | 5      | 5     |
| 3134   | 0     | 1      |       | 3      | 4      | 2      | 2      | 3     |
| 3135   | 0     | 1      |       | 4      | 5      | 1      | 2      | 4     |
| 3145   | 0     | 0      | 2     | 4      | 4      | 4      | 4      | 4     |
| 3147   | 0     | 1      |       | 6      | 6      | 1      | 1      | 5     |
| 3152   | 0     | 0      | 3     | 5      | 5      | 1      | 1      | 5     |
| 3155   | 0     | 0      | 2     | 2      | 1      | 2      | 3      | 1     |
| 3156   |       |        |       |        |        |        |        |       |
| 3157   | 0     | 0      | 3     | 4      | 4      | 4      | 4      | 3     |
| 3166   | 0     | 0      | 4     | 5      | 5      | 2      | 2      | 4     |
| 3169   | 0     | 0      | 5     | 6      | 4      | 2      | 4      | 4     |
| 3179   | 1     | 0      | 4     | 5      | 5      | 5      | 5      | 5     |
| 3181   | 0     | 1      |       | 6      | 6      | 6      | 6      | 6     |
| 3185   |       |        |       |        |        |        |        |       |
| 3190   | 0     | 1      |       | 6      | 6      | 6      | 6      | 6     |

| respid | Q43_9 | Q43_99 | Q44_1 | Q46x1a | Q46x1b | Q46x2a | Q46x2b | Q46x3 |
|--------|-------|--------|-------|--------|--------|--------|--------|-------|
| 3191   |       |        |       |        |        |        |        |       |
| 3192   | 0     | 0      | 5     | 5      | 5      | 5      | 5      | 5     |
| 3193   | 0     | 1      |       | 6      | 5      | 3      | 3      | 4     |
| 3195   | 0     | 1      |       | 5      | 5      | 1      | 1      | 5     |
| 3202   | 0     | 0      | 3     | 5      | 4      | 1      | 2      | 5     |
| 3204   | 0     | 1      |       | 5      | 5      | 5      | 5      | 5     |
| 3208   | 0     | 1      |       | 5      | 5      | 2      | 4      | 4     |
| 3212   | 0     | 1      |       | 6      | 6      | 6      | 6      | 5     |
| 3218   | 0     | 1      |       | 6      | 6      | 6      | 6      | 6     |
| 3219   | 0     | 0      | 4     | 5      | 5      | 5      | 5      | 5     |
| 3220   | 0     | 1      |       | 5      | 5      | 1      | 1      | 5     |
| 3221   | 0     | 0      | 3     | 4      | 4      | 2      | 2      | 4     |
| 3223   | 0     | 1      |       | 6      | 6      | 6      | 6      | 5     |
| 3231   | 0     | 1      |       | 4      | 4      | 2      | 2      | 3     |
| 3232   | 0     | 0      | 2     | 3      | 3      | 3      | 3      | 3     |
| 3234   | 0     | 0      | 3     | 3      | 4      | 5      | 5      | 5     |
| 3235   | 0     | 1      |       | 5      | 5      | 5      | 5      | 5     |
| 3237   | 0     | 0      | 4     | 4      | 4      | 1      | 1      | 4     |
| 3238   | 0     | 1      |       | 5      | 5      | 5      | 5      | 5     |
| 3240   | 0     | 1      |       | 5      | 5      | 1      | 2      | 5     |
| 3241   | 0     | 1      |       | 6      | 6      | 5      | 5      | 5     |
| 3243   | 0     | 0      | 2     | 3      | 4      | 1      | 2      | 4     |
| 3244   | 0     | 1      |       | 5      | 5      | 1      | 1      | 4     |
| 3247   | 0     | 1      |       | 5      | 5      | 1      | 1      | 5     |
| 3250   | 0     | 1      |       | 5      | 5      | 1      | 1      | 5     |
| 3251   | 1     | 0      | 3     | 3      | 3      | 3      | 3      | 3     |
| 3255   | 0     | 1      |       | 5      | 5      | 1      | 2      | 5     |
| 3256   | 0     | 1      |       | 6      | 6      | 6      | 6      | 6     |
| 3257   | 0     | 1      |       | 5      | 5      | 1      | 1      | 5     |
| 3258   |       |        |       |        |        |        |        |       |
| 3259   | 0     | 1      |       | 6      | 6      | 6      | 6      | 6     |
| 3260   | 0     | 1      |       | 5      | 5      | 2      | 2      | 5     |

| respid | Q43_9 | Q43_99 | Q44_1 | Q46x1a | Q46x1b | Q46x2a | Q46x2b | Q46x3 |
|--------|-------|--------|-------|--------|--------|--------|--------|-------|
| 3261   |       |        |       |        |        |        |        |       |
| 3262   | 0     | 1      |       | 5      | 5      | 3      | 3      | 4     |
| 3264   | 0     | 0      | 3     | 4      | 4      | 2      | 2      | 4     |
| 3265   | 0     | 1      |       | 5      | 5      | 5      | 5      | 5     |
| 3267   | 0     | 1      |       | 4      | 4      | 1      | 2      | 5     |
| 3268   | 0     | 0      | 3     | 3      | 4      | 3      | 3      | 4     |
| 3270   | 0     | 1      |       | 5      | 5      | 1      | 1      | 5     |
| 3271   | 0     | 1      |       | 5      | 4      | 4      | 4      | 4     |
| 3274   |       |        |       |        |        |        |        |       |
| 3276   | 0     | 1      |       | 6      | 6      | 6      | 6      | 6     |
| 3277   | 0     | 0      | 4     | 5      | 5      | 2      | 3      | 5     |
| 3279   | 0     | 1      |       | 5      | 5      | 5      | 5      | 5     |
| 3281   |       |        |       |        |        |        |        |       |
| 3283   | 0     | 0      | 2     | 4      | 5      | 1      | 2      | 4     |
| 3285   | 0     | 0      | 3     | 4      | 4      | 2      | 2      | 4     |
| 3286   | 0     | 1      |       | 5      | 5      | 5      | 5      | 5     |
| 3287   | 0     | 1      |       | 3      | 5      | 4      | 4      | 4     |
| 3289   | 0     | 1      |       | 6      | 6      | 6      | 6      | 5     |
| 3290   | 0     | 1      |       | 6      | 6      | 6      | 6      | 6     |
| 3291   | 0     | 0      | 4     | 5      | 5      | 3      | 3      | 5     |
| 3292   | 1     | 0      | 2     | 3      | 3      | 2      | 2      | 3     |
| 3293   | 0     | 0      | 2     | 4      | 3      | 2      | 3      | 3     |
| 3294   | 0     | 0      | 4     | 5      | 5      | 4      | 4      | 5     |
| 3296   | 0     | 1      |       | 5      | 4      | 1      | 1      | 4     |
| 3306   | 0     | 1      |       | 5      | 5      | 2      | 4      | 4     |
| 3307   | 0     | 0      | 2     | 3      | 2      | 3      | 4      | 3     |
| 3308   | 0     | 1      |       | 5      | 5      | 1      | 1      | 5     |
| 3312   | 0     | 0      | 4     | 5      | 5      | 6      | 6      | 5     |
| 3313   | 0     | 0      | 2     | 4      | 5      | 5      | 5      | 4     |
| 3316   | 0     | 1      |       | 5      | 5      | 1      | 1      | 4     |
| 3317   | 0     | 0      | 2     | 5      | 5      | 5      | 4      | 4     |
| 3320   | 0     | 0      | 3     | 6      | 6      | 6      | 6      | 6     |

| respid | Q43_9 | Q43_99 | Q44_1 | Q46x1a | Q46x1b | Q46x2a | Q46x2b | Q46x3 |
|--------|-------|--------|-------|--------|--------|--------|--------|-------|
| 3321   | 0     | 0      | 3     | 5      | 5      | 2      | 2      | 5     |
| 3322   | 0     | 1      |       | 5      | 5      | 5      | 5      | 5     |
| 3323   | 0     | 1      |       | 5      | 5      | 6      | 6      | 5     |
| 3325   |       |        |       |        |        |        |        |       |
| 3332   | 0     | 1      |       | 5      | 5      | 2      | 2      | 5     |
| 3334   | 0     | 1      |       | 5      | 5      | 5      | 5      | 5     |
| 3335   | 0     | 0      | 4     | 6      | 6      | 6      | 6      | 4     |
| 3341   | 0     | 1      |       | 5      | 4      | 2      | 2      | 4     |
| 3345   | 0     | 1      |       | 4      | 4      | 2      | 2      | 4     |
| 3346   | 0     | 1      |       | 6      | 6      | 6      | 6      | 6     |
| 3349   | 0     | 0      | 4     | 4      | 3      | 4      | 4      | 4     |
| 3351   | 0     | 1      |       | 5      | 5      | 1      | 1      | 5     |
| 3353   | 0     | 1      |       | 4      | 5      | 5      | 5      | 5     |
| 3354   | 0     | 0      | 2     | 4      | 4      | 5      | 5      | 4     |
| 3356   | 0     | 1      |       | 4      | 4      | 3      | 3      | 4     |
| 3357   | 0     | 1      |       | 6      | 6      | 6      | 6      | 5     |
| 3360   | 0     | 0      | 2     | 6      | 5      | 2      | 2      | 5     |
| 3361   | 0     | 0      | 3     | 5      | 5      | 1      | 2      | 4     |
| 3362   | 0     | 1      |       | 5      | 4      | 3      | 2      | 5     |
| 3363   |       |        |       |        |        |        |        |       |
| 3364   | 0     | 0      | 3     | 2      | 2      | 3      | 2      | 3     |
| 3368   | 0     | 1      |       | 5      | 5      | 5      | 5      | 4     |
| 3370   | 0     | 0      | 3     | 4      | 4      | 4      | 4      | 4     |
| 3371   | 0     | 1      |       | 6      | 5      | 5      | 5      | 5     |
| 3379   | 0     | 0      | 4     | 5      | 5      | 4      | 4      | 4     |
| 3380   | 0     | 0      | 4     | 4      | 4      | 5      | 4      | 4     |
| 3382   | 0     | 1      |       | 6      | 6      | 2      | 2      | 4     |
| 3384   | 0     | 0      | 2     | 4      | 3      | 4      | 4      | 4     |
| 3385   | 0     | 1      |       | 6      | 6      | 6      | 6      | 6     |
| 3388   | 0     | 1      |       | 6      | 6      | 2      | 2      | 5     |
| 3392   | 0     | 1      |       | 5      | 5      | 1      | 1      | 4     |
| 3393   | 0     | 1      |       | 5      | 5      | 5      | 5      | 5     |

| respid | Q43_9 | Q43_99 | Q44_1 | Q46x1a | Q46x1b | Q46x2a | Q46x2b | Q46x3 |
|--------|-------|--------|-------|--------|--------|--------|--------|-------|
| 3394   | 0     | 0      | 2     | 3      | 4      | 2      | 3      | 4     |
| 3395   | 0     | 1      |       | 4      | 4      | 6      | 6      | 6     |
| 3396   | 0     | 1      |       | 6      | 6      | 6      | 6      | 6     |
| 3397   | 0     | 0      | 3     | 6      | 6      | 6      | 5      | 4     |
| 3398   | 0     | 1      |       | 5      | 5      | 1      | 1      | 4     |
| 3399   | 0     | 0      | 3     | 3      | 3      | 4      | 4      | 4     |
| 3400   | 0     | 1      |       | 5      | 5      | 2      | 2      | 5     |
| 3401   | 0     | 0      | 3     | 1      | 3      | 4      | 2      | 4     |
| 3402   | 0     | 0      | 2     | 5      | 4      | 4      | 5      | 4     |
| 3403   | 0     | 0      | 3     | 4      | 4      | 4      | 4      | 4     |
| 3405   | 1     | 0      | 0     | 1      | 1      | 1      | 1      | 1     |
| 3407   | 0     | 0      | 2     | 4      | 4      | 4      | 4      | 4     |
| 3410   | 0     | 1      |       | 5      | 5      | 5      | 5      | 5     |
| 3411   | 0     | 1      |       | 3      | 4      | 2      | 3      | 4     |
| 3413   |       |        |       |        |        |        |        |       |
| 3414   | 0     | 1      |       | 5      | 5      | 5      | 5      | 5     |
| 3420   | 0     | 1      |       | 5      | 5      | 1      | 1      | 5     |
| 3421   | 0     | 0      | 3     | 4      | 4      | 4      | 4      | 4     |
| 3425   | 0     | 1      |       | 4      | 5      | 1      | 1      | 5     |
| 3426   | 0     | 0      | 3     | 4      | 4      | 4      | 5      | 5     |
| 3429   | 0     | 0      | 4     | 4      | 4      | 2      | 2      | 4     |
| 3430   | 0     | 0      | 2     | 4      | 3      | 3      | 3      | 4     |
| 3433   | 0     | 1      |       | 6      | 6      | 6      | 6      | 6     |
| 3434   | 0     | 0      | 3     | 4      | 4      | 2      | 2      | 2     |
| 3437   | 0     | 1      |       | 6      | 6      | 6      | 6      | 6     |
| 3439   | 0     | 0      | 2     | 4      | 5      | 5      | 6      | 6     |
| 3441   | 0     | 0      | 2     | 4      | 4      | 4      | 3      | 4     |
| 3442   | 0     | 1      |       | 4      | 4      | 5      | 4      | 4     |
| 3444   | 0     | 1      |       | 5      | 5      | 1      | 4      | 5     |
| 3445   | 0     | 1      |       | 4      | 4      | 2      | 2      | 4     |
| 3450   | 0     | 0      | 3     | 4      | 4      | 4      | 5      | 4     |
| 3452   | 0     | 1      |       | 5      | 5      | 2      | 4      | 2     |

| respid | Q43_9 | Q43_99 | Q44_1 | Q46x1a | Q46x1b | Q46x2a | Q46x2b | Q46x3 |
|--------|-------|--------|-------|--------|--------|--------|--------|-------|
| 3456   | 0     | 1      |       | 4      | 5      | 2      | 2      | 5     |
| 3459   |       |        |       |        |        |        |        |       |
| 3460   | 0     | 1      |       | 5      | 5      | 5      | 5      | 5     |
| 3461   | 0     | 1      |       | 5      | 5      | 2      | 2      | 4     |
| 3466   | 0     | 1      |       | 4      | 4      | 4      | 4      | 3     |
| 3471   | 0     | 1      |       | 4      | 4      | 2      | 2      | 4     |
| 3473   | 0     | 1      |       | 5      | 5      | 5      | 5      | 5     |
| 3475   | 0     | 0      | 3     | 4      | 4      | 4      | 4      | 4     |
| 3476   | 0     | 0      | 3     | 4      | 5      | 4      | 4      | 4     |
| 3477   | 0     | 0      | 3     | 4      | 5      | 2      | 2      | 3     |
| 3478   |       |        |       |        |        |        |        |       |
| 3479   | 0     | 1      |       | 5      | 5      | 2      | 2      | 4     |
| 3482   | 0     | 1      |       | 4      | 5      | 4      | 5      | 4     |
| 3483   | 0     | 1      |       | 6      | 6      | 6      | 6      | 6     |
| 3485   | 0     | 0      | 3     | 5      | 3      | 4      | 3      | 4     |
| 3489   |       |        |       |        |        |        |        |       |
| 3490   | 0     | 0      | 4     | 4      | 4      | 5      | 4      | 4     |
| 3491   | 0     | 0      | 2     | 4      | 3      | 3      | 3      | 3     |
| 3494   | 0     | 1      |       | 4      | 4      | 2      | 2      | 4     |
| 3495   | 0     | 0      | 3     | 4      | 4      | 4      | 4      | 4     |
| 3501   | 0     | 1      |       | 5      | 5      | 5      | 5      | 5     |
| 3506   | 0     | 1      |       | 5      | 5      | 2      | 2      | 4     |
| 3507   | 0     | 0      | 4     | 5      | 5      | 1      | 1      | 5     |
| 3517   | 0     | 1      |       | 5      | 5      | 2      | 2      | 5     |
| 3520   | 0     | 1      |       | 4      | 5      | 5      | 5      | 5     |
| 3521   | 0     | 0      | 5     | 4      | 4      | 1      | 1      | 4     |
| 3522   | 0     | 1      |       | 5      | 6      | 1      | 1      | 4     |
| 3524   | 0     | 1      |       | 5      | 5      | 5      | 5      | 5     |
| 3527   | 0     | 1      |       | 5      | 5      | 5      | 5      | 5     |
| 3528   | 0     | 1      |       | 6      | 6      | 6      | 6      | 6     |
| 3529   | 0     | 1      |       | 5      | 5      | 2      | 2      | 4     |
| 3536   | 0     | 0      | 3     | 3      | 3      | 6      | 2      | 3     |



| respid | Q43_9 | Q43_99 | Q44_1 | Q46x1a | Q46x1b | Q46x2a | Q46x2b | Q46x3 |
|--------|-------|--------|-------|--------|--------|--------|--------|-------|
| 3537   | 0     | 1      |       | 6      | 6      | 2      | 2      | 4     |
| 3538   | 0     | 0      | 3     | 5      | 5      | 1      | 1      | 5     |
| 3540   | 0     | 0      | 2     | 4      | 4      | 3      | 4      | 4     |
| 3545   | 0     | 0      | 5     | 5      | 5      | 1      | 1      | 5     |
| 3547   | 0     | 0      | 2     | 3      | 4      | 2      | 2      | 4     |
| 3554   | 0     | 1      |       | 6      | 6      | 6      | 6      | 6     |
| 3556   | 0     | 1      |       | 6      | 6      | 6      | 6      | 6     |
| 3557   | 0     | 0      | 4     | 5      | 5      | 1      | 1      | 5     |
| 3559   | 0     | 0      | 2     | 4      | 4      | 4      | 4      | 3     |
| 3560   | 0     | 0      | 2     | 6      | 6      | 1      | 1      | 4     |
| 3562   | 0     | 1      |       | 5      | 5      | 1      | 1      | 5     |
| 3564   | 0     | 0      | 3     | 3      | 5      | 1      | 2      | 4     |
| 3565   | 0     | 0      | 1     | 4      | 4      | 4      | 3      | 4     |
| 3568   | 0     | 0      | 3     | 4      | 4      | 2      | 2      | 4     |
| 3572   |       |        |       |        |        |        |        |       |
| 3578   |       |        |       |        |        |        |        |       |
| 3581   | 0     | 1      |       | 5      | 5      | 5      | 5      | 5     |
| 3583   | 0     | 0      | 3     | 4      | 5      | 3      | 2      | 3     |
| 3588   | 0     | 1      |       | 5      | 5      | 5      | 5      | 5     |
| 3591   | 0     | 1      |       | 5      | 5      | 5      | 5      | 5     |
| 3594   | 0     | 1      |       | 5      | 5      | 1      | 1      | 5     |
| 3595   | 0     | 1      |       | 6      | 6      | 1      | 1      | 5     |
| 3596   | 0     | 0      | 3     | 6      | 6      | 6      | 6      | 6     |
| 3597   | 0     | 1      |       | 6      | 6      | 6      | 6      | 6     |
| 3598   |       |        |       |        |        |        |        |       |
| 3600   | 0     | 1      |       | 4      | 4      | 5      | 1      | 4     |
| 3602   | 0     | 0      | 4     | 5      | 5      | 5      | 5      | 5     |
| 3604   | 0     | 1      |       | 5      | 5      | 1      | 1      | 5     |
| 3605   | 0     | 1      |       | 4      | 4      | 4      | 4      | 4     |
| 3606   | 0     | 1      |       | 4      | 4      | 5      | 5      | 4     |
| 3607   |       |        |       |        |        |        |        |       |
| 3610   | 0     | 1      |       | 6      | 6      | 6      | 6      | 6     |

| respid | Q43_9 | Q43_99 | Q44_1 | Q46x1a | Q46x1b | Q46x2a | Q46x2b | Q46x3 |
|--------|-------|--------|-------|--------|--------|--------|--------|-------|
| 3611   | 0     | 1      |       | 5      | 5      | 1      | 1      | 5     |
| 3612   | 0     | 1      |       | 6      | 5      | 5      | 5      | 5     |
| 3614   | 0     | 1      |       | 5      | 5      | 1      | 1      | 5     |
| 3616   | 0     | 1      |       | 5      | 5      | 5      | 5      | 5     |
| 3617   | 0     | 0      | 4     | 4      | 5      | 2      | 2      | 4     |
| 3618   |       |        |       |        |        |        |        |       |
| 3619   | 0     | 0      | 2     | 4      | 4      | 4      | 4      | 4     |
| 3621   | 0     | 0      | 2     | 2      | 5      | 1      | 1      | 3     |
| 3622   | 0     | 1      |       | 5      | 5      | 2      | 2      | 6     |
| 3624   | 0     | 0      | 3     | 5      | 5      | 3      | 1      | 5     |
| 3626   | 0     | 1      |       | 6      | 5      | 6      | 6      | 5     |
| 3629   | 0     | 1      |       | 5      | 5      | 5      | 5      | 5     |
| 3631   | 0     | 1      |       | 5      | 5      | 5      | 5      | 5     |
| 3632   | 0     | 1      |       | 5      | 5      | 2      | 2      | 4     |
| 3638   | 0     | 1      |       | 5      | 5      | 3      | 3      | 5     |
| 3640   | 0     | 0      | 3     | 5      | 5      | 1      | 1      | 5     |
| 3641   | 0     | 0      | 3     | 5      | 4      | 2      | 3      | 5     |
| 3645   | 0     | 1      |       | 4      | 4      | 2      | 3      | 4     |
| 3650   |       |        |       |        |        |        |        |       |
| 3653   | 0     | 0      | 3     | 3      | 3      | 2      | 4      | 5     |
| 3655   | 0     | 0      | 2     | 4      | 4      | 2      | 2      | 3     |
| 3657   | 0     | 1      |       | 4      | 5      | 1      | 2      | 5     |
| 3658   | 0     | 1      |       | 5      | 5      | 5      | 5      | 5     |
| 3659   | 0     | 1      |       | 6      | 6      | 6      | 6      | 6     |
| 3664   | 1     | 0      | 3     | 3      | 3      | 4      | 4      | 3     |
| 3665   | 0     | 0      | 3     | 5      | 5      | 2      | 2      | 5     |
| 3667   | 0     | 1      |       | 5      | 5      | 5      | 5      | 5     |
| 3668   | 0     | 0      | 3     | 3      | 3      | 4      | 3      | 3     |
| 3675   |       |        |       |        |        |        |        |       |
| 3678   |       |        |       |        |        |        |        |       |
| 3680   |       |        |       |        |        |        |        |       |
| 3684   | 0     | 0      | 3     | 4      | 5      | 3      | 2      | 4     |

| respid | Q43_9 | Q43_99 | Q44_1 | Q46x1a | Q46x1b | Q46x2a | Q46x2b | Q46x3 |
|--------|-------|--------|-------|--------|--------|--------|--------|-------|
| 3685   | 0     | 1      |       | 4      | 4      | 4      | 4      | 6     |
| 3687   | 0     | 0      | 3     | 4      | 5      | 4      | 4      | 4     |
| 3689   | 0     | 0      | 3     | 3      | 2      | 3      | 3      | 4     |
| 3690   | 0     | 1      |       | 5      | 5      | 4      | 4      | 4     |
| 3693   |       |        |       |        |        |        |        |       |
| 3694   | 0     | 1      |       | 5      | 5      | 5      | 6      | 5     |
| 3695   |       |        |       |        |        |        |        |       |
| 3700   | 0     | 1      |       | 5      | 5      | 5      | 5      | 5     |
| 3701   | 0     | 0      | 3     | 5      | 5      | 2      | 2      | 5     |
| 3703   | 0     | 0      | 4     | 5      | 5      | 5      | 5      | 4     |
| 3704   | 0     | 0      | 3     | 2      | 2      | 3      | 3      | 2     |
| 3705   |       |        |       |        |        |        |        |       |
| 3709   | 0     | 1      |       | 5      | 5      | 5      | 5      | 5     |
| 3710   | 0     | 0      | 3     | 4      | 6      | 1      | 2      | 4     |
| 3722   | 0     | 0      | 4     | 5      | 5      | 5      | 5      | 5     |
| 3725   | 0     | 1      |       | 4      | 5      | 5      | 5      | 5     |
| 3726   | 0     | 1      |       | 5      | 5      | 5      | 5      | 5     |
| 3727   | 0     | 1      |       | 5      | 5      | 1      | 1      | 4     |
| 3728   | 0     | 0      | 2     | 3      | 3      | 3      | 4      | 3     |
| 3729   | 0     | 1      |       | 5      | 5      | 1      | 1      | 5     |
| 3731   |       |        |       |        |        |        |        |       |
| 3738   | 0     | 1      |       | 6      | 6      | 6      | 6      | 6     |
| 3739   | 0     | 1      |       | 4      | 4      | 2      | 2      | 4     |
| 3740   | 0     | 1      |       | 5      | 5      | 1      | 1      | 5     |
| 3749   | 0     | 0      | 3     | 4      | 4      | 4      | 4      | 4     |
| 3758   | 0     | 0      | 3     | 3      | 4      | 3      | 3      | 4     |
| 3762   | 0     | 1      |       | 6      | 6      | 3      | 5      | 5     |
| 3765   | 0     | 0      | 5     | 5      | 5      | 1      | 1      | 5     |
| 3770   | 0     | 1      |       | 5      | 5      | 5      | 5      | 5     |
| 3771   |       |        |       |        |        |        |        |       |
| 3778   | 0     | 0      | 3     | 5      | 5      | 1      | 1      | 5     |
| 3779   | 0     | 1      |       | 5      | 5      | 6      | 6      | 6     |

| respid | Q43_9 | Q43_99 | Q44_1 | Q46x1a | Q46x1b | Q46x2a | Q46x2b | Q46x3 |
|--------|-------|--------|-------|--------|--------|--------|--------|-------|
| 3780   | 0     | 1      |       | 4      | 4      | 1      | 1      | 5     |
| 3782   | 0     | 0      | 3     | 5      | 5      | 5      | 5      | 5     |
| 3784   | 0     | 0      | 4     | 4      | 4      | 4      | 4      | 5     |
| 3787   | 0     | 1      |       | 6      | 6      | 6      | 6      | 6     |
| 3790   | 0     | 1      |       | 5      | 5      | 4      | 4      | 2     |
| 3791   | 0     | 0      | 2     | 4      | 4      | 4      | 4      | 4     |
| 3793   | 0     | 0      | 2     | 4      | 4      | 3      | 4      | 4     |
| 3795   | 0     | 1      |       | 6      | 5      | 4      | 5      | 5     |
| 3799   |       |        |       |        |        |        |        |       |
| 3801   | 0     | 1      |       | 3      | 2      | 3      | 3      | 3     |
| 3804   | 0     | 1      |       | 5      | 5      | 2      | 2      | 4     |
| 3809   | 0     | 1      |       | 5      | 5      | 1      | 1      | 5     |
| 3810   | 0     | 0      | 3     | 4      | 6      | 4      | 3      | 5     |
| 3813   | 0     | 0      | 3     | 4      | 4      | 5      | 4      | 4     |
| 3816   | 0     | 1      |       | 4      | 6      | 2      | 2      | 4     |
| 3820   | 0     | 1      |       | 5      | 5      | 6      | 6      | 5     |
| 3821   | 0     | 1      |       | 5      | 5      | 5      | 5      | 5     |
| 3823   | 0     | 0      | 3     | 4      | 4      | 4      | 4      | 4     |
| 3828   | 0     | 0      | 5     | 6      | 6      | 6      | 6      | 6     |
| 3829   | 0     | 1      |       | 5      | 5      | 1      | 1      | 5     |
| 3832   | 0     | 1      |       | 6      | 6      | 2      | 1      | 4     |
| 3835   | 0     | 0      | 3     | 5      | 5      | 1      | 1      | 5     |
| 3837   | 0     | 0      | 3     | 6      | 6      | 5      | 6      | 6     |
| 3838   | 0     | 0      | 3     | 6      | 6      | 2      | 4      | 4     |
| 3839   | 1     | 0      | 2     | 2      | 3      | 3      | 3      | 3     |
| 3840   |       |        |       |        |        |        |        |       |
| 3842   |       |        |       |        |        |        |        |       |
| 3843   | 0     | 1      |       | 5      | 5      | 1      | 1      | 5     |
| 3844   | 0     | 0      | 3     | 5      | 5      | 4      | 4      | 4     |
| 3850   | 0     | 1      |       | 5      | 5      | 2      | 2      | 5     |
| 3851   |       |        |       |        |        |        |        |       |
| 3856   | 0     | 1      |       | 5      | 5      | 4      | 4      | 4     |

| respid | Q43_9 | Q43_99 | Q44_1 | Q46x1a | Q46x1b | Q46x2a | Q46x2b | Q46x3 |
|--------|-------|--------|-------|--------|--------|--------|--------|-------|
| 3859   | 0     | 0      | 3     | 4      | 4      | 4      | 4      | 5     |
| 3860   | 0     | 0      | 4     | 5      | 5      | 5      | 5      | 4     |
| 3863   | 0     | 1      |       | 6      | 6      | 6      | 6      | 6     |
| 3866   | 0     | 1      |       | 6      | 6      | 6      | 6      | 6     |
| 3867   | 0     | 1      |       | 6      | 6      | 1      | 1      | 5     |
| 3870   | 0     | 1      |       | 5      | 5      | 5      | 5      | 5     |
| 3873   | 0     | 0      | 1     | 2      | 2      | 3      | 4      | 3     |
| 3875   | 0     | 1      |       | 6      | 5      | 1      | 1      | 5     |
| 3878   | 0     | 1      |       | 5      | 5      | 1      | 1      | 4     |
| 3881   | 0     | 1      |       | 5      | 5      | 1      | 2      | 5     |
| 3883   | 0     | 0      | 2     | 2      | 3      | 3      | 2      | 3     |
| 3884   | 0     | 0      | 3     | 3      | 4      | 4      | 4      | 3     |
| 3885   | 1     | 0      | 3     | 3      | 3      | 4      | 3      | 3     |
| 3886   | 0     | 0      | 4     | 4      | 4      | 5      | 4      | 4     |
| 3887   | 0     | 1      |       | 6      | 6      | 1      | 1      | 5     |
| 3888   |       |        |       |        |        |        |        |       |
| 3889   | 0     | 0      | 3     | 3      | 3      | 2      | 2      | 4     |
| 3890   | 1     | 0      | 4     | 1      | 1      | 1      | 1      | 5     |
| 3896   | 0     | 1      |       | 5      | 5      | 5      | 5      | 5     |
| 3902   | 1     | 0      | 3     | 4      | 4      | 3      | 3      | 4     |
| 3909   | 0     | 1      |       | 5      | 5      | 5      | 5      | 5     |
| 3912   | 0     | 1      |       | 5      | 4      | 2      | 2      | 4     |
| 3922   | 0     | 1      |       | 5      | 5      | 1      | 2      | 5     |
| 3928   | 0     | 0      | 3     | 4      | 4      | 1      | 1      | 5     |
| 3930   | 0     | 1      |       | 5      | 5      | 5      | 5      | 5     |
| 3931   | 0     | 1      |       | 6      | 6      | 3      | 3      | 4     |
| 3933   | 0     | 1      |       | 4      | 1      | 1      | 1      | 4     |
| 3935   | 0     | 0      | 3     | 5      | 5      | 5      | 5      | 5     |
| 3937   | 0     | 0      | 4     | 6      | 6      | 6      | 6      | 6     |
| 3939   | 0     | 1      |       | 6      | 5      | 1      | 1      | 5     |
| 3942   | 0     | 0      | 3     | 5      | 5      | 5      | 5      | 5     |
| 3943   | 0     | 1      |       | 6      | 5      | 5      | 4      | 4     |

| respid | Q43_9 | Q43_99 | Q44_1 | Q46x1a | Q46x1b | Q46x2a | Q46x2b | Q46x3 |
|--------|-------|--------|-------|--------|--------|--------|--------|-------|
| 3944   |       |        |       |        |        |        |        |       |
| 3945   | 0     | 1      |       | 5      | 5      | 5      | 5      | 5     |
| 3947   | 0     | 1      |       | 5      | 5      | 5      | 5      | 5     |
| 3948   | 0     | 1      |       | 4      | 5      | 4      | 5      | 4     |
| 3951   | 0     | 0      | 3     | 4      | 4      | 4      | 4      | 3     |
| 3959   | 0     | 1      |       | 6      | 6      | 3      | 2      | 5     |
| 3969   | 0     | 0      | 3     | 4      | 4      | 4      | 4      | 3     |
| 3973   | 0     | 1      |       | 6      | 6      | 2      | 2      | 5     |
| 3975   | 0     | 0      | 2     | 4      | 4      | 4      | 4      | 4     |
| 3976   | 0     | 1      |       | 5      | 4      | 5      | 5      | 4     |
| 3977   | 0     | 0      | 3     | 4      | 5      | 5      | 5      | 4     |
| 3978   | 0     | 1      |       | 6      | 6      | 6      | 6      | 6     |
| 3994   | 0     | 0      | 2     | 4      | 5      | 5      | 5      | 5     |
| 3995   | 0     | 0      | 3     | 6      | 6      | 6      | 6      | 6     |
| 3997   | 0     | 1      |       | 6      | 6      | 5      | 5      | 5     |
| 3998   | 0     | 1      |       | 6      | 6      | 1      | 1      | 5     |
| 3999   | 0     | 0      | 3     | 4      | 4      | 4      | 4      | 4     |
| 4002   | 0     | 0      | 3     | 6      | 6      | 6      | 6      | 6     |
| 4004   | 0     | 1      |       | 4      | 5      | 5      | 6      | 5     |
| 4005   |       |        |       |        |        |        |        |       |
| 4006   | 0     | 0      | 2     | 3      | 2      | 4      | 4      | 3     |
| 4008   | 0     | 1      |       | 5      | 5      | 2      | 2      | 4     |
| 4010   | 0     | 1      |       | 5      | 5      | 6      | 6      | 5     |
| 4011   | 0     | 0      | 2     | 4      | 2      | 4      | 4      | 3     |
| 4013   | 0     | 0      | 4     | 5      | 5      | 1      | 1      | 5     |
| 4014   | 0     | 1      |       | 5      | 5      | 5      | 5      | 5     |
| 4016   | 0     | 0      | 2     | 5      | 5      | 1      | 1      | 5     |
| 4017   | 0     | 0      | 4     | 4      | 4      | 2      | 2      | 4     |
| 4019   | 0     | 1      |       | 5      | 5      | 5      | 5      | 5     |
| 4021   |       |        |       |        |        |        |        |       |
| 4023   | 0     | 1      |       | 5      | 5      | 5      | 5      | 5     |
| 4024   | 0     | 0      | 4     | 5      | 5      | 6      | 6      | 5     |

| respid | Q43_9 | Q43_99 | Q44_1 | Q46x1a | Q46x1b | Q46x2a | Q46x2b | Q46x3 |
|--------|-------|--------|-------|--------|--------|--------|--------|-------|
| 4025   | 0     | 1      |       | 6      | 6      | 6      | 6      | 6     |
| 4027   | 0     | 1      |       | 6      | 6      | 6      | 6      | 6     |
| 4032   |       |        |       |        |        |        |        |       |
| 4034   | 0     | 1      |       | 5      | 5      | 6      | 6      | 5     |
| 4035   | 0     | 1      |       | 3      | 3      | 3      | 3      | 4     |
| 4037   | 0     | 0      | 2     | 2      | 4      | 2      | 1      | 4     |
| 4040   | 0     | 1      |       | 5      | 4      | 1      | 1      | 5     |
| 4041   | 0     | 1      |       | 6      | 6      | 6      | 6      | 6     |
| 4042   | 0     | 1      |       | 5      | 5      | 2      | 4      | 5     |
| 4043   | 0     | 1      |       | 3      | 6      | 5      | 6      | 5     |
| 4045   | 0     | 1      |       | 6      | 6      | 1      | 1      | 4     |
| 4046   | 0     | 1      |       | 5      | 5      | 1      | 1      | 4     |
| 4048   | 0     | 1      |       | 4      | 5      | 6      | 2      | 4     |
| 4049   | 0     | 0      | 3     | 5      | 5      | 1      | 1      | 5     |
| 4050   | 0     | 0      | 3     | 6      | 6      | 4      | 4      | 5     |
| 4052   | 0     | 0      | 4     | 5      | 5      | 1      | 1      | 5     |
| 4053   |       |        |       |        |        |        |        |       |
| 4060   | 0     | 0      | 5     | 5      | 5      | 5      | 5      | 5     |
| 4065   | 0     | 0      | 3     | 4      | 4      | 4      | 4      | 4     |
| 4066   | 0     | 1      |       | 5      | 5      | 5      | 5      | 5     |
| 4067   | 0     | 1      |       | 5      | 4      | 1      | 1      | 5     |
| 4068   | 0     | 1      |       | 3      | 3      | 3      | 3      | 3     |
| 4069   | 0     | 1      |       | 5      | 5      | 1      | 1      | 5     |
| 4070   | 0     | 1      |       | 5      | 5      | 1      | 1      | 5     |
| 4071   | 0     | 1      |       | 3      | 3      | 2      | 3      | 3     |
| 4072   | 0     | 1      |       | 5      | 6      | 1      | 1      | 4     |
| 4073   | 0     | 1      |       | 4      | 5      | 1      | 1      | 5     |
| 4074   | 0     | 1      |       | 4      | 4      | 5      | 5      | 5     |
| 4075   | 0     | 1      |       | 4      | 4      | 4      | 4      | 5     |
| 4078   | 0     | 0      | 3     | 5      | 5      | 1      | 1      | 4     |
| 4080   | 0     | 1      |       | 5      | 5      | 1      | 1      | 5     |
| 4081   |       |        |       |        |        |        |        |       |

| respid | Q43_9 | Q43_99 | Q44_1 | Q46x1a | Q46x1b | Q46x2a | Q46x2b | Q46x3 |
|--------|-------|--------|-------|--------|--------|--------|--------|-------|
| 4082   | 0     | 1      |       | 6      | 6      | 1      | 1      | 5     |
| 4083   | 0     | 0      | 2     | 3      | 3      | 3      | 4      | 4     |
| 4084   | 0     | 1      |       | 5      | 5      | 5      | 5      | 5     |
| 4086   |       |        |       |        |        |        |        |       |
| 4087   | 0     | 1      |       | 5      | 5      | 5      | 5      | 5     |
| 4088   | 0     | 1      |       | 4      | 4      | 4      | 2      | 4     |
| 4089   | 0     | 1      |       | 5      | 5      | 4      | 3      | 5     |
| 4090   | 0     | 1      |       | 5      | 5      | 5      | 5      | 5     |
| 4093   | 0     | 0      | 4     | 5      | 5      | 1      | 1      | 5     |
| 4094   | 0     | 1      |       | 5      | 5      | 1      | 1      | 5     |
| 4095   | 0     | 1      |       | 5      | 5      | 5      | 5      | 5     |
| 4096   |       |        |       |        |        |        |        |       |
| 4098   | 0     | 1      |       | 6      | 6      | 1      | 1      | 5     |
| 4103   | 0     | 1      |       | 5      | 5      | 1      | 2      | 5     |
| 4104   | 0     | 0      | 5     | 4      | 5      | 2      | 3      | 4     |
| 4107   | 0     | 1      |       | 5      | 5      | 5      | 5      | 5     |
| 4109   | 0     | 0      | 5     | 6      | 6      | 6      | 6      | 6     |
| 4110   | 0     | 1      |       | 5      | 5      | 5      | 5      | 5     |
| 4113   | 0     | 1      |       | 5      | 5      | 5      | 5      | 5     |
| 4114   | 0     | 1      |       | 5      | 6      | 6      | 6      | 6     |
| 4116   | 0     | 0      | 4     | 5      | 5      | 5      | 5      | 5     |
| 4119   | 0     | 1      |       | 4      | 4      | 1      | 1      | 5     |
| 4120   | 0     | 1      |       | 5      | 5      | 5      | 5      | 4     |
| 4121   | 0     | 0      | 4     | 6      | 6      | 6      | 6      | 6     |
| 4122   | 0     | 0      | 3     | 4      | 4      | 4      | 4      | 4     |
| 4124   | 0     | 1      |       | 4      | 4      | 4      | 4      | 4     |
| 4126   | 0     | 1      |       | 4      | 5      | 2      | 2      | 4     |
| 4127   | 0     | 1      |       | 6      | 4      | 3      | 3      | 3     |
| 4131   | 0     | 1      |       | 5      | 5      | 1      | 1      | 4     |
| 4134   | 0     | 1      |       | 6      | 6      | 6      | 6      | 6     |
| 4144   | 0     | 1      |       | 5      | 5      | 5      | 5      | 5     |
| 4145   | 0     | 0      | 3     | 4      | 4      | 2      | 2      | 4     |



| respid | Q43_9 | Q43_99 | Q44_1 | Q46x1a | Q46x1b | Q46x2a | Q46x2b | Q46x3 |
|--------|-------|--------|-------|--------|--------|--------|--------|-------|
| 4146   | 0     | 1      |       | 5      | 5      | 5      | 5      | 5     |
| 4147   | 0     | 1      |       | 5      | 5      | 5      | 5      | 5     |
| 4149   | 0     | 0      | 3     | 3      | 4      | 5      | 2      | 4     |
| 4150   |       |        |       |        |        |        |        |       |
| 4151   | 0     | 0      | 2     | 4      | 4      | 2      | 2      | 4     |
| 4153   | 0     | 1      |       | 5      | 5      | 1      | 1      | 5     |
| 4155   | 0     | 1      |       | 6      | 6      | 6      | 6      | 6     |
| 4157   | 0     | 1      |       | 5      | 5      | 5      | 5      | 5     |
| 4159   | 0     | 1      |       | 5      | 5      | 5      | 5      | 4     |
| 4160   | 0     | 1      |       | 6      | 6      | 1      | 1      | 5     |
| 4161   | 0     | 1      |       | 4      | 4      | 1      | 1      | 3     |
| 4163   | 0     | 0      | 4     | 5      | 4      | 3      | 3      | 5     |
| 4164   | 0     | 0      | 3     | 4      | 4      | 4      | 4      | 4     |
| 4165   | 0     | 1      |       | 5      | 5      | 1      | 1      | 5     |
| 4166   | 0     | 0      | 4     | 5      | 5      | 5      | 5      | 5     |
| 4167   | 0     | 1      |       | 6      | 6      | 6      | 6      | 6     |
| 4170   | 0     | 1      |       | 5      | 5      | 2      | 2      | 4     |
| 4172   | 0     | 1      |       | 5      | 5      | 3      | 3      | 1     |
| 4173   | 0     | 0      | 3     | 5      | 4      | 1      | 1      | 5     |
| 4180   | 0     | 1      |       | 5      | 5      | 5      | 5      | 5     |
| 4185   | 0     | 1      |       | 5      | 5      | 1      | 1      | 4     |
| 4187   | 0     | 1      |       | 5      | 5      | 1      | 1      | 5     |
| 4190   | 0     | 0      | 3     | 6      | 6      | 1      | 1      | 5     |
| 4191   | 0     | 1      |       | 5      | 5      | 5      | 5      | 5     |
| 4193   |       |        |       |        |        |        |        |       |
| 4194   | 0     | 1      |       | 6      | 6      | 1      | 1      | 5     |
| 4195   | 0     | 1      |       | 5      | 5      | 1      | 1      | 5     |
| 4196   |       |        |       |        |        |        |        |       |
| 4197   | 0     | 1      |       | 5      | 5      | 1      | 1      | 5     |
| 4198   | 0     | 1      |       | 6      | 6      | 6      | 6      | 6     |
| 4199   | 0     | 0      | 3     | 5      | 5      | 5      | 5      | 5     |
| 4205   | 0     | 1      |       | 6      | 6      | 6      | 6      | 6     |

| respid | Q43_9 | Q43_99 | Q44_1 | Q46x1a | Q46x1b | Q46x2a | Q46x2b | Q46x3 |
|--------|-------|--------|-------|--------|--------|--------|--------|-------|
| 4206   |       |        |       |        |        |        |        |       |
| 4207   | 0     | 0      | 3     | 4      | 3      | 2      | 3      | 3     |
| 4214   | 0     | 1      |       | 5      | 5      | 2      | 2      | 5     |
| 4215   | 0     | 1      |       | 5      | 5      | 2      | 2      | 5     |
| 4217   | 0     | 1      |       | 5      | 5      | 1      | 1      | 5     |
| 4219   | 0     | 1      |       | 6      | 6      | 6      | 6      | 6     |
| 4223   | 0     | 0      | 3     | 4      | 4      | 2      | 2      | 4     |
| 4226   | 0     | 0      | 4     | 5      | 5      | 1      | 1      | 4     |
| 4229   | 0     | 1      |       | 6      | 6      | 1      | 1      | 5     |
| 4230   | 0     | 1      |       | 5      | 5      | 1      | 2      | 4     |
| 4232   | 0     | 1      |       | 5      | 4      | 1      | 1      | 4     |
| 4233   | 0     | 1      |       | 5      | 5      | 1      | 1      | 5     |
| 4234   | 0     | 1      |       | 4      | 4      | 2      | 2      | 4     |
| 4235   | 0     | 1      |       | 5      | 5      | 5      | 5      | 5     |
| 4236   | 0     | 1      |       | 6      | 5      | 2      | 2      | 5     |
| 4237   | 0     | 1      |       | 3      | 4      | 4      | 3      | 3     |
| 4238   | 0     | 0      | 4     | 4      | 4      | 1      | 2      | 4     |
| 4240   | 0     | 0      | 3     | 5      | 5      | 5      | 5      | 5     |
| 4241   | 0     | 1      |       | 6      | 6      | 3      | 5      | 5     |
| 4247   | 0     | 1      |       | 6      | 6      | 6      | 6      | 6     |
| 4250   | 0     | 1      |       | 6      | 6      | 6      | 6      | 6     |
| 4251   | 0     | 1      |       | 6      | 6      | 6      | 6      | 6     |
| 4253   | 0     | 0      | 2     | 5      | 5      | 4      | 4      | 4     |
| 4254   | 0     | 1      |       | 5      | 5      | 1      | 1      | 5     |
| 4258   | 0     | 0      | 3     | 4      | 4      | 4      | 4      | 4     |
| 4260   | 0     | 1      |       | 5      | 5      | 5      | 5      | 5     |
| 4263   | 0     | 1      |       | 3      | 3      | 3      | 2      | 3     |
| 4265   | 0     | 1      |       | 5      | 5      | 5      | 5      | 5     |
| 4266   | 0     | 0      | 4     | 5      | 5      | 1      | 1      | 5     |
| 4267   | 0     | 0      | 4     | 5      | 5      | 4      | 3      | 4     |
| 4270   | 0     | 1      |       | 6      | 6      | 2      | 2      | 5     |
| 4273   | 0     | 1      |       | 5      | 5      | 5      | 5      | 5     |

| respid | Q43_9 | Q43_99 | Q44_1 | Q46x1a | Q46x1b | Q46x2a | Q46x2b | Q46x3 |
|--------|-------|--------|-------|--------|--------|--------|--------|-------|
| 4280   | 0     | 1      |       | 6      | 6      | 1      | 1      | 5     |
| 4281   | 0     | 1      |       | 6      | 6      | 6      | 6      | 6     |
| 4282   | 0     | 0      | 3     | 4      | 4      | 2      | 2      | 4     |
| 4283   |       |        |       |        |        |        |        |       |
| 4286   | 0     | 1      |       | 4      | 5      | 6      | 6      | 6     |
| 4287   | 0     | 1      |       | 6      | 6      | 6      | 6      | 6     |
| 4289   | 0     | 1      |       | 4      | 4      | 1      | 1      | 4     |
| 4290   | 0     | 1      |       | 5      | 5      | 4      | 5      | 4     |
| 4291   | 0     | 1      |       | 5      | 5      | 6      | 6      | 6     |
| 4292   | 0     | 0      | 1     | 5      | 4      | 1      | 1      | 5     |
| 4293   | 0     | 1      |       | 6      | 6      | 6      | 6      | 6     |
| 4294   | 0     | 0      | 4     | 5      | 4      | 1      | 1      | 4     |
| 4295   |       |        |       |        |        |        |        |       |
| 4296   | 0     | 1      |       | 6      | 6      | 6      | 6      | 6     |
| 4297   | 0     | 0      | 3     | 5      | 5      | 5      | 4      | 5     |
| 4298   | 0     | 1      |       | 4      | 5      | 5      | 5      | 5     |
| 4299   | 0     | 1      |       | 6      | 6      | 6      | 6      | 6     |
| 4300   | 0     | 1      |       | 5      | 5      | 1      | 2      | 5     |
| 4301   |       |        |       |        |        |        |        |       |
| 4302   | 0     | 1      |       | 4      | 4      | 5      | 4      | 5     |
| 4304   | 0     | 1      |       | 5      | 5      | 2      | 2      | 4     |
| 4305   | 0     | 1      |       | 6      | 5      | 5      | 4      | 4     |
| 4307   | 0     | 0      | 2     | 4      | 4      | 4      | 4      | 4     |
| 4308   | 0     | 1      |       | 3      | 3      | 3      | 3      | 3     |
| 4312   |       |        |       |        |        |        |        |       |
| 4314   | 0     | 1      |       | 4      | 4      | 5      | 3      | 4     |
| 4316   | 0     | 1      |       | 6      | 5      | 1      | 5      | 5     |
| 4317   | 1     | 0      | 3     | 3      | 2      | 3      | 3      | 3     |
| 4319   | 0     | 1      |       | 5      | 5      | 5      | 3      | 4     |
| 4323   | 0     | 1      |       | 4      | 4      | 1      | 1      | 4     |
| 4337   | 0     | 1      |       | 6      | 6      | 5      | 5      | 5     |
| 4341   | 0     | 0      | 2     | 4      | 3      | 2      | 1      | 4     |

| respid | Q43_9 | Q43_99 | Q44_1 | Q46x1a | Q46x1b | Q46x2a | Q46x2b | Q46x3 |
|--------|-------|--------|-------|--------|--------|--------|--------|-------|
| 4342   | 0     | 0      | 3     | 4      | 4      | 1      | 1      | 4     |
| 4344   | 0     | 1      |       | 4      | 5      | 1      | 1      | 4     |
| 4345   | 0     | 1      |       | 5      | 4      | 1      | 2      | 4     |
| 4346   | 0     | 1      |       | 4      | 5      | 5      | 6      | 6     |
| 4347   | 0     | 1      |       | 6      | 6      | 6      | 6      | 6     |
| 4350   |       |        |       |        |        |        |        |       |
| 4352   | 0     | 1      |       | 5      | 5      | 5      | 5      | 5     |
| 4353   |       |        |       |        |        |        |        |       |
| 4355   | 0     | 1      |       | 5      | 5      | 5      | 5      | 5     |
| 4356   | 0     | 1      |       | 4      | 4      | 1      | 1      | 3     |
| 4358   |       |        |       |        |        |        |        |       |
| 4359   | 0     | 1      |       | 6      | 6      | 6      | 6      | 6     |
| 4360   | 0     | 1      |       | 4      | 4      | 2      | 2      | 4     |
| 4361   | 0     | 0      | 1     | 3      | 3      | 4      | 4      | 3     |
| 4363   | 0     | 0      | 4     | 5      | 5      | 1      | 1      | 5     |
| 4364   | 1     | 0      | 2     | 6      | 5      | 4      | 4      | 4     |
| 4365   | 0     | 0      | 3     | 5      | 5      | 5      | 5      | 5     |
| 4367   | 0     | 1      |       | 5      | 5      | 5      | 5      | 5     |
| 4369   | 0     | 0      | 4     | 5      | 5      | 2      | 2      | 4     |
| 4373   | 0     | 0      | 3     | 4      | 4      | 5      | 5      | 4     |
| 4374   | 0     | 1      |       | 3      | 4      | 4      | 3      | 4     |
| 4375   |       |        |       |        |        |        |        |       |
| 4378   | 0     | 1      |       | 6      | 6      | 6      | 6      | 6     |
| 4379   | 0     | 1      |       | 5      | 5      | 2      | 2      | 4     |
| 4382   | 0     | 1      |       | 6      | 6      | 6      | 6      | 6     |
| 4383   |       |        |       |        |        |        |        |       |
| 4384   | 0     | 1      |       | 4      | 4      | 4      | 4      | 4     |
| 4385   | 0     | 1      |       | 6      | 6      | 1      | 1      | 5     |
| 4388   | 0     | 0      | 2     | 3      | 2      | 2      | 2      | 2     |
| 4389   | 0     | 1      |       | 4      | 5      | 1      | 1      | 5     |
| 4391   | 0     | 1      |       | 5      | 5      | 5      | 5      | 5     |
| 4392   | 0     | 1      |       | 4      | 5      | 2      | 2      | 4     |

| respid | Q43_9 | Q43_99 | Q44_1 | Q46x1a | Q46x1b | Q46x2a | Q46x2b | Q46x3 |
|--------|-------|--------|-------|--------|--------|--------|--------|-------|
| 4393   | 0     | 1      |       | 6      | 6      | 2      | 2      | 6     |
| 4395   | 0     | 0      | 4     | 5      | 4      | 2      | 2      | 4     |
| 4397   | 0     | 1      |       | 5      | 5      | 1      | 2      | 5     |
| 4398   | 0     | 1      |       | 5      | 5      | 1      | 1      | 5     |
| 4399   | 0     | 0      | 4     | 5      | 5      | 5      | 5      | 5     |
| 4400   |       |        |       |        |        |        |        |       |
| 4401   | 0     | 1      |       | 5      | 5      | 5      | 5      | 5     |
| 4402   | 0     | 1      |       | 5      | 5      | 4      | 4      | 5     |
| 4404   | 0     | 0      | 3     | 5      | 5      | 5      | 5      | 5     |
| 4405   |       |        |       |        |        |        |        |       |
| 4407   | 0     | 1      |       | 6      | 6      | 5      | 5      | 5     |
| 4408   | 0     | 1      |       | 5      | 5      | 2      | 2      | 4     |
| 4411   |       |        |       |        |        |        |        |       |
| 4420   | 0     | 1      |       | 5      | 5      | 5      | 5      | 5     |
| 4421   | 0     | 1      |       | 5      | 5      | 5      | 5      | 5     |
| 4424   | 0     | 0      | 4     | 2      | 2      | 1      | 2      | 3     |
| 4425   | 0     | 0      | 3     | 3      | 4      | 2      | 2      | 4     |
| 4427   | 0     | 1      |       | 6      | 6      | 6      | 6      | 6     |
| 4430   | 0     | 1      |       | 5      | 5      | 1      | 1      | 5     |
| 4431   | 0     | 1      |       | 6      | 6      | 6      | 6      | 5     |
| 4432   | 0     | 1      |       | 6      | 6      | 6      | 6      | 6     |
| 4436   | 0     | 1      |       | 6      | 5      | 6      | 6      | 6     |
| 4439   | 0     | 1      |       | 5      | 1      | 5      | 1      | 5     |
| 4451   | 0     | 1      |       | 3      | 3      | 4      | 4      | 4     |
| 4452   | 0     | 0      | 2     | 4      | 4      | 4      | 4      | 3     |
| 4458   | 0     | 1      |       | 6      | 6      | 5      | 5      | 5     |
| 4464   | 0     | 0      | 3     | 4      | 4      | 1      | 2      | 4     |
| 4465   | 0     | 1      |       | 5      | 5      | 1      | 6      | 5     |
| 4467   | 0     | 1      |       | 6      | 6      | 6      | 6      | 6     |
| 4470   | 0     | 0      | 1     | 3      | 3      | 5      | 5      | 4     |
| 4471   | 0     | 1      |       | 5      | 5      | 3      | 2      | 4     |
| 4472   | 0     | 0      | 3     | 3      | 4      | 1      | 1      | 5     |

| respid | Q43_9 | Q43_99 | Q44_1 | Q46x1a | Q46x1b | Q46x2a | Q46x2b | Q46x3 |
|--------|-------|--------|-------|--------|--------|--------|--------|-------|
| 4473   | 0     | 1      |       | 5      | 5      | 5      | 5      | 5     |
| 4475   | 0     | 1      |       | 6      | 6      | 6      | 6      | 6     |
| 4476   | 0     | 1      |       | 3      | 3      | 1      | 2      | 3     |
| 4478   | 0     | 1      |       | 6      | 6      | 6      | 6      | 6     |
| 4485   | 0     | 1      |       | 5      | 5      | 5      | 5      | 5     |
| 4486   | 0     | 1      |       | 5      | 5      | 1      | 6      | 5     |
| 4490   |       |        |       |        |        |        |        |       |
| 4502   |       |        |       |        |        |        |        |       |
| 4503   | 0     | 1      |       | 6      | 6      | 6      | 6      | 6     |
| 4504   | 0     | 1      |       | 5      | 5      | 1      | 1      | 5     |
| 4506   | 0     | 1      |       | 5      | 5      | 5      | 5      | 5     |
| 4508   | 0     | 1      |       | 5      | 5      | 1      | 1      | 5     |
| 4515   | 0     | 1      |       | 5      | 5      | 1      | 1      | 5     |
| 4516   | 0     | 0      | 3     | 4      | 4      | 5      | 4      | 4     |
| 4519   | 0     | 1      |       | 6      | 6      | 6      | 6      | 6     |
| 4523   | 0     | 0      | 3     | 6      | 6      | 6      | 6      | 6     |
| 4525   | 0     | 1      |       | 6      | 5      | 6      | 6      | 6     |
| 4526   | 0     | 0      | 4     | 5      | 5      | 1      | 1      | 5     |
| 4528   |       |        |       |        |        |        |        |       |
| 4530   | 0     | 1      |       | 5      | 5      | 1      | 1      | 5     |
| 4531   | 0     | 0      | 3     | 4      | 4      | 5      | 4      | 4     |
| 4532   | 0     | 1      |       | 6      | 6      | 6      | 6      | 6     |
| 4537   | 0     | 0      | 3     | 4      | 4      | 1      | 1      | 4     |
| 4538   | 0     | 1      |       | 6      | 6      | 1      | 1      | 6     |
| 4539   | 0     | 1      |       | 4      | 4      | 2      | 2      | 2     |
| 4541   | 0     | 1      |       | 5      | 5      | 5      | 5      | 3     |
| 4543   |       |        |       |        |        |        |        |       |
| 4544   | 0     | 1      |       | 6      | 6      | 1      | 2      | 6     |
| 4546   | 0     | 0      | 4     | 5      | 5      | 5      | 5      | 5     |
| 4547   | 0     | 0      | 4     | 5      | 5      | 1      | 2      | 5     |
| 4549   |       |        |       |        |        |        |        |       |
| 4550   | 0     | 0      | 3     | 3      | 3      | 3      | 3      | 3     |

| respid | Q43_9 | Q43_99 | Q44_1 | Q46x1a | Q46x1b | Q46x2a | Q46x2b | Q46x3 |
|--------|-------|--------|-------|--------|--------|--------|--------|-------|
| 4551   | 0     | 1      |       | 5      | 5      | 1      | 1      | 5     |
| 4554   | 0     | 1      |       | 5      | 5      | 5      | 5      | 5     |
| 4557   |       |        |       |        |        |        |        |       |
| 4565   | 0     | 1      |       | 6      | 6      | 6      | 6      | 5     |
| 4568   | 0     | 1      |       | 5      | 5      | 4      | 3      | 5     |
| 4569   | 0     | 1      |       | 6      | 6      | 6      | 6      | 6     |
| 4570   | 0     | 1      |       | 6      | 6      | 6      | 6      | 6     |
| 4572   | 0     | 1      |       | 5      | 5      | 5      | 5      | 5     |
| 4574   | 0     | 0      | 2     | 5      | 5      | 5      | 5      | 5     |
| 4576   | 0     | 0      | 3     | 4      | 6      | 2      | 2      | 4     |
| 4578   | 0     | 1      |       | 5      | 5      | 5      | 5      | 5     |
| 4579   |       |        |       |        |        |        |        |       |
| 4580   | 0     | 1      |       | 5      | 5      | 1      | 1      | 5     |
| 4581   |       |        |       |        |        |        |        |       |
| 4584   | 0     | 0      | 5     | 5      | 5      | 5      | 5      | 5     |
| 4586   | 0     | 1      |       | 5      | 5      | 5      | 5      | 5     |
| 4587   | 0     | 0      | 3     | 4      | 4      | 4      | 4      | 4     |
| 4590   | 0     | 0      | 3     | 4      | 4      | 4      | 4      | 4     |
| 4592   | 0     | 1      |       | 6      | 6      | 6      | 6      | 6     |
| 4593   | 0     | 1      |       | 5      | 4      | 3      | 1      | 4     |
| 4595   | 0     | 1      |       | 4      | 4      | 1      | 1      | 5     |
| 4597   | 0     | 0      | 4     | 6      | 6      | 6      | 6      | 6     |
| 4598   | 0     | 0      | 2     | 3      | 3      | 4      | 4      | 3     |
| 4599   | 0     | 1      |       | 6      | 6      | 1      | 1      | 5     |
| 4600   | 0     | 1      |       | 4      | 4      | 2      | 2      | 4     |
| 4601   | 0     | 0      | 4     | 5      | 5      | 5      | 5      | 5     |
| 4608   | 0     | 1      |       | 1      | 3      | 4      | 2      | 5     |
| 4609   | 0     | 1      |       | 6      | 6      | 6      | 6      | 6     |
| 4611   | 0     | 1      |       | 6      | 6      | 1      | 2      | 5     |
| 4612   | 0     | 0      | 3     | 4      | 4      | 4      | 4      | 4     |
| 4613   |       |        |       |        |        |        |        |       |
| 4616   | 0     | 0      | 3     | 4      | 5      | 2      | 2      | 5     |

| respid | Q43_9 | Q43_99 | Q44_1 | Q46x1a | Q46x1b | Q46x2a | Q46x2b | Q46x3 |
|--------|-------|--------|-------|--------|--------|--------|--------|-------|
| 4617   | 0     | 1      |       | 5      | 5      | 5      | 5      | 5     |
| 4620   | 0     | 1      |       | 5      | 4      | 2      | 3      | 4     |
| 4621   | 0     | 0      | 4     | 5      | 5      | 5      | 5      | 5     |
| 4622   | 0     | 0      | 1     | 2      | 2      | 4      | 4      | 4     |
| 4624   | 0     | 1      |       | 5      | 6      | 1      | 1      | 5     |
| 4625   | 0     | 0      | 3     | 4      | 4      | 2      | 2      | 4     |
| 4627   | 0     | 0      | 3     | 5      | 5      | 5      | 5      | 6     |
| 4628   | 0     | 1      |       | 3      | 3      | 2      | 2      | 3     |
| 4629   |       |        |       |        |        |        |        |       |
| 4630   | 0     | 0      | 3     | 4      | 5      | 2      | 2      | 4     |
| 4632   | 0     | 1      |       | 6      | 6      | 6      | 6      | 6     |
| 4634   | 0     | 1      |       | 4      | 4      | 2      | 2      | 4     |
| 4635   | 0     | 1      |       | 4      | 4      | 6      | 6      | 4     |
| 4636   | 0     | 1      |       | 5      | 5      | 5      | 5      | 5     |
| 4637   | 0     | 1      |       | 5      | 5      | 5      | 5      | 5     |
| 4638   | 0     | 0      | 3     | 4      | 5      | 1      | 1      | 4     |
| 4639   | 0     | 0      | 3     | 4      | 4      | 2      | 2      | 4     |
| 4641   | 0     | 1      |       | 5      | 5      | 2      | 2      | 5     |
| 4643   | 0     | 1      |       | 5      | 5      | 1      | 1      | 5     |
| 4645   | 0     | 1      |       | 5      | 5      | 2      | 5      | 5     |
| 4646   | 0     | 0      | 3     | 4      | 4      | 4      | 4      | 4     |
| 4647   |       |        |       |        |        |        |        |       |
| 4648   | 0     | 1      |       | 6      | 6      | 6      | 6      | 6     |
| 4649   | 0     | 1      |       | 5      | 5      | 5      | 5      | 5     |
| 4650   | 0     | 1      |       | 4      | 4      | 4      | 4      | 4     |
| 4651   | 0     | 1      |       | 6      | 5      | 2      | 6      | 5     |
| 4652   | 0     | 1      |       | 6      | 6      | 1      | 1      | 4     |
| 4653   |       |        |       |        |        |        |        |       |
| 4657   |       |        |       |        |        |        |        |       |
| 4660   | 0     | 1      |       | 5      | 5      | 1      | 1      | 4     |
| 4661   | 0     | 1      |       | 5      | 5      | 1      | 1      | 5     |
| 4662   | 0     | 1      |       | 5      | 5      | 1      | 2      | 4     |



| respid | Q43_9 | Q43_99 | Q44_1 | Q46x1a | Q46x1b | Q46x2a | Q46x2b | Q46x3 |
|--------|-------|--------|-------|--------|--------|--------|--------|-------|
| 4667   | 0     | 0      | 3     | 3      | 4      | 4      | 4      | 4     |
| 4669   | 0     | 1      |       | 6      | 6      | 6      | 6      | 6     |
| 4671   |       |        |       |        |        |        |        |       |
| 4672   | 0     | 0      | 2     | 5      | 5      | 1      | 1      | 5     |
| 4673   | 0     | 1      |       | 6      | 6      | 5      | 5      | 5     |
| 4677   |       |        |       |        |        |        |        |       |
| 4679   | 0     | 0      | 4     | 5      | 4      | 5      | 5      | 5     |
| 4683   | 0     | 0      | 4     | 5      | 5      | 6      | 6      | 5     |
| 4684   | 0     | 1      |       | 6      | 6      | 6      | 6      | 6     |
| 4685   | 0     | 1      |       | 6      | 6      | 6      | 6      | 6     |
| 4686   | 0     | 0      | 3     | 6      | 5      | 6      | 6      | 6     |
| 4687   | 0     | 1      |       | 5      | 5      | 5      | 5      | 4     |
| 4688   | 0     | 1      |       | 6      | 6      | 6      | 6      | 6     |
| 4691   | 0     | 1      |       | 6      | 6      | 6      | 6      | 5     |
| 4692   | 0     | 1      |       | 5      | 5      | 1      | 1      | 5     |
| 4694   | 0     | 1      |       | 5      | 4      | 4      | 4      | 5     |
| 4695   | 0     | 1      |       | 4      | 5      | 2      | 2      | 4     |
| 4696   | 0     | 0      | 4     | 5      | 5      | 4      | 5      | 5     |
| 4697   |       |        |       |        |        |        |        |       |
| 4698   | 0     | 0      | 2     | 3      | 1      | 3      | 2      | 3     |
| 4699   | 0     | 0      | 4     | 5      | 5      | 5      | 5      | 5     |
| 4701   |       |        |       |        |        |        |        |       |
| 4703   | 0     | 1      |       | 5      | 5      | 2      | 2      | 5     |
| 4704   | 0     | 0      | 4     | 3      | 2      | 3      | 3      | 3     |
| 4705   | 0     | 1      |       | 5      | 5      | 5      | 5      | 5     |
| 4706   | 0     | 1      |       | 5      | 5      | 5      | 5      | 5     |
| 4707   | 0     | 1      |       | 5      | 5      | 5      | 5      | 5     |
| 4708   | 0     | 1      |       | 5      | 5      | 1      | 1      | 5     |
| 4710   | 0     | 1      |       | 4      | 5      | 2      | 5      | 4     |
| 4711   | 0     | 0      | 2     | 3      | 3      | 3      | 3      | 3     |
| 4715   |       |        |       |        |        |        |        |       |
| 4716   | 0     | 1      |       | 6      | 5      | 5      | 5      | 5     |

| respid | Q43_9 | Q43_99 | Q44_1 | Q46x1a | Q46x1b | Q46x2a | Q46x2b | Q46x3 |
|--------|-------|--------|-------|--------|--------|--------|--------|-------|
| 4717   | 0     | 0      | 4     | 5      | 5      | 5      | 5      | 5     |
| 4718   | 0     | 1      |       | 4      | 4      | 2      | 2      | 4     |
| 4722   | 0     | 0      | 1     | 4      | 4      | 4      | 4      | 4     |
| 4727   | 0     | 0      | 3     | 4      | 4      | 3      | 3      | 4     |
| 4728   | 0     | 0      | 1     | 4      | 5      | 5      | 5      | 5     |
| 4729   | 0     | 1      |       | 5      | 5      | 5      | 5      | 5     |
| 4732   | 0     | 1      |       | 5      | 5      | 4      | 4      | 4     |
| 4733   | 0     | 1      |       | 5      | 5      | 5      | 5      | 5     |
| 4734   | 0     | 1      |       | 6      | 6      | 6      | 6      | 6     |
| 4735   | 0     | 0      | 4     | 5      | 5      | 5      | 5      | 5     |
| 4737   | 0     | 0      | 4     | 6      | 5      | 5      | 1      | 5     |
| 4738   | 0     | 0      | 3     | 5      | 5      | 1      | 1      | 5     |
| 4740   | 0     | 1      |       | 5      | 5      | 5      | 5      | 5     |
| 4741   | 0     | 1      |       | 4      | 4      | 2      | 2      | 4     |
| 4743   | 0     | 1      |       | 5      | 5      | 1      | 1      | 5     |
| 4746   | 0     | 0      | 3     | 6      | 6      | 6      | 6      | 6     |
| 4750   | 0     | 0      | 3     | 4      | 5      | 4      | 4      | 4     |
| 4752   | 0     | 0      | 4     | 5      | 5      | 1      | 1      | 5     |
| 4753   | 1     | 0      | 3     | 4      | 4      | 2      | 2      | 3     |
| 4754   | 0     | 1      |       | 5      | 4      | 1      | 1      | 5     |
| 4755   | 0     | 0      | 1     | 2      | 2      | 4      | 4      | 2     |
| 4758   | 0     | 0      | 3     | 4      | 4      | 2      | 2      | 4     |
| 4766   |       |        |       |        |        |        |        |       |
| 4767   | 0     | 0      | 3     | 3      | 6      | 2      | 2      | 4     |
| 4768   | 0     | 0      | 4     | 5      | 5      | 5      | 5      | 5     |
| 4769   | 0     | 0      | 3     | 5      | 5      | 5      | 5      | 5     |
| 4771   | 0     | 1      |       | 4      | 4      | 4      | 4      | 4     |
| 4772   | 0     | 0      | 4     | 6      | 6      | 1      | 1      | 5     |
| 4773   | 0     | 1      |       | 5      | 5      | 5      | 5      | 5     |
| 4774   | 0     | 1      |       | 6      | 6      | 6      | 2      | 3     |
| 4776   | 0     | 1      |       | 4      | 5      | 5      | 4      | 3     |
| 4777   | 0     | 1      |       | 5      | 5      | 5      | 5      | 5     |

| respid | Q43_9 | Q43_99 | Q44_1 | Q46x1a | Q46x1b | Q46x2a | Q46x2b | Q46x3 |
|--------|-------|--------|-------|--------|--------|--------|--------|-------|
| 4779   |       |        |       |        |        |        |        |       |
| 4780   | 0     | 1      |       | 6      | 6      | 1      | 1      | 5     |
| 4781   | 0     | 1      |       | 6      | 6      | 6      | 6      | 5     |
| 4783   | 1     | 0      | 2     | 3      | 3      | 3      | 3      | 3     |
| 4784   | 0     | 1      |       | 5      | 5      | 5      | 5      | 5     |
| 4785   | 0     | 1      |       | 5      | 5      | 5      | 5      | 5     |
| 4788   |       |        |       |        |        |        |        |       |
| 4789   | 0     | 1      |       | 3      | 3      | 3      | 3      | 3     |
| 4790   | 0     | 1      |       | 5      | 5      | 5      | 5      | 5     |
| 4791   |       |        |       |        |        |        |        |       |
| 4794   |       |        |       |        |        |        |        |       |
| 4795   | 0     | 1      |       | 5      | 5      | 1      | 1      | 5     |
| 4797   | 0     | 1      |       | 4      | 4      | 2      | 2      | 3     |
| 4802   | 0     | 0      | 3     | 4      | 4      | 2      | 2      | 4     |
| 4803   | 0     | 1      |       | 4      | 4      | 1      | 1      | 4     |
| 4804   |       |        |       |        |        |        |        |       |
| 4805   | 0     | 1      |       | 5      | 5      | 5      | 5      | 5     |
| 4807   |       |        |       |        |        |        |        |       |
| 4808   | 0     | 0      | 3     | 4      | 5      | 5      | 5      | 4     |
| 4809   | 0     | 0      | 3     | 4      | 3      | 3      | 3      | 3     |
| 4811   | 0     | 1      |       | 6      | 6      | 6      | 5      | 4     |
| 4817   |       |        |       |        |        |        |        |       |
| 4819   | 0     | 0      | 3     | 6      | 3      | 6      | 5      | 4     |
| 4820   |       |        |       |        |        |        |        |       |
| 4821   | 0     | 0      | 5     | 2      | 4      | 2      | 4      | 4     |
| 4822   | 0     | 0      | 3     | 5      | 5      | 1      | 1      | 5     |
| 4823   | 0     | 1      |       | 5      | 5      | 5      | 5      | 4     |
| 4825   | 0     | 1      |       | 5      | 5      | 1      | 1      | 5     |
| 4826   |       |        |       |        |        |        |        |       |
| 4830   | 0     | 1      |       | 5      | 5      | 5      | 5      | 6     |
| 4832   |       |        |       |        |        |        |        |       |
| 4838   | 0     | 0      | 2     | 4      | 4      | 4      | 4      | 4     |

| respid | Q43_9 | Q43_99 | Q44_1 | Q46x1a | Q46x1b | Q46x2a | Q46x2b | Q46x3 |
|--------|-------|--------|-------|--------|--------|--------|--------|-------|
| 4840   | 0     | 1      |       | 5      | 5      | 6      | 6      | 5     |
| 4841   |       |        |       |        |        |        |        |       |
| 4843   | 0     | 1      |       | 4      | 5      | 1      | 2      | 4     |
| 4845   | 0     | 1      |       | 4      | 6      | 4      | 4      | 4     |
| 4846   | 0     | 1      |       | 4      | 4      | 4      | 4      | 4     |
| 4848   | 0     | 1      |       | 5      | 5      | 1      | 1      | 5     |
| 4853   | 0     | 1      |       | 5      | 5      | 1      | 1      | 5     |
| 4854   | 0     | 1      |       | 5      | 5      | 5      | 5      | 5     |
| 4859   | 0     | 1      |       | 5      | 5      | 1      | 1      | 5     |
| 4861   |       |        |       |        |        |        |        |       |
| 4864   | 0     | 0      | 3     | 6      | 6      | 6      | 6      | 6     |
| 4867   |       |        |       |        |        |        |        |       |
| 4870   | 0     | 1      |       | 6      | 6      | 6      | 6      | 6     |
| 4872   | 0     | 0      | 3     | 5      | 4      | 5      | 5      | 5     |
| 4873   | 0     | 1      |       | 4      | 4      | 4      | 4      | 4     |
| 4874   | 0     | 0      | 4     | 5      | 5      | 5      | 5      | 5     |
| 4878   | 0     | 1      |       | 6      | 6      | 6      | 6      | 6     |
| 4880   | 0     | 1      |       | 6      | 6      | 6      | 6      | 6     |
| 4881   | 0     | 1      |       | 6      | 6      | 6      | 6      | 6     |
| 4882   | 0     | 0      | 2     | 4      | 2      | 5      | 5      | 4     |
| 4883   | 0     | 1      |       | 5      | 5      | 2      | 2      | 4     |
| 4885   | 0     | 0      | 3     | 5      | 4      | 1      | 1      | 5     |
| 4889   |       |        |       |        |        |        |        |       |
| 4890   |       |        |       |        |        |        |        |       |
| 4891   | 0     | 1      |       | 5      | 5      | 1      | 1      | 4     |
| 4894   | 0     | 1      |       | 4      | 6      | 5      | 5      | 5     |
| 4895   | 0     | 0      | 3     | 3      | 3      | 3      | 2      | 2     |
| 4896   | 0     | 1      |       | 6      | 6      | 6      | 6      | 6     |
| 4897   | 0     | 1      |       | 6      | 6      | 6      | 6      | 6     |
| 4898   | 0     | 0      | 3     | 6      | 6      | 6      | 6      | 6     |
| 4899   |       |        |       |        |        |        |        |       |
| 4900   | 0     | 0      | 3     | 3      | 5      | 1      | 1      | 2     |

| respid | Q43_9 | Q43_99 | Q44_1 | Q46x1a | Q46x1b | Q46x2a | Q46x2b | Q46x3 |
|--------|-------|--------|-------|--------|--------|--------|--------|-------|
| 4901   | 0     | 1      |       | 4      | 4      | 1      | 1      | 5     |
| 4903   | 0     | 0      | 3     | 5      | 5      | 2      | 2      | 5     |
| 4904   | 0     | 1      |       | 4      | 4      | 4      | 4      | 4     |
| 4908   | 0     | 1      |       | 6      | 6      | 5      | 5      | 5     |
| 4909   | 0     | 0      | 0     | 4      | 4      | 1      | 3      | 1     |
| 4913   | 0     | 1      |       | 6      | 6      | 6      | 6      | 5     |
| 4917   | 0     | 1      |       | 6      | 6      | 6      | 6      | 6     |
| 4918   | 0     | 1      |       | 6      | 5      | 4      | 6      | 4     |
| 4920   |       |        |       |        |        |        |        |       |
| 4921   | 0     | 0      | 4     | 4      | 4      | 4      | 4      | 4     |
| 4925   | 1     | 0      | 2     | 6      | 6      | 6      | 6      | 6     |
| 4926   | 0     | 1      |       | 5      | 5      | 5      | 5      | 5     |
| 4927   | 0     | 1      |       | 5      | 5      | 1      | 1      | 4     |
| 4928   | 0     | 1      |       | 6      | 6      | 6      | 6      | 6     |
| 4929   | 0     | 1      |       | 5      | 5      | 2      | 2      | 5     |
| 4930   | 0     | 1      |       | 6      | 6      | 6      | 6      | 6     |
| 4931   | 0     | 1      |       | 5      | 5      | 2      | 2      | 5     |
| 4932   | 0     | 0      | 2     | 4      | 3      | 3      | 3      | 3     |
| 4933   | 0     | 1      |       | 6      | 6      | 1      | 1      | 6     |
| 4934   | 0     | 0      | 3     | 4      | 3      | 6      | 1      | 4     |
| 5934   | 0     | 1      |       | 5      | 5      | 1      | 1      | 5     |
| 5935   | 0     | 0      | 2     | 5      | 5      | 1      | 6      | 4     |
| 5936   | 0     | 1      |       | 5      | 5      | 6      | 6      | 6     |
| 5938   |       |        |       |        |        |        |        |       |
| 5939   | 0     | 1      |       | 6      | 6      | 2      | 3      | 6     |
| 5940   | 0     | 0      | 3     | 4      | 4      | 4      | 4      | 3     |
| 5942   | 0     | 1      |       | 6      | 6      | 6      | 6      | 6     |
| 5944   | 0     | 0      | 3     | 4      | 4      | 2      | 2      | 4     |
| 5951   | 0     | 0      | 3     | 4      | 4      | 5      | 4      | 4     |
| 5952   | 0     | 1      |       | 6      | 6      | 5      | 5      | 5     |
| 5954   | 0     | 1      |       | 5      | 5      | 5      | 5      | 5     |
| 5956   | 0     | 1      |       | 5      | 5      | 2      | 1      | 5     |

| respid | Q43_9 | Q43_99 | Q44_1 | Q46x1a | Q46x1b | Q46x2a | Q46x2b | Q46x3 |
|--------|-------|--------|-------|--------|--------|--------|--------|-------|
| 5957   | 0     | 0      | 3     | 5      | 5      | 1      | 1      | 5     |
| 5958   | 0     | 0      | 3     | 4      | 4      | 4      | 4      | 4     |
| 5959   | 0     | 0      | 3     | 4      | 6      | 4      | 6      | 4     |
| 5960   | 0     | 1      |       | 6      | 6      | 6      | 6      | 6     |
| 5963   | 0     | 1      |       | 6      | 6      | 5      | 5      | 6     |
| 5966   | 0     | 0      | 3     | 5      | 5      | 5      | 5      | 5     |
| 5968   | 0     | 1      |       | 6      | 6      | 3      | 3      | 6     |
| 5974   | 0     | 1      |       | 5      | 5      | 5      | 5      | 5     |
| 5975   | 0     | 0      | 4     | 5      | 5      | 4      | 4      | 4     |
| 5976   | 0     | 1      |       | 6      | 6      | 6      | 6      | 4     |
| 5977   | 0     | 1      |       | 6      | 5      | 2      | 2      | 5     |
| 5978   | 0     | 1      |       | 4      | 4      | 4      | 4      | 4     |
| 5979   | 0     | 1      |       | 5      | 5      | 2      | 2      | 5     |
| 5983   | 0     | 1      |       | 5      | 5      | 1      | 5      | 5     |
| 5984   | 0     | 0      | 2     | 4      | 5      | 2      | 2      | 5     |
| 5990   | 0     | 1      |       | 6      | 6      | 6      | 6      | 6     |
| 5991   | 0     | 1      |       | 3      | 5      | 1      | 1      | 4     |
| 5992   |       |        |       |        |        |        |        |       |
| 5993   | 0     | 0      | 3     | 5      | 5      | 1      | 2      | 5     |
| 5994   | 0     | 1      |       | 5      | 5      | 4      | 5      | 4     |
| 5996   | 0     | 1      |       | 6      | 6      | 1      | 1      | 5     |
| 6001   | 0     | 0      | 3     | 4      | 4      | 3      | 3      | 4     |
| 6003   | 0     | 1      |       | 5      | 5      | 5      | 5      | 5     |
| 6004   | 0     | 1      |       | 6      | 6      | 6      | 6      | 6     |
| 6005   | 0     | 0      | 3     | 6      | 6      | 1      | 1      | 5     |
| 6006   | 0     | 1      |       | 6      | 6      | 6      | 6      | 5     |
| 6008   | 0     | 0      | 2     | 4      | 5      | 5      | 1      | 5     |
| 6009   | 0     | 0      | 5     | 5      | 5      | 5      | 5      | 5     |
| 6014   |       |        |       |        |        |        |        |       |
| 6016   | 0     | 0      | 4     | 5      | 4      | 4      | 4      | 4     |
| 6017   | 0     | 1      |       | 6      | 6      | 2      | 2      | 3     |
| 6018   | 0     | 1      |       | 5      | 5      | 4      | 4      | 4     |

| respid | Q43_9 | Q43_99 | Q44_1 | Q46x1a | Q46x1b | Q46x2a | Q46x2b | Q46x3 |
|--------|-------|--------|-------|--------|--------|--------|--------|-------|
| 6020   | 0     | 1      |       | 4      | 4      | 4      | 3      | 4     |
| 6021   |       |        |       |        |        |        |        |       |
| 6024   | 0     | 1      |       | 6      | 6      | 6      | 5      | 6     |
| 6025   | 0     | 0      | 5     | 6      | 6      | 6      | 6      | 6     |
| 6026   | 0     | 1      |       | 5      | 5      | 2      | 2      | 5     |
| 6032   | 0     | 0      | 3     | 6      | 6      | 5      | 5      | 6     |
| 6035   | 0     | 0      | 2     | 5      | 5      | 1      | 1      | 4     |
| 6038   | 0     | 1      |       | 6      | 5      | 2      | 2      | 4     |
| 6043   | 0     | 1      |       | 4      | 4      | 4      | 3      | 4     |
| 6044   | 0     | 1      |       | 5      | 5      | 2      | 2      | 4     |
| 6046   | 0     | 1      |       | 5      | 4      | 1      | 2      | 4     |
| 6047   | 0     | 1      |       | 5      | 6      | 6      | 6      | 5     |
| 6048   | 0     | 1      |       | 5      | 5      | 2      | 2      | 4     |
| 6050   | 0     | 0      | 3     | 6      | 5      | 1      | 1      | 5     |
| 6051   | 0     | 1      |       | 4      | 6      | 4      | 4      | 4     |
| 6053   | 0     | 1      |       | 6      | 6      | 6      | 6      | 6     |
| 6054   | 0     | 0      | 3     | 3      | 4      | 2      | 2      | 4     |
| 6056   | 0     | 1      |       | 5      | 5      | 2      | 2      | 4     |
| 6058   | 0     | 1      |       | 6      | 6      | 2      | 2      | 4     |
| 6060   | 0     | 1      |       | 5      | 5      | 5      | 5      | 5     |
| 6061   | 0     | 1      |       | 5      | 5      | 5      | 5      | 5     |
| 6062   | 0     | 1      |       | 6      | 6      | 6      | 6      | 6     |
| 6067   | 0     | 0      | 3     | 5      | 5      | 2      | 2      | 5     |
| 6070   | 0     | 1      |       | 5      | 5      | 1      | 1      | 5     |
| 6074   | 0     | 1      |       | 6      | 6      | 2      | 2      | 5     |
| 6076   | 0     | 1      |       | 4      | 3      | 4      | 4      | 4     |
| 6078   |       |        |       |        |        |        |        |       |
| 6081   | 0     | 1      |       | 5      | 5      | 5      | 5      | 5     |
| 6085   | 0     | 1      |       | 6      | 6      | 4      | 4      | 4     |
| 6088   |       |        |       |        |        |        |        |       |
| 6092   | 0     | 1      |       | 4      | 5      | 3      | 2      | 4     |
| 6095   | 0     | 1      |       | 5      | 5      | 1      | 2      | 5     |

| respid | Q43_9 | Q43_99 | Q44_1 | Q46x1a | Q46x1b | Q46x2a | Q46x2b | Q46x3 |
|--------|-------|--------|-------|--------|--------|--------|--------|-------|
| 6098   | 0     | 1      |       | 4      | 4      | 4      | 4      | 4     |
| 6101   |       |        |       |        |        |        |        |       |
| 6102   | 0     | 0      | 3     | 5      | 5      | 5      | 5      | 5     |
| 6105   | 0     | 1      |       | 5      | 5      | 2      | 2      | 4     |
| 6106   | 0     | 1      |       | 5      | 5      | 1      | 1      | 4     |
| 6107   | 0     | 0      | 3     | 6      | 6      | 6      | 6      | 6     |
| 6111   | 0     | 0      | 4     | 6      | 6      | 6      | 6      | 6     |
| 6112   | 0     | 0      | 3     | 4      | 5      | 1      | 1      | 5     |
| 6113   | 0     | 0      | 2     | 3      | 3      | 3      | 3      | 3     |
| 6115   | 0     | 1      |       | 5      | 5      | 5      | 5      | 4     |
| 6116   |       |        |       |        |        |        |        |       |
| 6117   | 0     | 0      | 3     | 4      | 4      | 2      | 2      | 4     |
| 6124   | 0     | 0      | 2     | 4      | 3      | 4      | 4      | 4     |
| 6125   | 0     | 1      |       | 5      | 5      | 4      | 4      | 4     |
| 6128   |       |        |       |        |        |        |        |       |
| 6133   | 0     | 1      |       | 6      | 6      | 6      | 6      | 6     |
| 6134   | 0     | 0      | 3     | 6      | 4      | 5      | 5      | 4     |
| 6135   | 0     | 0      | 2     | 6      | 5      | 5      | 5      | 5     |
| 6138   | 0     | 0      | 1     | 2      | 4      | 2      | 2      | 4     |
| 6140   | 0     | 1      |       | 6      | 6      | 2      | 2      | 5     |
| 6143   | 0     | 1      |       | 5      | 5      | 1      | 1      | 5     |
| 6147   | 0     | 0      | 3     | 4      | 4      | 1      | 1      | 5     |
| 6154   | 0     | 1      |       | 5      | 5      | 2      | 2      | 5     |
| 6162   |       |        |       |        |        |        |        |       |
| 6165   | 0     | 0      | 3     | 5      | 5      | 1      | 1      | 5     |
| 6166   | 0     | 0      | 3     | 5      | 5      | 4      | 4      | 4     |
| 6173   | 0     | 0      | 3     | 3      | 3      | 3      | 3      | 4     |
| 6180   | 0     | 0      | 4     | 5      | 5      | 5      | 5      | 5     |
| 6184   | 1     | 0      | 3     | 3      | 4      | 2      | 3      | 4     |
| 6185   | 0     | 1      |       | 6      | 5      | 2      | 2      | 5     |
| 6186   | 0     | 1      |       | 5      | 5      | 2      | 2      | 5     |
| 6188   | 0     | 1      |       | 5      | 5      | 5      | 5      | 5     |



| respid | Q43_9 | Q43_99 | Q44_1 | Q46x1a | Q46x1b | Q46x2a | Q46x2b | Q46x3 |
|--------|-------|--------|-------|--------|--------|--------|--------|-------|
| 6192   | 0     | 0      | 3     | 6      | 1      | 2      | 3      | 4     |
| 6194   |       |        |       |        |        |        |        |       |
| 6195   | 0     | 1      |       | 6      | 6      | 6      | 6      | 6     |
| 6196   | 0     | 1      |       | 4      | 4      | 4      | 4      | 2     |
| 6199   | 0     | 0      | 2     | 4      | 4      | 5      | 5      | 4     |
| 6200   |       |        |       |        |        |        |        |       |
| 6201   | 0     | 1      |       | 5      | 5      | 5      | 5      | 5     |
| 6202   | 0     | 1      |       | 6      | 6      | 6      | 6      | 6     |
| 6203   | 0     | 1      |       | 5      | 5      | 1      | 1      | 5     |
| 6205   | 0     | 1      |       | 6      | 6      | 6      | 6      | 6     |
| 6210   | 0     | 0      | 3     | 5      | 4      | 4      | 4      | 4     |
| 6212   | 0     | 0      | 3     | 6      | 6      | 6      | 6      | 6     |
| 6216   | 0     | 0      | 2     | 4      | 4      | 2      | 2      | 4     |
| 6218   | 0     | 1      |       | 6      | 6      | 6      | 6      | 6     |
| 6221   | 0     | 0      | 3     | 4      | 5      | 1      | 1      | 4     |
| 6224   | 0     | 1      |       | 5      | 5      | 5      | 5      | 5     |
| 6225   | 0     | 1      |       | 5      | 5      | 1      | 1      | 4     |
| 6227   | 0     | 1      |       | 6      | 6      | 4      | 5      | 5     |
| 6230   |       |        |       |        |        |        |        |       |
| 6231   | 0     | 1      |       | 5      | 5      | 1      | 1      | 5     |
| 6233   | 0     | 0      | 3     | 5      | 5      | 5      | 5      | 5     |
| 6234   | 0     | 0      | 3     | 6      | 5      | 4      | 5      | 5     |
| 6235   |       |        |       |        |        |        |        |       |
| 6237   |       |        |       |        |        |        |        |       |
| 6240   |       |        |       |        |        |        |        |       |
| 6248   | 0     | 0      | 3     | 5      | 5      | 5      | 5      | 5     |
| 6249   | 0     | 1      |       | 6      | 6      | 6      | 6      | 6     |
| 6252   | 0     | 0      | 3     | 5      | 5      | 2      | 2      | 5     |
| 6254   | 0     | 1      |       | 4      | 5      | 5      | 5      | 4     |
| 6269   | 0     | 0      | 2     | 4      | 4      | 3      | 3      | 4     |
| 6304   |       |        |       |        |        |        |        |       |
| 6334   | 1     | 0      | 3     | 4      | 4      | 4      | 4      | 4     |

| respid | Q43_9 | Q43_99 | Q44_1 | Q46x1a | Q46x1b | Q46x2a | Q46x2b | Q46x3 |
|--------|-------|--------|-------|--------|--------|--------|--------|-------|
| 6341   | 0     | 1      |       | 5      | 5      | 6      | 6      | 6     |
| 6350   | 0     | 0      | 3     | 4      | 4      | 4      | 4      | 4     |
| 6370   | 0     | 1      |       | 5      | 5      | 1      | 2      | 4     |
| 6384   | 0     | 1      |       | 4      | 5      | 4      | 5      | 5     |
| 6400   | 0     | 1      |       | 6      | 6      | 6      | 6      | 6     |
| 6418   |       |        |       |        |        |        |        |       |
| 6467   | 0     | 1      |       | 5      | 5      | 1      | 1      | 5     |
| 6469   | 0     | 1      |       | 5      | 5      | 1      | 1      | 5     |
| 6474   | 0     | 1      |       | 6      | 5      | 5      | 5      | 5     |
| 6475   |       |        |       |        |        |        |        |       |
| 6476   | 0     | 1      |       | 4      | 4      | 4      | 4      | 4     |
| 6477   | 0     | 1      |       | 6      | 5      | 5      | 5      | 5     |
| 6480   | 0     | 1      |       | 5      | 5      | 2      | 2      | 4     |
| 6481   | 0     | 0      | 3     | 3      | 3      | 3      | 3      | 3     |
| 6485   | 0     | 1      |       | 5      | 5      | 1      | 2      | 5     |
| 6488   | 0     | 0      | 3     | 2      | 3      | 3      | 3      | 4     |
| 6495   | 0     | 1      |       | 5      | 5      | 5      | 5      | 5     |
| 6499   | 0     | 0      | 3     | 5      | 5      | 4      | 5      | 5     |
| 6500   | 0     | 1      |       | 5      | 5      | 5      | 5      | 5     |
| 6504   | 0     | 1      |       | 6      | 6      | 6      | 6      | 5     |
| 6507   | 0     | 1      |       | 6      | 6      | 6      | 6      | 6     |
| 6512   | 0     | 0      | 3     | 4      | 4      | 2      | 2      | 4     |
| 6525   | 0     | 0      | 3     | 6      | 4      | 6      | 3      | 6     |
| 6532   | 0     | 0      | 4     | 5      | 5      | 2      | 2      | 4     |
| 6535   | 0     | 1      |       | 5      | 5      | 1      | 1      | 5     |
| 6546   | 0     | 1      |       | 5      | 5      | 1      | 1      | 5     |
| 6551   | 0     | 0      | 3     | 3      | 2      | 5      | 5      | 4     |
| 6556   | 0     | 0      | 3     | 2      | 2      | 2      | 2      | 2     |
| 6566   | 0     | 0      | 2     | 4      | 4      | 4      | 4      | 4     |
| 6569   |       |        |       |        |        |        |        |       |
| 6574   | 0     | 1      |       | 5      | 5      | 5      | 5      | 5     |
| 6576   | 0     | 1      |       | 3      | 5      | 1      | 3      | 3     |

| respid | Q43_9 | Q43_99 | Q44_1 | Q46x1a | Q46x1b | Q46x2a | Q46x2b | Q46x3 |
|--------|-------|--------|-------|--------|--------|--------|--------|-------|
| 6580   |       |        |       |        |        |        |        |       |
| 6584   |       |        |       |        |        |        |        |       |
| 6585   | 0     | 1      |       | 5      | 5      | 4      | 1      | 5     |
| 6589   | 0     | 1      |       | 5      | 5      | 1      | 1      | 5     |
| 6590   | 0     | 1      |       | 5      | 5      | 5      | 4      | 6     |
| 6598   | 0     | 1      |       | 5      | 5      | 1      | 1      | 5     |
| 6603   | 0     | 0      | 2     | 2      | 2      | 2      | 1      | 2     |
| 6618   | 0     | 1      |       | 2      | 3      | 4      | 3      | 3     |
| 6630   | 0     | 0      | 3     | 2      | 3      | 3      | 5      | 2     |
| 6636   | 0     | 1      |       | 3      | 3      | 3      | 3      | 3     |
| 6649   |       |        |       |        |        |        |        |       |
| 6675   | 0     | 0      | 3     | 6      | 6      | 6      | 6      | 6     |
| 6678   | 0     | 1      |       | 5      | 5      | 5      | 5      | 5     |
| 6681   | 0     | 1      |       | 5      | 5      | 5      | 5      | 5     |
| 6684   | 0     | 0      | 2     | 4      | 4      | 3      | 3      | 4     |
| 6688   |       |        |       |        |        |        |        |       |
| 6691   | 0     | 1      |       | 5      | 5      | 5      | 5      | 5     |
| 6694   | 0     | 0      | 3     | 4      | 4      | 2      | 2      | 4     |
| 6696   | 0     | 1      |       | 5      | 6      | 1      | 1      | 5     |
| 6720   | 0     | 0      | 2     | 3      | 3      | 3      | 3      | 3     |
| 6722   | 0     | 0      | 3     | 2      | 2      | 4      | 4      | 4     |
| 6724   | 0     | 1      |       | 5      | 5      | 5      | 5      | 5     |
| 6725   | 0     | 1      |       | 5      | 5      | 1      | 1      | 5     |
| 6727   | 0     | 1      |       | 5      | 5      | 1      | 1      | 5     |
| 6734   | 0     | 0      | 3     | 4      | 4      | 2      | 2      | 4     |
| 6739   | 0     | 1      |       | 6      | 6      | 1      | 1      | 4     |
| 6743   | 0     | 0      | 2     | 4      | 3      | 3      | 2      | 3     |
| 6749   | 0     | 1      |       | 5      | 5      | 5      | 5      | 5     |
| 6756   | 0     | 1      |       | 5      | 5      | 5      | 5      | 5     |
| 6764   | 0     | 1      |       | 5      | 5      | 5      | 5      | 5     |
| 6765   | 0     | 1      |       | 6      | 6      | 3      | 3      | 3     |
| 6768   | 0     | 1      |       | 5      | 5      | 1      | 1      | 4     |

| respid | Q43_9 | Q43_99 | Q44_1 | Q46x1a | Q46x1b | Q46x2a | Q46x2b | Q46x3 |
|--------|-------|--------|-------|--------|--------|--------|--------|-------|
| 6773   | 0     | 1      |       | 5      | 5      | 5      | 5      | 4     |
| 6775   | 0     | 0      | 3     | 4      | 3      | 1      | 1      | 4     |
| 6777   | 0     | 0      | 4     | 5      | 5      | 5      | 5      | 5     |
| 6779   | 0     | 1      |       | 6      | 6      | 6      | 6      | 6     |
| 6790   | 0     | 0      | 3     | 4      | 4      | 4      | 4      | 4     |
| 6797   |       |        |       |        |        |        |        |       |
| 6798   | 0     | 1      |       | 4      | 4      | 5      | 4      | 4     |
| 6808   |       |        |       |        |        |        |        |       |
| 6810   | 0     | 1      |       | 5      | 4      | 2      | 2      | 4     |
| 6811   | 0     | 0      | 2     | 6      | 6      | 6      | 6      | 4     |
| 6812   | 0     | 1      |       | 5      | 5      | 1      | 1      | 5     |
| 6814   | 0     | 0      | 3     | 5      | 5      | 1      | 1      | 5     |
| 6819   | 0     | 1      |       | 4      | 5      | 1      | 2      | 4     |
| 6820   | 0     | 1      |       | 4      | 4      | 4      | 4      | 4     |
| 6832   | 0     | 1      |       | 5      | 5      | 1      | 1      | 5     |
| 6854   | 0     | 1      |       | 5      | 4      | 1      | 1      | 5     |
| 6855   |       |        |       |        |        |        |        |       |
| 6857   | 0     | 1      |       | 6      | 6      | 1      | 2      | 4     |
| 6858   | 0     | 1      |       | 5      | 5      | 1      | 2      | 5     |
| 6859   | 0     | 0      | 3     | 4      | 4      | 4      | 4      | 4     |
| 6860   | 0     | 1      |       | 3      | 4      | 4      | 5      | 6     |
| 6862   | 0     | 1      |       | 6      | 6      | 2      | 2      | 4     |
| 6879   |       |        |       |        |        |        |        |       |
| 6893   | 0     | 1      |       | 6      | 6      | 5      | 5      | 4     |
| 6898   | 0     | 0      | 3     | 4      | 4      | 4      | 4      | 5     |
| 6902   | 0     | 0      | 3     | 4      | 5      | 2      | 3      | 4     |
| 6903   | 0     | 0      | 2     | 3      | 2      | 4      | 6      | 2     |
| 6907   | 1     | 0      | 3     | 3      | 3      | 3      | 3      | 3     |
| 6908   |       |        |       |        |        |        |        |       |
| 6912   |       |        |       |        |        |        |        |       |
| 6915   | 0     | 0      | 3     | 4      | 4      | 3      | 3      | 2     |
| 6916   | 0     | 1      |       | 4      | 5      | 2      | 4      | 2     |

| respid | Q43_9 | Q43_99 | Q44_1 | Q46x1a | Q46x1b | Q46x2a | Q46x2b | Q46x3 |
|--------|-------|--------|-------|--------|--------|--------|--------|-------|
| 6917   | 0     | 0      | 2     | 6      | 6      | 6      | 6      | 6     |
| 6923   | 0     | 0      | 3     | 6      | 6      | 6      | 6      | 6     |
| 6934   | 0     | 1      |       | 2      | 5      | 1      | 1      | 5     |
| 6937   |       |        |       |        |        |        |        |       |
| 6945   | 0     | 1      |       | 5      | 5      | 5      | 5      | 5     |
| 6954   | 0     | 1      |       | 4      | 4      | 2      | 2      | 4     |
| 6956   | 0     | 0      | 4     | 5      | 5      | 5      | 5      | 5     |
| 6958   | 0     | 0      | 4     | 5      | 5      | 5      | 5      | 5     |
| 6961   | 0     | 1      |       | 5      | 5      | 6      | 6      | 5     |
| 6963   | 0     | 1      |       | 5      | 5      | 5      | 5      | 5     |
| 6964   | 0     | 1      |       | 5      | 5      | 1      | 1      | 5     |
| 6976   |       |        |       |        |        |        |        |       |
| 6977   | 0     | 1      |       | 5      | 5      | 5      | 5      | 5     |
| 7000   | 0     | 0      | 3     | 2      | 4      | 4      | 3      | 4     |
| 7001   | 0     | 1      |       | 6      | 6      | 5      | 5      | 5     |
| 7005   | 0     | 1      |       | 5      | 5      | 1      | 1      | 4     |
| 7006   | 0     | 1      |       | 4      | 4      | 4      | 5      | 3     |
| 7008   | 0     | 0      | 2     | 5      | 4      | 2      | 2      | 5     |
| 7009   | 0     | 1      |       | 6      | 6      | 6      | 6      | 6     |
| 7019   | 0     | 1      |       | 5      | 5      | 2      | 2      | 4     |
| 7021   | 0     | 1      |       | 5      | 5      | 5      | 5      | 5     |
| 7026   | 0     | 0      | 3     | 4      | 4      | 2      | 2      | 4     |
| 7030   | 0     | 0      | 2     | 4      | 4      | 4      | 4      | 4     |
| 7034   |       |        |       |        |        |        |        |       |
| 7039   | 0     | 1      |       | 6      | 6      | 6      | 6      | 6     |
| 7041   | 0     | 1      |       | 6      | 6      | 6      | 6      | 6     |
| 7047   | 0     | 1      |       | 5      | 5      | 1      | 1      | 5     |
| 7051   | 0     | 1      |       | 5      | 4      | 1      | 2      | 4     |
| 7052   | 0     | 1      |       | 4      | 4      | 4      | 4      | 4     |
| 7059   | 0     | 0      | 3     | 4      | 4      | 1      | 1      | 5     |
| 7062   | 0     | 1      |       | 6      | 6      | 6      | 6      | 6     |
| 7065   | 0     | 0      | 4     | 4      | 4      | 6      | 6      | 4     |

| respid | Q43_9 | Q43_99 | Q44_1 | Q46x1a | Q46x1b | Q46x2a | Q46x2b | Q46x3 |
|--------|-------|--------|-------|--------|--------|--------|--------|-------|
| 7066   | 0     | 1      |       | 5      | 5      | 1      | 1      | 5     |
| 7069   | 0     | 1      |       | 5      | 5      | 5      | 6      | 6     |
| 7070   |       |        |       |        |        |        |        |       |
| 7073   |       |        |       |        |        |        |        |       |
| 7078   | 0     | 1      |       | 5      | 5      | 5      | 5      | 5     |
| 7083   | 0     | 0      | 3     | 4      | 4      | 2      | 2      | 4     |
| 7084   | 0     | 0      | 2     | 3      | 3      | 3      | 3      | 3     |
| 7085   | 0     | 1      |       | 5      | 5      | 5      | 5      | 4     |
| 7088   | 0     | 0      | 2     | 4      | 4      | 3      | 3      | 3     |
| 7090   | 0     | 0      | 3     | 4      | 2      | 4      | 3      | 3     |
| 7095   | 0     | 1      |       | 4      | 5      | 2      | 2      | 4     |
| 7100   |       |        |       |        |        |        |        |       |
| 7102   | 0     | 0      | 2     | 5      | 5      | 4      | 4      | 4     |
| 7103   | 0     | 0      | 5     | 5      | 5      | 5      | 5      | 5     |
| 7108   | 0     | 1      |       | 5      | 5      | 5      | 5      | 5     |
| 7109   | 0     | 1      |       | 5      | 5      | 5      | 5      | 5     |
| 7110   |       |        |       |        |        |        |        |       |
| 7112   |       |        |       |        |        |        |        |       |
| 7114   | 0     | 1      |       | 5      | 5      | 6      | 6      | 5     |
| 7116   | 0     | 1      |       | 6      | 6      | 5      | 5      | 5     |
| 7117   | 0     | 0      | 4     | 5      | 5      | 4      | 5      | 4     |
| 7118   | 0     | 0      | 2     | 3      | 3      | 1      | 2      | 4     |
| 7120   | 0     | 0      | 3     | 4      | 3      | 2      | 4      | 4     |
| 7124   | 0     | 1      |       | 6      | 5      | 5      | 5      | 5     |
| 7130   | 0     | 1      |       | 5      | 5      | 5      | 5      | 5     |
| 7135   | 0     | 1      |       | 5      | 5      | 1      | 1      | 5     |
| 7137   | 0     | 0      | 3     | 3      | 2      | 3      | 2      | 2     |
| 7140   | 0     | 1      |       | 6      | 6      | 6      | 6      | 6     |
| 7141   | 0     | 1      |       | 5      | 5      | 5      | 5      | 5     |
| 7148   | 0     | 1      |       | 5      | 5      | 5      | 5      | 5     |
| 7152   |       |        |       |        |        |        |        |       |
| 7154   | 0     | 1      |       | 6      | 6      | 6      | 6      | 6     |

| respid | Q43_9 | Q43_99 | Q44_1 | Q46x1a | Q46x1b | Q46x2a | Q46x2b | Q46x3 |
|--------|-------|--------|-------|--------|--------|--------|--------|-------|
| 7156   | 0     | 1      |       | 5      | 5      | 4      | 4      | 5     |
| 7158   | 0     | 1      |       | 4      | 4      | 4      | 3      | 3     |
| 7159   |       |        |       |        |        |        |        |       |
| 7161   |       |        |       |        |        |        |        |       |
| 7164   | 0     | 1      |       | 5      | 3      | 2      | 2      | 3     |
| 7166   |       |        |       |        |        |        |        |       |
| 7167   |       |        |       |        |        |        |        |       |
| 7168   |       |        |       |        |        |        |        |       |
| 7170   |       |        |       |        |        |        |        |       |
| 7171   | 0     | 1      |       | 5      | 5      | 5      | 5      | 5     |
| 7172   | 0     | 1      |       | 5      | 5      | 4      | 5      | 5     |
| 7173   | 0     | 0      | 2     | 4      | 5      | 2      | 4      | 4     |
| 7175   | 0     | 1      |       | 6      | 6      | 6      | 6      | 4     |
| 7176   | 0     | 1      |       | 6      | 6      | 2      | 2      | 4     |
| 7180   | 0     | 1      |       | 6      | 6      | 6      | 6      | 6     |
| 7183   | 0     | 1      |       | 5      | 4      | 2      | 2      | 5     |
| 7189   | 0     | 0      | 4     | 6      | 6      | 6      | 6      | 6     |
| 7193   | 0     | 0      | 3     | 5      | 5      | 1      | 1      | 5     |
| 7194   | 0     | 0      | 3     | 5      | 5      | 4      | 3      | 4     |
| 7195   | 0     | 1      |       | 5      | 5      | 5      | 5      | 4     |
| 7200   | 0     | 0      | 3     | 5      | 5      | 2      | 2      | 3     |
| 7201   | 0     | 1      |       | 6      | 6      | 6      | 6      | 6     |
| 7205   | 0     | 0      | 2     | 3      | 3      | 4      | 4      | 3     |
| 7207   | 0     | 1      |       | 5      | 5      | 5      | 5      | 5     |
| 7208   |       |        |       |        |        |        |        |       |
| 7210   | 0     | 1      |       | 6      | 6      | 1      | 1      | 5     |
| 7211   | 0     | 1      |       | 5      | 5      | 5      | 5      | 5     |
| 7217   | 0     | 0      | 3     | 5      | 5      | 4      | 4      | 4     |
| 7218   | 0     | 1      |       | 5      | 5      | 5      | 5      | 5     |
| 7220   |       |        |       |        |        |        |        |       |
| 7225   | 0     | 1      |       | 6      | 6      | 6      | 6      | 6     |
| 7228   | 0     | 0      | 2     | 6      | 5      | 5      | 5      | 5     |

| respid | Q43_9 | Q43_99 | Q44_1 | Q46x1a | Q46x1b | Q46x2a | Q46x2b | Q46x3 |
|--------|-------|--------|-------|--------|--------|--------|--------|-------|
| 7230   | 0     | 0      | 3     | 5      | 5      | 1      | 1      | 5     |
| 7233   | 0     | 0      | 3     | 5      | 5      | 1      | 1      | 5     |
| 7234   | 0     | 1      |       | 5      | 5      | 5      | 5      | 5     |
| 7235   |       |        |       |        |        |        |        |       |
| 7236   |       |        |       |        |        |        |        |       |
| 7241   | 0     | 0      | 5     | 6      | 6      | 6      | 6      | 5     |
| 7251   | 0     | 1      |       | 6      | 6      | 6      | 6      | 6     |
| 7253   | 0     | 1      |       | 5      | 5      | 1      | 1      | 5     |
| 7259   | 0     | 0      | 4     | 5      | 5      | 5      | 5      | 5     |
| 7260   | 0     | 1      |       | 5      | 6      | 4      | 4      | 4     |
| 7261   | 0     | 1      |       | 4      | 4      | 4      | 4      | 4     |
| 7263   | 0     | 1      |       | 6      | 6      | 1      | 1      | 5     |
| 7265   |       |        |       |        |        |        |        |       |
| 7268   | 0     | 1      |       | 6      | 6      | 6      | 6      | 6     |
| 7269   |       |        |       |        |        |        |        |       |
| 7271   | 0     | 0      | 3     | 3      | 2      | 3      | 2      | 3     |
| 7276   | 0     | 0      | 4     | 4      | 3      | 4      | 3      | 3     |
| 7280   | 0     | 1      |       | 2      | 1      | 1      | 2      | 4     |
| 7283   | 0     | 1      |       | 5      | 5      | 6      | 6      | 5     |
| 7284   | 0     | 0      | 3     | 5      | 5      | 1      | 1      | 5     |
| 7286   | 0     | 0      | 4     | 5      | 5      | 5      | 5      | 5     |
| 7287   |       |        |       |        |        |        |        |       |
| 7288   | 0     | 1      |       | 6      | 6      | 6      | 6      | 6     |
| 7294   | 0     | 1      |       | 5      | 5      | 2      | 2      | 5     |
| 7295   | 0     | 1      |       | 5      | 5      | 1      | 1      | 5     |
| 7296   | 0     | 0      | 3     | 5      | 4      | 1      | 1      | 5     |
| 7297   | 0     | 1      |       | 6      | 6      | 6      | 6      | 5     |
| 7299   | 0     | 0      | 3     | 5      | 5      | 5      | 5      | 5     |
| 7300   | 0     | 0      | 2     | 2      | 4      | 4      | 2      | 3     |
| 7301   | 0     | 0      | 3     | 4      | 4      | 2      | 2      | 4     |
| 7302   |       |        |       |        |        |        |        |       |
| 7306   | 0     | 1      |       | 5      | 5      | 5      | 5      | 5     |



| respid | Q43_9 | Q43_99 | Q44_1 | Q46x1a | Q46x1b | Q46x2a | Q46x2b | Q46x3 |
|--------|-------|--------|-------|--------|--------|--------|--------|-------|
| 7313   | 0     | 0      | 1     | 3      | 3      | 2      | 3      | 3     |
| 7315   | 0     | 0      | 3     | 4      | 4      | 4      | 4      | 3     |
| 7317   | 0     | 1      |       | 5      | 5      | 2      | 2      | 4     |
| 7321   | 0     | 1      |       | 6      | 6      | 5      | 5      | 5     |
| 7322   | 0     | 0      | 4     | 4      | 4      | 3      | 4      | 4     |
| 7323   | 0     | 0      | 3     | 4      | 4      | 2      | 2      | 4     |
| 7333   | 0     | 0      | 3     | 5      | 5      | 3      | 3      | 3     |
| 7335   | 0     | 0      | 1     | 5      | 5      | 2      | 2      | 3     |
| 7336   | 0     | 0      | 4     | 5      | 5      | 3      | 4      | 4     |
| 7337   | 0     | 1      |       | 5      | 5      | 1      | 1      | 4     |
| 7338   | 0     | 1      |       | 6      | 6      | 6      | 6      | 6     |
| 7340   | 0     | 1      |       | 5      | 5      | 2      | 2      | 4     |
| 7341   | 0     | 0      | 3     | 5      | 5      | 5      | 5      | 5     |
| 7342   | 0     | 1      |       | 6      | 6      | 6      | 6      | 6     |
| 7344   | 0     | 1      |       | 3      | 3      | 3      | 3      | 3     |
| 7346   | 1     | 0      | 3     | 4      | 4      | 4      | 4      | 4     |
| 7347   | 0     | 1      |       | 6      | 6      | 6      | 6      | 6     |
| 7349   | 0     | 0      | 2     | 4      | 4      | 2      | 2      | 3     |
| 7352   | 0     | 1      |       | 5      | 5      | 4      | 4      | 5     |
| 7353   | 0     | 1      |       | 5      | 5      | 5      | 5      | 5     |
| 7355   | 0     | 0      | 3     | 6      | 6      | 6      | 6      | 6     |
| 7356   |       |        |       |        |        |        |        |       |
| 7360   | 0     | 0      | 3     | 2      | 1      | 3      | 2      | 3     |
| 7371   | 0     | 1      |       | 5      | 5      | 2      | 2      | 5     |
| 7376   | 0     | 0      | 2     | 4      | 4      | 4      | 4      | 4     |
| 7379   | 0     | 0      | 3     | 4      | 4      | 4      | 4      | 6     |
| 7381   | 0     | 1      |       | 5      | 5      | 5      | 5      | 5     |
| 7386   | 0     | 0      | 3     | 5      | 5      | 2      | 2      | 4     |
| 7389   | 0     | 0      | 4     | 5      | 5      | 1      | 1      | 5     |
| 7390   | 0     | 0      | 2     | 3      | 4      | 4      | 4      | 4     |
| 7393   | 0     | 1      |       | 6      | 6      | 6      | 6      | 5     |
| 7394   | 0     | 1      |       | 6      | 6      | 5      | 5      | 5     |

| respid | Q43_9 | Q43_99 | Q44_1 | Q46x1a | Q46x1b | Q46x2a | Q46x2b | Q46x3 |
|--------|-------|--------|-------|--------|--------|--------|--------|-------|
| 7396   | 0     | 0      | 2     | 6      | 4      | 3      | 4      | 5     |
| 7400   | 0     | 0      | 3     | 4      | 4      | 4      | 4      | 4     |
| 7401   | 0     | 0      | 3     | 4      | 4      | 5      | 5      | 4     |
| 7403   | 0     | 0      | 4     | 6      | 6      | 5      | 5      | 4     |
| 7406   | 0     | 0      | 2     | 5      | 5      | 3      | 3      | 4     |
| 7409   | 0     | 0      | 4     | 5      | 4      | 5      | 4      | 4     |
| 7410   | 0     | 0      | 3     | 3      | 3      | 2      | 3      | 3     |
| 7412   | 0     | 0      | 3     | 6      | 6      | 6      | 6      | 6     |
| 7414   | 0     | 1      |       | 5      | 5      | 5      | 5      | 5     |
| 7415   | 0     | 0      | 3     | 4      | 4      | 4      | 4      | 4     |
| 7417   | 0     | 0      | 4     | 4      | 4      | 4      | 4      | 4     |
| 7421   | 0     | 0      | 2     | 3      | 3      | 3      | 3      | 3     |
| 7425   | 0     | 0      | 3     | 4      | 5      | 5      | 5      | 5     |
| 7430   | 0     | 0      | 4     | 5      | 5      | 1      | 2      | 5     |
| 7432   | 0     | 1      |       | 6      | 6      | 1      | 1      | 5     |
| 7433   | 0     | 0      | 3     | 4      | 4      | 4      | 3      | 4     |
| 7442   | 0     | 0      | 3     | 4      | 5      | 3      | 3      | 5     |
| 7445   | 0     | 1      |       | 5      | 5      | 5      | 5      | 5     |
| 7446   | 0     | 1      |       | 6      | 6      | 5      | 5      | 5     |
| 7449   |       |        |       |        |        |        |        |       |
| 7450   |       |        |       |        |        |        |        |       |
| 7451   | 0     | 1      |       | 6      | 6      | 6      | 6      | 6     |
| 7459   | 0     | 1      |       | 6      | 6      | 6      | 6      | 6     |
| 7462   | 0     | 1      |       | 4      | 4      | 2      | 1      | 5     |
| 7463   | 0     | 1      |       | 4      | 4      | 2      | 2      | 4     |
| 7469   |       |        |       |        |        |        |        |       |
| 7482   | 0     | 1      |       | 6      | 6      | 6      | 6      | 6     |
| 7484   | 0     | 0      | 3     | 5      | 5      | 5      | 5      | 5     |
| 7486   | 0     | 0      | 4     | 5      | 5      | 5      | 4      | 5     |
| 7496   | 0     | 1      |       | 6      | 6      | 6      | 6      | 6     |
| 7502   | 0     | 1      |       | 5      | 5      | 6      | 5      | 5     |
| 7504   | 0     | 0      | 4     | 5      | 5      | 5      | 5      | 5     |

| respid | Q43_9 | Q43_99 | Q44_1 | Q46x1a | Q46x1b | Q46x2a | Q46x2b | Q46x3 |
|--------|-------|--------|-------|--------|--------|--------|--------|-------|
| 7509   | 0     | 0      | 2     | 4      | 3      | 4      | 4      | 4     |
| 7513   | 0     | 1      |       | 6      | 5      | 5      | 3      | 5     |
| 7514   |       |        |       |        |        |        |        |       |
| 7520   | 0     | 1      |       | 5      | 5      | 5      | 4      | 5     |
| 7523   |       |        |       |        |        |        |        |       |
| 7526   | 0     | 1      |       | 5      | 5      | 2      | 2      | 5     |
| 7529   | 0     | 1      |       | 5      | 5      | 1      | 1      | 5     |
| 7534   |       |        |       |        |        |        |        |       |
| 7536   | 0     | 0      | 2     | 4      | 5      | 3      | 2      | 4     |
| 7540   | 0     | 0      | 4     | 5      | 5      | 5      | 5      | 4     |
| 7541   | 0     | 0      | 2     | 4      | 2      | 4      | 4      | 4     |
| 7542   |       |        |       |        |        |        |        |       |
| 7555   | 0     | 1      |       | 6      | 6      | 6      | 6      | 6     |
| 7566   | 0     | 0      | 3     | 6      | 6      | 6      | 6      | 6     |
| 7568   | 0     | 1      |       | 5      | 5      | 5      | 5      | 5     |
| 7570   | 0     | 0      | 3     | 2      | 3      | 4      | 4      | 4     |
| 7572   | 0     | 1      |       | 4      | 4      | 1      | 3      | 2     |
| 7573   | 0     | 0      | 3     | 4      | 4      | 4      | 4      | 3     |
| 7576   | 0     | 1      |       | 5      | 5      | 5      | 5      | 5     |
| 7577   | 0     | 0      | 1     | 5      | 5      | 3      | 3      | 4     |
| 7583   | 0     | 1      |       | 6      | 6      | 6      | 6      | 6     |
| 7584   | 0     | 1      |       | 5      | 4      | 5      | 5      | 5     |
| 7585   | 0     | 0      | 3     | 4      | 4      | 4      | 4      | 4     |
| 7586   | 0     | 1      |       | 6      | 6      | 3      | 3      | 3     |
| 7587   | 0     | 1      |       | 5      | 5      | 1      | 1      | 5     |
| 7588   | 0     | 1      |       | 6      | 6      | 6      | 6      | 6     |
| 7596   | 0     | 1      |       | 5      | 5      | 1      | 1      | 5     |
| 7599   | 0     | 1      |       | 6      | 6      | 1      | 1      | 5     |
| 7600   | 0     | 0      | 3     | 3      | 3      | 4      | 2      | 3     |
| 7602   | 0     | 1      |       | 5      | 5      | 1      | 1      | 5     |
| 7613   | 0     | 1      |       | 5      | 5      | 2      | 2      | 4     |
| 7620   | 0     | 0      | 3     | 5      | 5      | 5      | 5      | 5     |

| respid | Q43_9 | Q43_99 | Q44_1 | Q46x1a | Q46x1b | Q46x2a | Q46x2b | Q46x3 |
|--------|-------|--------|-------|--------|--------|--------|--------|-------|
| 7623   | 0     | 1      |       | 5      | 5      | 3      | 3      | 5     |
| 7635   | 0     | 1      |       | 5      | 5      | 4      | 2      | 5     |
| 7636   | 0     | 0      | 4     | 5      | 5      | 1      | 2      | 4     |
| 7643   | 0     | 0      | 4     | 5      | 4      | 4      | 4      | 4     |
| 7645   | 0     | 0      | 3     | 5      | 5      | 1      | 1      | 5     |
| 7649   | 0     | 0      | 3     | 4      | 4      | 3      | 3      | 3     |
| 7651   | 0     | 1      |       | 5      | 5      | 5      | 5      | 5     |
| 7652   | 0     | 0      | 2     | 4      | 4      | 4      | 4      | 4     |
| 7655   | 0     | 1      |       | 4      | 6      | 1      | 1      | 4     |
| 7657   | 0     | 1      |       | 5      | 5      | 5      | 5      | 5     |
| 7675   | 0     | 1      |       | 5      | 5      | 1      | 1      | 5     |
| 7676   | 0     | 0      | 2     | 5      | 4      | 2      | 2      | 4     |
| 7684   | 0     | 1      |       | 5      | 5      | 5      | 5      | 5     |
| 7693   | 0     | 0      | 4     | 4      | 4      | 1      | 1      | 4     |
| 7694   | 0     | 0      | 1     | 2      | 2      | 4      | 4      | 2     |
| 7695   | 0     | 1      |       | 6      | 6      | 6      | 6      | 6     |
| 7696   | 0     | 0      | 1     | 2      | 2      | 4      | 4      | 2     |
| 7698   | 0     | 0      | 3     | 5      | 5      | 5      | 5      | 5     |
| 7700   | 0     | 1      |       | 5      | 5      | 5      | 5      | 5     |
| 7701   | 0     | 1      |       | 5      | 5      | 5      | 5      | 5     |
| 7704   | 0     | 1      |       | 5      | 5      | 5      | 5      | 5     |
| 7709   | 0     | 1      |       | 5      | 5      | 1      | 1      | 4     |
| 7713   | 0     | 1      |       | 5      | 5      | 5      | 5      | 4     |
| 7714   | 0     | 1      |       | 6      | 6      | 6      | 6      | 6     |
| 7718   | 1     | 0      | 3     | 3      | 2      | 3      | 2      | 3     |
| 7720   | 0     | 1      |       | 5      | 5      | 5      | 5      | 5     |
| 7721   | 0     | 0      | 2     | 5      | 5      | 1      | 1      | 5     |
| 7722   | 0     | 0      | 4     | 6      | 6      | 6      | 6      | 6     |
| 7724   | 0     | 0      | 2     | 5      | 5      | 2      | 2      | 5     |
| 7728   |       |        |       |        |        |        |        |       |
| 7731   | 0     | 1      |       | 4      | 4      | 3      | 3      | 4     |
| 7735   | 0     | 1      |       | 4      | 5      | 2      | 3      | 3     |

| respid | Q43_9 | Q43_99 | Q44_1 | Q46x1a | Q46x1b | Q46x2a | Q46x2b | Q46x3 |
|--------|-------|--------|-------|--------|--------|--------|--------|-------|
| 7737   | 0     | 1      |       | 6      | 6      | 1      | 1      | 6     |
| 7741   | 0     | 1      |       | 5      | 5      | 2      | 2      | 5     |
| 7746   | 0     | 1      |       | 5      | 5      | 1      | 1      | 5     |
| 7747   | 0     | 1      |       | 5      | 5      | 2      | 2      | 4     |
| 7748   | 0     | 1      |       | 5      | 5      | 5      | 5      | 5     |
| 7750   | 0     | 1      |       | 5      | 5      | 1      | 1      | 5     |
| 7754   | 0     | 1      |       | 6      | 6      | 6      | 6      | 6     |
| 7755   | 0     | 0      | 4     | 4      | 4      | 2      | 2      | 4     |
| 7762   |       |        |       |        |        |        |        |       |
| 7764   | 0     | 0      | 3     | 5      | 5      | 5      | 5      | 5     |
| 7766   |       |        |       |        |        |        |        |       |
| 7768   | 0     | 1      |       | 4      | 4      | 4      | 4      | 4     |
| 7770   | 0     | 0      | 3     | 4      | 4      | 2      | 2      | 4     |
| 7771   | 0     | 1      |       | 5      | 5      | 1      | 1      | 5     |
| 7777   | 0     | 1      |       | 5      | 5      | 2      | 2      | 4     |
| 7778   |       |        |       |        |        |        |        |       |
| 7783   | 1     | 0      | 3     | 3      | 3      | 3      | 3      | 3     |
| 7789   | 0     | 1      |       | 5      | 5      | 2      | 2      | 5     |
| 7790   | 0     | 1      |       | 4      | 4      | 6      | 6      | 6     |
| 7795   | 0     | 1      |       | 5      | 5      | 5      | 5      | 5     |
| 7807   | 0     | 1      |       | 5      | 5      | 5      | 5      | 5     |
| 7808   | 0     | 0      | 3     | 5      | 5      | 1      | 2      | 4     |
| 7818   | 0     | 1      |       | 4      | 4      | 1      | 2      | 4     |
| 7820   |       |        |       |        |        |        |        |       |
| 7831   | 0     | 0      | 3     | 4      | 4      | 4      | 4      | 4     |
| 7832   | 0     | 0      | 3     | 4      | 4      | 3      | 2      | 3     |
| 7837   | 0     | 0      | 4     | 5      | 5      | 5      | 5      | 5     |
| 7841   | 0     | 0      | 3     | 5      | 5      | 5      | 4      | 4     |
| 7845   | 0     | 0      | 2     | 4      | 2      | 3      | 3      | 3     |
| 7853   | 0     | 0      | 3     | 5      | 5      | 2      | 2      | 5     |
| 7854   | 0     | 1      |       | 5      | 6      | 5      | 5      | 5     |
| 7862   | 0     | 1      |       | 4      | 4      | 2      | 2      | 4     |

| respid | Q43_9 | Q43_99 | Q44_1 | Q46x1a | Q46x1b | Q46x2a | Q46x2b | Q46x3 |
|--------|-------|--------|-------|--------|--------|--------|--------|-------|
| 7871   | 0     | 1      |       | 4      | 6      | 5      | 6      | 6     |
| 7875   | 0     | 1      |       | 4      | 4      | 3      | 3      | 3     |
| 7880   | 0     | 0      | 4     | 5      | 5      | 5      | 5      | 5     |
| 7881   | 0     | 1      |       | 5      | 4      | 5      | 5      | 5     |
| 7883   | 0     | 0      | 3     | 4      | 4      | 2      | 2      | 4     |
| 7896   | 0     | 0      | 4     | 5      | 5      | 5      | 5      | 5     |
| 7905   | 0     | 1      |       | 5      | 5      | 5      | 5      | 5     |
| 7919   | 0     | 1      |       | 5      | 5      | 5      | 5      | 5     |
| 7928   | 0     | 0      | 3     | 3      | 3      | 2      | 3      | 3     |
| 7929   | 0     | 1      |       | 5      | 5      | 1      | 1      | 5     |
| 7938   | 0     | 0      | 3     | 4      | 4      | 5      | 5      | 4     |
| 7940   | 0     | 1      |       | 4      | 5      | 2      | 2      | 4     |
| 7941   | 0     | 0      | 3     | 6      | 6      | 1      | 1      | 5     |
| 7952   |       |        |       |        |        |        |        |       |
| 7962   | 0     | 1      |       | 5      | 5      | 5      | 5      | 5     |
| 7968   | 0     | 1      |       | 4      | 4      | 1      | 1      | 4     |
| 7972   | 0     | 1      |       | 5      | 5      | 1      | 5      | 5     |
| 7983   | 0     | 0      | 3     | 4      | 4      | 3      | 3      | 4     |
| 7990   | 0     | 1      |       | 5      | 5      | 1      | 1      | 5     |
| 7993   | 0     | 0      | 4     | 5      | 5      | 5      | 5      | 5     |
| 8005   | 0     | 1      |       | 5      | 5      | 5      | 5      | 4     |
| 8008   |       |        |       |        |        |        |        |       |
| 8012   | 0     | 0      | 3     | 5      | 4      | 5      | 4      | 4     |
| 8021   | 0     | 1      |       | 5      | 5      | 1      | 1      | 5     |
| 8024   | 0     | 0      | 4     | 5      | 5      | 2      | 2      | 4     |
| 8043   | 0     | 1      |       | 5      | 5      | 4      | 4      | 4     |
| 8051   | 1     | 0      | 3     | 5      | 5      | 5      | 5      | 5     |
| 8056   | 0     | 1      |       | 4      | 5      | 1      | 2      | 4     |
| 8061   | 0     | 0      | 3     | 5      | 5      | 5      | 5      | 5     |
| 8066   |       |        |       |        |        |        |        |       |
| 8069   | 1     | 0      | 3     | 4      | 4      | 4      | 4      | 4     |
| 8071   | 0     | 1      |       | 5      | 5      | 2      | 2      | 4     |

| respid | Q43_9 | Q43_99 | Q44_1 | Q46x1a | Q46x1b | Q46x2a | Q46x2b | Q46x3 |
|--------|-------|--------|-------|--------|--------|--------|--------|-------|
| 8072   | 0     | 1      |       | 4      | 4      | 2      | 2      | 4     |
| 8076   | 0     | 1      |       | 6      | 6      | 4      | 4      | 4     |
| 8080   | 0     | 0      | 4     | 5      | 5      | 5      | 5      | 5     |
| 8083   | 0     | 0      | 3     | 5      | 4      | 1      | 2      | 4     |
| 8093   | 0     | 0      | 2     | 4      | 4      | 4      | 4      | 4     |
| 8095   | 0     | 0      | 3     | 4      | 4      | 4      | 4      | 4     |
| 8099   | 0     | 1      |       | 6      | 6      | 6      | 6      | 6     |
| 8100   | 0     | 1      |       | 4      | 5      | 5      | 5      | 5     |
| 8103   |       |        |       |        |        |        |        |       |
| 8104   | 0     | 0      | 3     | 4      | 4      | 2      | 3      | 2     |
| 8115   | 0     | 0      | 3     | 4      | 4      | 4      | 4      | 4     |
| 8121   | 0     | 1      |       | 5      | 5      | 1      | 1      | 5     |
| 8128   | 0     | 1      |       | 5      | 5      | 1      | 1      | 5     |
| 8130   | 0     | 1      |       | 5      | 5      | 5      | 5      | 5     |
| 8131   | 0     | 0      | 4     | 4      | 4      | 4      | 4      | 4     |
| 8133   | 0     | 0      | 4     | 5      | 5      | 5      | 5      | 5     |
| 8143   | 0     | 0      | 3     | 6      | 6      | 6      | 6      | 6     |
| 8144   | 0     | 1      |       | 4      | 4      | 4      | 4      | 4     |
| 8146   | 0     | 1      |       | 5      | 5      | 5      | 5      | 5     |
| 8148   |       |        |       |        |        |        |        |       |
| 8157   |       |        |       |        |        |        |        |       |
| 8164   |       |        |       |        |        |        |        |       |
| 8173   |       |        |       |        |        |        |        |       |
| 8176   | 0     | 1      |       | 5      | 5      | 5      | 5      | 5     |
| 8179   | 0     | 1      |       | 6      | 6      | 6      | 6      | 6     |
| 8181   |       |        |       |        |        |        |        |       |
| 8182   | 0     | 1      |       | 5      | 5      | 5      | 6      | 4     |
| 8196   | 0     | 0      | 4     | 4      | 4      | 3      | 3      | 4     |
| 8200   | 0     | 1      |       | 6      | 6      | 6      | 6      | 6     |
| 8203   | 0     | 1      |       | 5      | 5      | 5      | 5      | 5     |
| 8204   | 0     | 1      |       | 6      | 5      | 6      | 2      | 3     |
| 8206   | 0     | 1      |       | 5      | 5      | 6      | 5      | 5     |

| respid | Q43_9 | Q43_99 | Q44_1 | Q46x1a | Q46x1b | Q46x2a | Q46x2b | Q46x3 |
|--------|-------|--------|-------|--------|--------|--------|--------|-------|
| 8208   | 0     | 1      |       | 5      | 5      | 1      | 1      | 5     |
| 8212   | 0     | 1      |       | 5      | 5      | 4      | 6      | 4     |
| 8222   | 0     | 0      | 3     | 3      | 2      | 3      | 3      | 3     |
| 8223   | 0     | 1      |       | 1      | 6      | 1      | 1      | 6     |
| 8225   | 0     | 1      |       | 5      | 5      | 5      | 5      | 5     |
| 8226   | 0     | 1      |       | 6      | 6      | 6      | 6      | 6     |
| 8228   | 0     | 0      | 1     | 6      | 6      | 1      | 2      | 4     |
| 8229   | 0     | 1      |       | 5      | 5      | 1      | 1      | 6     |
| 8239   | 0     | 0      | 3     | 4      | 4      | 2      | 4      | 4     |
| 8246   | 0     | 0      | 3     | 6      | 6      | 1      | 1      | 4     |
| 8258   | 0     | 0      | 3     | 3      | 3      | 2      | 4      | 2     |
| 8260   | 0     | 1      |       | 5      | 5      | 2      | 5      | 5     |
| 8262   | 0     | 0      | 3     | 5      | 4      | 5      | 5      | 4     |
| 8263   | 0     | 1      |       | 4      | 4      | 4      | 4      | 4     |
| 8267   | 0     | 0      | 3     | 6      | 6      | 6      | 6      | 6     |
| 8271   | 1     | 0      | 3     | 4      | 3      | 2      | 3      | 4     |
| 8274   | 0     | 1      |       | 6      | 6      | 1      | 1      | 5     |
| 8275   | 0     | 0      | 2     | 4      | 4      | 4      | 4      | 4     |
| 8279   | 0     | 1      |       | 5      | 5      | 1      | 5      | 5     |
| 8285   | 1     | 0      | 3     | 3      | 3      | 4      | 3      | 2     |
| 8287   | 0     | 0      | 1     | 1      | 1      | 4      | 4      | 2     |
| 8289   | 0     | 1      |       | 6      | 6      | 6      | 6      | 5     |
| 8291   | 0     | 1      |       | 5      | 5      | 5      | 5      | 5     |
| 8299   | 0     | 0      | 3     | 5      | 5      | 1      | 1      | 4     |
| 8301   | 0     | 0      | 3     | 4      | 4      | 4      | 4      | 4     |
| 8302   | 0     | 1      |       | 5      | 5      | 4      | 4      | 5     |
| 8308   | 0     | 0      | 3     | 6      | 4      | 5      | 4      | 4     |
| 8313   | 0     | 0      | 3     | 5      | 5      | 1      | 1      | 5     |
| 8316   | 0     | 0      | 3     | 5      | 4      | 4      | 4      | 4     |
| 8317   | 0     | 1      |       | 6      | 6      | 6      | 6      | 6     |
| 8319   | 0     | 1      |       | 6      | 6      | 6      | 6      | 6     |
| 8323   | 0     | 1      |       | 6      | 4      | 4      | 4      | 5     |



| respid | Q43_9 | Q43_99 | Q44_1 | Q46x1a | Q46x1b | Q46x2a | Q46x2b | Q46x3 |
|--------|-------|--------|-------|--------|--------|--------|--------|-------|
| 8324   | 0     | 1      |       | 6      | 6      | 6      | 6      | 6     |
| 8327   | 0     | 1      |       | 3      | 3      | 4      | 4      | 4     |
| 8328   | 0     | 1      |       | 4      | 4      | 3      | 3      | 3     |
| 8342   | 0     | 0      | 4     | 4      | 5      | 2      | 2      | 4     |
| 8350   | 0     | 0      | 3     | 5      | 5      | 2      | 2      | 4     |
| 8352   | 0     | 1      |       | 5      | 5      | 5      | 5      | 4     |
| 8353   | 0     | 1      |       | 6      | 6      | 2      | 2      | 5     |
| 8356   | 0     | 1      |       | 5      | 5      | 5      | 5      | 5     |
| 8367   | 0     | 0      | 4     | 5      | 5      | 2      | 1      | 5     |
| 8373   | 0     | 1      |       | 6      | 6      | 5      | 5      | 5     |
| 8379   |       |        |       |        |        |        |        |       |
| 8382   | 0     | 1      |       | 4      | 4      | 2      | 2      | 4     |
| 8387   | 0     | 0      | 2     | 4      | 4      | 4      | 4      | 4     |
| 8409   | 0     | 0      | 3     | 4      | 5      | 5      | 5      | 5     |
| 8410   | 0     | 1      |       | 5      | 5      | 1      | 1      | 5     |
| 8412   | 0     | 0      | 3     | 4      | 4      | 2      | 3      | 4     |
| 8415   | 0     | 0      | 3     | 5      | 5      | 2      | 2      | 4     |
| 8417   | 0     | 1      |       | 4      | 4      | 5      | 4      | 4     |
| 8422   | 0     | 0      | 3     | 5      | 4      | 2      | 2      | 4     |
| 8430   | 1     | 0      | 3     | 5      | 5      | 4      | 4      | 4     |
| 8434   | 0     | 0      | 3     | 5      | 5      | 1      | 1      | 5     |
| 8436   |       |        |       |        |        |        |        |       |
| 8446   | 0     | 0      | 3     | 4      | 4      | 4      | 4      | 4     |
| 8447   | 0     | 0      | 3     | 5      | 5      | 5      | 5      | 5     |
| 8448   | 0     | 1      |       | 6      | 6      | 6      | 6      | 6     |
| 8455   | 0     | 1      |       | 5      | 4      | 3      | 6      | 4     |
| 8456   | 0     | 1      |       | 6      | 5      | 4      | 4      | 5     |
| 8459   | 0     | 0      | 2     | 6      | 6      | 4      | 4      | 4     |
| 8460   | 0     | 1      |       | 5      | 5      | 5      | 5      | 5     |
| 8464   | 0     | 0      | 2     | 3      | 3      | 4      | 4      | 3     |
| 8470   | 0     | 0      | 3     | 5      | 5      | 1      | 1      | 5     |
| 8473   | 0     | 1      |       | 5      | 5      | 1      | 2      | 4     |

| respid | Q43_9 | Q43_99 | Q44_1 | Q46x1a | Q46x1b | Q46x2a | Q46x2b | Q46x3 |
|--------|-------|--------|-------|--------|--------|--------|--------|-------|
| 8486   | 0     | 1      |       | 5      | 5      | 5      | 5      | 5     |
| 8487   | 0     | 1      |       | 6      | 6      | 6      | 6      | 6     |
| 8489   | 0     | 1      |       | 5      | 5      | 1      | 1      | 5     |
| 8494   | 0     | 0      | 4     | 4      | 3      | 5      | 2      | 4     |
| 8495   | 1     | 0      | 2     | 2      | 3      | 3      | 2      | 2     |
| 8497   | 0     | 0      | 5     | 6      | 6      | 6      | 1      | 5     |
| 8510   | 0     | 1      |       | 5      | 5      | 1      | 1      | 5     |
| 8515   | 0     | 0      | 2     | 4      | 3      | 4      | 4      | 3     |
| 8526   |       |        |       |        |        |        |        |       |
| 8530   |       |        |       |        |        |        |        |       |
| 8532   | 0     | 1      |       | 6      | 4      | 1      | 2      | 4     |
| 8533   |       |        |       |        |        |        |        |       |
| 8534   | 0     | 0      | 3     | 5      | 5      | 2      | 2      | 4     |
| 8572   | 0     | 0      | 3     | 4      | 4      | 5      | 4      | 4     |
| 8582   | 0     | 1      |       | 5      | 5      | 1      | 1      | 5     |
| 8584   | 0     | 0      | 4     | 5      | 5      | 2      | 2      | 4     |
| 8585   |       |        |       |        |        |        |        |       |
| 8586   |       |        |       |        |        |        |        |       |
| 8589   | 0     | 0      | 2     | 2      | 2      | 3      | 1      | 3     |
| 8593   | 0     | 1      |       | 6      | 6      | 6      | 6      | 6     |
| 8594   | 0     | 1      |       | 5      | 5      | 2      | 2      | 5     |
| 8601   | 0     | 0      | 4     | 5      | 4      | 1      | 1      | 4     |
| 8603   | 0     | 1      |       | 6      | 6      | 6      | 6      | 6     |
| 8604   |       |        |       |        |        |        |        |       |
| 8605   |       |        |       |        |        |        |        |       |
| 8607   | 0     | 1      |       | 6      | 6      | 6      | 6      | 6     |
| 8623   | 0     | 1      |       | 6      | 6      | 6      | 6      | 6     |
| 8626   | 0     | 0      | 3     | 5      | 5      | 2      | 2      | 4     |
| 8638   | 0     | 1      |       | 6      | 6      | 6      | 6      | 6     |
| 8640   | 0     | 0      | 2     | 5      | 5      | 4      | 4      | 2     |
| 8641   | 0     | 0      | 2     | 5      | 5      | 1      | 1      | 5     |
| 8643   | 0     | 1      |       | 5      | 5      | 5      | 5      | 5     |

| respid | Q43_9 | Q43_99 | Q44_1 | Q46x1a | Q46x1b | Q46x2a | Q46x2b | Q46x3 |
|--------|-------|--------|-------|--------|--------|--------|--------|-------|
| 8644   | 0     | 0      | 3     | 4      | 4      | 2      | 2      | 4     |
| 8646   | 0     | 1      |       | 6      | 6      | 6      | 6      | 6     |
| 8647   |       |        |       |        |        |        |        |       |
| 8649   | 0     | 0      | 2     | 6      | 4      | 6      | 4      | 4     |
| 8650   | 0     | 0      | 3     | 4      | 4      | 2      | 3      | 4     |
| 8658   | 0     | 1      |       | 5      | 5      | 3      | 3      | 5     |
| 8659   | 0     | 1      |       | 5      | 4      | 5      | 5      | 4     |
| 8669   | 0     | 1      |       | 5      | 5      | 2      | 2      | 5     |
| 8672   | 0     | 0      | 2     | 4      | 5      | 5      | 5      | 5     |
| 8673   | 0     | 0      | 3     | 4      | 5      | 2      | 2      | 4     |
| 8676   | 0     | 1      |       | 5      | 5      | 1      | 1      | 5     |
| 8677   |       |        |       |        |        |        |        |       |
| 8681   | 0     | 1      |       | 5      | 5      | 5      | 5      | 5     |
| 8688   | 0     | 0      | 3     | 5      | 5      | 1      | 2      | 5     |
| 8689   | 0     | 0      | 2     | 4      | 4      | 2      | 2      | 4     |
| 8690   | 0     | 1      |       | 6      | 6      | 1      | 1      | 6     |
| 8693   | 0     | 1      |       | 5      | 4      | 5      | 5      | 5     |
| 8694   | 0     | 0      | 4     | 4      | 2      | 3      | 3      | 3     |
| 8699   | 0     | 0      | 3     | 4      | 4      | 4      | 4      | 4     |
| 8700   |       |        |       |        |        |        |        |       |
| 8703   | 0     | 1      |       | 6      | 6      | 5      | 5      | 5     |
| 8704   | 0     | 1      |       | 5      | 5      | 5      | 5      | 5     |
| 8706   | 0     | 0      | 3     | 4      | 4      | 4      | 4      | 4     |
| 8709   | 0     | 0      | 3     | 5      | 5      | 1      | 6      | 4     |
| 8715   | 0     | 1      |       | 5      | 5      | 2      | 2      | 4     |
| 8728   | 0     | 1      |       | 4      | 5      | 2      | 3      | 4     |
| 8729   | 0     | 1      |       | 4      | 5      | 2      | 6      | 4     |
| 8730   | 0     | 0      | 2     | 4      | 5      | 1      | 6      | 4     |
| 8742   | 0     | 1      |       | 5      | 5      | 5      | 5      | 5     |
| 8748   | 0     | 0      | 2     | 6      | 6      | 6      | 6      | 6     |
| 8749   | 0     | 0      | 3     | 4      | 5      | 1      | 2      | 4     |
| 8750   | 0     | 1      |       | 6      | 6      | 5      | 5      | 5     |

| respid | Q43_9 | Q43_99 | Q44_1 | Q46x1a | Q46x1b | Q46x2a | Q46x2b | Q46x3 |
|--------|-------|--------|-------|--------|--------|--------|--------|-------|
| 8751   | 0     | 1      |       | 5      | 5      | 5      | 5      | 5     |
| 8752   | 0     | 1      |       | 4      | 4      | 2      | 2      | 4     |
| 8754   | 0     | 1      |       | 5      | 5      | 6      | 5      | 5     |
| 8757   | 0     | 1      |       | 5      | 5      | 1      | 1      | 5     |
| 8760   | 0     | 1      |       | 5      | 5      | 5      | 4      | 5     |
| 8761   | 0     | 1      |       | 3      | 2      | 4      | 3      | 4     |
| 8762   | 0     | 1      |       | 5      | 5      | 4      | 4      | 4     |
| 8763   | 0     | 0      | 5     | 5      | 5      | 5      | 5      | 5     |
| 8764   | 0     | 1      |       | 6      | 6      | 3      | 3      | 4     |
| 8765   | 0     | 1      |       | 5      | 5      | 1      | 2      | 5     |
| 8766   | 0     | 1      |       | 6      | 6      | 4      | 3      | 4     |
| 8767   | 0     | 0      | 4     | 5      | 5      | 2      | 2      | 5     |
| 8768   | 0     | 1      |       | 5      | 5      | 5      | 5      | 5     |
| 8770   | 0     | 1      |       | 6      | 6      | 6      | 6      | 6     |
| 8771   |       |        |       |        |        |        |        |       |
| 8773   | 0     | 0      | 4     | 4      | 5      | 1      | 1      | 5     |
| 8774   | 0     | 0      | 3     | 6      | 6      | 6      | 6      | 6     |
| 8776   | 0     | 1      |       | 5      | 5      | 5      | 5      | 5     |
| 8777   | 0     | 1      |       | 6      | 6      | 1      | 1      | 5     |
| 8778   | 1     | 0      | 3     | 6      | 6      | 6      | 6      | 4     |
| 8779   |       |        |       |        |        |        |        |       |
| 8784   | 0     | 0      | 2     | 5      | 5      | 4      | 5      | 5     |
| 8786   |       |        |       |        |        |        |        |       |
| 8787   | 0     | 1      |       | 4      | 5      | 4      | 5      | 5     |
| 8790   |       |        |       |        |        |        |        |       |
| 8791   | 0     | 0      | 1     | 3      | 4      | 4      | 3      | 2     |
| 8793   |       |        |       |        |        |        |        |       |
| 8795   | 0     | 1      |       | 6      | 6      | 6      | 6      | 5     |
| 8797   | 0     | 1      |       | 5      | 5      | 5      | 5      | 5     |
| 8801   | 0     | 1      |       | 5      | 5      | 5      | 5      | 4     |
| 8802   | 0     | 1      |       | 5      | 5      | 2      | 2      | 5     |
| 8807   |       |        |       |        |        |        |        |       |

| respid | Q43_9 | Q43_99 | Q44_1 | Q46x1a | Q46x1b | Q46x2a | Q46x2b | Q46x3 |
|--------|-------|--------|-------|--------|--------|--------|--------|-------|
| 8813   | 0     | 1      |       | 4      | 4      | 1      | 1      | 4     |
| 8817   | 0     | 1      |       | 5      | 5      | 5      | 5      | 5     |
| 8818   | 0     | 0      | 4     | 4      | 4      | 2      | 2      | 4     |
| 8821   | 0     | 1      |       | 5      | 5      | 5      | 5      | 5     |
| 8822   | 0     | 1      |       | 4      | 4      | 5      | 4      | 4     |
| 8823   | 0     | 1      |       | 6      | 6      | 6      | 6      | 6     |
| 8824   | 0     | 0      | 4     | 5      | 6      | 1      | 1      | 6     |
| 8825   | 0     | 0      | 4     | 5      | 5      | 6      | 6      | 6     |
| 8834   | 0     | 0      | 0     | 2      | 3      | 4      | 2      | 2     |
| 8840   | 0     | 0      | 2     | 2      | 2      | 5      | 2      | 1     |
| 8843   | 0     | 0      | 5     | 1      | 1      | 1      | 1      | 1     |
| 8846   | 0     | 1      |       | 5      | 5      | 5      | 5      | 5     |
| 8862   |       |        |       |        |        |        |        |       |
| 8866   | 0     | 0      | 3     | 4      | 5      | 1      | 1      | 4     |
| 8869   | 0     | 0      | 3     | 5      | 5      | 1      | 6      | 4     |
| 8872   | 0     | 0      | 3     | 4      | 4      | 2      | 4      | 4     |
| 8903   |       |        |       |        |        |        |        |       |
| 8909   |       |        |       |        |        |        |        |       |
| 8926   | 0     | 0      | 5     | 5      | 5      | 5      | 5      | 5     |
| 8936   | 0     | 1      |       | 6      | 6      | 6      | 6      | 6     |
| 8945   |       |        |       |        |        |        |        |       |
| 8954   | 0     | 0      | 4     | 6      | 6      | 6      | 6      | 6     |
| 8955   | 0     | 0      | 2     | 3      | 5      | 2      | 2      | 4     |
| 8958   | 0     | 0      | 3     | 4      | 5      | 2      | 6      | 4     |
| 8959   | 0     | 1      |       | 4      | 4      | 4      | 4      | 4     |
| 8960   | 0     | 1      |       | 6      | 6      | 6      | 6      | 6     |
| 8976   | 0     | 1      |       | 4      | 5      | 2      | 2      | 4     |
| 8977   | 0     | 0      | 4     | 5      | 5      | 5      | 5      | 5     |
| 8979   | 0     | 0      | 3     | 3      | 4      | 4      | 3      | 3     |
| 8985   |       |        |       |        |        |        |        |       |
| 8994   | 0     | 1      |       | 6      | 6      | 2      | 2      | 2     |
| 8997   | 0     | 1      |       | 6      | 6      | 6      | 6      | 6     |

| respid | Q43_9 | Q43_99 | Q44_1 | Q46x1a | Q46x1b | Q46x2a | Q46x2b | Q46x3 |
|--------|-------|--------|-------|--------|--------|--------|--------|-------|
| 9002   | 0     | 1      |       | 5      | 5      | 5      | 5      | 5     |
| 9005   | 0     | 0      | 4     | 4      | 5      | 3      | 2      | 3     |
| 9017   | 0     | 1      |       | 4      | 4      | 1      | 1      | 4     |
| 9018   | 0     | 1      |       | 6      | 6      | 6      | 6      | 6     |
| 9021   | 0     | 1      |       | 5      | 5      | 5      | 5      | 5     |
| 9029   | 0     | 0      | 2     | 3      | 3      | 3      | 3      | 3     |
| 9035   | 0     | 1      |       | 5      | 4      | 5      | 5      | 4     |
| 9038   | 0     | 0      | 3     | 5      | 5      | 1      | 6      | 5     |
| 9039   |       |        |       |        |        |        |        |       |
| 9040   | 0     | 0      | 0     | 5      | 5      | 5      | 5      | 5     |
| 9042   | 0     | 1      |       | 5      | 5      | 4      | 5      | 4     |
| 9043   | 0     | 1      |       | 5      | 5      | 1      | 1      | 5     |
| 9045   | 0     | 1      |       | 5      | 5      | 4      | 2      | 4     |
| 9051   | 0     | 1      |       | 5      | 5      | 1      | 1      | 5     |
| 9067   | 0     | 1      |       | 5      | 5      | 1      | 1      | 5     |
| 9069   | 0     | 1      |       | 6      | 5      | 2      | 4      | 5     |
| 9073   | 0     | 1      |       | 5      | 5      | 3      | 2      | 5     |
| 9084   | 0     | 0      | 3     | 4      | 4      | 4      | 4      | 4     |
| 9096   |       |        |       |        |        |        |        |       |
| 9100   | 0     | 0      | 4     | 3      | 1      | 2      | 3      | 2     |
| 9107   |       |        |       |        |        |        |        |       |
| 9110   | 0     | 1      |       | 5      | 5      | 1      | 6      | 4     |
| 9120   | 0     | 1      |       | 6      | 6      | 6      | 6      | 6     |
| 9122   | 0     | 0      | 3     | 4      | 4      | 4      | 4      | 4     |
| 9130   | 0     | 1      |       | 4      | 3      | 1      | 2      | 3     |
| 9134   | 0     | 0      | 3     | 4      | 4      | 4      | 4      | 4     |
| 9137   | 0     | 0      | 4     | 5      | 5      | 4      | 4      | 4     |
| 9139   | 0     | 1      |       | 5      | 5      | 1      | 1      | 5     |
| 9144   |       |        |       |        |        |        |        |       |
| 9157   | 0     | 1      |       | 5      | 6      | 5      | 5      | 5     |
| 9166   | 0     | 0      | 3     | 4      | 4      | 1      | 1      | 4     |
| 9177   | 0     | 0      | 2     | 3      | 3      | 1      | 2      | 4     |

| respid | Q43_9 | Q43_99 | Q44_1 | Q46x1a | Q46x1b | Q46x2a | Q46x2b | Q46x3 |
|--------|-------|--------|-------|--------|--------|--------|--------|-------|
| 9181   | 0     | 1      |       | 6      | 6      | 6      | 6      | 6     |
| 9183   | 0     | 1      |       | 5      | 5      | 4      | 5      | 4     |
| 9184   | 0     | 1      |       | 5      | 5      | 1      | 1      | 4     |
| 9188   |       |        |       |        |        |        |        |       |
| 9197   | 0     | 1      |       | 6      | 6      | 5      | 5      | 5     |
| 9200   | 0     | 1      |       | 3      | 3      | 2      | 3      | 3     |
| 9205   | 0     | 0      | 4     | 4      | 4      | 1      | 1      | 5     |
| 9207   | 0     | 1      |       | 5      | 5      | 1      | 2      | 5     |
| 9213   | 0     | 1      |       | 6      | 6      | 2      | 2      | 6     |
| 9216   | 0     | 0      | 4     | 4      | 4      | 4      | 4      | 4     |
| 9217   |       |        |       |        |        |        |        |       |
| 9218   | 0     | 1      |       | 5      | 5      | 5      | 5      | 5     |
| 9219   | 0     | 0      | 2     | 4      | 2      | 2      | 3      | 4     |
| 9220   |       |        |       |        |        |        |        |       |
| 9221   | 0     | 0      | 3     | 6      | 6      | 6      | 6      | 6     |
| 9223   | 0     | 0      | 2     | 3      | 3      | 3      | 2      | 3     |
| 9228   |       |        |       |        |        |        |        |       |
| 9230   | 0     | 1      |       | 5      | 5      | 1      | 1      | 4     |
| 9231   | 0     | 0      | 5     | 4      | 6      | 1      | 1      | 5     |
| 9233   | 0     | 0      | 3     | 5      | 5      | 5      | 5      | 5     |
| 9235   | 0     | 1      |       | 5      | 6      | 6      | 2      | 6     |
| 9237   | 0     | 1      |       | 5      | 5      | 1      | 1      | 5     |
| 9242   | 0     | 1      |       | 5      | 5      | 2      | 2      | 4     |
| 9250   |       |        |       |        |        |        |        |       |
| 9253   | 0     | 1      |       | 5      | 5      | 2      | 2      | 4     |
| 9257   | 0     | 1      |       | 4      | 4      | 1      | 3      | 3     |
| 9263   | 0     | 1      |       | 6      | 6      | 6      | 6      | 6     |
| 9267   | 0     | 1      |       | 6      | 6      | 6      | 6      | 6     |
| 9272   | 0     | 0      | 3     | 4      | 5      | 4      | 4      | 4     |
| 9279   |       |        |       |        |        |        |        |       |
| 9281   | 0     | 1      |       | 4      | 4      | 4      | 4      | 4     |
| 9285   | 0     | 1      |       | 5      | 5      | 1      | 1      | 5     |

| respid | Q43_9 | Q43_99 | Q44_1 | Q46x1a | Q46x1b | Q46x2a | Q46x2b | Q46x3 |
|--------|-------|--------|-------|--------|--------|--------|--------|-------|
| 9286   | 0     | 0      | 3     | 5      | 5      | 5      | 5      | 5     |
| 9294   | 0     | 1      |       | 4      | 4      | 4      | 4      | 5     |
| 9295   | 0     | 1      |       | 5      | 5      | 1      | 1      | 5     |
| 9297   | 0     | 0      | 3     | 5      | 4      | 6      | 6      | 4     |
| 9299   | 0     | 1      |       | 6      | 6      | 6      | 6      | 4     |
| 9309   | 0     | 1      |       | 3      | 4      | 3      | 3      | 3     |
| 9315   |       |        |       |        |        |        |        |       |
| 9320   | 0     | 1      |       | 5      | 5      | 6      | 6      | 5     |
| 9324   | 0     | 1      |       | 5      | 5      | 5      | 5      | 5     |
| 9326   | 0     | 1      |       | 6      | 6      | 6      | 6      | 6     |
| 9333   | 0     | 1      |       | 5      | 5      | 3      | 5      | 5     |
| 9334   | 0     | 0      | 3     | 4      | 4      | 4      | 4      | 4     |
| 9336   | 0     | 0      | 3     | 3      | 4      | 3      | 2      | 2     |
| 9337   | 0     | 1      |       | 6      | 6      | 5      | 5      | 5     |
| 9342   | 0     | 1      |       | 5      | 5      | 1      | 1      | 5     |
| 9347   | 0     | 1      |       | 5      | 5      | 2      | 2      | 4     |
| 9352   | 0     | 1      |       | 6      | 6      | 6      | 6      | 6     |
| 9355   | 0     | 1      |       | 4      | 5      | 4      | 4      | 5     |
| 9356   | 0     | 1      |       | 4      | 5      | 5      | 4      | 4     |
| 9359   | 0     | 0      | 3     | 4      | 5      | 2      | 4      | 4     |
| 9368   | 0     | 1      |       | 6      | 6      | 6      | 6      | 6     |
| 9375   | 0     | 0      | 2     | 5      | 5      | 1      | 1      | 5     |
| 9384   | 0     | 1      |       | 3      | 2      | 3      | 3      | 2     |
| 9388   | 0     | 0      | 4     | 2      | 4      | 1      | 1      | 4     |
| 9397   | 0     | 0      | 3     | 4      | 3      | 4      | 3      | 3     |
| 9400   | 0     | 1      |       | 5      | 5      | 4      | 5      | 4     |
| 9401   | 0     | 0      | 3     | 4      | 4      | 5      | 5      | 5     |
| 9402   |       |        |       |        |        |        |        |       |
| 9417   | 0     | 0      | 3     | 4      | 3      | 4      | 3      | 4     |
| 9424   | 0     | 1      |       | 6      | 6      | 6      | 6      | 6     |
| 9427   | 0     | 1      |       | 6      | 6      | 6      | 6      | 6     |
| 9429   | 0     | 1      |       | 5      | 5      | 2      | 1      | 5     |



| respid | Q43_9 | Q43_99 | Q44_1 | Q46x1a | Q46x1b | Q46x2a | Q46x2b | Q46x3 |
|--------|-------|--------|-------|--------|--------|--------|--------|-------|
| 9437   | 0     | 0      | 3     | 3      | 3      | 3      | 3      | 3     |
| 9442   | 0     | 0      | 2     | 4      | 4      | 4      | 4      | 4     |
| 9446   | 0     | 0      | 3     | 4      | 4      | 2      | 2      | 4     |
| 9447   | 0     | 1      |       | 5      | 5      | 5      | 5      | 5     |
| 9448   | 0     | 1      |       | 6      | 6      | 5      | 5      | 5     |
| 9449   | 0     | 0      | 4     | 5      | 4      | 5      | 5      | 3     |
| 9455   |       |        |       |        |        |        |        |       |
| 9459   | 0     | 0      | 2     | 4      | 4      | 2      | 2      | 3     |
| 9460   | 0     | 1      |       | 6      | 6      | 1      | 1      | 5     |
| 9461   | 0     | 0      | 3     | 4      | 5      | 2      | 2      | 4     |
| 9463   | 0     | 1      |       | 5      | 5      | 2      | 3      | 5     |
| 9464   | 0     | 0      | 2     | 4      | 4      | 4      | 2      | 4     |
| 9466   | 0     | 1      |       | 4      | 4      | 4      | 4      | 4     |
| 9477   | 0     | 0      | 4     | 5      | 5      | 5      | 5      | 5     |
| 9482   | 0     | 0      | 2     | 4      | 4      | 3      | 2      | 4     |
| 9486   | 0     | 1      |       | 6      | 6      | 6      | 6      | 6     |
| 9488   | 1     | 0      | 3     | 4      | 1      | 4      | 3      | 1     |
| 9489   | 0     | 1      |       | 5      | 5      | 5      | 2      | 2     |
| 9496   | 0     | 0      | 2     | 2      | 3      | 5      | 3      | 3     |
| 9499   | 0     | 1      |       | 5      | 5      | 5      | 5      | 5     |
| 9512   | 0     | 0      | 4     | 5      | 5      | 1      | 1      | 5     |
| 9514   | 0     | 1      |       | 4      | 4      | 1      | 1      | 4     |
| 9516   | 0     | 1      |       | 6      | 6      | 6      | 6      | 5     |
| 9517   | 0     | 0      | 3     | 4      | 3      | 4      | 3      | 2     |
| 9520   | 0     | 0      | 3     | 4      | 5      | 1      | 1      | 4     |
| 9527   | 0     | 1      |       | 5      | 5      | 2      | 2      | 5     |
| 9532   | 0     | 0      | 3     | 4      | 5      | 2      | 2      | 1     |
| 9533   | 0     | 1      |       | 5      | 5      | 5      | 5      | 5     |
| 9543   | 0     | 1      |       | 6      | 5      | 5      | 6      | 3     |
| 9550   | 0     | 1      |       | 5      | 5      | 1      | 1      | 4     |
| 9553   | 0     | 1      |       | 5      | 5      | 5      | 5      | 5     |
| 9555   | 0     | 1      |       | 4      | 4      | 2      | 2      | 3     |

| respid | Q43_9 | Q43_99 | Q44_1 | Q46x1a | Q46x1b | Q46x2a | Q46x2b | Q46x3 |
|--------|-------|--------|-------|--------|--------|--------|--------|-------|
| 9565   | 0     | 1      |       | 4      | 5      | 2      | 2      | 3     |
| 9583   | 0     | 1      |       | 5      | 5      | 5      | 5      | 5     |
| 9594   | 0     | 1      |       | 6      | 6      | 5      | 5      | 5     |
| 9596   | 0     | 0      | 3     | 4      | 5      | 1      | 1      | 5     |
| 9600   | 0     | 1      |       | 6      | 6      | 1      | 2      | 5     |
| 9602   | 0     | 1      |       | 5      | 5      | 1      | 1      | 5     |
| 9606   | 0     | 1      |       | 6      | 6      | 6      | 6      | 6     |
| 9608   | 0     | 0      | 3     | 6      | 6      | 6      | 6      | 4     |
| 9610   | 0     | 0      | 3     | 4      | 4      | 2      | 2      | 4     |
| 9612   | 0     | 1      |       | 4      | 5      | 4      | 4      | 3     |
| 9613   | 0     | 1      |       | 5      | 5      | 1      | 1      | 5     |
| 9614   | 0     | 1      |       | 5      | 5      | 5      | 5      | 4     |
| 9620   | 0     | 1      |       | 5      | 5      | 2      | 2      | 3     |
| 9628   | 0     | 1      |       | 5      | 5      | 5      | 5      | 5     |
| 9631   | 0     | 0      | 3     | 4      | 5      | 1      | 1      | 4     |
| 9632   | 0     | 1      |       | 5      | 5      | 1      | 1      | 5     |
| 9633   | 0     | 0      | 3     | 6      | 6      | 1      | 1      | 5     |
| 9639   |       |        |       |        |        |        |        |       |
| 9640   | 0     | 0      | 4     | 5      | 5      | 5      | 5      | 5     |
| 9642   | 0     | 1      |       | 5      | 5      | 5      | 5      | 5     |
| 9653   | 0     | 0      | 3     | 6      | 6      | 1      | 1      | 6     |
| 9658   | 0     | 1      |       | 5      | 5      | 2      | 2      | 4     |
| 9659   | 0     | 1      |       | 4      | 5      | 5      | 1      | 4     |
| 9661   | 0     | 0      | 3     | 6      | 6      | 6      | 6      | 6     |
| 9664   | 0     | 1      |       | 5      | 5      | 2      | 2      | 5     |
| 9665   | 0     | 0      | 4     | 5      | 5      | 1      | 2      | 4     |
| 9666   | 0     | 0      | 3     | 4      | 5      | 6      | 6      | 6     |
| 9667   | 0     | 0      | 2     | 5      | 4      | 5      | 5      | 4     |
| 9668   |       |        |       |        |        |        |        |       |
| 9670   | 0     | 0      | 3     | 5      | 5      | 2      | 2      | 5     |
| 9671   | 0     | 0      | 3     | 6      | 6      | 6      | 6      | 6     |
| 9681   | 0     | 1      |       | 5      | 5      | 1      | 1      | 5     |

| respid | Q43_9 | Q43_99 | Q44_1 | Q46x1a | Q46x1b | Q46x2a | Q46x2b | Q46x3 |
|--------|-------|--------|-------|--------|--------|--------|--------|-------|
| 9684   | 0     | 1      |       | 6      | 6      | 6      | 6      | 6     |
| 9685   | 0     | 0      | 2     | 4      | 4      | 2      | 2      | 4     |
| 9686   | 0     | 0      | 2     | 4      | 5      | 3      | 4      | 3     |
| 9688   | 0     | 0      | 3     | 6      | 6      | 6      | 6      | 4     |
| 9692   | 0     | 0      | 4     | 5      | 5      | 5      | 5      | 5     |
| 9693   | 1     | 0      | 0     | 2      | 2      | 3      | 3      | 6     |
| 9698   | 0     | 0      | 3     | 3      | 4      | 4      | 3      | 4     |
| 9699   | 1     | 0      | 3     | 6      | 6      | 6      | 6      | 6     |
| 9701   | 0     | 1      |       | 5      | 5      | 1      | 1      | 6     |
| 9702   | 0     | 1      |       | 5      | 5      | 1      | 1      | 5     |
| 9709   | 0     | 1      |       | 6      | 6      | 6      | 6      | 6     |
| 9713   |       |        |       |        |        |        |        |       |
| 9715   |       |        |       |        |        |        |        |       |
| 9721   | 0     | 1      |       | 5      | 4      | 2      | 5      | 4     |
| 9725   | 0     | 0      | 3     | 5      | 5      | 2      | 2      | 4     |
| 9729   | 0     | 0      | 3     | 5      | 2      | 3      | 2      | 5     |
| 9731   | 0     | 1      |       | 5      | 5      | 4      | 5      | 5     |
| 9736   | 0     | 1      |       | 5      | 5      | 4      | 4      | 4     |
| 9740   |       |        |       |        |        |        |        |       |
| 9741   | 0     | 1      |       | 6      | 6      | 6      | 6      | 6     |
| 9749   | 0     | 0      | 3     | 5      | 4      | 2      | 2      | 4     |
| 9750   | 0     | 1      |       | 6      | 6      | 6      | 6      | 6     |
| 9751   | 0     | 0      | 2     | 3      | 3      | 2      | 3      | 4     |
| 9753   | 0     | 0      | 3     | 5      | 5      | 5      | 5      | 5     |
| 9754   | 0     | 0      | 2     | 4      | 5      | 3      | 4      | 4     |
| 9756   | 0     | 1      |       | 4      | 4      | 3      | 3      | 3     |
| 9758   | 1     | 0      | 3     | 2      | 3      | 3      | 4      | 4     |
| 9759   | 0     | 1      |       | 6      | 5      | 1      | 1      | 5     |
| 9760   | 0     | 1      |       | 6      | 6      | 6      | 6      | 6     |
| 9761   |       |        |       |        |        |        |        |       |
| 9762   | 0     | 1      |       | 5      | 5      | 1      | 1      | 4     |
| 9764   | 0     | 1      |       | 6      | 6      | 6      | 6      | 6     |

| respid | Q43_9 | Q43_99 | Q44_1 | Q46x1a | Q46x1b | Q46x2a | Q46x2b | Q46x3 |
|--------|-------|--------|-------|--------|--------|--------|--------|-------|
| 9768   | 0     | 1      |       | 5      | 5      | 2      | 2      | 5     |
| 9769   | 0     | 0      | 2     | 4      | 4      | 2      | 2      | 4     |
| 9770   | 0     | 0      | 3     | 6      | 6      | 2      | 2      | 6     |
| 9771   | 0     | 0      | 3     | 6      | 6      | 6      | 6      | 6     |
| 9772   | 0     | 1      |       | 5      | 5      | 5      | 5      | 5     |
| 9773   | 0     | 0      | 3     | 6      | 6      | 6      | 6      | 6     |
| 9776   | 0     | 1      |       | 5      | 5      | 1      | 1      | 5     |
| 9786   | 0     | 0      | 2     | 5      | 5      | 5      | 5      | 5     |
| 9790   | 0     | 1      |       | 5      | 5      | 6      | 6      | 5     |
| 9791   | 0     | 1      |       | 6      | 6      | 1      | 2      | 5     |
| 9794   | 0     | 0      | 3     | 3      | 4      | 3      | 4      | 4     |
| 9797   | 0     | 1      |       | 4      | 4      | 2      | 2      | 4     |
| 9799   | 0     | 1      |       | 6      | 6      | 1      | 1      | 5     |
| 9804   | 0     | 1      |       | 5      | 5      | 5      | 5      | 5     |
| 9805   | 0     | 1      |       | 4      | 4      | 1      | 1      | 3     |
| 9806   | 0     | 1      |       | 6      | 6      | 6      | 6      | 5     |
| 9807   | 0     | 1      |       | 4      | 4      | 2      | 2      | 2     |
| 9813   | 0     | 1      |       | 6      | 5      | 2      | 2      | 4     |
| 9817   | 0     | 1      |       | 5      | 5      | 1      | 1      | 5     |
| 9823   | 0     | 1      |       | 5      | 5      | 1      | 1      | 5     |
| 9826   | 0     | 1      |       | 5      | 4      | 3      | 4      | 5     |
| 9830   | 0     | 1      |       | 6      | 5      | 1      | 2      | 4     |
| 9835   | 0     | 0      | 3     | 4      | 5      | 2      | 3      | 4     |
| 9836   | 0     | 1      |       | 5      | 5      | 5      | 5      | 5     |
| 9841   |       |        |       |        |        |        |        |       |
| 9842   | 0     | 1      |       | 6      | 6      | 6      | 6      | 6     |
| 9844   | 0     | 1      |       | 5      | 5      | 5      | 5      | 5     |
| 9847   | 0     | 1      |       | 6      | 6      | 2      | 2      | 5     |
| 9851   | 0     | 1      |       | 6      | 6      | 6      | 6      | 4     |
| 9852   | 0     | 1      |       | 5      | 4      | 2      | 2      | 5     |
| 9854   | 0     | 1      |       | 6      | 6      | 6      | 6      | 6     |
| 9855   | 0     | 0      | 4     | 5      | 5      | 2      | 2      | 5     |

| respid | Q43_9 | Q43_99 | Q44_1 | Q46x1a | Q46x1b | Q46x2a | Q46x2b | Q46x3 |
|--------|-------|--------|-------|--------|--------|--------|--------|-------|
| 9856   | 0     | 1      |       | 6      | 6      | 1      | 1      | 5     |
| 9862   | 0     | 1      |       | 5      | 5      | 5      | 5      | 5     |
| 9863   |       |        |       |        |        |        |        |       |
| 9866   | 0     | 1      |       | 5      | 5      | 5      | 5      | 6     |
| 9867   | 0     | 0      | 4     | 6      | 6      | 6      | 6      | 6     |
| 9868   | 0     | 0      | 3     | 6      | 6      | 6      | 6      | 6     |
| 9869   | 0     | 1      |       | 5      | 5      | 5      | 1      | 4     |
| 9878   | 0     | 0      | 4     | 5      | 5      | 4      | 3      | 4     |
| 9879   | 0     | 0      | 2     | 4      | 4      | 3      | 3      | 4     |
| 9881   | 0     | 1      |       | 3      | 6      | 5      | 5      | 5     |
| 9882   | 0     | 1      |       | 5      | 5      | 1      | 1      | 5     |
| 9884   | 0     | 0      | 3     | 4      | 5      | 5      | 5      | 5     |
| 9885   | 0     | 1      |       | 5      | 5      | 2      | 2      | 5     |
| 9888   | 0     | 1      |       | 4      | 5      | 2      | 3      | 3     |
| 9889   | 0     | 1      |       | 5      | 5      | 5      | 5      | 5     |
| 9894   | 0     | 0      | 3     | 3      | 4      | 2      | 2      | 4     |
| 9895   | 0     | 1      |       | 5      | 5      | 1      | 1      | 5     |
| 9896   | 0     | 0      | 3     | 3      | 3      | 3      | 2      | 4     |
| 9897   | 0     | 0      | 1     | 3      | 4      | 5      | 4      | 5     |
| 9905   | 0     | 1      |       | 6      | 5      | 1      | 2      | 4     |
| 9907   | 0     | 1      |       | 5      | 5      | 2      | 4      | 4     |
| 9908   | 0     | 0      | 3     | 5      | 5      | 5      | 5      | 5     |
| 9909   | 0     | 0      | 2     | 5      | 5      | 4      | 4      | 4     |
| 9910   | 0     | 1      |       | 5      | 5      | 5      | 5      | 5     |
| 9913   | 0     | 1      |       | 6      | 6      | 6      | 6      | 6     |
| 9914   | 0     | 1      |       | 6      | 6      | 6      | 6      | 6     |
| 9915   | 0     | 1      |       | 4      | 5      | 2      | 2      | 4     |
| 9916   | 0     | 1      |       | 6      | 6      | 5      | 5      | 5     |
| 9918   |       |        |       |        |        |        |        |       |
| 9919   | 0     | 0      | 4     | 4      | 4      | 4      | 4      | 5     |
| 9922   | 0     | 0      | 2     | 2      | 2      | 3      | 4      | 3     |
| 9930   | 0     | 1      |       | 5      | 5      | 5      | 5      | 5     |

| respid | Q43_9 | Q43_99 | Q44_1 | Q46x1a | Q46x1b | Q46x2a | Q46x2b | Q46x3 |
|--------|-------|--------|-------|--------|--------|--------|--------|-------|
| 9934   | 0     | 0      | 5     | 5      | 5      | 5      | 5      | 5     |
| 9936   | 0     | 0      | 3     | 4      | 4      | 5      | 5      | 4     |
| 9938   | 0     | 1      |       | 5      | 5      | 2      | 2      | 5     |
| 9940   | 0     | 0      | 3     | 6      | 6      | 6      | 6      | 6     |
| 9944   | 0     | 1      |       | 6      | 6      | 6      | 6      | 6     |
| 9945   | 0     | 1      |       | 5      | 5      | 5      | 5      | 5     |
| 9948   | 0     | 1      |       | 3      | 3      | 3      | 1      | 4     |
| 9949   | 0     | 1      |       | 4      | 4      | 2      | 3      | 3     |
| 9951   | 0     | 0      | 3     | 5      | 5      | 5      | 5      | 5     |
| 9952   | 0     | 0      | 4     | 4      | 4      | 2      | 2      | 4     |
| 9954   | 0     | 0      | 5     | 3      | 3      | 2      | 2      | 2     |
| 9955   | 0     | 1      |       | 5      | 5      | 2      | 2      | 5     |
| 9956   | 0     | 0      | 1     | 4      | 4      | 2      | 2      | 4     |
| 9957   | 0     | 1      |       | 6      | 6      | 6      | 6      | 6     |
| 9958   | 0     | 1      |       | 6      | 6      | 6      | 6      | 6     |
| 9959   | 0     | 0      | 4     | 4      | 4      | 2      | 2      | 1     |
| 9960   | 0     | 0      | 3     | 5      | 5      | 1      | 1      | 5     |
| 9961   | 0     | 1      |       | 5      | 5      | 5      | 4      | 5     |
| 9962   | 0     | 1      |       | 6      | 6      | 5      | 5      | 5     |
| 9969   | 0     | 0      | 2     | 4      | 4      | 2      | 2      | 4     |
| 9982   | 0     | 0      | 2     | 4      | 5      | 2      | 2      | 4     |
| 9984   | 0     | 1      |       | 4      | 4      | 1      | 1      | 4     |
| 9990   | 0     | 1      |       | 5      | 5      | 1      | 1      | 5     |
| 9992   | 0     | 0      | 3     | 3      | 3      | 4      | 4      | 3     |
| 9993   | 0     | 0      | 3     | 4      | 4      | 4      | 4      | 4     |
| 9997   | 0     | 1      |       | 6      | 6      | 6      | 6      | 6     |
| 9999   | 0     | 1      |       | 5      | 5      | 5      | 5      | 5     |
| 10000  | 0     | 0      | 4     | 5      | 5      | 1      | 1      | 5     |
| 10005  | 0     | 1      |       | 5      | 5      | 1      | 1      | 5     |
| 10014  | 0     | 1      |       | 6      | 6      | 1      | 1      | 6     |
| 10016  | 0     | 0      | 3     | 4      | 4      | 2      | 2      | 4     |
| 10017  | 0     | 0      | 3     | 5      | 5      | 5      | 5      | 5     |

| respid | Q43_9 | Q43_99 | Q44_1 | Q46x1a | Q46x1b | Q46x2a | Q46x2b | Q46x3 |
|--------|-------|--------|-------|--------|--------|--------|--------|-------|
| 10018  | 0     | 0      | 3     | 6      | 6      | 6      | 6      | 6     |
| 10021  | 0     | 1      |       | 4      | 4      | 2      | 2      | 4     |
| 10025  | 0     | 0      | 2     | 4      | 4      | 1      | 2      | 4     |
| 10027  | 0     | 0      | 4     | 6      | 6      | 6      | 6      | 6     |
| 10028  | 0     | 1      |       | 6      | 6      | 6      | 6      | 6     |
| 10031  | 0     | 1      |       | 5      | 5      | 1      | 1      | 5     |
| 10036  | 0     | 0      | 3     | 6      | 6      | 6      | 6      | 6     |
| 10037  | 0     | 1      |       | 6      | 6      | 6      | 6      | 6     |
| 10038  | 0     | 0      | 3     | 6      | 4      | 6      | 6      | 4     |
| 10039  |       |        |       |        |        |        |        |       |
| 10041  | 0     | 0      | 0     | 3      | 4      | 3      | 3      | 5     |
| 10045  | 0     | 0      | 2     | 4      | 3      | 1      | 1      | 4     |
| 10046  | 0     | 0      | 3     | 5      | 5      | 1      | 2      | 5     |
| 10047  | 0     | 0      | 3     | 4      | 4      | 2      | 3      | 3     |
| 10048  | 0     | 0      | 3     | 4      | 5      | 2      | 2      | 4     |
| 10049  | 0     | 1      |       | 5      | 5      | 2      | 2      | 4     |
| 10051  | 0     | 1      |       | 6      | 6      | 6      | 6      | 6     |
| 10052  | 0     | 0      | 3     | 4      | 5      | 4      | 4      | 5     |
| 10056  | 0     | 1      |       | 5      | 5      | 1      | 2      | 5     |
| 10061  | 0     | 1      |       | 6      | 6      | 6      | 6      | 6     |
| 10064  | 0     | 1      |       | 5      | 5      | 6      | 6      | 5     |
| 10066  | 0     | 1      |       | 6      | 6      | 6      | 6      | 6     |
| 10069  | 0     | 1      |       | 5      | 5      | 1      | 1      | 5     |
| 10071  | 0     | 0      | 3     | 5      | 5      | 1      | 1      | 5     |
| 10074  | 0     | 1      |       | 6      | 6      | 6      | 6      | 6     |
| 10079  | 0     | 0      | 2     | 6      | 6      | 6      | 6      | 6     |
| 10087  | 0     | 0      | 3     | 3      | 4      | 4      | 3      | 4     |
| 10095  | 0     | 1      |       | 6      | 6      | 6      | 6      | 6     |
| 10097  | 0     | 0      | 3     | 6      | 5      | 5      | 5      | 5     |
| 10100  | 0     | 1      |       | 5      | 5      | 5      | 5      | 5     |
| 10105  | 0     | 1      |       | 5      | 5      | 2      | 2      | 5     |
| 10107  | 0     | 0      | 3     | 2      | 4      | 4      | 4      | 2     |

| respid | Q43_9 | Q43_99 | Q44_1 | Q46x1a | Q46x1b | Q46x2a | Q46x2b | Q46x3 |
|--------|-------|--------|-------|--------|--------|--------|--------|-------|
| 10111  | 0     | 1      |       | 5      | 5      | 6      | 6      | 6     |
| 10116  | 0     | 1      |       | 5      | 5      | 5      | 5      | 5     |
| 10118  | 0     | 1      |       | 6      | 6      | 6      | 6      | 6     |
| 10123  |       |        |       |        |        |        |        |       |
| 10124  | 0     | 1      |       | 4      | 5      | 6      | 5      | 5     |
| 10130  | 0     | 1      |       | 4      | 4      | 1      | 1      | 4     |
| 10134  | 0     | 1      |       | 4      | 5      | 2      | 2      | 5     |
| 10135  | 0     | 1      |       | 6      | 5      | 5      | 5      | 6     |
| 10136  |       |        |       |        |        |        |        |       |
| 10141  | 0     | 1      |       | 4      | 5      | 5      | 6      | 4     |
| 10142  | 0     | 1      |       | 5      | 5      | 1      | 1      | 5     |
| 10143  | 0     | 1      |       | 4      | 4      | 1      | 1      | 4     |
| 10145  | 0     | 0      | 4     | 6      | 6      | 1      | 1      | 1     |
| 10149  | 0     | 0      | 4     | 3      | 4      | 5      | 4      | 5     |
| 10150  | 0     | 0      | 4     | 6      | 6      | 1      | 1      | 6     |
| 10151  | 0     | 0      | 3     | 4      | 4      | 1      | 1      | 4     |
| 10152  | 0     | 0      | 3     | 4      | 4      | 2      | 2      | 4     |
| 10153  | 0     | 1      |       | 5      | 5      | 5      | 5      | 5     |
| 10156  | 0     | 1      |       | 5      | 5      | 1      | 1      | 4     |
| 10160  | 0     | 0      | 3     | 6      | 6      | 6      | 6      | 6     |
| 10161  | 0     | 1      |       | 4      | 4      | 4      | 4      | 4     |
| 10167  | 0     | 0      | 2     | 5      | 4      | 5      | 4      | 4     |
| 10171  |       |        |       |        |        |        |        |       |
| 10172  | 0     | 1      |       | 5      | 5      | 5      | 5      | 5     |
| 10176  | 0     | 0      | 4     | 5      | 5      | 2      | 2      | 5     |
| 10177  | 0     | 0      | 3     | 4      | 5      | 4      | 5      | 5     |
| 10182  | 0     | 0      | 2     | 4      | 3      | 2      | 3      | 4     |
| 10184  | 0     | 0      | 4     | 4      | 4      | 2      | 2      | 5     |
| 10186  | 1     | 0      | 2     | 6      | 4      | 5      | 5      | 5     |
| 10189  | 0     | 1      |       | 5      | 5      | 4      | 4      | 5     |
| 10191  | 0     | 1      |       | 6      | 6      | 5      | 5      | 5     |
| 10192  | 0     | 1      |       | 5      | 5      | 1      | 1      | 4     |



| respid | Q43_9 | Q43_99 | Q44_1 | Q46x1a | Q46x1b | Q46x2a | Q46x2b | Q46x3 |
|--------|-------|--------|-------|--------|--------|--------|--------|-------|
| 10195  | 0     | 0      | 4     | 5      | 5      | 1      | 1      | 5     |
| 10199  |       |        |       |        |        |        |        |       |
| 10201  | 0     | 0      | 4     | 5      | 5      | 1      | 1      | 5     |
| 10213  | 0     | 1      |       | 6      | 6      | 2      | 2      | 5     |
| 10222  | 0     | 0      | 1     | 4      | 4      | 4      | 4      | 4     |
| 10224  |       |        |       |        |        |        |        |       |
| 10245  | 0     | 1      |       | 6      | 6      | 6      | 6      | 5     |
| 10254  | 0     | 0      | 3     | 6      | 6      | 6      | 6      | 6     |
| 10255  | 0     | 0      | 2     | 3      | 3      | 2      | 4      | 3     |
| 10257  | 0     | 0      | 3     | 6      | 6      | 1      | 1      | 5     |
| 10260  | 0     | 0      | 4     | 5      | 5      | 2      | 2      | 5     |
| 10261  | 0     | 1      |       | 6      | 6      | 6      | 6      | 6     |
| 10263  | 0     | 0      | 2     | 3      | 5      | 6      | 2      | 6     |
| 10264  | 0     | 1      |       | 5      | 4      | 2      | 2      | 2     |
| 10268  | 0     | 0      | 3     | 3      | 3      | 4      | 2      | 2     |
| 10269  | 0     | 0      | 2     | 4      | 4      | 2      | 2      | 4     |
| 10270  |       |        |       |        |        |        |        |       |
| 10282  | 0     | 1      |       | 6      | 6      | 6      | 6      | 5     |
| 10285  |       |        |       |        |        |        |        |       |
| 10288  | 0     | 0      | 4     | 5      | 5      | 2      | 2      | 5     |
| 10291  | 0     | 1      |       | 5      | 5      | 5      | 5      | 5     |
| 10292  | 0     | 1      |       | 6      | 6      | 6      | 5      | 5     |
| 10304  |       |        |       |        |        |        |        |       |
| 10305  | 0     | 0      | 3     | 5      | 6      | 6      | 6      | 6     |
| 10310  | 0     | 1      |       | 6      | 6      | 5      | 5      | 5     |
| 10324  | 0     | 1      |       | 5      | 4      | 5      | 5      | 5     |
| 10325  | 0     | 1      |       | 6      | 5      | 6      | 5      | 5     |
| 10326  | 0     | 1      |       | 6      | 5      | 1      | 1      | 5     |
| 10329  |       |        |       |        |        |        |        |       |
| 10332  | 0     | 0      | 4     | 5      | 5      | 4      | 3      | 5     |
| 10337  | 0     | 1      |       | 5      | 5      | 1      | 1      | 5     |
| 10341  | 0     | 0      | 3     | 6      | 6      | 6      | 6      | 6     |

| respid | Q43_9 | Q43_99 | Q44_1 | Q46x1a | Q46x1b | Q46x2a | Q46x2b | Q46x3 |
|--------|-------|--------|-------|--------|--------|--------|--------|-------|
| 10353  | 0     | 1      |       | 6      | 6      | 6      | 6      | 6     |
| 10354  |       |        |       |        |        |        |        |       |
| 10359  | 0     | 0      | 2     | 6      | 4      | 2      | 2      | 4     |
| 10360  | 0     | 1      |       | 5      | 5      | 5      | 5      | 5     |
| 10362  | 0     | 0      | 4     | 5      | 5      | 4      | 4      | 4     |
| 10364  | 0     | 0      | 4     | 6      | 6      | 6      | 6      | 6     |
| 10366  | 0     | 0      | 2     | 4      | 4      | 4      | 5      | 4     |
| 10367  | 0     | 1      |       | 4      | 4      | 4      | 4      | 4     |
| 10371  | 0     | 1      |       | 5      | 5      | 1      | 1      | 5     |
| 10374  | 0     | 0      | 3     | 5      | 5      | 1      | 1      | 5     |
| 10375  | 0     | 1      |       | 5      | 5      | 1      | 1      | 5     |
| 10376  | 0     | 1      |       | 6      | 6      | 6      | 6      | 6     |
| 10377  | 0     | 1      |       | 5      | 5      | 1      | 1      | 4     |
| 10378  | 0     | 0      | 2     | 4      | 4      | 4      | 4      | 4     |
| 10387  | 0     | 1      |       | 5      | 5      | 6      | 6      | 6     |
| 10396  | 0     | 0      | 3     | 3      | 3      | 2      | 2      | 2     |
| 10397  | 0     | 0      | 4     | 6      | 6      | 6      | 6      | 6     |
| 10399  | 0     | 0      | 3     | 3      | 3      | 4      | 3      | 4     |
| 10405  | 0     | 1      |       | 4      | 5      | 5      | 5      | 5     |
| 10406  | 0     | 1      |       | 6      | 6      | 6      | 6      | 6     |
| 10408  | 0     | 1      |       | 5      | 5      | 5      | 5      | 5     |
| 10409  |       |        |       |        |        |        |        |       |
| 10412  | 0     | 1      |       | 6      | 6      | 6      | 5      | 5     |
| 10413  | 0     | 1      |       | 5      | 5      | 5      | 5      | 5     |
| 10419  | 0     | 0      | 2     | 4      | 4      | 2      | 2      | 4     |
| 10423  | 0     | 0      | 3     | 4      | 4      | 2      | 2      | 4     |
| 10426  | 0     | 1      |       | 5      | 5      | 1      | 1      | 5     |
| 10446  | 0     | 1      |       | 5      | 5      | 5      | 5      | 5     |
| 10448  | 0     | 1      |       | 6      | 6      | 2      | 6      | 6     |
| 10450  | 0     | 1      |       | 5      | 4      | 5      | 4      | 4     |
| 10455  | 0     | 1      |       | 6      | 6      | 6      | 6      | 5     |
| 10460  | 0     | 1      |       | 6      | 6      | 5      | 5      | 5     |

| respid | Q43_9 | Q43_99 | Q44_1 | Q46x1a | Q46x1b | Q46x2a | Q46x2b | Q46x3 |
|--------|-------|--------|-------|--------|--------|--------|--------|-------|
| 10461  | 0     | 1      |       | 5      | 5      | 5      | 5      | 5     |
| 10471  | 0     | 0      | 3     | 5      | 5      | 1      | 1      | 5     |
| 10472  | 0     | 1      |       | 6      | 6      | 6      | 6      | 6     |
| 10491  | 0     | 0      | 3     | 3      | 3      | 3      | 2      | 2     |
| 10493  | 0     | 1      |       | 5      | 5      | 5      | 5      | 5     |
| 10498  | 0     | 1      |       | 5      | 5      | 5      | 5      | 5     |
| 10533  | 0     | 1      |       | 5      | 5      | 1      | 1      | 4     |
| 10539  | 0     | 1      |       | 4      | 4      | 2      | 2      | 4     |
| 10540  | 0     | 1      |       | 6      | 6      | 1      | 2      | 5     |
| 10557  | 0     | 1      |       | 4      | 4      | 5      | 6      | 4     |
| 10558  | 0     | 0      | 2     | 3      | 3      | 3      | 4      | 3     |
| 10559  | 0     | 0      | 2     | 4      | 6      | 6      | 6      | 6     |
| 10564  | 0     | 0      | 2     | 4      | 5      | 1      | 1      | 5     |
| 10570  |       |        |       |        |        |        |        |       |
| 10572  | 0     | 1      |       | 6      | 6      | 6      | 6      | 6     |
| 10576  | 0     | 1      |       | 5      | 5      | 1      | 1      | 5     |
| 10582  | 0     | 0      | 0     | 1      | 1      | 3      | 3      | 2     |
| 10593  | 0     | 1      |       | 5      | 5      | 1      | 1      | 5     |
| 10596  | 0     | 1      |       | 4      | 4      | 6      | 6      | 4     |
| 10615  |       |        |       |        |        |        |        |       |
| 10616  | 0     | 1      |       | 5      | 5      | 1      | 1      | 5     |
| 10623  | 0     | 1      |       | 6      | 6      | 1      | 1      | 4     |
| 10626  | 0     | 0      | 4     | 5      | 5      | 1      | 1      | 5     |
| 10627  | 0     | 0      | 4     | 2      | 3      | 4      | 4      | 3     |
| 10629  | 0     | 0      | 1     | 2      | 4      | 2      | 2      | 4     |
| 10632  | 0     | 0      | 3     | 2      | 2      | 3      | 3      | 2     |
| 10641  |       |        |       |        |        |        |        |       |
| 10648  | 0     | 1      |       | 3      | 2      | 3      | 3      | 2     |
| 10651  | 0     | 0      | 2     | 4      | 4      | 4      | 4      | 4     |
| 10654  | 0     | 1      |       | 5      | 5      | 1      | 1      | 5     |
| 10673  | 0     | 1      |       | 6      | 6      | 6      | 6      | 5     |
| 10675  | 0     | 1      |       | 5      | 5      | 2      | 2      | 5     |

| respid | Q43_9 | Q43_99 | Q44_1 | Q46x1a | Q46x1b | Q46x2a | Q46x2b | Q46x3 |
|--------|-------|--------|-------|--------|--------|--------|--------|-------|
| 10689  | 0     | 1      |       | 2      | 2      | 2      | 2      | 1     |
| 10692  | 0     | 1      |       | 5      | 5      | 1      | 1      | 5     |
| 10694  | 0     | 1      |       | 6      | 6      | 1      | 1      | 5     |
| 10695  | 0     | 1      |       | 3      | 4      | 2      | 2      | 4     |
| 10702  | 0     | 1      |       | 4      | 6      | 5      | 5      | 4     |
| 10703  | 0     | 0      | 3     | 4      | 4      | 4      | 4      | 4     |
| 10708  | 0     | 1      |       | 5      | 5      | 1      | 1      | 5     |
| 10719  | 0     | 0      | 4     | 5      | 4      | 1      | 2      | 4     |
| 10722  | 0     | 1      |       | 6      | 6      | 6      | 6      | 6     |
| 10723  | 0     | 0      | 3     | 5      | 5      | 4      | 3      | 4     |
| 10726  | 0     | 0      | 0     | 5      | 5      | 2      | 5      | 5     |
| 10727  | 0     | 1      |       | 6      | 6      | 6      | 6      | 6     |
| 10730  | 0     | 1      |       | 5      | 5      | 5      | 6      | 6     |
| 10731  |       |        |       |        |        |        |        |       |
| 10737  | 0     | 1      |       | 5      | 5      | 2      | 1      | 5     |
| 10743  | 0     | 0      | 3     | 4      | 4      | 1      | 1      | 3     |
| 10763  | 0     | 1      |       | 5      | 5      | 2      | 2      | 5     |
| 10777  |       |        |       |        |        |        |        |       |
| 10787  | 0     | 1      |       | 6      | 4      | 5      | 5      | 5     |
| 10798  | 0     | 0      | 4     | 2      | 2      | 2      | 1      | 2     |
| 10800  | 0     | 1      |       | 5      | 5      | 2      | 2      | 5     |
| 10802  | 0     | 0      | 4     | 2      | 2      | 2      | 3      | 3     |
| 10803  | 0     | 0      | 1     | 3      | 3      | 2      | 2      | 4     |
| 10808  | 0     | 1      |       | 6      | 6      | 6      | 6      | 6     |
| 10810  | 0     | 1      |       | 5      | 5      | 1      | 1      | 5     |
| 10819  | 0     | 0      | 3     | 6      | 6      | 6      | 6      | 6     |
| 10825  | 0     | 0      | 5     | 6      | 6      | 6      | 6      | 6     |
| 10827  | 0     | 0      | 3     | 4      | 4      | 2      | 2      | 5     |
| 10830  | 0     | 0      | 3     | 6      | 6      | 6      | 6      | 6     |
| 10847  | 0     | 1      |       | 5      | 5      | 5      | 5      | 5     |
| 10849  | 0     | 1      |       | 5      | 5      | 1      | 1      | 5     |
| 10852  | 0     | 1      |       | 6      | 6      | 6      | 6      | 6     |

| respid | Q43_9 | Q43_99 | Q44_1 | Q46x1a | Q46x1b | Q46x2a | Q46x2b | Q46x3 |
|--------|-------|--------|-------|--------|--------|--------|--------|-------|
| 10854  | 0     | 0      | 3     | 4      | 4      | 4      | 4      | 4     |
| 10857  | 0     | 1      |       | 5      | 5      | 5      | 5      | 5     |
| 10861  | 0     | 0      | 3     | 6      | 6      | 2      | 6      | 6     |
| 10862  |       |        |       |        |        |        |        |       |
| 10870  | 0     | 0      | 4     | 5      | 5      | 5      | 5      | 3     |
| 10873  | 0     | 1      |       | 6      | 6      | 6      | 6      | 4     |
| 10881  | 0     | 0      | 4     | 5      | 5      | 1      | 2      | 5     |
| 10893  |       |        |       |        |        |        |        |       |
| 10898  | 0     | 0      | 5     | 4      | 6      | 6      | 2      | 3     |
| 10899  | 0     | 1      |       | 4      | 4      | 2      | 3      | 4     |
| 10905  | 0     | 1      |       | 6      | 6      | 6      | 4      | 4     |
| 10910  |       |        |       |        |        |        |        |       |
| 10911  | 0     | 0      | 4     | 5      | 4      | 5      | 4      | 4     |
| 10912  | 0     | 1      |       | 6      | 6      | 2      | 2      | 5     |
| 10913  | 0     | 0      | 3     | 6      | 6      | 6      | 6      | 6     |
| 10918  |       |        |       |        |        |        |        |       |
| 10995  |       |        |       |        |        |        |        |       |
| 11002  | 0     | 0      | 4     | 5      | 5      | 1      | 5      | 5     |
| 11003  | 0     | 1      |       | 6      | 6      | 6      | 6      | 6     |
| 11005  | 0     | 1      |       | 5      | 5      | 5      | 5      | 5     |
| 11015  | 0     | 0      | 4     | 4      | 5      | 5      | 5      | 5     |
| 11016  | 0     | 1      |       | 6      | 6      | 6      | 6      | 6     |
| 11017  | 0     | 1      |       | 5      | 5      | 5      | 5      | 5     |
| 11020  | 0     | 0      | 4     | 3      | 2      | 3      | 1      | 4     |
| 11024  | 0     | 0      | 4     | 5      | 5      | 4      | 2      | 4     |
| 11026  | 0     | 0      | 3     | 6      | 6      | 6      | 6      | 6     |
| 11028  | 0     | 1      |       | 3      | 3      | 3      | 3      | 3     |
| 11029  | 0     | 0      | 3     | 3      | 3      | 2      | 1      | 2     |
| 11030  | 0     | 1      |       | 6      | 6      | 6      | 6      | 5     |
| 11031  | 0     | 1      |       | 6      | 6      | 6      | 6      | 6     |
| 11038  | 0     | 1      |       | 6      | 6      | 6      | 6      | 6     |
| 11051  | 0     | 1      |       | 5      | 5      | 1      | 2      | 4     |

| respid | Q43_9 | Q43_99 | Q44_1 | Q46x1a | Q46x1b | Q46x2a | Q46x2b | Q46x3 |
|--------|-------|--------|-------|--------|--------|--------|--------|-------|
| 11052  | 0     | 0      | 1     | 2      | 2      | 3      | 3      | 1     |
| 11053  | 0     | 1      |       | 5      | 5      | 5      | 5      | 5     |
| 11054  | 0     | 0      | 3     | 2      | 1      | 2      | 1      | 1     |
| 11063  | 0     | 0      | 4     | 5      | 5      | 3      | 4      | 4     |
| 11075  | 0     | 0      | 3     | 2      | 3      | 3      | 3      | 3     |
| 11083  | 0     | 0      | 4     | 4      | 4      | 2      | 2      | 4     |
| 11092  | 0     | 1      |       | 6      | 6      | 5      | 5      | 5     |
| 11118  | 0     | 0      | 3     | 5      | 5      | 2      | 2      | 5     |
| 11119  | 0     | 0      | 2     | 6      | 6      | 2      | 2      | 4     |
| 11134  | 0     | 1      |       | 5      | 5      | 6      | 6      | 5     |
| 11139  | 0     | 1      |       | 6      | 6      | 6      | 6      | 6     |
| 11154  | 0     | 1      |       | 5      | 5      | 5      | 5      | 5     |
| 11166  | 0     | 0      | 5     | 6      | 6      | 5      | 4      | 6     |
| 11168  |       |        |       |        |        |        |        |       |
| 11176  | 0     | 0      | 3     | 2      | 2      | 2      | 2      | 2     |
| 11183  | 0     | 0      | 2     | 4      | 3      | 4      | 3      | 4     |
| 11189  | 0     | 1      |       | 6      | 6      | 6      | 6      | 6     |
| 11196  | 0     | 0      | 2     | 2      | 2      | 2      | 2      | 2     |
| 11200  | 0     | 1      |       | 5      | 5      | 5      | 5      | 5     |
| 11201  | 0     | 1      |       | 1      | 1      | 1      | 1      | 5     |
| 11211  | 0     | 0      | 2     | 2      | 2      | 2      | 2      | 3     |
| 11218  | 0     | 1      |       | 6      | 6      | 1      | 1      | 5     |
| 11219  | 0     | 1      |       | 5      | 5      | 5      | 5      | 5     |
| 11221  | 0     | 1      |       | 6      | 6      | 6      | 6      | 6     |
| 11222  | 0     | 1      |       | 6      | 6      | 6      | 6      | 6     |
| 11230  | 0     | 0      | 2     | 2      | 2      | 3      | 2      | 3     |
| 11236  | 0     | 0      | 2     | 2      | 3      | 3      | 2      | 2     |
| 11237  | 0     | 0      | 2     | 4      | 4      | 2      | 2      | 4     |
| 11240  | 0     | 0      | 3     | 4      | 4      | 1      | 1      | 4     |
| 11244  | 0     | 0      | 2     | 2      | 2      | 3      | 3      | 2     |
| 11249  | 0     | 0      | 4     | 5      | 5      | 3      | 3      | 4     |
| 11252  | 0     | 0      | 2     | 2      | 2      | 3      | 3      | 2     |

| respid | Q43_9 | Q43_99 | Q44_1 | Q46x1a | Q46x1b | Q46x2a | Q46x2b | Q46x3 |
|--------|-------|--------|-------|--------|--------|--------|--------|-------|
| 11254  | 0     | 0      | 3     | 4      | 4      | 2      | 2      | 4     |
| 11255  | 0     | 0      | 3     | 5      | 5      | 2      | 2      | 5     |
| 11258  | 0     | 0      | 2     | 2      | 2      | 3      | 3      | 2     |
| 11260  | 0     | 1      |       | 6      | 6      | 2      | 2      | 5     |
| 11264  | 0     | 0      | 2     | 3      | 3      | 4      | 3      | 3     |
| 11266  | 0     | 0      | 4     | 3      | 2      | 2      | 2      | 3     |
| 11268  | 0     | 0      | 2     | 5      | 5      | 2      | 2      | 4     |
| 11269  | 0     | 1      |       | 5      | 5      | 1      | 1      | 4     |
| 11272  | 0     | 0      | 4     | 4      | 4      | 4      | 3      | 4     |
| 11273  | 0     | 1      |       | 6      | 6      | 6      | 6      | 5     |
| 11275  | 0     | 0      | 3     | 4      | 5      | 5      | 5      | 4     |
| 11276  | 1     | 0      | 2     | 5      | 5      | 5      | 5      | 5     |
| 11278  | 0     | 0      | 3     | 3      | 3      | 3      | 3      | 3     |
| 11288  |       |        |       |        |        |        |        |       |
| 11289  |       |        |       |        |        |        |        |       |
| 11291  | 0     | 1      |       | 6      | 6      | 6      | 6      | 6     |
| 11295  | 0     | 1      |       | 5      | 5      | 5      | 5      | 4     |
| 11297  | 0     | 1      |       | 6      | 6      | 6      | 6      | 6     |
| 11304  | 0     | 0      | 1     | 6      | 6      | 6      | 6      | 6     |
| 11305  | 0     | 1      |       | 5      | 5      | 1      | 1      | 5     |
| 11311  | 0     | 1      |       | 5      | 5      | 5      | 5      | 5     |
| 11313  | 0     | 1      |       | 5      | 5      | 5      | 5      | 5     |
| 11315  | 0     | 0      | 0     | 3      | 3      | 3      | 3      | 3     |
| 11316  | 0     | 0      | 0     | 3      | 3      | 3      | 3      | 3     |
| 11318  | 0     | 0      | 3     | 3      | 4      | 2      | 3      | 4     |
| 11323  | 0     | 1      |       | 6      | 6      | 6      | 6      | 6     |
| 11331  | 0     | 0      | 3     | 4      | 5      | 5      | 5      | 4     |
| 11333  | 0     | 1      |       | 5      | 5      | 2      | 2      | 4     |
| 11334  | 0     | 0      | 3     | 4      | 4      | 4      | 4      | 4     |
| 11340  | 0     | 0      | 2     | 2      | 2      | 2      | 3      | 2     |
| 11345  | 0     | 0      | 3     | 5      | 5      | 5      | 6      | 5     |
| 11354  | 0     | 1      |       | 5      | 5      | 3      | 2      | 5     |

| respid | Q43_9 | Q43_99 | Q44_1 | Q46x1a | Q46x1b | Q46x2a | Q46x2b | Q46x3 |
|--------|-------|--------|-------|--------|--------|--------|--------|-------|
| 11360  |       |        |       |        |        |        |        |       |
| 11361  | 0     | 0      | 3     | 3      | 1      | 3      | 3      | 3     |
| 11367  |       |        |       |        |        |        |        |       |
| 11370  |       |        |       |        |        |        |        |       |
| 11371  | 0     | 0      | 2     | 4      | 4      | 3      | 3      | 4     |
| 11372  | 0     | 0      | 2     | 3      | 3      | 3      | 3      | 3     |
| 11373  | 0     | 0      | 3     | 5      | 5      | 1      | 1      | 4     |
| 11382  | 0     | 1      |       | 5      | 5      | 5      | 5      | 5     |
| 11394  | 0     | 0      | 2     | 4      | 4      | 1      | 2      | 4     |
| 11395  | 0     | 0      | 3     | 4      | 5      | 4      | 5      | 5     |
| 11397  |       |        |       |        |        |        |        |       |
| 11402  | 0     | 0      | 1     | 5      | 5      | 1      | 1      | 5     |
| 11409  | 0     | 0      | 4     | 5      | 4      | 5      | 5      | 4     |
| 11410  | 0     | 1      |       | 5      | 5      | 5      | 5      | 5     |
| 11411  | 0     | 1      |       | 5      | 5      | 3      | 4      | 5     |
| 11418  | 0     | 1      |       | 5      | 5      | 1      | 1      | 5     |
| 11425  | 0     | 0      | 3     | 3      | 3      | 3      | 3      | 3     |
| 11429  | 0     | 1      |       | 5      | 5      | 5      | 5      | 5     |
| 11430  | 0     | 0      | 2     | 3      | 2      | 2      | 4      | 2     |
| 11431  | 0     | 0      | 3     | 4      | 4      | 1      | 2      | 4     |
| 11432  |       |        |       |        |        |        |        |       |
| 11433  | 0     | 1      |       | 5      | 5      | 4      | 6      | 5     |
| 11435  | 0     | 1      |       | 4      | 4      | 4      | 3      | 4     |
| 11436  | 1     | 0      | 3     | 4      | 4      | 2      | 2      | 4     |
| 11437  | 0     | 0      | 3     | 4      | 4      | 2      | 3      | 4     |
| 11439  |       |        |       |        |        |        |        |       |
| 11440  | 0     | 0      | 3     | 5      | 5      | 6      | 6      | 4     |
| 11447  | 0     | 1      |       | 5      | 5      | 1      | 1      | 5     |
| 11455  | 0     | 1      |       | 5      | 5      | 5      | 5      | 5     |
| 11456  | 0     | 0      | 2     | 3      | 3      | 3      | 3      | 3     |
| 11461  | 0     | 0      | 4     | 4      | 4      | 4      | 4      | 4     |
| 11463  | 0     | 0      | 5     | 3      | 4      | 4      | 3      | 3     |



| respid | Q43_9 | Q43_99 | Q44_1 | Q46x1a | Q46x1b | Q46x2a | Q46x2b | Q46x3 |
|--------|-------|--------|-------|--------|--------|--------|--------|-------|
| 11470  | 1     | 0      | 2     | 3      | 4      | 3      | 5      | 4     |
| 11472  |       |        |       |        |        |        |        |       |
| 11475  | 0     | 1      |       | 6      | 6      | 6      | 6      | 6     |
| 11476  | 0     | 0      | 4     | 6      | 4      | 3      | 2      | 4     |
| 11482  | 0     | 0      | 2     | 3      | 3      | 3      | 3      | 3     |
| 11501  | 1     | 0      | 3     | 4      | 4      | 4      | 4      | 3     |
| 11503  | 0     | 0      | 4     | 3      | 2      | 2      | 1      | 2     |
| 11505  | 0     | 1      |       | 6      | 6      | 6      | 6      | 6     |
| 11510  | 1     | 0      | 3     | 5      | 5      | 2      | 3      | 5     |
| 11519  |       |        |       |        |        |        |        |       |
| 11527  | 0     | 0      | 3     | 3      | 3      | 3      | 3      | 3     |
| 11529  | 0     | 0      | 3     | 4      | 4      | 4      | 4      | 4     |
| 11530  | 0     | 1      |       | 4      | 4      | 4      | 5      | 4     |
| 11536  | 0     | 0      | 1     | 2      | 2      | 2      | 2      | 3     |
| 11543  | 0     | 1      |       | 6      | 6      | 6      | 6      | 4     |
| 11548  | 0     | 1      |       | 4      | 4      | 2      | 2      | 4     |
| 11566  | 0     | 0      | 3     | 6      | 6      | 6      | 6      | 6     |
| 11570  | 1     | 0      | 2     | 4      | 4      | 2      | 2      | 4     |
| 11571  | 0     | 1      |       | 4      | 4      | 2      | 2      | 4     |
| 11578  |       |        |       |        |        |        |        |       |
| 11579  | 0     | 1      |       | 5      | 5      | 1      | 2      | 5     |
| 11581  | 0     | 0      | 3     | 3      | 3      | 4      | 3      | 3     |
| 11582  | 0     | 0      | 3     | 5      | 5      | 1      | 2      | 5     |
| 11583  | 0     | 1      |       | 6      | 6      | 6      | 5      | 5     |
| 11589  | 0     | 0      | 1     | 3      | 2      | 5      | 4      | 3     |
| 11590  | 0     | 1      |       | 6      | 6      | 6      | 6      | 6     |
| 11592  | 0     | 1      |       | 6      | 6      | 6      | 6      | 6     |
| 11596  |       |        |       |        |        |        |        |       |
| 11598  | 0     | 0      | 2     | 4      | 5      | 2      | 2      | 4     |
| 11602  | 0     | 1      |       | 5      | 5      | 5      | 5      | 5     |
| 11605  | 0     | 0      | 4     | 4      | 4      | 2      | 2      | 4     |
| 11618  | 0     | 0      | 3     | 4      | 4      | 4      | 4      | 4     |

| respid | Q43_9 | Q43_99 | Q44_1 | Q46x1a | Q46x1b | Q46x2a | Q46x2b | Q46x3 |
|--------|-------|--------|-------|--------|--------|--------|--------|-------|
| 11621  | 0     | 0      | 2     | 2      | 2      | 3      | 3      | 3     |
| 11630  | 0     | 0      | 4     | 4      | 5      | 5      | 5      | 5     |
| 11636  | 0     | 0      | 3     | 3      | 3      | 3      | 4      | 2     |
| 11640  | 1     | 0      | 3     | 2      | 3      | 4      | 2      | 1     |
| 11658  | 0     | 1      |       | 4      | 4      | 4      | 4      | 4     |
| 11665  | 0     | 0      | 1     | 4      | 3      | 2      | 2      | 4     |
| 11666  | 0     | 0      | 4     | 6      | 4      | 4      | 4      | 4     |
| 11667  | 0     | 0      | 3     | 4      | 3      | 3      | 4      | 4     |
| 11674  | 0     | 1      |       | 4      | 5      | 1      | 1      | 5     |
| 11680  | 0     | 1      |       | 5      | 5      | 2      | 2      | 2     |
| 11683  | 0     | 1      |       | 6      | 6      | 6      | 6      | 6     |
| 11688  | 0     | 0      | 2     | 2      | 3      | 4      | 3      | 4     |
| 11690  |       |        |       |        |        |        |        |       |
| 11694  |       |        |       |        |        |        |        |       |
| 11705  | 0     | 0      | 2     | 5      | 4      | 4      | 3      | 3     |
| 11720  | 0     | 0      | 3     | 2      | 4      | 3      | 2      | 2     |
| 11724  |       |        |       |        |        |        |        |       |
| 11738  | 0     | 1      |       | 5      | 5      | 1      | 1      | 5     |
| 11744  | 0     | 0      | 2     | 4      | 4      | 4      | 4      | 4     |
| 11745  | 0     | 0      | 1     | 4      | 4      | 4      | 6      | 4     |
| 11747  |       |        |       |        |        |        |        |       |
| 11755  | 0     | 0      | 3     | 4      | 4      | 5      | 5      | 5     |
| 11756  | 0     | 0      | 1     | 4      | 3      | 5      | 4      | 4     |
| 11772  | 0     | 0      | 2     | 5      | 4      | 2      | 2      | 3     |
| 11773  |       |        |       |        |        |        |        |       |
| 11778  | 0     | 0      | 3     | 3      | 4      | 2      | 3      | 3     |
| 11790  | 0     | 0      | 2     | 4      | 4      | 4      | 4      | 4     |
| 11794  |       |        |       |        |        |        |        |       |
| 11795  | 0     | 0      | 3     | 3      | 3      | 2      | 2      | 4     |
| 11799  | 0     | 0      | 2     | 3      | 3      | 3      | 3      | 2     |
| 11803  | 0     | 1      |       | 4      | 4      | 4      | 4      | 4     |
| 11806  | 1     | 0      | 4     | 2      | 2      | 3      | 3      | 3     |

| respid | Q43_9 | Q43_99 | Q44_1 | Q46x1a | Q46x1b | Q46x2a | Q46x2b | Q46x3 |
|--------|-------|--------|-------|--------|--------|--------|--------|-------|
| 11808  | 0     | 0      | 3     | 4      | 2      | 4      | 3      | 4     |
| 11810  |       |        |       |        |        |        |        |       |
| 11811  |       |        |       |        |        |        |        |       |
| 11812  | 0     | 0      | 2     | 4      | 4      | 4      | 3      | 4     |
| 11813  | 0     | 0      | 4     | 4      | 4      | 2      | 2      | 4     |
| 11821  | 0     | 0      | 3     | 4      | 4      | 4      | 4      | 4     |
| 11827  |       |        |       |        |        |        |        |       |
| 11831  | 0     | 0      | 3     | 3      | 4      | 2      | 3      | 3     |
| 11841  |       |        |       |        |        |        |        |       |
| 11872  | 0     | 0      | 2     | 4      | 4      | 4      | 2      | 4     |
| 11898  | 0     | 1      |       | 6      | 6      | 6      | 6      | 6     |
| 11902  | 0     | 0      | 2     | 3      | 4      | 4      | 5      | 6     |
| 11912  | 0     | 1      |       | 4      | 4      | 3      | 2      | 5     |
| 11926  | 0     | 1      |       | 6      | 6      | 6      | 6      | 6     |
| 11928  | 0     | 0      | 4     | 2      | 2      | 3      | 1      | 3     |
| 11932  | 0     | 0      | 3     | 5      | 5      | 2      | 2      | 4     |
| 11934  | 0     | 1      |       | 5      | 5      | 5      | 5      | 5     |
| 11941  | 0     | 0      | 2     | 4      | 4      | 2      | 2      | 4     |
| 11942  |       |        |       |        |        |        |        |       |
| 11943  | 0     | 0      | 2     | 6      | 4      | 6      | 6      | 6     |
| 11944  | 0     | 0      | 2     | 4      | 4      | 5      | 4      | 4     |
| 11955  |       |        |       |        |        |        |        |       |
| 11958  | 0     | 1      |       | 5      | 5      | 1      | 1      | 4     |
| 11968  | 0     | 0      | 3     | 4      | 4      | 2      | 3      | 4     |
| 11979  | 1     | 0      | 3     | 3      | 4      | 3      | 3      | 4     |
| 11988  |       |        |       |        |        |        |        |       |
| 11999  | 0     | 0      | 3     | 6      | 6      | 6      | 6      | 6     |
| 12002  | 0     | 1      |       | 5      | 5      | 6      | 6      | 6     |
| 12004  | 0     | 1      |       | 5      | 4      | 5      | 5      | 4     |
| 12008  | 0     | 1      |       | 5      | 4      | 5      | 5      | 5     |
| 12013  | 0     | 1      |       | 6      | 6      | 6      | 6      | 4     |
| 12018  | 0     | 0      | 3     | 4      | 4      | 4      | 4      | 3     |

| respid | Q43_9 | Q43_99 | Q44_1 | Q46x1a | Q46x1b | Q46x2a | Q46x2b | Q46x3 |
|--------|-------|--------|-------|--------|--------|--------|--------|-------|
| 12023  | 1     | 0      | 3     | 4      | 4      | 2      | 1      | 4     |
| 12027  | 1     | 0      | 2     | 3      | 4      | 4      | 4      | 4     |
| 12030  | 0     | 0      | 3     | 6      | 5      | 4      | 4      | 6     |
| 12031  | 0     | 0      | 3     | 6      | 6      | 6      | 2      | 6     |
| 12036  | 0     | 0      | 2     | 4      | 4      | 4      | 4      | 4     |
| 12037  | 0     | 0      | 3     | 3      | 4      | 3      | 3      | 3     |
| 12038  | 0     | 1      |       | 3      | 3      | 3      | 3      | 3     |
| 12039  | 0     | 1      |       | 6      | 6      | 1      | 2      | 5     |
| 12045  | 0     | 0      | 3     | 4      | 4      | 6      | 6      | 6     |
| 12046  | 0     | 1      |       | 5      | 4      | 5      | 4      | 4     |
| 12054  | 1     | 0      | 4     | 3      | 4      | 4      | 4      | 4     |
| 12055  | 0     | 0      | 3     | 4      | 4      | 2      | 2      | 4     |
| 12069  | 0     | 0      | 3     | 4      | 4      | 4      | 4      | 5     |
| 12070  | 0     | 0      | 2     | 4      | 3      | 4      | 4      | 3     |
| 12074  | 0     | 1      |       | 6      | 5      | 1      | 1      | 4     |
| 12075  | 0     | 0      | 3     | 4      | 3      | 3      | 3      | 4     |
| 12078  | 0     | 0      | 2     | 4      | 4      | 4      | 4      | 4     |
| 12089  | 0     | 1      |       | 6      | 6      | 6      | 6      | 6     |
| 12091  | 0     | 0      | 2     | 4      | 4      | 4      | 3      | 4     |
| 12092  | 1     | 0      | 3     | 4      | 4      | 2      | 2      | 4     |
| 12108  | 0     | 0      | 1     | 3      | 2      | 1      | 5      | 4     |
| 12111  | 0     | 0      | 3     | 3      | 3      | 3      | 4      | 3     |
| 12112  | 0     | 0      | 2     | 4      | 3      | 4      | 4      | 4     |
| 12126  |       |        |       |        |        |        |        |       |
| 12132  | 0     | 0      | 3     | 4      | 3      | 3      | 4      | 3     |
| 12150  | 1     | 0      | 2     | 3      | 3      | 3      | 3      | 4     |
| 12152  | 0     | 1      |       | 4      | 4      | 4      | 4      | 4     |
| 12154  | 0     | 1      |       | 4      | 4      | 5      | 5      | 4     |
| 12157  | 0     | 0      | 3     | 5      | 4      | 4      | 3      | 4     |
| 12165  | 0     | 1      |       | 5      | 5      | 4      | 4      | 4     |
| 12169  | 0     | 0      | 2     | 4      | 4      | 2      | 2      | 4     |
| 12182  | 0     | 0      | 2     | 2      | 3      | 3      | 3      | 4     |

| respid | Q43_9 | Q43_99 | Q44_1 | Q46x1a | Q46x1b | Q46x2a | Q46x2b | Q46x3 |
|--------|-------|--------|-------|--------|--------|--------|--------|-------|
| 12198  | 0     | 1      |       | 6      | 6      | 3      | 3      | 4     |
| 12199  |       |        |       |        |        |        |        |       |
| 12202  | 0     | 0      | 3     | 5      | 5      | 2      | 2      | 5     |
| 12207  | 0     | 1      |       | 5      | 5      | 1      | 2      | 4     |
| 12208  | 0     | 0      | 2     | 4      | 4      | 4      | 4      | 4     |
| 12210  | 0     | 1      |       | 6      | 6      | 6      | 6      | 6     |
| 12219  | 0     | 1      |       | 3      | 3      | 3      | 3      | 3     |
| 12224  | 0     | 1      |       | 5      | 5      | 5      | 5      | 5     |
| 12230  | 0     | 0      | 3     | 4      | 4      | 2      | 2      | 4     |
| 12238  | 0     | 0      | 4     | 2      | 4      | 4      | 4      | 4     |
| 12239  | 0     | 1      |       | 5      | 5      | 1      | 1      | 5     |
| 12243  | 0     | 0      | 5     | 5      | 5      | 5      | 5      | 5     |
| 12245  | 0     | 1      |       | 6      | 6      | 2      | 2      | 4     |
| 12246  | 0     | 1      |       | 4      | 3      | 3      | 3      | 3     |
| 12247  | 0     | 0      | 4     | 6      | 6      | 6      | 6      | 6     |
| 12248  | 0     | 0      | 5     | 6      | 6      | 6      | 6      | 6     |
| 12249  | 0     | 1      |       | 4      | 4      | 4      | 4      | 4     |
| 12258  | 0     | 0      | 3     | 4      | 4      | 3      | 3      | 6     |
| 12265  | 0     | 1      |       | 4      | 3      | 3      | 4      | 3     |
| 12269  | 0     | 0      | 3     | 5      | 5      | 5      | 5      | 5     |
| 12270  | 0     | 0      | 1     | 5      | 5      | 5      | 5      | 5     |
| 12279  | 0     | 1      |       | 5      | 5      | 5      | 5      | 4     |
| 12280  | 0     | 1      |       | 6      | 4      | 6      | 6      | 5     |
| 12282  | 0     | 1      |       | 5      | 5      | 2      | 2      | 4     |
| 12283  | 0     | 1      |       | 4      | 5      | 2      | 2      | 4     |
| 12287  | 0     | 1      |       | 5      | 5      | 5      | 5      | 5     |
| 12288  | 0     | 0      | 3     | 5      | 5      | 2      | 2      | 4     |
| 12290  | 0     | 1      |       | 4      | 4      | 1      | 2      | 5     |
| 12292  | 0     | 1      |       | 4      | 4      | 2      | 2      | 4     |
| 12294  | 0     | 1      |       | 6      | 6      | 6      | 6      | 6     |
| 12296  | 0     | 1      |       | 5      | 5      | 5      | 5      | 5     |
| 12307  | 0     | 1      |       | 6      | 6      | 6      | 6      | 6     |

| respid | Q43_9 | Q43_99 | Q44_1 | Q46x1a | Q46x1b | Q46x2a | Q46x2b | Q46x3 |
|--------|-------|--------|-------|--------|--------|--------|--------|-------|
| 12309  | 0     | 1      |       | 5      | 5      | 4      | 5      | 5     |
| 12312  | 0     | 0      | 2     | 4      | 4      | 1      | 1      | 4     |
| 12317  | 0     | 1      |       | 4      | 4      | 4      | 4      | 4     |
| 12319  | 0     | 0      | 5     | 5      | 5      | 5      | 5      | 5     |
| 12320  | 0     | 1      |       | 4      | 4      | 1      | 1      | 3     |
| 12322  | 0     | 1      |       | 5      | 5      | 2      | 2      | 4     |
| 12328  | 0     | 0      | 3     | 4      | 3      | 4      | 3      | 3     |
| 12331  | 1     | 0      | 1     | 2      | 1      | 2      | 2      | 2     |
| 12332  | 0     | 1      |       | 5      | 5      | 5      | 6      | 5     |
| 12334  | 0     | 1      |       | 6      | 6      | 5      | 5      | 5     |
| 12337  | 0     | 0      | 3     | 5      | 5      | 1      | 1      | 4     |
| 12338  | 0     | 0      | 3     | 4      | 4      | 1      | 1      | 4     |
| 12342  | 0     | 0      | 4     | 4      | 6      | 4      | 4      | 4     |
| 12349  | 0     | 1      |       | 5      | 5      | 1      | 1      | 5     |
| 12352  | 0     | 0      | 2     | 4      | 4      | 4      | 5      | 4     |
| 12355  | 0     | 0      | 3     | 4      | 4      | 5      | 6      | 4     |
| 12357  | 0     | 0      | 3     | 4      | 3      | 3      | 4      | 4     |
| 12358  | 0     | 1      |       | 5      | 5      | 5      | 5      | 5     |
| 12371  | 0     | 0      | 3     | 4      | 2      | 4      | 3      | 3     |
| 12372  | 0     | 1      |       | 6      | 6      | 6      | 6      | 6     |
| 12373  | 0     | 1      |       | 5      | 5      | 5      | 5      | 5     |
| 12379  | 0     | 1      |       | 5      | 5      | 5      | 5      | 5     |
| 12381  | 1     | 0      | 2     | 4      | 6      | 2      | 2      | 3     |
| 12383  | 0     | 1      |       | 6      | 3      | 4      | 6      | 6     |
| 12384  | 0     | 0      | 3     | 5      | 5      | 1      | 1      | 5     |
| 12386  | 0     | 0      | 1     | 6      | 6      | 1      | 2      | 5     |
| 12389  |       |        |       |        |        |        |        |       |
| 12392  | 0     | 0      | 4     | 5      | 5      | 5      | 5      | 5     |
| 12396  | 0     | 1      |       | 4      | 2      | 4      | 2      | 3     |
| 12397  | 0     | 0      | 3     | 6      | 6      | 1      | 6      | 5     |
| 12399  | 0     | 0      | 2     | 3      | 4      | 2      | 2      | 4     |
| 12400  | 0     | 1      |       | 3      | 3      | 3      | 4      | 4     |

| respid | Q43_9 | Q43_99 | Q44_1 | Q46x1a | Q46x1b | Q46x2a | Q46x2b | Q46x3 |
|--------|-------|--------|-------|--------|--------|--------|--------|-------|
| 12406  | 0     | 0      | 3     | 5      | 5      | 1      | 1      | 3     |
| 12407  | 0     | 1      |       | 5      | 5      | 4      | 4      | 5     |
| 12410  | 0     | 1      |       | 5      | 5      | 5      | 5      | 5     |
| 12413  | 0     | 1      |       | 5      | 5      | 5      | 5      | 6     |
| 12416  | 0     | 1      |       | 4      | 4      | 2      | 2      | 3     |
| 12419  | 0     | 1      |       | 5      | 5      | 1      | 1      | 6     |
| 12422  | 0     | 0      | 4     | 2      | 2      | 2      | 2      | 2     |
| 12423  | 0     | 0      | 3     | 5      | 4      | 4      | 4      | 4     |
| 12429  | 0     | 1      |       | 5      | 5      | 2      | 2      | 5     |
| 12434  | 0     | 0      | 3     | 3      | 4      | 3      | 4      | 4     |
| 12435  | 0     | 0      | 4     | 4      | 4      | 2      | 2      | 4     |
| 12436  | 0     | 0      | 4     | 4      | 4      | 3      | 3      | 3     |
| 12442  |       |        |       |        |        |        |        |       |
| 12449  | 0     | 1      |       | 5      | 5      | 5      | 5      | 5     |
| 12451  | 0     | 1      |       | 5      | 5      | 5      | 4      | 5     |
| 12456  | 0     | 1      |       | 4      | 3      | 3      | 3      | 4     |
| 12457  | 0     | 1      |       | 5      | 5      | 5      | 5      | 5     |
| 12458  | 0     | 1      |       | 5      | 5      | 2      | 2      | 4     |
| 12461  | 1     | 0      | 3     | 4      | 4      | 3      | 3      | 4     |
| 12462  | 0     | 1      |       | 6      | 6      | 6      | 6      | 6     |
| 12463  | 0     | 0      | 3     | 2      | 2      | 2      | 1      | 2     |
| 12466  | 0     | 0      | 3     | 5      | 5      | 5      | 5      | 5     |
| 12470  | 0     | 0      | 4     | 4      | 4      | 3      | 2      | 2     |
| 12471  | 0     | 1      |       | 6      | 2      | 3      | 2      | 3     |
| 12472  | 0     | 1      |       | 6      | 6      | 5      | 5      | 5     |
| 12478  | 1     | 0      | 1     | 4      | 4      | 2      | 2      | 4     |
| 12479  | 0     | 0      | 3     | 2      | 3      | 4      | 4      | 3     |
| 12481  | 0     | 1      |       | 5      | 5      | 2      | 2      | 5     |
| 12482  | 0     | 1      |       | 3      | 3      | 3      | 3      | 2     |
| 12483  |       |        |       |        |        |        |        |       |
| 12496  | 0     | 1      |       | 6      | 6      | 1      | 2      | 4     |
| 12497  | 0     | 1      |       | 6      | 6      | 5      | 5      | 5     |

| respid | Q43_9 | Q43_99 | Q44_1 | Q46x1a | Q46x1b | Q46x2a | Q46x2b | Q46x3 |
|--------|-------|--------|-------|--------|--------|--------|--------|-------|
| 12498  | 1     | 0      | 2     | 3      | 6      | 3      | 3      | 3     |
| 12500  | 0     | 0      | 2     | 4      | 4      | 4      | 4      | 4     |
| 12501  | 0     | 0      | 3     | 6      | 4      | 4      | 5      | 4     |
| 12502  | 0     | 0      | 3     | 4      | 4      | 4      | 4      | 4     |
| 12503  | 0     | 1      |       | 5      | 5      | 5      | 5      | 5     |
| 12505  | 0     | 0      | 2     | 4      | 6      | 2      | 2      | 4     |
| 12508  | 0     | 0      | 3     | 4      | 4      | 4      | 4      | 4     |
| 12509  | 0     | 0      | 3     | 4      | 4      | 4      | 4      | 4     |
| 12510  |       |        |       |        |        |        |        |       |
| 12512  | 0     | 1      |       | 4      | 4      | 2      | 2      | 4     |
| 12514  | 0     | 0      | 3     | 4      | 4      | 4      | 4      | 4     |
| 12515  | 0     | 0      | 3     | 3      | 3      | 4      | 4      | 3     |
| 12520  | 0     | 1      |       | 5      | 5      | 5      | 5      | 5     |
| 12522  | 0     | 1      |       | 6      | 6      | 6      | 6      | 6     |
| 12526  | 0     | 0      | 2     | 3      | 2      | 3      | 3      | 3     |
| 12527  |       |        |       |        |        |        |        |       |
| 12528  | 0     | 1      |       | 4      | 5      | 1      | 1      | 4     |
| 12530  | 0     | 1      |       | 6      | 6      | 6      | 6      | 6     |
| 12535  | 0     | 1      |       | 4      | 4      | 1      | 1      | 4     |
| 12539  | 0     | 1      |       | 6      | 6      | 6      | 6      | 6     |
| 12541  | 0     | 0      | 3     | 2      | 3      | 2      | 2      | 2     |
| 12542  | 0     | 1      |       | 4      | 5      | 2      | 2      | 4     |
| 12545  | 0     | 1      |       | 6      | 6      | 6      | 6      | 6     |
| 12547  | 0     | 1      |       | 3      | 4      | 4      | 4      | 2     |
| 12549  | 0     | 1      |       | 2      | 2      | 2      | 2      | 2     |
| 12550  | 0     | 1      |       | 6      | 6      | 6      | 6      | 6     |
| 12555  |       |        |       |        |        |        |        |       |
| 12557  | 0     | 0      | 2     | 6      | 6      | 3      | 2      | 4     |
| 12559  | 0     | 1      |       | 4      | 3      | 4      | 4      | 4     |
| 12561  | 0     | 1      |       | 5      | 5      | 5      | 5      | 5     |
| 12562  | 0     | 1      |       | 2      | 3      | 3      | 3      | 3     |
| 12563  | 0     | 1      |       | 5      | 6      | 5      | 5      | 5     |



| respid | Q43_9 | Q43_99 | Q44_1 | Q46x1a | Q46x1b | Q46x2a | Q46x2b | Q46x3 |
|--------|-------|--------|-------|--------|--------|--------|--------|-------|
| 12565  | 0     | 0      | 3     | 3      | 3      | 3      | 3      | 4     |
| 12566  |       |        |       |        |        |        |        |       |
| 12570  |       |        |       |        |        |        |        |       |
| 12571  | 0     | 1      |       | 6      | 6      | 6      | 6      | 6     |
| 12572  | 0     | 1      |       | 3      | 3      | 2      | 5      | 4     |
| 12578  |       |        |       |        |        |        |        |       |
| 12579  | 0     | 0      | 5     | 3      | 5      | 2      | 2      | 3     |
| 12581  | 0     | 1      |       | 6      | 6      | 6      | 6      | 6     |
| 12582  | 0     | 1      |       | 6      | 6      | 6      | 6      | 6     |
| 12585  | 0     | 0      | 4     | 4      | 4      | 4      | 4      | 4     |
| 12586  | 0     | 0      | 3     | 5      | 5      | 5      | 5      | 5     |
| 12588  | 0     | 0      | 3     | 5      | 4      | 3      | 3      | 4     |
| 12589  | 0     | 0      | 3     | 4      | 5      | 1      | 1      | 4     |
| 12590  | 0     | 1      |       | 5      | 5      | 5      | 5      | 5     |
| 12591  | 0     | 0      | 3     | 4      | 4      | 4      | 3      | 3     |
| 12593  | 0     | 0      | 2     | 2      | 2      | 2      | 2      | 2     |
| 12594  | 0     | 1      |       | 3      | 4      | 4      | 4      | 4     |
| 12599  | 0     | 1      |       | 5      | 5      | 5      | 5      | 5     |
| 12600  | 0     | 1      |       | 5      | 5      | 2      | 3      | 4     |
| 12602  | 0     | 0      | 2     | 3      | 4      | 3      | 3      | 4     |
| 12606  | 0     | 0      | 2     | 1      | 2      | 1      | 1      | 2     |
| 12607  |       |        |       |        |        |        |        |       |
| 12608  |       |        |       |        |        |        |        |       |
| 12610  | 0     | 0      | 4     | 3      | 2      | 4      | 3      | 3     |
| 12611  | 0     | 1      |       | 5      | 5      | 5      | 5      | 5     |
| 12613  | 0     | 0      | 2     | 3      | 3      | 3      | 4      | 3     |
| 12616  | 0     | 1      |       | 4      | 4      | 4      | 4      | 4     |
| 12617  | 0     | 0      | 2     | 5      | 5      | 1      | 5      | 5     |
| 12619  | 0     | 1      |       | 6      | 6      | 6      | 6      | 6     |
| 12622  |       |        |       |        |        |        |        |       |
| 12628  | 0     | 0      | 5     | 5      | 5      | 2      | 1      | 3     |
| 12631  | 0     | 0      | 4     | 6      | 6      | 6      | 6      | 6     |

| respid | Q43_9 | Q43_99 | Q44_1 | Q46x1a | Q46x1b | Q46x2a | Q46x2b | Q46x3 |
|--------|-------|--------|-------|--------|--------|--------|--------|-------|
| 12635  | 0     | 1      |       | 3      | 3      | 3      | 3      | 3     |
| 12638  | 0     | 1      |       | 6      | 6      | 6      | 6      | 6     |
| 12639  | 0     | 1      |       | 5      | 5      | 1      | 2      | 5     |
| 12640  | 0     | 1      |       | 5      | 5      | 1      | 1      | 5     |
| 12643  | 0     | 0      | 2     | 6      | 6      | 5      | 1      | 6     |
| 12646  | 0     | 0      | 3     | 3      | 4      | 4      | 3      | 3     |
| 12648  | 1     | 0      | 1     | 2      | 2      | 2      | 3      | 3     |
| 12650  | 0     | 0      | 3     | 4      | 2      | 3      | 3      | 3     |
| 12651  | 0     | 0      | 3     | 6      | 6      | 6      | 6      | 6     |
| 12658  | 0     | 0      | 3     | 4      | 4      | 2      | 2      | 4     |
| 12662  | 0     | 1      |       | 3      | 3      | 3      | 3      | 3     |
| 12663  | 0     | 0      | 1     | 3      | 2      | 3      | 3      | 3     |
| 12664  | 0     | 0      | 2     | 4      | 4      | 4      | 4      | 4     |
| 12669  | 0     | 0      | 3     | 4      | 4      | 4      | 3      | 4     |
| 12670  | 0     | 1      |       | 5      | 5      | 4      | 4      | 5     |
| 12673  |       |        |       |        |        |        |        |       |
| 12675  | 0     | 1      |       | 5      | 6      | 4      | 4      | 5     |
| 12677  | 0     | 1      |       | 4      | 4      | 4      | 4      | 4     |
| 12679  | 0     | 0      | 3     | 4      | 5      | 6      | 6      | 5     |
| 12682  | 0     | 1      |       | 3      | 3      | 3      | 3      | 3     |
| 12696  | 0     | 1      |       | 5      | 5      | 5      | 5      | 4     |
| 12697  | 0     | 1      |       | 4      | 4      | 4      | 4      | 5     |
| 12699  | 0     | 0      | 4     | 5      | 5      | 2      | 2      | 4     |
| 12700  | 1     | 0      | 3     | 4      | 4      | 5      | 5      | 4     |
| 12701  | 0     | 1      |       | 3      | 3      | 3      | 3      | 3     |
| 12702  | 0     | 1      |       | 5      | 5      | 4      | 4      | 4     |
| 12704  | 0     | 0      | 3     | 3      | 3      | 3      | 3      | 4     |
| 12705  | 0     | 0      | 2     | 6      | 6      | 6      | 6      | 6     |
| 12709  | 0     | 0      | 4     | 6      | 6      | 6      | 6      | 6     |
| 12710  | 0     | 1      |       | 5      | 5      | 4      | 4      | 4     |
| 12713  | 0     | 1      |       | 4      | 4      | 1      | 2      | 2     |
| 12716  | 0     | 0      | 2     | 2      | 4      | 4      | 4      | 3     |

| respid | Q43_9 | Q43_99 | Q44_1 | Q46x1a | Q46x1b | Q46x2a | Q46x2b | Q46x3 |
|--------|-------|--------|-------|--------|--------|--------|--------|-------|
| 12719  | 0     | 0      | 3     | 5      | 4      | 1      | 1      | 4     |
| 12720  | 0     | 1      |       | 4      | 4      | 5      | 5      | 4     |
| 12723  | 0     | 1      |       | 5      | 5      | 1      | 1      | 5     |
| 12726  | 0     | 1      |       | 5      | 5      | 5      | 5      | 4     |
| 12728  | 0     | 0      | 1     | 4      | 3      | 3      | 3      | 3     |
| 12729  | 0     | 1      |       | 6      | 4      | 5      | 4      | 4     |
| 12731  | 0     | 1      |       | 5      | 5      | 5      | 5      | 4     |
| 12732  | 0     | 1      |       | 3      | 3      | 4      | 4      | 4     |
| 12733  | 0     | 0      | 2     | 4      | 4      | 1      | 2      | 5     |
| 12736  | 0     | 1      |       | 4      | 4      | 5      | 5      | 5     |
| 12737  | 0     | 1      |       | 4      | 4      | 4      | 4      | 4     |
| 12739  | 0     | 0      | 3     | 4      | 4      | 4      | 4      | 4     |
| 12742  | 0     | 1      |       | 4      | 5      | 4      | 4      | 4     |
| 12743  | 1     | 0      | 1     | 6      | 6      | 4      | 4      | 1     |
| 12744  | 0     | 1      |       | 3      | 3      | 1      | 3      | 4     |
| 12747  | 0     | 1      |       | 2      | 3      | 3      | 3      | 4     |
| 12751  | 0     | 1      |       | 4      | 5      | 5      | 5      | 5     |
| 12754  | 0     | 1      |       | 5      | 4      | 4      | 4      | 4     |
| 12756  | 0     | 1      |       | 4      | 4      | 3      | 3      | 3     |
| 12757  | 0     | 1      |       | 4      | 4      | 4      | 4      | 4     |
| 12760  | 0     | 1      |       | 3      | 3      | 4      | 4      | 4     |
| 12761  | 0     | 1      |       | 5      | 5      | 4      | 4      | 4     |
| 12762  | 0     | 0      | 3     | 4      | 4      | 4      | 4      | 4     |
| 12766  | 0     | 1      |       | 6      | 6      | 5      | 5      | 5     |
| 12769  | 0     | 1      |       | 5      | 5      | 2      | 2      | 5     |
| 12770  | 0     | 0      | 3     | 4      | 5      | 4      | 2      | 5     |
| 12773  | 0     | 0      | 3     | 2      | 2      | 4      | 2      | 1     |
| 12780  | 0     | 0      | 3     | 4      | 4      | 4      | 4      | 4     |
| 12789  | 0     | 0      | 3     | 6      | 6      | 6      | 6      | 6     |
| 12792  | 0     | 0      | 3     | 4      | 4      | 2      | 2      | 4     |
| 12795  | 0     | 0      | 3     | 4      | 4      | 2      | 2      | 4     |
| 12804  | 0     | 0      | 2     | 2      | 4      | 2      | 4      | 3     |

| respid | Q43_9 | Q43_99 | Q44_1 | Q46x1a | Q46x1b | Q46x2a | Q46x2b | Q46x3 |
|--------|-------|--------|-------|--------|--------|--------|--------|-------|
| 12811  | 0     | 1      |       | 4      | 3      | 4      | 4      | 4     |
| 12813  | 0     | 0      | 3     | 6      | 6      | 6      | 6      | 6     |
| 12814  | 0     | 1      |       | 3      | 3      | 3      | 3      | 4     |
| 12815  | 0     | 1      |       | 5      | 5      | 1      | 1      | 5     |
| 12816  | 0     | 1      |       | 5      | 5      | 5      | 5      | 5     |
| 12817  | 0     | 1      |       | 5      | 5      | 5      | 5      | 5     |
| 12818  | 0     | 0      | 2     | 6      | 6      | 1      | 6      | 6     |
| 12819  | 0     | 1      |       | 5      | 5      | 5      | 5      | 5     |
| 12820  | 0     | 1      |       | 5      | 5      | 5      | 5      | 5     |
| 12821  | 0     | 1      |       | 6      | 6      | 6      | 6      | 6     |
| 12824  | 0     | 0      | 3     | 4      | 4      | 5      | 5      | 4     |
| 12827  | 0     | 0      | 3     | 5      | 4      | 5      | 4      | 4     |
| 12836  | 0     | 0      | 2     | 1      | 2      | 1      | 2      | 1     |
| 12837  | 0     | 1      |       | 5      | 5      | 5      | 4      | 5     |
| 12838  | 0     | 0      | 3     | 5      | 5      | 5      | 5      | 5     |
| 12845  | 0     | 1      |       | 6      | 6      | 6      | 6      | 6     |
| 12847  | 0     | 0      | 2     | 4      | 4      | 4      | 4      | 6     |
| 12849  | 0     | 0      | 3     | 2      | 1      | 3      | 3      | 2     |
| 12850  | 0     | 0      | 3     | 4      | 4      | 4      | 3      | 3     |
| 12852  | 0     | 1      |       | 5      | 5      | 2      | 5      | 5     |
| 12853  | 0     | 0      | 4     | 2      | 1      | 1      | 1      | 2     |
| 12854  | 0     | 1      |       | 5      | 5      | 1      | 1      | 5     |
| 12860  | 0     | 1      |       | 5      | 5      | 1      | 1      | 5     |
| 12861  | 0     | 1      |       | 6      | 6      | 1      | 1      | 5     |
| 12863  | 0     | 1      |       | 5      | 5      | 5      | 5      | 5     |
| 12865  | 0     | 1      |       | 6      | 6      | 6      | 6      | 6     |
| 12870  | 0     | 1      |       | 4      | 4      | 5      | 6      | 5     |
| 12871  | 0     | 1      |       | 6      | 6      | 6      | 6      | 6     |
| 12873  | 0     | 0      | 3     | 4      | 4      | 5      | 6      | 5     |
| 12877  | 0     | 0      | 3     | 5      | 5      | 1      | 2      | 4     |
| 12880  | 0     | 1      |       | 5      | 5      | 2      | 2      | 5     |
| 12881  | 0     | 0      | 3     | 2      | 2      | 2      | 2      | 2     |

| respid | Q43_9 | Q43_99 | Q44_1 | Q46x1a | Q46x1b | Q46x2a | Q46x2b | Q46x3 |
|--------|-------|--------|-------|--------|--------|--------|--------|-------|
| 12882  | 0     | 1      |       | 5      | 5      | 5      | 5      | 5     |
| 12883  | 0     | 0      | 3     | 4      | 3      | 2      | 2      | 4     |
| 12885  | 0     | 1      |       | 5      | 5      | 6      | 6      | 6     |
| 12887  | 0     | 0      | 3     | 6      | 4      | 6      | 6      | 6     |
| 12889  | 0     | 1      |       | 5      | 5      | 1      | 1      | 5     |
| 12890  | 0     | 1      |       | 5      | 5      | 3      | 3      | 4     |
| 12891  | 0     | 0      | 3     | 5      | 5      | 5      | 5      | 5     |
| 12892  | 0     | 0      | 3     | 4      | 4      | 2      | 3      | 4     |
| 12893  | 0     | 1      |       | 6      | 6      | 6      | 6      | 6     |
| 12895  | 0     | 0      | 2     | 5      | 5      | 5      | 4      | 4     |
| 12898  | 0     | 1      |       | 5      | 5      | 2      | 3      | 4     |
| 12907  | 0     | 0      | 3     | 4      | 5      | 2      | 4      | 2     |
| 12908  | 0     | 0      | 3     | 6      | 6      | 1      | 1      | 4     |
| 12909  |       |        |       |        |        |        |        |       |
| 12914  | 0     | 0      | 4     | 5      | 5      | 5      | 5      | 4     |
| 12915  | 0     | 0      | 2     | 6      | 6      | 6      | 6      | 6     |
| 12916  |       |        |       |        |        |        |        |       |
| 12921  | 0     | 1      |       | 3      | 5      | 4      | 4      | 4     |
| 12922  | 0     | 1      |       | 5      | 5      | 5      | 5      | 5     |
| 12923  | 0     | 0      | 2     | 4      | 4      | 4      | 5      | 4     |
| 12926  | 0     | 0      | 3     | 5      | 4      | 4      | 4      | 3     |
| 12927  | 0     | 1      |       | 6      | 6      | 5      | 5      | 5     |
| 12932  | 0     | 1      |       | 5      | 5      | 5      | 5      | 5     |
| 12936  | 0     | 1      |       | 6      | 6      | 6      | 6      | 6     |
| 12937  | 0     | 0      | 4     | 6      | 4      | 4      | 4      | 5     |
| 12938  | 1     | 0      | 3     | 3      | 3      | 2      | 2      | 3     |
| 12939  | 0     | 1      |       | 5      | 5      | 1      | 1      | 5     |
| 12940  | 0     | 0      | 3     | 4      | 3      | 4      | 3      | 4     |
| 12945  | 0     | 0      | 3     | 6      | 5      | 6      | 6      | 4     |
| 12946  | 0     | 0      | 3     | 4      | 4      | 1      | 1      | 4     |
| 12947  | 0     | 0      | 3     | 4      | 4      | 4      | 4      | 3     |
| 12948  | 0     | 0      | 3     | 3      | 3      | 3      | 3      | 3     |

| respid | Q43_9 | Q43_99 | Q44_1 | Q46x1a | Q46x1b | Q46x2a | Q46x2b | Q46x3 |
|--------|-------|--------|-------|--------|--------|--------|--------|-------|
| 12951  | 0     | 0      | 2     | 4      | 4      | 1      | 1      | 5     |
| 12952  | 0     | 1      |       | 6      | 6      | 6      | 6      | 6     |
| 12954  | 1     | 0      | 2     | 6      | 6      | 3      | 3      | 4     |
| 12960  | 0     | 1      |       | 5      | 5      | 5      | 5      | 5     |
| 12961  | 0     | 1      |       | 6      | 6      | 6      | 6      | 6     |
| 12962  | 0     | 1      |       | 5      | 5      | 1      | 1      | 5     |
| 12963  | 0     | 1      |       | 6      | 6      | 6      | 6      | 6     |
| 12964  | 0     | 1      |       | 5      | 5      | 1      | 1      | 5     |
| 12966  | 0     | 0      | 4     | 4      | 4      | 4      | 4      | 4     |
| 12967  | 0     | 1      |       | 6      | 4      | 5      | 5      | 5     |
| 12969  | 0     | 1      |       | 4      | 4      | 4      | 4      | 4     |
| 12970  | 0     | 1      |       | 4      | 4      | 4      | 4      | 4     |
| 12974  | 0     | 0      | 3     | 3      | 3      | 3      | 3      | 3     |
| 12979  |       |        |       |        |        |        |        |       |
| 12980  | 0     | 1      |       | 5      | 5      | 5      | 5      | 5     |
| 12983  | 0     | 1      |       | 5      | 5      | 1      | 1      | 5     |
| 12988  | 0     | 0      | 3     | 5      | 4      | 5      | 5      | 4     |
| 12994  | 0     | 1      |       | 5      | 5      | 1      | 1      | 2     |
| 12995  | 0     | 0      | 3     | 6      | 6      | 6      | 6      | 6     |
| 12996  | 0     | 1      |       | 6      | 6      | 6      | 6      | 6     |
| 12998  | 0     | 1      |       | 6      | 5      | 5      | 5      | 5     |
| 12999  | 0     | 1      |       | 5      | 5      | 4      | 5      | 4     |
| 13001  | 0     | 0      | 4     | 4      | 4      | 4      | 4      | 4     |
| 13005  | 0     | 1      |       | 4      | 4      | 4      | 4      | 4     |
| 13006  | 0     | 0      | 2     | 6      | 6      | 6      | 6      | 6     |
| 13007  | 0     | 1      |       | 4      | 3      | 2      | 2      | 4     |
| 13011  | 0     | 1      |       | 4      | 4      | 4      | 5      | 6     |
| 13012  | 0     | 1      |       | 6      | 6      | 6      | 6      | 6     |
| 13013  | 0     | 0      | 2     | 2      | 2      | 3      | 3      | 2     |
| 13016  | 0     | 1      |       | 4      | 4      | 5      | 5      | 4     |
| 13018  | 0     | 1      |       | 5      | 5      | 5      | 5      | 5     |
| 13020  |       |        |       |        |        |        |        |       |

| respid | Q43_9 | Q43_99 | Q44_1 | Q46x1a | Q46x1b | Q46x2a | Q46x2b | Q46x3 |
|--------|-------|--------|-------|--------|--------|--------|--------|-------|
| 13024  | 0     | 1      |       | 6      | 6      | 6      | 6      | 6     |
| 13025  | 0     | 1      |       | 5      | 5      | 5      | 5      | 5     |
| 13027  | 0     | 1      |       | 6      | 6      | 6      | 6      | 6     |
| 13031  | 0     | 1      |       | 5      | 5      | 5      | 5      | 5     |
| 13032  | 0     | 0      | 2     | 4      | 4      | 2      | 2      | 4     |
| 13034  | 0     | 0      | 4     | 5      | 6      | 2      | 3      | 6     |
| 13036  | 0     | 0      | 1     | 4      | 5      | 2      | 3      | 4     |
| 13037  | 0     | 0      | 3     | 6      | 6      | 1      | 1      | 5     |
| 13038  | 1     | 0      | 3     | 2      | 2      | 1      | 2      | 2     |
| 13039  | 0     | 1      |       | 6      | 6      | 6      | 6      | 6     |
| 13040  | 0     | 1      |       | 4      | 3      | 4      | 4      | 4     |
| 13041  | 0     | 1      |       | 6      | 6      | 5      | 5      | 4     |
| 13045  | 0     | 0      | 3     | 2      | 2      | 2      | 2      | 2     |
| 13046  | 0     | 0      | 4     | 6      | 6      | 6      | 6      | 6     |
| 13048  | 0     | 1      |       | 6      | 6      | 6      | 6      | 6     |
| 13051  | 0     | 0      | 3     | 4      | 2      | 4      | 5      | 3     |
| 13053  | 0     | 1      |       | 5      | 5      | 1      | 1      | 5     |
| 13055  | 0     | 0      | 2     | 3      | 3      | 3      | 3      | 4     |
| 13059  | 0     | 1      |       | 5      | 6      | 2      | 2      | 5     |
| 13068  | 0     | 0      | 3     | 4      | 4      | 3      | 2      | 4     |
| 13069  | 0     | 1      |       | 6      | 6      | 6      | 6      | 6     |
| 13076  | 0     | 0      | 3     | 4      | 4      | 3      | 4      | 3     |
| 13081  | 0     | 1      |       | 6      | 6      | 6      | 6      | 5     |
| 13082  | 0     | 0      | 3     | 3      | 3      | 4      | 4      | 4     |
| 13084  | 0     | 0      | 2     | 4      | 5      | 5      | 5      | 5     |
| 13085  | 0     | 1      |       | 6      | 6      | 6      | 6      | 6     |
| 13086  | 0     | 1      |       | 5      | 5      | 5      | 5      | 5     |
| 13093  | 0     | 0      | 2     | 4      | 4      | 3      | 3      | 3     |
| 13094  | 0     | 0      | 3     | 3      | 3      | 3      | 3      | 3     |
| 13097  | 0     | 1      |       | 5      | 5      | 5      | 5      | 5     |
| 13098  | 0     | 0      | 3     | 6      | 6      | 6      | 6      | 6     |
| 13099  | 0     | 1      |       | 4      | 4      | 3      | 3      | 4     |

| respid | Q43_9 | Q43_99 | Q44_1 | Q46x1a | Q46x1b | Q46x2a | Q46x2b | Q46x3 |
|--------|-------|--------|-------|--------|--------|--------|--------|-------|
| 13100  | 0     | 0      | 2     | 6      | 6      | 6      | 6      | 6     |
| 13101  |       |        |       |        |        |        |        |       |
| 13103  |       |        |       |        |        |        |        |       |
| 13105  | 0     | 1      |       | 4      | 4      | 5      | 5      | 4     |
| 13106  | 0     | 0      | 4     | 4      | 4      | 5      | 5      | 4     |
| 13107  | 0     | 1      |       | 6      | 6      | 1      | 1      | 4     |
| 13110  | 0     | 0      | 3     | 4      | 4      | 1      | 2      | 4     |
| 13118  | 0     | 1      |       | 5      | 4      | 5      | 4      | 4     |
| 13120  | 0     | 0      | 2     | 2      | 3      | 2      | 3      | 3     |
| 13130  | 0     | 0      | 3     | 4      | 4      | 1      | 1      | 4     |
| 13133  | 0     | 1      |       | 6      | 6      | 6      | 6      | 5     |
| 13134  | 0     | 1      |       | 3      | 4      | 2      | 2      | 4     |
| 13139  | 0     | 1      |       | 6      | 6      | 6      | 6      | 6     |
| 13142  | 0     | 1      |       | 6      | 6      | 6      | 6      | 6     |
| 13143  | 0     | 1      |       | 6      | 6      | 6      | 6      | 6     |
| 13145  | 0     | 1      |       | 6      | 6      | 6      | 6      | 6     |
| 13148  | 0     | 0      | 4     | 5      | 5      | 1      | 2      | 5     |
| 13149  | 0     | 1      |       | 5      | 5      | 5      | 5      | 5     |
| 13151  | 1     | 0      | 3     | 4      | 2      | 4      | 3      | 3     |
| 13153  | 0     | 1      |       | 5      | 5      | 5      | 5      | 5     |
| 13158  | 0     | 1      |       | 6      | 6      | 6      | 6      | 6     |
| 13160  | 0     | 0      | 3     | 3      | 3      | 3      | 3      | 3     |
| 13162  | 0     | 0      | 3     | 3      | 3      | 3      | 3      | 3     |
| 13169  | 0     | 1      |       | 5      | 5      | 1      | 1      | 5     |
| 13172  | 0     | 1      |       | 5      | 5      | 5      | 5      | 5     |
| 13173  | 0     | 1      |       | 5      | 5      | 2      | 1      | 5     |
| 13176  | 0     | 0      | 3     | 5      | 5      | 1      | 2      | 5     |
| 13179  | 0     | 1      |       | 6      | 6      | 6      | 6      | 4     |
| 13184  | 0     | 1      |       | 4      | 6      | 5      | 5      | 4     |
| 13185  | 0     | 1      |       | 4      | 4      | 4      | 4      | 4     |
| 13186  | 0     | 1      |       | 6      | 6      | 1      | 1      | 5     |
| 13188  | 0     | 0      | 3     | 4      | 4      | 2      | 2      | 4     |



| respid | Q43_9 | Q43_99 | Q44_1 | Q46x1a | Q46x1b | Q46x2a | Q46x2b | Q46x3 |
|--------|-------|--------|-------|--------|--------|--------|--------|-------|
| 13190  | 0     | 0      | 2     | 4      | 4      | 5      | 5      | 4     |
| 13192  | 0     | 1      |       | 5      | 5      | 2      | 2      | 5     |
| 13193  |       |        |       |        |        |        |        |       |
| 13201  | 0     | 1      |       | 4      | 4      | 5      | 5      | 4     |
| 13207  | 0     | 1      |       | 5      | 5      | 5      | 5      | 5     |
| 13208  |       |        |       |        |        |        |        |       |
| 13209  | 0     | 0      | 2     | 2      | 2      | 2      | 4      | 4     |
| 13212  | 0     | 1      |       | 6      | 6      | 6      | 6      | 6     |
| 13215  | 0     | 1      |       | 6      | 6      | 6      | 6      | 6     |
| 13218  | 0     | 0      | 3     | 6      | 6      | 1      | 4      | 5     |
| 13219  | 0     | 1      |       | 5      | 5      | 1      | 1      | 5     |
| 13224  | 0     | 1      |       | 4      | 4      | 5      | 5      | 4     |
| 13225  | 0     | 1      |       | 5      | 5      | 1      | 2      | 4     |
| 13226  | 0     | 0      | 3     | 6      | 6      | 6      | 6      | 6     |
| 13232  | 0     | 1      |       | 5      | 5      | 5      | 5      | 5     |
| 13237  | 0     | 1      |       | 4      | 4      | 6      | 6      | 5     |
| 13239  | 0     | 0      | 3     | 5      | 5      | 5      | 5      | 5     |
| 13241  | 0     | 1      |       | 6      | 6      | 1      | 1      | 6     |
| 13243  | 0     | 1      |       | 3      | 3      | 3      | 3      | 3     |
| 13247  | 0     | 0      | 2     | 2      | 4      | 5      | 5      | 4     |
| 13248  | 0     | 0      | 2     | 5      | 5      | 4      | 5      | 5     |
| 13251  | 0     | 1      |       | 5      | 5      | 4      | 1      | 5     |
| 13256  | 0     | 1      |       | 6      | 6      | 5      | 5      | 5     |
| 13260  | 0     | 1      |       | 5      | 5      | 1      | 1      | 5     |
| 13261  | 0     | 1      |       | 4      | 4      | 2      | 2      | 3     |
| 13264  | 0     | 1      |       | 6      | 6      | 1      | 1      | 5     |
| 13273  | 0     | 1      |       | 6      | 6      | 6      | 6      | 6     |
| 13274  | 0     | 1      |       | 5      | 5      | 2      | 2      | 5     |
| 13276  | 0     | 1      |       | 4      | 4      | 1      | 1      | 4     |
| 13278  |       |        |       |        |        |        |        |       |
| 13279  | 0     | 1      |       | 6      | 6      | 1      | 1      | 5     |
| 13282  | 0     | 1      |       | 5      | 5      | 6      | 6      | 5     |

| respid | Q43_9 | Q43_99 | Q44_1 | Q46x1a | Q46x1b | Q46x2a | Q46x2b | Q46x3 |
|--------|-------|--------|-------|--------|--------|--------|--------|-------|
| 13283  | 0     | 0      | 3     | 3      | 4      | 4      | 2      | 3     |
| 13285  | 0     | 0      | 5     | 6      | 6      | 6      | 6      | 6     |
| 13286  | 0     | 1      |       | 5      | 4      | 5      | 5      | 4     |
| 13299  | 0     | 1      |       | 5      | 5      | 5      | 5      | 5     |
| 13300  | 0     | 0      | 2     | 3      | 3      | 3      | 3      | 3     |
| 13301  |       |        |       |        |        |        |        |       |
| 13303  | 0     | 1      |       | 5      | 5      | 3      | 3      | 4     |
| 13304  | 0     | 0      | 3     | 5      | 6      | 1      | 6      | 4     |
| 13307  | 0     | 1      |       | 6      | 6      | 6      | 6      | 6     |
| 13308  | 0     | 1      |       | 5      | 5      | 5      | 5      | 5     |
| 13312  | 0     | 1      |       | 5      | 5      | 1      | 1      | 5     |
| 13313  | 0     | 1      |       | 5      | 6      | 1      | 1      | 5     |
| 13314  | 0     | 0      | 3     | 4      | 4      | 4      | 4      | 4     |
| 13318  | 0     | 1      |       | 4      | 5      | 4      | 4      | 4     |
| 13320  | 0     | 0      | 3     | 4      | 5      | 5      | 3      | 5     |
| 13322  | 0     | 0      | 3     | 4      | 4      | 4      | 4      | 4     |
| 13324  | 0     | 0      | 3     | 6      | 6      | 6      | 6      | 6     |
| 13325  | 0     | 0      | 4     | 6      | 6      | 6      | 6      | 6     |
| 13327  | 0     | 1      |       | 5      | 5      | 2      | 2      | 5     |
| 13330  | 0     | 1      |       | 6      | 6      | 6      | 6      | 6     |
| 13332  | 0     | 1      |       | 6      | 6      | 5      | 5      | 5     |
| 13333  | 0     | 1      |       | 6      | 6      | 6      | 6      | 6     |
| 13334  | 0     | 1      |       | 5      | 5      | 5      | 5      | 5     |
| 13351  | 1     | 0      | 4     | 2      | 4      | 1      | 2      | 2     |
| 13353  | 0     | 0      | 3     | 6      | 6      | 2      | 2      | 4     |
| 13354  | 0     | 1      |       | 6      | 6      | 6      | 6      | 6     |
| 13355  | 0     | 1      |       | 5      | 5      | 1      | 1      | 5     |
| 13358  | 0     | 1      |       | 5      | 5      | 5      | 5      | 5     |
| 13359  | 0     | 1      |       | 6      | 6      | 1      | 1      | 4     |
| 13360  | 0     | 1      |       | 6      | 6      | 6      | 6      | 6     |
| 13364  | 0     | 1      |       | 4      | 3      | 6      | 1      | 4     |
| 13365  | 0     | 0      | 4     | 1      | 6      | 6      | 2      | 2     |

| respid | Q43_9 | Q43_99 | Q44_1 | Q46x1a | Q46x1b | Q46x2a | Q46x2b | Q46x3 |
|--------|-------|--------|-------|--------|--------|--------|--------|-------|
| 13368  | 0     | 1      |       | 6      | 6      | 5      | 5      | 5     |
| 13370  | 0     | 1      |       | 6      | 6      | 6      | 6      | 6     |
| 13375  | 0     | 1      |       | 5      | 5      | 5      | 5      | 5     |
| 13384  | 0     | 0      | 4     | 6      | 5      | 5      | 5      | 5     |
| 13387  | 0     | 0      | 3     | 4      | 4      | 5      | 5      | 5     |
| 13395  | 0     | 1      |       | 5      | 4      | 3      | 1      | 4     |
| 13398  | 0     | 1      |       | 5      | 5      | 6      | 6      | 5     |
| 13404  | 0     | 1      |       | 6      | 6      | 6      | 6      | 6     |
| 13405  | 0     | 1      |       | 6      | 6      | 2      | 1      | 6     |
| 13408  |       |        |       |        |        |        |        |       |
| 13411  | 0     | 1      |       | 6      | 6      | 6      | 6      | 6     |
| 13413  | 0     | 1      |       | 5      | 5      | 5      | 5      | 5     |
| 13419  | 0     | 1      |       | 6      | 6      | 6      | 6      | 6     |
| 13420  | 0     | 1      |       | 6      | 6      | 5      | 5      | 5     |
| 13427  | 0     | 1      |       | 3      | 4      | 3      | 3      | 3     |
| 13441  | 0     | 1      |       | 1      | 1      | 4      | 4      | 3     |
| 13444  | 0     | 1      |       | 3      | 4      | 2      | 3      | 4     |
| 13456  | 0     | 1      |       | 5      | 5      | 5      | 5      | 5     |
| 13466  | 0     | 1      |       | 3      | 3      | 4      | 4      | 4     |
| 13468  | 0     | 1      |       | 6      | 4      | 1      | 2      | 5     |
| 13475  | 0     | 1      |       | 5      | 5      | 1      | 1      | 5     |
| 13484  | 0     | 1      |       | 5      | 5      | 6      | 6      | 6     |
| 13486  | 0     | 1      |       | 4      | 5      | 5      | 5      | 5     |
| 13487  | 0     | 0      | 2     | 5      | 5      | 5      | 5      | 5     |
| 13491  |       |        |       |        |        |        |        |       |
| 13496  | 0     | 0      | 3     | 6      | 6      | 6      | 6      | 6     |
| 13497  | 0     | 1      |       | 4      | 4      | 4      | 4      | 4     |
| 13498  | 0     | 0      | 1     | 5      | 5      | 2      | 1      | 5     |
| 13502  |       |        |       |        |        |        |        |       |
| 13503  | 0     | 0      | 2     | 4      | 4      | 4      | 2      | 4     |
| 13505  | 0     | 0      | 3     | 5      | 5      | 2      | 2      | 5     |
| 13509  | 0     | 0      | 2     | 3      | 4      | 5      | 5      | 5     |

| respid | Q43_9 | Q43_99 | Q44_1 | Q46x1a | Q46x1b | Q46x2a | Q46x2b | Q46x3 |
|--------|-------|--------|-------|--------|--------|--------|--------|-------|
| 13510  | 0     | 1      |       | 4      | 4      | 4      | 4      | 4     |
| 13518  | 0     | 0      | 0     | 4      | 2      | 3      | 3      | 3     |
| 13521  | 0     | 1      |       | 6      | 5      | 1      | 1      | 6     |
| 13523  | 0     | 0      | 3     | 4      | 6      | 1      | 3      | 4     |
| 13528  | 0     | 1      |       | 6      | 6      | 6      | 6      | 6     |
| 13531  | 0     | 1      |       | 6      | 6      | 5      | 5      | 5     |
| 13532  | 0     | 1      |       | 5      | 5      | 5      | 5      | 5     |
| 13533  | 0     | 0      | 2     | 6      | 6      | 6      | 6      | 6     |
| 13534  |       |        |       |        |        |        |        |       |
| 13535  | 0     | 1      |       | 6      | 6      | 1      | 1      | 6     |
| 13538  | 0     | 0      | 3     | 3      | 3      | 3      | 3      | 3     |
| 13540  | 0     | 0      | 2     | 5      | 5      | 2      | 3      | 4     |
| 13541  | 0     | 1      |       | 4      | 4      | 4      | 4      | 4     |
| 13542  | 0     | 0      | 1     | 5      | 5      | 1      | 1      | 4     |
| 13550  | 0     | 1      |       | 6      | 6      | 6      | 6      | 6     |
| 13553  | 0     | 1      |       | 6      | 6      | 6      | 6      | 6     |
| 13554  | 0     | 1      |       | 5      | 5      | 1      | 1      | 5     |
| 13555  | 0     | 0      | 3     | 3      | 3      | 4      | 3      | 4     |
| 13556  | 0     | 0      | 3     | 4      | 4      | 2      | 2      | 4     |
| 13563  | 0     | 0      | 2     | 4      | 3      | 2      | 3      | 4     |
| 13564  | 0     | 0      | 2     | 4      | 4      | 3      | 3      | 3     |
| 13567  |       |        |       |        |        |        |        |       |
| 13568  | 0     | 0      | 1     | 3      | 2      | 3      | 3      | 1     |
| 13570  |       |        |       |        |        |        |        |       |
| 13573  | 0     | 1      |       | 4      | 4      | 4      | 4      | 4     |
| 13575  | 0     | 1      |       | 5      | 6      | 6      | 6      | 6     |
| 13577  | 0     | 0      | 1     | 2      | 3      | 3      | 2      | 4     |
| 13580  | 0     | 0      | 1     | 3      | 1      | 4      | 3      | 2     |
| 13582  | 0     | 1      |       | 5      | 5      | 6      | 6      | 5     |
| 13584  | 0     | 0      | 1     | 4      | 2      | 2      | 3      | 3     |
| 13585  |       |        |       |        |        |        |        |       |
| 13586  | 0     | 1      |       | 5      | 5      | 6      | 6      | 6     |

| respid | Q43_9 | Q43_99 | Q44_1 | Q46x1a | Q46x1b | Q46x2a | Q46x2b | Q46x3 |
|--------|-------|--------|-------|--------|--------|--------|--------|-------|
| 13587  | 0     | 0      | 3     | 4      | 4      | 1      | 2      | 4     |
| 13592  | 0     | 0      | 2     | 3      | 1      | 3      | 3      | 2     |
| 13596  | 0     | 1      |       | 6      | 6      | 6      | 6      | 6     |
| 13597  | 0     | 0      | 3     | 4      | 4      | 1      | 1      | 4     |
| 13599  | 0     | 1      |       | 4      | 5      | 2      | 1      | 3     |
| 13601  | 0     | 0      | 4     | 5      | 3      | 3      | 3      | 4     |
| 13604  | 0     | 1      |       | 4      | 4      | 1      | 1      | 4     |
| 13608  | 0     | 1      |       | 5      | 5      | 1      | 1      | 5     |
| 13616  | 0     | 1      |       | 5      | 5      | 2      | 2      | 4     |
| 13618  | 0     | 0      | 2     | 3      | 3      | 3      | 4      | 4     |
| 13619  | 0     | 0      | 3     | 6      | 6      | 6      | 6      | 6     |
| 13626  |       |        |       |        |        |        |        |       |
| 13628  | 0     | 0      | 3     | 4      | 5      | 2      | 2      | 4     |
| 13640  | 0     | 1      |       | 5      | 5      | 1      | 1      | 5     |
| 13645  | 0     | 1      |       | 5      | 5      | 1      | 2      | 5     |
| 13648  |       |        |       |        |        |        |        |       |
| 13653  | 0     | 0      | 5     | 4      | 5      | 5      | 4      | 5     |
| 13655  | 0     | 1      |       | 5      | 5      | 1      | 1      | 5     |
| 13662  | 0     | 1      |       | 5      | 5      | 1      | 2      | 5     |
| 13670  | 0     | 0      | 3     | 4      | 4      | 4      | 4      | 4     |
| 13673  | 0     | 0      | 2     | 4      | 3      | 2      | 4      | 4     |
| 13674  | 0     | 1      |       | 6      | 6      | 1      | 1      | 5     |
| 13675  | 0     | 1      |       | 5      | 4      | 1      | 6      | 5     |
| 13678  | 0     | 0      | 3     | 4      | 3      | 3      | 3      | 4     |
| 13680  | 0     | 0      | 3     | 5      | 5      | 1      | 1      | 5     |
| 13681  | 0     | 1      |       | 6      | 6      | 6      | 6      | 5     |
| 13683  | 0     | 0      | 3     | 6      | 6      | 6      | 6      | 6     |
| 13684  | 0     | 1      |       | 6      | 6      | 6      | 6      | 6     |
| 13685  | 0     | 1      |       | 6      | 6      | 6      | 6      | 5     |
| 13687  |       |        |       |        |        |        |        |       |
| 13690  | 0     | 1      |       | 4      | 4      | 1      | 1      | 1     |
| 13700  | 0     | 0      | 2     | 3      | 3      | 4      | 3      | 3     |

| respid | Q43_9 | Q43_99 | Q44_1 | Q46x1a | Q46x1b | Q46x2a | Q46x2b | Q46x3 |
|--------|-------|--------|-------|--------|--------|--------|--------|-------|
| 13705  | 0     | 0      | 2     | 4      | 4      | 4      | 4      | 4     |
| 13710  | 0     | 1      |       | 5      | 5      | 5      | 4      | 5     |
| 13711  | 0     | 0      | 1     | 4      | 5      | 5      | 5      | 4     |
| 13713  | 0     | 1      |       | 6      | 6      | 6      | 6      | 6     |
| 13716  | 0     | 1      |       | 5      | 5      | 1      | 1      | 5     |
| 13721  | 0     | 1      |       | 4      | 4      | 4      | 4      | 4     |
| 13722  | 0     | 1      |       | 4      | 4      | 4      | 4      | 4     |
| 13723  | 0     | 0      | 4     | 4      | 4      | 4      | 4      | 4     |
| 13726  | 0     | 0      | 2     | 3      | 2      | 4      | 4      | 3     |
| 13728  | 0     | 0      | 2     | 4      | 4      | 4      | 4      | 4     |
| 13730  | 0     | 1      |       | 6      | 6      | 2      | 2      | 4     |
| 13734  | 0     | 0      | 4     | 5      | 5      | 5      | 5      | 4     |
| 13736  | 0     | 0      | 3     | 3      | 2      | 2      | 3      | 3     |
| 13737  | 0     | 1      |       | 4      | 4      | 2      | 2      | 4     |
| 13739  | 0     | 1      |       | 5      | 5      | 2      | 2      | 4     |
| 13742  |       |        |       |        |        |        |        |       |
| 13746  | 0     | 1      |       | 5      | 6      | 1      | 1      | 6     |
| 13747  | 0     | 1      |       | 4      | 5      | 5      | 5      | 5     |
| 13749  | 0     | 1      |       | 5      | 5      | 5      | 5      | 5     |
| 13751  | 0     | 0      | 3     | 5      | 5      | 3      | 2      | 5     |
| 13752  | 0     | 1      |       | 4      | 4      | 5      | 4      | 4     |
| 13756  | 0     | 0      | 5     | 4      | 4      | 6      | 4      | 6     |
| 13757  | 0     | 1      |       | 5      | 5      | 5      | 5      | 4     |
| 13767  | 0     | 1      |       | 4      | 4      | 2      | 2      | 4     |
| 13771  | 0     | 1      |       | 5      | 5      | 5      | 5      | 5     |
| 13772  | 0     | 0      | 2     | 4      | 3      | 2      | 2      | 4     |
| 13779  |       |        |       |        |        |        |        |       |
| 13782  | 0     | 1      |       | 5      | 5      | 5      | 5      | 5     |
| 13783  | 0     | 1      |       | 5      | 5      | 5      | 5      | 5     |
| 13785  | 0     | 0      | 3     | 4      | 4      | 1      | 1      | 4     |
| 13786  | 0     | 0      | 4     | 5      | 5      | 5      | 5      | 5     |
| 13792  | 0     | 0      | 3     | 4      | 2      | 3      | 3      | 2     |

| respid | Q43_9 | Q43_99 | Q44_1 | Q46x1a | Q46x1b | Q46x2a | Q46x2b | Q46x3 |
|--------|-------|--------|-------|--------|--------|--------|--------|-------|
| 13796  | 0     | 0      | 3     | 6      | 6      | 6      | 6      | 6     |
| 13798  | 0     | 0      | 4     | 4      | 4      | 1      | 1      | 4     |
| 13799  | 0     | 1      |       | 4      | 4      | 2      | 3      | 4     |
| 13804  | 0     | 1      |       | 6      | 6      | 6      | 6      | 5     |
| 13805  | 0     | 1      |       | 5      | 5      | 5      | 5      | 5     |
| 13810  | 0     | 0      | 2     | 4      | 4      | 4      | 4      | 4     |
| 13811  | 0     | 0      | 4     | 5      | 5      | 2      | 2      | 5     |
| 13819  | 0     | 1      |       | 1      | 1      | 1      | 1      | 1     |
| 13821  | 0     | 0      | 3     | 2      | 2      | 5      | 2      | 1     |
| 13824  | 0     | 1      |       | 5      | 5      | 5      | 5      | 5     |
| 13828  | 0     | 1      |       | 3      | 3      | 2      | 3      | 3     |
| 13829  | 0     | 0      | 5     | 1      | 1      | 2      | 1      | 1     |
| 13831  |       |        |       |        |        |        |        |       |
| 13833  | 0     | 0      | 2     | 4      | 4      | 4      | 3      | 4     |
| 13835  | 0     | 0      | 1     | 3      | 4      | 2      | 3      | 4     |
| 13838  |       |        |       |        |        |        |        |       |
| 13839  | 0     | 0      | 3     | 1      | 1      | 1      | 3      | 1     |
| 13845  |       |        |       |        |        |        |        |       |
| 13846  | 0     | 1      |       | 5      | 5      | 1      | 1      | 5     |
| 13853  | 0     | 0      | 3     | 4      | 4      | 4      | 4      | 3     |
| 13855  | 0     | 0      | 1     | 4      | 2      | 3      | 2      | 3     |
| 13858  | 0     | 0      | 3     | 5      | 5      | 4      | 3      | 3     |
| 13860  |       |        |       |        |        |        |        |       |
| 13865  | 0     | 0      | 4     | 2      | 3      | 3      | 3      | 1     |
| 13870  | 0     | 1      |       | 5      | 5      | 5      | 5      | 4     |
| 13872  | 1     | 0      | 1     | 3      | 3      | 3      | 4      | 3     |
| 13873  | 0     | 0      | 3     | 4      | 3      | 4      | 4      | 4     |
| 13874  |       |        |       |        |        |        |        |       |
| 13875  | 0     | 0      | 1     | 2      | 1      | 1      | 1      | 1     |
| 13881  |       |        |       |        |        |        |        |       |
| 13887  | 0     | 1      |       | 5      | 5      | 2      | 2      | 4     |
| 13888  | 0     | 0      | 3     | 4      | 4      | 3      | 3      | 3     |

| respid | Q43_9 | Q43_99 | Q44_1 | Q46x1a | Q46x1b | Q46x2a | Q46x2b | Q46x3 |
|--------|-------|--------|-------|--------|--------|--------|--------|-------|
| 13889  | 0     | 0      | 3     | 3      | 3      | 2      | 2      | 3     |
| 13895  | 0     | 0      | 1     | 4      | 3      | 2      | 3      | 3     |
| 13897  |       |        |       |        |        |        |        |       |
| 13898  | 0     | 1      |       | 4      | 4      | 4      | 4      | 4     |
| 13901  | 0     | 1      |       | 5      | 5      | 1      | 1      | 5     |
| 13902  | 0     | 0      | 4     | 1      | 1      | 1      | 1      | 1     |
| 13903  | 0     | 1      |       | 1      | 1      | 6      | 6      | 6     |
| 13905  | 0     | 0      | 2     | 3      | 1      | 1      | 3      | 2     |
| 13908  | 0     | 0      | 2     | 3      | 3      | 3      | 4      | 2     |
| 13909  | 0     | 1      |       | 4      | 4      | 5      | 5      | 5     |
| 13910  | 0     | 0      | 3     | 2      | 1      | 4      | 1      | 1     |
| 13911  |       |        |       |        |        |        |        |       |
| 13914  | 1     | 0      | 2     | 2      | 3      | 2      | 3      | 3     |
| 13920  | 0     | 0      | 3     | 2      | 2      | 2      | 3      | 3     |
| 13926  | 0     | 1      |       | 5      | 5      | 5      | 5      | 5     |
| 13929  | 0     | 0      | 0     | 2      | 1      | 2      | 2      | 2     |
| 13930  | 0     | 0      | 3     | 4      | 2      | 3      | 3      | 3     |
| 13931  |       |        |       |        |        |        |        |       |
| 13932  | 0     | 1      |       | 5      | 4      | 2      | 2      | 4     |
| 13934  | 0     | 0      | 3     | 2      | 3      | 2      | 2      | 4     |
| 13938  | 0     | 1      |       | 5      | 5      | 2      | 1      | 5     |
| 13942  | 0     | 1      |       | 6      | 6      | 6      | 6      | 6     |
| 13945  | 0     | 0      | 3     | 4      | 4      | 4      | 4      | 4     |
| 13947  | 0     | 1      |       | 4      | 4      | 2      | 2      | 3     |
| 13948  |       |        |       |        |        |        |        |       |
| 13959  | 0     | 0      | 3     | 5      | 5      | 1      | 1      | 5     |
| 13962  | 0     | 1      |       | 5      | 5      | 1      | 1      | 5     |
| 13963  | 0     | 1      |       | 6      | 6      | 6      | 6      | 5     |
| 13964  | 0     | 1      |       | 5      | 5      | 1      | 1      | 4     |
| 13966  | 0     | 0      | 1     | 2      | 3      | 2      | 1      | 3     |
| 13968  | 0     | 0      | 4     | 6      | 3      | 5      | 3      | 4     |
| 13971  | 0     | 1      |       | 6      | 6      | 5      | 5      | 5     |



| respid | Q43_9 | Q43_99 | Q44_1 | Q46x1a | Q46x1b | Q46x2a | Q46x2b | Q46x3 |
|--------|-------|--------|-------|--------|--------|--------|--------|-------|
| 13979  | 0     | 0      | 3     | 3      | 3      | 3      | 3      | 3     |
| 13980  | 0     | 0      | 2     | 3      | 3      | 4      | 4      | 3     |
| 13981  | 0     | 1      |       | 4      | 5      | 2      | 2      | 4     |
| 13982  | 0     | 1      |       | 6      | 6      | 5      | 5      | 5     |
| 13984  | 0     | 1      |       | 4      | 4      | 4      | 4      | 4     |
| 13989  | 0     | 1      |       | 5      | 5      | 5      | 5      | 5     |
| 13990  | 0     | 1      |       | 6      | 6      | 6      | 6      | 6     |
| 13992  | 0     | 0      | 4     | 1      | 1      | 1      | 3      | 2     |
| 13998  | 0     | 1      |       | 3      | 4      | 4      | 4      | 3     |
| 13999  | 0     | 0      | 2     | 2      | 4      | 4      | 4      | 4     |
| 14000  | 0     | 1      |       | 6      | 6      | 6      | 6      | 5     |
| 14003  | 0     | 1      |       | 5      | 5      | 5      | 5      | 5     |
| 14004  | 0     | 0      | 0     | 3      | 3      | 3      | 4      | 3     |
| 14006  | 0     | 1      |       | 6      | 5      | 1      | 1      | 5     |
| 14007  | 0     | 1      |       | 3      | 4      | 1      | 3      | 4     |
| 14008  |       |        |       |        |        |        |        |       |
| 14013  | 0     | 1      |       | 5      | 4      | 1      | 2      | 5     |
| 14015  | 0     | 1      |       | 6      | 6      | 6      | 6      | 6     |
| 14018  | 0     | 1      |       | 6      | 6      | 1      | 1      | 5     |
| 14021  | 0     | 1      |       | 2      | 6      | 2      | 2      | 2     |
| 14023  | 0     | 1      |       | 6      | 6      | 6      | 6      | 6     |
| 14024  | 0     | 1      |       | 6      | 4      | 4      | 5      | 5     |
| 14026  | 0     | 1      |       | 6      | 6      | 5      | 5      | 5     |
| 14030  | 0     | 0      | 2     | 6      | 6      | 6      | 6      | 6     |
| 14032  | 0     | 0      | 3     | 4      | 4      | 2      | 2      | 4     |
| 14040  |       |        |       |        |        |        |        |       |
| 14045  | 0     | 1      |       | 6      | 6      | 6      | 6      | 6     |
| 14048  | 0     | 0      | 3     | 4      | 4      | 3      | 4      | 4     |
| 14049  | 0     | 0      | 2     | 4      | 3      | 1      | 1      | 4     |
| 14050  | 0     | 1      |       | 6      | 6      | 6      | 6      | 6     |
| 14051  | 0     | 0      | 4     | 6      | 1      | 3      | 2      | 1     |
| 14052  | 0     | 0      | 5     | 5      | 5      | 6      | 6      | 6     |

| respid | Q43_9 | Q43_99 | Q44_1 | Q46x1a | Q46x1b | Q46x2a | Q46x2b | Q46x3 |
|--------|-------|--------|-------|--------|--------|--------|--------|-------|
| 14054  | 0     | 0      | 3     | 5      | 5      | 5      | 5      | 5     |
| 14055  |       |        |       |        |        |        |        |       |
| 14057  | 0     | 0      | 2     | 3      | 3      | 2      | 2      | 3     |
| 14058  | 0     | 1      |       | 6      | 6      | 6      | 6      | 6     |
| 14059  | 0     | 1      |       | 5      | 5      | 1      | 1      | 5     |
| 14060  | 0     | 1      |       | 4      | 4      | 4      | 4      | 4     |
| 14061  | 0     | 1      |       | 3      | 3      | 3      | 3      | 4     |
| 14071  | 0     | 0      | 4     | 6      | 6      | 6      | 6      | 6     |
| 14073  | 0     | 0      | 4     | 5      | 5      | 1      | 1      | 4     |
| 14074  | 0     | 0      | 3     | 5      | 5      | 2      | 2      | 5     |
| 14076  | 0     | 1      |       | 5      | 6      | 5      | 5      | 4     |
| 14080  | 0     | 1      |       | 5      | 6      | 5      | 5      | 5     |
| 14082  | 0     | 1      |       | 5      | 5      | 5      | 5      | 5     |
| 14083  | 0     | 1      |       | 6      | 6      | 6      | 6      | 6     |
| 14084  | 0     | 1      |       | 5      | 5      | 5      | 5      | 5     |
| 14085  |       |        |       |        |        |        |        |       |
| 14086  | 0     | 0      | 1     | 4      | 4      | 2      | 2      | 4     |
| 14088  | 0     | 1      |       | 5      | 5      | 1      | 1      | 5     |
| 14090  | 0     | 1      |       | 5      | 5      | 1      | 1      | 5     |
| 14092  | 0     | 0      | 4     | 6      | 6      | 1      | 1      | 5     |
| 14093  | 0     | 1      |       | 5      | 5      | 5      | 5      | 5     |
| 14096  | 0     | 1      |       | 6      | 6      | 6      | 6      | 6     |
| 14103  | 0     | 0      | 3     | 4      | 4      | 3      | 4      | 3     |
| 14105  | 0     | 1      |       | 6      | 6      | 6      | 6      | 6     |
| 14106  | 0     | 1      |       | 6      | 6      | 6      | 6      | 4     |
| 14107  | 0     | 0      | 0     | 2      | 2      | 3      | 1      | 3     |
| 14108  | 0     | 0      | 3     | 3      | 3      | 3      | 3      | 4     |
| 14112  | 0     | 0      | 3     | 4      | 5      | 5      | 5      | 5     |
| 14114  | 0     | 0      | 3     | 6      | 6      | 6      | 6      | 6     |
| 14115  | 0     | 0      | 3     | 5      | 5      | 4      | 4      | 4     |
| 14116  | 0     | 1      |       | 5      | 5      | 5      | 5      | 5     |
| 14117  | 0     | 1      |       | 6      | 6      | 6      | 6      | 6     |

| respid | Q43_9 | Q43_99 | Q44_1 | Q46x1a | Q46x1b | Q46x2a | Q46x2b | Q46x3 |
|--------|-------|--------|-------|--------|--------|--------|--------|-------|
| 14118  | 0     | 0      | 2     | 4      | 4      | 4      | 3      | 4     |
| 14119  | 0     | 1      |       | 6      | 5      | 5      | 5      | 5     |
| 14127  |       |        |       |        |        |        |        |       |
| 14129  | 0     | 1      |       | 6      | 6      | 6      | 6      | 6     |
| 14131  | 0     | 0      | 2     | 4      | 4      | 2      | 2      | 4     |
| 14132  | 0     | 1      |       | 6      | 6      | 4      | 6      | 5     |
| 14133  | 0     | 0      | 3     | 3      | 3      | 3      | 3      | 3     |
| 14134  | 0     | 1      |       | 5      | 5      | 1      | 1      | 5     |
| 14135  | 0     | 0      | 2     | 4      | 4      | 4      | 4      | 4     |
| 14136  | 0     | 1      |       | 6      | 4      | 1      | 1      | 4     |
| 14138  |       |        |       |        |        |        |        |       |
| 14139  |       |        |       |        |        |        |        |       |
| 14140  | 0     | 1      |       | 4      | 4      | 4      | 4      | 4     |
| 14141  | 0     | 0      | 4     | 6      | 6      | 6      | 6      | 6     |
| 14143  | 0     | 0      | 3     | 5      | 5      | 1      | 1      | 5     |
| 14146  | 0     | 1      |       | 6      | 6      | 6      | 6      | 6     |
| 14147  | 0     | 0      | 2     | 3      | 3      | 3      | 4      | 3     |
| 14148  | 0     | 0      | 3     | 6      | 6      | 6      | 6      | 6     |
| 14151  | 0     | 0      | 3     | 4      | 4      | 1      | 2      | 4     |
| 14152  | 0     | 0      | 3     | 4      | 4      | 4      | 4      | 4     |
| 14153  | 0     | 0      | 3     | 6      | 6      | 6      | 6      | 6     |
| 14154  | 0     | 1      |       | 5      | 4      | 1      | 1      | 5     |
| 14158  | 0     | 0      | 3     | 6      | 5      | 3      | 4      | 5     |
| 14159  | 0     | 0      | 1     | 2      | 2      | 2      | 1      | 1     |
| 14160  | 0     | 0      | 3     | 4      | 4      | 1      | 1      | 4     |
| 14161  | 0     | 0      | 2     | 4      | 4      | 4      | 4      | 3     |
| 14162  | 0     | 0      | 3     | 5      | 5      | 5      | 5      | 5     |
| 14165  | 0     | 1      |       | 6      | 6      | 6      | 6      | 6     |
| 14166  | 0     | 0      | 2     | 4      | 4      | 4      | 4      | 3     |
| 14167  | 0     | 1      |       | 4      | 4      | 4      | 4      | 4     |
| 14169  | 0     | 1      |       | 6      | 6      | 6      | 6      | 6     |
| 14170  | 0     | 0      | 3     | 5      | 5      | 1      | 2      | 5     |

| respid | Q43_9 | Q43_99 | Q44_1 | Q46x1a | Q46x1b | Q46x2a | Q46x2b | Q46x3 |
|--------|-------|--------|-------|--------|--------|--------|--------|-------|
| 14172  | 0     | 1      |       | 2      | 6      | 5      | 5      | 4     |
| 14173  |       |        |       |        |        |        |        |       |
| 14174  | 0     | 0      | 3     | 4      | 5      | 5      | 5      | 5     |
| 14175  | 0     | 1      |       | 5      | 5      | 3      | 3      | 5     |
| 14176  | 0     | 1      |       | 5      | 5      | 5      | 5      | 4     |
| 14178  | 0     | 1      |       | 5      | 5      | 5      | 5      | 5     |
| 14179  | 0     | 1      |       | 5      | 5      | 6      | 6      | 5     |
| 14180  | 0     | 0      | 2     | 4      | 4      | 4      | 3      | 3     |
| 14183  | 0     | 0      | 2     | 2      | 2      | 3      | 1      | 2     |
| 14185  | 0     | 1      |       | 3      | 1      | 2      | 1      | 3     |
| 14187  | 0     | 1      |       | 4      | 6      | 1      | 6      | 4     |
| 14189  | 0     | 1      |       | 6      | 6      | 3      | 4      | 4     |
| 14191  | 1     | 0      | 2     | 4      | 3      | 3      | 3      | 4     |
| 14192  |       |        |       |        |        |        |        |       |
| 14195  | 0     | 1      |       | 4      | 4      | 4      | 4      | 4     |
| 14197  | 0     | 1      |       | 5      | 6      | 5      | 1      | 4     |
| 14203  | 0     | 0      | 3     | 4      | 3      | 4      | 3      | 4     |
| 14204  | 0     | 1      |       | 5      | 5      | 3      | 3      | 5     |
| 14205  | 0     | 0      | 3     | 4      | 5      | 2      | 2      | 4     |
| 14208  | 0     | 1      |       | 4      | 5      | 5      | 5      | 5     |
| 14211  | 0     | 0      | 3     | 3      | 3      | 3      | 3      | 3     |
| 14214  | 0     | 1      |       | 6      | 6      | 6      | 6      | 6     |
| 14215  | 0     | 0      | 2     | 5      | 5      | 1      | 1      | 4     |
| 14216  | 0     | 0      | 2     | 4      | 4      | 3      | 3      | 3     |
| 14218  | 0     | 1      |       | 6      | 6      | 5      | 6      | 6     |
| 14220  | 0     | 1      |       | 5      | 5      | 5      | 5      | 5     |
| 14223  |       |        |       |        |        |        |        |       |
| 14225  | 0     | 0      | 2     | 4      | 4      | 4      | 3      | 3     |
| 14226  | 0     | 0      | 3     | 5      | 5      | 1      | 1      | 5     |
| 14228  | 0     | 0      | 1     | 2      | 1      | 2      | 1      | 2     |
| 14231  | 0     | 0      | 3     | 2      | 2      | 2      | 3      | 3     |
| 14233  | 0     | 1      |       | 5      | 5      | 4      | 4      | 5     |

| respid | Q43_9 | Q43_99 | Q44_1 | Q46x1a | Q46x1b | Q46x2a | Q46x2b | Q46x3 |
|--------|-------|--------|-------|--------|--------|--------|--------|-------|
| 14237  | 0     | 1      |       | 4      | 4      | 4      | 4      | 4     |
| 14238  | 0     | 0      | 2     | 4      | 4      | 3      | 3      | 4     |
| 14243  | 0     | 0      | 4     | 4      | 5      | 4      | 5      | 4     |
| 14245  | 0     | 1      |       | 5      | 5      | 5      | 5      | 5     |
| 14246  | 0     | 0      | 2     | 2      | 2      | 4      | 1      | 1     |
| 14248  | 0     | 1      |       | 6      | 6      | 6      | 6      | 6     |
| 14250  | 0     | 0      | 4     | 6      | 6      | 6      | 6      | 5     |
| 14253  | 0     | 1      |       | 6      | 6      | 1      | 1      | 5     |
| 14254  | 0     | 1      |       | 6      | 5      | 5      | 5      | 5     |
| 14255  | 0     | 1      |       | 6      | 6      | 6      | 6      | 6     |
| 14257  | 0     | 1      |       | 5      | 5      | 1      | 1      | 5     |
| 14258  | 0     | 1      |       | 6      | 6      | 6      | 6      | 6     |
| 14259  | 0     | 0      | 2     | 5      | 4      | 1      | 1      | 5     |
| 14260  |       |        |       |        |        |        |        |       |
| 14261  | 0     | 0      | 3     | 2      | 2      | 4      | 2      | 3     |
| 14263  | 0     | 0      | 1     | 5      | 4      | 3      | 3      | 3     |
| 14264  | 0     | 0      | 3     | 5      | 5      | 3      | 2      | 4     |
| 14266  | 0     | 0      | 2     | 3      | 4      | 3      | 3      | 5     |
| 14267  | 0     | 0      | 0     | 3      | 2      | 4      | 2      | 2     |
| 14268  | 0     | 1      |       | 5      | 4      | 5      | 2      | 4     |
| 14275  | 0     | 0      | 3     | 4      | 5      | 4      | 4      | 4     |
| 14278  | 0     | 1      |       | 3      | 4      | 1      | 1      | 3     |
| 14279  |       |        |       |        |        |        |        |       |
| 14280  |       |        |       |        |        |        |        |       |
| 14281  | 0     | 1      |       | 6      | 6      | 6      | 6      | 6     |
| 14282  | 0     | 0      | 1     | 3      | 1      | 2      | 1      | 2     |
| 14283  | 0     | 0      | 2     | 4      | 4      | 2      | 3      | 3     |
| 14286  | 0     | 0      | 4     | 4      | 4      | 4      | 5      | 4     |
| 14287  |       |        |       |        |        |        |        |       |
| 14288  | 0     | 0      | 3     | 4      | 6      | 2      | 2      | 6     |
| 14291  |       |        |       |        |        |        |        |       |
| 14292  |       |        |       |        |        |        |        |       |

| respid | Q43_9 | Q43_99 | Q44_1 | Q46x1a | Q46x1b | Q46x2a | Q46x2b | Q46x3 |
|--------|-------|--------|-------|--------|--------|--------|--------|-------|
| 14293  | 0     | 1      |       | 5      | 5      | 5      | 2      | 5     |
| 14304  | 0     | 0      | 4     | 3      | 2      | 3      | 2      | 2     |
| 14308  | 0     | 1      |       | 6      | 6      | 6      | 6      | 6     |
| 14313  | 0     | 1      |       | 6      | 6      | 6      | 6      | 6     |
| 14314  | 0     | 0      | 2     | 6      | 6      | 6      | 6      | 6     |
| 14316  | 0     | 1      |       | 6      | 6      | 6      | 6      | 6     |
| 14317  | 0     | 1      |       | 5      | 5      | 5      | 5      | 5     |
| 14318  | 0     | 0      | 3     | 3      | 3      | 3      | 4      | 3     |
| 14319  | 0     | 1      |       | 5      | 5      | 1      | 1      | 4     |
| 14320  | 0     | 0      | 1     | 2      | 2      | 2      | 1      | 2     |
| 14321  | 0     | 1      |       | 6      | 6      | 6      | 6      | 6     |
| 14322  | 0     | 0      | 3     | 3      | 3      | 3      | 3      | 3     |
| 14326  | 0     | 0      | 4     | 2      | 1      | 6      | 6      | 6     |
| 14327  | 0     | 0      | 4     | 2      | 1      | 3      | 2      | 2     |
| 14328  |       |        |       |        |        |        |        |       |
| 14330  | 0     | 1      |       | 6      | 6      | 6      | 6      | 6     |
| 14332  | 0     | 0      | 3     | 6      | 6      | 1      | 1      | 6     |
| 14334  | 0     | 1      |       | 4      | 5      | 2      | 2      | 5     |
| 14336  | 0     | 0      | 2     | 6      | 6      | 6      | 6      | 6     |
| 14337  | 0     | 1      |       | 5      | 5      | 6      | 6      | 5     |
| 14339  |       |        |       |        |        |        |        |       |
| 14340  | 0     | 0      | 2     | 4      | 4      | 2      | 2      | 4     |
| 14341  | 0     | 0      | 5     | 5      | 4      | 5      | 4      | 5     |
| 14344  | 0     | 1      |       | 5      | 5      | 5      | 5      | 5     |
| 14345  | 0     | 1      |       | 6      | 4      | 6      | 6      | 6     |
| 14346  |       |        |       |        |        |        |        |       |
| 14348  | 0     | 1      |       | 5      | 5      | 5      | 5      | 5     |
| 14349  | 0     | 1      |       | 5      | 5      | 1      | 2      | 4     |
| 14358  | 0     | 0      | 3     | 3      | 3      | 3      | 3      | 3     |
| 14360  | 0     | 1      |       | 6      | 6      | 6      | 6      | 6     |
| 14362  |       |        |       |        |        |        |        |       |
| 14366  | 0     | 1      |       | 5      | 5      | 5      | 5      | 4     |

| respid | Q43_9 | Q43_99 | Q44_1 | Q46x1a | Q46x1b | Q46x2a | Q46x2b | Q46x3 |
|--------|-------|--------|-------|--------|--------|--------|--------|-------|
| 14367  | 0     | 0      | 3     | 4      | 5      | 2      | 2      | 4     |
| 14369  | 0     | 0      | 2     | 4      | 4      | 4      | 5      | 5     |
| 14371  | 0     | 1      |       | 5      | 5      | 1      | 1      | 5     |
| 14372  | 0     | 0      | 4     | 6      | 6      | 1      | 5      | 5     |
| 14374  | 0     | 1      |       | 6      | 6      | 6      | 6      | 6     |
| 14376  | 0     | 0      | 2     | 6      | 6      | 6      | 6      | 5     |
| 14377  |       |        |       |        |        |        |        |       |
| 14378  | 0     | 1      |       | 5      | 5      | 1      | 1      | 5     |
| 14379  | 0     | 1      |       | 5      | 5      | 1      | 1      | 4     |
| 14381  | 0     | 1      |       | 4      | 5      | 5      | 5      | 5     |
| 14383  | 0     | 1      |       | 6      | 6      | 6      | 6      | 6     |
| 14384  | 0     | 0      | 2     | 4      | 4      | 2      | 2      | 4     |
| 14385  | 0     | 0      | 4     | 3      | 2      | 2      | 2      | 2     |
| 14386  | 0     | 0      | 2     | 4      | 4      | 4      | 4      | 3     |
| 14390  | 0     | 1      |       | 5      | 4      | 2      | 2      | 4     |
| 14391  | 0     | 1      |       | 6      | 6      | 5      | 5      | 5     |
| 14392  | 0     | 0      | 3     | 5      | 6      | 4      | 4      | 4     |
| 14393  | 0     | 0      | 3     | 3      | 4      | 2      | 1      | 3     |
| 14394  | 0     | 0      | 3     | 4      | 4      | 2      | 2      | 4     |
| 14395  |       |        |       |        |        |        |        |       |
| 14396  |       |        |       |        |        |        |        |       |
| 14397  | 0     | 0      | 2     | 6      | 6      | 6      | 6      | 5     |
| 14398  | 0     | 0      | 3     | 6      | 6      | 6      | 6      | 6     |
| 14399  | 0     | 0      | 3     | 6      | 6      | 6      | 6      | 6     |
| 14400  | 0     | 1      |       | 5      | 5      | 5      | 5      | 4     |
| 14403  | 0     | 1      |       | 5      | 5      | 5      | 5      | 5     |
| 14404  | 0     | 0      | 4     | 5      | 5      | 5      | 5      | 5     |
| 14405  | 0     | 1      |       | 4      | 3      | 1      | 1      | 4     |
| 14407  | 0     | 0      | 3     | 5      | 5      | 5      | 5      | 5     |
| 14408  | 0     | 0      | 3     | 4      | 4      | 2      | 2      | 3     |
| 14410  | 0     | 0      | 2     | 2      | 2      | 3      | 1      | 1     |
| 14415  | 0     | 0      | 3     | 3      | 3      | 6      | 6      | 4     |

| respid | Q43_9 | Q43_99 | Q44_1 | Q46x1a | Q46x1b | Q46x2a | Q46x2b | Q46x3 |
|--------|-------|--------|-------|--------|--------|--------|--------|-------|
| 14419  | 0     | 0      | 2     | 4      | 4      | 1      | 1      | 4     |
| 14420  |       |        |       |        |        |        |        |       |
| 14421  |       |        |       |        |        |        |        |       |
| 14423  | 0     | 1      |       | 5      | 5      | 1      | 1      | 4     |
| 14424  | 0     | 1      |       | 5      | 5      | 5      | 5      | 5     |
| 14425  | 0     | 1      |       | 5      | 5      | 5      | 5      | 5     |
| 14426  | 0     | 1      |       | 5      | 5      | 5      | 5      | 5     |
| 14427  | 0     | 1      |       | 6      | 6      | 1      | 1      | 5     |
| 14428  | 0     | 0      | 3     | 3      | 2      | 2      | 1      | 3     |
| 14431  | 0     | 0      | 3     | 4      | 4      | 4      | 4      | 4     |
| 14433  | 0     | 0      | 4     | 6      | 5      | 4      | 5      | 6     |
| 14434  | 0     | 1      |       | 5      | 4      | 1      | 1      | 4     |
| 14435  | 0     | 1      |       | 6      | 6      | 6      | 6      | 6     |
| 14436  | 0     | 1      |       | 3      | 3      | 4      | 4      | 3     |
| 14438  | 0     | 1      |       | 5      | 5      | 5      | 5      | 5     |
| 14442  | 0     | 0      | 2     | 4      | 4      | 3      | 3      | 3     |
| 14447  | 0     | 1      |       | 6      | 6      | 6      | 6      | 6     |
| 14448  | 0     | 1      |       | 5      | 5      | 5      | 5      | 5     |
| 14450  | 0     | 0      | 2     | 2      | 4      | 2      | 4      | 4     |
| 14451  | 0     | 1      |       | 5      | 5      | 5      | 5      | 5     |
| 14454  | 0     | 0      | 2     | 3      | 3      | 4      | 2      | 3     |
| 14455  | 0     | 1      |       | 6      | 6      | 6      | 6      | 6     |
| 14456  | 0     | 0      | 2     | 3      | 4      | 1      | 2      | 5     |
| 14457  | 0     | 0      | 4     | 2      | 2      | 2      | 2      | 1     |
| 14458  | 0     | 0      | 3     | 4      | 2      | 5      | 2      | 2     |
| 14459  |       |        |       |        |        |        |        |       |
| 14460  | 0     | 0      | 2     | 4      | 4      | 5      | 5      | 5     |
| 14464  | 0     | 1      |       | 4      | 3      | 3      | 4      | 3     |
| 14465  | 0     | 1      |       | 4      | 4      | 2      | 3      | 4     |
| 14466  | 0     | 0      | 3     | 5      | 5      | 5      | 4      | 4     |
| 14467  | 0     | 1      |       | 6      | 6      | 6      | 5      | 6     |
| 14470  | 0     | 0      | 2     | 6      | 6      | 6      | 6      | 6     |



| respid | Q43_9 | Q43_99 | Q44_1 | Q46x1a | Q46x1b | Q46x2a | Q46x2b | Q46x3 |
|--------|-------|--------|-------|--------|--------|--------|--------|-------|
| 14472  | 0     | 1      |       | 6      | 4      | 5      | 5      | 6     |
| 14473  | 0     | 1      |       | 6      | 6      | 1      | 1      | 4     |
| 14474  |       |        |       |        |        |        |        |       |
| 14477  | 0     | 0      | 2     | 6      | 6      | 6      | 6      | 6     |
| 14478  | 0     | 1      |       | 5      | 6      | 5      | 5      | 5     |
| 14479  |       |        |       |        |        |        |        |       |
| 14484  | 0     | 1      |       | 5      | 5      | 6      | 2      | 5     |
| 14485  |       |        |       |        |        |        |        |       |
| 14486  | 0     | 1      |       | 3      | 4      | 2      | 3      | 4     |
| 14487  | 0     | 1      |       | 5      | 5      | 5      | 5      | 5     |
| 14488  | 0     | 0      | 3     | 3      | 3      | 3      | 4      | 4     |
| 14491  | 0     | 1      |       | 4      | 3      | 4      | 4      | 4     |
| 14495  | 0     | 1      |       | 4      | 4      | 1      | 1      | 5     |
| 14500  | 0     | 1      |       | 4      | 4      | 3      | 2      | 4     |
| 14502  | 0     | 1      |       | 5      | 5      | 5      | 5      | 5     |
| 14504  | 0     | 0      | 2     | 4      | 4      | 3      | 2      | 3     |
| 14505  | 0     | 0      | 1     | 3      | 1      | 1      | 2      | 1     |
| 14507  | 0     | 1      |       | 4      | 5      | 5      | 5      | 5     |
| 14517  | 0     | 0      | 4     | 4      | 4      | 4      | 4      | 4     |
| 14518  | 0     | 1      |       | 5      | 5      | 1      | 4      | 6     |
| 14519  | 0     | 1      |       | 4      | 4      | 5      | 5      | 4     |
| 14521  | 0     | 0      | 2     | 4      | 4      | 4      | 4      | 4     |
| 14522  | 0     | 1      |       | 5      | 5      | 5      | 5      | 5     |
| 14526  | 0     | 1      |       | 6      | 6      | 6      | 6      | 6     |
| 14528  | 0     | 0      | 4     | 4      | 3      | 3      | 3      | 2     |
| 14529  | 0     | 1      |       | 3      | 3      | 3      | 3      | 3     |
| 14530  | 0     | 0      | 3     | 4      | 5      | 5      | 6      | 5     |
| 14531  | 0     | 0      | 2     | 2      | 2      | 3      | 3      | 3     |
| 14534  | 0     | 0      | 2     | 4      | 2      | 4      | 2      | 2     |
| 14538  | 0     | 0      | 3     | 5      | 4      | 4      | 5      | 4     |
| 14539  | 0     | 1      |       | 6      | 6      | 6      | 6      | 6     |
| 14545  | 0     | 1      |       | 5      | 5      | 5      | 5      | 5     |

| respid | Q43_9 | Q43_99 | Q44_1 | Q46x1a | Q46x1b | Q46x2a | Q46x2b | Q46x3 |
|--------|-------|--------|-------|--------|--------|--------|--------|-------|
| 14546  | 0     | 1      |       | 4      | 5      | 2      | 2      | 4     |
| 14551  | 0     | 1      |       | 6      | 5      | 1      | 1      | 5     |
| 14553  | 0     | 0      | 3     | 3      | 3      | 3      | 3      | 4     |
| 14557  |       |        |       |        |        |        |        |       |
| 14558  | 0     | 1      |       | 5      | 3      | 5      | 5      | 5     |
| 14559  | 0     | 0      | 2     | 4      | 4      | 3      | 3      | 2     |
| 14560  | 0     | 1      |       | 5      | 3      | 4      | 4      | 5     |
| 14563  | 0     | 1      |       | 4      | 5      | 5      | 5      | 4     |
| 14565  | 0     | 1      |       | 6      | 6      | 6      | 6      | 6     |
| 14571  | 0     | 0      | 4     | 2      | 2      | 4      | 1      | 1     |
| 14572  | 0     | 1      |       | 5      | 4      | 5      | 5      | 4     |
| 14573  | 0     | 0      | 3     | 4      | 3      | 4      | 4      | 3     |
| 14575  | 0     | 1      |       | 6      | 6      | 6      | 6      | 6     |
| 14576  | 0     | 0      | 3     | 3      | 2      | 3      | 2      | 2     |
| 14578  | 0     | 1      |       | 4      | 4      | 5      | 5      | 5     |
| 14579  | 0     | 1      |       | 6      | 6      | 6      | 6      | 5     |
| 14580  | 0     | 1      |       | 4      | 5      | 5      | 4      | 5     |
| 14582  | 0     | 1      |       | 6      | 6      | 6      | 6      | 6     |
| 14585  | 0     | 0      | 4     | 4      | 3      | 4      | 4      | 4     |
| 14588  | 0     | 1      |       | 5      | 5      | 2      | 3      | 4     |
| 14590  | 0     | 0      | 2     | 4      | 2      | 3      | 2      | 2     |
| 14592  | 0     | 0      | 3     | 4      | 3      | 4      | 3      | 3     |
| 14593  | 0     | 1      |       | 4      | 5      | 4      | 4      | 5     |
| 14595  | 0     | 0      | 3     | 4      | 4      | 4      | 4      | 4     |
| 14597  | 0     | 1      |       | 5      | 5      | 2      | 2      | 5     |
| 14600  | 0     | 0      | 3     | 4      | 5      | 5      | 5      | 5     |
| 14602  | 0     | 0      | 3     | 3      | 3      | 3      | 3      | 3     |
| 14604  | 0     | 1      |       | 5      | 5      | 1      | 2      | 5     |
| 14605  | 0     | 1      |       | 6      | 6      | 6      | 6      | 5     |
| 14609  | 0     | 0      | 2     | 4      | 4      | 4      | 4      | 4     |
| 14610  | 0     | 0      | 4     | 4      | 4      | 1      | 1      | 4     |
| 14611  | 0     | 1      |       | 6      | 6      | 5      | 5      | 5     |

| respid | Q43_9 | Q43_99 | Q44_1 | Q46x1a | Q46x1b | Q46x2a | Q46x2b | Q46x3 |
|--------|-------|--------|-------|--------|--------|--------|--------|-------|
| 14612  | 0     | 1      |       | 4      | 5      | 5      | 5      | 5     |
| 14614  | 0     | 0      | 2     | 4      | 4      | 4      | 4      | 4     |
| 14615  | 0     | 1      |       | 5      | 4      | 1      | 1      | 4     |
| 14618  | 0     | 0      | 3     | 3      | 3      | 3      | 3      | 2     |
| 14621  |       |        |       |        |        |        |        |       |
| 14624  | 0     | 0      | 2     | 3      | 4      | 1      | 1      | 4     |
| 14626  | 0     | 1      |       | 6      | 6      | 6      | 6      | 6     |
| 14627  | 0     | 0      | 3     | 4      | 4      | 4      | 4      | 4     |
| 14628  | 0     | 0      | 4     | 1      | 2      | 4      | 5      | 2     |
| 14631  | 0     | 1      |       | 4      | 5      | 4      | 5      | 4     |
| 14633  | 0     | 0      | 1     | 4      | 4      | 4      | 4      | 4     |
| 14642  | 0     | 0      | 3     | 3      | 4      | 4      | 3      | 3     |
| 14647  | 0     | 1      |       | 6      | 6      | 5      | 5      | 5     |
| 14658  | 0     | 1      |       | 5      | 5      | 4      | 4      | 5     |
| 14659  | 0     | 0      | 2     | 4      | 4      | 4      | 4      | 3     |
| 14660  | 0     | 1      |       | 3      | 3      | 5      | 4      | 3     |
| 14661  | 0     | 0      | 4     | 4      | 4      | 5      | 5      | 5     |
| 14662  | 0     | 0      | 4     | 1      | 1      | 4      | 2      | 1     |
| 14663  | 0     | 0      | 3     | 5      | 5      | 5      | 5      | 4     |
| 14670  | 0     | 0      | 3     | 5      | 3      | 5      | 5      | 5     |
| 14671  |       |        |       |        |        |        |        |       |
| 14672  | 0     | 0      | 1     | 5      | 2      | 3      | 4      | 3     |
| 14675  | 0     | 1      |       | 3      | 3      | 3      | 3      | 3     |
| 14676  | 0     | 0      | 3     | 5      | 5      | 3      | 4      | 5     |
| 14677  | 0     | 0      | 1     | 1      | 3      | 4      | 2      | 1     |
| 14678  | 0     | 1      |       | 5      | 5      | 5      | 5      | 5     |
| 14681  | 0     | 0      | 2     | 4      | 3      | 4      | 4      | 4     |
| 14684  | 0     | 1      |       | 5      | 5      | 5      | 5      | 5     |
| 14688  | 0     | 1      |       | 5      | 5      | 5      | 5      | 5     |
| 14690  | 0     | 0      | 3     | 4      | 4      | 3      | 3      | 3     |
| 14694  | 0     | 0      | 2     | 5      | 3      | 3      | 3      | 2     |
| 14696  | 0     | 0      | 3     | 4      | 4      | 3      | 3      | 3     |

| respid | Q43_9 | Q43_99 | Q44_1 | Q46x1a | Q46x1b | Q46x2a | Q46x2b | Q46x3 |
|--------|-------|--------|-------|--------|--------|--------|--------|-------|
| 14700  |       |        |       |        |        |        |        |       |
| 14701  | 0     | 1      |       | 6      | 6      | 6      | 6      | 6     |
| 14703  | 0     | 0      | 1     | 1      | 2      | 3      | 2      | 1     |
| 14707  | 0     | 1      |       | 4      | 4      | 2      | 3      | 2     |
| 14711  | 0     | 0      | 2     | 5      | 3      | 3      | 3      | 2     |
| 14714  | 0     | 1      |       | 5      | 6      | 6      | 4      | 5     |
| 14715  | 0     | 0      | 2     | 1      | 1      | 3      | 2      | 1     |
| 14716  | 0     | 1      |       | 5      | 5      | 1      | 1      | 5     |
| 14720  | 0     | 1      |       | 5      | 5      | 5      | 5      | 5     |
| 14725  | 0     | 1      |       | 6      | 6      | 6      | 3      | 6     |
| 14726  | 0     | 1      |       | 6      | 6      | 1      | 1      | 5     |
| 14734  | 0     | 1      |       | 5      | 5      | 5      | 4      | 4     |
| 14735  | 0     | 0      | 3     | 5      | 5      | 5      | 5      | 5     |
| 14736  | 0     | 0      | 2     | 4      | 4      | 4      | 4      | 4     |
| 14740  | 0     | 1      |       | 5      | 5      | 5      | 5      | 5     |
| 14745  | 0     | 0      | 3     | 5      | 5      | 5      | 5      | 5     |
| 14747  | 0     | 0      | 2     | 5      | 5      | 5      | 5      | 5     |
| 14750  | 0     | 0      | 1     | 3      | 3      | 4      | 4      | 3     |
| 14751  | 0     | 0      | 5     | 5      | 5      | 1      | 1      | 5     |
| 14753  | 0     | 1      |       | 5      | 5      | 1      | 1      | 5     |
| 14756  | 0     | 0      | 2     | 3      | 3      | 3      | 4      | 3     |
| 14780  | 0     | 0      | 2     | 4      | 4      | 2      | 2      | 4     |
| 14782  | 0     | 1      |       | 5      | 5      | 5      | 5      | 5     |
| 14800  | 0     | 0      | 4     | 3      | 3      | 3      | 3      | 2     |
| 14801  | 0     | 1      |       | 5      | 5      | 5      | 5      | 5     |
| 14802  | 0     | 0      | 3     | 2      | 4      | 3      | 3      | 2     |
| 14805  | 0     | 0      | 2     | 4      | 4      | 2      | 2      | 4     |
| 14811  | 0     | 0      | 3     | 2      | 2      | 2      | 3      | 3     |
| 14814  | 0     | 0      | 2     | 3      | 3      | 5      | 5      | 4     |
| 14822  | 0     | 0      | 2     | 2      | 2      | 2      | 1      | 3     |
| 14827  | 0     | 0      | 5     | 3      | 3      | 1      | 2      | 3     |
| 14828  | 0     | 0      | 3     | 3      | 3      | 3      | 3      | 3     |

| respid | Q43_9 | Q43_99 | Q44_1 | Q46x1a | Q46x1b | Q46x2a | Q46x2b | Q46x3 |
|--------|-------|--------|-------|--------|--------|--------|--------|-------|
| 14830  |       |        |       |        |        |        |        |       |
| 14832  | 0     | 0      | 3     | 2      | 2      | 2      | 2      | 2     |
| 14835  | 0     | 0      | 1     | 4      | 4      | 2      | 2      | 4     |
| 14841  |       |        |       |        |        |        |        |       |
| 14849  | 0     | 0      | 4     | 4      | 5      | 2      | 2      | 4     |
| 14850  |       |        |       |        |        |        |        |       |
| 14851  | 0     | 1      |       | 5      | 5      | 5      | 5      | 5     |
| 14856  | 0     | 0      | 3     | 3      | 3      | 3      | 3      | 3     |
| 14862  | 0     | 0      | 1     | 3      | 2      | 2      | 1      | 2     |
| 14863  | 0     | 1      |       | 6      | 6      | 6      | 6      | 5     |
| 14864  | 0     | 1      |       | 5      | 4      | 1      | 1      | 2     |
| 14866  | 0     | 1      |       | 6      | 6      | 6      | 6      | 6     |
| 14867  | 0     | 0      | 3     | 3      | 3      | 2      | 2      | 4     |
| 14868  | 0     | 0      | 3     | 5      | 5      | 1      | 1      | 5     |
| 14870  | 0     | 1      |       | 4      | 4      | 2      | 2      | 4     |
| 14873  |       |        |       |        |        |        |        |       |
| 14878  | 0     | 1      |       | 5      | 5      | 2      | 2      | 5     |
| 14879  |       |        |       |        |        |        |        |       |
| 14881  | 0     | 0      | 3     | 4      | 2      | 3      | 3      | 3     |
| 14888  | 1     | 0      | 3     | 1      | 2      | 1      | 3      | 3     |
| 14895  | 0     | 0      | 3     | 4      | 5      | 1      | 2      | 4     |
| 14900  | 0     | 0      | 3     | 2      | 3      | 2      | 2      | 2     |
| 14912  |       |        |       |        |        |        |        |       |
| 14922  | 0     | 0      | 2     | 2      | 2      | 2      | 2      | 2     |
| 14923  | 0     | 0      | 3     | 3      | 2      | 3      | 2      | 3     |
| 14924  | 0     | 0      | 3     | 4      | 5      | 3      | 4      | 4     |
| 14925  | 0     | 0      | 1     | 1      | 3      | 2      | 3      | 2     |
| 14926  | 0     | 1      |       | 4      | 5      | 4      | 4      | 4     |
| 14927  | 0     | 0      | 3     | 3      | 2      | 3      | 3      | 3     |
| 14930  | 0     | 0      | 1     | 3      | 2      | 4      | 6      | 3     |
| 14937  | 0     | 0      | 1     | 4      | 3      | 3      | 3      | 3     |
| 14938  | 1     | 0      | 3     | 1      | 2      | 1      | 2      | 2     |

| respid | Q43_9 | Q43_99 | Q44_1 | Q46x1a | Q46x1b | Q46x2a | Q46x2b | Q46x3 |
|--------|-------|--------|-------|--------|--------|--------|--------|-------|
| 14939  | 0     | 0      | 2     | 1      | 1      | 1      | 1      | 2     |
| 14942  |       |        |       |        |        |        |        |       |
| 14943  |       |        |       |        |        |        |        |       |
| 14953  | 0     | 0      | 3     | 4      | 5      | 2      | 2      | 4     |
| 14954  | 0     | 1      |       | 5      | 5      | 5      | 5      | 4     |
| 14955  | 0     | 0      | 2     | 2      | 3      | 4      | 4      | 2     |
| 14957  | 0     | 0      | 3     | 4      | 4      | 2      | 4      | 3     |
| 14958  | 0     | 0      | 4     | 1      | 1      | 4      | 2      | 2     |
| 14959  | 0     | 0      | 3     | 4      | 4      | 4      | 2      | 3     |
| 14961  |       |        |       |        |        |        |        |       |
| 14963  | 0     | 0      | 3     | 3      | 3      | 3      | 3      | 3     |
| 14964  | 0     | 1      |       | 5      | 5      | 6      | 5      | 6     |
| 14965  | 0     | 1      |       | 5      | 5      | 5      | 5      | 4     |
| 14967  | 0     | 0      | 2     | 1      | 1      | 3      | 3      | 1     |
| 14970  | 0     | 0      | 3     | 3      | 2      | 3      | 1      | 2     |
| 14972  | 0     | 0      | 2     | 3      | 4      | 3      | 3      | 4     |
| 14975  | 0     | 0      | 3     | 1      | 2      | 2      | 1      | 2     |
| 14977  | 0     | 1      |       | 4      | 5      | 4      | 4      | 4     |
| 14982  | 0     | 0      | 2     | 5      | 5      | 6      | 6      | 6     |
| 14985  | 0     | 0      | 1     | 4      | 4      | 3      | 3      | 4     |
| 14986  |       |        |       |        |        |        |        |       |
| 14987  |       |        |       |        |        |        |        |       |
| 14988  | 0     | 0      | 4     | 2      | 1      | 1      | 2      | 1     |
| 14989  | 0     | 0      | 3     | 6      | 6      | 6      | 6      | 6     |
| 14993  | 0     | 0      | 3     | 3      | 3      | 4      | 4      | 3     |
| 15001  | 0     | 1      |       | 6      | 6      | 6      | 6      | 6     |
| 15002  | 1     | 0      | 3     | 2      | 1      | 1      | 3      | 3     |
| 15006  | 0     | 1      |       | 4      | 4      | 3      | 3      | 3     |
| 15007  | 0     | 1      |       | 4      | 5      | 4      | 4      | 5     |
| 15014  | 0     | 0      | 3     | 2      | 2      | 2      | 3      | 2     |
| 15020  | 0     | 0      | 3     | 4      | 4      | 2      | 3      | 3     |
| 15021  | 0     | 0      | 4     | 4      | 3      | 4      | 3      | 3     |

| respid | Q43_9 | Q43_99 | Q44_1 | Q46x1a | Q46x1b | Q46x2a | Q46x2b | Q46x3 |
|--------|-------|--------|-------|--------|--------|--------|--------|-------|
| 15023  | 0     | 0      | 3     | 2      | 2      | 3      | 2      | 2     |
| 15030  | 0     | 1      |       | 4      | 4      | 4      | 4      | 4     |
| 15032  |       |        |       |        |        |        |        |       |
| 15033  | 0     | 0      | 3     | 4      | 4      | 4      | 4      | 4     |
| 15034  | 0     | 0      | 3     | 5      | 5      | 2      | 2      | 4     |
| 15035  | 0     | 0      | 4     | 4      | 5      | 1      | 2      | 4     |
| 15037  | 0     | 1      |       | 5      | 4      | 2      | 2      | 5     |
| 15039  | 0     | 0      | 3     | 3      | 3      | 3      | 3      | 3     |
| 15040  | 0     | 1      |       | 5      | 5      | 6      | 6      | 6     |
| 15042  | 0     | 0      | 2     | 4      | 5      | 2      | 3      | 4     |
| 15044  |       |        |       |        |        |        |        |       |
| 15045  | 0     | 1      |       | 5      | 6      | 6      | 6      | 6     |
| 15046  | 0     | 0      | 3     | 3      | 3      | 3      | 3      | 3     |
| 15052  | 0     | 0      | 1     | 2      | 2      | 2      | 2      | 2     |
| 15058  | 0     | 0      | 2     | 2      | 3      | 4      | 4      | 3     |
| 15063  | 0     | 0      | 4     | 3      | 3      | 4      | 4      | 3     |
| 15066  | 0     | 0      | 4     | 4      | 4      | 4      | 4      | 4     |
| 15069  | 0     | 0      | 4     | 6      | 6      | 2      | 3      | 2     |
| 15071  | 0     | 0      | 3     | 4      | 4      | 2      | 2      | 4     |
| 15076  | 0     | 0      | 1     | 3      | 3      | 3      | 4      | 1     |
| 15078  | 0     | 1      |       | 6      | 6      | 6      | 6      | 6     |
| 15087  | 0     | 0      | 1     | 4      | 4      | 2      | 3      | 4     |
| 15090  | 0     | 1      |       | 3      | 4      | 4      | 2      | 4     |
| 15091  | 0     | 0      | 3     | 3      | 3      | 4      | 2      | 3     |
| 15092  | 0     | 1      |       | 5      | 5      | 2      | 2      | 4     |
| 15096  | 0     | 0      | 4     | 4      | 4      | 4      | 4      | 4     |
| 15106  | 0     | 0      | 3     | 4      | 4      | 3      | 2      | 3     |
| 15108  |       |        |       |        |        |        |        |       |
| 15113  | 0     | 0      | 2     | 2      | 4      | 2      | 4      | 4     |
| 15116  |       |        |       |        |        |        |        |       |
| 15119  | 1     | 0      | 3     | 3      | 4      | 4      | 3      | 3     |
| 15120  | 0     | 0      | 3     | 5      | 1      | 5      | 1      | 3     |

| respid | Q43_9 | Q43_99 | Q44_1 | Q46x1a | Q46x1b | Q46x2a | Q46x2b | Q46x3 |
|--------|-------|--------|-------|--------|--------|--------|--------|-------|
| 15121  | 0     | 0      | 3     | 4      | 5      | 2      | 2      | 4     |
| 15123  |       |        |       |        |        |        |        |       |
| 15124  | 0     | 1      |       | 5      | 4      | 3      | 5      | 5     |
| 15128  | 0     | 1      |       | 5      | 5      | 1      | 1      | 4     |
| 15131  |       |        |       |        |        |        |        |       |
| 15136  | 0     | 0      | 3     | 3      | 1      | 3      | 3      | 3     |
| 15137  | 0     | 0      | 3     | 4      | 4      | 4      | 4      | 4     |
| 15141  | 0     | 0      | 2     | 5      | 5      | 1      | 2      | 4     |
| 15144  | 0     | 0      | 1     | 5      | 2      | 5      | 2      | 3     |
| 15147  | 0     | 0      | 3     | 4      | 4      | 4      | 4      | 4     |
| 15151  | 0     | 0      | 2     | 4      | 3      | 4      | 3      | 4     |
| 15154  | 1     | 0      | 3     | 4      | 4      | 2      | 2      | 4     |
| 15157  | 0     | 0      | 2     | 5      | 1      | 2      | 4      | 4     |
| 15164  | 1     | 0      | 3     | 4      | 4      | 4      | 3      | 3     |
| 15168  | 0     | 0      | 2     | 4      | 1      | 4      | 3      | 1     |
| 15169  | 0     | 1      |       | 4      | 4      | 4      | 4      | 3     |
| 15172  | 0     | 0      | 2     | 3      | 2      | 3      | 2      | 2     |
| 15177  | 0     | 0      | 3     | 4      | 2      | 3      | 3      | 3     |
| 15178  |       |        |       |        |        |        |        |       |
| 15180  | 0     | 0      | 2     | 2      | 2      | 2      | 2      | 2     |
| 15181  | 0     | 1      |       | 5      | 5      | 1      | 1      | 5     |
| 15182  | 0     | 0      | 1     | 4      | 5      | 2      | 2      | 4     |
| 15183  |       |        |       |        |        |        |        |       |
| 15188  | 0     | 0      | 3     | 3      | 1      | 3      | 1      | 3     |
| 15190  | 0     | 0      | 3     | 1      | 3      | 1      | 2      | 2     |
| 15195  |       |        |       |        |        |        |        |       |
| 15201  | 0     | 0      | 3     | 3      | 1      | 1      | 2      | 2     |
| 15203  | 0     | 0      | 0     | 3      | 1      | 5      | 1      | 4     |
| 15204  | 0     | 1      |       | 5      | 5      | 2      | 2      | 5     |
| 15207  |       |        |       |        |        |        |        |       |
| 15208  | 0     | 0      | 3     | 1      | 3      | 2      | 2      | 1     |
| 15209  | 0     | 0      | 4     | 5      | 5      | 1      | 2      | 5     |



| respid | Q43_9 | Q43_99 | Q44_1 | Q46x1a | Q46x1b | Q46x2a | Q46x2b | Q46x3 |
|--------|-------|--------|-------|--------|--------|--------|--------|-------|
| 15212  |       |        |       |        |        |        |        |       |
| 15213  | 0     | 0      | 3     | 5      | 4      | 2      | 2      | 4     |
| 15219  | 0     | 0      | 3     | 5      | 5      | 2      | 1      | 4     |
| 15220  | 0     | 0      | 2     | 4      | 4      | 2      | 2      | 4     |
| 15221  | 0     | 1      |       | 4      | 4      | 5      | 5      | 4     |
| 15223  | 0     | 0      | 1     | 2      | 2      | 2      | 2      | 2     |
| 15224  | 0     | 0      | 3     | 5      | 4      | 1      | 2      | 3     |
| 15225  | 0     | 1      |       | 5      | 5      | 2      | 2      | 5     |
| 15226  | 0     | 1      |       | 5      | 4      | 5      | 5      | 4     |
| 15230  | 0     | 1      |       | 4      | 4      | 5      | 5      | 4     |
| 15231  | 0     | 0      | 0     | 1      | 1      | 1      | 3      | 2     |
| 15232  | 0     | 1      |       | 5      | 5      | 6      | 6      | 6     |
| 15237  | 0     | 1      |       | 5      | 5      | 2      | 2      | 5     |
| 15239  | 0     | 1      |       | 4      | 5      | 5      | 5      | 4     |
| 15241  | 0     | 1      |       | 4      | 5      | 4      | 4      | 5     |
| 15242  | 0     | 0      | 3     | 6      | 6      | 2      | 2      | 6     |
| 15247  | 0     | 1      |       | 5      | 4      | 4      | 5      | 5     |
| 15248  |       |        |       |        |        |        |        |       |
| 15251  |       |        |       |        |        |        |        |       |
| 15257  |       |        |       |        |        |        |        |       |
| 15260  | 0     | 1      |       | 4      | 4      | 5      | 5      | 4     |
| 15261  | 0     | 0      | 4     | 3      | 3      | 2      | 1      | 2     |
| 15262  | 0     | 0      | 2     | 4      | 4      | 2      | 2      | 4     |
| 15263  | 0     | 0      | 3     | 5      | 5      | 4      | 5      | 4     |
| 15265  | 0     | 1      |       | 4      | 4      | 5      | 4      | 5     |
| 15266  | 0     | 0      | 4     | 5      | 5      | 3      | 3      | 4     |
| 15268  | 0     | 0      | 3     | 5      | 3      | 4      | 5      | 5     |
| 15269  | 0     | 1      |       | 6      | 6      | 6      | 6      | 6     |
| 15270  | 0     | 0      | 2     | 2      | 3      | 4      | 4      | 4     |
| 15273  | 0     | 0      | 3     | 2      | 3      | 1      | 4      | 1     |
| 15276  | 0     | 0      | 3     | 2      | 2      | 3      | 2      | 2     |
| 15277  | 0     | 1      |       | 4      | 4      | 5      | 5      | 4     |

| respid | Q43_9 | Q43_99 | Q44_1 | Q46x1a | Q46x1b | Q46x2a | Q46x2b | Q46x3 |
|--------|-------|--------|-------|--------|--------|--------|--------|-------|
| 15282  | 0     | 1      |       | 1      | 1      | 1      | 1      | 1     |
| 15284  | 0     | 0      | 1     | 4      | 4      | 2      | 3      | 4     |
| 15285  | 0     | 1      |       | 4      | 4      | 4      | 2      | 4     |
| 15286  | 0     | 0      | 4     | 2      | 2      | 1      | 3      | 1     |
| 15288  | 0     | 0      | 2     | 3      | 1      | 4      | 3      | 3     |
| 15292  | 0     | 0      | 4     | 3      | 2      | 3      | 1      | 2     |
| 15296  | 0     | 1      |       | 5      | 5      | 4      | 5      | 5     |
| 15297  | 0     | 1      |       | 4      | 4      | 3      | 3      | 3     |
| 15298  |       |        |       |        |        |        |        |       |
| 15301  | 0     | 1      |       | 5      | 5      | 4      | 4      | 4     |
| 15302  | 0     | 1      |       | 5      | 5      | 2      | 1      | 5     |
| 15305  | 0     | 0      | 4     | 5      | 5      | 1      | 2      | 5     |
| 15307  | 0     | 1      |       | 4      | 4      | 1      | 1      | 6     |
| 15308  | 0     | 0      | 3     | 4      | 4      | 4      | 4      | 5     |
| 15309  | 0     | 0      | 3     | 6      | 5      | 5      | 5      | 5     |
| 15311  | 0     | 1      |       | 4      | 4      | 2      | 2      | 4     |
| 15315  | 0     | 0      | 2     | 5      | 5      | 1      | 2      | 5     |
| 15316  | 0     | 0      | 3     | 5      | 4      | 2      | 2      | 4     |
| 15318  |       |        |       |        |        |        |        |       |
| 15321  | 0     | 0      | 2     | 2      | 3      | 2      | 3      | 2     |
| 15322  | 0     | 0      | 4     | 6      | 6      | 5      | 5      | 5     |
| 15324  | 0     | 1      |       | 5      | 4      | 4      | 2      | 4     |
| 15326  | 0     | 0      | 3     | 5      | 5      | 1      | 2      | 5     |
| 15327  | 0     | 0      | 4     | 5      | 5      | 5      | 5      | 5     |
| 15328  | 0     | 0      | 0     | 2      | 1      | 5      | 2      | 2     |
| 15330  | 0     | 1      |       | 4      | 3      | 4      | 4      | 4     |
| 15332  | 0     | 0      | 4     | 4      | 4      | 2      | 2      | 4     |
| 15333  |       |        |       |        |        |        |        |       |
| 15334  | 0     | 0      | 4     | 5      | 5      | 1      | 2      | 5     |
| 15336  | 0     | 0      | 4     | 3      | 2      | 3      | 1      | 3     |
| 15337  | 0     | 1      |       | 5      | 5      | 5      | 5      | 5     |
| 15338  | 0     | 1      |       | 5      | 5      | 5      | 5      | 4     |

| respid | Q43_9 | Q43_99 | Q44_1 | Q46x1a | Q46x1b | Q46x2a | Q46x2b | Q46x3 |
|--------|-------|--------|-------|--------|--------|--------|--------|-------|
| 15339  | 0     | 0      | 2     | 3      | 3      | 2      | 3      | 4     |
| 15341  | 0     | 1      |       | 5      | 5      | 1      | 1      | 5     |
| 15344  |       |        |       |        |        |        |        |       |
| 15345  | 0     | 1      |       | 4      | 5      | 1      | 2      | 4     |
| 15350  |       |        |       |        |        |        |        |       |
| 15351  | 0     | 0      | 4     | 5      | 5      | 1      | 2      | 5     |
| 15352  | 0     | 1      |       | 3      | 4      | 2      | 2      | 3     |
| 15372  | 0     | 0      | 4     | 5      | 5      | 1      | 1      | 5     |
| 15373  | 0     | 0      | 2     | 1      | 1      | 1      | 2      | 1     |
| 15376  | 0     | 1      |       | 4      | 5      | 1      | 1      | 4     |
| 15377  | 0     | 1      |       | 4      | 4      | 4      | 4      | 4     |
| 15382  | 0     | 0      | 3     | 5      | 5      | 5      | 5      | 4     |
| 15383  | 0     | 0      | 1     | 1      | 3      | 3      | 2      | 3     |
| 15385  | 0     | 0      | 1     | 3      | 2      | 4      | 3      | 3     |
| 15390  | 0     | 1      |       | 5      | 4      | 4      | 4      | 4     |
| 15399  |       |        |       |        |        |        |        |       |
| 15404  | 0     | 1      |       | 4      | 4      | 4      | 4      | 4     |
| 15410  | 0     | 1      |       | 5      | 5      | 1      | 1      | 5     |
| 15411  | 0     | 0      | 2     | 4      | 4      | 4      | 4      | 4     |
| 15412  | 0     | 0      | 3     | 4      | 4      | 2      | 2      | 4     |
| 15413  | 0     | 0      | 3     | 6      | 4      | 6      | 6      | 6     |
| 15414  | 0     | 1      |       | 4      | 4      | 4      | 4      | 4     |
| 15417  | 0     | 1      |       | 5      | 5      | 1      | 1      | 5     |
| 15418  | 0     | 0      | 3     | 4      | 4      | 1      | 3      | 3     |
| 15421  | 0     | 1      |       | 4      | 4      | 4      | 4      | 4     |
| 15423  | 0     | 0      | 3     | 5      | 5      | 5      | 5      | 5     |
| 15425  | 0     | 0      | 4     | 6      | 6      | 6      | 6      | 6     |
| 15426  | 0     | 0      | 2     | 3      | 4      | 2      | 3      | 2     |
| 15430  | 0     | 1      |       | 5      | 5      | 1      | 1      | 5     |
| 15431  | 0     | 0      | 3     | 3      | 3      | 3      | 3      | 3     |
| 15435  |       |        |       |        |        |        |        |       |
| 15436  |       |        |       |        |        |        |        |       |

| respid | Q43_9 | Q43_99 | Q44_1 | Q46x1a | Q46x1b | Q46x2a | Q46x2b | Q46x3 |
|--------|-------|--------|-------|--------|--------|--------|--------|-------|
| 15437  |       |        |       |        |        |        |        |       |
| 15438  | 0     | 1      |       | 6      | 6      | 6      | 6      | 6     |
| 15439  | 0     | 0      | 4     | 5      | 5      | 1      | 1      | 5     |
| 15441  | 0     | 0      | 4     | 3      | 3      | 1      | 3      | 1     |
| 15443  | 0     | 0      | 3     | 5      | 5      | 4      | 4      | 4     |
| 15446  | 0     | 1      |       | 5      | 5      | 1      | 1      | 5     |
| 15449  | 0     | 0      | 2     | 4      | 4      | 3      | 3      | 4     |
| 15451  | 0     | 0      | 3     | 3      | 3      | 3      | 2      | 2     |
| 15452  | 0     | 0      | 3     | 4      | 3      | 4      | 3      | 3     |
| 15454  | 0     | 1      |       | 6      | 6      | 5      | 5      | 5     |
| 15456  | 0     | 0      | 3     | 5      | 5      | 3      | 2      | 3     |
| 15457  |       |        |       |        |        |        |        |       |
| 15458  | 0     | 0      | 3     | 3      | 3      | 4      | 3      | 4     |
| 15462  | 0     | 0      | 3     | 3      | 4      | 3      | 3      | 4     |
| 15467  | 1     | 0      | 3     | 4      | 4      | 2      | 3      | 4     |
| 15470  | 0     | 0      | 3     | 5      | 4      | 2      | 2      | 4     |
| 15472  | 0     | 1      |       | 5      | 5      | 5      | 1      | 4     |
| 15476  | 0     | 1      |       | 6      | 6      | 5      | 4      | 6     |
| 15477  | 0     | 1      |       | 4      | 4      | 4      | 5      | 4     |
| 15488  | 0     | 1      |       | 5      | 5      | 1      | 1      | 4     |
| 15489  | 0     | 1      |       | 4      | 5      | 1      | 1      | 5     |
| 15490  | 0     | 1      |       | 5      | 4      | 4      | 4      | 4     |
| 15496  | 0     | 1      |       | 5      | 5      | 2      | 2      | 5     |
| 15497  | 0     | 0      | 2     | 4      | 5      | 2      | 2      | 2     |
| 15498  |       |        |       |        |        |        |        |       |
| 15509  | 0     | 0      | 2     | 3      | 4      | 4      | 3      | 3     |
| 15510  | 0     | 1      |       | 4      | 4      | 4      | 4      | 4     |
| 15516  | 0     | 1      |       | 3      | 3      | 2      | 2      | 4     |
| 15519  | 0     | 1      |       | 5      | 5      | 5      | 5      | 5     |
| 15520  | 0     | 1      |       | 5      | 5      | 4      | 5      | 4     |
| 15524  | 0     | 0      | 3     | 5      | 4      | 2      | 2      | 3     |
| 15525  | 0     | 0      | 3     | 5      | 5      | 1      | 1      | 4     |

| respid | Q43_9 | Q43_99 | Q44_1 | Q46x1a | Q46x1b | Q46x2a | Q46x2b | Q46x3 |
|--------|-------|--------|-------|--------|--------|--------|--------|-------|
| 15526  | 0     | 0      | 3     | 4      | 5      | 5      | 4      | 5     |
| 15531  | 1     | 0      | 3     | 4      | 4      | 5      | 3      | 4     |
| 15532  | 0     | 1      |       | 5      | 5      | 5      | 5      | 5     |
| 15534  | 0     | 0      | 3     | 3      | 4      | 3      | 3      | 3     |
| 15535  | 0     | 0      | 3     | 2      | 1      | 3      | 2      | 2     |
| 15539  | 0     | 0      | 3     | 4      | 4      | 2      | 2      | 4     |
| 15550  | 0     | 1      |       | 5      | 5      | 5      | 5      | 5     |
| 15556  | 0     | 1      |       | 4      | 4      | 4      | 5      | 4     |
| 15558  | 0     | 0      | 3     | 3      | 3      | 3      | 2      | 2     |
| 15565  | 0     | 1      |       | 5      | 5      | 1      | 1      | 4     |
| 15567  | 0     | 0      | 2     | 3      | 3      | 3      | 3      | 3     |
| 15568  | 0     | 0      | 3     | 2      | 1      | 2      | 2      | 2     |
| 15571  | 0     | 1      |       | 6      | 6      | 6      | 6      | 6     |
| 15573  | 0     | 1      |       | 6      | 6      | 5      | 5      | 5     |
| 15574  | 0     | 0      | 2     | 2      | 1      | 3      | 1      | 2     |
| 15576  | 0     | 0      | 5     | 4      | 4      | 2      | 2      | 4     |
| 15587  | 0     | 0      | 1     | 4      | 4      | 2      | 2      | 4     |
| 15588  | 0     | 0      | 2     | 2      | 3      | 3      | 2      | 3     |
| 15593  | 1     | 0      | 2     | 4      | 4      | 3      | 4      | 3     |
| 15597  | 0     | 1      |       | 5      | 5      | 2      | 2      | 4     |
| 15598  | 0     | 0      | 4     | 5      | 4      | 6      | 6      | 6     |
| 15599  | 0     | 1      |       | 4      | 6      | 1      | 1      | 4     |
| 15601  | 0     | 1      |       | 6      | 6      | 6      | 6      | 6     |
| 15604  | 0     | 1      |       | 6      | 6      | 6      | 6      | 6     |
| 15611  | 0     | 0      | 4     | 5      | 5      | 1      | 1      | 5     |
| 15613  | 0     | 0      | 4     | 5      | 5      | 1      | 1      | 5     |
| 15614  | 0     | 1      |       | 6      | 6      | 6      | 6      | 6     |
| 15617  | 0     | 0      | 4     | 6      | 6      | 6      | 6      | 6     |
| 15622  |       |        |       |        |        |        |        |       |
| 15623  | 0     | 1      |       | 5      | 5      | 5      | 5      | 5     |
| 15625  | 0     | 1      |       | 4      | 4      | 5      | 5      | 5     |
| 15627  |       |        |       |        |        |        |        |       |

| respid | Q43_9 | Q43_99 | Q44_1 | Q46x1a | Q46x1b | Q46x2a | Q46x2b | Q46x3 |
|--------|-------|--------|-------|--------|--------|--------|--------|-------|
| 15628  | 0     | 0      | 2     | 5      | 5      | 5      | 5      | 5     |
| 15633  | 0     | 1      |       | 6      | 6      | 6      | 6      | 6     |
| 15634  | 0     | 1      |       | 5      | 5      | 1      | 1      | 5     |
| 15637  | 0     | 1      |       | 5      | 5      | 1      | 1      | 5     |
| 15644  | 0     | 1      |       | 5      | 4      | 2      | 2      | 4     |
| 15645  | 0     | 1      |       | 4      | 4      | 3      | 2      | 4     |
| 15649  | 0     | 1      |       | 5      | 5      | 5      | 5      | 5     |
| 15650  | 0     | 1      |       | 4      | 5      | 5      | 5      | 5     |
| 15651  | 0     | 1      |       | 6      | 6      | 6      | 6      | 6     |
| 15657  | 0     | 0      | 2     | 4      | 4      | 3      | 3      | 4     |
| 15658  | 0     | 1      |       | 5      | 5      | 1      | 1      | 5     |
| 15660  | 0     | 0      | 3     | 4      | 4      | 2      | 2      | 4     |
| 15667  | 0     | 1      |       | 5      | 5      | 1      | 1      | 5     |
| 15671  | 0     | 1      |       | 5      | 5      | 1      | 1      | 5     |
| 15679  | 0     | 1      |       | 6      | 6      | 6      | 6      | 6     |
| 15712  | 0     | 1      |       | 5      | 5      | 5      | 5      | 5     |
| 15715  | 0     | 1      |       | 6      | 6      | 5      | 5      | 5     |
| 15749  | 0     | 1      |       | 5      | 5      | 2      | 2      | 5     |
| 15754  | 0     | 0      | 3     | 4      | 4      | 2      | 2      | 4     |
| 15756  | 0     | 0      | 3     | 5      | 5      | 1      | 1      | 4     |
| 15773  | 0     | 1      |       | 6      | 6      | 5      | 5      | 5     |
| 15774  | 0     | 1      |       | 6      | 6      | 6      | 6      | 6     |
| 15776  | 0     | 1      |       | 5      | 5      | 1      | 1      | 5     |
| 15777  | 0     | 0      | 3     | 3      | 3      | 3      | 3      | 3     |
| 15779  |       |        |       |        |        |        |        |       |
| 15780  | 0     | 0      | 4     | 4      | 5      | 2      | 1      | 4     |
| 15792  | 0     | 1      |       | 5      | 5      | 5      | 4      | 4     |
| 15793  | 0     | 0      | 3     | 3      | 4      | 4      | 4      | 3     |
| 15796  | 0     | 0      | 3     | 5      | 5      | 1      | 1      | 5     |
| 15798  | 0     | 1      |       | 6      | 6      | 6      | 6      | 6     |
| 15809  | 0     | 1      |       | 5      | 5      | 1      | 1      | 5     |
| 15810  | 0     | 1      |       | 5      | 5      | 5      | 6      | 6     |

| respid | Q43_9 | Q43_99 | Q44_1 | Q46x1a | Q46x1b | Q46x2a | Q46x2b | Q46x3 |
|--------|-------|--------|-------|--------|--------|--------|--------|-------|
| 15815  | 0     | 1      |       | 5      | 5      | 1      | 1      | 4     |
| 15816  | 0     | 0      | 2     | 5      | 5      | 5      | 5      | 5     |
| 15817  |       |        |       |        |        |        |        |       |
| 15821  | 0     | 0      | 3     | 4      | 4      | 3      | 3      | 3     |
| 15823  | 0     | 0      | 3     | 3      | 4      | 4      | 4      | 4     |
| 15834  | 0     | 0      | 4     | 5      | 5      | 1      | 1      | 5     |
| 15835  |       |        |       |        |        |        |        |       |
| 15836  | 0     | 0      | 3     | 5      | 4      | 4      | 5      | 5     |
| 15837  | 0     | 1      |       | 5      | 5      | 2      | 2      | 4     |
| 15839  | 0     | 0      | 1     | 5      | 5      | 1      | 2      | 5     |
| 15840  | 0     | 1      |       | 4      | 4      | 5      | 4      | 4     |
| 15844  | 0     | 1      |       | 5      | 5      | 5      | 5      | 5     |
| 15845  | 0     | 0      | 4     | 6      | 6      | 6      | 6      | 6     |
| 15847  | 0     | 0      | 3     | 4      | 4      | 4      | 4      | 4     |
| 15848  | 0     | 0      | 4     | 5      | 5      | 6      | 6      | 6     |
| 15849  | 0     | 0      | 2     | 5      | 5      | 5      | 5      | 4     |
| 15857  | 0     | 0      | 3     | 4      | 4      | 4      | 4      | 4     |
| 15858  | 0     | 0      | 4     | 5      | 5      | 1      | 2      | 5     |
| 15862  | 0     | 0      | 4     | 2      | 1      | 4      | 5      | 3     |
| 15866  | 0     | 1      |       | 4      | 4      | 4      | 4      | 4     |
| 15870  | 0     | 1      |       | 4      | 4      | 4      | 4      | 4     |
| 15871  | 0     | 1      |       | 5      | 5      | 1      | 1      | 5     |
| 15872  | 0     | 0      | 4     | 5      | 5      | 2      | 1      | 4     |
| 15873  | 0     | 1      |       | 5      | 5      | 2      | 2      | 5     |
| 15874  |       |        |       |        |        |        |        |       |
| 15875  | 0     | 0      | 3     | 3      | 3      | 3      | 3      | 2     |
| 15876  | 0     | 0      | 3     | 3      | 3      | 4      | 4      | 3     |
| 15882  | 1     | 0      | 3     | 3      | 3      | 3      | 3      | 3     |
| 15884  | 1     | 0      | 2     | 4      | 5      | 3      | 2      | 4     |
| 15890  | 0     | 0      | 3     | 5      | 4      | 1      | 1      | 5     |
| 15892  | 1     | 0      | 4     | 4      | 4      | 5      | 5      | 3     |
| 15908  | 0     | 0      | 3     | 5      | 5      | 2      | 1      | 5     |

| respid | Q43_9 | Q43_99 | Q44_1 | Q46x1a | Q46x1b | Q46x2a | Q46x2b | Q46x3 |
|--------|-------|--------|-------|--------|--------|--------|--------|-------|
| 15914  | 0     | 1      |       | 4      | 4      | 5      | 4      | 4     |
| 15932  | 0     | 1      |       | 5      | 3      | 3      | 3      | 3     |
| 15933  | 0     | 0      | 4     | 5      | 5      | 1      | 6      | 5     |
| 15938  | 0     | 1      |       | 4      | 4      | 2      | 2      | 4     |
| 15940  | 0     | 0      | 4     | 2      | 4      | 1      | 2      | 2     |
| 15945  | 0     | 1      |       | 4      | 4      | 4      | 4      | 4     |
| 15947  | 0     | 1      |       | 5      | 4      | 1      | 1      | 5     |
| 15950  | 0     | 1      |       | 4      | 4      | 4      | 4      | 4     |
| 15951  | 0     | 0      | 3     | 4      | 5      | 5      | 5      | 4     |
| 15952  | 0     | 0      | 3     | 4      | 3      | 3      | 3      | 3     |
| 15953  | 0     | 1      |       | 5      | 4      | 5      | 2      | 4     |
| 15954  | 0     | 0      | 1     | 4      | 4      | 3      | 3      | 4     |
| 15957  | 0     | 0      | 1     | 2      | 2      | 2      | 2      | 2     |
| 15965  | 0     | 0      | 3     | 3      | 2      | 3      | 2      | 2     |
| 15966  |       |        |       |        |        |        |        |       |
| 15967  | 0     | 0      | 4     | 5      | 5      | 1      | 2      | 5     |
| 15968  | 0     | 0      | 2     | 5      | 5      | 1      | 2      | 4     |
| 15970  | 0     | 1      |       | 6      | 6      | 1      | 1      | 5     |
| 15973  | 0     | 1      |       | 4      | 5      | 4      | 5      | 4     |
| 15974  | 0     | 1      |       | 4      | 4      | 4      | 4      | 4     |
| 15975  |       |        |       |        |        |        |        |       |
| 15980  | 0     | 0      | 2     | 2      | 2      | 3      | 1      | 1     |
| 15984  | 0     | 0      | 3     | 5      | 5      | 1      | 1      | 5     |
| 15985  | 0     | 0      | 2     | 3      | 3      | 4      | 4      | 3     |
| 15994  |       |        |       |        |        |        |        |       |
| 15995  | 0     | 1      |       | 5      | 5      | 5      | 5      | 5     |
| 16000  | 0     | 0      | 3     | 5      | 5      | 1      | 1      | 5     |
| 16004  | 0     | 1      |       | 5      | 4      | 5      | 4      | 4     |
| 16005  | 0     | 1      |       | 4      | 4      | 5      | 4      | 4     |
| 16006  |       |        |       |        |        |        |        |       |
| 16009  | 0     | 1      |       | 5      | 5      | 1      | 1      | 5     |
| 16017  | 0     | 1      |       | 5      | 6      | 5      | 5      | 5     |



| respid | Q43_9 | Q43_99 | Q44_1 | Q46x1a | Q46x1b | Q46x2a | Q46x2b | Q46x3 |
|--------|-------|--------|-------|--------|--------|--------|--------|-------|
| 16019  | 0     | 1      |       | 4      | 5      | 2      | 1      | 4     |
| 16021  | 0     | 1      |       | 5      | 5      | 5      | 5      | 5     |
| 16024  | 0     | 1      |       | 6      | 6      | 5      | 6      | 5     |
| 16026  | 0     | 0      | 3     | 5      | 5      | 5      | 5      | 5     |
| 16029  |       |        |       |        |        |        |        |       |
| 16031  | 0     | 0      | 3     | 4      | 4      | 1      | 1      | 4     |
| 16037  | 0     | 1      |       | 5      | 5      | 1      | 1      | 5     |
| 16043  | 0     | 0      | 4     | 5      | 5      | 5      | 5      | 5     |
| 16044  | 0     | 1      |       | 6      | 6      | 5      | 5      | 5     |
| 16047  | 0     | 0      | 3     | 5      | 5      | 4      | 5      | 5     |
| 16048  | 0     | 0      | 4     | 6      | 6      | 5      | 5      | 6     |
| 16049  | 0     | 1      |       | 5      | 5      | 6      | 6      | 6     |
| 16051  | 0     | 1      |       | 6      | 6      | 6      | 6      | 6     |
| 16053  | 0     | 0      | 3     | 5      | 5      | 1      | 1      | 5     |
| 16054  | 0     | 0      | 3     | 5      | 5      | 3      | 3      | 5     |
| 16069  | 0     | 1      |       | 5      | 5      | 3      | 3      | 5     |
| 16070  | 0     | 1      |       | 5      | 5      | 1      | 1      | 5     |
| 16074  |       |        |       |        |        |        |        |       |
| 16076  |       |        |       |        |        |        |        |       |
| 16078  |       |        |       |        |        |        |        |       |
| 16081  | 0     | 1      |       | 5      | 5      | 3      | 4      | 5     |
| 16085  |       |        |       |        |        |        |        |       |
| 16088  | 0     | 0      | 4     | 5      | 5      | 5      | 5      | 5     |
| 16091  | 0     | 0      | 5     | 5      | 5      | 1      | 1      | 1     |
| 16092  | 0     | 1      |       | 5      | 6      | 6      | 6      | 6     |
| 16093  | 0     | 1      |       | 6      | 6      | 6      | 6      | 6     |
| 16097  | 0     | 1      |       | 4      | 4      | 5      | 5      | 5     |
| 16100  | 0     | 1      |       | 4      | 4      | 4      | 6      | 4     |
| 16101  | 0     | 1      |       | 6      | 6      | 6      | 6      | 6     |
| 16105  |       |        |       |        |        |        |        |       |
| 16118  | 0     | 0      | 3     | 2      | 3      | 3      | 3      | 3     |
| 16129  | 0     | 1      |       | 6      | 6      | 5      | 5      | 5     |

| respid | Q43_9 | Q43_99 | Q44_1 | Q46x1a | Q46x1b | Q46x2a | Q46x2b | Q46x3 |
|--------|-------|--------|-------|--------|--------|--------|--------|-------|
| 16130  | 0     | 0      | 3     | 6      | 5      | 1      | 1      | 5     |
| 16131  | 0     | 0      | 5     | 4      | 4      | 4      | 4      | 4     |
| 16136  | 0     | 1      |       | 5      | 5      | 5      | 5      | 5     |
| 16137  | 0     | 0      | 3     | 6      | 6      | 1      | 1      | 4     |
| 16138  | 0     | 1      |       | 5      | 5      | 2      | 2      | 4     |
| 16139  | 0     | 1      |       | 6      | 6      | 6      | 6      | 6     |
| 16140  | 0     | 1      |       | 5      | 5      | 5      | 5      | 5     |
| 16145  | 0     | 0      | 3     | 5      | 5      | 5      | 5      | 5     |
| 16150  | 0     | 0      | 2     | 5      | 5      | 1      | 2      | 5     |
| 16151  | 0     | 1      |       | 5      | 5      | 4      | 5      | 5     |
| 16153  | 0     | 1      |       | 5      | 5      | 5      | 5      | 5     |
| 16164  | 0     | 0      | 4     | 5      | 5      | 1      | 1      | 5     |
| 16168  | 0     | 0      | 2     | 3      | 4      | 4      | 4      | 4     |
| 16173  | 0     | 0      | 2     | 3      | 4      | 3      | 3      | 4     |
| 16174  | 0     | 1      |       | 6      | 6      | 6      | 6      | 6     |
| 16177  | 0     | 1      |       | 4      | 4      | 4      | 6      | 4     |
| 16185  | 0     | 0      | 3     | 6      | 6      | 5      | 5      | 5     |
| 16189  | 0     | 0      | 3     | 5      | 5      | 3      | 3      | 5     |
| 16192  | 0     | 1      |       | 4      | 5      | 2      | 1      | 5     |
| 16193  | 0     | 1      |       | 4      | 4      | 4      | 4      | 4     |
| 16194  | 0     | 1      |       | 4      | 4      | 5      | 4      | 4     |
| 16196  |       |        |       |        |        |        |        |       |
| 16202  | 0     | 0      | 3     | 4      | 4      | 3      | 3      | 4     |
| 16205  | 0     | 0      | 1     | 4      | 4      | 4      | 4      | 3     |
| 16206  | 0     | 1      |       | 4      | 6      | 4      | 3      | 4     |
| 16208  |       |        |       |        |        |        |        |       |
| 16211  | 0     | 0      | 3     | 4      | 6      | 2      | 4      | 3     |
| 16212  | 0     | 1      |       | 6      | 6      | 6      | 6      | 5     |
| 16215  |       |        |       |        |        |        |        |       |
| 16217  | 0     | 1      |       | 6      | 6      | 6      | 6      | 5     |
| 16221  | 0     | 0      | 3     | 4      | 4      | 1      | 1      | 4     |
| 16226  | 0     | 0      | 3     | 6      | 6      | 5      | 2      | 5     |

| respid | Q43_9 | Q43_99 | Q44_1 | Q46x1a | Q46x1b | Q46x2a | Q46x2b | Q46x3 |
|--------|-------|--------|-------|--------|--------|--------|--------|-------|
| 16228  | 0     | 0      | 3     | 4      | 4      | 5      | 4      | 4     |
| 16229  | 0     | 1      |       | 4      | 4      | 1      | 1      | 4     |
| 16230  | 0     | 1      |       | 6      | 6      | 6      | 6      | 6     |
| 16231  | 0     | 0      | 1     | 5      | 5      | 1      | 1      | 4     |
| 16232  | 0     | 0      | 3     | 4      | 4      | 1      | 1      | 4     |
| 16234  | 0     | 0      | 2     | 4      | 4      | 2      | 2      | 4     |
| 16235  | 0     | 0      | 3     | 2      | 2      | 3      | 3      | 3     |
| 16236  | 0     | 0      | 3     | 6      | 6      | 6      | 6      | 5     |
| 16237  | 0     | 0      | 3     | 6      | 6      | 1      | 2      | 5     |
| 16238  | 0     | 0      | 2     | 4      | 4      | 4      | 4      | 4     |
| 16239  | 0     | 0      | 4     | 6      | 6      | 6      | 6      | 6     |
| 16243  | 0     | 1      |       | 5      | 5      | 1      | 1      | 5     |
| 16248  | 0     | 1      |       | 4      | 4      | 1      | 1      | 4     |
| 16249  | 0     | 0      | 0     | 6      | 6      | 6      | 6      | 6     |
| 16251  |       |        |       |        |        |        |        |       |
| 16263  | 0     | 1      |       | 5      | 5      | 5      | 5      | 5     |
| 16265  | 0     | 0      | 3     | 5      | 4      | 5      | 5      | 4     |
| 16269  | 0     | 1      |       | 5      | 5      | 1      | 1      | 4     |
| 16272  | 0     | 1      |       | 4      | 4      | 1      | 1      | 4     |
| 16273  |       |        |       |        |        |        |        |       |
| 16281  | 0     | 1      |       | 5      | 5      | 5      | 5      | 5     |
| 16282  | 0     | 1      |       | 6      | 6      | 2      | 5      | 5     |
| 16287  | 0     | 1      |       | 6      | 6      | 1      | 1      | 6     |
| 16290  | 0     | 1      |       | 5      | 5      | 5      | 5      | 5     |
| 16294  | 0     | 1      |       | 5      | 5      | 1      | 2      | 5     |
| 16295  | 0     | 1      |       | 5      | 5      | 3      | 3      | 4     |
| 16296  | 0     | 1      |       | 6      | 6      | 6      | 6      | 6     |
| 16299  | 0     | 0      | 1     | 2      | 2      | 2      | 3      | 3     |
| 16302  | 0     | 1      |       | 5      | 5      | 5      | 5      | 5     |
| 16303  | 0     | 0      | 3     | 5      | 5      | 5      | 5      | 5     |
| 16304  | 0     | 0      | 1     | 1      | 1      | 3      | 4      | 5     |
| 16306  | 0     | 1      |       | 6      | 6      | 6      | 6      | 6     |

| respid | Q43_9 | Q43_99 | Q44_1 | Q46x1a | Q46x1b | Q46x2a | Q46x2b | Q46x3 |
|--------|-------|--------|-------|--------|--------|--------|--------|-------|
| 16318  | 0     | 0      | 3     | 4      | 4      | 2      | 2      | 3     |
| 16320  | 0     | 0      | 3     | 5      | 4      | 3      | 3      | 4     |
| 16321  | 0     | 1      |       | 4      | 4      | 1      | 1      | 5     |
| 16322  | 0     | 1      |       | 4      | 4      | 5      | 1      | 5     |
| 16324  | 0     | 1      |       | 1      | 1      | 4      | 4      | 3     |
| 16326  | 0     | 0      | 3     | 6      | 6      | 5      | 5      | 5     |
| 16328  | 0     | 0      | 3     | 4      | 4      | 3      | 4      | 4     |
| 16336  | 0     | 0      | 3     | 4      | 4      | 2      | 2      | 4     |
| 16341  | 0     | 0      | 3     | 5      | 5      | 6      | 6      | 5     |
| 16342  | 0     | 1      |       | 5      | 5      | 6      | 6      | 6     |
| 16343  | 0     | 1      |       | 6      | 6      | 4      | 4      | 3     |
| 16345  | 1     | 0      | 2     | 4      | 4      | 3      | 4      | 4     |
| 16349  | 0     | 0      | 2     | 5      | 5      | 6      | 5      | 5     |
| 16355  | 0     | 1      |       | 6      | 6      | 6      | 6      | 6     |
| 16364  | 0     | 0      | 2     | 4      | 4      | 4      | 4      | 4     |
| 16374  | 0     | 1      |       | 5      | 5      | 1      | 1      | 5     |
| 16375  |       |        |       |        |        |        |        |       |
| 16376  | 0     | 0      | 2     | 3      | 3      | 4      | 4      | 4     |
| 16393  | 0     | 1      |       | 4      | 4      | 5      | 4      | 4     |
| 16394  | 0     | 0      | 2     | 4      | 3      | 2      | 2      | 3     |
| 16395  | 0     | 1      |       | 5      | 5      | 1      | 1      | 5     |
| 16397  | 0     | 0      | 3     | 3      | 1      | 3      | 4      | 1     |
| 16398  | 0     | 0      | 2     | 4      | 3      | 4      | 3      | 4     |
| 16402  | 0     | 1      |       | 5      | 5      | 1      | 1      | 5     |
| 16405  | 0     | 1      |       | 5      | 5      | 5      | 5      | 4     |
| 16416  | 0     | 1      |       | 6      | 6      | 6      | 6      | 6     |
| 16422  | 0     | 0      | 1     | 3      | 3      | 3      | 3      | 3     |
| 16429  | 0     | 1      |       | 5      | 5      | 1      | 2      | 4     |
| 16430  | 0     | 1      |       | 5      | 5      | 5      | 4      | 5     |
| 16432  | 0     | 0      | 2     | 3      | 4      | 3      | 4      | 4     |
| 16433  | 0     | 1      |       | 6      | 6      | 6      | 6      | 6     |
| 16434  |       |        |       |        |        |        |        |       |

| respid | Q43_9 | Q43_99 | Q44_1 | Q46x1a | Q46x1b | Q46x2a | Q46x2b | Q46x3 |
|--------|-------|--------|-------|--------|--------|--------|--------|-------|
| 16437  | 0     | 1      |       | 4      | 6      | 6      | 4      | 6     |
| 16439  | 0     | 1      |       | 5      | 5      | 1      | 1      | 5     |
| 16440  | 0     | 1      |       | 4      | 5      | 2      | 2      | 4     |
| 16441  | 0     | 0      | 2     | 3      | 4      | 5      | 3      | 3     |
| 16442  | 0     | 1      |       | 6      | 6      | 6      | 6      | 6     |
| 16450  | 0     | 1      |       | 5      | 4      | 5      | 5      | 5     |
| 16451  | 0     | 1      |       | 6      | 5      | 5      | 5      | 4     |
| 16452  | 0     | 0      | 2     | 5      | 5      | 5      | 5      | 5     |
| 16467  | 0     | 1      |       | 5      | 5      | 1      | 1      | 5     |
| 16468  |       |        |       |        |        |        |        |       |
| 16469  | 0     | 1      |       | 4      | 5      | 2      | 2      | 5     |
| 16470  |       |        |       |        |        |        |        |       |
| 16471  | 0     | 1      |       | 6      | 6      | 6      | 6      | 6     |
| 16473  | 0     | 1      |       | 6      | 6      | 6      | 6      | 6     |
| 16476  | 0     | 0      | 4     | 4      | 4      | 6      | 6      | 6     |
| 16478  | 0     | 1      |       | 5      | 5      | 5      | 6      | 5     |
| 16484  | 0     | 1      |       | 5      | 5      | 5      | 5      | 5     |
| 16499  | 0     | 0      | 3     | 5      | 5      | 5      | 5      | 5     |
| 16502  |       |        |       |        |        |        |        |       |
| 16505  | 0     | 1      |       | 5      | 5      | 5      | 5      | 5     |
| 16514  | 0     | 1      |       | 5      | 5      | 1      | 2      | 5     |
| 16515  | 0     | 0      | 3     | 4      | 4      | 4      | 4      | 4     |
| 16517  | 0     | 1      |       | 4      | 4      | 4      | 4      | 4     |
| 16518  | 0     | 1      |       | 5      | 5      | 5      | 5      | 5     |
| 16519  | 0     | 1      |       | 1      | 4      | 3      | 4      | 3     |
| 16525  | 0     | 1      |       | 6      | 6      | 6      | 6      | 6     |
| 16526  | 0     | 0      | 5     | 5      | 4      | 1      | 1      | 4     |
| 16530  | 0     | 1      |       | 5      | 5      | 5      | 5      | 5     |
| 16532  | 0     | 1      |       | 5      | 5      | 5      | 5      | 5     |
| 16536  | 0     | 0      | 5     | 5      | 5      | 1      | 1      | 5     |
| 16537  | 0     | 0      | 2     | 4      | 3      | 4      | 3      | 4     |
| 16541  | 0     | 0      | 2     | 3      | 4      | 3      | 4      | 4     |

| respid | Q43_9 | Q43_99 | Q44_1 | Q46x1a | Q46x1b | Q46x2a | Q46x2b | Q46x3 |
|--------|-------|--------|-------|--------|--------|--------|--------|-------|
| 16543  | 0     | 1      |       | 5      | 5      | 6      | 6      | 6     |
| 16544  | 0     | 1      |       | 4      | 4      | 2      | 2      | 4     |
| 16545  | 0     | 1      |       | 5      | 5      | 1      | 1      | 4     |
| 16546  | 0     | 0      | 3     | 3      | 3      | 3      | 3      | 3     |
| 16548  | 0     | 1      |       | 6      | 6      | 5      | 5      | 5     |
| 16552  | 0     | 1      |       | 6      | 6      | 2      | 2      | 3     |
| 16559  | 0     | 1      |       | 5      | 5      | 5      | 5      | 5     |
| 16564  | 0     | 0      | 4     | 6      | 6      | 6      | 6      | 4     |
| 16565  | 0     | 0      | 1     | 2      | 3      | 3      | 1      | 2     |
| 16567  | 0     | 0      | 2     | 4      | 4      | 2      | 2      | 4     |
| 16571  |       |        |       |        |        |        |        |       |
| 16572  | 0     | 0      | 3     | 4      | 4      | 2      | 2      | 4     |
| 16579  | 0     | 1      |       | 5      | 4      | 2      | 1      | 2     |
| 16588  | 0     | 0      | 1     | 2      | 3      | 3      | 4      | 3     |
| 16599  | 0     | 1      |       | 6      | 6      | 6      | 6      | 6     |
| 16605  | 0     | 0      | 3     | 4      | 4      | 4      | 4      | 4     |
| 16622  | 0     | 1      |       | 6      | 6      | 6      | 6      | 6     |
| 16635  | 0     | 0      | 2     | 4      | 4      | 4      | 4      | 5     |
| 16638  | 0     | 1      |       | 6      | 6      | 6      | 6      | 6     |
| 16652  | 0     | 0      | 3     | 3      | 3      | 3      | 3      | 5     |
| 16656  | 0     | 1      |       | 6      | 6      | 6      | 6      | 6     |
| 16671  |       |        |       |        |        |        |        |       |
| 16676  | 0     | 1      |       | 6      | 6      | 6      | 6      | 6     |
| 16678  | 0     | 0      | 2     | 3      | 2      | 3      | 3      | 3     |
| 16702  | 0     | 0      | 3     | 4      | 4      | 1      | 1      | 4     |
| 16705  | 0     | 0      | 3     | 4      | 4      | 3      | 3      | 4     |
| 16707  | 0     | 0      | 3     | 2      | 3      | 4      | 3      | 2     |
| 16711  | 0     | 0      | 3     | 6      | 6      | 6      | 6      | 6     |
| 16712  | 0     | 0      | 5     | 6      | 6      | 6      | 6      | 6     |
| 16716  |       |        |       |        |        |        |        |       |
| 16724  | 0     | 1      |       | 4      | 4      | 2      | 2      | 4     |
| 16727  | 0     | 0      | 2     | 6      | 6      | 6      | 6      | 6     |

| respid | Q43_9 | Q43_99 | Q44_1 | Q46x1a | Q46x1b | Q46x2a | Q46x2b | Q46x3 |
|--------|-------|--------|-------|--------|--------|--------|--------|-------|
| 16734  | 0     | 0      | 2     | 5      | 5      | 5      | 5      | 4     |
| 16740  | 0     | 1      |       | 5      | 5      | 2      | 2      | 4     |
| 16748  | 0     | 1      |       | 4      | 4      | 2      | 2      | 4     |
| 16759  | 0     | 1      |       | 6      | 6      | 6      | 6      | 6     |
| 16761  |       |        |       |        |        |        |        |       |
| 16763  | 0     | 1      |       | 4      | 4      | 1      | 1      | 4     |
| 16764  | 1     | 0      | 3     | 3      | 3      | 3      | 3      | 3     |
| 16766  | 0     | 1      |       | 5      | 4      | 2      | 2      | 4     |
| 16767  | 0     | 1      |       | 5      | 5      | 2      | 6      | 5     |
| 16776  | 0     | 1      |       | 5      | 6      | 5      | 5      | 5     |
| 16781  | 0     | 0      | 2     | 5      | 5      | 1      | 1      | 5     |
| 16793  | 0     | 1      |       | 4      | 4      | 4      | 4      | 4     |
| 16796  | 1     | 0      | 2     | 3      | 3      | 2      | 3      | 2     |
| 16810  | 0     | 1      |       | 5      | 4      | 1      | 2      | 4     |
| 16811  | 0     | 0      | 2     | 4      | 4      | 2      | 2      | 4     |
| 16813  |       |        |       |        |        |        |        |       |
| 16814  | 0     | 0      | 1     | 4      | 5      | 1      | 2      | 5     |
| 16831  | 0     | 0      | 2     | 6      | 6      | 6      | 6      | 6     |
| 16833  | 0     | 0      | 2     | 6      | 6      | 6      | 6      | 6     |
| 16839  | 0     | 1      |       | 4      | 4      | 1      | 2      | 4     |
| 16843  | 0     | 0      | 3     | 4      | 4      | 2      | 2      | 4     |
| 16860  |       |        |       |        |        |        |        |       |
| 16871  | 0     | 1      |       | 6      | 6      | 6      | 6      | 6     |
| 16881  | 0     | 0      | 2     | 4      | 4      | 4      | 4      | 4     |
| 16884  | 0     | 1      |       | 3      | 4      | 2      | 2      | 4     |
| 16891  | 0     | 0      | 3     | 5      | 5      | 5      | 5      | 4     |
| 16909  | 0     | 1      |       | 5      | 5      | 5      | 5      | 5     |
| 16911  |       |        |       |        |        |        |        |       |
| 16922  | 0     | 0      | 2     | 3      | 3      | 4      | 4      | 4     |
| 16935  | 0     | 0      | 3     | 4      | 4      | 3      | 4      | 4     |
| 16942  | 0     | 1      |       | 5      | 5      | 5      | 5      | 5     |
| 16950  |       |        |       |        |        |        |        |       |

| respid | Q43_9 | Q43_99 | Q44_1 | Q46x1a | Q46x1b | Q46x2a | Q46x2b | Q46x3 |
|--------|-------|--------|-------|--------|--------|--------|--------|-------|
| 16952  | 0     | 0      | 3     | 3      | 3      | 2      | 3      | 3     |
| 16963  | 0     | 1      |       | 5      | 5      | 1      | 2      | 5     |
| 16967  | 0     | 0      | 3     | 3      | 4      | 4      | 4      | 3     |
| 16970  | 0     | 0      | 2     | 1      | 3      | 4      | 2      | 2     |
| 16976  | 1     | 0      | 3     | 4      | 3      | 2      | 2      | 4     |
| 16982  | 0     | 0      | 3     | 5      | 5      | 5      | 5      | 5     |
| 16995  | 0     | 1      |       | 6      | 6      | 6      | 6      | 6     |
| 17004  | 0     | 0      | 2     | 4      | 4      | 3      | 3      | 3     |
| 17006  | 0     | 1      |       | 5      | 5      | 1      | 1      | 4     |
| 17009  | 0     | 1      |       | 6      | 6      | 6      | 6      | 6     |
| 17021  |       |        |       |        |        |        |        |       |
| 17040  | 0     | 0      | 3     | 5      | 4      | 3      | 2      | 3     |
| 17041  |       |        |       |        |        |        |        |       |
| 17044  | 0     | 1      |       | 5      | 5      | 1      | 1      | 5     |
| 17046  | 0     | 0      | 2     | 2      | 2      | 2      | 2      | 2     |
| 17052  | 0     | 0      | 3     | 4      | 5      | 2      | 2      | 5     |
| 17055  | 0     | 1      |       | 5      | 5      | 5      | 5      | 5     |
| 17108  | 0     | 0      | 3     | 6      | 6      | 5      | 5      | 5     |
| 17109  | 0     | 0      | 4     | 4      | 4      | 6      | 6      | 4     |
| 17113  |       |        |       |        |        |        |        |       |
| 17115  | 0     | 1      |       | 4      | 5      | 2      | 2      | 4     |
| 17132  |       |        |       |        |        |        |        |       |
| 17135  | 1     | 0      | 3     | 4      | 4      | 2      | 2      | 2     |
| 17138  | 0     | 0      | 3     | 6      | 6      | 6      | 6      | 4     |
| 17141  | 0     | 1      |       | 5      | 5      | 5      | 5      | 5     |
| 17143  | 0     | 0      | 2     | 5      | 4      | 2      | 1      | 4     |
| 17148  | 0     | 0      | 3     | 5      | 5      | 5      | 5      | 5     |
| 17151  | 0     | 1      |       | 4      | 4      | 1      | 1      | 5     |
| 17153  | 0     | 1      |       | 5      | 5      | 1      | 1      | 4     |
| 17154  | 0     | 0      | 3     | 5      | 5      | 2      | 2      | 5     |
| 17157  | 0     | 1      |       | 6      | 6      | 3      | 2      | 4     |
| 17160  | 0     | 1      |       | 5      | 5      | 1      | 1      | 5     |



| respid | Q43_9 | Q43_99 | Q44_1 | Q46x1a | Q46x1b | Q46x2a | Q46x2b | Q46x3 |
|--------|-------|--------|-------|--------|--------|--------|--------|-------|
| 17167  | 0     | 0      | 2     | 4      | 4      | 2      | 2      | 4     |
| 17169  | 0     | 0      | 5     | 5      | 5      | 5      | 5      | 4     |
| 17174  | 0     | 0      | 4     | 3      | 3      | 3      | 3      | 3     |
| 17179  | 0     | 1      |       | 5      | 4      | 2      | 2      | 3     |
| 17180  | 0     | 1      |       | 4      | 4      | 2      | 2      | 4     |
| 17182  | 0     | 1      |       | 5      | 5      | 1      | 1      | 5     |
| 17184  | 0     | 0      | 3     | 5      | 5      | 5      | 5      | 4     |
| 17186  | 0     | 1      |       | 5      | 5      | 5      | 5      | 5     |
| 17187  | 0     | 1      |       | 5      | 5      | 1      | 1      | 5     |
| 17192  | 0     | 1      |       | 4      | 3      | 1      | 1      | 3     |
| 17197  | 0     | 0      | 4     | 5      | 5      | 5      | 5      | 5     |
| 17217  | 0     | 1      |       | 6      | 6      | 6      | 6      | 6     |
| 17226  | 0     | 0      | 1     | 4      | 5      | 5      | 5      | 5     |
| 17228  | 0     | 1      |       | 5      | 5      | 5      | 5      | 5     |
| 17245  | 0     | 1      |       | 5      | 5      | 5      | 5      | 5     |
| 17247  |       |        |       |        |        |        |        |       |
| 17258  | 0     | 1      |       | 5      | 5      | 2      | 2      | 5     |
| 17259  | 0     | 0      | 3     | 4      | 4      | 4      | 4      | 4     |
| 17262  | 0     | 1      |       | 5      | 5      | 5      | 5      | 5     |
| 17265  | 0     | 0      | 3     | 6      | 6      | 6      | 6      | 6     |
| 17281  | 0     | 0      | 4     | 4      | 4      | 4      | 4      | 4     |
| 17282  | 0     | 0      | 3     | 3      | 4      | 1      | 2      | 4     |
| 17293  | 0     | 1      |       | 6      | 6      | 1      | 4      | 6     |
| 17306  | 0     | 0      | 3     | 3      | 3      | 3      | 3      | 3     |
| 17312  | 0     | 1      |       | 4      | 5      | 5      | 5      | 4     |
| 17318  | 0     | 0      | 3     | 4      | 4      | 4      | 4      | 4     |
| 17328  | 0     | 0      | 3     | 5      | 4      | 2      | 2      | 4     |
| 17343  | 0     | 0      | 3     | 5      | 5      | 5      | 5      | 5     |
| 17344  | 0     | 1      |       | 5      | 5      | 5      | 5      | 5     |
| 17348  | 0     | 1      |       | 5      | 5      | 1      | 1      | 4     |
| 17352  | 0     | 0      | 3     | 5      | 5      | 5      | 5      | 5     |
| 17355  | 0     | 0      | 3     | 6      | 6      | 6      | 6      | 5     |

| respid | Q43_9 | Q43_99 | Q44_1 | Q46x1a | Q46x1b | Q46x2a | Q46x2b | Q46x3 |
|--------|-------|--------|-------|--------|--------|--------|--------|-------|
| 17356  | 0     | 1      |       | 6      | 6      | 3      | 3      | 3     |
| 17359  | 0     | 0      | 2     | 6      | 6      | 4      | 4      | 4     |
| 17373  | 0     | 0      | 2     | 4      | 3      | 3      | 4      | 3     |
| 17381  | 0     | 1      |       | 5      | 5      | 5      | 5      | 4     |
| 17388  | 0     | 1      |       | 4      | 4      | 3      | 2      | 4     |
| 17394  | 0     | 0      | 3     | 5      | 4      | 4      | 5      | 4     |
| 17401  |       |        |       |        |        |        |        |       |
| 17403  | 0     | 1      |       | 6      | 6      | 6      | 6      | 6     |
| 17411  |       |        |       |        |        |        |        |       |
| 17423  | 0     | 1      |       | 4      | 4      | 6      | 6      | 5     |
| 17427  |       |        |       |        |        |        |        |       |
| 17433  | 0     | 0      | 4     | 5      | 5      | 5      | 5      | 3     |
| 17441  | 0     | 1      |       | 5      | 5      | 5      | 5      | 5     |
| 17442  | 0     | 1      |       | 5      | 5      | 1      | 1      | 5     |
| 17447  | 0     | 0      | 4     | 5      | 5      | 5      | 5      | 5     |
| 17458  | 0     | 1      |       | 6      | 6      | 6      | 6      | 6     |
| 17474  | 0     | 1      |       | 5      | 5      | 4      | 4      | 4     |
| 17475  | 1     | 0      | 2     | 6      | 6      | 6      | 6      | 6     |
| 17476  | 0     | 0      | 3     | 4      | 4      | 2      | 2      | 4     |
| 17480  | 0     | 1      |       | 5      | 5      | 5      | 5      | 5     |
| 17484  | 0     | 1      |       | 5      | 5      | 5      | 5      | 5     |
| 17490  | 0     | 1      |       | 6      | 6      | 5      | 5      | 5     |
| 17491  | 0     | 1      |       | 6      | 6      | 6      | 6      | 6     |
| 17500  | 0     | 1      |       | 4      | 4      | 5      | 2      | 4     |
| 17507  | 0     | 1      |       | 5      | 5      | 6      | 6      | 5     |
| 17517  | 0     | 0      | 4     | 6      | 6      | 1      | 3      | 4     |
| 17520  | 0     | 1      |       | 3      | 4      | 2      | 2      | 3     |
| 17521  | 0     | 1      |       | 6      | 6      | 1      | 2      | 6     |
| 17531  | 0     | 1      |       | 5      | 5      | 5      | 5      | 5     |
| 17540  | 0     | 1      |       | 4      | 6      | 6      | 6      | 4     |
| 17550  | 0     | 1      |       | 6      | 5      | 6      | 6      | 6     |
| 17551  | 0     | 1      |       | 4      | 4      | 6      | 4      | 4     |

| respid | Q43_9 | Q43_99 | Q44_1 | Q46x1a | Q46x1b | Q46x2a | Q46x2b | Q46x3 |
|--------|-------|--------|-------|--------|--------|--------|--------|-------|
| 17555  | 1     | 0      | 3     | 4      | 3      | 4      | 4      | 4     |
| 17556  | 0     | 0      | 4     | 6      | 5      | 4      | 4      | 5     |
| 17574  | 0     | 0      | 3     | 5      | 5      | 5      | 5      | 5     |
| 17575  | 0     | 1      |       | 5      | 5      | 6      | 5      | 4     |
| 17582  | 0     | 1      |       | 6      | 6      | 5      | 5      | 5     |
| 17587  |       |        |       |        |        |        |        |       |
| 17601  | 0     | 1      |       | 5      | 5      | 5      | 5      | 5     |
| 17607  | 0     | 0      | 3     | 4      | 4      | 4      | 4      | 4     |
| 17609  | 0     | 1      |       | 5      | 5      | 5      | 5      | 5     |
| 17611  | 0     | 1      |       | 5      | 5      | 5      | 5      | 5     |
| 17613  | 0     | 1      |       | 6      | 6      | 6      | 6      | 6     |
| 17615  | 0     | 0      | 5     | 6      | 6      | 6      | 6      | 6     |
| 17620  | 0     | 1      |       | 5      | 5      | 1      | 1      | 4     |
| 17624  | 0     | 1      |       | 4      | 4      | 4      | 4      | 4     |
| 17635  | 0     | 1      |       | 3      | 3      | 4      | 6      | 5     |
| 17643  | 0     | 1      |       | 5      | 5      | 4      | 4      | 3     |
| 17645  | 0     | 0      | 3     | 6      | 6      | 6      | 6      | 6     |
| 17646  | 0     | 1      |       | 5      | 5      | 5      | 5      | 5     |
| 17649  | 0     | 1      |       | 5      | 5      | 4      | 5      | 5     |
| 17658  | 0     | 1      |       | 5      | 5      | 4      | 5      | 5     |
| 17666  |       |        |       |        |        |        |        |       |
| 17670  | 0     | 1      |       | 6      | 5      | 1      | 1      | 5     |
| 17678  | 0     | 1      |       | 6      | 6      | 2      | 2      | 4     |
| 17679  | 0     | 0      | 3     | 4      | 4      | 5      | 2      | 4     |
| 17695  | 0     | 1      |       | 5      | 5      | 5      | 5      | 5     |
| 17697  | 0     | 1      |       | 6      | 6      | 2      | 4      | 4     |
| 17698  | 0     | 0      | 2     | 3      | 4      | 4      | 4      | 3     |
| 17723  | 0     | 0      | 4     | 3      | 3      | 3      | 3      | 4     |
| 17727  | 0     | 1      |       | 6      | 6      | 6      | 6      | 5     |
| 17734  | 0     | 1      |       | 6      | 6      | 6      | 6      | 6     |
| 17737  | 0     | 1      |       | 6      | 6      | 6      | 6      | 6     |
| 17748  | 0     | 1      |       | 5      | 5      | 5      | 5      | 5     |

| respid | Q43_9 | Q43_99 | Q44_1 | Q46x1a | Q46x1b | Q46x2a | Q46x2b | Q46x3 |
|--------|-------|--------|-------|--------|--------|--------|--------|-------|
| 17749  |       |        |       |        |        |        |        |       |
| 17754  | 0     | 0      | 4     | 5      | 4      | 4      | 5      | 4     |
| 17766  | 0     | 0      | 3     | 2      | 2      | 3      | 3      | 3     |
| 17777  | 0     | 0      | 3     | 5      | 5      | 5      | 5      | 4     |
| 17780  | 0     | 0      | 3     | 5      | 5      | 5      | 5      | 5     |
| 17788  | 0     | 0      | 4     | 5      | 5      | 1      | 1      | 5     |
| 17801  | 0     | 1      |       | 4      | 4      | 5      | 5      | 5     |
| 17803  | 0     | 1      |       | 5      | 5      | 2      | 2      | 5     |
| 17807  | 0     | 1      |       | 6      | 6      | 6      | 6      | 5     |
| 17808  | 0     | 1      |       | 6      | 6      | 6      | 6      | 6     |
| 17809  | 0     | 1      |       | 3      | 3      | 3      | 3      | 3     |
| 17821  | 0     | 1      |       | 4      | 4      | 1      | 2      | 4     |
| 17827  | 0     | 1      |       | 3      | 3      | 3      | 3      | 3     |
| 17834  | 0     | 0      | 2     | 2      | 3      | 3      | 3      | 3     |
| 17838  | 0     | 1      |       | 4      | 4      | 4      | 4      | 4     |
| 17842  | 0     | 1      |       | 5      | 5      | 1      | 1      | 5     |
| 17862  | 0     | 0      | 3     | 4      | 4      | 1      | 1      | 4     |
| 17863  | 0     | 1      |       | 4      | 4      | 2      | 2      | 4     |
| 17871  | 0     | 1      |       | 4      | 4      | 4      | 4      | 4     |
| 17872  | 0     | 1      |       | 5      | 5      | 6      | 6      | 5     |
| 17903  | 1     | 0      | 2     | 4      | 6      | 4      | 6      | 4     |
| 17906  | 0     | 1      |       | 5      | 5      | 5      | 5      | 5     |
| 17910  | 0     | 0      | 2     | 3      | 3      | 3      | 3      | 4     |
| 17922  | 0     | 1      |       | 5      | 6      | 5      | 5      | 5     |
| 17923  | 0     | 0      | 3     | 4      | 5      | 5      | 5      | 4     |
| 17925  | 0     | 1      |       | 6      | 6      | 1      | 1      | 5     |
| 17926  | 0     | 1      |       | 6      | 6      | 6      | 6      | 6     |
| 17937  | 0     | 1      |       | 5      | 5      | 1      | 1      | 5     |
| 17956  | 0     | 1      |       | 5      | 5      | 1      | 1      | 5     |
| 17958  | 0     | 1      |       | 5      | 5      | 6      | 5      | 5     |
| 17985  | 0     | 1      |       | 4      | 4      | 5      | 5      | 5     |
| 17989  | 0     | 0      | 3     | 6      | 6      | 6      | 6      | 5     |

| respid | Q43_9 | Q43_99 | Q44_1 | Q46x1a | Q46x1b | Q46x2a | Q46x2b | Q46x3 |
|--------|-------|--------|-------|--------|--------|--------|--------|-------|
| 17995  | 0     | 1      |       | 5      | 5      | 5      | 5      | 5     |
| 18000  | 0     | 0      | 3     | 6      | 6      | 6      | 6      | 6     |
| 18010  | 0     | 1      |       | 5      | 5      | 5      | 5      | 5     |
| 18015  | 0     | 1      |       | 5      | 5      | 5      | 5      | 5     |
| 18018  | 0     | 0      | 0     | 5      | 5      | 6      | 6      | 5     |
| 18031  | 0     | 0      | 3     | 5      | 5      | 5      | 5      | 5     |
| 18033  | 0     | 1      |       | 4      | 4      | 1      | 1      | 4     |
| 18036  | 0     | 1      |       | 4      | 5      | 5      | 4      | 4     |
| 18041  | 0     | 1      |       | 5      | 5      | 1      | 1      | 5     |
| 18068  |       |        |       |        |        |        |        |       |
| 18080  | 0     | 0      | 5     | 6      | 6      | 6      | 1      | 6     |
| 18081  | 0     | 1      |       | 4      | 4      | 5      | 4      | 5     |
| 18083  | 0     | 1      |       | 2      | 2      | 4      | 4      | 4     |
| 18113  | 0     | 1      |       | 4      | 4      | 4      | 3      | 4     |
| 18115  | 0     | 1      |       | 5      | 5      | 5      | 5      | 5     |
| 18117  | 1     | 0      | 1     | 2      | 2      | 2      | 2      | 2     |
| 18129  | 0     | 1      |       | 5      | 5      | 3      | 3      | 5     |
| 18132  | 0     | 0      | 3     | 4      | 4      | 5      | 4      | 5     |
| 18146  | 0     | 0      | 3     | 6      | 6      | 5      | 5      | 5     |
| 18147  | 0     | 0      | 3     | 6      | 6      | 6      | 6      | 6     |
| 18153  |       |        |       |        |        |        |        |       |
| 18154  | 0     | 1      |       | 5      | 4      | 2      | 2      | 5     |
| 18157  | 0     | 1      |       | 4      | 4      | 3      | 2      | 4     |
| 18166  | 0     | 0      | 3     | 5      | 5      | 1      | 2      | 4     |
| 18169  | 0     | 1      |       | 5      | 5      | 5      | 5      | 5     |
| 18171  | 0     | 0      | 3     | 5      | 5      | 4      | 2      | 3     |
| 18173  | 0     | 0      | 2     | 4      | 4      | 4      | 4      | 3     |
| 18204  | 0     | 0      | 3     | 4      | 4      | 3      | 3      | 4     |
| 18210  | 0     | 0      | 3     | 3      | 4      | 1      | 1      | 5     |
| 18212  |       |        |       |        |        |        |        |       |
| 18220  | 0     | 0      | 2     | 3      | 3      | 2      | 3      | 4     |
| 18221  | 0     | 1      |       | 6      | 6      | 5      | 2      | 4     |

| respid | Q43_9 | Q43_99 | Q44_1 | Q46x1a | Q46x1b | Q46x2a | Q46x2b | Q46x3 |
|--------|-------|--------|-------|--------|--------|--------|--------|-------|
| 18228  | 0     | 1      |       | 4      | 4      | 1      | 1      | 5     |
| 18231  | 0     | 1      |       | 5      | 5      | 5      | 5      | 5     |
| 18233  | 0     | 0      | 4     | 5      | 5      | 1      | 1      | 5     |
| 18235  | 0     | 1      |       | 6      | 6      | 6      | 6      | 6     |
| 18237  |       |        |       |        |        |        |        |       |
| 18250  | 0     | 1      |       | 5      | 6      | 5      | 5      | 6     |
| 18253  | 0     | 0      | 2     | 5      | 5      | 6      | 6      | 5     |
| 18264  | 0     | 0      | 3     | 5      | 5      | 1      | 1      | 5     |
| 18285  | 0     | 0      | 3     | 6      | 6      | 6      | 6      | 6     |
| 18287  |       |        |       |        |        |        |        |       |
| 18296  | 0     | 1      |       | 5      | 5      | 6      | 6      | 5     |
| 18299  | 0     | 0      | 3     | 4      | 4      | 2      | 2      | 4     |
| 18313  | 0     | 0      | 3     | 6      | 6      | 6      | 6      | 6     |
| 18321  | 0     | 0      | 3     | 6      | 6      | 2      | 2      | 5     |
| 18324  |       |        |       |        |        |        |        |       |
| 18329  | 0     | 0      | 3     | 6      | 6      | 6      | 6      | 6     |
| 18332  | 0     | 1      |       | 6      | 6      | 6      | 6      | 6     |
| 18339  | 0     | 0      | 3     | 5      | 5      | 5      | 5      | 5     |
| 18340  | 0     | 1      |       | 5      | 5      | 5      | 5      | 5     |
| 18348  | 0     | 1      |       | 5      | 5      | 2      | 1      | 4     |
| 18355  | 0     | 0      | 3     | 5      | 5      | 1      | 1      | 5     |
| 18360  | 0     | 0      | 4     | 5      | 5      | 5      | 4      | 5     |
| 18380  | 0     | 1      |       | 6      | 6      | 6      | 6      | 6     |
| 18403  | 0     | 1      |       | 4      | 5      | 5      | 5      | 5     |
| 18405  | 0     | 1      |       | 4      | 4      | 4      | 4      | 4     |
| 18409  | 0     | 1      |       | 5      | 5      | 1      | 1      | 4     |
| 18445  | 0     | 1      |       | 6      | 6      | 6      | 6      | 6     |
| 18458  | 0     | 0      | 3     | 6      | 6      | 5      | 5      | 5     |
| 18477  | 0     | 1      |       | 6      | 6      | 1      | 1      | 6     |
| 18481  | 0     | 1      |       | 5      | 5      | 2      | 2      | 5     |
| 18491  | 0     | 1      |       | 5      | 5      | 5      | 5      | 5     |
| 18492  | 0     | 1      |       | 5      | 5      | 1      | 1      | 5     |

| respid | Q43_9 | Q43_99 | Q44_1 | Q46x1a | Q46x1b | Q46x2a | Q46x2b | Q46x3 |
|--------|-------|--------|-------|--------|--------|--------|--------|-------|
| 18494  | 0     | 0      | 3     | 5      | 5      | 2      | 3      | 4     |
| 18495  | 0     | 0      | 5     | 6      | 6      | 6      | 6      | 6     |
| 18496  | 0     | 0      | 3     | 6      | 6      | 4      | 2      | 2     |
| 18507  | 0     | 0      | 1     | 2      | 1      | 6      | 3      | 2     |
| 18509  |       |        |       |        |        |        |        |       |
| 18510  | 0     | 1      |       | 6      | 6      | 6      | 6      | 6     |
| 18513  | 0     | 1      |       | 5      | 5      | 5      | 5      | 3     |
| 18525  |       |        |       |        |        |        |        |       |
| 18526  | 1     | 0      | 1     | 5      | 4      | 3      | 3      | 5     |
| 18527  | 0     | 0      | 2     | 4      | 5      | 5      | 2      | 5     |
| 18536  | 0     | 1      |       | 6      | 6      | 6      | 6      | 6     |
| 18540  | 0     | 1      |       | 5      | 5      | 5      | 5      | 4     |
| 18548  | 0     | 1      |       | 5      | 5      | 2      | 5      | 5     |
| 18550  |       |        |       |        |        |        |        |       |
| 18556  | 0     | 0      | 3     | 6      | 6      | 6      | 6      | 6     |
| 18561  |       |        |       |        |        |        |        |       |
| 18577  | 0     | 0      | 3     | 6      | 5      | 6      | 6      | 6     |
| 18580  | 0     | 1      |       | 6      | 6      | 6      | 6      | 6     |
| 18633  | 0     | 0      | 3     | 5      | 6      | 5      | 5      | 4     |
| 18635  | 0     | 0      | 4     | 6      | 6      | 2      | 6      | 6     |
| 18636  |       |        |       |        |        |        |        |       |
| 18645  | 0     | 0      | 2     | 5      | 5      | 2      | 6      | 5     |
| 18649  | 0     | 0      | 2     | 4      | 4      | 2      | 2      | 4     |
| 18664  | 0     | 1      |       | 5      | 5      | 5      | 5      | 5     |
| 18668  | 0     | 1      |       | 6      | 6      | 6      | 6      | 6     |
| 18682  | 0     | 0      | 2     | 4      | 4      | 4      | 4      | 4     |
| 18685  | 0     | 1      |       | 6      | 6      | 6      | 6      | 6     |
| 18688  | 0     | 1      |       | 5      | 5      | 5      | 5      | 5     |
| 18689  | 0     | 0      | 3     | 2      | 3      | 3      | 2      | 2     |
| 18693  | 0     | 0      | 5     | 5      | 4      | 6      | 6      | 4     |
| 18694  | 0     | 1      |       | 6      | 6      | 5      | 5      | 6     |
| 18705  | 0     | 1      |       | 5      | 5      | 5      | 5      | 5     |

| respid | Q43_9 | Q43_99 | Q44_1 | Q46x1a | Q46x1b | Q46x2a | Q46x2b | Q46x3 |
|--------|-------|--------|-------|--------|--------|--------|--------|-------|
| 18710  | 0     | 0      | 2     | 5      | 5      | 2      | 2      | 5     |
| 18715  | 1     | 0      | 4     | 4      | 4      | 5      | 4      | 4     |
| 18718  | 0     | 0      | 3     | 6      | 6      | 6      | 6      | 6     |
| 18727  | 0     | 0      | 3     | 4      | 4      | 4      | 4      | 4     |
| 18732  | 0     | 1      |       | 5      | 5      | 5      | 5      | 5     |
| 18735  | 0     | 0      | 2     | 3      | 4      | 2      | 2      | 3     |
| 18742  | 0     | 1      |       | 5      | 5      | 5      | 5      | 5     |
| 18745  | 0     | 1      |       | 6      | 6      | 6      | 6      | 6     |
| 18747  | 0     | 1      |       | 6      | 6      | 6      | 6      | 6     |
| 18750  | 0     | 1      |       | 5      | 5      | 5      | 5      | 5     |
| 18751  | 0     | 0      | 3     | 5      | 5      | 5      | 5      | 5     |
| 18753  | 0     | 0      | 3     | 5      | 5      | 5      | 5      | 5     |
| 18754  |       |        |       |        |        |        |        |       |
| 18759  | 0     | 0      | 3     | 6      | 6      | 6      | 6      | 6     |
| 18780  | 0     | 1      |       | 5      | 5      | 1      | 2      | 5     |
| 18782  | 0     | 1      |       | 5      | 5      | 5      | 5      | 5     |
| 18807  | 0     | 0      | 4     | 2      | 2      | 1      | 1      | 1     |
| 18815  | 0     | 1      |       | 6      | 6      | 6      | 6      | 6     |
| 18818  | 0     | 1      |       | 5      | 6      | 2      | 2      | 3     |
| 18820  | 0     | 0      | 3     | 5      | 6      | 6      | 6      | 6     |
| 18823  | 0     | 0      | 5     | 2      | 2      | 2      | 2      | 2     |
| 18825  | 0     | 0      | 3     | 6      | 6      | 6      | 6      | 6     |
| 18828  |       |        |       |        |        |        |        |       |
| 18832  | 0     | 1      |       | 6      | 6      | 6      | 6      | 6     |
| 18834  | 0     | 0      | 3     | 4      | 4      | 2      | 4      | 4     |
| 18835  | 0     | 0      | 4     | 4      | 3      | 4      | 4      | 4     |
| 18837  | 0     | 1      |       | 6      | 6      | 2      | 5      | 4     |
| 18842  | 0     | 1      |       | 6      | 6      | 6      | 6      | 6     |
| 18846  |       |        |       |        |        |        |        |       |
| 18855  | 0     | 1      |       | 4      | 5      | 5      | 4      | 4     |
| 18856  | 0     | 1      |       | 5      | 4      | 1      | 1      | 5     |
| 18887  | 0     | 0      | 3     | 5      | 5      | 4      | 4      | 4     |



| respid | Q43_9 | Q43_99 | Q44_1 | Q46x1a | Q46x1b | Q46x2a | Q46x2b | Q46x3 |
|--------|-------|--------|-------|--------|--------|--------|--------|-------|
| 18903  | 0     | 0      | 3     | 5      | 4      | 4      | 4      | 5     |
| 18906  | 0     | 0      | 3     | 4      | 4      | 4      | 4      | 4     |
| 18910  |       |        |       |        |        |        |        |       |
| 18919  | 0     | 0      | 3     | 6      | 6      | 1      | 1      | 5     |
| 18928  | 0     | 1      |       | 5      | 5      | 6      | 6      | 6     |
| 18931  | 0     | 0      | 2     | 4      | 4      | 2      | 2      | 4     |
| 18939  | 0     | 1      |       | 4      | 4      | 2      | 2      | 4     |
| 18946  | 0     | 1      |       | 5      | 5      | 5      | 5      | 5     |
| 18952  | 0     | 0      | 3     | 4      | 4      | 3      | 3      | 4     |
| 18954  | 0     | 1      |       | 5      | 5      | 5      | 5      | 5     |
| 18982  |       |        |       |        |        |        |        |       |
| 18986  | 0     | 0      | 3     | 5      | 5      | 4      | 4      | 4     |
| 18989  | 0     | 0      | 4     | 3      | 4      | 4      | 3      | 3     |
| 18990  | 0     | 0      | 4     | 5      | 4      | 5      | 5      | 5     |
| 18996  | 0     | 1      |       | 5      | 5      | 2      | 2      | 4     |
| 18998  | 0     | 1      |       | 5      | 5      | 1      | 1      | 5     |
| 19009  | 0     | 0      | 2     | 1      | 1      | 4      | 2      | 2     |
| 19010  | 0     | 1      |       | 5      | 5      | 5      | 5      | 5     |
| 19017  | 0     | 1      |       | 5      | 5      | 5      | 5      | 5     |
| 19018  | 0     | 1      |       | 6      | 4      | 6      | 6      | 6     |
| 19020  | 0     | 1      |       | 6      | 6      | 5      | 5      | 5     |
| 19027  | 0     | 0      | 2     | 4      | 4      | 4      | 4      | 4     |
| 19035  | 0     | 1      |       | 5      | 5      | 2      | 2      | 4     |
| 19037  | 0     | 1      |       | 4      | 4      | 3      | 3      | 4     |
| 19048  | 0     | 1      |       | 5      | 5      | 1      | 1      | 5     |
| 19051  | 0     | 0      | 3     | 5      | 5      | 2      | 2      | 4     |
| 19054  | 0     | 1      |       | 4      | 4      | 1      | 1      | 4     |
| 19057  | 0     | 1      |       | 5      | 5      | 5      | 5      | 5     |
| 19073  | 0     | 0      | 2     | 4      | 4      | 4      | 4      | 3     |
| 19075  | 0     | 1      |       | 6      | 6      | 6      | 6      | 6     |
| 19079  | 0     | 0      | 3     | 4      | 4      | 2      | 2      | 4     |
| 19087  | 0     | 1      |       | 5      | 5      | 5      | 5      | 6     |

| respid | Q43_9 | Q43_99 | Q44_1 | Q46x1a | Q46x1b | Q46x2a | Q46x2b | Q46x3 |
|--------|-------|--------|-------|--------|--------|--------|--------|-------|
| 19090  | 0     | 1      |       | 6      | 6      | 6      | 6      | 6     |
| 19093  | 0     | 1      |       | 6      | 6      | 6      | 6      | 6     |
| 19099  | 0     | 0      | 2     | 4      | 4      | 2      | 3      | 4     |
| 19100  | 0     | 1      |       | 5      | 5      | 1      | 1      | 5     |
| 19101  | 0     | 1      |       | 6      | 6      | 5      | 5      | 6     |
| 19105  | 0     | 1      |       | 4      | 5      | 6      | 6      | 4     |
| 19111  | 0     | 0      | 3     | 4      | 4      | 2      | 3      | 4     |
| 19112  | 0     | 1      |       | 6      | 6      | 6      | 6      | 6     |
| 19117  | 0     | 0      | 4     | 4      | 4      | 4      | 4      | 3     |
| 19122  | 0     | 1      |       | 5      | 5      | 1      | 1      | 5     |
| 19126  | 0     | 1      |       | 6      | 6      | 5      | 5      | 5     |
| 19127  | 0     | 0      | 3     | 5      | 5      | 2      | 2      | 5     |
| 19131  | 0     | 0      | 3     | 4      | 5      | 2      | 2      | 5     |
| 19134  | 0     | 1      |       | 5      | 5      | 5      | 5      | 5     |
| 19149  | 0     | 1      |       | 4      | 4      | 4      | 4      | 4     |
| 19151  | 0     | 0      | 4     | 4      | 4      | 4      | 4      | 4     |
| 19164  | 0     | 1      |       | 6      | 6      | 6      | 6      | 6     |
| 19166  | 0     | 1      |       | 5      | 5      | 2      | 2      | 4     |
| 19172  | 0     | 1      |       | 5      | 5      | 5      | 5      | 5     |
| 19173  | 0     | 0      | 2     | 4      | 4      | 2      | 2      | 4     |
| 19180  | 0     | 1      |       | 6      | 6      | 6      | 6      | 5     |
| 19185  | 0     | 0      | 3     | 4      | 4      | 4      | 3      | 3     |
| 19189  | 0     | 1      |       | 5      | 5      | 2      | 2      | 5     |
| 19191  |       |        |       |        |        |        |        |       |
| 19198  | 0     | 0      | 4     | 6      | 6      | 6      | 6      | 6     |
| 19203  | 0     | 1      |       | 5      | 5      | 5      | 5      | 5     |
| 19209  | 0     | 1      |       | 5      | 5      | 3      | 2      | 4     |
| 19210  |       |        |       |        |        |        |        |       |
| 19218  |       |        |       |        |        |        |        |       |
| 19220  |       |        |       |        |        |        |        |       |
| 19225  | 0     | 1      |       | 5      | 5      | 4      | 4      | 3     |
| 19227  | 0     | 1      |       | 6      | 6      | 6      | 6      | 6     |

| respid | Q43_9 | Q43_99 | Q44_1 | Q46x1a | Q46x1b | Q46x2a | Q46x2b | Q46x3 |
|--------|-------|--------|-------|--------|--------|--------|--------|-------|
| 19228  | 0     | 1      |       | 5      | 5      | 5      | 5      | 5     |
| 19243  | 0     | 1      |       | 4      | 5      | 2      | 2      | 5     |
| 19244  | 0     | 0      | 4     | 4      | 4      | 2      | 3      | 4     |
| 19246  | 0     | 1      |       | 5      | 5      | 2      | 2      | 5     |
| 19248  |       |        |       |        |        |        |        |       |
| 19249  | 0     | 1      |       | 5      | 5      | 5      | 5      | 5     |
| 19252  | 0     | 0      | 3     | 5      | 5      | 4      | 3      | 4     |
| 19255  | 0     | 0      | 4     | 6      | 6      | 2      | 2      | 5     |
| 19257  | 0     | 1      |       | 5      | 4      | 5      | 4      | 4     |
| 19274  |       |        |       |        |        |        |        |       |
| 19279  |       |        |       |        |        |        |        |       |
| 19291  | 0     | 1      |       | 5      | 5      | 5      | 5      | 5     |
| 19292  | 0     | 0      | 3     | 4      | 5      | 1      | 2      | 4     |
| 19308  | 0     | 1      |       | 4      | 4      | 4      | 4      | 4     |
| 19310  | 0     | 0      | 3     | 5      | 5      | 5      | 5      | 5     |
| 19311  | 0     | 1      |       | 6      | 6      | 6      | 6      | 6     |
| 19326  | 0     | 1      |       | 5      | 5      | 2      | 2      | 4     |
| 19327  |       |        |       |        |        |        |        |       |
| 19329  |       |        |       |        |        |        |        |       |
| 19330  | 0     | 0      | 3     | 3      | 3      | 3      | 3      | 3     |
| 19333  | 0     | 0      | 2     | 2      | 3      | 1      | 1      | 2     |
| 19336  | 0     | 0      | 4     | 4      | 4      | 5      | 5      | 4     |
| 19343  | 0     | 0      | 3     | 4      | 4      | 1      | 1      | 5     |
| 19348  | 0     | 0      | 3     | 5      | 5      | 1      | 1      | 5     |
| 19349  | 0     | 0      | 3     | 4      | 5      | 2      | 4      | 3     |
| 19352  | 0     | 0      | 1     | 4      | 4      | 2      | 1      | 4     |
| 19356  | 0     | 1      |       | 5      | 5      | 5      | 5      | 4     |
| 19357  | 0     | 1      |       | 5      | 5      | 5      | 5      | 5     |
| 19358  | 0     | 1      |       | 5      | 5      | 5      | 5      | 4     |
| 19367  | 0     | 1      |       | 5      | 5      | 5      | 5      | 5     |
| 19376  |       |        |       |        |        |        |        |       |
| 19377  | 0     | 1      |       | 5      | 5      | 2      | 1      | 5     |

| respid | Q43_9 | Q43_99 | Q44_1 | Q46x1a | Q46x1b | Q46x2a | Q46x2b | Q46x3 |
|--------|-------|--------|-------|--------|--------|--------|--------|-------|
| 19380  | 0     | 1      |       | 5      | 5      | 2      | 2      | 5     |
| 19384  | 0     | 1      |       | 5      | 5      | 5      | 5      | 5     |
| 19391  | 0     | 0      | 2     | 6      | 5      | 5      | 5      | 5     |
| 19397  |       |        |       |        |        |        |        |       |
| 19398  | 0     | 1      |       | 5      | 5      | 5      | 5      | 5     |
| 19401  |       |        |       |        |        |        |        |       |
| 19402  | 0     | 1      |       | 5      | 5      | 1      | 1      | 4     |
| 19403  |       |        |       |        |        |        |        |       |
| 19405  |       |        |       |        |        |        |        |       |
| 19407  | 0     | 1      |       | 6      | 6      | 6      | 6      | 6     |
| 19415  | 0     | 1      |       | 6      | 6      | 6      | 6      | 5     |
| 19420  |       |        |       |        |        |        |        |       |
| 19423  | 0     | 0      | 3     | 3      | 2      | 4      | 2      | 3     |
| 19424  | 0     | 1      |       | 6      | 4      | 6      | 6      | 6     |
| 19426  | 0     | 1      |       | 4      | 4      | 1      | 1      | 4     |
| 19429  | 0     | 1      |       | 6      | 6      | 6      | 6      | 5     |
| 19435  | 0     | 0      | 3     | 3      | 2      | 3      | 3      | 3     |
| 19441  | 0     | 0      | 1     | 6      | 5      | 1      | 1      | 4     |
| 19450  | 0     | 1      |       | 5      | 5      | 5      | 5      | 5     |
| 19456  | 1     | 0      | 3     | 4      | 4      | 6      | 6      | 4     |
| 19457  | 0     | 1      |       | 4      | 4      | 2      | 2      | 4     |
| 19463  | 1     | 0      | 3     | 4      | 4      | 4      | 4      | 4     |
| 19467  | 0     | 1      |       | 6      | 6      | 4      | 4      | 4     |
| 19468  | 0     | 1      |       | 5      | 5      | 5      | 5      | 5     |
| 19471  | 0     | 1      |       | 4      | 4      | 4      | 4      | 4     |
| 19473  | 0     | 1      |       | 5      | 5      | 5      | 5      | 5     |
| 19478  | 0     | 0      | 3     | 3      | 3      | 3      | 3      | 4     |
| 19480  |       |        |       |        |        |        |        |       |
| 19481  | 0     | 1      |       | 5      | 5      | 5      | 5      | 5     |
| 19484  | 0     | 1      |       | 6      | 6      | 6      | 6      | 6     |
| 19487  | 0     | 1      |       | 6      | 6      | 6      | 6      | 6     |
| 19491  | 0     | 0      | 2     | 3      | 3      | 2      | 2      | 4     |

| respid | Q43_9 | Q43_99 | Q44_1 | Q46x1a | Q46x1b | Q46x2a | Q46x2b | Q46x3 |
|--------|-------|--------|-------|--------|--------|--------|--------|-------|
| 19495  | 0     | 0      | 4     | 4      | 3      | 3      | 3      | 3     |
| 19498  | 0     | 0      | 2     | 4      | 3      | 3      | 3      | 4     |
| 19500  | 0     | 0      | 2     | 4      | 5      | 1      | 1      | 4     |
| 19501  | 0     | 0      | 3     | 3      | 3      | 2      | 2      | 4     |
| 19503  |       |        |       |        |        |        |        |       |
| 19506  | 0     | 1      |       | 5      | 5      | 1      | 1      | 6     |
| 19508  | 0     | 1      |       | 5      | 5      | 1      | 2      | 5     |
| 19509  | 0     | 1      |       | 5      | 5      | 2      | 2      | 5     |
| 19518  | 0     | 1      |       | 5      | 5      | 5      | 4      | 4     |
| 19520  | 0     | 1      |       | 4      | 4      | 4      | 4      | 4     |
| 19536  | 0     | 1      |       | 6      | 6      | 1      | 1      | 4     |
| 19538  | 0     | 0      | 3     | 4      | 5      | 2      | 1      | 4     |
| 19541  | 0     | 1      |       | 2      | 5      | 2      | 2      | 4     |
| 19548  | 0     | 1      |       | 6      | 6      | 6      | 6      | 6     |
| 19553  |       |        |       |        |        |        |        |       |
| 19556  | 0     | 1      |       | 5      | 5      | 1      | 1      | 5     |
| 19559  |       |        |       |        |        |        |        |       |
| 19561  | 0     | 0      | 2     | 4      | 4      | 2      | 2      | 4     |
| 19562  | 0     | 0      | 5     | 6      | 6      | 6      | 6      | 6     |
| 19564  | 0     | 1      |       | 5      | 5      | 5      | 5      | 5     |
| 19567  | 0     | 0      | 2     | 2      | 2      | 3      | 3      | 2     |
| 19571  | 0     | 0      | 3     | 4      | 4      | 2      | 2      | 4     |
| 19576  | 0     | 0      | 2     | 4      | 4      | 4      | 4      | 4     |
| 19578  | 0     | 1      |       | 5      | 5      | 5      | 4      | 4     |
| 19606  |       |        |       |        |        |        |        |       |
| 19607  |       |        |       |        |        |        |        |       |
| 19608  | 0     | 0      | 3     | 5      | 5      | 5      | 5      | 5     |
| 19612  | 0     | 0      | 3     | 3      | 2      | 3      | 3      | 2     |
| 19618  | 1     | 0      | 3     | 4      | 4      | 3      | 3      | 5     |
| 19621  | 0     | 0      | 4     | 4      | 4      | 5      | 5      | 5     |
| 19624  | 0     | 0      | 3     | 2      | 3      | 3      | 2      | 2     |
| 19630  |       |        |       |        |        |        |        |       |

| respid | Q43_9 | Q43_99 | Q44_1 | Q46x1a | Q46x1b | Q46x2a | Q46x2b | Q46x3 |
|--------|-------|--------|-------|--------|--------|--------|--------|-------|
| 19637  | 0     | 1      |       | 5      | 4      | 1      | 2      | 4     |
| 19639  | 0     | 1      |       | 5      | 5      | 1      | 1      | 4     |
| 19647  | 0     | 1      |       | 5      | 4      | 1      | 2      | 5     |
| 19648  | 0     | 0      | 3     | 2      | 2      | 3      | 2      | 2     |
| 19660  | 0     | 1      |       | 5      | 5      | 5      | 5      | 5     |
| 19662  | 1     | 0      | 3     | 3      | 2      | 3      | 2      | 3     |
| 19669  | 0     | 1      |       | 5      | 5      | 5      | 5      | 5     |
| 19680  | 0     | 1      |       | 6      | 6      | 1      | 1      | 6     |
| 19682  | 0     | 1      |       | 4      | 4      | 4      | 4      | 4     |
| 19686  | 0     | 1      |       | 5      | 5      | 5      | 5      | 5     |
| 19700  | 0     | 0      | 4     | 5      | 5      | 1      | 1      | 5     |
| 19701  | 0     | 1      |       | 5      | 5      | 5      | 5      | 5     |
| 19704  |       |        |       |        |        |        |        |       |
| 19706  | 0     | 0      | 4     | 3      | 4      | 2      | 3      | 1     |
| 19707  | 0     | 1      |       | 5      | 5      | 5      | 5      | 5     |
| 19717  | 0     | 0      | 3     | 4      | 4      | 2      | 2      | 4     |
| 19718  | 0     | 1      |       | 5      | 5      | 1      | 1      | 5     |
| 19721  | 0     | 1      |       | 4      | 4      | 4      | 4      | 5     |
| 19722  | 0     | 1      |       | 5      | 5      | 5      | 5      | 5     |
| 19729  |       |        |       |        |        |        |        |       |
| 19738  | 0     | 0      | 2     | 3      | 4      | 4      | 3      | 4     |
| 19741  | 0     | 1      |       | 6      | 6      | 1      | 1      | 5     |
| 19742  | 0     | 0      | 5     | 5      | 4      | 4      | 4      | 3     |
| 19747  | 0     | 0      | 3     | 5      | 4      | 5      | 4      | 5     |
| 19748  | 0     | 1      |       | 5      | 5      | 5      | 5      | 5     |
| 19749  | 0     | 1      |       | 5      | 5      | 1      | 1      | 5     |
| 19756  | 0     | 0      | 2     | 5      | 4      | 2      | 2      | 4     |
| 19771  | 0     | 1      |       | 6      | 6      | 6      | 6      | 6     |
| 19772  | 1     | 0      | 2     | 4      | 4      | 2      | 2      | 4     |
| 19775  | 0     | 1      |       | 6      | 6      | 6      | 6      | 6     |
| 19783  |       |        |       |        |        |        |        |       |
| 19787  | 0     | 1      |       | 4      | 5      | 5      | 6      | 4     |

| respid | Q43_9 | Q43_99 | Q44_1 | Q46x1a | Q46x1b | Q46x2a | Q46x2b | Q46x3 |
|--------|-------|--------|-------|--------|--------|--------|--------|-------|
| 19790  |       |        |       |        |        |        |        |       |
| 19797  | 0     | 1      |       | 2      | 4      | 2      | 2      | 1     |
| 19802  | 0     | 1      |       | 5      | 5      | 3      | 3      | 5     |
| 19808  | 0     | 1      |       | 6      | 6      | 6      | 6      | 6     |
| 19810  | 0     | 1      |       | 5      | 5      | 5      | 5      | 5     |
| 19811  | 0     | 1      |       | 6      | 6      | 1      | 1      | 1     |
| 19812  | 0     | 1      |       | 5      | 4      | 1      | 2      | 5     |
| 19821  | 0     | 1      |       | 4      | 4      | 3      | 3      | 4     |
| 19826  | 0     | 1      |       | 5      | 5      | 5      | 5      | 5     |
| 19827  | 0     | 0      | 2     | 6      | 6      | 6      | 6      | 6     |
| 19830  | 0     | 1      |       | 5      | 5      | 5      | 5      | 5     |
| 19834  | 0     | 1      |       | 5      | 1      | 1      | 1      | 5     |
| 19838  | 0     | 0      | 3     | 5      | 4      | 2      | 2      | 4     |
| 19843  |       |        |       |        |        |        |        |       |
| 19845  | 0     | 0      | 3     | 4      | 3      | 4      | 3      | 4     |
| 19846  | 0     | 0      | 4     | 4      | 6      | 5      | 5      | 4     |
| 19852  | 0     | 0      | 3     | 3      | 3      | 4      | 3      | 3     |
| 19855  | 0     | 1      |       | 5      | 5      | 6      | 6      | 5     |
| 19858  | 0     | 0      | 2     | 4      | 4      | 1      | 1      | 4     |
| 19861  | 0     | 0      | 2     | 2      | 4      | 2      | 3      | 6     |
| 19863  | 0     | 1      |       | 5      | 5      | 5      | 5      | 5     |
| 19868  | 0     | 0      | 3     | 4      | 2      | 4      | 3      | 4     |
| 19874  | 0     | 1      |       | 5      | 5      | 4      | 4      | 5     |
| 19876  |       |        |       |        |        |        |        |       |
| 19880  | 0     | 0      | 3     | 3      | 3      | 2      | 2      | 3     |
| 19885  | 0     | 1      |       | 6      | 6      | 6      | 6      | 6     |
| 19890  |       |        |       |        |        |        |        |       |
| 19894  |       |        |       |        |        |        |        |       |
| 19895  | 0     | 1      |       | 6      | 6      | 6      | 6      | 6     |
| 19897  | 0     | 1      |       | 6      | 6      | 6      | 6      | 6     |
| 19906  | 0     | 1      |       | 4      | 5      | 5      | 5      | 4     |
| 19908  | 0     | 1      |       | 5      | 5      | 6      | 6      | 5     |

| respid | Q43_9 | Q43_99 | Q44_1 | Q46x1a | Q46x1b | Q46x2a | Q46x2b | Q46x3 |
|--------|-------|--------|-------|--------|--------|--------|--------|-------|
| 19912  | 0     | 1      |       | 5      | 5      | 1      | 1      | 5     |
| 19913  | 0     | 1      |       | 6      | 6      | 6      | 6      | 6     |
| 19914  | 0     | 1      |       | 4      | 4      | 4      | 4      | 4     |
| 19918  | 0     | 0      | 3     | 3      | 3      | 3      | 3      | 3     |
| 19924  | 0     | 0      | 2     | 4      | 4      | 3      | 3      | 4     |
| 19936  |       |        |       |        |        |        |        |       |
| 19940  |       |        |       |        |        |        |        |       |
| 19945  | 0     | 1      |       | 6      | 6      | 6      | 6      | 6     |
| 19948  |       |        |       |        |        |        |        |       |
| 19959  | 0     | 1      |       | 6      | 6      | 6      | 6      | 6     |
| 19961  | 0     | 0      | 4     | 5      | 5      | 5      | 5      | 5     |
| 19962  | 0     | 1      |       | 5      | 5      | 5      | 5      | 5     |
| 19965  | 0     | 1      |       | 6      | 6      | 6      | 6      | 6     |
| 19966  | 0     | 0      | 3     | 4      | 5      | 3      | 3      | 4     |
| 19973  | 0     | 0      | 4     | 4      | 5      | 5      | 4      | 4     |
| 19981  | 0     | 0      | 4     | 6      | 6      | 4      | 5      | 5     |
| 19986  | 0     | 1      |       | 6      | 6      | 2      | 2      | 4     |
| 19989  | 0     | 1      |       | 5      | 5      | 6      | 6      | 6     |
| 19998  | 0     | 1      |       | 6      | 6      | 5      | 5      | 5     |
| 20001  | 0     | 0      | 4     | 5      | 5      | 5      | 5      | 5     |
| 20005  |       |        |       |        |        |        |        |       |
| 20013  | 1     | 0      | 2     | 2      | 2      | 4      | 4      | 2     |
| 20015  | 0     | 1      |       | 5      | 5      | 5      | 4      | 4     |
| 20017  | 0     | 1      |       | 4      | 4      | 5      | 5      | 4     |
| 20020  | 0     | 1      |       | 6      | 6      | 6      | 6      | 6     |
| 20021  | 0     | 1      |       | 5      | 5      | 5      | 5      | 5     |
| 20026  | 0     | 1      |       | 6      | 6      | 1      | 6      | 6     |
| 20028  | 0     | 1      |       | 5      | 5      | 2      | 2      | 5     |
| 20030  | 0     | 1      |       | 5      | 5      | 6      | 6      | 5     |
| 20031  |       |        |       |        |        |        |        |       |
| 20034  | 0     | 1      |       | 5      | 6      | 6      | 6      | 6     |
| 20035  |       |        |       |        |        |        |        |       |



| respid | Q43_9 | Q43_99 | Q44_1 | Q46x1a | Q46x1b | Q46x2a | Q46x2b | Q46x3 |
|--------|-------|--------|-------|--------|--------|--------|--------|-------|
| 20040  | 0     | 1      |       | 5      | 5      | 1      | 1      | 5     |
| 20045  | 0     | 0      | 1     | 1      | 1      | 1      | 1      | 1     |
| 20048  | 1     | 0      | 2     | 6      | 6      | 6      | 6      | 6     |
| 20053  | 0     | 1      |       | 5      | 5      | 4      | 4      | 4     |
| 20064  | 0     | 0      | 2     | 4      | 4      | 3      | 4      | 4     |
| 20071  | 0     | 1      |       | 5      | 4      | 3      | 3      | 4     |
| 20072  | 0     | 1      |       | 4      | 4      | 2      | 2      | 2     |
| 20076  | 0     | 1      |       | 5      | 5      | 5      | 5      | 5     |
| 20081  | 0     | 1      |       | 6      | 6      | 5      | 5      | 5     |
| 20082  | 0     | 0      | 3     | 3      | 1      | 3      | 3      | 2     |
| 20083  | 0     | 0      | 3     | 5      | 5      | 2      | 2      | 4     |
| 20088  | 0     | 1      |       | 5      | 5      | 5      | 5      | 5     |
| 20089  | 0     | 0      | 4     | 5      | 5      | 5      | 5      | 4     |
| 20099  | 0     | 1      |       | 5      | 5      | 1      | 1      | 5     |
| 20101  | 0     | 1      |       | 5      | 5      | 5      | 5      | 5     |
| 20102  | 0     | 1      |       | 5      | 4      | 4      | 4      | 4     |
| 20109  | 0     | 0      | 3     | 5      | 5      | 5      | 5      | 5     |
| 20118  | 0     | 1      |       | 4      | 5      | 1      | 1      | 5     |
| 20119  | 0     | 1      |       | 6      | 6      | 1      | 1      | 6     |
| 20124  |       |        |       |        |        |        |        |       |
| 20126  | 0     | 1      |       | 4      | 4      | 2      | 2      | 4     |
| 20130  |       |        |       |        |        |        |        |       |
| 20131  | 0     | 1      |       | 5      | 5      | 6      | 6      | 4     |
| 20134  | 0     | 0      | 2     | 3      | 4      | 4      | 2      | 3     |
| 20146  | 0     | 1      |       | 5      | 5      | 5      | 5      | 5     |
| 20152  |       |        |       |        |        |        |        |       |
| 20155  | 0     | 0      | 3     | 5      | 5      | 2      | 2      | 5     |
| 20156  |       |        |       |        |        |        |        |       |
| 20157  |       |        |       |        |        |        |        |       |
| 20164  | 0     | 1      |       | 5      | 5      | 5      | 5      | 5     |
| 20168  | 0     | 1      |       | 3      | 3      | 3      | 3      | 3     |
| 20173  | 0     | 1      |       | 4      | 4      | 4      | 4      | 3     |

| respid | Q43_9 | Q43_99 | Q44_1 | Q46x1a | Q46x1b | Q46x2a | Q46x2b | Q46x3 |
|--------|-------|--------|-------|--------|--------|--------|--------|-------|
| 20174  | 0     | 1      |       | 6      | 6      | 6      | 6      | 6     |
| 20175  | 0     | 0      | 2     | 4      | 4      | 2      | 2      | 4     |
| 20189  | 0     | 1      |       | 5      | 5      | 5      | 5      | 5     |
| 20190  | 0     | 1      |       | 5      | 5      | 2      | 3      | 4     |
| 20201  | 0     | 1      |       | 5      | 5      | 1      | 1      | 5     |
| 20202  | 0     | 1      |       | 6      | 6      | 5      | 5      | 5     |
| 20204  | 0     | 1      |       | 1      | 1      | 6      | 6      | 6     |
| 20206  | 0     | 1      |       | 3      | 3      | 3      | 3      | 3     |
| 20207  | 0     | 1      |       | 5      | 5      | 1      | 1      | 4     |
| 20212  | 0     | 0      | 2     | 4      | 4      | 4      | 4      | 4     |
| 20213  | 0     | 0      | 3     | 6      | 6      | 6      | 6      | 6     |
| 20217  | 0     | 1      |       | 6      | 6      | 6      | 6      | 6     |
| 20222  | 0     | 0      | 3     | 5      | 5      | 1      | 1      | 4     |
| 20227  |       |        |       |        |        |        |        |       |
| 20228  | 0     | 1      |       | 4      | 4      | 5      | 4      | 4     |
| 20238  | 0     | 1      |       | 6      | 6      | 6      | 6      | 6     |
| 20242  | 0     | 1      |       | 5      | 5      | 5      | 5      | 5     |
| 20246  | 0     | 1      |       | 5      | 5      | 1      | 1      | 5     |
| 20255  | 0     | 0      | 3     | 4      | 4      | 4      | 4      | 4     |
| 20256  | 0     | 0      | 2     | 5      | 5      | 2      | 2      | 5     |
| 20259  | 0     | 0      | 2     | 3      | 4      | 2      | 2      | 4     |
| 20262  | 0     | 1      |       | 5      | 5      | 5      | 5      | 4     |
| 20274  | 0     | 0      | 4     | 5      | 5      | 5      | 5      | 5     |
| 20283  | 0     | 0      | 3     | 4      | 4      | 3      | 3      | 4     |
| 20284  |       |        |       |        |        |        |        |       |
| 20291  | 0     | 0      | 3     | 4      | 5      | 5      | 4      | 4     |
| 20292  | 0     | 1      |       | 5      | 5      | 2      | 2      | 5     |
| 20293  | 0     | 1      |       | 6      | 6      | 2      | 2      | 4     |
| 20298  | 0     | 1      |       | 6      | 6      | 6      | 6      | 6     |
| 20301  |       |        |       |        |        |        |        |       |
| 20303  | 0     | 1      |       | 5      | 5      | 2      | 2      | 4     |
| 20309  |       |        |       |        |        |        |        |       |

| respid | Q43_9 | Q43_99 | Q44_1 | Q46x1a | Q46x1b | Q46x2a | Q46x2b | Q46x3 |
|--------|-------|--------|-------|--------|--------|--------|--------|-------|
| 20318  | 0     | 1      |       | 5      | 5      | 1      | 5      | 5     |
| 20324  | 0     | 1      |       | 5      | 5      | 5      | 5      | 5     |
| 20335  | 0     | 1      |       | 5      | 5      | 2      | 5      | 4     |
| 20336  | 0     | 0      | 4     | 5      | 5      | 1      | 1      | 4     |
| 20339  | 0     | 0      | 4     | 5      | 5      | 5      | 5      | 5     |
| 20348  | 0     | 1      |       | 5      | 5      | 1      | 1      | 5     |
| 20351  | 0     | 1      |       | 4      | 4      | 5      | 4      | 4     |
| 20353  | 0     | 1      |       | 6      | 6      | 6      | 6      | 4     |
| 20356  | 0     | 0      | 5     | 5      | 5      | 5      | 5      | 5     |
| 20357  |       |        |       |        |        |        |        |       |
| 20366  | 0     | 1      |       | 5      | 5      | 5      | 5      | 5     |
| 20369  | 0     | 0      | 2     | 2      | 2      | 4      | 4      | 2     |
| 20372  | 0     | 0      | 4     | 5      | 5      | 5      | 5      | 5     |
| 20375  | 0     | 1      |       | 5      | 5      | 5      | 5      | 5     |
| 20379  | 0     | 0      | 3     | 5      | 5      | 1      | 1      | 5     |
| 20380  | 0     | 1      |       | 5      | 5      | 5      | 5      | 5     |
| 20396  | 0     | 1      |       | 6      | 6      | 6      | 6      | 6     |
| 20398  | 0     | 0      | 2     | 6      | 4      | 5      | 5      | 5     |
| 20412  | 0     | 1      |       | 5      | 5      | 5      | 5      | 5     |
| 20415  | 0     | 1      |       | 5      | 5      | 6      | 6      | 5     |
| 20424  | 0     | 0      | 3     | 4      | 4      | 4      | 2      | 4     |
| 20434  | 0     | 1      |       | 6      | 6      | 6      | 6      | 5     |
| 20435  | 0     | 0      | 4     | 5      | 5      | 1      | 2      | 4     |
| 20440  | 0     | 0      | 5     | 6      | 6      | 6      | 6      | 6     |
| 20441  | 0     | 1      |       | 5      | 5      | 2      | 1      | 4     |
| 20445  | 0     | 1      |       | 6      | 5      | 3      | 3      | 5     |
| 20446  | 0     | 0      | 3     | 4      | 4      | 4      | 4      | 4     |
| 20450  | 0     | 1      |       | 6      | 6      | 1      | 1      | 4     |
| 20453  | 0     | 1      |       | 4      | 3      | 3      | 3      | 3     |
| 20458  | 0     | 1      |       | 5      | 5      | 5      | 5      | 5     |
| 20464  | 0     | 0      | 4     | 6      | 6      | 6      | 6      | 6     |
| 20471  | 0     | 1      |       | 6      | 6      | 6      | 6      | 6     |

| respid | Q43_9 | Q43_99 | Q44_1 | Q46x1a | Q46x1b | Q46x2a | Q46x2b | Q46x3 |
|--------|-------|--------|-------|--------|--------|--------|--------|-------|
| 20473  | 0     | 0      | 3     | 6      | 6      | 1      | 1      | 4     |
| 20474  | 0     | 0      | 3     | 5      | 5      | 5      | 4      | 5     |
| 20477  |       |        |       |        |        |        |        |       |
| 20479  | 0     | 0      | 4     | 2      | 2      | 2      | 2      | 5     |
| 20485  | 0     | 1      |       | 5      | 5      | 5      | 5      | 5     |
| 20487  | 0     | 1      |       | 5      | 5      | 5      | 5      | 5     |
| 20488  | 0     | 1      |       | 5      | 5      | 5      | 5      | 5     |
| 20494  | 0     | 1      |       | 4      | 4      | 4      | 4      | 4     |
| 20502  | 1     | 0      | 3     | 3      | 4      | 4      | 3      | 3     |
| 20503  | 0     | 1      |       | 6      | 5      | 6      | 6      | 6     |
| 20510  | 0     | 0      | 3     | 6      | 6      | 1      | 1      | 5     |
| 20512  |       |        |       |        |        |        |        |       |
| 20516  | 0     | 1      |       | 5      | 5      | 3      | 3      | 5     |
| 20522  | 0     | 1      |       | 4      | 5      | 5      | 5      | 4     |
| 20527  | 0     | 1      |       | 6      | 6      | 6      | 6      | 6     |
| 20529  | 0     | 0      | 2     | 5      | 5      | 5      | 5      | 5     |
| 20535  | 0     | 1      |       | 5      | 5      | 5      | 5      | 5     |
| 20543  | 0     | 1      |       | 6      | 6      | 1      | 1      | 6     |
| 20546  | 0     | 0      | 3     | 5      | 4      | 5      | 5      | 4     |
| 20548  | 0     | 0      | 4     | 4      | 4      | 5      | 5      | 4     |
| 20552  | 0     | 1      |       | 4      | 4      | 1      | 1      | 4     |
| 20556  | 0     | 0      | 2     | 4      | 4      | 1      | 2      | 4     |
| 20566  | 0     | 0      | 3     | 4      | 3      | 4      | 4      | 4     |
| 20576  | 0     | 0      | 4     | 5      | 5      | 5      | 5      | 5     |
| 20587  | 0     | 1      |       | 5      | 5      | 1      | 1      | 5     |
| 20589  | 0     | 1      |       | 6      | 6      | 5      | 5      | 5     |
| 20593  |       |        |       |        |        |        |        |       |
| 20594  | 0     | 1      |       | 6      | 6      | 6      | 6      | 6     |
| 20602  | 0     | 0      | 3     | 4      | 4      | 4      | 4      | 4     |
| 20607  |       |        |       |        |        |        |        |       |
| 20608  | 0     | 1      |       | 5      | 5      | 5      | 5      | 5     |
| 20611  | 0     | 0      | 4     | 5      | 5      | 1      | 1      | 5     |

| respid | Q43_9 | Q43_99 | Q44_1 | Q46x1a | Q46x1b | Q46x2a | Q46x2b | Q46x3 |
|--------|-------|--------|-------|--------|--------|--------|--------|-------|
| 20612  | 0     | 1      |       | 6      | 6      | 6      | 6      | 6     |
| 20615  | 0     | 1      |       | 5      | 5      | 5      | 5      | 5     |
| 20625  | 0     | 0      | 4     | 5      | 5      | 5      | 5      | 5     |
| 20630  | 0     | 0      | 3     | 6      | 6      | 6      | 6      | 6     |
| 20639  | 0     | 1      |       | 5      | 5      | 5      | 5      | 4     |
| 20643  | 0     | 1      |       | 6      | 6      | 5      | 5      | 5     |
| 20645  |       |        |       |        |        |        |        |       |
| 20647  | 0     | 1      |       | 5      | 5      | 5      | 5      | 4     |
| 20652  | 0     | 0      | 3     | 3      | 2      | 3      | 3      | 2     |
| 20661  | 0     | 1      |       | 5      | 5      | 1      | 1      | 5     |
| 20665  |       |        |       |        |        |        |        |       |
| 20679  | 0     | 1      |       | 5      | 5      | 1      | 1      | 5     |
| 20682  | 0     | 0      | 3     | 3      | 3      | 4      | 4      | 3     |
| 20683  |       |        |       |        |        |        |        |       |
| 20700  | 0     | 1      |       | 5      | 5      | 5      | 5      | 5     |
| 20702  | 0     | 0      | 3     | 6      | 6      | 6      | 6      | 6     |
| 20709  | 0     | 0      | 4     | 6      | 6      | 5      | 5      | 5     |
| 20715  | 0     | 0      | 3     | 4      | 4      | 4      | 4      | 4     |
| 20718  | 0     | 1      |       | 5      | 5      | 5      | 5      | 5     |
| 20722  | 0     | 1      |       | 5      | 5      | 5      | 5      | 5     |
| 20729  |       |        |       |        |        |        |        |       |
| 20732  |       |        |       |        |        |        |        |       |
| 20746  | 0     | 0      | 3     | 5      | 4      | 4      | 4      | 4     |
| 20747  |       |        |       |        |        |        |        |       |
| 20758  | 0     | 1      |       | 6      | 6      | 1      | 1      | 5     |
| 20767  | 0     | 0      | 3     | 4      | 4      | 4      | 4      | 4     |
| 20777  | 0     | 1      |       | 6      | 6      | 6      | 6      | 6     |
| 20778  | 0     | 1      |       | 6      | 6      | 2      | 2      | 6     |
| 20780  | 0     | 1      |       | 6      | 6      | 6      | 6      | 6     |
| 20800  | 0     | 1      |       | 4      | 5      | 2      | 1      | 4     |
| 20810  | 0     | 1      |       | 5      | 5      | 5      | 5      | 5     |
| 20814  | 0     | 1      |       | 6      | 6      | 6      | 6      | 6     |

| respid | Q43_9 | Q43_99 | Q44_1 | Q46x1a | Q46x1b | Q46x2a | Q46x2b | Q46x3 |
|--------|-------|--------|-------|--------|--------|--------|--------|-------|
| 20816  | 0     | 0      | 4     | 5      | 5      | 5      | 5      | 5     |
| 20832  | 0     | 0      | 5     | 5      | 5      | 5      | 5      | 5     |
| 20838  | 0     | 0      | 3     | 3      | 3      | 3      | 2      | 3     |
| 20841  | 1     | 0      | 3     | 6      | 6      | 6      | 6      | 6     |
| 20848  | 0     | 1      |       | 6      | 6      | 6      | 6      | 6     |
| 20850  |       |        |       |        |        |        |        |       |
| 20851  | 0     | 0      | 3     | 4      | 5      | 6      | 4      | 4     |
| 20861  | 0     | 0      | 2     | 5      | 5      | 6      | 6      | 5     |
| 20870  | 0     | 1      |       | 4      | 4      | 4      | 4      | 4     |
| 20880  | 0     | 0      | 4     | 5      | 5      | 5      | 5      | 5     |
| 20883  | 0     | 1      |       | 4      | 5      | 1      | 1      | 4     |
| 20894  | 0     | 0      | 3     | 5      | 5      | 2      | 2      | 5     |
| 20896  | 0     | 0      | 3     | 2      | 2      | 3      | 2      | 2     |
| 20901  | 0     | 0      | 3     | 4      | 4      | 4      | 3      | 3     |
| 20903  | 0     | 1      |       | 6      | 6      | 6      | 6      | 6     |
| 20909  |       |        |       |        |        |        |        |       |
| 20919  | 0     | 1      |       | 5      | 5      | 1      | 1      | 5     |
| 20925  | 0     | 1      |       | 6      | 6      | 1      | 1      | 5     |
| 20935  | 0     | 0      | 3     | 5      | 5      | 5      | 5      | 5     |
| 20939  | 0     | 0      | 3     | 4      | 4      | 2      | 2      | 4     |
| 20956  | 1     | 0      | 2     | 2      | 3      | 2      | 2      | 2     |
| 20970  | 0     | 0      | 2     | 5      | 4      | 1      | 1      | 4     |
| 20974  | 0     | 1      |       | 4      | 4      | 4      | 4      | 3     |
| 20975  | 0     | 1      |       | 5      | 5      | 2      | 2      | 5     |
| 20984  | 1     | 0      | 2     | 4      | 4      | 5      | 5      | 3     |
| 20988  |       |        |       |        |        |        |        |       |
| 20996  | 0     | 1      |       | 4      | 3      | 3      | 3      | 3     |
| 20998  | 0     | 1      |       | 5      | 5      | 2      | 2      | 4     |
| 21007  |       |        |       |        |        |        |        |       |
| 21008  |       |        |       |        |        |        |        |       |
| 21014  | 0     | 1      |       | 4      | 4      | 2      | 2      | 4     |
| 21020  | 0     | 1      |       | 5      | 5      | 5      | 5      | 5     |

| respid | Q43_9 | Q43_99 | Q44_1 | Q46x1a | Q46x1b | Q46x2a | Q46x2b | Q46x3 |
|--------|-------|--------|-------|--------|--------|--------|--------|-------|
| 21022  | 0     | 0      | 3     | 4      | 4      | 2      | 2      | 2     |
| 21024  |       |        |       |        |        |        |        |       |
| 21026  | 0     | 0      | 3     | 4      | 4      | 2      | 3      | 4     |
| 21027  | 0     | 1      |       | 5      | 5      | 2      | 2      | 5     |
| 21030  | 0     | 1      |       | 5      | 5      | 5      | 5      | 5     |
| 21032  | 0     | 0      | 2     | 2      | 1      | 2      | 2      | 2     |
| 21040  | 0     | 1      |       | 5      | 5      | 5      | 5      | 5     |
| 21045  | 0     | 1      |       | 5      | 5      | 2      | 2      | 5     |
| 21058  | 0     | 1      |       | 6      | 6      | 6      | 6      | 6     |
| 21064  | 0     | 1      |       | 5      | 5      | 2      | 2      | 5     |
| 21073  | 0     | 1      |       | 5      | 5      | 1      | 1      | 5     |
| 21086  | 0     | 0      | 3     | 3      | 3      | 3      | 3      | 3     |
| 21092  | 0     | 0      | 4     | 2      | 2      | 2      | 3      | 1     |
| 21096  | 1     | 0      | 3     | 3      | 4      | 4      | 4      | 3     |
| 21103  | 0     | 0      | 3     | 5      | 5      | 1      | 1      | 5     |
| 21120  | 0     | 0      | 3     | 4      | 4      | 4      | 4      | 4     |
| 21125  |       |        |       |        |        |        |        |       |
| 21126  | 0     | 1      |       | 6      | 6      | 6      | 6      | 6     |
| 21132  |       |        |       |        |        |        |        |       |
| 21139  | 0     | 0      | 3     | 3      | 3      | 2      | 1      | 4     |
| 21147  |       |        |       |        |        |        |        |       |
| 21148  | 0     | 1      |       | 3      | 3      | 4      | 4      | 3     |
| 21149  | 0     | 0      | 3     | 5      | 5      | 1      | 1      | 5     |
| 21164  | 0     | 1      |       | 6      | 6      | 5      | 5      | 5     |
| 21165  | 0     | 1      |       | 4      | 5      | 1      | 1      | 5     |
| 21171  | 0     | 0      | 3     | 4      | 3      | 4      | 3      | 4     |
| 21176  | 0     | 1      |       | 5      | 5      | 5      | 5      | 5     |
| 21187  | 0     | 0      | 2     | 4      | 4      | 3      | 3      | 3     |
| 21192  | 0     | 0      | 3     | 4      | 4      | 3      | 3      | 4     |
| 21198  | 0     | 1      |       | 5      | 5      | 1      | 1      | 5     |
| 21199  | 0     | 0      | 2     | 4      | 4      | 2      | 2      | 4     |
| 21206  | 0     | 0      | 2     | 5      | 4      | 5      | 4      | 2     |

| respid | Q43_9 | Q43_99 | Q44_1 | Q46x1a | Q46x1b | Q46x2a | Q46x2b | Q46x3 |
|--------|-------|--------|-------|--------|--------|--------|--------|-------|
| 21212  | 0     | 1      |       | 6      | 6      | 6      | 6      | 6     |
| 21216  | 0     | 1      |       | 5      | 5      | 5      | 5      | 5     |
| 21217  | 0     | 0      | 3     | 3      | 3      | 4      | 3      | 3     |
| 21228  | 0     | 1      |       | 4      | 4      | 5      | 4      | 3     |
| 21229  | 0     | 0      | 3     | 5      | 5      | 5      | 5      | 5     |
| 21230  | 0     | 1      |       | 5      | 4      | 4      | 4      | 5     |
| 21243  | 0     | 0      | 3     | 4      | 4      | 3      | 4      | 4     |
| 21247  | 0     | 0      | 3     | 6      | 6      | 6      | 6      | 6     |
| 21253  | 0     | 0      | 3     | 5      | 5      | 5      | 5      | 5     |
| 21264  | 0     | 0      | 5     | 1      | 5      | 2      | 4      | 2     |
| 21265  | 0     | 1      |       | 6      | 6      | 2      | 2      | 4     |
| 21273  | 0     | 0      | 3     | 4      | 4      | 2      | 2      | 4     |
| 21275  | 0     | 0      | 3     | 5      | 6      | 6      | 6      | 4     |
| 21278  | 0     | 1      |       | 6      | 6      | 6      | 6      | 6     |
| 21291  | 0     | 0      | 2     | 6      | 6      | 6      | 6      | 6     |
| 21298  | 0     | 0      | 4     | 5      | 5      | 5      | 5      | 5     |
| 21301  | 0     | 0      | 3     | 3      | 4      | 3      | 4      | 2     |
| 21312  | 0     | 1      |       | 4      | 4      | 3      | 3      | 4     |
| 21323  | 0     | 0      | 3     | 6      | 6      | 2      | 1      | 4     |
| 21325  | 0     | 1      |       | 6      | 6      | 6      | 6      | 6     |
| 21341  | 0     | 1      |       | 5      | 5      | 1      | 1      | 5     |
| 21349  | 0     | 0      | 3     | 4      | 4      | 2      | 2      | 4     |
| 21350  | 0     | 0      | 3     | 5      | 5      | 1      | 1      | 5     |
| 21354  | 0     | 0      | 2     | 6      | 6      | 6      | 6      | 6     |
| 21372  | 0     | 0      | 3     | 4      | 4      | 2      | 3      | 4     |
| 21373  | 0     | 0      | 4     | 2      | 2      | 3      | 3      | 1     |
| 21378  | 0     | 0      | 3     | 5      | 5      | 1      | 1      | 4     |
| 21393  |       |        |       |        |        |        |        |       |
| 21401  | 0     | 0      | 3     | 5      | 5      | 6      | 6      | 5     |
| 21405  | 0     | 0      | 4     | 6      | 6      | 6      | 6      | 6     |
| 21406  |       |        |       |        |        |        |        |       |
| 21407  | 0     | 1      |       | 5      | 5      | 5      | 5      | 5     |



| respid | Q43_9 | Q43_99 | Q44_1 | Q46x1a | Q46x1b | Q46x2a | Q46x2b | Q46x3 |
|--------|-------|--------|-------|--------|--------|--------|--------|-------|
| 21418  | 0     | 1      |       | 5      | 5      | 1      | 1      | 4     |
| 21420  | 0     | 0      | 4     | 5      | 5      | 2      | 2      | 4     |
| 21421  |       |        |       |        |        |        |        |       |
| 21446  | 0     | 0      | 3     | 5      | 5      | 2      | 2      | 5     |
| 21449  | 0     | 0      | 3     | 4      | 4      | 4      | 4      | 4     |
| 21452  | 0     | 1      |       | 4      | 5      | 2      | 2      | 5     |
| 21455  | 0     | 0      | 2     | 2      | 1      | 1      | 4      | 2     |
| 21469  | 0     | 1      |       | 5      | 5      | 2      | 2      | 5     |
| 21471  | 0     | 0      | 3     | 6      | 6      | 6      | 6      | 6     |
| 21472  | 0     | 1      |       | 6      | 6      | 6      | 6      | 6     |
| 21474  | 0     | 1      |       | 5      | 5      | 1      | 1      | 5     |
| 21479  | 0     | 1      |       | 6      | 6      | 6      | 6      | 6     |
| 21485  | 0     | 1      |       | 4      | 4      | 3      | 3      | 4     |
| 21512  |       |        |       |        |        |        |        |       |
| 21513  | 0     | 1      |       | 5      | 5      | 5      | 5      | 5     |
| 21514  | 0     | 0      | 2     | 3      | 3      | 3      | 3      | 3     |
| 21520  | 0     | 0      | 3     | 4      | 5      | 3      | 4      | 4     |
| 21539  | 0     | 0      | 3     | 5      | 5      | 5      | 4      | 4     |
| 21553  | 0     | 1      |       | 6      | 6      | 2      | 2      | 4     |
| 21560  | 0     | 1      |       | 6      | 4      | 6      | 6      | 4     |
| 21561  | 0     | 1      |       | 5      | 5      | 5      | 5      | 5     |
| 21563  | 0     | 0      | 2     | 6      | 6      | 6      | 6      | 6     |
| 21565  |       |        |       |        |        |        |        |       |
| 21582  | 0     | 1      |       | 5      | 5      | 5      | 5      | 5     |
| 21584  | 0     | 1      |       | 4      | 5      | 6      | 5      | 4     |
| 21585  | 0     | 0      | 2     | 3      | 3      | 3      | 3      | 3     |
| 21586  | 0     | 1      |       | 4      | 4      | 6      | 6      | 5     |
| 21587  | 0     | 1      |       | 4      | 4      | 4      | 4      | 4     |
| 21590  | 1     | 0      | 0     | 6      | 6      | 6      | 6      | 6     |
| 21601  | 0     | 0      | 3     | 4      | 4      | 4      | 4      | 4     |
| 21611  | 0     | 0      | 3     | 4      | 4      | 2      | 2      | 4     |
| 21612  | 0     | 0      | 4     | 4      | 5      | 2      | 2      | 4     |

| respid | Q43_9 | Q43_99 | Q44_1 | Q46x1a | Q46x1b | Q46x2a | Q46x2b | Q46x3 |
|--------|-------|--------|-------|--------|--------|--------|--------|-------|
| 21625  | 0     | 0      | 3     | 4      | 4      | 4      | 4      | 4     |
| 21633  |       |        |       |        |        |        |        |       |
| 21640  | 0     | 0      | 2     | 5      | 5      | 1      | 2      | 4     |
| 21647  | 0     | 1      |       | 5      | 5      | 1      | 1      | 5     |
| 21648  | 0     | 0      | 2     | 3      | 3      | 3      | 3      | 3     |
| 21656  | 0     | 0      | 3     | 5      | 5      | 5      | 5      | 4     |
| 21657  | 0     | 0      | 5     | 5      | 5      | 5      | 5      | 5     |
| 21658  | 1     | 0      | 3     | 3      | 3      | 3      | 3      | 2     |
| 21665  | 0     | 0      | 1     | 3      | 3      | 3      | 4      | 4     |
| 21666  | 0     | 0      | 2     | 3      | 2      | 3      | 2      | 4     |
| 21668  | 0     | 0      | 3     | 3      | 3      | 3      | 3      | 3     |
| 21673  | 0     | 0      | 3     | 6      | 6      | 6      | 6      | 5     |
| 21681  | 0     | 0      | 2     | 3      | 3      | 3      | 3      | 3     |
| 21682  | 0     | 1      |       | 5      | 5      | 5      | 5      | 5     |
| 21685  | 0     | 1      |       | 5      | 5      | 4      | 4      | 4     |
| 21692  | 0     | 1      |       | 4      | 4      | 3      | 3      | 3     |
| 21697  | 0     | 1      |       | 5      | 5      | 2      | 2      | 5     |
| 21711  | 0     | 1      |       | 5      | 5      | 5      | 5      | 5     |
| 21715  | 1     | 0      | 3     | 4      | 4      | 5      | 5      | 5     |
| 21726  | 0     | 1      |       | 6      | 6      | 6      | 6      | 6     |
| 21748  |       |        |       |        |        |        |        |       |
| 21761  | 0     | 1      |       | 5      | 5      | 1      | 1      | 5     |
| 21769  | 1     | 0      | 3     | 4      | 4      | 4      | 4      | 4     |
| 21774  | 0     | 0      | 1     | 3      | 3      | 3      | 3      | 3     |
| 21778  |       |        |       |        |        |        |        |       |
| 21785  | 0     | 0      | 2     | 3      | 3      | 3      | 3      | 3     |
| 21799  | 0     | 0      | 3     | 4      | 5      | 6      | 6      | 6     |
| 21820  | 1     | 0      | 1     | 2      | 2      | 3      | 3      | 2     |
| 21837  | 0     | 0      | 3     | 5      | 5      | 5      | 5      | 5     |
| 21845  | 0     | 0      | 2     | 2      | 2      | 2      | 2      | 2     |
| 21846  | 0     | 1      |       | 6      | 5      | 2      | 2      | 4     |
| 21849  | 0     | 0      | 3     | 5      | 4      | 5      | 5      | 5     |

| respid | Q43_9 | Q43_99 | Q44_1 | Q46x1a | Q46x1b | Q46x2a | Q46x2b | Q46x3 |
|--------|-------|--------|-------|--------|--------|--------|--------|-------|
| 21850  | 0     | 1      |       | 4      | 4      | 4      | 4      | 4     |
| 21855  | 0     | 1      |       | 6      | 6      | 1      | 1      | 5     |
| 21859  | 0     | 1      |       | 5      | 5      | 5      | 5      | 5     |
| 21861  | 0     | 0      | 3     | 5      | 5      | 4      | 5      | 4     |
| 21866  |       |        |       |        |        |        |        |       |
| 21873  | 0     | 1      |       | 6      | 6      | 6      | 5      | 5     |
| 21876  | 0     | 0      | 4     | 6      | 6      | 6      | 6      | 6     |
| 21882  |       |        |       |        |        |        |        |       |
| 21884  | 0     | 0      | 3     | 3      | 6      | 2      | 2      | 3     |
| 21887  | 0     | 1      |       | 4      | 4      | 5      | 5      | 5     |
| 21892  | 0     | 1      |       | 6      | 6      | 6      | 6      | 6     |
| 21907  | 0     | 0      | 3     | 4      | 5      | 2      | 4      | 4     |
| 21910  | 0     | 0      | 3     | 2      | 2      | 3      | 3      | 2     |
| 21912  | 0     | 0      | 3     | 4      | 6      | 2      | 3      | 4     |
| 21914  | 0     | 0      | 2     | 4      | 4      | 2      | 2      | 3     |
| 21925  | 0     | 1      |       | 6      | 6      | 5      | 5      | 5     |
| 21937  |       |        |       |        |        |        |        |       |
| 21938  | 0     | 0      | 3     | 4      | 4      | 4      | 4      | 4     |
| 21940  | 0     | 0      | 4     | 5      | 5      | 6      | 5      | 5     |
| 21942  | 0     | 1      |       | 5      | 5      | 5      | 5      | 5     |
| 21947  |       |        |       |        |        |        |        |       |
| 21948  | 0     | 1      |       | 6      | 6      | 6      | 6      | 6     |
| 21961  | 0     | 1      |       | 4      | 6      | 1      | 1      | 5     |
| 21977  | 0     | 0      | 3     | 4      | 3      | 2      | 2      | 3     |
| 21983  |       |        |       |        |        |        |        |       |
| 21986  | 1     | 0      | 2     | 4      | 4      | 4      | 3      | 3     |
| 21988  | 0     | 1      |       | 5      | 5      | 5      | 5      | 5     |
| 21996  | 0     | 0      | 3     | 6      | 6      | 2      | 2      | 4     |
| 21997  | 0     | 1      |       | 6      | 6      | 2      | 2      | 3     |
| 22005  | 0     | 1      |       | 5      | 5      | 5      | 6      | 5     |
| 22013  | 0     | 1      |       | 5      | 5      | 5      | 5      | 5     |
| 22018  |       |        |       |        |        |        |        |       |

| respid | Q43_9 | Q43_99 | Q44_1 | Q46x1a | Q46x1b | Q46x2a | Q46x2b | Q46x3 |
|--------|-------|--------|-------|--------|--------|--------|--------|-------|
| 22019  | 0     | 0      | 3     | 4      | 4      | 4      | 4      | 4     |
| 22071  | 0     | 0      | 5     | 6      | 6      | 6      | 6      | 1     |
| 22082  | 0     | 1      |       | 5      | 5      | 4      | 5      | 5     |
| 22085  | 0     | 0      | 4     | 6      | 5      | 6      | 2      | 6     |
| 22092  | 0     | 1      |       | 6      | 6      | 6      | 6      | 6     |
| 22097  | 0     | 1      |       | 6      | 5      | 5      | 5      | 4     |
| 22111  |       |        |       |        |        |        |        |       |
| 22118  | 0     | 1      |       | 5      | 5      | 5      | 5      | 5     |
| 22132  | 0     | 1      |       | 6      | 6      | 6      | 5      | 5     |
| 22133  | 0     | 1      |       | 5      | 5      | 5      | 5      | 5     |
| 22139  |       |        |       |        |        |        |        |       |
| 22142  | 0     | 0      | 2     | 3      | 3      | 3      | 2      | 2     |
| 22146  | 0     | 1      |       | 6      | 6      | 6      | 6      | 6     |
| 22181  |       |        |       |        |        |        |        |       |
| 22202  | 0     | 1      |       | 6      | 6      | 6      | 6      | 6     |
| 22214  |       |        |       |        |        |        |        |       |
| 22223  | 0     | 1      |       | 6      | 6      | 6      | 6      | 6     |
| 22227  | 0     | 0      | 3     | 4      | 4      | 2      | 2      | 4     |
| 22229  | 0     | 1      |       | 5      | 5      | 5      | 4      | 5     |
| 22239  | 0     | 1      |       | 3      | 3      | 4      | 4      | 5     |
| 22245  | 0     | 0      | 3     | 3      | 3      | 3      | 3      | 3     |
| 22256  | 0     | 1      |       | 5      | 5      | 5      | 5      | 5     |
| 22260  | 0     | 0      | 3     | 5      | 5      | 4      | 5      | 5     |
| 22298  | 0     | 0      | 3     | 4      | 4      | 4      | 4      | 3     |
| 22321  | 0     | 1      |       | 4      | 5      | 1      | 1      | 1     |
| 22340  |       |        |       |        |        |        |        |       |
| 22346  | 0     | 0      | 2     | 4      | 4      | 4      | 4      | 4     |
| 22356  | 0     | 0      | 3     | 5      | 5      | 5      | 5      | 5     |
| 22361  | 0     | 1      |       | 4      | 5      | 6      | 6      | 6     |
| 22364  | 0     | 1      |       | 4      | 4      | 3      | 3      | 4     |
| 22368  |       |        |       |        |        |        |        |       |
| 22374  | 0     | 0      | 2     | 3      | 3      | 3      | 3      | 4     |

| respid | Q43_9 | Q43_99 | Q44_1 | Q46x1a | Q46x1b | Q46x2a | Q46x2b | Q46x3 |
|--------|-------|--------|-------|--------|--------|--------|--------|-------|
| 22375  | 0     | 1      |       | 5      | 4      | 2      | 2      | 5     |
| 22377  | 0     | 1      |       | 4      | 5      | 2      | 2      | 5     |
| 22383  |       |        |       |        |        |        |        |       |
| 22387  | 0     | 0      | 3     | 4      | 5      | 2      | 4      | 4     |
| 22392  |       |        |       |        |        |        |        |       |
| 22393  | 0     | 1      |       | 6      | 6      | 6      | 6      | 6     |
| 22394  | 0     | 1      |       | 5      | 4      | 2      | 3      | 4     |
| 22395  |       |        |       |        |        |        |        |       |
| 22401  | 0     | 1      |       | 6      | 6      | 6      | 6      | 6     |
| 22407  |       |        |       |        |        |        |        |       |
| 22410  | 0     | 0      | 3     | 5      | 5      | 2      | 2      | 4     |
| 22418  | 0     | 1      |       | 5      | 5      | 5      | 5      | 4     |
| 22421  |       |        |       |        |        |        |        |       |
| 22423  |       |        |       |        |        |        |        |       |
| 22425  | 0     | 0      | 3     | 5      | 4      | 2      | 2      | 5     |
| 22427  | 0     | 1      |       | 5      | 5      | 1      | 1      | 5     |
| 22431  | 1     | 0      | 3     | 6      | 6      | 6      | 6      | 6     |
| 22435  | 0     | 0      | 3     | 3      | 4      | 2      | 2      | 4     |
| 22436  | 1     | 0      | 2     | 4      | 4      | 1      | 2      | 3     |
| 22442  |       |        |       |        |        |        |        |       |
| 22444  | 0     | 0      | 2     | 4      | 4      | 3      | 3      | 3     |
| 22445  | 0     | 1      |       | 5      | 5      | 4      | 3      | 4     |
| 22446  |       |        |       |        |        |        |        |       |
| 22448  | 0     | 0      | 4     | 6      | 6      | 5      | 5      | 5     |
| 22449  | 0     | 1      |       | 5      | 5      | 5      | 5      | 5     |
| 22450  | 0     | 1      |       | 4      | 4      | 6      | 6      | 6     |
| 22453  | 0     | 0      | 3     | 2      | 3      | 4      | 3      | 3     |
| 22465  | 0     | 1      |       | 6      | 6      | 6      | 6      | 6     |
| 22472  | 0     | 0      | 3     | 5      | 5      | 4      | 5      | 5     |
| 22475  | 1     | 0      | 3     | 4      | 3      | 2      | 3      | 4     |
| 22478  | 0     | 0      | 2     | 4      | 4      | 2      | 2      | 4     |
| 22491  | 0     | 1      |       | 5      | 4      | 5      | 4      | 4     |

| respid | Q43_9 | Q43_99 | Q44_1 | Q46x1a | Q46x1b | Q46x2a | Q46x2b | Q46x3 |
|--------|-------|--------|-------|--------|--------|--------|--------|-------|
| 22497  | 0     | 0      | 2     | 4      | 4      | 4      | 4      | 4     |
| 22498  | 0     | 0      | 2     | 3      | 4      | 4      | 4      | 4     |
| 22499  | 0     | 1      |       | 6      | 6      | 6      | 6      | 6     |
| 22503  | 0     | 1      |       | 5      | 5      | 5      | 5      | 5     |
| 22507  | 0     | 1      |       | 4      | 5      | 2      | 2      | 4     |
| 22513  | 0     | 0      | 2     | 4      | 5      | 2      | 2      | 4     |
| 22517  | 0     | 0      | 3     | 5      | 5      | 5      | 5      | 5     |
| 22524  | 0     | 0      | 3     | 3      | 2      | 2      | 3      | 4     |
| 22528  | 0     | 1      |       | 5      | 5      | 1      | 1      | 5     |
| 22544  | 0     | 0      | 2     | 6      | 6      | 6      | 6      | 6     |
| 22571  | 0     | 1      |       | 5      | 5      | 2      | 2      | 5     |
| 22576  | 0     | 0      | 0     | 5      | 5      | 5      | 5      | 4     |
| 22579  | 0     | 0      | 2     | 6      | 6      | 6      | 6      | 6     |
| 22583  | 0     | 0      | 3     | 4      | 4      | 2      | 2      | 4     |
| 22591  | 0     | 0      | 3     | 4      | 4      | 4      | 4      | 3     |
| 22592  | 0     | 1      |       | 4      | 4      | 4      | 4      | 4     |
| 22612  | 0     | 0      | 0     | 5      | 5      | 4      | 4      | 5     |
| 22613  | 0     | 0      | 3     | 2      | 3      | 2      | 2      | 4     |
| 22615  | 0     | 0      | 2     | 4      | 4      | 4      | 4      | 4     |
| 22621  | 0     | 1      |       | 5      | 5      | 5      | 5      | 5     |
| 22625  | 0     | 1      |       | 6      | 6      | 6      | 4      | 6     |
| 22628  | 0     | 1      |       | 6      | 6      | 6      | 6      | 6     |
| 22632  | 0     | 1      |       | 5      | 5      | 1      | 2      | 6     |
| 22639  |       |        |       |        |        |        |        |       |
| 22648  | 0     | 1      |       | 6      | 6      | 6      | 6      | 6     |
| 22649  | 0     | 0      | 3     | 3      | 4      | 4      | 4      | 2     |
| 22655  |       |        |       |        |        |        |        |       |
| 22659  |       |        |       |        |        |        |        |       |
| 22660  | 0     | 1      |       | 6      | 6      | 6      | 6      | 6     |
| 22666  | 0     | 1      |       | 6      | 6      | 6      | 6      | 6     |
| 22667  | 0     | 0      | 3     | 1      | 5      | 1      | 1      | 4     |
| 22670  |       |        |       |        |        |        |        |       |

| respid | Q43_9 | Q43_99 | Q44_1 | Q46x1a | Q46x1b | Q46x2a | Q46x2b | Q46x3 |
|--------|-------|--------|-------|--------|--------|--------|--------|-------|
| 22681  |       |        |       |        |        |        |        |       |
| 22683  | 0     | 1      |       | 5      | 4      | 1      | 2      | 4     |
| 22688  | 0     | 0      | 3     | 4      | 5      | 2      | 2      | 4     |
| 22695  | 0     | 0      | 4     | 5      | 5      | 4      | 5      | 5     |
| 22696  | 0     | 1      |       | 6      | 6      | 6      | 6      | 6     |
| 22705  | 0     | 0      | 3     | 2      | 3      | 3      | 3      | 4     |
| 22718  | 1     | 0      | 3     | 4      | 4      | 4      | 4      | 3     |
| 22720  | 0     | 1      |       | 6      | 6      | 6      | 6      | 6     |
| 22724  | 0     | 0      | 4     | 4      | 4      | 4      | 4      | 4     |
| 22728  | 0     | 1      |       | 5      | 5      | 5      | 5      | 5     |
| 22751  | 0     | 1      |       | 5      | 5      | 5      | 5      | 5     |
| 22782  | 0     | 0      | 2     | 2      | 6      | 2      | 3      | 2     |
| 22786  | 0     | 0      | 4     | 6      | 6      | 6      | 6      | 6     |
| 22788  | 0     | 1      |       | 6      | 6      | 6      | 6      | 6     |
| 22810  | 0     | 0      | 3     | 4      | 4      | 2      | 2      | 4     |
| 22816  | 0     | 1      |       | 6      | 6      | 6      | 6      | 6     |
| 22818  | 0     | 1      |       | 6      | 6      | 6      | 6      | 6     |
| 22854  |       |        |       |        |        |        |        |       |
| 22858  | 0     | 1      |       | 5      | 5      | 1      | 1      | 5     |
| 22862  | 0     | 1      |       | 6      | 6      | 6      | 6      | 6     |
| 22865  | 0     | 1      |       | 5      | 5      | 5      | 5      | 5     |
| 22868  | 0     | 0      | 5     | 5      | 5      | 4      | 4      | 5     |
| 22869  | 0     | 0      | 3     | 5      | 5      | 4      | 2      | 4     |
| 22873  | 0     | 1      |       | 6      | 6      | 6      | 6      | 6     |
| 22875  | 0     | 1      |       | 4      | 4      | 5      | 5      | 4     |
| 22876  | 0     | 1      |       | 6      | 6      | 6      | 6      | 6     |
| 22882  | 0     | 1      |       | 3      | 3      | 5      | 2      | 5     |
| 22884  | 0     | 0      | 3     | 6      | 6      | 6      | 6      | 4     |
| 22887  | 0     | 1      |       | 4      | 2      | 3      | 2      | 2     |
| 22888  | 0     | 1      |       | 5      | 5      | 1      | 1      | 5     |
| 22900  |       |        |       |        |        |        |        |       |
| 22901  |       |        |       |        |        |        |        |       |

| respid | Q43_9 | Q43_99 | Q44_1 | Q46x1a | Q46x1b | Q46x2a | Q46x2b | Q46x3 |
|--------|-------|--------|-------|--------|--------|--------|--------|-------|
| 22912  | 0     | 1      |       | 5      | 5      | 5      | 5      | 5     |
| 22913  | 0     | 1      |       | 5      | 5      | 5      | 6      | 5     |
| 22921  | 0     | 1      |       | 5      | 5      | 5      | 5      | 5     |
| 22925  | 0     | 1      |       | 5      | 5      | 1      | 1      | 5     |
| 22940  | 0     | 1      |       | 6      | 6      | 1      | 1      | 5     |
| 22941  | 0     | 1      |       | 5      | 5      | 5      | 5      | 5     |
| 22947  | 0     | 0      | 4     | 5      | 5      | 1      | 1      | 5     |
| 22948  |       |        |       |        |        |        |        |       |
| 22964  | 0     | 0      | 2     | 6      | 6      | 2      | 2      | 4     |
| 22966  | 0     | 1      |       | 4      | 4      | 2      | 2      | 3     |
| 22969  | 0     | 0      | 4     | 5      | 5      | 3      | 2      | 4     |
| 22971  |       |        |       |        |        |        |        |       |
| 22988  |       |        |       |        |        |        |        |       |
| 22990  |       |        |       |        |        |        |        |       |
| 23000  | 0     | 1      |       | 5      | 5      | 1      | 1      | 5     |
| 23016  |       |        |       |        |        |        |        |       |
| 23026  | 0     | 0      | 3     | 6      | 6      | 6      | 6      | 6     |
| 23035  | 0     | 1      |       | 5      | 5      | 1      | 1      | 5     |
| 23037  | 0     | 0      | 1     | 6      | 6      | 4      | 4      | 3     |
| 23044  | 0     | 1      |       | 4      | 4      | 5      | 5      | 4     |
| 23046  | 0     | 1      |       | 5      | 5      | 5      | 5      | 5     |
| 23047  | 0     | 1      |       | 6      | 5      | 5      | 5      | 5     |
| 23049  | 0     | 1      |       | 5      | 4      | 4      | 4      | 4     |
| 23055  | 0     | 1      |       | 5      | 5      | 5      | 5      | 5     |
| 23066  | 0     | 1      |       | 6      | 6      | 6      | 6      | 6     |
| 23075  | 0     | 1      |       | 6      | 6      | 6      | 6      | 6     |
| 23081  | 0     | 0      | 3     | 6      | 6      | 6      | 6      | 6     |
| 23087  | 0     | 1      |       | 5      | 5      | 5      | 5      | 5     |
| 23094  |       |        |       |        |        |        |        |       |
| 23099  |       |        |       |        |        |        |        |       |
| 23101  | 0     | 0      | 3     | 3      | 2      | 2      | 2      | 2     |
| 23105  |       |        |       |        |        |        |        |       |



| respid | Q43_9 | Q43_99 | Q44_1 | Q46x1a | Q46x1b | Q46x2a | Q46x2b | Q46x3 |
|--------|-------|--------|-------|--------|--------|--------|--------|-------|
| 23115  | 0     | 1      |       | 6      | 6      | 6      | 6      | 6     |
| 23121  | 0     | 1      |       | 6      | 6      | 6      | 6      | 5     |
| 23127  | 0     | 1      |       | 5      | 5      | 5      | 5      | 5     |
| 23131  | 0     | 1      |       | 6      | 6      | 6      | 6      | 6     |
| 23134  | 0     | 1      |       | 6      | 6      | 6      | 6      | 6     |
| 23145  | 0     | 1      |       | 5      | 5      | 2      | 2      | 4     |
| 23151  | 0     | 1      |       | 5      | 5      | 5      | 5      | 5     |
| 23161  | 0     | 0      | 3     | 5      | 4      | 4      | 4      | 4     |
| 23169  | 0     | 1      |       | 4      | 4      | 4      | 4      | 4     |
| 23173  | 0     | 1      |       | 5      | 5      | 5      | 5      | 5     |
| 23174  | 0     | 1      |       | 5      | 4      | 5      | 5      | 5     |
| 23186  | 1     | 0      | 3     | 6      | 6      | 6      | 6      | 6     |
| 23195  | 0     | 1      |       | 5      | 5      | 3      | 5      | 5     |
| 23197  | 0     | 1      |       | 2      | 2      | 2      | 2      | 2     |
| 23198  | 0     | 1      |       | 6      | 6      | 2      | 4      | 5     |
| 23203  |       |        |       |        |        |        |        |       |
| 23204  | 0     | 0      | 2     | 4      | 5      | 2      | 2      | 4     |
| 23212  | 0     | 1      |       | 5      | 5      | 1      | 1      | 4     |
| 23214  | 0     | 1      |       | 6      | 6      | 6      | 6      | 6     |
| 23221  | 0     | 0      | 3     | 3      | 3      | 3      | 3      | 3     |
| 23237  | 0     | 1      |       | 5      | 5      | 5      | 5      | 5     |
| 23251  | 0     | 0      | 5     | 5      | 5      | 2      | 2      | 3     |
| 23254  | 0     | 1      |       | 5      | 5      | 5      | 5      | 5     |
| 23262  | 0     | 1      |       | 6      | 6      | 6      | 6      | 6     |
| 23267  | 0     | 1      |       | 6      | 6      | 1      | 4      | 4     |
| 23268  | 0     | 0      | 3     | 3      | 3      | 2      | 2      | 4     |
| 23273  | 0     | 1      |       | 5      | 5      | 2      | 2      | 5     |
| 23278  | 0     | 1      |       | 5      | 5      | 1      | 1      | 5     |
| 23279  |       |        |       |        |        |        |        |       |
| 23281  | 0     | 0      | 3     | 6      | 6      | 1      | 1      | 5     |
| 23282  | 0     | 0      | 2     | 4      | 4      | 4      | 4      | 4     |
| 23283  | 0     | 0      | 2     | 5      | 4      | 1      | 2      | 5     |

| respid | Q43_9 | Q43_99 | Q44_1 | Q46x1a | Q46x1b | Q46x2a | Q46x2b | Q46x3 |
|--------|-------|--------|-------|--------|--------|--------|--------|-------|
| 23285  | 0     | 1      |       | 5      | 5      | 1      | 1      | 5     |
| 23305  | 0     | 0      | 3     | 4      | 4      | 2      | 2      | 4     |
| 23309  | 0     | 1      |       | 6      | 6      | 1      | 1      | 6     |
| 23310  | 0     | 1      |       | 6      | 6      | 2      | 4      | 4     |
| 23311  | 0     | 0      | 3     | 5      | 5      | 6      | 1      | 5     |
| 23312  | 0     | 1      |       | 4      | 5      | 1      | 1      | 2     |
| 23319  | 0     | 0      | 3     | 5      | 5      | 5      | 5      | 5     |
| 23320  | 0     | 1      |       | 6      | 6      | 1      | 1      | 4     |
| 23322  | 0     | 0      | 3     | 6      | 6      | 6      | 6      | 5     |
| 23334  | 0     | 0      | 4     | 5      | 4      | 6      | 4      | 5     |
| 23340  | 0     | 0      | 4     | 5      | 5      | 5      | 5      | 5     |
| 23346  | 0     | 1      |       | 5      | 5      | 1      | 1      | 5     |
| 23353  | 0     | 1      |       | 5      | 5      | 5      | 5      | 5     |
| 23363  | 1     | 0      | 3     | 3      | 3      | 3      | 3      | 3     |
| 23364  | 0     | 0      | 3     | 3      | 3      | 3      | 2      | 3     |
| 23376  |       |        |       |        |        |        |        |       |
| 23378  | 0     | 1      |       | 5      | 5      | 5      | 5      | 5     |
| 23382  |       |        |       |        |        |        |        |       |
| 23383  |       |        |       |        |        |        |        |       |
| 23390  | 0     | 1      |       | 5      | 5      | 1      | 1      | 5     |
| 23395  | 0     | 1      |       | 5      | 5      | 5      | 5      | 4     |
| 23398  | 0     | 0      | 3     | 3      | 2      | 2      | 2      | 2     |
| 23399  | 0     | 1      |       | 5      | 5      | 5      | 5      | 5     |
| 23406  | 0     | 0      | 3     | 2      | 2      | 1      | 2      | 5     |
| 23418  | 0     | 1      |       | 4      | 5      | 5      | 6      | 4     |
| 23427  | 0     | 1      |       | 6      | 6      | 6      | 6      | 6     |
| 23428  | 0     | 1      |       | 5      | 4      | 4      | 5      | 4     |
| 23435  | 0     | 0      | 1     | 4      | 4      | 4      | 4      | 4     |
| 23439  | 0     | 1      |       | 6      | 6      | 2      | 6      | 6     |
| 23440  |       |        |       |        |        |        |        |       |
| 23444  | 0     | 0      | 3     | 5      | 4      | 1      | 4      | 4     |
| 23445  | 0     | 1      |       | 5      | 5      | 5      | 5      | 5     |

| respid | Q43_9 | Q43_99 | Q44_1 | Q46x1a | Q46x1b | Q46x2a | Q46x2b | Q46x3 |
|--------|-------|--------|-------|--------|--------|--------|--------|-------|
| 23455  |       |        |       |        |        |        |        |       |
| 23467  | 0     | 0      | 3     | 5      | 5      | 1      | 2      | 5     |
| 23478  | 0     | 0      | 2     | 5      | 6      | 6      | 6      | 5     |
| 23492  | 0     | 0      | 3     | 4      | 4      | 4      | 4      | 4     |
| 23498  | 0     | 1      |       | 6      | 6      | 6      | 6      | 6     |
| 23511  | 0     | 1      |       | 5      | 5      | 2      | 2      | 4     |
| 23514  | 0     | 1      |       | 5      | 5      | 4      | 5      | 5     |
| 23515  | 0     | 0      | 3     | 5      | 5      | 2      | 2      | 5     |
| 23522  |       |        |       |        |        |        |        |       |
| 23524  |       |        |       |        |        |        |        |       |
| 23531  | 0     | 1      |       | 5      | 5      | 1      | 1      | 5     |
| 23532  | 0     | 1      |       | 5      | 5      | 5      | 5      | 5     |
| 23533  | 0     | 1      |       | 4      | 4      | 1      | 1      | 4     |
| 23534  | 0     | 1      |       | 4      | 4      | 4      | 4      | 4     |
| 23538  | 0     | 1      |       | 6      | 6      | 1      | 1      | 3     |
| 23539  | 0     | 0      | 2     | 4      | 4      | 4      | 4      | 4     |
| 23548  | 0     | 1      |       | 4      | 5      | 1      | 1      | 5     |
| 23553  |       |        |       |        |        |        |        |       |
| 23556  | 0     | 1      |       | 5      | 5      | 5      | 5      | 5     |
| 23563  | 0     | 0      | 2     | 4      | 5      | 2      | 2      | 4     |
| 23572  | 0     | 1      |       | 5      | 5      | 5      | 5      | 5     |
| 23575  | 0     | 1      |       | 5      | 5      | 5      | 5      | 5     |
| 23576  | 0     | 1      |       | 6      | 6      | 6      | 6      | 6     |
| 23577  | 0     | 1      |       | 6      | 6      | 6      | 6      | 6     |
| 23578  | 0     | 1      |       | 5      | 4      | 2      | 2      | 2     |
| 23587  | 0     | 0      | 3     | 4      | 5      | 5      | 4      | 5     |
| 23597  | 0     | 1      |       | 4      | 5      | 2      | 2      | 4     |
| 23598  | 0     | 1      |       | 5      | 5      | 1      | 1      | 4     |
| 23604  |       |        |       |        |        |        |        |       |
| 23617  | 0     | 1      |       | 5      | 5      | 5      | 5      | 5     |
| 23620  | 0     | 0      | 3     | 5      | 5      | 5      | 5      | 5     |
| 23621  |       |        |       |        |        |        |        |       |

| respid | Q43_9 | Q43_99 | Q44_1 | Q46x1a | Q46x1b | Q46x2a | Q46x2b | Q46x3 |
|--------|-------|--------|-------|--------|--------|--------|--------|-------|
| 23625  | 0     | 0      | 3     | 5      | 5      | 5      | 5      | 5     |
| 23629  | 0     | 1      |       | 5      | 5      | 5      | 5      | 5     |
| 23635  | 0     | 1      |       | 4      | 4      | 1      | 6      | 4     |
| 23636  | 0     | 1      |       | 6      | 6      | 6      | 6      | 5     |
| 23637  | 0     | 0      | 3     | 3      | 3      | 3      | 3      | 3     |
| 23638  | 0     | 1      |       | 6      | 6      | 5      | 1      | 5     |
| 23644  | 0     | 1      |       | 5      | 5      | 2      | 1      | 5     |
| 23645  | 0     | 0      | 2     | 6      | 5      | 2      | 2      | 5     |
| 23649  | 0     | 0      | 0     | 2      | 6      | 3      | 6      | 3     |
| 23654  | 0     | 0      | 3     | 5      | 5      | 5      | 5      | 5     |
| 23662  | 0     | 1      |       | 5      | 5      | 6      | 6      | 6     |
| 23664  | 0     | 0      | 4     | 6      | 6      | 6      | 6      | 6     |
| 23665  | 0     | 1      |       | 6      | 6      | 6      | 6      | 6     |
| 23666  | 0     | 1      |       | 4      | 4      | 4      | 4      | 4     |
| 23671  | 0     | 1      |       | 5      | 5      | 1      | 1      | 5     |
| 23672  | 0     | 1      |       | 5      | 5      | 1      | 1      | 5     |
| 23685  | 0     | 1      |       | 5      | 5      | 5      | 5      | 5     |
| 23686  | 0     | 0      | 3     | 6      | 6      | 6      | 6      | 6     |
| 23689  | 0     | 0      | 2     | 2      | 2      | 2      | 2      | 4     |
| 23690  | 0     | 0      | 3     | 4      | 4      | 4      | 4      | 4     |
| 23695  | 1     | 0      | 3     | 5      | 4      | 1      | 2      | 4     |
| 23700  | 0     | 1      |       | 6      | 6      | 6      | 6      | 6     |
| 23714  | 0     | 0      | 5     | 6      | 6      | 6      | 6      | 6     |
| 23719  | 0     | 0      | 3     | 5      | 5      | 1      | 1      | 5     |
| 23720  | 0     | 0      | 3     | 4      | 4      | 2      | 2      | 4     |
| 23721  | 0     | 1      |       | 6      | 6      | 6      | 5      | 5     |
| 23729  | 0     | 1      |       | 5      | 5      | 5      | 5      | 5     |
| 23730  | 0     | 1      |       | 6      | 6      | 6      | 6      | 6     |
| 23732  | 0     | 1      |       | 5      | 5      | 4      | 5      | 5     |
| 23736  | 0     | 1      |       | 5      | 5      | 5      | 5      | 5     |
| 23754  |       |        |       |        |        |        |        |       |
| 23756  | 0     | 0      | 4     | 5      | 5      | 1      | 1      | 5     |

| respid | Q43_9 | Q43_99 | Q44_1 | Q46x1a | Q46x1b | Q46x2a | Q46x2b | Q46x3 |
|--------|-------|--------|-------|--------|--------|--------|--------|-------|
| 23759  | 0     | 0      | 3     | 5      | 5      | 2      | 2      | 4     |
| 23761  | 0     | 1      |       | 4      | 4      | 1      | 1      | 6     |
| 23766  | 0     | 1      |       | 5      | 5      | 6      | 6      | 6     |
| 23768  | 0     | 0      | 3     | 3      | 3      | 4      | 4      | 3     |
| 23773  | 0     | 1      |       | 6      | 6      | 6      | 6      | 6     |
| 23781  |       |        |       |        |        |        |        |       |
| 23782  | 0     | 0      | 3     | 6      | 6      | 5      | 6      | 5     |
| 23787  | 0     | 1      |       | 5      | 5      | 5      | 4      | 4     |
| 23788  | 0     | 1      |       | 6      | 6      | 6      | 6      | 6     |
| 23790  |       |        |       |        |        |        |        |       |
| 23794  | 0     | 1      |       | 5      | 5      | 5      | 5      | 5     |
| 23795  | 0     | 1      |       | 4      | 4      | 2      | 2      | 4     |
| 23801  | 0     | 1      |       | 5      | 5      | 5      | 5      | 4     |
| 23806  | 0     | 1      |       | 5      | 5      | 5      | 5      | 5     |
| 23809  | 0     | 0      | 4     | 4      | 4      | 2      | 4      | 4     |
| 23813  | 0     | 1      |       | 5      | 5      | 1      | 1      | 5     |
| 23815  | 0     | 1      |       | 5      | 5      | 5      | 5      | 5     |
| 23821  | 0     | 1      |       | 5      | 5      | 5      | 5      | 5     |
| 23825  | 0     | 1      |       | 5      | 5      | 6      | 6      | 5     |
| 23826  | 0     | 1      |       | 5      | 4      | 4      | 4      | 4     |
| 23830  | 0     | 1      |       | 5      | 5      | 1      | 1      | 5     |
| 23833  | 0     | 1      |       | 6      | 6      | 6      | 6      | 6     |
| 23837  | 0     | 1      |       | 5      | 5      | 5      | 5      | 5     |
| 23848  | 0     | 1      |       | 1      | 6      | 1      | 6      | 6     |
| 23850  | 0     | 1      |       | 6      | 6      | 1      | 2      | 5     |
| 23870  | 0     | 1      |       | 4      | 4      | 4      | 4      | 4     |
| 23877  |       |        |       |        |        |        |        |       |
| 23880  | 0     | 1      |       | 6      | 6      | 6      | 6      | 6     |
| 23882  | 0     | 1      |       | 4      | 4      | 4      | 4      | 4     |
| 23888  |       |        |       |        |        |        |        |       |
| 23908  | 0     | 1      |       | 5      | 5      | 2      | 2      | 5     |
| 23914  | 0     | 1      |       | 5      | 5      | 1      | 1      | 5     |

| respid | Q43_9 | Q43_99 | Q44_1 | Q46x1a | Q46x1b | Q46x2a | Q46x2b | Q46x3 |
|--------|-------|--------|-------|--------|--------|--------|--------|-------|
| 23916  | 0     | 1      |       | 6      | 6      | 6      | 6      | 6     |
| 23922  | 0     | 0      | 2     | 4      | 4      | 4      | 4      | 4     |
| 23932  | 0     | 0      | 4     | 5      | 5      | 2      | 2      | 4     |
| 23934  |       |        |       |        |        |        |        |       |
| 23942  | 0     | 0      | 2     | 6      | 6      | 5      | 5      | 5     |
| 23945  | 0     | 1      |       | 5      | 5      | 5      | 5      | 5     |
| 23948  | 0     | 1      |       | 5      | 5      | 2      | 1      | 4     |
| 23955  | 0     | 0      | 4     | 5      | 5      | 5      | 5      | 5     |
| 23956  | 0     | 0      | 3     | 4      | 5      | 2      | 2      | 4     |
| 23978  | 0     | 1      |       | 5      | 5      | 5      | 4      | 5     |
| 23981  |       |        |       |        |        |        |        |       |
| 23982  | 0     | 0      | 1     | 2      | 6      | 6      | 6      | 6     |
| 23991  | 0     | 1      |       | 6      | 6      | 6      | 6      | 6     |
| 23994  | 0     | 0      | 4     | 5      | 5      | 5      | 5      | 5     |
| 23995  | 0     | 1      |       | 5      | 5      | 1      | 1      | 5     |
| 23999  | 0     | 0      | 3     | 4      | 5      | 5      | 5      | 5     |
| 24005  | 1     | 0      | 1     | 2      | 3      | 4      | 3      | 2     |
| 24018  | 0     | 1      |       | 5      | 5      | 4      | 1      | 5     |
| 24021  |       |        |       |        |        |        |        |       |
| 24035  |       |        |       |        |        |        |        |       |
| 24040  | 0     | 0      | 4     | 6      | 6      | 6      | 6      | 6     |
| 24043  |       |        |       |        |        |        |        |       |
| 24046  | 0     | 0      | 2     | 4      | 4      | 4      | 4      | 4     |
| 24047  | 0     | 0      | 2     | 4      | 5      | 4      | 4      | 4     |
| 24048  | 0     | 1      |       | 5      | 5      | 5      | 5      | 5     |
| 24062  | 0     | 0      | 2     | 4      | 4      | 4      | 4      | 4     |
| 24063  | 0     | 1      |       | 4      | 4      | 5      | 4      | 4     |
| 24066  | 0     | 1      |       | 5      | 5      | 1      | 1      | 5     |
| 24069  | 0     | 1      |       | 5      | 5      | 1      | 1      | 5     |
| 24070  | 0     | 1      |       | 6      | 6      | 6      | 6      | 6     |
| 24074  | 0     | 0      | 4     | 4      | 5      | 5      | 4      | 6     |
| 24080  | 0     | 1      |       | 6      | 6      | 6      | 6      | 6     |

| respid | Q43_9 | Q43_99 | Q44_1 | Q46x1a | Q46x1b | Q46x2a | Q46x2b | Q46x3 |
|--------|-------|--------|-------|--------|--------|--------|--------|-------|
| 24082  | 0     | 0      | 5     | 4      | 5      | 1      | 2      | 5     |
| 24088  | 0     | 1      |       | 4      | 4      | 2      | 3      | 4     |
| 24089  | 0     | 1      |       | 5      | 5      | 1      | 1      | 5     |
| 24091  | 0     | 1      |       | 5      | 4      | 5      | 5      | 5     |
| 24095  |       |        |       |        |        |        |        |       |
| 24100  | 0     | 0      | 2     | 6      | 6      | 5      | 5      | 5     |
| 24105  | 0     | 0      | 3     | 3      | 5      | 4      | 4      | 4     |
| 24107  | 0     | 1      |       | 3      | 3      | 3      | 3      | 4     |
| 24108  |       |        |       |        |        |        |        |       |
| 24113  | 0     | 1      |       | 6      | 6      | 6      | 6      | 5     |
| 24120  |       |        |       |        |        |        |        |       |
| 24122  | 0     | 0      | 2     | 3      | 3      | 4      | 3      | 3     |
| 24123  | 0     | 1      |       | 6      | 6      | 6      | 6      | 6     |
| 24125  | 0     | 0      | 2     | 6      | 6      | 6      | 6      | 6     |
| 24132  | 0     | 1      |       | 6      | 6      | 1      | 1      | 5     |
| 24139  | 0     | 1      |       | 5      | 5      | 1      | 2      | 3     |
| 24140  | 0     | 1      |       | 4      | 4      | 2      | 2      | 4     |
| 24143  | 0     | 0      | 2     | 3      | 4      | 2      | 2      | 4     |
| 24150  | 0     | 0      | 2     | 3      | 3      | 3      | 3      | 3     |
| 24153  |       |        |       |        |        |        |        |       |
| 24161  |       |        |       |        |        |        |        |       |
| 24168  | 0     | 1      |       | 6      | 6      | 6      | 6      | 6     |
| 24179  | 0     | 1      |       | 6      | 6      | 1      | 2      | 5     |
| 24182  | 0     | 0      | 2     | 3      | 3      | 4      | 4      | 3     |
| 24194  | 0     | 1      |       | 6      | 6      | 6      | 6      | 6     |
| 24206  |       |        |       |        |        |        |        |       |
| 24214  |       |        |       |        |        |        |        |       |
| 24215  | 0     | 0      | 4     | 4      | 4      | 2      | 2      | 3     |
| 24224  | 0     | 1      |       | 5      | 5      | 5      | 5      | 5     |
| 24225  | 0     | 1      |       | 5      | 5      | 1      | 1      | 5     |
| 24227  |       |        |       |        |        |        |        |       |
| 24229  | 0     | 1      |       | 4      | 4      | 5      | 4      | 4     |

| respid | Q43_9 | Q43_99 | Q44_1 | Q46x1a | Q46x1b | Q46x2a | Q46x2b | Q46x3 |
|--------|-------|--------|-------|--------|--------|--------|--------|-------|
| 24230  | 0     | 1      |       | 5      | 5      | 2      | 2      | 5     |
| 24232  | 0     | 0      | 3     | 4      | 4      | 4      | 4      | 4     |
| 24253  | 0     | 1      |       | 6      | 6      | 6      | 6      | 6     |
| 24267  | 0     | 0      | 4     | 4      | 4      | 5      | 5      | 5     |
| 24274  | 0     | 1      |       | 5      | 4      | 1      | 1      | 5     |
| 24275  | 0     | 1      |       | 5      | 5      | 5      | 5      | 5     |
| 24277  | 0     | 1      |       | 6      | 6      | 6      | 6      | 6     |
| 24280  | 0     | 0      | 3     | 5      | 5      | 5      | 5      | 5     |
| 24285  | 0     | 1      |       | 5      | 5      | 2      | 2      | 5     |
| 24293  |       |        |       |        |        |        |        |       |
| 24295  | 0     | 0      | 2     | 6      | 6      | 6      | 6      | 6     |
| 24299  |       |        |       |        |        |        |        |       |
| 24303  | 0     | 1      |       | 1      | 6      | 3      | 2      | 6     |
| 24308  | 0     | 0      | 2     | 5      | 4      | 5      | 4      | 4     |
| 24322  |       |        |       |        |        |        |        |       |
| 24325  |       |        |       |        |        |        |        |       |
| 24328  | 0     | 1      |       | 5      | 5      | 2      | 2      | 5     |
| 24334  | 0     | 1      |       | 5      | 5      | 5      | 5      | 5     |
| 24342  | 0     | 0      | 3     | 5      | 5      | 5      | 5      | 5     |
| 24343  | 0     | 0      | 2     | 4      | 4      | 4      | 2      | 4     |
| 24348  | 0     | 1      |       | 6      | 6      | 6      | 6      | 3     |
| 24352  | 0     | 0      | 2     | 2      | 4      | 4      | 4      | 4     |
| 24354  | 0     | 0      | 3     | 4      | 4      | 2      | 2      | 4     |
| 24357  | 0     | 1      |       | 6      | 6      | 6      | 6      | 6     |
| 24360  | 0     | 0      | 3     | 4      | 4      | 2      | 2      | 4     |
| 24369  | 0     | 1      |       | 4      | 4      | 4      | 4      | 3     |
| 24373  | 0     | 0      | 3     | 6      | 6      | 6      | 6      | 6     |
| 24398  | 0     | 0      | 3     | 2      | 2      | 4      | 4      | 2     |
| 24402  | 0     | 1      |       | 5      | 5      | 5      | 5      | 4     |
| 24405  | 0     | 1      |       | 5      | 4      | 2      | 2      | 4     |
| 24407  | 0     | 0      | 3     | 6      | 6      | 6      | 6      | 6     |
| 24413  | 0     | 1      |       | 5      | 5      | 5      | 5      | 5     |



| respid | Q43_9 | Q43_99 | Q44_1 | Q46x1a | Q46x1b | Q46x2a | Q46x2b | Q46x3 |
|--------|-------|--------|-------|--------|--------|--------|--------|-------|
| 24443  | 0     | 0      | 2     | 5      | 4      | 4      | 4      | 5     |
| 24451  |       |        |       |        |        |        |        |       |
| 24459  | 0     | 0      | 3     | 3      | 3      | 4      | 2      | 3     |
| 24465  | 0     | 0      | 3     | 6      | 6      | 6      | 6      | 6     |
| 24481  | 0     | 0      | 3     | 6      | 6      | 6      | 6      | 6     |
| 24482  | 0     | 1      |       | 5      | 5      | 5      | 5      | 5     |
| 24491  | 0     | 0      | 4     | 6      | 6      | 6      | 6      | 6     |
| 24495  | 0     | 1      |       | 5      | 5      | 5      | 5      | 5     |
| 24497  | 0     | 0      | 3     | 3      | 2      | 3      | 3      | 3     |
| 24511  | 0     | 1      |       | 5      | 5      | 5      | 5      | 5     |
| 24513  | 0     | 0      | 2     | 4      | 5      | 4      | 3      | 4     |
| 24516  | 0     | 0      | 3     | 4      | 3      | 2      | 2      | 3     |
| 24518  | 0     | 1      |       | 5      | 5      | 3      | 2      | 4     |
| 24524  | 0     | 1      |       | 4      | 4      | 2      | 2      | 4     |
| 24528  | 0     | 1      |       | 6      | 6      | 6      | 6      | 6     |
| 24531  | 0     | 0      | 2     | 4      | 4      | 2      | 2      | 5     |
| 24533  | 1     | 0      | 3     | 4      | 4      | 3      | 3      | 4     |
| 24547  | 0     | 1      |       | 6      | 6      | 6      | 6      | 6     |
| 24557  | 0     | 0      | 2     | 2      | 2      | 3      | 3      | 2     |
| 24559  | 1     | 0      | 2     | 3      | 2      | 2      | 3      | 3     |
| 24567  | 0     | 1      |       | 5      | 5      | 5      | 5      | 5     |
| 24568  |       |        |       |        |        |        |        |       |
| 24577  |       |        |       |        |        |        |        |       |
| 24581  | 0     | 0      | 4     | 6      | 5      | 4      | 2      | 4     |
| 24588  | 0     | 1      |       | 6      | 6      | 2      | 3      | 4     |
| 24604  | 1     | 0      | 1     | 6      | 6      | 6      | 6      | 6     |
| 24612  | 0     | 0      | 3     | 5      | 5      | 2      | 2      | 5     |
| 24621  | 0     | 0      | 1     | 2      | 3      | 3      | 4      | 3     |
| 24625  | 0     | 1      |       | 6      | 5      | 3      | 3      | 3     |
| 24627  | 0     | 0      | 2     | 5      | 5      | 6      | 6      | 5     |
| 24640  | 0     | 1      |       | 6      | 6      | 6      | 6      | 6     |
| 24644  | 0     | 1      |       | 6      | 6      | 6      | 6      | 6     |

| respid | Q43_9 | Q43_99 | Q44_1 | Q46x1a | Q46x1b | Q46x2a | Q46x2b | Q46x3 |
|--------|-------|--------|-------|--------|--------|--------|--------|-------|
| 24664  | 0     | 0      | 3     | 5      | 5      | 5      | 4      | 5     |
| 24669  | 0     | 1      |       | 5      | 4      | 5      | 5      | 4     |
| 24685  | 0     | 1      |       | 6      | 6      | 6      | 6      | 6     |
| 24687  | 0     | 0      | 3     | 5      | 4      | 2      | 2      | 5     |
| 24688  | 0     | 1      |       | 4      | 4      | 4      | 4      | 4     |
| 24691  | 0     | 0      | 2     | 2      | 2      | 3      | 3      | 2     |
| 24693  | 0     | 0      | 3     | 5      | 5      | 5      | 5      | 5     |
| 24706  |       |        |       |        |        |        |        |       |
| 24710  |       |        |       |        |        |        |        |       |
| 24717  | 0     | 1      |       | 5      | 5      | 5      | 5      | 5     |
| 24720  | 0     | 1      |       | 6      | 6      | 1      | 1      | 4     |
| 24731  | 0     | 0      | 3     | 6      | 6      | 6      | 6      | 6     |
| 24732  | 0     | 0      | 4     | 5      | 5      | 5      | 5      | 5     |
| 24733  |       |        |       |        |        |        |        |       |
| 24747  | 0     | 0      | 2     | 4      | 4      | 3      | 3      | 3     |
| 24750  | 0     | 0      | 3     | 3      | 3      | 2      | 3      | 3     |
| 24758  | 0     | 0      | 3     | 4      | 6      | 4      | 4      | 3     |
| 24760  | 0     | 1      |       | 6      | 6      | 6      | 6      | 6     |
| 24765  |       |        |       |        |        |        |        |       |
| 24772  | 0     | 0      | 4     | 5      | 5      | 1      | 1      | 5     |
| 24779  | 0     | 0      | 2     | 2      | 2      | 2      | 2      | 2     |
| 24794  | 0     | 1      |       | 5      | 5      | 5      | 5      | 5     |
| 24796  | 1     | 0      | 3     | 3      | 3      | 3      | 2      | 2     |
| 24797  | 0     | 1      |       | 6      | 6      | 6      | 6      | 6     |
| 24800  | 0     | 1      |       | 5      | 5      | 5      | 5      | 5     |
| 24813  | 0     | 1      |       | 3      | 4      | 3      | 3      | 4     |
| 24815  | 0     | 1      |       | 6      | 6      | 6      | 6      | 6     |
| 24821  | 0     | 1      |       | 5      | 5      | 1      | 1      | 5     |
| 24822  | 0     | 1      |       | 5      | 5      | 1      | 6      | 5     |
| 24831  | 1     | 0      | 4     | 6      | 6      | 6      | 6      | 6     |
| 24835  |       |        |       |        |        |        |        |       |
| 24843  | 0     | 0      | 3     | 5      | 5      | 4      | 4      | 4     |

| respid | Q43_9 | Q43_99 | Q44_1 | Q46x1a | Q46x1b | Q46x2a | Q46x2b | Q46x3 |
|--------|-------|--------|-------|--------|--------|--------|--------|-------|
| 24844  | 0     | 0      | 3     | 3      | 4      | 4      | 3      | 4     |
| 24860  |       |        |       |        |        |        |        |       |
| 24861  | 0     | 1      |       | 6      | 6      | 6      | 6      | 6     |
| 24865  | 0     | 0      | 2     | 2      | 2      | 3      | 3      | 2     |
| 24870  | 0     | 1      |       | 5      | 5      | 5      | 4      | 4     |
| 24887  | 0     | 1      |       | 5      | 5      | 6      | 6      | 6     |
| 24897  | 0     | 0      | 2     | 4      | 4      | 4      | 3      | 4     |
| 24902  | 0     | 0      | 2     | 4      | 4      | 4      | 4      | 4     |
| 24914  | 0     | 0      | 3     | 4      | 4      | 4      | 4      | 6     |
| 24921  | 0     | 1      |       | 4      | 5      | 5      | 4      | 5     |
| 24922  | 0     | 1      |       | 5      | 5      | 1      | 6      | 4     |
| 24924  |       |        |       |        |        |        |        |       |
| 24927  | 0     | 1      |       | 5      | 5      | 5      | 5      | 5     |
| 24936  | 0     | 1      |       | 5      | 5      | 2      | 2      | 5     |
| 24937  | 0     | 1      |       | 5      | 5      | 2      | 2      | 5     |
| 24942  | 0     | 0      | 3     | 4      | 4      | 4      | 4      | 4     |
| 24947  | 0     | 1      |       | 5      | 5      | 5      | 5      | 5     |
| 24953  | 0     | 1      |       | 6      | 6      | 6      | 6      | 6     |
| 24954  | 0     | 0      | 2     | 3      | 3      | 3      | 3      | 3     |
| 24960  | 0     | 0      | 3     | 2      | 3      | 3      | 3      | 3     |
| 24965  | 0     | 1      |       | 6      | 6      | 6      | 6      | 6     |
| 24975  | 0     | 1      |       | 6      | 6      | 6      | 6      | 6     |
| 24983  | 0     | 0      | 2     | 2      | 2      | 3      | 3      | 2     |
| 24985  | 0     | 1      |       | 5      | 5      | 5      | 5      | 5     |
| 24990  | 0     | 1      |       | 6      | 6      | 2      | 3      | 4     |
| 25000  | 0     | 1      |       | 5      | 5      | 1      | 1      | 5     |
| 25007  | 0     | 1      |       | 3      | 4      | 4      | 4      | 3     |
| 25008  | 0     | 1      |       | 5      | 5      | 5      | 5      | 5     |
| 25010  |       |        |       |        |        |        |        |       |
| 25016  | 0     | 0      | 3     | 5      | 5      | 5      | 5      | 4     |
| 25021  | 0     | 1      |       | 6      | 6      | 6      | 6      | 6     |
| 25040  |       |        |       |        |        |        |        |       |

| respid | Q43_9 | Q43_99 | Q44_1 | Q46x1a | Q46x1b | Q46x2a | Q46x2b | Q46x3 |
|--------|-------|--------|-------|--------|--------|--------|--------|-------|
| 25043  | 0     | 1      |       | 5      | 5      | 2      | 2      | 5     |
| 25055  | 0     | 1      |       | 5      | 5      | 5      | 5      | 5     |
| 25057  | 0     | 0      | 3     | 4      | 5      | 2      | 2      | 5     |
| 25060  | 0     | 0      | 3     | 4      | 4      | 4      | 4      | 4     |
| 25062  | 0     | 1      |       | 5      | 5      | 1      | 1      | 4     |
| 25064  | 1     | 0      | 3     | 3      | 3      | 4      | 3      | 4     |
| 25069  |       |        |       |        |        |        |        |       |
| 25077  | 0     | 1      |       | 5      | 5      | 5      | 5      | 5     |
| 25088  |       |        |       |        |        |        |        |       |
| 25093  | 0     | 0      | 3     | 4      | 4      | 4      | 4      | 4     |
| 25121  | 0     | 1      |       | 2      | 2      | 3      | 3      | 3     |
| 25140  | 0     | 0      | 2     | 2      | 2      | 3      | 3      | 2     |
| 25144  | 0     | 1      |       | 5      | 5      | 5      | 5      | 5     |
| 25149  | 0     | 0      | 3     | 4      | 4      | 4      | 4      | 4     |
| 25159  | 0     | 1      |       | 5      | 5      | 1      | 1      | 5     |
| 25191  | 0     | 1      |       | 6      | 6      | 5      | 5      | 5     |
| 25193  | 1     | 0      | 3     | 5      | 5      | 3      | 3      | 4     |
| 25202  | 0     | 0      | 2     | 2      | 2      | 3      | 3      | 2     |
| 25215  | 0     | 0      | 2     | 2      | 4      | 4      | 3      | 2     |
| 25229  | 0     | 0      | 2     | 6      | 6      | 6      | 6      | 6     |
| 25231  | 0     | 0      | 4     | 5      | 5      | 4      | 4      | 3     |
| 25236  | 0     | 1      |       | 5      | 6      | 6      | 6      | 6     |
| 25242  | 0     | 1      |       | 5      | 5      | 5      | 5      | 5     |
| 25252  | 0     | 1      |       | 5      | 5      | 5      | 5      | 5     |
| 25253  | 0     | 0      | 3     | 4      | 4      | 3      | 4      | 4     |
| 25256  | 0     | 0      | 2     | 2      | 2      | 3      | 3      | 2     |
| 25260  | 0     | 1      |       | 5      | 5      | 5      | 5      | 5     |
| 25261  | 0     | 1      |       | 4      | 5      | 4      | 4      | 4     |
| 25280  | 0     | 0      | 2     | 4      | 4      | 2      | 2      | 4     |
| 25282  | 0     | 0      | 3     | 4      | 4      | 3      | 3      | 4     |
| 25289  | 0     | 0      | 1     | 3      | 3      | 2      | 3      | 3     |
| 25303  | 0     | 1      |       | 6      | 6      | 6      | 6      | 6     |

| respid | Q43_9 | Q43_99 | Q44_1 | Q46x1a | Q46x1b | Q46x2a | Q46x2b | Q46x3 |
|--------|-------|--------|-------|--------|--------|--------|--------|-------|
| 25304  | 0     | 0      | 3     | 6      | 4      | 1      | 3      | 3     |
| 25309  | 0     | 1      |       | 5      | 5      | 4      | 4      | 4     |
| 25317  | 0     | 0      | 2     | 4      | 4      | 3      | 3      | 3     |
| 25318  | 1     | 0      | 3     | 3      | 3      | 3      | 3      | 3     |
| 25320  | 0     | 1      |       | 3      | 4      | 4      | 4      | 4     |
| 25324  | 0     | 0      | 2     | 2      | 2      | 3      | 3      | 2     |
| 25331  | 0     | 1      |       | 5      | 5      | 1      | 1      | 5     |
| 25340  | 0     | 1      |       | 5      | 5      | 2      | 2      | 5     |
| 25342  | 0     | 1      |       | 6      | 6      | 6      | 6      | 6     |
| 25350  | 0     | 1      |       | 5      | 5      | 5      | 5      | 5     |
| 25352  |       |        |       |        |        |        |        |       |
| 25358  | 0     | 1      |       | 6      | 6      | 1      | 1      | 5     |
| 25375  | 0     | 1      |       | 5      | 5      | 2      | 2      | 4     |
| 25386  | 0     | 1      |       | 6      | 6      | 6      | 6      | 6     |
| 25388  | 0     | 1      |       | 5      | 5      | 1      | 1      | 5     |
| 25390  | 0     | 1      |       | 5      | 4      | 4      | 3      | 4     |
| 25391  | 0     | 1      |       | 4      | 4      | 1      | 1      | 4     |
| 25400  | 0     | 0      | 2     | 5      | 4      | 2      | 3      | 4     |
| 25413  | 0     | 0      | 2     | 2      | 2      | 3      | 3      | 2     |
| 25424  | 0     | 0      | 4     | 5      | 5      | 1      | 2      | 4     |
| 25426  | 0     | 0      | 3     | 4      | 4      | 4      | 4      | 4     |
| 25430  | 0     | 1      |       | 6      | 5      | 5      | 5      | 5     |
| 25434  | 0     | 0      | 2     | 4      | 4      | 4      | 5      | 5     |
| 25439  | 0     | 1      |       | 4      | 4      | 3      | 3      | 4     |
| 25441  | 0     | 1      |       | 6      | 6      | 6      | 6      | 6     |
| 25445  | 0     | 1      |       | 5      | 5      | 1      | 1      | 4     |
| 25451  | 0     | 1      |       | 6      | 6      | 6      | 6      | 6     |
| 25469  | 0     | 0      | 2     | 2      | 2      | 3      | 3      | 2     |
| 25471  | 0     | 0      | 2     | 4      | 4      | 4      | 4      | 4     |
| 25476  | 0     | 1      |       | 4      | 4      | 4      | 4      | 4     |
| 25480  | 0     | 0      | 5     | 3      | 3      | 3      | 3      | 3     |
| 25482  | 0     | 0      | 3     | 4      | 4      | 4      | 4      | 4     |

| respid | Q43_9 | Q43_99 | Q44_1 | Q46x1a | Q46x1b | Q46x2a | Q46x2b | Q46x3 |
|--------|-------|--------|-------|--------|--------|--------|--------|-------|
| 25500  | 0     | 0      | 4     | 4      | 3      | 4      | 3      | 3     |
| 25516  | 0     | 1      |       | 5      | 5      | 1      | 1      | 5     |
| 25521  | 0     | 0      | 3     | 3      | 4      | 3      | 3      | 3     |
| 25525  | 0     | 0      | 3     | 6      | 6      | 6      | 6      | 6     |
| 25530  | 0     | 0      | 3     | 2      | 3      | 3      | 1      | 2     |
| 25555  | 0     | 0      | 3     | 4      | 4      | 3      | 3      | 4     |
| 25558  | 0     | 0      | 2     | 5      | 5      | 2      | 4      | 4     |
| 25561  | 0     | 0      | 3     | 3      | 3      | 4      | 3      | 3     |
| 25566  |       |        |       |        |        |        |        |       |
| 25571  | 0     | 0      | 3     | 3      | 1      | 4      | 4      | 4     |
| 25572  | 0     | 1      |       | 5      | 5      | 1      | 1      | 5     |
| 25574  |       |        |       |        |        |        |        |       |
| 25588  | 0     | 1      |       | 6      | 6      | 6      | 6      | 6     |
| 25591  | 0     | 0      | 4     | 4      | 5      | 4      | 4      | 4     |
| 25599  | 0     | 0      | 3     | 4      | 4      | 2      | 2      | 4     |
| 25604  | 0     | 1      |       | 6      | 6      | 6      | 6      | 6     |
| 25614  | 0     | 0      | 3     | 3      | 3      | 3      | 4      | 3     |
| 25634  | 1     | 0      | 3     | 4      | 3      | 4      | 3      | 3     |
| 25642  | 0     | 1      |       | 5      | 5      | 5      | 5      | 5     |
| 25647  | 0     | 1      |       | 4      | 4      | 4      | 4      | 4     |
| 25653  | 0     | 1      |       | 5      | 5      | 5      | 5      | 5     |
| 25654  | 0     | 1      |       | 4      | 5      | 2      | 5      | 5     |
| 25660  | 0     | 1      |       | 6      | 6      | 6      | 6      | 6     |
| 25664  | 0     | 1      |       | 6      | 6      | 6      | 6      | 6     |
| 25665  | 0     | 1      |       | 4      | 5      | 5      | 5      | 5     |
| 25672  | 0     | 0      | 3     | 3      | 6      | 6      | 6      | 6     |
| 25677  | 0     | 0      | 4     | 1      | 1      | 1      | 1      | 1     |
| 25685  | 0     | 1      |       | 5      | 5      | 5      | 5      | 5     |
| 25699  | 0     | 0      | 3     | 4      | 4      | 3      | 4      | 3     |
| 25703  | 0     | 1      |       | 5      | 4      | 1      | 1      | 5     |
| 25704  | 0     | 0      | 2     | 3      | 4      | 4      | 4      | 4     |
| 25705  | 0     | 1      |       | 4      | 5      | 2      | 3      | 4     |

| respid | Q43_9 | Q43_99 | Q44_1 | Q46x1a | Q46x1b | Q46x2a | Q46x2b | Q46x3 |
|--------|-------|--------|-------|--------|--------|--------|--------|-------|
| 25711  | 0     | 1      |       | 5      | 5      | 5      | 5      | 5     |
| 25727  | 0     | 0      | 2     | 6      | 6      | 6      | 6      | 5     |
| 25728  | 0     | 1      |       | 4      | 4      | 2      | 2      | 4     |
| 25733  | 0     | 0      | 2     | 4      | 4      | 4      | 4      | 4     |
| 25735  | 0     | 1      |       | 6      | 6      | 5      | 5      | 5     |
| 25736  | 0     | 1      |       | 6      | 6      | 6      | 6      | 6     |
| 25742  | 0     | 1      |       | 5      | 5      | 2      | 2      | 4     |
| 25750  | 0     | 1      |       | 6      | 6      | 6      | 6      | 6     |
| 25754  |       |        |       |        |        |        |        |       |
| 25776  | 0     | 0      | 3     | 3      | 3      | 4      | 3      | 3     |
| 25778  |       |        |       |        |        |        |        |       |
| 25796  | 0     | 1      |       | 6      | 6      | 6      | 6      | 6     |
| 25852  | 0     | 0      | 3     | 4      | 4      | 3      | 3      | 4     |
| 25858  | 0     | 1      |       | 6      | 6      | 6      | 6      | 6     |
| 25859  |       |        |       |        |        |        |        |       |
| 25886  | 0     | 0      | 3     | 4      | 4      | 2      | 2      | 4     |
| 25890  | 0     | 0      | 3     | 4      | 4      | 2      | 2      | 3     |
| 25897  | 0     | 1      |       | 6      | 6      | 6      | 6      | 6     |
| 25903  | 0     | 1      |       | 5      | 5      | 1      | 1      | 5     |
| 25905  | 0     | 1      |       | 4      | 4      | 5      | 5      | 4     |
| 25917  |       |        |       |        |        |        |        |       |
| 25918  | 0     | 1      |       | 5      | 5      | 5      | 5      | 5     |
| 25928  | 0     | 1      |       | 4      | 5      | 4      | 4      | 3     |
| 25930  |       |        |       |        |        |        |        |       |
| 25949  | 0     | 1      |       | 5      | 5      | 5      | 5      | 5     |
| 25955  | 0     | 1      |       | 6      | 6      | 1      | 1      | 6     |
| 25959  | 0     | 1      |       | 6      | 5      | 6      | 6      | 6     |
| 25964  | 0     | 0      | 3     | 5      | 5      | 5      | 2      | 5     |
| 25972  | 0     | 1      |       | 5      | 5      | 4      | 5      | 5     |
| 25999  | 0     | 0      | 2     | 4      | 3      | 4      | 3      | 2     |
| 26019  | 0     | 1      |       | 6      | 6      | 6      | 6      | 6     |
| 26025  | 0     | 1      |       | 5      | 5      | 2      | 2      | 4     |

| respid | Q43_9 | Q43_99 | Q44_1 | Q46x1a | Q46x1b | Q46x2a | Q46x2b | Q46x3 |
|--------|-------|--------|-------|--------|--------|--------|--------|-------|
| 26039  | 0     | 0      | 3     | 3      | 3      | 3      | 2      | 4     |
| 26055  | 0     | 0      | 3     | 5      | 5      | 5      | 5      | 5     |
| 26061  | 0     | 1      |       | 4      | 5      | 4      | 5      | 4     |
| 26076  | 0     | 1      |       | 6      | 6      | 6      | 6      | 6     |
| 26088  | 0     | 1      |       | 4      | 4      | 4      | 6      | 5     |
| 26094  |       |        |       |        |        |        |        |       |
| 26104  | 0     | 1      |       | 6      | 1      | 2      | 1      | 2     |
| 26131  | 0     | 1      |       | 5      | 5      | 5      | 5      | 5     |
| 26134  | 0     | 0      | 2     | 4      | 3      | 4      | 3      | 4     |
| 26160  | 0     | 1      |       | 5      | 5      | 5      | 5      | 5     |
| 26168  | 0     | 1      |       | 6      | 6      | 6      | 6      | 6     |
| 26170  |       |        |       |        |        |        |        |       |
| 26191  | 0     | 1      |       | 2      | 3      | 3      | 3      | 3     |
| 26192  |       |        |       |        |        |        |        |       |
| 26195  | 0     | 0      | 3     | 4      | 4      | 4      | 4      | 4     |
| 26198  | 0     | 1      |       | 6      | 6      | 6      | 6      | 6     |
| 26199  | 0     | 1      |       | 5      | 5      | 5      | 5      | 4     |
| 26201  |       |        |       |        |        |        |        |       |
| 26202  | 0     | 1      |       | 5      | 5      | 5      | 5      | 5     |
| 26226  | 0     | 0      | 4     | 4      | 4      | 4      | 4      | 4     |
| 26233  | 0     | 0      | 2     | 6      | 5      | 2      | 2      | 4     |
| 26236  | 0     | 1      |       | 5      | 5      | 5      | 5      | 5     |
| 26242  | 0     | 0      | 3     | 5      | 5      | 5      | 5      | 5     |
| 26244  | 0     | 0      | 3     | 5      | 5      | 5      | 5      | 5     |
| 26250  | 0     | 1      |       | 4      | 4      | 4      | 4      | 4     |
| 26266  | 0     | 0      | 3     | 6      | 6      | 5      | 5      | 5     |
| 26274  | 0     | 1      |       | 4      | 4      | 5      | 5      | 4     |
| 26286  | 0     | 0      | 3     | 4      | 4      | 4      | 4      | 4     |
| 26288  | 0     | 0      | 3     | 4      | 5      | 2      | 2      | 5     |
| 26295  |       |        |       |        |        |        |        |       |
| 26296  | 0     | 1      |       | 6      | 6      | 5      | 5      | 5     |
| 26297  |       |        |       |        |        |        |        |       |



| respid | Q43_9 | Q43_99 | Q44_1 | Q46x1a | Q46x1b | Q46x2a | Q46x2b | Q46x3 |
|--------|-------|--------|-------|--------|--------|--------|--------|-------|
| 26300  | 0     | 0      | 3     | 4      | 4      | 4      | 4      | 4     |
| 26317  | 0     | 1      |       | 6      | 6      | 6      | 6      | 6     |
| 26343  |       |        |       |        |        |        |        |       |
| 26367  | 0     | 0      | 2     | 6      | 6      | 6      | 6      | 6     |
| 26372  | 0     | 0      | 3     | 5      | 3      | 4      | 4      | 4     |
| 26403  | 0     | 1      |       | 4      | 4      | 4      | 4      | 4     |
| 26423  | 0     | 1      |       | 4      | 4      | 6      | 6      | 6     |
| 26430  | 0     | 1      |       | 5      | 5      | 1      | 1      | 5     |
| 26437  | 0     | 0      | 3     | 4      | 4      | 4      | 4      | 4     |
| 26457  |       |        |       |        |        |        |        |       |
| 26466  | 0     | 0      | 2     | 6      | 6      | 6      | 6      | 6     |
| 26467  | 0     | 0      | 4     | 6      | 6      | 1      | 1      | 5     |
| 26469  | 0     | 0      | 4     | 4      | 5      | 5      | 5      | 5     |
| 26494  | 0     | 1      |       | 2      | 4      | 4      | 4      | 2     |
| 26510  | 0     | 0      | 3     | 5      | 5      | 1      | 1      | 4     |
| 26519  | 0     | 1      |       | 5      | 5      | 5      | 5      | 5     |
| 26525  | 0     | 0      | 3     | 6      | 6      | 6      | 6      | 6     |
| 26529  |       |        |       |        |        |        |        |       |
| 26533  | 0     | 1      |       | 6      | 6      | 5      | 5      | 6     |
| 26556  | 0     | 1      |       | 5      | 5      | 4      | 5      | 5     |
| 26559  | 0     | 0      | 2     | 4      | 4      | 2      | 2      | 4     |
| 26565  | 0     | 0      | 2     | 3      | 4      | 3      | 2      | 3     |
| 26576  | 0     | 1      |       | 5      | 5      | 5      | 5      | 5     |
| 26601  |       |        |       |        |        |        |        |       |
| 26607  | 0     | 0      | 3     | 4      | 4      | 3      | 4      | 4     |
| 26611  | 0     | 1      |       | 6      | 6      | 6      | 5      | 5     |
| 26619  | 0     | 1      |       | 4      | 5      | 5      | 5      | 6     |
| 26631  | 0     | 1      |       | 6      | 6      | 6      | 6      | 6     |
| 26654  | 0     | 1      |       | 4      | 4      | 4      | 4      | 4     |
| 26656  | 0     | 1      |       | 4      | 4      | 4      | 4      | 4     |
| 26664  |       |        |       |        |        |        |        |       |
| 26667  | 0     | 1      |       | 5      | 5      | 1      | 1      | 5     |

| respid | Q43_9 | Q43_99 | Q44_1 | Q46x1a | Q46x1b | Q46x2a | Q46x2b | Q46x3 |
|--------|-------|--------|-------|--------|--------|--------|--------|-------|
| 26674  | 1     | 0      | 2     | 4      | 3      | 4      | 3      | 3     |
| 26678  | 0     | 0      | 3     | 6      | 6      | 6      | 6      | 6     |
| 26693  | 0     | 1      |       | 6      | 6      | 2      | 6      | 6     |
| 26696  | 0     | 0      | 2     | 2      | 3      | 3      | 4      | 2     |
| 26703  | 0     | 0      | 3     | 3      | 3      | 3      | 3      | 3     |
| 26705  | 0     | 1      |       | 1      | 2      | 1      | 1      | 2     |
| 26706  | 0     | 0      | 3     | 3      | 3      | 4      | 3      | 4     |
| 26716  | 0     | 1      |       | 4      | 6      | 4      | 5      | 4     |
| 26721  | 0     | 0      | 4     | 5      | 5      | 5      | 4      | 5     |
| 26730  | 0     | 1      |       | 5      | 5      | 5      | 4      | 5     |
| 26752  | 0     | 1      |       | 4      | 4      | 6      | 6      | 6     |
| 26755  | 0     | 0      | 3     | 5      | 5      | 5      | 5      | 5     |
| 26791  | 0     | 1      |       | 4      | 4      | 4      | 4      | 4     |
| 26804  | 0     | 1      |       | 6      | 6      | 6      | 6      | 6     |
| 26810  | 0     | 0      | 2     | 3      | 2      | 4      | 4      | 4     |
| 26813  | 0     | 0      | 2     | 4      | 4      | 2      | 3      | 4     |
| 26833  | 0     | 0      | 3     | 4      | 4      | 4      | 4      | 4     |
| 26880  | 0     | 1      |       | 4      | 5      | 4      | 3      | 4     |
| 26884  | 0     | 1      |       | 4      | 4      | 5      | 5      | 4     |
| 26885  | 0     | 1      |       | 4      | 4      | 4      | 4      | 4     |
| 26890  | 0     | 0      | 3     | 6      | 6      | 6      | 6      | 6     |
| 26937  | 0     | 0      | 2     | 5      | 4      | 5      | 4      | 4     |
| 26939  | 0     | 0      | 3     | 4      | 4      | 4      | 4      | 4     |
| 26941  |       |        |       |        |        |        |        |       |
| 26992  | 0     | 0      | 3     | 6      | 6      | 1      | 2      | 6     |
| 27037  | 0     | 0      | 3     | 6      | 6      | 6      | 6      | 6     |
| 27045  | 0     | 0      | 3     | 4      | 4      | 4      | 4      | 4     |
| 27053  | 0     | 1      |       | 2      | 4      | 4      | 4      | 4     |
| 27060  | 0     | 0      | 3     | 4      | 4      | 4      | 4      | 4     |
| 27076  | 0     | 0      | 4     | 5      | 4      | 2      | 2      | 4     |
| 27124  | 0     | 1      |       | 5      | 5      | 5      | 5      | 5     |
| 27125  | 0     | 1      |       | 5      | 5      | 5      | 5      | 5     |

| respid | Q43_9 | Q43_99 | Q44_1 | Q46x1a | Q46x1b | Q46x2a | Q46x2b | Q46x3 |
|--------|-------|--------|-------|--------|--------|--------|--------|-------|
| 27132  | 0     | 1      |       | 5      | 5      | 1      | 1      | 5     |
| 27166  | 0     | 1      |       | 5      | 5      | 5      | 5      | 5     |
| 27190  | 0     | 0      | 3     | 4      | 1      | 2      | 1      | 1     |
| 27199  | 0     | 0      | 3     | 4      | 5      | 6      | 6      | 4     |
| 27221  | 0     | 0      | 3     | 4      | 4      | 4      | 4      | 4     |
| 27233  | 0     | 0      | 3     | 5      | 5      | 5      | 5      | 5     |
| 27241  | 0     | 0      | 3     | 6      | 6      | 4      | 3      | 4     |
| 27244  | 0     | 1      |       | 4      | 4      | 1      | 1      | 5     |
| 27245  | 0     | 0      | 3     | 3      | 3      | 3      | 3      | 3     |
| 27246  | 0     | 1      |       | 5      | 4      | 5      | 5      | 5     |
| 27253  | 0     | 1      |       | 5      | 5      | 6      | 2      | 4     |
| 27255  | 0     | 0      | 3     | 3      | 3      | 4      | 4      | 4     |
| 27267  | 0     | 0      | 3     | 5      | 5      | 5      | 5      | 5     |
| 27283  | 0     | 0      | 3     | 6      | 6      | 3      | 5      | 4     |
| 27289  | 0     | 0      | 2     | 1      | 2      | 3      | 4      | 3     |
| 27302  | 0     | 1      |       | 5      | 4      | 2      | 2      | 4     |
| 27317  | 0     | 1      |       | 5      | 5      | 1      | 1      | 5     |
| 27319  | 0     | 1      |       | 5      | 5      | 6      | 6      | 5     |
| 27331  | 0     | 1      |       | 4      | 4      | 2      | 2      | 4     |
| 27333  | 0     | 0      | 3     | 4      | 4      | 6      | 6      | 4     |
| 27340  |       |        |       |        |        |        |        |       |
| 27362  | 0     | 0      | 2     | 2      | 3      | 2      | 3      | 2     |
| 27370  | 0     | 0      | 3     | 6      | 6      | 6      | 6      | 6     |
| 27379  | 0     | 1      |       | 6      | 6      | 6      | 6      | 6     |
| 27386  |       |        |       |        |        |        |        |       |
| 27398  | 0     | 1      |       | 5      | 5      | 1      | 1      | 5     |
| 27404  | 0     | 1      |       | 5      | 5      | 2      | 2      | 5     |
| 27408  | 0     | 1      |       | 4      | 5      | 1      | 1      | 5     |
| 27412  | 0     | 1      |       | 3      | 3      | 3      | 3      | 3     |
| 27426  | 0     | 0      | 3     | 4      | 4      | 2      | 2      | 4     |
| 27455  | 0     | 0      | 3     | 6      | 6      | 5      | 5      | 5     |
| 27464  | 0     | 0      | 3     | 5      | 6      | 2      | 2      | 3     |

| respid | Q43_9 | Q43_99 | Q44_1 | Q46x1a | Q46x1b | Q46x2a | Q46x2b | Q46x3 |
|--------|-------|--------|-------|--------|--------|--------|--------|-------|
| 27484  | 0     | 0      | 3     | 5      | 5      | 5      | 5      | 5     |
| 27493  | 0     | 0      | 2     | 5      | 4      | 2      | 2      | 3     |
| 27512  | 0     | 0      | 3     | 6      | 4      | 2      | 4      | 4     |
| 27525  | 0     | 0      | 2     | 4      | 4      | 5      | 4      | 4     |
| 27532  | 0     | 0      | 3     | 6      | 6      | 6      | 6      | 6     |
| 27539  | 0     | 1      |       | 5      | 5      | 4      | 4      | 4     |
| 27540  | 0     | 1      |       | 4      | 5      | 4      | 5      | 6     |
| 27552  | 0     | 0      | 3     | 3      | 4      | 3      | 4      | 4     |
| 27562  | 0     | 1      |       | 5      | 5      | 5      | 5      | 4     |
| 27568  | 0     | 1      |       | 6      | 6      | 5      | 5      | 5     |
| 27574  | 1     | 0      | 3     | 3      | 3      | 4      | 4      | 3     |
| 27575  | 0     | 0      | 3     | 4      | 4      | 4      | 4      | 6     |
| 27577  | 0     | 0      | 3     | 4      | 4      | 5      | 4      | 5     |
| 27589  | 0     | 0      | 3     | 5      | 5      | 1      | 1      | 4     |
| 27593  | 0     | 1      |       | 6      | 6      | 6      | 6      | 6     |
| 27594  | 0     | 0      | 2     | 2      | 2      | 2      | 2      | 3     |
| 27595  | 0     | 0      | 3     | 4      | 4      | 4      | 4      | 4     |
| 27598  | 0     | 1      |       | 4      | 6      | 6      | 6      | 6     |
| 27620  | 0     | 0      | 3     | 4      | 4      | 2      | 2      | 5     |
| 27621  | 0     | 0      | 2     | 6      | 6      | 6      | 6      | 6     |
| 27628  | 0     | 0      | 3     | 6      | 6      | 2      | 4      | 4     |
| 27633  | 0     | 0      | 3     | 6      | 6      | 2      | 2      | 6     |
| 27643  | 0     | 1      |       | 4      | 4      | 4      | 4      | 4     |
| 27644  | 0     | 1      |       | 4      | 4      | 4      | 4      | 4     |
| 27668  | 0     | 1      |       | 4      | 4      | 4      | 4      | 4     |
| 27681  | 0     | 0      | 3     | 5      | 5      | 1      | 1      | 4     |
| 27691  | 0     | 1      |       | 5      | 5      | 1      | 1      | 5     |
| 27693  | 0     | 0      | 3     | 2      | 3      | 3      | 3      | 3     |
| 27703  | 0     | 0      | 2     | 4      | 4      | 4      | 4      | 4     |
| 27708  | 0     | 0      | 3     | 3      | 3      | 2      | 4      | 2     |
| 27719  | 0     | 1      |       | 6      | 5      | 5      | 5      | 5     |
| 27720  | 0     | 1      |       | 6      | 5      | 6      | 5      | 5     |

| respid | Q43_9 | Q43_99 | Q44_1 | Q46x1a | Q46x1b | Q46x2a | Q46x2b | Q46x3 |
|--------|-------|--------|-------|--------|--------|--------|--------|-------|
| 27723  | 0     | 0      | 3     | 5      | 5      | 2      | 2      | 5     |
| 27725  | 0     | 1      |       | 5      | 5      | 5      | 4      | 5     |
| 27734  | 0     | 1      |       | 4      | 4      | 5      | 5      | 4     |
| 27744  | 0     | 1      |       | 4      | 4      | 4      | 4      | 4     |
| 27749  | 0     | 0      | 4     | 4      | 4      | 3      | 4      | 4     |
| 27762  | 0     | 1      |       | 4      | 4      | 4      | 4      | 4     |
| 27808  | 0     | 0      | 3     | 2      | 4      | 2      | 3      | 3     |
| 27810  | 1     | 0      | 3     | 3      | 3      | 3      | 3      | 3     |
| 27812  | 0     | 0      | 3     | 5      | 5      | 2      | 2      | 5     |
| 27815  |       |        |       |        |        |        |        |       |
| 27818  | 0     | 1      |       | 5      | 5      | 5      | 5      | 5     |
| 27823  | 0     | 1      |       | 5      | 5      | 5      | 5      | 5     |
| 27841  | 0     | 0      | 3     | 3      | 3      | 3      | 3      | 3     |
| 27843  |       |        |       |        |        |        |        |       |
| 27851  | 0     | 1      |       | 6      | 6      | 6      | 6      | 6     |
| 27858  | 0     | 1      |       | 6      | 6      | 6      | 6      | 6     |
| 27859  | 0     | 0      | 2     | 6      | 6      | 6      | 6      | 6     |
| 27869  | 0     | 1      |       | 5      | 5      | 5      | 5      | 5     |
| 27872  | 0     | 1      |       | 6      | 6      | 6      | 6      | 6     |
| 27873  | 0     | 1      |       | 5      | 5      | 5      | 5      | 5     |
| 27884  | 0     | 1      |       | 6      | 6      | 6      | 6      | 4     |
| 27904  | 0     | 1      |       | 3      | 3      | 3      | 3      | 3     |
| 27915  | 0     | 1      |       | 4      | 4      | 4      | 3      | 4     |
| 27918  | 0     | 0      | 3     | 6      | 6      | 6      | 6      | 6     |
| 27937  | 0     | 0      | 3     | 2      | 3      | 2      | 2      | 2     |
| 27943  | 0     | 1      |       | 6      | 6      | 6      | 6      | 6     |
| 27948  | 0     | 1      |       | 6      | 6      | 6      | 6      | 6     |
| 27971  | 0     | 0      | 2     | 6      | 4      | 2      | 2      | 3     |
| 27991  | 0     | 1      |       | 6      | 6      | 6      | 6      | 6     |
| 28000  | 0     | 1      |       | 6      | 6      | 5      | 5      | 5     |
| 28011  | 0     | 0      | 2     | 6      | 6      | 1      | 1      | 5     |
| 28022  | 0     | 1      |       | 4      | 4      | 2      | 4      | 4     |

| respid | Q43_9 | Q43_99 | Q44_1 | Q46x1a | Q46x1b | Q46x2a | Q46x2b | Q46x3 |
|--------|-------|--------|-------|--------|--------|--------|--------|-------|
| 28025  | 0     | 1      |       | 5      | 5      | 2      | 1      | 5     |
| 28041  | 0     | 1      |       | 5      | 5      | 1      | 1      | 5     |
| 28057  | 0     | 0      | 2     | 6      | 6      | 6      | 6      | 6     |
| 28080  |       |        |       |        |        |        |        |       |
| 28098  | 0     | 1      |       | 5      | 5      | 1      | 2      | 5     |
| 28104  | 0     | 1      |       | 6      | 6      | 6      | 6      | 6     |
| 28109  | 0     | 0      | 3     | 4      | 4      | 2      | 2      | 6     |
| 28129  | 0     | 0      | 0     | 1      | 1      | 1      | 2      | 3     |
| 28141  |       |        |       |        |        |        |        |       |
| 28143  | 0     | 1      |       | 5      | 5      | 1      | 1      | 5     |
| 28149  | 0     | 1      |       | 6      | 6      | 2      | 2      | 6     |
| 28151  | 0     | 0      | 2     | 3      | 3      | 3      | 2      | 2     |
| 28161  | 0     | 0      | 2     | 3      | 3      | 5      | 4      | 2     |
| 28169  | 0     | 1      |       | 6      | 6      | 6      | 6      | 6     |
| 28194  | 0     | 0      | 0     | 4      | 4      | 4      | 4      | 4     |
| 28197  |       |        |       |        |        |        |        |       |
| 28206  | 0     | 0      | 3     | 5      | 1      | 2      | 2      | 4     |
| 28218  | 0     | 1      |       | 5      | 5      | 5      | 5      | 5     |
| 28227  | 0     | 1      |       | 5      | 5      | 1      | 1      | 5     |
| 28235  | 0     | 0      | 4     | 6      | 5      | 2      | 6      | 4     |
| 28246  | 0     | 1      |       | 4      | 4      | 4      | 5      | 4     |
| 28259  | 1     | 0      | 3     | 5      | 5      | 6      | 6      | 5     |
| 28263  | 0     | 0      | 3     | 2      | 2      | 2      | 2      | 2     |
| 28267  | 0     | 0      | 2     | 3      | 4      | 4      | 3      | 4     |
| 28274  | 0     | 1      |       | 5      | 5      | 1      | 1      | 5     |
| 28278  | 0     | 1      |       | 6      | 6      | 6      | 6      | 6     |
| 28288  | 0     | 1      |       | 6      | 4      | 6      | 6      | 6     |
| 28308  |       |        |       |        |        |        |        |       |
| 28309  | 0     | 0      | 3     | 4      | 3      | 4      | 4      | 3     |
| 28323  | 0     | 0      | 3     | 5      | 5      | 2      | 2      | 4     |
| 28335  | 0     | 0      | 2     | 3      | 1      | 3      | 4      | 3     |
| 28354  | 0     | 0      | 2     | 5      | 3      | 3      | 2      | 3     |

| respid | Q43_9 | Q43_99 | Q44_1 | Q46x1a | Q46x1b | Q46x2a | Q46x2b | Q46x3 |
|--------|-------|--------|-------|--------|--------|--------|--------|-------|
| 28355  | 0     | 0      | 2     | 4      | 4      | 4      | 4      | 4     |
| 28356  | 0     | 0      | 3     | 4      | 3      | 2      | 2      | 4     |
| 28357  | 0     | 0      | 3     | 5      | 5      | 5      | 5      | 5     |
| 28363  | 0     | 1      |       | 5      | 5      | 5      | 5      | 5     |
| 28366  | 0     | 1      |       | 5      | 5      | 2      | 2      | 5     |
| 28372  | 0     | 0      | 3     | 4      | 4      | 3      | 3      | 4     |
| 28381  | 0     | 1      |       | 4      | 4      | 6      | 6      | 6     |
| 28388  | 0     | 1      |       | 4      | 5      | 5      | 5      | 3     |
| 28413  | 0     | 0      | 1     | 4      | 1      | 3      | 2      | 2     |
| 28421  | 0     | 1      |       | 6      | 6      | 6      | 6      | 6     |
| 28430  | 0     | 0      | 2     | 3      | 1      | 3      | 4      | 3     |
| 28439  | 0     | 0      | 2     | 4      | 2      | 2      | 2      | 3     |
| 28458  | 0     | 0      | 4     | 3      | 3      | 3      | 4      | 3     |
| 28461  | 0     | 1      |       | 5      | 5      | 5      | 5      | 5     |
| 28466  | 0     | 1      |       | 6      | 6      | 6      | 6      | 6     |
| 28492  | 0     | 1      |       | 5      | 5      | 5      | 5      | 5     |
| 28534  |       |        |       |        |        |        |        |       |
| 28537  | 0     | 0      | 3     | 4      | 4      | 4      | 4      | 4     |
| 28560  | 0     | 1      |       | 5      | 5      | 2      | 2      | 5     |
| 28566  | 0     | 1      |       | 6      | 6      | 6      | 6      | 6     |
| 28569  | 0     | 1      |       | 6      | 6      | 6      | 6      | 6     |
| 28584  | 0     | 0      | 4     | 2      | 2      | 2      | 3      | 2     |
| 28590  | 0     | 0      | 2     | 6      | 6      | 2      | 1      | 5     |
| 28596  |       |        |       |        |        |        |        |       |
| 28608  | 0     | 0      | 4     | 5      | 4      | 2      | 2      | 5     |
| 28631  | 0     | 0      | 3     | 3      | 2      | 3      | 3      | 3     |
| 28644  | 0     | 1      |       | 5      | 5      | 5      | 5      | 5     |
| 28646  | 0     | 1      |       | 5      | 5      | 2      | 2      | 5     |
| 28665  |       |        |       |        |        |        |        |       |
| 28686  | 0     | 1      |       | 5      | 5      | 5      | 5      | 5     |
| 28704  | 0     | 0      | 4     | 2      | 3      | 4      | 3      | 3     |
| 28719  | 0     | 1      |       | 5      | 5      | 5      | 5      | 4     |

| respid | Q43_9 | Q43_99 | Q44_1 | Q46x1a | Q46x1b | Q46x2a | Q46x2b | Q46x3 |
|--------|-------|--------|-------|--------|--------|--------|--------|-------|
| 28736  | 0     | 0      | 2     | 6      | 6      | 6      | 6      | 5     |
| 28739  | 0     | 1      |       | 4      | 4      | 3      | 3      | 4     |
| 28758  | 0     | 0      | 2     | 6      | 6      | 6      | 6      | 6     |
| 28761  | 0     | 0      | 2     | 3      | 2      | 2      | 2      | 3     |
| 28770  | 1     | 0      | 2     | 4      | 4      | 4      | 4      | 4     |
| 28774  | 0     | 1      |       | 5      | 5      | 1      | 2      | 5     |
| 28778  | 0     | 0      | 2     | 3      | 3      | 4      | 3      | 3     |
| 28783  | 0     | 0      | 2     | 4      | 4      | 4      | 3      | 3     |
| 28785  | 0     | 0      | 4     | 5      | 5      | 1      | 1      | 5     |
| 28797  | 0     | 0      | 2     | 3      | 2      | 3      | 3      | 4     |
| 28801  | 0     | 0      | 3     | 6      | 6      | 6      | 6      | 6     |
| 28821  |       |        |       |        |        |        |        |       |
| 28827  | 0     | 0      | 2     | 5      | 5      | 5      | 5      | 5     |
| 28828  | 0     | 1      |       | 5      | 5      | 5      | 5      | 5     |
| 28871  | 0     | 1      |       | 6      | 6      | 6      | 6      | 6     |
| 28876  | 0     | 1      |       | 4      | 5      | 5      | 5      | 5     |
| 28891  | 0     | 0      | 1     | 4      | 3      | 2      | 2      | 4     |
| 28898  |       |        |       |        |        |        |        |       |
| 28909  | 0     | 1      |       | 5      | 5      | 5      | 5      | 4     |
| 28930  | 0     | 0      | 3     | 6      | 5      | 2      | 2      | 4     |
| 28935  | 0     | 0      | 3     | 6      | 6      | 4      | 3      | 3     |
| 28964  | 0     | 1      |       | 5      | 5      | 5      | 5      | 5     |
| 28965  | 0     | 1      |       | 6      | 6      | 6      | 6      | 6     |
| 28967  | 0     | 0      | 3     | 3      | 4      | 3      | 3      | 3     |
| 28975  |       |        |       |        |        |        |        |       |
| 28982  | 0     | 1      |       | 4      | 4      | 4      | 4      | 4     |
| 28989  | 0     | 0      | 3     | 4      | 3      | 4      | 4      | 4     |
| 29003  | 0     | 0      | 3     | 6      | 6      | 2      | 2      | 6     |
| 29004  | 0     | 1      |       | 5      | 2      | 6      | 2      | 4     |
| 29007  | 0     | 1      |       | 6      | 6      | 6      | 6      | 6     |
| 29008  | 0     | 1      |       | 1      | 5      | 1      | 1      | 4     |
| 29011  | 0     | 0      | 4     | 3      | 3      | 2      | 2      | 4     |



| respid | Q43_9 | Q43_99 | Q44_1 | Q46x1a | Q46x1b | Q46x2a | Q46x2b | Q46x3 |
|--------|-------|--------|-------|--------|--------|--------|--------|-------|
| 29012  | 0     | 0      | 3     | 5      | 5      | 4      | 4      | 4     |
| 29014  |       |        |       |        |        |        |        |       |
| 29016  | 0     | 1      |       | 5      | 5      | 2      | 2      | 4     |
| 29018  | 0     | 0      | 3     | 3      | 3      | 2      | 2      | 3     |
| 29048  | 0     | 0      | 3     | 5      | 4      | 5      | 5      | 4     |
| 29184  | 0     | 1      |       | 5      | 4      | 5      | 5      | 5     |
| 29237  | 0     | 1      |       | 5      | 5      | 1      | 1      | 5     |
| 29252  | 0     | 1      |       | 5      | 5      | 5      | 5      | 4     |
| 29267  | 0     | 1      |       | 6      | 6      | 6      | 6      | 6     |
| 29276  |       |        |       |        |        |        |        |       |
| 29281  | 0     | 0      | 3     | 6      | 6      | 6      | 6      | 6     |
| 29285  | 0     | 0      | 1     | 6      | 6      | 6      | 6      | 6     |
| 29291  | 0     | 0      | 1     | 3      | 3      | 3      | 2      | 3     |
| 29304  | 0     | 1      |       | 5      | 5      | 5      | 5      | 5     |
| 29323  | 0     | 1      |       | 6      | 6      | 2      | 2      | 5     |
| 29330  | 0     | 0      | 2     | 5      | 5      | 5      | 5      | 6     |
| 29357  | 0     | 0      | 4     | 4      | 4      | 4      | 4      | 3     |
| 29416  | 0     | 0      | 3     | 6      | 5      | 1      | 1      | 5     |
| 29432  | 0     | 1      |       | 4      | 4      | 4      | 4      | 4     |
| 29482  | 0     | 0      | 4     | 1      | 4      | 4      | 4      | 4     |
| 29506  | 0     | 0      | 2     | 4      | 5      | 2      | 3      | 4     |
| 29509  | 0     | 0      | 3     | 6      | 6      | 6      | 6      | 6     |
| 29512  | 0     | 0      | 3     | 4      | 3      | 4      | 4      | 3     |
| 29519  | 0     | 1      |       | 5      | 5      | 4      | 4      | 4     |
| 29520  | 0     | 0      | 3     | 3      | 3      | 2      | 2      | 4     |
| 29521  | 0     | 0      | 3     | 4      | 4      | 3      | 2      | 4     |
| 29529  | 0     | 0      | 3     | 3      | 3      | 3      | 3      | 3     |
| 29532  | 0     | 1      |       | 6      | 6      | 6      | 6      | 5     |
| 29547  | 0     | 0      | 2     | 4      | 5      | 4      | 3      | 4     |
| 29551  | 0     | 0      | 2     | 6      | 6      | 5      | 5      | 5     |
| 29584  | 0     | 0      | 3     | 3      | 4      | 3      | 2      | 3     |
| 29591  | 1     | 0      | 0     | 3      | 3      | 3      | 3      | 4     |

| respid | Q43_9 | Q43_99 | Q44_1 | Q46x1a | Q46x1b | Q46x2a | Q46x2b | Q46x3 |
|--------|-------|--------|-------|--------|--------|--------|--------|-------|
| 29613  | 0     | 1      |       | 5      | 5      | 4      | 2      | 5     |
| 29615  | 1     | 0      | 0     | 4      | 4      | 4      | 4      | 4     |
| 29625  | 0     | 0      | 2     | 4      | 4      | 5      | 4      | 4     |
| 29660  | 0     | 0      | 0     | 4      | 6      | 6      | 4      | 5     |
| 29677  |       |        |       |        |        |        |        |       |
| 29700  | 0     | 1      |       | 4      | 5      | 4      | 5      | 4     |
| 29715  | 0     | 0      | 1     | 4      | 4      | 2      | 2      | 2     |
| 29720  |       |        |       |        |        |        |        |       |
| 29730  | 0     | 1      |       | 6      | 6      | 6      | 6      | 6     |
| 29734  | 1     | 0      | 0     | 4      | 4      | 6      | 6      | 6     |
| 29754  |       |        |       |        |        |        |        |       |
| 29771  | 0     | 0      | 3     | 5      | 5      | 1      | 2      | 3     |
| 29774  | 0     | 1      |       | 5      | 5      | 5      | 5      | 5     |
| 29783  | 0     | 1      |       | 5      | 5      | 1      | 1      | 4     |
| 29812  | 0     | 0      | 3     | 6      | 6      | 6      | 6      | 6     |
| 29813  | 0     | 0      | 2     | 2      | 3      | 2      | 3      | 3     |
| 29814  | 1     | 0      | 1     | 6      | 6      | 6      | 6      | 6     |
| 29820  | 0     | 0      | 3     | 4      | 4      | 4      | 4      | 4     |
| 29906  | 0     | 0      | 3     | 5      | 6      | 1      | 2      | 6     |
| 29907  | 0     | 1      |       | 4      | 4      | 2      | 2      | 3     |
| 29928  |       |        |       |        |        |        |        |       |
| 29932  | 0     | 0      | 3     | 4      | 4      | 2      | 2      | 4     |
| 29958  | 0     | 0      | 3     | 3      | 3      | 2      | 2      | 3     |
| 29982  | 0     | 0      | 3     | 4      | 4      | 4      | 3      | 4     |
| 29989  | 0     | 1      |       | 6      | 6      | 2      | 2      | 5     |
| 29994  | 0     | 1      |       | 6      | 6      | 6      | 6      | 6     |
| 30005  | 0     | 0      | 4     | 4      | 4      | 4      | 4      | 5     |
| 30077  | 0     | 1      |       | 6      | 6      | 6      | 6      | 6     |
| 30098  |       |        |       |        |        |        |        |       |
| 30107  | 0     | 0      | 3     | 5      | 5      | 1      | 1      | 4     |
| 30154  | 0     | 0      | 3     | 6      | 6      | 6      | 6      | 6     |
| 30159  | 0     | 0      | 4     | 5      | 5      | 2      | 2      | 5     |

| respid | Q43_9 | Q43_99 | Q44_1 | Q46x1a | Q46x1b | Q46x2a | Q46x2b | Q46x3 |
|--------|-------|--------|-------|--------|--------|--------|--------|-------|
| 30162  | 0     | 1      |       | 6      | 6      | 4      | 4      | 5     |
| 30163  |       |        |       |        |        |        |        |       |
| 30189  | 0     | 0      | 3     | 6      | 6      | 2      | 3      | 4     |
| 30230  | 0     | 1      |       | 5      | 5      | 6      | 6      | 5     |
| 30259  | 0     | 0      | 3     | 3      | 2      | 2      | 3      | 2     |
| 30284  | 0     | 1      |       | 5      | 4      | 2      | 2      | 5     |
| 30296  | 0     | 1      |       | 6      | 6      | 6      | 6      | 6     |
| 30330  | 0     | 0      | 3     | 4      | 4      | 2      | 2      | 4     |
| 30341  | 0     | 1      |       | 5      | 5      | 2      | 2      | 4     |
| 30352  | 0     | 0      | 2     | 2      | 2      | 4      | 2      | 3     |
| 30379  | 0     | 1      |       | 6      | 6      | 6      | 6      | 6     |
| 30424  | 0     | 1      |       | 5      | 5      | 1      | 1      | 5     |
| 30447  | 0     | 1      |       | 6      | 6      | 6      | 6      | 6     |
| 30477  | 0     | 0      | 3     | 4      | 4      | 4      | 4      | 4     |
| 30503  | 0     | 0      | 4     | 5      | 5      | 5      | 5      | 5     |
| 30515  | 0     | 0      | 2     | 6      | 6      | 6      | 6      | 6     |
| 30516  | 0     | 1      |       | 5      | 5      | 5      | 5      | 5     |
| 30623  | 0     | 0      | 2     | 4      | 4      | 4      | 4      | 4     |
| 30639  | 0     | 0      | 3     | 4      | 4      | 3      | 1      | 2     |
| 30670  | 0     | 0      | 3     | 5      | 5      | 5      | 5      | 5     |
| 30697  | 0     | 1      |       | 6      | 6      | 5      | 5      | 5     |
| 30735  | 0     | 0      | 3     | 5      | 5      | 5      | 5      | 5     |
| 30742  | 0     | 1      |       | 6      | 6      | 6      | 6      | 6     |
| 30751  | 1     | 0      | 2     | 4      | 4      | 4      | 4      | 3     |
| 30789  |       |        |       |        |        |        |        |       |
| 30867  | 0     | 0      | 1     | 3      | 4      | 4      | 5      | 3     |
| 30876  | 0     | 1      |       | 5      | 5      | 5      | 5      | 4     |
| 30877  | 0     | 1      |       | 6      | 6      | 6      | 6      | 6     |
| 30887  | 0     | 1      |       | 4      | 4      | 4      | 4      | 4     |
| 30891  | 0     | 0      | 3     | 4      | 4      | 4      | 4      | 4     |
| 31030  | 0     | 1      |       | 6      | 6      | 6      | 6      | 6     |
| 31059  | 0     | 1      |       | 6      | 6      | 6      | 6      | 6     |

| respid | Q43_9 | Q43_99 | Q44_1 | Q46x1a | Q46x1b | Q46x2a | Q46x2b | Q46x3 |
|--------|-------|--------|-------|--------|--------|--------|--------|-------|
| 31082  |       |        |       |        |        |        |        |       |
| 31106  | 0     | 1      |       | 5      | 5      | 5      | 5      | 5     |
| 31110  | 0     | 1      |       | 5      | 5      | 1      | 1      | 5     |
| 31265  | 0     | 0      | 2     | 3      | 3      | 3      | 3      | 3     |
| 31266  | 0     | 0      | 1     | 3      | 3      | 3      | 3      | 3     |
| 31267  | 0     | 0      | 1     | 3      | 3      | 3      | 3      | 3     |
| 31310  | 0     | 1      |       | 5      | 5      | 2      | 2      | 5     |
| 31325  | 0     | 1      |       | 5      | 5      | 6      | 6      | 6     |
| 31367  | 0     | 1      |       | 4      | 4      | 4      | 4      | 4     |
| 31389  | 0     | 1      |       | 5      | 5      | 1      | 1      | 5     |
| 31440  | 0     | 1      |       | 6      | 6      | 6      | 6      | 6     |
| 31465  | 0     | 1      |       | 3      | 6      | 4      | 2      | 4     |
| 31477  | 0     | 1      |       | 6      | 4      | 5      | 5      | 5     |
| 31491  | 0     | 1      |       | 6      | 6      | 6      | 6      | 6     |
| 31494  | 0     | 0      | 3     | 2      | 2      | 2      | 2      | 2     |
| 31509  | 0     | 0      | 2     | 6      | 6      | 6      | 6      | 6     |
| 31533  | 0     | 0      | 4     | 6      | 6      | 6      | 6      | 6     |
| 31547  | 0     | 0      | 3     | 6      | 6      | 6      | 6      | 6     |
| 31558  | 0     | 1      |       | 4      | 4      | 4      | 4      | 4     |
| 31579  | 0     | 1      |       | 4      | 4      | 2      | 3      | 4     |
| 31591  | 0     | 0      | 3     | 4      | 4      | 5      | 4      | 4     |
| 31596  | 0     | 1      |       | 5      | 4      | 5      | 4      | 4     |
| 31601  | 0     | 0      | 2     | 3      | 3      | 2      | 2      | 2     |
| 31605  | 0     | 1      |       | 4      | 4      | 5      | 4      | 4     |
| 31637  | 0     | 1      |       | 5      | 4      | 6      | 3      | 5     |
| 31646  | 0     | 1      |       | 5      | 4      | 5      | 4      | 4     |
| 31647  | 0     | 0      | 2     | 4      | 4      | 1      | 1      | 4     |
| 31650  | 0     | 1      |       | 5      | 5      | 3      | 5      | 5     |
| 31651  | 0     | 0      | 3     | 4      | 4      | 4      | 3      | 4     |
| 31657  | 0     | 0      | 4     | 6      | 6      | 6      | 6      | 6     |
| 31660  | 0     | 0      | 4     | 5      | 5      | 2      | 2      | 5     |
| 31661  | 0     | 0      | 3     | 4      | 4      | 5      | 4      | 4     |

| respid | Q43_9 | Q43_99 | Q44_1 | Q46x1a | Q46x1b | Q46x2a | Q46x2b | Q46x3 |
|--------|-------|--------|-------|--------|--------|--------|--------|-------|
| 31667  | 0     | 0      | 3     | 4      | 4      | 5      | 5      | 4     |
| 31674  | 0     | 0      | 3     | 4      | 4      | 4      | 4      | 5     |
| 31686  | 0     | 0      | 3     | 6      | 6      | 6      | 6      | 6     |
| 31693  |       |        |       |        |        |        |        |       |
| 31716  |       |        |       |        |        |        |        |       |
| 31818  | 0     | 1      |       | 5      | 5      | 4      | 4      | 4     |
| 31886  | 0     | 1      |       | 6      | 6      | 6      | 6      | 6     |
| 31945  | 1     | 0      | 3     | 3      | 4      | 3      | 4      | 3     |
| 31957  | 0     | 0      | 2     | 4      | 4      | 2      | 2      | 5     |
| 31966  | 0     | 0      | 4     | 4      | 5      | 4      | 4      | 4     |
| 31978  | 0     | 1      |       | 4      | 5      | 6      | 6      | 6     |
| 31999  | 0     | 0      | 3     | 5      | 5      | 1      | 1      | 5     |
| 32026  | 0     | 0      | 3     | 5      | 4      | 5      | 4      | 4     |
| 32033  | 0     | 1      |       | 6      | 6      | 6      | 6      | 6     |
| 32037  | 0     | 0      | 1     | 3      | 3      | 3      | 3      | 3     |
| 32038  | 0     | 0      | 1     | 3      | 3      | 3      | 3      | 3     |
| 32047  | 0     | 0      | 3     | 4      | 4      | 4      | 4      | 4     |
| 32053  |       |        |       |        |        |        |        |       |
| 32069  | 0     | 1      |       | 6      | 6      | 6      | 6      | 6     |
| 32081  | 0     | 0      | 3     | 4      | 4      | 4      | 4      | 4     |
| 32123  | 0     | 1      |       | 5      | 5      | 4      | 4      | 6     |
| 32130  | 0     | 1      |       | 4      | 4      | 2      | 2      | 4     |
| 32141  | 0     | 0      | 4     | 5      | 5      | 5      | 5      | 4     |
| 32158  |       |        |       |        |        |        |        |       |
| 32165  | 0     | 1      |       | 6      | 6      | 6      | 6      | 5     |
| 32180  | 0     | 1      |       | 6      | 6      | 6      | 6      | 4     |
| 32221  | 0     | 0      | 3     | 2      | 2      | 2      | 3      | 3     |
| 32292  | 0     | 1      |       | 6      | 6      | 4      | 4      | 5     |
| 32318  | 0     | 1      |       | 5      | 5      | 4      | 4      | 4     |
| 32346  | 0     | 1      |       | 5      | 5      | 5      | 5      | 5     |
| 32402  | 0     | 0      | 2     | 3      | 3      | 3      | 3      | 3     |
| 32422  | 0     | 1      |       | 6      | 6      | 6      | 6      | 6     |

| respid | Q43_9 | Q43_99 | Q44_1 | Q46x1a | Q46x1b | Q46x2a | Q46x2b | Q46x3 |
|--------|-------|--------|-------|--------|--------|--------|--------|-------|
| 32439  | 0     | 1      |       | 6      | 6      | 6      | 6      | 6     |
| 32507  | 0     | 1      |       | 5      | 5      | 5      | 5      | 5     |
| 32522  |       |        |       |        |        |        |        |       |
| 32535  |       |        |       |        |        |        |        |       |
| 32546  | 0     | 1      |       | 6      | 6      | 6      | 6      | 6     |
| 32553  | 0     | 1      |       | 5      | 5      | 4      | 4      | 4     |
| 32570  |       |        |       |        |        |        |        |       |
| 32592  | 0     | 0      | 1     | 6      | 6      | 1      | 1      | 5     |
| 32605  | 0     | 0      | 3     | 4      | 3      | 2      | 2      | 6     |
| 32630  | 0     | 0      | 3     | 3      | 2      | 3      | 3      | 2     |
| 32642  | 0     | 0      | 2     | 4      | 4      | 2      | 2      | 4     |
| 32646  | 0     | 1      |       | 5      | 5      | 5      | 5      | 5     |
| 32665  | 0     | 0      | 3     | 6      | 6      | 6      | 6      | 6     |
| 32677  | 0     | 1      |       | 6      | 6      | 6      | 6      | 6     |
| 32694  | 0     | 1      |       | 6      | 6      | 2      | 1      | 5     |
| 32698  | 0     | 0      | 2     | 6      | 6      | 2      | 2      | 4     |
| 32754  | 1     | 0      | 2     | 4      | 4      | 4      | 4      | 3     |
| 32799  | 0     | 0      | 3     | 4      | 4      | 2      | 2      | 4     |
| 32816  |       |        |       |        |        |        |        |       |
| 32819  | 0     | 0      | 3     | 4      | 4      | 4      | 4      | 4     |
| 32840  | 0     | 0      | 3     | 4      | 4      | 4      | 4      | 4     |
| 32861  | 0     | 1      |       | 5      | 5      | 3      | 3      | 4     |
| 32866  | 0     | 1      |       | 5      | 5      | 5      | 5      | 5     |
| 32889  | 1     | 0      | 3     | 3      | 2      | 4      | 3      | 2     |
| 32960  | 0     | 1      |       | 6      | 6      | 6      | 6      | 6     |
| 32965  | 0     | 1      |       | 5      | 5      | 5      | 5      | 5     |
| 32986  | 0     | 0      | 2     | 6      | 6      | 6      | 6      | 4     |
| 33005  | 0     | 0      | 3     | 2      | 3      | 3      | 4      | 4     |
| 33054  | 0     | 0      | 3     | 4      | 4      | 2      | 3      | 4     |
| 33072  | 0     | 0      | 3     | 4      | 5      | 2      | 2      | 4     |
| 33095  | 0     | 1      |       | 6      | 6      | 2      | 2      | 4     |
| 33099  | 0     | 0      | 3     | 6      | 6      | 6      | 6      | 6     |

| respid | Q43_9 | Q43_99 | Q44_1 | Q46x1a | Q46x1b | Q46x2a | Q46x2b | Q46x3 |
|--------|-------|--------|-------|--------|--------|--------|--------|-------|
| 33121  | 0     | 1      |       | 5      | 4      | 5      | 5      | 4     |
| 33152  | 0     | 0      | 3     | 4      | 4      | 4      | 4      | 4     |
| 33159  | 0     | 0      | 3     | 4      | 4      | 1      | 2      | 5     |
| 33189  | 0     | 0      | 3     | 5      | 5      | 1      | 1      | 5     |
| 33198  | 0     | 0      | 3     | 4      | 5      | 1      | 1      | 4     |
| 33202  | 0     | 0      | 2     | 2      | 3      | 3      | 4      | 3     |
| 33204  | 0     | 1      |       | 5      | 5      | 5      | 5      | 5     |
| 33224  | 0     | 1      |       | 3      | 3      | 5      | 5      | 5     |
| 33272  | 0     | 0      | 3     | 4      | 4      | 3      | 3      | 3     |
| 33294  | 0     | 1      |       | 6      | 6      | 6      | 6      | 6     |
| 33300  | 0     | 1      |       | 4      | 4      | 4      | 5      | 4     |
| 33314  | 0     | 0      | 3     | 2      | 3      | 3      | 2      | 3     |
| 33338  | 0     | 1      |       | 4      | 4      | 2      | 2      | 4     |
| 33350  | 0     | 0      | 3     | 6      | 6      | 6      | 6      | 6     |
| 33362  | 0     | 0      | 3     | 6      | 6      | 6      | 6      | 6     |
| 33368  |       |        |       |        |        |        |        |       |
| 33374  | 0     | 0      | 2     | 4      | 4      | 4      | 3      | 3     |
| 33380  | 0     | 0      | 2     | 3      | 3      | 2      | 3      | 3     |
| 33385  | 0     | 0      | 3     | 6      | 6      | 6      | 6      | 6     |
| 33402  | 0     | 0      | 3     | 4      | 4      | 4      | 4      | 4     |
| 33414  | 0     | 1      |       | 6      | 6      | 6      | 6      | 6     |
| 33439  | 0     | 0      | 3     | 4      | 4      | 4      | 4      | 4     |
| 33449  | 0     | 0      | 3     | 4      | 3      | 2      | 2      | 3     |
| 33533  | 0     | 0      | 3     | 5      | 4      | 4      | 4      | 4     |
| 33540  | 0     | 1      |       | 6      | 6      | 6      | 6      | 6     |
| 33556  | 0     | 0      | 3     | 4      | 4      | 4      | 5      | 5     |
| 33615  | 0     | 1      |       | 5      | 5      | 5      | 5      | 5     |
| 33694  | 0     | 0      | 3     | 3      | 3      | 3      | 3      | 3     |
| 33717  | 0     | 0      | 3     | 6      | 6      | 6      | 6      | 6     |
| 33729  | 0     | 0      | 3     | 5      | 5      | 3      | 2      | 5     |
| 33746  | 0     | 1      |       | 4      | 4      | 4      | 4      | 4     |
| 33764  | 0     | 1      |       | 6      | 6      | 6      | 6      | 6     |

| respid | Q43_9 | Q43_99 | Q44_1 | Q46x1a | Q46x1b | Q46x2a | Q46x2b | Q46x3 |
|--------|-------|--------|-------|--------|--------|--------|--------|-------|
| 33790  | 0     | 0      | 3     | 4      | 5      | 4      | 5      | 4     |
| 33868  | 0     | 1      |       | 2      | 2      | 3      | 3      | 3     |
| 33872  | 0     | 0      | 1     | 2      | 1      | 3      | 2      | 2     |
| 33883  | 0     | 1      |       | 5      | 5      | 1      | 1      | 5     |
| 33884  | 0     | 1      |       | 5      | 5      | 5      | 5      | 5     |
| 33900  | 0     | 0      | 4     | 4      | 5      | 2      | 2      | 4     |
| 33933  | 0     | 0      | 3     | 5      | 5      | 1      | 2      | 4     |
| 33949  | 0     | 0      | 3     | 3      | 3      | 6      | 6      | 6     |
| 34005  |       |        |       |        |        |        |        |       |
| 34016  |       |        |       |        |        |        |        |       |
| 34041  | 0     | 1      |       | 1      | 2      | 2      | 2      | 2     |
| 34053  | 0     | 0      | 3     | 5      | 5      | 3      | 3      | 4     |
| 34056  | 0     | 1      |       | 6      | 6      | 6      | 6      | 6     |
| 34093  | 0     | 0      | 3     | 5      | 5      | 5      | 5      | 5     |
| 34112  | 0     | 0      | 3     | 4      | 4      | 4      | 2      | 4     |
| 34136  | 0     | 0      | 2     | 2      | 4      | 3      | 3      | 3     |
| 34138  | 0     | 1      |       | 5      | 5      | 5      | 5      | 5     |
| 34139  | 0     | 0      | 3     | 4      | 4      | 2      | 2      | 4     |
| 34189  | 0     | 0      | 4     | 6      | 6      | 6      | 6      | 6     |
| 34239  | 0     | 0      | 3     | 6      | 6      | 6      | 6      | 6     |
| 34240  | 0     | 1      |       | 5      | 5      | 6      | 6      | 5     |
| 34241  | 0     | 1      |       | 4      | 4      | 5      | 5      | 4     |
| 34259  | 0     | 0      | 3     | 4      | 3      | 3      | 4      | 4     |
| 34303  | 0     | 0      | 2     | 1      | 2      | 2      | 3      | 2     |
| 34306  | 0     | 1      |       | 5      | 4      | 1      | 2      | 6     |
| 34395  | 0     | 0      | 4     | 6      | 6      | 3      | 4      | 4     |
| 34463  | 0     | 0      | 3     | 4      | 5      | 3      | 4      | 4     |
| 34466  | 0     | 0      | 3     | 1      | 2      | 2      | 3      | 3     |
| 34471  | 0     | 1      |       | 5      | 5      | 1      | 1      | 5     |
| 34489  | 0     | 0      | 2     | 4      | 4      | 3      | 4      | 4     |
| 34518  | 0     | 0      | 3     | 6      | 6      | 6      | 6      | 6     |
| 34542  | 0     | 1      |       | 4      | 3      | 4      | 4      | 3     |



| respid | Q43_9 | Q43_99 | Q44_1 | Q46x1a | Q46x1b | Q46x2a | Q46x2b | Q46x3 |
|--------|-------|--------|-------|--------|--------|--------|--------|-------|
| 34595  |       |        |       |        |        |        |        |       |
| 34604  | 0     | 0      | 3     | 6      | 6      | 6      | 6      | 6     |
| 34631  | 0     | 0      | 2     | 6      | 6      | 5      | 5      | 5     |
| 34665  | 0     | 0      | 3     | 4      | 4      | 2      | 2      | 4     |
| 34716  | 0     | 1      |       | 6      | 6      | 6      | 6      | 6     |
| 34729  | 0     | 1      |       | 6      | 6      | 5      | 5      | 5     |
| 34772  | 1     | 0      | 2     | 4      | 6      | 4      | 4      | 6     |
| 34800  | 0     | 1      |       | 6      | 6      | 6      | 6      | 6     |
| 34819  | 0     | 0      | 3     | 2      | 2      | 1      | 2      | 2     |
| 34829  | 0     | 0      | 3     | 4      | 4      | 4      | 4      | 4     |
| 34831  | 0     | 0      | 3     | 4      | 3      | 3      | 4      | 3     |
| 34839  | 0     | 0      | 4     | 1      | 1      | 1      | 1      | 5     |
| 34868  | 0     | 1      |       | 5      | 4      | 2      | 2      | 4     |
| 34869  | 0     | 1      |       | 6      | 6      | 6      | 6      | 6     |
| 34882  | 0     | 0      | 1     | 3      | 4      | 4      | 4      | 3     |
| 34895  | 0     | 0      | 3     | 3      | 4      | 2      | 4      | 3     |
| 34901  | 0     | 1      |       | 6      | 6      | 6      | 6      | 6     |
| 34904  | 0     | 0      | 3     | 4      | 3      | 3      | 3      | 4     |
| 34907  | 0     | 0      | 3     | 6      | 6      | 6      | 6      | 6     |
| 34914  | 0     | 1      |       | 4      | 4      | 2      | 2      | 4     |
| 34918  | 0     | 0      | 3     | 4      | 4      | 2      | 2      | 4     |
| 34924  | 0     | 1      |       | 6      | 6      | 6      | 6      | 6     |
| 34933  | 0     | 1      |       | 4      | 4      | 4      | 4      | 4     |
| 34938  | 0     | 1      |       | 5      | 5      | 5      | 5      | 5     |
| 34952  | 0     | 0      | 2     | 3      | 4      | 3      | 4      | 3     |
| 34959  | 0     | 0      | 4     | 6      | 6      | 6      | 6      | 6     |
| 34972  | 0     | 1      |       | 5      | 4      | 2      | 1      | 5     |
| 34973  | 0     | 0      | 3     | 4      | 4      | 6      | 6      | 6     |
| 34975  | 1     | 0      | 2     | 4      | 4      | 3      | 2      | 4     |
| 34977  | 0     | 0      | 2     | 4      | 4      | 2      | 2      | 3     |
| 34978  | 0     | 0      | 3     | 6      | 6      | 2      | 2      | 6     |
| 34980  | 0     | 1      |       | 6      | 5      | 5      | 5      | 5     |

| respid | Q43_9 | Q43_99 | Q44_1 | Q46x1a | Q46x1b | Q46x2a | Q46x2b | Q46x3 |
|--------|-------|--------|-------|--------|--------|--------|--------|-------|
| 34984  | 0     | 0      | 3     | 4      | 4      | 2      | 2      | 4     |
| 34986  | 0     | 0      | 3     | 4      | 4      | 6      | 6      | 4     |
| 34994  | 0     | 1      |       | 5      | 5      | 5      | 5      | 5     |
| 34996  | 0     | 0      | 3     | 3      | 4      | 2      | 2      | 3     |
| 35003  | 0     | 1      |       | 5      | 5      | 1      | 1      | 4     |
| 35014  | 0     | 1      |       | 6      | 6      | 1      | 1      | 5     |
| 35029  | 0     | 0      | 3     | 2      | 2      | 2      | 2      | 2     |
| 35030  | 0     | 1      |       | 6      | 6      | 6      | 6      | 6     |
| 35037  | 0     | 0      | 4     | 6      | 6      | 4      | 4      | 3     |
| 35043  |       |        |       |        |        |        |        |       |
| 35048  |       |        |       |        |        |        |        |       |
| 35055  | 0     | 1      |       | 6      | 6      | 6      | 6      | 6     |
| 35067  | 0     | 1      |       | 6      | 6      | 6      | 6      | 6     |
| 35072  | 0     | 1      |       | 6      | 6      | 6      | 6      | 6     |
| 35078  | 0     | 0      | 3     | 4      | 5      | 5      | 5      | 5     |
| 35084  | 0     | 0      | 3     | 5      | 4      | 4      | 4      | 4     |
| 35095  |       |        |       |        |        |        |        |       |
| 35096  |       |        |       |        |        |        |        |       |
| 35097  | 0     | 0      | 3     | 4      | 4      | 4      | 4      | 4     |
| 35098  | 0     | 1      |       | 6      | 6      | 6      | 6      | 6     |
| 35109  | 0     | 0      | 2     | 3      | 2      | 3      | 4      | 2     |
| 35114  | 0     | 1      |       | 5      | 5      | 1      | 1      | 5     |
| 35115  | 0     | 1      |       | 5      | 5      | 5      | 5      | 5     |
| 35124  | 0     | 1      |       | 3      | 3      | 3      | 3      | 2     |
| 35125  | 0     | 1      |       | 5      | 5      | 1      | 2      | 5     |
| 35141  |       |        |       |        |        |        |        |       |
| 35142  | 0     | 1      |       | 5      | 5      | 5      | 5      | 5     |
| 35145  |       |        |       |        |        |        |        |       |
| 35149  | 0     | 1      |       | 3      | 6      | 6      | 4      | 3     |
| 35159  | 0     | 0      | 4     | 6      | 6      | 6      | 6      | 6     |
| 35163  | 1     | 0      | 2     | 6      | 6      | 6      | 6      | 3     |
| 35174  | 0     | 0      | 3     | 4      | 4      | 4      | 4      | 4     |

| respid | Q43_9 | Q43_99 | Q44_1 | Q46x1a | Q46x1b | Q46x2a | Q46x2b | Q46x3 |
|--------|-------|--------|-------|--------|--------|--------|--------|-------|
| 35188  |       |        |       |        |        |        |        |       |
| 35189  | 0     | 0      | 2     | 4      | 3      | 2      | 2      | 4     |
| 35201  | 0     | 0      | 3     | 3      | 4      | 4      | 4      | 5     |
| 35215  | 0     | 1      |       | 6      | 6      | 5      | 5      | 5     |
| 35228  | 0     | 1      |       | 5      | 6      | 2      | 2      | 6     |
| 35235  | 0     | 0      | 3     | 4      | 4      | 4      | 4      | 4     |
| 35239  | 0     | 0      | 4     | 4      | 4      | 2      | 2      | 4     |
| 35243  | 0     | 1      |       | 5      | 5      | 1      | 1      | 4     |
| 35245  | 0     | 1      |       | 4      | 4      | 3      | 3      | 6     |
| 35259  |       |        |       |        |        |        |        |       |
| 35265  | 0     | 1      |       | 3      | 3      | 4      | 4      | 3     |
| 35272  | 0     | 0      | 1     | 3      | 2      | 3      | 3      | 2     |
| 35280  | 0     | 0      | 3     | 5      | 4      | 2      | 2      | 4     |
| 35298  | 0     | 1      |       | 5      | 5      | 1      | 1      | 5     |
| 35305  | 0     | 0      | 3     | 6      | 6      | 6      | 6      | 6     |
| 35306  | 1     | 0      | 3     | 4      | 4      | 2      | 2      | 3     |
| 35307  | 0     | 1      |       | 5      | 5      | 5      | 5      | 5     |
| 35311  | 0     | 0      | 2     | 4      | 5      | 5      | 5      | 5     |
| 35322  | 0     | 0      | 4     | 4      | 4      | 3      | 2      | 3     |
| 35323  | 0     | 0      | 3     | 5      | 5      | 2      | 2      | 4     |
| 35327  | 0     | 0      | 4     | 5      | 4      | 2      | 2      | 4     |
| 35366  | 0     | 0      | 3     | 4      | 4      | 4      | 4      | 4     |
| 35378  | 0     | 1      |       | 5      | 4      | 2      | 2      | 5     |
| 35389  | 0     | 0      | 3     | 4      | 4      | 4      | 4      | 4     |
| 35390  | 0     | 0      | 4     | 4      | 4      | 4      | 4      | 4     |
| 35395  | 0     | 0      | 2     | 3      | 3      | 4      | 3      | 3     |
| 35411  | 0     | 0      | 2     | 4      | 4      | 1      | 1      | 3     |
| 35423  | 0     | 1      |       | 5      | 5      | 2      | 2      | 4     |
| 35425  | 0     | 1      |       | 4      | 4      | 4      | 4      | 6     |
| 35434  | 0     | 0      | 3     | 6      | 6      | 6      | 6      | 6     |
| 35462  | 0     | 0      | 4     | 5      | 5      | 2      | 2      | 4     |
| 35478  | 0     | 0      | 2     | 3      | 3      | 3      | 3      | 3     |

| respid | Q43_9 | Q43_99 | Q44_1 | Q46x1a | Q46x1b | Q46x2a | Q46x2b | Q46x3 |
|--------|-------|--------|-------|--------|--------|--------|--------|-------|
| 35481  | 0     | 0      | 3     | 3      | 4      | 2      | 2      | 3     |
| 35498  | 0     | 1      |       | 5      | 5      | 5      | 4      | 4     |
| 35499  |       |        |       |        |        |        |        |       |
| 35502  | 0     | 0      | 2     | 4      | 4      | 2      | 2      | 4     |
| 35503  |       |        |       |        |        |        |        |       |
| 35504  |       |        |       |        |        |        |        |       |
| 35508  | 0     | 0      | 2     | 4      | 4      | 2      | 2      | 4     |
| 35513  | 0     | 0      | 3     | 4      | 5      | 6      | 6      | 6     |
| 35516  | 0     | 1      |       | 5      | 6      | 6      | 6      | 6     |
| 35519  | 0     | 0      | 3     | 2      | 1      | 4      | 4      | 1     |
| 35530  | 0     | 0      | 1     | 4      | 4      | 2      | 2      | 4     |
| 35533  | 0     | 0      | 3     | 5      | 5      | 2      | 2      | 4     |
| 35561  | 0     | 0      | 3     | 2      | 2      | 3      | 4      | 4     |
| 35565  | 0     | 1      |       | 5      | 5      | 2      | 2      | 5     |
| 35588  | 0     | 1      |       | 6      | 6      | 6      | 6      | 6     |
| 35598  | 0     | 1      |       | 6      | 5      | 1      | 1      | 6     |
| 35607  | 0     | 0      | 3     | 5      | 5      | 1      | 1      | 5     |
| 35638  | 0     | 1      |       | 5      | 5      | 5      | 5      | 5     |
| 35642  | 0     | 1      |       | 6      | 6      | 6      | 6      | 6     |
| 35643  | 0     | 1      |       | 4      | 4      | 4      | 4      | 4     |
| 35680  | 0     | 1      |       | 6      | 5      | 1      | 1      | 5     |
| 35697  | 0     | 0      | 3     | 5      | 5      | 1      | 1      | 5     |
| 35703  |       |        |       |        |        |        |        |       |
| 35709  | 0     | 0      | 3     | 4      | 4      | 2      | 2      | 4     |
| 35710  | 0     | 1      |       | 6      | 6      | 2      | 2      | 5     |
| 35721  | 1     | 0      | 3     | 4      | 4      | 4      | 3      | 1     |
| 35723  | 0     | 0      | 4     | 6      | 6      | 6      | 6      | 6     |
| 35736  | 0     | 0      | 2     | 5      | 5      | 6      | 6      | 6     |
| 35739  | 0     | 0      | 3     | 4      | 6      | 4      | 5      | 6     |
| 35745  | 0     | 0      | 2     | 6      | 6      | 6      | 6      | 4     |
| 35748  | 0     | 0      | 2     | 3      | 6      | 4      | 4      | 6     |
| 35750  | 0     | 1      |       | 6      | 6      | 6      | 6      | 6     |

| respid | Q43_9 | Q43_99 | Q44_1 | Q46x1a | Q46x1b | Q46x2a | Q46x2b | Q46x3 |
|--------|-------|--------|-------|--------|--------|--------|--------|-------|
| 35752  | 0     | 0      | 3     | 6      | 6      | 6      | 6      | 6     |
| 35773  | 0     | 0      | 3     | 5      | 5      | 5      | 5      | 5     |
| 35779  | 0     | 1      |       | 5      | 5      | 1      | 1      | 5     |
| 35791  | 0     | 0      | 3     | 5      | 5      | 1      | 5      | 5     |
| 35801  | 0     | 0      | 3     | 5      | 5      | 5      | 5      | 5     |
| 35802  | 0     | 1      |       | 5      | 5      | 5      | 5      | 5     |
| 35837  | 0     | 0      | 3     | 4      | 4      | 5      | 5      | 4     |
| 35853  | 0     | 1      |       | 5      | 4      | 4      | 4      | 4     |
| 35858  | 0     | 0      | 3     | 4      | 4      | 2      | 2      | 4     |
| 35860  | 0     | 0      | 3     | 4      | 4      | 3      | 3      | 3     |
| 35875  | 0     | 0      | 2     | 5      | 4      | 2      | 2      | 4     |
| 35883  | 0     | 1      |       | 6      | 6      | 5      | 5      | 4     |
| 35890  | 0     | 0      | 4     | 5      | 5      | 6      | 6      | 5     |
| 35898  | 0     | 0      | 4     | 6      | 6      | 6      | 6      | 6     |
| 35901  | 1     | 0      | 2     | 2      | 2      | 4      | 4      | 2     |
| 35914  | 0     | 1      |       | 1      | 1      | 1      | 1      | 1     |
| 35924  | 0     | 1      |       | 3      | 5      | 4      | 3      | 4     |
| 35950  | 0     | 0      | 2     | 6      | 6      | 6      | 6      | 6     |
| 35961  | 0     | 1      |       | 6      | 6      | 6      | 6      | 6     |
| 35966  | 0     | 1      |       | 5      | 5      | 6      | 6      | 6     |
| 35967  | 0     | 1      |       | 5      | 5      | 2      | 2      | 5     |
| 35971  | 0     | 1      |       | 6      | 6      | 1      | 1      | 3     |
| 35974  | 0     | 0      | 4     | 5      | 5      | 5      | 5      | 5     |
| 35983  | 0     | 0      | 2     | 3      | 4      | 4      | 3      | 4     |
| 35992  | 1     | 0      | 3     | 6      | 6      | 6      | 6      | 6     |
| 36010  | 0     | 1      |       | 5      | 4      | 6      | 2      | 4     |
| 36019  | 0     | 0      | 1     | 4      | 4      | 1      | 1      | 4     |
| 36029  | 0     | 0      | 3     | 4      | 4      | 4      | 4      | 6     |
| 36033  | 0     | 1      |       | 6      | 6      | 6      | 6      | 5     |
| 36042  | 0     | 1      |       | 6      | 6      | 1      | 1      | 6     |
| 36043  | 0     | 0      | 3     | 4      | 2      | 4      | 3      | 6     |
| 36048  | 0     | 0      | 3     | 4      | 4      | 2      | 3      | 4     |

| respid | Q43_9 | Q43_99 | Q44_1 | Q46x1a | Q46x1b | Q46x2a | Q46x2b | Q46x3 |
|--------|-------|--------|-------|--------|--------|--------|--------|-------|
| 36050  | 0     | 0      | 4     | 4      | 4      | 5      | 5      | 4     |
| 36062  | 0     | 0      | 3     | 5      | 4      | 4      | 4      | 4     |
| 36063  |       |        |       |        |        |        |        |       |
| 36092  | 0     | 1      |       | 4      | 5      | 2      | 2      | 2     |
| 36097  | 0     | 0      | 2     | 4      | 4      | 2      | 3      | 4     |
| 36108  | 0     | 1      |       | 5      | 5      | 1      | 1      | 5     |
| 36113  | 0     | 0      | 3     | 3      | 2      | 4      | 4      | 3     |
| 36117  | 0     | 0      | 5     | 6      | 6      | 6      | 6      | 6     |
| 36129  | 0     | 0      | 3     | 5      | 5      | 6      | 6      | 6     |
| 36144  | 0     | 0      | 4     | 6      | 6      | 5      | 5      | 5     |
| 36152  | 0     | 0      | 3     | 6      | 6      | 6      | 6      | 4     |
| 36154  | 0     | 0      | 4     | 4      | 4      | 5      | 4      | 4     |
| 36155  | 0     | 0      | 3     | 6      | 6      | 5      | 5      | 5     |
| 36167  | 0     | 1      |       | 5      | 5      | 1      | 1      | 5     |
| 36172  | 0     | 0      | 3     | 5      | 5      | 1      | 1      | 5     |
| 36173  | 0     | 1      |       | 6      | 6      | 6      | 6      | 5     |
| 36174  | 0     | 0      | 3     | 6      | 6      | 5      | 5      | 6     |
| 36182  | 0     | 0      | 3     | 5      | 5      | 3      | 3      | 4     |
| 36192  | 0     | 0      | 2     | 4      | 6      | 2      | 2      | 2     |
| 36195  | 0     | 1      |       | 6      | 6      | 6      | 6      | 6     |
| 36204  | 0     | 1      |       | 5      | 4      | 4      | 2      | 4     |
| 36205  | 0     | 1      |       | 4      | 4      | 2      | 2      | 6     |
| 36208  | 0     | 1      |       | 6      | 6      | 6      | 6      | 6     |
| 36216  | 0     | 0      | 3     | 4      | 4      | 2      | 2      | 4     |
| 36221  | 0     | 1      |       | 6      | 4      | 4      | 3      | 2     |
| 36244  | 0     | 1      |       | 5      | 5      | 5      | 5      | 5     |
| 36255  | 0     | 0      | 4     | 3      | 4      | 3      | 3      | 3     |
| 36259  | 0     | 1      |       | 6      | 4      | 1      | 1      | 5     |
| 36262  | 0     | 0      | 3     | 3      | 3      | 3      | 3      | 3     |
| 36268  | 0     | 1      |       | 5      | 5      | 5      | 5      | 5     |
| 36308  | 0     | 0      | 3     | 6      | 6      | 6      | 6      | 4     |
| 36324  | 0     | 1      |       | 5      | 4      | 1      | 1      | 4     |

| respid | Q43_9 | Q43_99 | Q44_1 | Q46x1a | Q46x1b | Q46x2a | Q46x2b | Q46x3 |
|--------|-------|--------|-------|--------|--------|--------|--------|-------|
| 36330  | 0     | 1      |       | 6      | 6      | 6      | 6      | 6     |
| 36331  | 0     | 0      | 3     | 6      | 6      | 6      | 6      | 6     |
| 36336  | 0     | 0      | 4     | 5      | 4      | 5      | 5      | 5     |
| 36337  | 0     | 1      |       | 6      | 6      | 6      | 6      | 6     |
| 36364  | 0     | 1      |       | 6      | 6      | 6      | 6      | 6     |
| 36365  | 0     | 0      | 3     | 3      | 3      | 4      | 2      | 3     |
| 36396  | 0     | 0      | 3     | 4      | 4      | 6      | 6      | 6     |
| 36403  | 0     | 1      |       | 5      | 5      | 6      | 6      | 6     |
| 36410  | 0     | 1      |       | 5      | 5      | 6      | 1      | 5     |
| 36413  | 0     | 1      |       | 4      | 5      | 6      | 6      | 6     |
| 36422  | 0     | 0      | 4     | 4      | 5      | 6      | 5      | 4     |
| 36424  | 0     | 0      | 3     | 4      | 4      | 2      | 2      | 4     |
| 36425  | 1     | 0      | 2     | 4      | 2      | 3      | 3      | 2     |
| 36432  | 0     | 1      |       | 6      | 6      | 5      | 5      | 5     |
| 36435  | 0     | 0      | 3     | 4      | 4      | 4      | 4      | 4     |
| 36446  | 0     | 0      | 4     | 3      | 3      | 6      | 6      | 6     |
| 36451  | 0     | 0      | 3     | 6      | 6      | 6      | 6      | 6     |
| 36453  | 0     | 0      | 4     | 4      | 4      | 3      | 3      | 3     |
| 36459  | 0     | 0      | 2     | 3      | 3      | 3      | 2      | 3     |
| 36464  | 0     | 0      | 3     | 4      | 4      | 6      | 6      | 6     |
| 36465  | 0     | 0      | 3     | 4      | 4      | 2      | 2      | 4     |
| 36466  |       |        |       |        |        |        |        |       |
| 36476  | 0     | 0      | 3     | 4      | 4      | 3      | 4      | 4     |
| 36487  | 0     | 0      | 4     | 6      | 6      | 1      | 1      | 6     |
| 36488  | 0     | 1      |       | 4      | 4      | 4      | 4      | 4     |
| 36500  |       |        |       |        |        |        |        |       |
| 36504  | 0     | 1      |       | 6      | 6      | 6      | 6      | 6     |
| 36513  | 0     | 0      | 3     | 4      | 4      | 5      | 4      | 4     |
| 36515  | 0     | 0      | 3     | 4      | 4      | 3      | 4      | 4     |
| 36521  | 1     | 0      | 3     | 2      | 3      | 4      | 4      | 2     |
| 36530  | 0     | 0      | 3     | 3      | 3      | 3      | 3      | 3     |
| 36556  | 0     | 0      | 2     | 6      | 6      | 6      | 6      | 6     |

| respid | Q43_9 | Q43_99 | Q44_1 | Q46x1a | Q46x1b | Q46x2a | Q46x2b | Q46x3 |
|--------|-------|--------|-------|--------|--------|--------|--------|-------|
| 36564  | 0     | 0      | 3     | 3      | 3      | 3      | 3      | 2     |
| 36584  | 0     | 1      |       | 5      | 5      | 5      | 5      | 5     |
| 36585  |       |        |       |        |        |        |        |       |
| 36586  |       |        |       |        |        |        |        |       |
| 36606  | 0     | 0      | 3     | 6      | 6      | 6      | 6      | 6     |
| 36615  | 0     | 1      |       | 6      | 6      | 2      | 2      | 5     |
| 36628  | 0     | 0      | 4     | 5      | 5      | 5      | 5      | 5     |
| 36630  | 0     | 1      |       | 5      | 5      | 6      | 6      | 6     |
| 36631  | 0     | 0      | 2     | 4      | 6      | 6      | 6      | 6     |
| 36636  | 0     | 0      | 3     | 5      | 5      | 5      | 5      | 4     |
| 36637  | 0     | 1      |       | 4      | 4      | 2      | 2      | 4     |
| 36651  | 0     | 0      | 3     | 4      | 3      | 2      | 2      | 2     |
| 36661  | 0     | 0      | 5     | 5      | 5      | 5      | 5      | 5     |
| 36670  | 0     | 0      | 3     | 3      | 2      | 6      | 6      | 6     |
| 36671  | 0     | 0      | 3     | 4      | 4      | 2      | 3      | 4     |
| 36688  |       |        |       |        |        |        |        |       |
| 36694  | 0     | 1      |       | 4      | 4      | 4      | 4      | 4     |
| 36696  |       |        |       |        |        |        |        |       |
| 36703  |       |        |       |        |        |        |        |       |
| 36719  | 0     | 0      | 5     | 3      | 3      | 3      | 3      | 3     |
| 36721  | 0     | 0      | 1     | 3      | 3      | 3      | 3      | 3     |
| 36740  | 0     | 1      |       | 4      | 4      | 4      | 4      | 3     |
| 36755  | 0     | 1      |       | 5      | 5      | 5      | 5      | 5     |
| 36765  | 0     | 1      |       | 5      | 4      | 3      | 3      | 3     |
| 36770  |       |        |       |        |        |        |        |       |
| 36773  | 0     | 0      | 3     | 4      | 4      | 4      | 4      | 4     |
| 36813  | 0     | 0      | 3     | 4      | 4      | 6      | 6      | 4     |
| 36819  | 0     | 0      | 3     | 4      | 4      | 3      | 2      | 4     |
| 36820  | 0     | 0      | 3     | 6      | 6      | 6      | 6      | 6     |
| 36821  | 0     | 1      |       | 5      | 5      | 6      | 5      | 5     |
| 36827  | 0     | 1      |       | 5      | 5      | 2      | 2      | 5     |
| 36835  | 0     | 1      |       | 5      | 5      | 5      | 5      | 5     |



| respid | Q43_9 | Q43_99 | Q44_1 | Q46x1a | Q46x1b | Q46x2a | Q46x2b | Q46x3 |
|--------|-------|--------|-------|--------|--------|--------|--------|-------|
| 36837  | 0     | 0      | 2     | 4      | 4      | 2      | 2      | 3     |
| 36849  | 0     | 1      |       | 6      | 6      | 6      | 6      | 6     |
| 36851  | 0     | 0      | 4     | 4      | 4      | 4      | 4      | 4     |
| 36868  | 0     | 1      |       | 4      | 4      | 3      | 4      | 4     |
| 36870  | 0     | 0      | 4     | 5      | 5      | 5      | 5      | 5     |
| 36871  |       |        |       |        |        |        |        |       |
| 36874  | 0     | 0      | 3     | 4      | 4      | 4      | 4      | 4     |
| 36878  | 0     | 0      | 3     | 4      | 4      | 4      | 4      | 4     |
| 36887  | 0     | 0      | 3     | 5      | 5      | 5      | 5      | 4     |
| 36889  | 0     | 1      |       | 5      | 5      | 5      | 5      | 5     |
| 36891  | 0     | 0      | 4     | 5      | 5      | 2      | 6      | 3     |
| 36903  | 0     | 0      | 3     | 4      | 4      | 3      | 3      | 4     |
| 36905  | 0     | 0      | 3     | 5      | 5      | 1      | 1      | 5     |
| 36913  | 0     | 1      |       | 4      | 4      | 4      | 4      | 4     |
| 36949  | 0     | 1      |       | 4      | 4      | 4      | 4      | 4     |
| 36954  | 0     | 0      | 3     | 3      | 4      | 3      | 3      | 4     |
| 36962  | 0     | 0      | 1     | 3      | 3      | 2      | 2      | 2     |
| 36965  | 0     | 0      | 3     | 4      | 4      | 3      | 2      | 3     |
| 36970  | 0     | 1      |       | 6      | 6      | 6      | 6      | 6     |
| 36979  | 0     | 0      | 4     | 4      | 5      | 5      | 4      | 4     |
| 36990  | 0     | 0      | 2     | 4      | 5      | 4      | 4      | 4     |
| 36991  | 0     | 0      | 4     | 6      | 6      | 6      | 6      | 6     |
| 36992  | 0     | 1      |       | 4      | 4      | 3      | 2      | 3     |
| 37015  |       |        |       |        |        |        |        |       |
| 37017  | 0     | 1      |       | 4      | 6      | 2      | 2      | 4     |
| 37020  |       |        |       |        |        |        |        |       |
| 37033  | 0     | 0      | 3     | 3      | 3      | 3      | 3      | 3     |
| 37041  | 0     | 0      | 3     | 6      | 6      | 6      | 6      | 4     |
| 37048  | 0     | 0      | 3     | 4      | 4      | 2      | 2      | 4     |
| 37050  | 0     | 1      |       | 6      | 6      | 6      | 6      | 6     |
| 37054  | 0     | 0      | 2     | 6      | 6      | 6      | 6      | 6     |
| 37057  | 0     | 0      | 3     | 4      | 4      | 4      | 4      | 4     |

| respid | Q43_9 | Q43_99 | Q44_1 | Q46x1a | Q46x1b | Q46x2a | Q46x2b | Q46x3 |
|--------|-------|--------|-------|--------|--------|--------|--------|-------|
| 37067  | 0     | 0      | 4     | 3      | 3      | 2      | 2      | 4     |
| 37074  | 0     | 1      |       | 5      | 5      | 2      | 2      | 5     |
| 37088  | 0     | 0      | 3     | 4      | 4      | 2      | 3      | 4     |
| 37090  | 0     | 0      | 2     | 4      | 4      | 4      | 3      | 2     |
| 37110  | 0     | 0      | 3     | 2      | 2      | 4      | 4      | 2     |
| 37122  | 0     | 0      | 3     | 5      | 5      | 1      | 2      | 2     |
| 37124  | 0     | 0      | 3     | 4      | 4      | 6      | 4      | 6     |
| 37126  |       |        |       |        |        |        |        |       |
| 37129  | 0     | 0      | 2     | 4      | 4      | 5      | 5      | 4     |
| 37130  | 0     | 0      | 4     | 4      | 4      | 2      | 2      | 4     |
| 37142  | 0     | 0      | 3     | 4      | 4      | 3      | 3      | 4     |
| 37160  | 0     | 0      | 2     | 2      | 4      | 4      | 4      | 4     |
| 37168  | 0     | 0      | 2     | 4      | 4      | 3      | 4      | 4     |
| 37169  | 0     | 1      |       | 6      | 6      | 6      | 6      | 6     |
| 37191  | 0     | 0      | 3     | 6      | 6      | 6      | 6      | 6     |
| 37197  | 0     | 0      | 3     | 2      | 1      | 2      | 2      | 2     |
| 37204  | 0     | 1      |       | 5      | 5      | 5      | 5      | 5     |
| 37213  | 0     | 0      | 3     | 2      | 3      | 3      | 3      | 3     |
| 37238  | 0     | 0      | 3     | 6      | 6      | 6      | 6      | 6     |
| 37242  | 0     | 0      | 2     | 2      | 2      | 3      | 2      | 2     |
| 37243  | 0     | 0      | 3     | 4      | 4      | 4      | 4      | 2     |
| 37275  | 0     | 0      | 2     | 4      | 4      | 4      | 4      | 4     |
| 37305  | 0     | 0      | 3     | 4      | 3      | 2      | 3      | 4     |
| 37357  | 0     | 0      | 2     | 2      | 3      | 3      | 3      | 2     |
| 37365  | 0     | 0      | 2     | 2      | 3      | 3      | 3      | 2     |
| 37370  |       |        |       |        |        |        |        |       |
| 37406  | 0     | 0      | 2     | 3      | 2      | 3      | 3      | 3     |
| 37410  | 0     | 1      |       | 6      | 2      | 2      | 1      | 3     |
| 37411  | 0     | 0      | 3     | 3      | 3      | 3      | 3      | 3     |
| 37427  | 0     | 0      | 2     | 4      | 3      | 3      | 3      | 3     |
| 37437  | 0     | 0      | 2     | 2      | 2      | 4      | 4      | 3     |
| 37440  | 0     | 1      |       | 4      | 4      | 3      | 3      | 3     |

| respid | Q43_9 | Q43_99 | Q44_1 | Q46x1a | Q46x1b | Q46x2a | Q46x2b | Q46x3 |
|--------|-------|--------|-------|--------|--------|--------|--------|-------|
| 37452  | 0     | 0      | 4     | 4      | 4      | 4      | 4      | 4     |
| 37465  | 0     | 0      | 3     | 4      | 4      | 4      | 4      | 4     |
| 37468  | 0     | 0      | 3     | 4      | 4      | 2      | 2      | 3     |
| 37469  | 0     | 1      |       | 4      | 4      | 2      | 2      | 4     |
| 37477  | 1     | 0      | 3     | 2      | 3      | 3      | 3      | 2     |
| 37509  | 0     | 1      |       | 6      | 6      | 6      | 6      | 5     |
| 37513  | 0     | 0      | 2     | 5      | 6      | 5      | 5      | 6     |
| 37534  | 0     | 0      | 2     | 4      | 5      | 5      | 5      | 5     |
| 37537  | 0     | 1      |       | 6      | 6      | 6      | 6      | 6     |
| 37560  | 0     | 0      | 2     | 2      | 2      | 2      | 2      | 2     |
| 37566  | 0     | 0      | 3     | 4      | 4      | 4      | 4      | 4     |
| 37572  | 0     | 0      | 2     | 5      | 6      | 2      | 3      | 5     |
| 37574  | 0     | 0      | 2     | 4      | 4      | 2      | 2      | 3     |
| 37575  | 0     | 0      | 3     | 5      | 5      | 2      | 2      | 4     |
| 37590  | 0     | 0      | 3     | 6      | 6      | 6      | 6      | 6     |
| 37593  | 0     | 1      |       | 6      | 6      | 6      | 6      | 6     |
| 37599  | 0     | 1      |       | 5      | 5      | 1      | 1      | 5     |
| 37641  | 0     | 0      | 4     | 6      | 6      | 6      | 6      | 6     |
| 37651  | 0     | 0      | 3     | 4      | 4      | 2      | 2      | 4     |
| 37670  | 0     | 1      |       | 4      | 4      | 2      | 2      | 4     |
| 37680  | 0     | 0      | 4     | 6      | 6      | 6      | 6      | 6     |
| 37690  | 0     | 0      | 3     | 4      | 4      | 5      | 4      | 4     |
| 37694  |       |        |       |        |        |        |        |       |
| 37705  | 0     | 1      |       | 4      | 4      | 4      | 4      | 4     |
| 37710  | 0     | 0      | 4     | 2      | 2      | 2      | 2      | 2     |
| 37719  | 0     | 0      | 4     | 4      | 6      | 2      | 3      | 4     |
| 37741  | 0     | 0      | 3     | 3      | 4      | 3      | 3      | 3     |
| 37752  | 0     | 1      |       | 6      | 5      | 2      | 2      | 4     |
| 37755  | 0     | 0      | 1     | 4      | 4      | 4      | 3      | 4     |
| 37757  | 0     | 0      | 4     | 5      | 6      | 1      | 1      | 5     |
| 37783  | 0     | 0      | 2     | 3      | 4      | 4      | 4      | 4     |
| 37793  | 0     | 0      | 4     | 3      | 2      | 3      | 2      | 3     |

| respid | Q43_9 | Q43_99 | Q44_1 | Q46x1a | Q46x1b | Q46x2a | Q46x2b | Q46x3 |
|--------|-------|--------|-------|--------|--------|--------|--------|-------|
| 37800  | 0     | 0      | 2     | 3      | 3      | 3      | 3      | 2     |
| 37801  | 0     | 1      |       | 5      | 5      | 5      | 5      | 5     |
| 37820  | 0     | 0      | 2     | 3      | 3      | 3      | 3      | 3     |
| 37826  | 1     | 0      | 3     | 6      | 6      | 6      | 6      | 6     |
| 37835  | 0     | 0      | 1     | 2      | 2      | 4      | 4      | 3     |
| 37839  | 0     | 0      | 3     | 3      | 3      | 3      | 3      | 3     |
| 37871  | 0     | 0      | 2     | 4      | 3      | 4      | 3      | 4     |
| 37876  | 0     | 0      | 2     | 3      | 3      | 3      | 3      | 3     |
| 37879  | 0     | 0      | 2     | 4      | 4      | 3      | 4      | 3     |
| 37894  | 0     | 1      |       | 4      | 4      | 2      | 2      | 4     |
| 37895  | 1     | 0      | 3     | 4      | 4      | 4      | 4      | 3     |
| 37901  | 1     | 0      | 2     | 3      | 4      | 3      | 2      | 3     |
| 37926  | 0     | 0      | 3     | 4      | 4      | 1      | 1      | 4     |
| 37937  | 0     | 0      | 4     | 1      | 2      | 2      | 1      | 3     |
| 37938  | 1     | 0      | 4     | 4      | 4      | 4      | 4      | 4     |
| 37959  | 0     | 0      | 3     | 4      | 5      | 2      | 2      | 4     |
| 37970  |       |        |       |        |        |        |        |       |
| 37972  | 0     | 1      |       | 4      | 3      | 4      | 3      | 3     |
| 37988  | 0     | 0      | 2     | 4      | 4      | 4      | 4      | 4     |
| 37989  | 0     | 0      | 2     | 3      | 3      | 4      | 3      | 3     |
| 38000  | 0     | 0      | 3     | 4      | 4      | 5      | 5      | 4     |
| 38028  | 0     | 0      | 2     | 4      | 4      | 4      | 3      | 3     |
| 38042  | 0     | 0      | 3     | 3      | 3      | 3      | 3      | 2     |
| 38052  | 0     | 0      | 4     | 6      | 6      | 6      | 6      | 6     |
| 38056  | 0     | 1      |       | 6      | 6      | 6      | 6      | 6     |
| 38106  | 0     | 0      | 3     | 4      | 4      | 4      | 4      | 2     |
| 38114  | 0     | 0      | 3     | 4      | 3      | 3      | 3      | 3     |
| 38134  | 0     | 1      |       | 6      | 6      | 1      | 2      | 5     |
| 38135  | 0     | 0      | 2     | 3      | 2      | 4      | 4      | 2     |
| 38139  | 0     | 0      | 2     | 2      | 2      | 3      | 1      | 2     |
| 38160  | 0     | 0      | 3     | 6      | 6      | 6      | 6      | 6     |
| 38164  | 0     | 0      | 1     | 6      | 3      | 3      | 4      | 2     |

| respid | Q43_9 | Q43_99 | Q44_1 | Q46x1a | Q46x1b | Q46x2a | Q46x2b | Q46x3 |
|--------|-------|--------|-------|--------|--------|--------|--------|-------|
| 38168  |       |        |       |        |        |        |        |       |
| 38173  | 0     | 0      | 4     | 5      | 5      | 5      | 5      | 5     |
| 38193  | 0     | 0      | 2     | 2      | 3      | 4      | 2      | 2     |
| 38204  | 0     | 1      |       | 5      | 5      | 5      | 5      | 4     |
| 38206  | 0     | 0      | 3     | 4      | 4      | 2      | 2      | 4     |
| 38233  | 0     | 0      | 1     | 3      | 4      | 3      | 4      | 2     |
| 38242  | 0     | 0      | 3     | 3      | 3      | 3      | 3      | 3     |
| 38245  | 0     | 0      | 3     | 4      | 4      | 2      | 2      | 4     |
| 38261  | 0     | 0      | 2     | 4      | 4      | 4      | 4      | 4     |
| 38288  | 0     | 1      |       | 5      | 5      | 5      | 5      | 5     |
| 38296  | 0     | 0      | 3     | 4      | 4      | 4      | 3      | 3     |
| 38299  | 0     | 0      | 3     | 2      | 3      | 2      | 3      | 2     |
| 38300  | 0     | 0      | 3     | 4      | 4      | 3      | 4      | 4     |
| 38303  | 0     | 0      | 4     | 5      | 5      | 1      | 2      | 4     |
| 38317  | 0     | 1      |       | 6      | 6      | 6      | 6      | 6     |
| 38328  | 0     | 0      | 1     | 2      | 3      | 3      | 2      | 2     |
| 38333  | 0     | 1      |       | 4      | 4      | 4      | 4      | 4     |
| 38336  | 0     | 1      |       | 5      | 5      | 1      | 1      | 5     |
| 38338  | 0     | 1      |       | 6      | 6      | 6      | 6      | 6     |
| 38342  | 1     | 0      | 2     | 5      | 5      | 2      | 4      | 5     |
| 38360  | 0     | 1      |       | 6      | 6      | 6      | 6      | 6     |
| 38362  | 0     | 0      | 3     | 4      | 3      | 3      | 3      | 4     |
| 38364  | 0     | 0      | 1     | 3      | 3      | 2      | 3      | 4     |
| 38402  | 0     | 0      | 3     | 4      | 4      | 2      | 2      | 4     |
| 38423  | 0     | 0      | 3     | 3      | 4      | 4      | 4      | 4     |
| 38424  | 0     | 0      | 1     | 2      | 2      | 3      | 1      | 3     |
| 38435  | 0     | 0      | 2     | 5      | 2      | 2      | 1      | 2     |
| 38450  | 0     | 1      |       | 6      | 6      | 5      | 5      | 6     |
| 38455  | 0     | 0      | 3     | 4      | 4      | 1      | 3      | 6     |
| 38467  | 0     | 0      | 3     | 6      | 6      | 4      | 4      | 3     |
| 38468  | 1     | 0      | 3     | 6      | 3      | 6      | 6      | 6     |
| 38472  | 0     | 0      | 3     | 4      | 3      | 4      | 4      | 4     |

| respid | Q43_9 | Q43_99 | Q44_1 | Q46x1a | Q46x1b | Q46x2a | Q46x2b | Q46x3 |
|--------|-------|--------|-------|--------|--------|--------|--------|-------|
| 38484  | 0     | 1      |       | 5      | 5      | 5      | 5      | 4     |
| 38498  | 0     | 0      | 3     | 5      | 4      | 1      | 1      | 1     |
| 38507  | 0     | 1      |       | 6      | 6      | 6      | 6      | 6     |
| 38511  | 0     | 1      |       | 6      | 6      | 6      | 6      | 5     |
| 38524  | 1     | 0      | 2     | 2      | 2      | 4      | 4      | 2     |
| 38526  | 0     | 1      |       | 6      | 6      | 6      | 6      | 6     |
| 38534  | 0     | 0      | 2     | 3      | 2      | 2      | 4      | 3     |
| 38536  | 0     | 0      | 4     | 4      | 4      | 2      | 2      | 4     |
| 38539  | 0     | 0      | 4     | 6      | 5      | 1      | 1      | 5     |
| 38547  | 0     | 1      |       | 5      | 5      | 5      | 1      | 5     |
| 38549  | 0     | 0      | 4     | 5      | 5      | 5      | 5      | 5     |
| 38575  | 0     | 0      | 3     | 4      | 4      | 4      | 4      | 3     |
| 38579  | 0     | 0      | 3     | 6      | 6      | 6      | 6      | 6     |
| 38585  | 0     | 1      |       | 5      | 5      | 5      | 5      | 4     |
| 38589  | 0     | 0      | 2     | 4      | 4      | 4      | 4      | 4     |
| 38595  | 0     | 0      | 3     | 2      | 3      | 4      | 3      | 4     |
| 38602  | 0     | 0      | 4     | 5      | 5      | 5      | 5      | 4     |
| 38603  | 0     | 0      | 3     | 6      | 6      | 6      | 6      | 6     |
| 38612  | 0     | 0      | 4     | 4      | 4      | 4      | 4      | 4     |
| 38621  | 0     | 0      | 3     | 4      | 3      | 3      | 2      | 3     |
| 38624  | 0     | 0      | 4     | 3      | 4      | 4      | 4      | 3     |
| 38636  |       |        |       |        |        |        |        |       |
| 38656  | 0     | 0      | 2     | 4      | 4      | 4      | 1      | 4     |
| 38668  | 0     | 1      |       | 4      | 4      | 4      | 4      | 4     |
| 38675  | 0     | 1      |       | 4      | 4      | 4      | 4      | 4     |
| 38676  | 0     | 0      | 5     | 5      | 4      | 5      | 5      | 4     |
| 38682  | 0     | 0      | 2     | 4      | 4      | 3      | 4      | 3     |
| 38689  | 0     | 1      |       | 5      | 6      | 6      | 6      | 5     |
| 38702  |       |        |       |        |        |        |        |       |
| 38704  | 0     | 0      | 3     | 2      | 3      | 3      | 3      | 4     |
| 38713  | 0     | 1      |       | 6      | 6      | 6      | 6      | 6     |
| 38718  | 0     | 0      | 3     | 4      | 4      | 2      | 2      | 4     |

| respid | Q43_9 | Q43_99 | Q44_1 | Q46x1a | Q46x1b | Q46x2a | Q46x2b | Q46x3 |
|--------|-------|--------|-------|--------|--------|--------|--------|-------|
| 38725  | 0     | 1      |       | 6      | 5      | 5      | 5      | 4     |
| 38730  | 0     | 0      | 3     | 4      | 3      | 3      | 3      | 4     |
| 38737  | 0     | 0      | 4     | 4      | 4      | 6      | 4      | 4     |
| 38738  | 0     | 0      | 3     | 2      | 3      | 3      | 3      | 3     |
| 38744  | 1     | 0      | 4     | 6      | 6      | 6      | 6      | 6     |
| 38746  | 0     | 1      |       | 4      | 4      | 4      | 4      | 4     |
| 38753  | 0     | 0      | 3     | 5      | 5      | 2      | 2      | 2     |
| 38756  | 0     | 0      | 2     | 4      | 3      | 4      | 2      | 3     |
| 38760  | 0     | 1      |       | 3      | 4      | 2      | 2      | 4     |
| 38762  | 0     | 0      | 3     | 4      | 2      | 3      | 2      | 2     |
| 38765  | 0     | 1      |       | 4      | 3      | 4      | 4      | 5     |
| 38769  | 0     | 1      |       | 6      | 6      | 1      | 1      | 5     |
| 38781  | 0     | 0      | 3     | 4      | 4      | 4      | 4      | 4     |
| 38786  | 0     | 1      |       | 5      | 5      | 2      | 2      | 5     |
| 38790  | 0     | 0      | 2     | 6      | 6      | 6      | 6      | 6     |
| 38793  | 0     | 0      | 3     | 4      | 4      | 2      | 2      | 4     |
| 38797  | 0     | 1      |       | 6      | 6      | 6      | 6      | 6     |
| 38802  | 0     | 1      |       | 4      | 4      | 4      | 4      | 4     |
| 38815  | 0     | 1      |       | 6      | 6      | 6      | 6      | 6     |
| 38826  | 0     | 0      | 3     | 2      | 3      | 3      | 3      | 3     |
| 38828  | 0     | 1      |       | 5      | 5      | 2      | 2      | 5     |
| 38829  | 0     | 0      | 2     | 3      | 3      | 2      | 3      | 2     |
| 38835  | 0     | 0      | 3     | 4      | 4      | 4      | 4      | 4     |
| 38842  | 0     | 0      | 3     | 3      | 2      | 4      | 2      | 2     |
| 38853  | 0     | 1      |       | 5      | 5      | 4      | 4      | 4     |
| 38855  | 0     | 0      | 2     | 3      | 3      | 4      | 4      | 3     |
| 38860  | 0     | 0      | 3     | 3      | 2      | 3      | 2      | 2     |
| 38869  | 0     | 0      | 3     | 4      | 4      | 4      | 4      | 4     |
| 38882  | 0     | 0      | 4     | 3      | 3      | 2      | 1      | 4     |
| 38897  | 0     | 1      |       | 5      | 5      | 5      | 5      | 5     |
| 38903  | 0     | 0      | 4     | 6      | 6      | 6      | 5      | 5     |
| 38910  | 0     | 0      | 4     | 4      | 3      | 3      | 2      | 3     |

| respid | Q43_9 | Q43_99 | Q44_1 | Q46x1a | Q46x1b | Q46x2a | Q46x2b | Q46x3 |
|--------|-------|--------|-------|--------|--------|--------|--------|-------|
| 38948  | 0     | 0      | 4     | 3      | 2      | 3      | 2      | 2     |
| 38949  | 0     | 0      | 3     | 4      | 4      | 4      | 3      | 2     |
| 38953  | 0     | 0      | 1     | 3      | 3      | 3      | 3      | 3     |
| 38989  | 0     | 0      | 2     | 3      | 3      | 4      | 4      | 3     |
| 38997  | 0     | 0      | 4     | 4      | 4      | 2      | 3      | 3     |
| 38999  | 0     | 0      | 4     | 6      | 6      | 6      | 6      | 6     |
| 39002  | 1     | 0      | 3     | 3      | 2      | 2      | 3      | 2     |
| 39003  | 0     | 0      | 3     | 4      | 2      | 2      | 4      | 1     |
| 39006  | 0     | 1      |       | 4      | 6      | 1      | 6      | 5     |
| 39014  |       |        |       |        |        |        |        |       |
| 39017  | 0     | 0      | 1     | 3      | 3      | 2      | 2      | 3     |
| 39018  | 1     | 0      | 3     | 2      | 2      | 4      | 4      | 2     |
| 39025  | 0     | 0      | 3     | 2      | 3      | 3      | 2      | 3     |
| 39031  | 0     | 0      | 4     | 4      | 1      | 3      | 1      | 2     |
| 39061  | 0     | 0      | 4     | 3      | 2      | 4      | 2      | 1     |
| 39131  | 0     | 0      | 3     | 3      | 4      | 3      | 4      | 3     |
| 39153  | 0     | 0      | 3     | 6      | 6      | 2      | 4      | 3     |
| 39194  | 0     | 0      | 2     | 2      | 2      | 2      | 2      | 2     |
| 39204  | 0     | 0      | 3     | 6      | 6      | 6      | 6      | 6     |
| 39208  | 0     | 0      | 2     | 4      | 6      | 2      | 2      | 6     |
| 39213  | 0     | 0      | 3     | 6      | 6      | 6      | 6      | 6     |
| 39231  | 0     | 0      | 3     | 4      | 4      | 4      | 4      | 4     |
| 39251  | 0     | 0      | 3     | 6      | 6      | 6      | 6      | 6     |
| 39257  | 0     | 0      | 1     | 6      | 6      | 6      | 6      | 6     |
| 39262  | 0     | 0      | 3     | 4      | 4      | 4      | 4      | 4     |
| 39269  | 0     | 0      | 1     | 5      | 5      | 3      | 4      | 3     |
| 39272  | 0     | 0      | 3     | 2      | 3      | 1      | 2      | 4     |
| 39280  | 0     | 0      | 3     | 3      | 3      | 4      | 4      | 3     |
| 39294  | 0     | 0      | 2     | 3      | 3      | 3      | 4      | 4     |
| 39297  | 0     | 0      | 3     | 4      | 4      | 3      | 3      | 3     |
| 39300  | 0     | 0      | 1     | 3      | 3      | 2      | 2      | 6     |
| 39307  | 0     | 0      | 2     | 3      | 4      | 5      | 4      | 3     |



| respid | Q43_9 | Q43_99 | Q44_1 | Q46x1a | Q46x1b | Q46x2a | Q46x2b | Q46x3 |
|--------|-------|--------|-------|--------|--------|--------|--------|-------|
| 39320  | 1     | 0      | 2     | 4      | 2      | 2      | 3      | 5     |
| 39333  | 0     | 1      |       | 5      | 5      | 5      | 6      | 5     |
| 39335  | 0     | 0      | 1     | 3      | 3      | 3      | 4      | 3     |
| 39339  | 0     | 0      | 3     | 6      | 6      | 6      | 6      | 6     |
| 39375  | 0     | 0      | 1     | 1      | 1      | 1      | 3      | 1     |
| 39377  | 0     | 1      |       | 6      | 6      | 6      | 6      | 6     |
| 39380  | 1     | 0      | 3     | 5      | 5      | 1      | 2      | 4     |
| 39425  | 0     | 1      |       | 6      | 6      | 2      | 4      | 4     |
| 39590  | 0     | 1      |       | 6      | 6      | 6      | 6      | 6     |
| 40529  | 0     | 1      |       | 5      | 5      | 1      | 2      | 5     |
| 40702  | 0     | 1      |       | 6      | 6      | 6      | 6      | 6     |
| 40788  | 0     | 1      |       | 5      | 5      | 5      | 5      | 5     |
| 40841  | 0     | 1      |       | 5      | 5      | 2      | 2      | 5     |
| 40965  | 0     | 1      |       | 6      | 6      | 6      | 6      | 6     |
| 41092  | 0     | 0      | 3     | 6      | 6      | 6      | 6      | 6     |
| 41534  |       |        |       |        |        |        |        |       |
| 41919  | 0     | 1      |       | 6      | 6      | 6      | 6      | 6     |
| 42110  | 0     | 0      | 3     | 1      | 3      | 2      | 3      | 2     |
| 42135  | 0     | 0      | 2     | 4      | 4      | 2      | 2      | 5     |
| 42142  | 0     | 1      |       | 5      | 5      | 5      | 5      | 5     |
| 42163  | 0     | 0      | 3     | 6      | 6      | 4      | 4      | 4     |
| 42164  | 0     | 0      | 4     | 5      | 5      | 2      | 2      | 5     |
| 42172  | 0     | 0      | 3     | 3      | 2      | 3      | 3      | 3     |
| 42177  | 0     | 1      |       | 6      | 6      | 1      | 1      | 5     |
| 42181  | 0     | 1      |       | 6      | 6      | 6      | 2      | 4     |
| 42193  | 0     | 0      | 3     | 4      | 4      | 3      | 3      | 3     |
| 42196  | 0     | 0      | 3     | 4      | 4      | 4      | 5      | 4     |
| 42202  | 1     | 0      | 3     | 5      | 5      | 5      | 5      | 4     |
| 42248  | 0     | 0      | 3     | 3      | 3      | 3      | 2      | 4     |
| 42283  | 0     | 0      | 3     | 5      | 4      | 1      | 1      | 4     |
| 42284  | 0     | 0      | 3     | 5      | 3      | 3      | 3      | 2     |
| 42323  |       |        |       |        |        |        |        |       |

| respid | Q43_9 | Q43_99 | Q44_1 | Q46x1a | Q46x1b | Q46x2a | Q46x2b | Q46x3 |
|--------|-------|--------|-------|--------|--------|--------|--------|-------|
| 42349  | 0     | 0      | 3     | 4      | 5      | 3      | 4      | 4     |
| 42351  |       |        |       |        |        |        |        |       |
| 42357  | 0     | 1      |       | 6      | 6      | 5      | 5      | 5     |
| 42366  |       |        |       |        |        |        |        |       |
| 42380  | 0     | 1      |       | 6      | 6      | 1      | 1      | 5     |
| 42414  | 0     | 0      | 4     | 2      | 1      | 2      | 4      | 4     |
| 42420  | 1     | 0      | 3     | 5      | 3      | 2      | 2      | 2     |
| 42454  |       |        |       |        |        |        |        |       |
| 42458  | 0     | 0      | 5     | 6      | 5      | 6      | 5      | 5     |
| 42461  | 0     | 0      | 3     | 5      | 5      | 5      | 5      | 5     |
| 42488  | 0     | 0      | 3     | 6      | 5      | 5      | 4      | 4     |
| 42511  | 0     | 1      |       | 6      | 6      | 6      | 6      | 6     |
| 42512  | 0     | 1      |       | 5      | 5      | 5      | 5      | 5     |
| 42530  | 0     | 0      | 1     | 3      | 3      | 3      | 3      | 3     |
| 42531  | 0     | 0      | 2     | 3      | 2      | 4      | 3      | 2     |
| 42533  | 0     | 0      | 2     | 5      | 5      | 5      | 5      | 5     |
| 42549  | 0     | 1      |       | 5      | 5      | 5      | 5      | 4     |
| 42550  | 1     | 0      | 3     | 6      | 6      | 6      | 6      | 6     |
| 42553  |       |        |       |        |        |        |        |       |
| 42562  | 1     | 0      | 2     | 2      | 3      | 3      | 4      | 4     |
| 42567  | 0     | 1      |       | 5      | 5      | 5      | 5      | 4     |
| 42589  | 0     | 1      |       | 4      | 4      | 4      | 4      | 4     |
| 42604  | 0     | 1      |       | 4      | 4      | 2      | 2      | 4     |
| 42618  | 0     | 1      |       | 5      | 5      | 5      | 5      | 4     |
| 42621  | 0     | 1      |       | 3      | 3      | 3      | 3      | 3     |
| 42627  | 0     | 1      |       | 2      | 1      | 2      | 2      | 4     |
| 42641  | 0     | 0      | 4     | 4      | 5      | 4      | 3      | 4     |
| 42655  | 0     | 0      | 1     | 4      | 5      | 3      | 1      | 3     |
| 42666  | 0     | 1      |       | 4      | 4      | 2      | 2      | 4     |
| 42667  | 0     | 1      |       | 2      | 2      | 3      | 2      | 2     |
| 42697  | 0     | 0      | 3     | 6      | 5      | 3      | 2      | 3     |
| 42703  | 0     | 1      |       | 5      | 5      | 2      | 2      | 4     |

| respid | Q43_9 | Q43_99 | Q44_1 | Q46x1a | Q46x1b | Q46x2a | Q46x2b | Q46x3 |
|--------|-------|--------|-------|--------|--------|--------|--------|-------|
| 42712  | 0     | 0      | 3     | 5      | 5      | 4      | 4      | 5     |
| 42731  | 0     | 0      | 4     | 4      | 4      | 2      | 2      | 4     |
| 42780  | 0     | 1      |       | 5      | 5      | 5      | 5      | 5     |
| 42785  | 0     | 0      | 3     | 5      | 5      | 2      | 2      | 5     |
| 42788  | 0     | 1      |       | 4      | 5      | 4      | 5      | 5     |
| 42802  | 0     | 0      | 2     | 3      | 3      | 4      | 4      | 3     |
| 42818  | 0     | 0      | 3     | 4      | 5      | 4      | 4      | 4     |
| 42821  | 0     | 1      |       | 5      | 4      | 1      | 1      | 4     |
| 42824  | 0     | 0      | 3     | 6      | 6      | 6      | 6      | 6     |
| 42831  | 0     | 0      | 2     | 4      | 5      | 5      | 5      | 4     |
| 42836  | 0     | 0      | 3     | 4      | 4      | 4      | 4      | 4     |
| 42864  | 0     | 0      | 3     | 6      | 6      | 6      | 6      | 4     |
| 42875  | 0     | 0      | 3     | 5      | 5      | 5      | 5      | 5     |
| 42891  | 1     | 0      | 0     | 1      | 2      | 2      | 2      | 1     |
| 42897  | 0     | 1      |       | 6      | 6      | 6      | 6      | 6     |
| 42900  | 0     | 0      | 2     | 6      | 6      | 6      | 6      | 6     |
| 42902  | 0     | 0      | 3     | 2      | 3      | 4      | 3      | 2     |
| 42921  | 0     | 0      | 3     | 6      | 6      | 5      | 5      | 5     |
| 42925  | 0     | 0      | 3     | 4      | 4      | 3      | 3      | 4     |
| 42944  |       |        |       |        |        |        |        |       |
| 42950  |       |        |       |        |        |        |        |       |
| 42963  | 0     | 1      |       | 6      | 6      | 6      | 6      | 6     |
| 42967  | 0     | 0      | 4     | 5      | 5      | 5      | 5      | 5     |
| 42985  | 0     | 0      | 3     | 5      | 5      | 2      | 2      | 5     |
| 42990  | 0     | 0      | 3     | 4      | 3      | 1      | 2      | 4     |
| 42996  | 0     | 1      |       | 5      | 5      | 3      | 3      | 3     |
| 43002  | 0     | 0      | 3     | 5      | 5      | 2      | 2      | 5     |
| 43004  | 0     | 1      |       | 6      | 6      | 2      | 4      | 6     |
| 43012  | 0     | 0      | 5     | 5      | 5      | 5      | 5      | 5     |
| 43027  | 0     | 0      | 3     | 2      | 2      | 1      | 1      | 3     |
| 43028  | 0     | 1      |       | 6      | 6      | 6      | 6      | 6     |
| 43029  | 0     | 0      | 3     | 4      | 4      | 4      | 3      | 3     |

| respid | Q43_9 | Q43_99 | Q44_1 | Q46x1a | Q46x1b | Q46x2a | Q46x2b | Q46x3 |
|--------|-------|--------|-------|--------|--------|--------|--------|-------|
| 43031  | 0     | 1      |       | 5      | 5      | 5      | 5      | 5     |
| 43042  | 0     | 1      |       | 1      | 1      | 1      | 1      | 1     |
| 43054  | 1     | 0      | 1     | 4      | 4      | 6      | 6      | 4     |
| 43058  | 0     | 1      |       | 5      | 5      | 2      | 3      | 5     |
| 43064  | 0     | 0      | 3     | 4      | 4      | 4      | 4      | 3     |
| 43069  | 0     | 1      |       | 6      | 6      | 6      | 6      | 6     |
| 43071  |       |        |       |        |        |        |        |       |
| 43072  | 0     | 0      | 3     | 6      | 6      | 4      | 4      | 5     |
| 43077  | 0     | 0      | 4     | 6      | 6      | 6      | 6      | 6     |
| 43078  | 0     | 0      | 3     | 2      | 2      | 1      | 1      | 2     |
| 43082  |       |        |       |        |        |        |        |       |
| 43092  | 0     | 0      | 3     | 4      | 5      | 6      | 6      | 6     |
| 43096  | 0     | 1      |       | 5      | 5      | 5      | 5      | 5     |
| 43109  |       |        |       |        |        |        |        |       |
| 43113  | 0     | 1      |       | 4      | 4      | 4      | 2      | 4     |
| 43123  | 1     | 0      | 2     | 4      | 4      | 3      | 4      | 5     |
| 43127  | 0     | 1      |       | 4      | 5      | 5      | 4      | 4     |
| 43128  | 0     | 0      | 3     | 4      | 5      | 2      | 2      | 4     |
| 43129  | 0     | 1      |       | 5      | 5      | 5      | 5      | 5     |
| 43133  | 0     | 0      | 2     | 2      | 3      | 4      | 2      | 2     |
| 43140  |       |        |       |        |        |        |        |       |
| 43143  | 0     | 0      | 2     | 2      | 2      | 2      | 3      | 2     |
| 43149  | 0     | 0      | 2     | 2      | 2      | 3      | 3      | 2     |
| 43150  | 0     | 0      | 2     | 3      | 2      | 2      | 2      | 2     |
| 43153  | 0     | 0      | 3     | 4      | 3      | 3      | 3      | 3     |
| 43170  | 0     | 0      | 2     | 5      | 5      | 1      | 1      | 5     |
| 43187  | 0     | 0      | 3     | 6      | 6      | 6      | 6      | 6     |
| 43188  | 1     | 0      | 2     | 4      | 5      | 2      | 2      | 4     |
| 43198  | 0     | 0      | 4     | 6      | 5      | 6      | 6      | 4     |
| 43208  | 0     | 1      |       | 6      | 6      | 6      | 6      | 6     |
| 43216  | 0     | 1      |       | 5      | 5      | 5      | 5      | 4     |
| 43222  | 0     | 0      | 2     | 3      | 3      | 2      | 2      | 2     |

| respid | Q43_9 | Q43_99 | Q44_1 | Q46x1a | Q46x1b | Q46x2a | Q46x2b | Q46x3 |
|--------|-------|--------|-------|--------|--------|--------|--------|-------|
| 43224  | 0     | 1      |       | 5      | 5      | 4      | 4      | 4     |
| 43230  | 0     | 0      | 3     | 3      | 3      | 3      | 3      | 3     |
| 43231  | 0     | 0      | 2     | 3      | 3      | 3      | 3      | 3     |
| 43265  | 0     | 0      | 2     | 3      | 3      | 3      | 2      | 3     |
| 43270  | 0     | 0      | 2     | 3      | 3      | 3      | 3      | 3     |
| 43283  | 0     | 0      | 3     | 3      | 3      | 2      | 2      | 3     |
| 43295  | 0     | 0      | 2     | 2      | 2      | 3      | 3      | 2     |
| 43297  | 0     | 1      |       | 5      | 5      | 2      | 2      | 4     |
| 43299  | 0     | 0      | 2     | 2      | 4      | 4      | 5      | 4     |
| 43307  | 0     | 0      | 3     | 4      | 5      | 2      | 2      | 4     |
| 43316  | 0     | 0      | 2     | 2      | 2      | 2      | 1      | 2     |
| 43318  | 0     | 0      | 2     | 3      | 3      | 3      | 3      | 3     |
| 43319  | 0     | 1      |       | 5      | 5      | 6      | 6      | 6     |
| 43324  | 0     | 0      | 2     | 2      | 1      | 2      | 2      | 2     |
| 43325  | 0     | 0      | 1     | 6      | 5      | 4      | 4      | 2     |
| 43327  | 0     | 1      |       | 5      | 5      | 5      | 5      | 5     |
| 43338  | 0     | 1      |       | 4      | 4      | 2      | 3      | 4     |
| 43342  | 0     | 1      |       | 5      | 5      | 2      | 2      | 4     |
| 43348  | 0     | 0      | 3     | 4      | 5      | 2      | 2      | 4     |
| 43395  | 0     | 0      | 2     | 3      | 3      | 3      | 2      | 2     |
| 43404  | 0     | 0      | 2     | 2      | 2      | 2      | 2      | 2     |
| 43406  | 0     | 1      |       | 6      | 6      | 2      | 2      | 4     |
| 43407  | 0     | 1      |       | 6      | 6      | 6      | 6      | 6     |
| 43411  | 0     | 1      |       | 5      | 5      | 1      | 1      | 5     |
| 43416  | 0     | 0      | 3     | 2      | 2      | 2      | 3      | 2     |
| 43428  | 0     | 0      | 4     | 6      | 6      | 6      | 6      | 6     |
| 43429  | 0     | 0      | 2     | 3      | 3      | 3      | 3      | 4     |
| 43432  | 0     | 0      | 4     | 5      | 4      | 2      | 3      | 4     |
| 43443  | 0     | 1      |       | 5      | 4      | 5      | 4      | 5     |
| 43455  |       |        |       |        |        |        |        |       |
| 43457  | 0     | 0      | 2     | 3      | 4      | 2      | 2      | 3     |
| 43458  | 0     | 1      |       | 5      | 5      | 5      | 4      | 5     |

| respid | Q43_9 | Q43_99 | Q44_1 | Q46x1a | Q46x1b | Q46x2a | Q46x2b | Q46x3 |
|--------|-------|--------|-------|--------|--------|--------|--------|-------|
| 43477  | 0     | 0      | 3     | 3      | 4      | 3      | 3      | 3     |
| 43520  | 0     | 0      | 2     | 4      | 3      | 1      | 1      | 5     |
| 43521  | 0     | 1      |       | 4      | 4      | 4      | 4      | 4     |
| 43550  | 0     | 1      |       | 5      | 5      | 1      | 1      | 5     |
| 43551  | 0     | 0      | 3     | 3      | 5      | 4      | 5      | 4     |
| 43554  | 0     | 0      | 2     | 4      | 4      | 5      | 4      | 4     |
| 43560  | 0     | 0      | 3     | 5      | 5      | 5      | 5      | 4     |
| 43569  | 0     | 0      | 4     | 6      | 6      | 6      | 6      | 6     |
| 43583  | 0     | 0      | 3     | 3      | 4      | 2      | 2      | 3     |
| 43590  | 0     | 0      | 2     | 4      | 4      | 4      | 4      | 3     |
| 43591  | 0     | 0      | 4     | 5      | 5      | 1      | 1      | 5     |
| 43595  |       |        |       |        |        |        |        |       |
| 43599  | 1     | 0      | 3     | 6      | 6      | 6      | 6      | 6     |
| 43606  | 0     | 1      |       | 5      | 5      | 5      | 5      | 5     |
| 43609  | 0     | 1      |       | 6      | 6      | 6      | 6      | 6     |
| 43629  | 0     | 1      |       | 6      | 6      | 6      | 6      | 6     |
| 43636  | 0     | 0      | 5     | 6      | 5      | 5      | 5      | 5     |
| 43661  | 0     | 1      |       | 6      | 6      | 6      | 6      | 6     |
| 43668  | 0     | 1      |       | 5      | 4      | 4      | 5      | 4     |
| 43672  |       |        |       |        |        |        |        |       |
| 43677  | 0     | 0      | 3     | 5      | 4      | 2      | 1      | 4     |
| 43683  | 0     | 1      |       | 3      | 4      | 2      | 2      | 3     |
| 43708  | 1     | 0      | 2     | 3      | 4      | 3      | 4      | 4     |
| 43713  | 0     | 1      |       | 6      | 6      | 2      | 2      | 6     |
| 43718  |       |        |       |        |        |        |        |       |
| 43725  | 0     | 1      |       | 5      | 6      | 1      | 2      | 4     |
| 43747  | 0     | 0      | 3     | 5      | 4      | 2      | 2      | 4     |
| 43755  | 0     | 1      |       | 5      | 5      | 5      | 5      | 5     |
| 43770  | 0     | 1      |       | 5      | 5      | 5      | 5      | 5     |
| 43775  | 0     | 0      | 3     | 4      | 5      | 2      | 1      | 5     |
| 43788  |       |        |       |        |        |        |        |       |
| 43790  | 0     | 0      | 3     | 2      | 2      | 2      | 2      | 2     |

| respid | Q43_9 | Q43_99 | Q44_1 | Q46x1a | Q46x1b | Q46x2a | Q46x2b | Q46x3 |
|--------|-------|--------|-------|--------|--------|--------|--------|-------|
| 43797  | 0     | 0      | 1     | 4      | 2      | 3      | 3      | 2     |
| 43798  | 0     | 0      | 1     | 2      | 2      | 1      | 1      | 1     |
| 43811  | 0     | 0      | 2     | 2      | 1      | 3      | 3      | 2     |
| 43819  | 0     | 0      | 3     | 2      | 2      | 2      | 2      | 2     |
| 43821  | 0     | 0      | 2     | 1      | 1      | 3      | 3      | 3     |
| 43822  | 0     | 1      |       | 6      | 6      | 6      | 6      | 6     |
| 43825  | 0     | 0      | 3     | 4      | 4      | 3      | 3      | 3     |
| 43826  | 0     | 0      | 3     | 5      | 5      | 5      | 4      | 4     |
| 43831  | 0     | 0      | 3     | 5      | 5      | 1      | 1      | 5     |
| 43836  | 0     | 0      | 2     | 3      | 3      | 3      | 3      | 2     |
| 43852  | 0     | 0      | 3     | 2      | 3      | 2      | 2      | 1     |
| 43857  | 0     | 0      | 3     | 4      | 4      | 4      | 4      | 4     |
| 43858  | 0     | 1      |       | 5      | 5      | 2      | 1      | 5     |
| 43859  | 0     | 0      | 2     | 2      | 2      | 3      | 3      | 3     |
| 43863  | 0     | 1      |       | 6      | 6      | 6      | 6      | 6     |
| 43868  | 0     | 0      | 1     | 3      | 3      | 3      | 3      | 2     |
| 43872  | 0     | 0      | 2     | 2      | 2      | 2      | 2      | 2     |
| 43874  | 0     | 0      | 2     | 2      | 2      | 1      | 1      | 2     |
| 43882  | 0     | 0      | 4     | 6      | 3      | 1      | 1      | 5     |
| 43886  |       |        |       |        |        |        |        |       |
| 43903  | 0     | 0      | 3     | 4      | 3      | 4      | 4      | 3     |
| 43929  | 0     | 1      |       | 5      | 5      | 2      | 1      | 5     |
| 43932  | 0     | 0      | 3     | 6      | 6      | 5      | 1      | 5     |
| 43936  | 0     | 1      |       | 4      | 4      | 1      | 1      | 6     |
| 43962  | 0     | 0      | 3     | 6      | 6      | 6      | 6      | 6     |
| 43964  | 0     | 1      |       | 5      | 5      | 1      | 2      | 4     |
| 43968  | 0     | 1      |       | 3      | 5      | 1      | 1      | 4     |
| 43979  | 0     | 0      | 3     | 4      | 5      | 1      | 1      | 4     |
| 44006  | 0     | 0      | 3     | 4      | 4      | 4      | 4      | 4     |
| 44009  | 0     | 0      | 2     | 4      | 3      | 4      | 3      | 4     |
| 44023  | 0     | 0      | 3     | 4      | 5      | 3      | 3      | 4     |
| 44035  | 0     | 0      | 2     | 3      | 3      | 2      | 2      | 2     |

| respid | Q43_9 | Q43_99 | Q44_1 | Q46x1a | Q46x1b | Q46x2a | Q46x2b | Q46x3 |
|--------|-------|--------|-------|--------|--------|--------|--------|-------|
| 44038  | 0     | 0      | 3     | 4      | 3      | 3      | 2      | 4     |
| 44039  | 0     | 0      | 3     | 2      | 2      | 2      | 2      | 2     |
| 44043  | 0     | 0      | 4     | 4      | 4      | 3      | 3      | 3     |
| 44048  | 0     | 0      | 2     | 2      | 2      | 2      | 2      | 2     |
| 44050  | 0     | 1      |       | 4      | 5      | 5      | 4      | 4     |
| 44051  | 0     | 0      | 1     | 3      | 3      | 3      | 1      | 2     |
| 44061  | 0     | 0      | 3     | 2      | 2      | 2      | 2      | 2     |
| 44063  | 0     | 0      | 2     | 3      | 3      | 2      | 2      | 2     |
| 44072  | 0     | 0      | 4     | 2      | 2      | 3      | 3      | 2     |
| 44075  | 0     | 0      | 3     | 3      | 3      | 3      | 3      | 3     |
| 44089  | 0     | 0      | 1     | 3      | 3      | 3      | 3      | 3     |
| 44090  | 0     | 0      | 3     | 4      | 4      | 4      | 4      | 4     |
| 44091  | 0     | 0      | 1     | 2      | 2      | 2      | 2      | 2     |
| 44092  | 0     | 1      |       | 6      | 6      | 6      | 6      | 6     |
| 44110  | 0     | 0      | 1     | 3      | 3      | 2      | 2      | 3     |
| 44112  | 0     | 0      | 2     | 2      | 2      | 2      | 2      | 2     |
| 44114  | 0     | 0      | 2     | 3      | 3      | 3      | 3      | 2     |
| 44143  | 0     | 1      |       | 5      | 5      | 4      | 4      | 4     |
| 44179  | 0     | 0      | 3     | 5      | 4      | 2      | 2      | 4     |
| 44234  | 0     | 1      |       | 4      | 4      | 2      | 1      | 4     |
| 44236  | 0     | 1      |       | 4      | 4      | 5      | 5      | 4     |
| 44239  | 0     | 0      | 2     | 3      | 3      | 3      | 3      | 3     |
| 44241  | 0     | 0      | 3     | 4      | 4      | 3      | 3      | 2     |
| 44253  |       |        |       |        |        |        |        |       |
| 44260  | 0     | 0      | 2     | 4      | 3      | 2      | 2      | 2     |
| 44261  | 0     | 0      | 3     | 2      | 3      | 3      | 4      | 2     |
| 44263  | 0     | 0      | 2     | 3      | 2      | 2      | 1      | 2     |
| 44264  | 0     | 1      |       | 5      | 5      | 3      | 2      | 4     |
| 44265  | 0     | 1      |       | 6      | 6      | 6      | 6      | 6     |
| 44267  | 0     | 0      | 2     | 3      | 3      | 3      | 3      | 2     |
| 44306  | 0     | 0      | 3     | 5      | 4      | 2      | 1      | 4     |
| 44309  | 0     | 0      | 3     | 2      | 2      | 2      | 3      | 1     |



| respid | Q43_9 | Q43_99 | Q44_1 | Q46x1a | Q46x1b | Q46x2a | Q46x2b | Q46x3 |
|--------|-------|--------|-------|--------|--------|--------|--------|-------|
| 44310  | 0     | 1      |       | 6      | 6      | 1      | 1      | 6     |
| 44361  | 0     | 0      | 3     | 4      | 4      | 4      | 4      | 4     |
| 44380  | 0     | 1      |       | 5      | 5      | 2      | 6      | 4     |
| 44386  | 0     | 1      |       | 6      | 6      | 1      | 1      | 4     |
| 44419  | 0     | 0      | 3     | 4      | 4      | 4      | 4      | 4     |
| 44426  | 0     | 1      |       | 5      | 5      | 1      | 1      | 4     |
| 44479  | 0     | 1      |       | 5      | 5      | 4      | 4      | 3     |
| 44484  | 0     | 1      |       | 6      | 6      | 6      | 6      | 6     |
| 44487  | 0     | 0      | 2     | 3      | 4      | 2      | 2      | 3     |
| 44509  | 0     | 1      |       | 5      | 5      | 2      | 2      | 5     |
| 44540  | 0     | 0      | 3     | 4      | 4      | 1      | 1      | 5     |
| 44551  | 0     | 0      | 3     | 4      | 4      | 4      | 4      | 4     |
| 44553  | 0     | 0      | 4     | 5      | 5      | 5      | 5      | 5     |
| 44650  | 0     | 1      |       | 5      | 5      | 4      | 4      | 5     |
| 44665  | 0     | 0      | 3     | 4      | 3      | 3      | 2      | 4     |
| 44779  | 0     | 1      |       | 4      | 5      | 2      | 2      | 4     |
| 44797  | 0     | 0      | 3     | 4      | 5      | 1      | 3      | 5     |
| 44807  | 0     | 1      |       | 4      | 6      | 1      | 1      | 4     |
| 44815  | 0     | 0      | 4     | 5      | 4      | 2      | 2      | 4     |
| 44836  | 0     | 1      |       | 6      | 6      | 5      | 5      | 5     |
| 44868  | 0     | 0      | 3     | 5      | 5      | 2      | 1      | 5     |
| 44927  | 0     | 0      | 3     | 4      | 4      | 4      | 4      | 4     |
| 44983  |       |        |       |        |        |        |        |       |
| 45040  | 0     | 0      | 2     | 4      | 4      | 6      | 4      | 5     |
| 45051  | 0     | 0      | 3     | 5      | 5      | 5      | 4      | 3     |
| 45067  | 0     | 0      | 3     | 5      | 5      | 1      | 1      | 4     |
| 45074  |       |        |       |        |        |        |        |       |
| 45115  | 0     | 0      | 3     | 2      | 2      | 3      | 4      | 2     |
| 45187  | 1     | 0      | 3     | 3      | 2      | 3      | 3      | 2     |
| 45221  | 0     | 0      | 3     | 4      | 4      | 1      | 3      | 4     |
| 45279  | 0     | 1      |       | 3      | 4      | 1      | 1      | 4     |
| 45308  | 0     | 0      | 2     | 4      | 3      | 3      | 4      | 4     |

| respid | Q43_9 | Q43_99 | Q44_1 | Q46x1a | Q46x1b | Q46x2a | Q46x2b | Q46x3 |
|--------|-------|--------|-------|--------|--------|--------|--------|-------|
| 45317  | 0     | 1      |       | 5      | 5      | 5      | 5      | 5     |
| 45379  | 0     | 1      |       | 4      | 4      | 6      | 6      | 5     |
| 45451  | 0     | 1      |       | 5      | 5      | 4      | 4      | 4     |
| 45472  | 1     | 0      | 2     | 6      | 6      | 3      | 3      | 6     |
| 45474  | 0     | 0      | 2     | 3      | 3      | 4      | 4      | 4     |
| 45544  | 0     | 0      | 4     | 4      | 1      | 5      | 5      | 2     |
| 45561  | 0     | 0      | 3     | 3      | 3      | 3      | 3      | 3     |
| 45596  | 0     | 0      | 2     | 4      | 4      | 1      | 1      | 4     |

| Instrum   | WLQ (8-Item) | WLQ (8-Item) | WLQ (8-Item) | IIEF | IIEF | IIEF | IIEF | IIEF | IIEF | IIEF | IIEF | IIEF | IIEF | IIEF |   |
|-----------|--------------|--------------|--------------|------|------|------|------|------|------|------|------|------|------|------|---|
| Symptom   |              |              |              |      |      |      |      |      |      |      |      |      |      |      |   |
| Type of R |              |              |              |      |      |      |      |      |      |      |      |      |      |      |   |
| Descripti |              |              |              |      |      |      |      |      |      |      |      |      |      |      |   |
| respid    | Q46x4        | Q46x5a       | Q46x5b       | Q47a | Q47b | Q47c | Q47d | Q47e | Q47f | Q47g | Q47h | Q47i | Q47j | Q47k |   |
| 241       | 5            | 5            | 5            | 5    | 5    | 5    | 5    | 4    | 4    | 4    | 4    | 4    | 5    | 4    | 4 |
| 242       | 6            | 6            | 6            | 5    | 5    | 5    | 5    | 5    | 4    | 2    | 5    | 5    | 5    | 5    | 5 |
| 243       | 4            | 4            | 4            | 2    | 3    | 4    | 4    | 4    | 4    | 3    | 3    | 3    | 4    | 3    | 4 |
| 244       | 5            | 5            | 5            | 5    | 5    | 5    | 5    | 5    | 5    | 3    | 4    | 4    | 5    | 4    | 4 |
| 245       | 5            | 5            | 5            |      |      |      |      |      |      |      |      |      |      |      |   |
| 246       | 4            | 4            | 4            | 4    | 4    | 4    | 4    | 4    | 4    | 2    | 4    | 3    | 5    | 5    | 4 |
| 247       | 5            | 4            | 4            | 0    | 0    | 0    | 0    | 0    | 0    | 0    | 0    | 0    | 0    | 1    | 1 |
| 253       | 6            | 6            | 6            |      |      |      |      |      |      |      |      |      |      |      |   |
| 256       | 4            | 4            | 4            | 0    | 4    | 0    | 0    | 0    | 0    | 0    | 0    | 0    | 0    | 5    | 1 |
| 257       | 6            | 6            | 4            |      |      |      |      |      |      |      |      |      |      |      |   |
| 258       | 4            | 4            | 4            | 4    | 4    | 4    | 4    | 4    | 4    | 2    | 2    | 3    | 4    | 2    | 2 |
| 259       | 5            | 4            | 5            |      |      |      |      |      |      |      |      |      |      |      |   |
| 263       | 5            | 5            | 5            | 5    | 5    | 5    | 3    | 4    | 2    | 3    | 3    | 3    | 3    | 3    | 3 |
| 264       | 5            | 4            | 4            |      |      |      |      |      |      |      |      |      |      |      |   |
| 265       | 4            | 4            | 3            | 2    | 2    | 3    | 2    | 4    | 2    | 2    | 3    | 3    | 3    | 3    | 3 |
| 266       | 6            | 6            | 6            |      |      |      |      |      |      |      |      |      |      |      |   |
| 268       | 4            | 4            | 4            | 2    | 3    | 3    | 2    | 3    | 2    | 4    | 3    | 4    | 4    | 4    |   |
| 270       | 4            | 4            | 4            |      |      |      |      |      |      |      |      |      |      |      |   |
| 272       | 5            | 5            | 5            | 4    |      | 4    | 2    | 2    | 1    | 2    | 3    | 5    | 2    | 3    |   |
| 274       | 5            | 5            | 5            | 5    | 5    | 5    | 5    | 5    | 5    | 1    | 5    | 4    | 5    | 5    | 5 |

| respid | Q46x4 | Q46x5a | Q46x5b | Q47a | Q47b | Q47c | Q47d | Q47e | Q47f | Q47g | Q47h | Q47i | Q47j | Q47k |   |
|--------|-------|--------|--------|------|------|------|------|------|------|------|------|------|------|------|---|
| 275    |       |        |        |      |      |      |      |      |      |      |      |      |      |      |   |
| 276    | 5     | 5      | 5      |      |      |      |      |      |      |      |      |      |      |      |   |
| 277    | 4     | 4      | 4      | 1    | 3    | 0    | 0    | 0    | 0    | 0    | 0    | 0    | 5    | 4    | 1 |
| 279    | 4     | 4      | 4      | 2    | 4    | 4    | 4    | 4    | 4    | 1    | 4    | 3    | 4    | 4    | 2 |
| 286    | 5     | 5      | 5      |      |      |      |      |      |      |      |      |      |      |      |   |
| 290    | 5     | 5      | 5      | 5    | 4    | 4    | 5    | 5    | 4    | 4    | 4    | 4    | 5    | 4    | 4 |
| 291    | 6     | 6      | 6      |      |      |      |      |      |      |      |      |      |      |      |   |
| 295    |       |        |        |      |      |      |      |      |      |      |      |      |      |      |   |
| 297    | 6     | 5      | 5      | 5    | 5    | 5    | 5    | 4    | 4    | 5    | 4    | 4    | 4    | 5    | 5 |
| 299    | 4     | 4      | 3      | 0    | 0    | 0    | 0    | 0    | 0    | 0    | 0    | 0    | 0    | 1    | 1 |
| 300    | 4     | 4      | 4      | 4    | 4    | 4    | 4    | 4    | 5    | 3    | 4    | 4    | 4    | 4    |   |
| 303    | 5     | 5      | 5      | 0    | 0    | 0    | 0    | 0    | 0    | 0    | 0    | 0    | 0    | 1    | 1 |
| 304    | 4     | 5      | 3      |      |      |      |      |      |      |      |      |      |      |      |   |
| 306    | 4     | 5      | 5      | 5    | 5    | 4    | 4    | 5    | 2    | 5    | 5    | 5    | 5    | 5    | 3 |
| 307    | 5     | 5      | 5      |      |      |      |      |      |      |      |      |      |      |      |   |
| 312    | 4     | 4      | 4      |      |      |      |      |      |      |      |      |      |      |      |   |
| 315    | 6     | 6      | 6      | 0    | 0    | 0    | 0    | 3    | 0    | 0    | 0    | 0    | 0    | 1    | 1 |
| 317    | 5     | 5      | 5      | 5    | 5    | 5    | 5    | 5    | 4    | 4    | 3    | 4    | 4    | 4    | 4 |
| 322    | 6     | 5      | 5      |      |      |      |      |      |      |      |      |      |      |      |   |
| 335    | 5     | 6      | 5      |      |      |      |      |      |      |      |      |      |      |      |   |
| 374    | 4     | 4      | 4      |      |      |      |      |      |      |      |      |      |      |      |   |
| 378    | 6     | 6      | 6      | 1    | 1    | 1    | 1    | 5    | 0    | 1    | 1    | 1    | 1    | 1    |   |
| 380    | 5     | 4      | 4      | 1    | 3    | 3    | 4    | 3    | 2    | 2    | 3    | 2    | 3    | 3    | 3 |
| 382    | 5     | 5      | 5      | 3    | 3    | 4    | 4    | 4    | 2    | 4    | 3    | 5    | 5    | 5    | 4 |
| 384    | 4     | 4      | 3      | 4    | 4    | 4    | 3    | 4    | 3    | 3    | 3    | 3    | 3    | 2    | 2 |
| 385    | 4     | 4      | 4      | 0    | 4    | 0    | 0    | 0    | 0    | 0    | 0    |      |      | 2    | 1 |
| 395    | 5     | 5      | 5      | 5    | 4    | 5    | 5    | 4    | 2    | 5    | 5    | 5    | 5    | 5    | 4 |
| 396    |       |        |        |      |      |      |      |      |      |      |      |      |      |      |   |
| 398    |       |        |        |      |      |      |      |      |      |      |      |      |      |      |   |
| 402    | 4     | 4      | 4      |      |      |      |      |      |      |      |      |      |      |      |   |
| 414    | 5     | 5      | 4      | 2    | 2    | 2    | 1    | 2    | 1    | 2    | 2    | 5    |      |      | 2 |
| 415    | 5     | 5      | 5      | 4    | 4    | 5    | 4    | 5    | 2    | 4    | 3    | 4    | 4    | 4    | 4 |

| respid | Q46x4 | Q46x5a | Q46x5b | Q47a | Q47b | Q47c | Q47d | Q47e | Q47f | Q47g | Q47h | Q47i | Q47j | Q47k |   |
|--------|-------|--------|--------|------|------|------|------|------|------|------|------|------|------|------|---|
| 416    | 5     | 5      | 5      | 0    | 0    | 0    | 0    | 0    | 0    | 0    | 0    | 0    | 0    | 5    | 2 |
| 420    | 4     | 5      | 5      | 3    | 1    | 1    | 1    | 1    | 1    | 1    | 1    | 1    | 4    | 1    | 2 |
| 421    | 5     | 5      | 5      | 4    | 4    | 4    | 4    | 4    | 4    | 2    | 4    | 4    | 4    | 4    | 4 |
| 422    | 5     | 5      | 5      |      |      |      |      |      |      |      |      |      |      |      |   |
| 423    | 5     | 5      | 5      |      |      |      |      |      |      |      |      |      |      |      |   |
| 424    | 5     | 5      | 5      |      |      |      |      |      |      |      |      |      |      |      |   |
| 425    | 4     | 5      | 5      | 3    | 3    | 3    | 3    | 4    | 2    | 3    | 3    | 5    | 5    | 5    | 4 |
| 428    | 5     | 5      | 5      | 5    | 4    | 4    | 4    | 4    | 5    | 3    | 4    | 4    | 5    | 4    | 4 |
| 429    | 5     | 5      | 5      |      |      |      |      |      |      |      |      |      |      |      |   |
| 431    | 5     | 5      | 5      | 5    | 5    | 5    | 5    | 5    | 4    | 4    | 4    | 4    | 5    | 5    | 5 |
| 437    | 5     | 5      | 5      | 0    | 0    | 0    | 0    | 0    | 0    | 0    | 1    | 0    | 0    | 1    | 1 |
| 438    | 6     | 6      | 6      | 0    | 5    | 0    | 0    | 0    | 0    | 0    | 0    | 0    | 2    | 3    | 1 |
| 441    | 5     | 5      | 4      |      |      |      |      |      |      |      |      |      |      |      |   |
| 444    | 5     | 4      | 5      | 5    | 5    | 5    | 4    | 5    | 5    | 4    | 4    | 4    | 5    | 5    | 4 |
| 448    | 5     | 5      | 5      | 5    | 5    | 5    | 5    | 5    | 2    | 3    | 4    | 4    | 5    | 4    | 5 |
| 449    | 5     | 5      | 5      |      |      |      |      |      |      |      |      |      |      |      |   |
| 457    | 4     | 4      | 4      |      |      |      |      |      |      |      |      |      |      |      |   |
| 460    | 6     | 6      | 6      | 4    | 5    | 5    | 5    | 5    | 2    | 5    | 4    | 5    | 5    | 5    | 5 |
| 469    | 4     | 4      | 5      | 2    | 1    | 1    | 1    | 4    | 1    | 2    | 3    | 3    | 3    | 4    | 4 |
| 471    | 5     | 5      | 5      |      |      |      |      |      |      |      |      |      |      |      |   |
| 473    | 4     | 4      | 4      | 4    | 4    | 4    | 4    | 4    | 5    | 2    | 4    | 3    | 5    | 5    | 4 |
| 476    | 4     | 4      | 4      | 3    | 3    | 3    | 2    | 3    | 3    | 1    | 3    | 3    | 3    | 2    | 3 |
| 479    | 6     | 6      | 6      | 5    | 5    | 5    | 5    | 5    | 5    | 5    | 5    | 5    | 5    | 5    | 5 |
| 485    | 5     | 5      | 5      | 0    | 5    | 5    | 5    | 5    | 5    | 0    | 0    | 0    | 0    | 5    | 1 |
| 488    | 5     | 4      | 3      |      |      |      |      |      |      |      |      |      |      |      |   |
| 494    | 5     | 5      | 5      |      |      |      |      |      |      |      |      |      |      |      |   |
| 496    | 5     | 5      | 5      | 3    | 3    | 4    | 3    | 5    | 1    | 4    | 3    | 4    | 4    | 4    | 4 |
| 501    |       |        |        |      |      |      |      |      |      |      |      |      |      |      |   |
| 502    | 3     | 3      | 3      | 2    | 2    | 2    | 2    | 2    | 3    | 1    | 2    | 2    | 2    | 3    | 3 |
| 503    | 5     | 5      | 5      | 5    | 5    | 5    | 5    | 5    | 5    | 3    | 4    | 4    | 5    | 5    | 3 |
| 506    | 5     | 5      | 5      | 5    | 5    | 5    | 5    | 5    | 5    | 3    | 5    | 4    | 5    | 4    | 5 |
| 514    | 4     | 4      | 3      |      |      |      |      |      |      |      |      |      |      |      |   |

| respid | Q46x4 | Q46x5a | Q46x5b | Q47a | Q47b | Q47c | Q47d | Q47e | Q47f | Q47g | Q47h | Q47i | Q47j | Q47k |
|--------|-------|--------|--------|------|------|------|------|------|------|------|------|------|------|------|
| 515    | 5     | 5      | 5      | 5    | 4    | 5    | 4    | 4    | 2    | 5    | 4    | 5    | 4    | 4    |
| 516    | 6     | 5      | 5      |      |      |      |      |      |      |      |      |      |      |      |
| 519    | 5     | 4      | 5      |      |      |      |      |      |      |      |      |      |      |      |
| 522    |       |        |        |      |      |      |      |      |      |      |      |      |      |      |
| 525    | 5     | 5      | 6      | 1    | 0    | 0    | 5    | 5    | 0    | 0    | 0    | 0    | 1    | 1    |
| 528    | 4     | 4      | 4      | 0    | 5    | 0    | 0    | 0    | 0    | 0    | 0    | 4    | 5    | 1    |
| 532    | 5     | 5      | 5      | 5    | 5    | 5    | 4    | 4    | 2    | 4    | 4    | 4    | 4    | 2    |
| 536    | 4     | 4      | 4      |      |      |      |      |      |      |      |      |      |      |      |
| 539    | 4     | 3      | 3      |      |      |      |      |      |      |      |      |      |      |      |
| 540    | 6     | 6      | 6      |      |      |      |      |      |      |      |      |      |      |      |
| 547    | 4     | 5      | 5      | 2    | 1    | 1    | 2    | 1    | 2    | 1    | 1    | 4    | 2    | 4    |
| 551    | 5     | 5      | 5      | 3    | 3    | 4    | 3    | 4    | 0    | 0    | 0    | 0    | 1    | 1    |
| 554    | 6     | 6      | 6      | 2    | 4    | 5    | 4    | 5    | 2    | 4    | 4    | 4    | 5    | 5    |
| 558    | 6     | 6      | 6      | 5    | 5    | 5    | 5    |      | 5    | 5    | 4    | 4    | 4    | 4    |
| 563    | 5     | 5      | 5      |      |      |      |      |      |      |      |      |      |      |      |
| 564    | 4     | 4      | 4      | 3    | 4    | 3    | 4    | 5    | 1    | 3    | 4    | 4    | 4    | 4    |
| 565    | 6     | 4      | 5      | 4    | 4    | 5    | 4    | 4    | 3    | 5    | 4    | 4    | 4    | 4    |
| 567    | 5     | 5      | 5      |      |      |      |      |      |      |      |      |      |      |      |
| 569    | 4     | 4      | 4      |      |      |      |      |      |      |      |      |      |      |      |
| 572    | 5     | 5      | 5      | 0    | 0    | 0    | 0    | 0    | 0    | 0    | 0    | 0    | 1    | 1    |
| 574    | 5     | 5      | 5      |      |      |      |      |      |      |      |      |      |      |      |
| 583    | 4     | 4      | 4      | 4    | 3    | 3    | 4    | 4    | 2    | 2    | 2    | 4    | 2    | 3    |
| 589    | 5     | 5      | 5      | 5    | 5    | 5    | 5    | 5    | 3    | 5    | 4    | 4    | 4    | 5    |
| 592    | 5     | 6      | 4      | 3    | 4    | 5    | 2    | 4    | 2    | 4    | 3    | 2    | 4    | 3    |
| 593    |       |        |        |      |      |      |      |      |      |      |      |      |      |      |
| 594    | 4     | 4      | 3      | 0    | 2    | 1    | 2    | 0    | 0    | 1    | 0    | 0    | 1    | 1    |
| 597    | 5     | 5      | 4      | 4    | 4    | 5    | 5    | 5    | 4    | 5    | 4    | 5    | 5    | 4    |
| 601    | 6     | 6      | 5      |      |      |      |      |      |      |      |      |      |      |      |
| 607    | 5     | 4      | 4      | 4    | 4    | 4    | 4    | 4    | 1    | 4    | 4    | 4    | 4    | 4    |
| 610    | 5     | 5      | 4      | 5    | 5    | 5    | 5    | 5    | 1    | 5    | 4    | 5    | 5    | 2    |
| 612    | 6     | 6      | 6      | 0    | 0    | 0    | 0    | 0    | 0    | 0    | 0    | 0    | 1    | 1    |
| 627    | 5     | 5      | 5      | 4    | 4    | 4    | 4    | 5    | 2    | 4    | 4    | 5    | 5    | 3    |

| respid | Q46x4 | Q46x5a | Q46x5b | Q47a | Q47b | Q47c | Q47d | Q47e | Q47f | Q47g | Q47h | Q47i | Q47j | Q47k |
|--------|-------|--------|--------|------|------|------|------|------|------|------|------|------|------|------|
| 631    | 6     | 6      | 6      | 1    | 5    | 3    | 3    | 4    | 1    | 3    | 3    | 5    | 4    | 2    |
| 633    | 6     | 6      | 6      |      |      |      |      |      |      |      |      |      |      |      |
| 636    | 5     | 5      | 5      |      |      |      |      |      |      |      |      |      |      |      |
| 656    | 5     | 5      | 5      | 5    | 5    | 5    | 5    | 5    | 3    | 5    | 4    | 5    | 5    | 5    |
| 659    | 6     | 6      | 6      | 5    | 4    | 5    | 4    | 4    | 1    | 3    | 3    | 5    | 4    | 5    |
| 670    | 6     | 6      | 6      | 5    | 5    | 5    | 5    | 5    | 2    | 5    | 5    | 5    | 5    | 5    |
| 672    | 3     | 3      | 4      |      |      |      |      |      |      |      |      |      |      |      |
| 673    | 6     | 6      | 5      |      |      |      |      |      |      |      |      |      |      |      |
| 675    | 6     | 6      | 6      |      |      |      |      |      |      |      |      |      |      |      |
| 676    | 4     | 4      | 3      | 2    | 2    |      | 2    | 4    | 1    | 2    | 2    | 2    | 3    | 2    |
| 679    | 4     | 5      | 5      | 3    | 3    | 3    | 3    | 3    | 2    | 2    | 3    | 4    | 3    | 3    |
| 683    | 6     | 6      | 6      | 0    | 4    | 0    | 0    | 0    | 0    | 0    | 0    | 0    | 5    | 1    |
| 684    | 5     | 5      | 5      | 3    | 2    | 4    | 4    | 4    | 2    | 4    | 4    | 5    | 4    | 4    |
| 690    | 5     | 5      | 5      |      |      |      |      |      |      |      |      |      |      |      |
| 701    | 4     | 4      | 4      | 4    | 4    | 0    | 0    | 0    | 0    | 0    | 0    | 4    | 4    | 1    |
| 709    | 5     | 5      | 5      | 4    | 3    | 4    | 4    | 4    | 3    | 4    | 3    | 4    | 4    | 4    |
| 719    | 5     | 5      | 4      | 4    | 4    | 4    | 5    | 4    | 5    | 3    | 3    | 3    | 3    | 5    |
| 726    | 5     | 5      | 5      |      |      |      |      |      |      |      |      |      |      |      |
| 730    | 5     | 4      | 4      | 5    | 5    | 5    | 5    | 5    | 1    | 3    | 3    | 5    | 3    | 3    |
| 731    | 5     | 5      | 5      | 5    | 4    | 4    | 4    | 5    | 2    | 4    | 3    | 5    | 5    | 4    |
| 732    | 5     | 5      | 5      | 5    | 5    | 5    | 4    | 4    | 3    | 3    | 3    | 5    | 5    | 5    |
| 733    | 5     | 5      | 5      |      |      |      |      |      |      |      |      |      |      |      |
| 735    | 5     | 5      | 5      | 5    | 4    | 4    | 4    | 5    | 1    | 3    | 3    | 5    | 4    | 4    |
| 738    | 5     | 5      | 5      | 5    | 5    | 5    | 5    | 5    | 3    | 4    | 4    | 5    | 5    | 5    |
| 740    | 5     | 5      | 5      |      |      |      |      |      |      |      |      |      |      |      |
| 742    | 5     | 5      | 5      | 5    | 4    | 4    | 5    | 5    | 3    | 3    | 4    | 5    | 3    | 4    |
| 744    | 5     | 5      | 5      |      |      |      |      |      |      |      |      |      |      |      |
| 749    | 4     | 4      | 4      |      |      |      |      |      |      |      |      |      |      |      |
| 751    | 5     | 5      | 5      |      |      |      |      |      |      |      |      |      |      |      |
| 752    | 4     | 4      | 5      | 0    | 0    | 0    | 0    | 0    | 0    | 0    | 0    | 3    | 3    | 3    |
| 753    | 4     | 4      | 4      | 2    | 5    | 5    | 4    | 5    | 4    | 4    | 4    | 5    | 4    | 5    |
| 755    | 5     | 5      | 5      | 4    | 3    | 4    | 4    | 4    | 2    | 4    | 3    | 4    | 4    | 4    |

| respid | Q46x4 | Q46x5a | Q46x5b | Q47a | Q47b | Q47c | Q47d | Q47e | Q47f | Q47g | Q47h | Q47i | Q47j | Q47k |
|--------|-------|--------|--------|------|------|------|------|------|------|------|------|------|------|------|
| 756    |       |        |        |      |      |      |      |      |      |      |      |      |      |      |
| 759    | 4     | 4      | 4      |      |      |      |      |      |      |      |      |      |      |      |
| 760    | 5     | 5      | 4      |      |      |      |      |      |      |      |      |      |      |      |
| 763    | 5     | 5      | 5      | 2    | 3    | 4    | 4    | 4    | 1    | 3    | 3    | 5    | 5    | 2    |
| 764    | 4     | 4      | 5      |      |      |      |      |      |      |      |      |      |      |      |
| 765    | 5     | 5      | 5      |      |      |      |      |      |      |      |      |      |      |      |
| 766    | 5     | 5      | 5      | 5    | 5    | 5    | 5    | 4    | 1    | 4    | 4    | 5    | 5    | 5    |
| 767    | 4     | 4      | 5      | 5    | 5    | 5    | 5    | 5    | 1    | 5    | 4    | 5    | 4    | 4    |
| 771    | 4     | 4      | 5      | 1    | 1    | 1    | 1    | 1    | 0    | 1    | 2    | 2    | 3    | 3    |
| 773    | 5     | 5      | 5      | 1    | 5    | 5    | 5    | 5    | 2    | 5    | 4    | 5    | 5    | 3    |
| 774    | 5     | 4      | 5      | 5    | 5    | 5    | 5    | 5    | 2    | 5    | 3    | 5    | 5    | 3    |
| 775    | 4     | 5      | 5      |      |      |      |      |      |      |      |      |      |      |      |
| 776    | 5     | 5      | 5      | 1    | 1    | 1    | 1    | 5    | 1    | 2    | 2    | 5    | 5    | 2    |
| 778    | 4     | 5      | 5      | 5    | 5    | 5    | 5    | 5    | 3    | 5    | 3    | 5    | 1    | 4    |
| 780    | 5     | 5      | 4      | 5    | 5    | 5    | 4    | 4    | 1    | 4    | 3    | 5    | 5    | 4    |
| 781    | 5     | 5      | 5      | 4    | 4    | 4    | 5    | 5    | 3    | 4    | 4    | 5    | 5    | 4    |
| 782    | 4     | 5      | 5      |      |      |      |      |      |      |      |      |      |      |      |
| 783    | 6     | 6      | 6      |      |      |      |      |      |      |      |      |      |      |      |
| 786    | 4     | 4      | 4      | 4    | 3    | 3    | 2    | 1    | 2    | 2    | 3    | 4    | 3    | 3    |
| 788    |       |        |        |      |      |      |      |      |      |      |      |      |      |      |
| 792    | 5     | 5      | 5      | 5    | 5    | 5    | 5    | 5    | 3    | 4    | 4    | 4    | 4    | 3    |
| 794    | 5     | 4      | 4      | 5    | 5    | 5    | 5    | 5    | 0    | 0    | 0    | 0    | 4    | 2    |
| 795    | 6     | 5      | 5      | 5    | 5    | 5    | 5    | 5    | 2    | 5    | 5    | 5    | 5    | 3    |
| 799    | 5     | 5      | 5      | 2    | 2    | 2    | 2    | 4    | 1    | 2    | 2    | 2    | 2    | 3    |
| 800    | 6     | 6      | 6      | 5    | 5    | 5    | 5    | 5    |      | 5    | 4    | 5    | 5    | 5    |
| 801    | 5     | 5      | 5      | 0    | 0    | 0    | 0    | 0    | 0    | 0    | 0    | 0    | 1    | 1    |
| 804    | 5     | 5      | 5      |      |      |      |      |      |      |      |      |      |      |      |
| 806    | 5     | 5      | 5      | 5    | 5    | 5    | 5    | 5    | 5    | 4    | 4    | 5    | 5    | 5    |
| 807    | 4     | 5      | 5      | 4    | 4    | 4    | 4    | 5    | 5    | 4    | 5    | 5    | 5    | 5    |
| 808    | 5     | 5      | 5      | 2    | 2    | 3    | 4    | 4    | 1    | 1    | 1    | 1    | 1    | 2    |
| 809    | 6     | 6      | 6      | 0    | 0    | 0    | 0    | 0    | 0    | 0    | 0    | 4    |      |      |
| 811    | 5     | 5      | 5      |      |      |      |      |      |      |      |      |      |      |      |



| respid | Q46x4 | Q46x5a | Q46x5b | Q47a | Q47b | Q47c | Q47d | Q47e | Q47f | Q47g | Q47h | Q47i | Q47j | Q47k |
|--------|-------|--------|--------|------|------|------|------|------|------|------|------|------|------|------|
| 812    | 4     | 5      | 5      |      |      |      |      |      |      |      |      |      |      |      |
| 815    | 5     | 5      | 5      | 5    | 5    | 5    | 5    | 5    | 5    | 2    | 5    | 5    | 5    | 4 4  |
| 817    | 4     | 4      | 4      | 0    | 0    | 0    | 0    | 0    | 0    | 1    | 1    | 0    | 5    | 4 4  |
| 818    | 5     | 5      | 5      |      |      |      |      |      |      |      |      |      |      |      |
| 819    | 5     | 5      | 5      | 5    | 5    | 5    | 5    | 5    | 5    | 0    | 1    | 3    | 5    | 5 5  |
| 821    | 4     | 4      | 4      |      |      |      |      |      |      |      |      |      |      |      |
| 824    | 5     | 5      | 5      | 4    | 5    | 5    | 5    | 5    | 5    | 2    | 3    | 3    | 5    | 5 4  |
| 825    | 6     | 6      | 6      | 4    | 4    | 4    | 4    | 4    | 5    | 5    | 4    | 4    | 4    | 4 4  |
| 828    | 5     | 5      | 5      |      |      |      |      |      |      |      |      |      |      |      |
| 832    | 6     | 6      | 6      | 4    | 4    | 4    | 4    | 4    | 5    | 0    | 4    | 3    | 4    | 4 4  |
| 834    | 4     | 4      | 4      | 1    | 4    | 4    | 4    | 4    | 5    | 2    | 4    | 3    | 4    | 4 4  |
| 835    | 4     | 4      | 4      | 5    | 5    | 5    | 5    | 5    | 5    | 5    | 4    | 5    | 5    | 5 5  |
| 836    | 5     | 5      | 5      | 5    | 5    | 5    | 5    | 5    | 5    | 3    | 5    | 5    | 5    | 5 5  |
| 837    | 6     | 6      | 6      |      |      |      |      |      |      |      |      |      |      |      |
| 840    | 5     | 4      | 5      | 5    | 5    | 4    | 4    | 4    | 5    | 2    | 3    | 3    | 5    | 5 4  |
| 841    | 4     | 4      | 4      |      |      |      |      |      |      |      |      |      |      |      |
| 845    | 5     | 5      | 5      |      |      |      |      |      |      |      |      |      |      |      |
| 846    | 5     | 5      | 5      |      |      |      |      |      |      |      |      |      |      |      |
| 849    | 5     | 5      | 5      | 5    | 4    | 4    | 5    | 5    | 5    | 1    | 5    | 4    | 5    | 5 4  |
| 852    | 5     | 5      | 5      |      |      |      |      |      |      |      |      |      |      |      |
| 854    | 4     | 4      | 4      | 2    | 4    | 4    | 4    | 4    | 4    | 2    | 4    | 3    | 5    | 5 4  |
| 856    | 5     | 5      | 5      | 5    | 5    | 5    | 5    | 5    | 5    | 1    | 5    | 5    | 5    | 5 5  |
| 858    | 5     | 5      | 5      | 5    | 5    | 5    | 5    | 5    | 5    | 1    | 4    | 3    | 5    | 4 5  |
| 859    | 5     | 5      | 5      |      |      |      |      |      |      |      |      |      |      |      |
| 861    | 4     | 4      | 4      |      |      |      |      |      |      |      |      |      |      |      |
| 863    | 5     | 5      | 5      |      |      |      |      |      |      |      |      |      |      |      |
| 864    | 4     | 5      | 5      | 5    | 5    | 5    | 4    | 5    | 5    | 2    | 4    | 3    | 5    | 5 5  |
| 866    | 5     | 5      | 5      | 5    | 5    | 5    | 5    | 5    | 5    | 4    | 4    | 3    | 5    | 3    |
| 869    | 5     | 5      | 5      | 5    | 5    | 5    | 5    | 5    | 5    | 3    | 4    | 3    | 2    | 2 4  |
| 870    | 5     | 5      | 5      | 5    | 5    | 5    | 5    | 5    | 5    | 3    | 5    | 4    | 5    | 5 4  |
| 871    | 5     | 5      | 5      |      |      |      |      |      |      |      |      |      |      |      |
| 873    | 4     | 5      | 4      | 2    | 2    | 2    | 3    | 3    | 3    | 3    | 3    | 2    | 4    | 3 4  |

| respid | Q46x4 | Q46x5a | Q46x5b | Q47a | Q47b | Q47c | Q47d | Q47e | Q47f | Q47g | Q47h | Q47i | Q47j | Q47k |
|--------|-------|--------|--------|------|------|------|------|------|------|------|------|------|------|------|
| 879    | 5     | 2      | 5      | 3    | 1    | 4    | 2    | 4    | 2    | 4    | 1    | 4    | 3    | 3    |
| 880    | 5     | 5      | 5      |      |      |      |      |      |      |      |      |      |      |      |
| 881    | 4     | 5      | 4      | 5    | 5    | 5    | 5    | 5    | 4    | 3    | 3    | 4    | 4    | 4    |
| 882    | 6     | 5      | 5      | 0    | 1    | 1    | 1    | 2    | 0    | 0    | 0    | 0    | 1    | 1    |
| 885    |       |        |        |      |      |      |      |      |      |      |      |      |      |      |
| 886    | 4     | 4      | 4      | 5    | 5    | 0    | 0    | 0    | 0    | 0    | 0    | 0    | 5    | 1    |
| 887    | 4     | 4      | 4      |      |      |      |      |      |      |      |      |      |      |      |
| 888    | 6     | 6      | 6      | 5    | 5    | 5    | 5    | 5    | 0    | 5    | 3    | 5    | 5    | 5    |
| 889    | 4     | 6      | 6      | 1    | 5    | 5    | 5    | 5    | 2    | 5    | 4    | 5    | 5    | 4    |
| 890    | 5     | 5      | 5      | 4    | 4    | 4    | 4    | 5    | 0    | 4    | 4    | 4    | 4    | 4    |
| 900    |       |        |        |      |      |      |      |      |      |      |      |      |      |      |
| 901    | 5     | 5      | 5      | 1    | 1    | 1    | 1    | 1    | 1    | 1    | 3    | 1    | 1    | 4    |
| 902    | 5     | 5      | 5      |      |      |      |      |      |      |      |      |      |      |      |
| 903    | 5     | 5      | 5      | 5    | 5    | 5    | 5    | 5    | 5    | 5    | 4    | 5    | 5    | 1    |
| 906    | 5     | 5      | 5      |      |      |      |      |      |      |      |      |      |      |      |
| 907    | 6     | 6      | 6      |      |      |      |      |      |      |      |      |      |      |      |
| 908    | 5     | 5      | 5      |      |      |      |      |      |      |      |      |      |      |      |
| 910    | 5     | 5      | 5      |      |      |      |      |      |      |      |      |      |      |      |
| 911    | 5     | 5      | 5      | 2    | 4    | 4    | 3    | 4    | 4    | 4    | 3    | 4    | 4    | 4    |
| 912    | 5     | 5      | 5      | 2    | 4    | 4    | 4    | 5    | 1    | 3    | 3    | 4    | 3    | 3    |
| 915    |       |        |        |      |      |      |      |      |      |      |      |      |      |      |
| 923    | 3     | 4      | 3      | 2    | 2    | 2    | 1    | 1    | 4    | 2    | 2    | 3    | 2    | 4    |
| 925    | 5     | 5      | 5      |      |      |      |      |      |      |      |      |      |      |      |
| 926    | 5     | 5      | 5      | 1    | 1    | 5    |      | 5    |      | 4    |      | 5    | 5    |      |
| 929    |       |        |        |      |      |      |      |      |      |      |      |      |      |      |
| 932    | 4     | 4      | 4      |      |      |      |      |      |      |      |      |      |      |      |
| 933    | 5     | 4      | 5      | 5    | 5    | 5    | 5    | 5    | 4    | 5    | 4    | 5    | 5    | 5    |
| 934    | 5     | 5      | 5      |      |      |      |      |      |      |      |      |      |      |      |
| 938    | 4     | 4      | 3      | 4    | 2    | 2    | 1    | 1    | 0    | 1    | 2    | 3    | 3    | 3    |
| 941    |       |        |        |      |      |      |      |      |      |      |      |      |      |      |
| 942    | 5     | 5      | 5      | 5    | 5    | 5    | 5    | 5    | 3    | 4    | 4    | 5    | 4    | 4    |
| 943    |       |        |        |      |      |      |      |      |      |      |      |      |      |      |

| respid | Q46x4 | Q46x5a | Q46x5b | Q47a | Q47b | Q47c | Q47d | Q47e | Q47f | Q47g | Q47h | Q47i | Q47j | Q47k |
|--------|-------|--------|--------|------|------|------|------|------|------|------|------|------|------|------|
| 945    | 5     | 5      | 5      |      |      |      |      |      |      |      |      |      |      |      |
| 946    |       |        |        |      |      |      |      |      |      |      |      |      |      |      |
| 947    | 6     | 6      | 6      | 0    | 0    | 2    | 2    | 4    | 0    | 1    | 1    | 5    | 5    | 3    |
| 948    | 5     | 5      | 5      | 5    | 5    | 5    | 5    | 5    | 2    | 5    | 3    | 5    | 5    | 4    |
| 949    | 5     | 5      | 5      | 4    | 4    | 4    | 4    | 3    | 1    | 3    | 2    | 5    | 4    | 3    |
| 952    | 6     | 6      | 6      | 5    | 5    | 5    | 5    | 5    | 5    | 4    | 3    | 4    | 4    | 4    |
| 956    | 4     | 4      | 4      |      |      |      |      |      |      |      |      |      |      |      |
| 957    | 5     | 5      | 5      |      |      |      |      |      |      |      |      |      |      |      |
| 959    | 6     | 6      | 6      | 4    | 5    | 5    | 5    | 5    | 5    | 4    | 3    | 5    | 4    | 4    |
| 961    | 5     | 5      | 5      | 5    | 5    | 5    | 5    | 5    | 4    | 4    | 4    | 5    | 4    | 3    |
| 962    | 4     | 4      | 4      |      |      |      |      |      |      |      |      |      |      |      |
| 965    | 5     | 4      | 4      | 5    | 5    | 5    | 4    | 5    | 1    | 4    | 3    | 4    | 3    | 3    |
| 967    | 6     | 6      | 6      |      |      |      |      |      |      |      |      |      |      |      |
| 969    | 4     | 5      | 5      |      |      |      |      |      |      |      |      |      |      |      |
| 970    |       |        |        |      |      |      |      |      |      |      |      |      |      |      |
| 973    | 5     | 5      | 5      | 3    | 3    | 3    | 4    | 4    | 1    | 3    | 2    | 4    | 4    | 2    |
| 974    | 5     | 5      | 5      | 1    | 5    | 5    | 5    | 5    |      | 5    | 5    | 5    | 4    | 5    |
| 975    | 5     | 4      | 4      | 5    | 5    | 5    | 5    | 5    | 1    | 4    |      | 5    | 4    | 3    |
| 976    | 4     | 4      | 5      | 4    | 5    | 5    | 5    | 5    | 2    | 4    | 4    | 5    | 5    | 4    |
| 977    | 5     | 5      | 4      | 4    | 5    | 5    | 4    | 4    | 2    | 5    | 4    | 5    | 4    | 3    |
| 979    | 4     | 5      | 5      | 5    | 5    | 5    | 5    | 5    | 4    | 5    | 5    | 5    | 5    | 5    |
| 981    | 4     | 5      | 5      |      |      |      |      |      |      |      |      |      |      |      |
| 983    | 5     | 5      | 5      |      |      |      |      |      |      |      |      |      |      |      |
| 987    | 5     | 5      | 5      | 4    | 4    | 4    | 4    | 5    | 2    | 4    | 4    | 5    | 5    | 4    |
| 991    |       |        |        |      |      |      |      |      |      |      |      |      |      |      |
| 992    | 5     | 5      | 5      | 5    | 5    | 5    | 5    | 5    | 0    | 5    | 4    | 5    | 5    | 5    |
| 993    | 5     | 5      | 5      |      |      |      |      |      |      |      |      |      |      |      |
| 994    | 6     | 6      | 5      |      |      |      |      |      |      |      |      |      |      |      |
| 995    | 6     | 6      | 6      | 5    | 5    | 5    | 5    | 5    | 5    | 5    | 3    | 5    | 5    | 4    |
| 998    | 5     | 5      | 5      |      |      |      |      |      |      |      |      |      |      |      |
| 1000   | 4     | 4      | 4      | 5    |      |      |      |      | 0    |      | 0    | 0    |      | 5    |
| 1001   | 6     | 6      | 6      | 5    | 5    | 5    | 5    | 5    | 3    | 5    | 3    | 5    | 5    | 4    |

| respid | Q46x4 | Q46x5a | Q46x5b | Q47a | Q47b | Q47c | Q47d | Q47e | Q47f | Q47g | Q47h | Q47i | Q47j | Q47k |
|--------|-------|--------|--------|------|------|------|------|------|------|------|------|------|------|------|
| 1002   |       |        |        |      |      |      |      |      |      |      |      |      |      |      |
| 1004   | 5     | 4      | 4      | 5    | 5    | 5    | 5    | 5    | 3    | 5    | 4    | 5    | 5    | 4    |
| 1005   | 5     | 5      | 5      |      |      |      |      |      |      |      |      |      |      |      |
| 1006   | 5     | 5      | 5      | 0    | 0    | 0    | 0    | 0    | 0    | 0    | 0    | 0    | 1    | 1    |
| 1007   | 3     | 3      | 3      |      |      |      |      |      |      |      |      |      |      |      |
| 1009   |       |        |        |      |      |      |      |      |      |      |      |      |      |      |
| 1013   | 2     | 3      | 3      |      |      |      |      |      |      |      |      |      |      |      |
| 1015   | 6     | 6      | 6      | 4    | 3    | 5    | 4    | 4    |      | 4    | 3    | 4    | 3    | 4    |
| 1020   | 4     | 4      | 4      | 4    |      |      |      |      |      |      |      |      |      |      |
| 1022   | 4     | 4      | 4      | 4    | 5    | 5    | 5    | 5    | 2    | 4    | 3    | 5    | 4    | 4    |
| 1024   | 6     | 6      | 6      |      |      |      |      |      |      |      |      |      |      |      |
| 1025   |       |        |        |      |      |      |      |      |      |      |      |      |      |      |
| 1027   | 5     | 5      | 5      | 5    | 4    | 5    | 5    | 5    | 3    | 5    | 5    | 5    | 5    | 5    |
| 1031   | 5     | 5      | 5      | 5    | 4    | 5    | 5    | 5    | 1    | 5    | 4    | 5    | 5    | 4    |
| 1037   | 5     | 5      | 5      | 4    | 4    | 5    | 5    | 5    | 0    | 5    | 4    | 3    | 4    | 4    |
| 1039   | 5     | 5      | 5      | 4    | 4    | 4    | 4    | 5    | 1    | 4    |      | 5    | 5    | 4    |
| 1040   | 5     | 5      | 5      | 5    | 5    | 5    | 5    | 5    | 3    | 5    | 3    | 5    | 4    | 4    |
| 1056   | 4     | 5      | 5      | 4    | 4    | 4    | 4    | 4    | 2    | 4    | 4    | 5    | 4    | 4    |
| 1057   | 6     | 5      | 5      | 5    | 4    | 5    | 5    | 5    | 3    | 5    | 4    | 4    | 4    | 4    |
| 1062   | 6     | 6      | 6      | 5    | 5    | 5    | 5    | 5    | 0    | 5    | 4    | 5    | 5    | 4    |
| 1069   | 5     | 5      | 5      |      |      |      |      |      |      |      |      |      |      |      |
| 1070   | 5     | 5      | 5      |      |      |      |      |      |      |      |      |      |      |      |
| 1072   | 5     | 5      | 5      | 5    | 4    | 5    | 5    | 5    | 4    | 4    | 3    | 4    | 4    | 4    |
| 1076   | 5     | 4      | 4      | 4    | 4    | 5    | 5    | 5    | 2    | 4    | 4    | 5    | 5    | 4    |
| 1077   | 4     | 6      | 6      | 4    | 4    | 4    | 5    | 5    | 2    | 5    | 4    | 5    | 4    | 5    |
| 1078   | 5     | 5      | 5      |      |      |      |      |      |      |      |      |      |      |      |
| 1080   |       |        |        |      |      |      |      |      |      |      |      |      |      |      |
| 1094   | 4     | 4      | 4      |      |      |      |      |      |      |      |      |      |      |      |
| 1098   | 4     | 4      | 4      | 4    | 4    | 4    | 4    | 5    | 2    | 4    | 3    | 5    | 4    | 4    |
| 1099   | 5     | 5      | 5      |      |      |      |      |      |      |      |      |      |      |      |
| 1102   | 5     | 5      | 5      | 5    | 4    | 5    | 5    | 5    | 2    | 4    | 4    | 4    | 4    | 3    |
| 1110   | 5     | 5      | 5      |      | 4    | 5    | 4    | 5    | 5    | 5    | 5    | 4    | 4    | 4    |

| respid | Q46x4 | Q46x5a | Q46x5b | Q47a | Q47b | Q47c | Q47d | Q47e | Q47f | Q47g | Q47h | Q47i | Q47j | Q47k |
|--------|-------|--------|--------|------|------|------|------|------|------|------|------|------|------|------|
| 1117   | 4     | 5      | 5      |      |      |      |      |      |      |      |      |      |      |      |
| 1119   |       |        |        |      |      |      |      |      |      |      |      |      |      |      |
| 1126   | 4     | 5      | 5      | 5    | 4    | 5    | 4    | 5    | 1    | 3    | 3    | 5    | 3    | 5    |
| 1127   | 5     | 5      | 5      |      |      |      |      |      |      |      |      |      |      |      |
| 1130   | 5     | 5      | 5      |      |      |      |      |      |      |      |      |      |      |      |
| 1131   | 5     | 5      | 5      |      |      |      |      |      |      |      |      |      |      |      |
| 1135   | 4     | 3      | 4      | 0    | 3    | 3    | 2    | 2    | 1    | 3    | 3    | 2    | 2    | 3    |
| 1138   | 4     | 5      | 4      |      |      |      |      |      |      |      |      |      |      |      |
| 1139   |       |        |        |      |      |      |      |      |      |      |      |      |      |      |
| 1140   | 5     | 5      | 5      |      |      |      |      |      |      |      |      |      |      |      |
| 1142   |       |        |        |      |      |      |      |      |      |      |      |      |      |      |
| 1143   |       |        |        |      |      |      |      |      |      |      |      |      |      |      |
| 1145   | 5     | 5      | 5      | 5    | 5    | 5    | 5    | 5    | 2    | 4    | 4    | 5    | 4    | 5    |
| 1149   |       |        |        |      |      |      |      |      |      |      |      |      |      |      |
| 1152   | 4     | 5      | 5      | 5    | 5    | 5    | 5    | 5    | 3    | 4    | 4    | 5    | 5    | 4    |
| 1160   | 5     | 5      | 5      | 4    | 5    | 5    | 5    | 5    | 5    | 4    | 4    | 5    | 5    | 5    |
| 1164   |       |        |        |      |      |      |      |      |      |      |      |      |      |      |
| 1165   | 5     | 5      | 5      |      |      |      |      |      |      |      |      |      |      |      |
| 1169   | 5     | 5      | 5      |      |      |      |      |      |      |      |      |      |      |      |
| 1170   | 5     | 5      | 5      | 5    | 4    | 5    | 5    | 5    | 4    | 5    | 4    | 5    | 5    | 4    |
| 1179   | 5     | 4      | 5      |      |      |      |      |      |      |      |      |      |      |      |
| 1180   | 6     | 5      | 5      | 0    | 0    | 0    | 0    | 0    | 0    | 0    | 0    | 0    | 1    | 1    |
| 1183   | 5     | 5      | 5      | 5    | 5    | 5    | 5    | 5    | 3    | 5    | 4    | 5    | 5    | 4    |
| 1187   | 5     | 5      | 5      | 5    | 5    | 5    | 5    | 5    | 4    | 5    | 5    | 5    | 5    | 5    |
| 1188   | 4     | 4      | 4      | 4    | 3    | 4    | 4    | 5    | 2    | 4    | 4    | 2    | 3    | 4    |
| 1193   | 5     | 5      | 5      | 5    | 5    | 5    | 5    | 5    | 1    | 5    | 4    | 5    | 5    | 5    |
| 1194   | 4     | 3      | 2      | 5    | 5    | 5    | 5    | 5    | 1    | 5    | 4    | 5    | 5    | 5    |
| 1197   | 4     | 4      | 4      |      |      |      |      |      |      |      |      |      |      |      |
| 1202   |       |        |        |      |      |      |      |      |      |      |      |      |      |      |
| 1204   | 3     | 3      | 3      |      |      |      |      |      |      |      |      |      |      |      |
| 1211   | 5     | 5      | 5      | 4    | 5    | 5    | 5    | 5    | 2    | 5    | 4    | 5    | 5    | 5    |
| 1224   | 6     | 6      | 6      | 0    | 0    | 0    | 0    | 0    | 0    | 0    | 0    | 0    | 1    | 2    |

| respid | Q46x4 | Q46x5a | Q46x5b | Q47a | Q47b | Q47c | Q47d | Q47e | Q47f | Q47g | Q47h | Q47i | Q47j | Q47k |
|--------|-------|--------|--------|------|------|------|------|------|------|------|------|------|------|------|
| 1225   | 4     | 4      | 4      |      |      |      |      |      |      |      |      |      |      |      |
| 1230   | 6     | 6      | 6      |      |      |      |      |      |      |      |      |      |      |      |
| 1232   | 6     | 6      | 6      |      |      |      |      |      |      |      |      |      |      |      |
| 1233   | 4     | 4      | 4      | 4    | 4    | 5    | 5    | 5    | 4    | 5    | 3    | 5    | 5    | 4    |
| 1234   | 5     | 4      | 4      |      |      |      |      |      |      |      |      |      |      |      |
| 1235   | 4     | 5      | 5      | 0    | 3    | 0    | 0    | 0    | 0    | 0    | 0    | 0    | 1    | 1    |
| 1236   | 6     | 6      | 6      |      |      |      |      |      |      |      |      |      |      |      |
| 1237   | 5     | 5      | 4      |      |      |      |      |      |      |      |      |      |      |      |
| 1238   | 4     | 4      | 4      | 3    | 3    | 3    | 4    | 4    | 1    | 3    | 3    | 5    | 4    | 3    |
| 1239   | 4     | 5      | 5      |      |      |      |      |      |      |      |      |      |      |      |
| 1241   | 5     | 5      | 5      | 4    | 4    | 5    | 4    | 5    | 1    | 4    | 3    | 5    | 4    | 5    |
| 1242   | 6     | 6      | 6      | 5    | 5    | 5    | 5    | 5    | 2    | 5    | 5    | 5    | 5    | 5    |
| 1244   | 5     | 5      | 6      | 0    |      |      |      |      |      |      |      |      |      |      |
| 1245   | 5     | 5      | 5      | 2    | 4    | 4    | 4    | 5    | 1    | 2    | 3    | 5    | 3    | 2    |
| 1247   | 5     | 6      | 5      | 5    | 5    | 5    | 5    | 5    | 5    | 5    | 3    | 5    | 5    | 5    |
| 1248   | 6     | 6      | 6      |      |      |      |      |      |      |      |      |      |      |      |
| 1249   | 4     | 4      | 4      | 4    | 4    | 5    | 5    | 5    | 2    | 4    | 3    | 5    | 4    | 3    |
| 1250   | 5     | 5      | 5      | 5    | 5    | 5    | 5    | 5    | 5    | 5    | 4    | 5    | 4    | 5    |
| 1251   | 5     | 5      | 5      | 0    | 0    | 0    | 0    | 0    | 0    | 0    | 0    | 0    | 1    | 1    |
| 1252   | 6     | 5      | 5      |      |      |      |      |      |      |      |      |      |      |      |
| 1253   | 5     | 5      | 5      |      |      |      |      |      |      |      |      |      |      |      |
| 1254   | 3     | 4      | 4      | 2    | 2    | 2    | 2    | 2    | 2    | 2    | 2    | 2    | 2    | 2    |
| 1258   | 6     | 6      | 6      | 0    | 0    | 0    | 0    | 0    | 0    | 0    | 0    | 0    |      |      |
| 1260   | 6     | 6      | 6      | 2    | 1    | 2    | 2    | 2    | 1    | 1    | 2    | 4    | 3    | 3    |
| 1261   | 6     | 6      | 6      | 5    | 5    | 5    | 5    | 5    | 1    | 3    | 0    | 3    | 3    | 3    |
| 1262   | 5     | 5      | 5      | 0    | 2    | 0    | 0    | 0    | 0    | 0    | 0    | 2    | 2    | 2    |
| 1263   | 4     | 5      | 5      | 4    | 4    | 5    | 5    | 5    | 1    | 5    | 4    | 5    | 5    | 4    |
| 1264   | 5     | 5      | 5      |      |      |      |      |      |      |      |      |      |      |      |
| 1265   | 4     | 4      | 4      | 1    | 1    | 1    | 1    | 0    | 0    | 0    | 0    | 1    | 1    | 1    |
| 1266   | 5     | 5      | 5      | 5    | 5    | 4    | 4    | 5    | 3    | 4    | 4    | 5    | 4    | 4    |
| 1270   | 6     | 6      | 6      | 5    | 5    | 5    | 5    | 5    | 3    | 5    | 4    | 5    | 5    | 5    |
| 1272   | 6     | 6      | 6      |      |      |      |      |      |      |      |      |      |      |      |

| respid | Q46x4 | Q46x5a | Q46x5b | Q47a | Q47b | Q47c | Q47d | Q47e | Q47f | Q47g | Q47h | Q47i | Q47j | Q47k |
|--------|-------|--------|--------|------|------|------|------|------|------|------|------|------|------|------|
| 1273   | 5     | 4      | 4      |      |      |      |      |      |      |      |      |      |      |      |
| 1276   | 5     | 5      | 5      | 4    | 4    | 4    | 4    | 4    | 3    | 4    | 4    | 4    | 3    | 3    |
| 1277   | 4     | 5      | 5      | 4    |      | 5    | 3    | 4    | 2    | 4    | 4    | 4    | 4    | 4    |
| 1278   | 5     | 5      | 5      | 0    | 2    | 0    | 0    | 0    | 0    | 0    | 0    | 0    | 1    | 2    |
| 1280   | 5     | 5      | 5      |      |      |      |      |      |      |      |      |      |      |      |
| 1281   | 6     | 6      | 6      | 2    | 3    | 2    | 3    | 4    | 4    | 5    | 5    | 3    | 3    | 2    |
| 1282   | 4     | 4      | 4      | 3    | 3    | 2    | 3    | 5    | 1    | 4    | 4    | 4    | 4    | 2    |
| 1283   | 5     | 5      | 5      | 5    | 5    | 5    | 5    | 5    | 5    | 5    | 4    | 5    | 5    | 4    |
| 1288   | 5     | 5      | 5      |      |      |      |      |      |      |      |      |      |      |      |
| 1289   | 6     | 5      | 5      |      |      |      |      |      |      |      |      |      |      |      |
| 1290   | 5     | 5      | 5      | 2    | 2    | 2    | 3    | 5    | 2    | 2    | 2    | 4    | 3    | 4    |
| 1291   |       |        |        |      |      |      |      |      |      |      |      |      |      |      |
| 1293   | 5     | 5      | 5      |      |      |      |      |      |      |      |      |      |      |      |
| 1294   | 5     | 5      | 5      | 3    | 3    | 3    | 2    | 4    | 1    | 4    | 3    | 4    | 3    | 2    |
| 1295   | 5     | 4      | 3      | 0    | 2    | 0    | 0    | 0    | 0    | 0    | 0    | 2    | 3    | 1    |
| 1296   | 4     | 4      | 4      |      |      |      |      |      |      |      |      |      |      |      |
| 1297   | 5     | 4      | 5      |      |      |      |      |      |      |      |      |      |      |      |
| 1298   | 5     | 4      | 5      | 3    | 4    | 4    | 4    | 5    | 2    | 3    | 3    | 5    | 3    | 3    |
| 1300   | 4     | 4      | 4      | 5    | 5    | 5    | 5    | 4    | 1    | 4    | 3    | 5    | 3    | 5    |
| 1302   | 5     | 5      | 5      |      |      |      |      |      |      |      |      |      |      |      |
| 1303   | 5     | 4      | 4      | 5    | 5    | 5    | 5    | 5    | 1    | 5    | 4    | 5    | 5    |      |
| 1304   | 6     | 6      | 6      | 2    | 2    | 4    | 2    | 2    | 1    | 3    |      | 5    | 2    | 2    |
| 1305   | 5     | 5      | 5      | 0    | 0    | 0    | 0    | 0    | 0    | 0    | 0    | 0    | 1    | 1    |
| 1307   | 5     | 5      | 5      | 5    | 5    | 5    | 5    | 5    | 4    | 5    | 4    | 4    | 5    | 5    |
| 1312   | 4     | 4      | 4      |      |      |      |      |      |      |      |      |      |      |      |
| 1313   | 5     | 4      | 5      |      |      |      |      |      |      |      |      |      |      |      |
| 1314   | 5     | 5      | 5      |      |      |      |      |      |      |      |      |      |      |      |
| 1317   | 6     | 6      | 6      |      |      |      |      |      |      |      |      |      |      |      |
| 1318   | 6     | 5      | 5      | 3    | 3    | 3    | 3    | 4    | 1    | 3    | 3    | 3    | 3    | 3    |
| 1319   | 6     | 6      | 6      | 4    | 4    | 5    | 5    | 5    | 4    | 4    | 4    | 5    | 4    | 4    |
| 1321   | 5     | 5      | 5      | 5    | 5    | 5    | 5    | 5    | 3    | 4    | 4    | 5    | 4    | 4    |
| 1324   | 4     | 3      | 3      | 4    | 4    | 4    | 3    | 2    | 1    | 3    | 3    | 4    | 4    | 3    |

| respid | Q46x4 | Q46x5a | Q46x5b | Q47a | Q47b | Q47c | Q47d | Q47e | Q47f | Q47g | Q47h | Q47i | Q47j | Q47k |   |
|--------|-------|--------|--------|------|------|------|------|------|------|------|------|------|------|------|---|
| 1325   | 5     | 5      | 5      | 5    | 5    | 5    | 5    | 5    | 5    | 1    | 5    | 4    | 5    | 5    | 4 |
| 1326   | 5     | 4      | 4      | 5    | 5    | 5    | 5    | 5    | 5    | 3    | 3    | 2    | 5    | 4    | 4 |
| 1327   | 5     | 5      | 5      | 5    | 0    | 4    | 5    | 5    | 5    | 5    | 5    | 5    | 4    | 5    | 5 |
| 1329   | 4     | 4      | 3      | 4    | 4    | 5    | 4    | 5    | 5    | 2    | 3    | 3    | 4    | 3    | 3 |
| 1330   | 6     | 6      | 6      |      |      |      |      |      |      |      |      |      |      |      |   |
| 1331   | 5     | 5      | 5      |      |      |      |      |      |      |      |      |      |      |      |   |
| 1335   | 2     | 2      | 4      | 2    | 2    | 2    | 2    | 4    | 1    | 2    | 2    | 2    |      |      | 3 |
| 1337   | 5     | 5      | 5      |      |      |      |      |      |      |      |      |      |      |      |   |
| 1341   | 4     | 3      | 2      |      |      |      |      |      |      |      |      |      |      |      |   |
| 1342   | 6     | 6      | 6      |      |      |      |      |      |      |      |      |      |      |      |   |
| 1344   | 4     | 5      | 4      | 3    | 3    | 4    | 3    | 3    | 2    | 2    | 3    | 4    | 2    | 2    | 2 |
| 1345   | 5     | 5      | 5      |      |      |      |      |      |      |      |      |      |      |      |   |
| 1346   | 5     | 5      | 5      | 5    | 5    | 5    | 5    | 5    | 5    | 3    | 5    | 5    | 5    | 5    | 5 |
| 1350   | 4     | 4      | 4      |      |      |      |      |      |      |      |      |      |      |      |   |
| 1352   | 5     | 5      | 5      |      |      |      |      |      |      |      |      |      |      |      |   |
| 1353   | 5     | 4      | 4      | 3    | 3    | 4    | 4    | 4    | 2    | 3    | 2    | 4    | 3    | 3    | 3 |
| 1354   | 5     | 5      | 5      | 1    | 5    | 5    | 5    | 5    | 5    | 2    | 3    | 3    | 5    | 5    | 5 |
| 1355   | 5     | 5      | 5      | 5    | 5    | 5    | 5    | 5    | 4    | 1    | 5    | 5    | 5    | 5    | 5 |
| 1357   | 5     | 5      | 5      | 2    | 3    | 3    | 3    | 3    | 4    | 5    | 2    | 1    | 2    | 1    | 5 |
| 1360   |       |        |        |      |      |      |      |      |      |      |      |      |      |      |   |
| 1362   | 5     | 5      | 5      |      |      |      |      |      |      |      |      |      |      |      |   |
| 1363   | 5     | 5      | 5      |      |      |      |      |      |      |      |      |      |      |      |   |
| 1367   | 3     | 4      | 2      |      |      |      |      |      |      |      |      |      |      |      |   |
| 1369   | 4     | 5      | 5      | 4    | 4    | 4    | 4    | 5    | 1    | 4    | 4    | 4    | 4    | 4    | 4 |
| 1371   |       |        |        |      |      |      |      |      |      |      |      |      |      |      |   |
| 1372   |       |        |        |      |      |      |      |      |      |      |      |      |      |      |   |
| 1375   |       |        |        |      |      |      |      |      |      |      |      |      |      |      |   |
| 1377   | 5     | 4      | 5      | 4    | 4    | 4    | 4    |      | 4    | 4    | 4    | 4    | 4    | 4    | 4 |
| 1379   | 3     | 4      | 4      | 0    | 0    | 0    | 0    | 0    | 0    | 0    | 0    | 0    | 0    | 1    | 1 |
| 1380   | 3     | 5      | 4      | 0    | 5    | 0    | 0    | 0    | 0    | 0    | 0    | 0    | 0    | 1    | 1 |
| 1382   | 6     | 6      | 6      |      |      |      |      |      |      |      |      |      |      |      |   |
| 1383   | 5     | 5      | 5      |      |      |      |      |      |      |      |      |      |      |      |   |



| respid | Q46x4 | Q46x5a | Q46x5b | Q47a | Q47b | Q47c | Q47d | Q47e | Q47f | Q47g | Q47h | Q47i | Q47j | Q47k |
|--------|-------|--------|--------|------|------|------|------|------|------|------|------|------|------|------|
| 1384   | 5     | 5      | 5      |      |      |      |      |      |      |      |      |      |      |      |
| 1385   | 5     | 5      | 5      | 4    | 5    | 5    | 5    | 5    | 5    | 4    | 5    | 5    | 5    | 5    |
| 1387   | 5     | 5      | 3      | 5    | 4    | 5    | 4    | 5    | 3    | 5    | 4    | 5    | 4    | 4    |
| 1388   | 5     | 5      | 5      | 0    | 5    | 0    | 0    | 0    | 0    | 0    | 0    | 0    | 5    | 5    |
| 1389   | 5     | 5      | 5      |      |      |      |      |      |      |      |      |      |      |      |
| 1390   | 3     | 4      | 4      |      |      |      |      |      |      |      |      |      |      |      |
| 1395   | 6     | 5      | 5      | 5    | 5    | 5    | 5    | 5    | 5    | 1    | 5    | 5    | 5    | 5    |
| 1396   | 5     | 4      | 4      |      |      |      |      |      |      |      |      |      |      |      |
| 1397   | 4     | 4      | 4      | 0    | 0    | 0    | 0    | 0    | 0    | 0    | 0    | 0    | 0    | 1    |
| 1398   | 5     | 5      | 5      | 0    | 0    | 0    | 0    | 0    | 0    | 0    | 0    | 0    | 0    | 5    |
| 1399   | 5     | 5      | 5      | 0    | 3    | 0    | 0    | 0    | 0    | 0    | 0    | 0    | 0    | 1    |
| 1403   | 4     | 6      | 6      |      |      |      |      |      |      |      |      |      |      |      |
| 1405   | 5     | 5      | 5      | 3    | 3    | 4    | 4    | 5    | 1    | 3    | 3    | 3    | 3    | 2    |
| 1406   | 4     | 4      | 4      |      |      |      |      |      |      |      |      |      |      |      |
| 1407   | 4     | 4      | 4      |      |      |      |      |      |      |      |      |      |      |      |
| 1408   | 5     | 5      | 5      | 0    | 4    | 0    | 4    | 5    | 3    | 4    | 4    | 4    | 4    | 4    |
| 1409   | 5     | 5      | 5      | 5    | 5    | 5    | 5    | 5    | 3    | 5    | 4    | 5    | 5    | 5    |
| 1410   | 6     | 6      | 6      | 0    | 0    | 0    | 1    | 0    | 0    | 1    | 0    | 1    | 1    | 1    |
| 1411   | 5     | 5      | 5      |      |      |      |      |      |      |      |      |      |      |      |
| 1412   | 4     | 4      | 4      | 5    | 5    | 5    | 5    | 5    | 1    | 4    | 4    | 4    | 4    | 4    |
| 1413   | 5     | 5      | 5      |      |      |      |      |      |      |      |      |      |      |      |
| 1414   | 6     | 6      | 6      | 5    | 5    | 5    | 5    | 5    | 2    | 5    | 4    | 5    | 5    | 5    |
| 1415   | 5     | 5      | 5      | 4    | 4    | 5    | 4    | 4    | 2    | 4    | 4    | 5    | 5    | 4    |
| 1416   | 5     | 4      | 5      | 5    | 5    | 5    | 5    | 5    | 1    | 4    | 4    | 1    | 4    | 5    |
| 1417   | 5     | 5      | 5      |      |      |      |      |      |      |      |      |      |      |      |
| 1418   | 5     | 5      | 5      | 5    | 5    | 5    | 5    | 5    | 2    | 5    | 5    | 5    | 5    | 5    |
| 1419   | 3     | 4      | 4      | 2    | 2    | 1    | 2    | 1    | 2    | 1    | 1    | 1    | 1    | 2    |
| 1420   | 6     | 6      | 6      | 5    | 5    | 0    | 0    | 0    | 0    | 0    | 0    | 0    | 1    | 5    |
| 1421   | 4     | 4      | 4      | 3    |      | 3    | 3    | 4    | 1    | 2    | 3    | 5    | 5    | 2    |
| 1422   | 5     | 5      | 5      |      |      |      |      |      |      |      |      |      |      |      |
| 1423   | 4     | 4      | 4      | 5    | 5    | 5    | 5    | 5    | 2    | 3    | 3    | 5    | 4    | 4    |
| 1424   | 4     | 4      | 4      | 5    | 5    | 5    | 5    | 5    | 1    | 4    | 2    | 5    | 5    | 2    |

| respid | Q46x4 | Q46x5a | Q46x5b | Q47a | Q47b | Q47c | Q47d | Q47e | Q47f | Q47g | Q47h | Q47i | Q47j | Q47k |   |
|--------|-------|--------|--------|------|------|------|------|------|------|------|------|------|------|------|---|
| 1429   | 6     | 5      | 6      | 0    | 4    | 5    | 5    | 5    | 5    | 0    | 0    | 0    | 0    | 3    | 1 |
| 1430   | 5     | 5      | 5      | 0    | 2    | 0    | 0    | 0    | 0    | 0    | 0    | 0    | 0    |      |   |
| 1431   | 4     | 5      | 2      | 2    | 3    | 3    | 0    | 2    | 1    | 1    | 3    | 4    | 2    | 3    |   |
| 1433   | 5     | 4      | 3      | 0    | 0    | 0    | 0    | 0    | 0    | 0    | 0    | 0    | 0    | 1    | 1 |
| 1435   |       |        |        |      |      |      |      |      |      |      |      |      |      |      |   |
| 1436   | 5     | 5      | 5      | 5    | 5    | 5    | 5    | 5    | 1    | 4    | 4    | 5    | 4    | 5    |   |
| 1438   |       |        |        |      |      |      |      |      |      |      |      |      |      |      |   |
| 1439   | 4     | 4      | 5      | 4    | 4    | 4    | 4    | 4    | 1    | 5    | 5    | 5    | 5    | 5    | 4 |
| 1441   | 4     | 5      | 5      | 2    | 2    | 0    | 2    | 2    | 1    | 2    | 3    | 2    | 2    | 2    | 2 |
| 1442   | 5     | 5      | 5      | 5    | 5    | 5    | 5    | 5    | 1    | 5    | 5    | 5    | 5    | 5    | 5 |
| 1443   |       |        |        |      |      |      |      |      |      |      |      |      |      |      |   |
| 1444   | 5     | 5      | 5      |      |      |      |      |      |      |      |      |      |      |      |   |
| 1445   | 4     | 5      | 4      | 5    | 5    | 5    | 5    | 5    | 4    | 4    | 4    | 5    | 5    | 5    | 5 |
| 1446   | 6     | 6      | 6      |      |      |      |      |      |      |      |      |      |      |      |   |
| 1447   | 6     | 6      | 6      | 0    | 2    | 0    | 0    | 0    | 0    | 0    | 0    | 0    | 2    | 2    | 1 |
| 1449   | 6     | 6      | 6      |      |      |      |      |      |      |      |      |      |      |      |   |
| 1450   | 6     | 6      | 6      | 0    | 0    | 0    | 0    | 0    | 0    | 0    | 0    | 0    | 0    | 1    | 1 |
| 1451   | 6     | 6      | 6      |      |      |      |      |      |      |      |      |      |      |      |   |
| 1452   |       |        |        |      |      |      |      |      |      |      |      |      |      |      |   |
| 1453   | 3     | 3      | 4      |      |      |      |      |      |      |      |      |      |      |      |   |
| 1454   | 4     | 4      | 4      |      |      |      |      |      |      |      |      |      |      |      |   |
| 1456   | 4     | 4      | 4      | 1    | 1    | 1    | 1    | 1    | 1    | 1    | 1    | 1    | 5    | 2    | 2 |
| 1457   | 5     | 5      | 5      | 5    | 4    | 5    | 4    | 4    | 3    | 4    | 4    | 4    | 5    | 4    | 4 |
| 1459   | 5     | 5      | 5      | 4    | 4    | 4    | 4    | 5    | 4    | 4    | 4    | 4    | 4    | 4    | 4 |
| 1460   | 5     | 5      | 5      | 5    | 5    | 5    | 5    | 5    | 4    | 5    | 4    | 5    | 5    | 5    | 4 |
| 1463   | 5     | 5      | 5      | 1    | 1    | 1    | 1    | 1    | 1    | 1    | 4    | 3    | 3    | 3    | 2 |
| 1465   | 5     | 4      | 5      |      |      |      |      |      |      |      |      |      |      |      |   |
| 1467   | 5     | 5      | 5      | 3    | 3    | 3    | 3    | 4    | 1    | 3    | 3    | 3    | 3    | 3    | 3 |
| 1470   | 5     | 4      | 5      | 5    | 5    | 5    | 5    | 5    | 1    | 2    | 3    | 3    | 3    | 2    | 2 |
| 1471   | 3     | 3      | 4      | 1    | 1    | 1    | 1    | 2    | 1    | 1    | 1    | 1    | 1    | 2    | 2 |
| 1472   | 5     | 5      | 5      | 5    | 5    | 5    | 5    | 5    | 0    | 5    | 3    | 4    | 3    | 3    | 4 |
| 1474   | 5     | 5      | 5      |      |      |      |      |      |      |      |      |      |      |      |   |

| respid | Q46x4 | Q46x5a | Q46x5b | Q47a | Q47b | Q47c | Q47d | Q47e | Q47f | Q47g | Q47h | Q47i | Q47j | Q47k |   |
|--------|-------|--------|--------|------|------|------|------|------|------|------|------|------|------|------|---|
| 1475   | 4     | 4      | 4      | 5    | 5    | 5    | 5    | 5    | 5    | 3    | 4    | 3    | 4    | 4    | 4 |
| 1477   | 5     | 5      | 5      | 5    | 5    | 5    | 5    | 5    | 5    | 0    | 0    | 0    | 5    | 5    | 2 |
| 1478   | 4     | 3      | 3      | 2    | 3    | 2    | 2    | 5    | 1    | 3    | 3    | 2    | 4    | 4    | 2 |
| 1480   |       |        |        |      |      |      |      |      |      |      |      |      |      |      |   |
| 1481   | 4     | 4      | 4      |      |      |      |      |      |      |      |      |      |      |      |   |
| 1483   | 5     | 5      | 5      | 5    | 5    | 5    | 5    | 5    | 1    | 5    | 3    | 5    | 5    | 5    | 5 |
| 1484   | 5     | 5      | 5      | 0    | 2    |      | 2    | 2    | 0    | 3    | 0    | 4    | 3    | 3    | 2 |
| 1485   | 4     | 4      | 4      | 0    | 0    | 0    | 0    | 0    | 0    | 0    | 0    | 0    | 0    | 1    | 3 |
| 1486   | 5     | 5      | 5      | 5    | 5    | 5    | 5    | 5    | 1    | 4    | 4    | 5    | 4    | 4    | 4 |
| 1487   | 4     | 4      | 4      | 5    | 3    | 5    | 5    | 5    | 1    | 4    | 4    | 5    | 5    | 5    | 4 |
| 1488   | 5     | 5      | 5      | 4    | 4    | 4    | 4    | 4    | 1    | 4    | 4    | 5    | 5    | 5    | 2 |
| 1489   | 5     | 5      | 5      | 0    | 3    | 0    | 0    | 0    | 0    | 0    | 0    | 0    | 3    | 4    | 1 |
| 1490   | 4     | 3      | 3      | 1    | 0    | 0    | 2    | 4    | 0    | 2    | 3    | 4    | 4    | 4    | 3 |
| 1491   | 4     | 2      | 3      |      |      |      |      |      |      |      |      |      |      |      |   |
| 1492   | 5     | 6      | 6      |      |      |      |      |      |      |      |      |      |      |      |   |
| 1494   | 2     | 6      | 6      | 5    | 5    | 5    | 5    | 5    | 1    | 5    | 3    | 5    | 4    | 4    | 5 |
| 1495   | 5     | 5      | 5      | 1    | 1    | 1    | 1    | 1    | 1    | 1    | 2    | 1    | 1    | 1    | 1 |
| 1496   | 4     | 4      | 4      | 4    | 5    | 5    | 5    | 5    | 4    | 5    | 5    | 5    | 5    | 5    | 5 |
| 1498   | 5     | 5      | 5      | 3    | 3    | 3    | 3    | 4    | 1    | 3    | 3    | 3    | 3    | 3    | 3 |
| 1499   | 4     | 4      | 4      |      |      |      |      |      |      |      |      |      |      |      |   |
| 1500   | 6     | 6      | 6      |      |      |      |      |      |      |      |      |      |      |      |   |
| 1501   | 5     | 5      | 5      |      |      |      |      |      |      |      |      |      |      |      |   |
| 1503   |       |        |        |      |      |      |      |      |      |      |      |      |      |      |   |
| 1504   | 6     | 6      | 6      |      |      |      |      |      |      |      |      |      |      |      |   |
| 1508   | 5     | 5      | 5      | 5    | 5    | 5    | 5    | 5    | 3    | 5    | 4    | 5    | 5    | 5    | 5 |
| 1509   | 5     | 5      | 5      | 5    | 4    | 5    | 4    | 4    | 4    | 4    | 4    | 5    | 5    | 5    | 4 |
| 1511   | 5     | 5      | 5      | 0    |      |      |      |      |      |      |      |      |      |      |   |
| 1512   | 5     | 5      | 5      | 4    | 4    | 4    | 4    | 4    | 2    | 4    | 4    | 4    | 4    | 4    | 4 |
| 1513   | 6     | 6      | 6      | 5    | 5    | 5    |      | 5    | 2    | 5    | 5    | 5    | 5    | 5    | 5 |
| 1515   | 4     | 5      | 5      | 1    | 5    | 4    | 5    | 3    | 3    | 5    | 4    | 4    | 4    | 4    | 5 |
| 1517   | 5     | 5      | 5      | 0    | 0    | 0    | 0    | 0    | 0    | 0    | 0    | 0    | 0    | 1    | 1 |
| 1518   | 5     | 5      | 5      |      |      |      |      |      |      |      |      |      |      |      |   |

| respid | Q46x4 | Q46x5a | Q46x5b | Q47a | Q47b | Q47c | Q47d | Q47e | Q47f | Q47g | Q47h | Q47i | Q47j | Q47k |
|--------|-------|--------|--------|------|------|------|------|------|------|------|------|------|------|------|
| 1519   | 4     | 4      | 4      |      |      |      |      |      |      |      |      |      |      |      |
| 1520   | 4     | 3      | 4      | 4    |      |      |      |      |      |      |      |      |      |      |
| 1521   | 4     | 4      | 4      |      |      |      |      |      |      |      |      |      |      |      |
| 1522   | 5     | 5      | 5      |      |      |      |      |      |      |      |      |      |      |      |
| 1523   | 5     | 4      | 3      | 3    | 2    | 5    | 3    | 2    | 5    | 3    | 3    | 5    | 5    | 5    |
| 1524   | 4     | 5      | 5      |      |      |      |      |      |      |      |      |      |      |      |
| 1525   | 5     | 5      | 5      |      |      |      |      |      |      |      |      |      |      |      |
| 1526   | 5     | 3      | 4      | 4    | 4    | 4    | 3    | 3    | 2    | 4    | 3    | 5    | 4    | 4    |
| 1527   | 6     | 6      | 6      |      |      |      |      |      |      |      |      |      |      |      |
| 1534   | 5     | 5      | 5      | 5    | 5    | 5    | 5    | 5    | 2    | 4    | 4    | 5    | 5    | 5    |
| 1535   | 5     | 5      | 5      | 0    | 4    | 0    | 0    | 0    | 0    | 0    | 0    |      | 1    | 1    |
| 1536   | 5     | 4      | 4      | 2    | 3    | 4    | 3    | 4    | 1    | 3    | 3    | 4    | 4    | 3    |
| 1538   | 4     | 5      | 5      | 5    | 5    | 5    | 5    | 5    |      | 5    | 5    | 5    | 4    | 4    |
| 1539   | 5     | 5      | 5      | 0    | 5    | 0    | 0    | 0    | 0    | 0    | 0    | 0    | 1    | 1    |
| 1540   | 5     | 5      | 5      |      |      |      |      |      |      |      |      |      |      |      |
| 1541   | 5     | 5      | 5      | 5    | 5    | 5    | 4    | 5    |      | 5    |      |      |      |      |
| 1542   | 6     | 6      | 6      | 2    | 3    | 4    | 3    | 2    | 1    | 2    | 2    | 5    | 3    | 3    |
| 1543   | 5     | 5      | 5      |      |      |      |      |      |      |      |      |      |      |      |
| 1545   | 5     | 5      | 5      |      |      |      |      |      |      |      |      |      |      |      |
| 1546   | 5     | 5      | 5      | 5    | 5    | 5    | 5    | 5    | 4    | 5    | 4    | 5    | 5    | 5    |
| 1548   | 6     | 6      | 6      |      |      |      |      |      |      |      |      |      |      |      |
| 1549   |       |        |        |      |      |      |      |      |      |      |      |      |      |      |
| 1551   | 5     | 5      | 5      | 5    | 5    | 5    | 5    | 5    | 2    | 5    | 4    | 5    | 5    | 5    |
| 1552   | 3     | 4      | 4      | 4    | 4    | 5    | 5    | 5    | 3    | 3    | 3    | 5    | 3    | 3    |
| 1556   | 5     | 5      | 5      | 5    | 5    | 5    | 5    | 5    | 5    | 5    | 5    | 5    | 5    | 5    |
| 1557   |       |        |        |      |      |      |      |      |      |      |      |      |      |      |
| 1558   | 5     | 5      | 5      | 2    | 2    | 2    | 2    | 3    | 1    | 2    | 3    | 2    | 2    | 2    |
| 1561   | 5     | 5      | 5      | 5    | 5    | 5    | 5    | 5    | 5    | 5    | 5    | 5    | 5    | 5    |
| 1562   | 6     | 6      | 6      | 3    | 2    | 3    | 3    | 4    | 2    | 3    | 3    | 3    | 3    | 3    |
| 1563   | 5     | 5      | 5      | 5    | 5    | 5    | 5    | 5    | 1    | 5    | 5    | 5    | 5    | 5    |
| 1564   | 4     | 4      | 4      | 3    | 3    | 3    | 3    | 4    | 2    | 1    | 2    | 2    | 1    | 2    |
| 1565   |       |        |        |      |      |      |      |      |      |      |      |      |      |      |

| respid | Q46x4 | Q46x5a | Q46x5b | Q47a | Q47b | Q47c | Q47d | Q47e | Q47f | Q47g | Q47h | Q47i | Q47j | Q47k |
|--------|-------|--------|--------|------|------|------|------|------|------|------|------|------|------|------|
| 1566   | 5     | 5      | 5      | 5    | 5    | 5    | 5    | 4    | 4    |      | 4    | 3    | 5    | 4    |
| 1567   | 5     | 5      | 5      | 4    | 4    | 4    | 4    | 4    | 5    | 2    | 4    | 4    | 5    | 4    |
| 1569   |       |        |        |      |      |      |      |      |      |      |      |      |      |      |
| 1570   | 6     | 6      | 6      |      |      |      |      |      |      |      |      |      |      |      |
| 1574   | 4     | 4      | 4      | 0    | 0    |      | 0    | 0    | 0    | 0    | 0    | 0    | 0    | 2    |
| 1575   | 5     | 5      | 5      |      |      |      |      |      |      |      |      |      |      |      |
| 1576   | 5     | 5      | 5      | 1    | 1    | 1    | 1    | 4    | 0    | 0    | 0    | 0    | 0    | 1    |
| 1577   | 5     | 5      | 5      | 4    | 4    | 5    | 5    | 5    | 3    | 3    | 3    | 3    | 5    | 5    |
| 1581   | 5     | 5      | 5      |      |      |      |      |      |      |      |      |      |      |      |
| 1583   | 6     | 6      | 6      | 4    | 2    | 3    | 3    | 4    | 2    | 3    | 3    | 3    | 4    | 4    |
| 1585   | 5     | 5      | 4      | 4    | 4    | 4    | 4    | 4    | 5    | 3    | 4    | 4    | 5    | 4    |
| 1586   | 5     | 4      | 4      | 0    | 0    | 0    | 0    | 0    | 0    | 0    | 0    | 0    | 0    | 1    |
| 1588   | 5     | 5      | 5      | 2    | 4    | 5    | 4    | 4    | 4    | 2    | 2    | 3    | 5    | 5    |
| 1590   | 5     | 5      | 5      | 5    | 5    | 5    | 5    | 5    |      |      | 4    | 4    | 5    | 5    |
| 1592   | 5     | 5      | 5      |      |      |      |      |      |      |      |      |      |      |      |
| 1594   | 4     | 4      | 4      | 4    | 4    | 4    | 4    | 4    | 5    | 5    | 5    | 5    | 5    | 5    |
| 1598   | 4     | 4      | 4      | 1    | 1    | 1    | 1    | 1    | 0    | 0    | 0    | 0    | 0    |      |
| 1599   | 5     | 3      | 4      | 5    | 2    | 2    | 2    | 2    | 3    | 2    | 3    | 3    | 5    | 3    |
| 1600   | 5     | 5      | 5      | 4    | 4    | 4    | 4    | 4    | 5    | 1    | 5    | 3    | 5    | 5    |
| 1602   | 5     | 5      | 5      |      |      |      |      |      |      |      |      |      |      |      |
| 1603   | 5     | 5      | 5      |      |      |      |      |      |      |      |      |      |      |      |
| 1604   | 5     | 5      | 5      |      |      |      |      |      |      |      |      |      |      |      |
| 1605   | 6     | 6      | 6      | 0    | 1    | 1    | 0    | 0    | 0    | 0    | 0    | 0    | 0    | 1    |
| 1606   | 5     | 5      | 5      | 5    | 5    | 5    | 5    | 5    | 5    | 5    | 5    | 5    | 5    | 5    |
| 1610   | 5     | 5      | 5      | 5    | 4    | 4    | 4    | 4    | 4    | 3    | 4    | 4    | 5    | 5    |
| 1611   | 5     | 5      | 5      | 0    | 0    | 0    | 0    | 0    | 0    | 0    | 0    | 0    | 0    | 3    |
| 1612   | 5     | 5      | 5      | 5    | 5    | 4    | 4    | 4    | 4    | 4    | 5    | 4    | 5    | 5    |
| 1613   | 4     | 4      | 4      | 2    | 4    | 4    | 4    | 4    | 4    | 1    | 3    | 2    | 4    | 2    |
| 1615   | 4     | 4      | 4      | 4    | 4    | 4    | 4    | 4    | 4    | 1    | 3    | 3    | 4    | 3    |
| 1616   | 5     | 5      | 5      | 4    | 3    | 3    | 3    | 3    | 4    |      |      | 2    | 5    | 4    |
| 1617   | 5     | 5      | 5      | 3    | 3    | 3    | 3    | 3    | 3    | 3    | 2    | 3    | 2    | 3    |
| 1618   | 5     | 5      | 5      | 5    | 4    | 5    | 4    | 4    | 5    | 2    | 4    | 3    | 5    | 5    |

| respid | Q46x4 | Q46x5a | Q46x5b | Q47a | Q47b | Q47c | Q47d | Q47e | Q47f | Q47g | Q47h | Q47i | Q47j | Q47k |
|--------|-------|--------|--------|------|------|------|------|------|------|------|------|------|------|------|
| 1620   | 6     | 5      | 5      |      |      |      |      |      |      |      |      |      |      |      |
| 1621   | 6     | 4      | 6      | 2    | 1    | 2    | 2    | 3    | 1    | 2    | 3    | 3    | 3    | 2    |
| 1622   |       |        |        |      |      |      |      |      |      |      |      |      |      |      |
| 1623   | 5     | 5      | 5      |      | 5    | 5    | 5    | 5    | 1    |      | 3    |      |      |      |
| 1624   | 5     | 5      | 5      |      |      |      |      |      |      |      |      |      |      |      |
| 1625   | 5     | 5      | 5      | 5    | 5    | 5    | 5    | 5    | 2    | 5    | 4    | 5    | 5    |      |
| 1626   |       |        |        |      |      |      |      |      |      |      |      |      |      |      |
| 1627   | 5     | 5      | 5      |      |      |      |      |      |      |      |      |      |      |      |
| 1629   | 4     | 4      | 4      | 5    | 5    | 5    | 5    | 5    | 2    | 5    | 5    | 5    | 5    | 5    |
| 1630   | 5     | 5      | 5      | 0    | 0    | 0    | 0    | 0    | 0    | 0    | 0    | 0    | 1    | 3    |
| 1631   | 5     | 5      | 5      | 0    | 0    |      | 0    | 0    | 0    | 0    | 0    | 0    |      | 1    |
| 1634   | 5     | 5      | 5      |      |      |      |      |      |      |      |      |      |      |      |
| 1635   | 5     | 5      | 5      | 5    | 5    | 5    | 5    | 5    | 4    | 5    | 5    | 5    | 5    | 5    |
| 1636   |       |        |        |      |      |      |      |      |      |      |      |      |      |      |
| 1637   | 5     | 5      | 5      | 5    | 5    | 5    | 5    | 5    | 3    | 4    | 3    | 5    | 4    | 4    |
| 1640   | 6     | 6      | 6      |      |      |      |      |      |      |      |      |      |      |      |
| 1642   | 6     | 6      | 6      |      |      |      |      |      |      |      |      |      |      |      |
| 1643   | 6     | 6      | 6      |      |      |      |      |      |      |      |      |      |      |      |
| 1644   | 5     | 5      | 5      | 2    | 4    | 4    | 4    | 4    | 2    | 4    | 3    | 5    | 5    | 4    |
| 1645   | 4     | 5      | 5      |      |      |      |      |      |      |      |      |      |      |      |
| 1646   | 6     | 6      | 6      |      |      |      |      |      |      |      |      |      |      |      |
| 1647   | 5     | 5      | 4      | 5    | 5    | 5    | 5    | 5    | 4    | 5    | 3    | 5    | 5    | 5    |
| 1650   | 4     | 4      | 4      |      | 2    | 4    | 2    | 5    | 2    | 4    | 2    | 2    | 3    | 3    |
| 1654   | 4     | 4      | 4      | 3    | 3    | 4    | 3    | 4    | 1    | 3    | 3    | 5    | 4    | 3    |
| 1656   | 5     | 4      | 5      | 0    | 4    | 0    | 0    | 0    | 0    | 0    | 0    | 4    | 4    | 1    |
| 1657   | 5     | 5      | 5      | 4    | 4    | 4    | 4    | 5    | 1    | 4    | 3    | 5    | 4    | 2    |
| 1659   | 5     | 5      | 5      | 3    | 4    | 4    | 4    | 5    | 3    | 4    | 3    | 5    | 3    | 3    |
| 1662   | 4     | 4      | 4      |      |      |      |      |      |      |      |      |      |      |      |
| 1663   | 5     | 3      | 2      |      |      |      |      |      |      |      |      |      |      |      |
| 1664   | 6     | 6      | 5      |      |      |      |      |      |      |      |      |      |      |      |
| 1665   | 6     | 6      | 6      | 5    | 5    | 5    | 5    | 5    | 4    | 5    | 4    | 5    | 5    | 5    |
| 1667   | 4     | 3      | 2      | 5    | 5    | 5    | 5    | 5    | 2    | 5    | 5    | 5    | 5    | 5    |

| respid | Q46x4 | Q46x5a | Q46x5b | Q47a | Q47b | Q47c | Q47d | Q47e | Q47f | Q47g | Q47h | Q47i | Q47j | Q47k |   |
|--------|-------|--------|--------|------|------|------|------|------|------|------|------|------|------|------|---|
| 1668   | 4     | 4      | 4      | 5    | 5    | 5    | 5    | 5    | 5    | 3    | 4    | 4    | 5    | 4    | 4 |
| 1670   | 5     | 5      | 5      | 5    | 5    | 5    | 5    | 5    | 5    | 2    |      | 3    | 5    | 5    | 5 |
| 1671   | 6     | 6      | 6      | 0    | 4    | 0    | 0    | 0    | 0    | 0    | 0    | 0    | 0    | 4    | 1 |
| 1673   | 5     | 5      | 5      |      |      |      |      |      |      |      |      |      |      |      |   |
| 1674   | 4     | 4      | 4      | 5    | 3    | 4    | 3    | 4    | 1    | 3    | 3    | 5    | 2    | 3    |   |
| 1676   | 5     | 5      | 5      | 0    | 0    | 0    | 0    | 0    | 4    | 1    |      | 2    | 4    | 1    |   |
| 1677   | 5     | 5      | 5      | 5    | 4    | 4    | 4    | 5    | 5    | 5    | 4    | 5    | 5    | 5    | 5 |
| 1678   | 5     | 4      | 5      | 4    | 5    | 5    | 5    | 5    | 5    | 1    | 3    | 3    | 5    | 4    | 3 |
| 1680   | 5     | 5      | 5      |      |      |      |      |      |      |      |      |      |      |      |   |
| 1681   | 5     | 4      | 4      | 0    | 0    | 0    | 0    | 0    | 0    | 0    | 0    | 0    | 0    | 1    | 1 |
| 1683   | 5     | 5      | 5      | 2    | 1    | 5    | 3    | 4    | 1    |      | 3    | 5    | 3    | 3    |   |
| 1685   | 5     | 4      | 4      |      |      |      |      |      |      |      |      |      |      |      |   |
| 1686   | 4     | 4      | 5      |      |      |      |      |      |      |      |      |      |      |      |   |
| 1690   | 5     | 5      | 5      | 5    | 5    | 5    | 5    | 5    | 2    | 4    | 4    | 5    | 4    | 5    |   |
| 1691   | 5     | 5      | 5      |      |      |      |      |      |      |      |      |      |      |      |   |
| 1692   | 5     | 4      | 4      | 3    | 2    | 2    | 2    | 1    | 1    | 3    | 3    | 2    | 3    | 3    | 3 |
| 1693   | 5     | 5      | 5      | 5    | 3    | 5    | 4    | 5    | 2    | 4    | 4    | 5    | 5    | 5    | 4 |
| 1695   | 5     | 5      | 5      |      |      |      |      |      |      |      |      |      |      |      |   |
| 1696   | 5     | 5      | 5      | 0    | 0    | 0    | 0    | 0    | 0    | 0    | 0    | 5    | 5    | 5    | 4 |
| 1698   | 5     | 5      | 5      | 5    | 5    | 5    | 5    | 5    | 2    | 4    | 3    | 5    | 5    | 5    | 5 |
| 1699   | 5     | 5      | 5      |      |      |      |      |      |      |      |      |      |      |      |   |
| 1701   | 3     | 3      | 3      | 5    | 5    | 1    | 5    | 5    | 1    | 1    | 2    | 2    | 3    | 4    |   |
| 1702   | 5     | 5      | 5      |      |      |      |      |      |      |      |      |      |      |      |   |
| 1703   |       |        |        |      |      |      |      |      |      |      |      |      |      |      |   |
| 1705   | 5     | 5      | 5      |      |      |      |      |      |      |      |      |      |      |      |   |
| 1706   | 6     | 6      | 6      | 2    | 2    | 2    | 2    | 2    | 2    | 2    | 2    | 2    | 2    | 2    | 2 |
| 1708   |       |        |        |      |      |      |      |      |      |      |      |      |      |      |   |
| 1711   | 5     | 5      | 5      |      |      |      |      |      |      |      |      |      |      |      |   |
| 1712   | 5     | 5      | 5      | 5    | 5    | 5    | 5    | 5    | 0    | 5    | 5    | 4    | 4    | 4    | 4 |
| 1713   | 5     | 5      | 5      |      |      |      |      |      |      |      |      |      |      |      |   |
| 1715   | 5     | 5      | 5      |      |      |      |      |      |      |      |      |      |      |      |   |
| 1717   | 5     | 5      | 5      | 4    | 4    | 5    | 5    | 5    | 2    | 5    | 4    | 5    | 5    | 5    | 5 |

| respid | Q46x4 | Q46x5a | Q46x5b | Q47a | Q47b | Q47c | Q47d | Q47e | Q47f | Q47g | Q47h | Q47i | Q47j | Q47k |
|--------|-------|--------|--------|------|------|------|------|------|------|------|------|------|------|------|
| 1718   | 6     | 6      | 6      | 4    | 4    | 5    | 4    | 4    | 0    | 3    | 3    | 5    | 5    | 4    |
| 1719   | 6     | 6      | 6      |      |      |      |      |      |      |      |      |      |      |      |
| 1721   | 6     | 6      | 6      | 4    | 3    | 4    | 4    | 5    |      | 4    | 4    | 4    | 5    | 5    |
| 1722   | 5     | 4      | 4      |      |      |      |      |      |      |      |      |      |      |      |
| 1724   | 5     | 4      | 5      |      |      |      |      |      |      |      |      |      |      |      |
| 1725   | 5     | 5      | 5      |      |      |      |      |      |      |      |      |      |      |      |
| 1726   | 5     | 5      | 5      | 5    | 5    | 5    | 5    | 5    | 2    | 4    | 4    | 4    | 5    | 5    |
| 1727   | 5     | 5      | 5      | 5    | 5    | 5    | 5    | 5    | 2    | 4    | 3    | 5    | 3    | 5    |
| 1728   | 4     | 4      | 4      | 0    | 0    | 0    | 0    | 0    | 0    | 0    | 0    | 0    | 1    | 1    |
| 1731   | 5     | 5      | 4      | 5    | 5    | 5    | 5    | 5    | 1    | 4    | 3    | 5    | 4    | 4    |
| 1733   | 5     | 5      | 5      | 4    | 4    | 4    | 4    | 5    | 1    | 4    | 5    | 4    | 4    | 4    |
| 1734   | 4     | 4      | 4      | 5    | 5    | 5    | 5    | 5    | 1    | 5    | 4    | 5    | 5    | 5    |
| 1735   |       |        |        |      |      |      |      |      |      |      |      |      |      |      |
| 1736   | 4     | 4      | 5      |      |      |      |      |      |      |      |      |      |      |      |
| 1737   | 6     | 6      | 6      | 5    | 5    | 5    | 5    | 5    | 1    | 4    | 4    | 5    | 4    | 4    |
| 1738   | 6     | 6      | 6      |      |      |      |      |      |      |      |      |      |      |      |
| 1743   | 5     | 5      | 5      |      |      |      |      |      |      |      |      |      |      |      |
| 1755   | 3     | 4      | 4      |      |      |      |      |      |      |      |      |      |      |      |
| 1756   | 6     | 6      | 6      |      |      |      |      |      |      |      |      |      |      |      |
| 1757   | 5     | 5      | 5      |      |      |      |      |      |      |      |      |      |      |      |
| 1758   | 4     | 4      | 4      |      |      |      |      |      |      |      |      |      |      |      |
| 1759   | 5     | 5      | 5      | 5    | 5    | 5    | 5    | 5    | 2    | 2    | 3    | 5    | 3    | 5    |
| 1761   | 5     | 6      | 5      |      |      |      |      |      |      |      |      |      |      |      |
| 1762   | 5     | 5      | 5      |      |      |      |      |      |      |      |      |      |      |      |
| 1764   |       |        |        |      |      |      |      |      |      |      |      |      |      |      |
| 1767   | 4     | 4      | 4      |      |      |      |      |      |      |      |      |      |      |      |
| 1768   | 4     | 4      | 4      | 5    | 5    | 5    | 4    | 5    | 1    | 3    | 3    | 5    | 2    | 1    |
| 1769   | 5     | 5      | 5      | 5    | 5    | 5    | 5    | 5    | 1    | 5    | 4    | 5    | 5    | 5    |
| 1770   | 5     | 5      | 5      | 0    | 1    | 0    | 0    | 0    | 0    | 0    | 0    | 0    | 1    | 1    |
| 1771   | 4     | 3      | 3      | 4    | 3    | 4    | 3    | 4    | 3    | 3    | 3    | 5    | 3    | 4    |
| 1776   | 4     | 3      | 3      | 2    | 2    | 4    | 4    | 3    | 1    | 4    |      | 3    | 4    | 2    |
| 1777   | 5     | 5      | 5      |      |      |      |      |      |      |      |      |      |      |      |



| respid | Q46x4 | Q46x5a | Q46x5b | Q47a | Q47b | Q47c | Q47d | Q47e | Q47f | Q47g | Q47h | Q47i | Q47j | Q47k |
|--------|-------|--------|--------|------|------|------|------|------|------|------|------|------|------|------|
| 1778   | 5     | 5      | 5      | 1    | 5    | 5    | 4    | 4    | 0    | 0    | 0    | 5    | 4    | 5    |
| 1779   | 5     | 5      | 5      | 5    | 4    | 4    | 5    | 5    | 3    | 5    | 4    | 5    | 5    | 3    |
| 1780   | 4     | 5      | 5      | 2    | 2    | 2    | 1    | 1    | 1    | 2    | 1    | 2    | 4    | 2    |
| 1781   |       |        |        |      |      |      |      |      |      |      |      |      |      |      |
| 1783   | 5     | 5      | 5      |      |      |      |      |      |      |      |      |      |      |      |
| 1784   | 3     | 3      | 4      | 4    | 3    | 3    | 3    | 3    | 2    | 3    | 3    | 4    | 3    | 3    |
| 1785   | 4     | 4      | 4      | 4    | 4    | 4    | 4    | 5    | 3    | 3    | 3    | 4    | 3    | 3    |
| 1788   | 4     | 5      | 5      | 4    | 3    | 3    | 3    | 4    | 2    | 2    | 2    | 4    | 4    | 4    |
| 1792   | 5     | 5      | 5      |      |      |      |      |      |      |      |      |      |      |      |
| 1794   | 6     | 5      | 5      |      |      |      |      |      |      |      |      |      |      |      |
| 1798   | 4     | 4      | 4      |      |      |      |      |      |      |      |      |      |      |      |
| 1799   | 5     | 4      | 4      |      |      |      |      |      |      |      |      |      |      |      |
| 1800   | 6     | 6      | 6      | 5    | 5    | 5    | 5    | 5    |      | 5    | 3    | 4    | 4    |      |
| 1804   | 4     | 4      | 4      | 3    | 3    | 3    | 3    | 4    | 2    | 3    | 3    | 4    | 4    | 4    |
| 1806   | 6     | 6      | 6      |      |      |      |      |      |      |      |      |      |      |      |
| 1807   | 5     | 5      | 5      |      |      |      |      |      |      |      |      |      |      |      |
| 1808   | 5     | 5      | 5      | 5    | 5    | 5    | 5    | 5    | 3    | 4    | 3    |      | 4    | 5    |
| 1809   | 4     | 5      | 5      |      |      |      |      |      |      |      |      |      |      |      |
| 1811   | 4     | 4      | 4      | 4    | 4    | 4    | 4    | 5    | 2    | 4    | 2    | 5    | 4    | 4    |
| 1812   | 4     | 5      | 5      | 2    | 2    | 4    | 2    | 2    | 4    | 2    | 3    | 3    | 3    | 3    |
| 1813   | 6     | 6      | 5      | 1    | 1    | 4    | 4    | 4    | 0    | 4    | 3    | 4    | 4    | 4    |
| 1814   | 5     | 5      | 5      |      |      |      |      |      |      |      |      |      |      |      |
| 1815   | 5     | 5      | 5      |      |      |      |      |      |      |      |      |      |      |      |
| 1817   | 4     | 4      | 4      |      |      |      |      |      |      |      |      |      |      |      |
| 1820   | 5     | 4      | 4      | 5    | 5    | 5    | 5    | 4    | 2    | 4    | 4    | 5    | 5    | 4    |
| 1821   | 5     | 5      | 5      | 1    | 0    | 4    | 5    | 5    |      |      |      | 5    | 5    | 5    |
| 1822   | 5     | 4      | 5      | 5    | 5    | 5    | 5    | 5    | 3    | 5    | 4    | 5    | 5    | 4    |
| 1823   | 3     | 3      | 3      | 0    | 0    | 0    | 0    | 0    | 0    | 0    | 0    | 0    | 1    | 1    |
| 1824   | 5     | 5      | 5      | 4    | 2    | 3    | 2    | 3    | 1    | 4    | 3    | 5    | 4    | 2    |
| 1826   |       |        |        |      |      |      |      |      |      |      |      |      |      |      |
| 1828   | 5     | 5      | 4      | 0    | 0    | 0    | 0    | 0    | 0    | 0    | 0    | 0    | 1    | 4    |
| 1829   | 5     | 5      | 5      |      |      |      |      |      |      |      |      |      |      |      |

| respid | Q46x4 | Q46x5a | Q46x5b | Q47a | Q47b | Q47c | Q47d | Q47e | Q47f | Q47g | Q47h | Q47i | Q47j | Q47k |
|--------|-------|--------|--------|------|------|------|------|------|------|------|------|------|------|------|
| 1830   | 6     | 6      | 6      | 5    | 5    | 5    | 5    | 5    | 5    | 5    | 5    | 5    | 5    | 5    |
| 1831   | 5     | 5      | 5      | 5    | 5    | 5    | 5    | 5    | 5    | 1    | 4    | 3    | 3    | 4    |
| 1832   | 4     | 4      | 4      |      |      |      |      |      |      |      |      |      |      |      |
| 1836   | 4     | 4      | 4      | 3    |      |      | 3    | 3    | 4    |      |      |      | 5    | 4    |
| 1838   | 5     | 4      | 4      | 4    | 4    | 4    | 4    | 4    | 5    | 1    | 4    | 3    | 4    | 4    |
| 1839   | 4     | 6      | 6      | 2    | 1    |      |      | 1    |      |      |      |      | 1    | 2    |
| 1840   | 5     | 4      | 4      | 3    | 5    | 5    | 5    | 5    | 4    | 2    | 4    | 4    | 5    | 4    |
| 1841   | 5     | 5      | 6      | 0    | 0    | 0    | 0    | 0    |      |      |      |      |      |      |
| 1842   | 4     | 5      | 5      | 5    | 5    | 5    | 5    | 5    | 5    | 3    | 5    | 4    | 5    | 5    |
| 1843   | 5     | 5      | 5      | 2    | 4    | 4    | 4    | 4    | 5    | 2    | 5    | 4    | 5    | 4    |
| 1844   | 4     | 4      | 4      | 3    | 3    | 4    | 4    | 4    | 4    | 3    | 3    | 3    | 3    | 3    |
| 1845   | 5     | 5      | 5      | 2    | 2    | 2    | 2    | 2    | 4    | 1    | 2    | 2    | 1    | 2    |
| 1849   | 5     | 4      | 4      |      |      |      |      |      |      |      |      |      |      |      |
| 1850   | 5     | 5      | 5      |      |      |      |      |      |      |      |      |      |      |      |
| 1851   | 5     | 4      | 5      | 5    | 5    | 5    | 5    | 5    | 5    | 2    | 5    | 5    | 5    | 5    |
| 1852   |       |        |        |      |      |      |      |      |      |      |      |      |      |      |
| 1857   | 6     | 6      | 6      | 5    | 5    | 5    | 5    | 5    | 5    | 1    | 4    | 4    | 5    | 4    |
| 1858   | 6     | 6      | 6      |      |      |      |      |      |      |      |      |      |      |      |
| 1861   | 5     | 5      | 5      |      |      |      |      |      |      |      |      |      |      |      |
| 1862   | 5     | 5      | 5      |      |      |      |      |      |      |      |      |      |      |      |
| 1863   | 4     | 4      | 4      | 1    | 1    | 1    | 1    | 5    | 2    | 4    | 3    | 4    | 4    | 4    |
| 1864   | 5     | 5      | 5      | 3    | 3    | 3    | 5    | 5    | 5    | 2    | 3    | 3    | 3    | 3    |
| 1865   |       |        |        |      |      |      |      |      |      |      |      |      |      |      |
| 1867   | 6     | 6      | 6      | 4    | 3    | 3    | 4    | 5    | 1    | 4    | 5    | 5    | 5    | 4    |
| 1868   | 5     | 5      | 5      | 5    | 4    | 4    | 4    | 3    | 5    | 4    | 5    | 5    | 5    | 4    |
| 1869   | 5     | 4      | 5      | 4    | 5    | 5    | 4    | 4    | 5    | 5    | 4    | 4    | 5    | 4    |
| 1870   | 6     | 6      | 6      | 5    | 5    | 5    | 5    | 5    | 5    | 1    | 5    | 5    | 5    | 5    |
| 1871   | 6     | 6      | 6      | 0    | 3    | 0    | 0    | 0    | 0    | 0    | 0    | 1    | 4    | 1    |
| 1872   | 5     | 5      | 5      | 5    | 5    | 5    | 5    | 5    | 5    | 5    | 5    | 5    | 5    | 5    |
| 1873   | 6     | 6      | 6      |      |      |      |      |      |      |      |      |      |      |      |
| 1876   |       |        |        |      |      |      |      |      |      |      |      |      |      |      |
| 1877   |       |        |        |      |      |      |      |      |      |      |      |      |      |      |

| respid | Q46x4 | Q46x5a | Q46x5b | Q47a | Q47b | Q47c | Q47d | Q47e | Q47f | Q47g | Q47h | Q47i | Q47j | Q47k |
|--------|-------|--------|--------|------|------|------|------|------|------|------|------|------|------|------|
| 1878   | 4     | 4      | 4      | 3    | 4    | 3    | 3    | 4    | 1    | 3    | 3    | 2    | 3    | 3    |
| 1879   | 5     | 5      | 5      | 2    | 2    | 2    | 2    | 2    | 2    | 2    | 2    | 2    | 2    | 2    |
| 1880   | 5     | 5      | 5      | 5    | 5    | 5    | 4    | 4    | 2    | 4    | 3    | 4    | 4    | 4    |
| 1881   | 5     | 5      | 5      |      |      |      |      |      |      |      |      |      |      |      |
| 1883   | 6     | 5      | 6      | 3    | 3    | 4    | 4    | 4    | 2    | 4    | 3    | 5    | 4    | 4    |
| 1886   | 5     | 5      | 5      | 5    | 5    | 5    | 4    | 5    | 2    | 4    | 4    | 5    | 4    | 4    |
| 1888   | 3     | 4      | 3      | 1    | 3    | 3    | 1    | 3    | 2    | 2    | 2    | 2    | 3    | 2    |
| 1889   | 4     | 4      | 4      | 2    | 3    | 3    | 2    | 4    | 2    | 2    | 3    | 2    | 2    | 3    |
| 1890   | 4     | 4      | 4      | 4    | 3    | 3    | 3    | 3    | 2    | 3    | 3    | 5    | 5    | 3    |
| 1891   | 6     | 5      | 5      | 5    | 5    | 5    | 5    | 5    |      | 5    | 4    | 5    | 5    | 5    |
| 1893   | 5     | 5      | 5      |      |      |      |      |      |      |      |      |      |      |      |
| 1894   | 5     | 5      | 5      |      |      |      |      |      |      |      |      |      |      |      |
| 1895   | 4     | 5      | 5      | 1    | 4    | 4    | 5    | 5    |      | 3    | 3    | 4    | 4    | 2    |
| 1896   | 5     | 3      | 3      | 0    | 5    | 0    | 0    | 0    | 0    | 0    | 0    | 0    | 5    | 1    |
| 1897   | 5     | 4      | 5      | 3    | 3    | 3    | 2    | 4    | 1    | 2    | 4    | 4    | 5    | 3    |
| 1898   | 2     | 2      | 1      |      |      |      |      |      |      |      |      |      |      |      |
| 1899   | 4     | 3      | 3      | 3    | 3    | 3    | 2    | 3    | 4    | 3    | 3    | 3    | 3    | 3    |
| 1900   |       |        |        |      |      |      |      |      |      |      |      |      |      |      |
| 1903   | 5     | 5      | 5      | 4    | 4    | 4    | 4    | 5    | 3    | 4    | 4    | 5    | 4    | 5    |
| 1906   | 5     | 5      | 5      | 4    | 4    | 4    | 3    | 4    | 3    | 3    | 4    | 4    | 4    | 3    |
| 1907   | 4     | 4      | 4      | 1    | 1    | 1    | 1    | 2    | 1    | 1    | 2    | 1    | 1    | 1    |
| 1908   | 4     | 4      | 4      |      |      |      |      |      |      |      |      |      |      |      |
| 1909   | 4     | 4      | 4      |      |      |      |      |      |      |      |      |      |      |      |
| 1910   | 6     | 6      | 6      | 4    | 5    | 5    | 5    | 5    | 2    | 4    | 3    | 5    | 3    | 4    |
| 1911   | 5     | 5      | 5      | 5    | 5    | 5    | 5    | 5    | 1    | 5    | 4    | 5    | 5    | 5    |
| 1912   |       |        |        |      |      |      |      |      |      |      |      |      |      |      |
| 1917   | 5     | 5      | 5      |      |      |      |      |      |      |      |      |      |      |      |
| 1918   | 5     | 6      | 5      |      |      |      |      |      |      |      |      |      |      |      |
| 1919   | 5     | 5      | 5      | 0    | 0    | 0    | 0    | 0    | 0    | 0    | 0    | 0    | 1    | 1    |
| 1922   |       |        |        |      |      |      |      |      |      |      |      |      |      |      |
| 1925   |       |        |        |      |      |      |      |      |      |      |      |      |      |      |
| 1926   | 5     | 5      | 5      | 5    | 5    | 5    | 5    | 5    | 4    | 5    | 4    | 3    | 2    | 4    |

| respid | Q46x4 | Q46x5a | Q46x5b | Q47a | Q47b | Q47c | Q47d | Q47e | Q47f | Q47g | Q47h | Q47i | Q47j | Q47k |
|--------|-------|--------|--------|------|------|------|------|------|------|------|------|------|------|------|
| 1927   | 5     | 5      | 5      |      |      |      |      |      |      |      |      |      |      |      |
| 1928   |       |        |        |      |      |      |      |      |      |      |      |      |      |      |
| 1929   | 5     | 5      | 5      | 5    | 5    | 5    | 5    | 5    | 1    | 5    | 4    | 5    | 5    | 4    |
| 1934   | 6     | 6      | 6      | 3    | 3    | 4    | 4    | 5    | 1    | 4    | 3    | 5    | 4    | 3    |
| 1935   | 5     | 5      | 5      | 0    | 3    | 0    | 0    | 0    | 0    | 0    | 0    | 0    | 2    | 1    |
| 1936   | 4     | 3      | 3      | 0    | 4    | 0    | 0    | 0    | 0    | 0    | 0    | 0    | 0    | 1    |
| 1937   |       |        |        |      |      |      |      |      |      |      |      |      |      |      |
| 1938   |       |        |        |      |      |      |      |      |      |      |      |      |      |      |
| 1939   | 6     | 6      | 6      |      |      |      |      |      |      |      |      |      |      |      |
| 1940   | 5     | 4      | 5      | 2    | 2    | 5    | 4    | 3    | 1    | 4    | 4    | 5    | 4    | 5    |
| 1941   |       |        |        |      |      |      |      |      |      |      |      |      |      |      |
| 1948   |       |        |        |      |      |      |      |      |      |      |      |      |      |      |
| 1950   | 5     | 5      | 5      | 2    | 5    | 5    | 5    | 5    | 1    | 2    | 2    | 5    | 5    | 2    |
| 1955   | 5     | 4      | 4      | 4    | 4    | 4    | 4    | 5    | 4    | 4    | 4    | 4    | 4    | 5    |
| 1958   | 5     | 5      | 5      |      |      |      |      |      |      |      |      |      |      |      |
| 1960   | 5     | 5      | 5      | 1    | 5    | 5    | 5    | 5    | 1    | 2    | 3    | 5    | 4    | 4    |
| 1961   |       |        |        |      |      |      |      |      |      |      |      |      |      |      |
| 1962   | 6     | 6      | 6      |      |      |      |      |      |      |      |      |      |      |      |
| 1965   |       |        |        |      |      |      |      |      |      |      |      |      |      |      |
| 1966   | 5     | 5      | 5      | 5    | 5    | 5    | 5    | 5    | 2    | 4    | 4    | 5    | 5    | 4    |
| 1967   |       |        |        |      |      |      |      |      |      |      |      |      |      |      |
| 1968   | 4     | 5      | 5      |      |      |      |      |      |      |      |      |      |      |      |
| 1973   | 6     | 5      | 5      |      |      |      |      |      |      |      |      |      |      |      |
| 1974   | 4     | 5      | 5      |      |      |      |      |      |      |      |      |      |      |      |
| 1975   |       |        |        |      |      |      |      |      |      |      |      |      |      |      |
| 1977   | 5     | 5      | 5      |      |      |      |      |      |      |      |      |      |      |      |
| 1978   |       |        |        |      |      |      |      |      |      |      |      |      |      |      |
| 1979   | 3     | 3      | 3      |      |      |      |      |      |      |      |      |      |      |      |
| 1982   | 5     | 5      | 5      | 5    | 5    | 5    | 5    | 4    | 3    | 5    | 5    | 5    | 5    | 5    |
| 1983   | 4     | 5      | 5      | 4    | 4    | 5    | 5    | 5    | 3    | 3    | 3    | 5    | 1    | 4    |
| 1987   | 5     | 5      | 5      | 1    | 2    | 2    | 1    | 1    | 1    | 2    | 2    | 2    | 2    | 2    |
| 1988   | 4     | 4      | 4      | 4    | 4    | 4    | 4    | 4    | 4    | 4    | 4    | 4    | 4    | 4    |

| respid | Q46x4 | Q46x5a | Q46x5b | Q47a | Q47b | Q47c | Q47d | Q47e | Q47f | Q47g | Q47h | Q47i | Q47j | Q47k |
|--------|-------|--------|--------|------|------|------|------|------|------|------|------|------|------|------|
| 1991   | 6     | 6      | 6      |      |      |      |      |      |      |      |      |      |      |      |
| 1992   | 5     | 5      | 5      | 5    | 5    | 5    | 5    | 5    | 4    | 4    | 4    | 4    | 4    | 4    |
| 1993   | 5     | 4      | 5      |      |      |      |      |      |      |      |      |      |      |      |
| 1994   | 3     | 3      | 4      |      |      |      |      |      |      |      |      |      |      |      |
| 1995   | 6     | 6      | 6      |      |      |      |      |      |      |      |      |      |      |      |
| 1996   | 6     | 6      | 6      |      |      |      |      |      |      |      |      |      |      |      |
| 1997   | 6     | 6      | 6      |      |      |      |      |      |      |      |      |      |      |      |
| 1998   | 5     | 5      | 5      | 5    | 5    | 5    | 5    | 5    | 4    | 5    | 4    | 5    |      | 5    |
| 1999   | 4     | 4      | 4      | 0    | 1    | 0    | 0    | 0    | 0    | 0    | 0    | 0    | 1    | 1    |
| 2000   | 4     | 3      | 3      | 4    | 2    | 3    | 4    | 2    | 3    | 4    | 3    | 2    | 4    | 3    |
| 2001   | 5     | 5      | 5      |      |      |      |      |      |      |      |      |      |      |      |
| 2002   | 6     | 6      | 6      |      |      |      |      |      |      |      |      |      |      |      |
| 2003   |       |        |        |      |      |      |      |      |      |      |      |      |      |      |
| 2004   | 5     | 5      | 5      |      |      |      |      |      |      |      |      |      |      |      |
| 2005   | 5     | 4      | 4      |      |      |      |      |      |      |      |      |      |      |      |
| 2007   | 5     | 4      | 4      | 3    | 3    | 4    | 3    | 4    |      | 5    | 3    |      |      | 4    |
| 2009   | 4     | 5      | 5      | 5    | 5    | 5    | 5    | 5    | 3    | 4    | 4    | 5    | 4    | 4    |
| 2010   |       |        |        |      |      |      |      |      |      |      |      |      |      |      |
| 2011   | 5     | 5      | 5      |      |      |      |      |      |      |      |      |      |      |      |
| 2013   | 5     | 5      | 5      | 0    | 0    | 0    | 0    | 0    | 0    | 0    | 0    | 0    | 0    | 1    |
| 2014   | 4     | 5      | 4      | 4    | 4    | 4    | 4    | 4    | 0    | 0    | 0    | 0    | 0    | 1    |
| 2017   | 6     | 4      | 5      | 5    | 4    | 4    | 4    | 4    |      | 3    | 3    | 4    | 4    | 4    |
| 2020   | 5     | 5      | 5      |      |      |      |      |      |      |      |      |      |      |      |
| 2023   | 5     | 4      | 5      | 4    | 4    | 4    | 4    | 5    | 2    | 4    | 3    | 5    | 4    | 4    |
| 2024   | 6     | 6      | 6      | 1    | 2    | 1    | 2    | 4    | 1    | 2    | 2    | 2    | 3    | 3    |
| 2029   | 6     | 6      | 6      | 2    | 2    | 3    | 2    | 3    | 1    | 2    | 2    | 3    | 3    | 2    |
| 2030   |       |        |        |      |      |      |      |      |      |      |      |      |      |      |
| 2031   | 4     | 3      | 3      | 5    | 5    | 5    | 5    | 5    | 2    | 4    | 4    | 5    | 5    | 4    |
| 2032   | 5     | 4      | 5      | 4    | 4    | 5    | 4    | 5    | 3    | 4    | 4    | 5    | 4    | 4    |
| 2033   |       |        |        |      |      |      |      |      |      |      |      |      |      |      |
| 2034   | 5     | 5      | 5      | 5    | 4    | 5    | 3    | 4    | 1    | 4    | 3    | 5    | 5    | 4    |
| 2036   | 6     | 6      | 6      |      |      |      |      |      |      |      |      |      |      |      |

| respid | Q46x4 | Q46x5a | Q46x5b | Q47a | Q47b | Q47c | Q47d | Q47e | Q47f | Q47g | Q47h | Q47i | Q47j | Q47k |
|--------|-------|--------|--------|------|------|------|------|------|------|------|------|------|------|------|
| 2037   | 4     | 3      | 3      |      |      |      |      |      |      |      |      |      |      |      |
| 2038   | 5     | 5      | 5      | 3    | 5    | 5    | 5    | 5    | 5    | 2    | 5    | 4    | 5    | 4    |
| 2039   | 6     | 6      | 6      | 4    | 4    | 4    | 3    | 3    | 3    | 1    | 3    | 3    | 4    |      |
| 2040   |       |        |        |      |      |      |      |      |      |      |      |      |      |      |
| 2041   |       |        |        |      |      |      |      |      |      |      |      |      |      |      |
| 2042   | 5     | 5      | 5      |      |      |      |      |      |      |      |      |      |      |      |
| 2043   | 4     | 5      | 5      |      |      |      |      |      |      |      |      |      |      |      |
| 2051   | 5     | 4      | 3      | 5    | 5    | 5    | 5    | 4    | 0    | 4    | 4    | 4    | 4    | 4    |
| 2052   | 5     | 5      | 5      | 4    | 4    | 4    | 4    | 5    | 1    | 4    | 4    | 5    | 5    | 3    |
| 2053   | 5     | 5      | 5      |      |      |      |      |      |      |      |      |      |      |      |
| 2054   |       |        |        |      |      |      |      |      |      |      |      |      |      |      |
| 2055   | 5     | 5      | 5      |      |      |      |      |      |      |      |      |      |      |      |
| 2056   | 6     | 6      | 6      |      |      |      |      |      |      |      |      |      |      |      |
| 2057   | 5     | 5      | 6      | 5    | 5    | 5    | 4    | 5    | 3    | 4    | 4    | 5    | 4    | 4    |
| 2059   | 5     | 5      | 5      |      |      |      |      |      |      |      |      |      |      |      |
| 2063   | 6     | 6      | 6      |      |      |      |      |      |      |      |      |      |      |      |
| 2066   | 6     | 6      | 6      |      |      |      |      |      |      |      |      |      |      |      |
| 2068   | 5     | 5      | 5      |      |      |      |      |      |      |      |      |      |      |      |
| 2069   | 5     | 5      | 5      | 2    | 2    | 0    | 0    | 0    | 0    | 0    | 0    | 0    | 2    | 2    |
| 2070   |       |        |        |      |      |      |      |      |      |      |      |      |      |      |
| 2071   | 5     | 5      | 4      | 3    | 4    | 4    |      | 4    | 1    | 4    | 3    | 5    | 5    | 3    |
| 2073   |       |        |        |      |      |      |      |      |      |      |      |      |      |      |
| 2077   | 4     | 5      | 5      |      |      |      |      |      |      |      |      |      |      |      |
| 2079   |       |        |        |      |      |      |      |      |      |      |      |      |      |      |
| 2080   | 6     | 6      | 6      |      |      |      |      |      |      |      |      |      |      |      |
| 2081   | 4     | 4      | 4      | 2    | 3    | 3    | 2    | 3    | 1    | 1    | 2    | 2    | 2    | 3    |
| 2084   |       |        |        |      |      |      |      |      |      |      |      |      |      |      |
| 2085   | 5     | 5      | 5      |      |      |      |      |      |      |      |      |      |      |      |
| 2087   | 6     | 6      | 6      |      |      |      |      |      |      |      |      |      |      |      |
| 2089   | 6     | 6      | 6      | 0    | 0    | 0    | 0    | 0    | 0    | 0    | 0    | 0    | 1    | 1    |
| 2093   | 4     | 4      | 4      | 0    | 0    | 0    | 0    | 0    | 0    | 0    | 0    | 0    | 1    | 1    |
| 2094   | 5     | 5      | 5      | 4    | 3    | 4    | 3    | 4    | 1    | 4    | 3    | 5    | 5    | 4    |

| respid | Q46x4 | Q46x5a | Q46x5b | Q47a | Q47b | Q47c | Q47d | Q47e | Q47f | Q47g | Q47h | Q47i | Q47j | Q47k |   |
|--------|-------|--------|--------|------|------|------|------|------|------|------|------|------|------|------|---|
| 2095   | 4     | 5      | 5      | 2    | 2    | 2    | 1    | 3    | 1    | 1    | 1    | 1    | 2    | 2    | 4 |
| 2097   | 5     | 5      | 5      | 5    | 4    | 5    | 4    | 5    | 1    | 5    | 4    | 5    | 5    | 5    | 4 |
| 2099   | 5     | 5      | 6      |      |      |      |      |      |      |      |      |      |      |      |   |
| 2100   | 4     | 4      | 4      |      |      |      |      |      |      |      |      |      |      |      |   |
| 2101   | 4     | 4      | 4      | 2    | 4    | 5    | 4    | 4    | 2    | 3    | 3    | 4    | 4    | 4    | 4 |
| 2103   | 5     | 5      | 5      | 5    | 5    | 5    | 5    | 5    | 2    | 5    | 4    | 5    | 5    | 5    | 5 |
| 2104   | 6     | 6      | 6      |      |      |      |      |      |      |      |      |      |      |      |   |
| 2106   | 6     | 6      | 6      | 5    | 4    | 5    | 5    | 5    | 3    | 4    | 4    | 4    | 4    | 4    | 4 |
| 2111   | 4     | 4      | 4      | 4    | 4    | 4    | 3    | 4    | 2    | 2    | 3    | 5    | 4    | 4    | 4 |
| 2113   | 5     | 5      | 5      | 4    | 4    | 4    | 4    | 5    | 1    | 4    | 4    | 5    | 5    | 5    | 4 |
| 2115   |       |        |        |      |      |      |      |      |      |      |      |      |      |      |   |
| 2119   | 5     | 5      | 4      | 4    | 4    | 4    | 4    | 5    | 3    | 4    | 3    | 4    | 3    | 3    | 4 |
| 2120   |       |        |        |      |      |      |      |      |      |      |      |      |      |      |   |
| 2123   |       |        |        |      |      |      |      |      |      |      |      |      |      |      |   |
| 2124   | 4     | 5      | 5      | 5    | 4    | 4    | 4    | 5    | 2    | 3    | 3    | 4    | 4    | 4    | 3 |
| 2130   |       |        |        |      |      |      |      |      |      |      |      |      |      |      |   |
| 2131   | 4     | 4      | 4      |      |      |      |      |      |      |      |      |      |      |      |   |
| 2133   | 4     | 4      | 4      | 5    | 5    | 5    | 5    | 5    | 5    | 5    | 4    | 5    | 5    | 5    | 5 |
| 2139   | 6     | 6      | 6      |      |      |      |      |      |      |      |      |      |      |      |   |
| 2141   |       |        |        |      |      |      |      |      |      |      |      |      |      |      |   |
| 2143   | 5     | 5      | 5      | 4    | 4    | 4    | 4    | 4    | 2    | 4    | 3    | 4    | 4    | 4    | 4 |
| 2144   | 5     | 5      | 5      | 4    | 5    | 4    | 5    | 5    |      | 4    | 3    | 3    | 3    | 3    | 5 |
| 2147   |       |        |        |      |      |      |      |      |      |      |      |      |      |      |   |
| 2151   | 5     | 5      | 5      | 5    | 4    | 4    | 5    | 5    | 4    | 4    | 4    | 5    | 5    | 5    | 4 |
| 2153   | 6     | 6      | 6      | 5    | 5    | 5    | 5    | 5    | 3    | 4    | 4    | 5    | 5    | 5    | 4 |
| 2154   | 5     | 5      | 5      |      |      |      |      |      |      |      |      |      |      |      |   |
| 2155   | 5     | 5      | 5      | 4    | 4    | 4    | 4    | 5    | 2    | 3    | 3    | 4    | 3    | 3    | 3 |
| 2159   | 4     | 5      | 5      |      |      |      |      |      |      |      |      |      |      |      |   |
| 2160   | 4     | 4      | 4      |      |      |      |      |      |      |      |      |      |      |      |   |
| 2161   | 6     | 6      | 6      | 5    | 5    | 5    | 5    | 5    |      | 5    | 5    | 5    | 5    | 5    | 5 |
| 2163   | 6     | 5      | 5      | 0    | 0    | 0    | 0    | 0    | 0    | 0    | 0    | 0    | 0    | 1    | 1 |
| 2164   | 6     | 6      | 6      | 5    | 5    | 5    | 5    | 5    | 4    | 5    | 4    | 5    | 5    | 5    | 5 |

| respid | Q46x4 | Q46x5a | Q46x5b | Q47a | Q47b | Q47c | Q47d | Q47e | Q47f | Q47g | Q47h | Q47i | Q47j | Q47k |
|--------|-------|--------|--------|------|------|------|------|------|------|------|------|------|------|------|
| 2168   | 5     | 5      | 5      | 4    | 4    | 4    | 4    | 4    | 5    | 2    | 4    | 4    | 4    | 4    |
| 2169   | 3     | 3      | 3      | 1    | 1    | 1    | 1    | 1    | 5    | 0    | 0    | 0    | 0    | 1    |
| 2170   | 5     | 5      | 4      | 4    | 4    | 4    | 4    | 4    | 5    | 3    | 3    | 3    | 5    | 3    |
| 2171   | 5     | 4      | 4      | 4    | 4    | 4    | 4    | 4    | 4    | 3    | 4    | 3    | 4    | 4    |
| 2172   | 4     | 4      | 4      | 3    | 2    | 4    | 4    | 4    | 4    | 2    | 2    | 3    | 5    | 4    |
| 2173   | 5     | 5      | 5      | 4    | 4    | 4    | 4    | 4    | 5    | 2    | 4    | 4    | 5    | 4    |
| 2174   | 5     | 5      | 5      |      |      |      |      |      |      |      |      |      |      |      |
| 2175   | 3     | 4      | 4      | 0    | 3    | 0    | 0    | 0    | 0    | 0    | 0    | 0    | 5    | 4    |
| 2176   | 5     | 4      | 5      | 5    | 5    | 5    | 4    | 5    |      | 4    | 4    | 5    | 5    | 4    |
| 2177   | 4     | 4      | 4      | 4    | 3    | 3    | 4    | 4    | 4    | 3    | 3    | 3    | 4    | 3    |
| 2179   | 6     | 6      | 6      |      |      |      |      |      |      |      |      |      |      |      |
| 2181   | 5     | 5      | 5      | 5    | 5    | 5    | 5    | 5    | 4    | 5    | 4    | 5    | 5    | 5    |
| 2182   | 5     | 5      | 5      |      |      |      |      |      |      |      |      |      |      |      |
| 2183   | 3     | 3      | 3      | 2    | 2    | 2    | 2    | 3    | 1    | 2    | 2    | 2    | 3    | 3    |
| 2184   | 4     | 4      | 4      |      |      |      |      |      |      |      |      |      |      |      |
| 2185   |       |        |        |      |      |      |      |      |      |      |      |      |      |      |
| 2186   | 6     | 6      | 6      |      |      |      |      |      |      |      |      |      |      |      |
| 2187   | 5     | 5      | 5      | 4    | 4    | 4    | 4    | 3    | 2    | 5    | 5    | 5    | 5    | 5    |
| 2188   | 5     | 5      | 5      | 5    | 5    | 5    | 4    | 5    | 1    | 5    | 5    | 5    | 5    | 2    |
| 2189   |       |        |        |      |      |      |      |      |      |      |      |      |      |      |
| 2190   | 5     | 5      | 5      |      |      |      |      |      |      |      |      |      |      |      |
| 2193   | 3     | 4      | 5      |      |      |      |      |      |      |      |      |      |      |      |
| 2195   | 4     | 4      | 4      |      |      |      |      |      |      |      |      |      |      |      |
| 2198   | 6     | 5      | 5      | 5    | 5    | 5    | 5    | 4    | 3    | 4    | 4    | 5    | 5    | 4    |
| 2200   | 5     | 5      | 5      |      |      |      |      |      |      |      |      |      |      |      |
| 2205   | 4     | 4      | 3      | 3    | 3    | 3    | 4    | 1    | 2    | 2    | 3    | 2    | 4    | 2    |
| 2208   |       |        |        |      |      |      |      |      |      |      |      |      |      |      |
| 2209   | 4     | 4      | 4      | 5    | 5    | 5    | 4    | 5    | 5    | 4    | 3    | 5    | 4    | 5    |
| 2210   | 5     | 4      | 4      |      |      |      |      |      |      |      |      |      |      |      |
| 2211   | 5     | 5      | 5      | 5    | 5    | 5    | 5    | 5    | 4    | 5    | 5    | 5    | 5    | 5    |
| 2213   | 5     | 5      | 5      |      |      |      |      |      |      |      |      |      |      |      |
| 2214   | 5     | 5      | 3      |      |      |      |      |      |      |      |      |      |      |      |



| respid | Q46x4 | Q46x5a | Q46x5b | Q47a | Q47b | Q47c | Q47d | Q47e | Q47f | Q47g | Q47h | Q47i | Q47j | Q47k |   |
|--------|-------|--------|--------|------|------|------|------|------|------|------|------|------|------|------|---|
| 2216   | 5     | 5      | 5      | 0    | 4    | 0    | 0    | 0    | 0    | 0    | 0    | 0    | 0    | 1    | 1 |
| 2220   | 4     | 4      | 5      |      |      |      |      |      |      |      |      |      |      |      |   |
| 2225   | 5     | 5      | 5      | 5    | 5    | 5    | 5    | 5    | 2    | 5    | 3    | 5    | 5    | 5    | 5 |
| 2227   | 5     | 5      | 5      | 2    | 1    | 5    | 5    | 5    | 3    | 4    | 3    | 5    | 5    | 5    | 5 |
| 2228   | 4     | 4      | 4      |      |      |      |      |      |      |      |      |      |      |      |   |
| 2229   | 5     | 5      | 5      | 4    | 3    | 3    | 4    | 5    | 1    | 3    | 3    | 4    | 4    | 4    | 4 |
| 2230   |       |        |        |      |      |      |      |      |      |      |      |      |      |      |   |
| 2236   |       |        |        |      |      |      |      |      |      |      |      |      |      |      |   |
| 2238   | 4     | 4      | 3      | 4    | 4    | 4    | 4    | 5    | 3    | 4    | 3    | 4    | 4    | 4    | 3 |
| 2239   | 5     | 5      | 5      | 5    | 4    | 5    | 5    | 5    | 1    | 4    | 4    | 5    | 5    | 5    | 4 |
| 2240   | 5     | 5      | 5      | 5    | 5    | 5    | 5    | 5    | 5    | 5    | 5    | 5    | 5    | 5    | 5 |
| 2241   | 5     | 5      | 5      |      |      |      |      |      |      |      |      |      |      |      |   |
| 2243   |       |        |        |      |      |      |      |      |      |      |      |      |      |      |   |
| 2245   | 5     | 3      | 3      |      |      |      |      |      |      |      |      |      |      |      |   |
| 2247   | 4     | 4      | 4      |      |      |      |      |      |      |      |      |      |      |      |   |
| 2248   | 5     | 5      | 5      |      |      |      |      |      |      |      |      |      |      |      |   |
| 2249   | 6     | 6      | 6      |      |      |      |      |      |      |      |      |      |      |      |   |
| 2254   | 6     | 3      | 3      |      |      |      |      |      |      |      |      |      |      |      |   |
| 2256   | 5     | 5      | 5      | 5    | 5    | 5    | 5    | 5    | 2    | 5    | 3    | 5    | 5    | 5    | 5 |
| 2259   | 5     | 5      | 5      | 1    | 1    | 4    | 4    | 5    | 1    | 4    | 4    | 4    | 4    | 4    | 4 |
| 2261   | 6     | 6      | 6      |      |      |      |      |      |      |      |      |      |      |      |   |
| 2262   | 6     | 6      | 6      | 5    | 5    | 5    | 5    | 5    | 3    | 5    | 5    | 5    | 5    | 5    | 5 |
| 2263   | 4     | 3      | 3      |      |      |      |      |      |      |      |      |      |      |      |   |
| 2264   | 5     | 5      | 5      |      |      |      |      |      |      |      |      |      |      |      |   |
| 2265   | 6     | 6      | 6      | 5    | 5    | 5    | 5    | 5    | 5    | 5    | 5    | 5    | 5    | 5    | 5 |
| 2270   | 5     | 5      | 5      | 5    | 5    | 5    | 5    | 5    | 2    | 5    | 4    | 5    | 5    | 5    | 4 |
| 2271   | 5     | 4      | 4      | 5    | 5    | 5    | 5    | 5    | 3    | 5    | 5    | 5    | 5    | 5    | 5 |
| 2272   | 4     | 5      | 5      | 4    | 4    | 4    | 4    | 4    | 1    | 4    | 2    | 4    | 4    | 4    | 4 |
| 2273   | 5     | 5      | 5      |      |      |      |      |      |      |      |      |      |      |      |   |
| 2274   | 5     | 5      | 5      |      |      |      |      |      |      |      |      |      |      |      |   |
| 2276   | 4     | 3      | 4      |      |      |      |      |      |      |      |      |      |      |      |   |
| 2277   | 6     | 6      | 6      |      |      |      |      |      |      |      |      |      |      |      |   |

| respid | Q46x4 | Q46x5a | Q46x5b | Q47a | Q47b | Q47c | Q47d | Q47e | Q47f | Q47g | Q47h | Q47i | Q47j | Q47k |
|--------|-------|--------|--------|------|------|------|------|------|------|------|------|------|------|------|
| 2281   | 5     | 5      | 5      |      |      |      |      |      |      |      |      |      |      |      |
| 2288   | 5     | 5      | 5      | 5    | 5    | 5    | 5    | 5    | 5    | 4    | 5    | 5    | 5    | 5    |
| 2290   | 6     | 6      | 6      |      |      |      |      |      |      |      |      |      |      |      |
| 2294   | 4     | 4      | 4      |      |      |      |      |      |      |      |      |      |      |      |
| 2295   | 5     | 5      | 5      |      |      |      |      |      |      |      |      |      |      |      |
| 2296   | 4     | 4      | 4      |      |      |      |      |      |      |      |      |      |      |      |
| 2297   |       |        |        |      |      |      |      |      |      |      |      |      |      |      |
| 2298   | 5     | 4      | 4      | 4    | 4    | 5    | 5    | 5    | 2    | 4    | 3    | 5    | 4    | 3    |
| 2301   | 6     | 4      | 4      | 4    | 3    | 4    | 4    | 4    | 4    | 4    | 4    | 5    | 4    | 4    |
| 2302   | 4     | 4      | 4      |      |      |      |      |      |      |      |      |      |      |      |
| 2303   |       |        |        |      |      |      |      |      |      |      |      |      |      |      |
| 2305   | 5     | 5      | 5      | 5    | 5    | 5    | 5    | 5    | 3    | 5    | 5    | 4    | 5    | 5    |
| 2309   | 5     | 5      | 5      |      |      |      |      |      |      |      |      |      |      |      |
| 2310   | 5     | 5      | 5      | 5    | 5    | 5    | 5    | 5    | 3    | 4    | 4    | 5    | 4    | 4    |
| 2311   | 5     | 5      | 4      |      |      |      |      |      |      |      |      |      |      |      |
| 2313   | 4     | 4      | 4      | 1    | 1    | 1    | 1    | 1    | 1    | 2    | 2    | 2    | 2    | 2    |
| 2316   |       |        |        |      |      |      |      |      |      |      |      |      |      |      |
| 2317   | 4     | 5      | 5      |      |      |      |      |      |      |      |      |      |      |      |
| 2318   | 6     | 6      | 6      |      |      |      |      |      |      |      |      |      |      |      |
| 2319   | 5     | 5      | 5      |      |      |      |      |      |      |      |      |      |      |      |
| 2321   | 4     | 4      | 4      | 4    | 4    | 5    | 4    | 4    | 2    | 5    | 4    | 5    | 4    | 3    |
| 2324   | 5     | 5      | 5      |      |      |      |      |      |      |      |      |      |      |      |
| 2328   | 5     | 5      | 5      |      |      |      |      |      |      |      |      |      |      |      |
| 2329   |       |        |        |      |      |      |      |      |      |      |      |      |      |      |
| 2330   | 5     | 5      | 5      |      |      |      |      |      |      |      |      |      |      |      |
| 2333   | 4     | 4      | 4      |      |      |      |      |      |      |      |      |      |      |      |
| 2334   | 4     | 3      | 3      |      |      |      |      |      |      |      |      |      |      |      |
| 2338   | 5     | 5      | 5      |      |      |      |      |      |      |      |      |      |      |      |
| 2341   | 4     | 4      | 4      | 2    | 5    | 5    | 5    | 5    | 1    | 5    | 3    | 5    | 5    | 5    |
| 2342   | 4     | 4      | 4      |      |      |      |      |      |      |      |      |      |      |      |
| 2343   | 5     | 4      | 5      | 5    | 5    | 5    | 5    | 5    | 4    | 4    | 3    | 5    | 4    | 5    |
| 2346   | 6     | 6      | 6      |      |      |      |      |      |      |      |      |      |      |      |

| respid | Q46x4 | Q46x5a | Q46x5b | Q47a | Q47b | Q47c | Q47d | Q47e | Q47f | Q47g | Q47h | Q47i | Q47j | Q47k |
|--------|-------|--------|--------|------|------|------|------|------|------|------|------|------|------|------|
| 2347   | 4     | 4      | 4      |      |      | 4    | 4    | 4    | 5    | 1    | 3    | 3    | 3    | 3    |
| 2348   | 5     | 6      | 6      | 5    | 5    | 5    | 5    | 5    | 5    | 0    | 0    | 0    | 0    | 5    |
| 2349   | 6     | 6      | 6      |      |      |      |      |      |      |      |      |      |      |      |
| 2350   | 5     | 5      | 5      |      |      |      |      |      |      |      |      |      |      |      |
| 2351   | 5     | 5      | 5      | 5    | 5    | 5    | 5    | 5    | 5    | 4    | 3    | 5    | 5    | 4    |
| 2352   | 5     | 5      | 5      | 5    | 5    | 5    | 5    | 5    | 5    | 0    | 5    | 3    | 5    | 5    |
| 2359   | 5     | 5      | 5      | 5    | 4    | 4    | 4    | 4    | 5    | 5    | 5    | 4    | 4    | 4    |
| 2362   |       |        |        |      |      |      |      |      |      |      |      |      |      |      |
| 2363   | 5     | 5      | 5      | 1    | 5    | 5    | 5    | 5    | 5    | 5    | 5    | 5    | 5    | 5    |
| 2365   | 4     | 4      | 4      | 4    | 4    | 4    | 4    | 4    | 5    | 1    | 4    | 3    | 5    | 4    |
| 2367   | 4     | 4      | 4      | 5    | 5    | 5    | 5    | 5    | 5    | 4    | 4    | 3    | 5    | 5    |
| 2368   | 5     | 5      | 5      |      |      |      |      |      |      |      |      |      |      |      |
| 2369   | 5     | 5      | 5      | 5    | 5    | 5    | 4    | 4    | 4    | 1    | 4    | 4    | 5    | 4    |
| 2372   |       |        |        |      |      |      |      |      |      |      |      |      |      |      |
| 2374   | 5     | 5      | 4      | 4    | 3    | 3    | 4    | 4    | 4    | 1    | 4    | 3    | 5    | 4    |
| 2376   | 5     | 5      | 5      | 5    | 5    | 5    | 5    | 5    | 5    | 3    | 5    | 4    | 5    | 5    |
| 2379   | 5     | 4      | 5      | 4    | 4    | 4    | 4    | 4    | 5    | 3    |      | 4    | 5    | 5    |
| 2380   | 6     | 6      | 6      |      |      |      |      |      |      |      |      |      |      |      |
| 2381   | 3     | 3      | 3      |      |      |      |      |      |      |      |      |      |      |      |
| 2382   | 5     | 4      | 5      | 2    | 2    | 2    | 2    | 2    | 4    | 1    | 2    | 3    | 2    | 2    |
| 2385   | 4     | 4      | 4      |      |      |      |      |      |      |      |      |      |      |      |
| 2387   | 4     | 5      | 5      | 3    | 5    | 5    | 4    | 5    | 5    | 3    | 4    | 4    | 5    | 5    |
| 2388   | 5     | 5      | 5      | 5    | 5    | 5    | 5    | 5    | 5    | 4    | 5    | 4    | 5    | 4    |
| 2389   | 5     | 5      | 5      |      |      |      |      |      |      |      |      |      |      |      |
| 2391   | 5     | 6      | 4      |      |      |      |      |      |      |      |      |      |      |      |
| 2392   | 4     | 3      | 3      | 5    | 5    | 5    | 4    | 3    | 2    | 2    | 5    | 4    | 5    | 5    |
| 2393   | 5     | 5      | 5      | 5    | 5    | 5    | 5    | 5    | 5    | 3    | 5    | 4    | 5    | 5    |
| 2394   | 5     | 5      | 6      |      |      |      |      |      |      |      |      |      |      |      |
| 2397   | 5     | 6      | 6      | 5    | 5    | 5    | 0    | 0    | 0    | 1    | 4    | 3    | 4    | 4    |
| 2398   | 6     | 6      | 6      |      |      |      |      |      |      |      |      |      |      |      |
| 2400   | 3     | 4      | 3      | 0    | 5    | 5    | 5    | 5    | 5    | 1    | 4    | 3    | 4    | 4    |
| 2402   | 5     | 5      | 5      |      |      |      |      |      |      |      |      |      |      |      |

| respid | Q46x4 | Q46x5a | Q46x5b | Q47a | Q47b | Q47c | Q47d | Q47e | Q47f | Q47g | Q47h | Q47i | Q47j | Q47k |
|--------|-------|--------|--------|------|------|------|------|------|------|------|------|------|------|------|
| 2406   | 5     | 5      | 5      |      |      |      |      |      |      |      |      |      |      |      |
| 2408   | 3     | 4      | 3      |      |      |      |      |      |      |      |      |      |      |      |
| 2410   | 5     | 5      | 5      | 1    | 2    | 4    | 4    | 3    | 2    | 3    | 3    | 5    | 4    | 3    |
| 2411   | 3     | 3      | 3      | 2    | 1    | 1    | 1    | 2    | 2    | 1    | 2    | 3    | 3    | 3    |
| 2412   | 5     | 5      | 6      | 5    | 5    | 5    | 5    | 5    | 2    | 4    | 3    | 4    | 5    | 5    |
| 2414   | 3     | 3      | 3      |      |      |      |      |      |      |      |      |      |      |      |
| 2421   | 5     | 5      | 5      |      |      |      |      |      |      |      |      |      |      |      |
| 2423   | 5     | 5      | 5      | 0    | 3    | 0    | 0    | 0    | 0    | 0    | 0    | 0    | 1    | 1    |
| 2424   | 5     | 5      | 5      | 5    | 5    | 5    | 5    | 5    | 3    | 5    | 5    | 5    | 5    | 5    |
| 2425   | 5     | 5      | 5      |      |      |      |      |      |      |      |      |      |      |      |
| 2426   | 5     | 5      | 5      | 2    | 1    | 5    | 4    | 4    | 2    | 5    | 4    | 5    | 5    | 5    |
| 2429   | 4     | 4      | 4      | 5    | 5    | 5    | 5    | 5    | 4    | 5    | 5    | 5    | 5    | 5    |
| 2430   | 5     | 4      | 5      | 5    | 5    | 5    | 5    | 5    | 3    | 5    | 4    | 4    | 4    | 4    |
| 2432   | 5     | 5      | 5      | 4    | 4    | 4    | 4    | 4    | 3    | 4    | 4    | 4    | 4    | 4    |
| 2433   | 5     | 6      | 6      |      |      |      |      |      |      |      |      |      |      |      |
| 2434   | 4     | 5      | 4      | 5    | 5    | 5    | 5    | 5    | 3    | 4    | 4    | 4    | 5    | 5    |
| 2435   | 5     | 6      | 6      |      |      |      |      |      |      |      |      |      |      |      |
| 2436   | 3     | 5      | 5      |      |      |      |      |      |      |      |      |      |      |      |
| 2439   | 4     | 4      | 3      |      |      |      |      |      |      |      |      |      |      |      |
| 2440   | 4     | 4      | 5      | 0    | 5    | 0    | 0    | 0    | 0    | 0    | 0    | 0    | 5    | 1    |
| 2441   | 5     | 5      | 5      | 5    | 5    | 5    | 5    | 5    | 2    | 5    | 3    | 5    | 5    | 5    |
| 2446   | 5     | 4      | 4      | 3    | 3    | 4    | 3    | 4    | 1    | 3    | 3    | 3    | 3    | 3    |
| 2448   | 5     | 5      | 5      | 5    | 5    | 5    | 4    | 4    | 4    | 4    | 4    | 5    | 4    | 4    |
| 2449   | 5     | 5      | 5      | 0    |      | 0    | 0    | 0    | 0    | 0    | 0    | 0    | 1    | 1    |
| 2451   | 5     | 5      | 5      | 2    | 2    | 2    | 2    | 2    | 1    | 1    | 1    | 1    | 1    | 2    |
| 2452   | 6     | 5      | 5      | 0    | 4    | 0    | 0    | 0    | 0    | 0    |      | 0    | 1    | 1    |
| 2455   |       |        |        |      |      |      |      |      |      |      |      |      |      |      |
| 2457   | 6     | 6      | 6      |      |      |      |      |      |      |      |      |      |      |      |
| 2458   | 5     | 5      | 5      |      |      |      |      |      |      |      |      |      |      |      |
| 2459   | 5     | 5      | 5      |      |      |      |      |      |      |      |      |      |      |      |
| 2460   | 5     | 5      | 5      | 5    | 4    | 5    | 4    | 5    | 1    | 4    | 4    | 4    | 4    | 4    |
| 2462   | 2     | 2      | 2      | 0    | 0    | 0    | 0    |      | 2    | 0    |      |      |      | 2    |

| respid | Q46x4 | Q46x5a | Q46x5b | Q47a | Q47b | Q47c | Q47d | Q47e | Q47f | Q47g | Q47h | Q47i | Q47j | Q47k |
|--------|-------|--------|--------|------|------|------|------|------|------|------|------|------|------|------|
| 2464   | 4     | 4      | 4      | 1    | 1    | 1    | 1    | 2    | 1    | 3    | 2    | 3    | 2    | 2    |
| 2465   | 4     | 4      | 4      |      |      |      |      |      |      |      |      |      |      |      |
| 2468   | 4     | 4      | 5      |      |      |      |      |      |      |      |      |      |      |      |
| 2469   |       |        |        |      |      |      |      |      |      |      |      |      |      |      |
| 2470   | 5     | 1      | 1      |      |      |      |      |      |      |      |      |      |      |      |
| 2471   | 3     | 3      | 3      | 3    | 2    | 2    | 2    | 3    | 1    | 2    | 2    | 2    | 2    | 2    |
| 2472   | 6     | 6      | 3      | 5    | 5    | 5    | 5    | 4    | 2    | 4    | 4    | 5    | 4    | 5    |
| 2474   | 6     | 5      | 5      | 5    | 4    | 5    | 5    | 5    | 2    | 5    | 4    | 5    | 4    | 3    |
| 2476   | 4     | 4      | 4      | 2    | 2    | 4    | 3    | 4    | 2    | 2    | 2    | 3    | 3    | 2    |
| 2478   | 4     | 4      | 4      | 2    | 2    | 3    | 3    | 4    | 1    | 2    | 3    | 5    | 4    | 3    |
| 2479   | 4     | 5      | 5      | 2    | 2    | 2    | 2    | 4    | 1    | 2    | 2    | 2    | 2    | 3    |
| 2480   | 5     | 5      | 5      | 5    | 5    | 5    | 5    | 5    | 3    | 5    | 5    | 5    | 5    | 5    |
| 2482   | 5     | 5      | 5      | 0    | 3    | 0    | 0    | 0    | 0    | 0    | 0    | 0    | 0    | 1    |
| 2486   | 5     | 5      | 5      |      |      |      |      |      |      |      |      |      |      |      |
| 2488   | 4     | 4      | 4      |      |      |      |      |      |      |      |      |      |      |      |
| 2489   | 5     | 6      | 6      |      |      |      |      |      |      |      |      |      |      |      |
| 2491   | 5     | 5      | 5      |      |      |      |      |      |      |      |      |      |      |      |
| 2495   | 5     | 5      | 5      | 5    | 5    | 5    | 5    | 5    | 2    | 5    | 4    | 5    | 5    | 5    |
| 2496   | 5     | 5      | 5      | 4    | 4    | 4    | 4    | 5    | 4    | 4    | 3    | 4    | 4    | 4    |
| 2498   | 5     | 5      | 5      |      |      |      |      |      |      |      |      |      |      |      |
| 2501   | 6     | 6      | 6      | 2    | 1    | 1    | 1    | 5    | 3    | 1    | 2    | 1    | 2    | 5    |
| 2502   | 5     | 5      | 5      | 1    | 1    | 2    | 1    | 4    | 1    | 2    | 3    | 3    | 3    | 2    |
| 2503   | 5     | 5      | 4      | 4    | 4    | 4    | 4    | 5    | 3    | 4    | 3    | 5    | 3    | 4    |
| 2504   | 5     | 5      | 5      | 5    | 5    | 5    | 5    | 5    | 1    | 5    | 5    | 5    | 5    | 5    |
| 2507   | 6     | 6      | 6      |      |      |      |      |      |      |      |      |      |      |      |
| 2509   | 5     | 5      | 5      |      |      |      |      |      |      |      |      |      |      |      |
| 2512   | 5     | 4      | 4      |      |      |      |      |      |      |      |      |      |      |      |
| 2514   | 5     | 5      | 5      | 5    | 5    | 5    | 5    | 5    | 4    | 5    | 5    | 5    | 5    | 5    |
| 2516   | 5     | 5      | 5      | 2    | 1    | 1    | 1    | 1    | 1    | 1    | 2    | 3    | 4    | 3    |
| 2517   | 5     | 5      | 5      | 4    | 4    | 4    | 4    | 5    | 2    | 4    | 3    | 5    | 4    | 4    |
| 2521   | 6     | 5      | 5      | 5    | 5    | 5    | 5    | 5    | 2    | 5    | 5    | 4    | 4    | 4    |
| 2522   | 5     | 5      | 5      | 5    | 5    | 5    | 5    | 5    | 1    | 5    | 5    | 5    | 5    | 5    |

| respid | Q46x4 | Q46x5a | Q46x5b | Q47a | Q47b | Q47c | Q47d | Q47e | Q47f | Q47g | Q47h | Q47i | Q47j | Q47k |   |
|--------|-------|--------|--------|------|------|------|------|------|------|------|------|------|------|------|---|
| 2524   | 5     | 5      | 5      | 5    | 5    | 5    | 5    | 5    | 5    | 2    | 4    | 4    | 5    | 4    | 4 |
| 2525   | 5     | 5      | 4      |      |      |      |      |      |      |      |      |      |      |      |   |
| 2526   | 5     | 5      | 5      | 2    | 4    | 5    | 5    | 5    | 1    | 4    | 2    | 5    | 5    | 2    |   |
| 2527   | 6     | 6      | 6      |      |      |      |      |      |      |      |      |      |      |      |   |
| 2528   | 4     | 5      | 5      |      |      |      |      |      |      |      |      |      |      |      |   |
| 2531   |       |        |        |      |      |      |      |      |      |      |      |      |      |      |   |
| 2533   | 5     | 4      | 5      | 2    | 2    | 2    | 2    | 4    | 2    | 2    | 2    | 2    | 2    | 2    | 4 |
| 2535   | 5     | 5      | 5      | 5    | 5    | 5    | 4    | 5    | 4    | 4    | 3    | 5    | 4    | 4    | 4 |
| 2536   | 4     | 5      | 5      | 2    | 2    | 2    | 2    | 3    | 1    | 2    | 3    | 2    | 2    | 2    | 2 |
| 2539   | 5     | 5      | 5      |      |      |      |      |      |      |      |      |      |      |      |   |
| 2540   | 5     | 5      | 5      | 5    | 5    | 5    | 5    | 5    | 2    | 4    | 3    | 5    | 4    | 4    | 4 |
| 2543   | 5     | 5      | 5      | 4    | 4    | 4    | 4    | 5    | 3    | 4    | 3    | 4    | 4    | 4    | 4 |
| 2546   | 6     | 6      | 6      |      |      |      |      |      |      |      |      |      |      |      |   |
| 2547   | 5     | 4      | 4      |      |      |      |      |      |      |      |      |      |      |      |   |
| 2549   | 4     | 5      | 4      | 5    | 5    | 5    | 5    | 5    | 3    | 5    | 3    | 5    | 5    | 5    | 4 |
| 2553   | 5     | 5      | 5      | 2    | 2    | 2    | 2    | 3    | 2    | 2    | 3    | 5    | 2    | 3    |   |
| 2554   | 5     | 5      | 5      |      |      |      |      |      |      |      |      |      |      |      |   |
| 2555   | 5     | 5      | 5      | 5    | 4    | 4    | 4    | 4    | 5    | 4    | 4    | 5    | 5    | 5    | 4 |
| 2556   | 6     | 6      | 6      | 5    | 5    | 5    | 5    |      | 5    | 5    | 5    | 5    | 5    | 5    | 5 |
| 2557   | 4     | 4      | 4      | 5    | 5    | 4    | 4    | 5    | 4    | 4    | 3    | 4    | 4    | 4    | 5 |
| 2559   | 5     | 5      | 5      | 5    | 5    | 5    | 5    | 5    | 4    | 5    | 4    | 5    | 5    | 5    | 4 |
| 2560   | 4     | 3      | 4      |      |      |      |      |      |      |      |      |      |      |      |   |
| 2561   | 5     | 5      | 5      | 0    | 0    | 0    | 0    | 0    | 0    | 0    | 0    | 0    | 0    |      |   |
| 2566   | 4     | 5      | 4      | 2    | 2    | 3    | 3    | 4    | 3    | 4    | 3    | 5    | 5    | 5    | 4 |
| 2567   |       |        |        |      |      |      |      |      |      |      |      |      |      |      |   |
| 2570   | 4     | 3      | 2      | 0    | 0    | 0    | 0    | 0    | 0    | 0    | 0    | 0    | 0    | 3    | 3 |
| 2574   | 3     | 3      | 3      | 2    | 2    | 2    | 2    | 1    | 1    | 1    | 1    | 1    | 1    | 3    | 2 |
| 2578   | 5     | 5      | 5      | 5    | 5    | 5    | 5    | 5    | 4    | 5    | 4    | 5    | 5    | 5    | 5 |
| 2580   | 5     | 4      | 5      | 5    | 4    | 5    | 5    | 5    | 0    | 5    | 5    | 5    | 5    | 5    | 5 |
| 2590   | 6     | 5      | 6      | 0    | 5    | 0    | 0    | 0    | 0    | 0    | 0    | 0    | 5    | 5    | 1 |
| 2593   | 4     | 5      | 3      | 0    | 0    | 0    | 0    | 0    | 0    | 0    | 0    | 0    | 0    | 4    | 3 |
| 2594   | 5     | 5      | 5      | 0    | 2    | 1    | 0    | 0    | 0    | 0    | 0    | 0    | 0    | 1    | 1 |

| respid | Q46x4 | Q46x5a | Q46x5b | Q47a | Q47b | Q47c | Q47d | Q47e | Q47f | Q47g | Q47h | Q47i | Q47j | Q47k |   |
|--------|-------|--------|--------|------|------|------|------|------|------|------|------|------|------|------|---|
| 2595   | 5     | 4      | 4      | 0    | 0    | 0    | 0    | 0    | 0    | 0    | 0    | 0    | 0    | 1    | 1 |
| 2596   | 6     | 6      | 6      | 0    | 3    | 0    | 0    | 0    | 0    | 0    | 0    | 0    | 0    | 1    | 1 |
| 2597   | 4     | 4      | 3      | 3    | 3    | 3    | 2    | 4    | 2    | 2    | 2    | 2    | 4    | 3    | 4 |
| 2598   | 5     | 5      | 5      | 4    | 4    | 4    | 4    | 5    | 2    | 4    | 4    | 4    | 5    | 5    | 3 |
| 2602   | 5     | 5      | 5      |      |      |      |      |      |      |      |      |      |      |      |   |
| 2605   | 4     | 4      | 4      | 3    | 3    | 4    | 3    | 4    | 2    | 2    | 3    | 3    | 2    | 2    | 3 |
| 2606   |       |        |        |      |      |      |      |      |      |      |      |      |      |      |   |
| 2607   | 5     | 4      | 4      |      |      |      |      |      |      |      |      |      |      |      |   |
| 2608   |       |        |        |      |      |      |      |      |      |      |      |      |      |      |   |
| 2609   | 5     | 5      | 5      | 5    | 4    | 4    | 4    | 5    | 2    | 4    | 3    | 4    | 4    | 4    | 4 |
| 2610   | 5     | 5      | 5      |      |      |      |      |      |      |      |      |      |      |      |   |
| 2614   |       |        |        |      |      |      |      |      |      |      |      |      |      |      |   |
| 2615   | 5     | 5      | 5      | 4    | 5    | 5    | 5    | 5    | 1    | 2    | 2    | 5    | 3    | 3    | 3 |
| 2616   | 5     | 5      | 5      | 5    | 5    | 5    | 5    | 5    | 0    | 4    | 4    | 5    | 4    | 4    | 4 |
| 2618   | 6     | 6      | 6      | 3    | 5    | 5    | 5    | 5    | 5    | 3    | 3    | 3    | 3    | 3    | 5 |
| 2630   | 4     | 6      | 6      | 2    | 2    | 2    | 2    | 1    | 1    | 1    | 1    | 1    | 1    | 1    | 2 |
| 2633   | 5     | 5      | 5      | 5    | 5    | 5    | 5    | 5    | 1    | 5    | 3    | 5    | 5    | 5    | 5 |
| 2637   | 5     | 5      | 5      | 3    | 4    | 3    | 3    | 4    | 3    | 2    | 2    | 4    | 1    | 5    | 5 |
| 2638   | 5     | 6      | 6      | 4    | 4    | 3    | 3    | 4    | 2    | 3    | 3    | 3    | 3    | 3    | 3 |
| 2641   | 5     | 5      | 5      |      |      |      |      |      |      |      |      |      |      |      |   |
| 2644   | 5     | 5      | 5      |      |      |      |      |      |      |      |      |      |      |      |   |
| 2645   | 6     | 6      | 6      | 3    | 2    | 2    | 2    | 3    | 1    | 2    | 3    | 5    | 4    | 4    | 4 |
| 2646   | 4     | 5      | 5      | 5    | 4    | 5    | 5    | 5    | 4    | 5    | 4    | 5    | 5    | 5    | 4 |
| 2648   | 5     | 5      | 5      | 5    | 5    | 5    | 5    | 5    |      |      |      |      |      |      |   |
| 2651   |       |        |        |      |      |      |      |      |      |      |      |      |      |      |   |
| 2652   | 4     | 5      | 4      |      |      |      |      |      |      |      |      |      |      |      |   |
| 2653   | 5     | 5      | 5      | 5    | 5    | 5    | 5    | 5    | 2    | 4    | 3    | 4    | 4    | 4    | 5 |
| 2656   |       |        |        |      |      |      |      |      |      |      |      |      |      |      |   |
| 2657   | 5     | 5      | 5      | 4    | 4    | 4    | 4    | 5    | 2    | 4    | 4    | 4    | 4    | 4    | 4 |
| 2658   | 4     | 4      | 4      | 5    | 5    | 5    | 4    | 5    | 2    | 2    | 2    | 5    | 5    | 5    | 3 |
| 2661   | 6     | 6      | 6      |      |      |      |      |      |      |      |      |      |      |      |   |
| 2663   | 5     | 5      | 5      | 2    | 2    | 4    | 4    | 5    | 2    | 4    | 3    | 5    | 4    | 4    | 3 |

| respid | Q46x4 | Q46x5a | Q46x5b | Q47a | Q47b | Q47c | Q47d | Q47e | Q47f | Q47g | Q47h | Q47i | Q47j | Q47k |   |
|--------|-------|--------|--------|------|------|------|------|------|------|------|------|------|------|------|---|
| 2665   | 4     | 6      | 6      | 2    | 2    | 2    | 2    | 2    | 3    | 1    | 2    | 2    | 4    | 4    | 3 |
| 2670   | 6     | 6      | 6      | 1    | 5    | 5    | 5    | 5    | 5    | 2    | 5    | 5    | 5    | 5    | 5 |
| 2672   | 5     | 5      | 5      | 5    | 5    | 5    | 5    | 5    | 5    | 4    | 5    | 4    | 5    | 5    | 5 |
| 2673   |       |        |        |      |      |      |      |      |      |      |      |      |      |      |   |
| 2677   | 5     | 5      | 5      | 5    | 5    | 5    | 5    | 5    | 5    | 3    | 4    | 4    | 5    | 4    | 4 |
| 2686   | 4     | 4      | 4      | 3    | 2    | 2    | 2    | 3    | 2    | 2    | 2    | 2    | 2    | 2    | 2 |
| 2688   | 5     | 5      | 5      | 4    | 3    | 3    | 3    | 3    | 4    | 2    | 4    | 3    | 4    | 3    | 3 |
| 2689   | 4     | 4      | 4      | 3    | 3    | 3    | 3    | 3    | 2    | 5    | 2    | 3    | 3    | 4    | 4 |
| 2691   | 5     | 5      | 5      | 4    | 4    | 4    | 4    | 4    | 5    | 3    | 4    | 3    | 5    | 5    | 4 |
| 2695   | 5     | 5      | 5      | 0    | 5    | 0    | 0    | 0    | 0    | 0    | 0    | 0    | 5    | 2    | 1 |
| 2696   | 6     | 6      | 6      |      |      |      |      |      |      |      |      |      |      |      |   |
| 2697   |       |        |        |      |      |      |      |      |      |      |      |      |      |      |   |
| 2698   |       |        |        |      |      |      |      |      |      |      |      |      |      |      |   |
| 2703   | 6     | 5      | 5      |      |      |      |      |      |      |      |      |      |      |      |   |
| 2704   | 5     | 5      | 5      |      |      |      |      |      |      |      |      |      |      |      |   |
| 2706   | 5     | 4      | 5      | 2    | 3    | 3    | 2    | 3    | 1    | 3    | 3    | 4    | 5    | 5    | 4 |
| 2707   | 5     | 6      | 6      | 5    | 5    | 4    | 5    | 5    | 0    | 4    | 4    | 5    | 4    | 4    | 4 |
| 2710   | 5     | 5      | 5      | 2    | 4    | 4    | 4    | 4    | 4    | 2    | 3    | 3    | 2    | 3    | 5 |
| 2711   | 4     | 5      | 5      |      |      |      |      |      |      |      |      |      |      |      |   |
| 2712   | 5     | 5      | 4      | 5    | 5    | 4    | 5    | 5    | 1    | 3    | 2    | 5    | 5    | 5    | 4 |
| 2713   |       |        |        |      |      |      |      |      |      |      |      |      |      |      |   |
| 2721   |       |        |        |      |      |      |      |      |      |      |      |      |      |      |   |
| 2730   | 5     | 5      | 5      |      |      |      |      |      |      |      |      |      |      |      |   |
| 2731   | 5     | 5      | 5      | 4    | 4    | 4    | 4    | 5    | 2    | 5    | 5    | 5    | 5    | 5    | 5 |
| 2732   | 5     | 5      | 5      |      |      |      |      |      |      |      |      |      |      |      |   |
| 2733   | 5     | 5      | 5      | 2    | 2    | 2    | 2    | 1    | 1    | 2    | 2    | 5    | 2    | 2    | 2 |
| 2735   | 5     | 5      | 5      |      |      |      |      |      |      |      |      |      |      |      |   |
| 2736   | 4     | 3      | 3      |      |      |      |      |      |      |      |      |      |      |      |   |
| 2740   | 4     | 5      | 5      | 0    | 3    | 0    |      | 0    | 0    | 0    | 0    | 0    | 0    | 1    | 1 |
| 2741   | 5     | 5      | 5      | 4    | 4    | 4    | 4    | 5    | 3    | 4    | 4    | 4    | 4    | 4    | 4 |
| 2742   | 2     | 2      | 2      | 5    | 5    | 5    | 5    | 5    | 0    | 5    | 5    | 5    | 5    | 5    | 5 |
| 2743   | 5     | 5      | 4      | 1    | 5    | 5    | 5    | 5    | 5    | 3    | 4    | 3    | 5    | 5    | 5 |



| respid | Q46x4 | Q46x5a | Q46x5b | Q47a | Q47b | Q47c | Q47d | Q47e | Q47f | Q47g | Q47h | Q47i | Q47j | Q47k |
|--------|-------|--------|--------|------|------|------|------|------|------|------|------|------|------|------|
| 2744   | 5     | 5      | 5      | 4    | 4    | 4    | 4    | 4    | 3    | 3    | 3    | 3    | 3    | 4    |
| 2745   | 4     | 4      | 4      |      |      |      |      |      |      |      |      |      |      |      |
| 2749   | 6     | 6      | 6      |      |      |      |      |      |      |      |      |      |      |      |
| 2751   | 5     | 5      | 5      | 0    | 0    | 0    | 0    | 0    | 0    | 0    | 0    | 0    | 1    | 1    |
| 2754   | 5     | 5      | 5      | 0    | 0    | 0    | 0    | 0    | 0    | 0    | 0    | 0    | 1    | 1    |
| 2755   | 4     | 3      | 3      | 0    | 4    | 4    | 4    | 5    | 3    | 3    | 3    | 3    | 3    | 3    |
| 2757   | 6     | 6      | 6      | 0    | 0    | 0    | 0    | 0    | 0    | 0    | 0    | 0    | 1    | 1    |
| 2758   | 4     | 5      | 4      | 2    | 2    | 3    | 3    | 3    | 4    | 2    | 3    | 4    | 2    | 4    |
| 2759   | 6     | 4      | 5      | 2    | 5    | 4    | 4    | 5    | 2    | 3    | 4    | 2    | 2    | 2    |
| 2761   | 6     | 6      | 6      |      |      |      |      |      |      |      |      |      |      |      |
| 2762   | 5     | 5      | 5      | 0    | 0    | 0    | 0    | 0    | 0    | 0    | 0    | 4    | 1    | 4    |
| 2763   | 6     | 6      | 6      |      |      |      |      |      |      |      |      |      |      |      |
| 2764   | 2     | 4      | 3      | 3    | 4    | 4    | 2    | 2    | 3    | 1    | 1    | 4    | 1    | 2    |
| 2765   | 4     | 4      | 4      |      |      |      |      |      |      |      |      |      |      |      |
| 2766   | 5     | 5      | 5      | 5    | 5    | 5    | 5    | 5    | 1    | 4    | 3    | 5    | 4    | 4    |
| 2767   | 5     | 5      | 5      | 4    |      | 3    | 2    | 3    | 0    | 0    | 0    | 0    | 1    | 2    |
| 2769   | 5     | 5      | 4      |      |      |      |      |      |      |      |      |      |      |      |
| 2770   | 3     | 4      | 4      | 1    | 1    | 1    | 1    | 1    | 1    | 1    | 1    | 2    | 2    | 2    |
| 2771   | 2     | 2      | 4      |      |      |      |      |      |      |      |      |      |      |      |
| 2774   | 5     | 5      | 5      | 0    | 0    |      | 0    | 0    | 0    | 0    | 0    | 0    | 1    | 1    |
| 2777   | 5     | 4      | 4      |      |      |      |      |      |      |      |      |      |      |      |
| 2778   | 5     | 6      | 5      | 2    | 3    | 3    | 2    | 2    | 2    | 5    | 4    | 5    | 5    | 5    |
| 2781   | 5     | 5      | 5      | 3    | 3    | 3    | 3    | 4    | 1    | 2    | 3    | 3    | 5    | 5    |
| 2782   | 4     | 4      | 4      | 0    | 4    | 0    | 0    | 0    | 0    | 0    | 0    | 4    | 4    | 1    |
| 2784   | 6     | 6      | 6      |      |      |      |      |      |      |      |      |      |      |      |
| 2785   | 4     | 5      | 5      |      |      |      |      |      |      |      |      |      |      |      |
| 2786   | 4     | 5      | 5      |      |      |      |      |      |      |      |      |      |      |      |
| 2787   | 5     | 5      | 5      |      |      |      |      |      |      |      |      |      |      |      |
| 2789   | 4     | 4      | 4      |      |      |      |      |      |      |      |      |      |      |      |
| 2790   | 5     | 5      | 5      |      |      |      |      |      |      |      |      |      |      |      |
| 2791   | 4     | 4      | 4      |      |      |      |      |      |      |      |      |      |      |      |
| 2793   | 5     | 4      | 4      | 4    | 2    | 4    | 2    | 4    | 3    | 2    | 2    | 5    | 2    | 3    |

| respid | Q46x4 | Q46x5a | Q46x5b | Q47a | Q47b | Q47c | Q47d | Q47e | Q47f | Q47g | Q47h | Q47i | Q47j | Q47k |
|--------|-------|--------|--------|------|------|------|------|------|------|------|------|------|------|------|
| 2797   | 4     | 3      | 3      |      |      |      |      |      |      |      |      |      |      |      |
| 2798   | 5     | 4      | 4      | 5    | 5    | 5    | 5    | 5    | 5    | 5    | 5    | 5    | 5    | 5    |
| 2799   | 5     | 4      | 4      | 1    | 5    | 4    | 5    | 5    | 2    | 4    | 4    | 5    | 4    | 5    |
| 2801   | 4     | 5      | 5      | 4    | 4    | 4    | 4    | 4    | 1    | 3    | 3    | 4    | 3    | 2    |
| 2802   | 6     | 6      | 6      |      |      |      |      |      |      |      |      |      |      |      |
| 2803   | 4     | 5      | 5      |      |      |      |      |      |      |      |      |      |      |      |
| 2804   | 3     | 6      | 4      |      |      |      |      |      |      |      |      |      |      |      |
| 2807   | 5     | 4      | 4      | 5    | 4    | 4    | 4    | 5    | 5    | 4    | 4    | 4    | 4    | 4    |
| 2809   | 5     | 5      | 5      |      |      |      |      |      |      |      |      |      |      |      |
| 2810   | 3     | 4      | 5      |      |      |      |      |      |      |      |      |      |      |      |
| 2812   | 5     | 5      | 5      | 5    | 5    | 4    | 5    | 5    | 1    | 5    | 5    | 5    | 5    | 2    |
| 2814   | 5     | 5      | 5      | 5    | 5    | 5    | 5    | 5    | 5    | 5    | 3    | 4    | 4    | 4    |
| 2815   | 4     | 4      | 5      | 4    | 3    | 3    | 3    | 4    | 2    | 3    | 3    | 4    | 4    | 3    |
| 2816   | 4     | 4      | 3      | 5    | 5    | 5    | 5    | 5    | 3    | 3    | 3    | 4    | 2    | 4    |
| 2817   | 4     | 4      | 4      | 0    | 5    | 0    | 0    | 0    | 0    | 0    | 0    | 0    | 1    | 1    |
| 2819   | 5     | 4      | 4      | 5    | 5    | 5    | 5    | 5    | 1    | 4    | 3    | 5    | 5    | 5    |
| 2820   | 5     | 5      | 5      | 5    | 5    | 5    | 5    | 5    | 2    | 5    | 4    | 5    | 5    | 5    |
| 2821   | 4     | 4      | 5      |      |      |      |      |      |      |      |      |      |      |      |
| 2822   | 4     | 4      | 3      |      |      |      |      |      |      |      |      |      |      |      |
| 2823   | 6     | 6      | 6      | 5    | 5    | 5    | 5    | 5    | 1    | 4    | 4    | 5    | 4    | 4    |
| 2824   | 4     | 4      | 4      |      |      |      |      |      |      |      |      |      |      |      |
| 2825   | 5     | 5      | 5      | 5    | 5    | 5    | 4    | 5    | 3    | 4    | 3    | 5    | 4    | 4    |
| 2826   | 4     | 5      | 3      |      |      |      |      |      |      |      |      |      |      |      |
| 2827   | 4     | 5      | 5      |      |      |      |      |      |      |      |      |      |      |      |
| 2828   | 5     | 5      | 5      | 5    | 5    | 5    | 5    | 5    | 5    | 5    | 5    | 5    | 5    | 5    |
| 2829   | 6     | 6      | 6      | 5    | 5    | 5    | 5    | 5    | 5    | 5    | 5    | 5    | 5    | 5    |
| 2830   | 4     | 4      | 4      | 5    | 5    |      | 5    | 5    | 4    | 5    | 4    | 5    | 5    | 5    |
| 2831   | 4     | 4      | 3      | 0    | 2    | 0    | 0    | 0    | 0    | 0    | 0    | 0    | 1    | 1    |
| 2832   | 4     | 5      | 5      |      |      |      |      |      |      |      |      |      |      |      |
| 2833   | 6     | 6      | 5      |      |      |      |      |      |      |      |      |      |      |      |
| 2834   | 5     | 5      | 5      | 0    | 4    | 0    | 0    | 0    | 0    | 0    | 0    | 3    | 3    | 1    |
| 2835   | 3     | 3      | 2      | 2    | 3    | 1    | 0    | 1    | 2    | 4    | 1    | 2    | 2    | 4    |

| respid | Q46x4 | Q46x5a | Q46x5b | Q47a | Q47b | Q47c | Q47d | Q47e | Q47f | Q47g | Q47h | Q47i | Q47j | Q47k |   |
|--------|-------|--------|--------|------|------|------|------|------|------|------|------|------|------|------|---|
| 2836   | 5     | 4      | 4      | 1    | 5    | 4    | 4    | 4    | 4    | 1    | 4    | 3    | 5    | 4    | 4 |
| 2837   | 4     | 5      | 4      | 5    | 5    | 4    | 3    | 3    | 2    | 3    | 3    | 5    | 5    | 4    |   |
| 2838   | 3     | 5      | 4      |      |      |      |      |      |      |      |      |      |      |      |   |
| 2844   | 4     | 6      | 6      |      |      |      |      |      |      |      |      |      |      |      |   |
| 2845   | 5     | 5      | 5      | 5    | 5    | 5    | 5    | 5    | 5    | 5    | 5    | 5    | 5    | 5    |   |
| 2847   | 6     | 6      | 6      | 0    | 0    | 0    | 0    | 0    | 0    | 0    | 0    | 0    | 1    | 1    |   |
| 2848   | 5     | 5      | 5      | 5    | 4    | 4    | 4    | 5    | 1    | 5    | 4    | 5    | 5    | 3    |   |
| 2849   | 5     | 5      | 4      | 0    | 2    | 0    | 0    | 3    | 0    | 0    | 0    | 0    | 2    | 1    |   |
| 2851   | 5     | 5      | 5      |      |      |      |      |      |      |      |      |      |      |      |   |
| 2852   | 5     | 5      | 5      |      |      |      |      |      |      |      |      |      |      |      |   |
| 2853   | 2     | 4      | 4      |      |      |      |      |      |      |      |      |      |      |      |   |
| 2854   | 5     | 5      | 5      |      |      |      |      |      |      |      |      |      |      |      |   |
| 2856   | 4     | 4      | 4      | 3    | 3    | 3    | 3    | 2    | 2    | 5    | 5    | 4    | 5    | 4    |   |
| 2857   | 5     | 5      | 4      | 2    | 3    | 4    | 3    | 4    | 2    | 4    | 4    | 4    | 4    | 3    |   |
| 2858   | 4     | 4      | 4      | 0    | 0    | 0    | 0    | 0    | 0    | 0    | 0    | 0    | 1    | 1    |   |
| 2859   | 4     | 4      | 4      | 4    | 3    | 3    | 3    | 2    | 2    | 3    | 3    | 4    | 4    | 4    |   |
| 2860   | 5     | 5      | 5      |      |      |      |      |      |      |      |      |      |      |      |   |
| 2861   | 3     | 3      | 3      | 2    | 2    | 2    | 2    | 2    | 3    | 2    | 2    | 2    | 2    | 3    |   |
| 2863   | 5     | 5      | 5      | 2    | 2    | 3    | 3    | 4    | 2    | 4    | 3    | 3    | 3    | 4    |   |
| 2864   | 5     | 6      | 6      |      |      |      |      |      |      |      |      |      |      |      |   |
| 2866   | 5     | 5      | 5      |      |      |      |      |      |      |      |      |      |      |      |   |
| 2872   | 6     | 4      | 4      | 0    | 5    | 0    | 0    | 0    | 0    | 0    | 0    | 0    | 5    | 1    |   |
| 2875   | 5     | 5      | 5      |      |      |      |      |      |      |      |      |      |      |      |   |
| 2879   |       |        |        |      |      |      |      |      |      |      |      |      |      |      |   |
| 2881   | 4     | 4      | 4      |      |      |      |      |      |      |      |      |      |      |      |   |
| 2882   | 5     | 5      | 5      | 5    | 4    | 4    | 4    | 4    | 2    | 4    | 4    | 5    | 5    | 5    |   |
| 2883   | 5     | 5      | 5      | 5    | 5    | 5    | 5    | 4    | 4    | 4    | 4    | 5    | 5    | 5    |   |
| 2884   | 4     | 4      | 4      | 0    | 0    | 0    | 0    | 0    | 0    | 0    | 0    | 0    | 1    | 1    |   |
| 2885   | 4     | 4      | 4      |      |      |      |      |      |      |      |      |      |      |      |   |
| 2887   | 5     | 5      | 5      | 5    | 5    | 5    | 5    | 5    | 1    | 5    | 5    | 5    | 5    | 5    |   |
| 2888   | 5     | 5      | 2      | 5    | 5    | 5    | 5    | 5    | 3    | 5    | 5    | 5    | 5    | 5    |   |
| 2890   | 4     | 4      | 4      | 3    | 3    | 3    | 3    | 3    | 0    | 0    | 0    | 0    | 1    | 1    |   |

| respid | Q46x4 | Q46x5a | Q46x5b | Q47a | Q47b | Q47c | Q47d | Q47e | Q47f | Q47g | Q47h | Q47i | Q47j | Q47k |
|--------|-------|--------|--------|------|------|------|------|------|------|------|------|------|------|------|
| 2891   | 5     | 5      | 5      |      |      |      |      |      |      |      |      |      |      |      |
| 2892   |       |        |        |      |      |      |      |      |      |      |      |      |      |      |
| 2895   | 5     | 2      | 2      | 5    | 5    | 5    | 5    | 5    |      | 5    | 5    | 5    | 5    | 5    |
| 2899   | 5     | 4      | 4      | 4    | 4    | 4    | 4    | 4    | 2    | 4    | 3    | 4    | 4    | 4    |
| 2900   | 5     | 6      | 6      | 0    | 2    | 0    | 0    | 0    | 0    | 0    | 0    | 0    | 0    | 1    |
| 2902   | 5     | 5      | 5      |      |      |      |      |      |      |      |      |      |      |      |
| 2903   |       |        |        |      |      |      |      |      |      |      |      |      |      |      |
| 2904   | 5     | 5      | 5      | 5    | 5    | 5    | 5    | 5    | 5    | 5    | 5    | 4    | 5    | 5    |
| 2906   | 4     | 4      | 5      |      |      |      |      |      |      |      |      |      |      |      |
| 2908   | 6     | 6      | 6      |      |      |      |      |      |      |      |      |      |      |      |
| 2910   | 5     | 5      | 5      |      |      |      |      |      |      |      |      |      |      |      |
| 2917   | 4     | 3      | 4      | 3    | 3    | 3    | 2    | 3    | 1    | 3    | 3    | 4    | 3    | 3    |
| 2918   | 5     | 5      | 5      | 1    | 1    | 1    | 1    | 0    | 0    | 0    | 0    | 0    | 1    | 2    |
| 2919   | 5     | 5      | 5      | 5    | 5    | 5    | 5    | 5    | 4    | 5    | 4    | 5    | 4    | 5    |
| 2920   | 5     | 5      | 5      | 5    | 5    | 5    | 5    | 5    | 2    | 5    | 5    | 5    | 5    | 5    |
| 2921   | 4     | 4      | 4      | 4    | 4    | 4    | 4    | 4    | 4    | 4    | 4    | 4    | 5    | 3    |
| 2922   | 5     | 5      | 5      | 0    | 5    | 0    | 0    | 0    | 0    | 0    | 0    | 0    | 5    | 4    |
| 2923   |       |        |        |      |      |      |      |      |      |      |      |      |      |      |
| 2924   | 3     | 3      | 2      |      |      |      |      |      |      |      |      |      |      |      |
| 2926   | 5     | 5      | 5      |      |      |      |      |      |      |      |      |      |      |      |
| 2928   | 6     | 6      | 6      |      |      |      |      |      |      |      |      |      |      |      |
| 2930   |       |        |        |      |      |      |      |      |      |      |      |      |      |      |
| 2931   | 5     | 5      | 5      | 5    | 5    | 5    | 5    | 5    | 3    | 3    | 2    | 5    | 5    | 4    |
| 2933   | 6     | 6      | 6      | 5    |      | 5    | 5    | 5    | 2    | 5    |      | 5    | 5    | 5    |
| 2935   | 5     | 4      | 5      | 5    | 5    | 5    | 5    | 5    | 5    | 4    | 3    | 5    | 3    | 3    |
| 2936   |       |        |        |      |      |      |      |      |      |      |      |      |      |      |
| 2937   | 4     | 4      | 4      | 0    | 0    | 0    | 0    | 5    | 1    | 3    | 3    | 4    | 4    | 2    |
| 2938   | 5     | 5      | 5      | 5    | 5    | 5    | 5    | 5    | 2    | 5    | 4    | 4    | 4    | 4    |
| 2944   | 5     | 5      | 5      | 2    | 2    | 2    | 2    | 4    | 1    | 2    | 2    | 5    | 5    | 3    |
| 2945   | 5     | 5      | 5      |      |      |      |      |      |      |      |      |      |      |      |
| 2947   | 3     | 3      | 3      | 5    | 5    |      | 5    | 5    | 3    | 5    | 5    | 5    | 5    | 5    |
| 2949   | 5     | 5      | 5      |      |      |      |      |      |      |      |      |      |      |      |

| respid | Q46x4 | Q46x5a | Q46x5b | Q47a | Q47b | Q47c | Q47d | Q47e | Q47f | Q47g | Q47h | Q47i | Q47j | Q47k |
|--------|-------|--------|--------|------|------|------|------|------|------|------|------|------|------|------|
| 2951   | 4     | 4      | 4      |      |      |      |      |      |      |      |      |      |      |      |
| 2952   | 4     | 4      | 4      | 1    | 5    | 4    | 5    | 5    | 2    | 2    | 2    | 5    | 2    | 3    |
| 2953   |       |        |        |      |      |      |      |      |      |      |      |      |      |      |
| 2955   | 5     | 5      | 5      | 5    | 5    | 5    | 5    | 5    | 1    | 5    | 4    | 5    | 5    | 5    |
| 2957   | 5     | 5      | 5      | 4    | 4    | 4    | 4    | 5    | 2    | 4    | 5    | 4    | 4    | 4    |
| 2958   | 4     | 4      | 3      |      |      |      |      |      |      |      |      |      |      |      |
| 2960   | 5     | 5      | 5      |      |      |      |      |      |      |      |      |      |      |      |
| 2963   | 5     | 5      | 5      | 5    | 5    | 5    | 5    | 5    | 5    | 4    | 4    | 5    | 5    | 5    |
| 2964   | 6     | 6      | 6      |      |      |      |      |      |      |      |      |      |      |      |
| 2967   |       |        |        |      |      |      |      |      |      |      |      |      |      |      |
| 2968   | 6     | 6      | 6      |      |      |      |      |      |      |      |      |      |      |      |
| 2971   | 5     | 5      | 5      |      |      |      |      |      |      |      |      |      |      |      |
| 2974   | 5     | 5      | 5      |      |      |      |      |      |      |      |      |      |      |      |
| 2975   | 5     | 5      | 5      |      |      |      |      |      |      |      |      |      |      |      |
| 2982   |       |        |        |      |      |      |      |      |      |      |      |      |      |      |
| 2983   |       |        |        |      |      |      |      |      |      |      |      |      |      |      |
| 2985   | 5     | 5      | 5      |      |      |      |      |      |      |      |      |      |      |      |
| 2986   | 3     | 4      | 4      | 0    | 1    | 0    | 0    | 1    | 0    | 0    | 0    | 0    | 2    | 1    |
| 2987   | 4     | 5      | 5      |      |      |      |      |      |      |      |      |      |      |      |
| 2988   | 5     | 4      | 4      |      |      |      |      |      |      |      |      |      |      |      |
| 2993   | 5     | 5      | 5      | 0    | 0    | 0    | 0    | 0    | 0    | 0    | 0    | 0    | 1    | 1    |
| 2996   | 5     | 5      | 5      | 0    | 0    | 0    | 0    | 0    | 0    | 0    | 0    | 0    | 1    | 1    |
| 2997   | 5     | 5      | 5      | 5    | 5    | 5    | 5    | 5    |      | 4    | 4    | 4    | 4    | 5    |
| 2998   | 5     | 5      | 5      |      |      |      |      |      |      |      |      |      |      |      |
| 3004   | 5     | 5      | 5      | 5    | 5    | 5    | 5    | 5    | 5    | 5    | 4    | 5    | 5    | 5    |
| 3007   | 4     | 4      | 4      |      |      |      |      |      |      |      |      |      |      |      |
| 3011   | 3     | 3      | 3      | 2    | 3    | 1    | 3    | 2    | 2    | 2    | 2    | 2    | 3    | 3    |
| 3012   | 5     | 5      | 5      | 5    | 5    | 5    | 5    | 5    | 3    | 5    | 4    | 5    | 5    | 5    |
| 3013   | 4     | 3      | 2      |      |      | 5    |      |      | 4    | 3    | 4    | 3    |      |      |
| 3014   |       |        |        |      |      |      |      |      |      |      |      |      |      |      |
| 3015   | 5     | 5      | 5      | 5    | 5    | 5    | 5    | 5    | 2    | 5    | 5    | 5    | 5    | 5    |
| 3016   |       |        |        |      |      |      |      |      |      |      |      |      |      |      |

| respid | Q46x4 | Q46x5a | Q46x5b | Q47a | Q47b | Q47c | Q47d | Q47e | Q47f | Q47g | Q47h | Q47i | Q47j | Q47k |   |
|--------|-------|--------|--------|------|------|------|------|------|------|------|------|------|------|------|---|
| 3017   | 4     | 4      | 5      | 0    | 0    | 0    | 0    | 0    | 0    | 0    | 0    | 0    | 0    | 1    | 1 |
| 3020   | 4     | 4      | 4      | 4    | 4    | 4    | 4    | 4    | 5    | 3    | 4    | 3    | 4    | 4    | 4 |
| 3022   | 5     | 5      | 5      | 5    | 5    | 5    | 5    | 5    | 5    | 4    | 5    | 4    |      | 5    | 5 |
| 3023   | 5     | 5      | 5      | 5    | 5    | 5    | 5    | 5    | 5    | 2    | 5    | 4    | 5    | 5    | 5 |
| 3026   | 4     | 4      | 4      |      |      |      |      |      |      |      |      |      |      |      |   |
| 3038   | 4     | 4      | 4      | 4    | 4    | 4    | 4    | 4    | 5    | 3    | 3    | 2    | 5    |      | 5 |
| 3039   | 5     | 4      | 4      |      |      |      |      |      |      |      |      |      |      |      |   |
| 3040   | 5     | 4      | 4      | 4    | 4    | 5    | 5    | 5    | 5    | 2    | 5    | 4    | 5    | 5    | 4 |
| 3041   |       |        |        |      |      |      |      |      |      |      |      |      |      |      |   |
| 3042   | 4     | 3      | 4      |      |      |      |      |      |      |      |      |      |      |      |   |
| 3044   | 6     | 5      | 5      | 4    | 4    | 4    | 4    | 4    | 5    | 3    | 4    | 3    | 5    | 5    | 4 |
| 3050   | 5     | 5      | 5      | 5    | 5    | 5    | 5    | 5    | 5    | 1    | 5    | 4    | 4    | 4    | 4 |
| 3052   | 5     | 5      | 5      | 2    | 2    | 4    | 4    | 4    | 4    | 1    | 4    | 3    | 5    | 5    | 5 |
| 3056   | 4     | 4      | 5      |      |      |      |      |      |      |      |      |      |      |      |   |
| 3059   | 5     | 5      | 5      |      |      |      |      |      |      |      |      |      |      |      |   |
| 3060   | 5     | 5      | 5      | 5    | 5    | 5    | 5    | 5    | 5    | 4    |      | 3    | 5    | 5    | 5 |
| 3063   | 4     | 4      | 4      |      |      |      |      |      |      |      |      |      |      |      |   |
| 3065   | 5     | 4      | 4      | 2    | 2    | 2    | 3    | 4    | 2    | 2    | 2    | 2    | 2    | 3    | 3 |
| 3067   | 5     | 4      | 3      | 1    | 3    | 2    | 2    | 4    | 1    | 2    | 2    | 3    | 4    | 3    | 2 |
| 3068   |       |        |        |      |      |      |      |      |      |      |      |      |      |      |   |
| 3072   | 5     | 5      | 5      | 4    | 4    | 4    | 4    | 4    | 5    | 2    | 4    | 4    | 4    | 4    | 4 |
| 3074   | 6     | 6      | 6      | 2    | 2    | 0    | 0    | 0    | 0    | 0    | 0    | 0    | 0    | 2    | 2 |
| 3075   | 4     | 5      | 5      | 4    | 4    | 4    | 4    | 4    | 4    | 2    | 3    | 3    | 5    | 3    | 3 |
| 3076   | 5     | 5      | 4      |      |      |      |      |      |      |      |      |      |      |      |   |
| 3079   | 5     | 5      | 5      | 0    | 0    | 0    | 0    | 0    | 0    | 0    | 0    | 0    | 0    | 5    | 5 |
| 3082   | 3     | 3      | 3      | 2    | 2    | 3    | 3    | 3    | 3    | 2    | 2    | 3    | 2    | 3    | 2 |
| 3083   | 5     | 5      | 5      | 5    | 5    | 5    | 5    | 5    | 5    | 4    | 5    | 4    | 5    | 5    |   |
| 3084   | 6     | 6      | 6      | 0    | 0    | 0    | 0    | 0    | 0    | 0    | 0    | 0    | 0    | 1    | 1 |
| 3085   | 6     | 6      | 6      |      |      |      |      |      |      |      |      |      |      |      |   |
| 3090   | 5     | 5      | 5      |      |      |      |      |      |      |      |      |      |      |      |   |
| 3091   | 5     | 5      | 5      |      |      |      |      |      |      |      |      |      |      |      |   |
| 3092   | 6     | 6      | 6      | 4    | 3    | 4    | 4    | 4    | 4    | 2    | 4    | 4    | 4    | 4    | 3 |

| respid | Q46x4 | Q46x5a | Q46x5b | Q47a | Q47b | Q47c | Q47d | Q47e | Q47f | Q47g | Q47h | Q47i | Q47j | Q47k |
|--------|-------|--------|--------|------|------|------|------|------|------|------|------|------|------|------|
| 3095   | 5     | 4      | 4      | 4    | 5    | 5    | 4    | 5    | 5    | 4    | 4    | 4    | 4    | 5    |
| 3096   | 2     | 2      | 3      | 2    | 2    |      | 2    | 3    | 3    | 3    | 2    | 4    | 3    | 2    |
| 3097   | 5     | 5      | 5      |      |      |      |      |      |      |      |      |      |      |      |
| 3099   | 2     | 3      | 2      | 1    | 2    | 2    | 2    | 2    | 2    | 2    | 2    | 1    | 2    | 2    |
| 3101   | 5     | 5      | 5      |      |      |      |      |      |      |      |      |      |      |      |
| 3103   | 5     | 4      | 4      | 4    | 4    | 5    | 4    | 5    | 3    | 5    | 4    | 5    | 5    | 4    |
| 3104   | 5     | 4      | 5      | 0    |      | 0    | 0    | 0    | 0    | 0    | 0    | 0    |      | 1    |
| 3105   |       |        |        |      |      |      |      |      |      |      |      |      |      |      |
| 3107   | 5     | 2      | 2      | 3    | 5    | 4    | 1    | 3    | 1    | 1    | 1    | 1    | 1    | 1    |
| 3108   | 5     | 5      | 5      | 4    | 5    | 5    | 5    | 5    | 1    | 4    | 3    | 4    | 3    | 4    |
| 3109   | 5     | 5      | 5      |      |      |      |      |      |      |      |      |      |      |      |
| 3116   | 6     | 6      | 6      |      |      |      |      |      |      |      |      |      |      |      |
| 3117   | 3     | 4      | 4      |      |      |      |      |      |      |      |      |      |      |      |
| 3119   | 5     | 5      | 5      | 5    | 5    | 5    | 5    | 5    | 5    | 5    | 4    | 1    | 4    |      |
| 3120   | 6     | 6      | 6      | 3    | 3    | 4    | 3    | 4    | 1    | 3    | 3    | 3    | 3    | 2    |
| 3130   | 5     | 5      | 5      |      |      |      |      |      |      |      |      |      |      |      |
| 3131   | 6     | 6      | 6      |      |      |      |      |      |      |      |      |      |      |      |
| 3133   | 5     | 5      | 5      | 0    | 0    | 0    | 0    | 0    | 0    | 0    | 0    | 0    | 1    | 1    |
| 3134   | 3     | 3      | 3      | 4    | 4    | 4    | 4    | 5    | 4    | 4    | 4    | 5    | 5    | 4    |
| 3135   | 4     | 5      | 4      | 0    | 0    | 0    | 0    | 0    | 0    | 0    | 0    | 4    | 4    | 5    |
| 3145   | 5     | 4      | 4      | 5    | 5    | 5    | 5    | 5    | 3    | 5    | 5    | 5    | 3    | 3    |
| 3147   | 5     | 5      | 5      |      |      |      |      |      |      |      |      |      |      |      |
| 3152   | 5     | 5      | 5      | 5    | 5    | 5    | 5    | 5    | 2    | 3    | 3    | 5    | 5    | 5    |
| 3155   | 3     | 2      | 1      |      |      |      |      |      |      |      |      |      |      |      |
| 3156   |       |        |        |      |      |      |      |      |      |      |      |      |      |      |
| 3157   | 3     | 4      | 4      | 3    | 3    | 4    | 3    |      | 2    | 2    | 2    | 2    | 3    | 3    |
| 3166   | 4     | 4      | 4      | 5    | 4    | 4    | 4    | 5    | 2    | 4    | 3    | 4    | 4    | 4    |
| 3169   | 4     | 3      | 5      |      |      |      |      |      |      |      |      |      |      |      |
| 3179   | 5     | 5      | 5      |      |      |      |      |      |      |      |      |      |      |      |
| 3181   | 6     | 6      | 6      |      |      |      |      |      |      |      |      |      |      |      |
| 3185   |       |        |        |      |      |      |      |      |      |      |      |      |      |      |
| 3190   | 6     | 6      | 6      | 5    | 0    | 0    | 0    | 0    | 0    | 0    | 0    | 0    | 1    | 1    |

| respid | Q46x4 | Q46x5a | Q46x5b | Q47a | Q47b | Q47c | Q47d | Q47e | Q47f | Q47g | Q47h | Q47i | Q47j | Q47k |   |
|--------|-------|--------|--------|------|------|------|------|------|------|------|------|------|------|------|---|
| 3191   |       |        |        |      |      |      |      |      |      |      |      |      |      |      |   |
| 3192   |       | 5      | 5      | 5    | 5    |      |      |      |      |      |      |      |      |      |   |
| 3193   |       | 5      | 5      | 5    |      |      |      |      |      |      |      |      |      |      |   |
| 3195   |       | 5      | 5      | 5    | 0    | 0    | 0    | 0    | 0    | 0    | 0    | 0    | 0    | 1    | 1 |
| 3202   |       | 5      | 5      | 5    | 5    | 5    | 5    | 5    | 5    | 1    | 4    | 3    | 5    | 5    | 4 |
| 3204   |       | 4      | 4      | 5    | 4    | 4    | 5    | 4    | 5    | 4    | 4    | 4    | 5    | 5    | 5 |
| 3208   |       | 4      | 4      | 4    | 3    | 3    | 3    | 3    | 5    | 2    | 4    | 3    | 4    | 4    | 4 |
| 3212   |       | 5      | 5      | 5    | 3    | 3    | 3    | 3    | 4    | 0    | 3    | 3    | 5    | 5    | 4 |
| 3218   |       | 6      | 6      | 6    | 1    | 1    | 1    | 1    | 5    | 0    | 1    | 3    | 1    | 4    | 3 |
| 3219   |       | 5      | 5      | 5    |      |      |      |      |      |      |      |      |      |      |   |
| 3220   |       | 6      | 5      | 5    |      |      |      |      |      |      |      |      |      |      |   |
| 3221   |       | 3      | 4      | 4    | 0    | 3    | 0    | 0    | 0    | 0    | 0    | 0    | 4    | 3    | 1 |
| 3223   |       | 5      | 5      | 5    |      |      |      |      |      |      |      |      |      |      |   |
| 3231   |       | 3      | 4      | 3    |      |      |      |      |      |      |      |      |      |      |   |
| 3232   |       | 3      | 4      | 3    |      |      |      |      |      |      |      |      |      |      |   |
| 3234   |       | 4      | 4      | 4    | 4    | 2    | 3    | 4    | 5    | 1    | 4    | 4    | 4    | 4    | 4 |
| 3235   |       | 5      | 5      | 5    | 5    | 5    | 5    | 5    | 5    | 4    | 5    | 5    | 5    | 5    | 5 |
| 3237   |       | 5      | 4      | 4    |      |      |      |      |      |      |      |      |      |      |   |
| 3238   |       | 5      | 5      | 5    | 5    | 5    | 5    | 5    | 5    | 4    | 5    | 4    | 5    | 4    | 5 |
| 3240   |       | 5      | 5      | 5    | 5    | 5    | 5    | 5    | 5    | 2    | 5    | 3    | 5    | 5    | 4 |
| 3241   |       | 5      | 5      | 5    |      |      |      |      |      |      |      |      |      |      |   |
| 3243   |       | 4      | 4      | 4    |      |      |      |      |      |      |      |      |      |      |   |
| 3244   |       | 4      | 4      | 5    |      |      |      |      |      |      |      |      |      |      |   |
| 3247   |       | 5      | 5      | 5    | 2    | 2    | 3    | 2    | 4    | 4    | 2    | 3    | 4    | 3    | 2 |
| 3250   |       | 5      | 5      | 5    | 1    | 1    | 1    | 1    | 1    | 0    | 1    | 0    | 1    | 1    | 1 |
| 3251   |       | 3      | 3      | 4    |      |      |      |      |      |      |      |      |      |      |   |
| 3255   |       | 5      | 5      | 5    |      |      |      |      |      |      |      |      |      |      |   |
| 3256   |       | 5      | 5      | 5    | 5    | 5    | 5    | 5    | 5    | 1    | 5    | 5    | 5    | 5    | 5 |
| 3257   |       | 5      | 5      | 5    |      |      |      |      |      |      |      |      |      |      |   |
| 3258   |       |        |        |      |      |      |      |      |      |      |      |      |      |      |   |
| 3259   |       | 6      | 6      | 6    |      |      |      |      |      |      |      |      |      |      |   |
| 3260   |       | 5      | 5      | 5    | 0    | 0    | 0    | 0    | 0    | 0    | 0    | 0    | 4    | 5    | 3 |



| respid | Q46x4 | Q46x5a | Q46x5b | Q47a | Q47b | Q47c | Q47d | Q47e | Q47f | Q47g | Q47h | Q47i | Q47j | Q47k |
|--------|-------|--------|--------|------|------|------|------|------|------|------|------|------|------|------|
| 3261   |       |        |        |      |      |      |      |      |      |      |      |      |      |      |
| 3262   | 5     | 4      | 4      | 3    | 4    | 4    | 5    | 5    | 3    | 4    | 4    | 5    | 4    | 4    |
| 3264   | 4     | 4      | 5      |      |      |      |      |      |      |      |      |      |      |      |
| 3265   | 5     | 5      | 5      | 5    | 5    | 5    | 5    | 5    | 3    | 5    | 5    | 5    | 5    | 5    |
| 3267   | 4     | 5      | 4      | 5    | 5    | 5    | 5    | 5    | 4    | 5    | 3    | 5    | 5    | 5    |
| 3268   | 3     | 5      | 5      |      |      |      |      |      |      |      |      |      |      |      |
| 3270   | 5     | 5      | 5      | 5    | 5    | 5    | 5    | 5    | 1    | 5    | 4    | 5    | 5    | 5    |
| 3271   | 4     | 4      | 3      | 4    | 5    | 5    | 4    | 5    | 3    | 4    | 4    | 4    | 4    | 4    |
| 3274   |       |        |        |      |      |      |      |      |      |      |      |      |      |      |
| 3276   | 6     | 6      | 6      |      |      |      |      |      |      |      |      |      |      |      |
| 3277   | 5     | 5      | 5      |      |      |      |      |      |      |      |      |      |      |      |
| 3279   | 5     | 5      | 5      | 1    | 1    | 1    | 5    | 5    | 1    | 5    | 5    | 5    | 5    | 4    |
| 3281   |       |        |        |      |      |      |      |      |      |      |      |      |      |      |
| 3283   | 5     | 4      | 5      | 5    | 5    | 5    | 5    | 5    | 1    | 4    | 3    | 5    | 5    | 3    |
| 3285   | 5     | 4      | 4      | 4    | 4    | 5    | 5    | 5    | 4    | 4    | 4    | 5    | 4    | 3    |
| 3286   | 5     | 5      | 5      | 0    | 5    | 0    | 5    | 0    | 0    | 0    | 0    | 0    | 4    | 4    |
| 3287   | 5     | 4      | 5      | 4    | 5    | 5    | 4    | 4    | 2    | 4    | 3    | 4    | 4    | 3    |
| 3289   | 5     | 5      | 4      | 1    |      |      |      |      |      |      |      |      |      |      |
| 3290   | 6     | 6      | 6      | 5    | 3    | 3    | 4    | 4    | 1    | 4    | 4    | 5    | 4    | 4    |
| 3291   | 5     | 4      | 4      | 4    | 5    | 5    | 3    | 4    | 2    | 3    | 3    | 3    | 2    | 3    |
| 3292   | 3     | 3      | 3      |      |      |      |      |      |      |      |      |      |      |      |
| 3293   | 3     | 4      | 4      | 4    | 4    | 4    | 2    | 1    | 2    | 4    | 3    | 5    | 4    | 4    |
| 3294   | 5     | 5      | 5      | 5    | 5    | 5    | 5    | 5    | 2    | 4    | 3    | 4    | 4    | 4    |
| 3296   | 5     | 5      | 5      |      |      |      |      |      |      |      |      |      |      |      |
| 3306   | 5     | 5      | 5      |      |      |      |      |      |      |      |      |      |      |      |
| 3307   | 4     | 4      | 3      |      |      |      |      |      |      |      |      |      |      |      |
| 3308   | 5     | 5      | 5      |      |      |      |      |      |      |      |      |      |      |      |
| 3312   | 5     | 6      | 5      | 5    | 4    | 5    | 5    | 5    | 3    | 4    | 4    | 5    | 5    |      |
| 3313   | 4     | 4      | 4      | 5    |      |      |      | 5    |      |      |      |      |      |      |
| 3316   | 5     | 5      | 5      | 4    | 4    | 4    | 4    | 5    | 2    | 3    | 3    | 4    | 4    | 4    |
| 3317   | 5     | 5      | 5      | 0    | 2    | 4    | 2    | 1    | 2    | 2    | 3    | 4    | 3    | 4    |
| 3320   | 6     | 6      | 6      | 5    | 5    | 5    | 5    | 5    | 1    | 5    | 3    | 4    | 5    | 4    |

| respid | Q46x4 | Q46x5a | Q46x5b | Q47a | Q47b | Q47c | Q47d | Q47e | Q47f | Q47g | Q47h | Q47i | Q47j | Q47k |   |
|--------|-------|--------|--------|------|------|------|------|------|------|------|------|------|------|------|---|
| 3321   | 5     | 5      | 5      | 5    | 5    | 5    | 5    | 5    | 5    | 5    | 4    | 4    | 5    | 5    | 5 |
| 3322   | 5     | 4      | 3      | 5    | 5    | 5    | 5    | 5    | 5    | 2    | 5    | 5    | 5    | 5    | 5 |
| 3323   | 5     | 5      | 4      |      |      |      |      |      |      |      |      |      |      |      |   |
| 3325   |       |        |        |      |      |      |      |      |      |      |      |      |      |      |   |
| 3332   | 5     | 5      | 5      | 5    | 5    | 5    | 5    | 5    | 5    | 3    | 5    | 4    | 5    | 5    | 5 |
| 3334   | 5     | 5      | 5      |      |      |      |      |      |      |      |      |      |      |      |   |
| 3335   | 6     | 6      | 6      | 2    | 4    | 5    | 4    | 5    | 5    | 1    | 5    | 4    | 5    | 5    | 3 |
| 3341   | 5     | 4      | 4      |      |      |      |      |      |      |      |      |      |      |      |   |
| 3345   | 4     | 4      | 4      |      |      |      |      |      |      |      |      |      |      |      |   |
| 3346   | 6     | 6      | 6      | 2    | 3    | 2    | 3    | 5    | 5    | 5    | 3    | 2    | 5    | 4    | 4 |
| 3349   | 3     | 3      | 3      | 5    | 4    | 5    | 5    | 5    | 4    | 2    | 4    | 3    | 5    | 4    | 4 |
| 3351   | 5     | 5      | 5      |      |      |      |      |      |      |      |      |      |      |      |   |
| 3353   | 5     | 5      | 5      | 4    | 5    | 5    | 4    | 4    | 4    | 3    | 4    | 3    | 5    | 5    | 4 |
| 3354   | 5     | 5      | 5      |      |      |      |      |      |      |      |      |      |      |      |   |
| 3356   | 4     | 4      | 4      |      |      |      |      |      |      |      |      |      |      |      |   |
| 3357   | 5     | 5      | 5      |      |      |      |      |      |      |      |      |      |      |      |   |
| 3360   | 5     | 3      | 3      |      |      |      |      |      |      |      |      |      |      |      |   |
| 3361   | 5     | 4      | 5      | 4    | 5    | 5    | 5    | 5    | 5    | 4    | 4    | 5    | 5    | 5    | 5 |
| 3362   | 3     | 4      | 3      | 4    | 4    | 4    | 3    | 4    | 4    | 3    | 4    | 4    | 5    | 4    | 4 |
| 3363   |       |        |        |      |      |      |      |      |      |      |      |      |      |      |   |
| 3364   | 2     | 2      | 3      | 2    | 2    | 3    | 2    | 2    | 2    | 3    | 1    | 2    | 2    | 2    | 3 |
| 3368   | 5     | 5      | 5      | 3    | 2    | 4    | 2    | 4    | 4    | 2    | 4    | 3    | 5    | 5    | 4 |
| 3370   | 4     | 4      | 4      |      |      |      |      |      |      |      |      |      |      |      |   |
| 3371   | 5     | 5      | 5      | 0    | 0    | 0    | 0    | 0    | 0    | 0    | 0    | 0    | 0    | 1    | 2 |
| 3379   | 5     | 5      | 5      |      |      |      |      |      |      |      |      |      |      |      |   |
| 3380   | 5     | 5      | 4      | 5    | 4    | 4    | 4    | 4    | 5    | 0    | 4    | 4    | 4    | 4    | 4 |
| 3382   | 5     | 6      | 6      | 4    | 2    | 4    | 4    | 4    | 4    | 1    | 4    | 3    | 4    | 5    | 3 |
| 3384   | 5     | 4      | 4      | 4    | 2    | 5    | 5    | 5    | 4    | 1    | 4    | 4    | 4    | 5    | 4 |
| 3385   | 6     | 6      | 6      |      |      |      |      |      |      |      |      |      |      |      |   |
| 3388   | 5     | 5      | 5      | 4    | 4    | 4    | 4    | 4    | 5    | 2    | 4    | 4    | 3    | 4    | 3 |
| 3392   | 5     | 5      | 5      |      |      |      |      |      |      |      |      |      |      |      |   |
| 3393   | 5     | 5      | 5      |      |      |      |      |      |      |      |      |      |      |      |   |

| respid | Q46x4 | Q46x5a | Q46x5b | Q47a | Q47b | Q47c | Q47d | Q47e | Q47f | Q47g | Q47h | Q47i | Q47j | Q47k |
|--------|-------|--------|--------|------|------|------|------|------|------|------|------|------|------|------|
| 3394   | 3     | 4      | 3      | 4    | 3    | 2    | 3    | 3    | 3    | 2    | 2    | 4    | 3    | 3    |
| 3395   | 6     | 6      | 6      | 5    | 5    | 5    | 5    | 5    | 2    | 5    | 4    | 5    | 5    | 5    |
| 3396   | 6     | 6      | 6      | 5    | 4    | 4    | 4    | 4    | 2    | 2    | 3    | 5    | 4    | 4    |
| 3397   | 5     | 5      | 5      | 4    | 4    | 4    | 4    | 4    | 1    | 4    | 3    | 5    | 5    | 4    |
| 3398   | 5     | 5      | 5      |      |      |      |      |      |      |      |      |      |      |      |
| 3399   | 4     | 4      | 4      | 5    | 5    | 5    | 4    | 5    | 2    | 4    | 3    | 5    | 5    | 4    |
| 3400   | 5     | 5      | 5      | 5    | 5    | 5    | 5    | 5    | 3    | 4    | 3    | 5    | 5    | 5    |
| 3401   | 3     | 4      | 2      | 2    | 1    | 2    | 1    | 2    | 2    | 1    | 2    | 2    | 2    | 3    |
| 3402   | 4     | 4      | 4      | 3    | 3    | 3    | 2    | 2    | 2    | 2    | 2    | 4    | 3    | 3    |
| 3403   | 4     | 4      | 4      | 2    | 2    | 4    | 4    | 5    | 2    | 4    | 3    | 3    | 4    | 4    |
| 3405   | 1     | 1      | 1      |      |      |      |      |      |      |      |      |      |      |      |
| 3407   | 4     | 4      | 4      | 3    | 3    | 3    | 3    | 3    | 1    | 1    | 3    | 1    | 2    | 2    |
| 3410   | 5     | 5      | 5      | 5    | 5    | 5    | 5    | 5    | 1    | 4    | 2    | 5    | 5    | 4    |
| 3411   | 4     | 4      | 4      |      |      |      |      |      |      |      |      |      |      |      |
| 3413   |       |        |        |      |      |      |      |      |      |      |      |      |      |      |
| 3414   | 5     | 5      | 5      |      |      |      |      |      |      |      |      |      |      |      |
| 3420   | 5     | 5      | 5      |      |      |      |      |      |      |      |      |      |      |      |
| 3421   | 5     | 4      | 5      |      |      |      |      |      |      |      |      |      |      |      |
| 3425   | 5     | 5      | 5      | 5    | 5    | 5    | 5    | 5    | 2    | 5    | 3    | 5    | 4    | 5    |
| 3426   | 4     | 4      | 5      | 2    |      | 2    | 3    | 3    | 2    | 2    | 3    | 4    | 4    | 3    |
| 3429   | 5     | 4      | 4      |      |      |      |      |      |      |      |      |      |      |      |
| 3430   | 3     | 3      | 4      | 4    | 4    | 4    | 3    | 4    | 2    | 4    | 3    | 3    | 3    | 4    |
| 3433   | 6     | 6      | 6      |      |      |      |      |      |      |      |      |      |      |      |
| 3434   | 4     | 4      | 4      | 0    | 2    | 0    | 0    | 0    | 0    | 0    | 0    | 0    | 1    | 1    |
| 3437   | 6     | 6      | 6      | 2    | 2    | 2    | 2    | 4    | 0    | 2    | 2    | 5    | 5    | 5    |
| 3439   | 6     | 5      | 6      | 3    | 2    | 2    | 2    | 3    | 1    | 2    | 2    |      | 2    | 1    |
| 3441   | 4     | 4      | 4      | 1    | 1    | 1    | 1    | 2    | 1    | 2    | 3    |      | 2    | 2    |
| 3442   | 5     | 4      | 4      |      |      |      |      |      |      |      |      |      |      |      |
| 3444   | 5     | 5      | 5      |      |      |      |      |      |      |      |      |      |      |      |
| 3445   | 5     | 5      | 5      |      |      |      |      |      |      |      |      |      |      |      |
| 3450   | 4     | 5      | 4      | 4    | 4    | 4    | 4    | 4    | 2    | 4    | 4    | 4    | 4    | 4    |
| 3452   | 4     | 2      | 5      |      |      |      |      |      |      |      |      |      |      |      |

| respid | Q46x4 | Q46x5a | Q46x5b | Q47a | Q47b | Q47c | Q47d | Q47e | Q47f | Q47g | Q47h | Q47i | Q47j | Q47k |   |
|--------|-------|--------|--------|------|------|------|------|------|------|------|------|------|------|------|---|
| 3456   | 5     | 5      | 5      | 3    | 4    | 4    | 4    | 4    | 4    | 3    | 4    | 4    | 5    | 5    | 5 |
| 3459   |       |        |        |      |      |      |      |      |      |      |      |      |      |      |   |
| 3460   | 5     | 5      | 5      | 5    | 5    | 5    | 5    | 5    | 4    | 1    | 5    | 3    | 3    | 5    | 3 |
| 3461   | 4     | 4      | 4      |      |      |      |      |      |      |      |      |      |      |      |   |
| 3466   | 3     | 3      | 4      | 3    | 3    | 3    | 3    | 3    | 3    | 1    | 3    | 3    | 4    | 4    | 2 |
| 3471   | 4     | 4      | 4      | 4    | 4    | 4    | 4    | 4    | 5    | 1    | 2    | 2    | 2    | 2    | 2 |
| 3473   | 5     | 5      | 5      | 5    | 5    | 5    | 5    | 5    | 5    | 5    | 5    | 5    | 5    | 5    | 5 |
| 3475   | 4     | 4      | 4      |      |      |      |      |      |      |      |      |      |      |      |   |
| 3476   | 4     | 5      | 4      | 4    | 4    | 3    | 3    | 4    | 3    | 4    | 4    | 4    | 4    | 4    | 3 |
| 3477   | 4     | 4      | 5      | 0    | 3    | 3    | 3    | 4    | 1    | 2    | 2    | 3    | 2    | 2    | 2 |
| 3478   |       |        |        |      |      |      |      |      |      |      |      |      |      |      |   |
| 3479   | 5     | 5      | 5      |      |      |      |      |      |      |      |      |      |      |      |   |
| 3482   | 5     | 4      | 5      | 2    | 4    | 4    | 4    | 4    | 4    | 1    | 2    | 2    | 2    | 1    | 3 |
| 3483   | 6     | 6      | 6      |      |      |      |      |      |      |      |      |      |      |      |   |
| 3485   | 4     | 4      | 4      |      |      |      |      |      |      |      |      |      |      |      |   |
| 3489   |       |        |        |      |      |      |      |      |      |      |      |      |      |      |   |
| 3490   | 4     | 4      | 4      |      |      |      |      |      |      |      |      |      |      |      |   |
| 3491   | 4     | 4      | 5      |      |      |      |      |      |      |      |      |      |      |      |   |
| 3494   | 6     | 4      | 4      |      |      |      |      |      |      |      |      |      |      |      |   |
| 3495   | 4     | 4      | 4      |      |      |      |      |      |      |      |      |      |      |      |   |
| 3501   | 5     | 5      | 5      | 5    | 5    | 5    | 5    | 5    | 5    | 5    | 4    | 4    | 4    | 4    | 4 |
| 3506   | 5     | 4      | 5      | 5    | 5    | 5    | 5    | 5    | 5    | 5    | 5    | 5    | 5    | 5    | 5 |
| 3507   | 5     | 5      | 5      | 5    | 5    | 5    | 5    | 5    | 5    | 5    | 5    |      | 5    | 5    |   |
| 3517   | 5     | 5      | 5      | 2    | 2    | 2    | 3    | 4    | 2    | 3    | 3    | 3    | 2    | 3    | 3 |
| 3520   | 5     | 5      | 5      |      |      |      |      |      |      |      |      |      |      |      |   |
| 3521   | 5     | 4      | 4      | 0    | 0    | 0    | 0    | 0    | 0    | 0    | 0    | 0    | 0    | 1    | 1 |
| 3522   | 5     | 4      | 4      |      |      |      |      |      |      |      |      |      |      |      |   |
| 3524   | 5     | 5      | 5      | 1    | 1    | 1    | 1    | 5    | 1    | 4    | 4    | 4    | 4    | 4    | 3 |
| 3527   | 5     | 5      | 5      | 5    | 5    | 5    | 5    | 5    | 5    | 4    | 5    | 5    | 5    | 5    | 5 |
| 3528   | 6     | 5      | 5      | 0    | 0    | 5    | 3    | 5    | 0    | 4    | 4    | 4    | 0    | 1    | 2 |
| 3529   | 5     | 5      | 5      | 0    | 2    | 0    | 0    | 0    | 0    | 0    | 0    | 0    | 2    | 2    | 1 |
| 3536   | 6     | 6      | 6      |      |      |      |      |      |      |      |      |      |      |      |   |

| respid | Q46x4 | Q46x5a | Q46x5b | Q47a | Q47b | Q47c | Q47d | Q47e | Q47f | Q47g | Q47h | Q47i | Q47j | Q47k |   |
|--------|-------|--------|--------|------|------|------|------|------|------|------|------|------|------|------|---|
| 3537   | 5     | 5      | 5      | 4    | 5    | 5    | 5    | 5    | 5    | 4    | 5    | 3    | 5    | 3    | 4 |
| 3538   | 5     | 5      | 4      | 5    | 5    | 5    | 4    | 5    | 2    | 4    | 3    | 5    | 4    | 5    |   |
| 3540   | 4     | 3      | 4      |      |      |      |      |      |      |      |      |      |      |      |   |
| 3545   | 5     | 5      | 5      | 0    | 0    | 0    | 0    | 0    |      | 0    | 0    | 0    | 1    |      |   |
| 3547   | 4     | 4      | 4      | 3    | 3    | 4    | 4    | 4    | 5    | 5    | 4    | 4    | 4    | 4    |   |
| 3554   | 6     | 6      | 6      |      |      |      |      |      |      |      |      |      |      |      |   |
| 3556   | 6     | 6      | 6      | 0    | 0    | 0    | 0    | 0    | 0    | 0    | 0    | 0    | 1    | 1    |   |
| 3557   | 5     | 5      | 5      | 4    | 4    | 3    | 3    | 4    | 1    | 3    | 3    | 4    | 4    | 3    |   |
| 3559   | 4     | 4      | 4      |      |      |      |      |      |      |      |      |      |      |      |   |
| 3560   | 6     | 6      | 6      | 2    | 2    | 3    | 3    | 3    | 3    | 2    | 1    | 4    | 2    | 3    |   |
| 3562   | 5     | 5      | 5      |      |      |      |      |      |      |      |      |      |      |      |   |
| 3564   | 5     | 4      | 3      |      |      |      |      |      |      |      |      |      |      |      |   |
| 3565   | 4     | 2      | 4      |      |      |      |      |      |      |      |      |      |      |      |   |
| 3568   | 4     | 4      | 4      | 4    | 4    | 4    | 4    | 4    | 3    | 4    | 4    | 4    | 4    | 4    |   |
| 3572   |       |        |        |      |      |      |      |      |      |      |      |      |      |      |   |
| 3578   |       |        |        |      |      |      |      |      |      |      |      |      |      |      |   |
| 3581   | 5     | 5      | 5      |      |      |      |      |      |      |      |      |      |      |      |   |
| 3583   | 3     | 3      | 4      |      |      |      |      |      |      |      |      |      |      |      |   |
| 3588   | 5     | 5      | 5      | 5    | 5    | 5    | 4    | 5    | 3    | 4    | 3    | 4    | 4    | 4    |   |
| 3591   | 5     | 5      | 5      | 5    | 5    | 5    | 5    | 5    | 0    | 5    | 3    | 5    | 5    | 3    |   |
| 3594   | 5     | 5      | 5      | 5    | 4    | 5    | 4    | 4    | 5    | 4    | 4    | 5    | 5    | 4    |   |
| 3595   | 5     | 5      | 5      | 4    | 5    | 5    | 5    | 5    | 2    | 5    | 5    | 5    | 5    | 5    |   |
| 3596   | 6     | 6      | 6      |      |      |      |      |      |      |      |      |      |      |      |   |
| 3597   | 6     | 6      | 6      | 4    | 4    | 4    | 3    | 4    | 5    | 4    | 4    | 4    | 4    | 4    |   |
| 3598   |       |        |        |      |      |      |      |      |      |      |      |      |      |      |   |
| 3600   | 3     | 4      | 4      |      |      |      |      |      |      |      |      |      |      |      |   |
| 3602   | 5     | 5      | 5      |      |      |      |      |      |      |      |      |      |      |      |   |
| 3604   | 5     | 5      | 5      | 5    | 5    | 5    | 5    | 5    | 0    | 5    | 5    | 5    | 5    | 4    |   |
| 3605   | 4     | 4      | 4      | 0    | 0    | 0    | 0    | 0    | 0    | 0    | 0    | 0    | 1    | 1    |   |
| 3606   | 4     | 4      | 4      | 5    | 5    | 5    | 5    | 5    | 4    | 4    | 4    | 5    | 4    | 4    |   |
| 3607   |       |        |        |      |      |      |      |      |      |      |      |      |      |      |   |
| 3610   | 6     | 6      | 6      | 5    | 5    | 5    | 5    | 5    | 5    | 5    | 4    | 5    | 5    | 5    |   |

| respid | Q46x4 | Q46x5a | Q46x5b | Q47a | Q47b | Q47c | Q47d | Q47e | Q47f | Q47g | Q47h | Q47i | Q47j | Q47k |   |
|--------|-------|--------|--------|------|------|------|------|------|------|------|------|------|------|------|---|
| 3611   | 5     | 5      | 5      | 5    | 5    | 5    | 5    | 5    | 5    | 3    | 5    | 4    | 5    | 5    | 4 |
| 3612   | 5     | 5      | 5      | 5    | 5    | 5    | 5    | 5    | 5    | 0    | 5    | 5    | 5    | 5    | 3 |
| 3614   | 5     | 5      | 5      |      |      |      |      |      |      |      |      |      |      |      |   |
| 3616   | 5     | 5      | 5      | 4    | 3    | 4    | 4    | 5    | 3    | 3    | 3    | 4    | 3    | 3    |   |
| 3617   | 4     | 4      | 4      |      |      |      |      |      |      |      |      |      |      |      |   |
| 3618   |       |        |        |      |      |      |      |      |      |      |      |      |      |      |   |
| 3619   | 4     | 3      | 3      |      |      |      |      |      |      |      |      |      |      |      |   |
| 3621   | 5     | 4      | 4      | 0    | 5    | 0    | 0    | 0    | 0    | 0    | 0    | 0    | 5    | 2    | 1 |
| 3622   | 5     | 5      | 5      |      |      |      |      |      |      |      |      |      |      |      |   |
| 3624   | 5     | 5      | 5      | 5    | 5    | 5    | 4    | 5    | 2    | 5    | 4    | 4    | 4    | 4    | 4 |
| 3626   | 5     | 5      | 5      | 0    | 5    | 5    | 5    | 5    | 5    | 5    | 5    | 5    | 5    | 5    | 5 |
| 3629   | 5     | 5      | 5      |      |      |      |      |      |      |      |      |      |      |      |   |
| 3631   | 5     | 5      | 5      | 5    | 5    | 5    | 5    | 5    | 5    | 0    | 5    | 5    | 5    | 5    | 5 |
| 3632   | 3     | 5      | 4      |      | 4    | 5    | 5    | 5    | 5    | 2    | 4    | 3    | 5    | 4    | 4 |
| 3638   | 5     | 4      | 5      | 4    | 4    | 4    | 4    | 4    | 5    | 2    | 4    | 5    | 5    | 5    | 5 |
| 3640   | 5     | 5      | 5      |      |      |      |      |      |      |      |      |      |      |      |   |
| 3641   | 5     | 5      | 5      |      |      |      |      |      |      |      |      |      |      |      |   |
| 3645   | 4     | 4      | 4      | 4    | 3    | 4    | 3    | 3    | 3    | 3    | 3    | 3    | 1    | 3    | 3 |
| 3650   |       |        |        |      |      |      |      |      |      |      |      |      |      |      |   |
| 3653   | 4     | 4      | 3      | 4    | 3    | 4    | 4    | 4    | 4    | 1    | 4    | 3    | 4    | 4    | 3 |
| 3655   | 4     | 3      | 3      | 2    | 2    | 2    | 2    | 2    | 4    | 1    | 2    | 3    | 4    | 4    | 2 |
| 3657   | 5     | 5      | 4      |      |      |      |      |      |      |      |      |      |      |      |   |
| 3658   | 5     | 5      | 5      |      |      |      |      |      |      |      |      |      |      |      |   |
| 3659   | 6     | 6      | 6      |      |      |      |      |      |      |      |      |      |      |      |   |
| 3664   | 4     | 4      | 4      | 3    | 3    | 4    | 3    | 3    | 2    | 3    | 3    | 3    | 3    | 3    | 4 |
| 3665   | 5     | 5      | 2      | 3    | 2    | 3    | 2    | 3    | 3    | 3    | 2    | 3    | 4    | 4    | 3 |
| 3667   | 5     | 5      | 5      | 5    | 5    | 5    | 5    | 5    | 5    | 2    | 4    | 4    | 4    | 4    | 4 |
| 3668   | 2     | 2      | 3      | 2    | 1    | 2    | 3    | 1    | 3    | 3    | 1    | 2    | 1    | 2    | 2 |
| 3675   |       |        |        |      |      |      |      |      |      |      |      |      |      |      |   |
| 3678   |       |        |        |      |      |      |      |      |      |      |      |      |      |      |   |
| 3680   |       |        |        |      |      |      |      |      |      |      |      |      |      |      |   |
| 3684   | 4     | 4      | 5      | 4    | 4    | 4    | 4    | 5    | 4    | 3    | 4    | 4    | 5    | 5    | 3 |

| respid | Q46x4 | Q46x5a | Q46x5b | Q47a | Q47b | Q47c | Q47d | Q47e | Q47f | Q47g | Q47h | Q47i | Q47j | Q47k |   |
|--------|-------|--------|--------|------|------|------|------|------|------|------|------|------|------|------|---|
| 3685   | 5     | 5      | 5      |      |      |      |      |      |      |      |      |      |      |      |   |
| 3687   | 5     | 5      | 4      | 4    | 4    | 4    | 4    | 4    | 4    | 5    | 3    | 2    | 5    | 4    | 4 |
| 3689   | 4     | 4      | 4      | 4    | 3    | 3    | 3    | 2    | 2    | 2    | 3    | 2    | 3    | 3    | 3 |
| 3690   | 5     | 5      | 5      | 4    | 5    | 5    | 4    | 4    | 4    | 2    | 2    | 4    | 5    | 5    | 4 |
| 3693   |       |        |        |      |      |      |      |      |      |      |      |      |      |      |   |
| 3694   | 5     | 5      | 5      |      |      |      |      |      |      |      |      |      |      |      |   |
| 3695   |       |        |        |      |      |      |      |      |      |      |      |      |      |      |   |
| 3700   | 5     | 5      | 5      |      |      |      |      |      |      |      |      |      |      |      |   |
| 3701   | 5     | 5      | 5      | 4    | 4    | 4    | 4    | 5    | 3    | 3    | 3    | 3    | 3    | 3    | 3 |
| 3703   | 5     | 5      | 5      |      |      |      |      |      |      |      |      |      |      |      |   |
| 3704   | 3     | 3      | 3      |      |      |      |      |      |      |      |      |      |      |      |   |
| 3705   |       |        |        |      |      |      |      |      |      |      |      |      |      |      |   |
| 3709   | 5     | 5      | 5      | 1    | 1    | 1    | 1    | 4    | 0    | 0    | 0    | 0    | 0    | 1    | 1 |
| 3710   | 5     | 5      | 5      | 4    | 4    | 4    | 4    | 5    | 2    | 4    | 3    | 4    | 4    | 4    | 4 |
| 3722   | 5     | 5      | 5      | 5    | 4    | 4    | 4    | 4    | 5    | 0    | 5    | 4    | 4    | 4    | 4 |
| 3725   | 5     | 5      | 5      | 5    | 5    | 4    | 4    | 5    | 3    | 4    | 3    | 4    | 4    | 4    | 4 |
| 3726   | 5     | 5      | 5      |      |      |      |      |      |      |      |      |      |      |      |   |
| 3727   | 5     | 4      | 4      |      |      |      |      |      |      |      |      |      |      |      |   |
| 3728   | 3     | 4      | 4      |      |      |      |      |      |      |      |      |      |      |      |   |
| 3729   | 5     | 5      | 5      | 5    | 5    | 5    | 5    | 5    | 5    | 5    | 5    | 5    | 5    | 5    | 5 |
| 3731   |       |        |        |      |      |      |      |      |      |      |      |      |      |      |   |
| 3738   | 6     | 6      | 6      |      |      |      |      |      |      |      |      |      |      |      |   |
| 3739   | 5     | 5      | 5      |      |      |      |      |      |      |      |      |      |      |      |   |
| 3740   | 5     | 5      | 5      | 5    | 5    |      | 5    | 5    |      | 5    |      | 5    | 5    |      |   |
| 3749   | 4     | 4      | 4      | 0    | 0    | 0    | 0    | 0    | 0    | 0    | 0    | 0    | 0    | 1    | 1 |
| 3758   | 4     | 4      | 3      | 2    | 3    | 3    | 3    |      | 2    | 3    | 2    | 2    | 2    | 2    | 2 |
| 3762   | 5     | 5      | 6      |      |      |      |      |      |      |      |      |      |      |      |   |
| 3765   | 5     | 5      | 5      |      |      |      |      |      |      |      |      |      |      |      |   |
| 3770   | 5     | 5      | 5      |      |      |      |      |      |      |      |      |      |      |      |   |
| 3771   |       |        |        |      |      |      |      |      |      |      |      |      |      |      |   |
| 3778   | 5     | 5      | 5      |      |      |      |      |      |      |      |      |      |      |      |   |
| 3779   | 5     | 5      | 5      | 1    | 1    | 1    | 1    | 5    | 2    | 2    | 3    | 2    | 2    | 2    | 2 |

| respid | Q46x4 | Q46x5a | Q46x5b | Q47a | Q47b | Q47c | Q47d | Q47e | Q47f | Q47g | Q47h | Q47i | Q47j | Q47k |   |
|--------|-------|--------|--------|------|------|------|------|------|------|------|------|------|------|------|---|
| 3780   | 5     | 5      | 5      | 0    | 4    | 0    | 0    | 0    | 0    | 0    | 0    | 0    | 0    | 1    | 1 |
| 3782   | 5     | 5      | 5      |      |      |      |      |      |      |      |      |      |      |      |   |
| 3784   | 4     | 5      | 5      | 4    | 4    | 5    | 5    | 5    | 3    | 4    | 4    | 5    | 5    | 3    |   |
| 3787   | 6     | 6      | 6      |      |      |      |      |      |      |      |      |      |      |      |   |
| 3790   | 4     | 4      | 4      | 5    | 5    | 5    | 5    | 5    | 2    | 5    | 4    | 5    | 5    | 5    |   |
| 3791   | 4     | 4      | 4      | 0    | 3    | 3    | 0    | 3    | 0    |      |      | 4    | 4    | 1    |   |
| 3793   | 5     | 4      | 5      | 5    | 5    | 5    | 4    | 3    | 4    | 4    | 3    | 5    | 5    | 4    |   |
| 3795   | 5     | 5      | 5      |      |      |      |      |      |      |      |      |      |      |      |   |
| 3799   |       |        |        |      |      |      |      |      |      |      |      |      |      |      |   |
| 3801   | 4     | 4      | 3      | 2    | 2    | 3    | 2    | 3    | 2    | 1    | 2    | 2    | 3    | 3    |   |
| 3804   | 5     | 5      | 5      | 3    | 3    | 3    | 3    | 4    | 1    | 3    | 3    | 3    | 3    | 3    |   |
| 3809   | 5     | 5      | 5      |      |      |      |      |      |      |      |      |      |      |      |   |
| 3810   | 5     | 6      | 6      |      |      |      |      |      |      |      |      |      |      |      |   |
| 3813   | 4     | 5      | 5      | 4    | 5    | 5    | 4    | 5    | 3    | 4    | 4    | 5    | 4    | 4    |   |
| 3816   | 5     | 4      | 4      |      |      |      |      |      |      |      |      |      |      |      |   |
| 3820   | 5     | 5      | 5      |      |      |      |      |      |      |      |      |      |      |      |   |
| 3821   | 5     | 5      | 5      | 4    | 4    | 2    | 3    | 4    | 3    | 4    | 3    | 5    | 5    | 4    |   |
| 3823   | 4     | 4      | 4      |      |      |      |      |      |      |      |      |      |      |      |   |
| 3828   | 6     | 6      | 6      |      |      |      |      |      |      |      |      |      |      |      |   |
| 3829   | 5     | 5      | 5      | 4    | 4    | 4    | 4    | 4    | 1    | 4    | 3    | 4    | 4    |      |   |
| 3832   | 5     | 4      | 4      |      |      |      |      |      |      |      |      |      |      |      |   |
| 3835   | 5     | 5      | 4      |      |      |      |      |      |      |      |      |      |      |      |   |
| 3837   | 5     | 5      | 5      |      |      |      |      |      |      |      |      |      |      |      |   |
| 3838   | 5     | 4      | 4      |      |      |      |      |      |      |      |      |      |      |      |   |
| 3839   | 3     | 2      | 2      | 1    | 1    | 1    | 2    | 1    | 1    | 1    | 1    | 1    | 2    | 1    |   |
| 3840   |       |        |        |      |      |      |      |      |      |      |      |      |      |      |   |
| 3842   |       |        |        |      |      |      |      |      |      |      |      |      |      |      |   |
| 3843   | 5     | 5      | 5      |      |      |      |      |      |      |      |      |      |      |      |   |
| 3844   | 4     | 5      | 5      |      |      |      |      |      |      |      |      |      |      |      |   |
| 3850   | 5     | 5      | 5      | 1    | 0    | 0    | 0    | 0    | 0    | 0    | 0    | 0    | 3    | 2    |   |
| 3851   |       |        |        |      |      |      |      |      |      |      |      |      |      |      |   |
| 3856   | 5     | 5      | 5      | 1    | 5    | 5    | 5    | 5    | 4    | 4    | 3    | 5    | 5    | 5    |   |



| respid | Q46x4 | Q46x5a | Q46x5b | Q47a | Q47b | Q47c | Q47d | Q47e | Q47f | Q47g | Q47h | Q47i | Q47j | Q47k |   |
|--------|-------|--------|--------|------|------|------|------|------|------|------|------|------|------|------|---|
| 3859   | 4     | 4      | 4      |      |      | 2    | 5    | 5    | 5    | 1    | 5    | 3    | 4    | 5    | 4 |
| 3860   | 5     | 5      | 5      | 4    | 4    | 4    | 4    | 4    | 5    | 1    | 4    | 4    | 4    | 4    | 4 |
| 3863   | 6     | 6      | 6      | 4    | 4    | 4    | 4    | 4    | 5    | 2    | 4    | 3    | 4    | 4    | 4 |
| 3866   | 6     | 6      | 6      |      |      |      |      |      |      |      |      |      |      |      |   |
| 3867   | 6     | 6      | 6      | 0    | 5    | 0    | 0    | 0    | 0    | 0    | 0    | 0    | 5    | 5    | 1 |
| 3870   | 5     | 5      | 5      | 5    | 5    | 5    | 5    | 5    | 5    | 2    | 4    | 4    | 5    | 4    | 4 |
| 3873   | 3     | 3      | 3      |      |      |      |      |      |      |      |      |      |      |      |   |
| 3875   | 5     | 5      | 5      | 0    | 0    | 0    | 0    | 0    | 0    | 0    | 0    | 0    | 0    | 1    | 1 |
| 3878   | 5     | 5      | 5      |      |      |      |      |      |      |      |      |      |      |      |   |
| 3881   | 5     | 5      | 5      |      |      |      |      |      |      |      |      |      |      |      |   |
| 3883   | 4     | 2      | 2      | 3    | 2    | 3    | 3    | 4    | 3    | 2    | 2    | 3    | 2    | 2    | 3 |
| 3884   | 5     | 4      | 4      | 5    | 5    | 5    | 4    | 5    | 2    | 5    | 4    | 4    | 5    | 5    | 4 |
| 3885   | 3     | 3      | 3      | 3    | 2    | 2    | 3    | 3    | 2    | 2    | 2    | 2    | 2    | 2    | 3 |
| 3886   | 5     | 5      | 5      |      |      |      |      |      |      |      |      |      |      |      |   |
| 3887   | 5     | 5      | 5      | 5    | 5    | 5    | 5    | 5    | 4    | 5    | 4    | 4    | 5    | 4    | 4 |
| 3888   |       |        |        |      |      |      |      |      |      |      |      |      |      |      |   |
| 3889   | 3     | 4      | 4      |      |      |      |      |      |      |      |      |      |      |      |   |
| 3890   | 5     | 2      | 2      | 5    | 5    | 5    | 5    | 5    | 5    | 1    | 5    | 5    | 5    | 5    | 5 |
| 3896   | 5     | 5      | 5      |      |      |      |      |      |      |      |      |      |      |      |   |
| 3902   | 4     | 4      | 4      |      |      |      |      |      |      |      |      |      |      |      |   |
| 3909   | 5     | 5      | 5      |      |      |      |      |      |      |      |      |      |      |      |   |
| 3912   | 5     | 4      | 5      | 3    | 2    | 2    | 2    | 4    | 2    | 2    | 2    | 2    | 2    | 3    | 3 |
| 3922   | 5     | 5      | 5      | 4    | 4    | 4    | 4    | 4    | 5    | 1    | 4    | 3    | 4    | 4    | 4 |
| 3928   | 5     | 5      | 5      |      |      |      |      |      |      |      |      |      |      |      |   |
| 3930   | 5     | 5      | 5      | 5    | 4    | 4    | 4    | 4    | 5    | 2    | 4    | 4    | 5    | 4    | 3 |
| 3931   | 4     | 6      | 6      |      |      |      |      |      |      |      |      |      |      |      |   |
| 3933   | 5     | 4      | 3      | 3    | 2    | 5    | 5    | 5    | 5    | 1    |      | 3    | 5    | 5    | 2 |
| 3935   | 5     | 5      | 5      |      |      |      |      |      |      |      |      |      |      |      |   |
| 3937   | 6     | 6      | 6      |      |      |      |      |      |      |      |      |      |      |      |   |
| 3939   | 6     | 4      | 4      | 5    | 4    | 5    | 5    | 5    | 4    | 3    | 3    | 4    | 5    | 4    | 4 |
| 3942   | 5     | 5      | 5      | 5    | 5    | 5    | 5    | 5    | 5    | 4    | 4    | 3    | 5    | 5    | 5 |
| 3943   | 5     | 4      | 4      |      |      |      |      |      |      |      |      |      |      |      |   |

| respid | Q46x4 | Q46x5a | Q46x5b | Q47a | Q47b | Q47c | Q47d | Q47e | Q47f | Q47g | Q47h | Q47i | Q47j | Q47k |
|--------|-------|--------|--------|------|------|------|------|------|------|------|------|------|------|------|
| 3944   |       |        |        |      |      |      |      |      |      |      |      |      |      |      |
| 3945   | 5     | 4      | 4      | 1    | 4    | 4    | 3    | 3    | 1    | 4    | 3    | 4    | 4    | 2    |
| 3947   | 5     | 5      | 5      | 5    | 5    | 5    | 5    | 5    | 3    | 4    | 4    | 5    | 5    | 4    |
| 3948   | 4     | 5      | 4      | 4    | 4    | 4    | 4    | 4    | 3    | 3    | 3    | 5    | 4    | 4    |
| 3951   | 4     | 4      | 4      | 3    | 3    | 4    |      | 5    | 1    | 4    | 3    | 3    | 4    | 2    |
| 3959   | 5     | 5      | 5      | 5    | 5    | 5    | 5    |      |      |      |      |      |      |      |
| 3969   | 3     | 4      | 4      | 3    | 2    | 2    | 2    | 2    | 1    | 2    | 2    | 4    | 2    | 3    |
| 3973   | 5     | 5      | 5      | 5    | 5    | 5    | 5    | 5    | 0    | 5    | 4    | 5    | 5    | 4    |
| 3975   | 4     | 4      | 4      | 3    | 3    | 3    | 3    | 4    | 1    | 4    | 2    | 2    | 3    | 3    |
| 3976   | 5     | 5      | 5      | 3    | 2    | 3    | 3    | 4    | 2    | 3    | 3    | 4    | 3    | 3    |
| 3977   | 5     | 5      | 5      | 5    | 5    | 5    | 5    | 5    | 2    | 4    | 3    | 4    | 4    | 4    |
| 3978   | 6     | 5      | 5      |      |      |      |      |      |      |      |      |      |      |      |
| 3994   | 5     | 5      | 5      | 5    | 5    | 5    | 5    | 5    | 3    | 5    | 5    | 5    | 5    | 4    |
| 3995   | 5     | 6      | 6      |      |      |      |      |      |      |      |      |      |      |      |
| 3997   | 5     | 3      | 3      | 2    | 4    | 4    | 4    | 4    | 1    | 4    | 4    | 4    | 4    | 4    |
| 3998   | 5     | 5      | 4      | 3    | 4    | 4    | 3    | 3    | 1    | 3    | 3    | 5    | 3    | 2    |
| 3999   | 4     | 4      | 4      |      |      |      |      |      |      |      |      |      |      |      |
| 4002   | 6     | 6      | 4      |      |      |      |      |      |      |      |      |      |      |      |
| 4004   | 6     | 5      | 5      | 3    | 3    | 3    | 3    | 3    | 2    | 3    | 3    | 3    | 3    | 3    |
| 4005   |       |        |        |      |      |      |      |      |      |      |      |      |      |      |
| 4006   | 3     | 4      | 4      | 4    | 2    | 3    | 2    | 4    | 3    | 2    | 3    | 3    | 2    | 3    |
| 4008   | 5     | 5      | 5      | 5    | 5    | 4    | 4    | 4    | 2    | 3    | 3    | 5    | 3    | 3    |
| 4010   | 5     | 5      | 5      | 4    | 4    | 4    | 4    | 5    | 1    | 4    | 3    | 4    | 4    | 4    |
| 4011   | 4     | 4      | 4      | 5    | 4    | 4    | 3    | 4    | 1    | 5    | 2    | 2    | 3    | 4    |
| 4013   | 5     | 5      | 5      | 3    | 3    | 3    | 4    | 5    | 1    | 3    | 3    | 4    | 4    | 5    |
| 4014   | 5     | 5      | 5      | 5    | 5    | 5    | 5    | 5    | 2    | 5    | 5    | 5    | 5    | 5    |
| 4016   | 5     | 5      | 5      | 0    | 5    | 0    | 0    | 0    | 0    | 0    | 0    | 0    | 1    | 1    |
| 4017   | 4     | 5      | 5      | 0    | 0    | 0    | 0    | 0    | 0    | 0    | 0    | 0    | 1    | 1    |
| 4019   | 5     | 4      | 4      | 5    | 5    | 5    | 5    | 5    | 3    | 5    | 3    | 5    | 5    | 5    |
| 4021   |       |        |        |      |      |      |      |      |      |      |      |      |      |      |
| 4023   | 5     | 5      | 5      |      |      |      |      |      |      |      |      |      |      |      |
| 4024   | 5     | 5      | 5      |      |      |      |      |      |      |      |      |      |      |      |

| respid | Q46x4 | Q46x5a | Q46x5b | Q47a | Q47b | Q47c | Q47d | Q47e | Q47f | Q47g | Q47h | Q47i | Q47j | Q47k |
|--------|-------|--------|--------|------|------|------|------|------|------|------|------|------|------|------|
| 4025   | 6     | 6      | 6      |      |      |      |      |      |      |      |      |      |      |      |
| 4027   | 6     | 6      | 6      | 4    | 4    | 4    | 4    | 4    | 5    | 2    | 3    | 2    | 3    | 3    |
| 4032   |       |        |        |      |      |      |      |      |      |      |      |      |      |      |
| 4034   | 5     | 5      | 5      | 0    | 2    | 1    | 2    | 4    | 0    | 0    | 0    | 3    | 3    | 2    |
| 4035   | 4     | 4      | 4      | 3    | 3    | 3    | 3    | 4    | 1    | 4    | 3    | 5    | 5    | 5    |
| 4037   | 4     | 5      | 4      |      | 2    | 1    | 2    | 1    | 1    | 1    | 2    | 1    | 3    | 2    |
| 4040   | 5     | 5      | 4      |      |      |      |      |      |      |      |      |      |      |      |
| 4041   | 6     | 6      | 6      |      | 5    | 5    | 5    | 5    | 0    | 5    | 4    | 5    | 5    | 4    |
| 4042   | 5     | 5      | 5      |      |      |      |      |      |      |      |      |      |      |      |
| 4043   | 5     | 5      | 5      |      |      |      |      |      |      |      |      |      |      |      |
| 4045   | 4     | 5      | 4      |      |      |      |      |      |      |      |      |      |      |      |
| 4046   | 5     | 5      | 5      | 5    | 5    | 5    | 4    | 5    | 1    | 4    | 3    | 4    | 4    | 4    |
| 4048   | 4     | 4      | 3      |      |      |      |      |      |      |      |      |      |      |      |
| 4049   | 5     | 5      | 5      | 0    | 1    | 1    | 1    | 0    | 0    | 0    | 0    | 1    | 1    | 1    |
| 4050   | 5     | 5      | 5      |      |      |      |      |      |      |      |      |      |      |      |
| 4052   | 5     | 5      | 5      | 5    | 5    | 5    | 5    | 5    | 5    | 4    | 3    | 5    | 5    | 5    |
| 4053   |       |        |        |      |      |      |      |      |      |      |      |      |      |      |
| 4060   | 5     | 5      | 5      | 5    | 5    | 5    | 5    | 5    |      | 4    | 4    | 4    | 3    | 5    |
| 4065   | 4     | 4      | 4      | 4    | 4    | 4    | 5    | 5    | 1    | 2    | 3    |      | 4    | 4    |
| 4066   | 5     | 5      | 5      |      |      |      |      |      |      |      |      |      |      |      |
| 4067   | 5     | 5      | 5      | 4    | 5    | 5    | 5    | 4    | 2    | 4    | 3    | 4    | 2    | 3    |
| 4068   | 3     | 3      | 3      | 3    | 3    | 3    | 3    | 4    | 2    | 3    | 3    | 3    | 3    | 3    |
| 4069   | 5     | 5      | 5      | 1    | 4    | 0    | 0    | 0    | 0    | 0    | 0    | 5    | 4    | 4    |
| 4070   | 5     | 5      | 5      | 4    | 5    | 5    | 5    | 5    | 0    | 5    | 4    | 5    | 5    | 4    |
| 4071   | 4     | 2      | 3      | 3    | 2    | 3    | 1    | 2    | 2    | 3    | 2    | 1    | 3    | 3    |
| 4072   | 5     | 5      | 5      | 0    | 4    | 0    | 0    | 0    | 0    | 0    | 0    | 0    |      | 1    |
| 4073   | 5     | 5      | 5      | 5    | 5    | 5    | 5    | 5    | 1    | 4    | 3    | 4    | 4    | 2    |
| 4074   | 5     | 5      | 5      | 5    | 5    | 5    | 5    | 5    | 1    | 4    | 4    | 5    | 4    | 4    |
| 4075   | 5     | 4      | 5      | 3    | 3    | 3    | 3    | 5    | 4    | 3    | 3    | 5    | 3    | 4    |
| 4078   | 5     | 4      | 5      | 5    | 5    | 5    | 4    | 4    | 1    | 4    | 4    | 4    | 4    | 4    |
| 4080   | 5     | 5      | 5      | 3    | 5    | 0    | 0    | 5    | 0    | 0    | 0    | 5    | 5    | 1    |
| 4081   |       |        |        |      |      |      |      |      |      |      |      |      |      |      |

| respid | Q46x4 | Q46x5a | Q46x5b | Q47a | Q47b | Q47c | Q47d | Q47e | Q47f | Q47g | Q47h | Q47i | Q47j | Q47k |
|--------|-------|--------|--------|------|------|------|------|------|------|------|------|------|------|------|
| 4082   | 5     | 5      | 5      |      |      |      |      |      |      |      |      |      |      |      |
| 4083   | 4     | 4      | 4      | 3    | 2    | 3    | 3    | 4    | 5    | 4    | 4    | 4    | 4    | 4    |
| 4084   | 5     | 5      | 5      | 5    | 5    | 5    | 5    | 5    | 1    | 5    | 5    | 5    | 5    | 5    |
| 4086   |       |        |        |      |      |      |      |      |      |      |      |      |      |      |
| 4087   | 5     | 5      | 5      | 3    | 3    | 4    | 4    | 4    | 2    | 3    | 3    | 3    | 3    | 3    |
| 4088   | 3     | 4      | 4      | 5    | 5    | 5    | 5    | 5    | 5    | 4    | 3    | 3    | 3    | 4    |
| 4089   | 5     | 5      | 5      |      |      |      |      |      |      |      |      |      |      |      |
| 4090   | 5     | 4      | 5      | 4    | 3    | 4    | 4    | 5    | 4    | 4    | 4    | 5    | 5    | 4    |
| 4093   | 5     | 5      | 5      | 5    | 5    | 5    | 4    | 5    | 5    | 5    | 4    | 5    | 4    | 5    |
| 4094   | 5     | 5      | 5      |      |      |      |      |      |      |      |      |      |      |      |
| 4095   | 5     | 5      | 5      | 4    | 4    | 4    | 4    | 5    | 1    | 3    | 2    | 4    | 4    | 3    |
| 4096   |       |        |        |      |      |      |      |      |      |      |      |      |      |      |
| 4098   | 5     | 5      | 5      | 0    | 4    | 0    | 0    | 0    | 0    | 0    | 0    |      |      |      |
| 4103   | 5     | 5      | 5      | 3    | 2    | 3    | 2    | 3    | 1    | 2    | 3    | 4    | 3    | 3    |
| 4104   | 4     | 4      | 4      |      |      |      |      |      |      |      |      |      |      |      |
| 4107   | 5     | 5      | 5      | 3    | 2    | 3    | 2    | 3    | 0    | 0    | 2    | 2    | 3    | 3    |
| 4109   | 6     | 6      | 6      |      |      |      |      |      |      |      |      |      |      |      |
| 4110   | 5     | 5      | 5      |      |      |      |      |      |      |      |      |      |      |      |
| 4113   | 5     | 5      | 5      |      |      |      |      |      |      |      |      |      |      |      |
| 4114   | 6     | 6      | 6      | 0    | 0    | 0    | 0    | 0    | 0    | 0    | 0    | 0    | 2    | 2    |
| 4116   | 5     | 5      | 5      | 5    | 5    | 5    | 5    | 5    | 4    | 4    | 4    | 4    |      | 5    |
| 4119   | 5     | 4      | 4      | 5    | 5    | 5    | 5    | 5    | 1    | 4    | 4    | 5    | 5    | 2    |
| 4120   | 5     | 5      | 5      |      |      |      |      |      |      |      |      |      |      |      |
| 4121   | 6     | 6      | 6      |      |      |      |      |      |      |      |      |      |      |      |
| 4122   | 4     | 4      | 4      | 2    | 2    | 2    | 2    | 4    | 1    | 1    | 1    | 2    | 2    | 2    |
| 4124   | 5     | 4      | 4      |      |      |      |      |      |      |      |      |      |      |      |
| 4126   | 4     | 4      | 4      |      |      |      |      |      |      |      |      |      |      |      |
| 4127   | 3     | 3      | 3      | 3    | 3    |      | 3    | 3    | 0    | 3    | 0    | 3    | 3    | 3    |
| 4131   | 4     | 4      | 4      |      |      |      |      |      |      |      |      |      |      |      |
| 4134   | 6     | 6      | 6      |      |      |      |      |      |      |      |      |      |      |      |
| 4144   | 5     | 5      | 5      | 0    | 0    | 0    | 0    | 0    | 0    | 0    | 0    | 0    | 5    | 1    |
| 4145   | 4     | 4      | 4      | 4    | 4    | 5    | 4    | 4    | 3    | 4    | 4    | 5    | 5    | 4    |

| respid | Q46x4 | Q46x5a | Q46x5b | Q47a | Q47b | Q47c | Q47d | Q47e | Q47f | Q47g | Q47h | Q47i | Q47j | Q47k |
|--------|-------|--------|--------|------|------|------|------|------|------|------|------|------|------|------|
| 4146   | 5     | 5      | 5      | 5    | 5    | 5    | 5    | 5    | 5    | 4    | 5    | 5    | 5    | 5    |
| 4147   | 5     | 5      | 5      | 5    | 5    | 5    | 5    | 5    | 5    | 3    | 5    | 5    | 5    | 5    |
| 4149   | 2     | 4      | 3      |      |      |      |      |      |      |      |      |      |      |      |
| 4150   |       |        |        |      |      |      |      |      |      |      |      |      |      |      |
| 4151   | 6     | 6      | 6      |      |      |      |      |      |      |      |      |      |      |      |
| 4153   | 5     | 5      | 5      |      |      |      |      |      |      |      |      |      |      |      |
| 4155   | 6     | 6      | 6      |      |      |      |      |      |      |      |      |      |      |      |
| 4157   | 5     | 5      | 5      | 5    | 4    | 4    | 5    | 5    | 2    | 5    | 3    | 5    | 5    | 3    |
| 4159   | 4     | 4      | 4      |      |      |      |      |      |      |      |      |      |      |      |
| 4160   | 5     | 5      | 4      | 5    | 5    | 5    | 5    | 4    | 4    | 4    | 3    | 5    | 4    | 4    |
| 4161   | 4     | 4      | 3      | 0    | 4    | 0    | 0    | 0    | 0    | 0    | 0    | 0    | 5    | 1    |
| 4163   | 5     | 4      | 4      |      |      |      |      |      |      |      |      |      |      |      |
| 4164   | 5     | 5      | 5      | 4    | 4    | 4    | 4    | 5    | 2    | 3    | 3    | 5    | 4    | 3    |
| 4165   | 5     | 5      | 5      |      |      |      |      |      |      |      |      |      |      |      |
| 4166   | 5     | 5      | 5      | 5    | 5    | 5    | 5    | 4    | 2    | 4    | 3    | 5    | 5    | 5    |
| 4167   | 6     | 6      | 6      |      |      |      |      |      |      |      |      |      |      |      |
| 4170   | 4     | 4      | 4      |      |      |      |      |      |      |      |      |      |      |      |
| 4172   | 5     | 5      | 5      | 4    | 3    | 5    | 4    | 4    | 2    | 4    | 4    | 4    | 4    | 3    |
| 4173   | 5     | 5      | 5      | 5    | 5    | 5    | 5    | 5    | 3    | 4    | 4    | 5    | 5    | 5    |
| 4180   | 5     | 5      | 5      |      |      |      |      |      |      |      |      |      |      |      |
| 4185   | 5     | 5      | 5      | 3    | 3    | 4    | 2    | 2    | 4    | 3    | 4    | 4    | 3    | 4    |
| 4187   | 5     | 5      | 5      | 5    | 5    | 5    | 5    | 5    | 4    | 5    | 5    | 5    | 5    | 5    |
| 4190   | 5     | 5      | 5      | 3    | 3    | 5    | 5    | 5    | 1    | 4    | 3    | 5    | 4    | 4    |
| 4191   | 5     | 4      | 5      | 3    | 4    | 3    | 3    | 4    | 3    | 4    | 3    | 3    | 4    | 3    |
| 4193   |       |        |        |      |      |      |      |      |      |      |      |      |      |      |
| 4194   | 5     | 5      | 5      | 4    | 5    | 5    | 5    | 5    | 2    | 5    | 5    | 5    | 5    | 4    |
| 4195   | 5     | 5      | 5      | 0    | 4    | 0    | 0    | 0    | 0    | 0    | 0    | 0    | 5    | 1    |
| 4196   |       |        |        |      |      |      |      |      |      |      |      |      |      |      |
| 4197   | 5     | 5      | 5      |      |      |      |      |      |      |      |      |      |      |      |
| 4198   | 6     | 5      | 5      | 0    | 0    | 0    | 0    | 0    | 0    | 0    | 0    | 0    | 0    | 1    |
| 4199   | 5     | 4      | 4      |      |      |      |      |      |      |      |      |      |      |      |
| 4205   | 6     | 6      | 6      |      |      |      |      |      |      |      |      |      |      |      |

| respid | Q46x4 | Q46x5a | Q46x5b | Q47a | Q47b | Q47c | Q47d | Q47e | Q47f | Q47g | Q47h | Q47i | Q47j | Q47k |   |
|--------|-------|--------|--------|------|------|------|------|------|------|------|------|------|------|------|---|
| 4206   |       |        |        |      |      |      |      |      |      |      |      |      |      |      |   |
| 4207   | 4     | 3      | 4      | 5    | 5    | 5    | 5    | 5    | 5    | 1    | 5    | 3    | 5    | 5    | 2 |
| 4214   | 5     | 5      | 4      | 5    | 5    | 5    | 5    | 5    | 5    |      | 5    | 4    | 5    | 5    |   |
| 4215   | 5     | 5      | 5      | 5    | 5    | 5    | 5    | 5    | 5    | 2    | 5    | 5    | 5    | 5    | 5 |
| 4217   | 5     | 5      | 5      | 4    | 4    | 5    | 5    | 5    | 5    | 2    | 4    | 3    | 5    | 5    | 4 |
| 4219   | 6     | 5      | 5      |      |      |      |      |      |      |      |      |      |      |      |   |
| 4223   | 4     | 4      | 4      |      |      |      |      |      |      |      |      |      |      |      |   |
| 4226   | 4     | 5      | 4      | 4    | 4    | 4    | 4    | 5    | 2    | 2    | 2    | 3    | 2    | 2    | 3 |
| 4229   | 5     | 5      | 5      |      |      |      |      |      |      |      |      |      |      |      |   |
| 4230   | 4     | 4      | 4      | 5    | 5    | 5    | 5    | 5    | 2    | 4    | 3    | 4    | 4    | 4    | 4 |
| 4232   | 5     | 5      | 5      |      |      |      |      |      |      |      |      |      |      |      |   |
| 4233   | 5     | 5      | 5      | 4    | 4    | 5    | 5    | 5    | 3    | 5    | 5    | 5    | 5    | 5    | 5 |
| 4234   | 5     | 5      | 5      |      |      |      |      |      |      |      |      |      |      |      |   |
| 4235   | 5     | 5      | 5      | 3    | 3    | 3    | 3    | 4    | 1    | 3    | 3    | 3    | 3    | 3    | 3 |
| 4236   | 5     | 5      | 5      |      |      |      |      |      |      |      |      |      |      |      |   |
| 4237   | 5     | 4      | 4      |      |      |      |      |      |      |      |      |      |      |      |   |
| 4238   | 4     | 4      | 4      | 5    | 4    | 4    | 4    | 5    | 3    | 4    | 3    | 5    | 4    | 4    | 4 |
| 4240   | 5     | 5      | 5      | 5    | 5    | 5    | 5    | 5    | 3    | 5    | 4    | 5    | 5    | 5    | 5 |
| 4241   | 5     | 5      | 5      | 5    | 5    | 5    | 5    | 5    | 1    | 5    | 3    | 5    | 5    | 5    | 5 |
| 4247   | 6     | 6      | 6      | 5    | 5    | 5    | 5    | 5    | 3    | 5    | 4    | 5    | 5    | 5    | 5 |
| 4250   | 6     | 6      | 6      |      |      |      |      |      |      |      |      |      |      |      |   |
| 4251   | 6     | 6      | 6      |      |      |      |      |      |      |      |      |      |      |      |   |
| 4253   | 3     | 4      | 3      | 5    | 5    | 5    | 4    | 5    |      | 3    | 2    | 2    | 2    | 2    | 3 |
| 4254   | 5     | 5      | 5      |      |      |      |      |      |      |      |      |      |      |      |   |
| 4258   | 4     | 4      | 4      | 1    | 1    | 1    | 1    | 2    | 1    | 2    | 1    | 2    | 2    | 2    | 2 |
| 4260   | 5     | 5      | 5      |      |      |      |      |      |      |      |      |      |      |      |   |
| 4263   | 3     | 4      | 4      |      |      |      |      |      |      |      |      |      |      |      |   |
| 4265   | 5     | 5      | 5      | 0    | 0    | 0    | 0    | 0    | 0    | 0    | 0    | 0    | 0    | 0    | 0 |
| 4266   | 5     | 5      | 5      | 4    | 5    | 4    | 3    | 4    | 1    | 4    | 2    | 5    | 4    | 4    | 4 |
| 4267   | 4     | 5      | 5      | 4    | 5    | 5    | 5    | 5    | 3    | 4    | 4    | 4    | 4    | 4    | 5 |
| 4270   | 5     | 5      | 5      | 4    | 4    | 4    | 4    | 5    |      | 4    | 4    | 5    | 5    | 5    | 4 |
| 4273   | 5     | 5      | 5      |      |      |      |      |      |      |      |      |      |      |      |   |

| respid | Q46x4 | Q46x5a | Q46x5b | Q47a | Q47b | Q47c | Q47d | Q47e | Q47f | Q47g | Q47h | Q47i | Q47j | Q47k |   |
|--------|-------|--------|--------|------|------|------|------|------|------|------|------|------|------|------|---|
| 4280   | 5     | 5      | 5      | 5    | 5    | 5    | 5    | 5    | 5    | 3    | 5    | 4    | 5    | 5    | 5 |
| 4281   | 6     | 6      | 6      | 0    | 0    | 0    | 0    | 0    | 0    | 0    | 0    | 0    | 0    | 1    | 1 |
| 4282   | 4     | 4      | 4      | 5    | 5    | 5    | 5    | 5    | 5    | 2    | 4    | 4    | 5    | 5    | 4 |
| 4283   |       |        |        |      |      |      |      |      |      |      |      |      |      |      |   |
| 4286   | 6     | 6      | 6      | 0    | 0    | 0    | 0    | 0    | 0    | 0    | 0    | 0    | 0    | 1    | 1 |
| 4287   | 6     | 6      | 6      |      |      |      |      |      |      |      |      |      |      |      |   |
| 4289   | 4     | 5      | 5      |      |      |      |      |      |      |      |      |      |      |      |   |
| 4290   | 3     | 6      | 5      | 0    | 5    | 4    | 4    | 5    | 0    | 5    | 0    | 5    | 5    | 5    | 1 |
| 4291   | 5     | 5      | 5      |      |      |      |      |      |      |      |      |      |      |      |   |
| 4292   | 5     | 4      | 4      | 4    | 4    | 4    | 4    | 4    | 3    | 4    | 3    | 3    | 3    | 4    | 4 |
| 4293   | 6     | 6      | 6      | 0    | 0    | 0    | 0    | 0    | 0    | 0    | 0    | 0    | 0    | 1    | 3 |
| 4294   | 4     | 4      | 3      |      |      |      |      |      |      |      |      |      |      |      |   |
| 4295   |       |        |        |      |      |      |      |      |      |      |      |      |      |      |   |
| 4296   | 6     | 6      | 6      | 0    | 0    | 0    | 0    | 0    | 0    | 0    | 0    | 0    | 0    | 1    | 1 |
| 4297   | 4     | 5      | 4      | 4    | 4    | 4    | 4    | 4    | 1    | 3    | 3    | 3    | 4    | 3    | 3 |
| 4298   | 5     | 5      | 5      |      |      |      |      |      |      |      |      |      |      |      |   |
| 4299   | 6     | 2      | 2      |      |      |      |      |      |      |      |      |      |      |      |   |
| 4300   | 5     | 5      | 4      |      |      |      |      |      |      |      |      |      |      |      |   |
| 4301   |       |        |        |      |      |      |      |      |      |      |      |      |      |      |   |
| 4302   | 5     | 5      | 5      |      |      |      |      |      |      |      |      |      |      |      |   |
| 4304   | 5     | 4      | 4      | 3    | 4    | 4    | 4    | 4    | 2    | 2    | 3    | 3    | 4    | 2    | 3 |
| 4305   | 4     | 4      | 4      | 4    | 4    | 4    | 4    | 4    | 3    | 3    | 3    | 3    | 4    | 4    | 4 |
| 4307   | 5     | 5      | 4      | 1    | 1    | 0    | 0    | 0    | 0    | 0    | 0    | 0    | 2    | 3    | 2 |
| 4308   | 4     | 4      | 4      | 0    | 4    | 0    | 0    | 0    | 0    | 0    | 0    | 0    | 0    | 4    | 1 |
| 4312   |       |        |        |      |      |      |      |      |      |      |      |      |      |      |   |
| 4314   | 4     | 4      | 4      |      |      |      |      |      |      |      |      |      |      |      |   |
| 4316   | 5     | 5      | 6      | 5    | 4    | 4    | 4    | 5    | 2    | 3    | 3    | 3    | 4    | 4    | 5 |
| 4317   | 4     | 3      | 1      |      |      |      |      |      |      |      |      |      |      |      |   |
| 4319   | 5     | 5      | 5      |      |      |      |      |      |      |      |      |      |      |      |   |
| 4323   | 2     | 4      | 4      |      |      |      |      |      |      |      |      |      |      |      |   |
| 4337   | 5     | 5      | 5      |      |      |      |      |      |      |      |      |      |      |      |   |
| 4341   | 4     | 4      | 4      |      |      |      |      |      |      |      |      |      |      |      |   |

| respid | Q46x4 | Q46x5a | Q46x5b | Q47a | Q47b | Q47c | Q47d | Q47e | Q47f | Q47g | Q47h | Q47i | Q47j | Q47k |
|--------|-------|--------|--------|------|------|------|------|------|------|------|------|------|------|------|
| 4342   | 4     | 4      | 4      |      |      |      |      |      |      |      |      |      |      |      |
| 4344   | 6     | 5      | 5      | 3    | 4    | 4    | 4    | 4    | 3    | 4    | 3    | 4    | 4    | 4    |
| 4345   | 5     | 5      | 5      |      |      |      |      |      |      |      |      |      |      |      |
| 4346   | 6     | 6      | 6      |      |      |      |      |      |      |      |      |      |      |      |
| 4347   | 6     | 6      | 6      | 5    | 4    | 5    | 5    | 5    | 5    | 4    | 4    | 5    | 4    | 5    |
| 4350   |       |        |        |      |      |      |      |      |      |      |      |      |      |      |
| 4352   | 5     | 5      | 5      | 5    | 1    | 1    | 1    | 5    | 0    | 1    | 5    | 5    | 2    | 5    |
| 4353   |       |        |        |      |      |      |      |      |      |      |      |      |      |      |
| 4355   | 5     | 4      | 5      | 0    | 0    | 0    | 0    | 0    | 0    | 0    | 0    | 0    | 1    | 1    |
| 4356   | 5     | 4      | 4      | 1    | 1    | 1    | 1    | 4    | 5    | 4    | 3    | 4    | 3    | 3    |
| 4358   |       |        |        |      |      |      |      |      |      |      |      |      |      |      |
| 4359   | 6     | 6      | 6      | 5    | 5    | 5    | 4    | 4    | 1    | 4    | 4    | 4    | 4    | 4    |
| 4360   | 4     | 4      | 4      | 4    | 4    | 4    | 4    | 4    | 3    | 3    | 3    | 4    | 3    | 3    |
| 4361   | 3     | 3      | 3      | 3    | 2    | 3    | 2    | 2    | 2    | 2    | 3    | 2    | 3    | 3    |
| 4363   | 5     | 5      | 5      | 5    | 5    | 5    | 4    | 5    | 0    | 0    | 0    | 5    | 5    | 1    |
| 4364   | 4     | 6      | 6      |      |      |      |      |      |      |      |      |      |      |      |
| 4365   | 5     | 5      | 5      | 0    | 1    | 0    | 0    | 0    | 0    | 0    | 0    | 0    | 1    | 1    |
| 4367   | 5     | 5      | 5      | 3    | 3    | 2    | 3    | 4    | 1    | 3    | 3    | 2    | 3    | 4    |
| 4369   | 5     | 5      | 5      |      |      |      |      |      |      |      |      |      |      |      |
| 4373   | 5     | 5      | 5      |      |      |      |      |      |      |      |      |      |      |      |
| 4374   | 4     | 4      | 3      |      |      |      |      |      |      |      |      |      |      |      |
| 4375   |       |        |        |      |      |      |      |      |      |      |      |      |      |      |
| 4378   | 6     | 6      | 6      |      |      |      |      |      |      |      |      |      |      |      |
| 4379   | 4     | 5      | 4      | 4    | 5    | 5    | 5    | 4    | 3    | 5    | 4    | 5    | 5    | 4    |
| 4382   | 5     | 5      | 5      | 4    | 4    | 4    | 4    | 5    | 1    | 3    | 3    | 3    | 3    | 2    |
| 4383   |       |        |        |      |      |      |      |      |      |      |      |      |      |      |
| 4384   | 5     | 5      | 4      | 5    | 5    | 5    | 5    | 5    | 4    | 5    | 5    | 5    | 5    | 5    |
| 4385   | 5     | 5      | 5      | 4    | 4    | 4    | 4    | 4    | 2    | 4    | 3    | 4    | 4    | 4    |
| 4388   | 4     | 2      | 3      | 2    | 2    | 2    | 2    | 2    | 1    | 2    | 1    | 2    | 2    | 3    |
| 4389   | 5     | 5      | 5      |      |      |      |      |      |      |      |      |      |      |      |
| 4391   | 5     | 5      | 5      |      |      |      |      |      |      |      |      |      |      |      |
| 4392   | 4     | 4      | 3      | 5    | 5    | 5    | 5    | 5    | 4    | 5    | 4    | 5    | 5    | 4    |



| respid | Q46x4 | Q46x5a | Q46x5b | Q47a | Q47b | Q47c | Q47d | Q47e | Q47f | Q47g | Q47h | Q47i | Q47j | Q47k |
|--------|-------|--------|--------|------|------|------|------|------|------|------|------|------|------|------|
| 4393   | 6     | 6      | 6      |      |      |      |      |      |      |      |      |      |      |      |
| 4395   | 5     | 4      | 5      | 4    | 4    | 5    | 4    | 4    | 2    | 4    | 3    | 4    | 4    | 4    |
| 4397   | 4     | 5      | 5      |      |      |      |      |      |      |      |      |      |      |      |
| 4398   | 4     | 5      | 5      |      |      |      |      |      |      |      |      |      |      |      |
| 4399   | 5     | 5      | 5      | 4    | 5    | 5    | 5    | 5    | 4    | 4    | 4    | 4    | 4    | 4    |
| 4400   |       |        |        |      |      |      |      |      |      |      |      |      |      |      |
| 4401   | 5     | 5      | 5      | 0    | 2    | 0    | 0    | 0    | 0    | 0    | 0    | 4    | 2    | 2    |
| 4402   | 5     | 4      | 5      |      |      |      |      |      |      |      |      |      |      |      |
| 4404   | 5     | 5      | 5      |      |      |      |      |      |      |      |      |      |      |      |
| 4405   |       |        |        |      |      |      |      |      |      |      |      |      |      |      |
| 4407   | 5     | 5      | 5      | 5    | 5    | 5    | 5    | 5    | 5    | 5    | 4    | 5    | 5    | 5    |
| 4408   | 5     | 4      | 4      |      |      |      |      |      |      |      |      |      |      |      |
| 4411   |       |        |        |      |      |      |      |      |      |      |      |      |      |      |
| 4420   | 5     | 5      | 5      |      |      |      |      |      |      |      |      |      |      |      |
| 4421   | 5     | 5      | 5      |      |      |      |      |      |      |      |      |      |      |      |
| 4424   | 2     | 3      | 1      |      |      |      |      |      |      |      |      |      |      |      |
| 4425   | 3     | 4      | 3      |      |      |      |      |      |      |      |      |      |      |      |
| 4427   | 6     | 6      | 6      |      |      |      |      |      |      |      |      |      |      |      |
| 4430   | 5     | 5      | 5      |      |      |      |      |      |      |      |      |      |      |      |
| 4431   | 5     | 5      | 4      |      |      |      |      |      |      |      |      |      |      |      |
| 4432   | 5     | 5      | 5      | 0    | 0    | 0    | 0    | 0    | 0    |      | 0    | 0    | 1    | 1    |
| 4436   | 5     | 6      | 6      |      |      |      |      |      |      |      |      |      |      |      |
| 4439   | 5     | 5      | 5      | 5    | 5    | 5    | 5    | 5    | 0    | 5    |      | 5    | 5    | 5    |
| 4451   | 4     | 3      | 3      | 4    | 4    | 0    | 0    | 0    | 0    | 0    | 0    | 2    | 2    | 1    |
| 4452   | 4     | 4      | 4      | 4    | 3    | 3    | 3    | 4    | 2    | 3    | 3    | 3    | 3    | 3    |
| 4458   | 5     | 4      | 4      | 4    | 5    | 5    | 5    | 5    | 4    | 5    | 4    | 5    | 5    | 5    |
| 4464   | 3     | 2      | 3      |      |      |      |      |      |      |      |      |      |      |      |
| 4465   | 5     | 5      | 5      | 1    | 4    | 5    | 5    | 4    | 1    | 4    | 3    | 5    | 5    | 2    |
| 4467   | 6     | 6      | 6      | 4    | 5    | 5    | 5    | 4    | 2    | 3    | 3    | 4    | 4    | 3    |
| 4470   | 4     | 4      | 4      | 0    | 1    | 0    | 0    | 0    | 0    | 0    | 0    | 0    | 1    | 1    |
| 4471   | 4     | 4      | 4      | 4    | 4    | 0    | 4    | 5    | 1    |      | 3    | 5    | 4    | 3    |
| 4472   | 4     | 5      | 4      | 4    | 2    | 2    | 2    | 3    | 1    | 2    | 3    | 4    | 4    | 2    |

| respid | Q46x4 | Q46x5a | Q46x5b | Q47a | Q47b | Q47c | Q47d | Q47e | Q47f | Q47g | Q47h | Q47i | Q47j | Q47k |
|--------|-------|--------|--------|------|------|------|------|------|------|------|------|------|------|------|
| 4473   | 5     | 5      | 5      | 5    | 5    | 5    | 5    | 5    | 5    | 5    | 5    | 5    | 5    | 5    |
| 4475   | 6     | 6      | 6      |      |      |      |      |      |      |      |      |      |      |      |
| 4476   | 2     | 2      | 3      |      |      |      |      |      |      |      |      |      |      |      |
| 4478   | 5     | 5      | 5      | 0    | 5    | 0    | 0    | 0    | 0    | 0    | 0    | 0    | 1    | 1    |
| 4485   | 5     | 5      | 5      |      |      |      |      |      |      |      |      |      |      |      |
| 4486   | 5     | 5      | 5      |      |      |      |      |      |      |      |      |      |      |      |
| 4490   |       |        |        |      |      |      |      |      |      |      |      |      |      |      |
| 4502   |       |        |        |      |      |      |      |      |      |      |      |      |      |      |
| 4503   | 6     | 6      | 6      |      |      |      |      |      |      |      |      |      |      |      |
| 4504   | 5     | 5      | 5      |      |      |      |      |      |      |      |      |      |      |      |
| 4506   | 5     | 5      | 5      |      |      |      |      |      |      |      |      |      |      |      |
| 4508   | 5     | 5      | 5      |      |      |      |      |      |      |      |      |      |      |      |
| 4515   | 5     | 5      | 5      | 4    | 4    | 5    | 4    | 4    | 2    | 4    | 4    | 5    | 5    | 4    |
| 4516   | 4     | 4      | 4      | 5    | 5    | 5    | 5    | 5    | 4    | 4    | 3    | 5    | 5    | 5    |
| 4519   | 6     | 6      | 6      | 5    | 5    | 5    | 5    | 5    | 5    | 5    | 5    | 5    | 5    | 5    |
| 4523   | 6     | 6      | 6      |      |      |      |      |      |      |      |      |      |      |      |
| 4525   | 6     | 5      | 5      | 4    | 4    | 5    | 4    | 5    | 2    | 5    | 4    | 5    | 5    | 4    |
| 4526   | 5     | 5      | 5      | 0    | 0    | 0    | 0    | 0    | 0    | 0    | 0    | 0    | 1    | 1    |
| 4528   |       |        |        |      |      |      |      |      |      |      |      |      |      |      |
| 4530   | 5     | 5      | 5      | 0    | 0    | 0    | 0    | 0    |      | 0    | 0    | 0    | 1    |      |
| 4531   | 4     | 5      | 4      |      |      |      |      |      |      |      |      |      |      |      |
| 4532   | 6     | 6      | 6      | 4    | 4    | 4    | 4    | 5    | 2    | 4    | 4    | 5    | 5    | 4    |
| 4537   | 5     | 5      | 5      |      |      |      |      |      |      |      |      |      |      |      |
| 4538   | 6     | 6      | 5      |      |      |      |      |      |      |      |      |      |      |      |
| 4539   | 3     | 4      | 4      |      |      |      |      |      |      |      |      |      |      |      |
| 4541   | 5     | 5      | 5      | 5    | 5    | 5    | 5    | 5    | 5    | 4    | 4    | 5    | 4    | 3    |
| 4543   |       |        |        |      |      |      |      |      |      |      |      |      |      |      |
| 4544   | 5     | 5      | 5      |      |      |      |      |      |      |      |      |      |      |      |
| 4546   | 5     | 5      | 5      | 5    | 5    | 5    | 5    | 5    | 5    | 5    | 4    | 5    | 5    | 5    |
| 4547   | 5     | 5      | 5      |      |      |      |      |      |      |      |      |      |      |      |
| 4549   |       |        |        |      |      |      |      |      |      |      |      |      |      |      |
| 4550   | 3     | 3      | 3      | 2    | 2    | 2    | 2    | 4    | 1    | 2    | 2    |      | 2    | 2    |

| respid | Q46x4 | Q46x5a | Q46x5b | Q47a | Q47b | Q47c | Q47d | Q47e | Q47f | Q47g | Q47h | Q47i | Q47j | Q47k |   |
|--------|-------|--------|--------|------|------|------|------|------|------|------|------|------|------|------|---|
| 4551   | 5     | 5      | 5      | 5    | 5    | 5    | 5    | 5    | 5    | 1    | 5    | 4    | 5    | 4    | 3 |
| 4554   | 5     | 5      | 5      | 5    | 5    | 1    | 5    | 5    | 5    |      |      | 4    | 5    | 4    |   |
| 4557   |       |        |        |      |      |      |      |      |      |      |      |      |      |      |   |
| 4565   | 6     | 5      | 5      |      |      |      |      |      |      |      |      |      |      |      |   |
| 4568   | 5     | 5      | 5      | 5    | 5    | 5    | 5    | 5    | 5    | 1    | 4    | 3    | 5    | 4    | 3 |
| 4569   | 5     | 5      | 5      |      |      |      |      |      |      |      |      |      |      |      |   |
| 4570   | 6     | 5      | 5      | 5    | 5    | 5    | 5    | 5    | 5    | 5    | 5    | 5    | 4    | 5    | 5 |
| 4572   | 5     | 5      | 5      | 5    | 5    | 5    | 5    | 5    | 5    | 3    | 4    | 4    | 5    | 4    | 5 |
| 4574   | 5     | 5      | 5      | 5    | 5    | 5    | 5    | 2    | 4    | 3    | 3    | 4    | 5    | 4    | 2 |
| 4576   | 4     | 4      | 4      |      |      |      |      |      |      |      |      |      |      |      |   |
| 4578   | 5     | 5      | 5      | 5    | 5    | 5    | 5    | 5    | 5    |      | 5    | 4    | 5    |      |   |
| 4579   |       |        |        |      |      |      |      |      |      |      |      |      |      |      |   |
| 4580   | 5     | 5      | 5      |      |      |      |      |      |      |      |      |      |      |      |   |
| 4581   |       |        |        |      |      |      |      |      |      |      |      |      |      |      |   |
| 4584   | 5     | 5      | 5      | 5    | 5    | 5    | 5    |      | 5    | 0    | 5    | 5    | 5    | 5    | 5 |
| 4586   | 5     | 5      | 5      | 4    | 5    | 5    | 5    | 5    | 4    | 2    | 4    | 3    | 5    | 5    | 4 |
| 4587   | 4     | 4      | 4      | 2    | 2    | 1    | 2    | 5    | 5    | 1    | 2    | 2    | 4    | 2    | 4 |
| 4590   | 4     | 4      | 4      | 5    | 5    | 5    | 5    | 5    | 5    | 4    | 4    | 4    | 5    | 5    | 5 |
| 4592   | 6     | 6      | 6      | 5    | 5    | 5    | 5    | 5    | 5    | 3    | 5    | 5    | 5    | 4    | 4 |
| 4593   | 4     | 4      | 5      |      |      |      |      |      |      |      |      |      |      |      |   |
| 4595   | 4     | 4      | 4      | 4    | 4    | 4    | 4    | 4    | 4    | 1    | 4    | 3    | 4    | 4    | 4 |
| 4597   | 6     | 6      | 6      | 5    | 5    | 5    | 5    | 5    | 5    | 3    | 5    | 4    | 5    | 5    | 4 |
| 4598   | 3     | 3      | 3      | 0    | 2    | 2    | 2    | 2    | 4    | 1    | 2    | 3    | 2    | 2    | 2 |
| 4599   | 6     | 5      | 5      | 1    | 1    | 1    | 1    | 1    | 0    | 0    | 0    | 0    | 1    | 1    | 2 |
| 4600   | 5     | 5      | 4      |      |      |      |      |      |      |      |      |      |      |      |   |
| 4601   | 5     | 5      | 5      |      |      |      |      |      |      |      |      |      |      |      |   |
| 4608   | 5     | 5      | 5      |      |      |      |      |      |      |      |      |      |      |      |   |
| 4609   | 6     | 6      | 6      | 4    | 4    | 4    | 4    | 5    | 5    | 1    | 4    | 3    | 5    | 4    | 3 |
| 4611   | 5     | 6      | 6      |      |      |      |      |      |      |      |      |      |      |      |   |
| 4612   | 4     | 4      | 4      | 1    | 1    | 1    | 1    | 4    | 4    | 1    | 1    | 1    | 1    | 1    | 1 |
| 4613   |       |        |        |      |      |      |      |      |      |      |      |      |      |      |   |
| 4616   | 5     | 4      | 5      | 4    | 2    | 2    | 2    | 2    | 4    | 3    | 2    | 2    | 2    | 4    | 4 |

| respid | Q46x4 | Q46x5a | Q46x5b | Q47a | Q47b | Q47c | Q47d | Q47e | Q47f | Q47g | Q47h | Q47i | Q47j | Q47k |
|--------|-------|--------|--------|------|------|------|------|------|------|------|------|------|------|------|
| 4617   | 5     | 5      | 5      |      |      |      |      |      |      |      |      |      |      |      |
| 4620   | 4     | 4      | 4      |      |      |      |      |      |      |      |      |      |      |      |
| 4621   | 5     | 5      | 5      | 5    | 5    | 5    | 5    | 5    |      | 5    | 4    | 5    | 5    | 5    |
| 4622   | 6     | 4      | 4      | 4    | 4    | 3    | 2    | 3    | 1    | 1    | 2    | 2    | 3    | 2    |
| 4624   | 6     | 6      | 5      |      |      |      |      |      |      |      |      |      |      |      |
| 4625   | 4     | 5      | 5      | 4    | 5    | 5    | 5    | 5    | 0    | 4    | 3    | 5    | 5    | 5    |
| 4627   | 5     | 5      | 5      | 2    | 4    | 4    | 4    | 4    | 1    | 4    | 2    | 5    | 5    | 3    |
| 4628   | 3     | 3      | 3      | 0    | 2    | 1    | 1    | 3    | 1    | 1    | 2    | 3    | 3    | 3    |
| 4629   |       |        |        |      |      |      |      |      |      |      |      |      |      |      |
| 4630   | 4     | 4      | 4      |      |      |      |      |      |      |      |      |      |      |      |
| 4632   | 6     | 6      | 6      | 5    | 5    | 5    | 5    | 5    | 2    | 5    | 5    | 5    | 5    | 3    |
| 4634   | 4     | 4      | 4      |      |      |      |      |      |      |      |      |      |      |      |
| 4635   | 6     | 6      | 6      | 5    | 5    | 5    | 5    | 5    | 2    | 4    | 3    | 5    | 5    | 3    |
| 4636   | 5     | 5      | 5      | 0    | 0    | 0    | 0    | 0    | 0    | 0    | 0    | 0    | 1    | 1    |
| 4637   | 5     | 5      | 5      | 4    | 4    | 4    | 4    | 4    | 5    | 4    | 4    | 4    | 4    | 4    |
| 4638   | 4     | 4      | 4      | 5    | 4    | 5    | 5    | 5    | 5    | 4    | 4    | 5    | 5    | 4    |
| 4639   | 4     | 4      | 4      |      |      |      |      |      |      |      |      |      |      |      |
| 4641   | 5     | 5      | 5      |      |      |      |      |      |      |      |      |      |      |      |
| 4643   | 5     | 5      | 5      | 5    | 5    | 5    | 5    | 5    | 1    | 5    | 3    | 5    | 5    | 5    |
| 4645   | 5     | 5      | 5      | 5    | 5    | 5    | 5    | 5    | 4    | 5    | 4    | 4    | 4    | 4    |
| 4646   | 5     | 4      | 4      |      |      |      |      |      |      |      |      |      |      |      |
| 4647   |       |        |        |      |      |      |      |      |      |      |      |      |      |      |
| 4648   | 6     | 6      | 6      |      |      |      |      |      |      |      |      |      |      |      |
| 4649   | 5     | 5      | 5      |      |      |      |      |      |      |      |      |      |      |      |
| 4650   | 4     | 4      | 4      | 0    | 1    | 0    | 0    | 0    | 0    | 0    | 0    | 0    | 1    | 1    |
| 4651   | 5     | 5      | 5      | 0    | 0    | 0    | 0    | 0    | 0    | 0    | 0    | 0    | 1    | 1    |
| 4652   | 5     | 5      | 5      |      |      |      |      |      |      |      |      |      |      |      |
| 4653   |       |        |        |      |      |      |      |      |      |      |      |      |      |      |
| 4657   |       |        |        |      |      |      |      |      |      |      |      |      |      |      |
| 4660   | 5     | 5      | 4      |      |      |      |      |      |      |      |      |      |      |      |
| 4661   | 5     | 5      | 5      |      |      |      |      |      |      |      |      |      |      |      |
| 4662   | 5     | 5      | 5      |      |      |      |      |      |      |      |      |      |      |      |

| respid | Q46x4 | Q46x5a | Q46x5b | Q47a | Q47b | Q47c | Q47d | Q47e | Q47f | Q47g | Q47h | Q47i | Q47j | Q47k |   |
|--------|-------|--------|--------|------|------|------|------|------|------|------|------|------|------|------|---|
| 4667   | 4     | 3      | 4      | 1    | 5    | 5    | 5    | 5    | 5    | 2    | 5    | 4    | 5    | 5    | 4 |
| 4669   | 6     | 6      | 6      |      |      |      |      |      |      |      |      |      |      |      |   |
| 4671   |       |        |        |      |      |      |      |      |      |      |      |      |      |      |   |
| 4672   | 4     | 5      | 5      | 1    | 1    | 1    | 1    | 1    | 1    | 1    | 1    | 2    | 1    | 1    | 1 |
| 4673   | 5     | 5      | 5      |      |      |      |      |      |      |      |      |      |      |      |   |
| 4677   |       |        |        |      |      |      |      |      |      |      |      |      |      |      |   |
| 4679   | 5     | 5      | 5      | 1    | 1    | 1    | 1    | 1    | 1    | 1    | 1    | 1    | 2    | 1    | 2 |
| 4683   | 4     | 5      | 5      | 5    | 5    | 5    | 5    | 5    | 5    | 4    | 5    | 5    | 5    | 5    | 4 |
| 4684   | 6     | 6      | 6      |      |      |      |      |      |      |      |      |      |      |      |   |
| 4685   | 6     | 5      | 5      | 0    | 5    | 5    | 5    | 5    | 5    | 0    | 1    |      | 5    | 5    |   |
| 4686   | 6     | 6      | 6      | 5    | 5    | 4    | 4    | 5    | 3    | 4    | 4    | 3    | 4    | 4    | 3 |
| 4687   | 4     | 4      | 5      | 5    | 5    | 5    | 5    | 5    | 5    | 4    | 5    | 4    | 5    | 5    | 4 |
| 4688   | 6     | 5      | 5      | 5    | 4    | 5    | 5    | 5    | 5    | 3    | 4    | 4    | 5    | 4    | 4 |
| 4691   | 5     | 5      | 5      | 0    | 0    | 0    |      |      | 0    | 0    | 0    | 0    | 0    | 1    | 1 |
| 4692   | 5     | 5      | 5      |      |      |      |      |      |      |      |      |      |      |      |   |
| 4694   | 5     | 4      | 4      | 5    | 5    | 5    | 4    | 4    | 2    | 3    | 3    | 3    | 5    | 3    | 2 |
| 4695   | 5     | 4      | 5      | 5    | 5    | 5    | 5    | 5    | 5    | 4    | 5    | 5    | 5    | 5    | 5 |
| 4696   | 5     | 5      | 5      | 1    | 3    | 3    | 2    | 4    | 2    | 5    | 5    | 3    | 5    | 4    | 4 |
| 4697   |       |        |        |      |      |      |      |      |      |      |      |      |      |      |   |
| 4698   | 4     | 3      | 1      | 3    | 2    | 2    | 3    | 3    |      |      | 2    | 2    | 2    | 2    | 4 |
| 4699   | 5     | 5      | 5      | 4    | 4    | 4    | 4    | 4    | 5    | 1    | 4    | 3    | 4    | 4    | 4 |
| 4701   |       |        |        |      |      |      |      |      |      |      |      |      |      |      |   |
| 4703   | 5     | 5      | 5      | 5    | 5    | 5    | 5    | 5    | 5    | 5    | 5    | 3    | 5    | 5    | 3 |
| 4704   | 3     | 3      | 3      |      |      |      |      |      |      |      |      |      |      |      |   |
| 4705   | 5     | 5      | 5      |      |      |      |      |      |      |      |      |      |      |      |   |
| 4706   | 5     | 5      | 5      | 5    | 5    | 5    | 5    | 5    | 5    | 2    | 5    | 4    | 5    | 5    | 5 |
| 4707   | 5     | 5      | 5      |      |      |      |      |      |      |      |      |      |      |      |   |
| 4708   | 5     | 5      | 5      | 5    | 5    | 5    | 5    | 5    | 5    | 0    | 0    | 3    | 5    | 5    | 5 |
| 4710   | 5     | 4      | 4      | 0    | 0    | 0    | 0    | 0    | 0    | 0    | 0    | 0    | 0    | 1    | 2 |
| 4711   | 3     | 3      | 4      | 3    | 3    | 3    | 2    | 4    | 3    | 3    | 2    | 2    | 2    | 2    | 3 |
| 4715   |       |        |        |      |      |      |      |      |      |      |      |      |      |      |   |
| 4716   | 5     | 5      | 5      |      |      |      |      |      |      |      |      |      |      |      |   |

| respid | Q46x4 | Q46x5a | Q46x5b | Q47a | Q47b | Q47c | Q47d | Q47e | Q47f | Q47g | Q47h | Q47i | Q47j | Q47k |   |
|--------|-------|--------|--------|------|------|------|------|------|------|------|------|------|------|------|---|
| 4717   | 5     | 5      | 5      | 0    | 1    | 0    | 0    | 0    | 0    | 0    | 0    | 0    | 0    | 1    | 1 |
| 4718   | 4     | 4      | 4      | 4    | 4    | 4    | 4    | 4    | 4    | 2    | 4    | 3    | 4    | 4    | 4 |
| 4722   | 4     | 4      | 3      | 3    | 2    | 2    | 3    | 2    | 2    | 2    | 1    | 2    | 2    | 2    | 2 |
| 4727   | 5     | 5      | 5      | 4    | 3    | 4    | 4    | 4    | 4    | 2    | 4    | 4    | 4    | 4    | 4 |
| 4728   | 5     | 5      | 5      | 0    | 1    | 1    | 1    | 1    | 1    | 0    | 1    | 0    | 1    | 1    | 1 |
| 4729   | 5     | 5      | 5      | 5    | 5    | 5    | 5    | 5    | 5    | 3    | 4    | 4    | 5    | 4    | 4 |
| 4732   | 5     | 5      | 5      | 4    | 4    |      | 4    | 5    |      | 4    | 3    | 4    | 4    | 4    | 4 |
| 4733   | 5     | 5      | 5      |      |      |      |      |      |      |      |      |      |      |      |   |
| 4734   | 6     | 6      | 6      | 4    | 4    | 4    | 4    | 4    | 3    | 2    | 3    | 4    | 3    | 4    | 4 |
| 4735   | 5     | 5      | 5      | 0    | 0    | 0    | 0    | 0    | 0    | 0    | 0    | 0    | 0    | 1    | 1 |
| 4737   | 5     | 4      | 5      | 0    | 4    | 0    | 0    | 0    | 0    | 0    | 0    | 0    | 0    | 4    | 1 |
| 4738   | 5     | 5      | 5      | 1    | 1    | 1    | 1    | 1    | 1    | 1    | 2    | 3    | 5    | 2    | 2 |
| 4740   | 5     | 5      | 5      |      |      |      |      |      |      |      |      |      |      |      |   |
| 4741   | 5     | 4      | 4      | 2    | 3    | 3    | 2    | 3    | 1    | 3    | 4    | 4    | 4    | 4    | 4 |
| 4743   | 5     | 5      | 5      |      |      |      |      |      |      |      |      |      |      |      |   |
| 4746   | 5     | 5      | 5      | 4    | 4    | 5    | 5    | 4    | 4    | 5    | 4    | 5    | 5    | 5    | 5 |
| 4750   | 4     | 4      | 4      | 4    | 4    | 2    | 4    | 4    | 2    | 4    | 3    | 5    | 5    | 5    | 5 |
| 4752   | 5     | 5      | 5      | 5    | 5    | 5    | 5    | 5    | 2    | 5    | 5    | 5    | 5    | 5    | 5 |
| 4753   | 4     | 4      | 4      |      |      |      |      |      |      |      |      |      |      |      |   |
| 4754   | 5     | 5      | 5      | 5    | 5    | 5    | 5    | 5    | 1    | 3    | 3    | 4    | 4    | 4    | 3 |
| 4755   | 4     | 3      | 4      |      |      |      |      |      |      |      |      |      |      |      |   |
| 4758   | 4     | 4      | 4      |      |      |      |      |      |      |      |      |      |      |      |   |
| 4766   |       |        |        |      |      |      |      |      |      |      |      |      |      |      |   |
| 4767   | 6     | 6      | 6      |      |      |      |      |      |      |      |      |      |      |      |   |
| 4768   | 5     | 5      | 5      | 4    | 4    | 4    | 4    | 5    | 2    | 3    | 2    | 3    | 3    | 3    | 3 |
| 4769   | 5     | 5      | 5      | 5    | 5    | 5    | 5    | 5    | 3    | 5    | 5    | 5    | 5    | 5    | 5 |
| 4771   | 6     | 5      | 4      | 0    | 2    | 4    | 4    | 4    | 0    | 2    | 3    | 4    | 4    | 4    | 1 |
| 4772   | 5     | 5      | 5      |      |      |      |      |      |      |      |      |      |      |      |   |
| 4773   | 5     | 5      | 5      | 5    | 5    | 5    | 5    | 5    | 1    | 5    | 5    | 5    | 5    | 5    | 5 |
| 4774   | 4     | 3      | 3      |      |      |      |      |      |      |      |      |      |      |      |   |
| 4776   | 5     | 6      | 5      | 4    | 3    | 5    | 4    | 5    | 1    | 4    | 2    | 4    | 5    | 4    | 4 |
| 4777   | 5     | 5      | 5      |      |      |      |      |      |      |      |      |      |      |      |   |

| respid | Q46x4 | Q46x5a | Q46x5b | Q47a | Q47b | Q47c | Q47d | Q47e | Q47f | Q47g | Q47h | Q47i | Q47j | Q47k |   |
|--------|-------|--------|--------|------|------|------|------|------|------|------|------|------|------|------|---|
| 4779   |       |        |        |      |      |      |      |      |      |      |      |      |      |      |   |
| 4780   | 5     | 6      | 6      |      |      |      |      |      |      |      |      |      |      |      |   |
| 4781   | 5     | 5      | 5      | 5    | 5    | 4    | 5    | 5    | 3    | 4    | 4    | 5    | 5    | 4    |   |
| 4783   | 3     | 3      | 3      |      |      |      |      |      |      |      |      |      |      |      |   |
| 4784   | 5     | 5      | 5      | 5    | 5    | 5    | 5    | 5    | 5    | 5    | 5    | 5    | 5    | 5    |   |
| 4785   | 5     | 5      | 5      | 0    | 5    | 0    | 0    | 0    | 0    | 0    | 0    | 0    | 0    | 1    | 1 |
| 4788   |       |        |        |      |      |      |      |      |      |      |      |      |      |      |   |
| 4789   | 6     | 4      | 2      | 0    | 1    | 0    | 0    | 0    | 0    | 0    | 0    | 0    | 0    | 1    | 1 |
| 4790   | 5     | 5      | 5      | 4    | 4    | 4    | 4    | 4    |      |      |      | 4    |      |      |   |
| 4791   |       |        |        |      |      |      |      |      |      |      |      |      |      |      |   |
| 4794   |       |        |        |      |      |      |      |      |      |      |      |      |      |      |   |
| 4795   | 5     | 5      | 5      | 5    | 5    | 5    | 5    | 5    | 2    | 4    | 4    | 5    | 4    | 4    |   |
| 4797   | 5     | 4      | 4      | 2    | 4    | 4    | 4    | 4    | 4    | 2    | 3    | 4    | 2    | 4    |   |
| 4802   | 4     | 4      | 5      | 1    | 2    | 3    | 2    | 1    | 1    | 2    | 3    | 3    | 3    | 2    |   |
| 4803   | 4     | 4      | 4      | 2    | 2    | 2    | 2    | 2    | 2    | 2    | 2    | 2    | 3    | 2    |   |
| 4804   |       |        |        |      |      |      |      |      |      |      |      |      |      |      |   |
| 4805   | 5     | 5      | 5      | 4    | 4    | 4    | 4    | 4    | 2    | 4    | 4    | 4    | 4    | 4    |   |
| 4807   |       |        |        |      |      |      |      |      |      |      |      |      |      |      |   |
| 4808   | 4     | 4      | 4      | 5    | 5    | 5    | 5    | 5    | 3    | 4    | 4    | 4    | 4    | 4    |   |
| 4809   | 3     | 3      | 2      | 2    | 3    | 3    | 3    | 4    | 1    | 4    | 3    | 4    | 4    | 4    |   |
| 4811   | 5     | 5      | 4      |      |      |      |      |      |      |      |      |      |      |      |   |
| 4817   |       |        |        |      |      |      |      |      |      |      |      |      |      |      |   |
| 4819   | 4     | 5      | 5      | 4    | 4    | 4    | 3    | 4    | 2    | 4    | 4    | 4    | 4    | 4    |   |
| 4820   |       |        |        |      |      |      |      |      |      |      |      |      |      |      |   |
| 4821   | 4     | 4      | 5      | 4    | 5    | 4    | 4    | 5    | 4    | 5    | 4    | 5    | 4    | 4    |   |
| 4822   | 5     | 5      | 5      | 5    | 5    | 5    | 5    | 5    | 4    | 5    | 4    | 5    | 5    | 5    |   |
| 4823   | 5     | 5      | 5      |      |      |      |      |      |      |      |      |      |      |      |   |
| 4825   | 5     | 5      | 5      | 5    | 3    | 5    | 4    | 4    | 1    | 4    | 3    | 5    | 2    | 5    |   |
| 4826   |       |        |        |      |      |      |      |      |      |      |      |      |      |      |   |
| 4830   | 5     | 6      | 6      | 3    | 3    | 2    | 2    | 3    | 0    | 0    | 0    | 0    | 1    | 3    |   |
| 4832   |       |        |        |      |      |      |      |      |      |      |      |      |      |      |   |
| 4838   | 4     | 4      | 4      |      |      |      |      |      |      |      |      |      |      |      |   |

| respid | Q46x4 | Q46x5a | Q46x5b | Q47a | Q47b | Q47c | Q47d | Q47e | Q47f | Q47g | Q47h | Q47i | Q47j | Q47k |
|--------|-------|--------|--------|------|------|------|------|------|------|------|------|------|------|------|
| 4840   | 5     | 5      | 5      |      |      |      |      |      |      |      |      |      |      |      |
| 4841   |       |        |        |      |      |      |      |      |      |      |      |      |      |      |
| 4843   | 5     | 4      | 5      | 4    | 4    | 5    | 5    | 5    | 2    | 4    | 3    | 5    | 5    | 3    |
| 4845   | 4     | 4      | 5      | 5    | 4    | 5    | 5    | 5    | 3    | 5    | 4    | 5    | 5    | 4    |
| 4846   | 4     | 4      | 4      | 5    | 5    | 5    | 5    | 5    | 5    | 4    | 3    | 4    | 4    | 4    |
| 4848   | 5     | 5      | 5      | 5    | 5    | 5    | 5    | 5    | 1    | 5    | 4    | 5    | 5    | 4    |
| 4853   | 5     | 5      | 5      | 5    | 5    | 5    | 5    | 5    | 2    | 4    | 3    | 5    | 4    | 4    |
| 4854   | 5     | 5      | 5      | 4    | 4    | 4    | 5    | 5    | 5    | 5    | 4    | 4    | 4    | 5    |
| 4859   | 5     | 5      | 5      | 4    | 5    | 5    | 5    | 5    | 5    | 4    | 4    | 4    | 4    | 5    |
| 4861   |       |        |        |      |      |      |      |      |      |      |      |      |      |      |
| 4864   | 6     | 5      | 5      | 5    | 5    | 5    | 5    | 5    | 5    | 5    | 4    | 5    | 5    | 5    |
| 4867   |       |        |        |      |      |      |      |      |      |      |      |      |      |      |
| 4870   | 6     | 6      | 6      |      |      |      |      |      |      |      |      |      |      |      |
| 4872   | 4     | 5      | 4      | 4    | 4    | 4    | 3    | 4    | 4    | 4    | 3    | 4    | 4    | 4    |
| 4873   | 4     | 4      | 4      | 2    | 1    | 0    | 0    | 0    | 0    | 0    | 0    | 0    | 2    | 2    |
| 4874   | 5     | 5      | 5      |      |      |      |      |      |      |      |      |      |      |      |
| 4878   | 6     | 6      | 6      | 4    | 3    | 4    | 4    | 4    | 3    | 4    | 4    | 5    | 4    | 4    |
| 4880   | 6     | 6      | 6      |      |      |      |      |      |      |      |      |      |      |      |
| 4881   | 6     | 6      | 6      | 0    | 0    | 0    | 0    | 0    | 0    | 0    | 0    | 0    | 1    | 1    |
| 4882   | 4     | 4      | 4      |      |      |      |      |      |      |      |      |      |      |      |
| 4883   | 4     | 4      | 3      |      |      |      |      |      |      |      |      |      |      |      |
| 4885   | 5     | 5      | 5      | 5    |      |      |      | 5    |      |      |      |      |      | 5    |
| 4889   |       |        |        |      |      |      |      |      |      |      |      |      |      |      |
| 4890   |       |        |        |      |      |      |      |      |      |      |      |      |      |      |
| 4891   | 5     | 4      | 4      | 0    | 0    | 0    | 0    | 0    | 0    | 0    | 0    | 0    |      |      |
| 4894   | 5     | 5      | 4      |      |      |      |      |      |      |      |      |      |      |      |
| 4895   | 2     | 3      | 2      | 2    | 3    | 3    | 4    | 2    | 3    | 2    | 2    | 3    | 3    | 2    |
| 4896   | 6     | 6      | 6      |      |      |      |      |      |      |      |      |      |      |      |
| 4897   | 6     | 6      | 6      |      |      |      |      |      |      |      |      |      |      |      |
| 4898   | 6     | 6      | 6      | 0    | 1    | 0    | 0    | 0    | 0    | 0    | 0    | 1    | 1    | 1    |
| 4899   |       |        |        |      |      |      |      |      |      |      |      |      |      |      |
| 4900   | 4     | 2      | 5      | 4    | 4    | 5    | 4    | 5    | 0    | 0    | 1    | 5    | 2    | 1    |



| respid | Q46x4 | Q46x5a | Q46x5b | Q47a | Q47b | Q47c | Q47d | Q47e | Q47f | Q47g | Q47h | Q47i | Q47j | Q47k |   |
|--------|-------|--------|--------|------|------|------|------|------|------|------|------|------|------|------|---|
| 4901   | 5     | 5      | 5      | 5    | 5    | 5    | 5    | 5    | 5    | 4    | 4    | 3    | 4    | 4    | 4 |
| 4903   | 5     | 4      | 4      | 5    | 4    | 4    | 4    | 4    | 5    | 3    | 4    | 3    | 4    | 4    | 4 |
| 4904   | 4     | 4      | 4      | 1    | 5    | 5    | 5    | 5    | 5    | 4    | 5    | 4    | 5    | 5    | 5 |
| 4908   | 5     | 5      | 5      |      |      |      |      |      |      |      |      |      |      |      |   |
| 4909   | 4     | 1      | 2      | 1    | 0    | 3    | 0    | 3    | 0    | 4    | 0    | 3    | 4    | 4    | 1 |
| 4913   | 5     | 5      | 5      | 5    | 5    | 4    | 5    | 5    | 5    | 2    | 4    | 3    | 5    | 5    | 5 |
| 4917   | 5     | 5      | 5      |      |      |      |      |      |      |      |      |      |      |      |   |
| 4918   | 6     | 4      | 4      |      |      |      |      |      |      |      |      |      |      |      |   |
| 4920   |       |        |        |      |      |      |      |      |      |      |      |      |      |      |   |
| 4921   | 4     | 4      | 4      | 0    | 2    | 0    | 0    | 0    | 0    | 0    | 0    | 0    | 0    | 1    | 1 |
| 4925   | 6     | 6      | 6      |      |      |      |      |      |      |      |      |      |      |      |   |
| 4926   | 5     | 5      | 5      | 0    | 2    | 0    | 0    | 0    | 0    | 0    | 0    | 0    | 3    | 1    | 1 |
| 4927   | 4     | 5      | 5      | 5    | 5    | 5    | 4    | 5    | 2    | 4    | 4    | 4    | 3    | 4    |   |
| 4928   | 6     | 6      | 6      | 5    | 5    | 5    | 5    | 5    | 5    | 1    | 5    | 5    | 5    | 5    | 5 |
| 4929   | 5     | 5      | 5      | 5    | 5    | 5    | 5    | 5    | 5    | 3    | 5    | 5    | 5    | 5    | 5 |
| 4930   | 6     | 6      | 6      |      |      |      |      |      |      |      |      |      |      |      |   |
| 4931   | 5     | 4      | 4      | 0    | 0    | 0    | 0    | 0    | 0    | 0    | 0    | 0    | 0    | 1    | 1 |
| 4932   | 4     | 3      | 3      |      |      |      |      |      |      |      |      |      |      |      |   |
| 4933   | 5     | 5      | 5      | 5    | 5    | 5    | 5    | 5    | 5    | 2    | 4    | 4    | 4    | 4    | 4 |
| 4934   | 5     | 4      | 3      |      |      |      |      |      |      |      |      |      |      |      |   |
| 5934   | 5     | 5      | 5      | 4    | 3    | 3    | 4    | 4    | 4    | 3    | 4    | 4    | 4    | 5    | 4 |
| 5935   | 5     | 5      | 5      |      |      |      |      |      |      |      |      |      |      |      |   |
| 5936   | 6     | 5      | 5      |      |      |      |      |      |      |      |      |      |      |      |   |
| 5938   |       |        |        |      |      |      |      |      |      |      |      |      |      |      |   |
| 5939   | 6     | 6      | 6      |      |      |      |      |      |      |      |      |      |      |      |   |
| 5940   | 5     | 5      | 5      |      |      |      |      |      |      |      |      |      |      |      |   |
| 5942   | 6     | 5      | 5      | 5    | 4    | 4    | 4    | 5    | 5    | 5    | 5    | 4    | 5    | 5    | 4 |
| 5944   | 3     | 4      | 3      | 5    | 5    | 5    | 5    | 5    | 5    | 5    | 4    | 3    | 5    | 5    | 4 |
| 5951   | 3     | 3      | 3      | 3    | 3    | 4    | 4    | 4    | 3    | 4    | 4    | 3    | 3    | 4    | 3 |
| 5952   | 4     | 5      | 5      |      |      |      |      |      |      |      |      |      |      |      |   |
| 5954   | 5     | 5      | 5      | 4    | 4    | 4    | 4    | 4    | 4    | 3    | 4    | 4    | 4    | 4    | 4 |
| 5956   | 5     | 5      | 5      | 5    | 5    | 5    | 5    | 5    | 5    | 4    | 4    | 4    | 5    | 5    | 4 |

| respid | Q46x4 | Q46x5a | Q46x5b | Q47a | Q47b | Q47c | Q47d | Q47e | Q47f | Q47g | Q47h | Q47i | Q47j | Q47k |   |
|--------|-------|--------|--------|------|------|------|------|------|------|------|------|------|------|------|---|
| 5957   | 5     | 5      | 5      | 0    | 0    | 0    | 0    | 0    | 0    | 0    | 0    | 0    | 0    | 1    | 1 |
| 5958   | 4     | 4      | 4      | 3    | 2    | 4    | 5    | 5    | 5    | 5    | 5    | 4    | 5    | 5    | 5 |
| 5959   | 6     | 4      | 6      |      |      |      |      |      |      |      |      |      |      |      |   |
| 5960   | 6     | 6      | 6      | 2    | 4    | 5    | 5    | 5    | 2    | 5    | 3    | 5    | 4    | 5    | 5 |
| 5963   | 6     | 6      | 6      |      |      |      |      |      |      |      |      |      |      |      |   |
| 5966   | 5     | 5      | 5      | 4    | 4    | 4    | 4    | 4    |      | 4    | 4    | 4    | 4    | 4    | 4 |
| 5968   | 6     | 5      | 6      | 4    | 4    | 4    | 4    | 5    | 2    | 4    | 4    | 5    | 4    | 4    | 4 |
| 5974   | 5     | 5      | 5      |      |      |      |      |      |      |      |      |      |      |      |   |
| 5975   | 4     | 4      | 4      |      |      |      |      |      |      |      |      |      |      |      |   |
| 5976   | 3     | 6      | 5      | 5    | 5    | 5    | 5    | 5    | 5    | 5    | 5    | 5    | 5    | 5    | 5 |
| 5977   | 5     | 5      | 5      |      |      |      |      |      |      |      |      |      |      |      |   |
| 5978   | 4     | 4      | 4      | 5    | 4    | 5    | 5    | 5    | 3    | 5    | 4    | 5    | 4    | 4    | 5 |
| 5979   | 5     | 5      | 5      |      |      |      |      |      |      |      |      |      |      |      |   |
| 5983   | 5     | 5      | 5      |      |      |      |      |      |      |      |      |      |      |      |   |
| 5984   | 5     | 5      | 5      |      |      |      |      |      |      |      |      |      |      |      |   |
| 5990   | 6     | 6      | 6      |      |      |      |      |      |      |      |      |      |      |      |   |
| 5991   | 5     | 5      | 4      |      |      |      |      |      |      |      |      |      |      |      |   |
| 5992   |       |        |        |      |      |      |      |      |      |      |      |      |      |      |   |
| 5993   | 5     | 5      | 5      |      |      |      |      |      |      |      |      |      |      |      |   |
| 5994   | 5     | 4      | 4      |      |      |      |      |      |      |      |      |      |      |      |   |
| 5996   | 5     | 5      | 5      |      |      |      |      |      |      |      |      |      |      |      |   |
| 6001   | 4     | 4      | 4      | 4    | 5    | 5    | 4    | 4    | 2    | 3    | 3    | 5    | 5    | 5    | 4 |
| 6003   | 5     | 5      | 5      |      |      |      |      |      |      |      |      |      |      |      |   |
| 6004   | 6     | 6      | 6      | 0    | 0    | 0    | 0    | 0    | 0    | 0    | 0    | 0    | 0    | 1    | 3 |
| 6005   | 4     | 4      | 5      | 2    | 2    | 2    | 1    | 3    | 1    | 2    | 2    | 4    | 3    | 3    | 2 |
| 6006   | 5     | 5      | 5      |      |      |      |      |      |      |      |      |      |      |      |   |
| 6008   | 5     | 5      | 5      | 4    | 5    | 5    | 5    | 5    | 5    | 5    | 5    | 5    | 5    | 5    | 5 |
| 6009   | 5     | 5      | 5      |      |      |      |      |      |      |      |      |      |      |      |   |
| 6014   |       |        |        |      |      |      |      |      |      |      |      |      |      |      |   |
| 6016   | 5     | 5      | 5      | 4    | 5    | 5    | 4    | 5    | 2    | 5    | 5    | 5    | 5    | 5    | 5 |
| 6017   | 4     | 1      | 2      |      |      |      |      |      |      |      |      |      |      |      |   |
| 6018   | 4     | 4      | 4      |      |      |      |      |      |      |      |      |      |      |      |   |

| respid | Q46x4 | Q46x5a | Q46x5b | Q47a | Q47b | Q47c | Q47d | Q47e | Q47f | Q47g | Q47h | Q47i | Q47j | Q47k |
|--------|-------|--------|--------|------|------|------|------|------|------|------|------|------|------|------|
| 6020   | 4     | 4      | 4      |      |      |      |      |      |      |      |      |      |      |      |
| 6021   |       |        |        |      |      |      |      |      |      |      |      |      |      |      |
| 6024   | 6     | 6      | 6      | 3    | 2    | 4    | 4    | 5    | 3    | 4    | 3    | 4    | 4    | 4    |
| 6025   | 6     | 6      | 6      |      |      |      |      |      |      |      |      |      |      |      |
| 6026   | 5     | 5      | 5      |      |      |      |      |      |      |      |      |      |      |      |
| 6032   | 5     | 5      | 5      | 5    | 5    | 5    | 5    | 5    |      | 4    | 3    | 4    | 4    | 4    |
| 6035   | 5     | 4      | 4      |      |      |      |      |      |      |      |      |      |      |      |
| 6038   | 6     | 5      | 5      | 5    | 5    | 5    | 5    | 5    | 2    | 5    | 4    | 5    | 5    | 5    |
| 6043   | 4     | 4      | 4      |      |      |      |      |      |      |      |      |      |      |      |
| 6044   | 5     | 4      | 4      |      |      |      |      |      |      |      |      |      |      |      |
| 6046   | 4     | 3      | 3      | 0    | 5    | 0    | 0    | 0    | 0    | 0    | 0    | 5    | 4    | 1    |
| 6047   | 5     | 5      | 6      |      |      |      |      |      |      |      |      |      |      |      |
| 6048   | 4     | 4      | 4      |      |      |      |      |      |      |      |      |      |      |      |
| 6050   | 6     | 4      | 5      | 4    | 5    | 5    | 3    | 4    | 0    | 4    | 2    | 5    | 5    | 4    |
| 6051   | 4     | 5      | 5      |      |      |      |      |      |      |      |      |      |      |      |
| 6053   | 6     | 6      | 6      |      |      |      |      |      |      |      |      |      |      |      |
| 6054   | 4     | 4      | 4      | 3    | 4    | 4    | 3    | 4    | 3    | 3    | 2    | 4    | 3    | 4    |
| 6056   | 5     | 5      | 4      | 5    | 5    | 5    | 5    | 5    | 1    | 5    | 4    | 5    | 5    | 5    |
| 6058   | 5     | 5      | 5      |      |      |      |      |      |      |      |      |      |      |      |
| 6060   | 5     | 5      | 5      | 5    | 4    | 4    | 4    | 5    | 1    | 4    | 3    | 3    | 3    | 4    |
| 6061   | 5     | 5      | 5      |      |      |      |      |      |      |      |      |      |      |      |
| 6062   | 6     | 6      | 6      |      |      |      |      |      |      |      |      |      |      |      |
| 6067   | 5     | 5      | 5      |      |      |      |      |      |      |      |      |      |      |      |
| 6070   | 5     | 5      | 5      |      |      |      |      |      |      |      |      |      |      |      |
| 6074   | 5     | 5      | 5      |      |      |      |      |      |      |      |      |      |      |      |
| 6076   | 5     | 5      | 2      |      |      |      |      |      |      |      |      |      |      |      |
| 6078   |       |        |        |      |      |      |      |      |      |      |      |      |      |      |
| 6081   | 5     | 5      | 5      | 5    | 5    | 5    | 5    | 5    | 2    | 4    | 4    | 5    | 4    | 5    |
| 6085   | 4     | 4      | 4      |      |      |      |      |      |      |      |      |      |      |      |
| 6088   |       |        |        |      |      |      |      |      |      |      |      |      |      |      |
| 6092   | 5     | 5      | 5      | 0    | 0    | 0    | 0    | 0    | 0    | 0    | 0    | 5    | 3    | 5    |
| 6095   | 5     | 5      | 5      | 5    | 5    | 5    | 5    | 5    | 2    | 5    | 5    | 5    | 5    | 4    |

| respid | Q46x4 | Q46x5a | Q46x5b | Q47a | Q47b | Q47c | Q47d | Q47e | Q47f | Q47g | Q47h | Q47i | Q47j | Q47k |
|--------|-------|--------|--------|------|------|------|------|------|------|------|------|------|------|------|
| 6098   | 4     | 4      | 5      |      |      |      |      |      |      |      |      |      |      |      |
| 6101   |       |        |        |      |      |      |      |      |      |      |      |      |      |      |
| 6102   | 6     | 5      | 5      |      |      |      |      |      |      |      |      |      |      |      |
| 6105   | 5     | 5      | 5      |      |      |      |      |      |      |      |      |      |      |      |
| 6106   | 5     | 4      | 5      | 5    | 5    | 5    | 4    | 5    | 3    | 4    | 3    | 5    | 4    | 4    |
| 6107   | 6     | 5      | 5      |      |      |      |      |      |      |      |      |      |      |      |
| 6111   | 6     | 6      | 6      | 4    | 4    | 4    | 4    | 4    | 1    | 4    | 5    | 5    | 4    | 4    |
| 6112   | 5     | 5      | 5      |      |      |      |      |      |      |      |      |      |      |      |
| 6113   | 3     | 3      | 4      | 2    | 2    | 2    | 2    | 3    | 3    | 1    | 2    | 2    | 3    | 3    |
| 6115   | 4     | 4      | 4      | 2    | 5    | 5    | 5    | 5    | 3    | 5    | 5    | 5    | 4    | 4    |
| 6116   |       |        |        |      |      |      |      |      |      |      |      |      |      |      |
| 6117   | 5     | 4      | 5      |      |      |      |      |      |      |      |      |      |      |      |
| 6124   | 4     | 4      | 4      | 2    | 2    | 2    | 2    | 2    | 2    | 2    | 2    | 2    | 2    | 2    |
| 6125   | 4     | 5      | 4      | 0    | 0    | 0    | 0    | 0    | 0    | 0    | 0    | 0    | 1    | 1    |
| 6128   |       |        |        |      |      |      |      |      |      |      |      |      |      |      |
| 6133   | 6     | 6      | 6      |      |      |      |      |      |      |      |      |      |      |      |
| 6134   | 4     | 5      | 5      |      |      |      |      |      |      |      |      |      |      |      |
| 6135   | 5     | 5      | 5      | 5    | 5    | 5    | 5    | 5    | 4    | 5    | 4    | 2    | 2    | 5    |
| 6138   | 4     | 4      | 4      |      |      |      |      |      |      |      |      |      |      |      |
| 6140   | 5     | 5      | 5      | 3    | 4    | 4    | 4    | 4    | 1    | 4    | 3    | 4    | 4    | 4    |
| 6143   | 5     | 5      | 5      | 5    | 5    | 5    | 5    | 5    | 2    | 4    | 3    | 5    | 5    | 4    |
| 6147   | 5     | 5      | 5      |      |      |      |      |      |      |      |      |      |      |      |
| 6154   | 5     | 5      | 5      |      |      |      |      |      |      |      |      |      |      |      |
| 6162   |       |        |        |      |      |      |      |      |      |      |      |      |      |      |
| 6165   | 5     | 5      | 5      |      |      |      |      |      |      |      |      |      |      |      |
| 6166   | 4     | 4      | 4      | 3    | 2    | 3    | 3    | 4    | 1    | 2    | 2    | 2    | 3    | 3    |
| 6173   | 4     | 4      | 4      | 0    | 0    | 0    | 0    | 0    | 0    | 0    | 0    | 5    | 5    | 4    |
| 6180   | 5     | 5      | 5      | 2    | 1    | 1    | 2    | 4    | 1    | 2    |      | 2    | 2    | 2    |
| 6184   | 4     | 3      | 3      |      |      |      |      |      |      |      |      |      |      |      |
| 6185   | 5     | 5      | 5      | 5    | 5    | 5    | 5    | 5    | 3    | 4    | 3    | 5    | 4    | 3    |
| 6186   | 5     | 5      | 5      |      |      |      |      |      |      |      |      |      |      |      |
| 6188   | 5     | 5      | 5      | 5    | 5    | 5    | 5    | 5    | 3    | 5    | 4    | 5    | 5    | 5    |

| respid | Q46x4 | Q46x5a | Q46x5b | Q47a | Q47b | Q47c | Q47d | Q47e | Q47f | Q47g | Q47h | Q47i | Q47j | Q47k |
|--------|-------|--------|--------|------|------|------|------|------|------|------|------|------|------|------|
| 6192   | 4     | 4      | 4      |      |      |      |      |      |      |      |      |      |      |      |
| 6194   |       |        |        |      |      |      |      |      |      |      |      |      |      |      |
| 6195   | 6     | 6      | 6      |      |      |      |      |      |      |      |      |      |      |      |
| 6196   | 5     | 3      | 3      |      |      |      |      |      |      |      |      |      |      |      |
| 6199   | 5     | 4      | 4      | 4    | 5    | 4    | 4    | 5    | 2    | 4    | 4    | 4    | 4    | 4    |
| 6200   |       |        |        |      |      |      |      |      |      |      |      |      |      |      |
| 6201   | 5     | 5      | 5      | 5    | 5    | 5    | 5    | 5    | 2    | 5    | 4    | 5    | 5    | 5    |
| 6202   | 6     | 6      | 6      |      |      |      |      |      |      |      |      |      |      |      |
| 6203   | 5     | 5      | 5      | 0    | 0    | 0    | 0    | 0    | 0    | 0    | 0    | 0    | 5    | 1    |
| 6205   | 6     | 6      | 6      |      |      |      |      |      |      |      |      |      |      |      |
| 6210   | 4     | 4      | 4      | 4    | 3    | 3    | 3    | 4    | 1    | 2    | 3    | 4    | 3    | 3    |
| 6212   | 6     | 6      | 6      | 4    | 4    | 4    | 4    | 5    | 4    | 5    | 3    | 5    | 4    | 4    |
| 6216   | 4     | 3      | 3      |      |      |      |      |      |      |      |      |      |      |      |
| 6218   | 6     | 6      | 6      | 1    | 1    | 1    | 2    | 3    | 1    | 1    | 2    | 2    | 1    | 2    |
| 6221   | 5     | 5      | 5      | 4    | 4    | 4    | 4    | 4    | 1    | 4    | 3    | 5    | 5    | 5    |
| 6224   | 5     | 5      | 5      | 5    | 5    | 5    | 5    | 5    | 0    | 5    | 5    | 5    | 5    | 5    |
| 6225   | 5     | 4      | 4      | 0    | 0    | 0    | 0    | 0    | 0    | 0    | 0    | 0    | 1    | 2    |
| 6227   | 5     | 5      | 5      | 0    | 0    | 0    | 0    | 0    | 0    | 0    | 0    | 0    | 1    | 3    |
| 6230   |       |        |        |      |      |      |      |      |      |      |      |      |      |      |
| 6231   | 5     | 5      | 5      | 5    | 5    | 5    | 5    | 5    | 1    | 4    | 3    | 5    | 5    | 5    |
| 6233   | 5     | 5      | 5      |      |      |      |      |      |      |      |      |      |      |      |
| 6234   | 5     | 4      | 5      |      |      |      |      |      |      |      |      |      |      |      |
| 6235   |       |        |        |      |      |      |      |      |      |      |      |      |      |      |
| 6237   |       |        |        |      |      |      |      |      |      |      |      |      |      |      |
| 6240   |       |        |        |      |      |      |      |      |      |      |      |      |      |      |
| 6248   | 5     | 5      | 5      | 0    | 0    | 0    | 0    | 0    | 0    | 0    | 0    | 0    | 1    | 1    |
| 6249   | 5     | 5      | 5      | 5    | 5    | 5    | 5    | 5    | 5    | 4    | 3    | 5    | 3    | 4    |
| 6252   | 5     | 5      | 5      | 0    | 0    | 0    | 0    | 0    | 0    | 0    | 0    | 5    | 5    | 3    |
| 6254   | 5     | 6      | 6      | 4    | 5    | 4    | 4    | 5    | 3    | 4    | 3    | 5    | 4    | 3    |
| 6269   | 4     | 4      | 4      |      |      |      |      |      |      |      |      |      |      |      |
| 6304   |       |        |        |      |      |      |      |      |      |      |      |      |      |      |
| 6334   | 4     | 4      | 4      | 4    | 4    | 4    | 4    | 5    | 3    | 4    | 4    | 4    | 4    | 4    |

| respid | Q46x4 | Q46x5a | Q46x5b | Q47a | Q47b | Q47c | Q47d | Q47e | Q47f | Q47g | Q47h | Q47i | Q47j | Q47k |
|--------|-------|--------|--------|------|------|------|------|------|------|------|------|------|------|------|
| 6341   | 6     | 6      | 6      |      |      |      |      |      |      |      |      |      |      |      |
| 6350   | 4     | 4      | 4      |      |      |      |      |      |      |      |      |      |      |      |
| 6370   | 5     | 4      | 5      |      |      |      |      |      |      |      |      |      |      |      |
| 6384   | 5     | 5      | 5      |      |      |      |      |      |      |      |      |      |      |      |
| 6400   | 6     | 6      | 6      | 5    | 5    | 5    | 5    | 5    | 2    | 5    | 3    | 5    | 4    | 4    |
| 6418   |       |        |        |      |      |      |      |      |      |      |      |      |      |      |
| 6467   | 5     | 5      | 5      | 4    | 4    | 4    | 4    | 4    | 2    | 4    | 4    | 5    | 5    | 3    |
| 6469   | 5     | 5      | 5      | 5    | 5    | 5    | 5    | 5    |      | 5    | 4    | 5    | 5    | 5    |
| 6474   | 5     | 5      | 5      |      |      |      |      |      |      |      |      |      |      |      |
| 6475   |       |        |        |      |      |      |      |      |      |      |      |      |      |      |
| 6476   | 4     | 4      | 4      |      |      |      |      |      |      |      |      |      |      |      |
| 6477   | 6     | 5      | 5      | 5    | 5    | 5    | 5    | 5    | 1    | 5    | 3    | 5    | 5    | 5    |
| 6480   | 5     | 4      | 5      | 5    | 4    | 4    | 4    | 5    | 4    | 4    | 4    | 5    | 5    | 4    |
| 6481   | 4     | 3      | 4      | 4    | 4    | 4    | 3    | 3    | 2    | 2    | 2    | 3    | 4    | 4    |
| 6485   | 5     | 5      | 5      |      |      |      |      |      |      |      |      |      |      |      |
| 6488   | 3     | 4      | 4      | 2    | 2    | 2    | 3    | 4    |      | 3    | 3    | 2    | 3    |      |
| 6495   | 5     | 5      | 5      | 4    | 4    | 5    | 5    | 4    | 1    | 4    | 4    | 5    | 5    | 4    |
| 6499   | 4     | 5      | 5      |      |      |      |      |      |      |      |      |      |      |      |
| 6500   | 5     | 5      | 5      |      |      |      |      |      |      |      |      |      |      |      |
| 6504   | 6     | 6      | 6      | 3    | 4    | 3    | 5    | 4    | 1    | 2    | 4    | 4    | 4    | 3    |
| 6507   | 6     | 6      | 6      | 2    | 1    | 1    | 0    | 0    | 0    | 0    | 0    | 2    | 2    | 2    |
| 6512   | 4     | 4      | 4      |      |      |      |      |      |      |      |      |      |      |      |
| 6525   | 4     | 6      | 6      |      |      |      |      |      |      |      |      |      |      |      |
| 6532   | 5     | 5      | 5      |      |      |      |      |      |      |      |      |      |      |      |
| 6535   | 5     | 5      | 5      | 5    | 5    | 5    | 5    | 5    | 3    | 5    | 4    | 5    | 5    | 4    |
| 6546   | 5     | 5      | 5      |      |      |      |      |      |      |      |      |      |      |      |
| 6551   | 4     | 4      | 4      |      |      |      |      |      |      |      |      |      |      |      |
| 6556   | 2     | 2      | 2      |      |      |      |      |      |      |      |      |      |      |      |
| 6566   | 4     | 4      | 4      | 5    | 5    | 5    | 5    | 5    | 5    | 4    | 5    | 4    | 4    | 5    |
| 6569   |       |        |        |      |      |      |      |      |      |      |      |      |      |      |
| 6574   | 5     | 5      | 5      |      |      |      |      |      |      |      |      |      |      |      |
| 6576   | 3     | 2      | 4      |      |      |      |      |      |      |      |      |      |      |      |

| respid | Q46x4 | Q46x5a | Q46x5b | Q47a | Q47b | Q47c | Q47d | Q47e | Q47f | Q47g | Q47h | Q47i | Q47j | Q47k |
|--------|-------|--------|--------|------|------|------|------|------|------|------|------|------|------|------|
| 6580   |       |        |        |      |      |      |      |      |      |      |      |      |      |      |
| 6584   |       |        |        |      |      |      |      |      |      |      |      |      |      |      |
| 6585   | 5     | 5      | 5      | 5    | 5    | 4    | 4    | 4    | 2    | 3    | 3    | 4    | 3    | 4    |
| 6589   | 5     | 5      | 5      |      |      |      |      |      |      |      |      |      |      |      |
| 6590   | 6     | 4      | 5      |      |      |      |      |      |      |      |      |      |      |      |
| 6598   | 5     | 5      | 5      | 5    | 5    | 5    | 5    | 5    | 4    | 5    | 4    | 5    | 5    | 5    |
| 6603   | 6     | 6      | 5      | 5    | 5    | 2    | 2    | 3    | 3    | 2    | 4    | 4    | 3    | 3    |
| 6618   | 3     | 4      | 4      |      |      |      |      |      |      |      |      |      |      |      |
| 6630   | 2     | 2      | 2      | 3    | 3    | 4    | 4    |      |      |      |      |      |      |      |
| 6636   | 3     | 3      | 3      | 3    | 3    | 4    | 4    | 4    | 1    | 4    | 3    | 4    | 4    | 4    |
| 6649   |       |        |        |      |      |      |      |      |      |      |      |      |      |      |
| 6675   | 6     | 6      | 6      | 1    | 1    | 0    | 0    | 0    | 0    | 0    | 0    | 0    | 1    | 1    |
| 6678   | 5     | 5      | 5      | 3    | 4    | 4    | 3    | 4    | 2    | 3    | 3    | 4    | 4    | 4    |
| 6681   | 5     | 5      | 5      | 5    | 4    | 5    | 5    | 5    | 3    | 5    | 5    | 5    | 5    | 5    |
| 6684   | 4     | 4      | 4      | 3    | 3    | 3    | 3    | 4    | 1    | 2    | 2    | 2    | 3    | 3    |
| 6688   |       |        |        |      |      |      |      |      |      |      |      |      |      |      |
| 6691   | 5     | 5      | 5      | 4    | 3    | 4    | 4    | 4    | 4    | 4    | 3    | 5    | 4    | 4    |
| 6694   | 4     | 4      | 4      |      |      |      |      |      |      |      |      |      |      |      |
| 6696   | 5     | 6      | 5      | 5    | 5    | 5    | 5    | 5    | 2    | 4    | 4    | 5    | 4    | 4    |
| 6720   | 3     | 3      | 3      |      |      |      |      |      |      |      |      |      |      |      |
| 6722   | 2     | 3      | 3      | 2    | 4    | 2    | 2    | 1    | 1    | 1    | 1    | 1    | 2    | 2    |
| 6724   | 5     | 5      | 5      | 5    | 5    | 5    | 4    | 5    | 3    | 5    | 4    | 5    | 5    | 4    |
| 6725   | 5     | 5      | 5      | 5    | 5    | 5    | 5    | 5    | 3    | 5    | 4    | 5    | 5    | 5    |
| 6727   | 5     | 5      | 5      | 5    | 5    | 5    | 5    | 5    | 4    | 5    | 4    | 5    | 5    | 5    |
| 6734   | 4     | 4      | 4      |      |      |      |      |      |      |      |      |      |      |      |
| 6739   | 5     | 4      | 4      | 4    | 4    | 4    | 4    | 4    | 2    | 3    | 3    | 5    | 5    | 4    |
| 6743   | 2     | 3      | 5      | 4    | 3    | 3    | 3    | 2    | 4    | 2    | 2    | 3    | 3    | 4    |
| 6749   | 5     | 4      | 5      | 5    | 5    | 5    | 5    | 5    | 3    | 5    | 5    | 5    | 5    | 4    |
| 6756   | 5     | 5      | 5      | 3    | 4    | 4    | 4    | 4    | 1    | 4    | 3    | 4    | 4    | 3    |
| 6764   | 5     | 5      | 5      | 5    | 5    | 5    | 5    | 5    | 4    | 5    | 5    | 4    | 4    | 4    |
| 6765   | 5     | 5      | 4      |      |      |      |      |      |      |      |      |      |      |      |
| 6768   | 5     | 5      | 5      | 4    | 4    | 4    | 4    | 5    | 2    | 4    | 4    | 5    | 4    | 4    |

| respid | Q46x4 | Q46x5a | Q46x5b | Q47a | Q47b | Q47c | Q47d | Q47e | Q47f | Q47g | Q47h | Q47i | Q47j | Q47k |
|--------|-------|--------|--------|------|------|------|------|------|------|------|------|------|------|------|
| 6773   | 4     | 5      | 5      |      |      |      |      |      |      |      |      |      |      |      |
| 6775   | 5     | 4      | 4      |      |      |      |      |      |      |      |      |      |      |      |
| 6777   | 5     | 5      | 5      |      |      |      |      |      |      |      |      |      |      |      |
| 6779   | 6     | 6      | 6      |      |      |      |      |      |      |      |      |      |      |      |
| 6790   | 4     | 4      | 4      |      |      |      |      |      |      |      |      |      |      |      |
| 6797   |       |        |        |      |      |      |      |      |      |      |      |      |      |      |
| 6798   | 5     | 5      | 5      |      |      |      |      |      |      |      |      |      |      |      |
| 6808   |       |        |        |      |      |      |      |      |      |      |      |      |      |      |
| 6810   | 4     | 4      | 5      |      |      |      |      |      |      |      |      |      |      |      |
| 6811   | 4     | 4      | 4      | 4    | 3    | 3    | 3    | 2    | 1    | 1    | 1    | 4    | 1    | 4    |
| 6812   | 5     | 5      | 5      |      |      |      |      |      |      |      |      |      |      |      |
| 6814   | 5     | 5      | 5      |      |      |      |      |      |      |      |      |      |      |      |
| 6819   | 5     | 5      | 4      | 5    | 3    |      |      |      |      |      |      |      |      |      |
| 6820   | 4     | 4      | 4      | 5    | 5    | 5    | 5    | 5    | 1    | 4    | 3    | 5    | 3    | 4    |
| 6832   | 5     | 5      | 5      | 5    | 5    | 5    | 5    | 5    | 2    | 4    | 4    | 5    | 4    | 4    |
| 6854   | 5     | 5      | 5      | 0    | 5    | 0    | 0    | 0    | 0    | 0    | 0    | 3    | 5    | 5    |
| 6855   |       |        |        |      |      |      |      |      |      |      |      |      |      |      |
| 6857   | 4     | 4      | 4      | 0    | 0    | 0    | 0    | 0    | 0    | 0    | 0    | 0    | 3    | 3    |
| 6858   | 5     | 5      | 5      |      |      |      |      |      |      |      |      |      |      |      |
| 6859   | 4     | 4      | 4      |      |      |      |      |      |      |      |      |      |      |      |
| 6860   | 4     | 6      | 6      | 0    | 0    |      |      |      |      |      |      |      |      |      |
| 6862   | 6     | 6      | 6      |      |      |      |      |      |      |      |      |      |      |      |
| 6879   |       |        |        |      |      |      |      |      |      |      |      |      |      |      |
| 6893   | 4     | 4      | 4      | 5    | 4    | 4    | 5    | 5    | 3    | 4    | 4    | 5    | 4    | 4    |
| 6898   | 4     | 4      | 4      |      |      |      |      |      |      |      |      |      |      |      |
| 6902   | 5     | 4      | 4      | 5    | 5    | 5    | 5    | 4    | 4    | 4    | 4    | 4    | 4    | 5    |
| 6903   | 2     | 3      | 2      |      |      |      |      |      |      |      |      |      |      |      |
| 6907   | 3     | 3      | 3      |      |      |      |      |      |      |      |      |      |      |      |
| 6908   |       |        |        |      |      |      |      |      |      |      |      |      |      |      |
| 6912   |       |        |        |      |      |      |      |      |      |      |      |      |      |      |
| 6915   | 4     | 3      | 4      |      |      |      |      |      |      |      |      |      |      |      |
| 6916   | 2     | 5      | 5      |      |      |      |      |      |      |      |      |      |      |      |



| respid | Q46x4 | Q46x5a | Q46x5b | Q47a | Q47b | Q47c | Q47d | Q47e | Q47f | Q47g | Q47h | Q47i | Q47j | Q47k |
|--------|-------|--------|--------|------|------|------|------|------|------|------|------|------|------|------|
| 6917   | 6     | 6      | 6      |      |      |      |      |      |      |      |      |      |      |      |
| 6923   | 6     | 6      | 6      | 3    | 3    | 3    | 3    | 4    |      | 2    | 3    |      |      |      |
| 6934   | 5     | 5      | 5      | 5    | 5    | 5    | 5    | 5    | 2    | 5    | 4    | 5    | 5    | 5    |
| 6937   |       |        |        |      |      |      |      |      |      |      |      |      |      |      |
| 6945   | 5     | 5      | 5      | 5    | 5    | 5    | 4    | 5    | 2    | 4    | 3    | 5    | 3    | 3    |
| 6954   | 4     | 4      | 4      | 4    | 4    | 4    | 4    | 5    | 1    | 4    | 3    | 4    | 4    | 4    |
| 6956   | 6     | 6      | 6      |      |      |      |      |      |      |      |      |      |      |      |
| 6958   | 5     | 5      | 5      | 5    | 5    | 5    | 5    | 5    | 3    | 5    | 5    | 5    | 5    | 5    |
| 6961   | 5     | 5      | 5      |      |      |      |      |      |      |      |      |      |      |      |
| 6963   | 5     | 4      | 4      |      |      |      |      |      |      |      |      |      |      |      |
| 6964   | 5     | 5      | 5      |      |      |      |      |      |      |      |      |      |      |      |
| 6976   |       |        |        |      |      |      |      |      |      |      |      |      |      |      |
| 6977   | 5     | 5      | 5      |      |      |      |      |      |      |      |      |      |      |      |
| 7000   | 2     | 3      | 4      | 2    | 2    | 3    | 3    | 2    | 2    | 2    | 3    | 3    | 3    | 2    |
| 7001   | 5     | 5      | 5      | 0    | 0    | 0    | 0    | 0    | 0    | 0    | 0    | 0    | 1    | 2    |
| 7005   | 4     | 5      | 5      | 5    |      |      | 5    | 5    | 4    | 4    | 4    | 5    | 5    | 4    |
| 7006   | 5     | 4      | 4      |      |      |      |      |      |      |      |      |      |      |      |
| 7008   | 5     | 4      | 4      |      |      |      |      |      |      |      |      |      |      |      |
| 7009   | 6     | 6      | 6      |      |      |      |      |      |      |      |      |      |      |      |
| 7019   | 4     | 5      | 5      | 4    | 4    | 4    | 4    | 5    | 1    |      |      | 4    |      |      |
| 7021   | 5     | 5      | 5      |      |      |      |      |      |      |      |      |      |      |      |
| 7026   | 5     | 5      | 5      | 4    | 4    | 5    | 5    | 5    | 1    | 3    | 3    | 3    | 3    | 3    |
| 7030   | 4     | 4      | 4      |      |      |      |      |      |      |      |      |      |      |      |
| 7034   |       |        |        |      |      |      |      |      |      |      |      |      |      |      |
| 7039   | 6     | 6      | 6      |      |      |      |      |      |      |      |      |      |      |      |
| 7041   | 6     | 6      | 6      | 3    | 3    | 4    | 4    | 5    | 1    | 4    | 3    | 4    | 4    | 4    |
| 7047   | 5     | 5      | 5      |      |      |      |      |      |      |      |      |      |      |      |
| 7051   | 5     | 4      | 5      | 5    | 5    | 5    | 5    | 5    | 1    | 4    | 3    | 5    | 4    | 4    |
| 7052   | 4     | 4      | 4      | 4    | 4    | 4    | 4    | 5    | 3    | 4    | 4    | 4    | 4    | 4    |
| 7059   | 4     | 5      | 5      |      |      |      |      |      |      |      |      |      |      |      |
| 7062   | 6     | 6      | 6      |      |      |      |      |      |      |      |      |      |      |      |
| 7065   | 6     | 5      | 5      |      |      |      |      |      |      |      |      |      |      |      |

| respid | Q46x4 | Q46x5a | Q46x5b | Q47a | Q47b | Q47c | Q47d | Q47e | Q47f | Q47g | Q47h | Q47i | Q47j | Q47k |
|--------|-------|--------|--------|------|------|------|------|------|------|------|------|------|------|------|
| 7066   | 5     | 5      | 5      |      |      |      |      |      |      |      |      |      |      |      |
| 7069   | 5     | 5      | 5      |      |      |      |      |      |      |      |      |      |      |      |
| 7070   |       |        |        |      |      |      |      |      |      |      |      |      |      |      |
| 7073   |       |        |        |      |      |      |      |      |      |      |      |      |      |      |
| 7078   | 5     | 5      | 5      | 5    | 5    | 5    | 5    | 5    | 4    | 5    | 4    | 5    | 5    | 5    |
| 7083   | 4     | 4      | 4      | 3    | 4    | 4    | 4    | 5    | 2    | 4    | 4    | 5    | 5    | 4    |
| 7084   | 3     | 3      | 3      | 2    | 2    | 2    | 2    | 2    | 1    | 2    | 3    | 2    | 2    | 2    |
| 7085   | 5     | 5      | 5      |      | 1    |      |      |      |      |      |      |      |      |      |
| 7088   | 3     | 4      | 4      | 3    | 3    | 3    | 3    | 3    | 2    | 3    | 2    | 2    | 2    | 2    |
| 7090   | 4     | 2      | 2      | 2    | 2    | 3    | 3    | 4    | 2    | 2    | 3    | 2    | 2    | 3    |
| 7095   | 4     | 5      | 4      |      |      |      |      |      |      |      |      |      |      |      |
| 7100   |       |        |        |      |      |      |      |      |      |      |      |      |      |      |
| 7102   | 5     | 5      | 4      | 4    | 5    | 4    | 5    | 5    | 3    | 3    | 3    | 4    | 3    | 5    |
| 7103   | 5     | 5      | 5      |      |      |      |      |      |      |      |      |      |      |      |
| 7108   | 5     | 5      | 4      |      |      |      |      |      |      |      |      |      |      |      |
| 7109   | 5     | 5      | 5      |      |      |      |      |      |      |      |      |      |      |      |
| 7110   |       |        |        |      |      |      |      |      |      |      |      |      |      |      |
| 7112   |       |        |        |      |      |      |      |      |      |      |      |      |      |      |
| 7114   | 5     | 5      | 5      |      |      |      |      |      |      |      |      |      |      |      |
| 7116   | 4     | 5      | 5      | 0    | 0    | 0    | 0    | 0    | 0    | 0    | 0    | 0    | 1    | 1    |
| 7117   | 5     | 4      | 5      |      |      |      |      |      |      |      |      |      |      |      |
| 7118   | 5     | 4      | 4      |      |      |      |      |      |      |      |      |      |      |      |
| 7120   | 4     | 4      | 4      |      |      |      |      |      |      |      |      |      |      |      |
| 7124   | 5     | 5      | 5      |      |      |      |      |      |      |      |      |      |      |      |
| 7130   | 5     | 5      | 5      | 0    | 0    | 0    | 0    | 0    | 0    | 0    | 0    | 0    | 1    | 1    |
| 7135   | 5     | 5      | 5      | 0    | 1    | 1    | 1    | 1    | 1    | 1    | 1    | 5    | 1    | 1    |
| 7137   | 2     | 3      | 3      | 4    | 3    | 4    | 4    | 1    | 1    | 2    | 2    | 3    | 3    | 2    |
| 7140   | 6     | 6      | 6      | 4    | 4    | 5    | 5    | 5    | 0    | 4    | 0    | 0    | 5    | 1    |
| 7141   | 5     | 5      | 5      |      |      |      |      |      |      |      |      |      |      |      |
| 7148   | 5     | 5      | 5      |      |      |      |      |      |      |      |      |      |      |      |
| 7152   |       |        |        |      |      |      |      |      |      |      |      |      |      |      |
| 7154   | 6     | 6      | 6      | 5    | 0    | 0    | 0    | 0    | 0    | 0    | 0    | 0    | 5    | 2    |

| respid | Q46x4 | Q46x5a | Q46x5b | Q47a | Q47b | Q47c | Q47d | Q47e | Q47f | Q47g | Q47h | Q47i | Q47j | Q47k |
|--------|-------|--------|--------|------|------|------|------|------|------|------|------|------|------|------|
| 7156   | 5     | 5      | 5      |      |      |      |      |      |      |      |      |      |      |      |
| 7158   | 4     | 5      | 3      |      |      |      |      |      |      |      |      |      |      |      |
| 7159   |       |        |        |      |      |      |      |      |      |      |      |      |      |      |
| 7161   |       |        |        |      |      |      |      |      |      |      |      |      |      |      |
| 7164   | 4     | 5      | 5      | 5    | 5    | 5    | 5    | 5    | 2    | 5    | 4    | 4    | 4    | 3    |
| 7166   |       |        |        |      |      |      |      |      |      |      |      |      |      |      |
| 7167   |       |        |        |      |      |      |      |      |      |      |      |      |      |      |
| 7168   |       |        |        |      |      |      |      |      |      |      |      |      |      |      |
| 7170   |       |        |        |      |      |      |      |      |      |      |      |      |      |      |
| 7171   | 5     | 5      | 5      |      |      |      |      |      |      |      |      |      |      |      |
| 7172   | 5     | 5      | 5      |      |      |      |      |      |      |      |      |      |      |      |
| 7173   | 5     | 5      | 5      |      |      |      |      |      |      |      |      |      |      |      |
| 7175   | 6     | 6      | 6      |      |      |      |      |      |      |      |      |      |      |      |
| 7176   | 4     | 4      | 4      | 2    | 4    | 4    | 3    | 4    | 1    | 3    | 3    | 4    | 3    | 3    |
| 7180   | 5     | 5      | 5      | 5    | 5    | 5    | 5    | 5    | 4    | 5    | 5    | 5    | 5    | 5    |
| 7183   | 4     | 4      | 4      | 4    | 4    | 4    | 4    | 5    | 0    | 4    | 3    | 4    | 4    | 4    |
| 7189   | 6     | 6      | 6      | 5    | 5    | 5    | 5    | 5    | 3    | 5    | 4    | 5    | 5    | 5    |
| 7193   | 5     | 5      | 5      | 5    | 5    | 5    | 5    | 5    | 1    | 2    | 2    | 5    | 4    | 3    |
| 7194   | 4     | 4      | 4      |      |      |      |      |      |      |      |      |      |      |      |
| 7195   | 5     | 4      | 5      |      |      |      |      |      |      |      |      |      |      |      |
| 7200   | 5     | 5      | 5      |      |      |      |      |      |      |      |      |      |      |      |
| 7201   | 6     | 6      | 6      |      |      |      |      |      |      |      |      |      |      |      |
| 7205   | 3     | 4      | 4      | 4    | 4    | 3    | 3    | 4    | 2    | 4    | 3    | 4    | 3    | 4    |
| 7207   | 5     | 5      | 5      | 5    | 5    | 5    | 4    | 5    | 5    | 4    | 4    | 5    | 4    | 5    |
| 7208   |       |        |        |      |      |      |      |      |      |      |      |      |      |      |
| 7210   | 5     | 5      | 5      |      |      |      |      |      |      |      |      |      |      |      |
| 7211   | 5     | 5      | 5      | 5    | 5    | 5    | 5    | 5    | 4    | 5    | 4    | 5    | 5    | 5    |
| 7217   | 4     | 5      | 5      |      |      |      |      |      |      |      |      |      |      |      |
| 7218   | 5     | 5      | 5      |      |      |      |      |      |      |      |      |      |      |      |
| 7220   |       |        |        |      |      |      |      |      |      |      |      |      |      |      |
| 7225   | 6     | 6      | 6      | 5    | 5    | 5    | 5    | 5    | 5    | 5    | 5    | 5    | 5    | 5    |
| 7228   | 5     | 5      | 5      | 1    | 5    | 5    | 5    | 5    | 3    | 5    | 4    | 5    | 5    | 5    |

| respid | Q46x4 | Q46x5a | Q46x5b | Q47a | Q47b | Q47c | Q47d | Q47e | Q47f | Q47g | Q47h | Q47i | Q47j | Q47k |
|--------|-------|--------|--------|------|------|------|------|------|------|------|------|------|------|------|
| 7230   | 5     | 5      | 5      | 4    | 4    | 4    | 3    | 4    | 3    | 4    | 3    | 4    | 5    | 4    |
| 7233   | 5     | 5      | 5      | 4    | 5    | 5    | 4    | 5    | 2    | 4    | 4    | 4    | 4    | 4    |
| 7234   | 5     | 5      | 5      | 5    | 5    | 5    | 5    | 5    | 4    | 3    | 2    | 3    | 4    | 4    |
| 7235   |       |        |        |      |      |      |      |      |      |      |      |      |      |      |
| 7236   |       |        |        |      |      |      |      |      |      |      |      |      |      |      |
| 7241   | 5     | 5      | 5      | 4    | 4    | 4    | 4    | 5    | 3    | 4    | 5    | 5    | 5    | 4    |
| 7251   | 6     | 6      | 6      | 5    | 5    | 5    | 5    | 5    | 3    | 5    | 3    | 5    | 5    | 3    |
| 7253   | 5     | 5      | 5      | 5    | 5    | 5    | 5    | 5    | 2    | 5    | 5    | 5    | 5    | 3    |
| 7259   | 5     | 5      | 5      | 5    | 5    | 5    | 5    | 5    | 5    | 5    | 5    | 5    | 5    | 5    |
| 7260   | 5     | 4      | 4      |      |      |      |      |      |      |      |      |      |      |      |
| 7261   | 4     | 4      | 4      | 3    | 3    | 3    | 3    | 4    | 1    | 3    | 3    | 3    | 3    | 3    |
| 7263   | 5     | 5      | 5      |      |      |      |      |      |      |      |      |      |      |      |
| 7265   |       |        |        |      |      |      |      |      |      |      |      |      |      |      |
| 7268   | 6     | 6      | 6      |      |      |      |      |      |      |      |      |      |      |      |
| 7269   |       |        |        |      |      |      |      |      |      |      |      |      |      |      |
| 7271   | 3     | 3      | 3      | 2    | 2    | 2    | 2    | 2    | 2    | 2    | 2    | 2    | 3    | 2    |
| 7276   | 5     | 3      | 3      |      |      |      |      |      |      |      |      |      |      |      |
| 7280   | 4     | 5      | 5      | 0    | 4    | 4    | 0    | 0    | 0    | 0    | 0    | 0    | 3    | 1    |
| 7283   | 5     | 5      | 4      |      |      |      |      |      |      |      |      |      |      |      |
| 7284   | 5     | 5      | 5      |      |      |      |      |      |      |      |      |      |      |      |
| 7286   | 5     | 5      | 5      | 1    | 1    | 1    | 1    | 5    | 5    | 5    | 5    | 5    | 5    | 5    |
| 7287   |       |        |        |      |      |      |      |      |      |      |      |      |      |      |
| 7288   | 6     | 6      | 6      |      |      |      |      |      |      |      |      |      |      |      |
| 7294   | 5     | 5      | 5      |      |      |      |      |      |      |      |      |      |      |      |
| 7295   | 5     | 5      | 5      | 0    | 0    | 0    | 0    | 0    | 0    | 0    | 0    | 0    | 1    | 1    |
| 7296   | 4     | 5      | 4      | 4    | 5    | 5    | 5    | 5    | 4    | 5    | 4    | 4    | 4    | 4    |
| 7297   | 5     | 4      | 5      |      |      |      |      |      |      |      |      |      |      |      |
| 7299   | 5     | 5      | 5      |      |      |      |      |      |      |      |      |      |      |      |
| 7300   | 5     | 5      | 4      | 2    | 2    | 3    | 5    | 4    | 4    | 5    | 4    | 4    | 3    | 5    |
| 7301   | 5     | 4      | 4      | 3    | 2    |      | 3    | 4    | 2    | 2    | 2    | 3    | 2    | 2    |
| 7302   |       |        |        |      |      |      |      |      |      |      |      |      |      |      |
| 7306   | 5     | 5      | 5      |      |      |      |      |      |      |      |      |      |      |      |

| respid | Q46x4 | Q46x5a | Q46x5b | Q47a | Q47b | Q47c | Q47d | Q47e | Q47f | Q47g | Q47h | Q47i | Q47j | Q47k |   |
|--------|-------|--------|--------|------|------|------|------|------|------|------|------|------|------|------|---|
| 7313   | 4     | 4      | 4      | 4    | 4    | 4    | 4    | 4    | 4    | 1    | 1    | 2    | 4    | 3    | 2 |
| 7315   | 3     | 3      | 2      |      |      |      |      |      |      |      |      |      |      |      |   |
| 7317   | 5     | 5      | 5      |      |      |      |      |      |      |      |      |      |      |      |   |
| 7321   | 5     | 5      | 5      | 5    | 4    | 4    | 4    | 5    | 1    | 2    | 3    | 5    | 4    | 4    |   |
| 7322   | 5     | 5      | 5      | 2    | 4    | 4    | 4    | 5    | 3    | 4    | 3    | 5    | 4    | 5    |   |
| 7323   | 4     | 3      | 4      | 4    | 4    | 4    | 4    | 5    | 2    | 2    | 4    | 3    | 2    | 3    |   |
| 7333   | 4     | 5      | 5      | 4    | 4    | 4    | 4    | 5    | 2    | 3    | 3    | 4    | 4    | 4    |   |
| 7335   | 5     | 5      | 5      |      |      |      |      |      |      |      |      |      |      |      |   |
| 7336   | 5     | 5      | 5      | 0    | 0    | 0    | 0    | 0    | 0    | 0    | 0    | 0    | 0    | 1    | 1 |
| 7337   | 5     | 5      | 5      | 5    | 4    | 5    | 5    | 5    | 2    | 4    | 3    | 5    | 4    | 3    |   |
| 7338   | 6     | 6      | 6      | 5    | 5    | 5    | 5    | 5    | 5    | 5    | 5    | 5    | 5    | 5    | 5 |
| 7340   | 5     | 5      | 5      | 0    | 0    | 0    | 0    | 0    | 0    | 0    | 0    | 0    | 5    | 5    | 4 |
| 7341   | 5     | 5      | 5      |      |      |      |      |      |      |      |      |      |      |      |   |
| 7342   | 6     | 6      | 6      | 5    | 5    | 5    | 5    | 5    | 0    | 0    | 0    | 0    | 0    | 1    | 1 |
| 7344   | 3     | 3      | 3      |      |      |      |      |      |      |      |      |      |      |      |   |
| 7346   | 4     | 5      | 5      |      |      |      |      |      |      |      |      |      |      |      |   |
| 7347   | 6     | 5      | 5      |      |      |      |      |      |      |      |      |      |      |      |   |
| 7349   | 4     | 4      | 5      |      |      |      |      |      |      |      |      |      |      |      |   |
| 7352   | 4     | 5      | 5      | 5    | 5    | 5    | 5    | 5    | 2    | 4    | 4    | 4    | 4    | 5    | 5 |
| 7353   | 5     | 5      | 5      | 5    | 5    | 5    | 5    | 5    | 5    | 3    | 2    | 5    | 2    | 5    |   |
| 7355   | 6     | 6      | 6      |      |      |      |      |      |      |      |      |      |      |      |   |
| 7356   |       |        |        |      |      |      |      |      |      |      |      |      |      |      |   |
| 7360   | 2     | 2      | 1      |      |      |      |      |      |      |      |      |      |      |      |   |
| 7371   | 5     | 5      | 5      |      |      |      |      |      |      |      |      |      |      |      |   |
| 7376   | 4     | 4      | 4      | 1    | 1    | 1    | 1    | 1    | 1    | 1    | 1    | 1    | 1    | 1    | 2 |
| 7379   | 6     | 6      | 4      |      |      |      |      |      |      |      |      |      |      |      |   |
| 7381   | 5     | 4      | 4      | 5    | 5    | 5    | 5    | 5    | 3    | 4    | 4    | 5    | 5    | 5    | 5 |
| 7386   | 5     | 5      | 5      | 4    | 4    | 4    | 5    | 5    | 1    | 4    | 4    | 5    | 5    | 5    | 4 |
| 7389   | 5     | 5      | 5      | 5    | 5    | 5    | 5    | 5    | 0    | 5    | 4    | 5    | 5    | 5    | 4 |
| 7390   | 4     | 4      | 4      | 4    | 4    | 4    | 5    | 5    | 3    | 4    | 4    | 4    | 4    | 4    | 4 |
| 7393   | 5     | 5      | 5      | 5    | 5    | 5    | 5    | 5    | 5    | 5    | 5    | 5    | 5    | 5    | 5 |
| 7394   | 5     | 5      | 5      | 4    | 4    | 4    | 4    | 5    | 2    | 4    | 4    | 4    | 4    | 4    | 4 |

| respid | Q46x4 | Q46x5a | Q46x5b | Q47a | Q47b | Q47c | Q47d | Q47e | Q47f | Q47g | Q47h | Q47i | Q47j | Q47k |
|--------|-------|--------|--------|------|------|------|------|------|------|------|------|------|------|------|
| 7396   | 5     | 5      | 5      |      |      |      |      |      |      |      |      |      |      |      |
| 7400   | 4     | 4      | 4      |      |      |      |      |      |      |      |      |      |      |      |
| 7401   | 4     | 4      | 3      | 3    | 3    | 4    | 4    | 5    | 1    | 4    | 4    | 4    | 4    | 4    |
| 7403   | 5     | 4      | 5      | 1    | 1    | 1    | 0    | 0    | 0    | 0    | 0    | 5    | 4    | 4    |
| 7406   | 5     | 5      | 5      | 5    | 5    | 5    | 5    | 5    | 5    | 5    | 5    | 4    | 5    | 5    |
| 7409   | 4     | 4      | 5      | 5    | 5    | 5    | 4    | 5    | 5    | 5    | 5    | 5    | 4    | 5    |
| 7410   | 4     | 4      | 4      | 4    | 4    | 4    | 3    | 4    | 2    | 4    | 3    | 3    | 3    | 3    |
| 7412   | 6     | 6      | 6      |      |      |      |      |      |      |      |      |      |      |      |
| 7414   | 5     | 5      | 5      |      |      |      |      |      |      |      |      |      |      |      |
| 7415   | 4     | 4      | 5      | 3    | 4    | 5    | 4    | 5    | 4    | 4    | 4    | 4    | 5    | 4    |
| 7417   | 4     | 4      | 4      | 5    | 5    | 5    | 5    | 5    | 3    | 5    | 3    | 5    | 5    | 5    |
| 7421   | 3     | 3      | 3      | 2    | 3    | 3    | 3    | 4    | 2    |      | 3    |      |      |      |
| 7425   | 5     | 5      | 5      | 5    | 5    | 4    | 5    | 5    | 1    | 4    | 3    | 4    | 3    | 3    |
| 7430   | 5     | 5      | 5      | 3    | 3    | 3    | 3    | 4    |      |      |      | 4    |      | 4    |
| 7432   | 5     | 5      | 5      | 5    | 5    | 5    | 5    | 5    | 2    | 5    | 4    | 5    | 5    | 4    |
| 7433   | 4     | 3      | 4      |      |      |      |      |      |      |      |      |      |      |      |
| 7442   | 5     | 4      | 5      |      |      |      |      |      |      |      |      |      |      |      |
| 7445   | 5     | 5      | 5      |      |      |      |      |      |      |      |      |      |      |      |
| 7446   | 5     | 5      | 5      |      |      |      |      |      |      |      |      |      |      |      |
| 7449   |       |        |        |      |      |      |      |      |      |      |      |      |      |      |
| 7450   |       |        |        |      |      |      |      |      |      |      |      |      |      |      |
| 7451   | 6     | 6      | 6      | 5    | 5    | 5    | 5    | 5    | 1    | 1    | 2    | 4    | 4    | 4    |
| 7459   | 6     | 5      | 5      | 2    | 2    | 4    | 4    | 5    | 3    | 4    | 3    | 5    | 5    | 3    |
| 7462   | 5     | 5      | 5      |      |      |      |      |      |      |      |      |      |      |      |
| 7463   | 4     | 3      | 4      |      |      |      |      |      |      |      |      |      |      |      |
| 7469   |       |        |        |      |      |      |      |      |      |      |      |      |      |      |
| 7482   | 6     | 6      | 6      | 0    | 0    | 0    | 0    | 0    | 0    | 0    | 0    | 0    |      | 1    |
| 7484   | 5     | 5      | 5      |      |      |      |      |      |      |      |      |      |      |      |
| 7486   | 5     | 5      | 5      | 4    | 4    | 4    | 4    | 4    | 2    | 4    | 4    | 4    | 4    | 4    |
| 7496   | 6     | 6      | 6      | 5    | 5    | 5    | 5    | 5    | 2    | 2    | 2    | 3    | 3    | 4    |
| 7502   | 5     | 5      | 5      | 5    | 5    | 5    | 5    | 5    | 5    | 4    | 4    | 5    | 5    | 5    |
| 7504   | 4     | 4      | 5      | 3    | 4    | 4    | 4    | 4    | 1    | 3    | 3    | 3    | 2    | 4    |

| respid | Q46x4 | Q46x5a | Q46x5b | Q47a | Q47b | Q47c | Q47d | Q47e | Q47f | Q47g | Q47h | Q47i | Q47j | Q47k |   |
|--------|-------|--------|--------|------|------|------|------|------|------|------|------|------|------|------|---|
| 7509   | 4     | 4      | 4      | 3    | 3    | 3    | 3    | 3    | 2    | 1    | 2    | 2    | 4    | 3    | 3 |
| 7513   | 5     | 5      | 5      |      |      |      |      |      |      |      |      |      |      |      |   |
| 7514   |       |        |        |      |      |      |      |      |      |      |      |      |      |      |   |
| 7520   | 5     | 5      | 5      |      |      |      |      |      |      |      |      |      |      |      |   |
| 7523   |       |        |        |      |      |      |      |      |      |      |      |      |      |      |   |
| 7526   | 5     | 5      | 5      |      |      |      |      |      |      |      |      |      |      |      |   |
| 7529   | 5     | 4      | 4      | 4    |      |      | 5    | 5    | 5    | 1    | 5    | 4    | 5    | 5    | 2 |
| 7534   |       |        |        |      |      |      |      |      |      |      |      |      |      |      |   |
| 7536   | 4     | 4      | 4      | 1    | 5    | 5    | 5    | 5    | 4    | 5    | 4    | 3    | 5    | 5    | 4 |
| 7540   | 5     | 5      | 5      | 5    | 5    | 5    | 5    | 5    | 5    | 5    | 5    | 4    | 5    | 5    | 4 |
| 7541   | 4     | 4      | 4      | 0    | 0    | 0    | 0    | 0    | 4    | 0    | 0    | 1    | 2    | 2    |   |
| 7542   |       |        |        |      |      |      |      |      |      |      |      |      |      |      |   |
| 7555   | 6     | 6      | 6      | 5    | 5    | 5    | 5    | 5    | 5    | 2    | 4    | 3    | 4    | 4    | 4 |
| 7566   | 6     | 5      | 5      |      |      |      |      |      |      |      |      |      |      |      |   |
| 7568   | 5     | 5      | 5      | 2    | 2    | 3    | 3    | 4    | 1    | 3    | 2    | 2    | 2    | 4    | 4 |
| 7570   | 4     | 4      | 4      |      | 2    | 2    | 3    | 4    | 2    | 2    | 2    | 3    | 3    | 3    | 3 |
| 7572   | 6     | 5      | 2      |      |      |      |      |      |      |      |      |      |      |      |   |
| 7573   | 3     | 4      | 4      |      |      |      |      |      |      |      |      |      |      |      |   |
| 7576   | 5     | 5      | 5      |      |      |      |      |      |      |      |      |      |      |      |   |
| 7577   | 4     | 5      | 5      |      |      |      |      |      |      |      |      |      |      |      |   |
| 7583   | 6     | 6      | 6      | 5    | 5    | 5    | 5    | 5    | 5    | 5    | 5    | 5    | 5    | 5    | 5 |
| 7584   | 5     | 4      | 5      | 2    | 3    | 4    | 3    | 4    | 3    | 3    | 3    | 3    | 5    | 4    | 5 |
| 7585   | 4     | 4      | 5      |      |      |      |      |      |      |      |      |      |      |      |   |
| 7586   | 6     | 5      | 6      | 4    | 0    | 3    | 2    | 3    | 1    | 1    | 0    | 0    | 0    | 2    |   |
| 7587   | 5     | 5      | 5      | 5    |      |      |      |      |      |      |      |      |      |      |   |
| 7588   | 6     | 6      | 6      | 5    | 5    | 5    | 5    | 5    | 3    |      |      | 4    | 5    | 5    | 4 |
| 7596   | 5     | 5      | 5      | 5    | 4    | 5    | 5    | 5    | 5    | 1    | 5    | 4    | 5    | 5    | 4 |
| 7599   | 5     | 5      | 5      |      |      |      |      |      |      |      |      |      |      |      |   |
| 7600   | 3     | 3      | 3      | 2    | 2    | 4    | 3    | 3    | 3    | 2    | 3    | 3    | 4    | 3    | 3 |
| 7602   | 5     | 5      | 5      |      |      |      |      |      |      |      |      |      |      |      |   |
| 7613   | 5     | 5      | 5      | 5    | 5    | 5    | 5    | 5    | 5    | 1    | 5    | 4    | 5    | 5    | 5 |
| 7620   | 5     | 5      | 5      |      |      |      |      |      |      |      |      |      |      |      |   |

| respid | Q46x4 | Q46x5a | Q46x5b | Q47a | Q47b | Q47c | Q47d | Q47e | Q47f | Q47g | Q47h | Q47i | Q47j | Q47k |   |
|--------|-------|--------|--------|------|------|------|------|------|------|------|------|------|------|------|---|
| 7623   | 4     | 5      | 5      |      | 2    | 4    | 4    | 4    | 5    | 1    | 4    | 4    | 4    | 5    | 4 |
| 7635   | 5     | 5      | 5      |      | 5    | 5    | 5    | 5    | 5    | 5    | 5    | 3    | 5    | 5    | 4 |
| 7636   | 5     | 5      | 5      |      |      |      |      |      |      |      |      |      |      |      |   |
| 7643   | 4     | 4      | 5      |      |      |      |      |      |      |      |      |      |      |      |   |
| 7645   | 5     | 5      | 5      |      |      |      |      |      |      |      |      |      |      |      |   |
| 7649   | 3     | 4      | 4      |      |      |      |      |      |      |      |      |      |      |      |   |
| 7651   | 5     | 5      | 5      |      |      |      |      |      |      |      |      |      |      |      |   |
| 7652   | 4     | 4      | 4      | 2    | 1    | 1    | 1    | 1    | 3    | 1    | 2    | 2    | 2    | 2    | 3 |
| 7655   | 4     | 4      | 4      | 5    | 3    | 3    | 3    | 4    | 2    | 3    | 3    | 4    | 4    | 4    | 3 |
| 7657   | 5     | 5      | 5      | 5    | 5    | 5    | 5    | 5    | 5    | 3    | 5    | 4    | 5    | 5    | 5 |
| 7675   | 5     | 5      | 5      |      |      |      |      |      |      |      |      |      |      |      |   |
| 7676   | 5     | 4      | 4      | 4    | 2    | 3    | 3    | 4    | 2    | 2    | 2    | 2    | 5    | 2    | 2 |
| 7684   | 5     | 5      | 5      |      |      |      |      |      |      |      |      |      |      |      |   |
| 7693   | 4     | 4      | 4      | 4    | 5    | 5    | 5    | 5    | 2    | 4    | 4    | 5    | 5    | 5    | 4 |
| 7694   | 2     | 2      | 2      |      |      |      |      |      |      |      |      |      |      |      |   |
| 7695   | 6     | 6      | 6      | 5    |      | 5    | 5    | 5    | 5    | 5    | 5    | 4    | 5    | 5    | 5 |
| 7696   | 2     | 2      | 2      |      |      |      |      |      |      |      |      |      |      |      |   |
| 7698   | 5     | 5      | 5      |      |      |      |      |      |      |      |      |      |      |      |   |
| 7700   | 5     | 5      | 5      |      |      |      |      |      |      |      |      |      |      |      |   |
| 7701   | 5     | 5      | 5      | 5    | 5    | 5    | 5    | 5    | 5    | 5    | 5    | 4    | 5    | 5    | 4 |
| 7704   | 5     | 5      | 5      |      |      |      |      |      |      |      |      |      |      |      |   |
| 7709   | 4     | 4      | 4      | 5    | 5    | 5    | 5    | 5    | 2    | 4    | 4    | 5    | 4    | 4    | 4 |
| 7713   | 5     | 5      | 5      | 2    | 2    | 2    | 2    | 2    | 2    | 2    | 2    | 3    | 3    | 3    | 3 |
| 7714   | 6     | 6      | 6      | 5    | 5    | 5    | 5    | 5    | 5    | 5    | 5    | 5    | 5    | 5    | 5 |
| 7718   | 2     | 4      | 3      |      |      |      | 2    | 2    | 1    | 1    | 1    | 1    | 1    | 2    | 1 |
| 7720   | 5     | 5      | 6      | 5    | 5    | 5    | 5    | 5    | 5    | 0    | 5    | 5    | 5    | 5    | 5 |
| 7721   | 5     | 5      | 5      | 2    | 5    | 5    | 2    | 3    | 0    | 3    | 3    | 4    | 4    | 4    | 4 |
| 7722   | 5     | 5      | 5      | 5    | 5    | 5    | 5    | 5    | 5    | 1    | 5    | 4    | 5    | 4    | 3 |
| 7724   | 5     | 5      | 5      | 4    | 4    | 4    | 5    | 4    | 4    | 1    | 3    | 3    | 4    | 3    | 4 |
| 7728   |       |        |        |      |      |      |      |      |      |      |      |      |      |      |   |
| 7731   | 5     | 4      | 4      | 3    | 2    | 2    | 2    | 4    | 2    | 2    | 2    | 3    | 4    | 3    | 3 |
| 7735   | 4     | 3      | 4      |      |      |      |      |      |      |      |      |      |      |      |   |



| respid | Q46x4 | Q46x5a | Q46x5b | Q47a | Q47b | Q47c | Q47d | Q47e | Q47f | Q47g | Q47h | Q47i | Q47j | Q47k |   |
|--------|-------|--------|--------|------|------|------|------|------|------|------|------|------|------|------|---|
| 7737   | 6     | 6      | 6      | 5    | 5    | 5    | 5    | 5    | 5    | 3    | 5    | 4    | 5    | 5    | 5 |
| 7741   | 5     | 5      | 5      | 5    | 5    | 5    | 5    | 5    | 5    | 4    | 4    | 4    | 4    | 4    | 4 |
| 7746   | 5     | 5      | 5      | 5    | 5    | 5    | 5    | 5    | 5    | 3    | 5    | 5    | 5    | 5    | 5 |
| 7747   | 4     | 4      | 4      |      |      |      |      |      |      |      |      |      |      |      |   |
| 7748   | 5     | 5      | 5      | 3    | 3    | 4    | 3    | 5    | 1    | 3    | 3    | 3    | 3    | 3    | 3 |
| 7750   | 5     | 5      | 5      |      |      |      |      |      |      |      |      |      |      |      |   |
| 7754   | 6     | 6      | 6      |      |      |      |      |      |      |      |      |      |      |      |   |
| 7755   | 5     | 4      | 4      |      |      |      |      |      |      |      |      |      |      |      |   |
| 7762   |       |        |        |      |      |      |      |      |      |      |      |      |      |      |   |
| 7764   | 5     | 5      | 5      | 4    | 4    | 4    | 5    | 5    | 5    | 5    | 4    | 3    | 4    | 4    | 4 |
| 7766   |       |        |        |      |      |      |      |      |      |      |      |      |      |      |   |
| 7768   | 4     | 4      | 4      |      |      |      |      |      |      |      |      |      |      |      |   |
| 7770   | 4     | 4      | 4      | 4    | 4    | 4    | 4    | 4    | 2    | 2    | 2    | 2    | 4    | 2    |   |
| 7771   | 5     | 5      | 5      | 4    | 5    | 5    | 5    | 5    | 5    | 3    | 5    | 4    | 5    | 5    | 4 |
| 7777   | 5     | 4      | 5      | 4    | 4    | 4    | 5    | 5    | 5    | 2    | 4    | 4    | 4    | 4    | 5 |
| 7778   |       |        |        |      |      |      |      |      |      |      |      |      |      |      |   |
| 7783   | 4     | 3      | 3      | 2    | 2    | 2    | 2    | 3    | 2    | 2    | 2    | 2    | 2    | 2    | 2 |
| 7789   | 5     | 5      | 5      |      |      |      |      |      |      |      |      |      |      |      |   |
| 7790   | 6     | 6      | 6      | 0    | 0    | 0    | 0    | 0    | 0    | 0    | 0    | 0    | 0    | 1    |   |
| 7795   | 5     | 5      | 5      | 4    | 1    | 0    | 5    | 5    | 5    | 1    | 2    | 3    | 5    | 5    | 3 |
| 7807   | 5     | 5      | 5      | 0    | 0    | 0    | 0    | 0    | 0    | 0    | 0    | 0    | 0    | 1    | 1 |
| 7808   | 5     | 5      | 5      | 4    | 4    | 4    | 4    | 4    | 4    | 2    | 4    | 3    | 3    | 3    | 4 |
| 7818   | 4     | 5      | 5      |      |      |      |      |      |      |      |      |      |      |      |   |
| 7820   |       |        |        |      |      |      |      |      |      |      |      |      |      |      |   |
| 7831   | 4     | 5      | 5      |      |      |      |      |      |      |      |      |      |      |      |   |
| 7832   | 4     | 5      | 4      | 5    | 4    | 5    | 5    | 5    | 5    | 1    | 5    | 4    | 5    | 4    | 4 |
| 7837   | 5     | 5      | 5      | 5    | 5    | 5    | 5    | 5    | 5    | 1    | 5    | 3    | 5    | 5    | 5 |
| 7841   | 4     | 5      | 5      | 5    | 3    | 5    | 4    | 5    | 5    | 4    | 4    | 3    | 5    | 4    | 3 |
| 7845   | 3     | 4      | 4      | 2    | 2    | 1    | 3    | 4    | 4    | 2    | 3    | 2    | 3    | 3    | 3 |
| 7853   | 5     | 5      | 5      | 5    | 5    | 5    | 5    | 5    | 5    | 2    | 4    | 2    | 4    | 4    | 4 |
| 7854   | 5     | 5      | 5      |      |      |      |      |      |      |      |      |      |      |      |   |
| 7862   | 4     | 4      | 4      | 3    | 3    | 3    | 3    | 3    | 3    | 2    | 3    | 2    | 3    | 3    | 3 |

| respid | Q46x4 | Q46x5a | Q46x5b | Q47a | Q47b | Q47c | Q47d | Q47e | Q47f | Q47g | Q47h | Q47i | Q47j | Q47k |
|--------|-------|--------|--------|------|------|------|------|------|------|------|------|------|------|------|
| 7871   | 4     | 6      | 6      |      |      |      |      |      |      |      |      |      |      |      |
| 7875   | 3     | 4      | 5      |      |      |      |      |      |      |      |      |      |      |      |
| 7880   | 4     | 5      | 5      |      |      |      |      |      |      |      |      |      |      |      |
| 7881   | 5     | 5      | 5      |      |      |      |      |      |      |      |      |      |      |      |
| 7883   | 4     | 4      | 5      | 4    | 4    | 5    | 5    | 5    | 4    | 5    | 4    | 5    | 5    | 4    |
| 7896   | 5     | 4      | 5      | 4    | 4    | 4    | 5    | 5    | 1    | 5    | 4    | 5    | 5    | 4    |
| 7905   | 5     | 5      | 5      |      |      |      |      |      |      |      |      |      |      |      |
| 7919   | 5     | 5      | 5      | 4    | 4    | 4    | 4    | 4    |      | 4    | 4    | 4    | 4    | 4    |
| 7928   | 4     | 4      | 4      | 2    | 2    | 2    | 1    | 1    | 0    | 0    | 0    | 4    | 3    | 2    |
| 7929   | 5     | 5      | 5      |      |      |      |      |      |      |      |      |      |      |      |
| 7938   | 5     | 5      | 4      | 4    | 4    | 4    | 4    | 4    | 4    | 4    | 3    | 5    | 4    | 4    |
| 7940   | 4     | 4      | 4      | 5    | 4    | 4    | 4    | 5    | 3    | 4    | 4    | 4    | 4    | 3    |
| 7941   | 4     | 4      | 4      | 5    | 5    | 5    | 5    | 5    | 4    | 5    | 4    | 5    | 5    | 5    |
| 7952   |       |        |        |      |      |      |      |      |      |      |      |      |      |      |
| 7962   | 5     | 5      | 5      | 5    | 5    | 5    | 5    | 5    | 4    | 5    | 4    | 5    | 5    | 4    |
| 7968   | 6     | 4      | 4      | 5    | 5    | 5    | 5    | 5    | 5    | 5    | 4    | 5    | 5    | 4    |
| 7972   | 5     | 5      | 5      | 5    | 5    | 5    | 5    | 5    | 3    | 5    | 4    | 5    | 5    | 5    |
| 7983   | 4     | 4      | 4      | 4    | 4    | 5    | 4    | 4    | 3    | 4    | 4    | 4    | 4    | 3    |
| 7990   | 5     | 5      | 5      | 5    | 5    | 5    | 5    | 5    | 3    | 4    | 3    | 5    | 3    | 5    |
| 7993   | 5     | 5      | 5      |      |      |      |      |      |      |      |      |      |      |      |
| 8005   | 4     | 4      | 5      |      |      |      |      |      |      |      |      |      |      |      |
| 8008   |       |        |        |      |      |      |      |      |      |      |      |      |      |      |
| 8012   | 5     | 4      | 5      |      |      |      |      |      |      |      |      |      |      |      |
| 8021   | 5     | 5      | 5      |      |      |      |      |      |      |      |      |      |      |      |
| 8024   | 5     | 4      | 5      |      |      |      |      |      |      |      |      |      |      |      |
| 8043   | 5     | 5      | 5      |      |      |      |      |      |      |      |      |      |      |      |
| 8051   | 5     | 5      | 5      |      |      |      |      |      |      |      |      |      |      |      |
| 8056   | 4     | 4      | 5      | 4    | 4    | 4    | 4    | 4    | 2    | 4    | 3    | 5    | 4    | 3    |
| 8061   | 5     | 5      | 5      | 5    | 5    | 5    | 5    | 5    |      | 4    | 3    | 5    | 4    |      |
| 8066   |       |        |        |      |      |      |      |      |      |      |      |      |      |      |
| 8069   | 4     | 4      | 4      |      |      |      |      |      |      |      |      |      |      |      |
| 8071   | 5     | 5      | 5      |      |      |      |      |      |      |      |      |      |      |      |

| respid | Q46x4 | Q46x5a | Q46x5b | Q47a | Q47b | Q47c | Q47d | Q47e | Q47f | Q47g | Q47h | Q47i | Q47j | Q47k |
|--------|-------|--------|--------|------|------|------|------|------|------|------|------|------|------|------|
| 8072   | 4     | 4      | 4      |      |      |      |      |      |      |      |      |      |      |      |
| 8076   | 6     | 4      | 4      |      |      |      |      | 5    | 2    | 4    | 3    | 5    | 4    | 3    |
| 8080   | 5     | 5      | 5      | 5    | 5    | 5    | 5    | 5    | 5    | 5    | 3    | 4    | 5    | 4    |
| 8083   | 4     | 5      | 4      | 5    | 4    | 4    | 3    | 2    | 2    | 3    | 3    | 5    | 5    | 5    |
| 8093   | 4     | 4      | 4      | 4    | 4    | 4    | 4    | 4    | 4    | 3    | 4    | 3    | 4    | 3    |
| 8095   | 4     | 4      | 5      | 2    | 4    | 4    | 4    | 4    | 4    | 3    | 2    | 2    | 2    | 2    |
| 8099   | 6     | 6      | 6      | 5    | 5    | 5    | 5    | 5    | 5    | 0    | 5    | 4    | 5    | 4    |
| 8100   | 4     | 4      | 5      | 0    | 0    | 0    | 0    | 0    | 0    | 0    | 0    | 0    | 0    | 1    |
| 8103   |       |        |        |      |      |      |      |      |      |      |      |      |      |      |
| 8104   | 2     | 2      | 3      | 2    | 2    | 3    | 3    | 4    | 1    | 2    | 2    | 3    | 3    | 2    |
| 8115   | 4     | 4      | 3      | 2    | 2    | 2    | 2    | 3    | 1    | 2    | 2    | 3    | 1    | 4    |
| 8121   | 4     | 5      | 5      | 4    | 3    | 4    | 4    | 4    | 2    | 4    | 3    | 5    | 4    | 3    |
| 8128   | 5     | 5      | 5      |      |      |      |      |      |      |      |      |      |      |      |
| 8130   | 5     | 5      | 5      |      |      |      |      |      |      |      |      |      |      |      |
| 8131   | 4     | 4      | 4      |      |      |      |      |      |      |      |      |      |      |      |
| 8133   | 5     | 4      | 5      |      |      |      |      |      |      |      |      |      |      |      |
| 8143   | 6     | 6      | 6      | 5    | 4    | 4    | 4    | 4    | 2    | 4    | 3    | 5    | 4    | 4    |
| 8144   | 4     | 4      | 4      |      |      |      |      |      |      |      |      |      |      |      |
| 8146   | 5     | 5      | 5      | 5    | 5    | 5    | 5    | 5    | 3    | 5    | 3    | 5    | 5    | 4    |
| 8148   |       |        |        |      |      |      |      |      |      |      |      |      |      |      |
| 8157   |       |        |        |      |      |      |      |      |      |      |      |      |      |      |
| 8164   |       |        |        |      |      |      |      |      |      |      |      |      |      |      |
| 8173   |       |        |        |      |      |      |      |      |      |      |      |      |      |      |
| 8176   | 5     | 5      | 5      |      |      |      |      |      |      |      |      |      |      |      |
| 8179   | 6     | 6      | 6      | 5    | 5    | 5    | 5    | 5    | 1    | 1    | 1    | 5    | 2    | 5    |
| 8181   |       |        |        |      |      |      |      |      |      |      |      |      |      |      |
| 8182   | 4     | 4      | 4      |      |      |      |      |      |      |      |      |      |      |      |
| 8196   | 4     | 4      | 4      | 5    | 5    | 5    | 5    | 5    | 3    | 5    | 4    | 4    | 3    | 4    |
| 8200   | 6     | 6      | 6      |      |      |      |      |      |      |      |      |      |      |      |
| 8203   | 5     | 5      | 5      |      |      |      |      |      |      |      |      |      |      |      |
| 8204   | 4     | 5      | 5      |      |      |      |      |      |      |      |      |      |      |      |
| 8206   | 5     | 5      | 4      |      |      |      |      |      |      |      |      |      |      |      |

| respid | Q46x4 | Q46x5a | Q46x5b | Q47a | Q47b | Q47c | Q47d | Q47e | Q47f | Q47g | Q47h | Q47i | Q47j | Q47k |
|--------|-------|--------|--------|------|------|------|------|------|------|------|------|------|------|------|
| 8208   | 5     | 5      | 5      |      |      |      |      |      |      |      |      |      |      |      |
| 8212   | 4     | 4      | 4      | 4    | 3    | 4    | 4    | 4    | 1    | 2    | 2    | 5    | 1    | 4    |
| 8222   | 3     | 3      | 3      |      |      |      |      |      |      |      |      |      |      |      |
| 8223   | 5     | 5      | 5      | 5    | 5    | 5    | 5    | 5    | 3    | 5    | 5    | 5    | 5    | 5    |
| 8225   | 5     | 5      | 5      | 4    | 4    | 4    | 4    | 5    | 1    | 4    | 4    | 5    | 5    | 4    |
| 8226   | 6     | 6      | 6      | 5    | 5    | 5    | 5    | 5    | 3    | 5    | 4    | 5    | 5    | 5    |
| 8228   | 4     | 5      | 5      | 4    | 4    | 4    | 4    | 4    | 2    | 2    | 3    | 4    | 4    | 4    |
| 8229   | 6     | 5      | 5      | 5    | 5    | 5    | 5    | 5    | 5    |      |      |      |      |      |
| 8239   | 4     | 4      | 4      | 5    | 4    | 4    | 4    | 5    | 3    | 5    | 4    | 5    | 5    | 5    |
| 8246   | 4     | 6      | 6      | 0    | 0    | 0    | 0    | 0    | 0    | 0    | 0    | 0    | 1    | 1    |
| 8258   | 4     | 3      | 2      | 2    | 1    | 3    | 2    | 1    | 2    | 1    | 2    | 1    | 3    | 2    |
| 8260   | 5     | 5      | 5      | 4    | 3    | 2    | 2    | 4    |      | 4    | 4    | 5    | 5    | 4    |
| 8262   | 4     | 5      | 4      | 5    | 5    | 4    | 4    | 5    | 2    | 5    | 3    | 5    | 5    | 5    |
| 8263   | 4     | 4      | 4      | 4    | 3    | 4    | 4    | 4    | 2    | 3    | 2    | 5    | 3    | 3    |
| 8267   | 6     | 4      | 5      | 5    | 5    | 5    | 5    | 5    | 2    | 4    | 2    | 4    | 3    | 4    |
| 8271   | 4     | 4      | 3      |      |      |      |      |      |      |      |      |      |      |      |
| 8274   | 5     | 5      | 5      | 5    | 5    | 5    | 5    | 5    | 3    | 5    | 5    | 5    | 5    | 5    |
| 8275   | 4     | 4      | 4      | 4    | 4    | 5    | 5    | 5    | 4    | 5    | 4    | 5    | 5    | 4    |
| 8279   | 4     | 5      | 5      |      |      |      |      |      |      |      |      |      |      |      |
| 8285   | 3     | 4      | 3      | 3    | 3    | 3    | 3    | 3    | 2    | 3    | 3    | 3    | 3    | 3    |
| 8287   | 2     | 2      | 2      | 1    | 1    | 1    | 1    | 1    | 1    | 1    | 1    | 1    | 2    | 2    |
| 8289   | 5     | 5      | 5      | 4    | 5    | 3    | 3    | 3    | 3    | 3    | 3    | 5    | 3    | 4    |
| 8291   | 5     | 5      | 5      |      |      |      |      |      |      |      |      |      |      |      |
| 8299   | 5     | 5      | 4      | 5    | 5    | 5    | 5    | 5    | 3    | 5    | 4    | 5    | 5    | 4    |
| 8301   | 3     | 4      | 4      | 0    | 0    | 0    | 0    | 0    | 0    | 0    | 1    | 0    | 1    | 1    |
| 8302   | 5     | 5      | 5      |      |      |      |      |      |      |      |      |      |      |      |
| 8308   | 4     | 5      | 4      |      |      |      |      |      |      |      |      |      |      |      |
| 8313   | 5     | 5      | 5      | 4    | 4    | 5    | 4    | 5    | 3    | 4    | 3    | 5    | 4    | 4    |
| 8316   | 5     | 5      | 5      | 4    | 4    | 4    | 4    | 5    | 2    | 3    | 3    | 5    | 4    | 4    |
| 8317   | 6     | 6      | 6      |      |      |      |      |      |      |      |      |      |      |      |
| 8319   | 6     | 6      | 6      | 5    | 5    | 5    | 5    | 5    | 5    | 5    | 4    | 5    | 5    | 3    |
| 8323   | 5     | 5      | 5      | 5    | 5    | 5    | 4    | 4    | 1    | 3    | 3    | 5    | 4    | 4    |

| respid | Q46x4 | Q46x5a | Q46x5b | Q47a | Q47b | Q47c | Q47d | Q47e | Q47f | Q47g | Q47h | Q47i | Q47j | Q47k |
|--------|-------|--------|--------|------|------|------|------|------|------|------|------|------|------|------|
| 8324   | 6     | 6      | 6      |      |      |      |      |      |      |      |      |      |      |      |
| 8327   | 3     | 4      | 4      | 4    | 3    | 5    | 5    | 4    | 2    | 4    | 4    | 5    | 5    | 5    |
| 8328   | 4     | 4      | 5      |      |      |      |      |      |      |      |      |      |      |      |
| 8342   | 5     | 5      | 5      | 5    | 4    | 4    | 4    | 5    | 2    | 4    | 4    | 4    | 4    | 4    |
| 8350   | 5     | 5      | 5      |      |      |      |      |      |      |      |      |      |      |      |
| 8352   | 5     | 5      | 5      |      |      |      |      |      |      |      |      |      |      |      |
| 8353   | 5     | 5      | 5      | 5    | 5    | 5    | 5    | 5    | 2    | 4    | 3    | 5    | 5    | 4    |
| 8356   | 5     | 5      | 5      |      |      |      |      |      |      |      |      |      |      |      |
| 8367   | 5     | 5      | 5      |      |      |      |      |      |      |      |      |      |      |      |
| 8373   | 4     | 4      | 4      | 4    | 4    | 4    | 4    | 4    | 3    | 4    | 3    | 4    | 4    | 4    |
| 8379   |       |        |        |      |      |      |      |      |      |      |      |      |      |      |
| 8382   | 4     | 4      | 4      | 5    | 4    | 3    | 1    | 2    | 1    | 1    | 3    | 4    | 4    | 4    |
| 8387   | 4     | 4      | 5      |      |      |      |      |      |      |      |      |      |      |      |
| 8409   | 5     | 5      | 4      |      |      |      |      |      |      |      |      |      |      |      |
| 8410   | 5     | 5      | 5      |      |      |      |      |      |      |      |      |      |      |      |
| 8412   | 4     | 4      | 4      |      |      |      |      |      |      |      |      |      |      |      |
| 8415   | 5     | 5      | 5      |      |      |      |      |      |      |      |      |      |      |      |
| 8417   | 5     | 5      | 5      | 4    | 4    | 5    | 5    | 5    | 1    | 4    | 3    | 5    | 5    | 3    |
| 8422   | 4     | 4      | 5      | 4    | 3    | 4    | 4    | 4    | 1    | 3    | 3    | 4    | 3    | 3    |
| 8430   | 5     | 5      | 5      |      |      |      |      |      |      |      |      |      |      |      |
| 8434   | 5     | 5      | 5      |      |      |      |      |      |      |      |      |      |      |      |
| 8436   |       |        |        |      |      |      |      |      |      |      |      |      |      |      |
| 8446   | 4     | 4      | 4      | 5    | 5    | 5    | 5    | 5    | 3    | 5    | 4    | 5    | 4    | 4    |
| 8447   | 5     | 5      | 5      | 5    | 2    | 5    | 5    | 5    | 2    | 4    | 3    | 4    | 4    | 4    |
| 8448   | 6     | 6      | 6      |      |      |      |      |      |      |      |      |      |      |      |
| 8455   | 4     | 4      | 5      | 4    | 4    | 4    | 3    | 3    | 1    | 2    | 2    | 5    | 1    | 2    |
| 8456   | 5     | 5      | 5      | 5    | 5    | 5    | 5    | 5    | 4    | 5    | 5    | 5    | 5    | 5    |
| 8459   | 5     | 4      | 6      |      |      |      |      |      |      |      |      |      |      |      |
| 8460   | 5     | 5      | 5      |      |      |      |      |      |      |      |      |      |      |      |
| 8464   | 3     | 3      | 3      | 3    | 3    | 3    | 3    | 3    | 1    | 2    | 3    | 3    | 3    | 3    |
| 8470   | 5     | 5      | 5      |      |      |      |      |      |      |      |      |      |      |      |
| 8473   | 5     | 5      | 5      |      |      |      |      |      |      |      |      |      |      |      |

| respid | Q46x4 | Q46x5a | Q46x5b | Q47a | Q47b | Q47c | Q47d | Q47e | Q47f | Q47g | Q47h | Q47i | Q47j | Q47k |
|--------|-------|--------|--------|------|------|------|------|------|------|------|------|------|------|------|
| 8486   | 5     | 5      | 5      |      |      |      |      |      |      |      |      |      |      |      |
| 8487   | 6     | 6      | 6      |      |      |      |      |      |      |      |      |      |      |      |
| 8489   | 5     | 5      | 5      |      |      |      |      |      |      |      |      |      |      |      |
| 8494   | 3     | 5      | 3      | 5    | 4    | 3    | 5    | 4    | 4    | 4    | 3    | 4    | 3    | 4    |
| 8495   | 3     | 2      | 3      |      |      |      |      |      |      |      |      |      |      |      |
| 8497   | 5     | 5      | 5      |      |      |      |      |      |      |      |      |      |      |      |
| 8510   | 5     | 5      | 5      |      |      |      |      |      |      |      |      |      |      |      |
| 8515   | 3     | 4      | 4      |      |      |      |      |      |      |      |      |      |      |      |
| 8526   |       |        |        |      |      |      |      |      |      |      |      |      |      |      |
| 8530   |       |        |        |      |      |      |      |      |      |      |      |      |      |      |
| 8532   | 5     | 4      | 4      | 5    | 5    | 5    | 5    | 5    |      | 5    | 5    | 5    | 5    | 5    |
| 8533   |       |        |        |      |      |      |      |      |      |      |      |      |      |      |
| 8534   | 5     | 4      | 5      |      |      |      |      |      |      |      |      |      |      |      |
| 8572   | 4     | 4      | 4      | 3    |      | 2    | 2    | 4    | 2    | 2    | 3    | 2    | 3    | 3    |
| 8582   | 5     | 5      | 5      | 5    | 5    | 5    | 5    | 5    | 2    | 4    | 3    | 5    | 3    | 3    |
| 8584   | 5     | 4      | 4      | 5    | 5    | 5    | 5    | 5    | 3    | 5    | 5    | 5    | 5    | 5    |
| 8585   |       |        |        |      |      |      |      |      |      |      |      |      |      |      |
| 8586   |       |        |        |      |      |      |      |      |      |      |      |      |      |      |
| 8589   | 2     | 4      | 3      | 1    | 4    | 2    | 3    | 5    | 2    | 2    | 2    | 3    | 4    | 4    |
| 8593   | 6     | 6      | 6      |      |      |      |      |      |      |      |      |      |      |      |
| 8594   | 5     | 5      | 5      |      |      |      |      |      |      |      |      |      |      |      |
| 8601   | 5     | 5      | 4      |      |      |      |      |      |      |      |      |      |      |      |
| 8603   | 6     | 6      | 6      | 2    | 3    | 3    | 3    | 5    |      | 3    | 3    | 4    | 3    | 4    |
| 8604   |       |        |        |      |      |      |      |      |      |      |      |      |      |      |
| 8605   |       |        |        |      |      |      |      |      |      |      |      |      |      |      |
| 8607   | 6     | 6      | 6      | 5    | 5    | 5    | 5    | 5    | 2    | 3    | 3    | 4    | 4    | 4    |
| 8623   | 6     | 5      | 5      | 4    | 4    | 4    | 4    | 4    | 2    | 4    | 3    | 5    |      | 4    |
| 8626   | 5     | 4      | 5      | 5    | 5    | 5    | 4    | 4    | 3    | 4    | 3    | 4    | 4    | 5    |
| 8638   | 6     | 6      | 6      |      |      |      |      |      |      |      |      |      |      |      |
| 8640   | 5     | 4      | 4      |      |      |      |      |      |      |      |      |      |      |      |
| 8641   | 5     | 5      | 5      | 5    | 5    | 4    | 4    | 4    | 3    | 4    | 4    | 5    | 5    | 4    |
| 8643   | 5     | 5      | 5      |      |      |      |      |      |      |      |      |      |      |      |

| respid | Q46x4 | Q46x5a | Q46x5b | Q47a | Q47b | Q47c | Q47d | Q47e | Q47f | Q47g | Q47h | Q47i | Q47j | Q47k |   |
|--------|-------|--------|--------|------|------|------|------|------|------|------|------|------|------|------|---|
| 8644   | 5     | 5      | 5      |      |      |      |      |      |      |      |      |      |      |      |   |
| 8646   | 5     | 6      | 6      |      |      |      |      |      |      |      |      |      |      |      |   |
| 8647   |       |        |        |      |      |      |      |      |      |      |      |      |      |      |   |
| 8649   | 6     | 4      | 4      | 0    | 3    | 0    | 0    | 0    | 0    | 0    | 0    | 0    | 4    | 4    | 1 |
| 8650   | 4     | 4      | 5      |      |      |      |      |      |      |      |      |      |      |      |   |
| 8658   | 5     | 5      | 5      |      |      |      |      |      |      |      |      |      |      |      |   |
| 8659   | 4     | 4      | 5      | 4    | 4    | 4    | 4    | 5    | 4    | 4    | 4    | 4    | 5    | 4    | 3 |
| 8669   | 5     | 5      | 5      | 5    | 5    | 5    | 5    | 5    | 5    | 2    | 5    | 4    | 5    | 5    | 5 |
| 8672   | 5     | 4      | 5      | 0    | 0    | 0    | 0    | 0    | 0    | 0    | 0    | 0    | 0    | 1    | 1 |
| 8673   | 5     | 5      | 5      |      |      |      |      |      |      |      |      |      |      |      |   |
| 8676   | 5     | 5      | 5      | 5    | 5    | 5    | 5    | 5    |      | 5    | 4    | 5    | 5    | 5    | 5 |
| 8677   |       |        |        |      |      |      |      |      |      |      |      |      |      |      |   |
| 8681   | 5     | 5      | 5      |      |      |      |      |      |      |      |      |      |      |      |   |
| 8688   | 5     | 5      | 5      | 4    | 4    | 4    | 5    | 5    | 3    | 4    | 4    | 4    | 5    | 5    | 3 |
| 8689   | 4     | 4      | 5      |      |      |      |      |      |      |      |      |      |      |      |   |
| 8690   | 5     | 5      | 5      | 5    | 3    | 1    | 1    | 4    | 1    | 1    | 3    | 3    | 5    | 4    | 4 |
| 8693   | 5     | 4      | 4      | 4    | 5    |      | 5    | 5    | 2    | 4    | 3    | 3    | 5    | 4    | 1 |
| 8694   | 3     | 3      | 3      | 4    | 5    | 5    | 5    | 5    | 0    | 0    | 0    |      |      | 5    | 5 |
| 8699   | 5     | 4      | 4      | 5    | 5    | 5    | 5    | 5    | 5    | 3    | 5    | 3    | 5    | 5    | 5 |
| 8700   |       |        |        |      |      |      |      |      |      |      |      |      |      |      |   |
| 8703   | 5     | 5      | 5      |      |      |      |      |      |      |      |      |      |      |      |   |
| 8704   | 5     | 5      | 5      | 5    | 5    | 5    | 5    | 5    | 2    | 5    | 4    | 5    | 5    | 5    | 4 |
| 8706   | 4     | 4      | 3      | 4    | 4    | 4    | 4    | 4    | 1    | 4    | 3    | 3    | 5    | 5    | 4 |
| 8709   | 5     | 5      | 5      | 4    | 3    | 3    | 3    | 4    | 2    | 4    | 4    | 4    | 5    | 5    | 3 |
| 8715   | 5     | 5      | 5      | 4    | 4    | 4    | 4    | 5    | 1    | 4    | 3    | 3    | 5    | 5    | 4 |
| 8728   | 5     | 5      | 5      | 5    | 5    | 5    | 5    | 5    | 2    | 5    | 4    | 4    | 5    | 3    | 2 |
| 8729   | 5     | 4      | 4      | 5    | 5    | 5    | 5    | 5    | 2    | 3    | 3    | 3    | 3    | 2    | 5 |
| 8730   | 5     | 5      | 5      |      |      |      |      |      |      |      |      |      |      |      |   |
| 8742   | 5     | 5      | 5      | 2    | 2    | 3    | 3    | 4    | 1    | 2    | 2    | 2    | 5    | 4    | 2 |
| 8748   | 6     | 6      | 6      |      |      |      |      |      |      |      |      |      |      |      |   |
| 8749   | 5     | 5      | 5      | 4    | 4    | 5    | 5    | 5    | 2    | 4    | 4    | 4    | 5    | 5    | 3 |
| 8750   | 5     | 5      | 5      | 2    | 4    | 4    | 4    | 5    | 3    | 4    | 2    | 2    | 5    | 5    | 4 |

| respid | Q46x4 | Q46x5a | Q46x5b | Q47a | Q47b | Q47c | Q47d | Q47e | Q47f | Q47g | Q47h | Q47i | Q47j | Q47k |   |
|--------|-------|--------|--------|------|------|------|------|------|------|------|------|------|------|------|---|
| 8751   | 5     | 5      | 5      | 5    | 5    | 5    | 5    | 5    | 5    | 2    | 5    | 3    | 5    | 5    | 3 |
| 8752   | 5     | 4      | 4      | 5    | 4    | 4    | 4    | 3    | 3    | 1    | 2    | 2    | 2    | 2    | 3 |
| 8754   | 5     | 5      | 5      | 4    | 4    | 5    | 4    | 5    | 5    | 3    | 4    | 3    | 5    | 4    | 3 |
| 8757   | 5     | 5      | 5      | 3    | 4    | 3    | 3    | 5    | 5    | 1    | 3    | 3    | 4    | 3    | 3 |
| 8760   | 5     | 5      | 4      | 0    | 2    | 0    | 0    | 0    | 0    | 0    | 0    | 0    | 2    | 2    | 1 |
| 8761   | 4     | 3      | 1      | 2    | 2    | 2    | 2    | 2    | 2    | 2    | 1    | 2    | 2    | 3    | 2 |
| 8762   | 5     | 5      | 5      | 5    | 4    | 4    | 5    | 5    | 5    | 2    | 4    | 4    | 5    | 4    | 4 |
| 8763   | 5     | 5      | 5      | 1    | 5    | 5    | 5    | 5    | 5    | 4    | 5    | 5    | 5    | 5    | 5 |
| 8764   | 6     | 6      | 6      |      |      |      |      |      |      |      |      |      |      |      |   |
| 8765   | 5     | 5      | 5      | 5    | 5    | 5    | 5    | 5    | 5    | 4    | 4    | 3    | 5    | 5    | 4 |
| 8766   | 4     | 5      | 5      |      |      |      |      |      |      |      |      |      |      |      |   |
| 8767   | 5     | 5      | 5      |      |      |      |      |      |      |      |      |      |      |      |   |
| 8768   | 5     | 5      | 5      |      |      |      |      |      |      |      |      |      |      |      |   |
| 8770   | 5     | 5      | 5      | 5    | 5    | 5    | 5    | 5    | 5    | 5    | 5    | 4    | 5    | 5    | 4 |
| 8771   |       |        |        |      |      |      |      |      |      |      |      |      |      |      |   |
| 8773   | 5     | 5      | 4      |      |      |      |      |      |      |      |      |      |      |      |   |
| 8774   | 6     | 6      | 6      | 4    | 3    | 4    | 4    | 5    | 3    | 4    | 4    | 3    | 5    | 3    | 3 |
| 8776   | 5     | 5      | 5      |      |      |      |      |      |      |      |      |      |      |      |   |
| 8777   | 5     | 5      | 5      |      |      |      |      |      |      |      |      |      |      |      |   |
| 8778   | 4     | 6      | 6      |      |      |      |      |      |      |      |      |      |      |      |   |
| 8779   |       |        |        |      |      |      |      |      |      |      |      |      |      |      |   |
| 8784   | 4     | 5      | 5      | 4    | 4    | 4    | 4    | 5    | 3    | 4    | 4    | 3    | 2    | 4    | 3 |
| 8786   |       |        |        |      |      |      |      |      |      |      |      |      |      |      |   |
| 8787   | 5     | 5      | 5      | 0    | 0    | 0    | 0    | 0    | 0    | 0    | 0    | 0    | 0    | 1    | 5 |
| 8790   |       |        |        |      |      |      |      |      |      |      |      |      |      |      |   |
| 8791   | 3     | 3      | 4      | 3    | 3    | 3    | 2    | 2    | 2    | 3    | 3    | 3    | 3    | 3    | 4 |
| 8793   |       |        |        |      |      |      |      |      |      |      |      |      |      |      |   |
| 8795   | 5     | 5      | 5      |      |      |      |      |      |      |      |      |      |      |      |   |
| 8797   | 5     | 5      | 5      |      |      |      |      |      |      |      |      |      |      |      |   |
| 8801   | 4     | 4      | 4      | 5    | 5    | 5    | 5    | 5    | 5    | 5    | 4    | 4    | 4    | 4    | 4 |
| 8802   | 5     | 5      | 4      | 0    | 0    | 0    | 0    | 0    | 0    | 0    | 0    | 0    |      | 4    | 3 |
| 8807   |       |        |        |      |      |      |      |      |      |      |      |      |      |      |   |



| respid | Q46x4 | Q46x5a | Q46x5b | Q47a | Q47b | Q47c | Q47d | Q47e | Q47f | Q47g | Q47h | Q47i | Q47j | Q47k |   |
|--------|-------|--------|--------|------|------|------|------|------|------|------|------|------|------|------|---|
| 8813   | 5     | 4      | 4      | 4    | 4    | 4    | 4    | 4    | 4    | 4    | 4    | 3    | 4    | 4    | 3 |
| 8817   | 5     | 5      | 5      |      |      |      |      |      |      |      |      |      |      |      |   |
| 8818   | 4     | 4      | 4      | 5    | 5    | 5    | 5    | 5    | 3    | 3    | 4    | 5    | 4    | 4    |   |
| 8821   | 5     | 5      | 5      |      |      |      |      |      |      |      |      |      |      |      |   |
| 8822   | 4     | 5      | 4      |      |      |      |      |      |      |      |      |      |      |      |   |
| 8823   | 6     | 6      | 6      |      |      |      |      |      |      |      |      |      |      |      |   |
| 8824   | 5     | 5      | 5      | 5    | 4    | 4    | 3    | 4    | 2    | 3    | 3    | 4    | 4    | 4    | 4 |
| 8825   | 6     | 6      | 6      |      |      |      |      |      |      |      |      |      |      |      |   |
| 8834   | 3     | 2      | 2      | 3    |      | 3    | 2    | 2    | 2    | 2    | 1    | 1    | 3    | 3    |   |
| 8840   | 2     | 4      | 2      |      |      |      |      |      |      |      |      |      |      |      |   |
| 8843   | 4     | 1      | 1      | 2    | 3    | 2    | 4    | 4    | 3    |      | 1    | 0    | 1    | 1    | 1 |
| 8846   | 5     | 5      | 5      | 4    | 5    | 5    | 5    | 5    | 2    | 4    | 3    | 5    | 4    | 5    | 5 |
| 8862   |       |        |        |      |      |      |      |      |      |      |      |      |      |      |   |
| 8866   | 5     | 5      | 5      | 5    | 5    | 5    | 5    | 5    |      | 5    | 4    | 5    | 5    | 5    | 5 |
| 8869   | 5     | 5      | 5      | 4    | 4    | 5    | 5    | 5    | 1    | 5    | 4    | 5    | 5    | 5    | 3 |
| 8872   | 4     | 4      | 4      |      |      |      |      |      |      |      |      |      |      |      |   |
| 8903   |       |        |        |      |      |      |      |      |      |      |      |      |      |      |   |
| 8909   |       |        |        |      |      |      |      |      |      |      |      |      |      |      |   |
| 8926   | 4     | 4      | 4      |      |      |      |      |      |      |      |      |      |      |      |   |
| 8936   | 5     | 6      | 6      |      |      |      |      |      |      |      |      |      |      |      |   |
| 8945   |       |        |        |      |      |      |      |      |      |      |      |      |      |      |   |
| 8954   | 6     | 6      | 6      | 5    | 5    | 5    | 5    | 5    | 2    | 5    | 3    | 5    | 5    | 5    | 5 |
| 8955   | 4     | 5      | 5      |      |      |      |      |      |      |      |      |      |      |      |   |
| 8958   | 4     | 5      | 5      | 4    | 4    | 4    | 4    | 5    | 1    | 4    | 3    | 5    | 5    | 3    |   |
| 8959   | 6     | 4      | 4      |      |      |      |      |      |      |      |      |      |      |      |   |
| 8960   | 6     | 6      | 6      | 5    | 5    | 5    | 5    | 5    | 2    | 5    | 4    | 5    | 5    | 5    | 5 |
| 8976   | 5     | 4      | 4      |      |      |      |      |      |      |      |      |      |      |      |   |
| 8977   | 5     | 5      | 5      |      |      |      |      |      |      |      |      |      |      |      |   |
| 8979   | 4     | 3      | 3      | 1    | 3    | 2    | 1    | 2    | 2    | 2    | 2    | 2    | 3    | 3    | 2 |
| 8985   |       |        |        |      |      |      |      |      |      |      |      |      |      |      |   |
| 8994   | 6     | 6      | 6      | 5    | 5    | 5    | 4    | 5    | 2    | 4    | 4    | 5    | 4    | 3    | 3 |
| 8997   | 6     | 6      | 6      | 5    | 5    | 5    | 4    | 5    | 1    | 3    | 4    | 5    | 5    | 5    | 5 |

| respid | Q46x4 | Q46x5a | Q46x5b | Q47a | Q47b | Q47c | Q47d | Q47e | Q47f | Q47g | Q47h | Q47i | Q47j | Q47k |   |
|--------|-------|--------|--------|------|------|------|------|------|------|------|------|------|------|------|---|
| 9002   | 5     | 5      | 5      | 0    | 0    | 0    | 0    | 0    | 0    | 0    | 0    | 0    | 0    | 2    | 1 |
| 9005   | 4     | 3      | 5      |      |      |      |      |      |      |      |      |      |      |      |   |
| 9017   | 5     | 5      | 5      |      |      |      |      |      |      |      |      |      |      |      |   |
| 9018   | 5     | 5      | 5      | 3    | 4    | 4    | 4    | 5    | 1    | 4    | 4    | 5    | 5    | 4    |   |
| 9021   | 5     | 5      | 5      |      |      |      |      |      |      |      |      |      |      |      |   |
| 9029   | 3     | 3      | 3      | 2    | 2    | 2    | 2    | 3    | 2    | 2    | 2    | 2    | 2    | 3    | 3 |
| 9035   | 4     | 4      | 4      | 4    | 4    | 4    | 4    | 5    | 4    | 5    | 4    | 5    | 4    | 4    | 4 |
| 9038   | 5     | 5      | 5      | 5    | 5    | 5    | 5    | 5    | 3    | 5    | 4    | 5    | 5    | 5    | 4 |
| 9039   |       |        |        |      |      |      |      |      |      |      |      |      |      |      |   |
| 9040   | 5     | 5      | 5      |      |      |      |      |      |      |      |      |      |      |      |   |
| 9042   | 5     | 5      | 4      | 5    | 4    | 5    | 5    | 4    | 2    | 3    | 4    | 3    | 3    | 3    | 4 |
| 9043   | 5     | 5      | 5      | 5    | 5    | 5    | 5    | 5    | 5    | 5    | 4    | 4    | 5    | 5    | 5 |
| 9045   | 4     | 4      | 5      | 5    | 5    | 5    | 5    | 5    | 5    | 5    | 4    | 5    | 3    | 4    | 4 |
| 9051   | 5     | 5      | 5      | 5    | 5    | 5    | 5    | 5    | 0    | 5    | 3    | 5    | 5    | 5    | 3 |
| 9067   | 5     | 5      | 5      | 5    | 5    | 5    | 5    | 5    | 3    | 5    | 5    | 5    | 5    | 5    | 5 |
| 9069   | 5     | 5      | 5      | 4    | 4    | 5    | 5    | 5    | 5    | 3    | 5    | 4    | 3    | 5    | 5 |
| 9073   | 4     | 3      | 3      | 4    | 4    | 4    | 4    | 4    | 2    | 4    | 3    | 5    | 5    | 5    | 2 |
| 9084   | 4     | 4      | 4      |      |      |      |      |      |      |      |      |      |      |      |   |
| 9096   |       |        |        |      |      |      |      |      |      |      |      |      |      |      |   |
| 9100   | 3     | 3      | 4      |      |      |      |      |      |      |      |      |      |      |      |   |
| 9107   |       |        |        |      |      |      |      |      |      |      |      |      |      |      |   |
| 9110   | 5     | 5      | 5      | 5    | 5    | 5    | 5    | 5    | 3    | 5    | 4    | 5    | 5    | 5    | 4 |
| 9120   | 6     | 6      | 6      |      |      |      |      |      |      |      |      |      |      |      |   |
| 9122   | 4     | 5      | 5      |      |      |      |      |      |      |      |      |      |      |      |   |
| 9130   | 4     | 3      | 3      |      |      |      |      |      |      |      |      |      |      |      |   |
| 9134   | 4     | 4      | 4      |      |      |      |      |      |      |      |      |      |      |      |   |
| 9137   | 5     | 4      | 4      | 4    | 5    | 5    | 5    | 5    | 4    | 4    | 4    |      | 5    | 5    |   |
| 9139   | 5     | 5      | 5      |      |      |      |      |      |      |      |      |      |      |      |   |
| 9144   |       |        |        |      |      |      |      |      |      |      |      |      |      |      |   |
| 9157   | 5     | 6      | 6      | 5    | 4    | 4    | 4    | 5    | 4    | 4    | 3    | 4    | 5    | 4    | 4 |
| 9166   | 4     | 4      | 4      | 4    | 4    | 4    | 4    | 5    | 1    | 4    | 4    | 5    | 4    | 4    |   |
| 9177   | 4     | 4      | 5      | 2    | 3    | 3    | 2    | 3    | 3    | 1    | 2    | 5    | 4    | 4    | 3 |

| respid | Q46x4 | Q46x5a | Q46x5b | Q47a | Q47b | Q47c | Q47d | Q47e | Q47f | Q47g | Q47h | Q47i | Q47j | Q47k |   |
|--------|-------|--------|--------|------|------|------|------|------|------|------|------|------|------|------|---|
| 9181   | 6     | 6      | 6      |      |      |      |      |      |      |      |      |      |      |      |   |
| 9183   | 5     | 5      | 4      | 4    | 4    | 4    | 4    | 4    | 4    | 3    | 3    | 3    | 3    | 4    | 3 |
| 9184   | 4     | 5      | 5      | 2    |      | 2    | 2    | 3    | 2    | 3    | 2    | 2    | 2    | 3    | 3 |
| 9188   |       |        |        |      |      |      |      |      |      |      |      |      |      |      |   |
| 9197   | 5     | 5      | 5      | 4    | 1    | 1    | 3    | 4    | 1    | 1    | 1    | 1    | 3    | 4    | 3 |
| 9200   | 4     | 3      | 4      |      |      |      |      |      |      |      |      |      |      |      |   |
| 9205   | 5     | 4      | 5      |      |      |      |      |      |      |      |      |      |      |      |   |
| 9207   | 5     | 5      | 5      |      |      |      |      |      |      |      |      |      |      |      |   |
| 9213   | 6     | 6      | 6      | 4    | 5    | 5    | 5    | 5    | 4    | 4    | 4    | 4    | 3    | 4    | 5 |
| 9216   | 4     | 4      | 4      | 2    | 3    | 3    | 3    | 4    | 3    | 2    | 2    | 2    | 2    | 3    | 3 |
| 9217   |       |        |        |      |      |      |      |      |      |      |      |      |      |      |   |
| 9218   | 5     | 5      | 5      |      |      |      |      |      |      |      |      |      |      |      |   |
| 9219   | 4     | 4      | 3      |      |      |      |      |      |      |      |      |      |      |      |   |
| 9220   |       |        |        |      |      |      |      |      |      |      |      |      |      |      |   |
| 9221   | 4     | 6      | 6      |      |      | 3    | 3    |      |      |      |      |      |      |      |   |
| 9223   | 2     | 3      | 2      | 2    | 3    | 2    | 2    | 2    | 2    | 2    | 2    | 1    | 3    | 3    | 2 |
| 9228   |       |        |        |      |      |      |      |      |      |      |      |      |      |      |   |
| 9230   | 4     | 5      | 5      | 4    | 4    | 5    | 4    | 5    | 4    | 4    | 4    | 4    | 5    | 4    | 4 |
| 9231   | 5     | 6      | 5      |      |      |      |      |      |      |      |      |      |      |      |   |
| 9233   | 5     | 5      | 5      | 4    | 4    | 4    | 4    | 4    |      | 4    | 4    | 4    | 3    | 4    | 3 |
| 9235   | 5     | 6      | 6      |      |      |      |      |      |      |      |      |      |      |      |   |
| 9237   | 5     | 5      | 5      |      |      |      |      |      |      |      |      |      |      |      |   |
| 9242   | 5     | 5      | 5      |      |      |      |      |      |      |      |      |      |      |      |   |
| 9250   |       |        |        |      |      |      |      |      |      |      |      |      |      |      |   |
| 9253   | 5     | 5      | 5      |      |      |      |      |      |      |      |      |      |      |      |   |
| 9257   | 4     | 4      | 4      | 4    | 4    | 4    |      |      |      | 2    | 4    | 4    | 4    | 4    | 4 |
| 9263   | 6     | 6      | 6      | 5    | 5    | 5    | 5    | 5    | 5    | 3    | 4    | 3    | 5    | 5    | 3 |
| 9267   | 6     | 6      | 6      | 5    | 4    | 5    | 5    | 4    | 4    | 4    | 4    | 4    | 4    | 5    | 5 |
| 9272   | 5     | 4      | 4      | 3    | 2    | 3    | 2    | 4    | 3    | 2    | 3    | 2    | 3    | 2    | 2 |
| 9279   |       |        |        |      |      |      |      |      |      |      |      |      |      |      |   |
| 9281   | 5     | 4      | 4      |      |      |      |      |      |      |      |      |      |      |      |   |
| 9285   | 5     | 5      | 5      | 5    | 5    | 5    | 5    | 5    | 5    | 1    | 5    | 3    | 5    | 4    | 4 |

| respid | Q46x4 | Q46x5a | Q46x5b | Q47a | Q47b | Q47c | Q47d | Q47e | Q47f | Q47g | Q47h | Q47i | Q47j | Q47k |
|--------|-------|--------|--------|------|------|------|------|------|------|------|------|------|------|------|
| 9286   | 5     | 5      | 5      |      |      |      |      |      |      |      |      |      |      |      |
| 9294   | 5     | 5      | 5      | 4    | 3    | 5    | 4    | 4    | 2    | 4    | 4    | 4    | 4    | 4    |
| 9295   | 5     | 5      | 5      |      |      |      |      |      |      |      |      |      |      |      |
| 9297   | 5     | 5      | 4      | 4    | 4    | 4    | 4    | 5    | 1    | 4    | 3    | 5    | 5    | 3    |
| 9299   | 5     | 4      | 5      | 5    | 5    | 5    | 5    | 5    | 3    | 5    | 4    | 5    | 5    | 3    |
| 9309   | 4     | 5      | 5      |      |      |      |      |      |      |      |      |      |      |      |
| 9315   |       |        |        |      |      |      |      |      |      |      |      |      |      |      |
| 9320   | 5     | 5      | 5      | 4    | 3    | 4    | 4    | 5    | 2    | 5    | 4    |      | 5    | 4    |
| 9324   | 5     | 5      | 5      | 5    | 5    | 5    | 5    | 5    | 3    | 5    | 3    | 5    | 5    | 4    |
| 9326   | 6     | 5      | 5      |      |      |      |      |      |      |      |      |      |      |      |
| 9333   | 5     | 5      | 5      |      |      |      |      |      |      |      |      |      |      |      |
| 9334   | 4     | 4      | 4      |      |      |      |      |      |      |      |      |      |      |      |
| 9336   | 3     | 3      | 2      |      |      |      |      |      |      |      |      |      |      |      |
| 9337   | 5     | 5      | 5      | 5    | 5    | 5    | 5    | 5    | 2    | 3    | 3    | 5    | 4    | 5    |
| 9342   | 5     | 5      | 5      | 5    | 5    | 5    | 4    | 5    | 3    | 4    | 3    | 4    | 4    | 5    |
| 9347   | 4     | 4      | 4      |      |      |      |      |      |      |      |      |      |      |      |
| 9352   | 6     | 6      | 6      | 5    | 5    | 5    | 5    | 4    | 2    | 5    | 3    | 5    | 4    | 5    |
| 9355   | 5     | 5      | 5      | 4    | 5    | 5    | 4    | 5    | 2    | 5    | 3    | 5    | 5    | 4    |
| 9356   | 5     | 4      | 5      | 5    | 5    | 5    | 5    | 5    | 3    | 5    | 3    | 5    | 5    | 5    |
| 9359   | 5     | 4      | 4      | 5    | 5    | 5    | 5    | 5    | 2    | 4    | 4    | 5    | 4    | 4    |
| 9368   | 6     | 6      | 6      |      |      |      |      |      |      |      |      |      |      |      |
| 9375   | 5     | 5      | 5      | 4    | 5    | 5    | 4    | 5    | 2    | 4    | 4    | 5    | 5    | 4    |
| 9384   | 2     | 3      | 2      |      |      |      |      |      |      |      |      |      |      |      |
| 9388   | 5     | 5      | 4      | 5    | 0    | 0    | 0    | 0    | 0    | 0    | 0    | 0    | 1    | 4    |
| 9397   | 4     | 4      | 4      | 2    | 2    | 1    | 1    | 1    | 1    | 1    | 1    | 2    | 1    | 2    |
| 9400   | 5     | 4      | 4      | 5    | 4    | 5    | 5    | 5    | 2    | 4    | 4    | 5    | 5    | 4    |
| 9401   | 5     | 5      | 5      | 5    | 5    | 5    | 5    | 5    | 2    | 4    | 4    | 4    | 4    | 4    |
| 9402   |       |        |        |      |      |      |      |      |      |      |      |      |      |      |
| 9417   | 4     | 4      | 3      | 5    | 4    | 5    | 5    | 4    | 4    | 5    | 4    | 5    | 5    | 4    |
| 9424   | 6     | 6      | 6      | 0    | 0    | 0    | 0    | 0    | 0    | 0    | 0    | 0    | 1    | 1    |
| 9427   | 6     | 6      | 6      |      |      |      |      |      |      |      |      |      |      |      |
| 9429   | 5     | 5      | 4      | 4    | 5    | 4    | 5    | 5    | 4    | 5    | 4    | 5    | 5    | 4    |

| respid | Q46x4 | Q46x5a | Q46x5b | Q47a | Q47b | Q47c | Q47d | Q47e | Q47f | Q47g | Q47h | Q47i | Q47j | Q47k |
|--------|-------|--------|--------|------|------|------|------|------|------|------|------|------|------|------|
| 9437   | 3     | 3      | 3      | 2    | 2    | 2    | 2    | 2    | 3    | 2    | 2    | 2    | 2    | 2    |
| 9442   | 4     | 4      | 4      | 1    | 0    | 0    | 0    | 0    | 0    | 0    | 0    | 0    | 0    | 1    |
| 9446   | 4     | 4      | 4      | 5    | 4    | 5    | 4    | 4    | 4    | 2    | 5    | 4    | 5    | 5    |
| 9447   | 5     | 5      | 5      | 5    | 5    | 5    | 5    | 5    | 5    |      | 5    | 5    | 5    | 5    |
| 9448   | 5     | 5      | 5      |      |      |      |      |      |      |      |      |      |      |      |
| 9449   | 4     | 4      | 4      | 5    | 4    | 4    |      |      |      |      |      | 4    |      | 4    |
| 9455   |       |        |        |      |      |      |      |      |      |      |      |      |      |      |
| 9459   | 4     | 3      | 3      |      |      |      |      |      |      |      |      |      |      |      |
| 9460   | 5     | 5      | 5      | 0    | 0    | 0    | 0    | 0    | 0    | 0    | 0    | 0    | 0    | 1    |
| 9461   | 4     | 4      | 4      | 3    | 3    | 2    | 2    | 3    | 3    | 3    | 3    | 2    | 3    | 3    |
| 9463   | 6     | 5      | 5      |      |      |      |      |      |      |      |      |      |      |      |
| 9464   | 4     | 4      | 4      | 3    | 2    | 3    | 3    | 3    | 1    | 2    | 3    | 3    | 3    | 3    |
| 9466   | 4     | 5      | 5      | 4    | 4    | 4    | 5    | 5    | 3    | 4    | 3    | 4    | 4    | 4    |
| 9477   | 5     | 5      | 5      |      |      |      |      |      |      |      |      |      |      |      |
| 9482   | 4     | 4      | 4      | 4    | 4    | 0    | 0    | 0    | 0    | 0    | 0    | 0    | 0    | 1    |
| 9486   | 6     | 6      | 6      |      |      |      |      |      |      |      |      |      |      |      |
| 9488   | 4     | 5      | 3      | 1    | 4    | 5    | 3    | 3    | 2    | 1    | 2    | 2    | 3    | 4    |
| 9489   | 5     | 5      | 5      |      |      |      |      |      |      |      |      |      |      |      |
| 9496   | 2     | 4      | 2      | 2    | 2    | 2    | 2    | 2    | 1    | 2    | 2    | 2    | 2    | 3    |
| 9499   | 5     | 5      | 5      | 5    | 4    | 4    | 4    | 4    | 5    | 2    | 3    | 3    | 4    | 4    |
| 9512   | 5     | 5      | 5      |      |      |      |      |      |      |      |      |      |      |      |
| 9514   | 4     | 5      | 5      | 4    | 4    | 4    | 4    | 4    | 5    | 2    | 4    | 4    | 5    | 4    |
| 9516   | 5     | 5      | 5      | 0    | 0    | 0    | 1    | 5    | 1    | 0    | 0    | 0    | 0    | 1    |
| 9517   | 4     | 4      | 4      | 3    | 2    | 3    | 2    | 1    | 2    | 0    | 3    | 3    | 3    | 3    |
| 9520   | 5     | 4      | 4      | 2    | 2    | 3    | 3    | 3    | 4    | 2    | 3    | 2    | 3    | 3    |
| 9527   | 4     | 4      | 3      | 5    | 5    | 5    | 5    | 5    | 5    | 3    | 4    | 3    | 5    | 4    |
| 9532   | 5     | 4      | 4      | 5    | 4    | 5    | 5    | 5    | 5    | 0    | 5    | 4    | 5    | 5    |
| 9533   | 5     | 5      | 5      | 5    | 5    | 5    | 5    | 5    | 5    | 5    | 5    | 5    | 4    | 4    |
| 9543   | 5     | 5      | 5      | 4    | 4    | 4    | 4    | 4    | 5    | 4    | 5    | 4    | 4    | 4    |
| 9550   | 5     | 4      | 4      | 4    | 4    | 4    | 4    | 4    | 5    | 0    | 3    | 3    | 4    | 2    |
| 9553   | 5     | 5      | 5      |      |      |      |      |      |      |      |      |      |      |      |
| 9555   | 4     | 4      | 2      |      |      |      |      |      |      |      |      |      |      |      |

| respid | Q46x4 | Q46x5a | Q46x5b | Q47a | Q47b | Q47c | Q47d | Q47e | Q47f | Q47g | Q47h | Q47i | Q47j | Q47k |
|--------|-------|--------|--------|------|------|------|------|------|------|------|------|------|------|------|
| 9565   | 3     | 4      | 4      |      |      |      |      |      |      |      |      |      |      |      |
| 9583   | 5     | 5      | 5      | 5    | 4    | 5    | 4    | 5    | 1    | 5    | 2    | 5    | 5    | 4    |
| 9594   | 5     | 5      | 5      | 0    | 0    | 0    | 0    | 0    | 0    | 0    | 0    | 0    | 4    | 5    |
| 9596   | 5     | 4      | 4      | 4    | 4    | 5    | 4    | 5    | 1    | 5    | 4    | 5    | 5    | 3    |
| 9600   | 5     | 5      | 5      |      |      |      |      |      |      |      |      |      |      |      |
| 9602   | 5     | 5      | 5      | 5    | 5    | 5    | 5    | 5    | 5    | 5    | 3    | 3    | 4    | 5    |
| 9606   | 6     | 6      | 6      | 5    | 5    | 5    | 5    | 5    | 4    | 5    | 4    | 5    | 5    | 5    |
| 9608   | 5     | 6      | 6      | 5    | 4    | 4    | 4    | 4    |      | 4    | 4    | 4    | 4    |      |
| 9610   | 4     | 4      | 4      |      |      |      |      |      |      |      |      |      |      |      |
| 9612   | 4     | 5      | 5      |      |      |      |      |      |      |      |      |      |      |      |
| 9613   | 5     | 5      | 5      | 4    | 4    | 5    | 5    | 5    | 3    | 5    | 3    | 5    | 4    | 4    |
| 9614   | 4     | 5      | 5      | 5    | 5    | 4    | 5    | 5    | 4    | 5    | 5    | 5    | 5    | 4    |
| 9620   | 4     | 5      | 5      | 5    | 5    | 5    | 3    | 5    | 1    | 2    | 3    | 5    | 5    | 3    |
| 9628   | 5     | 5      | 5      |      |      |      |      |      |      |      |      |      |      |      |
| 9631   | 4     | 4      | 4      | 0    |      | 0    | 0    | 0    | 0    | 0    | 0    | 0    | 1    | 2    |
| 9632   | 5     | 5      | 5      | 4    | 4    | 4    | 4    | 5    | 3    | 4    | 3    | 4    | 4    | 4    |
| 9633   | 5     | 5      | 5      |      |      |      |      |      |      |      |      |      |      |      |
| 9639   |       |        |        |      |      |      |      |      |      |      |      |      |      |      |
| 9640   | 5     | 4      | 5      |      |      |      |      |      |      |      |      |      |      |      |
| 9642   | 5     | 5      | 5      | 3    | 5    | 5    | 4    | 5    | 1    | 4    | 3    | 3    | 4    | 3    |
| 9653   | 6     | 6      | 6      | 4    | 3    | 3    |      | 4    |      | 2    |      |      | 3    | 3    |
| 9658   | 4     | 5      | 4      |      |      |      |      |      |      |      |      |      |      |      |
| 9659   | 5     | 5      | 5      |      |      |      |      |      |      |      |      |      |      |      |
| 9661   | 6     | 6      | 6      |      |      |      |      |      |      |      |      |      |      |      |
| 9664   | 5     | 5      | 5      | 5    | 5    | 5    | 5    | 5    | 4    | 5    | 3    | 5    | 5    | 5    |
| 9665   | 5     | 5      | 5      |      |      |      |      |      |      |      |      |      |      |      |
| 9666   | 4     | 6      | 6      |      |      |      | 2    | 3    | 0    |      |      |      |      | 2    |
| 9667   | 5     | 5      | 5      |      |      |      |      |      |      |      |      |      |      |      |
| 9668   |       |        |        |      |      |      |      |      |      |      |      |      |      |      |
| 9670   | 5     | 4      | 4      | 4    | 4    | 4    | 4    | 4    | 5    | 4    | 4    | 5    | 4    | 4    |
| 9671   | 6     | 6      | 6      |      |      |      |      |      |      |      |      |      |      |      |
| 9681   | 5     | 5      | 5      | 0    | 0    | 0    | 0    | 0    | 0    | 0    | 0    | 0    | 5    | 4    |

| respid | Q46x4 | Q46x5a | Q46x5b | Q47a | Q47b | Q47c | Q47d | Q47e | Q47f | Q47g | Q47h | Q47i | Q47j | Q47k |   |
|--------|-------|--------|--------|------|------|------|------|------|------|------|------|------|------|------|---|
| 9684   | 6     | 6      | 6      | 5    | 5    | 5    | 5    | 5    | 5    | 5    | 4    | 4    | 5    | 4    | 4 |
| 9685   | 4     | 4      | 4      | 5    | 4    | 5    | 5    | 4    | 4    | 4    | 4    | 3    | 5    | 3    | 3 |
| 9686   | 5     | 5      | 5      | 2    | 5    | 5    | 5    | 5    | 5    | 4    | 3    | 2    | 5    | 3    | 4 |
| 9688   | 5     | 6      | 6      | 5    | 5    | 5    | 5    | 5    | 5    | 5    | 4    | 4    | 5    | 4    | 4 |
| 9692   | 5     | 5      | 5      | 5    | 5    | 5    | 5    | 5    | 5    | 5    | 5    | 3    | 5    | 5    | 4 |
| 9693   | 6     | 4      | 6      |      |      |      |      |      |      |      |      |      |      |      |   |
| 9698   | 3     | 4      | 2      |      |      |      |      |      |      |      |      |      |      |      |   |
| 9699   | 5     | 5      | 5      |      |      |      |      |      |      |      |      |      |      |      |   |
| 9701   | 5     | 5      | 5      | 5    | 4    | 4    | 4    | 5    | 1    | 4    | 3    | 4    | 4    | 4    | 4 |
| 9702   | 5     | 5      | 5      |      |      |      |      |      |      |      |      |      |      |      |   |
| 9709   | 6     | 6      | 6      | 5    | 5    | 5    | 5    | 5    |      | 5    | 4    | 5    | 5    | 5    | 5 |
| 9713   |       |        |        |      |      |      |      |      |      |      |      |      |      |      |   |
| 9715   |       |        |        |      |      |      |      |      |      |      |      |      |      |      |   |
| 9721   | 5     | 4      | 4      |      |      |      |      |      |      |      |      |      |      |      |   |
| 9725   | 5     | 5      | 5      |      |      |      |      |      |      |      |      |      |      |      |   |
| 9729   | 5     | 4      | 4      | 2    | 3    | 5    | 5    | 5    | 0    | 4    | 3    | 5    | 5    | 5    | 5 |
| 9731   | 4     | 5      | 5      |      |      |      |      |      |      |      |      |      |      |      |   |
| 9736   | 5     | 5      | 5      | 5    | 2    | 5    | 5    | 5    | 5    | 4    | 4    | 5    | 5    | 5    | 4 |
| 9740   |       |        |        |      |      |      |      |      |      |      |      |      |      |      |   |
| 9741   | 6     | 6      | 6      | 4    | 4    | 5    | 5    | 5    | 1    | 4    | 4    | 4    | 4    | 4    | 4 |
| 9749   | 4     | 4      | 5      | 4    | 3    | 4    | 4    | 0    | 0    | 0    | 0    | 0    | 0    | 3    | 2 |
| 9750   | 6     | 6      | 6      | 5    | 5    | 5    | 5    | 5    | 3    | 5    | 5    | 5    | 5    | 5    | 5 |
| 9751   | 4     | 4      | 4      |      |      |      |      |      |      |      |      |      |      |      |   |
| 9753   | 5     | 5      | 5      |      |      |      |      |      |      |      |      |      |      |      |   |
| 9754   | 3     | 4      | 4      | 2    | 3    | 2    | 2    | 4    | 2    | 2    | 2    | 2    | 2    | 3    | 3 |
| 9756   | 3     | 3      | 3      | 0    | 0    | 0    | 0    | 0    | 0    | 0    | 0    | 0    | 0    |      |   |
| 9758   | 4     | 4      | 4      |      |      |      |      |      |      |      |      |      |      |      |   |
| 9759   | 5     | 5      | 5      |      |      |      |      |      |      |      |      |      |      |      |   |
| 9760   | 6     | 6      | 6      |      |      |      |      |      |      |      |      |      |      |      |   |
| 9761   |       |        |        |      |      |      |      |      |      |      |      |      |      |      |   |
| 9762   | 5     | 5      | 5      | 3    | 3    | 3    | 3    | 4    | 2    | 3    | 3    | 4    | 4    | 4    | 3 |
| 9764   | 6     | 5      | 5      |      |      |      |      |      |      |      |      |      |      |      |   |

| respid | Q46x4 | Q46x5a | Q46x5b | Q47a | Q47b | Q47c | Q47d | Q47e | Q47f | Q47g | Q47h | Q47i | Q47j | Q47k |
|--------|-------|--------|--------|------|------|------|------|------|------|------|------|------|------|------|
| 9768   | 5     | 5      | 4      |      |      |      |      |      |      |      |      |      |      |      |
| 9769   | 4     | 4      | 4      |      |      |      |      |      |      |      |      |      |      |      |
| 9770   | 6     | 5      | 5      |      |      |      |      |      |      |      |      |      |      |      |
| 9771   | 6     | 6      | 6      | 0    | 0    | 0    | 0    | 0    | 0    | 0    | 0    | 0    | 1    | 1    |
| 9772   | 5     | 5      | 5      | 5    | 5    | 5    | 5    | 5    | 5    | 5    | 4    | 5    | 5    | 4    |
| 9773   | 6     | 6      | 6      | 2    | 2    | 2    | 2    | 4    | 2    | 3    | 2    | 2    | 1    | 3    |
| 9776   | 5     | 5      | 5      |      |      |      |      |      |      |      |      |      |      |      |
| 9786   | 5     | 5      | 5      | 3    | 2    | 2    | 3    | 4    | 1    | 2    | 2    | 2    | 2    | 2    |
| 9790   | 5     | 5      | 5      |      |      |      |      |      |      |      |      |      |      |      |
| 9791   | 5     | 5      | 5      | 5    | 5    | 5    | 5    | 5    | 4    | 4    | 4    | 5    | 4    | 4    |
| 9794   | 4     | 4      | 4      | 2    | 2    | 2    | 2    | 4    | 1    | 3    | 2    | 2    | 2    | 2    |
| 9797   | 4     | 4      | 4      |      |      |      |      |      |      |      |      |      |      |      |
| 9799   | 5     | 5      | 5      |      |      |      |      |      |      |      |      |      |      |      |
| 9804   | 5     | 5      | 5      | 4    | 4    | 4    | 4    | 5    | 2    | 4    | 4    | 3    | 4    | 4    |
| 9805   | 4     | 4      | 3      | 1    | 2    | 2    | 1    | 1    | 1    | 3    | 2    | 2    | 2    | 2    |
| 9806   | 5     | 5      | 5      | 3    | 3    | 3    | 3    | 3    | 1    | 4    | 3    | 4    | 5    | 4    |
| 9807   | 3     | 2      | 2      |      |      |      |      |      |      |      |      |      |      |      |
| 9813   | 5     | 4      | 5      |      |      |      |      |      |      |      |      |      |      |      |
| 9817   | 5     | 5      | 5      |      |      |      |      |      |      |      |      |      |      |      |
| 9823   | 5     | 5      | 5      |      |      |      |      |      |      |      |      |      |      |      |
| 9826   | 5     | 5      | 5      |      |      |      |      |      |      |      |      |      |      |      |
| 9830   | 5     | 6      | 6      |      |      |      |      |      |      |      |      |      |      |      |
| 9835   | 4     | 4      | 4      |      |      |      |      |      |      |      |      |      |      |      |
| 9836   | 5     | 5      | 5      | 3    | 4    | 4    | 4    | 4    | 1    | 4    | 3    | 4    | 4    | 3    |
| 9841   |       |        |        |      |      |      |      |      |      |      |      |      |      |      |
| 9842   | 6     | 5      | 5      | 5    | 3    | 3    | 3    | 5    | 0    | 3    | 3    | 3    | 3    | 4    |
| 9844   | 5     | 5      | 5      |      |      |      |      |      |      |      |      |      |      |      |
| 9847   | 5     | 5      | 5      |      |      |      |      |      |      |      |      |      |      |      |
| 9851   | 4     | 6      | 6      |      |      |      |      |      |      |      |      |      |      |      |
| 9852   | 5     | 5      | 5      | 1    | 3    | 3    | 2    | 2    | 1    | 1    | 2    | 2    | 1    | 3    |
| 9854   | 6     | 6      | 6      |      |      |      |      |      |      |      |      |      |      |      |
| 9855   | 5     | 5      | 4      |      |      |      |      |      |      |      |      |      |      |      |



| respid | Q46x4 | Q46x5a | Q46x5b | Q47a | Q47b | Q47c | Q47d | Q47e | Q47f | Q47g | Q47h | Q47i | Q47j | Q47k |
|--------|-------|--------|--------|------|------|------|------|------|------|------|------|------|------|------|
| 9856   | 5     | 5      | 5      |      |      |      |      |      |      |      |      |      |      |      |
| 9862   | 5     | 5      | 5      | 5    | 5    | 5    | 5    | 4    | 5    | 3    | 2    | 4    | 4    | 4    |
| 9863   |       |        |        |      |      |      |      |      |      |      |      |      |      |      |
| 9866   | 6     | 5      | 5      |      |      |      |      |      |      |      |      |      |      |      |
| 9867   | 6     | 6      | 6      | 0    | 0    | 0    | 0    | 0    | 0    | 0    | 0    | 0    |      | 1    |
| 9868   | 6     | 6      | 6      | 0    | 1    | 0    | 0    | 0    | 0    | 0    | 0    | 1    | 1    | 1    |
| 9869   | 5     | 5      | 4      | 3    | 4    | 4    | 4    | 3    | 2    | 4    | 3    | 5    | 5    | 4    |
| 9878   | 5     | 4      | 4      | 3    | 3    | 4    | 3    | 3    | 1    | 4    | 3    | 4    | 3    | 3    |
| 9879   | 4     | 4      | 4      | 2    | 2    | 2    | 4    | 3    | 1    | 2    | 3    | 4    | 4    | 3    |
| 9881   | 5     | 5      | 6      | 5    | 5    | 5    | 3    | 3    | 5    | 4    | 4    | 5    | 2    | 5    |
| 9882   | 5     | 5      | 5      | 0    | 4    | 0    | 0    | 4    | 1    | 5    | 3    | 4    | 4    | 2    |
| 9884   | 5     | 5      | 5      | 1    | 5    | 5    | 2    | 5    | 0    | 4    | 3    | 5    | 5    | 4    |
| 9885   | 5     | 5      | 5      | 5    | 5    | 5    | 5    | 5    | 1    | 5    | 4    | 5    | 5    | 5    |
| 9888   | 4     | 4      | 4      |      |      |      |      |      |      |      |      |      |      |      |
| 9889   | 5     | 5      | 5      | 5    | 5    | 5    | 5    | 5    | 3    | 5    | 4    | 5    | 5    | 5    |
| 9894   | 4     | 4      | 4      | 0    | 1    | 0    | 0    | 0    | 0    | 0    | 0    | 0    | 2    | 1    |
| 9895   | 5     | 5      | 5      | 5    | 5    | 5    | 5    | 5    | 0    | 0    | 4    | 5    | 5    | 4    |
| 9896   | 3     | 3      | 3      |      |      |      |      |      |      |      |      |      |      |      |
| 9897   | 5     | 4      | 3      | 5    | 5    | 5    | 5    | 5    | 1    | 2    | 2    | 2    | 3    | 3    |
| 9905   | 3     | 4      | 4      | 2    | 4    | 4    | 2    | 3    | 1    | 2    | 2    | 4    | 4    | 2    |
| 9907   | 5     | 5      | 5      |      |      |      |      |      |      |      |      |      |      |      |
| 9908   | 5     | 5      | 5      | 5    | 5    | 5    | 5    | 5    | 1    | 5    | 5    | 5    | 5    | 5    |
| 9909   | 4     | 4      | 4      | 0    | 5    | 5    | 4    | 4    | 0    | 0    | 0    | 4    | 5    | 5    |
| 9910   | 5     | 5      | 5      | 5    | 5    | 5    | 4    | 4    | 2    | 2    | 3    | 5    | 3    | 4    |
| 9913   | 6     | 6      | 6      | 4    | 4    | 4    | 4    | 5    | 2    | 5    | 5    | 4    | 5    | 5    |
| 9914   | 6     | 6      | 6      | 2    | 3    | 3    | 3    | 3    | 1    | 4    | 3    | 4    | 3    | 3    |
| 9915   | 4     | 4      | 4      |      |      |      |      |      |      |      |      |      |      |      |
| 9916   | 5     | 5      | 5      | 5    | 5    | 5    | 4    | 4    | 2    | 4    | 4    | 3    | 4    | 4    |
| 9918   |       |        |        |      |      |      |      |      |      |      |      |      |      |      |
| 9919   | 4     | 4      | 5      | 0    | 0    | 0    | 0    | 0    | 0    | 0    | 0    | 0    | 1    | 1    |
| 9922   | 3     | 3      | 4      | 1    | 2    | 2    | 3    | 3    |      |      | 3    | 4    |      |      |
| 9930   | 5     | 5      | 5      |      |      |      |      |      |      |      |      |      |      |      |

| respid | Q46x4 | Q46x5a | Q46x5b | Q47a | Q47b | Q47c | Q47d | Q47e | Q47f | Q47g | Q47h | Q47i | Q47j | Q47k |
|--------|-------|--------|--------|------|------|------|------|------|------|------|------|------|------|------|
| 9934   | 5     | 5      | 5      | 5    | 5    | 5    | 5    | 5    | 5    | 2    | 5    | 5    | 5    | 5    |
| 9936   | 4     | 5      | 5      | 4    | 4    | 4    | 4    | 4    | 5    | 3    | 4    | 4    | 3    | 3    |
| 9938   | 5     | 5      | 5      |      |      |      |      |      |      |      |      |      |      |      |
| 9940   | 6     | 6      | 6      | 5    | 5    | 5    | 5    | 5    | 5    | 2    | 5    | 4    | 5    | 5    |
| 9944   | 6     | 6      | 6      |      |      |      |      |      |      |      |      |      |      |      |
| 9945   | 5     | 5      | 5      | 3    | 3    | 4    | 4    | 5    | 3    | 4    | 4    | 4    | 5    | 4    |
| 9948   | 3     | 3      | 3      |      |      |      |      |      |      |      |      |      |      |      |
| 9949   | 4     | 4      | 4      |      |      |      |      |      |      |      |      |      |      |      |
| 9951   | 5     | 5      | 5      | 0    | 1    | 2    | 1    | 1    | 1    | 1    | 1    | 2    | 1    | 2    |
| 9952   | 4     | 4      | 4      |      |      |      |      |      |      |      |      |      |      |      |
| 9954   | 5     | 6      | 6      |      |      |      |      |      |      |      |      |      |      |      |
| 9955   | 5     | 5      | 5      |      |      |      |      |      |      |      |      |      |      |      |
| 9956   | 4     | 4      | 4      | 2    | 2    | 2    | 2    | 4    | 1    | 2    | 2    | 3    | 3    | 2    |
| 9957   | 6     | 6      | 6      |      |      |      |      |      |      |      |      |      |      |      |
| 9958   | 6     | 6      | 6      | 3    | 3    | 3    | 3    | 2    | 3    | 3    | 3    | 3    | 3    | 4    |
| 9959   | 4     | 4      | 4      |      |      |      |      |      |      |      |      |      |      |      |
| 9960   | 5     | 5      | 5      | 2    | 2    | 2    | 2    | 2    | 1    | 2    | 1    | 3    | 3    | 2    |
| 9961   | 5     | 5      | 5      | 4    | 4    | 4    | 4    | 4    | 4    | 2    | 3    | 3    | 4    | 3    |
| 9962   | 5     | 5      | 5      | 0    | 0    | 0    | 0    | 0    | 0    | 0    | 0    | 0    | 0    | 1    |
| 9969   | 4     | 4      | 4      | 3    | 4    | 4    | 4    | 4    | 5    | 2    | 4    | 4    | 5    | 5    |
| 9982   | 5     | 4      | 4      | 3    | 3    | 4    | 3    | 3    | 2    | 2    | 2    | 2    | 3    | 3    |
| 9984   | 5     | 4      | 3      | 5    | 5    | 5    | 5    | 5    | 5    | 4    | 4    | 4    | 5    | 5    |
| 9990   | 5     | 5      | 5      | 5    | 5    | 5    | 5    | 5    | 5    | 3    | 5    | 4    | 5    | 4    |
| 9992   | 4     | 4      | 4      |      |      |      |      |      |      |      |      |      |      |      |
| 9993   | 3     | 4      | 4      | 4    | 4    | 4    | 4    | 4    | 4    | 2    | 4    | 3    | 4    | 3    |
| 9997   | 6     | 6      | 6      |      |      |      |      |      |      |      |      |      |      |      |
| 9999   | 5     | 6      | 6      | 2    | 2    | 2    | 2    | 5    | 0    | 2    | 2    | 3    | 5    | 4    |
| 10000  | 5     | 5      | 5      | 0    | 1    | 0    | 1    | 0    | 0    | 0    | 0    | 0    | 0    | 1    |
| 10005  | 5     | 5      | 5      | 5    | 4    | 5    | 4    | 4    | 4    | 1    | 5    | 3    | 5    | 5    |
| 10014  | 6     | 5      | 5      | 5    | 5    | 5    | 5    | 5    | 5    | 2    | 4    | 3    | 5    | 3    |
| 10016  | 5     | 5      | 4      |      |      |      |      |      |      |      |      |      |      |      |
| 10017  | 5     | 5      | 5      | 0    | 0    | 0    | 0    | 0    | 0    | 0    | 0    | 0    | 0    | 1    |

| respid | Q46x4 | Q46x5a | Q46x5b | Q47a | Q47b | Q47c | Q47d | Q47e | Q47f | Q47g | Q47h | Q47i | Q47j | Q47k |   |
|--------|-------|--------|--------|------|------|------|------|------|------|------|------|------|------|------|---|
| 10018  | 6     | 6      | 6      | 4    | 5    | 5    | 5    | 5    | 5    | 1    | 3    | 3    | 4    | 2    | 4 |
| 10021  | 4     | 4      | 4      | 3    | 3    | 4    | 3    | 5    | 2    | 3    | 3    | 3    | 4    | 4    |   |
| 10025  | 5     | 4      | 4      |      |      |      |      |      |      |      |      |      |      |      |   |
| 10027  | 6     | 6      | 6      | 4    | 3    | 4    | 4    | 4    | 2    | 3    | 3    | 5    | 3    | 3    |   |
| 10028  | 6     | 6      | 6      | 2    | 2    | 3    | 3    | 4    | 1    | 2    | 3    | 3    | 3    | 3    |   |
| 10031  | 5     | 5      | 5      | 5    | 5    | 5    | 5    | 5    | 2    | 5    | 5    | 5    | 5    | 5    |   |
| 10036  | 6     | 6      | 6      |      |      |      |      |      |      |      |      |      |      |      |   |
| 10037  | 6     | 6      | 6      |      |      |      |      |      |      |      |      |      |      |      |   |
| 10038  | 4     | 5      | 5      | 3    | 3    | 4    | 4    | 3    | 1    | 2    | 3    | 5    | 3    | 3    |   |
| 10039  |       |        |        |      |      |      |      |      |      |      |      |      |      |      |   |
| 10041  | 3     | 5      | 5      | 4    | 3    | 4    | 4    | 3    | 3    | 4    | 4    | 4    | 5    | 4    |   |
| 10045  | 5     | 5      | 5      |      |      |      |      |      |      |      |      |      |      |      |   |
| 10046  | 4     | 4      | 4      | 5    | 5    | 3    | 4    | 4    | 1    | 5    | 4    | 5    | 5    | 5    |   |
| 10047  | 3     | 4      | 4      | 3    | 2    | 2    | 2    | 4    | 1    | 2    | 2    | 2    | 2    | 2    |   |
| 10048  | 4     | 4      | 5      |      |      |      |      |      |      |      |      |      |      |      |   |
| 10049  | 5     | 5      | 5      | 4    | 4    | 4    | 4    | 5    | 2    | 4    | 2    | 4    | 4    | 4    |   |
| 10051  | 6     | 6      | 6      | 3    | 3    | 5    | 5    | 5    | 3    | 4    | 3    | 3    | 3    | 3    |   |
| 10052  | 4     | 5      | 5      | 2    | 4    | 4    | 4    | 5    | 4    | 3    | 3    | 5    | 4    | 4    |   |
| 10056  | 5     | 5      | 5      | 4    | 5    | 5    | 5    | 5    | 4    | 4    | 3    | 5    | 5    | 4    |   |
| 10061  | 6     | 6      | 6      | 5    | 5    | 5    | 5    | 5    | 2    | 5    | 4    | 5    | 5    | 5    |   |
| 10064  | 5     | 5      | 5      | 5    | 4    | 4    | 4    | 5    | 3    | 4    | 3    | 4    | 5    | 4    |   |
| 10066  | 6     | 6      | 6      |      |      |      |      |      |      |      |      |      |      |      |   |
| 10069  | 5     | 5      | 5      | 5    | 5    | 5    | 5    | 5    | 3    | 5    | 4    | 5    | 5    | 4    |   |
| 10071  | 5     | 5      | 5      | 5    | 5    | 5    | 5    | 5    | 3    | 4    | 3    | 4    | 4    | 4    |   |
| 10074  | 6     | 6      | 6      | 5    | 5    | 5    | 5    | 5    | 4    | 5    | 4    | 5    | 5    | 4    |   |
| 10079  | 6     | 6      | 6      | 0    | 4    | 0    | 0    | 0    | 0    | 0    | 0    | 0    | 1    | 1    |   |
| 10087  | 3     | 4      | 4      | 3    | 2    | 4    | 3    | 3    | 1    | 3    | 3    | 4    | 2    | 2    |   |
| 10095  | 6     | 6      | 6      | 5    | 5    | 5    | 5    | 5    | 3    | 5    | 4    | 5    | 5    | 5    |   |
| 10097  | 5     | 5      | 5      |      |      |      |      |      |      |      |      |      |      |      |   |
| 10100  | 5     | 5      | 5      | 5    | 5    | 5    | 4    | 5    | 2    |      | 3    | 5    | 5    | 4    |   |
| 10105  | 5     | 5      | 5      | 5    | 5    | 5    | 5    | 5    | 3    | 5    | 4    | 5    | 5    | 4    |   |
| 10107  | 4     | 4      | 4      | 0    | 1    | 0    | 0    | 0    | 0    | 0    | 0    | 0    | 1    | 1    |   |

| respid | Q46x4 | Q46x5a | Q46x5b | Q47a | Q47b | Q47c | Q47d | Q47e | Q47f | Q47g | Q47h | Q47i | Q47j | Q47k |
|--------|-------|--------|--------|------|------|------|------|------|------|------|------|------|------|------|
| 10111  | 5     | 6      | 6      | 5    | 4    | 4    | 4    | 4    | 5    | 1    | 5    | 4    | 5    | 5    |
| 10116  | 5     | 5      | 5      |      |      |      |      |      |      |      |      |      |      |      |
| 10118  | 6     | 6      | 6      |      |      |      |      |      |      |      |      |      |      |      |
| 10123  |       |        |        |      |      |      |      |      |      |      |      |      |      |      |
| 10124  | 5     | 4      | 5      |      |      |      |      |      |      |      |      |      |      |      |
| 10130  | 4     | 4      | 3      | 5    | 2    | 2    | 1    | 1    | 2    | 3    | 3    | 5    | 4    | 3    |
| 10134  | 5     | 5      | 5      |      |      |      |      |      |      |      |      |      |      |      |
| 10135  | 5     | 5      | 5      | 4    | 4    | 4    | 5    | 5    | 2    | 4    | 3    | 4    | 5    | 4    |
| 10136  |       |        |        |      |      |      |      |      |      |      |      |      |      |      |
| 10141  | 5     | 4      | 5      | 2    | 0    | 0    | 0    | 0    | 0    | 0    | 0    | 0    | 3    | 3    |
| 10142  | 5     | 5      | 5      |      |      |      |      |      |      |      |      |      |      |      |
| 10143  | 4     | 4      | 4      | 1    |      |      |      |      |      |      |      |      |      |      |
| 10145  | 6     | 2      | 5      | 0    | 5    | 0    | 0    | 0    | 0    | 0    | 0    | 5    | 4    | 1    |
| 10149  | 4     | 5      | 4      |      |      |      |      |      |      |      |      |      |      |      |
| 10150  | 6     | 6      | 6      | 0    | 0    | 0    | 0    | 0    | 0    | 0    | 0    | 0    | 1    | 1    |
| 10151  | 5     | 5      | 5      | 5    | 5    |      |      |      |      |      |      |      |      |      |
| 10152  | 4     | 3      | 3      | 2    | 4    | 4    | 3    | 4    | 1    | 2    | 3    | 4    | 4    | 3    |
| 10153  | 5     | 5      | 5      | 5    | 5    | 5    | 5    | 5    | 1    | 5    | 5    | 5    | 5    | 5    |
| 10156  | 5     | 5      | 5      |      |      |      |      |      |      |      |      |      |      |      |
| 10160  | 6     | 6      | 6      |      |      |      |      |      |      |      |      |      |      |      |
| 10161  | 4     | 5      | 4      | 4    | 4    | 4    | 4    | 5    | 1    | 4    | 4    | 4    | 4    | 3    |
| 10167  | 5     | 4      | 4      |      |      |      |      |      |      |      |      |      |      |      |
| 10171  |       |        |        |      |      |      |      |      |      |      |      |      |      |      |
| 10172  | 6     | 6      | 5      | 5    | 5    | 4    | 5    | 5    | 5    | 5    | 5    |      | 5    | 5    |
| 10176  | 5     | 5      | 5      | 4    | 4    | 4    | 3    | 5    | 1    | 3    | 3    | 5    | 3    | 2    |
| 10177  | 5     | 5      | 5      |      |      |      |      |      |      |      |      |      |      |      |
| 10182  | 4     | 4      | 4      | 4    | 4    | 4    | 3    | 4    | 2    | 2    | 2    | 4    | 1    | 3    |
| 10184  | 5     | 4      | 4      | 5    | 4    | 4    | 4    | 4    | 2    | 3    | 2    | 4    | 4    | 4    |
| 10186  | 5     | 5      | 5      |      |      |      |      |      |      |      |      |      |      |      |
| 10189  | 5     | 5      | 5      | 4    | 3    | 4    | 4    | 4    | 1    | 3    | 3    | 5    | 3    | 3    |
| 10191  | 5     | 5      | 5      | 5    | 5    | 5    | 5    |      | 2    | 4    | 3    | 5    | 5    | 5    |
| 10192  | 5     | 5      | 5      | 4    | 3    | 4    | 4    | 4    | 3    | 4    | 3    | 5    | 4    | 4    |

| respid | Q46x4 | Q46x5a | Q46x5b | Q47a | Q47b | Q47c | Q47d | Q47e | Q47f | Q47g | Q47h | Q47i | Q47j | Q47k |   |
|--------|-------|--------|--------|------|------|------|------|------|------|------|------|------|------|------|---|
| 10195  | 5     | 5      | 5      | 4    | 5    | 5    | 5    | 5    | 5    | 5    | 5    | 4    | 5    | 4    | 5 |
| 10199  |       |        |        |      |      |      |      |      |      |      |      |      |      |      |   |
| 10201  | 5     | 5      | 5      | 0    | 1    | 0    | 1    | 1    | 0    | 0    | 0    | 0    | 0    | 1    | 1 |
| 10213  | 5     | 5      | 5      |      |      |      |      |      |      |      |      |      |      |      |   |
| 10222  | 4     | 4      | 4      |      |      |      |      |      |      |      |      |      |      |      |   |
| 10224  |       |        |        |      |      |      |      |      |      |      |      |      |      |      |   |
| 10245  | 5     | 5      | 5      |      |      |      |      |      |      |      |      |      |      |      |   |
| 10254  | 4     | 6      | 6      | 0    |      |      |      |      |      | 0    | 0    | 0    | 0    |      |   |
| 10255  | 3     | 2      | 3      | 2    | 1    | 2    | 2    | 2    |      |      | 1    | 1    | 1    | 2    | 3 |
| 10257  | 5     | 5      | 5      | 0    | 0    | 0    | 0    | 0    | 0    | 0    | 0    | 0    | 0    | 1    | 1 |
| 10260  | 5     | 5      | 5      | 1    | 1    | 1    | 1    | 0    | 0    | 0    | 0    | 0    | 0    | 1    |   |
| 10261  | 6     | 6      | 6      | 4    | 3    | 4    | 4    | 4    | 4    | 2    | 3    | 3    | 5    | 2    | 4 |
| 10263  | 6     | 6      | 6      |      |      |      |      |      |      |      |      |      |      |      |   |
| 10264  | 5     | 5      | 5      | 4    | 4    | 4    | 4    | 5    | 4    | 4    | 4    | 4    | 5    | 4    | 5 |
| 10268  | 3     | 4      | 2      | 4    | 4    | 4    | 4    | 4    | 5    | 2    | 4    | 3    | 4    | 4    | 4 |
| 10269  | 5     | 5      | 5      | 1    | 1    | 0    | 0    | 0    | 0    | 0    | 0    | 0    | 2    | 1    | 3 |
| 10270  |       |        |        |      |      |      |      |      |      |      |      |      |      |      |   |
| 10282  | 5     | 5      | 5      | 5    | 5    | 5    | 5    | 5    | 5    | 1    | 5    | 5    | 5    | 5    | 5 |
| 10285  |       |        |        |      |      |      |      |      |      |      |      |      |      |      |   |
| 10288  | 5     | 5      | 5      | 5    | 4    | 4    | 3    | 5    | 3    | 4    | 3    | 4    | 4    | 4    | 3 |
| 10291  | 5     | 5      | 5      | 5    | 5    | 5    | 5    | 5    | 5    |      |      |      | 5    | 4    |   |
| 10292  | 5     | 5      | 5      |      |      |      |      |      |      |      |      |      |      |      |   |
| 10304  |       |        |        |      |      |      |      |      |      |      |      |      |      |      |   |
| 10305  | 5     | 5      | 5      |      |      |      |      |      |      |      |      |      |      |      |   |
| 10310  | 5     | 5      | 5      | 1    | 5    | 5    | 4    | 5    | 3    | 4    | 3    | 5    | 4    | 4    | 4 |
| 10324  | 5     | 5      | 5      |      |      |      |      |      |      |      |      |      |      |      |   |
| 10325  | 5     | 5      | 5      |      |      |      |      |      |      |      |      |      |      |      |   |
| 10326  | 4     | 4      | 4      | 0    | 2    | 0    | 0    | 0    | 0    | 0    | 0    | 0    | 0    | 1    | 1 |
| 10329  |       |        |        |      |      |      |      |      |      |      |      |      |      |      |   |
| 10332  | 5     | 4      | 4      | 5    | 5    | 5    | 5    | 5    | 3    | 4    | 4    | 5    | 5    | 5    | 4 |
| 10337  | 5     | 5      | 5      | 2    | 2    | 4    | 4    | 5    | 2    | 4    | 3    | 5    | 4    | 4    | 3 |
| 10341  | 6     | 6      | 6      |      |      |      |      |      |      |      |      |      |      |      |   |

| respid | Q46x4 | Q46x5a | Q46x5b | Q47a | Q47b | Q47c | Q47d | Q47e | Q47f | Q47g | Q47h | Q47i | Q47j | Q47k |   |
|--------|-------|--------|--------|------|------|------|------|------|------|------|------|------|------|------|---|
| 10353  | 6     | 6      | 6      | 3    | 3    | 3    | 3    | 3    | 4    | 1    | 4    | 3    | 4    | 4    | 3 |
| 10354  |       |        |        |      |      |      |      |      |      |      |      |      |      |      |   |
| 10359  | 5     | 4      | 5      |      |      |      |      |      |      |      |      |      |      |      |   |
| 10360  | 5     | 5      | 5      | 5    | 5    | 5    | 5    | 5    | 5    | 1    | 5    | 5    | 5    | 5    | 5 |
| 10362  | 4     | 4      | 4      | 0    | 1    | 0    | 0    | 0    | 0    | 0    | 0    | 3    | 4    | 4    | 3 |
| 10364  | 6     | 6      | 6      | 2    | 2    | 4    | 3    | 3    | 3    | 1    | 3    | 4    | 4    | 4    | 4 |
| 10366  | 4     | 4      | 4      |      | 2    | 3    | 2    | 4    | 2    | 4    | 2    | 3    | 2    | 3    | 2 |
| 10367  | 4     | 4      | 4      |      |      |      |      |      |      |      |      |      |      |      |   |
| 10371  | 5     | 5      | 5      | 5    | 5    | 5    | 5    | 5    | 5    | 4    | 5    | 5    | 5    | 5    | 5 |
| 10374  | 5     | 5      | 5      |      |      |      |      |      |      |      |      |      |      |      |   |
| 10375  | 5     | 5      | 5      |      |      |      |      |      |      |      |      |      |      |      |   |
| 10376  | 6     | 6      | 6      | 4    | 4    | 4    | 4    | 5    | 1    | 4    | 3    | 4    | 4    | 4    | 4 |
| 10377  | 4     | 4      | 4      | 5    | 5    | 5    | 4    | 4    | 4    | 1    | 4    | 4    | 5    | 5    | 4 |
| 10378  | 4     | 5      | 4      | 4    | 4    | 4    | 4    | 5    | 1    | 4    |      | 3    | 4    | 4    | 4 |
| 10387  | 6     | 5      | 5      | 2    | 1    | 0    | 5    | 5    | 0    | 0    | 0    | 0    | 0    | 5    | 2 |
| 10396  | 2     | 2      | 2      | 4    | 3    | 3    | 3    | 4    | 1    | 3    | 3    | 2    | 3    | 3    | 4 |
| 10397  | 6     | 6      | 6      | 5    | 5    | 5    | 5    | 5    | 5    | 1    | 5    | 4    | 5    | 5    | 3 |
| 10399  | 3     | 3      | 2      | 2    | 2    | 2    | 2    | 2    | 4    | 5    | 1    | 2    | 2    | 4    | 4 |
| 10405  | 5     | 5      | 5      | 4    | 4    | 4    | 4    | 4    | 1    | 1    | 1    | 1    | 4    | 1    | 1 |
| 10406  | 6     | 6      | 6      | 1    | 1    | 2    | 2    | 2    | 1    | 1    | 1    | 1    | 4    | 2    | 2 |
| 10408  | 5     | 4      | 4      | 5    | 5    | 5    | 5    | 5    | 5    | 4    | 5    | 4    | 5    | 4    | 5 |
| 10409  |       |        |        |      |      |      |      |      |      |      |      |      |      |      |   |
| 10412  | 5     | 5      | 5      | 5    | 5    | 5    | 5    | 5    | 5    | 4    | 5    | 4    | 5    | 5    | 4 |
| 10413  | 5     | 5      | 5      | 5    | 5    | 5    | 5    | 5    | 5    | 1    | 5    | 4    | 5    | 5    | 4 |
| 10419  | 4     | 4      | 5      | 1    | 2    | 1    | 2    | 1    | 0    | 1    | 1    | 1    | 2    | 1    | 2 |
| 10423  | 4     | 5      | 5      | 1    | 1    | 2    | 2    | 2    | 2    | 1    | 1    | 1    | 4    | 1    | 1 |
| 10426  | 5     | 5      | 5      |      |      |      |      |      |      |      |      |      |      |      |   |
| 10446  | 5     | 5      | 5      | 3    | 3    | 4    | 3    | 4    | 4    | 0    | 0    | 3    | 5    | 4    | 2 |
| 10448  | 6     | 5      | 4      | 2    | 3    | 3    | 3    | 3    | 3    | 1    | 3    | 2    | 3    | 3    | 3 |
| 10450  | 5     | 5      | 5      |      |      |      |      |      |      |      |      |      |      |      |   |
| 10455  | 5     | 5      | 5      | 5    | 0    | 0    | 0    | 0    | 0    | 0    | 0    | 0    | 0    | 1    | 1 |
| 10460  | 5     | 5      | 5      |      |      |      |      |      |      |      |      |      |      |      |   |

| respid | Q46x4 | Q46x5a | Q46x5b | Q47a | Q47b | Q47c | Q47d | Q47e | Q47f | Q47g | Q47h | Q47i | Q47j | Q47k |
|--------|-------|--------|--------|------|------|------|------|------|------|------|------|------|------|------|
| 10461  | 5     | 5      | 5      | 0    | 0    | 1    | 1    | 2    | 0    | 0    | 0    | 0    | 1    | 3    |
| 10471  | 5     | 5      | 5      | 3    | 3    | 4    | 3    | 4    | 2    | 3    | 3    | 5    | 4    | 4    |
| 10472  | 6     | 6      | 6      | 4    | 4    | 5    | 5    | 5    | 3    | 4    | 4    | 4    | 4    | 4    |
| 10491  | 4     | 4      | 3      | 2    | 2    | 2    | 2    | 3    | 4    | 3    | 2    | 2    | 2    | 2    |
| 10493  | 5     | 5      | 5      |      |      |      |      |      |      |      |      |      |      |      |
| 10498  | 5     | 5      | 5      |      |      |      |      |      |      |      |      |      |      |      |
| 10533  | 5     | 4      | 5      |      |      |      |      |      |      |      |      |      |      |      |
| 10539  | 4     | 4      | 4      | 3    | 3    | 4    | 4    | 5    | 2    | 3    | 3    | 4    | 4    | 3    |
| 10540  | 4     | 4      | 5      | 0    | 0    | 0    | 0    | 0    | 0    | 0    | 0    | 2    | 2    | 3    |
| 10557  | 5     | 5      | 5      | 4    | 4    | 4    | 4    | 5    | 2    | 4    | 4    | 5    | 5    | 3    |
| 10558  | 3     | 3      | 4      | 0    | 0    | 0    | 0    | 0    | 0    |      |      |      |      |      |
| 10559  | 6     | 4      | 3      |      |      |      |      |      |      |      |      |      |      |      |
| 10564  | 5     | 4      | 5      |      |      |      |      |      |      |      |      |      |      |      |
| 10570  |       |        |        |      |      |      |      |      |      |      |      |      |      |      |
| 10572  | 6     | 6      | 6      |      |      |      |      |      |      |      |      |      |      |      |
| 10576  | 5     | 5      | 5      | 5    | 5    | 5    | 5    | 5    | 2    | 5    | 5    | 5    | 5    | 5    |
| 10582  | 2     | 3      | 2      | 0    | 0    | 0    | 0    | 0    | 0    | 0    | 0    | 0    | 1    | 1    |
| 10593  | 5     | 5      | 5      |      |      |      |      |      |      |      |      |      |      |      |
| 10596  | 4     | 5      | 4      | 0    |      |      |      |      |      |      |      |      |      |      |
| 10615  |       |        |        |      |      |      |      |      |      |      |      |      |      |      |
| 10616  | 5     | 5      | 5      | 4    | 4    | 5    | 5    | 5    | 3    | 4    | 3    | 5    | 4    | 4    |
| 10623  | 5     | 4      | 4      | 5    |      | 5    | 5    |      | 3    | 5    | 4    | 5    | 5    | 3    |
| 10626  | 5     | 5      | 5      |      |      |      |      |      |      |      |      |      |      |      |
| 10627  | 2     | 3      | 4      |      |      |      |      |      |      |      |      |      |      |      |
| 10629  | 4     | 3      | 4      |      |      |      |      |      |      |      |      |      |      |      |
| 10632  | 3     | 3      | 2      |      |      |      |      |      |      |      |      |      |      |      |
| 10641  |       |        |        |      |      |      |      |      |      |      |      |      |      |      |
| 10648  | 3     | 2      | 2      | 2    | 3    | 3    |      | 4    | 1    |      |      | 2    |      | 2    |
| 10651  | 4     | 4      | 4      |      |      |      |      |      |      |      |      |      |      |      |
| 10654  | 5     | 5      | 5      |      |      |      |      |      |      |      |      |      |      |      |
| 10673  | 5     | 5      | 5      |      |      |      |      |      |      |      |      |      |      |      |
| 10675  | 5     | 5      | 5      | 0    | 4    | 0    | 0    | 0    | 0    | 0    | 0    | 5    | 1    | 2    |

| respid | Q46x4 | Q46x5a | Q46x5b | Q47a | Q47b | Q47c | Q47d | Q47e | Q47f | Q47g | Q47h | Q47i | Q47j | Q47k |
|--------|-------|--------|--------|------|------|------|------|------|------|------|------|------|------|------|
| 10689  | 2     | 2      | 3      | 3    | 2    | 4    | 4    | 4    | 3    | 3    | 2    | 4    | 3    | 2    |
| 10692  | 5     | 5      | 5      |      |      |      |      |      |      |      |      |      |      |      |
| 10694  | 5     | 5      | 5      | 5    | 5    | 5    | 5    | 5    | 2    | 5    | 5    | 5    | 5    | 5    |
| 10695  | 4     | 4      | 3      | 5    | 5    | 5    | 4    | 4    | 3    | 4    | 4    | 4    | 4    | 4    |
| 10702  | 4     | 4      | 4      |      |      |      |      |      |      |      |      |      |      |      |
| 10703  | 4     | 3      | 3      | 2    | 2    | 2    | 2    | 1    | 1    | 2    | 3    | 2    | 2    | 2    |
| 10708  | 5     | 4      | 4      | 0    | 0    | 0    | 0    | 0    | 0    | 0    | 0    | 0    | 4    | 3    |
| 10719  | 4     | 4      | 5      | 3    | 3    | 3    | 3    | 4    | 1    | 3    | 3    | 3    | 3    | 3    |
| 10722  | 6     | 5      | 5      |      |      |      |      |      |      |      |      |      |      |      |
| 10723  | 5     | 5      | 4      | 0    | 3    | 2    |      | 2    | 0    | 0    | 0    | 1    | 1    | 1    |
| 10726  | 5     | 5      | 5      | 2    | 1    | 2    | 2    | 3    | 1    | 2    | 3    | 5    | 5    | 4    |
| 10727  | 6     | 6      | 6      | 2    | 2    | 3    | 4    | 4    | 2    | 4    | 3    | 4    | 3    | 3    |
| 10730  | 5     | 5      | 5      | 5    | 5    | 5    | 5    | 5    | 3    | 4    | 3    | 5    | 5    | 5    |
| 10731  |       |        |        |      |      |      |      |      |      |      |      |      |      |      |
| 10737  | 5     | 5      | 5      | 5    | 5    | 5    | 5    | 5    | 3    | 4    | 3    | 5    | 5    | 4    |
| 10743  | 4     | 4      | 4      |      |      |      |      |      |      |      |      |      |      |      |
| 10763  | 5     | 5      | 5      | 5    | 5    | 5    | 5    | 5    | 5    | 4    | 4    | 4    | 4    | 4    |
| 10777  |       |        |        |      |      |      |      |      |      |      |      |      |      |      |
| 10787  | 4     | 5      | 4      | 2    | 2    | 0    | 2    | 1    | 0    | 0    | 0    | 2    | 2    | 1    |
| 10798  | 3     | 3      | 1      |      |      |      |      |      |      |      |      |      |      |      |
| 10800  | 5     | 5      | 5      | 5    | 5    | 5    | 5    | 5    | 1    | 5    | 4    | 5    | 4    | 4    |
| 10802  | 3     | 2      | 2      |      |      |      |      |      |      |      |      |      |      |      |
| 10803  | 2     | 3      | 3      |      |      |      |      |      |      |      |      |      |      |      |
| 10808  | 6     | 6      | 6      |      |      |      |      |      |      |      |      |      |      |      |
| 10810  | 5     | 5      | 4      | 5    | 4    | 5    | 5    | 5    | 1    | 4    | 4    | 5    | 5    | 4    |
| 10819  | 6     | 5      | 5      | 1    | 2    | 4    | 4    | 5    | 2    | 4    | 4    | 5    | 4    | 4    |
| 10825  | 6     | 5      | 5      | 4    | 4    | 4    | 4    | 4    | 1    | 4    |      | 4    | 4    | 4    |
| 10827  | 5     | 5      | 4      | 4    | 2    | 4    | 4    | 4    | 3    | 4    | 4    | 4    | 4    | 5    |
| 10830  | 6     | 6      | 6      | 0    | 0    | 0    | 0    | 0    | 0    | 0    | 0    | 0    | 1    | 1    |
| 10847  | 5     | 5      | 5      | 4    | 0    | 0    | 0    | 0    | 0    | 0    | 0    | 4    | 4    | 4    |
| 10849  | 5     | 5      | 5      | 0    | 0    | 0    | 0    | 0    | 0    | 0    | 0    | 0    | 1    | 1    |
| 10852  | 6     | 6      | 6      |      |      |      |      |      |      |      |      |      |      |      |



| respid | Q46x4 | Q46x5a | Q46x5b | Q47a | Q47b | Q47c | Q47d | Q47e | Q47f | Q47g | Q47h | Q47i | Q47j | Q47k |
|--------|-------|--------|--------|------|------|------|------|------|------|------|------|------|------|------|
| 10854  | 4     | 4      | 4      | 2    | 2    | 2    | 2    | 2    | 3    | 2    | 2    | 2    | 2    | 2    |
| 10857  | 5     | 5      | 5      |      |      |      |      |      |      |      |      |      |      |      |
| 10861  | 6     | 6      | 6      |      |      |      |      |      |      |      |      |      |      |      |
| 10862  |       |        |        |      |      |      |      |      |      |      |      |      |      |      |
| 10870  | 5     | 5      | 4      | 3    | 4    | 4    | 4    | 5    | 1    | 4    | 4    | 4    | 3    | 2    |
| 10873  | 3     | 6      | 6      | 0    | 0    | 0    | 0    | 0    | 0    | 0    | 0    | 0    | 0    | 1    |
| 10881  | 5     | 5      | 5      |      |      |      |      |      |      |      |      |      |      |      |
| 10893  |       |        |        |      |      |      |      |      |      |      |      |      |      |      |
| 10898  | 2     | 3      | 4      |      |      |      |      |      |      |      |      |      |      |      |
| 10899  | 4     | 3      | 4      | 3    | 1    |      |      |      | 2    |      | 2    | 2    | 2    | 1    |
| 10905  | 5     | 6      | 4      |      |      |      |      |      |      | 0    | 0    | 0    | 0    |      |
| 10910  |       |        |        |      |      |      |      |      |      |      |      |      |      | 2    |
| 10911  | 5     | 5      | 4      |      |      |      |      |      |      |      |      |      |      |      |
| 10912  | 5     | 5      | 5      |      |      |      |      |      |      |      |      |      |      |      |
| 10913  | 6     | 6      | 6      |      |      |      |      |      |      |      |      |      |      |      |
| 10918  |       |        |        |      |      |      |      |      |      |      |      |      |      |      |
| 10995  |       |        |        |      |      |      |      |      |      |      |      |      |      |      |
| 11002  | 5     | 5      | 5      | 5    |      | 5    | 5    | 5    |      | 5    | 3    | 5    | 5    | 4    |
| 11003  | 6     | 5      | 5      | 4    | 4    | 5    | 5    | 5    | 3    | 4    | 4    | 5    | 5    | 5    |
| 11005  | 5     | 5      | 5      | 5    | 5    | 5    | 5    | 5    | 1    | 4    | 3    | 2    | 4    | 2    |
| 11015  | 5     | 5      | 5      |      |      |      |      |      |      |      |      |      |      |      |
| 11016  | 6     | 6      | 6      | 0    | 0    | 5    |      |      | 4    | 4    | 3    | 4    | 4    | 4    |
| 11017  | 5     | 5      | 5      | 5    | 5    | 5    | 5    | 5    | 4    | 5    | 5    | 5    | 5    | 5    |
| 11020  | 2     | 3      | 1      |      |      |      |      |      |      |      |      |      |      |      |
| 11024  | 5     | 6      | 6      | 5    | 5    | 5    | 5    | 5    | 1    | 3    | 3    | 5    | 4    | 4    |
| 11026  | 6     | 6      | 6      |      |      |      |      |      |      |      |      |      |      |      |
| 11028  | 3     | 3      | 3      | 2    | 3    | 3    | 3    | 3    | 1    | 2    | 2    | 1    | 3    | 2    |
| 11029  | 2     | 2      | 1      |      |      |      |      |      |      |      |      |      |      |      |
| 11030  | 5     | 5      | 5      |      | 4    | 4    | 3    |      |      |      |      | 4    | 4    | 4    |
| 11031  | 5     | 6      | 6      |      |      |      |      |      |      |      |      |      |      |      |
| 11038  | 6     | 6      | 6      |      |      |      |      |      |      |      |      |      |      |      |
| 11051  | 5     | 5      | 5      |      |      |      |      |      |      |      |      |      |      |      |

| respid | Q46x4 | Q46x5a | Q46x5b | Q47a | Q47b | Q47c | Q47d | Q47e | Q47f | Q47g | Q47h | Q47i | Q47j | Q47k |
|--------|-------|--------|--------|------|------|------|------|------|------|------|------|------|------|------|
| 11052  | 3     | 3      | 1      |      |      |      |      |      |      |      |      |      |      |      |
| 11053  | 5     | 5      | 5      |      |      |      |      |      |      |      |      |      |      |      |
| 11054  | 1     | 4      | 1      |      |      |      |      |      |      |      |      |      |      |      |
| 11063  | 4     | 6      | 6      |      |      |      |      |      |      |      |      |      |      |      |
| 11075  | 3     | 3      | 3      | 2    | 2    | 2    | 2    | 3    | 1    | 2    | 2    | 2    | 2    | 3    |
| 11083  | 5     | 5      | 5      | 2    | 2    | 3    | 5    | 4    | 2    | 3    | 3    | 5    | 5    | 3    |
| 11092  | 5     | 5      | 5      |      |      |      |      |      |      |      |      |      |      |      |
| 11118  | 5     | 5      | 5      | 5    | 5    | 5    | 4    | 5    | 4    | 4    | 4    | 3    | 2    | 4    |
| 11119  | 4     | 6      | 6      | 0    | 0    | 0    | 0    | 0    | 0    | 0    | 0    | 0    | 1    | 1    |
| 11134  | 5     | 5      | 5      | 5    | 5    | 5    | 5    | 5    | 5    | 5    | 5    | 5    | 5    | 5    |
| 11139  | 6     | 6      | 6      | 5    | 5    | 5    | 5    |      |      |      |      |      |      |      |
| 11154  | 5     | 5      | 5      | 5    | 5    | 5    | 5    | 5    | 4    | 5    | 4    | 5    | 4    | 4    |
| 11166  | 5     | 5      | 5      | 4    | 4    | 4    | 4    | 4    |      | 4    | 4    | 4    | 4    | 4    |
| 11168  |       |        |        |      |      |      |      |      |      |      |      |      |      |      |
| 11176  | 2     | 2      | 2      | 2    | 2    | 1    | 1    | 4    | 2    | 2    | 3    | 2    | 2    | 3    |
| 11183  | 3     | 4      | 4      |      |      |      |      |      |      |      |      |      |      |      |
| 11189  | 6     | 6      | 6      | 5    | 5    | 5    | 5    | 5    | 5    | 5    | 5    | 5    | 5    | 5    |
| 11196  | 2     | 2      | 2      |      |      |      |      |      |      |      |      |      |      |      |
| 11200  | 5     | 5      | 5      | 5    | 5    | 5    | 5    | 5    | 3    | 5    | 5    | 5    | 5    | 5    |
| 11201  | 5     | 1      | 1      | 0    | 5    | 5    | 5    | 5    | 0    | 4    | 4    | 5    | 4    | 3    |
| 11211  | 2     | 2      | 2      |      |      |      |      |      |      |      |      |      |      |      |
| 11218  | 5     | 5      | 5      |      |      |      |      |      |      |      |      |      |      |      |
| 11219  | 5     | 5      | 5      |      |      |      |      |      |      |      |      |      |      |      |
| 11221  | 6     | 6      | 6      |      |      |      |      |      |      |      |      |      |      |      |
| 11222  | 6     | 6      | 6      |      |      |      |      |      |      |      |      |      |      |      |
| 11230  | 2     | 2      | 2      |      |      |      |      |      |      |      |      |      |      |      |
| 11236  | 3     | 2      | 2      |      |      |      |      |      |      |      |      |      |      |      |
| 11237  | 4     | 3      | 3      | 0    | 1    | 0    | 0    | 0    | 0    | 0    | 0    | 2    | 2    | 1    |
| 11240  | 5     | 4      | 3      |      |      |      |      |      |      |      |      |      |      |      |
| 11244  | 3     | 2      | 3      |      |      |      |      |      |      |      |      |      |      |      |
| 11249  | 5     | 4      | 4      |      |      |      |      |      |      |      |      |      |      |      |
| 11252  | 3     | 2      | 3      |      |      |      |      |      |      |      |      |      |      |      |

| respid | Q46x4 | Q46x5a | Q46x5b | Q47a | Q47b | Q47c | Q47d | Q47e | Q47f | Q47g | Q47h | Q47i | Q47j | Q47k |
|--------|-------|--------|--------|------|------|------|------|------|------|------|------|------|------|------|
| 11254  | 4     | 4      | 4      | 4    | 4    | 4    | 4    | 4    |      | 4    | 3    | 4    | 3    | 4    |
| 11255  | 6     | 4      | 4      |      |      |      |      |      |      |      |      |      |      |      |
| 11258  | 3     | 3      | 2      |      |      |      |      |      |      |      |      |      |      |      |
| 11260  | 5     | 5      | 5      | 3    |      | 3    | 2    | 4    | 1    | 2    | 2    | 2    | 3    | 2    |
| 11264  | 4     | 4      | 4      | 1    | 1    | 1    | 1    | 1    | 1    | 1    | 1    | 1    | 1    | 2    |
| 11266  | 4     | 3      | 2      |      |      |      |      |      |      |      |      |      |      |      |
| 11268  | 4     | 4      | 4      | 4    | 3    | 4    | 3    | 4    | 1    | 2    | 3    | 4    | 3    | 2    |
| 11269  | 5     | 5      | 5      | 5    | 5    | 5    | 5    | 5    | 5    | 1    | 5    | 4    | 5    | 3    |
| 11272  | 5     | 4      | 4      |      |      |      |      |      |      |      |      |      |      |      |
| 11273  | 5     | 5      | 5      | 4    | 4    | 4    | 4    | 5    | 3    | 4    | 3    | 3    | 3    | 3    |
| 11275  | 5     | 5      | 5      |      |      |      |      |      |      |      |      |      |      |      |
| 11276  | 5     | 5      | 5      |      |      |      |      |      |      |      |      |      |      |      |
| 11278  | 3     | 4      | 4      |      |      |      |      |      |      |      |      |      |      |      |
| 11288  |       |        |        |      |      |      |      |      |      |      |      |      |      |      |
| 11289  |       |        |        |      |      |      |      |      |      |      |      |      |      |      |
| 11291  | 6     | 6      | 6      | 5    | 5    | 5    | 5    | 5    | 1    | 4    | 3    | 4    | 3    | 4    |
| 11295  | 5     | 4      | 4      | 3    | 3    | 4    | 3    | 4    |      |      |      |      |      |      |
| 11297  | 6     | 6      | 6      |      |      |      |      |      |      |      |      |      |      |      |
| 11304  | 6     | 6      | 6      | 0    | 0    | 0    | 0    | 0    | 0    | 0    | 0    | 0    | 1    | 1    |
| 11305  | 5     | 5      | 5      | 5    | 5    | 5    | 5    | 5    | 2    | 5    | 4    | 5    | 5    | 4    |
| 11311  | 5     | 5      | 5      |      |      |      |      |      |      |      |      |      |      |      |
| 11313  | 5     | 5      | 5      |      |      |      |      |      |      |      |      |      |      |      |
| 11315  | 3     | 3      | 3      |      |      |      |      |      |      |      |      |      |      |      |
| 11316  | 3     | 3      | 3      |      |      |      |      |      |      |      |      |      |      |      |
| 11318  | 3     | 4      | 3      |      |      |      |      |      |      |      |      |      |      |      |
| 11323  | 6     | 5      | 5      |      |      |      |      |      |      |      |      |      |      |      |
| 11331  | 4     | 2      | 3      |      |      |      |      |      |      |      |      |      |      |      |
| 11333  | 5     | 5      | 5      |      |      |      |      |      |      |      |      |      |      |      |
| 11334  | 4     | 4      | 4      | 4    | 4    |      | 5    | 5    | 2    | 4    | 4    | 5    | 4    | 4    |
| 11340  | 3     | 3      | 2      | 2    | 3    | 2    | 3    | 2    |      |      |      |      |      |      |
| 11345  | 5     | 4      | 4      | 5    | 5    | 5    | 5    | 5    | 3    | 5    | 4    | 5    | 5    | 3    |
| 11354  | 4     | 5      | 5      | 5    | 5    | 5    | 5    | 5    | 3    | 5    | 4    | 5    | 5    | 3    |

| respid | Q46x4 | Q46x5a | Q46x5b | Q47a | Q47b | Q47c | Q47d | Q47e | Q47f | Q47g | Q47h | Q47i | Q47j | Q47k |   |
|--------|-------|--------|--------|------|------|------|------|------|------|------|------|------|------|------|---|
| 11360  |       |        |        |      |      |      |      |      |      |      |      |      |      |      |   |
| 11361  | 2     | 4      | 2      | 2    | 2    | 2    | 2    | 3    | 2    | 1    | 2    | 3    | 2    | 3    | 2 |
| 11367  |       |        |        |      |      |      |      |      |      |      |      |      |      |      |   |
| 11370  |       |        |        |      |      |      |      |      |      |      |      |      |      |      |   |
| 11371  | 5     | 5      | 5      |      |      |      |      |      |      |      |      |      |      |      |   |
| 11372  | 3     | 2      | 2      |      |      |      |      |      |      |      |      |      |      |      |   |
| 11373  | 4     | 4      | 4      |      |      |      |      |      |      |      |      |      |      |      |   |
| 11382  | 5     | 5      | 5      | 5    | 5    | 5    | 5    | 4    | 1    | 4    | 4    | 5    | 5    | 4    | 4 |
| 11394  | 4     | 6      | 6      | 0    | 0    | 0    | 0    | 0    | 0    | 0    | 0    | 0    | 0    | 1    | 1 |
| 11395  | 4     | 4      | 4      | 4    | 4    | 3    | 3    | 2    | 2    | 4    | 3    | 5    | 4    | 3    | 3 |
| 11397  |       |        |        |      |      |      |      |      |      |      |      |      |      |      |   |
| 11402  | 5     | 5      | 5      | 0    | 0    | 0    | 0    | 0    | 0    | 0    | 0    | 0    | 0    | 1    | 2 |
| 11409  | 5     | 4      | 5      | 0    | 0    | 0    | 0    | 0    | 0    | 0    | 0    | 0    | 0    | 1    | 1 |
| 11410  | 5     | 5      | 5      |      |      |      |      |      |      |      |      |      |      |      |   |
| 11411  | 4     | 5      | 5      | 3    | 2    | 2    | 3    | 4    | 2    | 4    | 3    | 5    | 5    | 4    | 4 |
| 11418  | 5     | 5      | 5      | 5    | 5    | 5    | 5    | 5    | 4    | 5    | 3    | 4    | 4    | 4    | 4 |
| 11425  | 3     | 3      | 3      |      |      |      |      |      |      |      |      |      |      |      |   |
| 11429  | 5     | 5      | 5      |      |      |      |      |      |      |      |      |      |      |      |   |
| 11430  | 3     | 3      | 3      |      | 2    | 2    | 2    | 4    | 1    | 1    | 2    | 1    | 2    | 2    | 2 |
| 11431  | 4     | 4      | 4      |      |      |      |      |      |      |      |      |      |      |      |   |
| 11432  |       |        |        |      |      |      |      |      |      |      |      |      |      |      |   |
| 11433  | 5     | 5      | 4      | 4    | 4    | 4    | 4    | 4    | 4    | 4    | 3    | 5    | 4    | 5    | 5 |
| 11435  | 4     | 4      | 4      | 2    | 2    | 3    | 4    | 2    | 2    | 4    | 2    | 2    | 4    | 3    | 3 |
| 11436  | 4     | 4      | 4      |      |      |      |      |      |      |      |      |      |      |      |   |
| 11437  | 4     | 4      | 4      |      |      |      |      |      |      |      |      |      |      |      |   |
| 11439  |       |        |        |      |      |      |      |      |      |      |      |      |      |      |   |
| 11440  | 5     | 5      | 5      |      |      |      |      |      |      |      |      |      |      |      |   |
| 11447  | 5     | 5      | 5      | 0    |      | 0    | 0    | 0    | 0    | 0    | 0    | 0    | 0    | 1    | 1 |
| 11455  | 5     | 5      | 5      |      |      |      |      |      |      |      |      |      |      |      |   |
| 11456  | 3     | 3      | 3      |      |      |      |      |      |      |      |      |      |      |      |   |
| 11461  | 4     | 4      | 4      | 5    | 5    | 5    | 5    | 5    | 3    | 5    | 4    | 5    | 5    | 5    | 5 |
| 11463  | 4     | 4      | 4      | 4    | 4    | 4    | 5    | 5    | 2    | 4    | 5    | 5    | 5    | 5    | 4 |

| respid | Q46x4 | Q46x5a | Q46x5b | Q47a | Q47b | Q47c | Q47d | Q47e | Q47f | Q47g | Q47h | Q47i | Q47j | Q47k |   |
|--------|-------|--------|--------|------|------|------|------|------|------|------|------|------|------|------|---|
| 11470  | 4     | 4      | 2      | 2    | 2    | 2    | 3    | 2    | 5    | 4    | 3    | 2    | 3    | 4    | 2 |
| 11472  |       |        |        |      |      |      |      |      |      |      |      |      |      |      |   |
| 11475  | 6     | 6      | 6      | 5    | 5    | 5    | 5    | 5    | 5    | 5    | 5    | 5    | 5    | 5    | 3 |
| 11476  | 6     | 4      | 4      |      |      |      |      |      |      |      |      |      |      |      |   |
| 11482  | 3     | 3      | 3      |      |      |      |      |      |      |      |      |      |      |      |   |
| 11501  | 4     | 5      | 4      | 4    | 3    | 4    | 4    | 4    | 4    | 2    | 4    | 3    | 3    | 3    | 4 |
| 11503  | 1     | 2      | 1      |      |      |      |      |      |      |      |      |      |      |      |   |
| 11505  | 6     | 6      | 6      | 1    | 1    | 1    | 2    | 2    | 2    | 1    | 1    | 1    | 5    | 1    | 4 |
| 11510  | 5     | 4      | 5      |      |      |      |      |      |      |      |      |      |      |      |   |
| 11519  |       |        |        |      |      |      |      |      |      |      |      |      |      |      |   |
| 11527  | 4     | 3      | 4      | 5    | 4    | 5    | 5    | 5    | 5    | 4    | 4    | 4    | 5    | 3    | 4 |
| 11529  | 4     | 4      | 4      |      |      |      |      |      |      |      |      |      |      |      |   |
| 11530  | 4     | 6      | 6      | 1    | 1    | 1    | 1    | 1    | 0    | 0    | 0    | 0    | 0    | 1    | 1 |
| 11536  | 3     | 3      | 3      | 0    | 0    | 0    | 0    | 0    | 0    | 0    | 0    | 0    | 0    | 1    | 1 |
| 11543  | 5     | 5      | 5      | 5    | 4    | 4    | 4    | 4    | 5    | 3    | 4    | 3    | 5    | 3    | 4 |
| 11548  | 5     | 4      | 4      | 4    | 4    | 4    | 4    | 4    | 5    | 2    | 4    | 4    | 4    | 4    | 3 |
| 11566  | 6     | 6      | 6      | 0    | 0    | 0    | 0    | 0    | 0    | 0    | 0    | 0    | 0    | 1    | 1 |
| 11570  | 5     | 5      | 5      |      |      |      |      |      |      |      |      |      |      |      |   |
| 11571  | 4     | 4      | 4      | 5    | 5    | 5    | 5    | 5    | 5    | 4    | 5    | 4    | 4    | 4    | 4 |
| 11578  |       |        |        |      |      |      |      |      |      |      |      |      |      |      |   |
| 11579  | 5     | 5      | 5      |      |      |      |      |      |      |      |      |      |      |      |   |
| 11581  | 3     | 4      | 3      | 5    | 5    | 5    | 4    | 4    | 4    | 3    | 4    | 3    | 5    | 4    | 5 |
| 11582  | 5     | 4      | 4      |      |      |      |      |      |      |      |      |      |      |      |   |
| 11583  | 4     | 4      | 5      | 5    | 5    | 5    | 5    | 5    | 5    | 5    | 5    | 5    | 5    | 5    | 5 |
| 11589  | 3     | 4      | 2      | 1    | 1    | 2    | 3    | 3    | 3    | 3    | 2    | 3    | 2    | 4    | 3 |
| 11590  | 6     | 6      | 6      | 5    | 4    | 5    | 4    | 4    | 5    | 1    | 4    | 4    | 4    | 4    | 4 |
| 11592  | 6     | 6      | 6      | 3    | 3    | 3    | 3    | 3    | 5    | 1    | 3    | 3    | 5    | 4    | 4 |
| 11596  |       |        |        |      |      |      |      |      |      |      |      |      |      |      |   |
| 11598  | 5     | 5      | 5      | 3    | 3    | 3    | 3    | 3    | 4    | 2    | 2    | 3    | 3    | 2    | 3 |
| 11602  | 5     | 5      | 5      |      |      |      |      |      |      |      |      |      |      |      |   |
| 11605  | 5     | 4      | 5      | 5    | 4    | 5    | 4    | 4    | 5    | 3    | 4    | 4    | 4    | 3    | 3 |
| 11618  | 4     | 4      | 4      |      |      |      |      |      |      |      |      |      |      |      |   |

| respid | Q46x4 | Q46x5a | Q46x5b | Q47a | Q47b | Q47c | Q47d | Q47e | Q47f | Q47g | Q47h | Q47i | Q47j | Q47k |
|--------|-------|--------|--------|------|------|------|------|------|------|------|------|------|------|------|
| 11621  | 2     | 3      | 3      | 5    | 5    | 5    | 5    | 4    | 2    | 4    | 4    | 4    | 4    | 3    |
| 11630  | 5     | 5      | 5      |      |      |      |      |      |      |      |      |      |      |      |
| 11636  | 2     | 3      | 2      |      |      |      |      |      |      |      |      |      |      |      |
| 11640  | 2     | 2      | 2      |      |      |      |      |      |      |      |      |      |      |      |
| 11658  | 4     | 4      | 4      | 4    | 4    | 4    | 4    | 4    | 4    | 4    | 4    | 4    | 4    | 4    |
| 11665  | 4     | 4      | 5      |      |      |      |      |      |      |      |      |      |      |      |
| 11666  | 4     | 5      | 4      |      |      |      |      |      |      |      |      |      |      |      |
| 11667  | 3     | 3      | 2      | 2    | 3    | 3    | 2    | 3    | 1    | 2    | 3    | 3    | 3    | 3    |
| 11674  | 5     | 5      | 5      |      |      |      |      |      |      |      |      |      |      |      |
| 11680  | 5     | 5      | 5      | 3    | 4    | 5    | 4    | 5    | 1    | 4    | 3    | 5    | 5    | 3    |
| 11683  | 6     | 6      | 6      | 0    | 0    | 0    | 0    | 0    | 0    | 0    | 0    | 0    | 1    | 1    |
| 11688  | 2     | 3      | 3      | 1    | 3    | 3    | 1    | 2    | 1    | 1    | 1    | 1    | 4    | 2    |
| 11690  |       |        |        |      |      |      |      |      |      |      |      |      |      |      |
| 11694  |       |        |        |      |      |      |      |      |      |      |      |      |      |      |
| 11705  | 4     | 4      | 4      |      |      |      |      |      |      |      |      |      |      |      |
| 11720  | 3     | 3      | 3      | 2    | 2    | 2    | 3    | 1    | 1    | 3    | 4    | 4    | 3    | 4    |
| 11724  |       |        |        |      |      |      |      |      |      |      |      |      |      |      |
| 11738  | 5     | 5      | 5      |      |      |      |      |      |      |      |      |      |      |      |
| 11744  | 4     | 4      | 4      |      |      |      |      |      |      |      |      |      |      |      |
| 11745  | 5     | 5      | 4      |      |      |      |      |      |      |      |      |      |      |      |
| 11747  |       |        |        |      |      |      |      |      |      |      |      |      |      |      |
| 11755  | 4     | 4      | 4      |      |      |      |      |      |      |      |      |      |      |      |
| 11756  | 2     | 3      | 3      | 3    | 4    | 1    | 3    | 2    | 2    | 2    | 1    | 1    | 1    | 2    |
| 11772  | 5     | 4      | 4      |      |      |      |      |      |      |      |      |      |      |      |
| 11773  |       |        |        |      |      |      |      |      |      |      |      |      |      |      |
| 11778  | 3     | 4      | 5      | 2    | 2    | 3    | 4    | 4    | 2    | 3    | 3    | 4    | 3    | 3    |
| 11790  | 5     | 4      | 5      |      |      |      |      |      | 2    |      |      |      |      |      |
| 11794  |       |        |        |      |      |      |      |      |      |      |      |      |      |      |
| 11795  | 3     | 4      | 3      | 2    | 2    | 0    | 0    | 3    | 0    | 0    | 0    | 0    | 1    | 1    |
| 11799  | 3     | 4      | 2      | 4    | 3    | 3    | 4    | 3    | 1    | 2    | 3    | 3    | 3    | 3    |
| 11803  | 4     | 4      | 4      | 4    | 4    | 4    | 4    | 5    | 3    | 4    | 4    | 4    | 4    | 4    |
| 11806  | 3     | 3      | 2      |      |      |      |      |      |      |      |      |      |      |      |

| respid | Q46x4 | Q46x5a | Q46x5b | Q47a | Q47b | Q47c | Q47d | Q47e | Q47f | Q47g | Q47h | Q47i | Q47j | Q47k |
|--------|-------|--------|--------|------|------|------|------|------|------|------|------|------|------|------|
| 11808  | 4     | 4      | 5      |      |      |      |      |      |      |      |      |      |      |      |
| 11810  |       |        |        |      |      |      |      |      |      |      |      |      |      |      |
| 11811  |       |        |        |      |      |      |      |      |      |      |      |      |      |      |
| 11812  | 3     | 4      | 3      | 3    | 3    | 3    | 4    | 4    |      | 2    |      |      |      | 3    |
| 11813  | 4     | 4      | 4      | 4    | 4    | 4    | 3    | 4    | 3    | 4    | 3    | 5    | 5    | 4    |
| 11821  | 4     | 4      | 4      |      |      |      |      |      |      |      |      |      |      |      |
| 11827  |       |        |        |      |      |      |      |      |      |      |      |      |      |      |
| 11831  | 3     | 3      | 3      |      |      |      |      |      |      |      |      |      |      |      |
| 11841  |       |        |        |      |      |      |      |      |      |      |      |      |      |      |
| 11872  | 4     | 5      | 5      |      |      |      |      |      |      |      |      |      |      |      |
| 11898  | 6     | 6      | 6      | 5    | 5    | 5    | 5    | 5    | 5    |      | 3    | 5    | 5    | 5    |
| 11902  | 3     | 3      | 6      | 2    | 2    | 1    | 1    | 2    | 1    | 2    | 2    | 1    | 2    | 2    |
| 11912  | 5     | 4      | 4      |      |      |      |      |      |      |      |      |      |      |      |
| 11926  | 6     | 5      | 5      | 4    | 4    | 5    | 5    | 5    | 5    | 4    | 3    | 4    | 3    | 4    |
| 11928  | 2     | 3      | 2      |      |      |      |      |      |      |      |      |      |      |      |
| 11932  | 5     | 5      | 5      | 3    | 2    | 3    | 3    | 4    | 1    | 2    | 3    | 5    | 4    | 2    |
| 11934  | 5     | 5      | 5      | 5    | 5    | 5    | 5    | 5    | 5    | 4    | 4    | 3    | 4    | 4    |
| 11941  | 4     | 4      | 4      | 2    | 1    | 2    | 2    | 1    | 2    | 1    | 1    | 1    | 2    | 2    |
| 11942  |       |        |        |      |      |      |      |      |      |      |      |      |      |      |
| 11943  | 6     | 6      | 6      | 4    | 4    | 4    | 4    | 4    | 3    | 4    | 3    | 4    | 4    | 3    |
| 11944  | 4     | 4      | 4      |      |      |      |      |      |      |      |      |      |      |      |
| 11955  |       |        |        |      |      |      |      |      |      |      |      |      |      |      |
| 11958  | 6     | 6      | 5      | 0    | 1    | 1    | 4    | 4    | 1    | 0    | 0    | 0    | 3    | 2    |
| 11968  | 4     | 4      | 3      | 3    | 4    | 3    | 4    | 4    | 2    | 3    | 3    | 4    | 3    | 3    |
| 11979  | 3     | 4      | 3      |      |      |      |      |      |      |      |      |      |      |      |
| 11988  |       |        |        |      |      |      |      |      |      |      |      |      |      |      |
| 11999  | 4     | 6      | 6      | 0    | 0    | 0    | 0    | 0    | 0    | 0    | 0    | 0    | 1    | 1    |
| 12002  | 5     | 5      | 5      |      |      |      |      |      |      |      |      |      |      |      |
| 12004  | 6     | 6      | 5      | 2    | 1    | 0    | 0    | 3    | 1    | 1    | 0    | 0    | 2    | 2    |
| 12008  | 5     | 5      | 5      | 5    | 5    | 5    | 5    | 5    | 3    | 4    | 4    | 5    | 5    | 5    |
| 12013  | 5     | 6      | 6      |      |      |      |      |      |      |      |      |      |      |      |
| 12018  | 4     | 4      | 4      | 4    | 2    | 2    | 2    | 4    | 1    | 1    | 2    | 2    | 2    | 2    |

| respid | Q46x4 | Q46x5a | Q46x5b | Q47a | Q47b | Q47c | Q47d | Q47e | Q47f | Q47g | Q47h | Q47i | Q47j | Q47k |
|--------|-------|--------|--------|------|------|------|------|------|------|------|------|------|------|------|
| 12023  | 5     | 4      | 4      |      |      |      |      |      |      |      |      |      |      |      |
| 12027  | 4     | 4      | 4      |      |      |      |      |      |      |      |      |      |      |      |
| 12030  | 4     | 4      | 4      |      |      |      |      |      |      |      |      |      |      |      |
| 12031  | 5     | 5      | 5      |      |      |      |      |      |      |      |      |      |      |      |
| 12036  | 4     | 4      | 4      | 4    | 4    | 3    | 3    | 4    | 3    | 4    | 4    | 4    | 4    | 4    |
| 12037  | 4     | 3      | 3      | 2    | 2    | 2    | 1    | 1    | 2    | 1    | 1    | 1    | 2    | 2    |
| 12038  | 3     | 3      | 3      | 0    | 0    | 0    | 0    | 0    | 0    | 0    | 0    | 0    | 1    | 1    |
| 12039  | 5     | 5      | 5      | 5    | 5    | 5    | 5    | 5    | 3    | 5    | 4    | 5    | 4    | 4    |
| 12045  | 4     | 6      | 6      |      |      |      |      |      |      |      |      |      |      |      |
| 12046  | 4     | 4      | 4      | 0    | 2    | 2    | 0    | 0    | 0    | 0    | 0    | 0    | 1    | 2    |
| 12054  | 4     | 4      | 4      | 3    | 3    | 2    | 2    | 4    | 3    | 3    | 3    | 3    | 2    | 2    |
| 12055  | 4     | 4      | 4      |      |      |      |      |      |      |      |      |      |      |      |
| 12069  | 4     | 6      | 6      | 2    | 2    | 2    | 2    | 4    | 1    | 2    | 3    | 2    | 2    | 3    |
| 12070  | 4     | 3      | 4      | 3    | 4    | 4    | 3    | 4    | 1    | 3    | 3    | 2    | 2    | 3    |
| 12074  | 5     | 4      | 4      |      |      |      |      |      |      |      |      |      |      |      |
| 12075  | 3     | 4      | 4      | 3    | 2    | 2    | 2    | 4    | 2    | 2    | 2    | 2    | 2    | 2    |
| 12078  | 4     | 4      | 4      | 3    | 4    | 3    | 3    | 3    | 2    |      | 2    |      |      |      |
| 12089  | 6     | 6      | 6      |      |      |      |      |      |      |      |      |      |      |      |
| 12091  | 3     | 3      | 4      | 2    |      |      |      |      |      | 2    | 2    |      | 3    | 3    |
| 12092  | 4     | 4      | 4      |      |      |      |      |      |      |      |      |      |      |      |
| 12108  | 2     | 2      | 2      | 1    | 2    | 0    | 5    | 1    | 3    | 1    | 3    | 2    | 5    | 1    |
| 12111  | 4     | 3      | 4      | 3    | 3    | 3    | 3    | 2    | 2    | 3    | 3    | 3    | 3    | 3    |
| 12112  | 4     | 3      | 4      | 3    | 4    | 2    | 4    | 4    |      |      |      |      | 3    | 3    |
| 12126  |       |        |        |      |      |      |      |      |      |      |      |      |      |      |
| 12132  | 6     | 4      | 3      | 3    | 2    | 3    |      |      |      | 4    | 3    | 3    | 3    | 3    |
| 12150  | 4     | 4      | 4      | 3    | 3    | 3    | 3    | 4    | 3    | 3    | 3    | 2    | 3    | 3    |
| 12152  | 4     | 4      | 4      | 4    | 4    | 4    | 4    | 4    | 2    | 4    | 4    | 4    | 4    | 4    |
| 12154  | 5     | 5      | 5      | 3    | 3    | 3    | 3    | 4    | 1    | 2    | 2    | 4    | 3    | 3    |
| 12157  | 6     | 4      | 3      | 2    | 3    | 3    | 3    | 2    | 4    | 3    |      |      |      | 3    |
| 12165  | 5     | 5      | 5      |      |      |      |      |      |      |      |      |      |      |      |
| 12169  | 4     | 4      | 4      | 4    | 4    | 4    | 3    | 5    | 3    | 4    | 4    | 4    | 4    | 4    |
| 12182  | 4     | 4      | 3      | 1    | 2    | 0    | 0    |      |      |      |      |      |      |      |



| respid | Q46x4 | Q46x5a | Q46x5b | Q47a | Q47b | Q47c | Q47d | Q47e | Q47f | Q47g | Q47h | Q47i | Q47j | Q47k |
|--------|-------|--------|--------|------|------|------|------|------|------|------|------|------|------|------|
| 12198  | 5     | 5      | 5      |      |      |      |      |      |      |      |      |      |      |      |
| 12199  |       |        |        |      |      |      |      |      |      |      |      |      |      |      |
| 12202  | 5     | 5      | 5      |      |      |      |      |      |      |      |      |      |      |      |
| 12207  | 5     | 5      | 5      | 5    | 4    | 4    | 5    | 5    | 0    | 4    | 4    | 5    | 5    | 4    |
| 12208  | 4     | 4      | 4      | 4    | 4    | 4    | 4    | 4    | 1    | 4    | 4    | 4    | 4    | 4    |
| 12210  | 6     | 6      | 6      |      |      |      |      |      |      |      |      |      |      |      |
| 12219  | 3     | 4      | 4      |      |      |      |      |      |      |      |      |      |      |      |
| 12224  | 5     | 5      | 5      | 5    | 4    | 5    | 5    | 5    | 1    | 4    | 3    | 5    | 5    | 4    |
| 12230  | 4     | 4      | 4      | 5    | 3    | 5    | 4    | 4    | 3    | 3    | 4    | 4    | 3    | 4    |
| 12238  | 4     | 4      | 4      |      |      |      |      |      |      |      |      |      |      |      |
| 12239  | 5     | 5      | 5      |      |      |      |      |      |      |      |      |      |      |      |
| 12243  | 5     | 5      | 5      | 5    | 5    | 5    | 5    | 5    | 2    | 5    | 5    | 5    | 5    | 5    |
| 12245  | 4     | 5      | 5      | 4    | 5    | 1    | 0    | 0    | 0    | 0    | 0    | 5    | 2    | 4    |
| 12246  | 2     | 3      | 3      |      |      |      |      |      |      |      |      |      |      |      |
| 12247  | 6     | 6      | 6      | 4    | 4    | 4    | 4    | 5    | 3    | 4    | 4    | 4    | 4    | 4    |
| 12248  | 6     | 6      | 6      | 3    |      | 5    | 5    | 5    | 1    | 5    | 5    | 5    | 5    | 4    |
| 12249  | 4     | 5      | 4      |      |      |      |      |      |      |      |      |      |      |      |
| 12258  | 4     | 4      | 4      | 3    | 3    | 3    | 3    | 2    | 2    | 2    | 2    | 2    | 2    | 2    |
| 12265  | 3     | 3      | 2      |      |      |      |      |      |      |      |      |      |      |      |
| 12269  | 5     | 5      | 5      |      |      |      |      |      |      |      |      |      |      |      |
| 12270  | 5     | 5      | 5      | 2    | 4    | 2    |      | 4    | 1    | 2    | 3    | 5    | 4    | 3    |
| 12279  | 5     | 5      | 5      | 3    | 2    | 2    | 3    | 4    | 1    | 3    | 2    | 2    | 2    | 2    |
| 12280  | 5     | 6      | 6      | 3    |      |      |      | 2    |      | 2    | 2    |      | 2    |      |
| 12282  | 4     | 5      | 5      |      |      |      |      |      |      |      |      |      |      |      |
| 12283  | 4     | 4      | 5      |      |      |      |      |      |      |      |      |      |      |      |
| 12287  | 5     | 5      | 5      |      |      |      |      |      |      |      |      |      |      |      |
| 12288  | 5     | 4      | 5      |      |      |      |      |      |      |      |      |      |      |      |
| 12290  | 5     | 5      | 5      |      |      |      |      |      |      |      |      |      |      |      |
| 12292  | 4     | 4      | 3      |      |      |      |      |      |      |      |      |      |      |      |
| 12294  | 6     | 6      | 6      | 0    | 0    | 0    | 0    | 0    | 0    | 0    | 0    | 0    | 1    | 1    |
| 12296  | 5     | 5      | 4      | 0    | 0    | 0    | 0    | 0    | 0    | 0    | 0    | 0    |      |      |
| 12307  | 6     | 6      | 6      |      |      |      |      |      |      |      |      |      |      |      |

| respid | Q46x4 | Q46x5a | Q46x5b | Q47a | Q47b | Q47c | Q47d | Q47e | Q47f | Q47g | Q47h | Q47i | Q47j | Q47k |
|--------|-------|--------|--------|------|------|------|------|------|------|------|------|------|------|------|
| 12309  | 5     | 5      | 5      | 5    | 4    | 5    | 5    | 5    | 3    | 5    | 4    | 5    | 5    | 4    |
| 12312  | 4     | 4      | 4      | 4    | 4    | 4    | 4    | 4    | 3    | 3    | 3    | 4    | 3    | 4    |
| 12317  | 4     | 4      | 4      |      |      |      |      |      |      |      |      |      |      |      |
| 12319  | 5     | 5      | 5      | 4    | 0    | 0    | 0    | 0    | 0    | 0    | 0    | 0    | 1    | 1    |
| 12320  | 5     | 4      | 4      | 1    | 1    | 1    | 5    | 4    | 1    | 4    | 3    | 2    | 2    | 2    |
| 12322  | 4     | 4      | 3      | 3    | 4    | 4    | 4    | 4    | 3    | 4    | 4    | 3    | 3    | 3    |
| 12328  | 3     | 4      | 4      |      |      |      |      |      |      |      |      |      |      |      |
| 12331  | 2     | 2      | 2      | 3    | 2    | 4    | 3    | 2    | 3    | 3    | 2    | 3    | 3    | 3    |
| 12332  | 5     | 5      | 5      | 3    | 3    | 3    | 3    | 3    | 2    | 3    | 3    | 3    | 2    | 2    |
| 12334  | 5     | 5      | 5      |      |      |      |      |      |      |      |      |      |      |      |
| 12337  | 5     | 5      | 5      | 5    | 4    | 5    | 4    | 5    | 1    | 2    | 3    | 4    | 3    | 2    |
| 12338  | 4     | 4      | 5      | 5    | 5    | 5    | 5    | 5    | 3    | 4    | 4    | 5    | 5    | 4    |
| 12342  | 5     | 5      | 5      | 4    | 4    | 4    | 4    | 5    | 3    | 4    | 4    | 4    | 4    | 4    |
| 12349  | 5     | 5      | 5      |      |      |      |      |      |      |      |      |      |      |      |
| 12352  | 5     | 5      | 5      | 3    | 2    | 4    | 4    | 4    | 1    | 3    | 4    | 4    | 3    | 3    |
| 12355  | 5     | 5      | 6      | 5    | 4    | 5    | 4    | 5    | 3    | 4    | 3    | 4    | 4    | 4    |
| 12357  | 5     | 4      | 4      | 3    | 4    | 4    | 3    | 3    | 1    | 2    | 2    | 2    | 3    | 3    |
| 12358  | 5     | 5      | 5      | 4    | 4    | 4    | 4    | 4    | 4    | 4    | 3    | 4    | 4    | 5    |
| 12371  | 3     | 3      | 3      |      |      |      |      |      |      |      |      |      |      |      |
| 12372  | 6     | 6      | 6      |      |      |      |      |      |      |      |      |      |      |      |
| 12373  | 5     | 4      | 4      | 5    | 4    | 4    | 5    | 5    | 5    | 4    | 4    | 5    | 5    | 4    |
| 12379  | 5     | 5      | 5      | 5    | 5    | 5    | 4    | 5    | 2    | 5    | 4    | 5    | 5    | 4    |
| 12381  | 4     | 4      | 4      |      |      |      |      |      |      |      |      |      |      |      |
| 12383  | 6     | 6      | 6      | 0    | 4    | 0    | 0    | 0    | 0    | 0    | 0    | 0    | 1    | 1    |
| 12384  | 5     | 5      | 5      |      |      |      |      |      |      |      |      |      |      |      |
| 12386  | 5     | 4      | 5      | 4    | 4    | 4    | 4    | 5    | 1    | 5    | 4    | 5    | 5    | 5    |
| 12389  |       |        |        |      |      |      |      |      |      |      |      |      |      |      |
| 12392  | 5     | 5      | 5      |      |      |      |      |      |      |      |      |      |      |      |
| 12396  | 4     | 4      | 3      |      |      |      |      |      |      |      |      |      |      |      |
| 12397  | 6     | 6      | 6      |      |      |      |      |      |      |      |      |      |      |      |
| 12399  | 5     | 5      | 5      |      |      |      |      |      |      |      |      |      |      |      |
| 12400  | 4     | 4      | 3      | 1    | 1    | 5    | 3    | 3    | 1    | 4    | 3    | 5    | 4    | 4    |

| respid | Q46x4 | Q46x5a | Q46x5b | Q47a | Q47b | Q47c | Q47d | Q47e | Q47f | Q47g | Q47h | Q47i | Q47j | Q47k |
|--------|-------|--------|--------|------|------|------|------|------|------|------|------|------|------|------|
| 12406  | 5     | 5      | 5      |      |      |      |      |      |      |      |      |      |      |      |
| 12407  | 5     | 5      | 4      |      |      |      |      |      |      |      |      |      |      |      |
| 12410  | 5     | 5      | 5      | 5    | 5    | 5    | 5    | 5    | 2    | 5    | 5    | 5    | 5    | 5    |
| 12413  | 6     | 6      | 6      |      |      |      |      |      |      |      |      |      |      |      |
| 12416  | 5     | 5      | 5      | 4    | 3    | 4    | 3    | 4    | 2    | 1    | 2    | 2    | 1    | 2    |
| 12419  | 5     | 5      | 5      | 4    | 4    | 4    | 4    | 3    | 4    | 3    | 3    | 3    | 4    | 3    |
| 12422  | 2     | 2      | 2      | 4    | 4    | 4    | 4    | 3    | 2    | 4    | 4    | 4    | 4    | 4    |
| 12423  | 4     | 4      | 4      |      |      |      |      |      |      |      |      |      |      |      |
| 12429  | 5     | 5      | 5      |      |      |      |      |      |      |      |      |      |      |      |
| 12434  | 4     | 4      | 4      |      |      |      |      |      |      |      |      |      |      |      |
| 12435  | 5     | 4      | 4      | 5    | 5    | 5    | 5    | 5    | 2    | 5    | 4    | 5    | 5    | 5    |
| 12436  | 3     | 3      | 4      | 3    | 4    | 2    | 3    | 4    | 2    | 2    | 3    | 2    | 4    | 3    |
| 12442  |       |        |        |      |      |      |      |      |      |      |      |      |      |      |
| 12449  | 5     | 5      | 5      |      |      |      |      |      |      |      |      |      |      |      |
| 12451  | 6     | 5      | 5      | 5    | 4    | 5    | 5    | 5    | 4    | 4    | 4    | 4    | 4    | 4    |
| 12456  | 3     | 4      | 4      |      |      |      |      |      |      |      |      |      |      |      |
| 12457  | 5     | 5      | 5      | 4    | 4    | 4    | 4    | 5    | 2    | 4    | 4    | 5    | 4    | 4    |
| 12458  | 5     | 5      | 5      |      |      |      |      |      |      |      |      |      |      |      |
| 12461  | 4     | 4      | 4      |      |      |      |      |      |      |      |      |      |      |      |
| 12462  | 6     | 6      | 6      | 4    | 4    | 4    | 4    | 4    | 1    | 4    | 3    | 5    | 5    | 3    |
| 12463  | 2     | 2      | 2      | 1    | 2    |      |      |      |      |      |      |      |      |      |
| 12466  | 5     | 5      | 5      | 0    | 0    | 0    | 0    | 0    | 0    | 0    | 0    | 0    | 1    | 1    |
| 12470  | 3     | 4      | 4      |      |      |      |      |      |      |      |      |      |      |      |
| 12471  | 3     | 4      | 2      | 2    | 2    | 2    | 2    | 4    | 3    | 4    | 3    | 5    | 4    | 5    |
| 12472  | 6     | 5      | 5      | 5    | 5    | 4    | 5    | 5    | 4    | 4    | 3    | 5    | 2    |      |
| 12478  | 4     | 4      | 4      | 5    | 4    | 4    | 4    | 4    | 4    | 5    | 4    | 4    | 4    | 4    |
| 12479  | 4     | 3      | 4      | 0    | 0    | 0    | 0    | 0    | 0    | 0    | 0    | 0    | 1    | 1    |
| 12481  | 5     | 5      | 5      |      |      |      |      |      |      |      |      |      |      |      |
| 12482  | 4     | 3      | 2      |      |      |      |      |      |      |      |      |      |      |      |
| 12483  |       |        |        |      |      |      |      |      |      |      |      |      |      |      |
| 12496  | 6     | 6      | 4      |      |      |      |      |      |      |      |      |      |      |      |
| 12497  | 6     | 6      | 6      |      |      |      |      |      |      |      |      |      |      |      |

| respid | Q46x4 | Q46x5a | Q46x5b | Q47a | Q47b | Q47c | Q47d | Q47e | Q47f | Q47g | Q47h | Q47i | Q47j | Q47k |
|--------|-------|--------|--------|------|------|------|------|------|------|------|------|------|------|------|
| 12498  | 3     | 3      | 3      |      |      |      |      |      |      |      |      |      |      |      |
| 12500  | 4     | 4      | 3      |      |      |      |      |      |      |      |      |      |      |      |
| 12501  | 4     | 4      | 5      |      |      |      |      |      |      |      |      |      |      |      |
| 12502  | 4     | 4      | 4      |      |      |      |      |      |      |      |      |      |      |      |
| 12503  | 5     | 5      | 5      |      |      |      |      |      |      |      |      |      |      |      |
| 12505  | 4     | 4      | 4      |      |      |      |      |      |      |      |      |      |      |      |
| 12508  | 5     | 4      | 4      |      |      |      |      |      |      |      |      |      |      |      |
| 12509  | 5     | 4      | 4      | 3    | 2    | 2    | 2    | 3    | 2    | 3    | 2    | 2    | 2    | 3    |
| 12510  |       |        |        |      |      |      |      |      |      |      |      |      |      |      |
| 12512  | 4     | 4      | 4      |      |      |      |      |      |      |      |      |      |      |      |
| 12514  | 4     | 4      | 4      |      |      |      |      |      |      |      |      |      |      |      |
| 12515  | 2     | 3      | 2      |      |      |      |      |      |      |      |      |      |      |      |
| 12520  | 5     | 5      | 5      | 5    | 5    | 5    | 5    | 5    | 5    | 5    | 5    | 5    | 5    | 5    |
| 12522  | 6     | 6      | 6      |      |      |      |      |      |      |      |      |      |      |      |
| 12526  | 4     | 3      | 2      | 3    |      |      |      |      |      |      |      |      |      |      |
| 12527  |       |        |        |      |      |      |      |      |      |      |      |      |      |      |
| 12528  | 4     | 4      | 5      |      |      |      |      |      |      |      |      |      |      |      |
| 12530  | 6     | 5      | 6      |      |      |      |      |      |      |      |      |      |      |      |
| 12535  | 4     | 4      | 4      |      |      |      |      |      |      |      |      |      |      |      |
| 12539  | 6     | 6      | 6      |      |      |      |      |      |      |      |      |      |      |      |
| 12541  | 2     | 2      | 3      | 1    | 2    | 3    | 1    | 2    | 3    | 1    | 2    | 2    | 3    | 2    |
| 12542  | 4     | 4      | 4      |      |      |      |      |      |      |      |      |      |      |      |
| 12545  | 6     | 6      | 6      |      |      |      |      |      |      |      |      |      |      |      |
| 12547  | 2     | 4      | 3      |      |      |      |      |      |      |      |      |      |      |      |
| 12549  | 2     | 2      | 2      | 1    | 2    | 2    | 2    | 1    | 2    | 2    | 2    | 2    | 3    | 3    |
| 12550  | 6     | 5      | 5      |      |      |      |      |      |      |      |      |      |      |      |
| 12555  |       |        |        |      |      |      |      |      |      |      |      |      |      |      |
| 12557  | 5     | 6      | 4      |      |      |      |      |      |      |      |      |      |      |      |
| 12559  | 3     | 5      | 4      |      |      |      |      |      |      |      |      |      |      |      |
| 12561  | 5     | 5      | 5      |      |      |      |      |      |      |      |      |      |      |      |
| 12562  | 4     | 2      | 3      |      |      |      |      |      |      |      |      |      |      |      |
| 12563  | 6     | 5      | 5      |      |      |      |      |      |      |      |      |      |      |      |

| respid | Q46x4 | Q46x5a | Q46x5b | Q47a | Q47b | Q47c | Q47d | Q47e | Q47f | Q47g | Q47h | Q47i | Q47j | Q47k |
|--------|-------|--------|--------|------|------|------|------|------|------|------|------|------|------|------|
| 12565  | 5     | 4      | 1      |      |      |      |      |      |      |      |      |      |      |      |
| 12566  |       |        |        |      |      |      |      |      |      |      |      |      |      |      |
| 12570  |       |        |        |      |      |      |      |      |      |      |      |      |      |      |
| 12571  | 6     | 6      | 6      |      |      |      |      |      |      |      |      |      |      |      |
| 12572  | 4     | 4      | 3      |      |      |      |      |      |      |      |      |      |      |      |
| 12578  |       |        |        |      |      |      |      |      |      |      |      |      |      |      |
| 12579  | 3     | 2      | 4      | 4    | 4    | 3    | 3    | 4    | 2    | 4    | 4    | 3    | 4    | 4    |
| 12581  | 6     | 6      | 6      |      |      |      |      |      |      |      |      |      |      |      |
| 12582  | 6     | 6      | 6      |      |      |      |      |      |      |      |      |      |      |      |
| 12585  | 4     | 5      | 5      |      |      |      |      |      |      |      |      |      |      |      |
| 12586  | 5     | 5      | 5      |      |      |      |      |      |      |      |      |      |      |      |
| 12588  | 4     | 5      | 4      |      |      |      |      |      |      |      |      |      |      |      |
| 12589  | 5     | 5      | 4      |      |      |      |      |      |      |      |      |      |      |      |
| 12590  | 5     | 5      | 5      |      |      |      |      |      |      |      |      |      |      |      |
| 12591  | 3     | 3      | 3      |      |      |      |      |      |      |      |      |      |      |      |
| 12593  | 2     | 2      | 2      | 3    | 3    | 3    | 3    | 3    | 1    | 2    | 2    | 3    | 3    | 3    |
| 12594  | 4     | 4      | 3      |      |      |      |      |      |      |      |      |      |      |      |
| 12599  | 5     | 5      | 5      |      |      |      |      |      |      |      |      |      |      |      |
| 12600  | 5     | 5      | 4      |      |      |      |      |      |      |      |      |      |      |      |
| 12602  | 4     | 4      | 4      |      |      |      |      |      |      |      |      |      |      |      |
| 12606  | 2     | 1      | 1      |      |      |      |      |      |      |      |      |      |      |      |
| 12607  |       |        |        |      |      |      |      |      |      |      |      |      |      |      |
| 12608  |       |        |        |      |      |      |      |      |      |      |      |      |      |      |
| 12610  | 3     | 3      | 2      |      |      |      |      |      |      |      |      |      |      |      |
| 12611  | 5     | 5      | 5      | 5    | 5    | 5    | 5    | 5    |      | 5    | 4    | 5    | 5    | 4    |
| 12613  | 4     | 4      | 3      |      |      |      |      |      |      |      |      |      |      |      |
| 12616  | 5     | 5      | 5      |      |      |      |      |      |      |      |      |      |      |      |
| 12617  | 5     | 5      | 5      | 0    | 0    | 0    | 0    | 0    | 0    | 0    | 0    | 0    | 4    | 1    |
| 12619  | 6     | 6      | 6      |      |      |      |      |      |      |      |      |      |      |      |
| 12622  |       |        |        |      |      |      |      |      |      |      |      |      |      |      |
| 12628  | 5     | 5      | 5      |      |      |      |      |      |      |      |      |      |      |      |
| 12631  | 6     | 6      | 6      |      |      |      |      |      |      |      |      |      |      |      |

| respid | Q46x4 | Q46x5a | Q46x5b | Q47a | Q47b | Q47c | Q47d | Q47e | Q47f | Q47g | Q47h | Q47i | Q47j | Q47k |
|--------|-------|--------|--------|------|------|------|------|------|------|------|------|------|------|------|
| 12635  | 3     | 3      | 2      |      |      |      |      |      |      |      |      |      |      |      |
| 12638  | 6     | 6      | 6      |      |      |      |      |      |      |      |      |      |      |      |
| 12639  | 5     | 5      | 5      |      |      |      |      |      |      |      |      |      |      |      |
| 12640  | 5     | 5      | 5      |      |      |      |      |      |      |      |      |      |      |      |
| 12643  | 4     | 4      | 4      |      |      |      |      |      |      |      |      |      |      |      |
| 12646  | 4     | 4      | 4      | 2    | 2    | 2    | 4    | 5    | 1    | 1    | 2    | 5    | 1    | 2    |
| 12648  | 3     | 3      | 2      |      |      |      |      |      |      |      |      |      |      |      |
| 12650  | 3     | 4      | 3      |      |      |      |      |      |      |      |      |      |      |      |
| 12651  | 6     | 6      | 6      |      |      |      |      |      |      |      |      |      |      |      |
| 12658  | 4     | 4      | 4      |      |      |      |      |      |      |      |      |      |      |      |
| 12662  | 3     | 3      | 3      |      |      |      |      |      |      |      |      |      |      |      |
| 12663  | 2     | 3      | 3      |      |      |      |      |      |      |      |      |      |      |      |
| 12664  | 4     | 4      | 4      | 2    | 1    | 2    | 2    | 2    | 1    | 1    | 1    | 2    | 2    | 2    |
| 12669  | 4     | 4      | 4      |      |      |      |      |      |      |      |      |      |      |      |
| 12670  | 4     | 5      | 5      |      |      |      |      |      |      |      |      |      |      |      |
| 12673  |       |        |        |      |      |      |      |      |      |      |      |      |      |      |
| 12675  | 5     | 4      | 4      |      |      |      |      |      |      |      |      |      |      |      |
| 12677  | 5     | 4      | 4      |      |      |      |      |      |      |      |      |      |      |      |
| 12679  | 5     | 4      | 4      |      |      |      |      |      |      |      |      |      |      |      |
| 12682  | 3     | 4      | 2      | 2    | 4    | 3    | 3    | 2    | 1    | 3    | 3    | 3    | 3    | 3    |
| 12696  | 4     | 4      | 4      |      |      |      |      |      |      |      |      |      |      |      |
| 12697  | 4     | 4      | 4      |      |      |      |      |      |      |      |      |      |      |      |
| 12699  | 5     | 5      | 4      |      |      |      |      |      |      |      |      |      |      |      |
| 12700  | 4     | 5      | 5      |      |      |      |      |      |      |      |      |      |      |      |
| 12701  | 3     | 3      | 3      |      |      |      |      |      |      |      |      |      |      |      |
| 12702  | 4     | 5      | 5      |      |      |      |      |      |      |      |      |      |      |      |
| 12704  | 4     | 4      | 4      | 2    | 2    | 2    | 2    | 3    | 2    | 2    | 2    | 2    | 2    | 2    |
| 12705  | 6     | 6      | 6      |      |      |      |      |      |      |      |      |      |      |      |
| 12709  | 6     | 6      | 6      | 5    | 5    | 5    | 5    | 5    | 2    | 5    | 5    | 5    | 5    | 5    |
| 12710  | 5     | 4      | 4      |      |      |      |      |      |      |      |      |      |      |      |
| 12713  | 3     | 4      | 3      |      |      |      |      |      |      |      |      |      |      |      |
| 12716  | 3     | 4      | 3      |      |      |      |      |      |      |      |      |      |      |      |

| respid | Q46x4 | Q46x5a | Q46x5b | Q47a | Q47b | Q47c | Q47d | Q47e | Q47f | Q47g | Q47h | Q47i | Q47j | Q47k |   |
|--------|-------|--------|--------|------|------|------|------|------|------|------|------|------|------|------|---|
| 12719  | 5     | 4      | 4      |      |      |      | 5    |      | 5    | 2    | 4    | 3    | 5    | 3    | 4 |
| 12720  | 4     | 4      | 5      |      |      |      |      |      |      |      |      |      |      |      |   |
| 12723  | 4     | 5      | 5      |      |      |      |      |      |      |      |      |      |      |      |   |
| 12726  | 4     | 5      | 5      |      |      |      |      |      |      |      |      |      |      |      |   |
| 12728  | 3     | 3      | 3      |      |      |      |      |      |      |      |      |      |      |      |   |
| 12729  | 4     | 5      | 4      |      |      |      |      |      |      |      |      |      |      |      |   |
| 12731  | 4     | 4      | 4      |      |      |      |      |      |      |      |      |      |      |      |   |
| 12732  | 4     | 4      | 4      |      |      |      |      |      |      |      |      |      |      |      |   |
| 12733  | 4     | 4      | 5      |      |      |      |      |      |      |      |      |      |      |      |   |
| 12736  | 5     | 5      | 5      | 4    | 4    | 4    | 4    | 4    | 1    | 2    | 2    | 1    | 1    | 1    | 1 |
| 12737  | 4     | 5      | 5      |      |      |      |      |      |      |      |      |      |      |      |   |
| 12739  | 3     | 3      | 3      | 4    |      |      |      |      |      |      |      |      |      |      |   |
| 12742  | 4     | 4      | 4      |      |      |      |      |      |      |      |      |      |      |      |   |
| 12743  | 1     | 2      | 2      | 2    | 2    | 2    | 2    | 1    | 1    | 1    | 1    | 1    | 1    | 1    | 2 |
| 12744  | 4     | 3      | 3      |      |      |      |      |      |      |      |      |      |      |      |   |
| 12747  | 3     | 3      | 3      |      |      |      |      |      |      |      |      |      |      |      |   |
| 12751  | 5     | 5      | 5      | 4    | 4    | 5    | 5    | 5    | 2    | 4    | 3    | 5    | 5    | 5    | 4 |
| 12754  | 5     | 5      | 5      |      |      |      |      |      |      |      |      |      |      |      |   |
| 12756  | 3     | 3      | 3      |      |      |      |      |      |      |      |      |      |      |      |   |
| 12757  | 4     | 4      | 4      |      |      |      |      |      |      |      |      |      |      |      |   |
| 12760  | 4     | 4      | 4      |      |      |      |      |      |      |      |      |      |      |      |   |
| 12761  | 4     | 4      | 5      |      |      |      |      |      |      |      |      |      |      |      |   |
| 12762  | 5     | 4      | 4      |      |      |      |      |      |      |      |      |      |      |      |   |
| 12766  | 5     | 5      | 5      | 4    | 4    | 4    | 4    | 5    | 1    | 4    | 4    | 4    | 4    | 4    | 4 |
| 12769  | 5     | 5      | 5      | 3    | 4    | 4    | 4    | 4    | 5    | 2    | 4    | 3    | 4    | 4    | 4 |
| 12770  | 4     | 3      | 3      |      |      |      |      | 2    | 4    | 4    | 4    | 3    |      | 3    |   |
| 12773  | 2     | 2      | 2      |      |      |      |      |      |      |      |      |      |      |      |   |
| 12780  | 5     | 5      | 4      | 0    | 0    | 0    | 0    | 0    | 0    | 0    | 0    | 1    | 0    | 1    | 1 |
| 12789  | 6     | 6      | 6      |      |      |      |      |      |      |      |      |      |      |      |   |
| 12792  | 5     | 4      | 4      | 3    | 2    | 2    | 3    | 1    | 1    | 1    | 1    | 1    | 1    | 1    | 2 |
| 12795  | 4     | 4      | 4      | 4    | 4    | 4    | 4    | 4    | 5    | 2    | 4    | 3    | 4    | 4    | 4 |
| 12804  | 1     | 2      | 1      | 0    | 3    | 1    | 2    | 2    | 2    | 1    | 3    | 2    | 5    | 3    | 3 |

| respid | Q46x4 | Q46x5a | Q46x5b | Q47a | Q47b | Q47c | Q47d | Q47e | Q47f | Q47g | Q47h | Q47i | Q47j | Q47k |
|--------|-------|--------|--------|------|------|------|------|------|------|------|------|------|------|------|
| 12811  | 4     | 4      | 4      |      |      |      |      |      |      |      |      |      |      |      |
| 12813  | 6     | 6      | 6      |      |      |      |      |      |      |      |      |      |      |      |
| 12814  | 4     | 4      | 4      |      |      |      |      |      |      |      |      |      |      |      |
| 12815  | 5     | 5      | 5      |      |      |      |      |      |      |      |      |      |      |      |
| 12816  | 5     | 5      | 5      | 5    | 5    | 5    | 5    | 5    | 2    | 4    | 4    | 5    | 5    | 4    |
| 12817  | 5     | 5      | 5      |      |      |      |      |      |      |      |      |      |      |      |
| 12818  | 6     | 6      | 6      |      |      |      |      |      |      |      |      |      |      |      |
| 12819  | 5     | 5      | 5      | 5    | 4    | 5    | 4    | 5    | 1    | 5    | 4    | 3    | 5    | 5    |
| 12820  | 5     | 5      | 5      |      |      |      |      |      |      |      |      |      |      |      |
| 12821  | 6     | 6      | 6      | 4    | 4    | 5    | 5    | 5    | 0    | 4    | 5    | 5    | 5    | 4    |
| 12824  | 5     | 5      | 5      |      |      |      |      |      |      |      |      |      |      |      |
| 12827  | 4     | 6      | 6      | 4    | 4    | 4    | 4    | 4    | 3    | 5    | 4    | 4    | 4    | 4    |
| 12836  | 2     | 2      | 1      | 2    | 2    | 2    | 2    | 2    | 1    |      | 2    | 2    | 2    | 2    |
| 12837  | 5     | 5      | 5      | 3    | 2    | 3    | 2    | 4    | 1    | 5    | 3    | 5    | 5    | 4    |
| 12838  | 5     | 5      | 5      |      |      |      |      |      |      |      |      |      |      |      |
| 12845  | 6     | 6      | 6      |      |      |      |      |      |      |      |      |      |      |      |
| 12847  | 5     | 1      | 3      | 3    | 3    | 4    | 3    | 4    | 2    | 3    | 3    | 4    | 3    | 4    |
| 12849  | 1     | 2      | 1      |      |      |      |      |      |      |      |      |      |      |      |
| 12850  | 3     | 4      | 4      |      |      |      |      |      |      |      |      |      |      |      |
| 12852  | 5     | 5      | 5      | 5    | 5    | 5    | 5    | 5    | 2    | 5    | 5    | 5    |      | 3    |
| 12853  | 2     | 1      | 1      |      |      |      |      |      |      |      |      |      |      |      |
| 12854  | 5     | 5      | 5      | 4    | 4    | 5    | 4    | 4    | 2    | 3    | 3    | 4    | 3    | 3    |
| 12860  | 5     | 5      | 5      | 5    | 5    | 5    | 5    | 5    | 1    | 5    | 4    | 4    | 5    | 4    |
| 12861  | 5     | 5      | 5      | 5    | 5    | 5    | 5    | 5    | 2    | 5    | 4    | 5    | 5    | 4    |
| 12863  | 5     | 5      | 5      |      |      |      |      |      |      |      |      |      |      |      |
| 12865  | 6     | 6      | 6      |      |      |      |      |      |      |      |      |      |      |      |
| 12870  | 5     | 5      | 5      |      |      |      |      |      |      |      |      |      |      |      |
| 12871  | 6     | 6      | 6      | 5    | 5    | 5    |      | 5    | 3    | 5    | 5    | 5    |      | 5    |
| 12873  | 4     | 5      | 4      | 2    | 1    | 2    | 3    | 4    | 1    | 3    | 3    | 5    | 5    | 3    |
| 12877  | 5     | 5      | 5      | 4    | 5    | 5    | 5    | 5    |      |      |      |      |      |      |
| 12880  | 5     | 4      | 3      |      |      |      |      |      |      |      |      |      |      |      |
| 12881  | 2     | 3      | 3      |      |      |      |      |      |      |      |      |      |      |      |



| respid | Q46x4 | Q46x5a | Q46x5b | Q47a | Q47b | Q47c | Q47d | Q47e | Q47f | Q47g | Q47h | Q47i | Q47j | Q47k |
|--------|-------|--------|--------|------|------|------|------|------|------|------|------|------|------|------|
| 12882  | 5     | 5      | 5      |      |      |      |      |      |      |      |      |      |      |      |
| 12883  | 5     | 4      | 5      |      |      |      |      |      |      |      |      |      |      |      |
| 12885  | 6     | 6      | 6      | 5    | 5    | 5    | 5    | 4    | 1    | 3    | 3    | 5    | 5    | 5    |
| 12887  | 6     | 6      | 6      |      |      |      |      |      |      |      |      |      |      |      |
| 12889  | 5     | 4      | 5      |      |      |      |      |      |      |      |      |      |      |      |
| 12890  | 5     | 4      | 4      | 5    | 5    | 5    | 5    | 5    | 4    | 5    | 4    | 5    | 5    | 5    |
| 12891  | 5     | 5      | 4      |      |      |      |      |      |      |      |      |      |      |      |
| 12892  | 4     | 4      | 4      |      |      |      |      |      |      |      |      |      |      |      |
| 12893  | 6     | 6      | 6      | 0    | 3    | 3    | 3    | 5    | 0    | 0    | 0    | 3    | 3    | 3    |
| 12895  | 4     | 4      | 4      |      |      |      |      |      |      |      |      |      |      |      |
| 12898  | 5     | 5      | 5      | 5    | 5    | 5    | 5    | 5    | 3    | 5    | 4    | 5    | 5    | 4    |
| 12907  | 4     | 4      | 4      | 4    | 2    | 4    |      |      | 4    |      |      | 3    |      |      |
| 12908  | 5     | 4      | 4      |      |      |      |      |      |      |      |      |      |      |      |
| 12909  |       |        |        |      |      |      |      |      |      |      |      |      |      |      |
| 12914  | 5     | 5      | 5      | 0    | 0    | 0    | 0    | 0    | 0    | 0    | 0    | 0    | 5    | 3    |
| 12915  | 6     | 6      | 6      |      |      |      |      |      |      |      |      |      |      |      |
| 12916  |       |        |        |      |      |      |      |      |      |      |      |      |      |      |
| 12921  | 4     | 4      | 4      |      |      |      |      |      |      |      |      |      |      |      |
| 12922  | 5     | 5      | 5      |      |      |      |      |      |      |      |      |      |      |      |
| 12923  | 4     | 5      | 4      | 3    | 3    |      |      |      |      |      |      |      |      |      |
| 12926  | 4     | 4      | 4      | 3    | 3    | 3    | 3    | 4    | 1    | 3    | 3    | 4    | 4    | 3    |
| 12927  | 5     | 5      | 5      |      |      |      |      |      |      |      |      |      |      |      |
| 12932  | 5     | 5      | 5      | 5    | 5    | 5    | 5    | 5    | 0    | 0    | 0    | 5    | 5    | 5    |
| 12936  | 6     | 6      | 6      | 3    | 3    | 3    | 3    | 3    | 2    | 2    | 2    | 5    | 3    | 3    |
| 12937  | 4     | 6      | 5      |      |      |      |      |      |      |      |      |      |      |      |
| 12938  | 3     | 4      | 4      |      |      |      |      |      |      |      |      |      |      |      |
| 12939  | 5     | 5      | 5      |      |      |      |      |      |      |      |      |      |      |      |
| 12940  | 3     | 4      | 4      |      |      |      |      |      |      |      |      |      |      |      |
| 12945  | 4     | 4      | 5      |      |      |      |      |      |      |      |      |      |      |      |
| 12946  | 5     | 4      | 4      |      |      |      |      |      |      |      |      |      |      |      |
| 12947  | 4     | 4      | 4      | 2    | 2    | 4    | 4    | 4    | 2    | 4    | 4    | 4    | 4    | 4    |
| 12948  | 3     | 2      | 2      | 2    | 2    | 2    | 2    | 4    | 3    | 2    | 2    | 2    | 2    | 2    |

| respid | Q46x4 | Q46x5a | Q46x5b | Q47a | Q47b | Q47c | Q47d | Q47e | Q47f | Q47g | Q47h | Q47i | Q47j | Q47k |
|--------|-------|--------|--------|------|------|------|------|------|------|------|------|------|------|------|
| 12951  | 4     | 4      | 5      |      |      |      |      |      |      |      |      |      |      |      |
| 12952  | 6     | 6      | 6      |      |      |      |      |      |      |      |      |      |      |      |
| 12954  | 6     | 6      | 4      |      |      |      |      |      |      |      |      |      |      |      |
| 12960  | 5     | 6      | 5      |      |      |      |      |      |      |      |      |      |      |      |
| 12961  | 6     | 5      | 5      |      |      |      |      |      |      |      |      |      |      |      |
| 12962  | 5     | 5      | 5      |      |      |      |      |      |      |      |      |      |      |      |
| 12963  | 6     | 6      | 6      | 4    | 4    | 4    | 4    | 4    | 1    | 4    | 4    | 5    | 5    | 4    |
| 12964  | 5     | 5      | 5      |      |      |      |      |      |      |      |      |      |      |      |
| 12966  | 4     | 3      | 3      | 0    | 1    | 0    | 0    | 0    | 0    | 0    | 0    | 0    | 1    | 1    |
| 12967  | 5     | 5      | 5      | 1    | 1    | 1    | 2    | 1    | 1    | 2    | 2    | 2    | 3    | 3    |
| 12969  | 4     | 4      | 4      | 5    | 5    | 5    | 5    | 5    | 1    | 4    | 3    | 5    | 4    | 5    |
| 12970  | 4     | 4      | 4      | 4    | 4    | 5    | 5    | 5    | 1    | 4    | 4    | 5    | 4    | 4    |
| 12974  | 3     | 3      | 3      | 2    | 2    | 2    | 2    | 3    | 2    | 2    | 2    | 2    | 2    | 2    |
| 12979  |       |        |        |      |      |      |      |      |      |      |      |      |      |      |
| 12980  | 5     | 4      | 4      | 5    | 4    | 4    | 4    | 5    | 5    | 4    | 4    | 4    | 4    | 4    |
| 12983  | 5     | 5      | 5      |      |      |      |      |      |      |      |      |      |      |      |
| 12988  | 5     | 5      | 4      |      |      |      |      |      |      |      |      |      |      |      |
| 12994  | 3     | 4      | 4      |      |      |      |      |      |      |      |      |      |      |      |
| 12995  | 6     | 6      | 6      |      |      |      |      |      |      |      |      |      |      |      |
| 12996  | 6     | 6      | 6      |      |      |      |      |      |      |      |      |      |      |      |
| 12998  | 5     | 5      | 5      |      |      |      |      |      |      |      |      |      |      |      |
| 12999  | 4     | 5      | 5      |      |      |      |      |      |      |      |      |      |      |      |
| 13001  | 4     | 4      | 4      | 4    | 4    | 4    | 4    | 5    | 1    | 4    | 4    | 4    | 4    | 4    |
| 13005  | 4     | 4      | 4      |      |      |      |      |      |      |      |      |      |      |      |
| 13006  | 6     | 6      | 6      |      |      |      |      |      |      |      |      |      |      |      |
| 13007  | 5     | 4      | 4      |      |      |      |      |      |      |      |      |      |      |      |
| 13011  | 6     | 6      | 6      |      |      |      |      |      |      |      |      |      |      |      |
| 13012  | 6     | 6      | 6      |      |      |      |      |      |      |      |      |      |      |      |
| 13013  | 3     | 2      | 3      |      |      |      |      |      |      |      |      |      |      |      |
| 13016  | 5     | 4      | 5      | 5    | 5    | 5    | 4    | 5    | 4    | 4    | 4    | 5    | 4    | 5    |
| 13018  | 5     | 5      | 5      | 3    | 3    | 4    | 2    | 2    | 2    | 2    | 3    | 3    | 4    | 3    |
| 13020  |       |        |        |      |      |      |      |      |      |      |      |      |      |      |

| respid | Q46x4 | Q46x5a | Q46x5b | Q47a | Q47b | Q47c | Q47d | Q47e | Q47f | Q47g | Q47h | Q47i | Q47j | Q47k |   |
|--------|-------|--------|--------|------|------|------|------|------|------|------|------|------|------|------|---|
| 13024  | 6     | 6      | 6      |      | 5    | 4    |      |      |      |      |      |      |      |      |   |
| 13025  | 5     | 5      | 5      |      |      |      |      |      |      |      |      |      |      |      |   |
| 13027  | 6     | 6      | 6      |      |      |      |      |      |      |      |      |      |      |      |   |
| 13031  | 5     | 5      | 5      |      | 0    | 2    | 3    | 4    | 5    | 0    | 1    | 2    | 2    | 3    | 2 |
| 13032  | 4     | 4      | 4      |      | 2    | 2    | 2    | 2    | 3    | 2    | 2    | 2    | 3    | 2    | 2 |
| 13034  | 6     | 6      | 6      |      |      |      |      |      |      |      |      |      |      |      |   |
| 13036  | 5     | 3      | 3      |      |      |      |      |      |      |      |      |      |      |      |   |
| 13037  | 5     | 5      | 5      |      |      |      |      |      |      |      |      |      |      |      |   |
| 13038  | 2     | 3      | 3      |      |      |      |      |      |      |      |      |      |      |      |   |
| 13039  | 6     | 6      | 6      |      |      |      |      |      |      |      |      |      |      |      |   |
| 13040  | 4     | 4      | 4      |      |      |      |      |      |      |      |      |      |      |      |   |
| 13041  | 4     | 5      | 5      |      |      |      |      |      |      |      |      |      |      |      |   |
| 13045  | 2     | 3      | 3      |      |      |      |      |      |      |      |      |      |      |      |   |
| 13046  | 6     | 6      | 6      |      |      |      |      |      |      |      |      |      |      |      |   |
| 13048  | 6     | 6      | 6      |      |      |      |      |      |      |      |      |      |      |      |   |
| 13051  | 4     | 5      | 3      |      |      |      |      |      |      |      |      |      |      |      |   |
| 13053  | 5     | 5      | 5      |      |      |      |      |      |      |      |      |      |      |      |   |
| 13055  | 3     | 3      | 3      |      |      |      |      |      |      |      |      |      |      |      |   |
| 13059  | 5     | 5      | 5      |      |      |      |      |      |      |      |      |      |      |      |   |
| 13068  | 5     | 4      | 4      |      |      |      |      |      |      |      |      |      |      |      |   |
| 13069  | 6     | 6      | 6      |      |      |      |      |      |      |      |      |      |      |      |   |
| 13076  | 5     | 3      | 4      |      |      |      |      |      |      |      |      |      |      |      |   |
| 13081  | 5     | 5      | 5      |      |      |      |      |      |      |      |      |      |      |      |   |
| 13082  | 4     | 4      | 4      |      |      |      |      |      |      |      |      |      |      |      |   |
| 13084  | 5     | 4      | 4      |      |      |      |      |      |      |      |      |      |      |      |   |
| 13085  | 6     | 6      | 6      |      | 2    | 2    | 2    | 2    | 3    | 1    | 2    | 1    | 2    | 2    | 2 |
| 13086  | 5     | 5      | 5      |      |      |      |      |      |      |      |      |      |      |      |   |
| 13093  | 4     | 4      | 4      |      |      |      |      |      |      |      |      |      |      |      |   |
| 13094  | 3     | 3      | 3      |      |      |      |      |      |      |      |      |      |      |      |   |
| 13097  | 5     | 5      | 5      |      |      |      |      |      |      |      |      |      |      |      |   |
| 13098  | 6     | 6      | 6      |      |      |      |      |      |      |      |      |      |      |      |   |
| 13099  | 4     | 4      | 4      |      |      |      |      |      |      |      |      |      |      |      |   |

| respid | Q46x4 | Q46x5a | Q46x5b | Q47a | Q47b | Q47c | Q47d | Q47e | Q47f | Q47g | Q47h | Q47i | Q47j | Q47k |
|--------|-------|--------|--------|------|------|------|------|------|------|------|------|------|------|------|
| 13100  | 5     | 6      | 6      |      |      |      |      |      |      |      |      |      |      |      |
| 13101  |       |        |        |      |      |      |      |      |      |      |      |      |      |      |
| 13103  |       |        |        |      |      |      |      |      |      |      |      |      |      |      |
| 13105  | 5     | 4      | 4      |      |      |      |      |      |      |      |      |      |      |      |
| 13106  | 4     | 4      | 4      |      |      |      |      |      |      |      |      |      |      |      |
| 13107  | 4     | 5      | 5      |      |      |      |      |      |      |      |      |      |      |      |
| 13110  | 4     | 5      | 5      |      |      |      |      |      |      |      |      |      |      |      |
| 13118  | 5     | 4      | 4      |      |      |      |      |      |      |      |      |      |      |      |
| 13120  | 4     | 4      | 4      |      |      |      |      |      |      |      |      |      |      |      |
| 13130  | 5     | 4      | 4      | 4    | 5    | 5    | 4    | 5    | 4    | 4    | 4    | 4    | 4    | 4    |
| 13133  | 5     | 5      | 5      |      |      |      |      |      |      |      |      |      |      |      |
| 13134  | 4     | 4      | 4      |      | 4    |      | 4    | 4    | 3    | 3    | 3    | 4    | 1    | 3    |
| 13139  | 5     | 5      | 6      |      |      |      |      |      |      |      |      |      |      |      |
| 13142  | 6     | 6      | 6      |      |      |      |      |      |      |      |      |      |      |      |
| 13143  | 5     | 5      | 5      |      |      |      |      |      |      |      |      |      |      |      |
| 13145  | 6     | 6      | 6      |      |      |      |      |      |      |      |      |      |      |      |
| 13148  | 5     | 5      | 4      | 4    | 4    | 4    | 4    | 5    | 1    | 5    | 5    | 4    | 3    | 4    |
| 13149  | 5     | 5      | 5      | 5    | 4    | 5    | 5    | 5    | 3    | 5    | 4    | 5    | 5    | 4    |
| 13151  | 3     | 4      | 4      |      |      |      |      |      |      |      |      |      |      |      |
| 13153  | 5     | 5      | 5      |      |      |      |      |      |      |      |      |      |      |      |
| 13158  | 6     | 6      | 6      |      |      |      |      |      |      |      |      |      |      |      |
| 13160  | 3     | 3      | 3      |      |      |      |      |      |      |      |      |      |      |      |
| 13162  | 4     | 4      | 3      |      |      |      |      |      |      |      |      |      |      |      |
| 13169  | 5     | 5      | 5      | 0    | 3    | 3    | 3    | 5    | 1    | 2    | 3    | 2    | 4    | 4    |
| 13172  | 5     | 4      | 5      |      |      |      |      |      |      |      |      |      |      |      |
| 13173  | 5     | 5      | 5      |      |      |      |      |      |      |      |      |      |      |      |
| 13176  | 5     | 5      | 5      |      |      |      |      |      |      |      |      |      |      |      |
| 13179  | 4     | 6      | 6      |      |      |      |      |      |      |      |      |      |      |      |
| 13184  | 5     | 4      | 5      |      |      |      |      |      |      |      |      |      |      |      |
| 13185  | 5     | 4      | 4      |      |      |      |      |      |      |      |      |      |      |      |
| 13186  | 5     | 5      | 5      |      |      |      |      |      |      |      |      |      |      |      |
| 13188  | 5     | 4      | 4      |      |      |      |      |      |      |      |      |      |      |      |

| respid | Q46x4 | Q46x5a | Q46x5b | Q47a | Q47b | Q47c | Q47d | Q47e | Q47f | Q47g | Q47h | Q47i | Q47j | Q47k |
|--------|-------|--------|--------|------|------|------|------|------|------|------|------|------|------|------|
| 13190  | 4     | 5      | 5      |      |      |      |      |      |      |      |      |      |      |      |
| 13192  | 5     | 5      | 5      |      |      |      |      |      |      |      |      |      |      |      |
| 13193  |       |        |        |      |      |      |      |      |      |      |      |      |      |      |
| 13201  | 4     | 4      | 4      |      |      |      |      |      |      |      |      |      |      |      |
| 13207  | 5     | 5      | 5      |      |      |      |      |      |      |      |      |      |      |      |
| 13208  |       |        |        |      |      |      |      |      |      |      |      |      |      |      |
| 13209  | 3     | 3      | 4      | 0    | 1    | 1    | 2    | 1    | 1    | 1    | 1    | 1    | 2    | 3    |
| 13212  | 5     | 6      | 6      |      |      |      |      |      |      |      |      |      |      |      |
| 13215  | 6     | 6      | 6      |      |      |      |      |      |      |      |      |      |      |      |
| 13218  | 4     | 5      | 5      |      |      |      |      |      |      |      |      |      |      |      |
| 13219  | 5     | 5      | 5      | 5    | 5    | 5    | 5    | 5    | 4    | 5    | 4    | 5    | 5    | 5    |
| 13224  | 4     | 4      | 4      |      |      |      |      |      |      |      |      |      |      |      |
| 13225  | 5     | 5      | 5      |      |      |      |      |      |      |      |      |      |      |      |
| 13226  | 6     | 6      | 6      |      |      |      |      |      |      |      |      |      |      |      |
| 13232  | 5     | 5      | 5      |      |      |      |      |      |      |      |      |      |      |      |
| 13237  | 4     | 3      | 5      |      |      |      |      |      |      |      |      |      |      |      |
| 13239  | 5     | 5      | 5      |      |      |      |      |      |      |      |      |      |      |      |
| 13241  | 6     | 6      | 6      |      |      |      |      |      |      |      |      |      |      |      |
| 13243  | 3     | 3      | 2      |      |      |      |      |      |      |      |      |      |      |      |
| 13247  | 5     | 5      | 5      |      |      |      |      |      |      |      |      |      |      |      |
| 13248  | 5     | 5      | 5      |      |      |      |      |      |      |      |      |      |      |      |
| 13251  | 5     | 5      | 5      |      |      |      |      |      |      |      |      |      |      |      |
| 13256  | 5     | 5      | 5      |      |      |      |      |      |      |      |      |      |      |      |
| 13260  | 5     | 5      | 5      | 3    | 3    | 3    | 3    | 3    | 1    | 2    | 2    | 3    | 3    | 2    |
| 13261  | 4     | 4      | 4      |      |      |      |      |      |      |      |      |      |      |      |
| 13264  | 5     | 5      | 5      |      |      |      |      |      |      |      |      |      |      |      |
| 13273  | 6     | 6      | 6      |      |      |      |      |      |      |      |      |      |      |      |
| 13274  | 5     | 5      | 5      |      |      |      |      |      |      |      |      |      |      |      |
| 13276  | 4     | 3      | 4      |      |      |      |      |      |      |      |      |      |      |      |
| 13278  |       |        |        |      |      |      |      |      |      |      |      |      |      |      |
| 13279  | 5     | 5      | 5      |      |      |      |      |      |      |      |      |      |      |      |
| 13282  | 4     | 5      | 5      |      |      |      |      |      |      |      |      |      |      |      |

| respid | Q46x4 | Q46x5a | Q46x5b | Q47a | Q47b | Q47c | Q47d | Q47e | Q47f | Q47g | Q47h | Q47i | Q47j | Q47k |   |
|--------|-------|--------|--------|------|------|------|------|------|------|------|------|------|------|------|---|
| 13283  | 4     | 4      | 3      |      | 2    | 4    | 3    | 2    | 2    | 1    | 2    | 1    | 2    | 2    | 2 |
| 13285  | 6     | 6      | 6      |      |      |      |      |      |      |      |      |      |      |      |   |
| 13286  | 4     | 5      | 4      |      |      |      |      |      |      |      |      |      |      |      |   |
| 13299  | 5     | 5      | 5      |      |      |      |      |      |      |      |      |      |      |      |   |
| 13300  | 3     | 3      | 3      |      |      |      |      |      |      |      |      |      |      |      |   |
| 13301  |       |        |        |      |      |      |      |      |      |      |      |      |      |      |   |
| 13303  | 3     | 3      | 3      |      |      |      |      |      |      |      |      |      |      |      |   |
| 13304  | 5     | 6      | 6      |      |      |      |      |      |      |      |      |      |      |      |   |
| 13307  | 6     | 6      | 6      |      |      |      |      |      |      |      |      |      |      |      |   |
| 13308  | 5     | 4      | 5      |      |      |      |      |      |      |      |      |      |      |      |   |
| 13312  | 5     | 5      | 5      |      |      |      |      |      |      |      |      |      |      |      |   |
| 13313  | 5     | 5      | 6      |      |      |      |      |      |      |      |      |      |      |      |   |
| 13314  | 4     | 4      | 4      |      |      |      |      |      |      |      |      |      |      |      |   |
| 13318  | 4     | 4      | 4      |      |      |      |      |      |      |      |      |      |      |      |   |
| 13320  | 4     | 5      | 5      |      |      |      |      |      |      |      |      |      |      |      |   |
| 13322  | 4     | 4      | 3      |      |      |      |      |      |      |      |      |      |      |      |   |
| 13324  | 6     | 6      | 6      |      |      |      |      |      |      |      |      |      |      |      |   |
| 13325  | 6     | 6      | 6      |      |      |      |      |      |      |      |      |      |      |      |   |
| 13327  | 5     | 5      | 5      | 4    | 4    | 4    | 4    | 5    | 3    | 4    | 3    | 4    | 3    | 1    |   |
| 13330  | 6     | 6      | 6      |      |      |      |      |      |      |      |      |      |      |      |   |
| 13332  | 5     | 5      | 4      | 1    | 4    | 4    | 3    | 3    | 1    | 2    | 3    | 4    | 2    | 2    |   |
| 13333  | 6     | 6      | 6      |      |      |      |      |      |      |      |      |      |      |      |   |
| 13334  | 5     | 5      | 5      |      |      |      |      |      |      |      |      |      |      |      |   |
| 13351  | 1     | 1      | 3      |      |      |      |      |      |      |      |      |      |      |      |   |
| 13353  | 4     | 4      | 4      |      |      |      |      |      |      |      |      |      |      |      |   |
| 13354  | 6     | 6      | 6      |      |      |      |      |      |      |      |      |      |      |      |   |
| 13355  | 5     | 5      | 5      |      |      |      |      |      |      |      |      |      |      |      |   |
| 13358  | 5     | 5      | 5      |      |      |      |      |      |      |      |      |      |      |      |   |
| 13359  | 6     | 4      | 6      |      |      |      |      |      |      |      |      |      |      |      |   |
| 13360  | 6     | 6      | 6      |      |      |      |      |      |      |      |      |      |      |      |   |
| 13364  | 4     | 2      | 3      |      |      |      |      |      |      |      |      |      |      |      |   |
| 13365  | 6     | 6      | 6      | 0    | 2    | 0    | 0    | 0    | 0    | 0    | 0    | 0    | 0    | 1    | 1 |

| respid | Q46x4 | Q46x5a | Q46x5b | Q47a | Q47b | Q47c | Q47d | Q47e | Q47f | Q47g | Q47h | Q47i | Q47j | Q47k |
|--------|-------|--------|--------|------|------|------|------|------|------|------|------|------|------|------|
| 13368  | 5     | 5      | 5      |      |      |      |      |      |      |      |      |      |      |      |
| 13370  | 6     | 6      | 6      |      |      |      |      |      |      |      |      |      |      |      |
| 13375  | 5     | 5      | 5      |      |      |      |      |      |      |      |      |      |      |      |
| 13384  | 5     | 5      | 5      |      |      |      |      |      |      |      |      |      |      |      |
| 13387  | 5     | 5      | 5      |      |      |      |      |      |      |      |      |      |      |      |
| 13395  | 4     | 4      | 5      |      |      |      |      |      |      |      |      |      |      |      |
| 13398  | 5     | 5      | 5      |      |      |      |      |      |      |      |      |      |      |      |
| 13404  | 6     | 6      | 6      |      |      |      |      |      |      |      |      |      |      |      |
| 13405  | 6     | 6      | 6      |      |      |      |      |      |      |      |      |      |      |      |
| 13408  |       |        |        |      |      |      |      |      |      |      |      |      |      |      |
| 13411  | 6     | 6      | 6      |      |      |      |      |      |      |      |      |      |      |      |
| 13413  | 5     | 5      | 5      |      |      |      |      |      |      |      |      |      |      |      |
| 13419  | 6     | 5      | 5      |      |      |      |      |      |      |      |      |      |      |      |
| 13420  | 5     | 5      | 5      |      |      |      |      |      |      |      |      |      |      |      |
| 13427  | 4     | 4      | 4      |      |      |      |      |      |      |      |      |      |      |      |
| 13441  | 3     | 3      | 3      |      |      |      |      |      |      |      |      |      |      |      |
| 13444  | 4     | 4      | 4      |      |      |      |      |      |      |      |      |      |      |      |
| 13456  | 5     | 5      | 5      |      |      |      |      |      |      |      |      |      |      |      |
| 13466  | 4     | 4      | 4      |      |      |      |      |      |      |      |      |      |      |      |
| 13468  | 5     | 5      | 5      |      |      |      |      |      |      |      |      |      |      |      |
| 13475  | 5     | 5      | 5      |      |      |      |      |      |      |      |      |      |      |      |
| 13484  | 6     | 6      | 6      |      |      |      |      |      |      |      |      |      |      |      |
| 13486  | 5     | 5      | 5      |      |      |      |      |      |      |      |      |      |      |      |
| 13487  | 5     | 5      | 5      |      |      |      |      |      |      |      |      |      |      |      |
| 13491  |       |        |        |      |      |      |      |      |      |      |      |      |      |      |
| 13496  | 6     | 6      | 6      |      |      |      |      |      |      |      |      |      |      |      |
| 13497  | 4     | 4      | 4      |      |      |      |      |      |      |      |      |      |      |      |
| 13498  | 5     | 5      | 5      |      |      |      |      |      |      |      |      |      |      |      |
| 13502  |       |        |        |      |      |      |      |      |      |      |      |      |      |      |
| 13503  | 4     | 4      | 4      | 3    | 0    | 3    | 4    | 4    | 1    | 0    | 2    | 1    | 3    | 3    |
| 13505  | 5     | 6      | 6      |      |      |      |      |      |      |      |      |      |      |      |
| 13509  | 4     | 4      | 5      |      |      |      |      |      |      |      |      |      |      |      |

| respid | Q46x4 | Q46x5a | Q46x5b | Q47a | Q47b | Q47c | Q47d | Q47e | Q47f | Q47g | Q47h | Q47i | Q47j | Q47k |
|--------|-------|--------|--------|------|------|------|------|------|------|------|------|------|------|------|
| 13510  | 4     | 4      | 4      |      |      |      |      |      |      |      |      |      |      |      |
| 13518  | 3     | 2      | 3      | 3    | 2    | 1    | 3    | 3    |      | 1    | 1    | 3    | 2    | 1    |
| 13521  | 6     | 5      | 4      |      |      |      |      |      |      |      |      |      |      |      |
| 13523  | 5     | 4      | 6      |      |      |      |      |      |      |      |      |      |      |      |
| 13528  | 6     | 6      | 6      |      |      |      |      |      |      |      |      |      |      |      |
| 13531  | 5     | 5      | 5      |      |      |      |      |      |      |      |      |      |      |      |
| 13532  | 5     | 5      | 5      |      |      |      |      |      |      |      |      |      |      |      |
| 13533  | 6     | 5      | 5      |      |      |      |      |      |      |      |      |      |      |      |
| 13534  |       |        |        |      |      |      |      |      |      |      |      |      |      |      |
| 13535  | 5     | 6      | 5      |      |      |      |      |      |      |      |      |      |      |      |
| 13538  | 3     | 3      | 3      |      |      |      |      |      |      |      |      |      |      |      |
| 13540  | 4     | 4      | 3      |      |      |      |      |      |      |      |      |      |      |      |
| 13541  | 4     | 4      | 4      |      |      |      |      |      |      |      |      |      |      |      |
| 13542  | 3     | 4      | 5      |      |      |      |      |      |      |      |      |      |      |      |
| 13550  | 6     | 6      | 6      |      |      |      |      |      |      |      |      |      |      |      |
| 13553  | 6     | 6      | 6      |      |      |      |      |      |      |      |      |      |      |      |
| 13554  | 5     | 5      | 5      |      |      |      |      |      |      |      |      |      |      |      |
| 13555  | 2     | 3      | 4      |      |      |      |      |      |      |      |      |      |      |      |
| 13556  | 5     | 4      | 4      | 0    | 0    | 0    | 0    | 0    | 0    | 0    | 0    | 0    | 1    | 1    |
| 13563  | 4     | 3      | 2      |      |      |      |      |      |      |      |      |      |      |      |
| 13564  | 4     | 4      | 4      |      |      |      |      |      |      |      |      |      |      |      |
| 13567  |       |        |        |      |      |      |      |      |      |      |      |      |      |      |
| 13568  | 2     | 3      | 3      | 1    | 3    | 2    | 2    | 2    | 2    | 3    | 2    | 2    | 3    | 3    |
| 13570  |       |        |        |      |      |      |      |      |      |      |      |      |      |      |
| 13573  | 4     | 4      | 4      |      |      |      |      |      |      |      |      |      |      |      |
| 13575  | 6     | 6      | 6      |      |      |      |      |      |      |      |      |      |      |      |
| 13577  | 3     | 3      | 2      | 2    | 3    | 2    | 3    | 1    | 2    | 2    | 3    | 2    | 3    | 2    |
| 13580  | 3     | 3      | 3      | 2    | 1    | 2    | 3    | 2    | 2    | 3    | 2    | 2    | 2    | 3    |
| 13582  | 5     | 5      | 4      |      |      |      |      |      |      |      |      |      |      |      |
| 13584  | 3     | 2      | 3      | 1    | 2    | 2    | 2    | 0    | 2    | 2    | 2    | 2    | 3    | 4    |
| 13585  |       |        |        |      |      |      |      |      |      |      |      |      |      |      |
| 13586  | 6     | 6      | 6      |      |      |      |      |      |      |      |      |      |      |      |



| respid | Q46x4 | Q46x5a | Q46x5b | Q47a | Q47b | Q47c | Q47d | Q47e | Q47f | Q47g | Q47h | Q47i | Q47j | Q47k |
|--------|-------|--------|--------|------|------|------|------|------|------|------|------|------|------|------|
| 13587  | 4     | 4      | 5      |      |      |      |      |      |      |      |      |      |      |      |
| 13592  | 3     | 2      | 2      | 1    | 1    | 2    | 2    | 2    | 2    | 2    | 2    | 2    | 3    | 3    |
| 13596  | 6     | 6      | 6      |      |      |      |      |      |      |      |      |      |      |      |
| 13597  | 4     | 4      | 5      |      |      |      |      |      |      |      |      |      |      |      |
| 13599  | 4     | 4      | 3      |      |      |      |      |      |      |      |      |      |      |      |
| 13601  | 5     | 4      | 4      |      |      |      |      |      |      |      |      |      |      |      |
| 13604  | 4     | 4      | 4      | 4    | 4    | 4    | 4    | 4    | 1    | 4    | 2    | 4    | 4    | 3    |
| 13608  | 5     | 5      | 5      | 4    | 5    | 5    | 5    | 4    |      | 4    |      | 5    | 4    | 4    |
| 13616  | 5     | 5      | 5      |      |      |      |      |      |      |      |      |      |      |      |
| 13618  | 4     | 3      | 4      |      |      |      |      |      |      |      |      |      |      |      |
| 13619  | 6     | 6      | 6      |      |      |      |      |      |      |      |      |      |      |      |
| 13626  |       |        |        |      |      |      |      |      |      |      |      |      |      |      |
| 13628  | 4     | 4      | 5      | 4    | 3    | 3    | 3    | 4    | 2    | 4    | 4    | 4    | 4    | 3    |
| 13640  | 5     | 4      | 4      | 4    | 3    | 4    | 4    | 3    | 2    | 1    | 2    | 4    | 2    | 3    |
| 13645  | 5     | 5      | 5      | 4    | 4    | 4    | 4    | 5    | 2    | 3    | 3    | 4    | 4    | 4    |
| 13648  |       |        |        |      |      |      |      |      |      |      |      |      |      |      |
| 13653  | 4     | 4      | 5      |      |      |      |      |      |      |      |      |      |      |      |
| 13655  | 5     | 5      | 5      | 5    | 4    | 5    | 5    | 5    | 5    | 4    | 4    | 5    | 5    | 3    |
| 13662  | 5     | 4      | 4      | 5    | 4    | 4    | 4    | 5    | 5    | 3    | 3    | 4    | 3    | 4    |
| 13670  | 3     | 4      | 4      | 4    | 4    | 4    | 4    | 4    | 2    | 4    | 3    | 3    | 3    | 3    |
| 13673  | 6     | 3      | 2      |      |      |      |      |      |      |      |      |      |      |      |
| 13674  | 5     | 4      | 3      |      |      |      |      |      |      |      |      |      |      |      |
| 13675  | 4     | 4      | 4      | 0    |      |      |      |      |      |      |      |      |      |      |
| 13678  | 4     | 4      | 3      | 4    | 4    | 4    | 4    | 5    | 2    | 3    | 4    | 4    | 4    | 3    |
| 13680  | 3     | 4      | 5      |      |      |      |      |      |      |      |      |      |      |      |
| 13681  | 4     | 5      | 5      | 2    | 2    | 2    | 2    | 2    | 2    | 3    | 3    | 4    | 3    | 2    |
| 13683  | 6     | 6      | 6      |      |      |      |      |      |      |      |      |      |      |      |
| 13684  | 6     | 6      | 6      |      |      |      |      |      |      |      |      |      |      |      |
| 13685  | 5     | 5      | 5      |      |      |      |      |      |      |      |      |      |      |      |
| 13687  |       |        |        |      |      |      |      |      |      |      |      |      |      |      |
| 13690  | 1     | 1      | 1      | 5    | 4    | 4    | 4    | 4    | 2    | 4    | 3    | 4    | 4    | 3    |
| 13700  | 4     | 4      | 4      | 2    | 0    | 2    | 2    | 4    | 2    | 3    | 2    | 2    | 3    | 3    |

| respid | Q46x4 | Q46x5a | Q46x5b | Q47a | Q47b | Q47c | Q47d | Q47e | Q47f | Q47g | Q47h | Q47i | Q47j | Q47k |
|--------|-------|--------|--------|------|------|------|------|------|------|------|------|------|------|------|
| 13705  | 4     | 4      | 4      | 5    | 4    | 5    | 4    | 5    | 2    | 4    | 3    | 4    | 4    | 4    |
| 13710  | 5     | 4      | 5      | 3    | 3    | 4    | 3    | 4    | 0    | 4    | 3    | 4    | 4    | 4    |
| 13711  | 4     | 4      | 5      | 1    | 2    | 2    | 4    | 2    | 1    | 1    | 2    | 4    | 2    | 2    |
| 13713  | 6     | 6      | 6      |      |      |      |      |      |      |      |      |      |      |      |
| 13716  | 4     | 5      | 5      | 0    | 0    | 0    | 0    | 0    | 0    | 0    | 0    | 0    | 1    | 1    |
| 13721  | 4     | 4      | 4      |      |      |      |      |      |      |      |      |      |      |      |
| 13722  | 5     | 4      | 4      | 5    | 4    | 5    | 5    | 5    |      | 5    | 5    | 5    | 5    | 5    |
| 13723  | 4     | 4      | 4      | 4    | 4    | 4    | 4    | 5    | 2    | 4    | 5    | 5    | 5    | 4    |
| 13726  | 4     | 4      | 4      | 4    | 3    | 3    | 4    | 4    | 2    | 2    | 2    | 3    | 3    | 4    |
| 13728  | 4     | 4      | 4      | 4    | 4    | 5    | 5    | 5    | 3    | 4    | 3    | 4    | 4    | 4    |
| 13730  | 4     | 4      | 4      | 3    | 3    | 3    | 3    | 3    | 1    | 3    | 3    | 2    | 2    | 2    |
| 13734  | 5     | 5      | 5      | 5    | 5    | 5    | 5    | 5    | 4    | 5    | 5    | 5    | 5    | 5    |
| 13736  | 4     | 4      | 4      |      |      |      |      |      |      |      |      |      |      |      |
| 13737  | 5     | 5      | 5      | 5    | 5    | 5    | 5    | 5    | 3    | 4    | 4    | 5    | 5    | 5    |
| 13739  | 5     | 4      | 4      |      |      |      |      |      |      |      |      |      |      |      |
| 13742  |       |        |        |      |      |      |      |      |      |      |      |      |      |      |
| 13746  | 6     | 6      | 6      |      |      |      |      |      |      |      |      |      |      |      |
| 13747  | 5     | 5      | 5      | 5    | 4    | 5    | 5    | 5    | 1    | 4    | 3    | 5    | 4    | 4    |
| 13749  | 5     | 5      | 5      |      |      |      |      |      |      |      |      |      |      |      |
| 13751  | 5     | 4      | 4      | 0    | 0    | 0    | 0    | 0    | 1    | 1    | 1    | 0    | 1    | 2    |
| 13752  | 4     | 4      | 4      |      |      |      |      |      |      |      |      |      |      |      |
| 13756  | 6     | 6      | 6      |      |      |      |      |      |      |      |      |      |      |      |
| 13757  | 5     | 5      | 5      | 5    | 5    | 5    | 5    | 5    | 3    | 5    | 5    | 5    | 5    | 5    |
| 13767  | 4     | 4      | 4      |      |      |      |      |      |      |      |      |      |      |      |
| 13771  | 5     | 5      | 5      | 5    | 5    | 5    | 5    | 5    | 1    | 5    | 4    | 5    | 4    | 4    |
| 13772  | 3     | 4      | 5      | 3    | 3    | 4    | 3    | 3    | 1    | 3    | 3    | 4    | 3    | 2    |
| 13779  |       |        |        |      |      |      |      |      |      |      |      |      |      |      |
| 13782  | 5     | 5      | 5      | 1    | 1    | 1    | 1    | 4    | 1    | 1    | 1    | 1    | 1    | 1    |
| 13783  | 5     | 5      | 5      |      |      |      |      |      |      |      |      |      |      |      |
| 13785  | 4     | 4      | 4      | 4    | 5    | 5    | 5    | 5    | 4    | 5    | 5    | 5    | 5    | 5    |
| 13786  | 5     | 5      | 5      |      |      |      |      |      |      |      |      |      |      |      |
| 13792  | 4     | 3      | 3      | 1    | 1    | 2    | 1    | 2    | 5    | 1    | 1    | 1    | 2    | 3    |

| respid | Q46x4 | Q46x5a | Q46x5b | Q47a | Q47b | Q47c | Q47d | Q47e | Q47f | Q47g | Q47h | Q47i | Q47j | Q47k |
|--------|-------|--------|--------|------|------|------|------|------|------|------|------|------|------|------|
| 13796  | 6     | 6      | 6      | 4    | 3    | 3    | 4    | 4    | 1    | 4    | 3    | 5    | 4    | 4    |
| 13798  | 4     | 4      | 4      | 3    | 2    | 3    | 3    |      | 1    | 1    | 2    | 3    | 2    | 3    |
| 13799  | 4     | 4      | 4      | 4    | 3    | 4    | 4    | 4    | 3    | 4    | 4    | 4    | 4    | 4    |
| 13804  | 5     | 5      | 5      | 5    | 5    | 5    | 5    | 5    |      | 5    | 4    | 5    | 4    | 5    |
| 13805  | 5     | 5      | 5      |      |      |      |      |      |      |      |      |      |      |      |
| 13810  | 4     | 4      | 4      |      |      |      |      |      |      |      |      |      |      |      |
| 13811  | 5     | 5      | 5      |      |      |      |      |      |      |      |      |      |      |      |
| 13819  | 1     | 2      | 2      | 1    | 1    | 1    | 1    | 0    | 0    |      |      |      |      |      |
| 13821  | 1     | 2      | 2      |      |      |      |      |      |      |      |      |      |      |      |
| 13824  | 5     | 5      | 5      | 2    | 2    |      | 4    | 3    | 3    | 2    | 2    | 1    | 2    | 3    |
| 13828  | 4     | 4      | 4      |      |      |      |      |      |      |      |      |      |      |      |
| 13829  | 2     | 2      | 3      |      |      |      |      |      |      |      |      |      |      |      |
| 13831  |       |        |        |      |      |      |      |      |      |      |      |      |      |      |
| 13833  | 4     | 4      | 4      | 0    | 0    | 1    | 2    | 1    | 1    | 1    | 2    | 1    | 1    | 2    |
| 13835  | 4     | 4      | 5      | 3    | 3    | 4    | 3    | 4    | 2    | 4    | 4    | 4    | 3    | 3    |
| 13838  |       |        |        |      |      |      |      |      |      |      |      |      |      |      |
| 13839  | 1     | 3      | 3      |      |      |      |      |      |      |      |      |      |      |      |
| 13845  |       |        |        |      |      |      |      |      |      |      |      |      |      |      |
| 13846  | 5     | 5      | 5      | 0    | 0    | 0    | 0    | 0    | 0    | 0    | 0    | 0    | 1    | 1    |
| 13853  | 5     | 3      | 4      | 3    | 3    | 1    | 4    | 2    | 2    | 0    | 0    | 0    | 1    | 1    |
| 13855  | 2     | 2      | 2      |      |      |      |      |      |      |      |      |      |      |      |
| 13858  | 4     | 4      | 4      |      |      |      |      |      |      |      |      |      |      |      |
| 13860  |       |        |        |      |      |      |      |      |      |      |      |      |      |      |
| 13865  | 1     | 2      | 4      |      |      |      |      |      |      |      |      |      |      |      |
| 13870  | 4     | 5      | 5      | 5    | 5    | 5    | 5    | 5    | 3    | 5    | 5    | 5    | 5    | 5    |
| 13872  | 3     | 2      | 3      |      |      |      |      |      |      |      |      |      |      |      |
| 13873  | 4     | 4      | 4      |      |      |      |      |      |      |      |      |      |      |      |
| 13874  |       |        |        |      |      |      |      |      |      |      |      |      |      |      |
| 13875  | 2     | 1      | 1      |      |      |      |      |      |      |      |      |      |      |      |
| 13881  |       |        |        |      |      |      |      |      |      |      |      |      |      |      |
| 13887  | 5     | 5      | 5      | 5    | 5    | 5    | 5    | 5    | 0    | 4    | 3    | 5    | 4    | 4    |
| 13888  | 4     | 4      | 4      |      |      |      |      |      |      |      |      |      |      |      |

| respid | Q46x4 | Q46x5a | Q46x5b | Q47a | Q47b | Q47c | Q47d | Q47e | Q47f | Q47g | Q47h | Q47i | Q47j | Q47k |
|--------|-------|--------|--------|------|------|------|------|------|------|------|------|------|------|------|
| 13889  | 4     | 4      | 4      |      |      |      |      |      |      |      |      |      |      |      |
| 13895  | 4     | 4      | 4      | 3    | 4    | 4    | 3    | 4    | 2    | 3    | 3    | 4    | 2    | 3    |
| 13897  |       |        |        |      |      |      |      |      |      |      |      |      |      |      |
| 13898  | 4     | 4      | 4      | 3    | 2    |      |      |      |      |      |      |      |      |      |
| 13901  | 5     | 5      | 5      | 0    | 0    | 0    | 0    | 0    | 0    | 0    | 0    | 0    | 1    | 5    |
| 13902  | 1     | 1      | 1      |      |      |      |      |      |      |      |      |      |      |      |
| 13903  | 6     | 6      | 6      |      |      |      |      |      |      |      |      |      |      |      |
| 13905  | 1     | 3      | 1      |      |      |      |      |      |      |      |      |      |      |      |
| 13908  | 3     | 2      | 3      |      |      |      |      |      |      |      |      |      |      |      |
| 13909  | 5     | 5      | 5      | 4    | 4    | 4    | 4    | 5    | 1    | 4    |      | 4    | 4    | 4    |
| 13910  | 1     | 1      | 2      |      |      |      |      |      |      |      |      |      |      |      |
| 13911  |       |        |        |      |      |      |      |      |      |      |      |      |      |      |
| 13914  | 2     | 2      | 3      |      |      |      |      |      |      |      |      |      |      |      |
| 13920  | 2     | 3      | 4      |      |      |      |      |      |      |      |      |      |      |      |
| 13926  | 5     | 5      | 5      |      |      |      |      |      |      |      |      |      |      |      |
| 13929  | 1     | 2      | 1      |      |      |      |      |      |      |      |      |      |      |      |
| 13930  | 3     | 3      | 4      | 2    | 3    | 3    | 2    | 3    | 1    | 2    | 2    | 3    | 2    | 2    |
| 13931  |       |        |        |      |      |      |      |      |      |      |      |      |      |      |
| 13932  | 5     | 5      | 4      | 4    | 4    | 4    | 4    | 5    | 3    | 4    | 4    | 4    |      | 4    |
| 13934  | 4     | 4      | 4      |      |      |      |      |      |      |      |      |      |      |      |
| 13938  | 5     | 5      | 5      | 2    | 3    | 4    | 2    | 4    | 1    | 3    | 3    | 3    | 3    | 3    |
| 13942  | 6     | 6      | 6      |      |      |      |      |      |      |      |      |      |      |      |
| 13945  | 4     | 4      | 4      |      |      |      |      |      |      |      |      |      |      |      |
| 13947  | 4     | 4      | 4      | 1    | 2    | 0    | 4    | 0    | 0    | 0    | 0    | 5    | 4    | 1    |
| 13948  |       |        |        |      |      |      |      |      |      |      |      |      |      |      |
| 13959  | 5     | 5      | 5      | 0    | 0    | 0    | 0    | 0    | 0    | 0    | 0    | 0    | 5    | 1    |
| 13962  | 5     | 5      | 5      | 4    | 4    | 4    | 4    | 5    | 2    | 4    | 4    | 4    | 4    | 4    |
| 13963  | 6     | 5      | 5      | 5    | 4    | 5    | 5    | 4    | 1    | 4    | 4    | 4    |      |      |
| 13964  | 4     | 4      | 4      | 5    | 5    | 5    | 5    | 4    | 2    | 4    | 4    | 5    | 4    |      |
| 13966  | 3     | 2      | 1      |      |      |      |      |      |      |      |      |      |      |      |
| 13968  | 4     | 5      | 3      | 4    | 4    | 5    | 4    | 4    | 2    | 4    | 5    | 4    | 5    | 3    |
| 13971  | 4     | 4      | 4      | 2    | 2    | 3    | 3    | 4    | 2    | 2    | 3    | 3    | 3    | 4    |

| respid | Q46x4 | Q46x5a | Q46x5b | Q47a | Q47b | Q47c | Q47d | Q47e | Q47f | Q47g | Q47h | Q47i | Q47j | Q47k |
|--------|-------|--------|--------|------|------|------|------|------|------|------|------|------|------|------|
| 13979  | 3     | 3      | 3      |      |      |      |      |      |      |      |      |      |      |      |
| 13980  | 4     | 3      | 3      |      |      |      |      |      |      |      |      |      |      |      |
| 13981  | 4     | 4      | 3      |      |      |      |      |      |      |      |      |      |      |      |
| 13982  | 5     | 5      | 5      | 4    | 4    | 5    | 5    | 5    | 3    | 4    |      | 5    | 5    | 4    |
| 13984  | 3     | 4      | 4      | 4    | 3    | 2    | 4    | 5    | 1    | 3    | 3    | 4    | 4    | 3    |
| 13989  | 5     | 5      | 5      | 3    | 3    | 4    | 5    | 5    | 2    | 5    | 4    | 5    | 5    | 5    |
| 13990  | 6     | 5      | 5      |      |      |      |      |      |      |      |      |      |      |      |
| 13992  | 1     | 2      | 3      |      |      |      |      |      |      |      |      |      |      |      |
| 13998  | 4     | 4      | 3      |      |      |      |      |      |      |      |      |      |      |      |
| 13999  | 4     | 4      | 4      |      |      |      |      |      |      |      |      |      |      |      |
| 14000  | 5     | 5      | 5      | 3    | 2    | 2    | 2    | 3    | 2    | 1    | 2    | 5    | 3    | 2    |
| 14003  | 5     | 5      | 5      | 0    | 2    | 0    | 0    | 0    | 0    | 0    | 0    | 0    | 1    | 1    |
| 14004  | 3     | 3      | 2      |      |      |      |      |      |      |      |      |      |      |      |
| 14006  | 5     | 5      | 4      | 5    | 4    | 5    | 5    | 4    | 2    | 4    | 4    | 5    | 4    | 4    |
| 14007  | 4     | 3      | 4      |      |      |      |      |      |      |      |      |      |      |      |
| 14008  |       |        |        |      |      |      |      |      |      |      |      |      |      |      |
| 14013  | 4     | 4      | 4      |      |      |      |      |      |      |      |      |      |      |      |
| 14015  | 6     | 6      | 6      |      |      |      |      |      |      |      |      |      |      |      |
| 14018  | 5     | 6      | 6      |      |      |      |      |      |      |      |      |      |      |      |
| 14021  | 2     | 4      | 4      |      |      |      |      |      |      |      |      |      |      |      |
| 14023  | 6     | 6      | 6      | 0    | 0    | 0    | 0    | 0    | 0    | 0    | 0    | 0    | 1    | 1    |
| 14024  | 5     | 5      | 4      | 0    | 0    | 0    | 0    | 0    | 0    | 0    | 0    | 0    | 1    | 1    |
| 14026  | 5     | 5      | 5      | 0    | 0    | 0    | 0    | 0    | 0    | 0    | 0    | 0    | 1    | 1    |
| 14030  | 6     | 6      | 6      |      | 4    | 4    | 4    | 5    | 4    | 4    | 3    | 4    | 4    | 4    |
| 14032  | 4     | 4      | 4      | 2    | 2    | 2    | 2    | 4    | 1    | 2    | 2    | 2    | 2    | 2    |
| 14040  |       |        |        |      |      |      |      |      |      |      |      |      |      |      |
| 14045  | 6     | 6      | 6      |      |      |      |      |      |      |      |      |      |      |      |
| 14048  | 4     | 3      | 4      |      |      |      |      |      |      |      |      |      |      |      |
| 14049  | 4     | 4      | 3      | 1    | 1    | 0    | 1    | 1    | 1    | 1    | 1    | 1    | 1    | 2    |
| 14050  | 6     | 6      | 6      |      |      |      |      |      |      |      |      |      |      |      |
| 14051  | 1     | 1      | 1      |      |      |      |      |      |      |      |      |      |      |      |
| 14052  | 6     | 6      | 6      | 3    | 3    | 4    | 3    | 4    | 2    | 3    | 3    | 5    | 5    | 5    |

| respid | Q46x4 | Q46x5a | Q46x5b | Q47a | Q47b | Q47c | Q47d | Q47e | Q47f | Q47g | Q47h | Q47i | Q47j | Q47k |
|--------|-------|--------|--------|------|------|------|------|------|------|------|------|------|------|------|
| 14054  | 5     | 5      | 5      |      |      |      |      |      |      |      |      |      |      |      |
| 14055  |       |        |        |      |      |      |      |      |      |      |      |      |      |      |
| 14057  | 3     | 3      | 3      |      |      |      |      |      |      |      |      |      |      |      |
| 14058  | 6     | 6      | 6      |      |      |      |      |      |      |      |      |      |      |      |
| 14059  | 5     | 5      | 5      | 3    | 4    | 4    | 4    | 4    | 2    | 4    | 3    | 4    | 4    | 4    |
| 14060  | 5     | 5      | 5      |      |      |      |      |      |      |      |      |      |      |      |
| 14061  | 3     | 3      | 2      | 3    | 2    | 4    | 3    | 3    | 0    | 0    | 0    | 0    | 1    | 1    |
| 14071  | 6     | 6      | 6      |      |      |      |      |      |      |      |      |      |      |      |
| 14073  | 6     | 6      | 6      | 5    | 5    | 5    | 5    | 5    | 4    | 5    | 5    | 5    | 5    | 5    |
| 14074  | 2     | 3      | 5      |      |      |      |      |      |      |      |      |      |      |      |
| 14076  | 5     | 5      | 5      |      |      |      |      |      |      |      |      |      |      |      |
| 14080  | 5     | 5      | 5      | 4    | 2    | 2    | 3    | 3    | 1    | 5    | 5    | 5    | 5    |      |
| 14082  | 5     | 5      | 5      | 2    | 3    | 4    | 4    | 4    | 2    | 4    | 4    | 4    | 4    |      |
| 14083  | 6     | 6      | 6      |      |      |      |      |      |      |      |      |      |      |      |
| 14084  | 5     | 5      | 5      |      |      |      |      |      |      |      |      |      |      |      |
| 14085  |       |        |        |      |      |      |      |      |      |      |      |      |      |      |
| 14086  | 4     | 5      | 5      | 4    | 4    | 4    | 4    | 5    | 4    | 4    | 4    | 4    | 3    | 3    |
| 14088  | 5     | 5      | 5      |      |      |      |      |      |      |      |      |      |      |      |
| 14090  | 5     | 5      | 5      | 5    | 5    | 5    | 5    | 5    | 3    | 4    | 4    | 4    | 4    | 4    |
| 14092  | 5     | 6      | 6      | 4    | 4    | 4    | 4    | 4    | 4    | 4    | 4    | 4    | 4    | 4    |
| 14093  | 5     | 5      | 5      | 5    | 0    | 5    | 5    | 5    | 1    | 5    | 5    | 5    | 5    | 5    |
| 14096  | 6     | 6      | 6      |      |      |      |      |      |      |      |      |      |      |      |
| 14103  | 4     | 4      | 4      |      |      |      |      |      |      |      |      |      |      |      |
| 14105  | 6     | 6      | 6      |      |      |      |      |      |      |      |      |      |      |      |
| 14106  | 6     | 5      | 5      | 0    | 0    | 0    | 0    | 0    | 0    | 0    | 0    | 0    | 1    | 1    |
| 14107  | 1     | 1      | 2      |      |      |      |      |      |      |      |      |      |      |      |
| 14108  | 4     | 4      | 4      |      |      |      |      |      |      |      |      |      |      |      |
| 14112  | 5     | 5      | 5      |      |      |      |      |      |      |      |      |      |      |      |
| 14114  | 6     | 6      | 6      |      |      |      |      |      |      |      |      |      |      |      |
| 14115  | 4     | 4      | 4      |      |      |      |      |      |      |      |      |      |      |      |
| 14116  | 5     | 5      | 5      | 4    | 4    | 5    | 5    | 5    |      |      |      | 4    | 5    |      |
| 14117  | 6     | 6      | 6      | 2    | 2    | 2    | 2    | 5    | 1    | 2    | 3    | 2    | 2    | 2    |

| respid | Q46x4 | Q46x5a | Q46x5b | Q47a | Q47b | Q47c | Q47d | Q47e | Q47f | Q47g | Q47h | Q47i | Q47j | Q47k |
|--------|-------|--------|--------|------|------|------|------|------|------|------|------|------|------|------|
| 14118  | 4     | 4      | 4      |      |      |      |      |      |      |      |      |      |      |      |
| 14119  | 5     | 5      | 5      |      |      |      |      |      |      |      |      |      |      |      |
| 14127  |       |        |        |      |      |      |      |      |      |      |      |      |      |      |
| 14129  | 6     | 6      | 6      |      |      |      |      |      |      |      |      |      |      |      |
| 14131  | 4     | 4      | 4      |      |      |      |      |      |      |      |      |      |      |      |
| 14132  | 4     | 6      | 5      | 5    | 5    | 5    | 5    | 5    | 2    | 5    | 4    | 5    | 5    | 5    |
| 14133  | 3     | 4      | 4      |      |      |      |      |      |      |      |      |      |      |      |
| 14134  | 5     | 5      | 5      | 2    | 4    | 4    | 4    | 4    | 1    | 4    | 2    | 4    | 4    | 4    |
| 14135  | 4     | 4      | 4      |      |      |      |      |      |      |      |      |      |      |      |
| 14136  | 5     | 4      | 5      |      |      |      |      |      |      |      |      |      |      |      |
| 14138  |       |        |        |      |      |      |      |      |      |      |      |      |      |      |
| 14139  |       |        |        |      |      |      |      |      |      |      |      |      |      |      |
| 14140  | 6     | 6      | 6      |      |      |      |      |      |      |      |      |      |      |      |
| 14141  | 6     | 6      | 6      | 0    |      |      |      |      |      |      |      | 0    |      |      |
| 14143  | 5     | 5      | 5      | 5    | 5    | 5    | 5    | 5    | 2    | 5    | 4    | 5    | 5    | 5    |
| 14146  | 6     | 6      | 6      |      |      |      |      |      |      |      |      |      |      |      |
| 14147  | 3     | 3      | 4      | 2    | 3    | 4    | 3    | 2    | 1    | 2    | 2    | 2    | 2    | 2    |
| 14148  | 6     | 6      | 6      |      |      |      |      |      |      |      |      |      |      |      |
| 14151  | 4     | 3      | 3      |      |      |      |      |      |      |      |      |      |      |      |
| 14152  | 4     | 4      | 4      |      |      |      |      |      |      |      |      |      |      |      |
| 14153  | 6     | 6      | 6      |      |      |      |      |      |      |      |      |      |      |      |
| 14154  | 6     | 5      | 5      | 5    | 5    | 5    | 4    | 4    | 2    | 2    | 2    | 5    | 3    | 4    |
| 14158  | 4     | 4      | 4      |      |      |      |      |      |      |      |      |      |      |      |
| 14159  | 2     | 2      | 1      |      |      |      |      |      |      |      |      |      |      |      |
| 14160  | 4     | 4      | 5      | 0    | 2    | 2    | 2    | 2    | 0    | 0    | 0    | 1    | 1    | 1    |
| 14161  | 4     | 4      | 4      |      |      |      |      |      |      |      |      |      |      |      |
| 14162  | 5     | 5      | 5      | 5    | 5    | 5    | 5    | 4    | 1    | 4    | 3    | 4    | 4    | 4    |
| 14165  | 6     | 6      | 6      | 4    | 2    | 4    | 2    | 1    | 2    | 2    | 3    | 4    | 4    | 4    |
| 14166  | 4     | 4      | 4      |      |      |      |      |      |      |      |      |      |      |      |
| 14167  | 5     | 4      | 4      |      |      |      |      |      |      |      |      |      |      |      |
| 14169  | 6     | 6      | 6      |      |      |      |      |      |      |      |      |      |      |      |
| 14170  | 5     | 5      | 5      |      |      |      |      |      |      |      |      |      |      |      |

| respid | Q46x4 | Q46x5a | Q46x5b | Q47a | Q47b | Q47c | Q47d | Q47e | Q47f | Q47g | Q47h | Q47i | Q47j | Q47k |
|--------|-------|--------|--------|------|------|------|------|------|------|------|------|------|------|------|
| 14172  | 6     | 6      | 6      | 3    | 3    | 3    | 3    | 2    | 1    | 2    | 3    | 1    | 2    | 3    |
| 14173  |       |        |        |      |      |      |      |      |      |      |      |      |      |      |
| 14174  | 5     | 5      | 5      |      |      |      |      |      |      |      |      |      |      |      |
| 14175  | 5     | 5      | 5      |      |      |      |      |      |      |      |      |      |      |      |
| 14176  | 4     | 5      | 5      | 0    | 0    | 0    | 0    | 0    | 0    | 0    | 0    | 0    | 1    | 1    |
| 14178  | 5     | 5      | 5      | 4    | 4    | 4    | 3    | 4    | 2    | 3    | 3    | 4    | 4    | 3    |
| 14179  | 5     | 5      | 5      | 0    | 5    | 0    | 0    | 0    | 0    | 0    | 0    | 0    | 4    | 1    |
| 14180  | 4     | 3      | 4      |      |      |      |      |      |      |      |      |      |      |      |
| 14183  | 1     | 5      | 1      |      |      |      |      |      |      |      |      |      |      |      |
| 14185  | 2     | 2      | 1      |      |      |      |      |      |      |      |      |      |      |      |
| 14187  | 4     | 5      | 5      |      |      |      |      |      |      |      |      |      |      |      |
| 14189  | 4     | 4      | 4      |      |      |      |      |      |      |      |      |      |      |      |
| 14191  | 4     | 4      | 4      |      |      |      |      |      |      |      |      |      |      |      |
| 14192  |       |        |        |      |      |      |      |      |      |      |      |      |      |      |
| 14195  | 4     | 4      | 4      |      |      |      |      |      |      |      |      |      |      |      |
| 14197  | 6     | 6      | 4      |      |      |      |      |      |      |      |      |      |      |      |
| 14203  | 4     | 4      | 4      |      |      |      |      |      |      |      |      |      |      |      |
| 14204  | 5     | 5      | 5      |      |      |      |      |      |      |      |      |      |      |      |
| 14205  | 4     | 4      | 5      |      |      |      |      |      |      |      |      |      |      |      |
| 14208  | 5     | 5      | 5      | 4    | 4    | 4    | 4    |      |      |      |      |      |      |      |
| 14211  | 3     | 3      | 4      |      |      |      |      |      |      |      |      |      |      |      |
| 14214  | 6     | 6      | 6      |      |      |      |      |      |      |      |      |      |      |      |
| 14215  | 4     | 4      | 4      | 0    | 2    | 0    | 0    | 0    | 0    | 0    | 0    | 0    | 2    | 1    |
| 14216  | 4     | 4      | 4      |      | 3    | 3    | 3    | 3    | 1    | 3    | 3    | 3    | 3    | 2    |
| 14218  | 5     | 5      | 5      | 3    | 4    | 4    | 4    | 5    | 2    | 3    | 3    | 4    | 2    | 3    |
| 14220  | 5     | 5      | 5      | 4    | 5    | 3    | 5    | 4    | 2    | 5    | 3    | 5    | 5    | 4    |
| 14223  |       |        |        |      |      |      |      |      |      |      |      |      |      |      |
| 14225  | 4     | 4      | 4      |      |      |      |      |      |      |      |      |      |      |      |
| 14226  | 5     | 5      | 4      | 5    | 5    | 5    | 5    | 5    | 3    | 3    | 5    | 5    | 5    | 5    |
| 14228  | 2     | 2      | 1      |      |      |      |      |      |      |      |      |      |      |      |
| 14231  | 3     | 4      | 3      |      |      |      |      |      |      |      |      |      |      |      |
| 14233  | 5     | 5      | 5      |      |      |      |      |      |      |      |      |      |      |      |



| respid | Q46x4 | Q46x5a | Q46x5b | Q47a | Q47b | Q47c | Q47d | Q47e | Q47f | Q47g | Q47h | Q47i | Q47j | Q47k |
|--------|-------|--------|--------|------|------|------|------|------|------|------|------|------|------|------|
| 14237  | 3     | 5      | 4      |      |      |      |      |      |      |      |      |      |      |      |
| 14238  | 4     | 3      | 4      |      |      |      |      |      |      |      |      |      |      |      |
| 14243  | 4     | 5      | 5      | 5    | 5    | 5    | 4    | 5    | 2    | 5    | 5    | 5    | 5    | 4    |
| 14245  | 5     | 5      | 5      | 5    | 5    | 4    | 4    | 4    | 0    | 0    | 5    | 5    | 5    | 5    |
| 14246  | 2     | 2      | 1      |      |      |      |      |      |      |      |      |      |      |      |
| 14248  | 6     | 6      | 6      |      |      |      |      |      |      |      |      |      |      |      |
| 14250  | 5     | 5      | 5      |      |      |      |      |      |      |      |      |      |      |      |
| 14253  | 5     | 6      | 4      |      |      |      |      |      |      |      |      |      |      |      |
| 14254  | 4     | 5      | 4      | 5    | 5    | 5    | 4    |      | 1    | 5    | 4    | 1    | 4    | 2    |
| 14255  | 6     | 6      | 6      |      |      |      |      |      |      |      |      |      |      |      |
| 14257  | 6     | 6      | 6      |      |      |      |      |      |      |      |      |      |      |      |
| 14258  | 6     | 6      | 6      |      |      |      |      |      |      |      |      |      |      |      |
| 14259  | 5     | 5      | 4      | 3    | 3    | 3    | 3    | 3    | 1    | 4    | 3    | 4    | 3    | 2    |
| 14260  |       |        |        |      |      |      |      |      |      |      |      |      |      |      |
| 14261  | 3     | 2      | 3      |      |      |      |      |      |      |      |      |      |      |      |
| 14263  | 4     | 3      | 3      |      |      |      |      |      |      |      |      |      |      |      |
| 14264  | 5     | 5      | 5      |      |      |      |      |      |      |      |      |      |      |      |
| 14266  | 3     | 5      | 3      |      |      |      |      |      |      |      |      |      |      |      |
| 14267  | 3     | 3      | 2      |      |      |      |      |      |      |      |      |      |      |      |
| 14268  | 4     | 4      | 4      | 5    | 5    | 5    | 5    | 5    | 2    | 4    | 5    | 5    | 4    | 5    |
| 14275  | 4     | 4      | 3      |      |      |      |      |      |      |      |      |      |      |      |
| 14278  | 3     | 3      | 2      |      |      |      |      |      |      |      |      |      |      |      |
| 14279  |       |        |        |      |      |      |      |      |      |      |      |      |      |      |
| 14280  |       |        |        |      |      |      |      |      |      |      |      |      |      |      |
| 14281  | 6     | 6      | 6      |      |      |      |      |      |      |      |      |      |      |      |
| 14282  | 2     | 4      | 1      |      |      |      |      |      |      |      |      |      |      |      |
| 14283  | 4     | 3      | 2      | 2    | 2    | 1    | 2    | 2    | 0    | 2    | 0    | 2    | 2    | 2    |
| 14286  | 5     | 5      | 4      |      |      |      |      |      |      |      |      |      |      |      |
| 14287  |       |        |        |      |      |      |      |      |      |      |      |      |      |      |
| 14288  | 6     | 5      | 5      |      |      |      |      |      |      |      |      |      |      |      |
| 14291  |       |        |        |      |      |      |      |      |      |      |      |      |      |      |
| 14292  |       |        |        |      |      |      |      |      |      |      |      |      |      |      |

| respid | Q46x4 | Q46x5a | Q46x5b | Q47a | Q47b | Q47c | Q47d | Q47e | Q47f | Q47g | Q47h | Q47i | Q47j | Q47k |
|--------|-------|--------|--------|------|------|------|------|------|------|------|------|------|------|------|
| 14293  | 4     | 5      | 4      |      |      |      |      |      |      |      |      |      |      |      |
| 14304  | 3     | 3      | 3      |      |      |      |      |      |      |      |      |      |      |      |
| 14308  | 6     | 6      | 6      | 5    | 5    | 5    | 5    | 5    | 3    | 5    | 5    | 5    | 5    |      |
| 14313  | 6     | 6      | 6      |      |      |      |      |      |      |      |      |      |      |      |
| 14314  | 6     | 6      | 6      | 0    | 0    | 0    | 0    | 0    | 0    | 0    | 0    | 0    | 0    | 1    |
| 14316  | 6     | 6      | 6      |      |      |      |      |      |      |      |      |      |      | 1    |
| 14317  | 5     | 5      | 5      | 5    | 4    | 4    | 4    | 5    | 3    | 4    | 3    | 4    | 4    | 3    |
| 14318  | 4     | 4      | 4      |      |      |      |      |      |      |      |      |      |      |      |
| 14319  | 4     | 4      | 5      | 0    | 5    | 0    | 0    | 0    | 0    | 0    | 0    | 5    | 5    | 1    |
| 14320  | 1     | 3      | 1      |      |      |      |      |      |      |      |      |      |      |      |
| 14321  | 5     | 5      | 5      |      |      |      |      |      |      |      |      |      |      |      |
| 14322  | 3     | 4      | 4      |      |      |      |      |      |      |      |      |      |      |      |
| 14326  | 6     | 6      | 6      |      |      |      |      |      |      |      |      |      |      |      |
| 14327  | 2     | 2      | 2      |      |      |      |      |      |      |      |      |      |      |      |
| 14328  |       |        |        |      |      |      |      |      |      |      |      |      |      |      |
| 14330  | 6     | 6      | 6      |      |      |      |      |      |      |      |      |      |      |      |
| 14332  | 4     | 6      | 6      |      |      |      |      |      |      |      |      |      |      |      |
| 14334  | 5     | 5      | 5      |      |      |      |      |      |      |      |      |      |      |      |
| 14336  | 6     | 6      | 6      |      |      |      |      |      |      |      |      |      |      |      |
| 14337  | 5     | 6      | 6      |      |      |      |      |      |      |      |      |      |      |      |
| 14339  |       |        |        |      |      |      |      |      |      |      |      |      |      |      |
| 14340  | 4     | 5      | 5      |      |      |      |      |      |      |      |      |      |      |      |
| 14341  | 4     | 5      | 4      |      |      |      |      |      |      |      |      |      |      |      |
| 14344  | 5     | 5      | 5      | 5    | 4    | 4    | 4    | 5    | 4    | 4    | 4    | 4    | 5    | 5    |
| 14345  | 6     | 4      | 4      | 0    | 4    | 0    | 0    | 0    | 0    | 0    |      | 0    | 1    |      |
| 14346  |       |        |        |      |      |      |      |      |      |      |      |      |      |      |
| 14348  | 5     | 5      | 5      | 5    | 5    | 5    | 5    | 5    | 1    | 5    | 5    | 5    | 5    | 5    |
| 14349  | 4     | 4      | 4      | 1    | 5    | 5    | 4    | 5    | 4    | 4    | 4    | 5    | 5    | 4    |
| 14358  | 3     | 4      | 4      |      |      |      |      |      |      |      |      |      |      |      |
| 14360  | 6     | 6      | 6      |      |      |      |      |      |      |      |      |      |      |      |
| 14362  |       |        |        |      |      |      |      |      |      |      |      |      |      |      |
| 14366  | 5     | 4      | 5      | 3    | 4    | 4    | 4    | 4    | 3    | 3    | 4    | 4    | 4    | 4    |

| respid | Q46x4 | Q46x5a | Q46x5b | Q47a | Q47b | Q47c | Q47d | Q47e | Q47f | Q47g | Q47h | Q47i | Q47j | Q47k |   |
|--------|-------|--------|--------|------|------|------|------|------|------|------|------|------|------|------|---|
| 14367  | 4     | 5      | 5      |      | 2    | 4    | 4    | 4    | 5    | 2    | 4    | 3    | 5    | 4    | 4 |
| 14369  | 4     | 4      | 4      |      | 2    | 4    | 4    | 4    | 4    | 3    | 3    | 3    | 4    | 4    | 3 |
| 14371  | 5     | 5      | 5      |      |      |      |      |      |      |      |      |      |      |      |   |
| 14372  | 6     | 6      | 6      |      |      |      |      |      |      |      |      |      |      |      |   |
| 14374  | 6     | 6      | 6      |      |      |      |      |      |      |      |      |      |      |      |   |
| 14376  | 6     | 6      | 6      |      |      |      |      |      |      |      |      |      |      |      |   |
| 14377  |       |        |        |      |      |      |      |      |      |      |      |      |      |      |   |
| 14378  | 6     | 5      | 5      |      |      |      |      |      |      |      |      |      |      |      |   |
| 14379  | 4     | 4      | 4      |      | 5    | 5    | 5    | 5    | 5    | 2    | 4    | 4    | 5    | 5    | 3 |
| 14381  | 5     | 5      | 5      |      | 4    | 3    | 2    | 3    | 4    | 3    | 4    | 3    | 2    |      | 3 |
| 14383  | 6     | 6      | 6      |      |      |      |      |      |      |      |      |      |      |      |   |
| 14384  | 4     | 4      | 5      |      |      |      |      |      |      |      |      |      |      |      |   |
| 14385  | 2     | 3      | 3      |      |      |      |      |      |      |      |      |      |      |      |   |
| 14386  | 3     | 4      | 4      |      |      |      |      |      |      |      |      |      |      |      |   |
| 14390  | 5     | 4      | 4      |      | 0    | 0    | 0    | 0    |      | 0    | 0    | 0    | 0    | 1    | 1 |
| 14391  | 5     | 5      | 5      |      |      |      |      |      |      |      |      |      |      |      |   |
| 14392  | 5     | 5      | 4      |      | 5    | 4    | 5    | 4    | 5    |      | 4    | 4    |      | 5    |   |
| 14393  | 4     | 4      | 4      |      |      |      |      |      |      |      |      |      |      |      |   |
| 14394  | 4     | 4      | 4      |      |      |      |      |      |      |      |      |      |      |      |   |
| 14395  |       |        |        |      |      |      |      |      |      |      |      |      |      |      |   |
| 14396  |       |        |        |      |      |      |      |      |      |      |      |      |      |      |   |
| 14397  | 5     | 6      | 6      |      | 0    | 0    | 0    | 0    | 0    | 0    | 0    | 0    | 1    | 1    | 1 |
| 14398  | 6     | 6      | 6      |      |      |      |      |      |      |      |      |      |      |      |   |
| 14399  | 6     | 6      | 6      |      |      |      |      |      |      |      |      |      |      |      |   |
| 14400  | 4     | 4      | 4      |      |      |      |      |      |      |      |      |      |      |      |   |
| 14403  | 5     | 5      | 5      |      |      |      |      |      |      |      |      |      |      |      |   |
| 14404  | 4     | 4      | 5      |      |      |      |      |      |      |      |      |      |      |      |   |
| 14405  | 5     | 4      | 5      |      | 4    | 4    | 4    | 4    | 4    | 2    | 4    | 4    | 4    | 4    | 3 |
| 14407  | 4     | 4      | 5      |      | 5    | 2    | 3    | 3    | 4    | 2    | 2    | 2    | 3    | 4    | 3 |
| 14408  | 4     | 4      | 4      |      | 5    | 5    | 5    | 4    | 5    | 4    | 5    | 5    | 4    | 4    | 3 |
| 14410  | 1     | 1      | 1      |      |      |      |      |      |      |      |      |      |      |      |   |
| 14415  | 4     | 4      | 6      |      | 0    | 5    | 5    | 5    | 5    | 0    | 0    | 0    | 0    | 1    | 1 |

| respid | Q46x4 | Q46x5a | Q46x5b | Q47a | Q47b | Q47c | Q47d | Q47e | Q47f | Q47g | Q47h | Q47i | Q47j | Q47k |   |
|--------|-------|--------|--------|------|------|------|------|------|------|------|------|------|------|------|---|
| 14419  | 4     | 4      | 4      |      |      |      |      |      |      |      |      |      |      |      |   |
| 14420  |       |        |        |      |      |      |      |      |      |      |      |      |      |      |   |
| 14421  |       |        |        |      |      |      |      |      |      |      |      |      |      |      |   |
| 14423  | 4     | 4      | 4      | 0    | 2    | 0    | 0    | 0    | 0    | 0    | 0    | 0    | 0    | 1    | 1 |
| 14424  | 5     | 5      | 5      | 4    | 5    | 4    | 4    | 5    | 4    | 5    | 4    | 4    | 4    | 4    | 4 |
| 14425  | 5     | 5      | 5      |      |      |      |      |      |      |      |      |      |      |      |   |
| 14426  | 5     | 5      | 5      | 3    | 4    | 4    | 3    | 4    | 2    | 3    |      |      |      |      |   |
| 14427  | 5     | 5      | 5      |      |      |      |      |      |      |      |      |      |      |      |   |
| 14428  | 1     | 3      | 2      |      |      |      |      |      |      |      |      |      |      |      |   |
| 14431  | 4     | 4      | 4      |      |      |      |      |      |      |      |      |      |      |      |   |
| 14433  | 4     | 4      | 5      | 3    | 3    | 2    | 1    | 4    | 1    | 2    | 1    | 1    | 1    | 2    | 2 |
| 14434  | 5     | 5      | 5      |      |      |      |      |      |      |      |      |      |      |      |   |
| 14435  | 6     | 6      | 6      |      |      |      |      |      |      |      |      |      |      |      |   |
| 14436  | 4     | 4      | 4      |      |      |      |      |      |      |      |      |      |      |      |   |
| 14438  | 5     | 5      | 5      | 5    | 5    | 5    | 5    | 5    | 4    | 5    | 5    | 4    | 4    | 4    | 4 |
| 14442  | 4     | 4      | 4      |      |      |      |      |      |      |      |      |      |      |      |   |
| 14447  | 6     | 6      | 6      | 3    | 4    | 4    | 5    | 5    | 4    | 5    | 4    | 5    | 5    | 5    | 4 |
| 14448  | 5     | 5      | 5      | 4    | 5    | 4    | 4    | 4    | 4    | 3    | 3    | 4    | 4    | 4    | 4 |
| 14450  | 4     | 4      | 4      | 0    | 1    | 0    | 0    | 0    | 0    | 0    | 0    | 0    | 0    | 1    |   |
| 14451  | 6     | 6      | 6      |      |      |      |      |      |      |      |      |      |      |      |   |
| 14454  | 3     | 2      | 4      | 3    | 3    | 4    | 2    | 3    | 3    | 3    | 2    | 2    | 2    | 4    | 3 |
| 14455  | 6     | 6      | 4      |      |      |      |      |      |      |      |      |      |      |      |   |
| 14456  | 4     | 4      | 4      | 2    | 2    | 2    | 3    | 4    | 2    | 4    | 4    | 4    | 4    | 4    | 3 |
| 14457  | 1     | 2      | 3      |      |      |      |      |      |      |      |      |      |      |      |   |
| 14458  | 2     | 3      | 2      |      |      |      |      |      |      |      |      |      |      |      |   |
| 14459  |       |        |        |      |      |      |      |      |      |      |      |      |      |      |   |
| 14460  | 5     | 5      | 5      | 3    | 3    | 3    | 3    |      | 3    | 2    | 4    | 4    | 4    | 5    | 5 |
| 14464  | 3     | 4      | 3      |      |      |      |      |      |      |      |      |      |      |      |   |
| 14465  | 4     | 4      | 4      | 2    | 2    | 2    | 3    | 2    | 2    | 2    | 3    | 2    | 2    | 2    | 2 |
| 14466  | 4     | 4      | 4      | 2    | 2    | 2    | 1    | 2    | 1    | 2    | 3    | 3    | 2    | 2    | 3 |
| 14467  | 6     | 6      | 6      |      |      |      |      |      |      |      |      |      |      |      |   |
| 14470  | 6     | 6      | 6      |      |      |      |      |      |      |      |      |      |      |      |   |

| respid | Q46x4 | Q46x5a | Q46x5b | Q47a | Q47b | Q47c | Q47d | Q47e | Q47f | Q47g | Q47h | Q47i | Q47j | Q47k |
|--------|-------|--------|--------|------|------|------|------|------|------|------|------|------|------|------|
| 14472  | 5     | 5      | 5      | 2    | 2    | 4    | 4    | 5    | 1    | 3    | 4    | 5    | 4    | 2    |
| 14473  | 5     | 5      | 4      |      |      |      |      |      |      |      |      |      |      |      |
| 14474  |       |        |        |      |      |      |      |      |      |      |      |      |      |      |
| 14477  | 6     | 6      | 6      |      |      |      |      |      |      |      |      |      |      |      |
| 14478  | 6     | 5      | 6      |      |      |      |      |      |      |      |      |      |      |      |
| 14479  |       |        |        |      |      |      |      |      |      |      |      |      |      |      |
| 14484  | 5     | 5      | 5      | 5    | 4    | 0    | 0    | 5    | 0    | 0    | 0    | 5    | 4    | 1    |
| 14485  |       |        |        |      |      |      |      |      |      |      |      |      |      |      |
| 14486  | 4     | 5      | 4      |      |      |      |      |      |      |      |      |      |      |      |
| 14487  | 5     | 5      | 5      | 3    | 3    | 2    | 2    | 3    | 3    | 3    | 3    | 3    | 3    | 3    |
| 14488  | 3     | 4      | 3      |      |      |      |      |      |      |      |      |      |      |      |
| 14491  | 5     | 4      | 4      | 3    | 3    | 3    | 2    | 3    | 2    | 4    | 3    | 4    | 4    | 3    |
| 14495  | 5     | 5      | 5      |      |      |      |      |      |      |      |      |      |      |      |
| 14500  | 4     | 4      | 4      |      |      |      |      |      |      |      |      |      |      |      |
| 14502  | 5     | 5      | 5      | 4    | 3    | 4    | 4    | 4    | 3    | 3    | 3    | 4    | 4    | 3    |
| 14504  | 2     | 5      | 2      | 3    | 2    | 2    | 2    | 2    | 2    | 2    | 3    | 2    | 3    | 3    |
| 14505  | 2     | 2      | 3      |      |      |      |      |      |      |      |      |      |      |      |
| 14507  | 4     | 5      | 5      |      |      |      |      |      |      |      |      |      |      |      |
| 14517  | 5     | 4      | 4      |      |      |      |      |      |      |      |      |      |      |      |
| 14518  | 6     | 5      | 5      |      |      |      |      |      |      |      |      |      |      |      |
| 14519  | 4     | 4      | 5      |      |      |      |      |      |      |      |      |      |      |      |
| 14521  | 4     | 4      | 3      | 1    | 2    | 2    | 2    | 2    | 1    | 2    | 2    |      | 2    | 2    |
| 14522  | 5     | 5      | 5      |      |      |      |      |      |      |      |      |      |      |      |
| 14526  | 6     | 6      | 6      |      |      |      |      |      |      |      |      |      |      |      |
| 14528  | 3     | 4      | 4      | 3    | 3    | 4    | 2    | 2    | 2    | 2    | 2    | 1    | 1    | 3    |
| 14529  | 3     | 4      | 4      | 0    | 0    | 0    | 0    |      |      |      |      |      |      |      |
| 14530  | 5     | 4      | 4      | 5    | 4    | 4    | 4    | 5    | 2    | 4    | 3    | 4    | 4    | 4    |
| 14531  | 3     | 3      | 3      | 3    | 2    | 3    | 3    |      |      |      |      |      |      |      |
| 14534  | 5     | 3      | 3      |      |      |      |      |      |      |      |      |      |      |      |
| 14538  | 5     | 5      | 5      | 4    | 3    | 3    | 4    | 3    | 3    | 2    | 3    | 3    | 3    | 3    |
| 14539  | 6     | 6      | 6      | 0    | 0    | 0    | 0    | 0    | 0    | 0    | 0    | 0    | 1    | 1    |
| 14545  | 5     | 5      | 5      |      |      |      |      |      |      |      |      |      |      |      |

| respid | Q46x4 | Q46x5a | Q46x5b | Q47a | Q47b | Q47c | Q47d | Q47e | Q47f | Q47g | Q47h | Q47i | Q47j | Q47k |
|--------|-------|--------|--------|------|------|------|------|------|------|------|------|------|------|------|
| 14546  | 3     | 4      | 3      |      |      |      |      |      |      |      |      |      |      |      |
| 14551  | 5     | 5      | 4      | 3    | 2    | 4    | 2    | 4    | 2    | 4    | 3    | 5    | 4    |      |
| 14553  | 4     | 4      | 4      |      |      |      |      |      |      |      |      |      |      |      |
| 14557  |       |        |        |      |      |      |      |      |      |      |      |      |      |      |
| 14558  | 5     | 5      | 5      | 4    | 4    | 4    | 4    | 4    | 2    | 3    | 3    | 3    | 3    | 3    |
| 14559  | 2     | 3      | 3      | 2    | 2    | 2    | 2    | 2    | 2    | 2    | 2    | 2    | 2    | 2    |
| 14560  | 4     | 4      | 4      |      |      |      |      |      |      |      |      |      |      |      |
| 14563  | 4     | 4      | 4      |      |      |      |      |      |      |      |      |      |      |      |
| 14565  | 6     | 6      | 6      |      |      |      |      |      |      |      |      |      |      |      |
| 14571  | 1     | 3      | 2      |      |      |      |      |      |      |      |      |      |      |      |
| 14572  | 5     | 5      | 5      | 3    | 3    | 2    | 3    | 3    | 3    | 3    | 3    | 3    | 3    | 2    |
| 14573  | 4     | 4      | 3      |      |      |      |      |      |      |      |      |      |      |      |
| 14575  | 6     | 6      | 6      |      |      |      |      |      |      |      |      |      |      |      |
| 14576  | 3     | 4      | 4      | 2    | 3    | 3    | 3    | 3    | 2    | 2    | 3    | 3    | 3    | 3    |
| 14578  | 5     | 5      | 4      |      |      |      |      |      |      |      |      |      |      |      |
| 14579  | 5     | 5      | 5      | 0    | 2    | 0    | 0    | 0    | 0    | 0    | 0    | 0    | 2    |      |
| 14580  | 5     | 5      | 5      | 4    | 3    | 2    | 3    | 3    | 3    | 3    | 3    | 3    | 3    | 4    |
| 14582  | 6     | 6      | 6      |      |      |      |      |      |      |      |      |      |      |      |
| 14585  | 4     | 3      | 4      |      |      |      |      |      |      |      |      |      |      |      |
| 14588  | 5     | 4      | 4      |      |      |      |      |      |      |      |      |      |      |      |
| 14590  | 4     | 4      | 3      | 2    | 3    | 3    | 2    | 2    | 2    | 3    | 2    | 3    | 3    | 3    |
| 14592  | 3     | 2      | 3      |      |      |      |      |      |      |      |      |      |      |      |
| 14593  | 5     | 5      | 4      | 4    | 2    | 3    | 3    |      | 3    | 3    | 2    | 4    | 4    | 3    |
| 14595  | 4     | 5      | 5      | 2    | 2    | 2    | 2    | 4    | 1    | 2    | 3    | 3    | 3    | 3    |
| 14597  | 5     | 5      | 5      |      |      |      |      |      |      |      |      |      |      |      |
| 14600  | 5     | 5      | 5      | 0    | 0    |      |      | 0    | 0    | 0    | 0    | 0    | 1    | 1    |
| 14602  | 3     | 3      | 3      |      |      |      |      |      |      |      |      |      |      |      |
| 14604  | 5     | 4      | 5      | 4    | 4    | 4    | 4    | 4    | 4    | 4    | 4    | 4    | 4    | 4    |
| 14605  | 5     | 5      | 5      | 1    | 4    | 5    | 4    | 4    | 3    | 4    | 3    | 4    |      | 3    |
| 14609  | 4     | 4      | 4      |      |      |      |      |      |      |      |      |      |      |      |
| 14610  | 5     | 5      | 4      | 5    | 5    | 5    | 5    | 5    | 2    | 5    | 4    | 5    | 5    | 5    |
| 14611  | 6     | 5      | 5      |      | 4    | 5    | 4    | 4    | 2    | 4    | 3    | 5    | 2    | 3    |

| respid | Q46x4 | Q46x5a | Q46x5b | Q47a | Q47b | Q47c | Q47d | Q47e | Q47f | Q47g | Q47h | Q47i | Q47j | Q47k |   |
|--------|-------|--------|--------|------|------|------|------|------|------|------|------|------|------|------|---|
| 14612  | 5     | 5      | 5      | 3    | 3    | 3    | 2    | 2    | 2    | 2    | 2    | 2    | 3    | 3    | 2 |
| 14614  | 4     | 4      | 4      | 3    | 4    | 3    | 3    | 2    | 2    | 3    | 3    | 2    | 3    | 3    |   |
| 14615  | 5     | 5      | 4      |      |      |      |      |      |      |      |      |      |      |      |   |
| 14618  | 3     | 3      | 3      |      |      |      |      |      |      |      |      |      |      |      |   |
| 14621  |       |        |        |      |      |      |      |      |      |      |      |      |      |      |   |
| 14624  | 4     | 4      | 4      |      |      |      |      |      |      |      |      |      |      |      |   |
| 14626  | 6     | 6      | 6      |      |      |      |      |      |      |      |      |      |      |      |   |
| 14627  | 4     | 4      | 4      |      |      |      |      |      |      |      |      |      |      |      |   |
| 14628  | 2     | 5      | 1      |      |      |      |      |      |      |      |      |      |      |      |   |
| 14631  | 5     | 5      | 4      | 3    | 4    | 4    | 3    | 3    | 3    | 2    | 2    | 3    | 4    | 3    |   |
| 14633  | 4     | 4      | 4      | 3    | 3    | 3    | 2    | 1    | 2    | 2    | 2    | 2    | 3    | 3    |   |
| 14642  | 3     | 3      | 3      | 3    | 2    | 2    | 2    | 4    | 3    | 2    | 3    | 2    | 3    | 2    |   |
| 14647  | 5     | 5      | 5      |      |      |      |      |      |      |      |      |      |      |      |   |
| 14658  | 4     | 5      | 4      | 4    | 3    | 4    | 4    | 5    | 1    | 2    | 2    | 2    | 3    | 3    |   |
| 14659  | 3     | 4      | 4      | 3    | 2    | 2    | 2    | 2    | 2    | 2    | 2    | 2    | 4    | 2    |   |
| 14660  | 3     | 4      | 4      | 3    | 3    | 3    | 3    | 3    | 4    | 3    | 4    | 3    | 4    | 3    |   |
| 14661  | 5     | 5      | 5      | 3    | 2    | 4    | 3    | 4    | 2    | 2    | 3    | 2    | 3    | 3    |   |
| 14662  | 2     | 2      | 3      | 3    | 1    | 2    | 4    | 1    | 0    | 2    | 1    | 2    | 3    | 4    |   |
| 14663  | 5     | 5      | 5      | 3    | 4    | 4    | 4    | 5    | 2    | 2    | 3    | 4    | 3    | 3    |   |
| 14670  | 5     | 5      | 5      | 3    | 3    | 2    | 3    | 1    | 1    | 1    | 1    | 2    | 2    | 2    |   |
| 14671  |       |        |        |      |      |      |      |      |      |      |      |      |      |      |   |
| 14672  | 3     | 4      | 3      | 2    | 2    | 4    | 2    | 2    | 2    | 1    | 3    | 1    | 3    | 3    |   |
| 14675  | 3     | 4      | 3      | 4    | 4    | 4    | 4    | 5    | 3    | 3    | 3    | 4    | 4    | 4    |   |
| 14676  | 5     | 4      | 4      | 3    | 3    | 3    | 1    | 3    | 3    | 3    | 3    | 1    | 3    | 2    |   |
| 14677  | 3     | 2      | 3      |      |      |      |      |      |      |      |      |      |      |      |   |
| 14678  | 5     | 4      | 5      | 4    | 3    | 3    | 2    | 4    | 2    | 2    | 3    | 3    | 3    | 3    |   |
| 14681  | 4     | 4      | 4      | 2    | 2    | 2    | 2    | 2    | 2    | 2    | 2    | 2    | 2    | 2    |   |
| 14684  | 5     | 5      | 5      |      |      |      |      |      |      |      |      |      |      |      |   |
| 14688  | 5     | 5      | 5      | 4    | 5    |      | 5    | 5    | 0    | 5    | 5    | 5    | 5    | 5    |   |
| 14690  | 3     | 4      | 4      | 3    | 3    | 3    | 3    | 4    | 3    | 3    | 3    | 3    | 3    | 3    |   |
| 14694  | 3     | 3      | 2      | 2    | 2    | 3    | 2    | 2    | 2    | 2    | 2    | 1    | 2    | 3    |   |
| 14696  | 3     | 4      | 4      | 3    | 4    | 4    | 4    | 4    | 4    | 4    | 4    | 4    | 4    | 4    |   |

| respid | Q46x4 | Q46x5a | Q46x5b | Q47a | Q47b | Q47c | Q47d | Q47e | Q47f | Q47g | Q47h | Q47i | Q47j | Q47k |   |
|--------|-------|--------|--------|------|------|------|------|------|------|------|------|------|------|------|---|
| 14700  |       |        |        |      |      |      |      |      |      |      |      |      |      |      |   |
| 14701  | 6     | 6      | 6      | 0    | 0    | 0    | 0    | 0    | 0    | 0    | 0    | 0    | 0    | 1    | 1 |
| 14703  | 3     | 3      | 3      |      |      |      |      |      |      |      |      |      |      |      |   |
| 14707  | 4     | 3      | 3      | 2    | 3    | 4    |      | 4    | 3    | 3    | 4    | 3    | 3    | 3    | 3 |
| 14711  | 2     | 4      | 3      | 2    | 3    | 2    | 4    | 2    | 2    | 3    | 2    | 2    | 3    | 2    | 2 |
| 14714  | 6     | 5      | 6      | 5    | 4    | 4    | 3    | 5    | 2    | 4    | 5    | 3    | 4    | 4    | 4 |
| 14715  | 3     | 2      | 3      |      |      |      |      |      |      |      |      |      |      |      |   |
| 14716  | 5     | 5      | 5      |      |      |      |      |      |      |      |      |      |      |      |   |
| 14720  | 5     | 4      | 4      | 5    | 5    | 5    | 5    | 5    | 3    | 5    | 4    | 5    | 5    | 4    | 4 |
| 14725  | 6     | 6      | 2      |      |      |      |      |      |      |      |      |      |      |      |   |
| 14726  | 5     | 5      | 5      |      |      |      |      |      |      |      |      |      |      |      |   |
| 14734  | 5     | 5      | 5      | 4    | 4    | 3    | 3    | 5    | 3    | 4    | 4    | 4    | 4    | 4    | 4 |
| 14735  | 5     | 5      | 5      | 5    | 4    | 5    | 5    | 4    | 3    | 4    | 4    | 4    | 4    | 5    | 4 |
| 14736  | 4     | 4      | 4      | 2    | 2    | 2    | 2    | 2    | 2    | 2    | 2    | 2    | 2    | 2    | 3 |
| 14740  | 5     | 5      | 5      | 5    | 4    |      | 4    | 5    | 3    | 4    | 4    | 4    | 4    | 5    | 4 |
| 14745  | 5     | 5      | 5      | 4    | 5    | 5    | 4    | 5    | 4    | 3    | 4    | 3    | 4    | 4    | 4 |
| 14747  | 5     | 5      | 5      | 4    | 4    | 5    | 4    | 5    | 4    | 3    | 4    | 4    | 4    | 5    | 4 |
| 14750  | 3     | 3      | 4      | 2    | 3    | 2    | 3    | 1    | 3    | 3    | 3    | 3    | 3    | 2    | 3 |
| 14751  | 5     | 5      | 5      | 4    | 5    | 4    | 3    | 4    | 4    | 4    | 4    | 4    | 4    | 5    | 4 |
| 14753  | 5     | 5      | 5      | 4    | 3    | 5    | 4    | 3    | 2    | 3    | 3    | 3    | 3    | 3    | 3 |
| 14756  | 3     | 3      | 4      |      |      |      |      |      |      |      |      |      |      |      |   |
| 14780  | 4     | 4      | 4      |      |      |      |      |      |      |      |      |      |      |      |   |
| 14782  | 5     | 5      | 5      | 2    | 5    | 5    | 4    | 4    | 2    | 4    | 3    | 3    | 4    | 4    | 4 |
| 14800  | 3     | 2      | 2      |      |      |      |      |      |      |      |      |      |      |      |   |
| 14801  | 5     | 5      | 5      |      |      |      |      |      |      |      |      |      |      |      |   |
| 14802  | 3     | 3      | 3      |      |      |      |      |      |      |      |      |      |      |      |   |
| 14805  | 4     | 4      | 5      |      |      |      |      |      |      |      |      |      |      |      |   |
| 14811  | 3     | 3      | 3      | 2    | 2    | 2    | 2    | 1    | 2    | 2    | 2    | 2    | 2    | 2    | 2 |
| 14814  | 4     | 4      | 4      |      |      |      |      |      |      |      |      |      |      |      |   |
| 14822  | 2     | 3      | 1      |      |      |      |      |      |      |      |      |      |      |      |   |
| 14827  | 3     | 3      | 4      |      |      |      |      |      |      |      |      |      |      |      |   |
| 14828  | 3     | 3      | 3      | 2    | 3    | 3    | 3    | 2    | 2    | 2    | 3    | 3    | 3    | 3    | 3 |



| respid | Q46x4 | Q46x5a | Q46x5b | Q47a | Q47b | Q47c | Q47d | Q47e | Q47f | Q47g | Q47h | Q47i | Q47j | Q47k |
|--------|-------|--------|--------|------|------|------|------|------|------|------|------|------|------|------|
| 14830  |       |        |        |      |      |      |      |      |      |      |      |      |      |      |
| 14832  | 2     | 1      | 1      |      |      |      |      |      |      |      |      |      |      |      |
| 14835  | 4     | 4      | 4      |      |      |      |      |      |      |      |      |      |      |      |
| 14841  |       |        |        |      |      |      |      |      |      |      |      |      |      |      |
| 14849  | 4     | 4      | 5      |      |      |      |      |      |      |      |      |      |      |      |
| 14850  |       |        |        |      |      |      |      |      |      |      |      |      |      |      |
| 14851  | 5     | 5      | 5      |      |      |      |      | 4    |      |      |      |      |      |      |
| 14856  | 3     | 3      | 3      |      |      |      |      |      |      |      |      |      |      |      |
| 14862  | 2     | 3      | 2      |      |      |      |      |      |      |      |      |      |      |      |
| 14863  | 5     | 5      | 5      |      |      |      |      |      |      |      |      |      |      |      |
| 14864  | 5     | 4      | 4      |      |      |      |      |      |      |      |      |      |      |      |
| 14866  | 6     | 6      | 6      |      |      |      |      |      |      |      |      |      |      |      |
| 14867  | 2     | 4      | 2      |      |      |      |      |      |      |      |      |      |      |      |
| 14868  | 5     | 5      | 5      | 5    | 4    | 5    | 5    | 5    | 3    | 5    | 3    | 5    | 5    | 4    |
| 14870  | 5     | 5      | 5      |      |      |      |      |      |      |      |      |      |      |      |
| 14873  |       |        |        |      |      |      |      |      |      |      |      |      |      |      |
| 14878  | 5     | 5      | 5      |      |      |      |      |      |      |      |      |      |      |      |
| 14879  |       |        |        |      |      |      |      |      |      |      |      |      |      |      |
| 14881  | 4     | 3      | 3      |      |      |      |      |      |      |      |      |      |      |      |
| 14888  | 2     | 2      | 1      |      |      |      |      |      |      |      |      |      |      |      |
| 14895  | 4     | 5      | 5      |      |      |      |      |      |      |      |      |      |      |      |
| 14900  | 3     | 2      | 1      |      |      |      |      |      |      |      |      |      |      |      |
| 14912  |       |        |        |      |      |      |      |      |      |      |      |      |      |      |
| 14922  | 2     | 2      | 2      |      |      |      |      |      |      |      |      |      |      |      |
| 14923  | 2     | 1      | 2      |      |      |      |      |      |      |      |      |      |      |      |
| 14924  | 4     | 4      | 4      | 2    | 3    | 4    | 2    | 3    | 1    | 2    | 2    | 4    | 4    | 2    |
| 14925  | 2     | 2      | 3      |      |      |      |      |      |      |      |      |      |      |      |
| 14926  | 5     | 5      | 5      |      |      |      |      |      |      |      |      |      |      |      |
| 14927  | 3     | 4      | 4      |      |      |      |      |      |      |      |      |      |      |      |
| 14930  | 3     | 2      | 4      |      |      |      |      |      |      |      |      |      |      |      |
| 14937  | 3     | 3      | 3      |      |      |      |      |      |      |      |      |      |      |      |
| 14938  | 3     | 1      | 3      |      |      |      |      |      |      |      |      |      |      |      |

| respid | Q46x4 | Q46x5a | Q46x5b | Q47a | Q47b | Q47c | Q47d | Q47e | Q47f | Q47g | Q47h | Q47i | Q47j | Q47k |
|--------|-------|--------|--------|------|------|------|------|------|------|------|------|------|------|------|
| 14939  | 2     | 2      | 2      |      |      |      |      |      |      |      |      |      |      |      |
| 14942  |       |        |        |      |      |      |      |      |      |      |      |      |      |      |
| 14943  |       |        |        |      |      |      |      |      |      |      |      |      |      |      |
| 14953  | 4     | 5      | 5      |      |      |      |      |      |      |      |      |      |      |      |
| 14954  | 4     | 5      | 5      |      |      |      |      |      |      |      |      |      |      |      |
| 14955  | 3     | 4      | 4      |      | 0    | 0    | 0    | 0    | 0    | 0    | 0    | 0    | 1    | 1    |
| 14957  | 4     | 4      | 4      |      |      |      |      |      |      |      |      |      |      |      |
| 14958  | 2     | 1      | 1      |      |      |      |      |      |      |      |      |      |      |      |
| 14959  | 3     | 4      | 3      |      |      |      |      |      |      |      |      |      |      |      |
| 14961  |       |        |        |      |      |      |      |      |      |      |      |      |      |      |
| 14963  | 3     | 3      | 4      |      |      |      |      |      |      |      |      |      |      |      |
| 14964  | 6     | 6      | 6      |      |      |      | 2    | 3    | 4    | 1    | 3    | 3    | 3    | 3    |
| 14965  | 4     | 4      | 5      |      |      |      |      |      |      |      |      |      |      |      |
| 14967  | 3     | 2      | 2      |      |      |      |      |      |      |      |      |      |      |      |
| 14970  | 4     | 3      | 3      |      |      |      |      |      |      |      |      |      |      |      |
| 14972  | 4     | 3      | 3      |      |      |      |      |      |      |      |      |      |      |      |
| 14975  | 1     | 2      | 3      |      |      |      |      |      |      |      |      |      |      |      |
| 14977  | 4     | 5      | 4      |      |      |      |      |      |      |      |      |      |      |      |
| 14982  | 6     | 6      | 6      | 2    | 3    | 4    | 4    | 4    | 2    | 3    | 2    | 3    | 3    | 4    |
| 14985  | 4     | 3      | 3      |      |      |      |      |      |      |      |      |      |      |      |
| 14986  |       |        |        |      |      |      |      |      |      |      |      |      |      |      |
| 14987  |       |        |        |      |      |      |      |      |      |      |      |      |      |      |
| 14988  | 2     | 2      | 4      |      |      |      |      |      |      |      |      |      |      |      |
| 14989  | 6     | 6      | 6      |      |      |      |      |      |      |      |      |      |      |      |
| 14993  | 4     | 4      | 3      |      |      |      |      |      |      |      |      |      |      |      |
| 15001  | 6     | 6      | 6      | 0    |      | 1    |      |      |      |      |      |      |      |      |
| 15002  | 3     | 5      | 1      |      |      |      |      |      |      |      |      |      |      |      |
| 15006  | 4     | 4      | 3      |      |      |      |      |      |      |      |      |      |      |      |
| 15007  | 5     | 4      | 4      |      |      |      |      |      |      |      |      |      |      |      |
| 15014  | 2     | 2      | 2      |      |      |      |      |      |      |      |      |      |      |      |
| 15020  | 4     | 4      | 4      |      |      |      |      |      |      |      |      |      |      |      |
| 15021  | 4     | 3      | 3      |      |      |      |      |      |      |      |      |      |      |      |

| respid | Q46x4 | Q46x5a | Q46x5b | Q47a | Q47b | Q47c | Q47d | Q47e | Q47f | Q47g | Q47h | Q47i | Q47j | Q47k |   |
|--------|-------|--------|--------|------|------|------|------|------|------|------|------|------|------|------|---|
| 15023  |       | 2      | 1      | 1    |      |      |      |      |      |      |      |      |      |      |   |
| 15030  |       | 4      | 4      | 4    |      |      |      |      |      |      |      |      |      |      |   |
| 15032  |       |        |        |      |      |      |      |      |      |      |      |      |      |      |   |
| 15033  |       | 4      | 4      | 4    |      |      |      |      |      |      |      |      |      |      |   |
| 15034  |       | 5      | 4      | 4    |      | 2    | 3    |      |      |      |      |      | 2    |      |   |
| 15035  |       | 4      | 5      | 5    |      |      |      |      |      |      |      |      |      |      |   |
| 15037  |       | 5      | 5      | 5    | 4    | 5    | 3    | 4    | 4    | 3    | 3    | 4    | 4    | 5    | 4 |
| 15039  |       | 3      | 4      | 5    |      |      |      |      |      |      |      |      |      |      |   |
| 15040  |       | 6      | 6      | 6    |      |      |      |      |      |      |      |      |      |      |   |
| 15042  |       | 4      | 5      | 5    |      |      |      |      |      |      |      |      |      |      |   |
| 15044  |       |        |        |      |      |      |      |      |      |      |      |      |      |      |   |
| 15045  |       | 6      | 6      | 6    |      |      |      |      |      |      |      |      |      |      |   |
| 15046  |       | 4      | 3      | 3    | 4    | 4    | 5    | 5    | 4    | 3    | 3    | 4    | 3    | 4    | 4 |
| 15052  |       | 2      | 2      | 3    |      |      |      |      |      |      |      |      |      |      |   |
| 15058  |       | 4      | 4      | 1    |      |      |      |      |      |      |      |      |      |      |   |
| 15063  |       | 3      | 3      | 3    |      |      |      |      |      |      |      |      |      |      |   |
| 15066  |       | 4      | 4      | 4    |      |      |      |      |      |      |      |      |      |      |   |
| 15069  |       | 2      | 4      | 4    | 4    | 4    | 4    | 4    | 5    | 3    | 3    | 4    | 4    | 4    | 4 |
| 15071  |       | 4      | 4      | 4    |      |      |      |      |      |      |      |      |      |      |   |
| 15076  |       | 3      | 2      | 3    | 1    | 2    | 2    | 1    | 2    | 1    | 3    | 2    | 2    | 3    | 3 |
| 15078  |       | 6      | 6      | 6    |      |      |      |      |      |      |      |      |      |      |   |
| 15087  |       | 4      | 4      | 4    |      |      |      |      |      |      |      |      |      |      |   |
| 15090  |       | 2      | 3      | 2    |      |      |      |      |      |      |      |      |      |      |   |
| 15091  |       | 3      | 4      | 6    |      |      |      |      |      |      |      |      |      |      |   |
| 15092  |       | 4      | 4      | 4    |      |      |      |      |      |      |      |      |      |      |   |
| 15096  |       | 4      | 4      | 4    |      |      |      |      |      |      |      |      |      |      |   |
| 15106  |       | 2      | 3      | 3    |      |      |      |      |      |      |      |      |      |      |   |
| 15108  |       |        |        |      |      |      |      |      |      |      |      |      |      |      |   |
| 15113  |       | 5      | 5      | 2    |      |      |      |      |      |      |      |      |      |      |   |
| 15116  |       |        |        |      |      |      |      |      |      |      |      |      |      |      |   |
| 15119  |       | 4      | 3      | 3    | 3    | 4    | 4    | 4    | 3    | 3    | 4    | 4    | 4    | 4    | 4 |
| 15120  |       | 3      | 3      | 2    | 2    | 3    | 2    | 2    | 1    | 3    | 2    | 1    | 1    | 3    | 2 |

| respid | Q46x4 | Q46x5a | Q46x5b | Q47a | Q47b | Q47c | Q47d | Q47e | Q47f | Q47g | Q47h | Q47i | Q47j | Q47k |   |
|--------|-------|--------|--------|------|------|------|------|------|------|------|------|------|------|------|---|
| 15121  | 4     | 5      | 5      | 4    | 3    | 3    | 3    | 3    | 3    | 1    | 3    | 3    | 2    | 3    | 2 |
| 15123  |       |        |        |      |      |      |      |      |      |      |      |      |      |      |   |
| 15124  | 5     | 5      | 5      |      |      |      |      |      |      |      |      |      |      |      |   |
| 15128  | 5     | 5      | 4      |      |      |      |      |      |      |      |      |      |      |      |   |
| 15131  |       |        |        |      |      |      |      |      |      |      |      |      |      |      |   |
| 15136  | 4     | 5      | 1      |      |      |      |      |      |      |      |      |      |      |      |   |
| 15137  | 4     | 4      | 4      |      |      |      |      |      |      |      |      |      |      |      |   |
| 15141  | 4     | 5      | 5      | 4    | 4    | 5    | 5    | 5    | 4    | 4    | 4    | 4    | 4    | 4    | 4 |
| 15144  | 3     | 5      | 4      |      |      |      |      |      |      |      |      |      |      |      |   |
| 15147  | 4     | 4      | 4      | 3    | 4    | 4    | 5    | 3    | 3    | 3    | 4    | 4    | 4    | 5    | 4 |
| 15151  | 4     | 4      | 3      |      |      |      |      |      |      |      | 1    |      | 2    | 2    | 1 |
| 15154  | 3     | 3      | 4      |      |      |      |      |      |      |      |      |      |      |      |   |
| 15157  | 4     | 5      | 4      | 3    | 4    | 4    | 2    | 2    | 2    | 2    | 0    | 3    | 1    | 3    | 2 |
| 15164  | 4     | 4      | 4      |      |      |      |      |      |      |      |      |      |      |      |   |
| 15168  | 3     | 3      | 3      | 2    | 2    | 2    | 1    | 1    | 1    | 1    | 1    | 2    | 4    | 1    | 2 |
| 15169  | 4     | 4      | 4      | 4    | 5    | 5    | 4    | 4    | 4    | 4    | 4    | 5    | 4    | 5    | 5 |
| 15172  | 3     | 3      | 2      |      |      |      |      |      |      |      |      |      |      |      |   |
| 15177  | 3     | 3      | 3      |      |      |      |      |      |      |      |      |      |      |      |   |
| 15178  |       |        |        |      |      |      |      |      |      |      |      |      |      |      |   |
| 15180  | 2     | 2      | 2      |      |      |      |      |      |      |      |      |      |      |      |   |
| 15181  | 5     | 5      | 5      | 5    | 5    | 5    | 5    | 5    | 4    | 5    | 4    | 4    | 4    | 4    | 4 |
| 15182  | 4     | 4      | 4      | 3    | 3    | 3    | 3    | 4    | 1    | 3    | 3    | 2    | 3    | 3    | 2 |
| 15183  |       |        |        |      |      |      |      |      |      |      |      |      |      |      |   |
| 15188  | 3     | 2      | 2      |      |      |      |      |      |      |      |      |      |      |      |   |
| 15190  | 2     | 2      | 3      |      |      |      |      |      |      |      |      |      |      |      |   |
| 15195  |       |        |        |      |      |      |      |      |      |      |      |      |      |      |   |
| 15201  | 1     | 2      | 3      |      |      |      |      |      |      |      |      |      |      |      |   |
| 15203  | 5     | 6      | 3      | 3    | 1    | 2    | 1    | 3    | 1    | 1    | 1    | 1    | 1    | 2    | 2 |
| 15204  | 5     | 5      | 5      | 4    | 4    | 5    | 5    | 5    | 5    | 5    | 5    | 5    | 5    | 5    | 5 |
| 15207  |       |        |        |      |      |      |      |      |      |      |      |      |      |      |   |
| 15208  | 2     | 2      | 1      |      |      |      |      |      |      |      |      |      |      |      |   |
| 15209  | 4     | 5      | 5      | 4    | 4    | 4    | 4    | 5    | 4    | 4    | 4    | 4    | 4    | 4    | 4 |

| respid | Q46x4 | Q46x5a | Q46x5b | Q47a | Q47b | Q47c | Q47d | Q47e | Q47f | Q47g | Q47h | Q47i | Q47j | Q47k |
|--------|-------|--------|--------|------|------|------|------|------|------|------|------|------|------|------|
| 15212  |       |        |        |      |      |      |      |      |      |      |      |      |      |      |
| 15213  | 4     | 4      | 4      |      | 3    |      |      |      |      | 1    |      |      |      |      |
| 15219  | 4     | 4      | 4      |      |      |      |      | 2    |      |      |      |      |      |      |
| 15220  | 4     | 5      | 5      | 4    | 3    | 3    | 3    | 4    | 1    | 3    | 3    | 3    | 2    | 2    |
| 15221  | 4     | 5      | 5      |      |      |      |      |      |      |      |      |      |      |      |
| 15223  | 2     | 2      | 2      |      |      |      |      |      |      |      |      |      |      |      |
| 15224  | 4     | 4      | 4      |      |      |      |      |      |      |      |      |      |      |      |
| 15225  | 5     | 5      | 5      |      |      |      |      |      |      |      |      |      |      |      |
| 15226  | 4     | 4      | 4      |      |      |      |      |      |      |      |      |      |      |      |
| 15230  | 4     | 4      | 5      |      |      |      |      |      |      |      |      |      |      |      |
| 15231  | 3     | 2      | 1      |      |      |      |      |      |      |      |      |      |      |      |
| 15232  | 6     | 5      | 5      | 4    | 3    | 3    | 4    | 3    | 2    | 2    | 3    | 4    | 4    | 3    |
| 15237  | 5     | 5      | 5      | 4    |      |      |      |      | 3    |      | 3    | 2    | 4    |      |
| 15239  | 5     | 4      | 4      |      |      |      |      |      |      |      |      |      |      |      |
| 15241  | 5     | 5      | 5      |      |      |      |      |      |      |      |      |      |      |      |
| 15242  | 5     | 5      | 5      | 0    | 0    |      |      |      |      |      |      |      |      |      |
| 15247  | 4     | 4      | 4      |      |      |      |      |      |      |      |      |      |      |      |
| 15248  |       |        |        |      |      |      |      |      |      |      |      |      |      |      |
| 15251  |       |        |        |      |      |      |      |      |      |      |      |      |      |      |
| 15257  |       |        |        |      |      |      |      |      |      |      |      |      |      |      |
| 15260  | 4     | 4      | 4      |      |      |      |      |      |      |      |      |      |      |      |
| 15261  | 2     | 2      | 3      | 1    | 1    | 1    | 2    | 1    | 1    | 2    | 2    | 3    | 2    | 3    |
| 15262  | 4     | 4      | 4      | 3    | 3    | 3    | 3    | 3    | 1    | 2    | 2    | 2    | 2    | 2    |
| 15263  | 5     | 5      | 5      | 5    | 4    | 4    | 5    | 5    | 2    | 5    | 4    | 5    | 4    | 3    |
| 15265  | 4     | 4      | 4      |      |      |      |      |      |      |      |      |      |      |      |
| 15266  | 2     | 4      | 4      | 3    | 3    | 4    | 2    | 2    | 4    | 3    | 3    | 5    | 5    | 5    |
| 15268  | 5     | 4      | 4      | 4    | 3    | 4    | 2    | 2    | 2    | 2    | 3    | 3    | 3    | 3    |
| 15269  | 6     | 6      | 6      | 0    | 0    | 0    | 0    | 0    | 0    | 0    | 0    | 0    | 1    | 1    |
| 15270  | 2     | 3      | 3      | 2    | 4    | 4    | 3    | 4    | 4    | 4    | 3    | 5    | 3    | 4    |
| 15273  | 3     | 2      | 3      |      |      |      |      |      |      |      |      |      |      |      |
| 15276  | 2     | 4      | 2      | 2    | 1    | 2    | 1    | 0    | 3    | 1    | 1    | 3    | 2    | 3    |
| 15277  | 4     | 4      | 4      |      |      |      |      |      |      |      |      |      |      |      |

| respid | Q46x4 | Q46x5a | Q46x5b | Q47a | Q47b | Q47c | Q47d | Q47e | Q47f | Q47g | Q47h | Q47i | Q47j | Q47k |
|--------|-------|--------|--------|------|------|------|------|------|------|------|------|------|------|------|
| 15282  | 1     | 1      | 1      |      |      |      |      |      |      |      |      |      |      |      |
| 15284  | 4     | 3      | 4      | 3    | 3    | 3    | 4    | 3    | 1    | 3    | 3    | 3    | 3    | 2    |
| 15285  | 2     | 4      | 5      | 0    | 4    | 0    | 0    | 0    | 0    | 0    | 0    | 0    | 3    | 1    |
| 15286  | 3     | 4      | 1      |      |      |      |      |      |      |      |      |      |      |      |
| 15288  | 2     | 4      | 3      | 4    | 4    | 3    | 3    | 4    | 4    | 3    | 3    | 3    | 4    | 3    |
| 15292  | 2     | 2      | 3      | 1    | 1    | 1    | 1    | 2    | 2    | 2    | 2    | 2    | 3    | 3    |
| 15296  | 5     | 5      | 4      |      |      |      |      |      |      |      |      |      |      |      |
| 15297  | 3     | 4      | 4      |      |      |      |      |      |      |      |      |      |      |      |
| 15298  |       |        |        |      |      |      |      |      |      |      |      |      |      |      |
| 15301  | 4     | 5      | 5      |      |      |      |      |      |      |      |      |      |      |      |
| 15302  | 5     | 5      | 5      | 4    | 3    | 3    | 4    | 4    | 3    | 3    | 3    | 3    | 4    | 3    |
| 15305  | 4     | 5      | 5      | 4    | 4    | 4    | 4    | 5    | 4    | 4    | 4    | 4    | 4    | 3    |
| 15307  | 4     | 5      | 5      | 5    | 5    | 5    | 5    | 5    | 4    | 4    | 4    | 5    | 4    | 4    |
| 15308  | 5     | 5      | 4      |      |      |      |      |      |      |      |      |      |      |      |
| 15309  | 5     | 5      | 5      | 5    | 5    | 5    | 5    | 5    | 2    | 3    | 3    | 5    | 5    | 5    |
| 15311  | 4     | 4      | 3      | 0    | 5    | 0    | 0    | 0    | 0    | 0    | 0    | 0    |      | 1    |
| 15315  | 5     | 5      | 5      | 4    | 3    | 3    | 4    | 4    | 2    | 4    | 3    | 3    | 4    | 4    |
| 15316  | 4     | 4      | 4      |      |      |      |      |      |      |      |      |      |      |      |
| 15318  |       |        |        |      |      |      |      |      |      |      |      |      |      |      |
| 15321  | 3     | 2      | 1      | 3    | 1    | 2    | 1    | 1    | 1    | 1    | 3    | 2    | 3    | 2    |
| 15322  | 5     | 5      | 5      | 0    | 1    | 0    | 0    | 0    | 0    | 0    | 0    | 0    | 1    | 1    |
| 15324  | 4     | 4      | 4      |      |      |      |      |      |      |      |      |      |      |      |
| 15326  | 5     | 5      | 5      | 4    | 3    | 4    | 4    | 4    | 2    | 2    | 3    | 3    | 4    | 3    |
| 15327  | 5     | 5      | 4      | 4    | 4    | 3    | 3    | 4    | 1    | 4    | 4    | 5    | 5    | 4    |
| 15328  | 3     | 5      | 4      |      |      |      |      |      |      |      |      |      |      |      |
| 15330  | 4     | 5      | 4      |      |      |      |      |      |      |      |      |      |      |      |
| 15332  | 4     | 4      | 4      | 0    | 0    | 0    | 0    | 0    | 0    | 0    | 0    | 0    | 1    | 1    |
| 15333  |       |        |        |      |      |      |      |      |      |      |      |      |      |      |
| 15334  | 5     | 4      | 5      | 2    | 1    | 2    | 2    | 2    | 1    | 1    | 1    | 2    | 2    | 2    |
| 15336  | 2     | 3      | 3      | 2    | 1    | 2    | 1    | 1    | 1    | 3    | 2    | 3    | 2    | 3    |
| 15337  | 5     | 5      | 5      |      |      |      |      |      |      |      |      |      |      |      |
| 15338  | 4     | 4      | 4      |      |      |      |      |      |      |      |      |      |      |      |

| respid | Q46x4 | Q46x5a | Q46x5b | Q47a | Q47b | Q47c | Q47d | Q47e | Q47f | Q47g | Q47h | Q47i | Q47j | Q47k |
|--------|-------|--------|--------|------|------|------|------|------|------|------|------|------|------|------|
| 15339  | 4     | 4      | 4      |      |      |      |      |      |      |      |      |      |      |      |
| 15341  | 5     | 5      | 5      | 5    | 5    | 5    | 5    | 5    | 5    | 5    | 5    | 5    | 5    | 5    |
| 15344  |       |        |        |      |      |      |      |      |      |      |      |      |      |      |
| 15345  | 5     | 5      | 5      |      |      |      |      |      |      |      |      |      |      |      |
| 15350  |       |        |        |      |      |      |      |      |      |      |      |      |      |      |
| 15351  | 5     | 5      | 5      | 4    | 3    | 3    | 4    | 3    | 2    | 4    | 3    | 3    | 3    | 3    |
| 15352  | 4     | 4      | 5      |      |      |      |      |      |      |      |      |      |      |      |
| 15372  | 5     | 5      | 5      | 3    | 3    | 2    | 3    | 3    | 2    | 2    | 3    | 2    | 4    | 3    |
| 15373  | 1     | 6      | 2      |      |      |      |      |      |      |      |      |      |      |      |
| 15376  | 4     | 4      | 3      | 5    | 5    | 5    | 4    | 5    | 1    | 4    | 4    | 4    | 4    |      |
| 15377  | 4     | 5      | 5      |      |      |      |      |      |      |      |      |      |      |      |
| 15382  | 4     | 5      | 5      | 4    |      | 3    | 3    | 3    | 1    | 2    | 3    | 3    | 3    | 3    |
| 15383  | 3     | 2      | 3      | 1    | 1    | 1    | 2    | 2    | 2    | 2    | 2    | 2    | 3    | 3    |
| 15385  | 3     | 3      | 3      |      |      |      |      |      |      |      |      |      |      |      |
| 15390  | 4     | 4      | 4      |      |      |      |      |      |      |      |      |      |      |      |
| 15399  |       |        |        |      |      |      |      |      |      |      |      |      |      |      |
| 15404  | 4     | 4      | 4      | 3    | 3    | 3    | 3    | 4    | 2    | 3    | 3    | 3    | 3    | 2    |
| 15410  | 5     | 5      | 5      |      |      |      |      |      |      |      |      |      |      |      |
| 15411  | 4     | 4      | 4      | 2    | 3    | 2    | 2    | 2    | 2    | 2    | 2    | 2    | 2    | 2    |
| 15412  | 5     | 4      | 5      |      |      |      |      |      |      |      |      |      |      |      |
| 15413  | 6     | 5      | 4      | 5    | 5    | 5    | 5    | 5    | 1    | 4    | 3    | 5    | 4    | 3    |
| 15414  | 4     | 4      | 5      |      |      |      |      |      |      |      |      |      |      |      |
| 15417  | 5     | 5      | 5      |      |      |      |      |      |      |      |      |      |      |      |
| 15418  | 4     | 2      | 3      | 2    | 2    | 4    | 3    | 4    | 2    | 4    | 3    | 4    | 4    | 3    |
| 15421  | 4     | 4      | 4      |      |      |      |      |      |      |      |      |      |      |      |
| 15423  | 5     | 5      | 5      | 4    | 4    | 3    | 3    | 3    | 2    | 2    | 2    | 2    | 3    | 2    |
| 15425  | 6     | 5      | 5      |      |      |      |      |      |      |      |      |      |      |      |
| 15426  | 3     | 3      | 3      | 2    | 2    | 2    | 1    | 2    | 0    | 2    | 2    | 3    | 3    | 4    |
| 15430  | 5     | 5      | 5      | 2    | 3    |      | 2    | 1    | 2    | 3    | 3    | 3    | 3    | 3    |
| 15431  | 3     | 3      | 3      |      |      |      |      |      |      |      |      |      |      |      |
| 15435  |       |        |        |      |      |      |      |      |      |      |      |      |      |      |
| 15436  |       |        |        |      |      |      |      |      |      |      |      |      |      |      |

| respid | Q46x4 | Q46x5a | Q46x5b | Q47a | Q47b | Q47c | Q47d | Q47e | Q47f | Q47g | Q47h | Q47i | Q47j | Q47k |
|--------|-------|--------|--------|------|------|------|------|------|------|------|------|------|------|------|
| 15437  |       |        |        |      |      |      |      |      |      |      |      |      |      |      |
| 15438  | 6     | 6      | 6      |      |      |      |      |      |      |      |      |      |      |      |
| 15439  | 5     | 5      | 5      |      | 4    | 3    | 2    | 2    | 2    | 3    | 2    | 3    | 3    | 3    |
| 15441  | 2     | 4      | 2      |      |      |      |      |      |      |      |      |      |      |      |
| 15443  | 5     | 6      | 6      | 1    | 0    | 0    | 0    | 0    | 0    | 0    | 0    | 0    | 1    | 1    |
| 15446  | 5     | 5      | 5      | 4    | 4    | 3    | 3    | 2    | 3    | 3    | 4    | 3    | 3    |      |
| 15449  | 3     | 4      | 4      | 3    | 2    | 3    | 2    | 2    | 3    | 2    | 2    | 2    | 1    | 4    |
| 15451  | 3     | 3      | 3      |      |      |      |      |      |      |      |      |      |      |      |
| 15452  | 3     | 3      | 2      |      |      |      |      |      |      |      |      |      |      |      |
| 15454  | 5     | 5      | 5      | 5    | 5    | 5    | 5    | 5    | 3    | 4    | 3    | 5    | 4    | 5    |
| 15456  | 3     | 3      | 1      | 5    | 5    | 5    | 5    | 5    | 4    | 5    | 4    | 5    | 5    | 4    |
| 15457  |       |        |        |      |      |      |      |      |      |      |      |      |      |      |
| 15458  | 4     | 4      | 3      |      |      |      |      |      |      |      |      |      |      |      |
| 15462  | 4     | 4      | 4      | 2    | 3    | 3    | 2    | 2    | 4    | 2    | 3    | 2    | 2    | 2    |
| 15467  | 4     | 4      | 5      |      |      |      |      |      |      |      |      |      |      |      |
| 15470  | 4     | 4      | 4      |      |      |      |      |      |      |      |      |      |      |      |
| 15472  | 5     | 5      | 5      | 4    | 5    | 5    | 5    | 4    | 1    | 4    | 4    | 5    | 4    | 4    |
| 15476  | 5     | 5      | 5      |      |      |      |      |      |      |      |      |      |      |      |
| 15477  | 4     | 4      | 4      |      |      |      |      |      |      |      |      |      |      |      |
| 15488  | 4     | 5      | 5      |      |      |      |      |      |      |      |      |      |      |      |
| 15489  | 5     | 4      | 4      |      |      |      |      |      |      |      |      |      |      |      |
| 15490  | 4     | 4      | 5      |      |      |      |      |      |      |      |      |      |      |      |
| 15496  | 5     | 4      | 4      | 0    | 1    | 0    | 0    | 1    | 1    | 2    | 0    | 1    | 1    |      |
| 15497  | 4     | 4      | 4      |      |      |      |      |      |      |      |      |      |      |      |
| 15498  |       |        |        |      |      |      |      |      |      |      |      |      |      |      |
| 15509  | 3     | 3      | 3      | 2    | 3    | 3    | 3    | 2    | 3    | 3    | 3    | 4    | 2    | 3    |
| 15510  | 4     | 4      | 5      |      |      |      |      |      |      |      |      |      |      |      |
| 15516  | 4     | 4      | 4      |      |      |      |      |      |      |      |      |      |      |      |
| 15519  | 5     | 5      | 5      |      |      |      |      |      |      |      |      |      |      |      |
| 15520  | 4     | 4      | 4      |      |      |      |      |      |      |      |      |      |      |      |
| 15524  | 5     | 5      | 4      |      |      |      |      |      |      |      |      |      |      |      |
| 15525  | 5     | 4      | 5      | 5    | 5    | 4    | 4    | 5    | 4    | 4    | 4    | 4    | 3    | 4    |



| respid | Q46x4 | Q46x5a | Q46x5b | Q47a | Q47b | Q47c | Q47d | Q47e | Q47f | Q47g | Q47h | Q47i | Q47j | Q47k |
|--------|-------|--------|--------|------|------|------|------|------|------|------|------|------|------|------|
| 15526  | 5     | 5      | 4      |      |      |      |      |      |      |      |      |      |      |      |
| 15531  | 6     | 3      | 4      |      |      |      |      |      |      |      |      |      |      |      |
| 15532  | 5     | 5      | 5      |      |      |      |      |      |      |      |      |      |      |      |
| 15534  | 4     | 3      | 3      |      |      |      |      |      |      |      |      |      |      |      |
| 15535  | 2     | 2      | 1      |      |      |      |      |      |      |      |      |      |      |      |
| 15539  | 4     | 4      | 5      | 2    | 2    | 2    | 2    | 4    | 1    | 2    | 2    | 4    | 2    | 2    |
| 15550  | 5     | 5      | 5      | 4    | 4    | 4    | 4    | 5    | 1    | 4    | 4    | 5    | 5    | 3    |
| 15556  | 4     | 4      | 4      |      |      |      |      |      |      |      |      |      |      |      |
| 15558  | 2     | 3      | 2      |      |      |      |      |      |      |      |      |      |      |      |
| 15565  | 4     | 4      | 4      |      |      |      |      |      |      |      |      |      |      |      |
| 15567  | 3     | 3      | 2      |      |      |      |      |      |      |      |      |      |      |      |
| 15568  | 2     | 3      | 2      |      |      |      |      |      |      |      |      |      |      |      |
| 15571  | 5     | 5      | 5      | 0    | 0    | 0    | 0    | 0    | 0    | 0    | 0    | 0    | 1    | 1    |
| 15573  | 5     | 5      | 5      | 4    | 3    | 4    | 4    | 5    | 2    | 5    | 3    | 4    | 3    | 4    |
| 15574  | 3     | 2      | 3      |      |      |      |      |      |      |      |      |      |      |      |
| 15576  | 4     | 4      | 4      | 4    | 4    | 4    | 4    | 4    | 2    | 3    | 3    | 3    | 3    | 3    |
| 15587  | 4     | 3      | 4      |      |      |      |      |      |      |      |      |      |      |      |
| 15588  | 4     | 4      | 4      |      |      |      |      |      |      |      |      |      |      |      |
| 15593  | 3     | 3      | 3      | 2    | 2    | 3    | 3    | 4    | 1    | 2    | 3    | 4    | 2    | 3    |
| 15597  | 5     | 5      | 5      |      |      |      |      |      |      |      |      |      |      |      |
| 15598  | 6     | 6      | 6      | 5    | 5    | 5    | 5    | 5    | 1    | 5    | 5    | 5    | 5    | 2    |
| 15599  | 5     | 4      | 4      | 3    | 3    | 3    | 2    | 3    | 3    | 2    | 3    | 2    | 2    | 2    |
| 15601  | 6     | 6      | 6      | 0    | 2    | 1    | 1    | 0    | 0    | 0    | 0    | 1    | 2    | 2    |
| 15604  | 6     | 6      | 6      |      |      |      |      |      |      |      |      |      |      |      |
| 15611  | 5     | 5      | 5      | 0    | 1    | 1    | 1    | 1    | 0    | 1    | 0    | 0    | 1    | 1    |
| 15613  | 5     | 5      | 5      | 0    | 4    |      |      |      |      |      |      | 4    | 4    |      |
| 15614  | 6     | 6      | 6      | 2    | 2    | 2    | 1    | 1    | 1    | 3    | 3    | 4    | 3    | 2    |
| 15617  | 6     | 6      | 6      |      |      |      |      |      |      |      |      |      |      |      |
| 15622  |       |        |        |      |      |      |      |      |      |      |      |      |      |      |
| 15623  | 5     | 5      | 5      |      |      |      |      |      |      |      |      |      |      |      |
| 15625  | 5     | 5      | 5      | 2    | 4    | 4    | 4    | 5    | 1    | 4    | 3    | 4    | 4    | 3    |
| 15627  |       |        |        |      |      |      |      |      |      |      |      |      |      |      |

| respid | Q46x4 | Q46x5a | Q46x5b | Q47a | Q47b | Q47c | Q47d | Q47e | Q47f | Q47g | Q47h | Q47i | Q47j | Q47k |
|--------|-------|--------|--------|------|------|------|------|------|------|------|------|------|------|------|
| 15628  | 5     | 5      | 5      | 4    | 3    | 2    | 3    | 3    | 2    | 2    | 3    | 3    | 4    | 3    |
| 15633  | 6     | 6      | 6      | 4    | 5    | 5    | 5    | 5    | 5    | 5    | 5    | 5    | 5    | 5    |
| 15634  | 5     | 5      | 5      | 3    | 2    | 2    | 3    | 2    | 1    | 2    | 2    | 2    | 3    | 3    |
| 15637  | 5     | 5      | 5      | 2    | 3    | 2    | 3    | 2    | 2    | 3    | 1    | 2    | 3    | 2    |
| 15644  | 4     | 4      | 5      |      |      |      |      |      |      |      |      |      |      |      |
| 15645  | 4     | 4      | 4      | 5    | 5    | 5    | 4    | 4    | 4    | 5    | 3    | 5    | 4    | 5    |
| 15649  | 5     | 5      | 5      |      |      |      |      |      |      |      |      |      |      |      |
| 15650  | 5     | 4      | 5      | 4    | 4    | 4    | 4    | 4    | 1    | 5    | 4    | 5    | 5    | 4    |
| 15651  | 6     | 6      | 6      |      |      |      |      |      |      |      |      |      |      |      |
| 15657  | 3     | 4      | 4      | 2    | 3    | 3    | 2    | 3    | 1    | 2    | 2    | 2    | 2    | 2    |
| 15658  | 5     | 5      | 5      |      |      |      |      |      |      |      |      |      |      |      |
| 15660  | 4     | 4      | 4      |      |      |      |      |      |      |      |      |      |      |      |
| 15667  | 5     | 5      | 5      |      |      |      |      |      |      |      |      |      |      |      |
| 15671  | 6     | 5      | 5      |      |      |      |      |      |      |      |      |      |      |      |
| 15679  | 6     | 6      | 6      | 0    | 0    | 0    | 0    | 0    | 0    | 0    | 0    | 0    | 5    | 1    |
| 15712  | 5     | 5      | 5      |      |      |      |      |      |      |      |      |      |      |      |
| 15715  | 6     | 5      | 5      | 0    | 3    | 0    | 0    | 0    |      | 0    | 0    | 3    | 2    | 1    |
| 15749  | 5     | 5      | 5      |      |      |      |      |      |      |      |      |      |      |      |
| 15754  | 4     | 2      | 2      |      |      |      |      |      |      |      |      |      |      |      |
| 15756  | 4     | 5      | 5      | 4    | 4    | 4    | 4    | 5    | 3    | 4    | 4    | 3    | 3    | 3    |
| 15773  | 6     | 6      | 6      | 1    | 1    | 0    | 5    | 0    | 0    | 0    | 0    | 2    | 1    | 1    |
| 15774  | 6     | 6      | 6      | 3    | 4    | 3    | 3    | 4    | 2    | 4    | 3    | 3    | 3    | 3    |
| 15776  | 5     | 5      | 4      | 1    | 2    | 2    | 2    | 3    | 1    | 4    | 4    | 4    | 5    | 4    |
| 15777  | 3     | 3      | 3      | 2    | 2    | 2    | 2    | 2    | 3    | 2    | 2    | 3    | 3    | 3    |
| 15779  |       |        |        |      |      |      |      |      |      |      |      |      |      |      |
| 15780  | 4     | 4      | 5      |      |      |      |      |      |      |      |      |      |      |      |
| 15792  | 5     | 5      | 4      | 0    | 3    | 1    | 1    | 1    | 1    | 2    | 2    | 2    | 2    | 2    |
| 15793  | 3     | 3      | 3      | 2    | 3    | 3    | 2    | 2    | 2    | 2    | 3    | 3    | 3    | 3    |
| 15796  | 5     | 5      | 5      | 4    | 3    | 2    | 2    | 3    | 3    | 2    | 3    | 2    | 3    | 3    |
| 15798  | 6     | 6      | 6      |      |      |      |      |      |      |      |      |      |      |      |
| 15809  | 5     | 5      | 5      | 5    | 4    | 5    | 4    | 5    | 2    | 5    | 4    | 5    | 5    | 4    |
| 15810  | 6     | 6      | 6      |      |      |      |      |      |      |      |      |      |      |      |

| respid | Q46x4 | Q46x5a | Q46x5b | Q47a | Q47b | Q47c | Q47d | Q47e | Q47f | Q47g | Q47h | Q47i | Q47j | Q47k |
|--------|-------|--------|--------|------|------|------|------|------|------|------|------|------|------|------|
| 15815  | 4     | 4      | 5      |      |      |      |      |      |      |      |      |      |      |      |
| 15816  | 4     | 5      | 5      | 1    | 2    | 1    | 1    | 1    | 1    | 2    | 1    | 1    | 2    | 2    |
| 15817  |       |        |        |      |      |      |      |      |      |      |      |      |      |      |
| 15821  | 4     | 4      | 3      |      |      |      |      |      |      |      |      |      |      |      |
| 15823  | 4     | 4      | 4      |      |      |      |      |      |      |      |      |      |      |      |
| 15834  | 5     | 5      | 5      | 2    | 2    | 2    | 3    | 1    | 2    | 1    | 1    | 2    | 2    | 2    |
| 15835  |       |        |        |      |      |      |      |      |      |      |      |      |      |      |
| 15836  | 6     | 6      | 6      |      |      |      |      |      |      |      |      |      |      |      |
| 15837  | 4     | 4      | 5      |      |      |      |      |      |      |      |      |      |      |      |
| 15839  | 5     | 5      | 5      | 2    | 3    | 2    | 3    | 2    | 3    | 2    | 2    | 1    | 2    | 2    |
| 15840  | 4     | 4      | 4      |      |      |      |      |      |      |      |      |      |      |      |
| 15844  | 5     | 5      | 5      | 3    | 3    | 3    | 3    | 4    | 5    | 3    | 3    | 3    | 3    | 3    |
| 15845  | 6     | 6      | 6      | 2    | 2    | 1    | 1    | 1    | 1    | 2    | 1    | 2    | 2    | 2    |
| 15847  | 3     | 3      | 3      | 3    | 3    | 3    | 3    | 2    | 2    | 2    | 3    | 3    | 3    | 2    |
| 15848  | 6     | 6      | 6      |      |      |      |      |      |      |      |      |      |      |      |
| 15849  | 4     | 3      | 3      | 3    | 2    | 3    | 3    | 3    | 2    | 3    | 2    | 3    | 3    | 3    |
| 15857  | 4     | 4      | 4      |      |      |      |      |      |      |      |      |      |      |      |
| 15858  | 5     | 5      | 5      | 4    | 4    | 4    | 4    | 5    | 4    | 4    | 4    | 4    | 4    | 4    |
| 15862  | 2     | 3      | 2      | 2    | 2    | 2    | 1    | 3    | 1    | 2    | 1    | 1    |      |      |
| 15866  | 4     | 4      | 5      |      |      |      |      |      |      |      |      |      |      |      |
| 15870  | 4     | 4      | 4      |      |      |      |      |      |      |      |      |      |      |      |
| 15871  | 5     | 5      | 5      | 5    | 5    | 5    | 3    | 2    | 3    | 2    | 3    | 3    | 2    | 3    |
| 15872  | 4     | 4      | 5      | 2    | 1    |      | 2    |      | 1    | 2    | 2    | 2    | 2    | 2    |
| 15873  | 5     | 5      | 5      | 5    | 5    | 5    | 5    | 5    | 5    | 5    | 5    | 5    | 5    | 5    |
| 15874  |       |        |        |      |      |      |      |      |      |      |      |      |      |      |
| 15875  | 3     | 4      | 2      |      |      |      |      |      |      |      |      |      |      |      |
| 15876  | 4     | 4      | 4      |      |      |      |      |      |      |      |      |      |      |      |
| 15882  | 4     | 4      | 4      |      |      |      |      |      |      |      |      |      |      |      |
| 15884  | 5     | 6      | 6      |      |      |      |      |      |      |      |      |      |      |      |
| 15890  | 5     | 5      | 5      | 3    | 2    | 3    | 2    | 3    | 2    | 4    | 3    | 3    | 3    | 3    |
| 15892  | 5     | 5      | 4      |      |      |      |      |      |      |      |      |      |      |      |
| 15908  | 5     | 5      | 5      | 2    | 1    | 2    | 2    | 1    | 2    | 2    | 2    | 2    | 2    | 3    |

| respid | Q46x4 | Q46x5a | Q46x5b | Q47a | Q47b | Q47c | Q47d | Q47e | Q47f | Q47g | Q47h | Q47i | Q47j | Q47k |
|--------|-------|--------|--------|------|------|------|------|------|------|------|------|------|------|------|
| 15914  | 4     | 4      | 4      |      |      |      |      |      |      |      |      |      |      |      |
| 15932  | 3     | 4      | 4      | 3    | 2    | 3    | 3    | 0    | 0    | 0    | 0    | 0    | 1    | 1    |
| 15933  | 5     | 5      | 5      | 4    | 4    | 4    | 4    | 5    | 5    | 4    | 4    | 4    | 4    | 4    |
| 15938  | 4     | 4      | 4      |      |      |      |      |      |      |      |      |      |      |      |
| 15940  | 3     | 1      | 2      |      |      |      |      |      |      |      |      |      |      |      |
| 15945  | 4     | 4      | 4      |      |      |      |      |      |      |      |      |      |      |      |
| 15947  | 5     | 5      | 5      | 2    | 4    | 3    | 2    | 3    | 3    | 3    | 2    | 2    | 3    |      |
| 15950  | 4     | 5      | 4      |      |      |      |      |      |      |      |      |      |      |      |
| 15951  | 5     | 5      | 5      |      |      |      |      |      |      |      |      |      |      |      |
| 15952  | 3     | 3      | 3      | 2    | 2    | 2    | 2    | 2    | 4    | 2    | 2    | 3    | 3    | 3    |
| 15953  | 4     | 5      | 5      |      |      |      |      |      |      |      |      |      |      |      |
| 15954  | 4     | 4      | 4      |      |      |      |      |      |      |      |      |      |      |      |
| 15957  | 2     | 4      | 2      |      |      |      |      |      |      |      |      |      |      |      |
| 15965  | 1     | 1      | 1      |      |      |      |      |      |      |      |      |      |      |      |
| 15966  |       |        |        |      |      |      |      |      |      |      |      |      |      |      |
| 15967  | 5     | 5      | 5      | 2    | 3    | 1    | 2    | 2    | 2    | 2    | 2    | 2    | 3    | 2    |
| 15968  | 4     | 4      | 4      | 3    | 3    | 3    | 4    | 4    | 1    | 3    | 3    | 3    | 3    | 4    |
| 15970  | 5     | 5      | 5      |      |      |      |      |      |      |      |      |      |      |      |
| 15973  | 4     | 4      | 4      |      |      |      |      |      |      |      |      |      |      |      |
| 15974  | 4     | 5      | 4      |      |      |      |      |      |      |      |      |      |      |      |
| 15975  |       |        |        |      |      |      |      |      |      |      |      |      |      |      |
| 15980  | 1     | 1      | 2      |      |      |      |      |      |      |      |      |      |      |      |
| 15984  | 5     | 5      | 5      | 3    | 2    | 3    | 3    |      | 3    | 2    | 3    | 2    | 4    | 3    |
| 15985  | 3     | 4      | 4      |      |      |      |      |      |      |      |      |      |      |      |
| 15994  |       |        |        |      |      |      |      |      |      |      |      |      |      |      |
| 15995  | 5     | 5      | 5      |      |      |      |      |      |      |      |      |      |      |      |
| 16000  | 1     | 5      | 3      | 4    | 3    | 3    | 2    | 3    | 2    | 2    | 3    | 2    | 3    | 3    |
| 16004  | 4     | 4      | 4      |      |      |      |      |      |      |      |      |      |      |      |
| 16005  | 4     | 4      | 4      |      |      |      |      |      |      |      |      |      |      |      |
| 16006  |       |        |        |      |      |      |      |      |      |      |      |      |      |      |
| 16009  | 5     | 5      | 5      |      |      |      |      | 4    | 1    | 3    | 2    | 4    | 4    | 2    |
| 16017  | 6     | 6      | 6      |      |      |      |      |      |      |      |      |      |      |      |

| respid | Q46x4 | Q46x5a | Q46x5b | Q47a | Q47b | Q47c | Q47d | Q47e | Q47f | Q47g | Q47h | Q47i | Q47j | Q47k |
|--------|-------|--------|--------|------|------|------|------|------|------|------|------|------|------|------|
| 16019  | 4     | 4      | 5      |      |      |      |      |      |      |      |      |      |      |      |
| 16021  | 5     | 5      | 5      |      |      |      |      |      |      |      |      |      |      |      |
| 16024  | 5     | 5      | 5      | 0    | 5    | 0    | 0    | 0    | 0    | 0    | 0    | 0    | 1    | 1    |
| 16026  | 5     | 5      | 5      | 3    | 3    | 4    | 3    | 4    | 1    | 2    | 2    | 2    | 2    | 2    |
| 16029  |       |        |        |      |      |      |      |      |      |      |      |      |      |      |
| 16031  | 4     | 4      | 4      | 0    | 2    | 0    | 0    | 0    | 0    | 0    | 0    | 0    | 1    | 1    |
| 16037  | 5     | 5      | 5      |      |      |      |      |      |      |      |      |      |      |      |
| 16043  | 5     | 5      | 5      | 2    | 2    | 2    | 2    | 5    | 1    | 4    | 3    | 5    | 5    | 3    |
| 16044  | 5     | 5      | 5      |      |      |      |      |      |      |      |      |      |      |      |
| 16047  | 5     | 5      | 5      | 2    | 4    | 2    | 2    | 2    | 2    | 2    | 2    | 2    | 2    | 2    |
| 16048  | 5     | 6      | 6      | 0    | 2    | 0    | 0    | 0    | 0    | 0    | 0    | 0    | 1    | 1    |
| 16049  | 6     | 6      | 6      |      |      |      |      |      |      |      |      |      |      |      |
| 16051  | 5     | 5      | 5      |      |      |      |      |      |      |      |      |      |      |      |
| 16053  | 5     | 5      | 5      | 5    | 5    | 5    | 5    | 5    | 3    | 5    | 5    | 5    | 5    | 5    |
| 16054  | 5     | 5      | 5      |      |      |      |      |      |      |      |      |      |      |      |
| 16069  | 5     | 5      | 4      |      |      |      |      |      |      |      |      |      |      |      |
| 16070  | 5     | 5      | 5      | 0    | 1    | 1    | 1    | 0    | 0    | 0    | 0    |      | 1    | 1    |
| 16074  |       |        |        |      |      |      |      |      |      |      |      |      |      |      |
| 16076  |       |        |        |      |      |      |      |      |      |      |      |      |      |      |
| 16078  |       |        |        |      |      |      |      |      |      |      |      |      |      |      |
| 16081  | 5     | 4      | 4      |      |      |      |      |      |      |      |      |      |      |      |
| 16085  |       |        |        |      |      |      |      |      |      |      |      |      |      |      |
| 16088  | 5     | 5      | 4      | 5    | 5    | 5    | 5    | 5    | 5    | 4    | 5    | 5    | 5    | 4    |
| 16091  | 5     | 5      | 5      |      |      |      |      |      |      |      |      |      |      |      |
| 16092  | 6     | 6      | 6      | 0    | 4    | 0    | 0    | 0    | 0    | 0    | 0    | 4    | 4    | 4    |
| 16093  | 5     | 5      | 5      | 2    | 5    | 5    | 5    | 5    | 1    | 5    | 0    | 5    |      | 2    |
| 16097  | 5     | 5      | 5      | 1    | 2    | 2    | 2    | 2    | 2    | 1    | 2    | 3    | 1    | 3    |
| 16100  | 6     | 6      | 6      |      |      |      |      |      |      |      |      |      |      |      |
| 16101  | 6     | 6      | 6      |      |      |      |      |      |      |      |      |      |      |      |
| 16105  |       |        |        |      |      |      |      |      |      |      |      |      |      |      |
| 16118  | 3     | 3      | 3      |      |      |      |      |      |      |      |      |      |      |      |
| 16129  | 5     | 5      | 5      | 5    | 5    | 5    | 5    | 5    | 2    | 5    | 4    | 5    | 5    | 4    |

| respid | Q46x4 | Q46x5a | Q46x5b | Q47a | Q47b | Q47c | Q47d | Q47e | Q47f | Q47g | Q47h | Q47i | Q47j | Q47k |   |
|--------|-------|--------|--------|------|------|------|------|------|------|------|------|------|------|------|---|
| 16130  | 5     | 5      | 5      | 5    | 5    | 5    | 5    | 5    | 5    | 1    | 5    | 4    | 5    | 5    | 5 |
| 16131  | 4     | 4      | 4      | 4    | 4    | 3    | 3    | 4    | 4    | 1    | 4    | 3    | 3    | 4    | 4 |
| 16136  | 5     | 5      | 5      |      |      |      |      |      |      |      |      |      |      |      |   |
| 16137  | 5     | 4      | 5      |      |      |      |      |      |      |      |      |      |      |      |   |
| 16138  | 4     | 4      | 4      |      |      |      |      |      |      |      |      |      |      |      |   |
| 16139  | 6     | 6      | 6      |      |      |      |      |      |      |      |      |      |      |      |   |
| 16140  | 5     | 5      | 5      |      |      |      |      |      |      |      |      |      |      |      |   |
| 16145  | 5     | 5      | 5      |      |      |      |      |      |      |      |      |      |      |      |   |
| 16150  | 5     | 5      | 5      |      |      |      |      |      |      |      |      |      |      |      |   |
| 16151  | 5     | 5      | 5      |      |      |      |      |      |      |      |      |      |      |      |   |
| 16153  | 5     | 5      | 5      | 0    | 0    | 0    | 3    | 5    | 2    | 2    | 4    | 4    | 4    | 4    | 4 |
| 16164  | 5     | 5      | 5      | 5    | 5    | 5    | 5    | 5    | 5    | 4    | 4    | 5    | 4    | 4    | 4 |
| 16168  | 4     | 4      | 4      | 2    | 2    | 2    | 2    | 4    | 2    | 2    | 2    | 3    | 3    | 3    | 3 |
| 16173  | 4     | 4      | 4      |      |      |      |      |      |      |      |      |      |      |      |   |
| 16174  | 6     | 6      | 6      | 5    | 5    | 5    | 5    | 5    | 4    | 5    | 4    | 5    | 5    | 5    | 5 |
| 16177  | 5     | 5      | 5      | 5    | 5    | 5    | 5    | 5    | 3    | 4    | 3    | 5    | 4    | 4    | 4 |
| 16185  | 5     | 5      | 5      | 0    | 2    | 0    | 0    | 0    | 0    | 0    | 0    | 0    | 1    | 2    | 1 |
| 16189  | 5     | 5      | 5      |      |      |      |      |      |      |      |      |      |      |      |   |
| 16192  | 4     | 4      | 5      | 3    | 3    | 5    | 4    | 4    | 5    | 4    | 4    | 5    | 5    | 4    | 4 |
| 16193  | 4     | 4      | 4      |      |      |      |      |      |      |      |      |      |      |      |   |
| 16194  | 5     | 5      | 4      | 0    | 0    | 1    | 0    | 0    | 0    | 0    | 0    | 0    | 0    | 1    | 1 |
| 16196  |       |        |        |      |      |      |      |      |      |      |      |      |      |      |   |
| 16202  | 4     | 4      | 4      |      |      |      |      |      |      |      |      |      |      |      |   |
| 16205  | 4     | 3      | 3      |      |      |      |      |      |      |      |      |      |      |      |   |
| 16206  | 4     | 4      | 5      |      |      |      |      |      |      |      |      |      |      |      |   |
| 16208  |       |        |        |      |      |      |      |      |      |      |      |      |      |      |   |
| 16211  | 6     | 2      | 4      |      |      |      |      |      |      |      |      |      |      |      |   |
| 16212  | 6     | 6      | 6      |      |      |      |      |      |      |      |      |      |      |      |   |
| 16215  |       |        |        |      |      |      |      |      |      |      |      |      |      |      |   |
| 16217  | 5     | 6      | 6      | 5    | 5    | 4    | 4    | 5    |      | 4    | 3    | 5    | 4    | 4    | 4 |
| 16221  | 5     | 5      | 5      | 4    | 4    | 4    | 4    | 4    | 3    | 4    | 4    | 4    | 3    | 4    | 4 |
| 16226  | 5     | 4      | 5      |      |      |      |      |      |      |      |      |      |      |      |   |

| respid | Q46x4 | Q46x5a | Q46x5b | Q47a | Q47b | Q47c | Q47d | Q47e | Q47f | Q47g | Q47h | Q47i | Q47j | Q47k |
|--------|-------|--------|--------|------|------|------|------|------|------|------|------|------|------|------|
| 16228  | 4     | 4      | 5      |      |      |      |      |      |      |      |      |      |      |      |
| 16229  | 5     | 5      | 5      | 0    | 5    | 0    | 0    | 0    | 0    | 0    | 0    | 0    | 5    | 5    |
| 16230  | 6     | 6      | 6      |      |      |      |      |      |      |      |      |      |      |      |
| 16231  | 5     | 4      | 4      | 4    | 4    | 4    | 3    | 4    | 2    | 4    | 4    | 4    | 4    | 3    |
| 16232  | 4     | 5      | 5      | 5    | 5    | 5    | 5    | 5    | 5    |      | 5    |      |      |      |
| 16234  | 5     | 4      | 5      | 4    | 4    | 5    | 4    | 4    | 1    | 4    | 3    | 5    | 5    | 3    |
| 16235  | 3     | 3      | 3      | 4    | 4    | 4    | 5    | 5    | 5    | 5    | 5    | 5    | 5    | 5    |
| 16236  | 5     | 5      | 5      | 0    | 0    | 0    | 0    | 0    | 0    | 0    | 0    | 0    | 1    | 1    |
| 16237  | 6     | 6      | 6      |      |      |      |      |      |      |      |      |      |      |      |
| 16238  | 4     | 5      | 4      | 0    | 0    | 2    | 2    | 4    | 2    | 3    | 2    | 3    | 2    | 2    |
| 16239  | 6     | 6      | 6      |      |      |      |      |      |      |      |      |      |      |      |
| 16243  | 5     | 5      | 5      |      |      |      |      |      |      |      |      |      |      |      |
| 16248  | 5     | 5      | 5      | 0    | 5    | 0    | 0    | 0    | 0    | 0    | 0    | 5    | 5    | 1    |
| 16249  | 6     | 6      | 6      |      |      |      |      |      |      |      |      |      |      |      |
| 16251  |       |        |        |      |      |      |      |      |      |      |      |      |      |      |
| 16263  | 5     | 5      | 5      |      |      |      |      |      |      |      |      |      |      |      |
| 16265  | 4     | 5      | 4      |      |      |      |      |      |      |      |      |      |      |      |
| 16269  | 5     | 4      | 4      |      |      |      |      |      |      |      |      |      |      |      |
| 16272  | 4     | 4      | 4      |      |      |      |      |      |      |      |      |      |      |      |
| 16273  |       |        |        |      |      |      |      |      |      |      |      |      |      |      |
| 16281  | 5     | 5      | 5      |      |      |      |      |      |      |      |      |      |      |      |
| 16282  | 5     | 5      | 5      |      |      |      |      |      |      |      |      |      |      |      |
| 16287  | 4     | 4      | 4      | 2    | 2    | 2    | 2    | 5    | 1    |      | 4    | 2    | 1    | 2    |
| 16290  | 5     | 5      | 5      | 5    | 5    | 5    | 5    | 5    | 2    | 5    | 3    | 5    | 5    | 4    |
| 16294  | 5     | 5      | 5      | 5    | 5    | 5    | 5    | 5    | 3    | 3    | 3    | 5    | 5    | 4    |
| 16295  | 4     | 4      | 2      | 4    | 4    | 4    | 4    | 5    | 2    | 4    | 3    | 4    |      | 4    |
| 16296  | 6     | 6      | 6      |      |      |      |      |      |      |      |      |      |      |      |
| 16299  | 3     | 4      | 3      | 5    | 4    | 5    | 1    | 1    | 1    | 1    | 2    | 5    | 1    | 2    |
| 16302  | 5     | 5      | 5      | 4    | 5    | 5    | 5    | 5    | 4    | 4    | 3    | 5    | 4    | 4    |
| 16303  | 5     | 5      | 5      |      |      |      |      |      |      |      |      |      |      |      |
| 16304  | 4     | 4      | 4      |      |      |      |      |      |      |      |      |      |      |      |
| 16306  | 6     | 6      | 6      |      |      |      |      |      |      |      |      |      |      |      |

| respid | Q46x4 | Q46x5a | Q46x5b | Q47a | Q47b | Q47c | Q47d | Q47e | Q47f | Q47g | Q47h | Q47i | Q47j | Q47k |   |
|--------|-------|--------|--------|------|------|------|------|------|------|------|------|------|------|------|---|
| 16318  | 4     | 4      | 4      | 5    | 5    | 5    | 5    | 5    | 5    | 0    | 4    | 4    | 5    | 4    | 4 |
| 16320  | 4     | 5      | 4      | 3    | 4    | 4    | 4    | 4    | 4    | 4    | 4    | 4    | 4    | 4    | 4 |
| 16321  | 5     | 5      | 5      | 0    |      |      |      |      |      |      |      |      |      |      |   |
| 16322  | 5     | 5      | 4      | 5    | 5    | 5    | 5    | 5    | 5    | 1    | 4    | 3    | 5    | 5    | 1 |
| 16324  | 3     | 5      | 5      |      |      |      |      |      |      |      |      |      |      |      |   |
| 16326  | 4     | 5      | 5      | 3    | 3    | 3    | 2    |      |      | 2    | 2    | 3    | 5    | 5    | 3 |
| 16328  | 4     | 4      | 4      |      |      |      |      |      |      |      |      |      |      |      |   |
| 16336  | 4     | 4      | 4      | 4    | 4    | 4    | 4    | 4    | 5    | 2    | 4    | 3    | 4    | 4    | 4 |
| 16341  | 5     | 5      | 4      | 0    | 3    | 0    | 0    | 0    | 0    | 0    | 0    | 0    | 0    | 1    | 1 |
| 16342  | 6     | 6      | 6      |      |      |      |      |      |      |      |      |      |      |      |   |
| 16343  | 6     | 6      | 6      |      |      |      |      |      |      |      |      |      |      |      |   |
| 16345  | 3     | 4      | 2      | 1    | 2    | 2    | 2    | 1    | 1    | 1    | 1    | 1    | 2    | 2    | 3 |
| 16349  | 5     | 5      | 5      |      |      |      |      |      |      |      |      |      |      |      |   |
| 16355  | 6     | 6      | 6      | 5    | 5    | 5    | 5    | 5    | 5    | 1    | 4    | 4    | 4    | 4    | 2 |
| 16364  | 4     | 4      | 4      | 2    | 3    | 5    | 3    | 4    | 4    | 2    | 3    | 3    | 3    | 3    | 3 |
| 16374  | 5     | 5      | 5      |      |      |      |      |      |      |      |      |      |      |      |   |
| 16375  |       |        |        |      |      |      |      |      |      |      |      |      |      |      |   |
| 16376  | 3     | 4      | 3      | 3    | 3    | 3    | 2    | 4    | 4    | 1    | 2    | 2    | 2    | 2    | 3 |
| 16393  | 5     | 5      | 5      |      |      |      |      |      |      |      |      |      |      |      |   |
| 16394  | 4     | 4      | 4      |      |      |      |      |      |      |      |      |      |      |      |   |
| 16395  | 4     | 4      | 4      | 5    | 5    | 5    | 5    | 5    | 5    | 1    | 2    | 5    | 5    | 2    | 5 |
| 16397  | 4     | 2      | 3      | 2    | 2    | 2    | 3    | 1    | 1    | 1    | 4    |      | 5    | 5    | 2 |
| 16398  | 4     | 3      | 3      | 4    | 4    | 4    | 4    | 4    | 4    | 2    | 4    | 3    | 4    | 4    | 3 |
| 16402  | 5     | 5      | 5      | 5    | 5    | 5    | 5    | 5    | 5    | 5    | 5    | 5    | 4    | 5    | 5 |
| 16405  | 4     | 5      | 5      | 3    | 4    | 4    | 4    | 3    | 4    | 2    | 4    | 3    | 5    | 4    | 4 |
| 16416  | 6     | 6      | 6      | 0    | 0    | 0    | 0    | 0    | 0    | 0    | 0    | 0    | 0    | 1    | 1 |
| 16422  | 3     | 3      | 4      | 1    | 2    | 3    | 3    | 3    | 3    | 1    | 2    | 3    | 4    | 3    | 3 |
| 16429  | 5     | 5      | 5      |      |      |      |      |      |      |      |      |      |      |      |   |
| 16430  | 5     | 4      | 5      |      |      |      |      |      |      |      |      |      |      |      |   |
| 16432  | 4     | 4      | 3      | 3    | 3    | 3    | 3    | 3    | 3    | 3    | 3    | 3    | 3    | 3    | 3 |
| 16433  | 6     | 6      | 6      | 1    | 5    | 4    | 4    | 5    | 5    | 1    | 3    | 3    | 5    | 4    | 4 |
| 16434  |       |        |        |      |      |      |      |      |      |      |      |      |      |      |   |



| respid | Q46x4 | Q46x5a | Q46x5b | Q47a | Q47b | Q47c | Q47d | Q47e | Q47f | Q47g | Q47h | Q47i | Q47j | Q47k |   |
|--------|-------|--------|--------|------|------|------|------|------|------|------|------|------|------|------|---|
| 16437  | 6     | 4      | 6      |      |      |      |      |      |      |      |      |      |      |      |   |
| 16439  | 5     | 5      | 5      | 5    | 5    | 5    | 5    | 5    | 2    | 5    | 5    | 5    | 5    | 5    |   |
| 16440  | 4     | 3      | 5      |      |      |      |      |      |      |      |      |      |      |      |   |
| 16441  | 5     | 3      | 5      | 0    | 5    | 5    | 5    | 5    | 5    | 5    | 4    | 5    | 4    | 3    |   |
| 16442  | 5     | 5      | 5      | 5    | 5    | 5    | 5    | 5    |      |      |      | 5    | 5    |      |   |
| 16450  | 5     | 5      | 5      |      |      |      |      |      |      |      |      |      |      |      |   |
| 16451  | 4     | 4      | 4      | 5    | 5    | 5    | 5    | 5    | 4    | 5    | 5    | 5    | 5    | 5    |   |
| 16452  | 5     | 5      | 5      |      |      |      |      |      |      |      |      |      |      |      |   |
| 16467  | 5     | 5      | 5      |      |      |      |      |      |      |      |      |      |      |      |   |
| 16468  |       |        |        |      |      |      |      |      |      |      |      |      |      |      |   |
| 16469  | 5     | 5      | 5      | 0    | 0    | 0    | 0    | 0    | 0    | 0    | 0    | 0    | 0    | 4    | 1 |
| 16470  |       |        |        |      |      |      |      |      |      |      |      |      |      |      |   |
| 16471  | 6     | 6      | 6      |      |      |      |      |      |      |      |      |      |      |      |   |
| 16473  | 6     | 6      | 6      |      |      |      |      |      |      |      |      |      |      |      |   |
| 16476  | 6     | 6      | 6      | 5    |      | 5    | 5    | 5    |      | 5    | 4    | 5    | 5    | 5    |   |
| 16478  | 5     | 4      | 4      |      |      |      |      |      |      |      |      |      |      |      |   |
| 16484  | 5     | 5      | 5      |      |      |      |      |      |      |      |      |      |      |      |   |
| 16499  | 5     | 5      | 5      |      |      |      |      |      |      |      |      |      |      |      |   |
| 16502  |       |        |        |      |      |      |      |      |      |      |      |      |      |      |   |
| 16505  | 5     | 5      | 5      |      |      |      |      |      |      |      |      |      |      |      |   |
| 16514  | 6     | 4      | 5      | 5    | 4    | 4    | 4    | 4    | 2    | 5    | 4    | 4    | 5    | 3    |   |
| 16515  | 4     | 4      | 4      | 2    | 4    | 4    | 4    | 5    | 3    | 4    | 3    | 4    | 3    | 4    |   |
| 16517  | 4     | 4      | 4      |      |      |      |      |      |      |      |      |      |      |      |   |
| 16518  | 5     | 5      | 5      | 3    | 3    | 3    | 3    | 4    | 1    | 3    | 3    | 4    | 4    | 3    |   |
| 16519  | 5     | 4      | 4      |      | 3    | 4    | 4    | 5    |      | 4    | 3    | 2    | 2    | 2    |   |
| 16525  | 6     | 6      | 6      | 5    |      |      |      |      |      |      |      |      |      | 5    |   |
| 16526  | 6     | 5      | 5      |      |      |      |      |      |      |      |      |      |      |      |   |
| 16530  | 5     | 4      | 5      |      |      |      |      |      |      |      |      |      |      |      |   |
| 16532  | 5     | 5      | 5      | 4    | 4    | 5    | 4    | 5    | 2    | 5    | 5    | 5    | 5    | 5    | 4 |
| 16536  | 5     | 5      | 5      | 5    | 5    | 5    | 5    | 5    | 5    | 5    | 4    | 4    | 5    | 5    |   |
| 16537  | 3     | 4      | 4      |      |      |      |      |      |      |      |      |      |      |      |   |
| 16541  | 4     | 6      | 4      | 0    | 2    | 3    | 2    | 3    | 1    | 2    | 2    | 1    | 2    | 2    |   |

| respid | Q46x4 | Q46x5a | Q46x5b | Q47a | Q47b | Q47c | Q47d | Q47e | Q47f | Q47g | Q47h | Q47i | Q47j | Q47k |   |
|--------|-------|--------|--------|------|------|------|------|------|------|------|------|------|------|------|---|
| 16543  | 6     | 6      | 6      | 3    | 2    | 2    | 2    | 2    | 2    | 4    | 2    | 3    | 4    | 3    | 3 |
| 16544  | 4     | 4      | 4      |      |      |      |      |      |      |      |      |      |      |      |   |
| 16545  | 4     | 4      | 4      | 0    | 0    | 0    | 0    | 0    | 0    | 0    | 0    | 0    | 0    | 1    | 1 |
| 16546  | 3     | 3      | 3      |      |      |      |      |      |      |      |      |      |      |      |   |
| 16548  | 5     | 4      | 4      | 0    | 4    | 0    | 0    | 0    | 0    | 0    | 0    | 0    | 0    | 1    | 1 |
| 16552  | 3     | 3      | 4      |      |      |      |      |      |      | 0    |      |      | 5    |      | 4 |
| 16559  | 5     | 5      | 5      |      |      |      |      |      |      |      |      |      |      |      |   |
| 16564  | 4     | 6      | 6      |      |      |      |      |      |      |      |      |      |      |      |   |
| 16565  | 3     | 4      | 3      | 3    | 3    | 3    | 3    | 3    | 3    | 2    | 2    | 2    | 2    | 3    | 3 |
| 16567  | 4     | 4      | 4      |      |      |      |      |      |      |      |      |      |      |      |   |
| 16571  |       |        |        |      |      |      |      |      |      |      |      |      |      |      |   |
| 16572  | 4     | 4      | 4      |      |      |      |      |      |      |      |      |      |      |      |   |
| 16579  | 4     | 4      | 4      |      |      |      |      |      |      |      |      |      |      |      |   |
| 16588  | 3     | 3      | 4      |      |      |      |      |      |      |      |      |      |      |      |   |
| 16599  | 6     | 4      | 4      |      |      |      |      |      |      |      |      |      |      |      |   |
| 16605  | 4     | 4      | 4      | 0    | 0    | 0    | 0    | 0    | 0    | 0    | 0    | 0    | 0    | 1    | 1 |
| 16622  | 6     | 6      | 6      |      |      |      |      |      |      |      |      |      |      |      |   |
| 16635  | 4     | 4      | 4      | 5    | 5    | 5    | 5    | 5    | 5    | 2    | 5    | 4    | 4    | 5    | 4 |
| 16638  | 6     | 6      | 6      |      |      |      |      |      |      |      |      |      |      |      |   |
| 16652  | 5     | 5      | 5      |      |      |      |      |      |      |      |      |      |      |      |   |
| 16656  | 6     | 6      | 6      | 4    | 4    | 4    | 4    | 5    | 1    | 4    | 3    | 4    | 4    | 4    | 4 |
| 16671  |       |        |        |      |      |      |      |      |      |      |      |      |      |      |   |
| 16676  | 6     | 6      | 6      | 0    | 0    | 0    | 0    | 0    | 0    | 0    | 0    | 0    | 0    | 1    | 1 |
| 16678  | 3     | 5      | 3      | 2    | 2    | 2    | 2    | 2    | 2    | 2    | 2    | 2    | 2    | 3    | 3 |
| 16702  | 4     | 4      | 4      | 5    | 5    | 5    | 5    | 4    | 4    | 1    | 4    | 3    | 5    | 4    | 4 |
| 16705  | 4     | 5      | 4      |      |      |      |      |      |      |      |      |      |      |      |   |
| 16707  | 3     | 3      | 3      | 1    | 2    | 3    | 2    | 2    | 2    | 2    | 2    | 1    | 1    | 4    | 3 |
| 16711  | 6     | 6      | 6      |      |      |      |      |      |      |      |      |      |      |      |   |
| 16712  | 6     | 6      | 6      | 0    | 0    | 0    | 0    | 0    | 0    | 0    | 0    | 0    | 0    | 1    | 1 |
| 16716  |       |        |        |      |      |      |      |      |      |      |      |      |      |      |   |
| 16724  | 5     | 4      | 4      |      |      |      |      |      |      |      |      |      |      |      |   |
| 16727  | 6     | 6      | 6      | 4    | 4    | 4    | 4    | 4    | 4    | 1    | 4    | 3    | 4    | 4    | 4 |

| respid | Q46x4 | Q46x5a | Q46x5b | Q47a | Q47b | Q47c | Q47d | Q47e | Q47f | Q47g | Q47h | Q47i | Q47j | Q47k |   |
|--------|-------|--------|--------|------|------|------|------|------|------|------|------|------|------|------|---|
| 16734  | 2     | 2      | 4      | 0    | 0    | 0    | 0    | 0    | 0    | 0    | 0    | 0    | 0    | 1    | 2 |
| 16740  | 4     | 3      | 3      |      |      |      |      |      |      |      |      |      |      |      |   |
| 16748  | 2     | 3      | 3      | 5    | 5    | 5    | 4    | 4    | 5    | 5    | 4    | 5    | 5    | 5    | 5 |
| 16759  | 6     | 6      | 6      | 5    | 5    | 5    | 5    | 5    | 5    | 4    | 4    | 5    | 5    | 5    | 5 |
| 16761  |       |        |        |      |      |      |      |      |      |      |      |      |      |      |   |
| 16763  | 5     | 5      | 4      | 2    | 2    | 5    | 3    | 4    | 1    | 3    | 2    | 5    | 4    | 4    | 3 |
| 16764  | 3     | 4      | 3      | 3    | 3    | 2    | 2    | 1    | 1    | 3    | 2    | 3    | 2    | 2    | 4 |
| 16766  | 5     | 5      | 5      |      |      |      |      |      |      |      |      |      |      |      |   |
| 16767  | 5     | 6      | 6      | 5    | 5    | 5    | 5    | 5    | 5    | 5    | 5    | 5    | 5    | 5    | 5 |
| 16776  | 6     | 6      | 6      |      |      |      |      |      |      |      |      |      |      |      |   |
| 16781  | 4     | 4      | 4      | 0    | 4    | 0    | 0    | 0    | 0    | 0    | 0    | 0    | 0    | 1    | 1 |
| 16793  | 4     | 4      | 4      | 3    | 2    | 2    | 3    | 4    | 1    | 2    | 3    | 5    | 5    | 5    | 3 |
| 16796  | 2     | 3      | 2      |      |      |      |      |      |      |      |      |      |      |      |   |
| 16810  | 5     | 5      | 5      |      |      |      |      |      |      |      |      |      |      |      |   |
| 16811  | 4     | 4      | 3      |      |      |      |      |      |      |      |      |      |      |      |   |
| 16813  |       |        |        |      |      |      |      |      |      |      |      |      |      |      |   |
| 16814  | 5     | 5      | 5      | 5    | 5    | 5    | 4    | 4    | 2    | 4    | 5    | 5    | 5    | 5    | 4 |
| 16831  | 6     | 6      | 6      |      |      |      |      |      |      |      |      |      |      |      |   |
| 16833  | 6     | 6      | 6      |      |      |      |      |      |      |      |      |      |      |      |   |
| 16839  | 5     | 4      | 4      | 3    | 3    | 4    | 4    |      |      |      | 3    |      |      | 4    |   |
| 16843  | 4     | 5      | 4      |      |      |      |      |      |      |      |      |      |      |      |   |
| 16860  |       |        |        |      |      |      |      |      |      |      |      |      |      |      |   |
| 16871  | 6     | 5      | 6      | 4    | 5    | 5    | 5    | 5    | 1    | 5    | 5    | 5    | 5    | 5    | 5 |
| 16881  | 4     | 4      | 4      | 3    | 3    | 3    | 3    | 4    | 1    | 3    | 4    | 3    | 3    | 3    | 3 |
| 16884  | 2     | 4      | 4      |      |      |      |      |      |      |      |      |      |      |      |   |
| 16891  | 4     | 5      | 4      | 5    | 5    | 5    | 5    | 5    | 4    | 4    | 4    | 5    | 5    | 5    | 5 |
| 16909  | 5     | 5      | 5      |      |      |      |      |      |      |      |      |      |      |      |   |
| 16911  |       |        |        |      |      |      |      |      |      |      |      |      |      |      |   |
| 16922  | 4     | 4      | 4      | 0    | 0    | 0    | 0    | 0    | 0    | 0    | 0    | 0    | 0    | 1    | 1 |
| 16935  | 5     | 5      | 3      | 3    | 3    | 2    | 2    |      | 2    | 3    | 3    | 4    | 4    | 4    | 3 |
| 16942  | 5     | 5      | 5      |      |      |      |      |      |      |      |      |      |      |      |   |
| 16950  |       |        |        |      |      |      |      |      |      |      |      |      |      |      |   |

| respid | Q46x4 | Q46x5a | Q46x5b | Q47a | Q47b | Q47c | Q47d | Q47e | Q47f | Q47g | Q47h | Q47i | Q47j | Q47k |
|--------|-------|--------|--------|------|------|------|------|------|------|------|------|------|------|------|
| 16952  | 3     | 4      | 4      |      |      |      |      |      |      |      |      |      |      |      |
| 16963  | 5     | 4      | 4      | 5    | 5    | 5    | 5    | 5    | 2    | 4    | 3    | 5    | 5    | 4    |
| 16967  | 3     | 3      | 3      | 3    | 4    | 3    | 5    | 3    | 1    | 4    | 3    | 2    |      | 2    |
| 16970  | 2     | 4      | 4      |      |      |      |      |      |      |      |      |      |      |      |
| 16976  | 4     | 4      | 4      | 4    | 4    | 5    | 4    | 4    | 4    | 3    | 3    | 4    | 3    | 4    |
| 16982  | 5     | 5      | 5      | 2    | 4    | 0    | 0    | 0    | 0    | 0    | 0    | 0    | 2    | 1    |
| 16995  | 6     | 6      | 6      | 4    | 4    | 4    | 4    | 4    | 1    | 4    | 3    | 4    | 5    | 4    |
| 17004  | 3     | 4      | 4      | 0    | 0    | 0    | 0    | 0    | 0    | 0    | 0    | 0    |      | 1    |
| 17006  | 5     | 5      | 4      | 4    | 4    | 4    | 5    | 5    | 4    | 4    | 4    | 5    | 5    | 4    |
| 17009  | 6     | 6      | 6      | 4    | 0    | 0    | 0    | 0    | 0    | 0    | 0    | 0    | 5    | 1    |
| 17021  |       |        |        |      |      |      |      |      |      |      |      |      |      |      |
| 17040  | 5     | 4      | 4      |      |      |      |      |      |      |      |      |      |      |      |
| 17041  |       |        |        |      |      |      |      |      |      |      |      |      |      |      |
| 17044  | 5     | 5      | 5      |      |      |      |      |      |      |      |      |      |      |      |
| 17046  | 2     | 2      | 2      |      |      |      |      |      |      |      |      |      |      |      |
| 17052  | 4     | 5      | 4      | 3    | 3    | 3    | 2    | 2    | 1    | 3    | 3    | 3    | 3    | 3    |
| 17055  | 5     | 5      | 5      |      |      |      |      |      |      |      |      |      |      |      |
| 17108  | 4     | 6      | 6      |      | 2    |      |      |      |      |      |      |      |      |      |
| 17109  | 4     | 3      | 4      |      |      |      |      |      |      |      |      |      |      |      |
| 17113  |       |        |        |      |      |      |      |      |      |      |      |      |      |      |
| 17115  | 4     | 4      | 5      | 3    | 2    | 0    | 0    | 2    | 1    | 2    | 2    | 5    | 2    | 4    |
| 17132  |       |        |        |      |      |      |      |      |      |      |      |      |      |      |
| 17135  | 2     | 4      | 4      |      |      |      |      |      |      |      |      |      |      |      |
| 17138  | 6     | 5      | 6      |      |      |      |      |      |      |      |      |      |      |      |
| 17141  | 5     | 5      | 5      | 0    |      |      |      |      |      |      |      |      |      |      |
| 17143  | 5     | 4      | 3      | 5    | 5    | 0    | 0    | 0    | 1    | 1    | 0    | 1    |      | 1    |
| 17148  | 5     | 5      | 5      | 0    | 2    | 0    | 0    | 0    | 0    | 0    | 0    | 0    | 1    | 1    |
| 17151  | 5     | 5      | 5      | 2    | 4    | 4    | 4    | 4    | 2    | 4    | 4    | 3    | 3    | 4    |
| 17153  | 4     | 5      | 5      | 4    | 4    | 4    | 3    | 4    | 1    | 4    | 3    | 5    | 4    | 4    |
| 17154  | 4     | 4      | 3      | 2    | 2    | 2    | 3    | 4    | 2    | 3    | 4    | 5    | 4    | 3    |
| 17157  | 4     | 4      | 3      | 0    | 1    | 2    | 2    | 2    | 0    | 0    | 0    | 0    | 1    | 1    |
| 17160  | 5     | 5      | 5      | 1    | 5    | 5    | 5    | 5    | 1    | 5    | 4    | 5    | 5    | 5    |

| respid | Q46x4 | Q46x5a | Q46x5b | Q47a | Q47b | Q47c | Q47d | Q47e | Q47f | Q47g | Q47h | Q47i | Q47j | Q47k |   |
|--------|-------|--------|--------|------|------|------|------|------|------|------|------|------|------|------|---|
| 17167  | 4     | 4      | 4      | 4    | 4    | 4    | 4    | 4    | 4    | 3    | 3    | 3    | 3    | 2    | 3 |
| 17169  | 5     | 5      | 5      | 5    | 4    | 4    | 4    | 4    | 4    | 3    | 4    | 3    | 5    | 4    | 4 |
| 17174  | 2     | 3      | 3      | 2    | 2    | 3    | 2    | 2    | 2    | 2    | 2    | 3    | 3    | 3    |   |
| 17179  | 5     | 4      | 4      | 1    | 4    | 4    | 4    | 4    | 5    | 1    | 4    | 4    | 3    | 3    | 3 |
| 17180  | 4     | 4      | 4      | 0    | 5    | 0    | 0    | 0    | 0    | 0    | 0    | 0    | 5    | 3    | 1 |
| 17182  | 5     | 5      | 5      | 1    | 0    | 0    | 0    | 0    | 0    | 0    | 0    | 0    | 5    | 5    | 3 |
| 17184  | 5     | 6      | 6      | 0    | 3    | 0    | 0    | 0    | 0    | 0    | 0    |      | 0    | 1    | 1 |
| 17186  | 5     | 5      | 5      | 4    | 4    | 5    | 4    | 4    | 4    | 4    | 4    | 3    | 5    | 5    | 5 |
| 17187  | 5     | 4      | 4      | 0    | 0    | 0    | 0    | 0    | 0    | 0    | 0    | 0    | 0    | 1    | 1 |
| 17192  | 4     | 4      | 4      | 0    | 2    | 0    | 0    | 0    | 0    | 0    | 0    | 0    | 0    | 1    | 1 |
| 17197  | 5     | 5      | 5      | 5    | 4    | 5    | 5    | 5    | 5    | 5    | 5    | 3    | 5    | 5    | 5 |
| 17217  | 6     | 6      | 6      |      |      |      |      |      |      |      |      |      |      |      |   |
| 17226  | 5     | 5      | 5      | 3    | 3    | 4    | 2    | 4    | 2    | 3    | 3    | 3    | 5    | 4    | 4 |
| 17228  | 5     | 5      | 5      | 5    | 5    | 5    | 5    | 5    | 5    | 2    | 5    | 4    | 5    | 5    | 4 |
| 17245  | 5     | 5      | 5      | 1    | 5    | 2    | 2    | 1    | 1    | 1    | 3    | 3    | 3    | 3    | 3 |
| 17247  |       |        |        |      |      |      |      |      |      |      |      |      |      |      |   |
| 17258  | 5     | 5      | 5      |      |      |      |      |      |      |      |      |      |      |      |   |
| 17259  | 4     | 4      | 4      | 3    | 3    | 3    | 3    | 4    | 2    | 3    | 3    | 3    | 3    | 3    | 3 |
| 17262  | 5     | 5      | 5      | 4    | 4    | 4    | 4    | 5    | 3    | 4    | 4    | 4    | 5    | 4    | 4 |
| 17265  | 6     | 6      | 6      |      |      |      |      |      |      |      |      |      |      |      |   |
| 17281  | 4     | 5      | 4      | 5    | 5    | 5    | 5    | 5    | 3    | 5    | 4    | 5    | 5    | 5    | 4 |
| 17282  | 4     | 4      | 4      |      |      |      |      |      |      |      |      |      |      |      |   |
| 17293  | 6     | 6      | 6      | 5    | 5    | 3    | 5    | 5    | 2    | 5    | 4    | 5    | 5    | 4    | 5 |
| 17306  | 3     | 3      | 3      |      |      |      |      |      |      |      |      |      |      |      |   |
| 17312  | 5     | 4      | 5      | 4    | 3    | 4    | 2    | 4    | 2    | 4    | 3    | 4    | 4    | 4    | 4 |
| 17318  | 4     | 4      | 4      | 0    | 0    | 0    | 0    | 0    | 0    | 0    | 0    | 0    | 0    | 1    | 1 |
| 17328  | 4     | 5      | 5      |      |      |      |      |      |      |      |      |      |      |      |   |
| 17343  | 5     | 5      | 5      | 5    | 5    | 5    | 5    | 5    | 3    | 5    | 3    | 5    | 5    | 5    | 5 |
| 17344  | 5     | 5      | 5      |      |      |      |      |      |      |      |      |      |      |      |   |
| 17348  | 4     | 5      | 5      | 4    | 4    | 4    | 4    | 5    | 1    | 3    | 3    | 5    | 5    | 4    | 4 |
| 17352  | 5     | 5      | 5      |      |      |      |      |      |      |      |      |      |      |      |   |
| 17355  | 5     | 5      | 6      | 5    | 5    | 5    | 4    | 5    | 3    | 4    | 3    | 5    | 5    | 5    | 5 |

| respid | Q46x4 | Q46x5a | Q46x5b | Q47a | Q47b | Q47c | Q47d | Q47e | Q47f | Q47g | Q47h | Q47i | Q47j | Q47k |
|--------|-------|--------|--------|------|------|------|------|------|------|------|------|------|------|------|
| 17356  | 4     | 4      | 4      |      |      |      |      |      |      |      |      |      |      |      |
| 17359  | 6     | 6      | 6      |      |      |      |      |      |      |      |      |      |      |      |
| 17373  | 4     | 4      | 3      |      |      |      |      |      |      |      |      |      |      |      |
| 17381  | 4     | 5      | 5      |      |      |      |      |      |      |      |      |      |      |      |
| 17388  | 5     | 4      | 4      |      |      |      |      |      |      |      |      |      |      |      |
| 17394  | 4     | 4      | 4      |      |      |      |      |      |      |      |      |      |      |      |
| 17401  |       |        |        |      |      |      |      |      |      |      |      |      |      |      |
| 17403  | 5     | 5      | 5      |      |      |      |      |      |      |      |      |      |      |      |
| 17411  |       |        |        |      |      |      |      |      |      |      |      |      |      |      |
| 17423  | 4     | 4      | 4      |      |      |      |      |      |      |      |      |      |      |      |
| 17427  |       |        |        |      |      |      |      |      |      |      |      |      |      |      |
| 17433  | 4     | 4      | 3      |      |      |      |      |      |      |      |      |      |      |      |
| 17441  | 5     | 5      | 5      | 5    | 5    | 5    | 5    | 5    | 3    | 5    | 4    | 4    | 5    | 5    |
| 17442  | 5     | 5      | 5      | 4    | 5    | 5    | 4    | 4    | 2    | 4    | 4    | 4    | 4    | 4    |
| 17447  | 5     | 5      | 5      | 1    | 5    | 5    | 5    | 5    | 1    | 5    | 4    | 5    | 5    | 3    |
| 17458  | 6     | 6      | 6      |      |      |      |      |      |      |      |      |      |      |      |
| 17474  | 4     | 4      | 4      |      |      |      |      |      |      |      |      |      |      |      |
| 17475  | 6     | 6      | 6      | 3    | 3    | 3    | 3    | 3    | 2    | 1    | 2    | 2    | 3    | 3    |
| 17476  | 4     | 4      | 4      | 2    | 3    | 3    | 3    | 4    | 2    | 3    | 3    | 3    | 3    | 3    |
| 17480  | 5     | 5      | 5      |      |      |      |      |      |      |      |      |      |      |      |
| 17484  | 5     | 5      | 5      | 0    | 0    | 0    | 0    | 0    | 0    | 0    | 0    | 0    | 1    | 1    |
| 17490  | 5     | 5      | 5      |      |      |      |      |      |      |      |      |      |      |      |
| 17491  | 6     | 6      | 6      |      |      |      |      |      |      |      |      |      |      |      |
| 17500  | 4     | 4      | 5      |      |      |      |      |      |      |      |      |      |      |      |
| 17507  | 5     | 5      | 5      | 4    | 4    | 4    | 4    | 5    | 2    | 4    | 4    | 5    | 5    | 5    |
| 17517  | 4     | 3      | 2      | 0    | 2    | 0    | 0    | 0    | 0    | 0    | 0    | 0    | 1    | 1    |
| 17520  | 2     | 5      | 5      | 0    | 0    | 0    | 0    | 0    | 0    | 0    | 0    | 0    | 1    | 1    |
| 17521  | 5     | 6      | 6      | 4    | 5    | 5    | 5    | 5    | 2    | 4    | 4    | 5    | 5    | 4    |
| 17531  | 5     | 5      | 5      | 5    | 5    | 5    | 5    | 5    | 1    | 5    | 3    | 5    | 5    | 4    |
| 17540  | 6     | 5      | 6      |      |      |      |      |      |      |      |      |      |      |      |
| 17550  | 6     | 5      | 5      | 5    | 5    | 5    | 5    | 5    | 2    | 5    | 4    | 5    | 5    | 4    |
| 17551  | 6     | 5      | 5      |      |      |      |      |      |      |      |      |      |      |      |

| respid | Q46x4 | Q46x5a | Q46x5b | Q47a | Q47b | Q47c | Q47d | Q47e | Q47f | Q47g | Q47h | Q47i | Q47j | Q47k |   |
|--------|-------|--------|--------|------|------|------|------|------|------|------|------|------|------|------|---|
| 17555  | 4     | 4      | 4      | 3    | 3    | 3    | 3    | 3    | 4    | 3    | 3    | 2    | 3    | 3    | 3 |
| 17556  | 5     | 4      | 4      |      |      |      |      |      |      |      |      |      |      |      |   |
| 17574  | 5     | 5      | 5      | 0    | 0    | 0    | 0    | 0    | 0    | 0    | 0    | 0    | 0    | 1    | 1 |
| 17575  | 5     | 5      | 5      |      |      |      |      |      |      |      |      |      |      |      |   |
| 17582  | 5     | 5      | 5      |      |      |      |      |      |      |      |      |      |      |      |   |
| 17587  |       |        |        |      |      |      |      |      |      |      |      |      |      |      |   |
| 17601  | 5     | 5      | 5      | 5    | 5    | 5    | 5    | 5    | 1    | 4    | 3    | 5    | 5    | 5    | 3 |
| 17607  | 4     | 4      | 4      | 3    | 3    | 3    | 3    | 3    | 4    | 1    | 2    | 2    | 4    | 2    | 2 |
| 17609  | 5     | 5      | 5      |      |      |      |      |      |      |      |      |      |      |      |   |
| 17611  | 5     | 5      | 5      |      |      |      |      |      |      |      |      |      |      |      |   |
| 17613  | 6     | 6      | 6      |      |      |      |      |      |      |      |      |      |      |      |   |
| 17615  | 6     | 6      | 6      |      |      |      |      |      |      |      |      |      |      |      |   |
| 17620  | 5     | 5      | 5      | 5    | 4    | 5    | 5    | 5    | 3    | 4    | 4    | 5    | 5    | 5    | 5 |
| 17624  | 5     | 4      | 4      |      |      |      |      |      |      |      |      |      |      |      |   |
| 17635  | 6     | 6      | 6      | 4    | 5    | 5    | 5    | 5    | 3    | 5    | 4    | 5    | 5    | 5    | 3 |
| 17643  | 4     | 4      | 4      |      |      |      |      |      |      |      |      |      |      |      |   |
| 17645  | 6     | 6      | 6      |      |      |      |      |      |      |      |      |      |      |      |   |
| 17646  | 5     | 5      | 5      |      |      |      |      |      |      |      |      |      |      |      |   |
| 17649  | 5     | 4      | 5      | 1    | 2    | 2    | 2    | 4    | 1    | 1    | 3    | 3    | 3    | 2    | 2 |
| 17658  | 5     | 5      | 5      | 5    | 4    | 5    | 5    | 5    | 1    | 5    | 4    | 5    | 5    | 5    | 4 |
| 17666  |       |        |        |      |      |      |      |      |      |      |      |      |      |      |   |
| 17670  | 5     | 5      | 5      |      |      |      |      |      |      |      |      |      |      |      |   |
| 17678  | 4     | 5      | 5      |      |      |      |      |      |      |      |      |      |      |      |   |
| 17679  | 4     | 5      | 4      |      |      |      |      |      |      |      |      |      |      |      |   |
| 17695  | 5     | 5      | 5      |      |      |      |      |      |      |      |      |      |      |      |   |
| 17697  | 6     | 6      | 6      | 1    | 1    | 5    | 3    | 2    | 3    | 3    | 3    | 3    | 5    | 4    | 5 |
| 17698  | 4     | 4      | 4      | 2    | 4    | 4    | 3    | 4    | 2    | 4    | 3    | 3    | 5    | 5    | 2 |
| 17723  | 3     | 2      | 4      |      |      |      |      |      |      |      |      |      |      |      |   |
| 17727  | 5     | 5      | 5      | 4    | 5    | 5    | 5    | 5    | 3    | 5    | 5    | 5    | 5    | 4    | 3 |
| 17734  | 6     | 6      | 6      |      |      |      |      |      |      |      |      |      |      |      |   |
| 17737  | 6     | 5      | 5      |      |      |      |      |      |      |      |      |      |      |      |   |
| 17748  | 5     | 5      | 5      | 0    | 1    | 0    | 0    | 0    | 0    | 0    | 0    | 0    | 0    | 1    | 1 |

| respid | Q46x4 | Q46x5a | Q46x5b | Q47a | Q47b | Q47c | Q47d | Q47e | Q47f | Q47g | Q47h | Q47i | Q47j | Q47k |   |
|--------|-------|--------|--------|------|------|------|------|------|------|------|------|------|------|------|---|
| 17749  |       |        |        |      |      |      |      |      |      |      |      |      |      |      |   |
| 17754  | 3     | 4      | 4      | 0    | 0    | 0    | 0    | 0    | 0    | 0    | 0    | 0    | 0    | 1    | 1 |
| 17766  | 4     | 2      | 4      |      |      |      |      |      |      |      |      |      |      |      |   |
| 17777  | 5     | 5      | 5      |      |      |      |      |      |      |      |      |      |      |      |   |
| 17780  | 5     | 5      | 5      | 2    | 2    | 2    | 2    | 4    | 1    | 2    | 3    | 2    | 2    | 2    | 2 |
| 17788  | 5     | 5      | 5      | 0    | 0    | 0    | 0    | 0    | 0    | 0    | 0    | 0    | 0    | 1    | 1 |
| 17801  | 5     | 5      | 5      | 5    | 5    | 5    | 4    | 5    | 4    | 5    | 4    | 5    | 5    | 5    | 4 |
| 17803  | 5     | 5      | 5      |      |      |      |      |      |      |      |      |      |      |      |   |
| 17807  | 6     | 6      | 6      | 0    | 0    | 0    | 0    | 0    | 0    | 0    | 0    | 0    | 0    | 1    | 1 |
| 17808  | 6     | 5      | 5      | 5    | 5    | 5    | 5    | 5    |      | 5    | 5    | 5    | 5    | 5    |   |
| 17809  | 3     | 3      | 3      | 2    | 2    | 3    | 3    | 3    | 3    | 2    | 2    | 2    | 2    | 3    | 2 |
| 17821  | 5     | 4      | 5      | 5    | 5    | 5    | 5    | 5    | 2    | 5    | 4    | 5    | 5    | 5    | 4 |
| 17827  | 3     | 3      | 3      | 2    | 2    | 2    | 2    | 2    | 1    | 1    | 2    | 1    | 1    | 1    | 2 |
| 17834  | 3     | 3      | 1      | 3    | 3    | 2    | 2    | 1    | 1    | 1    | 1    | 0    | 1    | 1    | 1 |
| 17838  | 4     | 4      | 4      | 0    | 0    | 0    | 0    | 0    | 0    | 0    | 0    | 0    | 0    | 1    |   |
| 17842  | 5     | 5      | 5      |      |      |      |      |      |      |      |      |      |      |      |   |
| 17862  | 4     | 4      | 4      | 3    | 3    | 3    | 3    | 4    | 1    | 4    | 4    | 4    | 4    | 4    | 3 |
| 17863  | 4     | 6      | 4      |      |      |      |      |      |      |      |      |      |      |      |   |
| 17871  | 4     | 3      | 3      | 0    | 0    | 0    | 0    | 0    | 0    | 0    | 0    | 0    | 0    | 1    | 1 |
| 17872  | 5     | 6      | 6      | 4    | 4    | 4    | 4    | 5    | 2    | 4    | 5    | 5    | 5    | 5    | 4 |
| 17903  | 4     | 5      | 4      |      |      |      |      |      |      |      |      |      |      |      |   |
| 17906  | 5     | 5      | 5      | 1    | 1    | 5    | 5    | 4    | 3    | 5    | 4    | 4    | 4    | 4    | 4 |
| 17910  | 4     | 4      | 4      |      |      |      |      |      |      |      |      |      |      |      |   |
| 17922  | 5     | 5      | 5      | 1    | 0    | 2    | 0    | 0    | 0    | 0    | 0    | 0    | 0    | 1    | 1 |
| 17923  | 5     | 5      | 5      | 4    | 4    | 5    | 4    | 5    | 4    | 4    | 4    | 4    | 4    | 4    | 4 |
| 17925  | 5     | 5      | 5      | 1    | 5    | 5    | 5    | 5    | 1    | 5    | 3    | 5    | 5    | 5    | 5 |
| 17926  | 6     | 6      | 6      | 5    | 5    | 5    | 5    | 5    | 5    | 5    | 5    | 5    | 5    | 5    | 5 |
| 17937  | 5     | 5      | 5      | 0    | 0    | 5    | 0    | 0    | 0    | 0    | 0    | 0    | 0    | 1    | 1 |
| 17956  | 5     | 5      | 5      | 5    | 5    | 5    | 5    | 5    | 1    | 5    | 4    | 5    | 5    | 5    | 5 |
| 17958  | 5     | 5      | 5      | 4    | 4    |      |      |      |      |      |      |      |      |      |   |
| 17985  | 5     | 5      | 5      | 5    | 5    | 5    | 5    | 5    | 2    | 5    | 4    | 5    | 5    | 5    | 5 |
| 17989  | 6     | 4      | 4      |      |      |      |      |      |      |      |      |      |      |      |   |



| respid | Q46x4 | Q46x5a | Q46x5b | Q47a | Q47b | Q47c | Q47d | Q47e | Q47f | Q47g | Q47h | Q47i | Q47j | Q47k |
|--------|-------|--------|--------|------|------|------|------|------|------|------|------|------|------|------|
| 17995  | 5     | 5      | 5      |      |      |      |      |      |      |      |      |      |      |      |
| 18000  | 6     | 6      | 6      |      |      |      |      |      |      |      |      |      |      |      |
| 18010  | 5     | 5      | 5      | 2    | 4    | 4    | 3    | 3    | 2    | 5    | 4    | 4    | 4    | 3    |
| 18015  | 5     | 5      | 5      | 5    | 5    | 5    | 5    | 5    | 5    | 4    | 5    | 5    | 5    | 5    |
| 18018  | 5     | 5      | 5      |      |      |      |      |      |      |      |      |      |      |      |
| 18031  | 5     | 5      | 5      |      |      |      |      |      |      |      |      |      |      |      |
| 18033  | 3     | 4      | 4      |      |      |      |      |      |      |      |      |      |      |      |
| 18036  | 5     | 4      | 4      |      |      |      |      |      |      |      |      |      |      |      |
| 18041  | 5     | 5      | 5      | 0    | 4    | 1    | 0    | 0    | 0    | 0    | 0    | 0    | 1    |      |
| 18068  |       |        |        |      |      |      |      |      |      |      |      |      |      |      |
| 18080  | 5     | 5      | 5      | 0    | 4    | 0    | 0    | 0    | 0    | 0    | 0    | 0    | 1    | 1    |
| 18081  | 4     | 4      | 4      | 2    | 2    | 4    | 4    | 4    | 2    | 4    | 4    | 4    | 4    | 4    |
| 18083  | 4     | 4      | 4      | 0    | 0    | 0    | 0    | 0    | 0    | 0    | 0    | 0    | 1    | 1    |
| 18113  | 4     | 4      | 4      | 1    | 2    | 3    | 3    | 2    | 1    | 2    | 0    | 2    | 3    | 1    |
| 18115  | 5     | 5      | 5      | 2    | 2    |      | 1    | 4    | 2    | 1    | 3    | 3    | 3    | 3    |
| 18117  | 2     | 2      | 2      |      |      |      |      |      |      |      |      |      |      |      |
| 18129  | 5     | 5      | 5      |      |      |      |      |      |      |      |      |      |      |      |
| 18132  | 4     | 4      | 4      | 2    | 3    | 3    | 3    | 4    | 1    | 2    | 3    | 3    | 2    | 3    |
| 18146  | 6     | 6      | 6      | 5    | 4    | 3    | 2    | 4    | 2    | 3    | 3    | 4    | 4    | 3    |
| 18147  | 6     | 6      | 6      | 0    | 2    | 0    | 0    | 0    | 0    | 0    | 0    | 2    | 2    | 1    |
| 18153  |       |        |        |      |      |      |      |      |      |      |      |      |      |      |
| 18154  | 5     | 5      | 5      |      |      |      |      |      |      |      |      |      |      |      |
| 18157  | 5     | 6      | 6      | 5    | 5    | 5    | 5    | 4    |      | 3    | 4    | 4    | 4    | 3    |
| 18166  | 5     | 4      | 4      | 0    | 0    | 0    | 0    | 0    | 0    | 0    | 0    | 0    | 5    |      |
| 18169  | 5     | 5      | 5      | 5    | 5    | 5    | 5    | 5    | 2    | 5    | 5    | 5    | 5    | 5    |
| 18171  | 5     | 4      | 4      |      |      |      |      |      |      |      |      |      |      |      |
| 18173  | 4     | 4      | 4      |      |      |      |      |      |      |      |      |      |      |      |
| 18204  | 6     | 4      | 4      | 5    | 3    | 5    | 5    | 4    | 2    | 4    |      | 5    | 5    | 4    |
| 18210  | 5     | 5      | 5      | 0    | 2    | 1    | 3    | 3    | 0    | 0    | 0    | 4    | 4    | 1    |
| 18212  |       |        |        |      |      |      |      |      |      |      |      |      |      |      |
| 18220  | 4     | 3      | 4      | 2    | 3    | 3    | 2    | 2    | 2    | 3    | 2    | 2    | 1    | 2    |
| 18221  | 5     | 5      | 5      |      |      |      |      |      |      |      |      |      |      |      |

| respid | Q46x4 | Q46x5a | Q46x5b | Q47a | Q47b | Q47c | Q47d | Q47e | Q47f | Q47g | Q47h | Q47i | Q47j | Q47k |
|--------|-------|--------|--------|------|------|------|------|------|------|------|------|------|------|------|
| 18228  | 5     | 5      | 5      | 4    | 3    | 4    | 2    | 3    | 1    | 2    | 3    | 4    | 5    | 3    |
| 18231  | 5     | 5      | 5      | 5    | 5    | 5    | 5    | 5    | 0    | 0    | 5    | 5    | 5    | 4    |
| 18233  | 6     | 5      | 5      | 5    | 4    | 4    | 4    | 5    | 2    | 4    | 4    | 4    | 4    | 4    |
| 18235  | 6     | 6      | 6      |      |      |      |      |      |      |      |      |      |      |      |
| 18237  |       |        |        |      |      |      |      |      |      |      |      |      |      |      |
| 18250  | 5     | 5      | 5      |      |      |      |      |      |      |      |      |      |      |      |
| 18253  | 5     | 5      | 5      |      |      |      |      |      |      |      |      |      |      |      |
| 18264  | 5     | 5      | 5      |      |      |      |      |      |      |      |      |      |      |      |
| 18285  | 6     | 6      | 6      | 0    | 0    | 0    | 0    | 0    | 0    | 0    | 0    | 0    | 1    | 1    |
| 18287  |       |        |        |      |      |      |      |      |      |      |      |      |      |      |
| 18296  | 5     | 5      | 5      |      |      |      |      |      |      |      |      |      |      |      |
| 18299  | 4     | 4      | 5      | 2    | 2    | 4    | 4    | 5    |      | 3    | 2    |      | 3    | 3    |
| 18313  | 6     | 6      | 6      |      |      |      |      |      |      |      |      |      |      |      |
| 18321  | 5     | 5      | 5      |      |      |      |      |      |      |      |      |      |      |      |
| 18324  |       |        |        |      |      |      |      |      |      |      |      |      |      |      |
| 18329  | 6     | 6      | 6      | 4    | 4    | 4    | 4    | 4    | 5    | 5    | 4    | 4    | 4    | 4    |
| 18332  | 6     | 6      | 6      |      |      |      |      |      |      |      |      |      |      |      |
| 18339  | 5     | 5      | 5      | 5    | 5    | 5    | 5    | 5    | 1    | 4    | 3    | 5    | 4    | 2    |
| 18340  | 5     | 4      | 5      | 4    | 4    | 4    | 4    | 4    | 5    | 3    | 4    | 4    | 5    | 4    |
| 18348  | 5     | 5      | 5      |      |      |      |      |      |      |      |      |      |      |      |
| 18355  | 5     | 5      | 5      | 1    | 2    | 1    | 2    | 1    | 0    | 0    | 0    | 0    | 1    | 1    |
| 18360  | 5     | 4      | 4      | 4    | 4    | 4    | 4    | 5    | 3    | 4    | 4    | 4    | 4    | 4    |
| 18380  | 6     | 6      | 6      |      |      |      |      |      |      |      |      |      |      |      |
| 18403  | 5     | 5      | 4      |      |      |      |      |      |      |      |      |      |      |      |
| 18405  | 4     | 4      | 4      | 3    | 0    | 0    | 0    | 0    | 0    | 0    | 0    | 0    | 3    | 3    |
| 18409  | 5     | 4      | 4      | 4    | 4    | 4    | 4    | 5    | 3    | 4    | 4    | 4    | 4    | 4    |
| 18445  | 5     | 6      | 5      | 4    | 4    | 5    | 5    | 5    | 2    | 4    | 4    | 5    | 5    | 5    |
| 18458  | 5     | 6      | 6      | 4    | 5    | 4    | 4    | 5    | 1    | 4    | 5    | 4    | 4    | 4    |
| 18477  | 5     | 5      | 5      |      |      |      |      |      |      |      |      |      |      |      |
| 18481  | 4     | 5      | 5      | 3    | 3    | 3    | 2    | 3    | 3    | 2    | 2    | 1    | 2    | 2    |
| 18491  | 5     | 5      | 5      | 5    | 5    | 5    | 5    | 5    | 2    | 5    | 4    | 5    | 5    | 4    |
| 18492  | 5     | 5      | 5      | 5    | 5    | 5    | 5    | 5    | 4    | 5    | 5    | 5    | 5    | 5    |

| respid | Q46x4 | Q46x5a | Q46x5b | Q47a | Q47b | Q47c | Q47d | Q47e | Q47f | Q47g | Q47h | Q47i | Q47j | Q47k |
|--------|-------|--------|--------|------|------|------|------|------|------|------|------|------|------|------|
| 18494  | 5     | 5      | 5      |      |      |      |      |      |      |      |      |      |      |      |
| 18495  | 6     | 6      | 6      |      |      |      |      |      |      |      |      |      |      |      |
| 18496  | 6     | 6      | 6      |      |      |      |      |      |      |      |      |      |      |      |
| 18507  | 3     | 2      | 2      |      |      |      |      |      |      |      |      |      |      |      |
| 18509  |       |        |        |      |      |      |      |      |      |      |      |      |      |      |
| 18510  | 6     | 6      | 6      |      |      |      |      |      |      |      |      |      |      |      |
| 18513  | 5     | 5      | 5      |      |      |      |      |      |      |      |      |      |      |      |
| 18525  |       |        |        |      |      |      |      |      |      |      |      |      |      |      |
| 18526  | 4     | 4      | 3      |      |      |      |      |      |      |      |      |      |      |      |
| 18527  | 5     | 5      | 4      | 2    |      | 2    | 1    | 1    | 0    | 1    | 0    | 1    | 1    | 1    |
| 18536  | 6     | 6      | 6      |      |      |      |      |      |      |      |      |      |      |      |
| 18540  | 5     | 5      | 5      |      |      |      |      |      |      |      |      |      |      |      |
| 18548  | 4     | 4      | 4      |      |      |      |      |      |      |      |      |      |      |      |
| 18550  |       |        |        |      |      |      |      |      |      |      |      |      |      |      |
| 18556  | 6     | 6      | 6      | 0    |      |      |      |      |      |      |      |      |      |      |
| 18561  |       |        |        |      |      |      |      |      |      |      |      |      |      |      |
| 18577  | 6     | 6      | 6      | 1    | 2    | 1    | 0    | 0    | 0    | 0    | 0    | 1    | 2    | 1    |
| 18580  | 6     | 6      | 6      |      |      |      |      |      |      |      |      |      |      |      |
| 18633  | 5     | 5      | 5      | 0    | 0    | 0    | 0    | 0    | 0    | 0    | 0    | 0    | 1    | 1    |
| 18635  | 5     | 5      | 5      | 0    | 0    | 0    | 0    | 0    | 0    | 0    | 0    | 0    | 1    | 1    |
| 18636  |       |        |        |      |      |      |      |      |      |      |      |      |      |      |
| 18645  | 5     | 5      | 5      |      |      |      |      |      |      |      |      |      |      |      |
| 18649  | 4     | 4      | 4      |      |      |      |      |      |      |      |      |      |      |      |
| 18664  | 5     | 5      | 5      | 5    | 5    | 5    | 5    | 5    | 2    | 4    | 4    | 5    | 5    | 5    |
| 18668  | 6     | 6      | 6      | 5    | 5    | 5    | 5    | 5    | 2    | 5    | 4    | 5    | 5    | 5    |
| 18682  | 4     | 4      | 4      |      |      |      |      |      |      |      |      |      |      |      |
| 18685  | 6     | 6      | 6      |      |      |      |      |      |      |      |      |      |      |      |
| 18688  | 5     | 5      | 5      |      |      |      |      |      |      |      |      |      |      |      |
| 18689  | 2     | 2      | 1      | 1    | 2    | 2    | 1    | 4    | 2    | 3    | 3    | 1    | 3    | 2    |
| 18693  | 4     | 5      | 2      |      |      |      |      |      |      |      |      |      |      |      |
| 18694  | 6     | 6      | 6      |      |      |      |      |      |      |      |      |      |      |      |
| 18705  | 5     | 5      | 5      | 4    | 3    | 4    | 3    | 4    | 1    | 4    | 3    | 4    | 4    | 3    |

| respid | Q46x4 | Q46x5a | Q46x5b | Q47a | Q47b | Q47c | Q47d | Q47e | Q47f | Q47g | Q47h | Q47i | Q47j | Q47k |
|--------|-------|--------|--------|------|------|------|------|------|------|------|------|------|------|------|
| 18710  | 5     | 5      | 5      | 4    | 3    | 5    | 5    | 4    | 2    | 5    | 3    | 5    | 5    | 3    |
| 18715  | 4     | 4      | 4      |      |      |      |      |      |      |      |      |      |      |      |
| 18718  | 6     | 6      | 6      | 0    | 0    | 0    | 0    | 0    | 0    | 0    | 0    | 0    | 1    | 1    |
| 18727  | 4     | 4      | 4      |      |      |      |      |      |      |      |      |      |      |      |
| 18732  | 5     | 5      | 5      |      |      |      |      |      |      |      |      |      |      |      |
| 18735  | 4     | 4      | 4      |      |      |      |      |      |      |      |      |      |      |      |
| 18742  | 5     | 5      | 5      | 5    | 5    | 5    | 5    | 5    | 2    | 5    | 4    | 5    | 5    | 4    |
| 18745  | 6     | 5      | 5      | 1    | 1    | 5    | 5    | 5    | 3    | 5    | 4    | 5    | 5    | 5    |
| 18747  | 6     | 6      | 6      | 5    | 5    | 5    | 5    | 5    | 3    | 5    | 4    | 5    | 5    | 5    |
| 18750  | 5     | 5      | 5      |      |      |      |      |      |      |      |      |      |      |      |
| 18751  | 5     | 5      | 5      | 4    | 4    | 4    | 4    | 4    | 2    | 4    | 3    | 4    | 4    | 4    |
| 18753  | 5     | 5      | 5      |      |      |      |      |      |      |      |      |      |      |      |
| 18754  |       |        |        |      |      |      |      |      |      |      |      |      |      |      |
| 18759  | 6     | 6      | 6      |      |      |      |      |      |      |      |      |      |      |      |
| 18780  | 5     | 5      | 5      |      |      |      |      |      |      |      |      |      |      |      |
| 18782  | 5     | 5      | 5      |      |      |      |      |      |      |      |      |      |      |      |
| 18807  | 2     | 1      | 1      |      |      |      |      |      |      |      |      |      |      |      |
| 18815  | 6     | 6      | 6      | 0    | 0    |      |      |      |      |      |      |      |      |      |
| 18818  | 1     | 2      | 3      |      |      |      |      |      |      |      |      |      |      |      |
| 18820  | 6     | 6      | 6      |      |      |      |      |      |      |      |      |      |      |      |
| 18823  | 2     | 2      | 2      |      |      |      |      |      |      |      |      |      |      |      |
| 18825  | 6     | 6      | 6      |      |      |      |      |      |      |      |      |      |      |      |
| 18828  |       |        |        |      |      |      |      |      |      |      |      |      |      |      |
| 18832  | 6     | 6      | 6      |      |      |      |      |      |      |      |      |      |      |      |
| 18834  | 4     | 4      | 5      | 5    | 5    | 5    | 4    | 4    | 3    | 4    | 3    | 5    | 5    | 4    |
| 18835  | 3     | 4      | 5      | 2    | 3    | 3    | 3    | 4    | 3    | 2    | 2    | 2    | 3    | 3    |
| 18837  | 6     | 6      | 6      |      |      |      |      |      |      |      |      |      |      |      |
| 18842  | 6     | 6      | 6      |      |      |      |      |      |      |      |      |      |      |      |
| 18846  |       |        |        |      |      |      |      |      |      |      |      |      |      |      |
| 18855  | 4     | 4      | 4      | 3    | 3    | 3    | 3    | 4    | 2    | 2    | 3    | 3    | 3    | 3    |
| 18856  | 5     | 5      | 5      | 0    | 3    | 0    | 0    | 0    | 0    | 0    | 0    | 5    | 5    | 1    |
| 18887  | 4     | 4      | 4      | 1    | 1    | 2    | 1    | 2    | 1    | 1    | 1    | 1    | 1    | 2    |

| respid | Q46x4 | Q46x5a | Q46x5b | Q47a | Q47b | Q47c | Q47d | Q47e | Q47f | Q47g | Q47h | Q47i | Q47j | Q47k |   |
|--------|-------|--------|--------|------|------|------|------|------|------|------|------|------|------|------|---|
| 18903  | 6     | 5      | 4      | 5    | 5    | 5    | 5    | 5    | 5    | 2    | 4    | 4    | 5    | 4    | 3 |
| 18906  | 4     | 5      | 4      | 2    | 1    | 2    | 1    | 4    | 1    | 1    | 2    | 2    | 2    | 2    | 2 |
| 18910  |       |        |        |      |      |      |      |      |      |      |      |      |      |      |   |
| 18919  | 5     | 5      | 5      |      |      |      |      |      |      |      |      |      |      |      |   |
| 18928  | 4     | 4      | 4      |      |      |      |      |      |      |      |      |      |      |      |   |
| 18931  | 4     | 4      | 4      | 4    | 5    | 5    | 4    | 5    | 3    | 4    | 4    | 4    | 4    | 4    | 4 |
| 18939  | 4     | 4      | 4      | 5    | 5    | 5    | 5    | 5    | 4    | 5    | 4    | 5    | 5    | 5    | 4 |
| 18946  | 5     | 5      | 5      |      |      |      |      |      |      |      |      |      |      |      |   |
| 18952  | 4     | 4      | 4      |      |      |      |      |      |      |      |      |      |      |      |   |
| 18954  | 5     | 5      | 5      | 5    | 5    | 5    | 5    | 5    | 2    | 5    | 4    | 5    | 5    | 5    | 5 |
| 18982  |       |        |        |      |      |      |      |      |      |      |      |      |      |      |   |
| 18986  | 4     | 4      | 4      | 3    | 3    | 5    | 5    | 4    |      |      | 3    | 4    |      |      |   |
| 18989  | 3     | 4      | 4      | 3    | 4    | 4    | 4    | 5    | 3    | 4    | 4    | 4    | 4    | 4    | 4 |
| 18990  | 5     | 5      | 5      | 4    | 4    | 4    | 4    | 5    | 2    | 4    | 4    | 4    | 4    | 4    | 4 |
| 18996  | 4     | 5      | 5      | 4    | 5    | 5    | 5    | 5    | 1    | 5    | 4    | 5    | 5    | 5    | 4 |
| 18998  | 5     | 5      | 5      |      |      |      |      |      |      |      |      |      |      |      |   |
| 19009  | 2     | 2      | 1      |      |      |      |      |      |      |      |      |      |      |      |   |
| 19010  | 5     | 5      | 5      |      |      |      |      |      |      |      |      |      |      |      |   |
| 19017  | 5     | 5      | 5      |      |      |      |      |      |      |      |      |      |      |      |   |
| 19018  | 6     | 6      | 6      | 4    | 4    | 5    |      |      |      |      |      |      |      |      |   |
| 19020  | 5     | 5      | 5      | 5    | 5    | 5    | 5    | 5    | 1    | 4    | 4    | 5    | 5    | 5    | 5 |
| 19027  | 5     | 5      | 4      |      |      |      |      |      |      |      |      |      |      |      |   |
| 19035  | 4     | 5      | 5      |      |      |      |      |      |      |      |      |      |      |      |   |
| 19037  | 4     | 4      | 4      | 0    |      |      |      |      |      |      |      |      |      |      |   |
| 19048  | 5     | 5      | 5      | 5    | 5    | 5    | 5    | 5    |      | 5    | 4    | 5    | 5    | 5    | 4 |
| 19051  | 5     | 5      | 5      |      |      |      |      |      |      |      |      |      |      |      |   |
| 19054  | 4     | 4      | 4      | 5    | 5    | 5    | 5    | 5    | 2    | 5    | 5    | 5    | 5    | 5    | 5 |
| 19057  | 5     | 5      | 5      |      |      |      |      |      |      |      |      |      |      |      |   |
| 19073  | 2     | 3      | 4      |      |      |      |      |      |      |      |      |      |      |      |   |
| 19075  | 6     | 6      | 6      | 5    | 0    | 0    | 0    | 0    | 0    | 0    | 0    | 0    | 0    | 1    | 1 |
| 19079  | 4     | 4      | 4      | 4    | 4    | 4    | 4    | 4    | 2    | 3    | 3    | 4    | 3    | 3    | 3 |
| 19087  | 5     | 5      | 5      |      |      |      |      |      |      |      |      |      |      |      |   |

| respid | Q46x4 | Q46x5a | Q46x5b | Q47a | Q47b | Q47c | Q47d | Q47e | Q47f | Q47g | Q47h | Q47i | Q47j | Q47k |
|--------|-------|--------|--------|------|------|------|------|------|------|------|------|------|------|------|
| 19090  | 6     | 6      | 6      |      |      |      |      |      |      |      |      |      |      |      |
| 19093  | 6     | 6      | 6      | 5    | 4    | 4    | 4    | 5    | 5    | 4    | 4    | 5    | 5    | 4    |
| 19099  | 4     | 4      | 2      |      |      |      |      |      |      |      |      |      |      |      |
| 19100  | 5     | 5      | 5      |      |      |      |      |      |      |      |      |      |      |      |
| 19101  | 5     | 5      | 5      |      |      |      |      |      |      |      |      |      |      |      |
| 19105  | 5     | 5      | 4      |      |      |      |      |      |      |      |      |      |      |      |
| 19111  | 4     | 4      | 4      | 4    | 5    | 5    | 5    | 5    | 5    | 5    | 4    | 5    | 5    | 4    |
| 19112  | 6     | 6      | 6      |      |      |      |      |      |      |      |      |      |      |      |
| 19117  | 3     | 5      | 4      |      |      |      |      |      |      |      |      |      |      |      |
| 19122  | 5     | 5      | 5      |      |      |      |      |      |      |      |      |      |      |      |
| 19126  | 5     | 5      | 5      | 4    | 4    | 4    | 4    | 5    | 2    | 4    | 4    | 5    | 5    | 4    |
| 19127  | 6     | 5      | 5      | 0    | 0    | 0    | 0    | 0    | 0    | 0    | 0    | 1    | 1    | 1    |
| 19131  | 5     | 4      | 5      | 4    | 4    | 4    | 4    | 4    |      | 4    | 3    | 4    | 4    | 3    |
| 19134  | 5     | 5      | 5      |      |      |      |      |      |      |      |      |      |      |      |
| 19149  | 4     | 4      | 4      |      |      |      |      |      |      |      |      |      |      |      |
| 19151  | 4     | 5      | 4      | 2    | 4    | 4    | 3    | 5    | 3    | 4    | 4    | 4    | 3    | 3    |
| 19164  | 5     | 5      | 5      | 1    | 5    | 5    | 5    | 5    | 3    | 4    | 3    | 5    | 4    | 4    |
| 19166  | 5     | 5      | 5      | 4    | 3    | 4    | 4    | 5    | 1    | 4    | 4    | 5    | 5    | 4    |
| 19172  | 5     | 5      | 5      |      |      |      |      |      |      |      |      |      |      |      |
| 19173  | 4     | 4      | 4      | 4    | 3    | 4    | 4    | 4    | 3    | 2    | 2    | 4    | 2    | 2    |
| 19180  | 5     | 6      | 5      | 5    | 5    | 5    | 5    | 5    | 1    | 5    | 3    | 5    | 5    | 2    |
| 19185  | 5     | 4      | 4      | 2    | 3    | 4    | 4    | 5    | 3    | 2    | 4    | 4    | 4    | 4    |
| 19189  | 5     | 4      | 5      |      |      |      |      |      |      |      |      |      |      |      |
| 19191  |       |        |        |      |      |      |      |      |      |      |      |      |      |      |
| 19198  | 6     | 6      | 6      |      |      |      |      |      |      |      |      |      |      |      |
| 19203  | 5     | 5      | 5      | 4    | 4    | 4    | 4    | 5    | 1    | 3    | 3    | 4    | 4    | 4    |
| 19209  | 5     | 5      | 5      |      |      |      |      |      |      |      |      |      |      |      |
| 19210  |       |        |        |      |      |      |      |      |      |      |      |      |      |      |
| 19218  |       |        |        |      |      |      |      |      |      |      |      |      |      |      |
| 19220  |       |        |        |      |      |      |      |      |      |      |      |      |      |      |
| 19225  | 4     | 4      | 4      | 4    | 4    | 4    | 4    | 5    | 2    | 2    | 3    | 4    | 3    | 4    |
| 19227  | 6     | 6      | 6      | 5    | 5    | 5    | 5    | 5    | 5    | 5    | 4    | 5    | 5    | 4    |

| respid | Q46x4 | Q46x5a | Q46x5b | Q47a | Q47b | Q47c | Q47d | Q47e | Q47f | Q47g | Q47h | Q47i | Q47j | Q47k |
|--------|-------|--------|--------|------|------|------|------|------|------|------|------|------|------|------|
| 19228  | 5     | 5      | 5      | 4    | 4    | 4    | 4    | 5    | 4    | 4    | 4    | 4    | 4    | 4    |
| 19243  | 5     | 5      | 5      |      |      |      |      |      |      |      |      |      |      |      |
| 19244  | 4     | 4      | 4      | 2    | 2    | 2    | 2    | 4    | 5    | 4    | 3    | 4    | 4    | 4    |
| 19246  | 5     | 5      | 5      |      |      |      |      |      |      |      |      |      |      |      |
| 19248  |       |        |        |      |      |      |      |      |      |      |      |      |      |      |
| 19249  | 5     | 5      | 5      | 4    | 4    | 4    | 4    | 5    | 0    | 5    | 4    | 4    | 4    | 4    |
| 19252  | 4     | 4      | 3      |      |      |      |      |      |      |      |      |      |      |      |
| 19255  | 5     | 5      | 5      | 5    | 5    | 5    | 5    | 5    | 4    | 5    | 4    | 3    | 4    | 4    |
| 19257  | 4     | 4      | 5      |      |      |      |      |      |      |      |      |      |      |      |
| 19274  |       |        |        |      |      |      |      |      |      |      |      |      |      |      |
| 19279  |       |        |        |      |      |      |      |      |      |      |      |      |      |      |
| 19291  | 5     | 5      | 5      | 5    | 5    | 5    | 5    | 5    | 2    | 5    | 4    | 5    | 5    | 5    |
| 19292  | 4     | 4      | 5      |      |      |      |      |      |      |      |      |      |      |      |
| 19308  | 4     | 4      | 4      | 3    | 3    | 3    | 3    | 5    | 3    | 3    | 3    | 3    | 3    | 3    |
| 19310  | 5     | 5      | 5      | 4    | 3    | 3    | 4    | 4    | 2    | 2    | 2    | 4    | 2    | 4    |
| 19311  | 6     | 6      | 6      | 0    | 0    | 0    | 0    | 0    | 0    | 0    | 0    | 0    | 1    | 1    |
| 19326  | 4     | 4      | 4      |      |      |      |      |      |      |      |      |      |      |      |
| 19327  |       |        |        |      |      |      |      |      |      |      |      |      |      |      |
| 19329  |       |        |        |      |      |      |      |      |      |      |      |      |      |      |
| 19330  | 3     | 3      | 4      | 3    | 3    | 3    | 3    | 4    | 0    | 0    | 0    | 0    | 3    | 4    |
| 19333  | 3     | 4      | 3      |      |      |      |      |      |      |      |      |      |      |      |
| 19336  | 4     | 4      | 5      |      |      |      |      |      |      |      |      |      |      |      |
| 19343  | 5     | 5      | 5      |      |      |      |      |      |      |      |      |      |      |      |
| 19348  | 5     | 5      | 5      |      |      |      |      |      |      |      |      |      |      |      |
| 19349  | 3     | 3      | 2      |      |      |      |      |      |      |      |      |      |      |      |
| 19352  | 4     | 6      | 4      | 4    | 4    | 4    | 5    | 4    | 2    | 3    | 3    | 4    | 3    | 3    |
| 19356  | 4     | 4      | 4      |      |      |      |      |      |      |      |      |      |      |      |
| 19357  | 5     | 5      | 5      | 5    | 5    | 5    | 5    | 5    | 4    | 4    | 4    | 5    | 5    | 4    |
| 19358  | 4     | 4      | 4      |      |      |      |      |      |      |      |      |      |      |      |
| 19367  | 5     | 5      | 5      | 5    | 5    |      | 5    | 5    | 1    | 4    | 3    | 4    | 3    | 4    |
| 19376  |       |        |        |      |      |      |      |      |      |      |      |      |      |      |
| 19377  | 5     | 5      | 5      |      |      |      |      |      |      |      |      |      |      |      |

| respid | Q46x4 | Q46x5a | Q46x5b | Q47a | Q47b | Q47c | Q47d | Q47e | Q47f | Q47g | Q47h | Q47i | Q47j | Q47k |   |
|--------|-------|--------|--------|------|------|------|------|------|------|------|------|------|------|------|---|
| 19380  | 5     | 5      | 5      |      |      | 0    | 0    | 0    | 0    | 0    | 0    | 0    | 0    | 5    |   |
| 19384  | 5     | 5      | 5      | 5    | 5    | 5    | 5    | 5    | 5    | 2    | 5    | 4    | 5    | 5    | 5 |
| 19391  | 5     | 5      | 5      | 5    | 5    | 5    | 5    | 5    | 5    | 0    | 3    | 3    | 5    | 3    | 5 |
| 19397  |       |        |        |      |      |      |      |      |      |      |      |      |      |      |   |
| 19398  | 5     | 5      | 5      |      |      |      |      |      |      |      |      |      |      |      |   |
| 19401  |       |        |        |      |      |      |      |      |      |      |      |      |      |      |   |
| 19402  | 5     | 5      | 5      |      |      |      |      |      |      |      |      |      |      |      |   |
| 19403  |       |        |        |      |      |      |      |      |      |      |      |      |      |      |   |
| 19405  |       |        |        |      |      |      |      |      |      |      |      |      |      |      |   |
| 19407  | 6     | 6      | 6      |      |      |      |      |      |      |      |      |      |      |      |   |
| 19415  | 5     | 5      | 5      |      |      |      |      |      |      |      |      |      |      |      |   |
| 19420  |       |        |        |      |      |      |      |      |      |      |      |      |      |      |   |
| 19423  | 4     | 2      | 4      | 4    | 3    | 3    | 2    | 3    | 2    | 3    | 3    | 2    | 3    | 3    | 4 |
| 19424  | 6     | 6      | 6      |      |      |      |      |      |      |      |      |      |      |      |   |
| 19426  | 4     | 4      | 5      |      |      |      |      |      |      |      |      |      |      |      |   |
| 19429  | 5     | 5      | 5      |      |      |      |      |      |      |      |      |      |      |      |   |
| 19435  | 3     | 3      | 4      |      |      |      |      |      |      |      |      |      |      |      |   |
| 19441  | 5     | 5      | 5      |      |      |      |      |      |      |      |      |      |      |      |   |
| 19450  | 5     | 5      | 5      | 5    | 5    | 5    | 5    | 5    | 5    | 3    | 4    | 4    | 5    | 4    | 4 |
| 19456  | 4     | 3      | 4      |      |      |      |      |      |      |      |      |      |      |      |   |
| 19457  | 5     | 5      | 5      |      |      |      |      |      |      |      |      |      |      |      |   |
| 19463  | 4     | 4      | 4      |      |      |      |      |      |      |      |      |      |      |      |   |
| 19467  | 4     | 4      | 4      | 5    | 5    | 5    | 5    | 5    | 5    | 5    | 2    | 2    | 5    | 5    | 5 |
| 19468  | 5     | 5      | 5      | 5    | 5    | 5    | 5    | 5    | 5    | 5    | 4    | 4    | 5    | 4    | 4 |
| 19471  | 5     | 5      | 5      |      |      |      |      |      |      |      |      |      |      |      |   |
| 19473  | 5     | 5      | 5      | 2    | 2    | 3    | 2    | 1    | 5    | 3    | 2    | 4    | 3    | 3    | 2 |
| 19478  | 4     | 4      | 4      | 4    | 3    | 4    | 3    | 4    | 4    | 2    | 3    | 3    | 5    | 4    | 4 |
| 19480  |       |        |        |      |      |      |      |      |      |      |      |      |      |      |   |
| 19481  | 4     | 5      | 5      |      |      |      |      |      |      |      |      |      |      |      |   |
| 19484  | 6     | 5      | 5      | 5    | 5    | 5    | 5    | 5    | 5    | 5    | 4    | 3    | 4    | 2    | 4 |
| 19487  | 6     | 6      | 6      | 5    | 5    | 0    | 0    | 0    | 0    | 0    | 0    | 0    | 0    | 0    | 0 |
| 19491  | 4     | 4      | 4      |      |      |      |      |      |      |      |      |      |      |      |   |



| respid | Q46x4 | Q46x5a | Q46x5b | Q47a | Q47b | Q47c | Q47d | Q47e | Q47f | Q47g | Q47h | Q47i | Q47j | Q47k |   |
|--------|-------|--------|--------|------|------|------|------|------|------|------|------|------|------|------|---|
| 19495  | 4     | 4      | 4      | 4    | 4    | 4    | 4    | 4    | 5    | 2    | 4    | 4    | 4    | 4    | 5 |
| 19498  | 4     | 3      | 3      |      |      |      |      |      |      |      |      |      |      |      |   |
| 19500  | 5     | 4      | 4      | 4    | 4    | 4    | 4    | 4    | 5    | 2    | 4    | 4    | 4    | 4    | 4 |
| 19501  | 4     | 3      | 4      |      |      |      |      |      |      |      |      |      |      |      |   |
| 19503  |       |        |        |      |      |      |      |      |      |      |      |      |      |      |   |
| 19506  | 6     | 5      | 5      | 5    | 5    | 5    | 5    | 5    | 5    | 2    | 5    | 4    | 4    | 4    | 4 |
| 19508  | 5     | 5      | 5      |      |      |      |      |      |      |      |      |      |      |      |   |
| 19509  | 5     | 5      | 5      | 3    | 3    | 4    | 4    | 4    | 5    | 3    | 4    | 4    | 5    | 5    | 4 |
| 19518  | 5     | 4      | 5      |      |      |      |      |      |      |      |      |      |      |      |   |
| 19520  | 4     | 4      | 4      | 5    | 4    | 5    | 5    | 5    | 5    | 4    | 4    | 5    | 5    | 4    | 4 |
| 19536  | 5     | 4      | 5      |      |      |      |      |      |      |      |      |      |      |      |   |
| 19538  | 4     | 4      | 4      |      |      |      |      |      |      |      |      |      |      |      |   |
| 19541  | 4     | 4      | 5      |      |      |      |      |      |      |      |      |      |      |      |   |
| 19548  | 6     | 6      | 6      | 0    | 0    | 0    | 0    | 0    | 0    | 0    | 0    | 0    | 0    | 1    |   |
| 19553  |       |        |        |      |      |      |      |      |      |      |      |      |      |      |   |
| 19556  | 5     | 5      | 5      |      |      |      |      |      |      |      |      |      |      |      |   |
| 19559  |       |        |        |      |      |      |      |      |      |      |      |      |      |      |   |
| 19561  | 4     | 5      | 4      |      |      |      |      |      |      |      |      |      |      |      |   |
| 19562  | 5     | 5      | 5      |      |      |      |      |      |      |      |      |      |      |      |   |
| 19564  | 5     | 5      | 5      | 5    | 5    | 5    | 5    | 5    | 5    | 3    | 5    | 4    | 5    | 5    |   |
| 19567  | 2     | 3      | 3      | 2    | 4    | 3    | 2    | 3    | 3    | 2    | 2    | 2    | 2    | 2    | 2 |
| 19571  | 4     | 4      | 4      | 4    | 4    | 4    | 4    | 4    | 5    | 2    | 4    | 4    | 4    | 4    | 3 |
| 19576  | 4     | 4      | 4      | 4    | 4    | 4    | 4    | 4    | 4    | 3    | 4    | 3    | 3    | 3    | 3 |
| 19578  | 5     | 5      | 5      |      |      |      |      |      |      |      |      |      |      |      |   |
| 19606  |       |        |        |      |      |      |      |      |      |      |      |      |      |      |   |
| 19607  |       |        |        |      |      |      |      |      |      |      |      |      |      |      |   |
| 19608  | 5     | 5      | 5      |      |      |      |      |      |      |      |      |      |      |      |   |
| 19612  | 3     | 3      | 2      |      |      |      |      |      |      |      |      |      |      |      |   |
| 19618  | 4     | 5      | 5      |      |      |      |      |      |      |      |      |      |      |      |   |
| 19621  | 5     | 5      | 5      |      |      |      |      |      |      |      |      |      |      |      |   |
| 19624  | 2     | 3      | 2      | 4    | 4    | 4    | 4    | 4    | 2    | 3    | 4    | 3    | 4    | 3    | 4 |
| 19630  |       |        |        |      |      |      |      |      |      |      |      |      |      |      |   |

| respid | Q46x4 | Q46x5a | Q46x5b | Q47a | Q47b | Q47c | Q47d | Q47e | Q47f | Q47g | Q47h | Q47i | Q47j | Q47k |   |
|--------|-------|--------|--------|------|------|------|------|------|------|------|------|------|------|------|---|
| 19637  | 4     | 4      | 4      | 3    | 3    | 3    | 3    | 3    | 4    | 1    | 4    | 4    | 5    | 4    | 4 |
| 19639  | 5     | 4      | 5      | 5    | 5    | 5    | 5    | 5    | 5    |      |      |      | 5    |      |   |
| 19647  | 5     | 5      | 5      |      |      |      |      |      |      |      |      |      |      |      |   |
| 19648  | 2     | 3      | 2      | 3    | 2    | 0    | 1    | 4    | 3    | 2    | 2    | 2    | 3    |      | 4 |
| 19660  | 5     | 5      | 5      | 0    | 0    | 0    | 0    | 0    | 0    | 0    | 0    | 0    | 0    | 1    | 1 |
| 19662  | 3     | 2      | 2      |      |      |      |      |      |      |      |      |      |      |      |   |
| 19669  | 5     | 5      | 5      |      |      |      |      |      |      |      |      |      |      |      |   |
| 19680  | 5     | 5      | 5      | 5    | 5    | 5    | 5    | 5    | 5    | 4    | 5    | 4    | 5    | 5    | 4 |
| 19682  | 4     | 4      | 4      |      |      |      |      |      |      |      |      |      |      |      |   |
| 19686  | 5     | 5      | 5      |      |      |      |      |      |      |      |      |      |      |      |   |
| 19700  | 5     | 5      | 5      |      |      |      |      |      |      |      |      |      |      |      |   |
| 19701  | 5     | 5      | 5      |      |      |      |      |      |      |      |      |      |      |      |   |
| 19704  |       |        |        |      |      |      |      |      |      |      |      |      |      |      |   |
| 19706  | 3     | 4      | 5      |      |      |      |      |      |      |      |      |      |      |      |   |
| 19707  | 5     | 5      | 5      | 4    | 5    | 5    | 5    | 5    | 5    | 1    | 4    | 3    | 5    | 4    | 4 |
| 19717  | 4     | 4      | 4      |      |      |      |      |      |      |      |      |      |      |      |   |
| 19718  | 5     | 4      | 5      |      |      |      |      |      |      |      |      |      |      |      |   |
| 19721  | 5     | 4      | 4      |      |      |      |      |      |      |      |      |      |      |      |   |
| 19722  | 5     | 5      | 5      | 5    | 5    | 5    | 5    | 5    | 5    | 2    | 5    | 4    | 4    | 5    | 5 |
| 19729  |       |        |        |      |      |      |      |      |      |      |      |      |      |      |   |
| 19738  | 4     | 5      | 5      |      |      |      |      |      |      |      |      |      |      |      |   |
| 19741  | 5     | 5      | 5      |      |      |      |      |      |      |      |      |      |      |      |   |
| 19742  | 4     | 5      | 5      | 3    | 3    | 3    | 3    | 3    | 4    | 2    | 1    | 2    | 2    | 3    | 3 |
| 19747  | 5     | 5      | 5      | 1    | 1    | 1    | 1    | 1    | 0    | 0    | 0    | 0    | 0    | 2    | 2 |
| 19748  | 5     | 5      | 5      |      |      |      |      |      |      |      |      |      |      |      |   |
| 19749  | 5     | 5      | 5      |      |      |      |      |      |      |      |      |      |      |      |   |
| 19756  | 5     | 4      | 4      | 5    | 4    | 5    | 4    | 5    | 5    | 2    | 3    | 3    | 5    | 3    | 4 |
| 19771  | 5     | 5      | 5      |      |      |      |      |      |      |      |      |      |      |      |   |
| 19772  | 4     | 4      | 4      |      |      |      |      |      |      |      |      |      |      |      |   |
| 19775  | 6     | 5      | 5      | 3    | 3    | 4    | 3    | 4    | 4    | 1    | 3    | 3    | 3    | 3    | 3 |
| 19783  |       |        |        |      |      |      |      |      |      |      |      |      |      |      |   |
| 19787  | 5     | 5      | 5      | 5    | 4    | 4    | 4    | 4    | 5    | 4    | 4    | 4    | 5    | 4    | 4 |

| respid | Q46x4 | Q46x5a | Q46x5b | Q47a | Q47b | Q47c | Q47d | Q47e | Q47f | Q47g | Q47h | Q47i | Q47j | Q47k |
|--------|-------|--------|--------|------|------|------|------|------|------|------|------|------|------|------|
| 19790  |       |        |        |      |      |      |      |      |      |      |      |      |      |      |
| 19797  | 6     | 6      | 6      |      |      |      |      |      |      |      |      |      |      |      |
| 19802  | 5     | 5      | 5      |      |      |      |      |      |      |      |      |      |      |      |
| 19808  | 6     | 6      | 6      | 5    | 5    | 5    | 5    | 5    | 5    | 4    | 4    | 5    | 5    | 4    |
| 19810  | 5     | 5      | 5      |      |      |      |      |      |      |      |      |      |      |      |
| 19811  | 1     | 1      | 1      | 5    | 5    | 5    | 5    | 5    | 2    | 5    | 4    | 5    | 5    | 5    |
| 19812  | 4     | 4      | 4      |      |      |      |      |      |      |      |      |      |      |      |
| 19821  | 4     | 4      | 4      | 3    | 2    | 3    | 3    | 4    | 1    | 2    | 2    | 3    | 2    | 2    |
| 19826  | 5     | 5      | 4      |      |      |      |      |      |      |      |      |      |      |      |
| 19827  | 6     | 6      | 6      |      |      |      |      |      |      |      |      |      |      |      |
| 19830  | 5     | 5      | 5      |      |      |      |      |      |      |      |      |      |      |      |
| 19834  | 5     | 5      | 5      |      |      |      |      |      |      |      |      |      |      |      |
| 19838  | 5     | 4      | 4      |      |      |      |      |      |      |      |      |      |      |      |
| 19843  |       |        |        |      |      |      |      |      |      |      |      |      |      |      |
| 19845  | 4     | 4      | 3      | 2    | 3    | 4    | 3    | 5    | 3    | 3    | 4    | 3    | 4    | 4    |
| 19846  | 5     | 5      | 5      | 5    | 5    | 5    | 5    | 5    | 4    | 5    | 4    | 5    | 5    | 4    |
| 19852  | 4     | 2      | 4      | 4    | 3    | 3    | 3    | 4    | 1    | 3    | 2    | 4    | 3    | 3    |
| 19855  | 5     | 5      | 5      |      |      |      |      |      |      |      |      |      |      |      |
| 19858  | 5     | 5      | 5      | 4    | 4    | 5    | 4    | 5    | 2    | 4    | 4    | 4    | 4    | 4    |
| 19861  | 6     | 3      | 4      |      |      |      |      |      |      |      |      |      |      |      |
| 19863  | 5     | 5      | 4      |      |      |      |      |      |      |      |      |      |      |      |
| 19868  | 4     | 4      | 4      | 5    | 5    | 5    | 5    | 5    | 2    | 5    | 5    | 5    | 5    | 4    |
| 19874  | 5     | 5      | 5      |      |      |      |      |      |      |      |      |      |      |      |
| 19876  |       |        |        |      |      |      |      |      |      |      |      |      |      |      |
| 19880  | 3     | 2      | 3      |      |      |      |      |      |      |      |      |      |      |      |
| 19885  | 6     | 6      | 6      | 4    | 4    | 4    | 4    | 5    | 3    | 4    | 4    | 5    | 5    | 4    |
| 19890  |       |        |        |      |      |      |      |      |      |      |      |      |      |      |
| 19894  |       |        |        |      |      |      |      |      |      |      |      |      |      |      |
| 19895  | 6     | 6      | 6      | 5    | 5    | 5    | 5    | 5    | 0    | 5    | 4    | 5    | 5    | 5    |
| 19897  | 6     | 6      | 6      |      |      |      |      |      |      |      |      |      |      |      |
| 19906  | 5     | 4      | 5      |      |      |      |      |      |      |      |      |      |      |      |
| 19908  | 5     | 5      | 5      |      |      |      |      |      |      |      |      |      |      |      |

| respid | Q46x4 | Q46x5a | Q46x5b | Q47a | Q47b | Q47c | Q47d | Q47e | Q47f | Q47g | Q47h | Q47i | Q47j | Q47k |
|--------|-------|--------|--------|------|------|------|------|------|------|------|------|------|------|------|
| 19912  | 5     | 5      | 5      |      |      |      |      |      |      |      |      |      |      |      |
| 19913  | 6     | 6      | 6      |      |      |      |      |      |      |      |      |      |      |      |
| 19914  | 3     | 4      | 4      |      |      |      |      |      |      |      |      |      |      |      |
| 19918  | 3     | 3      | 2      |      |      |      |      |      |      |      |      |      |      |      |
| 19924  | 4     | 4      | 4      |      |      |      |      |      |      |      |      |      |      |      |
| 19936  |       |        |        |      |      |      |      |      |      |      |      |      |      |      |
| 19940  |       |        |        |      |      |      |      |      |      |      |      |      |      |      |
| 19945  | 6     | 6      | 6      |      |      |      |      |      |      |      |      |      |      |      |
| 19948  |       |        |        |      |      |      |      |      |      |      |      |      |      |      |
| 19959  | 6     | 6      | 6      |      |      |      |      |      |      |      |      |      |      |      |
| 19961  | 5     | 5      | 5      |      |      |      |      |      |      |      |      |      |      |      |
| 19962  | 5     | 5      | 5      | 5    | 5    | 5    | 4    | 3    | 1    | 2    | 2    | 3    | 2    | 4    |
| 19965  | 6     | 6      | 6      |      |      |      |      |      |      |      |      |      |      |      |
| 19966  | 4     | 3      | 4      |      |      |      |      |      |      |      |      |      |      |      |
| 19973  | 5     | 5      | 4      |      |      |      |      |      |      |      |      |      |      |      |
| 19981  | 5     | 5      | 5      | 5    | 5    | 5    | 5    | 5    | 2    | 5    | 5    | 5    | 5    | 5    |
| 19986  | 5     | 5      | 5      | 4    | 3    | 4    | 4    | 4    | 2    | 4    | 3    | 5    | 3    | 4    |
| 19989  | 6     | 6      | 6      | 5    | 5    | 5    | 5    | 5    | 4    | 5    | 5    | 5    | 5    | 5    |
| 19998  | 5     | 6      | 6      |      |      |      |      |      |      |      |      |      |      |      |
| 20001  | 5     | 5      | 5      | 4    | 4    | 4    | 3    | 4    | 5    | 4    | 4    | 4    | 4    | 4    |
| 20005  |       |        |        |      |      |      |      |      |      |      |      |      |      |      |
| 20013  | 2     | 2      | 2      |      |      |      |      |      |      |      |      |      |      |      |
| 20015  | 5     | 4      | 5      | 4    | 5    | 5    | 5    | 5    | 5    | 4    | 4    | 5    | 4    | 5    |
| 20017  | 5     | 5      | 5      |      |      |      |      |      |      |      |      |      |      |      |
| 20020  | 6     | 6      | 6      |      |      |      |      |      |      |      |      |      |      |      |
| 20021  | 5     | 5      | 5      |      |      |      |      |      |      |      |      |      |      |      |
| 20026  | 5     | 5      | 5      |      |      |      |      |      |      |      |      |      |      |      |
| 20028  | 4     | 4      | 4      | 3    | 4    | 4    | 4    | 5    | 5    | 4    | 4    | 5    | 4    |      |
| 20030  | 5     | 5      | 5      |      |      |      |      |      |      |      |      |      |      |      |
| 20031  |       |        |        |      |      |      |      |      |      |      |      |      |      |      |
| 20034  | 5     | 6      | 6      |      |      |      |      |      |      |      |      |      |      |      |
| 20035  |       |        |        |      |      |      |      |      |      |      |      |      |      |      |

| respid | Q46x4 | Q46x5a | Q46x5b | Q47a | Q47b | Q47c | Q47d | Q47e | Q47f | Q47g | Q47h | Q47i | Q47j | Q47k |   |
|--------|-------|--------|--------|------|------|------|------|------|------|------|------|------|------|------|---|
| 20040  |       | 5      | 5      | 5    |      |      |      |      |      |      |      |      |      |      |   |
| 20045  |       | 1      | 1      | 1    | 2    | 2    | 1    | 3    | 5    | 5    | 4    | 4    | 5    | 4    | 4 |
| 20048  |       | 6      | 6      | 6    |      |      |      |      |      |      |      |      |      |      |   |
| 20053  |       | 5      | 4      | 4    |      |      |      |      |      |      |      |      |      |      |   |
| 20064  |       | 4      | 4      | 4    | 4    | 4    | 4    | 4    | 4    | 3    | 4    | 3    | 4    | 4    | 4 |
| 20071  |       | 4      | 5      | 5    | 3    | 3    | 4    | 4    | 4    | 1    | 3    | 3    | 4    | 3    | 2 |
| 20072  |       | 5      | 5      | 5    | 5    | 5    | 5    | 5    | 5    | 5    | 5    | 5    | 4    | 4    | 5 |
| 20076  |       | 5      | 5      | 5    |      |      |      |      |      |      |      |      |      |      |   |
| 20081  |       | 5      | 5      | 5    | 3    | 4    | 4    | 4    |      | 2    | 4    | 3    | 4    | 4    | 4 |
| 20082  |       | 3      | 3      | 2    | 2    | 2    | 2    | 2    | 2    | 2    | 2    | 3    | 3    | 3    | 3 |
| 20083  |       | 5      | 4      | 5    |      |      |      |      |      |      |      |      |      |      |   |
| 20088  |       | 5      | 5      | 5    | 5    | 5    | 5    | 5    | 5    | 2    | 5    | 4    | 5    | 5    | 5 |
| 20089  |       | 5      | 5      | 5    | 4    | 4    | 4    | 4    | 4    | 1    | 4    | 4    | 4    | 4    | 3 |
| 20099  |       | 5      | 5      | 5    |      |      |      |      |      |      |      |      |      |      |   |
| 20101  |       | 5      | 5      | 5    |      |      |      |      |      |      |      |      |      |      |   |
| 20102  |       | 4      | 4      | 4    | 5    | 4    | 5    | 5    | 5    | 3    | 5    | 5    | 5    | 5    | 5 |
| 20109  |       | 5      | 5      | 5    |      |      |      |      |      |      |      |      |      |      |   |
| 20118  |       | 5      | 5      | 5    |      |      |      |      |      |      |      |      |      |      |   |
| 20119  |       | 6      | 6      | 6    | 1    | 1    | 1    | 1    | 3    | 1    | 1    | 1    | 1    | 1    | 1 |
| 20124  |       |        |        |      |      |      |      |      |      |      |      |      |      |      |   |
| 20126  |       | 4      | 4      | 4    |      |      |      |      |      |      |      |      |      |      |   |
| 20130  |       |        |        |      |      |      |      |      |      |      |      |      |      |      |   |
| 20131  |       | 5      | 5      | 5    |      |      |      |      |      |      |      |      |      |      |   |
| 20134  |       | 3      | 4      | 4    |      |      |      |      |      |      |      |      |      |      |   |
| 20146  |       | 5      | 5      | 5    |      |      |      |      |      |      |      |      |      |      |   |
| 20152  |       |        |        |      |      |      |      |      |      |      |      |      |      |      |   |
| 20155  |       | 5      | 5      | 5    |      |      |      |      |      |      |      |      |      |      |   |
| 20156  |       |        |        |      |      |      |      |      |      |      |      |      |      |      |   |
| 20157  |       |        |        |      |      |      |      |      |      |      |      |      |      |      |   |
| 20164  |       | 5      | 5      | 5    |      |      |      |      |      |      |      |      |      |      |   |
| 20168  |       | 4      | 3      | 3    |      |      |      |      |      |      |      |      |      |      |   |
| 20173  |       | 4      | 4      | 4    | 3    | 3    | 4    | 3    | 3    | 3    | 4    | 3    | 3    | 4    | 4 |

| respid | Q46x4 | Q46x5a | Q46x5b | Q47a | Q47b | Q47c | Q47d | Q47e | Q47f | Q47g | Q47h | Q47i | Q47j | Q47k |
|--------|-------|--------|--------|------|------|------|------|------|------|------|------|------|------|------|
| 20174  | 6     | 6      | 6      |      |      |      |      |      |      |      |      |      |      |      |
| 20175  | 4     | 4      | 4      | 4    | 4    | 5    | 5    | 4    | 4    | 4    | 4    | 4    | 3    | 4    |
| 20189  | 5     | 5      | 5      | 5    | 5    | 5    | 5    | 5    | 4    | 5    | 4    | 5    | 5    | 5    |
| 20190  | 5     | 5      | 5      |      |      |      |      |      |      |      |      |      |      |      |
| 20201  | 5     | 5      | 5      | 5    | 5    | 5    | 4    | 5    |      | 3    | 3    | 4    | 2    | 3    |
| 20202  | 5     | 5      | 5      | 4    | 4    | 4    | 4    | 5    | 2    | 4    | 4    | 3    | 4    | 4    |
| 20204  | 6     | 6      | 6      | 5    | 5    |      | 5    | 5    | 5    | 5    | 5    | 5    | 5    | 5    |
| 20206  | 4     | 4      | 4      |      |      |      |      |      |      |      |      |      |      |      |
| 20207  | 5     | 5      | 5      |      |      |      |      |      |      |      |      |      |      |      |
| 20212  | 4     | 4      | 4      | 3    | 3    | 4    | 1    | 3    | 1    | 2    | 2    | 2    | 2    | 2    |
| 20213  | 5     | 6      | 6      |      |      |      |      |      |      |      |      |      |      |      |
| 20217  | 6     | 6      | 6      |      |      |      |      |      |      |      |      |      |      |      |
| 20222  | 5     | 5      | 4      | 0    | 1    | 0    | 0    | 0    | 0    |      |      |      |      | 2    |
| 20227  |       |        |        |      |      |      |      |      |      |      |      |      |      |      |
| 20228  | 4     | 4      | 4      |      |      |      |      |      |      |      |      |      |      |      |
| 20238  | 6     | 6      | 6      |      |      |      |      |      |      |      |      |      |      |      |
| 20242  | 5     | 5      | 5      | 5    | 4    | 5    | 5    | 5    | 1    | 4    | 4    | 5    | 5    | 4    |
| 20246  | 5     | 5      | 5      |      |      |      |      |      |      |      |      |      |      |      |
| 20255  | 5     | 4      | 4      | 2    | 3    | 4    | 4    | 4    | 1    | 1    | 2    | 2    | 3    | 3    |
| 20256  | 5     | 5      | 5      | 2    | 2    | 2    | 2    | 4    | 1    | 2    | 2    | 4    | 4    | 3    |
| 20259  | 4     | 4      | 4      | 2    | 2    | 2    | 3    | 5    | 1    | 2    | 3    | 4    | 3    | 4    |
| 20262  | 5     | 4      | 5      | 4    | 4    | 4    | 4    | 5    | 3    | 4    | 4    | 5    | 5    | 4    |
| 20274  | 5     | 5      | 5      | 1    | 1    | 1    | 5    | 5    | 2    | 5    | 3    | 4    | 5    | 4    |
| 20283  | 4     | 4      | 4      |      |      |      |      |      |      |      |      |      |      |      |
| 20284  |       |        |        |      |      |      |      |      |      |      |      |      |      |      |
| 20291  | 5     | 5      | 4      |      |      |      |      |      |      |      |      |      |      |      |
| 20292  | 5     | 4      | 5      |      |      |      |      |      |      |      |      |      |      |      |
| 20293  | 6     | 4      | 4      |      |      |      |      |      |      |      |      |      |      |      |
| 20298  | 5     | 4      | 5      |      |      |      |      |      |      |      |      |      |      |      |
| 20301  |       |        |        |      |      |      |      |      |      |      |      |      |      |      |
| 20303  | 5     | 4      | 4      | 5    | 4    | 5    | 5    | 5    | 3    | 4    | 4    | 5    | 5    | 4    |
| 20309  |       |        |        |      |      |      |      |      |      |      |      |      |      |      |

| respid | Q46x4 | Q46x5a | Q46x5b | Q47a | Q47b | Q47c | Q47d | Q47e | Q47f | Q47g | Q47h | Q47i | Q47j | Q47k |
|--------|-------|--------|--------|------|------|------|------|------|------|------|------|------|------|------|
| 20318  | 5     | 5      | 5      | 4    | 4    | 4    | 4    | 5    | 3    | 5    | 4    | 5    | 5    | 5    |
| 20324  | 5     | 5      | 5      | 5    | 5    | 5    | 5    | 4    | 2    | 4    | 4    | 5    | 5    | 4    |
| 20335  | 5     | 5      | 5      | 5    | 5    | 5    | 5    | 5    | 3    | 3    | 3    | 5    | 5    | 3    |
| 20336  | 5     | 4      | 3      |      |      |      |      |      |      |      |      |      |      |      |
| 20339  | 5     | 5      | 5      | 5    | 5    | 5    | 5    | 5    | 4    | 4    | 4    | 5    | 4    | 4    |
| 20348  | 5     | 5      | 5      |      |      |      |      |      |      |      |      |      |      |      |
| 20351  | 4     | 4      | 4      | 3    | 3    | 3    | 3    | 4    | 3    | 4    | 4    | 4    | 4    | 4    |
| 20353  | 4     | 5      | 5      |      |      |      |      |      |      |      |      |      |      |      |
| 20356  | 5     | 5      | 5      |      |      |      |      |      |      |      |      |      |      |      |
| 20357  |       |        |        |      |      |      |      |      |      |      |      |      |      |      |
| 20366  | 5     | 5      | 5      | 5    | 5    | 5    | 5    | 5    | 2    | 4    | 4    | 5    | 5    | 3    |
| 20369  | 2     | 2      | 2      | 2    | 2    | 2    | 2    | 1    | 2    | 1    | 2    | 2    | 2    | 3    |
| 20372  | 4     | 4      | 5      | 5    | 5    | 5    | 5    | 5    | 3    | 5    | 4    | 5    | 5    | 5    |
| 20375  | 5     | 5      | 5      |      |      |      |      |      |      |      |      |      |      |      |
| 20379  | 5     | 5      | 5      |      |      |      |      |      |      |      |      |      |      |      |
| 20380  | 5     | 5      | 5      |      |      |      |      |      |      |      |      |      |      |      |
| 20396  | 6     | 6      | 6      |      |      |      |      |      |      |      |      |      |      |      |
| 20398  | 6     | 4      | 4      |      |      |      |      |      |      |      |      |      |      |      |
| 20412  | 5     | 5      | 5      |      |      |      |      |      |      |      |      |      |      |      |
| 20415  | 5     | 5      | 5      |      |      |      |      |      |      |      |      |      |      |      |
| 20424  | 4     | 4      | 4      |      |      |      |      |      |      |      |      |      |      |      |
| 20434  | 5     | 5      | 5      |      |      |      |      |      |      |      |      |      |      |      |
| 20435  | 5     | 5      | 5      | 4    | 4    | 4    | 3    | 4    | 4    | 4    | 4    | 5    | 4    | 4    |
| 20440  | 5     | 5      | 5      | 5    | 5    | 5    | 5    | 5    | 2    | 5    | 5    | 5    | 5    | 3    |
| 20441  | 4     | 4      | 4      | 5    | 5    | 5    | 5    | 5    | 5    | 5    | 5    | 5    | 5    | 3    |
| 20445  | 5     | 5      | 5      |      |      |      |      |      |      |      |      |      |      |      |
| 20446  | 4     | 4      | 4      |      |      |      |      |      |      |      |      |      |      |      |
| 20450  | 6     | 6      | 6      |      |      |      |      |      |      |      |      |      |      |      |
| 20453  | 3     | 3      | 3      |      |      |      |      |      |      |      |      |      |      |      |
| 20458  | 5     | 5      | 5      |      |      |      |      |      |      |      |      |      |      |      |
| 20464  | 6     | 6      | 6      | 5    | 5    | 5    | 5    | 5    | 2    | 5    | 4    | 5    | 5    | 5    |
| 20471  | 6     | 6      | 6      |      |      |      |      |      |      |      |      |      |      |      |

| respid | Q46x4 | Q46x5a | Q46x5b | Q47a | Q47b | Q47c | Q47d | Q47e | Q47f | Q47g | Q47h | Q47i | Q47j | Q47k |   |
|--------|-------|--------|--------|------|------|------|------|------|------|------|------|------|------|------|---|
| 20473  | 5     | 5      | 5      | 0    | 0    | 0    | 0    | 0    | 0    | 0    | 0    |      | 5    | 5    | 1 |
| 20474  | 5     | 4      | 5      |      |      |      |      |      |      |      |      |      |      |      |   |
| 20477  |       |        |        |      |      |      |      |      |      |      |      |      |      |      |   |
| 20479  | 2     | 3      | 3      |      |      |      |      |      |      |      |      |      |      |      |   |
| 20485  | 5     | 5      | 5      |      |      |      |      |      |      |      |      |      |      |      |   |
| 20487  | 5     | 5      | 5      |      |      |      |      |      |      |      |      |      |      |      |   |
| 20488  | 5     | 5      | 5      | 5    |      | 5    | 5    | 5    | 5    | 5    | 5    | 5    | 5    | 5    | 5 |
| 20494  | 4     | 4      | 4      |      |      |      |      |      |      |      |      |      |      |      |   |
| 20502  | 3     | 3      | 3      | 2    | 2    | 2    | 2    | 4    | 2    | 2    | 2    | 2    | 2    | 2    | 2 |
| 20503  | 5     | 4      | 4      |      |      |      |      |      |      |      |      |      |      |      |   |
| 20510  | 5     | 5      | 5      | 5    | 5    | 5    | 5    | 5    | 3    | 5    | 4    | 4    | 4    | 4    | 5 |
| 20512  |       |        |        |      |      |      |      |      |      |      |      |      |      |      |   |
| 20516  | 5     | 5      | 5      | 4    | 4    | 4    | 4    | 5    | 0    | 0    | 0    | 4    | 4    | 4    | 4 |
| 20522  | 5     | 4      | 4      |      |      |      |      |      |      |      |      |      |      |      |   |
| 20527  | 6     | 6      | 6      |      |      |      |      |      |      |      |      |      |      |      |   |
| 20529  | 4     | 4      | 4      | 3    | 2    | 2    | 2    | 4    | 2    | 3    | 3    | 3    | 3    | 3    | 3 |
| 20535  | 5     | 5      | 4      | 5    | 4    | 5    | 5    | 5    | 1    | 5    | 4    | 5    | 5    | 5    | 5 |
| 20543  | 6     | 5      | 5      | 5    | 4    | 5    | 4    | 5    | 3    | 4    | 4    | 4    | 4    | 4    | 4 |
| 20546  | 5     | 4      | 4      |      |      |      |      |      |      |      |      |      |      |      |   |
| 20548  | 6     | 6      | 6      | 4    | 3    | 3    | 3    | 5    | 0    | 3    | 3    | 5    | 5    | 5    | 3 |
| 20552  | 4     | 4      | 4      | 5    | 5    | 5    | 5    | 5    | 0    | 5    | 4    | 5    | 4    | 4    | 4 |
| 20556  | 4     | 5      | 5      | 4    | 3    | 4    | 3    | 4    | 2    | 2    | 3    | 4    | 4    | 4    | 3 |
| 20566  | 4     | 4      | 3      | 4    | 4    | 4    | 4    | 4    | 3    | 4    | 3    | 5    | 4    | 4    | 4 |
| 20576  | 5     | 4      | 5      | 4    | 4    | 4    | 4    | 5    | 2    | 4    | 4    | 4    | 5    | 4    | 4 |
| 20587  | 5     | 5      | 5      | 5    | 5    | 5    | 5    | 5    |      | 5    | 4    | 5    | 5    | 5    | 5 |
| 20589  | 5     | 5      | 5      | 0    | 0    | 0    | 0    | 0    | 0    | 0    | 0    | 0    | 0    | 1    | 1 |
| 20593  |       |        |        |      |      |      |      |      |      |      |      |      |      |      |   |
| 20594  | 6     | 6      | 6      |      |      |      |      |      |      |      |      |      |      |      |   |
| 20602  | 4     | 6      | 4      |      |      |      |      |      |      |      |      |      |      |      |   |
| 20607  |       |        |        |      |      |      |      |      |      |      |      |      |      |      |   |
| 20608  | 5     | 5      | 5      | 5    | 5    | 5    | 5    | 5    | 4    | 5    | 5    | 5    | 5    | 5    | 3 |
| 20611  | 5     | 5      | 5      | 5    | 5    | 5    | 5    | 5    | 5    | 5    | 4    | 5    | 5    | 5    | 5 |



| respid | Q46x4 | Q46x5a | Q46x5b | Q47a | Q47b | Q47c | Q47d | Q47e | Q47f | Q47g | Q47h | Q47i | Q47j | Q47k |   |
|--------|-------|--------|--------|------|------|------|------|------|------|------|------|------|------|------|---|
| 20612  | 6     | 6      | 6      |      |      |      |      |      |      |      |      |      |      |      |   |
| 20615  | 5     | 6      | 6      | 5    | 5    | 5    | 5    | 5    | 5    | 2    | 5    | 3    | 5    | 5    | 5 |
| 20625  | 4     | 4      | 4      | 4    | 5    | 5    | 5    | 5    | 5    | 2    | 4    | 4    | 5    | 5    | 4 |
| 20630  | 6     | 6      | 6      |      |      |      |      |      |      |      |      |      |      |      |   |
| 20639  | 4     | 4      | 4      |      |      |      |      |      |      |      |      |      |      |      |   |
| 20643  | 5     | 5      | 5      | 0    | 0    | 0    | 0    | 0    | 0    | 0    | 0    | 0    | 0    | 1    | 1 |
| 20645  |       |        |        |      |      |      |      |      |      |      |      |      |      |      |   |
| 20647  | 5     | 5      | 5      | 5    | 5    | 5    | 5    | 5    | 5    | 2    | 4    | 4    | 4    | 4    | 4 |
| 20652  | 3     | 3      | 2      |      |      |      |      |      |      |      |      |      |      |      |   |
| 20661  | 5     | 5      | 5      |      |      |      |      |      |      |      |      |      |      |      |   |
| 20665  |       |        |        |      |      |      |      |      |      |      |      |      |      |      |   |
| 20679  | 5     | 5      | 5      | 0    | 0    | 0    | 0    | 0    | 0    | 0    | 0    | 0    | 0    | 1    | 1 |
| 20682  | 4     | 4      | 3      | 2    | 2    | 2    | 2    | 3    | 2    | 2    | 2    | 2    | 1    | 1    | 2 |
| 20683  |       |        |        |      |      |      |      |      |      |      |      |      |      |      |   |
| 20700  | 5     | 5      | 5      | 0    | 0    | 0    | 0    | 0    | 0    | 0    | 0    | 0    | 0    | 1    | 2 |
| 20702  | 6     | 4      | 3      |      |      |      |      |      |      |      |      |      |      |      |   |
| 20709  | 5     | 5      | 5      |      |      |      |      |      |      |      |      |      |      |      |   |
| 20715  | 4     | 4      | 4      | 4    | 4    | 4    | 4    | 4    | 4    | 4    | 4    | 4    | 4    | 4    | 4 |
| 20718  | 5     | 5      | 5      |      |      |      |      |      |      |      |      |      |      |      |   |
| 20722  | 5     | 5      | 5      | 5    | 5    | 5    | 5    | 5    | 4    | 5    | 5    | 5    | 5    | 5    | 5 |
| 20729  |       |        |        |      |      |      |      |      |      |      |      |      |      |      |   |
| 20732  |       |        |        |      |      |      |      |      |      |      |      |      |      |      |   |
| 20746  | 4     | 4      | 4      | 3    | 3    | 3    | 3    | 4    | 2    | 2    | 2    | 3    | 3    | 3    | 4 |
| 20747  |       |        |        |      |      |      |      |      |      |      |      |      |      |      |   |
| 20758  | 5     | 5      | 5      | 4    | 5    | 5    | 5    | 5    | 5    | 2    | 5    | 4    | 5    | 3    | 4 |
| 20767  | 5     | 4      | 4      |      |      |      |      |      |      |      |      |      |      |      |   |
| 20777  | 6     | 6      | 6      | 5    | 5    | 5    | 5    | 5    | 5    | 5    | 5    | 5    | 5    | 5    | 5 |
| 20778  | 5     | 6      | 6      |      |      |      |      |      |      |      |      |      |      |      |   |
| 20780  | 6     | 5      | 5      |      |      |      |      |      |      |      |      |      |      |      |   |
| 20800  | 5     | 5      | 5      |      |      |      |      |      |      |      |      |      |      |      |   |
| 20810  | 5     | 5      | 5      | 5    | 5    | 5    | 5    | 5    | 5    | 3    | 4    | 4    | 5    | 4    | 4 |
| 20814  | 6     | 6      | 6      |      |      |      |      |      |      |      |      |      |      |      |   |

| respid | Q46x4 | Q46x5a | Q46x5b | Q47a | Q47b | Q47c | Q47d | Q47e | Q47f | Q47g | Q47h | Q47i | Q47j | Q47k |
|--------|-------|--------|--------|------|------|------|------|------|------|------|------|------|------|------|
| 20816  | 5     | 5      | 5      |      |      |      |      |      |      |      |      |      |      |      |
| 20832  | 5     | 5      | 5      |      |      |      |      |      |      |      |      |      |      |      |
| 20838  | 3     | 3      | 4      | 5    | 5    | 4    | 5    | 5    | 3    | 4    | 4    | 4    | 4    | 5    |
| 20841  | 6     | 6      | 6      |      |      |      |      |      |      |      |      |      |      |      |
| 20848  | 6     | 6      | 6      | 4    | 4    | 4    | 4    | 5    | 4    | 4    | 3    | 4    | 4    | 4    |
| 20850  |       |        |        |      |      |      |      |      |      |      |      |      |      |      |
| 20851  | 4     | 4      | 4      |      |      |      |      |      |      |      |      |      |      |      |
| 20861  | 5     | 5      | 5      |      |      |      |      |      |      |      |      |      |      |      |
| 20870  | 4     | 4      | 4      | 5    | 5    | 5    | 5    | 5    | 5    | 4    | 4    | 5    | 5    | 5    |
| 20880  | 5     | 5      | 5      | 4    | 4    |      |      |      |      |      |      |      |      |      |
| 20883  | 4     | 4      | 5      | 4    | 4    | 4    | 4    | 5    |      | 4    |      |      | 4    |      |
| 20894  | 5     | 5      | 5      |      |      |      |      |      |      |      |      |      |      |      |
| 20896  | 3     | 3      | 4      | 1    | 3    | 1    | 2    | 2    | 3    | 2    | 2    | 2    | 3    | 4    |
| 20901  | 4     | 4      | 4      | 3    | 3    | 3    | 3    | 4    | 2    | 2    | 2    | 2    | 3    | 3    |
| 20903  | 6     | 6      | 6      |      |      |      |      |      |      |      |      |      |      |      |
| 20909  |       |        |        |      |      |      |      |      |      |      |      |      |      |      |
| 20919  | 5     | 5      | 5      | 4    | 4    | 4    | 4    | 5    | 1    | 4    | 3    | 5    | 5    | 3    |
| 20925  | 5     | 5      | 5      | 4    | 3    | 3    | 3    | 3    | 1    | 5    | 3    | 2    | 5    | 5    |
| 20935  | 5     | 5      | 5      | 4    | 4    | 5    | 4    | 5    | 1    | 4    | 3    | 5    | 4    | 4    |
| 20939  | 4     | 4      | 4      |      |      |      |      |      |      |      |      |      |      |      |
| 20956  | 2     | 3      | 2      |      |      |      |      |      |      |      |      |      |      |      |
| 20970  | 5     | 5      | 4      |      |      |      |      |      |      |      |      |      |      |      |
| 20974  | 6     | 4      | 4      | 3    | 4    | 4    | 4    | 5    | 3    | 4    | 4    | 4    | 4    | 4    |
| 20975  | 5     | 5      | 5      | 4    | 4    | 4    | 4    | 5    | 2    | 4    | 4    | 4    | 4    | 4    |
| 20984  | 5     | 3      | 3      | 3    | 3    | 2    | 4    | 5    | 2    | 4    | 4    | 5    | 5    | 3    |
| 20988  |       |        |        |      |      |      |      |      |      |      |      |      |      |      |
| 20996  | 3     | 3      | 3      |      |      |      |      |      |      |      |      |      |      |      |
| 20998  | 5     | 4      | 4      |      |      |      |      |      |      |      |      |      |      |      |
| 21007  |       |        |        |      |      |      |      |      |      |      |      |      |      |      |
| 21008  |       |        |        |      |      |      |      |      |      |      |      |      |      |      |
| 21014  | 4     | 4      | 4      |      |      |      |      |      |      |      |      |      |      |      |
| 21020  | 5     | 5      | 5      |      |      |      |      |      |      |      |      |      |      |      |

| respid | Q46x4 | Q46x5a | Q46x5b | Q47a | Q47b | Q47c | Q47d | Q47e | Q47f | Q47g | Q47h | Q47i | Q47j | Q47k |
|--------|-------|--------|--------|------|------|------|------|------|------|------|------|------|------|------|
| 21022  | 4     | 4      | 4      |      |      |      |      |      |      |      |      |      |      |      |
| 21024  |       |        |        |      |      |      |      |      |      |      |      |      |      |      |
| 21026  | 3     | 5      | 4      | 4    | 4    | 5    | 5    | 5    | 4    | 5    | 4    | 5    | 4    | 5    |
| 21027  | 5     | 5      | 5      |      | 5    | 5    | 5    | 5    | 3    | 5    | 4    | 5    | 5    | 4    |
| 21030  | 5     | 5      | 5      |      |      |      |      |      |      |      |      |      |      |      |
| 21032  | 2     | 2      | 2      |      |      |      |      |      |      |      |      |      |      |      |
| 21040  | 5     | 5      | 5      |      |      |      |      |      |      |      |      |      |      |      |
| 21045  | 5     | 5      | 5      | 2    | 1    | 4    | 4    | 5    | 2    | 4    | 3    | 5    | 5    | 4    |
| 21058  | 6     | 6      | 6      |      |      |      |      |      |      |      |      |      |      |      |
| 21064  | 5     | 4      | 4      |      |      |      |      |      |      |      |      |      |      |      |
| 21073  | 5     | 5      | 5      |      |      |      |      |      |      |      |      |      |      |      |
| 21086  | 4     | 3      | 4      | 3    | 3    | 3    | 3    | 3    | 1    | 3    | 3    | 2    | 3    | 2    |
| 21092  | 1     | 2      | 3      | 3    | 0    | 2    | 2    | 3    | 1    | 1    | 1    | 1    | 2    | 2    |
| 21096  | 4     | 4      | 4      |      |      |      |      |      |      |      |      |      |      |      |
| 21103  | 5     | 5      | 5      |      |      |      |      |      |      |      |      |      |      |      |
| 21120  | 4     | 4      | 4      |      |      |      |      |      |      |      |      |      |      |      |
| 21125  |       |        |        |      |      |      |      |      |      |      |      |      |      |      |
| 21126  | 6     | 6      | 6      | 5    | 5    | 5    | 5    | 5    | 2    | 5    | 3    | 5    | 5    | 4    |
| 21132  |       |        |        |      |      |      |      |      |      |      |      |      |      |      |
| 21139  | 2     | 3      | 2      |      |      |      |      |      |      |      |      |      |      |      |
| 21147  |       |        |        |      |      |      |      |      |      |      |      |      |      |      |
| 21148  | 5     | 4      | 4      | 4    | 4    | 4    | 4    | 4    |      |      |      |      |      |      |
| 21149  | 5     | 5      | 5      |      |      |      |      |      |      |      |      |      |      |      |
| 21164  | 5     | 5      | 5      | 4    | 3    | 3    | 3    | 4    | 1    | 3    | 3    | 3    | 3    | 4    |
| 21165  | 5     | 5      | 5      | 5    | 5    | 5    | 5    | 5    | 3    | 4    | 4    | 5    | 4    | 4    |
| 21171  | 4     | 4      | 4      |      |      |      |      |      |      |      |      |      |      |      |
| 21176  | 5     | 5      | 5      |      |      |      |      |      |      |      |      |      |      |      |
| 21187  | 4     | 4      | 4      |      |      |      |      |      |      |      |      |      |      |      |
| 21192  | 4     | 4      | 4      |      |      |      |      |      |      |      |      |      |      |      |
| 21198  | 5     | 5      | 5      |      |      |      |      |      |      |      |      |      |      |      |
| 21199  | 4     | 4      | 4      |      |      |      |      |      |      |      |      |      |      |      |
| 21206  | 4     | 4      | 4      |      |      |      |      |      |      |      |      |      |      |      |

| respid | Q46x4 | Q46x5a | Q46x5b | Q47a | Q47b | Q47c | Q47d | Q47e | Q47f | Q47g | Q47h | Q47i | Q47j | Q47k |   |
|--------|-------|--------|--------|------|------|------|------|------|------|------|------|------|------|------|---|
| 21212  | 6     | 6      | 6      | 0    | 0    | 0    | 0    | 0    | 0    | 0    | 0    | 0    | 0    | 1    | 1 |
| 21216  | 5     | 5      | 5      |      |      |      |      |      |      |      |      |      |      |      |   |
| 21217  | 3     | 4      | 3      | 3    | 3    | 3    | 3    | 2    | 2    | 3    | 3    | 3    | 3    | 3    | 4 |
| 21228  | 3     | 4      | 4      | 4    | 3    | 4    | 4    | 5    | 2    | 4    | 4    | 4    | 4    | 4    | 4 |
| 21229  | 5     | 6      | 6      |      |      |      |      |      |      |      |      |      |      |      |   |
| 21230  | 5     | 5      | 5      |      |      |      |      |      |      |      |      |      |      |      |   |
| 21243  | 4     | 4      | 4      |      |      |      |      |      |      |      |      |      |      |      |   |
| 21247  | 6     | 6      | 6      |      |      |      |      |      |      |      |      |      |      |      |   |
| 21253  | 5     | 5      | 5      | 5    | 5    | 5    | 5    | 5    | 3    | 5    | 3    | 5    | 5    | 5    | 5 |
| 21264  | 2     | 5      | 5      | 3    | 2    | 2    | 4    | 4    | 4    | 1    | 3    | 0    | 3    | 3    | 3 |
| 21265  | 5     | 5      | 5      |      |      |      |      |      |      |      |      |      |      |      |   |
| 21273  | 4     | 4      | 4      | 4    | 4    | 5    | 5    | 5    | 3    | 4    | 4    | 4    | 4    | 4    | 3 |
| 21275  | 5     | 6      | 6      |      |      |      |      |      |      |      |      |      |      |      |   |
| 21278  | 6     | 6      | 6      |      |      |      |      |      |      |      |      |      |      |      |   |
| 21291  | 6     | 6      | 6      | 0    | 0    | 0    | 0    | 0    | 0    | 0    | 0    | 0    | 0    | 1    | 1 |
| 21298  | 5     | 4      | 5      | 5    | 5    | 5    | 5    | 5    | 2    | 4    | 3    | 4    | 3    | 3    | 4 |
| 21301  | 4     | 3      | 2      | 5    | 5    | 5    | 5    | 5    | 4    | 5    | 4    | 5    | 5    | 5    | 5 |
| 21312  | 4     | 6      | 5      | 2    | 2    | 3    | 3    | 4    | 1    | 3    | 3    | 5    | 3    | 3    | 2 |
| 21323  | 5     | 4      | 4      |      |      |      |      |      |      |      |      |      |      |      |   |
| 21325  | 6     | 6      | 6      | 1    |      |      |      |      |      |      |      |      |      |      |   |
| 21341  | 5     | 5      | 5      |      |      |      |      |      |      |      |      |      |      |      |   |
| 21349  | 4     | 4      | 4      |      |      |      |      |      |      |      |      |      |      |      |   |
| 21350  | 5     | 5      | 5      |      |      |      |      |      |      |      |      |      |      |      |   |
| 21354  | 3     | 6      | 6      |      |      |      |      |      |      |      |      |      |      |      |   |
| 21372  | 4     | 4      | 5      |      |      |      |      |      |      |      |      |      |      |      |   |
| 21373  | 2     | 2      | 2      |      |      |      |      |      |      |      |      |      |      |      |   |
| 21378  | 5     | 5      | 5      |      |      |      |      |      |      |      |      |      |      |      |   |
| 21393  |       |        |        |      |      |      |      |      |      |      |      |      |      |      |   |
| 21401  | 5     | 5      | 5      | 3    | 2    | 3    | 3    | 2    | 3    | 2    | 3    | 3    | 3    | 3    | 4 |
| 21405  | 6     | 6      | 6      | 4    | 5    | 5    | 5    | 5    | 3    | 5    | 5    | 5    | 5    | 5    | 5 |
| 21406  |       |        |        |      |      |      |      |      |      |      |      |      |      |      |   |
| 21407  | 5     | 5      | 5      | 3    | 3    | 3    | 3    | 4    | 2    | 4    | 3    | 4    | 4    | 4    | 3 |

| respid | Q46x4 | Q46x5a | Q46x5b | Q47a | Q47b | Q47c | Q47d | Q47e | Q47f | Q47g | Q47h | Q47i | Q47j | Q47k |
|--------|-------|--------|--------|------|------|------|------|------|------|------|------|------|------|------|
| 21418  | 5     | 5      | 5      | 5    | 5    | 5    | 5    | 5    | 5    | 5    | 5    | 5    | 5    | 5    |
| 21420  | 5     | 5      | 5      | 3    |      |      |      |      |      |      |      |      |      |      |
| 21421  |       |        |        |      |      |      |      |      |      |      |      |      |      |      |
| 21446  | 5     | 5      | 5      |      |      |      |      |      |      |      |      |      |      |      |
| 21449  | 4     | 4      | 4      | 2    | 2    | 2    | 2    | 4    | 2    | 2    | 3    | 2    | 3    | 2    |
| 21452  | 5     | 4      | 4      |      |      |      |      |      |      |      |      |      |      |      |
| 21455  | 2     | 2      | 1      | 1    | 1    | 1    | 0    | 3    | 0    | 1    | 1    | 0    | 1    | 3    |
| 21469  | 5     | 5      | 5      |      |      |      |      |      |      |      |      |      |      |      |
| 21471  | 6     | 6      | 6      |      |      |      |      |      |      |      |      |      |      |      |
| 21472  | 6     | 6      | 6      |      |      |      |      |      |      |      |      |      |      |      |
| 21474  | 5     | 5      | 5      |      |      |      |      |      |      |      |      |      |      |      |
| 21479  | 6     | 6      | 6      |      |      |      |      |      |      |      |      |      |      |      |
| 21485  | 4     | 5      | 5      | 5    | 5    |      | 5    | 5    | 5    | 5    | 4    | 5    | 5    | 5    |
| 21512  |       |        |        |      |      |      |      |      |      |      |      |      |      |      |
| 21513  | 5     | 4      | 5      |      |      |      |      |      |      |      |      |      |      |      |
| 21514  | 3     | 3      | 3      | 2    | 2    | 2    | 2    | 2    | 2    | 2    | 2    | 2    | 3    | 3    |
| 21520  | 4     | 4      | 4      |      |      |      |      |      |      |      |      |      |      |      |
| 21539  | 5     | 5      | 5      |      |      |      |      |      |      |      |      |      |      |      |
| 21553  | 4     | 5      | 5      | 5    | 0    | 0    | 0    | 0    | 5    | 4    | 2    | 5    | 4    | 4    |
| 21560  | 4     | 5      | 5      |      |      |      |      |      |      |      |      |      |      |      |
| 21561  | 5     | 5      | 5      |      |      |      |      |      |      |      |      |      |      |      |
| 21563  | 6     | 5      | 5      |      |      |      |      |      |      |      |      |      |      |      |
| 21565  |       |        |        |      |      |      |      |      |      |      |      |      |      |      |
| 21582  | 5     | 5      | 5      |      |      |      |      |      |      |      |      |      |      |      |
| 21584  | 5     | 6      | 6      | 5    | 5    | 5    | 4    | 5    | 3    | 4    | 3    | 5    | 3    | 4    |
| 21585  | 3     | 3      | 3      | 2    | 2    | 2    | 3    | 2    | 2    | 2    | 2    | 2    | 2    | 2    |
| 21586  | 5     | 5      | 5      | 5    | 5    | 5    | 5    | 5    |      |      | 3    |      |      |      |
| 21587  | 4     | 4      | 4      |      |      |      |      |      |      |      |      |      |      |      |
| 21590  | 6     | 6      | 6      | 2    | 2    | 2    | 2    | 4    | 1    | 3    | 3    | 5    | 4    | 2    |
| 21601  | 4     | 4      | 4      |      |      |      |      |      |      |      |      |      |      |      |
| 21611  | 4     | 4      | 4      |      |      |      |      |      |      |      |      |      |      |      |
| 21612  | 5     | 4      | 4      | 1    | 1    | 1    | 3    | 3    | 0    | 0    | 2    | 1    | 4    | 2    |

| respid | Q46x4 | Q46x5a | Q46x5b | Q47a | Q47b | Q47c | Q47d | Q47e | Q47f | Q47g | Q47h | Q47i | Q47j | Q47k |   |
|--------|-------|--------|--------|------|------|------|------|------|------|------|------|------|------|------|---|
| 21625  | 4     | 4      | 4      | 0    | 0    | 0    | 0    | 0    | 0    | 0    | 0    | 0    | 0    | 1    | 1 |
| 21633  |       |        |        |      |      |      |      |      |      |      |      |      |      |      |   |
| 21640  | 5     | 5      | 5      | 5    | 5    | 5    | 5    |      |      |      | 3    | 5    | 5    |      |   |
| 21647  | 5     | 5      | 5      |      |      |      |      |      |      |      |      |      |      |      |   |
| 21648  | 3     | 3      | 3      |      |      |      |      |      |      |      |      |      |      |      |   |
| 21656  | 6     | 5      | 5      |      |      |      |      |      |      |      |      |      |      |      |   |
| 21657  | 5     | 5      | 5      |      |      |      |      |      |      |      |      |      |      |      |   |
| 21658  | 3     | 3      | 2      | 2    | 2    | 2    | 2    | 2    | 1    | 1    | 2    | 2    | 2    | 2    | 2 |
| 21665  | 3     | 4      | 3      |      |      |      |      |      |      |      |      |      |      |      |   |
| 21666  | 3     | 3      | 2      | 3    | 2    | 2    | 4    | 5    | 0    | 4    | 3    | 4    | 4    | 4    | 4 |
| 21668  | 3     | 4      | 3      | 2    | 2    | 2    | 2    | 3    | 2    | 3    | 3    | 3    | 3    | 3    | 3 |
| 21673  | 5     | 5      | 5      |      |      |      |      |      |      |      |      |      |      |      |   |
| 21681  | 3     | 3      | 3      | 2    | 2    | 2    | 2    | 2    | 2    | 2    | 2    | 2    | 2    | 2    | 2 |
| 21682  | 5     | 5      | 5      | 5    | 5    | 5    | 5    | 5    |      | 5    | 4    | 5    | 4    | 4    | 4 |
| 21685  | 5     | 5      | 6      | 4    | 3    | 4    | 4    | 4    | 3    | 4    | 4    | 4    | 4    | 4    | 5 |
| 21692  | 3     | 3      | 3      |      |      |      |      |      |      |      |      |      |      |      |   |
| 21697  | 5     | 5      | 4      |      |      |      |      |      |      |      |      |      |      |      |   |
| 21711  | 5     | 5      | 5      |      |      |      |      |      |      |      |      |      |      |      |   |
| 21715  | 5     | 4      | 4      |      |      |      |      |      |      |      |      |      |      |      |   |
| 21726  | 6     | 6      | 6      | 5    | 5    | 5    | 5    | 5    | 0    | 0    | 0    | 0    | 0    | 1    | 1 |
| 21748  |       |        |        |      |      |      |      |      |      |      |      |      |      |      |   |
| 21761  | 5     | 5      | 5      |      |      |      |      |      |      |      |      |      |      |      |   |
| 21769  | 4     | 4      | 4      |      |      |      |      |      |      |      |      |      |      |      |   |
| 21774  | 3     | 3      | 3      | 2    | 2    | 2    | 2    | 2    | 2    | 2    | 2    | 2    | 2    | 2    | 2 |
| 21778  |       |        |        |      |      |      |      |      |      |      |      |      |      |      |   |
| 21785  | 3     | 3      | 3      | 2    | 2    | 2    | 2    | 2    | 2    | 2    | 2    | 2    | 2    | 3    | 3 |
| 21799  | 6     | 6      | 6      | 5    | 2    | 2    | 1    | 4    | 1    | 1    | 2    | 1    | 2    | 2    | 2 |
| 21820  | 2     | 2      | 2      |      |      |      |      |      |      |      |      |      |      |      |   |
| 21837  | 5     | 5      | 5      |      |      |      |      |      |      |      |      |      |      |      |   |
| 21845  | 3     | 2      | 2      | 1    | 2    | 2    | 2    | 2    | 3    | 1    | 2    | 2    | 2    | 2    | 2 |
| 21846  | 4     | 4      | 4      |      |      |      |      |      |      |      |      |      |      |      |   |
| 21849  | 5     | 5      | 5      | 3    | 3    | 3    | 3    | 3    | 2    | 4    | 4    | 4    | 4    | 4    | 4 |

| respid | Q46x4 | Q46x5a | Q46x5b | Q47a | Q47b | Q47c | Q47d | Q47e | Q47f | Q47g | Q47h | Q47i | Q47j | Q47k |
|--------|-------|--------|--------|------|------|------|------|------|------|------|------|------|------|------|
| 21850  | 4     | 5      | 5      |      |      |      |      |      |      |      |      |      |      |      |
| 21855  | 5     | 5      | 5      | 4    | 4    | 4    | 5    | 5    | 3    | 4    | 4    | 3    | 5    | 4    |
| 21859  | 5     | 5      | 5      | 5    | 5    | 5    | 5    | 5    | 3    | 4    | 4    | 4    | 4    | 4    |
| 21861  | 4     | 5      | 4      | 4    | 3    | 3    | 3    | 5    | 1    | 3    | 3    | 4    | 3    | 4    |
| 21866  |       |        |        |      |      |      |      |      |      |      |      |      |      |      |
| 21873  | 4     | 4      | 5      | 3    | 2    | 3    | 4    | 2    | 2    | 2    | 3    | 3    | 3    | 3    |
| 21876  | 6     | 6      | 6      | 4    | 3    | 4    | 4    | 4    | 2    | 3    | 3    | 3    | 3    | 2    |
| 21882  |       |        |        |      |      |      |      |      |      |      |      |      |      |      |
| 21884  | 6     | 6      | 6      |      |      |      |      |      |      |      |      |      |      |      |
| 21887  | 5     | 5      | 5      | 4    | 4    | 4    | 4    | 4    |      | 4    | 3    | 4    | 4    | 4    |
| 21892  | 6     | 6      | 6      | 5    | 4    | 5    | 5    | 5    | 1    | 5    | 4    | 4    | 5    | 4    |
| 21907  | 4     | 4      | 5      |      |      |      |      |      |      |      |      |      |      |      |
| 21910  | 3     | 3      | 3      | 1    | 1    | 2    | 1    | 2    | 2    | 1    | 2    | 1    | 2    | 2    |
| 21912  | 6     | 4      | 4      |      |      |      |      |      |      |      |      |      |      |      |
| 21914  | 4     | 4      | 4      | 5    | 5    | 5    | 4    | 5    | 3    | 5    | 4    | 5    | 5    | 4    |
| 21925  | 5     | 4      | 5      | 3    | 3    | 4    | 4    | 5    | 2    | 3    | 3    | 4    | 4    | 3    |
| 21937  |       |        |        |      |      |      |      |      |      |      |      |      |      |      |
| 21938  | 4     | 4      | 4      |      |      |      |      |      |      |      |      |      |      |      |
| 21940  | 5     | 5      | 5      | 2    | 4    | 4    | 3    | 3    | 2    | 2    | 3    | 5    | 5    | 4    |
| 21942  | 5     | 5      | 5      |      |      |      |      |      |      |      |      |      |      |      |
| 21947  |       |        |        |      |      |      |      |      |      |      |      |      |      |      |
| 21948  | 6     | 6      | 6      |      |      |      |      |      |      |      |      |      |      |      |
| 21961  | 5     | 5      | 5      |      |      |      |      |      |      |      |      |      |      |      |
| 21977  | 4     | 4      | 3      | 2    | 2    | 3    | 3    | 4    | 1    | 2    | 2    | 2    | 2    | 2    |
| 21983  |       |        |        |      |      |      |      |      |      |      |      |      |      |      |
| 21986  | 4     | 3      | 4      |      |      |      |      |      |      |      |      |      |      |      |
| 21988  | 5     | 5      | 5      | 5    | 4    | 5    | 5    | 5    | 3    | 4    | 3    | 5    | 5    | 5    |
| 21996  | 5     | 6      | 5      |      |      |      |      |      |      |      |      |      |      |      |
| 21997  | 5     | 4      | 4      |      |      |      |      |      |      |      |      |      |      |      |
| 22005  | 5     | 5      | 5      | 5    | 5    | 5    | 5    | 5    | 1    | 5    | 3    | 5    | 5    | 3    |
| 22013  | 5     | 5      | 5      |      |      |      |      |      |      |      |      |      |      |      |
| 22018  |       |        |        |      |      |      |      |      |      |      |      |      |      |      |

| respid | Q46x4 | Q46x5a | Q46x5b | Q47a | Q47b | Q47c | Q47d | Q47e | Q47f | Q47g | Q47h | Q47i | Q47j | Q47k |
|--------|-------|--------|--------|------|------|------|------|------|------|------|------|------|------|------|
| 22019  | 4     | 4      | 4      |      |      |      |      |      |      |      |      |      |      |      |
| 22071  | 1     | 1      | 1      |      |      |      |      |      |      |      |      |      |      |      |
| 22082  | 5     | 4      | 5      |      |      |      |      |      |      |      |      |      |      |      |
| 22085  | 5     | 6      | 6      | 5    | 5    | 5    | 5    | 5    |      | 5    | 3    | 5    | 5    |      |
| 22092  | 6     | 6      | 6      |      |      |      |      |      |      |      |      |      |      |      |
| 22097  | 5     | 5      | 5      |      |      |      |      |      |      |      |      |      |      |      |
| 22111  |       |        |        |      |      |      |      |      |      |      |      |      |      |      |
| 22118  | 5     | 5      | 5      | 4    | 5    | 5    | 4    | 5    | 3    | 5    | 4    | 5    | 5    | 4    |
| 22132  | 6     | 5      | 5      |      |      |      |      |      |      |      |      |      |      |      |
| 22133  | 5     | 5      | 5      | 5    | 5    | 5    | 5    | 5    | 4    | 4    | 4    | 5    | 4    | 5    |
| 22139  |       |        |        |      |      |      |      |      |      |      |      |      |      |      |
| 22142  | 2     | 2      | 2      | 0    | 1    | 0    | 0    | 0    | 0    | 0    | 0    | 0    | 1    | 1    |
| 22146  | 6     | 6      | 6      |      |      |      |      |      |      |      |      |      |      |      |
| 22181  |       |        |        |      |      |      |      |      |      |      |      |      |      |      |
| 22202  | 6     | 6      | 6      | 4    | 4    | 4    | 4    | 5    | 1    | 4    | 3    | 4    | 4    | 4    |
| 22214  |       |        |        |      |      |      |      |      |      |      |      |      |      |      |
| 22223  | 6     | 6      | 6      |      |      |      |      |      |      |      |      |      |      |      |
| 22227  | 4     | 4      | 4      |      |      |      |      |      |      |      |      |      |      |      |
| 22229  | 5     | 5      | 5      |      |      |      |      |      |      |      |      |      |      |      |
| 22239  | 6     | 6      | 6      |      |      |      |      |      |      |      |      |      |      |      |
| 22245  | 3     | 3      | 3      | 1    | 2    | 2    | 2    | 2    | 2    | 2    | 2    | 2    | 2    | 2    |
| 22256  | 5     | 5      | 5      |      |      |      |      |      |      |      |      |      |      |      |
| 22260  | 5     | 5      | 5      |      |      |      |      |      |      |      |      |      |      |      |
| 22298  | 4     | 4      | 4      | 3    | 3    | 3    | 3    | 4    | 2    | 3    | 3    | 3    | 3    | 4    |
| 22321  | 1     | 1      | 1      |      |      |      |      |      |      |      |      |      |      |      |
| 22340  |       |        |        |      |      |      |      |      |      |      |      |      |      |      |
| 22346  | 3     | 6      | 6      |      |      |      |      |      |      |      |      |      |      |      |
| 22356  | 5     | 5      | 5      | 4    | 4    | 4    | 4    | 5    | 3    | 4    | 3    | 4    | 4    | 3    |
| 22361  | 5     | 6      | 6      | 2    | 2    | 2    | 2    | 4    | 0    | 0    | 0    | 0    | 1    | 1    |
| 22364  | 4     | 4      | 4      | 4    | 0    | 0    | 0    | 0    | 0    | 0    | 0    | 0    |      | 3    |
| 22368  |       |        |        |      |      |      |      |      |      |      |      |      |      |      |
| 22374  | 3     | 3      | 3      |      |      |      |      |      |      |      |      |      |      |      |



| respid | Q46x4 | Q46x5a | Q46x5b | Q47a | Q47b | Q47c | Q47d | Q47e | Q47f | Q47g | Q47h | Q47i | Q47j | Q47k |
|--------|-------|--------|--------|------|------|------|------|------|------|------|------|------|------|------|
| 22375  | 5     | 5      | 5      |      |      |      |      |      |      |      |      |      |      |      |
| 22377  | 4     | 4      | 4      |      |      |      |      |      |      |      |      |      |      |      |
| 22383  |       |        |        |      |      |      |      |      |      |      |      |      |      |      |
| 22387  | 4     | 5      | 5      |      |      |      |      |      |      |      |      |      |      |      |
| 22392  |       |        |        |      |      |      |      |      |      |      |      |      |      |      |
| 22393  | 6     | 6      | 6      |      |      |      |      |      |      |      |      |      |      |      |
| 22394  | 4     | 4      | 4      |      |      |      |      |      |      |      |      |      |      |      |
| 22395  |       |        |        |      |      |      |      |      |      |      |      |      |      |      |
| 22401  | 6     | 6      | 6      | 4    | 5    | 5    | 4    | 5    | 1    | 5    | 5    | 5    | 5    | 4    |
| 22407  |       |        |        |      |      |      |      |      |      |      |      |      |      |      |
| 22410  | 5     | 4      | 5      | 2    | 3    |      |      | 4    | 1    | 2    | 3    | 2    | 3    | 3    |
| 22418  | 5     | 5      | 5      |      |      |      |      |      |      |      |      |      |      |      |
| 22421  |       |        |        |      |      |      |      |      |      |      |      |      |      |      |
| 22423  |       |        |        |      |      |      |      |      |      |      |      |      |      |      |
| 22425  | 5     | 5      | 5      |      |      |      |      |      |      |      |      |      |      |      |
| 22427  | 5     | 5      | 5      | 0    | 4    | 5    | 4    | 5    |      | 4    | 3    | 4    | 4    | 4    |
| 22431  | 6     | 6      | 6      |      |      |      |      |      |      |      |      |      |      |      |
| 22435  | 5     | 4      | 4      | 2    | 1    | 1    | 1    | 1    | 2    | 2    | 2    | 4    | 4    | 3    |
| 22436  | 3     | 3      | 3      |      |      |      |      |      |      |      |      |      |      |      |
| 22442  |       |        |        |      |      |      |      |      |      |      |      |      |      |      |
| 22444  | 3     | 3      | 4      | 4    | 4    | 4    | 4    | 5    | 2    | 3    | 3    | 5    | 4    | 4    |
| 22445  | 5     | 4      | 5      |      |      |      |      |      |      |      |      |      |      |      |
| 22446  |       |        |        |      |      |      |      |      |      |      |      |      |      |      |
| 22448  | 6     | 5      | 5      |      |      |      |      |      |      |      |      |      |      |      |
| 22449  | 5     | 5      | 5      |      |      |      |      |      |      |      |      |      |      |      |
| 22450  | 6     | 6      | 6      | 2    | 1    | 2    |      | 4    | 1    | 1    |      |      |      |      |
| 22453  | 4     | 4      | 3      | 4    | 4    | 4    | 4    | 4    | 3    | 4    | 3    | 4    | 4    | 4    |
| 22465  | 6     | 6      | 6      |      |      |      |      |      |      |      |      |      |      |      |
| 22472  | 5     | 5      | 5      | 3    | 4    | 4    | 4    | 5    | 3    | 3    | 3    | 3    | 4    |      |
| 22475  | 6     | 4      | 5      |      |      |      |      |      |      |      |      |      |      |      |
| 22478  | 5     | 5      | 5      | 0    | 0    | 1    | 1    | 0    | 0    | 0    | 0    | 0    | 1    | 1    |
| 22491  | 5     | 5      | 5      | 5    | 5    | 5    | 5    | 5    | 4    | 5    | 4    | 5    | 5    | 4    |

| respid | Q46x4 | Q46x5a | Q46x5b | Q47a | Q47b | Q47c | Q47d | Q47e | Q47f | Q47g | Q47h | Q47i | Q47j | Q47k |
|--------|-------|--------|--------|------|------|------|------|------|------|------|------|------|------|------|
| 22497  | 5     | 4      | 4      |      |      |      |      |      |      |      |      |      |      |      |
| 22498  | 4     | 4      | 4      |      |      |      |      |      |      |      |      |      |      |      |
| 22499  | 6     | 6      | 6      | 0    | 0    | 0    | 0    | 0    | 0    | 0    | 0    | 0    | 1    | 1    |
| 22503  | 5     | 5      | 5      | 5    | 5    | 5    | 5    | 5    | 1    | 5    | 3    | 5    | 5    |      |
| 22507  | 5     | 4      | 4      |      |      |      |      |      |      |      |      |      |      |      |
| 22513  | 5     | 5      | 5      |      |      |      |      |      |      |      |      |      |      |      |
| 22517  | 4     | 5      | 6      |      |      |      |      |      |      |      |      |      |      |      |
| 22524  | 5     | 5      | 4      | 3    | 3    | 2    | 2    | 4    | 2    | 2    | 2    | 2    | 3    | 3    |
| 22528  | 5     | 5      | 5      |      |      |      |      |      |      |      |      |      |      |      |
| 22544  | 5     | 6      | 6      | 0    | 0    | 0    | 0    | 0    | 0    | 0    | 0    | 0    | 1    | 1    |
| 22571  | 5     | 5      | 5      |      |      |      |      |      |      |      |      |      |      |      |
| 22576  | 3     | 5      | 4      |      |      |      |      |      |      |      |      |      |      |      |
| 22579  | 6     | 6      | 6      |      |      |      |      |      |      |      |      |      |      |      |
| 22583  | 4     | 4      | 4      |      |      |      |      |      |      |      |      |      |      |      |
| 22591  | 4     | 4      | 4      | 3    | 3    | 3    | 3    | 3    | 3    | 3    | 3    | 3    | 3    | 3    |
| 22592  | 4     | 4      | 4      |      |      |      |      |      |      |      |      |      |      |      |
| 22612  | 5     | 5      | 5      |      |      |      |      |      |      |      |      |      |      |      |
| 22613  | 5     | 5      | 4      | 5    | 4    | 5    | 4    | 5    | 4    | 4    | 4    | 4    | 4    | 4    |
| 22615  | 4     | 4      | 4      | 4    | 4    | 5    | 5    | 5    | 2    | 4    | 4    | 4    | 4    | 4    |
| 22621  | 5     | 5      | 5      | 4    | 4    | 4    | 4    | 5    | 4    | 4    | 4    | 5    | 4    | 4    |
| 22625  | 6     | 6      | 6      |      |      |      |      |      |      |      |      |      |      |      |
| 22628  | 6     | 6      | 6      |      |      |      |      |      |      |      |      |      |      |      |
| 22632  | 6     | 6      | 6      |      |      |      |      |      |      |      |      |      |      |      |
| 22639  |       |        |        |      |      |      |      |      |      |      |      |      |      |      |
| 22648  | 6     | 6      | 6      |      |      |      |      |      |      |      |      |      |      |      |
| 22649  | 4     | 4      | 4      | 0    | 0    | 1    | 0    | 0    | 0    | 1    | 0    | 0    | 1    | 3    |
| 22655  |       |        |        |      |      |      |      |      |      |      |      |      |      |      |
| 22659  |       |        |        |      |      |      |      |      |      |      |      |      |      |      |
| 22660  | 6     | 6      | 6      | 0    | 5    | 5    | 5    | 5    | 1    | 5    | 4    | 5    | 4    | 3    |
| 22666  | 6     | 6      | 6      |      |      |      |      |      |      |      |      |      |      |      |
| 22667  | 4     | 4      | 4      | 5    | 5    | 5    | 5    | 5    | 2    | 4    | 3    | 5    | 4    | 3    |
| 22670  |       |        |        |      |      |      |      |      |      |      |      |      |      |      |

| respid | Q46x4 | Q46x5a | Q46x5b | Q47a | Q47b | Q47c | Q47d | Q47e | Q47f | Q47g | Q47h | Q47i | Q47j | Q47k |
|--------|-------|--------|--------|------|------|------|------|------|------|------|------|------|------|------|
| 22681  |       |        |        |      |      |      |      |      |      |      |      |      |      |      |
| 22683  | 4     | 5      | 5      |      |      |      |      |      |      |      |      |      |      |      |
| 22688  | 4     | 4      | 4      |      |      |      |      |      |      |      |      |      |      |      |
| 22695  | 5     | 6      | 6      | 3    | 3    | 3    | 4    | 5    | 1    | 4    | 4    | 3    | 4    | 4    |
| 22696  | 6     | 6      | 6      | 5    | 5    | 5    | 5    | 5    | 2    | 5    | 4    | 5    | 4    | 5    |
| 22705  | 4     | 3      | 3      |      |      |      |      |      |      |      |      |      |      |      |
| 22718  | 3     | 4      | 4      | 3    | 3    | 3    | 3    | 4    | 1    | 2    | 2    | 3    | 2    | 3    |
| 22720  | 6     | 6      | 6      | 0    | 0    | 0    | 0    | 0    | 0    | 0    | 0    | 0    | 5    | 1    |
| 22724  | 4     | 4      | 4      |      |      |      |      |      |      |      |      |      |      |      |
| 22728  | 5     | 5      | 5      |      |      |      |      |      |      |      |      |      |      |      |
| 22751  | 5     | 5      | 5      | 4    | 4    | 4    | 4    | 5    | 3    | 4    | 3    | 5    | 5    | 4    |
| 22782  | 3     | 3      | 3      | 1    | 0    | 0    | 0    | 0    | 0    | 0    | 0    | 0    | 1    | 1    |
| 22786  | 6     | 6      | 6      | 4    | 4    | 4    | 4    | 5    | 3    | 4    | 3    | 4    | 4    | 4    |
| 22788  | 6     | 6      | 6      |      |      |      |      |      |      |      |      |      |      |      |
| 22810  | 4     | 4      | 4      |      |      |      |      |      |      |      |      |      |      |      |
| 22816  | 6     | 6      | 6      |      |      |      |      |      |      |      |      |      |      |      |
| 22818  | 6     | 6      | 6      |      |      |      |      |      |      |      |      |      |      |      |
| 22854  |       |        |        |      |      |      |      |      |      |      |      |      |      |      |
| 22858  | 5     | 5      | 5      |      |      |      |      |      |      |      |      |      |      |      |
| 22862  | 6     | 6      | 6      |      |      |      |      |      |      |      |      |      |      |      |
| 22865  | 5     | 5      | 5      | 5    | 5    | 5    | 5    | 5    | 3    | 3    | 2    | 5    | 4    | 3    |
| 22868  | 5     | 4      | 5      |      |      |      |      |      |      |      |      |      |      |      |
| 22869  | 4     | 4      | 4      | 4    | 4    | 5    | 5    | 5    | 2    | 4    | 3    | 5    | 5    | 4    |
| 22873  | 6     | 6      | 6      |      |      |      |      |      |      |      |      |      |      |      |
| 22875  | 5     | 5      | 5      | 0    |      |      | 4    | 4    | 1    | 2    | 2    | 4    |      | 4    |
| 22876  | 6     | 6      | 6      |      |      |      |      |      |      |      |      |      |      |      |
| 22882  | 4     | 4      | 4      |      |      |      |      |      |      |      |      |      |      |      |
| 22884  | 4     | 4      | 4      |      |      |      |      |      |      |      |      |      |      | 3    |
| 22887  | 3     | 3      | 3      |      |      |      |      |      |      |      |      |      |      |      |
| 22888  | 5     | 5      | 5      |      |      |      |      |      |      |      |      |      |      |      |
| 22900  |       |        |        |      |      |      |      |      |      |      |      |      |      |      |
| 22901  |       |        |        |      |      |      |      |      |      |      |      |      |      |      |

| respid | Q46x4 | Q46x5a | Q46x5b | Q47a | Q47b | Q47c | Q47d | Q47e | Q47f | Q47g | Q47h | Q47i | Q47j | Q47k |
|--------|-------|--------|--------|------|------|------|------|------|------|------|------|------|------|------|
| 22912  | 5     | 5      | 5      | 5    | 4    | 5    | 4    | 4    | 3    | 4    | 4    | 5    | 5    | 4    |
| 22913  | 5     | 5      | 5      |      |      |      |      |      |      |      |      |      |      |      |
| 22921  | 5     | 5      | 5      | 5    | 5    | 5    | 5    | 5    | 3    | 5    | 5    | 5    | 5    | 5    |
| 22925  | 5     | 5      | 5      | 5    | 5    | 5    | 5    | 5    | 5    | 5    | 4    | 5    | 5    | 4    |
| 22940  | 5     | 5      | 5      |      |      |      |      |      |      |      |      |      |      |      |
| 22941  | 5     | 5      | 5      | 1    | 1    | 1    | 1    | 5    | 0    | 0    | 0    | 0    | 1    | 2    |
| 22947  | 5     | 5      | 5      | 5    | 5    | 5    | 5    | 5    | 1    | 4    |      | 5    | 5    | 4    |
| 22948  |       |        |        |      |      |      |      |      |      |      |      |      |      |      |
| 22964  | 4     | 4      | 4      |      |      |      |      |      |      |      |      |      |      |      |
| 22966  | 4     | 3      | 3      | 2    | 1    | 3    | 2    | 3    |      | 2    | 2    | 3    | 2    | 3    |
| 22969  | 5     | 4      | 5      |      |      |      |      |      |      |      |      |      |      |      |
| 22971  |       |        |        |      |      |      |      |      |      |      |      |      |      |      |
| 22988  |       |        |        |      |      |      |      |      |      |      |      |      |      |      |
| 22990  |       |        |        |      |      |      |      |      |      |      |      |      |      |      |
| 23000  | 5     | 5      | 5      |      |      |      |      |      |      |      |      |      |      |      |
| 23016  |       |        |        |      |      |      |      |      |      |      |      |      |      |      |
| 23026  | 5     | 6      | 6      | 5    | 3    | 4    | 5    | 5    | 1    | 5    | 3    | 5    | 5    | 4    |
| 23035  | 5     | 5      | 5      | 5    | 5    | 5    | 5    | 5    | 1    | 5    | 4    | 5    | 5    | 5    |
| 23037  | 4     | 4      | 4      | 0    | 3    | 3    | 2    | 3    | 2    | 2    | 2    | 2    | 1    | 3    |
| 23044  | 5     | 5      | 5      |      |      |      |      |      |      |      |      |      |      |      |
| 23046  | 5     | 5      | 5      | 0    | 0    | 0    | 0    | 0    | 0    | 0    | 0    | 0    | 1    | 1    |
| 23047  | 5     | 5      | 5      |      |      |      |      |      |      |      |      |      |      |      |
| 23049  | 4     | 4      | 4      |      |      |      |      |      |      |      |      |      |      |      |
| 23055  | 5     | 5      | 5      | 5    | 5    | 5    | 5    | 5    | 1    | 5    | 3    | 5    | 5    | 3    |
| 23066  | 6     | 6      | 6      |      |      |      |      |      |      |      |      |      |      |      |
| 23075  | 6     | 6      | 6      |      |      |      |      |      |      |      |      |      |      |      |
| 23081  | 5     | 6      | 6      | 4    | 5    | 5    | 5    | 5    | 1    | 4    | 3    | 5    | 5    | 4    |
| 23087  | 5     | 5      | 5      | 5    | 5    | 5    | 5    | 5    | 3    | 4    | 3    | 4    | 4    | 4    |
| 23094  |       |        |        |      |      |      |      |      |      |      |      |      |      |      |
| 23099  |       |        |        |      |      |      |      |      |      |      |      |      |      |      |
| 23101  | 3     | 4      | 4      |      |      |      |      |      |      |      |      |      |      |      |
| 23105  |       |        |        |      |      |      |      |      |      |      |      |      |      |      |

| respid | Q46x4 | Q46x5a | Q46x5b | Q47a | Q47b | Q47c | Q47d | Q47e | Q47f | Q47g | Q47h | Q47i | Q47j | Q47k |
|--------|-------|--------|--------|------|------|------|------|------|------|------|------|------|------|------|
| 23115  | 6     | 6      | 6      |      |      |      |      |      |      |      |      |      |      |      |
| 23121  | 6     | 6      | 6      |      |      |      |      |      |      |      |      |      |      |      |
| 23127  | 5     | 5      | 5      |      |      |      |      |      |      |      |      |      |      |      |
| 23131  | 6     | 6      | 6      |      |      |      |      |      |      |      |      |      |      |      |
| 23134  | 6     | 6      | 6      |      |      |      |      |      |      |      |      |      |      |      |
| 23145  | 5     | 4      | 4      | 5    | 5    | 5    | 5    | 5    | 4    | 5    | 4    | 5    | 4    | 5    |
| 23151  | 5     | 4      | 5      | 5    | 5    | 5    | 5    | 5    | 5    | 4    | 3    | 5    | 4    | 5    |
| 23161  | 4     | 4      | 4      |      |      |      |      |      |      |      |      |      |      |      |
| 23169  | 4     | 4      | 4      |      |      |      |      |      |      |      |      |      |      |      |
| 23173  | 5     | 5      | 5      |      |      |      |      |      |      |      |      |      |      |      |
| 23174  | 5     | 4      | 5      | 5    | 4    | 4    | 5    | 5    | 4    | 4    | 4    | 5    | 4    | 4    |
| 23186  | 6     | 6      | 6      |      |      |      |      |      |      |      |      |      |      |      |
| 23195  | 5     | 5      | 5      |      |      |      |      |      |      |      |      |      |      |      |
| 23197  | 2     | 2      | 2      | 2    | 2    | 4    | 4    | 3    | 4    | 3    |      | 3    | 3    | 3    |
| 23198  | 5     | 5      | 5      | 5    | 5    | 5    | 5    | 5    | 2    | 5    | 5    | 5    | 5    | 4    |
| 23203  |       |        |        |      |      |      |      |      |      |      |      |      |      |      |
| 23204  | 5     | 4      | 4      | 4    | 5    | 5    | 4    | 4    | 5    | 4    | 3    | 5    | 5    | 5    |
| 23212  | 5     | 5      | 5      |      |      |      |      |      |      |      |      |      |      |      |
| 23214  | 6     | 6      | 6      |      |      |      |      |      |      |      |      |      |      |      |
| 23221  | 4     | 3      | 4      | 5    | 4    | 5    | 4    | 5    | 1    | 3    | 3    | 3    | 4    | 4    |
| 23237  | 5     | 5      | 5      | 5    | 5    | 5    | 5    | 5    | 1    | 5    | 4    | 5    | 4    | 4    |
| 23251  | 3     | 4      | 5      |      |      |      |      |      |      |      |      |      |      |      |
| 23254  | 5     | 5      | 5      | 5    | 5    | 5    | 5    | 5    | 2    | 5    | 4    | 3    | 3    | 4    |
| 23262  | 6     | 6      | 6      |      |      |      |      |      |      |      |      |      |      |      |
| 23267  | 6     | 4      | 4      | 5    | 5    | 5    | 5    | 5    |      | 5    | 4    | 5    | 5    | 5    |
| 23268  | 4     | 4      | 4      | 3    | 3    | 3    | 4    | 3    | 2    | 3    | 3    | 5    | 5    | 5    |
| 23273  | 5     | 5      | 5      |      |      |      |      |      |      |      |      |      |      |      |
| 23278  | 5     | 5      | 5      | 5    | 5    | 5    | 4    | 5    | 4    | 5    | 5    | 5    | 5    | 3    |
| 23279  |       |        |        |      |      |      |      |      |      |      |      |      |      |      |
| 23281  | 5     | 5      | 5      | 4    | 5    | 5    | 5    | 5    | 5    | 5    | 4    | 4    | 4    | 4    |
| 23282  | 4     | 4      | 4      | 2    | 2    | 2    | 2    | 4    |      | 1    | 2    | 2    | 2    | 2    |
| 23283  | 6     | 6      | 6      |      |      |      |      |      |      |      |      |      |      |      |

| respid | Q46x4 | Q46x5a | Q46x5b | Q47a | Q47b | Q47c | Q47d | Q47e | Q47f | Q47g | Q47h | Q47i | Q47j | Q47k |
|--------|-------|--------|--------|------|------|------|------|------|------|------|------|------|------|------|
| 23285  | 5     | 5      | 5      |      |      |      |      |      |      |      |      |      |      |      |
| 23305  | 6     | 4      | 4      |      |      |      |      |      |      |      |      |      |      |      |
| 23309  | 6     | 6      | 6      |      |      |      |      |      |      |      |      |      |      |      |
| 23310  | 6     | 5      | 5      | 4    | 4    | 4    | 5    | 5    |      | 3    | 3    | 4    | 4    |      |
| 23311  | 5     | 4      | 5      |      |      |      |      |      |      |      |      |      |      |      |
| 23312  | 2     | 3      | 2      | 5    | 5    | 5    | 5    | 5    | 3    | 4    | 4    | 5    | 5    | 5    |
| 23319  | 5     | 5      | 5      | 3    | 3    | 4    | 4    | 5    | 2    | 4    | 3    | 5    | 4    | 1    |
| 23320  | 5     | 5      | 5      | 5    | 5    | 5    | 5    | 5    | 5    | 4    | 4    | 5    | 5    | 5    |
| 23322  | 6     | 6      | 6      |      |      |      |      |      |      |      |      |      |      |      |
| 23334  | 5     | 5      | 4      |      |      |      |      |      |      |      |      |      |      |      |
| 23340  | 5     | 5      | 5      |      |      |      |      |      |      |      |      |      |      |      |
| 23346  | 5     | 5      | 5      |      |      |      |      |      |      |      |      |      |      |      |
| 23353  | 5     | 5      | 5      | 4    | 4    | 4    | 4    | 5    | 2    | 4    | 3    | 4    | 4    | 5    |
| 23363  | 3     | 3      | 3      |      |      |      |      |      |      |      |      |      |      |      |
| 23364  | 3     | 3      | 4      |      |      |      |      |      |      |      |      |      |      |      |
| 23376  |       |        |        |      |      |      |      |      |      |      |      |      |      |      |
| 23378  | 5     | 5      | 5      | 4    | 4    | 4    | 4    | 5    | 2    | 4    | 3    | 5    | 5    | 5    |
| 23382  |       |        |        |      |      |      |      |      |      |      |      |      |      |      |
| 23383  |       |        |        |      |      |      |      |      |      |      |      |      |      |      |
| 23390  | 5     | 5      | 5      | 5    | 5    | 5    | 5    | 5    |      | 4    | 4    | 5    | 4    | 4    |
| 23395  | 5     | 4      | 4      | 5    | 4    | 5    | 4    | 5    | 4    | 5    | 3    | 4    | 3    | 4    |
| 23398  | 3     | 3      | 2      |      |      |      |      |      |      |      |      |      |      |      |
| 23399  | 5     | 5      | 5      | 1    | 5    | 5    | 5    | 5    | 2    | 4    | 2    | 5    | 4    | 4    |
| 23406  | 4     | 4      | 4      | 4    | 4    | 4    | 4    | 5    | 1    | 4    | 2    | 2    | 2    | 3    |
| 23418  | 5     | 5      | 5      | 5    | 5    | 5    | 5    | 5    | 3    | 5    | 4    | 5    | 5    | 4    |
| 23427  | 6     | 6      | 6      |      |      |      |      |      |      |      |      |      |      |      |
| 23428  | 5     | 4      | 5      |      |      |      |      |      |      |      |      |      |      |      |
| 23435  | 4     | 4      | 5      | 4    | 4    | 4    | 4    | 4    | 4    | 4    | 4    | 4    | 4    | 4    |
| 23439  | 6     | 6      | 6      |      |      |      |      |      |      |      |      |      |      |      |
| 23440  |       |        |        |      |      |      |      |      |      |      |      |      |      |      |
| 23444  | 5     | 4      | 4      |      |      |      |      |      |      |      |      |      |      |      |
| 23445  | 5     | 5      | 5      | 0    | 0    | 0    | 0    | 0    | 0    | 0    | 0    | 0    | 1    | 1    |

| respid | Q46x4 | Q46x5a | Q46x5b | Q47a | Q47b | Q47c | Q47d | Q47e | Q47f | Q47g | Q47h | Q47i | Q47j | Q47k |
|--------|-------|--------|--------|------|------|------|------|------|------|------|------|------|------|------|
| 23455  |       |        |        |      |      |      |      |      |      |      |      |      |      |      |
| 23467  | 5     | 5      | 5      | 5    | 5    | 5    | 5    | 4    | 4    | 1    | 4    | 3    | 4    | 3    |
| 23478  | 5     | 6      | 6      | 4    | 2    | 3    | 3    | 3    | 5    | 3    | 3    | 3    | 5    | 3    |
| 23492  | 4     | 4      | 4      | 4    | 3    | 4    | 4    | 4    | 4    | 1    | 2    | 2    | 4    | 3    |
| 23498  | 6     | 6      | 6      |      |      |      |      |      |      |      |      |      |      |      |
| 23511  | 5     | 5      | 5      |      |      |      |      |      |      |      |      |      |      |      |
| 23514  | 5     | 5      | 5      |      |      |      |      |      |      |      |      |      |      |      |
| 23515  | 5     | 5      | 4      | 4    | 4    | 4    | 5    | 5    | 5    | 2    | 4    | 4    | 5    | 4    |
| 23522  |       |        |        |      |      |      |      |      |      |      |      |      |      |      |
| 23524  |       |        |        |      |      |      |      |      |      |      |      |      |      |      |
| 23531  | 5     | 5      | 4      | 4    | 3    | 5    | 5    | 5    | 5    | 1    | 4    | 3    | 5    | 5    |
| 23532  | 5     | 5      | 5      |      |      |      |      |      |      |      |      |      |      |      |
| 23533  | 5     | 5      | 5      |      |      |      |      |      |      |      |      |      |      |      |
| 23534  | 4     | 4      | 4      | 3    | 3    | 3    | 3    | 4    | 3    | 3    | 3    | 4    | 3    | 3    |
| 23538  | 4     | 5      | 4      |      |      |      |      |      |      |      |      |      |      |      |
| 23539  | 4     | 4      | 4      | 4    | 4    | 4    | 4    | 4    | 4    | 3    | 3    | 3    | 5    | 5    |
| 23548  | 5     | 5      | 5      |      |      |      |      |      |      |      |      |      |      |      |
| 23553  |       |        |        |      |      |      |      |      |      |      |      |      |      |      |
| 23556  | 5     | 5      | 5      |      |      |      |      |      |      |      |      |      |      |      |
| 23563  | 4     | 4      | 4      | 0    | 0    | 0    | 0    | 0    | 0    | 0    | 0    | 0    | 0    | 1    |
| 23572  | 5     | 5      | 5      | 5    | 5    | 5    | 4    | 5    | 5    | 5    | 4    | 4    | 4    | 4    |
| 23575  | 5     | 5      | 5      |      |      |      |      |      |      |      |      |      |      |      |
| 23576  | 6     | 5      | 5      | 5    | 5    | 5    | 5    | 5    | 5    | 1    | 5    | 4    | 5    | 5    |
| 23577  | 6     | 6      | 6      | 5    | 1    | 5    | 5    | 5    | 5    | 3    | 3    | 4    | 4    | 3    |
| 23578  | 4     | 4      | 3      |      |      |      |      |      |      |      |      |      |      |      |
| 23587  | 4     | 5      | 5      | 5    | 5    | 5    | 5    | 5    | 5    | 4    | 4    | 4    | 5    | 4    |
| 23597  | 4     | 4      | 4      |      |      |      |      |      |      |      |      |      |      |      |
| 23598  | 4     | 4      | 4      | 4    | 4    | 4    | 4    | 4    | 5    | 2    | 5    | 4    | 5    | 5    |
| 23604  |       |        |        |      |      |      |      |      |      |      |      |      |      |      |
| 23617  | 5     | 5      | 5      |      |      |      |      |      |      |      |      |      |      |      |
| 23620  | 5     | 5      | 5      | 5    | 5    | 5    | 5    | 5    | 5    | 2    | 5    | 4    | 5    | 5    |
| 23621  |       |        |        |      |      |      |      |      |      |      |      |      |      |      |

| respid | Q46x4 | Q46x5a | Q46x5b | Q47a | Q47b | Q47c | Q47d | Q47e | Q47f | Q47g | Q47h | Q47i | Q47j | Q47k |
|--------|-------|--------|--------|------|------|------|------|------|------|------|------|------|------|------|
| 23625  | 5     | 5      | 5      | 1    | 5    | 5    | 5    |      |      | 3    | 5    | 4    | 5    | 5    |
| 23629  | 5     | 5      | 5      |      |      |      |      |      |      |      |      |      |      |      |
| 23635  | 4     | 5      | 5      |      |      |      |      |      |      |      |      |      |      |      |
| 23636  | 6     | 5      | 4      |      |      |      |      |      |      |      |      |      |      |      |
| 23637  | 3     | 3      | 3      | 3    | 3    | 3    | 3    | 4    | 2    | 3    |      |      | 3    | 3    |
| 23638  | 5     | 5      | 5      |      |      |      |      |      |      |      |      |      |      |      |
| 23644  | 5     | 5      | 5      |      |      |      |      |      |      |      |      |      |      |      |
| 23645  | 5     | 5      | 5      |      |      |      |      |      |      |      |      |      |      |      |
| 23649  | 3     | 3      | 6      | 2    | 2    | 1    | 2    | 1    | 3    | 3    | 2    | 2    | 3    | 3    |
| 23654  | 5     | 4      | 4      |      |      |      |      |      |      |      |      |      |      |      |
| 23662  | 6     | 6      | 6      |      |      |      |      |      |      |      |      |      |      |      |
| 23664  | 6     | 5      | 5      |      |      |      |      |      |      |      |      |      |      |      |
| 23665  | 6     | 6      | 6      | 5    |      | 5    | 5    | 5    | 1    | 5    | 5    | 5    | 5    | 5    |
| 23666  | 4     | 4      | 4      |      |      |      |      |      |      |      |      |      |      |      |
| 23671  | 5     | 5      | 5      |      |      |      |      |      |      |      |      |      |      |      |
| 23672  | 5     | 5      | 5      | 5    | 5    | 0    | 0    | 0    | 0    | 0    | 0    | 0    | 1    | 1    |
| 23685  | 5     | 5      | 5      | 1    | 5    | 5    | 5    | 5    | 2    | 5    | 3    | 5    | 4    | 4    |
| 23686  | 6     | 6      | 6      | 0    |      |      |      |      |      |      |      |      |      |      |
| 23689  | 4     | 4      | 4      | 0    | 0    | 0    | 0    | 0    | 0    | 0    | 0    | 0    | 1    | 1    |
| 23690  | 4     | 4      | 4      | 4    | 4    | 4    | 4    | 4    | 2    | 3    | 3    | 3    | 3    | 3    |
| 23695  | 4     | 5      | 4      |      |      |      |      |      |      |      |      |      |      |      |
| 23700  | 6     | 5      | 5      | 5    | 5    | 5    | 5    | 5    | 3    | 5    | 3    | 5    | 5    | 5    |
| 23714  | 6     | 6      | 6      |      |      |      |      |      |      |      |      |      |      |      |
| 23719  | 5     | 5      | 5      | 5    |      |      |      |      |      |      | 4    |      |      |      |
| 23720  | 4     | 4      | 4      |      |      |      |      |      |      |      |      |      |      |      |
| 23721  | 5     | 5      | 5      | 5    | 5    | 5    | 5    | 5    | 3    | 5    | 5    | 4    | 5    | 5    |
| 23729  | 5     | 5      | 5      |      |      |      |      |      |      |      |      |      |      |      |
| 23730  | 6     | 6      | 6      | 5    | 5    | 5    | 5    | 5    |      | 5    | 4    | 4    | 5    | 4    |
| 23732  | 5     | 5      | 5      |      |      |      |      |      |      |      |      |      |      |      |
| 23736  | 5     | 5      | 5      | 5    | 5    | 5    | 5    | 5    | 1    | 4    | 3    | 5    | 4    | 4    |
| 23754  |       |        |        |      |      |      |      |      |      |      |      |      |      |      |
| 23756  | 5     | 5      | 5      | 3    | 3    | 3    | 3    | 5    | 1    | 3    | 3    | 2    | 3    | 3    |



| respid | Q46x4 | Q46x5a | Q46x5b | Q47a | Q47b | Q47c | Q47d | Q47e | Q47f | Q47g | Q47h | Q47i | Q47j | Q47k |
|--------|-------|--------|--------|------|------|------|------|------|------|------|------|------|------|------|
| 23759  | 5     | 5      | 4      |      |      |      |      |      |      |      |      |      |      |      |
| 23761  | 5     | 5      | 5      |      |      |      |      |      |      |      |      |      |      |      |
| 23766  | 6     | 6      | 6      | 4    | 4    | 4    | 4    | 5    |      | 4    | 3    |      | 4    | 4    |
| 23768  | 4     | 3      | 3      |      |      |      |      |      |      |      |      |      |      |      |
| 23773  | 6     | 6      | 6      | 4    | 5    | 5    | 5    | 5    | 2    | 4    | 3    | 5    | 3    | 4    |
| 23781  |       |        |        |      |      |      |      |      |      |      |      |      |      |      |
| 23782  | 5     | 5      | 5      |      |      |      |      |      |      |      |      |      |      |      |
| 23787  | 5     | 4      | 5      |      |      |      |      |      |      |      |      |      |      |      |
| 23788  | 6     | 6      | 6      |      |      |      |      |      |      |      |      |      |      |      |
| 23790  |       |        |        |      |      |      |      |      |      |      |      |      |      |      |
| 23794  | 5     | 5      | 5      | 5    | 4    | 5    | 5    | 5    |      | 4    | 3    | 4    | 3    |      |
| 23795  | 4     | 5      | 5      | 4    | 4    | 4    | 4    | 5    | 2    | 3    | 3    | 5    | 4    | 3    |
| 23801  | 5     | 5      | 5      |      |      |      |      |      |      |      |      |      |      |      |
| 23806  | 5     | 4      | 5      |      |      |      |      |      |      |      |      |      |      |      |
| 23809  | 4     | 4      | 4      | 5    | 4    | 4    | 4    | 5    | 4    | 4    | 3    | 4    | 4    | 3    |
| 23813  | 5     | 5      | 5      |      |      |      |      |      |      |      |      |      |      |      |
| 23815  | 5     | 5      | 5      |      |      |      |      |      |      |      |      |      |      |      |
| 23821  | 5     | 5      | 5      | 4    | 5    |      |      |      |      |      |      |      |      |      |
| 23825  | 5     | 5      | 5      |      |      |      |      |      |      |      |      |      |      |      |
| 23826  | 5     | 4      | 5      | 5    | 5    | 2    | 2    | 4    | 1    | 3    | 2    | 3    | 5    | 4    |
| 23830  | 5     | 5      | 5      |      |      |      |      |      |      |      |      |      |      |      |
| 23833  | 6     | 6      | 6      |      |      |      |      |      |      |      |      |      |      |      |
| 23837  | 5     | 5      | 5      | 5    | 5    | 5    | 5    | 5    | 4    | 5    | 4    | 5    | 5    | 5    |
| 23848  | 6     | 1      | 6      |      |      |      |      |      |      |      |      |      |      |      |
| 23850  | 5     | 5      | 5      |      |      |      |      |      |      |      |      |      |      |      |
| 23870  | 5     | 4      | 4      | 4    | 4    | 4    | 3    | 4    | 1    | 4    | 4    | 4    | 3    | 3    |
| 23877  |       |        |        |      |      |      |      |      |      |      |      |      |      |      |
| 23880  | 4     | 6      | 6      | 3    | 3    | 3    | 2    | 4    | 2    | 2    | 2    | 2    | 2    | 2    |
| 23882  | 4     | 4      | 4      |      |      |      |      |      |      |      |      |      |      |      |
| 23888  |       |        |        |      |      |      |      |      |      |      |      |      |      |      |
| 23908  | 5     | 5      | 5      | 5    | 5    | 5    | 4    | 5    | 0    | 5    | 3    | 4    | 4    | 4    |
| 23914  | 5     | 5      | 5      |      |      |      |      |      |      |      |      |      |      |      |

| respid | Q46x4 | Q46x5a | Q46x5b | Q47a | Q47b | Q47c | Q47d | Q47e | Q47f | Q47g | Q47h | Q47i | Q47j | Q47k |
|--------|-------|--------|--------|------|------|------|------|------|------|------|------|------|------|------|
| 23916  | 6     | 6      | 5      |      |      |      |      |      |      |      |      |      |      |      |
| 23922  | 4     | 4      | 4      | 3    | 3    | 3    | 3    | 4    | 1    | 4    | 4    | 4    | 4    | 4    |
| 23932  | 4     | 4      | 5      | 4    | 4    | 4    | 4    | 4    | 3    | 4    | 4    | 4    | 4    | 4    |
| 23934  |       |        |        |      |      |      |      |      |      |      |      |      |      |      |
| 23942  | 5     | 5      | 5      |      |      |      |      |      |      |      |      |      |      |      |
| 23945  | 5     | 5      | 5      | 3    | 3    | 3    | 3    | 5    | 2    | 3    | 3    | 3    | 3    | 3    |
| 23948  | 5     | 4      | 5      | 4    | 5    | 4    | 4    | 4    | 3    | 5    | 4    | 5    | 4    | 4    |
| 23955  | 5     | 5      | 5      | 4    | 4    | 4    | 4    | 5    | 1    | 4    | 4    | 5    | 4    | 4    |
| 23956  | 4     | 5      | 5      |      |      |      |      |      |      |      |      |      |      |      |
| 23978  | 5     | 5      | 5      | 3    | 2    | 2    | 2    | 3    | 0    | 2    | 2    | 2    | 2    | 1    |
| 23981  |       |        |        |      |      |      |      |      |      |      |      |      |      |      |
| 23982  | 6     | 6      | 6      |      |      |      |      |      |      |      |      |      |      |      |
| 23991  | 6     | 6      | 6      |      |      |      |      |      |      |      |      |      |      |      |
| 23994  | 5     | 5      | 5      | 2    | 4    | 4    | 4    | 5    | 2    | 4    | 4    | 4    | 4    | 4    |
| 23995  | 5     | 5      | 5      | 5    | 5    | 4    | 5    | 5    | 2    | 5    | 4    | 5    | 5    | 4    |
| 23999  | 5     | 4      | 4      |      |      |      |      |      |      |      |      |      |      |      |
| 24005  | 2     | 3      | 4      |      |      |      |      |      |      |      |      |      |      |      |
| 24018  | 5     | 5      | 5      |      |      |      |      |      |      |      |      |      |      |      |
| 24021  |       |        |        |      |      |      |      |      |      |      |      |      |      |      |
| 24035  |       |        |        |      |      |      |      |      |      |      |      |      |      |      |
| 24040  | 6     | 6      | 6      | 3    | 0    | 0    | 0    | 0    | 0    | 0    | 0    | 0    | 2    | 2    |
| 24043  |       |        |        |      |      |      |      |      |      |      |      |      |      |      |
| 24046  | 4     | 4      | 4      | 3    | 3    | 2    | 4    | 3    | 1    | 3    | 2    | 1    | 2    | 3    |
| 24047  | 5     | 4      | 4      |      |      |      |      |      |      |      |      |      |      |      |
| 24048  | 5     | 5      | 5      | 5    | 5    | 5    | 5    | 5    | 3    | 5    | 4    | 5    | 5    | 4    |
| 24062  | 4     | 4      | 4      | 4    | 4    | 4    | 4    | 5    | 5    | 4    | 4    | 5    | 5    | 5    |
| 24063  | 4     | 4      | 4      | 4    |      |      |      |      |      |      | 3    | 4    | 4    | 3    |
| 24066  | 5     | 5      | 5      |      |      |      |      |      |      |      |      |      |      |      |
| 24069  | 5     | 4      | 5      |      |      |      |      |      |      |      |      |      |      |      |
| 24070  | 6     | 6      | 6      |      |      |      |      |      |      |      |      |      |      |      |
| 24074  | 5     | 4      | 4      |      |      |      |      |      |      |      |      |      |      |      |
| 24080  | 6     | 6      | 6      |      |      |      |      |      |      |      |      |      |      |      |

| respid | Q46x4 | Q46x5a | Q46x5b | Q47a | Q47b | Q47c | Q47d | Q47e | Q47f | Q47g | Q47h | Q47i | Q47j | Q47k |
|--------|-------|--------|--------|------|------|------|------|------|------|------|------|------|------|------|
| 24082  | 5     | 4      | 5      |      |      |      |      |      |      |      |      |      |      |      |
| 24088  | 4     | 4      | 5      |      |      |      |      |      |      |      |      |      |      |      |
| 24089  | 5     | 5      | 5      | 5    | 5    | 5    | 5    | 5    | 4    | 5    | 5    | 5    | 5    | 5    |
| 24091  | 5     | 4      | 3      |      |      |      |      |      |      |      |      |      |      |      |
| 24095  |       |        |        |      |      |      |      |      |      |      |      |      |      |      |
| 24100  | 5     | 5      | 5      |      |      |      |      |      |      |      |      |      |      |      |
| 24105  | 4     | 4      | 4      | 2    | 2    | 2    | 2    | 2    | 4    | 5    | 4    | 5    | 5    | 5    |
| 24107  | 3     | 4      | 4      |      |      |      |      |      |      |      |      |      |      |      |
| 24108  |       |        |        |      |      |      |      |      |      |      |      |      |      |      |
| 24113  | 5     | 5      | 5      |      |      |      |      |      |      |      |      |      |      |      |
| 24120  |       |        |        |      |      |      |      |      |      |      |      |      |      |      |
| 24122  | 4     | 6      | 6      |      |      |      |      |      |      |      |      |      |      |      |
| 24123  | 6     | 6      | 6      |      |      |      |      |      |      |      |      |      |      |      |
| 24125  | 6     | 6      | 6      |      |      |      |      |      |      |      |      |      |      |      |
| 24132  | 5     | 5      | 5      | 0    | 0    | 0    | 0    | 0    | 0    | 0    | 0    | 0    | 0    | 1    |
| 24139  | 5     | 5      | 5      | 3    | 3    | 3    | 4    | 4    | 2    | 3    | 3    | 5    | 4    | 3    |
| 24140  | 4     | 4      | 4      | 4    | 4    | 4    | 4    | 4    | 2    | 4    | 4    | 5    | 4    | 4    |
| 24143  | 3     | 4      | 5      |      |      |      |      |      |      |      |      |      |      |      |
| 24150  | 3     | 3      | 3      | 2    | 3    | 3    | 4    | 4    | 3    | 2    | 1    | 3    | 2    | 3    |
| 24153  |       |        |        |      |      |      |      |      |      |      |      |      |      |      |
| 24161  |       |        |        |      |      |      |      |      |      |      |      |      |      |      |
| 24168  | 4     | 6      | 6      | 0    | 0    | 0    | 0    | 0    | 0    | 0    | 0    | 0    | 1    | 4    |
| 24179  | 5     | 5      | 5      | 5    | 4    | 5    | 4    | 5    | 2    | 4    | 4    | 5    | 4    | 4    |
| 24182  | 4     | 4      | 3      | 3    | 3    | 3    | 3    | 4    | 4    | 4    | 4    | 5    | 4    | 4    |
| 24194  | 6     | 6      | 6      | 4    | 5    | 5    | 5    | 5    | 4    | 4    | 4    | 5    | 5    | 5    |
| 24206  |       |        |        |      |      |      |      |      |      |      |      |      |      |      |
| 24214  |       |        |        |      |      |      |      |      |      |      |      |      |      |      |
| 24215  | 5     | 4      | 5      | 5    | 5    | 5    | 5    | 5    | 5    | 4    | 4    | 5    | 4    | 5    |
| 24224  | 5     | 5      | 5      |      |      |      |      |      |      |      |      |      |      |      |
| 24225  | 5     | 4      | 4      |      |      |      |      |      |      |      |      |      |      |      |
| 24227  |       |        |        |      |      |      |      |      |      |      |      |      |      |      |
| 24229  | 4     | 5      | 4      |      |      |      |      |      |      |      |      |      |      |      |

| respid | Q46x4 | Q46x5a | Q46x5b | Q47a | Q47b | Q47c | Q47d | Q47e | Q47f | Q47g | Q47h | Q47i | Q47j | Q47k |   |
|--------|-------|--------|--------|------|------|------|------|------|------|------|------|------|------|------|---|
| 24230  | 5     | 4      | 4      | 5    | 5    | 5    | 5    | 5    | 5    | 5    | 5    | 4    | 5    | 4    | 5 |
| 24232  | 4     | 6      | 6      |      |      |      |      |      |      |      |      |      |      |      |   |
| 24253  | 6     | 6      | 6      |      |      |      |      |      |      |      |      |      |      |      |   |
| 24267  | 5     | 5      | 5      |      |      |      |      |      |      |      |      |      |      |      |   |
| 24274  | 5     | 5      | 5      | 2    | 3    | 3    | 3    | 4    | 1    | 4    | 3    | 4    | 4    | 4    | 3 |
| 24275  | 5     | 5      | 5      |      |      |      |      |      |      |      |      |      |      |      |   |
| 24277  | 6     | 6      | 6      | 5    | 4    | 5    | 5    | 5    | 4    | 4    | 4    | 5    | 3    | 4    | 4 |
| 24280  | 5     | 6      | 6      | 1    | 3    | 3    | 3    | 2    | 1    | 1    | 2    | 1    | 1    | 1    | 3 |
| 24285  | 5     | 4      | 5      | 4    | 5    | 5    | 5    | 5    | 2    | 4    | 3    | 5    | 3    | 3    | 3 |
| 24293  |       |        |        |      |      |      |      |      |      |      |      |      |      |      |   |
| 24295  | 6     | 6      | 6      |      |      |      |      |      |      |      |      |      |      |      |   |
| 24299  |       |        |        |      |      |      |      |      |      |      |      |      |      |      |   |
| 24303  | 6     | 6      | 6      | 5    | 5    | 5    | 5    | 5    | 2    | 5    | 5    | 5    | 5    | 5    | 4 |
| 24308  | 5     | 5      | 5      | 3    | 3    |      | 3    | 4    |      |      |      |      |      |      |   |
| 24322  |       |        |        |      |      |      |      |      |      |      |      |      |      |      |   |
| 24325  |       |        |        |      |      |      |      |      |      |      |      |      |      |      |   |
| 24328  | 5     | 5      | 5      |      |      |      |      |      |      |      |      |      |      |      |   |
| 24334  | 5     | 5      | 5      | 2    | 5    | 5    | 5    | 5    | 3    | 4    | 3    | 5    | 5    | 5    | 4 |
| 24342  | 5     | 5      | 5      |      |      |      |      |      |      |      |      |      |      |      |   |
| 24343  | 4     | 4      | 5      | 4    | 4    | 5    | 5    | 5    | 1    | 5    | 4    | 5    | 5    | 5    | 4 |
| 24348  | 4     | 6      | 6      | 0    | 0    | 0    | 0    | 0    | 0    | 0    | 0    | 0    | 0    | 1    | 1 |
| 24352  | 4     | 4      | 4      |      |      |      |      |      |      |      |      |      |      |      |   |
| 24354  | 4     | 4      | 4      |      |      |      |      |      |      |      |      |      |      |      |   |
| 24357  | 6     | 6      | 6      |      |      |      |      |      |      |      |      |      |      |      |   |
| 24360  | 5     | 5      | 5      | 2    | 2    | 2    | 2    | 4    | 1    | 2    | 3    | 4    | 4    | 4    | 3 |
| 24369  | 4     | 4      | 4      |      |      |      |      |      |      |      |      |      |      |      |   |
| 24373  | 6     | 6      | 6      |      |      |      |      |      |      |      |      |      |      |      |   |
| 24398  | 3     | 2      | 2      | 2    | 2    | 2    | 1    | 2    | 4    | 1    | 2    | 2    | 2    | 1    | 3 |
| 24402  | 5     | 4      | 5      |      |      |      |      |      |      |      |      |      |      |      |   |
| 24405  | 4     | 4      | 4      |      |      |      |      |      |      |      |      |      |      |      |   |
| 24407  | 5     | 6      | 6      | 0    |      |      |      |      |      |      |      |      |      |      |   |
| 24413  | 5     | 5      | 5      |      |      |      |      |      |      |      |      |      |      |      |   |

| respid | Q46x4 | Q46x5a | Q46x5b | Q47a | Q47b | Q47c | Q47d | Q47e | Q47f | Q47g | Q47h | Q47i | Q47j | Q47k |
|--------|-------|--------|--------|------|------|------|------|------|------|------|------|------|------|------|
| 24443  | 4     | 5      | 5      |      |      |      |      |      |      |      |      |      |      |      |
| 24451  |       |        |        |      |      |      |      |      |      |      |      |      |      |      |
| 24459  | 4     | 4      | 4      | 3    | 3    | 3    | 3    | 3    | 2    | 2    | 3    | 2    | 3    | 2    |
| 24465  | 6     | 6      | 6      |      |      |      |      |      |      |      |      |      |      |      |
| 24481  | 6     | 6      | 6      |      |      |      |      |      |      |      |      |      |      |      |
| 24482  | 5     | 5      | 5      |      |      |      |      |      |      |      |      |      |      |      |
| 24491  | 6     | 6      | 6      |      |      |      |      |      |      |      |      |      |      |      |
| 24495  | 5     | 5      | 5      | 5    | 5    | 5    | 5    | 5    | 2    | 5    | 4    | 5    | 5    | 4    |
| 24497  | 2     | 2      | 4      | 2    | 2    | 2    | 0    | 1    | 0    | 0    | 0    | 0    | 1    | 1    |
| 24511  | 5     | 5      | 4      |      |      |      |      |      |      |      |      |      |      |      |
| 24513  | 4     | 5      | 4      | 4    | 3    | 3    | 3    | 4    | 1    | 2    | 3    | 2    | 3    | 3    |
| 24516  | 3     | 5      | 4      | 2    | 2    | 4    | 3    | 4    | 3    | 3    | 3    | 4    | 4    | 4    |
| 24518  | 5     | 4      | 6      |      |      |      |      |      |      |      |      |      |      |      |
| 24524  | 4     | 4      | 4      |      |      |      |      |      |      |      |      |      |      |      |
| 24528  | 6     | 6      | 6      |      |      |      |      |      |      |      |      |      |      |      |
| 24531  | 4     | 4      | 4      |      |      |      |      |      |      |      |      |      |      |      |
| 24533  | 4     | 5      | 6      | 1    | 1    | 0    | 0    | 0    | 1    | 1    | 1    |      | 1    | 1    |
| 24547  | 6     | 6      | 6      |      |      |      |      |      |      |      |      |      |      |      |
| 24557  | 3     | 2      | 3      |      |      |      |      |      |      |      |      |      |      |      |
| 24559  | 3     | 2      | 3      | 3    | 2    | 2    | 2    | 3    | 2    | 3    | 2    | 5    | 4    | 4    |
| 24567  | 5     | 5      | 5      |      |      |      |      |      |      |      |      |      |      |      |
| 24568  |       |        |        |      |      |      |      |      |      |      |      |      |      |      |
| 24577  |       |        |        |      |      |      |      |      |      |      |      |      |      |      |
| 24581  | 4     | 4      | 4      |      |      |      |      |      |      |      |      |      |      |      |
| 24588  | 4     | 5      | 5      |      |      |      |      |      |      |      |      |      |      |      |
| 24604  | 6     | 6      | 6      | 0    | 0    | 0    | 0    | 0    | 0    | 0    | 0    | 0    | 1    | 1    |
| 24612  | 5     | 5      | 5      | 4    | 4    | 4    | 4    | 5    | 1    | 4    | 3    | 4    | 3    | 4    |
| 24621  | 4     | 4      | 3      |      |      |      |      |      |      |      |      |      |      |      |
| 24625  | 4     | 2      | 2      |      |      |      |      |      |      |      |      |      |      |      |
| 24627  | 4     | 6      | 6      |      |      |      |      |      |      |      |      |      |      |      |
| 24640  | 6     | 6      | 6      |      |      |      |      |      |      |      |      |      |      |      |
| 24644  | 6     | 6      | 6      |      |      |      |      |      |      |      |      |      |      |      |

| respid | Q46x4 | Q46x5a | Q46x5b | Q47a | Q47b | Q47c | Q47d | Q47e | Q47f | Q47g | Q47h | Q47i | Q47j | Q47k |
|--------|-------|--------|--------|------|------|------|------|------|------|------|------|------|------|------|
| 24664  | 5     | 4      | 5      | 3    | 4    | 4    | 3    | 4    | 1    | 3    | 3    | 4    | 3    | 4    |
| 24669  | 4     | 5      | 5      | 4    | 5    | 4    | 4    | 5    | 3    | 4    | 4    | 4    | 4    | 4    |
| 24685  | 6     | 6      | 6      |      |      |      |      |      |      |      |      |      |      |      |
| 24687  | 5     | 5      | 5      |      |      |      |      |      |      |      |      |      |      |      |
| 24688  | 4     | 4      | 4      | 4    | 3    | 4    | 3    | 3    | 1    | 2    | 2    | 4    | 3    | 3    |
| 24691  | 3     | 2      | 3      |      |      |      |      |      |      |      |      |      |      |      |
| 24693  | 5     | 5      | 5      | 5    | 5    | 5    | 5    | 5    | 5    | 5    | 5    | 5    | 5    | 5    |
| 24706  |       |        |        |      |      |      |      |      |      |      |      |      |      |      |
| 24710  |       |        |        |      |      |      |      |      |      |      |      |      |      |      |
| 24717  | 5     | 5      | 5      | 5    | 4    | 5    | 5    | 5    | 3    | 5    | 4    | 5    | 4    | 4    |
| 24720  | 5     | 5      | 5      |      |      |      |      |      |      |      |      |      |      |      |
| 24731  | 6     | 6      | 6      | 0    | 0    | 0    | 0    | 0    | 0    | 0    | 0    | 0    | 1    | 1    |
| 24732  | 3     | 5      | 5      |      |      |      |      | 4    | 0    |      | 3    |      |      | 4    |
| 24733  |       |        |        |      |      |      |      |      |      |      |      |      |      |      |
| 24747  | 3     | 3      | 4      |      |      |      |      |      |      |      |      |      |      |      |
| 24750  | 4     | 4      | 3      | 2    | 2    | 2    | 3    | 3    | 2    | 4    | 2    | 3    | 3    | 2    |
| 24758  | 4     | 4      | 4      |      |      |      |      |      |      |      |      |      |      |      |
| 24760  | 6     | 6      | 6      |      |      |      |      |      |      |      |      |      |      |      |
| 24765  |       |        |        |      |      |      |      |      |      |      |      |      |      |      |
| 24772  | 5     | 5      | 5      |      |      |      |      |      |      |      |      |      |      |      |
| 24779  | 2     | 2      | 2      | 2    | 3    | 3    | 4    | 2    | 1    | 2    | 3    | 2    |      | 3    |
| 24794  | 5     | 5      | 5      | 2    | 2    | 2    | 2    | 5    | 0    | 5    | 3    | 5    | 5    | 5    |
| 24796  | 3     | 3      | 2      |      |      |      |      |      |      |      |      |      |      |      |
| 24797  | 6     | 6      | 6      | 4    | 4    | 4    | 4    | 5    | 5    | 4    | 4    | 5    | 4    | 4    |
| 24800  | 5     | 5      | 5      | 5    | 4    | 5    | 5    | 5    | 5    | 4    | 4    | 5    | 5    | 5    |
| 24813  | 4     | 4      | 4      |      |      |      |      |      |      |      |      |      |      |      |
| 24815  | 6     | 6      | 6      |      |      |      |      |      |      |      |      |      |      |      |
| 24821  | 5     | 5      | 5      |      |      |      |      |      |      |      |      |      |      |      |
| 24822  | 5     | 5      | 5      |      |      |      |      |      |      |      |      |      |      |      |
| 24831  | 6     | 6      | 6      |      |      |      |      |      |      |      |      |      |      |      |
| 24835  |       |        |        |      |      |      |      |      |      |      |      |      |      |      |
| 24843  | 4     | 6      | 6      |      |      |      |      |      |      |      |      |      |      |      |

| respid | Q46x4 | Q46x5a | Q46x5b | Q47a | Q47b | Q47c | Q47d | Q47e | Q47f | Q47g | Q47h | Q47i | Q47j | Q47k |   |
|--------|-------|--------|--------|------|------|------|------|------|------|------|------|------|------|------|---|
| 24844  | 3     | 4      | 4      | 2    | 2    | 2    | 2    | 2    | 3    | 0    | 0    | 0    | 0    | 1    | 1 |
| 24860  |       |        |        |      |      |      |      |      |      |      |      |      |      |      |   |
| 24861  | 6     | 6      | 6      | 0    |      |      |      |      |      |      |      |      |      |      |   |
| 24865  | 3     | 3      | 2      |      |      |      |      |      |      |      |      |      |      |      |   |
| 24870  | 4     | 5      | 5      | 3    | 4    | 4    | 4    | 4    | 4    | 4    | 3    | 4    | 3    | 4    | 3 |
| 24887  | 6     | 6      | 6      |      |      |      |      |      |      |      |      |      |      |      |   |
| 24897  | 6     | 6      | 6      |      |      |      |      |      |      |      |      |      |      |      |   |
| 24902  | 4     | 4      | 4      | 1    | 2    | 2    | 4    | 5    | 2    | 2    | 2    | 2    | 2    | 2    | 2 |
| 24914  | 6     | 6      | 6      |      |      |      |      |      |      |      |      |      |      |      |   |
| 24921  | 5     | 5      | 4      |      |      |      |      |      |      |      |      |      |      |      |   |
| 24922  | 5     | 5      | 5      | 5    | 5    | 5    | 5    | 5    | 5    | 3    | 4    | 4    | 5    | 5    | 4 |
| 24924  |       |        |        |      |      |      |      |      |      |      |      |      |      |      |   |
| 24927  | 5     | 5      | 5      |      |      |      |      |      |      |      |      |      |      |      |   |
| 24936  | 5     | 5      | 5      |      |      |      |      |      |      |      |      |      |      |      |   |
| 24937  | 5     | 5      | 5      |      |      |      |      |      |      |      |      |      |      |      |   |
| 24942  | 4     | 4      | 4      | 0    | 2    | 2    | 2    | 4    | 1    | 2    | 2    | 2    | 2    | 2    | 3 |
| 24947  | 5     | 5      | 5      |      |      |      |      |      |      |      |      |      |      |      |   |
| 24953  | 6     | 6      | 6      | 3    | 3    | 4    | 4    | 5    | 1    | 1    | 3    | 1    | 4    | 4    | 4 |
| 24954  | 3     | 3      | 3      | 1    | 1    | 2    | 2    | 1    | 2    | 2    | 2    | 2    | 1    | 2    | 2 |
| 24960  | 4     | 2      | 3      | 3    | 3    | 3    | 2    | 2    | 2    | 2    | 2    | 3    | 3    | 3    | 3 |
| 24965  | 6     | 6      | 6      |      |      |      |      |      |      |      |      |      |      |      |   |
| 24975  | 5     | 5      | 5      |      |      |      |      |      |      |      |      |      |      |      |   |
| 24983  | 3     | 2      | 3      |      |      |      |      |      |      |      |      |      |      |      |   |
| 24985  | 5     | 5      | 5      | 3    | 3    | 2    | 4    | 5    | 1    | 4    | 3    | 4    | 4    | 4    | 3 |
| 24990  | 4     | 4      | 4      | 4    | 2    | 2    | 2    |      | 2    | 1    | 1    | 4    | 1    | 1    | 2 |
| 25000  | 5     | 5      | 5      |      |      |      |      |      |      |      |      |      |      |      |   |
| 25007  | 3     | 4      | 4      |      |      |      |      |      |      |      |      |      |      |      |   |
| 25008  | 5     | 5      | 5      |      |      |      |      |      |      |      |      |      |      |      |   |
| 25010  |       |        |        |      |      |      |      |      |      |      |      |      |      |      |   |
| 25016  | 5     | 5      | 5      | 5    | 5    | 5    | 5    | 5    | 2    | 4    | 4    | 5    | 4    | 4    | 3 |
| 25021  | 6     | 6      | 6      |      |      |      |      |      |      |      |      |      |      |      |   |
| 25040  |       |        |        |      |      |      |      |      |      |      |      |      |      |      |   |

| respid | Q46x4 | Q46x5a | Q46x5b | Q47a | Q47b | Q47c | Q47d | Q47e | Q47f | Q47g | Q47h | Q47i | Q47j | Q47k |
|--------|-------|--------|--------|------|------|------|------|------|------|------|------|------|------|------|
| 25043  | 5     | 5      | 4      | 4    | 5    | 5    | 4    | 5    | 5    | 4    | 4    | 4    | 4    | 4    |
| 25055  | 4     | 4      | 4      | 5    | 5    | 5    | 5    | 5    | 4    | 5    | 5    | 5    | 5    | 5    |
| 25057  | 5     | 5      | 5      | 4    | 4    | 4    | 4    | 4    | 3    | 4    | 3    | 4    | 3    | 3    |
| 25060  | 4     | 4      | 4      | 3    | 2    |      | 3    | 3    | 2    |      | 3    | 3    | 4    | 3    |
| 25062  | 5     | 5      | 5      | 4    | 4    | 4    | 4    | 5    | 3    | 4    | 4    | 5    | 5    | 5    |
| 25064  | 4     | 4      | 4      |      |      |      |      |      |      |      |      |      |      |      |
| 25069  |       |        |        |      |      |      |      |      |      |      |      |      |      |      |
| 25077  | 5     | 5      | 5      |      |      |      |      |      |      |      |      |      |      |      |
| 25088  |       |        |        |      |      |      |      |      |      |      |      |      |      |      |
| 25093  | 4     | 4      | 4      | 4    | 3    | 4    | 4    | 4    | 3    | 3    | 3    | 3    | 3    | 3    |
| 25121  | 4     | 4      | 4      |      |      |      |      |      |      |      |      |      |      |      |
| 25140  | 3     | 3      | 3      |      |      |      |      |      |      |      |      |      |      |      |
| 25144  | 5     | 5      | 5      |      |      |      |      |      |      |      |      |      |      |      |
| 25149  | 4     | 4      | 4      |      |      |      |      |      |      |      |      |      |      |      |
| 25159  | 5     | 5      | 5      | 5    | 4    | 5    | 5    | 5    | 2    | 5    | 4    | 5    | 4    | 3    |
| 25191  | 6     | 6      | 6      | 4    | 4    | 4    | 4    | 5    | 3    | 4    | 3    | 5    | 4    | 4    |
| 25193  | 4     | 4      | 5      |      |      |      |      |      |      |      |      |      |      |      |
| 25202  | 3     | 2      | 3      |      |      |      |      |      |      |      |      |      |      |      |
| 25215  | 4     | 2      | 3      | 4    | 3    | 4    | 4    | 5    | 2    | 2    | 4    | 2    | 4    | 5    |
| 25229  | 6     | 6      | 6      | 0    | 0    | 0    | 0    | 0    | 0    | 0    | 0    | 0    | 1    | 1    |
| 25231  | 4     | 4      | 5      |      |      |      |      |      |      |      |      |      |      |      |
| 25236  | 6     | 6      | 6      |      |      |      |      |      |      |      |      |      |      |      |
| 25242  | 5     | 5      | 5      |      | 3    | 4    | 4    | 5    |      | 4    | 3    | 4    | 4    | 4    |
| 25252  | 5     | 5      | 5      | 5    | 5    | 5    | 5    | 5    | 2    | 4    | 4    |      | 5    | 4    |
| 25253  | 3     | 4      | 3      |      |      |      |      |      |      |      |      |      |      |      |
| 25256  | 3     | 3      | 2      |      |      |      |      |      |      |      |      |      |      |      |
| 25260  | 5     | 5      | 5      | 5    | 5    | 5    | 5    | 5    | 3    | 5    | 5    | 5    | 5    | 4    |
| 25261  | 5     | 5      | 4      | 2    | 2    | 3    | 3    | 4    | 3    | 3    | 2    | 2    | 3    | 2    |
| 25280  | 4     | 4      | 4      |      |      |      |      |      |      |      |      |      |      |      |
| 25282  | 5     | 5      | 5      |      |      |      |      |      |      |      |      |      |      |      |
| 25289  | 2     | 3      | 3      | 3    | 3    | 3    | 3    | 4    | 4    | 2    | 1    | 0    | 3    | 3    |
| 25303  | 6     | 6      | 6      |      |      |      |      |      |      |      |      |      |      |      |



| respid | Q46x4 | Q46x5a | Q46x5b | Q47a | Q47b | Q47c | Q47d | Q47e | Q47f | Q47g | Q47h | Q47i | Q47j | Q47k |
|--------|-------|--------|--------|------|------|------|------|------|------|------|------|------|------|------|
| 25304  | 6     | 3      | 3      |      |      |      |      |      |      |      |      |      |      |      |
| 25309  | 4     | 4      | 4      |      |      |      |      |      |      |      |      |      |      |      |
| 25317  | 3     | 4      | 5      |      |      |      |      |      |      |      |      |      |      |      |
| 25318  | 3     | 3      | 3      |      |      |      |      |      |      |      |      |      |      |      |
| 25320  | 4     | 4      | 4      |      |      |      |      |      |      |      |      |      |      |      |
| 25324  | 3     | 2      | 3      |      |      |      |      |      |      |      |      |      |      |      |
| 25331  | 4     | 5      | 5      |      |      |      |      |      |      |      |      |      |      |      |
| 25340  | 5     | 5      | 5      | 5    | 5    | 5    | 5    | 5    | 5    | 5    | 4    | 5    | 5    | 5    |
| 25342  | 6     | 6      | 6      |      |      |      |      |      |      |      |      |      |      |      |
| 25350  | 5     | 5      | 5      |      |      |      |      |      |      |      |      |      |      |      |
| 25352  |       |        |        |      |      |      |      |      |      |      |      |      |      |      |
| 25358  | 5     | 5      | 5      |      |      |      |      |      |      |      |      |      |      |      |
| 25375  | 5     | 5      | 5      |      |      |      |      |      |      |      |      |      |      |      |
| 25386  | 6     | 6      | 6      | 0    | 1    | 0    | 0    | 0    | 0    | 0    | 0    | 0    | 1    | 2    |
| 25388  | 5     | 5      | 5      | 1    | 0    | 0    | 0    | 0    | 0    | 0    | 0    | 0    | 1    | 1    |
| 25390  | 4     | 6      | 5      |      |      |      |      |      |      |      |      |      |      |      |
| 25391  | 4     | 5      | 5      | 5    | 5    | 5    | 5    | 5    | 2    | 4    | 4    | 5    | 5    | 4    |
| 25400  | 5     | 5      | 5      |      |      |      |      |      |      |      |      |      |      |      |
| 25413  | 3     | 2      | 3      |      |      |      |      |      |      |      |      |      |      |      |
| 25424  | 5     | 5      | 4      | 4    | 3    | 3    | 4    | 4    | 3    | 4    | 4    | 3    | 2    | 3    |
| 25426  | 4     | 4      | 4      | 0    | 0    | 0    | 0    | 0    | 0    | 0    | 0    | 0    | 1    | 1    |
| 25430  | 5     | 5      | 5      |      |      |      |      |      |      |      |      |      |      |      |
| 25434  | 5     | 5      | 5      |      |      |      |      |      |      |      |      |      |      |      |
| 25439  | 4     | 4      | 4      | 1    | 2    | 2    | 2    | 2    | 2    | 1    | 2    | 2    | 2    | 2    |
| 25441  | 6     | 6      | 6      | 5    | 5    | 5    | 5    | 5    | 2    | 5    | 3    | 5    | 3    | 3    |
| 25445  | 5     | 5      | 5      | 0    | 0    | 0    | 0    | 0    | 0    | 0    | 0    | 0    | 1    | 1    |
| 25451  | 6     | 6      | 6      | 5    | 5    | 5    | 5    | 5    | 0    | 5    | 4    | 5    | 5    | 5    |
| 25469  | 3     | 2      | 3      |      |      |      |      |      |      |      |      |      |      |      |
| 25471  | 4     | 4      | 4      | 4    | 4    | 4    | 4    | 4    | 2    | 2    | 2    | 4    | 4    | 2    |
| 25476  | 4     | 4      | 5      |      |      |      |      |      |      |      |      |      |      |      |
| 25480  | 4     | 4      | 5      | 4    | 3    | 4    | 4    | 4    | 4    | 4    | 3    | 4    | 3    | 4    |
| 25482  | 4     | 4      | 5      |      |      |      |      |      |      |      |      |      |      |      |

| respid | Q46x4 | Q46x5a | Q46x5b | Q47a | Q47b | Q47c | Q47d | Q47e | Q47f | Q47g | Q47h | Q47i | Q47j | Q47k |
|--------|-------|--------|--------|------|------|------|------|------|------|------|------|------|------|------|
| 25500  | 3     | 4      | 3      | 4    | 4    | 4    | 4    | 4    | 4    | 3    | 4    | 3    | 3    | 3    |
| 25516  | 5     | 5      | 5      | 4    | 5    | 5    | 5    | 5    | 5    | 1    | 5    | 3    | 5    | 5    |
| 25521  | 4     | 4      | 4      | 2    | 3    | 3    | 3    | 3    | 3    | 2    | 2    | 2    | 3    | 3    |
| 25525  | 6     | 6      | 6      | 2    | 2    | 2    | 2    | 2    | 2    | 1    | 2    | 2    | 1    | 2    |
| 25530  | 5     | 4      | 2      | 0    | 2    | 2    | 2    | 2    | 2    | 1    | 2    | 1    | 2    | 2    |
| 25555  | 4     | 4      | 4      | 4    | 4    | 4    | 4    | 4    | 5    | 4    | 4    | 4    | 4    | 4    |
| 25558  | 4     | 4      | 5      |      |      |      |      |      |      |      |      |      |      |      |
| 25561  | 4     | 3      | 3      |      |      |      |      |      |      |      |      |      |      |      |
| 25566  |       |        |        |      |      |      |      |      |      |      |      |      |      |      |
| 25571  | 3     | 4      | 3      |      |      |      |      |      |      |      |      |      |      |      |
| 25572  | 5     | 5      | 5      | 0    | 0    | 0    | 0    | 0    | 0    | 0    | 0    | 0    | 0    | 1    |
| 25574  |       |        |        |      |      |      |      |      |      |      |      |      |      | 1    |
| 25588  | 6     | 6      | 6      |      |      |      |      |      |      |      |      |      |      |      |
| 25591  | 5     | 5      | 5      |      |      |      |      |      |      |      |      |      |      |      |
| 25599  | 4     | 2      | 2      |      |      |      |      |      |      |      |      |      |      |      |
| 25604  | 6     | 6      | 6      | 0    | 0    | 0    | 0    | 0    | 0    | 0    | 0    | 0    | 0    | 1    |
| 25614  | 5     | 4      | 5      |      |      |      |      |      |      |      |      |      |      | 1    |
| 25634  | 3     | 2      | 3      | 2    | 3    | 3    | 3    | 3    | 3    | 1    | 3    | 2    | 2    | 3    |
| 25642  | 5     | 5      | 5      | 5    | 5    | 5    | 5    | 5    | 5    | 0    | 4    | 5    | 5    | 5    |
| 25647  | 4     | 4      | 4      | 3    | 3    | 3    | 3    | 3    | 4    | 3    | 4    | 4    | 4    | 4    |
| 25653  | 5     | 5      | 4      | 3    | 5    | 4    | 4    | 4    | 5    | 1    | 3    | 3    | 3    | 3    |
| 25654  | 5     | 4      | 5      |      |      |      |      |      |      |      |      |      |      | 4    |
| 25660  | 6     | 6      | 6      | 5    | 5    | 5    | 5    | 5    | 5    | 3    | 5    | 4    | 5    | 5    |
| 25664  | 6     | 6      | 6      | 1    | 1    | 1    | 5    | 5    | 5    | 0    | 4    | 3    | 4    | 4    |
| 25665  | 5     | 5      | 5      | 4    | 5    | 5    | 5    | 5    | 5    | 4    | 4    | 5    | 5    | 5    |
| 25672  | 6     | 6      | 6      | 1    | 1    | 1    | 1    | 1    | 0    | 0    | 1    | 0    | 1    | 1    |
| 25677  | 1     | 1      | 1      | 1    | 0    | 1    | 1    | 1    | 1    | 1    | 1    | 1    | 1    | 1    |
| 25685  | 5     | 5      | 5      | 2    | 2    | 2    | 2    | 2    | 2    | 1    | 2    | 2    | 2    | 2    |
| 25699  | 4     | 4      | 4      | 4    | 4    | 4    | 4    | 4    | 5    | 1    | 4    | 3    | 4    | 4    |
| 25703  | 5     | 5      | 5      | 5    | 5    | 5    | 5    | 5    | 5    | 3    | 4    | 3    | 5    | 4    |
| 25704  | 5     | 4      | 4      | 3    | 3    | 3    | 3    | 3    | 2    | 2    | 3    | 3    | 3    | 3    |
| 25705  | 4     | 4      | 4      | 4    | 4    | 4    | 4    | 4    | 4    | 3    | 4    | 3    | 5    | 2    |

| respid | Q46x4 | Q46x5a | Q46x5b | Q47a | Q47b | Q47c | Q47d | Q47e | Q47f | Q47g | Q47h | Q47i | Q47j | Q47k |
|--------|-------|--------|--------|------|------|------|------|------|------|------|------|------|------|------|
| 25711  | 5     | 5      | 5      |      |      |      |      |      |      |      |      |      |      |      |
| 25727  | 5     | 6      | 6      |      | 1    | 2    | 1    | 1    | 1    | 1    | 1    | 1    | 2    | 3    |
| 25728  | 5     | 5      | 5      | 5    | 4    | 5    | 5    | 5    | 1    | 3    | 3    | 4    | 2    | 3    |
| 25733  | 4     | 4      | 4      | 4    | 4    | 5    | 4    | 4    | 3    | 3    | 3    | 5    | 4    | 4    |
| 25735  | 5     | 5      | 5      |      |      |      |      |      |      |      |      |      |      |      |
| 25736  | 6     | 6      | 6      |      |      |      |      |      |      |      |      |      |      |      |
| 25742  | 4     | 5      | 5      |      |      |      |      |      |      |      |      |      |      |      |
| 25750  | 6     | 6      | 6      | 5    | 4    | 5    | 4    | 5    | 1    | 4    | 3    | 4    | 4    | 4    |
| 25754  |       |        |        |      |      |      |      |      |      |      |      |      |      |      |
| 25776  | 2     | 2      | 3      |      |      |      |      |      |      |      |      |      |      |      |
| 25778  |       |        |        |      |      |      |      |      |      |      |      |      |      |      |
| 25796  | 6     | 6      | 6      |      |      |      |      |      |      |      |      |      |      |      |
| 25852  | 4     | 5      | 4      |      |      |      |      |      |      |      |      |      |      |      |
| 25858  | 6     | 6      | 6      |      |      |      |      |      |      |      |      |      |      |      |
| 25859  |       |        |        |      |      |      |      |      |      |      |      |      |      |      |
| 25886  | 4     | 4      | 4      | 4    | 4    | 4    | 4    | 5    | 3    | 3    | 3    | 4    | 4    | 4    |
| 25890  | 4     | 4      | 4      | 4    | 4    | 4    | 5    | 4    | 4    | 4    | 4    | 3    | 4    | 4    |
| 25897  | 6     | 6      | 6      | 2    | 2    | 2    | 2    | 3    |      | 2    | 2    | 2    | 3    | 3    |
| 25903  | 5     | 5      | 5      |      |      |      |      |      |      |      |      |      |      |      |
| 25905  | 4     | 4      | 4      |      |      |      |      |      |      |      |      |      |      |      |
| 25917  |       |        |        |      |      |      |      |      |      |      |      |      |      |      |
| 25918  | 5     | 5      | 5      |      |      |      |      |      |      |      |      |      |      |      |
| 25928  | 5     | 4      | 4      | 4    | 4    | 4    | 4    | 4    |      | 4    | 3    | 5    | 5    | 3    |
| 25930  |       |        |        |      |      |      |      |      |      |      |      |      |      |      |
| 25949  | 5     | 5      | 5      |      |      |      |      |      |      |      |      |      |      |      |
| 25955  | 6     | 6      | 6      |      |      |      |      |      |      |      |      |      |      |      |
| 25959  | 6     | 6      | 6      |      |      |      |      |      |      |      |      |      |      |      |
| 25964  | 5     | 5      | 4      | 1    | 1    | 1    | 1    | 0    | 0    | 0    | 0    | 0    | 2    | 2    |
| 25972  | 5     | 5      | 5      | 4    | 4    | 4    | 4    | 5    | 1    | 4    | 4    | 5    | 4    | 4    |
| 25999  | 4     | 3      | 3      |      |      |      |      |      |      |      |      |      |      |      |
| 26019  | 6     | 6      | 6      |      |      |      |      |      |      |      |      |      |      |      |
| 26025  | 5     | 5      | 5      |      |      |      |      |      |      |      |      |      |      |      |

| respid | Q46x4 | Q46x5a | Q46x5b | Q47a | Q47b | Q47c | Q47d | Q47e | Q47f | Q47g | Q47h | Q47i | Q47j | Q47k |
|--------|-------|--------|--------|------|------|------|------|------|------|------|------|------|------|------|
| 26039  | 4     | 3      | 4      |      |      | 3    |      |      | 4    |      | 2    | 3    | 3    | 3    |
| 26055  | 5     | 5      | 5      |      |      |      |      |      |      |      |      |      |      |      |
| 26061  | 4     | 4      | 4      |      |      |      |      |      |      |      |      |      |      |      |
| 26076  | 6     | 6      | 6      |      |      |      | 5    | 5    | 1    | 5    | 5    | 5    | 5    | 5    |
| 26088  | 5     | 6      | 6      | 3    | 2    | 1    | 3    | 3    | 1    | 1    | 2    | 3    | 2    | 2    |
| 26094  |       |        |        |      |      |      |      |      |      |      |      |      |      |      |
| 26104  | 1     | 3      | 3      |      |      |      |      |      |      |      |      |      |      |      |
| 26131  | 5     | 5      | 5      | 5    | 5    | 5    | 5    | 5    | 3    | 5    | 4    | 4    | 4    | 4    |
| 26134  | 4     | 4      | 4      | 2    |      | 2    | 2    | 4    | 1    | 2    | 1    | 2    | 1    | 3    |
| 26160  | 5     | 5      | 4      | 3    | 2    | 3    | 3    | 4    | 1    | 2    | 2    | 4    | 2    | 3    |
| 26168  | 6     | 6      | 6      | 4    | 4    | 4    | 4    | 5    | 4    | 5    | 4    | 4    | 4    | 4    |
| 26170  |       |        |        |      |      |      |      |      |      |      |      |      |      |      |
| 26191  | 3     | 3      | 2      |      |      |      |      |      |      |      |      |      |      |      |
| 26192  |       |        |        |      |      |      |      |      |      |      |      |      |      |      |
| 26195  | 4     | 4      | 4      | 4    | 4    | 4    | 4    | 4    | 3    | 4    | 3    | 4    | 4    | 4    |
| 26198  | 6     | 6      | 6      |      |      |      |      |      |      |      |      |      |      |      |
| 26199  | 5     | 5      | 4      |      |      |      |      |      |      |      |      |      |      |      |
| 26201  |       |        |        |      |      |      |      |      |      |      |      |      |      |      |
| 26202  | 5     | 5      | 4      | 0    | 0    | 0    | 0    | 0    | 0    | 0    | 0    | 0    | 1    | 1    |
| 26226  | 4     | 4      | 4      |      |      |      |      |      |      |      |      |      |      |      |
| 26233  | 5     | 4      | 4      |      |      |      |      |      |      |      |      |      |      |      |
| 26236  | 5     | 5      | 5      |      |      |      |      |      |      |      |      |      |      |      |
| 26242  | 5     | 5      | 5      |      |      |      |      |      |      |      |      |      |      |      |
| 26244  | 5     | 5      | 5      | 5    | 5    | 5    | 5    | 5    | 4    | 5    | 5    | 5    | 5    | 5    |
| 26250  | 3     | 4      | 4      |      |      |      |      |      |      |      |      |      |      |      |
| 26266  | 5     | 5      | 6      |      |      |      |      |      |      |      |      |      |      |      |
| 26274  | 5     | 4      | 5      | 3    | 3    | 4    | 3    | 4    | 2    | 3    | 3    | 2    | 3    | 3    |
| 26286  | 4     | 4      | 4      |      |      |      |      |      |      |      |      |      |      |      |
| 26288  | 5     | 5      | 5      |      |      |      |      |      |      |      |      |      |      |      |
| 26295  |       |        |        |      |      |      |      |      |      |      |      |      |      |      |
| 26296  | 5     | 5      | 5      | 5    | 5    | 5    | 5    | 5    | 1    | 5    | 5    | 5    | 5    | 5    |
| 26297  |       |        |        |      |      |      |      |      |      |      |      |      |      |      |

| respid | Q46x4 | Q46x5a | Q46x5b | Q47a | Q47b | Q47c | Q47d | Q47e | Q47f | Q47g | Q47h | Q47i | Q47j | Q47k |
|--------|-------|--------|--------|------|------|------|------|------|------|------|------|------|------|------|
| 26300  | 4     | 4      | 4      |      |      |      |      |      |      |      |      |      |      |      |
| 26317  | 6     | 6      | 6      |      |      |      |      |      |      |      |      |      |      |      |
| 26343  |       |        |        |      |      |      |      |      |      |      |      |      |      |      |
| 26367  | 6     | 6      | 6      |      |      |      |      |      |      |      |      |      |      |      |
| 26372  | 4     | 5      | 4      | 1    | 2    | 1    | 1    | 1    | 2    | 1    | 2    | 2    | 3    | 2    |
| 26403  | 4     | 4      | 4      |      |      |      |      |      |      |      |      |      |      |      |
| 26423  | 6     | 6      | 6      | 5    | 5    | 5    | 5    | 5    | 5    | 4    | 4    | 5    | 4    | 4    |
| 26430  | 5     | 5      | 5      | 0    | 0    | 0    | 0    | 0    | 0    | 0    | 0    | 0    | 0    | 0    |
| 26437  | 4     | 3      | 4      | 3    | 2    | 3    | 3    | 4    | 1    | 2    | 2    | 2    | 2    | 2    |
| 26457  |       |        |        |      |      |      |      |      |      |      |      |      |      |      |
| 26466  | 6     | 6      | 6      | 5    | 5    | 5    | 5    | 5    | 5    | 5    | 5    | 5    | 5    | 5    |
| 26467  | 5     | 5      | 5      |      |      |      |      |      |      |      |      |      |      |      |
| 26469  | 5     | 5      | 5      |      |      |      |      |      |      |      |      |      |      |      |
| 26494  | 5     | 4      | 2      |      |      |      |      |      |      |      |      |      |      |      |
| 26510  | 5     | 4      | 4      |      |      |      |      |      |      |      |      |      |      |      |
| 26519  | 5     | 5      | 5      |      |      |      |      |      |      |      |      |      |      |      |
| 26525  | 6     | 6      | 6      |      |      |      |      |      |      |      |      |      |      |      |
| 26529  |       |        |        |      |      |      |      |      |      |      |      |      |      |      |
| 26533  | 6     | 6      | 6      | 5    | 5    | 5    | 5    | 5    | 0    | 0    | 0    | 0    | 1    | 1    |
| 26556  | 5     | 5      | 5      |      |      |      |      |      |      |      |      |      |      |      |
| 26559  | 5     | 4      | 4      |      |      |      |      |      |      |      |      |      |      |      |
| 26565  | 4     | 4      | 3      | 1    | 1    | 2    | 1    | 3    | 1    | 1    | 2    | 2    | 2    | 2    |
| 26576  | 5     | 5      | 5      | 3    | 2    | 3    | 3    | 3    | 2    | 2    | 2    | 3    | 3    | 4    |
| 26601  |       |        |        |      |      |      |      |      |      |      |      |      |      |      |
| 26607  | 4     | 4      | 3      |      |      |      |      |      |      |      |      |      |      |      |
| 26611  | 6     | 5      | 3      |      |      |      |      |      |      |      |      |      |      |      |
| 26619  | 6     | 4      | 5      |      |      |      |      |      |      |      |      |      |      |      |
| 26631  | 6     | 6      | 6      | 5    | 5    | 5    | 5    | 5    | 2    | 5    | 3    | 5    | 5    | 5    |
| 26654  | 5     | 4      | 5      | 3    | 2    | 4    | 4    | 4    | 3    | 3    | 3    | 3    | 3    | 3    |
| 26656  | 4     | 4      | 4      |      |      |      |      |      |      |      |      |      |      |      |
| 26664  |       |        |        |      |      |      |      |      |      |      |      |      |      |      |
| 26667  | 5     | 5      | 5      | 0    | 0    | 0    | 0    | 0    | 0    | 0    | 0    | 0    | 3    | 3    |

| respid | Q46x4 | Q46x5a | Q46x5b | Q47a | Q47b | Q47c | Q47d | Q47e | Q47f | Q47g | Q47h | Q47i | Q47j | Q47k |
|--------|-------|--------|--------|------|------|------|------|------|------|------|------|------|------|------|
| 26674  | 3     | 4      | 3      |      |      |      |      |      |      |      |      |      |      |      |
| 26678  | 6     | 6      | 6      | 5    | 5    | 5    | 5    | 5    | 1    | 5    | 5    | 5    | 5    | 2    |
| 26693  | 6     | 6      | 6      | 3    | 3    |      |      |      |      |      |      |      |      |      |
| 26696  | 3     | 3      | 2      |      |      |      |      |      |      |      |      |      |      |      |
| 26703  | 3     | 3      | 3      |      |      |      |      |      |      |      |      |      |      |      |
| 26705  | 3     | 3      | 2      |      |      |      |      |      |      |      |      |      |      |      |
| 26706  | 4     | 3      | 4      | 2    | 2    | 4    | 3    | 5    | 1    | 3    | 2    | 5    | 3    | 4    |
| 26716  | 4     | 5      | 5      |      |      |      |      |      |      |      |      |      |      |      |
| 26721  | 5     | 4      | 4      |      |      |      |      |      |      |      |      |      |      |      |
| 26730  | 5     | 5      | 5      |      |      |      |      |      |      |      |      |      |      |      |
| 26752  | 5     | 6      | 6      |      |      |      |      |      |      |      |      |      |      |      |
| 26755  | 5     | 5      | 5      |      |      |      |      |      |      |      |      |      |      |      |
| 26791  | 4     | 4      | 4      | 1    | 1    |      | 1    | 5    | 3    | 3    | 3    | 5    |      | 5    |
| 26804  | 6     | 6      | 6      | 2    | 2    | 2    | 2    | 5    | 1    | 2    | 2    | 2    | 3    | 3    |
| 26810  | 2     | 3      | 2      |      |      |      |      |      |      |      |      |      |      |      |
| 26813  | 4     | 4      | 4      | 3    | 3    | 3    | 4    | 4    | 2    | 3    | 3    | 3    | 3    | 3    |
| 26833  | 4     | 4      | 4      |      |      |      |      |      |      |      |      |      |      |      |
| 26880  | 4     | 5      | 5      |      |      |      |      |      |      |      |      |      |      |      |
| 26884  | 4     | 4      | 5      |      |      |      |      |      |      |      |      |      |      |      |
| 26885  | 4     | 4      | 4      | 3    | 3    | 3    | 3    | 4    | 3    | 4    | 4    | 4    | 4    | 4    |
| 26890  | 6     | 6      | 6      | 0    | 0    | 0    | 0    | 0    | 0    | 0    | 0    | 0    |      | 1    |
| 26937  | 4     | 4      | 5      |      |      |      |      |      |      |      |      |      |      |      |
| 26939  | 4     | 5      | 5      |      |      |      |      |      |      |      |      |      |      |      |
| 26941  |       |        |        |      |      |      |      |      |      |      |      |      |      |      |
| 26992  | 3     | 6      | 6      |      |      |      |      |      |      |      |      |      |      |      |
| 27037  | 6     | 5      | 5      |      |      |      |      |      |      |      |      |      |      |      |
| 27045  | 4     | 4      | 4      |      |      |      |      |      |      |      |      |      |      |      |
| 27053  | 3     | 3      | 6      |      |      |      |      |      |      |      |      |      |      |      |
| 27060  | 4     | 4      | 4      |      |      |      |      |      |      |      |      |      |      |      |
| 27076  | 5     | 5      | 4      |      |      |      |      |      |      |      |      |      |      |      |
| 27124  | 5     | 5      | 5      |      |      |      |      |      |      |      |      |      |      |      |
| 27125  | 3     | 3      | 3      | 4    | 4    | 4    | 4    | 4    | 4    | 4    | 3    | 4    | 4    | 4    |

| respid | Q46x4 | Q46x5a | Q46x5b | Q47a | Q47b | Q47c | Q47d | Q47e | Q47f | Q47g | Q47h | Q47i | Q47j | Q47k |
|--------|-------|--------|--------|------|------|------|------|------|------|------|------|------|------|------|
| 27132  | 5     | 5      | 5      | 5    | 5    | 5    | 5    | 5    | 5    | 1    | 5    | 5    | 5    | 5    |
| 27166  | 5     | 5      | 5      |      |      |      |      |      |      |      |      |      |      |      |
| 27190  | 2     | 3      | 1      | 1    | 1    | 0    | 0    | 3    | 1    | 1    | 1    | 2    | 1    | 2    |
| 27199  | 5     | 6      | 6      | 2    | 2    | 2    | 2    | 3    | 2    | 1    | 2    | 2    | 1    | 3    |
| 27221  | 4     | 4      | 4      |      |      |      |      |      |      |      |      |      |      |      |
| 27233  | 5     | 5      | 5      |      |      |      |      |      |      |      |      |      |      |      |
| 27241  | 4     | 4      | 4      |      |      |      |      |      |      |      |      |      |      |      |
| 27244  | 5     | 5      | 4      | 4    | 5    | 4    | 4    | 5    | 2    | 4    | 3    | 5    | 5    | 4    |
| 27245  | 3     | 3      | 3      |      |      |      |      |      |      |      |      |      |      |      |
| 27246  | 4     | 5      | 5      |      |      |      |      |      |      |      |      |      |      |      |
| 27253  | 4     | 4      | 4      | 4    | 4    | 4    | 4    | 5    | 2    | 4    | 4    | 4    | 4    | 3    |
| 27255  | 4     | 3      | 3      |      |      |      |      |      |      |      |      |      |      |      |
| 27267  | 5     | 5      | 5      | 4    | 4    | 4    | 4    | 5    | 1    | 4    | 3    | 3    | 4    | 4    |
| 27283  | 5     | 5      | 4      |      |      |      |      |      |      |      |      |      |      |      |
| 27289  | 3     | 3      | 4      |      |      |      |      |      |      |      |      |      |      |      |
| 27302  | 5     | 5      | 5      |      |      |      |      |      |      |      |      |      |      |      |
| 27317  | 5     | 5      | 5      |      |      |      |      |      |      |      |      |      |      |      |
| 27319  | 6     | 5      | 5      |      |      |      |      |      |      |      |      |      |      |      |
| 27331  | 4     | 4      | 4      |      |      |      |      |      |      |      |      |      |      |      |
| 27333  | 5     | 4      | 4      | 2    | 2    | 3    | 2    | 3    | 2    | 2    | 2    | 3    | 3    | 2    |
| 27340  |       |        |        |      |      |      |      |      |      |      |      |      |      |      |
| 27362  | 4     | 3      | 2      | 2    | 3    | 2    | 2    | 2    | 1    | 1    | 2    | 2    | 3    | 2    |
| 27370  | 6     | 6      | 6      |      |      |      |      |      |      |      |      |      |      |      |
| 27379  | 6     | 6      | 6      |      |      |      |      |      |      |      |      |      |      |      |
| 27386  |       |        |        |      |      |      |      |      |      |      |      |      |      |      |
| 27398  | 5     | 5      | 5      |      |      |      |      |      |      |      |      |      |      |      |
| 27404  | 5     | 5      | 5      |      |      |      |      |      |      |      |      |      |      |      |
| 27408  | 5     | 4      | 4      |      |      |      |      |      |      |      |      |      |      |      |
| 27412  | 3     | 3      | 3      |      |      |      |      |      |      |      |      |      |      |      |
| 27426  | 5     | 4      | 4      |      |      |      |      |      |      |      |      |      |      |      |
| 27455  | 5     | 5      | 5      |      |      |      |      |      |      |      |      |      |      |      |
| 27464  | 4     | 4      | 4      | 2    | 2    | 4    | 4    | 4    | 1    | 3    | 2    | 2    | 3    | 2    |

| respid | Q46x4 | Q46x5a | Q46x5b | Q47a | Q47b | Q47c | Q47d | Q47e | Q47f | Q47g | Q47h | Q47i | Q47j | Q47k |
|--------|-------|--------|--------|------|------|------|------|------|------|------|------|------|------|------|
| 27484  | 5     | 4      | 4      | 0    | 0    | 0    | 0    | 0    | 0    |      |      |      |      |      |
| 27493  | 4     | 3      | 3      |      |      |      |      |      |      |      |      |      |      |      |
| 27512  | 4     | 3      | 4      | 2    | 1    | 2    | 1    | 2    | 2    | 2    | 2    | 1    | 2    | 2    |
| 27525  | 4     | 5      | 5      | 3    | 3    | 4    | 3    | 3    |      |      |      |      |      |      |
| 27532  | 6     | 6      | 6      |      |      |      |      |      |      |      |      |      |      |      |
| 27539  | 4     | 4      | 4      |      |      |      |      |      |      |      |      |      |      |      |
| 27540  | 5     | 6      | 5      | 3    | 4    | 3    | 4    | 4    | 2    | 2    | 3    | 3    | 4    | 3    |
| 27552  | 4     | 4      | 3      | 2    | 2    | 2    | 3    | 3    | 3    | 3    | 3    | 2    | 3    | 4    |
| 27562  | 5     | 5      | 5      |      |      |      |      |      |      |      |      |      |      |      |
| 27568  | 5     | 5      | 5      |      |      |      |      |      |      |      |      |      |      |      |
| 27574  | 3     | 3      | 3      | 2    | 2    | 2    | 2    | 2    | 2    | 2    | 2    | 2    | 2    | 2    |
| 27575  | 6     | 4      | 5      |      |      |      |      |      |      |      |      |      |      |      |
| 27577  | 4     | 4      | 4      | 3    | 3    | 2    | 3    | 4    | 2    | 2    | 3    | 3    | 2    | 3    |
| 27589  | 5     | 4      | 4      |      |      |      |      |      |      |      |      |      |      |      |
| 27593  | 6     | 6      | 6      |      |      |      |      |      |      |      |      |      |      |      |
| 27594  | 3     | 3      | 3      | 2    | 4    | 4    | 4    | 4    | 3    | 3    | 2    | 2    | 2    | 3    |
| 27595  | 3     | 4      | 5      |      |      |      |      |      |      |      |      |      |      |      |
| 27598  | 6     | 6      | 6      |      |      |      |      |      |      |      |      |      |      |      |
| 27620  | 3     | 4      | 5      | 4    | 1    | 3    | 4    | 3    | 2    | 2    | 2    | 1    | 3    | 2    |
| 27621  | 6     | 6      | 6      |      |      |      |      |      |      |      |      |      |      |      |
| 27628  | 6     | 6      | 6      | 3    | 4    | 5    | 4    | 5    | 1    | 4    | 2    | 5    | 4    | 5    |
| 27633  | 4     | 4      | 4      |      |      |      |      |      |      |      |      |      |      |      |
| 27643  | 4     | 5      | 4      |      |      |      |      |      |      |      |      |      |      |      |
| 27644  | 3     | 4      | 4      | 3    | 2    | 3    | 3    | 3    | 3    | 3    | 2    | 2    | 3    | 3    |
| 27668  | 4     | 4      | 4      |      |      |      |      |      |      |      |      |      |      |      |
| 27681  | 5     | 5      | 5      | 2    | 2    | 2    |      |      |      |      |      |      |      |      |
| 27691  | 5     | 5      | 5      |      |      |      |      |      |      |      |      |      |      |      |
| 27693  | 4     | 1      | 3      | 2    | 1    | 2    | 2    | 1    |      | 3    | 2    | 2    | 2    |      |
| 27703  | 4     | 4      | 5      |      |      |      |      |      |      |      |      |      |      |      |
| 27708  | 4     | 3      | 4      |      |      |      |      |      |      |      |      |      |      |      |
| 27719  | 5     | 5      | 5      |      |      |      |      |      |      |      |      |      |      |      |
| 27720  | 5     | 5      | 5      |      |      |      |      |      |      |      |      |      |      |      |



| respid | Q46x4 | Q46x5a | Q46x5b | Q47a | Q47b | Q47c | Q47d | Q47e | Q47f | Q47g | Q47h | Q47i | Q47j | Q47k |
|--------|-------|--------|--------|------|------|------|------|------|------|------|------|------|------|------|
| 27723  | 5     | 5      | 5      |      |      |      |      |      |      |      |      |      |      |      |
| 27725  | 5     | 4      | 4      |      |      |      |      |      |      |      |      |      |      |      |
| 27734  | 4     | 4      | 4      |      |      |      |      |      |      |      |      |      |      |      |
| 27744  | 3     | 4      | 4      | 3    | 2    | 2    | 2    | 3    | 2    | 1    | 2    | 1    | 1    | 3    |
| 27749  | 3     | 4      | 4      | 3    | 2    | 3    | 4    | 4    | 2    | 2    | 3    | 4    | 3    | 4    |
| 27762  | 4     | 4      | 4      |      |      |      |      |      |      |      |      |      |      |      |
| 27808  | 3     | 3      | 4      |      |      |      |      |      |      |      |      |      |      |      |
| 27810  | 2     | 4      | 3      |      |      |      |      |      |      |      |      |      |      |      |
| 27812  | 5     | 5      | 5      | 0    | 0    | 0    | 0    | 0    | 0    |      | 0    | 0    | 1    | 1    |
| 27815  |       |        |        |      |      |      |      |      |      |      |      |      |      |      |
| 27818  | 5     | 5      | 5      |      |      |      |      |      |      |      |      |      |      |      |
| 27823  | 5     | 5      | 5      |      |      |      |      |      |      |      |      |      |      |      |
| 27841  | 3     | 3      | 3      |      |      |      |      |      |      |      |      |      |      |      |
| 27843  |       |        |        |      |      |      |      |      |      |      |      |      |      |      |
| 27851  | 6     | 6      | 6      |      |      |      |      |      |      |      |      |      |      |      |
| 27858  | 6     | 6      | 6      |      |      |      |      |      |      |      |      |      |      |      |
| 27859  | 6     | 6      | 6      | 0    | 0    | 0    | 0    | 0    | 0    | 0    | 0    | 0    | 1    | 2    |
| 27869  | 5     | 5      | 5      |      |      |      |      |      |      |      |      |      |      |      |
| 27872  | 6     | 6      | 6      | 4    | 3    | 4    | 4    | 5    |      |      |      |      |      |      |
| 27873  | 5     | 5      | 5      |      |      |      |      |      |      |      |      |      |      |      |
| 27884  | 5     | 4      | 4      |      |      |      |      |      |      |      |      |      |      |      |
| 27904  | 3     | 3      | 3      |      |      |      |      |      |      |      |      |      |      |      |
| 27915  | 5     | 4      | 4      | 2    | 2    | 2    | 2    | 3    | 3    | 2    | 2    | 2    | 2    | 3    |
| 27918  | 6     | 6      | 6      |      |      |      |      |      |      |      |      |      |      |      |
| 27937  | 2     | 2      | 4      |      |      |      |      |      |      |      |      |      |      |      |
| 27943  | 6     | 6      | 6      |      |      |      |      |      |      |      |      |      |      |      |
| 27948  | 5     | 6      | 6      |      |      |      |      |      |      |      |      |      |      |      |
| 27971  | 6     | 4      | 4      |      |      |      |      |      |      |      |      |      |      |      |
| 27991  | 6     | 6      | 6      |      |      |      |      |      |      |      |      |      |      |      |
| 28000  | 5     | 5      | 5      | 1    | 1    | 1    | 1    | 5    | 2    | 4    | 4    | 4    | 4    | 4    |
| 28011  | 6     | 6      | 6      |      |      |      |      |      |      |      |      |      |      |      |
| 28022  | 4     | 4      | 4      |      |      |      |      |      |      |      |      |      |      |      |

| respid | Q46x4 | Q46x5a | Q46x5b | Q47a | Q47b | Q47c | Q47d | Q47e | Q47f | Q47g | Q47h | Q47i | Q47j | Q47k |
|--------|-------|--------|--------|------|------|------|------|------|------|------|------|------|------|------|
| 28025  | 5     | 4      | 5      |      |      |      |      |      |      |      |      |      |      |      |
| 28041  | 5     | 5      | 5      | 0    | 5    | 5    | 5    | 5    | 0    | 0    | 0    | 0    | 5    | 2    |
| 28057  | 6     | 6      | 6      | 0    | 0    | 0    | 0    | 0    | 0    | 0    | 0    | 0    | 1    | 1    |
| 28080  |       |        |        |      |      |      |      |      |      |      |      |      |      |      |
| 28098  | 5     | 5      | 5      |      |      |      |      |      |      |      |      |      |      |      |
| 28104  | 6     | 6      | 6      |      |      |      |      |      |      |      |      |      |      |      |
| 28109  | 5     | 5      | 5      | 4    | 4    | 4    | 4    |      |      |      |      | 4    | 4    | 4    |
| 28129  | 4     | 2      | 2      |      |      |      |      |      |      |      |      |      |      |      |
| 28141  |       |        |        |      |      |      |      |      |      |      |      |      |      |      |
| 28143  | 5     | 5      | 5      | 5    | 5    | 4    | 5    | 4    | 1    | 4    | 3    | 3    | 3    | 4    |
| 28149  | 6     | 6      | 6      |      |      |      |      |      |      |      |      |      |      |      |
| 28151  | 3     | 4      | 4      |      |      |      |      |      |      |      |      |      |      |      |
| 28161  | 4     | 3      | 4      | 0    | 1    | 1    | 1    | 1    | 1    | 1    | 1    | 0    | 1    | 1    |
| 28169  | 5     | 5      | 5      | 5    | 5    | 5    | 5    | 4    | 3    | 5    | 4    | 3    | 4    | 4    |
| 28194  | 4     | 4      | 4      |      |      |      |      |      |      |      |      |      |      |      |
| 28197  |       |        |        |      |      |      |      |      |      |      |      |      |      |      |
| 28206  | 5     | 5      | 5      |      |      |      |      |      |      |      |      |      |      |      |
| 28218  | 5     | 5      | 5      | 4    | 3    | 4    | 3    | 5    | 2    | 3    | 3    | 3    | 3    | 3    |
| 28227  | 5     | 5      | 5      | 0    | 0    | 0    | 0    | 0    | 0    | 0    | 0    | 0    | 1    | 1    |
| 28235  | 5     | 5      | 5      |      |      |      |      |      |      |      |      |      |      |      |
| 28246  | 4     | 5      | 5      |      |      |      |      |      |      |      |      |      |      |      |
| 28259  | 5     | 4      | 5      |      |      |      |      |      |      |      |      |      |      |      |
| 28263  | 2     | 2      | 2      |      |      |      |      |      |      |      |      |      |      |      |
| 28267  | 4     | 4      | 4      | 4    | 4    | 4    | 4    | 4    | 1    | 2    | 2    | 2    | 2    | 2    |
| 28274  | 5     | 5      | 5      | 5    | 5    | 5    | 5    | 5    | 5    | 5    | 4    | 5    | 5    | 5    |
| 28278  | 6     | 6      | 6      |      |      |      |      |      |      |      |      |      |      |      |
| 28288  | 6     | 6      | 6      |      |      |      |      |      |      |      |      |      |      |      |
| 28308  |       |        |        |      |      |      |      |      |      |      |      |      |      |      |
| 28309  | 4     | 4      | 4      |      |      |      |      |      |      |      |      |      |      |      |
| 28323  | 5     | 5      | 5      |      |      |      |      |      |      |      |      |      |      |      |
| 28335  | 3     | 5      | 4      | 2    | 1    | 3    | 2    | 2    | 2    | 2    | 2    | 2    | 3    | 3    |
| 28354  | 4     | 3      | 2      | 3    | 2    | 2    | 2    | 2    | 2    | 3    | 2    | 2    | 3    | 2    |

| respid | Q46x4 | Q46x5a | Q46x5b | Q47a | Q47b | Q47c | Q47d | Q47e | Q47f | Q47g | Q47h | Q47i | Q47j | Q47k |
|--------|-------|--------|--------|------|------|------|------|------|------|------|------|------|------|------|
| 28355  | 4     | 3      | 4      | 1    | 1    | 1    | 0    | 2    | 0    |      | 0    | 0    |      | 2    |
| 28356  | 2     | 6      | 6      | 4    | 4    | 4    | 2    | 2    | 1    | 1    | 2    | 5    | 2    | 3    |
| 28357  | 5     | 5      | 5      | 5    | 4    | 0    | 5    | 5    | 5    | 5    | 5    | 5    | 5    | 4    |
| 28363  | 5     | 5      | 5      | 0    | 0    | 0    | 0    | 0    | 0    | 0    | 0    | 0    | 0    | 1    |
| 28366  | 5     | 5      | 5      | 0    | 0    | 0    | 0    | 0    | 0    | 0    | 0    | 0    | 0    | 1    |
| 28372  | 4     | 4      | 4      |      |      |      |      |      |      |      |      |      |      |      |
| 28381  | 6     | 6      | 6      |      |      |      |      |      |      |      |      |      |      |      |
| 28388  | 4     | 5      | 5      | 0    | 0    |      |      |      |      |      |      |      |      |      |
| 28413  | 3     | 3      | 2      | 1    | 2    | 2    | 2    | 2    | 2    | 2    | 2    | 2    | 2    | 3    |
| 28421  | 6     | 6      | 6      | 4    | 4    | 4    | 4    | 5    | 1    | 4    | 3    | 4    | 3    | 3    |
| 28430  | 3     | 3      | 3      | 1    | 3    | 2    | 2    | 2    | 1    | 2    | 1    | 3    | 3    | 2    |
| 28439  | 2     | 2      | 2      | 3    | 2    | 2    | 2    | 1    | 2    | 1    | 1    | 2    | 3    | 2    |
| 28458  | 3     | 3      | 4      |      |      |      |      |      |      |      |      |      |      |      |
| 28461  | 5     | 5      | 5      | 5    | 5    | 5    | 5    | 5    | 2    | 4    | 3    | 4    | 4    | 3    |
| 28466  | 6     | 6      | 6      |      |      |      |      |      |      |      |      |      |      |      |
| 28492  | 5     | 5      | 5      | 4    | 4    | 4    | 4    | 5    | 3    | 4    | 4    | 5    | 5    | 4    |
| 28534  |       |        |        |      |      |      |      |      |      |      |      |      |      |      |
| 28537  | 4     | 4      | 4      | 1    | 1    | 1    | 1    | 2    | 0    | 1    | 1    | 1    | 2    | 2    |
| 28560  | 5     | 5      | 5      | 3    | 3    | 3    | 3    | 4    | 1    | 3    | 3    | 3    | 3    | 3    |
| 28566  | 6     | 6      | 6      |      |      |      |      |      |      |      |      |      |      |      |
| 28569  | 6     | 6      | 6      | 3    | 3    | 3    | 3    | 4    | 2    | 3    | 3    | 3    | 3    | 3    |
| 28584  | 3     | 4      | 4      | 0    | 0    | 0    | 0    | 2    | 0    | 0    | 0    | 0    | 0    | 1    |
| 28590  | 5     | 5      | 5      | 0    | 0    | 0    | 2    | 0    | 0    | 0    | 0    | 0    | 0    | 2    |
| 28596  |       |        |        |      |      |      |      |      |      |      |      |      |      |      |
| 28608  | 5     | 4      | 4      | 4    | 4    | 4    | 4    | 4    | 3    | 3    | 4    | 3    | 3    | 3    |
| 28631  | 3     | 4      | 4      |      |      |      |      |      |      |      |      |      |      |      |
| 28644  | 5     | 5      | 5      |      |      |      |      |      |      |      |      |      |      |      |
| 28646  | 5     | 5      | 5      |      |      |      |      |      |      |      |      |      |      |      |
| 28665  |       |        |        |      |      |      |      |      |      |      |      |      |      |      |
| 28686  | 5     | 5      | 5      | 4    | 4    | 4    | 4    | 5    | 1    | 4    | 3    | 4    | 4    | 3    |
| 28704  | 3     | 4      | 3      |      |      |      |      |      |      |      |      |      |      |      |
| 28719  | 5     | 5      | 5      | 5    | 4    | 4    | 5    | 5    | 4    | 5    | 4    | 5    | 5    | 4    |

| respid | Q46x4 | Q46x5a | Q46x5b | Q47a | Q47b | Q47c | Q47d | Q47e | Q47f | Q47g | Q47h | Q47i | Q47j | Q47k |
|--------|-------|--------|--------|------|------|------|------|------|------|------|------|------|------|------|
| 28736  | 5     | 5      | 5      | 4    | 4    | 4    | 4    | 5    | 3    | 2    | 3    | 5    | 5    | 5    |
| 28739  | 4     | 4      | 4      | 3    | 2    | 3    | 3    | 4    | 2    | 3    | 3    | 3    | 3    | 3    |
| 28758  | 6     | 6      | 6      |      |      |      |      |      |      |      |      |      |      |      |
| 28761  | 2     | 4      | 2      |      |      |      |      |      |      |      |      |      |      |      |
| 28770  | 4     | 3      | 4      |      |      |      |      |      |      |      |      |      |      |      |
| 28774  | 5     | 5      | 5      |      |      |      |      |      |      |      |      |      |      |      |
| 28778  | 4     | 3      | 4      | 3    | 2    | 3    | 3    | 3    | 2    | 2    | 3    | 3    | 2    | 3    |
| 28783  | 4     | 4      | 4      | 2    | 2    | 2    | 3    | 4    | 1    | 2    | 3    | 4    | 4    | 3    |
| 28785  | 5     | 5      | 5      | 5    | 5    | 5    | 5    | 5    | 2    | 5    | 4    | 5    | 5    | 5    |
| 28797  | 6     | 6      | 6      | 1    | 1    | 0    | 0    | 0    | 0    | 0    | 0    | 2    | 1    | 2    |
| 28801  | 5     | 4      | 5      | 0    | 0    | 0    | 0    | 0    | 0    | 0    | 0    | 0    | 1    | 1    |
| 28821  |       |        |        |      |      |      |      |      |      |      |      |      |      |      |
| 28827  | 6     | 6      | 6      | 4    | 5    | 5    | 5    | 5    | 3    | 5    | 3    | 5    | 5    | 5    |
| 28828  | 5     | 5      | 5      |      |      |      |      |      |      |      |      |      |      |      |
| 28871  | 6     | 6      | 6      |      |      |      |      |      |      |      |      |      |      |      |
| 28876  | 5     | 5      | 4      | 3    | 3    | 3    | 2    | 4    | 2    | 2    | 2    | 2    | 3    | 3    |
| 28891  | 4     | 5      | 4      | 4    | 4    | 4    | 4    | 5    | 2    | 2    | 3    | 4    | 3    | 4    |
| 28898  |       |        |        |      |      |      |      |      |      |      |      |      |      |      |
| 28909  | 5     | 5      | 5      | 1    | 2    | 3    | 3    | 3    | 2    | 5    | 4    | 5    | 5    | 4    |
| 28930  | 5     | 5      | 4      |      |      |      |      |      |      |      |      |      |      |      |
| 28935  | 5     | 5      | 5      |      |      |      |      |      |      |      |      |      |      |      |
| 28964  | 5     | 5      | 5      | 3    | 2    | 2    | 2    | 4    | 1    | 2    | 2    | 3    | 2    | 2    |
| 28965  | 6     | 6      | 6      | 0    | 0    | 0    | 0    | 0    | 0    | 0    | 0    | 0    | 1    | 1    |
| 28967  | 4     | 3      | 4      | 4    | 4    | 4    | 4    | 4    | 3    | 4    | 3    | 4    | 4    | 3    |
| 28975  |       |        |        |      |      |      |      |      |      |      |      |      |      |      |
| 28982  | 4     | 4      | 4      | 4    | 4    | 3    | 3    | 4    | 3    | 4    | 4    | 3    | 3    | 4    |
| 28989  | 4     | 5      | 5      | 4    | 4    | 4    | 3    | 4    | 4    | 4    | 3    | 4    | 4    | 4    |
| 29003  | 5     | 6      | 6      | 4    | 4    | 4    | 4    | 5    | 2    | 4    | 3    | 4    | 4    | 4    |
| 29004  | 6     | 5      | 4      |      |      |      |      |      |      |      |      |      |      |      |
| 29007  | 6     | 6      | 6      |      |      |      |      |      |      |      |      |      |      |      |
| 29008  | 5     | 1      | 5      | 5    | 5    | 5    | 5    | 5    |      |      |      |      |      |      |
| 29011  | 4     | 4      | 4      |      |      |      |      |      |      |      |      |      |      |      |

| respid | Q46x4 | Q46x5a | Q46x5b | Q47a | Q47b | Q47c | Q47d | Q47e | Q47f | Q47g | Q47h | Q47i | Q47j | Q47k |   |
|--------|-------|--------|--------|------|------|------|------|------|------|------|------|------|------|------|---|
| 29012  | 4     | 4      | 4      | 5    | 5    | 5    | 5    | 5    | 5    | 5    | 4    | 3    | 5    | 5    | 5 |
| 29014  |       |        |        |      |      |      |      |      |      |      |      |      |      |      |   |
| 29016  | 5     | 5      | 4      |      |      |      |      |      |      |      |      |      |      |      |   |
| 29018  | 4     | 4      | 5      |      |      |      |      |      |      |      |      |      |      |      |   |
| 29048  | 5     | 5      | 5      |      |      |      |      |      |      |      |      |      |      |      |   |
| 29184  | 5     | 5      | 5      |      |      |      |      |      |      |      |      |      |      |      |   |
| 29237  | 5     | 5      | 5      |      |      |      |      |      |      |      |      |      |      |      |   |
| 29252  | 5     | 5      | 5      | 4    | 4    | 4    | 4    | 5    | 1    | 4    | 3    | 5    | 5    | 3    |   |
| 29267  | 5     | 6      | 6      | 0    | 0    | 0    | 0    | 0    | 0    | 0    | 0    | 0    | 0    | 1    | 1 |
| 29276  |       |        |        |      |      |      |      |      |      |      |      |      |      |      |   |
| 29281  | 6     | 6      | 6      |      |      |      |      |      |      |      |      |      |      |      |   |
| 29285  | 6     | 6      | 6      |      |      |      |      |      |      |      |      |      |      |      |   |
| 29291  | 3     | 3      | 2      |      |      |      |      |      |      |      |      |      |      |      |   |
| 29304  | 5     | 5      | 5      | 3    | 2    | 2    | 2    | 4    | 1    | 2    | 3    | 4    | 4    | 4    | 4 |
| 29323  | 5     | 5      | 5      |      |      |      |      |      |      |      |      |      |      |      |   |
| 29330  | 4     | 6      | 6      | 0    | 0    | 0    | 0    | 0    | 0    | 0    | 0    | 0    | 0    | 1    | 2 |
| 29357  | 4     | 3      | 4      | 4    | 4    | 4    | 4    | 5    | 2    | 4    | 4    | 5    | 4    | 4    | 4 |
| 29416  | 5     | 4      | 3      |      |      |      |      |      |      |      |      |      |      |      |   |
| 29432  | 4     | 4      | 4      | 4    | 4    | 4    | 4    | 4    | 3    | 4    | 4    | 4    | 4    | 4    | 4 |
| 29482  | 3     | 4      | 4      |      |      |      |      |      |      |      |      |      |      |      |   |
| 29506  | 4     | 5      | 4      |      |      |      |      |      |      |      |      |      |      |      |   |
| 29509  | 6     | 6      | 6      | 0    | 0    | 0    | 0    | 0    | 0    | 0    | 0    | 0    | 0    | 1    | 1 |
| 29512  | 4     | 4      | 4      |      |      |      |      |      |      |      |      |      |      |      |   |
| 29519  | 5     | 5      | 5      |      |      |      |      |      |      |      |      |      |      |      |   |
| 29520  | 4     | 4      | 4      |      |      |      |      |      |      |      |      |      |      |      |   |
| 29521  | 3     | 4      | 4      |      |      |      |      |      |      |      |      |      |      |      |   |
| 29529  | 3     | 3      | 3      |      |      |      |      |      |      |      |      |      |      |      |   |
| 29532  | 5     | 6      | 6      | 0    |      |      |      |      |      |      |      |      |      |      |   |
| 29547  | 5     | 5      | 4      |      |      |      |      |      |      |      |      |      |      |      |   |
| 29551  | 5     | 5      | 5      | 1    | 2    | 2    | 2    | 5    | 1    | 2    | 5    | 5    | 5    | 5    | 5 |
| 29584  | 4     | 3      | 2      | 2    | 3    | 3    | 2    | 3    | 2    | 2    | 2    | 2    | 2    | 2    | 2 |
| 29591  | 4     | 4      | 4      |      |      |      |      |      |      |      |      |      |      |      |   |

| respid | Q46x4 | Q46x5a | Q46x5b | Q47a | Q47b | Q47c | Q47d | Q47e | Q47f | Q47g | Q47h | Q47i | Q47j | Q47k |
|--------|-------|--------|--------|------|------|------|------|------|------|------|------|------|------|------|
| 29613  | 5     | 5      | 5      |      |      |      |      |      |      |      |      |      |      |      |
| 29615  | 5     | 6      | 6      |      |      |      |      |      |      |      |      |      |      |      |
| 29625  | 5     | 5      | 5      | 4    | 4    | 4    | 4    | 5    | 1    | 4    | 3    | 4    | 4    | 3    |
| 29660  | 5     | 6      | 5      |      |      |      |      |      |      |      |      |      |      |      |
| 29677  |       |        |        |      |      |      |      |      |      |      |      |      |      |      |
| 29700  | 4     | 5      | 4      | 0    | 1    | 2    | 2    | 1    | 1    | 1    | 2    | 2    | 2    | 3    |
| 29715  | 2     | 4      | 4      | 2    | 5    | 1    | 3    | 3    | 2    | 1    | 3    | 3    | 2    | 4    |
| 29720  |       |        |        |      |      |      |      |      |      |      |      |      |      |      |
| 29730  | 6     | 6      | 6      | 1    | 5    | 5    | 5    | 5    | 1    | 5    | 4    | 5    | 5    | 5    |
| 29734  | 6     | 6      | 6      |      |      |      |      |      |      |      |      |      |      |      |
| 29754  |       |        |        |      |      |      |      |      |      |      |      |      |      |      |
| 29771  | 5     | 3      | 4      | 3    | 3    | 4    | 4    | 4    | 1    | 2    | 2    | 4    | 3    | 3    |
| 29774  | 5     | 5      | 5      | 2    | 2    | 2    | 4    | 4    | 0    | 1    | 2    | 4    | 3    | 2    |
| 29783  | 5     | 5      | 5      |      |      |      |      |      |      |      |      |      |      |      |
| 29812  | 6     | 6      | 6      |      |      |      |      |      |      |      |      |      |      |      |
| 29813  | 4     | 5      | 5      | 1    | 1    | 1    | 0    | 0    | 0    | 0    | 0    | 0    | 1    | 1    |
| 29814  | 6     | 6      | 6      |      |      |      |      |      |      |      |      |      |      |      |
| 29820  | 4     | 4      | 4      | 2    | 4    | 4    | 4    | 4    | 2    | 4    | 3    | 4    | 4    | 3    |
| 29906  | 5     | 6      | 6      | 2    | 2    | 2    | 3    | 4    | 1    |      | 3    | 4    | 3    | 3    |
| 29907  | 4     | 4      | 4      |      |      |      |      |      |      |      |      |      |      |      |
| 29928  |       |        |        |      |      |      |      |      |      |      |      |      |      |      |
| 29932  | 5     | 4      | 4      |      |      |      |      |      |      |      |      |      |      |      |
| 29958  | 3     | 4      | 4      |      |      |      |      |      |      |      |      |      |      |      |
| 29982  | 5     | 5      | 5      | 1    | 4    | 4    | 4    | 4    | 1    | 3    | 3    | 2    | 3    | 3    |
| 29989  | 5     | 5      | 5      |      |      |      |      |      |      |      |      |      |      |      |
| 29994  | 6     | 6      | 6      | 0    | 0    | 0    |      |      |      |      |      |      |      |      |
| 30005  | 4     | 4      | 4      |      |      |      |      |      |      |      |      |      |      |      |
| 30077  | 6     | 6      | 6      | 0    | 0    | 0    | 0    | 0    | 0    | 0    | 0    | 0    | 1    | 1    |
| 30098  |       |        |        |      |      |      |      |      |      |      |      |      |      |      |
| 30107  | 6     | 6      | 6      |      |      |      |      |      |      |      |      |      |      |      |
| 30154  | 6     | 5      | 5      | 2    | 1    | 2    | 2    | 3    | 0    | 0    | 4    | 5    | 5    | 3    |
| 30159  | 5     | 5      | 5      | 5    | 5    | 5    | 5    | 5    | 2    | 5    | 4    | 5    | 5    | 5    |

| respid | Q46x4 | Q46x5a | Q46x5b | Q47a | Q47b | Q47c | Q47d | Q47e | Q47f | Q47g | Q47h | Q47i | Q47j | Q47k |
|--------|-------|--------|--------|------|------|------|------|------|------|------|------|------|------|------|
| 30162  | 5     | 5      | 3      |      |      |      |      |      |      |      |      |      | 3    | 4    |
| 30163  |       |        |        |      |      |      |      |      |      |      |      |      |      |      |
| 30189  | 4     | 3      | 4      |      |      |      |      |      |      |      |      |      |      |      |
| 30230  | 5     | 5      | 5      |      |      |      |      |      |      |      |      |      |      |      |
| 30259  | 3     | 4      | 3      | 3    | 2    | 3    | 2    | 2    | 2    | 2    | 1    | 2    | 2    | 3    |
| 30284  | 5     | 5      | 5      | 0    | 0    | 0    | 0    | 0    | 0    | 0    | 0    | 0    | 1    | 1    |
| 30296  | 6     | 6      | 6      |      |      |      |      |      |      |      |      |      |      |      |
| 30330  | 4     | 4      | 4      | 3    | 3    | 3    | 3    | 4    | 1    | 3    | 3    | 5    | 4    | 3    |
| 30341  | 5     | 5      | 5      |      |      |      |      |      |      |      |      |      |      |      |
| 30352  | 3     | 2      | 2      |      |      |      |      |      |      |      |      |      |      |      |
| 30379  | 6     | 6      | 6      | 5    | 5    | 5    | 5    | 1    | 5    | 5    | 3    | 5    | 5    | 5    |
| 30424  | 5     | 5      | 5      |      |      |      |      |      |      |      |      |      |      |      |
| 30447  | 6     | 6      | 6      | 5    | 5    | 5    | 5    | 5    | 0    | 4    | 4    | 5    | 5    | 5    |
| 30477  | 4     | 4      | 4      | 2    | 1    | 1    | 1    | 2    | 2    | 1    | 1    | 1    | 1    | 1    |
| 30503  | 5     | 5      | 5      | 1    | 1    | 1    | 1    | 0    | 1    | 1    | 1    | 1    | 1    | 1    |
| 30515  | 6     | 6      | 6      | 0    | 0    | 0    | 0    | 0    | 0    | 0    | 0    | 0    | 1    | 1    |
| 30516  | 5     | 5      | 5      |      |      |      |      |      |      |      |      |      |      |      |
| 30623  | 4     | 4      | 4      | 2    | 2    | 2    | 2    | 2    | 2    | 2    | 2    | 2    | 2    | 2    |
| 30639  | 1     | 5      | 4      | 0    | 0    | 0    | 0    | 0    | 0    | 0    | 0    | 0    | 1    | 1    |
| 30670  | 5     | 5      | 5      | 1    | 1    | 1    | 1    | 0    | 1    | 1    | 1    | 1    | 2    | 3    |
| 30697  | 5     | 5      | 5      | 5    | 5    | 5    | 5    | 5    | 4    | 5    | 4    | 5    | 5    |      |
| 30735  | 5     | 5      | 5      |      |      |      |      |      |      |      |      |      |      |      |
| 30742  | 6     | 6      | 6      | 5    | 5    | 5    |      | 5    | 5    | 4    | 5    | 5    | 5    | 5    |
| 30751  | 4     | 6      | 6      | 3    | 3    | 2    | 2    | 4    | 2    | 2    | 2    | 2    | 2    | 2    |
| 30789  |       |        |        |      |      |      |      |      |      |      |      |      |      |      |
| 30867  | 3     | 2      | 4      | 3    | 1    | 2    | 2    | 3    | 1    | 2    | 2    | 2    | 4    | 2    |
| 30876  | 5     | 5      | 5      |      |      |      |      |      |      |      |      |      |      |      |
| 30877  | 6     | 6      | 6      | 0    | 0    | 0    | 0    | 0    | 0    | 0    | 0    | 0    | 3    | 1    |
| 30887  | 4     | 4      | 4      | 0    | 0    | 0    | 0    | 0    | 0    | 0    | 0    | 0    | 1    | 1    |
| 30891  | 4     | 4      | 4      | 2    | 2    | 2    | 2    | 2    | 2    | 2    | 1    | 1    | 2    | 2    |
| 31030  | 6     | 6      | 6      |      |      |      |      |      |      |      |      |      |      |      |
| 31059  | 6     | 6      | 6      | 1    | 1    | 2    | 1    |      |      |      |      |      |      |      |

| respid | Q46x4 | Q46x5a | Q46x5b | Q47a | Q47b | Q47c | Q47d | Q47e | Q47f | Q47g | Q47h | Q47i | Q47j | Q47k |
|--------|-------|--------|--------|------|------|------|------|------|------|------|------|------|------|------|
| 31082  |       |        |        |      |      |      |      |      |      |      |      |      |      |      |
| 31106  | 6     | 5      | 5      |      |      |      |      |      |      |      |      |      |      | 2    |
| 31110  | 5     | 5      | 5      | 4    | 4    | 4    | 4    | 4    | 1    | 3    | 3    | 2    | 2    | 2    |
| 31265  | 3     | 3      | 3      |      |      |      |      |      |      |      |      |      |      |      |
| 31266  | 3     | 3      | 3      |      |      |      |      |      |      |      |      |      |      |      |
| 31267  | 3     | 3      | 3      |      |      |      |      |      |      |      |      |      |      |      |
| 31310  | 5     | 5      | 5      | 3    |      |      |      |      |      |      |      |      |      |      |
| 31325  | 6     | 5      | 5      | 5    | 5    | 5    | 5    | 5    | 4    | 5    | 4    | 5    | 5    | 4    |
| 31367  | 4     | 4      | 4      | 0    | 0    | 0    | 0    | 0    | 0    | 0    | 0    | 0    | 1    | 1    |
| 31389  | 5     | 5      | 5      |      |      |      |      |      |      |      |      |      |      |      |
| 31440  | 6     | 5      | 5      |      |      |      |      |      |      |      |      |      |      |      |
| 31465  | 4     | 4      | 4      |      |      |      |      |      |      |      |      |      |      |      |
| 31477  | 5     | 5      | 5      |      |      |      |      |      |      |      |      |      |      |      |
| 31491  | 6     | 6      | 6      | 0    | 0    | 0    |      |      |      |      |      |      |      |      |
| 31494  | 2     | 2      | 2      | 5    | 5    | 5    | 5    | 5    | 4    | 4    | 2    | 4    | 4    | 4    |
| 31509  | 3     | 3      | 6      | 1    | 1    | 1    | 1    | 1    | 1    | 1    | 1    | 1    | 1    | 2    |
| 31533  | 6     | 6      | 6      | 0    | 0    | 0    | 0    | 0    | 0    | 0    | 0    | 0    | 1    | 1    |
| 31547  | 6     | 6      | 6      |      |      |      |      |      |      |      |      |      |      |      |
| 31558  | 4     | 4      | 4      |      |      |      |      |      |      |      |      |      |      |      |
| 31579  | 4     | 2      | 3      |      |      |      |      |      |      |      |      |      |      |      |
| 31591  | 6     | 4      | 5      |      |      |      |      |      |      |      |      |      |      |      |
| 31596  | 4     | 4      | 3      |      |      |      |      |      |      |      |      |      |      |      |
| 31601  | 3     | 3      | 2      | 2    | 2    | 3    | 3    | 2    | 3    | 2    | 2    | 3    | 2    | 2    |
| 31605  | 4     | 5      | 4      |      |      |      |      |      |      |      |      |      |      |      |
| 31637  | 5     | 5      | 5      |      |      |      |      |      |      |      |      |      |      |      |
| 31646  | 4     | 4      | 4      |      |      |      |      |      |      |      |      |      |      |      |
| 31647  | 3     | 4      | 4      |      |      |      |      |      |      |      |      |      |      |      |
| 31650  | 5     | 5      | 5      | 5    |      | 5    | 5    | 5    | 5    | 5    | 3    | 5    | 5    | 5    |
| 31651  | 4     | 4      | 4      | 4    | 2    | 1    | 1    | 4    | 3    | 2    | 2    | 2    | 4    | 3    |
| 31657  | 6     | 6      | 6      | 0    | 0    | 0    | 0    | 0    | 0    | 0    | 0    | 0    | 1    | 1    |
| 31660  | 5     | 5      | 5      |      |      |      |      |      |      |      |      |      |      |      |
| 31661  | 5     | 5      | 4      | 3    | 2    | 4    | 4    | 5    | 3    | 4    | 3    | 4    | 4    | 4    |



| respid | Q46x4 | Q46x5a | Q46x5b | Q47a | Q47b | Q47c | Q47d | Q47e | Q47f | Q47g | Q47h | Q47i | Q47j | Q47k |
|--------|-------|--------|--------|------|------|------|------|------|------|------|------|------|------|------|
| 31667  | 4     | 4      | 4      | 3    | 3    | 3    | 3    | 4    | 2    | 3    | 3    | 3    | 4    | 3    |
| 31674  | 4     | 5      | 5      | 3    | 3    | 3    | 3    | 4    | 2    | 4    | 3    | 3    | 4    | 4    |
| 31686  | 6     | 6      | 6      |      |      |      |      |      | 0    | 0    | 0    | 0    | 1    | 1    |
| 31693  |       |        |        |      |      |      |      |      |      |      |      |      |      |      |
| 31716  |       |        |        |      |      |      |      |      |      |      |      |      |      |      |
| 31818  | 5     | 4      | 5      | 0    | 0    | 0    | 0    | 0    | 0    | 0    | 0    | 0    | 1    | 1    |
| 31886  | 6     | 6      | 6      | 4    | 4    | 4    | 4    | 5    | 3    | 4    | 3    | 4    | 4    | 4    |
| 31945  | 4     | 3      | 3      | 3    | 3    | 3    | 3    | 3    |      | 3    | 3    | 3    | 3    | 3    |
| 31957  | 5     | 5      | 5      |      |      |      |      |      |      |      |      |      |      |      |
| 31966  | 4     | 5      | 5      |      |      |      |      |      |      |      |      |      |      |      |
| 31978  | 6     | 6      | 6      | 2    | 2    | 2    | 2    | 4    | 0    | 0    | 0    | 0    | 1    | 1    |
| 31999  | 5     | 5      | 5      |      |      |      |      |      |      |      |      |      |      |      |
| 32026  | 4     | 4      | 4      |      |      |      |      |      |      |      |      |      |      |      |
| 32033  | 6     | 6      | 6      |      |      |      |      |      |      |      |      |      |      |      |
| 32037  | 3     | 3      | 3      |      |      |      |      |      |      |      |      |      |      |      |
| 32038  | 3     | 3      | 3      |      |      |      |      |      |      |      |      |      |      |      |
| 32047  | 4     | 4      | 4      |      |      |      |      |      |      |      |      |      |      |      |
| 32053  |       |        |        |      |      |      |      |      |      |      |      |      |      |      |
| 32069  | 6     | 6      | 6      |      |      |      |      |      |      |      |      |      |      |      |
| 32081  | 5     | 4      | 4      | 4    | 4    | 4    | 3    | 4    | 1    | 4    | 3    | 3    | 4    | 3    |
| 32123  | 4     | 5      | 5      |      |      |      |      |      |      |      |      |      |      |      |
| 32130  | 4     | 4      | 4      |      |      |      |      |      |      |      |      |      |      |      |
| 32141  | 5     | 5      | 5      | 4    | 4    | 5    | 5    | 5    | 4    | 4    | 4    | 5    | 4    | 4    |
| 32158  |       |        |        |      |      |      |      |      |      |      |      |      |      |      |
| 32165  | 5     | 5      | 5      |      |      |      |      |      |      |      |      |      |      |      |
| 32180  | 4     | 4      | 4      |      |      |      |      |      |      |      |      |      |      |      |
| 32221  | 3     | 3      | 4      |      |      |      |      |      |      |      |      |      |      |      |
| 32292  | 5     | 5      | 5      |      |      |      |      |      |      |      |      |      |      |      |
| 32318  | 4     | 4      | 4      |      |      |      |      |      |      |      |      |      |      |      |
| 32346  | 4     | 4      | 5      |      |      |      |      |      |      |      |      |      |      |      |
| 32402  | 3     | 3      | 3      | 2    | 2    | 2    | 2    | 4    | 2    | 2    | 2    | 2    | 2    | 2    |
| 32422  | 6     | 6      | 6      |      |      |      |      |      |      |      |      |      |      |      |

| respid | Q46x4 | Q46x5a | Q46x5b | Q47a | Q47b | Q47c | Q47d | Q47e | Q47f | Q47g | Q47h | Q47i | Q47j | Q47k |   |
|--------|-------|--------|--------|------|------|------|------|------|------|------|------|------|------|------|---|
| 32439  | 6     | 6      | 6      | 4    | 4    | 4    | 4    | 4    | 5    | 3    | 4    | 3    | 5    | 4    | 4 |
| 32507  | 5     | 5      | 5      | 0    | 0    | 0    | 0    | 0    | 0    | 0    | 0    | 0    | 0    | 1    | 1 |
| 32522  |       |        |        |      |      |      |      |      |      |      |      |      |      |      |   |
| 32535  |       |        |        |      |      |      |      |      |      |      |      |      |      |      |   |
| 32546  | 6     | 6      | 6      |      |      |      |      |      |      |      |      |      |      |      |   |
| 32553  | 4     | 4      | 4      | 3    | 4    | 3    | 2    | 3    | 3    | 2    | 4    | 3    | 3    | 3    | 3 |
| 32570  |       |        |        |      |      |      |      |      |      |      |      |      |      |      |   |
| 32592  | 6     | 6      | 6      | 3    | 3    | 3    | 3    | 4    | 2    | 2    | 2    | 2    | 2    | 1    | 1 |
| 32605  | 6     | 6      | 6      |      |      |      |      |      |      |      |      |      |      |      |   |
| 32630  | 3     | 3      | 3      | 1    | 2    | 2    | 2    | 2    | 1    | 2    | 2    | 4    | 2    | 3    | 5 |
| 32642  | 4     | 4      | 4      | 2    | 2    | 2    | 2    | 2    | 3    | 1    | 2    | 2    | 2    | 2    |   |
| 32646  | 5     | 5      | 5      |      |      |      |      |      |      |      |      |      |      |      |   |
| 32665  | 6     | 6      | 6      | 2    | 2    | 3    | 3    | 4    | 2    | 2    | 2    | 3    | 3    | 3    | 2 |
| 32677  | 6     | 6      | 6      |      |      |      |      |      |      |      |      |      |      |      |   |
| 32694  | 5     | 5      | 5      |      |      |      |      |      |      |      |      |      |      |      |   |
| 32698  | 5     | 3      | 6      |      |      |      |      |      |      |      |      |      |      |      |   |
| 32754  | 6     | 4      | 4      |      |      |      |      |      |      |      |      |      |      |      |   |
| 32799  | 4     | 4      | 4      |      |      |      |      |      |      |      |      |      |      |      |   |
| 32816  |       |        |        |      |      |      |      |      |      |      |      |      |      |      |   |
| 32819  | 4     | 4      | 4      |      |      |      |      |      |      |      |      |      |      |      |   |
| 32840  | 4     | 4      | 4      |      |      |      |      |      |      |      |      |      |      |      |   |
| 32861  | 5     | 5      | 5      | 5    | 5    | 5    | 5    | 5    | 5    | 1    | 2    | 3    | 5    | 5    | 3 |
| 32866  | 5     | 5      | 5      |      |      |      |      |      |      |      |      |      |      |      |   |
| 32889  | 2     | 3      | 3      |      |      |      |      |      |      |      |      |      |      |      |   |
| 32960  | 6     | 6      | 6      | 1    | 1    | 1    | 1    | 5    | 0    | 1    |      |      |      |      | 3 |
| 32965  | 5     | 5      | 5      |      |      |      |      |      |      |      |      |      |      |      |   |
| 32986  | 4     | 4      | 4      |      |      |      |      |      |      |      |      |      |      |      |   |
| 33005  | 4     | 3      | 3      |      |      |      |      |      |      |      |      |      |      |      |   |
| 33054  | 4     | 4      | 4      | 4    | 4    | 5    | 4    | 4    | 3    | 4    | 3    | 5    | 5    | 5    | 3 |
| 33072  | 5     | 4      | 5      |      |      |      |      |      |      |      |      |      |      |      |   |
| 33095  | 6     | 6      | 6      | 5    | 5    | 5    | 5    |      |      | 1    | 4    | 3    | 5    | 4    | 4 |
| 33099  | 6     | 6      | 6      |      |      |      |      |      |      |      |      |      |      |      |   |

| respid | Q46x4 | Q46x5a | Q46x5b | Q47a | Q47b | Q47c | Q47d | Q47e | Q47f | Q47g | Q47h | Q47i | Q47j | Q47k |
|--------|-------|--------|--------|------|------|------|------|------|------|------|------|------|------|------|
| 33121  | 5     | 5      | 5      | 5    | 4    | 4    | 4    | 5    |      |      |      |      |      | 5    |
| 33152  | 4     | 5      | 5      |      |      |      |      |      |      |      |      |      |      |      |
| 33159  | 5     | 5      | 5      | 3    | 3    | 4    | 3    | 4    | 3    | 3    |      |      |      |      |
| 33189  | 5     | 5      | 5      | 0    |      |      |      |      |      |      |      |      |      |      |
| 33198  | 4     | 4      | 5      |      |      |      |      |      |      |      |      |      |      |      |
| 33202  | 3     | 4      | 3      |      |      |      |      |      |      |      |      |      |      |      |
| 33204  | 5     | 5      | 5      |      |      |      |      |      |      |      |      |      |      |      |
| 33224  | 5     | 4      | 5      | 5    | 5    | 5    | 5    | 5    | 2    | 5    | 5    | 5    | 5    | 5    |
| 33272  | 4     | 4      | 4      |      |      |      |      |      |      |      |      |      |      |      |
| 33294  | 6     | 6      | 6      |      |      |      |      |      |      |      |      |      |      |      |
| 33300  | 4     | 4      | 5      | 2    | 2    | 2    | 2    | 3    | 2    | 3    | 2    | 3    | 3    | 2    |
| 33314  | 2     | 2      | 3      |      |      |      |      |      |      |      |      |      |      |      |
| 33338  | 4     | 4      | 4      | 3    | 3    | 3    | 3    | 4    | 2    | 3    | 3    | 3    | 3    | 3    |
| 33350  | 6     | 6      | 6      | 0    | 0    | 0    | 0    | 0    | 0    | 0    | 0    | 0    | 1    | 1    |
| 33362  | 6     | 6      | 6      | 0    |      |      |      |      |      |      |      |      |      |      |
| 33368  |       |        |        |      |      |      |      |      |      |      |      |      |      |      |
| 33374  | 4     | 4      | 3      | 2    | 2    | 2    | 2    | 3    | 1    | 1    | 1    | 1    | 2    | 2    |
| 33380  | 4     | 4      | 3      | 4    | 3    | 4    | 5    | 5    | 4    | 4    | 3    | 4    |      | 4    |
| 33385  | 6     | 6      | 6      |      |      |      |      |      |      |      |      |      |      |      |
| 33402  | 4     | 4      | 4      | 3    | 3    | 4    | 4    | 5    | 3    | 4    | 4    | 4    | 4    | 4    |
| 33414  | 6     | 6      | 6      | 0    |      |      |      |      |      |      |      |      |      |      |
| 33439  | 4     | 4      | 4      | 3    | 4    | 4    | 4    | 5    | 3    | 4    | 4    | 4    | 4    | 4    |
| 33449  | 4     | 4      | 3      | 3    | 4    | 5    | 5    | 4    | 3    | 5    | 4    | 5    | 4    | 4    |
| 33533  | 5     | 5      | 4      |      |      |      |      |      |      |      |      |      |      |      |
| 33540  | 6     | 6      | 6      |      |      |      |      |      |      |      |      |      |      |      |
| 33556  | 5     | 5      | 5      |      |      |      |      |      |      |      |      |      |      |      |
| 33615  | 5     | 5      | 5      |      |      |      |      |      |      |      |      |      |      |      |
| 33694  | 3     | 4      | 3      | 2    | 3    | 3    | 3    | 3    | 1    | 3    | 2    | 1    | 2    | 2    |
| 33717  | 6     | 6      | 6      | 0    | 0    | 0    | 0    | 0    | 0    | 0    | 0    | 0    | 1    | 1    |
| 33729  | 5     | 4      | 4      |      |      |      |      |      |      |      |      |      |      |      |
| 33746  | 6     | 4      | 6      |      |      |      |      |      |      |      |      |      |      |      |
| 33764  | 5     | 6      | 4      |      |      |      |      |      |      |      |      |      |      |      |

| respid | Q46x4 | Q46x5a | Q46x5b | Q47a | Q47b | Q47c | Q47d | Q47e | Q47f | Q47g | Q47h | Q47i | Q47j | Q47k |
|--------|-------|--------|--------|------|------|------|------|------|------|------|------|------|------|------|
| 33790  | 5     | 6      | 6      |      |      |      |      |      |      |      |      |      |      |      |
| 33868  | 2     | 4      | 3      | 2    | 2    | 2    | 2    | 3    | 2    | 2    | 2    | 4    | 4    | 3    |
| 33872  | 3     | 2      | 2      | 0    | 0    | 0    | 2    | 4    |      |      |      |      | 1    | 2    |
| 33883  | 5     | 4      | 5      |      |      |      |      |      |      |      |      |      |      |      |
| 33884  | 5     | 5      | 5      |      |      |      |      |      |      |      |      |      |      |      |
| 33900  | 6     | 5      | 4      |      |      |      |      |      |      |      |      |      |      |      |
| 33933  | 4     | 4      | 4      |      |      |      |      |      |      |      |      |      |      |      |
| 33949  | 4     | 6      | 6      |      |      |      |      |      |      |      |      |      |      |      |
| 34005  |       |        |        |      |      |      |      |      |      |      |      |      |      |      |
| 34016  |       |        |        |      |      |      |      |      |      |      |      |      |      |      |
| 34041  | 2     | 1      | 2      | 3    | 4    | 2    | 2    | 1    | 1    | 1    | 2    | 1    | 2    | 2    |
| 34053  | 4     | 4      | 4      |      |      |      |      |      |      |      |      |      |      |      |
| 34056  | 6     | 6      | 6      |      |      |      |      |      |      |      |      |      |      |      |
| 34093  | 5     | 5      | 5      | 2    | 2    | 3    | 2    | 4    | 1    | 2    |      |      |      |      |
| 34112  | 4     | 3      | 3      |      |      |      |      |      |      |      |      |      |      |      |
| 34136  | 4     | 4      | 2      | 3    | 2    | 3    | 2    | 2    | 2    | 2    | 2    | 2    |      | 2    |
| 34138  | 5     | 5      | 5      |      |      |      |      |      |      |      |      |      |      |      |
| 34139  | 4     | 4      | 4      | 2    | 2    | 2    | 3    |      |      |      |      |      |      |      |
| 34189  | 6     | 5      | 5      | 2    | 0    | 0    | 0    | 0    | 0    | 0    | 0    | 0    | 1    | 1    |
| 34239  | 6     | 6      | 6      |      |      |      |      |      |      |      |      |      |      |      |
| 34240  | 5     | 5      | 5      |      |      |      |      |      |      |      |      |      |      |      |
| 34241  | 5     | 4      | 4      |      |      |      |      |      |      |      |      |      |      |      |
| 34259  | 4     | 3      | 4      | 2    | 2    | 3    |      | 4    |      |      | 3    |      |      | 3    |
| 34303  | 2     | 4      | 1      | 1    | 0    | 2    | 1    | 3    | 1    | 2    | 2    | 1    | 3    | 5    |
| 34306  | 6     | 5      | 5      |      |      |      |      |      |      |      |      |      |      |      |
| 34395  | 6     | 6      | 6      | 0    | 0    | 0    | 0    | 0    | 0    | 0    | 0    | 1    | 1    | 2    |
| 34463  | 4     | 4      | 5      |      |      |      |      |      |      |      |      |      |      |      |
| 34466  | 3     | 4      | 2      | 3    | 3    | 4    | 4    | 4    | 1    | 3    | 3    | 3    | 4    | 3    |
| 34471  | 5     | 5      | 5      |      |      |      |      |      |      |      |      |      |      |      |
| 34489  | 4     | 3      | 4      | 3    | 2    | 3    | 3    | 4    | 1    | 3    | 2    | 3    | 3    | 2    |
| 34518  | 6     | 6      | 6      |      |      |      |      |      |      |      |      |      |      |      |
| 34542  | 4     | 5      | 5      |      |      |      |      |      |      |      |      |      |      |      |

| respid | Q46x4 | Q46x5a | Q46x5b | Q47a | Q47b | Q47c | Q47d | Q47e | Q47f | Q47g | Q47h | Q47i | Q47j | Q47k |
|--------|-------|--------|--------|------|------|------|------|------|------|------|------|------|------|------|
| 34595  |       |        |        |      |      |      |      |      |      |      |      |      |      |      |
| 34604  | 6     | 6      | 6      |      |      |      |      |      |      |      |      |      |      |      |
| 34631  | 5     | 5      | 5      |      |      |      |      |      |      |      |      |      |      |      |
| 34665  | 5     | 5      | 5      |      |      |      |      |      |      |      |      |      |      |      |
| 34716  | 6     | 6      | 6      |      |      |      |      |      |      |      |      |      |      |      |
| 34729  | 6     | 6      | 6      |      |      |      |      |      |      |      |      |      |      |      |
| 34772  | 3     | 6      | 6      |      |      |      |      |      |      |      |      |      |      |      |
| 34800  | 6     | 6      | 6      |      |      |      |      |      |      |      |      |      |      |      |
| 34819  | 3     | 4      | 4      |      |      |      |      |      |      |      |      |      |      |      |
| 34829  | 4     | 4      | 4      |      |      |      |      |      |      |      |      |      |      |      |
| 34831  | 5     | 4      | 4      |      |      |      |      |      |      |      |      |      |      |      |
| 34839  | 5     | 5      | 5      |      |      |      |      |      |      |      |      |      |      |      |
| 34868  | 5     | 4      | 4      |      |      |      |      |      |      |      |      |      |      |      |
| 34869  | 6     | 6      | 6      |      |      |      |      |      |      |      |      |      |      |      |
| 34882  | 4     | 3      | 3      |      |      |      |      |      |      |      |      |      |      |      |
| 34895  | 3     | 3      | 3      | 3    | 4    | 4    | 4    | 4    | 3    | 3    | 3    | 4    | 3    | 3    |
| 34901  | 6     | 6      | 6      |      |      |      |      |      |      |      |      |      |      |      |
| 34904  | 3     | 3      | 3      |      |      |      |      |      |      |      |      |      |      |      |
| 34907  | 6     | 6      | 6      |      |      |      |      |      |      |      |      |      |      |      |
| 34914  | 5     | 6      | 6      | 0    | 0    | 0    | 0    | 0    | 0    | 0    | 0    | 0    | 1    | 1    |
| 34918  | 4     | 4      | 4      | 3    | 2    | 3    | 3    | 4    |      | 3    | 3    | 4    | 4    | 3    |
| 34924  | 6     | 6      | 6      |      |      |      |      |      |      |      |      |      |      |      |
| 34933  | 4     | 4      | 4      |      |      |      |      |      |      |      |      |      |      |      |
| 34938  | 5     | 5      | 5      | 4    | 5    | 5    | 5    | 5    | 3    | 4    | 4    | 4    | 4    | 4    |
| 34952  | 4     | 3      | 3      | 0    | 1    | 1    | 1    | 1    | 1    | 1    | 1    | 1    | 1    | 3    |
| 34959  | 6     | 6      | 6      | 3    |      | 4    | 3    | 4    | 1    | 2    | 2    | 2    | 2    |      |
| 34972  | 5     | 4      | 5      |      |      |      |      |      |      |      |      |      |      |      |
| 34973  | 4     | 6      | 6      |      |      |      |      |      |      |      |      |      |      |      |
| 34975  | 4     | 6      | 6      | 2    | 2    | 2    | 2    | 2    | 1    | 2    | 2    | 2    | 2    | 3    |
| 34977  | 4     | 4      | 4      | 2    | 3    | 2    | 2    | 3    | 1    | 2    | 3    | 2    | 2    | 3    |
| 34978  | 5     | 6      | 6      |      |      |      |      |      |      |      |      |      |      |      |
| 34980  | 5     | 5      | 5      | 5    | 5    | 5    | 5    | 5    | 3    | 5    | 4    | 4    | 4    | 4    |

| respid | Q46x4 | Q46x5a | Q46x5b | Q47a | Q47b | Q47c | Q47d | Q47e | Q47f | Q47g | Q47h | Q47i | Q47j | Q47k |
|--------|-------|--------|--------|------|------|------|------|------|------|------|------|------|------|------|
| 34984  | 4     | 4      | 4      |      |      |      |      |      |      |      |      |      |      |      |
| 34986  | 4     | 4      | 6      | 4    | 3    | 3    | 4    | 4    | 1    | 3    | 3    | 3    | 3    | 3    |
| 34994  | 5     | 5      | 5      |      |      |      |      |      |      |      |      |      |      |      |
| 34996  | 5     | 4      | 4      | 4    | 4    | 5    | 4    | 5    | 2    | 4    | 4    | 5    | 5    | 4    |
| 35003  | 4     | 5      | 5      | 0    | 0    | 0    | 0    | 0    | 0    | 0    | 0    | 0    | 0    | 1    |
| 35014  | 5     | 5      | 5      |      |      |      |      |      |      |      |      |      |      |      |
| 35029  | 2     | 2      | 2      | 0    | 0    | 0    | 0    | 0    | 0    | 0    | 0    | 0    | 0    | 1    |
| 35030  | 6     | 6      | 6      |      |      |      |      |      |      |      |      |      |      | 1    |
| 35037  | 4     | 3      | 3      |      |      |      |      |      |      |      |      |      |      |      |
| 35043  |       |        |        |      |      |      |      |      |      |      |      |      |      |      |
| 35048  |       |        |        |      |      |      |      |      |      |      |      |      |      |      |
| 35055  | 6     | 4      | 6      |      |      |      |      |      |      |      |      |      |      |      |
| 35067  | 4     | 6      | 6      |      |      |      |      |      |      |      |      |      |      |      |
| 35072  | 5     | 5      | 6      |      |      |      |      |      |      |      |      |      |      |      |
| 35078  | 5     | 5      | 5      | 0    | 0    | 0    | 0    | 0    | 0    | 0    | 0    | 0    | 0    | 1    |
| 35084  | 4     | 5      | 4      |      | 2    | 2    |      | 5    | 1    |      |      |      |      | 1    |
| 35095  |       |        |        |      |      |      |      |      |      |      |      |      |      |      |
| 35096  |       |        |        |      |      |      |      |      |      |      |      |      |      |      |
| 35097  | 4     | 4      | 4      | 1    | 1    | 2    | 2    | 3    | 1    | 2    | 2    | 3    | 3    | 3    |
| 35098  | 6     | 6      | 6      |      |      |      |      |      |      |      |      |      |      |      |
| 35109  | 2     | 2      | 2      | 2    | 2    | 2    | 2    | 2    | 1    | 1    | 2    | 2    | 1    | 3    |
| 35114  | 5     | 5      | 5      |      |      |      |      |      |      |      |      |      |      |      |
| 35115  | 5     | 5      | 5      |      |      |      |      |      |      |      |      |      |      |      |
| 35124  | 3     | 4      | 4      |      |      |      |      |      |      |      |      |      |      |      |
| 35125  | 5     | 6      | 6      | 0    | 0    | 0    | 0    | 0    | 0    | 0    | 0    | 0    | 0    | 1    |
| 35141  |       |        |        |      |      |      |      |      |      |      |      |      |      |      |
| 35142  | 5     | 4      | 4      |      |      |      |      |      |      |      |      |      |      |      |
| 35145  |       |        |        |      |      |      |      |      |      |      |      |      |      |      |
| 35149  | 4     | 6      | 4      |      |      |      |      |      |      |      |      |      |      |      |
| 35159  | 5     | 5      | 5      |      |      |      |      |      |      |      |      |      |      |      |
| 35163  | 4     | 6      | 6      |      |      |      |      |      |      |      |      |      |      |      |
| 35174  | 4     | 4      | 4      |      |      |      |      |      |      |      |      |      |      |      |

| respid | Q46x4 | Q46x5a | Q46x5b | Q47a | Q47b | Q47c | Q47d | Q47e | Q47f | Q47g | Q47h | Q47i | Q47j | Q47k |
|--------|-------|--------|--------|------|------|------|------|------|------|------|------|------|------|------|
| 35188  |       |        |        |      |      |      |      |      |      |      |      |      |      |      |
| 35189  | 4     | 4      | 4      |      |      |      |      |      |      |      |      |      |      |      |
| 35201  | 4     | 4      | 5      |      |      |      |      |      |      |      |      |      |      |      |
| 35215  | 5     | 5      | 5      |      |      |      |      |      |      |      |      |      |      |      |
| 35228  | 6     | 5      | 5      |      |      |      |      |      |      |      |      |      |      |      |
| 35235  | 4     | 4      | 4      |      |      |      |      |      |      |      |      |      |      |      |
| 35239  | 4     | 4      | 4      | 2    | 3    | 5    | 4    | 5    | 4    | 4    | 3    | 3    | 3    | 3    |
| 35243  | 5     | 5      | 4      | 3    |      | 4    | 4    | 4    | 1    | 1    | 1    | 4    | 1    | 3    |
| 35245  | 6     | 6      | 6      |      |      |      |      |      |      |      |      |      |      |      |
| 35259  |       |        |        |      |      |      |      |      |      |      |      |      |      |      |
| 35265  | 3     | 3      | 3      |      |      |      |      |      |      |      |      |      |      |      |
| 35272  | 3     | 3      | 2      |      |      |      |      |      |      |      |      |      |      |      |
| 35280  | 6     | 3      | 5      |      |      |      |      |      |      |      |      |      |      |      |
| 35298  | 5     | 5      | 5      | 5    | 5    | 5    | 5    | 5    | 3    | 5    | 4    | 4    | 5    | 5    |
| 35305  | 6     | 6      | 6      |      |      |      |      |      |      |      |      |      |      |      |
| 35306  | 3     | 4      | 3      | 2    | 2    | 2    | 2    | 3    | 1    | 1    | 2    | 1    | 2    | 2    |
| 35307  | 5     | 5      | 5      | 5    | 5    | 5    | 5    | 5    | 3    | 5    | 5    | 5    | 5    | 5    |
| 35311  | 5     | 5      | 4      |      |      |      |      |      |      |      |      |      |      |      |
| 35322  | 4     | 4      | 3      |      |      |      |      |      |      |      |      |      |      |      |
| 35323  | 4     | 6      | 6      | 0    | 0    | 0    | 0    | 0    | 0    | 0    | 0    | 0    | 1    | 1    |
| 35327  | 5     | 5      | 5      |      |      |      |      |      |      |      |      |      |      |      |
| 35366  | 4     | 4      | 4      | 2    | 3    | 4    | 4    | 0    | 1    | 0    | 3    | 3    | 4    | 4    |
| 35378  | 5     | 5      | 5      |      |      |      |      |      |      |      |      |      |      |      |
| 35389  | 4     | 4      | 4      |      |      |      |      |      |      |      |      |      |      |      |
| 35390  | 4     | 4      | 4      | 3    | 3    | 3    | 3    | 4    | 2    | 2    | 3    | 2    | 2    | 2    |
| 35395  | 4     | 4      | 4      | 4    | 4    | 4    | 5    | 5    | 2    | 4    | 3    | 4    | 4    | 4    |
| 35411  | 5     | 4      | 4      | 0    | 0    | 3    | 2    | 2    | 1    | 2    | 3    | 3    | 2    | 3    |
| 35423  | 5     | 5      | 4      | 0    | 0    | 0    | 0    | 0    | 0    | 0    | 0    | 0    | 5    | 1    |
| 35425  | 6     | 6      | 6      |      |      |      |      |      |      |      |      |      |      |      |
| 35434  | 6     | 6      | 6      |      |      |      |      |      |      |      |      |      |      |      |
| 35462  | 5     | 4      | 5      |      |      |      |      |      |      |      |      |      |      |      |
| 35478  | 3     | 3      | 3      | 3    | 2    | 3    | 2    | 3    | 4    | 2    | 2    | 2    | 2    | 3    |

| respid | Q46x4 | Q46x5a | Q46x5b | Q47a | Q47b | Q47c | Q47d | Q47e | Q47f | Q47g | Q47h | Q47i | Q47j | Q47k |
|--------|-------|--------|--------|------|------|------|------|------|------|------|------|------|------|------|
| 35481  | 2     | 3      | 4      | 4    | 5    | 4    | 5    | 4    | 2    | 4    | 4    | 3    | 4    | 3    |
| 35498  | 5     | 4      | 5      | 5    | 5    | 5    | 5    | 5    | 1    | 5    | 4    | 5    | 5    |      |
| 35499  |       |        |        |      |      |      |      |      |      |      |      |      |      |      |
| 35502  | 3     | 5      | 3      |      |      |      |      |      |      |      |      |      |      |      |
| 35503  |       |        |        |      |      |      |      |      |      |      |      |      |      |      |
| 35504  |       |        |        |      |      |      |      |      |      |      |      |      |      |      |
| 35508  | 4     | 6      | 6      |      |      |      |      |      |      |      |      |      |      |      |
| 35513  | 6     | 6      | 6      | 5    | 5    | 5    | 5    | 5    | 2    | 5    | 4    | 5    | 4    | 4    |
| 35516  | 5     | 6      | 6      | 0    | 0    | 0    | 0    | 0    | 0    | 0    | 0    | 0    | 1    | 1    |
| 35519  | 1     | 1      | 1      |      |      |      |      |      |      |      |      |      |      |      |
| 35530  | 5     | 4      | 5      |      |      |      |      |      |      |      |      |      |      |      |
| 35533  | 5     | 5      | 4      |      |      |      |      |      |      |      |      |      |      |      |
| 35561  | 4     | 4      | 4      |      |      |      |      |      |      |      |      |      |      |      |
| 35565  | 5     | 5      | 5      | 3    | 3    | 3    | 3    | 4    |      |      | 3    |      | 3    |      |
| 35588  | 6     | 6      | 6      |      |      |      |      |      |      |      |      |      |      |      |
| 35598  | 5     | 6      | 6      |      |      |      | 0    | 0    | 0    | 0    | 0    | 0    | 1    | 1    |
| 35607  | 5     | 5      | 5      |      |      |      |      |      |      |      |      |      |      |      |
| 35638  | 5     | 5      | 5      |      |      |      |      |      |      |      |      |      |      |      |
| 35642  | 6     | 6      | 6      | 4    | 4    | 4    | 4    | 4    |      | 4    | 4    | 4    | 4    | 5    |
| 35643  | 3     | 4      | 4      | 5    | 5    | 4    | 4    | 5    | 1    | 2    | 2    | 4    | 3    | 2    |
| 35680  | 5     | 5      | 5      |      |      |      |      |      |      |      |      |      |      |      |
| 35697  | 5     | 5      | 5      |      |      |      |      |      |      |      |      |      |      |      |
| 35703  |       |        |        |      |      |      |      |      |      |      |      |      |      |      |
| 35709  | 2     | 3      | 4      |      |      |      |      |      |      |      |      |      |      |      |
| 35710  | 5     | 5      | 5      | 5    | 5    | 5    | 5    | 5    | 2    | 4    | 3    | 4    | 4    | 4    |
| 35721  | 3     | 4      | 4      |      |      |      |      |      |      |      |      |      |      |      |
| 35723  | 6     | 6      | 6      |      |      |      |      |      |      |      |      |      |      |      |
| 35736  | 6     | 6      | 6      |      |      |      |      |      |      |      |      |      |      |      |
| 35739  | 6     | 6      | 4      |      |      |      |      |      |      |      |      |      |      |      |
| 35745  | 4     | 6      | 6      |      |      |      |      |      |      |      |      |      |      |      |
| 35748  | 3     | 6      | 6      | 1    | 1    | 1    | 1    | 1    | 1    | 1    | 1    | 0    | 1    | 1    |
| 35750  | 6     | 6      | 6      |      |      |      |      |      |      |      |      |      |      |      |



| respid | Q46x4 | Q46x5a | Q46x5b | Q47a | Q47b | Q47c | Q47d | Q47e | Q47f | Q47g | Q47h | Q47i | Q47j | Q47k |
|--------|-------|--------|--------|------|------|------|------|------|------|------|------|------|------|------|
| 35752  | 6     | 6      | 6      |      |      |      |      |      |      |      |      |      |      |      |
| 35773  | 5     | 5      | 5      |      |      |      |      |      |      |      |      |      |      |      |
| 35779  | 5     | 5      | 5      | 0    | 0    | 0    | 0    | 0    | 0    | 0    | 0    | 0    | 0    | 1    |
| 35791  | 5     | 5      | 5      | 4    |      |      |      |      |      |      | 3    |      |      | 1    |
| 35801  | 5     | 5      | 5      |      |      |      |      |      |      |      |      |      |      |      |
| 35802  | 5     | 5      | 5      |      |      |      |      |      |      |      |      |      |      |      |
| 35837  | 4     | 4      | 4      |      |      |      |      |      |      |      |      |      |      |      |
| 35853  | 5     | 5      | 6      |      |      |      |      |      |      |      |      |      |      |      |
| 35858  | 4     | 4      | 4      |      | 4    | 5    | 4    | 4    | 3    | 2    | 2    | 4    | 3    | 4    |
| 35860  | 3     | 3      | 3      |      |      |      |      |      |      |      |      |      |      |      |
| 35875  | 4     | 4      | 4      |      |      |      |      |      |      |      |      |      |      |      |
| 35883  | 5     | 5      | 6      | 2    | 3    | 3    | 3    | 4    | 1    | 2    | 3    | 2    | 2    | 2    |
| 35890  | 5     | 5      | 5      |      |      |      |      |      |      |      |      |      |      |      |
| 35898  | 6     | 6      | 6      |      |      |      |      |      |      |      |      |      |      |      |
| 35901  | 3     | 3      | 3      |      |      |      |      |      |      |      |      |      |      |      |
| 35914  | 4     | 5      | 5      |      |      |      |      |      |      |      |      |      |      |      |
| 35924  | 5     | 3      | 4      |      |      |      |      |      |      |      |      |      |      |      |
| 35950  | 6     | 6      | 6      | 3    | 4    | 4    | 4    | 5    | 1    | 4    | 3    | 4    | 4    | 3    |
| 35961  | 6     | 6      | 6      | 4    | 3    | 5    | 4    | 5    | 1    | 4    | 4    | 4    | 4    | 3    |
| 35966  | 6     | 6      | 6      |      |      |      |      |      |      |      |      |      |      |      |
| 35967  | 5     | 5      | 5      | 5    | 5    | 5    | 5    | 5    | 4    | 4    | 4    | 5    | 5    | 5    |
| 35971  | 4     | 5      | 5      | 4    | 4    | 4    | 4    | 4    | 1    | 4    | 4    | 4    | 4    | 4    |
| 35974  | 5     | 5      | 5      |      |      |      |      |      |      |      |      |      |      |      |
| 35983  | 4     | 4      | 3      |      |      |      |      |      |      |      |      |      |      |      |
| 35992  | 6     | 6      | 6      |      |      |      |      |      |      |      |      |      |      |      |
| 36010  | 4     | 4      | 5      |      |      |      |      |      |      |      |      |      |      |      |
| 36019  | 4     | 4      | 4      | 3    | 4    | 5    | 4    | 4    | 1    | 4    | 3    | 5    | 4    | 3    |
| 36029  | 4     | 6      | 6      |      |      |      |      |      |      |      |      |      |      |      |
| 36033  | 5     | 5      | 5      | 3    | 3    | 3    | 3    | 4    | 2    | 3    | 3    | 2    | 3    | 3    |
| 36042  | 4     | 6      | 6      |      |      |      |      |      |      |      |      |      |      |      |
| 36043  | 6     | 6      | 6      |      |      |      |      |      |      |      |      |      |      |      |
| 36048  | 6     | 4      | 4      |      |      |      |      |      |      |      |      |      |      |      |

| respid | Q46x4 | Q46x5a | Q46x5b | Q47a | Q47b | Q47c | Q47d | Q47e | Q47f | Q47g | Q47h | Q47i | Q47j | Q47k |
|--------|-------|--------|--------|------|------|------|------|------|------|------|------|------|------|------|
| 36050  | 4     | 5      | 5      | 4    | 3    | 3    | 0    | 0    | 0    | 0    | 0    | 0    | 2    | 2    |
| 36062  | 5     | 4      | 4      |      |      |      |      |      |      |      |      |      |      |      |
| 36063  |       |        |        |      |      |      |      |      |      |      |      |      |      |      |
| 36092  | 5     | 5      | 5      |      |      |      |      |      |      |      |      |      |      |      |
| 36097  | 4     | 4      | 4      |      |      |      |      |      |      |      |      |      |      |      |
| 36108  | 5     | 5      | 5      | 5    | 4    | 4    | 5    | 5    | 2    | 5    | 4    | 5    | 5    | 5    |
| 36113  | 4     | 3      | 3      | 2    | 2    | 2    | 2    | 2    | 2    | 2    | 2    | 2    | 2    | 2    |
| 36117  | 6     | 5      | 5      |      |      |      |      |      |      |      |      |      |      |      |
| 36129  | 6     | 6      | 6      | 3    | 3    | 3    | 3    | 4    | 0    | 0    |      |      |      | 3    |
| 36144  | 5     | 5      | 5      | 4    | 5    | 5    | 5    | 5    | 1    | 5    | 4    | 5    | 5    | 5    |
| 36152  | 5     | 5      | 5      | 0    | 0    | 0    | 0    | 0    | 0    | 0    | 0    | 0    | 1    | 1    |
| 36154  | 4     | 4      | 4      |      |      |      |      |      |      |      |      |      |      |      |
| 36155  | 5     | 5      | 5      | 5    | 5    | 0    | 0    | 0    | 0    | 0    | 0    | 0    | 1    | 1    |
| 36167  | 5     | 5      | 5      |      |      |      |      |      |      |      |      |      |      |      |
| 36172  | 5     | 5      | 5      | 5    | 4    | 4    | 4    | 5    | 3    | 4    | 4    | 5    | 5    | 5    |
| 36173  | 6     | 5      | 6      |      |      |      |      |      |      |      |      |      |      |      |
| 36174  | 6     | 6      | 6      |      |      |      |      |      |      |      |      |      |      |      |
| 36182  | 6     | 6      | 6      |      |      |      |      |      |      |      |      |      |      |      |
| 36192  | 4     | 6      | 4      |      |      |      |      |      |      |      |      |      |      |      |
| 36195  | 4     | 6      | 6      | 2    | 2    | 3    | 3    | 3    | 1    | 2    | 2    | 2    | 2    | 3    |
| 36204  | 5     | 4      | 5      | 3    | 2    | 4    | 4    | 5    | 1    | 2    | 3    | 3    | 2    | 2    |
| 36205  | 4     | 4      | 4      |      |      |      |      |      |      |      |      |      |      |      |
| 36208  | 6     | 6      | 6      | 0    | 3    | 4    | 3    | 0    | 0    | 0    | 0    | 0    | 3    | 2    |
| 36216  | 4     | 4      | 3      |      |      |      |      |      |      |      |      |      |      |      |
| 36221  | 3     | 2      | 2      |      |      |      |      |      |      |      |      |      |      |      |
| 36244  | 5     | 5      | 5      | 5    | 5    | 5    | 5    | 5    | 2    | 5    | 5    | 5    | 5    | 5    |
| 36255  | 3     | 3      | 3      | 0    | 0    | 0    | 0    | 0    | 0    | 0    | 0    | 0    | 1    | 1    |
| 36259  | 5     | 4      | 4      | 1    | 0    | 0    | 0    | 0    | 1    | 1    | 0    | 0    | 1    | 2    |
| 36262  | 3     | 3      | 3      | 2    | 0    | 0    | 0    | 0    | 0    | 0    | 0    | 0    | 1    | 1    |
| 36268  | 5     | 5      | 5      |      |      |      |      |      |      |      |      |      |      |      |
| 36308  | 4     | 6      | 6      | 0    | 0    | 0    | 0    | 0    | 0    | 0    | 0    | 0    | 1    | 1    |
| 36324  | 6     | 5      | 4      |      |      |      |      |      |      |      |      |      |      |      |

| respid | Q46x4 | Q46x5a | Q46x5b | Q47a | Q47b | Q47c | Q47d | Q47e | Q47f | Q47g | Q47h | Q47i | Q47j | Q47k |
|--------|-------|--------|--------|------|------|------|------|------|------|------|------|------|------|------|
| 36330  | 6     | 6      | 6      |      |      |      |      |      |      |      |      |      |      |      |
| 36331  | 4     | 6      | 6      |      |      |      |      |      |      |      |      |      |      |      |
| 36336  | 4     | 5      | 5      | 5    | 4    | 5    | 4    | 5    | 2    | 4    | 5    | 5    | 5    | 3    |
| 36337  | 6     | 6      | 6      | 2    | 2    | 2    | 2    | 3    | 2    | 1    | 2    | 2    | 1    | 2    |
| 36364  | 6     | 6      | 6      | 5    |      | 4    | 4    | 4    | 1    | 1    | 2    | 2    | 2    | 2    |
| 36365  | 3     | 3      | 3      | 2    | 2    | 2    | 2    | 3    | 1    | 1    | 1    | 1    | 2    | 2    |
| 36396  | 6     | 6      | 6      |      |      |      |      |      |      |      |      |      |      |      |
| 36403  | 5     | 6      | 6      | 5    | 4    | 4    | 4    | 5    | 2    | 2    | 3    | 4    | 1    | 2    |
| 36410  | 5     | 5      | 5      |      |      |      |      |      |      |      |      |      |      |      |
| 36413  | 6     | 6      | 6      |      |      |      |      |      |      |      |      |      |      |      |
| 36422  | 6     | 6      | 6      | 4    | 3    | 3    | 3    | 4    |      | 4    | 3    |      | 2    | 4    |
| 36424  | 5     | 6      | 6      | 2    | 0    | 0    | 0    | 0    | 0    | 0    | 0    | 0    | 1    | 1    |
| 36425  | 3     | 3      | 3      | 2    | 3    | 3    | 2    | 2    | 3    | 3    | 2    | 2    | 3    | 2    |
| 36432  | 5     | 5      | 5      | 0    | 0    | 0    | 0    | 0    | 0    | 0    | 0    | 0    | 1    | 1    |
| 36435  | 4     | 3      | 4      | 2    | 2    | 3    | 2    | 3    | 1    | 2    | 2    | 3    | 3    | 3    |
| 36446  | 6     | 6      | 6      |      |      |      |      |      |      |      |      |      |      |      |
| 36451  | 6     | 6      | 6      |      |      |      |      |      |      |      |      |      |      |      |
| 36453  | 3     | 4      | 4      | 0    | 0    | 0    | 0    | 0    | 0    | 0    | 0    | 0    | 1    | 1    |
| 36459  | 2     | 3      | 3      |      |      |      |      |      |      |      |      |      |      |      |
| 36464  | 6     | 6      | 6      |      |      |      |      |      |      |      |      |      |      |      |
| 36465  | 4     | 4      | 4      |      |      |      |      |      |      |      |      |      |      |      |
| 36466  |       |        |        |      |      |      |      |      |      |      |      |      |      |      |
| 36476  | 3     | 4      | 4      | 2    | 4    | 4    | 4    | 4    | 1    | 4    | 4    | 3    | 4    | 2    |
| 36487  | 6     | 6      | 6      | 0    |      |      |      |      |      |      |      |      |      |      |
| 36488  | 4     | 5      | 5      | 4    | 4    | 4    | 4    | 5    | 2    | 5    | 5    | 5    | 5    | 4    |
| 36500  |       |        |        |      |      |      |      |      |      |      |      |      |      |      |
| 36504  | 6     | 6      | 6      |      |      |      |      |      |      |      |      |      |      |      |
| 36513  | 5     | 5      | 5      |      |      |      |      |      |      |      |      |      |      |      |
| 36515  | 4     | 4      | 4      | 0    | 0    | 0    | 0    | 0    | 0    | 0    | 0    | 0    | 1    | 1    |
| 36521  | 4     | 4      | 4      |      |      |      |      |      |      |      |      |      |      |      |
| 36530  | 3     | 3      | 3      | 0    | 0    | 0    | 0    | 0    | 0    | 0    | 0    | 0    | 1    | 1    |
| 36556  | 6     | 6      | 6      |      |      |      |      |      |      |      |      |      |      |      |

| respid | Q46x4 | Q46x5a | Q46x5b | Q47a | Q47b | Q47c | Q47d | Q47e | Q47f | Q47g | Q47h | Q47i | Q47j | Q47k |   |
|--------|-------|--------|--------|------|------|------|------|------|------|------|------|------|------|------|---|
| 36564  | 6     | 4      | 4      | 3    | 3    | 3    | 3    | 3    | 3    | 1    | 1    | 2    | 4    | 2    | 2 |
| 36584  | 5     | 5      | 5      | 0    | 5    | 5    | 5    | 5    | 5    |      |      |      |      |      |   |
| 36585  |       |        |        |      |      |      |      |      |      |      |      |      |      |      |   |
| 36586  |       |        |        |      |      |      |      |      |      |      |      |      |      |      |   |
| 36606  | 6     | 4      | 4      |      |      |      |      |      |      |      |      |      |      |      |   |
| 36615  | 5     | 6      | 6      |      |      |      |      |      |      |      |      |      |      |      |   |
| 36628  | 5     | 5      | 5      |      |      |      |      |      |      |      |      |      |      |      |   |
| 36630  | 6     | 6      | 6      | 2    | 1    | 1    | 1    | 1    | 0    | 0    | 0    | 0    | 0    | 1    | 1 |
| 36631  | 6     | 6      | 6      | 4    | 4    | 5    | 5    | 4    | 1    | 4    | 4    | 4    | 5    | 5    | 3 |
| 36636  | 5     | 5      | 5      |      |      |      |      |      |      |      |      |      |      |      |   |
| 36637  | 4     | 4      | 4      |      |      |      |      |      |      |      |      |      |      |      |   |
| 36651  | 2     | 2      | 3      | 3    | 4    |      | 2    | 0    | 1    | 1    | 2    |      |      | 2    | 1 |
| 36661  | 5     | 5      | 5      | 0    | 0    | 0    | 0    | 0    | 0    | 0    | 0    | 0    | 0    | 1    | 1 |
| 36670  | 6     | 6      | 6      |      |      |      |      |      |      |      |      |      |      |      |   |
| 36671  | 4     | 4      | 4      | 3    | 2    | 3    | 3    | 4    | 2    | 3    | 3    | 2    | 2    | 3    | 3 |
| 36688  |       |        |        |      |      |      |      |      |      |      |      |      |      |      |   |
| 36694  | 4     | 4      | 4      | 0    | 0    | 0    |      | 0    | 0    | 0    | 0    | 0    | 0    | 1    |   |
| 36696  |       |        |        |      |      |      |      |      |      |      |      |      |      |      |   |
| 36703  |       |        |        |      |      |      |      |      |      |      |      |      |      |      |   |
| 36719  | 3     | 3      | 3      |      |      |      |      |      |      |      |      |      |      |      |   |
| 36721  | 3     | 3      | 3      |      |      |      |      |      |      |      |      |      |      |      |   |
| 36740  | 3     | 4      | 4      | 4    | 4    | 4    | 4    | 4    | 3    | 3    | 2    | 1    | 1    | 3    | 2 |
| 36755  | 5     | 5      | 5      | 3    | 3    | 3    | 2    | 5    | 1    | 3    | 3    | 3    | 3    | 3    | 3 |
| 36765  | 3     | 4      | 3      |      |      |      |      |      |      |      |      |      |      |      |   |
| 36770  |       |        |        |      |      |      |      |      |      |      |      |      |      |      |   |
| 36773  | 4     | 4      | 3      | 3    | 3    | 4    | 3    | 4    | 2    | 3    | 3    | 3    | 3    | 4    | 4 |
| 36813  | 3     | 6      | 6      |      |      |      |      |      |      |      |      |      |      |      |   |
| 36819  | 4     | 4      | 4      | 3    | 2    | 2    | 2    | 4    | 1    | 2    | 2    | 2    | 2    | 2    | 2 |
| 36820  | 6     | 6      | 6      |      |      |      |      |      |      |      |      |      |      |      |   |
| 36821  | 5     | 5      | 5      |      |      |      |      |      |      |      |      |      |      |      |   |
| 36827  | 5     | 5      | 5      |      |      |      |      |      |      |      |      |      |      |      |   |
| 36835  | 5     | 5      | 5      |      |      |      |      |      |      |      |      |      |      |      |   |

| respid | Q46x4 | Q46x5a | Q46x5b | Q47a | Q47b | Q47c | Q47d | Q47e | Q47f | Q47g | Q47h | Q47i | Q47j | Q47k |
|--------|-------|--------|--------|------|------|------|------|------|------|------|------|------|------|------|
| 36837  | 2     | 4      | 2      |      |      |      |      |      |      |      |      |      |      |      |
| 36849  | 6     | 6      | 6      | 1    | 1    | 1    |      | 1    | 0    | 0    | 0    | 1    | 1    | 2    |
| 36851  | 4     | 4      | 4      |      |      |      |      |      |      |      |      |      |      |      |
| 36868  | 4     | 4      | 4      | 1    | 0    | 0    | 0    | 0    | 0    | 0    | 0    |      | 1    | 1    |
| 36870  | 5     | 5      | 5      | 1    | 1    | 1    | 2    | 4    | 1    | 2    | 3    | 3    | 3    | 3    |
| 36871  |       |        |        |      |      |      |      |      |      |      |      |      |      |      |
| 36874  | 4     | 3      | 3      | 0    | 0    | 0    | 0    | 0    | 0    |      |      | 0    | 1    | 1    |
| 36878  | 4     | 4      | 4      | 4    | 4    | 4    | 3    | 4    | 1    | 3    | 3    | 3    | 3    | 4    |
| 36887  | 5     | 4      | 4      |      |      |      |      |      |      |      |      |      |      |      |
| 36889  | 5     | 5      | 5      |      |      |      |      |      |      |      |      |      |      |      |
| 36891  | 4     | 5      | 5      | 0    | 0    | 0    | 0    | 0    | 0    | 0    | 0    | 0    | 1    | 1    |
| 36903  | 4     | 4      | 4      | 3    | 3    | 3    | 3    | 4    | 1    | 3    | 3    | 2    | 2    | 2    |
| 36905  | 3     | 2      | 2      |      |      |      |      |      |      |      |      |      |      |      |
| 36913  | 4     | 4      | 4      | 4    | 4    | 4    | 4    | 4    | 3    | 4    | 4    | 4    | 4    | 4    |
| 36949  | 4     | 4      | 4      |      |      |      |      |      |      |      |      |      |      |      |
| 36954  | 3     | 4      | 3      | 2    | 3    | 3    | 3    | 4    | 5    | 3    | 3    | 3    | 3    | 3    |
| 36962  | 2     | 3      | 3      |      |      |      |      |      |      |      |      |      |      |      |
| 36965  | 4     | 4      | 4      | 5    | 5    | 5    | 4    | 5    | 3    | 4    | 4    | 5    | 4    | 4    |
| 36970  | 6     | 6      | 6      | 5    | 5    | 5    | 5    | 5    | 2    | 5    | 5    | 5    | 5    | 5    |
| 36979  | 5     | 5      | 5      |      |      |      |      |      |      |      |      |      |      |      |
| 36990  | 4     | 5      | 4      |      |      |      |      |      |      |      |      |      |      |      |
| 36991  | 6     | 6      | 6      | 3    |      |      |      |      |      |      |      |      |      |      |
| 36992  | 4     | 3      | 3      | 3    | 2    | 3    | 2    | 3    | 2    | 3    | 3    | 2    | 2    | 2    |
| 37015  |       |        |        |      |      |      |      |      |      |      |      |      |      |      |
| 37017  | 4     | 4      | 4      |      |      |      |      |      |      |      |      |      |      |      |
| 37020  |       |        |        |      |      |      |      |      |      |      |      |      |      |      |
| 37033  | 2     | 3      | 3      | 3    | 3    | 3    | 3    | 3    | 2    | 2    | 2    | 2    | 2    | 3    |
| 37041  | 6     | 6      | 6      | 0    | 0    | 0    | 0    | 0    | 0    | 0    | 0    | 0    | 1    | 1    |
| 37048  | 4     | 4      | 4      |      |      |      |      |      |      |      |      |      |      |      |
| 37050  | 6     | 6      | 6      | 0    |      |      |      |      |      |      |      |      |      |      |
| 37054  | 6     | 6      | 6      |      |      |      |      |      |      |      |      |      |      |      |
| 37057  | 4     | 4      | 4      |      |      |      |      |      |      |      |      |      |      |      |

| respid | Q46x4 | Q46x5a | Q46x5b | Q47a | Q47b | Q47c | Q47d | Q47e | Q47f | Q47g | Q47h | Q47i | Q47j | Q47k |   |
|--------|-------|--------|--------|------|------|------|------|------|------|------|------|------|------|------|---|
| 37067  | 4     | 4      | 4      | 3    | 3    | 3    | 3    | 3    | 3    | 0    | 0    | 0    | 0    | 1    | 1 |
| 37074  | 4     | 3      | 5      | 4    | 4    | 4    | 4    | 4    | 5    | 1    | 4    | 4    | 5    | 4    | 4 |
| 37088  | 4     | 4      | 4      |      |      |      |      |      |      |      |      |      |      |      |   |
| 37090  | 3     | 3      | 2      | 2    | 1    | 2    | 1    | 4    | 3    | 2    | 3    | 2    | 3    | 3    | 3 |
| 37110  | 2     | 2      | 2      | 4    | 4    | 4    | 4    | 5    | 4    | 4    | 4    | 4    | 4    | 4    | 4 |
| 37122  | 5     | 4      | 4      | 0    | 0    | 0    | 0    | 0    | 0    | 0    | 0    | 0    | 0    | 1    | 1 |
| 37124  | 4     | 6      | 6      | 0    | 0    | 0    | 0    | 0    | 0    | 0    | 0    | 0    | 0    | 1    | 1 |
| 37126  |       |        |        |      |      |      |      |      |      |      |      |      |      |      |   |
| 37129  | 4     | 5      | 5      | 2    | 1    | 1    | 2    | 1    | 1    | 1    | 1    | 2    | 1    | 1    | 1 |
| 37130  | 4     | 4      | 4      |      |      |      |      |      |      |      |      |      |      |      |   |
| 37142  | 4     | 4      | 5      | 1    | 1    |      |      | 0    | 0    | 0    | 0    | 0    | 0    | 1    | 2 |
| 37160  | 4     | 4      | 4      | 2    | 2    | 2    | 2    | 4    | 1    | 1    | 1    | 0    | 2    | 1    | 2 |
| 37168  | 5     | 4      | 5      |      |      |      |      |      |      |      |      |      |      |      |   |
| 37169  | 6     | 6      | 6      | 5    | 4    | 5    |      |      |      |      |      |      |      |      |   |
| 37191  | 6     | 6      | 6      | 0    | 0    | 0    | 0    | 0    | 0    | 0    | 0    | 0    | 0    | 1    | 1 |
| 37197  | 2     | 4      | 3      | 1    | 2    | 2    | 2    | 1    | 2    | 1    | 1    | 1    | 1    | 2    | 1 |
| 37204  | 5     | 5      | 5      |      |      |      |      |      |      |      |      |      |      |      |   |
| 37213  | 2     | 3      | 2      |      |      |      |      |      |      |      |      |      |      |      |   |
| 37238  | 6     | 6      | 6      |      |      |      |      |      |      |      |      |      |      |      |   |
| 37242  | 3     | 2      | 2      |      |      |      |      |      |      |      |      |      |      |      |   |
| 37243  | 3     | 2      | 2      | 0    | 0    | 0    | 0    | 0    | 0    | 0    | 0    | 0    | 0    | 1    | 1 |
| 37275  | 3     | 4      | 4      |      |      |      |      |      |      |      |      |      |      |      |   |
| 37305  | 3     | 4      | 4      |      |      |      |      |      |      |      |      |      |      |      |   |
| 37357  | 3     | 3      | 2      |      |      |      |      |      |      |      |      |      |      |      |   |
| 37365  | 3     | 4      | 4      |      |      |      |      |      |      |      |      |      |      |      |   |
| 37370  |       |        |        |      |      |      |      |      |      |      |      |      |      |      |   |
| 37406  | 3     | 2      | 3      |      |      |      |      |      |      |      |      |      |      |      |   |
| 37410  | 4     | 6      | 3      |      |      |      |      |      |      |      |      |      |      |      |   |
| 37411  | 3     | 4      | 2      |      |      |      |      |      |      |      |      |      |      |      |   |
| 37427  | 4     | 4      | 2      |      |      |      |      |      |      |      |      |      |      |      |   |
| 37437  | 3     | 5      | 5      |      |      |      |      |      |      |      |      |      |      |      |   |
| 37440  | 4     | 3      | 4      | 0    | 0    | 0    | 0    | 0    | 0    | 0    | 0    | 0    | 0    | 1    | 1 |

| respid | Q46x4 | Q46x5a | Q46x5b | Q47a | Q47b | Q47c | Q47d | Q47e | Q47f | Q47g | Q47h | Q47i | Q47j | Q47k |
|--------|-------|--------|--------|------|------|------|------|------|------|------|------|------|------|------|
| 37452  | 4     | 5      | 4      |      |      |      |      |      |      |      |      |      |      |      |
| 37465  | 4     | 4      | 4      |      |      |      |      |      |      |      |      |      |      |      |
| 37468  | 4     | 3      | 4      |      |      |      |      |      |      |      |      |      |      |      |
| 37469  | 4     | 4      | 3      |      |      |      |      |      |      |      |      |      |      |      |
| 37477  | 4     | 4      | 4      |      |      |      |      |      |      |      |      |      |      |      |
| 37509  | 5     | 5      | 5      |      |      |      |      |      |      |      |      |      |      |      |
| 37513  | 6     | 6      | 6      |      |      |      |      |      |      |      |      |      |      |      |
| 37534  | 5     | 5      | 5      |      |      |      |      |      |      |      |      |      |      |      |
| 37537  | 6     | 6      | 6      |      |      |      |      |      |      |      |      |      |      |      |
| 37560  | 2     | 4      | 4      |      |      |      |      |      |      |      |      |      |      |      |
| 37566  | 4     | 4      | 4      |      |      |      |      |      |      |      |      |      |      |      |
| 37572  | 4     | 5      | 5      |      |      |      |      |      |      |      |      |      |      |      |
| 37574  | 4     | 4      | 5      |      |      |      |      |      |      |      |      |      |      |      |
| 37575  | 5     | 5      | 5      |      |      |      |      |      |      |      |      |      |      |      |
| 37590  | 6     | 6      | 6      |      |      |      |      |      |      |      |      |      |      |      |
| 37593  | 6     | 5      | 5      |      |      |      |      |      |      |      |      |      |      |      |
| 37599  | 5     | 5      | 5      |      |      |      |      |      |      |      |      |      |      |      |
| 37641  | 6     | 6      | 6      |      |      |      |      |      |      |      |      |      |      |      |
| 37651  | 4     | 4      | 4      |      |      |      |      |      |      |      |      |      |      |      |
| 37670  | 5     | 5      | 4      |      |      |      |      |      |      |      |      |      |      |      |
| 37680  | 6     | 6      | 6      |      |      |      |      |      |      |      |      |      |      |      |
| 37690  | 4     | 5      | 5      |      |      |      |      |      |      |      |      |      |      |      |
| 37694  |       |        |        |      |      |      |      |      |      |      |      |      |      |      |
| 37705  | 4     | 4      | 4      |      |      |      |      |      |      |      |      |      |      |      |
| 37710  | 2     | 2      | 2      |      |      |      |      |      |      |      |      |      |      |      |
| 37719  | 4     | 3      | 4      |      |      |      |      |      |      |      |      |      |      |      |
| 37741  | 4     | 2      | 3      |      |      |      |      |      |      |      |      |      |      |      |
| 37752  | 4     | 4      | 4      |      |      |      |      |      |      |      |      |      |      |      |
| 37755  | 4     | 3      | 3      |      |      |      |      |      |      |      |      |      |      |      |
| 37757  | 5     | 5      | 5      |      |      |      |      |      |      |      |      |      |      |      |
| 37783  | 4     | 3      | 4      |      |      |      |      |      |      |      |      |      |      |      |
| 37793  | 2     | 3      | 2      |      |      |      |      |      |      |      |      |      |      |      |

| respid | Q46x4 | Q46x5a | Q46x5b | Q47a | Q47b | Q47c | Q47d | Q47e | Q47f | Q47g | Q47h | Q47i | Q47j | Q47k |
|--------|-------|--------|--------|------|------|------|------|------|------|------|------|------|------|------|
| 37800  |       | 3      | 3      | 4    |      |      |      |      |      |      |      |      |      |      |
| 37801  |       | 5      | 5      | 5    |      |      |      |      |      |      |      |      |      |      |
| 37820  |       | 3      | 2      | 3    |      |      |      |      |      |      |      |      |      |      |
| 37826  |       | 4      | 6      | 6    |      |      |      |      |      |      |      |      |      |      |
| 37835  |       | 3      | 4      | 4    |      |      |      |      |      |      |      |      |      |      |
| 37839  |       | 3      | 4      | 3    |      |      |      |      |      |      |      |      |      |      |
| 37871  |       | 3      | 3      | 4    |      |      |      |      |      |      |      |      |      |      |
| 37876  |       | 4      | 3      | 2    |      |      |      |      |      |      |      |      |      |      |
| 37879  |       | 4      | 4      | 4    |      |      |      |      |      |      |      |      |      |      |
| 37894  |       | 4      | 4      | 4    |      |      |      |      |      |      |      |      |      |      |
| 37895  |       | 4      | 4      | 4    |      |      |      |      |      |      |      |      |      |      |
| 37901  |       | 4      | 4      | 4    |      |      |      |      |      |      |      |      |      |      |
| 37926  |       | 4      | 4      | 4    |      |      |      |      |      |      |      |      |      |      |
| 37937  |       | 3      | 4      | 4    |      |      |      |      |      |      |      |      |      |      |
| 37938  |       | 4      | 4      | 4    |      |      |      |      |      |      |      |      |      |      |
| 37959  |       | 4      | 5      | 4    |      |      |      |      |      |      |      |      |      |      |
| 37970  |       |        |        |      |      |      |      |      |      |      |      |      |      |      |
| 37972  |       | 4      | 4      | 2    |      |      |      |      |      |      |      |      |      |      |
| 37988  |       | 4      | 4      | 4    |      |      |      |      |      |      |      |      |      |      |
| 37989  |       | 2      | 4      | 4    |      |      |      |      |      |      |      |      |      |      |
| 38000  |       | 3      | 5      | 4    |      |      |      |      |      |      |      |      |      |      |
| 38028  |       | 3      | 4      | 2    |      |      |      |      |      |      |      |      |      |      |
| 38042  |       | 3      | 4      | 3    |      |      |      |      |      |      |      |      |      |      |
| 38052  |       | 6      | 6      | 6    |      |      |      |      |      |      |      |      |      |      |
| 38056  |       | 6      | 6      | 6    |      |      |      |      |      |      |      |      |      |      |
| 38106  |       | 3      | 4      | 3    |      |      |      |      |      |      |      |      |      |      |
| 38114  |       | 4      | 4      | 3    | 2    | 2    | 2    | 2    | 2    | 1    | 2    | 2    | 2    | 2    |
| 38134  |       | 6      | 4      | 5    |      |      |      |      |      |      |      |      |      |      |
| 38135  |       | 3      | 2      | 2    |      |      |      |      |      |      |      |      |      |      |
| 38139  |       | 3      | 4      | 4    |      |      |      |      |      |      |      |      |      |      |
| 38160  |       | 6      | 6      | 6    | 4    | 3    | 3    |      |      |      | 2    | 2    | 2    | 2    |
| 38164  |       | 2      | 5      | 3    |      |      |      |      |      |      |      |      |      |      |



| respid | Q46x4 | Q46x5a | Q46x5b | Q47a | Q47b | Q47c | Q47d | Q47e | Q47f | Q47g | Q47h | Q47i | Q47j | Q47k |
|--------|-------|--------|--------|------|------|------|------|------|------|------|------|------|------|------|
| 38168  |       |        |        |      |      |      |      |      |      |      |      |      |      |      |
| 38173  | 5     | 5      | 5      | 5    | 5    | 5    | 5    | 5    | 2    | 5    | 5    | 5    | 5    | 5    |
| 38193  | 3     | 3      | 2      |      |      |      |      |      |      |      |      |      |      |      |
| 38204  | 5     | 5      | 5      |      |      |      |      |      |      |      |      |      |      |      |
| 38206  | 4     | 4      | 4      |      |      |      |      |      |      |      |      |      |      |      |
| 38233  | 2     | 1      | 3      | 0    | 2    | 2    | 1    | 3    | 1    | 3    | 2    | 1    | 2    | 2    |
| 38242  | 3     | 4      | 4      |      |      |      |      |      |      |      |      |      |      |      |
| 38245  | 3     | 4      | 4      | 4    | 4    | 4    | 4    | 4    | 2    | 4    | 4    | 4    | 4    | 4    |
| 38261  | 4     | 4      | 3      |      |      |      |      |      |      |      |      |      |      |      |
| 38288  | 5     | 5      | 5      |      |      |      |      |      |      |      |      |      |      |      |
| 38296  | 4     | 4      | 4      |      |      |      |      |      |      |      |      |      |      |      |
| 38299  | 2     | 3      | 3      | 0    | 0    | 0    | 0    | 0    | 0    | 0    | 0    | 0    | 1    | 1    |
| 38300  | 5     | 4      | 4      | 0    | 2    | 3    | 3    | 4    | 2    | 2    | 2    | 2    | 3    | 2    |
| 38303  | 5     | 4      | 4      | 0    | 1    | 0    | 0    | 0    | 0    | 0    | 0    | 0    | 1    | 2    |
| 38317  | 5     | 6      | 6      |      |      |      |      |      |      |      |      |      |      |      |
| 38328  | 2     | 3      | 2      |      |      |      |      |      |      |      |      |      |      |      |
| 38333  | 4     | 4      | 4      |      |      |      |      |      |      |      |      |      |      |      |
| 38336  | 5     | 5      | 5      | 5    | 5    | 5    | 5    | 5    | 4    | 5    | 5    | 5    | 5    | 5    |
| 38338  | 6     | 6      | 6      |      |      |      |      |      |      |      |      |      |      |      |
| 38342  | 5     | 5      | 5      | 4    | 3    | 4    | 3    | 4    | 1    | 3    | 3    | 3    | 3    | 3    |
| 38360  | 6     | 6      | 6      | 0    | 2    | 0    |      |      |      | 0    | 0    | 0    |      | 1    |
| 38362  | 4     | 3      | 4      | 4    | 3    | 3    | 2    | 4    | 3    | 4    | 3    | 4    | 3    | 3    |
| 38364  | 3     | 4      | 3      | 0    | 0    | 0    | 0    | 0    | 0    | 0    | 0    | 0    | 1    | 1    |
| 38402  | 5     | 6      | 6      |      |      |      |      |      |      |      |      | 0    |      |      |
| 38423  | 4     | 4      | 3      |      |      |      |      |      |      |      |      |      |      |      |
| 38424  | 3     | 5      | 4      | 2    | 2    | 2    | 1    | 0    |      | 1    | 1    | 1    | 2    | 4    |
| 38435  | 3     | 3      | 2      |      |      |      |      |      |      |      |      |      |      |      |
| 38450  | 5     | 5      | 5      |      |      |      |      |      |      |      |      |      |      |      |
| 38455  | 5     | 2      | 2      | 0    | 0    | 5    | 2    | 1    | 1    |      | 2    | 2    | 5    | 2    |
| 38467  | 4     | 2      | 3      |      |      |      |      |      |      |      |      |      |      |      |
| 38468  | 4     | 6      | 6      | 2    | 3    | 3    | 3    | 4    | 1    | 3    | 3    | 2    | 2    | 2    |
| 38472  | 5     | 4      | 4      |      |      |      |      |      |      |      |      |      |      |      |

| respid | Q46x4 | Q46x5a | Q46x5b | Q47a | Q47b | Q47c | Q47d | Q47e | Q47f | Q47g | Q47h | Q47i | Q47j | Q47k |
|--------|-------|--------|--------|------|------|------|------|------|------|------|------|------|------|------|
| 38484  | 4     | 4      | 4      | 4    | 4    | 4    | 4    | 3    | 4    | 3    | 4    | 3    | 3    | 3    |
| 38498  | 1     | 5      | 6      | 1    | 0    | 0    | 0    | 0    | 0    | 0    | 0    | 0    | 0    | 1    |
| 38507  | 6     | 5      | 5      | 0    | 0    | 0    | 0    | 0    | 0    | 0    | 0    | 0    | 0    | 1    |
| 38511  | 5     | 5      | 5      |      |      |      |      |      |      |      |      |      |      |      |
| 38524  | 2     | 6      | 6      | 1    | 1    | 2    | 1    | 2    | 1    | 1    | 1    | 2    | 1    | 1    |
| 38526  | 6     | 6      | 6      |      |      |      |      |      |      |      |      |      |      |      |
| 38534  | 4     | 3      | 3      |      |      |      |      |      |      |      |      |      |      |      |
| 38536  | 4     | 4      | 4      | 2    | 3    | 3    | 3    | 3    | 4    | 2    | 2    | 3    | 2    | 3    |
| 38539  | 5     | 5      | 5      | 4    | 4    | 4    | 4    | 4    | 5    | 2    | 4    | 3    | 3    | 3    |
| 38547  | 5     | 5      | 5      |      |      |      |      |      |      |      |      |      |      |      |
| 38549  | 4     | 5      | 5      | 4    | 4    | 4    | 4    | 4    | 5    | 3    | 4    | 4    | 3    | 4    |
| 38575  | 3     | 4      | 3      |      |      |      |      |      |      |      |      |      |      |      |
| 38579  | 6     | 6      | 6      |      |      |      |      |      |      |      |      |      |      |      |
| 38585  | 4     | 4      | 4      | 2    | 5    | 0    | 0    | 0    | 0    | 0    | 0    | 0    | 0    | 1    |
| 38589  | 6     | 6      | 6      | 2    | 0    | 3    | 4    | 4    | 4    | 1    | 4    | 4    | 5    | 5    |
| 38595  | 3     | 4      | 4      |      |      |      |      |      |      |      |      |      |      |      |
| 38602  | 4     | 4      | 4      |      |      |      |      |      |      |      |      |      |      |      |
| 38603  | 5     | 6      | 6      |      |      |      |      |      |      |      |      |      |      |      |
| 38612  | 5     | 4      | 4      |      |      |      |      |      |      |      |      |      |      |      |
| 38621  | 3     | 3      | 2      |      |      |      |      |      |      |      |      |      |      |      |
| 38624  | 4     | 4      | 3      |      |      |      |      |      |      |      |      |      |      |      |
| 38636  |       |        |        |      |      |      |      |      |      |      |      |      |      |      |
| 38656  | 5     | 4      | 5      | 4    | 4    | 4    | 5    | 4    | 4    | 3    | 4    | 4    | 4    | 4    |
| 38668  | 4     | 4      | 4      | 4    | 4    | 4    | 4    | 4    | 4    | 3    | 4    | 4    | 4    | 4    |
| 38675  | 4     | 4      | 4      |      |      |      |      |      |      |      |      |      |      |      |
| 38676  | 5     | 4      | 4      | 2    | 2    | 2    | 2    | 2    | 3    | 1    | 2    | 2    | 2    | 2    |
| 38682  | 4     | 4      | 4      | 3    |      |      |      |      |      | 4    | 4    | 3    | 2    | 4    |
| 38689  | 5     | 5      | 5      | 3    | 3    | 3    | 2    | 4    | 4    | 1    |      | 3    | 5    | 5    |
| 38702  |       |        |        |      |      |      |      |      |      |      |      |      |      |      |
| 38704  | 3     | 4      | 2      |      |      |      |      |      |      |      |      |      |      |      |
| 38713  | 6     | 6      | 6      | 0    | 0    | 0    | 0    | 0    | 0    | 0    | 0    | 0    | 0    | 1    |
| 38718  | 6     | 4      | 4      | 3    | 3    | 3    | 3    | 3    | 4    | 2    | 3    | 3    | 4    | 2    |

| respid | Q46x4 | Q46x5a | Q46x5b | Q47a | Q47b | Q47c | Q47d | Q47e | Q47f | Q47g | Q47h | Q47i | Q47j | Q47k |
|--------|-------|--------|--------|------|------|------|------|------|------|------|------|------|------|------|
| 38725  | 5     | 1      | 1      |      |      |      |      |      |      |      |      |      |      |      |
| 38730  | 3     | 4      | 4      |      |      |      |      |      |      |      |      |      |      |      |
| 38737  | 4     | 3      | 3      |      |      |      |      |      |      |      |      |      |      |      |
| 38738  | 3     | 4      | 3      |      |      |      |      |      |      |      |      |      |      |      |
| 38744  | 6     | 6      | 6      |      |      |      |      |      |      |      |      |      |      |      |
| 38746  | 5     | 4      | 4      |      |      |      |      |      |      |      |      |      |      |      |
| 38753  | 5     | 5      | 5      |      |      |      |      |      |      |      |      |      |      |      |
| 38756  | 4     | 4      | 3      |      |      |      |      |      |      |      |      |      |      |      |
| 38760  | 4     | 3      | 4      |      |      |      |      |      |      |      |      |      |      |      |
| 38762  | 3     | 4      | 2      |      |      |      |      |      |      |      |      |      |      |      |
| 38765  | 4     | 4      | 3      |      |      |      |      |      |      |      |      |      |      |      |
| 38769  | 5     | 5      | 4      |      |      |      |      |      |      |      |      |      |      |      |
| 38781  | 4     | 3      | 4      |      |      |      |      |      |      |      |      |      |      |      |
| 38786  | 5     | 5      | 5      |      |      |      |      |      |      |      |      |      |      |      |
| 38790  | 6     | 6      | 6      | 0    | 0    | 0    | 0    | 0    |      | 0    | 0    | 0    |      |      |
| 38793  | 4     | 4      | 4      |      |      |      |      |      |      |      |      |      |      |      |
| 38797  | 6     | 6      | 6      |      |      |      |      |      |      |      |      |      |      |      |
| 38802  | 4     | 4      | 4      |      |      |      |      |      |      |      |      |      |      |      |
| 38815  | 6     | 6      | 6      | 0    | 0    | 0    | 0    | 0    | 0    | 0    | 0    | 0    | 1    | 1    |
| 38826  | 3     | 2      | 3      |      |      |      |      |      |      |      |      |      |      |      |
| 38828  | 5     | 4      | 5      | 4    | 4    |      | 4    | 5    | 1    | 4    | 4    | 5    | 4    | 3    |
| 38829  | 3     | 3      | 3      |      |      |      |      |      |      |      |      |      |      |      |
| 38835  | 4     | 5      | 4      | 0    | 1    | 2    | 2    | 4    | 1    | 2    | 2    | 2    | 2    | 3    |
| 38842  | 2     | 3      | 2      |      |      |      |      |      |      |      |      |      |      |      |
| 38853  | 4     | 4      | 4      | 4    | 3    | 2    | 2    | 4    | 1    | 2    | 2    | 5    | 5    | 2    |
| 38855  | 3     | 3      | 3      |      |      |      |      |      |      |      |      |      |      |      |
| 38860  | 3     | 4      | 3      |      |      |      |      |      |      |      |      |      |      |      |
| 38869  | 4     | 4      | 4      |      |      |      |      |      |      |      |      |      |      |      |
| 38882  | 2     | 4      | 2      |      |      |      |      |      |      |      |      |      |      |      |
| 38897  | 5     | 5      | 5      |      |      |      |      |      |      |      |      |      |      |      |
| 38903  | 5     | 5      | 5      |      |      |      |      |      |      |      |      |      |      |      |
| 38910  | 3     | 3      | 3      |      |      |      |      |      |      |      |      |      |      |      |

| respid | Q46x4 | Q46x5a | Q46x5b | Q47a | Q47b | Q47c | Q47d | Q47e | Q47f | Q47g | Q47h | Q47i | Q47j | Q47k |
|--------|-------|--------|--------|------|------|------|------|------|------|------|------|------|------|------|
| 38948  | 3     | 4      | 2      |      |      |      |      |      |      |      |      |      |      |      |
| 38949  | 4     | 4      | 4      | 0    | 0    | 0    | 0    | 0    | 0    | 0    | 0    | 0    | 1    | 2    |
| 38953  | 3     | 3      | 3      |      |      |      |      |      |      |      |      |      |      |      |
| 38989  | 3     | 3      | 2      |      |      |      |      |      |      |      |      |      |      |      |
| 38997  | 4     | 4      | 4      |      |      |      |      |      |      |      |      |      |      |      |
| 38999  | 6     | 6      | 6      |      |      |      |      |      |      |      |      |      | 3    | 3    |
| 39002  | 2     | 3      | 2      |      |      |      |      |      |      |      |      |      |      |      |
| 39003  | 2     | 2      | 1      |      |      |      |      |      |      |      |      |      |      |      |
| 39006  | 5     | 5      | 5      | 3    | 2    | 0    | 0    | 0    | 0    | 0    | 0    | 0    | 1    | 2    |
| 39014  |       |        |        |      |      |      |      |      |      |      |      |      |      |      |
| 39017  | 3     | 3      | 4      |      |      |      |      |      |      |      |      |      |      |      |
| 39018  | 2     | 2      | 2      |      |      |      |      |      |      |      |      |      |      |      |
| 39025  | 4     | 3      | 3      |      |      |      |      |      |      |      |      |      |      |      |
| 39031  | 4     | 4      | 1      |      |      |      |      |      |      |      |      |      |      |      |
| 39061  | 3     | 2      | 1      |      |      |      |      |      |      |      |      |      |      |      |
| 39131  | 2     | 2      | 4      |      |      |      |      |      |      |      |      |      |      |      |
| 39153  | 3     | 6      | 5      |      |      |      |      |      |      |      |      |      |      |      |
| 39194  | 2     | 2      | 2      |      |      |      |      |      |      |      |      |      |      |      |
| 39204  | 6     | 6      | 6      |      |      |      |      |      |      |      |      |      |      |      |
| 39208  | 6     | 4      | 5      |      |      |      |      |      |      |      |      |      |      |      |
| 39213  | 6     | 6      | 6      |      |      |      |      |      |      |      |      |      |      |      |
| 39231  | 4     | 4      | 4      |      |      |      |      |      |      |      |      |      |      |      |
| 39251  | 6     | 6      | 6      |      |      |      |      |      |      |      |      |      |      |      |
| 39257  | 6     | 6      | 6      |      |      |      |      |      |      |      |      |      |      |      |
| 39262  | 3     | 3      | 3      |      |      |      |      |      |      |      |      |      |      |      |
| 39269  | 4     | 3      | 4      |      |      |      |      |      |      |      |      |      |      |      |
| 39272  | 3     | 6      | 4      |      |      |      |      |      |      |      |      |      |      |      |
| 39280  | 3     | 4      | 4      |      |      |      |      |      |      |      |      |      |      |      |
| 39294  | 4     | 4      | 4      |      |      |      |      |      |      |      |      |      |      |      |
| 39297  | 4     | 4      | 3      |      |      |      |      |      |      |      |      |      |      |      |
| 39300  | 6     | 5      | 5      |      |      |      |      |      |      |      |      |      |      |      |
| 39307  | 4     | 3      | 4      |      |      |      |      |      |      |      |      |      |      |      |

| respid | Q46x4 | Q46x5a | Q46x5b | Q47a | Q47b | Q47c | Q47d | Q47e | Q47f | Q47g | Q47h | Q47i | Q47j | Q47k |
|--------|-------|--------|--------|------|------|------|------|------|------|------|------|------|------|------|
| 39320  | 3     | 3      | 2      |      |      |      |      |      |      |      |      |      |      |      |
| 39333  | 5     | 5      | 5      |      |      |      |      |      |      |      |      |      |      |      |
| 39335  | 3     | 3      | 3      |      |      |      |      |      |      |      |      |      |      |      |
| 39339  | 6     | 6      | 6      |      |      |      |      |      |      |      |      |      |      |      |
| 39375  | 3     | 1      | 1      |      |      |      |      |      |      |      |      |      |      |      |
| 39377  | 6     | 6      | 6      |      |      |      |      |      |      |      |      |      |      |      |
| 39380  | 3     | 4      | 4      |      |      |      |      |      |      |      |      |      |      |      |
| 39425  | 4     | 6      | 6      |      |      |      |      |      |      |      |      |      |      |      |
| 39590  | 6     | 6      | 6      |      |      |      |      |      |      |      |      |      |      |      |
| 40529  | 5     | 5      | 5      |      |      |      |      |      |      |      |      |      |      |      |
| 40702  | 6     | 6      | 6      |      |      |      |      |      |      |      |      |      |      |      |
| 40788  | 5     | 5      | 5      |      |      |      |      |      |      |      |      |      |      |      |
| 40841  | 5     | 5      | 5      |      |      |      |      |      |      |      |      |      |      |      |
| 40965  | 6     | 6      | 6      |      |      |      |      |      |      |      |      |      |      |      |
| 41092  | 6     | 6      | 6      | 0    | 0    | 0    | 0    | 0    |      |      |      |      |      |      |
| 41534  |       |        |        |      |      |      |      |      |      |      |      |      |      |      |
| 41919  | 6     | 6      | 6      |      |      |      |      |      |      |      |      |      |      |      |
| 42110  | 4     | 3      | 3      | 1    | 3    | 4    | 2    | 1    | 2    | 1    | 1    | 0    | 2    | 2    |
| 42135  | 5     | 4      | 5      | 5    | 5    | 5    | 5    | 5    | 1    | 5    | 5    | 5    | 5    | 4    |
| 42142  | 5     | 5      | 5      | 3    | 3    | 5    | 5    | 5    | 3    | 5    | 4    | 5    | 5    | 4    |
| 42163  | 4     | 4      | 4      |      |      |      |      |      |      |      |      |      |      |      |
| 42164  | 5     | 5      | 5      | 4    |      |      |      |      |      |      |      |      |      |      |
| 42172  | 2     | 3      | 2      |      |      |      |      |      |      |      |      |      |      |      |
| 42177  | 5     | 5      | 5      | 5    | 5    | 5    | 4    | 5    | 2    | 5    | 4    | 5    | 5    | 5    |
| 42181  | 4     | 6      | 6      | 4    | 3    | 3    | 4    | 4    | 5    | 3    | 3    | 4    | 5    | 4    |
| 42193  | 4     | 3      | 4      |      |      |      |      |      |      |      |      |      |      |      |
| 42196  | 4     | 5      | 4      | 5    | 4    | 4    | 4    | 5    | 1    | 4    | 4    | 5    | 5    | 3    |
| 42202  | 5     | 5      | 5      |      |      |      |      |      |      |      |      |      |      |      |
| 42248  | 4     | 4      | 4      | 4    | 4    | 4    | 4    | 4    | 2    | 4    | 3    | 3    | 3    | 3    |
| 42283  | 5     | 5      | 4      | 4    | 4    | 4    | 4    | 5    | 2    | 4    | 3    | 3    | 2    | 3    |
| 42284  | 3     | 2      | 1      | 2    | 2    | 2    | 3    | 1    | 1    | 2    | 3    | 1    | 3    | 2    |
| 42323  |       |        |        |      |      |      |      |      |      |      |      |      |      |      |

| respid | Q46x4 | Q46x5a | Q46x5b | Q47a | Q47b | Q47c | Q47d | Q47e | Q47f | Q47g | Q47h | Q47i | Q47j | Q47k |
|--------|-------|--------|--------|------|------|------|------|------|------|------|------|------|------|------|
| 42349  | 4     | 4      | 4      |      |      |      |      |      |      |      |      |      |      |      |
| 42351  |       |        |        |      |      |      |      |      |      |      |      |      |      |      |
| 42357  | 4     | 4      | 3      |      |      |      |      |      |      |      |      |      |      |      |
| 42366  |       |        |        |      |      |      |      |      |      |      |      |      |      |      |
| 42380  | 5     | 5      | 5      |      |      |      |      |      |      |      |      |      |      |      |
| 42414  | 2     | 3      | 3      | 3    | 2    | 3    | 4    | 1    | 2    | 3    | 3    | 1    | 2    | 4    |
| 42420  | 2     | 2      | 3      | 4    | 4    | 4    | 4    | 4    | 5    | 3    | 2    | 3    | 3    | 4    |
| 42454  |       |        |        |      |      |      |      |      |      |      |      |      |      |      |
| 42458  | 5     | 5      | 5      |      |      |      |      |      |      |      |      |      |      |      |
| 42461  | 5     | 5      | 5      | 0    | 0    | 0    | 0    | 0    | 0    | 0    | 0    | 0    | 1    | 1    |
| 42488  | 5     | 4      | 3      |      |      |      |      |      |      |      |      |      |      |      |
| 42511  | 6     | 6      | 6      |      |      |      |      |      |      |      |      |      |      |      |
| 42512  | 5     | 5      | 5      |      |      |      |      |      |      |      |      |      |      |      |
| 42530  | 3     | 4      | 4      |      |      |      |      |      |      |      |      |      |      |      |
| 42531  | 3     | 2      | 2      | 3    | 1    | 2    | 2    | 1    | 2    | 1    | 2    | 1    | 1    | 2    |
| 42533  | 5     | 5      | 5      | 0    | 0    | 0    | 0    | 0    | 2    | 1    | 1    | 1    | 1    | 1    |
| 42549  | 5     | 5      | 5      | 1    | 1    | 1    | 1    | 5    | 1    | 2    | 2    | 2    | 2    | 2    |
| 42550  | 6     | 6      | 6      |      |      |      |      |      |      |      |      |      |      |      |
| 42553  |       |        |        |      |      |      |      |      |      |      |      |      |      |      |
| 42562  | 4     | 4      | 4      |      |      |      |      |      |      |      |      |      |      |      |
| 42567  | 5     | 6      | 6      | 1    | 1    | 1    | 1    | 5    | 0    | 0    | 0    | 0    | 1    | 1    |
| 42589  | 4     | 4      | 4      |      |      |      |      |      |      |      |      |      |      |      |
| 42604  | 5     | 5      | 5      |      |      |      |      |      |      |      |      |      |      |      |
| 42618  | 4     | 4      | 5      |      |      |      |      |      |      |      |      |      |      |      |
| 42621  | 2     | 4      | 3      | 2    | 3    | 4    | 4    | 5    | 3    | 3    | 4    | 4    | 4    | 3    |
| 42627  | 3     | 5      | 5      |      |      |      |      |      |      |      |      |      |      |      |
| 42641  | 5     | 5      | 5      | 4    | 4    | 4    | 2    | 3    | 2    | 3    | 3    | 3    | 3    | 4    |
| 42655  | 1     | 2      | 2      | 2    | 2    | 2    | 3    | 1    | 2    | 2    | 1    | 3    | 2    | 2    |
| 42666  | 4     | 4      | 5      |      |      |      |      |      |      |      |      |      |      |      |
| 42667  | 3     | 2      | 1      | 2    | 4    | 4    | 4    | 5    | 4    | 4    | 3    | 4    | 4    | 4    |
| 42697  | 6     | 4      | 4      |      |      |      |      |      |      |      |      |      |      |      |
| 42703  | 6     | 5      | 5      |      |      |      |      |      |      |      |      |      |      |      |

| respid | Q46x4 | Q46x5a | Q46x5b | Q47a | Q47b | Q47c | Q47d | Q47e | Q47f | Q47g | Q47h | Q47i | Q47j | Q47k |   |
|--------|-------|--------|--------|------|------|------|------|------|------|------|------|------|------|------|---|
| 42712  | 5     | 5      | 4      | 2    | 2    | 2    | 2    | 2    | 4    | 1    | 2    | 3    | 2    | 2    | 2 |
| 42731  | 4     | 4      | 4      | 0    | 0    | 0    | 0    | 0    | 0    | 0    | 0    | 0    | 0    | 1    | 1 |
| 42780  | 5     | 5      | 5      | 5    | 5    | 5    | 5    | 5    | 5    |      | 4    | 4    | 5    | 4    | 3 |
| 42785  | 5     | 5      | 5      |      |      |      |      |      |      |      |      |      |      |      |   |
| 42788  | 4     | 4      | 5      | 1    | 1    | 1    | 0    | 1    | 0    | 0    | 0    | 0    | 0    | 1    | 1 |
| 42802  | 3     | 4      | 4      | 0    | 0    | 1    | 1    | 1    | 0    | 0    | 0    | 0    |      |      |   |
| 42818  | 5     | 5      | 5      |      |      |      |      |      |      |      |      |      |      |      |   |
| 42821  | 5     | 5      | 4      |      |      |      |      |      |      |      |      |      |      |      |   |
| 42824  | 6     | 6      | 6      |      |      |      |      |      |      |      |      |      |      |      |   |
| 42831  | 5     | 5      | 5      |      |      |      |      |      |      |      |      |      |      |      |   |
| 42836  | 4     | 4      | 5      | 4    | 5    | 5    | 4    | 5    | 5    | 4    | 4    | 4    | 5    | 5    | 4 |
| 42864  | 4     | 4      | 4      | 0    | 0    | 0    | 0    | 0    | 0    | 0    | 0    | 0    | 0    | 1    | 1 |
| 42875  | 5     | 5      | 5      | 5    | 5    | 5    | 5    | 5    | 5    | 3    | 5    | 4    | 5    | 5    | 5 |
| 42891  | 1     | 2      | 2      |      |      |      |      |      |      |      |      |      |      |      |   |
| 42897  | 6     | 6      | 6      |      |      |      |      |      |      |      |      |      |      |      |   |
| 42900  | 6     | 6      | 6      |      |      |      |      |      |      |      |      |      |      |      |   |
| 42902  | 3     | 3      | 4      | 1    | 2    |      | 2    | 2    | 2    | 2    | 2    | 3    | 2    | 3    | 2 |
| 42921  | 5     | 5      | 5      |      |      |      |      |      |      |      |      |      |      |      |   |
| 42925  | 4     | 4      | 4      |      |      |      |      |      |      |      |      |      |      |      |   |
| 42944  |       |        |        |      |      |      |      |      |      |      |      |      |      |      |   |
| 42950  |       |        |        |      |      |      |      |      |      |      |      |      |      |      |   |
| 42963  | 6     | 6      | 6      |      |      |      |      |      |      |      |      |      |      |      |   |
| 42967  | 5     | 5      | 4      | 4    | 4    | 4    | 3    | 4    | 5    | 4    | 4    | 4    | 4    | 4    | 4 |
| 42985  | 5     | 5      | 5      |      |      |      |      |      |      |      |      |      |      |      |   |
| 42990  | 5     | 4      | 4      | 4    | 4    | 4    | 4    | 4    | 5    |      |      | 4    |      |      |   |
| 42996  | 4     | 5      | 5      | 3    | 2    | 2    | 2    | 2    | 3    | 1    | 3    | 2    | 2    | 2    | 3 |
| 43002  | 5     | 5      | 5      |      |      |      |      |      |      |      |      |      |      |      |   |
| 43004  | 5     | 5      | 5      | 4    | 2    | 4    | 4    | 4    | 5    | 0    | 3    | 3    | 5    | 5    | 3 |
| 43012  | 5     | 5      | 5      |      |      |      |      |      |      |      |      |      |      |      |   |
| 43027  | 4     | 3      | 2      | 0    | 0    | 0    | 1    | 0    | 0    | 0    | 0    | 1    | 1    | 1    | 2 |
| 43028  | 6     | 6      | 6      | 5    | 5    | 5    | 5    | 5    | 5    | 0    | 0    | 3    | 5    | 5    | 5 |
| 43029  | 4     | 4      | 6      |      |      |      |      |      |      |      |      |      |      |      |   |

| respid | Q46x4 | Q46x5a | Q46x5b | Q47a | Q47b | Q47c | Q47d | Q47e | Q47f | Q47g | Q47h | Q47i | Q47j | Q47k |
|--------|-------|--------|--------|------|------|------|------|------|------|------|------|------|------|------|
| 43031  |       | 5      | 5      | 5    |      |      |      |      |      |      |      |      |      |      |
| 43042  |       | 1      | 1      | 1    | 0    | 0    | 0    | 0    | 0    | 0    | 0    | 0    | 0    | 1 1  |
| 43054  |       | 4      | 6      | 6    |      |      |      |      |      |      |      |      |      |      |
| 43058  |       | 5      | 5      | 4    | 5    | 5    | 5    | 5    | 5    | 5    | 5    | 4    | 5    | 5 5  |
| 43064  |       | 4      | 4      | 4    |      |      |      |      |      |      |      |      |      |      |
| 43069  |       | 6      | 6      | 6    |      |      |      |      |      |      |      |      |      |      |
| 43071  |       |        |        |      |      |      |      |      |      |      |      |      |      |      |
| 43072  |       | 5      | 5      | 5    | 4    | 4    | 5    | 5    | 5    | 3    | 4    | 4    |      | 4 4  |
| 43077  |       | 6      | 6      | 6    |      |      |      |      |      |      |      |      |      |      |
| 43078  |       | 2      | 3      | 3    | 1    | 1    | 1    | 0    | 1    | 0    | 1    | 1    | 1    | 2 2  |
| 43082  |       |        |        |      |      |      |      |      |      |      |      |      |      |      |
| 43092  |       | 6      | 6      | 6    | 5    | 5    | 5    | 5    | 5    | 3    | 5    | 4    | 5    | 5 5  |
| 43096  |       | 5      | 5      | 5    | 5    | 5    | 5    | 5    | 5    | 2    | 5    | 5    | 5    | 5 5  |
| 43109  |       |        |        |      |      |      |      |      |      |      |      |      |      |      |
| 43113  |       | 4      | 4      | 4    |      |      |      |      |      |      |      |      |      |      |
| 43123  |       | 3      | 4      | 5    |      |      |      |      |      |      |      |      |      |      |
| 43127  |       | 5      | 6      | 5    |      |      |      |      |      |      |      |      |      |      |
| 43128  |       | 4      | 5      | 5    |      |      |      |      |      |      |      |      |      |      |
| 43129  |       | 5      | 5      | 5    |      |      |      |      |      |      |      |      |      |      |
| 43133  |       | 3      | 3      | 3    |      |      |      |      |      |      |      |      |      |      |
| 43140  |       |        |        |      |      |      |      |      |      |      |      |      |      |      |
| 43143  |       | 2      | 2      | 2    |      |      |      |      |      |      |      |      |      |      |
| 43149  |       | 3      | 3      | 3    |      |      |      |      |      |      |      |      |      |      |
| 43150  |       | 2      | 2      | 2    |      |      |      |      |      |      |      |      |      |      |
| 43153  |       | 4      | 4      | 4    |      |      |      |      |      |      |      |      |      |      |
| 43170  |       | 5      | 5      | 5    | 5    | 4    | 4    | 5    | 5    | 2    | 5    | 5    | 5    | 5 3  |
| 43187  |       | 6      | 6      | 6    |      |      |      |      |      |      |      |      |      |      |
| 43188  |       | 5      | 4      | 5    |      |      |      |      |      |      |      |      |      |      |
| 43198  |       | 5      | 4      | 5    |      |      |      |      |      |      |      |      |      |      |
| 43208  |       | 6      | 6      | 6    |      |      |      |      |      |      |      |      |      |      |
| 43216  |       | 5      | 5      | 5    | 4    | 4    | 4    | 4    | 4    | 3    | 4    | 4    | 5    | 5 3  |
| 43222  |       | 2      | 3      | 3    |      |      |      |      |      |      |      |      |      |      |



| respid | Q46x4 | Q46x5a | Q46x5b | Q47a | Q47b | Q47c | Q47d | Q47e | Q47f | Q47g | Q47h | Q47i | Q47j | Q47k |
|--------|-------|--------|--------|------|------|------|------|------|------|------|------|------|------|------|
| 43224  | 4     | 5      | 5      |      |      |      |      |      |      |      |      |      |      |      |
| 43230  | 3     | 3      | 3      | 1    | 2    | 1    | 0    | 0    | 1    | 0    | 1    | 1    | 1    | 2    |
| 43231  | 3     | 3      | 3      | 1    | 1    | 1    | 0    | 0    | 1    | 1    | 1    | 1    | 2    | 2    |
| 43265  | 2     | 3      | 2      | 1    | 0    | 0    | 1    | 1    | 2    | 2    | 2    | 2    | 2    | 1    |
| 43270  | 3     | 3      | 3      | 1    | 1    | 1    | 1    | 1    | 2    | 1    | 1    | 1    | 2    | 3    |
| 43283  | 2     | 1      | 1      | 1    | 1    | 1    | 0    | 1    | 1    | 1    | 1    | 1    | 2    | 2    |
| 43295  | 3     | 3      | 3      | 1    | 0    | 1    | 1    | 1    | 1    | 0    | 0    | 1    | 2    | 1    |
| 43297  | 5     | 5      | 5      | 5    | 5    | 5    | 5    | 5    | 4    | 4    | 4    | 5    | 4    | 4    |
| 43299  | 3     | 4      | 4      |      |      |      |      |      |      |      |      |      |      |      |
| 43307  | 4     | 4      | 5      |      |      |      |      |      |      |      |      |      |      |      |
| 43316  | 2     | 3      | 3      | 1    | 1    | 1    | 1    | 1    | 1    | 1    | 1    | 1    | 2    | 2    |
| 43318  | 3     | 3      | 2      | 1    | 1    | 2    | 1    | 2    | 1    | 1    | 1    | 2    | 2    | 2    |
| 43319  | 6     | 6      | 6      | 4    | 5    | 5    | 4    | 5    | 1    | 3    | 2    | 5    | 4    | 3    |
| 43324  | 2     | 3      | 3      | 1    | 1    | 1    | 1    | 1    | 1    | 1    | 1    | 1    | 2    | 2    |
| 43325  | 5     | 5      | 5      |      |      |      |      |      |      |      |      |      |      |      |
| 43327  | 5     | 5      | 5      |      |      |      |      |      |      |      |      |      |      |      |
| 43338  | 4     | 3      | 4      |      |      |      |      |      |      |      |      |      |      |      |
| 43342  | 5     | 3      | 2      |      |      |      |      |      |      |      |      |      |      |      |
| 43348  | 5     | 3      | 5      |      |      |      |      |      |      |      |      |      |      |      |
| 43395  | 3     | 3      | 3      | 2    | 1    | 1    | 1    | 1    | 0    | 1    | 1    | 1    | 2    | 1    |
| 43404  | 2     | 2      | 2      | 1    | 1    | 1    | 1    | 0    | 1    | 1    | 1    | 0    | 2    | 1    |
| 43406  | 5     | 4      | 4      | 0    | 1    | 0    | 0    | 0    | 0    | 0    | 0    | 0    | 1    | 1    |
| 43407  | 6     | 6      | 6      |      |      |      |      |      |      |      |      |      |      |      |
| 43411  | 4     | 5      | 5      |      |      |      |      |      |      |      |      |      |      |      |
| 43416  | 3     | 3      | 3      | 1    | 1    | 1    | 1    | 1    | 1    | 1    | 1    | 1    | 2    | 2    |
| 43428  | 6     | 6      | 6      | 4    | 4    | 4    | 4    | 5    | 4    | 4    | 4    | 4    | 4    | 4    |
| 43429  | 3     | 4      | 3      | 2    | 2    | 2    | 2    | 4    | 2    | 2    | 2    | 2    | 3    | 3    |
| 43432  | 5     | 4      | 4      | 5    | 5    | 5    | 4    | 5    | 2    | 4    | 4    | 4    | 4    | 3    |
| 43443  | 5     | 5      | 5      | 1    | 2    | 4    | 4    | 5    | 0    | 1    | 0    | 1    | 1    | 2    |
| 43455  |       |        |        |      |      |      |      |      |      |      |      |      |      |      |
| 43457  | 4     | 3      | 3      | 3    | 3    | 3    | 3    | 4    | 2    | 4    | 3    | 4    | 3    | 3    |
| 43458  | 5     | 5      | 5      |      |      |      |      |      |      |      |      |      |      |      |

| respid | Q46x4 | Q46x5a | Q46x5b | Q47a | Q47b | Q47c | Q47d | Q47e | Q47f | Q47g | Q47h | Q47i | Q47j | Q47k |
|--------|-------|--------|--------|------|------|------|------|------|------|------|------|------|------|------|
| 43477  | 3     | 4      | 4      |      |      |      |      |      |      |      |      |      |      |      |
| 43520  | 5     | 5      | 5      |      |      |      |      |      |      |      |      |      |      |      |
| 43521  | 4     | 4      | 4      | 5    | 5    | 5    | 5    | 4    | 3    | 3    | 2    | 5    | 3    | 3    |
| 43550  | 5     | 5      | 5      |      |      |      |      |      |      |      |      |      |      |      |
| 43551  | 5     | 4      | 5      | 4    | 4    | 4    | 3    | 4    | 1    | 3    | 3    | 4    | 3    | 3    |
| 43554  | 5     | 4      | 4      |      |      |      |      |      |      |      |      |      |      |      |
| 43560  | 5     | 5      | 5      |      |      |      |      |      |      |      |      |      |      |      |
| 43569  | 6     | 6      | 6      |      |      |      |      |      |      |      |      |      |      |      |
| 43583  | 6     | 6      | 4      |      |      |      |      |      |      |      |      |      |      |      |
| 43590  | 4     | 4      | 4      |      |      |      |      |      |      |      |      |      |      |      |
| 43591  | 5     | 5      | 5      |      |      |      |      |      |      |      |      |      |      |      |
| 43595  |       |        |        |      |      |      |      |      |      |      |      |      |      |      |
| 43599  | 6     | 6      | 6      |      |      |      |      |      |      |      |      |      |      |      |
| 43606  | 6     | 5      | 5      |      |      |      |      |      |      |      |      |      |      |      |
| 43609  | 6     | 6      | 6      |      |      |      |      |      |      |      |      |      |      |      |
| 43629  | 6     | 6      | 6      | 0    | 0    | 0    | 0    | 0    | 0    | 0    | 0    | 0    | 1    | 1    |
| 43636  | 5     | 5      | 5      |      |      |      |      |      |      |      |      |      |      |      |
| 43661  | 6     | 6      | 6      | 2    | 4    | 4    | 4    | 5    | 2    | 4    | 4    | 3    | 4    | 4    |
| 43668  | 4     | 4      | 4      | 5    | 5    | 5    | 5    | 5    | 5    | 5    | 4    | 5    | 5    | 5    |
| 43672  |       |        |        |      |      |      |      |      |      |      |      |      |      |      |
| 43677  | 4     | 4      | 4      |      |      |      |      |      |      |      |      |      |      |      |
| 43683  | 3     | 3      | 4      |      |      |      |      |      |      |      |      |      |      |      |
| 43708  | 3     | 4      | 4      | 2    | 2    | 2    | 2    | 4    | 2    | 2    | 2    | 2    | 3    | 2    |
| 43713  | 5     | 5      | 5      |      |      |      |      |      |      |      |      |      |      |      |
| 43718  |       |        |        |      |      |      |      |      |      |      |      |      |      |      |
| 43725  | 4     | 4      | 4      |      |      |      |      |      |      |      |      |      |      |      |
| 43747  | 5     | 4      | 4      |      |      |      |      |      |      |      |      |      |      |      |
| 43755  | 5     | 5      | 5      |      |      |      |      |      |      |      |      |      |      |      |
| 43770  | 5     | 5      | 5      | 0    |      |      |      |      |      |      |      |      |      |      |
| 43775  | 4     | 4      | 4      |      |      |      |      |      |      |      |      |      |      |      |
| 43788  |       |        |        |      |      |      |      |      |      |      |      |      |      |      |
| 43790  | 2     | 1      | 1      |      |      |      |      |      |      |      |      |      |      |      |

| respid | Q46x4 | Q46x5a | Q46x5b | Q47a | Q47b | Q47c | Q47d | Q47e | Q47f | Q47g | Q47h | Q47i | Q47j | Q47k |
|--------|-------|--------|--------|------|------|------|------|------|------|------|------|------|------|------|
| 43797  | 3     | 4      | 4      |      |      |      |      |      |      |      |      |      |      |      |
| 43798  | 3     | 3      | 3      |      |      |      |      |      |      |      |      |      |      |      |
| 43811  | 2     | 2      | 2      |      |      |      |      |      |      |      |      |      |      |      |
| 43819  | 2     | 2      | 2      |      |      |      |      |      |      |      |      |      |      |      |
| 43821  | 3     | 4      | 5      |      |      |      |      |      |      |      |      |      |      |      |
| 43822  | 6     | 6      | 6      |      |      |      |      |      |      |      |      |      |      |      |
| 43825  | 2     | 3      | 4      |      |      |      |      |      |      |      |      |      |      |      |
| 43826  | 5     | 5      | 5      |      |      |      |      |      |      |      |      |      |      |      |
| 43831  | 5     | 5      | 5      |      |      |      |      |      |      |      |      |      |      |      |
| 43836  | 2     | 3      | 3      |      |      |      |      |      |      |      |      |      |      |      |
| 43852  | 2     | 1      | 1      |      |      |      |      |      |      |      |      |      |      |      |
| 43857  | 4     | 5      | 5      |      |      |      |      |      |      |      |      |      |      |      |
| 43858  | 5     | 5      | 5      | 4    | 4    | 4    | 3    | 3    | 3    | 5    | 4    | 5    | 4    | 5    |
| 43859  | 3     | 3      | 3      |      |      |      |      |      |      |      |      |      |      |      |
| 43863  | 6     | 6      | 6      |      |      |      |      |      |      |      |      |      |      |      |
| 43868  | 2     | 4      | 4      |      |      |      |      |      |      |      |      |      |      |      |
| 43872  | 1     | 2      | 3      |      |      |      |      |      |      |      |      |      |      |      |
| 43874  | 2     | 3      | 3      |      |      |      |      |      |      |      |      |      |      |      |
| 43882  | 5     | 5      | 5      |      |      |      |      |      |      |      |      |      |      |      |
| 43886  |       |        |        |      |      |      |      |      |      |      |      |      |      |      |
| 43903  | 3     | 4      | 2      |      |      |      |      |      |      |      |      |      |      |      |
| 43929  | 5     | 5      | 5      |      |      |      |      |      |      |      |      |      |      |      |
| 43932  | 6     | 6      | 6      |      |      |      |      |      |      |      |      |      |      |      |
| 43936  | 6     | 6      | 6      |      |      |      |      |      |      |      |      |      |      |      |
| 43962  | 6     | 6      | 6      |      |      |      |      |      |      |      |      |      |      |      |
| 43964  | 5     | 4      | 5      |      |      |      |      |      |      |      |      |      |      |      |
| 43968  | 6     | 3      | 2      |      |      |      |      |      |      |      |      |      |      |      |
| 43979  | 5     | 5      | 5      |      |      |      |      |      |      |      |      |      |      |      |
| 44006  | 4     | 4      | 4      | 2    | 2    | 2    | 2    | 3    | 1    | 2    | 3    | 3    | 3    | 3    |
| 44009  | 5     | 5      | 4      |      |      |      |      |      |      |      |      |      |      |      |
| 44023  | 3     | 3      | 4      |      |      |      |      |      |      |      |      |      |      |      |
| 44035  | 2     | 2      | 2      |      |      |      |      |      |      |      |      |      |      |      |

| respid | Q46x4 | Q46x5a | Q46x5b | Q47a | Q47b | Q47c | Q47d | Q47e | Q47f | Q47g | Q47h | Q47i | Q47j | Q47k |   |
|--------|-------|--------|--------|------|------|------|------|------|------|------|------|------|------|------|---|
| 44038  | 4     | 4      | 4      |      | 2    | 4    | 4    | 4    | 5    | 1    | 4    | 3    | 4    | 5    | 2 |
| 44039  | 2     | 2      | 2      |      |      |      |      |      |      |      |      |      |      |      |   |
| 44043  | 3     | 3      | 3      |      |      |      |      |      |      |      |      |      |      |      |   |
| 44048  | 2     | 2      | 2      |      |      |      |      |      |      |      |      |      |      |      |   |
| 44050  | 4     | 4      | 4      |      |      |      |      |      |      |      |      |      |      |      |   |
| 44051  | 1     | 3      | 3      |      |      |      |      |      |      |      |      |      |      |      |   |
| 44061  | 2     | 2      | 2      |      |      |      |      |      |      |      |      |      |      |      |   |
| 44063  | 1     | 3      | 3      |      |      |      |      |      |      |      |      |      |      |      |   |
| 44072  | 2     | 2      | 2      |      |      |      |      |      |      |      |      |      |      |      |   |
| 44075  | 3     | 3      | 3      |      |      |      |      |      |      |      |      |      |      |      |   |
| 44089  | 3     | 3      | 2      |      |      |      |      |      |      |      |      |      |      |      |   |
| 44090  | 4     | 4      | 4      | 4    | 4    | 4    | 4    | 4    | 1    | 1    | 2    | 2    | 2    | 2    | 2 |
| 44091  | 1     | 2      | 2      |      |      |      |      |      |      |      |      |      |      |      |   |
| 44092  | 6     | 6      | 6      |      |      |      |      |      |      |      |      |      |      |      |   |
| 44110  | 3     | 3      | 2      |      |      |      |      |      |      |      |      |      |      |      |   |
| 44112  | 2     | 2      | 2      |      |      |      |      |      |      |      |      |      |      |      |   |
| 44114  | 3     | 3      | 3      |      |      |      |      |      |      |      |      |      |      |      |   |
| 44143  | 5     | 6      | 5      | 2    | 2    | 2    | 2    | 3    | 1    | 1    | 2    | 2    | 2    | 2    | 2 |
| 44179  | 4     | 4      | 4      |      |      |      |      |      |      |      |      |      |      |      |   |
| 44234  | 5     | 4      | 5      | 0    | 0    | 0    | 0    | 0    | 0    | 0    | 0    | 0    | 0    | 1    | 1 |
| 44236  | 4     | 5      | 5      | 5    | 5    | 5    | 5    | 5    | 1    | 5    | 5    | 5    | 5    | 5    | 5 |
| 44239  | 2     | 2      | 2      | 1    | 1    | 2    | 1    | 1    | 1    | 1    | 1    | 1    | 1    | 2    | 2 |
| 44241  | 2     | 3      | 3      | 1    | 1    | 1    | 1    | 1    | 1    | 1    | 1    | 1    | 1    | 2    | 2 |
| 44253  |       |        |        |      |      |      |      |      |      |      |      |      |      |      |   |
| 44260  | 2     | 2      | 2      | 2    | 4    | 4    | 4    | 3    | 3    | 3    | 4    | 3    | 4    | 3    | 3 |
| 44261  | 2     | 2      | 1      | 1    | 4    | 3    | 5    | 5    | 4    | 1    | 2    | 2    | 3    | 2    | 2 |
| 44263  | 1     | 2      | 2      | 1    | 1    | 1    | 1    | 1    | 0    | 4    | 3    | 3    | 5    | 5    | 5 |
| 44264  | 5     | 5      | 5      |      |      |      |      |      |      |      |      |      |      |      |   |
| 44265  | 6     | 6      | 6      | 5    | 5    | 5    | 5    | 5    | 5    | 5    | 5    | 5    | 5    | 5    | 5 |
| 44267  | 2     | 3      | 3      | 2    | 1    | 2    | 2    | 1    | 1    | 1    | 1    | 0    | 2    | 3    | 3 |
| 44306  | 5     | 4      | 4      |      |      |      |      |      |      |      |      |      |      |      |   |
| 44309  | 2     | 2      | 3      |      |      |      |      |      |      |      |      |      |      |      |   |

| respid | Q46x4 | Q46x5a | Q46x5b | Q47a | Q47b | Q47c | Q47d | Q47e | Q47f | Q47g | Q47h | Q47i | Q47j | Q47k |
|--------|-------|--------|--------|------|------|------|------|------|------|------|------|------|------|------|
| 44310  | 6     | 6      | 6      |      |      |      |      |      |      |      |      |      |      |      |
| 44361  | 4     | 4      | 4      |      |      |      |      |      |      |      |      |      |      |      |
| 44380  | 6     | 3      | 6      |      |      |      |      |      |      |      |      |      |      |      |
| 44386  | 6     | 5      | 5      |      |      |      |      |      |      |      |      |      |      |      |
| 44419  | 4     | 4      | 4      |      |      |      |      |      |      |      |      |      |      |      |
| 44426  | 4     | 5      | 5      |      |      |      |      |      |      |      |      |      |      |      |
| 44479  | 3     | 2      | 2      | 2    | 1    | 1    | 2    | 2    | 1    | 1    | 1    | 2    | 2    | 2    |
| 44484  | 6     | 6      | 6      | 0    | 0    | 0    | 0    | 0    | 0    | 0    | 0    | 0    | 1    | 1    |
| 44487  | 4     | 3      | 4      |      |      |      |      |      |      |      |      |      |      |      |
| 44509  | 5     | 5      | 5      |      |      |      |      |      |      |      |      |      |      |      |
| 44540  | 5     | 5      | 4      |      |      |      |      |      |      |      |      |      |      |      |
| 44551  | 4     | 4      | 4      | 0    | 0    | 0    | 0    | 0    | 0    | 0    | 0    | 2    | 4    | 3    |
| 44553  | 5     | 5      | 5      | 5    | 5    | 5    | 5    | 5    | 1    | 5    | 4    | 4    | 5    | 4    |
| 44650  | 5     | 5      | 5      |      |      |      |      |      |      |      |      |      |      |      |
| 44665  | 4     | 4      | 4      |      |      |      |      |      |      |      |      |      |      |      |
| 44779  | 5     | 5      | 4      | 5    | 5    | 5    | 4    | 4    | 5    | 2    | 2    | 3    | 3    | 4    |
| 44797  | 6     | 4      | 5      |      |      |      |      |      |      |      |      |      |      |      |
| 44807  | 4     | 4      | 4      | 0    | 0    | 0    | 0    | 0    | 0    | 0    | 0    | 0    | 1    | 1    |
| 44815  | 4     | 4      | 4      |      |      |      |      |      |      |      |      |      |      |      |
| 44836  | 5     | 5      | 5      |      |      |      |      |      |      |      |      |      |      |      |
| 44868  | 5     | 5      | 5      | 3    | 0    | 0    | 0    | 0    | 0    | 0    | 0    | 0    | 1    | 2    |
| 44927  | 4     | 4      | 4      | 2    | 3    | 4    | 3    | 3    | 2    | 2    | 3    | 4    | 4    | 4    |
| 44983  |       |        |        |      |      |      |      |      |      |      |      |      |      |      |
| 45040  | 6     | 5      | 5      |      |      |      |      |      |      |      |      |      |      |      |
| 45051  | 5     | 5      | 4      |      |      |      |      |      |      |      |      |      |      |      |
| 45067  | 5     | 5      | 5      |      |      |      |      |      |      |      |      |      |      |      |
| 45074  |       |        |        |      |      |      |      |      |      |      |      |      |      |      |
| 45115  | 2     | 3      | 4      |      |      |      |      |      |      |      |      |      |      |      |
| 45187  | 3     | 2      | 3      | 2    | 2    | 1    | 1    | 2    | 1    | 1    | 1    | 2    | 1    | 2    |
| 45221  | 4     | 4      | 4      | 1    | 1    | 1    | 1    | 1    | 1    | 1    | 1    | 4    | 1    | 2    |
| 45279  | 4     | 4      | 5      |      |      |      |      |      |      |      |      |      |      |      |
| 45308  | 5     | 4      | 4      |      |      |      |      |      |      |      |      |      |      |      |

| respid | Q46x4 | Q46x5a | Q46x5b | Q47a | Q47b | Q47c | Q47d | Q47e | Q47f | Q47g | Q47h | Q47i | Q47j | Q47k |
|--------|-------|--------|--------|------|------|------|------|------|------|------|------|------|------|------|
| 45317  | 4     | 5      | 5      | 4    | 3    |      | 3    |      | 1    | 2    | 3    | 3    | 4    | 3    |
| 45379  | 4     | 4      | 4      | 0    | 4    | 3    | 4    | 5    | 3    | 3    | 3    | 3    | 3    | 3    |
| 45451  | 5     | 5      | 5      |      |      |      |      |      |      |      |      |      |      |      |
| 45472  | 6     | 6      | 6      | 1    | 1    | 0    | 1    | 1    | 0    | 0    | 0    | 0    |      | 2    |
| 45474  | 4     | 3      | 3      | 3    | 1    | 2    |      | 3    | 3    | 1    | 1    | 2    | 1    | 2    |
| 45544  | 4     | 4      | 3      | 1    | 2    | 4    | 3    | 3    | 4    | 3    | 4    | 4    | 4    | 4    |
| 45561  | 4     | 3      | 4      |      |      |      |      |      |      |      |      |      |      |      |
| 45596  | 6     | 4      | 3      |      |      |      |      |      |      |      |      |      |      |      |

| Instrum   | IIEF | IIEF | IIEF | IIEF | SQOL-F        | SQOL-F      | SQOL-F      | SQOL-F      | SQOL-F        | SQOL-F      | SQOL-F      | SQOL-F      | SQOL-F        | SQOL-F      |
|-----------|------|------|------|------|---------------|-------------|-------------|-------------|---------------|-------------|-------------|-------------|---------------|-------------|
| Symptom   |      |      |      |      |               |             |             |             |               |             |             |             |               |             |
| Type of R |      |      |      |      | Reverse (1=6) | As is (1=1) | As is (1=1) | As is (1=1) | Reverse (1=6) | As is (1=1) | As is (1=1) | As is (1=1) | Reverse (1=6) | As is (1=1) |
| Descripti |      |      |      |      | Pos           | Neg         | Neg         | Neg         | Neg           | Neg         | Neg         | Neg         | Pos           | Neg         |
| respid    | Q47l | Q47m | Q47n | Q47o | Q48a          | Q48b        | Q48c        | Q48d        | Q48e          | Q48f        | Q48g        | Q48h        | Q48i          | Q48j        |
| 241       | 4    | 4    | 4    | 4    | 4             |             |             |             |               |             |             |             |               |             |
| 242       | 5    | 5    | 5    | 5    | 5             |             |             |             |               |             |             |             |               |             |
| 243       | 3    | 3    | 3    | 3    | 3             |             |             |             |               |             |             |             |               |             |
| 244       | 4    | 4    | 4    | 4    | 5             |             |             |             |               |             |             |             |               |             |
| 245       |      |      |      |      |               | 3           | 5           | 5           | 5             | 3           | 5           | 5           | 5             | 2 5         |
| 246       | 3    | 4    | 4    | 4    | 4             |             |             |             |               |             |             |             |               |             |
| 247       | 3    | 3    | 1    | 3    | 3             |             |             |             |               |             |             |             |               |             |
| 253       |      |      |      |      |               | 3           | 5           | 5           | 5             | 2           | 5           | 6           | 5             | 2 5         |
| 256       | 4    | 4    | 4    | 4    | 4             |             |             |             |               |             |             |             |               |             |
| 257       |      |      |      |      |               | 2           | 5           | 5           | 5             | 2           | 6           | 6           | 6             | 2 6         |
| 258       | 3    | 3    | 3    | 4    | 4             |             |             |             |               |             |             |             |               |             |
| 259       |      |      |      |      |               | 3           | 6           | 6           | 5             | 5           | 3           | 5           | 5             | 2 5         |
| 263       | 4    | 4    | 3    | 4    | 4             |             |             |             |               |             |             |             |               |             |
| 264       |      |      |      |      |               | 3           | 3           | 5           | 6             | 1           | 6           | 5           | 5             | 1 2         |
| 265       | 3    | 3    | 4    | 3    | 3             |             |             |             |               |             |             |             |               |             |
| 266       |      |      |      |      |               | 4           | 5           | 3           | 6             | 3           | 4           | 3           | 5             | 4 5         |
| 268       | 4    | 4    | 4    | 2    | 2             |             |             |             |               |             |             |             |               |             |
| 270       |      |      |      |      |               | 6           | 6           | 6           | 6             | 2           | 6           | 6           | 6             | 6 6         |
| 272       | 3    | 3    | 3    | 4    | 4             |             |             |             |               |             |             |             |               |             |
| 274       | 4    | 4    | 4    | 4    | 4             |             |             |             |               |             |             |             |               |             |

| respid | Q47l | Q47m | Q47n | Q47o | Q48a | Q48b | Q48c | Q48d | Q48e | Q48f | Q48g | Q48h | Q48i | Q48j |
|--------|------|------|------|------|------|------|------|------|------|------|------|------|------|------|
| 275    |      |      |      |      |      |      |      |      |      |      |      |      |      |      |
| 276    |      |      |      |      | 3    | 2    | 3    | 3    | 2    | 5    | 5    | 5    |      | 3    |
| 277    | 3    | 3    | 3    | 2    |      |      |      |      |      |      |      |      |      |      |
| 279    | 3    | 3    | 3    | 3    |      |      |      |      |      |      |      |      |      |      |
| 286    |      |      |      |      | 3    | 5    | 6    | 6    | 1    | 5    | 6    | 6    | 1    | 6    |
| 290    | 4    | 4    | 4    | 4    |      |      |      |      |      |      |      |      |      |      |
| 291    |      |      |      |      | 6    | 6    |      | 6    | 5    | 6    | 6    | 6    | 5    | 4    |
| 295    |      |      |      |      |      |      |      |      |      |      |      |      |      |      |
| 297    | 5    | 5    | 5    | 4    |      |      |      |      |      |      |      |      |      |      |
| 299    | 3    | 1    | 5    | 5    |      |      |      |      |      |      |      |      |      |      |
| 300    | 4    | 4    | 4    | 3    |      |      |      |      |      |      |      |      |      |      |
| 303    | 1    | 3    | 3    | 3    |      |      |      |      |      |      |      |      |      |      |
| 304    |      |      |      |      | 3    | 4    | 4    | 5    | 4    | 5    | 5    | 6    | 3    | 3    |
| 306    | 3    | 4    | 3    | 4    |      |      |      |      |      |      |      |      |      |      |
| 307    |      |      |      |      | 5    | 5    | 5    | 5    | 2    | 5    | 5    | 5    | 2    | 5    |
| 312    |      |      |      |      | 4    | 4    | 4    | 4    | 4    | 4    | 4    | 4    | 4    | 4    |
| 315    | 3    | 3    | 3    | 3    |      |      |      |      |      |      |      |      |      |      |
| 317    | 4    | 4    | 4    | 3    |      |      |      |      |      |      |      |      |      |      |
| 322    |      |      |      |      | 2    | 2    | 2    | 2    | 4    | 5    | 1    | 1    | 5    | 1    |
| 335    |      |      |      |      | 6    | 5    | 5    | 5    | 6    | 5    | 5    | 5    | 5    | 5    |
| 374    |      |      |      |      | 3    | 3    | 3    | 3    | 3    | 3    | 3    | 5    | 2    | 3    |
| 378    | 2    | 2    | 3    | 3    |      |      |      |      |      |      |      |      |      |      |
| 380    | 3    | 3    | 3    | 3    |      |      |      |      |      |      |      |      |      |      |
| 382    | 3    | 3    | 3    | 3    |      |      |      |      |      |      |      |      |      |      |
| 384    | 3    | 3    | 3    | 3    |      |      |      |      |      |      |      |      |      |      |
| 385    | 2    | 2    | 2    | 3    |      |      |      |      |      |      |      |      |      |      |
| 395    | 4    | 4    | 4    | 4    |      |      |      |      |      |      |      |      |      |      |
| 396    |      |      |      |      |      |      |      |      |      |      |      |      |      |      |
| 398    |      |      |      |      |      |      |      |      |      |      |      |      |      |      |
| 402    |      |      |      |      | 3    | 3    | 3    | 3    | 3    | 3    | 3    | 3    | 3    | 3    |
| 414    | 3    | 2    | 2    | 1    |      |      |      |      |      |      |      |      |      |      |
| 415    | 4    | 4    | 4    | 4    |      |      |      |      |      |      |      |      |      |      |



| respid | Q47l | Q47m | Q47n | Q47o | Q48a | Q48b | Q48c | Q48d | Q48e | Q48f | Q48g | Q48h | Q48i | Q48j |   |
|--------|------|------|------|------|------|------|------|------|------|------|------|------|------|------|---|
| 416    |      | 3    |      |      | 3    |      |      |      |      |      |      |      |      |      |   |
| 420    |      | 2    | 2    | 3    | 2    |      |      |      |      |      |      |      |      |      |   |
| 421    |      | 4    | 5    | 4    | 4    |      |      |      |      |      |      |      |      |      |   |
| 422    |      |      |      |      |      | 4    | 6    | 6    | 6    | 3    | 5    | 6    | 6    | 2    | 5 |
| 423    |      |      |      |      |      | 3    | 4    | 4    | 4    | 4    | 4    | 4    | 4    | 3    | 3 |
| 424    |      |      |      |      |      | 1    | 6    | 6    | 5    | 2    | 6    | 6    | 6    | 1    | 5 |
| 425    |      | 3    | 3    | 4    | 3    |      |      |      |      |      |      |      |      |      |   |
| 428    |      | 4    | 4    | 4    | 4    |      |      |      |      |      |      |      |      |      |   |
| 429    |      |      |      |      |      | 4    | 4    | 3    | 4    | 4    | 4    | 5    | 4    | 3    | 6 |
| 431    |      | 4    | 4    | 4    | 4    |      |      |      |      |      |      |      |      |      |   |
| 437    |      | 1    | 1    | 2    | 1    |      |      |      |      |      |      |      |      |      |   |
| 438    |      | 4    | 3    | 3    | 2    |      |      |      |      |      |      |      |      |      |   |
| 441    |      |      |      |      |      | 4    | 4    | 4    | 5    | 4    | 4    | 4    | 5    | 3    | 4 |
| 444    |      | 4    | 4    | 3    | 4    |      |      |      |      |      |      |      |      |      |   |
| 448    |      | 3    | 3    | 4    | 5    |      |      |      |      |      |      |      |      |      |   |
| 449    |      |      |      |      |      | 5    | 5    | 5    | 5    |      | 5    | 5    | 5    | 3    | 5 |
| 457    |      |      |      |      |      | 4    | 1    | 2    | 2    | 5    | 5    | 2    | 2    | 6    | 1 |
| 460    |      | 4    | 4    | 4    | 4    |      |      |      |      |      |      |      |      |      |   |
| 469    |      | 4    | 4    | 4    | 4    |      |      |      |      |      |      |      |      |      |   |
| 471    |      |      |      |      |      | 5    | 5    | 5    | 5    | 5    | 5    | 5    | 5    | 3    | 4 |
| 473    |      | 3    | 4    | 4    | 3    |      |      |      |      |      |      |      |      |      |   |
| 476    |      | 2    | 2    | 2    | 2    |      |      |      |      |      |      |      |      |      |   |
| 479    |      | 4    | 5    | 5    | 4    |      |      |      |      |      |      |      |      |      |   |
| 485    |      | 5    | 5    | 5    | 5    |      |      |      |      |      |      |      |      |      |   |
| 488    |      |      |      |      |      | 6    | 3    | 1    | 2    | 6    | 2    | 1    | 1    | 4    | 1 |
| 494    |      |      |      |      |      | 5    | 6    | 6    | 3    | 3    | 4    | 5    | 6    | 3    | 3 |
| 496    |      | 4    | 4    | 4    | 4    |      |      |      |      |      |      |      |      |      |   |
| 501    |      |      |      |      |      |      |      |      |      |      |      |      |      |      |   |
| 502    |      | 3    | 3    | 3    | 3    |      |      |      |      |      |      |      |      |      |   |
| 503    |      | 3    | 4    | 4    | 4    |      |      |      |      |      |      |      |      |      |   |
| 506    |      | 4    | 4    | 4    | 4    |      |      |      |      |      |      |      |      |      |   |
| 514    |      |      |      |      |      | 5    | 1    | 2    | 2    | 5    | 2    | 2    | 2    | 5    | 2 |

| respid | Q47l | Q47m | Q47n | Q47o | Q48a | Q48b | Q48c | Q48d | Q48e | Q48f | Q48g | Q48h | Q48i | Q48j |   |
|--------|------|------|------|------|------|------|------|------|------|------|------|------|------|------|---|
| 515    | 4    | 4    | 4    | 4    |      |      |      |      |      |      |      |      |      |      |   |
| 516    |      |      |      |      |      | 2    | 3    | 5    | 5    | 3    | 3    | 2    | 3    | 4    | 2 |
| 519    |      |      |      |      |      | 4    | 5    | 5    | 5    |      | 4    | 6    | 6    | 3    | 5 |
| 522    |      |      |      |      |      |      |      |      |      |      |      |      |      |      |   |
| 525    | 4    | 2    | 2    | 4    |      |      |      |      |      |      |      |      |      |      |   |
| 528    | 4    | 2    | 1    | 4    |      |      |      |      |      |      |      |      |      |      |   |
| 532    | 3    | 3    | 3    | 3    |      |      |      |      |      |      |      |      |      |      |   |
| 536    |      |      |      |      |      | 5    | 5    | 5    | 5    | 4    | 5    | 5    | 5    | 5    | 5 |
| 539    |      |      |      |      |      | 5    | 3    | 2    | 2    | 2    | 2    | 5    | 2    | 5    | 2 |
| 540    |      |      |      |      |      | 2    | 5    | 5    | 5    | 3    | 3    | 3    | 5    | 2    | 3 |
| 547    | 2    | 1    | 4    | 1    |      |      |      |      |      |      |      |      |      |      |   |
| 551    | 3    | 3    | 3    | 3    |      |      |      |      |      |      |      |      |      |      |   |
| 554    | 4    | 4    | 4    | 5    |      |      |      |      |      |      |      |      |      |      |   |
| 558    | 4    | 4    | 4    | 4    |      |      |      |      |      |      |      |      |      |      |   |
| 563    |      |      |      |      |      | 1    | 6    | 6    | 6    | 2    | 6    | 6    | 6    | 1    | 6 |
| 564    | 4    | 4    | 4    | 4    |      |      |      |      |      |      |      |      |      |      |   |
| 565    | 3    | 4    | 4    | 4    |      |      |      |      |      |      |      |      |      |      |   |
| 567    |      |      |      |      |      |      |      |      |      |      |      |      |      |      |   |
| 569    |      |      |      |      |      | 3    | 5    | 5    | 5    | 2    | 5    | 5    | 5    | 2    | 5 |
| 572    | 1    | 1    | 1    | 1    |      |      |      |      |      |      |      |      |      |      |   |
| 574    |      |      |      |      |      | 5    | 3    | 3    | 3    | 4    | 3    | 4    | 3    | 3    | 5 |
| 583    | 2    | 3    | 3    | 3    |      |      |      |      |      |      |      |      |      |      |   |
| 589    | 4    | 4    | 4    | 4    |      |      |      |      |      |      |      |      |      |      |   |
| 592    | 4    | 4    | 4    | 3    |      |      |      |      |      |      |      |      |      |      |   |
| 593    |      |      |      |      |      |      |      |      |      |      |      |      |      |      |   |
| 594    | 4    | 1    | 1    | 1    |      |      |      |      |      |      |      |      |      |      |   |
| 597    | 5    | 4    | 4    | 4    |      |      |      |      |      |      |      |      |      |      |   |
| 601    |      |      |      |      |      | 6    | 6    | 6    | 6    | 6    | 6    | 6    | 6    | 6    | 6 |
| 607    | 3    | 4    | 4    | 4    |      |      |      |      |      |      |      |      |      |      |   |
| 610    | 3    | 4    | 3    | 5    |      |      |      |      |      |      |      |      |      |      |   |
| 612    | 1    | 1    | 1    | 1    |      |      |      |      |      |      |      |      |      |      |   |
| 627    | 4    | 4    | 4    | 4    |      |      |      |      |      |      |      |      |      |      |   |

| respid | Q47l | Q47m | Q47n | Q47o | Q48a | Q48b | Q48c | Q48d | Q48e | Q48f | Q48g | Q48h | Q48i | Q48j |   |
|--------|------|------|------|------|------|------|------|------|------|------|------|------|------|------|---|
| 631    | 3    | 3    | 3    | 3    |      |      |      |      |      |      |      |      |      |      |   |
| 633    |      |      |      |      |      | 5    | 5    | 3    | 3    | 4    | 3    | 2    | 3    | 5    | 4 |
| 636    |      |      |      |      |      | 3    | 3    | 5    | 6    | 2    | 3    | 6    | 6    | 2    | 5 |
| 656    | 1    | 4    | 4    | 4    |      |      |      |      |      |      |      |      |      |      |   |
| 659    | 3    | 3    | 3    | 3    |      |      |      |      |      |      |      |      |      |      |   |
| 670    | 3    | 4    | 4    | 4    |      |      |      |      |      |      |      |      |      |      |   |
| 672    |      |      |      |      |      | 5    | 3    | 3    | 5    | 5    | 5    | 2    | 2    | 4    | 2 |
| 673    |      |      |      |      |      | 2    | 2    | 5    | 5    | 2    | 5    | 5    | 4    | 4    | 3 |
| 675    |      |      |      |      |      | 2    | 5    | 5    | 5    | 2    | 5    | 5    | 5    | 2    | 5 |
| 676    | 3    | 2    | 3    | 3    |      |      |      |      |      |      |      |      |      |      |   |
| 679    | 3    | 3    | 3    | 2    |      |      |      |      |      |      |      |      |      |      |   |
| 683    | 4    | 3    | 3    | 4    |      |      |      |      |      |      |      |      |      |      |   |
| 684    | 4    | 4    | 4    | 3    |      |      |      |      |      |      |      |      |      |      |   |
| 690    |      |      |      |      |      | 5    | 5    | 5    | 5    | 2    | 6    | 6    | 6    | 2    | 5 |
| 701    | 2    | 1    | 1    | 3    |      |      |      |      |      |      |      |      |      |      |   |
| 709    | 3    | 3    | 3    | 3    |      |      |      |      |      |      |      |      |      |      |   |
| 719    | 4    | 3    | 3    | 3    |      |      |      |      |      |      |      |      |      |      |   |
| 726    |      |      |      |      |      | 2    | 4    | 4    | 4    | 3    | 4    | 5    | 6    | 3    | 3 |
| 730    | 3    | 4    | 3    | 3    |      |      |      |      |      |      |      |      |      |      |   |
| 731    | 4    | 3    | 3    | 4    |      |      |      |      |      |      |      |      |      |      |   |
| 732    | 3    | 3    | 3    | 2    |      |      |      |      |      |      |      |      |      |      |   |
| 733    |      |      |      |      |      | 2    | 6    | 6    | 6    | 3    | 6    | 6    | 6    | 1    | 6 |
| 735    | 4    | 3    | 3    | 3    |      |      |      |      |      |      |      |      |      |      |   |
| 738    | 3    | 3    | 4    | 4    |      |      |      |      |      |      |      |      |      |      |   |
| 740    |      |      |      |      |      | 2    | 5    | 6    | 6    | 2    | 5    | 6    | 6    | 5    | 6 |
| 742    | 3    | 3    | 4    | 3    |      |      |      |      |      |      |      |      |      |      |   |
| 744    |      |      |      |      |      | 1    | 6    | 6    | 6    | 1    | 6    | 6    | 6    | 1    | 6 |
| 749    |      |      |      |      |      | 3    | 3    | 3    | 3    | 3    | 5    | 3    | 3    | 4    | 3 |
| 751    |      |      |      |      |      | 4    | 3    | 3    | 2    | 5    | 3    | 3    | 3    | 6    | 3 |
| 752    | 2    | 1    | 2    | 3    |      |      |      |      |      |      |      |      |      |      |   |
| 753    | 4    | 4    | 4    | 3    |      |      |      |      |      |      |      |      |      |      |   |
| 755    | 3    | 3    | 3    | 3    |      |      |      |      |      |      |      |      |      |      |   |

| respid | Q47l | Q47m | Q47n | Q47o | Q48a | Q48b | Q48c | Q48d | Q48e | Q48f | Q48g | Q48h | Q48i | Q48j |   |
|--------|------|------|------|------|------|------|------|------|------|------|------|------|------|------|---|
| 756    |      |      |      |      |      |      |      |      |      |      |      |      |      |      |   |
| 759    |      |      |      |      |      | 3    | 4    | 5    | 6    | 3    | 5    | 6    | 6    | 3    | 3 |
| 760    |      |      |      |      |      | 2    | 6    | 6    | 6    | 2    | 6    | 6    | 6    | 1    | 6 |
| 763    | 3    | 3    | 4    | 4    |      |      |      |      |      |      |      |      |      |      |   |
| 764    |      |      |      |      |      | 6    | 2    | 3    | 3    | 4    | 3    | 6    | 5    | 6    | 6 |
| 765    |      |      |      |      |      | 1    |      | 6    |      | 6    | 6    | 6    | 6    | 3    | 6 |
| 766    | 4    | 3    | 3    | 3    |      |      |      |      |      |      |      |      |      |      |   |
| 767    | 3    | 4    | 4    | 4    |      |      |      |      |      |      |      |      |      |      |   |
| 771    | 2    | 2    | 2    | 1    |      |      |      |      |      |      |      |      |      |      |   |
| 773    | 3    | 4    | 5    | 4    |      |      |      |      |      |      |      |      |      |      |   |
| 774    | 3    | 4    | 4    | 4    |      |      |      |      |      |      |      |      |      |      |   |
| 775    |      |      |      |      |      | 6    | 3    | 3    | 5    | 6    | 3    | 6    | 6    | 3    | 5 |
| 776    | 3    | 3    | 3    | 3    |      |      |      |      |      |      |      |      |      |      |   |
| 778    | 3    | 3    | 3    | 3    |      |      |      |      |      |      |      |      |      |      |   |
| 780    | 3    | 4    | 4    | 3    |      |      |      |      |      |      |      |      |      |      |   |
| 781    | 3    | 4    | 4    | 4    |      |      |      |      |      |      |      |      |      |      |   |
| 782    |      |      |      |      |      | 1    | 6    | 6    | 3    | 2    | 6    | 3    | 6    | 1    | 3 |
| 783    |      |      |      |      |      | 3    | 3    | 4    | 3    | 3    | 3    | 3    | 3    | 2    | 4 |
| 786    | 3    | 3    | 3    | 3    |      |      |      |      |      |      |      |      |      |      |   |
| 788    |      |      |      |      |      |      |      |      |      |      |      |      |      |      |   |
| 792    | 3    | 4    | 3    | 4    |      |      |      |      |      |      |      |      |      |      |   |
| 794    | 3    | 3    | 3    | 4    |      |      |      |      |      |      |      |      |      |      |   |
| 795    | 3    | 5    | 5    | 5    |      |      |      |      |      |      |      |      |      |      |   |
| 799    | 3    | 3    | 3    | 3    |      |      |      |      |      |      |      |      |      |      |   |
| 800    | 3    | 4    | 4    |      |      |      |      |      |      |      |      |      |      |      |   |
| 801    | 1    | 1    | 1    | 1    |      |      |      |      |      |      |      |      |      |      |   |
| 804    |      |      |      |      |      | 5    |      | 3    | 3    | 4    | 4    | 5    | 5    | 5    | 3 |
| 806    | 5    | 3    | 3    | 4    |      |      |      |      |      |      |      |      |      |      |   |
| 807    | 3    | 3    | 3    | 3    |      |      |      |      |      |      |      |      |      |      |   |
| 808    | 3    | 2    | 2    | 2    |      |      |      |      |      |      |      |      |      |      |   |
| 809    | 3    |      |      | 3    |      |      |      |      |      |      |      |      |      |      |   |
| 811    |      |      |      |      |      | 1    | 6    | 6    | 6    | 1    | 6    | 6    | 6    | 1    | 6 |

| respid | Q47l | Q47m | Q47n | Q47o | Q48a | Q48b | Q48c | Q48d | Q48e | Q48f | Q48g | Q48h | Q48i | Q48j |
|--------|------|------|------|------|------|------|------|------|------|------|------|------|------|------|
| 812    |      |      |      |      |      |      |      |      |      |      |      |      |      |      |
| 815    | 3    | 4    | 4    | 4    |      |      |      |      |      |      |      |      |      |      |
| 817    | 5    | 1    | 1    | 3    |      |      |      |      |      |      |      |      |      |      |
| 818    |      |      |      |      | 1    | 6    | 6    | 6    | 1    | 6    | 6    | 6    | 1    | 6    |
| 819    | 4    | 3    | 3    | 3    |      |      |      |      |      |      |      |      |      |      |
| 821    |      |      |      |      | 3    | 4    | 5    | 3    | 4    | 3    | 5    | 5    | 4    | 4    |
| 824    | 3    | 3    | 2    | 3    |      |      |      |      |      |      |      |      |      |      |
| 825    |      | 4    | 4    | 5    |      |      |      |      |      |      |      |      |      |      |
| 828    |      |      |      |      | 1    | 5    | 6    | 5    | 1    | 5    | 6    | 6    | 1    | 5    |
| 832    | 3    | 3    | 4    | 3    |      |      |      |      |      |      |      |      |      |      |
| 834    | 3    | 3    | 3    | 3    |      |      |      |      |      |      |      |      |      |      |
| 835    | 5    | 4    | 5    | 5    |      |      |      |      |      |      |      |      |      |      |
| 836    | 5    | 5    | 5    | 5    |      |      |      |      |      |      |      |      |      |      |
| 837    |      |      |      |      | 3    | 3    | 4    | 4    | 3    | 4    | 4    | 4    | 3    | 4    |
| 840    | 2    | 3    | 3    | 3    |      |      |      |      |      |      |      |      |      |      |
| 841    |      |      |      |      | 2    | 5    | 5    | 5    | 2    | 5    | 5    | 6    | 2    | 5    |
| 845    |      |      |      |      | 6    | 6    | 6    | 3    | 6    | 6    | 6    | 6    | 6    | 6    |
| 846    |      |      |      |      |      |      | 3    | 3    | 4    | 3    | 5    | 5    | 6    | 5    |
| 849    | 3    | 5    | 5    | 4    |      |      |      |      |      |      |      |      |      |      |
| 852    |      |      |      |      | 2    | 2    | 3    | 4    | 2    | 6    | 6    | 6    | 2    | 6    |
| 854    | 3    | 3    | 4    | 3    |      |      |      |      |      |      |      |      |      |      |
| 856    | 5    | 5    | 5    | 5    |      |      |      |      |      |      |      |      |      |      |
| 858    | 3    | 4    | 4    | 4    |      |      |      |      |      |      |      |      |      |      |
| 859    |      |      |      |      | 2    | 4    | 4    | 4    | 3    | 4    | 5    | 5    | 2    | 4    |
| 861    |      |      |      |      | 3    | 4    | 5    | 4    | 3    | 4    | 6    | 6    | 3    | 5    |
| 863    |      |      |      |      | 1    | 6    | 6    | 6    | 1    | 6    | 6    | 6    | 1    | 6    |
| 864    | 5    | 3    | 2    | 4    |      |      |      |      |      |      |      |      |      |      |
| 866    | 4    | 3    | 3    | 4    |      |      |      |      |      |      |      |      |      |      |
| 869    | 4    | 4    | 4    | 3    |      |      |      |      |      |      |      |      |      |      |
| 870    | 3    | 4    | 4    | 5    |      |      |      |      |      |      |      |      |      |      |
| 871    |      |      |      |      | 2    |      |      |      |      |      |      |      | 2    |      |
| 873    | 4    | 3    | 4    | 2    |      |      |      |      |      |      |      |      |      |      |

| respid | Q47l | Q47m | Q47n | Q47o | Q48a | Q48b | Q48c | Q48d | Q48e | Q48f | Q48g | Q48h | Q48i | Q48j |   |
|--------|------|------|------|------|------|------|------|------|------|------|------|------|------|------|---|
| 879    | 1    | 3    | 3    | 3    |      |      |      |      |      |      |      |      |      |      |   |
| 880    |      |      |      |      |      | 4    | 4    | 4    | 4    | 3    | 4    | 5    | 4    | 3    | 4 |
| 881    | 4    | 3    | 3    | 4    |      |      |      |      |      |      |      |      |      |      |   |
| 882    | 2    | 1    |      | 1    |      |      |      |      |      |      |      |      |      |      |   |
| 885    |      |      |      |      |      |      |      |      |      |      |      |      |      |      |   |
| 886    | 3    | 3    | 3    | 3    |      |      |      |      |      |      |      |      |      |      |   |
| 887    |      |      |      |      |      | 3    | 3    | 3    | 3    | 4    | 3    | 3    | 3    | 3    | 1 |
| 888    | 3    | 3    | 3    | 4    |      |      |      |      |      |      |      |      |      |      |   |
| 889    | 3    | 3    | 3    | 4    |      |      |      |      |      |      |      |      |      |      |   |
| 890    | 4    | 4    | 4    | 4    |      |      |      |      |      |      |      |      |      |      |   |
| 900    |      |      |      |      |      |      |      |      |      |      |      |      |      |      |   |
| 901    | 3    | 1    | 3    | 1    |      |      |      |      |      |      |      |      |      |      |   |
| 902    |      | 3    | 3    | 3    |      |      |      |      |      |      |      |      |      |      |   |
| 903    | 5    | 4    | 4    | 5    |      |      |      |      |      |      |      |      |      |      |   |
| 906    |      |      |      |      |      | 2    | 3    | 3    | 5    | 3    | 3    | 3    | 4    | 3    | 3 |
| 907    |      |      |      |      |      | 4    | 3    | 3    | 3    | 4    | 3    | 3    | 3    | 4    | 3 |
| 908    |      |      |      |      |      | 1    | 6    | 6    | 5    | 3    | 6    | 5    | 5    | 1    | 6 |
| 910    |      |      |      |      |      | 1    | 6    | 6    | 6    | 1    | 6    | 6    | 6    | 1    | 6 |
| 911    | 3    | 3    | 3    | 3    |      |      |      |      |      |      |      |      |      |      |   |
| 912    | 3    | 3    | 3    | 4    |      |      |      |      |      |      |      |      |      |      |   |
| 915    |      |      |      |      |      |      |      |      |      |      |      |      |      |      |   |
| 923    | 4    | 1    | 1    | 1    |      |      |      |      |      |      |      |      |      |      |   |
| 925    |      |      |      |      |      | 4    | 6    | 6    | 3    | 4    | 6    | 4    | 6    | 2    | 5 |
| 926    | 1    | 3    | 3    | 3    |      |      |      |      |      |      |      |      |      |      |   |
| 929    |      |      |      |      |      |      |      |      |      |      |      |      |      |      |   |
| 932    |      |      |      |      |      | 4    | 1    | 5    | 6    | 6    | 1    | 1    | 3    | 6    | 1 |
| 933    | 4    | 4    | 4    | 3    |      |      |      |      |      |      |      |      |      |      |   |
| 934    |      |      |      |      |      | 3    | 4    | 4    | 5    | 3    | 6    | 5    | 5    | 2    | 5 |
| 938    | 2    | 2    | 2    | 2    |      |      |      |      |      |      |      |      |      |      |   |
| 941    |      |      |      |      |      |      |      |      |      |      |      |      |      |      |   |
| 942    | 3    | 4    | 4    | 4    |      |      |      |      |      |      |      |      |      |      |   |
| 943    |      |      |      |      |      |      |      |      |      |      |      |      |      |      |   |

| respid | Q47l | Q47m | Q47n | Q47o | Q48a | Q48b | Q48c | Q48d | Q48e | Q48f | Q48g | Q48h | Q48i | Q48j |   |
|--------|------|------|------|------|------|------|------|------|------|------|------|------|------|------|---|
| 945    |      |      |      |      |      | 3    | 4    | 4    | 4    | 3    | 4    | 5    | 4    | 3    | 4 |
| 946    |      |      |      |      |      |      |      |      |      |      |      |      |      |      |   |
| 947    | 2    | 1    | 2    | 2    |      |      |      |      |      |      |      |      |      |      |   |
| 948    | 3    | 4    | 4    | 4    |      |      |      |      |      |      |      |      |      |      |   |
| 949    | 3    | 1    | 1    | 2    |      |      |      |      |      |      |      |      |      |      |   |
| 952    | 4    | 4    | 4    | 4    |      |      |      |      |      |      |      |      |      |      |   |
| 956    |      |      |      |      |      |      | 5    | 5    |      |      | 6    | 6    | 5    | 2    |   |
| 957    |      |      |      |      |      |      |      |      |      |      |      |      |      |      |   |
| 959    | 3    | 3    | 3    | 3    |      |      |      |      |      |      |      |      |      |      |   |
| 961    | 4    | 5    | 5    | 5    |      |      |      |      |      |      |      |      |      |      |   |
| 962    |      |      |      |      |      | 4    |      | 3    | 3    | 3    | 4    | 4    | 4    | 3    | 3 |
| 965    | 2    | 3    | 3    | 3    |      |      |      |      |      |      |      |      |      |      |   |
| 967    |      |      |      |      |      | 3    | 4    | 4    | 4    | 3    | 4    | 5    |      | 3    | 4 |
| 969    |      |      |      |      |      | 1    | 6    | 6    | 6    | 2    | 6    | 6    | 6    | 1    | 6 |
| 970    |      |      |      |      |      |      |      |      |      |      |      |      |      |      |   |
| 973    | 2    | 2    | 2    | 2    |      |      |      |      |      |      |      |      |      |      |   |
| 974    | 3    | 4    | 4    | 4    |      |      |      |      |      |      |      |      |      |      |   |
| 975    | 3    | 2    | 2    | 3    |      |      |      |      |      |      |      |      |      |      |   |
| 976    | 3    | 4    | 2    | 4    |      |      |      |      |      |      |      |      |      |      |   |
| 977    | 4    | 4    | 4    | 5    |      |      |      |      |      |      |      |      |      |      |   |
| 979    | 5    | 5    | 5    | 5    |      |      |      |      |      |      |      |      |      |      |   |
| 981    |      |      |      |      |      | 2    | 5    | 2    | 2    | 3    | 3    | 4    | 4    | 1    | 4 |
| 983    |      |      |      |      |      | 3    | 4    | 3    | 4    | 2    | 4    | 5    | 4    | 3    | 4 |
| 987    | 3    | 4    | 4    | 3    |      |      |      |      |      |      |      |      |      |      |   |
| 991    |      |      |      |      |      |      |      |      |      |      |      |      |      |      |   |
| 992    | 5    | 4    | 4    | 4    |      |      |      |      |      |      |      |      |      |      |   |
| 993    |      |      |      |      |      | 3    | 3    | 3    | 3    | 3    | 3    | 3    | 3    | 3    | 3 |
| 994    |      |      |      |      |      | 3    | 3    | 3    | 3    | 6    | 3    | 5    | 3    | 4    | 3 |
| 995    | 4    | 4    | 4    | 4    |      |      |      |      |      |      |      |      |      |      |   |
| 998    |      |      |      |      |      | 3    | 3    | 3    | 3    | 3    | 4    | 4    | 4    | 3    | 3 |
| 1000   | 2    | 3    |      | 3    |      |      |      |      |      |      |      |      |      |      |   |
| 1001   | 4    | 4    | 4    | 4    |      |      |      |      |      |      |      |      |      |      |   |

| respid | Q47l | Q47m | Q47n | Q47o | Q48a | Q48b | Q48c | Q48d | Q48e | Q48f | Q48g | Q48h | Q48i | Q48j |   |
|--------|------|------|------|------|------|------|------|------|------|------|------|------|------|------|---|
| 1002   |      |      |      |      |      |      |      |      |      |      |      |      |      |      |   |
| 1004   | 4    | 4    | 4    | 4    |      |      |      |      |      |      |      |      |      |      |   |
| 1005   |      |      |      |      |      | 3    | 5    | 5    | 5    | 3    | 5    | 5    | 5    | 1    | 3 |
| 1006   | 1    | 3    | 3    | 2    |      |      |      |      |      |      |      |      |      |      |   |
| 1007   |      |      |      |      |      | 6    | 3    | 3    | 3    | 3    | 3    | 3    | 3    | 6    | 5 |
| 1009   |      |      |      |      |      |      |      |      |      |      |      |      |      |      |   |
| 1013   |      |      |      |      |      | 3    | 3    | 2    | 3    | 2    | 3    | 3    | 2    | 2    | 3 |
| 1015   | 3    | 4    | 4    | 3    |      |      |      |      |      |      |      |      |      |      |   |
| 1020   |      |      |      |      |      |      |      |      |      |      |      |      |      |      |   |
| 1022   | 3    | 4    | 4    | 4    |      |      |      |      |      |      |      |      |      |      |   |
| 1024   |      |      |      |      |      |      |      |      | 2    |      |      |      |      | 1    |   |
| 1025   |      |      |      |      |      |      |      |      |      |      |      |      |      |      |   |
| 1027   | 4    | 4    | 4    | 4    |      |      |      |      |      |      |      |      |      |      |   |
| 1031   | 3    | 4    | 4    | 4    |      |      |      |      |      |      |      |      |      |      |   |
| 1037   | 3    | 4    | 4    | 4    |      |      |      |      |      |      |      |      |      |      |   |
| 1039   | 2    | 4    | 4    | 3    |      |      |      |      |      |      |      |      |      |      |   |
| 1040   | 3    | 3    | 3    | 3    |      |      |      |      |      |      |      |      |      |      |   |
| 1056   | 4    | 3    | 3    | 3    |      |      |      |      |      |      |      |      |      |      |   |
| 1057   | 3    | 4    | 4    | 4    |      |      |      |      |      |      |      |      |      |      |   |
| 1062   | 3    | 4    | 4    | 4    |      |      |      |      |      |      |      |      |      |      |   |
| 1069   |      |      |      |      |      | 1    | 6    | 6    | 6    | 1    | 6    | 6    | 6    | 1    | 6 |
| 1070   |      |      |      |      |      | 5    | 2    | 2    | 1    | 6    | 1    | 6    | 6    | 5    | 6 |
| 1072   | 4    | 4    | 4    | 3    |      |      |      |      |      |      |      |      |      |      |   |
| 1076   | 3    | 3    | 4    | 4    |      |      |      |      |      |      |      |      |      |      |   |
| 1077   | 4    | 4    | 3    | 4    |      |      |      |      |      |      |      |      |      |      |   |
| 1078   |      |      |      |      |      | 3    | 4    | 4    | 5    | 1    | 6    | 3    | 4    | 3    | 2 |
| 1080   |      |      |      |      |      |      |      |      |      |      |      |      |      |      |   |
| 1094   |      |      |      |      |      | 3    | 5    | 5    | 5    | 3    | 6    | 6    | 6    | 2    | 6 |
| 1098   | 3    | 3    | 3    | 3    |      |      |      |      |      |      |      |      |      |      |   |
| 1099   |      |      |      |      |      | 3    | 5    | 5    | 3    | 4    | 6    | 5    | 4    | 2    | 6 |
| 1102   | 3    | 3    | 3    | 3    |      |      |      |      |      |      |      |      |      |      |   |
| 1110   | 3    | 4    | 4    | 4    |      |      |      |      |      |      |      |      |      |      |   |



| respid | Q47l | Q47m | Q47n | Q47o | Q48a | Q48b | Q48c | Q48d | Q48e | Q48f | Q48g | Q48h | Q48i | Q48j |   |
|--------|------|------|------|------|------|------|------|------|------|------|------|------|------|------|---|
| 1117   |      |      |      |      |      | 3    | 3    | 3    | 4    | 3    | 5    | 3    | 5    | 4    | 3 |
| 1119   |      |      |      |      |      |      |      |      |      |      |      |      |      |      |   |
| 1126   | 5    | 3    | 3    | 3    |      |      |      |      |      |      |      |      |      |      |   |
| 1127   |      |      |      |      |      | 1    | 5    | 6    | 6    | 1    | 6    | 6    | 6    | 1    | 6 |
| 1130   |      |      |      |      |      | 2    | 3    | 3    | 3    | 3    | 2    | 2    | 2    | 3    | 2 |
| 1131   |      |      |      |      |      | 1    | 6    | 6    | 6    | 1    | 6    | 6    | 6    | 1    | 6 |
| 1135   | 1    | 2    | 2    | 2    |      |      |      |      |      |      |      |      |      |      |   |
| 1138   |      |      |      |      |      | 2    | 4    | 4    | 4    | 3    | 3    | 4    | 5    | 3    | 4 |
| 1139   |      |      |      |      |      |      |      |      |      |      |      |      |      |      |   |
| 1140   |      |      |      |      |      | 2    | 2    | 3    | 2    | 2    | 2    | 3    | 2    | 2    | 2 |
| 1142   |      |      |      |      |      |      |      |      |      |      |      |      |      |      |   |
| 1143   |      |      |      |      |      |      |      |      |      |      |      |      |      |      |   |
| 1145   | 4    | 3    | 3    | 3    |      |      |      |      |      |      |      |      |      |      |   |
| 1149   |      |      |      |      |      |      |      |      |      |      |      |      |      |      |   |
| 1152   | 4    | 3    | 3    | 4    |      |      |      |      |      |      |      |      |      |      |   |
| 1160   | 4    | 4    | 4    | 4    |      |      |      |      |      |      |      |      |      |      |   |
| 1164   |      |      |      |      |      |      |      |      |      |      |      |      |      |      |   |
| 1165   |      |      |      |      |      | 4    | 4    | 4    | 4    | 4    | 4    | 4    | 4    | 5    | 5 |
| 1169   |      |      |      |      |      | 2    | 5    | 5    | 6    | 2    | 6    | 5    | 6    | 2    | 2 |
| 1170   | 4    | 4    | 4    | 3    |      |      |      |      |      |      |      |      |      |      |   |
| 1179   |      |      |      |      |      | 3    | 5    | 5    | 5    | 3    | 6    | 5    | 6    | 3    | 5 |
| 1180   | 1    | 3    | 3    | 3    |      |      |      |      |      |      |      |      |      |      |   |
| 1183   | 4    | 4    | 4    | 4    |      |      |      |      |      |      |      |      |      |      |   |
| 1187   | 5    | 5    | 5    | 5    |      |      |      |      |      |      |      |      |      |      |   |
| 1188   | 4    | 4    | 4    | 3    |      |      |      |      |      |      |      |      |      |      |   |
| 1193   | 4    | 5    | 2    | 4    |      |      |      |      |      |      |      |      |      |      |   |
| 1194   | 5    | 4    |      | 4    |      |      |      |      |      |      |      |      |      |      |   |
| 1197   |      |      |      |      |      | 1    | 2    | 2    | 2    | 2    | 2    | 2    | 2    | 2    | 2 |
| 1202   |      |      |      |      |      |      |      |      |      |      |      |      |      |      |   |
| 1204   |      |      |      |      |      | 1    | 2    | 2    | 2    | 2    | 2    | 2    | 1    | 2    | 1 |
| 1211   | 3    | 3    | 3    | 3    |      |      |      |      |      |      |      |      |      |      |   |
| 1224   | 2    | 2    | 2    | 2    |      |      |      |      |      |      |      |      |      |      |   |

| respid | Q47l | Q47m | Q47n | Q47o | Q48a | Q48b | Q48c | Q48d | Q48e | Q48f | Q48g | Q48h | Q48i | Q48j |   |
|--------|------|------|------|------|------|------|------|------|------|------|------|------|------|------|---|
| 1225   |      |      |      |      |      | 5    | 5    | 3    | 4    | 4    | 4    | 4    | 3    | 5    | 4 |
| 1230   |      |      |      |      |      |      |      |      |      |      |      |      |      |      |   |
| 1232   |      |      |      |      |      | 5    | 6    | 6    | 6    | 6    | 2    | 2    | 6    | 6    | 6 |
| 1233   | 4    | 4    | 4    | 4    |      |      |      |      |      |      |      |      |      |      |   |
| 1234   |      |      |      |      |      | 4    | 5    | 6    | 3    | 2    | 5    | 6    | 6    | 2    | 6 |
| 1235   | 2    | 1    | 1    | 3    |      |      |      |      |      |      |      |      |      |      |   |
| 1236   |      |      |      |      |      | 6    |      |      |      |      |      |      |      |      | 1 |
| 1237   |      |      |      |      |      |      |      |      |      |      |      |      |      |      |   |
| 1238   | 3    | 3    | 3    | 3    |      |      |      |      |      |      |      |      |      |      |   |
| 1239   |      |      |      |      |      | 5    | 5    | 5    | 5    | 3    | 5    | 5    | 5    | 3    | 5 |
| 1241   | 3    | 3    | 4    | 2    |      |      |      |      |      |      |      |      |      |      |   |
| 1242   | 3    | 5    | 5    | 4    |      |      |      |      |      |      |      |      |      |      |   |
| 1244   |      |      |      |      |      |      |      |      |      |      |      |      |      |      |   |
| 1245   | 2    | 2    | 2    | 1    |      |      |      |      |      |      |      |      |      |      |   |
| 1247   | 5    | 4    | 4    | 4    |      |      |      |      |      |      |      |      |      |      |   |
| 1248   |      |      |      |      |      | 3    | 5    | 5    |      | 4    | 5    | 5    | 5    | 2    | 5 |
| 1249   | 3    | 4    | 4    | 4    |      |      |      |      |      |      |      |      |      |      |   |
| 1250   | 3    | 4    | 4    | 4    |      |      |      |      |      |      |      |      |      |      |   |
| 1251   | 3    | 3    | 3    | 3    |      |      |      |      |      |      |      |      |      |      |   |
| 1252   |      |      |      |      |      | 3    | 6    | 6    | 6    | 3    | 6    | 6    | 6    | 1    | 6 |
| 1253   |      |      |      |      |      |      | 6    | 6    | 6    | 3    | 6    | 6    | 6    | 1    | 6 |
| 1254   | 2    | 2    | 2    | 2    |      |      |      |      |      |      |      |      |      |      |   |
| 1258   |      |      |      |      |      |      |      |      |      |      |      |      |      |      |   |
| 1260   | 2    | 1    | 1    | 1    |      |      |      |      |      |      |      |      |      |      |   |
| 1261   | 3    | 3    | 3    | 3    |      |      |      |      |      |      |      |      |      |      |   |
| 1262   | 2    | 2    | 2    | 3    |      |      |      |      |      |      |      |      |      |      |   |
| 1263   | 3    | 4    | 4    | 3    |      |      |      |      |      |      |      |      |      |      |   |
| 1264   |      |      |      |      |      | 5    | 2    | 2    | 6    | 1    | 6    | 6    | 2    | 4    | 6 |
| 1265   | 1    | 2    | 2    | 1    |      |      |      |      |      |      |      |      |      |      |   |
| 1266   | 4    | 4    | 4    | 4    |      |      |      |      |      |      |      |      |      |      |   |
| 1270   | 4    | 4    | 4    | 4    |      |      |      |      |      |      |      |      |      |      |   |
| 1272   |      |      |      |      |      | 6    | 6    | 6    | 6    | 6    | 6    | 6    | 6    | 6    | 6 |

| respid | Q47l | Q47m | Q47n | Q47o | Q48a | Q48b | Q48c | Q48d | Q48e | Q48f | Q48g | Q48h | Q48i | Q48j |   |
|--------|------|------|------|------|------|------|------|------|------|------|------|------|------|------|---|
| 1273   |      |      |      |      |      | 5    | 5    | 4    | 4    | 5    | 5    | 5    | 4    | 2    | 3 |
| 1276   | 4    | 4    | 4    | 4    |      |      |      |      |      |      |      |      |      |      |   |
| 1277   | 4    | 4    | 4    | 5    |      |      |      |      |      |      |      |      |      |      |   |
| 1278   | 1    | 3    | 3    | 3    |      |      |      |      |      |      |      |      |      |      |   |
| 1280   |      |      |      |      |      | 2    | 6    | 6    | 6    | 1    | 6    | 5    | 6    | 2    | 6 |
| 1281   | 4    | 4    | 4    |      |      |      |      |      |      |      |      |      |      |      |   |
| 1282   | 4    | 4    | 4    | 4    |      |      |      |      |      |      |      |      |      |      |   |
| 1283   | 4    | 4    | 4    | 4    |      |      |      |      |      |      |      |      |      |      |   |
| 1288   |      |      |      |      |      | 3    | 3    | 3    | 3    | 3    | 3    | 3    | 3    | 3    | 3 |
| 1289   |      |      |      |      |      | 6    | 5    | 3    | 5    | 5    | 2    | 2    | 3    | 5    | 2 |
| 1290   | 4    | 3    | 3    | 3    |      |      |      |      |      |      |      |      |      |      |   |
| 1291   |      |      |      |      |      |      |      |      |      |      |      |      |      |      |   |
| 1293   |      |      |      |      |      | 5    | 5    | 5    | 5    | 5    | 5    | 5    | 5    | 4    | 5 |
| 1294   | 3    | 2    | 3    | 2    |      |      |      |      |      |      |      |      |      |      |   |
| 1295   | 3    | 2    | 1    | 2    |      |      |      |      |      |      |      |      |      |      |   |
| 1296   |      |      |      |      |      | 6    | 6    | 6    | 1    | 5    | 1    | 6    | 6    | 2    | 6 |
| 1297   |      |      |      |      |      | 3    | 4    | 3    | 3    | 4    | 3    | 3    | 3    | 3    | 3 |
| 1298   | 3    | 3    | 3    | 3    |      |      |      |      |      |      |      |      |      |      |   |
| 1300   | 4    | 4    | 4    | 3    |      |      |      |      |      |      |      |      |      |      |   |
| 1302   |      |      |      |      |      | 6    | 6    |      |      |      |      |      |      |      |   |
| 1303   | 5    | 4    | 4    | 4    |      |      |      |      |      |      |      |      |      |      |   |
| 1304   | 3    | 2    | 2    | 2    |      |      |      |      |      |      |      |      |      |      |   |
| 1305   | 1    | 1    | 1    | 1    |      |      |      |      |      |      |      |      |      |      |   |
| 1307   | 4    | 4    | 4    | 4    |      |      |      |      |      |      |      |      |      |      |   |
| 1312   |      |      |      |      |      | 4    | 5    | 5    | 5    | 4    | 4    | 4    | 4    | 4    | 6 |
| 1313   |      |      |      |      |      | 3    | 6    | 6    | 6    | 2    | 6    | 6    | 6    | 3    | 4 |
| 1314   |      |      |      |      |      | 4    | 2    | 2    | 3    | 6    | 3    | 2    | 4    | 5    | 1 |
| 1317   |      |      |      |      |      | 3    |      | 3    | 3    | 3    | 3    | 3    | 4    | 2    | 4 |
| 1318   | 4    | 3    | 3    | 3    |      |      |      |      |      |      |      |      |      |      |   |
| 1319   | 4    | 2    | 4    | 4    |      |      |      |      |      |      |      |      |      |      |   |
| 1321   | 4    | 4    | 4    | 4    |      |      |      |      |      |      |      |      |      |      |   |
| 1324   | 3    | 3    | 3    |      |      |      |      |      |      |      |      |      |      |      |   |

| respid | Q47l | Q47m | Q47n | Q47o | Q48a | Q48b | Q48c | Q48d | Q48e | Q48f | Q48g | Q48h | Q48i | Q48j |
|--------|------|------|------|------|------|------|------|------|------|------|------|------|------|------|
| 1325   | 2    | 2    | 2    | 3    |      |      |      |      |      |      |      |      |      |      |
| 1326   | 4    | 3    | 3    | 4    |      |      |      |      |      |      |      |      |      |      |
| 1327   | 5    | 5    | 5    | 5    |      |      |      |      |      |      |      |      |      |      |
| 1329   | 3    | 4    | 3    | 3    |      |      |      |      |      |      |      |      |      |      |
| 1330   |      |      |      |      | 6    | 5    | 3    | 4    | 5    | 5    | 5    | 5    | 6    | 6    |
| 1331   |      |      |      |      | 3    | 1    | 2    | 3    | 3    | 4    | 3    | 5    | 5    | 3    |
| 1335   | 3    | 2    | 3    | 2    |      |      |      |      |      |      |      |      |      |      |
| 1337   |      |      |      |      | 1    | 6    | 6    | 6    | 2    | 6    | 6    | 6    | 1    | 6    |
| 1341   |      |      |      |      | 3    | 4    | 5    | 5    | 4    | 5    | 4    | 5    | 2    | 5    |
| 1342   |      |      |      |      | 6    | 6    | 6    | 6    | 1    | 6    | 6    | 6    | 1    | 6    |
| 1344   | 2    | 1    | 3    | 2    |      |      |      |      |      |      |      |      |      |      |
| 1345   |      |      |      |      | 1    | 2    | 4    | 3    | 4    | 2    | 2    | 2    | 3    | 2    |
| 1346   | 5    | 5    | 5    | 5    |      |      |      |      |      |      |      |      |      |      |
| 1350   |      |      |      |      | 3    | 3    | 4    | 4    | 3    | 4    | 4    | 4    | 3    | 3    |
| 1352   |      |      |      |      | 2    | 5    | 5    | 6    | 2    | 6    | 5    | 6    | 2    | 5    |
| 1353   | 3    | 3    | 3    | 3    |      |      |      |      |      |      |      |      |      |      |
| 1354   | 4    | 3    | 3    | 4    |      |      |      |      |      |      |      |      |      |      |
| 1355   | 4    | 5    | 5    | 4    |      |      |      |      |      |      |      |      |      |      |
| 1357   | 5    | 2    | 1    | 2    |      |      |      |      |      |      |      |      |      |      |
| 1360   |      |      |      |      |      |      |      |      |      |      |      |      |      |      |
| 1362   |      |      |      |      | 3    | 4    | 4    | 3    | 4    | 4    | 5    | 4    | 3    | 2    |
| 1363   |      |      |      |      | 1    | 6    | 6    | 4    | 3    | 4    | 6    | 6    | 2    | 5    |
| 1367   |      |      |      |      | 3    | 3    | 3    | 3    | 4    | 4    | 4    | 4    | 2    | 4    |
| 1369   | 4    | 4    | 4    | 4    |      |      |      |      |      |      |      |      |      |      |
| 1371   |      |      |      |      |      |      |      |      |      |      |      |      |      |      |
| 1372   |      |      |      |      |      |      |      |      |      |      |      |      |      |      |
| 1375   |      |      |      |      |      |      |      |      |      |      |      |      |      |      |
| 1377   | 4    | 4    | 4    | 4    |      |      |      |      |      |      |      |      |      |      |
| 1379   | 1    | 2    | 2    | 2    |      |      |      |      |      |      |      |      |      |      |
| 1380   | 4    | 1    | 1    | 2    |      |      |      |      |      |      |      |      |      |      |
| 1382   |      |      |      |      | 6    | 6    | 5    | 5    | 5    | 5    | 5    | 5    | 5    | 5    |
| 1383   |      |      |      |      | 2    | 6    | 6    | 3    | 2    | 5    | 6    | 6    | 1    | 6    |

| respid | Q47l | Q47m | Q47n | Q47o | Q48a | Q48b | Q48c | Q48d | Q48e | Q48f | Q48g | Q48h | Q48i | Q48j |   |
|--------|------|------|------|------|------|------|------|------|------|------|------|------|------|------|---|
| 1384   |      |      |      |      |      | 5    | 5    | 5    | 6    | 5    | 5    | 5    | 3    | 5    | 6 |
| 1385   | 5    | 5    | 5    | 5    |      |      |      |      |      |      |      |      |      |      |   |
| 1387   | 3    | 5    | 5    | 5    |      |      |      |      |      |      |      |      |      |      |   |
| 1388   | 2    | 1    | 1    | 3    |      |      |      |      |      |      |      |      |      |      |   |
| 1389   |      |      |      |      |      | 1    | 1    | 1    | 1    | 6    | 1    | 1    | 1    | 3    | 1 |
| 1390   |      |      |      |      |      | 3    | 5    | 5    | 6    | 2    | 4    | 5    | 5    | 2    | 4 |
| 1395   | 5    | 5    | 5    | 5    |      |      |      |      |      |      |      |      |      |      |   |
| 1396   |      |      |      |      |      | 3    | 4    | 5    | 4    | 3    | 4    | 5    | 4    | 3    | 5 |
| 1397   | 3    | 2    | 2    | 2    |      |      |      |      |      |      |      |      |      |      |   |
| 1398   | 3    | 3    | 3    | 3    |      |      |      |      |      |      |      |      |      |      |   |
| 1399   | 3    | 3    | 3    | 3    |      |      |      |      |      |      |      |      |      |      |   |
| 1403   |      |      |      |      |      | 3    | 4    | 5    | 5    | 2    | 5    | 5    | 5    | 2    | 5 |
| 1405   | 3    | 3    | 3    | 3    |      |      |      |      |      |      |      |      |      |      |   |
| 1406   |      |      |      |      |      | 5    | 3    | 5    | 3    | 4    | 3    | 5    | 5    | 5    | 5 |
| 1407   |      |      |      |      |      | 4    | 4    | 4    | 5    | 2    | 6    | 6    | 5    | 3    | 3 |
| 1408   | 3    | 4    | 4    | 3    |      |      |      |      |      |      |      |      |      |      |   |
| 1409   | 4    | 4    | 4    | 4    |      |      |      |      |      |      |      |      |      |      |   |
| 1410   | 1    | 1    | 1    | 1    |      |      |      |      |      |      |      |      |      |      |   |
| 1411   |      |      |      |      |      | 2    | 5    | 5    | 5    | 4    | 5    | 5    | 5    | 3    | 3 |
| 1412   | 4    | 4    |      | 4    |      |      |      |      |      |      |      |      |      |      |   |
| 1413   |      |      |      |      |      | 3    | 5    | 5    | 5    | 4    | 5    | 5    | 5    | 2    | 5 |
| 1414   | 4    | 4    | 4    | 4    |      |      |      |      |      |      |      |      |      |      |   |
| 1415   | 4    | 4    | 4    | 3    |      |      |      |      |      |      |      |      |      |      |   |
| 1416   | 4    | 4    | 4    | 4    |      |      |      |      |      |      |      |      |      |      |   |
| 1417   |      |      |      |      |      | 1    | 5    | 6    | 6    | 1    | 3    | 6    | 6    | 1    | 6 |
| 1418   | 4    | 5    | 5    | 4    |      |      |      |      |      |      |      |      |      |      |   |
| 1419   | 1    | 2    | 2    | 2    |      |      |      |      |      |      |      |      |      |      |   |
| 1420   | 3    | 1    | 1    | 3    |      |      |      |      |      |      |      |      |      |      |   |
| 1421   | 3    | 2    | 2    | 2    |      |      |      |      |      |      |      |      |      |      |   |
| 1422   |      |      |      |      |      | 1    | 6    | 6    | 6    | 2    | 6    | 6    | 6    | 1    | 6 |
| 1423   | 5    | 4    | 4    | 5    |      |      |      |      |      |      |      |      |      |      |   |
| 1424   | 2    | 2    | 2    | 4    |      |      |      |      |      |      |      |      |      |      |   |

| respid | Q47l | Q47m | Q47n | Q47o | Q48a | Q48b | Q48c | Q48d | Q48e | Q48f | Q48g | Q48h | Q48i | Q48j |   |
|--------|------|------|------|------|------|------|------|------|------|------|------|------|------|------|---|
| 1429   | 4    | 2    | 2    | 2    |      |      |      |      |      |      |      |      |      |      |   |
| 1430   | 1    | 1    | 1    | 1    |      |      |      |      |      |      |      |      |      |      |   |
| 1431   | 5    | 4    | 2    | 3    |      |      |      |      |      |      |      |      |      |      |   |
| 1433   | 1    | 1    | 1    | 1    |      |      |      |      |      |      |      |      |      |      |   |
| 1435   |      |      |      |      |      |      |      |      |      |      |      |      |      |      |   |
| 1436   | 5    | 4    | 4    | 2    |      |      |      |      |      |      |      |      |      |      |   |
| 1438   |      |      |      |      |      |      |      |      |      |      |      |      |      |      |   |
| 1439   | 4    | 4    | 4    | 4    |      |      |      |      |      |      |      |      |      |      |   |
| 1441   | 3    | 3    | 3    | 3    |      |      |      |      |      |      |      |      |      |      |   |
| 1442   | 4    | 5    | 5    | 5    |      |      |      |      |      |      |      |      |      |      |   |
| 1443   |      |      |      |      |      |      |      |      |      |      |      |      |      |      |   |
| 1444   |      |      |      |      |      | 5    | 5    | 5    | 6    | 2    | 5    | 5    | 6    | 2    | 3 |
| 1445   | 5    | 5    | 5    | 5    |      |      |      |      |      |      |      |      |      |      |   |
| 1446   |      |      |      |      |      | 6    | 6    | 5    | 5    | 3    | 5    | 5    | 5    | 3    | 5 |
| 1447   | 3    | 3    | 3    | 3    |      |      |      |      |      |      |      |      |      |      |   |
| 1449   |      |      |      |      |      | 2    | 5    | 3    | 6    | 2    | 3    | 3    | 5    | 2    | 2 |
| 1450   | 1    | 3    | 3    | 3    |      |      |      |      |      |      |      |      |      |      |   |
| 1451   |      |      |      |      |      | 2    | 2    | 2    | 2    | 5    | 3    | 1    | 2    | 6    | 3 |
| 1452   |      |      |      |      |      |      |      |      |      |      |      |      |      |      |   |
| 1453   |      |      |      |      |      | 3    | 3    | 3    | 3    | 3    | 3    | 4    | 3    | 4    | 3 |
| 1454   |      |      |      |      |      | 4    | 5    | 3    | 3    | 5    | 4    | 3    | 3    | 5    | 4 |
| 1456   | 1    | 1    | 1    | 1    |      |      |      |      |      |      |      |      |      |      |   |
| 1457   | 4    | 4    | 4    | 4    |      |      |      |      |      |      |      |      |      |      |   |
| 1459   | 4    | 4    | 4    | 4    |      |      |      |      |      |      |      |      |      |      |   |
| 1460   | 4    | 4    | 4    | 4    |      |      |      |      |      |      |      |      |      |      |   |
| 1463   | 2    | 3    | 3    | 1    |      |      |      |      |      |      |      |      |      |      |   |
| 1465   |      |      |      |      |      | 3    | 4    | 3    | 3    | 3    | 3    | 3    | 3    | 3    | 3 |
| 1467   | 3    | 3    | 3    | 3    |      |      |      |      |      |      |      |      |      |      |   |
| 1470   | 4    | 3    | 3    | 4    |      |      |      |      |      |      |      |      |      |      |   |
| 1471   | 2    | 2    | 2    | 2    |      |      |      |      |      |      |      |      |      |      |   |
| 1472   | 2    | 3    | 3    | 3    |      |      |      |      |      |      |      |      |      |      |   |
| 1474   |      |      |      |      |      | 4    | 3    | 4    | 5    | 3    | 5    | 5    | 6    | 3    | 5 |

| respid | Q47l | Q47m | Q47n | Q47o | Q48a | Q48b | Q48c | Q48d | Q48e | Q48f | Q48g | Q48h | Q48i | Q48j |
|--------|------|------|------|------|------|------|------|------|------|------|------|------|------|------|
| 1475   | 4    | 4    | 3    | 3    |      |      |      |      |      |      |      |      |      |      |
| 1477   | 3    | 3    | 3    | 5    |      |      |      |      |      |      |      |      |      |      |
| 1478   | 3    | 4    | 4    | 3    |      |      |      |      |      |      |      |      |      |      |
| 1480   |      |      |      |      |      |      |      |      |      |      |      |      |      |      |
| 1481   |      |      |      |      | 3    | 4    | 4    | 4    | 4    | 4    | 4    | 4    | 4    | 4    |
| 1483   | 4    | 4    | 4    | 4    |      |      |      |      |      |      |      |      |      |      |
| 1484   | 3    | 4    | 3    | 3    |      |      |      |      |      |      |      |      |      |      |
| 1485   | 3    | 1    | 1    | 2    |      |      |      |      |      |      |      |      |      |      |
| 1486   | 3    | 4    | 4    | 3    |      |      |      |      |      |      |      |      |      |      |
| 1487   | 3    | 4    | 4    | 3    |      |      |      |      |      |      |      |      |      |      |
| 1488   | 3    | 4    | 4    | 4    |      |      |      |      |      |      |      |      |      |      |
| 1489   | 3    | 1    | 1    | 1    |      |      |      |      |      |      |      |      |      |      |
| 1490   | 3    | 3    | 3    | 3    |      |      |      |      |      |      |      |      |      |      |
| 1491   |      |      |      |      | 3    | 2    | 4    |      | 3    | 4    | 4    | 3    | 3    |      |
| 1492   |      |      |      |      | 3    | 6    | 6    | 6    | 3    | 6    | 6    | 6    | 3    | 6    |
| 1494   | 4    | 3    | 3    | 5    |      |      |      |      |      |      |      |      |      |      |
| 1495   | 2    | 2    | 2    | 1    |      |      |      |      |      |      |      |      |      |      |
| 1496   | 3    | 5    | 5    | 4    |      |      |      |      |      |      |      |      |      |      |
| 1498   | 3    | 3    | 4    | 3    |      |      |      |      |      |      |      |      |      |      |
| 1499   |      |      |      |      | 2    | 4    | 4    | 3    | 4    | 3    | 3    | 6    | 3    | 3    |
| 1500   |      |      |      |      | 5    | 4    | 5    | 5    | 4    | 3    | 3    | 3    | 4    | 5    |
| 1501   |      |      |      |      | 4    | 5    | 6    | 6    | 3    | 6    | 6    | 6    | 3    | 6    |
| 1503   |      |      |      |      |      |      |      |      |      |      |      |      |      |      |
| 1504   |      |      |      |      | 4    | 6    | 6    | 6    | 3    | 4    | 6    | 6    | 3    | 6    |
| 1508   | 4    | 4    | 4    | 4    |      |      |      |      |      |      |      |      |      |      |
| 1509   | 3    | 4    | 4    | 3    |      |      |      |      |      |      |      |      |      |      |
| 1511   |      |      |      |      |      |      |      |      |      |      |      |      |      |      |
| 1512   | 5    | 4    | 4    | 4    |      |      |      |      |      |      |      |      |      |      |
| 1513   | 5    | 5    | 5    | 5    |      |      |      |      |      |      |      |      |      |      |
| 1515   | 4    | 4    | 4    | 4    |      |      |      |      |      |      |      |      |      |      |
| 1517   | 1    | 3    | 3    | 1    |      |      |      |      |      |      |      |      |      |      |
| 1518   |      |      |      |      | 3    | 5    | 5    | 5    | 3    | 5    | 5    | 5    | 2    | 5    |

| respid | Q47l | Q47m | Q47n | Q47o | Q48a | Q48b | Q48c | Q48d | Q48e | Q48f | Q48g | Q48h | Q48i | Q48j |   |
|--------|------|------|------|------|------|------|------|------|------|------|------|------|------|------|---|
| 1519   |      |      |      |      |      | 5    | 5    | 5    | 6    | 4    | 5    | 3    | 5    | 3    | 2 |
| 1520   |      |      |      |      |      |      |      |      |      |      |      |      |      |      |   |
| 1521   |      |      |      |      |      | 5    | 5    | 5    | 5    | 4    | 4    | 4    | 5    | 4    | 4 |
| 1522   |      |      |      |      |      | 2    | 6    | 6    | 6    | 2    | 6    | 6    | 6    | 1    | 6 |
| 1523   | 4    | 3    | 3    | 2    |      |      |      |      |      |      |      |      |      |      |   |
| 1524   |      |      |      |      |      |      | 6    | 6    | 6    |      | 6    | 6    | 6    |      | 6 |
| 1525   |      |      |      |      |      |      | 6    |      |      |      |      |      |      |      |   |
| 1526   | 3    | 3    | 3    | 3    |      |      |      |      |      |      |      |      |      |      |   |
| 1527   |      |      |      |      |      |      |      |      |      |      |      |      |      |      |   |
| 1534   | 5    | 4    | 4    | 4    |      |      |      |      |      |      |      |      |      |      |   |
| 1535   | 4    | 3    | 4    | 3    |      |      |      |      |      |      |      |      |      |      |   |
| 1536   | 3    | 3    | 3    | 3    |      |      |      |      |      |      |      |      |      |      |   |
| 1538   | 3    | 4    | 3    | 3    |      |      |      |      |      |      |      |      |      |      |   |
| 1539   | 1    | 3    | 3    | 3    |      |      |      |      |      |      |      |      |      |      |   |
| 1540   |      |      |      |      |      | 6    | 6    |      |      |      |      |      |      |      |   |
| 1541   | 3    | 4    | 4    | 4    |      |      |      |      |      |      |      |      |      |      |   |
| 1542   | 2    | 3    | 3    | 2    |      |      |      |      |      |      |      |      |      |      |   |
| 1543   |      |      |      |      |      | 2    | 3    | 5    | 4    | 2    | 6    | 4    | 5    | 3    | 5 |
| 1545   |      |      |      |      |      | 2    | 4    | 5    | 5    | 2    | 4    | 3    | 4    | 3    | 3 |
| 1546   | 3    | 4    | 4    | 5    |      |      |      |      |      |      |      |      |      |      |   |
| 1548   |      |      |      |      |      | 6    | 6    | 6    | 6    | 6    | 1    | 6    | 1    | 1    | 1 |
| 1549   |      |      |      |      |      |      |      |      |      |      |      |      |      |      |   |
| 1551   | 4    | 4    | 4    | 4    |      |      |      |      |      |      |      |      |      |      |   |
| 1552   | 3    | 3    | 3    | 3    |      |      |      |      |      |      |      |      |      |      |   |
| 1556   | 5    | 5    | 5    | 5    |      |      |      |      |      |      |      |      |      |      |   |
| 1557   |      |      |      |      |      |      |      |      |      |      |      |      |      |      |   |
| 1558   | 3    | 3    | 3    | 3    |      |      |      |      |      |      |      |      |      |      |   |
| 1561   | 5    | 5    | 4    | 5    |      |      |      |      |      |      |      |      |      |      |   |
| 1562   | 3    | 3    | 3    | 3    |      |      |      |      |      |      |      |      |      |      |   |
| 1563   | 4    | 5    | 5    | 5    |      |      |      |      |      |      |      |      |      |      |   |
| 1564   | 2    | 1    | 2    | 2    |      |      |      |      |      |      |      |      |      |      |   |
| 1565   |      |      |      |      |      |      |      |      |      |      |      |      |      |      |   |



| respid | Q47l | Q47m | Q47n | Q47o | Q48a | Q48b | Q48c | Q48d | Q48e | Q48f | Q48g | Q48h | Q48i | Q48j |   |
|--------|------|------|------|------|------|------|------|------|------|------|------|------|------|------|---|
| 1566   | 3    | 4    | 4    | 4    | 3    |      |      |      |      |      |      |      |      |      |   |
| 1567   | 4    | 4    | 4    | 4    | 4    |      |      |      |      |      |      |      |      |      |   |
| 1569   |      |      |      |      |      |      |      |      |      |      |      |      |      |      |   |
| 1570   |      |      |      |      |      | 1    | 6    | 6    | 6    | 2    | 6    | 6    | 6    | 1    | 6 |
| 1574   | 1    | 3    | 3    | 2    |      |      |      |      |      |      |      |      |      |      |   |
| 1575   |      |      |      |      |      | 2    | 6    | 6    | 6    | 2    | 6    | 6    | 6    | 1    | 5 |
| 1576   | 3    | 3    | 3    | 3    |      |      |      |      |      |      |      |      |      |      |   |
| 1577   | 4    | 4    | 4    | 4    |      |      |      |      |      |      |      |      |      |      |   |
| 1581   |      |      |      |      |      | 4    | 3    | 4    | 3    | 4    | 4    | 3    | 4    | 3    | 4 |
| 1583   | 4    | 3    | 4    | 3    |      |      |      |      |      |      |      |      |      |      |   |
| 1585   | 4    | 4    | 4    | 4    |      |      |      |      |      |      |      |      |      |      |   |
| 1586   | 3    | 2    | 2    | 4    |      |      |      |      |      |      |      |      |      |      |   |
| 1588   | 3    | 4    | 4    | 4    |      |      |      |      |      |      |      |      |      |      |   |
| 1590   | 4    | 4    | 4    | 4    |      |      |      |      |      |      |      |      |      |      |   |
| 1592   |      |      |      |      |      | 2    | 5    | 6    | 4    | 2    | 5    | 5    | 6    | 2    | 5 |
| 1594   | 4    | 5    | 5    | 5    |      |      |      |      |      |      |      |      |      |      |   |
| 1598   | 1    | 3    | 3    | 2    |      |      |      |      |      |      |      |      |      |      |   |
| 1599   | 4    | 3    | 3    | 3    |      |      |      |      |      |      |      |      |      |      |   |
| 1600   | 3    | 4    | 4    | 3    |      |      |      |      |      |      |      |      |      |      |   |
| 1602   |      |      |      |      |      | 5    | 3    | 6    | 4    | 5    | 5    | 5    | 5    | 2    | 5 |
| 1603   |      |      |      |      |      | 1    | 6    | 6    | 6    | 1    | 6    | 6    | 6    | 1    | 6 |
| 1604   |      |      |      |      |      | 2    | 3    | 4    | 4    | 4    | 4    | 4    | 4    | 3    | 3 |
| 1605   | 1    | 1    | 1    | 1    |      |      |      |      |      |      |      |      |      |      |   |
| 1606   | 5    | 4    | 5    | 5    |      |      |      |      |      |      |      |      |      |      |   |
| 1610   | 4    | 4    | 4    | 4    |      |      |      |      |      |      |      |      |      |      |   |
| 1611   | 3    | 3    | 3    | 3    |      |      |      |      |      |      |      |      |      |      |   |
| 1612   | 4    | 4    | 4    | 3    |      |      |      |      |      |      |      |      |      |      |   |
| 1613   | 3    | 3    | 3    | 3    |      |      |      |      |      |      |      |      |      |      |   |
| 1615   | 3    | 4    | 4    | 3    |      |      |      |      |      |      |      |      |      |      |   |
| 1616   | 2    | 2    | 2    | 2    |      |      |      |      |      |      |      |      |      |      |   |
| 1617   | 3    | 3    | 3    | 3    |      |      |      |      |      |      |      |      |      |      |   |
| 1618   | 4    | 4    | 4    | 4    |      |      |      |      |      |      |      |      |      |      |   |

| respid | Q47l | Q47m | Q47n | Q47o | Q48a | Q48b | Q48c | Q48d | Q48e | Q48f | Q48g | Q48h | Q48i | Q48j |   |
|--------|------|------|------|------|------|------|------|------|------|------|------|------|------|------|---|
| 1620   |      |      |      |      |      | 2    | 3    | 5    | 5    | 3    | 6    | 6    | 6    | 1    | 3 |
| 1621   | 2    | 2    | 2    | 2    |      |      |      |      |      |      |      |      |      |      |   |
| 1622   |      |      |      |      |      |      |      |      |      |      |      |      |      |      |   |
| 1623   | 3    | 4    | 4    | 4    |      |      |      |      |      |      |      |      |      |      |   |
| 1624   |      |      |      |      |      | 2    | 6    | 6    | 5    | 2    | 6    | 5    | 6    | 1    | 5 |
| 1625   | 3    |      |      | 4    | 4    |      |      |      |      |      |      |      |      |      |   |
| 1626   |      |      |      |      |      |      |      |      |      |      |      |      |      |      |   |
| 1627   |      |      |      |      |      | 2    | 6    | 6    | 6    | 1    | 6    | 6    | 6    | 1    | 6 |
| 1629   | 4    | 4    | 4    | 5    |      |      |      |      |      |      |      |      |      |      |   |
| 1630   | 3    |      |      | 4    |      |      |      |      |      |      |      |      |      |      |   |
| 1631   | 4    | 1    |      |      |      |      |      |      |      |      |      |      |      |      |   |
| 1634   |      |      |      |      |      | 3    | 5    | 5    | 5    | 3    | 5    | 5    | 5    | 3    | 5 |
| 1635   | 3    | 5    | 5    | 3    |      |      |      |      |      |      |      |      |      |      |   |
| 1636   |      |      |      |      |      |      |      |      |      |      |      |      |      |      |   |
| 1637   | 3    | 3    | 4    | 5    |      |      |      |      |      |      |      |      |      |      |   |
| 1640   |      |      |      |      |      | 4    | 3    | 5    | 5    | 2    | 4    | 4    | 4    | 3    | 3 |
| 1642   |      |      |      |      |      | 3    | 3    | 5    | 6    | 4    | 4    | 5    | 6    | 3    | 6 |
| 1643   |      |      |      |      |      | 3    | 4    | 5    | 5    | 3    | 5    | 5    | 6    | 3    | 4 |
| 1644   | 3    | 3    | 3    | 3    |      |      |      |      |      |      |      |      |      |      |   |
| 1645   |      |      |      |      |      |      |      | 6    | 6    | 6    | 6    | 6    | 6    | 6    | 6 |
| 1646   |      |      |      |      |      | 6    | 6    | 6    | 6    | 5    | 2    | 6    | 6    | 5    | 6 |
| 1647   | 4    | 3    | 4    | 4    |      |      |      |      |      |      |      |      |      |      |   |
| 1650   | 4    | 3    | 3    | 3    |      |      |      |      |      |      |      |      |      |      |   |
| 1654   | 3    | 3    | 3    | 2    |      |      |      |      |      |      |      |      |      |      |   |
| 1656   | 4    | 3    | 3    | 4    |      |      |      |      |      |      |      |      |      |      |   |
| 1657   | 2    | 4    | 4    | 4    |      |      |      |      |      |      |      |      |      |      |   |
| 1659   | 3    | 3    | 3    | 3    |      |      |      |      |      |      |      |      |      |      |   |
| 1662   |      |      |      |      |      | 3    | 3    | 3    | 4    | 4    | 4    |      | 4    | 4    | 4 |
| 1663   |      |      |      |      |      | 2    | 5    | 5    | 5    | 4    | 5    | 3    |      | 3    | 3 |
| 1664   |      |      |      |      |      | 1    | 6    | 6    | 6    | 1    | 6    | 6    | 6    | 1    | 6 |
| 1665   | 3    | 4    | 4    | 4    |      |      |      |      |      |      |      |      |      |      |   |
| 1667   | 3    | 4    | 5    | 3    |      |      |      |      |      |      |      |      |      |      |   |

| respid | Q47l | Q47m | Q47n | Q47o | Q48a | Q48b | Q48c | Q48d | Q48e | Q48f | Q48g | Q48h | Q48i | Q48j |   |
|--------|------|------|------|------|------|------|------|------|------|------|------|------|------|------|---|
| 1668   | 4    | 4    | 4    | 4    |      |      |      |      |      |      |      |      |      |      |   |
| 1670   | 3    | 4    | 4    | 4    |      |      |      |      |      |      |      |      |      |      |   |
| 1671   | 3    | 3    | 1    | 4    |      |      |      |      |      |      |      |      |      |      |   |
| 1673   |      |      |      |      |      | 1    | 6    | 6    | 6    | 1    | 6    | 6    | 6    | 1    | 6 |
| 1674   | 3    | 2    | 2    | 3    |      |      |      |      |      |      |      |      |      |      |   |
| 1676   | 4    | 1    | 1    | 4    |      |      |      |      |      |      |      |      |      |      |   |
| 1677   | 4    | 4    | 3    | 4    |      |      |      |      |      |      |      |      |      |      |   |
| 1678   | 3    | 3    | 2    | 3    |      |      |      |      |      |      |      |      |      |      |   |
| 1680   |      |      |      |      |      | 3    | 6    | 6    | 6    | 2    | 6    | 6    | 6    | 1    | 6 |
| 1681   | 2    | 3    | 3    | 3    |      |      |      |      |      |      |      |      |      |      |   |
| 1683   | 2    | 3    | 3    | 2    |      |      |      |      |      |      |      |      |      |      |   |
| 1685   |      |      |      |      |      | 5    | 3    | 3    | 3    | 5    | 5    | 3    | 5    | 3    | 5 |
| 1686   |      |      |      |      |      | 2    | 5    | 5    | 5    | 2    | 6    | 2    | 6    | 1    | 6 |
| 1690   | 4    | 3    | 3    | 4    |      |      |      |      |      |      |      |      |      |      |   |
| 1691   |      |      |      |      |      | 6    | 6    | 6    | 4    | 5    | 2    | 4    | 5    | 4    | 6 |
| 1692   |      | 3    | 3    | 2    |      |      |      |      |      |      |      |      |      |      |   |
| 1693   | 4    | 3    | 3    | 3    |      |      |      |      |      |      |      |      |      |      |   |
| 1695   |      |      |      |      |      | 2    | 5    | 5    | 4    | 4    | 4    | 4    | 4    | 3    | 4 |
| 1696   | 3    | 3    | 2    | 3    |      |      |      |      |      |      |      |      |      |      |   |
| 1698   | 3    | 3    | 3    | 3    |      |      |      |      |      |      |      |      |      |      |   |
| 1699   |      |      |      |      |      |      |      |      |      |      |      |      |      |      |   |
| 1701   | 3    | 3    | 3    | 3    |      |      |      |      |      |      |      |      |      |      |   |
| 1702   |      |      |      |      |      | 5    | 5    |      | 5    | 4    | 5    |      | 4    | 3    | 5 |
| 1703   |      |      |      |      |      |      |      |      |      |      |      |      |      |      |   |
| 1705   |      |      |      |      |      | 1    | 6    | 6    | 6    | 1    | 6    | 6    | 6    | 1    | 6 |
| 1706   | 4    | 2    | 2    | 1    |      |      |      |      |      |      |      |      |      |      |   |
| 1708   |      |      |      |      |      |      |      |      |      |      |      |      |      |      |   |
| 1711   |      |      |      |      |      | 3    | 5    | 5    | 5    | 4    | 5    | 5    | 5    | 5    | 5 |
| 1712   | 4    | 4    | 4    | 4    |      |      |      |      |      |      |      |      |      |      |   |
| 1713   |      |      |      |      |      | 1    | 5    | 5    | 5    | 2    | 5    | 5    | 6    | 1    | 5 |
| 1715   |      |      |      |      |      | 1    | 6    | 6    | 5    | 1    | 6    | 6    | 6    | 1    | 6 |
| 1717   | 4    | 4    | 4    | 4    |      |      |      |      |      |      |      |      |      |      |   |

| respid | Q47l | Q47m | Q47n | Q47o | Q48a | Q48b | Q48c | Q48d | Q48e | Q48f | Q48g | Q48h | Q48i | Q48j |
|--------|------|------|------|------|------|------|------|------|------|------|------|------|------|------|
| 1718   | 4    | 3    | 3    | 4    |      |      |      |      |      |      |      |      |      |      |
| 1719   |      |      |      |      | 4    | 3    | 4    | 3    | 3    | 5    | 5    | 5    | 3    | 5    |
| 1721   | 3    | 4    | 4    | 4    |      |      |      |      |      |      |      |      |      |      |
| 1722   |      |      |      |      | 4    | 6    | 6    | 6    | 4    | 4    | 4    | 5    | 2    | 5    |
| 1724   |      |      |      |      | 1    | 6    | 6    | 6    | 1    | 6    | 6    | 6    | 1    | 6    |
| 1725   |      |      |      |      | 1    | 6    | 6    | 6    | 1    | 6    | 6    | 6    | 1    | 6    |
| 1726   | 5    | 4    | 4    | 4    |      |      |      |      |      |      |      |      |      |      |
| 1727   | 3    | 3    | 3    | 3    |      |      |      |      |      |      |      |      |      |      |
| 1728   | 3    | 3    | 3    | 3    |      |      |      |      |      |      |      |      |      |      |
| 1731   | 3    | 3    | 4    | 3    |      |      |      |      |      |      |      |      |      |      |
| 1733   | 4    | 4    | 4    | 4    |      |      |      |      |      |      |      |      |      |      |
| 1734   | 3    | 3    | 4    | 4    |      |      |      |      |      |      |      |      |      |      |
| 1735   |      |      |      |      |      |      |      |      |      |      |      |      |      |      |
| 1736   |      |      |      |      | 1    | 6    | 6    | 6    | 1    | 6    | 6    | 6    | 1    | 3    |
| 1737   | 4    | 3    | 3    | 3    |      |      |      |      |      |      |      |      |      |      |
| 1738   |      |      |      |      | 3    | 4    | 4    | 4    | 3    | 4    | 5    | 4    | 3    | 4    |
| 1743   |      |      |      |      | 3    |      |      |      |      |      |      |      |      |      |
| 1755   |      |      |      |      | 2    | 5    | 4    | 5    | 4    | 5    | 4    | 5    | 2    | 3    |
| 1756   |      |      |      |      | 1    | 6    | 6    | 6    | 1    | 6    | 6    | 6    | 1    | 6    |
| 1757   |      |      |      |      | 1    | 6    | 6    | 6    | 1    | 6    | 6    | 6    | 1    | 6    |
| 1758   |      |      |      |      | 3    | 3    | 3    | 1    | 5    | 3    | 3    | 3    | 3    | 3    |
| 1759   | 4    | 4    | 4    | 4    |      |      |      |      |      |      |      |      |      |      |
| 1761   |      |      |      |      | 1    | 6    | 6    | 6    | 1    | 6    | 6    | 6    | 2    | 6    |
| 1762   |      |      |      |      | 1    | 6    | 6    | 6    | 1    | 6    | 6    | 6    | 1    | 6    |
| 1764   |      |      |      |      |      |      |      |      |      |      |      |      |      |      |
| 1767   |      |      |      |      | 2    | 5    | 6    | 6    | 1    | 6    | 6    | 6    | 1    | 6    |
| 1768   | 3    | 4    | 4    | 4    |      |      |      |      |      |      |      |      |      |      |
| 1769   | 4    | 4    | 4    | 4    |      |      |      |      |      |      |      |      |      |      |
| 1770   | 1    | 1    | 1    | 1    |      |      |      |      |      |      |      |      |      |      |
| 1771   | 4    | 2    | 2    | 3    |      |      |      |      |      |      |      |      |      |      |
| 1776   | 3    | 4    | 4    | 4    |      |      |      |      |      |      |      |      |      |      |
| 1777   |      |      |      |      | 2    | 6    | 6    | 5    | 2    | 6    | 6    | 6    | 1    | 5    |

| respid | Q47l | Q47m | Q47n | Q47o | Q48a | Q48b | Q48c | Q48d | Q48e | Q48f | Q48g | Q48h | Q48i | Q48j |
|--------|------|------|------|------|------|------|------|------|------|------|------|------|------|------|
| 1778   | 3    | 1    | 1    | 4    |      |      |      |      |      |      |      |      |      |      |
| 1779   | 3    | 4    | 4    | 3    |      |      |      |      |      |      |      |      |      |      |
| 1780   | 3    | 1    | 2    | 2    |      |      |      |      |      |      |      |      |      |      |
| 1781   |      |      |      |      |      |      |      |      |      |      |      |      |      |      |
| 1783   |      |      |      |      | 3    | 4    | 4    | 4    | 3    | 4    | 5    | 4    | 3    | 4    |
| 1784   | 2    | 3    | 2    | 3    |      |      |      |      |      |      |      |      |      |      |
| 1785   | 3    | 3    | 3    | 3    |      |      |      |      |      |      |      |      |      |      |
| 1788   | 4    | 3    | 3    | 3    |      |      |      |      |      |      |      |      |      |      |
| 1792   |      |      |      |      | 2    | 6    |      |      |      |      |      |      |      |      |
| 1794   |      |      |      |      | 2    | 3    | 5    | 5    | 2    | 5    | 6    | 5    | 2    | 2    |
| 1798   |      |      |      |      | 3    | 3    | 4    | 5    | 5    | 3    | 3    | 3    | 4    | 1    |
| 1799   |      |      |      |      | 2    | 5    | 4    | 3    | 3    | 3    | 3    | 5    | 4    | 2    |
| 1800   | 4    | 4    | 4    | 4    |      |      |      |      |      |      |      |      |      |      |
| 1804   | 3    | 3    | 3    | 3    |      |      |      |      |      |      |      |      |      |      |
| 1806   |      |      |      |      | 4    | 3    | 3    | 3    | 4    | 3    | 3    | 3    | 6    | 3    |
| 1807   |      |      |      |      | 5    | 5    | 3    | 3    | 5    | 5    | 3    | 3    | 4    | 3    |
| 1808   | 3    | 4    | 4    | 3    |      |      |      |      |      |      |      |      |      |      |
| 1809   |      |      |      |      | 6    | 6    | 6    | 3    | 4    | 3    | 6    | 6    | 3    | 3    |
| 1811   | 2    | 3    | 3    | 3    |      |      |      |      |      |      |      |      |      |      |
| 1812   | 3    | 4    | 4    | 3    |      |      |      |      |      |      |      |      |      |      |
| 1813   | 3    | 3    | 3    | 3    |      |      |      |      |      |      |      |      |      |      |
| 1814   |      |      |      |      | 1    | 6    | 6    | 6    | 1    | 6    | 6    | 6    | 1    | 6    |
| 1815   |      |      |      |      | 2    | 6    | 6    | 6    | 2    | 6    | 6    | 6    | 2    | 5    |
| 1817   |      |      |      |      | 3    | 4    | 4    | 5    | 3    | 4    | 5    | 5    | 3    | 4    |
| 1820   | 4    | 4    | 4    | 4    |      |      |      |      |      |      |      |      |      |      |
| 1821   | 4    | 4    | 4    | 4    |      |      |      |      |      |      |      |      |      |      |
| 1822   | 4    | 4    | 4    | 3    |      |      |      |      |      |      |      |      |      |      |
| 1823   | 1    | 3    | 3    | 3    |      |      |      |      |      |      |      |      |      |      |
| 1824   | 2    | 3    | 3    | 2    |      |      |      |      |      |      |      |      |      |      |
| 1826   |      |      |      |      |      |      |      |      |      |      |      |      |      |      |
| 1828   | 3    | 1    | 3    | 1    |      |      |      |      |      |      |      |      |      |      |
| 1829   |      |      |      |      | 1    | 6    | 6    | 6    | 1    | 6    | 6    | 6    | 1    | 6    |

| respid | Q47l | Q47m | Q47n | Q47o | Q48a | Q48b | Q48c | Q48d | Q48e | Q48f | Q48g | Q48h | Q48i | Q48j |   |
|--------|------|------|------|------|------|------|------|------|------|------|------|------|------|------|---|
| 1830   |      | 5    | 5    | 5    | 5    |      |      |      |      |      |      |      |      |      |   |
| 1831   |      | 3    | 4    | 4    | 4    |      |      |      |      |      |      |      |      |      |   |
| 1832   |      |      |      |      |      | 6    | 6    | 6    | 6    | 3    | 5    | 6    | 6    | 2    | 6 |
| 1836   |      | 2    | 3    | 3    | 2    |      |      |      |      |      |      |      |      |      |   |
| 1838   |      | 3    | 3    | 4    | 2    |      |      |      |      |      |      |      |      |      |   |
| 1839   |      | 2    |      |      | 2    |      |      |      |      |      |      |      |      |      |   |
| 1840   |      | 4    | 4    | 4    | 4    |      |      |      |      |      |      |      |      |      |   |
| 1841   |      |      |      |      |      |      |      |      |      |      |      |      |      |      |   |
| 1842   |      | 5    | 4    | 3    | 5    |      |      |      |      |      |      |      |      |      |   |
| 1843   |      | 2    | 4    | 4    | 4    |      |      |      |      |      |      |      |      |      |   |
| 1844   |      | 3    | 3    | 3    | 3    |      |      |      |      |      |      |      |      |      |   |
| 1845   |      | 4    | 2    | 2    | 2    |      |      |      |      |      |      |      |      |      |   |
| 1849   |      |      |      |      |      | 2    | 5    | 6    | 6    | 1    | 6    | 6    | 6    | 2    | 6 |
| 1850   |      |      |      |      |      | 2    | 4    | 4    | 4    | 4    | 4    | 4    | 4    | 3    | 4 |
| 1851   |      | 3    | 4    | 4    | 4    |      |      |      |      |      |      |      |      |      |   |
| 1852   |      |      |      |      |      |      |      |      |      |      |      |      |      |      |   |
| 1857   |      | 4    | 4    | 4    | 4    |      |      |      |      |      |      |      |      |      |   |
| 1858   |      |      |      |      |      | 6    | 5    | 5    | 6    | 6    | 6    | 6    | 6    | 6    | 6 |
| 1861   |      |      |      |      |      | 2    | 5    | 6    | 6    | 2    | 5    | 5    | 6    | 1    | 5 |
| 1862   |      |      |      |      |      | 1    | 6    | 6    | 6    | 1    | 6    | 6    | 6    | 6    | 6 |
| 1863   |      | 3    | 3    | 3    | 3    |      |      |      |      |      |      |      |      |      |   |
| 1864   |      | 3    | 3    | 3    | 3    |      |      |      |      |      |      |      |      |      |   |
| 1865   |      |      |      |      |      |      |      |      |      |      |      |      |      |      |   |
| 1867   |      | 5    | 4    | 3    | 2    |      |      |      |      |      |      |      |      |      |   |
| 1868   |      | 5    | 4    | 4    | 4    |      |      |      |      |      |      |      |      |      |   |
| 1869   |      | 3    | 3    | 3    | 3    |      |      |      |      |      |      |      |      |      |   |
| 1870   |      | 5    | 4    | 4    | 5    |      |      |      |      |      |      |      |      |      |   |
| 1871   |      | 2    | 1    | 1    | 2    |      |      |      |      |      |      |      |      |      |   |
| 1872   |      | 5    | 5    | 5    | 5    |      |      |      |      |      |      |      |      |      |   |
| 1873   |      |      |      |      |      | 2    | 6    | 6    | 6    | 1    | 6    | 6    | 6    | 1    | 6 |
| 1876   |      |      |      |      |      |      |      |      |      |      |      |      |      |      |   |
| 1877   |      |      |      |      |      |      |      |      |      |      |      |      |      |      |   |

| respid | Q47l | Q47m | Q47n | Q47o | Q48a | Q48b | Q48c | Q48d | Q48e | Q48f | Q48g | Q48h | Q48i | Q48j |   |
|--------|------|------|------|------|------|------|------|------|------|------|------|------|------|------|---|
| 1878   |      | 2    | 4    | 3    | 2    |      |      |      |      |      |      |      |      |      |   |
| 1879   |      | 2    | 2    | 2    | 2    |      |      |      |      |      |      |      |      |      |   |
| 1880   |      | 3    | 4    | 4    | 4    |      |      |      |      |      |      |      |      |      |   |
| 1881   |      |      |      |      |      | 3    | 4    | 4    | 6    | 2    | 5    | 5    | 5    | 2    | 5 |
| 1883   |      | 3    | 3    | 3    | 3    |      |      |      |      |      |      |      |      |      |   |
| 1886   |      | 3    | 4    | 4    | 4    |      |      |      |      |      |      |      |      |      |   |
| 1888   |      | 3    | 3    | 3    | 3    |      |      |      |      |      |      |      |      |      |   |
| 1889   |      | 3    | 3    | 4    | 2    |      |      |      |      |      |      |      |      |      |   |
| 1890   |      | 3    | 3    | 3    | 3    |      |      |      |      |      |      |      |      |      |   |
| 1891   |      | 3    | 4    | 4    | 4    |      |      |      |      |      |      |      |      |      |   |
| 1893   |      |      |      |      |      | 2    | 5    | 5    | 5    | 2    | 5    | 5    | 6    | 2    | 5 |
| 1894   |      |      |      |      |      | 3    | 6    | 6    | 6    | 5    | 5    | 6    | 5    | 4    | 6 |
| 1895   | 2    | 2    |      | 2    |      |      |      |      |      |      |      |      |      |      |   |
| 1896   | 5    | 3    | 5    | 4    |      |      |      |      |      |      |      |      |      |      |   |
| 1897   | 2    | 3    | 4    | 3    |      |      |      |      |      |      |      |      |      |      |   |
| 1898   |      |      |      |      |      | 2    | 1    | 1    | 1    | 4    | 1    | 1    | 1    | 3    | 1 |
| 1899   | 3    | 3    | 3    | 3    |      |      |      |      |      |      |      |      |      |      |   |
| 1900   |      |      |      |      |      |      |      |      |      |      |      |      |      |      |   |
| 1903   | 4    | 4    | 4    | 4    |      |      |      |      |      |      |      |      |      |      |   |
| 1906   | 4    | 2    | 3    | 4    |      |      |      |      |      |      |      |      |      |      |   |
| 1907   | 1    | 2    | 2    | 1    |      |      |      |      |      |      |      |      |      |      |   |
| 1908   |      |      |      |      |      | 1    | 6    | 5    | 3    | 3    | 4    | 4    | 6    | 2    | 2 |
| 1909   |      |      |      |      |      | 4    | 3    | 3    | 3    | 4    | 4    | 4    | 3    | 4    | 2 |
| 1910   | 4    | 4    | 4    | 4    |      |      |      |      |      |      |      |      |      |      |   |
| 1911   | 3    | 4    | 4    | 4    |      |      |      |      |      |      |      |      |      |      |   |
| 1912   |      |      |      |      |      |      |      |      |      |      |      |      |      |      |   |
| 1917   |      |      |      |      |      | 3    | 4    | 4    | 4    | 3    | 4    | 5    | 4    | 3    | 4 |
| 1918   |      |      |      |      |      | 4    | 5    | 5    | 6    | 4    | 4    | 6    | 6    | 4    | 5 |
| 1919   | 1    | 1    | 1    | 5    |      |      |      |      |      |      |      |      |      |      |   |
| 1922   |      |      |      |      |      |      |      |      |      |      |      |      |      |      |   |
| 1925   |      |      |      |      |      |      |      |      |      |      |      |      |      |      |   |
| 1926   | 4    | 4    | 4    | 4    |      |      |      |      |      |      |      |      |      |      |   |

| respid | Q47l | Q47m | Q47n | Q47o | Q48a | Q48b | Q48c | Q48d | Q48e | Q48f | Q48g | Q48h | Q48i | Q48j |   |
|--------|------|------|------|------|------|------|------|------|------|------|------|------|------|------|---|
| 1927   |      |      |      |      |      | 5    |      | 6    | 6    |      | 6    |      |      |      |   |
| 1928   |      |      |      |      |      |      |      |      |      |      |      |      |      |      |   |
| 1929   | 3    | 3    | 4    | 3    |      |      |      |      |      |      |      |      |      |      |   |
| 1934   | 3    | 3    | 3    | 3    |      |      |      |      |      |      |      |      |      |      |   |
| 1935   | 3    | 3    | 3    | 4    |      |      |      |      |      |      |      |      |      |      |   |
| 1936   | 2    | 3    | 1    | 3    |      |      |      |      |      |      |      |      |      |      |   |
| 1937   |      |      |      |      |      |      |      |      |      |      |      |      |      |      |   |
| 1938   |      |      |      |      |      |      |      |      |      |      |      |      |      |      |   |
| 1939   |      |      |      |      |      | 3    | 4    | 5    | 6    | 3    | 6    | 5    | 6    | 3    | 5 |
| 1940   | 3    | 2    | 4    | 2    |      |      |      |      |      |      |      |      |      |      |   |
| 1941   |      |      |      |      |      |      |      |      |      |      |      |      |      |      |   |
| 1948   |      |      |      |      |      |      |      |      |      |      |      |      |      |      |   |
| 1950   | 2    | 2    | 2    | 3    |      |      |      |      |      |      |      |      |      |      |   |
| 1955   | 4    | 4    | 4    | 4    |      |      |      |      |      |      |      |      |      |      |   |
| 1958   |      |      |      |      |      | 3    | 3    | 3    | 2    | 2    | 3    | 3    | 2    | 3    | 4 |
| 1960   | 2    | 3    | 3    | 4    |      |      |      |      |      |      |      |      |      |      |   |
| 1961   |      |      |      |      |      |      |      |      |      |      |      |      |      |      |   |
| 1962   |      |      |      |      |      | 1    | 6    | 6    | 6    | 1    | 6    | 6    | 6    | 2    | 6 |
| 1965   |      |      |      |      |      |      |      |      |      |      |      |      |      |      |   |
| 1966   | 4    | 4    | 4    | 4    |      |      |      |      |      |      |      |      |      |      |   |
| 1967   |      |      |      |      |      |      |      |      |      |      |      |      |      |      |   |
| 1968   |      |      |      |      |      | 1    | 3    | 3    | 5    | 3    | 4    | 5    | 4    | 4    | 3 |
| 1973   |      |      |      |      |      | 4    | 3    | 3    | 4    | 4    | 4    | 4    | 4    | 5    | 5 |
| 1974   |      |      |      |      |      |      |      |      |      |      |      |      |      |      |   |
| 1975   |      |      |      |      |      |      |      |      |      |      |      |      |      |      |   |
| 1977   |      |      |      |      |      |      |      |      |      |      |      |      |      |      |   |
| 1978   |      |      |      |      |      |      |      |      |      |      |      |      |      |      |   |
| 1979   |      |      |      |      |      | 3    | 3    | 3    | 3    | 3    | 3    | 3    | 3    | 3    | 3 |
| 1982   | 5    | 5    | 5    | 4    |      |      |      |      |      |      |      |      |      |      |   |
| 1983   | 3    | 3    | 3    | 3    |      |      |      |      |      |      |      |      |      |      |   |
| 1987   | 4    | 2    | 2    | 1    |      |      |      |      |      |      |      |      |      |      |   |
| 1988   | 5    | 4    | 5    | 3    |      |      |      |      |      |      |      |      |      |      |   |



| respid | Q47l | Q47m | Q47n | Q47o | Q48a | Q48b | Q48c | Q48d | Q48e | Q48f | Q48g | Q48h | Q48i | Q48j |   |
|--------|------|------|------|------|------|------|------|------|------|------|------|------|------|------|---|
| 1991   |      |      |      |      |      | 3    | 6    | 6    | 6    | 2    | 5    | 6    | 6    | 1    | 6 |
| 1992   | 4    | 4    | 4    | 4    |      |      |      |      |      |      |      |      |      |      |   |
| 1993   |      |      |      |      |      | 5    | 5    | 5    | 5    | 3    | 5    | 5    | 5    | 3    | 5 |
| 1994   |      |      |      |      |      | 3    | 3    | 3    | 3    | 3    | 4    | 4    | 5    | 4    | 5 |
| 1995   |      |      |      |      |      | 4    | 4    | 4    | 4    | 3    | 4    | 5    | 5    | 3    | 4 |
| 1996   |      |      |      |      |      | 1    | 5    | 5    | 4    | 3    | 4    | 5    | 5    | 1    | 6 |
| 1997   |      |      |      |      |      |      |      |      |      |      |      |      |      |      |   |
| 1998   | 4    | 4    | 4    | 4    |      |      |      |      |      |      |      |      |      |      |   |
| 1999   | 1    | 3    | 3    | 1    |      |      |      |      |      |      |      |      |      |      |   |
| 2000   | 4    | 2    | 3    | 2    |      |      |      |      |      |      |      |      |      |      |   |
| 2001   |      |      |      |      |      | 2    | 5    | 5    | 6    | 2    | 6    | 6    | 6    | 3    | 5 |
| 2002   |      |      |      |      |      | 3    | 4    | 5    | 4    | 4    | 4    | 4    | 4    | 5    | 5 |
| 2003   |      |      |      |      |      |      |      |      |      |      |      |      |      |      |   |
| 2004   |      |      |      |      |      | 1    | 6    | 6    | 6    | 1    | 6    | 6    | 6    | 1    | 6 |
| 2005   |      |      |      |      |      | 4    | 4    | 4    | 4    | 3    | 5    | 4    | 5    | 3    | 5 |
| 2007   | 4    | 4    | 4    | 4    |      |      |      |      |      |      |      |      |      |      |   |
| 2009   | 4    | 4    | 4    | 4    |      |      |      |      |      |      |      |      |      |      |   |
| 2010   |      |      |      |      |      |      |      |      |      |      |      |      |      |      |   |
| 2011   |      |      |      |      |      | 2    | 5    | 5    | 3    | 5    | 3    | 6    | 6    | 1    | 6 |
| 2013   | 1    |      |      |      |      |      |      |      |      |      |      |      |      |      |   |
| 2014   | 4    | 3    | 4    | 4    |      |      |      |      |      |      |      |      |      |      |   |
| 2017   | 4    | 3    | 3    | 2    |      |      |      |      |      |      |      |      |      |      |   |
| 2020   |      |      |      |      |      |      |      |      |      |      |      |      |      |      |   |
| 2023   | 3    | 4    | 4    | 3    |      |      |      |      |      |      |      |      |      |      |   |
| 2024   | 3    | 3    | 3    | 3    |      |      |      |      |      |      |      |      |      |      |   |
| 2029   | 3    | 3    | 3    | 3    |      |      |      |      |      |      |      |      |      |      |   |
| 2030   |      |      |      |      |      |      |      |      |      |      |      |      |      |      |   |
| 2031   | 4    | 4    | 4    | 4    |      |      |      |      |      |      |      |      |      |      |   |
| 2032   | 3    | 4    | 4    | 4    |      |      |      |      |      |      |      |      |      |      |   |
| 2033   |      |      |      |      |      |      |      |      |      |      |      |      |      |      |   |
| 2034   | 3    | 4    | 4    | 3    |      |      |      |      |      |      |      |      |      |      |   |
| 2036   |      |      |      |      |      | 3    | 2    | 2    | 1    | 6    | 3    | 3    | 2    | 5    | 5 |

| respid | Q47l | Q47m | Q47n | Q47o | Q48a | Q48b | Q48c | Q48d | Q48e | Q48f | Q48g | Q48h | Q48i | Q48j |   |
|--------|------|------|------|------|------|------|------|------|------|------|------|------|------|------|---|
| 2037   |      |      |      |      |      | 3    | 3    | 2    |      | 3    | 3    | 2    | 1    | 3    | 1 |
| 2038   |      | 4    | 4    | 5    | 4    |      |      |      |      |      |      |      |      |      |   |
| 2039   |      | 3    | 3    | 3    | 3    |      |      |      |      |      |      |      |      |      |   |
| 2040   |      |      |      |      |      |      |      |      |      |      |      |      |      |      |   |
| 2041   |      |      |      |      |      |      |      |      |      |      |      |      |      |      |   |
| 2042   |      |      |      |      |      | 5    | 6    | 6    | 6    | 4    | 5    | 6    | 6    | 2    | 6 |
| 2043   |      |      |      |      |      | 2    | 4    | 4    | 5    | 2    | 5    | 5    | 6    | 2    | 5 |
| 2051   |      | 4    | 4    | 4    | 4    |      |      |      |      |      |      |      |      |      |   |
| 2052   |      | 2    | 4    | 4    | 4    |      |      |      |      |      |      |      |      |      |   |
| 2053   |      |      |      |      |      | 1    | 6    | 6    | 6    | 1    | 6    | 6    | 6    | 1    | 6 |
| 2054   |      |      |      |      |      |      |      |      |      |      |      |      |      |      |   |
| 2055   |      |      |      |      |      | 1    | 6    | 6    | 6    | 2    | 6    | 6    | 6    | 1    | 6 |
| 2056   |      |      |      |      |      | 5    | 5    | 5    | 4    | 4    | 3    | 3    | 4    | 3    | 3 |
| 2057   |      | 4    | 3    | 3    | 4    |      |      |      |      |      |      |      |      |      |   |
| 2059   |      |      |      |      |      | 3    | 4    | 4    | 2    | 4    | 3    | 3    | 4    | 3    | 1 |
| 2063   |      |      |      |      |      | 4    | 5    | 5    | 5    | 3    | 5    | 5    | 5    | 3    | 5 |
| 2066   |      |      |      |      |      | 6    | 3    | 3    | 3    | 3    | 3    | 3    | 3    | 6    | 6 |
| 2068   |      |      |      |      |      | 1    | 5    | 5    | 6    | 2    | 5    | 5    | 6    | 2    | 5 |
| 2069   |      | 2    | 2    | 2    | 1    |      |      |      |      |      |      |      |      |      |   |
| 2070   |      |      |      |      |      |      |      |      |      |      |      |      |      |      |   |
| 2071   |      | 2    | 3    | 3    | 2    |      |      |      |      |      |      |      |      |      |   |
| 2073   |      |      |      |      |      |      |      |      |      |      |      |      |      |      |   |
| 2077   |      |      |      |      |      | 2    | 2    | 4    | 2    | 3    | 4    | 5    | 6    | 2    | 2 |
| 2079   |      |      |      |      |      |      |      |      |      |      |      |      |      |      |   |
| 2080   |      |      |      |      |      | 1    | 1    | 1    | 2    |      | 1    | 1    | 1    | 6    | 5 |
| 2081   |      | 2    | 2    | 2    | 2    |      |      |      |      |      |      |      |      |      |   |
| 2084   |      |      |      |      |      |      |      |      |      |      |      |      |      |      |   |
| 2085   |      |      |      |      |      | 2    | 5    | 5    | 6    | 2    | 6    | 6    | 6    | 1    | 6 |
| 2087   |      |      |      |      |      | 2    | 5    | 5    | 5    | 2    | 5    | 5    | 5    | 2    | 5 |
| 2089   |      |      |      |      |      |      |      |      |      |      |      |      |      |      |   |
| 2093   |      | 2    | 3    | 3    | 3    |      |      |      |      |      |      |      |      |      |   |
| 2094   |      | 3    | 4    | 4    | 3    |      |      |      |      |      |      |      |      |      |   |

| respid | Q47l | Q47m | Q47n | Q47o | Q48a | Q48b | Q48c | Q48d | Q48e | Q48f | Q48g | Q48h | Q48i | Q48j |
|--------|------|------|------|------|------|------|------|------|------|------|------|------|------|------|
| 2095   | 4    | 2    | 2    | 1    |      |      |      |      |      |      |      |      |      |      |
| 2097   | 3    | 4    | 4    | 4    |      |      |      |      |      |      |      |      |      |      |
| 2099   |      |      |      |      | 6    | 5    | 6    | 6    | 6    | 6    | 3    | 4    | 2    | 6    |
| 2100   |      |      |      |      | 2    | 5    | 5    | 5    | 2    | 5    | 5    | 6    | 1    | 5    |
| 2101   | 4    | 4    | 4    | 3    |      |      |      |      |      |      |      |      |      |      |
| 2103   | 3    | 4    | 4    | 3    |      |      |      |      |      |      |      |      |      |      |
| 2104   |      |      |      |      | 1    | 6    | 6    | 6    | 1    | 6    | 6    | 6    | 6    | 4    |
| 2106   | 4    | 4    | 3    | 3    |      |      |      |      |      |      |      |      |      |      |
| 2111   | 4    | 3    | 3    | 3    |      |      |      |      |      |      |      |      |      |      |
| 2113   | 3    | 4    | 4    | 4    |      |      |      |      |      |      |      |      |      |      |
| 2115   |      |      |      |      |      |      |      |      |      |      |      |      |      |      |
| 2119   | 4    | 3    | 3    | 3    |      |      |      |      |      |      |      |      |      |      |
| 2120   |      |      |      |      |      |      |      |      |      |      |      |      |      |      |
| 2123   |      |      |      |      |      |      |      |      |      |      |      |      |      |      |
| 2124   | 3    | 3    | 4    | 3    |      |      |      |      |      |      |      |      |      |      |
| 2130   |      |      |      |      |      |      |      |      |      |      |      |      |      |      |
| 2131   |      |      |      |      | 3    | 3    | 3    | 4    | 3    | 4    | 5    | 4    | 3    | 3    |
| 2133   | 5    | 5    | 4    | 5    |      |      |      |      |      |      |      |      |      |      |
| 2139   |      |      |      |      | 4    | 5    | 6    | 4    | 5    | 2    | 5    | 5    | 4    | 6    |
| 2141   |      |      |      |      |      |      |      |      |      |      |      |      |      |      |
| 2143   | 4    | 4    | 4    | 4    |      |      |      |      |      |      |      |      |      |      |
| 2144   | 5    | 3    | 3    | 4    |      |      |      |      |      |      |      |      |      |      |
| 2147   |      |      |      |      |      |      |      |      |      |      |      |      |      |      |
| 2151   | 4    | 4    | 4    | 4    |      |      |      |      |      |      |      |      |      |      |
| 2153   | 4    | 4    | 3    | 4    |      |      |      |      |      |      |      |      |      |      |
| 2154   |      |      |      |      | 2    | 5    | 6    | 6    | 1    | 6    | 6    | 6    | 1    | 6    |
| 2155   | 3    | 3    | 3    | 3    |      |      |      |      |      |      |      |      |      |      |
| 2159   |      |      |      |      | 3    | 3    | 4    | 4    | 3    | 4    |      | 6    | 3    | 4    |
| 2160   |      |      |      |      | 2    | 3    | 4    | 5    | 3    | 4    | 5    | 5    | 2    | 4    |
| 2161   | 3    | 3    | 3    | 5    |      |      |      |      |      |      |      |      |      |      |
| 2163   | 1    | 1    | 1    | 1    |      |      |      |      |      |      |      |      |      |      |
| 2164   | 4    | 4    | 4    | 4    |      |      |      |      |      |      |      |      |      |      |

| respid | Q47l | Q47m | Q47n | Q47o | Q48a | Q48b | Q48c | Q48d | Q48e | Q48f | Q48g | Q48h | Q48i | Q48j |   |
|--------|------|------|------|------|------|------|------|------|------|------|------|------|------|------|---|
| 2168   | 4    | 4    | 3    | 4    |      |      |      |      |      |      |      |      |      |      |   |
| 2169   | 1    | 4    | 4    | 4    |      |      |      |      |      |      |      |      |      |      |   |
| 2170   | 3    | 3    | 3    | 4    |      |      |      |      |      |      |      |      |      |      |   |
| 2171   | 3    | 4    | 3    | 4    |      |      |      |      |      |      |      |      |      |      |   |
| 2172   | 2    | 2    | 2    | 2    |      |      |      |      |      |      |      |      |      |      |   |
| 2173   | 4    | 3    | 3    | 3    |      |      |      |      |      |      |      |      |      |      |   |
| 2174   |      |      |      |      |      | 3    | 6    | 6    | 6    | 3    | 6    | 6    | 6    | 3    | 6 |
| 2175   | 3    | 2    |      | 3    |      |      |      |      |      |      |      |      |      |      |   |
| 2176   |      | 4    | 4    | 4    |      |      |      |      |      |      |      |      |      |      |   |
| 2177   | 3    | 3    | 2    | 3    |      |      |      |      |      |      |      |      |      |      |   |
| 2179   |      |      |      |      |      | 2    | 5    | 6    | 6    | 2    | 6    | 6    | 6    | 1    | 6 |
| 2181   | 5    | 4    | 4    | 4    |      |      |      |      |      |      |      |      |      |      |   |
| 2182   |      |      |      |      |      | 6    | 6    | 6    | 6    | 6    | 6    | 6    | 6    | 6    | 6 |
| 2183   | 3    | 3    | 3    | 3    |      |      |      |      |      |      |      |      |      |      |   |
| 2184   |      |      |      |      |      | 1    | 6    | 6    | 5    | 2    | 5    | 5    | 6    | 2    | 5 |
| 2185   |      |      |      |      |      |      |      |      |      |      |      |      |      |      |   |
| 2186   |      |      |      |      |      | 6    | 6    | 5    | 4    | 3    | 5    | 5    | 6    | 1    | 5 |
| 2187   | 4    | 3    | 3    | 2    |      |      |      |      |      |      |      |      |      |      |   |
| 2188   | 3    | 4    | 4    | 4    |      |      |      |      |      |      |      |      |      |      |   |
| 2189   |      |      |      |      |      |      |      |      |      |      |      |      |      |      |   |
| 2190   |      |      |      |      |      | 1    | 6    | 6    | 6    | 1    | 6    | 6    | 6    | 1    | 6 |
| 2193   |      |      |      |      |      | 6    |      |      |      |      |      |      |      |      | 6 |
| 2195   |      |      |      |      |      |      | 3    | 4    | 4    |      | 4    | 6    | 6    | 4    | 6 |
| 2198   | 3    | 4    | 4    | 3    |      |      |      |      |      |      |      |      |      |      |   |
| 2200   |      |      |      |      |      | 2    | 4    | 5    | 5    | 2    | 5    | 5    | 6    | 2    | 5 |
| 2205   | 3    | 4    | 2    | 3    |      |      |      |      |      |      |      |      |      |      |   |
| 2208   |      |      |      |      |      |      |      |      |      |      |      |      |      |      |   |
| 2209   | 4    | 3    | 4    | 4    |      |      |      |      |      |      |      |      |      |      |   |
| 2210   |      |      |      |      |      | 6    | 6    | 6    | 6    |      |      |      |      |      |   |
| 2211   | 4    | 4    | 4    | 4    |      |      |      |      |      |      |      |      |      |      |   |
| 2213   |      |      |      |      |      | 3    | 6    |      | 6    | 2    | 6    | 6    | 6    | 1    | 6 |
| 2214   |      |      |      |      |      | 3    | 2    | 3    | 5    | 4    | 4    | 3    | 3    | 3    | 3 |

| respid | Q47l | Q47m | Q47n | Q47o | Q48a | Q48b | Q48c | Q48d | Q48e | Q48f | Q48g | Q48h | Q48i | Q48j |   |
|--------|------|------|------|------|------|------|------|------|------|------|------|------|------|------|---|
| 2216   | 1    | 1    | 1    |      |      |      |      |      |      |      |      |      |      |      |   |
| 2220   |      |      |      |      |      | 2    |      |      |      | 2    |      |      |      | 2    |   |
| 2225   | 1    | 4    | 4    | 4    |      |      |      |      |      |      |      |      |      |      |   |
| 2227   | 4    | 3    | 3    | 3    |      |      |      |      |      |      |      |      |      |      |   |
| 2228   |      |      |      |      |      |      | 2    | 2    | 5    | 2    | 5    | 5    | 5    | 2    | 5 |
| 2229   | 3    | 3    | 4    | 3    |      |      |      |      |      |      |      |      |      |      |   |
| 2230   |      |      |      |      |      |      |      |      |      |      |      |      |      |      |   |
| 2236   |      |      |      |      |      |      |      |      |      |      |      |      |      |      |   |
| 2238   | 4    | 3    | 3    | 3    |      |      |      |      |      |      |      |      |      |      |   |
| 2239   | 3    | 3    | 4    |      |      |      |      |      |      |      |      |      |      |      |   |
| 2240   | 4    | 4    | 4    | 5    |      |      |      |      |      |      |      |      |      |      |   |
| 2241   |      |      |      |      |      | 3    | 6    | 6    | 3    | 3    | 4    | 3    | 5    | 2    | 6 |
| 2243   |      |      |      |      |      |      |      |      |      |      |      |      |      |      |   |
| 2245   |      |      |      |      |      | 2    | 3    | 4    | 3    | 4    | 4    | 3    | 4    | 3    | 3 |
| 2247   |      |      |      |      |      | 2    | 4    | 5    | 5    | 3    | 5    | 5    | 6    | 2    | 5 |
| 2248   |      |      |      |      |      | 3    | 4    | 4    | 5    | 3    | 5    | 5    | 5    | 3    | 5 |
| 2249   |      |      |      |      |      |      |      |      |      |      |      |      |      |      |   |
| 2254   |      |      |      |      |      | 6    | 1    | 5    | 5    | 5    | 5    | 5    | 6    | 5    | 5 |
| 2256   | 4    | 3    | 3    | 5    |      |      |      |      |      |      |      |      |      |      |   |
| 2259   | 3    | 4    | 4    | 4    |      |      |      |      |      |      |      |      |      |      |   |
| 2261   |      |      |      |      |      | 3    | 4    | 4    | 5    | 3    |      |      |      |      |   |
| 2262   | 5    | 5    | 5    | 5    |      |      |      |      |      |      |      |      |      |      |   |
| 2263   |      |      |      |      |      | 6    | 2    | 2    | 3    | 5    | 2    | 2    | 1    | 4    | 2 |
| 2264   |      |      |      |      |      | 2    | 5    | 5    | 5    | 3    | 5    | 5    | 5    | 3    | 3 |
| 2265   | 5    | 5    | 5    | 5    |      |      |      |      |      |      |      |      |      |      |   |
| 2270   | 3    | 4    | 4    | 4    |      |      |      |      |      |      |      |      |      |      |   |
| 2271   | 3    | 4    | 3    | 4    |      |      |      |      |      |      |      |      |      |      |   |
| 2272   | 3    | 3    | 3    | 3    |      |      |      |      |      |      |      |      |      |      |   |
| 2273   |      |      |      |      |      | 3    | 4    | 4    | 6    | 1    | 6    | 6    | 6    | 1    | 6 |
| 2274   |      |      |      |      |      | 3    | 5    | 5    | 5    | 3    | 5    | 5    | 5    | 3    | 5 |
| 2276   |      |      |      |      |      | 6    | 1    | 2    | 1    | 6    | 2    | 5    | 1    | 4    | 1 |
| 2277   |      |      |      |      |      | 3    | 4    | 4    | 4    | 3    | 4    | 5    | 6    | 5    | 6 |

| respid | Q47l | Q47m | Q47n | Q47o | Q48a | Q48b | Q48c | Q48d | Q48e | Q48f | Q48g | Q48h | Q48i | Q48j |   |
|--------|------|------|------|------|------|------|------|------|------|------|------|------|------|------|---|
| 2281   |      |      |      |      |      | 1    | 6    | 6    | 6    | 1    | 6    | 6    | 6    | 1    | 6 |
| 2288   | 5    | 5    | 5    | 5    |      |      |      |      |      |      |      |      |      |      |   |
| 2290   |      |      |      |      |      | 3    | 2    | 2    | 4    | 2    | 4    | 3    | 4    | 4    | 4 |
| 2294   |      |      |      |      |      | 1    | 6    | 6    | 6    | 2    | 6    | 6    | 6    | 1    | 2 |
| 2295   |      |      |      |      |      | 2    | 5    | 6    | 6    | 3    | 5    | 5    | 5    | 2    | 4 |
| 2296   |      |      |      |      |      | 3    | 3    | 3    | 3    | 4    | 3    | 3    | 3    | 4    | 3 |
| 2297   |      |      |      |      |      |      |      |      |      |      |      |      |      |      |   |
| 2298   | 4    | 4    | 4    | 4    |      |      |      |      |      |      |      |      |      |      |   |
| 2301   | 4    | 4    | 4    | 4    |      |      |      |      |      |      |      |      |      |      |   |
| 2302   |      |      |      |      |      | 3    | 4    | 4    | 3    | 3    | 3    | 4    | 4    | 3    | 4 |
| 2303   |      |      |      |      |      |      |      |      |      |      |      |      |      |      |   |
| 2305   | 5    | 5    | 4    | 5    |      |      |      |      |      |      |      |      |      |      |   |
| 2309   |      |      |      |      |      | 1    | 6    | 6    | 6    | 1    | 6    | 6    | 6    | 1    | 2 |
| 2310   | 4    | 4    | 4    | 4    |      |      |      |      |      |      |      |      |      |      |   |
| 2311   |      |      |      |      |      | 2    | 6    | 5    | 5    | 3    | 4    | 5    | 6    | 2    | 3 |
| 2313   | 2    | 2    | 3    | 1    |      |      |      |      |      |      |      |      |      |      |   |
| 2316   |      |      |      |      |      |      |      |      |      |      |      |      |      |      |   |
| 2317   |      |      |      |      |      |      |      |      |      |      |      |      |      |      |   |
| 2318   |      |      |      |      |      | 3    | 3    | 4    | 4    | 4    | 3    | 3    |      |      |   |
| 2319   |      |      |      |      |      | 3    | 6    | 6    | 3    | 4    | 4    | 5    | 6    | 2    | 3 |
| 2321   | 2    | 4    | 4    | 3    |      |      |      |      |      |      |      |      |      |      |   |
| 2324   |      |      |      |      |      | 2    | 5    | 5    | 6    | 2    | 6    | 6    | 6    | 2    | 5 |
| 2328   |      |      |      |      |      | 1    | 6    | 6    | 6    | 1    | 6    | 6    | 6    | 1    | 6 |
| 2329   |      |      |      |      |      |      |      |      |      |      |      |      |      |      |   |
| 2330   |      |      |      |      |      | 6    | 6    | 6    | 6    | 3    | 6    | 6    | 5    | 5    | 5 |
| 2333   |      |      |      |      |      | 3    | 4    | 5    | 6    | 3    | 3    | 3    | 5    | 2    | 3 |
| 2334   |      |      |      |      |      | 3    | 3    | 4    | 4    | 3    | 5    | 5    | 5    | 3    | 4 |
| 2338   |      |      |      |      |      | 1    | 1    | 6    | 6    |      |      | 6    | 6    | 6    | 6 |
| 2341   | 3    | 4    | 4    | 3    |      |      |      |      |      |      |      |      |      |      |   |
| 2342   |      |      |      |      |      | 3    | 3    | 4    | 5    | 4    | 5    | 3    | 5    | 2    | 5 |
| 2343   | 4    | 3    | 4    | 3    |      |      |      |      |      |      |      |      |      |      |   |
| 2346   |      |      |      |      |      | 4    | 5    | 6    | 3    | 4    | 2    | 5    | 3    | 3    | 3 |

| respid | Q47l | Q47m | Q47n | Q47o | Q48a | Q48b | Q48c | Q48d | Q48e | Q48f | Q48g | Q48h | Q48i | Q48j |   |
|--------|------|------|------|------|------|------|------|------|------|------|------|------|------|------|---|
| 2347   | 3    | 3    | 4    | 4    |      |      |      |      |      |      |      |      |      |      |   |
| 2348   | 3    | 3    | 3    | 3    |      |      |      |      |      |      |      |      |      |      |   |
| 2349   |      |      |      |      |      | 4    | 3    | 4    | 5    | 4    | 5    | 3    | 4    | 3    | 4 |
| 2350   |      |      |      |      |      | 2    | 6    | 6    | 6    | 2    | 6    | 6    | 6    | 2    | 6 |
| 2351   | 5    | 3    | 3    | 5    |      |      |      |      |      |      |      |      |      |      |   |
| 2352   | 2    | 3    | 3    |      |      |      |      |      |      |      |      |      |      |      |   |
| 2359   | 4    | 4    | 3    | 4    |      |      |      |      |      |      |      |      |      |      |   |
| 2362   |      |      |      |      |      |      |      |      |      |      |      |      |      |      |   |
| 2363   | 5    | 5    | 5    | 5    |      |      |      |      |      |      |      |      |      |      |   |
| 2365   | 3    | 4    | 4    | 4    |      |      |      |      |      |      |      |      |      |      |   |
| 2367   | 5    | 4    | 4    | 5    |      |      |      |      |      |      |      |      |      |      |   |
| 2368   |      |      |      |      |      | 3    | 4    | 4    | 4    | 3    | 4    | 5    | 4    | 3    | 4 |
| 2369   | 3    | 4    | 4    | 4    |      |      |      |      |      |      |      |      |      |      |   |
| 2372   |      |      |      |      |      |      |      |      |      |      |      |      |      |      |   |
| 2374   | 4    | 4    | 3    | 4    |      |      |      |      |      |      |      |      |      |      |   |
| 2376   | 4    | 4    | 4    | 5    |      |      |      |      |      |      |      |      |      |      |   |
| 2379   | 4    | 4    | 4    | 4    |      |      |      |      |      |      |      |      |      |      |   |
| 2380   |      |      |      |      |      | 3    | 6    | 6    | 6    | 3    | 6    | 6    | 6    | 2    | 6 |
| 2381   |      |      |      |      |      |      |      |      |      |      |      |      |      |      |   |
| 2382   | 5    | 2    | 1    | 2    |      |      |      |      |      |      |      |      |      |      |   |
| 2385   |      |      |      |      |      | 1    | 6    | 6    | 6    | 1    | 6    | 6    | 6    | 1    | 3 |
| 2387   | 3    | 4    | 4    | 3    |      |      |      |      |      |      |      |      |      |      |   |
| 2388   | 3    | 4    | 4    | 4    |      |      |      |      |      |      |      |      |      |      |   |
| 2389   |      |      |      |      |      | 4    | 4    | 4    | 4    | 3    | 4    | 4    | 4    | 4    | 5 |
| 2391   |      |      |      |      |      | 6    | 5    | 4    | 2    | 6    | 2    | 5    | 3    | 5    | 5 |
| 2392   | 3    | 4    | 4    | 4    |      |      |      |      |      |      |      |      |      |      |   |
| 2393   | 3    | 4    | 4    | 4    |      |      |      |      |      |      |      |      |      |      |   |
| 2394   |      |      |      |      |      | 1    | 5    | 6    | 1    | 1    | 6    | 6    | 6    | 1    | 4 |
| 2397   | 3    | 3    | 3    | 3    |      |      |      |      |      |      |      |      |      |      |   |
| 2398   |      |      |      |      |      | 3    | 4    | 4    | 4    |      | 4    | 4    | 4    | 4    | 4 |
| 2400   | 3    | 4    | 3    | 3    |      |      |      |      |      |      |      |      |      |      |   |
| 2402   |      |      |      |      |      | 1    | 5    | 6    | 4    | 1    | 6    | 6    | 6    | 1    | 5 |

| respid | Q47l | Q47m | Q47n | Q47o | Q48a | Q48b | Q48c | Q48d | Q48e | Q48f | Q48g | Q48h | Q48i | Q48j |   |
|--------|------|------|------|------|------|------|------|------|------|------|------|------|------|------|---|
| 2406   |      |      |      |      |      | 1    | 6    | 6    | 6    | 1    | 6    | 6    | 6    | 1    | 6 |
| 2408   |      |      |      |      |      | 5    | 6    | 6    | 6    | 4    | 6    | 6    | 6    | 3    | 6 |
| 2410   | 3    | 2    | 2    | 2    |      |      |      |      |      |      |      |      |      |      |   |
| 2411   | 3    | 2    | 3    | 2    |      |      |      |      |      |      |      |      |      |      |   |
| 2412   | 5    | 4    | 4    | 5    |      |      |      |      |      |      |      |      |      |      |   |
| 2414   |      |      |      |      |      | 3    | 3    | 3    | 3    | 3    | 2    | 2    | 6    | 6    | 6 |
| 2421   |      |      |      |      |      | 1    | 6    | 6    | 6    | 2    | 2    | 5    | 6    | 2    | 6 |
| 2423   | 2    | 1    | 1    | 1    |      |      |      |      |      |      |      |      |      |      |   |
| 2424   | 5    | 5    | 5    | 5    |      |      |      |      |      |      |      |      |      |      |   |
| 2425   |      |      |      |      |      | 2    | 5    | 6    | 5    | 3    | 5    | 5    | 5    | 3    | 5 |
| 2426   | 4    | 4    | 4    | 3    |      |      |      |      |      |      |      |      |      |      |   |
| 2429   | 5    | 5    | 5    | 5    |      |      |      |      |      |      |      |      |      |      |   |
| 2430   | 3    | 5    | 5    | 4    |      |      |      |      |      |      |      |      |      |      |   |
| 2432   | 4    | 4    | 4    | 4    |      |      |      |      |      |      |      |      |      |      |   |
| 2433   |      |      |      |      |      | 5    |      |      |      |      |      | 2    | 6    | 6    | 6 |
| 2434   | 4    | 4    | 4    | 4    |      |      |      |      |      |      |      |      |      |      |   |
| 2435   |      |      |      |      |      | 1    | 4    | 4    | 3    | 3    | 5    | 4    | 5    | 3    | 2 |
| 2436   |      |      |      |      |      | 4    | 4    | 4    | 4    | 3    | 5    | 5    | 5    | 3    | 3 |
| 2439   |      |      |      |      |      | 6    | 6    | 5    | 5    | 4    | 3    | 4    | 4    | 3    |   |
| 2440   | 1    |      |      | 3    |      |      |      |      |      |      |      |      |      |      |   |
| 2441   | 4    | 4    | 4    | 5    |      |      |      |      |      |      |      |      |      |      |   |
| 2446   | 3    | 3    | 3    | 3    |      |      |      |      |      |      |      |      |      |      |   |
| 2448   | 4    | 4    | 3    | 4    |      |      |      |      |      |      |      |      |      |      |   |
| 2449   |      |      |      |      |      |      |      |      |      |      |      |      |      |      |   |
| 2451   | 2    | 1    | 1    | 1    |      |      |      |      |      |      |      |      |      |      |   |
| 2452   | 3    | 2    | 1    | 5    |      |      |      |      |      |      |      |      |      |      |   |
| 2455   |      |      |      |      |      |      |      |      |      |      |      |      |      |      |   |
| 2457   |      |      |      |      |      | 5    | 4    | 5    | 4    | 4    | 5    | 5    | 5    | 5    | 5 |
| 2458   |      |      |      |      |      | 2    | 5    | 5    | 5    | 3    | 5    | 5    | 5    | 3    | 5 |
| 2459   |      |      |      |      |      |      |      |      |      |      |      |      |      |      |   |
| 2460   | 3    | 4    | 3    | 4    |      |      |      |      |      |      |      |      |      |      |   |
| 2462   | 2    | 1    |      |      |      |      |      |      |      |      |      |      |      |      |   |



| respid | Q47l | Q47m | Q47n | Q47o | Q48a | Q48b | Q48c | Q48d | Q48e | Q48f | Q48g | Q48h | Q48i | Q48j |   |
|--------|------|------|------|------|------|------|------|------|------|------|------|------|------|------|---|
| 2464   | 3    | 1    | 1    | 1    |      |      |      |      |      |      |      |      |      |      |   |
| 2465   |      |      |      |      |      | 2    | 2    | 2    | 5    | 5    | 5    | 5    |      | 5    | 5 |
| 2468   |      |      |      |      |      | 3    | 4    | 5    | 5    | 3    | 4    | 5    | 5    | 3    | 5 |
| 2469   |      |      |      |      |      |      |      |      |      |      |      |      |      |      |   |
| 2470   |      |      |      |      |      | 2    | 3    | 5    | 4    | 3    | 4    | 5    | 5    | 2    | 3 |
| 2471   | 3    | 2    | 1    | 2    |      |      |      |      |      |      |      |      |      |      |   |
| 2472   | 4    | 4    | 4    | 5    |      |      |      |      |      |      |      |      |      |      |   |
| 2474   | 3    | 4    | 4    | 4    |      |      |      |      |      |      |      |      |      |      |   |
| 2476   | 2    | 3    | 3    | 2    |      |      |      |      |      |      |      |      |      |      |   |
| 2478   | 4    | 2    | 3    | 3    |      |      |      |      |      |      |      |      |      |      |   |
| 2479   | 2    | 2    | 3    | 2    |      |      |      |      |      |      |      |      |      |      |   |
| 2480   | 4    | 4    | 4    | 4    |      |      |      |      |      |      |      |      |      |      |   |
| 2482   | 4    | 1    | 1    | 2    |      |      |      |      |      |      |      |      |      |      |   |
| 2486   |      |      |      |      |      | 1    | 5    | 5    | 6    | 2    | 6    | 6    | 6    | 1    | 6 |
| 2488   |      |      |      |      |      | 5    | 5    | 5    | 5    | 4    | 3    | 4    | 4    | 3    | 4 |
| 2489   |      |      |      |      |      | 3    | 5    | 5    | 5    | 2    | 5    | 3    | 5    | 4    | 5 |
| 2491   |      | 5    | 5    |      |      |      |      |      |      |      |      |      |      |      |   |
| 2495   | 3    | 4    | 4    | 4    |      |      |      |      |      |      |      |      |      |      |   |
| 2496   | 4    | 4    | 4    | 4    |      |      |      |      |      |      |      |      |      |      |   |
| 2498   |      |      |      |      |      | 3    | 4    | 5    | 5    | 2    | 5    | 5    | 5    | 2    | 5 |
| 2501   | 4    | 2    | 3    | 3    |      |      |      |      |      |      |      |      |      |      |   |
| 2502   | 3    | 3    | 3    | 3    |      |      |      |      |      |      |      |      |      |      |   |
| 2503   | 3    | 3    | 3    | 3    |      |      |      |      |      |      |      |      |      |      |   |
| 2504   | 5    | 3    | 3    | 5    |      |      |      |      |      |      |      |      |      |      |   |
| 2507   |      |      |      |      |      | 4    | 3    | 2    | 5    | 5    | 3    | 3    | 4    | 3    | 3 |
| 2509   |      |      |      |      |      | 3    | 3    | 3    | 4    | 4    | 4    | 5    | 3    | 4    | 3 |
| 2512   |      |      |      |      |      | 3    | 4    | 5    | 5    | 4    | 4    | 6    | 3    | 2    | 5 |
| 2514   | 5    | 5    | 4    |      |      |      |      |      |      |      |      |      |      |      |   |
| 2516   | 2    | 3    | 3    | 1    |      |      |      |      |      |      |      |      |      |      |   |
| 2517   | 4    | 4    | 4    | 4    |      |      |      |      |      |      |      |      |      |      |   |
| 2521   | 4    | 4    | 4    | 4    |      |      |      |      |      |      |      |      |      |      |   |
| 2522   | 3    | 5    | 5    | 5    |      |      |      |      |      |      |      |      |      |      |   |

| respid | Q47l | Q47m | Q47n | Q47o | Q48a | Q48b | Q48c | Q48d | Q48e | Q48f | Q48g | Q48h | Q48i | Q48j |   |
|--------|------|------|------|------|------|------|------|------|------|------|------|------|------|------|---|
| 2524   | 3    | 4    | 4    | 4    |      |      |      |      |      |      |      |      |      |      |   |
| 2525   |      |      |      |      |      | 2    | 6    | 6    | 6    | 2    | 6    | 6    | 6    | 2    | 6 |
| 2526   | 2    | 3    | 3    | 2    |      |      |      |      |      |      |      |      |      |      |   |
| 2527   |      |      |      |      |      | 4    | 4    | 1    | 1    | 6    | 4    | 1    | 3    | 6    | 4 |
| 2528   |      |      |      |      |      | 1    | 5    | 6    | 6    | 2    | 6    | 5    | 6    | 2    | 3 |
| 2531   |      |      |      |      |      |      |      |      |      |      |      |      |      |      |   |
| 2533   | 2    | 3    | 3    | 2    |      |      |      |      |      |      |      |      |      |      |   |
| 2535   | 4    | 4    | 4    | 3    |      |      |      |      |      |      |      |      |      |      |   |
| 2536   | 2    | 2    | 2    | 2    |      |      |      |      |      |      |      |      |      |      |   |
| 2539   |      |      |      |      |      | 1    | 6    | 6    | 6    | 1    | 6    | 6    | 6    | 1    | 6 |
| 2540   | 4    | 4    | 4    | 4    |      |      |      |      |      |      |      |      |      |      |   |
| 2543   | 3    | 3    | 3    | 3    |      |      |      |      |      |      |      |      |      |      |   |
| 2546   |      |      |      |      |      | 3    | 3    | 3    | 3    | 3    | 3    | 3    | 3    | 3    | 3 |
| 2547   |      |      |      |      |      | 3    | 5    | 6    | 4    | 3    | 4    | 5    | 5    | 3    | 5 |
| 2549   | 4    | 4    | 4    | 5    |      |      |      |      |      |      |      |      |      |      |   |
| 2553   | 3    | 3    | 3    | 3    |      |      |      |      |      |      |      |      |      |      |   |
| 2554   |      |      |      |      |      | 5    | 6    | 6    | 6    | 2    | 6    | 5    | 6    | 2    | 5 |
| 2555   | 5    | 4    | 4    | 3    |      |      |      |      |      |      |      |      |      |      |   |
| 2556   | 5    | 5    | 5    | 5    |      |      |      |      |      |      |      |      |      |      |   |
| 2557   | 4    | 4    | 4    | 4    |      |      |      |      |      |      |      |      |      |      |   |
| 2559   | 3    | 4    | 4    | 3    |      |      |      |      |      |      |      |      |      |      |   |
| 2560   |      |      |      |      |      | 3    | 2    | 4    | 5    | 2    | 5    | 3    | 5    | 1    | 3 |
| 2561   | 2    | 3    |      | 3    |      |      |      |      |      |      |      |      |      |      |   |
| 2566   | 4    | 4    | 3    | 3    |      |      |      |      |      |      |      |      |      |      |   |
| 2567   |      |      |      |      |      |      |      |      |      |      |      |      |      |      |   |
| 2570   | 4    | 1    | 1    | 1    |      |      |      |      |      |      |      |      |      |      |   |
| 2574   | 2    | 2    | 2    | 2    |      |      |      |      |      |      |      |      |      |      |   |
| 2578   | 4    | 4    | 4    | 4    |      |      |      |      |      |      |      |      |      |      |   |
| 2580   | 5    | 4    | 4    | 4    |      |      |      |      |      |      |      |      |      |      |   |
| 2590   | 5    | 1    |      | 5    |      |      |      |      |      |      |      |      |      |      |   |
| 2593   | 3    | 1    | 1    | 1    |      |      |      |      |      |      |      |      |      |      |   |
| 2594   | 3    | 1    | 1    | 1    |      |      |      |      |      |      |      |      |      |      |   |

| respid | Q47l | Q47m | Q47n | Q47o | Q48a | Q48b | Q48c | Q48d | Q48e | Q48f | Q48g | Q48h | Q48i | Q48j |   |
|--------|------|------|------|------|------|------|------|------|------|------|------|------|------|------|---|
| 2595   |      | 2    | 3    | 3    | 3    |      |      |      |      |      |      |      |      |      |   |
| 2596   |      | 3    | 3    | 3    | 3    |      |      |      |      |      |      |      |      |      |   |
| 2597   |      | 3    | 3    | 3    | 4    |      |      |      |      |      |      |      |      |      |   |
| 2598   |      | 3    | 4    | 4    | 4    |      |      |      |      |      |      |      |      |      |   |
| 2602   |      |      |      |      |      | 1    | 6    | 6    | 6    | 1    | 6    | 6    | 6    | 1    | 6 |
| 2605   |      | 3    | 3    | 2    | 3    |      |      |      |      |      |      |      |      |      |   |
| 2606   |      |      |      |      |      |      |      |      |      |      |      |      |      |      |   |
| 2607   |      |      |      |      |      | 2    | 6    | 6    | 5    | 2    | 6    | 5    | 5    | 1    | 5 |
| 2608   |      |      |      |      |      |      |      |      |      |      |      |      |      |      |   |
| 2609   |      | 3    | 4    | 4    | 3    |      |      |      |      |      |      |      |      |      |   |
| 2610   |      |      |      |      |      | 4    | 3    |      |      |      | 4    | 4    |      |      |   |
| 2614   |      |      |      |      |      |      |      |      |      |      |      |      |      |      |   |
| 2615   |      | 3    | 3    | 2    | 3    |      |      |      |      |      |      |      |      |      |   |
| 2616   |      | 3    | 3    | 3    | 5    |      |      |      |      |      |      |      |      |      |   |
| 2618   |      | 4    | 3    | 3    | 4    |      |      |      |      |      |      |      |      |      |   |
| 2630   |      | 2    | 2    | 2    | 1    |      |      |      |      |      |      |      |      |      |   |
| 2633   |      | 3    | 4    | 4    | 4    |      |      |      |      |      |      |      |      |      |   |
| 2637   |      | 5    | 2    | 2    | 2    |      |      |      |      |      |      |      |      |      |   |
| 2638   |      | 3    | 3    | 3    | 3    |      |      |      |      |      |      |      |      |      |   |
| 2641   |      |      |      |      |      | 1    | 2    | 2    | 4    | 4    | 3    | 3    | 3    | 4    | 4 |
| 2644   |      |      |      |      |      | 1    | 6    | 6    | 6    | 1    | 6    | 6    | 6    | 1    | 6 |
| 2645   |      | 3    | 3    | 4    | 3    |      |      |      |      |      |      |      |      |      |   |
| 2646   |      | 3    | 4    | 4    | 3    |      |      |      |      |      |      |      |      |      |   |
| 2648   |      |      |      |      |      |      |      |      |      |      |      |      |      |      |   |
| 2651   |      |      |      |      |      |      |      |      |      |      |      |      |      |      |   |
| 2652   |      |      |      |      |      | 2    | 6    | 6    | 6    | 2    | 6    | 6    | 6    | 1    | 6 |
| 2653   |      | 4    | 3    | 4    | 3    |      |      |      |      |      |      |      |      |      |   |
| 2656   |      |      |      |      |      |      |      |      |      |      |      |      |      |      |   |
| 2657   |      | 4    | 4    | 4    | 4    |      |      |      |      |      |      |      |      |      |   |
| 2658   |      | 3    | 3    | 3    | 3    |      |      |      |      |      |      |      |      |      |   |
| 2661   |      |      |      |      |      | 5    | 5    | 5    | 5    | 5    | 6    | 1    | 4    | 6    | 5 |
| 2663   |      | 3    | 4    | 3    | 3    |      |      |      |      |      |      |      |      |      |   |

| respid | Q47l | Q47m | Q47n | Q47o | Q48a | Q48b | Q48c | Q48d | Q48e | Q48f | Q48g | Q48h | Q48i | Q48j |   |
|--------|------|------|------|------|------|------|------|------|------|------|------|------|------|------|---|
| 2665   |      | 2    | 2    | 2    | 2    |      |      |      |      |      |      |      |      |      |   |
| 2670   |      | 5    | 3    | 3    | 4    |      |      |      |      |      |      |      |      |      |   |
| 2672   |      | 4    | 4    | 4    | 4    |      |      |      |      |      |      |      |      |      |   |
| 2673   |      |      |      |      |      |      |      |      |      |      |      |      |      |      |   |
| 2677   |      | 4    | 4    | 4    | 4    |      |      |      |      |      |      |      |      |      |   |
| 2686   |      | 3    | 2    | 2    | 2    |      |      |      |      |      |      |      |      |      |   |
| 2688   |      | 3    | 3    | 3    | 3    |      |      |      |      |      |      |      |      |      |   |
| 2689   |      | 4    | 4    | 3    | 2    |      |      |      |      |      |      |      |      |      |   |
| 2691   |      | 3    | 3    | 3    | 3    |      |      |      |      |      |      |      |      |      |   |
| 2695   |      | 4    | 2    | 1    | 3    |      |      |      |      |      |      |      |      |      |   |
| 2696   |      |      |      |      |      | 6    |      |      |      |      |      |      |      |      |   |
| 2697   |      |      |      |      |      |      |      |      |      |      |      |      |      |      |   |
| 2698   |      |      |      |      |      |      |      |      |      |      |      |      |      |      |   |
| 2703   |      |      |      |      |      | 1    | 6    | 6    | 6    | 1    | 6    | 6    | 6    | 1    | 6 |
| 2704   |      |      |      |      |      | 6    | 2    | 2    | 2    | 6    | 2    | 3    | 5    | 5    | 5 |
| 2706   |      | 3    | 3    | 4    | 3    |      |      |      |      |      |      |      |      |      |   |
| 2707   |      | 3    | 3    | 3    | 3    |      |      |      |      |      |      |      |      |      |   |
| 2710   |      | 4    | 3    | 4    | 4    |      |      |      |      |      |      |      |      |      |   |
| 2711   |      |      |      |      |      | 3    | 3    | 3    | 3    | 4    | 3    | 3    | 3    | 6    | 1 |
| 2712   |      | 3    | 3    | 3    | 3    |      |      |      |      |      |      |      |      |      |   |
| 2713   |      |      |      |      |      |      |      |      |      |      |      |      |      |      |   |
| 2721   |      |      |      |      |      |      |      |      |      |      |      |      |      |      |   |
| 2730   |      |      |      |      |      |      |      |      |      |      |      |      |      |      |   |
| 2731   |      | 5    | 5    | 5    | 5    |      |      |      |      |      |      |      |      |      |   |
| 2732   |      |      |      |      |      | 3    | 5    | 5    | 5    | 3    | 5    | 5    | 5    | 2    | 3 |
| 2733   |      | 3    | 2    | 2    | 2    |      |      |      |      |      |      |      |      |      |   |
| 2735   |      |      |      |      |      | 5    | 3    | 5    | 5    | 5    | 5    | 5    | 3    | 3    | 5 |
| 2736   |      |      |      |      |      | 3    | 4    | 5    | 5    | 2    | 5    | 5    | 5    | 2    | 5 |
| 2740   |      | 4    | 2    | 2    | 4    |      |      |      |      |      |      |      |      |      |   |
| 2741   |      | 3    | 4    | 4    | 4    |      |      |      |      |      |      |      |      |      |   |
| 2742   |      | 5    | 4    | 4    | 3    |      |      |      |      |      |      |      |      |      |   |
| 2743   |      | 4    | 4    | 3    | 3    |      |      |      |      |      |      |      |      |      |   |

| respid | Q47l | Q47m | Q47n | Q47o | Q48a | Q48b | Q48c | Q48d | Q48e | Q48f | Q48g | Q48h | Q48i | Q48j |   |
|--------|------|------|------|------|------|------|------|------|------|------|------|------|------|------|---|
| 2744   | 4    | 4    | 4    | 4    |      |      |      |      |      |      |      |      |      |      |   |
| 2745   |      |      |      |      |      | 2    | 4    | 4    | 4    | 4    | 3    | 3    | 3    | 3    | 5 |
| 2749   |      |      |      |      |      | 5    | 5    | 5    | 3    | 5    | 5    | 5    | 5    | 5    | 5 |
| 2751   | 1    | 1    |      |      |      |      |      |      |      |      |      |      |      |      |   |
| 2754   | 1    | 1    | 3    | 3    |      |      |      |      |      |      |      |      |      |      |   |
| 2755   | 4    | 4    | 4    | 3    |      |      |      |      |      |      |      |      |      |      |   |
| 2757   | 1    | 3    | 3    | 3    |      |      |      |      |      |      |      |      |      |      |   |
| 2758   | 4    | 3    | 4    | 3    |      |      |      |      |      |      |      |      |      |      |   |
| 2759   | 3    | 4    | 5    | 2    |      |      |      |      |      |      |      |      |      |      |   |
| 2761   |      |      |      |      |      | 6    |      | 6    | 6    | 6    | 6    | 6    | 6    | 6    | 6 |
| 2762   | 4    | 1    | 1    | 3    |      |      |      |      |      |      |      |      |      |      |   |
| 2763   |      |      |      |      |      | 2    | 3    | 4    | 3    | 3    | 2    | 3    | 2    | 4    | 4 |
| 2764   | 2    | 1    | 1    | 1    |      |      |      |      |      |      |      |      |      |      |   |
| 2765   |      |      |      |      |      | 2    | 4    | 5    | 5    | 3    | 4    | 4    | 5    | 2    | 3 |
| 2766   | 4    | 4    | 4    | 3    |      |      |      |      |      |      |      |      |      |      |   |
| 2767   | 2    | 1    | 1    | 2    |      |      |      |      |      |      |      |      |      |      |   |
| 2769   |      |      |      |      |      | 3    | 4    | 6    | 5    | 3    | 4    | 6    | 6    | 3    | 5 |
| 2770   | 3    | 1    | 1    | 1    |      |      |      |      |      |      |      |      |      |      |   |
| 2771   |      |      |      |      |      | 5    | 3    | 3    | 3    | 4    | 4    | 3    | 3    | 4    | 3 |
| 2774   | 1    | 1    | 1    | 5    |      |      |      |      |      |      |      |      |      |      |   |
| 2777   |      |      |      |      |      | 6    | 2    | 2    | 3    | 5    | 3    | 2    | 3    | 4    | 1 |
| 2778   | 4    | 5    | 4    | 4    |      |      |      |      |      |      |      |      |      |      |   |
| 2781   | 4    | 3    | 3    | 2    |      |      |      |      |      |      |      |      |      |      |   |
| 2782   | 2    | 3    | 3    | 3    |      |      |      |      |      |      |      |      |      |      |   |
| 2784   |      |      |      |      |      | 2    | 6    | 6    | 6    | 3    | 6    | 6    | 6    | 2    | 6 |
| 2785   |      |      |      |      |      | 2    | 6    | 6    | 5    | 2    | 5    | 5    | 5    | 2    | 5 |
| 2786   |      |      |      |      |      | 3    |      |      |      |      |      |      | 6    |      |   |
| 2787   |      |      |      |      |      | 6    | 6    | 6    | 6    | 1    | 6    | 6    | 6    | 6    | 6 |
| 2789   |      |      |      |      |      | 2    | 2    | 3    | 3    | 2    | 3    | 3    | 2    | 3    | 2 |
| 2790   |      |      |      |      |      | 4    | 3    | 4    | 4    | 4    | 4    | 4    | 4    | 3    | 4 |
| 2791   |      |      |      |      |      | 3    | 5    | 5    | 5    | 2    | 5    | 5    | 5    | 2    | 5 |
| 2793   | 3    | 1    | 1    | 2    |      |      |      |      |      |      |      |      |      |      |   |

| respid | Q47l | Q47m | Q47n | Q47o | Q48a | Q48b | Q48c | Q48d | Q48e | Q48f | Q48g | Q48h | Q48i | Q48j |   |
|--------|------|------|------|------|------|------|------|------|------|------|------|------|------|------|---|
| 2797   |      |      |      |      |      | 3    | 5    | 5    | 5    | 3    | 5    | 5    | 5    | 2    | 3 |
| 2798   | 4    | 4    | 4    | 4    | 4    |      |      |      |      |      |      |      |      |      |   |
| 2799   | 4    | 4    | 4    | 4    | 5    |      |      |      |      |      |      |      |      |      |   |
| 2801   | 3    | 3    | 3    | 3    | 3    |      |      |      |      |      |      |      |      |      |   |
| 2802   |      |      |      |      |      | 6    | 1    | 2    | 2    | 5    | 4    | 6    | 6    | 2    | 6 |
| 2803   |      |      |      |      |      | 4    | 5    | 4    | 4    | 4    | 4    | 4    | 5    | 3    | 5 |
| 2804   |      |      |      |      |      | 6    | 5    | 5    | 5    | 2    | 6    | 6    | 6    | 1    | 4 |
| 2807   | 4    | 4    | 4    | 4    | 4    |      |      |      |      |      |      |      |      |      |   |
| 2809   |      |      |      |      |      | 4    | 5    | 5    | 5    | 3    | 5    | 5    | 5    | 3    | 5 |
| 2810   |      |      |      |      |      | 4    | 3    | 3    | 3    | 5    | 3    | 3    | 3    | 2    | 3 |
| 2812   | 5    | 4    |      |      | 5    |      |      |      |      |      |      |      |      |      |   |
| 2814   | 4    | 4    | 4    | 4    | 4    |      |      |      |      |      |      |      |      |      |   |
| 2815   | 4    | 3    | 4    | 4    | 4    |      |      |      |      |      |      |      |      |      |   |
| 2816   | 3    | 3    | 3    | 3    | 3    |      |      |      |      |      |      |      |      |      |   |
| 2817   | 4    | 1    | 1    | 4    | 4    |      |      |      |      |      |      |      |      |      |   |
| 2819   | 4    | 4    | 4    | 4    | 4    |      |      |      |      |      |      |      |      |      |   |
| 2820   | 4    | 4    | 5    | 4    | 4    |      |      |      |      |      |      |      |      |      |   |
| 2821   |      |      |      |      |      | 5    | 3    | 5    | 3    | 4    | 3    | 4    | 6    | 4    | 5 |
| 2822   |      |      |      |      |      | 5    | 2    | 3    | 4    | 5    | 3    | 3    | 3    | 6    | 3 |
| 2823   | 4    | 4    | 4    | 3    | 3    |      |      |      |      |      |      |      |      |      |   |
| 2824   |      |      |      |      |      | 4    | 5    | 5    | 5    | 3    | 5    | 5    | 5    | 3    | 3 |
| 2825   | 4    | 4    | 4    | 4    | 4    |      |      |      |      |      |      |      |      |      |   |
| 2826   |      |      |      |      |      | 2    | 5    | 5    | 6    | 2    | 6    | 5    | 6    | 2    | 4 |
| 2827   |      |      |      |      |      | 1    | 4    | 4    | 4    | 1    | 4    | 6    | 6    | 6    | 6 |
| 2828   | 4    | 4    | 4    | 5    | 5    |      |      |      |      |      |      |      |      |      |   |
| 2829   | 5    | 5    | 5    | 5    | 5    |      |      |      |      |      |      |      |      |      |   |
| 2830   | 4    | 4    | 4    | 4    | 4    |      |      |      |      |      |      |      |      |      |   |
| 2831   | 4    | 2    | 1    | 3    | 3    |      |      |      |      |      |      |      |      |      |   |
| 2832   |      |      |      |      |      | 6    | 3    | 3    | 3    | 4    | 3    | 3    | 6    | 1    | 3 |
| 2833   |      |      |      |      |      | 2    | 5    | 5    | 5    | 5    | 5    | 5    | 5    | 2    | 5 |
| 2834   | 3    | 3    | 2    | 3    | 3    |      |      |      |      |      |      |      |      |      |   |
| 2835   | 2    | 4    | 1    | 4    | 4    |      |      |      |      |      |      |      |      |      |   |

| respid | Q47l | Q47m | Q47n | Q47o | Q48a | Q48b | Q48c | Q48d | Q48e | Q48f | Q48g | Q48h | Q48i | Q48j |   |
|--------|------|------|------|------|------|------|------|------|------|------|------|------|------|------|---|
| 2836   | 3    | 4    | 4    | 4    |      |      |      |      |      |      |      |      |      |      |   |
| 2837   | 4    | 4    | 3    | 3    |      |      |      |      |      |      |      |      |      |      |   |
| 2838   |      |      |      |      |      | 2    | 5    | 6    | 6    | 2    | 6    | 5    | 6    | 2    | 6 |
| 2844   |      |      |      |      |      | 5    | 2    | 3    | 3    | 5    | 1    | 2    | 3    | 5    | 3 |
| 2845   | 5    | 5    | 5    | 5    |      |      |      |      |      |      |      |      |      |      |   |
| 2847   | 1    | 1    | 1    | 5    |      |      |      |      |      |      |      |      |      |      |   |
| 2848   | 3    | 3    | 3    | 4    |      |      |      |      |      |      |      |      |      |      |   |
| 2849   | 3    | 1    | 1    | 2    |      |      |      |      |      |      |      |      |      |      |   |
| 2851   |      |      |      |      |      |      |      |      |      |      |      |      |      |      |   |
| 2852   |      |      |      |      |      | 4    | 5    | 5    | 6    | 2    | 5    | 5    | 5    | 3    | 5 |
| 2853   |      |      |      |      |      | 4    | 4    | 4    | 4    | 3    | 4    | 4    | 4    | 4    | 4 |
| 2854   |      |      |      |      |      | 3    | 3    | 5    | 5    | 3    | 5    | 5    | 6    | 2    | 6 |
| 2856   | 5    | 5    | 5    | 3    |      |      |      |      |      |      |      |      |      |      |   |
| 2857   | 3    | 3    | 4    | 3    |      |      |      |      |      |      |      |      |      |      |   |
| 2858   | 2    |      |      |      |      |      |      |      |      |      |      |      |      |      |   |
| 2859   | 3    | 3    | 3    | 3    |      |      |      |      |      |      |      |      |      |      |   |
| 2860   |      |      |      |      |      | 6    | 2    | 2    | 4    | 4    | 3    | 2    | 1    | 5    | 3 |
| 2861   | 3    | 3    | 3    | 3    |      |      |      |      |      |      |      |      |      |      |   |
| 2863   | 4    | 3    | 3    | 3    |      |      |      |      |      |      |      |      |      |      |   |
| 2864   |      |      |      |      |      | 6    | 6    | 6    | 6    | 6    | 6    | 6    | 6    | 4    | 6 |
| 2866   |      |      |      |      |      | 1    | 6    | 6    | 3    | 4    | 6    | 6    | 6    | 1    | 6 |
| 2872   | 5    | 3    | 5    | 5    |      |      |      |      |      |      |      |      |      |      |   |
| 2875   |      |      |      |      |      | 3    | 6    | 6    | 6    | 2    | 6    | 6    | 6    | 3    | 6 |
| 2879   |      |      |      |      |      |      |      |      |      |      |      |      |      |      |   |
| 2881   |      |      |      |      |      | 3    | 3    | 3    | 3    | 4    | 3    | 3    | 2    | 4    | 3 |
| 2882   | 5    | 3    | 3    | 3    |      |      |      |      |      |      |      |      |      |      |   |
| 2883   | 4    | 4    | 4    | 4    |      |      |      |      |      |      |      |      |      |      |   |
| 2884   | 1    | 1    | 1    | 1    |      |      |      |      |      |      |      |      |      |      |   |
| 2885   |      |      |      |      |      | 2    | 5    | 5    | 5    | 2    | 5    | 5    | 5    | 2    | 5 |
| 2887   | 5    | 5    | 5    | 5    |      |      |      |      |      |      |      |      |      |      |   |
| 2888   | 3    | 4    | 4    | 3    |      |      |      |      |      |      |      |      |      |      |   |
| 2890   | 3    | 2    | 2    | 2    |      |      |      |      |      |      |      |      |      |      |   |

| respid | Q47l | Q47m | Q47n | Q47o | Q48a | Q48b | Q48c | Q48d | Q48e | Q48f | Q48g | Q48h | Q48i | Q48j |   |
|--------|------|------|------|------|------|------|------|------|------|------|------|------|------|------|---|
| 2891   |      |      |      |      |      | 4    | 5    | 5    | 5    | 3    | 5    | 5    | 5    | 2    | 5 |
| 2892   |      |      |      |      |      |      |      |      |      |      |      |      |      |      |   |
| 2895   | 3    | 4    | 4    | 4    |      |      |      |      |      |      |      |      |      |      |   |
| 2899   | 3    | 3    | 3    | 4    |      |      |      |      |      |      |      |      |      |      |   |
| 2900   | 3    | 1    | 1    | 1    |      |      |      |      |      |      |      |      |      |      |   |
| 2902   |      |      |      |      |      | 1    | 1    | 2    | 2    | 1    | 2    | 1    | 4    | 3    | 4 |
| 2903   |      |      |      |      |      |      |      |      |      |      |      |      |      |      |   |
| 2904   | 4    | 4    | 4    | 5    |      |      |      |      |      |      |      |      |      |      |   |
| 2906   |      |      |      |      |      | 4    | 5    | 3    | 5    | 3    | 5    | 3    | 5    | 3    | 3 |
| 2908   |      |      |      |      |      | 3    | 6    | 6    | 6    | 4    | 4    | 6    | 6    | 1    | 6 |
| 2910   |      |      |      |      |      | 1    | 5    | 5    | 5    | 3    | 5    | 5    | 5    | 2    | 4 |
| 2917   | 4    | 2    | 3    | 2    |      |      |      |      |      |      |      |      |      |      |   |
| 2918   | 2    | 2    | 1    | 1    |      |      |      |      |      |      |      |      |      |      |   |
| 2919   | 4    | 4    | 4    | 5    |      |      |      |      |      |      |      |      |      |      |   |
| 2920   | 5    | 5    | 5    | 5    |      |      |      |      |      |      |      |      |      |      |   |
| 2921   | 4    | 4    | 4    | 4    |      |      |      |      |      |      |      |      |      |      |   |
| 2922   | 3    | 1    | 1    | 4    |      |      |      |      |      |      |      |      |      |      |   |
| 2923   |      |      |      |      |      |      |      |      |      |      |      |      |      |      |   |
| 2924   |      |      |      |      |      | 3    | 4    | 5    | 5    | 2    | 6    | 6    | 5    | 2    | 5 |
| 2926   |      |      |      |      |      | 2    | 5    | 6    | 5    | 2    | 5    | 5    | 5    | 2    | 2 |
| 2928   |      |      |      |      |      |      |      |      |      |      |      |      |      |      |   |
| 2930   |      |      |      |      |      |      |      |      |      |      |      |      |      |      |   |
| 2931   | 3    | 3    | 3    | 3    |      |      |      |      |      |      |      |      |      |      |   |
| 2933   | 5    | 5    | 5    | 5    |      |      |      |      |      |      |      |      |      |      |   |
| 2935   | 3    | 3    | 3    | 4    |      |      |      |      |      |      |      |      |      |      |   |
| 2936   |      |      |      |      |      |      |      |      |      |      |      |      |      |      |   |
| 2937   | 3    | 4    | 3    | 3    |      |      |      |      |      |      |      |      |      |      |   |
| 2938   | 3    | 3    | 3    | 4    |      |      |      |      |      |      |      |      |      |      |   |
| 2944   | 2    | 3    | 2    | 2    |      |      |      |      |      |      |      |      |      |      |   |
| 2945   |      |      |      |      |      | 4    | 3    | 5    | 3    | 4    | 3    | 3    | 5    | 4    | 5 |
| 2947   | 3    | 5    | 5    | 5    |      |      |      |      |      |      |      |      |      |      |   |
| 2949   |      |      |      |      |      |      |      |      |      | 1    | 6    | 6    | 6    | 1    | 6 |



| respid | Q47l | Q47m | Q47n | Q47o | Q48a | Q48b | Q48c | Q48d | Q48e | Q48f | Q48g | Q48h | Q48i | Q48j |   |
|--------|------|------|------|------|------|------|------|------|------|------|------|------|------|------|---|
| 2951   |      |      |      |      |      | 5    | 5    | 6    | 6    | 5    | 6    | 6    | 6    | 5    | 6 |
| 2952   | 3    | 3    | 3    | 3    |      |      |      |      |      |      |      |      |      |      |   |
| 2953   |      |      |      |      |      |      |      |      |      |      |      |      |      |      |   |
| 2955   | 4    | 4    | 4    | 4    |      |      |      |      |      |      |      |      |      |      |   |
| 2957   | 5    | 5    | 5    | 5    |      |      |      |      |      |      |      |      |      |      |   |
| 2958   |      |      |      |      |      | 5    | 6    | 6    | 6    | 2    | 6    | 6    | 6    | 2    | 6 |
| 2960   |      |      |      |      |      | 3    | 4    | 4    | 4    | 3    | 4    | 5    | 4    | 3    | 4 |
| 2963   | 3    | 3    | 3    | 3    |      |      |      |      |      |      |      |      |      |      |   |
| 2964   |      |      |      |      |      | 6    | 5    | 5    | 6    | 5    | 6    | 5    | 5    | 5    | 6 |
| 2967   |      |      |      |      |      |      |      |      |      |      |      |      |      |      |   |
| 2968   |      |      |      |      |      | 1    | 6    | 6    | 5    | 1    | 6    | 6    | 6    | 1    | 6 |
| 2971   |      |      |      |      |      | 3    | 3    | 3    | 2    | 3    | 4    | 4    | 4    | 4    | 5 |
| 2974   |      |      |      |      |      |      |      |      |      |      |      |      |      |      | 3 |
| 2975   |      |      |      |      |      | 1    | 1    | 6    | 6    | 6    | 6    | 6    | 1    | 6    | 6 |
| 2982   |      |      |      |      |      |      |      |      |      |      |      |      |      |      |   |
| 2983   |      |      |      |      |      |      |      |      |      |      |      |      |      |      |   |
| 2985   |      |      |      |      |      | 3    | 5    | 5    | 6    | 2    | 6    | 6    | 6    | 2    | 5 |
| 2986   | 2    | 2    | 1    | 4    |      |      |      |      |      |      |      |      |      |      |   |
| 2987   |      |      |      |      |      | 5    | 5    | 5    | 5    | 5    | 6    | 6    | 6    | 6    |   |
| 2988   |      |      |      |      |      |      |      | 6    | 6    |      |      |      |      |      |   |
| 2993   | 1    | 3    |      |      |      |      |      |      |      |      |      |      |      |      |   |
| 2996   | 1    | 3    | 1    | 3    |      |      |      |      |      |      |      |      |      |      |   |
| 2997   | 4    | 4    | 4    | 4    |      |      |      |      |      |      |      |      |      |      |   |
| 2998   |      |      |      |      |      | 4    | 3    | 3    | 3    | 4    | 4    | 2    | 3    | 3    | 4 |
| 3004   | 4    | 4    | 3    | 4    |      |      |      |      |      |      |      |      |      |      |   |
| 3007   |      |      |      |      |      | 5    | 3    | 3    | 3    | 3    | 3    | 3    | 3    | 3    | 3 |
| 3011   | 3    | 4    | 4    | 4    |      |      |      |      |      |      |      |      |      |      |   |
| 3012   | 4    | 3    | 3    | 4    |      |      |      |      |      |      |      |      |      |      |   |
| 3013   | 3    | 4    | 4    | 3    |      |      |      |      |      |      |      |      |      |      |   |
| 3014   |      |      |      |      |      |      |      |      |      |      |      |      |      |      |   |
| 3015   | 5    | 5    | 5    | 5    |      |      |      |      |      |      |      |      |      |      |   |
| 3016   |      |      |      |      |      |      |      |      |      |      |      |      |      |      |   |

| respid | Q47l | Q47m | Q47n | Q47o | Q48a | Q48b | Q48c | Q48d | Q48e | Q48f | Q48g | Q48h | Q48i | Q48j |   |
|--------|------|------|------|------|------|------|------|------|------|------|------|------|------|------|---|
| 3017   |      | 1    | 1    | 1    | 4    |      |      |      |      |      |      |      |      |      |   |
| 3020   |      | 4    | 3    | 3    | 3    |      |      |      |      |      |      |      |      |      |   |
| 3022   |      | 5    | 4    | 4    | 4    |      |      |      |      |      |      |      |      |      |   |
| 3023   |      | 4    | 4    | 4    | 4    |      |      |      |      |      |      |      |      |      |   |
| 3026   |      |      |      |      |      | 1    | 6    | 6    | 6    | 1    | 6    | 6    | 6    | 1    | 6 |
| 3038   |      | 5    | 3    | 3    | 5    |      |      |      |      |      |      |      |      |      |   |
| 3039   |      |      |      |      |      |      |      |      |      |      |      |      |      |      |   |
| 3040   |      | 3    | 3    | 3    | 3    |      |      |      |      |      |      |      |      |      |   |
| 3041   |      |      |      |      |      |      |      |      |      |      |      |      |      |      |   |
| 3042   |      |      |      |      |      | 4    | 4    | 3    | 4    | 4    | 4    | 4    | 4    | 4    | 4 |
| 3044   |      | 4    | 4    | 4    | 4    |      |      |      |      |      |      |      |      |      |   |
| 3050   |      | 4    | 3    | 4    | 4    |      |      |      |      |      |      |      |      |      |   |
| 3052   |      | 4    | 3    | 4    | 3    |      |      |      |      |      |      |      |      |      |   |
| 3056   |      |      |      |      |      | 1    | 5    | 5    | 4    | 2    | 5    | 2    | 5    | 1    | 3 |
| 3059   |      |      |      |      |      | 2    | 5    | 5    | 5    | 2    | 5    | 5    | 5    | 2    | 4 |
| 3060   |      | 4    | 3    | 4    | 3    |      |      |      |      |      |      |      |      |      |   |
| 3063   |      |      |      |      |      | 3    | 5    | 5    | 5    | 3    | 4    | 4    | 5    | 3    | 5 |
| 3065   |      | 3    | 3    | 3    | 3    |      |      |      |      |      |      |      |      |      |   |
| 3067   |      | 4    | 2    | 1    | 3    |      |      |      |      |      |      |      |      |      |   |
| 3068   |      |      |      |      |      |      |      |      |      |      |      |      |      |      |   |
| 3072   |      | 4    | 4    | 4    | 4    |      |      |      |      |      |      |      |      |      |   |
| 3074   |      | 3    | 3    | 3    | 3    |      |      |      |      |      |      |      |      |      |   |
| 3075   |      | 3    | 3    | 3    | 4    |      |      |      |      |      |      |      |      |      |   |
| 3076   |      |      |      |      |      | 1    | 3    | 3    | 3    | 4    | 3    | 2    | 3    | 4    | 3 |
| 3079   |      | 3    | 3    | 3    | 3    |      |      |      |      |      |      |      |      |      |   |
| 3082   |      | 3    | 3    | 4    | 3    |      |      |      |      |      |      |      |      |      |   |
| 3083   |      | 4    | 4    | 4    | 4    |      |      |      |      |      |      |      |      |      |   |
| 3084   |      | 5    | 1    | 1    | 5    |      |      |      |      |      |      |      |      |      |   |
| 3085   |      |      |      |      |      | 3    | 3    | 4    | 4    | 3    | 4    | 5    | 4    | 3    | 4 |
| 3090   |      |      |      |      |      |      | 6    | 6    | 6    | 2    | 6    | 6    | 6    | 3    | 5 |
| 3091   |      |      |      |      |      | 2    | 3    | 3    | 2    | 4    | 4    | 5    | 2    | 6    | 2 |
| 3092   |      | 3    | 4    | 4    | 3    |      |      |      |      |      |      |      |      |      |   |

| respid | Q47l | Q47m | Q47n | Q47o | Q48a | Q48b | Q48c | Q48d | Q48e | Q48f | Q48g | Q48h | Q48i | Q48j |   |
|--------|------|------|------|------|------|------|------|------|------|------|------|------|------|------|---|
| 3095   | 4    | 4    | 4    | 4    |      |      |      |      |      |      |      |      |      |      |   |
| 3096   | 4    | 4    | 4    | 4    |      |      |      |      |      |      |      |      |      |      |   |
| 3097   |      |      |      |      |      | 3    | 5    | 5    | 4    | 3    | 4    | 5    | 5    | 2    | 5 |
| 3099   | 2    | 1    | 2    | 2    |      |      |      |      |      |      |      |      |      |      |   |
| 3101   |      |      |      |      |      | 3    | 5    | 5    | 5    | 3    | 5    | 5    | 5    | 3    | 5 |
| 3103   | 4    | 4    | 4    | 4    |      |      |      |      |      |      |      |      |      |      |   |
| 3104   | 3    |      | 3    | 3    |      |      |      |      |      |      |      |      |      |      |   |
| 3105   |      |      |      |      |      |      |      |      |      |      |      |      |      |      |   |
| 3107   | 5    | 1    | 1    | 4    |      |      |      |      |      |      |      |      |      |      |   |
| 3108   | 3    | 3    | 3    | 3    |      |      |      |      |      |      |      |      |      |      |   |
| 3109   |      |      |      |      |      | 3    | 4    | 4    | 4    | 3    | 4    | 5    | 5    | 3    | 5 |
| 3116   |      |      |      |      |      | 2    | 6    | 6    | 6    | 2    | 6    | 6    | 6    | 2    | 6 |
| 3117   |      |      |      |      |      | 3    | 3    | 5    | 5    | 2    | 3    | 3    | 5    | 2    | 5 |
| 3119   | 5    | 5    | 5    | 4    |      |      |      |      |      |      |      |      |      |      |   |
| 3120   | 3    | 3    | 3    | 3    |      |      |      |      |      |      |      |      |      |      |   |
| 3130   |      |      |      |      |      | 3    | 6    | 6    | 4    | 3    | 6    | 6    | 6    | 3    | 6 |
| 3131   |      |      |      |      |      | 2    | 3    | 5    | 6    | 2    | 5    | 3    | 6    | 1    | 3 |
| 3133   | 3    | 3    | 3    | 3    |      |      |      |      |      |      |      |      |      |      |   |
| 3134   | 5    | 3    | 3    | 4    |      |      |      |      |      |      |      |      |      |      |   |
| 3135   | 2    | 1    | 2    | 1    |      |      |      |      |      |      |      |      |      |      |   |
| 3145   | 4    | 4    | 4    | 4    |      |      |      |      |      |      |      |      |      |      |   |
| 3147   |      |      |      |      |      | 3    | 4    | 5    | 5    | 3    | 5    | 5    | 5    | 2    | 5 |
| 3152   | 4    | 4    | 4    | 5    |      |      |      |      |      |      |      |      |      |      |   |
| 3155   |      |      |      |      |      | 3    | 2    | 3    | 2    | 5    | 3    | 1    | 3    | 4    | 2 |
| 3156   |      |      |      |      |      |      |      |      |      |      |      |      |      |      |   |
| 3157   | 3    | 3    | 3    | 4    |      |      |      |      |      |      |      |      |      |      |   |
| 3166   | 3    | 4    | 4    | 4    |      |      |      |      |      |      |      |      |      |      |   |
| 3169   |      |      |      |      |      | 4    | 5    | 5    | 6    | 3    | 5    | 5    | 4    | 5    | 4 |
| 3179   |      |      |      |      |      | 2    | 6    | 6    | 3    | 5    | 4    | 5    | 6    | 3    | 5 |
| 3181   |      |      |      |      |      | 3    | 3    | 4    | 4    | 3    | 3    | 4    | 4    | 3    | 3 |
| 3185   |      |      |      |      |      |      |      |      |      |      |      |      |      |      |   |
| 3190   | 3    | 3    | 3    | 3    |      |      |      |      |      |      |      |      |      |      |   |

| respid | Q47l | Q47m | Q47n | Q47o | Q48a | Q48b | Q48c | Q48d | Q48e | Q48f | Q48g | Q48h | Q48i | Q48j |
|--------|------|------|------|------|------|------|------|------|------|------|------|------|------|------|
| 3191   |      |      |      |      |      |      |      |      |      |      |      |      |      |      |
| 3192   |      |      |      |      |      |      |      |      |      |      |      |      |      |      |
| 3193   |      |      |      |      | 5    | 5    | 5    | 4    | 4    | 3    | 5    | 5    |      | 6    |
| 3195   | 2    | 3    | 3    | 3    |      |      |      |      |      |      |      |      |      |      |
| 3202   | 3    | 3    | 3    | 3    |      |      |      |      |      |      |      |      |      |      |
| 3204   | 3    | 4    | 4    | 3    |      |      |      |      |      |      |      |      |      |      |
| 3208   | 3    | 4    | 4    | 4    |      |      |      |      |      |      |      |      |      |      |
| 3212   | 5    | 4    | 4    | 3    |      |      |      |      |      |      |      |      |      |      |
| 3218   | 3    | 4    | 4    | 3    |      |      |      |      |      |      |      |      |      |      |
| 3219   |      |      |      |      | 3    | 6    | 6    | 6    | 3    | 6    | 6    | 6    | 3    | 6    |
| 3220   |      |      |      |      | 3    | 5    | 5    | 5    | 3    | 5    | 5    | 5    | 2    | 5    |
| 3221   | 2    | 1    |      | 4    |      |      |      |      |      |      |      |      |      |      |
| 3223   |      |      |      |      | 2    | 5    | 6    | 6    | 2    | 6    | 6    | 5    | 2    | 5    |
| 3231   |      |      |      |      | 4    | 5    | 3    | 4    | 4    | 4    | 2    | 2    | 4    | 3    |
| 3232   |      |      |      |      | 4    | 5    | 5    | 5    | 4    | 5    | 5    | 5    | 5    | 5    |
| 3234   | 3    | 4    | 4    | 4    |      |      |      |      |      |      |      |      |      |      |
| 3235   | 5    | 4    | 4    | 5    |      |      |      |      |      |      |      |      |      |      |
| 3237   |      |      |      |      |      |      |      |      |      |      |      |      |      | 6    |
| 3238   | 4    | 4    | 4    | 4    |      |      |      |      |      |      |      |      |      |      |
| 3240   | 3    | 4    | 5    | 3    |      |      |      |      |      |      |      |      |      |      |
| 3241   |      |      |      |      | 2    | 4    | 4    | 3    | 3    | 4    | 5    | 4    | 3    | 4    |
| 3243   |      |      |      |      | 5    | 2    | 2    | 2    | 5    | 2    | 2    | 3    | 5    | 3    |
| 3244   |      |      |      |      | 2    | 3    | 4    | 4    | 4    | 3    | 3    | 5    | 3    | 3    |
| 3247   | 4    | 3    | 4    | 3    |      |      |      |      |      |      |      |      |      |      |
| 3250   | 1    | 2    | 1    | 2    |      |      |      |      |      |      |      |      |      |      |
| 3251   |      |      |      |      | 3    | 3    | 3    | 3    | 4    | 3    | 3    | 3    | 4    | 3    |
| 3255   |      |      |      |      | 1    | 6    | 6    | 6    | 1    | 6    | 6    | 6    | 1    | 6    |
| 3256   | 5    | 5    | 5    | 5    |      |      |      |      |      |      |      |      |      |      |
| 3257   |      |      |      |      | 2    | 2    | 2    | 2    | 2    | 2    | 3    | 2    | 2    | 4    |
| 3258   |      |      |      |      |      |      |      |      |      |      |      |      |      |      |
| 3259   |      |      |      |      | 6    | 1    | 1    | 1    | 6    | 1    | 1    | 1    | 6    | 1    |
| 3260   | 3    | 1    | 1    | 3    |      |      |      |      |      |      |      |      |      |      |

| respid | Q47l | Q47m | Q47n | Q47o | Q48a | Q48b | Q48c | Q48d | Q48e | Q48f | Q48g | Q48h | Q48i | Q48j |   |
|--------|------|------|------|------|------|------|------|------|------|------|------|------|------|------|---|
| 3261   |      |      |      |      |      |      |      |      |      |      |      |      |      |      |   |
| 3262   | 4    | 3    | 3    | 3    |      |      |      |      |      |      |      |      |      |      |   |
| 3264   |      |      |      |      |      | 3    | 4    | 4    | 4    | 3    | 4    | 5    | 5    | 1    | 4 |
| 3265   | 3    | 4    | 5    | 5    |      |      |      |      |      |      |      |      |      |      |   |
| 3267   | 4    | 4    | 4    | 4    |      |      |      |      |      |      |      |      |      |      |   |
| 3268   |      |      |      |      |      | 3    | 5    | 5    | 5    | 3    | 5    | 5    | 5    | 2    | 5 |
| 3270   | 4    | 4    | 4    | 4    |      |      |      |      |      |      |      |      |      |      |   |
| 3271   | 4    | 4    | 4    | 4    |      |      |      |      |      |      |      |      |      |      |   |
| 3274   |      |      |      |      |      |      |      |      |      |      |      |      |      |      |   |
| 3276   |      |      |      |      |      |      |      |      |      |      |      |      |      |      |   |
| 3277   |      |      |      |      |      | 3    | 5    | 6    | 5    | 2    | 5    | 6    | 6    | 2    | 6 |
| 3279   | 4    | 5    | 5    | 5    |      |      |      |      |      |      |      |      |      |      |   |
| 3281   |      |      |      |      |      |      |      |      |      |      |      |      |      |      |   |
| 3283   | 3    | 3    | 2    | 3    |      |      |      |      |      |      |      |      |      |      |   |
| 3285   | 3    | 4    | 4    | 3    |      |      |      |      |      |      |      |      |      |      |   |
| 3286   | 2    | 2    | 2    | 2    |      |      |      |      |      |      |      |      |      |      |   |
| 3287   | 4    | 3    | 4    | 3    |      |      |      |      |      |      |      |      |      |      |   |
| 3289   |      | 3    | 3    | 3    |      |      |      |      |      |      |      |      |      |      |   |
| 3290   | 4    | 4    | 4    | 4    |      |      |      |      |      |      |      |      |      |      |   |
| 3291   | 3    | 3    | 4    | 2    |      |      |      |      |      |      |      |      |      |      |   |
| 3292   |      |      |      |      |      | 2    | 2    | 3    | 3    | 4    | 3    | 2    | 3    | 4    | 2 |
| 3293   | 2    | 3    | 3    | 3    |      |      |      |      |      |      |      |      |      |      |   |
| 3294   | 3    | 4    | 4    | 4    |      |      |      |      |      |      |      |      |      |      |   |
| 3296   |      |      |      |      |      | 3    | 3    | 5    | 6    | 2    | 5    | 5    | 5    | 2    | 5 |
| 3306   |      |      |      |      |      | 2    | 5    | 6    | 5    | 2    | 6    | 5    | 6    | 2    | 5 |
| 3307   |      |      |      |      |      | 2    | 4    | 3    | 3    | 4    | 4    | 3    | 3    | 2    | 3 |
| 3308   |      |      |      |      |      | 2    | 3    | 3    | 5    | 4    | 6    | 6    | 5    | 5    | 5 |
| 3312   | 4    | 4    | 4    | 4    |      |      |      |      |      |      |      |      |      |      |   |
| 3313   | 3    |      |      |      |      |      |      |      |      |      |      |      |      |      |   |
| 3316   | 3    | 2    | 3    | 2    |      |      |      |      |      |      |      |      |      |      |   |
| 3317   | 3    |      | 3    | 2    |      |      |      |      |      |      |      |      |      |      |   |
| 3320   | 4    | 4    | 4    | 4    |      |      |      |      |      |      |      |      |      |      |   |

| respid | Q47l | Q47m | Q47n | Q47o | Q48a | Q48b | Q48c | Q48d | Q48e | Q48f | Q48g | Q48h | Q48i | Q48j |   |
|--------|------|------|------|------|------|------|------|------|------|------|------|------|------|------|---|
| 3321   | 4    | 4    | 4    | 4    |      |      |      |      |      |      |      |      |      |      |   |
| 3322   | 4    | 5    | 5    | 5    |      |      |      |      |      |      |      |      |      |      |   |
| 3323   |      |      |      |      |      | 1    | 6    | 6    | 6    | 1    | 6    | 6    | 6    | 1    | 6 |
| 3325   |      |      |      |      |      |      |      |      |      |      |      |      |      |      |   |
| 3332   | 4    | 4    | 4    | 4    |      |      |      |      |      |      |      |      |      |      |   |
| 3334   |      |      |      |      |      |      |      |      |      |      |      |      |      |      |   |
| 3335   | 3    | 3    | 3    | 3    |      |      |      |      |      |      |      |      |      |      |   |
| 3341   |      |      |      |      |      |      |      |      |      |      |      |      |      |      |   |
| 3345   |      |      |      |      |      |      |      |      |      |      |      |      |      |      |   |
| 3346   | 4    | 3    | 3    | 3    |      |      |      |      |      |      |      |      |      |      |   |
| 3349   | 4    | 3    | 3    | 3    |      |      |      |      |      |      |      |      |      |      |   |
| 3351   |      |      |      |      |      | 2    | 6    | 6    | 6    | 2    | 6    | 6    | 6    | 1    | 5 |
| 3353   | 3    | 3    | 4    | 3    |      |      |      |      |      |      |      |      |      |      |   |
| 3354   |      |      |      |      |      | 2    | 2    | 5    | 2    | 5    | 5    | 5    | 2    | 2    | 2 |
| 3356   |      |      |      |      |      | 3    | 3    | 4    | 4    | 4    | 4    | 4    | 5    | 3    | 4 |
| 3357   |      |      |      |      |      | 3    | 1    | 3    | 1    | 6    | 6    | 3    | 4    | 6    | 1 |
| 3360   |      |      |      |      |      | 1    | 1    | 1    | 6    | 1    | 3    | 1    | 1    | 5    | 1 |
| 3361   | 5    | 3    | 3    | 5    |      |      |      |      |      |      |      |      |      |      |   |
| 3362   | 4    | 4    | 4    | 4    |      |      |      |      |      |      |      |      |      |      |   |
| 3363   |      |      |      |      |      |      |      |      |      |      |      |      |      |      |   |
| 3364   | 1    | 2    | 3    | 2    |      |      |      |      |      |      |      |      |      |      |   |
| 3368   | 3    | 4    | 4    | 3    |      |      |      |      |      |      |      |      |      |      |   |
| 3370   |      |      |      |      |      | 2    | 2    | 5    | 5    | 2    | 4    | 5    | 6    | 1    | 3 |
| 3371   | 2    | 3    | 3    | 3    |      |      |      |      |      |      |      |      |      |      |   |
| 3379   |      |      |      |      |      | 1    | 3    | 3    | 6    | 2    | 5    | 5    | 6    | 5    | 6 |
| 3380   | 3    | 4    | 4    | 3    |      |      |      |      |      |      |      |      |      |      |   |
| 3382   | 2    | 4    | 4    | 3    |      |      |      |      |      |      |      |      |      |      |   |
| 3384   | 3    | 3    | 4    | 3    |      |      |      |      |      |      |      |      |      |      |   |
| 3385   |      |      |      |      |      |      |      |      |      |      |      |      |      |      |   |
| 3388   | 3    | 4    | 4    | 3    |      |      |      |      |      |      |      |      |      |      |   |
| 3392   |      |      |      |      |      | 3    | 5    | 4    | 4    | 5    | 5    | 3    | 4    | 4    | 3 |
| 3393   |      |      |      |      |      |      |      | 6    | 6    | 2    | 6    | 6    | 6    | 1    | 6 |

| respid | Q47l | Q47m | Q47n | Q47o | Q48a | Q48b | Q48c | Q48d | Q48e | Q48f | Q48g | Q48h | Q48i | Q48j |   |
|--------|------|------|------|------|------|------|------|------|------|------|------|------|------|------|---|
| 3394   | 3    | 3    | 3    | 3    |      |      |      |      |      |      |      |      |      |      |   |
| 3395   | 5    | 5    | 5    | 5    |      |      |      |      |      |      |      |      |      |      |   |
| 3396   | 4    | 3    | 3    | 3    |      |      |      |      |      |      |      |      |      |      |   |
| 3397   | 3    | 3    | 3    | 3    |      |      |      |      |      |      |      |      |      |      |   |
| 3398   |      |      |      |      |      | 2    | 6    | 6    | 5    | 2    | 6    | 6    | 6    | 1    | 6 |
| 3399   | 3    | 3    | 3    | 2    |      |      |      |      |      |      |      |      |      |      |   |
| 3400   | 5    | 3    | 3    | 3    |      |      |      |      |      |      |      |      |      |      |   |
| 3401   | 2    | 2    | 3    | 2    |      |      |      |      |      |      |      |      |      |      |   |
| 3402   | 3    | 2    | 2    | 2    |      |      |      |      |      |      |      |      |      |      |   |
| 3403   | 3    | 4    | 4    | 4    |      |      |      |      |      |      |      |      |      |      |   |
| 3405   |      |      |      |      |      | 1    | 1    | 1    | 1    | 1    | 1    | 1    | 1    | 1    | 1 |
| 3407   | 2    | 2    | 2    | 2    |      |      |      |      |      |      |      |      |      |      |   |
| 3410   | 4    | 3    | 4    | 4    |      |      |      |      |      |      |      |      |      |      |   |
| 3411   |      |      |      |      |      | 2    | 3    | 4    | 5    | 3    | 6    | 5    | 6    | 3    | 4 |
| 3413   |      |      |      |      |      |      |      |      |      |      |      |      |      |      |   |
| 3414   |      |      |      |      |      | 3    | 5    | 5    | 3    | 3    | 5    | 6    | 6    | 2    | 6 |
| 3420   |      |      |      |      |      | 2    | 5    | 5    | 5    | 2    | 5    | 6    | 6    | 5    | 6 |
| 3421   |      |      |      |      |      | 1    | 6    | 6    | 6    | 1    | 6    | 6    | 6    | 1    | 5 |
| 3425   | 3    | 3    | 3    | 3    |      |      |      |      |      |      |      |      |      |      |   |
| 3426   | 3    | 3    | 2    | 3    |      |      |      |      |      |      |      |      |      |      |   |
| 3429   |      |      |      |      |      | 4    | 3    | 3    | 6    | 1    | 6    | 6    | 4    | 4    | 6 |
| 3430   | 3    | 4    | 3    | 3    |      |      |      |      |      |      |      |      |      |      |   |
| 3433   |      |      |      |      |      | 6    | 6    | 6    | 6    | 6    | 6    | 6    | 6    |      | 4 |
| 3434   | 2    | 1    | 1    | 2    |      |      |      |      |      |      |      |      |      |      |   |
| 3437   | 3    | 3    | 3    | 3    |      |      |      |      |      |      |      |      |      |      |   |
| 3439   | 2    | 2    | 2    | 2    |      |      |      |      |      |      |      |      |      |      |   |
| 3441   | 2    | 2    | 3    | 2    |      |      |      |      |      |      |      |      |      |      |   |
| 3442   |      |      |      |      |      | 3    | 3    | 3    | 3    | 4    | 3    | 3    | 4    | 3    | 3 |
| 3444   |      |      |      |      |      | 5    | 5    | 3    | 5    | 2    | 5    | 5    | 6    | 1    | 6 |
| 3445   |      |      |      |      |      | 1    | 6    | 6    | 6    | 1    | 6    | 6    | 6    | 1    | 6 |
| 3450   | 3    | 4    | 4    | 3    |      |      |      |      |      |      |      |      |      |      |   |
| 3452   |      |      |      |      |      | 6    | 1    | 6    | 6    | 4    | 5    | 6    | 3    | 5    | 2 |

| respid | Q47l | Q47m | Q47n | Q47o | Q48a | Q48b | Q48c | Q48d | Q48e | Q48f | Q48g | Q48h | Q48i | Q48j |   |
|--------|------|------|------|------|------|------|------|------|------|------|------|------|------|------|---|
| 3456   | 4    | 4    | 4    | 4    |      |      |      |      |      |      |      |      |      |      |   |
| 3459   |      |      |      |      |      |      |      |      |      |      |      |      |      |      |   |
| 3460   | 3    | 3    | 3    | 3    |      |      |      |      |      |      |      |      |      |      |   |
| 3461   |      |      |      |      |      | 1    | 4    | 6    | 6    | 2    | 6    | 6    | 6    | 2    | 5 |
| 3466   | 3    | 3    | 3    | 3    |      |      |      |      |      |      |      |      |      |      |   |
| 3471   | 2    | 2    | 2    | 3    |      |      |      |      |      |      |      |      |      |      |   |
| 3473   | 5    | 5    | 5    | 5    |      |      |      |      |      |      |      |      |      |      |   |
| 3475   |      |      |      |      |      | 3    | 3    | 3    | 3    | 2    | 3    | 2    | 3    | 3    | 2 |
| 3476   | 4    | 5    | 4    | 4    |      |      |      |      |      |      |      |      |      |      |   |
| 3477   | 2    | 2    | 2    | 2    |      |      |      |      |      |      |      |      |      |      |   |
| 3478   |      |      |      |      |      |      |      |      |      |      |      |      |      |      |   |
| 3479   |      |      |      |      |      | 3    | 5    | 5    | 5    | 3    | 4    | 5    | 4    | 3    | 4 |
| 3482   | 2    | 2    | 1    | 2    |      |      |      |      |      |      |      |      |      |      |   |
| 3483   |      |      |      |      |      | 1    |      |      |      |      |      |      |      |      |   |
| 3485   |      |      |      |      |      | 2    | 4    | 5    | 6    | 2    | 6    | 6    | 6    | 2    | 6 |
| 3489   |      |      |      |      |      |      |      |      |      |      |      |      |      |      |   |
| 3490   |      |      |      |      |      | 1    | 4    | 4    | 4    | 3    | 4    | 5    | 4    | 3    | 4 |
| 3491   |      |      |      |      |      | 2    | 5    | 6    | 5    | 2    | 5    | 6    | 6    | 1    | 2 |
| 3494   |      |      |      |      |      | 4    | 3    | 5    | 5    |      | 5    | 5    | 5    |      | 4 |
| 3495   |      |      |      |      |      | 6    | 6    | 6    | 6    | 4    | 6    | 6    | 4    | 4    | 6 |
| 3501   | 3    | 4    | 4    | 4    |      |      |      |      |      |      |      |      |      |      |   |
| 3506   | 3    | 3    | 3    | 4    |      |      |      |      |      |      |      |      |      |      |   |
| 3507   |      | 4    |      | 5    |      |      |      |      |      |      |      |      |      |      |   |
| 3517   | 3    | 3    | 3    | 3    |      |      |      |      |      |      |      |      |      |      |   |
| 3520   |      |      |      |      |      | 1    | 1    | 1    | 1    | 5    | 1    | 5    | 5    | 6    | 5 |
| 3521   | 1    | 1    | 1    | 1    |      |      |      |      |      |      |      |      |      |      |   |
| 3522   |      |      |      |      |      | 3    | 5    | 5    | 5    | 2    | 5    | 5    | 5    | 3    | 5 |
| 3524   | 4    | 4    | 4    | 4    |      |      |      |      |      |      |      |      |      |      |   |
| 3527   | 5    | 5    | 5    | 5    |      |      |      |      |      |      |      |      |      |      |   |
| 3528   | 3    | 3    | 3    | 4    |      |      |      |      |      |      |      |      |      |      |   |
| 3529   | 2    | 3    | 3    | 2    |      |      |      |      |      |      |      |      |      |      |   |
| 3536   |      |      |      |      |      | 2    | 5    | 6    | 6    | 3    | 6    | 6    | 6    | 2    | 5 |



| respid | Q47l | Q47m | Q47n | Q47o | Q48a | Q48b | Q48c | Q48d | Q48e | Q48f | Q48g | Q48h | Q48i | Q48j |
|--------|------|------|------|------|------|------|------|------|------|------|------|------|------|------|
| 3537   | 3    | 3    | 3    | 3    |      |      |      |      |      |      |      |      |      |      |
| 3538   | 3    | 3    | 4    | 3    |      |      |      |      |      |      |      |      |      |      |
| 3540   |      |      |      |      |      | 3    | 3    | 3    | 3    | 2    | 3    | 3    | 3    | 4    |
| 3545   | 3    | 3    | 3    | 3    |      |      |      |      |      |      |      |      |      |      |
| 3547   | 4    | 4    | 4    | 4    |      |      |      |      |      |      |      |      |      |      |
| 3554   |      |      |      |      |      | 4    | 3    | 3    | 2    | 5    | 3    | 3    | 3    | 4    |
| 3556   | 1    | 1    | 1    | 1    |      |      |      |      |      |      |      |      |      |      |
| 3557   |      | 3    | 3    | 3    |      |      |      |      |      |      |      |      |      |      |
| 3559   |      |      |      |      |      | 3    | 3    | 3    | 3    | 3    | 3    | 3    | 3    | 3    |
| 3560   | 3    | 3    | 3    | 3    |      |      |      |      |      |      |      |      |      |      |
| 3562   |      |      |      |      |      |      |      |      |      |      |      |      |      |      |
| 3564   |      |      |      |      |      | 5    | 2    | 2    | 2    | 5    | 2    | 2    | 3    | 5    |
| 3565   |      |      |      |      |      | 2    | 4    | 5    | 2    | 2    | 2    | 3    | 2    | 3    |
| 3568   | 3    | 4    | 4    | 4    |      |      |      |      |      |      |      |      |      |      |
| 3572   |      |      |      |      |      |      |      |      |      |      |      |      |      |      |
| 3578   |      |      |      |      |      |      |      |      |      |      |      |      |      |      |
| 3581   |      |      |      |      |      | 5    | 2    | 4    | 2    | 5    | 2    | 4    | 4    | 5    |
| 3583   |      |      |      |      |      | 3    | 4    | 6    | 5    | 3    | 6    | 6    | 6    | 1    |
| 3588   | 4    | 4    | 4    | 4    |      |      |      |      |      |      |      |      |      |      |
| 3591   | 3    | 4    | 4    | 5    |      |      |      |      |      |      |      |      |      |      |
| 3594   | 4    | 4    | 5    | 4    |      |      |      |      |      |      |      |      |      |      |
| 3595   | 5    |      | 5    | 5    |      |      |      |      |      |      |      |      |      |      |
| 3596   |      |      |      |      |      | 2    | 5    | 6    | 6    | 2    | 6    | 6    | 6    | 2    |
| 3597   | 4    | 4    | 4    | 3    |      |      |      |      |      |      |      |      |      |      |
| 3598   |      |      |      |      |      |      |      |      |      |      |      |      |      |      |
| 3600   |      |      |      |      |      | 6    | 2    | 5    | 3    | 6    | 1    | 3    | 3    | 6    |
| 3602   |      |      |      |      |      |      | 6    | 6    | 6    | 3    | 6    | 6    | 6    | 3    |
| 3604   | 3    | 3    | 3    | 5    |      |      |      |      |      |      |      |      |      |      |
| 3605   | 1    | 1    | 1    | 1    |      |      |      |      |      |      |      |      |      |      |
| 3606   | 4    | 4    | 4    | 4    |      |      |      |      |      |      |      |      |      |      |
| 3607   |      |      |      |      |      |      |      |      |      |      |      |      |      |      |
| 3610   | 4    | 4    | 4    | 4    |      |      |      |      |      |      |      |      |      |      |

| respid | Q47l | Q47m | Q47n | Q47o | Q48a | Q48b | Q48c | Q48d | Q48e | Q48f | Q48g | Q48h | Q48i | Q48j |   |
|--------|------|------|------|------|------|------|------|------|------|------|------|------|------|------|---|
| 3611   |      | 3    | 4    | 4    | 3    |      |      |      |      |      |      |      |      |      |   |
| 3612   |      | 4    | 5    | 4    | 5    |      |      |      |      |      |      |      |      |      |   |
| 3614   |      |      |      |      |      |      |      |      |      |      | 6    | 6    | 1    | 6    |   |
| 3616   |      | 3    | 3    | 3    | 3    |      |      |      |      |      |      |      |      |      |   |
| 3617   |      |      |      |      |      | 3    | 5    | 5    | 5    | 3    | 5    | 5    | 5    | 2    | 5 |
| 3618   |      |      |      |      |      |      |      |      |      |      |      |      |      |      |   |
| 3619   |      |      |      |      |      | 1    | 6    | 6    | 4    | 4    | 3    | 4    | 4    | 1    | 3 |
| 3621   |      | 4    | 1    | 1    | 3    |      |      |      |      |      |      |      |      |      |   |
| 3622   |      |      |      |      |      |      |      |      |      |      | 5    | 6    | 6    |      |   |
| 3624   |      | 3    | 3    | 3    | 3    |      |      |      |      |      |      |      |      |      |   |
| 3626   |      | 3    | 5    | 5    | 5    |      |      |      |      |      |      |      |      |      |   |
| 3629   |      |      |      |      |      | 1    | 6    | 6    | 6    | 2    | 6    | 5    | 6    | 1    | 4 |
| 3631   |      | 3    | 5    | 5    | 5    |      |      |      |      |      |      |      |      |      |   |
| 3632   |      | 3    | 4    | 4    | 4    |      |      |      |      |      |      |      |      |      |   |
| 3638   |      | 5    | 4    | 4    | 5    |      |      |      |      |      |      |      |      |      |   |
| 3640   |      |      |      |      |      | 4    | 2    | 2    | 2    | 5    | 2    | 2    | 2    | 5    | 2 |
| 3641   |      |      |      |      |      | 3    | 4    | 5    | 3    | 4    | 4    | 3    | 5    | 3    | 3 |
| 3645   |      | 5    | 4    | 4    | 2    |      |      |      |      |      |      |      |      |      |   |
| 3650   |      |      |      |      |      |      |      |      |      |      |      |      |      |      |   |
| 3653   |      | 3    | 3    | 4    | 4    |      |      |      |      |      |      |      |      |      |   |
| 3655   |      | 3    | 2    | 3    | 2    |      |      |      |      |      |      |      |      |      |   |
| 3657   |      |      |      |      |      | 3    | 4    | 5    | 4    | 3    | 5    | 5    | 5    | 2    | 3 |
| 3658   |      |      |      |      |      | 2    | 4    | 3    | 4    | 3    | 3    | 3    | 4    | 2    | 3 |
| 3659   |      |      |      |      |      | 2    | 5    | 5    | 5    | 3    | 5    | 5    | 5    | 2    | 5 |
| 3664   |      | 3    | 3    | 3    | 3    |      |      |      |      |      |      |      |      |      |   |
| 3665   |      | 4    | 3    | 4    | 3    |      |      |      |      |      |      |      |      |      |   |
| 3667   |      | 4    | 4    | 4    | 4    |      |      |      |      |      |      |      |      |      |   |
| 3668   |      | 2    | 2    | 2    | 2    |      |      |      |      |      |      |      |      |      |   |
| 3675   |      |      |      |      |      |      |      |      |      |      |      |      |      |      |   |
| 3678   |      |      |      |      |      |      |      |      |      |      |      |      |      |      |   |
| 3680   |      |      |      |      |      |      |      |      |      |      |      |      |      |      |   |
| 3684   |      | 3    | 4    | 4    | 3    |      |      |      |      |      |      |      |      |      |   |

| respid | Q47l | Q47m | Q47n | Q47o | Q48a | Q48b | Q48c | Q48d | Q48e | Q48f | Q48g | Q48h | Q48i | Q48j |
|--------|------|------|------|------|------|------|------|------|------|------|------|------|------|------|
| 3685   |      |      |      |      |      | 5    | 5    | 5    | 5    | 5    | 5    | 5    | 5    | 5    |
| 3687   | 4    | 3    | 2    | 2    |      |      |      |      |      |      |      |      |      |      |
| 3689   | 3    | 3    | 2    | 3    |      |      |      |      |      |      |      |      |      |      |
| 3690   | 3    | 3    | 3    | 3    |      |      |      |      |      |      |      |      |      |      |
| 3693   |      |      |      |      |      |      |      |      |      |      |      |      |      |      |
| 3694   |      |      |      |      |      | 6    | 6    | 6    | 6    | 6    | 6    | 6    | 6    | 3    |
| 3695   |      |      |      |      |      |      |      |      |      |      |      |      |      |      |
| 3700   |      |      |      |      |      | 1    | 6    | 6    | 6    | 1    | 6    | 6    | 6    | 1    |
| 3701   | 3    | 4    | 4    | 4    |      |      |      |      |      |      |      |      |      |      |
| 3703   |      |      |      |      |      | 1    | 6    | 6    | 6    | 1    | 6    | 6    | 6    | 1    |
| 3704   |      |      |      |      |      | 2    | 4    | 5    | 5    | 3    | 5    | 5    | 6    | 1    |
| 3705   |      |      |      |      |      |      |      |      |      |      |      |      |      |      |
| 3709   | 2    | 2    | 2    | 2    |      |      |      |      |      |      |      |      |      |      |
| 3710   | 3    | 3    | 3    | 3    |      |      |      |      |      |      |      |      |      |      |
| 3722   | 3    | 3    | 3    | 3    |      |      |      |      |      |      |      |      |      |      |
| 3725   | 4    | 4    | 4    | 4    |      |      |      |      |      |      |      |      |      |      |
| 3726   |      |      |      |      |      | 1    | 6    | 6    | 5    | 1    | 6    | 6    | 6    | 1    |
| 3727   |      |      |      |      |      | 6    | 2    | 1    | 5    | 6    |      | 1    | 3    | 5    |
| 3728   |      |      |      |      |      | 3    | 4    | 4    | 4    | 4    | 4    | 4    | 4    | 4    |
| 3729   | 4    | 5    | 5    | 5    |      |      |      |      |      |      |      |      |      |      |
| 3731   |      |      |      |      |      |      |      |      |      |      |      |      |      |      |
| 3738   |      |      |      |      |      | 6    | 6    | 6    | 6    | 6    | 6    | 6    | 6    | 6    |
| 3739   |      |      |      |      |      | 6    |      | 6    | 6    | 2    | 6    | 6    | 6    | 2    |
| 3740   | 3    | 3    |      | 4    |      |      |      |      |      |      |      |      |      |      |
| 3749   | 1    | 1    | 1    | 1    |      |      |      |      |      |      |      |      |      |      |
| 3758   | 2    | 3    | 2    | 2    |      |      |      |      |      |      |      |      |      |      |
| 3762   |      |      |      |      |      |      |      |      |      |      |      |      |      |      |
| 3765   |      |      |      |      |      | 3    |      | 3    | 3    | 4    | 3    | 6    | 6    | 3    |
| 3770   |      |      |      |      |      |      |      |      |      |      |      |      |      |      |
| 3771   |      |      |      |      |      |      |      |      |      |      |      |      |      |      |
| 3778   |      |      |      |      |      | 2    | 6    | 6    | 6    | 2    | 6    | 6    | 6    | 1    |
| 3779   | 3    | 3    | 3    | 3    |      |      |      |      |      |      |      |      |      |      |

| respid | Q47l | Q47m | Q47n | Q47o | Q48a | Q48b | Q48c | Q48d | Q48e | Q48f | Q48g | Q48h | Q48i | Q48j |
|--------|------|------|------|------|------|------|------|------|------|------|------|------|------|------|
| 3780   | 1    | 3    | 3    | 3    |      |      |      |      |      |      |      |      |      |      |
| 3782   |      |      |      |      |      | 4    | 4    | 4    | 4    | 4    | 4    | 3    | 4    | 4    |
| 3784   | 3    | 3    | 3    | 4    |      |      |      |      |      |      |      |      |      |      |
| 3787   |      |      |      |      | 3    | 4    | 4    | 3    | 4    | 3    | 3    | 3    | 3    | 3    |
| 3790   | 4    | 4    | 3    | 4    |      |      |      |      |      |      |      |      |      |      |
| 3791   | 3    | 3    |      | 2    |      |      |      |      |      |      |      |      |      |      |
| 3793   | 4    | 3    | 2    | 4    |      |      |      |      |      |      |      |      |      |      |
| 3795   |      |      |      |      | 2    | 6    | 6    | 2    | 1    | 2    | 2    | 2    | 1    | 2    |
| 3799   |      |      |      |      |      |      |      |      |      |      |      |      |      |      |
| 3801   | 3    | 3    | 3    | 3    |      |      |      |      |      |      |      |      |      |      |
| 3804   | 3    | 2    | 2    | 3    |      |      |      |      |      |      |      |      |      |      |
| 3809   |      |      |      |      | 3    | 4    | 4    | 4    | 3    | 4    | 4    | 4    | 3    | 4    |
| 3810   |      |      |      |      | 4    | 5    | 5    | 4    | 4    | 4    | 4    | 4    | 5    | 3    |
| 3813   | 3    | 3    | 3    | 4    |      |      |      |      |      |      |      |      |      |      |
| 3816   |      |      |      |      | 3    | 6    | 6    | 6    | 3    |      | 6    | 6    | 6    | 6    |
| 3820   |      |      |      |      |      | 4    | 5    | 6    | 4    |      | 6    | 6    | 6    | 6    |
| 3821   | 3    | 3    | 3    | 3    |      |      |      |      |      |      |      |      |      |      |
| 3823   |      |      |      |      | 4    | 3    | 3    | 3    | 4    | 3    | 3    | 3    | 3    | 4    |
| 3828   |      |      |      |      | 3    | 4    | 4    | 4    | 4    | 4    | 4    | 6    | 6    | 6    |
| 3829   | 3    | 3    | 3    | 3    |      |      |      |      |      |      |      |      |      |      |
| 3832   |      |      |      |      | 3    | 5    | 6    | 4    | 2    | 5    | 6    | 6    | 6    | 2    |
| 3835   |      |      |      |      | 1    | 5    | 3    | 6    | 2    | 3    | 3    | 3    | 2    | 1    |
| 3837   |      |      |      |      | 5    | 4    | 4    | 3    | 4    | 4    | 4    | 5    | 6    | 3    |
| 3838   |      |      |      |      | 3    | 3    | 3    | 2    | 4    | 3    | 3    | 3    | 4    | 4    |
| 3839   | 2    | 1    | 1    | 2    |      |      |      |      |      |      |      |      |      |      |
| 3840   |      |      |      |      |      |      |      |      |      |      |      |      |      |      |
| 3842   |      |      |      |      |      |      |      |      |      |      |      |      |      |      |
| 3843   |      |      |      |      | 2    | 6    | 5    | 6    | 2    | 6    | 6    | 6    | 6    | 2    |
| 3844   |      |      |      |      | 1    | 6    | 6    | 6    | 1    | 6    | 6    | 6    | 3    | 1    |
| 3850   | 3    | 3    | 3    | 3    |      |      |      |      |      |      |      |      |      |      |
| 3851   |      |      |      |      |      |      |      |      |      |      |      |      |      |      |
| 3856   | 3    | 3    | 3    | 3    |      |      |      |      |      |      |      |      |      |      |

| respid | Q47l | Q47m | Q47n | Q47o | Q48a | Q48b | Q48c | Q48d | Q48e | Q48f | Q48g | Q48h | Q48i | Q48j |   |
|--------|------|------|------|------|------|------|------|------|------|------|------|------|------|------|---|
| 3859   | 3    | 4    | 4    | 4    |      |      |      |      |      |      |      |      |      |      |   |
| 3860   | 3    | 3    | 4    | 3    |      |      |      |      |      |      |      |      |      |      |   |
| 3863   | 4    | 4    | 4    | 4    |      |      |      |      |      |      |      |      |      |      |   |
| 3866   |      |      |      |      |      |      |      |      |      |      |      |      |      |      |   |
| 3867   | 4    | 3    | 3    | 3    |      |      |      |      |      |      |      |      |      |      |   |
| 3870   | 3    | 3    | 3    | 3    |      |      |      |      |      |      |      |      |      |      |   |
| 3873   |      |      |      |      |      | 5    | 6    | 2    | 2    | 5    | 5    | 4    | 6    | 5    | 5 |
| 3875   | 4    | 2    | 2    | 2    |      |      |      |      |      |      |      |      |      |      |   |
| 3878   |      |      |      |      |      | 3    | 5    | 5    | 6    | 4    | 5    | 6    | 6    | 2    | 6 |
| 3881   |      |      |      |      |      | 4    | 4    | 4    | 6    | 4    | 4    | 5    | 6    | 4    | 6 |
| 3883   | 2    | 3    | 2    | 3    |      |      |      |      |      |      |      |      |      |      |   |
| 3884   | 4    | 4    | 4    | 4    |      |      |      |      |      |      |      |      |      |      |   |
| 3885   | 3    | 3    | 3    | 3    |      |      |      |      |      |      |      |      |      |      |   |
| 3886   |      |      |      |      |      | 4    | 4    | 3    | 4    | 4    | 3    | 3    | 3    | 5    | 3 |
| 3887   | 3    | 4    | 4    | 4    |      |      |      |      |      |      |      |      |      |      |   |
| 3888   |      |      |      |      |      |      |      |      |      |      |      |      |      |      |   |
| 3889   |      |      |      |      |      | 1    | 6    | 6    | 5    | 5    | 6    | 6    | 6    | 1    | 5 |
| 3890   | 5    | 5    | 3    | 5    |      |      |      |      |      |      |      |      |      |      |   |
| 3896   |      |      |      |      |      | 2    | 3    | 5    | 4    | 3    | 5    | 5    | 5    | 2    | 5 |
| 3902   |      |      |      |      |      | 1    | 6    | 6    | 6    | 1    | 6    | 6    | 6    | 1    | 6 |
| 3909   |      |      |      |      |      | 4    | 2    | 3    | 3    | 5    | 3    | 6    | 6    | 5    | 6 |
| 3912   | 3    | 3    | 2    | 2    |      |      |      |      |      |      |      |      |      |      |   |
| 3922   | 3    | 4    | 4    | 3    |      |      |      |      |      |      |      |      |      |      |   |
| 3928   |      |      |      |      |      | 3    | 5    | 3    | 6    | 2    | 6    | 5    | 5    | 2    | 5 |
| 3930   | 3    | 3    | 3    | 3    |      |      |      |      |      |      |      |      |      |      |   |
| 3931   |      |      |      |      |      | 4    | 5    | 5    | 5    | 2    | 5    | 5    | 5    | 2    | 5 |
| 3933   | 2    | 3    | 3    | 2    |      |      |      |      |      |      |      |      |      |      |   |
| 3935   |      |      |      |      |      | 4    | 4    | 4    | 4    | 4    | 4    | 4    | 5    | 4    | 4 |
| 3937   |      |      |      |      |      | 2    | 5    | 6    | 5    | 1    | 6    | 6    | 6    | 1    | 6 |
| 3939   | 3    | 3    | 4    | 4    |      |      |      |      |      |      |      |      |      |      |   |
| 3942   | 3    | 3    | 4    | 3    |      |      |      |      |      |      |      |      |      |      |   |
| 3943   |      |      |      |      |      |      | 6    | 6    | 6    | 3    | 6    | 5    | 6    | 2    | 5 |

| respid | Q47l | Q47m | Q47n | Q47o | Q48a | Q48b | Q48c | Q48d | Q48e | Q48f | Q48g | Q48h | Q48i | Q48j |   |
|--------|------|------|------|------|------|------|------|------|------|------|------|------|------|------|---|
| 3944   |      |      |      |      |      |      |      |      |      |      |      |      |      |      |   |
| 3945   |      | 2    | 4    | 4    | 3    |      |      |      |      |      |      |      |      |      |   |
| 3947   |      | 4    | 4    | 4    | 4    |      |      |      |      |      |      |      |      |      |   |
| 3948   |      | 3    | 3    | 4    | 3    |      |      |      |      |      |      |      |      |      |   |
| 3951   |      | 4    | 4    | 4    | 3    |      |      |      |      |      |      |      |      |      |   |
| 3959   |      | 3    | 3    | 3    | 3    |      |      |      |      |      |      |      |      |      |   |
| 3969   |      | 3    | 2    | 2    | 2    |      |      |      |      |      |      |      |      |      |   |
| 3973   |      | 3    | 5    | 5    | 4    |      |      |      |      |      |      |      |      |      |   |
| 3975   |      | 3    | 3    | 3    | 3    |      |      |      |      |      |      |      |      |      |   |
| 3976   |      | 4    | 3    | 3    | 3    |      |      |      |      |      |      |      |      |      |   |
| 3977   |      | 3    | 3    | 3    | 3    |      |      |      |      |      |      |      |      |      |   |
| 3978   |      |      |      |      |      | 3    | 6    | 6    | 6    | 2    | 6    | 6    | 6    | 1    | 6 |
| 3994   |      | 5    | 3    | 3    | 4    |      |      |      |      |      |      |      |      |      |   |
| 3995   |      |      |      |      |      | 3    |      | 6    | 6    |      | 6    |      |      |      |   |
| 3997   |      | 4    | 3    | 4    | 3    |      |      |      |      |      |      |      |      |      |   |
| 3998   |      | 3    | 3    | 3    | 2    |      |      |      |      |      |      |      |      |      |   |
| 3999   |      |      |      |      |      | 3    | 3    | 3    | 3    | 3    | 3    | 4    | 4    | 4    | 5 |
| 4002   |      |      |      |      |      | 2    | 3    | 5    | 5    | 3    | 5    | 3    | 6    | 2    | 3 |
| 4004   |      | 4    | 4    | 4    | 4    |      |      |      |      |      |      |      |      |      |   |
| 4005   |      |      |      |      |      |      |      |      |      |      |      |      |      |      |   |
| 4006   |      | 3    | 3    | 3    | 3    |      |      |      |      |      |      |      |      |      |   |
| 4008   |      | 4    | 3    | 3    | 4    |      |      |      |      |      |      |      |      |      |   |
| 4010   |      | 3    | 4    | 4    | 4    |      |      |      |      |      |      |      |      |      |   |
| 4011   |      | 2    | 2    | 2    | 3    |      |      |      |      |      |      |      |      |      |   |
| 4013   |      | 4    | 3    | 3    | 3    |      |      |      |      |      |      |      |      |      |   |
| 4014   |      | 4    | 5    | 5    | 5    |      |      |      |      |      |      |      |      |      |   |
| 4016   |      | 2    | 2    | 2    | 3    |      |      |      |      |      |      |      |      |      |   |
| 4017   |      | 4    | 1    | 1    | 1    |      |      |      |      |      |      |      |      |      |   |
| 4019   |      | 4    | 4    | 4    | 4    |      |      |      |      |      |      |      |      |      |   |
| 4021   |      |      |      |      |      |      |      |      |      |      |      |      |      |      |   |
| 4023   |      |      |      |      |      | 3    | 3    | 6    | 3    | 4    | 3    | 3    | 4    | 4    | 3 |
| 4024   |      |      |      |      |      | 3    | 3    | 5    | 6    | 3    | 5    | 5    | 5    | 2    | 5 |

| respid | Q47l | Q47m | Q47n | Q47o | Q48a | Q48b | Q48c | Q48d | Q48e | Q48f | Q48g | Q48h | Q48i | Q48j |   |
|--------|------|------|------|------|------|------|------|------|------|------|------|------|------|------|---|
| 4025   |      |      |      |      |      | 2    | 5    | 5    | 6    | 2    | 6    | 6    | 6    | 1    | 3 |
| 4027   | 3    | 3    | 4    | 3    |      |      |      |      |      |      |      |      |      |      |   |
| 4032   |      |      |      |      |      |      |      |      |      |      |      |      |      |      |   |
| 4034   | 2    | 1    | 2    | 2    |      |      |      |      |      |      |      |      |      |      |   |
| 4035   | 4    | 4    | 4    | 3    |      |      |      |      |      |      |      |      |      |      |   |
| 4037   | 2    | 2    | 1    | 2    |      |      |      |      |      |      |      |      |      |      |   |
| 4040   |      |      |      |      |      | 4    | 3    | 4    | 3    | 4    | 3    | 3    | 3    | 4    | 4 |
| 4041   | 3    | 3    | 4    | 3    |      |      |      |      |      |      |      |      |      |      |   |
| 4042   |      |      |      |      |      | 4    | 3    | 6    | 4    | 4    | 6    | 3    | 6    | 4    | 3 |
| 4043   |      |      |      |      |      | 6    | 1    | 1    | 1    | 5    | 4    | 3    | 5    | 6    | 6 |
| 4045   |      |      |      |      |      | 1    | 3    | 3    | 5    | 2    | 5    | 3    | 6    | 2    | 5 |
| 4046   | 3    | 3    | 3    | 4    |      |      |      |      |      |      |      |      |      |      |   |
| 4048   |      |      |      |      |      | 1    | 6    | 6    | 6    | 2    | 5    | 6    | 6    | 1    | 6 |
| 4049   | 1    | 2    | 1    | 1    |      |      |      |      |      |      |      |      |      |      |   |
| 4050   |      |      |      |      |      | 1    | 6    | 6    | 6    |      |      |      |      | 1    | 5 |
| 4052   | 3    | 3    | 3    | 4    |      |      |      |      |      |      |      |      |      |      |   |
| 4053   |      |      |      |      |      |      |      |      |      |      |      |      |      |      |   |
| 4060   | 4    | 3    | 4    | 3    |      |      |      |      |      |      |      |      |      |      |   |
| 4065   | 2    | 3    | 3    | 3    |      |      |      |      |      |      |      |      |      |      |   |
| 4066   |      |      |      |      |      | 6    | 6    | 6    | 6    | 3    | 6    | 6    | 6    | 6    | 6 |
| 4067   | 2    | 4    | 4    | 4    |      |      |      |      |      |      |      |      |      |      |   |
| 4068   | 4    | 4    | 4    | 4    |      |      |      |      |      |      |      |      |      |      |   |
| 4069   | 3    | 3    |      | 3    |      |      |      |      |      |      |      |      |      |      |   |
| 4070   | 4    | 4    | 4    | 4    |      |      |      |      |      |      |      |      |      |      |   |
| 4071   | 2    | 4    | 3    | 2    |      |      |      |      |      |      |      |      |      |      |   |
| 4072   |      |      |      | 4    |      |      |      |      |      |      |      |      |      |      |   |
| 4073   | 3    | 3    | 3    | 3    |      |      |      |      |      |      |      |      |      |      |   |
| 4074   | 4    | 4    | 4    | 4    |      |      |      |      |      |      |      |      |      |      |   |
| 4075   | 3    | 3    | 3    | 4    |      |      |      |      |      |      |      |      |      |      |   |
| 4078   | 3    | 4    | 4    | 4    |      |      |      |      |      |      |      |      |      |      |   |
| 4080   | 5    | 3    | 4    | 4    |      |      |      |      |      |      |      |      |      |      |   |
| 4081   |      |      |      |      |      |      |      |      |      |      |      |      |      |      |   |

| respid | Q47l | Q47m | Q47n | Q47o | Q48a | Q48b | Q48c | Q48d | Q48e | Q48f | Q48g | Q48h | Q48i | Q48j |   |
|--------|------|------|------|------|------|------|------|------|------|------|------|------|------|------|---|
| 4082   |      |      |      |      |      | 3    | 5    | 5    | 5    | 2    | 5    | 5    | 5    | 2    | 5 |
| 4083   | 4    | 4    | 4    | 4    |      |      |      |      |      |      |      |      |      |      |   |
| 4084   | 4    | 3    | 3    | 3    |      |      |      |      |      |      |      |      |      |      |   |
| 4086   |      |      |      |      |      |      |      |      |      |      |      |      |      |      |   |
| 4087   | 3    | 4    | 4    | 3    |      |      |      |      |      |      |      |      |      |      |   |
| 4088   | 4    | 4    | 4    | 4    |      |      |      |      |      |      |      |      |      |      |   |
| 4089   |      |      |      |      |      | 4    |      |      |      |      |      |      |      |      |   |
| 4090   | 4    | 5    | 5    | 4    |      |      |      |      |      |      |      |      |      |      |   |
| 4093   | 5    | 4    | 5    | 5    |      |      |      |      |      |      |      |      |      |      |   |
| 4094   |      |      |      |      | 4    | 6    | 6    | 3    | 2    | 3    | 3    | 6    | 3    | 3    |   |
| 4095   | 2    | 3    | 3    | 2    |      |      |      |      |      |      |      |      |      |      |   |
| 4096   |      |      |      |      |      |      |      |      |      |      |      |      |      |      |   |
| 4098   | 5    |      |      | 5    |      |      |      |      |      |      |      |      |      |      |   |
| 4103   | 3    | 3    | 3    | 3    |      |      |      |      |      |      |      |      |      |      |   |
| 4104   |      |      |      |      | 3    | 3    | 4    | 5    | 3    | 5    | 5    | 5    | 3    | 2    |   |
| 4107   | 3    | 1    | 1    | 2    |      |      |      |      |      |      |      |      |      |      |   |
| 4109   |      |      |      |      | 1    |      |      |      |      |      |      |      | 1    |      |   |
| 4110   |      |      |      |      | 3    | 3    | 4    | 5    | 6    | 5    | 5    | 5    | 5    | 5    | 2 |
| 4113   |      |      |      |      | 2    | 4    | 4    | 4    | 3    | 3    | 5    | 4    | 3    | 4    |   |
| 4114   | 3    | 2    | 1    | 2    |      |      |      |      |      |      |      |      |      |      |   |
| 4116   | 4    | 4    | 4    | 4    |      |      |      |      |      |      |      |      |      |      |   |
| 4119   | 4    | 4    | 4    | 4    |      |      |      |      |      |      |      |      |      |      |   |
| 4120   |      |      |      |      | 3    | 6    | 6    | 6    | 3    | 6    | 6    | 6    | 3    | 6    |   |
| 4121   |      |      |      |      | 1    | 6    | 6    | 6    | 1    | 6    | 6    | 6    | 1    | 6    |   |
| 4122   | 2    | 2    | 2    | 2    |      |      |      |      |      |      |      |      |      |      |   |
| 4124   |      |      |      |      | 6    | 3    | 3    | 5    | 5    | 5    | 5    | 3    | 2    | 3    |   |
| 4126   |      |      |      |      | 3    | 2    | 3    | 5    | 3    | 4    | 4    | 4    | 3    | 5    |   |
| 4127   | 3    | 3    | 3    | 3    |      |      |      |      |      |      |      |      |      |      |   |
| 4131   |      |      |      |      | 2    | 3    | 5    | 5    | 2    | 5    | 4    | 5    | 2    | 3    |   |
| 4134   |      |      |      |      | 4    | 3    | 3    | 3    | 3    | 3    | 2    | 3    | 4    | 2    |   |
| 4144   | 1    |      |      | 1    |      |      |      |      |      |      |      |      |      |      |   |
| 4145   | 4    | 4    | 4    | 3    |      |      |      |      |      |      |      |      |      |      |   |



| respid | Q47l | Q47m | Q47n | Q47o | Q48a | Q48b | Q48c | Q48d | Q48e | Q48f | Q48g | Q48h | Q48i | Q48j |   |
|--------|------|------|------|------|------|------|------|------|------|------|------|------|------|------|---|
| 4146   | 4    | 5    | 4    | 5    |      |      |      |      |      |      |      |      |      |      |   |
| 4147   | 5    | 5    | 5    | 5    |      |      |      |      |      |      |      |      |      |      |   |
| 4149   |      |      |      |      |      | 4    | 5    | 5    | 5    | 4    | 5    | 5    | 5    | 2    | 5 |
| 4150   |      |      |      |      |      |      |      |      |      |      |      |      |      |      |   |
| 4151   |      |      |      |      |      | 4    | 5    | 6    | 5    | 3    | 5    | 5    | 5    | 2    | 5 |
| 4153   |      |      |      |      |      | 3    | 4    | 5    | 5    | 3    | 5    | 5    | 5    | 2    | 5 |
| 4155   |      |      |      |      |      | 6    | 6    | 6    | 6    | 6    | 6    | 6    | 6    | 6    | 6 |
| 4157   | 2    | 3    | 3    | 2    |      |      |      |      |      |      |      |      |      |      |   |
| 4159   |      |      |      |      |      | 2    | 6    | 6    | 6    | 2    | 6    | 6    | 6    | 1    | 6 |
| 4160   | 4    | 3    | 2    | 4    |      |      |      |      |      |      |      |      |      |      |   |
| 4161   | 4    | 3    | 3    | 3    |      |      |      |      |      |      |      |      |      |      |   |
| 4163   |      |      |      |      |      | 5    | 3    | 5    | 5    | 4    | 4    | 5    | 5    | 3    | 5 |
| 4164   | 4    | 4    | 4    | 4    |      |      |      |      |      |      |      |      |      |      |   |
| 4165   |      |      |      |      |      | 3    | 4    | 4    | 5    | 3    | 5    | 5    | 5    | 3    | 5 |
| 4166   | 5    | 4    | 4    | 3    |      |      |      |      |      |      |      |      |      |      |   |
| 4167   |      |      |      |      |      | 2    | 4    | 4    | 4    | 3    | 4    | 5    | 4    | 3    | 4 |
| 4170   |      |      |      |      |      | 4    | 5    | 6    | 5    | 2    | 5    | 5    | 5    | 2    | 5 |
| 4172   | 4    | 4    | 4    | 4    |      |      |      |      |      |      |      |      |      |      |   |
| 4173   | 4    | 4    | 4    | 5    |      |      |      |      |      |      |      |      |      |      |   |
| 4180   |      |      |      |      |      | 4    | 3    | 3    | 4    | 4    | 4    | 5    | 5    | 3    | 4 |
| 4185   | 4    | 3    | 3    | 2    |      |      |      |      |      |      |      |      |      |      |   |
| 4187   | 4    | 4    | 4    | 5    |      |      |      |      |      |      |      |      |      |      |   |
| 4190   | 4    | 4    | 4    | 4    |      |      |      |      |      |      |      |      |      |      |   |
| 4191   | 3    | 3    | 3    | 3    |      |      |      |      |      |      |      |      |      |      |   |
| 4193   |      |      |      |      |      |      |      |      |      |      |      |      |      |      |   |
| 4194   | 5    | 5    | 4    | 5    |      |      |      |      |      |      |      |      |      |      |   |
| 4195   | 3    | 3    | 3    | 4    |      |      |      |      |      |      |      |      |      |      |   |
| 4196   |      |      |      |      |      |      |      |      |      |      |      |      |      |      |   |
| 4197   |      |      |      |      |      | 4    | 4    | 4    | 4    | 4    | 4    | 5    | 4    | 3    | 6 |
| 4198   | 5    | 1    | 1    | 1    |      |      |      |      |      |      |      |      |      |      |   |
| 4199   |      |      |      |      |      |      | 5    | 6    | 5    | 4    | 4    | 4    | 4    | 5    | 3 |
| 4205   |      |      |      |      |      | 5    | 5    | 5    | 5    | 5    | 5    | 5    | 5    | 5    | 5 |

| respid | Q47l | Q47m | Q47n | Q47o | Q48a | Q48b | Q48c | Q48d | Q48e | Q48f | Q48g | Q48h | Q48i | Q48j |   |
|--------|------|------|------|------|------|------|------|------|------|------|------|------|------|------|---|
| 4206   |      |      |      |      |      |      |      |      |      |      |      |      |      |      |   |
| 4207   |      | 5    | 3    | 2    | 5    |      |      |      |      |      |      |      |      |      |   |
| 4214   |      | 3    | 4    | 4    | 4    |      |      |      |      |      |      |      |      |      |   |
| 4215   |      | 4    | 5    | 4    | 5    |      |      |      |      |      |      |      |      |      |   |
| 4217   |      | 4    | 4    | 3    | 5    |      |      |      |      |      |      |      |      |      |   |
| 4219   |      |      |      |      |      | 2    | 5    | 5    | 6    | 2    | 6    | 6    | 6    | 1    | 5 |
| 4223   |      |      |      |      |      | 3    | 3    | 3    | 3    | 4    | 3    | 3    | 3    | 4    | 3 |
| 4226   |      | 2    | 3    | 2    | 3    |      |      |      |      |      |      |      |      |      |   |
| 4229   |      |      |      |      |      | 3    | 3    | 4    | 4    | 3    | 4    | 3    | 5    | 2    | 4 |
| 4230   |      | 3    | 4    | 4    | 4    |      |      |      |      |      |      |      |      |      |   |
| 4232   |      |      |      |      |      | 6    | 2    | 1    | 2    | 5    | 5    | 5    | 3    | 6    | 3 |
| 4233   |      | 5    | 4    | 4    | 5    |      |      |      |      |      |      |      |      |      |   |
| 4234   |      |      |      |      |      | 1    | 1    | 5    | 5    | 5    | 3    | 6    | 6    | 1    | 5 |
| 4235   |      | 3    | 3    | 3    | 3    |      |      |      |      |      |      |      |      |      |   |
| 4236   |      |      |      |      |      | 1    | 1    | 1    | 4    | 6    | 6    | 1    | 2    | 6    | 1 |
| 4237   |      |      |      |      |      | 2    | 5    | 5    | 5    | 2    | 5    | 5    | 6    | 2    | 5 |
| 4238   |      | 4    | 4    | 4    | 4    |      |      |      |      |      |      |      |      |      |   |
| 4240   |      | 3    | 4    | 3    | 4    |      |      |      |      |      |      |      |      |      |   |
| 4241   |      | 3    | 4    | 4    | 3    |      |      |      |      |      |      |      |      |      |   |
| 4247   |      | 4    | 4    | 4    | 4    |      |      |      |      |      |      |      |      |      |   |
| 4250   |      |      |      |      |      | 1    | 3    | 3    | 6    | 3    | 6    | 6    | 6    | 6    | 6 |
| 4251   |      |      |      |      |      |      |      |      | 6    | 5    | 6    | 6    | 6    | 2    | 6 |
| 4253   |      | 3    | 3    | 2    | 4    |      |      |      |      |      |      |      |      |      |   |
| 4254   |      |      |      |      |      | 4    | 4    | 4    | 5    | 4    | 4    | 4    | 5    | 3    | 4 |
| 4258   |      | 2    | 2    | 2    | 2    |      |      |      |      |      |      |      |      |      |   |
| 4260   |      |      |      |      |      | 3    | 4    | 5    | 5    | 3    | 5    | 5    | 6    | 1    | 3 |
| 4263   |      |      |      |      |      | 4    | 3    | 3    | 4    | 4    | 4    | 4    | 3    | 3    | 3 |
| 4265   |      | 1    |      |      | 4    |      |      |      |      |      |      |      |      |      |   |
| 4266   |      | 4    | 3    | 2    | 4    |      |      |      |      |      |      |      |      |      |   |
| 4267   |      | 4    | 4    | 4    | 4    |      |      |      |      |      |      |      |      |      |   |
| 4270   |      | 4    | 4    | 4    | 4    |      |      |      |      |      |      |      |      |      |   |
| 4273   |      |      |      |      |      | 3    | 4    | 3    | 4    | 3    | 3    | 4    | 4    | 3    | 4 |

| respid | Q47l | Q47m | Q47n | Q47o | Q48a | Q48b | Q48c | Q48d | Q48e | Q48f | Q48g | Q48h | Q48i | Q48j |   |
|--------|------|------|------|------|------|------|------|------|------|------|------|------|------|------|---|
| 4280   | 4    | 3    | 3    | 5    |      |      |      |      |      |      |      |      |      |      |   |
| 4281   | 1    | 1    | 1    | 1    |      |      |      |      |      |      |      |      |      |      |   |
| 4282   | 4    | 5    | 5    | 4    |      |      |      |      |      |      |      |      |      |      |   |
| 4283   |      |      |      |      |      |      |      |      |      |      |      |      |      |      |   |
| 4286   | 1    | 3    | 3    | 3    |      |      |      |      |      |      |      |      |      |      |   |
| 4287   |      |      |      |      |      | 2    | 5    | 5    | 4    | 3    | 4    | 5    | 4    | 3    | 3 |
| 4289   |      |      |      |      |      | 4    | 3    | 3    | 5    | 4    | 3    | 5    | 6    | 3    | 3 |
| 4290   | 5    | 5    | 5    | 5    |      |      |      |      |      |      |      |      |      |      |   |
| 4291   |      |      |      |      |      | 6    | 5    |      |      |      | 5    |      | 5    | 2    | 3 |
| 4292   | 4    | 4    | 4    | 3    |      |      |      |      |      |      |      |      |      |      |   |
| 4293   | 3    | 3    | 3    | 3    |      |      |      |      |      |      |      |      |      |      |   |
| 4294   |      |      |      |      |      | 6    |      |      |      |      |      |      |      |      |   |
| 4295   |      |      |      |      |      |      |      |      |      |      |      |      |      |      |   |
| 4296   | 3    | 3    | 3    | 3    |      |      |      |      |      |      |      |      |      |      |   |
| 4297   | 3    | 4    | 4    | 3    |      |      |      |      |      |      |      |      |      |      |   |
| 4298   |      |      |      |      |      | 3    | 3    | 3    | 4    | 4    | 6    | 6    | 3    | 3    | 2 |
| 4299   |      |      |      |      |      | 5    | 5    | 5    | 5    | 4    | 3    | 5    | 5    | 5    | 5 |
| 4300   |      |      |      |      |      | 3    | 5    | 6    | 3    | 4    | 4    | 6    | 6    | 4    | 6 |
| 4301   |      |      |      |      |      |      |      |      |      |      |      |      |      |      |   |
| 4302   |      |      |      |      |      | 3    | 3    | 4    | 5    | 2    | 3    | 5    | 5    | 4    | 5 |
| 4304   | 3    | 3    | 3    | 3    |      |      |      |      |      |      |      |      |      |      |   |
| 4305   | 4    | 3    | 3    | 3    |      |      |      |      |      |      |      |      |      |      |   |
| 4307   | 1    | 2    | 1    | 2    |      |      |      |      |      |      |      |      |      |      |   |
| 4308   | 4    | 3    | 3    | 4    |      |      |      |      |      |      |      |      |      |      |   |
| 4312   |      |      |      |      |      |      |      |      |      |      |      |      |      |      |   |
| 4314   |      |      |      |      |      | 4    | 5    | 2    | 5    | 5    | 5    | 5    | 3    | 3    | 3 |
| 4316   | 4    | 3    | 3    | 3    |      |      |      |      |      |      |      |      |      |      |   |
| 4317   |      |      |      |      |      | 3    | 2    | 2    | 3    | 1    | 5    | 4    | 5    | 2    | 3 |
| 4319   |      |      |      |      |      | 5    | 2    | 3    | 5    | 5    | 4    | 3    |      | 4    | 2 |
| 4323   |      |      |      |      |      | 2    | 3    | 4    | 3    | 4    | 4    | 5    | 6    | 4    | 5 |
| 4337   |      |      |      |      |      | 1    | 1    | 6    | 6    | 1    | 6    | 6    | 6    | 1    | 6 |
| 4341   |      |      |      |      |      |      |      | 5    | 5    |      |      |      | 6    | 1    | 5 |

| respid | Q47l | Q47m | Q47n | Q47o | Q48a | Q48b | Q48c | Q48d | Q48e | Q48f | Q48g | Q48h | Q48i | Q48j |   |
|--------|------|------|------|------|------|------|------|------|------|------|------|------|------|------|---|
| 4342   |      |      |      |      |      | 3    | 3    | 5    | 4    | 3    | 4    | 5    | 5    | 2    | 5 |
| 4344   | 3    | 3    | 4    | 3    |      |      |      |      |      |      |      |      |      |      |   |
| 4345   |      |      |      |      |      | 5    | 4    | 6    | 4    | 3    | 5    | 6    |      | 3    | 6 |
| 4346   |      |      |      |      |      | 6    | 6    | 6    | 6    | 6    | 6    | 6    | 6    | 6    | 6 |
| 4347   | 4    | 4    | 4    | 4    |      |      |      |      |      |      |      |      |      |      |   |
| 4350   |      |      |      |      |      |      |      |      |      |      |      |      |      |      |   |
| 4352   | 5    | 5    |      | 5    |      |      |      |      |      |      |      |      |      |      |   |
| 4353   |      |      |      |      |      |      |      |      |      |      |      |      |      |      |   |
| 4355   | 1    | 1    | 3    | 2    |      |      |      |      |      |      |      |      |      |      |   |
| 4356   | 4    | 3    | 4    | 4    |      |      |      |      |      |      |      |      |      |      |   |
| 4358   |      |      |      |      |      |      |      |      |      |      |      |      |      |      |   |
| 4359   | 4    | 4    | 4    | 4    |      |      |      |      |      |      |      |      |      |      |   |
| 4360   | 4    | 4    | 4    | 3    |      |      |      |      |      |      |      |      |      |      |   |
| 4361   | 4    | 2    | 2    | 3    |      |      |      |      |      |      |      |      |      |      |   |
| 4363   | 3    | 3    | 3    | 5    |      |      |      |      |      |      |      |      |      |      |   |
| 4364   |      |      |      |      |      | 3    | 3    | 3    | 4    | 4    | 2    | 2    | 4    | 3    | 5 |
| 4365   | 1    | 1    | 1    | 1    |      |      |      |      |      |      |      |      |      |      |   |
| 4367   | 3    | 3    | 5    | 3    |      |      |      |      |      |      |      |      |      |      |   |
| 4369   |      |      |      |      |      | 1    | 4    | 4    | 3    | 3    | 4    | 3    | 4    | 2    | 3 |
| 4373   |      |      |      |      |      | 3    | 5    | 5    | 5    | 2    | 5    | 5    | 5    | 3    | 3 |
| 4374   |      |      |      |      |      | 3    | 4    | 5    | 5    | 5    | 4    | 4    | 6    | 3    | 5 |
| 4375   |      |      |      |      |      |      |      |      |      |      |      |      |      |      |   |
| 4378   |      |      |      |      |      | 3    | 3    | 2    | 4    | 4    | 4    | 3    | 2    | 3    | 2 |
| 4379   | 4    | 4    | 4    | 4    |      |      |      |      |      |      |      |      |      |      |   |
| 4382   | 3    | 3    | 3    | 3    |      |      |      |      |      |      |      |      |      |      |   |
| 4383   |      |      |      |      |      |      |      |      |      |      |      |      |      |      |   |
| 4384   | 5    | 5    | 5    | 5    |      |      |      |      |      |      |      |      |      |      |   |
| 4385   | 3    | 3    | 2    | 3    |      |      |      |      |      |      |      |      |      |      |   |
| 4388   | 2    | 3    | 3    | 2    |      |      |      |      |      |      |      |      |      |      |   |
| 4389   |      |      |      |      |      | 1    | 1    | 5    | 6    | 1    | 6    | 6    | 6    | 1    | 6 |
| 4391   |      |      |      |      |      | 6    | 6    | 6    | 6    |      |      |      |      |      | 6 |
| 4392   | 4    | 4    | 4    | 4    |      |      |      |      |      |      |      |      |      |      |   |

| respid | Q47l | Q47m | Q47n | Q47o | Q48a | Q48b | Q48c | Q48d | Q48e | Q48f | Q48g | Q48h | Q48i | Q48j |   |
|--------|------|------|------|------|------|------|------|------|------|------|------|------|------|------|---|
| 4393   |      |      |      |      |      | 5    | 6    | 6    | 6    | 2    | 6    | 6    | 6    | 2    | 6 |
| 4395   | 3    | 4    | 4    | 4    |      |      |      |      |      |      |      |      |      |      |   |
| 4397   |      |      |      |      |      | 6    | 6    | 6    | 6    | 3    | 6    | 6    | 6    | 6    | 6 |
| 4398   |      |      |      |      |      | 2    | 3    | 3    | 3    |      |      |      |      |      | 3 |
| 4399   | 4    | 4    | 4    | 4    |      |      |      |      |      |      |      |      |      |      |   |
| 4400   |      |      |      |      |      |      |      |      |      |      |      |      |      |      |   |
| 4401   | 3    | 3    | 3    | 3    |      |      |      |      |      |      |      |      |      |      |   |
| 4402   |      |      |      |      |      | 3    | 4    | 5    | 4    | 3    | 5    | 5    | 5    | 3    | 5 |
| 4404   |      |      |      |      |      | 2    | 5    | 5    | 5    | 2    | 5    | 5    | 5    | 2    | 5 |
| 4405   |      |      |      |      |      |      |      |      |      |      |      |      |      |      |   |
| 4407   | 4    | 3    | 3    | 5    |      |      |      |      |      |      |      |      |      |      |   |
| 4408   |      |      |      |      |      | 5    | 3    | 3    | 3    | 5    | 3    | 3    | 3    | 4    | 2 |
| 4411   |      |      |      |      |      |      |      |      |      |      |      |      |      |      |   |
| 4420   |      |      |      |      |      | 1    | 6    | 6    | 4    | 1    | 6    | 6    | 6    | 1    | 6 |
| 4421   |      |      |      |      |      | 4    | 4    | 5    | 6    | 4    | 4    | 4    | 6    | 3    | 6 |
| 4424   |      |      |      |      |      | 2    | 3    | 3    | 5    | 4    | 4    | 4    | 4    | 3    | 4 |
| 4425   |      |      |      |      |      | 3    | 3    | 3    | 3    | 4    | 3    | 4    | 4    | 2    | 5 |
| 4427   |      |      |      |      |      | 3    | 4    | 4    | 3    | 3    | 4    | 4    | 4    | 4    | 4 |
| 4430   |      |      |      |      |      | 5    | 5    | 5    | 5    | 2    | 5    | 5    | 5    | 2    | 5 |
| 4431   |      |      |      |      |      | 5    | 5    | 5    | 5    | 5    | 5    | 5    | 5    | 5    | 5 |
| 4432   | 1    | 1    | 1    | 1    |      |      |      |      |      |      |      |      |      |      |   |
| 4436   |      |      |      |      |      |      |      |      |      |      |      |      |      |      |   |
| 4439   | 3    | 3    | 3    | 4    |      |      |      |      |      |      |      |      |      |      |   |
| 4451   | 2    | 3    | 3    | 4    |      |      |      |      |      |      |      |      |      |      |   |
| 4452   | 3    | 3    | 3    | 3    |      |      |      |      |      |      |      |      |      |      |   |
| 4458   | 4    | 4    | 4    | 4    |      |      |      |      |      |      |      |      |      |      |   |
| 4464   |      |      |      |      |      | 1    | 3    | 3    | 6    | 1    | 6    | 6    | 6    | 2    | 6 |
| 4465   | 3    | 3    | 3    | 3    |      |      |      |      |      |      |      |      |      |      |   |
| 4467   | 3    | 2    | 3    | 4    |      |      |      |      |      |      |      |      |      |      |   |
| 4470   | 1    | 1    |      | 1    |      |      |      |      |      |      |      |      |      |      |   |
| 4471   | 4    | 2    | 2    | 3    |      |      |      |      |      |      |      |      |      |      |   |
| 4472   | 3    | 2    | 3    | 2    |      |      |      |      |      |      |      |      |      |      |   |

| respid | Q47l | Q47m | Q47n | Q47o | Q48a | Q48b | Q48c | Q48d | Q48e | Q48f | Q48g | Q48h | Q48i | Q48j |   |
|--------|------|------|------|------|------|------|------|------|------|------|------|------|------|------|---|
| 4473   | 5    | 4    | 4    | 5    |      |      |      |      |      |      |      |      |      |      |   |
| 4475   |      |      |      |      |      | 2    | 4    | 4    | 4    | 4    | 5    | 4    | 5    | 3    | 4 |
| 4476   |      |      |      |      |      | 5    | 6    | 3    | 5    | 5    | 5    | 5    | 3    | 5    | 6 |
| 4478   | 4    | 2    | 2    | 3    |      |      |      |      |      |      |      |      |      |      |   |
| 4485   |      |      |      |      |      | 2    | 6    | 6    | 6    | 1    | 6    | 6    | 6    | 1    | 6 |
| 4486   |      |      |      |      |      | 3    | 3    | 5    | 6    | 3    | 6    | 6    | 6    | 2    | 5 |
| 4490   |      |      |      |      |      |      |      |      |      |      |      |      |      |      |   |
| 4502   |      |      |      |      |      |      |      |      |      |      |      |      |      |      |   |
| 4503   |      |      |      |      |      | 5    | 5    | 5    | 3    | 6    | 3    | 2    | 5    | 2    | 6 |
| 4504   |      |      |      |      |      | 1    | 6    | 6    | 6    | 6    | 6    | 6    | 6    | 1    | 5 |
| 4506   |      |      |      |      |      | 1    | 6    | 6    | 6    | 2    | 6    | 6    | 6    | 1    | 6 |
| 4508   |      |      |      |      |      | 3    | 5    | 6    | 6    | 1    | 6    | 6    | 6    | 2    | 6 |
| 4515   | 3    | 3    | 3    | 3    |      |      |      |      |      |      |      |      |      |      |   |
| 4516   | 4    | 4    | 4    | 4    |      |      |      |      |      |      |      |      |      |      |   |
| 4519   | 5    | 5    | 5    | 5    |      |      |      |      |      |      |      |      |      |      |   |
| 4523   |      |      |      |      |      | 6    | 6    | 6    | 6    | 6    | 5    | 5    | 5    | 6    | 5 |
| 4525   | 4    | 3    | 3    | 4    |      |      |      |      |      |      |      |      |      |      |   |
| 4526   |      |      |      |      |      |      |      |      |      |      |      |      |      |      |   |
| 4528   |      |      |      |      |      |      |      |      |      |      |      |      |      |      |   |
| 4530   | 1    |      | 1    | 1    |      |      |      |      |      |      |      |      |      |      |   |
| 4531   |      |      |      |      |      | 1    | 5    | 6    | 5    | 2    | 5    | 3    | 5    | 1    | 3 |
| 4532   | 3    | 4    | 4    | 4    |      |      |      |      |      |      |      |      |      |      |   |
| 4537   |      |      |      |      |      | 1    | 5    | 6    | 4    | 3    | 6    | 5    | 6    | 1    | 5 |
| 4538   |      |      |      |      |      | 3    | 3    | 3    | 3    | 4    | 3    | 4    | 4    | 4    | 4 |
| 4539   |      |      |      |      |      | 3    | 3    | 3    | 3    | 3    |      | 3    | 3    | 3    | 3 |
| 4541   | 4    | 3    | 3    | 4    |      |      |      |      |      |      |      |      |      |      |   |
| 4543   |      |      |      |      |      |      |      |      |      |      |      |      |      |      |   |
| 4544   |      |      |      |      |      | 1    | 1    | 1    | 4    | 2    | 2    | 5    | 1    | 6    | 6 |
| 4546   | 5    | 5    | 5    | 5    |      |      |      |      |      |      |      |      |      |      |   |
| 4547   |      |      |      |      |      | 1    | 6    | 6    | 6    | 1    | 6    | 6    | 6    | 1    | 6 |
| 4549   |      |      |      |      |      |      |      |      |      |      |      |      |      |      |   |
| 4550   |      |      | 3    | 3    |      |      |      |      |      |      |      |      |      |      |   |

| respid | Q47l | Q47m | Q47n | Q47o | Q48a | Q48b | Q48c | Q48d | Q48e | Q48f | Q48g | Q48h | Q48i | Q48j |   |
|--------|------|------|------|------|------|------|------|------|------|------|------|------|------|------|---|
| 4551   | 3    | 4    | 4    | 4    |      |      |      |      |      |      |      |      |      |      |   |
| 4554   | 3    | 4    | 4    | 4    |      |      |      |      |      |      |      |      |      |      |   |
| 4557   |      |      |      |      |      |      |      |      |      |      |      |      |      |      |   |
| 4565   |      |      |      |      |      |      |      |      |      |      |      |      |      |      |   |
| 4568   | 3    | 4    | 3    | 3    |      |      |      |      |      |      |      |      |      |      |   |
| 4569   |      |      |      |      |      | 2    | 6    | 6    | 6    | 2    | 6    | 6    | 6    | 1    | 6 |
| 4570   | 4    | 5    | 5    | 5    |      |      |      |      |      |      |      |      |      |      |   |
| 4572   | 4    | 3    | 3    | 4    |      |      |      |      |      |      |      |      |      |      |   |
| 4574   | 4    | 4    | 4    | 4    |      |      |      |      |      |      |      |      |      |      |   |
| 4576   |      |      |      |      |      | 5    | 5    | 5    | 4    | 4    |      |      |      |      |   |
| 4578   |      | 4    | 4    | 5    |      |      |      |      |      |      |      |      |      |      |   |
| 4579   |      |      |      |      |      |      |      |      |      |      |      |      |      |      |   |
| 4580   |      |      |      |      |      | 1    | 6    | 6    | 6    | 1    | 6    | 6    | 6    | 1    | 6 |
| 4581   |      |      |      |      |      |      |      |      |      |      |      |      |      |      |   |
| 4584   | 4    | 4    | 4    | 4    |      |      |      |      |      |      |      |      |      |      |   |
| 4586   | 4    | 4    | 4    | 3    |      |      |      |      |      |      |      |      |      |      |   |
| 4587   | 4    | 2    | 2    | 3    |      |      |      |      |      |      |      |      |      |      |   |
| 4590   | 5    | 5    | 5    | 5    |      |      |      |      |      |      |      |      |      |      |   |
| 4592   | 3    | 3    | 3    | 3    |      |      |      |      |      |      |      |      |      |      |   |
| 4593   |      |      |      |      |      | 5    | 3    | 5    | 2    | 4    | 2    | 3    | 4    | 6    | 3 |
| 4595   | 4    | 4    | 4    | 4    |      |      |      |      |      |      |      |      |      |      |   |
| 4597   | 3    | 4    | 4    | 3    |      |      |      |      |      |      |      |      |      |      |   |
| 4598   | 3    | 3    | 3    | 3    |      |      |      |      |      |      |      |      |      |      |   |
| 4599   | 2    | 3    | 3    | 2    |      |      |      |      |      |      |      |      |      |      |   |
| 4600   |      |      |      |      |      | 2    | 6    | 6    | 6    | 2    | 6    | 5    | 5    | 1    | 6 |
| 4601   |      |      |      |      |      | 5    | 5    | 5    | 4    | 4    | 6    | 6    | 6    | 6    | 6 |
| 4608   |      |      |      |      |      | 6    | 1    | 1    | 1    | 6    | 2    | 2    | 5    | 6    | 6 |
| 4609   | 3    | 3    | 3    | 3    |      |      |      |      |      |      |      |      |      |      |   |
| 4611   |      |      |      |      |      | 1    | 1    | 1    | 2    | 6    | 1    | 1    | 2    | 5    | 1 |
| 4612   | 1    | 1    | 2    | 2    |      |      |      |      |      |      |      |      |      |      |   |
| 4613   |      |      |      |      |      |      |      |      |      |      |      |      |      |      |   |
| 4616   | 3    | 3    | 3    | 2    |      |      |      |      |      |      |      |      |      |      |   |

| respid | Q47l | Q47m | Q47n | Q47o | Q48a | Q48b | Q48c | Q48d | Q48e | Q48f | Q48g | Q48h | Q48i | Q48j |   |
|--------|------|------|------|------|------|------|------|------|------|------|------|------|------|------|---|
| 4617   |      |      |      |      |      | 2    | 2    | 4    | 5    | 2    | 5    | 5    | 5    | 2    | 5 |
| 4620   |      |      |      |      |      | 1    | 6    | 6    | 6    | 2    | 6    | 6    | 6    | 1    | 6 |
| 4621   | 4    | 4    | 4    | 4    |      |      |      |      |      |      |      |      |      |      |   |
| 4622   |      | 2    | 3    | 2    |      |      |      |      |      |      |      |      |      |      |   |
| 4624   |      |      |      |      |      | 3    | 4    | 5    | 6    | 3    | 6    | 6    | 6    | 3    | 6 |
| 4625   | 4    | 4    | 4    | 4    |      |      |      |      |      |      |      |      |      |      |   |
| 4627   | 2    | 3    | 3    | 3    |      |      |      |      |      |      |      |      |      |      |   |
| 4628   | 3    | 3    | 3    | 3    |      |      |      |      |      |      |      |      |      |      |   |
| 4629   |      |      |      |      |      |      |      |      |      |      |      |      |      |      |   |
| 4630   |      |      |      |      |      | 2    | 4    | 4    | 5    | 2    | 5    | 5    | 5    | 2    | 4 |
| 4632   | 3    | 4    | 4    | 4    |      |      |      |      |      |      |      |      |      |      |   |
| 4634   |      |      |      |      |      | 2    | 5    | 5    | 6    | 2    | 6    | 5    | 6    | 2    | 6 |
| 4635   | 3    | 4    | 4    | 4    |      |      |      |      |      |      |      |      |      |      |   |
| 4636   | 1    | 1    | 1    | 3    |      |      |      |      |      |      |      |      |      |      |   |
| 4637   | 3    | 3    | 3    | 3    |      |      |      |      |      |      |      |      |      |      |   |
| 4638   | 3    | 4    | 4    | 3    |      |      |      |      |      |      |      |      |      |      |   |
| 4639   |      |      |      |      |      |      |      |      |      |      |      |      |      |      |   |
| 4641   |      |      |      |      |      |      | 1    | 6    | 6    | 1    | 6    | 6    | 6    | 1    | 6 |
| 4643   | 3    | 4    | 4    | 4    |      |      |      |      |      |      |      |      |      |      |   |
| 4645   | 5    | 4    | 4    | 4    |      |      |      |      |      |      |      |      |      |      |   |
| 4646   |      |      |      |      |      | 4    | 4    | 3    | 2    | 3    | 3    | 3    | 3    | 3    | 3 |
| 4647   |      |      |      |      |      |      |      |      |      |      |      |      |      |      |   |
| 4648   |      |      |      |      |      |      |      |      |      |      |      |      |      |      | 6 |
| 4649   |      |      |      |      |      | 3    | 3    | 4    | 3    | 3    | 4    | 5    | 4    | 5    | 4 |
| 4650   | 1    | 1    | 1    | 1    |      |      |      |      |      |      |      |      |      |      |   |
| 4651   | 1    | 3    | 3    | 4    |      |      |      |      |      |      |      |      |      |      |   |
| 4652   |      |      |      |      |      | 5    | 5    | 5    | 5    | 5    | 5    | 5    | 5    | 5    | 5 |
| 4653   |      |      |      |      |      |      |      |      |      |      |      |      |      |      |   |
| 4657   |      |      |      |      |      |      |      |      |      |      |      |      |      |      |   |
| 4660   |      |      |      |      |      | 6    | 1    | 1    | 3    | 6    | 3    | 6    | 6    | 2    | 2 |
| 4661   |      |      |      |      |      | 2    | 3    | 3    | 4    | 3    | 4    | 3    | 4    | 4    | 3 |
| 4662   |      |      |      |      |      |      | 2    | 1    | 4    | 4    | 4    | 2    | 1    | 5    | 2 |



| respid | Q47l | Q47m | Q47n | Q47o | Q48a | Q48b | Q48c | Q48d | Q48e | Q48f | Q48g | Q48h | Q48i | Q48j |   |
|--------|------|------|------|------|------|------|------|------|------|------|------|------|------|------|---|
| 4667   | 3    | 4    | 4    | 5    |      |      |      |      |      |      |      |      |      |      |   |
| 4669   |      |      |      |      |      | 2    | 5    | 5    | 4    | 3    | 4    | 5    | 5    | 3    | 5 |
| 4671   |      |      |      |      |      |      |      |      |      |      |      |      |      |      |   |
| 4672   | 3    | 2    | 2    | 1    |      |      |      |      |      |      |      |      |      |      |   |
| 4673   |      |      |      |      |      |      |      |      |      |      |      |      |      |      |   |
| 4677   |      |      |      |      |      |      |      |      |      |      |      |      |      |      |   |
| 4679   | 2    | 1    | 3    | 1    |      |      |      |      |      |      |      |      |      |      |   |
| 4683   | 4    | 4    | 4    | 5    |      |      |      |      |      |      |      |      |      |      |   |
| 4684   |      |      |      |      |      | 4    | 6    | 6    | 5    | 5    | 5    | 4    | 5    | 4    | 5 |
| 4685   |      |      |      | 2    |      |      |      |      |      |      |      |      |      |      |   |
| 4686   | 3    | 4    | 4    | 3    |      |      |      |      |      |      |      |      |      |      |   |
| 4687   | 4    | 4    | 5    | 5    |      |      |      |      |      |      |      |      |      |      |   |
| 4688   | 4    | 4    | 4    | 4    |      |      |      |      |      |      |      |      |      |      |   |
| 4691   | 3    |      | 3    | 3    |      |      |      |      |      |      |      |      |      |      |   |
| 4692   |      |      |      |      |      |      | 4    | 6    | 5    | 4    | 6    | 6    | 6    | 5    | 6 |
| 4694   | 3    | 3    | 3    | 3    |      |      |      |      |      |      |      |      |      |      |   |
| 4695   | 4    | 5    | 5    | 4    |      |      |      |      |      |      |      |      |      |      |   |
| 4696   | 3    | 4    | 3    | 3    |      |      |      |      |      |      |      |      |      |      |   |
| 4697   |      |      |      |      |      |      |      |      |      |      |      |      |      |      |   |
| 4698   | 3    | 3    | 3    | 3    |      |      |      |      |      |      |      |      |      |      |   |
| 4699   | 4    | 4    | 4    | 3    |      |      |      |      |      |      |      |      |      |      |   |
| 4701   |      |      |      |      |      |      |      |      |      |      |      |      |      |      |   |
| 4703   | 2    | 3    | 3    | 2    |      |      |      |      |      |      |      |      |      |      |   |
| 4704   |      |      |      |      |      | 2    | 1    | 1    | 1    | 6    | 6    | 1    | 1    | 6    | 1 |
| 4705   |      |      |      |      |      | 1    | 6    | 6    | 6    | 1    | 6    | 6    | 6    | 1    | 6 |
| 4706   | 3    | 4    | 4    | 5    |      |      |      |      |      |      |      |      |      |      |   |
| 4707   |      |      |      |      |      | 4    | 4    | 6    | 5    | 3    | 6    | 6    | 5    | 3    | 4 |
| 4708   | 3    | 3    | 3    | 3    |      |      |      |      |      |      |      |      |      |      |   |
| 4710   | 2    | 1    | 1    | 1    |      |      |      |      |      |      |      |      |      |      |   |
| 4711   | 3    | 3    | 3    | 3    |      |      |      |      |      |      |      |      |      |      |   |
| 4715   |      |      |      |      |      |      |      |      |      |      |      |      |      |      |   |
| 4716   |      |      |      |      |      | 3    |      | 4    | 5    | 3    | 4    | 4    | 4    | 3    | 4 |

| respid | Q47l | Q47m | Q47n | Q47o | Q48a | Q48b | Q48c | Q48d | Q48e | Q48f | Q48g | Q48h | Q48i | Q48j |   |
|--------|------|------|------|------|------|------|------|------|------|------|------|------|------|------|---|
| 4717   |      | 1    | 1    | 1    | 1    |      |      |      |      |      |      |      |      |      |   |
| 4718   |      | 4    | 4    | 4    | 4    |      |      |      |      |      |      |      |      |      |   |
| 4722   |      | 2    | 2    | 3    | 2    |      |      |      |      |      |      |      |      |      |   |
| 4727   |      | 3    | 4    | 4    | 4    |      |      |      |      |      |      |      |      |      |   |
| 4728   |      | 1    | 1    | 1    | 1    |      |      |      |      |      |      |      |      |      |   |
| 4729   |      | 3    | 4    | 4    | 5    |      |      |      |      |      |      |      |      |      |   |
| 4732   |      | 3    | 3    | 3    | 3    |      |      |      |      |      |      |      |      |      |   |
| 4733   |      |      |      |      |      | 2    | 5    | 5    | 5    | 2    | 5    | 5    | 5    | 2    | 5 |
| 4734   |      | 3    | 4    | 4    | 4    |      |      |      |      |      |      |      |      |      |   |
| 4735   |      | 1    | 3    | 3    | 3    |      |      |      |      |      |      |      |      |      |   |
| 4737   |      | 5    | 3    | 1    | 5    |      |      |      |      |      |      |      |      |      |   |
| 4738   |      | 3    | 3    | 3    | 1    |      |      |      |      |      |      |      |      |      |   |
| 4740   |      |      |      |      |      | 2    | 5    | 5    | 5    | 2    | 5    | 5    | 5    | 2    | 5 |
| 4741   |      | 3    | 4    | 3    | 3    |      |      |      |      |      |      |      |      |      |   |
| 4743   |      |      |      |      |      | 1    | 4    | 4    | 4    | 2    | 4    | 4    | 4    | 2    | 4 |
| 4746   |      | 3    | 4    |      | 4    |      |      |      |      |      |      |      |      |      |   |
| 4750   |      | 5    | 3    | 3    | 3    |      |      |      |      |      |      |      |      |      |   |
| 4752   |      | 4    | 4    | 4    | 5    |      |      |      |      |      |      |      |      |      |   |
| 4753   |      |      |      |      |      | 4    | 3    | 3    | 3    | 4    | 5    | 5    | 4    | 4    | 5 |
| 4754   |      | 3    | 3    | 3    | 4    |      |      |      |      |      |      |      |      |      |   |
| 4755   |      |      |      |      |      | 5    | 5    | 4    | 3    | 4    | 3    | 5    | 5    | 4    | 5 |
| 4758   |      |      |      |      |      | 6    | 1    | 1    | 6    | 1    | 1    | 1    | 1    | 6    | 1 |
| 4766   |      |      |      |      |      |      |      |      |      |      |      |      |      |      |   |
| 4767   |      |      |      |      |      | 4    | 5    | 6    | 6    | 4    | 5    | 6    | 5    | 5    | 6 |
| 4768   |      | 3    | 2    | 2    | 2    |      |      |      |      |      |      |      |      |      |   |
| 4769   |      | 5    | 5    | 5    | 5    |      |      |      |      |      |      |      |      |      |   |
| 4771   |      | 2    | 3    | 3    | 3    |      |      |      |      |      |      |      |      |      |   |
| 4772   |      |      |      |      |      | 6    | 5    | 6    | 6    | 3    | 6    | 6    | 6    | 2    | 6 |
| 4773   |      | 4    | 5    | 5    | 4    |      |      |      |      |      |      |      |      |      |   |
| 4774   |      |      |      |      |      | 3    | 4    | 4    | 3    | 4    | 3    | 3    | 4    | 4    | 4 |
| 4776   |      | 4    | 4    | 3    | 4    |      |      |      |      |      |      |      |      |      |   |
| 4777   |      |      |      |      |      | 2    | 5    | 6    | 6    | 1    | 6    | 6    | 6    | 2    | 6 |

| respid | Q47l | Q47m | Q47n | Q47o | Q48a | Q48b | Q48c | Q48d | Q48e | Q48f | Q48g | Q48h | Q48i | Q48j |
|--------|------|------|------|------|------|------|------|------|------|------|------|------|------|------|
| 4779   |      |      |      |      |      |      |      |      |      |      |      |      |      |      |
| 4780   |      |      |      |      | 5    | 5    | 5    | 5    | 2    | 5    | 5    | 5    | 2    | 5    |
| 4781   | 5    | 4    | 4    | 5    |      |      |      |      |      |      |      |      |      |      |
| 4783   |      |      |      |      | 4    | 4    | 4    | 4    | 4    | 5    | 4    | 4    | 4    | 5    |
| 4784   | 5    | 5    | 5    | 5    |      |      |      |      |      |      |      |      |      |      |
| 4785   | 3    | 1    | 1    | 2    |      |      |      |      |      |      |      |      |      |      |
| 4788   |      |      |      |      |      |      |      |      |      |      |      |      |      |      |
| 4789   | 1    | 1    | 1    | 1    |      |      |      |      |      |      |      |      |      |      |
| 4790   |      |      |      |      |      |      |      |      |      |      |      |      |      |      |
| 4791   |      |      |      |      |      |      |      |      |      |      |      |      |      |      |
| 4794   |      |      |      |      |      |      |      |      |      |      |      |      |      |      |
| 4795   | 3    | 4    | 4    | 4    |      |      |      |      |      |      |      |      |      |      |
| 4797   | 4    | 3    | 3    | 3    |      |      |      |      |      |      |      |      |      |      |
| 4802   | 3    | 2    | 2    | 2    |      |      |      |      |      |      |      |      |      |      |
| 4803   | 3    | 2    | 2    | 1    |      |      |      |      |      |      |      |      |      |      |
| 4804   |      |      |      |      |      |      |      |      |      |      |      |      |      |      |
| 4805   | 4    | 4    | 4    | 4    |      |      |      |      |      |      |      |      |      |      |
| 4807   |      |      |      |      |      |      |      |      |      |      |      |      |      |      |
| 4808   | 3    | 4    | 4    | 4    |      |      |      |      |      |      |      |      |      |      |
| 4809   | 3    | 4    | 4    | 3    |      |      |      |      |      |      |      |      |      |      |
| 4811   |      |      |      |      | 1    | 6    | 6    | 6    | 2    | 6    | 6    | 6    | 1    | 6    |
| 4817   |      |      |      |      |      |      |      |      |      |      |      |      |      |      |
| 4819   | 3    | 4    | 4    | 4    |      |      |      |      |      |      |      |      |      |      |
| 4820   |      |      |      |      |      |      |      |      |      |      |      |      |      |      |
| 4821   | 3    | 4    | 5    | 4    |      |      |      |      |      |      |      |      |      |      |
| 4822   | 4    | 4    | 4    | 4    |      |      |      |      |      |      |      |      |      |      |
| 4823   |      |      |      |      | 4    | 3    | 3    | 3    | 4    | 3    | 3    | 5    | 2    | 3    |
| 4825   | 5    | 3    | 3    | 3    |      |      |      |      |      |      |      |      |      |      |
| 4826   |      |      |      |      |      |      |      |      |      |      |      |      |      |      |
| 4830   | 2    | 1    | 1    | 1    |      |      |      |      |      |      |      |      |      |      |
| 4832   |      |      |      |      |      |      |      |      |      |      |      |      |      |      |
| 4838   |      |      |      |      | 4    | 4    | 4    | 4    | 4    | 4    | 4    | 4    | 4    | 4    |

| respid | Q47l | Q47m | Q47n | Q47o | Q48a | Q48b | Q48c | Q48d | Q48e | Q48f | Q48g | Q48h | Q48i | Q48j |   |
|--------|------|------|------|------|------|------|------|------|------|------|------|------|------|------|---|
| 4840   |      |      |      |      |      | 6    | 3    | 6    | 3    | 4    | 3    | 4    | 5    | 4    | 3 |
| 4841   |      |      |      |      |      |      |      |      |      |      |      |      |      |      |   |
| 4843   | 3    | 4    | 4    | 3    |      |      |      |      |      |      |      |      |      |      |   |
| 4845   | 3    | 4    | 4    | 4    |      |      |      |      |      |      |      |      |      |      |   |
| 4846   | 3    | 4    | 4    | 4    |      |      |      |      |      |      |      |      |      |      |   |
| 4848   | 3    | 4    | 4    | 4    |      |      |      |      |      |      |      |      |      |      |   |
| 4853   | 3    | 4    | 4    | 3    |      |      |      |      |      |      |      |      |      |      |   |
| 4854   | 4    | 4    | 4    | 4    |      |      |      |      |      |      |      |      |      |      |   |
| 4859   | 4    | 4    | 3    | 3    |      |      |      |      |      |      |      |      |      |      |   |
| 4861   |      |      |      |      |      |      |      |      |      |      |      |      |      |      |   |
| 4864   | 5    | 4    | 4    | 4    |      |      |      |      |      |      |      |      |      |      |   |
| 4867   |      |      |      |      |      |      |      |      |      |      |      |      |      |      |   |
| 4870   |      |      |      |      |      | 6    | 3    | 4    | 4    | 3    | 4    | 3    | 4    | 3    | 3 |
| 4872   | 4    | 4    | 3    | 3    |      |      |      |      |      |      |      |      |      |      |   |
| 4873   | 2    | 2    | 2    | 2    |      |      |      |      |      |      |      |      |      |      |   |
| 4874   |      |      |      |      |      | 1    | 6    | 6    | 6    | 1    | 6    | 6    | 6    | 1    | 5 |
| 4878   | 4    | 4    |      | 4    |      |      |      |      |      |      |      |      |      |      |   |
| 4880   |      |      |      |      |      | 6    | 6    | 6    | 6    | 2    | 6    | 6    | 6    | 2    | 6 |
| 4881   | 1    |      |      |      |      |      |      |      |      |      |      |      |      |      |   |
| 4882   |      |      |      |      |      | 2    | 3    | 5    | 5    | 2    | 5    | 5    | 5    | 2    | 5 |
| 4883   |      |      |      |      |      |      |      |      |      |      |      |      |      |      |   |
| 4885   |      |      |      |      |      |      |      |      |      |      |      |      |      |      |   |
| 4889   |      |      |      |      |      |      |      |      |      |      |      |      |      |      |   |
| 4890   |      |      |      |      |      |      |      |      |      |      |      |      |      |      |   |
| 4891   | 3    |      |      |      |      |      |      |      |      |      |      |      |      |      |   |
| 4894   |      |      |      |      |      | 2    | 5    | 6    | 6    | 1    | 6    | 6    | 6    | 1    | 6 |
| 4895   | 4    | 2    | 2    | 3    |      |      |      |      |      |      |      |      |      |      |   |
| 4896   |      |      |      |      |      | 5    | 2    | 3    | 4    | 4    | 4    | 4    | 4    | 3    | 3 |
| 4897   |      |      |      |      |      | 2    | 4    | 4    | 5    | 2    | 4    | 5    | 5    | 2    | 5 |
| 4898   | 1    | 3    | 3    | 3    |      |      |      |      |      |      |      |      |      |      |   |
| 4899   |      |      |      |      |      |      |      |      |      |      |      |      |      |      |   |
| 4900   | 3    | 1    | 1    | 3    |      |      |      |      |      |      |      |      |      |      |   |

| respid | Q47l | Q47m | Q47n | Q47o | Q48a | Q48b | Q48c | Q48d | Q48e | Q48f | Q48g | Q48h | Q48i | Q48j |   |
|--------|------|------|------|------|------|------|------|------|------|------|------|------|------|------|---|
| 4901   | 4    | 4    | 4    | 4    | 4    |      |      |      |      |      |      |      |      |      |   |
| 4903   | 3    | 4    | 4    | 4    | 3    |      |      |      |      |      |      |      |      |      |   |
| 4904   | 4    | 4    | 4    | 4    | 4    |      |      |      |      |      |      |      |      |      |   |
| 4908   |      |      |      |      |      |      |      |      |      |      |      |      |      |      |   |
| 4909   | 3    | 1    | 4    | 4    | 1    |      |      |      |      |      |      |      |      |      |   |
| 4913   | 3    | 4    | 4    | 4    | 3    |      |      |      |      |      |      |      |      |      |   |
| 4917   |      |      |      |      |      | 6    | 1    | 1    | 1    | 6    | 1    | 2    | 1    | 6    | 6 |
| 4918   |      |      |      |      |      | 3    | 3    | 2    | 3    | 3    | 2    | 2    | 2    | 3    | 2 |
| 4920   |      |      |      |      |      |      |      |      |      |      |      |      |      |      |   |
| 4921   | 2    | 3    | 3    | 3    | 3    |      |      |      |      |      |      |      |      |      |   |
| 4925   |      |      |      |      |      | 3    | 3    | 6    | 6    | 3    | 3    | 3    | 3    | 3    | 3 |
| 4926   | 1    | 1    | 1    | 1    | 1    |      |      |      |      |      |      |      |      |      |   |
| 4927   | 5    | 4    | 4    | 4    | 3    |      |      |      |      |      |      |      |      |      |   |
| 4928   | 4    | 4    | 4    | 4    | 4    |      |      |      |      |      |      |      |      |      |   |
| 4929   | 3    | 4    | 4    | 4    | 3    |      |      |      |      |      |      |      |      |      |   |
| 4930   |      |      |      |      |      | 6    | 6    | 6    | 6    | 6    | 6    |      | 6    | 2    | 6 |
| 4931   | 1    |      | 3    |      |      |      |      |      |      |      |      |      |      |      |   |
| 4932   |      |      |      |      |      | 3    | 3    | 3    | 4    | 3    | 4    | 3    | 3    | 3    | 4 |
| 4933   | 4    | 4    | 4    | 4    | 4    |      |      |      |      |      |      |      |      |      |   |
| 4934   |      |      |      |      |      | 3    | 5    | 5    | 5    | 3    | 5    | 6    | 6    | 2    | 5 |
| 5934   | 4    | 4    | 4    | 4    | 3    |      |      |      |      |      |      |      |      |      |   |
| 5935   |      |      |      |      |      | 1    | 5    | 5    | 5    | 2    | 5    | 5    | 6    | 2    | 5 |
| 5936   |      |      |      |      |      | 1    | 6    | 6    | 6    | 1    | 5    | 6    | 6    | 1    | 6 |
| 5938   |      |      |      |      |      |      |      |      |      |      |      |      |      |      |   |
| 5939   |      |      |      |      |      | 3    |      | 4    | 4    | 3    | 4    | 5    | 4    | 6    | 5 |
| 5940   |      |      |      |      |      | 4    | 5    | 6    | 6    | 4    | 5    | 5    | 6    | 4    | 6 |
| 5942   | 3    | 4    | 4    | 4    | 3    |      |      |      |      |      |      |      |      |      |   |
| 5944   | 4    | 4    | 4    | 4    | 5    |      |      |      |      |      |      |      |      |      |   |
| 5951   | 3    | 2    | 3    | 3    | 3    |      |      |      |      |      |      |      |      |      |   |
| 5952   |      |      |      |      |      | 3    | 3    | 2    | 3    | 3    | 3    | 2    | 6    | 4    | 2 |
| 5954   | 3    | 4    | 4    | 4    | 3    |      |      |      |      |      |      |      |      |      |   |
| 5956   | 3    | 4    | 4    | 4    | 5    |      |      |      |      |      |      |      |      |      |   |

| respid | Q47l | Q47m | Q47n | Q47o | Q48a | Q48b | Q48c | Q48d | Q48e | Q48f | Q48g | Q48h | Q48i | Q48j |
|--------|------|------|------|------|------|------|------|------|------|------|------|------|------|------|
| 5957   | 1    | 1    | 1    | 3    |      |      |      |      |      |      |      |      |      |      |
| 5958   | 3    | 3    | 2    | 2    |      |      |      |      |      |      |      |      |      |      |
| 5959   |      |      |      |      | 3    | 3    | 3    | 3    | 4    | 6    | 5    | 3    | 6    | 2    |
| 5960   | 3    | 3    | 4    | 3    |      |      |      |      |      |      |      |      |      |      |
| 5963   |      |      |      |      |      |      |      |      |      |      |      |      |      |      |
| 5966   | 4    | 4    | 4    | 4    |      |      |      |      |      |      |      |      |      |      |
| 5968   | 3    | 3    | 3    | 3    |      |      |      |      |      |      |      |      |      |      |
| 5974   |      |      |      |      | 1    | 6    | 6    | 6    | 2    | 6    | 6    | 6    | 1    | 6    |
| 5975   |      |      |      |      | 1    | 6    | 6    | 5    | 1    | 3    | 6    | 6    | 1    | 2    |
| 5976   | 4    | 4    | 4    | 4    |      |      |      |      |      |      |      |      |      |      |
| 5977   |      |      |      |      | 3    | 5    | 6    | 5    | 3    | 6    | 6    | 6    | 3    | 6    |
| 5978   |      | 4    |      |      |      |      |      |      |      |      |      |      |      |      |
| 5979   |      |      |      |      | 1    | 5    | 6    | 4    | 2    | 5    | 5    | 6    | 1    | 4    |
| 5983   |      |      |      |      | 1    | 6    | 6    | 6    | 3    | 4    | 5    | 6    |      | 5    |
| 5984   |      |      |      |      |      |      |      |      |      |      |      |      |      |      |
| 5990   |      |      |      |      | 1    | 6    | 6    | 6    | 2    | 6    | 6    | 6    | 1    | 6    |
| 5991   |      |      |      |      | 3    | 5    | 5    | 5    | 3    | 5    | 5    | 6    | 5    | 5    |
| 5992   |      |      |      |      |      |      |      |      |      |      |      |      |      |      |
| 5993   |      |      |      |      |      |      | 4    | 5    | 2    | 5    | 5    | 6    |      | 6    |
| 5994   |      |      |      |      | 3    | 6    | 6    | 6    | 6    | 6    | 6    | 6    | 6    | 6    |
| 5996   |      |      |      |      | 3    | 3    | 4    | 3    | 4    | 6    | 6    | 6    | 6    | 6    |
| 6001   | 4    | 4    | 3    | 3    |      |      |      |      |      |      |      |      |      |      |
| 6003   |      |      |      |      | 2    | 2    | 3    | 4    | 2    | 5    | 5    | 5    | 3    | 5    |
| 6004   | 3    | 1    | 1    | 1    |      |      |      |      |      |      |      |      |      |      |
| 6005   | 3    | 2    | 2    | 1    |      |      |      |      |      |      |      |      |      |      |
| 6006   |      |      |      |      | 3    | 4    | 4    | 4    | 3    | 4    | 4    | 4    | 3    | 4    |
| 6008   | 3    | 3    | 3    | 3    |      |      |      |      |      |      |      |      |      |      |
| 6009   |      |      |      |      | 1    | 6    | 6    | 5    | 2    | 6    | 6    | 6    | 2    | 6    |
| 6014   |      |      |      |      |      |      |      |      |      |      |      |      |      |      |
| 6016   | 4    | 4    | 4    | 4    |      |      |      |      |      |      |      |      |      |      |
| 6017   |      |      |      |      | 4    | 4    | 4    | 6    | 4    | 4    | 3    | 6    | 6    | 6    |
| 6018   |      |      |      |      | 2    | 4    | 4    | 4    | 3    | 4    | 4    | 4    | 3    | 3    |

| respid | Q47l | Q47m | Q47n | Q47o | Q48a | Q48b | Q48c | Q48d | Q48e | Q48f | Q48g | Q48h | Q48i | Q48j |   |
|--------|------|------|------|------|------|------|------|------|------|------|------|------|------|------|---|
| 6020   |      |      |      |      |      | 3    | 3    | 3    | 4    | 5    | 3    | 3    | 3    | 5    | 2 |
| 6021   |      |      |      |      |      |      |      |      |      |      |      |      |      |      |   |
| 6024   | 3    | 3    | 3    | 3    |      |      |      |      |      |      |      |      |      |      |   |
| 6025   |      |      |      |      |      |      |      |      |      |      |      |      |      |      |   |
| 6026   |      |      |      |      | 3    | 6    | 6    | 6    | 1    | 6    | 6    | 6    | 6    | 5    | 5 |
| 6032   | 3    | 4    | 4    | 3    |      |      |      |      |      |      |      |      |      |      |   |
| 6035   |      |      |      |      | 1    | 6    | 6    | 5    | 2    | 6    | 6    | 6    | 6    | 1    | 5 |
| 6038   | 3    | 4    | 4    | 4    |      |      |      |      |      |      |      |      |      |      |   |
| 6043   |      |      |      |      | 1    | 5    | 6    | 6    | 1    | 6    | 5    | 6    | 6    | 1    | 6 |
| 6044   |      |      |      |      | 3    | 6    | 6    | 6    | 2    |      | 6    | 6    | 6    | 3    |   |
| 6046   | 4    | 4    | 3    | 3    |      |      |      |      |      |      |      |      |      |      |   |
| 6047   |      |      |      |      |      |      |      |      |      |      |      |      |      |      | 6 |
| 6048   |      |      |      |      | 5    | 2    | 1    | 4    | 5    | 6    | 5    | 5    | 5    | 1    | 6 |
| 6050   | 3    | 3    | 3    | 3    |      |      |      |      |      |      |      |      |      |      |   |
| 6051   |      |      |      |      | 4    | 5    | 4    | 4    | 3    | 4    | 5    | 4    | 4    | 3    | 3 |
| 6053   |      |      |      |      | 1    | 6    | 6    | 6    | 1    | 6    | 6    | 6    | 6    | 1    | 6 |
| 6054   | 4    | 3    | 2    | 3    |      |      |      |      |      |      |      |      |      |      |   |
| 6056   | 3    | 4    | 4    | 3    |      |      |      |      |      |      |      |      |      |      |   |
| 6058   |      |      |      |      | 5    | 4    | 3    | 3    | 4    | 4    | 4    | 6    | 5    | 4    | 5 |
| 6060   | 4    | 3    | 3    | 3    |      |      |      |      |      |      |      |      |      |      |   |
| 6061   |      |      |      |      | 1    | 5    | 6    | 5    | 5    | 5    | 5    | 6    | 6    | 1    | 6 |
| 6062   |      |      |      |      | 3    | 3    | 3    | 3    | 3    | 3    | 3    | 3    | 4    | 4    | 4 |
| 6067   |      |      |      |      | 2    | 5    | 5    | 5    | 2    | 5    | 5    | 5    | 5    | 2    | 3 |
| 6070   |      |      |      |      | 1    | 6    | 6    | 6    | 2    | 6    | 6    | 6    | 6    | 1    | 6 |
| 6074   |      |      |      |      | 3    | 4    | 4    | 6    | 2    | 6    | 5    | 6    | 6    |      | 4 |
| 6076   |      |      |      |      | 6    | 6    | 6    | 6    | 6    | 6    | 6    | 6    | 6    | 6    | 6 |
| 6078   |      |      |      |      |      |      |      |      |      |      |      |      |      |      |   |
| 6081   | 5    | 4    | 4    | 4    |      |      |      |      |      |      |      |      |      |      |   |
| 6085   |      |      |      |      | 1    | 3    | 4    | 2    | 3    | 3    | 4    | 6    | 6    | 2    | 2 |
| 6088   |      |      |      |      |      |      |      |      |      |      |      |      |      |      |   |
| 6092   | 4    | 1    | 1    | 2    |      |      |      |      |      |      |      |      |      |      |   |
| 6095   | 3    | 4    | 4    | 4    |      |      |      |      |      |      |      |      |      |      |   |

| respid | Q47l | Q47m | Q47n | Q47o | Q48a | Q48b | Q48c | Q48d | Q48e | Q48f | Q48g | Q48h | Q48i | Q48j |   |
|--------|------|------|------|------|------|------|------|------|------|------|------|------|------|------|---|
| 6098   |      |      |      |      |      | 3    | 3    | 4    | 4    | 3    | 4    | 4    | 4    | 3    | 4 |
| 6101   |      |      |      |      |      |      |      |      |      |      |      |      |      |      |   |
| 6102   |      |      |      |      |      | 1    | 3    | 3    | 2    | 6    | 3    | 4    | 4    | 3    | 2 |
| 6105   |      |      |      |      |      | 3    | 4    | 3    | 4    | 3    | 4    | 5    | 4    | 1    | 3 |
| 6106   | 3    | 3    | 3    | 4    |      |      |      |      |      |      |      |      |      |      |   |
| 6107   |      |      |      |      |      | 5    | 4    |      | 4    | 4    | 4    |      | 4    | 4    | 4 |
| 6111   | 5    | 5    | 5    | 5    |      |      |      |      |      |      |      |      |      |      |   |
| 6112   |      |      |      |      |      |      |      | 6    | 6    | 2    | 6    | 6    | 6    | 1    | 2 |
| 6113   | 3    | 2    | 3    | 2    |      |      |      |      |      |      |      |      |      |      |   |
| 6115   | 5    | 4    | 5    | 3    |      |      |      |      |      |      |      |      |      |      |   |
| 6116   |      |      |      |      |      |      |      |      |      |      |      |      |      |      |   |
| 6117   |      |      |      |      |      | 2    | 5    | 6    | 4    | 3    | 6    | 5    | 5    | 2    | 6 |
| 6124   | 2    | 2    | 2    | 2    |      |      |      |      |      |      |      |      |      |      |   |
| 6125   | 1    | 3    | 3    | 4    |      |      |      |      |      |      |      |      |      |      |   |
| 6128   |      |      |      |      |      |      |      |      |      |      |      |      |      |      |   |
| 6133   |      |      |      |      |      | 1    | 6    | 6    | 6    | 6    | 6    | 6    | 6    | 1    | 6 |
| 6134   |      |      |      |      |      | 3    | 4    | 4    | 4    | 3    | 4    | 5    | 5    | 2    | 5 |
| 6135   | 4    | 4    | 4    | 5    |      |      |      |      |      |      |      |      |      |      |   |
| 6138   |      |      |      |      |      | 4    | 3    | 3    | 4    | 4    | 4    | 4    | 5    | 4    | 2 |
| 6140   | 3    | 3    | 3    | 3    |      |      |      |      |      |      |      |      |      |      |   |
| 6143   | 3    | 4    | 4    | 3    |      |      |      |      |      |      |      |      |      |      |   |
| 6147   |      |      |      |      |      | 4    | 3    | 3    | 4    |      | 4    | 3    | 3    | 4    | 3 |
| 6154   |      |      |      |      |      | 1    | 3    | 3    | 6    | 1    | 6    | 6    | 6    | 1    | 3 |
| 6162   |      |      |      |      |      |      |      |      |      |      |      |      |      |      |   |
| 6165   |      |      |      |      |      | 4    | 6    | 6    | 6    | 3    | 6    | 6    | 6    | 6    | 6 |
| 6166   | 4    | 2    | 2    | 3    |      |      |      |      |      |      |      |      |      |      |   |
| 6173   | 3    | 1    | 1    | 2    |      |      |      |      |      |      |      |      |      |      |   |
| 6180   | 2    | 2    | 2    | 2    |      |      |      |      |      |      |      |      |      |      |   |
| 6184   |      |      |      |      |      | 3    | 4    | 5    | 3    | 5    | 5    | 5    | 4    | 3    | 3 |
| 6185   | 4    | 3    | 4    | 3    |      |      |      |      |      |      |      |      |      |      |   |
| 6186   |      |      |      |      |      | 2    | 2    | 4    | 3    | 4    | 3    | 5    | 5    | 3    | 4 |
| 6188   | 4    | 3    | 3    | 4    |      |      |      |      |      |      |      |      |      |      |   |



| respid | Q47l | Q47m | Q47n | Q47o | Q48a | Q48b | Q48c | Q48d | Q48e | Q48f | Q48g | Q48h | Q48i | Q48j |   |
|--------|------|------|------|------|------|------|------|------|------|------|------|------|------|------|---|
| 6192   |      |      |      |      |      | 2    | 2    | 1    | 3    | 5    | 2    | 3    | 2    | 6    | 2 |
| 6194   |      |      |      |      |      |      |      |      |      |      |      |      |      |      |   |
| 6195   |      |      |      |      |      | 6    | 6    | 6    | 6    | 6    | 6    | 6    | 6    | 6    | 6 |
| 6196   |      |      |      |      |      | 3    | 4    | 3    | 1    | 1    | 2    | 2    | 2    | 2    | 2 |
| 6199   | 4    | 4    | 4    | 4    |      |      |      |      |      |      |      |      |      |      |   |
| 6200   |      |      |      |      |      |      |      |      |      |      |      |      |      |      |   |
| 6201   | 4    | 5    | 4    | 5    |      |      |      |      |      |      |      |      |      |      |   |
| 6202   |      |      |      |      |      | 3    | 6    | 6    | 5    | 2    | 5    | 5    | 6    | 2    | 4 |
| 6203   | 1    | 3    | 3    | 3    |      |      |      |      |      |      |      |      |      |      |   |
| 6205   |      |      |      |      |      | 3    | 6    | 6    | 6    | 3    | 6    | 6    | 6    | 4    | 6 |
| 6210   | 3    | 3    | 3    | 3    |      |      |      |      |      |      |      |      |      |      |   |
| 6212   | 4    | 4    | 3    | 4    |      |      |      |      |      |      |      |      |      |      |   |
| 6216   |      |      |      |      |      | 4    | 2    | 2    | 3    | 5    | 2    | 2    | 3    | 3    | 1 |
| 6218   | 1    | 1    | 1    | 2    |      |      |      |      |      |      |      |      |      |      |   |
| 6221   | 3    | 4    | 4    | 3    |      |      |      |      |      |      |      |      |      |      |   |
| 6224   | 5    | 5    | 5    | 5    |      |      |      |      |      |      |      |      |      |      |   |
| 6225   | 1    | 1    | 1    | 3    |      |      |      |      |      |      |      |      |      |      |   |
| 6227   | 3    | 1    | 1    | 3    |      |      |      |      |      |      |      |      |      |      |   |
| 6230   |      |      |      |      |      |      |      |      |      |      |      |      |      |      |   |
| 6231   | 3    | 3    | 3    | 4    |      |      |      |      |      |      |      |      |      |      |   |
| 6233   |      |      |      |      |      | 3    | 4    | 3    | 3    | 4    | 3    | 3    | 4    | 3    | 4 |
| 6234   |      |      |      |      |      |      |      |      |      |      |      |      |      |      |   |
| 6235   |      |      |      |      |      |      |      |      |      |      |      |      |      |      |   |
| 6237   |      |      |      |      |      |      |      |      |      |      |      |      |      |      |   |
| 6240   |      |      |      |      |      |      |      |      |      |      |      |      |      |      |   |
| 6248   | 1    | 3    |      |      |      |      |      |      |      |      |      |      |      |      |   |
| 6249   | 4    | 3    | 3    | 4    |      |      |      |      |      |      |      |      |      |      |   |
| 6252   | 3    | 3    | 3    | 3    |      |      |      |      |      |      |      |      |      |      |   |
| 6254   | 3    | 3    | 3    | 3    |      |      |      |      |      |      |      |      |      |      |   |
| 6269   |      |      |      |      |      | 2    | 3    | 5    | 4    | 3    | 5    | 3    | 4    | 2    | 3 |
| 6304   |      |      |      |      |      |      |      |      |      |      |      |      |      |      |   |
| 6334   | 3    | 4    | 4    | 3    |      |      |      |      |      |      |      |      |      |      |   |

| respid | Q47l | Q47m | Q47n | Q47o | Q48a | Q48b | Q48c | Q48d | Q48e | Q48f | Q48g | Q48h | Q48i | Q48j |   |
|--------|------|------|------|------|------|------|------|------|------|------|------|------|------|------|---|
| 6341   |      |      |      |      |      | 6    | 6    | 6    | 1    | 3    | 2    | 6    | 6    | 5    | 6 |
| 6350   |      |      |      |      |      | 2    | 4    | 4    | 4    | 3    | 4    | 4    | 5    | 2    | 4 |
| 6370   |      |      |      |      |      | 2    | 3    | 3    | 3    | 4    | 3    | 6    | 6    | 4    | 3 |
| 6384   |      |      |      |      |      | 5    | 5    | 6    | 6    | 6    | 6    | 6    | 6    | 3    | 6 |
| 6400   | 3    | 4    | 4    | 4    |      |      |      |      |      |      |      |      |      |      |   |
| 6418   |      |      |      |      |      |      |      |      |      |      |      |      |      |      |   |
| 6467   | 3    | 3    | 3    | 3    |      |      |      |      |      |      |      |      |      |      |   |
| 6469   | 4    | 4    | 4    | 4    |      |      |      |      |      |      |      |      |      |      |   |
| 6474   |      |      |      |      |      | 2    | 6    | 6    | 5    | 3    | 6    | 6    | 6    | 1    | 6 |
| 6475   |      |      |      |      |      |      |      |      |      |      |      |      |      |      |   |
| 6476   |      |      |      |      |      | 3    | 4    | 4    | 4    | 3    | 4    | 4    | 4    | 3    | 3 |
| 6477   | 4    | 3    | 3    | 3    |      |      |      |      |      |      |      |      |      |      |   |
| 6480   | 4    | 4    | 4    | 4    |      |      |      |      |      |      |      |      |      |      |   |
| 6481   | 3    | 3    | 4    | 3    |      |      |      |      |      |      |      |      |      |      |   |
| 6485   |      |      |      |      |      | 5    | 2    | 2    | 5    | 4    | 4    | 3    | 4    |      |   |
| 6488   | 3    | 3    | 3    | 3    |      |      |      |      |      |      |      |      |      |      |   |
| 6495   | 3    | 3    | 3    | 3    |      |      |      |      |      |      |      |      |      |      |   |
| 6499   |      |      |      |      |      | 3    | 3    | 3    | 4    | 4    | 3    | 3    | 4    | 3    | 4 |
| 6500   |      |      |      |      |      | 3    | 5    |      |      |      | 4    | 5    | 4    | 5    | 4 |
| 6504   | 3    | 2    | 2    | 2    |      |      |      |      |      |      |      |      |      |      |   |
| 6507   | 2    | 2    | 2    | 2    |      |      |      |      |      |      |      |      |      |      |   |
| 6512   |      |      |      |      |      | 2    | 5    | 5    | 4    | 2    | 5    | 5    | 6    | 2    | 4 |
| 6525   |      |      |      |      |      | 4    | 6    | 4    | 3    | 4    | 4    | 5    | 4    | 4    | 4 |
| 6532   |      |      |      |      |      | 1    | 6    | 6    | 6    | 2    | 5    | 6    | 6    | 1    | 5 |
| 6535   | 4    | 4    | 4    | 4    |      |      |      |      |      |      |      |      |      |      |   |
| 6546   |      |      |      |      |      | 1    | 2    | 6    | 5    | 2    | 6    | 6    | 6    | 2    | 6 |
| 6551   |      |      |      |      |      | 1    | 6    | 6    | 5    | 1    | 6    | 6    | 6    | 1    | 5 |
| 6556   |      |      |      |      |      | 6    | 3    | 3    | 5    | 5    | 5    | 2    | 3    | 5    | 5 |
| 6566   | 5    | 4    | 4    | 4    |      |      |      |      |      |      |      |      |      |      |   |
| 6569   |      |      |      |      |      |      |      |      |      |      |      |      |      |      |   |
| 6574   |      |      |      |      |      | 3    | 5    | 5    | 5    | 3    | 5    | 5    | 5    | 3    | 5 |
| 6576   |      |      |      |      |      | 2    | 3    | 3    | 5    | 3    | 6    | 4    | 4    | 2    | 3 |

| respid | Q47l | Q47m | Q47n | Q47o | Q48a | Q48b | Q48c | Q48d | Q48e | Q48f | Q48g | Q48h | Q48i | Q48j |
|--------|------|------|------|------|------|------|------|------|------|------|------|------|------|------|
| 6580   |      |      |      |      |      |      |      |      |      |      |      |      |      |      |
| 6584   |      |      |      |      |      |      |      |      |      |      |      |      |      |      |
| 6585   | 4    | 3    | 3    | 4    |      |      |      |      |      |      |      |      |      |      |
| 6589   |      |      |      |      | 1    | 6    | 6    | 4    | 3    | 6    | 6    | 6    | 2    | 6    |
| 6590   |      |      |      |      | 6    | 1    | 1    | 2    | 5    | 1    | 1    | 2    | 5    | 1    |
| 6598   | 5    | 5    | 5    | 5    |      |      |      |      |      |      |      |      |      |      |
| 6603   | 4    | 4    | 4    |      |      |      |      |      |      |      |      |      |      |      |
| 6618   |      |      |      |      | 3    | 3    | 3    | 3    | 2    | 4    | 3    | 4    | 4    | 3    |
| 6630   |      |      |      |      |      |      |      |      |      |      |      |      |      |      |
| 6636   | 3    | 3    | 3    | 3    |      |      |      |      |      |      |      |      |      |      |
| 6649   |      |      |      |      |      |      |      |      |      |      |      |      |      |      |
| 6675   | 1    | 1    | 1    | 1    |      |      |      |      |      |      |      |      |      |      |
| 6678   | 2    | 3    | 3    | 2    |      |      |      |      |      |      |      |      |      |      |
| 6681   | 5    | 5    | 5    | 5    |      |      |      |      |      |      |      |      |      |      |
| 6684   | 3    | 3    | 3    | 3    |      |      |      |      |      |      |      |      |      |      |
| 6688   |      |      |      |      |      |      |      |      |      |      |      |      |      |      |
| 6691   | 4    | 3    | 3    | 3    |      |      |      |      |      |      |      |      |      |      |
| 6694   |      |      |      |      | 2    | 2    | 2    | 6    | 2    | 6    | 5    | 6    | 1    | 2    |
| 6696   | 3    | 4    | 4    | 4    |      |      |      |      |      |      |      |      |      |      |
| 6720   |      |      |      |      | 3    | 2    | 2    | 2    | 3    | 3    | 3    | 3    | 2    | 1    |
| 6722   | 1    | 1    | 1    | 1    |      |      |      |      |      |      |      |      |      |      |
| 6724   | 4    | 4    | 4    | 4    |      |      |      |      |      |      |      |      |      |      |
| 6725   | 3    | 4    | 4    | 3    |      |      |      |      |      |      |      |      |      |      |
| 6727   | 4    | 4    | 4    | 4    |      |      |      |      |      |      |      |      |      |      |
| 6734   |      |      |      |      | 1    | 6    | 6    | 6    | 2    | 6    | 5    | 6    | 1    | 3    |
| 6739   | 3    | 3    | 3    | 2    |      |      |      |      |      |      |      |      |      |      |
| 6743   | 5    | 3    | 5    | 5    |      |      |      |      |      |      |      |      |      |      |
| 6749   | 3    | 4    | 4    | 4    |      |      |      |      |      |      |      |      |      |      |
| 6756   | 3    | 4    | 4    | 3    |      |      |      |      |      |      |      |      |      |      |
| 6764   | 5    | 5    | 5    | 5    |      |      |      |      |      |      |      |      |      |      |
| 6765   |      |      |      |      | 2    | 4    | 6    | 5    | 3    | 5    | 4    | 5    | 3    | 4    |
| 6768   | 3    | 4    | 4    | 4    |      |      |      |      |      |      |      |      |      |      |

| respid | Q47l | Q47m | Q47n | Q47o | Q48a | Q48b | Q48c | Q48d | Q48e | Q48f | Q48g | Q48h | Q48i | Q48j |   |
|--------|------|------|------|------|------|------|------|------|------|------|------|------|------|------|---|
| 6773   |      |      |      |      |      | 2    | 6    | 6    | 6    | 1    | 6    | 6    | 6    | 1    | 5 |
| 6775   |      |      |      |      |      | 1    | 4    | 6    | 4    | 5    | 6    | 6    | 6    | 1    | 4 |
| 6777   |      |      |      |      |      | 2    | 2    | 2    | 2    | 2    | 2    | 2    | 2    | 2    | 2 |
| 6779   |      |      |      |      |      |      |      |      | 3    |      | 3    |      |      |      |   |
| 6790   |      |      |      |      |      | 2    | 5    | 6    | 6    | 6    | 6    | 6    | 6    | 6    | 6 |
| 6797   |      |      |      |      |      |      |      |      |      |      |      |      |      |      |   |
| 6798   |      |      |      |      |      | 3    | 3    | 3    | 4    | 4    | 3    | 3    | 4    | 3    | 3 |
| 6808   |      |      |      |      |      |      |      |      |      |      |      |      |      |      |   |
| 6810   |      |      |      |      |      | 1    | 6    | 6    | 5    | 2    | 6    | 3    | 6    | 1    | 3 |
| 6811   | 4    | 1    | 1    | 1    |      |      |      |      |      |      |      |      |      |      |   |
| 6812   |      |      |      |      |      | 1    | 6    | 6    | 6    | 1    | 6    | 6    | 6    | 1    | 5 |
| 6814   |      |      |      |      |      |      |      |      |      |      |      |      |      |      |   |
| 6819   |      |      |      | 4    |      |      |      |      |      |      |      |      |      |      |   |
| 6820   | 4    | 3    | 3    | 5    |      |      |      |      |      |      |      |      |      |      |   |
| 6832   | 3    | 3    | 4    | 3    |      |      |      |      |      |      |      |      |      |      |   |
| 6854   | 4    | 2    | 5    | 4    |      |      |      |      |      |      |      |      |      |      |   |
| 6855   |      |      |      |      |      |      |      |      |      |      |      |      |      |      |   |
| 6857   | 3    | 3    | 3    | 3    |      |      |      |      |      |      |      |      |      |      |   |
| 6858   |      |      |      |      |      | 1    | 6    | 6    | 5    | 2    | 6    | 6    | 6    | 1    | 6 |
| 6859   |      |      |      |      |      | 2    | 6    | 6    | 5    | 2    | 5    | 5    | 5    | 2    | 3 |
| 6860   |      |      |      |      |      |      |      |      |      |      |      |      |      |      |   |
| 6862   |      |      |      |      |      | 1    | 5    | 5    | 5    | 2    | 5    | 5    |      |      | 5 |
| 6879   |      |      |      |      |      |      |      |      |      |      |      |      |      |      |   |
| 6893   | 4    | 4    | 4    | 4    |      |      |      |      |      |      |      |      |      |      |   |
| 6898   |      |      |      |      |      | 5    | 5    | 3    | 3    | 5    | 5    | 6    | 4    | 5    | 5 |
| 6902   | 4    | 4    | 4    | 4    |      |      |      |      |      |      |      |      |      |      |   |
| 6903   |      |      |      |      |      |      |      |      |      |      |      |      |      |      |   |
| 6907   |      |      |      |      |      | 2    | 5    | 5    | 4    | 3    | 5    | 3    | 4    | 2    | 3 |
| 6908   |      |      |      |      |      |      |      |      |      |      |      |      |      |      |   |
| 6912   |      |      |      |      |      |      |      |      |      |      |      |      |      |      |   |
| 6915   |      |      |      |      |      | 1    |      | 1    | 3    | 2    | 4    | 3    | 5    | 3    | 5 |
| 6916   |      |      |      |      |      | 2    | 4    | 5    | 2    | 5    | 4    | 4    | 6    | 4    | 3 |

| respid | Q47l | Q47m | Q47n | Q47o | Q48a | Q48b | Q48c | Q48d | Q48e | Q48f | Q48g | Q48h | Q48i | Q48j |   |
|--------|------|------|------|------|------|------|------|------|------|------|------|------|------|------|---|
| 6917   |      |      |      |      |      | 1    | 2    | 2    | 2    | 4    | 6    | 5    | 2    | 6    | 2 |
| 6923   |      |      |      | 3    | 3    |      |      |      |      |      |      |      |      |      |   |
| 6934   | 4    | 4    | 4    | 4    | 3    |      |      |      |      |      |      |      |      |      |   |
| 6937   |      |      |      |      |      |      |      |      |      |      |      |      |      |      |   |
| 6945   | 3    | 3    | 4    | 3    |      |      |      |      |      |      |      |      |      |      |   |
| 6954   | 3    | 4    |      | 3    |      |      |      |      |      |      |      |      |      |      |   |
| 6956   |      |      |      |      |      | 3    | 6    | 6    | 4    | 1    | 4    | 4    | 6    | 1    | 4 |
| 6958   | 5    | 5    | 5    | 5    |      |      |      |      |      |      |      |      |      |      |   |
| 6961   |      |      |      |      |      | 1    | 6    | 6    | 6    | 2    | 5    | 3    | 6    | 2    | 3 |
| 6963   |      |      |      |      |      | 1    | 5    | 5    | 6    | 2    | 6    | 6    | 6    | 1    | 5 |
| 6964   |      |      |      |      |      | 2    | 6    | 6    | 6    | 2    | 6    | 6    | 6    | 1    | 6 |
| 6976   |      |      |      |      |      |      |      |      |      |      |      |      |      |      |   |
| 6977   |      |      |      |      |      | 1    | 2    | 3    | 6    | 6    | 3    | 4    | 5    | 5    | 5 |
| 7000   | 3    | 3    | 4    | 3    |      |      |      |      |      |      |      |      |      |      |   |
| 7001   | 1    | 3    | 3    | 3    |      |      |      |      |      |      |      |      |      |      |   |
| 7005   | 3    | 4    | 4    | 4    |      |      |      |      |      |      |      |      |      |      |   |
| 7006   |      |      |      |      |      | 3    | 6    | 6    | 4    | 3    | 6    | 6    | 6    | 1    | 5 |
| 7008   |      |      |      |      |      | 3    | 3    | 3    | 2    | 6    | 1    | 2    | 3    | 5    | 2 |
| 7009   |      |      |      |      |      | 4    | 4    | 3    | 4    | 4    | 4    | 3    | 4    | 3    | 3 |
| 7019   |      | 4    |      |      |      |      |      |      |      |      |      |      |      |      |   |
| 7021   |      |      |      |      |      | 3    | 4    | 5    | 4    | 3    | 4    | 4    | 4    | 3    | 4 |
| 7026   | 3    | 3    | 3    | 4    |      |      |      |      |      |      |      |      |      |      |   |
| 7030   |      |      |      |      |      | 2    | 2    | 2    | 2    | 2    | 2    | 2    | 2    | 2    | 2 |
| 7034   |      |      |      |      |      |      |      |      |      |      |      |      |      |      |   |
| 7039   |      |      |      |      |      | 3    | 5    | 5    | 6    | 2    | 6    | 5    | 6    | 2    | 5 |
| 7041   | 3    | 4    | 4    | 3    |      |      |      |      |      |      |      |      |      |      |   |
| 7047   |      |      |      |      |      | 3    | 4    | 4    | 4    | 3    | 4    | 4    | 4    | 3    | 4 |
| 7051   | 3    | 4    | 4    | 3    |      |      |      |      |      |      |      |      |      |      |   |
| 7052   | 4    | 4    | 4    | 4    |      |      |      |      |      |      |      |      |      |      |   |
| 7059   |      |      |      |      |      | 2    | 6    | 5    | 2    | 2    | 2    | 6    | 6    | 2    | 5 |
| 7062   |      |      |      |      |      | 5    | 2    | 2    | 2    | 4    | 2    | 3    | 2    | 6    | 1 |
| 7065   |      |      |      |      |      | 2    | 2    | 2    | 6    | 1    | 2    | 3    | 5    | 5    | 3 |

| respid | Q47l | Q47m | Q47n | Q47o | Q48a | Q48b | Q48c | Q48d | Q48e | Q48f | Q48g | Q48h | Q48i | Q48j |   |
|--------|------|------|------|------|------|------|------|------|------|------|------|------|------|------|---|
| 7066   |      |      |      |      |      | 1    | 6    | 6    | 6    | 1    | 6    | 6    | 6    | 1    | 6 |
| 7069   |      |      |      |      |      | 2    | 6    | 5    | 6    | 6    | 3    | 4    | 6    | 3    | 2 |
| 7070   |      |      |      |      |      |      |      |      |      |      |      |      |      |      |   |
| 7073   |      |      |      |      |      |      |      |      |      |      |      |      |      |      |   |
| 7078   | 3    | 4    | 4    | 3    |      |      |      |      |      |      |      |      |      |      |   |
| 7083   | 3    | 4    | 4    | 4    |      |      |      |      |      |      |      |      |      |      |   |
| 7084   | 3    | 4    | 4    | 2    |      |      |      |      |      |      |      |      |      |      |   |
| 7085   |      |      |      |      |      |      |      |      |      |      |      |      |      |      |   |
| 7088   | 2    | 2    | 2    | 1    |      |      |      |      |      |      |      |      |      |      |   |
| 7090   | 3    | 3    | 2    | 3    |      |      |      |      |      |      |      |      |      |      |   |
| 7095   |      |      |      |      |      | 2    | 3    | 3    | 3    | 3    | 2    | 2    | 2    | 6    | 5 |
| 7100   |      |      |      |      |      |      |      |      |      |      |      |      |      |      |   |
| 7102   |      | 3    | 3    | 3    |      |      |      |      |      |      |      |      |      |      |   |
| 7103   |      |      |      |      |      | 2    | 6    | 6    | 3    | 2    | 6    | 5    | 6    | 1    | 6 |
| 7108   |      |      |      |      |      | 2    | 2    | 4    | 4    | 2    | 5    | 5    | 5    | 2    | 6 |
| 7109   |      |      |      |      |      | 3    | 6    | 6    | 6    | 1    | 6    | 6    | 6    | 6    | 6 |
| 7110   |      |      |      |      |      |      |      |      |      |      |      |      |      |      |   |
| 7112   |      |      |      |      |      |      |      |      |      |      |      |      |      |      |   |
| 7114   |      |      |      |      |      | 1    | 3    | 4    | 3    | 2    | 4    | 5    | 6    | 2    | 3 |
| 7116   | 2    | 3    | 3    | 2    |      |      |      |      |      |      |      |      |      |      |   |
| 7117   |      |      |      |      |      | 1    | 6    | 6    | 4    | 3    | 5    | 4    | 6    | 5    | 3 |
| 7118   |      |      |      |      |      | 3    | 4    | 4    | 4    | 3    | 4    | 4    | 4    | 3    | 4 |
| 7120   |      |      |      |      |      | 1    | 4    | 5    |      | 4    | 4    | 3    | 5    | 1    | 3 |
| 7124   |      |      |      |      |      | 3    | 4    | 5    | 4    | 3    | 5    | 5    | 4    | 3    | 4 |
| 7130   | 2    | 2    | 2    | 2    |      |      |      |      |      |      |      |      |      |      |   |
| 7135   | 1    | 1    | 1    | 1    |      |      |      |      |      |      |      |      |      |      |   |
| 7137   | 3    | 3    | 2    | 2    |      |      |      |      |      |      |      |      |      |      |   |
| 7140   | 2    | 3    | 4    | 3    |      |      |      |      |      |      |      |      |      |      |   |
| 7141   |      |      |      |      |      | 1    | 6    | 6    | 6    | 3    | 6    | 6    | 6    | 1    | 4 |
| 7148   |      |      |      |      |      | 3    | 4    | 4    | 4    | 3    | 4    | 4    | 4    | 3    | 4 |
| 7152   |      |      |      |      |      |      |      |      |      |      |      |      |      |      |   |
| 7154   | 2    | 4    |      | 4    |      |      |      |      |      |      |      |      |      |      |   |

| respid | Q47l | Q47m | Q47n | Q47o | Q48a | Q48b | Q48c | Q48d | Q48e | Q48f | Q48g | Q48h | Q48i | Q48j |   |
|--------|------|------|------|------|------|------|------|------|------|------|------|------|------|------|---|
| 7156   |      |      |      |      |      | 1    | 4    | 4    | 6    | 3    | 6    | 6    |      | 3    |   |
| 7158   |      |      |      |      |      | 1    | 1    | 3    | 2    | 4    | 3    | 5    | 2    | 4    | 3 |
| 7159   |      |      |      |      |      |      |      |      |      |      |      |      |      |      |   |
| 7161   |      |      |      |      |      |      |      |      |      |      |      |      |      |      |   |
| 7164   | 4    | 3    | 4    | 5    |      |      |      |      |      |      |      |      |      |      |   |
| 7166   |      |      |      |      |      |      |      |      |      |      |      |      |      |      |   |
| 7167   |      |      |      |      |      |      |      |      |      |      |      |      |      |      |   |
| 7168   |      |      |      |      |      |      |      |      |      |      |      |      |      |      |   |
| 7170   |      |      |      |      |      |      |      |      |      |      |      |      |      |      |   |
| 7171   |      |      |      |      |      | 3    | 4    | 5    | 4    | 3    | 4    | 5    | 6    | 3    | 5 |
| 7172   |      |      |      |      |      | 4    | 4    | 4    | 3    | 4    | 4    | 5    | 5    | 3    | 4 |
| 7173   |      |      |      |      |      | 2    | 6    | 6    | 5    | 2    | 5    | 6    | 6    | 1    | 5 |
| 7175   |      |      |      |      |      | 1    | 6    | 6    | 4    | 3    | 6    | 6    | 6    | 1    | 5 |
| 7176   | 3    | 3    | 3    | 3    |      |      |      |      |      |      |      |      |      |      |   |
| 7180   | 4    | 4    | 4    | 5    |      |      |      |      |      |      |      |      |      |      |   |
| 7183   | 3    | 4    | 4    | 3    |      |      |      |      |      |      |      |      |      |      |   |
| 7189   | 4    | 4    | 4    | 4    |      |      |      |      |      |      |      |      |      |      |   |
| 7193   | 3    | 3    | 3    | 4    |      |      |      |      |      |      |      |      |      |      |   |
| 7194   |      |      |      |      |      | 3    | 4    | 4    | 3    | 5    | 5    | 2    | 2    | 6    | 3 |
| 7195   |      |      |      |      |      | 2    | 6    | 6    | 6    | 2    | 6    | 6    | 6    | 2    | 6 |
| 7200   |      |      |      |      |      | 3    | 5    | 5    | 3    | 3    | 4    | 5    | 4    | 3    | 4 |
| 7201   |      |      |      |      |      | 3    | 4    | 4    | 4    | 3    | 4    | 4    | 4    | 3    | 4 |
| 7205   | 3    | 3    | 4    | 2    |      |      |      |      |      |      |      |      |      |      |   |
| 7207   | 3    | 3    | 3    | 3    |      |      |      |      |      |      |      |      |      |      |   |
| 7208   |      |      |      |      |      |      |      |      |      |      |      |      |      |      |   |
| 7210   |      |      |      |      |      | 1    | 6    | 6    | 6    | 3    | 6    | 6    | 6    | 2    | 6 |
| 7211   | 4    | 4    | 4    | 4    |      |      |      |      |      |      |      |      |      |      |   |
| 7217   |      |      |      |      |      | 3    | 4    | 4    | 4    | 2    | 4    | 5    | 5    | 4    | 6 |
| 7218   |      |      |      |      |      | 4    | 4    | 4    | 3    | 4    | 3    | 4    | 4    | 4    | 4 |
| 7220   |      |      |      |      |      |      |      |      |      |      |      |      |      |      |   |
| 7225   | 5    | 5    | 5    | 5    |      |      |      |      |      |      |      |      |      |      |   |
| 7228   | 3    | 3    | 3    | 3    |      |      |      |      |      |      |      |      |      |      |   |

| respid | Q47l | Q47m | Q47n | Q47o | Q48a | Q48b | Q48c | Q48d | Q48e | Q48f | Q48g | Q48h | Q48i | Q48j |
|--------|------|------|------|------|------|------|------|------|------|------|------|------|------|------|
| 7230   | 3    | 3    | 3    | 3    |      |      |      |      |      |      |      |      |      |      |
| 7233   | 3    | 4    | 4    | 3    |      |      |      |      |      |      |      |      |      |      |
| 7234   | 4    | 3    |      | 4    |      |      |      |      |      |      |      |      |      |      |
| 7235   |      |      |      |      |      |      |      |      |      |      |      |      |      |      |
| 7236   |      |      |      |      |      |      |      |      |      |      |      |      |      |      |
| 7241   | 4    | 5    | 5    | 4    |      |      |      |      |      |      |      |      |      |      |
| 7251   | 3    | 4    | 4    | 3    |      |      |      |      |      |      |      |      |      |      |
| 7253   | 3    | 4    | 4    | 3    |      |      |      |      |      |      |      |      |      |      |
| 7259   | 4    | 4    | 4    | 5    |      |      |      |      |      |      |      |      |      |      |
| 7260   |      |      |      |      | 4    | 3    | 3    | 4    | 4    | 5    | 4    | 4    | 3    | 4    |
| 7261   | 3    | 3    | 3    | 3    |      |      |      |      |      |      |      |      |      |      |
| 7263   |      |      |      |      | 2    | 5    | 5    | 5    | 2    | 5    | 5    | 5    | 2    | 5    |
| 7265   |      |      |      |      |      |      |      |      |      |      |      |      |      |      |
| 7268   |      |      |      |      | 3    | 4    | 6    | 3    | 3    | 4    | 6    | 6    | 6    | 3    |
| 7269   |      |      |      |      |      |      |      |      |      |      |      |      |      |      |
| 7271   | 3    | 3    | 3    | 3    |      |      |      |      |      |      |      |      |      |      |
| 7276   |      |      |      |      | 2    | 2    | 3    | 2    | 1    | 6    | 6    | 1    | 2    | 6    |
| 7280   | 2    | 2    | 2    | 3    |      |      |      |      |      |      |      |      |      |      |
| 7283   |      |      |      |      | 1    | 5    | 6    | 6    | 2    | 6    | 6    | 6    | 2    | 4    |
| 7284   |      |      |      |      | 1    | 6    | 6    | 6    | 1    | 6    | 6    | 6    | 1    | 6    |
| 7286   | 5    | 5    | 5    | 5    |      |      |      |      |      |      |      |      |      |      |
| 7287   |      |      |      |      |      |      |      |      |      |      |      |      |      |      |
| 7288   |      |      |      |      | 5    | 4    | 4    | 3    | 3    | 3    | 3    | 4    | 4    | 4    |
| 7294   |      |      |      |      | 3    | 3    | 3    | 2    | 4    | 3    | 5    | 4    | 4    | 4    |
| 7295   | 1    | 1    | 1    | 1    |      |      |      |      |      |      |      |      |      |      |
| 7296   | 4    | 4    | 4    | 4    |      |      |      |      |      |      |      |      |      |      |
| 7297   | 3    |      |      |      |      |      |      |      |      |      |      |      |      |      |
| 7299   |      |      |      |      |      | 6    | 6    | 6    | 1    | 6    | 6    | 6    | 1    | 2    |
| 7300   |      | 4    | 4    | 5    |      |      |      |      |      |      |      |      |      |      |
| 7301   | 2    | 3    | 3    | 2    |      |      |      |      |      |      |      |      |      |      |
| 7302   |      |      |      |      |      |      |      |      |      |      |      |      |      |      |
| 7306   |      |      |      |      | 2    | 5    | 6    | 6    | 1    | 6    | 6    | 6    | 2    | 6    |



| respid | Q47l | Q47m | Q47n | Q47o | Q48a | Q48b | Q48c | Q48d | Q48e | Q48f | Q48g | Q48h | Q48i | Q48j |
|--------|------|------|------|------|------|------|------|------|------|------|------|------|------|------|
| 7313   |      | 3    | 3    | 3    | 2    |      |      |      |      |      |      |      |      |      |
| 7315   |      |      |      |      |      | 6    | 6    | 6    | 4    | 5    | 6    | 6    | 6    | 6    |
| 7317   |      |      |      |      |      | 1    | 4    | 4    | 4    | 2    | 4    | 5    | 4    | 2    |
| 7321   | 4    | 3    | 3    | 3    |      |      |      |      |      |      |      |      |      |      |
| 7322   | 5    | 4    | 4    | 5    |      |      |      |      |      |      |      |      |      |      |
| 7323   | 4    | 4    | 4    | 4    |      |      |      |      |      |      |      |      |      |      |
| 7333   | 4    | 3    | 3    | 3    |      |      |      |      |      |      |      |      |      |      |
| 7335   |      |      |      |      |      | 2    | 5    | 5    | 3    | 4    | 6    | 6    |      | 2    |
| 7336   | 2    | 3    | 1    | 3    |      |      |      |      |      |      |      |      |      | 5    |
| 7337   | 3    | 4    | 4    | 4    |      |      |      |      |      |      |      |      |      |      |
| 7338   | 5    | 5    | 5    | 5    |      |      |      |      |      |      |      |      |      |      |
| 7340   | 4    | 3    | 3    | 3    |      |      |      |      |      |      |      |      |      |      |
| 7341   |      |      |      |      |      | 3    | 6    | 6    | 4    | 3    | 4    | 4    | 4    | 2    |
| 7342   | 1    | 4    | 4    | 3    |      |      |      |      |      |      |      |      |      | 6    |
| 7344   |      |      |      |      |      | 3    | 3    | 2    | 4    | 4    | 4    | 4    | 4    | 5    |
| 7346   |      |      |      |      |      | 3    | 5    | 6    | 6    | 2    | 6    | 6    | 6    | 1    |
| 7347   |      |      |      |      |      | 3    | 5    | 4    | 6    | 2    | 4    | 5    | 4    | 3    |
| 7349   |      |      |      |      |      | 2    | 4    | 2    | 4    | 2    | 3    | 4    | 5    | 2    |
| 7352   | 4    | 3    | 3    | 5    |      |      |      |      |      |      |      |      |      |      |
| 7353   | 5    | 2    | 2    | 5    |      |      |      |      |      |      |      |      |      |      |
| 7355   |      |      |      |      |      |      |      |      |      |      |      |      |      |      |
| 7356   |      |      |      |      |      |      |      |      |      |      |      |      |      |      |
| 7360   |      |      |      |      |      | 2    | 3    | 2    | 4    | 2    | 2    | 1    | 2    | 4    |
| 7371   |      |      |      |      |      | 2    | 6    | 5    | 3    | 4    | 2    | 3    | 2    | 2    |
| 7376   | 1    | 1    | 1    | 1    |      |      |      |      |      |      |      |      |      |      |
| 7379   |      |      |      |      |      | 4    | 4    | 4    | 4    | 3    | 2    | 4    | 4    | 4    |
| 7381   | 4    | 4    | 4    | 4    |      |      |      |      |      |      |      |      |      | 3    |
| 7386   | 3    | 4    | 4    | 3    |      |      |      |      |      |      |      |      |      |      |
| 7389   | 3    | 4    | 4    | 4    |      |      |      |      |      |      |      |      |      |      |
| 7390   | 2    | 3    | 3    | 3    |      |      |      |      |      |      |      |      |      |      |
| 7393   | 4    | 5    | 5    | 5    |      |      |      |      |      |      |      |      |      |      |
| 7394   | 4    | 4    | 4    | 4    |      |      |      |      |      |      |      |      |      |      |

| respid | Q47l | Q47m | Q47n | Q47o | Q48a | Q48b | Q48c | Q48d | Q48e | Q48f | Q48g | Q48h | Q48i | Q48j |   |
|--------|------|------|------|------|------|------|------|------|------|------|------|------|------|------|---|
| 7396   |      |      |      |      |      | 4    | 3    | 3    | 3    | 4    | 3    | 3    | 3    | 4    | 3 |
| 7400   |      |      |      |      |      | 2    | 3    | 4    | 5    | 2    | 6    | 4    | 6    | 1    | 4 |
| 7401   | 3    | 4    | 4    | 3    |      |      |      |      |      |      |      |      |      |      |   |
| 7403   | 3    | 3    | 3    | 3    |      |      |      |      |      |      |      |      |      |      |   |
| 7406   | 3    | 4    | 4    | 4    |      |      |      |      |      |      |      |      |      |      |   |
| 7409   | 3    | 5    | 5    | 5    |      |      |      |      |      |      |      |      |      |      |   |
| 7410   | 3    | 3    | 3    | 3    |      |      |      |      |      |      |      |      |      |      |   |
| 7412   |      |      |      |      |      | 2    | 2    | 2    | 2    | 2    | 3    | 2    | 2    | 2    | 2 |
| 7414   |      |      |      |      |      | 1    | 6    | 6    | 6    | 1    | 6    | 6    | 6    | 1    | 6 |
| 7415   | 3    | 4    | 4    | 4    |      |      |      |      |      |      |      |      |      |      |   |
| 7417   | 4    | 4    | 4    | 4    |      |      |      |      |      |      |      |      |      |      |   |
| 7421   |      |      |      |      |      |      |      |      |      |      |      |      |      |      |   |
| 7425   | 3    | 3    | 3    | 4    |      |      |      |      |      |      |      |      |      |      |   |
| 7430   | 3    | 3    | 3    | 3    |      |      |      |      |      |      |      |      |      |      |   |
| 7432   | 4    | 4    | 3    | 4    |      |      |      |      |      |      |      |      |      |      |   |
| 7433   |      |      |      |      |      | 1    |      | 2    |      |      | 2    | 2    | 2    | 3    | 3 |
| 7442   |      |      |      |      |      | 1    | 1    | 1    | 6    | 1    | 6    | 6    | 6    | 5    | 6 |
| 7445   |      |      |      |      |      | 1    | 6    | 6    | 6    | 1    | 6    | 6    | 6    | 1    | 6 |
| 7446   |      |      |      |      |      | 3    | 6    | 6    | 5    | 4    | 4    | 3    | 3    | 6    | 6 |
| 7449   |      |      |      |      |      |      |      |      |      |      |      |      |      |      |   |
| 7450   |      |      |      |      |      |      |      |      |      |      |      |      |      |      |   |
| 7451   | 3    | 3    | 3    | 3    |      |      |      |      |      |      |      |      |      |      |   |
| 7459   |      | 3    | 3    | 3    |      |      |      |      |      |      |      |      |      |      |   |
| 7462   |      |      |      |      |      |      |      |      |      |      |      |      |      |      |   |
| 7463   |      |      |      |      |      | 5    | 5    | 6    | 6    | 5    | 6    | 6    | 6    | 5    | 5 |
| 7469   |      |      |      |      |      |      |      |      |      |      |      |      |      |      |   |
| 7482   | 1    | 1    | 1    | 3    |      |      |      |      |      |      |      |      |      |      |   |
| 7484   |      |      |      |      |      | 3    | 4    | 4    | 4    | 3    | 4    | 4    | 4    | 3    | 4 |
| 7486   | 3    | 4    | 4    | 3    |      |      |      |      |      |      |      |      |      |      |   |
| 7496   | 4    | 4    | 4    | 4    |      |      |      |      |      |      |      |      |      |      |   |
| 7502   | 5    | 3    | 3    | 4    |      |      |      |      |      |      |      |      |      |      |   |
| 7504   | 3    | 3    | 3    | 3    |      |      |      |      |      |      |      |      |      |      |   |

| respid | Q47l | Q47m | Q47n | Q47o | Q48a | Q48b | Q48c | Q48d | Q48e | Q48f | Q48g | Q48h | Q48i | Q48j |   |
|--------|------|------|------|------|------|------|------|------|------|------|------|------|------|------|---|
| 7509   | 3    | 2    | 2    | 2    |      |      |      |      |      |      |      |      |      |      |   |
| 7513   |      |      |      |      |      | 2    | 2    | 2    | 2    | 4    | 3    | 2    | 2    | 3    | 4 |
| 7514   |      |      |      |      |      |      |      |      |      |      |      |      |      |      |   |
| 7520   |      |      |      |      |      | 3    | 3    | 4    | 4    | 4    |      | 3    | 6    |      | 3 |
| 7523   |      |      |      |      |      |      |      |      |      |      |      |      |      |      |   |
| 7526   |      |      |      |      |      | 4    | 3    | 3    | 4    | 5    | 4    | 3    | 4    | 4    | 2 |
| 7529   | 3    | 4    | 4    | 4    |      |      |      |      |      |      |      |      |      |      |   |
| 7534   |      |      |      |      |      |      |      |      |      |      |      |      |      |      |   |
| 7536   | 4    | 3    | 3    | 3    |      |      |      |      |      |      |      |      |      |      |   |
| 7540   | 3    | 4    | 4    | 4    |      |      |      |      |      |      |      |      |      |      |   |
| 7541   | 2    | 3    | 3    | 3    |      |      |      |      |      |      |      |      |      |      |   |
| 7542   |      |      |      |      |      |      |      |      |      |      |      |      |      |      |   |
| 7555   | 2    | 3    | 3    | 3    |      |      |      |      |      |      |      |      |      |      |   |
| 7566   |      |      |      |      |      | 6    | 6    |      |      |      |      |      |      |      |   |
| 7568   | 3    | 2    | 2    | 3    |      |      |      |      |      |      |      |      |      |      |   |
| 7570   | 3    | 3    | 3    | 3    |      |      |      |      |      |      |      |      |      |      |   |
| 7572   |      |      |      |      |      | 1    | 5    | 6    | 6    | 6    | 6    | 6    | 6    |      |   |
| 7573   |      |      |      |      |      | 2    | 4    | 4    | 4    | 4    | 4    | 5    | 4    | 4    | 4 |
| 7576   |      |      |      |      |      | 2    | 4    | 3    | 4    | 4    | 5    | 5    | 5    | 3    | 3 |
| 7577   |      |      |      |      |      | 2    | 4    | 4    | 5    | 3    | 5    | 6    | 6    | 2    | 5 |
| 7583   | 5    | 5    | 5    | 5    |      |      |      |      |      |      |      |      |      |      |   |
| 7584   | 4    | 3    | 2    | 3    |      |      |      |      |      |      |      |      |      |      |   |
| 7585   |      |      |      |      |      | 1    | 6    | 6    | 6    | 1    | 6    | 6    | 6    | 1    | 6 |
| 7586   | 3    | 4    | 4    | 3    |      |      |      |      |      |      |      |      |      |      |   |
| 7587   | 3    | 4    | 4    | 4    |      |      |      |      |      |      |      |      |      |      |   |
| 7588   | 4    | 4    | 4    | 5    |      |      |      |      |      |      |      |      |      |      |   |
| 7596   | 3    | 4    | 4    | 3    |      |      |      |      |      |      |      |      |      |      |   |
| 7599   |      |      |      |      |      | 1    | 6    | 6    | 6    | 1    | 6    | 6    | 6    | 1    | 6 |
| 7600   | 3    | 3    | 3    | 4    |      |      |      |      |      |      |      |      |      |      |   |
| 7602   |      |      |      |      |      | 1    | 6    | 6    | 6    | 1    | 6    | 6    | 6    | 1    | 6 |
| 7613   | 4    | 5    | 5    | 5    |      |      |      |      |      |      |      |      |      |      |   |
| 7620   |      |      |      |      |      | 2    | 6    | 6    | 6    | 2    | 6    | 6    | 6    | 2    | 6 |

| respid | Q47l | Q47m | Q47n | Q47o | Q48a | Q48b | Q48c | Q48d | Q48e | Q48f | Q48g | Q48h | Q48i | Q48j |   |
|--------|------|------|------|------|------|------|------|------|------|------|------|------|------|------|---|
| 7623   |      | 5    | 3    | 3    | 5    |      |      |      |      |      |      |      |      |      |   |
| 7635   |      | 4    | 4    | 4    | 3    |      |      |      |      |      |      |      |      |      |   |
| 7636   |      |      |      |      |      | 3    | 3    | 6    | 5    | 2    | 6    | 6    | 6    | 2    | 2 |
| 7643   |      |      |      |      |      | 2    | 6    | 6    | 6    | 1    | 6    | 6    | 6    | 1    | 6 |
| 7645   |      |      |      |      |      | 1    | 3    | 3    | 5    | 2    | 5    | 5    | 5    | 3    | 5 |
| 7649   |      |      |      |      |      | 2    | 2    | 3    | 3    | 4    | 3    | 3    | 3    | 3    | 3 |
| 7651   |      |      |      |      |      | 2    | 5    | 5    | 3    | 3    | 5    | 5    | 6    | 2    | 3 |
| 7652   |      | 2    | 1    |      | 2    |      |      |      |      |      |      |      |      |      |   |
| 7655   |      | 3    | 4    | 4    | 3    |      |      |      |      |      |      |      |      |      |   |
| 7657   |      | 5    | 5    | 5    | 5    |      |      |      |      |      |      |      |      |      |   |
| 7675   |      |      |      |      |      |      |      |      | 1    | 1    |      | 6    |      |      |   |
| 7676   |      | 2    | 1    | 2    | 2    |      |      |      |      |      |      |      |      |      |   |
| 7684   |      |      |      |      |      | 1    | 6    | 6    | 6    | 1    | 6    | 6    | 6    | 1    | 6 |
| 7693   |      | 4    | 4    | 4    | 4    |      |      |      |      |      |      |      |      |      |   |
| 7694   |      |      |      |      |      | 5    | 4    | 4    | 4    | 5    |      |      |      |      |   |
| 7695   |      | 5    | 4    | 5    | 5    |      |      |      |      |      |      |      |      |      |   |
| 7696   |      |      |      |      |      | 5    | 4    | 4    | 4    | 5    |      |      |      |      |   |
| 7698   |      |      |      |      |      | 3    | 1    | 6    | 6    | 1    | 6    | 6    | 6    | 1    | 6 |
| 7700   |      |      |      |      |      | 2    | 6    | 6    | 6    | 2    | 6    | 6    | 6    | 1    | 5 |
| 7701   |      | 3    | 4    | 4    | 4    |      |      |      |      |      |      |      |      |      |   |
| 7704   |      |      |      |      |      | 1    | 6    | 6    | 6    | 1    | 6    | 6    | 6    | 1    | 6 |
| 7709   |      | 3    | 4    | 4    | 4    |      |      |      |      |      |      |      |      |      |   |
| 7713   |      | 2    | 1    | 1    | 2    |      |      |      |      |      |      |      |      |      |   |
| 7714   |      | 5    | 5    | 5    | 5    |      |      |      |      |      |      |      |      |      |   |
| 7718   |      | 1    | 1    | 1    | 2    |      |      |      |      |      |      |      |      |      |   |
| 7720   |      | 4    | 4    | 5    | 4    |      |      |      |      |      |      |      |      |      |   |
| 7721   |      | 3    | 4    | 4    | 3    |      |      |      |      |      |      |      |      |      |   |
| 7722   |      | 3    | 4    | 4    | 3    |      |      |      |      |      |      |      |      |      |   |
| 7724   |      | 3    | 3    | 3    | 2    |      |      |      |      |      |      |      |      |      |   |
| 7728   |      |      |      |      |      |      |      |      |      |      |      |      |      |      |   |
| 7731   |      | 3    | 4    | 3    | 3    |      |      |      |      |      |      |      |      |      |   |
| 7735   |      | 2    |      |      |      |      |      |      |      |      |      |      |      |      |   |

| respid | Q47l | Q47m | Q47n | Q47o | Q48a | Q48b | Q48c | Q48d | Q48e | Q48f | Q48g | Q48h | Q48i | Q48j |   |
|--------|------|------|------|------|------|------|------|------|------|------|------|------|------|------|---|
| 7737   |      | 4    | 4    | 4    | 4    |      |      |      |      |      |      |      |      |      |   |
| 7741   |      | 4    | 4    | 4    | 4    |      |      |      |      |      |      |      |      |      |   |
| 7746   |      | 5    | 4    | 5    | 3    |      |      |      |      |      |      |      |      |      |   |
| 7747   |      |      |      |      |      | 3    |      | 6    | 4    | 3    | 4    | 4    | 6    | 2    | 5 |
| 7748   |      | 3    | 2    | 2    | 3    |      |      |      |      |      |      |      |      |      |   |
| 7750   |      |      |      |      |      | 1    | 6    | 6    | 6    | 1    | 6    | 6    | 6    | 1    | 6 |
| 7754   |      |      |      |      |      | 2    | 5    | 5    | 5    | 2    | 5    | 5    | 6    | 3    | 6 |
| 7755   |      |      |      |      |      | 4    | 4    | 5    | 4    | 4    | 3    | 6    | 6    | 1    | 6 |
| 7762   |      |      |      |      |      |      |      |      |      |      |      |      |      |      |   |
| 7764   |      | 3    | 4    | 4    | 4    |      |      |      |      |      |      |      |      |      |   |
| 7766   |      |      |      |      |      |      |      |      |      |      |      |      |      |      |   |
| 7768   |      |      |      |      |      | 2    | 3    | 6    | 5    | 2    | 6    | 6    | 6    | 1    | 6 |
| 7770   |      | 3    | 1    | 2    | 1    |      |      |      |      |      |      |      |      |      |   |
| 7771   |      | 4    | 4    | 4    | 4    |      |      |      |      |      |      |      |      |      |   |
| 7777   |      | 4    | 4    | 5    |      |      |      |      |      |      |      |      |      |      |   |
| 7778   |      |      |      |      |      |      |      |      |      |      |      |      |      |      |   |
| 7783   |      | 3    | 2    | 2    | 2    |      |      |      |      |      |      |      |      |      |   |
| 7789   |      |      |      |      |      | 2    | 6    | 6    | 6    | 1    | 6    | 6    | 6    | 1    | 6 |
| 7790   |      |      |      |      |      |      |      |      |      |      |      |      |      |      |   |
| 7795   |      | 4    | 2    | 2    | 2    |      |      |      |      |      |      |      |      |      |   |
| 7807   |      | 1    | 3    | 3    | 3    |      |      |      |      |      |      |      |      |      |   |
| 7808   |      | 3    | 3    | 3    | 3    |      |      |      |      |      |      |      |      |      |   |
| 7818   |      |      |      |      |      | 6    | 2    | 2    | 5    | 2    | 5    | 2    | 3    | 5    | 2 |
| 7820   |      |      |      |      |      |      |      |      |      |      |      |      |      |      |   |
| 7831   |      |      |      |      |      | 1    | 6    | 6    | 6    | 2    | 6    | 6    | 6    | 1    | 5 |
| 7832   |      | 3    | 4    | 4    | 3    |      |      |      |      |      |      |      |      |      |   |
| 7837   |      | 3    | 3    | 3    | 3    |      |      |      |      |      |      |      |      |      |   |
| 7841   |      | 3    | 3    | 2    | 3    |      |      |      |      |      |      |      |      |      |   |
| 7845   |      | 3    | 3    | 3    | 3    |      |      |      |      |      |      |      |      |      |   |
| 7853   |      | 4    | 4    | 3    | 4    |      |      |      |      |      |      |      |      |      |   |
| 7854   |      |      |      |      |      | 3    | 4    | 4    | 4    | 3    | 4    | 5    | 4    | 3    | 4 |
| 7862   |      | 2    | 3    | 3    | 2    |      |      |      |      |      |      |      |      |      |   |

| respid | Q47l | Q47m | Q47n | Q47o | Q48a | Q48b | Q48c | Q48d | Q48e | Q48f | Q48g | Q48h | Q48i | Q48j |   |
|--------|------|------|------|------|------|------|------|------|------|------|------|------|------|------|---|
| 7871   |      |      |      |      |      | 2    | 6    | 6    | 4    | 3    | 6    | 6    | 6    | 1    | 6 |
| 7875   |      |      |      |      |      | 2    | 5    | 5    | 2    | 4    | 6    | 3    | 6    | 2    | 2 |
| 7880   |      |      |      |      |      | 2    |      |      |      |      |      |      |      |      |   |
| 7881   |      |      |      |      |      | 1    | 6    | 6    | 3    | 2    | 6    | 6    | 6    | 1    | 3 |
| 7883   | 3    | 4    | 4    | 4    |      |      |      |      |      |      |      |      |      |      |   |
| 7896   | 3    | 3    | 3    | 3    |      |      |      |      |      |      |      |      |      |      |   |
| 7905   | 3    |      |      |      |      |      |      |      |      |      |      |      |      |      |   |
| 7919   | 4    | 4    | 4    | 4    |      |      |      |      |      |      |      |      |      |      |   |
| 7928   | 2    | 1    | 1    | 1    |      |      |      |      |      |      |      |      |      |      |   |
| 7929   |      |      |      |      |      | 6    | 1    | 1    | 2    | 6    | 2    | 1    | 2    | 6    | 1 |
| 7938   | 3    | 3    | 3    | 3    |      |      |      |      |      |      |      |      |      |      |   |
| 7940   | 3    | 4    | 4    | 4    |      |      |      |      |      |      |      |      |      |      |   |
| 7941   | 4    | 4    | 4    | 4    |      |      |      |      |      |      |      |      |      |      |   |
| 7952   |      |      |      |      |      |      |      |      |      |      |      |      |      |      |   |
| 7962   | 4    | 4    | 4    | 4    |      |      |      |      |      |      |      |      |      |      |   |
| 7968   | 4    | 4    |      |      |      |      |      |      |      |      |      |      |      |      |   |
| 7972   | 5    | 4    | 4    | 5    |      |      |      |      |      |      |      |      |      |      |   |
| 7983   | 3    | 3    | 3    | 4    |      |      |      |      |      |      |      |      |      |      |   |
| 7990   | 4    | 4    | 4    | 1    |      |      |      |      |      |      |      |      |      |      |   |
| 7993   |      |      |      |      |      | 1    | 6    | 6    | 6    | 1    | 6    | 6    | 6    | 1    | 6 |
| 8005   |      |      |      |      |      | 3    | 3    | 6    | 2    | 6    | 3    | 5    | 6    | 2    | 1 |
| 8008   |      |      |      |      |      |      |      |      |      |      |      |      |      |      |   |
| 8012   |      |      |      |      |      | 3    | 4    | 4    | 5    | 2    | 5    | 5    | 6    | 2    | 6 |
| 8021   |      |      |      |      |      | 2    | 5    | 5    | 3    | 3    | 4    | 3    | 6    | 3    | 3 |
| 8024   |      |      |      |      |      | 2    | 5    | 5    | 3    | 3    | 4    | 5    | 5    | 3    | 5 |
| 8043   |      |      |      |      |      | 3    |      |      |      |      |      |      |      |      |   |
| 8051   |      |      |      |      |      | 2    | 6    | 6    | 5    | 4    | 4    | 4    | 6    | 1    | 3 |
| 8056   | 2    | 3    | 3    | 3    |      |      |      |      |      |      |      |      |      |      |   |
| 8061   | 3    | 3    | 3    | 3    |      |      |      |      |      |      |      |      |      |      |   |
| 8066   |      |      |      |      |      |      |      |      |      |      |      |      |      |      |   |
| 8069   |      |      |      |      |      | 2    | 3    | 3    | 4    | 2    | 3    | 3    | 4    | 1    | 3 |
| 8071   |      |      |      |      |      | 1    | 6    | 6    | 6    | 1    | 6    | 6    | 6    | 1    | 6 |

| respid | Q47l | Q47m | Q47n | Q47o | Q48a | Q48b | Q48c | Q48d | Q48e | Q48f | Q48g | Q48h | Q48i | Q48j |   |
|--------|------|------|------|------|------|------|------|------|------|------|------|------|------|------|---|
| 8072   |      |      |      |      |      | 1    | 2    | 3    | 3    | 3    | 3    | 5    | 5    | 5    | 4 |
| 8076   | 3    | 4    | 4    | 4    |      |      |      |      |      |      |      |      |      |      |   |
| 8080   | 3    | 4    | 3    | 4    |      |      |      |      |      |      |      |      |      |      |   |
| 8083   | 4    | 3    | 3    | 2    |      |      |      |      |      |      |      |      |      |      |   |
| 8093   | 3    | 3    | 3    | 3    |      |      |      |      |      |      |      |      |      |      |   |
| 8095   | 2    | 3    | 3    | 3    |      |      |      |      |      |      |      |      |      |      |   |
| 8099   | 3    | 4    | 4    | 4    |      |      |      |      |      |      |      |      |      |      |   |
| 8100   |      |      |      |      |      |      |      |      |      |      |      |      |      |      |   |
| 8103   |      |      |      |      |      |      |      |      |      |      |      |      |      |      |   |
| 8104   | 3    | 2    | 2    | 3    |      |      |      |      |      |      |      |      |      |      |   |
| 8115   | 2    | 3    | 3    | 3    |      |      |      |      |      |      |      |      |      |      |   |
| 8121   | 3    | 3    | 3    | 3    |      |      |      |      |      |      |      |      |      |      |   |
| 8128   |      |      |      |      |      | 1    | 6    | 6    | 6    | 1    | 6    | 6    | 6    | 1    | 6 |
| 8130   |      |      |      |      |      | 2    | 2    | 4    | 5    | 3    | 6    | 6    | 6    | 2    | 6 |
| 8131   |      |      |      |      |      | 3    | 2    |      | 3    | 3    | 3    | 3    | 3    | 3    | 3 |
| 8133   |      |      |      |      |      | 1    | 6    | 6    | 6    | 1    | 6    | 6    | 6    | 1    | 6 |
| 8143   | 3    | 4    | 4    | 3    |      |      |      |      |      |      |      |      |      |      |   |
| 8144   |      |      |      |      |      | 2    | 5    | 6    | 6    | 2    | 6    | 6    | 6    | 1    | 5 |
| 8146   | 4    | 4    | 4    | 4    |      |      |      |      |      |      |      |      |      |      |   |
| 8148   |      |      |      |      |      |      |      |      |      |      |      |      |      |      |   |
| 8157   |      |      |      |      |      |      |      |      |      |      |      |      |      |      |   |
| 8164   |      |      |      |      |      |      |      |      |      |      |      |      |      |      |   |
| 8173   |      |      |      |      |      |      |      |      |      |      |      |      |      |      |   |
| 8176   |      |      |      |      |      | 1    | 6    | 6    | 6    | 1    | 6    | 6    | 6    | 1    | 6 |
| 8179   | 5    | 3    | 3    | 4    |      |      |      |      |      |      |      |      |      |      |   |
| 8181   |      |      |      |      |      |      |      |      |      |      |      |      |      |      |   |
| 8182   |      |      |      |      |      | 4    | 4    | 4    | 4    | 4    | 4    | 4    | 4    | 4    | 4 |
| 8196   | 4    | 4    | 4    | 4    |      |      |      |      |      |      |      |      |      |      |   |
| 8200   |      |      |      |      |      | 4    | 3    | 3    | 3    | 4    | 3    | 3    | 3    | 4    | 3 |
| 8203   |      |      |      |      |      |      |      |      |      |      |      |      |      |      |   |
| 8204   |      |      |      |      |      | 3    | 3    | 3    | 1    | 6    | 6    | 6    | 1    | 3    | 6 |
| 8206   |      |      |      |      |      |      |      |      |      |      | 6    | 6    | 6    | 2    | 5 |

| respid | Q47l | Q47m | Q47n | Q47o | Q48a | Q48b | Q48c | Q48d | Q48e | Q48f | Q48g | Q48h | Q48i | Q48j |   |
|--------|------|------|------|------|------|------|------|------|------|------|------|------|------|------|---|
| 8208   |      |      |      |      |      | 1    | 6    | 6    | 6    | 1    | 6    | 6    | 6    | 1    | 6 |
| 8212   | 3    | 2    | 2    | 2    |      |      |      |      |      |      |      |      |      |      |   |
| 8222   |      |      |      |      |      | 2    | 2    | 2    | 3    | 3    | 4    | 4    | 5    | 2    | 3 |
| 8223   | 4    | 4    | 4    | 4    | 5    |      |      |      |      |      |      |      |      |      |   |
| 8225   | 4    | 4    | 4    | 4    | 4    |      |      |      |      |      |      |      |      |      |   |
| 8226   | 5    | 4    | 4    | 4    | 4    |      |      |      |      |      |      |      |      |      |   |
| 8228   | 3    | 3    | 3    | 3    | 3    |      |      |      |      |      |      |      |      |      |   |
| 8229   |      |      | 4    |      |      |      |      |      |      |      |      |      |      |      |   |
| 8239   | 4    | 4    | 4    | 4    | 4    |      |      |      |      |      |      |      |      |      |   |
| 8246   | 1    | 1    | 1    | 1    | 1    |      |      |      |      |      |      |      |      |      |   |
| 8258   | 1    | 3    | 2    | 3    | 3    |      |      |      |      |      |      |      |      |      |   |
| 8260   | 3    | 3    | 3    | 3    | 3    |      |      |      |      |      |      |      |      |      |   |
| 8262   | 5    | 3    | 4    | 4    | 4    |      |      |      |      |      |      |      |      |      |   |
| 8263   | 3    | 3    | 3    | 3    | 3    |      |      |      |      |      |      |      |      |      |   |
| 8267   | 3    | 3    | 3    | 3    | 3    |      |      |      |      |      |      |      |      |      |   |
| 8271   |      |      |      |      |      | 2    | 3    | 3    | 4    | 4    | 3    | 3    | 4    | 3    | 3 |
| 8274   | 4    | 4    | 4    | 4    | 4    |      |      |      |      |      |      |      |      |      |   |
| 8275   | 4    | 4    | 4    | 4    | 4    |      |      |      |      |      |      |      |      |      |   |
| 8279   |      |      |      |      |      | 3    | 4    | 4    | 4    | 3    | 4    | 4    | 4    | 4    | 4 |
| 8285   | 3    | 3    | 3    | 3    | 3    |      |      |      |      |      |      |      |      |      |   |
| 8287   | 1    | 1    | 1    | 1    | 1    |      |      |      |      |      |      |      |      |      |   |
| 8289   | 3    | 3    | 3    | 2    | 2    |      |      |      |      |      |      |      |      |      |   |
| 8291   |      |      |      |      |      | 1    | 6    | 6    | 6    | 2    | 6    | 6    | 6    | 1    | 3 |
| 8299   | 3    | 4    | 4    | 4    | 4    |      |      |      |      |      |      |      |      |      |   |
| 8301   | 4    | 1    | 1    | 4    | 4    |      |      |      |      |      |      |      |      |      |   |
| 8302   |      |      |      |      |      | 1    | 5    | 5    | 4    | 3    | 4    | 4    | 6    | 1    | 2 |
| 8308   |      |      |      |      |      | 3    | 3    | 4    | 3    | 4    | 4    | 3    | 4    | 2    | 3 |
| 8313   | 4    | 4    | 4    | 4    | 4    |      |      |      |      |      |      |      |      |      |   |
| 8316   | 3    | 3    | 3    | 3    | 3    |      |      |      |      |      |      |      |      |      |   |
| 8317   |      |      |      |      |      | 2    | 6    |      |      |      |      |      |      |      |   |
| 8319   | 3    | 4    | 4    | 3    | 3    |      |      |      |      |      |      |      |      |      |   |
| 8323   | 3    | 3    | 3    | 3    | 3    |      |      |      |      |      |      |      |      |      |   |



| respid | Q47l | Q47m | Q47n | Q47o | Q48a | Q48b | Q48c | Q48d | Q48e | Q48f | Q48g | Q48h | Q48i | Q48j |   |
|--------|------|------|------|------|------|------|------|------|------|------|------|------|------|------|---|
| 8324   |      |      |      |      |      | 3    | 6    | 6    | 4    | 3    | 5    | 5    | 6    | 1    | 6 |
| 8327   | 4    | 4    | 4    | 4    |      |      |      |      |      |      |      |      |      |      |   |
| 8328   |      |      |      |      | 6    | 2    | 1    | 1    | 6    | 1    | 1    | 1    | 5    | 4    |   |
| 8342   | 4    | 4    | 4    | 4    |      |      |      |      |      |      |      |      |      |      |   |
| 8350   |      |      |      |      | 2    | 3    | 3    | 6    | 2    | 2    | 3    | 6    | 3    | 3    |   |
| 8352   |      |      |      |      | 2    | 5    | 5    | 6    | 2    | 5    | 6    | 6    | 2    | 5    |   |
| 8353   | 3    | 3    | 3    | 4    |      |      |      |      |      |      |      |      |      |      |   |
| 8356   |      |      |      |      | 2    | 5    | 5    | 6    | 2    |      | 5    | 5    | 1    | 6    |   |
| 8367   |      |      |      |      | 2    | 6    | 6    | 6    | 5    | 6    | 6    | 6    | 1    | 6    |   |
| 8373   | 3    | 3    | 3    | 3    |      |      |      |      |      |      |      |      |      |      |   |
| 8379   |      |      |      |      |      |      |      |      |      |      |      |      |      |      |   |
| 8382   | 3    | 3    | 2    | 3    |      |      |      |      |      |      |      |      |      |      |   |
| 8387   |      |      |      |      |      | 6    | 6    | 6    | 6    | 6    | 6    | 6    | 3    | 1    |   |
| 8409   |      |      |      |      | 2    | 6    | 6    | 6    | 2    | 6    | 6    | 6    | 1    | 6    |   |
| 8410   |      |      |      |      | 1    | 6    | 6    | 6    | 1    | 6    | 6    | 6    | 1    | 6    |   |
| 8412   |      |      |      |      | 1    | 4    | 5    | 5    | 3    | 5    | 5    | 6    | 2    | 3    |   |
| 8415   |      |      |      |      | 1    | 6    | 6    | 6    | 1    | 6    | 3    | 6    | 1    | 3    |   |
| 8417   | 4    | 4    | 4    | 4    |      |      |      |      |      |      |      |      |      |      |   |
| 8422   | 3    | 3    | 3    | 3    |      |      |      |      |      |      |      |      |      |      |   |
| 8430   |      |      |      |      | 3    | 4    | 4    | 4    | 3    | 5    | 5    | 6    | 3    | 4    |   |
| 8434   |      |      |      |      | 1    | 6    | 6    | 6    | 1    | 6    | 6    | 6    | 1    | 2    |   |
| 8436   |      |      |      |      |      |      |      |      |      |      |      |      |      |      |   |
| 8446   | 3    | 4    | 4    | 4    |      |      |      |      |      |      |      |      |      |      |   |
| 8447   | 3    | 3    | 3    | 3    |      |      |      |      |      |      |      |      |      |      |   |
| 8448   |      |      |      |      | 6    | 2    | 2    | 3    | 4    | 1    | 2    | 4    | 6    | 2    |   |
| 8455   | 2    | 2    | 2    | 2    |      |      |      |      |      |      |      |      |      |      |   |
| 8456   | 4    | 4    | 4    | 4    |      |      |      |      |      |      |      |      |      |      |   |
| 8459   |      |      |      |      | 6    | 6    | 6    | 6    | 6    | 6    | 6    | 6    | 6    | 6    |   |
| 8460   |      |      |      |      | 2    | 6    | 6    | 6    | 1    | 6    | 6    | 6    | 1    | 6    |   |
| 8464   | 3    | 3    | 3    | 3    |      |      |      |      |      |      |      |      |      |      |   |
| 8470   |      |      |      |      | 5    | 2    | 2    | 4    | 4    | 4    | 2    | 3    | 4    | 3    |   |
| 8473   |      |      |      |      |      |      |      |      |      |      |      |      |      |      |   |

| respid | Q47l | Q47m | Q47n | Q47o | Q48a | Q48b | Q48c | Q48d | Q48e | Q48f | Q48g | Q48h | Q48i | Q48j |   |
|--------|------|------|------|------|------|------|------|------|------|------|------|------|------|------|---|
| 8486   |      |      |      |      |      | 1    | 6    | 6    | 6    | 1    | 6    | 6    | 6    | 1    | 6 |
| 8487   |      |      |      |      |      | 3    |      |      |      | 3    |      |      | 4    | 3    |   |
| 8489   |      |      |      |      |      | 3    |      |      |      |      |      |      |      |      |   |
| 8494   | 4    | 3    | 2    | 3    |      |      |      |      |      |      |      |      |      |      |   |
| 8495   |      |      |      |      |      | 4    | 1    | 2    | 3    | 5    | 1    | 2    | 1    | 3    | 2 |
| 8497   |      |      |      |      |      | 1    | 6    | 6    | 6    | 1    | 6    | 6    | 6    | 1    | 5 |
| 8510   |      |      |      |      |      | 2    | 6    | 6    | 3    | 3    | 4    | 1    | 6    | 1    | 3 |
| 8515   |      |      |      |      |      | 3    | 4    | 4    | 3    | 3    | 4    | 4    | 4    | 3    | 3 |
| 8526   |      |      |      |      |      |      |      |      |      |      |      |      |      |      |   |
| 8530   |      |      |      |      |      |      |      |      |      |      |      |      |      |      |   |
| 8532   | 4    | 5    | 5    | 4    |      |      |      |      |      |      |      |      |      |      |   |
| 8533   |      |      |      |      |      |      |      |      |      |      |      |      |      |      |   |
| 8534   |      |      |      |      |      | 2    | 5    | 5    | 5    | 3    | 5    | 6    | 6    | 2    | 2 |
| 8572   | 3    | 3    | 3    | 3    |      |      |      |      |      |      |      |      |      |      |   |
| 8582   | 3    | 3    | 3    | 4    |      |      |      |      |      |      |      |      |      |      |   |
| 8584   | 5    | 5    | 5    | 5    |      |      |      |      |      |      |      |      |      |      |   |
| 8585   |      |      |      |      |      |      |      |      |      |      |      |      |      |      |   |
| 8586   |      |      |      |      |      |      |      |      |      |      |      |      |      |      |   |
| 8589   |      | 4    | 2    | 3    |      |      |      |      |      |      |      |      |      |      |   |
| 8593   |      |      |      |      |      | 3    | 4    | 4    | 3    | 3    | 4    | 5    | 4    | 3    | 3 |
| 8594   |      |      |      |      |      | 2    | 5    | 5    | 5    | 2    | 5    | 5    | 5    | 2    | 5 |
| 8601   |      |      |      |      |      | 2    | 5    | 5    | 6    | 1    | 6    | 6    | 6    | 2    | 6 |
| 8603   | 3    | 4    | 4    | 3    |      |      |      |      |      |      |      |      |      |      |   |
| 8604   |      |      |      |      |      |      |      |      |      |      |      |      |      |      |   |
| 8605   |      |      |      |      |      |      |      |      |      |      |      |      |      |      |   |
| 8607   | 3    | 3    | 3    | 3    |      |      |      |      |      |      |      |      |      |      |   |
| 8623   | 3    | 3    | 3    | 3    |      |      |      |      |      |      |      |      |      |      |   |
| 8626   | 3    | 3    | 3    | 4    |      |      |      |      |      |      |      |      |      |      |   |
| 8638   |      |      |      |      |      | 6    | 6    | 6    | 6    | 6    | 6    | 4    | 4    | 3    | 4 |
| 8640   |      |      |      |      |      | 5    | 2    | 2    | 2    | 5    | 2    | 2    | 3    | 3    | 2 |
| 8641   | 4    | 4    | 4    | 3    |      |      |      |      |      |      |      |      |      |      |   |
| 8643   |      |      |      |      |      | 1    | 6    | 6    | 3    | 3    | 4    | 6    | 6    | 1    | 6 |

| respid | Q47l | Q47m | Q47n | Q47o | Q48a | Q48b | Q48c | Q48d | Q48e | Q48f | Q48g | Q48h | Q48i | Q48j |   |
|--------|------|------|------|------|------|------|------|------|------|------|------|------|------|------|---|
| 8644   |      |      |      |      |      | 3    | 4    | 4    | 3    | 4    | 5    | 4    | 6    | 3    | 1 |
| 8646   |      |      |      |      |      | 3    |      | 4    | 4    | 3    | 5    | 5    | 4    | 3    |   |
| 8647   |      |      |      |      |      |      |      |      |      |      |      |      |      |      |   |
| 8649   | 5    | 1    | 1    | 3    |      |      |      |      |      |      |      |      |      |      |   |
| 8650   |      |      |      |      |      | 2    | 2    | 2    | 2    |      | 5    | 6    | 6    | 1    | 6 |
| 8658   |      |      |      |      |      | 1    | 6    | 6    | 6    | 2    | 6    | 6    | 6    | 1    | 6 |
| 8659   | 3    | 4    | 4    | 3    |      |      |      |      |      |      |      |      |      |      |   |
| 8669   | 3    | 4    | 4    | 4    |      |      |      |      |      |      |      |      |      |      |   |
| 8672   | 1    | 1    | 1    | 1    |      |      |      |      |      |      |      |      |      |      |   |
| 8673   |      |      |      |      |      | 2    | 5    | 6    | 5    | 2    | 6    | 5    | 6    | 2    | 2 |
| 8676   |      | 4    | 4    | 4    |      |      |      |      |      |      |      |      |      |      |   |
| 8677   |      |      |      |      |      |      |      |      |      |      |      |      |      |      |   |
| 8681   |      |      |      |      |      | 2    | 6    | 6    | 6    | 2    | 5    | 5    | 6    | 2    | 6 |
| 8688   | 3    | 3    | 3    | 3    |      |      |      |      |      |      |      |      |      |      |   |
| 8689   |      |      |      |      |      | 1    | 4    | 5    | 5    | 2    | 5    | 5    | 6    | 2    | 3 |
| 8690   | 3    | 3    | 3    | 2    |      |      |      |      |      |      |      |      |      |      |   |
| 8693   | 1    | 4    | 4    | 4    |      |      |      |      |      |      |      |      |      |      |   |
| 8694   | 3    | 3    | 3    | 3    |      |      |      |      |      |      |      |      |      |      |   |
| 8699   | 3    | 4    | 4    | 4    |      |      |      |      |      |      |      |      |      |      |   |
| 8700   |      |      |      |      |      |      |      |      |      |      |      |      |      |      |   |
| 8703   |      |      |      |      |      | 2    | 5    | 5    | 4    | 3    | 4    | 5    | 5    | 3    | 6 |
| 8704   | 4    | 4    | 4    | 4    |      |      |      |      |      |      |      |      |      |      |   |
| 8706   | 3    | 2    | 2    | 3    |      |      |      |      |      |      |      |      |      |      |   |
| 8709   | 3    | 3    | 3    | 3    |      |      |      |      |      |      |      |      |      |      |   |
| 8715   | 3    | 3    | 3    | 3    |      |      |      |      |      |      |      |      |      |      |   |
| 8728   | 4    | 4    | 3    | 4    |      |      |      |      |      |      |      |      |      |      |   |
| 8729   | 5    | 3    | 3    | 3    |      |      |      |      |      |      |      |      |      |      |   |
| 8730   |      |      |      |      |      | 3    | 4    | 3    | 4    | 4    | 4    | 2    | 4    | 3    | 1 |
| 8742   | 2    | 3    | 3    | 2    |      |      |      |      |      |      |      |      |      |      |   |
| 8748   |      |      |      |      |      | 1    |      | 6    | 6    | 4    | 5    | 5    | 6    | 3    | 6 |
| 8749   | 3    | 3    | 3    | 4    |      |      |      |      |      |      |      |      |      |      |   |
| 8750   | 4    | 3    | 3    | 3    |      |      |      |      |      |      |      |      |      |      |   |

| respid | Q47l | Q47m | Q47n | Q47o | Q48a | Q48b | Q48c | Q48d | Q48e | Q48f | Q48g | Q48h | Q48i | Q48j |   |
|--------|------|------|------|------|------|------|------|------|------|------|------|------|------|------|---|
| 8751   |      | 3    | 4    | 4    | 3    |      |      |      |      |      |      |      |      |      |   |
| 8752   |      | 2    | 2    | 2    | 2    |      |      |      |      |      |      |      |      |      |   |
| 8754   |      | 3    | 3    | 3    | 3    |      |      |      |      |      |      |      |      |      |   |
| 8757   |      | 3    | 3    | 3    | 3    |      |      |      |      |      |      |      |      |      |   |
| 8760   |      | 1    | 3    |      | 2    |      |      |      |      |      |      |      |      |      |   |
| 8761   |      | 3    | 4    | 3    | 3    |      |      |      |      |      |      |      |      |      |   |
| 8762   |      | 3    | 4    | 4    | 4    |      |      |      |      |      |      |      |      |      |   |
| 8763   |      | 3    | 3    | 3    | 3    |      |      |      |      |      |      |      |      |      |   |
| 8764   |      |      |      |      |      | 4    | 6    | 6    | 6    | 2    | 6    | 6    | 6    | 2    | 5 |
| 8765   |      | 3    | 3    | 3    | 3    |      |      |      |      |      |      |      |      |      |   |
| 8766   |      |      |      |      |      | 4    | 3    | 3    | 6    | 4    | 6    | 4    | 6    | 6    | 3 |
| 8767   |      |      |      |      |      | 2    | 6    | 6    | 6    | 2    | 6    | 6    | 6    | 2    | 6 |
| 8768   |      |      |      |      |      |      |      |      |      |      |      |      |      |      |   |
| 8770   |      | 4    | 4    | 4    | 4    |      |      |      |      |      |      |      |      |      |   |
| 8771   |      |      |      |      |      |      |      |      |      |      |      |      |      |      |   |
| 8773   |      |      |      |      |      |      | 3    | 5    | 3    | 5    | 2    | 5    | 5    | 3    | 5 |
| 8774   |      | 3    | 3    | 3    | 3    |      |      |      |      |      |      |      |      |      |   |
| 8776   |      |      |      |      |      | 1    | 6    | 6    | 6    | 4    | 6    | 6    | 6    | 1    | 3 |
| 8777   |      |      |      |      |      | 2    | 5    | 5    | 5    | 2    | 5    | 5    | 5    | 2    | 5 |
| 8778   |      |      |      |      |      | 1    | 6    | 6    | 4    | 3    | 3    | 6    | 6    | 3    | 5 |
| 8779   |      |      |      |      |      |      |      |      |      |      |      |      |      |      |   |
| 8784   |      | 3    | 3    | 4    | 4    |      |      |      |      |      |      |      |      |      |   |
| 8786   |      |      |      |      |      |      |      |      |      |      |      |      |      |      |   |
| 8787   |      | 3    | 1    | 1    | 3    |      |      |      |      |      |      |      |      |      |   |
| 8790   |      |      |      |      |      |      |      |      |      |      |      |      |      |      |   |
| 8791   |      | 4    | 3    | 3    | 3    |      |      |      |      |      |      |      |      |      |   |
| 8793   |      |      |      |      |      |      |      |      |      |      |      |      |      |      |   |
| 8795   |      |      |      |      |      | 1    | 6    | 6    | 6    | 1    | 6    | 6    | 6    | 1    | 6 |
| 8797   |      |      |      |      |      | 3    | 6    | 6    | 6    | 3    | 6    | 6    | 6    | 2    | 4 |
| 8801   |      | 3    | 4    | 4    | 3    |      |      |      |      |      |      |      |      |      |   |
| 8802   |      | 3    | 3    | 3    | 4    |      |      |      |      |      |      |      |      |      |   |
| 8807   |      |      |      |      |      |      |      |      |      |      |      |      |      |      |   |

| respid | Q47l | Q47m | Q47n | Q47o | Q48a | Q48b | Q48c | Q48d | Q48e | Q48f | Q48g | Q48h | Q48i | Q48j |   |
|--------|------|------|------|------|------|------|------|------|------|------|------|------|------|------|---|
| 8813   | 3    | 2    | 2    | 3    |      |      |      |      |      |      |      |      |      |      |   |
| 8817   |      |      |      |      |      | 5    | 6    | 6    | 6    | 3    | 6    | 6    | 6    | 3    | 6 |
| 8818   | 4    | 3    | 3    | 4    |      |      |      |      |      |      |      |      |      |      |   |
| 8821   |      |      |      |      |      | 1    | 6    | 6    | 6    |      | 6    | 6    | 6    | 1    | 5 |
| 8822   |      |      |      |      |      | 1    | 2    | 6    | 6    | 1    | 6    | 6    | 6    | 1    | 6 |
| 8823   |      |      |      |      |      | 3    | 3    | 4    | 4    | 4    | 3    | 3    | 4    | 3    | 2 |
| 8824   | 4    | 3    | 2    | 3    |      |      |      |      |      |      |      |      |      |      |   |
| 8825   |      |      |      |      |      | 1    | 6    | 6    | 6    | 1    | 6    | 6    | 6    | 1    | 6 |
| 8834   | 3    | 3    | 3    | 3    |      |      |      |      |      |      |      |      |      |      |   |
| 8840   |      |      |      |      |      | 2    | 3    | 4    | 3    | 2    | 3    | 4    | 2    | 3    | 1 |
| 8843   | 1    | 3    | 3    | 4    |      |      |      |      |      |      |      |      |      |      |   |
| 8846   | 4    | 3    | 4    | 3    |      |      |      |      |      |      |      |      |      |      |   |
| 8862   |      |      |      |      |      |      |      |      |      |      |      |      |      |      |   |
| 8866   | 4    | 4    | 4    | 4    |      |      |      |      |      |      |      |      |      |      |   |
| 8869   | 3    | 3    | 3    | 4    |      |      |      |      |      |      |      |      |      |      |   |
| 8872   |      |      |      |      |      | 1    | 2    | 2    | 2    | 2    | 3    | 2    | 4    | 2    | 2 |
| 8903   |      |      |      |      |      |      |      |      |      |      |      |      |      |      |   |
| 8909   |      |      |      |      |      |      |      |      |      |      |      |      |      |      |   |
| 8926   |      |      |      |      |      | 1    | 6    | 6    | 5    | 2    | 6    | 6    | 6    | 2    | 6 |
| 8936   |      |      |      |      |      | 1    | 6    | 6    | 6    | 1    |      | 6    | 6    | 1    | 6 |
| 8945   |      |      |      |      |      |      |      |      |      |      |      |      |      |      |   |
| 8954   | 4    | 4    | 4    | 4    |      |      |      |      |      |      |      |      |      |      |   |
| 8955   |      |      |      |      |      | 3    | 4    | 4    | 3    | 4    | 3    | 5    | 4    | 5    | 3 |
| 8958   | 2    | 3    | 3    | 3    |      |      |      |      |      |      |      |      |      |      |   |
| 8959   |      |      |      |      |      | 5    | 2    | 2    | 1    | 6    | 1    | 2    | 6    | 3    | 1 |
| 8960   | 4    | 4    | 4    | 4    |      |      |      |      |      |      |      |      |      |      |   |
| 8976   |      |      |      |      |      | 3    | 4    | 4    | 4    | 3    | 3    | 4    | 3    | 4    | 2 |
| 8977   |      |      |      |      |      | 2    | 5    | 5    | 5    | 2    | 5    | 5    | 5    | 2    | 5 |
| 8979   | 3    | 4    | 3    | 2    |      |      |      |      |      |      |      |      |      |      |   |
| 8985   |      |      |      |      |      |      |      |      |      |      |      |      |      |      |   |
| 8994   | 3    | 4    | 4    | 4    |      |      |      |      |      |      |      |      |      |      |   |
| 8997   | 4    | 4    | 4    | 4    |      |      |      |      |      |      |      |      |      |      |   |

| respid | Q47l | Q47m | Q47n | Q47o | Q48a | Q48b | Q48c | Q48d | Q48e | Q48f | Q48g | Q48h | Q48i | Q48j |   |
|--------|------|------|------|------|------|------|------|------|------|------|------|------|------|------|---|
| 9002   | 2    | 3    | 3    | 2    |      |      |      |      |      |      |      |      |      |      |   |
| 9005   |      |      |      |      |      | 3    | 3    | 4    | 3    | 3    | 4    | 3    | 4    | 2    | 2 |
| 9017   |      |      |      |      |      | 2    | 4    | 4    | 4    | 3    | 4    | 5    | 4    | 2    | 4 |
| 9018   | 4    | 4    | 4    | 4    |      |      |      |      |      |      |      |      |      |      |   |
| 9021   |      |      |      |      |      | 1    | 6    | 6    | 6    | 1    | 6    | 5    | 6    | 1    | 3 |
| 9029   | 3    | 3    | 3    | 3    |      |      |      |      |      |      |      |      |      |      |   |
| 9035   | 4    | 4    | 4    | 4    |      |      |      |      |      |      |      |      |      |      |   |
| 9038   | 4    | 4    | 4    | 4    |      |      |      |      |      |      |      |      |      |      |   |
| 9039   |      |      |      |      |      |      |      |      |      |      |      |      |      |      |   |
| 9040   |      |      |      |      |      | 3    | 6    | 6    | 6    | 1    | 6    | 6    | 6    | 1    | 6 |
| 9042   | 4    | 4    | 4    | 4    |      |      |      |      |      |      |      |      |      |      |   |
| 9043   | 4    | 4    | 5    | 4    |      |      |      |      |      |      |      |      |      |      |   |
| 9045   | 3    | 4    | 4    | 4    |      |      |      |      |      |      |      |      |      |      |   |
| 9051   | 3    | 3    | 3    | 3    |      |      |      |      |      |      |      |      |      |      |   |
| 9067   | 4    | 4    | 4    | 4    |      |      |      |      |      |      |      |      |      |      |   |
| 9069   | 5    | 3    | 4    | 4    |      |      |      |      |      |      |      |      |      |      |   |
| 9073   | 3    | 4    | 4    | 4    |      |      |      |      |      |      |      |      |      |      |   |
| 9084   |      |      |      |      |      |      |      |      |      |      |      |      |      |      |   |
| 9096   |      |      |      |      |      |      |      |      |      |      |      |      |      |      |   |
| 9100   |      |      |      |      |      | 4    | 3    | 4    | 3    | 3    | 2    | 4    | 3    | 4    | 2 |
| 9107   |      |      |      |      |      |      |      |      |      |      |      |      |      |      |   |
| 9110   | 4    | 4    | 4    | 4    |      |      |      |      |      |      |      |      |      |      |   |
| 9120   |      |      |      |      |      |      |      |      |      |      |      |      |      |      |   |
| 9122   |      |      |      |      |      | 3    | 3    | 2    | 3    | 3    | 2    | 3    | 5    | 2    | 4 |
| 9130   |      |      |      |      |      |      |      |      |      |      |      |      |      |      |   |
| 9134   |      |      |      |      |      | 2    | 5    | 4    | 5    | 2    | 5    | 5    | 6    | 3    | 4 |
| 9137   | 4    | 4    | 3    | 5    |      |      |      |      |      |      |      |      |      |      |   |
| 9139   |      |      |      |      |      | 1    | 3    | 3    | 4    | 5    | 3    | 3    | 3    | 6    | 1 |
| 9144   |      |      |      |      |      |      |      |      |      |      |      |      |      |      |   |
| 9157   | 3    | 4    | 4    | 4    |      |      |      |      |      |      |      |      |      |      |   |
| 9166   | 3    | 4    | 4    | 4    |      |      |      |      |      |      |      |      |      |      |   |
| 9177   | 3    | 2    | 3    | 2    |      |      |      |      |      |      |      |      |      |      |   |

| respid | Q47l | Q47m | Q47n | Q47o | Q48a | Q48b | Q48c | Q48d | Q48e | Q48f | Q48g | Q48h | Q48i | Q48j |   |
|--------|------|------|------|------|------|------|------|------|------|------|------|------|------|------|---|
| 9181   |      |      |      |      |      | 1    | 6    | 6    | 6    | 1    | 6    | 6    | 6    | 1    | 6 |
| 9183   | 3    | 3    | 3    | 3    |      |      |      |      |      |      |      |      |      |      |   |
| 9184   | 2    | 2    | 2    | 2    |      |      |      |      |      |      |      |      |      |      |   |
| 9188   |      |      |      |      |      |      |      |      |      |      |      |      |      |      |   |
| 9197   | 3    | 3    | 3    | 3    |      |      |      |      |      |      |      |      |      |      |   |
| 9200   |      |      |      |      |      | 3    | 5    | 5    | 4    | 3    | 5    | 5    | 5    | 2    | 3 |
| 9205   |      |      |      |      |      | 1    | 6    | 6    |      |      | 6    | 6    |      |      |   |
| 9207   |      |      |      |      |      | 2    | 6    | 6    | 6    | 2    | 6    | 6    | 6    | 2    | 6 |
| 9213   | 4    | 3    | 3    | 4    |      |      |      |      |      |      |      |      |      |      |   |
| 9216   | 3    | 3    | 3    | 3    |      |      |      |      |      |      |      |      |      |      |   |
| 9217   |      |      |      |      |      |      |      |      |      |      |      |      |      |      |   |
| 9218   |      |      |      |      |      | 4    | 3    | 3    | 3    | 4    | 3    | 3    | 3    | 6    | 3 |
| 9219   |      |      |      |      |      | 3    | 3    | 3    | 2    | 5    | 3    | 2    | 4    | 4    | 1 |
| 9220   |      |      |      |      |      |      |      |      |      |      |      |      |      |      |   |
| 9221   | 2    |      |      |      |      |      |      |      |      |      |      |      |      |      |   |
| 9223   | 3    | 3    | 3    | 3    |      |      |      |      |      |      |      |      |      |      |   |
| 9228   |      |      |      |      |      |      |      |      |      |      |      |      |      |      |   |
| 9230   | 3    | 4    | 4    | 3    |      |      |      |      |      |      |      |      |      |      |   |
| 9231   |      |      |      |      |      | 4    | 3    | 5    | 3    | 5    | 5    | 4    | 4    | 4    | 4 |
| 9233   | 3    | 4    | 4    | 3    |      |      |      |      |      |      |      |      |      |      |   |
| 9235   |      |      |      |      |      | 6    | 5    | 6    | 6    | 2    | 6    | 6    | 6    | 2    | 6 |
| 9237   |      |      |      |      |      |      |      |      |      |      |      |      |      |      |   |
| 9242   |      |      |      |      |      | 1    | 6    | 5    | 6    | 1    | 6    | 6    | 6    | 1    | 4 |
| 9250   |      |      |      |      |      |      |      |      |      |      |      |      |      |      |   |
| 9253   |      |      |      |      |      | 3    | 5    | 5    | 3    | 2    | 5    | 5    | 5    | 2    | 3 |
| 9257   | 4    | 4    | 3    | 4    |      |      |      |      |      |      |      |      |      |      |   |
| 9263   | 5    | 3    | 3    | 4    |      |      |      |      |      |      |      |      |      |      |   |
| 9267   | 4    | 5    | 5    | 5    |      |      |      |      |      |      |      |      |      |      |   |
| 9272   | 3    | 3    | 4    | 3    |      |      |      |      |      |      |      |      |      |      |   |
| 9279   |      |      |      |      |      |      |      |      |      |      |      |      |      |      |   |
| 9281   |      |      |      |      |      | 1    | 1    | 6    | 5    |      | 5    | 5    | 4    | 4    | 6 |
| 9285   | 3    | 4    | 4    | 4    |      |      |      |      |      |      |      |      |      |      |   |

| respid | Q47l | Q47m | Q47n | Q47o | Q48a | Q48b | Q48c | Q48d | Q48e | Q48f | Q48g | Q48h | Q48i | Q48j |   |
|--------|------|------|------|------|------|------|------|------|------|------|------|------|------|------|---|
| 9286   |      |      |      |      |      | 3    | 5    | 6    | 5    | 3    | 5    | 4    | 6    | 3    | 4 |
| 9294   | 3    | 3    | 3    | 3    |      |      |      |      |      |      |      |      |      |      |   |
| 9295   |      |      |      |      |      | 4    | 6    | 6    | 6    | 3    | 6    | 6    | 6    | 3    | 6 |
| 9297   | 3    | 3    | 3    | 3    |      |      |      |      |      |      |      |      |      |      |   |
| 9299   | 3    | 4    | 3    | 4    |      |      |      |      |      |      |      |      |      |      |   |
| 9309   |      |      |      |      |      | 3    | 5    | 4    | 4    | 3    | 5    | 4    | 4    | 3    | 4 |
| 9315   |      |      |      |      |      |      |      |      |      |      |      |      |      |      |   |
| 9320   | 4    | 4    | 4    | 4    |      |      |      |      |      |      |      |      |      |      |   |
| 9324   | 3    | 4    | 4    | 4    |      |      |      |      |      |      |      |      |      |      |   |
| 9326   |      |      |      |      |      | 1    | 6    | 6    | 5    | 6    | 6    | 6    | 6    | 6    | 6 |
| 9333   |      |      |      |      |      | 1    | 6    | 6    | 6    | 1    | 6    | 6    | 6    | 1    | 3 |
| 9334   |      |      |      |      |      | 4    | 3    | 3    | 3    | 3    | 3    | 3    | 2    | 2    | 2 |
| 9336   |      |      |      |      |      | 3    | 4    | 4    | 4    | 3    | 4    | 5    | 5    | 3    | 6 |
| 9337   | 4    | 3    | 3    | 4    |      |      |      |      |      |      |      |      |      |      |   |
| 9342   | 3    | 4    | 4    | 3    |      |      |      |      |      |      |      |      |      |      |   |
| 9347   |      |      |      |      |      | 2    | 2    | 2    | 2    | 2    | 5    | 4    | 4    | 2    | 5 |
| 9352   | 4    | 4    | 4    | 4    |      |      |      |      |      |      |      |      |      |      |   |
| 9355   | 3    | 4    | 4    | 3    |      |      |      |      |      |      |      |      |      |      |   |
| 9356   | 3    | 4    | 4    | 4    |      |      |      |      |      |      |      |      |      |      |   |
| 9359   | 3    | 4    | 4    | 4    |      |      |      |      |      |      |      |      |      |      |   |
| 9368   |      |      |      |      |      | 1    | 3    | 3    | 6    | 2    |      | 5    |      | 4    |   |
| 9375   | 4    | 4    | 4    |      |      |      |      |      |      |      |      |      |      |      |   |
| 9384   |      |      |      |      |      | 3    | 3    | 3    | 3    | 3    | 3    | 3    | 3    | 3    | 3 |
| 9388   | 4    | 3    | 1    | 1    |      |      |      |      |      |      |      |      |      |      |   |
| 9397   | 2    | 1    | 1    | 1    |      |      |      |      |      |      |      |      |      |      |   |
| 9400   | 4    | 4    | 4    | 4    |      |      |      |      |      |      |      |      |      |      |   |
| 9401   | 3    | 4    | 4    | 4    |      |      |      |      |      |      |      |      |      |      |   |
| 9402   |      |      |      |      |      |      |      |      |      |      |      |      |      |      |   |
| 9417   | 4    | 4    | 4    | 4    |      |      |      |      |      |      |      |      |      |      |   |
| 9424   | 3    | 1    |      | 3    |      |      |      |      |      |      |      |      |      |      |   |
| 9427   |      |      |      |      |      |      |      |      |      |      |      |      |      |      |   |
| 9429   | 4    | 4    | 4    | 4    |      |      |      |      |      |      |      |      |      |      |   |



| respid | Q47l | Q47m | Q47n | Q47o | Q48a | Q48b | Q48c | Q48d | Q48e | Q48f | Q48g | Q48h | Q48i | Q48j |
|--------|------|------|------|------|------|------|------|------|------|------|------|------|------|------|
| 9437   |      | 3    | 3    | 3    | 3    |      |      |      |      |      |      |      |      |      |
| 9442   |      | 1    | 3    | 3    | 3    |      |      |      |      |      |      |      |      |      |
| 9446   |      | 4    | 3    | 3    | 3    |      |      |      |      |      |      |      |      |      |
| 9447   |      | 4    | 5    | 5    | 5    |      |      |      |      |      |      |      |      |      |
| 9448   |      |      |      |      |      | 3    | 3    | 3    | 3    |      | 3    | 3    | 3    | 3    |
| 9449   |      | 3    | 4    |      |      |      |      |      |      |      |      |      |      |      |
| 9455   |      |      |      |      |      |      |      |      |      |      |      |      |      |      |
| 9459   |      |      |      |      |      | 2    | 3    | 3    | 6    | 4    | 6    | 4    | 6    | 2    |
| 9460   |      | 3    | 3    | 2    | 3    |      |      |      |      |      |      |      |      | 2    |
| 9461   |      | 3    | 3    | 3    | 2    |      |      |      |      |      |      |      |      |      |
| 9463   |      |      |      |      |      | 1    | 6    | 6    | 6    | 2    | 6    | 6    | 6    | 1    |
| 9464   |      | 3    | 3    | 3    | 3    |      |      |      |      |      |      |      |      | 6    |
| 9466   |      | 3    | 3    | 3    | 4    |      |      |      |      |      |      |      |      |      |
| 9477   |      |      |      |      |      | 6    | 5    | 5    | 6    | 6    | 6    | 6    | 6    | 6    |
| 9482   |      | 3    | 3    | 3    | 2    |      |      |      |      |      |      |      |      |      |
| 9486   |      |      |      |      |      | 2    |      |      |      |      |      |      |      |      |
| 9488   |      | 4    | 4    | 3    | 2    |      |      |      |      |      |      |      |      |      |
| 9489   |      |      |      |      |      |      |      | 6    | 4    | 6    | 6    | 6    |      | 1    |
| 9496   |      |      | 2    | 3    | 3    |      |      |      |      |      |      |      |      | 6    |
| 9499   |      | 3    | 3    |      |      |      |      |      |      |      |      |      |      |      |
| 9512   |      |      |      |      |      | 2    | 5    | 5    | 6    | 1    | 6    | 6    | 6    | 2    |
| 9514   |      | 4    | 4    | 4    | 4    |      |      |      |      |      |      |      |      | 6    |
| 9516   |      | 1    | 5    | 4    | 3    |      |      |      |      |      |      |      |      |      |
| 9517   |      | 2    | 3    | 3    | 2    |      |      |      |      |      |      |      |      |      |
| 9520   |      | 3    | 3    | 3    | 3    |      |      |      |      |      |      |      |      |      |
| 9527   |      | 3    | 3    | 3    | 4    |      |      |      |      |      |      |      |      |      |
| 9532   |      | 3    | 4    | 4    | 4    |      |      |      |      |      |      |      |      |      |
| 9533   |      | 3    | 4    | 4    | 5    |      |      |      |      |      |      |      |      |      |
| 9543   |      | 4    | 4    | 4    | 3    |      |      |      |      |      |      |      |      |      |
| 9550   |      | 2    | 3    | 3    | 3    |      |      |      |      |      |      |      |      |      |
| 9553   |      |      |      |      |      | 2    | 4    | 4    | 6    | 2    | 4    | 4    | 4    | 2    |
| 9555   |      |      |      |      |      | 3    | 4    | 5    | 3    | 4    | 4    | 5    | 4    | 2    |

| respid | Q47l | Q47m | Q47n | Q47o | Q48a | Q48b | Q48c | Q48d | Q48e | Q48f | Q48g | Q48h | Q48i | Q48j |   |
|--------|------|------|------|------|------|------|------|------|------|------|------|------|------|------|---|
| 9565   |      |      |      |      |      | 3    | 5    | 5    | 5    | 3    | 5    | 3    | 4    | 2    | 2 |
| 9583   | 2    | 3    | 4    | 3    |      |      |      |      |      |      |      |      |      |      |   |
| 9594   | 3    | 3    | 3    | 3    |      |      |      |      |      |      |      |      |      |      |   |
| 9596   | 4    | 4    | 5    | 3    |      |      |      |      |      |      |      |      |      |      |   |
| 9600   |      |      |      |      |      | 3    | 4    | 5    | 6    | 3    | 5    | 5    | 5    | 3    | 4 |
| 9602   | 5    | 3    | 3    | 5    |      |      |      |      |      |      |      |      |      |      |   |
| 9606   | 5    | 4    | 4    | 4    |      |      |      |      |      |      |      |      |      |      |   |
| 9608   | 3    | 3    | 2    | 3    |      |      |      |      |      |      |      |      |      |      |   |
| 9610   |      |      |      |      |      | 2    | 2    | 5    | 2    | 1    | 6    | 3    | 6    | 1    | 6 |
| 9612   |      |      |      |      |      | 1    | 2    | 2    | 6    | 1    | 3    | 6    | 3    | 3    | 5 |
| 9613   | 3    | 4    | 4    | 3    |      |      |      |      |      |      |      |      |      |      |   |
| 9614   | 4    | 3    | 3    | 3    |      |      |      |      |      |      |      |      |      |      |   |
| 9620   | 3    | 3    | 3    | 3    |      |      |      |      |      |      |      |      |      |      |   |
| 9628   |      |      |      |      |      | 1    | 4    | 4    | 4    | 2    | 4    | 5    | 5    | 2    | 4 |
| 9631   | 1    | 1    | 1    |      |      |      |      |      |      |      |      |      |      |      |   |
| 9632   | 3    | 4    | 4    | 4    |      |      |      |      |      |      |      |      |      |      |   |
| 9633   |      |      |      |      |      | 2    | 6    | 6    | 6    | 2    | 6    | 6    | 6    | 3    | 6 |
| 9639   |      |      |      |      |      |      |      |      |      |      |      |      |      |      |   |
| 9640   |      |      |      |      |      | 1    | 6    | 6    | 4    | 3    | 4    | 6    | 6    | 3    | 6 |
| 9642   | 3    | 4    | 4    | 4    |      |      |      |      |      |      |      |      |      |      |   |
| 9653   |      | 3    | 3    | 3    |      |      |      |      |      |      |      |      |      |      |   |
| 9658   |      |      |      |      |      | 4    | 3    | 3    | 5    | 4    | 5    | 2    | 2    | 3    | 2 |
| 9659   |      |      |      |      |      | 6    | 3    | 2    | 2    | 5    | 2    | 3    | 3    | 5    | 1 |
| 9661   |      |      |      |      |      | 4    | 2    | 2    | 4    | 4    | 3    | 3    | 3    | 3    | 1 |
| 9664   | 4    | 4    | 4    | 3    |      |      |      |      |      |      |      |      |      |      |   |
| 9665   |      |      |      |      |      | 2    | 4    | 5    | 3    | 3    | 4    | 6    | 6    | 3    | 6 |
| 9666   | 2    | 2    | 2    | 2    |      |      |      |      |      |      |      |      |      |      |   |
| 9667   |      |      |      |      |      | 3    | 5    | 5    | 3    | 3    | 5    | 4    | 5    | 2    | 3 |
| 9668   |      |      |      |      |      |      |      |      |      |      |      |      |      |      |   |
| 9670   | 4    | 4    | 3    | 4    |      |      |      |      |      |      |      |      |      |      |   |
| 9671   |      |      |      |      |      | 4    | 4    | 4    | 4    | 4    | 4    | 3    | 3    | 4    | 4 |
| 9681   | 3    | 3    | 3    | 3    |      |      |      |      |      |      |      |      |      |      |   |

| respid | Q47l | Q47m | Q47n | Q47o | Q48a | Q48b | Q48c | Q48d | Q48e | Q48f | Q48g | Q48h | Q48i | Q48j |   |
|--------|------|------|------|------|------|------|------|------|------|------|------|------|------|------|---|
| 9684   | 4    | 3    | 3    | 4    |      |      |      |      |      |      |      |      |      |      |   |
| 9685   | 3    | 4    | 4    | 4    |      |      |      |      |      |      |      |      |      |      |   |
| 9686   | 4    | 3    | 3    | 4    |      |      |      |      |      |      |      |      |      |      |   |
| 9688   | 4    | 4    | 4    | 4    |      |      |      |      |      |      |      |      |      |      |   |
| 9692   | 3    | 4    | 4    | 4    |      |      |      |      |      |      |      |      |      |      |   |
| 9693   |      |      |      |      |      | 5    | 2    | 3    | 2    | 5    | 3    | 2    | 4    | 5    | 3 |
| 9698   |      |      |      |      |      | 2    | 4    | 3    | 3    | 4    | 4    | 4    | 4    | 3    | 1 |
| 9699   |      |      |      |      |      | 3    | 4    | 5    | 5    | 3    | 5    | 6    | 6    | 2    | 6 |
| 9701   | 3    | 3    | 3    | 3    |      |      |      |      |      |      |      |      |      |      |   |
| 9702   |      |      |      |      |      | 1    | 6    | 6    | 3    | 3    | 3    | 3    | 6    | 2    | 2 |
| 9709   | 3    | 5    | 5    | 5    |      |      |      |      |      |      |      |      |      |      |   |
| 9713   |      |      |      |      |      |      |      |      |      |      |      |      |      |      |   |
| 9715   |      |      |      |      |      |      |      |      |      |      |      |      |      |      |   |
| 9721   |      |      |      |      |      | 1    | 6    | 6    | 6    | 1    | 6    | 6    | 6    | 1    | 6 |
| 9725   |      |      |      |      |      | 2    | 4    | 5    | 6    | 3    | 4    | 4    | 6    | 3    | 4 |
| 9729   | 4    | 3    | 3    | 3    |      |      |      |      |      |      |      |      |      |      |   |
| 9731   |      |      |      |      |      | 3    | 5    | 6    | 6    | 3    | 6    | 6    | 5    | 5    | 5 |
| 9736   | 4    | 3    | 3    | 4    |      |      |      |      |      |      |      |      |      |      |   |
| 9740   |      |      |      |      |      |      |      |      |      |      |      |      |      |      |   |
| 9741   | 3    | 4    | 4    | 3    |      |      |      |      |      |      |      |      |      |      |   |
| 9749   | 2    | 3    | 3    | 2    |      |      |      |      |      |      |      |      |      |      |   |
| 9750   | 3    | 3    | 3    | 3    |      |      |      |      |      |      |      |      |      |      |   |
| 9751   |      |      |      |      |      | 2    | 4    | 4    | 5    | 3    | 5    | 4    | 5    | 2    | 3 |
| 9753   |      |      |      |      |      | 3    | 4    | 4    | 4    | 3    | 4    | 5    | 5    | 3    | 4 |
| 9754   | 2    | 2    | 2    | 2    |      |      |      |      |      |      |      |      |      |      |   |
| 9756   | 4    |      |      | 2    |      |      |      |      |      |      |      |      |      |      |   |
| 9758   |      |      |      |      |      | 3    |      |      | 2    | 3    |      | 3    | 3    | 3    | 2 |
| 9759   |      |      |      |      |      | 2    | 2    | 2    | 6    | 4    | 4    | 3    | 3    | 6    | 3 |
| 9760   |      |      |      |      |      | 6    | 6    | 6    | 6    | 6    | 6    | 6    | 6    | 6    | 6 |
| 9761   |      |      |      |      |      |      |      |      |      |      |      |      |      |      |   |
| 9762   | 3    | 3    | 3    | 3    |      |      |      |      |      |      |      |      |      |      |   |
| 9764   |      |      |      |      |      | 3    | 5    | 5    | 6    | 3    | 6    | 6    | 6    | 3    | 3 |

| respid | Q47l | Q47m | Q47n | Q47o | Q48a | Q48b | Q48c | Q48d | Q48e | Q48f | Q48g | Q48h | Q48i | Q48j |   |
|--------|------|------|------|------|------|------|------|------|------|------|------|------|------|------|---|
| 9768   |      |      |      |      |      |      |      |      |      |      |      |      |      |      |   |
| 9769   |      |      |      |      |      | 2    | 4    | 4    | 3    | 3    | 4    | 4    | 4    | 3    | 3 |
| 9770   |      |      |      |      |      | 4    | 4    | 4    | 4    | 3    | 4    | 5    | 4    | 3    | 4 |
| 9771   | 1    | 1    | 1    | 1    |      |      |      |      |      |      |      |      |      |      |   |
| 9772   | 4    | 3    | 3    | 3    |      |      |      |      |      |      |      |      |      |      |   |
| 9773   | 3    | 3    | 3    | 3    |      |      |      |      |      |      |      |      |      |      |   |
| 9776   |      |      |      |      |      | 3    | 4    | 4    | 6    | 1    | 6    | 6    | 6    | 3    | 6 |
| 9786   | 2    | 3    | 3    | 2    |      |      |      |      |      |      |      |      |      |      |   |
| 9790   |      |      |      |      |      | 3    | 1    | 1    | 6    | 6    |      | 4    | 1    | 6    | 3 |
| 9791   | 3    | 4    | 4    | 4    |      |      |      |      |      |      |      |      |      |      |   |
| 9794   | 3    | 3    | 3    | 3    |      |      |      |      |      |      |      |      |      |      |   |
| 9797   |      |      |      |      |      | 1    | 5    | 6    | 6    | 2    | 6    | 6    | 6    | 2    | 3 |
| 9799   |      |      |      |      |      | 2    | 4    | 6    | 6    | 5    | 6    | 6    | 6    | 1    | 6 |
| 9804   | 4    | 4    | 4    | 4    |      |      |      |      |      |      |      |      |      |      |   |
| 9805   | 3    | 2    | 2    | 2    |      |      |      |      |      |      |      |      |      |      |   |
| 9806   | 4    | 3    | 3    | 2    |      |      |      |      |      |      |      |      |      |      |   |
| 9807   |      |      |      |      |      |      | 4    | 4    | 4    | 3    | 4    | 3    | 4    | 3    | 3 |
| 9813   |      |      |      |      |      | 4    | 4    | 4    | 4    | 4    | 4    | 5    | 5    | 5    | 6 |
| 9817   |      |      |      |      |      | 1    | 3    | 6    | 6    | 4    | 6    | 6    | 6    | 6    | 4 |
| 9823   |      |      |      |      |      | 1    | 5    | 6    | 3    | 3    | 6    | 5    | 6    | 6    | 5 |
| 9826   |      |      |      |      |      | 2    | 6    | 6    | 6    | 2    | 6    | 5    | 6    | 1    | 3 |
| 9830   |      |      |      |      |      | 3    | 3    | 3    | 3    | 4    | 4    | 4    | 5    | 4    | 3 |
| 9835   |      |      |      |      |      | 2    | 3    | 3    | 3    | 4    |      | 3    | 3    | 1    | 3 |
| 9836   | 3    | 4    | 4    | 3    |      |      |      |      |      |      |      |      |      |      |   |
| 9841   |      |      |      |      |      |      |      |      |      |      |      |      |      |      |   |
| 9842   | 3    | 3    | 3    | 3    |      |      |      |      |      |      |      |      |      |      |   |
| 9844   |      |      |      |      |      | 1    | 6    | 6    | 6    | 1    | 6    | 6    | 6    | 1    | 6 |
| 9847   |      |      |      |      |      | 1    | 6    | 6    | 6    | 1    | 6    | 6    | 6    | 1    | 6 |
| 9851   |      |      |      |      |      |      | 6    | 6    | 6    | 6    | 6    | 6    | 6    | 6    | 1 |
| 9852   | 2    | 2    | 2    | 2    |      |      |      |      |      |      |      |      |      |      |   |
| 9854   |      |      |      |      |      | 3    | 6    | 6    | 6    | 3    | 6    | 6    | 6    | 2    | 6 |
| 9855   |      |      |      |      |      | 4    | 3    | 3    | 3    | 5    | 3    | 3    | 4    | 5    | 3 |

| respid | Q47l | Q47m | Q47n | Q47o | Q48a | Q48b | Q48c | Q48d | Q48e | Q48f | Q48g | Q48h | Q48i | Q48j |   |
|--------|------|------|------|------|------|------|------|------|------|------|------|------|------|------|---|
| 9856   |      |      |      |      |      | 2    | 4    | 4    | 2    | 2    | 3    | 5    | 5    | 2    | 3 |
| 9862   | 4    | 2    | 3    | 3    |      |      |      |      |      |      |      |      |      |      |   |
| 9863   |      |      |      |      |      |      |      |      |      |      |      |      |      |      |   |
| 9866   |      |      |      |      |      | 2    | 5    | 4    | 6    | 1    | 6    | 6    | 6    | 1    | 6 |
| 9867   | 1    | 1    |      |      |      |      |      |      |      |      |      |      |      |      |   |
| 9868   | 4    | 1    | 1    | 1    |      |      |      |      |      |      |      |      |      |      |   |
| 9869   | 3    | 3    | 2    | 2    |      |      |      |      |      |      |      |      |      |      |   |
| 9878   | 4    | 4    | 3    | 4    |      |      |      |      |      |      |      |      |      |      |   |
| 9879   | 2    | 3    | 3    | 2    |      |      |      |      |      |      |      |      |      |      |   |
| 9881   | 4    | 4    | 4    | 4    |      |      |      |      |      |      |      |      |      |      |   |
| 9882   | 2    | 3    | 3    | 2    |      |      |      |      |      |      |      |      |      |      |   |
| 9884   | 3    | 3    | 3    | 4    |      |      |      |      |      |      |      |      |      |      |   |
| 9885   | 3    | 3    | 3    | 5    |      |      |      |      |      |      |      |      |      |      |   |
| 9888   |      |      |      |      |      | 2    | 5    | 6    | 3    | 4    | 3    | 3    | 6    | 1    | 2 |
| 9889   | 4    | 4    | 4    | 4    |      |      |      |      |      |      |      |      |      |      |   |
| 9894   | 1    | 1    | 1    | 1    |      |      |      |      |      |      |      |      |      |      |   |
| 9895   | 3    | 4    | 4    | 4    |      |      |      |      |      |      |      |      |      |      |   |
| 9896   |      |      |      |      |      | 2    | 1    | 2    | 2    | 1    | 1    | 2    | 2    | 2    | 1 |
| 9897   | 2    | 3    | 3    | 3    |      |      |      |      |      |      |      |      |      |      |   |
| 9905   | 3    | 2    | 1    | 4    |      |      |      |      |      |      |      |      |      |      |   |
| 9907   |      |      |      |      |      | 3    | 4    | 4    | 3    | 3    | 4    | 6    | 5    | 3    | 4 |
| 9908   | 4    | 4    | 4    | 3    |      |      |      |      |      |      |      |      |      |      |   |
| 9909   | 4    | 1    | 1    | 3    |      |      |      |      |      |      |      |      |      |      |   |
| 9910   | 3    | 2    | 2    | 2    |      |      |      |      |      |      |      |      |      |      |   |
| 9913   | 5    | 5    | 5    | 5    |      |      |      |      |      |      |      |      |      |      |   |
| 9914   | 3    | 4    | 4    | 2    |      |      |      |      |      |      |      |      |      |      |   |
| 9915   |      |      |      |      |      | 3    | 4    |      |      |      |      |      |      |      | 3 |
| 9916   | 4    | 4    | 4    | 5    |      |      |      |      |      |      |      |      |      |      |   |
| 9918   |      |      |      |      |      |      |      |      |      |      |      |      |      |      |   |
| 9919   | 2    | 3    | 3    | 1    |      |      |      |      |      |      |      |      |      |      |   |
| 9922   |      |      | 4    |      |      |      |      |      |      |      |      |      |      |      |   |
| 9930   |      |      |      |      |      | 1    | 5    | 5    | 6    | 5    | 6    | 5    | 6    | 2    | 4 |

| respid | Q47l | Q47m | Q47n | Q47o | Q48a | Q48b | Q48c | Q48d | Q48e | Q48f | Q48g | Q48h | Q48i | Q48j |   |
|--------|------|------|------|------|------|------|------|------|------|------|------|------|------|------|---|
| 9934   | 5    | 5    | 5    | 5    |      |      |      |      |      |      |      |      |      |      |   |
| 9936   | 4    | 4    | 4    | 4    |      |      |      |      |      |      |      |      |      |      |   |
| 9938   |      |      |      |      |      | 1    | 6    | 6    | 6    | 1    | 6    | 6    | 1    | 1    | 6 |
| 9940   | 4    | 4    | 4    | 4    |      |      |      |      |      |      |      |      |      |      |   |
| 9944   |      |      |      |      |      | 3    | 4    | 5    | 4    | 3    | 4    | 4    | 4    | 3    | 4 |
| 9945   | 3    | 3    | 3    | 3    |      |      |      |      |      |      |      |      |      |      |   |
| 9948   |      |      |      |      |      | 3    | 3    | 3    | 3    | 3    | 4    |      | 4    | 4    | 4 |
| 9949   |      |      |      |      |      | 1    | 6    | 6    | 5    | 3    | 6    | 5    | 6    | 1    | 4 |
| 9951   | 2    | 3    | 3    | 2    |      |      |      |      |      |      |      |      |      |      |   |
| 9952   |      |      |      |      |      | 1    | 1    | 1    | 3    | 4    | 4    | 4    | 4    | 4    | 4 |
| 9954   |      |      |      |      |      | 6    | 4    | 6    | 4    | 3    | 4    | 3    | 3    | 3    | 2 |
| 9955   |      |      |      |      |      | 1    | 3    | 4    | 3    | 3    | 3    | 5    | 6    | 5    | 4 |
| 9956   | 3    | 3    | 4    | 3    |      |      |      |      |      |      |      |      |      |      |   |
| 9957   |      |      |      |      |      | 6    | 6    | 6    | 6    | 6    | 6    | 6    | 6    | 6    | 6 |
| 9958   | 3    | 3    | 3    |      |      |      |      |      |      |      |      |      |      |      |   |
| 9959   |      |      |      |      |      | 1    | 1    | 5    | 3    | 4    | 3    | 4    | 5    | 1    | 2 |
| 9960   | 2    | 2    | 2    | 2    |      |      |      |      |      |      |      |      |      |      |   |
| 9961   | 3    | 3    |      | 3    |      |      |      |      |      |      |      |      |      |      |   |
| 9962   |      |      |      |      |      |      |      |      |      |      |      |      |      |      |   |
| 9969   | 3    | 3    | 3    | 3    |      |      |      |      |      |      |      |      |      |      |   |
| 9982   | 3    | 2    | 3    | 2    |      |      |      |      |      |      |      |      |      |      |   |
| 9984   | 5    | 4    | 4    | 4    |      |      |      |      |      |      |      |      |      |      |   |
| 9990   | 4    | 4    | 4    | 4    |      |      |      |      |      |      |      |      |      |      |   |
| 9992   |      |      |      |      |      | 3    | 2    | 2    | 2    | 2    | 2    | 3    | 2    | 2    | 2 |
| 9993   | 4    | 3    | 3    | 3    |      |      |      |      |      |      |      |      |      |      |   |
| 9997   |      |      |      |      |      | 6    | 6    | 6    | 1    | 6    | 6    | 6    | 1    | 1    | 1 |
| 9999   | 3    | 4    | 4    | 3    |      |      |      |      |      |      |      |      |      |      |   |
| 10000  | 1    | 1    | 1    | 1    |      |      |      |      |      |      |      |      |      |      |   |
| 10005  | 4    | 4    | 3    | 3    |      |      |      |      |      |      |      |      |      |      |   |
| 10014  | 4    | 4    | 5    | 3    |      |      |      |      |      |      |      |      |      |      |   |
| 10016  |      |      |      |      |      |      |      |      |      |      |      |      |      |      |   |
| 10017  | 1    | 5    | 5    | 1    |      |      |      |      |      |      |      |      |      |      |   |

| respid | Q47l | Q47m | Q47n | Q47o | Q48a | Q48b | Q48c | Q48d | Q48e | Q48f | Q48g | Q48h | Q48i | Q48j |   |
|--------|------|------|------|------|------|------|------|------|------|------|------|------|------|------|---|
| 10018  |      | 4    | 2    | 2    | 3    |      |      |      |      |      |      |      |      |      |   |
| 10021  |      | 4    | 4    | 4    | 4    |      |      |      |      |      |      |      |      |      |   |
| 10025  |      |      |      |      |      | 3    | 5    | 5    | 3    | 4    | 5    | 4    | 4    | 3    | 4 |
| 10027  |      | 3    | 3    | 3    | 2    |      |      |      |      |      |      |      |      |      |   |
| 10028  |      | 3    | 3    | 3    | 3    |      |      |      |      |      |      |      |      |      |   |
| 10031  |      | 4    | 4    | 4    | 4    |      |      |      |      |      |      |      |      |      |   |
| 10036  |      |      |      |      |      | 3    | 6    | 6    | 6    | 1    | 6    | 6    | 6    | 1    | 6 |
| 10037  |      |      |      |      |      | 2    | 1    | 1    | 1    | 6    | 1    | 2    | 3    | 5    | 1 |
| 10038  |      | 3    | 3    | 2    | 3    |      |      |      |      |      |      |      |      |      |   |
| 10039  |      |      |      |      |      |      |      |      |      |      |      |      |      |      |   |
| 10041  |      | 4    | 4    | 3    | 4    |      |      |      |      |      |      |      |      |      |   |
| 10045  |      |      |      |      |      |      |      |      |      |      |      |      |      |      |   |
| 10046  |      | 2    | 4    | 4    | 3    |      |      |      |      |      |      |      |      |      |   |
| 10047  |      | 2    |      | 3    | 2    |      |      |      |      |      |      |      |      |      |   |
| 10048  |      |      |      |      |      | 1    | 5    | 3    | 6    | 2    | 6    | 6    | 3    | 2    | 3 |
| 10049  |      | 2    | 3    | 2    | 3    |      |      |      |      |      |      |      |      |      |   |
| 10051  |      | 3    | 4    | 4    | 4    |      |      |      |      |      |      |      |      |      |   |
| 10052  |      | 3    | 3    | 3    | 3    |      |      |      |      |      |      |      |      |      |   |
| 10056  |      | 3    | 4    | 4    | 3    |      |      |      |      |      |      |      |      |      |   |
| 10061  |      | 3    | 4    | 4    | 4    |      |      |      |      |      |      |      |      |      |   |
| 10064  |      | 4    | 4    | 4    | 4    |      |      |      |      |      |      |      |      |      |   |
| 10066  |      |      |      |      |      | 5    | 6    | 6    | 6    | 5    | 6    | 5    | 6    | 3    | 4 |
| 10069  |      | 4    | 5    | 4    | 4    |      |      |      |      |      |      |      |      |      |   |
| 10071  |      | 4    | 3    | 3    | 4    |      |      |      |      |      |      |      |      |      |   |
| 10074  |      | 4    | 4    | 4    | 4    |      |      |      |      |      |      |      |      |      |   |
| 10079  |      | 4    | 1    | 1    | 1    |      |      |      |      |      |      |      |      |      |   |
| 10087  |      | 3    | 3    | 3    | 3    |      |      |      |      |      |      |      |      |      |   |
| 10095  |      | 3    | 3    | 3    | 5    |      |      |      |      |      |      |      |      |      |   |
| 10097  |      |      |      |      |      | 4    | 5    | 5    | 6    | 3    | 4    | 6    | 6    | 3    | 4 |
| 10100  |      | 4    | 3    | 3    | 4    |      |      |      |      |      |      |      |      |      |   |
| 10105  |      | 4    | 4    | 4    | 4    |      |      |      |      |      |      |      |      |      |   |
| 10107  |      | 1    | 1    | 1    | 1    |      |      |      |      |      |      |      |      |      |   |

| respid | Q47l | Q47m | Q47n | Q47o | Q48a | Q48b | Q48c | Q48d | Q48e | Q48f | Q48g | Q48h | Q48i | Q48j |   |
|--------|------|------|------|------|------|------|------|------|------|------|------|------|------|------|---|
| 10111  | 4    | 4    | 4    | 4    |      |      |      |      |      |      |      |      |      |      |   |
| 10116  |      |      |      |      |      | 4    | 2    | 2    | 2    | 5    | 2    | 2    | 4    | 3    | 1 |
| 10118  |      |      |      |      |      | 6    | 6    | 6    | 6    | 6    | 6    | 6    | 6    | 6    | 6 |
| 10123  |      |      |      |      |      |      |      |      |      |      |      |      |      |      |   |
| 10124  |      |      |      |      |      | 1    | 6    | 6    | 3    | 4    | 6    | 6    | 6    | 2    | 6 |
| 10130  | 4    | 2    | 3    | 2    |      |      |      |      |      |      |      |      |      |      |   |
| 10134  |      |      |      |      |      | 2    | 5    | 6    | 4    | 3    | 4    | 5    | 6    | 3    | 6 |
| 10135  | 3    | 4    | 4    | 4    |      |      |      |      |      |      |      |      |      |      |   |
| 10136  |      |      |      |      |      |      |      |      |      |      |      |      |      |      |   |
| 10141  | 3    | 1    | 1    | 3    |      |      |      |      |      |      |      |      |      |      |   |
| 10142  |      |      |      |      |      | 2    | 5    | 6    | 3    | 4    | 5    | 6    | 5    | 3    | 3 |
| 10143  |      |      |      |      |      |      |      |      |      |      |      |      |      |      |   |
| 10145  | 3    | 3    |      | 4    |      |      |      |      |      |      |      |      |      |      |   |
| 10149  |      |      |      |      |      | 2    | 3    | 5    | 3    | 2    | 5    | 4    | 6    | 2    | 3 |
| 10150  | 1    | 1    | 1    | 1    |      |      |      |      |      |      |      |      |      |      |   |
| 10151  |      |      |      |      |      |      |      |      |      |      |      |      |      |      |   |
| 10152  | 4    | 3    | 3    | 2    |      |      |      |      |      |      |      |      |      |      |   |
| 10153  | 5    | 4    | 4    | 5    |      |      |      |      |      |      |      |      |      |      |   |
| 10156  |      |      |      |      |      | 1    | 6    | 6    | 6    | 2    | 6    | 6    | 6    | 1    | 6 |
| 10160  |      |      |      |      |      | 6    | 6    | 6    | 4    | 6    | 3    | 6    | 6    | 6    | 6 |
| 10161  | 3    | 4    | 4    | 3    |      |      |      |      |      |      |      |      |      |      |   |
| 10167  |      |      |      |      |      | 3    | 3    | 3    | 3    | 2    | 2    | 3    | 3    | 3    | 3 |
| 10171  |      |      |      |      |      |      |      |      |      |      |      |      |      |      |   |
| 10172  | 4    | 5    | 5    | 4    |      |      |      |      |      |      |      |      |      |      |   |
| 10176  | 3    | 4    | 4    | 3    |      |      |      |      |      |      |      |      |      |      |   |
| 10177  |      |      |      |      |      | 1    | 6    | 6    | 6    | 3    |      |      | 6    | 6    | 6 |
| 10182  | 3    | 3    | 4    | 3    |      |      |      |      |      |      |      |      |      |      |   |
| 10184  | 2    | 2    | 3    | 3    |      |      |      |      |      |      |      |      |      |      |   |
| 10186  |      |      |      |      |      | 1    | 3    | 5    | 1    | 5    | 3    | 3    | 4    | 4    | 6 |
| 10189  | 2    | 3    | 4    | 4    |      |      |      |      |      |      |      |      |      |      |   |
| 10191  | 5    | 5    | 3    | 4    |      |      |      |      |      |      |      |      |      |      |   |
| 10192  | 4    | 4    | 5    | 3    |      |      |      |      |      |      |      |      |      |      |   |



| respid | Q47l | Q47m | Q47n | Q47o | Q48a | Q48b | Q48c | Q48d | Q48e | Q48f | Q48g | Q48h | Q48i | Q48j |   |
|--------|------|------|------|------|------|------|------|------|------|------|------|------|------|------|---|
| 10195  |      | 5    | 4    | 4    | 4    |      |      |      |      |      |      |      |      |      |   |
| 10199  |      |      |      |      |      |      |      |      |      |      |      |      |      |      |   |
| 10201  |      | 1    | 1    | 1    | 1    |      |      |      |      |      |      |      |      |      |   |
| 10213  |      |      |      |      |      | 2    | 6    | 6    | 6    | 2    | 6    | 6    | 6    | 2    | 6 |
| 10222  |      |      |      |      |      | 2    | 5    | 5    | 5    | 2    | 5    | 5    | 5    | 2    | 5 |
| 10224  |      |      |      |      |      |      |      |      |      |      |      |      |      |      |   |
| 10245  |      |      |      |      |      | 3    | 6    | 4    | 6    | 3    | 4    | 4    | 6    | 2    | 6 |
| 10254  |      |      |      |      |      |      |      |      |      |      |      |      |      |      |   |
| 10255  |      | 2    | 2    | 2    | 2    |      |      |      |      |      |      |      |      |      |   |
| 10257  |      | 1    | 3    | 3    | 3    |      |      |      |      |      |      |      |      |      |   |
| 10260  |      | 1    |      |      | 1    |      |      |      |      |      |      |      |      |      |   |
| 10261  |      | 3    | 3    | 3    | 3    |      |      |      |      |      |      |      |      |      |   |
| 10263  |      |      |      |      |      | 6    | 6    | 6    | 6    | 5    | 6    | 6    | 6    | 6    | 6 |
| 10264  |      | 5    | 4    | 4    | 4    |      |      |      |      |      |      |      |      |      |   |
| 10268  |      | 3    |      |      |      |      |      |      |      |      |      |      |      |      |   |
| 10269  |      | 2    | 1    | 1    | 1    |      |      |      |      |      |      |      |      |      |   |
| 10270  |      |      |      |      |      |      |      |      |      |      |      |      |      |      |   |
| 10282  |      | 3    | 4    | 5    | 4    |      |      |      |      |      |      |      |      |      |   |
| 10285  |      |      |      |      |      |      |      |      |      |      |      |      |      |      |   |
| 10288  |      | 3    | 4    | 4    | 3    |      |      |      |      |      |      |      |      |      |   |
| 10291  |      | 3    | 3    | 4    | 3    |      |      |      |      |      |      |      |      |      |   |
| 10292  |      |      |      |      |      | 5    | 6    | 6    | 6    | 4    | 6    | 6    | 6    | 6    | 6 |
| 10304  |      |      |      |      |      |      |      |      |      |      |      |      |      |      |   |
| 10305  |      |      |      |      |      | 1    | 1    | 2    | 3    | 4    | 5    | 3    | 3    | 2    | 2 |
| 10310  |      | 3    | 3    | 3    | 3    |      |      |      |      |      |      |      |      |      |   |
| 10324  |      |      |      |      |      | 2    | 2    | 2    | 2    | 2    | 3    | 2    | 5    | 2    | 5 |
| 10325  |      |      |      |      |      | 2    | 5    | 5    | 4    | 3    | 4    | 5    | 6    | 5    | 5 |
| 10326  |      | 2    | 1    | 1    | 2    |      |      |      |      |      |      |      |      |      |   |
| 10329  |      |      |      |      |      |      |      |      |      |      |      |      |      |      |   |
| 10332  |      | 4    | 4    | 4    | 4    |      |      |      |      |      |      |      |      |      |   |
| 10337  |      | 4    | 3    | 3    | 3    |      |      |      |      |      |      |      |      |      |   |
| 10341  |      |      |      |      |      | 6    |      |      |      |      |      |      | 1    | 6    |   |

| respid | Q47l | Q47m | Q47n | Q47o | Q48a | Q48b | Q48c | Q48d | Q48e | Q48f | Q48g | Q48h | Q48i | Q48j |
|--------|------|------|------|------|------|------|------|------|------|------|------|------|------|------|
| 10353  | 3    | 4    | 4    | 3    |      |      |      |      |      |      |      |      |      |      |
| 10354  |      |      |      |      |      |      |      |      |      |      |      |      |      |      |
| 10359  |      |      |      |      | 1    | 3    | 3    | 5    | 5    | 5    | 5    | 3    | 6    | 5    |
| 10360  | 3    | 4    | 4    | 4    |      |      |      |      |      |      |      |      |      |      |
| 10362  | 3    | 3    | 4    | 3    |      |      |      |      |      |      |      |      |      |      |
| 10364  | 4    | 4    | 4    | 4    |      |      |      |      |      |      |      |      |      |      |
| 10366  | 3    | 2    | 2    | 2    |      |      |      |      |      |      |      |      |      |      |
| 10367  |      |      |      |      | 3    | 2    | 2    | 2    | 3    | 2    | 3    | 3    | 3    | 3    |
| 10371  | 4    | 4    | 4    | 5    |      |      |      |      |      |      |      |      |      |      |
| 10374  |      |      |      |      | 6    | 1    | 1    | 6    | 6    | 6    | 1    | 1    | 6    | 1    |
| 10375  |      |      |      |      | 3    | 3    | 6    | 6    | 3    | 6    | 6    | 6    | 2    | 4    |
| 10376  | 3    | 4    | 4    | 3    |      |      |      |      |      |      |      |      |      |      |
| 10377  | 4    | 4    | 3    | 4    |      |      |      |      |      |      |      |      |      |      |
| 10378  | 3    | 4    | 4    | 4    |      |      |      |      |      |      |      |      |      |      |
| 10387  | 1    | 5    | 4    | 1    |      |      |      |      |      |      |      |      |      |      |
| 10396  | 4    | 3    | 2    | 3    |      |      |      |      |      |      |      |      |      |      |
| 10397  | 3    | 4    | 4    | 3    |      |      |      |      |      |      |      |      |      |      |
| 10399  | 3    | 3    | 2    | 3    |      |      |      |      |      |      |      |      |      |      |
| 10405  | 1    | 2    | 2    | 1    |      |      |      |      |      |      |      |      |      |      |
| 10406  | 2    | 1    | 1    | 1    |      |      |      |      |      |      |      |      |      |      |
| 10408  | 4    | 4    | 4    | 3    |      |      |      |      |      |      |      |      |      |      |
| 10409  |      |      |      |      |      |      |      |      |      |      |      |      |      |      |
| 10412  | 4    | 5    | 5    | 5    |      |      |      |      |      |      |      |      |      |      |
| 10413  | 4    | 4    | 4    | 4    |      |      |      |      |      |      |      |      |      |      |
| 10419  | 2    | 2    | 2    | 2    |      |      |      |      |      |      |      |      |      |      |
| 10423  | 1    | 1    | 2    | 1    |      |      |      |      |      |      |      |      |      |      |
| 10426  |      |      |      |      | 1    | 1    | 6    | 6    | 1    | 6    | 6    | 6    | 1    | 6    |
| 10446  | 2    | 3    | 4    | 2    |      |      |      |      |      |      |      |      |      |      |
| 10448  | 2    | 2    | 2    | 2    |      |      |      |      |      |      |      |      |      |      |
| 10450  |      |      |      |      | 2    | 4    | 5    | 6    | 3    | 4    | 5    | 6    | 1    | 3    |
| 10455  | 4    | 3    | 3    | 5    |      |      |      |      |      |      |      |      |      |      |
| 10460  |      |      |      |      | 3    | 3    | 3    | 3    | 4    | 6    | 6    | 6    | 1    | 3    |

| respid | Q47l | Q47m | Q47n | Q47o | Q48a | Q48b | Q48c | Q48d | Q48e | Q48f | Q48g | Q48h | Q48i | Q48j |   |
|--------|------|------|------|------|------|------|------|------|------|------|------|------|------|------|---|
| 10461  |      | 2    | 2    | 2    | 1    |      |      |      |      |      |      |      |      |      |   |
| 10471  |      | 3    | 3    | 3    | 3    |      |      |      |      |      |      |      |      |      |   |
| 10472  |      | 3    | 4    | 4    | 4    |      |      |      |      |      |      |      |      |      |   |
| 10491  |      | 3    |      | 2    | 3    |      |      |      |      |      |      |      |      |      |   |
| 10493  |      |      |      |      |      | 1    | 6    | 6    | 6    | 1    | 6    | 6    | 6    | 2    | 6 |
| 10498  |      |      |      |      |      | 2    | 6    | 6    | 4    | 3    | 4    | 6    | 6    | 1    | 4 |
| 10533  |      |      |      |      |      | 4    | 3    | 5    | 5    | 4    | 4    | 5    | 5    | 3    | 5 |
| 10539  | 3    | 3    | 3    | 3    | 3    |      |      |      |      |      |      |      |      |      |   |
| 10540  | 2    | 3    |      |      | 2    |      |      |      |      |      |      |      |      |      |   |
| 10557  | 3    | 3    | 3    | 3    | 3    |      |      |      |      |      |      |      |      |      |   |
| 10558  |      |      |      |      |      |      |      |      |      |      |      |      |      |      |   |
| 10559  |      |      |      |      |      |      | 1    | 1    | 6    | 1    | 6    | 6    | 6    | 1    | 6 |
| 10564  |      |      |      |      |      | 4    | 3    | 3    | 5    | 4    | 5    | 5    | 3    | 3    | 3 |
| 10570  |      |      |      |      |      |      |      |      |      |      |      |      |      |      |   |
| 10572  |      |      |      |      |      | 3    | 4    | 4    | 4    | 2    | 4    | 5    | 6    | 2    | 6 |
| 10576  | 5    | 5    | 5    | 5    | 5    |      |      |      |      |      |      |      |      |      |   |
| 10582  | 1    | 1    | 1    | 1    | 1    |      |      |      |      |      |      |      |      |      |   |
| 10593  |      |      |      |      |      | 2    | 5    | 6    | 6    | 2    | 5    | 6    | 6    | 2    | 2 |
| 10596  | 3    | 1    |      |      |      |      |      |      |      |      |      |      |      |      |   |
| 10615  |      |      |      |      |      |      |      |      |      |      |      |      |      |      |   |
| 10616  | 4    | 3    | 3    | 3    | 3    |      |      |      |      |      |      |      |      |      |   |
| 10623  | 3    | 3    | 5    | 4    |      |      |      |      |      |      |      |      |      |      |   |
| 10626  |      |      |      |      |      | 2    | 5    | 5    | 5    | 5    | 5    | 5    | 6    | 1    | 2 |
| 10627  |      |      |      |      |      | 3    | 2    | 2    | 2    | 2    | 2    | 2    | 2    | 2    | 2 |
| 10629  |      |      |      |      |      |      |      |      |      |      |      |      |      |      |   |
| 10632  |      |      |      |      |      | 3    | 2    | 2    | 2    | 2    | 2    | 2    | 2    | 2    | 2 |
| 10641  |      |      |      |      |      |      |      |      |      |      |      |      |      |      |   |
| 10648  | 2    | 3    | 2    |      |      |      |      |      |      |      |      |      |      |      |   |
| 10651  |      |      |      |      |      | 5    | 5    | 1    | 5    | 6    | 5    | 6    | 6    | 6    | 6 |
| 10654  |      |      |      |      |      | 2    | 6    | 6    | 6    | 2    | 6    | 6    | 6    | 2    | 6 |
| 10673  |      |      |      |      |      | 1    | 6    | 6    | 6    | 6    | 6    | 6    | 6    | 1    | 6 |
| 10675  | 2    | 2    | 2    | 3    |      |      |      |      |      |      |      |      |      |      |   |

| respid | Q47l | Q47m | Q47n | Q47o | Q48a | Q48b | Q48c | Q48d | Q48e | Q48f | Q48g | Q48h | Q48i | Q48j |   |
|--------|------|------|------|------|------|------|------|------|------|------|------|------|------|------|---|
| 10689  | 3    | 3    | 2    | 3    |      |      |      |      |      |      |      |      |      |      |   |
| 10692  |      |      |      |      |      | 1    | 1    | 2    | 2    | 5    |      | 2    | 2    | 3    | 2 |
| 10694  | 4    | 4    | 4    | 4    |      |      |      |      |      |      |      |      |      |      |   |
| 10695  | 4    | 4    | 4    | 4    |      |      |      |      |      |      |      |      |      |      |   |
| 10702  |      |      |      |      |      |      |      |      |      |      |      |      |      |      |   |
| 10703  | 3    | 3    | 3    | 3    |      |      |      |      |      |      |      |      |      |      |   |
| 10708  | 3    | 3    | 3    | 5    |      |      |      |      |      |      |      |      |      |      |   |
| 10719  | 3    | 2    | 3    | 3    |      |      |      |      |      |      |      |      |      |      |   |
| 10722  |      |      |      |      |      | 1    | 6    | 6    | 5    | 1    | 4    | 6    | 6    | 1    | 6 |
| 10723  | 2    | 3    | 3    | 1    |      |      |      |      |      |      |      |      |      |      |   |
| 10726  | 4    | 3    | 4    | 1    |      |      |      |      |      |      |      |      |      |      |   |
| 10727  | 3    | 3    | 3    | 3    |      |      |      |      |      |      |      |      |      |      |   |
| 10730  | 4    | 3    | 3    | 4    |      |      |      |      |      |      |      |      |      |      |   |
| 10731  |      |      |      |      |      |      |      |      |      |      |      |      |      |      |   |
| 10737  | 3    | 3    | 2    | 4    |      |      |      |      |      |      |      |      |      |      |   |
| 10743  |      |      |      |      |      |      |      |      |      |      |      |      |      |      | 3 |
| 10763  | 3    | 4    | 4    | 4    |      |      |      |      |      |      |      |      |      |      |   |
| 10777  |      |      |      |      |      |      |      |      |      |      |      |      |      |      |   |
| 10787  | 2    | 2    | 1    | 1    |      |      |      |      |      |      |      |      |      |      |   |
| 10798  |      |      |      |      |      | 1    | 1    | 2    | 3    | 3    | 3    | 2    | 2    | 3    | 3 |
| 10800  | 3    | 4    | 4    | 5    |      |      |      |      |      |      |      |      |      |      |   |
| 10802  |      |      |      |      |      | 2    | 2    | 1    | 1    | 1    | 2    | 3    | 2    | 2    | 2 |
| 10803  |      |      |      |      |      | 1    | 4    | 3    | 2    | 2    | 5    | 5    | 5    | 2    | 5 |
| 10808  |      |      |      |      |      | 4    | 4    | 4    | 4    | 3    | 5    | 4    | 5    | 2    | 4 |
| 10810  | 3    | 4    | 4    | 3    |      |      |      |      |      |      |      |      |      |      |   |
| 10819  | 3    | 4    | 4    | 4    |      |      |      |      |      |      |      |      |      |      |   |
| 10825  | 4    | 4    | 4    | 4    |      |      |      |      |      |      |      |      |      |      |   |
| 10827  | 4    | 4    | 4    | 4    |      |      |      |      |      |      |      |      |      |      |   |
| 10830  | 2    | 3    | 2    | 2    |      |      |      |      |      |      |      |      |      |      |   |
| 10847  | 3    | 2    |      | 2    |      |      |      |      |      |      |      |      |      |      |   |
| 10849  | 1    | 3    | 3    | 1    |      |      |      |      |      |      |      |      |      |      |   |
| 10852  |      |      |      |      |      |      |      |      |      |      |      |      |      |      |   |

| respid | Q47l | Q47m | Q47n | Q47o | Q48a | Q48b | Q48c | Q48d | Q48e | Q48f | Q48g | Q48h | Q48i | Q48j |   |
|--------|------|------|------|------|------|------|------|------|------|------|------|------|------|------|---|
| 10854  | 3    | 3    | 3    | 3    |      |      |      |      |      |      |      |      |      |      |   |
| 10857  |      |      |      |      |      | 4    | 4    | 4    | 4    | 3    | 4    | 4    | 4    | 3    | 4 |
| 10861  |      |      |      |      |      |      | 6    | 6    | 1    | 6    | 1    | 1    | 1    | 6    | 6 |
| 10862  |      |      |      |      |      |      |      |      |      |      |      |      |      |      |   |
| 10870  | 3    | 4    | 4    | 4    |      |      |      |      |      |      |      |      |      |      |   |
| 10873  | 1    |      |      |      |      |      |      |      |      |      |      |      |      |      |   |
| 10881  |      |      |      |      |      | 1    | 6    | 6    | 4    | 1    | 6    | 6    | 6    | 1    | 6 |
| 10893  |      |      |      |      |      |      |      |      |      |      |      |      |      |      |   |
| 10898  |      |      |      |      |      | 2    | 5    | 6    | 6    | 3    | 5    | 6    | 6    | 3    | 6 |
| 10899  | 3    | 2    | 3    | 2    |      |      |      |      |      |      |      |      |      |      |   |
| 10905  | 2    | 2    | 3    | 2    |      |      |      |      |      |      |      |      |      |      |   |
| 10910  |      |      |      |      |      |      |      |      |      |      |      |      |      |      |   |
| 10911  |      |      |      |      |      | 4    | 4    | 4    | 5    | 4    | 4    | 4    | 3    | 4    | 3 |
| 10912  |      |      |      |      |      | 3    | 6    | 6    | 5    | 2    | 6    | 5    | 4    | 1    | 5 |
| 10913  |      |      |      |      |      | 4    | 3    | 3    | 4    | 4    | 5    | 4    | 5    | 4    | 3 |
| 10918  |      |      |      |      |      |      |      |      |      |      |      |      |      |      |   |
| 10995  |      |      |      |      |      |      |      |      |      |      |      |      |      |      |   |
| 11002  | 3    | 4    | 4    | 4    |      |      |      |      |      |      |      |      |      |      |   |
| 11003  | 4    | 4    |      | 4    |      |      |      |      |      |      |      |      |      |      |   |
| 11005  | 3    | 3    | 3    | 3    |      |      |      |      |      |      |      |      |      |      |   |
| 11015  |      |      |      |      |      | 1    | 6    | 6    | 6    | 1    | 6    | 6    | 6    | 1    | 6 |
| 11016  | 5    | 3    | 1    | 1    |      |      |      |      |      |      |      |      |      |      |   |
| 11017  | 5    | 5    | 5    | 5    |      |      |      |      |      |      |      |      |      |      |   |
| 11020  |      |      |      |      |      | 1    | 1    | 3    | 2    | 3    | 3    | 3    | 2    | 1    | 1 |
| 11024  | 3    | 3    | 3    | 2    |      |      |      |      |      |      |      |      |      |      |   |
| 11026  |      |      |      |      |      | 2    | 5    | 5    | 5    | 2    | 3    | 5    | 5    | 2    | 4 |
| 11028  | 3    | 3    | 3    | 2    |      |      |      |      |      |      |      |      |      |      |   |
| 11029  |      |      |      |      |      | 1    | 2    | 2    | 1    | 1    | 1    | 1    | 1    | 2    | 2 |
| 11030  | 3    |      |      |      |      |      |      |      |      |      |      |      |      |      |   |
| 11031  |      |      |      |      |      | 2    | 5    | 3    | 4    | 3    | 2    | 5    | 6    | 5    | 6 |
| 11038  |      |      |      |      |      | 4    | 3    | 3    | 4    | 3    | 3    | 4    | 2    | 4    | 4 |
| 11051  |      |      |      |      |      | 2    | 4    | 5    | 5    | 4    | 4    | 6    | 5    | 5    | 4 |

| respid | Q47l | Q47m | Q47n | Q47o | Q48a | Q48b | Q48c | Q48d | Q48e | Q48f | Q48g | Q48h | Q48i | Q48j |
|--------|------|------|------|------|------|------|------|------|------|------|------|------|------|------|
| 11052  |      |      |      |      |      | 1    | 2    | 2    | 1    | 3    | 2    | 2    | 2    | 2    |
| 11053  |      |      |      |      |      | 1    | 6    | 6    | 6    | 1    | 6    | 6    | 6    | 1    |
| 11054  |      |      |      |      |      | 2    | 2    | 1    | 1    | 2    | 2    | 3    | 1    | 4    |
| 11063  |      |      |      |      |      | 6    | 1    | 1    | 6    | 1    | 2    | 2    | 2    | 6    |
| 11075  | 3    | 3    | 3    | 3    |      |      |      |      |      |      |      |      |      |      |
| 11083  | 5    | 4    | 5    | 5    |      |      |      |      |      |      |      |      |      |      |
| 11092  |      |      |      |      |      |      |      |      |      |      |      |      |      |      |
| 11118  | 3    | 4    | 4    | 4    |      |      |      |      |      |      |      |      |      |      |
| 11119  | 2    | 2    | 3    | 3    |      |      |      |      |      |      |      |      |      |      |
| 11134  | 5    | 4    | 4    | 5    |      |      |      |      |      |      |      |      |      |      |
| 11139  |      |      |      |      |      |      |      |      |      |      |      |      |      |      |
| 11154  | 2    | 4    | 4    | 4    |      |      |      |      |      |      |      |      |      |      |
| 11166  | 3    | 4    | 4    | 3    |      |      |      |      |      |      |      |      |      |      |
| 11168  |      |      |      |      |      |      |      |      |      |      |      |      |      |      |
| 11176  | 3    | 3    | 3    | 3    |      |      |      |      |      |      |      |      |      |      |
| 11183  |      |      |      |      | 4    | 5    | 5    | 5    | 3    | 6    | 5    | 6    | 2    | 6    |
| 11189  | 5    | 5    | 5    | 5    |      |      |      |      |      |      |      |      |      |      |
| 11196  |      |      |      |      | 2    | 2    | 2    | 2    | 2    | 3    | 3    | 3    | 3    | 2    |
| 11200  | 4    | 4    | 4    | 4    |      |      |      |      |      |      |      |      |      |      |
| 11201  | 3    | 1    | 1    | 5    |      |      |      |      |      |      |      |      |      |      |
| 11211  |      |      |      |      | 2    | 2    | 2    | 3    | 2    | 2    | 2    | 2    | 3    | 2    |
| 11218  |      |      |      |      | 3    | 4    | 4    | 4    | 3    | 4    | 4    | 4    | 4    | 3    |
| 11219  |      |      |      |      | 2    | 6    | 6    | 6    | 2    | 6    | 6    | 6    | 6    | 1    |
| 11221  |      |      |      |      |      |      |      |      |      |      |      |      |      |      |
| 11222  |      |      |      |      | 6    | 5    | 3    | 2    | 4    | 3    | 4    | 4    | 4    | 5    |
| 11230  |      |      |      |      | 2    | 2    | 3    | 2    | 3    | 2    | 3    | 2    | 3    | 2    |
| 11236  |      |      |      |      | 2    | 2    | 3    | 3    | 2    | 3    | 2    | 2    | 2    | 3    |
| 11237  | 2    | 2    | 2    | 1    |      |      |      |      |      |      |      |      |      |      |
| 11240  |      |      |      |      | 3    | 3    |      | 3    | 6    | 2    | 3    | 5    | 5    | 4    |
| 11244  |      |      |      |      | 2    | 3    | 2    | 3    | 2    | 3    | 2    | 3    | 2    | 3    |
| 11249  |      |      |      |      | 2    | 4    | 4    | 3    | 3    | 4    | 3    | 5    | 2    | 3    |
| 11252  |      |      |      |      | 3    | 2    | 2    | 3    | 3    | 2    | 2    | 3    | 2    | 3    |

| respid | Q47l | Q47m | Q47n | Q47o | Q48a | Q48b | Q48c | Q48d | Q48e | Q48f | Q48g | Q48h | Q48i | Q48j |   |
|--------|------|------|------|------|------|------|------|------|------|------|------|------|------|------|---|
| 11254  | 4    | 3    | 4    | 4    |      |      |      |      |      |      |      |      |      |      |   |
| 11255  |      |      |      |      |      |      |      |      |      |      |      |      |      |      |   |
| 11258  |      |      |      |      |      | 3    | 2    | 2    | 3    | 2    | 2    | 2    | 2    | 3    | 3 |
| 11260  | 3    | 3    | 3    | 3    |      |      |      |      |      |      |      |      |      |      |   |
| 11264  | 2    | 1    | 1    | 1    |      |      |      |      |      |      |      |      |      |      |   |
| 11266  |      |      |      |      |      |      |      |      |      |      |      |      |      |      |   |
| 11268  | 2    | 2    | 2    | 2    |      |      |      |      |      |      |      |      |      |      |   |
| 11269  | 3    | 3    | 3    | 3    |      |      |      |      |      |      |      |      |      |      |   |
| 11272  | 1    | 1    |      |      |      |      |      |      |      |      |      |      |      |      |   |
| 11273  | 3    | 3    | 3    | 3    |      |      |      |      |      |      |      |      |      |      |   |
| 11275  |      |      |      |      |      | 2    | 6    | 6    | 6    | 1    | 6    | 2    | 6    | 2    | 6 |
| 11276  |      |      |      |      |      | 2    | 3    | 3    | 4    | 4    | 4    | 4    | 4    | 3    | 4 |
| 11278  |      |      |      |      |      |      |      | 1    | 2    |      |      |      |      |      |   |
| 11288  |      |      |      |      |      |      |      |      |      |      |      |      |      |      |   |
| 11289  |      |      |      |      |      |      |      |      |      |      |      |      |      |      |   |
| 11291  | 3    | 3    | 3    | 3    |      |      |      |      |      |      |      |      |      |      |   |
| 11295  |      | 3    |      |      |      |      |      |      |      |      |      |      |      |      |   |
| 11297  |      |      |      |      |      | 3    | 4    | 4    | 4    | 3    | 4    | 5    | 4    | 3    | 4 |
| 11304  | 1    |      |      | 1    |      |      |      |      |      |      |      |      |      |      |   |
| 11305  | 3    | 5    | 5    | 5    |      |      |      |      |      |      |      |      |      |      |   |
| 11311  |      |      |      |      |      |      | 6    | 6    | 6    | 3    | 6    | 6    | 6    | 6    | 6 |
| 11313  |      |      |      |      |      | 1    | 5    | 5    | 5    | 2    | 5    | 6    | 6    | 1    | 3 |
| 11315  |      |      |      |      |      |      |      |      |      |      |      |      |      |      |   |
| 11316  |      |      |      |      |      |      |      |      |      |      |      |      |      |      |   |
| 11318  |      |      |      |      |      | 3    | 2    | 3    | 2    | 3    | 4    | 3    | 2    | 3    | 3 |
| 11323  |      |      |      |      |      | 2    | 5    | 6    | 6    | 2    | 6    | 6    | 6    | 1    | 5 |
| 11331  |      |      |      |      |      | 2    | 5    | 3    | 2    | 5    | 3    | 3    | 4    | 3    | 2 |
| 11333  |      |      |      |      |      | 2    | 4    | 5    | 6    | 2    | 5    | 6    | 6    | 6    | 2 |
| 11334  | 3    | 4    | 4    | 4    |      |      |      |      |      |      |      |      |      |      |   |
| 11340  |      |      |      |      |      |      |      |      |      |      |      |      |      |      |   |
| 11345  | 3    | 4    | 4    | 3    |      |      |      |      |      |      |      |      |      |      |   |
| 11354  | 3    | 3    | 3    | 5    |      |      |      |      |      |      |      |      |      |      |   |

| respid | Q47l | Q47m | Q47n | Q47o | Q48a | Q48b | Q48c | Q48d | Q48e | Q48f | Q48g | Q48h | Q48i | Q48j |   |
|--------|------|------|------|------|------|------|------|------|------|------|------|------|------|------|---|
| 11360  |      |      |      |      |      |      |      |      |      |      |      |      |      |      |   |
| 11361  | 3    | 3    | 3    | 3    |      |      |      |      |      |      |      |      |      |      |   |
| 11367  |      |      |      |      |      |      |      |      |      |      |      |      |      |      |   |
| 11370  |      |      |      |      |      |      |      |      |      |      |      |      |      |      |   |
| 11371  |      |      |      |      |      | 2    | 3    | 4    | 3    | 4    | 3    | 4    | 4    | 4    | 3 |
| 11372  |      |      |      |      |      | 3    | 3    | 3    | 3    | 3    | 4    | 4    | 3    | 4    | 3 |
| 11373  |      |      |      |      |      | 3    | 3    | 3    | 5    | 5    | 4    | 4    | 4    | 4    | 4 |
| 11382  | 5    | 4    | 5    | 4    |      |      |      |      |      |      |      |      |      |      |   |
| 11394  | 2    | 2    | 3    | 2    |      |      |      |      |      |      |      |      |      |      |   |
| 11395  | 3    | 2    | 3    | 3    |      |      |      |      |      |      |      |      |      |      |   |
| 11397  |      |      |      |      |      |      |      |      |      |      |      |      |      |      |   |
| 11402  | 3    | 3    | 3    | 1    |      |      |      |      |      |      |      |      |      |      |   |
| 11409  | 1    | 3    | 3    | 3    |      |      |      |      |      |      |      |      |      |      |   |
| 11410  |      |      |      |      |      |      |      |      |      |      |      |      |      |      |   |
| 11411  | 3    | 3    | 3    | 2    |      |      |      |      |      |      |      |      |      |      |   |
| 11418  | 3    | 4    | 4    | 3    |      |      |      |      |      |      |      |      |      |      |   |
| 11425  |      |      |      |      |      | 3    | 3    | 3    | 3    | 3    | 4    | 3    | 3    | 4    | 3 |
| 11429  |      |      |      |      |      | 3    | 4    | 4    | 4    | 3    | 4    | 4    | 4    | 3    | 4 |
| 11430  | 3    | 2    | 2    |      |      |      |      |      |      |      |      |      |      |      |   |
| 11431  |      |      |      |      |      | 6    | 1    | 1    | 6    | 6    | 5    | 2    | 4    | 1    | 1 |
| 11432  |      |      |      |      |      |      |      |      |      |      |      |      |      |      |   |
| 11433  | 5    | 1    | 5    |      |      |      |      |      |      |      |      |      |      |      |   |
| 11435  | 3    | 3    | 3    | 2    |      |      |      |      |      |      |      |      |      |      |   |
| 11436  |      |      |      |      |      | 2    | 4    | 6    | 6    | 1    | 5    | 5    | 5    | 1    | 5 |
| 11437  |      |      |      |      |      | 3    | 5    | 5    | 4    | 3    |      | 3    | 4    | 3    | 4 |
| 11439  |      |      |      |      |      |      |      |      |      |      |      |      |      |      |   |
| 11440  |      |      |      |      |      |      |      |      |      |      |      |      |      |      |   |
| 11447  | 3    | 4    |      | 3    |      |      |      |      |      |      |      |      |      |      |   |
| 11455  |      |      |      |      |      | 2    | 2    | 5    | 6    | 2    | 5    | 6    | 5    | 2    | 3 |
| 11456  |      |      |      |      |      | 3    | 3    | 3    | 3    | 3    | 3    | 3    | 4    | 4    | 3 |
| 11461  | 5    | 5    | 5    | 5    |      |      |      |      |      |      |      |      |      |      |   |
| 11463  | 4    | 5    | 4    | 4    |      |      |      |      |      |      |      |      |      |      |   |



| respid | Q47l | Q47m | Q47n | Q47o | Q48a | Q48b | Q48c | Q48d | Q48e | Q48f | Q48g | Q48h | Q48i | Q48j |   |
|--------|------|------|------|------|------|------|------|------|------|------|------|------|------|------|---|
| 11470  | 2    | 2    | 4    | 3    |      |      |      |      |      |      |      |      |      |      |   |
| 11472  |      |      |      |      |      |      |      |      |      |      |      |      |      |      |   |
| 11475  | 4    | 4    | 4    | 5    |      |      |      |      |      |      |      |      |      |      |   |
| 11476  |      |      |      |      |      | 1    | 6    | 6    | 6    | 2    | 6    | 6    | 6    | 1    | 6 |
| 11482  |      |      |      |      |      | 4    | 3    | 3    | 4    | 3    | 4    | 3    | 3    | 3    | 3 |
| 11501  | 3    | 3    | 3    | 3    |      |      |      |      |      |      |      |      |      |      |   |
| 11503  |      |      |      |      |      | 2    | 2    | 1    | 2    | 1    | 2    | 4    | 6    | 3    | 4 |
| 11505  | 3    | 1    | 1    | 1    |      |      |      |      |      |      |      |      |      |      |   |
| 11510  |      |      |      |      |      | 1    | 6    | 5    | 5    | 2    | 6    | 6    | 6    | 1    | 4 |
| 11519  |      |      |      |      |      |      |      |      |      |      |      |      |      |      |   |
| 11527  | 4    | 4    | 4    | 4    |      |      |      |      |      |      |      |      |      |      |   |
| 11529  |      |      |      |      |      | 3    | 2    | 2    | 2    | 4    | 3    | 3    | 3    | 4    | 2 |
| 11530  | 1    | 1    | 1    | 1    |      |      |      |      |      |      |      |      |      |      |   |
| 11536  | 1    | 1    | 1    | 1    |      |      |      |      |      |      |      |      |      |      |   |
| 11543  | 3    | 3    | 3    | 3    |      |      |      |      |      |      |      |      |      |      |   |
| 11548  | 4    | 4    | 4    | 4    |      |      |      |      |      |      |      |      |      |      |   |
| 11566  | 1    | 1    | 1    | 3    |      |      |      |      |      |      |      |      |      |      |   |
| 11570  |      |      |      |      |      | 2    | 5    | 6    | 3    | 2    | 5    | 5    | 5    | 2    | 3 |
| 11571  | 4    | 4    | 3    | 4    |      |      |      |      |      |      |      |      |      |      |   |
| 11578  |      |      |      |      |      |      |      |      |      |      |      |      |      |      |   |
| 11579  |      |      |      |      |      | 1    | 6    | 6    | 6    | 1    | 6    | 6    | 6    | 1    | 6 |
| 11581  | 5    | 5    | 5    | 4    |      |      |      |      |      |      |      |      |      |      |   |
| 11582  |      |      |      |      |      | 2    | 6    | 6    | 6    | 1    | 6    | 6    | 6    | 1    | 6 |
| 11583  | 5    | 5    | 5    | 5    |      |      |      |      |      |      |      |      |      |      |   |
| 11589  | 3    | 3    | 3    | 3    |      |      |      |      |      |      |      |      |      |      |   |
| 11590  | 4    | 4    | 4    | 4    |      |      |      |      |      |      |      |      |      |      |   |
| 11592  | 3    | 3    | 3    | 3    |      |      |      |      |      |      |      |      |      |      |   |
| 11596  |      |      |      |      |      |      |      |      |      |      |      |      |      |      |   |
| 11598  | 3    | 3    | 3    | 4    |      |      |      |      |      |      |      |      |      |      |   |
| 11602  |      |      |      |      |      | 3    | 5    | 5    | 4    | 2    | 5    | 5    | 5    | 2    | 4 |
| 11605  | 3    | 3    | 4    | 4    |      |      |      |      |      |      |      |      |      |      |   |
| 11618  |      |      |      |      |      | 3    | 2    | 2    | 3    | 4    |      | 3    |      | 2    | 2 |

| respid | Q47l | Q47m | Q47n | Q47o | Q48a | Q48b | Q48c | Q48d | Q48e | Q48f | Q48g | Q48h | Q48i | Q48j |   |
|--------|------|------|------|------|------|------|------|------|------|------|------|------|------|------|---|
| 11621  | 3    | 3    | 3    | 3    |      |      |      |      |      |      |      |      |      |      |   |
| 11630  |      |      |      |      |      | 1    | 5    | 6    | 4    | 1    | 6    | 6    | 6    | 1    | 6 |
| 11636  |      |      |      |      |      | 2    | 2    | 3    | 2    | 4    | 3    | 3    | 2    | 3    | 2 |
| 11640  |      |      |      |      |      | 1    | 6    | 6    | 5    | 2    | 5    | 6    | 6    | 1    | 2 |
| 11658  | 3    | 4    | 4    | 4    |      |      |      |      |      |      |      |      |      |      |   |
| 11665  |      |      |      |      |      | 2    | 6    | 5    | 6    | 1    | 2    | 2    | 6    | 1    | 5 |
| 11666  |      |      |      |      |      | 1    | 4    | 3    | 3    | 4    | 3    | 3    | 3    | 3    | 3 |
| 11667  | 3    | 3    | 3    | 3    |      |      |      |      |      |      |      |      |      |      |   |
| 11674  |      |      |      |      |      | 1    | 6    | 6    | 6    | 1    | 6    | 6    | 6    | 1    | 6 |
| 11680  | 3    | 3    | 3    | 3    |      |      |      |      |      |      |      |      |      |      |   |
| 11683  | 1    | 1    | 1    | 1    |      |      |      |      |      |      |      |      |      |      |   |
| 11688  | 3    | 2    | 1    | 2    |      |      |      |      |      |      |      |      |      |      |   |
| 11690  |      |      |      |      |      |      |      |      |      |      |      |      |      |      |   |
| 11694  |      |      |      |      |      |      |      |      |      |      |      |      |      |      |   |
| 11705  |      |      |      |      |      | 2    | 2    |      | 1    | 2    | 2    | 5    | 6    |      | 6 |
| 11720  | 4    | 4    | 3    | 3    |      |      |      |      |      |      |      |      |      |      |   |
| 11724  |      |      |      |      |      |      |      |      |      |      |      |      |      |      |   |
| 11738  |      |      |      |      |      | 2    | 4    | 5    | 5    | 2    | 6    | 5    | 5    | 2    | 5 |
| 11744  |      |      |      |      |      | 1    | 6    | 6    | 6    | 1    | 6    | 6    | 6    | 1    | 6 |
| 11745  |      |      |      |      |      | 2    | 5    | 6    | 2    | 2    | 5    | 6    | 6    | 1    | 5 |
| 11747  |      |      |      |      |      |      |      |      |      |      |      |      |      |      |   |
| 11755  |      |      |      |      |      | 1    | 2    | 3    | 5    | 3    | 6    | 5    | 4    | 2    | 6 |
| 11756  | 2    | 2    | 2    | 1    |      |      |      |      |      |      |      |      |      |      |   |
| 11772  |      |      |      |      |      | 1    | 5    | 6    | 6    | 2    | 6    | 4    | 5    | 2    | 3 |
| 11773  |      |      |      |      |      |      |      |      |      |      |      |      |      |      |   |
| 11778  | 2    | 3    | 3    | 2    |      |      |      |      |      |      |      |      |      |      |   |
| 11790  | 3    |      |      |      |      |      |      |      |      |      |      |      |      |      |   |
| 11794  |      |      |      |      |      |      |      |      |      |      |      |      |      |      |   |
| 11795  | 2    | 2    | 2    | 2    |      |      |      |      |      |      |      |      |      |      |   |
| 11799  | 3    | 3    | 3    | 3    |      |      |      |      |      |      |      |      |      |      |   |
| 11803  | 4    | 4    | 4    | 4    |      |      |      |      |      |      |      |      |      |      |   |
| 11806  |      |      |      |      |      | 1    | 2    | 3    | 3    | 3    | 3    | 3    | 3    | 2    | 3 |

| respid | Q47l | Q47m | Q47n | Q47o | Q48a | Q48b | Q48c | Q48d | Q48e | Q48f | Q48g | Q48h | Q48i | Q48j |   |
|--------|------|------|------|------|------|------|------|------|------|------|------|------|------|------|---|
| 11808  |      |      |      |      |      |      |      | 6    | 6    | 1    | 6    | 6    | 6    | 1    | 6 |
| 11810  |      |      |      |      |      |      |      |      |      |      |      |      |      |      |   |
| 11811  |      |      |      |      |      |      |      |      |      |      |      |      |      |      |   |
| 11812  | 3    | 3    | 3    | 3    |      |      |      |      |      |      |      |      |      |      |   |
| 11813  | 4    | 4    | 4    | 4    |      |      |      |      |      |      |      |      |      |      |   |
| 11821  |      |      |      |      |      | 2    | 4    | 4    |      | 4    | 4    | 3    | 5    | 3    | 3 |
| 11827  |      |      |      |      |      |      |      |      |      |      |      |      |      |      |   |
| 11831  |      |      |      |      |      | 1    | 2    | 2    | 3    | 2    | 2    | 1    | 2    | 1    | 2 |
| 11841  |      |      |      |      |      |      |      |      |      |      |      |      |      |      |   |
| 11872  |      |      |      |      |      | 3    | 4    | 5    | 4    | 5    | 4    | 5    | 6    | 3    | 4 |
| 11898  | 3    | 4    | 4    | 3    |      |      |      |      |      |      |      |      |      |      |   |
| 11902  | 3    | 1    | 1    | 1    |      |      |      |      |      |      |      |      |      |      |   |
| 11912  |      |      |      |      |      | 2    |      |      |      | 2    |      |      |      |      |   |
| 11926  | 3    | 3    | 3    | 3    |      |      |      |      |      |      |      |      |      |      |   |
| 11928  |      |      |      |      |      | 2    | 2    | 1    | 1    | 1    | 1    | 1    | 1    | 1    | 2 |
| 11932  | 3    | 3    | 3    | 2    |      |      |      |      |      |      |      |      |      |      |   |
| 11934  | 3    | 4    | 4    | 3    |      |      |      |      |      |      |      |      |      |      |   |
| 11941  | 2    | 2    | 2    | 2    |      |      |      |      |      |      |      |      |      |      |   |
| 11942  |      |      |      |      |      |      |      |      |      |      |      |      |      |      |   |
| 11943  | 3    | 3    | 3    | 3    |      |      |      |      |      |      |      |      |      |      |   |
| 11944  |      |      |      |      |      | 3    | 3    | 3    | 3    | 3    | 4    |      |      | 2    | 1 |
| 11955  |      |      |      |      |      |      |      |      |      |      |      |      |      |      |   |
| 11958  | 2    | 1    | 1    | 1    |      |      |      |      |      |      |      |      |      |      |   |
| 11968  | 3    | 3    | 3    | 3    |      |      |      |      |      |      |      |      |      |      |   |
| 11979  |      |      |      |      |      | 3    | 2    | 3    | 4    | 3    | 2    | 3    | 3    | 3    | 4 |
| 11988  |      |      |      |      |      |      |      |      |      |      |      |      |      |      |   |
| 11999  | 1    | 1    | 1    | 2    |      |      |      |      |      |      |      |      |      |      |   |
| 12002  |      |      |      |      |      |      | 6    | 6    | 6    | 1    | 6    | 6    | 6    | 1    | 4 |
| 12004  | 2    | 3    | 3    | 2    |      |      |      |      |      |      |      |      |      |      |   |
| 12008  | 4    | 4    | 4    | 5    |      |      |      |      |      |      |      |      |      |      |   |
| 12013  |      |      |      |      |      | 5    | 4    | 5    | 6    | 2    | 4    | 5    | 2    | 3    | 6 |
| 12018  | 2    | 3    | 3    | 3    |      |      |      |      |      |      |      |      |      |      |   |

| respid | Q47l | Q47m | Q47n | Q47o | Q48a | Q48b | Q48c | Q48d | Q48e | Q48f | Q48g | Q48h | Q48i | Q48j |   |
|--------|------|------|------|------|------|------|------|------|------|------|------|------|------|------|---|
| 12023  |      |      |      |      |      | 3    |      |      |      |      |      |      |      |      |   |
| 12027  |      |      |      |      |      | 2    | 3    | 4    | 3    | 2    | 4    | 3    | 5    | 2    | 2 |
| 12030  |      |      |      |      |      | 3    | 5    | 4    | 4    | 3    | 4    | 4    | 4    | 3    | 4 |
| 12031  |      |      |      |      |      | 5    | 6    | 6    | 6    | 3    | 3    | 6    | 6    | 3    | 6 |
| 12036  | 3    | 3    | 3    | 3    |      |      |      |      |      |      |      |      |      |      |   |
| 12037  | 2    | 1    | 1    | 1    |      |      |      |      |      |      |      |      |      |      |   |
| 12038  |      |      |      |      |      |      |      |      |      |      |      |      |      |      |   |
| 12039  | 3    | 4    | 4    | 4    |      |      |      |      |      |      |      |      |      |      |   |
| 12045  |      |      |      |      |      | 4    | 3    | 3    | 4    | 4    | 6    | 4    | 6    | 6    | 6 |
| 12046  | 1    | 1    | 1    | 1    |      |      |      |      |      |      |      |      |      |      |   |
| 12054  | 2    | 3    | 3    | 2    |      |      |      |      |      |      |      |      |      |      |   |
| 12055  |      |      |      |      |      | 1    | 6    | 6    | 6    | 6    | 6    | 6    | 6    | 1    | 2 |
| 12069  | 3    | 3    | 3    | 3    |      |      |      |      |      |      |      |      |      |      |   |
| 12070  | 2    | 3    | 3    | 3    |      |      |      |      |      |      |      |      |      |      |   |
| 12074  |      |      |      |      |      |      | 6    | 6    | 6    | 6    | 6    | 6    | 6    | 1    | 6 |
| 12075  | 3    | 3    | 3    | 3    |      |      |      |      |      |      |      |      |      |      |   |
| 12078  |      |      |      |      |      |      |      |      |      |      |      |      |      |      |   |
| 12089  |      |      |      |      |      | 1    | 6    | 6    | 6    | 1    | 6    | 6    | 6    | 6    | 6 |
| 12091  | 3    | 3    | 3    | 3    |      |      |      |      |      |      |      |      |      |      |   |
| 12092  |      |      |      |      |      | 6    | 2    | 2    | 2    | 3    | 4    | 4    | 4    | 4    | 3 |
| 12108  | 3    | 2    | 3    | 1    |      |      |      |      |      |      |      |      |      |      |   |
| 12111  | 3    | 2    | 2    | 3    |      |      |      |      |      |      |      |      |      |      |   |
| 12112  | 3    | 3    | 2    | 3    |      |      |      |      |      |      |      |      |      |      |   |
| 12126  |      |      |      |      |      |      |      |      |      |      |      |      |      |      |   |
| 12132  | 3    | 3    | 3    | 3    |      |      |      |      |      |      |      |      |      |      |   |
| 12150  | 3    | 3    | 3    | 3    |      |      |      |      |      |      |      |      |      |      |   |
| 12152  | 4    | 4    | 4    | 4    |      |      |      |      |      |      |      |      |      |      |   |
| 12154  | 3    | 3    | 3    | 3    |      |      |      |      |      |      |      |      |      |      |   |
| 12157  | 3    | 3    | 3    |      |      |      |      |      |      |      |      |      |      |      |   |
| 12165  |      |      |      |      |      | 2    | 6    | 6    | 6    | 2    | 6    | 6    | 6    | 1    | 6 |
| 12169  | 3    | 4    | 3    | 3    |      |      |      |      |      |      |      |      |      |      |   |
| 12182  |      |      |      |      |      |      |      |      |      |      |      |      |      |      |   |

| respid | Q47l | Q47m | Q47n | Q47o | Q48a | Q48b | Q48c | Q48d | Q48e | Q48f | Q48g | Q48h | Q48i | Q48j |   |
|--------|------|------|------|------|------|------|------|------|------|------|------|------|------|------|---|
| 12198  |      |      |      |      |      | 1    | 6    | 5    | 6    | 2    | 6    | 6    | 6    | 2    | 5 |
| 12199  |      |      |      |      |      |      |      |      |      |      |      |      |      |      |   |
| 12202  |      |      |      |      |      | 2    | 2    | 3    | 2    | 3    | 3    | 2    | 2    | 2    | 2 |
| 12207  | 4    | 4    | 3    | 4    |      |      |      |      |      |      |      |      |      |      |   |
| 12208  | 4    | 4    | 4    | 4    |      |      |      |      |      |      |      |      |      |      |   |
| 12210  |      |      |      |      |      |      |      |      |      |      |      |      |      |      |   |
| 12219  |      |      |      |      |      | 2    | 4    | 3    | 3    | 3    | 4    | 4    | 6    |      |   |
| 12224  | 4    | 3    | 4    | 3    |      |      |      |      |      |      |      |      |      |      |   |
| 12230  | 4    | 4    | 4    | 4    |      |      |      |      |      |      |      |      |      |      |   |
| 12238  |      |      |      |      |      | 3    | 3    | 3    | 3    | 4    | 3    | 3    | 3    | 3    | 3 |
| 12239  |      |      |      |      |      | 2    | 6    | 6    | 6    | 1    | 6    | 6    | 6    | 1    | 6 |
| 12243  | 5    | 5    | 5    | 5    |      |      |      |      |      |      |      |      |      |      |   |
| 12245  | 3    | 2    | 1    | 4    |      |      |      |      |      |      |      |      |      |      |   |
| 12246  |      |      |      |      |      |      |      |      |      |      |      |      |      |      |   |
| 12247  | 4    | 4    | 4    | 4    |      |      |      |      |      |      |      |      |      |      |   |
| 12248  | 3    | 5    | 5    | 5    |      |      |      |      |      |      |      |      |      |      |   |
| 12249  |      |      |      |      |      | 1    | 5    | 6    | 5    | 3    | 5    | 6    | 6    | 1    | 5 |
| 12258  | 3    | 3    | 2    | 3    |      |      |      |      |      |      |      |      |      |      |   |
| 12265  |      |      |      |      |      |      |      |      |      |      |      |      |      |      |   |
| 12269  |      |      |      |      |      | 1    | 6    | 6    | 6    | 1    | 6    | 6    | 6    | 1    | 6 |
| 12270  | 2    | 3    | 3    | 2    |      |      |      |      |      |      |      |      |      |      |   |
| 12279  | 2    | 3    | 3    | 3    |      |      |      |      |      |      |      |      |      |      |   |
| 12280  | 2    | 3    | 3    | 2    |      |      |      |      |      |      |      |      |      |      |   |
| 12282  |      |      |      |      |      |      |      |      |      |      |      |      |      |      |   |
| 12283  |      |      |      |      |      |      |      |      |      |      |      |      |      |      |   |
| 12287  |      |      |      |      |      | 1    | 6    | 6    | 6    | 1    | 6    | 6    | 6    | 1    | 6 |
| 12288  |      |      |      |      |      | 2    | 4    | 5    | 4    | 2    | 6    | 5    | 6    | 1    | 5 |
| 12290  |      |      |      |      |      | 2    |      | 4    | 3    | 3    | 2    | 5    | 5    | 3    | 3 |
| 12292  |      |      |      |      |      | 5    | 3    | 3    | 3    | 5    | 5    | 2    | 2    | 5    | 3 |
| 12294  | 1    | 3    | 3    | 3    |      |      |      |      |      |      |      |      |      |      |   |
| 12296  | 1    |      |      |      |      |      |      |      |      |      |      |      |      |      |   |
| 12307  |      |      |      |      |      | 2    | 6    | 4    | 4    | 3    | 6    | 4    | 6    | 1    | 2 |

| respid | Q47l | Q47m | Q47n | Q47o | Q48a | Q48b | Q48c | Q48d | Q48e | Q48f | Q48g | Q48h | Q48i | Q48j |   |
|--------|------|------|------|------|------|------|------|------|------|------|------|------|------|------|---|
| 12309  |      | 3    | 4    | 3    | 4    |      |      |      |      |      |      |      |      |      |   |
| 12312  |      | 3    | 3    | 3    | 3    |      |      |      |      |      |      |      |      |      |   |
| 12317  |      |      |      |      |      | 3    | 3    | 3    | 4    | 3    | 5    | 4    | 3    | 3    | 5 |
| 12319  |      | 1    | 1    | 1    | 3    |      |      |      |      |      |      |      |      |      |   |
| 12320  |      | 3    | 3    | 3    | 3    |      |      |      |      |      |      |      |      |      |   |
| 12322  |      | 4    | 4    | 4    | 4    |      |      |      |      |      |      |      |      |      |   |
| 12328  |      |      |      |      |      | 2    |      |      |      |      |      |      |      |      |   |
| 12331  |      | 3    | 3    | 4    | 4    |      |      |      |      |      |      |      |      |      |   |
| 12332  |      | 3    | 2    | 2    | 2    |      |      |      |      |      |      |      |      |      |   |
| 12334  |      |      |      |      |      | 6    | 6    | 6    |      |      |      |      |      |      |   |
| 12337  |      | 3    | 3    | 3    | 3    |      |      |      |      |      |      |      |      |      |   |
| 12338  |      | 4    | 4    | 4    | 4    |      |      |      |      |      |      |      |      |      |   |
| 12342  |      | 4    | 4    | 4    | 4    |      |      |      |      |      |      |      |      |      |   |
| 12349  |      |      |      |      |      | 1    | 4    | 5    | 5    | 3    | 5    | 5    | 5    | 3    | 4 |
| 12352  |      | 3    | 3    | 3    | 3    |      |      |      |      |      |      |      |      |      |   |
| 12355  |      | 3    | 4    | 4    | 3    |      |      |      |      |      |      |      |      |      |   |
| 12357  |      | 3    | 3    | 3    | 3    |      |      |      |      |      |      |      |      |      |   |
| 12358  |      | 3    | 3    | 3    | 3    |      |      |      |      |      |      |      |      |      |   |
| 12371  |      |      |      |      |      | 3    |      |      |      |      |      |      |      |      |   |
| 12372  |      |      |      |      |      | 3    | 6    | 6    |      | 3    | 6    | 6    | 6    | 3    | 6 |
| 12373  |      | 4    | 4    | 4    | 4    |      |      |      |      |      |      |      |      |      |   |
| 12379  |      | 3    | 4    | 4    | 4    |      |      |      |      |      |      |      |      |      |   |
| 12381  |      |      |      |      |      | 5    | 3    | 3    | 2    | 5    | 2    | 3    | 4    | 5    | 3 |
| 12383  |      | 3    | 3    | 3    | 3    |      |      |      |      |      |      |      |      |      |   |
| 12384  |      |      |      |      |      | 3    | 5    | 6    |      |      |      | 6    | 6    | 1    | 6 |
| 12386  |      | 4    | 4    | 3    | 4    |      |      |      |      |      |      |      |      |      |   |
| 12389  |      |      |      |      |      |      |      |      |      |      |      |      |      |      |   |
| 12392  |      |      |      |      |      | 5    | 5    | 4    | 4    | 4    | 5    | 5    | 5    | 2    | 5 |
| 12396  |      |      |      |      |      | 6    |      |      |      |      |      |      |      |      |   |
| 12397  |      |      |      |      |      | 2    | 5    | 6    | 5    | 3    | 3    | 3    | 6    | 3    | 2 |
| 12399  |      |      |      |      |      | 1    |      |      |      |      |      |      |      | 3    |   |
| 12400  |      | 4    | 4    | 4    | 3    |      |      |      |      |      |      |      |      |      |   |

| respid | Q47l | Q47m | Q47n | Q47o | Q48a | Q48b | Q48c | Q48d | Q48e | Q48f | Q48g | Q48h | Q48i | Q48j |   |
|--------|------|------|------|------|------|------|------|------|------|------|------|------|------|------|---|
| 12406  |      |      |      |      |      | 5    | 1    | 3    | 3    | 6    | 3    | 6    | 3    | 6    | 6 |
| 12407  |      |      |      |      |      | 4    | 3    | 4    | 4    | 4    | 5    | 4    | 5    | 3    | 6 |
| 12410  | 5    | 5    | 5    | 5    |      |      |      |      |      |      |      |      |      |      |   |
| 12413  |      |      |      |      |      |      |      | 6    | 4    | 1    | 6    | 6    | 6    | 1    | 3 |
| 12416  | 3    | 2    | 2    | 3    |      |      |      |      |      |      |      |      |      |      |   |
| 12419  | 3    | 4    | 4    | 4    |      |      |      |      |      |      |      |      |      |      |   |
| 12422  | 4    | 4    | 4    | 4    |      |      |      |      |      |      |      |      |      |      |   |
| 12423  |      |      |      |      |      | 2    | 5    | 5    | 5    | 2    | 6    | 6    | 5    | 1    | 5 |
| 12429  |      |      |      |      |      | 5    | 5    |      |      | 2    |      |      |      |      |   |
| 12434  |      |      |      |      |      | 2    | 3    | 4    | 3    | 3    | 3    | 3    | 4    | 2    | 3 |
| 12435  | 4    | 5    | 5    | 4    |      |      |      |      |      |      |      |      |      |      |   |
| 12436  | 2    | 3    | 3    | 3    |      |      |      |      |      |      |      |      |      |      |   |
| 12442  |      |      |      |      |      |      |      |      |      |      |      |      |      |      |   |
| 12449  |      |      |      |      |      | 1    | 1    | 1    | 1    | 1    | 6    |      | 6    | 1    | 3 |
| 12451  | 4    | 4    | 4    | 4    |      |      |      |      |      |      |      |      |      |      |   |
| 12456  |      |      |      |      |      | 1    | 6    | 4    | 5    | 3    | 4    | 5    | 4    | 3    | 5 |
| 12457  | 4    | 4    | 4    | 4    |      |      |      |      |      |      |      |      |      |      |   |
| 12458  |      |      |      |      |      | 1    | 6    | 6    | 6    | 1    | 6    | 6    | 6    | 1    | 6 |
| 12461  |      |      |      |      |      | 3    | 4    | 4    | 4    | 3    | 4    | 4    | 4    | 3    | 4 |
| 12462  | 3    | 4    | 4    | 3    |      |      |      |      |      |      |      |      |      |      |   |
| 12463  | 3    |      | 4    | 3    |      |      |      |      |      |      |      |      |      |      |   |
| 12466  | 3    | 3    | 3    | 3    |      |      |      |      |      |      |      |      |      |      |   |
| 12470  |      |      |      |      |      |      |      |      |      |      |      |      |      |      |   |
| 12471  | 4    | 4    | 4    | 4    |      |      |      |      |      |      |      |      |      |      |   |
| 12472  | 4    | 3    | 4    | 4    |      |      |      |      |      |      |      |      |      |      |   |
| 12478  | 4    | 4    | 4    | 4    |      |      |      |      |      |      |      |      |      |      |   |
| 12479  | 1    | 1    | 1    |      |      |      |      |      |      |      |      |      |      |      |   |
| 12481  |      |      |      |      |      | 2    | 5    | 5    | 5    | 3    | 5    | 5    | 5    | 3    | 6 |
| 12482  |      |      |      |      |      |      |      |      |      |      |      |      |      |      |   |
| 12483  |      |      |      |      |      |      |      |      |      |      |      |      |      |      |   |
| 12496  |      |      |      |      |      | 4    | 4    | 5    | 5    | 4    | 3    | 5    | 4    | 3    | 4 |
| 12497  |      |      |      |      |      | 6    | 6    | 6    | 6    | 6    | 6    | 5    | 5    | 3    | 4 |

| respid | Q47l | Q47m | Q47n | Q47o | Q48a | Q48b | Q48c | Q48d | Q48e | Q48f | Q48g | Q48h | Q48i | Q48j |   |
|--------|------|------|------|------|------|------|------|------|------|------|------|------|------|------|---|
| 12498  |      |      |      |      |      | 3    | 3    | 4    | 4    | 4    | 3    | 3    | 3    | 2    | 3 |
| 12500  |      |      |      |      |      |      |      |      |      |      |      |      |      |      |   |
| 12501  |      |      |      |      |      | 2    | 3    | 5    | 5    | 3    | 5    | 5    | 5    | 3    | 5 |
| 12502  |      |      |      |      |      | 4    | 4    | 4    | 4    | 4    | 4    | 4    | 4    | 4    | 4 |
| 12503  |      |      |      |      |      | 4    | 4    | 6    | 6    | 6    | 6    | 6    | 6    | 5    | 5 |
| 12505  |      |      |      |      |      | 6    | 6    | 2    | 5    | 5    | 1    | 2    | 2    | 5    | 1 |
| 12508  |      |      |      |      |      | 3    | 4    | 5    | 5    | 3    | 4    | 2    | 4    | 3    | 2 |
| 12509  | 3    | 3    | 3    | 2    |      |      |      |      |      |      |      |      |      |      |   |
| 12510  |      |      |      |      |      |      |      |      |      |      |      |      |      |      |   |
| 12512  |      |      |      |      |      | 5    | 5    | 5    | 5    | 2    | 5    | 5    | 5    | 3    | 5 |
| 12514  |      |      |      |      |      | 3    | 3    | 3    | 4    | 4    | 3    | 3    | 3    | 4    | 5 |
| 12515  |      |      |      |      |      | 2    | 3    | 3    | 4    | 4    | 5    | 6    | 6    | 1    | 6 |
| 12520  | 5    | 5    | 5    | 5    |      |      |      |      |      |      |      |      |      |      |   |
| 12522  |      |      |      |      |      | 3    | 5    | 5    | 5    | 2    | 5    | 5    | 5    | 2    | 3 |
| 12526  |      |      |      |      |      |      |      |      |      |      |      |      |      |      |   |
| 12527  |      |      |      |      |      |      |      |      |      |      |      |      |      |      |   |
| 12528  |      |      |      |      |      | 2    | 5    | 6    | 5    | 2    | 5    | 5    | 6    | 2    | 4 |
| 12530  |      |      |      |      |      | 5    | 4    | 5    | 4    | 4    | 4    | 4    | 4    | 4    | 4 |
| 12535  |      |      |      |      |      | 4    | 6    | 6    | 4    | 3    | 5    | 4    | 5    | 2    | 5 |
| 12539  |      |      |      |      |      | 2    | 6    | 5    | 5    | 2    | 5    | 5    | 5    | 2    | 5 |
| 12541  | 3    | 3    | 3    | 3    |      |      |      |      |      |      |      |      |      |      |   |
| 12542  |      |      |      |      |      |      |      |      |      |      |      |      |      |      |   |
| 12545  |      |      |      |      |      | 6    | 2    | 1    | 2    | 6    | 2    | 2    | 2    | 6    | 2 |
| 12547  |      |      |      |      |      | 2    | 5    | 5    | 6    | 5    | 4    | 5    | 4    | 1    | 6 |
| 12549  | 3    | 4    | 3    | 3    |      |      |      |      |      |      |      |      |      |      |   |
| 12550  |      |      |      |      |      | 3    | 4    | 5    | 3    |      |      |      |      |      | 3 |
| 12555  |      |      |      |      |      |      |      |      |      |      |      |      |      |      |   |
| 12557  |      |      |      |      |      |      |      |      |      |      |      |      |      |      |   |
| 12559  |      |      |      |      |      | 4    | 5    | 5    | 5    | 4    | 5    | 5    | 5    | 4    | 5 |
| 12561  |      |      |      |      |      | 1    | 6    | 6    | 2    | 2    | 6    | 6    | 6    | 1    | 6 |
| 12562  |      |      |      |      |      | 3    |      |      |      |      |      |      |      |      |   |
| 12563  |      |      |      |      |      | 1    | 6    | 6    | 6    | 2    | 6    | 6    | 6    | 1    | 2 |



| respid | Q47l | Q47m | Q47n | Q47o | Q48a | Q48b | Q48c | Q48d | Q48e | Q48f | Q48g | Q48h | Q48i | Q48j |   |
|--------|------|------|------|------|------|------|------|------|------|------|------|------|------|------|---|
| 12565  |      |      |      |      |      | 6    | 1    | 1    | 1    | 6    | 1    | 1    | 1    | 6    | 1 |
| 12566  |      |      |      |      |      |      |      |      |      |      |      |      |      |      |   |
| 12570  |      |      |      |      |      |      |      |      |      |      |      |      |      |      |   |
| 12571  |      |      |      |      |      | 6    | 5    | 5    | 5    | 5    | 5    | 5    | 5    | 5    | 5 |
| 12572  |      |      |      |      |      |      |      |      |      |      |      |      |      |      |   |
| 12578  |      |      |      |      |      |      |      |      |      |      |      |      |      |      |   |
| 12579  | 4    | 4    | 4    | 4    |      |      |      |      |      |      |      |      |      |      |   |
| 12581  |      |      |      |      |      | 3    | 3    | 3    | 3    | 3    | 3    | 4    | 4    | 4    | 4 |
| 12582  |      |      |      |      |      | 3    | 4    | 4    | 4    | 4    |      | 3    | 4    | 4    | 3 |
| 12585  |      |      |      |      |      |      |      |      |      |      |      |      |      |      |   |
| 12586  |      |      |      |      |      | 4    | 3    | 4    | 3    | 4    | 4    | 4    | 4    | 3    | 3 |
| 12588  |      |      |      |      |      | 3    | 5    | 5    | 4    | 3    | 4    | 4    | 5    | 2    | 3 |
| 12589  |      |      |      |      |      |      |      |      |      |      |      |      |      | 2    |   |
| 12590  |      |      |      |      |      | 5    | 5    | 5    | 5    | 5    | 5    | 5    | 5    | 2    | 5 |
| 12591  |      |      |      |      |      |      |      |      |      |      |      |      |      |      |   |
| 12593  | 3    | 4    | 3    | 3    |      |      |      |      |      |      |      |      |      |      |   |
| 12594  |      |      |      |      |      | 4    | 4    | 5    | 5    | 3    | 5    | 5    | 5    | 3    | 5 |
| 12599  |      |      |      |      |      | 1    | 6    | 6    | 6    | 1    | 6    | 6    | 6    | 2    | 2 |
| 12600  |      |      |      |      |      | 2    | 5    | 5    | 6    | 2    | 5    | 6    | 6    | 2    | 5 |
| 12602  |      |      |      |      |      | 3    | 2    | 3    | 4    | 4    | 4    | 3    | 4    | 4    | 2 |
| 12606  |      |      |      |      |      | 3    | 3    | 3    | 3    | 4    | 2    | 2    | 3    | 2    | 2 |
| 12607  |      |      |      |      |      |      |      |      |      |      |      |      |      |      |   |
| 12608  |      |      |      |      |      |      |      |      |      |      |      |      |      |      |   |
| 12610  |      |      |      |      |      | 1    | 5    | 5    | 4    | 4    | 5    | 4    | 4    | 4    | 5 |
| 12611  | 3    | 4    | 4    | 4    |      |      |      |      |      |      |      |      |      |      |   |
| 12613  |      |      |      |      |      | 4    | 3    | 3    | 2    | 4    | 3    | 5    | 3    | 5    | 4 |
| 12616  |      |      |      |      |      | 1    | 6    | 6    | 6    | 2    | 6    | 6    | 6    | 2    | 2 |
| 12617  | 1    | 2    | 3    | 2    |      |      |      |      |      |      |      |      |      |      |   |
| 12619  |      |      |      |      |      | 2    | 3    | 5    | 5    | 2    | 6    | 6    | 5    | 2    | 5 |
| 12622  |      |      |      |      |      |      |      |      |      |      |      |      |      |      |   |
| 12628  |      |      |      |      |      | 6    | 4    | 6    | 1    | 3    | 3    | 3    | 3    | 3    | 3 |
| 12631  |      |      |      |      |      | 3    | 3    | 6    | 5    | 3    | 5    | 5    | 5    | 2    | 6 |

| respid | Q47l | Q47m | Q47n | Q47o | Q48a | Q48b | Q48c | Q48d | Q48e | Q48f | Q48g | Q48h | Q48i | Q48j |
|--------|------|------|------|------|------|------|------|------|------|------|------|------|------|------|
| 12635  |      |      |      |      |      | 3    |      |      |      |      |      |      |      |      |
| 12638  |      |      |      |      |      | 6    | 6    | 6    | 6    | 6    | 6    | 6    | 6    | 6    |
| 12639  |      |      |      |      |      | 2    | 5    | 6    | 6    | 2    | 6    | 6    | 6    | 5    |
| 12640  |      |      |      |      |      | 2    | 6    | 6    | 6    | 2    | 6    | 6    | 6    | 3    |
| 12643  |      |      |      |      |      | 1    | 1    |      | 1    | 1    | 3    | 2    | 1    | 3    |
| 12646  | 2    | 1    | 1    | 2    |      |      |      |      |      |      |      |      |      |      |
| 12648  |      |      |      |      |      | 4    | 2    | 2    | 3    | 6    | 2    | 2    | 4    | 1    |
| 12650  |      |      |      |      |      |      |      |      |      |      |      |      |      |      |
| 12651  |      |      |      |      |      | 5    | 5    | 5    | 5    | 4    | 4    | 4    | 6    | 4    |
| 12658  |      |      |      |      |      | 1    | 6    | 5    | 5    | 2    | 6    | 5    | 6    | 5    |
| 12662  |      |      |      |      |      | 5    | 2    | 2    | 2    | 5    | 3    | 2    | 3    | 3    |
| 12663  |      |      |      |      |      |      |      |      |      |      |      |      |      |      |
| 12664  | 2    | 2    | 2    | 2    |      |      |      |      |      |      |      |      |      |      |
| 12669  |      |      |      |      |      | 1    | 6    | 6    | 6    | 1    | 6    | 6    | 6    | 5    |
| 12670  |      |      |      |      |      | 1    | 6    | 5    | 1    | 2    | 5    | 5    | 6    | 2    |
| 12673  |      |      |      |      |      |      |      |      |      |      |      |      |      |      |
| 12675  |      |      |      |      |      | 2    | 3    | 3    | 5    | 4    | 4    | 5    | 6    | 3    |
| 12677  |      |      |      |      |      | 1    | 6    | 6    | 2    | 2    | 3    | 6    | 6    | 3    |
| 12679  |      |      |      |      |      | 5    | 3    | 3    | 3    | 5    | 3    | 3    | 3    | 3    |
| 12682  | 3    | 3    | 3    | 3    |      |      |      |      |      |      |      |      |      |      |
| 12696  |      |      |      |      |      | 4    | 5    | 5    | 5    | 5    | 4    | 5    | 4    | 4    |
| 12697  |      |      |      |      |      | 2    | 5    | 4    | 2    | 1    | 4    | 5    | 6    | 1    |
| 12699  |      |      |      |      |      | 2    | 4    | 5    | 4    | 3    | 5    | 5    | 6    | 4    |
| 12700  |      |      |      |      |      | 1    | 5    | 5    | 4    | 1    | 6    | 4    | 6    | 4    |
| 12701  |      |      |      |      |      | 2    | 4    | 3    | 5    | 2    | 5    | 3    | 6    | 6    |
| 12702  |      |      |      |      |      | 1    | 3    | 5    | 2    | 2    | 5    | 5    | 5    | 3    |
| 12704  | 2    | 2    | 2    | 2    |      |      |      |      |      |      |      |      |      |      |
| 12705  |      |      |      |      |      | 5    | 5    | 5    | 5    | 5    | 4    | 5    | 5    | 4    |
| 12709  | 5    | 5    | 5    | 5    |      |      |      |      |      |      |      |      |      |      |
| 12710  |      |      |      |      |      | 2    | 5    | 5    | 2    | 3    | 3    | 5    | 6    | 1    |
| 12713  |      |      |      |      |      | 3    | 3    | 3    | 5    | 1    | 6    | 5    | 5    | 5    |
| 12716  |      |      |      |      |      | 2    | 2    | 2    | 2    | 2    | 3    | 3    | 2    | 2    |

| respid | Q47l | Q47m | Q47n | Q47o | Q48a | Q48b | Q48c | Q48d | Q48e | Q48f | Q48g | Q48h | Q48i | Q48j |
|--------|------|------|------|------|------|------|------|------|------|------|------|------|------|------|
| 12719  |      | 3    | 3    | 3    |      |      |      |      |      |      |      |      |      |      |
| 12720  |      |      |      |      | 1    | 6    | 6    | 2    | 1    | 1    | 6    | 6    | 2    | 2    |
| 12723  |      |      |      |      | 6    | 4    | 3    | 5    | 3    | 5    | 5    | 3    | 5    | 6    |
| 12726  |      |      |      |      | 1    | 6    | 6    | 3    | 3    | 5    | 6    | 6    | 2    | 3    |
| 12728  |      |      |      |      |      |      |      |      |      |      |      |      |      |      |
| 12729  |      |      |      |      | 4    | 5    | 5    | 6    | 3    | 5    | 5    | 5    | 3    | 5    |
| 12731  |      |      |      |      | 1    | 6    | 6    | 2    | 2    | 5    | 6    | 6    | 2    | 2    |
| 12732  |      |      |      |      |      |      |      |      |      |      |      |      |      |      |
| 12733  |      |      |      |      | 3    | 5    | 5    | 6    | 2    | 6    | 6    | 6    | 2    | 5    |
| 12736  | 4    | 3    | 3    | 3    |      |      |      |      |      |      |      |      |      |      |
| 12737  |      |      |      |      | 1    | 6    | 6    | 2    | 2    | 3    | 6    | 6    | 2    | 2    |
| 12739  |      |      |      |      |      |      |      |      |      |      |      |      |      |      |
| 12742  |      |      |      |      | 1    | 6    | 6    | 2    | 2    | 6    | 6    | 6    | 2    | 3    |
| 12743  | 5    | 1    | 1    | 1    |      |      |      |      |      |      |      |      |      |      |
| 12744  |      |      |      |      | 5    | 2    | 5    | 4    | 5    | 4    | 4    | 4    | 4    | 3    |
| 12747  |      |      |      |      |      |      |      |      |      |      |      |      |      |      |
| 12751  | 3    | 3    | 3    | 4    |      |      |      |      |      |      |      |      |      |      |
| 12754  |      |      |      |      | 1    | 6    | 6    | 2    | 2    | 6    | 6    | 6    | 3    | 3    |
| 12756  |      |      |      |      |      |      |      |      |      |      |      |      |      |      |
| 12757  |      |      |      |      | 1    | 6    | 6    | 1    | 2    | 6    | 6    | 6    | 2    | 3    |
| 12760  |      |      |      |      |      |      |      |      |      |      |      |      |      |      |
| 12761  |      |      |      |      | 1    | 6    | 6    | 1    | 2    | 4    | 5    | 6    | 2    | 3    |
| 12762  |      |      |      |      | 3    | 4    | 5    | 5    | 3    | 5    | 5    | 5    | 2    | 5    |
| 12766  | 4    | 4    | 4    | 4    |      |      |      |      |      |      |      |      |      |      |
| 12769  | 4    | 4    | 4    | 4    |      |      |      |      |      |      |      |      |      |      |
| 12770  |      | 3    |      | 3    |      |      |      |      |      |      |      |      |      |      |
| 12773  |      |      |      |      | 2    | 2    | 3    | 2    | 2    | 1    | 2    | 2    | 3    | 5    |
| 12780  | 1    | 3    | 2    | 2    |      |      |      |      |      |      |      |      |      |      |
| 12789  |      |      |      |      | 5    | 5    | 5    | 4    | 5    | 4    | 5    | 4    | 5    | 4    |
| 12792  | 3    | 2    | 2    | 2    |      |      |      |      |      |      |      |      |      |      |
| 12795  | 3    | 4    | 4    | 4    |      |      |      |      |      |      |      |      |      |      |
| 12804  | 1    | 1    | 3    | 1    |      |      |      |      |      |      |      |      |      |      |

| respid | Q47l | Q47m | Q47n | Q47o | Q48a | Q48b | Q48c | Q48d | Q48e | Q48f | Q48g | Q48h | Q48i | Q48j |
|--------|------|------|------|------|------|------|------|------|------|------|------|------|------|------|
| 12811  |      |      |      |      |      | 2    | 3    | 2    | 2    | 2    | 2    | 2    | 2    | 2    |
| 12813  |      |      |      |      |      | 5    | 3    | 4    | 4    | 4    | 4    | 3    | 3    | 4    |
| 12814  |      |      |      |      |      |      |      |      |      |      |      |      |      |      |
| 12815  |      |      |      |      |      | 3    | 3    | 4    | 3    | 4    | 3    | 4    | 3    | 4    |
| 12816  | 5    | 4    | 4    | 4    |      |      |      |      |      |      |      |      |      |      |
| 12817  |      |      |      |      |      | 3    | 1    | 2    | 1    | 5    | 2    | 3    | 2    | 6    |
| 12818  |      |      |      |      |      | 5    | 5    | 4    | 6    | 3    | 5    | 5    | 5    | 2    |
| 12819  | 3    | 4    | 4    | 4    |      |      |      |      |      |      |      |      |      |      |
| 12820  |      |      |      |      |      | 5    | 3    | 6    | 5    | 3    | 6    | 5    | 5    | 2    |
| 12821  | 4    | 4    | 4    | 4    |      |      |      |      |      |      |      |      |      |      |
| 12824  |      |      |      |      |      | 3    | 5    | 6    | 5    | 4    | 5    | 5    | 5    | 3    |
| 12827  | 4    | 4    | 3    | 4    |      |      |      |      |      |      |      |      |      |      |
| 12836  | 2    | 1    | 2    | 2    |      |      |      |      |      |      |      |      |      |      |
| 12837  | 2    | 3    | 3    | 3    |      |      |      |      |      |      |      |      |      |      |
| 12838  |      |      |      |      |      | 2    | 3    | 2    | 2    | 3    | 4    | 3    | 3    | 4    |
| 12845  |      |      |      |      |      | 3    | 5    | 5    | 5    | 3    | 4    | 5    | 5    | 3    |
| 12847  | 3    | 3    | 3    | 3    |      |      |      |      |      |      |      |      |      |      |
| 12849  |      |      |      |      |      | 2    | 2    | 2    | 2    | 2    | 1    | 2    | 2    | 1    |
| 12850  |      |      |      |      |      | 3    | 3    | 4    | 4    | 3    | 3    | 3    | 3    | 3    |
| 12852  | 4    | 4    | 5    | 5    |      |      |      |      |      |      |      |      |      |      |
| 12853  |      |      |      |      |      | 1    | 1    | 1    | 1    | 1    | 1    | 1    | 1    | 1    |
| 12854  | 3    | 3    | 3    | 3    |      |      |      |      |      |      |      |      |      |      |
| 12860  | 4    | 4    | 4    | 4    |      |      |      |      |      |      |      |      |      |      |
| 12861  | 3    | 4    | 4    | 3    |      |      |      |      |      |      |      |      |      |      |
| 12863  |      |      |      |      |      | 1    | 6    | 6    | 6    | 1    | 6    | 6    | 6    | 1    |
| 12865  |      |      |      |      |      | 4    | 4    | 4    | 3    | 4    | 4    | 4    | 4    | 4    |
| 12870  |      |      |      |      |      | 4    | 3    | 5    | 5    | 4    | 4    | 4    | 4    | 4    |
| 12871  | 5    | 5    | 5    | 5    |      |      |      |      |      |      |      |      |      |      |
| 12873  | 2    | 2    | 2    | 2    |      |      |      |      |      |      |      |      |      |      |
| 12877  | 3    | 4    | 4    |      |      |      |      |      |      |      |      |      |      |      |
| 12880  |      |      |      |      |      | 3    | 3    | 2    | 3    | 2    | 3    | 3    | 4    | 3    |
| 12881  |      |      |      |      |      | 4    | 4    | 3    | 4    | 4    | 4    | 4    | 3    | 4    |

| respid | Q47l | Q47m | Q47n | Q47o | Q48a | Q48b | Q48c | Q48d | Q48e | Q48f | Q48g | Q48h | Q48i | Q48j |   |
|--------|------|------|------|------|------|------|------|------|------|------|------|------|------|------|---|
| 12882  |      |      |      |      |      | 2    | 6    | 6    | 6    | 2    | 6    | 6    | 6    | 2    | 6 |
| 12883  |      |      |      |      |      | 6    | 6    | 6    | 3    | 5    | 3    | 3    | 4    | 4    | 4 |
| 12885  | 4    | 4    | 4    | 4    |      |      |      |      |      |      |      |      |      |      |   |
| 12887  |      |      |      |      |      | 2    | 5    | 5    | 5    | 2    | 5    | 5    | 5    | 3    | 5 |
| 12889  |      |      |      |      |      | 4    | 5    | 5    | 5    | 5    | 5    | 5    | 5    | 5    | 5 |
| 12890  | 3    | 4    | 4    | 4    |      |      |      |      |      |      |      |      |      |      |   |
| 12891  |      |      |      |      |      | 3    | 4    | 6    | 5    | 3    | 3    | 5    | 6    | 2    | 3 |
| 12892  |      |      |      |      |      | 5    | 3    | 3    | 3    | 5    | 1    | 1    | 1    | 6    | 1 |
| 12893  | 4    | 4    | 4    | 4    |      |      |      |      |      |      |      |      |      |      |   |
| 12895  |      |      |      |      |      | 4    | 3    | 3    | 3    | 3    | 3    | 3    | 3    | 3    | 3 |
| 12898  | 4    | 3    | 3    | 4    |      |      |      |      |      |      |      |      |      |      |   |
| 12907  | 3    |      |      | 3    |      |      |      |      |      |      |      |      |      |      |   |
| 12908  |      |      |      |      |      | 5    | 5    | 5    | 5    | 5    | 5    | 5    | 5    | 5    | 5 |
| 12909  |      |      |      |      |      |      |      |      |      |      |      |      |      |      |   |
| 12914  | 4    | 3    | 3    | 2    |      |      |      |      |      |      |      |      |      |      |   |
| 12915  |      |      |      |      |      | 5    | 5    | 5    | 6    | 3    | 5    | 5    | 5    | 3    | 5 |
| 12916  |      |      |      |      |      |      |      |      |      |      |      |      |      |      |   |
| 12921  |      |      |      |      |      | 3    | 4    | 4    | 4    | 3    | 3    | 4    | 5    | 3    | 5 |
| 12922  |      |      |      |      |      | 3    | 4    | 4    | 4    | 3    | 4    | 4    | 6    | 1    | 4 |
| 12923  |      |      |      |      |      |      |      |      |      |      |      |      |      |      |   |
| 12926  | 3    | 3    | 3    | 3    |      |      |      |      |      |      |      |      |      |      |   |
| 12927  |      |      |      |      |      | 2    | 6    | 6    | 6    | 2    | 6    | 6    | 6    | 1    | 6 |
| 12932  | 4    | 2    | 1    | 4    |      |      |      |      |      |      |      |      |      |      |   |
| 12936  | 3    | 3    | 2    | 2    |      |      |      |      |      |      |      |      |      |      |   |
| 12937  |      |      |      |      |      | 3    | 3    | 2    | 2    | 2    | 4    | 6    | 5    | 2    | 3 |
| 12938  |      |      |      |      |      | 2    | 6    | 5    | 3    | 3    | 2    | 4    | 6    | 2    | 2 |
| 12939  |      |      |      |      |      | 1    | 6    | 6    | 6    | 1    | 6    | 6    | 6    | 1    | 6 |
| 12940  |      |      |      |      |      | 4    | 3    | 3    | 3    | 3    | 3    | 3    | 2    | 4    | 3 |
| 12945  |      |      |      |      |      | 2    | 4    | 5    | 5    | 2    | 5    | 5    | 5    | 2    | 5 |
| 12946  |      |      |      |      |      | 4    | 6    | 4    | 3    | 4    | 5    | 3    | 4    | 3    | 5 |
| 12947  | 4    | 4    | 4    | 4    |      |      |      |      |      |      |      |      |      |      |   |
| 12948  | 2    | 2    | 2    | 2    |      |      |      |      |      |      |      |      |      |      |   |

| respid | Q47l | Q47m | Q47n | Q47o | Q48a | Q48b | Q48c | Q48d | Q48e | Q48f | Q48g | Q48h | Q48i | Q48j |   |
|--------|------|------|------|------|------|------|------|------|------|------|------|------|------|------|---|
| 12951  |      |      |      |      |      | 5    | 1    | 5    | 4    | 5    | 2    | 5    | 2    | 5    | 5 |
| 12952  |      |      |      |      |      | 5    | 6    | 6    | 6    | 4    | 4    | 4    | 5    | 5    | 6 |
| 12954  |      |      |      |      |      | 4    | 4    | 4    | 5    | 4    | 3    | 4    | 4    | 4    | 5 |
| 12960  |      |      |      |      |      | 2    | 4    | 6    | 5    | 2    | 6    | 6    | 6    | 2    | 6 |
| 12961  |      |      |      |      |      | 4    | 4    | 5    | 5    | 3    | 6    | 5    | 6    | 3    | 3 |
| 12962  |      |      |      |      |      | 1    | 6    | 6    | 3    | 3    | 6    | 6    | 6    | 1    | 4 |
| 12963  | 3    | 3    | 3    | 3    |      |      |      |      |      |      |      |      |      |      |   |
| 12964  |      |      |      |      |      | 5    | 2    | 2    | 2    | 5    | 2    | 3    | 3    | 5    | 3 |
| 12966  | 1    | 1    | 1    | 1    |      |      |      |      |      |      |      |      |      |      |   |
| 12967  | 3    | 2    | 2    | 2    |      |      |      |      |      |      |      |      |      |      |   |
| 12969  | 4    | 4    | 4    | 5    |      |      |      |      |      |      |      |      |      |      |   |
| 12970  | 3    | 3    | 3    | 3    |      |      |      |      |      |      |      |      |      |      |   |
| 12974  | 2    | 2    | 2    | 2    |      |      |      |      |      |      |      |      |      |      |   |
| 12979  |      |      |      |      |      |      |      |      |      |      |      |      |      |      |   |
| 12980  | 3    | 3    | 3    | 4    |      |      |      |      |      |      |      |      |      |      |   |
| 12983  |      |      |      |      |      | 5    | 4    | 5    | 5    | 5    | 5    | 6    | 5    | 5    | 5 |
| 12988  |      |      |      |      |      | 6    | 3    | 3    | 2    | 5    | 2    | 3    | 3    | 5    | 3 |
| 12994  |      |      |      |      |      | 5    | 5    | 3    | 3    | 4    | 2    | 4    | 4    | 6    | 6 |
| 12995  |      |      |      |      |      | 4    | 5    | 6    | 6    | 2    | 5    | 5    | 5    | 2    | 5 |
| 12996  |      |      |      |      |      | 2    | 3    | 5    | 5    | 2    | 6    | 5    | 5    |      | 5 |
| 12998  |      |      |      |      |      | 4    | 3    | 3    | 3    | 4    | 3    | 3    | 3    | 4    | 3 |
| 12999  |      |      |      |      |      | 2    | 6    | 6    | 6    | 1    | 6    | 6    | 6    | 1    | 6 |
| 13001  | 4    | 4    | 4    | 4    |      |      |      |      |      |      |      |      |      |      |   |
| 13005  |      |      |      |      |      | 3    | 4    | 4    | 4    | 3    | 4    | 4    | 4    | 3    | 4 |
| 13006  |      |      |      |      |      | 6    | 6    | 6    | 3    | 6    | 2    | 2    | 3    | 6    | 6 |
| 13007  |      |      |      |      |      | 6    | 4    | 4    | 3    | 4    | 4    | 5    | 6    | 6    | 6 |
| 13011  |      |      |      |      |      | 5    | 5    |      | 5    | 5    | 5    | 5    | 5    | 5    | 5 |
| 13012  |      |      |      |      |      |      |      |      |      |      | 5    |      | 6    |      |   |
| 13013  |      |      |      |      |      | 2    | 3    | 2    | 2    | 3    | 3    | 2    | 3    | 3    | 2 |
| 13016  | 4    | 4    | 4    | 4    |      |      |      |      |      |      |      |      |      |      |   |
| 13018  | 4    | 2    | 3    | 3    |      |      |      |      |      |      |      |      |      |      |   |
| 13020  |      |      |      |      |      |      |      |      |      |      |      |      |      |      |   |

| respid | Q47l | Q47m | Q47n | Q47o | Q48a | Q48b | Q48c | Q48d | Q48e | Q48f | Q48g | Q48h | Q48i | Q48j |   |
|--------|------|------|------|------|------|------|------|------|------|------|------|------|------|------|---|
| 13024  |      | 3    |      |      |      |      |      |      |      |      |      |      |      |      |   |
| 13025  |      |      |      |      |      | 3    | 3    | 6    | 5    | 3    | 4    | 5    | 5    | 3    | 4 |
| 13027  |      |      |      |      |      | 5    | 5    | 5    | 5    | 5    | 4    | 5    | 6    | 4    | 3 |
| 13031  | 2    | 3    | 3    | 3    |      |      |      |      |      |      |      |      |      |      |   |
| 13032  | 3    | 2    | 2    | 2    |      |      |      |      |      |      |      |      |      |      |   |
| 13034  |      |      |      |      |      | 3    | 3    | 4    | 3    | 4    | 3    | 3    | 4    | 3    | 4 |
| 13036  |      |      |      |      |      | 2    | 2    | 2    |      |      |      |      |      | 1    |   |
| 13037  |      |      |      |      |      |      |      |      |      |      |      |      |      |      |   |
| 13038  |      |      |      |      |      | 2    | 1    | 2    | 2    | 5    | 2    | 1    | 1    | 5    | 1 |
| 13039  |      |      |      |      |      | 6    | 5    | 5    | 5    | 2    | 5    | 5    | 5    | 2    | 5 |
| 13040  |      |      |      |      |      | 4    | 4    | 4    | 4    | 4    | 4    | 5    | 4    | 4    | 4 |
| 13041  |      |      |      |      |      | 5    | 5    | 5    | 3    | 3    | 2    | 2    | 2    | 6    | 2 |
| 13045  |      |      |      |      |      | 4    | 4    | 4    | 4    | 4    | 4    | 4    | 3    | 2    |   |
| 13046  |      |      |      |      |      | 4    | 4    | 5    | 5    | 5    | 4    | 5    | 5    | 5    | 5 |
| 13048  |      |      |      |      |      | 6    |      | 6    | 6    | 2    |      | 6    | 6    | 2    | 6 |
| 13051  |      |      |      |      |      | 2    | 3    | 5    | 3    | 2    | 3    | 2    | 3    | 2    | 1 |
| 13053  |      |      |      |      |      | 4    |      |      |      |      |      |      |      |      |   |
| 13055  |      |      |      |      |      | 4    | 4    | 3    | 3    | 3    | 3    | 4    | 3    | 4    | 4 |
| 13059  |      |      |      |      |      | 5    | 5    | 5    | 2    | 3    | 5    | 5    | 6    | 5    | 5 |
| 13068  |      |      |      |      |      | 3    | 4    | 4    | 4    |      | 4    |      | 4    | 4    |   |
| 13069  |      |      |      |      |      | 6    | 6    |      | 6    | 6    | 5    | 5    | 5    | 5    | 5 |
| 13076  |      |      |      |      |      | 5    | 2    | 2    | 2    | 5    | 5    | 5    | 2    | 6    | 6 |
| 13081  |      |      |      |      |      | 3    | 3    | 3    | 3    | 3    | 3    | 3    | 2    | 2    | 2 |
| 13082  |      |      |      |      |      | 3    | 3    | 5    | 5    | 2    | 6    | 5    | 6    | 2    | 6 |
| 13084  |      |      |      |      |      | 4    | 3    | 4    | 5    | 3    | 4    | 5    | 5    | 1    | 4 |
| 13085  | 2    | 2    | 2    | 2    |      |      |      |      |      |      |      |      |      |      |   |
| 13086  |      |      |      |      |      | 5    | 5    | 5    | 5    | 3    | 4    | 6    | 6    | 1    | 6 |
| 13093  |      |      |      |      |      | 1    | 4    | 4    | 5    | 3    | 4    | 3    | 5    | 2    | 5 |
| 13094  |      |      |      |      |      | 3    | 3    | 3    | 3    | 3    | 3    | 3    | 3    | 3    | 3 |
| 13097  |      |      |      |      |      | 6    |      | 6    | 6    | 3    | 5    | 5    | 5    | 5    | 5 |
| 13098  |      |      |      |      |      | 3    | 3    | 4    | 5    | 3    | 4    | 5    | 4    | 2    | 5 |
| 13099  |      |      |      |      |      | 3    | 5    | 5    | 5    | 2    | 5    | 5    | 5    | 3    | 5 |

| respid | Q47l | Q47m | Q47n | Q47o | Q48a | Q48b | Q48c | Q48d | Q48e | Q48f | Q48g | Q48h | Q48i | Q48j |
|--------|------|------|------|------|------|------|------|------|------|------|------|------|------|------|
| 13100  |      |      |      |      |      |      |      |      |      |      |      |      |      |      |
| 13101  |      |      |      |      |      |      |      |      |      |      |      |      |      |      |
| 13103  |      |      |      |      |      |      |      |      |      |      |      |      |      |      |
| 13105  |      |      |      |      |      | 6    | 6    | 6    |      |      |      | 6    | 2    | 6    |
| 13106  |      |      |      |      | 3    | 3    | 4    |      | 3    | 5    | 5    | 4    | 3    | 5    |
| 13107  |      |      |      |      | 4    | 5    | 5    | 5    | 3    | 6    | 6    | 6    | 3    | 5    |
| 13110  |      |      |      |      | 2    | 4    | 5    | 4    | 3    | 4    | 4    | 5    | 2    | 3    |
| 13118  |      |      |      |      |      | 6    | 6    | 5    | 3    | 6    | 6    | 6    | 3    | 6    |
| 13120  |      |      |      |      | 3    | 5    | 6    | 5    | 3    | 5    | 6    | 6    | 6    | 3    |
| 13130  | 3    | 4    | 4    | 4    |      |      |      |      |      |      |      |      |      |      |
| 13133  |      |      |      |      | 6    | 2    | 2    | 2    | 5    | 2    | 3    | 4    | 5    | 3    |
| 13134  | 3    | 3    | 3    | 3    |      |      |      |      |      |      |      |      |      |      |
| 13139  |      |      |      |      | 5    | 5    | 5    | 5    | 5    |      | 5    | 5    | 5    | 5    |
| 13142  |      |      |      |      | 3    | 4    | 4    | 4    | 3    | 4    | 5    | 5    | 2    | 4    |
| 13143  |      |      |      |      | 3    | 3    | 4    | 1    | 4    | 3    | 3    | 5    | 4    | 3    |
| 13145  |      |      |      |      | 6    | 6    | 6    | 6    | 6    | 6    | 6    | 6    | 6    | 6    |
| 13148  | 4    | 4    | 4    | 5    |      |      |      |      |      |      |      |      |      |      |
| 13149  | 4    | 4    | 4    | 5    |      |      |      |      |      |      |      |      |      |      |
| 13151  |      |      |      |      | 5    | 5    | 5    | 6    | 5    | 5    | 6    | 5    | 5    | 5    |
| 13153  |      |      |      |      | 5    | 5    | 6    | 6    | 6    | 6    | 6    | 6    | 2    | 5    |
| 13158  |      |      |      |      | 4    | 4    | 4    | 4    | 4    | 4    | 4    | 4    | 4    | 4    |
| 13160  |      |      |      |      | 1    | 6    | 6    | 6    | 1    | 6    | 6    | 6    | 1    | 6    |
| 13162  |      |      |      |      | 2    | 3    | 4    | 4    | 2    | 5    | 3    | 3    | 5    | 4    |
| 13169  | 3    | 3    | 3    | 3    |      |      |      |      |      |      |      |      |      |      |
| 13172  |      |      |      |      | 4    | 5    | 6    | 4    | 4    | 5    | 4    | 5    | 2    | 5    |
| 13173  |      |      |      |      | 3    | 4    | 4    | 4    | 3    | 4    | 4    | 4    | 3    | 4    |
| 13176  |      |      |      |      | 3    | 5    | 6    | 6    | 2    | 6    | 6    | 6    | 1    | 5    |
| 13179  |      |      |      |      | 3    | 6    | 6    | 6    | 3    | 6    | 6    | 6    | 4    | 4    |
| 13184  |      |      |      |      |      | 5    |      | 5    | 4    |      |      | 6    | 1    | 4    |
| 13185  |      |      |      |      | 1    | 6    | 5    | 6    | 2    | 3    | 6    | 6    | 2    | 3    |
| 13186  |      |      |      |      | 2    | 4    | 5    | 5    | 2    | 5    | 5    | 6    | 2    | 5    |
| 13188  |      |      |      |      | 2    | 4    | 5    | 5    | 2    | 5    | 5    | 5    | 2    | 5    |



| respid | Q47l | Q47m | Q47n | Q47o | Q48a | Q48b | Q48c | Q48d | Q48e | Q48f | Q48g | Q48h | Q48i | Q48j |   |
|--------|------|------|------|------|------|------|------|------|------|------|------|------|------|------|---|
| 13190  |      |      |      |      |      | 4    | 4    | 3    | 2    | 3    | 3    | 3    | 3    | 4    | 4 |
| 13192  |      |      |      |      |      | 3    | 6    | 6    | 6    | 3    | 5    | 6    | 6    | 3    | 6 |
| 13193  |      |      |      |      |      |      |      |      |      |      |      |      |      |      |   |
| 13201  |      |      |      |      |      | 1    | 6    | 6    | 3    | 2    | 6    | 6    | 6    | 2    | 5 |
| 13207  |      |      |      |      |      | 6    | 6    | 6    | 5    | 5    | 6    | 5    | 6    | 5    | 5 |
| 13208  |      |      |      |      |      |      |      |      |      |      |      |      |      |      |   |
| 13209  | 2    | 2    | 2    | 1    |      |      |      |      |      |      |      |      |      |      |   |
| 13212  |      |      |      |      |      | 2    | 5    | 6    | 6    | 2    | 6    | 6    | 5    | 2    | 5 |
| 13215  |      |      |      |      |      | 2    | 6    | 6    | 6    | 2    | 4    | 4    | 5    | 2    | 4 |
| 13218  |      |      |      |      |      | 4    | 5    | 5    | 5    | 3    | 5    | 5    | 5    | 2    | 5 |
| 13219  | 4    | 4    | 4    | 3    |      |      |      |      |      |      |      |      |      |      |   |
| 13224  |      |      |      |      |      | 1    | 6    | 6    | 2    | 1    | 3    | 6    | 2    | 2    | 3 |
| 13225  |      |      |      |      |      | 2    | 3    | 5    | 6    | 2    | 6    | 5    | 5    | 2    | 5 |
| 13226  |      |      |      |      |      | 6    | 6    | 6    | 6    | 6    | 6    | 6    | 6    | 6    | 6 |
| 13232  |      |      |      |      |      |      |      |      |      |      |      |      |      |      |   |
| 13237  |      |      |      |      |      | 6    | 3    | 2    | 2    | 6    | 3    | 2    | 2    | 5    | 2 |
| 13239  |      |      |      |      |      | 3    | 3    | 3    | 3    | 4    | 3    | 3    | 3    | 4    | 3 |
| 13241  |      |      |      |      |      | 6    | 6    | 6    | 3    | 5    | 5    | 6    | 6    | 5    | 6 |
| 13243  |      |      |      |      |      | 5    | 5    | 5    | 5    | 5    | 5    | 5    | 5    | 5    | 5 |
| 13247  |      |      |      |      |      | 3    | 4    | 4    | 4    |      |      |      |      |      |   |
| 13248  |      |      |      |      |      | 3    | 3    | 6    | 5    | 2    |      | 6    | 6    | 2    | 5 |
| 13251  |      |      |      |      |      | 5    | 5    | 5    | 3    | 5    | 5    | 5    | 5    | 3    | 6 |
| 13256  |      |      |      |      |      | 6    | 6    | 6    | 6    | 6    | 6    | 5    | 6    | 5    | 5 |
| 13260  | 2    | 3    | 3    | 3    |      |      |      |      |      |      |      |      |      |      |   |
| 13261  |      |      |      |      |      | 4    | 5    | 4    | 5    | 4    | 4    | 4    | 4    | 2    | 5 |
| 13264  |      |      |      |      |      | 4    | 3    | 5    | 5    | 4    | 3    | 4    | 5    | 4    | 5 |
| 13273  |      |      |      |      |      | 4    | 3    | 3    | 4    | 3    | 5    | 5    | 5    | 3    | 5 |
| 13274  |      |      |      |      |      | 3    | 4    | 4    | 4    | 3    | 4    | 5    | 4    | 3    | 4 |
| 13276  |      |      |      |      |      | 3    | 5    | 5    | 5    | 2    | 5    | 5    | 5    | 2    | 5 |
| 13278  |      |      |      |      |      |      |      |      |      |      |      |      |      |      |   |
| 13279  |      |      |      |      |      | 3    | 3    | 5    | 5    | 3    | 3    | 5    | 6    | 2    | 6 |
| 13282  |      |      |      |      |      | 1    | 6    | 5    | 5    | 5    | 6    | 6    | 6    | 4    | 6 |

| respid | Q47l | Q47m | Q47n | Q47o | Q48a | Q48b | Q48c | Q48d | Q48e | Q48f | Q48g | Q48h | Q48i | Q48j |   |
|--------|------|------|------|------|------|------|------|------|------|------|------|------|------|------|---|
| 13283  | 2    | 2    | 2    | 2    |      |      |      |      |      |      |      |      |      |      |   |
| 13285  |      |      |      |      |      | 2    | 5    | 5    | 5    | 2    | 6    | 5    | 6    | 2    | 5 |
| 13286  |      |      |      |      |      | 3    | 3    |      | 3    | 3    | 4    | 4    | 4    | 3    | 4 |
| 13299  |      |      |      |      |      | 2    | 5    | 6    | 6    | 2    | 6    | 6    | 6    | 1    | 6 |
| 13300  |      |      |      |      |      | 3    | 3    | 3    | 3    | 3    | 3    | 3    | 4    | 3    | 3 |
| 13301  |      |      |      |      |      |      |      |      |      |      |      |      |      |      |   |
| 13303  |      |      |      |      |      | 6    | 6    | 6    | 6    | 5    | 6    | 6    | 6    | 6    | 6 |
| 13304  |      |      |      |      |      | 3    | 3    | 5    | 5    | 3    | 5    | 5    | 6    | 2    | 5 |
| 13307  |      |      |      |      |      |      |      |      |      |      |      |      |      |      |   |
| 13308  |      |      |      |      |      |      |      |      |      |      |      |      |      |      |   |
| 13312  |      |      |      |      |      | 6    | 6    | 6    | 3    | 2    | 2    | 6    | 6    | 6    | 6 |
| 13313  |      |      |      |      |      |      |      |      |      |      |      |      |      |      |   |
| 13314  |      |      |      |      |      | 4    | 4    | 4    | 4    | 4    | 4    | 4    | 4    | 4    | 6 |
| 13318  |      |      |      |      |      | 5    |      | 5    | 5    | 5    | 4    | 5    | 6    | 5    | 4 |
| 13320  |      |      |      |      |      | 3    | 5    | 5    | 5    | 2    | 6    | 6    | 6    | 4    | 6 |
| 13322  |      |      |      |      |      | 5    | 5    | 5    | 5    | 6    | 1    | 1    | 1    | 5    | 6 |
| 13324  |      |      |      |      |      | 5    | 5    | 5    | 5    | 5    | 4    | 5    | 5    | 5    | 4 |
| 13325  |      |      |      |      |      |      |      |      |      |      |      |      |      |      |   |
| 13327  | 4    | 4    | 4    | 4    |      |      |      |      |      |      |      |      |      |      |   |
| 13330  |      |      |      |      |      | 3    | 5    | 5    | 6    | 2    | 6    | 5    | 6    | 2    | 5 |
| 13332  | 2    | 2    | 3    | 3    |      |      |      |      |      |      |      |      |      |      |   |
| 13333  |      |      |      |      |      | 2    | 5    | 5    | 5    | 2    | 5    | 5    | 5    | 2    | 5 |
| 13334  |      |      |      |      |      | 3    | 6    | 6    | 6    | 1    | 6    | 6    | 6    | 1    | 6 |
| 13351  |      |      |      |      |      | 1    | 2    | 2    | 1    | 1    | 1    | 2    | 3    | 1    | 2 |
| 13353  |      |      |      |      |      | 3    | 5    |      | 5    | 3    | 5    | 5    | 5    |      | 4 |
| 13354  |      |      |      |      |      | 6    | 6    | 6    | 6    | 6    | 6    | 6    | 6    | 6    | 6 |
| 13355  |      |      |      |      |      | 3    | 3    | 5    | 5    | 2    | 5    | 5    | 5    | 1    | 6 |
| 13358  |      |      |      |      |      | 5    | 5    | 3    | 3    | 5    | 3    | 3    |      | 6    | 5 |
| 13359  |      |      |      |      |      | 6    | 2    | 2    | 2    | 5    | 2    | 2    | 3    | 5    | 2 |
| 13360  |      |      |      |      |      | 6    | 5    | 5    | 5    | 5    | 3    | 3    | 3    | 5    | 5 |
| 13364  |      |      |      |      |      | 3    | 6    | 6    | 6    | 1    | 6    | 6    | 6    | 1    | 6 |
| 13365  | 2    | 1    | 1    | 1    |      |      |      |      |      |      |      |      |      |      |   |

| respid | Q47l | Q47m | Q47n | Q47o | Q48a | Q48b | Q48c | Q48d | Q48e | Q48f | Q48g | Q48h | Q48i | Q48j |
|--------|------|------|------|------|------|------|------|------|------|------|------|------|------|------|
| 13368  |      |      |      |      |      |      |      |      |      |      |      |      |      |      |
| 13370  |      |      |      |      |      | 6    | 5    | 5    | 5    | 5    | 5    | 5    | 5    | 5    |
| 13375  |      |      |      |      |      | 4    | 3    | 4    | 3    | 4    | 4    | 4    | 3    | 3    |
| 13384  |      |      |      |      |      | 4    | 5    | 6    | 5    | 3    | 5    | 6    | 6    | 3    |
| 13387  |      |      |      |      |      | 5    | 5    | 5    | 5    | 5    | 5    | 5    | 5    | 5    |
| 13395  |      |      |      |      |      | 3    | 6    | 6    | 6    | 1    | 6    | 6    | 6    | 1    |
| 13398  |      |      |      |      |      | 1    | 6    | 5    | 5    | 2    | 5    | 5    | 5    | 2    |
| 13404  |      |      |      |      |      | 5    | 5    | 5    | 5    | 3    | 3    | 5    | 5    | 2    |
| 13405  |      |      |      |      |      | 3    | 4    | 4    | 5    | 3    | 4    | 5    | 5    | 3    |
| 13408  |      |      |      |      |      |      |      |      |      |      |      |      |      |      |
| 13411  |      |      |      |      |      | 2    | 1    | 2    | 5    | 3    | 5    | 3    | 3    | 3    |
| 13413  |      |      |      |      |      | 6    | 6    | 6    | 6    | 6    | 6    | 6    | 6    | 6    |
| 13419  |      |      |      |      |      | 4    | 6    | 5    | 6    | 1    | 6    | 6    | 6    | 1    |
| 13420  |      |      |      |      |      | 5    | 5    | 3    | 3    | 4    | 3    | 4    | 3    | 5    |
| 13427  |      |      |      |      |      | 3    | 3    | 3    | 3    | 3    | 3    | 3    | 3    | 3    |
| 13441  |      |      |      |      |      | 3    | 4    | 4    | 3    | 5    | 3    | 3    | 3    | 4    |
| 13444  |      |      |      |      |      | 4    | 4    | 5    | 3    | 5    | 2    | 4    | 6    | 2    |
| 13456  |      |      |      |      |      |      |      |      |      |      |      |      |      |      |
| 13466  |      |      |      |      |      | 5    | 4    | 4    | 4    | 4    | 4    | 5    | 5    | 4    |
| 13468  |      |      |      |      |      | 3    | 6    | 6    | 5    | 2    | 5    | 5    | 5    | 2    |
| 13475  |      |      |      |      |      | 1    | 4    | 5    | 5    | 2    | 5    | 5    | 5    | 2    |
| 13484  |      |      |      |      |      |      |      |      |      |      |      |      |      | 6    |
| 13486  |      |      |      |      |      | 2    | 3    | 3    | 3    | 4    | 5    | 3    | 3    | 4    |
| 13487  |      |      |      |      |      | 3    | 3    | 4    | 3    | 3    | 4    | 4    | 5    | 3    |
| 13491  |      |      |      |      |      |      |      |      |      |      |      |      |      |      |
| 13496  |      |      |      |      |      | 5    | 6    |      |      |      |      |      |      |      |
| 13497  |      |      |      |      |      | 3    | 5    | 5    | 5    | 3    | 4    | 5    | 5    | 3    |
| 13498  |      |      |      |      |      | 4    | 3    | 5    | 6    | 3    | 5    | 5    | 5    | 2    |
| 13502  |      |      |      |      |      |      |      |      |      |      |      |      |      |      |
| 13503  | 3    | 2    | 2    | 3    |      |      |      |      |      |      |      |      |      |      |
| 13505  |      |      |      |      |      |      |      |      |      |      |      |      |      |      |
| 13509  |      |      |      |      |      | 4    | 4    | 3    | 4    | 4    | 4    | 4    | 4    | 4    |

| respid | Q47l | Q47m | Q47n | Q47o | Q48a | Q48b | Q48c | Q48d | Q48e | Q48f | Q48g | Q48h | Q48i | Q48j |
|--------|------|------|------|------|------|------|------|------|------|------|------|------|------|------|
| 13510  |      |      |      |      |      | 3    |      | 3    | 4    | 4    | 3    | 3    | 3    | 3    |
| 13518  |      | 1    | 2    | 2    |      |      |      |      |      |      |      |      |      |      |
| 13521  |      |      |      |      |      | 3    | 5    | 5    | 5    | 3    | 5    | 5    | 5    | 3    |
| 13523  |      |      |      |      |      | 3    | 2    | 3    | 4    | 3    | 3    | 3    | 5    | 2    |
| 13528  |      |      |      |      |      | 6    | 6    | 6    | 6    | 6    | 6    | 6    | 6    | 6    |
| 13531  |      |      |      |      |      | 3    | 4    | 4    | 5    | 5    | 6    | 6    | 6    | 2    |
| 13532  |      |      |      |      |      | 3    | 5    | 5    | 5    | 2    | 5    | 5    | 5    | 3    |
| 13533  |      |      |      |      |      | 6    |      |      |      |      | 3    | 5    |      |      |
| 13534  |      |      |      |      |      |      |      |      |      |      |      |      |      |      |
| 13535  |      |      |      |      |      | 5    | 5    | 3    | 5    | 3    | 4    | 5    | 6    | 5    |
| 13538  |      |      |      |      |      | 3    | 3    | 3    | 3    | 3    | 3    | 3    | 3    | 3    |
| 13540  |      |      |      |      |      | 5    | 3    | 3    | 4    | 4    | 3    | 4    | 5    | 3    |
| 13541  |      |      |      |      |      | 5    | 5    | 5    | 5    | 5    | 5    | 5    | 5    | 5    |
| 13542  |      |      |      |      |      | 5    | 6    | 6    | 6    | 2    | 4    | 4    | 5    |      |
| 13550  |      |      |      |      |      | 3    | 3    | 5    | 5    | 3    | 4    | 5    | 5    | 2    |
| 13553  |      |      |      |      |      | 4    | 4    | 3    | 5    | 3    | 3    | 4    | 5    | 3    |
| 13554  |      |      |      |      |      | 2    | 3    | 5    | 5    | 2    | 5    | 5    | 6    | 3    |
| 13555  |      |      |      |      |      | 4    | 2    | 4    | 3    | 3    | 5    | 3    | 4    | 5    |
| 13556  | 1    | 1    | 1    | 1    |      |      |      |      |      |      |      |      |      |      |
| 13563  |      |      |      |      |      | 3    | 4    | 3    | 3    | 2    | 3    | 4    | 4    | 4    |
| 13564  |      |      |      |      |      | 3    | 3    | 4    | 4    | 3    | 3    | 4    | 3    | 3    |
| 13567  |      |      |      |      |      |      |      |      |      |      |      |      |      |      |
| 13568  | 3    | 3    | 2    | 2    |      |      |      |      |      |      |      |      |      |      |
| 13570  |      |      |      |      |      |      |      |      |      |      |      |      |      |      |
| 13573  |      |      |      |      |      | 3    | 4    | 4    | 4    |      | 4    | 4    | 4    | 4    |
| 13575  |      |      |      |      |      | 2    | 2    | 3    | 4    | 4    | 3    | 4    | 5    | 2    |
| 13577  | 3    | 3    | 2    | 3    |      |      |      |      |      |      |      |      |      |      |
| 13580  | 3    | 3    | 2    | 2    |      |      |      |      |      |      |      |      |      |      |
| 13582  |      |      |      |      |      | 1    | 5    | 5    | 5    | 2    | 5    | 5    | 5    | 2    |
| 13584  | 2    | 3    | 2    | 3    |      |      |      |      |      |      |      |      |      |      |
| 13585  |      |      |      |      |      |      |      |      |      |      |      |      |      |      |
| 13586  |      |      |      |      |      | 3    | 5    | 6    | 5    | 2    | 4    | 6    | 6    | 1    |

| respid | Q47l | Q47m | Q47n | Q47o | Q48a | Q48b | Q48c | Q48d | Q48e | Q48f | Q48g | Q48h | Q48i | Q48j |   |
|--------|------|------|------|------|------|------|------|------|------|------|------|------|------|------|---|
| 13587  |      |      |      |      |      | 4    | 3    | 3    | 4    | 4    | 5    | 3    | 5    | 3    | 5 |
| 13592  | 2    | 3    | 2    | 3    |      |      |      |      |      |      |      |      |      |      |   |
| 13596  |      |      |      |      |      |      |      |      |      | 6    | 6    | 6    | 6    | 6    | 6 |
| 13597  |      |      |      |      |      | 3    | 3    | 3    | 5    | 3    | 5    | 3    | 5    | 4    | 5 |
| 13599  |      |      |      |      |      | 2    | 5    | 4    | 3    | 5    | 3    | 3    | 3    | 2    | 4 |
| 13601  |      |      |      |      |      | 5    | 5    | 5    | 5    | 5    | 5    | 5    | 5    | 3    | 5 |
| 13604  |      |      | 3    | 3    | 4    |      |      |      |      |      |      |      |      |      |   |
| 13608  | 3    | 3    |      |      | 4    |      |      |      |      |      |      |      |      |      |   |
| 13616  |      |      |      |      |      | 4    | 3    | 3    | 3    | 3    | 4    | 3    | 4    | 4    | 3 |
| 13618  |      |      |      |      |      | 4    | 3    | 4    | 4    | 4    |      | 3    | 3    | 3    | 4 |
| 13619  |      |      |      |      |      | 1    | 6    | 6    | 6    | 2    | 6    | 6    | 6    | 1    | 6 |
| 13626  |      |      |      |      |      |      |      |      |      |      |      |      |      |      |   |
| 13628  | 3    | 4    | 4    | 3    |      |      |      |      |      |      |      |      |      |      |   |
| 13640  | 2    | 3    | 3    | 3    |      |      |      |      |      |      |      |      |      |      |   |
| 13645  | 3    | 3    | 4    | 3    |      |      |      |      |      |      |      |      |      |      |   |
| 13648  |      |      |      |      |      |      |      |      |      |      |      |      |      |      |   |
| 13653  |      |      |      |      |      | 1    | 6    | 6    | 6    | 1    | 6    | 6    | 6    | 1    | 6 |
| 13655  | 4    | 3    | 3    | 4    |      |      |      |      |      |      |      |      |      |      |   |
| 13662  | 4    | 3    | 3    | 4    |      |      |      |      |      |      |      |      |      |      |   |
| 13670  | 4    | 4    | 4    | 4    |      |      |      |      |      |      |      |      |      |      |   |
| 13673  |      |      |      |      |      | 5    |      | 5    | 6    | 5    | 2    | 3    | 5    | 2    | 2 |
| 13674  |      |      |      |      |      | 5    | 2    |      | 2    | 5    | 3    | 3    | 2    | 6    | 2 |
| 13675  |      |      |      |      |      |      |      |      |      |      |      |      |      |      |   |
| 13678  | 3    | 3    | 3    | 4    |      |      |      |      |      |      |      |      |      |      |   |
| 13680  |      |      |      |      |      | 1    | 6    | 6    | 6    | 1    | 6    |      | 6    | 1    | 6 |
| 13681  | 2    | 2    | 2    | 2    |      |      |      |      |      |      |      |      |      |      |   |
| 13683  |      |      |      |      |      | 5    | 5    | 5    | 5    | 4    | 5    | 5    | 5    | 3    | 5 |
| 13684  |      |      |      |      |      | 3    | 3    | 4    | 3    | 4    | 3    | 4    | 4    | 4    | 2 |
| 13685  |      |      |      |      |      |      | 5    |      |      | 4    | 6    | 3    |      | 2    | 5 |
| 13687  |      |      |      |      |      |      |      |      |      |      |      |      |      |      |   |
| 13690  | 3    | 3    | 3    | 3    |      |      |      |      |      |      |      |      |      |      |   |
| 13700  | 3    | 3    | 3    | 3    |      |      |      |      |      |      |      |      |      |      |   |

| respid | Q47l | Q47m | Q47n | Q47o | Q48a | Q48b | Q48c | Q48d | Q48e | Q48f | Q48g | Q48h | Q48i | Q48j |   |
|--------|------|------|------|------|------|------|------|------|------|------|------|------|------|------|---|
| 13705  | 3    | 3    | 3    | 3    |      |      |      |      |      |      |      |      |      |      |   |
| 13710  | 3    | 4    | 5    | 3    |      |      |      |      |      |      |      |      |      |      |   |
| 13711  | 2    | 2    | 1    | 1    |      |      |      |      |      |      |      |      |      |      |   |
| 13713  |      |      |      |      |      |      |      |      |      |      |      |      |      |      |   |
| 13716  | 2    | 5    | 5    | 5    |      |      |      |      |      |      |      |      |      |      |   |
| 13721  |      |      |      |      |      | 4    | 5    | 5    | 5    | 4    | 4    | 4    | 4    | 3    | 5 |
| 13722  | 5    | 5    | 5    | 5    |      |      |      |      |      |      |      |      |      |      |   |
| 13723  | 4    | 4    | 4    | 4    |      |      |      |      |      |      |      |      |      |      |   |
| 13726  | 3    | 3    | 2    | 3    |      |      |      |      |      |      |      |      |      |      |   |
| 13728  | 4    | 4    | 4    | 4    |      |      |      |      |      |      |      |      |      |      |   |
| 13730  | 3    | 3    | 3    | 3    |      |      |      |      |      |      |      |      |      |      |   |
| 13734  | 4    | 4    | 4    | 4    |      |      |      |      |      |      |      |      |      |      |   |
| 13736  |      |      |      |      |      | 4    | 2    | 2    | 2    | 4    | 3    | 3    | 3    | 4    | 1 |
| 13737  | 4    | 4    | 4    | 4    |      |      |      |      |      |      |      |      |      |      |   |
| 13739  |      |      |      |      |      |      |      |      |      |      |      |      |      |      |   |
| 13742  |      |      |      |      |      |      |      |      |      |      |      |      |      |      |   |
| 13746  |      |      |      |      |      | 6    | 6    | 6    | 6    | 3    | 5    | 6    | 6    | 1    | 6 |
| 13747  | 3    | 4    | 4    | 4    |      |      |      |      |      |      |      |      |      |      |   |
| 13749  |      |      |      |      |      | 1    | 6    | 6    | 6    | 1    | 6    | 6    | 6    | 2    | 6 |
| 13751  | 1    | 1    | 2    | 1    |      |      |      |      |      |      |      |      |      |      |   |
| 13752  |      |      |      |      |      | 3    | 3    | 3    | 3    | 3    | 5    | 3    | 3    | 3    | 5 |
| 13756  |      |      |      |      |      | 4    | 5    | 3    | 5    | 5    | 5    | 3    | 4    | 2    | 3 |
| 13757  | 4    | 5    | 5    | 5    |      |      |      |      |      |      |      |      |      |      |   |
| 13767  |      |      |      |      |      | 2    | 2    | 2    | 2    |      | 2    | 1    |      | 2    | 2 |
| 13771  | 3    | 4    | 4    | 3    |      |      |      |      |      |      |      |      |      |      |   |
| 13772  | 2    | 3    | 2    | 3    |      |      |      |      |      |      |      |      |      |      |   |
| 13779  |      |      |      |      |      |      |      |      |      |      |      |      |      |      |   |
| 13782  | 1    | 3    | 3    | 2    |      |      |      |      |      |      |      |      |      |      |   |
| 13783  |      |      |      |      |      |      |      | 6    | 6    | 1    | 6    | 6    | 6    | 1    | 6 |
| 13785  | 5    | 5    | 5    | 4    |      |      |      |      |      |      |      |      |      |      |   |
| 13786  |      |      |      |      |      | 4    | 4    | 5    | 5    | 3    | 5    | 3    | 4    | 2    | 6 |
| 13792  | 3    | 2    | 2    | 2    |      |      |      |      |      |      |      |      |      |      |   |

| respid | Q47l | Q47m | Q47n | Q47o | Q48a | Q48b | Q48c | Q48d | Q48e | Q48f | Q48g | Q48h | Q48i | Q48j |   |
|--------|------|------|------|------|------|------|------|------|------|------|------|------|------|------|---|
| 13796  | 3    | 3    | 4    | 3    |      |      |      |      |      |      |      |      |      |      |   |
| 13798  | 3    | 3    | 2    | 3    |      |      |      |      |      |      |      |      |      |      |   |
| 13799  | 3    | 3    | 4    | 3    |      |      |      |      |      |      |      |      |      |      |   |
| 13804  | 5    | 5    | 5    | 5    |      |      |      |      |      |      |      |      |      |      |   |
| 13805  |      |      |      |      |      |      |      |      |      |      |      |      |      | 3    |   |
| 13810  |      |      |      |      |      | 1    | 5    | 5    | 6    | 1    | 6    | 6    | 6    | 1    | 5 |
| 13811  |      |      |      |      |      | 2    | 6    | 6    | 2    | 1    | 6    | 6    | 6    | 1    | 6 |
| 13819  |      |      | 1    | 2    |      |      |      |      |      |      |      |      |      |      |   |
| 13821  |      |      |      |      |      | 2    | 1    | 3    | 1    | 1    | 2    | 1    | 1    | 1    | 1 |
| 13824  | 4    | 2    | 2    | 2    |      |      |      |      |      |      |      |      |      |      |   |
| 13828  |      |      |      |      |      | 5    | 5    | 5    | 3    | 5    | 2    | 5    | 5    | 5    | 5 |
| 13829  |      |      |      |      |      | 2    | 2    | 1    | 1    | 2    | 3    | 2    | 1    | 1    | 1 |
| 13831  |      |      |      |      |      |      |      |      |      |      |      |      |      |      |   |
| 13833  | 2    | 2    | 2    | 2    |      |      |      |      |      |      |      |      |      |      |   |
| 13835  | 3    | 3    | 4    | 2    |      |      |      |      |      |      |      |      |      |      |   |
| 13838  |      |      |      |      |      |      |      |      |      |      |      |      |      |      |   |
| 13839  |      |      |      |      |      | 1    | 1    | 2    | 1    | 1    | 3    | 2    | 1    | 2    | 4 |
| 13845  |      |      |      |      |      |      |      |      |      |      |      |      |      |      |   |
| 13846  | 1    | 1    | 1    | 1    |      |      |      |      |      |      |      |      |      |      |   |
| 13853  | 2    | 2    | 2    | 1    |      |      |      |      |      |      |      |      |      |      |   |
| 13855  |      |      |      |      |      | 2    | 2    | 2    | 2    | 2    | 2    | 1    | 1    | 2    | 2 |
| 13858  |      |      |      |      |      | 1    | 6    | 6    | 2    | 2    | 4    | 6    | 6    | 1    | 2 |
| 13860  |      |      |      |      |      |      |      |      |      |      |      |      |      |      |   |
| 13865  |      |      |      |      |      | 2    | 1    | 1    | 2    | 1    | 1    | 1    | 3    | 1    | 4 |
| 13870  | 1    | 5    | 5    | 1    |      |      |      |      |      |      |      |      |      |      |   |
| 13872  |      |      |      |      |      | 1    | 2    | 3    | 6    | 4    | 3    | 3    | 4    | 2    | 2 |
| 13873  |      |      |      |      |      | 3    | 5    | 4    | 3    | 3    | 3    | 3    | 3    | 3    | 3 |
| 13874  |      |      |      |      |      |      |      |      |      |      |      |      |      |      |   |
| 13875  |      |      |      |      |      | 1    | 1    | 3    | 2    | 2    | 3    | 2    | 1    | 1    | 1 |
| 13881  |      |      |      |      |      |      |      |      |      |      |      |      |      |      |   |
| 13887  | 3    | 4    | 3    | 3    |      |      |      |      |      |      |      |      |      |      |   |
| 13888  |      |      |      |      |      | 5    | 5    | 5    | 5    | 3    | 5    | 5    | 5    | 3    | 5 |

| respid | Q47l | Q47m | Q47n | Q47o | Q48a | Q48b | Q48c | Q48d | Q48e | Q48f | Q48g | Q48h | Q48i | Q48j |   |
|--------|------|------|------|------|------|------|------|------|------|------|------|------|------|------|---|
| 13889  |      |      |      |      |      | 2    | 2    | 2    | 2    | 2    | 2    | 2    | 3    | 2    | 3 |
| 13895  | 2    | 3    | 3    | 2    |      |      |      |      |      |      |      |      |      |      |   |
| 13897  |      |      |      |      |      |      |      |      |      |      |      |      |      |      |   |
| 13898  |      |      | 3    | 3    | 3    |      |      |      |      |      |      |      |      |      |   |
| 13901  | 3    | 1    | 1    | 4    |      |      |      |      |      |      |      |      |      |      |   |
| 13902  |      |      |      |      |      | 1    | 1    | 1    | 1    | 1    | 2    | 1    | 1    | 2    | 1 |
| 13903  |      |      |      |      |      | 1    | 1    | 1    | 1    | 1    | 1    | 6    |      |      |   |
| 13905  |      |      |      |      |      | 2    | 2    | 2    | 1    | 2    | 1    | 3    | 2    | 1    | 1 |
| 13908  |      |      |      |      |      | 2    | 3    | 3    | 3    | 2    | 3    | 2    | 2    | 4    | 2 |
| 13909  | 4    | 4    | 4    | 4    |      |      |      |      |      |      |      |      |      |      |   |
| 13910  |      |      |      |      |      | 1    | 1    | 1    | 1    | 1    | 2    | 2    | 2    | 2    | 3 |
| 13911  |      |      |      |      |      |      |      |      |      |      |      |      |      |      |   |
| 13914  |      |      |      |      |      | 4    | 2    | 2    | 2    | 5    | 2    | 2    | 2    | 5    | 1 |
| 13920  |      |      |      |      |      | 4    | 2    |      |      |      | 1    | 1    | 2    | 5    |   |
| 13926  |      |      |      |      |      | 3    | 6    | 6    | 4    | 3    | 4    | 5    | 6    | 3    | 6 |
| 13929  |      |      |      |      |      | 2    | 2    | 2    | 1    | 3    | 1    | 2    | 2    | 2    | 2 |
| 13930  | 2    | 2    | 2    | 1    |      |      |      |      |      |      |      |      |      |      |   |
| 13931  |      |      |      |      |      |      |      |      |      |      |      |      |      |      |   |
| 13932  | 3    | 4    | 4    | 4    |      |      |      |      |      |      |      |      |      |      |   |
| 13934  |      |      |      |      |      | 5    |      |      |      | 5    |      | 2    | 2    |      |   |
| 13938  | 3    | 3    | 3    | 3    |      |      |      |      |      |      |      |      |      |      |   |
| 13942  |      |      |      |      |      | 3    | 6    | 6    | 6    | 3    | 5    | 5    | 5    | 2    | 6 |
| 13945  |      |      |      |      |      |      |      | 2    | 2    | 3    | 2    | 3    | 3    | 4    | 3 |
| 13947  | 2    | 1    | 1    | 2    |      |      |      |      |      |      |      |      |      |      |   |
| 13948  |      |      |      |      |      |      |      |      |      |      |      |      |      |      |   |
| 13959  | 4    | 4    | 4    | 3    |      |      |      |      |      |      |      |      |      |      |   |
| 13962  | 4    | 4    | 4    | 4    |      |      |      |      |      |      |      |      |      |      |   |
| 13963  |      |      |      |      |      |      |      |      |      |      |      |      |      |      |   |
| 13964  | 3    | 4    | 4    | 3    |      |      |      |      |      |      |      |      |      |      |   |
| 13966  |      |      |      |      |      | 2    | 3    | 2    | 2    | 2    | 2    | 2    | 2    | 2    | 2 |
| 13968  | 5    | 4    | 3    | 4    |      |      |      |      |      |      |      |      |      |      |   |
| 13971  | 3    | 4    | 3    | 3    |      |      |      |      |      |      |      |      |      |      |   |



| respid | Q47l | Q47m | Q47n | Q47o | Q48a | Q48b | Q48c | Q48d | Q48e | Q48f | Q48g | Q48h | Q48i | Q48j |
|--------|------|------|------|------|------|------|------|------|------|------|------|------|------|------|
| 13979  |      |      |      |      |      | 3    | 3    | 3    | 3    | 3    | 3    | 3    | 3    | 3    |
| 13980  |      |      |      |      |      | 3    | 3    | 3    | 3    | 3    | 3    | 3    | 3    | 4    |
| 13981  |      |      |      |      |      | 2    | 4    | 6    | 6    | 2    | 6    | 6    | 6    | 1    |
| 13982  | 3    | 3    | 3    | 3    |      |      |      |      |      |      |      |      |      |      |
| 13984  | 3    | 4    | 3    | 3    |      |      |      |      |      |      |      |      |      |      |
| 13989  | 3    | 4    | 4    | 3    |      |      |      |      |      |      |      |      |      |      |
| 13990  |      |      |      |      |      | 2    | 5    | 6    | 5    | 2    | 5    | 6    | 6    | 2    |
| 13992  |      |      |      |      |      | 5    | 5    | 6    | 5    | 5    | 2    | 2    | 6    | 4    |
| 13998  |      |      |      |      |      | 3    | 2    | 3    | 3    | 5    | 3    | 3    | 2    | 5    |
| 13999  |      |      |      |      |      | 3    | 2    |      |      |      |      |      |      |      |
| 14000  | 3    | 3    | 3    | 2    |      |      |      |      |      |      |      |      |      |      |
| 14003  | 2    | 1    | 1    | 1    |      |      |      |      |      |      |      |      |      |      |
| 14004  |      |      |      |      |      | 2    | 4    | 3    | 4    | 3    | 3    | 3    | 4    | 4    |
| 14006  | 4    | 4    | 4    | 4    |      |      |      |      |      |      |      |      |      |      |
| 14007  |      |      |      |      |      | 3    | 5    | 6    | 5    | 3    | 4    | 5    | 6    | 2    |
| 14008  |      |      |      |      |      |      |      |      |      |      |      |      |      |      |
| 14013  |      |      |      |      |      | 2    | 5    | 6    | 6    | 1    | 6    | 6    | 6    | 1    |
| 14015  |      |      |      |      |      | 6    | 6    | 6    | 6    |      | 6    | 6    | 5    | 5    |
| 14018  |      |      |      |      |      | 1    | 5    | 6    | 6    | 1    | 6    | 6    | 6    | 2    |
| 14021  |      |      |      |      |      | 2    | 3    |      | 2    | 1    | 2    | 2    | 2    | 3    |
| 14023  | 1    | 1    | 1    | 1    |      |      |      |      |      |      |      |      |      |      |
| 14024  | 1    | 1    | 1    | 1    |      |      |      |      |      |      |      |      |      |      |
| 14026  | 1    | 3    | 3    |      |      |      |      |      |      |      |      |      |      |      |
| 14030  | 3    | 3    | 3    | 3    |      |      |      |      |      |      |      |      |      |      |
| 14032  | 2    | 2    | 2    | 2    |      |      |      |      |      |      |      |      |      |      |
| 14040  |      |      |      |      |      |      |      |      |      |      |      |      |      |      |
| 14045  |      |      |      |      |      | 3    |      | 6    |      |      |      |      |      |      |
| 14048  |      |      |      |      |      | 3    | 2    | 2    |      |      |      |      |      |      |
| 14049  | 2    | 2    | 3    | 1    |      |      |      |      |      |      |      |      |      |      |
| 14050  |      |      |      |      |      | 4    | 5    | 5    | 5    | 3    | 3    | 4    | 4    | 3    |
| 14051  |      |      |      |      |      | 1    | 1    | 2    | 1    | 1    |      | 1    | 1    | 1    |
| 14052  | 5    | 4    | 4    | 4    |      |      |      |      |      |      |      |      |      |      |

| respid | Q47l | Q47m | Q47n | Q47o | Q48a | Q48b | Q48c | Q48d | Q48e | Q48f | Q48g | Q48h | Q48i | Q48j |   |
|--------|------|------|------|------|------|------|------|------|------|------|------|------|------|------|---|
| 14054  |      |      |      |      |      | 4    | 4    | 4    | 4    | 3    | 4    | 4    | 5    | 2    | 5 |
| 14055  |      |      |      |      |      |      |      |      |      |      |      |      |      |      |   |
| 14057  |      |      |      |      |      | 2    | 5    | 5    | 5    | 2    | 5    | 5    | 5    | 2    | 5 |
| 14058  |      |      |      |      |      | 6    | 6    | 6    | 6    | 6    | 6    | 6    | 6    | 6    | 6 |
| 14059  | 4    | 4    | 4    | 4    |      |      |      |      |      |      |      |      |      |      |   |
| 14060  |      |      |      |      |      | 2    | 4    | 5    | 5    | 2    | 5    | 6    | 6    | 1    | 6 |
| 14061  | 1    | 1    | 1    | 1    |      |      |      |      |      |      |      |      |      |      |   |
| 14071  |      |      |      |      |      |      |      |      |      |      |      |      |      |      |   |
| 14073  | 5    | 4    | 4    | 5    |      |      |      |      |      |      |      |      |      |      |   |
| 14074  |      |      |      |      |      |      |      |      |      |      |      |      |      |      |   |
| 14076  |      |      |      |      |      | 3    | 4    | 4    | 4    | 4    | 4    | 5    | 5    | 3    | 4 |
| 14080  | 4    | 5    | 5    | 2    |      |      |      |      |      |      |      |      |      |      |   |
| 14082  | 4    | 4    | 4    | 4    |      |      |      |      |      |      |      |      |      |      |   |
| 14083  |      |      |      |      |      | 1    | 6    | 6    | 6    | 1    | 6    | 6    | 6    | 1    | 6 |
| 14084  |      |      |      |      |      | 5    | 5    | 5    | 4    | 4    | 4    | 4    | 3    | 4    | 5 |
| 14085  |      |      |      |      |      |      |      |      |      |      |      |      |      |      |   |
| 14086  | 3    | 4    | 4    | 4    |      |      |      |      |      |      |      |      |      |      |   |
| 14088  |      |      |      |      |      | 4    | 4    | 4    | 5    | 3    | 6    | 4    | 4    | 3    | 4 |
| 14090  | 3    | 4    | 4    | 4    |      |      |      |      |      |      |      |      |      |      |   |
| 14092  | 3    | 4    | 4    | 4    |      |      |      |      |      |      |      |      |      |      |   |
| 14093  | 3    | 4    | 4    | 5    |      |      |      |      |      |      |      |      |      |      |   |
| 14096  |      |      |      |      |      | 4    | 6    | 6    | 6    | 3    | 5    | 6    | 6    | 3    | 6 |
| 14103  |      |      |      |      |      |      |      |      |      |      |      |      |      |      |   |
| 14105  |      |      |      |      |      | 2    | 5    | 5    |      | 2    | 5    | 5    | 5    | 5    | 5 |
| 14106  | 1    | 1    | 1    |      |      |      |      |      |      |      |      |      |      |      |   |
| 14107  |      |      |      |      |      | 2    | 2    | 1    | 2    | 1    | 1    | 2    | 2    | 1    | 2 |
| 14108  |      |      |      |      |      | 3    | 3    | 3    | 2    | 3    | 2    | 2    | 3    | 3    | 2 |
| 14112  |      |      |      |      |      | 5    | 3    | 3    | 4    | 4    | 4    | 4    | 4    | 4    | 4 |
| 14114  |      |      |      |      |      | 6    | 2    | 3    | 2    | 6    | 2    | 2    | 1    | 6    | 2 |
| 14115  |      |      |      |      |      |      |      |      |      |      |      |      |      |      |   |
| 14116  | 1    | 4    |      |      |      |      |      |      |      |      |      |      |      |      |   |
| 14117  | 3    | 3    | 3    | 2    |      |      |      |      |      |      |      |      |      |      |   |

| respid | Q47l | Q47m | Q47n | Q47o | Q48a | Q48b | Q48c | Q48d | Q48e | Q48f | Q48g | Q48h | Q48i | Q48j |
|--------|------|------|------|------|------|------|------|------|------|------|------|------|------|------|
| 14118  |      |      |      |      |      |      |      |      |      |      |      |      |      |      |
| 14119  |      |      |      |      | 5    | 6    | 6    | 5    | 3    | 3    |      |      | 3    | 3    |
| 14127  |      |      |      |      |      |      |      |      |      |      |      |      |      |      |
| 14129  |      |      |      |      | 5    | 5    | 5    | 2    | 5    | 2    | 5    | 5    | 5    | 5    |
| 14131  |      |      |      |      | 5    | 6    | 3    | 3    | 6    | 1    | 3    | 6    | 3    | 3    |
| 14132  | 4    | 4    | 4    | 4    |      |      |      |      |      |      |      |      |      |      |
| 14133  |      |      |      |      | 3    | 3    | 3    | 3    | 3    | 3    | 3    | 3    | 3    | 3    |
| 14134  | 3    | 2    | 3    | 2    |      |      |      |      |      |      |      |      |      |      |
| 14135  |      |      |      |      | 4    |      |      |      |      |      |      |      |      |      |
| 14136  |      |      |      |      | 5    | 5    | 3    | 2    | 5    | 1    | 2    | 3    | 5    | 3    |
| 14138  |      |      |      |      |      |      |      |      |      |      |      |      |      |      |
| 14139  |      |      |      |      |      |      |      |      |      |      |      |      |      |      |
| 14140  |      |      |      |      | 4    | 4    | 5    | 5    | 4    | 3    | 4    | 5    | 5    | 5    |
| 14141  |      |      |      |      |      |      |      |      |      |      |      |      |      |      |
| 14143  | 4    | 4    | 4    | 4    |      |      |      |      |      |      |      |      |      |      |
| 14146  |      |      |      |      | 2    | 6    | 6    | 6    | 3    | 3    | 6    | 6    | 3    | 6    |
| 14147  | 2    | 2    | 1    | 1    |      |      |      |      |      |      |      |      |      |      |
| 14148  |      |      |      |      | 4    | 4    | 4    | 4    | 4    | 4    | 4    | 4    | 4    | 4    |
| 14151  |      |      |      |      | 6    | 2    | 3    | 2    | 5    | 3    | 5    | 5    | 5    | 5    |
| 14152  |      |      |      |      |      |      |      |      |      |      |      |      |      |      |
| 14153  |      |      |      |      |      |      |      |      |      |      |      |      |      |      |
| 14154  | 3    | 2    | 2    | 3    |      |      |      |      |      |      |      |      |      |      |
| 14158  |      |      |      |      | 5    | 5    | 5    | 5    | 4    | 5    | 5    | 5    | 3    | 5    |
| 14159  |      |      |      |      | 1    | 1    | 2    | 1    | 2    | 2    | 2    | 1    | 2    | 2    |
| 14160  | 1    | 1    | 1    | 1    |      |      |      |      |      |      |      |      |      |      |
| 14161  |      |      |      |      |      |      |      |      |      |      |      |      |      |      |
| 14162  | 4    | 3    | 3    | 4    |      |      |      |      |      |      |      |      |      |      |
| 14165  | 4    | 2    | 2    | 1    |      |      |      |      |      |      |      |      |      |      |
| 14166  |      |      |      |      |      |      |      |      |      |      |      |      |      |      |
| 14167  |      |      |      |      | 3    | 4    | 5    | 5    | 3    | 4    | 5    | 6    | 2    | 5    |
| 14169  |      |      |      |      | 6    | 6    | 6    | 6    | 6    | 6    | 6    | 6    | 6    | 6    |
| 14170  |      |      |      |      | 6    | 2    | 3    | 2    | 5    | 2    | 2    | 4    | 5    | 6    |

| respid | Q47l | Q47m | Q47n | Q47o | Q48a | Q48b | Q48c | Q48d | Q48e | Q48f | Q48g | Q48h | Q48i | Q48j |   |
|--------|------|------|------|------|------|------|------|------|------|------|------|------|------|------|---|
| 14172  |      | 2    | 2    | 2    | 3    |      |      |      |      |      |      |      |      |      |   |
| 14173  |      |      |      |      |      |      |      |      |      |      |      |      |      |      |   |
| 14174  |      |      |      |      |      | 2    | 5    | 6    | 4    | 3    | 5    | 5    | 6    | 1    | 3 |
| 14175  |      |      |      |      |      | 3    | 3    | 4    | 5    | 3    | 5    | 5    | 5    | 3    | 6 |
| 14176  | 3    |      | 1    | 1    | 3    |      |      |      |      |      |      |      |      |      |   |
| 14178  | 3    |      | 3    | 3    | 3    |      |      |      |      |      |      |      |      |      |   |
| 14179  | 3    |      | 3    | 4    | 4    |      |      |      |      |      |      |      |      |      |   |
| 14180  |      |      |      |      |      |      |      |      |      |      |      |      |      |      |   |
| 14183  |      |      |      |      |      | 1    | 1    | 1    | 2    | 1    | 2    | 1    | 2    | 1    | 2 |
| 14185  |      |      |      |      |      | 1    | 2    | 1    | 2    | 3    | 1    | 2    | 3    | 2    | 2 |
| 14187  |      |      |      |      |      |      |      |      |      |      |      |      |      |      |   |
| 14189  |      |      |      |      |      | 5    |      | 4    | 5    | 5    | 2    | 2    | 4    | 4    | 3 |
| 14191  |      |      |      |      |      |      |      |      |      |      |      |      |      |      |   |
| 14192  |      |      |      |      |      |      |      |      |      |      |      |      |      |      |   |
| 14195  |      |      |      |      |      | 5    | 2    | 3    | 3    | 4    | 2    | 3    | 2    | 5    | 5 |
| 14197  |      |      |      |      |      | 5    | 2    | 5    | 2    | 5    | 2    | 5    | 3    | 4    | 5 |
| 14203  |      |      |      |      |      |      |      |      |      |      |      |      |      |      |   |
| 14204  |      |      |      |      |      | 3    | 5    | 5    | 6    | 3    | 6    | 5    | 6    | 2    | 5 |
| 14205  |      |      |      |      |      | 4    | 4    | 4    | 3    | 4    | 2    | 3    | 5    | 4    | 4 |
| 14208  |      |      |      |      |      |      |      |      |      |      |      |      |      |      |   |
| 14211  |      |      |      |      |      | 5    | 2    | 1    | 1    | 6    | 2    | 2    | 3    | 5    | 1 |
| 14214  |      |      |      |      |      | 3    | 6    | 6    | 3    | 3    | 4    |      |      | 3    | 4 |
| 14215  | 3    |      | 3    | 3    | 3    |      |      |      |      |      |      |      |      |      |   |
| 14216  | 2    |      | 2    | 3    | 3    |      |      |      |      |      |      |      |      |      |   |
| 14218  | 4    |      | 4    | 4    | 3    |      |      |      |      |      |      |      |      |      |   |
| 14220  | 4    |      | 4    | 3    | 3    |      |      |      |      |      |      |      |      |      |   |
| 14223  |      |      |      |      |      |      |      |      |      |      |      |      |      |      |   |
| 14225  |      |      |      |      |      |      |      |      |      |      |      |      |      |      |   |
| 14226  | 4    |      | 3    | 3    | 4    |      |      |      |      |      |      |      |      |      |   |
| 14228  |      |      |      |      |      | 1    | 2    | 1    | 1    | 1    | 1    | 1    | 1    | 1    | 1 |
| 14231  |      |      |      |      |      | 3    | 2    | 3    | 3    | 4    | 4    | 4    | 4    | 4    | 4 |
| 14233  |      |      |      |      |      | 4    | 4    | 4    | 5    | 3    | 4    | 3    | 4    | 3    | 3 |

| respid | Q47l | Q47m | Q47n | Q47o | Q48a | Q48b | Q48c | Q48d | Q48e | Q48f | Q48g | Q48h | Q48i | Q48j |   |
|--------|------|------|------|------|------|------|------|------|------|------|------|------|------|------|---|
| 14237  |      |      |      |      |      | 3    | 3    | 3    |      | 3    | 5    | 2    | 5    | 2    | 5 |
| 14238  |      |      |      |      |      |      |      |      |      |      |      |      |      |      |   |
| 14243  | 4    | 4    | 4    | 4    |      |      |      |      |      |      |      |      |      |      |   |
| 14245  | 5    | 5    | 5    | 4    |      |      |      |      |      |      |      |      |      |      |   |
| 14246  |      |      |      |      |      | 1    | 2    | 3    | 1    | 2    | 2    | 2    | 1    | 1    | 1 |
| 14248  |      |      |      |      |      |      | 6    |      |      |      |      |      |      |      |   |
| 14250  |      |      |      |      |      | 4    | 5    | 3    | 3    | 4    | 4    | 3    | 3    | 3    | 2 |
| 14253  |      |      |      |      |      | 5    | 4    | 5    | 4    | 2    | 5    | 6    | 6    | 4    | 5 |
| 14254  | 3    | 3    | 3    | 4    |      |      |      |      |      |      |      |      |      |      |   |
| 14255  |      |      |      |      |      | 6    | 6    | 6    | 6    | 6    | 6    |      |      |      |   |
| 14257  |      |      |      |      |      | 2    | 5    | 5    | 5    | 3    | 5    | 5    | 6    | 2    | 5 |
| 14258  |      |      |      |      |      | 4    | 4    | 4    | 4    | 4    | 4    | 4    | 4    | 4    | 4 |
| 14259  | 2    | 3    | 3    | 2    |      |      |      |      |      |      |      |      |      |      |   |
| 14260  |      |      |      |      |      |      |      |      |      |      |      |      |      |      |   |
| 14261  |      |      |      |      |      | 2    | 1    | 2    | 1    | 2    | 1    | 4    | 2    | 1    | 2 |
| 14263  |      |      |      |      |      | 3    | 3    | 4    | 5    | 4    | 5    | 3    | 5    | 3    | 3 |
| 14264  |      |      |      |      |      | 5    | 3    | 3    | 3    | 3    | 5    | 4    | 5    | 5    | 5 |
| 14266  |      |      |      |      |      | 3    | 5    | 3    | 4    | 3    | 4    | 4    | 4    | 2    | 4 |
| 14267  |      |      |      |      |      | 2    | 2    | 2    | 2    | 3    | 4    | 2    | 2    | 2    | 1 |
| 14268  | 5    | 4    | 4    | 5    |      |      |      |      |      |      |      |      |      |      |   |
| 14275  |      |      |      |      |      | 3    | 5    | 4    | 3    |      | 4    | 4    | 5    | 3    | 4 |
| 14278  |      |      |      |      |      | 6    | 1    | 1    | 1    | 6    | 1    | 1    | 1    | 6    | 1 |
| 14279  |      |      |      |      |      |      |      |      |      |      |      |      |      |      |   |
| 14280  |      |      |      |      |      |      |      |      |      |      |      |      |      |      |   |
| 14281  |      |      |      |      |      | 6    | 1    | 3    | 2    | 2    | 3    | 5    | 3    | 6    | 6 |
| 14282  |      |      |      |      |      | 1    | 1    | 2    | 2    | 3    | 2    | 2    | 1    | 2    | 3 |
| 14283  | 2    | 1    | 2    | 2    |      |      |      |      |      |      |      |      |      |      |   |
| 14286  |      |      |      |      |      | 4    | 5    | 5    | 5    | 3    | 5    | 5    | 6    | 5    | 6 |
| 14287  |      |      |      |      |      |      |      |      |      |      |      |      |      |      |   |
| 14288  |      |      |      |      |      | 4    | 4    | 5    | 3    | 4    | 2    | 4    | 4    | 2    | 3 |
| 14291  |      |      |      |      |      |      |      |      |      |      |      |      |      |      |   |
| 14292  |      |      |      |      |      |      |      |      |      |      |      |      |      |      |   |

| respid | Q47l | Q47m | Q47n | Q47o | Q48a | Q48b | Q48c | Q48d | Q48e | Q48f | Q48g | Q48h | Q48i | Q48j |   |
|--------|------|------|------|------|------|------|------|------|------|------|------|------|------|------|---|
| 14293  |      |      |      |      |      | 3    | 5    | 4    | 5    | 3    | 3    | 3    | 4    | 3    | 3 |
| 14304  |      |      |      |      |      | 2    | 1    | 2    | 2    | 3    | 2    | 1    | 2    | 3    | 2 |
| 14308  | 4    | 4    | 4    | 4    |      |      |      |      |      |      |      |      |      |      |   |
| 14313  |      |      |      |      |      | 6    | 6    |      | 3    |      | 4    | 4    | 4    | 4    | 4 |
| 14314  | 1    | 1    | 1    | 1    |      |      |      |      |      |      |      |      |      |      |   |
| 14316  |      |      |      |      |      | 6    | 6    | 6    | 6    | 2    | 6    | 6    | 6    | 1    | 6 |
| 14317  | 3    | 4    | 4    | 4    |      |      |      |      |      |      |      |      |      |      |   |
| 14318  |      |      |      |      |      | 3    | 4    | 3    | 2    | 3    | 2    | 4    | 4    | 4    | 5 |
| 14319  | 3    | 3    | 3    | 4    |      |      |      |      |      |      |      |      |      |      |   |
| 14320  |      |      |      |      |      | 1    | 2    | 1    | 1    | 1    | 1    | 1    | 1    | 1    | 1 |
| 14321  |      |      |      |      |      | 2    | 5    | 5    | 5    | 2    | 5    | 5    | 5    | 2    | 5 |
| 14322  |      |      |      |      |      | 3    | 3    | 3    | 3    | 3    | 3    | 3    | 3    | 3    | 3 |
| 14326  |      |      |      |      |      | 6    | 6    | 6    | 6    | 6    | 6    | 6    | 2    | 4    | 4 |
| 14327  |      |      |      |      |      | 2    | 1    | 2    | 3    | 1    | 2    | 3    | 3    | 1    | 4 |
| 14328  |      |      |      |      |      |      |      |      |      |      |      |      |      |      |   |
| 14330  |      |      |      |      |      | 5    | 5    | 5    | 5    | 5    | 5    | 5    | 5    | 5    | 5 |
| 14332  |      |      |      |      |      | 4    | 5    | 3    | 6    | 4    | 5    | 4    | 3    | 4    | 4 |
| 14334  |      |      |      |      |      | 1    | 1    | 1    | 1    | 2    | 2    | 2    | 4    | 6    | 4 |
| 14336  |      |      |      |      |      | 3    | 2    | 3    | 2    | 5    | 2    | 5    | 5    | 5    |   |
| 14337  |      |      |      |      |      | 2    | 5    | 5    | 5    | 2    | 5    | 5    | 5    | 2    | 5 |
| 14339  |      |      |      |      |      |      |      |      |      |      |      |      |      |      |   |
| 14340  |      |      |      |      |      | 2    | 5    | 5    | 5    | 2    | 6    | 5    | 5    | 2    | 5 |
| 14341  |      |      |      |      |      | 1    | 6    | 6    | 6    | 1    | 6    | 6    | 6    | 1    | 6 |
| 14344  | 4    | 4    | 5    | 4    |      |      |      |      |      |      |      |      |      |      |   |
| 14345  | 3    | 3    | 3    | 3    |      |      |      |      |      |      |      |      |      |      |   |
| 14346  |      |      |      |      |      |      |      |      |      |      |      |      |      |      |   |
| 14348  | 4    | 4    | 4    | 4    |      |      |      |      |      |      |      |      |      |      |   |
| 14349  | 4    | 3    | 3    | 4    |      |      |      |      |      |      |      |      |      |      |   |
| 14358  |      |      |      |      |      | 3    | 3    | 3    | 3    | 3    | 3    | 3    | 3    | 3    | 3 |
| 14360  |      |      |      |      |      | 6    | 5    | 5    | 5    | 2    | 5    | 5    | 5    | 2    | 5 |
| 14362  |      |      |      |      |      |      |      |      |      |      |      |      |      |      |   |
| 14366  | 4    | 3    | 4    | 4    |      |      |      |      |      |      |      |      |      |      |   |

| respid | Q47l | Q47m | Q47n | Q47o | Q48a | Q48b | Q48c | Q48d | Q48e | Q48f | Q48g | Q48h | Q48i | Q48j |   |
|--------|------|------|------|------|------|------|------|------|------|------|------|------|------|------|---|
| 14367  | 4    | 4    | 4    | 3    |      |      |      |      |      |      |      |      |      |      |   |
| 14369  | 3    | 3    | 3    |      |      |      |      |      |      |      |      |      |      |      |   |
| 14371  |      |      |      |      |      | 5    | 2    | 5    | 3    | 5    | 2    | 5    | 5    | 4    | 3 |
| 14372  |      |      |      |      |      | 6    | 1    | 1    | 1    | 5    | 1    | 1    | 1    | 6    | 1 |
| 14374  |      |      |      |      |      | 6    | 1    | 1    | 1    | 6    | 1    | 3    | 1    | 6    | 5 |
| 14376  |      |      |      |      |      | 3    | 5    | 6    | 5    | 3    | 5    | 5    | 5    | 3    | 4 |
| 14377  |      |      |      |      |      |      |      |      |      |      |      |      |      |      |   |
| 14378  |      |      |      |      |      | 1    | 4    | 6    | 6    | 2    | 6    | 6    | 6    | 1    | 5 |
| 14379  | 3    | 3    | 4    | 4    |      |      |      |      |      |      |      |      |      |      |   |
| 14381  | 4    | 4    | 2    | 2    |      |      |      |      |      |      |      |      |      |      |   |
| 14383  |      |      |      |      |      | 4    | 6    | 6    | 6    | 6    | 6    | 6    | 6    | 6    | 6 |
| 14384  |      |      |      |      |      | 1    | 6    | 6    | 5    | 2    | 6    | 5    | 6    | 1    | 5 |
| 14385  |      |      |      |      |      | 2    | 1    | 3    | 1    | 2    | 1    | 2    | 3    | 3    | 4 |
| 14386  |      |      |      |      |      | 5    | 5    | 5    | 5    | 5    | 5    | 5    | 5    | 5    | 5 |
| 14390  |      |      |      | 2    |      |      |      |      |      |      |      |      |      |      |   |
| 14391  |      |      |      |      |      | 2    | 5    | 5    | 5    | 2    | 5    | 5    | 5    | 1    | 5 |
| 14392  | 4    | 5    | 4    | 4    |      |      |      |      |      |      |      |      |      |      |   |
| 14393  |      |      |      |      |      | 2    | 4    | 5    | 6    | 2    | 5    | 6    | 5    | 2    | 5 |
| 14394  |      |      |      |      |      | 5    | 5    | 5    | 3    | 2    | 3    | 4    | 4    | 5    | 5 |
| 14395  |      |      |      |      |      |      |      |      |      |      |      |      |      |      |   |
| 14396  |      |      |      |      |      |      |      |      |      |      |      |      |      |      |   |
| 14397  | 1    | 1    |      |      |      |      |      |      |      |      |      |      |      |      |   |
| 14398  |      |      |      |      |      | 5    | 4    | 6    | 6    | 5    | 5    | 6    | 6    | 6    | 5 |
| 14399  |      |      |      |      |      | 6    | 6    | 6    | 6    | 6    | 5    | 6    | 6    | 6    | 6 |
| 14400  |      |      |      |      |      | 4    | 3    | 3    | 3    | 3    | 3    | 3    | 3    | 4    | 3 |
| 14403  |      |      |      |      |      | 3    | 5    | 5    | 5    | 2    | 5    | 5    | 5    | 2    | 5 |
| 14404  |      |      |      |      |      | 3    | 5    | 5    | 4    | 4    | 5    | 5    | 4    | 5    | 4 |
| 14405  | 4    | 4    | 4    | 4    |      |      |      |      |      |      |      |      |      |      |   |
| 14407  | 2    | 2    | 2    | 3    |      |      |      |      |      |      |      |      |      |      |   |
| 14408  | 3    | 5    | 5    | 4    |      |      |      |      |      |      |      |      |      |      |   |
| 14410  |      |      |      |      |      | 1    | 1    | 2    | 3    | 1    | 1    | 1    | 1    | 1    | 1 |
| 14415  | 3    | 3    | 3    | 3    |      |      |      |      |      |      |      |      |      |      |   |

| respid | Q47l | Q47m | Q47n | Q47o | Q48a | Q48b | Q48c | Q48d | Q48e | Q48f | Q48g | Q48h | Q48i | Q48j |   |
|--------|------|------|------|------|------|------|------|------|------|------|------|------|------|------|---|
| 14419  |      |      |      |      |      | 2    | 5    | 5    | 5    | 2    | 2    | 5    | 5    | 2    | 6 |
| 14420  |      |      |      |      |      |      |      |      |      |      |      |      |      |      |   |
| 14421  |      |      |      |      |      |      |      |      |      |      |      |      |      |      |   |
| 14423  | 1    | 1    | 1    | 1    |      |      |      |      |      |      |      |      |      |      |   |
| 14424  | 4    | 4    | 4    | 4    |      |      |      |      |      |      |      |      |      |      |   |
| 14425  |      |      |      |      |      | 5    | 5    | 5    | 5    | 5    | 5    | 5    | 5    | 3    | 5 |
| 14426  |      |      |      |      |      |      |      |      |      |      |      |      |      |      |   |
| 14427  |      |      |      |      |      | 3    | 3    | 3    | 2    | 2    | 4    | 2    | 5    | 3    | 2 |
| 14428  |      |      |      |      |      | 2    | 1    | 3    | 4    | 2    | 1    | 2    | 2    | 2    | 1 |
| 14431  |      |      |      |      |      | 1    | 6    | 6    | 2    | 1    | 6    | 6    | 6    | 1    | 6 |
| 14433  | 2    | 2    | 2    | 2    |      |      |      |      |      |      |      |      |      |      |   |
| 14434  |      |      |      |      |      | 2    | 5    | 6    | 5    | 2    | 6    | 6    | 6    | 1    | 5 |
| 14435  |      |      |      |      |      | 2    | 5    | 5    | 6    | 2    | 5    | 5    | 6    | 1    | 3 |
| 14436  |      |      |      |      |      | 5    | 3    | 4    | 3    | 4    | 4    | 5    | 3    | 5    | 5 |
| 14438  | 5    | 4    | 4    | 4    |      |      |      |      |      |      |      |      |      |      |   |
| 14442  |      |      |      |      |      | 5    | 5    | 4    | 4    | 4    | 5    | 4    | 5    | 5    | 4 |
| 14447  | 4    | 4    | 4    | 4    |      |      |      |      |      |      |      |      |      |      |   |
| 14448  | 5    | 5    | 4    | 4    |      |      |      |      |      |      |      |      |      |      |   |
| 14450  | 1    | 1    | 1    | 2    |      |      |      |      |      |      |      |      |      |      |   |
| 14451  |      |      |      |      |      | 6    | 6    | 6    | 5    | 5    | 4    | 5    | 6    | 6    | 6 |
| 14454  | 3    | 3    | 3    | 3    |      |      |      |      |      |      |      |      |      |      |   |
| 14455  |      |      |      |      |      | 6    | 6    | 6    | 6    | 5    | 6    | 6    | 6    | 6    | 6 |
| 14456  | 4    | 3    | 2    | 3    |      |      |      |      |      |      |      |      |      |      |   |
| 14457  |      |      |      |      |      | 1    | 1    | 1    | 2    | 1    | 2    | 2    | 1    | 1    | 1 |
| 14458  |      |      |      |      |      | 3    | 3    | 2    | 2    | 1    | 3    | 4    | 1    | 2    | 4 |
| 14459  |      |      |      |      |      |      |      |      |      |      |      |      |      |      |   |
| 14460  | 4    | 4    | 4    | 5    |      |      |      |      |      |      |      |      |      |      |   |
| 14464  |      |      |      |      |      | 3    | 3    | 3    | 5    | 4    | 3    | 5    | 5    | 2    | 5 |
| 14465  | 3    | 3    | 3    | 3    |      |      |      |      |      |      |      |      |      |      |   |
| 14466  | 2    | 2    | 2    | 2    |      |      |      |      |      |      |      |      |      |      |   |
| 14467  |      |      |      |      |      |      | 3    | 3    | 6    | 5    | 3    | 6    |      |      |   |
| 14470  |      |      |      |      |      | 5    | 5    | 5    | 5    | 4    | 3    | 5    | 5    | 3    | 5 |



| respid | Q47l | Q47m | Q47n | Q47o | Q48a | Q48b | Q48c | Q48d | Q48e | Q48f | Q48g | Q48h | Q48i | Q48j |   |
|--------|------|------|------|------|------|------|------|------|------|------|------|------|------|------|---|
| 14472  | 4    | 4    | 4    | 2    |      |      |      |      |      |      |      |      |      |      |   |
| 14473  |      |      |      |      |      | 3    | 3    | 4    | 5    | 3    | 5    | 5    | 5    | 2    | 4 |
| 14474  |      |      |      |      |      |      |      |      |      |      |      |      |      |      |   |
| 14477  |      |      |      |      |      | 1    | 6    | 6    | 6    | 1    | 6    | 6    | 6    | 2    | 2 |
| 14478  |      |      |      |      |      | 2    | 5    | 6    | 6    | 2    | 6    | 5    | 6    | 1    | 3 |
| 14479  |      |      |      |      |      |      |      |      |      |      |      |      |      |      |   |
| 14484  | 2    | 3    | 3    | 4    |      |      |      |      |      |      |      |      |      |      |   |
| 14485  |      |      |      |      |      |      |      |      |      |      |      |      |      |      |   |
| 14486  |      |      |      |      |      | 4    | 3    | 5    | 5    | 4    | 3    | 4    | 4    | 5    | 4 |
| 14487  | 4    | 3    | 4    | 4    |      |      |      |      |      |      |      |      |      |      |   |
| 14488  |      |      |      |      |      | 2    | 2    | 2    | 2    | 3    | 2    | 3    | 2    | 1    | 3 |
| 14491  |      | 3    | 3    | 4    |      |      |      |      |      |      |      |      |      |      |   |
| 14495  |      |      |      |      |      | 4    | 5    | 5    | 4    | 4    | 4    | 4    | 6    | 3    | 6 |
| 14500  |      |      |      |      |      | 2    | 5    | 5    | 4    | 2    | 6    | 4    | 5    | 2    | 4 |
| 14502  | 3    | 3    | 3    |      |      |      |      |      |      |      |      |      |      |      |   |
| 14504  | 3    | 2    | 2    | 3    |      |      |      |      |      |      |      |      |      |      |   |
| 14505  |      |      |      |      |      | 2    | 2    | 1    | 1    | 2    | 1    | 1    | 1    | 1    | 1 |
| 14507  |      |      |      |      |      |      |      |      |      |      |      |      |      |      |   |
| 14517  |      |      |      |      |      | 3    | 3    | 5    | 5    | 3    | 3    | 4    | 5    | 3    | 5 |
| 14518  |      |      |      |      |      |      |      |      |      |      |      |      |      |      |   |
| 14519  |      |      |      |      |      | 5    | 3    | 4    | 2    | 5    | 2    | 5    | 5    | 4    | 2 |
| 14521  | 2    | 2    | 2    | 2    |      |      |      |      |      |      |      |      |      |      |   |
| 14522  |      |      |      |      |      | 5    | 5    | 5    | 5    | 2    | 5    | 5    | 5    | 2    | 5 |
| 14526  |      |      |      |      |      | 4    | 4    | 4    | 3    | 4    | 3    | 5    | 5    | 4    | 5 |
| 14528  | 2    | 3    | 2    | 2    |      |      |      |      |      |      |      |      |      |      |   |
| 14529  |      |      |      |      |      |      |      |      |      |      |      |      |      |      |   |
| 14530  | 3    | 4    | 3    | 4    |      |      |      |      |      |      |      |      |      |      |   |
| 14531  |      |      |      |      |      |      |      |      |      |      |      |      |      |      |   |
| 14534  |      |      |      |      |      | 3    | 2    | 4    | 3    | 3    | 2    | 5    | 2    | 1    | 2 |
| 14538  | 4    | 4    | 4    | 3    |      |      |      |      |      |      |      |      |      |      |   |
| 14539  | 1    | 1    | 1    | 3    |      |      |      |      |      |      |      |      |      |      |   |
| 14545  |      |      |      |      |      | 4    | 4    | 5    | 4    | 4    | 3    | 5    | 5    | 3    | 5 |

| respid | Q47l | Q47m | Q47n | Q47o | Q48a | Q48b | Q48c | Q48d | Q48e | Q48f | Q48g | Q48h | Q48i | Q48j |   |
|--------|------|------|------|------|------|------|------|------|------|------|------|------|------|------|---|
| 14546  |      |      |      |      |      | 5    | 5    |      |      |      |      |      | 5    | 2    | 3 |
| 14551  | 4    | 3    | 3    | 3    |      |      |      |      |      |      |      |      |      |      |   |
| 14553  |      |      |      |      | 3    | 3    | 3    | 3    | 3    | 3    | 3    | 3    | 3    | 3    | 3 |
| 14557  |      |      |      |      |      |      |      |      |      |      |      |      |      |      |   |
| 14558  | 4    | 4    | 3    | 4    |      |      |      |      |      |      |      |      |      |      |   |
| 14559  | 3    | 2    | 3    | 3    |      |      |      |      |      |      |      |      |      |      |   |
| 14560  |      |      |      |      | 3    | 4    | 5    | 5    | 2    | 5    | 5    | 5    | 5    | 3    | 3 |
| 14563  |      |      |      |      | 2    | 3    | 4    | 2    | 4    | 2    | 2    | 2    | 2    | 2    | 2 |
| 14565  |      |      |      |      | 6    | 6    | 6    | 6    | 6    | 6    | 6    | 6    | 6    | 6    | 6 |
| 14571  |      |      |      |      | 1    | 1    | 2    | 2    | 1    | 1    | 1    | 1    | 1    | 1    | 1 |
| 14572  | 3    | 4    | 3    | 3    |      |      |      |      |      |      |      |      |      |      |   |
| 14573  |      |      |      |      | 3    | 5    | 5    | 5    | 3    | 5    | 5    | 5    | 5    | 3    | 5 |
| 14575  |      |      |      |      | 6    | 6    | 6    | 6    | 6    | 6    | 6    | 6    | 6    | 6    | 5 |
| 14576  | 3    | 2    | 3    | 3    |      |      |      |      |      |      |      |      |      |      |   |
| 14578  |      |      |      |      | 3    | 4    | 6    | 5    | 2    | 5    | 5    | 6    | 2    | 5    |   |
| 14579  | 2    | 3    | 3    | 2    |      |      |      |      |      |      |      |      |      |      |   |
| 14580  | 3    | 3    | 4    | 3    |      |      |      |      |      |      |      |      |      |      |   |
| 14582  |      |      |      |      | 2    | 3    | 3    | 5    | 3    | 5    | 5    | 5    | 5    | 4    | 4 |
| 14585  |      |      |      |      | 1    | 3    | 5    | 5    | 2    | 5    | 5    | 5    | 5    | 2    |   |
| 14588  |      |      |      |      | 4    | 4    | 4    | 5    | 3    | 4    | 4    | 4    | 5    | 3    | 5 |
| 14590  | 3    | 2    | 3    | 3    |      |      |      |      |      |      |      |      |      |      |   |
| 14592  |      |      |      |      | 3    | 3    | 4    | 5    | 5    | 4    | 4    | 4    | 4    | 2    | 5 |
| 14593  | 4    | 3    | 4    | 3    |      |      |      |      |      |      |      |      |      |      |   |
| 14595  | 3    | 2    | 2    | 2    |      |      |      |      |      |      |      |      |      |      |   |
| 14597  |      |      |      |      | 3    | 5    | 5    |      | 3    | 3    | 5    | 5    | 5    | 3    | 5 |
| 14600  | 3    |      |      |      |      |      |      |      |      |      |      |      |      |      |   |
| 14602  |      |      |      |      | 3    | 3    | 3    | 3    | 3    | 3    | 3    | 3    | 3    | 3    | 4 |
| 14604  | 4    | 4    | 4    | 4    |      |      |      |      |      |      |      |      |      |      |   |
| 14605  |      | 4    | 4    | 3    |      |      |      |      |      |      |      |      |      |      |   |
| 14609  |      |      |      |      | 5    | 3    | 3    | 3    | 4    | 2    | 3    | 3    | 3    | 4    | 3 |
| 14610  | 3    | 4    | 4    | 4    |      |      |      |      |      |      |      |      |      |      |   |
| 14611  | 3    | 3    | 3    | 3    |      |      |      |      |      |      |      |      |      |      |   |

| respid | Q47l | Q47m | Q47n | Q47o | Q48a | Q48b | Q48c | Q48d | Q48e | Q48f | Q48g | Q48h | Q48i | Q48j |   |
|--------|------|------|------|------|------|------|------|------|------|------|------|------|------|------|---|
| 14612  |      |      | 4    | 3    | 2    |      |      |      |      |      |      |      |      |      |   |
| 14614  | 3    | 2    | 2    | 3    |      |      |      |      |      |      |      |      |      |      |   |
| 14615  |      |      |      |      |      | 3    | 4    | 6    | 6    | 4    | 3    | 3    | 5    | 3    | 4 |
| 14618  |      |      |      |      |      | 3    | 4    | 4    | 3    | 3    | 4    | 4    | 4    | 3    | 4 |
| 14621  |      |      |      |      |      |      |      |      |      |      |      |      |      |      |   |
| 14624  |      |      |      |      |      | 2    | 6    | 5    | 6    | 2    | 6    | 6    | 6    | 1    | 6 |
| 14626  |      |      |      |      |      | 6    | 6    | 6    | 6    | 6    | 6    | 6    | 6    | 6    | 6 |
| 14627  |      |      |      |      |      | 2    | 4    | 6    | 6    | 2    | 5    | 3    | 6    | 2    | 1 |
| 14628  |      |      |      |      |      | 2    | 2    | 1    | 2    | 1    | 1    | 1    | 1    | 1    | 1 |
| 14631  | 2    |      |      | 3    | 3    |      |      |      |      |      |      |      |      |      |   |
| 14633  | 3    | 3    |      | 2    | 3    |      |      |      |      |      |      |      |      |      |   |
| 14642  | 3    | 3    |      | 4    | 3    |      |      |      |      |      |      |      |      |      |   |
| 14647  |      |      |      |      |      |      |      |      |      |      |      |      |      |      |   |
| 14658  | 3    | 3    |      | 3    | 3    |      |      |      |      |      |      |      |      |      |   |
| 14659  | 2    | 2    |      | 2    | 3    |      |      |      |      |      |      |      |      |      |   |
| 14660  | 4    | 4    |      | 4    | 4    |      |      |      |      |      |      |      |      |      |   |
| 14661  | 3    | 3    |      | 2    | 2    |      |      |      |      |      |      |      |      |      |   |
| 14662  | 3    | 3    |      | 1    | 3    |      |      |      |      |      |      |      |      |      |   |
| 14663  | 3    | 2    |      | 3    | 2    |      |      |      |      |      |      |      |      |      |   |
| 14670  | 1    | 2    |      | 2    | 3    |      |      |      |      |      |      |      |      |      |   |
| 14671  |      |      |      |      |      |      |      |      |      |      |      |      |      |      |   |
| 14672  | 3    | 2    |      | 3    | 3    |      |      |      |      |      |      |      |      |      |   |
| 14675  | 5    | 4    |      | 4    | 4    |      |      |      |      |      |      |      |      |      |   |
| 14676  | 1    |      |      | 3    | 3    |      |      |      |      |      |      |      |      |      |   |
| 14677  |      |      |      |      |      | 1    | 1    | 1    | 2    | 1    | 1    | 2    | 3    | 1    | 2 |
| 14678  | 3    | 3    |      | 2    | 2    |      |      |      |      |      |      |      |      |      |   |
| 14681  | 2    | 2    |      | 2    | 3    |      |      |      |      |      |      |      |      |      |   |
| 14684  |      |      |      |      |      |      |      |      |      |      |      |      |      |      |   |
| 14688  | 5    | 5    |      | 5    | 5    |      |      |      |      |      |      |      |      |      |   |
| 14690  | 3    | 4    |      | 4    | 4    |      |      |      |      |      |      |      |      |      |   |
| 14694  | 3    | 3    |      | 3    | 3    |      |      |      |      |      |      |      |      |      |   |
| 14696  | 4    | 4    |      | 4    | 4    |      |      |      |      |      |      |      |      |      |   |

| respid | Q47l | Q47m | Q47n | Q47o | Q48a | Q48b | Q48c | Q48d | Q48e | Q48f | Q48g | Q48h | Q48i | Q48j |   |
|--------|------|------|------|------|------|------|------|------|------|------|------|------|------|------|---|
| 14700  |      |      |      |      |      |      |      |      |      |      |      |      |      |      |   |
| 14701  | 2    | 2    |      |      |      |      |      |      |      |      |      |      |      |      |   |
| 14703  |      |      |      |      |      | 2    | 2    | 3    | 3    | 2    | 1    | 1    | 2    | 2    | 2 |
| 14707  | 3    | 4    | 4    | 4    |      |      |      |      |      |      |      |      |      |      |   |
| 14711  | 3    | 3    | 3    | 3    |      |      |      |      |      |      |      |      |      |      |   |
| 14714  | 5    | 4    | 4    | 5    |      |      |      |      |      |      |      |      |      |      |   |
| 14715  |      |      |      |      |      | 2    | 3    | 1    | 2    | 2    | 2    | 3    | 2    | 1    | 1 |
| 14716  |      |      |      |      |      |      |      |      |      |      |      |      |      |      |   |
| 14720  | 3    | 4    | 4    | 3    |      |      |      |      |      |      |      |      |      |      |   |
| 14725  |      |      |      |      |      | 1    | 1    | 1    |      |      | 6    | 6    | 6    | 1    | 4 |
| 14726  |      |      |      |      |      | 1    | 3    | 3    | 4    | 1    | 6    | 5    | 6    | 1    | 6 |
| 14734  | 4    | 4    | 4    | 4    |      |      |      |      |      |      |      |      |      |      |   |
| 14735  | 4    | 4    | 4    | 4    |      |      |      |      |      |      |      |      |      |      |   |
| 14736  | 3    | 3    | 3    | 3    |      |      |      |      |      |      |      |      |      |      |   |
| 14740  | 5    | 4    | 4    | 4    |      |      |      |      |      |      |      |      |      |      |   |
| 14745  | 4    | 4    | 4    | 4    |      |      |      |      |      |      |      |      |      |      |   |
| 14747  | 5    | 4    | 5    | 4    |      |      |      |      |      |      |      |      |      |      |   |
| 14750  | 3    | 2    | 3    | 3    |      |      |      |      |      |      |      |      |      |      |   |
| 14751  | 3    | 4    | 4    | 3    |      |      |      |      |      |      |      |      |      |      |   |
| 14753  | 3    | 2    | 2    | 3    |      |      |      |      |      |      |      |      |      |      |   |
| 14756  |      |      |      |      |      | 6    | 2    | 2    | 2    | 5    | 2    | 1    | 3    | 5    | 1 |
| 14780  |      |      |      |      |      | 1    | 5    | 6    | 6    | 2    | 6    | 5    | 6    | 1    | 5 |
| 14782  | 3    | 4    | 4    | 3    |      |      |      |      |      |      |      |      |      |      |   |
| 14800  |      |      |      |      |      | 2    | 3    | 2    | 1    | 3    | 3    | 1    | 2    | 3    | 4 |
| 14801  |      |      |      |      |      |      |      |      |      |      |      |      |      |      |   |
| 14802  |      |      |      |      |      | 2    | 2    | 2    | 3    | 3    | 3    | 2    | 2    | 2    | 3 |
| 14805  |      |      |      |      |      | 3    | 4    | 3    | 3    | 3    | 5    | 3    | 5    | 3    | 2 |
| 14811  | 3    | 3    | 3    | 3    |      |      |      |      |      |      |      |      |      |      |   |
| 14814  |      |      |      |      |      | 3    | 2    | 3    | 2    | 3    | 3    | 2    | 2    | 2    | 2 |
| 14822  |      |      |      |      |      | 2    | 2    | 2    | 2    | 2    | 2    | 2    | 4    | 4    | 3 |
| 14827  |      |      |      |      |      |      |      | 3    | 2    | 1    | 3    | 2    | 3    | 3    | 2 |
| 14828  |      | 3    | 3    | 3    |      |      |      |      |      |      |      |      |      |      |   |

| respid | Q47l | Q47m | Q47n | Q47o | Q48a | Q48b | Q48c | Q48d | Q48e | Q48f | Q48g | Q48h | Q48i | Q48j |   |
|--------|------|------|------|------|------|------|------|------|------|------|------|------|------|------|---|
| 14830  |      |      |      |      |      |      |      |      |      |      |      |      |      |      |   |
| 14832  |      |      |      |      |      | 2    | 1    | 1    | 2    | 2    | 1    | 2    | 1    | 2    | 2 |
| 14835  |      |      |      |      |      | 3    | 3    | 3    | 2    | 4    | 2    | 2    | 3    | 4    | 1 |
| 14841  |      |      |      |      |      |      |      |      |      |      |      |      |      |      |   |
| 14849  |      |      |      |      |      | 1    | 6    | 5    | 5    | 2    | 6    | 5    | 5    | 1    | 5 |
| 14850  |      |      |      |      |      |      |      |      |      |      |      |      |      |      |   |
| 14851  | 3    |      |      |      |      |      |      |      |      |      |      |      |      |      |   |
| 14856  |      |      |      |      |      | 3    | 2    | 2    | 2    | 2    | 2    | 3    | 3    | 3    | 3 |
| 14862  |      |      |      |      |      | 2    | 2    | 2    | 2    | 2    | 3    | 2    | 2    | 2    | 2 |
| 14863  |      |      |      |      |      | 1    | 6    | 6    | 6    | 3    | 6    | 6    | 6    | 1    | 6 |
| 14864  |      |      |      |      |      | 2    |      | 6    | 6    | 2    | 6    | 6    | 5    | 2    | 4 |
| 14866  |      |      |      |      |      | 1    | 6    | 6    | 2    | 2    | 6    | 6    | 6    | 1    | 6 |
| 14867  |      |      |      |      |      | 2    | 2    | 3    | 2    | 3    | 4    | 3    | 2    | 3    | 2 |
| 14868  | 3    | 4    | 4    | 3    |      |      |      |      |      |      |      |      |      |      |   |
| 14870  |      |      |      |      |      | 2    | 6    | 6    | 5    | 2    | 6    | 6    | 6    | 1    | 5 |
| 14873  |      |      |      |      |      |      |      |      |      |      |      |      |      |      |   |
| 14878  |      |      |      |      |      |      |      |      |      |      |      |      |      |      |   |
| 14879  |      |      |      |      |      |      |      |      |      |      |      |      |      |      |   |
| 14881  |      |      |      |      |      | 3    |      |      |      |      |      |      |      |      |   |
| 14888  |      |      |      |      |      | 1    | 2    | 1    | 1    | 3    | 2    | 1    | 4    | 1    | 4 |
| 14895  |      |      |      |      |      | 2    | 5    | 5    | 5    | 2    | 5    | 5    | 6    | 2    | 5 |
| 14900  |      |      |      |      |      | 1    | 2    | 3    | 2    | 2    | 3    | 4    | 3    | 5    | 4 |
| 14912  |      |      |      |      |      |      |      |      |      |      |      |      |      |      |   |
| 14922  |      |      |      |      |      | 2    | 2    | 2    | 2    | 2    | 2    | 2    | 2    | 2    | 2 |
| 14923  |      |      |      |      |      | 2    | 3    | 2    | 3    | 2    | 2    | 2    | 1    | 3    | 2 |
| 14924  | 2    | 2    | 2    | 2    |      |      |      |      |      |      |      |      |      |      |   |
| 14925  |      |      |      |      |      | 2    | 1    | 1    | 1    | 1    | 1    | 2    | 1    | 1    | 2 |
| 14926  |      |      |      |      |      | 1    | 6    | 4    | 2    | 3    | 2    | 6    | 6    | 2    | 2 |
| 14927  |      |      |      |      |      | 2    | 2    | 3    | 2    | 2    | 2    | 2    | 2    | 2    | 2 |
| 14930  |      |      |      |      |      | 2    | 3    | 4    | 3    | 2    | 1    | 3    | 4    | 3    | 3 |
| 14937  |      |      |      |      |      | 2    | 2    | 2    | 2    | 2    | 2    | 2    | 2    | 2    | 2 |
| 14938  |      |      |      |      |      | 2    | 2    | 2    | 2    | 3    | 3    | 2    | 2    | 2    | 1 |

| respid | Q47l | Q47m | Q47n | Q47o | Q48a | Q48b | Q48c | Q48d | Q48e | Q48f | Q48g | Q48h | Q48i | Q48j |
|--------|------|------|------|------|------|------|------|------|------|------|------|------|------|------|
| 14939  |      |      |      |      |      | 2    | 2    | 2    | 2    | 2    | 1    | 2    | 2    | 2    |
| 14942  |      |      |      |      |      |      |      |      |      |      |      |      |      |      |
| 14943  |      |      |      |      |      |      |      |      |      |      |      |      |      |      |
| 14953  |      |      |      |      |      | 2    | 5    | 5    | 5    | 2    | 5    | 5    | 5    | 2    |
| 14954  |      |      |      |      |      | 1    | 3    | 3    | 2    | 1    | 3    | 6    | 6    | 2    |
| 14955  | 1    | 1    | 1    | 1    |      |      |      |      |      |      |      |      |      |      |
| 14957  |      |      |      |      |      | 1    | 5    | 6    | 6    | 2    | 6    | 6    | 6    | 2    |
| 14958  |      |      |      |      |      | 2    | 1    | 1    | 1    | 3    | 3    | 2    | 1    | 2    |
| 14959  |      |      |      |      |      | 3    | 2    | 3    | 2    | 3    | 2    |      |      |      |
| 14961  |      |      |      |      |      |      |      |      |      |      |      |      |      |      |
| 14963  |      |      |      |      |      | 2    | 2    | 2    | 2    | 3    | 2    | 3    | 3    | 2    |
| 14964  | 3    | 4    | 4    | 4    |      |      |      |      |      |      |      |      |      |      |
| 14965  |      |      |      |      |      | 1    | 5    | 5    | 2    | 2    | 5    | 3    | 5    | 1    |
| 14967  |      |      |      |      |      | 1    | 2    | 1    | 1    | 2    | 2    | 1    | 2    | 1    |
| 14970  |      |      |      |      |      | 2    | 3    | 2    | 2    | 2    | 2    | 4    | 3    | 3    |
| 14972  |      |      |      |      |      |      |      |      |      |      |      |      |      |      |
| 14975  |      |      |      |      |      | 2    | 2    | 2    | 2    | 2    | 4    | 4    | 4    | 4    |
| 14977  |      |      |      |      |      | 1    | 6    | 6    | 6    | 2    | 6    | 3    | 6    | 2    |
| 14982  | 4    | 3    | 3    | 2    |      |      |      |      |      |      |      |      |      |      |
| 14985  |      |      |      |      |      |      |      |      |      |      |      |      |      |      |
| 14986  |      |      |      |      |      |      |      |      |      |      |      |      |      |      |
| 14987  |      |      |      |      |      |      |      |      |      |      |      |      |      |      |
| 14988  |      |      |      |      |      | 2    | 1    | 2    | 2    | 2    | 1    | 2    | 2    | 3    |
| 14989  |      |      |      |      |      | 1    | 4    | 5    | 5    | 2    | 5    | 3    | 6    | 1    |
| 14993  |      |      |      |      |      |      |      |      |      |      |      |      |      |      |
| 15001  |      |      |      |      |      |      |      |      |      |      |      |      |      |      |
| 15002  |      |      |      |      |      | 2    | 1    | 1    | 2    | 1    | 1    | 1    | 2    | 2    |
| 15006  |      |      |      |      |      |      |      |      |      |      |      |      |      |      |
| 15007  |      |      |      |      |      | 1    | 1    | 6    | 3    | 2    | 1    | 6    | 6    | 2    |
| 15014  |      |      |      |      |      | 2    | 2    | 2    | 2    | 2    | 2    | 2    | 2    | 2    |
| 15020  |      |      |      |      |      |      |      |      |      |      |      |      |      |      |
| 15021  |      |      |      |      |      | 3    | 3    | 4    | 4    | 4    | 5    | 6    | 5    | 5    |

| respid | Q47l | Q47m | Q47n | Q47o | Q48a | Q48b | Q48c | Q48d | Q48e | Q48f | Q48g | Q48h | Q48i | Q48j |   |
|--------|------|------|------|------|------|------|------|------|------|------|------|------|------|------|---|
| 15023  |      |      |      |      |      | 2    | 1    | 2    | 2    | 2    | 1    | 1    | 2    | 3    | 1 |
| 15030  |      |      |      |      |      | 1    | 5    | 6    | 2    | 6    | 3    | 5    | 6    | 3    | 6 |
| 15032  |      |      |      |      |      |      |      |      |      |      |      |      |      |      |   |
| 15033  |      |      |      |      |      | 3    | 2    | 2    | 2    | 3    | 3    | 3    | 3    | 3    | 3 |
| 15034  |      |      |      |      |      |      |      |      |      |      |      |      |      |      |   |
| 15035  |      |      |      |      |      | 1    | 6    | 6    | 6    | 2    | 6    | 6    | 6    | 1    | 6 |
| 15037  | 4    | 4    | 4    | 4    |      |      |      |      |      |      |      |      |      |      |   |
| 15039  |      |      |      |      |      | 2    | 3    | 2    | 2    | 2    | 2    | 2    | 3    | 2    | 2 |
| 15040  |      |      |      |      |      | 1    |      |      |      |      |      |      |      |      |   |
| 15042  |      |      |      |      |      | 2    | 5    | 5    | 5    | 2    | 5    | 5    | 5    | 2    | 4 |
| 15044  |      |      |      |      |      |      |      |      |      |      |      |      |      |      |   |
| 15045  |      |      |      |      |      | 6    | 6    | 6    | 6    | 5    | 5    | 5    | 6    | 5    | 5 |
| 15046  | 4    | 4    | 4    | 4    |      |      |      |      |      |      |      |      |      |      |   |
| 15052  |      |      |      |      |      | 3    | 2    | 3    | 1    | 2    | 2    | 2    | 2    | 2    | 2 |
| 15058  |      |      |      |      |      | 1    | 4    | 1    | 4    | 1    | 2    | 5    | 2    | 4    | 2 |
| 15063  |      |      |      |      |      | 3    | 3    | 3    | 2    | 2    | 3    | 2    | 2    | 2    | 2 |
| 15066  |      |      |      |      |      | 2    | 2    | 2    | 3    | 3    | 2    | 1    |      | 1    | 1 |
| 15069  | 4    | 3    | 4    | 4    |      |      |      |      |      |      |      |      |      |      |   |
| 15071  |      |      |      |      |      | 2    | 2    | 2    | 3    | 3    | 3    | 2    | 4    | 4    | 2 |
| 15076  | 1    | 3    | 2    | 3    |      |      |      |      |      |      |      |      |      |      |   |
| 15078  |      |      |      |      |      | 5    | 5    | 5    | 5    | 5    | 4    | 4    | 4    | 4    | 4 |
| 15087  |      |      |      |      |      | 3    | 4    | 4    | 3    | 4    | 4    | 3    | 4    | 3    | 2 |
| 15090  |      |      |      |      |      |      |      |      |      |      |      |      |      |      |   |
| 15091  |      |      |      |      |      | 2    | 4    | 3    | 4    | 4    | 2    | 3    | 5    | 2    | 3 |
| 15092  |      |      |      |      |      | 1    | 6    | 6    | 5    | 1    | 6    | 6    | 6    | 1    | 5 |
| 15096  |      |      |      |      |      | 2    | 2    | 3    | 3    | 2    | 2    | 4    | 5    |      | 5 |
| 15106  |      |      |      |      |      | 3    | 2    | 2    | 2    | 3    | 2    | 2    | 2    | 2    | 2 |
| 15108  |      |      |      |      |      |      |      |      |      |      |      |      |      |      |   |
| 15113  |      |      |      |      |      | 3    | 2    | 3    | 4    | 2    | 2    | 2    | 4    | 4    | 3 |
| 15116  |      |      |      |      |      |      |      |      |      |      |      |      |      |      |   |
| 15119  | 4    | 4    | 4    | 4    |      |      |      |      |      |      |      |      |      |      |   |
| 15120  | 3    | 1    | 2    | 1    |      |      |      |      |      |      |      |      |      |      |   |

| respid | Q47l | Q47m | Q47n | Q47o | Q48a | Q48b | Q48c | Q48d | Q48e | Q48f | Q48g | Q48h | Q48i | Q48j |   |
|--------|------|------|------|------|------|------|------|------|------|------|------|------|------|------|---|
| 15121  |      | 2    | 3    | 3    | 2    |      |      |      |      |      |      |      |      |      |   |
| 15123  |      |      |      |      |      |      |      |      |      |      |      |      |      |      |   |
| 15124  |      |      |      |      |      | 3    | 6    | 6    | 5    | 3    | 6    | 5    | 5    | 3    | 5 |
| 15128  |      |      |      |      |      | 1    | 6    | 6    | 6    | 1    | 6    | 5    | 6    | 2    | 5 |
| 15131  |      |      |      |      |      |      |      |      |      |      |      |      |      |      |   |
| 15136  |      |      |      |      |      | 3    | 2    | 5    | 2    | 2    | 4    | 4    | 3    | 3    | 4 |
| 15137  |      |      |      |      |      | 1    | 4    | 3    | 3    | 2    | 4    | 2    | 3    | 2    | 3 |
| 15141  | 4    | 4    | 4    | 4    |      |      |      |      |      |      |      |      |      |      |   |
| 15144  |      |      |      |      |      | 2    | 4    | 4    | 4    | 1    | 2    | 3    | 4    | 4    | 2 |
| 15147  | 4    | 4    | 5    | 4    |      |      |      |      |      |      |      |      |      |      |   |
| 15151  | 3    | 3    | 3    | 3    |      |      |      |      |      |      |      |      |      |      |   |
| 15154  |      |      |      |      |      | 3    | 5    | 3    | 3    | 3    | 4    | 3    | 5    | 2    | 1 |
| 15157  | 2    | 1    | 2    | 1    |      |      |      |      |      |      |      |      |      |      |   |
| 15164  |      |      |      |      |      | 2    | 4    | 5    | 2    | 2    | 4    | 5    | 5    | 2    | 5 |
| 15168  | 1    | 2    | 1    | 1    |      |      |      |      |      |      |      |      |      |      |   |
| 15169  | 4    | 4    | 4    | 4    |      |      |      |      |      |      |      |      |      |      |   |
| 15172  |      |      |      |      |      | 2    | 3    | 2    | 1    | 2    | 2    | 2    | 2    | 2    | 2 |
| 15177  |      |      |      |      |      | 3    | 3    | 3    | 3    | 2    |      |      |      |      |   |
| 15178  |      |      |      |      |      |      |      |      |      |      |      |      |      |      |   |
| 15180  |      |      |      |      |      | 2    | 2    | 2    | 2    | 2    | 2    | 2    | 2    | 2    | 2 |
| 15181  | 4    | 5    | 5    | 5    |      |      |      |      |      |      |      |      |      |      |   |
| 15182  | 2    | 3    | 2    | 2    |      |      |      |      |      |      |      |      |      |      |   |
| 15183  |      |      |      |      |      |      |      |      |      |      |      |      |      |      |   |
| 15188  |      |      |      |      |      | 1    | 3    | 1    | 2    | 4    | 4    | 4    | 4    | 5    | 3 |
| 15190  |      |      |      |      |      | 1    | 2    | 3    | 2    | 2    | 1    | 2    | 1    | 1    | 2 |
| 15195  |      |      |      |      |      |      |      |      |      |      |      |      |      |      |   |
| 15201  |      |      |      |      |      | 2    | 1    | 2    | 1    | 2    | 2    | 3    | 3    | 1    | 2 |
| 15203  | 1    | 1    | 2    | 2    |      |      |      |      |      |      |      |      |      |      |   |
| 15204  | 5    | 5    | 5    | 5    |      |      |      |      |      |      |      |      |      |      |   |
| 15207  |      |      |      |      |      |      |      |      |      |      |      |      |      |      |   |
| 15208  |      |      |      |      |      | 1    | 1    | 2    | 1    | 2    | 1    | 1    | 1    | 1    | 4 |
| 15209  | 4    | 4    | 4    | 4    |      |      |      |      |      |      |      |      |      |      |   |



| respid | Q47l | Q47m | Q47n | Q47o | Q48a | Q48b | Q48c | Q48d | Q48e | Q48f | Q48g | Q48h | Q48i | Q48j |
|--------|------|------|------|------|------|------|------|------|------|------|------|------|------|------|
| 15212  |      |      |      |      |      |      |      |      |      |      |      |      |      |      |
| 15213  |      |      |      |      |      |      |      |      |      |      |      |      |      |      |
| 15219  |      |      |      |      |      |      |      |      |      |      |      |      |      |      |
| 15220  | 2    | 3    | 3    | 3    |      |      |      |      |      |      |      |      |      |      |
| 15221  |      |      |      |      | 1    | 4    | 4    | 2    | 1    | 5    | 6    | 6    | 1    | 1    |
| 15223  |      |      |      |      | 2    | 2    | 2    | 2    | 2    | 2    | 2    | 2    | 2    | 2    |
| 15224  |      |      |      |      |      |      |      |      |      |      |      |      |      |      |
| 15225  |      |      |      |      | 1    | 6    | 6    | 6    | 1    | 6    | 6    | 6    | 1    | 5    |
| 15226  |      |      |      |      | 1    | 4    | 4    | 2    | 1    | 2    | 5    | 5    | 1    | 2    |
| 15230  |      |      |      |      | 1    | 6    | 4    | 2    | 1    | 3    | 6    | 6    | 2    | 6    |
| 15231  |      |      |      |      | 6    | 1    | 2    | 2    | 2    | 1    | 2    | 4    | 4    | 3    |
| 15232  | 3    | 2    | 3    | 3    |      |      |      |      |      |      |      |      |      |      |
| 15237  |      |      |      |      |      |      |      |      |      |      |      |      |      |      |
| 15239  |      |      |      |      | 1    | 6    | 6    | 2    | 1    | 2    | 5    | 5    | 1    | 6    |
| 15241  |      |      |      |      | 1    | 5    | 5    | 2    | 1    | 6    | 6    | 6    | 2    | 1    |
| 15242  |      |      |      |      |      |      |      |      |      |      |      |      |      |      |
| 15247  |      |      |      |      | 1    | 6    | 5    | 2    | 2    | 3    | 3    | 5    | 1    | 6    |
| 15248  |      |      |      |      |      |      |      |      |      |      |      |      |      |      |
| 15251  |      |      |      |      |      |      |      |      |      |      |      |      |      |      |
| 15257  |      |      |      |      |      |      |      |      |      |      |      |      |      |      |
| 15260  |      |      |      |      | 1    | 6    | 6    | 2    | 2    | 6    | 1    | 6    | 1    | 2    |
| 15261  | 3    | 1    | 3    | 4    |      |      |      |      |      |      |      |      |      |      |
| 15262  | 2    | 2    | 2    | 2    |      |      |      |      |      |      |      |      |      |      |
| 15263  | 3    | 4    | 4    | 3    |      |      |      |      |      |      |      |      |      |      |
| 15265  |      |      |      |      | 1    | 5    | 6    | 2    | 1    | 6    | 5    | 3    | 2    | 1    |
| 15266  | 2    | 4    | 4    | 4    |      |      |      |      |      |      |      |      |      |      |
| 15268  | 3    | 4    | 2    | 3    |      |      |      |      |      |      |      |      |      |      |
| 15269  | 1    | 1    | 1    | 3    |      |      |      |      |      |      |      |      |      |      |
| 15270  | 4    | 3    | 4    | 3    |      |      |      |      |      |      |      |      |      |      |
| 15273  |      |      |      |      | 1    | 2    | 3    | 4    | 3    | 2    | 4    | 2    | 4    | 2    |
| 15276  | 3    | 2    | 2    | 1    |      |      |      |      |      |      |      |      |      |      |
| 15277  |      |      |      |      | 1    | 6    | 5    | 2    | 2    | 6    | 4    | 6    | 1    | 1    |

| respid | Q47l | Q47m | Q47n | Q47o | Q48a | Q48b | Q48c | Q48d | Q48e | Q48f | Q48g | Q48h | Q48i | Q48j |
|--------|------|------|------|------|------|------|------|------|------|------|------|------|------|------|
| 15282  |      |      |      |      |      | 6    | 6    | 6    | 1    | 6    | 6    | 6    | 6    | 6    |
| 15284  | 2    | 3    | 3    | 3    |      |      |      |      |      |      |      |      |      |      |
| 15285  | 4    | 3    | 3    | 3    |      |      |      |      |      |      |      |      |      |      |
| 15286  |      |      |      |      |      | 1    | 1    | 2    | 2    | 1    | 2    | 2    | 1    | 1    |
| 15288  | 3    | 4    | 3    | 3    |      |      |      |      |      |      |      |      |      |      |
| 15292  | 4    | 2    | 3    | 3    |      |      |      |      |      |      |      |      |      |      |
| 15296  |      |      |      |      |      | 2    | 6    | 6    | 3    | 2    | 6    | 6    | 6    | 1    |
| 15297  |      |      |      |      |      | 1    | 1    | 1    | 2    |      | 6    | 6    | 6    | 1    |
| 15298  |      |      |      |      |      |      |      |      |      |      |      |      |      |      |
| 15301  |      |      |      |      |      | 2    | 4    | 5    | 5    | 3    | 4    | 5    | 5    | 5    |
| 15302  | 3    | 3    | 3    | 3    |      |      |      |      |      |      |      |      |      |      |
| 15305  | 4    | 4    | 4    | 4    |      |      |      |      |      |      |      |      |      |      |
| 15307  | 4    | 4    | 4    | 5    |      |      |      |      |      |      |      |      |      |      |
| 15308  |      |      |      |      |      | 6    | 6    | 6    | 6    | 6    | 6    | 5    | 6    | 5    |
| 15309  | 4    | 4    | 4    | 4    |      |      |      |      |      |      |      |      |      |      |
| 15311  | 3    | 3    |      | 3    |      |      |      |      |      |      |      |      |      |      |
| 15315  |      |      | 4    |      |      |      |      |      |      |      |      |      |      |      |
| 15316  |      |      |      |      |      | 2    | 4    | 6    | 2    | 2    | 6    | 6    | 6    | 2    |
| 15318  |      |      |      |      |      |      |      |      |      |      |      |      |      |      |
| 15321  | 3    | 3    | 1    | 3    |      |      |      |      |      |      |      |      |      |      |
| 15322  | 1    | 1    | 1    | 1    |      |      |      |      |      |      |      |      |      |      |
| 15324  |      |      |      |      |      | 3    | 5    | 6    | 6    | 3    | 6    | 6    | 6    | 5    |
| 15326  | 3    | 3    | 3    | 3    |      |      |      |      |      |      |      |      |      |      |
| 15327  | 4    | 4    | 4    | 4    |      |      |      |      |      |      |      |      |      |      |
| 15328  |      |      |      |      |      | 1    | 3    | 2    | 2    | 3    | 1    | 4    | 6    | 4    |
| 15330  |      |      |      |      |      | 1    | 3    | 5    | 5    | 2    | 4    | 3    | 6    | 3    |
| 15332  | 1    | 4    | 4    | 3    |      |      |      |      |      |      |      |      |      |      |
| 15333  |      |      |      |      |      |      |      |      |      |      |      |      |      |      |
| 15334  | 3    | 3    | 2    | 2    |      |      |      |      |      |      |      |      |      |      |
| 15336  | 1    | 3    | 2    | 3    |      |      |      |      |      |      |      |      |      |      |
| 15337  |      |      |      |      |      | 6    | 2    | 3    | 4    | 3    | 3    | 3    | 4    | 4    |
| 15338  |      |      |      |      |      | 1    | 5    | 6    | 2    | 2    | 5    | 6    | 5    | 2    |

| respid | Q47l | Q47m | Q47n | Q47o | Q48a | Q48b | Q48c | Q48d | Q48e | Q48f | Q48g | Q48h | Q48i | Q48j |   |
|--------|------|------|------|------|------|------|------|------|------|------|------|------|------|------|---|
| 15339  |      |      |      |      |      | 2    | 5    | 5    | 5    | 2    | 5    | 5    | 6    | 1    | 5 |
| 15341  | 4    | 5    | 5    | 4    |      |      |      |      |      |      |      |      |      |      |   |
| 15344  |      |      |      |      |      |      |      |      |      |      |      |      |      |      |   |
| 15345  |      |      |      |      |      | 3    | 4    | 4    | 4    | 3    | 4    | 4    | 4    | 3    | 4 |
| 15350  |      |      |      |      |      |      |      |      |      |      |      |      |      |      |   |
| 15351  | 3    | 2    | 2    | 2    |      |      |      |      |      |      |      |      |      |      |   |
| 15352  |      |      |      |      |      | 2    | 3    | 3    | 3    | 4    | 2    | 2    | 4    | 3    | 2 |
| 15372  | 3    | 3    | 2    | 3    |      |      |      |      |      |      |      |      |      |      |   |
| 15373  |      |      |      |      |      | 2    | 1    | 1    | 1    | 1    | 1    | 1    | 1    | 1    | 1 |
| 15376  | 3    | 4    | 4    | 3    |      |      |      |      |      |      |      |      |      |      |   |
| 15377  |      |      |      |      |      | 1    | 5    | 5    | 3    | 2    | 6    | 6    | 6    | 3    | 6 |
| 15382  | 4    | 2    | 2    | 2    |      |      |      |      |      |      |      |      |      |      |   |
| 15383  | 3    | 3    | 3    | 3    |      |      |      |      |      |      |      |      |      |      |   |
| 15385  |      |      |      |      |      | 3    | 2    | 3    | 2    |      |      |      |      |      |   |
| 15390  |      |      |      |      |      | 1    | 5    | 5    | 3    | 2    | 5    | 5    | 5    | 2    | 1 |
| 15399  |      |      |      |      |      |      |      |      |      |      |      |      |      |      |   |
| 15404  | 4    | 4    | 3    | 3    |      |      |      |      |      |      |      |      |      |      |   |
| 15410  |      |      |      |      |      | 1    | 6    | 6    | 6    | 2    | 6    | 6    | 6    | 1    | 6 |
| 15411  | 3    | 2    | 2    | 2    |      |      |      |      |      |      |      |      |      |      |   |
| 15412  |      |      |      |      |      | 2    | 6    | 5    | 5    | 3    | 5    | 4    | 6    | 2    | 3 |
| 15413  | 3    | 4    | 4    | 3    |      |      |      |      |      |      |      |      |      |      |   |
| 15414  |      |      |      |      |      | 1    | 3    | 4    | 2    | 2    | 5    | 5    | 5    | 2    | 2 |
| 15417  |      |      |      |      |      | 2    | 5    | 6    | 6    | 4    | 6    | 6    | 6    | 1    | 2 |
| 15418  | 4    | 4    | 4    | 4    |      |      |      |      |      |      |      |      |      |      |   |
| 15421  |      |      |      |      |      | 1    | 5    | 4    | 1    | 1    | 6    | 5    | 5    | 1    | 6 |
| 15423  | 3    | 4    |      | 3    |      |      |      |      |      |      |      |      |      |      |   |
| 15425  |      |      |      |      |      | 2    | 5    | 5    | 5    | 2    | 5    | 5    | 5    | 1    | 5 |
| 15426  | 1    | 3    | 2    | 1    |      |      |      |      |      |      |      |      |      |      |   |
| 15430  | 3    |      |      |      |      |      |      |      |      |      |      |      |      |      |   |
| 15431  |      |      |      |      |      | 2    | 3    | 2    | 3    | 3    | 3    | 3    | 2    | 2    | 2 |
| 15435  |      |      |      |      |      |      |      |      |      |      |      |      |      |      |   |
| 15436  |      |      |      |      |      |      |      |      |      |      |      |      |      |      |   |

| respid | Q47l | Q47m | Q47n | Q47o | Q48a | Q48b | Q48c | Q48d | Q48e | Q48f | Q48g | Q48h | Q48i | Q48j |
|--------|------|------|------|------|------|------|------|------|------|------|------|------|------|------|
| 15437  |      |      |      |      |      |      |      |      |      |      |      |      |      |      |
| 15438  |      |      |      |      | 3    | 5    | 6    | 5    | 2    | 6    | 6    | 6    | 1    | 6    |
| 15439  | 3    | 3    | 3    | 3    |      |      |      |      |      |      |      |      |      |      |
| 15441  |      |      |      |      | 3    | 3    | 2    | 2    | 2    | 4    | 1    | 2    | 2    | 3    |
| 15443  | 1    | 3    | 3    | 3    |      |      |      |      |      |      |      |      |      |      |
| 15446  |      | 3    | 3    | 3    |      |      |      |      |      |      |      |      |      |      |
| 15449  | 3    | 3    | 3    | 2    |      |      |      |      |      |      |      |      |      |      |
| 15451  |      |      |      |      | 2    | 2    | 1    | 1    | 6    | 1    | 1    | 1    | 3    | 1    |
| 15452  |      |      |      |      | 2    | 3    |      |      |      |      |      |      |      |      |
| 15454  | 4    | 4    | 4    | 4    |      |      |      |      |      |      |      |      |      |      |
| 15456  | 4    | 4    | 4    | 4    |      |      |      |      |      |      |      |      |      |      |
| 15457  |      |      |      |      |      |      |      |      |      |      |      |      |      |      |
| 15458  |      |      |      |      | 4    | 4    | 4    | 4    | 4    | 3    | 4    | 4    | 4    | 3    |
| 15462  | 2    | 2    | 1    | 1    |      |      |      |      |      |      |      |      |      |      |
| 15467  |      |      |      |      | 2    | 5    | 5    | 3    | 4    | 3    | 2    | 6    | 1    | 1    |
| 15470  |      |      |      |      | 1    | 4    | 4    | 3    | 4    | 4    | 3    | 5    | 1    | 3    |
| 15472  | 4    | 4    | 4    | 3    |      |      |      |      |      |      |      |      |      |      |
| 15476  |      |      |      |      | 6    | 6    | 6    | 6    | 6    | 6    | 6    | 6    | 6    | 6    |
| 15477  |      |      |      |      | 2    | 4    | 4    | 2    | 1    | 4    | 5    | 5    | 3    | 5    |
| 15488  |      |      |      |      | 2    | 4    | 5    | 2    | 2    | 3    | 6    | 6    | 2    | 2    |
| 15489  |      |      |      |      | 6    | 4    | 3    | 1    | 5    | 2    | 3    | 4    | 4    | 3    |
| 15490  |      |      |      |      | 1    | 5    | 5    | 1    | 1    | 5    | 5    | 6    | 2    | 1    |
| 15496  | 2    | 2    | 2    | 1    |      |      |      |      |      |      |      |      |      |      |
| 15497  |      |      |      |      | 4    | 2    | 2    |      | 2    | 2    |      | 2    | 1    | 6    |
| 15498  |      |      |      |      |      |      |      |      |      |      |      |      |      |      |
| 15509  | 3    | 3    | 4    | 3    |      |      |      |      |      |      |      |      |      |      |
| 15510  |      |      |      |      | 1    | 4    | 5    | 2    | 2    | 6    | 6    | 6    | 1    | 3    |
| 15516  |      |      |      |      | 6    | 3    | 5    | 3    | 5    | 1    | 2    | 5    | 6    | 5    |
| 15519  |      |      |      |      | 2    | 3    | 3    | 3    | 4    | 4    | 4    | 5    | 3    | 3    |
| 15520  |      |      |      |      | 1    | 6    | 6    | 2    | 1    | 5    | 5    | 5    | 3    | 4    |
| 15524  |      |      |      |      | 3    | 4    | 5    | 5    | 3    | 5    | 4    | 6    | 2    |      |
| 15525  | 4    | 4    | 4    | 4    |      |      |      |      |      |      |      |      |      |      |

| respid | Q47l | Q47m | Q47n | Q47o | Q48a | Q48b | Q48c | Q48d | Q48e | Q48f | Q48g | Q48h | Q48i | Q48j |   |
|--------|------|------|------|------|------|------|------|------|------|------|------|------|------|------|---|
| 15526  |      |      |      |      |      | 3    | 3    | 3    | 2    | 4    | 2    |      | 3    | 2    | 2 |
| 15531  |      |      |      |      |      | 2    | 4    | 3    | 1    | 4    | 5    | 3    | 4    | 3    | 1 |
| 15532  |      |      |      |      |      | 1    | 6    | 6    | 6    |      | 6    | 5    | 5    | 1    | 6 |
| 15534  |      |      |      |      |      | 2    | 2    | 3    | 2    | 2    | 3    | 3    | 3    | 2    | 3 |
| 15535  |      |      |      |      |      | 2    | 3    | 2    | 6    | 2    | 3    | 2    | 2    | 3    | 3 |
| 15539  | 2    | 2    | 2    | 2    |      |      |      |      |      |      |      |      |      |      |   |
| 15550  | 4    | 5    | 5    | 4    |      |      |      |      |      |      |      |      |      |      |   |
| 15556  |      |      |      |      |      | 1    | 5    | 2    | 3    | 1    | 4    | 6    | 6    | 1    | 1 |
| 15558  |      |      |      |      |      | 2    | 2    | 2    | 2    | 2    | 2    | 2    | 3    | 2    | 3 |
| 15565  |      |      |      |      |      | 1    | 1    | 3    | 4    | 1    | 6    | 4    | 3    |      | 1 |
| 15567  |      |      |      |      |      | 3    | 3    | 1    | 2    | 2    | 2    | 3    | 2    | 2    | 2 |
| 15568  |      |      |      |      |      | 3    | 2    | 2    | 2    | 2    | 2    | 2    | 2    | 2    | 3 |
| 15571  | 1    | 1    | 1    | 1    |      |      |      |      |      |      |      |      |      |      |   |
| 15573  | 3    | 4    | 4    | 3    |      |      |      |      |      |      |      |      |      |      |   |
| 15574  |      |      |      |      |      | 2    | 1    | 2    | 1    | 1    | 2    | 1    | 2    | 1    | 1 |
| 15576  | 3    | 3    | 5    | 5    |      |      |      |      |      |      |      |      |      |      |   |
| 15587  |      |      |      |      |      | 4    | 3    | 3    | 3    | 4    | 3    | 3    | 3    | 3    | 3 |
| 15588  |      |      |      |      |      | 2    | 2    | 2    | 3    | 3    | 5    | 2    | 2    | 2    | 1 |
| 15593  | 3    | 2    | 3    | 3    |      |      |      |      |      |      |      |      |      |      |   |
| 15597  |      |      |      |      |      | 3    | 5    | 5    | 5    | 3    | 5    | 5    | 5    | 2    | 5 |
| 15598  | 5    | 5    | 5    | 4    |      |      |      |      |      |      |      |      |      |      |   |
| 15599  | 2    | 3    | 3    | 2    |      |      |      |      |      |      |      |      |      |      |   |
| 15601  | 4    | 2    | 1    | 4    |      |      |      |      |      |      |      |      |      |      |   |
| 15604  |      |      |      |      |      | 3    | 3    | 4    | 4    | 3    | 3    | 4    | 4    | 3    | 3 |
| 15611  | 4    | 1    | 1    | 1    |      |      |      |      |      |      |      |      |      |      |   |
| 15613  | 5    | 4    |      | 5    |      |      |      |      |      |      |      |      |      |      |   |
| 15614  | 3    | 3    | 3    | 2    |      |      |      |      |      |      |      |      |      |      |   |
| 15617  |      |      |      |      |      | 6    | 4    | 4    | 5    | 6    | 4    |      | 5    |      | 6 |
| 15622  |      |      |      |      |      |      |      |      |      |      |      |      |      |      |   |
| 15623  |      |      |      |      |      | 1    | 6    | 6    | 6    | 1    | 6    | 6    | 6    | 1    | 6 |
| 15625  |      | 3    | 3    | 3    |      |      |      |      |      |      |      |      |      |      |   |
| 15627  |      |      |      |      |      |      |      |      |      |      |      |      |      |      |   |

| respid | Q47l | Q47m | Q47n | Q47o | Q48a | Q48b | Q48c | Q48d | Q48e | Q48f | Q48g | Q48h | Q48i | Q48j |   |
|--------|------|------|------|------|------|------|------|------|------|------|------|------|------|------|---|
| 15628  |      | 3    | 3    | 3    | 3    |      |      |      |      |      |      |      |      |      |   |
| 15633  |      | 5    | 5    | 5    | 5    |      |      |      |      |      |      |      |      |      |   |
| 15634  |      | 3    | 3    | 2    | 2    |      |      |      |      |      |      |      |      |      |   |
| 15637  |      | 2    | 2    | 1    | 2    |      |      |      |      |      |      |      |      |      |   |
| 15644  |      |      |      |      |      |      |      |      |      |      |      |      |      |      |   |
| 15645  |      | 4    | 4    | 4    | 4    |      |      |      |      |      |      |      |      |      |   |
| 15649  |      |      |      |      |      |      |      |      |      |      |      |      |      |      |   |
| 15650  |      | 3    | 4    | 4    | 3    |      |      |      |      |      |      |      |      |      |   |
| 15651  |      |      |      |      |      | 3    | 5    | 5    | 5    | 3    | 5    | 5    | 5    | 2    | 5 |
| 15657  |      | 2    | 2    | 2    | 2    |      |      |      |      |      |      |      |      |      |   |
| 15658  |      |      |      |      |      | 2    | 3    | 5    | 6    | 2    | 5    | 5    | 6    | 2    | 6 |
| 15660  |      |      |      |      |      |      |      |      |      |      |      |      |      |      |   |
| 15667  |      |      |      |      |      | 1    | 6    | 6    | 6    | 1    | 6    | 6    | 6    | 1    | 6 |
| 15671  |      |      |      |      |      | 5    |      |      |      |      |      |      |      |      |   |
| 15679  |      | 1    | 1    | 1    | 1    |      |      |      |      |      |      |      |      |      |   |
| 15712  |      |      |      |      |      | 1    | 1    | 1    | 2    | 2    | 6    | 6    | 6    | 1    | 5 |
| 15715  |      | 3    | 2    | 2    | 2    |      |      |      |      |      |      |      |      |      |   |
| 15749  |      |      |      |      |      | 1    | 5    | 5    | 5    | 3    | 5    | 5    | 6    | 2    | 6 |
| 15754  |      |      |      |      |      |      |      |      |      |      |      |      |      |      |   |
| 15756  |      | 3    | 4    | 4    | 4    |      |      |      |      |      |      |      |      |      |   |
| 15773  |      | 1    | 3    | 2    | 1    |      |      |      |      |      |      |      |      |      |   |
| 15774  |      | 3    | 3    | 3    | 3    |      |      |      |      |      |      |      |      |      |   |
| 15776  |      | 3    | 3    | 4    | 2    |      |      |      |      |      |      |      |      |      |   |
| 15777  |      | 3    | 3    | 3    | 3    |      |      |      |      |      |      |      |      |      |   |
| 15779  |      |      |      |      |      |      |      |      |      |      |      |      |      |      |   |
| 15780  |      |      |      |      |      |      |      |      |      |      |      |      |      |      |   |
| 15792  |      | 2    | 2    | 2    | 2    |      |      |      |      |      |      |      |      |      |   |
| 15793  |      | 3    | 3    | 3    | 3    |      |      |      |      |      |      |      |      |      |   |
| 15796  |      | 3    | 2    | 2    | 3    |      |      |      |      |      |      |      |      |      |   |
| 15798  |      |      |      |      |      | 1    | 5    | 1    | 6    | 3    | 4    | 4    | 4    | 2    | 5 |
| 15809  |      | 4    | 4    | 4    | 4    |      |      |      |      |      |      |      |      |      |   |
| 15810  |      |      |      |      |      |      |      |      |      |      |      |      |      |      |   |

| respid | Q47l | Q47m | Q47n | Q47o | Q48a | Q48b | Q48c | Q48d | Q48e | Q48f | Q48g | Q48h | Q48i | Q48j |   |
|--------|------|------|------|------|------|------|------|------|------|------|------|------|------|------|---|
| 15815  |      |      |      |      |      | 3    | 3    | 5    | 3    | 4    | 3    | 3    | 4    | 3    | 3 |
| 15816  | 1    | 2    | 2    |      |      |      |      |      |      |      |      |      |      |      |   |
| 15817  |      |      |      |      |      |      |      |      |      |      |      |      |      |      |   |
| 15821  |      |      |      |      |      | 2    | 2    | 2    | 2    | 2    | 2    | 2    | 2    | 3    | 2 |
| 15823  |      |      |      |      |      | 3    | 3    | 3    | 4    | 3    | 4    | 5    | 4    | 3    | 4 |
| 15834  | 2    | 2    | 1    | 2    |      |      |      |      |      |      |      |      |      |      |   |
| 15835  |      |      |      |      |      |      |      |      |      |      |      |      |      |      |   |
| 15836  |      |      |      |      |      | 3    | 5    | 5    | 6    | 3    | 6    | 5    | 6    | 2    | 6 |
| 15837  |      |      |      |      |      | 2    | 6    | 6    | 5    | 5    | 5    | 6    | 6    | 1    | 6 |
| 15839  | 3    | 3    | 2    | 2    |      |      |      |      |      |      |      |      |      |      |   |
| 15840  |      |      |      |      |      | 1    | 5    | 5    | 3    | 1    | 5    | 5    | 5    | 1    | 6 |
| 15844  | 3    | 3    | 3    | 3    |      |      |      |      |      |      |      |      |      |      |   |
| 15845  | 1    | 1    | 1    | 1    |      |      |      |      |      |      |      |      |      |      |   |
| 15847  | 3    | 4    | 3    | 3    |      |      |      |      |      |      |      |      |      |      |   |
| 15848  |      |      |      |      |      | 4    | 6    | 4    | 2    | 5    | 2    | 4    | 4    | 3    | 3 |
| 15849  | 2    | 2    | 3    | 2    |      |      |      |      |      |      |      |      |      |      |   |
| 15857  |      |      |      |      |      | 3    | 4    | 4    | 4    | 3    | 4    | 5    | 4    | 3    | 4 |
| 15858  | 4    | 4    | 4    | 4    |      |      |      |      |      |      |      |      |      |      |   |
| 15862  | 2    | 3    | 2    | 3    |      |      |      |      |      |      |      |      |      |      |   |
| 15866  |      |      |      |      |      | 1    | 6    | 5    | 2    | 1    | 5    | 5    | 5    | 2    | 3 |
| 15870  |      |      |      |      |      | 1    | 5    | 5    | 2    | 1    | 1    | 4    | 5    | 2    | 5 |
| 15871  | 4    | 3    | 3    | 2    |      |      |      |      |      |      |      |      |      |      |   |
| 15872  | 2    | 2    | 2    | 3    |      |      |      |      |      |      |      |      |      |      |   |
| 15873  | 5    | 5    | 5    | 5    |      |      |      |      |      |      |      |      |      |      |   |
| 15874  |      |      |      |      |      |      |      |      |      |      |      |      |      |      |   |
| 15875  |      |      |      |      |      | 3    | 3    | 4    | 3    | 4    | 3    | 3    | 3    | 3    | 3 |
| 15876  |      |      |      |      |      | 2    | 2    | 2    | 2    | 2    | 2    | 2    | 2    | 2    | 2 |
| 15882  |      |      |      |      |      | 3    | 3    | 2    | 3    | 3    | 3    | 3    | 3    | 3    | 3 |
| 15884  |      |      |      |      |      | 3    | 2    | 4    | 3    | 4    | 5    | 4    | 6    | 1    | 2 |
| 15890  | 3    | 3    | 2    | 3    |      |      |      |      |      |      |      |      |      |      |   |
| 15892  |      |      |      |      |      |      |      |      | 6    | 2    | 6    | 2    | 3    | 3    | 1 |
| 15908  | 3    | 2    | 2    | 2    |      |      |      |      |      |      |      |      |      |      |   |

| respid | Q47l | Q47m | Q47n | Q47o | Q48a | Q48b | Q48c | Q48d | Q48e | Q48f | Q48g | Q48h | Q48i | Q48j |   |
|--------|------|------|------|------|------|------|------|------|------|------|------|------|------|------|---|
| 15914  |      |      |      |      |      | 1    | 6    | 6    | 2    | 1    | 6    | 6    | 6    | 2    | 6 |
| 15932  | 1    | 1    | 2    | 3    |      |      |      |      |      |      |      |      |      |      |   |
| 15933  | 4    | 4    | 5    | 4    |      |      |      |      |      |      |      |      |      |      |   |
| 15938  |      |      |      |      |      |      |      |      |      |      |      |      |      |      |   |
| 15940  |      |      |      |      |      | 2    | 3    | 3    | 2    | 3    | 1    | 2    | 1    | 2    | 3 |
| 15945  |      |      |      |      |      | 2    | 6    | 6    | 3    | 1    | 6    | 6    | 6    | 1    | 6 |
| 15947  | 3    | 3    | 2    | 2    |      |      |      |      |      |      |      |      |      |      |   |
| 15950  |      |      |      |      |      | 1    | 6    | 6    | 2    | 1    | 6    | 6    | 6    | 2    | 3 |
| 15951  |      |      |      |      |      | 1    | 6    | 6    | 6    | 1    | 6    | 6    | 6    | 1    | 6 |
| 15952  | 3    | 3    | 3    | 3    |      |      |      |      |      |      |      |      |      |      |   |
| 15953  |      |      |      |      |      | 1    | 6    | 6    | 3    | 4    | 4    | 4    | 6    | 1    | 4 |
| 15954  |      |      |      |      |      | 2    | 5    | 5    | 5    | 2    | 5    | 5    | 5    | 2    | 4 |
| 15957  |      |      |      |      |      | 1    | 1    | 1    | 1    | 2    | 4    | 3    | 3    | 1    | 2 |
| 15965  |      |      |      |      |      | 2    | 2    | 2    | 2    | 1    | 2    | 2    | 2    | 2    | 2 |
| 15966  |      |      |      |      |      |      |      |      |      |      |      |      |      |      |   |
| 15967  | 3    | 2    | 3    | 2    |      |      |      |      |      |      |      |      |      |      |   |
| 15968  | 2    | 3    | 3    | 3    |      |      |      |      |      |      |      |      |      |      |   |
| 15970  |      |      |      |      |      | 5    | 5    | 6    | 5    | 5    | 5    | 6    | 6    | 3    | 6 |
| 15973  |      |      |      |      |      | 1    | 6    | 6    | 3    | 1    | 6    | 6    | 6    | 2    | 1 |
| 15974  |      |      |      |      |      | 1    | 6    | 5    | 2    | 1    | 1    | 6    | 6    | 1    | 6 |
| 15975  |      |      |      |      |      |      |      |      |      |      |      |      |      |      |   |
| 15980  |      |      |      |      |      | 2    | 1    | 2    | 1    | 2    | 1    | 2    | 2    | 1    | 1 |
| 15984  | 3    | 2    | 2    | 3    |      |      |      |      |      |      |      |      |      |      |   |
| 15985  |      |      |      |      |      | 2    | 2    | 2    | 2    | 3    | 2    | 2    | 2    | 2    | 2 |
| 15994  |      |      |      |      |      |      |      |      |      |      |      |      |      |      |   |
| 15995  |      |      |      |      |      | 2    | 4    | 5    | 4    | 2    | 4    | 6    | 6    | 2    | 3 |
| 16000  | 3    | 2    | 3    | 3    |      |      |      |      |      |      |      |      |      |      |   |
| 16004  |      |      |      |      |      | 1    | 5    | 6    | 3    | 1    | 5    | 6    | 6    | 2    | 4 |
| 16005  |      |      |      |      |      | 2    | 6    | 6    | 3    | 1    | 6    | 6    | 6    | 2    | 4 |
| 16006  |      |      |      |      |      |      |      |      |      |      |      |      |      |      |   |
| 16009  | 3    | 3    | 3    | 2    |      |      |      |      |      |      |      |      |      |      |   |
| 16017  |      |      |      |      |      | 3    | 6    | 6    | 6    | 3    | 5    | 6    | 6    | 1    | 6 |



| respid | Q47l | Q47m | Q47n | Q47o | Q48a | Q48b | Q48c | Q48d | Q48e | Q48f | Q48g | Q48h | Q48i | Q48j |   |
|--------|------|------|------|------|------|------|------|------|------|------|------|------|------|------|---|
| 16019  |      |      |      |      |      | 5    | 5    | 5    | 6    | 2    | 6    | 6    | 6    | 1    | 6 |
| 16021  |      |      |      |      |      | 6    | 6    | 6    | 6    | 6    | 6    | 6    | 6    | 6    | 6 |
| 16024  | 3    | 3    | 3    | 4    |      |      |      |      |      |      |      |      |      |      |   |
| 16026  |      | 2    | 2    | 2    |      |      |      |      |      |      |      |      |      |      |   |
| 16029  |      |      |      |      |      |      |      |      |      |      |      |      |      |      |   |
| 16031  | 1    | 1    | 1    | 2    |      |      |      |      |      |      |      |      |      |      |   |
| 16037  |      |      |      |      | 2    | 6    | 6    | 6    | 1    | 6    | 6    | 6    | 1    | 6    |   |
| 16043  | 4    | 4    | 4    | 4    |      |      |      |      |      |      |      |      |      |      |   |
| 16044  |      |      |      |      | 1    | 6    | 5    | 3    | 5    | 4    | 6    | 6    | 1    | 5    |   |
| 16047  | 3    | 2    | 2    | 3    |      |      |      |      |      |      |      |      |      |      |   |
| 16048  | 2    | 1    | 1    | 1    |      |      |      |      |      |      |      |      |      |      |   |
| 16049  |      |      |      |      | 3    | 5    | 5    | 5    | 3    | 5    | 5    | 5    | 2    | 5    |   |
| 16051  |      |      |      |      | 3    | 5    | 5    | 6    | 2    | 6    | 6    | 6    | 1    | 5    |   |
| 16053  | 5    | 5    | 5    | 4    |      |      |      |      |      |      |      |      |      |      |   |
| 16054  |      |      |      |      | 3    | 6    | 6    | 5    | 3    | 5    | 5    | 5    | 2    | 4    |   |
| 16069  |      |      |      |      | 3    | 3    | 4    | 4    | 4    | 3    | 3    | 4    | 3    | 3    |   |
| 16070  |      | 1    | 1    | 1    |      |      |      |      |      |      |      |      |      |      |   |
| 16074  |      |      |      |      |      |      |      |      |      |      |      |      |      |      |   |
| 16076  |      |      |      |      |      |      |      |      |      |      |      |      |      |      |   |
| 16078  |      |      |      |      |      |      |      |      |      |      |      |      |      |      |   |
| 16081  |      |      |      |      | 3    | 4    | 5    | 5    | 3    | 4    | 5    | 5    | 2    | 5    |   |
| 16085  |      |      |      |      |      |      |      |      |      |      |      |      |      |      |   |
| 16088  | 5    | 4    | 4    | 4    |      |      |      |      |      |      |      |      |      |      |   |
| 16091  |      |      |      |      | 3    | 5    | 5    | 5    | 3    | 5    | 5    | 5    | 4    | 2    |   |
| 16092  | 3    | 1    | 1    | 4    |      |      |      |      |      |      |      |      |      |      |   |
| 16093  | 2    | 3    | 3    | 3    |      |      |      |      |      |      |      |      |      |      |   |
| 16097  | 3    | 1    | 1    | 1    |      |      |      |      |      |      |      |      |      |      |   |
| 16100  |      |      |      |      | 4    | 3    | 3    | 3    | 4    | 1    | 3    | 3    | 4    | 3    |   |
| 16101  |      |      |      |      | 1    | 6    | 6    | 5    | 1    | 6    | 6    | 6    | 1    | 6    |   |
| 16105  |      |      |      |      |      |      |      |      |      |      |      |      |      |      |   |
| 16118  |      |      |      |      | 2    | 2    | 2    | 2    | 4    | 3    | 2    | 3    | 3    | 2    |   |
| 16129  | 4    | 4    | 4    | 4    |      |      |      |      |      |      |      |      |      |      |   |

| respid | Q47l | Q47m | Q47n | Q47o | Q48a | Q48b | Q48c | Q48d | Q48e | Q48f | Q48g | Q48h | Q48i | Q48j |   |
|--------|------|------|------|------|------|------|------|------|------|------|------|------|------|------|---|
| 16130  |      | 3    | 4    | 4    | 3    |      |      |      |      |      |      |      |      |      |   |
| 16131  |      | 4    | 3    | 3    | 3    |      |      |      |      |      |      |      |      |      |   |
| 16136  |      |      |      |      |      | 5    | 5    | 5    | 3    | 5    | 4    | 5    | 5    | 6    | 3 |
| 16137  |      |      |      |      |      | 4    | 3    | 4    | 3    | 4    | 3    | 3    | 3    | 4    | 5 |
| 16138  |      |      |      |      |      | 2    | 4    | 6    | 6    | 2    | 6    | 6    | 6    | 1    | 4 |
| 16139  |      |      |      |      |      | 2    | 6    | 6    | 6    | 2    | 6    | 6    | 6    | 2    | 6 |
| 16140  |      |      |      |      |      | 1    | 6    | 6    | 6    | 1    | 6    | 6    | 6    | 1    | 6 |
| 16145  |      |      |      |      |      | 5    | 5    | 4    | 5    | 4    | 6    | 5    | 6    | 3    | 6 |
| 16150  |      |      |      |      |      | 6    | 6    | 6    | 6    | 3    | 6    | 6    | 6    | 6    | 6 |
| 16151  |      |      |      |      |      | 1    |      |      |      |      |      |      |      |      |   |
| 16153  |      | 4    | 4    | 4    | 4    |      |      |      |      |      |      |      |      |      |   |
| 16164  |      | 4    | 4    | 4    | 4    |      |      |      |      |      |      |      |      |      |   |
| 16168  |      | 3    | 3    | 3    | 3    |      |      |      |      |      |      |      |      |      |   |
| 16173  |      |      |      |      |      | 4    | 3    | 3    | 3    | 5    | 3    | 3    | 3    | 4    | 5 |
| 16174  |      | 4    | 4    | 4    | 4    |      |      |      |      |      |      |      |      |      |   |
| 16177  |      | 3    | 3    | 3    |      |      |      |      |      |      |      |      |      |      |   |
| 16185  |      | 3    | 1    | 1    | 2    |      |      |      |      |      |      |      |      |      |   |
| 16189  |      |      |      |      |      | 3    | 4    | 4    | 3    | 4    | 3    | 3    | 4    | 4    | 3 |
| 16192  |      | 4    | 4    | 4    | 3    |      |      |      |      |      |      |      |      |      |   |
| 16193  |      |      |      |      |      | 5    | 4    | 5    |      | 4    | 5    | 5    | 5    | 5    | 5 |
| 16194  |      | 1    | 2    | 2    |      |      |      |      |      |      |      |      |      |      |   |
| 16196  |      |      |      |      |      |      |      |      |      |      |      |      |      |      |   |
| 16202  |      |      |      |      |      | 3    |      |      |      |      |      |      |      |      |   |
| 16205  |      |      |      |      |      | 5    | 2    | 2    | 3    | 5    | 5    | 5    | 2    | 5    |   |
| 16206  |      |      |      |      |      | 2    | 4    | 5    | 5    | 2    | 5    | 5    | 5    | 2    | 5 |
| 16208  |      |      |      |      |      |      |      |      |      |      |      |      |      |      |   |
| 16211  |      |      |      |      |      | 1    | 6    | 6    | 3    | 2    | 6    | 4    | 6    | 2    | 1 |
| 16212  |      |      |      |      |      | 3    | 6    | 6    | 6    | 6    | 6    | 6    | 6    | 2    | 6 |
| 16215  |      |      |      |      |      |      |      |      |      |      |      |      |      |      |   |
| 16217  |      | 4    | 4    | 3    | 4    |      |      |      |      |      |      |      |      |      |   |
| 16221  |      | 4    | 4    | 4    | 4    |      |      |      |      |      |      |      |      |      |   |
| 16226  |      |      |      |      |      | 2    | 3    | 5    | 5    | 2    | 5    | 5    | 5    | 2    | 3 |

| respid | Q47l | Q47m | Q47n | Q47o | Q48a | Q48b | Q48c | Q48d | Q48e | Q48f | Q48g | Q48h | Q48i | Q48j |
|--------|------|------|------|------|------|------|------|------|------|------|------|------|------|------|
| 16228  |      |      |      |      |      |      |      |      |      |      |      |      |      |      |
| 16229  | 5    | 4    | 3    | 4    |      |      |      |      |      |      |      |      |      |      |
| 16230  |      |      |      |      | 5    | 5    | 5    | 6    | 6    |      |      |      |      |      |
| 16231  | 5    | 4    | 4    | 3    |      |      |      |      |      |      |      |      |      |      |
| 16232  | 5    | 5    | 5    | 5    |      |      |      |      |      |      |      |      |      |      |
| 16234  | 2    | 3    | 3    | 3    |      |      |      |      |      |      |      |      |      |      |
| 16235  |      | 5    | 5    | 5    |      |      |      |      |      |      |      |      |      |      |
| 16236  | 3    | 2    | 2    | 3    |      |      |      |      |      |      |      |      |      |      |
| 16237  |      |      |      |      |      |      |      |      |      |      |      |      |      |      |
| 16238  | 3    | 2    | 3    | 3    |      |      |      |      |      |      |      |      |      |      |
| 16239  |      |      |      |      |      |      | 6    | 6    | 6    | 6    | 6    | 6    | 6    | 6    |
| 16243  |      |      |      |      | 1    | 6    | 6    | 1    | 1    | 6    | 6    | 6    | 1    | 6    |
| 16248  | 4    | 1    | 1    | 4    |      |      |      |      |      |      |      |      |      |      |
| 16249  |      |      |      |      | 6    | 6    | 6    | 6    | 6    | 6    | 6    | 6    | 6    | 6    |
| 16251  |      |      |      |      |      |      |      |      |      |      |      |      |      |      |
| 16263  |      |      |      |      |      |      |      |      |      |      |      |      |      |      |
| 16265  |      |      |      |      | 5    | 5    | 4    | 4    | 2    | 4    | 4    | 5    | 4    | 5    |
| 16269  |      |      |      |      | 3    | 4    | 4    | 4    | 3    | 5    | 5    | 5    | 2    | 5    |
| 16272  |      |      |      |      | 5    | 2    | 2    | 3    | 3    | 3    | 3    | 3    | 4    | 2    |
| 16273  |      |      |      |      |      |      |      |      |      |      |      |      |      |      |
| 16281  |      |      |      |      | 1    | 4    | 4    | 4    | 3    |      | 4    | 4    | 2    | 5    |
| 16282  |      |      |      |      | 1    | 6    | 6    | 6    | 2    | 6    | 6    | 6    | 1    | 6    |
| 16287  | 4    | 4    | 4    | 4    |      |      |      |      |      |      |      |      |      |      |
| 16290  | 3    | 4    | 4    | 4    |      |      |      |      |      |      |      |      |      |      |
| 16294  | 3    | 4    | 3    | 4    |      |      |      |      |      |      |      |      |      |      |
| 16295  | 3    | 3    | 3    | 3    |      |      |      |      |      |      |      |      |      |      |
| 16296  |      |      |      |      | 3    | 5    | 6    | 6    | 5    | 6    | 6    | 6    | 2    | 6    |
| 16299  | 4    | 1    | 1    | 2    |      |      |      |      |      |      |      |      |      |      |
| 16302  | 4    |      | 4    | 4    |      |      |      |      |      |      |      |      |      |      |
| 16303  |      |      |      |      |      |      |      |      |      |      |      |      |      |      |
| 16304  |      |      |      |      | 1    | 2    | 4    | 1    | 5    | 3    | 2    | 6    | 3    | 5    |
| 16306  |      |      |      |      | 6    | 6    | 6    | 5    | 3    | 6    | 6    | 6    | 2    | 6    |

| respid | Q47l | Q47m | Q47n | Q47o | Q48a | Q48b | Q48c | Q48d | Q48e | Q48f | Q48g | Q48h | Q48i | Q48j |
|--------|------|------|------|------|------|------|------|------|------|------|------|------|------|------|
| 16318  | 4    | 2    | 3    | 3    |      |      |      |      |      |      |      |      |      |      |
| 16320  | 4    | 4    | 4    | 4    |      |      |      |      |      |      |      |      |      |      |
| 16321  |      |      |      |      |      |      |      |      |      |      |      |      |      |      |
| 16322  | 4    | 4    | 4    | 3    |      |      |      |      |      |      |      |      |      |      |
| 16324  |      |      |      |      | 5    | 5    | 4    | 3    | 4    | 3    | 3    | 3    | 3    | 3    |
| 16326  | 3    | 3    | 3    | 2    |      |      |      |      |      |      |      |      |      |      |
| 16328  |      |      |      |      |      |      |      |      | 2    | 2    | 2    | 2    | 2    | 2    |
| 16336  | 3    | 4    | 4    | 4    |      |      |      |      |      |      |      |      |      |      |
| 16341  | 1    | 1    | 1    | 2    |      |      |      |      |      |      |      |      |      |      |
| 16342  |      |      |      |      | 2    | 6    | 6    | 6    | 2    | 6    | 6    | 6    | 6    | 1    |
| 16343  |      |      |      |      | 6    | 1    | 1    | 2    | 6    | 1    | 1    | 1    | 1    | 6    |
| 16345  | 2    | 2    | 3    | 2    |      |      |      |      |      |      |      |      |      |      |
| 16349  |      |      |      |      | 2    | 4    | 5    | 5    | 3    | 6    | 5    | 6    | 2    | 6    |
| 16355  | 4    | 4    | 4    | 4    |      |      |      |      |      |      |      |      |      |      |
| 16364  | 3    | 3    | 3    | 3    |      |      |      |      |      |      |      |      |      |      |
| 16374  |      |      |      |      | 2    | 5    | 5    | 2    | 2    | 5    | 5    | 5    | 4    | 6    |
| 16375  |      |      |      |      |      |      |      |      |      |      |      |      |      |      |
| 16376  | 2    | 2    | 3    | 2    |      |      |      |      |      |      |      |      |      |      |
| 16393  |      |      |      |      | 4    | 4    | 4    | 4    | 4    | 4    | 4    | 4    | 4    | 3    |
| 16394  |      |      |      |      | 4    | 4    | 4    | 4    | 4    | 4    | 4    | 5    | 5    | 4    |
| 16395  | 5    | 1    | 1    | 5    |      |      |      |      |      |      |      |      |      |      |
| 16397  | 3    | 4    |      |      |      |      |      |      |      |      |      |      |      |      |
| 16398  | 3    | 3    | 3    | 4    |      |      |      |      |      |      |      |      |      |      |
| 16402  | 5    | 5    | 5    | 5    |      |      |      |      |      |      |      |      |      |      |
| 16405  | 3    | 3    | 3    | 3    |      |      |      |      |      |      |      |      |      |      |
| 16416  | 1    | 1    | 1    | 1    |      |      |      |      |      |      |      |      |      |      |
| 16422  | 4    | 2    | 2    | 3    |      |      |      |      |      |      |      |      |      |      |
| 16429  |      |      |      |      | 2    | 6    | 6    | 6    | 2    | 6    | 6    | 6    | 1    | 5    |
| 16430  |      |      |      |      | 3    | 5    | 6    | 6    | 3    | 6    | 5    | 6    | 2    | 5    |
| 16432  | 3    | 3    | 3    | 3    |      |      |      |      |      |      |      |      |      |      |
| 16433  | 3    | 3    | 3    | 3    |      |      |      |      |      |      |      |      |      |      |
| 16434  |      |      |      |      |      |      |      |      |      |      |      |      |      |      |

| respid | Q47l | Q47m | Q47n | Q47o | Q48a | Q48b | Q48c | Q48d | Q48e | Q48f | Q48g | Q48h | Q48i | Q48j |   |
|--------|------|------|------|------|------|------|------|------|------|------|------|------|------|------|---|
| 16437  |      |      |      |      |      | 6    | 3    | 3    | 4    | 4    | 1    | 2    | 4    | 5    | 3 |
| 16439  | 5    | 5    | 5    | 5    |      |      |      |      |      |      |      |      |      |      |   |
| 16440  |      |      |      |      | 4    | 4    | 3    | 5    | 3    | 5    | 3    | 4    | 2    | 2    |   |
| 16441  | 3    | 4    | 4    | 4    |      |      |      |      |      |      |      |      |      |      |   |
| 16442  |      |      |      |      |      |      |      |      |      |      |      |      |      |      |   |
| 16450  |      |      |      |      | 5    | 5    | 5    | 6    |      | 5    | 5    | 5    | 3    | 5    |   |
| 16451  | 5    | 5    | 5    | 5    |      |      |      |      |      |      |      |      |      |      |   |
| 16452  |      |      |      |      | 3    | 5    | 3    | 3    | 5    | 3    | 3    | 3    | 2    | 2    |   |
| 16467  |      |      |      |      | 5    | 5    | 6    | 3    | 3    | 1    | 6    | 6    | 3    | 6    |   |
| 16468  |      |      |      |      |      |      |      |      |      |      |      |      |      |      |   |
| 16469  | 2    | 1    | 1    | 2    |      |      |      |      |      |      |      |      |      |      |   |
| 16470  |      |      |      |      |      |      |      |      |      |      |      |      |      |      |   |
| 16471  |      |      |      |      | 1    | 5    | 6    | 5    | 6    | 6    | 6    | 6    | 1    | 6    |   |
| 16473  |      |      |      |      | 4    | 4    | 4    | 4    | 4    | 4    | 4    | 3    | 3    | 5    |   |
| 16476  | 4    | 4    | 4    | 4    |      |      |      |      |      |      |      |      |      |      |   |
| 16478  |      |      |      |      |      |      |      |      |      |      |      |      |      |      |   |
| 16484  |      |      |      |      | 5    | 2    | 2    | 2    | 5    | 2    | 2    | 2    | 5    | 2    |   |
| 16499  |      |      |      |      | 5    | 3    | 4    | 4    | 4    | 4    | 4    | 4    | 5    | 3    | 4 |
| 16502  |      |      |      |      |      |      |      |      |      |      |      |      |      |      |   |
| 16505  |      |      |      |      |      |      |      |      |      |      |      |      |      |      |   |
| 16514  | 3    | 4    | 4    | 4    |      |      |      |      |      |      |      |      |      |      |   |
| 16515  | 3    | 3    | 4    | 3    |      |      |      |      |      |      |      |      |      |      |   |
| 16517  |      |      |      |      | 6    | 6    | 5    | 2    |      | 5    |      | 1    | 2    | 6    |   |
| 16518  | 4    | 3    | 3    | 2    |      |      |      |      |      |      |      |      |      |      |   |
| 16519  | 2    | 3    | 3    | 4    |      |      |      |      |      |      |      |      |      |      |   |
| 16525  | 4    |      |      | 5    |      |      |      |      |      |      |      |      |      |      |   |
| 16526  |      |      |      |      | 1    | 6    | 6    | 6    | 1    | 6    | 6    | 6    | 1    | 5    |   |
| 16530  |      |      |      |      | 1    | 6    | 6    | 6    | 1    | 6    | 6    | 6    | 1    | 6    |   |
| 16532  | 4    | 4    | 5    | 4    |      |      |      |      |      |      |      |      |      |      |   |
| 16536  | 4    | 4    | 4    | 4    |      |      |      |      |      |      |      |      |      |      |   |
| 16537  |      |      |      |      | 3    | 5    | 4    | 3    | 4    | 3    | 3    | 5    | 4    | 4    |   |
| 16541  | 2    | 2    | 3    | 3    |      |      |      |      |      |      |      |      |      |      |   |

| respid | Q47l | Q47m | Q47n | Q47o | Q48a | Q48b | Q48c | Q48d | Q48e | Q48f | Q48g | Q48h | Q48i | Q48j |   |
|--------|------|------|------|------|------|------|------|------|------|------|------|------|------|------|---|
| 16543  | 3    | 3    | 3    | 3    |      |      |      |      |      |      |      |      |      |      |   |
| 16544  |      |      |      |      |      | 1    | 5    | 5    | 6    | 1    | 6    | 6    | 6    | 1    | 6 |
| 16545  | 1    |      |      |      | 3    |      |      |      |      |      |      |      |      |      |   |
| 16546  |      |      |      |      |      | 2    | 3    | 3    | 2    | 5    | 2    | 2    | 2    | 5    | 2 |
| 16548  | 4    | 1    | 1    | 4    |      |      |      |      |      |      |      |      |      |      |   |
| 16552  | 4    | 2    | 4    | 3    |      |      |      |      |      |      |      |      |      |      |   |
| 16559  |      |      |      |      |      |      | 6    |      |      |      | 6    | 6    | 6    | 1    | 6 |
| 16564  |      |      |      |      |      | 2    | 4    | 3    | 5    | 4    | 3    | 4    | 6    | 4    | 5 |
| 16565  |      | 3    |      |      | 3    |      |      |      |      |      |      |      |      |      |   |
| 16567  |      |      |      |      |      | 1    | 6    | 6    | 6    | 1    | 6    | 6    | 6    | 1    | 6 |
| 16571  |      |      |      |      |      |      |      |      |      |      |      |      |      |      |   |
| 16572  |      |      |      |      |      | 2    |      | 6    | 6    | 1    | 5    | 6    | 6    | 1    | 2 |
| 16579  |      |      |      |      |      | 1    | 1    | 2    | 5    | 3    | 6    | 3    | 5    | 1    | 3 |
| 16588  |      |      |      |      |      | 5    | 2    | 2    | 2    | 5    | 3    | 2    | 2    | 4    | 1 |
| 16599  |      |      |      |      |      | 6    | 6    | 6    | 3    | 6    | 2    | 5    | 4    | 6    | 6 |
| 16605  | 1    | 3    | 3    | 2    |      |      |      |      |      |      |      |      |      |      |   |
| 16622  |      |      |      |      |      | 4    | 4    | 4    | 4    | 4    | 4    | 4    | 4    | 4    | 4 |
| 16635  | 5    | 5    | 5    | 5    |      |      |      |      |      |      |      |      |      |      |   |
| 16638  |      |      |      |      |      | 6    | 6    | 6    | 6    | 6    | 6    | 6    | 6    | 3    | 6 |
| 16652  |      |      |      |      |      | 6    | 6    | 6    | 6    | 3    | 6    | 6    | 6    | 3    | 6 |
| 16656  | 3    | 4    | 4    | 4    |      |      |      |      |      |      |      |      |      |      |   |
| 16671  |      |      |      |      |      |      |      |      |      |      |      |      |      |      |   |
| 16676  | 1    | 1    | 1    |      |      |      |      |      |      |      |      |      |      |      |   |
| 16678  | 2    | 2    | 3    | 3    |      |      |      |      |      |      |      |      |      |      |   |
| 16702  | 4    | 4    | 4    | 4    |      |      |      |      |      |      |      |      |      |      |   |
| 16705  |      |      |      |      |      | 3    | 5    | 5    | 5    | 3    | 3    | 5    | 6    | 3    | 6 |
| 16707  | 1    | 3    | 1    | 2    |      |      |      |      |      |      |      |      |      |      |   |
| 16711  |      |      |      |      |      | 5    | 5    | 5    | 3    | 5    | 4    | 5    | 5    | 6    | 5 |
| 16712  | 3    | 3    | 3    | 3    |      |      |      |      |      |      |      |      |      |      |   |
| 16716  |      |      |      |      |      |      |      |      |      |      |      |      |      |      |   |
| 16724  |      |      |      |      |      | 3    | 4    | 4    | 4    | 3    | 5    | 4    | 5    | 3    | 3 |
| 16727  | 3    | 3    | 3    | 3    |      |      |      |      |      |      |      |      |      |      |   |

| respid | Q47l | Q47m | Q47n | Q47o | Q48a | Q48b | Q48c | Q48d | Q48e | Q48f | Q48g | Q48h | Q48i | Q48j |
|--------|------|------|------|------|------|------|------|------|------|------|------|------|------|------|
| 16734  | 3    | 1    | 1    | 3    |      |      |      |      |      |      |      |      |      |      |
| 16740  |      |      |      |      | 1    | 6    | 6    | 6    | 1    | 6    | 6    | 6    | 1    | 6    |
| 16748  | 5    | 5    | 5    | 4    |      |      |      |      |      |      |      |      |      |      |
| 16759  | 4    | 4    | 4    | 4    |      |      |      |      |      |      |      |      |      |      |
| 16761  |      |      |      |      |      |      |      |      |      |      |      |      |      |      |
| 16763  | 2    | 3    | 3    | 2    |      |      |      |      |      |      |      |      |      |      |
| 16764  | 3    | 3    | 2    | 3    |      |      |      |      |      |      |      |      |      |      |
| 16766  |      |      |      |      | 4    | 6    | 6    | 6    | 1    | 6    | 6    | 6    | 1    | 6    |
| 16767  | 5    | 5    | 5    | 5    |      |      |      |      |      |      |      |      |      |      |
| 16776  |      |      |      |      | 3    | 5    | 5    | 5    | 3    | 5    | 6    | 6    | 2    | 5    |
| 16781  | 2    | 1    | 1    | 2    |      |      |      |      |      |      |      |      |      |      |
| 16793  | 3    | 3    | 3    | 3    |      |      |      |      |      |      |      |      |      |      |
| 16796  |      |      |      |      | 2    | 2    | 2    | 2    | 5    | 2    | 2    | 2    | 5    | 2    |
| 16810  |      |      |      |      | 1    | 6    | 6    | 6    | 1    | 6    | 4    | 6    | 1    | 6    |
| 16811  |      |      |      |      | 3    | 3    | 5    | 5    | 3    | 5    | 5    | 6    | 3    | 4    |
| 16813  |      |      |      |      |      |      |      |      |      |      |      |      |      |      |
| 16814  | 4    | 4    | 4    | 3    |      |      |      |      |      |      |      |      |      |      |
| 16831  |      |      |      |      | 3    | 5    | 6    | 6    | 3    | 6    | 6    | 6    | 2    | 6    |
| 16833  |      |      |      |      | 3    | 5    | 6    | 6    | 2    | 6    | 6    | 6    | 1    | 6    |
| 16839  | 3    | 3    | 3    | 3    |      |      |      |      |      |      |      |      |      |      |
| 16843  |      |      |      |      | 2    | 4    | 5    | 5    | 3    | 5    | 6    | 5    | 2    | 5    |
| 16860  |      |      |      |      |      |      |      |      |      |      |      |      |      |      |
| 16871  | 5    | 5    | 5    | 5    |      |      |      |      |      |      |      |      |      |      |
| 16881  | 4    | 4    | 4    | 3    |      |      |      |      |      |      |      |      |      |      |
| 16884  |      |      |      |      | 5    | 4    | 4    | 4    | 3    | 4    | 4    | 2    | 3    | 5    |
| 16891  | 4    | 4    | 4    | 4    |      |      |      |      |      |      |      |      |      |      |
| 16909  |      |      |      |      | 4    | 3    | 3    | 3    | 3    | 4    | 3    | 5    | 4    | 3    |
| 16911  |      |      |      |      |      |      |      |      |      |      |      |      |      |      |
| 16922  | 1    | 3    | 3    | 3    |      |      |      |      |      |      |      |      |      |      |
| 16935  | 3    | 3    | 4    | 2    |      |      |      |      |      |      |      |      |      |      |
| 16942  |      |      |      |      | 2    | 2    | 2    | 2    | 4    | 2    | 3    | 2    | 2    | 2    |
| 16950  |      |      |      |      |      |      |      |      |      |      |      |      |      |      |

| respid | Q47l | Q47m | Q47n | Q47o | Q48a | Q48b | Q48c | Q48d | Q48e | Q48f | Q48g | Q48h | Q48i | Q48j |   |
|--------|------|------|------|------|------|------|------|------|------|------|------|------|------|------|---|
| 16952  |      |      |      |      |      | 3    | 4    | 4    | 3    | 5    | 3    | 4    | 2    | 4    | 3 |
| 16963  | 3    | 3    | 4    | 4    |      |      |      |      |      |      |      |      |      |      |   |
| 16967  | 3    | 3    | 3    | 3    |      |      |      |      |      |      |      |      |      |      |   |
| 16970  |      |      |      |      |      | 6    | 1    | 1    | 3    | 2    | 2    | 2    | 2    | 5    | 2 |
| 16976  | 4    | 4    | 4    | 3    |      |      |      |      |      |      |      |      |      |      |   |
| 16982  | 3    | 3    |      | 4    |      |      |      |      |      |      |      |      |      |      |   |
| 16995  | 3    | 4    | 4    | 3    |      |      |      |      |      |      |      |      |      |      |   |
| 17004  | 2    | 3    | 3    | 2    |      |      |      |      |      |      |      |      |      |      |   |
| 17006  | 4    | 4    | 5    | 4    |      |      |      |      |      |      |      |      |      |      |   |
| 17009  | 5    | 3    |      | 2    |      |      |      |      |      |      |      |      |      |      |   |
| 17021  |      |      |      |      |      |      |      |      |      |      |      |      |      |      |   |
| 17040  |      |      |      |      |      | 4    | 3    | 5    | 3    | 4    | 4    | 5    | 5    | 4    | 5 |
| 17041  |      |      |      |      |      |      |      |      |      |      |      |      |      |      |   |
| 17044  |      |      |      |      |      | 6    | 6    | 6    | 6    | 6    | 6    | 6    | 6    | 6    | 6 |
| 17046  |      |      |      |      |      | 2    | 2    | 2    | 2    | 3    | 3    | 3    | 3    | 3    | 2 |
| 17052  | 3    | 3    | 3    | 3    |      |      |      |      |      |      |      |      |      |      |   |
| 17055  |      |      |      |      |      | 3    | 3    | 3    | 3    | 3    | 3    | 3    | 3    | 3    | 3 |
| 17108  |      |      |      |      |      |      |      |      |      |      |      |      |      |      |   |
| 17109  |      |      |      |      |      | 3    | 3    | 6    | 6    | 3    | 6    | 6    | 6    | 1    | 6 |
| 17113  |      |      |      |      |      |      |      |      |      |      |      |      |      |      |   |
| 17115  | 4    | 1    | 2    | 3    |      |      |      |      |      |      |      |      |      |      |   |
| 17132  |      |      |      |      |      |      |      |      |      |      |      |      |      |      |   |
| 17135  |      |      |      |      |      | 2    | 3    | 4    | 5    | 2    | 5    | 5    | 5    | 2    | 5 |
| 17138  |      |      |      |      |      | 3    | 4    | 4    | 4    | 3    | 3    | 3    | 4    | 3    | 3 |
| 17141  |      |      |      |      |      |      |      |      |      |      |      |      |      |      |   |
| 17143  | 3    | 3    | 3    | 3    |      |      |      |      |      |      |      |      |      |      |   |
| 17148  | 2    | 1    | 1    | 1    |      |      |      |      |      |      |      |      |      |      |   |
| 17151  | 4    | 4    | 4    | 4    |      |      |      |      |      |      |      |      |      |      |   |
| 17153  | 4    | 4    | 4    | 4    |      |      |      |      |      |      |      |      |      |      |   |
| 17154  | 3    | 4    | 4    | 2    |      |      |      |      |      |      |      |      |      |      |   |
| 17157  | 2    | 1    | 2    | 1    |      |      |      |      |      |      |      |      |      |      |   |
| 17160  | 4    | 5    | 5    | 4    |      |      |      |      |      |      |      |      |      |      |   |



| respid | Q47l | Q47m | Q47n | Q47o | Q48a | Q48b | Q48c | Q48d | Q48e | Q48f | Q48g | Q48h | Q48i | Q48j |   |
|--------|------|------|------|------|------|------|------|------|------|------|------|------|------|------|---|
| 17167  |      | 3    | 2    | 2    | 3    |      |      |      |      |      |      |      |      |      |   |
| 17169  |      | 4    | 4    | 3    | 4    |      |      |      |      |      |      |      |      |      |   |
| 17174  |      | 3    | 4    | 3    | 3    |      |      |      |      |      |      |      |      |      |   |
| 17179  |      | 3    | 4    | 4    | 4    |      |      |      |      |      |      |      |      |      |   |
| 17180  |      | 4    | 2    | 1    | 3    |      |      |      |      |      |      |      |      |      |   |
| 17182  |      | 2    | 2    | 3    | 3    |      |      |      |      |      |      |      |      |      |   |
| 17184  |      | 3    | 1    | 1    | 1    |      |      |      |      |      |      |      |      |      |   |
| 17186  |      | 4    | 4    | 4    | 4    |      |      |      |      |      |      |      |      |      |   |
| 17187  |      | 1    | 4    | 4    | 4    |      |      |      |      |      |      |      |      |      |   |
| 17192  |      | 2    | 1    | 1    | 1    |      |      |      |      |      |      |      |      |      |   |
| 17197  |      | 4    | 5    | 5    | 4    |      |      |      |      |      |      |      |      |      |   |
| 17217  |      |      |      |      |      | 2    | 6    | 6    | 6    | 2    | 6    | 6    | 6    | 2    | 6 |
| 17226  |      | 3    | 4    | 3    | 2    |      |      |      |      |      |      |      |      |      |   |
| 17228  |      | 4    | 4    | 4    | 4    |      |      |      |      |      |      |      |      |      |   |
| 17245  |      | 4    | 4    | 4    | 4    |      |      |      |      |      |      |      |      |      |   |
| 17247  |      |      |      |      |      |      |      |      |      |      |      |      |      |      |   |
| 17258  |      |      |      |      |      | 4    | 5    | 5    | 5    | 3    | 5    | 5    | 5    | 3    | 4 |
| 17259  |      | 3    | 3    | 3    | 3    |      |      |      |      |      |      |      |      |      |   |
| 17262  |      | 4    | 5    | 5    | 5    |      |      |      |      |      |      |      |      |      |   |
| 17265  |      |      |      |      |      | 3    | 3    | 5    | 5    | 3    | 4    | 5    | 5    | 3    | 6 |
| 17281  |      | 4    | 4    | 4    | 4    |      |      |      |      |      |      |      |      |      |   |
| 17282  |      |      |      |      |      | 2    | 5    | 5    | 5    | 2    | 5    | 4    | 5    | 2    | 4 |
| 17293  |      | 4    | 4    | 4    |      |      |      |      |      |      |      |      |      |      |   |
| 17306  |      |      |      |      |      | 3    | 4    | 3    | 3    | 4    | 4    | 4    | 4    | 4    | 4 |
| 17312  |      | 4    | 4    | 4    | 4    |      |      |      |      |      |      |      |      |      |   |
| 17318  |      | 1    | 3    | 3    | 3    |      |      |      |      |      |      |      |      |      |   |
| 17328  |      |      |      |      |      | 5    | 5    | 5    | 5    | 5    | 5    | 5    | 5    | 5    | 5 |
| 17343  |      | 4    | 4    | 4    | 4    |      |      |      |      |      |      |      |      |      |   |
| 17344  |      |      |      |      |      | 2    | 3    | 3    | 3    | 4    | 3    | 3    | 3    | 4    | 2 |
| 17348  |      | 3    | 3    | 3    | 3    |      |      |      |      |      |      |      |      |      |   |
| 17352  |      |      |      |      |      | 3    | 4    | 4    | 4    | 3    | 4    | 5    | 4    | 3    | 4 |
| 17355  |      | 3    | 3    | 3    | 3    |      |      |      |      |      |      |      |      |      |   |

| respid | Q47l | Q47m | Q47n | Q47o | Q48a | Q48b | Q48c | Q48d | Q48e | Q48f | Q48g | Q48h | Q48i | Q48j |
|--------|------|------|------|------|------|------|------|------|------|------|------|------|------|------|
| 17356  |      |      |      |      |      | 3    | 5    | 5    | 5    | 3    | 5    | 5    | 5    | 5    |
| 17359  |      |      |      |      |      | 4    | 3    | 3    | 3    | 4    | 4    | 4    | 5    | 4    |
| 17373  |      |      |      |      |      | 3    | 3    | 3    | 4    | 3    | 4    | 5    | 5    | 3    |
| 17381  |      |      |      |      |      | 6    | 6    | 6    |      |      |      |      |      |      |
| 17388  |      |      |      |      |      | 2    | 4    | 5    | 5    | 2    | 5    | 5    | 5    | 2    |
| 17394  |      |      |      |      |      | 3    | 4    | 4    | 4    | 3    | 4    | 3    | 4    | 3    |
| 17401  |      |      |      |      |      |      |      |      |      |      |      |      |      |      |
| 17403  |      |      |      |      |      | 1    | 6    | 6    | 6    | 1    | 6    | 6    | 6    | 1    |
| 17411  |      |      |      |      |      |      |      |      |      |      |      |      |      |      |
| 17423  |      |      |      |      |      | 5    | 5    | 5    | 5    | 5    | 6    | 5    | 5    | 2    |
| 17427  |      |      |      |      |      |      |      |      |      |      |      |      |      |      |
| 17433  |      |      |      |      |      | 2    | 6    | 6    | 5    | 2    | 6    | 6    | 6    | 2    |
| 17441  | 5    | 5    | 5    | 5    |      |      |      |      |      |      |      |      |      |      |
| 17442  | 4    | 4    | 4    | 4    |      |      |      |      |      |      |      |      |      |      |
| 17447  | 4    | 4    | 4    | 4    |      |      |      |      |      |      |      |      |      |      |
| 17458  |      |      |      |      |      | 2    | 3    | 6    | 6    | 1    | 6    | 6    | 6    | 1    |
| 17474  |      |      |      |      |      | 6    | 6    | 5    |      | 6    |      | 2    | 6    |      |
| 17475  | 3    | 3    | 3    | 3    |      |      |      |      |      |      |      |      |      |      |
| 17476  | 3    | 4    | 3    | 3    |      |      |      |      |      |      |      |      |      |      |
| 17480  |      |      |      |      |      | 2    | 5    | 6    | 6    | 2    | 6    | 6    | 6    | 2    |
| 17484  | 1    | 3    | 3    | 3    |      |      |      |      |      |      |      |      |      |      |
| 17490  |      |      |      |      |      | 4    | 4    | 4    | 3    | 3    | 4    | 3    | 4    | 4    |
| 17491  |      |      |      |      |      | 5    | 5    | 5    | 5    | 5    | 5    | 5    | 5    | 5    |
| 17500  |      |      |      |      |      | 3    | 5    | 4    | 5    | 4    | 3    | 5    | 5    | 4    |
| 17507  | 4    | 4    | 4    | 4    |      |      |      |      |      |      |      |      |      |      |
| 17517  | 1    | 1    | 1    | 1    |      |      |      |      |      |      |      |      |      |      |
| 17520  | 3    | 3    |      | 3    |      |      |      |      |      |      |      |      |      |      |
| 17521  | 3    | 4    | 4    | 4    |      |      |      |      |      |      |      |      |      |      |
| 17531  | 3    | 3    | 3    | 3    |      |      |      |      |      |      |      |      |      |      |
| 17540  |      |      |      |      |      | 3    | 4    | 4    | 4    | 4    | 4    | 4    | 5    | 3    |
| 17550  | 4    | 4    | 4    | 4    |      |      |      |      |      |      |      |      |      |      |
| 17551  |      |      |      |      |      | 3    | 5    | 5    | 5    | 2    | 5    | 5    | 5    | 2    |

| respid | Q47l | Q47m | Q47n | Q47o | Q48a | Q48b | Q48c | Q48d | Q48e | Q48f | Q48g | Q48h | Q48i | Q48j |
|--------|------|------|------|------|------|------|------|------|------|------|------|------|------|------|
| 17555  | 3    | 2    | 2    | 2    |      |      |      |      |      |      |      |      |      |      |
| 17556  |      |      |      |      |      | 5    | 2    | 2    | 3    | 4    | 3    | 4    | 3    | 3    |
| 17574  | 1    | 3    | 3    | 4    |      |      |      |      |      |      |      |      |      |      |
| 17575  |      |      |      |      |      | 1    | 6    | 6    | 6    | 1    | 6    | 6    | 6    | 1    |
| 17582  |      |      |      |      |      | 5    |      |      |      |      |      |      |      |      |
| 17587  |      |      |      |      |      |      |      |      |      |      |      |      |      |      |
| 17601  | 3    | 3    | 3    | 3    |      |      |      |      |      |      |      |      |      |      |
| 17607  | 3    | 2    | 3    | 3    |      |      |      |      |      |      |      |      |      |      |
| 17609  |      |      |      |      |      | 3    | 3    | 2    | 3    | 3    | 2    | 2    | 3    | 5    |
| 17611  |      |      |      |      |      | 1    | 3    | 6    | 5    | 2    | 5    | 5    | 5    | 2    |
| 17613  |      |      |      |      |      | 2    | 5    | 5    | 5    | 3    | 4    | 5    | 5    | 4    |
| 17615  |      |      |      |      |      | 5    | 5    | 5    | 5    | 5    | 5    | 5    | 5    | 5    |
| 17620  | 3    | 4    | 4    | 3    |      |      |      |      |      |      |      |      |      |      |
| 17624  |      |      |      |      |      | 3    | 4    | 4    | 3    | 4    | 4    | 4    | 4    | 4    |
| 17635  | 3    | 4    | 3    | 4    |      |      |      |      |      |      |      |      |      |      |
| 17643  |      |      |      |      |      | 6    | 2    | 3    | 3    | 5    | 3    | 2    | 5    | 3    |
| 17645  |      |      |      |      |      | 5    | 3    | 3    | 3    | 4    | 5    | 5    | 3    | 5    |
| 17646  |      |      |      |      |      | 6    | 6    | 1    | 5    | 3    | 4    | 4    | 5    | 6    |
| 17649  | 4    | 3    | 3    | 4    |      |      |      |      |      |      |      |      |      |      |
| 17658  | 3    | 4    | 5    | 3    |      |      |      |      |      |      |      |      |      |      |
| 17666  |      |      |      |      |      |      |      |      |      |      |      |      |      |      |
| 17670  |      |      |      |      |      | 5    | 5    | 5    | 5    | 5    | 5    | 5    | 5    | 5    |
| 17678  |      |      |      |      |      | 1    | 6    | 5    | 3    | 2    | 6    | 3    | 6    | 1    |
| 17679  |      |      |      |      |      | 2    | 3    | 4    | 6    | 1    | 6    | 6    | 6    | 2    |
| 17695  |      |      |      |      |      | 5    | 2    | 3    | 4    | 3    | 4    | 6    | 6    | 3    |
| 17697  | 4    | 4    |      | 3    |      |      |      |      |      |      |      |      |      |      |
| 17698  | 2    | 3    | 3    | 3    |      |      |      |      |      |      |      |      |      |      |
| 17723  |      |      |      |      |      | 3    | 4    | 3    | 3    | 2    | 3    | 3    | 3    | 3    |
| 17727  | 4    | 4    | 4    | 4    |      |      |      |      |      |      |      |      |      |      |
| 17734  |      |      |      |      |      | 3    | 6    | 6    | 6    | 3    | 6    | 6    | 6    | 2    |
| 17737  |      |      |      |      |      | 3    | 6    | 6    | 5    | 3    | 4    | 5    | 6    | 2    |
| 17748  | 1    | 1    | 1    | 1    |      |      |      |      |      |      |      |      |      |      |

| respid | Q47l | Q47m | Q47n | Q47o | Q48a | Q48b | Q48c | Q48d | Q48e | Q48f | Q48g | Q48h | Q48i | Q48j |   |
|--------|------|------|------|------|------|------|------|------|------|------|------|------|------|------|---|
| 17749  |      |      |      |      |      |      |      |      |      |      |      |      |      |      |   |
| 17754  | 3    | 2    | 2    | 2    |      |      |      |      |      |      |      |      |      |      |   |
| 17766  |      |      |      |      |      | 5    | 5    | 3    | 2    | 5    | 1    | 5    | 5    | 6    | 6 |
| 17777  |      |      |      |      |      | 3    | 4    | 4    | 5    | 2    | 6    | 6    | 6    | 2    | 5 |
| 17780  | 2    | 3    | 3    | 2    |      |      |      |      |      |      |      |      |      |      |   |
| 17788  | 3    | 3    | 3    | 3    |      |      |      |      |      |      |      |      |      |      |   |
| 17801  | 4    | 4    | 4    | 4    |      |      |      |      |      |      |      |      |      |      |   |
| 17803  |      |      |      |      |      |      |      |      |      |      | 5    |      |      |      |   |
| 17807  | 1    | 4    |      |      |      |      |      |      |      |      |      |      |      |      |   |
| 17808  | 5    | 5    | 5    | 4    |      |      |      |      |      |      |      |      |      |      |   |
| 17809  | 3    | 3    | 3    | 3    |      |      |      |      |      |      |      |      |      |      |   |
| 17821  | 3    | 4    | 5    | 4    |      |      |      |      |      |      |      |      |      |      |   |
| 17827  | 2    | 2    | 2    | 2    |      |      |      |      |      |      |      |      |      |      |   |
| 17834  | 1    | 1    | 2    | 2    |      |      |      |      |      |      |      |      |      |      |   |
| 17838  |      | 1    | 1    | 1    |      |      |      |      |      |      |      |      |      |      |   |
| 17842  |      |      |      |      |      | 2    | 2    | 6    | 6    | 1    | 2    | 6    | 6    | 2    | 6 |
| 17862  | 4    | 4    | 4    | 4    |      |      |      |      |      |      |      |      |      |      |   |
| 17863  |      |      |      |      |      |      |      |      |      |      |      | 1    |      |      | 1 |
| 17871  | 1    | 1    | 1    | 3    |      |      |      |      |      |      |      |      |      |      |   |
| 17872  | 4    | 4    | 4    | 4    |      |      |      |      |      |      |      |      |      |      |   |
| 17903  |      |      |      |      |      | 6    | 4    | 6    | 5    | 3    | 4    | 4    | 4    | 3    | 3 |
| 17906  | 4    | 4    | 4    | 5    |      |      |      |      |      |      |      |      |      |      |   |
| 17910  |      |      |      |      |      | 3    | 3    | 3    | 3    | 3    | 3    | 3    | 3    | 3    | 3 |
| 17922  | 1    | 1    | 1    | 2    |      |      |      |      |      |      |      |      |      |      |   |
| 17923  | 4    | 4    | 4    | 4    |      |      |      |      |      |      |      |      |      |      |   |
| 17925  | 3    | 4    | 4    | 3    |      |      |      |      |      |      |      |      |      |      |   |
| 17926  | 5    | 5    | 5    | 5    |      |      |      |      |      |      |      |      |      |      |   |
| 17937  | 1    | 1    | 1    | 1    |      |      |      |      |      |      |      |      |      |      |   |
| 17956  | 4    | 4    | 4    | 4    |      |      |      |      |      |      |      |      |      |      |   |
| 17958  | 3    | 3    | 3    | 3    |      |      |      |      |      |      |      |      |      |      |   |
| 17985  | 4    | 4    | 4    | 4    |      |      |      |      |      |      |      |      |      |      |   |
| 17989  |      |      |      |      |      |      |      |      | 6    |      |      |      |      |      |   |

| respid | Q47l | Q47m | Q47n | Q47o | Q48a | Q48b | Q48c | Q48d | Q48e | Q48f | Q48g | Q48h | Q48i | Q48j |
|--------|------|------|------|------|------|------|------|------|------|------|------|------|------|------|
| 17995  |      |      |      |      |      |      |      |      |      |      |      |      |      |      |
| 18000  |      |      |      |      | 3    | 4    | 4    | 3    | 4    | 3    | 3    | 3    | 3    | 3    |
| 18010  | 3    | 4    | 4    | 3    |      |      |      |      |      |      |      |      |      |      |
| 18015  | 4    | 3    | 3    | 5    |      |      |      |      |      |      |      |      |      |      |
| 18018  |      |      |      |      | 2    | 4    | 3    | 4    | 3    | 4    | 4    | 5    | 3    | 5    |
| 18031  |      |      |      |      | 3    | 3    | 3    | 3    | 3    | 3    | 3    | 3    | 3    | 3    |
| 18033  |      |      |      |      | 5    | 5    | 5    | 5    | 2    | 5    | 5    | 5    | 2    | 5    |
| 18036  |      |      |      |      | 2    | 3    | 5    | 3    | 4    | 4    | 6    | 6    | 3    | 3    |
| 18041  |      |      |      |      |      |      |      |      |      |      |      |      |      |      |
| 18068  |      |      |      |      |      |      |      |      |      |      |      |      |      |      |
| 18080  | 1    | 4    | 1    | 3    |      |      |      |      |      |      |      |      |      |      |
| 18081  | 4    | 4    | 4    | 4    |      |      |      |      |      |      |      |      |      |      |
| 18083  | 1    | 3    | 1    | 1    |      |      |      |      |      |      |      |      |      |      |
| 18113  | 4    | 2    | 2    | 3    |      |      |      |      |      |      |      |      |      |      |
| 18115  | 3    | 3    | 3    | 3    |      |      |      |      |      |      |      |      |      |      |
| 18117  |      |      |      |      | 2    | 1    | 1    | 1    | 5    | 1    | 1    | 1    | 5    | 1    |
| 18129  |      |      |      |      | 3    | 2    | 6    | 6    | 2    | 6    | 6    | 6    | 1    | 6    |
| 18132  | 3    | 3    | 3    | 3    |      |      |      |      |      |      |      |      |      |      |
| 18146  | 3    | 3    | 3    | 3    |      |      |      |      |      |      |      |      |      |      |
| 18147  | 2    | 3    | 1    | 2    |      |      |      |      |      |      |      |      |      |      |
| 18153  |      |      |      |      |      |      |      |      |      |      |      |      |      |      |
| 18154  |      |      |      |      |      |      |      |      |      |      |      |      |      |      |
| 18157  | 4    | 4    | 4    | 4    |      |      |      |      |      |      |      |      |      |      |
| 18166  |      |      |      |      |      |      |      |      |      |      |      |      |      |      |
| 18169  | 4    | 4    | 4    | 4    |      |      |      |      |      |      |      |      |      |      |
| 18171  |      |      |      |      | 2    | 5    | 6    | 6    | 2    | 5    | 6    | 6    | 1    | 5    |
| 18173  |      |      |      |      | 3    | 3    | 3    | 3    | 4    | 4    | 4    | 5    | 3    | 3    |
| 18204  | 4    | 4    | 4    | 4    |      |      |      |      |      |      |      |      |      |      |
| 18210  | 4    | 3    | 3    | 3    |      |      |      |      |      |      |      |      |      |      |
| 18212  |      |      |      |      |      |      |      |      |      |      |      |      |      |      |
| 18220  | 3    | 3    | 2    | 2    |      |      |      |      |      |      |      |      |      |      |
| 18221  |      |      |      |      | 6    | 6    | 6    | 6    |      |      |      |      |      |      |

| respid | Q47l | Q47m | Q47n | Q47o | Q48a | Q48b | Q48c | Q48d | Q48e | Q48f | Q48g | Q48h | Q48i | Q48j |   |
|--------|------|------|------|------|------|------|------|------|------|------|------|------|------|------|---|
| 18228  |      | 3    | 3    | 3    | 2    |      |      |      |      |      |      |      |      |      |   |
| 18231  |      | 4    | 4    | 4    | 4    |      |      |      |      |      |      |      |      |      |   |
| 18233  |      | 4    | 4    | 4    | 4    |      |      |      |      |      |      |      |      |      |   |
| 18235  |      |      |      |      |      | 4    | 3    | 4    | 4    | 3    | 3    | 4    | 5    | 4    | 3 |
| 18237  |      |      |      |      |      |      |      |      |      |      |      |      |      |      |   |
| 18250  |      |      |      |      |      | 2    | 4    | 5    | 4    | 2    | 4    | 5    | 5    | 3    | 6 |
| 18253  |      |      |      |      |      | 3    | 3    | 3    | 4    | 3    | 5    | 3    | 3    | 4    | 3 |
| 18264  |      |      |      |      |      | 2    | 4    | 5    | 5    | 3    | 5    | 5    | 6    | 2    | 5 |
| 18285  | 1    | 1    | 1    | 1    |      |      |      |      |      |      |      |      |      |      |   |
| 18287  |      |      |      |      |      |      |      |      |      |      |      |      |      |      |   |
| 18296  |      |      |      |      |      | 4    | 6    | 6    | 6    | 5    | 5    | 5    | 5    | 5    | 5 |
| 18299  | 3    | 3    | 3    | 3    |      |      |      |      |      |      |      |      |      |      |   |
| 18313  |      |      |      |      |      |      |      |      |      |      |      |      |      |      |   |
| 18321  |      |      |      |      |      | 3    | 6    | 6    | 6    | 3    | 6    | 6    | 6    | 3    | 6 |
| 18324  |      |      |      |      |      |      |      |      |      |      |      |      |      |      |   |
| 18329  | 4    | 4    | 4    | 4    |      |      |      |      |      |      |      |      |      |      |   |
| 18332  |      |      |      |      |      | 3    | 4    | 4    | 4    | 3    | 4    | 5    | 4    | 3    | 4 |
| 18339  | 2    | 3    | 3    | 4    |      |      |      |      |      |      |      |      |      |      |   |
| 18340  | 4    | 4    | 4    | 3    |      |      |      |      |      |      |      |      |      |      |   |
| 18348  |      |      |      |      |      | 2    | 5    | 5    | 6    | 3    | 6    | 6    | 6    | 2    | 6 |
| 18355  | 2    | 1    | 1    | 1    |      |      |      |      |      |      |      |      |      |      |   |
| 18360  | 4    | 4    | 4    | 4    |      |      |      |      |      |      |      |      |      |      |   |
| 18380  |      |      |      |      |      | 3    | 5    | 5    | 5    | 2    | 3    | 5    | 4    | 5    | 4 |
| 18403  |      |      |      |      |      | 5    | 5    | 5    | 5    | 4    | 5    | 5    | 5    | 3    | 5 |
| 18405  | 3    | 3    | 3    | 3    |      |      |      |      |      |      |      |      |      |      |   |
| 18409  | 3    | 4    | 3    | 3    |      |      |      |      |      |      |      |      |      |      |   |
| 18445  | 3    | 4    | 4    | 4    |      |      |      |      |      |      |      |      |      |      |   |
| 18458  | 4    | 4    | 4    | 4    |      |      |      |      |      |      |      |      |      |      |   |
| 18477  |      |      |      |      |      | 6    | 1    | 3    | 1    | 6    | 1    | 3    | 6    | 4    | 6 |
| 18481  | 2    | 1    | 2    | 2    |      |      |      |      |      |      |      |      |      |      |   |
| 18491  | 3    | 5    | 5    | 5    |      |      |      |      |      |      |      |      |      |      |   |
| 18492  | 3    | 5    | 5    | 5    |      |      |      |      |      |      |      |      |      |      |   |

| respid | Q47l | Q47m | Q47n | Q47o | Q48a | Q48b | Q48c | Q48d | Q48e | Q48f | Q48g | Q48h | Q48i | Q48j |   |
|--------|------|------|------|------|------|------|------|------|------|------|------|------|------|------|---|
| 18494  |      |      |      |      |      | 1    | 2    | 5    | 6    | 4    | 3    | 3    | 6    | 6    | 2 |
| 18495  |      |      |      |      |      | 6    | 6    | 6    | 6    | 6    | 6    | 6    | 6    | 6    | 6 |
| 18496  |      |      |      |      |      | 6    | 6    | 6    | 6    | 5    | 6    | 6    | 6    | 2    | 6 |
| 18507  |      |      |      |      |      | 4    | 2    | 2    | 1    | 1    | 1    | 1    | 1    | 5    | 3 |
| 18509  |      |      |      |      |      |      |      |      |      |      |      |      |      |      |   |
| 18510  |      |      |      |      |      | 3    | 4    | 4    | 5    | 2    | 5    | 5    | 5    | 2    | 5 |
| 18513  |      |      |      |      |      | 3    | 5    | 3    | 2    | 5    | 5    | 3    | 6    | 2    | 5 |
| 18525  |      |      |      |      |      |      |      |      |      |      |      |      |      |      |   |
| 18526  |      |      |      |      |      | 4    | 3    | 3    | 3    | 4    | 3    | 3    | 3    | 4    | 3 |
| 18527  | 1    | 1    | 1    | 1    |      |      |      |      |      |      |      |      |      |      |   |
| 18536  |      |      |      |      |      | 3    | 3    | 3    | 3    | 3    | 3    | 3    | 3    | 3    | 3 |
| 18540  |      |      |      |      |      | 3    | 4    | 4    | 4    | 3    | 3    | 4    | 4    | 3    | 4 |
| 18548  |      |      |      |      |      | 3    | 4    | 4    | 3    | 4    | 4    | 4    | 4    | 3    | 4 |
| 18550  |      |      |      |      |      |      |      |      |      |      |      |      |      |      |   |
| 18556  |      |      |      |      |      |      |      |      |      |      |      |      |      |      |   |
| 18561  |      |      |      |      |      |      |      |      |      |      |      |      |      |      |   |
| 18577  | 2    | 2    | 2    | 1    |      |      |      |      |      |      |      |      |      |      |   |
| 18580  |      |      |      |      |      | 6    | 6    | 6    | 6    | 3    | 6    | 6    | 6    | 1    | 5 |
| 18633  | 1    | 3    | 3    | 1    |      |      |      |      |      |      |      |      |      |      |   |
| 18635  | 1    | 3    | 3    | 1    |      |      |      |      |      |      |      |      |      |      |   |
| 18636  |      |      |      |      |      |      |      |      |      |      |      |      |      |      |   |
| 18645  |      |      |      |      |      | 2    | 6    | 6    | 5    | 2    | 5    | 5    | 6    | 2    | 3 |
| 18649  |      |      |      |      |      |      | 3    | 3    | 3    | 4    | 4    | 3    | 4    | 2    | 3 |
| 18664  | 3    | 4    | 4    | 4    |      |      |      |      |      |      |      |      |      |      |   |
| 18668  | 3    | 4    | 4    | 4    |      |      |      |      |      |      |      |      |      |      |   |
| 18682  | 3    |      |      |      |      |      |      |      |      |      |      |      |      |      |   |
| 18685  |      |      |      |      |      | 4    | 3    | 3    | 3    | 4    | 4    | 4    | 4    | 4    | 3 |
| 18688  |      |      |      |      |      | 3    | 4    | 4    | 4    | 3    | 4    | 6    | 6    | 2    | 4 |
| 18689  | 3    | 2    | 2    | 3    |      |      |      |      |      |      |      |      |      |      |   |
| 18693  |      |      |      |      |      | 3    | 2    | 2    | 4    | 4    | 4    | 4    | 4    | 4    | 4 |
| 18694  |      |      |      |      |      |      | 6    | 6    | 6    | 4    | 5    | 5    | 5    | 5    |   |
| 18705  | 3    | 2    | 3    | 2    |      |      |      |      |      |      |      |      |      |      |   |

| respid | Q47l | Q47m | Q47n | Q47o | Q48a | Q48b | Q48c | Q48d | Q48e | Q48f | Q48g | Q48h | Q48i | Q48j |
|--------|------|------|------|------|------|------|------|------|------|------|------|------|------|------|
| 18710  | 4    | 3    | 3    | 4    |      |      |      |      |      |      |      |      |      |      |
| 18715  |      |      |      |      | 1    | 1    | 1    | 6    | 5    | 5    | 3    | 5    | 2    | 3    |
| 18718  | 1    | 3    | 3    | 3    |      |      |      |      |      |      |      |      |      |      |
| 18727  |      |      |      |      | 3    | 4    | 4    | 4    | 4    | 4    | 4    | 4    | 4    | 4    |
| 18732  |      |      |      |      | 3    | 4    |      |      |      |      |      |      |      |      |
| 18735  |      |      |      |      | 3    | 4    | 3    | 5    | 3    | 4    | 3    | 4    | 3    | 4    |
| 18742  | 3    | 4    | 4    | 3    |      |      |      |      |      |      |      |      |      |      |
| 18745  | 3    | 4    | 4    | 4    |      |      |      |      |      |      |      |      |      |      |
| 18747  | 4    | 4    | 5    | 4    |      |      |      |      |      |      |      |      |      |      |
| 18750  |      |      |      |      | 2    | 3    | 5    | 5    |      | 5    | 5    | 5    | 2    | 5    |
| 18751  | 4    | 4    | 4    | 4    |      |      |      |      |      |      |      |      |      |      |
| 18753  |      |      |      |      |      |      |      |      |      |      |      |      |      |      |
| 18754  |      |      |      |      |      |      |      |      |      |      |      |      |      |      |
| 18759  |      |      |      |      | 5    | 5    | 5    | 5    | 5    | 4    | 6    | 6    | 5    | 6    |
| 18780  |      |      |      |      | 2    | 5    | 6    | 6    | 1    | 6    | 6    | 6    | 1    | 5    |
| 18782  |      |      |      |      | 3    | 3    | 3    | 3    | 3    | 3    | 3    | 4    | 4    | 6    |
| 18807  |      |      |      |      | 1    | 1    | 2    | 2    | 2    | 2    | 2    | 1    | 1    | 2    |
| 18815  |      |      |      |      |      |      |      |      |      |      |      |      |      |      |
| 18818  |      |      |      |      | 3    | 3    | 4    | 3    | 3    | 4    | 3    | 6    | 2    | 4    |
| 18820  |      |      |      |      | 6    | 2    | 2    | 3    | 6    | 2    | 2    | 2    | 6    | 2    |
| 18823  |      |      |      |      | 2    | 3    | 2    | 3    | 3    | 3    | 3    | 2    | 2    | 2    |
| 18825  |      |      |      |      | 6    | 6    | 6    | 6    | 3    | 6    | 6    | 6    | 3    | 6    |
| 18828  |      |      |      |      |      |      |      |      |      |      |      |      |      |      |
| 18832  |      |      |      |      | 3    | 3    | 4    | 4    | 4    | 4    | 5    | 4    | 3    | 3    |
| 18834  | 4    | 5    | 5    | 4    |      |      |      |      |      |      |      |      |      |      |
| 18835  | 4    | 4    | 4    | 3    |      |      |      |      |      |      |      |      |      |      |
| 18837  |      |      |      |      | 4    | 3    | 3    | 6    | 4    | 3    | 3    | 4    | 4    | 4    |
| 18842  |      |      |      |      | 3    | 4    | 4    | 4    | 3    | 4    | 4    | 4    | 3    | 4    |
| 18846  |      |      |      |      |      |      |      |      |      |      |      |      |      |      |
| 18855  | 3    | 3    |      | 3    |      |      |      |      |      |      |      |      |      |      |
| 18856  | 3    | 3    | 3    | 4    |      |      |      |      |      |      |      |      |      |      |
| 18887  | 4    | 2    | 2    | 2    |      |      |      |      |      |      |      |      |      |      |



| respid | Q47l | Q47m | Q47n | Q47o | Q48a | Q48b | Q48c | Q48d | Q48e | Q48f | Q48g | Q48h | Q48i | Q48j |   |
|--------|------|------|------|------|------|------|------|------|------|------|------|------|------|------|---|
| 18903  |      | 4    | 4    | 4    | 4    |      |      |      |      |      |      |      |      |      |   |
| 18906  |      | 3    | 3    | 3    | 3    |      |      |      |      |      |      |      |      |      |   |
| 18910  |      |      |      |      |      |      |      |      |      |      |      |      |      |      |   |
| 18919  |      |      |      |      |      | 3    | 5    | 5    | 6    | 2    | 3    | 5    | 5    | 2    | 3 |
| 18928  |      |      |      |      |      |      |      |      |      |      |      |      |      |      |   |
| 18931  |      | 3    | 4    | 4    | 4    |      |      |      |      |      |      |      |      |      |   |
| 18939  |      | 4    | 4    | 5    | 4    |      |      |      |      |      |      |      |      |      |   |
| 18946  |      |      |      |      |      | 3    | 4    | 4    | 4    | 3    | 4    | 5    | 4    | 3    | 4 |
| 18952  |      |      |      |      |      | 2    | 4    | 5    | 3    | 3    | 4    | 4    | 4    | 2    | 3 |
| 18954  |      | 4    | 4    | 4    | 4    |      |      |      |      |      |      |      |      |      |   |
| 18982  |      |      |      |      |      |      |      |      |      |      |      |      |      |      |   |
| 18986  |      |      | 3    | 3    | 3    |      |      |      |      |      |      |      |      |      |   |
| 18989  |      | 4    | 4    | 4    | 4    |      |      |      |      |      |      |      |      |      |   |
| 18990  |      | 3    | 4    | 4    | 3    |      |      |      |      |      |      |      |      |      |   |
| 18996  |      | 4    | 4    | 4    | 4    |      |      |      |      |      |      |      |      |      |   |
| 18998  |      |      |      |      |      | 1    | 6    | 6    | 6    | 1    | 6    | 6    | 6    | 2    | 6 |
| 19009  |      |      |      |      |      | 5    | 1    | 2    | 3    | 3    | 4    | 3    | 5    | 5    | 3 |
| 19010  |      |      |      |      |      | 2    | 5    | 5    | 5    | 2    | 5    | 5    | 6    | 2    | 5 |
| 19017  |      |      |      |      |      | 2    | 5    | 5    | 6    | 5    | 6    | 5    | 6    | 1    | 6 |
| 19018  |      |      |      |      |      |      |      |      |      |      |      |      |      |      |   |
| 19020  |      | 4    | 4    | 4    | 4    |      |      |      |      |      |      |      |      |      |   |
| 19027  |      |      |      |      |      | 5    | 5    | 5    | 5    | 4    | 5    | 5    | 6    | 2    | 4 |
| 19035  |      |      |      |      |      | 3    | 2    | 2    | 2    | 4    | 3    | 3    | 4    | 4    | 2 |
| 19037  |      |      |      |      |      |      |      |      |      |      |      |      |      |      |   |
| 19048  |      | 3    | 4    | 4    | 4    |      |      |      |      |      |      |      |      |      |   |
| 19051  |      |      |      |      |      | 3    | 6    | 6    | 6    | 3    | 5    | 5    | 5    | 2    | 2 |
| 19054  |      | 5    | 5    | 3    | 5    |      |      |      |      |      |      |      |      |      |   |
| 19057  |      |      |      |      |      | 1    | 1    | 1    | 1    | 1    | 1    | 1    | 1    | 1    | 1 |
| 19073  |      |      |      |      |      | 1    | 1    | 2    | 1    | 2    | 2    | 1    | 1    | 2    | 1 |
| 19075  |      | 3    | 3    | 3    | 3    |      |      |      |      |      |      |      |      |      |   |
| 19079  |      | 3    | 3    | 3    | 3    |      |      |      |      |      |      |      |      |      |   |
| 19087  |      |      |      |      |      | 2    | 2    | 2    | 2    | 2    | 2    | 2    | 2    | 2    | 2 |

| respid | Q47l | Q47m | Q47n | Q47o | Q48a | Q48b | Q48c | Q48d | Q48e | Q48f | Q48g | Q48h | Q48i | Q48j |
|--------|------|------|------|------|------|------|------|------|------|------|------|------|------|------|
| 19090  |      |      |      |      |      | 3    | 6    | 6    | 3    |      | 3    |      | 6    | 3    |
| 19093  | 4    | 5    | 5    | 4    |      |      |      |      |      |      |      |      |      |      |
| 19099  |      |      |      |      |      | 3    |      | 3    | 3    | 4    | 3    | 3    | 3    | 4    |
| 19100  |      |      |      |      |      | 3    | 5    | 6    | 6    | 3    | 6    | 5    | 6    | 1    |
| 19101  |      |      |      |      |      | 1    | 2    | 2    | 2    | 2    | 2    | 2    | 2    | 2    |
| 19105  |      |      |      |      |      | 3    | 6    | 6    | 6    | 2    | 6    | 6    | 6    | 2    |
| 19111  | 4    | 3    | 3    | 4    |      |      |      |      |      |      |      |      |      |      |
| 19112  |      |      |      |      |      | 2    | 6    | 6    | 6    | 2    | 5    | 6    | 6    | 1    |
| 19117  |      |      |      |      |      | 1    | 4    | 6    | 5    | 1    | 6    | 5    | 6    | 1    |
| 19122  |      |      |      |      |      | 2    | 3    | 6    | 6    | 1    |      | 6    | 6    | 3    |
| 19126  | 4    | 4    | 4    | 4    |      |      |      |      |      |      |      |      |      |      |
| 19127  | 1    | 3    | 3    | 3    |      |      |      |      |      |      |      |      |      |      |
| 19131  | 3    | 3    | 3    | 3    |      |      |      |      |      |      |      |      |      |      |
| 19134  |      |      |      |      |      | 1    | 6    | 6    | 6    | 1    | 6    | 6    | 6    | 1    |
| 19149  |      |      |      |      |      | 4    | 3    | 3    | 4    | 4    | 4    | 3    | 3    | 4    |
| 19151  | 3    | 4    | 4    | 3    |      |      |      |      |      |      |      |      |      |      |
| 19164  | 3    | 3    | 4    | 4    |      |      |      |      |      |      |      |      |      |      |
| 19166  | 3    | 3    | 2    | 3    |      |      |      |      |      |      |      |      |      |      |
| 19172  |      |      |      |      |      |      |      | 6    |      |      |      |      |      |      |
| 19173  | 4    | 2    | 2    | 2    |      |      |      |      |      |      |      |      |      |      |
| 19180  | 2    | 3    | 4    | 3    |      |      |      |      |      |      |      |      |      |      |
| 19185  | 5    | 5    | 4    | 5    |      |      |      |      |      |      |      |      |      |      |
| 19189  |      |      |      |      |      |      |      |      |      |      |      |      |      | 3    |
| 19191  |      |      |      |      |      |      |      |      |      |      |      |      |      |      |
| 19198  |      |      |      |      |      | 6    | 6    | 6    | 6    | 6    | 6    | 6    | 6    | 6    |
| 19203  | 3    | 3    | 4    | 4    |      |      |      |      |      |      |      |      |      |      |
| 19209  |      |      |      |      |      | 2    | 5    | 6    | 6    | 2    | 6    | 6    | 6    | 1    |
| 19210  |      |      |      |      |      |      |      |      |      |      |      |      |      |      |
| 19218  |      |      |      |      |      |      |      |      |      |      |      |      |      |      |
| 19220  |      |      |      |      |      |      |      |      |      |      |      |      |      |      |
| 19225  | 3    | 3    | 3    | 3    |      |      |      |      |      |      |      |      |      |      |
| 19227  | 5    | 4    | 4    | 5    |      |      |      |      |      |      |      |      |      |      |

| respid | Q47l | Q47m | Q47n | Q47o | Q48a | Q48b | Q48c | Q48d | Q48e | Q48f | Q48g | Q48h | Q48i | Q48j |   |
|--------|------|------|------|------|------|------|------|------|------|------|------|------|------|------|---|
| 19228  | 4    | 4    | 4    | 4    |      |      |      |      |      |      |      |      |      |      |   |
| 19243  |      |      |      |      |      | 3    | 4    | 5    | 3    | 4    | 4    | 4    | 5    | 3    | 2 |
| 19244  | 3    | 3    | 3    | 3    |      |      |      |      |      |      |      |      |      |      |   |
| 19246  |      |      |      |      |      | 1    | 6    | 6    | 6    | 1    | 6    | 6    | 6    | 1    | 6 |
| 19248  |      |      |      |      |      |      |      |      |      |      |      |      |      |      |   |
| 19249  | 3    | 3    | 3    | 3    |      |      |      |      |      |      |      |      |      |      |   |
| 19252  |      |      |      |      |      | 3    | 4    | 4    | 4    | 3    | 4    | 4    | 3    | 3    | 2 |
| 19255  | 4    | 4    | 5    | 4    |      |      |      |      |      |      |      |      |      |      |   |
| 19257  |      |      |      |      |      | 5    | 5    | 5    | 4    | 4    | 6    | 6    | 6    | 5    | 5 |
| 19274  |      |      |      |      |      |      |      |      |      |      |      |      |      |      |   |
| 19279  |      |      |      |      |      |      |      |      |      |      |      |      |      |      |   |
| 19291  | 5    | 5    | 5    | 5    |      |      |      |      |      |      |      |      |      |      |   |
| 19292  |      |      |      |      |      | 2    | 5    | 5    | 6    | 2    | 6    | 5    | 6    | 2    | 3 |
| 19308  | 3    | 3    | 3    | 3    |      |      |      |      |      |      |      |      |      |      |   |
| 19310  | 2    | 3    | 2    | 3    |      |      |      |      |      |      |      |      |      |      |   |
| 19311  | 1    | 1    | 5    | 5    |      |      |      |      |      |      |      |      |      |      |   |
| 19326  |      |      |      |      |      | 4    | 6    | 6    | 6    | 2    | 5    | 6    | 6    | 3    | 6 |
| 19327  |      |      |      |      |      |      |      |      |      |      |      |      |      |      |   |
| 19329  |      |      |      |      |      |      |      |      |      |      |      |      |      |      |   |
| 19330  | 3    | 3    | 3    | 3    |      |      |      |      |      |      |      |      |      |      |   |
| 19333  |      |      |      |      |      | 2    | 5    | 4    | 4    | 3    | 4    | 4    | 5    | 3    | 4 |
| 19336  |      |      |      |      |      | 3    | 3    | 5    | 5    | 4    | 3    | 4    | 5    | 2    | 5 |
| 19343  |      |      |      |      |      | 2    | 6    | 6    | 6    | 2    | 6    | 6    | 6    | 2    | 5 |
| 19348  |      |      |      |      |      | 1    | 6    | 6    | 6    | 1    | 6    | 6    | 6    | 1    | 5 |
| 19349  |      |      |      |      |      | 4    | 3    |      | 3    | 4    | 3    |      |      | 3    | 3 |
| 19352  | 3    | 3    | 3    | 3    |      |      |      |      |      |      |      |      |      |      |   |
| 19356  |      |      |      |      |      | 2    | 5    | 6    | 5    | 1    | 6    | 6    | 6    | 2    | 6 |
| 19357  | 3    | 4    | 4    | 4    |      |      |      |      |      |      |      |      |      |      |   |
| 19358  |      |      |      |      |      | 4    | 3    | 3    | 2    | 5    | 2    | 2    | 3    | 4    | 2 |
| 19367  | 3    | 3    | 3    | 4    |      |      |      |      |      |      |      |      |      |      |   |
| 19376  |      |      |      |      |      |      |      |      |      |      |      |      |      |      |   |
| 19377  |      |      |      |      |      |      |      |      | 5    |      |      |      |      |      | 6 |

| respid | Q47l | Q47m | Q47n | Q47o | Q48a | Q48b | Q48c | Q48d | Q48e | Q48f | Q48g | Q48h | Q48i | Q48j |   |
|--------|------|------|------|------|------|------|------|------|------|------|------|------|------|------|---|
| 19380  |      |      |      |      |      |      |      |      |      |      |      |      |      |      |   |
| 19384  |      | 5    | 5    | 4    | 5    |      |      |      |      |      |      |      |      |      |   |
| 19391  |      | 4    | 4    | 4    | 4    |      |      |      |      |      |      |      |      |      |   |
| 19397  |      |      |      |      |      |      |      |      |      |      |      |      |      |      |   |
| 19398  |      |      |      |      |      | 2    | 6    | 6    | 6    | 1    | 6    | 6    | 6    | 1    | 6 |
| 19401  |      |      |      |      |      |      |      |      |      |      |      |      |      |      |   |
| 19402  |      |      |      |      |      |      |      |      |      |      |      |      |      |      |   |
| 19403  |      |      |      |      |      |      |      |      |      |      |      |      |      |      |   |
| 19405  |      |      |      |      |      |      |      |      |      |      |      |      |      |      |   |
| 19407  |      |      |      |      |      |      |      |      |      |      |      |      |      |      |   |
| 19415  |      |      |      |      |      | 5    | 5    |      | 5    | 5    | 5    | 5    | 5    | 5    | 5 |
| 19420  |      |      |      |      |      |      |      |      |      |      |      |      |      |      |   |
| 19423  |      | 3    | 3    | 3    | 2    |      |      |      |      |      |      |      |      |      |   |
| 19424  |      |      |      |      |      | 2    | 3    | 3    | 3    | 3    | 4    | 4    | 4    | 4    | 4 |
| 19426  |      |      |      |      |      | 2    | 3    | 5    | 3    | 4    | 3    | 5    | 5    | 2    | 5 |
| 19429  |      |      |      |      |      | 1    | 6    | 6    | 6    | 1    | 6    | 6    | 6    | 1    | 6 |
| 19435  |      |      |      |      |      | 2    | 3    | 3    | 3    | 2    | 4    | 4    | 4    | 3    | 2 |
| 19441  |      |      |      |      |      | 1    | 6    | 6    | 6    | 1    | 6    | 6    | 6    | 1    | 3 |
| 19450  |      | 5    | 4    | 4    | 4    |      |      |      |      |      |      |      |      |      |   |
| 19456  |      |      |      |      |      | 4    |      |      | 3    |      |      |      |      | 3    |   |
| 19457  |      |      |      |      |      | 2    | 5    | 6    | 5    | 2    | 6    | 6    | 6    | 1    | 6 |
| 19463  |      |      |      |      |      | 1    | 3    | 5    | 3    | 3    | 4    | 4    | 4    | 2    | 5 |
| 19467  |      | 5    | 3    | 4    | 4    |      |      |      |      |      |      |      |      |      |   |
| 19468  |      | 3    | 5    | 5    | 4    |      |      |      |      |      |      |      |      |      |   |
| 19471  |      |      |      |      |      | 3    | 5    | 5    | 4    | 3    | 4    | 4    | 6    | 2    | 4 |
| 19473  |      | 2    | 2    | 2    | 2    |      |      |      |      |      |      |      |      |      |   |
| 19478  |      | 4    | 4    | 3    | 3    |      |      |      |      |      |      |      |      |      |   |
| 19480  |      |      |      |      |      |      |      |      |      |      |      |      |      |      |   |
| 19481  |      |      |      |      |      | 3    | 5    | 4    | 6    | 2    | 4    | 6    | 6    | 4    | 3 |
| 19484  |      | 4    | 4    | 4    | 4    |      |      |      |      |      |      |      |      |      |   |
| 19487  |      |      |      |      |      |      |      |      |      |      |      |      |      |      |   |
| 19491  |      |      |      |      |      | 2    | 5    | 5    | 2    | 5    | 5    | 6    | 6    | 2    | 2 |

| respid | Q47l | Q47m | Q47n | Q47o | Q48a | Q48b | Q48c | Q48d | Q48e | Q48f | Q48g | Q48h | Q48i | Q48j |   |
|--------|------|------|------|------|------|------|------|------|------|------|------|------|------|------|---|
| 19495  |      | 5    | 5    | 5    | 5    |      |      |      |      |      |      |      |      |      |   |
| 19498  |      |      |      |      |      | 3    | 2    | 4    | 1    | 5    | 2    | 1    | 3    | 5    | 1 |
| 19500  |      | 3    | 4    | 4    | 4    |      |      |      |      |      |      |      |      |      |   |
| 19501  |      |      |      |      |      | 1    | 6    | 6    | 6    | 1    | 6    | 5    | 6    | 1    | 4 |
| 19503  |      |      |      |      |      |      |      |      |      |      |      |      |      |      |   |
| 19506  |      | 3    | 4    | 4    | 4    |      |      |      |      |      |      |      |      |      |   |
| 19508  |      |      |      |      |      | 2    | 6    | 6    | 6    | 2    | 6    | 6    | 6    | 1    | 5 |
| 19509  |      | 3    | 4    | 5    | 3    |      |      |      |      |      |      |      |      |      |   |
| 19518  |      |      |      |      |      | 3    | 2    | 3    | 3    | 3    | 3    | 3    | 3    | 3    | 3 |
| 19520  |      | 4    | 4    | 5    | 5    |      |      |      |      |      |      |      |      |      |   |
| 19536  |      |      |      |      |      | 1    | 6    | 6    | 2    | 5    | 6    | 2    | 6    | 1    | 2 |
| 19538  |      |      |      |      |      | 1    | 1    | 6    | 2    | 2    | 6    | 6    | 6    | 1    | 6 |
| 19541  |      |      |      |      |      | 6    |      |      |      |      |      |      |      |      |   |
| 19548  |      | 1    | 3    | 3    | 1    |      |      |      |      |      |      |      |      |      |   |
| 19553  |      |      |      |      |      |      |      |      |      |      |      |      |      |      |   |
| 19556  |      |      |      |      |      | 2    | 2    | 6    | 6    | 1    | 6    | 6    | 6    | 1    | 6 |
| 19559  |      |      |      |      |      |      |      |      |      |      |      |      |      |      |   |
| 19561  |      |      |      |      |      | 2    | 3    | 4    | 5    | 3    | 4    | 5    | 6    | 2    | 5 |
| 19562  |      |      |      |      |      | 3    | 4    | 4    | 4    | 2    | 4    | 5    | 6    | 2    | 6 |
| 19564  |      | 1    | 5    | 5    | 3    |      |      |      |      |      |      |      |      |      |   |
| 19567  |      | 2    | 1    | 2    | 2    |      |      |      |      |      |      |      |      |      |   |
| 19571  |      | 3    | 4    | 4    | 4    |      |      |      |      |      |      |      |      |      |   |
| 19576  |      | 3    | 3    | 3    | 3    |      |      |      |      |      |      |      |      |      |   |
| 19578  |      |      |      |      |      | 1    | 6    | 6    | 6    | 1    | 6    | 6    | 6    | 1    | 6 |
| 19606  |      |      |      |      |      |      |      |      |      |      |      |      |      |      |   |
| 19607  |      |      |      |      |      |      |      |      |      |      |      |      |      |      |   |
| 19608  |      |      |      |      |      | 3    | 4    | 4    | 4    | 3    | 6    | 5    | 6    | 2    | 5 |
| 19612  |      |      |      |      |      | 1    | 3    | 3    | 4    | 3    | 2    | 3    | 2    | 2    | 3 |
| 19618  |      |      |      |      |      | 2    | 3    | 3    | 2    | 4    | 4    | 3    | 5    | 4    | 3 |
| 19621  |      |      |      |      |      | 5    | 6    | 6    | 6    | 1    | 6    | 6    | 6    | 1    | 6 |
| 19624  |      | 4    | 4    | 4    | 5    |      |      |      |      |      |      |      |      |      |   |
| 19630  |      |      |      |      |      |      |      |      |      |      |      |      |      |      |   |

| respid | Q47l | Q47m | Q47n | Q47o | Q48a | Q48b | Q48c | Q48d | Q48e | Q48f | Q48g | Q48h | Q48i | Q48j |   |
|--------|------|------|------|------|------|------|------|------|------|------|------|------|------|------|---|
| 19637  | 4    | 3    | 3    | 3    |      |      |      |      |      |      |      |      |      |      |   |
| 19639  |      | 4    |      |      |      |      |      |      |      |      |      |      |      |      |   |
| 19647  |      |      |      |      |      | 2    | 5    | 6    | 5    | 2    | 6    | 5    | 6    | 2    | 3 |
| 19648  | 4    | 3    | 5    | 3    |      |      |      |      |      |      |      |      |      |      |   |
| 19660  | 1    | 3    | 3    | 3    |      |      |      |      |      |      |      |      |      |      |   |
| 19662  |      |      |      |      |      | 3    | 4    | 5    | 3    | 4    | 4    | 4    | 6    | 3    | 3 |
| 19669  |      |      |      |      |      | 1    | 5    | 6    | 6    | 1    | 6    | 6    | 6    | 1    | 6 |
| 19680  | 4    | 5    | 4    | 4    |      |      |      |      |      |      |      |      |      |      |   |
| 19682  |      |      |      |      |      | 4    | 2    | 2    | 2    | 5    | 2    | 6    | 6    | 4    | 4 |
| 19686  |      |      |      |      |      | 1    | 1    | 6    | 6    | 4    | 6    | 6    | 6    | 3    | 5 |
| 19700  |      |      |      |      |      | 2    | 6    | 6    | 3    | 2    | 5    | 5    | 6    | 2    | 3 |
| 19701  |      |      |      |      |      | 1    | 1    | 6    | 6    | 1    | 6    | 6    | 6    | 2    | 6 |
| 19704  |      |      |      |      |      |      |      |      |      |      |      |      |      |      |   |
| 19706  |      |      |      |      |      | 3    | 2    | 2    | 3    | 2    | 3    | 1    | 3    | 2    | 3 |
| 19707  | 3    | 4    | 4    | 3    |      |      |      |      |      |      |      |      |      |      |   |
| 19717  |      |      |      |      |      | 1    | 6    | 6    | 6    | 1    | 6    | 6    | 6    | 1    | 2 |
| 19718  |      |      |      |      |      | 4    | 3    | 4    | 6    | 4    | 3    | 4    | 6    | 1    | 3 |
| 19721  |      |      |      |      |      | 3    | 3    |      | 3    | 3    | 3    | 3    | 4    | 4    | 3 |
| 19722  | 4    | 4    | 4    |      |      |      |      |      |      |      |      |      |      |      |   |
| 19729  |      |      |      |      |      |      |      |      |      |      |      |      |      |      |   |
| 19738  |      |      |      |      |      | 1    | 5    | 6    | 3    | 4    | 3    | 4    | 6    | 3    | 4 |
| 19741  |      |      |      |      |      | 1    | 6    | 6    | 6    | 1    | 6    | 6    | 6    | 1    | 6 |
| 19742  | 2    | 2    | 3    | 3    |      |      |      |      |      |      |      |      |      |      |   |
| 19747  | 2    | 3    | 3    | 2    |      |      |      |      |      |      |      |      |      |      |   |
| 19748  |      |      |      |      |      | 2    | 2    | 2    | 2    | 2    | 2    | 3    | 5    | 3    | 4 |
| 19749  |      |      |      |      |      | 3    | 3    | 5    | 4    | 3    | 6    | 6    | 6    | 3    | 6 |
| 19756  | 3    | 3    | 3    | 4    |      |      |      |      |      |      |      |      |      |      |   |
| 19771  |      |      |      |      |      | 6    | 2    | 2    | 3    | 4    | 4    |      | 6    | 6    | 6 |
| 19772  |      |      |      |      |      | 1    | 2    | 2    | 6    | 2    | 5    | 2    | 2    | 5    | 2 |
| 19775  | 3    | 3    | 4    | 3    |      |      |      |      |      |      |      |      |      |      |   |
| 19783  |      |      |      |      |      |      |      |      |      |      |      |      |      |      |   |
| 19787  | 4    | 4    | 4    | 4    |      |      |      |      |      |      |      |      |      |      |   |

| respid | Q47l | Q47m | Q47n | Q47o | Q48a | Q48b | Q48c | Q48d | Q48e | Q48f | Q48g | Q48h | Q48i | Q48j |
|--------|------|------|------|------|------|------|------|------|------|------|------|------|------|------|
| 19790  |      |      |      |      |      |      |      |      |      |      |      |      |      |      |
| 19797  |      |      |      |      |      | 2    | 3    | 3    | 3    | 6    | 3    | 3    | 3    | 1    |
| 19802  |      |      |      |      |      | 2    | 6    | 6    | 6    | 1    | 6    | 6    | 6    | 6    |
| 19808  | 4    | 4    | 3    | 4    |      |      |      |      |      |      |      |      |      |      |
| 19810  |      |      |      |      |      | 1    | 1    | 1    | 5    | 3    | 3    | 4    | 6    | 6    |
| 19811  | 4    | 4    | 4    | 4    |      |      |      |      |      |      |      |      |      |      |
| 19812  |      |      |      |      |      | 1    | 1    | 1    | 1    | 3    | 5    | 6    | 6    | 4    |
| 19821  | 2    | 2    | 3    | 2    |      |      |      |      |      |      |      |      |      |      |
| 19826  |      |      |      |      |      | 3    | 4    | 4    | 4    | 3    | 4    | 4    | 4    | 4    |
| 19827  |      |      |      |      |      | 6    | 6    | 6    |      |      |      |      |      |      |
| 19830  |      |      |      |      |      | 2    | 3    | 6    | 6    | 3    | 4    | 4    | 6    | 3    |
| 19834  |      |      |      |      |      | 1    | 6    | 6    | 3    | 3    | 4    | 5    | 6    | 3    |
| 19838  |      |      | 5    |      |      |      |      |      |      |      |      |      |      |      |
| 19843  |      |      |      |      |      |      |      |      |      |      |      |      |      |      |
| 19845  | 3    | 4    | 5    | 4    |      |      |      |      |      |      |      |      |      |      |
| 19846  | 4    | 4    | 4    | 4    |      |      |      |      |      |      |      |      |      |      |
| 19852  | 2    | 2    | 2    | 3    |      |      |      |      |      |      |      |      |      |      |
| 19855  |      |      |      |      |      | 2    | 3    | 4    | 5    | 4    | 5    | 5    | 5    | 6    |
| 19858  | 3    | 4    | 4    | 4    |      |      |      |      |      |      |      |      |      |      |
| 19861  |      |      |      |      |      |      |      |      |      |      | 6    | 5    | 5    | 5    |
| 19863  |      |      |      |      |      | 1    | 5    | 6    | 6    | 1    | 6    | 6    | 6    | 5    |
| 19868  | 4    | 4    | 4    | 4    |      |      |      |      |      |      |      |      |      |      |
| 19874  |      |      |      |      |      | 1    | 6    | 6    | 6    | 5    | 6    | 6    | 6    | 6    |
| 19876  |      |      |      |      |      |      |      |      |      |      |      |      |      |      |
| 19880  |      |      |      |      |      | 1    | 2    | 1    | 2    | 1    | 3    | 2    | 1    | 1    |
| 19885  | 4    | 3    | 3    | 4    |      |      |      |      |      |      |      |      |      |      |
| 19890  |      |      |      |      |      |      |      |      |      |      |      |      |      |      |
| 19894  |      |      |      |      |      |      |      |      |      |      |      |      |      |      |
| 19895  | 3    | 4    | 4    | 3    |      |      |      |      |      |      |      |      |      |      |
| 19897  |      |      |      |      |      | 6    | 6    | 6    | 6    | 6    | 6    | 6    | 6    | 6    |
| 19906  |      |      |      |      |      | 3    | 4    | 5    | 5    | 3    | 5    | 5    | 5    | 4    |
| 19908  |      |      |      |      |      | 1    | 6    | 6    | 6    | 1    | 6    | 6    | 6    | 6    |

| respid | Q47l | Q47m | Q47n | Q47o | Q48a | Q48b | Q48c | Q48d | Q48e | Q48f | Q48g | Q48h | Q48i | Q48j |   |
|--------|------|------|------|------|------|------|------|------|------|------|------|------|------|------|---|
| 19912  |      |      |      |      |      | 3    | 5    | 6    | 5    | 3    | 6    | 6    | 6    | 3    | 6 |
| 19913  |      |      |      |      |      | 3    | 5    | 5    | 5    | 4    | 5    | 5    | 5    | 4    | 5 |
| 19914  |      |      |      |      |      | 2    | 4    | 4    | 3    | 3    | 4    | 4    | 5    | 3    | 2 |
| 19918  |      |      |      |      |      | 1    | 3    | 4    | 4    | 3    | 3    | 4    | 4    | 2    | 2 |
| 19924  |      |      |      |      |      | 2    | 4    | 4    | 5    | 3    | 5    | 5    | 6    | 1    | 3 |
| 19936  |      |      |      |      |      |      |      |      |      |      |      |      |      |      |   |
| 19940  |      |      |      |      |      |      |      |      |      |      |      |      |      |      |   |
| 19945  |      |      |      |      |      | 2    | 6    | 6    | 6    | 2    | 6    | 6    | 6    | 2    | 5 |
| 19948  |      |      |      |      |      |      |      |      |      |      |      |      |      |      |   |
| 19959  |      |      |      |      |      | 2    | 6    | 6    | 6    | 2    | 5    | 6    | 6    | 2    | 5 |
| 19961  |      |      |      |      |      |      |      |      |      |      |      |      |      |      |   |
| 19962  | 4    | 3    | 3    | 2    |      |      |      |      |      |      |      |      |      |      |   |
| 19965  |      |      |      |      |      | 1    | 6    | 6    | 6    | 1    | 6    | 6    | 6    | 1    | 2 |
| 19966  |      |      |      |      |      | 3    | 4    | 5    | 4    | 4    | 4    | 4    | 4    | 4    | 4 |
| 19973  |      |      |      |      |      | 1    | 5    | 6    | 5    | 5    | 5    | 6    | 6    | 1    | 5 |
| 19981  | 5    | 5    | 5    | 5    |      |      |      |      |      |      |      |      |      |      |   |
| 19986  | 2    | 3    | 2    | 3    |      |      |      |      |      |      |      |      |      |      |   |
| 19989  | 5    | 5    | 5    | 5    |      |      |      |      |      |      |      |      |      |      |   |
| 19998  |      |      |      |      |      | 4    | 4    | 4    | 4    | 4    | 4    | 4    | 4    | 4    | 4 |
| 20001  | 5    | 3    | 3    | 3    |      |      |      |      |      |      |      |      |      |      |   |
| 20005  |      |      |      |      |      |      |      |      |      |      |      |      |      |      |   |
| 20013  |      |      |      |      |      | 3    | 4    | 3    | 3    | 4    | 3    | 2    | 3    | 3    | 2 |
| 20015  | 5    | 4    | 5    | 5    |      |      |      |      |      |      |      |      |      |      |   |
| 20017  |      |      |      |      |      | 2    | 5    | 5    | 6    | 2    | 6    | 3    | 6    | 2    | 3 |
| 20020  |      |      |      |      |      |      |      |      | 6    |      |      | 6    | 6    | 3    | 6 |
| 20021  |      |      |      |      |      |      |      |      |      |      |      |      |      |      |   |
| 20026  |      |      |      |      |      | 3    | 6    | 5    | 6    | 2    | 5    | 3    | 6    | 2    | 2 |
| 20028  | 3    | 5    | 5    | 5    |      |      |      |      |      |      |      |      |      |      |   |
| 20030  |      |      |      |      |      | 3    | 6    | 6    | 4    | 3    | 5    | 3    | 6    | 2    | 3 |
| 20031  |      |      |      |      |      |      |      |      |      |      |      |      |      |      |   |
| 20034  |      |      |      |      |      | 5    | 6    | 6    | 6    | 5    | 6    | 6    | 6    | 5    | 6 |
| 20035  |      |      |      |      |      |      |      |      |      |      |      |      |      |      |   |



| respid | Q47l | Q47m | Q47n | Q47o | Q48a | Q48b | Q48c | Q48d | Q48e | Q48f | Q48g | Q48h | Q48i | Q48j |   |
|--------|------|------|------|------|------|------|------|------|------|------|------|------|------|------|---|
| 20040  |      |      |      |      |      | 5    | 3    | 3    | 1    | 6    | 3    | 3    | 4    | 3    | 3 |
| 20045  | 4    | 4    | 4    | 4    |      |      |      |      |      |      |      |      |      |      |   |
| 20048  |      |      |      |      |      |      |      |      |      |      |      |      |      |      |   |
| 20053  |      |      |      |      |      |      |      |      |      |      |      |      |      |      |   |
| 20064  | 4    | 4    | 4    | 4    |      |      |      |      |      |      |      |      |      |      |   |
| 20071  | 2    | 2    | 3    | 3    |      |      |      |      |      |      |      |      |      |      |   |
| 20072  | 4    | 4    | 4    | 4    |      |      |      |      |      |      |      |      |      |      |   |
| 20076  |      |      |      |      |      | 1    | 5    | 6    | 6    | 1    | 6    | 6    | 6    | 1    | 6 |
| 20081  | 3    | 4    | 4    | 4    |      |      |      |      |      |      |      |      |      |      |   |
| 20082  | 3    | 3    | 3    | 3    |      |      |      |      |      |      |      |      |      |      |   |
| 20083  |      |      |      |      |      | 1    | 6    | 6    | 6    | 2    | 6    | 6    | 6    | 2    | 6 |
| 20088  | 4    | 4    | 4    | 5    |      |      |      |      |      |      |      |      |      |      |   |
| 20089  | 3    |      | 3    | 3    |      |      |      |      |      |      |      |      |      |      |   |
| 20099  |      |      |      |      |      |      |      |      |      |      |      |      |      |      |   |
| 20101  |      |      |      |      |      | 1    |      | 1    | 4    | 2    | 6    | 6    | 6    | 1    | 6 |
| 20102  | 4    | 4    | 4    | 4    |      |      |      |      |      |      |      |      |      |      |   |
| 20109  |      |      |      |      |      |      |      |      |      |      |      |      |      |      |   |
| 20118  |      |      |      |      |      | 5    | 5    | 5    | 5    | 4    | 3    |      | 5    | 4    | 4 |
| 20119  | 2    | 3    | 3    | 2    |      |      |      |      |      |      |      |      |      |      |   |
| 20124  |      |      |      |      |      |      |      |      |      |      |      |      |      |      |   |
| 20126  |      |      |      |      |      | 2    | 6    | 6    | 5    | 3    | 4    | 3    | 6    | 3    | 5 |
| 20130  |      |      |      |      |      |      |      |      |      |      |      |      |      |      |   |
| 20131  |      |      |      |      |      | 2    | 5    | 5    | 6    | 2    | 6    | 5    | 6    | 4    | 5 |
| 20134  |      |      |      |      |      | 3    | 4    | 5    | 3    | 4    | 5    | 3    | 5    | 2    | 4 |
| 20146  |      |      |      |      |      | 1    | 6    | 6    | 6    | 2    | 6    | 5    | 6    | 1    | 6 |
| 20152  |      |      |      |      |      |      |      |      |      |      |      |      |      |      |   |
| 20155  |      |      |      |      |      | 2    | 4    | 4    | 6    | 3    | 5    | 5    | 5    | 2    | 2 |
| 20156  |      |      |      |      |      |      |      |      |      |      |      |      |      |      |   |
| 20157  |      |      |      |      |      |      |      |      |      |      |      |      |      |      |   |
| 20164  |      |      |      |      |      | 5    | 6    | 6    | 6    | 2    | 6    | 6    | 6    | 1    | 6 |
| 20168  |      |      |      |      |      | 5    | 5    | 5    | 5    |      | 5    | 5    | 5    | 5    | 5 |
| 20173  | 4    | 3    | 3    | 3    |      |      |      |      |      |      |      |      |      |      |   |

| respid | Q47l | Q47m | Q47n | Q47o | Q48a | Q48b | Q48c | Q48d | Q48e | Q48f | Q48g | Q48h | Q48i | Q48j |   |
|--------|------|------|------|------|------|------|------|------|------|------|------|------|------|------|---|
| 20174  |      |      |      |      |      | 1    | 1    | 1    | 5    | 4    |      |      |      |      |   |
| 20175  | 4    | 4    | 5    | 4    |      |      |      |      |      |      |      |      |      |      |   |
| 20189  | 4    | 4    | 4    | 4    |      |      |      |      |      |      |      |      |      |      |   |
| 20190  |      |      |      |      |      | 3    | 4    | 6    | 6    | 2    | 4    | 6    | 6    | 2    | 6 |
| 20201  | 3    | 3    | 4    | 3    |      |      |      |      |      |      |      |      |      |      |   |
| 20202  | 3    | 3    | 4    | 3    |      |      |      |      |      |      |      |      |      |      |   |
| 20204  | 5    | 5    | 5    | 5    |      |      |      |      |      |      |      |      |      |      |   |
| 20206  |      |      |      |      |      | 3    | 2    | 3    | 4    | 3    | 4    | 3    | 4    | 2    | 4 |
| 20207  |      |      |      |      |      | 2    | 6    | 6    | 6    | 2    | 6    | 6    | 6    | 1    | 5 |
| 20212  | 2    | 3    |      | 2    |      |      |      |      |      |      |      |      |      |      |   |
| 20213  |      |      |      |      |      | 5    | 5    | 4    |      | 4    | 4    | 4    | 3    | 3    | 4 |
| 20217  |      |      |      |      |      | 3    | 4    | 4    | 4    | 3    | 4    | 4    | 4    | 3    | 4 |
| 20222  | 2    | 1    | 1    |      |      |      |      |      |      |      |      |      |      |      |   |
| 20227  |      |      |      |      |      |      |      |      |      |      |      |      |      |      |   |
| 20228  |      |      |      |      |      | 3    | 3    | 6    | 5    | 6    | 6    | 6    | 6    | 3    | 6 |
| 20238  |      |      |      |      |      | 3    | 3    |      | 3    |      | 3    | 4    | 5    | 2    | 6 |
| 20242  | 3    | 4    | 3    | 3    |      |      |      |      |      |      |      |      |      |      |   |
| 20246  |      |      |      |      |      | 2    | 6    | 6    | 5    | 2    | 6    | 6    | 6    | 1    | 6 |
| 20255  | 3    | 3    | 3    | 2    |      |      |      |      |      |      |      |      |      |      |   |
| 20256  | 2    | 2    | 3    | 2    |      |      |      |      |      |      |      |      |      |      |   |
| 20259  | 3    | 2    | 2    | 2    |      |      |      |      |      |      |      |      |      |      |   |
| 20262  | 3    | 4    | 4    | 4    |      |      |      |      |      |      |      |      |      |      |   |
| 20274  | 3    | 4    | 4    | 3    |      |      |      |      |      |      |      |      |      |      |   |
| 20283  |      |      |      |      |      | 3    | 5    | 5    | 4    | 3    | 6    | 6    | 6    | 1    | 4 |
| 20284  |      |      |      |      |      |      |      |      |      |      |      |      |      |      |   |
| 20291  |      |      |      |      |      | 1    | 6    | 6    | 6    | 1    | 6    | 5    | 5    | 1    | 6 |
| 20292  |      |      |      |      |      | 2    | 5    | 5    | 4    | 2    | 5    | 5    | 5    | 2    | 4 |
| 20293  |      |      |      |      |      | 4    | 4    | 4    | 3    | 4    | 3    | 5    | 3    | 4    | 4 |
| 20298  |      |      |      |      |      | 4    | 5    | 4    | 4    | 3    | 3    | 3    | 5    | 4    | 5 |
| 20301  |      |      |      |      |      |      |      |      |      |      |      |      |      |      |   |
| 20303  | 4    | 4    | 3    | 3    |      |      |      |      |      |      |      |      |      |      |   |
| 20309  |      |      |      |      |      |      |      |      |      |      |      |      |      |      |   |

| respid | Q47l | Q47m | Q47n | Q47o | Q48a | Q48b | Q48c | Q48d | Q48e | Q48f | Q48g | Q48h | Q48i | Q48j |   |
|--------|------|------|------|------|------|------|------|------|------|------|------|------|------|------|---|
| 20318  |      | 4    | 4    | 4    | 4    |      |      |      |      |      |      |      |      |      |   |
| 20324  |      | 4    | 4    | 4    | 5    |      |      |      |      |      |      |      |      |      |   |
| 20335  |      | 3    | 4    | 4    | 4    |      |      |      |      |      |      |      |      |      |   |
| 20336  |      |      |      |      |      | 2    | 2    | 3    | 3    | 4    | 3    | 2    | 2    | 6    | 1 |
| 20339  |      | 4    | 4    | 4    | 4    |      |      |      |      |      |      |      |      |      |   |
| 20348  |      |      |      |      |      | 2    | 3    | 3    | 5    | 2    | 5    | 5    | 5    | 3    | 5 |
| 20351  |      | 4    | 4    | 4    | 4    |      |      |      |      |      |      |      |      |      |   |
| 20353  |      |      |      |      |      | 2    | 4    | 4    | 5    | 2    | 6    | 6    | 5    | 2    | 3 |
| 20356  |      |      |      |      |      | 4    | 4    | 4    | 5    | 3    | 4    | 4    | 4    | 5    | 5 |
| 20357  |      |      |      |      |      |      |      |      |      |      |      |      |      |      |   |
| 20366  |      | 3    | 4    | 4    | 3    |      |      |      |      |      |      |      |      |      |   |
| 20369  |      | 2    | 2    | 2    | 2    |      |      |      |      |      |      |      |      |      |   |
| 20372  |      | 3    | 4    | 4    | 4    |      |      |      |      |      |      |      |      |      |   |
| 20375  |      |      |      |      |      | 1    | 1    | 3    | 5    | 3    | 5    | 4    | 4    | 4    | 4 |
| 20379  |      |      |      |      |      | 1    | 6    | 6    | 6    | 1    | 6    | 6    | 6    | 1    | 3 |
| 20380  |      |      |      |      |      | 4    |      | 4    | 3    | 3    | 2    | 6    | 6    | 6    | 6 |
| 20396  |      |      |      |      |      | 2    | 6    | 6    | 6    | 2    | 6    | 6    | 6    | 2    | 6 |
| 20398  |      |      |      |      |      | 3    | 2    | 2    | 4    | 5    | 5    | 2    | 4    | 4    | 3 |
| 20412  |      |      |      |      |      | 1    | 6    | 6    | 6    | 1    | 6    | 6    | 6    | 1    | 6 |
| 20415  |      |      |      |      |      | 3    | 4    | 4    | 4    | 3    | 4    | 4    | 4    | 4    | 4 |
| 20424  |      |      |      |      |      | 2    | 3    | 3    | 3    | 3    | 4    | 5    | 6    | 5    | 5 |
| 20434  |      |      |      |      |      | 3    | 5    | 5    | 5    | 5    | 5    | 5    | 5    | 3    | 5 |
| 20435  |      | 4    | 4    | 3    | 3    |      |      |      |      |      |      |      |      |      |   |
| 20440  |      | 1    | 4    | 4    | 4    |      |      |      |      |      |      |      |      |      |   |
| 20441  |      | 3    | 5    | 3    | 5    |      |      |      |      |      |      |      |      |      |   |
| 20445  |      |      |      |      |      | 2    | 2    | 6    | 5    | 5    | 5    | 5    | 5    | 2    | 4 |
| 20446  |      |      |      |      |      | 3    | 5    | 5    | 5    | 5    | 5    | 5    | 5    | 5    | 5 |
| 20450  |      |      |      |      |      | 2    | 5    | 6    | 6    | 1    | 6    | 6    | 6    | 1    | 6 |
| 20453  |      |      |      |      |      | 3    | 3    |      | 2    | 3    | 2    | 3    | 3    | 3    | 3 |
| 20458  |      |      |      |      |      | 2    | 5    | 6    | 6    | 2    | 6    | 6    | 6    | 1    | 5 |
| 20464  |      | 4    | 5    |      | 4    |      |      |      |      |      |      |      |      |      |   |
| 20471  |      |      |      |      |      | 4    | 4    | 4    | 4    | 4    | 4    | 4    | 4    | 4    | 4 |

| respid | Q47l | Q47m | Q47n | Q47o | Q48a | Q48b | Q48c | Q48d | Q48e | Q48f | Q48g | Q48h | Q48i | Q48j |   |
|--------|------|------|------|------|------|------|------|------|------|------|------|------|------|------|---|
| 20473  | 1    | 1    |      |      | 1    |      |      |      |      |      |      |      |      |      |   |
| 20474  |      |      |      |      |      |      |      |      |      | 3    |      |      | 3    | 5    |   |
| 20477  |      |      |      |      |      |      |      |      |      |      |      |      |      |      |   |
| 20479  |      |      |      |      |      | 2    | 5    | 5    | 4    | 4    | 4    | 5    | 6    | 2    | 4 |
| 20485  |      |      |      |      |      | 2    | 6    | 6    | 6    | 2    | 5    | 6    | 6    | 1    | 5 |
| 20487  |      |      |      |      |      | 1    | 5    | 5    | 5    | 3    | 5    | 5    | 4    | 3    | 5 |
| 20488  | 4    | 4    | 4    | 4    | 4    |      |      |      |      |      |      |      |      |      |   |
| 20494  |      |      |      |      |      | 3    | 3    | 3    | 4    | 4    | 3    | 3    | 3    | 3    | 3 |
| 20502  | 2    | 2    | 2    | 2    | 2    |      |      |      |      |      |      |      |      |      |   |
| 20503  |      |      |      |      |      | 2    | 4    | 4    | 4    | 4    | 4    | 5    | 5    | 3    | 4 |
| 20510  | 4    | 4    | 4    | 4    | 4    |      |      |      |      |      |      |      |      |      |   |
| 20512  |      |      |      |      |      |      |      |      |      |      |      |      |      |      |   |
| 20516  | 3    | 2    | 3    | 3    | 3    |      |      |      |      |      |      |      |      |      |   |
| 20522  |      |      |      |      |      | 5    | 4    | 5    | 5    | 4    | 3    | 3    | 4    | 4    | 4 |
| 20527  |      |      |      |      |      | 3    | 6    | 6    | 6    | 3    | 6    | 6    | 6    | 3    | 6 |
| 20529  | 2    | 2    | 3    | 2    | 2    |      |      |      |      |      |      |      |      |      |   |
| 20535  | 4    | 3    | 3    | 5    | 5    |      |      |      |      |      |      |      |      |      |   |
| 20543  | 3    | 4    | 4    | 4    | 4    |      |      |      |      |      |      |      |      |      |   |
| 20546  |      |      |      |      |      | 2    | 5    | 5    | 3    | 3    | 6    | 5    | 5    | 1    | 6 |
| 20548  | 2    | 2    | 3    | 3    | 3    |      |      |      |      |      |      |      |      |      |   |
| 20552  | 4    | 4    | 4    | 4    | 4    |      |      |      |      |      |      |      |      |      |   |
| 20556  | 3    | 2    | 2    | 3    | 3    |      |      |      |      |      |      |      |      |      |   |
| 20566  | 3    | 3    | 4    | 3    | 3    |      |      |      |      |      |      |      |      |      |   |
| 20576  | 4    | 4    | 4    | 4    | 4    |      |      |      |      |      |      |      |      |      |   |
| 20587  | 5    | 4    | 4    | 5    | 5    |      |      |      |      |      |      |      |      |      |   |
| 20589  | 1    | 4    |      | 5    | 5    |      |      |      |      |      |      |      |      |      |   |
| 20593  |      |      |      |      |      |      |      |      |      |      |      |      |      |      |   |
| 20594  |      |      |      |      |      |      |      |      |      |      |      |      |      |      |   |
| 20602  |      |      |      |      |      | 3    | 3    | 3    | 3    | 4    | 3    | 3    | 3    | 4    | 3 |
| 20607  |      |      |      |      |      |      |      |      |      |      |      |      |      |      |   |
| 20608  | 4    | 4    | 4    | 5    | 5    |      |      |      |      |      |      |      |      |      |   |
| 20611  | 4    | 4    | 4    | 4    | 4    |      |      |      |      |      |      |      |      |      |   |

| respid | Q47l | Q47m | Q47n | Q47o | Q48a | Q48b | Q48c | Q48d | Q48e | Q48f | Q48g | Q48h | Q48i | Q48j |
|--------|------|------|------|------|------|------|------|------|------|------|------|------|------|------|
| 20612  |      |      |      |      |      |      |      |      |      |      |      |      |      |      |
| 20615  | 3    | 4    | 4    | 3    |      |      |      |      |      |      |      |      |      |      |
| 20625  | 4    | 4    | 4    | 4    |      |      |      |      |      |      |      |      |      |      |
| 20630  |      |      |      |      |      |      |      |      |      |      |      |      |      |      |
| 20639  |      |      |      |      | 5    | 2    | 2    | 2    | 5    | 2    | 2    | 2    | 2    | 2    |
| 20643  | 3    | 3    | 3    | 3    |      |      |      |      |      |      |      |      |      |      |
| 20645  |      |      |      |      |      |      |      |      |      |      |      |      |      |      |
| 20647  | 4    | 4    | 4    | 4    |      |      |      |      |      |      |      |      |      |      |
| 20652  |      |      |      |      | 2    | 3    | 2    | 3    | 4    | 4    | 2    | 4    | 2    | 1    |
| 20661  |      |      |      |      |      |      |      | 6    |      | 6    |      |      | 1    | 6    |
| 20665  |      |      |      |      |      |      |      |      |      |      |      |      |      |      |
| 20679  | 1    | 3    | 3    | 3    |      |      |      |      |      |      |      |      |      |      |
| 20682  | 3    | 3    | 3    | 3    |      |      |      |      |      |      |      |      |      |      |
| 20683  |      |      |      |      |      |      |      |      |      |      |      |      |      |      |
| 20700  | 2    | 3    | 3    | 2    |      |      |      |      |      |      |      |      |      |      |
| 20702  |      |      |      |      | 6    | 6    | 5    | 2    | 6    | 1    | 4    | 6    | 6    | 6    |
| 20709  |      |      |      |      |      |      |      |      |      |      |      |      |      |      |
| 20715  | 3    | 3    | 3    | 3    |      |      |      |      |      |      |      |      |      |      |
| 20718  |      |      |      |      | 1    | 6    | 6    | 6    | 2    | 3    | 2    | 6    | 1    | 1    |
| 20722  | 3    | 4    | 4    | 3    |      |      |      |      |      |      |      |      |      |      |
| 20729  |      |      |      |      |      |      |      |      |      |      |      |      |      |      |
| 20732  |      |      |      |      |      |      |      |      |      |      |      |      |      |      |
| 20746  | 3    | 3    | 3    | 3    |      |      |      |      |      |      |      |      |      |      |
| 20747  |      |      |      |      |      |      |      |      |      |      |      |      |      |      |
| 20758  | 4    | 4    | 4    | 4    |      |      |      |      |      |      |      |      |      |      |
| 20767  |      |      |      |      | 1    | 5    | 6    | 3    | 4    | 4    | 6    | 6    | 1    | 4    |
| 20777  | 1    | 5    | 5    | 5    |      |      |      |      |      |      |      |      |      |      |
| 20778  |      |      |      |      | 2    | 6    | 6    | 6    | 5    | 6    | 6    | 6    | 1    | 6    |
| 20780  |      |      |      |      | 3    | 3    | 4    | 4    | 4    | 4    | 4    | 4    | 4    | 3    |
| 20800  |      |      |      |      | 1    | 3    | 4    | 5    | 1    | 5    | 3    | 5    | 2    | 3    |
| 20810  | 3    | 4    | 4    | 4    |      |      |      |      |      |      |      |      |      |      |
| 20814  |      |      |      |      | 3    | 3    | 4    | 4    | 3    | 4    | 4    | 3    | 4    | 4    |

| respid | Q47l | Q47m | Q47n | Q47o | Q48a | Q48b | Q48c | Q48d | Q48e | Q48f | Q48g | Q48h | Q48i | Q48j |   |
|--------|------|------|------|------|------|------|------|------|------|------|------|------|------|------|---|
| 20816  |      |      |      |      |      | 4    | 2    | 3    | 3    | 4    | 3    | 3    | 3    | 6    | 2 |
| 20832  |      |      |      |      |      | 1    | 6    | 6    | 6    | 1    | 6    | 6    | 6    | 1    | 6 |
| 20838  | 4    | 5    | 5    | 4    |      |      |      |      |      |      |      |      |      |      |   |
| 20841  |      |      |      |      |      | 3    | 4    | 4    | 4    | 3    | 4    | 4    | 6    | 3    | 4 |
| 20848  | 3    | 4    | 3    | 4    |      |      |      |      |      |      |      |      |      |      |   |
| 20850  |      |      |      |      |      |      |      |      |      |      |      |      |      |      |   |
| 20851  |      |      |      |      |      | 3    | 6    | 6    | 6    | 3    | 6    | 6    | 6    | 3    | 6 |
| 20861  |      |      |      |      |      |      |      |      |      |      |      |      |      |      |   |
| 20870  | 5    | 4    | 4    | 4    |      |      |      |      |      |      |      |      |      |      |   |
| 20880  |      |      |      |      |      |      |      |      |      |      |      |      |      |      |   |
| 20883  |      |      |      | 3    |      |      |      |      |      |      |      |      |      |      |   |
| 20894  |      |      |      |      |      | 4    | 5    | 5    | 5    | 5    | 3    | 5    | 6    | 5    | 6 |
| 20896  | 3    | 2    | 3    | 3    |      |      |      |      |      |      |      |      |      |      |   |
| 20901  | 3    | 3    | 3    | 3    |      |      |      |      |      |      |      |      |      |      |   |
| 20903  |      |      |      |      |      | 2    | 6    | 6    | 6    | 2    | 6    | 6    | 6    | 2    | 6 |
| 20909  |      |      |      |      |      |      |      |      |      |      |      |      |      |      |   |
| 20919  | 3    | 4    | 4    | 3    |      |      |      |      |      |      |      |      |      |      |   |
| 20925  | 3    | 2    | 3    | 1    |      |      |      |      |      |      |      |      |      |      |   |
| 20935  | 3    | 4    | 4    | 4    |      |      |      |      |      |      |      |      |      |      |   |
| 20939  |      |      |      |      |      | 2    | 5    | 5    | 2    | 4    | 2    | 5    | 6    | 2    | 6 |
| 20956  |      |      |      |      |      |      |      |      |      |      |      |      |      |      |   |
| 20970  |      |      |      |      |      | 1    | 3    | 4    | 2    | 3    | 4    | 5    | 6    | 2    | 3 |
| 20974  | 3    | 4    | 4    | 3    |      |      |      |      |      |      |      |      |      |      |   |
| 20975  | 3    | 4    | 4    | 4    |      |      |      |      |      |      |      |      |      |      |   |
| 20984  | 3    | 3    | 3    | 3    |      |      |      |      |      |      |      |      |      |      |   |
| 20988  |      |      |      |      |      |      |      |      |      |      |      |      |      |      |   |
| 20996  |      |      |      |      |      | 2    | 2    |      |      | 4    | 3    | 3    | 3    | 4    | 6 |
| 20998  |      |      |      |      |      |      |      |      |      |      |      |      |      |      |   |
| 21007  |      |      |      |      |      |      |      |      |      |      |      |      |      |      |   |
| 21008  |      |      |      |      |      |      |      |      |      |      |      |      |      |      |   |
| 21014  |      |      |      |      |      | 2    | 3    | 5    | 5    | 1    | 6    | 6    | 6    | 2    | 5 |
| 21020  |      |      |      |      |      | 3    | 6    | 6    | 6    | 3    | 5    | 6    | 6    | 3    | 5 |

| respid | Q47l | Q47m | Q47n | Q47o | Q48a | Q48b | Q48c | Q48d | Q48e | Q48f | Q48g | Q48h | Q48i | Q48j |
|--------|------|------|------|------|------|------|------|------|------|------|------|------|------|------|
| 21022  |      |      |      |      |      |      |      |      |      |      |      |      |      |      |
| 21024  |      |      |      |      |      |      |      |      |      |      |      |      |      |      |
| 21026  | 1    | 4    | 4    | 1    |      |      |      |      |      |      |      |      |      |      |
| 21027  | 4    | 4    | 5    | 4    |      |      |      |      |      |      |      |      |      |      |
| 21030  |      |      |      |      |      | 2    | 2    | 5    | 4    | 4    | 4    | 4    | 4    | 3    |
| 21032  |      |      |      |      |      | 2    | 2    | 2    |      | 2    | 2    | 2    | 3    | 4    |
| 21040  |      |      |      |      |      | 3    | 3    | 3    | 3    | 2    | 3    | 3    | 6    | 1    |
| 21045  | 4    | 4    | 4    | 4    |      |      |      |      |      |      |      |      |      | 2    |
| 21058  |      |      |      |      |      |      |      |      |      |      |      |      |      |      |
| 21064  |      |      |      |      |      | 4    | 4    | 4    | 4    | 4    | 4    | 6    | 6    | 3    |
| 21073  |      |      |      |      |      | 3    | 3    | 3    | 3    | 3    | 5    | 5    | 6    | 3    |
| 21086  | 3    | 3    | 3    | 3    |      |      |      |      |      |      |      |      |      |      |
| 21092  | 2    | 2    | 2    | 2    |      |      |      |      |      |      |      |      |      |      |
| 21096  |      |      |      |      |      | 2    | 2    | 1    | 2    | 2    | 2    | 2    | 3    | 2    |
| 21103  |      |      |      |      |      |      |      |      |      |      |      |      |      | 1    |
| 21120  |      |      |      |      |      | 2    | 4    | 4    | 3    | 3    | 4    | 4    | 5    | 2    |
| 21125  |      |      |      |      |      |      |      |      |      |      |      |      |      | 3    |
| 21126  | 3    | 3    | 3    | 3    |      |      |      |      |      |      |      |      |      |      |
| 21132  |      |      |      |      |      |      |      |      |      |      |      |      |      |      |
| 21139  |      |      |      |      |      | 2    | 2    | 2    | 2    | 2    | 2    | 1    | 3    | 1    |
| 21147  |      |      |      |      |      |      |      |      |      |      |      |      |      | 3    |
| 21148  |      |      |      |      |      |      |      |      |      |      |      |      |      |      |
| 21149  |      |      |      |      |      | 3    | 4    | 4    | 3    | 4    | 4    | 4    | 4    | 3    |
| 21164  | 3    | 4    | 4    | 3    |      |      |      |      |      |      |      |      |      | 4    |
| 21165  | 4    | 4    | 5    | 5    |      |      |      |      |      |      |      |      |      |      |
| 21171  |      |      |      |      |      | 1    | 3    | 3    | 3    | 5    | 4    | 3    | 2    | 3    |
| 21176  |      |      |      |      |      | 5    | 5    | 5    | 5    | 5    | 5    | 5    | 5    | 5    |
| 21187  |      |      |      |      |      | 3    | 3    | 3    | 3    | 4    | 3    | 4    | 4    | 5    |
| 21192  |      |      |      |      |      | 2    | 4    | 6    | 4    | 2    | 6    | 5    | 6    | 1    |
| 21198  |      |      |      |      |      | 3    | 4    | 4    | 5    | 2    | 5    | 5    | 5    | 3    |
| 21199  |      |      |      |      |      | 4    | 3    | 4    | 4    | 3    | 4    | 4    | 5    | 2    |
| 21206  |      |      |      |      |      | 3    | 5    | 3    | 3    | 5    | 4    | 3    | 3    | 3    |

| respid | Q47l | Q47m | Q47n | Q47o | Q48a | Q48b | Q48c | Q48d | Q48e | Q48f | Q48g | Q48h | Q48i | Q48j |   |
|--------|------|------|------|------|------|------|------|------|------|------|------|------|------|------|---|
| 21212  |      |      | 3    | 3    | 3    |      |      |      |      |      |      |      |      |      |   |
| 21216  |      |      |      |      |      | 2    | 5    | 5    | 5    | 3    | 5    | 5    | 6    | 2    | 3 |
| 21217  | 3    | 4    | 4    | 4    | 3    |      |      |      |      |      |      |      |      |      |   |
| 21228  | 3    | 4    | 4    | 4    | 4    |      |      |      |      |      |      |      |      |      |   |
| 21229  |      |      |      |      |      | 2    | 4    | 4    | 4    | 4    | 4    | 4    | 5    | 4    | 4 |
| 21230  |      |      |      |      |      | 1    | 6    | 6    | 6    | 1    | 5    | 6    | 6    | 1    | 6 |
| 21243  |      |      |      |      |      | 3    | 4    | 5    | 5    | 3    | 4    | 4    | 4    | 3    | 4 |
| 21247  |      |      |      |      |      | 5    | 4    | 3    | 4    | 2    | 6    | 3    | 4    | 2    | 2 |
| 21253  | 2    | 4    | 4    | 4    | 4    |      |      |      |      |      |      |      |      |      |   |
| 21264  | 1    | 4    | 3    | 3    | 3    |      |      |      |      |      |      |      |      |      |   |
| 21265  |      |      |      |      |      |      |      |      |      |      |      |      |      |      |   |
| 21273  | 3    | 4    | 4    | 4    | 4    |      |      |      |      |      |      |      |      |      |   |
| 21275  |      |      |      |      |      | 1    | 3    | 4    | 6    | 5    | 6    | 6    | 6    | 1    | 4 |
| 21278  |      |      |      |      |      | 3    | 3    | 2    | 4    | 4    | 4    | 3    | 4    | 3    | 4 |
| 21291  | 1    | 3    | 3    | 3    | 3    |      |      |      |      |      |      |      |      |      |   |
| 21298  | 3    | 3    | 4    | 4    | 4    |      |      |      |      |      |      |      |      |      |   |
| 21301  | 4    | 4    | 5    | 4    | 4    |      |      |      |      |      |      |      |      |      |   |
| 21312  | 3    | 2    | 2    | 3    | 3    |      |      |      |      |      |      |      |      |      |   |
| 21323  |      |      |      |      |      | 3    |      | 5    | 5    | 3    | 4    | 4    | 5    | 3    | 5 |
| 21325  |      |      |      |      |      |      |      |      |      |      |      |      |      |      |   |
| 21341  |      |      |      |      |      | 1    | 5    | 5    | 6    | 1    | 5    | 6    | 6    | 1    | 6 |
| 21349  |      |      |      |      |      | 1    | 6    | 6    | 6    | 1    | 6    | 3    | 6    | 1    | 3 |
| 21350  |      |      |      |      |      | 3    | 4    | 4    | 3    | 4    | 4    | 4    | 4    | 3    | 4 |
| 21354  |      |      |      |      |      |      |      |      |      |      |      |      |      |      |   |
| 21372  |      |      |      |      |      |      | 4    | 4    | 5    | 2    | 5    | 5    | 5    | 4    | 6 |
| 21373  |      |      |      |      |      | 2    | 2    | 2    | 3    |      | 4    | 5    | 5    | 3    | 5 |
| 21378  |      |      |      |      |      |      |      |      |      |      |      |      |      |      |   |
| 21393  |      |      |      |      |      |      |      |      |      |      |      |      |      |      |   |
| 21401  | 3    | 4    | 3    | 3    | 3    |      |      |      |      |      |      |      |      |      |   |
| 21405  | 5    | 5    | 5    | 5    | 5    |      |      |      |      |      |      |      |      |      |   |
| 21406  |      |      |      |      |      |      |      |      |      |      |      |      |      |      |   |
| 21407  | 2    | 3    | 3    | 2    | 2    |      |      |      |      |      |      |      |      |      |   |



| respid | Q47l | Q47m | Q47n | Q47o | Q48a | Q48b | Q48c | Q48d | Q48e | Q48f | Q48g | Q48h | Q48i | Q48j |
|--------|------|------|------|------|------|------|------|------|------|------|------|------|------|------|
| 21418  | 5    | 5    | 5    | 5    |      |      |      |      |      |      |      |      |      |      |
| 21420  |      |      |      |      |      |      |      |      |      |      |      |      |      |      |
| 21421  |      |      |      |      |      |      |      |      |      |      |      |      |      |      |
| 21446  |      |      |      |      |      |      |      |      |      |      |      |      |      |      |
| 21449  | 2    |      | 3    | 3    |      |      |      |      |      |      |      |      |      |      |
| 21452  |      |      |      |      | 4    | 4    | 3    | 3    | 4    | 3    | 5    | 5    | 5    | 5    |
| 21455  | 3    | 4    | 4    | 5    |      |      |      |      |      |      |      |      |      |      |
| 21469  |      |      |      |      | 2    | 2    | 2    | 2    | 1    | 5    | 5    | 6    | 1    | 3    |
| 21471  |      |      |      |      | 3    | 4    | 4    | 4    | 3    | 4    | 4    | 4    | 3    | 4    |
| 21472  |      |      |      |      | 3    | 4    | 4    | 4    | 3    | 4    | 4    | 6    | 3    | 4    |
| 21474  |      |      |      |      | 3    | 5    | 5    | 5    | 5    | 5    | 5    | 5    | 5    | 5    |
| 21479  |      |      |      |      | 3    | 4    | 4    | 4    | 2    | 5    | 5    | 5    | 5    | 5    |
| 21485  | 5    | 4    | 3    | 4    |      |      |      |      |      |      |      |      |      |      |
| 21512  |      |      |      |      |      |      |      |      |      |      |      |      |      |      |
| 21513  |      |      |      |      |      |      |      |      |      |      |      |      |      |      |
| 21514  | 3    | 3    | 3    | 3    |      |      |      |      |      |      |      |      |      |      |
| 21520  |      |      |      |      | 4    | 3    | 3    | 4    | 3    | 4    | 4    | 4    | 3    | 3    |
| 21539  |      |      |      |      | 1    | 5    | 5    | 5    | 2    | 5    | 5    | 5    | 2    | 5    |
| 21553  | 3    | 3    | 3    | 3    |      |      |      |      |      |      |      |      |      |      |
| 21560  |      |      |      |      | 3    | 3    | 5    | 3    | 3    | 5    | 5    | 5    | 2    | 5    |
| 21561  |      |      |      |      | 1    | 1    | 1    | 1    | 1    | 5    | 4    | 6    | 5    | 6    |
| 21563  |      |      |      |      | 3    | 5    | 5    | 5    | 2    | 5    | 5    | 5    | 3    | 3    |
| 21565  |      |      |      |      |      |      |      |      |      |      |      |      |      |      |
| 21582  |      |      |      |      | 4    | 2    | 2    | 2    | 5    | 2    | 2    | 2    | 6    | 2    |
| 21584  | 3    | 4    | 3    | 3    |      |      |      |      |      |      |      |      |      |      |
| 21585  | 3    | 3    | 3    | 3    |      |      |      |      |      |      |      |      |      |      |
| 21586  | 4    |      |      |      |      |      |      |      |      |      |      |      |      |      |
| 21587  |      |      |      |      |      |      |      |      |      |      |      |      |      |      |
| 21590  | 2    | 2    | 2    | 2    |      |      |      |      |      |      |      |      |      |      |
| 21601  |      |      |      |      | 3    | 3    | 3    | 3    | 3    | 3    | 3    | 3    | 3    | 3    |
| 21611  |      |      |      |      |      | 5    | 3    | 5    | 4    | 6    | 2    | 3    | 4    | 6    |
| 21612  | 2    | 3    | 3    | 3    |      |      |      |      |      |      |      |      |      |      |

| respid | Q47l | Q47m | Q47n | Q47o | Q48a | Q48b | Q48c | Q48d | Q48e | Q48f | Q48g | Q48h | Q48i | Q48j |   |
|--------|------|------|------|------|------|------|------|------|------|------|------|------|------|------|---|
| 21625  | 1    | 3    | 3    | 3    |      |      |      |      |      |      |      |      |      |      |   |
| 21633  |      |      |      |      |      |      |      |      |      |      |      |      |      |      |   |
| 21640  |      |      |      |      | 4    |      |      |      |      |      |      |      |      |      |   |
| 21647  |      |      |      |      |      | 1    | 6    | 6    | 6    | 1    | 6    | 6    | 6    | 1    | 6 |
| 21648  |      |      |      |      |      |      |      |      |      |      |      |      |      |      |   |
| 21656  |      |      |      |      |      | 5    | 5    | 5    | 5    | 5    | 6    | 5    | 5    | 5    | 5 |
| 21657  |      |      |      |      |      | 2    | 4    | 4    | 4    | 3    | 4    | 5    | 4    | 3    | 4 |
| 21658  | 2    | 2    | 3    | 3    |      |      |      |      |      |      |      |      |      |      |   |
| 21665  |      |      |      |      |      | 3    | 3    | 2    | 2    | 5    | 3    | 5    | 5    | 3    | 4 |
| 21666  | 3    | 4    | 4    | 3    |      |      |      |      |      |      |      |      |      |      |   |
| 21668  | 3    | 3    | 3    | 3    |      |      |      |      |      |      |      |      |      |      |   |
| 21673  |      |      |      |      |      | 5    |      |      |      |      |      |      |      |      |   |
| 21681  | 3    | 3    | 3    | 3    |      |      |      |      |      |      |      |      |      |      |   |
| 21682  | 4    | 4    | 4    | 4    |      |      |      |      |      |      |      |      |      |      |   |
| 21685  | 3    | 3    | 3    | 3    |      |      |      |      |      |      |      |      |      |      |   |
| 21692  |      |      |      |      |      | 2    | 2    | 2    | 2    | 1    | 6    | 6    | 6    | 1    | 3 |
| 21697  |      |      |      |      |      | 3    | 5    | 3    | 2    | 3    |      |      | 6    | 2    | 2 |
| 21711  |      |      |      |      |      | 3    | 3    | 3    | 3    | 4    | 4    | 4    | 4    | 3    | 3 |
| 21715  |      |      |      |      |      | 5    | 2    | 2    | 2    | 4    | 2    | 2    | 2    | 5    | 2 |
| 21726  | 3    | 4    | 4    | 4    |      |      |      |      |      |      |      |      |      |      |   |
| 21748  |      |      |      |      |      |      |      |      |      |      |      |      |      |      |   |
| 21761  |      |      |      |      |      | 3    | 2    | 2    | 3    | 4    | 2    | 2    | 6    | 3    | 2 |
| 21769  |      |      |      |      |      | 3    | 4    | 4    | 4    | 3    | 4    | 4    | 4    | 3    | 4 |
| 21774  | 3    | 2    | 2    | 3    |      |      |      |      |      |      |      |      |      |      |   |
| 21778  |      |      |      |      |      |      |      |      |      |      |      |      |      |      |   |
| 21785  | 3    | 3    | 3    | 3    |      |      |      |      |      |      |      |      |      |      |   |
| 21799  | 2    | 3    | 2    | 2    |      |      |      |      |      |      |      |      |      |      |   |
| 21820  |      |      |      |      |      | 1    | 1    | 2    | 2    | 5    | 3    | 2    | 2    | 4    | 1 |
| 21837  |      |      |      |      |      |      |      |      |      |      |      |      |      |      |   |
| 21845  | 2    | 2    | 2    | 2    |      |      |      |      |      |      |      |      |      |      |   |
| 21846  |      |      |      |      |      | 6    | 6    | 6    | 6    | 6    | 6    | 6    | 6    | 6    | 6 |
| 21849  | 3    | 3    | 2    | 3    |      |      |      |      |      |      |      |      |      |      |   |

| respid | Q47l | Q47m | Q47n | Q47o | Q48a | Q48b | Q48c | Q48d | Q48e | Q48f | Q48g | Q48h | Q48i | Q48j |   |
|--------|------|------|------|------|------|------|------|------|------|------|------|------|------|------|---|
| 21850  |      |      |      |      |      | 3    | 3    | 4    | 4    | 3    | 4    | 4    | 4    | 3    | 4 |
| 21855  | 4    | 3    | 4    | 3    |      |      |      |      |      |      |      |      |      |      |   |
| 21859  | 4    | 4    | 4    | 5    |      |      |      |      |      |      |      |      |      |      |   |
| 21861  | 3    | 3    | 3    | 3    |      |      |      |      |      |      |      |      |      |      |   |
| 21866  |      |      |      |      |      |      |      |      |      |      |      |      |      |      |   |
| 21873  | 2    | 2    | 3    | 3    |      |      |      |      |      |      |      |      |      |      |   |
| 21876  | 3    | 3    | 3    | 3    |      |      |      |      |      |      |      |      |      |      |   |
| 21882  |      |      |      |      |      |      |      |      |      |      |      |      |      |      |   |
| 21884  |      |      |      |      | 6    | 5    | 5    | 2    | 5    | 2    | 4    | 5    | 6    | 6    |   |
| 21887  | 3    | 3    | 3    | 3    |      |      |      |      |      |      |      |      |      |      |   |
| 21892  | 4    | 4    | 4    | 4    |      |      |      |      |      |      |      |      |      |      |   |
| 21907  |      |      |      |      | 2    | 5    | 6    | 4    | 3    | 6    | 5    | 6    | 1    | 3    |   |
| 21910  | 2    | 2    | 2    | 2    |      |      |      |      |      |      |      |      |      |      |   |
| 21912  |      |      |      |      | 2    | 1    | 2    | 3    | 6    | 3    | 2    | 2    | 3    | 4    |   |
| 21914  | 4    | 4    | 3    | 4    |      |      |      |      |      |      |      |      |      |      |   |
| 21925  | 3    | 3    | 3    | 3    |      |      |      |      |      |      |      |      |      |      |   |
| 21937  |      |      |      |      |      |      |      |      |      |      |      |      |      |      |   |
| 21938  |      |      |      |      | 5    | 5    | 5    | 5    | 4    | 3    | 4    | 4    | 4    | 4    | 4 |
| 21940  | 3    | 3    | 3    | 3    |      |      |      |      |      |      |      |      |      |      |   |
| 21942  |      |      |      |      |      |      |      |      |      |      |      |      |      | 1    | 6 |
| 21947  |      |      |      |      |      |      |      |      |      |      |      |      |      |      |   |
| 21948  |      |      |      |      | 6    | 6    | 6    | 5    | 3    | 5    | 6    |      | 6    | 6    |   |
| 21961  |      |      |      |      | 3    | 3    | 3    | 3    | 5    | 3    | 3    | 3    | 5    | 3    |   |
| 21977  | 2    | 3    | 3    | 2    |      |      |      |      |      |      |      |      |      |      |   |
| 21983  |      |      |      |      |      |      |      |      |      |      |      |      |      |      |   |
| 21986  |      |      |      |      | 2    | 4    | 4    | 2    | 3    | 4    | 4    | 4    | 3    | 2    |   |
| 21988  | 4    | 4    | 4    | 5    |      |      |      |      |      |      |      |      |      |      |   |
| 21996  |      |      |      |      |      |      |      |      |      |      |      |      |      |      |   |
| 21997  |      |      |      |      | 3    | 4    | 5    | 3    | 3    | 5    | 5    | 6    | 3    | 5    |   |
| 22005  | 3    | 4    | 4    | 3    |      |      |      |      |      |      |      |      |      |      |   |
| 22013  |      |      |      |      | 1    | 6    | 6    | 6    | 1    | 6    | 6    | 6    | 1    | 6    |   |
| 22018  |      |      |      |      |      |      |      |      |      |      |      |      |      |      |   |

| respid | Q47l | Q47m | Q47n | Q47o | Q48a | Q48b | Q48c | Q48d | Q48e | Q48f | Q48g | Q48h | Q48i | Q48j |   |
|--------|------|------|------|------|------|------|------|------|------|------|------|------|------|------|---|
| 22019  |      |      |      |      |      | 5    | 5    | 5    | 5    | 5    | 5    |      | 5    | 4    | 6 |
| 22071  |      |      |      |      |      | 1    | 1    | 1    | 1    | 1    | 1    | 1    | 1    | 1    | 1 |
| 22082  |      |      |      |      |      | 2    | 4    | 4    | 5    | 2    | 4    | 5    | 6    | 1    | 4 |
| 22085  | 3    | 3    | 3    | 3    |      |      |      |      |      |      |      |      |      |      |   |
| 22092  |      |      |      |      |      | 1    | 6    | 6    | 6    | 1    | 6    | 6    | 6    | 1    | 6 |
| 22097  |      |      |      |      |      |      |      |      |      |      |      |      |      |      |   |
| 22111  |      |      |      |      |      |      |      |      |      |      |      |      |      |      |   |
| 22118  | 3    | 4    | 4    | 4    |      |      |      |      |      |      |      |      |      |      |   |
| 22132  |      |      |      |      |      | 6    | 6    | 1    | 6    | 1    | 6    | 6    | 6    | 6    | 6 |
| 22133  | 4    | 4    | 4    | 3    |      |      |      |      |      |      |      |      |      |      |   |
| 22139  |      |      |      |      |      |      |      |      |      |      |      |      |      |      |   |
| 22142  | 2    | 1    | 1    | 1    |      |      |      |      |      |      |      |      |      |      |   |
| 22146  |      |      |      |      |      | 2    | 6    | 6    | 6    | 3    | 6    | 6    | 6    | 3    | 6 |
| 22181  |      |      |      |      |      |      |      |      |      |      |      |      |      |      |   |
| 22202  | 3    | 3    | 3    | 3    |      |      |      |      |      |      |      |      |      |      |   |
| 22214  |      |      |      |      |      |      |      |      |      |      |      |      |      |      |   |
| 22223  |      |      |      |      |      |      |      |      |      |      |      |      |      |      |   |
| 22227  |      |      |      |      |      | 2    | 2    | 2    | 2    | 2    | 5    | 5    | 5    | 5    | 5 |
| 22229  |      |      |      |      |      | 3    | 3    | 2    | 2    | 3    | 3    | 2    | 2    | 3    | 3 |
| 22239  |      |      |      |      |      | 6    | 6    | 6    | 6    | 6    | 6    | 6    | 6    | 6    | 6 |
| 22245  | 2    | 2    | 2    | 2    |      |      |      |      |      |      |      |      |      |      |   |
| 22256  |      |      |      |      |      |      |      |      |      |      |      |      |      |      |   |
| 22260  |      |      |      |      |      | 5    | 6    | 5    | 3    | 4    | 3    | 5    | 6    | 6    | 6 |
| 22298  | 3    | 3    | 3    | 3    |      |      |      |      |      |      |      |      |      |      |   |
| 22321  |      |      |      |      |      | 2    | 6    | 6    | 5    | 5    | 5    | 6    | 6    | 2    | 6 |
| 22340  |      |      |      |      |      |      |      |      |      |      |      |      |      |      |   |
| 22346  |      |      |      |      |      | 4    | 4    | 4    | 3    | 3    | 4    | 4    | 4    | 3    | 2 |
| 22356  | 3    | 4    | 4    | 4    |      |      |      |      |      |      |      |      |      |      |   |
| 22361  | 1    | 3    | 3    | 3    |      |      |      |      |      |      |      |      |      |      |   |
| 22364  | 3    | 2    | 3    | 3    |      |      |      |      |      |      |      |      |      |      |   |
| 22368  |      |      |      |      |      |      |      |      |      |      |      |      |      |      |   |
| 22374  |      |      |      |      |      | 3    | 3    | 5    | 3    | 1    | 3    | 3    | 3    | 4    | 3 |

| respid | Q47l | Q47m | Q47n | Q47o | Q48a | Q48b | Q48c | Q48d | Q48e | Q48f | Q48g | Q48h | Q48i | Q48j |   |
|--------|------|------|------|------|------|------|------|------|------|------|------|------|------|------|---|
| 22375  |      |      |      |      |      | 2    | 6    | 6    | 6    | 2    | 6    | 6    | 6    | 1    | 6 |
| 22377  |      |      |      |      |      |      | 5    | 5    | 6    | 2    | 5    | 5    | 6    | 1    | 4 |
| 22383  |      |      |      |      |      |      |      |      |      |      |      |      |      |      |   |
| 22387  |      |      |      |      |      | 1    | 4    | 4    | 4    | 3    | 4    | 4    | 5    | 4    | 4 |
| 22392  |      |      |      |      |      |      |      |      |      |      |      |      |      |      |   |
| 22393  |      |      |      |      |      | 3    | 5    | 5    | 5    | 3    | 5    | 5    | 6    | 3    | 4 |
| 22394  |      |      |      |      |      | 3    | 6    | 6    | 3    | 5    | 6    | 3    | 6    | 1    | 6 |
| 22395  |      |      |      |      |      |      |      |      |      |      |      |      |      |      |   |
| 22401  | 3    | 4    | 4    | 4    |      |      |      |      |      |      |      |      |      |      |   |
| 22407  |      |      |      |      |      |      |      |      |      |      |      |      |      |      |   |
| 22410  | 3    | 3    | 3    | 3    |      |      |      |      |      |      |      |      |      |      |   |
| 22418  |      |      |      |      |      |      |      |      |      |      |      |      |      |      |   |
| 22421  |      |      |      |      |      |      |      |      |      |      |      |      |      |      |   |
| 22423  |      |      |      |      |      |      |      |      |      |      |      |      |      |      |   |
| 22425  |      |      |      |      |      | 2    | 5    | 5    | 6    | 4    | 5    | 5    | 6    | 1    | 5 |
| 22427  | 4    | 3    | 3    | 3    |      |      |      |      |      |      |      |      |      |      |   |
| 22431  |      |      |      |      |      | 3    | 2    | 2    | 3    | 4    | 3    | 2    | 3    | 4    | 3 |
| 22435  | 4    | 2    | 2    | 1    |      |      |      |      |      |      |      |      |      |      |   |
| 22436  |      |      |      |      |      | 3    | 3    | 3    | 3    | 4    | 3    | 3    | 3    | 4    | 3 |
| 22442  |      |      |      |      |      |      |      |      |      |      |      |      |      |      |   |
| 22444  | 3    | 3    | 3    | 3    |      |      |      |      |      |      |      |      |      |      |   |
| 22445  |      |      |      |      |      |      |      |      |      | 4    | 4    | 3    | 5    | 5    | 5 |
| 22446  |      |      |      |      |      |      |      |      |      |      |      |      |      |      |   |
| 22448  |      |      |      |      |      | 2    | 5    | 5    | 5    | 3    | 5    | 5    | 5    | 2    | 4 |
| 22449  |      |      |      |      |      | 3    | 6    | 5    | 3    | 3    | 6    | 6    | 6    | 2    | 5 |
| 22450  |      |      |      |      |      |      |      |      |      |      |      |      |      |      |   |
| 22453  | 3    | 3    | 4    | 3    |      |      |      |      |      |      |      |      |      |      |   |
| 22465  |      |      |      |      |      | 3    | 4    | 4    | 4    | 3    | 4    | 5    | 4    | 4    | 4 |
| 22472  | 4    | 4    | 4    | 4    |      |      |      |      |      |      |      |      |      |      |   |
| 22475  |      |      |      |      |      | 3    | 3    | 4    | 5    | 4    | 3    | 3    | 4    | 2    | 3 |
| 22478  | 2    | 2    | 3    | 3    |      |      |      |      |      |      |      |      |      |      |   |
| 22491  | 5    | 5    | 4    | 5    |      |      |      |      |      |      |      |      |      |      |   |

| respid | Q47l | Q47m | Q47n | Q47o | Q48a | Q48b | Q48c | Q48d | Q48e | Q48f | Q48g | Q48h | Q48i | Q48j |
|--------|------|------|------|------|------|------|------|------|------|------|------|------|------|------|
| 22497  |      |      |      |      |      | 3    | 4    | 4    | 3    | 3    | 3    | 4    | 4    | 4    |
| 22498  |      |      |      |      |      | 3    | 4    | 3    | 3    | 4    | 4    | 4    | 4    | 4    |
| 22499  |      |      |      |      |      |      |      |      |      |      |      |      |      |      |
| 22503  | 3    | 3    | 4    | 3    |      |      |      |      |      |      |      |      |      |      |
| 22507  |      |      |      |      | 3    | 3    | 3    | 4    | 4    | 4    | 3    | 3    | 4    | 3    |
| 22513  |      |      |      |      | 3    | 3    | 4    | 4    | 4    | 4    | 4    | 5    | 6    | 4    |
| 22517  |      |      |      |      | 1    | 5    | 6    | 6    | 6    | 2    | 6    | 5    | 6    | 1    |
| 22524  | 2    | 2    | 2    | 2    |      |      |      |      |      |      |      |      |      |      |
| 22528  |      |      |      |      |      | 2    | 6    | 6    | 6    | 1    | 5    | 6    | 6    | 1    |
| 22544  | 1    | 1    | 1    | 1    |      |      |      |      |      |      |      |      |      |      |
| 22571  |      |      |      |      |      |      |      |      |      |      |      |      |      |      |
| 22576  |      |      |      |      |      | 2    | 5    | 4    | 3    | 3    | 3    | 4    | 3    | 3    |
| 22579  |      |      |      |      |      | 3    | 4    | 4    | 4    | 3    | 4    | 4    | 4    | 4    |
| 22583  |      |      |      |      |      | 3    | 4    | 5    | 4    | 3    | 5    | 5    | 5    | 3    |
| 22591  | 3    | 3    | 3    | 3    |      |      |      |      |      |      |      |      |      |      |
| 22592  |      |      |      |      |      | 3    | 3    | 3    | 4    | 3    | 4    | 5    | 4    | 4    |
| 22612  |      |      |      |      |      | 3    | 5    | 6    | 5    | 5    | 5    | 6    | 5    | 5    |
| 22613  | 5    | 3    | 3    | 5    |      |      |      |      |      |      |      |      |      |      |
| 22615  | 4    | 4    | 4    | 3    |      |      |      |      |      |      |      |      |      |      |
| 22621  | 3    | 4    | 4    | 3    |      |      |      |      |      |      |      |      |      |      |
| 22625  |      |      |      |      |      | 6    | 2    |      |      |      |      |      |      |      |
| 22628  |      |      |      |      |      | 5    | 5    | 5    | 5    | 5    | 5    | 5    | 5    | 5    |
| 22632  |      |      |      |      |      | 1    | 6    | 6    | 6    | 1    | 6    | 6    | 6    | 1    |
| 22639  |      |      |      |      |      |      |      |      |      |      |      |      |      |      |
| 22648  |      |      |      |      |      | 6    | 6    | 6    | 6    | 6    | 6    | 6    | 6    | 2    |
| 22649  | 2    | 1    | 2    | 3    |      |      |      |      |      |      |      |      |      |      |
| 22655  |      |      |      |      |      |      |      |      |      |      |      |      |      |      |
| 22659  |      |      |      |      |      |      |      |      |      |      |      |      |      |      |
| 22660  | 3    | 4    |      | 4    |      |      |      |      |      |      |      |      |      |      |
| 22666  |      |      |      |      |      |      |      |      |      |      |      |      |      |      |
| 22667  | 3    | 3    | 3    | 3    |      |      |      |      |      |      |      |      |      |      |
| 22670  |      |      |      |      |      |      |      |      |      |      |      |      |      |      |

| respid | Q47l | Q47m | Q47n | Q47o | Q48a | Q48b | Q48c | Q48d | Q48e | Q48f | Q48g | Q48h | Q48i | Q48j |   |
|--------|------|------|------|------|------|------|------|------|------|------|------|------|------|------|---|
| 22681  |      |      |      |      |      |      |      |      |      |      |      |      |      |      |   |
| 22683  |      |      |      |      |      | 2    | 6    | 6    | 6    | 3    | 6    | 6    | 6    | 3    | 6 |
| 22688  |      |      |      |      |      | 3    | 4    | 4    | 4    | 3    | 4    | 5    | 4    | 3    | 4 |
| 22695  | 3    | 4    | 4    | 3    |      |      |      |      |      |      |      |      |      |      |   |
| 22696  | 3    | 4    | 4    | 4    |      |      |      |      |      |      |      |      |      |      |   |
| 22705  |      |      |      |      |      | 5    | 2    | 2    | 3    | 5    | 2    | 2    | 3    | 5    | 5 |
| 22718  | 2    | 3    | 3    | 3    |      |      |      |      |      |      |      |      |      |      |   |
| 22720  | 1    | 3    | 3    | 3    |      |      |      |      |      |      |      |      |      |      |   |
| 22724  |      |      |      |      |      | 4    | 5    | 5    | 6    | 2    | 6    | 6    | 6    | 1    | 5 |
| 22728  |      |      |      |      |      | 3    | 4    | 4    | 5    | 3    | 4    | 4    |      | 3    |   |
| 22751  | 3    | 3    | 3    | 3    |      |      |      |      |      |      |      |      |      |      |   |
| 22782  | 1    | 2    | 2    | 2    |      |      |      |      |      |      |      |      |      |      |   |
| 22786  | 4    | 4    | 4    | 4    |      |      |      |      |      |      |      |      |      |      |   |
| 22788  |      |      |      |      |      | 2    | 6    | 6    | 5    | 2    | 5    | 5    | 6    | 2    | 5 |
| 22810  |      |      |      |      |      | 2    | 5    | 5    | 5    | 1    | 1    | 5    | 5    | 1    | 5 |
| 22816  |      |      |      |      |      | 4    | 4    | 5    | 5    | 3    | 5    | 5    | 5    |      | 6 |
| 22818  |      |      |      |      |      | 1    | 6    | 6    | 6    | 1    | 6    | 6    | 6    | 1    | 6 |
| 22854  |      |      |      |      |      |      |      |      |      |      |      |      |      |      |   |
| 22858  |      |      |      |      |      | 2    | 6    | 6    | 3    | 2    | 6    | 6    | 6    | 2    | 6 |
| 22862  |      |      |      |      |      | 1    | 6    | 6    | 6    | 1    | 6    | 6    | 6    | 1    | 6 |
| 22865  | 4    | 2    | 3    | 3    |      |      |      |      |      |      |      |      |      |      |   |
| 22868  |      |      |      |      |      | 3    | 5    | 5    | 3    | 3    | 4    | 6    | 6    | 3    | 6 |
| 22869  | 4    | 4    | 4    | 5    |      |      |      |      |      |      |      |      |      |      |   |
| 22873  |      |      |      |      |      | 6    | 6    | 5    | 6    | 5    | 6    | 6    | 6    | 4    | 6 |
| 22875  | 4    | 2    | 2    | 3    |      |      |      |      |      |      |      |      |      |      |   |
| 22876  |      |      |      |      |      | 2    | 6    | 6    | 6    | 1    | 6    | 6    | 6    | 1    | 6 |
| 22882  |      |      |      |      |      | 5    | 4    | 4    |      |      |      | 4    | 5    | 4    | 4 |
| 22884  | 3    | 3    | 4    |      |      |      |      |      |      |      |      |      |      |      |   |
| 22887  |      |      |      |      |      | 2    | 3    | 4    | 4    | 3    | 3    | 3    | 3    | 4    | 2 |
| 22888  |      |      |      |      |      | 3    |      |      |      |      |      |      |      |      |   |
| 22900  |      |      |      |      |      |      |      |      |      |      |      |      |      |      |   |
| 22901  |      |      |      |      |      |      |      |      |      |      |      |      |      |      |   |

| respid | Q47l | Q47m | Q47n | Q47o | Q48a | Q48b | Q48c | Q48d | Q48e | Q48f | Q48g | Q48h | Q48i | Q48j |   |
|--------|------|------|------|------|------|------|------|------|------|------|------|------|------|------|---|
| 22912  | 3    | 4    | 4    | 3    |      |      |      |      |      |      |      |      |      |      |   |
| 22913  |      |      |      |      |      |      |      |      |      |      |      |      |      |      |   |
| 22921  | 5    | 5    | 5    | 5    |      |      |      |      |      |      |      |      |      |      |   |
| 22925  | 4    | 5    | 4    | 4    |      |      |      |      |      |      |      |      |      |      |   |
| 22940  |      |      |      |      |      | 2    | 5    | 6    | 6    | 2    | 6    | 6    | 6    | 1    | 6 |
| 22941  | 2    | 1    | 1    | 1    |      |      |      |      |      |      |      |      |      |      |   |
| 22947  | 3    | 4    | 4    | 5    |      |      |      |      |      |      |      |      |      |      |   |
| 22948  |      |      |      |      |      |      |      |      |      |      |      |      |      |      |   |
| 22964  |      |      |      |      |      | 4    | 4    | 5    | 5    | 3    | 4    | 5    | 5    | 3    | 5 |
| 22966  | 3    | 2    | 2    | 2    |      |      |      |      |      |      |      |      |      |      |   |
| 22969  |      |      |      |      |      | 2    | 6    | 6    | 6    | 3    | 5    | 6    | 6    | 3    | 6 |
| 22971  |      |      |      |      |      |      |      |      |      |      |      |      |      |      |   |
| 22988  |      |      |      |      |      |      |      |      |      |      |      |      |      |      |   |
| 22990  |      |      |      |      |      |      |      |      |      |      |      |      |      |      |   |
| 23000  |      |      |      |      |      | 3    | 4    | 4    | 4    | 3    | 4    | 4    | 4    | 3    | 4 |
| 23016  |      |      |      |      |      |      |      |      |      |      |      |      |      |      |   |
| 23026  | 3    | 4    | 4    | 3    |      |      |      |      |      |      |      |      |      |      |   |
| 23035  | 4    | 4    | 4    | 5    |      |      |      |      |      |      |      |      |      |      |   |
| 23037  | 3    | 2    | 2    | 2    |      |      |      |      |      |      |      |      |      |      |   |
| 23044  |      |      |      |      |      | 1    | 4    | 6    | 6    | 1    | 6    | 6    | 6    | 1    | 6 |
| 23046  | 1    | 1    | 1    | 1    |      |      |      |      |      |      |      |      |      |      |   |
| 23047  |      |      |      |      |      | 2    |      |      | 2    | 2    | 5    | 2    | 6    | 1    | 5 |
| 23049  |      |      |      |      |      | 2    | 3    | 4    | 4    | 3    | 4    | 5    | 4    | 1    | 1 |
| 23055  | 3    | 5    | 5    | 4    |      |      |      |      |      |      |      |      |      |      |   |
| 23066  |      |      |      |      |      |      |      |      |      |      |      |      |      |      |   |
| 23075  |      |      |      |      |      | 2    | 4    | 5    | 3    | 3    | 4    | 4    | 6    | 2    | 5 |
| 23081  | 3    | 4    | 4    | 3    |      |      |      |      |      |      |      |      |      |      |   |
| 23087  | 3    | 3    | 4    | 3    |      |      |      |      |      |      |      |      |      |      |   |
| 23094  |      |      |      |      |      |      |      |      |      |      |      |      |      |      |   |
| 23099  |      |      |      |      |      |      |      |      |      |      |      |      |      |      |   |
| 23101  |      |      |      |      |      | 3    | 3    | 3    | 3    | 3    | 4    | 3    | 2    | 3    | 3 |
| 23105  |      |      |      |      |      |      |      |      |      |      |      |      |      |      |   |



| respid | Q47l | Q47m | Q47n | Q47o | Q48a | Q48b | Q48c | Q48d | Q48e | Q48f | Q48g | Q48h | Q48i | Q48j |
|--------|------|------|------|------|------|------|------|------|------|------|------|------|------|------|
| 23115  |      |      |      |      |      |      | 2    | 6    | 5    | 2    | 6    | 6    | 6    | 6    |
| 23121  |      |      |      |      |      | 5    | 5    | 5    | 5    | 5    | 5    | 3    | 5    | 4    |
| 23127  |      |      |      |      |      | 1    | 6    | 6    | 3    | 1    | 6    | 6    | 6    | 1    |
| 23131  |      |      |      |      |      | 1    | 1    | 1    | 1    | 1    | 1    | 1    | 1    | 1    |
| 23134  |      |      |      |      |      | 2    | 5    | 5    | 4    | 2    | 6    | 5    | 5    | 6    |
| 23145  | 4    | 4    | 4    | 4    |      |      |      |      |      |      |      |      |      |      |
| 23151  | 3    | 4    | 4    | 4    |      |      |      |      |      |      |      |      |      |      |
| 23161  |      |      |      |      |      | 4    | 4    | 3    | 4    | 4    | 4    | 3    | 3    | 4    |
| 23169  |      |      |      |      |      | 4    | 4    | 4    | 4    | 4    | 4    | 4    | 4    | 4    |
| 23173  |      |      |      |      |      | 1    | 6    | 6    | 6    | 1    | 6    |      |      |      |
| 23174  | 3    | 4    | 4    | 3    |      |      |      |      |      |      |      |      |      |      |
| 23186  |      |      |      |      |      |      |      |      |      |      |      |      |      |      |
| 23195  |      |      |      |      |      |      |      |      |      |      |      |      |      |      |
| 23197  | 3    |      | 3    | 3    |      |      |      |      |      |      |      |      |      |      |
| 23198  | 3    | 5    | 5    | 5    |      |      |      |      |      |      |      |      |      |      |
| 23203  |      |      |      |      |      |      |      |      |      |      |      |      |      |      |
| 23204  | 4    | 4    | 4    | 4    |      |      |      |      |      |      |      |      |      |      |
| 23212  |      |      |      |      |      |      |      |      |      |      |      |      |      |      |
| 23214  |      |      |      |      |      | 5    | 5    | 5    | 5    | 3    | 5    | 5    | 5    | 2    |
| 23221  | 3    | 3    | 3    | 3    |      |      |      |      |      |      |      |      |      |      |
| 23237  | 3    | 5    | 4    | 4    |      |      |      |      |      |      |      |      |      |      |
| 23251  |      |      |      |      |      | 1    | 6    | 6    | 6    | 1    | 6    | 6    | 6    | 1    |
| 23254  | 3    | 4    | 4    | 3    |      |      |      |      |      |      |      |      |      |      |
| 23262  |      |      |      |      |      | 2    | 4    | 4    | 4    | 3    | 4    | 5    | 4    | 3    |
| 23267  | 4    | 5    | 5    | 5    |      |      |      |      |      |      |      |      |      |      |
| 23268  | 3    | 3    | 3    | 2    |      |      |      |      |      |      |      |      |      |      |
| 23273  |      |      |      |      |      | 1    | 6    | 6    | 6    | 1    | 6    | 6    | 6    | 1    |
| 23278  | 4    | 4    | 4    | 4    |      |      |      |      |      |      |      |      |      |      |
| 23279  |      |      |      |      |      |      |      |      |      |      |      |      |      |      |
| 23281  | 4    | 4    | 4    | 4    |      |      |      |      |      |      |      |      |      |      |
| 23282  | 2    | 2    | 2    | 2    |      |      |      |      |      |      |      |      |      |      |
| 23283  |      |      |      |      |      | 3    | 1    | 5    | 2    | 5    | 3    | 5    | 6    | 3    |

| respid | Q47l | Q47m | Q47n | Q47o | Q48a | Q48b | Q48c | Q48d | Q48e | Q48f | Q48g | Q48h | Q48i | Q48j |   |
|--------|------|------|------|------|------|------|------|------|------|------|------|------|------|------|---|
| 23285  |      |      |      |      |      | 5    | 3    | 2    |      | 4    | 2    | 5    | 6    | 3    | 5 |
| 23305  |      |      |      |      |      | 6    | 6    | 6    | 6    | 6    | 6    | 6    | 6    | 6    | 6 |
| 23309  |      |      |      |      |      | 3    | 3    | 4    | 3    | 4    | 3    | 3    | 3    | 4    | 2 |
| 23310  | 3    | 3    | 3    | 3    |      |      |      |      |      |      |      |      |      |      |   |
| 23311  |      |      |      |      |      | 3    | 5    | 6    | 6    | 2    | 6    | 5    | 6    | 1    | 4 |
| 23312  | 5    | 3    | 3    | 4    |      |      |      |      |      |      |      |      |      |      |   |
| 23319  | 2    | 4    | 4    | 3    |      |      |      |      |      |      |      |      |      |      |   |
| 23320  | 4    | 4    | 3    | 4    |      |      |      |      |      |      |      |      |      |      |   |
| 23322  |      |      |      |      |      | 3    | 3    | 3    | 3    | 3    | 3    | 3    | 3    | 3    | 4 |
| 23334  |      |      |      |      |      | 2    | 6    | 6    | 5    | 2    | 6    | 6    | 6    | 1    | 5 |
| 23340  |      |      |      |      |      |      |      |      |      |      |      |      |      |      |   |
| 23346  |      |      |      |      |      | 1    | 6    | 6    | 6    | 1    | 6    | 6    | 6    | 1    | 6 |
| 23353  | 3    | 4    | 4    | 3    |      |      |      |      |      |      |      |      |      |      |   |
| 23363  |      |      |      |      |      | 3    | 3    | 4    | 4    | 4    | 3    | 3    | 4    | 3    | 3 |
| 23364  |      |      |      |      |      | 3    | 2    | 3    | 3    | 2    | 3    | 3    | 3    | 3    | 3 |
| 23376  |      |      |      |      |      |      |      |      |      |      |      |      |      |      |   |
| 23378  | 3    | 4    | 4    | 3    |      |      |      |      |      |      |      |      |      |      |   |
| 23382  |      |      |      |      |      |      |      |      |      |      |      |      |      |      |   |
| 23383  |      |      |      |      |      |      |      |      |      |      |      |      |      |      |   |
| 23390  |      |      | 3    | 4    | 3    |      |      |      |      |      |      |      |      |      |   |
| 23395  | 2    | 3    | 4    | 3    |      |      |      |      |      |      |      |      |      |      |   |
| 23398  |      |      |      |      |      | 2    | 3    | 3    | 4    | 3    | 3    | 5    | 2    | 2    | 5 |
| 23399  | 3    | 3    | 3    | 3    |      |      |      |      |      |      |      |      |      |      |   |
| 23406  | 3    | 3    | 3    | 3    |      |      |      |      |      |      |      |      |      |      |   |
| 23418  | 4    | 4    | 4    | 4    |      |      |      |      |      |      |      |      |      |      |   |
| 23427  |      |      |      |      |      | 3    | 4    | 4    | 4    | 3    | 4    | 5    | 6    | 2    | 6 |
| 23428  |      |      |      |      |      | 2    | 5    | 5    | 6    | 1    | 6    | 4    | 6    | 1    | 2 |
| 23435  | 4    | 4    | 4    | 4    |      |      |      |      |      |      |      |      |      |      |   |
| 23439  |      |      |      |      |      | 2    | 2    | 3    | 6    | 1    | 2    | 6    | 6    | 1    | 2 |
| 23440  |      |      |      |      |      |      |      |      |      |      |      |      |      |      |   |
| 23444  |      |      |      |      |      | 3    |      | 5    | 4    | 3    | 5    | 4    | 6    | 3    | 3 |
| 23445  | 1    | 5    | 5    | 5    |      |      |      |      |      |      |      |      |      |      |   |

| respid | Q47l | Q47m | Q47n | Q47o | Q48a | Q48b | Q48c | Q48d | Q48e | Q48f | Q48g | Q48h | Q48i | Q48j |   |
|--------|------|------|------|------|------|------|------|------|------|------|------|------|------|------|---|
| 23455  |      |      |      |      |      |      |      |      |      |      |      |      |      |      |   |
| 23467  | 4    | 3    | 3    | 3    |      |      |      |      |      |      |      |      |      |      |   |
| 23478  | 3    | 4    | 4    | 3    |      |      |      |      |      |      |      |      |      |      |   |
| 23492  | 3    | 3    | 3    | 3    |      |      |      |      |      |      |      |      |      |      |   |
| 23498  |      |      |      |      |      | 3    | 6    | 6    | 6    | 3    | 6    | 6    | 6    | 3    | 6 |
| 23511  |      |      |      |      |      |      | 6    | 6    | 6    | 1    | 6    | 6    | 6    | 1    | 6 |
| 23514  |      |      |      |      |      | 3    | 5    | 4    | 3    | 4    | 5    | 4    | 6    | 5    | 3 |
| 23515  | 4    | 4    | 4    | 4    |      |      |      |      |      |      |      |      |      |      |   |
| 23522  |      |      |      |      |      |      |      |      |      |      |      |      |      |      |   |
| 23524  |      |      |      |      |      |      |      |      |      |      |      |      |      |      |   |
| 23531  | 3    | 3    | 3    | 3    |      |      |      |      |      |      |      |      |      |      |   |
| 23532  |      |      |      |      |      | 3    | 2    | 3    | 3    | 4    | 2    | 4    | 4    | 4    | 4 |
| 23533  |      |      |      |      |      | 2    |      | 3    | 3    | 3    | 5    | 4    | 6    | 1    | 5 |
| 23534  | 4    | 4    | 4    | 4    |      |      |      |      |      |      |      |      |      |      |   |
| 23538  |      |      |      |      |      | 3    | 4    | 5    | 6    | 4    | 6    | 5    | 6    | 1    | 4 |
| 23539  | 3    | 2    | 3    | 2    |      |      |      |      |      |      |      |      |      |      |   |
| 23548  |      |      |      |      |      | 2    | 5    | 5    | 4    | 3    | 5    | 5    | 5    | 5    | 5 |
| 23553  |      |      |      |      |      |      |      |      |      |      |      |      |      |      |   |
| 23556  |      |      |      |      |      |      |      |      |      |      |      |      |      |      |   |
| 23563  | 1    | 2    | 3    | 1    |      |      |      |      |      |      |      |      |      |      |   |
| 23572  | 4    | 4    | 4    | 3    |      |      |      |      |      |      |      |      |      |      |   |
| 23575  |      |      |      |      |      | 1    | 6    | 6    | 6    | 1    | 6    | 6    | 6    | 1    | 5 |
| 23576  | 4    | 4    | 4    | 4    |      |      |      |      |      |      |      |      |      |      |   |
| 23577  | 3    | 4    | 4    | 4    |      |      |      |      |      |      |      |      |      |      |   |
| 23578  |      |      |      |      |      | 3    | 5    | 4    |      | 2    | 5    | 4    | 5    |      | 5 |
| 23587  | 4    | 4    | 4    | 4    |      |      |      |      |      |      |      |      |      |      |   |
| 23597  |      |      |      |      |      | 5    | 5    | 5    | 5    | 4    | 5    | 5    | 6    | 2    | 5 |
| 23598  | 4    | 4    | 4    | 4    |      |      |      |      |      |      |      |      |      |      |   |
| 23604  |      |      |      |      |      |      |      |      |      |      |      |      |      |      |   |
| 23617  |      |      |      |      |      | 2    | 5    | 6    | 3    | 2    | 6    | 5    | 6    | 5    | 5 |
| 23620  | 4    | 4    | 4    | 4    |      |      |      |      |      |      |      |      |      |      |   |
| 23621  |      |      |      |      |      |      |      |      |      |      |      |      |      |      |   |

| respid | Q47l | Q47m | Q47n | Q47o | Q48a | Q48b | Q48c | Q48d | Q48e | Q48f | Q48g | Q48h | Q48i | Q48j |   |
|--------|------|------|------|------|------|------|------|------|------|------|------|------|------|------|---|
| 23625  |      | 4    | 4    | 4    |      |      |      |      |      |      |      |      |      |      |   |
| 23629  |      |      |      |      |      | 1    | 6    | 6    | 6    | 2    | 6    | 6    | 6    | 1    | 6 |
| 23635  |      |      |      |      |      |      |      |      |      |      |      |      |      |      |   |
| 23636  |      |      |      |      |      | 2    | 3    | 3    | 2    | 4    | 4    | 3    | 4    | 1    | 4 |
| 23637  | 3    | 3    | 3    | 2    |      |      |      |      |      |      |      |      |      |      |   |
| 23638  |      |      |      |      |      |      |      |      |      |      |      |      |      |      |   |
| 23644  |      |      |      |      |      | 2    | 3    | 3    | 3    | 2    | 5    | 5    | 5    | 2    | 5 |
| 23645  |      |      |      |      |      | 2    | 4    | 4    | 3    | 4    | 3    | 3    | 4    | 4    | 3 |
| 23649  | 3    | 3    | 3    | 3    |      |      |      |      |      |      |      |      |      |      |   |
| 23654  |      |      |      |      |      |      |      |      |      |      |      |      |      |      |   |
| 23662  |      |      |      |      |      | 6    | 6    | 6    | 6    | 2    | 6    | 6    | 6    | 2    | 6 |
| 23664  |      |      |      |      |      | 2    | 4    | 4    | 2    | 3    | 4    | 3    | 5    | 2    | 3 |
| 23665  | 5    | 5    | 5    | 5    |      |      |      |      |      |      |      |      |      |      |   |
| 23666  |      |      |      |      |      | 4    | 4    | 4    | 4    | 4    | 4    | 4    | 4    | 4    | 4 |
| 23671  |      |      |      |      |      | 1    | 6    | 6    | 6    | 1    | 6    | 6    | 6    | 1    | 6 |
| 23672  | 3    | 3    | 3    | 5    |      |      |      |      |      |      |      |      |      |      |   |
| 23685  | 3    | 3    | 3    | 3    |      |      |      |      |      |      |      |      |      |      |   |
| 23686  |      |      |      |      |      |      |      |      |      |      |      |      |      |      |   |
| 23689  | 1    | 1    | 1    | 1    |      |      |      |      |      |      |      |      |      |      |   |
| 23690  | 3    | 3    | 3    | 3    |      |      |      |      |      |      |      |      |      |      |   |
| 23695  |      |      |      |      |      | 1    | 5    | 4    | 2    | 4    | 4    | 6    | 6    | 3    | 1 |
| 23700  | 3    | 3    | 3    | 3    |      |      |      |      |      |      |      |      |      |      |   |
| 23714  |      |      |      |      |      | 1    | 6    | 6    | 6    | 1    | 6    | 6    | 6    | 1    | 6 |
| 23719  |      | 4    |      |      |      |      |      |      |      |      |      |      |      |      |   |
| 23720  |      |      |      |      |      | 1    | 6    | 6    | 6    | 1    | 6    | 6    | 6    | 1    | 6 |
| 23721  | 4    | 4    | 4    | 4    |      |      |      |      |      |      |      |      |      |      |   |
| 23729  |      |      |      |      |      |      |      |      |      |      |      |      |      |      |   |
| 23730  | 4    | 4    | 4    | 4    |      |      |      |      |      |      |      |      |      |      |   |
| 23732  |      |      |      |      |      | 2    | 2    | 2    | 6    | 5    | 6    | 2    | 4    | 4    | 4 |
| 23736  | 4    | 4    | 4    | 4    |      |      |      |      |      |      |      |      |      |      |   |
| 23754  |      |      |      |      |      |      |      |      |      |      |      |      |      |      |   |
| 23756  | 3    | 3    | 3    | 3    |      |      |      |      |      |      |      |      |      |      |   |

| respid | Q47l | Q47m | Q47n | Q47o | Q48a | Q48b | Q48c | Q48d | Q48e | Q48f | Q48g | Q48h | Q48i | Q48j |   |
|--------|------|------|------|------|------|------|------|------|------|------|------|------|------|------|---|
| 23759  |      |      |      |      |      | 2    | 4    | 4    | 6    | 2    | 6    | 3    | 5    | 1    | 2 |
| 23761  |      |      |      |      |      | 5    | 5    | 5    | 5    | 3    | 5    | 5    | 5    | 2    | 3 |
| 23766  | 3    | 4    | 4    | 3    |      |      |      |      |      |      |      |      |      |      |   |
| 23768  |      |      |      |      |      | 2    | 1    | 3    | 1    | 2    | 2    | 1    | 1    | 3    | 2 |
| 23773  | 4    | 3    | 3    | 3    |      |      |      |      |      |      |      |      |      |      |   |
| 23781  |      |      |      |      |      |      |      |      |      |      |      |      |      |      |   |
| 23782  |      |      |      |      |      | 2    | 2    | 2    | 4    | 4    | 4    | 4    | 3    | 4    | 3 |
| 23787  |      |      |      |      |      | 2    | 6    | 6    | 6    | 2    | 5    | 6    | 5    | 1    | 6 |
| 23788  |      |      |      |      |      | 2    | 5    | 5    | 6    | 2    | 6    | 6    | 6    | 4    | 6 |
| 23790  |      |      |      |      |      |      |      |      |      |      |      |      |      |      |   |
| 23794  | 3    | 4    | 4    | 3    |      |      |      |      |      |      |      |      |      |      |   |
| 23795  | 2    | 2    | 2    | 2    |      |      |      |      |      |      |      |      |      |      |   |
| 23801  |      |      |      |      |      | 2    | 4    | 4    | 5    | 3    | 4    | 4    | 4    | 2    | 4 |
| 23806  |      |      |      |      |      | 3    |      | 5    | 5    | 3    | 6    | 5    | 6    | 1    | 5 |
| 23809  | 3    | 4    | 4    | 3    |      |      |      |      |      |      |      |      |      |      |   |
| 23813  |      |      |      |      |      | 2    | 5    | 5    | 5    | 4    | 5    | 6    | 6    | 5    | 6 |
| 23815  |      |      |      |      |      | 1    | 6    | 5    | 3    | 3    | 2    | 3    | 4    | 2    | 3 |
| 23821  |      |      |      |      |      |      |      |      |      |      |      |      |      |      |   |
| 23825  |      |      |      |      |      | 3    | 3    | 4    | 6    | 4    | 4    | 6    | 6    | 3    | 6 |
| 23826  | 4    | 3    | 3    | 3    |      |      |      |      |      |      |      |      |      |      |   |
| 23830  |      |      |      |      |      | 6    | 1    | 1    | 2    | 5    | 1    | 2    | 2    | 6    | 1 |
| 23833  |      |      |      |      |      | 1    | 6    | 6    | 6    | 1    | 6    | 6    | 6    | 1    | 6 |
| 23837  | 4    | 4    | 4    | 4    |      |      |      |      |      |      |      |      |      |      |   |
| 23848  |      |      |      |      |      | 6    | 6    | 6    | 6    | 6    | 6    | 6    | 6    | 6    | 6 |
| 23850  |      |      |      |      |      | 2    | 5    | 6    | 3    | 4    | 3    | 4    | 5    | 3    | 3 |
| 23870  | 3    | 4    | 3    | 4    |      |      |      |      |      |      |      |      |      |      |   |
| 23877  |      |      |      |      |      |      |      |      |      |      |      |      |      |      |   |
| 23880  | 3    | 3    | 3    | 3    |      |      |      |      |      |      |      |      |      |      |   |
| 23882  |      |      |      |      |      | 2    | 2    | 3    | 3    | 3    | 3    | 2    | 2    | 3    | 3 |
| 23888  |      |      |      |      |      |      |      |      |      |      |      |      |      |      |   |
| 23908  | 3    | 3    | 3    | 3    |      |      |      |      |      |      |      |      |      |      |   |
| 23914  |      |      |      |      |      | 1    | 6    | 6    | 6    | 1    | 6    | 6    | 6    | 2    | 6 |

| respid | Q47l | Q47m | Q47n | Q47o | Q48a | Q48b | Q48c | Q48d | Q48e | Q48f | Q48g | Q48h | Q48i | Q48j |
|--------|------|------|------|------|------|------|------|------|------|------|------|------|------|------|
| 23916  |      |      |      |      |      |      |      |      |      |      |      |      |      |      |
| 23922  | 4    | 4    | 4    | 4    |      |      |      |      |      |      |      |      |      |      |
| 23932  | 4    | 4    | 4    | 3    |      |      |      |      |      |      |      |      |      |      |
| 23934  |      |      |      |      |      |      |      |      |      |      |      |      |      |      |
| 23942  |      |      |      |      | 1    | 4    | 6    | 5    | 1    | 6    | 6    | 6    | 2    | 2    |
| 23945  | 3    | 3    | 3    | 3    |      |      |      |      |      |      |      |      |      |      |
| 23948  | 4    | 4    | 4    | 3    |      |      |      |      |      |      |      |      |      |      |
| 23955  | 4    | 4    | 4    | 4    |      |      |      |      |      |      |      |      |      |      |
| 23956  |      |      |      |      | 1    | 6    | 6    | 6    | 1    | 6    | 6    | 6    | 1    | 6    |
| 23978  | 2    | 1    | 2    | 2    |      |      |      |      |      |      |      |      |      |      |
| 23981  |      |      |      |      |      |      |      |      |      |      |      |      |      |      |
| 23982  |      |      |      |      | 1    | 1    | 1    | 6    | 6    | 1    | 6    | 6    | 6    | 6    |
| 23991  |      |      |      |      | 6    | 6    | 6    | 6    | 4    | 4    | 6    | 6    | 3    | 3    |
| 23994  | 4    | 3    | 3    | 3    |      |      |      |      |      |      |      |      |      |      |
| 23995  | 3    | 4    | 4    | 3    |      |      |      |      |      |      |      |      |      |      |
| 23999  |      |      |      |      | 3    | 4    | 4    | 4    | 3    | 4    | 5    | 5    | 3    | 4    |
| 24005  |      |      |      |      | 4    | 2    | 2    | 1    | 5    | 3    | 2    | 4    | 5    | 1    |
| 24018  |      |      |      |      |      |      |      |      |      |      |      |      |      |      |
| 24021  |      |      |      |      |      |      |      |      |      |      |      |      |      |      |
| 24035  |      |      |      |      |      |      |      |      |      |      |      |      |      |      |
| 24040  | 2    | 3    | 4    | 3    |      |      |      |      |      |      |      |      |      |      |
| 24043  |      |      |      |      |      |      |      |      |      |      |      |      |      |      |
| 24046  | 3    | 3    | 2    | 5    |      |      |      |      |      |      |      |      |      |      |
| 24047  |      |      |      |      | 2    | 5    | 3    | 4    | 2    | 5    | 3    | 3    | 3    | 3    |
| 24048  | 4    | 4    | 4    | 4    |      |      |      |      |      |      |      |      |      |      |
| 24062  | 4    | 4    | 4    | 4    |      |      |      |      |      |      |      |      |      |      |
| 24063  |      |      | 4    | 4    |      |      |      |      |      |      |      |      |      |      |
| 24066  |      |      |      |      | 3    | 4    | 4    | 4    | 3    | 4    | 4    | 6    | 1    | 3    |
| 24069  |      |      |      |      | 5    | 5    | 5    | 5    | 5    | 5    | 5    | 5    | 5    | 5    |
| 24070  |      |      |      |      | 6    | 6    | 6    | 6    | 6    | 6    | 6    | 6    | 6    | 6    |
| 24074  |      |      |      |      | 5    | 3    | 4    | 3    | 4    | 3    | 3    | 5    | 3    | 4    |
| 24080  |      |      |      |      | 5    | 5    | 4    | 4    | 5    | 6    | 6    | 6    | 5    | 6    |

| respid | Q47l | Q47m | Q47n | Q47o | Q48a | Q48b | Q48c | Q48d | Q48e | Q48f | Q48g | Q48h | Q48i | Q48j |   |
|--------|------|------|------|------|------|------|------|------|------|------|------|------|------|------|---|
| 24082  |      |      |      |      |      | 1    | 6    | 6    | 6    | 1    | 6    | 6    | 6    | 1    | 6 |
| 24088  |      |      |      |      |      | 3    |      | 4    | 3    | 5    | 3    | 3    | 6    | 3    | 3 |
| 24089  | 4    | 4    | 4    | 5    |      |      |      |      |      |      |      |      |      |      |   |
| 24091  |      |      |      |      |      | 5    | 3    | 3    | 3    | 3    | 3    |      | 3    | 2    | 3 |
| 24095  |      |      |      |      |      |      |      |      |      |      |      |      |      |      |   |
| 24100  |      |      |      |      |      | 2    | 4    | 4    | 5    | 4    | 4    | 3    | 4    | 3    | 3 |
| 24105  | 3    | 4    | 4    | 4    |      |      |      |      |      |      |      |      |      |      |   |
| 24107  |      |      |      |      |      | 1    | 2    | 1    | 2    | 2    | 2    | 1    | 2    | 1    | 2 |
| 24108  |      |      |      |      |      |      |      |      |      |      |      |      |      |      |   |
| 24113  |      |      |      |      |      | 3    | 5    | 6    | 6    | 3    | 6    | 6    | 6    | 1    | 6 |
| 24120  |      |      |      |      |      |      |      |      |      |      |      |      |      |      |   |
| 24122  |      |      |      |      |      | 4    | 3    | 3    | 3    | 5    | 3    | 3    | 4    | 4    | 4 |
| 24123  |      |      |      |      |      |      |      |      |      |      |      |      |      |      |   |
| 24125  |      |      |      |      |      | 2    | 4    | 4    | 4    | 2    | 5    | 4    | 6    | 2    | 4 |
| 24132  | 1    | 3    | 3    | 5    |      |      |      |      |      |      |      |      |      |      |   |
| 24139  | 3    | 3    | 2    | 3    |      |      |      |      |      |      |      |      |      |      |   |
| 24140  | 3    | 4    | 4    | 4    |      |      |      |      |      |      |      |      |      |      |   |
| 24143  |      |      |      |      |      | 1    | 5    | 2    | 6    | 2    | 6    | 2    | 6    | 1    | 3 |
| 24150  | 3    | 3    | 3    | 3    |      |      |      |      |      |      |      |      |      |      |   |
| 24153  |      |      |      |      |      |      |      |      |      |      |      |      |      |      |   |
| 24161  |      |      |      |      |      |      |      |      |      |      |      |      |      |      |   |
| 24168  | 4    | 1    | 1    | 4    |      |      |      |      |      |      |      |      |      |      |   |
| 24179  | 3    | 4    | 4    | 3    |      |      |      |      |      |      |      |      |      |      |   |
| 24182  | 3    | 3    | 3    | 3    |      |      |      |      |      |      |      |      |      |      |   |
| 24194  | 3    |      |      |      |      |      |      |      |      |      |      |      |      |      |   |
| 24206  |      |      |      |      |      |      |      |      |      |      |      |      |      |      |   |
| 24214  |      |      |      |      |      |      |      |      |      |      |      |      |      |      |   |
| 24215  | 5    | 3    | 4    | 4    |      |      |      |      |      |      |      |      |      |      |   |
| 24224  |      |      |      |      |      | 5    | 6    | 6    | 6    | 5    | 5    | 6    | 6    | 5    | 5 |
| 24225  |      |      |      |      |      | 2    | 6    | 6    | 6    | 2    | 5    | 6    | 6    | 2    | 5 |
| 24227  |      |      |      |      |      |      |      |      |      |      |      |      |      |      |   |
| 24229  |      |      |      |      |      | 1    | 5    | 6    | 5    | 1    | 6    | 6    | 6    | 1    | 6 |

| respid | Q47l | Q47m | Q47n | Q47o | Q48a | Q48b | Q48c | Q48d | Q48e | Q48f | Q48g | Q48h | Q48i | Q48j |   |
|--------|------|------|------|------|------|------|------|------|------|------|------|------|------|------|---|
| 24230  | 4    | 3    | 3    | 5    |      |      |      |      |      |      |      |      |      |      |   |
| 24232  |      |      |      |      |      | 3    | 4    | 4    | 4    | 2    | 4    | 4    | 5    | 3    | 4 |
| 24253  |      |      |      |      |      |      |      |      |      |      |      |      |      |      |   |
| 24267  |      |      |      |      |      | 1    | 5    | 6    | 3    | 2    | 6    | 6    | 6    | 1    | 3 |
| 24274  | 3    | 3    | 3    | 3    |      |      |      |      |      |      |      |      |      |      |   |
| 24275  |      |      |      |      |      | 3    | 2    | 3    | 3    | 3    | 3    | 3    | 3    | 2    | 3 |
| 24277  | 4    | 4    | 4    | 4    |      |      |      |      |      |      |      |      |      |      |   |
| 24280  | 2    | 2    | 2    | 2    |      |      |      |      |      |      |      |      |      |      |   |
| 24285  | 3    | 3    | 3    | 4    |      |      |      |      |      |      |      |      |      |      |   |
| 24293  |      |      |      |      |      |      |      |      |      |      |      |      |      |      |   |
| 24295  |      |      |      |      |      | 6    | 6    | 6    | 6    | 6    | 6    | 6    | 6    | 6    | 6 |
| 24299  |      |      |      |      |      |      |      |      |      |      |      |      |      |      |   |
| 24303  | 4    | 4    | 4    | 5    |      |      |      |      |      |      |      |      |      |      |   |
| 24308  |      |      |      | 2    |      |      |      |      |      |      |      |      |      |      |   |
| 24322  |      |      |      |      |      |      |      |      |      |      |      |      |      |      |   |
| 24325  |      |      |      |      |      |      |      |      |      |      |      |      |      |      |   |
| 24328  |      |      |      |      |      | 3    | 4    | 2    | 4    | 3    | 5    | 4    | 3    | 6    | 2 |
| 24334  | 2    | 3    | 3    | 2    |      |      |      |      |      |      |      |      |      |      |   |
| 24342  |      |      |      |      |      | 2    | 6    | 6    | 5    | 3    | 5    | 5    | 5    | 3    | 5 |
| 24343  | 3    | 4    | 4    | 4    |      |      |      |      |      |      |      |      |      |      |   |
| 24348  | 1    | 1    | 1    | 1    |      |      |      |      |      |      |      |      |      |      |   |
| 24352  |      |      |      |      |      | 2    | 2    | 2    | 5    | 5    | 2    | 3    | 2    | 2    | 2 |
| 24354  |      |      |      |      |      | 2    |      |      |      |      |      |      |      |      |   |
| 24357  |      |      |      |      |      | 1    | 6    | 6    | 4    | 3    | 6    | 6    | 6    | 1    | 6 |
| 24360  | 2    | 3    | 3    | 2    |      |      |      |      |      |      |      |      |      |      |   |
| 24369  |      |      |      |      |      |      |      |      |      |      |      |      |      |      |   |
| 24373  |      |      |      |      |      |      |      |      |      |      |      |      |      |      |   |
| 24398  | 4    | 2    | 2    | 2    |      |      |      |      |      |      |      |      |      |      |   |
| 24402  |      |      |      |      |      | 3    | 6    | 6    | 6    | 4    | 4    | 4    | 6    | 2    | 6 |
| 24405  |      |      |      |      |      | 2    | 5    | 5    | 3    | 2    | 4    | 3    | 6    | 1    | 5 |
| 24407  |      |      |      |      |      |      |      |      |      |      |      |      |      |      |   |
| 24413  |      |      |      |      |      | 1    | 6    | 6    | 6    | 1    | 6    | 6    | 6    | 1    | 1 |



| respid | Q47l | Q47m | Q47n | Q47o | Q48a | Q48b | Q48c | Q48d | Q48e | Q48f | Q48g | Q48h | Q48i | Q48j |   |
|--------|------|------|------|------|------|------|------|------|------|------|------|------|------|------|---|
| 24443  |      |      |      |      |      | 3    | 4    | 4    | 4    | 4    | 4    | 4    | 4    | 3    | 3 |
| 24451  |      |      |      |      |      |      |      |      |      |      |      |      |      |      |   |
| 24459  | 3    | 3    | 3    | 4    |      |      |      |      |      |      |      |      |      |      |   |
| 24465  |      |      |      |      |      | 2    | 5    | 5    | 4    | 2    | 6    | 5    | 6    | 1    | 3 |
| 24481  |      |      |      |      |      | 4    | 4    | 3    | 4    | 4    | 4    | 4    | 4    | 3    | 4 |
| 24482  |      |      |      |      |      |      |      |      |      |      |      |      |      |      |   |
| 24491  |      |      |      |      |      | 4    | 4    | 4    | 4    | 4    | 4    | 4    | 4    | 4    | 4 |
| 24495  | 4    | 4    | 5    | 4    |      |      |      |      |      |      |      |      |      |      |   |
| 24497  | 1    | 1    | 1    | 1    |      |      |      |      |      |      |      |      |      |      |   |
| 24511  |      |      |      |      |      | 6    | 6    | 6    | 5    | 4    | 5    | 5    | 6    | 2    | 3 |
| 24513  | 3    | 3    | 4    | 3    |      |      |      |      |      |      |      |      |      |      |   |
| 24516  | 3    | 3    | 4    | 3    |      |      |      |      |      |      |      |      |      |      |   |
| 24518  |      |      |      |      |      | 1    | 4    | 6    | 4    | 4    | 4    | 6    | 6    | 3    | 5 |
| 24524  |      |      |      |      |      |      |      | 3    | 3    | 4    | 3    | 3    | 4    | 4    | 3 |
| 24528  |      |      |      |      |      |      |      |      |      |      |      |      |      |      |   |
| 24531  |      |      |      |      |      |      |      |      |      |      |      |      |      |      |   |
| 24533  | 1    | 2    | 2    | 2    |      |      |      |      |      |      |      |      |      |      |   |
| 24547  |      |      |      |      |      | 6    | 6    | 6    | 6    | 6    | 6    | 6    | 6    | 6    | 6 |
| 24557  |      |      |      |      |      | 2    | 2    | 2    | 2    | 2    | 3    | 2    | 3    | 2    | 2 |
| 24559  | 3    | 3    | 3    | 3    |      |      |      |      |      |      |      |      |      |      |   |
| 24567  |      |      |      |      |      | 3    | 6    | 6    | 6    | 2    | 5    | 5    | 6    | 2    | 5 |
| 24568  |      |      |      |      |      |      |      |      |      |      |      |      |      |      |   |
| 24577  |      |      |      |      |      |      |      |      |      |      |      |      |      |      |   |
| 24581  |      |      |      |      |      | 1    | 4    | 5    | 3    | 3    | 6    | 5    | 6    | 1    | 6 |
| 24588  |      |      |      |      |      | 2    | 6    | 6    | 6    | 2    | 6    | 6    | 6    | 2    | 6 |
| 24604  | 1    | 1    | 1    | 1    |      |      |      |      |      |      |      |      |      |      |   |
| 24612  | 3    | 3    | 3    | 3    |      |      |      |      |      |      |      |      |      |      |   |
| 24621  |      |      |      |      |      | 2    | 3    | 4    | 4    | 3    | 2    | 2    | 3    | 3    | 4 |
| 24625  |      |      |      |      |      | 3    | 2    | 2    | 3    | 4    | 3    | 3    | 5    | 2    | 4 |
| 24627  |      |      |      |      |      | 3    | 4    | 4    | 4    | 3    | 4    | 4    | 6    | 2    | 5 |
| 24640  |      |      |      |      |      | 6    | 6    | 6    | 6    | 6    | 6    | 6    | 6    | 6    | 6 |
| 24644  |      |      |      |      |      | 1    | 6    | 6    | 4    | 3    | 6    | 5    | 6    | 3    | 5 |

| respid | Q47l | Q47m | Q47n | Q47o | Q48a | Q48b | Q48c | Q48d | Q48e | Q48f | Q48g | Q48h | Q48i | Q48j |   |
|--------|------|------|------|------|------|------|------|------|------|------|------|------|------|------|---|
| 24664  |      | 3    | 4    | 4    | 3    |      |      |      |      |      |      |      |      |      |   |
| 24669  |      | 4    | 4    | 4    | 4    |      |      |      |      |      |      |      |      |      |   |
| 24685  |      |      |      |      |      |      |      |      |      |      |      |      |      |      |   |
| 24687  |      |      |      |      |      | 3    | 5    | 4    | 4    | 3    | 4    | 4    | 4    | 3    | 4 |
| 24688  |      | 3    | 2    | 2    | 3    |      |      |      |      |      |      |      |      |      |   |
| 24691  |      |      |      |      |      | 2    | 2    | 3    | 3    | 2    | 3    | 2    | 3    | 2    | 3 |
| 24693  |      | 5    | 4    | 5    | 4    |      |      |      |      |      |      |      |      |      |   |
| 24706  |      |      |      |      |      |      |      |      |      |      |      |      |      |      |   |
| 24710  |      |      |      |      |      |      |      |      |      |      |      |      |      |      |   |
| 24717  |      | 4    | 4    | 4    | 4    |      |      |      |      |      |      |      |      |      |   |
| 24720  |      |      |      |      |      | 3    | 5    | 5    | 5    | 3    | 5    | 6    | 6    | 3    | 4 |
| 24731  |      | 1    |      |      | 1    |      |      |      |      |      |      |      |      |      |   |
| 24732  |      | 4    |      |      |      |      |      |      |      |      |      |      |      |      |   |
| 24733  |      |      |      |      |      |      |      |      |      |      |      |      |      |      |   |
| 24747  |      |      |      |      |      | 3    | 6    | 6    | 6    | 4    | 3    | 5    | 5    | 6    | 6 |
| 24750  |      | 3    | 2    | 2    | 3    |      |      |      |      |      |      |      |      |      |   |
| 24758  |      |      |      |      |      | 3    | 4    | 4    | 4    | 4    | 4    | 4    | 5    | 2    | 4 |
| 24760  |      |      |      |      |      | 1    | 6    | 6    | 6    | 1    | 6    | 6    | 6    | 1    | 6 |
| 24765  |      |      |      |      |      |      |      |      |      |      |      |      |      |      |   |
| 24772  |      |      |      |      |      | 1    | 6    | 6    | 5    | 1    | 6    | 6    | 6    | 1    | 3 |
| 24779  |      | 3    | 4    | 4    | 3    |      |      |      |      |      |      |      |      |      |   |
| 24794  |      | 3    | 4    | 4    | 3    |      |      |      |      |      |      |      |      |      |   |
| 24796  |      |      |      |      |      | 1    | 5    | 5    | 6    | 1    | 6    | 6    | 6    | 1    | 5 |
| 24797  |      | 3    | 3    | 3    | 3    |      |      |      |      |      |      |      |      |      |   |
| 24800  |      | 4    | 4    | 4    | 4    |      |      |      |      |      |      |      |      |      |   |
| 24813  |      |      |      |      |      |      |      |      |      |      |      |      |      |      |   |
| 24815  |      |      |      |      |      | 3    | 5    | 5    | 5    | 2    | 3    | 5    | 5    | 3    |   |
| 24821  |      |      |      |      |      |      | 4    | 4    | 4    | 3    | 4    | 4    | 4    | 3    | 4 |
| 24822  |      |      |      |      |      | 2    | 5    | 5    | 6    | 2    | 5    | 6    | 6    | 2    | 3 |
| 24831  |      |      |      |      |      | 6    | 6    | 6    | 6    |      | 6    | 6    | 6    | 6    | 6 |
| 24835  |      |      |      |      |      |      |      |      |      |      |      |      |      |      |   |
| 24843  |      |      |      |      |      | 5    | 4    | 2    | 2    | 5    | 3    | 3    | 4    | 4    | 3 |

| respid | Q47l | Q47m | Q47n | Q47o | Q48a | Q48b | Q48c | Q48d | Q48e | Q48f | Q48g | Q48h | Q48i | Q48j |
|--------|------|------|------|------|------|------|------|------|------|------|------|------|------|------|
| 24844  | 2    | 2    | 2    | 2    |      |      |      |      |      |      |      |      |      |      |
| 24860  |      |      |      |      |      |      |      |      |      |      |      |      |      |      |
| 24861  |      |      |      |      |      |      |      |      |      |      |      |      |      |      |
| 24865  |      |      |      |      | 2    | 3    | 3    | 2    | 2    | 2    | 3    | 2    | 3    | 2    |
| 24870  | 3    | 3    | 4    | 3    |      |      |      |      |      |      |      |      |      |      |
| 24887  |      |      |      |      | 3    | 3    | 4    | 5    | 2    | 6    | 5    | 6    | 1    | 6    |
| 24897  |      |      |      |      |      |      |      |      |      |      |      |      |      |      |
| 24902  | 2    | 3    | 2    | 2    |      |      |      |      |      |      |      |      |      |      |
| 24914  |      |      |      |      | 3    | 6    | 6    | 6    | 2    | 4    | 6    | 6    | 1    | 6    |
| 24921  |      |      |      |      | 4    | 4    | 4    | 4    | 4    | 4    | 4    | 4    | 3    | 3    |
| 24922  | 3    | 4    | 4    | 4    |      |      |      |      |      |      |      |      |      |      |
| 24924  |      |      |      |      |      |      |      |      |      |      |      |      |      |      |
| 24927  |      |      |      |      | 2    | 2    | 2    | 2    | 2    | 2    | 2    | 2    | 2    | 2    |
| 24936  |      |      |      |      | 4    | 6    | 6    | 6    | 2    | 5    | 6    | 6    | 4    | 6    |
| 24937  |      |      |      |      | 1    | 6    | 6    | 6    | 1    | 6    | 6    | 6    | 2    | 6    |
| 24942  | 3    | 3    | 3    | 3    |      |      |      |      |      |      |      |      |      |      |
| 24947  |      |      |      |      | 1    | 6    | 6    | 6    | 1    | 6    | 6    | 6    | 1    | 5    |
| 24953  | 3    | 3    | 3    | 3    |      |      |      |      |      |      |      |      |      |      |
| 24954  | 2    | 2    | 2    | 3    |      |      |      |      |      |      |      |      |      |      |
| 24960  | 3    | 2    | 2    | 2    |      |      |      |      |      |      |      |      |      |      |
| 24965  |      |      |      |      |      |      |      |      |      |      |      |      |      |      |
| 24975  |      |      |      |      | 1    | 6    | 6    | 6    | 1    | 1    | 1    | 6    | 1    | 3    |
| 24983  |      |      |      |      | 2    | 3    | 2    | 3    | 3    | 2    | 3    | 2    | 2    | 3    |
| 24985  | 3    | 3    | 3    | 3    |      |      |      |      |      |      |      |      |      |      |
| 24990  | 2    | 2    | 2    | 1    |      |      |      |      |      |      |      |      |      |      |
| 25000  |      |      |      |      | 3    | 4    | 4    | 4    | 3    | 4    |      | 4    | 3    | 4    |
| 25007  |      |      |      |      | 3    | 4    | 4    | 4    | 3    | 4    | 4    | 4    | 3    | 4    |
| 25008  |      |      |      |      | 6    | 6    | 6    | 6    | 1    | 6    | 6    | 6    | 1    | 6    |
| 25010  |      |      |      |      |      |      |      |      |      |      |      |      |      |      |
| 25016  | 3    | 3    | 3    | 4    |      |      |      |      |      |      |      |      |      |      |
| 25021  |      |      |      |      |      |      |      |      |      |      |      |      |      |      |
| 25040  |      |      |      |      |      |      |      |      |      |      |      |      |      |      |

| respid | Q47l | Q47m | Q47n | Q47o | Q48a | Q48b | Q48c | Q48d | Q48e | Q48f | Q48g | Q48h | Q48i | Q48j |   |
|--------|------|------|------|------|------|------|------|------|------|------|------|------|------|------|---|
| 25043  | 4    | 4    | 4    | 4    |      |      |      |      |      |      |      |      |      |      |   |
| 25055  | 5    | 5    | 5    | 5    |      |      |      |      |      |      |      |      |      |      |   |
| 25057  | 3    | 4    | 3    | 3    |      |      |      |      |      |      |      |      |      |      |   |
| 25060  | 3    | 3    | 3    | 3    |      |      |      |      |      |      |      |      |      |      |   |
| 25062  | 4    | 4    | 4    | 4    |      |      |      |      |      |      |      |      |      |      |   |
| 25064  |      |      |      |      |      | 3    | 3    | 3    | 3    | 4    | 3    | 3    | 3    | 4    | 3 |
| 25069  |      |      |      |      |      |      |      |      |      |      |      |      |      |      |   |
| 25077  |      |      |      |      |      | 2    | 6    | 6    | 5    | 2    | 6    | 6    | 6    | 1    | 5 |
| 25088  |      |      |      |      |      |      |      |      |      |      |      |      |      |      |   |
| 25093  | 3    | 3    | 3    | 3    |      |      |      |      |      |      |      |      |      |      |   |
| 25121  |      |      |      |      |      | 3    | 2    | 2    | 3    | 2    | 2    | 2    | 2    | 2    | 3 |
| 25140  |      |      |      |      |      | 2    | 3    | 3    | 2    | 2    | 2    | 3    | 2    | 3    | 3 |
| 25144  |      |      |      |      |      | 3    | 4    | 4    | 3    | 3    | 4    | 4    | 4    | 3    | 4 |
| 25149  |      |      |      |      |      | 3    | 4    | 5    | 3    | 3    | 3    | 3    | 3    | 3    | 2 |
| 25159  | 3    | 3    | 3    | 3    |      |      |      |      |      |      |      |      |      |      |   |
| 25191  | 4    | 4    | 4    | 3    |      |      |      |      |      |      |      |      |      |      |   |
| 25193  |      |      |      |      |      | 1    | 6    | 5    | 4    | 2    | 6    | 3    | 6    | 1    | 3 |
| 25202  |      |      |      |      |      | 2    | 3    | 3    | 2    | 2    | 3    | 2    | 2    | 2    | 3 |
| 25215  | 4    | 4    | 3    | 4    |      |      |      |      |      |      |      |      |      |      |   |
| 25229  | 1    | 1    | 1    | 1    |      |      |      |      |      |      |      |      |      |      |   |
| 25231  |      |      |      |      |      | 3    | 4    | 4    | 6    | 2    | 6    | 5    | 6    | 1    | 5 |
| 25236  |      |      |      |      |      | 3    | 6    | 6    | 6    | 3    | 6    | 6    | 6    | 3    | 6 |
| 25242  | 4    | 4    | 4    | 3    |      |      |      |      |      |      |      |      |      |      |   |
| 25252  | 3    |      |      |      |      |      |      |      |      |      |      |      |      |      |   |
| 25253  |      |      |      |      |      | 1    | 5    | 2    | 6    | 6    | 4    | 6    | 6    | 1    | 3 |
| 25256  |      |      |      |      |      | 2    | 3    | 3    | 2    | 2    | 3    | 2    | 2    | 2    | 3 |
| 25260  | 4    | 4    | 4    | 4    |      |      |      |      |      |      |      |      |      |      |   |
| 25261  | 3    | 3    | 3    | 3    |      |      |      |      |      |      |      |      |      |      |   |
| 25280  |      |      |      |      |      | 2    | 4    | 3    | 2    | 2    | 2    | 4    | 5    | 2    | 4 |
| 25282  |      |      |      |      |      | 2    | 5    | 5    | 5    | 2    | 5    | 5    | 5    | 5    | 6 |
| 25289  | 2    | 2    | 2    | 3    |      |      |      |      |      |      |      |      |      |      |   |
| 25303  |      |      |      |      |      |      |      |      |      |      |      |      |      |      |   |

| respid | Q47l | Q47m | Q47n | Q47o | Q48a | Q48b | Q48c | Q48d | Q48e | Q48f | Q48g | Q48h | Q48i | Q48j |   |
|--------|------|------|------|------|------|------|------|------|------|------|------|------|------|------|---|
| 25304  |      |      |      |      |      | 1    | 4    | 4    | 6    | 4    | 4    | 4    | 6    | 3    | 6 |
| 25309  |      |      |      |      |      | 2    | 2    | 3    | 2    | 2    | 3    | 1    | 2    | 3    | 3 |
| 25317  |      |      |      |      |      |      |      |      |      |      | 5    | 5    | 5    |      | 5 |
| 25318  |      |      |      |      |      | 1    | 4    | 3    | 4    | 3    | 4    | 3    | 6    | 3    | 3 |
| 25320  |      |      |      |      |      | 3    | 2    | 3    | 4    | 2    | 2    | 3    | 3    | 4    | 2 |
| 25324  |      |      |      |      |      | 2    | 3    | 2    | 3    | 3    | 2    | 3    | 3    | 2    | 3 |
| 25331  |      |      |      |      |      | 2    | 5    | 5    | 6    | 2    | 6    | 6    | 6    | 2    | 6 |
| 25340  | 4    | 3    | 4    | 4    |      |      |      |      |      |      |      |      |      |      |   |
| 25342  |      |      |      |      |      |      |      |      |      |      |      |      |      |      |   |
| 25350  |      |      |      |      |      | 3    | 6    | 6    | 5    | 2    | 5    | 5    | 6    | 2    | 5 |
| 25352  |      |      |      |      |      |      |      |      |      |      |      |      |      |      |   |
| 25358  |      |      |      |      |      | 2    | 5    | 5    | 5    | 2    | 5    | 5    | 5    | 2    | 5 |
| 25375  |      |      |      |      |      | 1    | 6    | 6    | 6    | 1    | 6    | 6    | 6    | 1    | 6 |
| 25386  | 1    | 2    | 2    | 1    |      |      |      |      |      |      |      |      |      |      |   |
| 25388  | 1    | 1    | 1    | 2    |      |      |      |      |      |      |      |      |      |      |   |
| 25390  |      |      |      |      |      | 3    | 4    | 4    | 2    | 4    | 3    | 4    | 4    | 3    | 4 |
| 25391  | 3    | 3    | 3    | 3    |      |      |      |      |      |      |      |      |      |      |   |
| 25400  |      |      |      |      |      | 1    | 6    | 6    | 3    | 2    | 6    | 6    | 6    | 1    | 6 |
| 25413  |      |      |      |      |      | 2    | 3    | 2    | 3    | 3    | 2    | 3    | 2    | 2    | 2 |
| 25424  | 3    | 4    | 4    | 3    |      |      |      |      |      |      |      |      |      |      |   |
| 25426  | 1    | 3    | 3    | 1    |      |      |      |      |      |      |      |      |      |      |   |
| 25430  |      |      |      |      |      | 1    | 6    | 6    | 6    | 2    | 6    | 6    | 6    | 1    | 6 |
| 25434  |      |      |      |      |      | 3    | 4    | 4    | 4    | 3    | 4    | 4    | 3    | 4    | 3 |
| 25439  | 2    | 2    | 2    | 2    |      |      |      |      |      |      |      |      |      |      |   |
| 25441  | 3    | 3    | 3    | 3    |      |      |      |      |      |      |      |      |      |      |   |
| 25445  | 3    |      |      |      |      |      |      |      |      |      |      |      |      |      |   |
| 25451  | 3    | 4    | 4    | 4    |      |      |      |      |      |      |      |      |      |      |   |
| 25469  |      |      |      |      |      | 3    | 2    | 3    | 2    | 2    | 3    | 2    | 2    | 3    | 3 |
| 25471  | 2    | 2    | 2    | 3    |      |      |      |      |      |      |      |      |      |      |   |
| 25476  |      |      |      |      |      | 3    | 3    | 3    | 3    | 3    | 3    | 3    | 3    | 3    | 3 |
| 25480  | 3    | 3    | 3    | 3    |      |      |      |      |      |      |      |      |      |      |   |
| 25482  |      |      |      |      |      | 3    | 3    | 5    | 5    | 4    | 2    | 4    | 5    | 4    | 5 |

| respid | Q47l | Q47m | Q47n | Q47o | Q48a | Q48b | Q48c | Q48d | Q48e | Q48f | Q48g | Q48h | Q48i | Q48j |
|--------|------|------|------|------|------|------|------|------|------|------|------|------|------|------|
| 25500  |      | 3    | 4    | 3    | 3    |      |      |      |      |      |      |      |      |      |
| 25516  |      | 3    | 4    | 4    | 3    |      |      |      |      |      |      |      |      |      |
| 25521  |      | 3    | 4    | 2    | 2    |      |      |      |      |      |      |      |      |      |
| 25525  |      | 2    | 3    | 3    | 2    |      |      |      |      |      |      |      |      |      |
| 25530  |      | 3    | 3    | 3    | 2    |      |      |      |      |      |      |      |      |      |
| 25555  |      | 3    | 3    | 4    | 3    |      |      |      |      |      |      |      |      |      |
| 25558  |      |      |      |      |      | 3    | 2    | 4    | 3    | 3    | 3    | 3    | 3    | 3    |
| 25561  |      |      |      |      |      | 3    | 3    | 3    | 3    | 3    | 4    | 2    | 4    | 3    |
| 25566  |      |      |      |      |      |      |      |      |      |      |      |      |      |      |
| 25571  |      |      |      |      |      | 3    | 4    | 4    | 4    | 3    | 4    | 4    | 4    | 4    |
| 25572  |      | 1    | 3    | 3    | 3    |      |      |      |      |      |      |      |      |      |
| 25574  |      |      |      |      |      |      |      |      |      |      |      |      |      |      |
| 25588  |      |      |      |      |      | 3    | 3    | 3    | 3    | 3    | 3    | 3    | 4    | 3    |
| 25591  |      |      |      |      |      | 2    | 5    | 5    | 6    | 2    | 5    | 4    | 6    | 2    |
| 25599  |      |      |      |      |      | 2    | 5    | 5    | 5    | 2    | 2    | 2    | 2    | 2    |
| 25604  |      | 1    | 4    | 3    | 1    |      |      |      |      |      |      |      |      |      |
| 25614  |      |      |      |      |      | 2    | 4    | 5    | 5    | 3    | 4    | 5    | 5    | 3    |
| 25634  |      | 3    | 3    | 3    | 3    |      |      |      |      |      |      |      |      |      |
| 25642  |      | 4    | 4    | 4    | 4    |      |      |      |      |      |      |      |      |      |
| 25647  |      | 4    | 4    | 4    | 4    |      |      |      |      |      |      |      |      |      |
| 25653  |      | 3    | 4    | 4    | 3    |      |      |      |      |      |      |      |      |      |
| 25654  |      |      |      |      |      | 3    | 4    | 4    | 5    | 2    | 5    | 5    | 5    | 3    |
| 25660  |      | 4    | 4    | 4    | 4    |      |      |      |      |      |      |      |      |      |
| 25664  |      | 3    | 3    | 3    | 3    |      |      |      |      |      |      |      |      |      |
| 25665  |      | 4    | 4    | 4    | 4    |      |      |      |      |      |      |      |      |      |
| 25672  |      | 1    | 3    | 3    | 1    |      |      |      |      |      |      |      |      |      |
| 25677  |      | 1    | 1    | 1    | 1    |      |      |      |      |      |      |      |      |      |
| 25685  |      | 2    | 2    | 2    | 2    |      |      |      |      |      |      |      |      |      |
| 25699  |      | 4    | 3    | 3    | 3    |      |      |      |      |      |      |      |      |      |
| 25703  |      | 4    | 3    | 3    | 3    |      |      |      |      |      |      |      |      |      |
| 25704  |      | 3    | 3    | 4    | 3    |      |      |      |      |      |      |      |      |      |
| 25705  |      | 4    | 3    | 3    | 3    |      |      |      |      |      |      |      |      |      |

| respid | Q47l | Q47m | Q47n | Q47o | Q48a | Q48b | Q48c | Q48d | Q48e | Q48f | Q48g | Q48h | Q48i | Q48j |
|--------|------|------|------|------|------|------|------|------|------|------|------|------|------|------|
| 25711  |      |      |      |      |      | 3    | 3    | 3    | 3    | 3    | 3    | 3    | 3    | 3    |
| 25727  | 2    | 1    | 2    | 1    |      |      |      |      |      |      |      |      |      |      |
| 25728  | 3    | 3    | 3    | 3    |      |      |      |      |      |      |      |      |      |      |
| 25733  | 3    | 3    | 2    | 3    |      |      |      |      |      |      |      |      |      |      |
| 25735  |      |      |      |      |      | 4    | 4    | 4    | 4    | 4    | 4    | 3    | 4    | 4    |
| 25736  |      |      |      |      |      | 2    | 5    | 5    | 5    | 2    | 5    | 5    | 5    | 2    |
| 25742  |      |      |      |      |      | 2    | 6    | 6    | 5    | 2    | 5    | 6    | 6    | 1    |
| 25750  | 3    | 3    | 3    | 3    |      |      |      |      |      |      |      |      |      |      |
| 25754  |      |      |      |      |      |      |      |      |      |      |      |      |      |      |
| 25776  |      |      |      |      |      | 2    | 3    | 3    | 2    | 1    | 2    | 3    | 3    | 2    |
| 25778  |      |      |      |      |      |      |      |      |      |      |      |      |      |      |
| 25796  |      |      |      |      |      | 2    | 4    | 4    | 4    | 3    | 4    | 4    | 6    | 4    |
| 25852  |      |      |      |      |      | 2    | 2    | 3    | 3    | 2    | 2    | 2    | 3    | 3    |
| 25858  |      |      |      |      |      | 2    | 6    | 6    | 5    | 2    | 6    | 6    | 6    | 2    |
| 25859  |      |      |      |      |      |      |      |      |      |      |      |      |      |      |
| 25886  | 4    | 4    | 4    | 4    |      |      |      |      |      |      |      |      |      |      |
| 25890  | 3    | 4    | 4    | 4    |      |      |      |      |      |      |      |      |      |      |
| 25897  |      | 3    | 3    | 3    |      |      |      |      |      |      |      |      |      |      |
| 25903  |      |      |      |      |      |      | 6    |      | 6    | 2    | 2    | 6    | 6    | 1    |
| 25905  |      |      |      |      |      | 3    | 3    | 3    | 3    | 3    | 3    | 3    | 3    | 3    |
| 25917  |      |      |      |      |      |      |      |      |      |      |      |      |      |      |
| 25918  |      |      |      |      |      | 2    | 5    | 5    | 3    | 4    | 3    | 5    | 6    | 1    |
| 25928  | 3    | 3    | 3    | 3    |      |      |      |      |      |      |      |      |      |      |
| 25930  |      |      |      |      |      |      |      |      |      |      |      |      |      |      |
| 25949  |      |      |      |      |      | 4    | 4    | 4    | 4    | 3    | 5    | 5    | 6    | 3    |
| 25955  |      |      |      |      |      | 6    | 2    | 2    | 2    | 6    | 1    | 6    | 6    | 6    |
| 25959  |      |      |      |      |      | 3    | 4    | 4    | 2    | 2    | 4    | 5    | 5    | 2    |
| 25964  | 2    | 3    | 3    | 3    |      |      |      |      |      |      |      |      |      |      |
| 25972  | 3    | 4    | 4    | 4    |      |      |      |      |      |      |      |      |      |      |
| 25999  |      |      |      |      |      | 1    | 2    | 2    | 2    | 3    | 3    | 2    | 3    | 2    |
| 26019  |      |      |      |      |      |      |      |      |      |      |      |      |      |      |
| 26025  |      |      |      |      |      |      |      |      |      |      |      |      |      |      |

| respid | Q47l | Q47m | Q47n | Q47o | Q48a | Q48b | Q48c | Q48d | Q48e | Q48f | Q48g | Q48h | Q48i | Q48j |   |
|--------|------|------|------|------|------|------|------|------|------|------|------|------|------|------|---|
| 26039  |      |      |      |      | 3    |      |      |      |      |      |      |      |      |      |   |
| 26055  |      |      |      |      |      | 2    | 5    | 6    | 5    | 2    | 6    | 5    | 6    | 2    | 3 |
| 26061  |      |      |      |      |      | 2    | 5    | 5    | 5    | 2    | 3    | 5    | 4    | 3    | 3 |
| 26076  | 3    | 5    | 5    | 3    |      |      |      |      |      |      |      |      |      |      |   |
| 26088  | 2    | 2    | 3    | 2    |      |      |      |      |      |      |      |      |      |      |   |
| 26094  |      |      |      |      |      |      |      |      |      |      |      |      |      |      |   |
| 26104  |      |      |      |      |      | 2    | 2    | 3    | 4    | 2    | 3    | 2    | 3    | 2    | 2 |
| 26131  | 4    | 4    | 4    | 4    |      |      |      |      |      |      |      |      |      |      |   |
| 26134  | 2    | 2    | 2    | 2    |      |      |      |      |      |      |      |      |      |      |   |
| 26160  | 3    | 2    | 2    | 2    |      |      |      |      |      |      |      |      |      |      |   |
| 26168  | 4    | 5    | 5    | 4    |      |      |      |      |      |      |      |      |      |      |   |
| 26170  |      |      |      |      |      |      |      |      |      |      |      |      |      |      |   |
| 26191  |      |      |      |      |      | 2    | 2    | 2    | 2    | 2    | 2    | 2    | 2    | 2    | 2 |
| 26192  |      |      |      |      |      |      |      |      |      |      |      |      |      |      |   |
| 26195  | 3    | 4    | 4    | 3    |      |      |      |      |      |      |      |      |      |      |   |
| 26198  |      |      |      |      |      | 2    | 5    | 6    | 5    | 3    | 6    | 5    | 6    | 1    | 6 |
| 26199  |      |      |      |      |      | 4    | 3    | 5    | 3    | 4    | 3    | 3    | 4    | 4    | 4 |
| 26201  |      |      |      |      |      |      |      |      |      |      |      |      |      |      |   |
| 26202  | 1    | 3    | 3    | 3    |      |      |      |      |      |      |      |      |      |      |   |
| 26226  |      |      |      |      |      | 3    |      |      |      |      |      |      |      |      |   |
| 26233  |      |      |      |      |      | 1    | 6    | 6    | 6    | 1    | 6    | 6    | 6    | 1    | 3 |
| 26236  |      |      |      |      |      | 3    | 4    | 4    | 5    | 3    | 6    | 6    | 6    | 3    | 6 |
| 26242  |      |      |      |      |      | 3    | 4    | 5    | 4    | 3    | 4    | 5    | 5    | 2    | 4 |
| 26244  | 5    | 5    | 4    | 4    |      |      |      |      |      |      |      |      |      |      |   |
| 26250  |      |      |      |      |      | 2    | 3    | 3    | 3    | 3    | 3    | 3    | 2    | 3    | 3 |
| 26266  |      |      |      |      |      | 5    | 5    | 5    | 5    | 3    | 5    | 5    | 5    | 3    | 3 |
| 26274  | 3    | 3    | 2    | 3    |      |      |      |      |      |      |      |      |      |      |   |
| 26286  |      |      |      |      |      | 3    | 3    | 3    | 3    | 3    | 3    | 3    | 3    | 3    | 3 |
| 26288  |      |      |      |      |      | 1    | 2    | 3    | 4    | 2    | 6    | 5    | 6    | 1    | 3 |
| 26295  |      |      |      |      |      |      |      |      |      |      |      |      |      |      |   |
| 26296  | 5    | 5    | 5    | 5    |      |      |      |      |      |      |      |      |      |      |   |
| 26297  |      |      |      |      |      |      |      |      |      |      |      |      |      |      |   |



| respid | Q47l | Q47m | Q47n | Q47o | Q48a | Q48b | Q48c | Q48d | Q48e | Q48f | Q48g | Q48h | Q48i | Q48j |   |
|--------|------|------|------|------|------|------|------|------|------|------|------|------|------|------|---|
| 26300  |      |      |      |      |      | 3    | 4    | 4    | 4    | 3    | 4    | 5    | 4    | 3    | 4 |
| 26317  |      |      |      |      |      |      |      |      |      |      |      |      |      |      |   |
| 26343  |      |      |      |      |      |      |      |      |      |      |      |      |      |      |   |
| 26367  |      |      |      |      |      | 6    | 6    | 6    | 6    | 6    | 6    | 6    | 6    | 6    | 6 |
| 26372  | 3    | 3    | 2    | 3    |      |      |      |      |      |      |      |      |      |      |   |
| 26403  |      |      |      |      |      | 3    | 4    | 4    | 4    | 3    | 4    | 5    | 4    | 3    | 4 |
| 26423  | 4    | 4    | 4    | 5    |      |      |      |      |      |      |      |      |      |      |   |
| 26430  |      |      |      |      |      |      |      |      |      |      |      |      |      |      |   |
| 26437  | 2    | 3    | 3    | 2    |      |      |      |      |      |      |      |      |      |      |   |
| 26457  |      |      |      |      |      |      |      |      |      |      |      |      |      |      |   |
| 26466  | 5    | 5    | 5    | 5    |      |      |      |      |      |      |      |      |      |      |   |
| 26467  |      |      |      |      |      | 2    | 6    | 6    | 6    | 1    | 6    | 6    | 6    | 1    | 6 |
| 26469  |      |      |      |      |      | 1    | 6    | 6    | 5    | 1    | 6    | 6    | 6    | 1    | 5 |
| 26494  |      |      |      |      |      | 4    | 4    | 4    | 4    | 3    | 4    | 5    | 5    | 4    | 4 |
| 26510  |      |      |      |      |      |      | 4    |      |      |      | 5    |      |      |      |   |
| 26519  |      |      |      |      |      | 6    | 6    | 6    | 6    | 1    | 6    | 6    | 6    | 1    | 6 |
| 26525  |      |      |      |      |      | 3    | 6    | 6    |      |      | 6    |      | 6    | 6    | 6 |
| 26529  |      |      |      |      |      |      |      |      |      |      |      |      |      |      |   |
| 26533  | 1    | 5    | 4    | 5    |      |      |      |      |      |      |      |      |      |      |   |
| 26556  |      |      |      |      |      | 6    | 6    |      |      |      |      |      |      |      |   |
| 26559  |      |      |      |      |      | 1    | 6    | 6    | 6    | 1    | 6    | 3    | 6    | 1    | 3 |
| 26565  | 2    | 2    | 2    | 2    |      |      |      |      |      |      |      |      |      |      |   |
| 26576  | 3    | 2    | 3    | 2    |      |      |      |      |      |      |      |      |      |      |   |
| 26601  |      |      |      |      |      |      |      |      |      |      |      |      |      |      |   |
| 26607  |      |      |      |      |      | 3    | 4    | 3    | 3    | 4    | 4    | 4    | 5    | 3    | 3 |
| 26611  |      |      |      |      |      | 2    | 2    | 3    | 5    | 6    | 3    | 4    | 3    | 4    | 4 |
| 26619  |      |      |      |      |      | 2    | 5    | 3    | 5    | 2    | 5    | 4    | 6    | 3    | 4 |
| 26631  | 3    | 4    | 4    | 3    |      |      |      |      |      |      |      |      |      |      |   |
| 26654  | 4    | 3    | 3    | 3    |      |      |      |      |      |      |      |      |      |      |   |
| 26656  |      |      |      |      |      | 3    |      | 3    | 3    | 3    | 4    |      | 4    | 3    | 4 |
| 26664  |      |      |      |      |      |      |      |      |      |      |      |      |      |      |   |
| 26667  | 3    | 3    | 3    | 2    |      |      |      |      |      |      |      |      |      |      |   |

| respid | Q47l | Q47m | Q47n | Q47o | Q48a | Q48b | Q48c | Q48d | Q48e | Q48f | Q48g | Q48h | Q48i | Q48j |   |
|--------|------|------|------|------|------|------|------|------|------|------|------|------|------|------|---|
| 26674  |      |      |      |      |      | 3    | 5    | 6    | 6    | 4    | 5    | 2    | 3    | 4    | 3 |
| 26678  | 3    | 3    | 4    | 4    |      |      |      |      |      |      |      |      |      |      |   |
| 26693  |      | 3    | 3    | 3    |      |      |      |      |      |      |      |      |      |      |   |
| 26696  |      |      |      |      |      | 4    | 3    | 3    | 3    | 3    | 3    | 4    | 4    | 4    | 4 |
| 26703  |      |      |      |      |      | 3    | 3    | 3    | 2    | 4    | 2    | 2    | 3    | 4    | 2 |
| 26705  |      |      |      |      |      | 2    | 2    | 2    | 2    | 2    | 2    | 3    | 3    | 4    | 3 |
| 26706  | 4    | 3    | 3    | 4    |      |      |      |      |      |      |      |      |      |      |   |
| 26716  |      |      |      |      |      | 5    | 3    | 5    | 5    | 4    | 5    | 5    | 5    | 5    | 5 |
| 26721  |      |      |      |      |      | 1    | 6    | 6    | 6    | 2    | 6    | 6    | 6    | 2    | 6 |
| 26730  |      |      |      |      |      | 1    | 1    | 1    | 6    | 4    | 4    | 6    | 2    | 5    | 3 |
| 26752  |      |      |      |      |      | 2    | 6    | 6    | 6    | 1    | 6    | 6    | 6    | 1    | 6 |
| 26755  |      |      |      |      |      | 5    | 6    | 6    | 6    | 3    | 5    | 5    | 6    | 3    | 5 |
| 26791  | 5    | 3    | 4    | 4    |      |      |      |      |      |      |      |      |      |      |   |
| 26804  | 3    | 3    | 3    | 3    |      |      |      |      |      |      |      |      |      |      |   |
| 26810  |      |      |      |      |      | 3    | 2    | 1    | 5    | 3    | 4    | 5    | 4    | 2    | 1 |
| 26813  | 3    | 3    | 3    | 3    |      |      |      |      |      |      |      |      |      |      |   |
| 26833  |      |      |      |      |      | 3    | 3    | 3    | 3    | 3    | 3    | 3    | 3    | 3    | 3 |
| 26880  |      |      |      |      |      | 3    | 5    | 3    | 2    | 4    | 4    | 4    | 4    | 3    | 3 |
| 26884  |      |      |      |      |      | 2    | 6    | 6    | 5    | 2    | 5    | 6    | 6    | 1    | 5 |
| 26885  | 4    | 4    | 4    | 4    |      |      |      |      |      |      |      |      |      |      |   |
| 26890  | 1    |      |      |      |      |      |      |      |      |      |      |      |      |      |   |
| 26937  |      |      |      |      |      |      | 5    | 4    | 5    | 6    | 6    | 6    | 6    | 6    | 6 |
| 26939  |      |      |      |      |      | 3    | 3    | 3    | 2    | 2    | 4    | 5    | 5    | 2    | 5 |
| 26941  |      |      |      |      |      |      |      |      |      |      |      |      |      |      |   |
| 26992  |      |      |      |      |      | 3    | 6    | 6    | 6    | 3    | 6    | 6    | 6    | 3    | 6 |
| 27037  |      |      |      |      |      |      |      |      |      |      |      |      |      |      |   |
| 27045  |      |      |      |      |      | 1    | 6    | 6    | 2    | 1    | 6    | 6    | 6    | 1    | 6 |
| 27053  |      |      |      |      |      | 5    | 5    |      | 3    | 4    | 5    | 5    | 6    | 5    | 6 |
| 27060  |      |      |      |      |      | 1    | 6    | 6    | 3    | 1    | 6    | 6    | 6    | 1    | 5 |
| 27076  |      |      |      |      |      | 2    | 5    | 5    | 6    | 2    | 5    | 3    | 6    | 1    | 3 |
| 27124  |      |      |      |      |      | 1    | 6    | 6    | 6    | 1    | 6    | 6    | 6    | 1    | 6 |
| 27125  | 3    | 4    | 4    | 3    |      |      |      |      |      |      |      |      |      |      |   |

| respid | Q47l | Q47m | Q47n | Q47o | Q48a | Q48b | Q48c | Q48d | Q48e | Q48f | Q48g | Q48h | Q48i | Q48j |   |
|--------|------|------|------|------|------|------|------|------|------|------|------|------|------|------|---|
| 27132  | 5    | 5    | 5    | 5    |      |      |      |      |      |      |      |      |      |      |   |
| 27166  |      |      |      |      |      | 1    | 6    | 6    | 6    | 1    | 6    | 5    | 6    | 1    | 5 |
| 27190  | 1    | 1    | 3    | 2    |      |      |      |      |      |      |      |      |      |      |   |
| 27199  | 2    | 2    | 4    | 2    |      |      |      |      |      |      |      |      |      |      |   |
| 27221  |      |      |      |      |      | 1    | 6    | 6    | 2    | 1    | 6    | 6    | 6    | 1    | 1 |
| 27233  |      |      |      |      |      | 4    | 6    | 5    | 4    | 3    | 3    | 5    | 6    | 4    | 4 |
| 27241  |      |      |      |      |      | 3    | 4    | 4    | 4    | 3    | 4    | 5    | 4    | 3    | 4 |
| 27244  | 3    | 4    | 4    | 4    |      |      |      |      |      |      |      |      |      |      |   |
| 27245  |      |      |      |      |      | 5    | 2    | 2    | 1    | 6    | 1    | 1    | 2    | 6    | 1 |
| 27246  |      |      |      |      |      | 2    | 5    | 6    | 5    | 2    | 5    |      | 6    | 1    | 6 |
| 27253  | 3    | 4    | 4    | 4    |      |      |      |      |      |      |      |      |      |      |   |
| 27255  |      |      |      |      |      | 2    | 2    | 1    | 2    | 1    | 2    | 1    | 2    | 2    | 2 |
| 27267  | 3    | 3    | 3    | 3    |      |      |      |      |      |      |      |      |      |      |   |
| 27283  |      |      |      |      |      | 3    | 5    | 5    | 3    | 3    | 3    | 5    | 6    | 2    | 3 |
| 27289  |      |      |      |      |      | 2    | 4    | 3    | 3    | 4    | 3    | 2    | 3    | 4    | 3 |
| 27302  |      |      |      |      |      | 1    | 1    | 6    | 6    | 1    | 6    | 6    | 6    | 1    | 6 |
| 27317  |      |      |      |      |      | 6    | 6    | 6    | 6    | 1    | 6    | 6    | 6    | 6    | 6 |
| 27319  |      |      |      |      |      | 1    | 6    | 6    | 6    | 1    | 6    | 6    | 6    | 1    | 6 |
| 27331  |      |      |      |      |      |      |      |      |      |      |      |      |      |      |   |
| 27333  | 2    | 2    | 2    | 3    |      |      |      |      |      |      |      |      |      |      |   |
| 27340  |      |      |      |      |      |      |      |      |      |      |      |      |      |      |   |
| 27362  | 1    | 2    | 2    | 3    |      |      |      |      |      |      |      |      |      |      |   |
| 27370  |      |      |      |      |      |      |      |      |      |      |      |      |      |      |   |
| 27379  |      |      |      |      |      | 4    | 3    | 3    | 3    | 5    | 4    | 4    | 4    | 5    | 6 |
| 27386  |      |      |      |      |      |      |      |      |      |      |      |      |      |      |   |
| 27398  |      |      |      |      |      |      |      |      |      |      |      |      |      |      |   |
| 27404  |      |      |      |      |      | 2    | 2    | 2    | 2    | 2    | 2    | 2    | 2    | 2    | 5 |
| 27408  |      |      |      |      |      | 5    | 3    | 3    | 3    | 4    | 4    | 3    | 4    | 4    | 5 |
| 27412  |      |      |      |      |      | 3    | 4    | 4    | 4    | 3    | 4    | 4    | 4    | 3    | 4 |
| 27426  |      |      |      |      |      | 2    | 4    | 4    | 3    | 3    | 4    | 4    | 4    | 3    | 3 |
| 27455  |      |      |      |      |      | 1    | 6    | 5    | 4    | 2    | 6    | 6    | 6    | 6    | 6 |
| 27464  | 2    | 2    | 2    | 2    |      |      |      |      |      |      |      |      |      |      |   |

| respid | Q47l | Q47m | Q47n | Q47o | Q48a | Q48b | Q48c | Q48d | Q48e | Q48f | Q48g | Q48h | Q48i | Q48j |
|--------|------|------|------|------|------|------|------|------|------|------|------|------|------|------|
| 27484  |      |      |      |      |      |      |      |      |      |      |      |      |      |      |
| 27493  |      |      |      |      | 2    | 4    | 3    | 3    | 4    | 3    | 3    | 4    | 2    | 3    |
| 27512  | 2    | 3    | 3    | 3    |      |      |      |      |      |      |      |      |      |      |
| 27525  |      |      |      |      |      |      |      |      |      |      |      |      |      |      |
| 27532  |      |      |      |      | 3    | 3    | 4    | 3    | 3    | 3    | 3    | 3    | 2    | 3    |
| 27539  |      |      |      |      | 2    | 3    | 3    | 5    | 2    | 5    | 6    | 6    | 2    | 5    |
| 27540  | 4    | 3    | 3    | 3    |      |      |      |      |      |      |      |      |      |      |
| 27552  | 2    | 2    | 3    | 2    |      |      |      |      |      |      |      |      |      |      |
| 27562  |      |      |      |      | 1    | 6    | 6    | 5    | 1    | 6    | 6    | 6    | 1    | 6    |
| 27568  |      |      |      |      | 4    |      | 4    | 4    | 4    | 4    | 4    | 6    | 6    | 3    |
| 27574  | 2    | 2    | 2    | 2    |      |      |      |      |      |      |      |      |      |      |
| 27575  |      |      |      |      | 4    | 4    | 4    | 4    | 4    | 4    | 4    | 4    | 4    |      |
| 27577  | 3    | 3    | 3    | 3    |      |      |      |      |      |      |      |      |      |      |
| 27589  |      |      |      |      | 2    | 6    | 6    | 4    | 3    | 6    | 6    | 6    | 1    | 5    |
| 27593  |      |      |      |      | 1    | 6    | 6    | 6    | 1    | 6    | 6    | 6    | 1    | 5    |
| 27594  | 2    | 2    | 2    | 2    |      |      |      |      |      |      |      |      |      |      |
| 27595  |      |      |      |      | 1    | 6    | 6    | 6    | 2    | 6    | 5    | 6    | 1    | 5    |
| 27598  |      |      |      |      | 1    | 3    | 3    | 6    | 3    | 2    | 5    | 6    | 2    | 5    |
| 27620  | 2    | 2    | 2    | 3    |      |      |      |      |      |      |      |      |      |      |
| 27621  |      |      |      |      |      |      |      |      |      |      |      |      |      |      |
| 27628  | 4    | 3    | 3    | 3    |      |      |      |      |      |      |      |      |      |      |
| 27633  |      |      |      |      | 2    | 5    | 6    | 6    | 2    | 6    | 6    | 6    | 2    | 3    |
| 27643  |      |      |      |      | 3    | 3    | 3    | 3    | 3    | 3    | 3    | 3    | 3    | 3    |
| 27644  | 3    | 3    | 3    | 3    |      |      |      |      |      |      |      |      |      |      |
| 27668  |      |      |      |      | 3    | 5    | 5    | 4    | 2    | 4    | 4    | 6    | 2    | 3    |
| 27681  |      |      |      |      |      |      |      |      |      |      |      |      |      |      |
| 27691  |      |      |      |      | 1    | 6    | 6    | 4    | 1    | 4    | 4    | 4    | 1    | 4    |
| 27693  |      | 1    | 2    | 3    |      |      |      |      |      |      |      |      |      |      |
| 27703  |      |      |      |      | 3    | 4    | 5    | 4    | 3    | 4    | 5    | 6    | 3    | 4    |
| 27708  |      |      |      |      | 3    | 3    | 2    | 2    | 5    | 2    | 3    | 2    | 5    | 3    |
| 27719  |      |      |      |      | 3    | 4    | 4    | 4    | 3    | 4    | 5    | 4    | 3    | 3    |
| 27720  |      |      |      |      | 2    | 6    | 6    | 6    | 2    | 6    | 6    | 6    | 1    | 6    |

| respid | Q47l | Q47m | Q47n | Q47o | Q48a | Q48b | Q48c | Q48d | Q48e | Q48f | Q48g | Q48h | Q48i | Q48j |   |
|--------|------|------|------|------|------|------|------|------|------|------|------|------|------|------|---|
| 27723  |      |      |      |      |      | 3    | 4    | 4    | 4    | 3    | 4    | 5    | 5    | 3    | 6 |
| 27725  |      |      |      |      |      | 4    | 4    | 4    | 4    | 4    | 4    | 5    | 6    | 5    | 6 |
| 27734  |      |      |      |      |      | 2    | 5    | 5    | 4    | 2    | 4    | 5    | 5    | 2    | 4 |
| 27744  | 3    | 3    | 3    | 3    |      |      |      |      |      |      |      |      |      |      |   |
| 27749  | 3    | 2    | 4    | 3    |      |      |      |      |      |      |      |      |      |      |   |
| 27762  |      |      |      |      |      | 3    | 4    | 4    | 3    | 4    | 4    | 3    | 5    | 3    | 3 |
| 27808  |      |      |      |      |      | 3    |      | 3    | 2    | 2    | 4    | 3    | 2    | 1    | 4 |
| 27810  |      |      |      |      |      | 1    | 6    | 5    | 5    | 3    | 4    | 5    | 6    | 2    | 2 |
| 27812  | 1    | 4    | 4    | 3    |      |      |      |      |      |      |      |      |      |      |   |
| 27815  |      |      |      |      |      |      |      |      |      |      |      |      |      |      |   |
| 27818  |      |      |      |      |      | 2    | 4    | 4    | 2    | 3    | 4    | 3    | 4    | 4    | 3 |
| 27823  |      |      |      |      |      | 3    | 4    | 4    | 4    | 3    | 4    | 5    | 5    | 2    | 4 |
| 27841  |      |      |      |      |      | 3    | 2    | 4    | 4    | 4    | 4    | 4    | 4    | 3    | 2 |
| 27843  |      |      |      |      |      |      |      |      |      |      |      |      |      |      |   |
| 27851  |      |      |      |      |      |      |      |      |      |      |      |      |      |      |   |
| 27858  |      |      |      |      |      |      |      |      |      |      |      |      |      |      |   |
| 27859  | 3    |      |      |      |      |      |      |      |      |      |      |      |      |      |   |
| 27869  |      |      |      |      |      | 1    | 6    | 6    | 6    | 1    | 6    | 6    | 6    | 1    | 6 |
| 27872  | 2    |      | 4    |      |      |      |      |      |      |      |      |      |      |      |   |
| 27873  |      |      |      |      |      | 4    | 6    | 6    | 6    | 6    | 6    | 6    | 6    | 6    | 6 |
| 27884  |      |      |      |      |      |      |      |      |      |      |      |      |      |      |   |
| 27904  |      |      |      |      |      | 5    | 5    | 5    | 5    | 5    | 5    | 5    | 5    | 5    | 5 |
| 27915  | 3    | 3    | 4    | 3    |      |      |      |      |      |      |      |      |      |      |   |
| 27918  |      |      |      |      |      | 4    | 3    |      | 4    | 3    |      |      |      |      |   |
| 27937  |      |      |      |      |      | 3    | 4    | 5    | 5    | 2    | 5    | 6    | 5    | 3    | 5 |
| 27943  |      |      |      |      |      | 3    | 5    | 6    | 6    | 6    | 6    | 6    | 6    |      | 6 |
| 27948  |      |      |      |      |      |      |      | 6    | 6    | 6    | 6    | 6    |      |      | 6 |
| 27971  |      |      |      |      |      | 3    | 3    | 4    | 3    | 4    | 4    | 3    | 3    | 3    | 2 |
| 27991  |      |      |      |      |      | 3    | 4    | 4    | 4    | 3    | 4    | 4    | 4    | 3    | 3 |
| 28000  | 4    | 4    | 4    | 4    |      |      |      |      |      |      |      |      |      |      |   |
| 28011  |      |      |      |      |      |      |      |      | 3    | 4    |      |      |      |      |   |
| 28022  |      |      |      |      |      | 5    | 2    | 3    | 2    | 2    | 1    | 2    | 4    | 3    | 2 |

| respid | Q47l | Q47m | Q47n | Q47o | Q48a | Q48b | Q48c | Q48d | Q48e | Q48f | Q48g | Q48h | Q48i | Q48j |   |
|--------|------|------|------|------|------|------|------|------|------|------|------|------|------|------|---|
| 28025  |      |      |      |      |      | 1    | 6    | 6    | 5    | 1    | 6    | 6    | 6    | 1    | 3 |
| 28041  | 1    | 3    | 3    | 4    |      |      |      |      |      |      |      |      |      |      |   |
| 28057  |      |      |      |      |      |      |      |      |      |      |      |      |      |      |   |
| 28080  |      |      |      |      |      |      |      |      |      |      |      |      |      |      |   |
| 28098  |      |      |      |      |      | 2    | 5    | 5    | 5    | 2    | 5    | 5    | 5    | 2    | 5 |
| 28104  |      |      |      |      |      | 2    | 6    | 5    | 5    | 2    | 6    | 5    | 6    | 1    | 4 |
| 28109  | 3    |      |      |      |      |      |      |      |      |      |      |      |      |      |   |
| 28129  |      |      |      |      |      | 2    | 2    | 5    | 2    | 3    | 3    | 3    | 4    | 4    | 4 |
| 28141  |      |      |      |      |      |      |      |      |      |      |      |      |      |      |   |
| 28143  | 3    | 3    | 3    | 3    |      |      |      |      |      |      |      |      |      |      |   |
| 28149  |      |      |      |      |      | 6    | 3    | 4    | 6    | 6    | 2    | 6    | 6    | 6    | 6 |
| 28151  |      |      |      |      |      | 3    | 3    | 3    | 3    | 3    | 4    | 3    | 3    | 3    | 3 |
| 28161  | 1    | 1    | 2    | 1    |      |      |      |      |      |      |      |      |      |      |   |
| 28169  | 3    | 4    | 3    | 3    |      |      |      |      |      |      |      |      |      |      |   |
| 28194  |      |      |      |      |      | 3    | 3    | 3    | 3    | 3    | 3    | 3    | 3    | 3    | 3 |
| 28197  |      |      |      |      |      |      |      |      |      |      |      |      |      |      |   |
| 28206  |      |      |      |      |      |      |      |      |      |      |      |      |      |      |   |
| 28218  | 3    | 3    | 3    | 3    |      |      |      |      |      |      |      |      |      |      |   |
| 28227  | 1    | 3    | 3    | 5    |      |      |      |      |      |      |      |      |      |      |   |
| 28235  |      |      |      |      |      | 5    | 6    | 6    | 6    | 4    | 6    | 6    | 6    | 2    | 6 |
| 28246  |      |      |      |      |      | 4    | 4    | 4    | 4    | 3    | 3    | 4    | 4    | 2    | 2 |
| 28259  |      |      |      |      |      | 2    | 4    | 5    | 4    | 3    | 5    | 4    | 6    | 2    | 3 |
| 28263  |      |      |      |      |      |      |      |      |      |      |      |      |      | 1    | 6 |
| 28267  | 2    | 2    | 2    | 2    |      |      |      |      |      |      |      |      |      |      |   |
| 28274  | 4    | 4    | 4    | 4    |      |      |      |      |      |      |      |      |      |      |   |
| 28278  |      |      |      |      |      | 1    | 1    |      | 2    | 1    | 3    | 6    | 3    | 1    | 3 |
| 28288  |      |      |      |      |      |      | 6    |      |      |      |      |      |      |      |   |
| 28308  |      |      |      |      |      |      |      |      |      |      |      |      |      |      |   |
| 28309  |      |      |      |      |      | 3    | 4    | 4    |      | 3    | 3    | 3    | 3    | 4    | 4 |
| 28323  |      |      |      |      |      | 5    | 3    | 5    | 4    | 4    | 2    | 4    | 4    | 5    | 6 |
| 28335  | 3    | 3    | 3    | 3    |      |      |      |      |      |      |      |      |      |      |   |
| 28354  | 3    | 2    | 3    | 2    |      |      |      |      |      |      |      |      |      |      |   |

| respid | Q47l | Q47m | Q47n | Q47o | Q48a | Q48b | Q48c | Q48d | Q48e | Q48f | Q48g | Q48h | Q48i | Q48j |   |
|--------|------|------|------|------|------|------|------|------|------|------|------|------|------|------|---|
| 28355  |      | 3    |      |      | 3    |      |      |      |      |      |      |      |      |      |   |
| 28356  |      | 3    | 2    | 2    | 2    |      |      |      |      |      |      |      |      |      |   |
| 28357  |      | 5    | 5    | 5    | 5    |      |      |      |      |      |      |      |      |      |   |
| 28363  |      | 1    | 2    | 2    | 1    |      |      |      |      |      |      |      |      |      |   |
| 28366  |      | 1    | 2    | 2    | 1    |      |      |      |      |      |      |      |      |      |   |
| 28372  |      |      |      |      |      | 3    | 2    | 2    | 3    | 4    | 3    | 3    | 3    | 2    | 2 |
| 28381  |      |      |      |      |      | 3    | 4    | 4    | 4    | 4    | 4    | 4    | 4    | 3    | 3 |
| 28388  |      |      | 3    | 4    |      |      |      |      |      |      |      |      |      |      |   |
| 28413  |      | 3    | 2    | 3    | 2    |      |      |      |      |      |      |      |      |      |   |
| 28421  |      | 3    | 3    | 3    | 3    |      |      |      |      |      |      |      |      |      |   |
| 28430  |      | 3    | 2    | 2    | 2    |      |      |      |      |      |      |      |      |      |   |
| 28439  |      | 1    | 2    | 2    | 2    |      |      |      |      |      |      |      |      |      |   |
| 28458  |      |      |      |      |      | 1    | 6    | 5    | 6    | 2    | 5    | 4    | 6    | 1    | 3 |
| 28461  |      | 4    | 3    | 3    | 4    |      |      |      |      |      |      |      |      |      |   |
| 28466  |      |      |      |      |      |      | 6    | 6    | 6    | 6    | 6    | 6    | 6    | 6    | 6 |
| 28492  |      | 3    | 3    | 3    | 3    |      |      |      |      |      |      |      |      |      |   |
| 28534  |      |      |      |      |      |      |      |      |      |      |      |      |      |      |   |
| 28537  |      | 3    | 3    | 3    | 3    |      |      |      |      |      |      |      |      |      |   |
| 28560  |      | 3    | 3    | 3    | 3    |      |      |      |      |      |      |      |      |      |   |
| 28566  |      |      |      |      |      | 3    | 6    | 6    | 6    | 2    | 5    | 5    | 6    | 3    | 4 |
| 28569  |      | 3    | 3    | 3    | 3    |      |      |      |      |      |      |      |      |      |   |
| 28584  |      | 1    | 1    | 1    | 2    |      |      |      |      |      |      |      |      |      |   |
| 28590  |      | 2    | 1    | 1    | 3    |      |      |      |      |      |      |      |      |      |   |
| 28596  |      |      |      |      |      |      |      |      |      |      |      |      |      |      |   |
| 28608  |      | 3    | 3    | 3    | 3    |      |      |      |      |      |      |      |      |      |   |
| 28631  |      |      |      |      |      | 4    | 3    | 3    | 2    | 5    | 4    | 2    | 4    | 2    | 4 |
| 28644  |      |      |      |      |      | 4    | 3    | 3    | 3    | 4    | 3    | 3    | 3    | 4    | 3 |
| 28646  |      |      |      |      |      | 1    | 6    | 6    | 6    | 1    | 6    | 6    | 6    | 1    | 6 |
| 28665  |      |      |      |      |      |      |      |      |      |      |      |      |      |      |   |
| 28686  |      | 3    | 4    | 4    | 3    |      |      |      |      |      |      |      |      |      |   |
| 28704  |      |      |      |      |      | 3    | 3    | 4    | 3    | 4    | 3    | 4    | 4    | 4    | 3 |
| 28719  |      | 4    | 4    | 4    | 4    |      |      |      |      |      |      |      |      |      |   |

| respid | Q47l | Q47m | Q47n | Q47o | Q48a | Q48b | Q48c | Q48d | Q48e | Q48f | Q48g | Q48h | Q48i | Q48j |   |
|--------|------|------|------|------|------|------|------|------|------|------|------|------|------|------|---|
| 28736  |      | 3    | 4    | 4    | 3    |      |      |      |      |      |      |      |      |      |   |
| 28739  |      | 3    | 3    | 4    | 4    |      |      |      |      |      |      |      |      |      |   |
| 28758  |      |      |      |      |      | 1    | 1    | 1    | 1    | 6    | 2    | 1    | 1    | 4    | 4 |
| 28761  |      |      |      |      |      | 2    | 2    |      | 6    | 2    | 5    | 4    | 6    | 1    | 5 |
| 28770  |      |      |      |      |      | 1    | 5    | 5    | 1    | 2    | 6    | 6    | 6    | 1    | 3 |
| 28774  |      |      |      |      |      | 1    | 6    | 6    | 6    | 1    | 6    | 5    | 6    | 1    | 3 |
| 28778  |      | 2    | 2    | 3    | 2    |      |      |      |      |      |      |      |      |      |   |
| 28783  |      | 3    | 3    | 3    | 3    |      |      |      |      |      |      |      |      |      |   |
| 28785  |      | 3    | 4    | 4    | 4    |      |      |      |      |      |      |      |      |      |   |
| 28797  |      | 2    | 1    | 2    | 2    |      |      |      |      |      |      |      |      |      |   |
| 28801  |      | 2    | 3    | 4    | 3    |      |      |      |      |      |      |      |      |      |   |
| 28821  |      |      |      |      |      |      |      |      |      |      |      |      |      |      |   |
| 28827  |      | 3    | 4    | 4    | 3    |      |      |      |      |      |      |      |      |      |   |
| 28828  |      |      |      |      |      | 5    | 5    | 5    | 5    | 5    | 6    | 5    | 5    |      | 5 |
| 28871  |      |      |      |      |      | 3    | 4    | 5    | 3    | 3    | 4    | 4    | 4    | 3    | 4 |
| 28876  |      | 3    | 3    | 1    | 3    |      |      |      |      |      |      |      |      |      |   |
| 28891  |      | 4    | 2    | 2    | 4    |      |      |      |      |      |      |      |      |      |   |
| 28898  |      |      |      |      |      |      |      |      |      |      |      |      |      |      |   |
| 28909  |      | 4    | 4    | 4    | 3    |      |      |      |      |      |      |      |      |      |   |
| 28930  |      |      |      |      |      | 2    | 3    | 4    | 4    | 3    | 5    | 5    | 4    | 3    | 5 |
| 28935  |      |      |      |      |      | 4    | 4    | 4    | 4    | 3    | 4    | 5    | 4    | 4    |   |
| 28964  |      | 2    | 2    | 2    | 2    |      |      |      |      |      |      |      |      |      |   |
| 28965  |      | 3    | 3    | 3    | 3    |      |      |      |      |      |      |      |      |      |   |
| 28967  |      | 3    | 3    | 3    | 3    |      |      |      |      |      |      |      |      |      |   |
| 28975  |      |      |      |      |      |      |      |      |      |      |      |      |      |      |   |
| 28982  |      | 4    | 4    | 4    | 4    |      |      |      |      |      |      |      |      |      |   |
| 28989  |      | 4    | 4    | 3    | 4    |      |      |      |      |      |      |      |      |      |   |
| 29003  |      | 3    | 3    | 4    | 4    |      |      |      |      |      |      |      |      |      |   |
| 29004  |      |      |      |      |      | 4    | 4    | 6    | 6    | 3    | 5    | 5    | 6    | 2    | 4 |
| 29007  |      |      |      |      |      | 6    | 6    | 6    | 6    | 6    | 6    | 6    | 6    | 6    | 6 |
| 29008  |      |      |      |      |      |      |      |      |      |      |      |      |      |      |   |
| 29011  |      |      |      |      |      | 1    | 5    | 5    | 6    | 1    | 2    | 5    | 4    | 2    | 5 |



| respid | Q47l | Q47m | Q47n | Q47o | Q48a | Q48b | Q48c | Q48d | Q48e | Q48f | Q48g | Q48h | Q48i | Q48j |   |
|--------|------|------|------|------|------|------|------|------|------|------|------|------|------|------|---|
| 29012  | 4    | 4    | 4    | 4    |      |      |      |      |      |      |      |      |      |      |   |
| 29014  |      |      |      |      |      |      |      |      |      |      |      |      |      |      |   |
| 29016  |      |      |      |      |      |      |      |      |      |      |      |      |      |      |   |
| 29018  |      |      |      |      |      | 2    | 6    | 6    | 3    | 3    | 6    | 6    | 6    | 2    | 6 |
| 29048  |      |      |      |      |      | 2    | 4    | 5    | 4    | 2    | 4    | 4    | 6    | 3    | 3 |
| 29184  |      |      |      |      |      | 3    | 3    | 3    | 3    | 4    | 3    | 3    | 3    | 3    | 3 |
| 29237  |      |      |      |      |      | 3    | 2    | 4    | 2    | 2    | 2    | 6    | 6    | 2    | 6 |
| 29252  | 3    | 2    | 2    | 3    |      |      |      |      |      |      |      |      |      |      |   |
| 29267  | 1    | 5    | 5    | 3    |      |      |      |      |      |      |      |      |      |      |   |
| 29276  |      |      |      |      |      |      |      |      |      |      |      |      |      |      |   |
| 29281  |      |      |      |      |      | 3    | 3    | 3    | 2    | 5    | 3    | 2    | 2    | 5    | 1 |
| 29285  |      |      |      |      |      | 3    | 2    | 2    | 5    | 2    | 5    | 5    | 5    | 2    | 5 |
| 29291  |      |      |      |      |      |      |      |      |      |      |      |      |      |      |   |
| 29304  | 4    | 3    | 3    | 3    |      |      |      |      |      |      |      |      |      |      |   |
| 29323  |      |      |      |      |      | 3    | 4    | 4    | 4    | 3    | 4    | 5    | 5    | 2    | 5 |
| 29330  | 1    |      |      |      |      |      |      |      |      |      |      |      |      |      |   |
| 29357  | 4    | 5    | 4    | 4    |      |      |      |      |      |      |      |      |      |      |   |
| 29416  |      |      |      |      |      | 2    | 6    | 6    | 6    | 2    | 6    | 6    | 6    | 2    | 5 |
| 29432  | 4    | 4    | 4    | 4    |      |      |      |      |      |      |      |      |      |      |   |
| 29482  |      |      |      |      |      | 2    | 2    | 3    | 2    | 1    | 2    | 1    | 1    | 2    | 3 |
| 29506  |      |      |      |      |      |      |      |      |      |      |      |      |      |      |   |
| 29509  | 1    | 3    | 3    | 1    |      |      |      |      |      |      |      |      |      |      |   |
| 29512  |      |      |      |      |      | 2    | 1    | 3    | 2    | 2    | 1    | 2    | 1    | 2    | 3 |
| 29519  |      |      |      |      |      | 3    | 4    | 4    | 4    | 3    | 4    | 5    | 5    | 3    | 4 |
| 29520  |      |      |      |      |      | 1    | 6    | 6    | 6    | 1    | 6    | 3    | 4    | 3    | 5 |
| 29521  |      |      |      |      |      | 2    | 1    | 2    | 1    | 1    | 3    | 2    | 2    | 3    | 1 |
| 29529  |      |      |      |      |      | 5    | 1    | 1    | 1    | 6    | 1    | 2    | 2    | 5    | 1 |
| 29532  |      |      |      |      |      |      |      |      |      |      |      |      |      |      |   |
| 29547  |      |      |      |      |      | 1    | 1    | 1    | 1    | 6    | 1    | 3    | 3    | 6    | 1 |
| 29551  | 4    | 4    | 4    | 4    |      |      |      |      |      |      |      |      |      |      |   |
| 29584  | 2    | 2    | 2    | 2    |      |      |      |      |      |      |      |      |      |      |   |
| 29591  |      |      |      |      |      | 6    | 3    | 1    | 4    | 4    | 2    | 1    | 2    | 5    | 1 |

| respid | Q47l | Q47m | Q47n | Q47o | Q48a | Q48b | Q48c | Q48d | Q48e | Q48f | Q48g | Q48h | Q48i | Q48j |
|--------|------|------|------|------|------|------|------|------|------|------|------|------|------|------|
| 29613  |      |      |      |      |      | 5    | 6    | 6    | 6    | 4    | 6    | 6    | 6    | 6    |
| 29615  |      |      |      |      |      | 6    | 2    | 2    | 3    | 5    | 3    | 2    | 2    | 6    |
| 29625  | 3    | 3    | 3    | 4    |      |      |      |      |      |      |      |      |      |      |
| 29660  |      |      |      |      |      | 5    | 6    | 5    | 4    | 5    |      | 4    | 5    | 4    |
| 29677  |      |      |      |      |      |      |      |      |      |      |      |      |      |      |
| 29700  | 2    | 2    | 2    | 2    |      |      |      |      |      |      |      |      |      |      |
| 29715  | 2    | 2    | 4    | 3    |      |      |      |      |      |      |      |      |      |      |
| 29720  |      |      |      |      |      |      |      |      |      |      |      |      |      |      |
| 29730  | 4    | 4    | 4    | 4    |      |      |      |      |      |      |      |      |      |      |
| 29734  |      |      |      |      |      | 6    | 5    | 1    | 3    | 4    | 1    | 1    | 1    | 4    |
| 29754  |      |      |      |      |      |      |      |      |      |      |      |      |      |      |
| 29771  | 3    | 3    | 3    | 3    |      |      |      |      |      |      |      |      |      |      |
| 29774  | 2    | 2    | 2    | 2    |      |      |      |      |      |      |      |      |      |      |
| 29783  |      |      |      |      |      | 3    | 5    | 5    | 6    | 3    | 6    | 6    | 6    | 3    |
| 29812  |      |      |      |      |      | 4    | 3    | 3    | 3    | 4    | 3    | 3    | 3    | 4    |
| 29813  | 1    | 1    | 1    |      |      |      |      |      |      |      |      |      |      |      |
| 29814  |      |      |      |      |      | 6    | 4    | 2    | 3    | 4    | 3    | 3    | 2    | 4    |
| 29820  | 3    | 4    | 4    | 3    |      |      |      |      |      |      |      |      |      |      |
| 29906  | 2    | 3    | 4    | 3    |      |      |      |      |      |      |      |      |      |      |
| 29907  |      |      |      |      |      | 2    | 5    | 5    | 5    | 2    | 5    | 5    | 5    | 2    |
| 29928  |      |      |      |      |      |      |      |      |      |      |      |      |      |      |
| 29932  |      |      |      |      |      |      |      |      |      |      |      |      |      |      |
| 29958  |      |      |      |      |      | 3    | 3    | 3    | 3    | 3    | 3    | 3    | 3    | 3    |
| 29982  | 3    | 4    | 4    | 3    |      |      |      |      |      |      |      |      |      |      |
| 29989  |      |      |      |      |      |      |      |      |      |      |      |      |      |      |
| 29994  |      |      |      |      |      |      |      |      |      |      |      |      |      |      |
| 30005  |      |      |      |      |      | 1    | 6    | 5    | 6    | 1    | 1    | 1    | 1    | 1    |
| 30077  | 1    | 3    | 3    | 2    |      |      |      |      |      |      |      |      |      |      |
| 30098  |      |      |      |      |      |      |      |      |      |      |      |      |      |      |
| 30107  |      |      |      |      |      | 4    | 4    | 5    | 6    | 3    | 5    | 5    | 5    | 3    |
| 30154  | 3    | 5    | 5    | 2    |      |      |      |      |      |      |      |      |      |      |
| 30159  | 3    | 4    | 4    | 4    |      |      |      |      |      |      |      |      |      |      |

| respid | Q47l | Q47m | Q47n | Q47o | Q48a | Q48b | Q48c | Q48d | Q48e | Q48f | Q48g | Q48h | Q48i | Q48j |   |
|--------|------|------|------|------|------|------|------|------|------|------|------|------|------|------|---|
| 30162  | 3    | 3    |      |      | 4    |      |      |      |      |      |      |      |      |      |   |
| 30163  |      |      |      |      |      |      |      |      |      |      |      |      |      |      |   |
| 30189  |      |      |      |      |      | 3    | 4    | 4    | 5    | 3    | 4    | 4    | 4    | 3    | 4 |
| 30230  |      |      |      |      |      | 2    | 6    | 6    | 6    | 2    | 6    | 6    | 6    | 2    | 6 |
| 30259  | 3    | 2    | 3    | 3    |      |      |      |      |      |      |      |      |      |      |   |
| 30284  | 1    | 3    | 3    | 3    |      |      |      |      |      |      |      |      |      |      |   |
| 30296  |      |      |      |      |      | 6    | 6    | 6    | 6    | 6    | 6    | 6    | 6    | 6    |   |
| 30330  | 3    | 3    | 3    | 3    |      |      |      |      |      |      |      |      |      |      |   |
| 30341  |      |      |      |      |      | 1    | 3    | 3    | 1    | 6    | 2    | 2    | 2    | 4    | 2 |
| 30352  |      |      |      |      |      | 2    | 1    | 3    | 2    | 1    | 2    | 1    | 3    | 4    | 2 |
| 30379  | 4    | 4    | 4    | 4    |      |      |      |      |      |      |      |      |      |      |   |
| 30424  |      |      |      |      |      | 4    | 2    | 3    | 2    | 4    | 2    | 2    | 2    | 6    | 2 |
| 30447  | 4    | 3    | 3    | 4    |      |      |      |      |      |      |      |      |      |      |   |
| 30477  | 2    | 1    | 1    | 1    |      |      |      |      |      |      |      |      |      |      |   |
| 30503  | 1    | 1    | 1    | 1    |      |      |      |      |      |      |      |      |      |      |   |
| 30515  | 1    |      |      |      |      |      |      |      |      |      |      |      |      |      |   |
| 30516  |      |      |      |      |      | 6    | 1    | 1    | 4    | 3    | 6    | 1    | 1    | 4    | 6 |
| 30623  | 3    | 3    | 3    | 3    |      |      |      |      |      |      |      |      |      |      |   |
| 30639  | 1    | 1    | 1    | 1    |      |      |      |      |      |      |      |      |      |      |   |
| 30670  | 3    | 3    | 4    | 4    |      |      |      |      |      |      |      |      |      |      |   |
| 30697  | 4    | 5    | 5    | 5    |      |      |      |      |      |      |      |      |      |      |   |
| 30735  |      |      |      |      |      |      |      |      |      |      |      |      |      |      |   |
| 30742  | 5    | 4    | 4    | 4    |      |      |      |      |      |      |      |      |      |      |   |
| 30751  | 2    | 2    | 2    | 2    |      |      |      |      |      |      |      |      |      |      |   |
| 30789  |      |      |      |      |      |      |      |      |      |      |      |      |      |      |   |
| 30867  | 3    | 3    | 3    | 3    |      |      |      |      |      |      |      |      |      |      |   |
| 30876  |      |      |      |      |      | 1    | 6    | 6    | 6    | 2    | 6    | 6    | 6    | 1    | 6 |
| 30877  | 1    | 3    | 3    | 1    |      |      |      |      |      |      |      |      |      |      |   |
| 30887  | 3    | 3    | 3    | 1    |      |      |      |      |      |      |      |      |      |      |   |
| 30891  | 3    | 2    | 3    | 3    |      |      |      |      |      |      |      |      |      |      |   |
| 31030  |      |      |      |      |      | 3    | 4    | 4    | 4    | 2    | 5    | 6    | 5    | 2    | 4 |
| 31059  | 3    | 1    |      | 2    |      |      |      |      |      |      |      |      |      |      |   |

| respid | Q47l | Q47m | Q47n | Q47o | Q48a | Q48b | Q48c | Q48d | Q48e | Q48f | Q48g | Q48h | Q48i | Q48j |   |
|--------|------|------|------|------|------|------|------|------|------|------|------|------|------|------|---|
| 31082  |      |      |      |      |      |      |      |      |      |      |      |      |      |      |   |
| 31106  |      | 3    | 3    | 2    | 4    |      |      |      |      |      |      |      |      |      |   |
| 31110  |      | 3    | 3    | 4    | 3    |      |      |      |      |      |      |      |      |      |   |
| 31265  |      |      |      |      |      |      |      |      |      |      |      |      |      |      |   |
| 31266  |      |      |      |      |      |      |      |      |      |      |      |      |      |      |   |
| 31267  |      |      |      |      |      |      |      |      |      |      |      |      |      |      |   |
| 31310  |      |      |      |      |      |      |      |      |      |      |      |      |      |      |   |
| 31325  |      | 4    | 5    | 4    | 4    |      |      |      |      |      |      |      |      |      |   |
| 31367  |      | 1    | 1    | 2    | 1    |      |      |      |      |      |      |      |      |      |   |
| 31389  |      |      |      |      |      | 1    | 6    | 6    | 6    | 1    | 6    | 6    | 6    | 1    | 6 |
| 31440  |      |      |      |      |      |      |      |      |      |      |      |      |      |      |   |
| 31465  |      |      |      |      |      |      |      |      |      |      |      |      |      |      |   |
| 31477  |      |      |      |      |      | 6    | 2    | 2    | 2    | 6    | 1    | 1    | 6    | 6    | 3 |
| 31491  |      |      |      |      |      |      |      |      |      |      |      |      |      |      |   |
| 31494  |      | 4    | 4    | 4    | 3    |      |      |      |      |      |      |      |      |      |   |
| 31509  |      | 2    | 1    | 1    | 1    |      |      |      |      |      |      |      |      |      |   |
| 31533  |      | 1    | 3    | 3    | 3    |      |      |      |      |      |      |      |      |      |   |
| 31547  |      |      |      |      |      |      |      |      |      |      |      |      |      |      |   |
| 31558  |      |      |      |      |      | 5    | 3    | 3    | 3    | 4    | 1    | 3    | 3    | 6    | 4 |
| 31579  |      |      |      |      |      | 6    | 2    | 3    | 2    | 4    | 3    | 1    | 3    | 5    | 5 |
| 31591  |      |      |      |      |      | 2    | 4    | 4    | 5    | 3    | 4    | 5    | 6    | 2    | 5 |
| 31596  |      |      |      |      |      | 3    | 4    | 4    | 4    | 4    | 4    | 4    | 4    | 4    | 2 |
| 31601  |      | 3    | 2    | 2    | 3    |      |      |      |      |      |      |      |      |      |   |
| 31605  |      |      |      |      |      | 1    | 4    | 5    | 6    | 2    | 5    | 6    | 6    | 1    | 2 |
| 31637  |      |      |      |      |      | 4    | 5    | 4    | 5    | 5    | 5    | 5    | 6    | 1    | 3 |
| 31646  |      |      |      |      |      | 2    | 5    | 5    | 6    | 5    | 3    | 3    | 4    | 2    | 3 |
| 31647  |      |      |      |      |      | 4    | 4    | 4    | 4    | 4    | 4    | 4    | 4    | 4    | 4 |
| 31650  |      | 3    | 4    | 4    | 5    |      |      |      |      |      |      |      |      |      |   |
| 31651  |      | 3    | 3    | 3    | 3    |      |      |      |      |      |      |      |      |      |   |
| 31657  |      | 1    | 5    | 5    | 3    |      |      |      |      |      |      |      |      |      |   |
| 31660  |      |      |      |      |      | 1    | 5    | 6    | 6    | 2    | 6    | 6    | 6    | 1    | 4 |
| 31661  |      | 3    | 4    | 4    | 3    |      |      |      |      |      |      |      |      |      |   |

| respid | Q47l | Q47m | Q47n | Q47o | Q48a | Q48b | Q48c | Q48d | Q48e | Q48f | Q48g | Q48h | Q48i | Q48j |
|--------|------|------|------|------|------|------|------|------|------|------|------|------|------|------|
| 31667  |      | 3    | 3    | 3    | 3    |      |      |      |      |      |      |      |      |      |
| 31674  |      | 3    | 4    | 4    | 3    |      |      |      |      |      |      |      |      |      |
| 31686  |      | 1    |      |      |      |      |      |      |      |      |      |      |      |      |
| 31693  |      |      |      |      |      |      |      |      |      |      |      |      |      |      |
| 31716  |      |      |      |      |      |      |      |      |      |      |      |      |      |      |
| 31818  |      | 3    | 4    | 1    | 1    |      |      |      |      |      |      |      |      |      |
| 31886  |      | 3    | 4    | 3    | 4    |      |      |      |      |      |      |      |      |      |
| 31945  |      | 2    | 2    | 2    | 3    |      |      |      |      |      |      |      |      |      |
| 31957  |      |      |      |      |      | 3    | 3    | 4    | 4    | 3    |      |      | 4    | 3    |
| 31966  |      |      |      |      |      | 3    | 4    | 4    | 3    | 4    | 4    | 4    | 4    | 3    |
| 31978  |      | 1    | 3    | 3    | 2    |      |      |      |      |      |      |      |      |      |
| 31999  |      |      |      |      |      | 1    | 3    | 3    | 6    | 5    | 3    | 6    | 6    | 5    |
| 32026  |      |      |      |      |      | 3    | 3    | 4    | 4    | 4    | 4    | 4    | 4    | 4    |
| 32033  |      |      |      |      |      | 3    | 4    | 4    | 4    | 3    | 4    | 4    | 4    | 3    |
| 32037  |      |      |      |      |      |      |      |      |      |      |      |      |      |      |
| 32038  |      |      |      |      |      | 1    |      |      |      |      |      |      |      |      |
| 32047  |      |      |      |      |      | 3    | 3    | 4    | 3    | 4    | 3    | 3    | 4    | 3    |
| 32053  |      |      |      |      |      |      |      |      |      |      |      |      |      |      |
| 32069  |      |      |      |      |      | 3    | 2    | 3    | 4    | 4    | 4    | 4    | 3    | 3    |
| 32081  |      | 3    | 4    | 4    | 3    |      |      |      |      |      |      |      |      |      |
| 32123  |      |      |      |      |      | 3    | 3    | 5    | 5    | 2    | 6    | 5    | 6    | 2    |
| 32130  |      |      |      |      |      | 1    | 5    | 5    | 5    | 2    | 5    | 4    | 5    | 2    |
| 32141  |      | 3    | 4    | 5    | 4    |      |      |      |      |      |      |      |      |      |
| 32158  |      |      |      |      |      |      |      |      |      |      |      |      |      |      |
| 32165  |      |      |      |      |      | 2    | 6    | 6    | 6    | 2    | 6    | 6    | 6    | 2    |
| 32180  |      |      |      |      |      | 6    | 6    | 6    | 6    | 6    | 6    | 6    | 6    | 6    |
| 32221  |      |      |      |      |      | 2    | 2    | 2    | 2    | 4    | 5    | 5    | 5    | 2    |
| 32292  |      |      |      |      |      |      |      |      |      |      |      |      |      |      |
| 32318  |      |      |      |      |      | 3    | 3    | 4    | 4    | 3    | 4    | 5    | 5    | 5    |
| 32346  |      |      |      |      |      | 3    | 4    | 4    | 4    | 3    | 5    | 5    | 5    | 3    |
| 32402  |      | 3    | 2    | 2    | 2    |      |      |      |      |      |      |      |      |      |
| 32422  |      |      |      |      |      | 2    | 6    | 6    | 5    | 2    | 5    | 6    | 6    | 2    |

| respid | Q47l | Q47m | Q47n | Q47o | Q48a | Q48b | Q48c | Q48d | Q48e | Q48f | Q48g | Q48h | Q48i | Q48j |   |
|--------|------|------|------|------|------|------|------|------|------|------|------|------|------|------|---|
| 32439  |      | 3    | 3    | 3    | 3    |      |      |      |      |      |      |      |      |      |   |
| 32507  |      | 1    | 1    | 1    | 1    |      |      |      |      |      |      |      |      |      |   |
| 32522  |      |      |      |      |      |      |      |      |      |      |      |      |      |      |   |
| 32535  |      |      |      |      |      |      |      |      |      |      |      |      |      |      |   |
| 32546  |      |      |      |      |      | 6    | 6    | 6    | 6    | 6    | 6    | 6    | 6    | 6    |   |
| 32553  |      | 3    | 3    | 3    | 3    |      |      |      |      |      |      |      |      |      |   |
| 32570  |      |      |      |      |      |      |      |      |      |      |      |      |      |      |   |
| 32592  |      | 1    | 1    | 2    | 2    |      |      |      |      |      |      |      |      |      |   |
| 32605  |      |      |      |      |      | 4    | 3    | 3    | 3    | 6    | 4    | 4    | 6    | 4    | 5 |
| 32630  |      | 2    | 2    | 2    | 2    |      |      |      |      |      |      |      |      |      |   |
| 32642  |      | 2    | 2    | 2    | 2    |      |      |      |      |      |      |      |      |      |   |
| 32646  |      |      |      |      |      | 3    | 6    | 6    | 6    | 3    | 6    | 6    | 6    | 3    | 6 |
| 32665  |      | 2    | 3    | 3    | 3    |      |      |      |      |      |      |      |      |      |   |
| 32677  |      |      |      |      |      | 4    | 6    | 6    | 6    | 1    | 6    | 6    | 6    | 3    | 6 |
| 32694  |      |      |      |      |      | 1    | 6    | 6    | 5    | 1    | 6    | 6    | 6    | 1    | 6 |
| 32698  |      |      |      |      |      | 4    | 4    | 5    | 5    | 4    | 4    | 5    | 5    | 4    | 6 |
| 32754  |      |      |      |      |      | 5    | 5    | 4    | 2    | 4    | 2    | 3    | 3    | 4    | 4 |
| 32799  |      |      |      |      |      | 3    | 3    | 4    | 3    | 4    | 4    | 4    | 5    | 2    | 3 |
| 32816  |      |      |      |      |      |      |      |      |      |      |      |      |      |      |   |
| 32819  |      |      |      |      |      | 5    | 6    | 5    | 6    | 2    | 6    | 4    | 6    | 1    | 4 |
| 32840  |      |      |      |      |      | 2    | 4    | 4    | 4    | 3    | 5    | 5    | 5    | 3    | 4 |
| 32861  |      | 3    | 3    | 3    | 3    |      |      |      |      |      |      |      |      |      |   |
| 32866  |      |      |      |      |      | 4    | 4    | 4    | 4    | 3    | 5    | 5    | 4    | 1    | 4 |
| 32889  |      |      |      |      |      | 2    | 3    | 3    | 3    | 4    | 3    | 3    | 4    | 4    | 3 |
| 32960  |      | 3    | 3    |      | 3    |      |      |      |      |      |      |      |      |      |   |
| 32965  |      |      |      |      |      | 3    | 4    | 4    | 4    | 3    | 4    | 4    | 5    | 3    | 4 |
| 32986  |      |      |      |      |      |      |      |      |      |      |      |      |      |      |   |
| 33005  |      |      |      |      |      | 3    | 2    | 3    | 3    | 2    | 3    | 2    | 3    | 3    | 3 |
| 33054  |      | 3    | 3    | 3    | 3    |      |      |      |      |      |      |      |      |      |   |
| 33072  |      |      |      |      |      | 2    | 2    | 4    | 5    | 3    | 3    | 4    | 5    | 3    | 2 |
| 33095  |      | 3    | 4    | 4    | 3    |      |      |      |      |      |      |      |      |      |   |
| 33099  |      |      |      |      |      | 3    | 6    | 6    | 6    | 3    | 6    | 6    | 6    | 2    | 3 |

| respid | Q47l | Q47m | Q47n | Q47o | Q48a | Q48b | Q48c | Q48d | Q48e | Q48f | Q48g | Q48h | Q48i | Q48j |
|--------|------|------|------|------|------|------|------|------|------|------|------|------|------|------|
| 33121  |      | 4    | 4    |      |      |      |      |      |      |      |      |      |      |      |
| 33152  |      |      |      |      |      | 3    | 3    | 3    | 2    | 5    | 3    | 3    | 3    | 3    |
| 33159  |      |      |      |      |      |      |      |      |      |      |      |      |      |      |
| 33189  |      |      |      |      |      |      |      |      |      |      |      |      |      |      |
| 33198  |      |      |      |      |      | 5    | 5    | 5    | 6    | 4    | 5    | 5    | 6    | 2    |
| 33202  |      |      |      |      |      | 3    | 4    | 4    | 3    | 3    | 2    | 2    | 3    | 4    |
| 33204  |      |      |      |      |      |      |      |      |      |      |      |      |      |      |
| 33224  | 3    | 5    | 5    | 3    |      |      |      |      |      |      |      |      |      |      |
| 33272  |      |      |      |      |      | 3    | 3    | 2    | 4    | 2    | 2    | 2    | 2    | 3    |
| 33294  |      |      |      |      |      | 3    | 3    | 3    | 3    | 3    | 3    | 3    | 3    | 3    |
| 33300  | 2    | 3    | 3    | 3    |      |      |      |      |      |      |      |      |      |      |
| 33314  |      |      |      |      |      | 2    | 3    | 2    | 2    | 2    | 2    | 2    | 3    | 2    |
| 33338  | 3    | 3    | 3    | 3    |      |      |      |      |      |      |      |      |      |      |
| 33350  | 1    |      |      |      |      |      |      |      |      |      |      |      |      |      |
| 33362  |      |      |      |      |      |      |      |      |      |      |      |      |      |      |
| 33368  |      |      |      |      |      |      |      |      |      |      |      |      |      |      |
| 33374  | 2    | 2    | 2    | 2    |      |      |      |      |      |      |      |      |      |      |
| 33380  | 4    | 3    | 3    | 4    |      |      |      |      |      |      |      |      |      |      |
| 33385  |      |      |      |      |      |      |      |      |      |      |      |      |      |      |
| 33402  | 4    | 4    | 4    | 4    |      |      |      |      |      |      |      |      |      |      |
| 33414  |      |      |      |      |      |      |      |      |      |      |      |      |      |      |
| 33439  | 4    | 4    | 4    | 4    |      |      |      |      |      |      |      |      |      |      |
| 33449  | 4    | 4    | 4    | 4    |      |      |      |      |      |      |      |      |      |      |
| 33533  |      |      |      |      |      | 2    | 5    | 5    | 5    | 2    | 5    | 5    | 6    | 2    |
| 33540  |      |      |      |      |      | 4    | 4    | 4    | 5    | 4    | 5    | 5    | 6    | 3    |
| 33556  |      |      |      |      |      | 5    | 5    | 5    | 5    | 5    | 5    | 5    | 5    | 3    |
| 33615  |      |      |      |      |      | 3    | 5    | 5    | 5    | 3    | 5    | 5    | 5    | 3    |
| 33694  | 2    | 2    | 2    | 2    |      |      |      |      |      |      |      |      |      |      |
| 33717  |      |      |      |      |      |      |      |      |      |      |      |      |      |      |
| 33729  |      |      |      |      |      | 3    | 4    | 5    | 5    | 2    | 5    | 5    | 5    | 2    |
| 33746  |      |      |      |      |      |      |      |      |      |      |      |      |      |      |
| 33764  |      |      |      |      |      | 4    | 3    | 3    | 2    | 5    | 3    | 3    | 4    | 4    |

| respid | Q47l | Q47m | Q47n | Q47o | Q48a | Q48b | Q48c | Q48d | Q48e | Q48f | Q48g | Q48h | Q48i | Q48j |   |
|--------|------|------|------|------|------|------|------|------|------|------|------|------|------|------|---|
| 33790  |      |      |      |      |      | 3    | 3    | 3    | 3    | 4    | 3    | 3    | 3    | 1    | 3 |
| 33868  | 4    | 2    | 2    | 2    |      |      |      |      |      |      |      |      |      |      |   |
| 33872  | 1    | 1    | 1    | 1    |      |      |      |      |      |      |      |      |      |      |   |
| 33883  |      |      |      |      |      | 3    | 4    | 5    | 3    | 4    | 5    | 4    | 4    | 2    | 5 |
| 33884  |      |      |      |      |      | 3    | 4    | 4    | 2    | 4    | 3    | 3    | 3    | 4    | 3 |
| 33900  |      |      |      |      |      |      | 6    | 6    | 6    | 2    | 6    | 6    | 6    | 2    | 5 |
| 33933  |      |      |      |      |      | 2    | 6    | 6    | 5    | 2    | 6    | 6    | 6    | 2    | 6 |
| 33949  |      |      |      |      |      | 4    | 2    | 3    | 5    | 4    | 3    | 3    | 5    | 3    | 3 |
| 34005  |      |      |      |      |      |      |      |      |      |      |      |      |      |      |   |
| 34016  |      |      |      |      |      |      |      |      |      |      |      |      |      |      |   |
| 34041  |      |      |      |      |      |      |      |      |      |      |      |      |      |      |   |
| 34053  |      |      |      |      |      |      |      |      |      |      |      |      |      |      |   |
| 34056  |      |      |      |      |      | 3    | 3    | 3    | 3    | 3    | 3    | 3    | 3    | 3    | 3 |
| 34093  |      |      |      |      |      |      |      |      |      |      |      |      |      |      |   |
| 34112  |      |      |      |      |      | 1    | 6    | 6    | 6    | 1    | 5    | 5    | 6    | 1    | 2 |
| 34136  | 3    | 2    | 3    | 2    |      |      |      |      |      |      |      |      |      |      |   |
| 34138  |      |      |      |      |      | 6    |      |      |      |      |      |      |      |      |   |
| 34139  |      |      |      |      |      |      |      |      |      |      |      |      |      |      |   |
| 34189  | 1    | 1    | 1    | 1    |      |      |      |      |      |      |      |      |      |      |   |
| 34239  |      |      |      |      |      | 6    | 6    | 6    | 6    | 6    | 6    | 6    | 6    | 6    | 6 |
| 34240  |      |      |      |      |      | 5    | 4    | 5    | 4    | 4    | 4    | 5    | 5    | 6    | 5 |
| 34241  |      |      |      |      |      | 2    | 4    | 5    | 5    | 3    | 5    | 5    | 5    | 3    | 2 |
| 34259  |      |      |      |      |      |      |      |      |      |      |      |      |      |      |   |
| 34303  | 2    | 4    | 3    | 2    |      |      |      |      |      |      |      |      |      |      |   |
| 34306  |      | 5    | 5    | 5    |      |      |      |      |      |      |      |      |      |      |   |
| 34395  | 2    | 3    | 3    | 3    |      |      |      |      |      |      |      |      |      |      |   |
| 34463  |      |      |      |      |      | 3    | 5    | 5    | 5    | 3    | 4    | 5    | 6    | 3    | 3 |
| 34466  | 3    | 3    | 3    | 3    |      |      |      |      |      |      |      |      |      |      |   |
| 34471  |      |      |      |      |      | 2    | 4    | 4    | 5    | 3    | 6    | 5    | 6    | 3    | 6 |
| 34489  | 3    | 3    | 3    | 3    |      |      |      |      |      |      |      |      |      |      |   |
| 34518  |      |      |      |      |      | 5    | 4    | 4    | 2    | 4    | 2    | 5    | 5    | 4    | 4 |
| 34542  |      |      |      |      |      | 4    | 4    | 5    | 4    | 5    | 4    | 5    | 4    | 5    | 5 |



| respid | Q47l | Q47m | Q47n | Q47o | Q48a | Q48b | Q48c | Q48d | Q48e | Q48f | Q48g | Q48h | Q48i | Q48j |   |
|--------|------|------|------|------|------|------|------|------|------|------|------|------|------|------|---|
| 34595  |      |      |      |      |      |      |      |      |      |      |      |      |      |      |   |
| 34604  |      |      |      |      |      | 4    | 4    | 6    | 6    | 6    | 6    | 6    | 6    | 3    | 6 |
| 34631  |      |      |      |      |      | 3    | 4    | 5    | 6    | 3    | 5    | 6    | 6    | 3    | 4 |
| 34665  |      |      |      |      |      | 3    | 5    | 5    | 4    | 3    | 6    | 6    | 6    | 2    | 4 |
| 34716  |      |      |      |      |      | 6    |      |      |      |      |      |      |      |      |   |
| 34729  |      |      |      |      |      | 6    | 6    | 6    | 6    | 5    | 5    | 5    | 5    | 5    | 4 |
| 34772  |      |      |      |      |      | 6    | 1    | 1    | 1    | 6    | 1    | 1    | 3    | 6    | 1 |
| 34800  |      |      |      |      |      | 3    | 4    | 4    | 4    | 4    | 4    | 5    | 4    | 4    | 4 |
| 34819  |      |      |      |      |      | 2    | 2    | 4    | 4    | 3    | 5    | 3    | 3    | 4    | 4 |
| 34829  |      |      |      |      |      | 1    | 4    | 3    | 4    | 2    | 3    | 4    | 4    | 3    | 2 |
| 34831  |      |      |      |      |      | 3    | 3    | 4    | 4    | 3    | 3    | 3    | 4    | 3    | 5 |
| 34839  |      |      |      |      |      |      |      |      |      |      |      |      |      |      |   |
| 34868  |      |      |      |      |      | 2    | 5    | 5    | 4    | 2    | 5    | 5    | 5    | 2    | 5 |
| 34869  |      |      |      |      |      | 3    | 5    | 5    | 5    | 3    | 6    | 5    | 5    |      |   |
| 34882  |      |      |      |      |      | 6    | 6    | 6    | 6    | 6    | 6    | 6    | 6    | 6    | 6 |
| 34895  | 3    | 3    | 4    | 3    |      |      |      |      |      |      |      |      |      |      |   |
| 34901  |      |      |      |      |      |      |      |      |      |      |      |      |      |      |   |
| 34904  |      |      |      |      |      | 2    | 3    | 3    | 3    | 3    | 3    | 3    | 3    | 2    | 3 |
| 34907  |      |      |      |      |      |      |      |      |      |      |      |      |      |      |   |
| 34914  | 1    | 5    | 5    | 1    |      |      |      |      |      |      |      |      |      |      |   |
| 34918  | 3    | 3    | 4    | 3    |      |      |      |      |      |      |      |      |      |      |   |
| 34924  |      |      |      |      |      | 2    | 6    | 6    | 5    | 3    | 6    | 3    | 5    | 4    | 5 |
| 34933  |      |      |      |      |      | 1    | 3    | 4    | 4    | 2    | 6    | 6    | 6    | 1    | 5 |
| 34938  | 4    | 4    | 4    | 4    |      |      |      |      |      |      |      |      |      |      |   |
| 34952  | 2    | 2    | 2    | 2    |      |      |      |      |      |      |      |      |      |      |   |
| 34959  | 2    | 3    | 3    |      |      |      |      |      |      |      |      |      |      |      |   |
| 34972  |      |      |      |      |      |      |      | 5    |      |      |      | 3    |      |      | 6 |
| 34973  |      |      |      |      |      | 3    | 4    | 4    | 4    | 3    | 4    | 4    | 4    | 3    | 3 |
| 34975  | 2    | 3    | 3    | 2    |      |      |      |      |      |      |      |      |      |      |   |
| 34977  | 3    | 3    | 3    | 3    |      |      |      |      |      |      |      |      |      |      |   |
| 34978  |      |      |      |      |      | 2    | 5    | 6    | 5    | 2    | 5    | 5    | 6    | 1    | 3 |
| 34980  | 4    | 4    | 4    | 4    |      |      |      |      |      |      |      |      |      |      |   |

| respid | Q47l | Q47m | Q47n | Q47o | Q48a | Q48b | Q48c | Q48d | Q48e | Q48f | Q48g | Q48h | Q48i | Q48j |   |
|--------|------|------|------|------|------|------|------|------|------|------|------|------|------|------|---|
| 34984  |      |      |      |      |      | 3    | 4    | 4    | 4    | 3    | 4    | 4    | 4    | 3    | 4 |
| 34986  | 3    | 3    | 2    | 3    |      |      |      |      |      |      |      |      |      |      |   |
| 34994  |      |      |      |      | 3    | 6    | 6    | 6    | 6    | 6    | 6    | 6    | 6    | 6    | 6 |
| 34996  | 3    | 4    | 4    | 3    |      |      |      |      |      |      |      |      |      |      |   |
| 35003  | 1    | 3    | 3    | 3    |      |      |      |      |      |      |      |      |      |      |   |
| 35014  |      |      |      |      | 3    | 4    | 4    | 4    | 3    | 5    | 5    | 6    | 3    | 6    |   |
| 35029  | 1    | 1    | 1    | 3    |      |      |      |      |      |      |      |      |      |      |   |
| 35030  |      |      |      |      |      |      |      |      |      |      |      |      |      |      |   |
| 35037  |      |      |      |      | 1    | 6    | 6    | 6    | 1    | 6    | 6    | 6    | 1    | 2    |   |
| 35043  |      |      |      |      |      |      |      |      |      |      |      |      |      |      |   |
| 35048  |      |      |      |      |      |      |      |      |      |      |      |      |      |      |   |
| 35055  |      |      |      |      | 1    | 5    | 6    | 5    | 2    | 5    | 6    | 6    | 1    | 6    |   |
| 35067  |      |      |      |      | 2    | 5    | 4    | 4    | 3    | 5    | 4    | 5    | 2    | 2    |   |
| 35072  |      |      |      |      | 4    | 5    | 4    | 5    | 3    | 5    | 4    | 5    | 3    | 5    |   |
| 35078  | 1    | 2    | 3    | 1    |      |      |      |      |      |      |      |      |      |      |   |
| 35084  | 3    | 3    | 4    | 3    |      |      |      |      |      |      |      |      |      |      |   |
| 35095  |      |      |      |      |      |      |      |      |      |      |      |      |      |      |   |
| 35096  |      |      |      |      |      |      |      |      |      |      |      |      |      |      |   |
| 35097  | 3    | 3    | 3    | 3    |      |      |      |      |      |      |      |      |      |      |   |
| 35098  |      |      |      |      | 3    | 4    | 4    | 4    | 3    | 4    | 4    | 4    | 3    | 3    |   |
| 35109  | 1    | 1    | 1    | 1    |      |      |      |      |      |      |      |      |      |      |   |
| 35114  |      |      |      |      | 6    | 6    | 6    | 6    | 6    | 6    | 6    | 6    | 6    | 6    | 6 |
| 35115  |      |      |      |      | 3    |      |      |      |      |      |      |      |      |      |   |
| 35124  |      |      |      |      | 2    | 2    | 3    | 3    | 5    | 4    | 3    | 3    | 2    | 2    |   |
| 35125  | 1    | 5    | 5    | 5    |      |      |      |      |      |      |      |      |      |      |   |
| 35141  |      |      |      |      |      |      |      |      |      |      |      |      |      |      |   |
| 35142  |      |      |      |      | 3    | 5    | 6    | 4    | 3    | 3    | 4    | 4    | 3    | 3    |   |
| 35145  |      |      |      |      |      |      |      |      |      |      |      |      |      |      |   |
| 35149  |      |      |      |      | 4    | 3    | 3    | 3    | 3    | 3    | 2    | 4    | 3    | 3    |   |
| 35159  |      |      |      |      | 5    | 4    | 3    | 3    | 3    | 5    | 5    | 6    | 5    | 6    |   |
| 35163  |      |      |      |      |      | 3    | 3    | 4    | 4    | 6    | 6    | 6    | 3    | 6    |   |
| 35174  |      |      |      |      | 2    | 4    | 5    | 4    | 3    | 5    | 5    | 5    | 2    | 6    |   |

| respid | Q47l | Q47m | Q47n | Q47o | Q48a | Q48b | Q48c | Q48d | Q48e | Q48f | Q48g | Q48h | Q48i | Q48j |   |
|--------|------|------|------|------|------|------|------|------|------|------|------|------|------|------|---|
| 35188  |      |      |      |      |      |      |      |      |      |      |      |      |      |      |   |
| 35189  |      |      |      |      |      | 2    | 4    | 5    | 2    | 3    | 4    | 3    | 6    | 1    | 1 |
| 35201  |      |      |      |      |      | 3    | 4    | 5    | 3    | 3    | 6    | 5    | 6    | 1    | 2 |
| 35215  |      |      |      |      |      | 2    | 6    | 6    | 3    | 2    | 5    | 5    | 5    | 2    | 5 |
| 35228  |      |      |      |      |      | 5    | 3    | 3    | 6    | 6    | 2    | 3    | 5    | 5    | 2 |
| 35235  |      |      |      |      |      | 2    | 3    | 4    | 3    | 4    | 4    | 4    | 5    | 3    | 4 |
| 35239  | 4    | 4    | 4    | 3    |      |      |      |      |      |      |      |      |      |      |   |
| 35243  | 2    | 2    | 2    | 1    |      |      |      |      |      |      |      |      |      |      |   |
| 35245  |      |      |      |      |      |      |      |      |      |      |      |      |      |      |   |
| 35259  |      |      |      |      |      |      |      |      |      |      |      |      |      |      |   |
| 35265  |      |      |      |      |      |      |      |      |      |      |      |      |      |      |   |
| 35272  |      |      |      |      |      | 2    | 3    | 3    | 4    | 4    | 3    | 3    | 2    | 3    | 3 |
| 35280  |      |      |      |      |      | 6    | 6    | 6    | 6    | 6    | 6    | 6    | 6    | 1    | 6 |
| 35298  | 4    | 4    | 4    | 4    |      |      |      |      |      |      |      |      |      |      |   |
| 35305  |      |      |      |      |      | 3    | 5    | 5    | 5    | 3    | 5    | 5    | 5    | 3    | 5 |
| 35306  | 2    | 2    | 2    | 2    |      |      |      |      |      |      |      |      |      |      |   |
| 35307  | 4    | 5    | 5    | 5    |      |      |      |      |      |      |      |      |      |      |   |
| 35311  |      |      |      |      |      | 1    | 6    | 6    | 6    | 6    | 6    | 6    | 6    | 6    | 6 |
| 35322  |      |      |      |      |      |      |      |      |      |      |      |      |      |      |   |
| 35323  | 1    | 1    | 1    | 1    |      |      |      |      |      |      |      |      |      |      |   |
| 35327  |      |      |      |      |      | 1    | 1    |      |      | 1    |      | 4    | 4    | 2    | 4 |
| 35366  | 3    | 4    | 4    | 4    |      |      |      |      |      |      |      |      |      |      |   |
| 35378  |      |      |      |      |      | 2    | 5    | 5    | 5    | 2    | 6    | 5    | 6    | 3    | 6 |
| 35389  |      |      |      |      |      |      |      |      |      |      |      |      |      |      |   |
| 35390  | 3    | 4    | 4    | 3    |      |      |      |      |      |      |      |      |      |      |   |
| 35395  | 3    | 4    | 3    | 3    |      |      |      |      |      |      |      |      |      |      |   |
| 35411  | 3    | 2    | 3    | 4    |      |      |      |      |      |      |      |      |      |      |   |
| 35423  | 1    | 4    | 4    | 3    |      |      |      |      |      |      |      |      |      |      |   |
| 35425  |      |      |      |      |      | 5    | 1    | 1    | 2    | 6    | 1    | 4    | 6    | 5    | 1 |
| 35434  |      |      |      |      |      |      |      |      |      |      |      |      |      |      |   |
| 35462  |      |      |      |      |      |      |      | 3    | 3    | 2    | 6    | 6    | 6    | 1    | 6 |
| 35478  | 2    | 2    | 2    | 2    |      |      |      |      |      |      |      |      |      |      |   |

| respid | Q47l | Q47m | Q47n | Q47o | Q48a | Q48b | Q48c | Q48d | Q48e | Q48f | Q48g | Q48h | Q48i | Q48j |   |
|--------|------|------|------|------|------|------|------|------|------|------|------|------|------|------|---|
| 35481  |      | 3    | 4    | 4    | 3    |      |      |      |      |      |      |      |      |      |   |
| 35498  |      | 3    | 4    | 4    | 3    |      |      |      |      |      |      |      |      |      |   |
| 35499  |      |      |      |      |      |      |      |      |      |      |      |      |      |      |   |
| 35502  |      |      |      |      |      | 3    | 4    | 4    | 4    | 3    | 4    | 4    | 5    | 5    | 6 |
| 35503  |      |      |      |      |      |      |      |      |      |      |      |      |      |      |   |
| 35504  |      |      |      |      |      |      |      |      |      |      |      |      |      |      |   |
| 35508  |      |      |      |      |      | 3    | 4    | 4    | 4    | 4    | 5    | 4    | 6    | 3    | 5 |
| 35513  |      | 3    | 4    | 4    | 5    |      |      |      |      |      |      |      |      |      |   |
| 35516  |      |      |      |      | 1    |      |      |      |      |      |      |      |      |      |   |
| 35519  |      |      |      |      |      | 2    | 3    | 1    | 2    | 3    | 3    | 3    | 3    | 3    | 1 |
| 35530  |      |      |      |      |      | 3    | 3    | 4    | 5    | 3    | 3    | 3    | 4    | 3    | 3 |
| 35533  |      |      |      |      |      | 3    | 5    | 5    | 6    | 3    | 6    | 5    | 6    | 2    | 5 |
| 35561  |      |      |      |      |      | 4    | 2    | 3    | 4    | 2    | 2    | 3    | 4    | 4    | 5 |
| 35565  |      | 3    | 3    |      |      |      |      |      |      |      |      |      |      |      |   |
| 35588  |      |      |      |      |      | 6    |      |      |      |      |      |      |      |      |   |
| 35598  |      | 1    | 1    | 1    | 2    |      |      |      |      |      |      |      |      |      |   |
| 35607  |      |      |      |      |      |      |      |      |      |      |      |      |      |      |   |
| 35638  |      |      |      |      |      | 1    | 2    | 6    | 6    | 1    | 6    | 6    | 6    | 1    | 6 |
| 35642  |      | 4    | 4    | 4    | 3    |      |      |      |      |      |      |      |      |      |   |
| 35643  |      | 3    | 3    | 2    | 3    |      |      |      |      |      |      |      |      |      |   |
| 35680  |      |      |      |      |      | 3    | 6    | 6    | 5    | 2    | 6    | 6    | 6    | 1    | 6 |
| 35697  |      |      |      |      |      | 3    | 6    | 6    | 6    | 3    | 5    | 5    | 5    | 3    | 6 |
| 35703  |      |      |      |      |      |      |      |      |      |      |      |      |      |      |   |
| 35709  |      |      |      |      |      | 2    |      | 2    | 3    | 2    | 4    | 3    | 5    | 1    | 2 |
| 35710  |      | 3    | 4    | 4    | 4    |      |      |      |      |      |      |      |      |      |   |
| 35721  |      |      |      |      |      |      |      |      |      |      |      |      |      |      |   |
| 35723  |      |      |      |      |      |      |      | 6    | 6    | 1    | 6    | 6    | 6    | 1    | 6 |
| 35736  |      |      |      |      |      | 6    | 6    | 6    | 6    | 6    | 6    | 6    | 6    | 6    | 6 |
| 35739  |      |      |      |      |      | 6    | 6    | 6    | 6    | 5    | 6    | 6    | 6    | 3    | 6 |
| 35745  |      |      |      |      |      | 4    | 5    | 5    | 3    | 4    | 2    | 6    | 5    | 4    | 5 |
| 35748  |      | 1    | 1    | 1    | 1    |      |      |      |      |      |      |      |      |      |   |
| 35750  |      |      |      |      |      | 1    | 6    | 6    | 6    | 1    | 6    | 6    | 6    | 1    | 6 |

| respid | Q47l | Q47m | Q47n | Q47o | Q48a | Q48b | Q48c | Q48d | Q48e | Q48f | Q48g | Q48h | Q48i | Q48j |   |
|--------|------|------|------|------|------|------|------|------|------|------|------|------|------|------|---|
| 35752  |      |      |      |      |      | 3    | 6    | 6    |      |      | 6    |      |      | 1    |   |
| 35773  |      |      |      |      |      | 6    | 6    | 6    | 6    | 6    | 3    | 6    | 5    | 6    | 3 |
| 35779  | 1    | 3    | 3    | 2    |      |      |      |      |      |      |      |      |      |      |   |
| 35791  | 3    | 4    | 4    | 4    |      |      |      |      |      |      |      |      |      |      |   |
| 35801  |      |      |      |      |      | 3    | 6    | 6    | 6    | 2    | 3    | 5    | 6    | 1    | 4 |
| 35802  |      |      |      |      |      | 3    | 5    | 5    | 5    | 2    | 3    | 4    | 5    | 2    | 5 |
| 35837  |      |      |      |      |      | 4    | 5    | 5    | 5    | 4    | 5    | 5    | 6    | 2    | 2 |
| 35853  |      |      |      |      |      | 3    | 5    | 6    | 6    | 2    | 6    | 5    | 4    | 2    | 2 |
| 35858  | 3    | 3    | 3    | 2    |      |      |      |      |      |      |      |      |      |      |   |
| 35860  |      |      |      |      |      | 5    | 4    | 5    | 3    | 3    | 3    | 4    | 4    | 4    | 6 |
| 35875  |      |      |      |      |      |      |      |      |      |      |      |      |      |      |   |
| 35883  | 3    | 3    | 3    | 3    |      |      |      |      |      |      |      |      |      |      |   |
| 35890  |      |      |      |      |      |      |      |      |      |      |      |      |      |      |   |
| 35898  |      |      |      |      |      | 1    | 6    | 6    | 1    | 1    | 6    | 6    | 6    | 2    | 1 |
| 35901  |      |      |      |      |      | 3    | 3    | 3    | 2    | 5    | 5    | 3    | 2    | 3    | 1 |
| 35914  |      |      |      |      |      |      |      |      |      |      |      |      |      |      |   |
| 35924  |      |      |      |      |      | 5    | 4    | 3    | 5    | 5    | 5    | 5    | 5    | 4    | 4 |
| 35950  | 3    | 4    | 4    | 3    |      |      |      |      |      |      |      |      |      |      |   |
| 35961  | 3    | 3    | 4    | 3    |      |      |      |      |      |      |      |      |      |      |   |
| 35966  |      |      |      |      |      | 6    |      |      |      |      |      |      |      |      |   |
| 35967  | 4    | 4    | 5    | 4    |      |      |      |      |      |      |      |      |      |      |   |
| 35971  | 3    | 4    | 3    | 4    |      |      |      |      |      |      |      |      |      |      |   |
| 35974  |      |      |      |      |      |      |      |      |      |      |      |      |      |      |   |
| 35983  |      |      |      |      |      |      | 5    | 5    | 3    | 2    | 6    | 4    |      |      |   |
| 35992  |      |      |      |      |      | 2    | 5    | 5    | 2    | 4    | 5    | 6    | 6    | 1    | 5 |
| 36010  |      |      |      |      |      | 2    | 4    | 4    | 5    | 3    | 4    | 4    | 5    | 3    | 2 |
| 36019  | 2    | 1    | 1    | 2    |      |      |      |      |      |      |      |      |      |      |   |
| 36029  |      |      |      |      |      | 3    | 5    | 3    | 4    | 3    | 4    | 3    | 6    | 3    | 2 |
| 36033  | 3    | 3    | 3    | 3    |      |      |      |      |      |      |      |      |      |      |   |
| 36042  |      |      |      |      |      | 1    | 6    | 6    | 5    | 2    |      | 5    | 5    | 1    | 5 |
| 36043  |      |      |      |      |      | 3    | 6    | 6    | 5    | 4    | 6    | 6    |      | 5    | 6 |
| 36048  |      |      |      |      |      | 5    | 4    | 4    | 3    | 4    | 3    | 3    | 3    | 3    | 3 |

| respid | Q47l | Q47m | Q47n | Q47o | Q48a | Q48b | Q48c | Q48d | Q48e | Q48f | Q48g | Q48h | Q48i | Q48j |   |
|--------|------|------|------|------|------|------|------|------|------|------|------|------|------|------|---|
| 36050  | 2    | 3    | 3    | 2    |      |      |      |      |      |      |      |      |      |      |   |
| 36062  |      |      |      |      |      | 3    | 5    | 6    | 5    | 2    | 5    | 5    | 6    | 2    | 6 |
| 36063  |      |      |      |      |      |      |      |      |      |      |      |      |      |      |   |
| 36092  |      |      |      |      |      | 2    | 4    | 5    | 6    | 2    | 5    | 4    | 6    | 1    | 3 |
| 36097  |      |      |      |      |      | 2    | 4    | 3    | 4    | 3    | 4    | 3    | 5    | 3    | 2 |
| 36108  | 4    | 5    | 5    | 4    |      |      |      |      |      |      |      |      |      |      |   |
| 36113  | 2    | 2    | 2    | 2    |      |      |      |      |      |      |      |      |      |      |   |
| 36117  |      |      |      |      |      | 3    | 3    | 4    | 4    | 3    | 4    | 3    | 5    | 3    | 3 |
| 36129  | 3    | 3    | 3    | 3    |      |      |      |      |      |      |      |      |      |      |   |
| 36144  | 4    | 4    | 4    | 4    |      |      |      |      |      |      |      |      |      |      |   |
| 36152  | 1    | 3    | 3    | 3    |      |      |      |      |      |      |      |      |      |      |   |
| 36154  |      |      |      |      |      | 5    | 5    | 5    | 6    | 2    | 6    | 6    | 5    | 1    | 6 |
| 36155  | 2    | 3    | 3    | 5    |      |      |      |      |      |      |      |      |      |      |   |
| 36167  |      |      |      |      |      | 1    | 6    | 6    | 6    | 1    | 6    | 6    | 6    | 1    | 4 |
| 36172  | 4    | 4    | 4    | 4    |      |      |      |      |      |      |      |      |      |      |   |
| 36173  |      |      |      |      |      | 4    | 4    | 4    | 3    | 4    | 4    | 4    | 5    | 5    | 3 |
| 36174  |      |      |      |      |      | 3    | 4    | 5    | 4    | 3    | 5    | 5    | 5    | 3    | 5 |
| 36182  |      |      |      |      |      | 2    | 5    | 5    | 6    | 2    | 5    | 6    | 6    | 2    | 6 |
| 36192  |      |      |      |      |      |      | 6    |      | 5    | 4    |      | 4    |      | 3    |   |
| 36195  |      |      |      |      |      |      |      |      |      |      |      |      |      |      |   |
| 36204  | 2    | 2    | 2    | 2    |      |      |      |      |      |      |      |      |      |      |   |
| 36205  |      |      |      |      |      | 6    |      |      |      |      |      |      |      |      |   |
| 36208  | 2    | 3    | 4    | 3    |      |      |      |      |      |      |      |      |      |      |   |
| 36216  |      |      |      |      |      | 2    | 4    | 4    | 3    | 4    | 3    | 3    | 4    | 3    | 2 |
| 36221  |      |      |      |      |      | 6    | 6    | 6    | 6    | 3    | 6    | 3    | 5    | 2    | 6 |
| 36244  | 5    | 4    | 5    | 4    |      |      |      |      |      |      |      |      |      |      |   |
| 36255  | 2    | 3    | 4    | 1    |      |      |      |      |      |      |      |      |      |      |   |
| 36259  | 1    | 1    | 1    | 2    |      |      |      |      |      |      |      |      |      |      |   |
| 36262  | 1    | 3    | 3    | 1    |      |      |      |      |      |      |      |      |      |      |   |
| 36268  |      |      |      |      |      | 6    | 6    | 6    | 6    | 6    | 6    | 6    | 6    | 6    | 6 |
| 36308  | 1    | 3    | 3    | 2    |      |      |      |      |      |      |      |      |      |      |   |
| 36324  |      |      |      |      |      | 3    | 5    | 6    | 5    | 2    | 5    | 5    | 6    | 2    | 1 |

| respid | Q47l | Q47m | Q47n | Q47o | Q48a | Q48b | Q48c | Q48d | Q48e | Q48f | Q48g | Q48h | Q48i | Q48j |
|--------|------|------|------|------|------|------|------|------|------|------|------|------|------|------|
| 36330  |      |      |      |      |      | 6    | 6    | 6    | 6    | 6    | 6    | 6    | 6    | 6    |
| 36331  |      |      |      |      |      | 3    | 4    | 5    | 5    | 3    | 6    |      | 3    | 6    |
| 36336  | 3    | 4    | 3    | 3    |      |      |      |      |      |      |      |      |      |      |
| 36337  | 2    | 2    | 2    | 2    |      |      |      |      |      |      |      |      |      |      |
| 36364  | 2    | 3    | 3    | 3    |      |      |      |      |      |      |      |      |      |      |
| 36365  | 2    | 1    | 3    | 2    |      |      |      |      |      |      |      |      |      |      |
| 36396  |      |      |      |      |      | 2    | 5    | 5    | 5    | 2    | 6    | 5    | 6    | 2    |
| 36403  | 2    | 3    | 3    | 3    |      |      |      |      |      |      |      |      |      |      |
| 36410  |      |      |      |      |      |      |      |      |      |      |      |      |      |      |
| 36413  |      |      |      |      |      | 1    | 1    | 1    | 1    | 1    | 1    | 1    | 1    | 1    |
| 36422  | 4    | 4    | 4    | 4    |      |      |      |      |      |      |      |      |      |      |
| 36424  | 1    | 2    | 3    | 1    |      |      |      |      |      |      |      |      |      |      |
| 36425  | 4    | 3    | 3    | 3    |      |      |      |      |      |      |      |      |      |      |
| 36432  | 1    | 1    | 2    | 1    |      |      |      |      |      |      |      |      |      |      |
| 36435  | 2    | 2    | 2    | 2    |      |      |      |      |      |      |      |      |      |      |
| 36446  |      |      |      |      |      | 5    | 2    | 5    | 5    | 5    | 5    | 5    | 5    | 5    |
| 36451  |      |      |      |      |      | 2    | 6    | 6    | 4    | 3    | 5    | 6    | 6    | 2    |
| 36453  | 1    | 4    | 4    | 3    |      |      |      |      |      |      |      |      |      |      |
| 36459  |      |      |      |      |      | 3    | 4    | 3    | 4    | 2    | 3    | 3    | 3    | 4    |
| 36464  |      |      |      |      |      | 1    | 6    | 6    | 4    | 1    | 6    | 6    | 6    | 2    |
| 36465  |      |      |      |      |      | 5    | 5    | 5    | 5    | 3    | 5    | 5    | 4    | 3    |
| 36466  |      |      |      |      |      |      |      |      |      |      |      |      |      |      |
| 36476  | 3    | 4    | 4    | 3    |      |      |      |      |      |      |      |      |      |      |
| 36487  |      |      |      |      |      |      |      |      |      |      |      |      |      |      |
| 36488  | 5    | 5    | 5    | 5    |      |      |      |      |      |      |      |      |      |      |
| 36500  |      |      |      |      |      |      |      |      |      |      |      |      |      |      |
| 36504  |      |      |      |      |      | 3    | 6    | 6    | 6    | 3    | 6    | 6    | 6    | 1    |
| 36513  |      |      |      |      |      | 2    | 2    | 3    | 1    | 1    | 1    | 2    | 4    | 4    |
| 36515  | 2    | 2    | 2    | 2    |      |      |      |      |      |      |      |      |      |      |
| 36521  |      |      |      |      |      | 1    | 3    | 4    | 5    | 4    | 4    | 5    | 6    | 1    |
| 36530  | 3    | 3    | 3    | 2    |      |      |      |      |      |      |      |      |      |      |
| 36556  |      |      |      |      |      | 1    | 6    | 5    | 5    | 2    | 5    | 6    | 6    | 2    |

| respid | Q47l | Q47m | Q47n | Q47o | Q48a | Q48b | Q48c | Q48d | Q48e | Q48f | Q48g | Q48h | Q48i | Q48j |   |
|--------|------|------|------|------|------|------|------|------|------|------|------|------|------|------|---|
| 36564  |      | 2    | 1    | 1    | 2    |      |      |      |      |      |      |      |      |      |   |
| 36584  |      | 4    |      |      |      |      |      |      |      |      |      |      |      |      |   |
| 36585  |      |      |      |      |      |      |      |      |      |      |      |      |      |      |   |
| 36586  |      |      |      |      |      |      |      |      |      |      |      |      |      |      |   |
| 36606  |      |      |      |      |      | 3    | 3    | 4    | 3    | 4    | 3    | 2    | 3    | 3    | 2 |
| 36615  |      |      |      |      |      | 1    | 6    | 6    | 6    | 1    | 6    | 6    | 6    | 1    | 5 |
| 36628  |      |      |      |      |      | 3    | 4    | 4    | 4    | 3    | 4    | 4    | 4    | 3    | 4 |
| 36630  | 1    | 3    | 3    | 3    |      |      |      |      |      |      |      |      |      |      |   |
| 36631  | 3    | 3    | 4    | 3    |      |      |      |      |      |      |      |      |      |      |   |
| 36636  |      |      |      |      |      | 3    | 5    | 5    | 5    | 3    | 5    | 5    | 5    | 3    | 5 |
| 36637  |      |      |      |      |      | 2    | 3    | 3    | 4    | 4    | 3    | 3    | 4    | 3    | 2 |
| 36651  | 2    |      |      | 2    | 2    |      |      |      |      |      |      |      |      |      |   |
| 36661  | 1    | 4    | 5    | 1    |      |      |      |      |      |      |      |      |      |      |   |
| 36670  |      |      |      |      |      | 6    | 4    | 4    | 3    | 6    | 4    | 4    | 5    | 4    | 4 |
| 36671  | 3    | 3    | 4    | 3    |      |      |      |      |      |      |      |      |      |      |   |
| 36688  |      |      |      |      |      |      |      |      |      |      |      |      |      |      |   |
| 36694  |      |      |      |      |      |      |      |      |      |      |      |      |      |      |   |
| 36696  |      |      |      |      |      |      |      |      |      |      |      |      |      |      |   |
| 36703  |      |      |      |      |      |      |      |      |      |      |      |      |      |      |   |
| 36719  |      |      |      |      |      |      |      |      |      |      |      |      |      |      |   |
| 36721  |      |      |      |      |      |      |      |      |      |      |      |      |      |      |   |
| 36740  | 3    | 5    | 4    | 4    |      |      |      |      |      |      |      |      |      |      |   |
| 36755  | 2    | 4    | 4    | 3    |      |      |      |      |      |      |      |      |      |      |   |
| 36765  |      |      |      |      |      | 3    | 4    | 3    | 3    | 3    |      | 4    | 4    | 3    | 2 |
| 36770  |      |      |      |      |      |      |      |      |      |      |      |      |      |      |   |
| 36773  | 3    | 4    | 4    | 3    |      |      |      |      |      |      |      |      |      |      |   |
| 36813  |      |      |      |      |      | 3    | 4    |      | 4    |      | 4    |      |      |      | 3 |
| 36819  | 3    | 3    | 3    | 3    |      |      |      |      |      |      |      |      |      |      |   |
| 36820  |      |      |      |      |      | 1    | 6    | 6    | 6    | 1    | 6    | 6    | 6    | 1    | 6 |
| 36821  | 3    | 3    | 3    |      |      |      |      |      |      |      |      |      |      |      |   |
| 36827  |      |      |      |      |      |      |      |      |      |      |      |      |      |      |   |
| 36835  |      |      |      |      |      | 5    | 2    | 2    | 3    | 5    | 2    | 5    | 6    | 5    | 6 |



| respid | Q47l | Q47m | Q47n | Q47o | Q48a | Q48b | Q48c | Q48d | Q48e | Q48f | Q48g | Q48h | Q48i | Q48j |
|--------|------|------|------|------|------|------|------|------|------|------|------|------|------|------|
| 36837  |      |      |      |      |      |      | 3    | 4    | 4    | 3    | 4    | 2    | 2    | 2    |
| 36849  | 1    | 1    | 1    | 1    |      |      |      |      |      |      |      |      |      |      |
| 36851  |      |      |      |      |      | 5    | 5    | 5    | 4    | 4    | 4    | 4    | 4    | 4    |
| 36868  | 1    | 1    | 1    | 1    |      |      |      |      |      |      |      |      |      |      |
| 36870  |      |      |      |      |      |      |      |      |      |      |      |      |      |      |
| 36871  |      |      |      |      |      |      |      |      |      |      |      |      |      |      |
| 36874  | 1    | 1    | 1    | 2    |      |      |      |      |      |      |      |      |      |      |
| 36878  | 3    | 3    | 4    | 3    |      |      |      |      |      |      |      |      |      |      |
| 36887  |      |      |      |      |      | 3    | 4    | 4    | 4    | 3    | 6    | 6    | 6    | 3    |
| 36889  |      |      |      |      |      |      |      |      |      |      |      |      |      |      |
| 36891  | 3    | 4    | 4    | 3    |      |      |      |      |      |      |      |      |      |      |
| 36903  | 3    | 3    | 3    | 3    |      |      |      |      |      |      |      |      |      |      |
| 36905  |      |      |      |      |      | 4    | 6    | 6    | 6    | 2    | 6    | 6    | 6    | 2    |
| 36913  | 4    | 4    | 4    | 4    |      |      |      |      |      |      |      |      |      |      |
| 36949  |      |      |      |      |      |      |      |      |      |      |      |      |      |      |
| 36954  | 3    | 3    | 3    | 3    |      |      |      |      |      |      |      |      |      |      |
| 36962  |      |      |      |      |      |      | 2    | 4    | 1    | 6    | 5    | 4    | 3    | 3    |
| 36965  | 4    | 4    | 4    | 4    |      |      |      |      |      |      |      |      |      |      |
| 36970  | 4    | 4    | 4    | 4    |      |      |      |      |      |      |      |      |      |      |
| 36979  |      |      |      |      |      | 2    | 6    | 6    | 5    | 6    | 6    | 6    | 6    | 6    |
| 36990  |      |      |      |      |      |      | 2    | 2    |      | 3    | 4    | 4    | 3    | 3    |
| 36991  |      |      |      |      |      |      |      |      |      |      |      |      |      |      |
| 36992  | 3    | 3    | 3    | 3    |      |      |      |      |      |      |      |      |      |      |
| 37015  |      |      |      |      |      |      |      |      |      |      |      |      |      |      |
| 37017  |      |      |      |      |      |      |      |      |      |      |      |      |      |      |
| 37020  |      |      |      |      |      |      |      |      |      |      |      |      |      |      |
| 37033  | 3    | 3    | 3    | 3    |      |      |      |      |      |      |      |      |      |      |
| 37041  | 1    | 3    | 3    | 1    |      |      |      |      |      |      |      |      |      |      |
| 37048  |      |      |      |      |      | 2    | 4    | 4    | 2    | 4    | 3    | 3    | 4    | 3    |
| 37050  |      |      |      |      |      |      |      |      |      |      |      |      |      |      |
| 37054  |      |      |      |      |      | 3    | 2    | 4    | 3    | 4    | 4    | 6    | 6    | 2    |
| 37057  |      |      |      |      |      | 3    | 5    | 5    | 4    |      | 3    | 4    | 3    | 3    |

| respid | Q47l | Q47m | Q47n | Q47o | Q48a | Q48b | Q48c | Q48d | Q48e | Q48f | Q48g | Q48h | Q48i | Q48j |   |
|--------|------|------|------|------|------|------|------|------|------|------|------|------|------|------|---|
| 37067  |      | 1    | 3    | 3    | 3    |      |      |      |      |      |      |      |      |      |   |
| 37074  |      | 4    | 4    | 4    | 3    |      |      |      |      |      |      |      |      |      |   |
| 37088  |      |      |      |      |      |      | 1    | 1    | 1    | 4    | 3    | 3    | 2    | 3    | 3 |
| 37090  |      | 3    | 2    | 3    | 3    |      |      |      |      |      |      |      |      |      |   |
| 37110  |      | 4    | 4    | 4    | 4    |      |      |      |      |      |      |      |      |      |   |
| 37122  |      | 1    | 1    | 3    | 5    |      |      |      |      |      |      |      |      |      |   |
| 37124  |      | 1    | 2    | 2    | 2    |      |      |      |      |      |      |      |      |      |   |
| 37126  |      |      |      |      |      |      |      |      |      |      |      |      |      |      |   |
| 37129  |      | 2    | 2    | 3    | 3    |      |      |      |      |      |      |      |      |      |   |
| 37130  |      |      |      |      |      | 3    | 3    | 3    | 5    | 2    | 6    | 1    | 5    | 1    | 6 |
| 37142  |      | 1    | 1    | 1    |      |      |      |      |      |      |      |      |      |      |   |
| 37160  |      | 2    | 2    | 4    | 2    |      |      |      |      |      |      |      |      |      |   |
| 37168  |      |      |      |      |      |      | 3    | 6    | 6    | 5    | 6    | 3    | 6    | 3    | 6 |
| 37169  |      |      |      |      |      |      |      |      |      |      |      |      |      |      |   |
| 37191  |      |      | 1    | 1    | 1    |      |      |      |      |      |      |      |      |      |   |
| 37197  |      | 1    | 1    | 2    | 2    |      |      |      |      |      |      |      |      |      |   |
| 37204  |      |      |      |      |      |      |      |      |      |      | 6    | 5    | 6    | 1    | 5 |
| 37213  |      |      |      |      |      | 2    | 2    | 2    | 3    | 2    | 2    | 2    | 2    | 1    | 2 |
| 37238  |      |      |      |      |      | 3    | 6    | 6    | 3    | 3    | 5    | 4    | 6    | 2    | 2 |
| 37242  |      |      |      |      |      | 3    | 4    | 3    | 3    | 4    | 4    | 4    | 3    | 4    | 4 |
| 37243  |      | 1    | 1    | 1    | 1    |      |      |      |      |      |      |      |      |      |   |
| 37275  |      |      |      |      |      | 3    | 6    | 6    | 5    | 1    | 6    | 6    | 6    | 1    | 5 |
| 37305  |      |      |      |      |      | 2    | 3    | 3    | 3    | 4    | 3    | 3    | 4    | 3    | 2 |
| 37357  |      |      |      |      |      | 2    | 3    | 2    | 2    | 4    | 4    | 4    | 4    | 4    | 5 |
| 37365  |      |      |      |      |      | 3    | 2    | 2    | 2    | 3    | 3    | 2    | 2    | 2    | 2 |
| 37370  |      |      |      |      |      |      |      |      |      |      |      |      |      |      |   |
| 37406  |      |      |      |      |      | 3    | 3    |      |      | 4    |      |      |      |      |   |
| 37410  |      |      |      |      |      | 4    | 2    | 3    | 3    | 6    | 4    | 5    | 3    | 4    | 4 |
| 37411  |      |      |      |      |      | 3    | 3    | 2    | 3    | 3    | 3    | 3    | 3    | 3    | 3 |
| 37427  |      |      |      |      |      | 2    | 3    | 2    | 2    | 2    | 2    | 3    | 2    | 3    | 3 |
| 37437  |      |      |      |      |      | 2    | 2    | 1    | 1    | 2    | 2    | 2    | 1    | 1    | 1 |
| 37440  |      | 1    | 3    | 3    | 3    |      |      |      |      |      |      |      |      |      |   |

| respid | Q47l | Q47m | Q47n | Q47o | Q48a | Q48b | Q48c | Q48d | Q48e | Q48f | Q48g | Q48h | Q48i | Q48j |
|--------|------|------|------|------|------|------|------|------|------|------|------|------|------|------|
| 37452  |      |      |      |      |      | 3    |      | 6    | 6    | 1    | 3    |      | 1    |      |
| 37465  |      |      |      |      |      | 3    | 3    | 3    | 2    | 2    | 2    | 2    | 3    | 2    |
| 37468  |      |      |      |      |      | 1    | 6    | 6    | 6    | 5    | 5    | 5    | 6    | 2    |
| 37469  |      |      |      |      |      | 1    | 6    | 5    | 5    | 2    | 5    | 4    | 5    | 3    |
| 37477  |      |      |      |      |      | 3    | 2    | 2    | 2    | 2    | 4    | 3    | 3    | 2    |
| 37509  |      |      |      |      |      | 5    | 6    | 6    | 6    | 6    | 6    | 6    | 6    | 6    |
| 37513  |      |      |      |      |      | 4    | 2    | 2    | 3    | 4    | 4    | 4    | 4    | 3    |
| 37534  |      |      |      |      |      | 3    | 6    | 6    | 4    | 3    | 2    | 3    | 4    | 3    |
| 37537  |      |      |      |      |      | 4    |      |      |      |      |      |      |      |      |
| 37560  |      |      |      |      |      | 2    | 2    | 3    | 3    | 3    | 3    | 2    | 3    | 3    |
| 37566  |      |      |      |      |      | 3    | 4    | 3    | 4    | 3    | 3    | 3    | 3    | 3    |
| 37572  |      |      |      |      |      | 1    | 6    | 6    | 5    | 2    | 6    | 5    | 6    | 2    |
| 37574  |      |      |      |      |      | 1    | 1    | 3    | 2    | 3    | 4    | 3    | 5    | 3    |
| 37575  |      |      |      |      |      | 3    |      |      |      |      |      |      |      |      |
| 37590  |      |      |      |      |      | 1    | 1    | 1    | 1    | 1    | 1    | 1    | 1    | 1    |
| 37593  |      |      |      |      |      |      |      |      |      |      |      |      |      |      |
| 37599  |      |      |      |      |      | 1    | 3    | 3    | 6    | 3    | 2    | 2    | 6    | 2    |
| 37641  |      |      |      |      |      |      |      |      |      |      |      |      |      |      |
| 37651  |      |      |      |      |      | 2    | 5    | 5    | 5    | 2    | 5    | 5    | 5    | 5    |
| 37670  |      |      |      |      |      | 2    | 5    | 4    | 4    | 3    | 4    | 4    | 6    | 3    |
| 37680  |      |      |      |      |      | 6    | 1    |      |      |      |      |      |      |      |
| 37690  |      |      |      |      |      |      |      |      |      |      |      |      |      |      |
| 37694  |      |      |      |      |      |      |      |      |      |      |      |      |      |      |
| 37705  |      |      |      |      |      | 2    | 2    | 2    | 3    | 3    | 3    | 4    | 4    | 3    |
| 37710  |      |      |      |      |      | 2    | 2    | 2    | 2    | 2    | 2    | 2    | 2    | 2    |
| 37719  |      |      |      |      |      | 3    | 5    | 5    | 5    | 3    | 6    | 6    | 6    | 5    |
| 37741  |      |      |      |      |      | 3    | 3    | 3    | 4    | 2    | 3    | 3    | 3    | 3    |
| 37752  |      |      |      |      |      | 2    | 2    | 5    | 6    | 2    | 5    | 5    | 6    | 4    |
| 37755  |      |      |      |      |      | 4    | 3    | 2    | 2    | 5    | 2    | 4    | 2    | 2    |
| 37757  |      |      |      |      |      | 1    | 6    | 6    | 5    | 2    | 6    | 6    | 6    | 6    |
| 37783  |      |      |      |      |      |      | 2    | 2    |      |      |      |      | 3    |      |
| 37793  |      |      |      |      |      | 3    | 2    | 1    | 3    | 4    | 3    | 2    | 2    | 2    |

| respid | Q47l | Q47m | Q47n | Q47o | Q48a | Q48b | Q48c | Q48d | Q48e | Q48f | Q48g | Q48h | Q48i | Q48j |   |
|--------|------|------|------|------|------|------|------|------|------|------|------|------|------|------|---|
| 37800  |      |      |      |      |      | 2    | 3    | 4    | 4    | 3    | 4    | 4    | 6    | 2    | 3 |
| 37801  |      |      |      |      |      |      |      |      |      |      |      |      | 5    |      | 1 |
| 37820  |      |      |      |      |      | 1    | 2    | 2    | 2    | 2    | 2    | 2    | 2    | 1    | 2 |
| 37826  |      |      |      |      |      | 6    | 6    | 6    | 6    | 3    | 6    | 6    | 6    | 2    | 6 |
| 37835  |      |      |      |      |      | 3    | 2    | 3    | 1    | 2    | 3    | 2    | 2    | 2    | 3 |
| 37839  |      |      |      |      |      | 3    | 3    | 3    | 3    | 4    | 4    | 3    | 4    | 3    | 4 |
| 37871  |      |      |      |      |      | 4    | 4    | 2    | 2    | 2    | 2    | 3    | 2    | 2    | 2 |
| 37876  |      |      |      |      |      | 2    | 3    | 2    | 3    | 3    | 2    | 3    | 2    | 2    | 3 |
| 37879  |      |      |      |      |      | 5    |      |      |      |      |      |      |      |      |   |
| 37894  |      |      |      |      |      | 2    | 4    | 4    | 5    | 3    | 4    | 4    | 5    | 3    | 3 |
| 37895  |      |      |      |      |      | 3    | 4    | 4    | 4    | 3    | 4    | 4    | 4    | 2    | 6 |
| 37901  |      |      |      |      |      | 3    | 4    | 4    | 5    | 2    | 5    | 4    | 5    | 1    | 6 |
| 37926  |      |      |      |      |      | 2    | 2    | 2    | 3    | 3    | 3    | 4    | 3    | 3    | 3 |
| 37937  |      |      |      |      |      | 2    | 3    | 2    | 3    | 4    | 3    | 3    | 2    | 3    | 3 |
| 37938  |      |      |      |      |      |      |      |      |      |      |      |      |      |      |   |
| 37959  |      |      |      |      |      | 1    | 6    | 6    | 3    | 2    | 6    | 6    | 6    | 1    | 3 |
| 37970  |      |      |      |      |      |      |      |      |      |      |      |      |      |      |   |
| 37972  |      |      |      |      |      |      |      |      |      |      |      |      |      |      |   |
| 37988  |      |      |      |      |      | 5    | 2    | 2    | 3    | 4    | 4    | 3    | 3    | 3    | 3 |
| 37989  |      |      |      |      |      | 2    | 2    | 2    | 2    | 4    | 3    | 5    | 5    | 4    | 2 |
| 38000  |      |      |      |      |      | 3    | 5    | 4    | 6    | 3    | 4    | 4    | 4    | 2    | 5 |
| 38028  |      |      |      |      |      | 4    | 3    | 3    | 3    | 3    | 3    | 4    |      |      |   |
| 38042  |      |      |      |      |      | 3    | 3    | 4    | 4    | 3    | 4    | 4    | 3    | 4    | 3 |
| 38052  |      |      |      |      |      |      | 6    | 6    | 6    | 6    | 6    | 6    | 6    | 6    | 6 |
| 38056  |      |      |      |      |      | 6    | 6    | 6    | 6    | 1    | 6    | 6    | 6    | 1    | 6 |
| 38106  |      |      |      |      |      | 3    | 2    | 1    | 1    | 5    | 2    | 2    | 2    | 6    | 2 |
| 38114  | 2    | 2    | 2    | 2    |      |      |      |      |      |      |      |      |      |      |   |
| 38134  |      |      |      |      |      | 4    | 1    | 2    | 2    | 5    | 2    | 2    | 4    | 6    | 5 |
| 38135  |      |      |      |      |      | 4    | 4    | 4    | 4    | 4    | 4    | 3    | 5    | 3    | 6 |
| 38139  |      |      |      |      |      | 2    | 3    | 3    | 3    | 3    | 4    | 3    | 2    | 3    | 4 |
| 38160  | 3    | 3    |      |      |      |      |      |      |      |      |      |      |      |      |   |
| 38164  |      |      |      |      |      | 3    | 3    | 4    | 5    | 3    |      |      |      |      |   |

| respid | Q47l | Q47m | Q47n | Q47o | Q48a | Q48b | Q48c | Q48d | Q48e | Q48f | Q48g | Q48h | Q48i | Q48j |
|--------|------|------|------|------|------|------|------|------|------|------|------|------|------|------|
| 38168  |      |      |      |      |      |      |      |      |      |      |      |      |      |      |
| 38173  | 5    | 5    | 4    | 5    |      |      |      |      |      |      |      |      |      |      |
| 38193  |      |      |      |      | 2    | 2    | 1    | 1    | 6    | 2    | 2    | 2    | 6    | 2    |
| 38204  |      |      |      |      | 1    | 1    | 6    | 6    | 1    | 6    | 6    | 6    | 1    | 6    |
| 38206  |      |      |      |      | 2    | 5    | 5    | 4    | 3    | 4    | 5    | 4    | 4    | 3    |
| 38233  | 3    | 1    | 5    | 3    |      |      |      |      |      |      |      |      |      |      |
| 38242  |      |      |      |      | 3    | 4    | 3    | 3    | 3    | 4    | 3    | 3    | 4    | 3    |
| 38245  | 3    | 3    |      | 3    |      |      |      |      |      |      |      |      |      |      |
| 38261  |      |      |      |      | 3    | 4    | 3    | 4    | 4    | 3    | 3    | 3    | 2    | 3    |
| 38288  |      |      |      |      | 4    | 4    | 4    | 4    | 4    | 4    | 3    | 4    | 3    | 3    |
| 38296  |      |      |      |      | 2    | 5    | 4    | 4    | 2    | 6    | 6    | 6    | 1    | 6    |
| 38299  | 1    | 3    | 3    | 1    |      |      |      |      |      |      |      |      |      |      |
| 38300  | 3    | 4    | 4    | 3    |      |      |      |      |      |      |      |      |      |      |
| 38303  | 1    | 3    | 5    | 3    |      |      |      |      |      |      |      |      |      |      |
| 38317  |      |      |      |      | 1    | 6    | 6    | 3    | 1    | 6    | 6    | 6    | 1    | 6    |
| 38328  |      |      |      |      |      |      |      |      |      |      |      |      |      |      |
| 38333  |      |      |      |      | 3    | 3    | 3    | 4    | 4    | 3    | 4    | 3    | 4    | 4    |
| 38336  | 5    | 5    | 5    | 4    |      |      |      |      |      |      |      |      |      |      |
| 38338  |      |      |      |      | 1    | 6    | 6    | 5    |      |      |      |      |      |      |
| 38342  | 3    | 4    | 4    | 3    |      |      |      |      |      |      |      |      |      |      |
| 38360  | 2    |      |      |      |      |      |      |      |      |      |      |      |      |      |
| 38362  | 3    | 3    | 4    | 3    |      |      |      |      |      |      |      |      |      |      |
| 38364  | 1    | 1    | 1    | 1    |      |      |      |      |      |      |      |      |      |      |
| 38402  |      |      |      |      |      |      |      |      |      |      |      |      |      |      |
| 38423  |      |      |      |      | 3    | 4    | 5    | 4    | 2    | 5    | 4    | 5    | 1    | 5    |
| 38424  | 2    | 1    | 2    | 2    |      |      |      |      |      |      |      |      |      |      |
| 38435  |      |      |      |      | 1    | 1    | 2    | 1    | 1    | 1    | 3    | 2    | 2    | 2    |
| 38450  |      |      |      |      |      |      |      |      |      |      |      |      |      |      |
| 38455  | 3    | 1    | 1    | 1    |      |      |      |      |      |      |      |      |      |      |
| 38467  |      |      |      |      | 6    | 5    | 6    | 6    | 4    | 1    | 6    | 5    | 5    | 6    |
| 38468  | 1    | 3    | 3    | 2    |      |      |      |      |      |      |      |      |      |      |
| 38472  |      |      |      |      | 3    | 3    | 3    | 3    | 3    | 3    | 3    | 3    | 3    | 2    |

| respid | Q47l | Q47m | Q47n | Q47o | Q48a | Q48b | Q48c | Q48d | Q48e | Q48f | Q48g | Q48h | Q48i | Q48j |   |
|--------|------|------|------|------|------|------|------|------|------|------|------|------|------|------|---|
| 38484  | 3    | 3    | 4    | 4    |      |      |      |      |      |      |      |      |      |      |   |
| 38498  | 1    | 1    | 1    | 1    |      |      |      |      |      |      |      |      |      |      |   |
| 38507  | 1    | 1    | 1    | 1    |      |      |      |      |      |      |      |      |      |      |   |
| 38511  |      |      |      |      |      | 2    | 4    | 4    | 4    | 2    | 4    | 4    | 4    | 1    | 2 |
| 38524  | 2    | 1    | 2    | 2    |      |      |      |      |      |      |      |      |      |      |   |
| 38526  |      |      |      |      |      |      |      |      |      |      |      |      |      |      |   |
| 38534  |      |      |      |      |      | 2    | 2    | 2    | 2    | 3    | 2    | 3    | 2    | 2    | 6 |
| 38536  | 3    | 3    | 3    | 3    |      |      |      |      |      |      |      |      |      |      |   |
| 38539  | 3    | 4    | 4    | 3    |      |      |      |      |      |      |      |      |      |      |   |
| 38547  |      |      |      |      |      | 2    | 2    | 5    | 5    | 2    | 2    | 5    | 5    | 1    | 6 |
| 38549  | 4    | 4    | 4    | 4    |      |      |      |      |      |      |      |      |      |      |   |
| 38575  |      |      |      |      |      | 3    | 4    | 4    | 4    | 3    | 4    | 3    | 3    | 3    | 4 |
| 38579  |      |      |      |      |      | 3    | 5    | 5    | 6    | 2    | 6    | 6    | 6    | 2    | 6 |
| 38585  | 1    | 3    | 3    | 2    |      |      |      |      |      |      |      |      |      |      |   |
| 38589  | 2    | 3    | 3    | 3    |      |      |      |      |      |      |      |      |      |      |   |
| 38595  |      |      |      |      |      | 3    | 2    | 2    | 5    | 3    | 2    | 1    | 3    | 2    | 1 |
| 38602  |      |      |      |      |      |      |      | 5    | 6    | 2    |      | 5    | 6    | 1    | 6 |
| 38603  |      |      |      |      |      | 1    | 6    | 6    | 6    | 1    | 6    | 6    | 6    | 1    | 6 |
| 38612  |      |      |      |      |      | 3    | 4    | 3    | 3    | 4    | 5    | 3    | 3    | 3    | 2 |
| 38621  |      |      |      |      |      |      | 2    | 3    | 3    | 3    | 2    | 3    | 3    | 3    |   |
| 38624  |      |      |      |      |      |      |      | 3    |      | 4    | 5    | 3    | 4    | 5    | 3 |
| 38636  |      |      |      |      |      |      |      |      |      |      |      |      |      |      |   |
| 38656  | 3    | 4    | 4    | 3    |      |      |      |      |      |      |      |      |      |      |   |
| 38668  | 4    | 4    | 4    | 4    |      |      |      |      |      |      |      |      |      |      |   |
| 38675  |      |      |      |      |      | 3    | 4    | 3    | 4    | 3    | 3    | 3    | 3    | 3    | 4 |
| 38676  | 2    | 2    | 1    | 2    |      |      |      |      |      |      |      |      |      |      |   |
| 38682  | 4    | 4    | 4    | 4    |      |      |      |      |      |      |      |      |      |      |   |
| 38689  | 3    | 3    | 4    | 3    |      |      |      |      |      |      |      |      |      |      |   |
| 38702  |      |      |      |      |      |      |      |      |      |      |      |      |      |      |   |
| 38704  |      |      |      |      |      | 3    | 3    | 2    | 2    | 3    | 4    |      |      |      | 3 |
| 38713  | 1    | 1    | 1    | 1    |      |      |      |      |      |      |      |      |      |      |   |
| 38718  | 3    | 3    | 3    | 3    |      |      |      |      |      |      |      |      |      |      |   |

| respid | Q47l | Q47m | Q47n | Q47o | Q48a | Q48b | Q48c | Q48d | Q48e | Q48f | Q48g | Q48h | Q48i | Q48j |   |
|--------|------|------|------|------|------|------|------|------|------|------|------|------|------|------|---|
| 38725  |      |      |      |      |      | 2    | 4    | 6    | 6    | 2    | 6    | 3    | 6    | 2    | 3 |
| 38730  |      |      |      |      |      | 4    | 3    | 4    | 4    | 3    | 3    | 4    | 4    | 4    | 4 |
| 38737  |      |      |      |      |      |      |      |      |      |      |      |      |      |      |   |
| 38738  |      |      |      |      |      | 2    | 4    | 4    | 4    | 3    | 4    | 3    | 4    | 2    | 4 |
| 38744  |      |      |      |      |      |      |      |      |      |      |      |      |      |      |   |
| 38746  |      |      |      |      |      |      |      |      |      |      |      | 3    |      | 1    | 3 |
| 38753  |      |      |      |      |      | 4    | 1    | 1    | 6    | 2    | 4    | 1    | 4    | 1    | 6 |
| 38756  |      |      |      |      |      | 3    | 2    | 4    | 2    | 3    | 3    | 4    | 4    | 2    | 3 |
| 38760  |      |      |      |      |      | 3    | 6    | 6    | 3    | 3    | 5    | 6    | 6    | 1    | 6 |
| 38762  |      |      |      |      |      | 2    | 1    | 2    | 2    | 3    | 4    | 3    | 2    | 2    | 1 |
| 38765  |      |      |      |      |      | 4    | 5    | 5    | 5    | 5    | 4    | 6    | 4    | 5    | 5 |
| 38769  |      |      |      |      |      | 2    | 3    | 3    | 3    | 3    | 3    | 3    | 4    | 2    | 2 |
| 38781  |      |      |      |      |      | 2    |      |      | 3    | 3    | 3    | 5    | 3    | 2    | 3 |
| 38786  |      |      |      |      |      | 2    | 4    | 5    | 3    | 2    | 4    | 5    | 5    | 2    | 2 |
| 38790  | 1    |      |      |      |      |      |      |      |      |      |      |      |      |      |   |
| 38793  |      |      |      |      |      | 2    | 2    | 2    | 2    | 2    |      | 2    | 1    | 6    | 4 |
| 38797  |      |      |      |      |      | 3    | 5    | 5    | 4    | 3    | 4    | 5    | 6    | 2    | 3 |
| 38802  |      |      |      |      |      | 3    | 3    | 3    | 3    | 3    | 3    | 3    | 3    | 3    | 3 |
| 38815  | 1    | 1    |      |      |      |      |      |      |      |      |      |      |      |      |   |
| 38826  |      |      |      |      |      | 2    | 4    | 3    | 4    | 2    | 2    | 3    | 4    | 2    | 4 |
| 38828  | 3    | 4    | 4    | 4    |      |      |      |      |      |      |      |      |      |      |   |
| 38829  |      |      |      |      |      |      |      | 4    | 5    | 4    | 5    | 5    | 4    | 4    | 5 |
| 38835  | 2    | 3    | 3    | 3    |      |      |      |      |      |      |      |      |      |      |   |
| 38842  |      |      |      |      |      | 2    | 3    | 4    | 1    | 3    | 2    | 2    | 1    | 4    | 2 |
| 38853  | 3    | 3    | 4    | 3    |      |      |      |      |      |      |      |      |      |      |   |
| 38855  |      |      |      |      |      | 2    | 3    | 4    | 2    | 2    | 2    | 2    | 3    | 3    | 2 |
| 38860  |      |      |      |      |      | 2    | 3    | 3    | 2    | 4    | 3    | 3    | 3    | 2    | 1 |
| 38869  |      |      |      |      |      | 3    | 4    | 5    | 3    | 4    | 4    | 3    | 5    | 3    | 2 |
| 38882  |      |      |      |      |      | 2    | 1    | 2    | 1    | 4    | 1    | 2    | 3    | 4    | 2 |
| 38897  |      |      |      |      |      | 6    |      | 5    | 4    | 5    | 3    | 2    | 5    | 3    | 1 |
| 38903  |      |      |      |      |      | 5    |      |      |      | 5    |      | 4    | 6    | 2    | 1 |
| 38910  |      |      |      |      |      | 2    | 2    | 3    | 2    | 2    | 4    | 3    | 5    | 3    | 5 |

| respid | Q47l | Q47m | Q47n | Q47o | Q48a | Q48b | Q48c | Q48d | Q48e | Q48f | Q48g | Q48h | Q48i | Q48j |   |
|--------|------|------|------|------|------|------|------|------|------|------|------|------|------|------|---|
| 38948  |      |      |      |      |      | 2    | 3    | 2    | 2    | 2    | 1    | 4    | 1    | 1    | 2 |
| 38949  | 1    | 3    | 3    | 2    |      |      |      |      |      |      |      |      |      |      |   |
| 38953  |      |      |      |      |      | 3    | 2    | 3    | 3    | 3    | 3    | 3    | 3    | 2    | 3 |
| 38989  |      |      |      |      |      | 2    | 1    | 1    | 2    | 6    | 1    | 1    | 1    | 6    | 1 |
| 38997  |      |      |      |      |      | 2    | 5    | 5    | 4    | 3    | 5    | 6    | 6    | 2    | 6 |
| 38999  |      |      |      |      |      |      |      |      |      |      |      |      |      |      |   |
| 39002  |      |      |      |      |      | 3    | 3    | 4    | 2    | 3    | 4    | 6    | 6    | 2    | 6 |
| 39003  |      |      |      |      |      | 1    | 6    | 3    | 2    | 3    | 4    | 1    | 3    | 4    | 2 |
| 39006  | 2    | 3    | 4    | 2    |      |      |      |      |      |      |      |      |      |      |   |
| 39014  |      |      |      |      |      |      |      |      |      |      |      |      |      |      |   |
| 39017  |      |      |      |      |      | 2    | 3    | 4    | 3    | 3    | 3    | 3    | 3    | 2    | 2 |
| 39018  |      |      |      |      |      | 3    | 2    | 3    | 2    | 4    | 3    | 2    | 2    | 4    | 3 |
| 39025  |      |      |      |      |      | 3    | 4    | 6    | 2    | 2    | 4    | 5    | 5    | 1    | 3 |
| 39031  |      |      |      |      |      | 2    | 1    | 2    | 1    | 4    | 2    | 1    | 3    | 2    | 4 |
| 39061  |      |      |      |      |      | 1    | 3    | 4    | 5    | 4    | 1    | 2    | 1    | 2    | 4 |
| 39131  |      |      |      |      |      | 2    | 6    | 6    | 6    | 2    | 6    | 2    | 2    | 1    | 5 |
| 39153  |      |      |      |      |      | 3    | 3    | 4    | 4    | 3    | 3    | 3    | 2    | 3    | 3 |
| 39194  |      |      |      |      |      |      |      |      |      |      |      |      |      |      |   |
| 39204  |      |      |      |      |      | 1    | 6    | 6    | 6    | 2    | 6    | 6    | 6    | 3    | 6 |
| 39208  |      |      |      |      |      |      |      |      |      |      | 6    |      |      |      |   |
| 39213  |      |      |      |      |      | 2    | 3    | 2    | 1    | 2    | 2    | 3    | 3    | 1    | 2 |
| 39231  |      |      |      |      |      | 4    | 4    | 4    | 4    | 4    | 4    | 4    | 3    | 3    | 4 |
| 39251  |      |      |      |      |      | 2    | 3    | 2    | 1    | 3    | 1    | 3    | 2    | 1    | 3 |
| 39257  |      |      |      |      |      | 2    | 3    | 1    | 3    | 2    | 1    | 3    | 4    | 2    | 1 |
| 39262  |      |      |      |      |      | 3    | 2    | 1    | 3    | 2    | 1    | 4    | 2    | 1    | 1 |
| 39269  |      |      |      |      |      | 3    | 5    | 2    | 4    | 1    | 4    | 3    | 2    | 4    | 1 |
| 39272  |      |      |      |      |      |      | 4    | 5    | 6    | 3    | 2    | 5    | 6    |      | 3 |
| 39280  |      |      |      |      |      | 3    | 4    | 4    | 3    | 3    | 4    | 3    | 3    | 3    | 4 |
| 39294  |      |      |      |      |      | 3    | 4    | 2    | 5    | 1    | 2    | 4    | 2    | 1    | 4 |
| 39297  |      |      |      |      |      | 3    | 4    | 3    | 4    | 4    | 4    | 4    | 3    | 2    | 3 |
| 39300  |      |      |      |      |      | 3    | 6    | 6    | 2    | 4    | 3    | 2    | 6    | 3    | 3 |
| 39307  |      |      |      |      |      | 3    | 2    | 1    | 3    | 4    | 1    | 2    | 4    | 5    | 2 |



| respid | Q47l | Q47m | Q47n | Q47o | Q48a | Q48b | Q48c | Q48d | Q48e | Q48f | Q48g | Q48h | Q48i | Q48j |   |
|--------|------|------|------|------|------|------|------|------|------|------|------|------|------|------|---|
| 39320  |      |      |      |      |      | 2    | 3    | 1    | 4    | 2    | 3    | 1    | 4    | 2    | 1 |
| 39333  |      |      |      |      |      | 2    | 4    | 4    | 2    | 2    | 2    | 4    | 6    | 2    | 2 |
| 39335  |      |      |      |      |      | 3    | 2    | 2    | 1    | 5    | 2    | 2    | 3    | 4    | 1 |
| 39339  |      |      |      |      |      | 4    | 5    | 3    | 5    | 4    | 2    | 1    | 3    | 4    | 3 |
| 39375  |      |      |      |      |      | 1    | 1    | 1    | 1    | 1    | 1    | 1    | 1    | 1    | 1 |
| 39377  |      |      |      |      |      |      |      |      |      |      |      |      |      |      |   |
| 39380  |      |      |      |      |      | 1    | 4    | 3    | 2    | 4    | 1    | 5    | 2    | 3    | 1 |
| 39425  |      |      |      |      |      | 2    | 2    |      | 3    | 3    | 3    | 3    | 3    | 3    | 3 |
| 39590  |      |      |      |      |      | 3    | 3    | 3    | 3    | 2    | 4    | 4    | 5    | 4    | 3 |
| 40529  |      |      |      |      |      | 2    | 4    | 4    | 5    | 2    | 5    | 5    | 5    | 2    | 5 |
| 40702  |      |      |      |      |      | 4    |      | 5    |      | 5    | 5    | 5    | 5    | 3    | 5 |
| 40788  |      |      |      |      |      | 3    | 4    | 4    | 4    | 3    | 4    | 5    | 4    | 4    | 4 |
| 40841  |      |      |      |      |      | 1    | 6    | 6    | 6    | 1    | 6    | 6    | 6    | 1    | 6 |
| 40965  |      |      |      |      |      | 3    | 3    | 3    | 3    | 3    | 4    | 6    | 6    | 4    | 4 |
| 41092  |      |      |      |      |      |      |      |      |      |      |      |      |      |      |   |
| 41534  |      |      |      |      |      |      |      |      |      |      |      |      |      |      |   |
| 41919  |      |      |      |      |      | 3    | 6    | 6    | 6    | 3    | 6    | 6    | 6    | 3    | 5 |
| 42110  | 4    | 3    | 3    | 2    |      |      |      |      |      |      |      |      |      |      |   |
| 42135  | 4    | 4    | 4    | 4    |      |      |      |      |      |      |      |      |      |      |   |
| 42142  | 4    | 4    | 4    | 4    |      |      |      |      |      |      |      |      |      |      |   |
| 42163  |      |      |      |      |      | 6    | 5    | 5    | 5    | 4    | 6    | 5    | 6    | 5    | 6 |
| 42164  |      | 3    | 5    | 3    |      |      |      |      |      |      |      |      |      |      |   |
| 42172  |      |      |      |      |      | 2    | 3    | 4    | 2    | 4    | 3    | 3    | 5    | 2    | 1 |
| 42177  | 4    | 4    | 4    | 4    |      |      |      |      |      |      |      |      |      |      |   |
| 42181  | 4    | 3    | 4    | 3    |      |      |      |      |      |      |      |      |      |      |   |
| 42193  |      |      |      |      |      |      |      |      |      |      |      |      |      |      |   |
| 42196  | 3    | 4    |      | 3    |      |      |      |      |      |      |      |      |      |      |   |
| 42202  |      |      |      |      |      | 1    | 1    | 1    | 1    | 2    | 5    | 5    | 5    | 1    | 6 |
| 42248  | 3    | 3    | 4    | 3    |      |      |      |      |      |      |      |      |      |      |   |
| 42283  | 3    | 3    | 3    | 4    |      |      |      |      |      |      |      |      |      |      |   |
| 42284  | 3    | 3    | 2    | 3    |      |      |      |      |      |      |      |      |      |      |   |
| 42323  |      |      |      |      |      |      |      |      |      |      |      |      |      |      |   |

| respid | Q47l | Q47m | Q47n | Q47o | Q48a | Q48b | Q48c | Q48d | Q48e | Q48f | Q48g | Q48h | Q48i | Q48j |   |
|--------|------|------|------|------|------|------|------|------|------|------|------|------|------|------|---|
| 42349  |      |      |      |      |      | 4    | 3    | 3    | 3    | 4    | 3    | 3    | 3    | 4    | 3 |
| 42351  |      |      |      |      |      |      |      |      |      |      |      |      |      |      |   |
| 42357  |      |      |      |      |      |      | 5    | 6    | 6    | 1    | 6    | 6    | 6    | 1    | 6 |
| 42366  |      |      |      |      |      |      |      |      |      |      |      |      |      |      |   |
| 42380  |      |      |      |      |      | 1    | 5    | 6    | 6    | 3    | 4    | 6    | 6    | 2    | 5 |
| 42414  | 1    | 2    | 4    | 3    |      |      |      |      |      |      |      |      |      |      |   |
| 42420  | 3    | 3    | 3    | 3    |      |      |      |      |      |      |      |      |      |      |   |
| 42454  |      |      |      |      |      |      |      |      |      |      |      |      |      |      |   |
| 42458  |      |      |      |      |      | 1    | 3    | 3    | 3    | 4    | 3    | 3    | 3    | 2    | 2 |
| 42461  | 3    | 3    | 3    | 4    |      |      |      |      |      |      |      |      |      |      |   |
| 42488  |      |      |      |      |      | 3    | 4    | 4    | 5    | 3    | 5    | 4    | 4    | 3    | 3 |
| 42511  |      |      |      |      |      |      |      |      |      |      |      |      |      |      |   |
| 42512  |      |      |      |      |      | 3    | 4    | 4    | 4    | 3    | 5    | 5    | 4    | 4    | 3 |
| 42530  |      |      |      |      |      | 4    | 2    | 4    | 4    | 3    | 2    | 2    | 3    | 2    | 3 |
| 42531  | 3    | 2    | 2    | 2    |      |      |      |      |      |      |      |      |      |      |   |
| 42533  | 1    | 1    | 1    | 1    |      |      |      |      |      |      |      |      |      |      |   |
| 42549  | 2    | 3    | 3    |      |      |      |      |      |      |      |      |      |      |      |   |
| 42550  |      |      |      |      |      | 4    | 3    | 3    | 4    | 4    | 4    | 4    | 4    | 4    | 4 |
| 42553  |      |      |      |      |      |      |      |      |      |      |      |      |      |      |   |
| 42562  |      |      |      |      |      | 3    | 3    | 3    | 3    | 3    | 3    | 4    | 4    | 3    | 2 |
| 42567  | 1    | 3    | 3    | 2    |      |      |      |      |      |      |      |      |      |      |   |
| 42589  |      |      |      |      |      | 5    |      | 5    | 5    | 5    | 5    | 5    | 5    | 5    | 5 |
| 42604  |      |      |      |      |      | 3    | 3    | 4    | 3    | 4    | 3    | 4    | 4    | 4    | 3 |
| 42618  |      |      |      |      |      | 1    | 1    | 6    | 1    | 6    | 6    | 5    | 6    | 1    | 6 |
| 42621  | 4    | 3    |      | 3    |      |      |      |      |      |      |      |      |      |      |   |
| 42627  |      |      |      |      |      | 2    | 5    | 6    | 6    | 3    | 5    | 6    | 6    | 1    | 6 |
| 42641  | 3    | 4    | 4    | 3    |      |      |      |      |      |      |      |      |      |      |   |
| 42655  | 1    | 3    | 2    | 1    |      |      |      |      |      |      |      |      |      |      |   |
| 42666  |      |      |      |      |      | 2    | 5    | 5    | 4    | 3    | 5    | 4    | 6    | 2    | 4 |
| 42667  | 3    | 4    | 4    | 4    |      |      |      |      |      |      |      |      |      |      |   |
| 42697  |      |      |      |      |      | 4    | 4    | 4    | 4    | 4    | 4    | 4    | 4    | 3    | 4 |
| 42703  |      |      |      |      |      | 6    | 5    | 5    | 5    | 2    | 5    |      | 5    | 2    | 5 |

| respid | Q47l | Q47m | Q47n | Q47o | Q48a | Q48b | Q48c | Q48d | Q48e | Q48f | Q48g | Q48h | Q48i | Q48j |   |
|--------|------|------|------|------|------|------|------|------|------|------|------|------|------|------|---|
| 42712  |      | 2    | 3    | 3    | 2    |      |      |      |      |      |      |      |      |      |   |
| 42731  |      | 3    | 2    | 2    | 4    |      |      |      |      |      |      |      |      |      |   |
| 42780  |      | 5    | 3    | 3    | 5    |      |      |      |      |      |      |      |      |      |   |
| 42785  |      |      |      |      |      | 3    | 4    | 4    | 3    | 3    | 4    | 4    | 4    | 3    | 4 |
| 42788  |      | 1    | 3    | 3    | 3    |      |      |      |      |      |      |      |      |      |   |
| 42802  |      |      |      |      |      |      |      |      |      |      |      |      |      |      |   |
| 42818  |      |      |      |      |      | 3    | 4    | 5    | 5    | 3    | 5    | 5    | 5    | 2    | 4 |
| 42821  |      |      |      |      |      | 2    | 2    | 5    | 3    | 2    | 5    | 5    | 6    | 2    | 1 |
| 42824  |      |      |      |      |      | 3    | 4    | 4    | 4    | 3    | 3    | 5    | 5    | 3    | 6 |
| 42831  |      |      |      |      |      |      | 6    | 6    | 3    |      |      |      |      |      | 3 |
| 42836  |      | 4    | 4    | 4    | 4    |      |      |      |      |      |      |      |      |      |   |
| 42864  |      | 1    | 3    | 3    | 3    |      |      |      |      |      |      |      |      |      |   |
| 42875  |      | 4    | 4    | 4    | 4    |      |      |      |      |      |      |      |      |      |   |
| 42891  |      |      |      |      |      | 6    | 1    | 1    | 1    | 5    | 1    | 1    | 2    | 6    | 1 |
| 42897  |      |      |      |      |      | 4    | 4    | 4    | 4    | 4    | 4    | 4    | 4    | 4    | 4 |
| 42900  |      |      |      |      |      | 5    |      | 5    | 4    | 3    | 5    | 5    | 4    | 5    | 6 |
| 42902  |      | 3    | 3    | 3    | 2    |      |      |      |      |      |      |      |      |      |   |
| 42921  |      |      |      |      |      |      | 6    | 6    | 6    | 3    | 6    | 6    | 6    | 2    | 6 |
| 42925  |      |      |      |      |      | 3    | 3    | 3    | 2    | 4    | 5    | 5    | 4    | 3    | 2 |
| 42944  |      |      |      |      |      |      |      |      |      |      |      |      |      |      |   |
| 42950  |      |      |      |      |      |      |      |      |      |      |      |      |      |      |   |
| 42963  |      |      |      |      |      | 2    | 6    | 6    | 5    | 2    | 6    | 5    | 6    | 3    | 3 |
| 42967  |      | 4    | 4    | 4    | 4    |      |      |      |      |      |      |      |      |      |   |
| 42985  |      |      |      |      |      |      |      |      |      |      |      |      |      |      |   |
| 42990  |      | 4    | 4    | 4    | 4    |      |      |      |      |      |      |      |      |      |   |
| 42996  |      | 2    | 3    | 3    | 2    |      |      |      |      |      |      |      |      |      |   |
| 43002  |      |      |      |      |      | 2    | 5    | 6    | 6    | 2    | 5    | 5    | 5    | 5    | 6 |
| 43004  |      | 3    | 2    | 1    | 3    |      |      |      |      |      |      |      |      |      |   |
| 43012  |      |      |      |      |      | 3    | 4    | 5    | 5    | 3    | 4    | 4    | 5    | 3    | 3 |
| 43027  |      | 3    | 3    | 3    | 3    |      |      |      |      |      |      |      |      |      |   |
| 43028  |      | 4    | 3    | 3    | 3    |      |      |      |      |      |      |      |      |      |   |
| 43029  |      |      |      |      |      | 4    | 6    | 4    | 1    | 5    | 6    | 6    | 6    | 6    | 6 |

| respid | Q47l | Q47m | Q47n | Q47o | Q48a | Q48b | Q48c | Q48d | Q48e | Q48f | Q48g | Q48h | Q48i | Q48j |   |
|--------|------|------|------|------|------|------|------|------|------|------|------|------|------|------|---|
| 43031  |      |      |      |      |      | 3    | 4    | 4    | 3    | 4    | 4    | 3    | 4    | 3    | 4 |
| 43042  | 1    | 1    | 1    | 1    |      |      |      |      |      |      |      |      |      |      |   |
| 43054  |      |      |      |      |      |      |      |      |      |      |      |      |      |      |   |
| 43058  | 3    | 4    | 4    | 3    |      |      |      |      |      |      |      |      |      |      |   |
| 43064  |      |      |      |      | 4    | 3    | 5    | 4    | 4    | 4    | 2    | 3    |      |      |   |
| 43069  |      |      |      |      | 5    | 5    |      |      |      | 5    | 5    | 5    | 5    | 5    | 5 |
| 43071  |      |      |      |      |      |      |      |      |      |      |      |      |      |      |   |
| 43072  | 3    | 4    | 4    | 4    |      |      |      |      |      |      |      |      |      |      |   |
| 43077  |      |      |      |      |      |      |      |      |      |      |      |      |      |      |   |
| 43078  | 3    | 1    | 1    | 2    |      |      |      |      |      |      |      |      |      |      |   |
| 43082  |      |      |      |      |      |      |      |      |      |      |      |      |      |      |   |
| 43092  | 5    | 5    | 4    | 4    |      |      |      |      |      |      |      |      |      |      |   |
| 43096  | 5    | 5    | 5    | 5    |      |      |      |      |      |      |      |      |      |      |   |
| 43109  |      |      |      |      |      |      |      |      |      |      |      |      |      |      |   |
| 43113  |      |      |      |      |      | 6    | 4    | 4    | 4    | 3    | 4    | 4    | 4    | 3    | 6 |
| 43123  |      |      |      |      |      | 2    | 6    | 6    | 6    | 2    | 6    | 6    | 6    | 1    | 6 |
| 43127  |      |      |      |      |      | 5    | 5    | 3    | 6    | 4    | 5    | 5    | 5    | 5    | 3 |
| 43128  |      |      |      |      |      | 5    | 2    | 2    | 2    | 5    | 1    | 1    | 1    | 5    | 1 |
| 43129  |      |      |      |      |      | 2    | 4    | 4    | 4    | 3    | 4    | 4    | 4    | 3    | 4 |
| 43133  |      |      |      |      |      | 3    | 3    | 2    | 2    | 5    | 4    | 4    | 2    | 3    | 2 |
| 43140  |      |      |      |      |      |      |      |      |      |      |      |      |      |      |   |
| 43143  |      |      |      |      |      | 2    | 2    | 2    | 1    | 1    | 1    | 1    | 1    | 2    | 2 |
| 43149  |      |      |      |      |      | 2    | 2    | 2    | 2    | 2    | 2    | 2    | 1    | 1    | 2 |
| 43150  |      |      |      |      |      | 2    | 2    | 2    | 2    | 1    | 1    | 1    | 1    | 1    | 2 |
| 43153  |      |      |      |      |      | 3    | 5    | 4    | 4    | 3    | 5    | 5    | 4    | 3    | 3 |
| 43170  | 3    | 5    | 5    | 5    |      |      |      |      |      |      |      |      |      |      |   |
| 43187  |      |      |      |      |      | 4    | 4    | 3    | 3    | 4    | 3    | 3    | 4    | 4    | 3 |
| 43188  |      |      |      |      |      | 3    | 4    | 3    | 4    | 3    | 4    | 3    | 4    | 3    | 3 |
| 43198  |      |      |      |      |      |      |      |      |      |      |      |      |      |      |   |
| 43208  |      |      |      |      |      | 3    | 6    | 6    | 6    | 3    | 6    | 6    | 6    | 3    | 6 |
| 43216  | 3    | 4    | 3    | 3    |      |      |      |      |      |      |      |      |      |      |   |
| 43222  |      |      |      |      |      | 2    | 2    | 2    | 2    | 2    | 2    | 2    | 2    | 2    | 2 |

| respid | Q47l | Q47m | Q47n | Q47o | Q48a | Q48b | Q48c | Q48d | Q48e | Q48f | Q48g | Q48h | Q48i | Q48j |
|--------|------|------|------|------|------|------|------|------|------|------|------|------|------|------|
| 43224  |      |      |      |      |      | 5    | 6    | 6    | 3    | 4    | 5    | 5    | 5    | 5    |
| 43230  | 2    | 2    | 2    | 2    |      |      |      |      |      |      |      |      |      |      |
| 43231  | 1    | 2    | 2    | 3    |      |      |      |      |      |      |      |      |      |      |
| 43265  | 2    | 2    | 2    | 2    |      |      |      |      |      |      |      |      |      |      |
| 43270  | 1    | 2    | 1    | 1    |      |      |      |      |      |      |      |      |      |      |
| 43283  | 2    | 2    | 2    | 2    |      |      |      |      |      |      |      |      |      |      |
| 43295  | 1    | 2    | 2    | 2    |      |      |      |      |      |      |      |      |      |      |
| 43297  | 4    | 4    | 4    | 4    |      |      |      |      |      |      |      |      |      |      |
| 43299  |      |      |      |      |      | 3    | 3    | 4    | 3    | 4    | 3    | 4    | 3    | 4    |
| 43307  |      |      |      |      |      | 2    | 6    | 6    | 6    | 2    | 6    | 6    | 6    | 2    |
| 43316  | 1    | 2    | 2    | 2    |      |      |      |      |      |      |      |      |      |      |
| 43318  | 3    | 3    | 2    | 2    |      |      |      |      |      |      |      |      |      |      |
| 43319  | 3    | 3    | 3    |      |      |      |      |      |      |      |      |      |      |      |
| 43324  | 1    | 2    | 2    | 2    |      |      |      |      |      |      |      |      |      |      |
| 43325  |      |      |      |      |      | 4    | 3    | 3    | 4    | 4    | 3    | 3    | 3    | 4    |
| 43327  |      |      |      |      |      | 1    | 4    | 4    | 4    | 2    | 5    | 5    | 5    | 1    |
| 43338  |      |      |      |      |      | 3    | 4    | 4    | 3    | 3    | 5    | 3    | 4    | 5    |
| 43342  |      |      |      |      |      |      | 4    | 4    | 4    |      | 5    | 4    | 5    | 3    |
| 43348  |      |      |      |      |      | 2    |      |      |      |      |      |      |      |      |
| 43395  | 3    | 2    | 2    | 2    |      |      |      |      |      |      |      |      |      |      |
| 43404  | 1    | 1    | 2    | 2    |      |      |      |      |      |      |      |      |      |      |
| 43406  | 1    | 1    | 1    | 1    |      |      |      |      |      |      |      |      |      |      |
| 43407  |      |      |      |      |      | 1    | 1    | 1    | 1    | 1    | 6    | 6    | 6    | 6    |
| 43411  |      |      |      |      |      | 3    | 5    | 4    | 5    | 2    | 5    | 5    | 6    | 3    |
| 43416  | 1    | 1    | 1    | 1    |      |      |      |      |      |      |      |      |      |      |
| 43428  | 4    | 4    | 4    | 4    |      |      |      |      |      |      |      |      |      |      |
| 43429  | 3    | 3    | 3    | 3    |      |      |      |      |      |      |      |      |      |      |
| 43432  | 3    | 4    | 4    | 4    |      |      |      |      |      |      |      |      |      |      |
| 43443  | 1    | 3    | 3    | 3    |      |      |      |      |      |      |      |      |      |      |
| 43455  |      |      |      |      |      |      |      |      |      |      |      |      |      |      |
| 43457  | 3    | 3    | 3    | 2    |      |      |      |      |      |      |      |      |      |      |
| 43458  |      |      |      |      |      | 2    | 6    | 6    | 6    | 2    | 6    | 6    | 6    | 1    |

| respid | Q47l | Q47m | Q47n | Q47o | Q48a | Q48b | Q48c | Q48d | Q48e | Q48f | Q48g | Q48h | Q48i | Q48j |   |
|--------|------|------|------|------|------|------|------|------|------|------|------|------|------|------|---|
| 43477  |      |      |      |      |      |      | 3    | 5    | 4    | 3    | 4    | 4    | 6    | 3    | 4 |
| 43520  |      |      |      |      |      | 1    |      |      |      |      |      |      |      |      |   |
| 43521  | 3    | 3    | 3    | 3    |      |      |      |      |      |      |      |      |      |      |   |
| 43550  |      |      |      |      |      | 5    | 5    | 6    | 6    | 2    | 6    | 6    | 6    | 1    | 4 |
| 43551  | 3    | 3    | 3    | 3    |      |      |      |      |      |      |      |      |      |      |   |
| 43554  |      |      |      |      |      |      | 4    | 4    | 5    | 3    | 4    | 4    | 6    | 2    | 4 |
| 43560  |      |      |      |      |      | 2    | 5    | 5    | 6    | 2    | 5    | 5    | 5    | 2    | 3 |
| 43569  |      |      |      |      |      | 6    | 6    | 6    | 6    | 6    | 6    | 6    | 6    | 6    | 6 |
| 43583  |      |      |      |      |      | 2    | 3    | 5    | 5    | 3    | 5    | 5    | 5    | 2    | 3 |
| 43590  |      |      |      |      |      | 4    | 3    | 3    | 4    | 4    | 3    | 3    | 4    | 5    | 5 |
| 43591  |      |      |      |      |      | 1    | 6    | 6    | 5    | 1    | 6    | 6    | 6    | 1    | 6 |
| 43595  |      |      |      |      |      |      |      |      |      |      |      |      |      |      |   |
| 43599  |      |      |      |      |      | 3    |      |      | 4    | 3    | 4    |      | 4    | 3    |   |
| 43606  |      |      |      |      |      | 4    | 5    | 5    | 5    | 3    | 5    | 5    | 6    | 3    | 5 |
| 43609  |      |      |      |      |      | 4    | 5    | 5    | 5    | 5    | 5    | 5    | 5    | 4    | 3 |
| 43629  | 1    | 1    | 1    | 1    |      |      |      |      |      |      |      |      |      |      |   |
| 43636  |      |      |      |      |      | 1    | 6    | 6    | 6    | 1    | 6    | 6    | 6    | 2    | 1 |
| 43661  | 3    | 4    | 4    | 4    |      |      |      |      |      |      |      |      |      |      |   |
| 43668  | 4    | 5    | 5    | 4    |      |      |      |      |      |      |      |      |      |      |   |
| 43672  |      |      |      |      |      |      |      |      |      |      |      |      |      |      |   |
| 43677  |      |      |      |      |      | 3    | 5    | 4    | 5    | 3    | 4    | 6    | 4    | 3    | 4 |
| 43683  |      |      |      |      |      | 3    | 5    | 6    | 3    | 4    | 3    | 3    | 5    |      | 3 |
| 43708  | 2    | 3    | 3    | 2    |      |      |      |      |      |      |      |      |      |      |   |
| 43713  |      |      |      |      |      | 6    | 1    | 1    | 3    | 6    | 2    | 2    | 1    | 6    | 1 |
| 43718  |      |      |      |      |      |      |      |      |      |      |      |      |      |      |   |
| 43725  |      |      |      |      |      | 4    | 3    | 5    | 5    | 3    | 3    | 5    | 5    | 2    | 5 |
| 43747  |      |      |      |      |      | 4    | 3    | 3    | 3    | 5    | 2    | 2    | 4    | 5    | 2 |
| 43755  |      |      |      |      |      | 3    | 6    | 6    | 6    | 2    | 6    | 6    | 6    | 2    | 6 |
| 43770  |      |      |      |      |      |      |      |      |      |      |      |      |      |      |   |
| 43775  |      |      |      |      |      | 3    | 4    | 4    | 4    | 3    | 5    | 4    | 4    | 3    | 4 |
| 43788  |      |      |      |      |      |      |      |      |      |      |      |      |      |      |   |
| 43790  |      |      |      |      |      | 3    | 2    | 2    | 2    | 2    | 2    | 2    | 2    | 2    | 2 |

| respid | Q47l | Q47m | Q47n | Q47o | Q48a | Q48b | Q48c | Q48d | Q48e | Q48f | Q48g | Q48h | Q48i | Q48j |   |
|--------|------|------|------|------|------|------|------|------|------|------|------|------|------|------|---|
| 43797  |      |      |      |      |      | 2    | 2    | 2    | 2    | 2    | 2    | 2    | 1    | 1    | 2 |
| 43798  |      |      |      |      |      | 2    | 3    | 2    | 1    | 1    | 2    | 2    | 2    | 2    | 2 |
| 43811  |      |      |      |      |      | 2    | 2    | 2    | 2    | 2    | 2    | 2    | 2    | 2    | 2 |
| 43819  |      |      |      |      |      | 2    | 1    | 2    | 1    | 2    | 2    | 2    | 2    | 2    | 1 |
| 43821  |      |      |      |      |      | 2    | 2    | 1    | 2    | 2    | 2    | 2    | 2    | 2    | 2 |
| 43822  |      |      |      |      |      | 6    | 6    | 6    | 1    | 6    | 1    | 6    | 6    | 6    | 1 |
| 43825  |      |      |      |      |      | 3    | 4    | 5    | 4    | 3    | 5    | 5    | 4    | 2    | 3 |
| 43826  |      |      |      |      |      | 4    | 4    | 4    | 4    | 4    | 4    | 4    | 4    | 4    | 4 |
| 43831  |      |      |      |      |      | 3    | 4    | 4    | 3    | 4    | 3    | 5    | 5    | 3    | 6 |
| 43836  |      |      |      |      |      | 2    | 3    | 4    | 1    | 1    | 2    | 3    | 3    | 2    | 1 |
| 43852  |      |      |      |      |      | 2    | 3    | 1    | 2    | 2    | 3    | 1    | 2    | 3    | 2 |
| 43857  |      |      |      |      |      | 5    | 6    | 6    | 6    | 6    | 6    | 6    | 6    | 6    | 6 |
| 43858  | 4    | 4    | 4    | 2    |      |      |      |      |      |      |      |      |      |      |   |
| 43859  |      |      |      |      |      | 2    | 1    | 2    | 2    | 2    | 3    | 2    | 2    | 2    | 1 |
| 43863  |      |      |      |      |      |      |      |      |      |      |      |      |      |      |   |
| 43868  |      |      |      |      |      | 2    | 2    | 2    | 2    | 2    | 2    | 2    | 2    | 2    | 2 |
| 43872  |      |      |      |      |      | 2    | 2    | 2    | 3    | 2    | 2    | 1    | 3    | 1    | 2 |
| 43874  |      |      |      |      |      | 2    | 2    | 2    | 2    | 2    | 2    | 2    | 2    | 3    | 2 |
| 43882  |      |      |      |      |      | 2    | 5    | 5    | 6    | 2    | 6    | 6    | 6    | 2    | 6 |
| 43886  |      |      |      |      |      |      |      |      |      |      |      |      |      |      |   |
| 43903  |      |      |      |      |      |      |      | 3    | 2    |      |      |      |      |      |   |
| 43929  |      |      |      |      |      | 1    | 5    | 6    | 6    | 1    | 6    | 6    | 6    | 1    | 6 |
| 43932  |      |      |      |      |      | 3    | 5    | 5    | 5    | 3    | 5    | 5    | 5    | 2    | 5 |
| 43936  |      |      |      |      |      | 5    | 3    | 4    | 4    | 4    | 4    | 4    | 3    | 4    | 4 |
| 43962  |      |      |      |      |      | 1    | 6    | 6    | 6    | 1    | 5    | 5    | 6    | 1    | 6 |
| 43964  |      |      |      |      |      | 2    | 4    | 5    | 5    | 2    | 6    | 6    | 6    | 1    | 5 |
| 43968  |      |      |      |      |      | 6    | 6    |      |      | 1    |      | 6    |      | 5    | 1 |
| 43979  |      |      |      |      |      | 2    | 3    | 4    | 5    | 2    | 5    | 5    | 4    | 3    | 4 |
| 44006  | 2    | 3    | 3    | 3    |      |      |      |      |      |      |      |      |      |      |   |
| 44009  |      |      |      |      |      |      |      |      |      |      |      |      |      |      |   |
| 44023  |      |      |      |      |      | 3    | 4    | 4    | 5    | 4    | 4    | 4    | 6    | 4    | 3 |
| 44035  |      |      |      |      |      | 2    | 2    | 2    | 2    | 1    | 3    | 3    | 2    | 2    | 1 |

| respid | Q47l | Q47m | Q47n | Q47o | Q48a | Q48b | Q48c | Q48d | Q48e | Q48f | Q48g | Q48h | Q48i | Q48j |   |
|--------|------|------|------|------|------|------|------|------|------|------|------|------|------|------|---|
| 44038  | 3    | 4    | 3    | 3    |      |      |      |      |      |      |      |      |      |      |   |
| 44039  |      |      |      |      |      | 2    | 1    | 3    | 2    | 3    | 2    | 1    | 1    | 2    | 2 |
| 44043  |      |      |      |      |      | 4    | 3    | 4    | 3    | 4    | 4    | 4    | 4    | 4    | 4 |
| 44048  |      |      |      |      |      | 2    | 2    | 2    | 2    | 2    | 2    | 2    | 2    | 2    | 1 |
| 44050  |      |      |      |      |      | 6    | 6    | 6    | 6    | 3    | 6    | 6    | 6    | 6    | 1 |
| 44051  |      |      |      |      |      | 2    | 2    | 2    | 2    | 2    | 2    | 2    | 2    | 3    | 1 |
| 44061  |      |      |      |      |      | 2    | 1    | 2    | 3    | 1    | 1    | 3    | 1    | 2    | 1 |
| 44063  |      |      |      |      |      | 3    | 2    | 2    | 2    | 2    | 1    | 1    | 1    | 4    | 2 |
| 44072  |      |      |      |      |      | 2    | 1    | 1    | 2    | 2    | 2    | 3    | 1    | 2    | 1 |
| 44075  |      |      |      |      |      | 1    | 2    | 1    | 1    | 3    | 2    | 2    | 1    | 1    | 1 |
| 44089  |      |      |      |      |      | 2    | 3    | 1    | 2    | 3    | 2    | 2    | 1    | 2    | 2 |
| 44090  | 2    | 2    | 2    | 2    |      |      |      |      |      |      |      |      |      |      |   |
| 44091  |      |      |      |      |      | 1    | 2    | 2    | 3    | 2    | 2    | 2    | 2    | 2    | 2 |
| 44092  |      |      |      |      |      | 3    | 5    | 4    | 5    | 3    | 6    | 5    | 5    | 3    | 6 |
| 44110  |      |      |      |      |      | 2    | 1    | 1    | 2    | 1    | 2    | 3    | 2    | 2    | 1 |
| 44112  |      |      |      |      |      | 2    | 3    | 2    | 2    | 2    | 2    | 1    | 1    | 1    | 1 |
| 44114  |      |      |      |      |      | 2    | 2    | 3    | 2    | 2    | 2    | 2    | 3    | 1    | 3 |
| 44143  | 2    | 3    | 3    | 3    |      |      |      |      |      |      |      |      |      |      |   |
| 44179  |      |      |      |      |      | 2    | 4    | 4    | 4    | 3    | 4    | 4    | 4    | 3    | 4 |
| 44234  | 1    | 3    | 3    | 3    |      |      |      |      |      |      |      |      |      |      |   |
| 44236  | 5    | 5    | 5    | 5    |      |      |      |      |      |      |      |      |      |      |   |
| 44239  | 1    | 2    | 2    | 2    |      |      |      |      |      |      |      |      |      |      |   |
| 44241  | 2    | 2    | 2    | 2    |      |      |      |      |      |      |      |      |      |      |   |
| 44253  |      |      |      |      |      |      |      |      |      |      |      |      |      |      |   |
| 44260  | 2    | 3    | 3    | 2    |      |      |      |      |      |      |      |      |      |      |   |
| 44261  | 3    | 3    | 3    | 3    |      |      |      |      |      |      |      |      |      |      |   |
| 44263  | 2    | 3    | 3    | 3    |      |      |      |      |      |      |      |      |      |      |   |
| 44264  |      |      |      |      |      | 3    | 4    | 4    | 3    | 3    | 4    | 3    | 4    | 3    | 4 |
| 44265  | 5    | 3    | 3    | 5    |      |      |      |      |      |      |      |      |      |      |   |
| 44267  | 3    | 2    | 3    | 2    |      |      |      |      |      |      |      |      |      |      |   |
| 44306  |      |      |      |      |      | 3    | 5    | 5    | 5    | 3    | 4    | 5    | 5    | 3    | 4 |
| 44309  |      |      |      |      |      | 3    | 2    | 2    | 4    | 3    | 2    | 3    | 4    | 3    | 2 |



| respid | Q47l | Q47m | Q47n | Q47o | Q48a | Q48b | Q48c | Q48d | Q48e | Q48f | Q48g | Q48h | Q48i | Q48j |   |
|--------|------|------|------|------|------|------|------|------|------|------|------|------|------|------|---|
| 44310  |      |      |      |      |      | 2    | 3    | 3    | 4    | 5    | 6    | 2    | 2    | 3    | 3 |
| 44361  |      |      |      |      |      | 3    | 2    | 2    | 3    | 3    | 1    | 5    | 3    | 5    | 5 |
| 44380  |      |      |      |      |      | 6    | 5    | 5    | 5    | 5    | 5    | 5    | 5    | 5    | 5 |
| 44386  |      |      |      |      |      | 6    | 5    | 3    | 3    | 4    | 3    | 3    | 4    | 6    | 4 |
| 44419  |      |      |      |      |      | 2    | 2    | 4    | 4    | 3    | 3    | 3    | 4    | 3    | 3 |
| 44426  |      |      |      |      |      | 1    | 6    | 6    | 6    | 2    | 6    | 6    | 6    | 1    | 6 |
| 44479  |      |      | 2    | 2    | 2    |      |      |      |      |      |      |      |      |      |   |
| 44484  | 5    | 3    | 3    | 3    | 1    |      |      |      |      |      |      |      |      |      |   |
| 44487  |      |      |      |      |      |      |      |      |      |      |      |      |      |      |   |
| 44509  |      |      |      |      |      | 3    | 5    | 5    | 5    | 3    | 5    | 5    | 5    | 3    | 5 |
| 44540  |      |      |      |      |      | 3    | 4    | 4    | 5    | 3    | 4    | 2    | 4    | 2    | 5 |
| 44551  |      |      | 2    | 2    | 3    |      |      |      |      |      |      |      |      |      |   |
| 44553  | 3    | 4    | 4    | 4    | 4    |      |      |      |      |      |      |      |      |      |   |
| 44650  |      |      |      |      |      | 3    | 4    | 4    | 4    | 3    | 4    | 4    | 6    | 3    | 4 |
| 44665  |      |      |      |      |      | 4    | 3    | 3    | 2    | 5    | 3    | 3    | 4    | 4    | 3 |
| 44779  | 5    | 1    | 1    | 4    |      |      |      |      |      |      |      |      |      |      |   |
| 44797  |      |      |      |      |      | 4    | 5    | 5    | 5    | 3    | 4    | 3    | 5    | 3    | 3 |
| 44807  | 4    | 3    | 3    | 3    | 3    |      |      |      |      |      |      |      |      |      |   |
| 44815  |      |      |      |      |      | 3    | 3    | 5    | 4    | 4    | 4    | 5    | 6    | 4    | 3 |
| 44836  |      |      |      |      |      | 4    | 3    | 4    | 4    | 3    | 3    | 5    | 6    | 2    | 5 |
| 44868  | 2    | 1    | 4    | 2    |      |      |      |      |      |      |      |      |      |      |   |
| 44927  | 3    | 3    | 3    | 2    |      |      |      |      |      |      |      |      |      |      |   |
| 44983  |      |      |      |      |      |      |      |      |      |      |      |      |      |      |   |
| 45040  |      |      |      |      |      | 6    |      |      |      |      |      |      |      |      |   |
| 45051  |      |      |      |      |      | 4    | 4    | 5    | 5    | 6    | 6    | 5    | 4    | 3    | 4 |
| 45067  |      |      |      |      |      | 3    | 5    | 6    | 6    | 3    | 5    | 5    | 6    | 3    | 5 |
| 45074  |      |      |      |      |      |      |      |      |      |      |      |      |      |      |   |
| 45115  |      |      |      |      |      | 3    | 5    | 5    | 5    | 2    | 5    | 6    | 6    | 1    | 6 |
| 45187  | 2    | 2    | 2    | 2    |      |      |      |      |      |      |      |      |      |      |   |
| 45221  | 1    | 1    | 1    | 1    |      |      |      |      |      |      |      |      |      |      |   |
| 45279  |      |      |      |      |      | 2    | 5    | 6    | 4    | 4    | 4    | 5    | 5    | 4    | 5 |
| 45308  |      |      |      |      |      | 4    | 3    | 4    | 4    | 5    | 4    | 4    | 5    | 5    | 5 |

| respid | Q47l | Q47m | Q47n | Q47o | Q48a | Q48b | Q48c | Q48d | Q48e | Q48f | Q48g | Q48h | Q48i | Q48j |   |
|--------|------|------|------|------|------|------|------|------|------|------|------|------|------|------|---|
| 45317  | 3    | 3    | 3    | 3    |      |      |      |      |      |      |      |      |      |      |   |
| 45379  | 4    | 2    | 2    | 4    |      |      |      |      |      |      |      |      |      |      |   |
| 45451  |      |      |      |      |      | 3    | 4    | 4    | 4    | 3    | 4    | 4    | 4    | 3    | 4 |
| 45472  | 2    | 2    | 3    | 1    |      |      |      |      |      |      |      |      |      |      |   |
| 45474  | 3    | 2    | 2    | 2    |      |      |      |      |      |      |      |      |      |      |   |
| 45544  | 4    | 4    | 4    | 4    |      |      |      |      |      |      |      |      |      |      |   |
| 45561  |      |      |      |      |      | 3    | 5    | 5    |      | 2    |      | 5    | 5    |      |   |
| 45596  |      |      |      |      |      | 3    | 5    | 5    | 5    | 5    | 5    | 6    | 6    | 2    | 6 |

**Instrum** **SQOL-F** **SQOL-F** **SQOL-F** **SQOL-F** **SQOL-F** **SQOL-F** **SQOL-F** **SQOL-F** **SF-12** **SF-12** **SF-12** **SF-12** **SF-12** **SF-12**

**Symptom**

**Type of RAs** is (1=1) As is (1=1) Reverse (1=6) As is (1=1) As is (1=1) As is (1=1) As is (1=1) Reverse (1=6)

**Descripti** Neg Neg Pos Neg Neg Neg Neg Pos

| respid | Q48k | Q48l | Q48m | Q48n | Q48o | Q48p | Q48q | Q48r | Q49_1 | Q50a_1 | Q50b_1 | Q51_1 | Q51_2 | Q52_1 |   |
|--------|------|------|------|------|------|------|------|------|-------|--------|--------|-------|-------|-------|---|
| 241    |      |      |      |      |      |      |      |      |       | 3      | 3      | 3     | 5     | 5     | 5 |
| 242    |      |      |      |      |      |      |      |      |       | 3      | 3      | 3     | 5     | 5     | 5 |
| 243    |      |      |      |      |      |      |      |      |       | 3      | 2      | 2     | 3     | 4     | 3 |
| 244    |      |      |      |      |      |      |      |      |       | 2      | 2      | 3     | 4     | 4     | 5 |
| 245    | 5    | 5    | 2    | 2    | 5    | 2    | 5    | 2    | 2     | 2      | 2      | 3     | 3     | 3     | 5 |
| 246    |      |      |      |      |      |      |      |      |       | 3      | 3      | 3     | 4     | 5     | 4 |
| 247    |      |      |      |      |      |      |      |      |       | 3      | 2      | 1     | 3     | 2     | 5 |
| 253    | 5    | 3    | 2    | 5    | 5    | 5    | 6    | 2    | 2     | 2      | 2      | 2     | 3     | 4     | 5 |
| 256    |      |      |      |      |      |      |      |      |       | 3      | 3      | 3     | 5     | 5     | 5 |
| 257    | 6    | 3    | 3    | 6    | 6    | 6    | 6    | 6    | 2     | 3      | 3      | 3     | 4     | 4     | 5 |
| 258    |      |      |      |      |      |      |      |      |       | 3      | 2      | 2     | 3     | 3     | 3 |
| 259    | 5    | 3    | 2    | 3    | 6    | 3    | 5    | 2    | 3     | 2      | 2      | 2     | 3     | 3     | 4 |
| 263    |      |      |      |      |      |      |      |      |       | 2      | 3      | 2     | 5     | 5     | 5 |
| 264    | 6    | 3    | 2    | 6    | 5    | 6    | 5    | 2    | 3     | 3      | 3      | 3     | 5     | 5     | 4 |
| 265    |      |      |      |      |      |      |      |      |       | 3      | 2      | 2     | 3     | 4     | 3 |
| 266    | 4    | 4    | 4    | 3    | 5    | 3    | 5    | 2    | 2     | 2      | 3      | 3     | 4     | 5     | 5 |
| 268    |      |      |      |      |      |      |      |      |       | 3      | 2      | 3     | 5     | 5     | 2 |
| 270    | 6    | 6    | 6    | 6    | 6    | 6    | 6    | 6    | 6     | 3      | 3      | 3     | 4     | 4     | 4 |
| 272    |      |      |      |      |      |      |      |      |       | 2      | 3      | 2     | 3     | 4     | 4 |
| 274    |      |      |      |      |      |      |      |      |       | 4      | 3      | 3     | 5     | 5     | 5 |

| respid | Q48k | Q48l | Q48m | Q48n | Q48o | Q48p | Q48q | Q48r | Q49_1 | Q50a_1 | Q50b_1 | Q51_1 | Q51_2 | Q52_1 |   |
|--------|------|------|------|------|------|------|------|------|-------|--------|--------|-------|-------|-------|---|
| 275    |      |      |      |      |      |      |      |      |       | 3      | 3      | 3     | 5     | 5     | 5 |
| 276    | 5    | 5    | 2    | 5    | 5    | 3    | 5    | 3    |       | 3      | 3      | 3     | 5     | 5     | 5 |
| 277    |      |      |      |      |      |      |      |      |       | 2      | 3      | 3     | 4     | 5     | 4 |
| 279    |      |      |      |      |      |      |      |      |       | 3      | 2      | 2     | 3     | 3     | 3 |
| 286    | 6    | 6    | 1    | 5    | 6    | 6    | 6    | 1    |       | 4      | 3      | 3     | 5     | 5     | 4 |
| 290    |      |      |      |      |      |      |      |      |       | 3      | 2      | 2     | 4     | 4     | 4 |
| 291    | 6    | 5    | 5    | 5    | 5    | 5    | 5    | 5    |       | 3      | 3      | 3     | 5     | 5     | 5 |
| 295    |      |      |      |      |      |      |      |      |       | 3      | 3      | 3     | 5     | 5     | 5 |
| 297    |      |      |      |      |      |      |      |      |       | 3      | 3      | 2     | 5     | 5     | 5 |
| 299    |      |      |      |      |      |      |      |      |       | 3      | 3      | 3     | 5     | 5     | 3 |
| 300    |      |      |      |      |      |      |      |      |       | 3      | 2      | 2     | 3     | 4     | 4 |
| 303    |      |      |      |      |      |      |      |      |       | 4      | 3      | 3     | 5     | 5     | 5 |
| 304    | 5    | 5    | 4    | 4    | 5    | 3    | 5    | 5    |       | 4      | 3      | 3     | 5     | 5     | 5 |
| 306    |      |      |      |      |      |      |      |      |       | 3      | 3      | 3     | 5     | 5     | 4 |
| 307    | 5    | 5    | 3    | 5    | 5    | 5    | 5    | 2    |       | 3      | 3      | 3     | 5     | 5     | 5 |
| 312    | 4    | 4    | 4    | 4    | 4    | 4    | 4    | 4    |       | 2      | 2      | 2     | 3     | 3     | 3 |
| 315    |      |      |      |      |      |      |      |      |       | 2      | 2      | 2     | 3     | 3     | 3 |
| 317    |      |      |      |      |      |      |      |      |       | 4      | 3      | 3     | 5     | 5     | 5 |
| 322    | 2    | 2    | 2    | 3    | 5    | 1    | 2    | 5    |       | 3      | 3      | 3     | 5     | 5     | 2 |
| 335    | 5    | 5    | 5    | 6    | 6    | 6    | 6    | 6    |       | 3      | 3      | 3     | 4     | 4     | 4 |
| 374    | 4    | 2    | 2    | 5    | 5    | 2    | 4    | 4    |       | 2      | 2      | 2     | 4     | 4     | 4 |
| 378    |      |      |      |      |      |      |      |      |       | 3      | 3      | 3     | 3     | 3     | 3 |
| 380    |      |      |      |      |      |      |      |      |       | 3      | 3      | 3     | 4     | 4     | 5 |
| 382    |      |      |      |      |      |      |      |      |       | 2      | 3      | 3     | 4     | 5     | 5 |
| 384    |      |      |      |      |      |      |      |      |       | 3      | 3      | 2     | 4     | 5     | 4 |
| 385    |      |      |      |      |      |      |      |      |       | 2      | 2      | 2     | 3     | 4     | 3 |
| 395    |      |      |      |      |      |      |      |      |       | 4      | 3      | 3     | 5     | 5     | 5 |
| 396    |      |      |      |      |      |      |      |      |       | 2      | 3      | 3     | 5     | 5     | 5 |
| 398    |      |      |      |      |      |      |      |      |       | 4      | 3      | 3     | 5     | 5     | 5 |
| 402    | 3    | 3    | 3    | 3    | 3    | 3    | 3    | 3    |       | 2      | 2      | 2     | 3     | 3     | 3 |
| 414    |      |      |      |      |      |      |      |      |       | 3      | 3      | 3     | 5     | 5     | 5 |
| 415    |      |      |      |      |      |      |      |      |       | 3      | 3      | 3     | 5     | 5     | 5 |

| respid | Q48k | Q48l | Q48m | Q48n | Q48o | Q48p | Q48q | Q48r | Q49_1 | Q50a_1 | Q50b_1 | Q51_1 | Q51_2 | Q52_1 |   |
|--------|------|------|------|------|------|------|------|------|-------|--------|--------|-------|-------|-------|---|
| 416    |      |      |      |      |      |      |      |      |       | 1      | 2      | 2     | 3     | 3     | 5 |
| 420    |      |      |      |      |      |      |      |      |       | 2      | 2      | 2     | 5     | 5     | 3 |
| 421    |      |      |      |      |      |      |      |      |       | 4      | 3      | 3     | 5     | 5     | 4 |
| 422    | 6    | 6    | 4    | 3    | 6    | 6    | 6    | 6    | 1     | 3      | 3      | 3     | 5     | 5     | 5 |
| 423    | 4    | 4    | 3    | 5    | 5    | 5    | 5    | 5    | 3     | 2      | 2      | 3     | 4     | 4     | 4 |
| 424    | 6    | 6    | 1    | 6    | 6    | 6    | 6    | 6    | 5     | 4      | 3      | 3     | 5     | 5     | 4 |
| 425    |      |      |      |      |      |      |      |      |       | 2      | 2      | 2     | 4     | 4     | 4 |
| 428    |      |      |      |      |      |      |      |      |       | 4      | 2      | 2     | 3     | 4     | 4 |
| 429    | 3    | 3    | 5    | 3    | 5    | 5    | 5    | 5    | 3     | 3      | 3      | 2     | 4     | 5     | 5 |
| 431    |      |      |      |      |      |      |      |      |       | 4      | 3      | 3     | 5     | 5     | 5 |
| 437    |      |      |      |      |      |      |      |      |       | 2      | 1      | 2     | 2     | 3     | 2 |
| 438    |      |      |      |      |      |      |      |      |       | 1      | 2      | 3     | 5     | 3     | 5 |
| 441    | 3    | 4    | 3    | 3    | 4    | 3    | 5    | 4    | 4     | 3      | 3      | 3     | 5     | 5     | 4 |
| 444    |      |      |      |      |      |      |      |      |       | 4      | 3      | 3     | 5     | 5     | 4 |
| 448    |      |      |      |      |      |      |      |      |       | 3      | 3      | 3     | 5     | 5     | 5 |
| 449    | 5    | 5    | 5    | 5    | 5    | 5    | 5    | 5    | 3     | 3      | 2      | 2     | 3     | 4     | 4 |
| 457    | 2    | 2    | 5    | 2    | 5    | 3    | 1    |      |       | 3      | 3      | 2     | 4     | 4     | 4 |
| 460    |      |      |      |      |      |      |      |      |       | 3      | 3      | 3     | 5     | 5     | 5 |
| 469    |      |      |      |      |      |      |      |      |       | 3      | 3      | 2     | 4     | 5     | 5 |
| 471    | 5    | 5    | 4    | 4    | 5    | 5    | 5    | 5    | 5     | 2      | 3      | 3     | 3     | 4     | 4 |
| 473    |      |      |      |      |      |      |      |      |       | 2      | 2      | 2     | 3     | 3     | 5 |
| 476    |      |      |      |      |      |      |      |      |       | 3      | 3      | 3     | 4     | 4     | 4 |
| 479    |      |      |      |      |      |      |      |      |       | 4      | 3      | 3     | 5     | 5     | 5 |
| 485    |      |      |      |      |      |      |      |      |       | 4      | 2      | 3     | 5     | 4     | 5 |
| 488    | 2    | 1    | 2    | 1    | 2    | 3    | 1    | 6    |       | 2      | 2      | 2     | 4     | 3     | 5 |
| 494    | 4    | 4    | 3    | 2    | 5    | 4    | 4    | 3    |       | 3      | 3      | 3     | 4     | 5     | 4 |
| 496    |      |      |      |      |      |      |      |      |       | 4      | 3      | 3     | 5     | 5     | 5 |
| 501    |      |      |      |      |      |      |      |      |       | 3      | 3      | 3     | 4     | 4     | 4 |
| 502    |      |      |      |      |      |      |      |      |       | 3      | 3      | 2     | 3     | 3     | 3 |
| 503    |      |      |      |      |      |      |      |      |       | 4      | 3      | 3     | 5     | 5     | 5 |
| 506    |      |      |      |      |      |      |      |      |       | 4      | 3      | 3     | 5     | 5     | 5 |
| 514    | 2    | 3    | 6    | 5    | 6    | 2    | 2    | 6    |       | 2      | 2      | 2     | 2     | 3     | 3 |

| respid | Q48k | Q48l | Q48m | Q48n | Q48o | Q48p | Q48q | Q48r | Q49_1 | Q50a_1 | Q50b_1 | Q51_1 | Q51_2 | Q52_1 |   |
|--------|------|------|------|------|------|------|------|------|-------|--------|--------|-------|-------|-------|---|
| 515    |      |      |      |      |      |      |      |      |       | 3      | 3      | 3     | 4     | 5     | 4 |
| 516    | 4    | 5    | 4    | 6    | 6    | 3    | 5    | 4    |       | 2      | 3      | 3     | 5     | 5     | 4 |
| 519    | 3    | 5    | 4    | 3    | 5    | 5    | 5    |      |       | 3      | 2      | 2     | 5     | 5     | 5 |
| 522    |      |      |      |      |      |      |      |      |       | 3      | 3      | 3     | 3     | 3     | 3 |
| 525    |      |      |      |      |      |      |      |      |       | 3      | 3      | 3     | 5     | 5     | 5 |
| 528    |      |      |      |      |      |      |      |      |       | 4      | 3      | 3     | 5     | 5     | 5 |
| 532    |      |      |      |      |      |      |      |      |       | 3      | 3      | 2     | 5     | 4     | 4 |
| 536    | 3    | 5    | 2    | 2    | 5    | 4    | 5    | 3    |       | 3      | 2      | 3     | 5     | 4     | 4 |
| 539    | 2    | 2    | 3    | 2    | 5    | 5    | 2    | 5    |       | 3      | 3      | 3     | 4     | 4     | 4 |
| 540    | 5    | 3    | 3    | 5    | 5    | 5    | 5    | 3    |       | 2      | 3      | 3     | 5     | 5     | 4 |
| 547    |      |      |      |      |      |      |      |      |       | 1      | 3      | 3     | 2     | 2     | 5 |
| 551    |      |      |      |      |      |      |      |      |       | 3      | 3      | 3     | 5     | 5     | 5 |
| 554    |      |      |      |      |      |      |      |      |       | 2      | 2      | 2     | 1     | 3     | 3 |
| 558    |      |      |      |      |      |      |      |      |       | 3      | 2      | 2     | 3     | 3     | 3 |
| 563    | 6    | 6    | 1    | 6    | 6    | 6    | 6    | 1    |       | 4      | 3      | 3     | 5     | 5     | 5 |
| 564    |      |      |      |      |      |      |      |      |       | 4      | 3      | 3     | 2     | 2     | 2 |
| 565    |      |      |      |      |      |      |      |      |       | 4      | 3      | 3     | 4     | 4     | 4 |
| 567    |      |      |      |      |      |      |      |      |       | 3      | 3      | 3     | 5     | 5     | 5 |
| 569    | 5    | 5    | 2    | 5    | 5    | 3    | 5    | 3    |       | 3      | 3      | 3     | 5     | 5     | 5 |
| 572    |      |      |      |      |      |      |      |      |       | 3      | 3      | 3     | 3     | 3     | 4 |
| 574    | 3    | 5    | 4    | 4    | 5    | 5    | 5    | 4    |       | 3      | 2      | 2     | 4     | 4     | 5 |
| 583    |      |      |      |      |      |      |      |      |       | 2      | 2      | 1     | 2     | 2     | 2 |
| 589    |      |      |      |      |      |      |      |      |       | 4      | 3      | 3     | 5     | 5     | 5 |
| 592    |      |      |      |      |      |      |      |      |       | 2      | 2      | 2     | 3     | 4     | 5 |
| 593    |      |      |      |      |      |      |      |      |       | 2      | 2      | 2     | 4     | 4     | 5 |
| 594    |      |      |      |      |      |      |      |      |       | 1      | 2      | 2     | 2     | 2     | 2 |
| 597    |      |      |      |      |      |      |      |      |       | 4      | 3      | 3     | 5     | 5     | 5 |
| 601    | 6    | 6    | 6    | 1    | 6    | 6    | 6    | 6    |       | 3      | 2      | 3     | 4     | 4     | 5 |
| 607    |      |      |      |      |      |      |      |      |       | 3      | 2      | 3     | 4     | 4     | 4 |
| 610    |      |      |      |      |      |      |      |      |       | 3      | 3      | 3     | 5     | 5     | 5 |
| 612    |      |      |      |      |      |      |      |      |       | 4      | 3      | 3     | 4     | 4     | 4 |
| 627    |      |      |      |      |      |      |      |      |       | 4      | 3      | 3     | 5     | 5     | 5 |

| respid | Q48k | Q48l | Q48m | Q48n | Q48o | Q48p | Q48q | Q48r | Q49_1 | Q50a_1 | Q50b_1 | Q51_1 | Q51_2 | Q52_1 |   |
|--------|------|------|------|------|------|------|------|------|-------|--------|--------|-------|-------|-------|---|
| 631    |      |      |      |      |      |      |      |      |       | 3      | 3      | 3     | 5     | 5     | 5 |
| 633    | 4    | 4    | 4    | 1    | 4    | 2    | 4    | 1    | 3     | 3      | 3      | 3     | 3     | 3     | 4 |
| 636    | 5    | 6    | 3    | 5    | 6    | 5    | 6    | 3    | 3     | 2      | 2      | 4     | 3     | 5     | 5 |
| 656    |      |      |      |      |      |      |      |      | 4     | 3      | 3      | 5     | 5     | 4     | 4 |
| 659    |      |      |      |      |      |      |      |      | 3     | 3      | 3      | 5     | 5     | 5     | 5 |
| 670    |      |      |      |      |      |      |      |      | 2     | 3      | 2      | 5     | 5     | 5     | 5 |
| 672    | 3    | 2    | 5    | 1    | 5    |      | 5    | 5    | 3     | 3      | 2      | 5     | 5     | 5     | 5 |
| 673    |      | 3    | 4    | 3    | 4    | 3    | 4    | 3    | 3     | 3      | 3      | 4     | 4     | 4     | 4 |
| 675    | 6    | 5    | 2    | 6    | 6    | 6    | 6    | 2    | 3     | 3      | 3      | 5     | 5     | 5     | 5 |
| 676    |      |      |      |      |      |      |      |      | 2     | 2      | 2      | 3     | 2     | 4     | 4 |
| 679    |      |      |      |      |      |      |      |      | 2     | 2      | 2      | 2     | 3     | 3     | 3 |
| 683    |      |      |      |      |      |      |      |      | 3     | 3      | 3      | 5     | 5     | 5     | 5 |
| 684    |      |      |      |      |      |      |      |      | 3     | 3      | 3      | 5     | 4     | 5     | 5 |
| 690    | 5    | 5    | 2    | 3    | 5    | 5    | 5    | 2    | 3     | 2      | 2      | 4     | 4     | 5     | 5 |
| 701    |      |      |      |      |      |      |      |      | 1     | 2      | 3      | 4     | 4     | 4     | 4 |
| 709    |      |      |      |      |      |      |      |      | 2     | 3      | 3      | 5     | 5     | 5     | 5 |
| 719    |      |      |      |      |      |      |      |      | 3     | 3      | 3      | 5     | 5     | 4     | 4 |
| 726    | 5    | 6    | 2    | 5    | 6    | 6    | 5    | 2    | 2     | 3      | 3      | 4     | 4     | 4     | 4 |
| 730    |      |      |      |      |      |      |      |      | 3     | 3      | 3      | 2     | 5     | 3     | 3 |
| 731    |      |      |      |      |      |      |      |      | 2     | 3      | 3      | 4     | 4     | 4     | 4 |
| 732    |      |      |      |      |      |      |      |      | 2     | 3      | 2      | 4     | 4     | 3     | 3 |
| 733    | 6    | 6    | 2    | 4    | 6    | 6    | 6    | 1    | 3     | 3      | 3      | 5     | 5     | 5     | 5 |
| 735    |      |      |      |      |      |      |      |      | 4     | 2      | 3      | 5     | 5     | 5     | 5 |
| 738    |      |      |      |      |      |      |      |      | 3     | 3      | 2      | 5     | 5     | 5     | 5 |
| 740    | 6    | 6    | 4    | 5    | 6    | 6    | 6    |      | 4     | 3      | 3      | 4     | 4     | 5     | 5 |
| 742    |      |      |      |      |      |      |      |      | 3     | 3      | 3      | 5     | 5     | 4     | 4 |
| 744    | 6    | 6    | 1    | 6    | 6    | 6    | 6    | 1    | 4     | 3      | 3      | 5     | 5     | 4     | 4 |
| 749    | 4    | 5    | 3    | 3    | 4    | 3    | 3    | 3    | 2     | 2      | 3      | 3     | 3     | 4     | 4 |
| 751    | 4    | 3    | 3    | 2    | 3    | 2    | 2    | 6    | 2     | 3      | 3      | 5     | 5     | 4     | 4 |
| 752    |      |      |      |      |      |      |      |      | 2     | 3      | 3      | 4     | 4     | 4     | 4 |
| 753    |      |      |      |      |      |      |      |      | 2     | 3      | 3      | 3     | 4     | 4     | 4 |
| 755    |      |      |      |      |      |      |      |      | 3     | 2      | 3      | 4     | 4     | 5     | 5 |

| respid | Q48k | Q48l | Q48m | Q48n | Q48o | Q48p | Q48q | Q48r | Q49_1 | Q50a_1 | Q50b_1 | Q51_1 | Q51_2 | Q52_1 |   |
|--------|------|------|------|------|------|------|------|------|-------|--------|--------|-------|-------|-------|---|
| 756    |      |      |      |      |      |      |      |      |       | 2      | 3      | 3     | 5     | 5     | 5 |
| 759    | 5    | 6    | 2    | 5    | 6    | 6    | 6    | 5    | 5     | 1      | 3      | 2     | 1     | 1     | 5 |
| 760    | 6    | 6    | 2    | 6    | 6    | 6    | 3    | 6    | 2     | 4      | 3      | 3     | 4     | 4     | 5 |
| 763    |      |      |      |      |      |      |      |      |       | 3      | 3      | 2     | 3     | 3     | 4 |
| 764    | 5    | 5    | 6    | 2    | 6    | 5    | 6    | 6    | 5     | 2      | 2      | 3     | 4     | 4     | 4 |
| 765    | 6    | 6    | 6    | 6    | 6    | 6    | 3    | 6    | 3     | 3      | 3      | 3     | 4     | 5     | 4 |
| 766    |      |      |      |      |      |      |      |      |       | 2      | 3      | 3     | 5     | 4     | 4 |
| 767    |      |      |      |      |      |      |      |      |       | 2      | 2      | 2     | 3     | 3     | 3 |
| 771    |      |      |      |      |      |      |      |      |       | 2      | 2      | 2     | 5     | 4     | 5 |
| 773    |      |      |      |      |      |      |      |      |       | 4      | 3      | 3     | 4     | 5     | 5 |
| 774    |      |      |      |      |      |      |      |      |       | 3      | 2      | 2     | 4     | 4     | 4 |
| 775    | 2    | 6    | 1    | 3    | 6    | 6    | 6    | 6    | 6     | 1      | 2      | 2     | 1     | 1     | 4 |
| 776    |      |      |      |      |      |      |      |      |       | 2      | 3      | 3     | 4     | 4     | 4 |
| 778    |      |      |      |      |      |      |      |      |       | 2      | 3      | 3     | 4     | 3     | 4 |
| 780    |      |      |      |      |      |      |      |      |       | 4      | 3      | 3     | 4     | 5     | 4 |
| 781    |      |      |      |      |      |      |      |      |       | 3      | 3      | 3     | 5     | 5     | 4 |
| 782    | 6    | 6    | 1    | 6    | 6    | 6    | 3    | 3    | 4     | 2      | 3      | 2     | 3     | 4     | 3 |
| 783    | 3    | 3    | 3    | 3    | 3    | 3    | 3    | 3    | 3     | 2      | 3      | 2     | 3     | 3     | 3 |
| 786    |      |      |      |      |      |      |      |      |       | 4      | 2      | 3     | 4     | 3     | 2 |
| 788    |      |      |      |      |      |      |      |      |       | 3      | 3      | 3     | 5     | 5     | 4 |
| 792    |      |      |      |      |      |      |      |      |       | 4      | 3      | 3     | 3     | 4     | 3 |
| 794    |      |      |      |      |      |      |      |      |       | 2      | 3      | 3     | 4     | 5     | 4 |
| 795    |      |      |      |      |      |      |      |      |       | 5      | 3      | 2     | 5     | 5     | 5 |
| 799    |      |      |      |      |      |      |      |      |       | 3      | 2      | 2     | 4     | 3     | 5 |
| 800    |      |      |      |      |      |      |      |      |       | 3      | 3      | 3     | 5     | 5     | 5 |
| 801    |      |      |      |      |      |      |      |      |       | 2      | 2      | 2     | 4     | 4     | 5 |
| 804    | 3    | 4    | 2    | 3    | 3    | 3    | 3    | 3    | 4     | 1      | 3      | 2     | 4     | 4     | 4 |
| 806    |      |      |      |      |      |      |      |      |       | 4      | 3      | 3     | 5     | 5     | 5 |
| 807    |      |      |      |      |      |      |      |      |       | 3      | 3      | 3     | 5     | 4     | 5 |
| 808    |      |      |      |      |      |      |      |      |       | 2      | 3      | 3     | 4     | 4     | 4 |
| 809    |      |      |      |      |      |      |      |      |       | 4      | 2      | 3     | 5     | 4     | 5 |
| 811    | 6    | 6    | 1    | 6    | 6    | 6    | 6    | 6    | 1     | 4      | 3      | 3     | 5     | 5     | 5 |



| respid | Q48k | Q48l | Q48m | Q48n | Q48o | Q48p | Q48q | Q48r | Q49_1 | Q50a_1 | Q50b_1 | Q51_1 | Q51_2 | Q52_1 |   |
|--------|------|------|------|------|------|------|------|------|-------|--------|--------|-------|-------|-------|---|
| 812    |      |      |      |      |      |      |      |      |       | 2      | 3      | 2     | 5     | 4     | 4 |
| 815    |      |      |      |      |      |      |      |      |       | 4      | 3      | 3     | 5     | 5     | 5 |
| 817    |      |      |      |      |      |      |      |      |       | 2      | 3      | 3     | 3     | 3     | 4 |
| 818    | 6    | 6    | 1    | 4    | 6    | 6    | 6    | 6    | 1     | 3      | 3      | 2     | 4     | 4     | 4 |
| 819    |      |      |      |      |      |      |      |      |       | 2      | 3      | 2     | 5     | 5     | 5 |
| 821    | 3    | 4    | 2    | 4    | 5    | 4    | 4    | 4    | 4     | 2      | 2      | 2     | 4     | 4     | 2 |
| 824    |      |      |      |      |      |      |      |      |       | 3      | 3      | 3     | 5     | 5     | 5 |
| 825    |      |      |      |      |      |      |      |      |       | 4      | 3      | 3     | 5     | 5     | 5 |
| 828    | 5    | 5    | 2    | 6    | 5    | 6    | 6    | 6    | 2     | 4      | 3      | 3     | 5     | 5     | 5 |
| 832    |      |      |      |      |      |      |      |      |       | 2      | 3      | 3     | 4     | 4     | 4 |
| 834    |      |      |      |      |      |      |      |      |       | 2      | 2      | 2     | 3     | 3     | 4 |
| 835    |      |      |      |      |      |      |      |      |       | 3      | 3      | 3     | 5     | 5     | 4 |
| 836    |      |      |      |      |      |      |      |      |       | 4      | 3      | 3     | 5     | 5     | 5 |
| 837    | 5    | 4    | 3    | 4    | 4    | 4    | 4    | 4    | 3     | 5      | 3      | 3     | 5     | 5     | 5 |
| 840    |      |      |      |      |      |      |      |      |       | 2      | 3      | 2     | 3     | 3     | 3 |
| 841    | 5    | 6    | 1    | 5    | 5    | 4    | 5    | 3    | 3     | 3      | 3      | 3     | 4     | 4     | 4 |
| 845    | 4    | 6    | 6    | 3    | 6    | 6    | 6    | 6    | 3     | 2      | 3      | 3     | 5     | 5     | 5 |
| 846    | 2    | 5    | 6    | 6    | 6    | 6    | 6    | 1    | 6     | 3      | 3      | 3     | 4     | 4     | 4 |
| 849    |      |      |      |      |      |      |      |      |       | 3      | 1      | 2     | 5     | 3     | 5 |
| 852    | 6    | 6    | 1    | 6    | 6    | 6    | 6    | 6    | 1     | 4      | 3      | 3     | 5     | 5     | 5 |
| 854    |      |      |      |      |      |      |      |      |       | 1      | 3      | 2     | 4     | 4     | 4 |
| 856    |      |      |      |      |      |      |      |      |       | 4      | 3      | 3     | 5     | 5     | 5 |
| 858    |      |      |      |      |      |      |      |      |       | 3      | 3      | 3     | 4     | 4     | 4 |
| 859    | 5    | 5    | 3    | 6    | 6    | 5    | 5    | 4    | 4     | 2      | 2      | 3     | 4     | 4     | 4 |
| 861    | 6    | 6    | 5    | 4    | 6    | 4    | 4    | 5    | 4     | 3      | 2      | 2     | 4     | 4     | 4 |
| 863    | 6    | 6    | 2    | 6    | 6    | 6    | 6    | 6    | 1     | 4      | 3      | 3     | 5     | 5     | 5 |
| 864    |      |      |      |      |      |      |      |      |       | 2      | 3      | 2     | 5     | 4     | 5 |
| 866    |      |      |      |      |      |      |      |      |       | 2      | 3      | 3     | 5     | 4     | 4 |
| 869    |      |      |      |      |      |      |      |      |       | 3      | 3      | 3     | 5     | 5     | 5 |
| 870    |      |      |      |      |      |      |      |      |       | 4      | 3      | 3     | 4     | 4     | 4 |
| 871    |      |      |      |      |      |      |      |      |       | 3      | 3      | 3     | 5     | 5     | 4 |
| 873    |      |      |      |      |      |      |      |      |       | 3      | 3      | 3     | 4     | 4     | 4 |

| respid | Q48k | Q48l | Q48m | Q48n | Q48o | Q48p | Q48q | Q48r | Q49_1 | Q50a_1 | Q50b_1 | Q51_1 | Q51_2 | Q52_1 |   |
|--------|------|------|------|------|------|------|------|------|-------|--------|--------|-------|-------|-------|---|
| 879    |      |      |      |      |      |      |      |      |       | 5      | 2      | 2     | 3     | 4     | 4 |
| 880    | 5    | 5    | 3    | 3    | 4    | 4    | 4    | 4    | 3     | 2      | 3      | 2     | 4     | 4     | 4 |
| 881    |      |      |      |      |      |      |      |      |       | 3      | 3      | 3     | 4     | 4     | 4 |
| 882    |      |      |      |      |      |      |      |      |       | 2      | 3      | 3     | 5     | 5     | 5 |
| 885    |      |      |      |      |      |      |      |      |       | 3      | 3      | 3     | 5     | 5     | 4 |
| 886    |      |      |      |      |      |      |      |      |       | 2      | 2      | 2     | 5     | 5     | 5 |
| 887    | 3    | 3    | 3    | 3    | 3    | 3    | 3    | 2    | 5     | 2      | 3      | 3     | 3     | 4     | 3 |
| 888    |      |      |      |      |      |      |      |      |       | 3      | 2      | 2     | 4     | 4     | 4 |
| 889    |      |      |      |      |      |      |      |      |       | 4      | 3      | 3     | 5     | 5     | 5 |
| 890    |      |      |      |      |      |      |      |      |       | 4      | 3      | 3     | 4     | 5     | 4 |
| 900    |      |      |      |      |      |      |      |      |       | 4      | 3      | 3     | 5     | 5     | 5 |
| 901    |      |      |      |      |      |      |      |      |       | 2      | 3      | 3     | 5     | 5     | 5 |
| 902    |      |      |      |      |      |      |      |      |       | 2      | 2      | 2     | 3     | 3     | 5 |
| 903    |      |      |      |      |      |      |      |      |       | 5      | 3      | 3     | 5     | 5     | 5 |
| 906    | 3    | 3    | 4    | 4    | 4    | 4    | 4    | 3    | 4     | 1      | 2      | 2     | 3     | 2     | 4 |
| 907    | 3    | 3    | 3    | 4    | 3    | 3    | 3    | 3    | 4     | 1      | 3      | 3     | 3     | 3     | 4 |
| 908    | 6    | 6    | 2    | 6    | 6    | 6    | 6    | 6    | 2     | 3      | 3      | 3     | 4     | 4     | 3 |
| 910    | 6    | 6    | 2    | 6    | 6    | 6    | 6    | 6    | 2     | 3      | 3      | 3     | 4     | 4     | 5 |
| 911    |      |      |      |      |      |      |      |      |       | 2      | 2      | 2     | 3     | 4     | 4 |
| 912    |      |      |      |      |      |      |      |      |       | 2      | 3      | 3     | 5     | 5     | 4 |
| 915    |      |      |      |      |      |      |      |      |       | 3      | 2      | 3     | 5     | 5     | 5 |
| 923    |      |      |      |      |      |      |      |      |       | 2      | 2      | 2     | 2     | 2     | 2 |
| 925    | 5    | 6    | 1    | 5    | 5    | 5    | 5    | 5    | 3     | 4      | 3      | 2     | 5     | 5     | 5 |
| 926    |      |      |      |      |      |      |      |      |       | 2      | 3      | 3     | 5     | 5     | 5 |
| 929    |      |      |      |      |      |      |      |      |       | 4      | 3      | 3     | 5     | 5     | 5 |
| 932    | 1    | 6    | 1    | 1    | 1    | 1    | 1    | 6    | 6     | 5      | 2      | 2     | 1     | 5     | 2 |
| 933    |      |      |      |      |      |      |      |      |       | 3      | 3      | 3     | 4     | 5     | 4 |
| 934    | 4    | 5    | 3    | 4    |      |      | 4    | 5    | 3     | 3      | 3      | 3     | 4     | 4     | 5 |
| 938    |      |      |      |      |      |      |      |      |       | 2      | 2      | 2     | 3     | 3     | 3 |
| 941    |      |      |      |      |      |      |      |      |       | 5      | 3      | 3     | 5     | 5     | 5 |
| 942    |      |      |      |      |      |      |      |      |       | 2      | 3      | 3     | 4     | 5     | 4 |
| 943    |      |      |      |      |      |      |      |      |       | 4      | 3      | 3     | 5     | 5     | 5 |

| respid | Q48k | Q48l | Q48m | Q48n | Q48o | Q48p | Q48q | Q48r | Q49_1 | Q50a_1 | Q50b_1 | Q51_1 | Q51_2 | Q52_1 |   |
|--------|------|------|------|------|------|------|------|------|-------|--------|--------|-------|-------|-------|---|
| 945    | 4    | 4    | 3    | 4    | 4    | 4    | 4    | 4    | 3     | 3      | 3      | 3     | 5     | 5     | 5 |
| 946    |      |      |      |      |      |      |      |      |       | 2      | 3      | 2     | 3     | 3     | 3 |
| 947    |      |      |      |      |      |      |      |      |       | 3      | 3      | 3     | 5     | 5     | 5 |
| 948    |      |      |      |      |      |      |      |      |       | 4      | 3      | 3     | 5     | 5     | 5 |
| 949    |      |      |      |      |      |      |      |      |       | 2      | 3      | 3     | 5     | 5     | 5 |
| 952    |      |      |      |      |      |      |      |      |       | 3      | 3      | 3     | 5     | 5     | 5 |
| 956    |      |      |      |      | 5    | 6    |      | 5    |       | 4      | 2      | 3     | 4     | 4     | 4 |
| 957    |      |      |      |      |      |      |      |      |       | 3      | 3      | 3     | 5     | 5     | 5 |
| 959    |      |      |      |      |      |      |      |      |       | 3      | 3      | 3     | 4     | 4     | 3 |
| 961    |      |      |      |      |      |      |      |      |       | 2      | 3      | 2     | 3     | 3     | 3 |
| 962    | 4    | 4    | 3    | 4    | 4    | 4    | 4    | 3    | 4     | 2      | 2      | 2     | 3     | 3     | 3 |
| 965    |      |      |      |      |      |      |      |      |       | 2      | 3      | 2     | 4     | 4     | 3 |
| 967    | 4    | 4    | 3    | 4    | 4    | 4    | 4    | 4    | 3     | 3      | 3      | 3     | 3     | 3     | 3 |
| 969    | 6    | 6    | 1    | 6    | 6    | 6    | 6    | 6    | 5     | 4      | 3      | 2     | 4     | 4     | 4 |
| 970    |      |      |      |      |      |      |      |      |       | 4      | 3      | 3     | 5     | 5     | 5 |
| 973    |      |      |      |      |      |      |      |      |       | 2      | 3      | 3     | 4     | 4     | 5 |
| 974    |      |      |      |      |      |      |      |      |       | 3      | 3      | 3     | 5     | 5     | 4 |
| 975    |      |      |      |      |      |      |      |      |       | 2      | 3      | 3     | 4     | 4     | 4 |
| 976    |      |      |      |      |      |      |      |      |       | 3      | 2      | 2     | 3     | 3     | 4 |
| 977    |      |      |      |      |      |      |      |      |       | 4      | 2      | 3     | 5     | 4     | 5 |
| 979    |      |      |      |      |      |      |      |      |       | 4      | 3      | 3     | 5     | 4     | 5 |
| 981    | 3    | 3    | 3    | 3    | 6    | 4    | 3    | 3    | 3     | 3      | 2      | 3     | 3     | 4     | 3 |
| 983    | 4    | 4    | 3    | 4    | 4    | 4    | 3    | 4    | 3     | 2      | 3      | 3     | 5     | 5     | 5 |
| 987    |      |      |      |      |      |      |      |      |       | 1      | 3      | 3     | 4     | 4     | 4 |
| 991    |      |      |      |      |      |      |      |      |       | 4      | 3      | 3     | 5     | 5     | 5 |
| 992    |      |      |      |      |      |      |      |      |       | 4      | 2      | 2     | 5     | 5     | 5 |
| 993    | 3    | 3    | 3    | 3    | 3    | 3    | 3    | 3    | 3     | 4      | 3      | 3     | 5     | 5     | 5 |
| 994    | 3    | 3    | 4    | 3    | 5    | 3    | 2    | 4    | 4     | 2      | 3      | 2     | 5     | 5     | 3 |
| 995    |      |      |      |      |      |      |      |      |       | 3      | 3      | 3     | 4     | 4     | 5 |
| 998    | 4    | 3    | 4    | 4    | 4    | 4    | 4    | 4    | 4     | 3      | 2      | 2     | 4     | 4     | 4 |
| 1000   |      |      |      |      |      |      |      |      |       | 2      | 1      | 1     | 1     | 1     | 3 |
| 1001   |      |      |      |      |      |      |      |      |       | 1      | 2      | 2     | 3     | 3     | 3 |

| respid | Q48k | Q48l | Q48m | Q48n | Q48o | Q48p | Q48q | Q48r | Q49_1 | Q50a_1 | Q50b_1 | Q51_1 | Q51_2 | Q52_1 |   |
|--------|------|------|------|------|------|------|------|------|-------|--------|--------|-------|-------|-------|---|
| 1002   |      |      |      |      |      |      |      |      |       | 4      | 3      | 3     | 5     | 5     | 5 |
| 1004   |      |      |      |      |      |      |      |      |       | 3      | 3      | 3     | 5     | 5     | 4 |
| 1005   | 6    | 4    | 3    | 5    | 5    | 6    | 5    | 2    |       | 4      | 3      | 3     | 4     | 4     | 4 |
| 1006   |      |      |      |      |      |      |      |      |       | 2      | 2      | 2     | 5     | 5     | 5 |
| 1007   | 3    | 3    | 6    | 3    | 3    | 3    | 3    | 6    |       | 2      | 1      | 1     | 5     | 5     | 5 |
| 1009   |      |      |      |      |      |      |      |      |       | 3      | 3      | 3     | 5     | 5     | 4 |
| 1013   | 2    | 2    | 3    | 2    | 3    | 2    | 3    | 2    |       | 3      | 2      | 2     | 3     | 3     | 3 |
| 1015   |      |      |      |      |      |      |      |      |       | 2      | 3      | 3     | 4     | 5     | 4 |
| 1020   |      |      |      |      |      |      |      |      |       | 3      | 3      | 3     | 5     | 3     | 5 |
| 1022   |      |      |      |      |      |      |      |      |       | 3      | 2      | 2     | 4     | 4     | 4 |
| 1024   |      |      |      |      |      |      |      | 2    |       | 2      | 3      | 3     | 4     | 5     | 5 |
| 1025   |      |      |      |      |      |      |      |      |       | 3      | 3      | 3     | 4     | 4     | 5 |
| 1027   |      |      |      |      |      |      |      |      |       | 4      | 3      | 3     | 5     | 5     | 4 |
| 1031   |      |      |      |      |      |      |      |      |       | 3      | 3      | 3     | 5     | 5     | 4 |
| 1037   |      |      |      |      |      |      |      |      |       | 2      | 3      | 3     | 5     | 5     | 5 |
| 1039   |      |      |      |      |      |      |      |      |       | 3      | 3      | 3     | 5     | 5     | 5 |
| 1040   |      |      |      |      |      |      |      |      |       | 3      | 3      | 3     | 5     | 5     | 5 |
| 1056   |      |      |      |      |      |      |      |      |       | 2      | 2      | 2     | 4     | 4     | 4 |
| 1057   |      |      |      |      |      |      |      |      |       | 3      | 3      | 3     | 4     | 4     | 4 |
| 1062   |      |      |      |      |      |      |      |      |       | 3      | 3      | 3     | 4     | 4     | 3 |
| 1069   | 6    | 6    | 1    | 6    | 6    | 6    | 6    | 1    |       | 3      | 2      | 2     | 3     | 3     | 4 |
| 1070   | 1    | 3    | 5    | 1    | 6    | 2    | 3    | 6    |       | 4      | 3      | 3     | 5     | 5     | 4 |
| 1072   |      |      |      |      |      |      |      |      |       | 3      | 3      | 3     | 5     | 5     | 4 |
| 1076   |      |      |      |      |      |      |      |      |       | 3      | 3      | 3     | 5     | 5     | 5 |
| 1077   |      |      |      |      |      |      |      |      |       | 2      | 3      | 2     | 3     | 4     | 3 |
| 1078   | 3    | 4    | 1    | 4    | 6    | 4    | 3    | 4    |       | 3      | 3      | 3     | 5     | 5     | 5 |
| 1080   |      |      |      |      |      |      |      |      |       | 3      | 2      | 2     | 4     | 4     | 5 |
| 1094   | 6    | 6    | 2    | 6    | 6    | 6    | 6    | 2    |       | 3      | 2      | 2     | 4     | 4     | 3 |
| 1098   |      |      |      |      |      |      |      |      |       | 2      | 3      | 2     | 4     | 4     | 4 |
| 1099   | 5    | 4    | 4    | 5    | 4    | 3    | 4    | 3    |       | 4      | 3      | 3     | 5     | 5     | 5 |
| 1102   |      |      |      |      |      |      |      |      |       | 2      | 2      | 3     | 5     | 5     | 5 |
| 1110   |      |      |      |      |      |      |      |      |       | 3      | 3      | 3     | 4     | 4     | 5 |

| respid | Q48k | Q48l | Q48m | Q48n | Q48o | Q48p | Q48q | Q48r | Q49_1 | Q50a_1 | Q50b_1 | Q51_1 | Q51_2 | Q52_1 |
|--------|------|------|------|------|------|------|------|------|-------|--------|--------|-------|-------|-------|
| 1117   | 4    | 3    | 3    | 4    | 4    | 3    | 2    | 4    | 3     | 2      | 2      | 2     | 3     | 3     |
| 1119   |      |      |      |      |      |      |      |      | 3     | 3      | 3      | 5     | 5     | 5     |
| 1126   |      |      |      |      |      |      |      |      | 2     | 3      | 3      | 5     | 5     | 5     |
| 1127   | 6    | 6    | 1    | 6    | 6    | 6    | 6    | 1    | 4     | 3      | 3      | 5     | 5     | 5     |
| 1130   | 3    | 2    | 2    | 2    | 2    | 2    | 3    | 2    | 3     | 3      | 3      | 4     | 3     | 3     |
| 1131   | 6    | 6    | 2    | 6    | 6    | 6    | 6    | 1    | 3     | 2      | 3      | 4     | 4     | 5     |
| 1135   |      |      |      |      |      |      |      |      | 1     | 2      | 2      | 3     | 3     | 4     |
| 1138   | 4    | 5    | 3    | 5    | 6    | 5    | 4    | 3    | 2     | 2      | 3      | 4     | 4     | 4     |
| 1139   |      |      |      |      |      |      |      |      | 3     | 3      | 3      | 2     | 3     | 4     |
| 1140   | 2    | 2    | 2    | 3    | 2    | 2    | 2    | 2    | 3     | 3      | 3      | 3     | 4     | 4     |
| 1142   |      |      |      |      |      |      |      |      | 4     | 2      | 3      | 5     | 5     | 5     |
| 1143   |      |      |      |      |      |      |      |      | 4     | 3      | 3      | 5     | 5     | 5     |
| 1145   |      |      |      |      |      |      |      |      | 3     | 3      | 3      | 5     | 5     | 4     |
| 1149   |      |      |      |      |      |      |      |      | 2     | 3      | 3      | 5     | 5     | 5     |
| 1152   |      |      |      |      |      |      |      |      | 3     | 3      | 3      | 4     | 4     | 4     |
| 1160   |      |      |      |      |      |      |      |      | 3     | 3      | 3      | 5     | 5     | 5     |
| 1164   |      |      |      |      |      |      |      |      | 4     | 3      | 3      | 5     | 5     | 5     |
| 1165   | 3    | 4    | 4    | 4    | 4    | 4    | 4    | 4    | 2     | 3      | 3      | 5     | 4     | 4     |
| 1169   | 5    | 5    | 2    | 4    | 6    | 3    | 4    | 5    | 2     | 2      | 2      | 4     | 4     | 5     |
| 1170   |      |      |      |      |      |      |      |      | 3     | 3      | 3      | 5     | 4     | 5     |
| 1179   | 5    | 5    | 1    | 5    | 6    | 5    | 5    | 3    | 2     | 2      | 3      | 4     | 4     | 3     |
| 1180   |      |      |      |      |      |      |      |      | 2     | 3      | 3      | 5     | 5     | 5     |
| 1183   |      |      |      |      |      |      |      |      | 3     | 2      | 3      | 4     | 4     | 4     |
| 1187   |      |      |      |      |      |      |      |      | 5     | 3      | 3      | 5     | 5     | 5     |
| 1188   |      |      |      |      |      |      |      |      | 2     | 3      | 2      | 3     | 3     | 3     |
| 1193   |      |      |      |      |      |      |      |      | 3     | 3      | 3      | 5     | 5     | 5     |
| 1194   |      |      |      |      |      |      |      |      | 3     | 2      | 2      | 4     | 3     | 3     |
| 1197   | 2    | 2    | 2    | 3    | 2    | 2    | 3    | 2    | 3     | 3      | 3      | 5     | 5     | 5     |
| 1202   |      |      |      |      |      |      |      |      | 3     | 3      | 3      | 5     | 5     | 4     |
| 1204   | 2    | 2    | 2    | 2    | 1    | 2    | 1    | 2    | 2     | 2      | 2      | 4     | 3     | 3     |
| 1211   |      |      |      |      |      |      |      |      | 3     | 3      | 3      | 5     | 5     | 4     |
| 1224   |      |      |      |      |      |      |      |      | 2     | 3      | 2      | 5     | 5     | 5     |

| respid | Q48k | Q48l | Q48m | Q48n | Q48o | Q48p | Q48q | Q48r | Q49_1 | Q50a_1 | Q50b_1 | Q51_1 | Q51_2 | Q52_1 |   |
|--------|------|------|------|------|------|------|------|------|-------|--------|--------|-------|-------|-------|---|
| 1225   | 2    | 3    | 4    | 3    | 4    | 4    |      | 4    |       | 2      | 2      | 2     | 4     | 4     | 4 |
| 1230   |      |      |      |      |      |      |      |      |       | 3      | 3      | 2     | 5     | 5     | 4 |
| 1232   | 3    | 6    | 6    | 1    | 2    | 6    | 3    | 2    |       | 2      | 3      | 3     | 5     | 5     | 3 |
| 1233   |      |      |      |      |      |      |      |      |       | 2      | 2      | 2     | 5     | 4     | 5 |
| 1234   | 6    | 6    | 4    | 5    | 6    | 6    | 6    | 1    |       | 4      | 2      | 3     | 4     | 4     | 5 |
| 1235   |      |      |      |      |      |      |      |      |       | 2      | 2      | 2     | 3     | 3     | 3 |
| 1236   |      |      |      |      |      |      |      |      |       | 2      | 3      | 3     | 5     | 5     | 3 |
| 1237   |      |      |      |      |      |      |      |      |       | 3      | 2      | 3     | 5     | 5     | 3 |
| 1238   |      |      |      |      |      |      |      |      |       | 2      | 3      | 3     | 4     | 3     | 3 |
| 1239   | 5    | 5    | 2    | 5    | 5    | 5    | 5    | 2    |       | 3      | 3      | 3     | 5     | 5     | 5 |
| 1241   |      |      |      |      |      |      |      |      |       | 4      | 2      | 3     | 5     | 4     | 5 |
| 1242   |      |      |      |      |      |      |      |      |       | 5      | 3      | 3     | 5     | 5     | 4 |
| 1244   |      |      |      |      |      |      |      |      |       | 3      | 2      | 2     | 5     | 5     | 5 |
| 1245   |      |      |      |      |      |      |      |      |       | 2      | 3      | 2     | 4     | 4     | 5 |
| 1247   |      |      |      |      |      |      |      |      |       | 3      | 3      | 2     | 5     | 5     | 5 |
| 1248   | 5    | 5    | 5    | 3    | 5    | 5    | 5    | 3    |       | 3      | 2      | 2     | 5     | 5     | 5 |
| 1249   |      |      |      |      |      |      |      |      |       | 3      | 3      | 3     | 5     | 5     | 5 |
| 1250   |      |      |      |      |      |      |      |      |       | 3      | 3      | 3     | 5     | 5     | 5 |
| 1251   |      |      |      |      |      |      |      |      |       | 4      | 3      | 3     | 5     | 5     | 5 |
| 1252   | 5    | 6    | 1    | 6    | 6    | 6    | 6    | 5    | 2     | 2      | 3      | 3     | 5     | 5     | 5 |
| 1253   | 6    | 6    | 4    | 4    | 6    | 6    | 6    | 6    | 3     | 3      | 3      | 3     | 5     | 5     | 5 |
| 1254   |      |      |      |      |      |      |      |      |       | 1      | 2      | 2     | 3     | 3     | 3 |
| 1258   |      |      |      |      |      |      |      |      |       | 3      | 2      | 2     | 3     | 3     | 5 |
| 1260   |      |      |      |      |      |      |      |      |       | 2      | 2      | 3     | 4     | 4     | 4 |
| 1261   |      |      |      |      |      |      |      |      |       | 3      | 3      | 3     | 5     | 5     | 5 |
| 1262   |      |      |      |      |      |      |      |      |       | 1      | 2      | 2     | 3     | 3     | 3 |
| 1263   |      |      |      |      |      |      |      |      |       | 2      | 3      | 2     | 3     | 3     | 3 |
| 1264   | 2    | 3    | 4    | 2    | 6    | 5    | 3    | 5    |       | 4      | 3      | 2     | 5     | 5     | 5 |
| 1265   |      |      |      |      |      |      |      |      |       | 1      | 2      | 2     | 3     | 3     | 4 |
| 1266   |      |      |      |      |      |      |      |      |       | 4      | 3      | 3     | 4     | 4     | 4 |
| 1270   |      |      |      |      |      |      |      |      |       | 3      | 2      | 3     | 5     | 5     | 5 |
| 1272   | 1    | 6    | 6    | 1    | 6    | 6    | 6    | 6    | 6     | 1      | 1      | 1     | 1     | 1     | 4 |

| respid | Q48k | Q48l | Q48m | Q48n | Q48o | Q48p | Q48q | Q48r | Q49_1 | Q50a_1 | Q50b_1 | Q51_1 | Q51_2 | Q52_1 |   |
|--------|------|------|------|------|------|------|------|------|-------|--------|--------|-------|-------|-------|---|
| 1273   | 4    | 5    | 3    | 3    | 5    | 3    | 3    | 3    |       | 2      | 3      | 3     | 5     | 5     | 5 |
| 1276   |      |      |      |      |      |      |      |      |       | 3      | 3      | 3     | 5     | 5     | 5 |
| 1277   |      |      |      |      |      |      |      |      |       | 4      | 3      | 3     | 3     | 3     | 4 |
| 1278   |      |      |      |      |      |      |      |      |       | 2      | 3      | 2     | 5     | 5     | 5 |
| 1280   | 6    | 6    | 1    | 6    | 6    | 1    | 6    | 5    |       | 4      | 3      | 3     | 5     | 5     | 5 |
| 1281   |      |      |      |      |      |      |      |      |       | 3      | 2      | 2     | 4     | 4     | 5 |
| 1282   |      |      |      |      |      |      |      |      |       | 3      | 3      | 3     | 3     | 3     | 4 |
| 1283   |      |      |      |      |      |      |      |      |       | 3      | 3      | 3     | 4     | 5     | 5 |
| 1288   | 3    | 3    | 3    | 3    | 3    | 3    | 4    | 3    |       | 3      | 3      | 3     | 3     | 3     | 3 |
| 1289   | 2    | 2    | 5    | 2    | 4    |      |      | 3    | 5     | 3      | 3      | 3     | 5     | 5     | 4 |
| 1290   |      |      |      |      |      |      |      |      |       | 2      | 3      | 3     | 4     | 4     | 3 |
| 1291   |      |      |      |      |      |      |      |      |       | 2      | 3      | 3     | 5     | 5     | 5 |
| 1293   | 2    | 5    | 2    | 2    | 5    | 1    | 2    | 5    |       | 3      | 3      | 3     | 5     | 5     | 5 |
| 1294   |      |      |      |      |      |      |      |      |       | 3      | 3      | 2     | 5     | 5     | 4 |
| 1295   |      |      |      |      |      |      |      |      |       | 3      | 3      | 3     | 5     | 5     | 4 |
| 1296   | 1    | 2    | 2    | 1    | 5    | 5    | 2    | 1    |       | 3      | 3      | 3     | 5     | 5     | 5 |
| 1297   | 3    | 3    | 3    | 3    | 3    | 3    | 4    | 3    |       | 2      | 3      | 3     | 3     | 5     | 3 |
| 1298   |      |      |      |      |      |      |      |      |       | 3      | 3      | 3     | 5     | 5     | 4 |
| 1300   |      |      |      |      |      |      |      |      |       | 1      | 1      | 2     | 4     | 3     | 4 |
| 1302   |      |      |      |      |      |      |      |      |       | 3      | 3      | 3     | 5     | 5     | 5 |
| 1303   |      |      |      |      |      |      |      |      |       | 2      | 3      | 3     | 4     | 4     | 4 |
| 1304   |      |      |      |      |      |      |      |      |       | 3      | 3      | 3     | 5     | 5     | 5 |
| 1305   |      |      |      |      |      |      |      |      |       | 3      | 3      | 3     | 5     | 5     | 4 |
| 1307   |      |      |      |      |      |      |      |      |       | 3      | 3      | 3     | 4     | 4     | 5 |
| 1312   | 4    |      | 3    | 1    | 3    | 3    | 3    | 4    |       | 3      | 3      | 3     | 4     | 4     | 4 |
| 1313   | 5    | 6    | 3    | 5    | 6    | 6    | 6    | 4    |       | 1      | 3      | 2     | 1     | 1     | 5 |
| 1314   | 2    | 2    | 4    | 3    | 5    | 3    | 2    | 6    |       | 2      | 3      | 3     | 5     | 5     | 3 |
| 1317   | 4    | 5    | 4    | 3    | 4    | 4    | 3    | 4    |       | 3      | 3      | 3     | 5     | 5     | 3 |
| 1318   |      |      |      |      |      |      |      |      |       | 2      | 3      | 3     | 5     | 5     | 5 |
| 1319   |      |      |      |      |      |      |      |      |       | 2      | 2      | 2     | 3     | 3     | 3 |
| 1321   |      |      |      |      |      |      |      |      |       | 4      | 3      | 3     | 5     | 5     | 5 |
| 1324   |      |      |      |      |      |      |      |      |       | 2      | 2      | 1     | 3     | 3     | 4 |

| respid | Q48k | Q48l | Q48m | Q48n | Q48o | Q48p | Q48q | Q48r | Q49_1 | Q50a_1 | Q50b_1 | Q51_1 | Q51_2 | Q52_1 |   |
|--------|------|------|------|------|------|------|------|------|-------|--------|--------|-------|-------|-------|---|
| 1325   |      |      |      |      |      |      |      |      |       | 2      | 3      | 2     | 5     | 5     | 5 |
| 1326   |      |      |      |      |      |      |      |      |       | 3      | 3      | 3     | 4     | 4     | 4 |
| 1327   |      |      |      |      |      |      |      |      |       | 5      | 3      | 3     | 5     | 5     | 5 |
| 1329   |      |      |      |      |      |      |      |      |       | 4      | 3      | 3     | 3     | 3     | 3 |
| 1330   | 1    | 6    | 5    | 1    | 5    | 6    | 6    | 6    | 1     | 1      | 1      | 3     | 3     | 4     |   |
| 1331   | 1    | 3    | 4    | 4    |      | 3    | 6    | 1    | 3     | 3      | 1      | 2     | 2     | 3     |   |
| 1335   |      |      |      |      |      |      |      |      |       | 1      | 2      | 2     | 1     | 1     | 3 |
| 1337   | 6    | 6    | 1    | 6    | 6    | 6    | 6    | 1    | 4     | 3      | 3      | 5     | 5     | 4     |   |
| 1341   | 4    | 3    | 4    | 4    | 4    | 4    | 4    | 3    | 4     | 3      | 3      | 5     | 5     | 5     |   |
| 1342   | 6    | 6    | 1    | 6    | 6    | 6    | 6    | 1    | 4     | 3      | 3      | 5     | 5     | 5     |   |
| 1344   |      |      |      |      |      |      |      |      |       | 2      | 2      | 2     | 4     | 5     | 4 |
| 1345   | 5    | 3    | 2    | 3    | 4    | 3    | 3    | 4    | 2     | 2      | 2      | 4     | 4     | 4     |   |
| 1346   |      |      |      |      |      |      |      |      |       | 3      | 3      | 3     | 5     | 5     | 5 |
| 1350   | 5    | 4    | 3    | 4    | 4    | 4    | 4    | 4    | 2     | 2      | 2      | 3     | 3     | 3     |   |
| 1352   | 5    | 5    | 2    | 5    | 5    | 4    | 5    | 2    | 3     | 3      | 3      | 5     | 5     | 5     |   |
| 1353   |      |      |      |      |      |      |      |      |       | 2      | 2      | 2     | 3     | 4     | 4 |
| 1354   |      |      |      |      |      |      |      |      |       | 4      | 3      | 3     | 4     | 4     | 4 |
| 1355   |      |      |      |      |      |      |      |      |       | 4      | 3      | 3     | 5     | 5     | 5 |
| 1357   |      |      |      |      |      |      |      |      |       | 2      | 2      | 2     | 5     | 5     | 5 |
| 1360   |      |      |      |      |      |      |      |      |       | 4      | 3      | 3     | 5     | 5     | 5 |
| 1362   | 4    | 4    | 3    | 5    | 6    | 4    | 5    | 4    | 3     | 2      | 2      | 3     | 2     | 4     |   |
| 1363   | 6    | 6    | 2    | 6    | 6    | 6    | 6    | 3    | 2     | 3      | 2      | 4     | 4     | 4     |   |
| 1367   | 6    | 5    | 3    | 6    | 6    | 3    | 4    | 4    | 2     | 3      | 3      | 4     | 4     | 4     |   |
| 1369   |      |      |      |      |      |      |      |      |       | 3      | 3      | 2     | 4     | 5     | 5 |
| 1371   |      |      |      |      |      |      |      |      |       | 3      | 3      | 3     | 5     | 5     | 5 |
| 1372   |      |      |      |      |      |      |      |      |       | 3      | 3      | 3     | 4     | 4     | 5 |
| 1375   |      |      |      |      |      |      |      |      |       | 2      | 3      | 3     | 5     | 5     | 5 |
| 1377   |      |      |      |      |      |      |      |      |       | 3      | 3      | 3     | 5     | 1     | 4 |
| 1379   |      |      |      |      |      |      |      |      |       | 1      | 1      | 1     | 1     | 1     | 1 |
| 1380   |      |      |      |      |      |      |      |      |       | 2      | 2      | 3     | 3     | 4     | 5 |
| 1382   | 5    | 5    |      | 5    | 5    | 5    | 5    | 5    | 2     | 2      | 2      | 4     | 4     | 4     |   |
| 1383   | 6    | 6    | 2    | 6    | 6    | 5    | 5    | 5    | 4     | 3      | 3      | 5     | 5     | 5     |   |



| respid | Q48k | Q48l | Q48m | Q48n | Q48o | Q48p | Q48q | Q48r | Q49_1 | Q50a_1 | Q50b_1 | Q51_1 | Q51_2 | Q52_1 |   |
|--------|------|------|------|------|------|------|------|------|-------|--------|--------|-------|-------|-------|---|
| 1384   | 6    | 5    | 3    | 2    | 6    | 5    | 5    | 3    |       | 4      | 3      | 3     | 5     | 5     | 5 |
| 1385   |      |      |      |      |      |      |      |      |       | 4      | 3      | 3     | 5     | 5     | 5 |
| 1387   |      |      |      |      |      |      |      |      |       | 4      | 2      | 3     | 5     | 4     | 5 |
| 1388   |      |      |      |      |      |      |      |      |       | 3      | 3      | 3     | 4     | 5     | 4 |
| 1389   | 1    | 1    | 4    | 5    | 3    | 2    | 1    | 6    |       | 2      | 3      | 3     | 2     | 5     | 2 |
| 1390   | 5    | 4    | 4    | 3    | 5    | 5    | 5    | 2    |       | 2      | 2      | 3     | 3     | 3     | 5 |
| 1395   |      |      |      |      |      |      |      |      |       | 4      | 3      | 3     | 5     | 5     | 5 |
| 1396   | 6    | 5    | 2    | 4    | 5    | 5    | 5    | 5    |       | 2      | 2      | 2     | 3     | 3     | 3 |
| 1397   |      |      |      |      |      |      |      |      |       | 2      | 3      | 3     | 4     | 4     | 4 |
| 1398   |      |      |      |      |      |      |      |      |       | 4      | 3      | 3     | 5     | 5     | 5 |
| 1399   |      |      |      |      |      |      |      |      |       | 2      | 3      | 3     | 5     | 5     | 5 |
| 1403   | 5    | 5    | 2    | 3    | 4    | 3    | 5    | 3    |       | 3      | 2      | 3     | 4     | 4     | 4 |
| 1405   |      |      |      |      |      |      |      |      |       | 2      | 3      | 3     | 5     | 5     | 5 |
| 1406   | 3    | 5    | 5    | 3    | 5    | 2    | 3    | 4    |       | 3      | 3      | 3     | 3     | 4     | 4 |
| 1407   | 5    | 5    | 3    | 5    | 5    | 5    | 5    | 3    |       | 2      | 1      | 1     | 2     | 2     | 5 |
| 1408   |      |      |      |      |      |      |      |      |       | 3      | 3      | 3     | 5     | 5     | 5 |
| 1409   |      |      |      |      |      |      |      |      |       | 4      | 3      | 3     | 5     | 5     | 5 |
| 1410   |      |      |      |      |      |      |      |      |       | 1      | 3      | 3     | 3     | 3     | 3 |
| 1411   | 5    | 5    | 5    | 5    | 5    | 5    | 5    | 4    |       | 3      | 3      | 3     | 5     | 5     | 5 |
| 1412   |      |      |      |      |      |      |      |      |       | 3      | 3      | 3     | 4     | 5     | 4 |
| 1413   | 5    | 5    | 3    | 5    | 5    | 5    | 5    | 3    |       | 3      | 3      | 3     | 4     | 4     | 4 |
| 1414   |      |      |      |      |      |      |      |      |       | 3      | 2      | 2     | 3     | 3     | 3 |
| 1415   |      |      |      |      |      |      |      |      |       | 2      | 2      | 2     | 4     | 4     | 5 |
| 1416   |      |      |      |      |      |      |      |      |       | 3      | 2      | 3     | 5     | 5     | 4 |
| 1417   | 6    | 6    | 1    | 6    | 6    | 6    | 6    | 4    |       | 2      | 3      | 2     | 5     | 5     | 5 |
| 1418   |      |      |      |      |      |      |      |      |       | 3      | 3      | 3     | 4     | 5     | 5 |
| 1419   |      |      |      |      |      |      |      |      |       | 3      | 2      | 2     | 1     | 2     | 2 |
| 1420   |      |      |      |      |      |      |      |      |       | 2      | 3      | 2     | 4     | 4     | 5 |
| 1421   |      |      |      |      |      |      |      |      |       | 2      | 2      | 2     | 3     | 3     | 4 |
| 1422   | 6    | 6    | 1    | 6    | 6    | 6    | 6    | 2    |       | 3      | 3      | 3     | 4     | 5     | 5 |
| 1423   |      |      |      |      |      |      |      |      |       | 2      | 3      | 3     | 5     | 5     | 4 |
| 1424   |      |      |      |      |      |      |      |      |       | 3      | 2      | 3     | 5     | 4     | 3 |

| respid | Q48k | Q48l | Q48m | Q48n | Q48o | Q48p | Q48q | Q48r | Q49_1 | Q50a_1 | Q50b_1 | Q51_1 | Q51_2 | Q52_1 |   |
|--------|------|------|------|------|------|------|------|------|-------|--------|--------|-------|-------|-------|---|
| 1429   |      |      |      |      |      |      |      |      |       | 3      | 2      | 3     | 5     | 5     | 5 |
| 1430   |      |      |      |      |      |      |      |      |       | 3      | 3      | 3     | 5     | 5     | 5 |
| 1431   |      |      |      |      |      |      |      |      |       | 3      | 2      | 2     | 2     | 2     | 2 |
| 1433   |      |      |      |      |      |      |      |      |       | 3      | 2      | 3     | 4     | 3     | 3 |
| 1435   |      |      |      |      |      |      |      |      |       | 4      | 3      | 3     | 4     | 4     | 3 |
| 1436   |      |      |      |      |      |      |      |      |       | 3      | 3      | 3     | 5     | 5     | 5 |
| 1438   |      |      |      |      |      |      |      |      |       | 3      | 3      | 3     | 5     | 5     | 5 |
| 1439   |      |      |      |      |      |      |      |      |       | 3      | 3      | 3     | 5     | 5     | 5 |
| 1441   |      |      |      |      |      |      |      |      |       | 2      | 2      | 3     | 4     | 5     | 5 |
| 1442   |      |      |      |      |      |      |      |      |       | 3      | 3      | 3     | 5     | 5     | 5 |
| 1443   |      |      |      |      |      |      |      |      |       | 5      | 3      | 3     | 5     | 5     | 5 |
| 1444   | 5    | 4    | 4    | 5    | 4    | 5    | 5    | 3    |       | 3      | 3      | 3     | 5     | 5     | 5 |
| 1445   |      |      |      |      |      |      |      |      |       | 2      | 1      | 2     | 1     | 1     | 3 |
| 1446   | 5    | 5    | 4    | 5    | 5    | 5    | 5    | 4    |       | 2      | 3      | 3     | 4     | 4     | 5 |
| 1447   |      |      |      |      |      |      |      |      |       | 3      | 3      | 3     | 4     | 4     | 5 |
| 1449   | 3    | 3    | 2    | 3    | 3    | 2    |      |      | 5     | 2      | 2      | 2     | 4     | 4     | 5 |
| 1450   |      |      |      |      |      |      |      |      |       | 3      | 3      | 3     | 5     | 5     | 5 |
| 1451   | 1    | 1    | 6    | 1    | 1    | 1    | 1    | 6    |       | 2      | 3      | 3     | 5     | 5     | 5 |
| 1452   |      |      |      |      |      |      |      |      |       | 3      | 3      | 3     | 4     | 5     | 5 |
| 1453   | 3    | 3    | 4    | 3    | 3    | 3    | 3    | 4    |       | 3      | 2      | 2     | 4     | 3     | 3 |
| 1454   | 3    | 4    | 4    | 3    | 4    | 4    | 4    | 5    |       | 3      | 3      | 3     | 4     | 4     | 4 |
| 1456   |      |      |      |      |      |      |      |      |       | 2      | 1      | 1     | 4     | 4     | 4 |
| 1457   |      |      |      |      |      |      |      |      |       | 2      | 1      | 2     | 3     | 2     | 4 |
| 1459   |      |      |      |      |      |      |      |      |       | 3      | 3      | 3     | 4     | 4     | 4 |
| 1460   |      |      |      |      |      |      |      |      |       | 4      | 3      | 3     | 5     | 5     | 5 |
| 1463   |      |      |      |      |      |      |      |      |       | 2      | 3      | 3     | 5     | 3     | 5 |
| 1465   | 3    | 3    | 3    | 3    | 3    | 3    | 3    | 3    |       | 2      | 3      | 3     | 4     | 4     | 4 |
| 1467   |      |      |      |      |      |      |      |      |       | 2      | 2      | 2     | 3     | 3     | 4 |
| 1470   |      |      |      |      |      |      |      |      |       | 2      | 2      | 2     | 3     | 3     | 3 |
| 1471   |      |      |      |      |      |      |      |      |       | 2      | 2      | 2     | 3     | 3     | 3 |
| 1472   |      |      |      |      |      |      |      |      |       | 3      | 3      | 3     | 5     | 5     | 5 |
| 1474   | 3    | 5    | 3    | 3    | 5    | 5    | 4    | 4    |       | 3      | 3      | 3     | 4     | 5     | 5 |

| respid | Q48k | Q48l | Q48m | Q48n | Q48o | Q48p | Q48q | Q48r | Q49_1 | Q50a_1 | Q50b_1 | Q51_1 | Q51_2 | Q52_1 |   |
|--------|------|------|------|------|------|------|------|------|-------|--------|--------|-------|-------|-------|---|
| 1475   |      |      |      |      |      |      |      |      |       | 1      | 2      | 2     | 4     | 3     | 4 |
| 1477   |      |      |      |      |      |      |      |      |       | 2      | 3      | 3     | 5     | 5     | 5 |
| 1478   |      |      |      |      |      |      |      |      |       | 3      | 2      | 2     | 3     | 3     | 3 |
| 1480   |      |      |      |      |      |      |      |      |       | 4      | 3      | 3     | 5     | 5     | 5 |
| 1481   | 4    | 4    | 3    | 4    | 4    | 4    | 4    | 4    | 3     | 2      | 2      | 2     | 3     | 3     | 3 |
| 1483   |      |      |      |      |      |      |      |      |       | 3      | 3      | 3     | 5     | 5     | 5 |
| 1484   |      |      |      |      |      |      |      |      |       | 3      | 3      | 3     | 2     | 2     | 5 |
| 1485   |      |      |      |      |      |      |      |      |       | 2      | 3      | 3     | 4     | 4     | 3 |
| 1486   |      |      |      |      |      |      |      |      |       | 2      | 3      | 3     | 4     | 4     | 5 |
| 1487   |      |      |      |      |      |      |      |      |       | 2      | 2      | 2     | 3     | 3     | 3 |
| 1488   |      |      |      |      |      |      |      |      |       | 2      | 3      | 3     | 5     | 5     | 5 |
| 1489   |      |      |      |      |      |      |      |      |       | 2      | 3      | 2     | 5     | 5     | 5 |
| 1490   |      |      |      |      |      |      |      |      |       | 2      | 2      | 2     | 3     | 3     | 3 |
| 1491   | 3    | 4    |      | 3    | 2    | 3    | 2    | 3    | 3     | 3      | 3      | 3     | 3     | 4     | 3 |
| 1492   | 6    | 6    | 3    | 5    | 6    | 6    | 6    | 6    | 2     | 4      | 3      | 3     | 5     | 5     | 5 |
| 1494   |      |      |      |      |      |      |      |      |       | 2      | 2      | 2     | 5     | 5     | 5 |
| 1495   |      |      |      |      |      |      |      |      |       | 3      | 3      | 2     | 5     | 5     | 5 |
| 1496   |      |      |      |      |      |      |      |      |       | 3      | 3      | 3     | 4     | 4     | 4 |
| 1498   |      |      |      |      |      |      |      |      |       | 2      | 2      | 2     | 4     | 4     | 5 |
| 1499   | 5    | 4    | 3    | 3    | 5    | 4    | 3    | 4    | 4     | 2      | 2      | 2     | 3     | 3     | 4 |
| 1500   | 2    | 4    | 5    | 4    | 5    | 5    | 2    | 5    | 5     | 2      | 2      | 2     | 3     | 4     | 4 |
| 1501   | 6    | 3    | 4    | 3    | 6    | 5    | 6    | 6    | 3     | 3      | 3      | 3     | 5     | 5     | 5 |
| 1503   |      |      |      |      |      |      |      |      |       | 3      | 3      | 3     | 4     | 4     | 5 |
| 1504   | 6    | 6    | 4    | 6    | 6    | 6    | 6    | 6    | 3     | 3      | 3      | 3     | 5     | 5     | 5 |
| 1508   |      |      |      |      |      |      |      |      |       | 2      | 3      | 3     | 5     | 5     | 5 |
| 1509   |      |      |      |      |      |      |      |      |       | 3      | 3      | 3     | 3     | 3     | 4 |
| 1511   |      |      |      |      |      |      |      |      |       | 1      | 1      | 1     | 2     | 2     | 5 |
| 1512   |      |      |      |      |      |      |      |      |       | 3      | 3      | 3     | 5     | 5     | 5 |
| 1513   |      |      |      |      |      |      |      |      |       | 3      | 3      | 3     | 5     | 5     | 5 |
| 1515   |      |      |      |      |      |      |      |      |       | 2      | 2      | 3     | 3     | 3     | 2 |
| 1517   |      |      |      |      |      |      |      |      |       | 3      | 3      | 2     | 5     | 5     | 5 |
| 1518   | 5    | 5    | 2    | 5    | 5    | 5    | 5    | 5    | 2     | 2      | 3      | 3     | 5     | 5     | 5 |

| respid | Q48k | Q48l | Q48m | Q48n | Q48o | Q48p | Q48q | Q48r | Q49_1 | Q50a_1 | Q50b_1 | Q51_1 | Q51_2 | Q52_1 |   |
|--------|------|------|------|------|------|------|------|------|-------|--------|--------|-------|-------|-------|---|
| 1519   | 3    | 5    | 4    | 5    | 5    | 5    | 5    | 3    | 4     | 2      | 2      | 2     | 4     | 4     | 4 |
| 1520   |      |      |      |      |      |      |      |      |       | 1      | 1      | 1     | 2     | 2     | 3 |
| 1521   | 5    | 1    | 1    | 2    | 2    | 2    | 4    | 3    | 3     | 3      | 2      | 2     | 2     | 3     | 2 |
| 1522   | 6    | 6    | 2    | 6    | 6    | 6    | 6    | 6    | 2     | 4      | 3      | 3     | 5     | 5     | 5 |
| 1523   |      |      |      |      |      |      |      |      |       | 2      | 2      | 3     | 4     | 4     | 4 |
| 1524   | 6    | 6    | 3    |      |      |      |      |      |       | 3      | 3      | 3     | 3     | 5     | 4 |
| 1525   |      |      |      |      |      |      |      |      |       | 3      | 3      | 3     | 5     | 5     | 4 |
| 1526   |      |      |      |      |      |      |      |      |       | 3      | 3      | 3     | 4     | 4     | 3 |
| 1527   |      |      |      |      |      |      |      |      |       | 1      | 3      | 2     | 1     | 1     | 5 |
| 1534   |      |      |      |      |      |      |      |      |       | 3      | 3      | 2     | 4     | 5     | 5 |
| 1535   |      |      |      |      |      |      |      |      |       | 2      | 3      | 3     | 5     | 5     | 5 |
| 1536   |      |      |      |      |      |      |      |      |       | 3      | 3      | 3     | 4     | 4     | 4 |
| 1538   |      |      |      |      |      |      |      |      |       | 2      | 3      | 3     | 4     | 5     | 4 |
| 1539   |      |      |      |      |      |      |      |      |       | 3      | 3      | 3     | 5     | 5     | 5 |
| 1540   |      |      |      |      |      |      |      |      |       | 3      | 3      | 3     | 5     | 5     | 5 |
| 1541   |      |      |      |      |      |      |      |      |       | 3      | 3      | 3     | 5     | 5     | 5 |
| 1542   |      |      |      |      |      |      |      |      |       | 3      | 3      | 3     | 4     | 5     | 5 |
| 1543   | 6    | 5    | 3    | 5    | 6    | 4    | 6    | 3    | 3     | 3      | 3      | 2     | 4     | 4     | 4 |
| 1545   | 4    | 3    | 3    | 3    | 5    | 3    | 4    | 4    | 4     | 2      | 2      | 2     | 3     | 3     | 3 |
| 1546   |      |      |      |      |      |      |      |      |       | 2      | 3      | 3     | 5     | 5     | 4 |
| 1548   | 1    | 1    | 6    | 1    | 1    | 6    | 6    | 6    | 6     | 2      | 3      | 3     | 4     | 5     | 3 |
| 1549   |      |      |      |      |      |      |      |      |       | 3      | 3      | 3     | 5     | 5     | 5 |
| 1551   |      |      |      |      |      |      |      |      |       | 3      | 3      | 3     | 5     | 5     | 5 |
| 1552   |      |      |      |      |      |      |      |      |       | 2      | 2      | 3     | 5     | 4     | 4 |
| 1556   |      |      |      |      |      |      |      |      |       | 3      | 3      | 3     | 2     | 5     | 3 |
| 1557   |      |      |      |      |      |      |      |      |       | 2      | 2      | 2     | 4     | 4     | 3 |
| 1558   |      |      |      |      |      |      |      |      |       | 3      | 3      | 3     | 5     | 5     | 4 |
| 1561   |      |      |      |      |      |      |      |      |       | 4      | 3      | 3     | 5     | 5     | 5 |
| 1562   |      |      |      |      |      |      |      |      |       | 3      | 2      | 3     | 4     | 5     | 4 |
| 1563   |      |      |      |      |      |      |      |      |       | 3      | 2      | 3     | 4     | 4     | 4 |
| 1564   |      |      |      |      |      |      |      |      |       | 1      | 2      | 2     | 3     | 3     | 2 |
| 1565   |      |      |      |      |      |      |      |      |       | 3      | 3      | 3     | 5     | 5     | 5 |

| respid | Q48k | Q48l | Q48m | Q48n | Q48o | Q48p | Q48q | Q48r | Q49_1 | Q50a_1 | Q50b_1 | Q51_1 | Q51_2 | Q52_1 |   |
|--------|------|------|------|------|------|------|------|------|-------|--------|--------|-------|-------|-------|---|
| 1566   |      |      |      |      |      |      |      |      |       | 4      | 3      | 3     | 5     | 5     | 5 |
| 1567   |      |      |      |      |      |      |      |      |       | 3      | 3      | 3     | 5     | 5     | 5 |
| 1569   |      |      |      |      |      |      |      |      |       | 3      | 2      | 2     | 4     | 4     | 4 |
| 1570   | 6    | 6    | 2    | 6    | 6    | 6    | 6    | 2    |       | 3      | 3      | 3     | 5     | 5     | 5 |
| 1574   |      |      |      |      |      |      |      |      |       | 2      | 3      | 3     | 4     | 4     | 4 |
| 1575   | 6    | 6    | 1    | 6    | 6    | 6    | 6    | 1    |       | 3      | 3      | 3     | 5     | 5     | 5 |
| 1576   |      |      |      |      |      |      |      |      |       | 3      | 3      | 3     | 4     | 4     | 4 |
| 1577   |      |      |      |      |      |      |      |      |       | 4      | 3      | 3     | 5     | 5     | 5 |
| 1581   | 3    | 4    | 4    | 3    | 5    | 3    | 4    | 4    |       | 2      | 3      | 2     | 4     | 5     | 5 |
| 1583   |      |      |      |      |      |      |      |      |       | 3      | 3      | 3     | 4     | 5     | 5 |
| 1585   |      |      |      |      |      |      |      |      |       | 4      | 3      | 3     | 5     | 5     | 5 |
| 1586   |      |      |      |      |      |      |      |      |       | 3      | 3      | 3     | 3     | 3     | 3 |
| 1588   |      |      |      |      |      |      |      |      |       | 3      | 3      | 3     | 5     | 5     | 5 |
| 1590   |      |      |      |      |      |      |      |      |       | 4      | 3      | 3     | 5     | 4     | 5 |
| 1592   | 5    | 4    | 3    | 5    | 6    | 4    | 5    | 2    |       | 4      | 3      | 3     | 4     | 5     | 4 |
| 1594   |      |      |      |      |      |      |      |      |       | 2      | 3      | 3     | 4     | 4     | 4 |
| 1598   |      |      |      |      |      |      |      |      |       | 2      | 2      | 2     | 3     | 3     | 3 |
| 1599   |      |      |      |      |      |      |      |      |       | 3      | 3      | 3     | 4     | 5     | 5 |
| 1600   |      |      |      |      |      |      |      |      |       | 4      | 3      | 3     | 5     | 5     | 5 |
| 1602   | 5    | 5    | 2    | 5    | 5    | 5    | 5    | 5    |       | 3      | 3      | 3     | 5     | 5     | 5 |
| 1603   | 6    | 6    | 1    | 6    | 6    | 6    | 6    | 1    |       | 2      | 2      | 3     | 4     | 4     | 4 |
| 1604   | 3    | 4    | 3    | 4    | 4    | 4    | 4    | 3    |       | 2      | 2      | 2     | 5     | 5     | 4 |
| 1605   |      |      |      |      |      |      |      |      |       | 2      | 1      | 1     | 2     | 3     | 2 |
| 1606   |      |      |      |      |      |      |      |      |       | 3      | 3      | 3     | 5     | 5     | 5 |
| 1610   |      |      |      |      |      |      |      |      |       | 3      | 3      | 3     | 5     | 5     | 5 |
| 1611   |      |      |      |      |      |      |      |      |       | 2      | 3      | 3     | 5     | 5     | 5 |
| 1612   |      |      |      |      |      |      |      |      |       | 4      | 3      | 3     | 5     | 5     | 5 |
| 1613   |      |      |      |      |      |      |      |      |       | 3      | 2      | 2     | 3     | 3     | 4 |
| 1615   |      |      |      |      |      |      |      |      |       | 2      | 2      | 2     | 4     | 4     | 4 |
| 1616   |      |      |      |      |      |      |      |      |       | 3      | 3      | 2     | 4     | 4     | 5 |
| 1617   |      |      |      |      |      |      |      |      |       | 3      | 2      | 2     | 4     | 4     | 4 |
| 1618   |      |      |      |      |      |      |      |      |       | 3      | 3      | 3     | 5     | 5     | 5 |

| respid | Q48k | Q48l | Q48m | Q48n | Q48o | Q48p | Q48q | Q48r | Q49_1 | Q50a_1 | Q50b_1 | Q51_1 | Q51_2 | Q52_1 |   |
|--------|------|------|------|------|------|------|------|------|-------|--------|--------|-------|-------|-------|---|
| 1620   | 6    | 6    | 3    | 6    | 6    | 6    | 6    | 6    | 4     | 3      | 3      | 3     | 5     | 5     | 5 |
| 1621   |      |      |      |      |      |      |      |      |       | 2      | 2      | 2     | 3     | 4     | 3 |
| 1622   |      |      |      |      |      |      |      |      |       | 5      | 3      | 3     | 5     | 5     | 5 |
| 1623   |      |      |      |      |      |      |      |      |       | 2      | 3      | 3     | 5     | 5     | 5 |
| 1624   | 6    | 5    | 2    | 4    | 6    | 6    | 6    | 6    | 2     | 3      | 3      | 3     | 4     | 5     | 4 |
| 1625   |      |      |      |      |      |      |      |      |       | 4      | 3      | 3     | 5     | 5     | 5 |
| 1626   |      |      |      |      |      |      |      |      |       | 2      | 1      | 3     | 2     | 2     | 2 |
| 1627   | 6    | 5    | 1    | 5    | 6    | 5    | 6    | 6    | 1     | 3      | 3      | 2     | 4     | 5     | 5 |
| 1629   |      |      |      |      |      |      |      |      |       | 4      | 3      | 3     | 5     | 5     | 5 |
| 1630   |      |      |      |      |      |      |      |      |       | 1      | 2      | 2     | 4     | 4     | 5 |
| 1631   |      |      |      |      |      |      |      |      |       | 2      | 3      | 3     | 5     | 5     | 5 |
| 1634   | 5    | 5    | 3    | 5    | 5    | 5    | 5    | 5    | 3     | 2      | 3      | 3     | 5     | 5     | 5 |
| 1635   |      |      |      |      |      |      |      |      |       | 2      | 2      | 2     | 4     | 4     | 4 |
| 1636   |      |      |      |      |      |      |      |      |       | 4      | 3      | 3     | 5     | 5     | 5 |
| 1637   |      |      |      |      |      |      |      |      |       | 3      | 3      | 3     | 5     | 5     | 5 |
| 1640   | 4    | 3    | 4    | 3    | 4    | 4    | 4    | 3    | 3     | 3      | 2      | 3     | 5     | 5     | 5 |
| 1642   | 4    | 5    | 5    | 3    | 6    | 6    | 6    | 5    | 5     | 3      | 3      | 3     | 5     | 5     | 4 |
| 1643   | 5    | 5    | 2    | 5    | 6    | 6    | 6    | 5    | 3     | 3      | 2      | 3     | 4     | 4     | 4 |
| 1644   |      |      |      |      |      |      |      |      |       | 1      | 1      | 2     | 3     | 3     | 3 |
| 1645   |      |      |      |      |      |      |      |      |       | 1      | 2      | 2     | 2     | 3     | 4 |
| 1646   | 1    | 6    | 6    | 1    | 6    | 6    | 6    | 6    | 6     | 2      | 3      | 3     | 5     | 5     | 5 |
| 1647   |      |      |      |      |      |      |      |      |       | 3      | 3      | 3     | 5     | 5     | 4 |
| 1650   |      |      |      |      |      |      |      |      |       | 2      | 3      | 2     | 2     | 2     | 2 |
| 1654   |      |      |      |      |      |      |      |      |       | 2      | 2      | 2     | 3     | 3     | 3 |
| 1656   |      |      |      |      |      |      |      |      |       | 3      | 3      | 3     | 5     | 5     | 5 |
| 1657   |      |      |      |      |      |      |      |      |       | 2      | 3      | 3     | 5     | 5     | 3 |
| 1659   |      |      |      |      |      |      |      |      |       | 2      | 3      | 2     | 3     | 4     | 4 |
| 1662   | 4    | 4    | 4    | 4    | 4    | 4    | 4    | 4    | 4     | 3      | 2      | 2     | 4     | 4     | 4 |
| 1663   | 5    | 3    | 2    | 4    | 3    | 2    | 2    | 3    | 4     | 2      | 3      | 3     | 4     | 5     | 2 |
| 1664   | 6    | 6    | 1    | 6    | 6    | 6    | 6    | 6    | 2     | 2      | 3      | 3     | 5     | 5     | 5 |
| 1665   |      |      |      |      |      |      |      |      |       | 3      | 3      | 3     | 4     | 4     | 4 |
| 1667   |      |      |      |      |      |      |      |      |       | 3      | 2      | 2     | 2     | 3     | 2 |

| respid | Q48k | Q48l | Q48m | Q48n | Q48o | Q48p | Q48q | Q48r | Q49_1 | Q50a_1 | Q50b_1 | Q51_1 | Q51_2 | Q52_1 |   |
|--------|------|------|------|------|------|------|------|------|-------|--------|--------|-------|-------|-------|---|
| 1668   |      |      |      |      |      |      |      |      |       | 3      | 3      | 2     | 4     | 4     | 4 |
| 1670   |      |      |      |      |      |      |      |      |       | 2      | 3      | 3     | 3     | 4     | 5 |
| 1671   |      |      |      |      |      |      |      |      |       | 4      | 3      | 3     | 5     | 5     | 5 |
| 1673   | 6    | 6    | 2    | 6    | 6    | 6    | 6    | 6    | 1     | 2      | 2      | 2     | 3     | 3     | 4 |
| 1674   |      |      |      |      |      |      |      |      |       | 3      | 3      | 3     | 4     | 4     | 4 |
| 1676   |      |      |      |      |      |      |      |      |       | 3      | 3      | 2     | 5     | 5     | 5 |
| 1677   |      |      |      |      |      |      |      |      |       | 4      | 3      | 3     | 5     | 5     | 5 |
| 1678   |      |      |      |      |      |      |      |      |       | 2      | 3      | 3     | 5     | 5     | 5 |
| 1680   | 6    | 6    | 2    | 6    | 6    | 6    | 6    | 6    | 2     | 3      | 3      | 3     | 5     | 5     | 5 |
| 1681   |      |      |      |      |      |      |      |      |       | 2      | 2      | 3     | 5     | 3     | 5 |
| 1683   |      |      |      |      |      |      |      |      |       | 2      | 3      | 3     | 5     | 5     | 4 |
| 1685   | 5    | 5    | 3    | 4    | 3    | 6    | 3    | 5    |       | 2      | 3      | 3     | 5     | 5     | 5 |
| 1686   | 1    | 6    | 1    | 3    | 6    | 6    | 6    | 6    | 2     | 2      | 2      | 2     | 4     | 4     | 4 |
| 1690   |      |      |      |      |      |      |      |      |       | 3      | 3      | 3     | 5     | 5     | 5 |
| 1691   | 1    | 4    | 5    | 1    | 4    | 4    | 4    | 5    | 1     | 2      | 3      | 3     | 4     | 5     | 5 |
| 1692   |      |      |      |      |      |      |      |      |       | 2      | 2      | 2     | 3     | 4     | 4 |
| 1693   |      |      |      |      |      |      |      |      |       | 2      | 3      | 3     | 5     | 5     | 5 |
| 1695   | 4    | 5    | 3    | 4    | 6    | 4    | 4    | 4    | 3     | 2      | 3      | 3     | 5     | 5     | 5 |
| 1696   |      |      |      |      |      |      |      |      |       | 2      | 3      | 2     | 5     | 5     | 5 |
| 1698   |      |      |      |      |      |      |      |      |       | 2      | 3      | 3     | 4     | 4     | 4 |
| 1699   |      |      |      | 3    |      |      |      |      |       | 3      | 3      | 3     | 3     | 3     | 5 |
| 1701   |      |      |      |      |      |      |      |      |       | 2      | 2      | 2     | 2     | 3     | 2 |
| 1702   | 3    | 5    | 3    | 2    | 5    | 4    | 4    | 4    | 2     | 3      | 3      | 3     | 5     | 5     | 5 |
| 1703   |      |      |      |      |      |      |      |      |       | 3      | 3      | 3     | 5     | 5     | 5 |
| 1705   | 6    | 6    | 1    | 6    | 6    | 6    | 6    | 6    | 2     | 3      | 3      | 3     | 5     | 5     | 5 |
| 1706   |      |      |      |      |      |      |      |      |       | 2      | 3      | 3     | 4     | 4     | 4 |
| 1708   |      |      |      |      |      |      |      |      |       | 4      | 2      | 3     | 4     | 3     | 4 |
| 1711   | 5    | 5    | 5    | 5    | 5    | 5    | 5    | 5    | 5     | 3      | 3      | 3     | 4     | 4     | 4 |
| 1712   |      |      |      |      |      |      |      |      |       | 3      | 3      | 3     | 5     | 5     | 4 |
| 1713   | 5    | 6    | 2    | 5    | 5    | 5    | 6    | 6    | 2     | 3      | 3      | 2     | 5     | 5     | 4 |
| 1715   | 6    | 6    | 1    | 6    | 6    | 5    | 6    | 6    | 1     | 4      | 3      | 2     | 5     | 4     | 5 |
| 1717   |      |      |      |      |      |      |      |      |       | 4      | 3      | 3     | 5     | 5     | 5 |

| respid | Q48k | Q48l | Q48m | Q48n | Q48o | Q48p | Q48q | Q48r | Q49_1 | Q50a_1 | Q50b_1 | Q51_1 | Q51_2 | Q52_1 |
|--------|------|------|------|------|------|------|------|------|-------|--------|--------|-------|-------|-------|
| 1718   |      |      |      |      |      |      |      |      |       | 1      | 1      | 1     | 1     | 1     |
| 1719   | 5    | 5    | 3    | 3    | 5    | 5    | 5    | 3    |       | 3      | 3      | 3     | 5     | 4     |
| 1721   |      |      |      |      |      |      |      |      |       | 3      | 2      | 3     | 5     | 4     |
| 1722   | 3    | 4    | 4    | 3    | 3    | 3    | 3    | 3    |       | 2      | 3      | 2     | 3     | 3     |
| 1724   | 6    | 6    | 1    | 6    | 6    | 6    | 6    | 1    |       | 3      | 3      | 3     | 4     | 4     |
| 1725   | 6    | 6    | 1    | 6    | 6    | 6    | 6    | 1    |       | 4      | 3      | 3     | 1     | 5     |
| 1726   |      |      |      |      |      |      |      |      |       | 2      | 3      | 3     | 4     | 5     |
| 1727   |      |      |      |      |      |      |      |      |       | 2      | 3      | 3     | 5     | 5     |
| 1728   |      |      |      |      |      |      |      |      |       | 3      | 3      | 3     | 5     | 5     |
| 1731   |      |      |      |      |      |      |      |      |       | 2      | 2      | 2     | 3     | 3     |
| 1733   |      |      |      |      |      |      |      |      |       | 4      | 3      | 3     | 4     | 5     |
| 1734   |      |      |      |      |      |      |      |      |       | 4      | 3      | 3     | 5     | 4     |
| 1735   |      |      |      |      |      |      |      |      |       | 4      | 3      | 3     | 5     | 5     |
| 1736   | 6    | 6    | 5    | 6    | 6    | 6    | 6    | 1    |       | 2      | 2      | 2     | 5     | 5     |
| 1737   |      |      |      |      |      |      |      |      |       | 2      | 3      | 3     | 4     | 4     |
| 1738   | 3    | 4    | 4    | 4    | 4    | 4    | 4    | 3    |       | 2      | 3      | 3     | 4     | 5     |
| 1743   |      |      |      |      |      |      |      |      |       | 2      | 2      | 2     | 4     | 4     |
| 1755   | 5    | 3    | 3    | 3    | 5    | 3    | 3    | 3    |       | 2      | 2      | 2     | 3     | 3     |
| 1756   | 6    | 6    | 1    | 6    | 6    | 6    | 6    | 1    |       | 2      | 3      | 2     | 5     | 5     |
| 1757   | 6    | 6    | 2    | 6    | 6    | 6    | 6    | 6    |       | 4      | 3      | 3     | 5     | 5     |
| 1758   | 3    | 3    | 3    | 1    | 3    | 1    |      | 6    |       | 1      | 1      | 2     | 3     | 3     |
| 1759   |      |      |      |      |      |      |      |      |       | 3      | 2      | 2     | 4     | 4     |
| 1761   | 5    | 5    | 2    | 5    | 6    | 5    | 6    | 2    |       | 2      | 1      | 3     | 4     | 4     |
| 1762   | 6    | 6    | 1    | 6    | 6    | 6    | 6    | 1    |       | 3      | 3      | 3     | 4     | 5     |
| 1764   |      |      |      |      |      |      |      |      |       | 3      | 2      | 3     | 5     | 5     |
| 1767   | 3    | 6    | 1    | 6    | 6    | 6    | 6    | 1    |       | 2      | 2      | 2     | 4     | 4     |
| 1768   |      |      |      |      |      |      |      |      |       | 3      | 3      | 3     | 5     | 3     |
| 1769   |      |      |      |      |      |      |      |      |       | 3      | 3      | 3     | 5     | 5     |
| 1770   |      |      |      |      |      |      |      |      |       | 1      | 3      | 2     | 3     | 5     |
| 1771   |      |      |      |      |      |      |      |      |       | 1      | 2      | 2     | 3     | 3     |
| 1776   |      |      |      |      |      |      |      |      |       | 3      | 2      | 1     | 4     | 4     |
| 1777   | 3    | 5    | 2    | 6    | 6    | 6    | 6    | 3    |       | 2      | 3      | 3     | 4     | 4     |



| respid | Q48k | Q48l | Q48m | Q48n | Q48o | Q48p | Q48q | Q48r | Q49_1 | Q50a_1 | Q50b_1 | Q51_1 | Q51_2 | Q52_1 |   |
|--------|------|------|------|------|------|------|------|------|-------|--------|--------|-------|-------|-------|---|
| 1778   |      |      |      |      |      |      |      |      |       | 3      | 3      | 3     | 5     | 5     | 5 |
| 1779   |      |      |      |      |      |      |      |      |       | 3      | 2      | 3     | 4     | 5     | 4 |
| 1780   |      |      |      |      |      |      |      |      |       | 1      | 3      | 2     | 3     | 4     | 4 |
| 1781   |      |      |      |      |      |      |      |      |       | 4      | 3      | 3     | 5     | 5     | 5 |
| 1783   | 5    | 5    | 3    | 4    | 5    | 4    | 4    | 3    | 3     | 3      | 3      | 3     | 4     | 4     | 5 |
| 1784   |      |      |      |      |      |      |      |      |       | 1      | 2      | 3     | 3     | 3     | 3 |
| 1785   |      |      |      |      |      |      |      |      |       | 3      | 3      | 3     | 5     | 5     | 4 |
| 1788   |      |      |      |      |      |      |      |      |       | 3      | 2      | 2     | 2     | 2     | 2 |
| 1792   |      |      |      |      |      |      |      |      |       | 3      | 3      | 2     | 4     | 4     | 4 |
| 1794   | 5    | 3    |      | 5    | 6    | 6    | 6    | 4    | 2     | 3      | 3      | 5     | 5     | 5     | 3 |
| 1798   | 1    | 5    | 3    |      | 6    | 6    | 6    | 5    | 5     | 2      | 1      | 1     | 3     | 4     | 3 |
| 1799   | 4    | 6    | 1    | 5    | 6    | 4    | 3    | 4    | 2     | 2      | 2      | 2     | 4     | 4     | 4 |
| 1800   |      |      |      |      |      |      |      |      |       | 3      | 3      | 3     | 5     | 5     | 5 |
| 1804   |      |      |      |      |      |      |      |      |       | 2      | 2      | 2     | 3     | 3     | 3 |
| 1806   | 3    | 1    | 6    | 2    | 3    | 5    | 3    | 4    | 2     | 2      | 2      | 2     | 3     | 3     | 3 |
| 1807   | 3    | 2    | 3    | 2    | 5    | 2    | 5    | 3    | 3     | 3      | 3      | 3     | 3     | 4     | 4 |
| 1808   |      |      |      |      |      |      |      |      |       | 4      | 3      | 3     | 5     | 5     | 5 |
| 1809   | 3    | 3    | 6    | 3    | 3    | 3    | 3    | 3    | 6     | 1      | 2      | 2     | 3     | 3     | 3 |
| 1811   |      |      |      |      |      |      |      |      |       | 2      | 2      | 2     | 1     | 3     | 3 |
| 1812   |      |      |      |      |      |      |      |      |       | 3      | 2      | 2     | 4     | 4     | 5 |
| 1813   |      |      |      |      |      |      |      |      |       | 3      | 2      | 2     | 3     | 3     | 3 |
| 1814   | 6    | 6    | 1    | 6    | 6    | 6    | 6    | 6    | 1     | 3      | 3      | 3     | 5     | 5     | 5 |
| 1815   | 6    | 6    | 2    | 6    | 6    | 6    | 6    | 6    | 2     | 2      | 2      | 2     | 3     | 3     | 3 |
| 1817   | 4    | 4    | 2    | 4    | 4    | 4    | 4    | 4    | 3     | 2      | 2      | 2     | 4     | 3     | 4 |
| 1820   |      |      |      |      |      |      |      |      |       | 2      | 3      | 3     | 4     | 4     | 4 |
| 1821   |      |      |      |      |      |      |      |      |       | 4      | 3      | 3     | 5     | 5     | 5 |
| 1822   |      |      |      |      |      |      |      |      |       | 3      | 2      | 2     | 3     | 3     | 3 |
| 1823   |      |      |      |      |      |      |      |      |       | 1      | 1      | 1     | 5     | 3     | 5 |
| 1824   |      |      |      |      |      |      |      |      |       | 2      | 2      | 2     | 4     | 4     | 4 |
| 1826   |      |      |      |      |      |      |      |      |       | 5      | 3      | 3     | 5     | 5     | 5 |
| 1828   |      |      |      |      |      |      |      |      |       | 2      | 3      | 3     | 5     | 5     | 3 |
| 1829   | 6    | 6    | 1    | 6    | 6    | 6    | 6    | 6    | 1     | 3      | 3      | 3     | 5     | 5     | 5 |

| respid | Q48k | Q48l | Q48m | Q48n | Q48o | Q48p | Q48q | Q48r | Q49_1 | Q50a_1 | Q50b_1 | Q51_1 | Q51_2 | Q52_1 |   |
|--------|------|------|------|------|------|------|------|------|-------|--------|--------|-------|-------|-------|---|
| 1830   |      |      |      |      |      |      |      |      |       | 4      | 3      | 3     | 5     | 5     | 5 |
| 1831   |      |      |      |      |      |      |      |      |       | 3      | 3      | 3     | 5     | 5     | 5 |
| 1832   | 6    | 5    | 3    | 2    | 6    | 6    | 6    | 2    |       | 3      | 2      | 2     | 4     | 4     | 4 |
| 1836   |      |      |      |      |      |      |      |      |       | 2      | 2      | 2     | 3     | 3     | 4 |
| 1838   |      |      |      |      |      |      |      |      |       | 2      | 3      | 3     | 4     | 5     | 4 |
| 1839   |      |      |      |      |      |      |      |      |       | 2      | 3      | 2     | 4     | 5     | 4 |
| 1840   |      |      |      |      |      |      |      |      |       | 3      | 3      | 3     | 4     | 5     | 5 |
| 1841   |      |      |      |      |      |      |      |      |       | 3      | 3      | 3     | 4     | 2     | 2 |
| 1842   |      |      |      |      |      |      |      |      |       | 4      | 3      | 3     | 4     | 4     | 5 |
| 1843   |      |      |      |      |      |      |      |      |       | 2      | 2      | 3     | 3     | 3     | 4 |
| 1844   |      |      |      |      |      |      |      |      |       | 2      | 2      | 2     | 2     | 2     | 2 |
| 1845   |      |      |      |      |      |      |      |      |       | 2      | 3      | 3     | 4     | 4     | 4 |
| 1849   | 6    | 6    | 1    | 6    | 6    | 6    | 6    | 2    |       | 2      | 1      | 2     | 3     | 2     | 4 |
| 1850   | 5    | 4    | 3    | 5    | 5    | 4    | 3    | 4    |       | 3      | 3      | 3     | 4     | 5     | 4 |
| 1851   |      |      |      |      |      |      |      |      |       | 2      | 3      | 3     | 5     | 4     | 4 |
| 1852   |      |      |      |      |      |      |      |      |       | 3      | 3      | 3     | 4     | 4     | 4 |
| 1857   |      |      |      |      |      |      |      |      |       | 3      | 3      | 3     | 5     | 5     | 5 |
| 1858   | 6    | 6    | 6    | 6    | 6    | 6    | 6    | 6    |       | 2      | 2      | 1     | 2     | 5     | 5 |
| 1861   | 6    | 6    | 1    | 6    | 6    | 6    | 6    | 1    |       | 4      | 3      | 3     | 5     | 5     | 4 |
| 1862   | 6    | 6    | 2    | 6    | 6    | 5    | 6    | 1    |       | 3      | 2      | 2     | 4     | 4     | 4 |
| 1863   |      |      |      |      |      |      |      |      |       | 2      | 2      | 2     | 3     | 3     | 3 |
| 1864   |      |      |      |      |      |      |      |      |       | 2      | 3      | 3     | 5     | 4     | 4 |
| 1865   |      |      |      |      |      |      |      |      |       | 4      | 3      | 3     | 5     | 5     | 5 |
| 1867   |      |      |      |      |      |      |      |      |       | 2      | 3      | 3     | 5     | 5     | 5 |
| 1868   |      |      |      |      |      |      |      |      |       | 2      | 3      | 3     | 5     | 4     | 5 |
| 1869   |      |      |      |      |      |      |      |      |       | 2      | 3      | 3     | 4     | 4     | 3 |
| 1870   |      |      |      |      |      |      |      |      |       | 4      | 3      | 3     | 5     | 5     | 5 |
| 1871   |      |      |      |      |      |      |      |      |       | 2      | 1      | 3     | 2     | 1     | 5 |
| 1872   |      |      |      |      |      |      |      |      |       | 3      | 3      | 3     | 5     | 5     | 4 |
| 1873   | 6    | 6    | 1    | 5    | 6    | 6    | 6    | 2    |       | 4      | 3      | 3     | 5     | 5     | 5 |
| 1876   |      |      |      |      |      |      |      |      |       | 4      | 3      | 3     | 5     | 5     | 5 |
| 1877   |      |      |      |      |      |      |      |      |       | 4      | 3      | 3     | 5     | 5     | 5 |

| respid | Q48k | Q48l | Q48m | Q48n | Q48o | Q48p | Q48q | Q48r | Q49_1 | Q50a_1 | Q50b_1 | Q51_1 | Q51_2 | Q52_1 |   |
|--------|------|------|------|------|------|------|------|------|-------|--------|--------|-------|-------|-------|---|
| 1878   |      |      |      |      |      |      |      |      |       | 3      | 3      | 3     | 5     | 4     | 5 |
| 1879   |      |      |      |      |      |      |      |      |       | 2      | 3      | 3     | 5     | 5     | 5 |
| 1880   |      |      |      |      |      |      |      |      |       | 3      | 3      | 3     | 5     | 5     | 5 |
| 1881   | 6    | 6    | 2    | 5    | 6    | 6    | 6    | 6    | 2     | 2      | 3      | 3     | 5     | 5     | 5 |
| 1883   |      |      |      |      |      |      |      |      |       | 2      | 3      | 3     | 4     | 4     | 4 |
| 1886   |      |      |      |      |      |      |      |      |       | 3      | 3      | 3     | 5     | 5     | 5 |
| 1888   |      |      |      |      |      |      |      |      |       | 3      | 2      | 2     | 3     | 3     | 2 |
| 1889   |      |      |      |      |      |      |      |      |       | 3      | 2      | 3     | 4     | 3     | 3 |
| 1890   |      |      |      |      |      |      |      |      |       | 2      | 1      | 2     | 3     | 3     | 3 |
| 1891   |      |      |      |      |      |      |      |      |       | 2      | 3      | 3     | 5     | 5     | 5 |
| 1893   | 5    | 6    | 2    | 5    | 5    | 5    | 5    | 6    | 2     | 3      | 3      | 3     | 5     | 5     | 5 |
| 1894   | 5    | 5    | 6    | 5    | 4    | 6    | 6    | 6    | 5     | 3      | 2      | 2     | 5     | 5     | 5 |
| 1895   |      |      |      |      |      |      |      |      |       | 2      | 3      | 3     | 5     | 4     | 5 |
| 1896   |      |      |      |      |      |      |      |      |       | 2      | 2      | 2     | 2     | 2     | 3 |
| 1897   |      |      |      |      |      |      |      |      |       | 3      | 3      | 3     | 5     | 5     | 5 |
| 1898   | 2    | 2    | 5    | 3    | 2    | 1    | 1    | 5    | 5     | 2      | 1      | 1     | 2     | 2     | 2 |
| 1899   |      |      |      |      |      |      |      |      |       | 2      | 3      | 3     | 3     | 3     | 5 |
| 1900   |      |      |      |      |      |      |      |      |       | 2      | 2      | 2     | 3     | 3     | 3 |
| 1903   |      |      |      |      |      |      |      |      |       | 4      | 3      | 3     | 5     | 5     | 5 |
| 1906   |      |      |      |      |      |      |      |      |       | 3      | 3      | 2     | 5     | 5     | 3 |
| 1907   |      |      |      |      |      |      |      |      |       | 1      | 1      | 1     | 1     | 1     | 3 |
| 1908   | 4    | 5    | 2    |      | 6    | 3    | 4    | 3    | 3     | 2      | 3      | 3     | 5     | 4     | 4 |
| 1909   | 4    | 3    | 3    | 3    | 4    | 1    | 3    | 6    | 6     | 2      | 3      | 2     | 3     | 3     | 3 |
| 1910   |      |      |      |      |      |      |      |      |       | 3      | 3      | 3     | 4     | 5     | 4 |
| 1911   |      |      |      |      |      |      |      |      |       | 3      | 3      | 3     | 5     | 5     | 5 |
| 1912   |      |      |      |      |      |      |      |      |       | 2      | 3      | 3     | 5     | 5     | 5 |
| 1917   | 4    | 4    | 3    | 3    | 4    | 4    | 4    | 4    | 3     | 2      | 3      | 2     | 4     | 4     | 5 |
| 1918   | 3    | 4    | 2    | 3    | 3    | 6    | 3    | 3    | 3     | 2      | 2      | 2     | 1     | 1     | 4 |
| 1919   |      |      |      |      |      |      |      |      |       | 5      | 3      | 3     | 5     | 5     | 5 |
| 1922   |      |      |      |      |      |      |      |      |       | 3      | 3      | 3     | 4     | 4     | 4 |
| 1925   |      |      |      |      |      |      |      |      |       | 2      | 3      | 3     | 5     | 5     | 5 |
| 1926   |      |      |      |      |      |      |      |      |       | 4      | 3      | 3     | 5     | 5     | 4 |

| respid | Q48k | Q48l | Q48m | Q48n | Q48o | Q48p | Q48q | Q48r | Q49_1 | Q50a_1 | Q50b_1 | Q51_1 | Q51_2 | Q52_1 |   |
|--------|------|------|------|------|------|------|------|------|-------|--------|--------|-------|-------|-------|---|
| 1927   |      |      |      | 2    |      | 6    |      |      |       | 3      | 2      | 3     | 3     | 3     | 4 |
| 1928   |      |      |      |      |      |      |      |      |       | 3      | 3      | 3     | 5     | 5     | 5 |
| 1929   |      |      |      |      |      |      |      |      |       | 4      | 3      | 3     | 5     | 5     | 5 |
| 1934   |      |      |      |      |      |      |      |      |       | 2      | 3      | 3     | 3     | 3     | 4 |
| 1935   |      |      |      |      |      |      |      |      |       | 3      | 3      | 3     | 5     | 5     | 5 |
| 1936   |      |      |      |      |      |      |      |      |       | 2      | 2      | 3     | 4     | 4     | 3 |
| 1937   |      |      |      |      |      |      |      |      |       | 3      | 3      | 3     | 5     | 5     | 5 |
| 1938   |      |      |      |      |      |      |      |      |       | 3      | 2      | 2     | 3     | 3     | 4 |
| 1939   | 5    | 5    | 2    | 4    | 6    | 5    | 5    | 2    | 4     | 3      | 3      | 5     | 5     | 5     | 4 |
| 1940   |      |      |      |      |      |      |      |      |       | 3      | 3      | 3     | 5     | 5     | 5 |
| 1941   |      |      |      |      |      |      |      |      |       | 4      | 3      | 3     | 5     | 5     | 5 |
| 1948   |      |      |      |      |      |      |      |      |       | 3      | 3      | 3     | 5     | 5     | 5 |
| 1950   |      |      |      |      |      |      |      |      |       | 2      | 3      | 3     | 5     | 5     | 5 |
| 1955   |      |      |      |      |      |      |      |      |       | 3      | 3      | 3     | 3     | 3     | 4 |
| 1958   | 4    | 4    | 3    | 4    | 4    | 5    | 4    | 3    | 3     | 3      | 3      | 4     | 4     | 4     | 5 |
| 1960   |      |      |      |      |      |      |      |      |       | 3      | 3      | 3     | 5     | 5     | 5 |
| 1961   |      |      |      |      |      |      |      |      |       | 3      | 2      | 2     | 5     | 5     | 5 |
| 1962   | 6    | 6    | 2    | 6    | 6    | 6    | 6    | 1    | 3     | 3      | 3      | 5     | 5     | 5     | 5 |
| 1965   |      |      |      |      |      |      |      |      |       | 4      | 3      | 3     | 5     | 5     | 4 |
| 1966   |      |      |      |      |      |      |      |      |       | 4      | 3      | 3     | 4     | 4     | 4 |
| 1967   |      |      |      |      |      |      |      |      |       | 4      | 3      | 3     | 5     | 5     | 5 |
| 1968   | 4    | 3    | 2    | 3    | 3    | 3    | 3    | 5    | 3     | 2      | 2      | 3     | 2     | 2     | 4 |
| 1973   | 4    | 4    | 4    | 3    | 4    | 3    | 4    | 4    | 2     | 2      | 2      | 4     | 4     | 4     | 4 |
| 1974   |      |      |      |      |      |      |      |      |       | 1      | 1      | 1     | 3     | 1     | 3 |
| 1975   |      |      |      |      |      |      |      |      |       | 4      | 3      | 3     | 5     | 5     | 5 |
| 1977   |      |      |      |      |      |      |      |      |       | 1      | 1      | 2     | 5     | 1     | 5 |
| 1978   |      |      |      |      |      |      |      |      |       | 4      | 3      | 3     | 5     | 5     | 5 |
| 1979   | 3    | 3    | 3    | 3    | 3    | 3    | 3    | 3    | 3     | 2      | 2      | 2     | 3     | 3     | 3 |
| 1982   |      |      |      |      |      |      |      |      |       | 2      | 2      | 2     | 5     | 5     | 5 |
| 1983   |      |      |      |      |      |      |      |      |       | 3      | 2      | 2     | 4     | 4     | 4 |
| 1987   |      |      |      |      |      |      |      |      |       | 1      | 2      | 2     | 4     | 5     | 5 |
| 1988   |      |      |      |      |      |      |      |      |       | 3      | 2      | 2     | 3     | 3     | 3 |

| respid | Q48k | Q48l | Q48m | Q48n | Q48o | Q48p | Q48q | Q48r | Q49_1 | Q50a_1 | Q50b_1 | Q51_1 | Q51_2 | Q52_1 |   |
|--------|------|------|------|------|------|------|------|------|-------|--------|--------|-------|-------|-------|---|
| 1991   | 6    | 4    | 2    | 2    | 5    | 6    | 6    | 6    | 2     | 2      | 2      | 2     | 3     | 3     | 5 |
| 1992   |      |      |      |      |      |      |      |      |       | 4      | 3      | 3     | 5     | 5     | 5 |
| 1993   | 3    | 3    | 5    | 3    | 4    | 5    | 5    | 4    | 4     | 3      | 3      | 3     | 5     | 5     | 5 |
| 1994   | 4    | 4    | 4    | 4    | 5    | 4    | 4    | 4    | 3     | 2      | 1      | 1     | 2     | 2     | 4 |
| 1995   | 4    | 5    | 3    | 3    | 5    | 4    | 4    | 4    | 4     | 3      | 3      | 3     | 4     | 5     | 4 |
| 1996   | 5    | 6    | 2    | 6    | 6    |      |      |      |       | 2      | 2      | 3     | 4     | 4     | 4 |
| 1997   |      |      |      |      |      |      |      |      |       | 2      | 2      | 2     | 3     | 4     | 4 |
| 1998   |      |      |      |      |      |      |      |      |       | 4      | 3      | 3     | 5     | 5     | 5 |
| 1999   |      |      |      |      |      |      |      |      |       | 2      | 2      | 2     | 4     | 4     | 4 |
| 2000   |      |      |      |      |      |      |      |      |       | 2      | 2      | 2     | 2     | 3     | 2 |
| 2001   | 4    | 6    | 3    | 5    | 6    | 6    | 6    | 5    | 4     | 2      | 3      | 3     | 5     | 5     | 5 |
| 2002   | 4    | 4    | 3    | 3    | 5    | 5    | 5    | 5    | 3     | 3      | 2      | 2     | 5     | 5     | 5 |
| 2003   |      |      |      |      |      |      |      |      |       | 4      | 3      | 3     | 4     | 4     | 4 |
| 2004   | 6    | 6    | 2    | 6    | 6    | 6    | 6    | 6    | 2     | 3      | 3      | 3     | 5     | 5     | 5 |
| 2005   | 4    | 3    | 4    | 3    | 5    | 4    | 5    | 5    | 4     | 3      | 3      | 3     | 4     | 5     | 5 |
| 2007   |      |      |      |      |      |      |      |      |       | 3      | 2      | 2     | 4     | 5     | 5 |
| 2009   |      |      |      |      |      |      |      |      |       | 3      | 3      | 3     | 5     | 5     | 5 |
| 2010   |      |      |      |      |      |      |      |      |       | 3      | 3      | 3     | 5     | 5     | 5 |
| 2011   | 2    | 3    | 1    | 2    | 4    | 6    | 6    | 6    | 3     | 2      | 3      | 3     | 5     | 5     | 5 |
| 2013   |      |      |      |      |      |      |      |      |       | 3      | 3      | 3     | 5     | 5     | 5 |
| 2014   |      |      |      |      |      |      |      |      |       | 4      | 3      | 3     | 5     | 5     | 5 |
| 2017   |      |      |      |      |      |      |      |      |       | 2      | 2      | 2     | 4     | 4     | 4 |
| 2020   |      |      |      |      |      |      |      |      |       | 5      | 3      | 3     | 5     | 5     | 5 |
| 2023   |      |      |      |      |      |      |      |      |       | 2      | 2      | 2     | 4     | 4     | 5 |
| 2024   |      |      |      |      |      |      |      |      |       | 2      | 2      | 2     | 3     | 3     | 4 |
| 2029   |      |      |      |      |      |      |      |      |       | 3      | 3      | 2     | 5     | 5     | 5 |
| 2030   |      |      |      |      |      |      |      |      |       | 4      | 3      | 3     | 5     | 5     | 5 |
| 2031   |      |      |      |      |      |      |      |      |       | 2      | 1      | 1     | 2     | 2     | 3 |
| 2032   |      |      |      |      |      |      |      |      |       | 2      | 3      | 3     | 5     | 4     | 4 |
| 2033   |      |      |      |      |      |      |      |      |       | 3      | 2      | 2     | 4     | 4     | 4 |
| 2034   |      |      |      |      |      |      |      |      |       | 3      | 3      | 3     | 5     | 5     | 5 |
| 2036   | 1    | 2    | 4    | 3    | 3    | 5    | 2    | 6    | 6     | 3      | 3      | 3     | 5     | 5     | 5 |

| respid | Q48k | Q48l | Q48m | Q48n | Q48o | Q48p | Q48q | Q48r | Q49_1 | Q50a_1 | Q50b_1 | Q51_1 | Q51_2 | Q52_1 |
|--------|------|------|------|------|------|------|------|------|-------|--------|--------|-------|-------|-------|
| 2037   | 1    | 1    | 3    | 1    | 2    | 2    |      | 2    | 2     | 2      | 2      | 3     | 3     | 3     |
| 2038   |      |      |      |      |      |      |      |      |       | 3      | 3      | 2     | 5     | 5     |
| 2039   |      |      |      |      |      |      |      |      |       | 2      | 3      | 3     | 4     | 5     |
| 2040   |      |      |      |      |      |      |      |      |       | 2      | 3      | 3     | 4     | 4     |
| 2041   |      |      |      |      |      |      |      |      |       | 4      | 3      | 3     | 5     | 5     |
| 2042   | 5    | 6    | 4    | 5    | 6    | 5    | 6    | 2    | 3     | 3      | 3      | 5     | 5     | 5     |
| 2043   | 5    | 6    | 2    | 5    | 6    | 6    | 6    | 2    | 4     | 3      | 3      | 5     | 5     | 4     |
| 2051   |      |      |      |      |      |      |      |      |       | 2      | 3      | 3     | 5     | 4     |
| 2052   |      |      |      |      |      |      |      |      |       | 3      | 2      | 2     | 4     | 4     |
| 2053   | 6    | 6    | 1    | 6    | 6    | 6    | 6    | 2    | 4     | 3      | 3      | 5     | 5     | 5     |
| 2054   |      |      |      |      |      |      |      |      |       | 2      | 3      | 2     | 4     | 3     |
| 2055   | 6    | 6    | 1    | 6    | 6    | 6    | 6    | 1    | 3     | 3      | 3      | 5     | 5     | 4     |
| 2056   | 3    | 3    | 3    | 3    | 4    | 4    | 4    | 3    | 2     | 2      | 2      | 3     | 3     | 4     |
| 2057   |      |      |      |      |      |      |      |      |       | 3      | 3      | 3     | 4     | 4     |
| 2059   | 2    | 3    | 2    | 4    | 6    | 6    | 3    | 1    | 4     | 3      | 3      | 5     | 5     | 4     |
| 2063   | 5    | 4    | 4    | 3    | 4    | 5    | 4    | 3    | 3     | 2      | 3      | 4     | 5     | 4     |
| 2066   | 6    | 3    | 6    | 3    | 3    | 3    | 3    | 5    | 2     | 3      | 2      | 3     | 3     | 4     |
| 2068   | 6    | 6    | 5    | 6    | 6    | 6    | 5    | 1    | 3     | 2      | 2      | 4     | 4     | 5     |
| 2069   |      |      |      |      |      |      |      |      |       | 2      | 2      | 3     | 5     | 5     |
| 2070   |      |      |      |      |      |      |      |      |       | 4      | 3      | 3     | 5     | 5     |
| 2071   |      |      |      |      |      |      |      |      |       | 2      | 3      | 3     | 4     | 5     |
| 2073   |      |      |      |      |      |      |      |      |       | 2      | 3      | 3     | 5     | 4     |
| 2077   | 5    | 5    | 1    | 6    | 6    | 5    | 3    | 4    | 2     | 3      | 3      | 4     | 4     | 4     |
| 2079   |      |      |      |      |      |      |      |      |       | 3      | 3      | 3     | 4     | 4     |
| 2080   | 1    | 1    | 1    | 1    | 6    | 1    | 1    | 6    | 1     | 3      | 1      | 1     | 1     | 1     |
| 2081   |      |      |      |      |      |      |      |      |       | 2      | 2      | 2     | 3     | 2     |
| 2084   |      |      |      |      |      |      |      |      |       | 3      | 3      | 3     | 5     | 5     |
| 2085   | 6    | 6    | 1    | 6    | 6    | 6    | 6    | 2    | 3     | 3      | 3      | 5     | 5     | 5     |
| 2087   | 5    | 5    | 3    | 5    | 5    | 5    | 5    | 2    | 2     | 2      | 2      | 4     | 3     | 4     |
| 2089   |      |      |      |      |      |      |      |      |       | 2      | 3      | 2     | 5     | 5     |
| 2093   |      |      |      |      |      |      |      |      |       | 2      | 3      | 3     | 4     | 4     |
| 2094   |      |      |      |      |      |      |      |      |       | 3      | 2      | 2     | 5     | 4     |

| respid | Q48k | Q48l | Q48m | Q48n | Q48o | Q48p | Q48q | Q48r | Q49_1 | Q50a_1 | Q50b_1 | Q51_1 | Q51_2 | Q52_1 |   |
|--------|------|------|------|------|------|------|------|------|-------|--------|--------|-------|-------|-------|---|
| 2095   |      |      |      |      |      |      |      |      |       | 3      | 3      | 3     | 5     | 5     | 5 |
| 2097   |      |      |      |      |      |      |      |      |       | 4      | 3      | 3     | 5     | 5     | 5 |
| 2099   | 6    | 6    | 4    | 5    | 5    | 4    | 3    | 4    | 3     | 2      | 2      | 3     | 3     | 3     | 3 |
| 2100   | 5    | 5    | 2    | 5    | 6    | 5    | 5    | 2    | 2     | 3      | 2      | 4     | 4     | 4     | 4 |
| 2101   |      |      |      |      |      |      |      |      |       | 3      | 3      | 3     | 4     | 4     | 5 |
| 2103   |      |      |      |      |      |      |      |      |       | 2      | 3      | 3     | 4     | 5     | 5 |
| 2104   | 6    | 6    | 4    | 6    | 6    | 6    | 6    | 2    | 3     | 3      | 3      | 4     | 4     | 4     | 4 |
| 2106   |      |      |      |      |      |      |      |      |       | 2      | 3      | 3     | 3     | 4     | 5 |
| 2111   |      |      |      |      |      |      |      |      |       | 3      | 3      | 3     | 5     | 5     | 4 |
| 2113   |      |      |      |      |      |      |      |      |       | 2      | 3      | 3     | 5     | 5     | 5 |
| 2115   |      |      |      |      |      |      |      |      |       | 3      | 3      | 3     | 5     | 5     | 5 |
| 2119   |      |      |      |      |      |      |      |      |       | 1      | 2      | 2     | 3     | 3     | 4 |
| 2120   |      |      |      |      |      |      |      |      |       | 2      | 3      | 3     | 4     | 4     | 4 |
| 2123   |      |      |      |      |      |      |      |      |       | 4      | 3      | 3     | 5     | 5     | 5 |
| 2124   |      |      |      |      |      |      |      |      |       | 2      | 2      | 3     | 4     | 4     | 5 |
| 2130   |      |      |      |      |      |      |      |      |       | 4      | 2      | 2     | 5     | 4     | 5 |
| 2131   | 5    | 4    | 4    | 4    | 4    | 4    | 4    | 3    | 3     | 2      | 2      | 4     | 4     | 4     | 4 |
| 2133   |      |      |      |      |      |      |      |      |       | 5      | 3      | 3     | 4     | 4     | 4 |
| 2139   | 2    | 4    | 6    | 4    | 6    | 3    | 3    | 4    | 2     | 2      | 2      | 2     | 3     | 3     | 3 |
| 2141   |      |      |      |      |      |      |      |      |       | 3      | 3      | 3     | 4     | 4     | 4 |
| 2143   |      |      |      |      |      |      |      |      |       | 3      | 3      | 3     | 5     | 5     | 5 |
| 2144   |      |      |      |      |      |      |      |      |       | 3      | 3      | 3     | 4     | 4     | 5 |
| 2147   |      |      |      |      |      |      |      |      |       | 3      | 3      | 3     | 5     | 5     | 5 |
| 2151   |      |      |      |      |      |      |      |      |       | 3      | 3      | 3     | 5     | 5     | 4 |
| 2153   |      |      |      |      |      |      |      |      |       | 4      | 3      | 3     | 5     | 5     | 5 |
| 2154   | 6    | 6    | 2    | 6    | 6    | 5    | 6    | 2    | 4     | 3      | 3      | 5     | 5     | 5     | 5 |
| 2155   |      |      |      |      |      |      |      |      |       | 3      | 3      | 3     | 4     | 4     | 4 |
| 2159   | 4    | 4    |      | 5    | 4    | 5    | 5    |      | 3     | 3      | 2      | 3     | 3     | 3     | 3 |
| 2160   | 6    | 6    | 1    | 6    | 6    | 5    | 5    | 4    | 3     | 3      | 3      | 4     | 4     | 4     | 3 |
| 2161   |      |      |      |      |      |      |      |      |       | 3      | 2      | 2     | 4     | 4     | 4 |
| 2163   |      |      |      |      |      |      |      |      |       | 2      | 2      | 2     | 4     | 4     | 4 |
| 2164   |      |      |      |      |      |      |      |      |       | 4      | 3      | 3     | 5     | 5     | 5 |

| respid | Q48k | Q48l | Q48m | Q48n | Q48o | Q48p | Q48q | Q48r | Q49_1 | Q50a_1 | Q50b_1 | Q51_1 | Q51_2 | Q52_1 |   |
|--------|------|------|------|------|------|------|------|------|-------|--------|--------|-------|-------|-------|---|
| 2168   |      |      |      |      |      |      |      |      |       | 3      | 3      | 3     | 4     | 4     | 3 |
| 2169   |      |      |      |      |      |      |      |      |       | 3      | 2      | 2     | 4     | 4     | 4 |
| 2170   |      |      |      |      |      |      |      |      |       | 2      | 3      | 3     | 4     | 5     | 4 |
| 2171   |      |      |      |      |      |      |      |      |       | 3      | 2      | 2     | 4     | 4     | 3 |
| 2172   |      |      |      |      |      |      |      |      |       | 2      | 2      | 2     | 3     | 3     | 3 |
| 2173   |      |      |      |      |      |      |      |      |       | 4      | 3      | 3     | 5     | 5     | 5 |
| 2174   | 3    | 5    | 3    | 5    | 5    | 5    | 6    | 2    |       | 4      | 3      | 3     | 5     | 5     | 5 |
| 2175   |      |      |      |      |      |      |      |      |       | 3      | 3      | 3     | 4     | 5     | 3 |
| 2176   |      |      |      |      |      |      |      |      |       | 3      | 3      | 3     | 4     | 5     | 4 |
| 2177   |      |      |      |      |      |      |      |      |       | 2      | 2      | 2     | 3     | 3     | 3 |
| 2179   | 6    | 5    | 2    | 6    | 6    | 6    | 6    | 2    |       | 3      | 3      | 3     | 4     | 5     | 5 |
| 2181   |      |      |      |      |      |      |      |      |       | 4      | 3      | 3     | 5     | 5     | 5 |
| 2182   | 6    | 6    | 6    | 6    | 6    | 6    | 6    | 6    |       | 3      | 3      | 3     | 5     | 5     | 5 |
| 2183   |      |      |      |      |      |      |      |      |       | 2      | 2      | 2     | 3     | 3     | 3 |
| 2184   | 5    | 5    | 2    | 6    | 6    | 5    | 6    | 2    |       | 3      | 3      | 3     | 4     | 4     | 4 |
| 2185   |      |      |      |      |      |      |      |      |       | 4      | 3      | 3     | 5     | 5     | 5 |
| 2186   | 6    | 5    | 5    | 6    | 5    | 6    | 5    | 2    |       | 4      | 3      | 3     | 5     | 5     | 5 |
| 2187   |      |      |      |      |      |      |      |      |       | 3      | 3      | 3     | 5     | 5     | 5 |
| 2188   |      |      |      |      |      |      |      |      |       | 4      | 3      | 3     | 5     | 5     | 5 |
| 2189   |      |      |      |      |      |      |      |      |       | 3      | 3      | 3     | 5     | 5     | 4 |
| 2190   | 6    | 6    | 1    | 6    | 6    | 6    | 6    | 1    |       | 4      | 3      | 3     | 5     | 5     | 5 |
| 2193   |      | 3    | 2    |      | 6    |      |      |      |       | 3      | 3      | 3     | 5     | 5     | 4 |
| 2195   | 3    | 4    | 4    | 1    | 4    | 3    | 3    | 3    |       | 3      | 2      | 2     | 4     | 4     | 3 |
| 2198   |      |      |      |      |      |      |      |      |       | 2      | 3      | 3     | 5     | 5     | 5 |
| 2200   | 5    | 5    | 1    | 5    | 6    | 5    | 5    | 1    |       | 2      | 3      | 3     | 5     | 5     | 4 |
| 2205   |      |      |      |      |      |      |      |      |       | 3      | 2      | 2     | 4     | 4     | 3 |
| 2208   |      |      |      |      |      |      |      |      |       | 4      | 3      | 3     | 5     | 5     | 5 |
| 2209   |      |      |      |      |      |      |      |      |       | 2      | 2      | 3     | 2     | 2     | 2 |
| 2210   |      | 3    | 6    |      | 6    |      | 4    |      |       | 2      | 2      | 2     | 4     | 4     | 4 |
| 2211   |      |      |      |      |      |      |      |      |       | 3      | 3      | 3     | 5     | 4     | 5 |
| 2213   |      |      |      |      |      |      |      |      |       | 3      | 3      | 3     | 5     | 5     | 5 |
| 2214   | 4    | 5    | 2    | 3    | 5    | 3    | 3    | 5    |       | 2      | 3      | 3     | 2     | 3     | 3 |



| respid | Q48k | Q48l | Q48m | Q48n | Q48o | Q48p | Q48q | Q48r | Q49_1 | Q50a_1 | Q50b_1 | Q51_1 | Q51_2 | Q52_1 |   |
|--------|------|------|------|------|------|------|------|------|-------|--------|--------|-------|-------|-------|---|
| 2216   |      |      |      |      |      |      |      |      |       | 1      | 1      | 1     | 4     | 1     | 4 |
| 2220   |      |      |      |      |      |      |      |      | 2     | 4      | 3      | 3     | 4     | 4     | 4 |
| 2225   |      |      |      |      |      |      |      |      |       | 3      | 3      | 1     | 4     | 4     | 4 |
| 2227   |      |      |      |      |      |      |      |      |       | 2      | 3      | 3     | 3     | 3     | 4 |
| 2228   | 5    | 5    | 4    | 5    | 5    | 5    | 5    | 5    | 2     | 2      | 3      | 2     | 4     | 3     | 4 |
| 2229   |      |      |      |      |      |      |      |      |       | 2      | 3      | 3     | 5     | 5     | 5 |
| 2230   |      |      |      |      |      |      |      |      |       | 4      | 3      | 3     | 5     | 5     | 5 |
| 2236   |      |      |      |      |      |      |      |      |       | 5      | 3      | 3     | 5     | 5     | 5 |
| 2238   |      |      |      |      |      |      |      |      |       | 1      | 2      | 2     | 3     | 3     | 2 |
| 2239   |      |      |      |      |      |      |      |      |       | 4      | 3      | 3     | 5     | 5     | 5 |
| 2240   |      |      |      |      |      |      |      |      |       | 4      | 3      | 3     | 5     | 5     | 5 |
| 2241   | 5    | 4    | 4    | 3    | 3    | 4    | 4    | 4    | 3     | 2      | 3      | 3     | 4     | 4     | 4 |
| 2243   |      |      |      |      |      |      |      |      |       | 2      | 3      | 3     | 5     | 5     | 5 |
| 2245   | 4    | 3    | 3    | 4    | 4    | 4    | 4    | 3    | 4     | 2      | 3      | 2     | 3     | 3     | 3 |
| 2247   | 6    | 5    | 2    | 5    | 5    | 5    | 5    | 5    | 3     | 3      | 3      | 3     | 4     | 5     | 4 |
| 2248   | 5    | 5    | 4    | 4    | 5    | 5    | 5    | 5    | 4     | 3      | 3      | 2     | 4     | 3     | 5 |
| 2249   |      |      |      |      |      |      |      |      |       | 2      | 3      | 3     | 5     | 5     | 5 |
| 2254   | 1    | 5    | 5    | 5    | 6    | 6    | 6    | 6    | 6     | 3      | 2      | 3     | 3     | 3     | 3 |
| 2256   |      |      |      |      |      |      |      |      |       | 3      | 2      | 3     | 4     | 4     | 4 |
| 2259   |      |      |      |      |      |      |      |      |       | 4      | 3      | 2     | 5     | 5     | 5 |
| 2261   |      |      |      |      |      |      |      |      |       | 3      | 2      | 2     | 4     | 4     | 4 |
| 2262   |      |      |      |      |      |      |      |      |       | 2      | 3      | 3     | 1     | 2     | 1 |
| 2263   | 3    | 2    | 4    | 1    | 4    | 3    | 2    | 6    | 6     | 1      | 2      | 2     | 1     | 1     | 2 |
| 2264   | 5    | 4    | 3    | 4    | 4    | 5    | 4    | 3    | 3     | 3      | 2      | 2     | 4     | 4     | 5 |
| 2265   |      |      |      |      |      |      |      |      |       | 3      | 3      | 3     | 5     | 5     | 5 |
| 2270   |      |      |      |      |      |      |      |      |       | 3      | 3      | 3     | 4     | 5     | 4 |
| 2271   |      |      |      |      |      |      |      |      |       | 3      | 3      | 3     | 5     | 5     | 5 |
| 2272   |      |      |      |      |      |      |      |      |       | 3      | 3      | 3     | 4     | 4     | 4 |
| 2273   | 6    | 6    | 1    | 6    | 6    | 6    | 6    | 6    | 1     | 3      | 2      | 2     | 3     | 3     | 3 |
| 2274   | 5    | 5    | 5    | 5    | 5    | 5    | 5    | 5    | 3     | 3      | 3      | 3     | 5     | 5     | 5 |
| 2276   | 1    | 6    | 4    | 1    | 6    | 3    | 6    | 6    | 1     | 3      | 2      | 2     | 4     | 3     | 3 |
| 2277   | 4    |      | 3    | 4    | 5    | 4    | 4    | 4    | 3     | 2      | 2      | 2     | 5     | 4     | 5 |

| respid | Q48k | Q48l | Q48m | Q48n | Q48o | Q48p | Q48q | Q48r | Q49_1 | Q50a_1 | Q50b_1 | Q51_1 | Q51_2 | Q52_1 |   |
|--------|------|------|------|------|------|------|------|------|-------|--------|--------|-------|-------|-------|---|
| 2281   | 6    | 6    | 1    | 6    | 6    | 6    | 6    | 6    | 1     | 4      | 3      | 3     | 5     | 5     | 5 |
| 2288   |      |      |      |      |      |      |      |      |       | 4      | 3      | 3     | 5     | 5     | 5 |
| 2290   | 3    | 3    | 4    | 4    | 3    | 3    | 3    | 3    | 4     | 2      | 2      | 2     | 3     | 3     | 3 |
| 2294   | 6    | 6    | 1    | 5    | 6    | 1    | 2    | 1    | 1     | 3      | 2      | 2     | 3     | 4     | 3 |
| 2295   | 4    | 5    | 1    | 5    | 5    | 5    | 5    | 5    | 3     | 3      | 3      | 3     | 5     | 5     | 5 |
| 2296   | 2    | 3    | 4    | 3    | 4    | 3    | 3    | 3    | 4     | 2      | 2      | 2     | 4     | 4     | 4 |
| 2297   |      |      |      |      |      |      |      |      |       | 4      | 3      | 3     | 5     | 5     | 5 |
| 2298   |      |      |      |      |      |      |      |      |       | 4      | 3      | 3     | 5     | 5     | 5 |
| 2301   |      |      |      |      |      |      |      |      |       | 3      | 3      | 3     | 5     | 4     | 4 |
| 2302   | 4    | 4    | 3    | 4    | 4    | 4    | 4    | 4    | 3     | 2      | 2      | 2     | 3     | 3     | 3 |
| 2303   |      |      |      |      |      |      |      |      |       | 4      | 3      | 3     | 5     | 5     | 5 |
| 2305   |      |      |      |      |      |      |      |      |       | 4      | 3      | 3     | 5     | 5     | 5 |
| 2309   | 6    | 6    | 1    | 5    | 6    | 5    | 6    | 6    | 1     | 4      | 3      | 3     | 4     | 5     | 5 |
| 2310   |      |      |      |      |      |      |      |      |       | 4      | 3      | 3     | 5     | 5     | 4 |
| 2311   | 4    | 4    | 4    | 4    | 5    | 5    | 5    | 5    | 3     | 3      | 3      | 3     | 3     | 4     | 4 |
| 2313   |      |      |      |      |      |      |      |      |       | 2      | 2      | 2     | 3     | 4     | 3 |
| 2316   |      |      |      |      |      |      |      |      |       | 3      | 1      | 1     | 2     | 3     | 2 |
| 2317   |      |      |      |      |      |      |      |      |       | 3      | 3      | 2     | 3     | 3     | 4 |
| 2318   |      | 4    |      |      |      |      |      |      |       | 3      | 3      | 3     | 5     | 5     | 5 |
| 2319   | 6    | 6    | 1    | 6    | 6    | 4    | 4    | 4    | 5     | 2      | 2      | 2     | 1     | 1     | 1 |
| 2321   |      |      |      |      |      |      |      |      |       | 2      | 2      | 2     | 3     | 3     | 4 |
| 2324   | 6    | 6    | 3    | 6    | 6    | 6    | 6    | 6    | 3     | 3      | 2      | 2     | 4     | 4     | 4 |
| 2328   | 6    | 6    | 1    | 6    | 6    | 6    | 6    | 6    | 1     | 3      | 3      | 3     | 4     | 5     | 5 |
| 2329   |      |      |      |      |      |      |      |      |       | 3      | 3      | 2     | 4     | 5     | 4 |
| 2330   | 6    | 6    | 6    | 5    | 6    |      |      | 6    | 6     | 3      | 2      | 2     | 3     | 3     | 3 |
| 2333   | 3    | 5    | 2    | 3    | 5    | 3    | 5    | 5    | 5     | 2      | 1      | 1     | 2     | 3     | 2 |
| 2334   | 4    | 5    | 3    | 4    | 4    | 4    | 4    | 5    | 3     | 2      | 3      | 2     | 3     | 3     | 3 |
| 2338   | 6    | 6    | 6    | 6    | 6    | 6    | 6    | 6    |       | 4      | 3      | 3     | 4     | 4     | 5 |
| 2341   |      |      |      |      |      |      |      |      |       | 3      | 2      | 2     | 4     | 4     | 4 |
| 2342   | 5    | 3    | 4    | 3    | 5    | 5    | 6    | 6    | 3     | 1      | 2      | 2     | 3     | 3     | 4 |
| 2343   |      |      |      |      |      |      |      |      |       | 3      | 3      | 3     | 4     | 4     | 4 |
| 2346   | 2    | 1    | 6    | 2    | 5    | 2    | 3    | 3    | 4     | 3      | 3      | 3     | 4     | 5     | 4 |

| respid | Q48k | Q48l | Q48m | Q48n | Q48o | Q48p | Q48q | Q48r | Q49_1 | Q50a_1 | Q50b_1 | Q51_1 | Q51_2 | Q52_1 |   |
|--------|------|------|------|------|------|------|------|------|-------|--------|--------|-------|-------|-------|---|
| 2347   |      |      |      |      |      |      |      |      |       | 3      | 2      | 2     | 4     | 3     | 4 |
| 2348   |      |      |      |      |      |      |      |      |       | 3      | 2      | 2     | 3     | 3     | 3 |
| 2349   | 4    | 4    | 3    | 4    | 4    | 4    | 4    | 4    | 3     | 2      | 3      | 2     | 4     | 4     | 4 |
| 2350   | 6    | 6    | 2    | 6    | 6    | 6    | 6    | 6    | 2     | 3      | 3      | 3     | 5     | 5     | 5 |
| 2351   |      |      |      |      |      |      |      |      |       | 2      | 3      | 3     | 5     | 5     | 5 |
| 2352   |      |      |      |      |      |      |      |      |       | 3      | 3      | 2     | 5     | 5     | 5 |
| 2359   |      |      |      |      |      |      |      |      |       | 4      | 3      | 3     | 5     | 5     | 5 |
| 2362   |      |      |      |      |      |      |      |      |       | 3      | 3      | 3     | 5     | 5     | 5 |
| 2363   |      |      |      |      |      |      |      |      |       | 5      | 3      | 3     | 5     | 5     | 5 |
| 2365   |      |      |      |      |      |      |      |      |       | 3      | 3      | 3     | 4     | 4     | 4 |
| 2367   |      |      |      |      |      |      |      |      |       | 2      | 2      | 3     | 4     | 4     | 4 |
| 2368   | 4    | 4    | 3    | 4    | 4    | 4    | 4    | 4    | 3     | 3      | 3      | 3     | 1     | 1     | 5 |
| 2369   |      |      |      |      |      |      |      |      |       | 3      | 2      | 2     | 5     | 4     | 5 |
| 2372   |      |      |      |      |      |      |      |      |       | 3      | 3      | 3     | 5     | 5     | 5 |
| 2374   |      |      |      |      |      |      |      |      |       | 3      | 3      | 3     | 4     | 5     | 4 |
| 2376   |      |      |      |      |      |      |      |      |       | 4      | 3      | 3     | 5     | 5     | 5 |
| 2379   |      |      |      |      |      |      |      |      |       | 2      | 2      | 3     | 3     | 3     | 4 |
| 2380   | 6    | 6    | 2    | 5    | 6    | 6    | 6    | 6    | 2     | 2      | 3      | 3     | 4     | 5     | 5 |
| 2381   |      |      |      |      |      |      |      |      |       | 1      | 1      | 1     | 1     | 1     | 1 |
| 2382   |      |      |      |      |      |      |      |      |       | 2      | 2      | 2     | 4     | 4     | 4 |
| 2385   | 6    | 6    | 1    | 6    | 6    | 6    | 6    | 6    | 1     | 3      | 2      | 3     | 5     | 5     | 4 |
| 2387   |      |      |      |      |      |      |      |      |       | 2      | 2      | 2     | 2     | 2     | 4 |
| 2388   |      |      |      |      |      |      |      |      |       | 4      | 3      | 3     | 5     | 5     | 5 |
| 2389   | 5    | 5    | 4    | 3    | 6    | 5    | 4    |      |       | 2      | 2      | 1     | 3     | 3     | 4 |
| 2391   | 1    | 3    | 6    | 2    | 5    | 3    | 2    | 6    |       | 2      | 3      | 2     | 3     | 4     | 5 |
| 2392   |      |      |      |      |      |      |      |      |       | 3      | 2      | 3     | 3     | 2     | 4 |
| 2393   |      |      |      |      |      |      |      |      |       | 4      | 3      | 3     | 5     | 5     | 4 |
| 2394   | 6    | 6    | 2    | 3    | 6    | 6    | 6    | 5    | 2     | 3      | 3      | 3     | 2     | 4     | 3 |
| 2397   |      |      |      |      |      |      |      |      |       | 2      | 3      | 2     | 4     | 4     | 4 |
| 2398   | 4    | 4    | 4    | 4    | 4    | 4    | 4    | 4    | 4     | 2      | 2      | 2     | 4     | 4     | 4 |
| 2400   |      |      |      |      |      |      |      |      |       | 3      | 3      | 3     | 5     | 5     | 5 |
| 2402   | 6    | 6    | 1    | 6    | 6    | 6    | 6    | 6    | 1     | 4      | 3      | 3     | 4     | 4     | 4 |

| respid | Q48k | Q48l | Q48m | Q48n | Q48o | Q48p | Q48q | Q48r | Q49_1 | Q50a_1 | Q50b_1 | Q51_1 | Q51_2 | Q52_1 |   |
|--------|------|------|------|------|------|------|------|------|-------|--------|--------|-------|-------|-------|---|
| 2406   | 6    | 6    | 1    | 6    | 6    | 6    | 6    | 6    | 1     | 4      | 3      | 3     | 4     | 4     | 5 |
| 2408   | 6    | 6    | 3    | 6    | 6    | 6    | 6    | 6    | 2     | 3      | 3      | 3     | 5     | 5     | 4 |
| 2410   |      |      |      |      |      |      |      |      |       | 3      | 3      | 3     | 5     | 5     | 5 |
| 2411   |      |      |      |      |      |      |      |      |       | 2      | 2      | 3     | 3     | 4     | 4 |
| 2412   |      |      |      |      |      |      |      |      |       | 4      | 2      | 2     | 2     | 5     | 4 |
| 2414   | 1    | 6    | 6    | 1    | 6    | 6    | 1    | 6    | 6     | 2      | 2      | 2     | 3     | 3     | 2 |
| 2421   | 6    | 5    | 6    | 5    | 6    | 6    | 6    | 6    | 6     | 4      | 3      | 3     | 3     | 4     | 4 |
| 2423   |      |      |      |      |      |      |      |      |       | 2      | 3      | 2     | 4     | 3     | 4 |
| 2424   |      |      |      |      |      |      |      |      |       | 3      | 3      | 3     | 5     | 5     | 5 |
| 2425   | 5    | 5    | 4    | 4    | 4    | 4    | 4    | 4    | 3     | 3      | 3      | 3     | 5     | 5     | 5 |
| 2426   |      |      |      |      |      |      |      |      |       | 3      | 3      | 3     | 5     | 5     | 5 |
| 2429   |      |      |      |      |      |      |      |      |       | 1      | 1      | 2     | 2     | 2     | 2 |
| 2430   |      |      |      |      |      |      |      |      |       | 3      | 3      | 3     | 5     | 4     | 4 |
| 2432   |      |      |      |      |      |      |      |      |       | 3      | 3      | 3     | 5     | 5     | 5 |
| 2433   | 2    |      |      | 2    | 6    |      |      |      |       | 3      | 3      | 2     | 5     | 5     | 4 |
| 2434   |      |      |      |      |      |      |      |      |       | 4      | 3      | 3     | 4     | 4     | 4 |
| 2435   | 4    | 4    | 4    | 4    | 6    | 6    | 5    | 4    | 4     | 3      | 3      | 3     | 4     | 4     | 4 |
| 2436   | 3    | 3    | 3    | 3    | 5    | 5    | 4    | 3    | 3     | 2      | 3      | 3     | 4     | 4     | 4 |
| 2439   | 3    | 3    | 5    | 3    | 3    | 3    | 4    | 4    | 4     | 2      | 2      | 2     | 4     | 4     | 4 |
| 2440   |      |      |      |      |      |      |      |      |       | 2      | 2      | 2     | 4     | 4     | 4 |
| 2441   |      |      |      |      |      |      |      |      |       | 3      | 3      | 2     | 5     | 5     | 5 |
| 2446   |      |      |      |      |      |      |      |      |       | 4      | 3      | 3     | 5     | 4     | 4 |
| 2448   |      |      |      |      |      |      |      |      |       | 3      | 3      | 3     | 4     | 4     | 3 |
| 2449   |      |      |      |      |      |      |      |      |       | 3      | 3      | 3     | 5     | 5     | 5 |
| 2451   |      |      |      |      |      |      |      |      |       | 2      | 3      | 3     | 4     | 4     | 5 |
| 2452   |      |      |      |      |      |      |      |      |       | 2      | 3      | 3     | 4     | 4     | 4 |
| 2455   |      |      |      |      |      |      |      |      |       | 3      | 3      | 3     | 5     | 5     | 4 |
| 2457   | 5    | 3    | 4    | 3    | 5    | 4    | 4    | 3    | 3     | 2      | 2      | 2     | 4     | 4     | 3 |
| 2458   | 5    | 5    | 2    | 5    | 5    | 5    | 5    | 5    | 3     | 2      | 3      | 3     | 5     | 5     | 5 |
| 2459   |      |      |      |      |      |      |      |      |       | 3      | 3      | 3     | 5     | 5     | 5 |
| 2460   |      |      |      |      |      |      |      |      |       | 3      | 3      | 3     | 5     | 5     | 3 |
| 2462   |      |      |      |      |      |      |      |      |       | 2      | 2      | 3     | 2     | 2     | 3 |

| respid | Q48k | Q48l | Q48m | Q48n | Q48o | Q48p | Q48q | Q48r | Q49_1 | Q50a_1 | Q50b_1 | Q51_1 | Q51_2 | Q52_1 |   |
|--------|------|------|------|------|------|------|------|------|-------|--------|--------|-------|-------|-------|---|
| 2464   |      |      |      |      |      |      |      |      |       | 2      | 1      | 1     | 2     | 2     | 2 |
| 2465   | 5    |      |      | 5    | 5    | 5    |      | 5    | 5     | 3      | 3      | 2     | 4     | 4     | 4 |
| 2468   | 5    | 3    | 3    | 5    | 5    |      | 4    | 4    | 3     | 2      | 2      | 2     | 4     | 3     | 4 |
| 2469   |      |      |      |      |      |      |      |      |       | 3      | 3      | 3     | 5     | 5     | 5 |
| 2470   | 3    | 5    | 2    | 5    | 5    |      | 3    | 5    | 4     | 4      | 2      | 2     | 4     | 4     | 4 |
| 2471   |      |      |      |      |      |      |      |      |       | 2      | 3      | 3     | 4     | 4     | 4 |
| 2472   |      |      |      |      |      |      |      |      |       | 3      | 3      | 3     | 4     | 4     | 4 |
| 2474   |      |      |      |      |      |      |      |      |       | 2      | 2      | 3     | 4     | 4     | 4 |
| 2476   |      |      |      |      |      |      |      |      |       | 2      | 2      | 2     | 4     | 4     | 3 |
| 2478   |      |      |      |      |      |      |      |      |       | 2      | 3      | 3     | 4     | 4     | 4 |
| 2479   |      |      |      |      |      |      |      |      |       | 2      | 3      | 3     | 4     | 4     | 4 |
| 2480   |      |      |      |      |      |      |      |      |       | 2      | 3      | 3     | 5     | 5     | 5 |
| 2482   |      |      |      |      |      |      |      |      |       | 2      | 3      | 3     | 4     | 4     | 5 |
| 2486   | 6    |      |      | 1    | 6    | 6    | 6    | 6    | 2     | 3      | 3      | 3     | 4     | 5     | 4 |
| 2488   | 3    | 4    | 3    | 3    | 3    | 4    | 3    | 4    | 4     | 2      | 3      | 2     | 3     | 4     | 4 |
| 2489   | 5    | 5    | 3    | 5    | 5    |      | 4    | 4    | 3     | 3      | 3      | 3     | 4     | 4     | 4 |
| 2491   |      |      |      |      |      |      |      |      |       | 4      | 3      | 3     | 5     | 5     | 5 |
| 2495   |      |      |      |      |      |      |      |      |       | 3      | 3      | 3     | 5     | 5     | 5 |
| 2496   |      |      |      |      |      |      |      |      |       | 4      | 3      | 3     | 5     | 5     | 5 |
| 2498   | 5    | 5    | 2    | 5    | 5    |      | 5    | 5    | 3     | 3      | 3      | 3     | 5     | 5     | 5 |
| 2501   |      |      |      |      |      |      |      |      |       | 2      | 2      | 2     | 3     | 3     | 3 |
| 2502   |      |      |      |      |      |      |      |      |       | 3      | 2      | 2     | 2     | 3     | 3 |
| 2503   |      |      |      |      |      |      |      |      |       | 3      | 3      | 3     | 4     | 4     | 5 |
| 2504   |      |      |      |      |      |      |      |      |       | 4      | 3      | 3     | 5     | 5     | 5 |
| 2507   | 3    | 3    | 3    | 3    | 3    | 3    | 3    | 3    | 3     | 3      | 3      | 3     | 5     | 5     | 4 |
| 2509   | 4    | 3    | 3    | 4    | 4    | 4    | 4    | 3    | 4     | 2      | 3      | 3     | 4     | 4     | 3 |
| 2512   | 5    | 5    | 3    | 3    | 3    | 3    | 3    | 5    | 4     | 2      | 2      | 2     | 3     | 4     | 3 |
| 2514   |      |      |      |      |      |      |      |      |       | 3      | 3      | 2     | 5     | 5     | 5 |
| 2516   |      |      |      |      |      |      |      |      |       | 4      | 3      | 3     | 4     | 5     | 4 |
| 2517   |      |      |      |      |      |      |      |      |       | 3      | 3      | 3     | 5     | 5     | 5 |
| 2521   |      |      |      |      |      |      |      |      |       | 4      | 3      | 3     | 4     | 4     | 5 |
| 2522   |      |      |      |      |      |      |      |      |       | 3      | 3      | 3     | 4     | 4     | 4 |

| respid | Q48k | Q48l | Q48m | Q48n | Q48o | Q48p | Q48q | Q48r | Q49_1 | Q50a_1 | Q50b_1 | Q51_1 | Q51_2 | Q52_1 |   |
|--------|------|------|------|------|------|------|------|------|-------|--------|--------|-------|-------|-------|---|
| 2524   |      |      |      |      |      |      |      |      |       | 4      | 3      | 3     | 4     | 4     | 4 |
| 2525   | 6    | 6    | 2    | 6    | 6    | 6    | 6    | 6    | 3     | 3      | 3      | 3     | 4     | 4     | 5 |
| 2526   |      |      |      |      |      |      |      |      |       | 2      | 3      | 3     | 5     | 5     | 5 |
| 2527   | 2    | 1    | 6    | 1    | 4    | 1    | 1    | 6    | 6     | 4      | 3      | 3     | 5     | 5     | 5 |
| 2528   | 6    | 6    | 2    | 6    | 6    | 5    | 5    | 2    | 2     | 4      | 3      | 3     | 4     | 4     | 4 |
| 2531   |      |      |      |      |      |      |      |      |       | 3      | 3      | 3     | 3     | 4     | 5 |
| 2533   |      |      |      |      |      |      |      |      |       | 2      | 3      | 3     | 3     | 3     | 3 |
| 2535   |      |      |      |      |      |      |      |      |       | 4      | 3      | 3     | 4     | 4     | 5 |
| 2536   |      |      |      |      |      |      |      |      |       | 1      | 2      | 3     | 2     | 2     | 3 |
| 2539   | 6    | 6    | 1    | 6    | 6    | 6    | 6    | 6    | 1     | 4      | 3      | 3     | 5     | 5     | 5 |
| 2540   |      |      |      |      |      |      |      |      |       | 4      | 3      | 3     | 5     | 5     | 5 |
| 2543   |      |      |      |      |      |      |      |      |       | 2      | 3      | 3     | 5     | 5     | 5 |
| 2546   | 3    | 3    | 3    | 4    | 5    | 5    | 5    | 5    | 5     | 3      | 2      | 2     | 4     | 4     | 4 |
| 2547   | 6    | 5    | 2    | 6    | 6    | 4    | 6    | 3    | 3     | 2      | 3      | 2     | 5     | 5     | 5 |
| 2549   |      |      |      |      |      |      |      |      |       | 4      | 3      | 3     | 4     | 3     | 4 |
| 2553   |      |      |      |      |      |      |      |      |       | 3      | 3      | 3     | 5     | 5     | 5 |
| 2554   | 6    | 6    | 5    | 3    | 5    | 3    | 5    | 2    | 2     | 4      | 3      | 3     | 5     | 5     | 5 |
| 2555   |      |      |      |      |      |      |      |      |       | 3      | 3      | 3     | 5     | 5     | 4 |
| 2556   |      |      |      |      |      |      |      |      |       | 4      | 3      | 3     | 4     | 4     | 5 |
| 2557   |      |      |      |      |      |      |      |      |       | 4      | 2      | 2     | 3     | 3     | 3 |
| 2559   |      |      |      |      |      |      |      |      |       | 3      | 3      | 3     | 5     | 5     | 4 |
| 2560   | 5    | 6    | 2    | 6    | 6    | 5    | 4    | 5    | 5     | 4      | 2      | 2     | 3     | 3     | 4 |
| 2561   |      |      |      |      |      |      |      |      |       | 2      | 3      | 3     | 4     | 4     | 4 |
| 2566   |      |      |      |      |      |      |      |      |       | 3      | 3      | 3     | 5     | 5     | 4 |
| 2567   |      |      |      |      |      |      |      |      |       | 2      | 3      | 2     | 5     | 5     | 5 |
| 2570   |      |      |      |      |      |      |      |      |       | 2      | 3      | 3     | 2     | 3     | 4 |
| 2574   |      |      |      |      |      |      |      |      |       | 1      | 2      | 2     | 3     | 3     | 3 |
| 2578   |      |      |      |      |      |      |      |      |       | 4      | 3      | 3     | 5     | 5     | 5 |
| 2580   |      |      |      |      |      |      |      |      |       | 2      | 3      | 3     | 5     | 5     | 5 |
| 2590   |      |      |      |      |      |      |      |      |       | 2      | 2      | 3     | 5     | 5     | 5 |
| 2593   |      |      |      |      |      |      |      |      |       | 3      | 3      | 3     | 5     | 5     | 4 |
| 2594   |      |      |      |      |      |      |      |      |       | 2      | 2      | 2     | 3     | 4     | 3 |

| respid | Q48k | Q48l | Q48m | Q48n | Q48o | Q48p | Q48q | Q48r | Q49_1 | Q50a_1 | Q50b_1 | Q51_1 | Q51_2 | Q52_1 |   |
|--------|------|------|------|------|------|------|------|------|-------|--------|--------|-------|-------|-------|---|
| 2595   |      |      |      |      |      |      |      |      |       | 2      | 2      | 3     | 4     | 4     | 4 |
| 2596   |      |      |      |      |      |      |      |      |       | 3      | 3      | 3     | 5     | 5     | 5 |
| 2597   |      |      |      |      |      |      |      |      |       | 3      | 2      | 2     | 3     | 4     | 3 |
| 2598   |      |      |      |      |      |      |      |      |       | 3      | 2      | 2     | 4     | 4     | 4 |
| 2602   | 6    | 6    | 1    | 6    | 6    | 6    | 6    | 6    | 1     | 2      | 3      | 3     | 5     | 5     | 4 |
| 2605   |      |      |      |      |      |      |      |      |       | 2      | 2      | 2     | 4     | 3     | 4 |
| 2606   |      |      |      |      |      |      |      |      |       | 3      | 3      | 3     | 5     | 5     | 4 |
| 2607   | 5    | 5    | 2    | 5    | 5    | 4    | 5    | 5    | 2     | 3      | 2      | 3     | 4     | 4     | 3 |
| 2608   |      |      |      |      |      |      |      |      |       | 4      | 3      | 3     | 5     | 5     | 5 |
| 2609   |      |      |      |      |      |      |      |      |       | 2      | 3      | 3     | 3     | 3     | 3 |
| 2610   |      | 3    | 4    | 3    |      |      |      |      |       | 3      | 3      | 3     | 5     | 5     | 5 |
| 2614   |      |      |      |      |      |      |      |      |       | 3      | 3      | 3     | 5     | 5     | 4 |
| 2615   |      |      |      |      |      |      |      |      |       | 3      | 2      | 3     | 5     | 5     | 4 |
| 2616   |      |      |      |      |      |      |      |      |       | 4      | 3      | 3     | 5     | 5     | 5 |
| 2618   |      |      |      |      |      |      |      |      |       | 4      | 3      | 3     | 3     | 4     | 3 |
| 2630   |      |      |      |      |      |      |      |      |       | 1      | 1      | 1     | 2     | 2     | 2 |
| 2633   |      |      |      |      |      |      |      |      |       | 2      | 3      | 3     | 5     | 5     | 5 |
| 2637   |      |      |      |      |      |      |      |      |       | 2      | 2      | 2     | 4     | 4     | 4 |
| 2638   |      |      |      |      |      |      |      |      |       | 2      | 2      | 2     | 2     | 3     | 3 |
| 2641   | 3    | 3    | 4    | 3    | 3    | 4    | 3    | 4    | 4     | 2      | 3      | 2     | 4     | 4     | 4 |
| 2644   | 6    | 6    | 1    | 6    | 6    | 6    | 6    | 6    | 1     | 4      | 3      | 3     | 5     | 5     | 5 |
| 2645   |      |      |      |      |      |      |      |      |       | 2      | 3      | 1     | 3     | 2     | 5 |
| 2646   |      |      |      |      |      |      |      |      |       | 3      | 3      | 3     | 4     | 5     | 4 |
| 2648   |      |      |      |      |      |      |      |      |       | 2      | 3      | 2     | 4     | 4     | 4 |
| 2651   |      |      |      |      |      |      |      |      |       | 5      | 3      | 3     | 5     | 5     | 4 |
| 2652   | 6    | 6    | 2    | 6    | 6    | 6    | 6    | 6    | 2     | 2      | 2      | 2     | 2     | 2     | 2 |
| 2653   |      |      |      |      |      |      |      |      |       | 2      | 2      | 2     | 4     | 3     | 5 |
| 2656   |      |      |      |      |      |      |      |      |       | 3      | 3      | 2     | 3     | 3     | 3 |
| 2657   |      |      |      |      |      |      |      |      |       | 4      | 3      | 3     | 5     | 5     | 5 |
| 2658   |      |      |      |      |      |      |      |      |       | 2      | 3      | 3     | 3     | 4     | 3 |
| 2661   | 2    | 1    | 5    | 1    | 2    | 2    | 2    | 2    | 5     | 2      | 2      | 3     | 2     | 2     | 3 |
| 2663   |      |      |      |      |      |      |      |      |       | 3      | 2      | 2     | 4     | 4     | 5 |

| respid | Q48k | Q48l | Q48m | Q48n | Q48o | Q48p | Q48q | Q48r | Q49_1 | Q50a_1 | Q50b_1 | Q51_1 | Q51_2 | Q52_1 |   |
|--------|------|------|------|------|------|------|------|------|-------|--------|--------|-------|-------|-------|---|
| 2665   |      |      |      |      |      |      |      |      |       | 2      | 3      | 3     | 5     | 5     | 4 |
| 2670   |      |      |      |      |      |      |      |      |       | 2      | 3      | 3     | 5     | 5     | 5 |
| 2672   |      |      |      |      |      |      |      |      |       | 3      | 3      | 3     | 4     | 4     | 5 |
| 2673   |      |      |      |      |      |      |      |      |       | 3      | 3      | 3     | 4     | 4     | 4 |
| 2677   |      |      |      |      |      |      |      |      |       | 3      | 3      | 3     | 5     | 5     | 5 |
| 2686   |      |      |      |      |      |      |      |      |       | 2      | 1      | 1     | 2     | 2     | 2 |
| 2688   |      |      |      |      |      |      |      |      |       | 3      | 3      | 3     | 5     | 5     | 4 |
| 2689   |      |      |      |      |      |      |      |      |       | 2      | 3      | 3     | 5     | 5     | 4 |
| 2691   |      |      |      |      |      |      |      |      |       | 4      | 3      | 3     | 5     | 5     | 4 |
| 2695   |      |      |      |      |      |      |      |      |       | 3      | 3      | 3     | 5     | 5     | 5 |
| 2696   |      |      |      |      |      |      |      |      |       | 2      | 3      | 3     | 5     | 5     | 5 |
| 2697   |      |      |      |      |      |      |      |      |       | 3      | 3      | 3     | 5     | 5     | 5 |
| 2698   |      |      |      |      |      |      |      |      |       | 4      | 3      | 3     | 5     | 5     | 5 |
| 2703   | 6    | 6    | 1    | 6    | 6    | 6    | 6    | 6    | 1     | 3      | 3      | 3     | 5     | 5     | 5 |
| 2704   | 3    | 4    | 3    | 1    | 4    | 4    | 4    | 4    | 5     | 2      | 2      | 2     | 4     | 4     | 4 |
| 2706   |      |      |      |      |      |      |      |      |       | 2      | 2      | 1     | 3     | 3     | 2 |
| 2707   |      |      |      |      |      |      |      |      |       | 2      | 2      | 2     | 3     | 3     | 4 |
| 2710   |      |      |      |      |      |      |      |      |       | 3      | 3      | 3     | 5     | 5     | 5 |
| 2711   | 3    | 3    | 4    | 3    | 6    | 6    | 3    | 6    | 6     | 2      | 3      | 3     | 5     | 5     | 5 |
| 2712   |      |      |      |      |      |      |      |      |       | 3      | 3      | 3     | 5     | 5     | 4 |
| 2713   |      |      |      |      |      |      |      |      |       | 2      | 3      | 3     | 5     | 5     | 4 |
| 2721   |      |      |      |      |      |      |      |      |       | 2      | 3      | 3     | 5     | 5     | 4 |
| 2730   |      |      |      |      |      |      |      |      |       | 3      | 3      | 3     | 4     | 4     | 4 |
| 2731   |      |      |      |      |      |      |      |      |       | 4      | 3      | 3     | 4     | 4     | 4 |
| 2732   | 5    | 3    | 3    | 4    | 6    | 3    | 5    | 3    | 3     | 4      | 3      | 3     | 5     | 5     | 4 |
| 2733   |      |      |      |      |      |      |      |      |       | 3      | 3      | 3     | 4     | 5     | 5 |
| 2735   | 5    | 4    | 3    | 5    | 5    | 5    | 5    | 5    | 3     | 2      | 2      | 2     | 4     | 4     | 4 |
| 2736   | 5    | 5    | 4    | 5    | 5    | 5    | 5    | 5    | 3     | 3      | 3      | 3     | 5     | 5     | 4 |
| 2740   |      |      |      |      |      |      |      |      |       | 3      | 2      | 2     | 4     | 5     | 5 |
| 2741   |      |      |      |      |      |      |      |      |       | 3      | 3      | 3     | 4     | 4     | 4 |
| 2742   |      |      |      |      |      |      |      |      |       | 2      | 3      | 3     | 4     | 4     | 4 |
| 2743   |      |      |      |      |      |      |      |      |       | 2      | 2      | 2     | 4     | 4     | 4 |



| respid | Q48k | Q48l | Q48m | Q48n | Q48o | Q48p | Q48q | Q48r | Q49_1 | Q50a_1 | Q50b_1 | Q51_1 | Q51_2 | Q52_1 |   |
|--------|------|------|------|------|------|------|------|------|-------|--------|--------|-------|-------|-------|---|
| 2744   |      |      |      |      |      |      |      |      |       | 3      | 3      | 3     | 5     | 5     | 5 |
| 2745   | 5    | 5    | 5    | 5    | 5    | 5    | 5    | 5    | 3     | 3      | 2      | 2     | 3     | 3     | 2 |
| 2749   | 5    | 3    | 2    | 2    | 5    | 2    | 5    | 5    | 2     | 4      | 3      | 3     | 5     | 5     | 5 |
| 2751   |      |      |      |      |      |      |      |      |       | 2      | 1      | 2     | 4     | 4     | 4 |
| 2754   |      |      |      |      |      |      |      |      |       | 2      | 3      | 2     | 3     | 3     | 3 |
| 2755   |      |      |      |      |      |      |      |      |       | 2      | 2      | 2     | 4     | 4     | 4 |
| 2757   |      |      |      |      |      |      |      |      |       | 3      | 3      | 3     | 5     | 5     | 5 |
| 2758   |      |      |      |      |      |      |      |      |       | 4      | 3      | 3     | 4     | 5     | 5 |
| 2759   |      |      |      |      |      |      |      |      |       | 2      | 3      | 3     | 5     | 5     | 5 |
| 2761   | 6    | 6    | 6    | 6    | 6    | 6    | 6    | 6    | 6     | 3      | 3      | 3     | 5     | 5     | 5 |
| 2762   |      |      |      |      |      |      |      |      |       | 2      | 3      | 2     | 5     | 4     | 4 |
| 2763   | 3    | 5    | 4    | 3    | 5    | 5    | 2    | 5    | 5     | 4      | 3      | 3     | 5     | 5     | 4 |
| 2764   |      |      |      |      |      |      |      |      |       | 3      | 3      | 2     | 4     | 5     | 2 |
| 2765   | 5    | 5    | 3    | 5    | 6    | 5    | 5    | 4    | 4     | 3      | 3      | 3     | 5     | 5     | 4 |
| 2766   |      |      |      |      |      |      |      |      |       | 2      | 3      | 3     | 5     | 5     | 5 |
| 2767   |      |      |      |      |      |      |      |      |       | 2      | 2      | 2     | 4     | 4     | 3 |
| 2769   | 5    | 5    | 2    | 6    | 5    | 5    | 5    | 4    | 4     | 4      | 3      | 3     | 5     | 5     | 5 |
| 2770   |      |      |      |      |      |      |      |      |       | 2      | 2      | 2     | 3     | 4     | 4 |
| 2771   | 3    | 3    | 2    | 3    | 3    | 3    | 3    | 3    | 4     | 1      | 2      | 2     | 3     | 3     | 3 |
| 2774   |      |      |      |      |      |      |      |      |       | 3      | 3      | 2     | 4     | 4     | 4 |
| 2777   | 2    | 3    | 4    | 2    | 3    | 2    | 3    | 3    | 4     | 2      | 2      | 2     | 3     | 4     | 4 |
| 2778   |      |      |      |      |      |      |      |      |       | 2      | 2      | 2     | 5     | 5     | 5 |
| 2781   |      |      |      |      |      |      |      |      |       | 2      | 2      | 2     | 3     | 3     | 3 |
| 2782   |      |      |      |      |      |      |      |      |       | 3      | 2      | 2     | 4     | 4     | 4 |
| 2784   | 6    | 6    | 4    | 2    | 6    | 6    | 6    | 6    | 2     | 2      | 2      | 2     | 2     | 2     | 3 |
| 2785   | 5    | 5    | 2    | 5    | 5    | 5    | 5    | 5    | 2     | 3      | 3      | 3     | 4     | 5     | 4 |
| 2786   |      |      |      |      |      | 6    | 6    | 6    |       | 3      | 3      | 3     | 4     | 5     | 5 |
| 2787   | 6    | 6    |      | 6    | 6    | 6    | 6    | 6    | 1     | 3      | 3      | 3     | 5     | 5     | 5 |
| 2789   | 3    | 3    | 3    | 4    | 4    | 4    | 4    | 4    | 3     | 3      | 2      | 2     | 3     | 4     | 3 |
| 2790   | 4    | 5    | 3    | 3    | 5    | 3    | 4    | 4    | 4     | 2      | 3      | 3     | 5     | 5     | 5 |
| 2791   | 5    | 5    | 2    | 3    | 5    | 5    | 5    | 5    | 4     | 3      | 2      | 2     | 2     | 3     | 4 |
| 2793   |      |      |      |      |      |      |      |      |       | 2      | 3      | 3     | 5     | 5     | 4 |

| respid | Q48k | Q48l | Q48m | Q48n | Q48o | Q48p | Q48q | Q48r | Q49_1 | Q50a_1 | Q50b_1 | Q51_1 | Q51_2 | Q52_1 |   |
|--------|------|------|------|------|------|------|------|------|-------|--------|--------|-------|-------|-------|---|
| 2797   | 5    | 5    | 4    | 5    | 6    | 5    | 5    | 3    | 3     | 3      | 3      | 2     | 5     | 5     | 4 |
| 2798   |      |      |      |      |      |      |      |      |       | 3      | 3      | 3     | 5     | 5     | 4 |
| 2799   |      |      |      |      |      |      |      |      |       | 4      | 3      | 3     | 4     | 4     | 4 |
| 2801   |      |      |      |      |      |      |      |      |       | 3      | 3      | 3     | 5     | 5     | 5 |
| 2802   | 5    | 5    | 3    | 6    | 6    | 6    | 6    | 2    | 2     | 2      | 1      | 1     | 2     | 2     | 3 |
| 2803   | 4    | 3    | 4    | 4    | 5    | 4    | 4    | 3    | 3     | 3      | 3      | 3     | 4     | 5     | 5 |
| 2804   | 6    | 6    | 3    | 6    | 6    | 6    | 6    | 3    | 3     | 3      | 2      | 3     | 3     | 2     | 3 |
| 2807   |      |      |      |      |      |      |      |      |       | 4      | 2      | 2     | 4     | 4     | 4 |
| 2809   | 5    | 3    | 3    | 5    | 5    | 5    | 5    | 2    | 4     | 4      | 3      | 3     | 5     | 5     | 5 |
| 2810   | 3    | 5    | 3    | 5    | 6    | 6    | 3    | 5    | 3     | 3      | 2      | 2     | 5     | 4     | 4 |
| 2812   |      |      |      |      |      |      |      |      |       | 3      | 3      | 3     | 5     | 5     | 5 |
| 2814   |      |      |      |      |      |      |      |      |       | 4      | 3      | 3     | 5     | 5     | 5 |
| 2815   |      |      |      |      |      |      |      |      |       | 3      | 2      | 2     | 4     | 4     | 4 |
| 2816   |      |      |      |      |      |      |      |      |       | 2      | 2      | 3     | 5     | 4     | 4 |
| 2817   |      |      |      |      |      |      |      |      |       | 3      | 3      | 3     | 5     | 5     | 5 |
| 2819   |      |      |      |      |      |      |      |      |       | 2      | 2      | 2     | 4     | 4     | 4 |
| 2820   |      |      |      |      |      |      |      |      |       | 3      | 3      | 3     | 5     | 5     | 5 |
| 2821   | 4    | 3    | 4    | 4    | 5    | 4    | 5    | 4    | 3     | 3      | 3      | 3     | 1     | 4     | 2 |
| 2822   | 2    | 2    | 5    | 2    | 4    | 4    | 3    | 4    | 2     | 2      | 3      | 3     | 4     | 5     | 4 |
| 2823   |      |      |      |      |      |      |      |      |       | 3      | 3      | 3     | 5     | 5     | 5 |
| 2824   | 5    | 5    | 2    | 3    | 5    | 3    | 5    | 3    | 3     | 4      | 2      | 2     | 4     | 4     | 4 |
| 2825   |      |      |      |      |      |      |      |      |       | 3      | 3      | 3     | 5     | 5     | 5 |
| 2826   | 5    | 5    | 3    | 4    | 5    | 5    | 5    | 2    | 2     | 2      | 3      | 3     | 4     | 3     | 5 |
| 2827   | 6    | 6    | 2    | 4    | 4    | 4    | 4    | 4    | 3     | 3      | 3      | 2     | 4     | 4     | 4 |
| 2828   |      |      |      |      |      |      |      |      |       | 3      | 3      | 3     | 5     | 5     | 5 |
| 2829   |      |      |      |      |      |      |      |      |       | 3      | 2      | 2     | 3     | 3     | 3 |
| 2830   |      |      |      |      |      |      |      |      |       | 2      | 2      | 2     | 4     | 4     | 4 |
| 2831   |      |      |      |      |      |      |      |      |       | 3      | 3      | 3     | 4     | 5     | 4 |
| 2832   | 4    | 3    | 3    | 5    | 6    | 5    | 5    | 5    | 3     | 3      | 2      | 3     | 4     | 4     | 3 |
| 2833   | 5    | 5    | 5    | 5    | 5    | 5    | 5    | 2    | 2     | 2      | 3      | 3     | 5     | 5     | 4 |
| 2834   |      |      |      |      |      |      |      |      |       | 4      | 3      | 3     | 5     | 5     | 5 |
| 2835   |      |      |      |      |      |      |      |      |       | 2      | 2      | 2     | 3     | 2     | 4 |

| respid | Q48k | Q48l | Q48m | Q48n | Q48o | Q48p | Q48q | Q48r | Q49_1 | Q50a_1 | Q50b_1 | Q51_1 | Q51_2 | Q52_1 |   |
|--------|------|------|------|------|------|------|------|------|-------|--------|--------|-------|-------|-------|---|
| 2836   |      |      |      |      |      |      |      |      |       | 2      | 3      | 2     | 4     | 4     | 4 |
| 2837   |      |      |      |      |      |      |      |      |       | 3      | 2      | 2     | 4     | 4     | 4 |
| 2838   | 6    | 5    | 2    | 5    | 6    | 6    | 6    | 4    | 2     | 3      | 3      | 4     | 5     | 5     |   |
| 2844   | 2    | 2    | 5    | 1    | 2    | 1    | 2    | 4    | 2     | 2      | 2      | 2     | 3     | 2     |   |
| 2845   |      |      |      |      |      |      |      |      | 4     | 2      | 2      | 4     | 4     | 5     |   |
| 2847   |      |      |      |      |      |      |      |      | 1     | 2      | 3      | 3     | 3     | 3     |   |
| 2848   |      |      |      |      |      |      |      |      | 3     | 2      | 2      | 4     | 4     | 3     |   |
| 2849   |      |      |      |      |      |      |      |      | 2     | 3      | 3      | 5     | 5     | 5     |   |
| 2851   |      |      |      |      |      |      |      |      | 2     | 3      | 3      | 5     | 4     | 4     |   |
| 2852   | 4    | 4    | 2    | 3    | 5    | 3    | 5    | 2    | 3     | 3      | 3      | 4     | 4     | 3     |   |
| 2853   | 4    | 4    | 4    | 4    | 4    | 4    | 4    | 4    | 2     | 1      | 1      | 2     | 3     | 2     |   |
| 2854   | 5    | 6    | 4    | 5    | 6    | 5    | 6    | 4    | 3     | 3      | 3      | 5     | 5     | 5     |   |
| 2856   |      |      |      |      |      |      |      |      | 2     | 2      | 2      | 3     | 3     | 5     |   |
| 2857   |      |      |      |      |      |      |      |      | 2     | 2      | 2      | 3     | 3     | 3     |   |
| 2858   |      |      |      |      |      |      |      |      | 2     | 3      | 3      | 4     | 4     | 4     |   |
| 2859   |      |      |      |      |      |      |      |      | 2     | 3      | 3      | 4     | 4     | 4     |   |
| 2860   | 3    | 3    | 5    | 1    | 6    | 1    | 3    | 6    | 2     | 3      | 3      | 4     | 4     | 1     |   |
| 2861   |      |      |      |      |      |      |      |      | 2     | 2      | 2      | 3     | 3     | 3     |   |
| 2863   |      |      |      |      |      |      |      |      | 3     | 3      | 3      | 5     | 5     | 5     |   |
| 2864   | 3    | 3    | 4    | 2    | 4    | 4    | 3    | 4    | 3     | 3      | 3      | 5     | 5     | 5     |   |
| 2866   | 6    | 6    | 1    | 6    | 6    | 6    | 6    | 5    | 4     | 3      | 3      | 5     | 5     | 5     |   |
| 2872   |      |      |      |      |      |      |      |      | 2     | 2      | 2      | 2     | 2     | 2     |   |
| 2875   | 6    | 6    | 3    | 6    | 6    | 6    | 6    | 3    | 4     | 3      | 3      | 4     | 4     | 5     |   |
| 2879   |      |      |      |      |      |      |      |      | 3     | 3      | 3      | 5     | 5     | 5     |   |
| 2881   | 2    | 3    | 4    | 2    | 3    | 3    | 2    | 5    | 3     | 3      | 3      | 5     | 5     | 4     |   |
| 2882   |      |      |      |      |      |      |      |      | 2     | 3      | 2      | 5     | 4     | 5     |   |
| 2883   |      |      |      |      |      |      |      |      | 4     | 3      | 3      | 5     | 5     | 5     |   |
| 2884   |      |      |      |      |      |      |      |      | 2     | 2      | 2      | 3     | 3     | 3     |   |
| 2885   | 6    | 3    | 4    | 5    | 5    | 5    | 5    | 2    | 3     | 3      | 3      | 5     | 4     | 3     |   |
| 2887   |      |      |      |      |      |      |      |      | 4     | 3      | 3      | 4     | 4     | 4     |   |
| 2888   |      |      |      |      |      |      |      |      | 3     | 3      | 3      | 5     | 5     | 4     |   |
| 2890   |      |      |      |      |      |      |      |      | 3     | 2      | 3      | 3     | 3     | 3     |   |

| respid | Q48k | Q48l | Q48m | Q48n | Q48o | Q48p | Q48q | Q48r | Q49_1 | Q50a_1 | Q50b_1 | Q51_1 | Q51_2 | Q52_1 |   |
|--------|------|------|------|------|------|------|------|------|-------|--------|--------|-------|-------|-------|---|
| 2891   |      | 5    | 5    | 4    | 3    | 5    | 5    | 5    | 3     | 3      | 3      | 3     | 4     | 5     | 4 |
| 2892   |      |      |      |      |      |      |      |      |       | 3      | 3      | 3     | 5     | 5     | 5 |
| 2895   |      |      |      |      |      |      |      |      |       | 2      | 3      | 2     | 4     | 4     | 3 |
| 2899   |      |      |      |      |      |      |      |      |       | 3      | 3      | 3     | 4     | 4     | 4 |
| 2900   |      |      |      |      |      |      |      |      |       | 3      | 2      | 2     | 2     | 5     | 2 |
| 2902   | 1    |      | 3    | 5    | 5    | 5    | 4    | 2    | 6     | 2      | 3      | 3     | 5     | 5     | 5 |
| 2903   |      |      |      |      |      |      |      |      |       | 3      | 3      | 3     | 5     | 5     | 5 |
| 2904   |      |      |      |      |      |      |      |      |       | 4      | 3      | 3     | 4     | 5     | 4 |
| 2906   | 3    |      | 4    | 3    | 3    | 5    | 3    | 5    | 2     | 3      | 3      | 3     | 5     | 5     | 4 |
| 2908   | 6    |      | 6    | 6    | 6    | 4    | 4    | 6    | 3     | 4      | 3      | 3     | 5     | 5     | 5 |
| 2910   | 5    |      | 5    | 4    | 5    | 6    | 4    | 5    | 4     | 3      | 3      | 3     | 4     | 4     | 4 |
| 2917   |      |      |      |      |      |      |      |      |       | 2      | 2      | 2     | 3     | 4     | 3 |
| 2918   |      |      |      |      |      |      |      |      |       | 2      | 3      | 3     | 4     | 4     | 4 |
| 2919   |      |      |      |      |      |      |      |      |       | 4      | 3      | 3     | 5     | 5     | 5 |
| 2920   |      |      |      |      |      |      |      |      |       | 5      | 3      | 3     | 5     | 5     | 5 |
| 2921   |      |      |      |      |      |      |      |      |       | 3      | 2      | 2     | 4     | 4     | 4 |
| 2922   |      |      |      |      |      |      |      |      |       | 3      | 3      | 3     | 5     | 5     | 4 |
| 2923   |      |      |      |      |      |      |      |      |       | 3      | 3      | 3     | 5     | 5     | 4 |
| 2924   | 6    |      | 6    | 1    | 5    | 5    | 6    | 6    | 2     | 3      | 3      | 3     | 4     | 4     | 5 |
| 2926   | 5    |      | 5    | 4    | 5    | 6    | 5    | 5    | 3     | 3      | 3      | 3     | 5     | 5     | 5 |
| 2928   |      |      |      |      |      |      |      |      |       | 4      | 3      | 3     | 4     | 4     | 4 |
| 2930   |      |      |      |      |      |      |      |      |       | 2      | 3      | 3     | 4     | 4     | 4 |
| 2931   |      |      |      |      |      |      |      |      |       | 2      | 3      | 3     | 5     | 5     | 4 |
| 2933   |      |      |      |      |      |      |      |      |       | 3      | 3      | 3     | 5     | 5     | 5 |
| 2935   |      |      |      |      |      |      |      |      |       | 3      | 3      | 3     | 5     | 5     | 4 |
| 2936   |      |      |      |      |      |      |      |      |       | 3      | 3      | 3     | 5     | 5     | 5 |
| 2937   |      |      |      |      |      |      |      |      |       | 2      | 2      | 2     | 3     | 4     | 2 |
| 2938   |      |      |      |      |      |      |      |      |       | 3      | 3      | 3     | 3     | 4     | 4 |
| 2944   |      |      |      |      |      |      |      |      |       | 2      | 2      | 2     | 2     | 2     | 4 |
| 2945   | 3    |      | 3    | 6    | 2    | 5    | 3    | 3    | 5     | 3      | 3      | 3     | 5     | 5     | 5 |
| 2947   |      |      |      |      |      |      |      |      |       | 4      | 3      | 3     | 5     | 5     | 5 |
| 2949   | 6    |      | 6    | 2    | 5    | 6    | 5    | 6    | 2     | 3      | 3      | 3     | 4     | 5     | 5 |

| respid | Q48k | Q48l | Q48m | Q48n | Q48o | Q48p | Q48q | Q48r | Q49_1 | Q50a_1 | Q50b_1 | Q51_1 | Q51_2 | Q52_1 |   |
|--------|------|------|------|------|------|------|------|------|-------|--------|--------|-------|-------|-------|---|
| 2951   |      | 2    | 6    | 2    | 1    | 6    | 5    | 6    | 1     | 3      | 3      | 3     | 4     | 4     | 4 |
| 2952   |      |      |      |      |      |      |      |      |       | 2      | 2      | 2     | 3     | 3     | 2 |
| 2953   |      |      |      |      |      |      |      |      |       | 3      | 3      | 3     | 4     | 4     | 4 |
| 2955   |      |      |      |      |      |      |      |      |       | 3      | 3      | 3     | 5     | 5     | 5 |
| 2957   |      |      |      |      |      |      |      |      |       | 4      | 3      | 3     | 5     | 5     | 5 |
| 2958   | 6    | 6    | 3    | 5    | 6    | 6    | 6    | 6    | 3     | 3      | 3      | 2     | 4     | 5     | 4 |
| 2960   | 6    | 5    | 3    | 5    | 4    | 4    | 4    | 4    | 3     | 2      | 3      | 3     | 5     | 5     | 5 |
| 2963   |      |      |      |      |      |      |      |      |       | 3      | 3      | 3     | 4     | 4     | 3 |
| 2964   | 5    | 6    | 4    | 5    | 5    | 6    | 4    | 5    | 5     | 4      | 3      | 3     | 3     | 5     | 5 |
| 2967   |      |      |      |      |      |      |      |      |       | 4      | 3      | 3     | 5     | 5     | 5 |
| 2968   | 6    | 6    | 1    | 5    | 6    | 6    | 6    | 6    | 2     | 5      | 3      | 3     | 5     | 5     | 4 |
| 2971   | 3    | 3    | 5    | 2    | 4    | 3    | 2    | 3    | 3     | 2      | 2      | 2     | 3     | 3     | 3 |
| 2974   | 2    |      |      |      |      |      |      |      |       | 3      | 3      | 3     | 5     | 5     | 5 |
| 2975   | 5    | 5    | 6    | 1    | 5    | 2    | 1    | 6    | 6     | 2      | 3      | 3     | 3     | 3     | 4 |
| 2982   |      |      |      |      |      |      |      |      |       | 2      | 3      | 3     | 5     | 5     | 5 |
| 2983   |      |      |      |      |      |      |      |      |       | 2      | 3      | 3     | 5     | 5     | 5 |
| 2985   | 6    | 5    | 2    | 5    | 6    | 5    | 6    | 3    | 3     | 3      | 3      | 3     | 5     | 5     | 5 |
| 2986   |      |      |      |      |      |      |      |      |       | 2      | 2      | 2     | 3     | 4     | 3 |
| 2987   |      |      |      |      |      |      |      |      |       | 2      | 3      | 3     | 4     | 4     | 3 |
| 2988   |      | 6    |      | 6    |      |      |      |      |       | 2      | 2      | 2     | 3     | 3     | 4 |
| 2993   |      |      |      |      |      |      |      |      |       | 3      | 3      | 3     | 5     | 5     | 5 |
| 2996   |      |      |      |      |      |      |      |      |       | 3      | 3      | 3     | 5     | 5     | 5 |
| 2997   |      |      |      |      |      |      |      |      |       | 4      | 3      | 3     | 4     | 4     | 4 |
| 2998   | 3    | 4    | 3    | 2    | 6    | 3    | 4    | 4    | 4     | 2      | 3      | 3     | 4     | 3     | 4 |
| 3004   |      |      |      |      |      |      |      |      |       | 4      | 3      | 3     | 5     | 5     | 5 |
| 3007   | 3    | 3    | 3    | 3    | 4    | 3    | 3    | 4    | 4     | 2      | 2      | 3     | 4     | 4     | 3 |
| 3011   |      |      |      |      |      |      |      |      |       | 2      | 2      | 2     | 3     | 4     | 2 |
| 3012   |      |      |      |      |      |      |      |      |       | 3      | 3      | 2     | 5     | 5     | 5 |
| 3013   |      |      |      |      |      |      |      |      |       | 3      | 3      | 3     | 4     | 4     | 4 |
| 3014   |      |      |      |      |      |      |      |      |       | 5      | 3      | 3     | 5     | 5     | 5 |
| 3015   |      |      |      |      |      |      |      |      |       | 5      | 3      | 3     | 5     | 5     | 5 |
| 3016   |      |      |      |      |      |      |      |      |       | 3      | 3      | 3     | 5     | 5     | 3 |

| respid | Q48k | Q48l | Q48m | Q48n | Q48o | Q48p | Q48q | Q48r | Q49_1 | Q50a_1 | Q50b_1 | Q51_1 | Q51_2 | Q52_1 |   |
|--------|------|------|------|------|------|------|------|------|-------|--------|--------|-------|-------|-------|---|
| 3017   |      |      |      |      |      |      |      |      |       | 2      | 3      | 3     | 5     | 5     | 4 |
| 3020   |      |      |      |      |      |      |      |      |       | 2      | 3      | 3     | 4     | 4     | 4 |
| 3022   |      |      |      |      |      |      |      |      |       | 3      | 3      | 3     | 4     | 4     | 4 |
| 3023   |      |      |      |      |      |      |      |      |       | 5      | 3      | 3     | 5     | 5     | 5 |
| 3026   | 6    | 6    | 1    | 6    | 6    | 6    | 6    | 6    | 1     | 3      | 2      | 2     | 4     | 4     | 4 |
| 3038   |      |      |      |      |      |      |      |      |       | 4      | 2      | 2     | 2     | 3     | 3 |
| 3039   |      |      |      |      |      |      |      |      |       | 2      | 2      | 2     | 3     | 2     | 3 |
| 3040   |      |      |      |      |      |      |      |      |       | 2      | 3      | 3     | 4     | 5     | 4 |
| 3041   |      |      |      |      |      |      |      |      |       | 3      | 3      | 3     | 5     | 5     | 5 |
| 3042   | 4    | 4    | 4    | 4    | 4    | 4    | 4    | 4    | 4     | 2      | 2      | 2     | 2     | 3     | 2 |
| 3044   |      |      |      |      |      |      |      |      |       | 3      | 3      | 3     | 4     | 5     | 4 |
| 3050   |      |      |      |      |      |      |      |      |       | 2      | 2      | 2     | 4     | 4     | 4 |
| 3052   |      |      |      |      |      |      |      |      |       | 2      | 3      | 3     | 4     | 4     | 4 |
| 3056   | 5    | 5    | 1    | 5    | 6    | 5    | 5    | 5    | 2     | 2      | 3      | 3     | 4     | 4     | 4 |
| 3059   | 5    | 5    | 2    | 5    | 5    | 5    | 5    | 4    | 4     | 3      | 3      | 3     | 5     | 4     | 5 |
| 3060   |      |      |      |      |      |      |      |      |       | 3      | 3      | 3     | 5     | 5     | 4 |
| 3063   | 5    | 5    |      | 5    | 5    | 5    | 5    | 5    | 3     | 3      | 3      | 3     | 5     | 5     | 4 |
| 3065   |      |      |      |      |      |      |      |      |       | 4      | 2      | 2     | 3     | 3     | 3 |
| 3067   |      |      |      |      |      |      |      |      |       | 2      | 2      | 3     | 4     | 4     | 4 |
| 3068   |      |      |      |      |      |      |      |      |       | 5      | 3      | 3     | 5     | 4     | 5 |
| 3072   |      |      |      |      |      |      |      |      |       | 4      | 3      | 3     | 5     | 5     | 5 |
| 3074   |      |      |      |      |      |      |      |      |       | 2      | 3      | 3     | 5     | 5     | 5 |
| 3075   |      |      |      |      |      |      |      |      |       | 3      | 3      | 3     | 5     | 5     | 5 |
| 3076   | 3    | 3    | 4    | 5    | 5    | 3    | 3    | 5    | 5     | 3      | 3      | 3     | 5     | 5     | 5 |
| 3079   |      |      |      |      |      |      |      |      |       | 2      | 3      | 3     | 5     | 4     | 5 |
| 3082   |      |      |      |      |      |      |      |      |       | 2      | 2      | 2     | 3     | 4     | 3 |
| 3083   |      |      |      |      |      |      |      |      |       | 4      | 3      | 3     | 5     | 5     | 4 |
| 3084   |      |      |      |      |      |      |      |      |       | 3      | 3      | 3     | 4     | 4     | 3 |
| 3085   | 4    | 4    | 4    | 4    | 3    | 3    | 4    | 4    | 4     | 2      | 3      | 2     | 5     | 5     | 5 |
| 3090   |      |      | 4    | 2    | 3    | 5    | 6    |      |       | 2      | 3      | 3     | 5     | 5     | 5 |
| 3091   | 2    | 2    | 5    | 5    | 4    | 6    | 2    | 6    | 6     | 3      | 3      | 3     | 4     | 3     | 4 |
| 3092   |      |      |      |      |      |      |      |      |       | 3      | 2      | 2     | 4     | 4     | 4 |

| respid | Q48k | Q48l | Q48m | Q48n | Q48o | Q48p | Q48q | Q48r | Q49_1 | Q50a_1 | Q50b_1 | Q51_1 | Q51_2 | Q52_1 |   |
|--------|------|------|------|------|------|------|------|------|-------|--------|--------|-------|-------|-------|---|
| 3095   |      |      |      |      |      |      |      |      |       | 3      | 3      | 3     | 5     | 5     | 5 |
| 3096   |      |      |      |      |      |      |      |      |       | 4      | 2      | 2     | 3     | 4     | 3 |
| 3097   | 4    | 3    | 4    | 3    | 5    | 1    | 4    | 3    | 3     | 3      | 3      | 2     | 5     | 4     | 4 |
| 3099   |      |      |      |      |      |      |      |      |       | 4      | 2      | 2     | 1     | 2     | 1 |
| 3101   | 5    | 5    | 2    | 5    | 5    | 5    | 5    | 5    | 2     | 2      | 3      | 3     | 5     | 4     | 5 |
| 3103   |      |      |      |      |      |      |      |      |       | 3      | 3      | 3     | 4     | 5     | 4 |
| 3104   |      |      |      |      |      |      |      |      |       | 2      | 2      | 3     | 3     | 4     | 3 |
| 3105   |      |      |      |      |      |      |      |      |       | 2      | 3      | 3     | 5     | 5     | 5 |
| 3107   |      |      |      |      |      |      |      |      |       | 3      | 3      | 3     | 5     | 5     | 4 |
| 3108   |      |      |      |      |      |      |      |      |       | 2      | 3      | 3     | 5     | 4     | 5 |
| 3109   | 5    | 5    | 2    | 5    | 5    | 5    | 5    | 5    | 2     | 3      | 3      | 2     | 4     | 4     | 4 |
| 3116   | 6    | 6    | 2    | 6    | 6    | 6    | 6    | 6    | 6     | 2      | 3      | 3     | 3     | 3     | 4 |
| 3117   | 5    | 3    | 3    | 3    | 3    | 3    | 3    | 5    | 3     | 3      | 3      | 3     | 5     | 5     | 5 |
| 3119   |      |      |      |      |      |      |      |      |       | 3      | 3      | 3     | 5     | 5     | 5 |
| 3120   |      |      |      |      |      |      |      |      |       | 3      | 3      | 3     | 5     | 5     | 5 |
| 3130   | 6    | 6    | 3    | 6    | 4    | 4    | 6    | 3    | 3     | 3      | 3      | 2     | 5     | 5     | 5 |
| 3131   | 5    | 6    | 2    | 3    | 5    | 3    | 5    | 4    | 2     | 2      | 2      | 2     | 3     | 4     | 4 |
| 3133   |      |      |      |      |      |      |      |      |       | 3      | 3      | 3     | 5     | 5     | 5 |
| 3134   |      |      |      |      |      |      |      |      |       | 4      | 2      | 2     | 4     | 4     | 4 |
| 3135   |      |      |      |      |      |      |      |      |       | 1      | 3      | 3     | 4     | 3     | 4 |
| 3145   |      |      |      |      |      |      |      |      |       | 2      | 3      | 3     | 5     | 5     | 5 |
| 3147   | 5    | 5    | 2    | 4    | 5    | 4    | 5    | 5    | 2     | 3      | 2      | 2     | 4     | 5     | 5 |
| 3152   |      |      |      |      |      |      |      |      |       | 4      | 3      | 3     | 5     | 5     | 4 |
| 3155   | 3    | 1    | 4    | 2    | 5    | 2    | 3    | 5    | 5     | 2      | 1      | 2     | 4     | 2     | 3 |
| 3156   |      |      |      |      |      |      |      |      |       | 3      | 3      | 3     | 5     | 5     | 5 |
| 3157   |      |      |      |      |      |      |      |      |       | 3      | 2      | 2     | 2     | 3     | 3 |
| 3166   |      |      |      |      |      |      |      |      |       | 3      | 2      | 2     | 3     | 3     | 3 |
| 3169   | 4    | 6    |      | 5    | 5    | 6    | 6    | 6    | 2     | 3      | 2      | 3     | 3     | 4     | 4 |
| 3179   | 6    | 6    | 2    | 6    | 6    | 6    | 3    | 4    | 5     | 1      | 2      | 3     | 3     | 3     | 3 |
| 3181   | 3    | 4    | 3    | 3    | 4    | 3    | 3    | 3    | 4     | 2      | 2      | 2     | 4     | 4     | 4 |
| 3185   |      |      |      |      |      |      |      |      |       | 3      | 3      | 3     | 5     | 5     | 5 |
| 3190   |      |      |      |      |      |      |      |      |       | 3      | 3      | 3     | 5     | 5     | 5 |

| respid | Q48k | Q48l | Q48m | Q48n | Q48o | Q48p | Q48q | Q48r | Q49_1 | Q50a_1 | Q50b_1 | Q51_1 | Q51_2 | Q52_1 |   |
|--------|------|------|------|------|------|------|------|------|-------|--------|--------|-------|-------|-------|---|
| 3191   |      |      |      |      |      |      |      |      |       | 3      | 3      | 3     | 4     | 4     | 5 |
| 3192   |      |      |      |      |      |      |      |      |       | 3      | 3      | 3     | 5     | 5     | 5 |
| 3193   | 4    | 5    | 5    | 5    | 6    | 5    | 5    | 5    | 5     | 3      | 3      | 3     | 1     | 5     | 5 |
| 3195   |      |      |      |      |      |      |      |      |       | 3      | 3      | 3     | 5     | 5     | 5 |
| 3202   |      |      |      |      |      |      |      |      |       | 2      | 3      | 2     | 4     | 4     | 5 |
| 3204   |      |      |      |      |      |      |      |      |       | 3      | 2      | 3     | 4     | 4     | 4 |
| 3208   |      |      |      |      |      |      |      |      |       | 3      | 2      | 2     | 4     | 4     | 4 |
| 3212   |      |      |      |      |      |      |      |      |       | 3      | 3      | 3     | 5     | 5     | 5 |
| 3218   |      |      |      |      |      |      |      |      |       | 3      | 3      | 3     | 4     | 4     | 4 |
| 3219   | 6    | 6    | 3    | 5    | 6    | 6    | 6    | 3    | 4     | 4      | 3      | 3     | 4     | 4     | 4 |
| 3220   | 5    | 5    | 2    | 5    | 6    | 6    | 6    | 5    | 2     | 3      | 3      | 3     | 4     | 5     | 4 |
| 3221   |      |      |      |      |      |      |      |      |       | 2      | 2      | 3     | 3     | 3     | 3 |
| 3223   | 6    | 6    | 2    | 6    | 6    | 6    | 6    | 6    | 2     | 4      | 3      | 3     | 5     | 5     | 5 |
| 3231   | 3    | 4    | 2    | 3    | 5    | 3    | 5    | 6    | 2     | 2      | 2      | 2     | 4     | 4     | 3 |
| 3232   | 5    | 5    | 4    | 6    | 4    | 4    | 4    | 5    | 4     | 3      | 2      | 2     | 3     | 3     | 4 |
| 3234   |      |      |      |      |      |      |      |      |       | 3      | 2      | 2     | 3     | 4     | 3 |
| 3235   |      |      |      |      |      |      |      |      |       | 4      | 3      | 3     | 5     | 5     | 5 |
| 3237   |      |      |      |      |      |      |      |      |       | 4      | 3      | 3     | 5     | 5     | 5 |
| 3238   |      |      |      |      |      |      |      |      |       | 4      | 3      | 3     | 5     | 5     | 5 |
| 3240   |      |      |      |      |      |      |      |      |       | 2      | 3      | 3     | 5     | 5     | 4 |
| 3241   | 5    | 4    | 3    | 5    | 5    | 5    | 5    | 5    | 3     | 2      | 3      | 3     | 4     | 4     | 5 |
| 3243   | 2    | 3    | 5    | 2    | 5    | 2    | 2    | 2    | 5     | 2      | 2      | 2     | 4     | 4     | 4 |
| 3244   | 5    | 3    | 2    | 5    | 3    | 3    | 3    | 5    |       | 3      | 3      | 2     | 5     | 5     | 5 |
| 3247   |      |      |      |      |      |      |      |      |       | 3      | 3      | 3     | 5     | 5     | 3 |
| 3250   |      |      |      |      |      |      |      |      |       | 4      | 3      | 3     | 5     | 5     | 5 |
| 3251   | 3    | 3    | 4    | 3    | 4    | 4    | 4    | 3    | 4     | 2      | 2      | 2     | 3     | 3     | 3 |
| 3255   | 6    | 6    | 1    | 6    | 6    | 6    | 6    | 6    | 1     | 3      | 3      | 3     | 5     | 5     | 5 |
| 3256   |      |      |      |      |      |      |      |      |       | 2      | 3      | 3     | 4     | 5     | 5 |
| 3257   | 2    | 3    | 3    | 3    | 6    | 4    | 4    | 2    | 2     | 3      | 3      | 3     | 5     | 5     | 5 |
| 3258   |      |      |      |      |      |      |      |      |       | 3      | 3      | 3     | 5     | 5     | 5 |
| 3259   | 1    | 1    | 6    | 1    | 6    | 3    | 3    | 1    | 6     | 3      | 3      | 3     | 5     | 5     | 4 |
| 3260   |      |      |      |      |      |      |      |      |       | 3      | 3      | 3     | 5     | 5     | 4 |



| respid | Q48k | Q48l | Q48m | Q48n | Q48o | Q48p | Q48q | Q48r | Q49_1 | Q50a_1 | Q50b_1 | Q51_1 | Q51_2 | Q52_1 |   |
|--------|------|------|------|------|------|------|------|------|-------|--------|--------|-------|-------|-------|---|
| 3261   |      |      |      |      |      |      |      |      |       | 3      | 3      | 3     | 5     | 5     | 5 |
| 3262   |      |      |      |      |      |      |      |      |       | 2      | 2      | 2     | 3     | 4     | 4 |
| 3264   | 6    | 6    | 3    | 4    | 5    | 3    | 6    | 4    |       | 3      | 2      | 2     | 4     | 4     | 3 |
| 3265   |      |      |      |      |      |      |      |      |       | 4      | 3      | 3     | 5     | 5     | 5 |
| 3267   |      |      |      |      |      |      |      |      |       | 3      | 3      | 3     | 5     | 5     | 4 |
| 3268   | 5    | 5    | 3    | 5    | 5    | 5    | 2    | 2    |       | 3      | 3      | 3     | 5     | 5     | 4 |
| 3270   |      |      |      |      |      |      |      |      |       | 3      | 3      | 3     | 5     | 5     | 5 |
| 3271   |      |      |      |      |      |      |      |      |       | 4      | 3      | 3     | 5     | 4     | 5 |
| 3274   |      |      |      |      |      |      |      |      |       | 3      | 3      | 3     | 5     | 5     | 5 |
| 3276   |      |      |      |      |      |      |      |      |       | 2      | 3      | 3     | 5     | 5     | 5 |
| 3277   | 6    | 6    | 3    | 4    | 6    | 5    | 6    | 3    |       | 4      | 3      | 3     | 5     | 5     | 4 |
| 3279   |      |      |      |      |      |      |      |      |       | 3      | 3      | 3     | 4     | 4     | 4 |
| 3281   |      |      |      |      |      |      |      |      |       | 3      | 3      | 3     | 5     | 5     | 5 |
| 3283   |      |      |      |      |      |      |      |      |       | 2      | 3      | 3     | 4     | 5     | 3 |
| 3285   |      |      |      |      |      |      |      |      |       | 4      | 3      | 3     | 4     | 4     | 3 |
| 3286   |      |      |      |      |      |      |      |      |       | 2      | 3      | 3     | 4     | 4     | 5 |
| 3287   |      |      |      |      |      |      |      |      |       | 3      | 3      | 2     | 3     | 4     | 3 |
| 3289   |      |      |      |      |      |      |      |      |       | 3      | 3      | 3     | 5     | 5     | 5 |
| 3290   |      |      |      |      |      |      |      |      |       | 3      | 3      | 3     | 4     | 5     | 5 |
| 3291   |      |      |      |      |      |      |      |      |       | 3      | 2      | 3     | 5     | 4     | 5 |
| 3292   | 3    | 2    | 3    | 3    | 4    | 2    | 3    | 4    |       | 1      | 2      | 2     | 3     | 3     | 3 |
| 3293   |      |      |      |      |      |      |      |      |       | 2      | 3      | 2     | 3     | 4     | 4 |
| 3294   |      |      |      |      |      |      |      |      |       | 2      | 3      | 3     | 4     | 4     | 4 |
| 3296   | 3    | 5    | 2    | 5    | 5    | 5    | 5    | 2    |       | 3      | 3      | 3     | 5     | 5     | 5 |
| 3306   | 5    | 5    | 3    | 5    | 6    | 5    | 5    | 2    |       | 3      | 3      | 3     | 5     | 5     | 5 |
| 3307   | 4    | 3    | 1    | 4    | 6    | 3    | 4    | 3    |       | 2      | 2      | 2     | 3     | 4     | 3 |
| 3308   | 3    | 5    | 3    | 4    | 6    | 6    | 3    | 5    |       | 4      | 3      | 3     | 5     | 5     | 5 |
| 3312   |      |      |      |      |      |      |      |      |       | 4      | 3      | 3     | 5     | 5     | 5 |
| 3313   |      |      |      |      |      |      |      |      |       | 2      | 3      | 2     | 4     | 4     | 3 |
| 3316   |      |      |      |      |      |      |      |      |       | 2      | 2      | 2     | 4     | 4     | 5 |
| 3317   |      |      |      |      |      |      |      |      |       | 2      | 2      | 2     | 2     | 5     | 5 |
| 3320   |      |      |      |      |      |      |      |      |       | 2      | 3      | 2     | 4     | 4     | 4 |

| respid | Q48k | Q48l | Q48m | Q48n | Q48o | Q48p | Q48q | Q48r | Q49_1 | Q50a_1 | Q50b_1 | Q51_1 | Q51_2 | Q52_1 |   |
|--------|------|------|------|------|------|------|------|------|-------|--------|--------|-------|-------|-------|---|
| 3321   |      |      |      |      |      |      |      |      |       | 3      | 3      | 3     | 5     | 4     | 5 |
| 3322   |      |      |      |      |      |      |      |      |       | 3      | 3      | 3     | 5     | 5     | 5 |
| 3323   | 6    | 6    | 1    | 1    | 6    | 6    | 6    | 6    | 6     | 3      | 2      | 3     | 5     | 3     | 5 |
| 3325   |      |      |      |      |      |      |      |      |       | 2      | 2      | 2     | 2     | 3     | 3 |
| 3332   |      |      |      |      |      |      |      |      |       | 3      | 3      | 3     | 5     | 5     | 5 |
| 3334   |      |      |      |      |      |      |      |      |       | 3      | 3      | 3     | 5     | 5     | 5 |
| 3335   |      |      |      |      |      |      |      |      |       | 1      | 2      | 2     | 5     | 4     | 3 |
| 3341   |      |      |      |      |      |      |      |      |       | 4      | 3      | 3     | 4     | 4     | 3 |
| 3345   |      |      |      |      |      |      |      |      |       | 2      | 2      | 2     | 3     | 3     | 4 |
| 3346   |      |      |      |      |      |      |      |      |       | 3      | 2      | 2     | 4     | 4     | 4 |
| 3349   |      |      |      |      |      |      |      |      |       | 3      | 3      | 3     | 5     | 5     | 4 |
| 3351   | 5    | 6    | 2    | 6    | 6    | 5    | 6    | 2    | 2     | 3      | 3      | 3     | 5     | 5     | 5 |
| 3353   |      |      |      |      |      |      |      |      |       | 4      | 3      | 3     | 5     | 5     | 5 |
| 3354   | 2    | 5    | 5    | 2    | 5    | 2    | 5    | 5    | 5     | 3      | 2      | 2     | 5     | 5     | 5 |
| 3356   | 4    | 4    | 3    | 3    | 4    | 3    | 4    | 4    | 4     | 3      | 2      | 2     | 4     | 4     | 4 |
| 3357   | 3    | 3    | 6    | 5    | 5    | 6    | 3    | 4    | 4     | 2      | 3      | 3     | 4     | 4     | 4 |
| 3360   | 6    | 1    | 6    | 6    | 6    | 1    | 1    | 6    | 6     | 3      | 2      | 3     | 4     | 2     | 4 |
| 3361   |      |      |      |      |      |      |      |      |       | 2      | 2      | 3     | 5     | 4     | 5 |
| 3362   |      |      |      |      |      |      |      |      |       | 4      | 3      | 3     | 5     | 5     | 4 |
| 3363   |      |      |      |      |      |      |      |      |       | 2      | 2      | 3     | 4     | 3     | 4 |
| 3364   |      |      |      |      |      |      |      |      |       | 2      | 2      | 1     | 2     | 3     | 2 |
| 3368   |      |      |      |      |      |      |      |      |       | 2      | 3      | 2     | 3     | 3     | 4 |
| 3370   | 6    | 6    | 5    | 6    | 6    | 5    | 6    | 1    | 1     | 3      | 2      | 2     | 1     | 2     | 3 |
| 3371   |      |      |      |      |      |      |      |      |       | 2      | 3      | 3     | 5     | 5     | 5 |
| 3379   | 6    | 6    | 1    | 6    | 6    | 6    | 6    | 6    | 4     | 4      | 3      | 3     | 5     | 5     | 5 |
| 3380   |      |      |      |      |      |      |      |      |       | 3      | 3      | 3     | 3     | 4     | 4 |
| 3382   |      |      |      |      |      |      |      |      |       | 3      | 2      | 2     | 4     | 3     | 5 |
| 3384   |      |      |      |      |      |      |      |      |       | 2      | 2      | 2     | 3     | 3     | 4 |
| 3385   |      |      |      |      |      |      |      |      |       | 2      | 3      | 3     | 4     | 4     | 4 |
| 3388   |      |      |      |      |      |      |      |      |       | 4      | 3      | 3     | 5     | 5     | 5 |
| 3392   | 3    | 3    | 4    | 3    | 3    | 3    | 3    | 3    | 3     | 3      | 3      | 3     | 4     | 4     | 4 |
| 3393   | 6    | 6    |      | 6    | 6    | 6    | 6    | 6    |       | 2      | 3      | 3     | 5     | 5     | 5 |

| respid | Q48k | Q48l | Q48m | Q48n | Q48o | Q48p | Q48q | Q48r | Q49_1 | Q50a_1 | Q50b_1 | Q51_1 | Q51_2 | Q52_1 |   |
|--------|------|------|------|------|------|------|------|------|-------|--------|--------|-------|-------|-------|---|
| 3394   |      |      |      |      |      |      |      |      |       | 3      | 2      | 2     | 3     | 3     | 4 |
| 3395   |      |      |      |      |      |      |      |      |       | 3      | 3      | 3     | 4     | 5     | 4 |
| 3396   |      |      |      |      |      |      |      |      |       | 2      | 3      | 3     | 4     | 4     | 4 |
| 3397   |      |      |      |      |      |      |      |      |       | 2      | 3      | 3     | 5     | 5     | 4 |
| 3398   | 6    | 6    | 2    | 6    | 6    | 6    | 6    | 6    | 2     | 2      | 3      | 2     | 5     | 5     | 5 |
| 3399   |      |      |      |      |      |      |      |      |       | 1      | 3      | 3     | 3     | 3     | 3 |
| 3400   |      |      |      |      |      |      |      |      |       | 2      | 3      | 3     | 3     | 3     | 3 |
| 3401   |      |      |      |      |      |      |      |      |       | 3      | 2      | 3     | 1     | 2     | 2 |
| 3402   |      |      |      |      |      |      |      |      |       | 2      | 2      | 3     | 4     | 4     | 3 |
| 3403   |      |      |      |      |      |      |      |      |       | 2      | 2      | 3     | 4     | 4     | 4 |
| 3405   | 1    | 1    | 1    | 1    | 1    | 1    | 1    | 1    | 1     | 3      | 2      | 2     | 1     | 2     | 1 |
| 3407   |      |      |      |      |      |      |      |      |       | 3      | 2      | 2     | 3     | 3     | 3 |
| 3410   |      |      |      |      |      |      |      |      |       | 4      | 3      | 2     | 4     | 4     | 5 |
| 3411   | 6    | 6    | 3    | 5    | 6    | 5    | 5    | 5    | 3     | 2      | 2      | 2     | 3     | 3     | 4 |
| 3413   |      |      |      |      |      |      |      |      |       | 3      | 3      | 3     | 5     | 5     | 5 |
| 3414   | 6    | 5    | 2    | 6    | 6    | 6    | 6    | 6    | 3     | 3      | 3      | 3     | 5     | 5     | 5 |
| 3420   | 6    | 6    | 1    | 5    | 6    | 6    | 6    | 6    | 1     | 4      | 3      | 2     | 5     | 5     | 5 |
| 3421   | 6    | 6    | 1    | 6    | 6    | 6    | 6    | 6    | 1     | 1      | 2      | 2     | 3     | 4     | 4 |
| 3425   |      |      |      |      |      |      |      |      |       | 3      | 3      | 3     | 5     | 2     | 5 |
| 3426   |      |      |      |      |      |      |      |      |       | 2      | 2      | 2     | 4     | 3     | 3 |
| 3429   | 1    | 1    | 1    | 1    | 6    | 1    | 6    | 6    | 6     | 2      | 1      | 1     | 2     | 2     | 2 |
| 3430   |      |      |      |      |      |      |      |      |       | 2      | 2      | 2     | 2     | 3     | 2 |
| 3433   | 6    | 1    |      | 6    | 6    | 6    | 6    | 6    | 6     | 3      | 2      | 3     | 4     | 4     | 4 |
| 3434   |      |      |      |      |      |      |      |      |       | 2      | 2      | 2     | 3     | 3     | 3 |
| 3437   |      |      |      |      |      |      |      |      |       | 2      | 3      | 3     | 3     | 3     | 3 |
| 3439   |      |      |      |      |      |      |      |      |       | 2      | 2      | 3     | 5     | 4     | 4 |
| 3441   |      |      |      |      |      |      |      |      |       | 2      | 3      | 3     | 2     | 3     | 2 |
| 3442   | 3    | 3    | 3    | 3    | 3    | 3    | 3    | 3    | 3     | 2      | 3      | 2     | 2     | 3     | 3 |
| 3444   | 5    | 5    | 2    | 5    | 5    | 5    | 5    | 5    | 2     | 2      | 3      | 3     | 4     | 5     | 5 |
| 3445   | 6    | 6    | 1    | 6    | 6    | 6    | 6    | 6    | 1     | 4      | 3      | 3     | 4     | 4     | 4 |
| 3450   |      |      |      |      |      |      |      |      |       | 3      | 2      | 3     | 4     | 3     | 4 |
| 3452   | 1    | 6    | 3    | 5    | 6    | 6    | 6    | 1    | 6     | 1      | 1      | 2     | 4     | 3     | 5 |

| respid | Q48k | Q48l | Q48m | Q48n | Q48o | Q48p | Q48q | Q48r | Q49_1 | Q50a_1 | Q50b_1 | Q51_1 | Q51_2 | Q52_1 |   |
|--------|------|------|------|------|------|------|------|------|-------|--------|--------|-------|-------|-------|---|
| 3456   |      |      |      |      |      |      |      |      |       | 4      | 2      | 3     | 5     | 5     | 5 |
| 3459   |      |      |      |      |      |      |      |      |       | 4      | 3      | 3     | 5     | 5     | 5 |
| 3460   |      |      |      |      |      |      |      |      |       | 3      | 3      | 3     | 5     | 5     | 5 |
| 3461   | 6    | 6    | 3    | 6    | 6    | 6    | 6    | 5    | 4     | 2      | 2      | 2     | 3     | 4     | 4 |
| 3466   |      |      |      |      |      |      |      |      |       | 2      | 2      | 2     | 3     | 3     | 3 |
| 3471   |      |      |      |      |      |      |      |      |       | 2      | 3      | 3     | 5     | 5     | 4 |
| 3473   |      |      |      |      |      |      |      |      |       | 4      | 3      | 3     | 5     | 5     | 5 |
| 3475   | 4    | 5    | 3    | 4    | 4    | 3    | 4    | 4    | 4     | 3      | 2      | 2     | 2     | 3     | 3 |
| 3476   |      |      |      |      |      |      |      |      |       | 4      | 3      | 3     | 5     | 5     | 4 |
| 3477   |      |      |      |      |      |      |      |      |       | 2      | 2      | 2     | 3     | 2     | 3 |
| 3478   |      |      |      |      |      |      |      |      |       | 4      | 3      | 3     | 5     | 5     | 5 |
| 3479   | 3    | 4    | 4    | 3    | 5    | 3    | 4    | 3    | 3     | 2      | 3      | 3     | 4     | 4     | 4 |
| 3482   |      |      |      |      |      |      |      |      |       | 2      | 3      | 2     | 4     | 4     | 3 |
| 3483   |      |      |      |      |      |      |      |      |       | 2      | 3      | 2     | 3     | 3     | 3 |
| 3485   | 6    | 5    | 1    | 6    | 6    | 6    | 6    | 5    | 4     | 3      | 3      | 3     | 5     | 5     | 4 |
| 3489   |      |      |      |      |      |      |      |      |       | 4      | 3      | 3     | 5     | 5     | 5 |
| 3490   | 4    | 4    | 3    | 4    | 4    | 3    | 4    | 3    | 3     | 3      | 3      | 3     | 4     | 4     | 4 |
| 3491   | 5    | 6    | 1    | 5    | 6    | 5    | 6    | 6    | 2     | 2      | 2      | 3     | 4     | 4     | 3 |
| 3494   | 5    | 5    |      |      | 5    | 5    | 5    | 5    |       | 3      | 2      | 2     | 4     | 4     | 4 |
| 3495   | 6    | 6    | 3    | 6    | 6    | 6    | 6    | 6    | 6     | 2      | 3      | 3     | 3     | 3     | 3 |
| 3501   |      |      |      |      |      |      |      |      |       | 3      | 3      | 3     | 5     | 5     | 5 |
| 3506   |      |      |      |      |      |      |      |      |       | 4      | 3      | 3     | 4     | 4     | 5 |
| 3507   |      |      |      |      |      |      |      |      |       | 4      | 3      | 3     | 5     | 5     | 5 |
| 3517   |      |      |      |      |      |      |      |      |       | 3      | 2      | 3     | 5     | 5     | 5 |
| 3520   | 1    | 1    | 6    | 6    | 6    | 6    | 6    | 1    | 6     | 4      | 3      | 3     | 5     | 5     | 5 |
| 3521   |      |      |      |      |      |      |      |      |       | 3      | 3      | 3     | 4     | 5     | 5 |
| 3522   | 5    | 5    | 3    | 3    | 5    | 5    | 5    | 5    | 3     | 3      | 3      | 3     | 3     | 4     | 5 |
| 3524   |      |      |      |      |      |      |      |      |       | 3      | 2      | 2     | 2     | 3     | 2 |
| 3527   |      |      |      |      |      |      |      |      |       | 4      | 3      | 3     | 5     | 5     | 5 |
| 3528   |      |      |      |      |      |      |      |      |       | 4      | 3      | 3     | 4     | 4     | 4 |
| 3529   |      |      |      |      |      |      |      |      |       | 2      | 3      | 3     | 5     | 4     | 5 |
| 3536   | 5    | 6    | 2    | 6    | 6    | 5    | 6    | 6    | 3     | 2      | 2      | 2     | 3     | 3     | 3 |

| respid | Q48k | Q48l | Q48m | Q48n | Q48o | Q48p | Q48q | Q48r | Q49_1 | Q50a_1 | Q50b_1 | Q51_1 | Q51_2 | Q52_1 |   |
|--------|------|------|------|------|------|------|------|------|-------|--------|--------|-------|-------|-------|---|
| 3537   |      |      |      |      |      |      |      |      |       | 3      | 3      | 2     | 4     | 4     | 4 |
| 3538   |      |      |      |      |      |      |      |      |       | 2      | 3      | 3     | 4     | 4     | 4 |
| 3540   | 3    | 4    | 3    | 4    | 3    | 4    | 3    | 4    | 4     | 2      | 2      | 2     | 4     | 3     | 3 |
| 3545   |      |      |      |      |      |      |      |      |       | 3      | 2      | 3     | 5     | 5     | 5 |
| 3547   |      |      |      |      |      |      |      |      |       | 2      | 2      | 2     | 4     | 4     | 4 |
| 3554   | 3    | 3    | 3    | 3    | 4    | 2    | 2    | 4    | 4     | 2      | 2      | 2     | 5     | 4     | 4 |
| 3556   |      |      |      |      |      |      |      |      |       | 2      | 2      | 2     | 3     | 3     | 3 |
| 3557   |      |      |      |      |      |      |      |      |       | 3      | 3      | 3     | 5     | 5     | 5 |
| 3559   | 3    | 3    | 3    | 3    | 3    | 3    | 3    | 3    | 3     | 2      | 3      | 2     | 4     | 4     | 4 |
| 3560   |      |      |      |      |      |      |      |      |       | 3      | 3      | 3     | 5     | 5     | 5 |
| 3562   |      |      |      |      |      |      |      |      |       | 3      | 3      | 3     | 4     | 4     | 5 |
| 3564   | 2    | 2    | 5    | 2    | 3    | 3    | 2    | 5    | 5     | 2      | 2      | 3     | 3     | 3     | 5 |
| 3565   | 2    | 2    | 3    | 2    | 2    | 2    | 2    | 3    | 5     | 1      | 2      | 2     | 4     | 3     | 3 |
| 3568   |      |      |      |      |      |      |      |      |       | 3      | 3      | 3     | 4     | 4     | 4 |
| 3572   |      |      |      |      |      |      |      |      |       | 2      | 3      | 3     | 5     | 5     | 5 |
| 3578   |      |      |      |      |      |      |      |      |       | 3      | 2      | 3     | 4     | 4     | 4 |
| 3581   | 2    | 2    | 5    | 5    | 5    | 3    | 2    | 5    | 5     | 3      | 2      | 3     | 3     | 4     | 3 |
| 3583   | 6    | 6    | 4    | 6    | 6    | 3    | 6    | 3    | 3     | 2      | 3      | 1     | 1     | 1     | 1 |
| 3588   |      |      |      |      |      |      |      |      |       | 3      | 3      | 3     | 5     | 5     | 5 |
| 3591   |      |      |      |      |      |      |      |      |       | 4      | 3      | 3     | 5     | 5     | 5 |
| 3594   |      |      |      |      |      |      |      |      |       | 4      | 3      | 3     | 4     | 5     | 5 |
| 3595   |      |      |      |      |      |      |      |      |       | 3      | 3      | 3     | 5     | 5     | 5 |
| 3596   | 6    | 6    | 2    | 6    | 6    | 5    | 6    | 3    | 3     | 2      | 2      | 2     | 3     | 3     | 3 |
| 3597   |      |      |      |      |      |      |      |      |       | 2      | 3      | 3     | 4     | 4     | 4 |
| 3598   |      |      |      |      |      |      |      |      |       | 3      | 3      | 3     | 5     | 5     | 5 |
| 3600   | 1    |      | 2    | 2    | 3    | 6    | 6    | 6    | 6     | 3      | 3      | 3     | 4     | 5     | 2 |
| 3602   | 6    | 6    | 3    | 5    | 6    | 6    | 6    | 6    | 3     | 2      | 3      | 3     | 5     | 5     | 4 |
| 3604   |      |      |      |      |      |      |      |      |       | 5      | 3      | 3     | 5     | 5     | 5 |
| 3605   |      |      |      |      |      |      |      |      |       | 2      | 2      | 2     | 2     | 2     | 2 |
| 3606   |      |      |      |      |      |      |      |      |       | 4      | 3      | 3     | 4     | 5     | 4 |
| 3607   |      |      |      |      |      |      |      |      |       | 3      | 3      | 3     | 4     | 5     | 4 |
| 3610   |      |      |      |      |      |      |      |      |       | 3      | 3      | 3     | 5     | 5     | 5 |

| respid | Q48k | Q48l | Q48m | Q48n | Q48o | Q48p | Q48q | Q48r | Q49_1 | Q50a_1 | Q50b_1 | Q51_1 | Q51_2 | Q52_1 |   |
|--------|------|------|------|------|------|------|------|------|-------|--------|--------|-------|-------|-------|---|
| 3611   |      |      |      |      |      |      |      |      |       | 3      | 3      | 3     | 5     | 5     | 5 |
| 3612   |      |      |      |      |      |      |      |      |       | 4      | 3      | 3     | 5     | 5     | 5 |
| 3614   | 6    | 6    | 1    | 6    | 6    |      |      | 6    |       | 3      | 2      | 2     | 5     | 5     | 5 |
| 3616   |      |      |      |      |      |      |      |      |       | 4      | 3      | 3     | 5     | 5     | 4 |
| 3617   | 5    | 5    | 3    | 4    | 5    |      | 4    | 5    | 2     | 3      | 3      | 3     | 5     | 5     | 5 |
| 3618   |      |      |      |      |      |      |      |      |       | 3      | 3      | 3     | 5     | 5     | 5 |
| 3619   | 6    | 6    | 2    | 6    | 6    |      | 5    | 5    | 4     | 1      | 2      | 2     | 4     | 3     | 3 |
| 3621   |      |      |      |      |      |      |      |      |       | 3      | 3      | 3     | 4     | 5     | 3 |
| 3622   |      |      |      |      |      |      | 3    | 6    | 2     | 3      | 2      | 3     | 5     | 5     | 5 |
| 3624   |      |      |      |      |      |      |      |      |       | 2      | 2      | 3     | 5     | 5     | 5 |
| 3626   |      |      |      |      |      |      |      |      |       | 4      | 3      | 3     | 5     | 5     | 5 |
| 3629   | 6    | 6    | 1    | 6    | 6    |      | 6    | 6    | 1     | 4      | 3      | 3     | 5     | 5     | 5 |
| 3631   |      |      |      |      |      |      |      |      |       | 4      | 2      | 2     | 5     | 5     | 5 |
| 3632   |      |      |      |      |      |      |      |      |       | 3      | 3      | 3     | 4     | 4     | 4 |
| 3638   |      |      |      |      |      |      |      |      |       | 4      | 3      | 3     | 4     | 5     | 4 |
| 3640   | 2    | 2    | 5    | 2    | 4    |      | 2    | 2    | 5     | 3      | 3      | 2     | 5     | 5     | 5 |
| 3641   | 4    | 4    | 4    | 3    | 5    |      | 4    | 5    | 3     | 3      | 2      | 2     | 4     | 5     | 4 |
| 3645   |      |      |      |      |      |      |      |      |       | 2      | 2      | 2     | 4     | 4     | 4 |
| 3650   |      |      |      |      |      |      |      |      |       | 2      | 3      | 3     | 5     | 5     | 5 |
| 3653   |      |      |      |      |      |      |      |      |       | 3      | 3      | 3     | 5     | 5     | 3 |
| 3655   |      |      |      |      |      |      |      |      |       | 2      | 3      | 3     | 3     | 3     | 3 |
| 3657   | 4    | 5    | 4    | 3    | 3    |      | 3    | 3    | 3     | 3      | 3      | 3     | 4     | 5     | 5 |
| 3658   | 4    | 3    | 3    | 2    | 3    |      | 2    | 2    | 3     | 3      | 2      | 2     | 4     | 4     | 5 |
| 3659   | 5    | 5    | 2    | 5    | 5    |      | 5    | 5    | 2     | 3      | 3      | 3     | 5     | 5     | 5 |
| 3664   |      |      |      |      |      |      |      |      |       | 1      | 2      | 2     | 3     | 3     | 3 |
| 3665   |      |      |      |      |      |      |      |      |       | 2      | 3      | 3     | 4     | 4     | 5 |
| 3667   |      |      |      |      |      |      |      |      |       | 4      | 3      | 3     | 5     | 5     | 5 |
| 3668   |      |      |      |      |      |      |      |      |       | 4      | 3      | 2     | 2     | 3     | 1 |
| 3675   |      |      |      |      |      |      |      |      |       | 4      | 3      | 3     | 5     | 4     | 3 |
| 3678   |      |      |      |      |      |      |      |      |       | 4      | 3      | 3     | 5     | 5     | 5 |
| 3680   |      |      |      |      |      |      |      |      |       | 3      | 3      | 3     | 3     | 3     | 3 |
| 3684   |      |      |      |      |      |      |      |      |       | 2      | 3      | 3     | 4     | 4     | 4 |

| respid | Q48k | Q48l | Q48m | Q48n | Q48o | Q48p | Q48q | Q48r | Q49_1 | Q50a_1 | Q50b_1 | Q51_1 | Q51_2 | Q52_1 |   |
|--------|------|------|------|------|------|------|------|------|-------|--------|--------|-------|-------|-------|---|
| 3685   | 2    | 5    | 5    | 5    | 5    | 5    | 5    | 5    | 5     | 3      | 3      | 3     | 5     | 5     | 5 |
| 3687   |      |      |      |      |      |      |      |      |       | 3      | 3      | 3     | 4     | 4     | 3 |
| 3689   |      |      |      |      |      |      |      |      |       | 2      | 2      | 2     | 4     | 3     | 3 |
| 3690   |      |      |      |      |      |      |      |      |       | 3      | 2      | 1     | 1     | 2     | 3 |
| 3693   |      |      |      |      |      |      |      |      |       | 4      | 3      | 3     | 5     | 5     | 5 |
| 3694   | 6    | 6    | 2    | 6    | 6    | 6    | 6    | 2    | 4     | 4      | 3      | 3     | 5     | 5     | 5 |
| 3695   |      |      |      |      |      |      |      |      |       | 4      | 3      | 3     | 5     | 5     | 5 |
| 3700   | 6    | 6    | 3    | 6    | 6    | 6    | 6    | 1    | 4     | 4      | 3      | 3     | 4     | 4     | 5 |
| 3701   |      |      |      |      |      |      |      |      |       | 3      | 3      | 3     | 5     | 5     | 5 |
| 3703   | 6    | 6    | 2    | 6    | 6    | 6    | 6    | 1    | 4     | 4      | 3      | 3     | 5     | 4     | 4 |
| 3704   | 5    | 6    | 1    | 6    | 6    | 6    | 6    | 4    | 1     | 1      | 2      | 2     | 3     | 3     | 3 |
| 3705   |      |      |      |      |      |      |      |      |       | 4      | 3      | 3     | 5     | 5     | 5 |
| 3709   |      |      |      |      |      |      |      |      |       | 4      | 2      | 3     | 4     | 3     | 4 |
| 3710   |      |      |      |      |      |      |      |      |       | 3      | 3      | 3     | 5     | 5     | 5 |
| 3722   |      |      |      |      |      |      |      |      |       | 2      | 3      | 3     | 5     | 5     | 5 |
| 3725   |      |      |      |      |      |      |      |      |       | 3      | 3      | 3     | 5     | 5     | 3 |
| 3726   | 6    | 6    | 1    | 6    | 6    | 6    | 6    | 1    | 4     | 4      | 3      | 3     | 4     | 4     | 4 |
| 3727   | 2    | 4    | 3    | 5    | 6    | 2    | 1    | 6    | 2     | 2      | 3      | 3     | 4     | 5     | 4 |
| 3728   | 3    | 3    | 3    | 4    | 5    | 5    | 4    | 3    | 3     | 3      | 3      | 3     | 2     | 3     | 2 |
| 3729   |      |      |      |      |      |      |      |      |       | 4      | 3      | 3     | 5     | 5     | 5 |
| 3731   |      |      |      |      |      |      |      |      |       | 4      | 3      | 3     | 5     | 5     | 5 |
| 3738   | 6    | 6    | 6    | 6    | 6    | 6    | 6    | 6    | 6     | 3      | 3      | 3     | 3     | 3     | 3 |
| 3739   | 6    | 6    | 2    | 6    | 6    | 6    | 6    | 2    | 4     | 4      | 3      | 3     | 5     | 5     | 5 |
| 3740   |      |      |      |      |      |      |      |      |       | 3      | 3      | 3     | 4     | 5     | 4 |
| 3749   |      |      |      |      |      |      |      |      |       | 2      | 2      | 2     | 3     | 3     | 3 |
| 3758   |      |      |      |      |      |      |      |      |       | 2      | 2      | 2     | 3     | 4     | 3 |
| 3762   |      |      |      |      |      |      |      |      |       | 2      | 3      | 3     | 5     | 5     | 4 |
| 3765   | 4    | 6    | 2    | 3    | 6    | 3    | 6    | 3    | 3     | 2      | 3      | 3     | 4     | 4     | 5 |
| 3770   |      |      |      |      |      |      |      |      |       | 4      | 3      | 3     | 5     | 5     | 5 |
| 3771   |      |      |      |      |      |      |      |      |       | 2      | 3      | 2     | 4     | 5     | 4 |
| 3778   | 6    | 6    | 2    | 6    | 6    | 6    | 6    | 2    | 4     | 4      | 3      | 3     | 5     | 5     | 5 |
| 3779   |      |      |      |      |      |      |      |      |       | 3      | 3      | 3     | 3     | 3     | 3 |

| respid | Q48k | Q48l | Q48m | Q48n | Q48o | Q48p | Q48q | Q48r | Q49_1 | Q50a_1 | Q50b_1 | Q51_1 | Q51_2 | Q52_1 |   |
|--------|------|------|------|------|------|------|------|------|-------|--------|--------|-------|-------|-------|---|
| 3780   |      |      |      |      |      |      |      |      |       | 3      | 3      | 3     | 5     | 5     | 5 |
| 3782   | 4    | 4    | 4    | 4    | 4    | 4    | 4    | 4    | 4     | 3      | 3      | 3     | 5     | 5     | 5 |
| 3784   |      |      |      |      |      |      |      |      |       | 3      | 3      | 3     | 4     | 5     | 4 |
| 3787   | 3    | 3    | 5    | 4    | 4    | 4    | 4    | 4    | 4     | 3      | 3      | 3     | 5     | 5     | 5 |
| 3790   |      |      |      |      |      |      |      |      |       | 2      | 3      | 3     | 3     | 4     | 4 |
| 3791   |      |      |      |      |      |      |      |      |       | 2      | 2      | 3     | 3     | 3     | 4 |
| 3793   |      |      |      |      |      |      |      |      |       | 3      | 3      | 3     | 5     | 5     | 5 |
| 3795   | 2    | 6    | 1    | 6    | 6    | 6    | 6    | 6    | 1     | 5      | 3      | 3     | 5     | 5     | 5 |
| 3799   |      |      |      |      |      |      |      |      |       | 5      | 3      | 3     | 5     | 5     | 5 |
| 3801   |      |      |      |      |      |      |      |      |       | 2      | 2      | 2     | 3     | 4     | 3 |
| 3804   |      |      |      |      |      |      |      |      |       | 2      | 3      | 3     | 4     | 4     | 5 |
| 3809   | 4    | 4    | 3    | 4    | 4    | 4    | 4    | 3    | 3     | 4      | 2      | 3     | 5     | 5     | 5 |
| 3810   | 5    | 4    | 3    | 3    | 5    | 3    | 5    | 3    | 3     | 2      | 3      | 3     | 4     | 3     | 3 |
| 3813   |      |      |      |      |      |      |      |      |       | 3      | 3      | 3     | 4     | 5     | 4 |
| 3816   | 6    | 6    | 3    | 6    | 6    | 6    | 6    | 3    | 3     | 1      | 1      | 2     | 4     | 3     | 4 |
| 3820   | 6    | 6    | 4    | 3    | 6    | 4    | 6    | 5    | 5     | 2      | 2      | 3     | 5     | 5     | 5 |
| 3821   |      |      |      |      |      |      |      |      |       | 3      | 3      | 3     | 5     | 5     | 5 |
| 3823   | 1    | 2    | 1    | 2    | 3    | 2    | 2    | 2    | 4     | 1      | 2      | 1     | 3     | 2     | 3 |
| 3828   | 4    | 4    | 4    | 4    | 4    | 4    | 4    | 4    | 4     | 2      | 3      | 3     | 4     | 4     | 3 |
| 3829   |      |      |      |      |      |      |      |      |       | 4      | 3      | 3     | 5     | 5     | 4 |
| 3832   | 5    | 5    | 3    | 5    | 5    | 5    | 5    | 3    | 3     | 4      | 3      | 3     | 4     | 4     | 4 |
| 3835   | 6    | 6    | 3    | 6    | 5    | 6    | 5    | 6    | 6     | 3      | 3      | 3     | 5     | 5     | 5 |
| 3837   | 6    | 5    | 4    | 3    | 4    | 5    | 3    | 3    | 3     | 4      | 2      | 2     | 4     | 5     | 4 |
| 3838   | 3    | 4    | 3    | 4    | 4    | 3    | 3    | 3    | 3     | 3      | 3      | 3     | 5     | 5     | 5 |
| 3839   |      |      |      |      |      |      |      |      |       | 1      | 1      | 1     | 2     | 2     | 2 |
| 3840   |      |      |      |      |      |      |      |      |       | 3      | 3      | 3     | 5     | 5     | 5 |
| 3842   |      |      |      |      |      |      |      |      |       | 3      | 3      | 3     | 5     | 5     | 5 |
| 3843   | 6    | 6    | 2    | 6    | 6    | 6    | 3    | 2    | 2     | 3      | 3      | 3     | 5     | 5     | 5 |
| 3844   | 6    | 6    | 1    | 6    | 6    | 6    | 6    | 6    | 4     | 3      | 3      | 2     | 4     | 4     | 4 |
| 3850   |      |      |      |      |      |      |      |      |       | 3      | 3      | 3     | 4     | 4     | 4 |
| 3851   |      |      |      |      |      |      |      |      |       | 3      | 3      | 3     | 5     | 5     | 5 |
| 3856   |      |      |      |      |      |      |      |      |       | 2      | 2      | 2     | 3     | 3     | 4 |



| respid | Q48k | Q48l | Q48m | Q48n | Q48o | Q48p | Q48q | Q48r | Q49_1 | Q50a_1 | Q50b_1 | Q51_1 | Q51_2 | Q52_1 |   |
|--------|------|------|------|------|------|------|------|------|-------|--------|--------|-------|-------|-------|---|
| 3859   |      |      |      |      |      |      |      |      |       | 2      | 2      | 2     | 4     | 4     | 4 |
| 3860   |      |      |      |      |      |      |      |      |       | 4      | 3      | 3     | 5     | 5     | 5 |
| 3863   |      |      |      |      |      |      |      |      |       | 4      | 3      | 3     | 4     | 4     | 4 |
| 3866   |      |      |      |      |      |      |      |      |       | 2      | 3      | 3     | 5     | 5     | 5 |
| 3867   |      |      |      |      |      |      |      |      |       | 3      | 3      | 3     | 5     | 5     | 4 |
| 3870   |      |      |      |      |      |      |      |      |       | 3      | 3      | 3     | 5     | 5     | 5 |
| 3873   | 1    | 3    | 2    | 1    | 5    | 4    | 5    | 5    | 2     | 2      | 2      | 1     | 1     | 2     | 2 |
| 3875   |      |      |      |      |      |      |      |      |       | 2      | 3      | 3     | 3     | 3     | 4 |
| 3878   | 6    | 6    | 2    | 5    | 6    | 6    | 6    | 2    | 2     | 2      | 3      | 2     | 5     | 5     | 5 |
| 3881   | 2    | 4    | 3    | 1    | 6    | 6    | 6    | 5    | 4     | 4      | 3      | 2     | 5     | 5     | 5 |
| 3883   |      |      |      |      |      |      |      |      |       | 2      | 2      | 2     | 3     | 2     | 2 |
| 3884   |      |      |      |      |      |      |      |      |       | 3      | 3      | 3     | 4     | 4     | 4 |
| 3885   |      |      |      |      |      |      |      |      |       | 1      | 2      | 2     | 3     | 3     | 3 |
| 3886   | 2    | 3    | 4    | 2    | 5    | 3    | 2    | 5    | 2     | 2      | 2      | 2     | 3     | 4     | 3 |
| 3887   |      |      |      |      |      |      |      |      |       | 3      | 3      | 3     | 5     | 5     | 3 |
| 3888   |      |      |      |      |      |      |      |      |       | 2      | 3      | 3     | 5     | 5     | 5 |
| 3889   | 6    | 5    | 1    | 5    | 6    | 5    | 5    | 2    | 2     | 2      | 1      | 1     | 3     | 3     | 3 |
| 3890   |      |      |      |      |      |      |      |      |       | 5      | 1      | 1     | 2     | 2     | 3 |
| 3896   | 5    | 5    | 4    | 5    | 5    | 5    | 5    | 4    | 3     | 3      | 3      | 3     | 5     | 5     | 5 |
| 3902   | 6    | 6    | 1    | 6    | 6    | 6    | 6    | 6    | 1     | 1      | 2      | 1     | 2     | 3     | 2 |
| 3909   | 3    | 3    | 6    | 3    | 5    | 3    | 3    | 3    | 6     | 2      | 3      | 3     | 5     | 5     | 5 |
| 3912   |      |      |      |      |      |      |      |      |       | 2      | 3      | 3     | 4     | 5     | 4 |
| 3922   |      |      |      |      |      |      |      |      |       | 4      | 3      | 3     | 5     | 5     | 5 |
| 3928   | 5    | 5    | 2    | 3    | 5    | 3    | 5    | 2    | 4     | 4      | 3      | 3     | 5     | 5     | 4 |
| 3930   |      |      |      |      |      |      |      |      |       | 3      | 3      | 3     | 5     | 5     | 5 |
| 3931   | 5    | 5    | 2    | 5    | 6    | 5    | 5    | 3    | 3     | 3      | 2      | 2     | 2     | 3     | 3 |
| 3933   |      |      |      |      |      |      |      |      |       | 2      | 3      | 2     | 3     | 3     | 2 |
| 3935   | 4    | 4    | 4    | 4    | 4    | 4    | 4    | 4    | 4     | 3      | 3      | 3     | 2     | 2     | 5 |
| 3937   | 6    | 6    | 1    | 5    | 6    | 6    | 6    | 6    | 1     | 4      | 2      | 2     | 5     | 5     | 5 |
| 3939   |      |      |      |      |      |      |      |      |       | 4      | 3      | 3     | 5     | 5     | 5 |
| 3942   |      |      |      |      |      |      |      |      |       | 3      | 3      | 3     | 5     | 5     | 5 |
| 3943   | 6    | 6    | 3    | 5    | 5    | 5    | 5    | 5    | 3     | 2      | 2      | 3     | 4     | 4     | 4 |

| respid | Q48k | Q48l | Q48m | Q48n | Q48o | Q48p | Q48q | Q48r | Q49_1 | Q50a_1 | Q50b_1 | Q51_1 | Q51_2 | Q52_1 |   |
|--------|------|------|------|------|------|------|------|------|-------|--------|--------|-------|-------|-------|---|
| 3944   |      |      |      |      |      |      |      |      |       | 3      | 3      | 3     | 4     | 4     | 4 |
| 3945   |      |      |      |      |      |      |      |      |       | 4      | 3      | 2     | 4     | 4     | 5 |
| 3947   |      |      |      |      |      |      |      |      |       | 3      | 3      | 3     | 3     | 5     | 4 |
| 3948   |      |      |      |      |      |      |      |      |       | 3      | 3      | 2     | 4     | 5     | 4 |
| 3951   |      |      |      |      |      |      |      |      |       | 3      | 2      | 2     | 3     | 3     | 3 |
| 3959   |      |      |      |      |      |      |      |      |       | 2      | 3      | 3     | 5     | 5     | 5 |
| 3969   |      |      |      |      |      |      |      |      |       | 2      | 1      | 2     | 2     | 2     | 3 |
| 3973   |      |      |      |      |      |      |      |      |       | 2      | 3      | 2     | 5     | 5     | 5 |
| 3975   |      |      |      |      |      |      |      |      |       | 3      | 2      | 2     | 2     | 2     | 3 |
| 3976   |      |      |      |      |      |      |      |      |       | 2      | 3      | 3     | 5     | 5     | 3 |
| 3977   |      |      |      |      |      |      |      |      |       | 3      | 3      | 3     | 5     | 5     | 5 |
| 3978   | 6    | 6    | 2    | 6    | 6    | 6    | 6    | 6    | 2     | 3      | 2      | 2     | 4     | 4     | 4 |
| 3994   |      |      |      |      |      |      |      |      |       | 2      | 3      | 3     | 4     | 4     | 4 |
| 3995   |      |      | 3    |      |      |      | 3    |      |       | 1      | 2      | 2     | 5     | 5     | 5 |
| 3997   |      |      |      |      |      |      |      |      |       | 3      | 3      | 2     | 5     | 4     | 5 |
| 3998   |      |      |      |      |      |      |      |      |       | 3      | 3      | 3     | 5     | 5     | 4 |
| 3999   | 5    | 5    | 5    | 5    | 5    | 5    | 5    | 5    | 5     | 3      | 3      | 3     | 4     | 4     | 2 |
| 4002   | 5    | 5    | 2    | 4    | 6    | 5    | 5    | 5    | 4     | 2      | 3      | 3     | 2     | 4     | 4 |
| 4004   |      |      |      |      |      |      |      |      |       | 3      | 3      | 3     | 4     | 4     | 5 |
| 4005   |      |      |      |      |      |      |      |      |       | 3      | 3      | 3     | 5     | 5     | 5 |
| 4006   |      |      |      |      |      |      |      |      |       | 3      | 2      | 2     | 2     | 3     | 3 |
| 4008   |      |      |      |      |      |      |      |      |       | 3      | 2      | 3     | 5     | 5     | 5 |
| 4010   |      |      |      |      |      |      |      |      |       | 3      | 3      | 3     | 4     | 4     | 5 |
| 4011   |      |      |      |      |      |      |      |      |       | 2      | 2      | 2     | 2     | 3     | 3 |
| 4013   |      |      |      |      |      |      |      |      |       | 3      | 3      | 3     | 5     | 5     | 5 |
| 4014   |      |      |      |      |      |      |      |      |       | 4      | 3      | 3     | 5     | 5     | 5 |
| 4016   |      |      |      |      |      |      |      |      |       | 2      | 3      | 3     | 5     | 5     | 5 |
| 4017   |      |      |      |      |      |      |      |      |       | 2      | 1      | 1     | 5     | 1     | 4 |
| 4019   |      |      |      |      |      |      |      |      |       | 4      | 3      | 3     | 5     | 5     | 5 |
| 4021   |      |      |      |      |      |      |      |      |       | 4      | 3      | 3     | 5     | 5     | 5 |
| 4023   | 4    | 6    | 1    | 3    | 6    | 2    | 4    | 4    | 4     | 1      | 2      | 1     | 4     | 2     | 4 |
| 4024   | 5    | 6    | 5    | 5    | 6    | 6    | 6    | 5    | 3     | 3      | 2      | 2     | 3     | 5     | 5 |

| respid | Q48k | Q48l | Q48m | Q48n | Q48o | Q48p | Q48q | Q48r | Q49_1 | Q50a_1 | Q50b_1 | Q51_1 | Q51_2 | Q52_1 |   |
|--------|------|------|------|------|------|------|------|------|-------|--------|--------|-------|-------|-------|---|
| 4025   | 6    | 6    | 1    | 6    | 6    | 6    | 5    | 6    | 3     | 3      | 2      | 2     | 3     | 4     | 3 |
| 4027   |      |      |      |      |      |      |      |      |       | 3      | 3      | 3     | 3     | 3     | 3 |
| 4032   |      |      |      |      |      |      |      |      |       | 3      | 3      | 3     | 4     | 4     | 4 |
| 4034   |      |      |      |      |      |      |      |      |       | 3      | 3      | 3     | 5     | 5     | 4 |
| 4035   |      |      |      |      |      |      |      |      |       | 2      | 3      | 3     | 4     | 4     | 4 |
| 4037   |      |      |      |      |      |      |      |      |       | 1      | 1      | 2     | 2     | 3     | 2 |
| 4040   | 3    | 3    | 4    | 4    | 4    | 3    | 4    | 4    | 4     | 3      | 3      | 3     | 4     | 4     | 3 |
| 4041   |      |      |      |      |      |      |      |      |       | 2      | 3      | 3     | 5     | 5     | 5 |
| 4042   | 2    | 4    | 6    | 1    | 3    | 6    | 3    | 6    | 6     | 3      | 3      | 2     | 3     | 3     | 3 |
| 4043   | 1    | 1    | 6    | 1    | 6    | 6    | 6    |      | 6     | 2      | 3      | 2     | 3     | 3     | 2 |
| 4045   | 6    | 6    | 6    | 5    | 6    | 2    | 5    | 4    | 4     | 3      | 2      | 2     | 3     | 4     | 3 |
| 4046   |      |      |      |      |      |      |      |      |       | 3      | 3      | 3     | 5     | 5     | 4 |
| 4048   | 6    | 6    | 1    | 5    | 6    | 4    | 6    | 2    | 2     | 2      | 2      | 2     | 2     | 3     | 4 |
| 4049   |      |      |      |      |      |      |      |      |       | 4      | 3      | 3     | 5     | 5     | 5 |
| 4050   | 3    | 5    | 4    | 3    | 6    | 6    | 6    | 3    | 3     | 3      | 2      | 3     | 4     | 4     | 2 |
| 4052   |      |      |      |      |      |      |      |      |       | 3      | 3      | 3     | 5     | 5     | 5 |
| 4053   |      |      |      |      |      |      |      |      |       | 3      | 3      | 3     | 5     | 5     | 5 |
| 4060   |      |      |      |      |      |      |      |      |       | 3      | 3      | 3     | 5     | 5     | 4 |
| 4065   |      |      |      |      |      |      |      |      |       | 2      | 2      | 2     | 3     | 3     | 3 |
| 4066   | 6    | 6    | 6    | 3    | 6    | 6    | 6    | 6    | 4     | 2      | 2      | 2     | 4     | 4     | 4 |
| 4067   |      |      |      |      |      |      |      |      |       | 3      | 3      | 3     | 5     | 5     | 5 |
| 4068   |      |      |      |      |      |      |      |      |       | 1      | 2      | 2     | 3     | 3     | 3 |
| 4069   |      |      |      |      |      |      |      |      |       | 2      | 3      | 2     | 5     | 3     | 5 |
| 4070   |      |      |      |      |      |      |      |      |       | 3      | 3      | 2     | 5     | 5     | 5 |
| 4071   |      |      |      |      |      |      |      |      |       | 3      | 3      | 2     | 3     | 2     | 3 |
| 4072   |      |      |      |      |      |      |      |      |       | 4      | 3      | 3     | 4     | 5     | 4 |
| 4073   |      |      |      |      |      |      |      |      |       | 3      | 3      | 3     | 5     | 5     | 5 |
| 4074   |      |      |      |      |      |      |      |      |       | 3      | 3      | 3     | 5     | 5     | 5 |
| 4075   |      |      |      |      |      |      |      |      |       | 2      | 3      | 3     | 4     | 4     | 5 |
| 4078   |      |      |      |      |      |      |      |      |       | 2      | 2      | 2     | 4     | 5     | 4 |
| 4080   |      |      |      |      |      |      |      |      |       | 2      | 3      | 3     | 5     | 5     | 5 |
| 4081   |      |      |      |      |      |      |      |      |       | 3      | 3      | 3     | 5     | 5     | 5 |

| respid | Q48k | Q48l | Q48m | Q48n | Q48o | Q48p | Q48q | Q48r | Q49_1 | Q50a_1 | Q50b_1 | Q51_1 | Q51_2 | Q52_1 |   |
|--------|------|------|------|------|------|------|------|------|-------|--------|--------|-------|-------|-------|---|
| 4082   |      | 5    | 5    | 2    | 5    | 5    | 3    | 5    | 3     | 3      | 3      | 3     | 5     | 5     | 4 |
| 4083   |      |      |      |      |      |      |      |      |       | 3      | 2      | 2     | 3     | 3     | 3 |
| 4084   |      |      |      |      |      |      |      |      |       | 3      | 3      | 3     | 5     | 5     | 5 |
| 4086   |      |      |      |      |      |      |      |      |       | 2      | 2      | 2     | 3     | 3     | 5 |
| 4087   |      |      |      |      |      |      |      |      |       | 3      | 3      | 3     | 5     | 5     | 5 |
| 4088   |      |      |      |      |      |      |      |      |       | 3      | 2      | 2     | 3     | 4     | 4 |
| 4089   |      |      |      |      |      |      |      |      |       | 3      | 3      | 3     | 5     | 5     | 4 |
| 4090   |      |      |      |      |      |      |      |      |       | 3      | 3      | 3     | 5     | 5     | 4 |
| 4093   |      |      |      |      |      |      |      |      |       | 2      | 3      | 2     | 5     | 5     | 2 |
| 4094   | 5    |      | 4    |      | 5    | 5    | 5    | 2    | 4     | 3      | 3      | 3     | 5     | 5     | 5 |
| 4095   |      |      |      |      |      |      |      |      |       | 3      | 3      | 3     | 4     | 4     | 4 |
| 4096   |      |      |      |      |      |      |      |      |       | 5      | 3      | 3     | 5     | 5     | 5 |
| 4098   |      |      |      |      |      |      |      |      |       | 4      | 3      | 3     | 5     | 5     | 5 |
| 4103   |      |      |      |      |      |      |      |      |       | 2      | 3      | 3     | 5     | 5     | 4 |
| 4104   | 2    |      | 4    |      | 2    | 4    | 3    | 4    | 4     | 3      | 3      | 2     | 4     | 4     | 5 |
| 4107   |      |      |      |      |      |      |      |      |       | 3      | 3      | 3     | 5     | 5     | 5 |
| 4109   |      |      |      |      |      |      |      |      |       | 3      | 3      | 3     | 5     | 5     | 5 |
| 4110   | 3    |      | 5    | 3    | 4    | 5    | 5    | 2    | 6     | 3      | 2      | 3     | 5     | 5     | 5 |
| 4113   | 5    |      | 4    | 4    | 5    | 5    | 6    | 6    | 4     | 3      | 3      | 3     | 4     | 5     | 4 |
| 4114   |      |      |      |      |      |      |      |      |       | 2      | 2      | 2     | 4     | 4     | 4 |
| 4116   |      |      |      |      |      |      |      |      |       | 2      | 3      | 3     | 5     | 5     | 3 |
| 4119   |      |      |      |      |      |      |      |      |       | 4      | 3      | 3     | 5     | 5     | 5 |
| 4120   | 6    |      | 6    | 3    | 6    | 6    | 6    | 6    | 6     | 3      | 3      | 3     | 5     | 5     | 5 |
| 4121   | 6    |      | 6    | 1    | 6    | 6    | 6    | 6    | 6     | 4      | 3      | 3     | 4     | 4     | 4 |
| 4122   |      |      |      |      |      |      |      |      |       | 2      | 3      | 3     | 4     | 4     | 4 |
| 4124   | 3    |      | 3    | 3    | 4    | 6    | 5    | 3    | 6     | 2      | 2      | 3     | 4     | 4     | 4 |
| 4126   | 5    |      | 5    | 3    | 4    | 6    | 3    | 3    | 4     | 2      | 2      | 3     | 3     | 3     | 3 |
| 4127   |      |      |      |      |      |      |      |      |       | 2      | 2      | 2     | 3     | 3     | 3 |
| 4131   | 5    |      | 4    | 2    | 5    | 5    | 4    | 3    | 3     | 3      | 3      | 3     | 4     | 4     | 4 |
| 4134   | 2    |      | 2    | 4    | 3    | 4    | 3    | 2    | 4     | 2      | 3      | 3     | 3     | 2     | 3 |
| 4144   |      |      |      |      |      |      |      |      |       | 3      | 3      | 3     | 5     | 5     | 5 |
| 4145   |      |      |      |      |      |      |      |      |       | 3      | 3      | 3     | 4     | 5     | 5 |

| respid | Q48k | Q48l | Q48m | Q48n | Q48o | Q48p | Q48q | Q48r | Q49_1 | Q50a_1 | Q50b_1 | Q51_1 | Q51_2 | Q52_1 |   |
|--------|------|------|------|------|------|------|------|------|-------|--------|--------|-------|-------|-------|---|
| 4146   |      |      |      |      |      |      |      |      |       | 3      | 3      | 3     | 5     | 5     | 5 |
| 4147   |      |      |      |      |      |      |      |      |       | 4      | 3      | 3     | 5     | 5     | 5 |
| 4149   | 4    | 4    | 3    | 3    | 5    | 3    | 4    | 4    | 4     | 2      | 3      | 3     | 2     | 3     | 4 |
| 4150   |      |      |      |      |      |      |      |      |       | 5      | 3      | 3     | 5     | 5     | 5 |
| 4151   | 5    | 5    | 2    | 3    | 5    | 3    | 5    | 2    | 3     | 3      | 3      | 3     | 3     | 5     | 5 |
| 4153   | 5    | 5    | 2    |      | 5    | 5    | 5    | 5    | 2     | 3      | 3      | 3     | 3     | 3     | 5 |
| 4155   | 6    | 6    | 6    | 6    | 6    | 6    | 6    | 6    | 6     | 3      | 3      | 3     | 5     | 5     | 5 |
| 4157   |      |      |      |      |      |      |      |      |       | 3      | 3      | 3     | 5     | 5     | 5 |
| 4159   | 5    | 4    | 2    | 5    | 6    | 4    | 6    | 2    | 3     | 3      | 3      | 3     | 4     | 5     | 4 |
| 4160   |      |      |      |      |      |      |      |      |       | 3      | 3      | 3     | 5     | 5     | 4 |
| 4161   |      |      |      |      |      |      |      |      |       | 3      | 3      | 3     | 4     | 5     | 3 |
| 4163   | 3    | 4    | 3    | 2    | 5    | 5    | 3    | 4    | 4     | 3      | 3      | 3     | 5     | 5     | 5 |
| 4164   |      |      |      |      |      |      |      |      |       | 3      | 3      | 3     | 5     | 5     | 5 |
| 4165   | 4    | 6    | 3    | 3    | 6    | 5    | 5    | 4    | 4     | 4      | 3      | 2     | 5     | 5     | 5 |
| 4166   |      |      |      |      |      |      |      |      |       | 2      | 3      | 2     | 5     | 5     | 5 |
| 4167   | 4    | 3    | 4    | 4    | 4    | 4    | 4    | 4    | 3     | 3      | 3      | 3     | 5     | 5     | 5 |
| 4170   | 3    | 2    | 5    | 2    | 5    | 2    | 5    | 3    | 3     | 4      | 3      | 3     | 4     | 4     | 4 |
| 4172   |      |      |      |      |      |      |      |      |       | 1      | 1      | 2     | 2     | 2     | 2 |
| 4173   |      |      |      |      |      |      |      |      |       | 5      | 3      | 3     | 5     | 5     | 5 |
| 4180   | 3    | 3    | 3    | 3    | 3    | 3    | 3    | 3    | 4     | 2      | 2      | 2     | 4     | 4     | 4 |
| 4185   |      |      |      |      |      |      |      |      |       | 3      | 3      | 3     | 4     | 5     | 5 |
| 4187   |      |      |      |      |      |      |      |      |       | 4      | 3      | 3     | 5     | 5     | 5 |
| 4190   |      |      |      |      |      |      |      |      |       | 3      | 3      | 3     | 5     | 5     | 4 |
| 4191   |      |      |      |      |      |      |      |      |       | 3      | 3      | 3     | 4     | 4     | 3 |
| 4193   |      |      |      |      |      |      |      |      |       | 4      | 3      | 3     | 5     | 5     | 5 |
| 4194   |      |      |      |      |      |      |      |      |       | 4      | 3      | 3     | 5     | 5     | 5 |
| 4195   |      |      |      |      |      |      |      |      |       | 4      | 3      | 3     | 5     | 5     | 5 |
| 4196   |      |      |      |      |      |      |      |      |       | 4      | 3      | 3     | 5     | 5     | 5 |
| 4197   | 4    | 4    | 4    | 4    | 4    | 4    | 4    | 4    | 3     | 4      | 3      | 3     | 5     | 5     | 5 |
| 4198   |      |      |      |      |      |      |      |      |       | 4      | 3      | 3     | 5     | 5     | 5 |
| 4199   | 5    | 5    | 5    | 4    | 5    | 4    | 3    | 5    | 5     | 3      | 2      | 2     | 5     | 4     | 4 |
| 4205   | 2    | 5    | 4    | 3    | 5    | 4    | 5    | 5    | 5     | 3      | 2      | 2     | 4     | 4     | 4 |

| respid | Q48k | Q48l | Q48m | Q48n | Q48o | Q48p | Q48q | Q48r | Q49_1 | Q50a_1 | Q50b_1 | Q51_1 | Q51_2 | Q52_1 |   |
|--------|------|------|------|------|------|------|------|------|-------|--------|--------|-------|-------|-------|---|
| 4206   |      |      |      |      |      |      |      |      |       | 3      | 3      | 3     | 4     | 4     | 4 |
| 4207   |      |      |      |      |      |      |      |      |       | 3      | 3      | 3     | 5     | 4     | 5 |
| 4214   |      |      |      |      |      |      |      |      |       | 3      | 3      | 3     | 5     | 5     | 4 |
| 4215   |      |      |      |      |      |      |      |      |       | 4      | 3      | 3     | 5     | 5     | 5 |
| 4217   |      |      |      |      |      |      |      |      |       | 3      | 2      | 2     | 3     | 4     | 5 |
| 4219   | 5    | 5    | 3    | 5    | 6    | 5    | 6    | 3    | 4     | 4      | 3      | 3     | 5     | 5     | 4 |
| 4223   | 3    | 3    | 4    | 3    | 4    | 4    | 3    | 4    | 3     | 3      | 2      | 2     | 3     | 3     | 3 |
| 4226   |      |      |      |      |      |      |      |      |       | 2      | 3      | 2     | 4     | 4     | 3 |
| 4229   | 4    | 4    | 3    | 3    | 6    | 3    | 5    | 3    | 3     | 3      | 3      | 3     | 4     | 5     | 5 |
| 4230   |      |      |      |      |      |      |      |      |       | 4      | 3      | 2     | 4     | 4     | 4 |
| 4232   | 1    | 3    | 5    | 6    | 6    | 6    | 3    | 6    | 3     | 3      | 3      | 3     | 5     | 5     | 5 |
| 4233   |      |      |      |      |      |      |      |      |       | 4      | 3      | 3     | 5     | 1     | 5 |
| 4234   | 6    | 6    | 6    | 6    | 6    | 5    | 4    | 3    | 3     | 3      | 3      | 3     | 4     | 5     | 3 |
| 4235   |      |      |      |      |      |      |      |      |       | 3      | 2      | 2     | 3     | 3     | 3 |
| 4236   | 1    | 1    | 6    | 6    | 6    | 6    | 1    | 6    | 2     | 2      | 3      | 3     | 5     | 5     | 5 |
| 4237   | 6    | 6    | 2    | 5    | 5    | 6    | 6    | 2    | 2     | 2      | 3      | 3     | 3     | 3     | 4 |
| 4238   |      |      |      |      |      |      |      |      |       | 3      | 3      | 3     | 4     | 4     | 4 |
| 4240   |      |      |      |      |      |      |      |      |       | 4      | 3      | 3     | 5     | 5     | 4 |
| 4241   |      |      |      |      |      |      |      |      |       | 3      | 3      | 3     | 5     | 5     | 5 |
| 4247   |      |      |      |      |      |      |      |      |       | 4      | 3      | 3     | 5     | 5     | 5 |
| 4250   | 6    | 6    | 3    | 6    | 6    | 6    | 6    | 1    | 4     | 4      | 3      | 3     | 5     | 5     | 5 |
| 4251   | 6    | 6    | 4    | 4    | 4    | 4    | 4    | 4    | 4     | 1      | 2      | 3     | 3     | 3     | 3 |
| 4253   |      |      |      |      |      |      |      |      |       | 3      | 3      | 3     | 4     | 4     | 5 |
| 4254   | 3    | 4    | 4    | 3    | 4    | 3    | 4    | 3    | 3     | 2      | 2      | 2     | 4     | 5     | 5 |
| 4258   |      |      |      |      |      |      |      |      |       | 2      | 2      | 2     | 3     | 3     | 3 |
| 4260   | 6    | 6    | 3    | 4    | 4    | 4    | 4    | 3    | 3     | 2      | 3      | 3     | 5     | 5     | 5 |
| 4263   | 3    | 4    | 5    | 3    | 5    | 5    | 3    | 4    | 4     | 2      | 2      | 2     | 4     | 4     | 4 |
| 4265   |      |      |      |      |      |      |      |      |       | 4      | 3      | 3     | 5     | 5     | 4 |
| 4266   |      |      |      |      |      |      |      |      |       | 4      | 3      | 3     | 5     | 5     | 5 |
| 4267   |      |      |      |      |      |      |      |      |       | 3      | 3      | 3     | 5     | 5     | 5 |
| 4270   |      |      |      |      |      |      |      |      |       | 4      | 3      | 3     | 5     | 5     | 5 |
| 4273   | 4    | 3    | 3    | 4    | 4    |      | 4    | 3    | 3     | 3      | 3      | 3     | 5     | 5     | 5 |

| respid | Q48k | Q48l | Q48m | Q48n | Q48o | Q48p | Q48q | Q48r | Q49_1 | Q50a_1 | Q50b_1 | Q51_1 | Q51_2 | Q52_1 |   |
|--------|------|------|------|------|------|------|------|------|-------|--------|--------|-------|-------|-------|---|
| 4280   |      |      |      |      |      |      |      |      |       | 4      | 3      | 3     | 5     | 5     | 5 |
| 4281   |      |      |      |      |      |      |      |      |       | 2      | 2      | 3     | 5     | 5     | 5 |
| 4282   |      |      |      |      |      |      |      |      |       | 3      | 3      | 3     | 4     | 4     | 5 |
| 4283   |      |      |      |      |      |      |      |      |       | 4      | 3      | 3     | 5     | 5     | 5 |
| 4286   |      |      |      |      |      |      |      |      |       | 1      | 2      | 2     | 5     | 5     | 5 |
| 4287   | 4    | 4    | 4    | 5    | 5    | 5    | 5    | 3    | 2     | 3      | 3      | 5     | 5     | 5     | 5 |
| 4289   | 3    | 3    | 4    | 5    | 5    | 3    | 3    | 5    | 3     | 2      | 3      | 4     | 4     | 4     | 3 |
| 4290   |      |      |      |      |      |      |      |      |       | 3      | 3      | 3     | 5     | 4     | 4 |
| 4291   |      | 5    | 2    | 5    |      |      |      |      |       | 2      | 3      | 3     | 4     | 4     | 5 |
| 4292   |      |      |      |      |      |      |      |      |       | 2      | 3      | 3     | 5     | 5     | 5 |
| 4293   |      |      |      |      |      |      |      |      |       | 2      | 3      | 3     | 3     | 3     | 3 |
| 4294   |      |      |      |      |      |      |      |      |       | 3      | 2      | 2     | 2     | 3     | 2 |
| 4295   |      |      |      |      |      |      |      |      |       | 3      | 3      | 3     | 5     | 5     | 5 |
| 4296   |      |      |      |      |      |      |      |      |       | 3      | 2      | 2     | 3     | 3     | 3 |
| 4297   |      |      |      |      |      |      |      |      |       | 2      | 2      | 2     | 4     | 4     | 4 |
| 4298   | 3    | 6    | 6    | 6    | 6    | 6    | 4    | 4    | 3     | 2      | 2      | 5     | 3     | 5     | 5 |
| 4299   | 3    | 3    | 3    | 3    | 5    | 3    | 3    | 3    | 2     | 2      | 2      | 2     | 3     | 3     | 3 |
| 4300   | 4    | 5    | 3    | 4    | 5    | 5    | 5    | 4    | 3     | 3      | 3      | 4     | 4     | 4     | 4 |
| 4301   |      |      |      |      |      |      |      |      |       | 4      | 3      | 3     | 3     | 5     | 5 |
| 4302   | 5    | 5    | 2    | 5    | 5    | 5    | 5    | 3    | 2     | 3      | 3      | 5     | 5     | 5     | 4 |
| 4304   |      |      |      |      |      |      |      |      |       | 3      | 3      | 3     | 3     | 3     | 3 |
| 4305   |      |      |      |      |      |      |      |      |       | 2      | 2      | 3     | 3     | 4     | 3 |
| 4307   |      |      |      |      |      |      |      |      |       | 3      | 2      | 2     | 2     | 3     | 2 |
| 4308   |      |      |      |      |      |      |      |      |       | 2      | 2      | 2     | 3     | 3     | 3 |
| 4312   |      |      |      |      |      |      |      |      |       | 3      | 3      | 3     | 5     | 5     | 5 |
| 4314   | 2    | 5    | 3    | 3    | 5    | 3    | 3    | 3    | 3     | 3      | 3      | 3     | 4     | 4     | 4 |
| 4316   |      |      |      |      |      |      |      |      |       | 3      | 3      | 3     | 5     | 5     | 5 |
| 4317   | 5    | 4    | 3    | 2    | 4    | 5    | 5    | 5    | 4     | 2      | 3      | 3     | 5     | 5     | 4 |
| 4319   | 5    | 5    | 2    | 5    | 5    | 2    | 5    | 6    | 3     | 3      | 3      | 4     | 5     | 5     | 4 |
| 4323   | 4    | 6    | 3    | 4    | 6    | 4    | 4    | 3    | 1     | 2      | 2      | 3     | 3     | 3     | 3 |
| 4337   | 6    | 6    | 1    | 6    | 6    | 6    | 6    | 1    | 3     | 3      | 3      | 5     | 5     | 5     | 5 |
| 4341   |      |      | 2    | 4    | 6    |      |      |      |       | 2      | 2      | 2     | 4     | 5     | 4 |

| respid | Q48k | Q48l | Q48m | Q48n | Q48o | Q48p | Q48q | Q48r | Q49_1 | Q50a_1 | Q50b_1 | Q51_1 | Q51_2 | Q52_1 |
|--------|------|------|------|------|------|------|------|------|-------|--------|--------|-------|-------|-------|
| 4342   | 5    | 5    | 3    | 5    | 6    | 5    | 5    | 3    | 3     | 3      | 2      | 4     | 4     | 5     |
| 4344   |      |      |      |      |      |      |      |      |       | 2      | 3      | 3     | 4     | 3     |
| 4345   | 4    | 3    | 3    | 5    | 5    | 6    | 5    | 5    | 2     | 2      | 2      | 3     | 4     | 4     |
| 4346   | 6    | 6    | 6    | 5    | 6    | 6    | 6    | 6    | 2     | 2      | 2      | 2     | 2     | 5     |
| 4347   |      |      |      |      |      |      |      |      | 3     | 3      | 2      | 4     | 4     | 4     |
| 4350   |      |      |      |      |      |      |      |      | 3     | 3      | 3      | 5     | 5     | 5     |
| 4352   |      |      |      |      |      |      |      |      | 3     | 3      | 3      | 4     | 5     | 5     |
| 4353   |      |      |      |      |      |      |      |      | 3     | 3      | 3      | 5     | 5     | 4     |
| 4355   |      |      |      |      |      |      |      |      | 3     | 3      | 3      | 5     | 5     | 5     |
| 4356   |      |      |      |      |      |      |      |      | 2     | 3      | 2      | 4     | 4     | 4     |
| 4358   |      |      |      |      |      |      |      |      | 4     | 2      | 2      | 5     | 4     | 5     |
| 4359   |      |      |      |      |      |      |      |      | 3     | 3      | 3      | 5     | 5     | 5     |
| 4360   |      |      |      |      |      |      |      |      | 3     | 3      | 3      | 5     | 5     | 4     |
| 4361   |      |      |      |      |      |      |      |      | 2     | 2      | 2      | 3     | 4     | 3     |
| 4363   |      |      |      |      |      |      |      |      | 3     | 3      | 3      | 5     | 5     | 4     |
| 4364   | 5    | 5    | 3    | 3    | 4    | 3    | 4    | 2    | 2     | 2      | 2      | 5     | 5     | 5     |
| 4365   |      |      |      |      |      |      |      |      | 2     | 2      | 2      | 2     | 4     | 5     |
| 4367   |      |      |      |      |      |      |      |      | 3     | 3      | 2      | 3     | 4     | 2     |
| 4369   | 5    | 5    | 4    | 5    | 5    | 3    | 4    | 4    | 4     | 2      | 2      | 4     | 4     | 4     |
| 4373   | 3    | 3    | 3    | 3    | 3    | 3    | 3    | 4    | 3     | 2      | 3      | 4     | 5     | 4     |
| 4374   | 5    | 4    | 5    | 4    | 6    | 5    | 5    | 4    | 3     | 2      | 2      | 3     | 4     | 2     |
| 4375   |      |      |      |      |      |      |      |      | 3     | 3      | 3      | 4     | 4     | 4     |
| 4378   | 2    | 2    | 4    | 5    | 6    | 6    | 2    | 6    | 5     | 3      | 3      | 4     | 4     | 4     |
| 4379   |      |      |      |      |      |      |      |      | 3     | 3      | 2      | 5     | 5     | 4     |
| 4382   |      |      |      |      |      |      |      |      | 2     | 2      | 2      | 3     | 3     | 3     |
| 4383   |      |      |      |      |      |      |      |      | 3     | 3      | 3      | 4     | 4     | 4     |
| 4384   |      |      |      |      |      |      |      |      | 4     | 3      | 3      | 5     | 5     | 4     |
| 4385   |      |      |      |      |      |      |      |      | 3     | 3      | 3      | 4     | 5     | 4     |
| 4388   |      |      |      |      |      |      |      |      | 3     | 2      | 3      | 2     | 2     | 2     |
| 4389   | 6    | 6    | 1    | 6    | 6    | 6    | 6    | 1    | 4     | 3      | 2      | 5     | 5     | 5     |
| 4391   |      |      |      |      |      |      | 6    |      | 3     | 3      | 3      | 3     | 3     | 5     |
| 4392   |      |      |      |      |      |      |      |      | 3     | 3      | 3      | 5     | 5     | 5     |



| respid | Q48k | Q48l | Q48m | Q48n | Q48o | Q48p | Q48q | Q48r | Q49_1 | Q50a_1 | Q50b_1 | Q51_1 | Q51_2 | Q52_1 |   |
|--------|------|------|------|------|------|------|------|------|-------|--------|--------|-------|-------|-------|---|
| 4393   | 6    | 6    | 2    | 3    | 3    | 6    | 6    | 2    | 2     | 2      | 2      | 2     | 5     | 5     | 5 |
| 4395   |      |      |      |      |      |      |      |      |       | 3      | 3      | 3     | 5     | 5     | 5 |
| 4397   | 5    | 4    | 5    | 5    | 6    | 6    | 6    | 2    | 2     | 2      | 3      | 3     | 5     | 5     | 4 |
| 4398   |      |      | 3    |      | 6    |      |      |      |       | 3      | 3      | 2     | 4     | 4     | 4 |
| 4399   |      |      |      |      |      |      |      |      |       | 4      | 3      | 3     | 5     | 5     | 5 |
| 4400   |      |      |      |      |      |      |      |      |       | 4      | 3      | 3     | 5     | 5     | 5 |
| 4401   |      |      |      |      |      |      |      |      |       | 4      | 3      | 3     | 5     | 5     | 5 |
| 4402   | 4    | 4    | 4    | 4    | 4    | 4    | 4    | 5    | 4     | 4      | 3      | 2     | 5     | 5     | 5 |
| 4404   | 5    | 5    | 2    | 4    | 5    | 5    | 5    | 5    | 2     | 3      | 2      | 3     | 4     | 5     | 5 |
| 4405   |      |      |      |      |      |      |      |      |       | 5      | 3      | 3     | 5     | 5     | 5 |
| 4407   |      |      |      |      |      |      |      |      |       | 2      | 3      | 3     | 5     | 5     | 5 |
| 4408   | 2    | 3    | 3    | 2    | 3    | 3    | 3    | 3    | 5     | 2      | 1      | 2     | 2     | 3     | 2 |
| 4411   |      |      |      |      |      |      |      |      |       | 3      | 3      | 2     | 4     | 4     | 4 |
| 4420   | 6    | 6    | 1    | 6    | 6    | 6    | 6    | 6    | 5     | 2      | 3      | 3     | 5     | 5     | 5 |
| 4421   | 5    | 6    | 5    | 6    | 6    | 6    | 3    | 5    | 4     | 3      | 3      | 3     | 5     | 5     | 5 |
| 4424   | 5    | 4    | 4    | 4    | 4    | 3    | 5    | 4    | 4     | 2      | 2      | 2     | 2     | 1     | 2 |
| 4425   | 5    | 3    | 3    | 3    | 3    | 3    | 3    | 5    | 5     | 3      | 1      | 1     | 5     | 5     | 4 |
| 4427   | 5    | 4    | 3    | 5    | 5    | 5    | 4    | 4    | 4     | 2      | 3      | 2     | 5     | 5     | 5 |
| 4430   | 5    | 5    |      | 2    | 5    | 5    | 5    | 5    | 2     | 2      | 2      | 2     | 4     | 4     | 4 |
| 4431   | 5    | 5    | 5    | 5    | 5    | 5    | 5    | 5    | 5     | 3      | 2      | 2     | 3     | 3     | 3 |
| 4432   |      |      |      |      |      |      |      |      |       | 2      | 1      | 1     | 3     | 3     | 3 |
| 4436   |      |      |      |      |      |      |      |      |       | 2      | 3      | 3     | 5     | 5     | 5 |
| 4439   |      |      |      |      |      |      |      |      |       | 2      | 2      | 3     | 4     | 4     | 4 |
| 4451   |      |      |      |      |      |      |      |      |       | 3      | 2      | 2     | 3     | 4     | 3 |
| 4452   |      |      |      |      |      |      |      |      |       | 2      | 1      | 1     | 3     | 3     | 2 |
| 4458   |      |      |      |      |      |      |      |      |       | 3      | 3      | 3     | 5     | 5     | 5 |
| 4464   | 5    | 5    | 2    | 5    | 5    | 3    | 5    | 2    | 2     | 3      | 2      | 2     | 3     | 4     | 3 |
| 4465   |      |      |      |      |      |      |      |      |       | 3      | 3      | 3     | 5     | 5     | 5 |
| 4467   |      |      |      |      |      |      |      |      |       | 2      | 3      | 3     | 5     | 5     | 3 |
| 4470   |      |      |      |      |      |      |      |      |       | 2      | 2      | 2     | 3     | 4     | 4 |
| 4471   |      |      |      |      |      |      |      |      |       | 2      | 3      | 3     | 4     | 4     | 4 |
| 4472   |      |      |      |      |      |      |      |      |       | 2      | 3      | 3     | 5     | 5     | 5 |

| respid | Q48k | Q48l | Q48m | Q48n | Q48o | Q48p | Q48q | Q48r | Q49_1 | Q50a_1 | Q50b_1 | Q51_1 | Q51_2 | Q52_1 |   |
|--------|------|------|------|------|------|------|------|------|-------|--------|--------|-------|-------|-------|---|
| 4473   |      |      |      |      |      |      |      |      |       | 4      | 3      | 3     | 5     | 5     | 5 |
| 4475   | 5    | 5    | 2    | 5    | 5    | 4    | 5    | 3    | 3     | 3      | 3      | 3     | 5     | 5     | 4 |
| 4476   | 2    | 3    | 3    | 2    | 3    | 2    | 4    | 3    | 3     | 3      | 3      | 3     | 4     | 4     | 4 |
| 4478   |      |      |      |      |      |      |      |      |       | 3      | 3      | 3     | 4     | 5     | 5 |
| 4485   | 6    | 6    | 1    | 6    | 6    | 6    | 6    | 6    | 1     | 3      | 3      | 3     | 5     | 5     | 5 |
| 4486   | 6    | 6    | 2    | 3    | 3    | 3    | 3    | 3    | 5     | 2      | 3      | 3     | 5     | 5     | 5 |
| 4490   |      |      |      |      |      |      |      |      |       | 5      | 3      | 3     | 5     | 5     | 5 |
| 4502   |      |      |      |      |      |      |      |      |       | 5      | 3      | 3     | 5     | 5     | 5 |
| 4503   | 3    | 3    | 6    | 3    | 3    | 2    | 3    | 2    | 3     | 3      | 3      | 3     | 5     | 5     | 5 |
| 4504   | 5    | 6    | 2    | 5    | 6    | 5    | 6    | 2    | 4     | 3      | 3      | 3     | 5     | 5     | 5 |
| 4506   | 1    | 6    | 2    | 5    | 6    | 5    | 6    | 2    | 3     | 3      | 3      | 3     | 5     | 5     | 5 |
| 4508   | 6    | 6    | 1    | 5    | 6    | 5    | 6    | 2    | 2     | 3      | 2      | 2     | 4     | 4     | 5 |
| 4515   |      |      |      |      |      |      |      |      |       | 3      | 3      | 3     | 4     | 4     | 4 |
| 4516   |      |      |      |      |      |      |      |      |       | 3      | 3      | 2     | 4     | 4     | 5 |
| 4519   |      |      |      |      |      |      |      |      |       | 2      | 2      | 3     | 1     | 1     | 1 |
| 4523   | 6    | 5    | 6    | 5    | 6    | 5    | 6    | 5    | 3     | 3      | 3      | 3     | 3     | 2     | 3 |
| 4525   |      |      |      |      |      |      |      |      |       | 3      | 3      | 2     | 5     | 5     | 5 |
| 4526   |      |      |      |      |      |      |      |      |       | 4      | 3      | 3     | 5     | 5     | 5 |
| 4528   |      |      |      |      |      |      |      |      |       | 4      | 3      | 3     | 4     | 4     | 4 |
| 4530   |      |      |      |      |      |      |      |      |       | 3      | 3      | 2     | 5     | 5     | 5 |
| 4531   | 6    | 5    | 2    | 6    | 6    | 5    | 5    | 2    | 2     | 3      | 3      | 3     | 3     | 3     | 3 |
| 4532   |      |      |      |      |      |      |      |      |       | 3      | 2      | 3     | 4     | 4     | 4 |
| 4537   | 5    | 6    | 1    | 6    | 6    | 5    | 4    | 4    | 2     | 2      | 2      | 2     | 4     | 4     | 4 |
| 4538   | 4    | 3    | 3    | 4    | 5    | 4    | 4    | 4    | 5     | 4      | 3      | 3     | 5     | 5     | 3 |
| 4539   | 4    | 4    | 3    | 4    | 4    | 4    | 4    | 4    | 4     | 3      | 2      | 2     | 3     | 3     | 3 |
| 4541   |      |      |      |      |      |      |      |      |       | 3      | 3      | 3     | 5     | 5     | 5 |
| 4543   |      |      |      |      |      |      |      |      |       | 4      | 3      | 3     | 5     | 5     | 5 |
| 4544   | 5    |      | 5    | 6    | 6    | 6    | 5    | 6    | 2     | 3      | 3      | 3     | 3     | 3     | 3 |
| 4546   |      |      |      |      |      |      |      |      |       | 4      | 1      | 3     | 5     | 5     | 5 |
| 4547   | 6    | 6    | 1    | 6    | 6    | 6    | 6    | 6    | 1     | 4      | 2      | 2     | 4     | 4     | 4 |
| 4549   |      |      |      |      |      |      |      |      |       | 2      | 2      | 2     | 3     | 3     | 2 |
| 4550   |      |      |      |      |      |      |      |      |       | 2      | 2      | 2     | 3     | 3     | 3 |

| respid | Q48k | Q48l | Q48m | Q48n | Q48o | Q48p | Q48q | Q48r | Q49_1 | Q50a_1 | Q50b_1 | Q51_1 | Q51_2 | Q52_1 |   |
|--------|------|------|------|------|------|------|------|------|-------|--------|--------|-------|-------|-------|---|
| 4551   |      |      |      |      |      |      |      |      |       | 3      | 3      | 3     | 5     | 5     | 5 |
| 4554   |      |      |      |      |      |      |      |      |       | 4      | 3      | 3     | 5     | 5     | 5 |
| 4557   |      |      |      |      |      |      |      |      |       | 4      | 3      | 3     | 1     | 5     | 5 |
| 4565   |      |      |      |      |      |      |      |      |       | 4      | 3      | 3     | 5     | 5     | 5 |
| 4568   |      |      |      |      |      |      |      |      |       | 4      | 3      | 3     | 5     | 5     | 4 |
| 4569   | 6    | 6    | 2    | 6    | 6    | 6    | 6    | 6    | 2     | 3      | 3      | 3     | 5     | 5     | 5 |
| 4570   |      |      |      |      |      |      |      |      |       | 4      | 3      | 3     | 5     | 5     | 5 |
| 4572   |      |      |      |      |      |      |      |      |       | 2      | 3      | 3     | 4     | 4     | 5 |
| 4574   |      |      |      |      |      |      |      |      |       | 2      | 3      | 3     | 4     | 4     | 5 |
| 4576   |      |      |      |      | 3    |      |      |      |       | 2      | 2      | 2     | 3     | 3     | 4 |
| 4578   |      |      |      |      |      |      |      |      |       | 3      | 3      | 3     | 5     | 5     | 5 |
| 4579   |      |      |      |      |      |      |      |      |       | 3      | 2      | 3     | 4     | 5     | 4 |
| 4580   | 6    | 6    | 1    | 6    | 6    | 6    | 6    | 6    | 1     | 2      | 1      | 2     | 5     | 5     | 5 |
| 4581   |      |      |      |      |      |      |      |      |       | 2      | 3      | 3     | 4     | 4     | 4 |
| 4584   |      |      |      |      |      |      |      |      |       | 4      | 3      | 3     | 5     | 5     | 5 |
| 4586   |      |      |      |      |      |      |      |      |       | 3      | 2      | 3     | 4     | 4     | 4 |
| 4587   |      |      |      |      |      |      |      |      |       | 2      | 2      | 2     | 2     | 2     | 3 |
| 4590   |      |      |      |      |      |      |      |      |       | 3      | 3      | 3     | 4     | 5     | 4 |
| 4592   |      |      |      |      |      |      |      |      |       | 3      | 3      | 3     | 5     | 5     | 5 |
| 4593   | 2    | 2    | 2    | 2    | 5    | 3    | 5    | 6    |       | 3      | 3      | 2     | 4     | 4     | 4 |
| 4595   |      |      |      |      |      |      |      |      |       | 3      | 2      | 3     | 4     | 4     | 4 |
| 4597   |      |      |      |      |      |      |      |      |       | 3      | 3      | 3     | 4     | 4     | 4 |
| 4598   |      |      |      |      |      |      |      |      |       | 3      | 2      | 2     | 3     | 3     | 3 |
| 4599   |      |      |      |      |      |      |      |      |       | 2      | 3      | 3     | 5     | 5     | 4 |
| 4600   | 6    | 5    | 2    | 5    | 5    | 3    | 5    | 3    |       | 3      | 3      | 2     | 3     | 4     | 4 |
| 4601   | 6    | 6    | 5    | 5    | 6    | 5    | 5    | 5    |       | 4      | 2      | 2     | 3     | 3     | 3 |
| 4608   | 1    | 3    | 6    | 6    | 6    | 6    | 4    | 6    |       | 1      | 3      | 3     | 5     | 5     | 4 |
| 4609   |      |      |      |      |      |      |      |      |       | 3      | 2      | 2     | 3     | 3     | 4 |
| 4611   | 1    | 1    | 2    | 3    | 4    | 1    | 1    | 6    |       | 2      | 3      | 2     | 3     | 3     | 3 |
| 4612   |      |      |      |      |      |      |      |      |       | 3      | 3      | 3     | 3     | 3     | 3 |
| 4613   |      |      |      |      |      |      |      |      |       | 3      | 3      | 3     | 5     | 5     | 5 |
| 4616   |      |      |      |      |      |      |      |      |       | 2      | 2      | 2     | 3     | 3     | 4 |

| respid | Q48k | Q48l | Q48m | Q48n | Q48o | Q48p | Q48q | Q48r | Q49_1 | Q50a_1 | Q50b_1 | Q51_1 | Q51_2 | Q52_1 |   |
|--------|------|------|------|------|------|------|------|------|-------|--------|--------|-------|-------|-------|---|
| 4617   |      | 5    | 5    | 5    | 5    | 5    | 5    | 5    | 2     | 4      | 2      | 2     | 4     | 4     | 4 |
| 4620   |      | 6    | 6    | 1    | 6    | 6    | 6    | 6    | 2     | 2      | 3      | 3     | 4     | 3     | 4 |
| 4621   |      |      |      |      |      |      |      |      |       | 4      | 3      | 3     | 5     | 5     | 4 |
| 4622   |      |      |      |      |      |      |      |      |       | 2      | 2      | 2     | 3     | 3     | 3 |
| 4624   |      | 5    | 4    | 3    | 5    | 6    | 4    | 6    | 4     | 4      | 3      | 3     | 4     | 4     | 5 |
| 4625   |      |      |      |      |      |      |      |      |       | 3      | 3      | 3     | 3     | 3     | 3 |
| 4627   |      |      |      |      |      |      |      |      |       | 2      | 3      | 3     | 5     | 5     | 5 |
| 4628   |      |      |      |      |      |      |      |      |       | 3      | 2      | 2     | 3     | 3     | 3 |
| 4629   |      |      |      |      |      |      |      |      |       | 2      | 2      | 2     | 4     | 4     | 4 |
| 4630   |      | 6    | 5    | 2    | 5    | 5    | 5    | 5    | 2     | 4      | 2      | 2     | 4     | 3     | 4 |
| 4632   |      |      |      |      |      |      |      |      |       | 3      | 3      | 3     | 5     | 5     | 5 |
| 4634   |      | 6    | 6    | 1    | 6    | 6    | 6    | 5    | 2     | 3      | 3      | 3     | 4     | 4     | 4 |
| 4635   |      |      |      |      |      |      |      |      |       | 2      | 3      | 3     | 5     | 5     | 5 |
| 4636   |      |      |      |      |      |      |      |      |       | 3      | 3      | 3     | 5     | 5     | 5 |
| 4637   |      |      |      |      |      |      |      |      |       | 3      | 2      | 2     | 2     | 2     | 2 |
| 4638   |      |      |      |      |      |      |      |      |       | 3      | 3      | 3     | 4     | 4     | 5 |
| 4639   |      |      |      |      |      |      |      |      |       | 1      | 2      | 3     | 3     | 3     | 3 |
| 4641   |      | 6    | 6    | 1    | 6    | 6    | 6    | 6    | 1     | 2      | 3      | 3     | 5     | 5     | 5 |
| 4643   |      |      |      |      |      |      |      |      |       | 3      | 3      | 3     | 5     | 5     | 4 |
| 4645   |      |      |      |      |      |      |      |      |       | 4      | 3      | 3     | 5     | 5     | 5 |
| 4646   |      | 3    | 3    | 4    | 2    | 3    | 2    | 2    | 4     | 3      | 2      | 2     | 4     | 3     | 4 |
| 4647   |      |      |      |      |      |      |      |      |       | 3      | 2      | 2     | 3     | 3     | 4 |
| 4648   |      | 6    |      |      |      |      |      |      |       | 2      | 3      | 3     | 5     | 5     | 5 |
| 4649   |      | 5    | 4    | 4    | 3    | 4    | 3    | 3    | 5     | 2      | 3      | 2     | 5     | 4     | 4 |
| 4650   |      |      |      |      |      |      |      |      |       | 2      | 2      | 2     | 4     | 4     | 4 |
| 4651   |      |      |      |      |      |      |      |      |       | 2      | 2      | 1     | 4     | 4     | 4 |
| 4652   |      | 2    | 5    | 5    | 5    | 5    | 5    | 5    | 5     | 2      | 3      | 3     | 2     | 2     | 4 |
| 4653   |      |      |      |      |      |      |      |      |       | 4      | 3      | 3     | 5     | 5     | 5 |
| 4657   |      |      |      |      |      |      |      |      |       | 4      | 3      | 3     | 5     | 5     | 5 |
| 4660   |      |      |      |      | 4    | 6    |      | 1    | 6     | 1      | 2      | 3     | 4     | 5     | 4 |
| 4661   |      | 4    | 4    | 4    | 4    | 4    | 4    | 3    | 4     | 3      | 2      | 2     | 4     | 3     | 5 |
| 4662   |      | 2    | 2    |      | 5    | 6    | 5    | 1    | 6     | 2      | 2      | 2     | 4     | 3     | 4 |

| respid | Q48k | Q48l | Q48m | Q48n | Q48o | Q48p | Q48q | Q48r | Q49_1 | Q50a_1 | Q50b_1 | Q51_1 | Q51_2 | Q52_1 |   |
|--------|------|------|------|------|------|------|------|------|-------|--------|--------|-------|-------|-------|---|
| 4667   |      |      |      |      |      |      |      |      |       | 2      | 2      | 3     | 3     | 4     | 4 |
| 4669   | 5    | 5    | 2    | 5    | 5    | 5    | 5    | 4    |       | 3      | 3      | 3     | 5     | 5     | 5 |
| 4671   |      |      |      |      |      |      |      |      |       | 3      | 3      | 3     | 4     | 4     | 4 |
| 4672   |      |      |      |      |      |      |      |      |       | 2      | 3      | 3     | 5     | 5     | 4 |
| 4673   | 3    |      |      |      | 3    |      |      |      |       | 2      | 2      | 2     | 3     | 4     | 3 |
| 4677   |      |      |      |      |      |      |      |      |       | 4      | 3      | 3     | 5     | 5     | 5 |
| 4679   |      |      |      |      |      |      |      |      |       | 3      | 3      | 3     | 5     | 5     | 5 |
| 4683   |      |      |      |      |      |      |      |      |       | 3      | 2      | 2     | 3     | 3     | 4 |
| 4684   | 5    | 6    | 4    | 5    | 6    | 3    | 4    | 6    |       | 2      | 3      | 3     | 5     | 5     | 5 |
| 4685   |      |      |      |      |      |      |      |      |       | 2      | 3      | 3     | 5     | 5     | 5 |
| 4686   |      |      |      |      |      |      |      |      |       | 3      | 3      | 3     | 5     | 5     | 4 |
| 4687   |      |      |      |      |      |      |      |      |       | 3      | 2      | 2     | 5     | 5     | 5 |
| 4688   |      |      |      |      |      |      |      |      |       | 3      | 3      | 2     | 3     | 3     | 3 |
| 4691   |      |      |      |      |      |      |      |      |       | 2      | 3      | 3     | 4     | 4     | 4 |
| 4692   | 5    | 6    | 4    | 4    | 6    | 5    | 4    | 3    |       | 4      | 3      | 3     | 4     | 5     | 4 |
| 4694   |      |      |      |      |      |      |      |      |       | 2      | 3      | 3     | 4     | 5     | 3 |
| 4695   |      |      |      |      |      |      |      |      |       | 2      | 3      | 3     | 5     | 5     | 5 |
| 4696   |      |      |      |      |      |      |      |      |       | 4      | 3      | 2     | 4     | 3     | 3 |
| 4697   |      |      |      |      |      |      |      |      |       | 4      | 3      | 3     | 5     | 5     | 5 |
| 4698   |      |      |      |      |      |      |      |      |       | 4      | 2      | 2     | 3     | 3     | 2 |
| 4699   |      |      |      |      |      |      |      |      |       | 3      | 3      | 3     | 5     | 5     | 5 |
| 4701   |      |      |      |      |      |      |      |      |       | 3      | 3      | 3     | 5     | 5     | 5 |
| 4703   |      |      |      |      |      |      |      |      |       | 2      | 3      | 2     | 4     | 3     | 4 |
| 4704   | 1    | 1    | 6    | 1    | 1    | 1    | 1    | 6    |       | 1      | 1      | 1     | 1     | 1     | 1 |
| 4705   | 6    | 6    | 1    | 6    |      |      | 6    | 6    | 1     | 4      | 3      | 3     | 5     | 5     | 5 |
| 4706   |      |      |      |      |      |      |      |      |       | 4      | 3      | 3     | 5     | 5     | 5 |
| 4707   | 4    | 5    | 3    | 5    | 6    | 4    | 6    | 4    |       | 4      | 3      | 3     | 4     | 5     | 4 |
| 4708   |      |      |      |      |      |      |      |      |       | 3      | 3      | 2     | 5     | 5     | 4 |
| 4710   |      |      |      |      |      |      |      |      |       | 1      | 2      | 3     | 4     | 5     | 4 |
| 4711   |      |      |      |      |      |      |      |      |       | 1      | 2      | 2     | 3     | 3     | 3 |
| 4715   |      |      |      |      |      |      |      |      |       | 2      | 3      | 3     | 4     | 5     | 4 |
| 4716   | 4    | 3    | 4    | 3    | 5    | 4    | 4    | 3    |       | 3      | 3      | 3     | 4     | 5     | 4 |

| respid | Q48k | Q48l | Q48m | Q48n | Q48o | Q48p | Q48q | Q48r | Q49_1 | Q50a_1 | Q50b_1 | Q51_1 | Q51_2 | Q52_1 |   |
|--------|------|------|------|------|------|------|------|------|-------|--------|--------|-------|-------|-------|---|
| 4717   |      |      |      |      |      |      |      |      |       | 3      | 3      | 2     | 5     | 4     | 5 |
| 4718   |      |      |      |      |      |      |      |      |       | 3      | 3      | 3     | 4     | 4     | 4 |
| 4722   |      |      |      |      |      |      |      |      |       | 2      | 2      | 2     | 3     | 3     | 3 |
| 4727   |      |      |      |      |      |      |      |      |       | 2      | 3      | 3     | 3     | 3     | 4 |
| 4728   |      |      |      |      |      |      |      |      |       | 2      | 3      | 3     | 5     | 5     | 5 |
| 4729   |      |      |      |      |      |      |      |      |       | 4      | 3      | 3     | 4     | 5     | 4 |
| 4732   |      |      |      |      |      |      |      |      |       | 3      | 3      | 3     | 5     | 5     | 4 |
| 4733   |      | 5    | 5    | 2    | 5    | 5    | 5    | 5    | 2     | 4      | 3      | 3     | 5     | 5     | 5 |
| 4734   |      |      |      |      |      |      |      |      |       | 2      | 2      | 3     | 3     | 3     | 3 |
| 4735   |      |      |      |      |      |      |      |      |       | 3      | 3      | 2     | 4     | 4     | 5 |
| 4737   |      |      |      |      |      |      |      |      |       | 5      | 3      | 3     | 5     | 5     | 5 |
| 4738   |      |      |      |      |      |      |      |      |       | 1      | 3      | 2     | 4     | 3     | 5 |
| 4740   |      | 5    | 5    | 2    | 5    | 5    | 5    | 5    | 2     | 4      | 3      | 3     | 5     | 5     | 5 |
| 4741   |      |      |      |      |      |      |      |      |       | 2      | 3      | 3     | 5     | 4     | 4 |
| 4743   |      | 1    | 5    | 2    | 6    | 6    | 6    | 5    | 3     | 3      | 3      | 2     | 5     | 5     | 5 |
| 4746   |      |      |      |      |      |      |      |      |       | 3      | 3      | 3     | 5     | 5     | 4 |
| 4750   |      |      |      |      |      |      |      |      |       | 2      | 3      | 3     | 4     | 5     | 4 |
| 4752   |      |      |      |      |      |      |      |      |       | 4      | 3      | 3     | 5     | 5     | 5 |
| 4753   |      | 5    | 5    | 3    | 5    | 5    | 4    | 3    | 4     | 4      | 3      | 2     | 3     | 4     | 4 |
| 4754   |      |      |      |      |      |      |      |      |       | 2      | 3      | 3     | 5     | 4     | 5 |
| 4755   |      | 4    | 5    | 5    | 3    | 5    | 5    | 5    | 4     | 2      | 1      | 2     | 2     | 2     | 2 |
| 4758   |      | 1    | 1    | 6    | 1    | 1    | 1    | 1    | 6     | 2      | 2      | 2     | 4     | 4     | 3 |
| 4766   |      |      |      |      |      |      |      |      |       | 4      | 3      | 3     | 5     | 5     | 5 |
| 4767   |      | 1    | 6    | 2    | 2    | 5    | 3    | 6    | 5     | 2      | 2      | 1     | 1     | 3     | 3 |
| 4768   |      |      |      |      |      |      |      |      |       | 2      | 3      | 3     | 3     | 3     | 3 |
| 4769   |      |      |      |      |      |      |      |      |       | 3      | 3      | 3     | 5     | 5     | 5 |
| 4771   |      |      |      |      |      |      |      |      |       | 2      | 2      | 2     | 3     | 3     | 4 |
| 4772   |      | 5    | 5    | 3    | 5    | 6    | 6    | 6    | 3     | 3      | 3      | 2     | 4     | 4     | 4 |
| 4773   |      |      |      |      |      |      |      |      |       | 4      | 3      | 3     | 4     | 4     | 4 |
| 4774   |      | 3    | 4    | 4    | 3    | 4    | 3    | 3    | 4     | 2      | 2      | 3     | 4     | 4     | 3 |
| 4776   |      |      |      |      |      |      |      |      |       | 4      | 2      | 3     | 2     | 3     | 2 |
| 4777   |      | 6    | 6    | 1    | 6    | 6    | 6    | 6    | 1     | 2      | 3      | 3     | 3     | 3     | 3 |

| respid | Q48k | Q48l | Q48m | Q48n | Q48o | Q48p | Q48q | Q48r | Q49_1 | Q50a_1 | Q50b_1 | Q51_1 | Q51_2 | Q52_1 |   |
|--------|------|------|------|------|------|------|------|------|-------|--------|--------|-------|-------|-------|---|
| 4779   |      |      |      |      |      |      |      |      |       | 3      | 3      | 2     | 5     | 5     | 5 |
| 4780   | 3    | 5    |      |      | 3    | 6    | 5    | 5    |       | 2      | 3      | 2     | 5     | 5     | 5 |
| 4781   |      |      |      |      |      |      |      |      |       | 4      | 3      | 3     | 5     | 5     | 5 |
| 4783   | 3    | 3    | 4    |      | 3    | 5    | 3    | 4    | 3     | 2      | 2      | 2     | 3     | 4     | 3 |
| 4784   |      |      |      |      |      |      |      |      |       | 4      | 3      | 3     | 1     | 1     | 5 |
| 4785   |      |      |      |      |      |      |      |      |       | 2      | 3      | 2     | 4     | 4     | 4 |
| 4788   |      |      |      |      |      |      |      |      |       | 5      | 3      | 3     | 5     | 5     | 5 |
| 4789   |      |      |      |      |      |      |      |      |       | 1      | 2      | 2     | 3     | 3     | 3 |
| 4790   |      |      |      |      |      |      |      |      |       | 3      | 3      | 3     | 3     | 3     | 3 |
| 4791   |      |      |      |      |      |      |      |      |       | 3      | 3      | 3     | 4     | 5     | 5 |
| 4794   |      |      |      |      |      |      |      |      |       | 3      | 3      | 3     | 5     | 5     | 5 |
| 4795   |      |      |      |      |      |      |      |      |       | 4      | 3      | 3     | 5     | 5     | 5 |
| 4797   |      |      |      |      |      |      |      |      |       | 3      | 3      | 3     | 3     | 4     | 4 |
| 4802   |      |      |      |      |      |      |      |      |       | 3      | 3      | 3     | 3     | 4     | 3 |
| 4803   |      |      |      |      |      |      |      |      |       | 2      | 2      | 2     | 4     | 4     | 4 |
| 4804   |      |      |      |      |      |      |      |      |       | 4      | 3      | 3     | 3     | 3     | 4 |
| 4805   |      |      |      |      |      |      |      |      |       | 3      | 3      | 3     | 5     | 5     | 5 |
| 4807   |      |      |      |      |      |      |      |      |       | 2      | 3      | 3     | 5     | 5     | 5 |
| 4808   |      |      |      |      |      |      |      |      |       | 3      | 3      | 3     | 4     | 4     | 5 |
| 4809   |      |      |      |      |      |      |      |      |       | 3      | 3      | 3     | 3     | 3     | 3 |
| 4811   | 5    | 6    | 2    |      | 6    | 6    | 5    | 6    | 3     | 3      | 2      | 2     | 4     | 4     | 3 |
| 4817   |      |      |      |      |      |      |      |      |       | 4      | 2      | 2     | 3     | 3     | 3 |
| 4819   |      |      |      |      |      |      |      |      |       | 3      | 3      | 3     | 5     | 5     | 5 |
| 4820   |      |      |      |      |      |      |      |      |       | 2      | 3      | 2     | 4     | 4     | 4 |
| 4821   |      |      |      |      |      |      |      |      |       | 5      | 3      | 3     | 3     | 4     | 2 |
| 4822   |      |      |      |      |      |      |      |      |       | 4      | 3      | 3     | 5     | 5     | 5 |
| 4823   | 3    | 3    | 5    |      | 2    | 6    | 3    | 3    | 1     | 3      | 3      | 2     | 5     | 3     | 5 |
| 4825   |      |      |      |      |      |      |      |      |       | 2      | 3      | 3     | 5     | 5     | 5 |
| 4826   |      |      |      |      |      |      |      |      |       | 5      | 3      | 3     | 5     | 5     | 5 |
| 4830   |      |      |      |      |      |      |      |      |       | 2      | 3      | 3     | 5     | 5     | 4 |
| 4832   |      |      |      |      |      |      |      |      |       | 4      | 3      | 3     | 5     | 5     | 5 |
| 4838   | 4    | 4    | 4    |      | 4    | 4    | 4    | 4    | 4     | 2      | 2      | 2     | 3     | 3     | 3 |

| respid | Q48k | Q48l | Q48m | Q48n | Q48o | Q48p | Q48q | Q48r | Q49_1 | Q50a_1 | Q50b_1 | Q51_1 | Q51_2 | Q52_1 |
|--------|------|------|------|------|------|------|------|------|-------|--------|--------|-------|-------|-------|
| 4840   | 2    | 5    | 4    | 3    | 5    | 3    | 5    | 4    | 3     | 3      | 3      | 5     | 5     | 5     |
| 4841   |      |      |      |      |      |      |      |      | 4     | 3      | 3      | 5     | 5     | 5     |
| 4843   |      |      |      |      |      |      |      |      | 3     | 2      | 2      | 3     | 3     | 3     |
| 4845   |      |      |      |      |      |      |      |      | 4     | 2      | 3      | 5     | 5     | 4     |
| 4846   |      |      |      |      |      |      |      |      | 3     | 3      | 3      | 4     | 4     | 4     |
| 4848   |      |      |      |      |      |      |      |      | 3     | 3      | 3      | 5     | 5     | 5     |
| 4853   |      |      |      |      |      |      |      |      | 4     | 3      | 3      | 5     | 5     | 5     |
| 4854   |      |      |      |      |      |      |      |      | 3     | 3      | 3      | 4     | 5     | 3     |
| 4859   |      |      |      |      |      |      |      |      | 2     | 3      | 3      | 5     | 5     | 5     |
| 4861   |      |      |      |      |      |      |      |      | 3     | 3      | 2      | 4     | 4     | 4     |
| 4864   |      |      |      |      |      |      |      |      | 1     | 2      | 2      | 5     | 5     | 5     |
| 4867   |      |      |      |      |      |      |      |      | 4     | 3      | 3      | 4     | 4     | 5     |
| 4870   | 4    | 3    | 3    | 3    | 5    | 5    | 5    | 3    | 3     | 3      | 3      | 5     | 5     | 5     |
| 4872   |      |      |      |      |      |      |      |      | 3     | 2      | 3      | 2     | 4     | 4     |
| 4873   |      |      |      |      |      |      |      |      | 1     | 3      | 3      | 4     | 4     | 2     |
| 4874   | 6    | 6    | 1    | 6    | 6    | 6    | 6    | 1    | 4     | 3      | 3      | 5     | 5     | 5     |
| 4878   |      |      |      |      |      |      |      |      | 3     | 3      | 2      | 4     | 4     | 5     |
| 4880   | 6    | 4    | 3    | 5    | 5    | 6    | 6    | 3    | 3     | 3      | 3      | 5     | 5     | 5     |
| 4881   |      |      |      |      |      |      |      |      | 2     | 2      | 1      | 3     | 3     | 3     |
| 4882   | 5    | 3    | 3    | 5    | 5    | 6    | 6    | 3    | 2     | 2      | 2      | 3     | 3     | 3     |
| 4883   |      |      |      |      |      |      |      |      | 3     | 3      | 3      | 4     | 4     | 4     |
| 4885   |      |      |      |      |      |      |      |      | 4     | 3      | 3      | 4     | 5     | 4     |
| 4889   |      |      |      |      |      |      |      |      | 3     | 2      | 2      | 2     | 2     | 2     |
| 4890   |      |      |      |      |      |      |      |      | 2     | 3      | 3      | 1     | 1     | 1     |
| 4891   |      |      |      |      |      |      |      |      | 3     | 3      | 3      | 5     | 5     | 4     |
| 4894   | 6    | 6    | 1    | 6    | 6    | 6    | 6    | 2    | 3     | 2      | 3      | 4     | 4     | 5     |
| 4895   |      |      |      |      |      |      |      |      | 2     | 2      | 2      | 2     | 2     | 2     |
| 4896   | 3    | 3    | 4    | 4    | 3    | 4    | 3    | 5    | 1     | 2      | 2      | 4     | 3     | 5     |
| 4897   | 5    | 5    | 3    | 4    | 4    | 4    | 4    | 4    | 4     | 3      | 3      | 5     | 5     | 5     |
| 4898   |      |      |      |      |      |      |      |      | 2     | 3      | 3      | 3     | 3     | 3     |
| 4899   |      |      |      |      |      |      |      |      | 5     | 3      | 3      | 5     | 5     | 5     |
| 4900   |      |      |      |      |      |      |      |      | 1     | 2      | 2      | 4     | 4     | 4     |



| respid | Q48k | Q48l | Q48m | Q48n | Q48o | Q48p | Q48q | Q48r | Q49_1 | Q50a_1 | Q50b_1 | Q51_1 | Q51_2 | Q52_1 |   |
|--------|------|------|------|------|------|------|------|------|-------|--------|--------|-------|-------|-------|---|
| 4901   |      |      |      |      |      |      |      |      |       | 2      | 3      | 3     | 5     | 5     | 5 |
| 4903   |      |      |      |      |      |      |      |      |       | 3      | 3      | 3     | 3     | 4     | 4 |
| 4904   |      |      |      |      |      |      |      |      |       | 3      | 3      | 3     | 5     | 5     | 5 |
| 4908   |      |      |      |      |      |      |      |      |       | 3      | 3      | 3     | 5     | 5     | 5 |
| 4909   |      |      |      |      |      |      |      |      |       | 1      | 2      | 2     | 2     | 3     | 1 |
| 4913   |      |      |      |      |      |      |      |      |       | 3      | 3      | 3     | 5     | 5     | 5 |
| 4917   | 1    | 5    | 6    | 2    | 6    | 6    | 1    | 6    | 2     | 2      | 2      | 4     | 4     | 4     | 4 |
| 4918   | 3    | 3    | 5    | 3    | 3    | 3    | 2    | 5    | 3     | 2      | 2      | 3     | 4     | 3     | 3 |
| 4920   |      |      |      |      |      |      |      |      |       | 5      | 3      | 3     | 5     | 5     | 5 |
| 4921   |      |      |      |      |      |      |      |      |       | 2      | 3      | 3     | 4     | 4     | 5 |
| 4925   | 3    | 2    | 3    | 2    | 5    | 3    | 3    | 3    | 3     | 3      | 2      | 5     | 5     | 3     | 3 |
| 4926   |      |      |      |      |      |      |      |      |       | 2      | 3      | 3     | 4     | 4     | 4 |
| 4927   |      |      |      |      |      |      |      |      |       | 3      | 3      | 3     | 5     | 5     | 4 |
| 4928   |      |      |      |      |      |      |      |      |       | 4      | 3      | 3     | 5     | 5     | 5 |
| 4929   |      |      |      |      |      |      |      |      |       | 2      | 2      | 2     | 2     | 2     | 2 |
| 4930   | 6    | 5    | 2    | 6    | 6    | 6    | 6    | 2    | 3     | 3      | 3      | 5     | 5     | 5     | 5 |
| 4931   |      |      |      |      |      |      |      |      |       | 2      | 3      | 3     | 4     | 4     | 3 |
| 4932   | 3    | 4    | 3    | 3    | 4    | 5    | 4    | 4    | 3     | 2      | 3      | 3     | 3     | 3     | 3 |
| 4933   |      |      |      |      |      |      |      |      |       | 3      | 3      | 3     | 5     | 5     | 4 |
| 4934   | 6    | 6    | 2    | 6    | 5    | 5    | 6    | 5    | 4     | 3      | 3      | 4     | 4     | 4     | 5 |
| 5934   |      |      |      |      |      |      |      |      |       | 4      | 3      | 3     | 5     | 5     | 5 |
| 5935   | 5    | 6    | 1    | 6    | 6    | 5    | 5    | 2    | 3     | 3      | 3      | 5     | 5     | 4     | 4 |
| 5936   | 6    | 6    | 1    | 6    | 5    | 6    | 6    | 1    | 3     | 3      | 3      | 5     | 5     | 5     | 5 |
| 5938   |      |      |      |      |      |      |      |      |       | 3      | 3      | 3     | 5     | 5     | 5 |
| 5939   | 5    | 4    | 4    | 4    | 4    | 4    | 4    | 5    | 3     | 3      | 3      | 4     | 4     | 4     | 5 |
| 5940   | 5    | 6    | 5    | 5    | 6    | 6    | 6    | 4    | 2     | 3      | 3      | 4     | 5     | 5     | 5 |
| 5942   |      |      |      |      |      |      |      |      |       | 4      | 3      | 3     | 4     | 4     | 3 |
| 5944   |      |      |      |      |      |      |      |      |       | 3      | 2      | 3     | 4     | 4     | 4 |
| 5951   |      |      |      |      |      |      |      |      |       | 2      | 2      | 2     | 2     | 3     | 2 |
| 5952   | 2    | 4    | 2    | 2    | 6    | 3    | 6    | 6    | 2     | 2      | 2      | 2     | 2     | 2     | 3 |
| 5954   |      |      |      |      |      |      |      |      |       | 3      | 3      | 3     | 4     | 5     | 5 |
| 5956   |      |      |      |      |      |      |      |      |       | 3      | 3      | 3     | 4     | 5     | 4 |

| respid | Q48k | Q48l | Q48m | Q48n | Q48o | Q48p | Q48q | Q48r | Q49_1 | Q50a_1 | Q50b_1 | Q51_1 | Q51_2 | Q52_1 |   |
|--------|------|------|------|------|------|------|------|------|-------|--------|--------|-------|-------|-------|---|
| 5957   |      |      |      |      |      |      |      |      |       | 3      | 2      | 2     | 4     | 4     | 4 |
| 5958   |      |      |      |      |      |      |      |      |       | 2      | 3      | 3     | 4     | 4     | 4 |
| 5959   | 5    | 5    | 3    | 4    | 4    | 3    | 5    | 6    | 3     | 3      | 3      | 5     | 5     | 3     |   |
| 5960   |      |      |      |      |      |      |      |      |       | 2      | 3      | 3     | 5     | 5     | 5 |
| 5963   |      |      |      |      |      |      |      |      |       | 5      | 3      | 3     | 5     | 5     | 5 |
| 5966   |      |      |      |      |      |      |      |      |       | 3      | 2      | 3     | 5     | 5     | 5 |
| 5968   |      |      |      |      |      |      |      |      |       | 2      | 3      | 3     | 5     | 5     | 5 |
| 5974   | 6    | 6    | 1    | 6    | 6    | 6    | 6    | 6    | 1     | 2      | 3      | 3     | 5     | 5     | 5 |
| 5975   | 6    | 6    | 1    | 6    | 6    | 6    | 6    | 6    | 6     | 4      | 3      | 3     | 5     | 5     | 4 |
| 5976   |      |      |      |      |      |      |      |      |       | 4      | 2      | 1     | 3     | 2     | 2 |
| 5977   | 6    | 6    | 4    | 4    | 5    | 5    | 5    | 4    | 4     | 2      | 3      | 3     | 5     | 5     | 5 |
| 5978   |      |      |      |      |      |      |      |      |       | 2      | 2      | 2     | 3     | 3     | 3 |
| 5979   | 5    | 6    | 1    | 5    | 6    | 6    | 6    | 6    | 2     | 4      | 3      | 3     | 4     | 5     | 4 |
| 5983   | 6    | 6    | 3    | 5    | 6    | 6    | 6    | 6    |       | 4      | 3      | 2     | 5     | 5     | 5 |
| 5984   |      |      |      |      |      |      |      |      |       | 1      | 2      | 1     | 4     | 3     | 4 |
| 5990   | 6    | 6    | 1    | 6    | 6    | 6    | 6    | 6    | 1     | 3      | 3      | 3     | 5     | 5     | 5 |
| 5991   | 6    | 4    | 3    | 5    | 6    | 4    | 6    | 6    | 2     | 5      | 3      | 3     | 5     | 5     | 5 |
| 5992   |      |      |      |      |      |      |      |      |       | 2      | 3      | 3     | 4     | 4     | 4 |
| 5993   | 6    | 6    | 2    | 6    | 6    | 6    | 6    | 6    |       | 2      | 2      | 2     | 4     | 3     | 5 |
| 5994   | 6    | 6    | 6    | 1    | 6    | 6    | 6    | 6    | 6     | 3      | 3      | 2     | 4     | 4     | 3 |
| 5996   | 6    | 6    | 6    | 6    | 6    | 6    | 6    | 6    | 6     | 2      | 3      | 3     | 5     | 5     | 5 |
| 6001   |      |      |      |      |      |      |      |      |       | 2      | 2      | 2     | 3     | 3     | 3 |
| 6003   | 6    | 5    | 3    | 5    | 6    | 5    | 5    | 5    | 3     | 3      | 3      | 3     | 5     | 5     | 5 |
| 6004   |      |      |      |      |      |      |      |      |       | 1      | 1      | 3     | 5     | 5     | 5 |
| 6005   |      |      |      |      |      |      |      |      |       | 2      | 2      | 2     | 3     | 3     | 4 |
| 6006   | 4    | 4    | 3    | 4    | 4    | 4    | 4    | 4    | 3     | 2      | 3      | 2     | 4     | 4     | 4 |
| 6008   |      |      |      |      |      |      |      |      |       | 2      | 3      | 3     | 4     | 4     | 4 |
| 6009   | 6    | 6    | 2    | 6    | 6    | 6    | 6    | 6    | 2     | 2      | 3      | 2     | 5     | 4     | 5 |
| 6014   |      |      |      |      |      |      |      |      |       | 3      | 3      | 3     | 5     | 5     | 5 |
| 6016   |      |      |      |      |      |      |      |      |       | 1      | 3      | 3     | 5     | 5     | 5 |
| 6017   | 4    | 6    | 4    | 4    | 4    | 4    | 4    | 4    | 6     | 4      | 3      | 3     | 3     | 3     | 4 |
| 6018   | 4    | 3    | 3    | 4    | 4    | 3    | 3    | 3    | 4     | 1      | 3      | 3     | 3     | 3     | 3 |

| respid | Q48k | Q48l | Q48m | Q48n | Q48o | Q48p | Q48q | Q48r | Q49_1 | Q50a_1 | Q50b_1 | Q51_1 | Q51_2 | Q52_1 |   |
|--------|------|------|------|------|------|------|------|------|-------|--------|--------|-------|-------|-------|---|
| 6020   | 2    | 3    | 5    | 3    | 3    | 3    | 3    | 3    | 5     | 1      | 2      | 2     | 4     | 4     | 4 |
| 6021   |      |      |      |      |      |      |      |      |       | 2      | 3      | 3     | 5     | 5     | 4 |
| 6024   |      |      |      |      |      |      |      |      |       | 3      | 3      | 3     | 5     | 5     | 5 |
| 6025   |      |      |      |      |      |      |      |      |       | 3      | 3      | 3     | 5     | 5     | 5 |
| 6026   | 5    | 6    | 1    | 6    | 6    | 6    | 6    | 6    | 3     | 2      | 2      | 2     | 4     | 4     | 4 |
| 6032   |      |      |      |      |      |      |      |      |       | 2      | 2      | 2     | 4     | 4     | 4 |
| 6035   | 6    | 6    | 2    | 6    | 6    | 6    | 6    | 6    | 2     | 2      | 3      | 3     | 4     | 4     | 4 |
| 6038   |      |      |      |      |      |      |      |      |       | 2      | 3      | 3     | 4     | 4     | 3 |
| 6043   | 3    | 6    | 2    | 6    | 6    | 6    | 6    | 5    | 1     | 2      | 3      | 2     | 3     | 3     | 3 |
| 6044   | 5    | 6    | 5    | 6    | 6    | 6    | 6    | 6    | 3     | 3      | 3      | 3     | 5     | 5     | 4 |
| 6046   |      |      |      |      |      |      |      |      |       | 2      | 3      | 3     | 5     | 5     | 5 |
| 6047   | 6    | 6    |      | 6    | 6    | 6    | 6    | 6    |       | 4      | 2      | 2     | 5     | 5     | 5 |
| 6048   | 5    | 5    | 3    | 5    | 5    | 5    | 5    | 5    | 5     | 2      | 3      | 2     | 3     | 4     | 3 |
| 6050   |      |      |      |      |      |      |      |      |       | 2      | 2      | 3     | 4     | 3     | 5 |
| 6051   | 4    | 4    | 3    | 3    | 4    | 3    | 4    | 4    | 5     | 3      | 2      | 2     | 3     | 3     | 3 |
| 6053   | 6    | 6    | 3    | 6    | 6    | 6    | 6    | 6    | 1     | 2      | 2      | 3     | 5     | 4     | 5 |
| 6054   |      |      |      |      |      |      |      |      |       | 3      | 2      | 3     | 4     | 4     | 3 |
| 6056   |      |      |      |      |      |      |      |      |       | 2      | 3      | 3     | 5     | 5     | 4 |
| 6058   | 3    | 3    | 2    | 2    | 2    | 3    | 5    | 5    | 5     | 2      | 3      | 2     | 4     | 4     | 5 |
| 6060   |      |      |      |      |      |      |      |      |       | 2      | 3      | 3     | 5     | 4     | 5 |
| 6061   | 6    | 6    | 1    | 6    | 6    | 6    | 6    | 6    | 2     | 4      | 1      | 3     | 4     | 4     | 4 |
| 6062   | 4    | 4    | 4    | 3    | 4    | 4    | 4    | 4    | 4     | 2      | 2      | 2     | 3     | 3     | 4 |
| 6067   | 5    | 5    | 2    | 5    | 5    | 4    | 5    | 5    | 2     | 3      | 3      | 3     | 5     | 5     | 5 |
| 6070   | 6    | 6    | 2    | 6    | 6    | 3    | 6    | 6    | 3     | 3      | 3      | 3     | 5     | 5     | 5 |
| 6074   | 5    | 6    | 5    | 5    | 6    | 5    | 5    | 5    | 2     | 2      | 2      | 3     | 4     | 3     | 5 |
| 6076   | 6    | 6    | 6    | 1    | 6    | 6    | 6    | 6    | 3     | 2      | 3      | 3     | 4     | 4     | 3 |
| 6078   |      |      |      |      |      |      |      |      |       | 2      | 3      | 3     | 5     | 5     | 5 |
| 6081   |      |      |      |      |      |      |      |      |       | 3      | 3      | 3     | 5     | 5     | 5 |
| 6085   | 5    | 5    | 1    | 5    | 6    | 5    | 4    | 5    | 5     | 3      | 2      | 2     | 3     | 3     | 3 |
| 6088   |      |      |      |      |      |      |      |      |       | 3      | 3      | 3     | 5     | 5     | 5 |
| 6092   |      |      |      |      |      |      |      |      |       | 2      | 3      | 3     | 5     | 5     | 5 |
| 6095   |      |      |      |      |      |      |      |      |       | 4      | 3      | 2     | 4     | 5     | 5 |

| respid | Q48k | Q48l | Q48m | Q48n | Q48o | Q48p | Q48q | Q48r | Q49_1 | Q50a_1 | Q50b_1 | Q51_1 | Q51_2 | Q52_1 |   |
|--------|------|------|------|------|------|------|------|------|-------|--------|--------|-------|-------|-------|---|
| 6098   | 4    | 4    | 3    | 4    | 4    | 4    | 4    | 4    | 3     | 2      | 2      | 2     | 3     | 3     | 3 |
| 6101   |      |      |      |      |      |      |      |      |       | 3      | 3      | 3     | 4     | 4     | 4 |
| 6102   | 2    | 2    | 1    | 1    | 3    | 1    | 3    | 6    | 2     | 2      | 2      | 3     | 4     | 4     | 4 |
| 6105   | 6    | 6    | 3    | 5    | 6    | 3    | 5    | 3    | 2     | 2      | 3      | 3     | 4     | 4     | 4 |
| 6106   |      |      |      |      |      |      |      |      |       | 4      | 3      | 3     | 3     | 5     | 4 |
| 6107   | 4    | 4    |      | 4    | 4    | 4    | 4    | 4    | 4     | 3      | 2      | 2     | 1     | 2     | 2 |
| 6111   |      |      |      |      |      |      |      |      |       | 4      | 1      | 1     | 3     | 3     | 3 |
| 6112   | 6    |      |      |      |      |      | 6    | 3    | 3     | 3      | 3      | 3     | 5     | 5     | 4 |
| 6113   |      |      |      |      |      |      |      |      |       | 1      | 2      | 2     | 3     | 3     | 3 |
| 6115   |      |      |      |      |      |      |      |      |       | 2      | 3      | 3     | 5     | 5     | 4 |
| 6116   |      |      |      |      |      |      |      |      |       | 4      | 3      | 3     | 5     | 5     | 5 |
| 6117   | 6    | 5    | 2    | 5    | 6    | 6    | 5    | 2    | 2     | 2      | 2      | 2     | 4     | 5     | 3 |
| 6124   |      |      |      |      |      |      |      |      |       | 1      | 2      | 3     | 3     | 4     | 3 |
| 6125   |      |      |      |      |      |      |      |      |       | 4      | 3      | 3     | 4     | 4     | 3 |
| 6128   |      |      |      |      |      |      |      |      |       | 2      | 3      | 3     | 4     | 4     | 4 |
| 6133   | 6    | 6    | 1    | 6    | 6    | 6    | 6    | 2    | 4     | 4      | 3      | 2     | 4     | 4     | 4 |
| 6134   | 5    | 5    | 3    | 4    | 4    | 4    | 4    | 4    | 3     | 3      | 3      | 3     | 4     | 4     | 5 |
| 6135   |      |      |      |      |      |      |      |      |       | 3      | 2      | 2     | 4     | 4     | 4 |
| 6138   | 3    | 3    | 6    | 2    | 3    | 3    | 3    | 3    | 5     | 2      | 2      | 3     | 3     | 4     | 3 |
| 6140   |      |      |      |      |      |      |      |      |       | 3      | 3      | 2     | 4     | 4     | 4 |
| 6143   |      |      |      |      |      |      |      |      |       | 3      | 2      | 2     | 5     | 5     | 4 |
| 6147   | 4    | 4    | 5    | 2    | 4    | 3    | 4    | 4    | 4     | 3      | 3      | 3     | 5     | 5     | 4 |
| 6154   | 3    | 5    | 3    | 5    | 6    | 5    | 6    | 6    | 1     | 3      | 2      | 2     | 5     | 4     | 5 |
| 6162   |      |      |      |      |      |      |      |      |       | 3      | 3      | 3     | 5     | 5     | 4 |
| 6165   | 3    | 6    | 4    | 3    | 6    | 6    | 6    | 6    | 3     | 2      | 3      | 3     | 5     | 5     | 5 |
| 6166   |      |      |      |      |      |      |      |      |       | 3      | 2      | 2     | 2     | 2     | 4 |
| 6173   |      |      |      |      |      |      |      |      |       | 2      | 2      | 2     | 3     | 3     | 3 |
| 6180   |      |      |      |      |      |      |      |      |       | 1      | 2      | 3     | 4     | 4     | 4 |
| 6184   | 4    | 4    | 3    | 4    | 6    | 6    | 4    | 3    | 2     | 2      | 2      | 2     | 3     | 3     | 3 |
| 6185   |      |      |      |      |      |      |      |      |       | 2      | 3      | 3     | 5     | 4     | 4 |
| 6186   | 6    | 4    | 3    | 4    | 4    | 3    | 4    | 4    | 4     | 3      | 2      | 2     | 4     | 4     | 4 |
| 6188   |      |      |      |      |      |      |      |      |       | 3      | 3      | 3     | 5     | 5     | 5 |

| respid | Q48k | Q48l | Q48m | Q48n | Q48o | Q48p | Q48q | Q48r | Q49_1 | Q50a_1 | Q50b_1 | Q51_1 | Q51_2 | Q52_1 |
|--------|------|------|------|------|------|------|------|------|-------|--------|--------|-------|-------|-------|
| 6192   | 3    | 3    | 2    | 3    | 3    | 4    | 2    | 6    | 2     | 2      | 2      | 2     | 2     | 3     |
| 6194   |      |      |      |      |      |      |      |      | 4     | 3      | 3      | 4     | 4     | 4     |
| 6195   | 6    | 6    | 6    | 6    | 6    | 6    | 6    | 6    | 3     | 3      | 3      | 5     | 5     | 5     |
| 6196   | 3    | 5    | 2    | 2    | 6    | 3    | 1    | 2    | 3     | 3      | 3      | 4     | 4     | 4     |
| 6199   |      |      |      |      |      |      |      |      | 2     | 2      | 2      | 4     | 3     | 4     |
| 6200   |      |      |      |      |      |      |      |      | 2     | 3      | 2      | 5     | 5     | 5     |
| 6201   |      |      |      |      |      |      |      |      | 3     | 3      | 3      | 5     | 5     | 5     |
| 6202   | 5    | 4    | 2    | 5    | 6    | 5    | 5    | 3    | 3     | 3      | 3      | 4     | 4     | 4     |
| 6203   |      |      |      |      |      |      |      |      | 4     | 3      | 3      | 5     | 5     | 5     |
| 6205   | 6    | 6    | 4    | 6    | 6    | 6    | 6    | 3    | 2     | 3      | 3      | 4     | 3     | 5     |
| 6210   |      |      |      |      |      |      |      |      | 3     | 2      | 2      | 2     | 3     | 2     |
| 6212   |      |      |      |      |      |      |      |      | 3     | 3      | 3      | 4     | 4     | 4     |
| 6216   | 2    | 2    | 1    | 2    | 4    | 2    | 2    | 4    | 1     | 1      | 1      | 2     | 3     | 3     |
| 6218   |      |      |      |      |      |      |      |      | 1     | 1      | 3      | 5     | 4     | 4     |
| 6221   |      |      |      |      |      |      |      |      | 2     | 1      | 3      | 2     | 2     | 4     |
| 6224   |      |      |      |      |      |      |      |      | 4     | 3      | 3      | 5     | 5     | 5     |
| 6225   |      |      |      |      |      |      |      |      | 3     | 3      | 3      | 5     | 5     | 4     |
| 6227   |      |      |      |      |      |      |      |      | 4     | 3      | 3      | 5     | 5     | 5     |
| 6230   |      |      |      |      |      |      |      |      | 3     | 3      | 3      | 4     | 4     | 4     |
| 6231   |      |      |      |      |      |      |      |      | 3     | 2      | 2      | 4     | 3     | 5     |
| 6233   | 3    | 4    | 3    | 4    | 4    | 3    | 4    | 4    | 2     | 3      | 2      | 4     | 3     | 4     |
| 6234   |      |      |      |      |      |      |      |      | 2     | 2      | 2      | 3     | 3     | 3     |
| 6235   |      |      |      |      |      |      |      |      | 3     | 3      | 2      | 3     | 3     | 3     |
| 6237   |      |      |      |      |      |      |      |      | 4     | 2      | 2      | 4     | 4     | 4     |
| 6240   |      |      |      |      |      |      |      |      | 2     | 3      | 3      | 4     | 4     | 4     |
| 6248   |      |      |      |      |      |      |      |      | 2     | 3      | 3      | 4     | 4     | 4     |
| 6249   |      |      |      |      |      |      |      |      | 2     | 3      | 3      | 5     | 5     | 4     |
| 6252   |      |      |      |      |      |      |      |      | 2     | 2      | 2      | 5     | 4     | 5     |
| 6254   |      |      |      |      |      |      |      |      | 3     | 3      | 3      | 5     | 5     | 4     |
| 6269   | 4    | 3    | 3    | 4    | 4    | 3    | 4    | 3    | 2     | 2      | 2      | 4     | 4     | 4     |
| 6304   |      |      |      |      |      |      |      |      | 2     | 3      | 3      | 5     | 5     | 5     |
| 6334   |      |      |      |      |      |      |      |      | 2     | 2      | 3      | 5     | 5     | 4     |

| respid | Q48k | Q48l | Q48m | Q48n | Q48o | Q48p | Q48q | Q48r | Q49_1 | Q50a_1 | Q50b_1 | Q51_1 | Q51_2 | Q52_1 |
|--------|------|------|------|------|------|------|------|------|-------|--------|--------|-------|-------|-------|
| 6341   | 1    | 1    | 6    | 1    | 1    | 3    | 6    | 3    | 3     | 2      | 2      | 5     | 5     | 5     |
| 6350   | 4    | 4    | 2    | 4    | 4    | 4    | 4    | 3    | 3     | 2      | 2      | 4     | 4     | 4     |
| 6370   | 6    | 6    | 4    | 6    | 6    | 6    | 3    | 6    | 4     | 3      | 3      | 5     | 5     | 4     |
| 6384   | 6    | 6    | 6    | 6    |      | 3    |      | 3    | 2     | 3      | 3      | 5     | 4     | 5     |
| 6400   |      |      |      |      |      |      |      |      | 4     | 3      | 3      | 3     | 3     | 3     |
| 6418   |      |      |      |      |      |      |      |      | 3     | 3      | 3      | 5     | 5     | 5     |
| 6467   |      |      |      |      |      |      |      |      | 4     | 3      | 3      | 5     | 5     | 5     |
| 6469   |      |      |      |      |      |      |      |      | 4     | 3      | 3      | 5     | 5     | 5     |
| 6474   | 6    | 6    | 3    | 3    | 6    | 3    | 6    | 3    | 4     | 3      | 3      | 5     | 5     | 5     |
| 6475   |      |      |      |      |      |      |      |      | 2     | 3      | 3      | 5     | 5     | 5     |
| 6476   | 4    | 4    | 3    | 4    | 4    | 4    | 4    | 3    | 3     | 2      | 2      | 3     | 3     | 3     |
| 6477   |      |      |      |      |      |      |      |      | 2     | 3      | 2      | 5     | 5     | 5     |
| 6480   |      |      |      |      |      |      |      |      | 2     | 3      | 3      | 5     | 5     | 5     |
| 6481   |      |      |      |      |      |      |      |      | 3     | 2      | 2      | 3     | 2     | 2     |
| 6485   | 4    |      |      |      | 5    |      |      |      | 3     | 3      | 3      | 5     | 5     | 5     |
| 6488   |      |      |      |      |      |      |      |      | 3     | 2      | 2      | 2     | 3     | 2     |
| 6495   |      |      |      |      |      |      |      |      | 3     | 3      | 3      | 5     | 5     | 5     |
| 6499   | 4    | 3    | 4    | 3    | 3    | 4    | 3    | 3    | 2     | 3      | 3      | 5     | 5     | 5     |
| 6500   | 5    | 5    | 4    | 5    | 4    | 5    | 5    | 4    | 3     | 2      | 2      | 3     | 4     | 3     |
| 6504   |      |      |      |      |      |      |      |      | 2     | 2      | 3      | 2     | 2     | 3     |
| 6507   |      |      |      |      |      |      |      |      | 1     | 3      | 3      | 4     | 4     | 5     |
| 6512   | 5    | 5    | 2    | 5    | 6    | 4    | 5    | 4    | 2     | 2      | 2      | 4     | 4     | 4     |
| 6525   | 4    | 4    | 4    | 3    | 3    | 4    | 4    | 4    | 1     | 2      | 2      | 3     | 3     | 3     |
| 6532   | 6    | 6    | 2    | 6    | 6    | 6    | 6    | 1    | 3     | 3      | 3      | 5     | 5     | 5     |
| 6535   |      |      |      |      |      |      |      |      | 3     | 3      | 3      | 5     | 5     | 4     |
| 6546   | 6    | 5    | 5    | 6    | 6    | 6    | 6    | 6    | 4     | 3      | 3      | 5     | 5     | 5     |
| 6551   | 6    | 6    | 1    | 6    | 6    | 6    | 6    | 1    | 4     | 3      | 3      | 4     | 5     | 4     |
| 6556   | 1    |      | 5    | 2    | 4    | 5    | 3    | 6    | 1     | 3      | 2      | 3     | 3     | 3     |
| 6566   |      |      |      |      |      |      |      |      | 3     | 2      | 3      | 4     | 4     | 4     |
| 6569   |      |      |      |      |      |      |      |      | 4     | 3      | 2      | 5     | 4     | 4     |
| 6574   | 5    | 5    | 3    | 5    | 5    | 5    | 5    | 3    | 2     | 3      | 3      | 4     | 4     | 5     |
| 6576   | 5    | 5    | 2    | 6    | 6    | 3    | 3    | 4    | 1     | 2      | 2      | 4     | 3     | 4     |

| respid | Q48k | Q48l | Q48m | Q48n | Q48o | Q48p | Q48q | Q48r | Q49_1 | Q50a_1 | Q50b_1 | Q51_1 | Q51_2 | Q52_1 |   |
|--------|------|------|------|------|------|------|------|------|-------|--------|--------|-------|-------|-------|---|
| 6580   |      |      |      |      |      |      |      |      |       | 4      | 3      | 3     | 5     | 5     | 4 |
| 6584   |      |      |      |      |      |      |      |      |       | 3      | 3      | 3     | 5     | 5     | 5 |
| 6585   |      |      |      |      |      |      |      |      |       | 3      | 3      | 3     | 4     | 4     | 4 |
| 6589   | 6    | 6    | 1    | 6    | 6    | 6    | 6    | 3    |       | 3      | 3      | 3     | 5     | 5     | 5 |
| 6590   | 2    | 1    | 6    | 1    | 5    | 2    | 2    | 4    |       | 2      | 2      | 2     | 3     | 3     | 4 |
| 6598   |      |      |      |      |      |      |      |      |       | 5      | 3      | 3     | 5     | 5     | 5 |
| 6603   |      |      |      |      |      |      |      |      |       | 2      | 2      | 2     | 1     | 1     | 2 |
| 6618   | 4    | 4    | 4    | 4    | 3    | 4    | 4    | 4    |       | 3      | 2      | 2     | 1     | 2     | 1 |
| 6630   |      |      |      |      |      |      |      |      |       | 2      | 2      | 2     | 2     | 1     | 2 |
| 6636   |      |      |      |      |      |      |      |      |       | 2      | 3      | 3     | 4     | 4     | 4 |
| 6649   |      |      |      |      |      |      |      |      |       | 4      | 3      | 3     | 5     | 5     | 5 |
| 6675   |      |      |      |      |      |      |      |      |       | 1      | 1      | 1     | 2     | 2     | 2 |
| 6678   |      |      |      |      |      |      |      |      |       | 2      | 3      | 3     | 5     | 5     | 4 |
| 6681   |      |      |      |      |      |      |      |      |       | 4      | 3      | 3     | 5     | 5     | 5 |
| 6684   |      |      |      |      |      |      |      |      |       | 1      | 2      | 1     | 2     | 2     | 3 |
| 6688   |      |      |      |      |      |      |      |      |       | 5      | 3      | 3     | 5     | 5     | 5 |
| 6691   |      |      |      |      |      |      |      |      |       | 4      | 3      | 3     | 5     | 5     | 5 |
| 6694   | 6    | 6    | 1    | 6    | 6    | 6    | 6    | 2    |       | 3      | 3      | 3     | 4     | 4     | 4 |
| 6696   |      |      |      |      |      |      |      |      |       | 4      | 3      | 3     | 4     | 4     | 3 |
| 6720   | 4    | 4    | 2    | 5    | 4    | 3    | 3    | 4    |       | 3      | 2      | 2     | 4     | 3     | 4 |
| 6722   |      |      |      |      |      |      |      |      |       | 2      | 1      | 1     | 2     | 2     | 2 |
| 6724   |      |      |      |      |      |      |      |      |       | 4      | 3      | 3     | 5     | 5     | 5 |
| 6725   |      |      |      |      |      |      |      |      |       | 3      | 3      | 3     | 5     | 5     | 4 |
| 6727   |      |      |      |      |      |      |      |      |       | 4      | 3      | 3     | 5     | 5     | 5 |
| 6734   | 6    | 6    | 1    | 6    | 6    | 6    | 6    | 2    |       | 3      | 3      | 3     | 4     | 4     | 4 |
| 6739   |      |      |      |      |      |      |      |      |       | 2      | 3      | 3     | 5     | 4     | 5 |
| 6743   |      |      |      |      |      |      |      |      |       | 1      | 2      | 1     | 2     | 2     | 2 |
| 6749   |      |      |      |      |      |      |      |      |       | 2      | 3      | 3     | 5     | 5     | 4 |
| 6756   |      |      |      |      |      |      |      |      |       | 2      | 3      | 3     | 5     | 5     | 5 |
| 6764   |      |      |      |      |      |      |      |      |       | 4      | 2      | 3     | 4     | 4     | 5 |
| 6765   | 5    | 4    | 3    | 5    | 6    | 5    | 5    | 3    |       | 3      | 3      | 3     | 3     | 3     | 3 |
| 6768   |      |      |      |      |      |      |      |      |       | 3      | 3      | 3     | 5     | 5     | 4 |

| respid | Q48k | Q48l | Q48m | Q48n | Q48o | Q48p | Q48q | Q48r | Q49_1 | Q50a_1 | Q50b_1 | Q51_1 | Q51_2 | Q52_1 |   |
|--------|------|------|------|------|------|------|------|------|-------|--------|--------|-------|-------|-------|---|
| 6773   | 5    | 6    | 5    | 6    | 6    | 6    | 6    | 6    | 1     | 4      | 3      | 3     | 5     | 4     | 5 |
| 6775   | 6    | 6    | 1    | 6    | 6    | 6    | 6    | 6    | 4     | 2      | 3      | 3     | 5     | 5     | 4 |
| 6777   | 2    | 2    | 2    | 2    | 2    | 2    | 2    | 2    | 2     | 3      | 3      | 3     | 5     | 5     | 5 |
| 6779   |      |      | 6    | 1    |      |      |      | 3    |       | 5      | 3      | 3     | 3     | 5     | 4 |
| 6790   | 6    | 6    | 3    | 6    | 6    | 6    | 6    | 6    | 3     | 2      | 2      | 2     | 4     | 4     | 3 |
| 6797   |      |      |      |      |      |      |      |      |       | 3      | 3      | 3     | 5     | 5     | 4 |
| 6798   | 3    | 3    | 5    | 3    | 5    | 5    | 3    | 4    | 4     | 2      | 2      | 2     | 4     | 4     | 4 |
| 6808   |      |      |      |      |      |      |      |      |       | 4      | 3      | 3     | 5     | 5     | 5 |
| 6810   | 6    | 4    | 3    | 6    | 6    | 3    | 4    | 2    | 2     | 2      | 3      | 2     | 3     | 3     | 3 |
| 6811   |      |      |      |      |      |      |      |      |       | 1      | 2      | 2     | 2     | 2     | 2 |
| 6812   | 6    | 6    | 1    | 6    | 6    | 6    | 6    | 6    | 1     | 3      | 3      | 2     | 5     | 5     | 5 |
| 6814   |      |      |      |      |      |      |      |      |       | 3      | 2      | 2     | 3     | 4     | 4 |
| 6819   |      |      |      |      |      |      |      |      |       | 2      | 2      | 2     | 3     | 4     | 4 |
| 6820   |      |      |      |      |      |      |      |      |       | 4      | 2      | 2     | 4     | 4     | 4 |
| 6832   |      |      |      |      |      |      |      |      |       | 2      | 3      | 3     | 5     | 5     | 5 |
| 6854   |      |      |      |      |      |      |      |      |       | 3      | 2      | 3     | 4     | 3     | 5 |
| 6855   |      |      |      |      |      |      |      |      |       | 4      | 3      | 3     | 5     | 5     | 5 |
| 6857   |      |      |      |      |      |      |      |      |       | 3      | 3      | 2     | 4     | 4     | 4 |
| 6858   | 6    | 6    | 2    | 6    | 6    | 6    | 6    | 6    | 1     | 3      | 3      | 3     | 5     | 5     | 4 |
| 6859   | 5    | 5    | 2    | 5    | 5    | 5    | 5    | 5    | 2     | 4      | 3      | 3     | 4     | 4     | 4 |
| 6860   |      |      |      |      |      |      |      |      |       | 1      | 2      | 3     | 4     | 5     | 3 |
| 6862   | 5    | 5    | 2    | 5    | 5    | 5    | 5    | 5    | 2     | 3      | 3      | 2     | 3     | 4     | 4 |
| 6879   |      |      |      |      |      |      |      |      |       | 2      | 3      | 3     | 5     | 5     | 4 |
| 6893   |      |      |      |      |      |      |      |      |       | 4      | 3      | 3     | 5     | 5     | 5 |
| 6898   | 5    | 5    | 1    | 5    | 6    | 6    | 6    | 5    | 2     | 2      | 2      | 2     | 3     | 4     | 4 |
| 6902   |      |      |      |      |      |      |      |      |       | 3      | 3      | 3     | 4     | 4     | 3 |
| 6903   |      |      |      |      |      |      |      |      |       | 2      | 2      | 2     | 3     | 2     | 3 |
| 6907   | 5    | 4    | 2    | 5    | 6    | 5    | 5    | 5    | 3     | 2      | 2      | 3     | 3     | 4     | 3 |
| 6908   |      |      |      |      |      |      |      |      |       | 2      | 2      | 2     | 2     | 2     | 2 |
| 6912   |      |      |      |      |      |      |      |      |       | 4      | 3      | 3     | 5     | 5     | 5 |
| 6915   | 6    | 6    | 6    | 6    | 6    | 6    | 6    | 4    | 4     | 3      | 3      | 2     | 4     | 4     | 3 |
| 6916   | 3    | 6    | 3    | 2    | 6    | 4    | 2    | 3    | 3     | 2      | 2      | 2     | 2     | 2     | 2 |



| respid | Q48k | Q48l | Q48m | Q48n | Q48o | Q48p | Q48q | Q48r | Q49_1 | Q50a_1 | Q50b_1 | Q51_1 | Q51_2 | Q52_1 |
|--------|------|------|------|------|------|------|------|------|-------|--------|--------|-------|-------|-------|
| 6917   | 5    | 6    | 2    | 5    | 5    | 2    | 2    | 6    | 2     | 3      | 3      | 5     | 5     | 3     |
| 6923   |      |      |      |      |      |      |      |      | 2     | 3      | 3      | 5     | 4     | 3     |
| 6934   |      |      |      |      |      |      |      |      | 2     | 3      | 3      | 5     | 5     | 5     |
| 6937   |      |      |      |      |      |      |      |      | 3     | 3      | 3      | 5     | 5     | 4     |
| 6945   |      |      |      |      |      |      |      |      | 3     | 3      | 3      | 4     | 4     | 3     |
| 6954   |      |      |      |      |      |      |      |      | 2     | 2      | 2      | 4     | 4     | 4     |
| 6956   | 4    | 4    | 2    | 5    | 6    | 6    | 5    | 2    | 3     | 3      | 3      | 4     | 4     | 5     |
| 6958   |      |      |      |      |      |      |      |      | 5     | 3      | 3      | 3     | 3     | 3     |
| 6961   | 5    | 6    | 5    | 6    | 6    | 6    | 6    | 2    | 2     | 2      | 2      | 4     | 4     | 4     |
| 6963   | 6    | 6    | 2    | 5    | 6    | 5    | 5    | 5    | 4     | 3      | 3      | 5     | 5     | 4     |
| 6964   | 6    | 6    | 2    | 5    | 6    | 6    | 6    | 2    | 4     | 3      | 3      | 5     | 5     | 4     |
| 6976   |      |      |      |      |      |      |      |      | 3     | 2      | 3      | 3     | 3     | 4     |
| 6977   | 5    | 5    | 5    | 5    | 5    | 5    | 5    | 5    | 2     | 2      | 2      | 2     | 2     | 2     |
| 7000   |      |      |      |      |      |      |      |      | 2     | 2      | 3      | 3     | 4     | 3     |
| 7001   |      |      |      |      |      |      |      |      | 4     | 3      | 3      | 5     | 5     | 5     |
| 7005   |      |      |      |      |      |      |      |      | 3     | 3      | 3      | 5     | 5     | 4     |
| 7006   | 5    | 5    | 5    | 6    | 6    | 5    | 6    | 3    | 4     | 2      | 2      | 4     | 3     | 3     |
| 7008   | 1    | 2    | 3    | 1    | 4    | 5    | 4    | 6    | 1     | 2      | 3      | 4     | 4     | 5     |
| 7009   | 3    | 4    | 3    | 4    | 6    | 6    | 4    | 3    | 2     | 3      | 3      | 4     | 4     | 3     |
| 7019   |      |      |      |      |      |      |      |      | 2     | 3      | 3      | 4     | 4     | 4     |
| 7021   | 4    | 4    | 3    | 4    | 4    | 4    | 4    | 4    | 3     | 2      | 3      | 5     | 5     | 5     |
| 7026   |      |      |      |      |      |      |      |      | 3     | 3      | 3      | 4     | 4     | 4     |
| 7030   | 3    | 2    | 2    | 2    | 2    | 2    | 2    | 3    | 3     | 2      | 2      | 2     | 2     | 3     |
| 7034   |      |      |      |      |      |      |      |      | 2     | 2      | 3      | 4     | 4     | 3     |
| 7039   | 6    | 5    | 1    | 6    | 6    | 5    | 4    | 4    | 3     | 3      | 3      | 5     | 5     | 5     |
| 7041   |      |      |      |      |      |      |      |      | 3     | 3      | 3      | 4     | 5     | 5     |
| 7047   | 4    | 4    | 3    | 4    | 6    | 4    | 4    | 3    | 3     | 3      | 3      | 5     | 5     | 5     |
| 7051   |      |      |      |      |      |      |      |      | 3     | 2      | 3      | 4     | 4     | 4     |
| 7052   |      |      |      |      |      |      |      |      | 3     | 2      | 2      | 3     | 3     | 4     |
| 7059   | 6    | 6    | 2    | 5    | 6    | 6    | 6    | 2    | 2     | 2      | 2      | 4     | 5     | 4     |
| 7062   | 4    | 2    | 5    | 4    | 5    | 2    | 2    | 6    | 2     | 3      | 3      | 5     | 5     | 3     |
| 7065   | 5    | 5    | 3    | 1    | 6    | 4    | 6    | 6    | 2     | 2      | 2      | 2     | 3     | 5     |

| respid | Q48k | Q48l | Q48m | Q48n | Q48o | Q48p | Q48q | Q48r | Q49_1 | Q50a_1 | Q50b_1 | Q51_1 | Q51_2 | Q52_1 |   |
|--------|------|------|------|------|------|------|------|------|-------|--------|--------|-------|-------|-------|---|
| 7066   |      | 6    | 6    | 1    | 6    | 6    | 6    | 6    | 1     | 3      | 3      | 3     | 5     | 5     | 5 |
| 7069   |      | 3    | 4    | 5    | 3    | 6    | 6    | 3    | 5     | 2      | 2      | 3     | 5     | 4     | 5 |
| 7070   |      |      |      |      |      |      |      |      |       | 2      | 3      | 3     | 5     | 5     | 5 |
| 7073   |      |      |      |      |      |      |      |      |       | 5      | 3      | 3     | 5     | 5     | 5 |
| 7078   |      |      |      |      |      |      |      |      |       | 2      | 3      | 3     | 5     | 5     | 5 |
| 7083   |      |      |      |      |      |      |      |      |       | 3      | 3      | 3     | 4     | 5     | 5 |
| 7084   |      |      |      |      |      |      |      |      |       | 2      | 2      | 2     | 3     | 2     | 3 |
| 7085   |      |      |      |      |      |      |      |      |       | 3      | 3      | 3     | 4     | 5     | 4 |
| 7088   |      |      |      |      |      |      |      |      |       | 2      | 2      | 2     | 3     | 4     | 3 |
| 7090   |      |      |      |      |      |      |      |      |       | 2      | 2      | 2     | 2     | 3     | 2 |
| 7095   |      | 1    | 3    | 2    | 1    | 2    | 5    | 2    | 5     | 3      | 3      | 3     | 5     | 4     | 4 |
| 7100   |      |      |      |      |      |      |      |      |       | 4      | 3      | 3     | 4     | 5     | 4 |
| 7102   |      |      |      |      |      |      |      |      |       | 1      | 2      | 2     | 4     | 4     | 4 |
| 7103   |      | 6    | 6    | 1    | 6    | 6    | 6    | 5    | 2     | 4      | 3      | 3     | 5     | 5     | 5 |
| 7108   |      | 6    | 6    | 3    | 5    | 6    | 6    | 6    | 3     | 4      | 3      | 3     | 4     | 4     | 5 |
| 7109   |      | 6    | 6    | 1    | 6    | 6    | 6    | 6    | 3     | 4      | 3      | 3     | 5     | 5     | 5 |
| 7110   |      |      |      |      |      |      |      |      |       | 2      | 3      | 3     | 5     | 5     | 5 |
| 7112   |      |      |      |      |      |      |      |      |       | 3      | 3      | 3     | 5     | 5     | 5 |
| 7114   |      | 6    | 6    | 2    | 6    | 6    | 5    | 3    | 4     | 3      | 2      | 3     | 5     | 5     | 4 |
| 7116   |      |      |      |      |      |      |      |      |       | 1      | 3      | 3     | 4     | 4     | 3 |
| 7117   |      | 6    | 4    | 4    | 6    | 6    | 6    | 5    | 4     | 3      | 2      | 2     | 2     | 4     | 3 |
| 7118   |      | 4    | 4    | 4    | 5    | 5    | 4    | 5    | 4     | 2      | 2      | 3     | 3     | 2     | 3 |
| 7120   |      | 4    | 3    | 3    | 5    | 6    | 3    | 3    | 4     | 2      | 2      | 3     | 4     | 3     | 3 |
| 7124   |      | 4    | 4    | 3    | 3    | 4    | 3    | 4    | 3     | 3      | 3      | 3     | 4     | 4     | 4 |
| 7130   |      |      |      |      |      |      |      |      |       | 2      | 3      | 3     | 4     | 4     | 4 |
| 7135   |      |      |      |      |      |      |      |      |       | 4      | 3      | 3     | 5     | 5     | 5 |
| 7137   |      |      |      |      |      |      |      |      |       | 2      | 1      | 2     | 2     | 3     | 4 |
| 7140   |      |      |      |      |      |      |      |      |       | 2      | 2      | 2     | 3     | 3     | 5 |
| 7141   |      | 6    | 6    | 1    | 6    | 6    | 5    | 5    | 3     | 3      | 3      | 3     | 4     | 4     | 4 |
| 7148   |      | 4    | 4    | 3    | 4    | 4    | 4    | 4    | 3     | 5      | 3      | 3     | 5     | 5     | 5 |
| 7152   |      |      |      |      |      |      |      |      |       | 4      | 3      | 3     | 5     | 5     | 5 |
| 7154   |      |      |      |      |      |      |      |      |       | 3      | 3      | 3     | 5     | 4     | 5 |

| respid | Q48k | Q48l | Q48m | Q48n | Q48o | Q48p | Q48q | Q48r | Q49_1 | Q50a_1 | Q50b_1 | Q51_1 | Q51_2 | Q52_1 |   |
|--------|------|------|------|------|------|------|------|------|-------|--------|--------|-------|-------|-------|---|
| 7156   |      | 6    | 6    | 4    | 6    | 6    | 6    | 5    | 4     | 3      | 3      | 3     | 5     | 5     | 5 |
| 7158   |      | 2    | 4    | 3    | 2    | 4    | 3    | 2    | 4     | 4      | 2      | 2     | 3     | 2     | 4 |
| 7159   |      |      |      |      |      |      |      |      |       | 3      | 3      | 3     | 5     | 5     | 4 |
| 7161   |      |      |      |      |      |      |      |      |       | 3      | 3      | 2     | 3     | 4     | 4 |
| 7164   |      |      |      |      |      |      |      |      |       | 2      | 3      | 3     | 5     | 5     | 5 |
| 7166   |      |      |      |      |      |      |      |      |       | 3      | 3      | 3     | 4     | 4     | 5 |
| 7167   |      |      |      |      |      |      |      |      |       | 2      | 3      | 3     | 4     | 4     | 4 |
| 7168   |      |      |      |      |      |      |      |      |       | 2      | 3      | 3     | 5     | 5     | 5 |
| 7170   |      |      |      |      |      |      |      |      |       | 3      | 2      | 3     | 5     | 5     | 5 |
| 7171   | 6    | 6    | 2    | 4    | 6    | 4    | 4    | 4    | 4     | 2      | 3      | 2     | 5     | 4     | 4 |
| 7172   | 4    | 4    | 4    | 3    | 4    | 4    | 4    | 4    | 3     | 3      | 3      | 3     | 4     | 4     | 4 |
| 7173   | 6    | 6    | 2    | 6    | 6    | 6    | 6    | 6    | 1     | 3      | 3      | 2     | 4     | 4     | 4 |
| 7175   | 6    | 6    | 1    | 6    | 6    | 6    | 6    | 6    | 3     | 4      | 3      | 3     | 4     | 4     | 4 |
| 7176   |      |      |      |      |      |      |      |      |       | 2      | 3      | 2     | 3     | 3     | 3 |
| 7180   |      |      |      |      |      |      |      |      |       | 4      | 3      | 3     | 5     | 5     | 5 |
| 7183   |      |      |      |      |      |      |      |      |       | 3      | 3      | 3     | 4     | 4     | 4 |
| 7189   |      |      |      |      |      |      |      |      |       | 4      | 3      | 3     | 5     | 5     | 5 |
| 7193   |      |      |      |      |      |      |      |      |       | 4      | 3      | 3     | 5     | 4     | 5 |
| 7194   | 3    | 4    | 2    | 2    | 2    | 3    | 3    | 4    | 4     | 2      | 2      | 2     | 2     | 3     | 4 |
| 7195   | 6    | 6    | 2    | 6    | 6    | 6    | 6    | 6    | 2     | 3      | 3      | 3     | 4     | 4     | 3 |
| 7200   | 4    | 4    | 3    | 4    | 4    | 4    | 3    | 4    | 3     | 2      | 3      | 3     | 4     | 4     | 4 |
| 7201   | 4    | 4    | 4    | 4    | 4    | 4    | 4    | 4    | 3     | 2      | 3      | 2     | 3     | 3     | 5 |
| 7205   |      |      |      |      |      |      |      |      |       | 2      | 2      | 2     | 4     | 4     | 3 |
| 7207   |      |      |      |      |      |      |      |      |       | 3      | 3      | 3     | 5     | 5     | 5 |
| 7208   |      |      |      |      |      |      |      |      |       | 4      | 3      | 3     | 5     | 5     | 5 |
| 7210   | 6    | 6    | 2    | 6    | 6    | 6    | 6    | 6    | 2     | 2      | 3      | 3     | 5     | 5     | 3 |
| 7211   |      |      |      |      |      |      |      |      |       | 5      | 3      | 3     | 5     | 5     | 5 |
| 7217   | 4    | 4    |      | 6    | 3    | 4    | 4    | 4    | 3     | 3      | 2      | 2     | 3     | 3     | 3 |
| 7218   | 3    | 4    | 4    | 3    | 4    | 4    | 4    | 4    | 3     | 2      | 3      | 2     | 4     | 4     | 5 |
| 7220   |      |      |      |      |      |      |      |      |       | 2      | 3      | 3     | 5     | 5     | 5 |
| 7225   |      |      |      |      |      |      |      |      |       | 4      | 3      | 3     | 4     | 4     | 4 |
| 7228   |      |      |      |      |      |      |      |      |       | 4      | 3      | 3     | 4     | 4     | 4 |

| respid | Q48k | Q48l | Q48m | Q48n | Q48o | Q48p | Q48q | Q48r | Q49_1 | Q50a_1 | Q50b_1 | Q51_1 | Q51_2 | Q52_1 |   |
|--------|------|------|------|------|------|------|------|------|-------|--------|--------|-------|-------|-------|---|
| 7230   |      |      |      |      |      |      |      |      |       | 3      | 3      | 3     | 5     | 5     | 5 |
| 7233   |      |      |      |      |      |      |      |      |       | 3      | 2      | 2     | 5     | 5     | 5 |
| 7234   |      |      |      |      |      |      |      |      |       | 3      | 2      | 2     | 3     | 3     | 3 |
| 7235   |      |      |      |      |      |      |      |      |       | 3      | 3      | 3     | 5     | 5     | 5 |
| 7236   |      |      |      |      |      |      |      |      |       | 2      | 2      | 2     | 3     | 3     | 3 |
| 7241   |      |      |      |      |      |      |      |      |       | 4      | 3      | 2     | 4     | 5     | 3 |
| 7251   |      |      |      |      |      |      |      |      |       | 3      | 3      | 3     | 4     | 4     | 4 |
| 7253   |      |      |      |      |      |      |      |      |       | 2      | 3      | 2     | 4     | 4     | 3 |
| 7259   |      |      |      |      |      |      |      |      |       | 4      | 3      | 3     | 4     | 4     | 4 |
| 7260   | 3    | 3    | 5    | 3    | 4    | 3    | 4    | 4    |       | 2      | 2      | 1     | 3     | 3     | 4 |
| 7261   |      |      |      |      |      |      |      |      |       | 2      | 2      | 2     | 3     | 3     | 3 |
| 7263   | 5    | 5    | 2    | 5    | 5    | 5    | 5    | 2    |       | 5      | 3      | 3     | 5     | 5     | 5 |
| 7265   |      |      |      |      |      |      |      |      |       | 3      | 3      | 3     | 5     | 5     | 5 |
| 7268   | 6    | 4    | 3    | 5    | 5    | 5    | 5    | 5    |       | 2      | 2      | 1     | 4     | 3     | 5 |
| 7269   |      |      |      |      |      |      |      |      |       | 2      | 3      | 3     | 5     | 5     | 5 |
| 7271   |      |      |      |      |      |      |      |      |       | 3      | 2      | 2     | 2     | 3     | 3 |
| 7276   | 3    | 1    | 2    | 1    | 3    | 1    | 6    | 3    |       | 2      | 1      | 1     | 3     | 4     | 3 |
| 7280   |      |      |      |      |      |      |      |      |       | 2      | 3      | 3     | 4     | 4     | 2 |
| 7283   | 6    | 6    | 1    | 6    | 6    | 6    | 6    | 2    |       | 3      | 3      | 3     | 4     | 4     | 4 |
| 7284   | 6    | 6    | 6    | 6    | 6    | 6    | 6    | 2    |       | 3      | 3      | 3     | 5     | 5     | 5 |
| 7286   |      |      |      |      |      |      |      |      |       | 4      | 3      | 3     | 4     | 4     | 4 |
| 7287   |      |      |      |      |      |      |      |      |       | 5      | 3      | 3     | 5     | 5     | 5 |
| 7288   | 3    | 4    | 3    | 4    | 3    | 3    | 3    | 3    |       | 2      | 2      | 2     | 3     | 3     | 3 |
| 7294   | 4    | 3    | 3    | 4    | 3    | 3    | 3    | 3    |       | 2      | 3      | 3     | 5     | 5     | 5 |
| 7295   |      |      |      |      |      |      |      |      |       | 4      | 3      | 3     | 5     | 5     | 5 |
| 7296   |      |      |      |      |      |      |      |      |       | 4      | 3      | 3     | 3     | 3     | 3 |
| 7297   |      |      |      |      |      |      |      |      |       | 4      | 3      | 3     | 5     | 5     | 5 |
| 7299   | 6    | 6    | 1    | 6    | 6    | 6    | 6    | 6    | 1     | 4      | 2      | 2     | 3     | 4     | 5 |
| 7300   |      |      |      |      |      |      |      |      |       | 2      | 2      | 2     | 3     | 3     | 2 |
| 7301   |      |      |      |      |      |      |      |      |       | 2      | 3      | 3     | 4     | 5     | 4 |
| 7302   |      |      |      |      |      |      |      |      |       | 3      | 3      | 3     | 5     | 5     | 4 |
| 7306   | 6    | 6    | 2    | 6    | 6    | 6    | 6    | 6    | 1     | 4      | 3      | 3     | 5     | 5     | 5 |

| respid | Q48k | Q48l | Q48m | Q48n | Q48o | Q48p | Q48q | Q48r | Q49_1 | Q50a_1 | Q50b_1 | Q51_1 | Q51_2 | Q52_1 |
|--------|------|------|------|------|------|------|------|------|-------|--------|--------|-------|-------|-------|
| 7313   |      |      |      |      |      |      |      |      |       | 2      | 2      | 2     | 2     | 2     |
| 7315   | 5    | 5    | 5    | 5    | 6    | 6    | 6    | 5    |       | 2      | 2      | 1     | 3     | 3     |
| 7317   | 5    | 5    | 2    | 5    | 6    | 4    | 4    | 2    |       | 3      | 3      | 3     | 4     | 4     |
| 7321   |      |      |      |      |      |      |      |      |       | 3      | 3      | 2     | 4     | 4     |
| 7322   |      |      |      |      |      |      |      |      |       | 4      | 3      | 2     | 4     | 5     |
| 7323   |      |      |      |      |      |      |      |      |       | 2      | 2      | 3     | 3     | 4     |
| 7333   |      |      |      |      |      |      |      |      |       | 1      | 2      | 2     | 3     | 3     |
| 7335   | 5    | 5    | 2    | 4    | 6    | 5    | 6    | 3    |       | 3      | 2      | 2     | 3     | 3     |
| 7336   |      |      |      |      |      |      |      |      |       | 4      | 3      | 3     | 4     | 4     |
| 7337   |      |      |      |      |      |      |      |      |       | 3      | 2      | 3     | 5     | 5     |
| 7338   |      |      |      |      |      |      |      |      |       | 4      | 3      | 3     | 5     | 5     |
| 7340   |      |      |      |      |      |      |      |      |       | 2      | 3      | 3     | 5     | 5     |
| 7341   | 4    | 4    | 4    | 3    | 3    | 4    | 4    | 3    |       | 3      | 3      | 2     | 4     | 4     |
| 7342   |      |      |      |      |      |      |      |      |       | 3      | 3      | 3     | 5     | 5     |
| 7344   | 2    | 3    | 4    | 4    | 4    | 4    | 4    | 2    | 4     | 2      | 2      | 2     | 2     | 3     |
| 7346   | 5    | 5    | 1    | 2    | 6    | 6    | 6    | 2    |       | 2      | 3      | 2     | 4     | 4     |
| 7347   | 5    | 4    | 3    | 4    | 3    | 3    | 3    | 4    | 4     | 3      | 3      | 3     | 4     | 4     |
| 7349   | 5    | 5    | 1    | 6    | 4    | 5    | 5    | 5    |       | 3      | 2      | 2     | 2     | 3     |
| 7352   |      |      |      |      |      |      |      |      |       | 3      | 3      | 3     | 5     | 5     |
| 7353   |      |      |      |      |      |      |      |      |       | 3      | 3      | 3     | 5     | 5     |
| 7355   |      |      |      |      |      |      |      |      |       | 2      | 2      | 2     | 3     | 3     |
| 7356   |      |      |      |      |      |      |      |      |       | 4      | 3      | 3     | 5     | 5     |
| 7360   | 3    | 2    | 3    | 2    | 3    | 2    | 1    | 3    |       | 4      | 2      | 3     | 1     | 2     |
| 7371   | 2    | 2    | 2    | 3    | 5    | 3    | 3    | 4    |       | 3      | 2      | 3     | 4     | 3     |
| 7376   |      |      |      |      |      |      |      |      |       | 2      | 2      | 2     | 2     | 2     |
| 7379   | 4    | 2    | 4    | 3    | 3    | 4    | 4    | 3    |       | 2      | 2      | 3     | 4     | 4     |
| 7381   |      |      |      |      |      |      |      |      |       | 3      | 3      | 3     | 4     | 5     |
| 7386   |      |      |      |      |      |      |      |      |       | 2      | 3      | 3     | 4     | 4     |
| 7389   |      |      |      |      |      |      |      |      |       | 3      | 2      | 3     | 5     | 4     |
| 7390   |      |      |      |      |      |      |      |      |       | 2      | 3      | 3     | 4     | 4     |
| 7393   |      |      |      |      |      |      |      |      |       | 4      | 1      | 3     | 5     | 5     |
| 7394   |      |      |      |      |      |      |      |      |       | 3      | 3      | 3     | 4     | 4     |

| respid | Q48k | Q48l | Q48m | Q48n | Q48o | Q48p | Q48q | Q48r | Q49_1 | Q50a_1 | Q50b_1 | Q51_1 | Q51_2 | Q52_1 |
|--------|------|------|------|------|------|------|------|------|-------|--------|--------|-------|-------|-------|
| 7396   |      | 3    | 3    | 4    | 3    | 3    | 3    | 3    | 5     | 2      | 2      | 3     | 3     | 3     |
| 7400   |      | 6    | 5    | 1    | 5    | 5    | 5    | 5    | 3     | 1      | 1      | 2     | 2     | 2     |
| 7401   |      |      |      |      |      |      |      |      |       | 3      | 2      | 2     | 3     | 3     |
| 7403   |      |      |      |      |      |      |      |      |       | 4      | 2      | 2     | 4     | 4     |
| 7406   |      |      |      |      |      |      |      |      |       | 3      | 3      | 3     | 5     | 4     |
| 7409   |      |      |      |      |      |      |      |      |       | 4      | 3      | 2     | 4     | 4     |
| 7410   |      |      |      |      |      |      |      |      |       | 2      | 3      | 3     | 4     | 3     |
| 7412   | 2    | 2    | 2    | 2    | 2    | 2    | 2    | 2    | 2     | 4      | 3      | 3     | 5     | 5     |
| 7414   | 6    | 6    | 1    | 6    | 6    | 6    | 6    | 6    | 1     | 3      | 3      | 3     | 3     | 3     |
| 7415   |      |      |      |      |      |      |      |      |       | 3      | 3      | 3     | 4     | 4     |
| 7417   |      |      |      |      |      |      |      |      |       | 3      | 3      | 3     | 5     | 5     |
| 7421   |      |      |      |      |      |      |      |      |       | 4      | 2      | 2     | 1     | 2     |
| 7425   |      |      |      |      |      |      |      |      |       | 4      | 3      | 3     | 4     | 4     |
| 7430   |      |      |      |      |      |      |      |      |       | 3      | 3      | 2     | 4     | 4     |
| 7432   |      |      |      |      |      |      |      |      |       | 3      | 3      | 3     | 5     | 5     |
| 7433   | 2    | 2    | 1    | 2    | 2    | 3    | 3    | 2    | 2     | 3      | 2      | 2     | 3     | 3     |
| 7442   | 4    | 3    | 2    | 3    | 6    | 3    | 1    | 3    | 3     | 3      | 2      | 2     | 3     | 4     |
| 7445   | 6    | 6    | 1    | 6    | 6    | 6    | 6    | 6    | 1     | 3      | 3      | 2     | 4     | 4     |
| 7446   | 6    | 6    | 4    | 4    | 5    | 6    | 5    | 4    | 4     | 3      | 3      | 3     | 5     | 5     |
| 7449   |      |      |      |      |      |      |      |      |       | 4      | 3      | 3     | 4     | 4     |
| 7450   |      |      |      |      |      |      |      |      |       | 4      | 3      | 3     | 5     | 5     |
| 7451   |      |      |      |      |      |      |      |      |       | 3      | 2      | 3     | 4     | 4     |
| 7459   |      |      |      |      |      |      |      |      |       | 3      | 3      | 3     | 5     | 5     |
| 7462   |      |      |      |      |      |      |      |      |       | 2      | 3      | 3     | 3     | 5     |
| 7463   | 5    | 5    | 5    | 5    | 5    | 5    | 5    | 5    | 5     | 2      | 2      | 2     | 4     | 4     |
| 7469   |      |      |      |      |      |      |      |      |       | 5      | 3      | 3     | 5     | 5     |
| 7482   |      |      |      |      |      |      |      |      |       | 3      | 3      | 3     | 5     | 5     |
| 7484   | 3    | 4    | 3    | 3    | 4    | 3    | 4    | 3    | 3     | 2      | 2      | 2     | 4     | 4     |
| 7486   |      |      |      |      |      |      |      |      |       | 3      | 3      | 3     | 5     | 5     |
| 7496   |      |      |      |      |      |      |      |      |       | 3      | 3      | 3     | 5     | 5     |
| 7502   |      |      |      |      |      |      |      |      |       | 2      | 3      | 2     | 4     | 4     |
| 7504   |      |      |      |      |      |      |      |      |       | 2      | 3      | 2     | 4     | 3     |

| respid | Q48k | Q48l | Q48m | Q48n | Q48o | Q48p | Q48q | Q48r | Q49_1 | Q50a_1 | Q50b_1 | Q51_1 | Q51_2 | Q52_1 |
|--------|------|------|------|------|------|------|------|------|-------|--------|--------|-------|-------|-------|
| 7509   |      |      |      |      |      |      |      |      |       | 2      | 1      | 2     | 2     | 2     |
| 7513   | 1    | 2    | 2    | 1    | 2    | 2    | 2    | 5    |       | 2      | 1      | 2     | 3     | 2     |
| 7514   |      |      |      |      |      |      |      |      |       | 3      | 3      | 3     | 5     | 5     |
| 7520   | 6    | 3    |      | 5    | 5    |      | 3    |      |       | 4      | 3      | 3     | 5     | 5     |
| 7523   |      |      |      |      |      |      |      |      |       | 3      | 3      | 3     | 4     | 5     |
| 7526   | 2    | 3    | 5    | 2    | 4    | 3    | 3    | 4    |       | 1      | 3      | 3     | 3     | 5     |
| 7529   |      |      |      |      |      |      |      |      |       | 2      | 2      | 1     | 2     | 3     |
| 7534   |      |      |      |      |      |      |      |      |       | 3      | 2      | 2     | 5     | 5     |
| 7536   |      |      |      |      |      |      |      |      |       | 2      | 3      | 2     | 4     | 4     |
| 7540   |      |      |      |      |      |      |      |      |       | 4      | 3      | 3     | 5     | 4     |
| 7541   |      |      |      |      |      |      |      |      |       | 2      | 2      | 2     | 2     | 2     |
| 7542   |      |      |      |      |      |      |      |      |       | 4      | 2      | 2     | 3     | 3     |
| 7555   |      |      |      |      |      |      |      |      |       | 2      | 3      | 3     | 5     | 5     |
| 7566   |      |      |      |      |      |      |      |      |       | 1      | 2      | 2     | 3     | 3     |
| 7568   |      |      |      |      |      |      |      |      |       | 2      | 2      | 2     | 4     | 4     |
| 7570   |      |      |      |      |      |      |      |      |       | 2      | 2      | 2     | 3     | 3     |
| 7572   |      |      |      |      |      |      |      |      |       | 2      | 3      | 3     | 4     | 3     |
| 7573   | 4    | 5    | 4    | 4    | 4    | 4    | 5    | 3    |       | 3      | 2      | 2     | 3     | 3     |
| 7576   | 3    | 4    | 4    | 4    | 6    | 6    | 4    | 5    |       | 2      | 2      | 2     | 3     | 3     |
| 7577   | 6    | 6    | 4    | 4    | 4    | 5    | 5    | 3    |       | 1      | 3      | 3     | 4     | 4     |
| 7583   |      |      |      |      |      |      |      |      |       | 3      | 3      | 3     | 5     | 5     |
| 7584   |      |      |      |      |      |      |      |      |       | 2      | 2      | 2     | 3     | 3     |
| 7585   | 6    | 6    | 1    | 6    | 6    | 6    | 6    | 1    |       | 1      | 2      | 2     | 2     | 2     |
| 7586   |      |      |      |      |      |      |      |      |       | 3      | 2      | 3     | 2     | 3     |
| 7587   |      |      |      |      |      |      |      |      |       | 4      | 3      | 3     | 5     | 5     |
| 7588   |      |      |      |      |      |      |      |      |       | 4      | 3      | 3     | 5     | 5     |
| 7596   |      |      |      |      |      |      |      |      |       | 3      | 3      | 3     | 5     | 5     |
| 7599   | 6    | 6    | 2    | 6    | 6    | 6    | 6    | 2    |       | 4      | 3      | 3     | 5     | 5     |
| 7600   |      |      |      |      |      |      |      |      |       | 3      | 2      | 2     | 3     | 3     |
| 7602   | 6    | 6    | 1    | 6    | 6    | 6    | 6    | 1    |       | 2      | 3      | 2     | 5     | 5     |
| 7613   |      |      |      |      |      |      |      |      |       | 3      | 3      | 3     | 5     | 5     |
| 7620   | 6    | 6    | 3    | 4    | 6    | 6    | 6    | 2    |       | 3      | 3      | 3     | 5     | 5     |

| respid | Q48k | Q48l | Q48m | Q48n | Q48o | Q48p | Q48q | Q48r | Q49_1 | Q50a_1 | Q50b_1 | Q51_1 | Q51_2 | Q52_1 |   |
|--------|------|------|------|------|------|------|------|------|-------|--------|--------|-------|-------|-------|---|
| 7623   |      |      |      |      |      |      |      |      |       | 2      | 3      | 3     | 5     | 4     | 3 |
| 7635   |      |      |      |      |      |      |      |      |       | 2      | 3      | 3     | 5     | 5     | 5 |
| 7636   | 6    | 6    | 2    | 6    | 6    | 6    | 6    | 2    | 4     | 3      | 3      | 5     | 5     | 4     |   |
| 7643   | 6    | 6    | 1    | 6    | 6    | 6    | 6    | 1    | 3     | 3      | 3      | 5     | 4     | 5     |   |
| 7645   | 5    | 4    | 4    | 6    | 6    | 6    | 5    | 6    | 3     | 3      | 3      | 5     | 5     | 5     |   |
| 7649   | 3    | 3    | 3    | 3    | 3    | 3    | 3    | 3    | 2     | 2      | 2      | 2     | 2     | 2     |   |
| 7651   | 6    | 6    | 3    | 5    | 6    | 5    | 6    | 2    | 3     | 3      | 3      | 5     | 5     | 4     |   |
| 7652   |      |      |      |      |      |      |      |      | 2     | 3      | 3      | 4     | 4     | 3     |   |
| 7655   |      |      |      |      |      |      |      |      | 2     | 2      | 3      | 3     | 3     | 4     |   |
| 7657   |      |      |      |      |      |      |      |      | 3     | 3      | 2      | 4     | 4     | 5     |   |
| 7675   |      |      |      |      |      |      | 6    |      | 4     | 3      | 3      | 5     | 5     | 5     |   |
| 7676   |      |      |      |      |      |      |      |      | 1     | 1      | 2      | 2     | 2     | 2     |   |
| 7684   | 6    | 6    | 2    |      | 6    | 6    | 6    | 1    | 2     | 3      | 3      | 5     | 5     | 4     |   |
| 7693   |      |      |      |      |      |      |      |      | 4     | 2      | 2      | 4     | 4     | 4     |   |
| 7694   |      |      |      |      |      |      |      |      | 2     | 1      | 1      | 2     | 2     | 2     |   |
| 7695   |      |      |      |      |      |      |      |      | 3     | 3      | 3      | 5     | 5     | 5     |   |
| 7696   |      |      |      |      |      |      |      |      | 2     | 1      | 1      | 2     | 2     | 2     |   |
| 7698   | 6    | 6    | 2    | 6    | 6    | 6    | 6    | 1    | 4     | 2      | 2      | 2     | 2     | 2     |   |
| 7700   | 6    | 6    | 1    | 6    | 6    | 6    | 6    | 2    | 3     | 3      | 3      | 4     | 5     | 5     |   |
| 7701   |      |      |      |      |      |      |      |      | 4     | 3      | 3      | 5     | 5     | 5     |   |
| 7704   | 6    | 6    | 1    | 6    | 6    | 6    | 6    | 1    | 2     | 3      | 3      | 5     | 5     | 5     |   |
| 7709   |      |      |      |      |      |      |      |      | 3     | 2      | 3      | 4     | 5     | 4     |   |
| 7713   |      |      |      |      |      |      |      |      | 2     | 2      | 2      | 4     | 4     | 5     |   |
| 7714   |      |      |      |      |      |      |      |      | 4     | 3      | 3      | 5     | 5     | 5     |   |
| 7718   |      |      |      |      |      |      |      |      | 1     | 1      | 1      | 2     | 2     | 2     |   |
| 7720   |      |      |      |      |      |      |      |      | 4     | 2      | 2      | 4     | 4     | 4     |   |
| 7721   |      |      |      |      |      |      |      |      | 3     | 3      | 3      | 5     | 5     | 5     |   |
| 7722   |      |      |      |      |      |      |      |      | 3     | 3      | 3      | 5     | 5     | 5     |   |
| 7724   |      |      |      |      |      |      |      |      | 2     | 3      | 2      | 5     | 4     | 5     |   |
| 7728   |      |      |      |      |      |      |      |      | 2     | 2      | 2      | 4     | 4     | 4     |   |
| 7731   |      |      |      |      |      |      |      |      | 2     | 2      | 3      | 4     | 4     | 3     |   |
| 7735   |      |      |      |      |      |      |      |      | 2     | 2      | 2      | 2     | 2     | 3     |   |



| respid | Q48k | Q48l | Q48m | Q48n | Q48o | Q48p | Q48q | Q48r | Q49_1 | Q50a_1 | Q50b_1 | Q51_1 | Q51_2 | Q52_1 |   |
|--------|------|------|------|------|------|------|------|------|-------|--------|--------|-------|-------|-------|---|
| 7737   |      |      |      |      |      |      |      |      |       | 2      | 3      | 3     | 5     | 5     | 4 |
| 7741   |      |      |      |      |      |      |      |      |       | 4      | 3      | 3     | 5     | 5     | 4 |
| 7746   |      |      |      |      |      |      |      |      |       | 2      | 3      | 3     | 5     | 5     | 5 |
| 7747   | 5    | 6    | 2    | 3    | 6    | 5    | 5    | 2    | 2     | 2      | 3      | 3     | 4     | 4     | 3 |
| 7748   |      |      |      |      |      |      |      |      |       | 4      | 2      | 3     | 5     | 5     | 5 |
| 7750   | 6    | 6    | 1    | 6    | 6    | 6    | 6    | 1    | 3     | 3      | 3      | 3     | 4     | 4     | 3 |
| 7754   | 5    | 6    | 3    | 5    | 6    | 6    | 6    | 3    | 3     | 3      | 2      | 2     | 3     | 3     | 3 |
| 7755   | 1    | 3    | 5    | 1    | 6    | 3    | 5    | 5    | 3     | 3      | 2      | 3     | 4     | 4     | 3 |
| 7762   |      |      |      |      |      |      |      |      |       | 2      | 2      | 2     | 3     | 3     | 3 |
| 7764   |      |      |      |      |      |      |      |      |       | 2      | 2      | 3     | 4     | 4     | 4 |
| 7766   |      |      |      |      |      |      |      |      |       | 2      | 3      | 3     | 5     | 5     | 5 |
| 7768   | 6    | 5    | 2    | 6    | 6    | 5    | 6    |      | 3     | 3      | 2      | 3     | 4     | 4     | 4 |
| 7770   |      |      |      |      |      |      |      |      |       | 1      | 1      | 2     | 2     | 2     | 2 |
| 7771   |      |      |      |      |      |      |      |      |       | 4      | 3      | 3     | 4     | 5     | 4 |
| 7777   |      |      |      |      |      |      |      |      |       | 3      | 3      | 3     | 5     | 5     | 4 |
| 7778   |      |      |      |      |      |      |      |      |       | 3      | 3      | 3     | 5     | 5     | 5 |
| 7783   |      |      |      |      |      |      |      |      |       | 1      | 2      | 2     | 2     | 3     | 3 |
| 7789   | 6    | 6    | 1    | 6    | 6    | 6    | 6    | 1    | 2     | 2      | 3      | 3     | 5     | 5     | 5 |
| 7790   |      |      |      |      |      |      |      |      |       | 1      | 1      | 1     | 1     | 1     | 1 |
| 7795   |      |      |      |      |      |      |      |      |       | 3      | 2      | 3     | 5     | 5     | 4 |
| 7807   |      |      |      |      |      |      |      |      |       | 3      | 3      | 3     | 5     | 5     | 5 |
| 7808   |      |      |      |      |      |      |      |      |       | 2      | 3      | 3     | 4     | 5     | 4 |
| 7818   | 2    | 5    | 3    | 4    | 5    | 5    | 3    | 5    | 3     | 3      | 3      | 3     | 5     | 5     | 4 |
| 7820   |      |      |      |      |      |      |      |      |       | 4      | 3      | 3     | 5     | 5     | 5 |
| 7831   | 6    | 6    | 1    | 6    | 6    | 6    | 6    | 2    | 2     | 2      | 3      | 3     | 3     | 4     | 4 |
| 7832   |      |      |      |      |      |      |      |      |       | 2      | 3      | 2     | 5     | 5     | 5 |
| 7837   |      |      |      |      |      |      |      |      |       | 4      | 3      | 3     | 5     | 5     | 5 |
| 7841   |      |      |      |      |      |      |      |      |       | 3      | 2      | 3     | 3     | 4     | 3 |
| 7845   |      |      |      |      |      |      |      |      |       | 4      | 2      | 2     | 3     | 2     | 2 |
| 7853   |      |      |      |      |      |      |      |      |       | 2      | 3      | 3     | 4     | 4     | 5 |
| 7854   | 4    | 4    | 3    | 4    | 4    | 4    | 4    | 3    | 2     | 2      | 3      | 2     | 4     | 4     | 4 |
| 7862   |      |      |      |      |      |      |      |      |       | 2      | 2      | 3     | 3     | 3     | 3 |

| respid | Q48k | Q48l | Q48m | Q48n | Q48o | Q48p | Q48q | Q48r | Q49_1 | Q50a_1 | Q50b_1 | Q51_1 | Q51_2 | Q52_1 |   |
|--------|------|------|------|------|------|------|------|------|-------|--------|--------|-------|-------|-------|---|
| 7871   | 6    | 6    | 4    | 6    | 6    | 6    | 6    | 6    | 1     | 3      | 2      | 3     | 4     | 4     | 4 |
| 7875   | 6    | 1    | 5    | 4    | 1    | 5    | 3    | 5    |       | 3      | 2      | 2     | 4     | 2     | 4 |
| 7880   |      |      |      |      |      |      |      |      |       | 2      | 3      | 3     | 5     | 4     | 5 |
| 7881   | 6    | 6    | 1    | 6    | 6    | 3    | 6    | 1    |       | 3      | 3      | 3     | 5     | 5     | 4 |
| 7883   |      |      |      |      |      |      |      |      |       | 2      | 2      | 2     | 4     | 4     | 4 |
| 7896   |      |      |      |      |      |      |      |      |       | 2      | 2      | 2     | 4     | 3     | 5 |
| 7905   |      |      |      |      |      |      |      |      |       | 4      | 3      | 3     | 4     | 4     | 4 |
| 7919   |      |      |      |      |      |      |      |      |       | 4      | 3      | 3     | 5     | 5     | 5 |
| 7928   |      |      |      |      |      |      |      |      |       | 1      | 1      | 2     | 2     | 3     | 4 |
| 7929   | 1    | 1    | 5    | 1    | 4    | 2    | 1    | 5    |       | 4      | 3      | 3     | 4     | 4     | 3 |
| 7938   |      |      |      |      |      |      |      |      |       | 2      | 3      | 3     | 3     | 3     | 3 |
| 7940   |      |      |      |      |      |      |      |      |       | 3      | 3      | 3     | 5     | 4     | 4 |
| 7941   |      |      |      |      |      |      |      |      |       | 3      | 3      | 3     | 5     | 4     | 5 |
| 7952   |      |      |      |      |      |      |      |      |       | 1      | 1      | 1     | 5     | 5     | 5 |
| 7962   |      |      |      |      |      |      |      |      |       | 3      | 3      | 3     | 5     | 5     | 5 |
| 7968   |      |      |      |      |      |      |      |      |       | 3      | 3      | 3     | 3     | 3     | 4 |
| 7972   |      |      |      |      |      |      |      |      |       | 4      | 3      | 3     | 5     | 5     | 4 |
| 7983   |      |      |      |      |      |      |      |      |       | 2      | 2      | 2     | 3     | 4     | 4 |
| 7990   |      |      |      |      |      |      |      |      |       | 4      | 3      | 3     | 5     | 5     | 5 |
| 7993   | 6    | 6    | 1    | 6    | 6    | 6    | 6    | 1    |       | 4      | 3      | 3     | 5     | 5     | 5 |
| 8005   | 5    | 5    | 5    | 5    | 6    | 5    | 2    | 5    |       | 3      | 3      | 2     | 4     | 4     | 5 |
| 8008   |      |      |      |      |      |      |      |      |       | 2      | 3      | 3     | 4     | 4     | 5 |
| 8012   | 6    | 5    | 2    | 5    | 6    | 5    | 5    | 2    |       | 2      | 2      | 2     | 4     | 4     | 3 |
| 8021   | 5    | 4    | 3    | 5    | 6    | 6    | 5    | 6    |       | 1      | 3      | 3     | 5     | 5     | 5 |
| 8024   | 5    | 5    | 2    | 4    | 4    | 4    | 5    | 3    |       | 2      | 3      | 2     | 4     | 3     | 5 |
| 8043   |      |      |      |      |      |      |      |      |       | 3      | 3      | 3     | 5     | 5     | 5 |
| 8051   | 6    | 6    | 1    | 6    | 6    | 4    | 4    | 3    |       | 2      | 3      | 3     | 5     | 5     | 5 |
| 8056   |      |      |      |      |      |      |      |      |       | 2      | 3      | 2     | 4     | 4     | 4 |
| 8061   |      |      |      |      |      |      |      |      |       | 2      | 2      | 2     | 4     | 5     | 4 |
| 8066   |      |      |      |      |      |      |      |      |       | 2      | 3      | 3     | 5     | 5     | 5 |
| 8069   | 3    | 2    | 3    | 2    | 2    | 3    | 2    | 3    |       | 2      | 3      | 2     | 4     | 3     | 4 |
| 8071   | 6    | 6    | 1    | 6    | 6    | 6    | 6    | 6    | 1     | 2      | 3      | 3     | 4     | 4     | 5 |

| respid | Q48k | Q48l | Q48m | Q48n | Q48o | Q48p | Q48q | Q48r | Q49_1 | Q50a_1 | Q50b_1 | Q51_1 | Q51_2 | Q52_1 |   |
|--------|------|------|------|------|------|------|------|------|-------|--------|--------|-------|-------|-------|---|
| 8072   |      | 3    | 4    | 2    | 3    | 4    | 3    | 3    | 3     | 2      | 2      | 2     | 2     | 2     | 3 |
| 8076   |      |      |      |      |      |      |      |      |       | 3      | 3      | 3     | 4     | 4     | 4 |
| 8080   |      |      |      |      |      |      |      |      |       | 3      | 3      | 3     | 4     | 4     | 4 |
| 8083   |      |      |      |      |      |      |      |      |       | 3      | 3      | 3     | 4     | 4     | 4 |
| 8093   |      |      |      |      |      |      |      |      |       | 3      | 3      | 2     | 3     | 4     | 4 |
| 8095   |      |      |      |      |      |      |      |      |       | 2      | 2      | 2     | 3     | 4     | 4 |
| 8099   |      |      |      |      |      |      |      |      |       | 4      | 2      | 3     | 2     | 4     | 3 |
| 8100   |      |      |      |      |      |      |      |      |       | 2      | 2      | 2     | 5     | 5     | 4 |
| 8103   |      |      |      |      |      |      |      |      |       | 4      | 3      | 3     | 4     | 4     | 4 |
| 8104   |      |      |      |      |      |      |      |      |       | 2      | 2      | 2     | 2     | 2     | 2 |
| 8115   |      |      |      |      |      |      |      |      |       | 3      | 2      | 2     | 2     | 2     | 3 |
| 8121   |      |      |      |      |      |      |      |      |       | 4      | 3      | 3     | 5     | 5     | 5 |
| 8128   | 6    | 6    | 1    | 6    | 6    | 6    | 6    | 1    | 4     | 3      | 3      | 4     | 4     | 4     | 5 |
| 8130   | 5    | 5    | 4    | 5    | 5    | 5    | 4    | 5    | 4     | 3      | 3      | 5     | 5     | 5     | 4 |
| 8131   | 3    | 4    | 3    | 4    | 5    | 4    | 5    | 3    | 3     | 3      | 3      | 4     | 4     | 4     | 4 |
| 8133   | 6    | 6    | 1    | 6    | 6    | 6    | 6    | 1    | 4     | 3      | 3      | 5     | 5     | 5     | 5 |
| 8143   |      |      |      |      |      |      |      |      |       | 2      | 2      | 2     | 4     | 4     | 5 |
| 8144   | 6    | 6    | 1    | 6    | 6    | 6    | 6    | 2    | 3     | 3      | 3      | 4     | 4     | 4     | 4 |
| 8146   |      |      |      |      |      |      |      |      |       | 3      | 3      | 3     | 5     | 5     | 5 |
| 8148   |      |      |      |      |      |      |      |      |       | 3      | 3      | 3     | 5     | 5     | 4 |
| 8157   |      |      |      |      |      |      |      |      |       | 2      | 3      | 3     | 5     | 5     | 5 |
| 8164   |      |      |      |      |      |      |      |      |       | 4      | 3      | 3     | 5     | 5     | 5 |
| 8173   |      |      |      |      |      |      |      |      |       | 3      | 3      | 3     | 5     | 5     | 5 |
| 8176   | 1    | 6    | 1    | 6    | 6    | 6    | 6    | 2    | 3     | 3      | 3      | 4     | 5     | 5     | 5 |
| 8179   |      |      |      |      |      |      |      |      |       | 4      | 2      | 3     | 4     | 4     | 4 |
| 8181   |      |      |      |      |      |      |      |      |       | 3      | 2      | 2     | 2     | 2     | 3 |
| 8182   | 4    | 4    | 4    | 4    | 4    | 4    | 4    | 4    | 2     | 3      | 3      | 3     | 3     | 3     | 3 |
| 8196   |      |      |      |      |      |      |      |      |       | 3      | 3      | 3     | 4     | 5     | 4 |
| 8200   | 3    | 3    | 3    | 4    | 3    | 3    | 3    | 4    | 1     | 3      | 3      | 4     | 4     | 4     | 4 |
| 8203   |      |      |      |      |      |      |      |      |       | 2      | 3      | 3     | 5     | 5     | 5 |
| 8204   | 3    | 4    | 6    | 1    | 6    | 6    | 1    | 6    | 2     | 3      | 2      | 4     | 4     | 4     | 4 |
| 8206   | 6    | 6    | 2    | 5    | 6    | 5    | 5    | 2    | 3     | 2      | 3      | 4     | 4     | 4     | 4 |

| respid | Q48k | Q48l | Q48m | Q48n | Q48o | Q48p | Q48q | Q48r | Q49_1 | Q50a_1 | Q50b_1 | Q51_1 | Q51_2 | Q52_1 |   |
|--------|------|------|------|------|------|------|------|------|-------|--------|--------|-------|-------|-------|---|
| 8208   | 6    | 6    | 1    | 6    | 6    | 6    | 6    | 6    | 1     | 4      | 3      | 3     | 5     | 5     | 5 |
| 8212   |      |      |      |      |      |      |      |      |       | 2      | 1      | 2     | 4     | 4     | 4 |
| 8222   | 4    | 4    | 3    | 4    | 4    |      |      | 5    | 3     | 4      | 2      | 1     | 3     | 3     | 2 |
| 8223   |      |      |      |      |      |      |      |      |       | 4      | 3      | 3     | 5     | 5     | 5 |
| 8225   |      |      |      |      |      |      |      |      |       | 4      | 3      | 3     | 4     | 4     | 5 |
| 8226   |      |      |      |      |      |      |      |      |       | 4      | 3      | 3     | 5     | 5     | 5 |
| 8228   |      |      |      |      |      |      |      |      |       | 2      | 2      | 2     | 4     | 4     | 4 |
| 8229   |      |      |      |      |      |      |      |      |       | 4      | 3      | 3     | 5     | 5     | 5 |
| 8239   |      |      |      |      |      |      |      |      |       | 4      | 3      | 3     | 4     | 4     | 4 |
| 8246   |      |      |      |      |      |      |      |      |       | 1      | 1      | 1     | 1     | 2     | 3 |
| 8258   |      |      |      |      |      |      |      |      |       | 3      | 2      | 2     | 2     | 3     | 3 |
| 8260   |      |      |      |      |      |      |      |      |       | 2      | 3      | 3     | 4     | 4     | 5 |
| 8262   |      |      |      |      |      |      |      |      |       | 2      | 2      | 3     | 4     | 4     | 4 |
| 8263   |      |      |      |      |      |      |      |      |       | 2      | 2      | 2     | 4     | 4     | 4 |
| 8267   |      |      |      |      |      |      |      |      |       | 2      | 2      | 1     | 2     | 2     | 3 |
| 8271   | 3    | 3    | 3    | 4    | 5    | 3    | 3    | 4    |       | 2      | 2      | 2     | 3     | 3     | 3 |
| 8274   |      |      |      |      |      |      |      |      |       | 4      | 3      | 3     | 5     | 4     | 4 |
| 8275   |      |      |      |      |      |      |      |      |       | 2      | 2      | 2     | 4     | 4     | 4 |
| 8279   | 4    | 4    | 3    | 4    | 4    | 4    | 4    | 4    | 3     | 3      | 2      | 2     | 3     | 3     | 5 |
| 8285   |      |      |      |      |      |      |      |      |       | 2      | 2      | 2     | 2     | 3     | 3 |
| 8287   |      |      |      |      |      |      |      |      |       | 1      | 1      | 1     | 2     | 2     | 2 |
| 8289   |      |      |      |      |      |      |      |      |       | 2      | 3      | 3     | 5     | 5     | 5 |
| 8291   | 6    | 6    | 2    | 6    | 6    | 6    | 6    | 6    | 2     | 3      | 3      | 3     | 4     | 4     | 3 |
| 8299   |      |      |      |      |      |      |      |      |       | 3      | 3      | 3     | 5     | 4     | 4 |
| 8301   |      |      |      |      |      |      |      |      |       | 2      | 1      | 2     | 3     | 3     | 3 |
| 8302   | 6    | 4    | 1    | 3    | 6    | 4    | 3    | 3    |       | 2      | 2      | 1     | 2     | 4     | 5 |
| 8308   | 4    | 2    | 4    | 2    | 6    | 4    | 5    | 4    |       | 2      | 2      | 2     | 3     | 3     | 4 |
| 8313   |      |      |      |      |      |      |      |      |       | 3      | 3      | 3     | 4     | 4     | 4 |
| 8316   |      |      |      |      |      |      |      |      |       | 2      | 2      | 2     | 4     | 4     | 4 |
| 8317   |      |      |      |      |      |      |      |      |       | 2      | 3      | 3     | 4     | 3     | 4 |
| 8319   |      |      |      |      |      |      |      |      |       | 4      | 3      | 3     | 5     | 5     | 5 |
| 8323   |      |      |      |      |      |      |      |      |       | 2      | 3      | 3     | 5     | 5     | 5 |

| respid | Q48k | Q48l | Q48m | Q48n | Q48o | Q48p | Q48q | Q48r | Q49_1 | Q50a_1 | Q50b_1 | Q51_1 | Q51_2 | Q52_1 |
|--------|------|------|------|------|------|------|------|------|-------|--------|--------|-------|-------|-------|
| 8324   | 6    | 6    | 4    | 6    | 5    | 4    | 4    | 3    | 2     | 3      | 3      | 4     | 4     | 4     |
| 8327   |      |      |      |      |      |      |      |      | 2     | 2      | 2      | 2     | 3     | 2     |
| 8328   | 1    | 1    | 5    | 1    | 5    | 1    | 2    | 6    | 1     | 2      | 2      | 3     | 3     | 2     |
| 8342   |      |      |      |      |      |      |      |      | 4     | 3      | 3      | 5     | 5     | 4     |
| 8350   | 2    | 6    | 2    | 2    | 6    | 6    | 6    | 2    | 2     | 2      | 2      | 3     | 3     | 4     |
| 8352   | 5    | 5    | 2    | 4    | 6    | 6    | 6    | 2    | 3     | 3      | 3      | 5     | 5     | 4     |
| 8353   |      |      |      |      |      |      |      |      | 2     | 2      | 1      | 4     | 4     | 4     |
| 8356   | 6    | 6    | 2    | 6    | 6    | 6    | 6    | 2    | 2     | 3      | 3      | 4     | 4     | 4     |
| 8367   | 6    | 4    | 2    | 5    | 5    | 6    | 5    | 1    | 3     | 2      | 2      | 5     | 5     | 5     |
| 8373   |      |      |      |      |      |      |      |      | 2     | 2      | 2      | 4     | 4     | 4     |
| 8379   |      |      |      |      |      |      |      |      | 2     | 3      | 3      | 5     | 5     | 5     |
| 8382   |      |      |      |      |      |      |      |      | 2     | 2      | 2      | 3     | 3     | 4     |
| 8387   | 1    | 6    | 1    | 3    | 6    | 6    | 1    | 6    | 2     | 2      | 2      | 3     | 3     | 4     |
| 8409   | 5    | 6    | 2    | 6    | 6    | 6    | 6    | 2    | 3     | 3      | 3      | 3     | 4     | 3     |
| 8410   | 6    | 6    | 1    | 6    | 6    | 6    | 6    | 2    | 4     | 3      | 3      | 5     | 5     | 5     |
| 8412   | 6    | 6    | 1    | 6    | 6    | 6    | 6    | 4    | 2     | 2      | 2      | 4     | 4     | 3     |
| 8415   | 6    | 6    | 1    | 3    | 6    | 6    | 6    | 1    | 2     | 3      | 3      | 5     | 5     | 5     |
| 8417   |      |      |      |      |      |      |      |      | 4     | 3      | 3      | 4     | 4     | 4     |
| 8422   |      |      |      |      |      |      |      |      | 2     | 2      | 3      | 4     | 4     | 4     |
| 8430   | 5    | 6    | 3    | 4    | 4    | 5    | 5    | 4    | 2     | 2      | 2      | 3     | 4     | 3     |
| 8434   | 6    | 2    | 1    | 3    | 6    | 5    | 6    | 2    | 3     | 2      | 3      | 5     | 5     | 5     |
| 8436   |      |      |      |      |      |      |      |      | 4     | 3      | 3      | 5     | 5     | 5     |
| 8446   |      |      |      |      |      |      |      |      | 2     | 2      | 3      | 4     | 4     | 4     |
| 8447   |      |      |      |      |      |      |      |      | 2     | 2      | 2      | 3     | 4     | 4     |
| 8448   | 3    | 3    | 4    | 4    | 6    | 4    | 3    | 3    | 3     | 3      | 2      | 5     | 5     | 5     |
| 8455   |      |      |      |      |      |      |      |      | 2     | 2      | 2      | 4     | 4     | 4     |
| 8456   |      |      |      |      |      |      |      |      | 4     | 3      | 3      | 5     | 5     | 4     |
| 8459   | 6    | 6    | 6    | 1    | 5    | 6    | 6    | 6    | 1     | 2      | 2      | 4     | 4     | 4     |
| 8460   | 6    | 6    | 2    | 6    | 6    | 6    | 5    | 1    | 3     | 3      | 3      | 5     | 5     | 5     |
| 8464   |      |      |      |      |      |      |      |      | 1     | 2      | 2      | 3     | 3     | 3     |
| 8470   | 3    | 3    | 3    | 4    | 5    | 4    | 3    | 5    | 3     | 3      | 3      | 5     | 4     | 4     |
| 8473   |      |      |      |      |      |      |      |      | 3     | 3      | 3      | 5     | 5     | 4     |

| respid | Q48k | Q48l | Q48m | Q48n | Q48o | Q48p | Q48q | Q48r | Q49_1 | Q50a_1 | Q50b_1 | Q51_1 | Q51_2 | Q52_1 |
|--------|------|------|------|------|------|------|------|------|-------|--------|--------|-------|-------|-------|
| 8486   | 6    | 6    | 1    | 6    | 6    | 6    | 6    | 1    | 4     | 3      | 3      | 5     | 5     | 5     |
| 8487   |      |      |      | 3    |      |      |      | 3    | 2     | 3      | 3      | 5     | 5     | 5     |
| 8489   |      |      |      |      |      |      |      |      | 3     | 3      | 3      | 5     | 5     | 5     |
| 8494   |      |      |      |      |      |      |      |      | 2     | 2      | 2      | 2     | 3     | 2     |
| 8495   | 1    | 3    | 2    | 2    | 3    | 2    | 1    | 6    | 2     | 2      | 2      | 2     | 3     | 3     |
| 8497   | 6    | 6    | 1    | 6    | 6    | 5    | 6    | 1    | 2     | 3      | 3      | 3     | 3     | 4     |
| 8510   | 5    | 6    | 4    | 3    | 6    | 4    | 6    | 2    | 2     | 2      | 2      | 4     | 4     | 5     |
| 8515   | 3    | 4    | 3    | 4    | 4    | 3    | 3    | 4    | 3     | 2      | 2      | 3     | 3     | 3     |
| 8526   |      |      |      |      |      |      |      |      | 3     | 3      | 3      | 5     | 5     | 5     |
| 8530   |      |      |      |      |      |      |      |      | 1     | 2      | 2      | 4     | 4     | 4     |
| 8532   |      |      |      |      |      |      |      |      | 3     | 3      | 2      | 4     | 3     | 4     |
| 8533   |      |      |      |      |      |      |      |      | 2     | 3      | 3      | 4     | 4     | 4     |
| 8534   | 5    | 6    | 3    | 4    | 6    | 5    | 4    | 3    | 3     | 3      | 3      | 4     | 4     | 4     |
| 8572   |      |      |      |      |      |      |      |      | 2     | 3      | 3      | 3     | 4     | 3     |
| 8582   |      |      |      |      |      |      |      |      | 3     | 3      | 3      | 5     | 5     | 4     |
| 8584   |      |      |      |      |      |      |      |      | 4     | 2      | 2      | 4     | 4     | 4     |
| 8585   |      |      |      |      |      |      |      |      | 2     | 3      | 3      | 4     | 4     | 3     |
| 8586   |      |      |      |      |      |      |      |      | 3     | 3      | 2      | 5     | 5     | 4     |
| 8589   |      |      |      |      |      |      |      |      | 4     | 2      | 3      | 1     | 2     | 3     |
| 8593   | 4    | 5    | 3    | 3    |      | 3    | 4    | 4    | 3     | 2      | 2      | 4     | 3     | 5     |
| 8594   | 5    | 5    | 2    | 5    | 5    | 5    | 5    | 2    | 2     | 2      | 3      | 4     | 4     | 4     |
| 8601   | 6    | 6    | 2    | 6    | 5    | 5    | 5    | 2    | 4     | 3      | 2      | 4     | 4     | 4     |
| 8603   |      |      |      |      |      |      |      |      | 2     | 2      | 2      | 3     | 2     | 3     |
| 8604   |      |      |      |      |      |      |      |      | 3     | 3      | 3      | 4     | 4     | 4     |
| 8605   |      |      |      |      |      |      |      |      | 4     | 3      | 3      | 5     | 5     | 4     |
| 8607   |      |      |      |      |      |      |      |      | 1     | 3      | 3      | 5     | 5     | 5     |
| 8623   |      |      |      |      |      |      |      |      | 3     | 3      | 3      | 4     | 4     | 4     |
| 8626   |      |      |      |      |      |      |      |      | 2     | 2      | 3      | 4     | 5     | 5     |
| 8638   | 3    | 4    | 5    | 3    | 5    | 3    | 4    | 4    | 2     | 3      | 2      | 3     | 3     | 4     |
| 8640   | 2    | 2    | 2    | 2    | 6    | 5    | 2    | 6    | 1     | 3      | 2      | 3     | 3     | 2     |
| 8641   |      |      |      |      |      |      |      |      | 2     | 3      | 3      | 5     | 5     | 5     |
| 8643   | 6    | 6    | 1    | 6    | 6    | 6    | 6    | 4    | 2     | 3      | 3      | 5     | 5     | 5     |

| respid | Q48k | Q48l | Q48m | Q48n | Q48o | Q48p | Q48q | Q48r | Q49_1 | Q50a_1 | Q50b_1 | Q51_1 | Q51_2 | Q52_1 |   |
|--------|------|------|------|------|------|------|------|------|-------|--------|--------|-------|-------|-------|---|
| 8644   | 4    | 4    | 4    | 4    |      | 6    | 2    | 4    | 5     | 3      | 3      | 3     | 4     | 5     | 4 |
| 8646   |      |      |      |      |      | 6    | 4    | 5    | 3     | 2      | 2      | 2     | 4     | 4     | 4 |
| 8647   |      |      |      |      |      |      |      |      |       | 4      | 3      | 3     | 5     | 4     | 4 |
| 8649   |      |      |      |      |      |      |      |      |       | 3      | 3      | 3     | 5     | 5     | 5 |
| 8650   | 6    | 6    | 5    | 6    |      | 6    | 6    | 6    | 5     | 2      | 2      | 3     | 4     | 4     | 4 |
| 8658   | 6    | 6    | 1    | 6    |      | 6    | 6    | 6    | 2     | 2      | 3      | 3     | 4     | 5     | 4 |
| 8659   |      |      |      |      |      |      |      |      |       | 3      | 3      | 2     | 5     | 4     | 4 |
| 8669   |      |      |      |      |      |      |      |      |       | 3      | 2      | 2     | 4     | 4     | 4 |
| 8672   |      |      |      |      |      |      |      |      |       | 2      | 2      | 3     | 3     | 3     | 5 |
| 8673   | 5    | 6    | 2    | 5    |      | 6    | 5    | 5    | 3     | 3      | 3      | 3     | 5     | 5     | 5 |
| 8676   |      |      |      |      |      |      |      |      |       | 4      | 3      | 3     | 5     | 5     | 5 |
| 8677   |      |      |      |      |      |      |      |      |       | 3      | 3      | 3     | 5     | 5     | 5 |
| 8681   | 5    | 6    | 3    | 6    |      | 6    | 6    | 6    | 2     | 4      | 3      | 3     | 5     | 5     | 5 |
| 8688   |      |      |      |      |      |      |      |      |       | 3      | 3      | 3     | 5     | 5     | 5 |
| 8689   | 6    | 6    | 1    | 6    |      | 6    | 6    | 5    | 3     | 2      | 3      | 3     | 5     | 5     | 4 |
| 8690   |      |      |      |      |      |      |      |      |       | 3      | 3      | 3     | 5     | 5     | 5 |
| 8693   |      |      |      |      |      |      |      |      |       | 3      | 3      | 3     | 5     | 5     | 5 |
| 8694   |      |      |      |      |      |      |      |      |       | 4      | 3      | 3     | 5     | 5     | 5 |
| 8699   |      |      |      |      |      |      |      |      |       | 2      | 3      | 3     | 5     | 5     | 5 |
| 8700   |      |      |      |      |      |      |      |      |       | 2      | 3      | 3     | 4     | 4     | 4 |
| 8703   | 4    | 4    | 4    | 2    |      | 3    | 3    | 3    | 3     | 4      | 2      | 2     | 4     | 4     | 3 |
| 8704   |      |      |      |      |      |      |      |      |       | 4      | 3      | 3     | 5     | 5     | 5 |
| 8706   |      |      |      |      |      |      |      |      |       | 2      | 2      | 2     | 3     | 3     | 3 |
| 8709   |      |      |      |      |      |      |      |      |       | 2      | 2      | 3     | 4     | 5     | 4 |
| 8715   |      |      |      |      |      |      |      |      |       | 2      | 2      | 2     | 4     | 4     | 4 |
| 8728   |      |      |      |      |      |      |      |      |       | 3      | 3      | 3     | 3     | 5     | 3 |
| 8729   |      |      |      |      |      |      |      |      |       | 3      | 2      | 2     | 4     | 3     | 4 |
| 8730   | 4    | 3    | 4    | 3    |      | 5    | 3    | 2    | 4     | 3      | 3      | 3     | 5     | 5     | 4 |
| 8742   |      |      |      |      |      |      |      |      |       | 2      | 3      | 3     | 4     | 4     | 4 |
| 8748   | 4    | 4    | 1    | 5    |      | 6    | 3    | 4    | 6     | 3      | 3      | 3     | 5     | 5     | 5 |
| 8749   |      |      |      |      |      |      |      |      |       | 3      | 3      | 3     | 5     | 5     | 5 |
| 8750   |      |      |      |      |      |      |      |      |       | 2      | 3      | 3     | 4     | 4     | 5 |

| respid | Q48k | Q48l | Q48m | Q48n | Q48o | Q48p | Q48q | Q48r | Q49_1 | Q50a_1 | Q50b_1 | Q51_1 | Q51_2 | Q52_1 |   |
|--------|------|------|------|------|------|------|------|------|-------|--------|--------|-------|-------|-------|---|
| 8751   |      |      |      |      |      |      |      |      |       | 3      | 3      | 2     | 4     | 4     | 4 |
| 8752   |      |      |      |      |      |      |      |      |       | 2      | 2      | 3     | 4     | 5     | 4 |
| 8754   |      |      |      |      |      |      |      |      |       | 3      | 3      | 3     | 4     | 4     | 4 |
| 8757   |      |      |      |      |      |      |      |      |       | 3      | 2      | 2     | 4     | 4     | 5 |
| 8760   |      |      |      |      |      |      |      |      |       | 1      | 1      | 1     | 1     | 1     | 5 |
| 8761   |      |      |      |      |      |      |      |      |       | 3      | 2      | 2     | 3     | 3     | 3 |
| 8762   |      |      |      |      |      |      |      |      |       | 3      | 2      | 2     | 4     | 4     | 5 |
| 8763   |      |      |      |      |      |      |      |      |       | 3      | 3      | 3     | 5     | 5     | 4 |
| 8764   | 2    | 4    | 1    | 3    | 6    | 6    | 6    | 4    | 2     | 1      | 2      | 1     | 4     | 4     | 4 |
| 8765   |      |      |      |      |      |      |      |      |       | 3      | 3      | 2     | 4     | 4     | 4 |
| 8766   | 3    | 6    | 3    | 3    | 6    | 3    | 3    | 6    | 2     | 3      | 3      | 3     | 5     | 5     | 5 |
| 8767   | 5    | 6    | 2    | 5    | 6    | 6    | 6    | 2    | 3     | 3      | 3      | 3     | 4     | 4     | 4 |
| 8768   |      |      |      |      |      |      |      |      |       | 3      | 3      | 3     | 5     | 5     | 4 |
| 8770   |      |      |      |      |      |      |      |      |       | 4      | 3      | 3     | 5     | 5     | 5 |
| 8771   |      |      |      |      |      |      |      |      |       | 2      | 3      | 3     | 5     | 5     | 5 |
| 8773   | 2    | 3    | 4    | 5    | 6    | 5    | 3    | 5    | 2     | 2      | 2      | 2     | 4     | 4     | 5 |
| 8774   |      |      |      |      |      |      |      |      |       | 2      | 2      | 2     | 3     | 3     | 3 |
| 8776   | 6    | 6    | 1    | 6    | 6    | 6    | 6    | 6    | 2     | 2      | 3      | 3     | 5     | 5     | 5 |
| 8777   | 5    |      | 2    | 5    | 5    | 5    | 5    | 5    | 2     | 3      | 3      | 3     | 5     | 5     | 5 |
| 8778   | 4    | 5    | 1    | 6    | 3    | 6    | 3    | 3    | 3     | 2      | 1      | 1     | 5     | 5     | 5 |
| 8779   |      |      |      |      |      |      |      |      |       | 3      | 3      | 3     | 5     | 5     | 4 |
| 8784   |      |      |      |      |      |      |      |      |       | 3      | 3      | 3     | 4     | 4     | 4 |
| 8786   |      |      |      |      |      |      |      |      |       | 3      | 3      | 3     | 5     | 5     | 5 |
| 8787   |      |      |      |      |      |      |      |      |       | 3      | 3      | 3     | 4     | 5     | 4 |
| 8790   |      |      |      |      |      |      |      |      |       | 3      | 3      | 3     | 3     | 3     | 5 |
| 8791   |      |      |      |      |      |      |      |      |       | 3      | 3      | 3     | 4     | 4     | 4 |
| 8793   |      |      |      |      |      |      |      |      |       | 3      | 3      | 3     | 4     | 4     | 3 |
| 8795   | 6    | 6    | 1    | 6    | 6    | 6    | 6    | 6    | 2     | 3      | 3      | 3     | 5     | 5     | 5 |
| 8797   | 5    | 6    | 2    | 5    | 6    | 6    | 6    | 6    | 4     | 2      | 3      | 3     | 4     | 5     | 4 |
| 8801   |      |      |      |      |      |      |      |      |       | 3      | 3      | 2     | 4     | 4     | 4 |
| 8802   |      |      |      |      |      |      |      |      |       | 4      | 3      | 3     | 4     | 4     | 4 |
| 8807   |      |      |      |      |      |      |      |      |       | 3      | 3      | 3     | 5     | 5     | 5 |



| respid | Q48k | Q48l | Q48m | Q48n | Q48o | Q48p | Q48q | Q48r | Q49_1 | Q50a_1 | Q50b_1 | Q51_1 | Q51_2 | Q52_1 |   |
|--------|------|------|------|------|------|------|------|------|-------|--------|--------|-------|-------|-------|---|
| 8813   |      |      |      |      |      |      |      |      |       | 2      | 2      | 3     | 4     | 4     | 4 |
| 8817   | 6    | 6    | 4    | 4    | 6    | 6    | 6    | 6    | 3     | 3      | 3      | 3     | 4     | 4     | 4 |
| 8818   |      |      |      |      |      |      |      |      |       | 3      | 2      | 2     | 4     | 4     | 4 |
| 8821   | 6    | 6    | 1    | 6    | 6    | 6    | 6    | 6    | 1     | 2      | 3      | 3     | 5     | 5     | 4 |
| 8822   | 6    | 6    | 1    | 6    | 6    | 6    | 6    | 5    | 2     | 4      | 2      | 2     | 4     | 3     | 4 |
| 8823   | 3    | 4    | 1    | 3    | 4    | 3    | 4    | 4    | 3     | 1      | 2      | 2     | 3     | 2     | 4 |
| 8824   |      |      |      |      |      |      |      |      |       | 3      | 3      | 3     | 3     | 4     | 4 |
| 8825   | 6    | 6    | 1    | 5    | 6    | 6    | 6    | 6    | 1     | 3      | 3      | 2     | 4     | 4     | 4 |
| 8834   |      |      |      |      |      |      |      |      |       | 2      | 3      | 3     | 2     | 3     | 1 |
| 8840   | 2    | 2    | 4    | 4    | 3    | 2    | 2    | 2    | 2     | 2      | 2      | 2     | 2     | 2     | 1 |
| 8843   |      |      |      |      |      |      |      |      |       | 2      | 3      | 3     | 2     | 4     | 1 |
| 8846   |      |      |      |      |      |      |      |      |       | 2      | 2      | 2     | 3     | 5     | 3 |
| 8862   |      |      |      |      |      |      |      |      |       | 4      | 3      | 3     | 5     | 5     | 5 |
| 8866   |      |      |      |      |      |      |      |      |       | 3      | 3      | 3     | 5     | 4     | 5 |
| 8869   |      |      |      |      |      |      |      |      |       | 2      | 3      | 3     | 5     | 5     | 5 |
| 8872   | 3    | 3    | 5    | 4    | 4    | 2    | 4    | 2    | 3     | 3      | 3      | 3     | 4     | 5     | 3 |
| 8903   |      |      |      |      |      |      |      |      |       | 3      | 2      | 2     | 3     | 3     | 3 |
| 8909   |      |      |      |      |      |      |      |      |       | 4      | 3      | 3     | 5     | 5     | 5 |
| 8926   | 6    | 6    | 1    | 2    | 6    | 6    | 6    | 6    | 2     | 2      | 3      | 3     | 2     | 3     | 4 |
| 8936   | 6    | 6    | 1    | 6    | 6    | 6    | 6    | 6    | 1     | 3      | 3      | 3     | 4     | 5     | 5 |
| 8945   |      |      |      |      |      |      |      |      |       | 3      | 3      | 3     | 5     | 5     | 5 |
| 8954   |      |      |      |      |      |      |      |      |       | 2      | 3      | 3     | 5     | 5     | 4 |
| 8955   | 4    | 6    | 6    | 4    | 4    | 6    | 4    | 3    | 2     | 2      | 3      | 4     | 4     | 3     | 4 |
| 8958   |      |      |      |      |      |      |      |      |       | 2      | 3      | 3     | 5     | 5     | 5 |
| 8959   | 5    | 2    | 6    | 1    | 2    | 2    | 2    | 2    | 6     | 2      | 3      | 2     | 3     | 3     | 3 |
| 8960   |      |      |      |      |      |      |      |      |       | 4      | 3      | 3     | 5     | 5     | 5 |
| 8976   | 4    | 3    | 4    | 3    |      | 3    | 3    | 4    | 2     | 2      | 2      | 2     | 4     | 3     | 5 |
| 8977   | 5    | 5    | 2    | 5    |      | 5    | 5    | 2    | 3     | 2      | 2      | 2     | 4     | 4     | 4 |
| 8979   |      |      |      |      |      |      |      |      |       | 2      | 2      | 2     | 2     | 3     | 2 |
| 8985   |      |      |      |      |      |      |      |      |       | 2      | 2      | 2     | 3     | 3     | 4 |
| 8994   |      |      |      |      |      |      |      |      |       | 4      | 3      | 3     | 5     | 5     | 4 |
| 8997   |      |      |      |      |      |      |      |      |       | 2      | 3      | 3     | 5     | 5     | 5 |

| respid | Q48k | Q48l | Q48m | Q48n | Q48o | Q48p | Q48q | Q48r | Q49_1 | Q50a_1 | Q50b_1 | Q51_1 | Q51_2 | Q52_1 |   |
|--------|------|------|------|------|------|------|------|------|-------|--------|--------|-------|-------|-------|---|
| 9002   |      |      |      |      |      |      |      |      |       | 2      | 3      | 3     | 5     | 5     | 5 |
| 9005   | 4    | 4    | 3    | 3    | 6    | 3    | 4    | 3    |       | 2      | 3      | 2     | 2     | 2     | 2 |
| 9017   | 4    | 4    | 3    | 6    | 6    | 6    | 5    | 3    |       | 4      | 3      | 3     | 4     | 4     | 4 |
| 9018   |      |      |      |      |      |      |      |      |       | 4      | 3      | 3     | 5     | 5     | 5 |
| 9021   | 5    | 6    | 1    | 6    | 6    | 6    | 6    | 2    |       | 4      | 3      | 3     | 5     | 5     | 4 |
| 9029   |      |      |      |      |      |      |      |      |       | 2      | 2      | 2     | 2     | 2     | 2 |
| 9035   |      |      |      |      |      |      |      |      |       | 3      | 3      | 3     | 4     | 4     | 4 |
| 9038   |      |      |      |      |      |      |      |      |       | 4      | 3      | 3     | 5     | 5     | 5 |
| 9039   |      |      |      |      |      |      |      |      |       | 3      | 3      | 3     | 5     | 5     | 5 |
| 9040   | 6    | 6    | 6    |      |      |      |      |      |       | 2      | 2      | 2     | 3     | 4     | 4 |
| 9042   |      |      |      |      |      |      |      |      |       | 4      | 3      | 3     | 5     | 5     | 5 |
| 9043   |      |      |      |      |      |      |      |      |       | 4      | 3      | 3     | 5     | 5     | 5 |
| 9045   |      |      |      |      |      |      |      |      |       | 3      | 3      | 3     | 4     | 5     | 4 |
| 9051   |      |      |      |      |      |      |      |      |       | 2      | 3      | 3     | 5     | 4     | 5 |
| 9067   |      |      |      |      |      |      |      |      |       | 4      | 3      | 3     | 5     | 5     | 5 |
| 9069   |      |      |      |      |      |      |      |      |       | 3      | 3      | 3     | 5     | 5     | 3 |
| 9073   |      |      |      |      |      |      |      |      |       | 2      | 3      | 3     | 4     | 5     | 5 |
| 9084   |      |      |      |      |      |      |      |      |       | 2      | 2      | 2     | 3     | 3     | 3 |
| 9096   |      |      |      |      |      |      |      |      |       | 2      | 3      | 3     | 5     | 5     | 5 |
| 9100   | 5    | 3    | 4    | 4    | 3    | 3    | 4    | 3    |       | 3      | 2      | 3     | 2     | 2     | 1 |
| 9107   |      |      |      |      |      |      |      |      |       | 2      | 2      | 3     | 5     | 5     | 5 |
| 9110   |      |      |      |      |      |      |      |      |       | 4      | 3      | 3     | 5     | 5     | 5 |
| 9120   |      |      |      |      |      |      |      |      |       | 2      | 3      | 2     | 5     | 5     | 5 |
| 9122   | 4    | 4    | 3    | 2    | 6    | 2    | 3    | 3    |       | 3      | 3      | 3     | 5     | 5     | 5 |
| 9130   |      |      |      |      |      |      |      |      |       | 4      | 3      | 3     | 4     | 4     | 3 |
| 9134   | 5    | 5    | 3    | 4    | 5    | 5    | 5    | 3    |       | 2      | 2      | 2     | 4     | 4     | 4 |
| 9137   |      |      |      |      |      |      |      |      |       | 2      | 3      | 3     | 4     | 4     | 4 |
| 9139   | 6    | 6    | 1    | 6    | 3    | 6    | 1    | 6    |       | 3      | 3      | 2     | 4     | 4     | 3 |
| 9144   |      |      |      |      |      |      |      |      |       | 4      | 3      | 3     | 4     | 5     | 4 |
| 9157   |      |      |      |      |      |      |      |      |       | 3      | 3      | 3     | 4     | 4     | 3 |
| 9166   |      |      |      |      |      |      |      |      |       | 2      | 2      | 2     | 3     | 4     | 3 |
| 9177   |      |      |      |      |      |      |      |      |       | 2      | 2      | 3     | 3     | 4     | 3 |

| respid | Q48k | Q48l | Q48m | Q48n | Q48o | Q48p | Q48q | Q48r | Q49_1 | Q50a_1 | Q50b_1 | Q51_1 | Q51_2 | Q52_1 |   |
|--------|------|------|------|------|------|------|------|------|-------|--------|--------|-------|-------|-------|---|
| 9181   | 6    | 6    | 1    | 6    | 6    | 6    | 6    | 6    | 1     | 4      | 3      | 3     | 1     | 1     | 1 |
| 9183   |      |      |      |      |      |      |      |      |       | 2      | 2      | 2     | 2     | 3     | 2 |
| 9184   |      |      |      |      |      |      |      |      |       | 2      | 3      | 2     | 3     | 4     | 3 |
| 9188   |      |      |      |      |      |      |      |      |       | 4      | 3      | 3     | 5     | 5     | 5 |
| 9197   |      |      |      |      |      |      |      |      |       | 3      | 2      | 2     | 3     | 3     | 3 |
| 9200   | 6    | 6    | 2    | 6    | 6    | 6    | 6    | 5    | 2     | 3      | 3      | 3     | 4     | 4     | 4 |
| 9205   | 6    | 6    | 6    | 6    | 6    | 6    | 6    | 5    | 6     | 3      | 3      | 3     | 4     | 5     | 5 |
| 9207   | 6    | 6    | 2    | 6    | 6    | 6    | 5    | 6    | 2     | 4      | 3      | 3     | 5     | 5     | 5 |
| 9213   |      |      |      |      |      |      |      |      |       | 3      | 3      | 3     | 5     | 5     | 4 |
| 9216   |      |      |      |      |      |      |      |      |       | 3      | 2      | 2     | 2     | 2     | 3 |
| 9217   |      |      |      |      |      |      |      |      |       | 3      | 3      | 3     | 5     | 5     | 5 |
| 9218   | 3    | 4    | 6    | 3    | 3    | 3    | 3    | 3    | 6     | 2      | 3      | 3     | 4     | 4     | 4 |
| 9219   | 2    | 3    | 4    | 4    | 4    | 4    | 3    | 3    | 5     | 1      | 2      | 2     | 3     | 3     | 3 |
| 9220   |      |      |      |      |      |      |      |      |       | 4      | 2      | 2     | 4     | 4     | 4 |
| 9221   |      |      |      |      |      |      |      |      |       | 2      | 2      | 2     | 4     | 4     | 4 |
| 9223   |      |      |      |      |      |      |      |      |       | 2      | 2      | 2     | 3     | 3     | 3 |
| 9228   |      |      |      |      |      |      |      |      |       | 3      | 3      | 3     | 5     | 5     | 5 |
| 9230   |      |      |      |      |      |      |      |      |       | 4      | 3      | 3     | 5     | 5     | 5 |
| 9231   | 4    | 4    | 3    | 3    | 6    | 5    | 3    | 4    | 4     | 4      | 3      | 3     | 4     | 5     | 5 |
| 9233   |      |      |      |      |      |      |      |      |       | 2      | 2      | 2     | 3     | 3     | 3 |
| 9235   | 6    | 6    | 4    | 5    | 6    | 6    | 6    | 6    | 2     | 3      | 3      | 3     | 4     | 5     | 5 |
| 9237   |      |      |      |      |      |      |      |      |       | 4      | 3      | 3     | 5     | 5     | 5 |
| 9242   | 6    | 6    | 1    | 6    | 6    | 6    | 6    | 5    | 4     | 3      | 3      | 3     | 5     | 5     | 4 |
| 9250   |      |      |      |      |      |      |      |      |       | 3      | 3      | 3     | 5     | 5     | 5 |
| 9253   | 4    | 4    | 3    | 4    | 4    | 4    | 4    | 4    | 3     | 2      | 2      | 2     | 2     | 3     | 3 |
| 9257   |      |      |      |      |      |      |      |      |       | 3      | 3      | 3     | 3     | 3     | 3 |
| 9263   |      |      |      |      |      |      |      |      |       | 3      | 2      | 2     | 5     | 5     | 5 |
| 9267   |      |      |      |      |      |      |      |      |       | 4      | 2      | 2     | 4     | 4     | 5 |
| 9272   |      |      |      |      |      |      |      |      |       | 2      | 3      | 3     | 4     | 5     | 5 |
| 9279   |      |      |      |      |      |      |      |      |       | 4      | 3      | 3     | 5     | 5     | 4 |
| 9281   | 5    | 6    | 1    | 6    | 6    | 6    | 6    | 6    | 1     | 3      | 3      | 3     | 4     | 5     | 3 |
| 9285   |      |      |      |      |      |      |      |      |       | 4      | 3      | 3     | 5     | 5     | 5 |

| respid | Q48k | Q48l | Q48m | Q48n | Q48o | Q48p | Q48q | Q48r | Q49_1 | Q50a_1 | Q50b_1 | Q51_1 | Q51_2 | Q52_1 |
|--------|------|------|------|------|------|------|------|------|-------|--------|--------|-------|-------|-------|
| 9286   | 5    | 5    | 5    | 4    | 5    | 4    | 5    | 3    | 2     | 3      | 3      | 5     | 5     | 5     |
| 9294   |      |      |      |      |      |      |      |      | 4     | 3      | 3      | 4     | 4     | 4     |
| 9295   | 3    | 6    | 3    | 4    | 6    | 6    | 6    | 3    | 2     | 3      | 3      | 5     | 5     | 4     |
| 9297   |      |      |      |      |      |      |      |      | 2     | 2      | 2      | 4     | 4     | 4     |
| 9299   |      |      |      |      |      |      |      |      | 2     | 2      | 3      | 4     | 3     | 3     |
| 9309   | 4    | 4    | 4    | 4    | 4    | 4    | 4    | 3    | 1     | 2      | 3      | 2     | 4     | 3     |
| 9315   |      |      |      |      |      |      |      |      | 2     | 3      | 3      | 5     | 4     | 5     |
| 9320   |      |      |      |      |      |      |      |      | 3     | 3      | 3      | 5     | 5     | 5     |
| 9324   |      |      |      |      |      |      |      |      | 4     | 3      | 3      | 5     | 5     | 4     |
| 9326   | 5    | 6    | 3    | 6    | 6    | 5    | 6    | 2    | 4     | 3      | 3      | 4     | 4     | 4     |
| 9333   | 6    | 6    | 1    | 6    | 6    | 6    | 6    | 3    | 2     | 3      | 2      | 5     | 4     | 4     |
| 9334   | 2    | 2    | 2    | 2    | 2    | 2    | 2    | 2    | 2     | 2      | 2      | 3     | 3     | 3     |
| 9336   | 6    | 5    | 5    | 5    | 6    | 6    | 5    | 3    | 2     | 3      | 2      | 4     | 3     | 4     |
| 9337   |      |      |      |      |      |      |      |      | 4     | 3      | 3      | 5     | 5     | 5     |
| 9342   |      |      |      |      |      |      |      |      | 3     | 2      | 2      | 5     | 5     | 5     |
| 9347   | 5    | 5    | 2    | 2    | 4    | 3    | 2    | 3    | 4     | 3      | 3      | 4     | 4     | 4     |
| 9352   |      |      |      |      |      |      |      |      | 2     | 3      | 3      | 5     | 5     | 5     |
| 9355   |      |      |      |      |      |      |      |      | 3     | 3      | 3      | 5     | 5     | 5     |
| 9356   |      |      |      |      |      |      |      |      | 3     | 3      | 3      | 3     | 3     | 5     |
| 9359   |      |      |      |      |      |      |      |      | 2     | 2      | 2      | 3     | 3     | 3     |
| 9368   | 6    | 4    |      | 6    | 6    | 6    | 2    |      | 2     | 2      | 2      | 4     | 4     | 4     |
| 9375   |      |      |      |      |      |      |      |      | 3     | 3      | 3      | 5     | 5     | 5     |
| 9384   | 3    | 3    | 3    | 3    | 3    | 3    | 3    | 3    | 2     | 2      | 2      | 2     | 2     | 2     |
| 9388   |      |      |      |      |      |      |      |      | 1     | 3      | 3      | 3     | 2     | 2     |
| 9397   |      |      |      |      |      |      |      |      | 2     | 3      | 3      | 4     | 4     | 4     |
| 9400   |      |      |      |      |      |      |      |      | 4     | 3      | 3      | 5     | 5     | 4     |
| 9401   |      |      |      |      |      |      |      |      | 4     | 2      | 2      | 4     | 4     | 4     |
| 9402   |      |      |      |      |      |      |      |      | 2     | 3      | 2      | 5     | 5     | 5     |
| 9417   |      |      |      |      |      |      |      |      | 3     | 3      | 3      | 4     | 5     | 4     |
| 9424   |      |      |      |      |      |      |      |      | 2     | 3      | 3      | 4     | 5     | 5     |
| 9427   |      |      | 2    | 2    |      |      |      |      | 2     | 2      | 3      | 4     | 4     | 4     |
| 9429   |      |      |      |      |      |      |      |      | 4     | 3      | 3      | 4     | 5     | 4     |

| respid | Q48k | Q48l | Q48m | Q48n | Q48o | Q48p | Q48q | Q48r | Q49_1 | Q50a_1 | Q50b_1 | Q51_1 | Q51_2 | Q52_1 |   |
|--------|------|------|------|------|------|------|------|------|-------|--------|--------|-------|-------|-------|---|
| 9437   |      |      |      |      |      |      |      |      |       | 3      | 2      | 2     | 3     | 3     | 3 |
| 9442   |      |      |      |      |      |      |      |      |       | 2      | 2      | 2     | 3     | 3     | 4 |
| 9446   |      |      |      |      |      |      |      |      |       | 3      | 2      | 2     | 4     | 4     | 4 |
| 9447   |      |      |      |      |      |      |      |      |       | 4      | 2      | 3     | 5     | 5     | 5 |
| 9448   | 3    | 3    | 3    | 3    | 3    | 3    | 3    | 3    | 3     | 2      | 2      | 2     | 5     | 5     | 5 |
| 9449   |      |      |      |      |      |      |      |      |       | 4      | 3      | 3     | 4     | 4     | 4 |
| 9455   |      |      |      |      |      |      |      |      |       | 2      | 2      | 2     | 2     | 2     | 2 |
| 9459   | 5    | 3    | 2    | 5    | 3    | 2    | 3    | 4    | 4     | 4      | 3      | 2     | 4     | 3     | 3 |
| 9460   |      |      |      |      |      |      |      |      |       | 4      | 3      | 3     | 5     | 5     | 5 |
| 9461   |      |      |      |      |      |      |      |      |       | 2      | 3      | 3     | 4     | 4     | 4 |
| 9463   | 6    | 6    | 1    | 6    | 6    | 6    | 6    | 1    | 3     | 3      | 3      | 1     | 5     | 4     | 5 |
| 9464   |      |      |      |      |      |      |      |      |       | 2      | 3      | 2     | 4     | 4     | 4 |
| 9466   |      |      |      |      |      |      |      |      |       | 2      | 2      | 2     | 3     | 3     | 4 |
| 9477   | 6    | 6    | 6    | 6    | 6    | 6    | 6    | 6    | 6     | 4      | 3      | 3     | 4     | 4     | 4 |
| 9482   |      |      |      |      |      |      |      |      |       | 2      | 2      | 2     | 2     | 2     | 3 |
| 9486   |      |      |      |      |      |      |      |      |       | 3      | 2      | 2     | 3     | 3     | 4 |
| 9488   |      |      |      |      |      |      |      |      |       | 4      | 2      | 3     | 2     | 3     | 1 |
| 9489   | 6    | 6    | 6    | 6    | 6    | 6    | 6    | 6    | 1     | 3      | 3      | 3     | 5     | 5     | 5 |
| 9496   |      |      |      |      |      |      |      |      |       | 2      | 2      | 2     | 2     | 3     | 2 |
| 9499   |      |      |      |      |      |      |      |      |       | 2      | 2      | 3     | 5     | 5     | 5 |
| 9512   | 6    | 6    | 1    | 6    | 6    | 6    | 6    | 6    | 2     | 4      | 3      | 3     | 5     | 5     | 5 |
| 9514   |      |      |      |      |      |      |      |      |       | 4      | 3      | 3     | 4     | 4     | 3 |
| 9516   |      |      |      |      |      |      |      |      |       | 3      | 3      | 3     | 3     | 3     | 4 |
| 9517   |      |      |      |      |      |      |      |      |       | 2      | 2      | 2     | 3     | 3     | 3 |
| 9520   |      |      |      |      |      |      |      |      |       | 2      | 3      | 3     | 3     | 3     | 3 |
| 9527   |      |      |      |      |      |      |      |      |       | 2      | 3      | 3     | 5     | 5     | 4 |
| 9532   |      |      |      |      |      |      |      |      |       | 2      | 2      | 2     | 4     | 3     | 5 |
| 9533   |      |      |      |      |      |      |      |      |       | 4      | 3      | 3     | 5     | 5     | 5 |
| 9543   |      |      |      |      |      |      |      |      |       | 3      | 2      | 3     | 5     | 5     | 5 |
| 9550   |      |      |      |      |      |      |      |      |       | 2      | 3      | 3     | 3     | 3     | 3 |
| 9553   | 5    | 6    | 3    | 5    | 6    | 3    | 4    | 5    | 5     | 2      | 2      | 2     | 2     | 2     | 4 |
| 9555   | 4    | 5    | 3    | 3    | 5    | 3    | 3    | 3    | 4     | 2      | 3      | 2     | 3     | 4     | 4 |

| respid | Q48k | Q48l | Q48m | Q48n | Q48o | Q48p | Q48q | Q48r | Q49_1 | Q50a_1 | Q50b_1 | Q51_1 | Q51_2 | Q52_1 |   |
|--------|------|------|------|------|------|------|------|------|-------|--------|--------|-------|-------|-------|---|
| 9565   |      | 2    | 3    | 3    | 4    | 2    | 4    | 3    | 4     | 1      | 3      | 2     | 3     | 1     | 3 |
| 9583   |      |      |      |      |      |      |      |      |       | 2      | 3      | 3     | 5     | 4     | 4 |
| 9594   |      |      |      |      |      |      |      |      |       | 4      | 3      | 3     | 5     | 5     | 5 |
| 9596   |      |      |      |      |      |      |      |      |       | 1      | 2      | 3     | 5     | 4     | 5 |
| 9600   |      | 4    | 5    | 3    | 5    | 6    | 5    | 5    | 2     | 2      | 2      | 2     | 3     | 4     | 4 |
| 9602   |      |      |      |      |      |      |      |      |       | 5      | 3      | 3     | 5     | 4     | 4 |
| 9606   |      |      |      |      |      |      |      |      |       | 2      | 2      | 2     | 2     | 2     | 2 |
| 9608   |      |      |      |      |      |      |      |      |       | 2      | 2      | 2     | 3     | 3     | 3 |
| 9610   |      | 6    | 6    | 1    | 6    | 6    | 6    | 6    | 1     | 2      | 3      | 3     | 4     | 5     | 4 |
| 9612   |      | 3    | 3    | 3    | 2    | 3    | 2    | 3    | 3     | 3      | 2      | 2     | 4     | 4     | 3 |
| 9613   |      |      |      |      |      |      |      |      |       | 4      | 3      | 3     | 4     | 4     | 4 |
| 9614   |      |      |      |      |      |      |      |      |       | 2      | 2      | 3     | 5     | 5     | 5 |
| 9620   |      |      |      |      |      |      |      |      |       | 2      | 3      | 2     | 4     | 3     | 3 |
| 9628   |      | 4    | 4    | 3    | 4    | 4    | 4    | 4    | 4     | 2      | 3      | 3     | 5     | 5     | 5 |
| 9631   |      |      |      |      |      |      |      |      |       | 1      | 2      | 3     | 3     | 3     | 3 |
| 9632   |      |      |      |      |      |      |      |      |       | 3      | 3      | 2     | 4     | 4     | 3 |
| 9633   |      | 6    | 6    | 2    | 6    | 6    | 6    | 6    | 3     | 2      | 3      | 3     | 4     | 4     | 4 |
| 9639   |      |      |      |      |      |      |      |      |       | 3      | 2      | 3     | 3     | 3     | 2 |
| 9640   |      | 6    | 6    | 3    | 4    | 4    | 4    | 6    | 4     | 4      | 3      | 3     | 5     | 5     | 4 |
| 9642   |      |      |      |      |      |      |      |      |       | 3      | 3      | 3     | 4     | 5     | 5 |
| 9653   |      |      |      |      |      |      |      |      |       | 2      | 3      | 3     | 4     | 5     | 4 |
| 9658   |      | 2    | 3    | 4    | 1    | 4    | 2    | 3    | 5     | 4      | 3      | 3     | 4     | 4     | 4 |
| 9659   |      | 1    | 2    | 3    | 1    | 3    | 3    | 1    | 6     | 2      | 2      | 2     | 3     | 4     | 4 |
| 9661   |      | 5    | 2    | 5    | 4    | 4    | 5    | 1    | 5     | 2      | 3      | 3     | 5     | 5     | 3 |
| 9664   |      |      |      |      |      |      |      |      |       | 3      | 3      | 3     | 5     | 5     | 5 |
| 9665   |      | 6    | 6    | 2    | 6    | 6    | 6    | 6    | 4     | 3      | 3      | 3     | 5     | 5     | 5 |
| 9666   |      |      |      |      |      |      |      |      |       | 2      | 2      | 2     | 3     | 3     | 4 |
| 9667   |      | 5    | 4    | 4    | 3    | 5    | 4    | 4    | 3     | 3      | 3      | 2     | 4     | 5     | 4 |
| 9668   |      |      |      |      |      |      |      |      |       | 5      | 3      | 3     | 5     | 5     | 5 |
| 9670   |      |      |      |      |      |      |      |      |       | 3      | 3      | 3     | 4     | 5     | 4 |
| 9671   |      | 4    | 4    | 5    | 3    | 4    | 4    | 4    | 3     | 2      | 3      | 2     | 4     | 4     | 4 |
| 9681   |      |      |      |      |      |      |      |      |       | 4      | 3      | 3     | 5     | 5     | 5 |

| respid | Q48k | Q48l | Q48m | Q48n | Q48o | Q48p | Q48q | Q48r | Q49_1 | Q50a_1 | Q50b_1 | Q51_1 | Q51_2 | Q52_1 |   |
|--------|------|------|------|------|------|------|------|------|-------|--------|--------|-------|-------|-------|---|
| 9684   |      |      |      |      |      |      |      |      |       | 2      | 3      | 2     | 4     | 4     | 4 |
| 9685   |      |      |      |      |      |      |      |      |       | 2      | 2      | 3     | 3     | 4     | 4 |
| 9686   |      |      |      |      |      |      |      |      |       | 2      | 3      | 3     | 5     | 5     | 5 |
| 9688   |      |      |      |      |      |      |      |      |       | 1      | 2      | 3     | 4     | 4     | 4 |
| 9692   |      |      |      |      |      |      |      |      |       | 3      | 3      | 3     | 4     | 4     | 4 |
| 9693   | 3    | 3    | 2    | 1    | 4    | 4    | 3    | 5    | 2     | 2      | 2      | 2     | 3     | 3     | 3 |
| 9698   | 4    | 3    | 5    | 2    | 3    | 3    | 4    | 3    | 2     | 2      | 2      | 3     | 4     | 4     | 3 |
| 9699   | 6    | 6    | 4    | 4    | 6    | 3    | 6    | 1    | 4     | 3      | 3      | 5     | 4     | 4     | 5 |
| 9701   |      |      |      |      |      |      |      |      |       | 3      | 3      | 3     | 5     | 5     | 5 |
| 9702   | 3    | 3    | 1    | 2    | 3    | 6    | 3    | 5    | 4     | 3      | 3      | 5     | 5     | 5     | 5 |
| 9709   |      |      |      |      |      |      |      |      |       | 2      | 3      | 3     | 5     | 5     | 4 |
| 9713   |      |      |      |      |      |      |      |      |       | 2      | 2      | 2     | 4     | 4     | 5 |
| 9715   |      |      |      |      |      |      |      |      |       | 3      | 3      | 3     | 5     | 5     | 5 |
| 9721   | 6    | 6    | 1    | 3    | 6    | 6    | 6    | 6    | 3     | 3      | 3      | 3     | 3     | 3     | 3 |
| 9725   | 5    | 5    | 3    | 6    | 6    | 4    | 5    | 3    | 2     | 2      | 2      | 4     | 4     | 4     | 4 |
| 9729   |      |      |      |      |      |      |      |      |       | 2      | 3      | 3     | 4     | 4     | 4 |
| 9731   | 6    | 6    | 5    | 6    | 6    | 6    | 6    | 3    | 3     | 3      | 3      | 5     | 5     | 5     | 5 |
| 9736   |      |      |      |      |      |      |      |      |       | 4      | 2      | 2     | 4     | 4     | 4 |
| 9740   |      |      |      |      |      |      |      |      |       | 4      | 3      | 3     | 5     | 5     | 5 |
| 9741   |      |      |      |      |      |      |      |      |       | 2      | 3      | 3     | 5     | 5     | 5 |
| 9749   |      |      |      |      |      |      |      |      |       | 2      | 2      | 3     | 4     | 4     | 4 |
| 9750   |      |      |      |      |      |      |      |      |       | 3      | 3      | 3     | 5     | 5     | 4 |
| 9751   | 4    | 5    | 2    | 5    | 6    | 5    | 4    | 2    | 2     | 2      | 2      | 3     | 3     | 4     | 4 |
| 9753   | 4    | 4    | 4    | 4    | 4    | 4    | 4    | 3    | 2     | 3      | 3      | 2     | 2     | 4     | 4 |
| 9754   |      |      |      |      |      |      |      |      |       | 1      | 1      | 1     | 4     | 4     | 2 |
| 9756   |      |      |      |      |      |      |      |      |       | 3      | 2      | 2     | 3     | 3     | 3 |
| 9758   | 4    | 3    | 2    | 3    | 5    | 3    | 3    | 3    | 2     | 2      | 2      | 3     | 4     | 4     | 4 |
| 9759   | 3    | 3    | 6    | 2    | 4    | 4    | 2    | 6    | 3     | 3      | 3      | 4     | 4     | 4     | 4 |
| 9760   | 6    | 6    | 6    | 6    | 6    | 6    | 6    | 6    | 2     | 2      | 2      | 3     | 3     | 3     | 3 |
| 9761   |      |      |      |      |      |      |      |      |       | 4      | 3      | 3     | 5     | 5     | 5 |
| 9762   |      |      |      |      |      |      |      |      |       | 2      | 3      | 3     | 5     | 5     | 5 |
| 9764   | 6    | 4    | 3    | 5    | 6    | 5    | 6    | 3    | 3     | 2      | 2      | 4     | 4     | 4     | 4 |

| respid | Q48k | Q48l | Q48m | Q48n | Q48o | Q48p | Q48q | Q48r | Q49_1 | Q50a_1 | Q50b_1 | Q51_1 | Q51_2 | Q52_1 |   |
|--------|------|------|------|------|------|------|------|------|-------|--------|--------|-------|-------|-------|---|
| 9768   |      |      |      |      |      |      |      |      |       | 2      | 3      | 3     | 4     | 4     | 4 |
| 9769   | 4    | 3    | 3    | 4    | 3    | 3    | 4    | 3    |       | 2      | 3      | 2     | 2     | 3     | 3 |
| 9770   | 4    | 4    | 3    | 4    | 4    | 4    | 4    | 3    |       | 3      | 3      | 3     | 4     | 4     | 4 |
| 9771   |      |      |      |      |      |      |      |      |       | 3      | 3      | 3     | 4     | 4     | 5 |
| 9772   |      |      |      |      |      |      |      |      |       | 2      | 3      | 3     | 4     | 4     | 4 |
| 9773   |      |      |      |      |      |      |      |      |       | 3      | 3      | 2     | 5     | 4     | 5 |
| 9776   | 6    | 6    | 3    | 6    | 6    | 6    | 5    | 1    |       | 4      | 3      | 3     | 5     | 5     | 5 |
| 9786   |      |      |      |      |      |      |      |      |       | 2      | 3      | 3     | 5     | 4     | 5 |
| 9790   | 5    | 3    | 2    | 4    | 3    | 3    | 1    | 6    |       | 2      | 3      | 3     | 5     | 5     | 4 |
| 9791   |      |      |      |      |      |      |      |      |       | 4      | 3      | 3     | 5     | 5     | 4 |
| 9794   |      |      |      |      |      |      |      |      |       | 2      | 3      | 2     | 4     | 4     | 3 |
| 9797   | 6    | 6    | 2    | 5    | 6    | 6    | 6    | 2    |       | 2      | 2      | 1     | 3     | 4     | 3 |
| 9799   | 6    | 5    | 2    | 6    | 6    | 6    | 6    | 2    |       | 3      | 3      | 3     | 5     | 5     | 4 |
| 9804   |      |      |      |      |      |      |      |      |       | 4      | 3      | 3     | 5     | 5     | 5 |
| 9805   |      |      |      |      |      |      |      |      |       | 2      | 2      | 2     | 4     | 4     | 4 |
| 9806   |      |      |      |      |      |      |      |      |       | 3      | 3      | 3     | 5     | 5     | 5 |
| 9807   | 4    | 4    |      | 4    | 4    |      | 4    | 2    |       | 3      | 2      | 2     | 2     | 2     | 2 |
| 9813   | 2    | 4    | 4    | 4    | 5    | 5    | 5    | 3    |       | 3      | 3      | 2     | 4     | 4     | 4 |
| 9817   | 2    | 2    | 6    | 1    | 6    | 6    | 6    | 1    |       | 2      | 3      | 3     | 5     | 5     | 4 |
| 9823   | 6    | 6    | 1    | 6    | 6    | 5    | 5    | 3    |       | 3      | 3      | 3     | 5     | 5     | 5 |
| 9826   | 4    | 6    | 4    | 5    | 6    | 3    | 5    | 4    |       | 3      | 3      | 2     | 4     | 4     | 4 |
| 9830   | 4    | 5    | 4    | 4    | 6    | 6    | 3    | 4    |       | 2      | 2      | 2     | 3     | 3     | 3 |
| 9835   | 5    | 3    | 2    | 6    | 6    | 4    | 3    | 5    |       | 2      | 3      | 3     | 4     | 3     | 4 |
| 9836   |      |      |      |      |      |      |      |      |       | 4      | 3      | 3     | 5     | 5     | 5 |
| 9841   |      |      |      |      |      |      |      |      |       | 4      | 3      | 3     | 5     | 5     | 5 |
| 9842   |      |      |      |      |      |      |      |      |       | 2      | 1      | 1     | 4     | 4     | 3 |
| 9844   | 6    | 6    | 1    | 6    | 6    | 6    | 6    | 1    |       | 2      | 3      | 3     | 5     | 5     | 5 |
| 9847   | 6    | 6    | 1    | 6    | 6    | 6    | 6    | 1    |       | 4      | 3      | 3     | 5     | 5     | 5 |
| 9851   | 1    | 1    | 6    | 1    | 1    | 6    | 6    | 6    |       | 2      | 3      | 3     | 5     | 5     | 3 |
| 9852   |      |      |      |      |      |      |      |      |       | 2      | 3      | 2     | 3     | 3     | 3 |
| 9854   | 6    | 6    | 4    | 4    | 6    | 6    | 6    | 2    |       | 2      | 3      | 3     | 4     | 4     | 4 |
| 9855   | 3    | 3    | 5    | 2    | 3    | 2    | 2    | 2    | 6     | 2      | 3      | 2     | 4     | 3     | 4 |



| respid | Q48k | Q48l | Q48m | Q48n | Q48o | Q48p | Q48q | Q48r | Q49_1 | Q50a_1 | Q50b_1 | Q51_1 | Q51_2 | Q52_1 |   |
|--------|------|------|------|------|------|------|------|------|-------|--------|--------|-------|-------|-------|---|
| 9856   | 5    | 5    | 2    | 5    | 5    | 5    | 5    | 5    | 3     | 2      | 3      | 2     | 3     | 4     | 3 |
| 9862   |      |      |      |      |      |      |      |      |       | 2      | 2      | 2     | 3     | 3     | 3 |
| 9863   |      |      |      |      |      |      |      |      |       | 3      | 2      | 3     | 5     | 5     | 5 |
| 9866   | 6    | 6    | 5    | 3    | 5    | 4    | 4    | 4    | 4     | 4      | 3      | 3     | 5     | 5     | 5 |
| 9867   |      |      |      |      |      |      |      |      |       | 2      | 3      | 3     | 5     | 5     | 5 |
| 9868   |      |      |      |      |      |      |      |      |       | 1      | 1      | 2     | 2     | 3     | 2 |
| 9869   |      |      |      |      |      |      |      |      |       | 3      | 3      | 3     | 5     | 5     | 5 |
| 9878   |      |      |      |      |      |      |      |      |       | 2      | 2      | 2     | 3     | 4     | 4 |
| 9879   |      |      |      |      |      |      |      |      |       | 3      | 3      | 3     | 4     | 4     | 3 |
| 9881   |      |      |      |      |      |      |      |      |       | 4      | 3      | 2     | 3     | 4     | 4 |
| 9882   |      |      |      |      |      |      |      |      |       | 3      | 3      | 2     | 3     | 5     | 5 |
| 9884   |      |      |      |      |      |      |      |      |       | 3      | 2      | 2     | 3     | 3     | 3 |
| 9885   |      |      |      |      |      |      |      |      |       | 2      | 3      | 3     | 5     | 5     | 5 |
| 9888   | 4    | 6    | 1    | 3    | 6    | 2    | 2    | 4    | 4     | 2      | 3      | 3     | 3     | 4     | 3 |
| 9889   |      |      |      |      |      |      |      |      |       | 4      | 3      | 3     | 5     | 5     | 5 |
| 9894   |      |      |      |      |      |      |      |      |       | 2      | 3      | 2     | 4     | 4     | 4 |
| 9895   |      |      |      |      |      |      |      |      |       | 3      | 3      | 3     | 5     | 5     | 4 |
| 9896   | 1    | 1    | 1    | 2    | 2    | 2    | 2    | 2    | 2     | 4      | 2      | 2     | 3     | 4     | 4 |
| 9897   |      |      |      |      |      |      |      |      |       | 3      | 3      | 3     | 5     | 5     | 4 |
| 9905   |      |      |      |      |      |      |      |      |       | 4      | 3      | 2     | 3     | 3     | 4 |
| 9907   | 4    | 4    | 4    | 3    | 3    | 3    | 4    | 3    | 3     | 4      | 3      | 3     | 5     | 5     | 4 |
| 9908   |      |      |      |      |      |      |      |      |       | 3      | 3      | 3     | 4     | 4     | 4 |
| 9909   |      |      |      |      |      |      |      |      |       | 2      | 2      | 2     | 3     | 3     | 3 |
| 9910   |      |      |      |      |      |      |      |      |       | 2      | 3      | 3     | 5     | 5     | 4 |
| 9913   |      |      |      |      |      |      |      |      |       | 4      | 3      | 3     | 5     | 5     | 5 |
| 9914   |      |      |      |      |      |      |      |      |       | 3      | 2      | 2     | 4     | 4     | 5 |
| 9915   |      |      |      |      |      | 6    |      |      |       | 2      | 3      | 2     | 4     | 4     | 4 |
| 9916   |      |      |      |      |      |      |      |      |       | 4      | 3      | 3     | 3     | 2     | 4 |
| 9918   |      |      |      |      |      |      |      |      |       | 4      | 3      | 3     | 5     | 5     | 5 |
| 9919   |      |      |      |      |      |      |      |      |       | 3      | 2      | 2     | 4     | 4     | 5 |
| 9922   |      |      |      |      |      |      |      |      |       | 2      | 2      | 3     | 4     | 4     | 2 |
| 9930   | 5    | 6    | 1    | 4    | 6    | 6    | 5    | 4    | 4     | 4      | 3      | 3     | 5     | 5     | 5 |

| respid | Q48k | Q48l | Q48m | Q48n | Q48o | Q48p | Q48q | Q48r | Q49_1 | Q50a_1 | Q50b_1 | Q51_1 | Q51_2 | Q52_1 |   |
|--------|------|------|------|------|------|------|------|------|-------|--------|--------|-------|-------|-------|---|
| 9934   |      |      |      |      |      |      |      |      |       | 5      | 3      | 3     | 5     | 5     | 5 |
| 9936   |      |      |      |      |      |      |      |      |       | 3      | 2      | 2     | 3     | 3     | 3 |
| 9938   | 6    | 6    | 2    | 6    | 6    | 6    | 6    | 6    | 1     | 4      | 3      | 2     | 5     | 5     | 5 |
| 9940   |      |      |      |      |      |      |      |      |       | 4      | 2      | 3     | 4     | 4     | 4 |
| 9944   | 4    | 4    | 4    | 3    | 4    | 4    | 4    | 4    | 3     | 3      | 2      | 2     | 3     | 4     | 3 |
| 9945   |      |      |      |      |      |      |      |      |       | 3      | 3      | 3     | 5     | 5     | 5 |
| 9948   | 3    | 3    | 4    | 3    | 4    | 4    | 4    | 4    | 3     | 3      | 3      | 2     | 5     | 5     | 5 |
| 9949   | 6    | 6    | 2    | 6    | 6    | 4    | 6    | 6    | 2     | 2      | 2      | 2     | 3     | 3     | 3 |
| 9951   |      |      |      |      |      |      |      |      |       | 3      | 3      | 3     | 3     | 3     | 4 |
| 9952   | 4    | 4    | 2    | 5    | 5    | 5    | 5    | 5    | 2     | 3      | 2      | 2     | 2     | 2     | 3 |
| 9954   | 3    | 4    | 3    | 4    | 3    | 3    | 3    | 5    | 4     | 2      | 3      | 3     | 5     | 5     | 5 |
| 9955   | 3    | 6    | 3    | 3    | 6    | 3    | 3    | 5    | 5     | 2      | 2      | 2     | 5     | 5     | 5 |
| 9956   |      |      |      |      |      |      |      |      |       | 2      | 3      | 3     | 4     | 4     | 4 |
| 9957   | 6    | 6    | 6    | 6    | 6    | 6    | 6    | 6    | 6     | 2      | 2      | 2     | 3     | 3     | 3 |
| 9958   |      |      |      |      |      |      |      |      |       | 3      | 1      | 3     | 2     | 2     | 2 |
| 9959   | 3    | 5    | 4    | 6    | 6    | 6    | 6    | 5    | 1     | 2      | 2      | 3     | 4     | 5     | 5 |
| 9960   |      |      |      |      |      |      |      |      |       | 2      | 3      | 2     | 3     | 4     | 5 |
| 9961   |      |      |      |      |      |      |      |      |       | 2      | 3      | 3     | 4     | 3     | 4 |
| 9962   |      |      |      |      |      |      |      |      |       | 2      | 2      | 3     | 3     | 3     | 4 |
| 9969   |      |      |      |      |      |      |      |      |       | 2      | 3      | 3     | 4     | 4     | 4 |
| 9982   |      |      |      |      |      |      |      |      |       | 3      | 3      | 2     | 4     | 4     | 4 |
| 9984   |      |      |      |      |      |      |      |      |       | 2      | 3      | 3     | 4     | 4     | 3 |
| 9990   |      |      |      |      |      |      |      |      |       | 4      | 3      | 3     | 5     | 5     | 4 |
| 9992   | 3    | 3    | 3    | 2    | 3    | 3    | 3    | 3    | 3     | 4      | 2      | 2     | 3     | 4     | 3 |
| 9993   |      |      |      |      |      |      |      |      |       | 2      | 2      | 2     | 3     | 3     | 3 |
| 9997   | 1    | 1    | 1    | 1    | 3    | 3    | 2    | 4    | 4     | 2      | 3      | 3     | 5     | 5     | 5 |
| 9999   |      |      |      |      |      |      |      |      |       | 3      | 3      | 3     | 5     | 5     | 5 |
| 10000  |      |      |      |      |      |      |      |      |       | 4      | 3      | 3     | 5     | 5     | 5 |
| 10005  |      |      |      |      |      |      |      |      |       | 2      | 3      | 2     | 5     | 5     | 5 |
| 10014  |      |      |      |      |      |      |      |      |       | 3      | 3      | 3     | 5     | 5     | 5 |
| 10016  |      |      |      |      |      |      |      |      |       | 1      | 2      | 3     | 3     | 4     | 5 |
| 10017  |      |      |      |      |      |      |      |      |       | 2      | 3      | 3     | 5     | 5     | 5 |

| respid | Q48k | Q48l | Q48m | Q48n | Q48o | Q48p | Q48q | Q48r | Q49_1 | Q50a_1 | Q50b_1 | Q51_1 | Q51_2 | Q52_1 |   |
|--------|------|------|------|------|------|------|------|------|-------|--------|--------|-------|-------|-------|---|
| 10018  |      |      |      |      |      |      |      |      |       | 2      | 3      | 2     | 5     | 4     | 3 |
| 10021  |      |      |      |      |      |      |      |      |       | 2      | 2      | 2     | 3     | 3     | 3 |
| 10025  | 4    | 4    | 3    | 5    | 6    | 5    | 4    | 3    |       | 2      | 2      | 3     | 3     | 3     | 4 |
| 10027  |      |      |      |      |      |      |      |      |       | 2      | 2      | 3     | 4     | 4     | 3 |
| 10028  |      |      |      |      |      |      |      |      |       | 4      | 3      | 3     | 5     | 5     | 5 |
| 10031  |      |      |      |      |      |      |      |      |       | 3      | 3      | 3     | 5     | 4     | 4 |
| 10036  | 3    | 6    | 3    | 6    | 6    | 6    | 6    | 2    |       | 2      | 2      | 2     | 3     | 4     | 3 |
| 10037  | 1    | 3    | 3    | 2    | 4    | 1    | 2    | 6    |       | 2      | 3      | 2     | 2     | 3     | 3 |
| 10038  |      |      |      |      |      |      |      |      |       | 2      | 2      | 3     | 4     | 5     | 4 |
| 10039  |      |      |      |      |      |      |      |      |       | 3      | 2      | 2     | 3     | 3     | 4 |
| 10041  |      |      |      |      |      |      |      |      |       | 2      | 2      | 2     | 1     | 1     | 1 |
| 10045  |      |      |      |      |      |      |      |      |       | 1      | 2      | 1     | 3     | 2     | 5 |
| 10046  |      |      |      |      |      |      |      |      |       | 3      | 3      | 3     | 4     | 5     | 4 |
| 10047  |      |      |      |      |      |      |      |      |       | 1      | 2      | 1     | 3     | 4     | 3 |
| 10048  | 3    | 3    | 1    | 3    | 3    | 3    | 3    | 5    |       | 3      | 2      | 2     | 4     | 3     | 3 |
| 10049  |      |      |      |      |      |      |      |      |       | 2      | 2      | 2     | 5     | 5     | 4 |
| 10051  |      |      |      |      |      |      |      |      |       | 3      | 3      | 3     | 5     | 5     | 5 |
| 10052  |      |      |      |      |      |      |      |      |       | 2      | 2      | 2     | 4     | 4     | 4 |
| 10056  |      |      |      |      |      |      |      |      |       | 3      | 3      | 3     | 5     | 5     | 4 |
| 10061  |      |      |      |      |      |      |      |      |       | 3      | 3      | 3     | 4     | 3     | 5 |
| 10064  |      |      |      |      |      |      |      |      |       | 4      | 3      | 3     | 4     | 4     | 4 |
| 10066  | 6    | 6    | 5    | 6    | 6    | 6    | 6    | 3    |       | 4      | 3      | 3     | 4     | 4     | 4 |
| 10069  |      |      |      |      |      |      |      |      |       | 4      | 3      | 3     | 4     | 5     | 5 |
| 10071  |      |      |      |      |      |      |      |      |       | 2      | 3      | 3     | 4     | 4     | 5 |
| 10074  |      |      |      |      |      |      |      |      |       | 3      | 2      | 2     | 2     | 3     | 3 |
| 10079  |      |      |      |      |      |      |      |      |       | 3      | 3      | 3     | 5     | 5     | 5 |
| 10087  |      |      |      |      |      |      |      |      |       | 3      | 2      | 2     | 3     | 4     | 2 |
| 10095  |      |      |      |      |      |      |      |      |       | 2      | 3      | 3     | 3     | 3     | 4 |
| 10097  | 6    | 6    | 6    | 6    | 6    | 6    | 6    | 3    |       | 4      | 3      | 3     | 4     | 4     | 4 |
| 10100  |      |      |      |      |      |      |      |      |       | 2      | 3      | 3     | 5     | 5     | 5 |
| 10105  |      |      |      |      |      |      |      |      |       | 4      | 3      | 3     | 5     | 5     | 5 |
| 10107  |      |      |      |      |      |      |      |      |       | 2      | 2      | 2     | 2     | 2     | 4 |

| respid | Q48k | Q48l | Q48m | Q48n | Q48o | Q48p | Q48q | Q48r | Q49_1 | Q50a_1 | Q50b_1 | Q51_1 | Q51_2 | Q52_1 |   |
|--------|------|------|------|------|------|------|------|------|-------|--------|--------|-------|-------|-------|---|
| 10111  |      |      |      |      |      |      |      |      |       | 3      | 2      | 2     | 4     | 4     | 4 |
| 10116  | 2    | 3    | 4    | 2    | 3    | 3    | 2    | 5    | 2     | 3      | 2      | 4     | 4     | 3     |   |
| 10118  | 6    | 6    | 6    | 6    | 6    | 6    | 6    | 6    | 3     | 3      | 3      | 5     | 5     | 5     |   |
| 10123  |      |      |      |      |      |      |      |      | 3     | 3      | 3      | 4     | 5     | 3     |   |
| 10124  | 6    | 6    | 3    | 5    | 6    | 6    | 6    | 2    | 2     | 2      | 3      | 3     | 4     | 3     |   |
| 10130  |      |      |      |      |      |      |      |      | 2     | 3      | 2      | 4     | 5     | 4     |   |
| 10134  | 4    | 6    | 3    | 5    | 6    | 6    | 5    | 4    | 3     | 3      | 3      | 4     | 4     | 4     |   |
| 10135  |      |      |      |      |      |      |      |      | 4     | 3      | 3      | 5     | 5     | 5     |   |
| 10136  |      |      |      |      |      |      |      |      | 3     | 3      | 3      | 3     | 5     | 2     |   |
| 10141  |      |      |      |      |      |      |      |      | 2     | 3      | 3      | 5     | 4     | 4     |   |
| 10142  | 5    | 5    | 3    | 6    | 5    | 5    | 5    | 3    | 4     | 3      | 3      | 5     | 5     | 5     |   |
| 10143  |      |      |      |      |      |      |      |      | 3     | 3      | 3      | 4     | 4     | 4     |   |
| 10145  |      |      |      |      |      |      |      |      | 3     | 3      | 3      | 5     | 5     | 2     |   |
| 10149  | 6    | 5    | 1    | 6    | 6    | 3    | 5    | 5    | 3     | 3      | 2      | 4     | 3     | 5     |   |
| 10150  |      |      |      |      |      |      |      |      | 1     | 3      | 3      | 4     | 4     | 4     |   |
| 10151  |      |      |      |      |      |      |      |      | 2     | 2      | 2      | 4     | 4     | 5     |   |
| 10152  |      |      |      |      |      |      |      |      | 2     | 3      | 2      | 4     | 4     | 4     |   |
| 10153  |      |      |      |      |      |      |      |      | 3     | 3      | 3      | 5     | 5     | 4     |   |
| 10156  | 6    | 6    | 2    | 6    | 6    | 6    | 6    | 2    | 2     | 3      | 2      | 5     | 4     | 4     |   |
| 10160  | 1    | 4    | 6    | 4    | 6    | 6    | 4    | 6    | 1     | 1      | 3      | 2     | 2     | 4     |   |
| 10161  |      |      |      |      |      |      |      |      | 3     | 3      | 3      | 5     | 5     | 5     |   |
| 10167  | 4    | 2    | 4    | 4    | 2    | 2    | 3    | 4    | 4     | 1      | 1      | 3     | 2     | 3     |   |
| 10171  |      |      |      |      |      |      |      |      | 4     | 3      | 1      | 1     | 1     | 1     |   |
| 10172  |      |      |      |      |      |      |      |      | 4     | 3      | 3      | 5     | 5     | 5     |   |
| 10176  |      |      |      |      |      |      |      |      | 3     | 2      | 2      | 4     | 4     | 5     |   |
| 10177  |      |      | 1    |      |      | 6    |      |      | 3     | 3      | 3      | 2     | 4     | 3     |   |
| 10182  |      |      |      |      |      |      |      |      | 2     | 2      | 3      | 2     | 3     | 3     |   |
| 10184  |      |      |      |      |      |      |      |      | 1     | 1      | 1      | 5     | 3     | 4     |   |
| 10186  | 4    | 4    | 2    | 5    | 4    | 4    | 4    | 5    | 2     | 2      | 2      | 3     | 3     | 4     |   |
| 10189  |      |      |      |      |      |      |      |      | 3     | 2      | 2      | 5     | 5     | 5     |   |
| 10191  |      |      |      |      |      |      |      |      | 3     | 3      | 3      | 5     | 5     | 5     |   |
| 10192  |      |      |      |      |      |      |      |      | 3     | 3      | 3      | 5     | 5     | 5     |   |

| respid | Q48k | Q48l | Q48m | Q48n | Q48o | Q48p | Q48q | Q48r | Q49_1 | Q50a_1 | Q50b_1 | Q51_1 | Q51_2 | Q52_1 |   |
|--------|------|------|------|------|------|------|------|------|-------|--------|--------|-------|-------|-------|---|
| 10195  |      |      |      |      |      |      |      |      |       | 4      | 3      | 3     | 5     | 5     | 5 |
| 10199  |      |      |      |      |      |      |      |      |       | 3      | 3      | 3     | 5     | 5     | 5 |
| 10201  |      |      |      |      |      |      |      |      |       | 3      | 3      | 2     | 5     | 5     | 5 |
| 10213  | 6    | 6    | 3    | 6    | 6    | 6    | 6    | 6    | 3     | 3      | 3      | 2     | 5     | 4     | 5 |
| 10222  | 5    | 5    | 2    | 6    | 6    | 6    | 6    | 6    | 2     | 2      | 2      | 2     | 4     | 4     | 4 |
| 10224  |      |      |      |      |      |      |      |      |       | 3      | 3      | 3     | 3     | 3     | 3 |
| 10245  | 6    | 6    | 3    | 4    | 4    | 5    | 6    |      |       | 3      | 3      | 3     | 5     | 5     | 5 |
| 10254  |      |      |      |      |      |      |      |      |       | 1      | 2      | 2     | 2     | 2     | 3 |
| 10255  |      |      |      |      |      |      |      |      |       | 2      | 2      | 2     | 2     | 3     | 3 |
| 10257  |      |      |      |      |      |      |      |      |       | 2      | 3      | 3     | 5     | 5     | 5 |
| 10260  |      |      |      |      |      |      |      |      |       | 1      | 3      | 2     | 5     | 5     | 5 |
| 10261  |      |      |      |      |      |      |      |      |       | 2      | 3      | 3     | 4     | 5     | 4 |
| 10263  | 3    | 6    | 6    | 3    | 6    | 6    | 6    | 6    | 6     | 1      | 1      | 1     | 2     | 2     | 2 |
| 10264  |      |      |      |      |      |      |      |      |       | 4      | 2      | 3     | 4     | 4     | 4 |
| 10268  |      |      |      |      |      |      |      |      |       | 3      | 2      | 2     | 3     | 4     | 4 |
| 10269  |      |      |      |      |      |      |      |      |       | 1      | 2      | 3     | 5     | 5     | 5 |
| 10270  |      |      |      |      |      |      |      |      |       | 4      | 3      | 3     | 4     | 4     | 4 |
| 10282  |      |      |      |      |      |      |      |      |       | 4      | 3      | 3     | 4     | 4     | 4 |
| 10285  |      |      |      |      |      |      |      |      |       | 2      | 2      | 2     | 2     | 1     | 2 |
| 10288  |      |      |      |      |      |      |      |      |       | 4      | 3      | 3     | 5     | 5     | 5 |
| 10291  |      |      |      |      |      |      |      |      |       | 4      | 3      | 3     | 5     | 5     | 5 |
| 10292  | 6    | 6    | 5    | 5    | 6    | 6    | 6    | 6    | 5     | 2      | 3      | 3     | 5     | 5     | 5 |
| 10304  |      |      |      |      |      |      |      |      |       | 3      | 3      | 3     | 5     | 5     | 5 |
| 10305  | 3    | 2    | 2    | 2    | 3    | 4    | 2    | 5    | 5     | 2      | 2      | 2     | 5     | 5     | 4 |
| 10310  |      |      |      |      |      |      |      |      |       | 2      | 2      | 2     | 4     | 4     | 4 |
| 10324  | 2    | 2    | 2    | 2    | 2    | 6    | 5    | 5    | 5     | 2      | 3      | 3     | 4     | 5     | 4 |
| 10325  | 6    | 6    | 1    | 2    | 6    | 3    | 5    | 2    | 2     | 3      | 3      | 3     | 4     | 4     | 4 |
| 10326  |      |      |      |      |      |      |      |      |       | 3      | 3      | 2     | 4     | 4     | 5 |
| 10329  |      |      |      |      |      |      |      |      |       | 3      | 3      | 3     | 5     | 5     | 5 |
| 10332  |      |      |      |      |      |      |      |      |       | 3      | 3      | 3     | 4     | 5     | 4 |
| 10337  |      |      |      |      |      |      |      |      |       | 3      | 3      | 2     | 4     | 5     | 4 |
| 10341  | 1    |      |      | 1    |      |      |      | 6    | 6     | 2      | 1      | 1     | 2     | 3     | 3 |

| respid | Q48k | Q48l | Q48m | Q48n | Q48o | Q48p | Q48q | Q48r | Q49_1 | Q50a_1 | Q50b_1 | Q51_1 | Q51_2 | Q52_1 |   |
|--------|------|------|------|------|------|------|------|------|-------|--------|--------|-------|-------|-------|---|
| 10353  |      |      |      |      |      |      |      |      |       | 2      | 2      | 2     | 2     | 4     | 4 |
| 10354  |      |      |      |      |      |      |      |      |       | 4      | 3      | 3     | 5     | 5     | 5 |
| 10359  | 5    | 3    | 2    | 2    | 3    | 3    | 3    | 3    | 6     | 1      | 2      | 2     | 4     | 3     | 5 |
| 10360  |      |      |      |      |      |      |      |      |       | 3      | 3      | 3     | 4     | 4     | 4 |
| 10362  |      |      |      |      |      |      |      |      |       | 2      | 2      | 2     | 3     | 4     | 3 |
| 10364  |      |      |      |      |      |      |      |      |       | 2      | 3      | 3     | 4     | 5     | 5 |
| 10366  |      |      |      |      |      |      |      |      |       | 2      | 2      | 2     | 3     | 4     | 3 |
| 10367  | 3    | 3    |      | 6    | 4    | 4    | 5    | 5    | 5     | 3      | 2      | 2     | 2     | 2     | 2 |
| 10371  |      |      |      |      |      |      |      |      |       | 4      | 3      | 3     | 5     | 5     | 5 |
| 10374  | 1    | 1    | 6    | 1    | 6    | 6    | 1    | 6    | 6     | 4      | 3      | 3     | 5     | 5     | 5 |
| 10375  | 6    | 6    | 5    | 6    | 6    | 6    | 6    | 6    | 5     | 3      | 3      | 2     | 5     | 5     | 5 |
| 10376  |      |      |      |      |      |      |      |      |       | 4      | 3      | 3     | 5     | 5     | 5 |
| 10377  |      |      |      |      |      |      |      |      |       | 4      | 3      | 3     | 5     | 5     | 4 |
| 10378  |      |      |      |      |      |      |      |      |       | 3      | 2      | 2     | 3     | 3     | 3 |
| 10387  |      |      |      |      |      |      |      |      |       | 2      | 3      | 3     | 5     | 5     | 5 |
| 10396  |      |      |      |      |      |      |      |      |       | 4      | 2      | 3     | 3     | 4     | 3 |
| 10397  |      |      |      |      |      |      |      |      |       | 3      | 3      | 3     | 4     | 4     | 5 |
| 10399  |      |      |      |      |      |      |      |      |       | 4      | 2      | 2     | 3     | 3     | 2 |
| 10405  |      |      |      |      |      |      |      |      |       | 2      | 2      | 2     | 2     | 2     | 4 |
| 10406  |      |      |      |      |      |      |      |      |       | 2      | 2      | 3     | 4     | 4     | 3 |
| 10408  |      |      |      |      |      |      |      |      |       | 3      | 3      | 3     | 5     | 5     | 5 |
| 10409  |      |      |      |      |      |      |      |      |       | 3      | 3      | 3     | 5     | 5     | 5 |
| 10412  |      |      |      |      |      |      |      |      |       | 5      | 3      | 3     | 5     | 5     | 4 |
| 10413  |      |      |      |      |      |      |      |      |       | 4      | 3      | 3     | 5     | 5     | 5 |
| 10419  |      |      |      |      |      |      |      |      |       | 2      | 2      | 2     | 4     | 4     | 4 |
| 10423  |      |      |      |      |      |      |      |      |       | 2      | 2      | 3     | 4     | 3     | 4 |
| 10426  | 6    | 3    | 2    | 6    | 6    | 6    | 6    | 6    | 1     | 2      | 2      | 2     | 3     | 3     | 3 |
| 10446  |      |      |      |      |      |      |      |      |       | 2      | 3      | 3     | 5     | 5     | 4 |
| 10448  |      |      |      |      |      |      |      |      |       | 2      | 3      | 3     | 4     | 4     | 5 |
| 10450  | 5    | 5    | 3    | 5    | 6    | 6    | 3    | 4    | 4     | 2      | 3      | 2     | 4     | 5     | 5 |
| 10455  |      |      |      |      |      |      |      |      |       | 4      | 3      | 3     | 5     | 5     | 5 |
| 10460  | 4    | 6    | 3    | 6    | 6    | 6    | 6    | 3    | 4     | 2      | 3      | 2     | 4     | 4     | 4 |

| respid | Q48k | Q48l | Q48m | Q48n | Q48o | Q48p | Q48q | Q48r | Q49_1 | Q50a_1 | Q50b_1 | Q51_1 | Q51_2 | Q52_1 |   |
|--------|------|------|------|------|------|------|------|------|-------|--------|--------|-------|-------|-------|---|
| 10461  |      |      |      |      |      |      |      |      |       | 2      | 2      | 2     | 3     | 4     | 5 |
| 10471  |      |      |      |      |      |      |      |      |       | 2      | 3      | 2     | 4     | 5     | 4 |
| 10472  |      |      |      |      |      |      |      |      |       | 4      | 3      | 3     | 5     | 5     | 5 |
| 10491  |      |      |      |      |      |      |      |      |       | 2      | 2      | 2     | 3     | 2     | 3 |
| 10493  | 5    | 6    | 2    | 2    | 6    | 6    | 6    | 2    | 2     | 2      | 2      | 2     | 3     | 3     | 3 |
| 10498  | 6    | 6    | 2    | 6    | 6    | 4    | 6    | 3    | 3     | 3      | 3      | 2     | 4     | 4     | 4 |
| 10533  | 4    | 5    | 2    | 3    | 5    | 3    | 5    | 3    | 3     | 3      | 2      | 3     | 5     | 5     | 5 |
| 10539  |      |      |      |      |      |      |      |      |       | 2      | 3      | 3     | 4     | 4     | 4 |
| 10540  |      |      |      |      |      |      |      |      |       | 2      | 3      | 2     | 4     | 5     | 5 |
| 10557  |      |      |      |      |      |      |      |      |       | 2      | 2      | 3     | 4     | 4     | 4 |
| 10558  |      |      |      |      |      |      |      |      |       | 2      | 2      | 2     | 2     | 3     | 2 |
| 10559  | 1    | 6    | 1    | 6    | 6    | 6    | 6    | 6    | 1     | 2      | 2      | 2     | 2     | 3     | 2 |
| 10564  | 3    | 4    | 5    | 3    | 3    | 3    | 3    | 3    | 5     | 3      | 3      | 3     | 5     | 5     | 4 |
| 10570  |      |      |      |      |      |      |      |      |       | 4      | 3      | 3     | 4     | 4     | 4 |
| 10572  | 6    | 6    | 3    | 5    | 6    | 6    | 6    | 6    | 3     | 2      | 2      | 3     | 5     | 3     | 5 |
| 10576  |      |      |      |      |      |      |      |      |       | 3      | 3      | 3     | 5     | 5     | 5 |
| 10582  |      |      |      |      |      |      |      |      |       | 3      | 2      | 2     | 1     | 2     | 1 |
| 10593  | 6    | 6    | 3    | 5    | 6    | 6    | 6    | 6    | 3     | 3      | 3      | 3     | 5     | 5     | 4 |
| 10596  |      |      |      |      |      |      |      |      |       | 1      | 1      | 2     | 2     | 3     | 3 |
| 10615  |      |      |      |      |      |      |      |      |       | 5      | 3      | 3     | 5     | 5     | 5 |
| 10616  |      |      |      |      |      |      |      |      |       | 2      | 2      | 3     | 4     | 4     | 5 |
| 10623  |      |      |      |      |      |      |      |      |       | 3      | 3      | 3     | 5     | 5     | 5 |
| 10626  | 6    | 6    | 1    | 6    | 6    | 5    | 6    | 2    | 4     | 4      | 3      | 3     | 5     | 5     | 5 |
| 10627  | 2    | 2    | 2    | 2    | 2    | 2    | 2    | 2    | 2     | 4      | 2      | 2     | 1     | 1     | 1 |
| 10629  |      |      |      |      |      |      |      |      |       | 2      | 2      | 2     | 2     | 2     | 2 |
| 10632  | 2    | 2    | 2    | 2    | 2    | 3    | 3    | 2    | 2     | 2      | 2      | 2     | 1     | 1     | 1 |
| 10641  |      |      |      |      |      |      |      |      |       | 3      | 3      | 3     | 5     | 5     | 5 |
| 10648  |      |      |      |      |      |      |      |      |       | 2      | 2      | 2     | 2     | 2     | 3 |
| 10651  | 2    | 4    | 6    | 1    | 6    | 6    | 6    | 6    | 1     | 1      | 2      | 1     | 3     | 3     | 2 |
| 10654  | 6    | 6    | 2    | 6    | 6    | 6    | 6    | 6    | 2     | 4      | 3      | 3     | 5     | 5     | 5 |
| 10673  | 6    | 6    | 1    | 6    | 6    | 6    | 6    | 6    | 1     | 4      | 3      | 3     | 5     | 5     | 5 |
| 10675  |      |      |      |      |      |      |      |      |       | 2      | 3      | 2     | 5     | 5     | 5 |

| respid | Q48k | Q48l | Q48m | Q48n | Q48o | Q48p | Q48q | Q48r | Q49_1 | Q50a_1 | Q50b_1 | Q51_1 | Q51_2 | Q52_1 |   |
|--------|------|------|------|------|------|------|------|------|-------|--------|--------|-------|-------|-------|---|
| 10689  |      |      |      |      |      |      |      |      |       | 2      | 2      | 2     | 2     | 1     | 1 |
| 10692  | 2    | 2    | 6    | 2    | 2    | 2    | 2    | 3    | 6     | 1      | 1      | 1     | 2     | 2     | 4 |
| 10694  |      |      |      |      |      |      |      |      |       | 4      | 3      | 3     | 5     | 5     | 5 |
| 10695  |      |      |      |      |      |      |      |      |       | 3      | 2      | 3     | 3     | 4     | 3 |
| 10702  |      |      |      |      |      |      |      |      |       | 2      | 2      | 2     | 3     | 3     | 3 |
| 10703  |      |      |      |      |      |      |      |      |       | 3      | 2      | 2     | 3     | 3     | 3 |
| 10708  |      |      |      |      |      |      |      |      |       | 4      | 3      | 3     | 4     | 4     | 4 |
| 10719  |      |      |      |      |      |      |      |      |       | 3      | 3      | 3     | 4     | 4     | 4 |
| 10722  | 6    | 6    | 1    | 6    | 6    | 5    | 6    | 3    |       | 3      | 2      | 2     | 4     | 4     | 4 |
| 10723  |      |      |      |      |      |      |      |      |       | 3      | 3      | 2     | 3     | 4     | 5 |
| 10726  |      |      |      |      |      |      |      |      |       | 3      | 3      | 3     | 3     | 4     | 5 |
| 10727  |      |      |      |      |      |      |      |      |       | 3      | 3      | 3     | 5     | 5     | 4 |
| 10730  |      |      |      |      |      |      |      |      |       | 3      | 3      | 3     | 5     | 5     | 5 |
| 10731  |      |      |      |      |      |      |      |      |       | 3      | 3      | 3     | 5     | 5     | 5 |
| 10737  |      |      |      |      |      |      |      |      |       | 3      | 3      | 3     | 4     | 4     | 5 |
| 10743  |      |      |      | 1    |      | 2    |      |      |       | 3      | 2      | 3     | 4     | 4     | 3 |
| 10763  |      |      |      |      |      |      |      |      |       | 4      | 3      | 3     | 4     | 5     | 4 |
| 10777  |      |      |      |      |      |      |      |      |       | 3      | 3      | 3     | 4     | 4     | 4 |
| 10787  |      |      |      |      |      |      |      |      |       | 2      | 2      | 1     | 5     | 5     | 4 |
| 10798  | 3    | 3    | 2    | 1    | 2    | 1    | 2    | 3    |       | 2      | 2      | 2     | 1     | 1     | 1 |
| 10800  |      |      |      |      |      |      |      |      |       | 2      | 2      | 2     | 4     | 4     | 5 |
| 10802  | 3    | 1    | 2    | 2    | 2    | 2    | 2    | 1    |       | 3      | 2      | 2     | 1     | 1     | 1 |
| 10803  | 5    | 6    | 1    | 5    | 6    | 5    | 5    | 5    |       | 2      | 2      | 2     | 3     | 3     | 2 |
| 10808  | 4    | 4    | 2    | 4    | 5    | 4    | 5    | 3    |       | 3      | 3      | 3     | 4     | 4     | 3 |
| 10810  |      |      |      |      |      |      |      |      |       | 2      | 1      | 1     | 1     | 1     | 4 |
| 10819  |      |      |      |      |      |      |      |      |       | 2      | 3      | 3     | 4     | 4     | 4 |
| 10825  |      |      |      |      |      |      |      |      |       | 3      | 2      | 2     | 4     | 4     | 4 |
| 10827  |      |      |      |      |      |      |      |      |       | 3      | 3      | 2     | 3     | 3     | 4 |
| 10830  |      |      |      |      |      |      |      |      |       | 3      | 2      | 2     | 4     | 5     | 4 |
| 10847  |      |      |      |      |      |      |      |      |       | 1      | 2      | 2     | 3     | 3     | 4 |
| 10849  |      |      |      |      |      |      |      |      |       | 1      | 3      | 3     | 5     | 5     | 5 |
| 10852  |      |      |      |      |      |      |      |      |       | 3      | 3      | 3     | 5     | 5     | 4 |



| respid | Q48k | Q48l | Q48m | Q48n | Q48o | Q48p | Q48q | Q48r | Q49_1 | Q50a_1 | Q50b_1 | Q51_1 | Q51_2 | Q52_1 |   |
|--------|------|------|------|------|------|------|------|------|-------|--------|--------|-------|-------|-------|---|
| 10854  |      |      |      |      |      |      |      |      |       | 2      | 2      | 2     | 2     | 3     | 3 |
| 10857  | 3    | 4    | 3    | 4    | 4    | 4    | 4    | 4    | 3     | 3      | 3      | 3     | 5     | 5     | 5 |
| 10861  | 3    | 3    | 3    | 3    | 6    | 6    | 3    | 6    |       | 2      | 2      | 1     | 1     | 1     | 4 |
| 10862  |      |      |      |      |      |      |      |      |       | 3      | 3      | 3     | 5     | 5     | 5 |
| 10870  |      |      |      |      |      |      |      |      |       | 3      | 2      | 2     | 3     | 4     | 3 |
| 10873  |      |      |      |      |      |      |      |      |       | 2      | 2      | 2     | 4     | 5     | 5 |
| 10881  | 6    | 6    | 2    | 5    | 6    | 6    | 6    | 6    | 1     | 4      | 3      | 3     | 5     | 5     | 4 |
| 10893  |      |      |      |      |      |      |      |      |       | 3      | 2      | 3     | 3     | 3     | 4 |
| 10898  | 5    | 6    | 5    | 4    | 6    | 3    | 6    | 5    |       | 4      | 2      | 2     | 4     | 4     | 3 |
| 10899  |      |      |      |      |      |      |      |      |       | 2      | 2      | 2     | 2     | 3     | 2 |
| 10905  |      |      |      |      |      |      |      |      |       | 2      | 3      | 3     | 3     | 2     | 3 |
| 10910  |      |      |      |      |      |      |      |      |       | 5      | 3      | 3     | 5     | 5     | 5 |
| 10911  | 4    | 3    | 4    | 3    | 4    | 3    | 3    | 4    |       | 3      | 2      | 3     | 4     | 4     | 4 |
| 10912  | 6    | 6    | 2    | 3    | 6    | 6    | 6    | 6    | 1     | 2      | 3      | 3     | 5     | 5     | 4 |
| 10913  | 4    | 4    | 3    | 3    | 5    | 4    | 3    | 4    |       | 2      | 2      | 2     | 4     | 4     | 5 |
| 10918  |      |      |      |      |      |      |      |      |       | 2      | 2      | 2     | 3     | 3     | 5 |
| 10995  |      |      |      |      |      |      |      |      |       | 2      | 3      | 3     | 5     | 5     | 4 |
| 11002  |      |      |      |      |      |      |      |      |       | 4      | 3      | 3     | 5     | 5     | 5 |
| 11003  |      |      |      |      |      |      |      |      |       | 4      | 3      | 3     | 5     | 5     | 5 |
| 11005  |      |      |      |      |      |      |      |      |       | 3      | 3      | 3     | 5     | 5     | 5 |
| 11015  | 6    | 6    | 1    | 6    | 6    | 6    | 6    | 6    | 1     | 4      | 2      | 3     | 5     | 4     | 5 |
| 11016  |      |      |      |      |      |      |      |      |       | 2      | 3      | 3     | 3     | 4     | 1 |
| 11017  |      |      |      |      |      |      |      |      |       | 4      | 3      | 3     | 5     | 5     | 5 |
| 11020  | 3    | 1    | 2    | 2    | 2    | 4    | 3    | 4    |       | 2      | 2      | 2     | 2     | 2     | 1 |
| 11024  |      |      |      |      |      |      |      |      |       | 2      | 3      | 3     | 5     | 5     | 4 |
| 11026  | 6    | 4    | 2    | 5    | 6    | 6    | 6    | 6    | 2     | 2      | 3      | 2     | 4     | 4     | 4 |
| 11028  |      |      |      |      |      |      |      |      |       | 2      | 2      | 2     | 3     | 3     | 3 |
| 11029  | 1    | 2    | 1    | 1    | 1    | 2    | 1    | 1    |       | 2      | 2      | 2     | 1     | 1     | 1 |
| 11030  |      |      |      |      |      |      |      |      |       | 3      | 3      | 3     | 3     | 4     | 4 |
| 11031  | 6    | 1    | 5    | 5    | 6    | 6    | 2    | 5    |       | 4      | 3      | 3     | 5     | 5     | 5 |
| 11038  | 4    | 4    | 4    | 4    | 3    | 3    | 3    | 3    |       | 2      | 3      | 3     | 4     | 4     | 4 |
| 11051  | 6    | 5    | 6    | 6    | 6    | 6    | 3    | 6    |       | 2      | 3      | 3     | 4     | 4     | 5 |

| respid | Q48k | Q48l | Q48m | Q48n | Q48o | Q48p | Q48q | Q48r | Q49_1 | Q50a_1 | Q50b_1 | Q51_1 | Q51_2 | Q52_1 |   |
|--------|------|------|------|------|------|------|------|------|-------|--------|--------|-------|-------|-------|---|
| 11052  |      | 2    | 1    | 1    | 2    | 1    | 1    | 1    | 1     | 2      | 2      | 2     | 1     | 1     | 2 |
| 11053  |      | 6    | 6    | 1    | 6    | 6    | 6    | 6    | 4     | 3      | 3      | 3     | 4     | 4     | 3 |
| 11054  |      | 2    | 1    | 1    | 1    | 1    | 1    | 1    | 1     | 2      | 3      | 2     | 1     | 1     | 1 |
| 11063  |      | 1    | 2    | 5    | 5    | 6    | 6    | 1    | 6     | 3      | 2      | 2     | 5     | 5     | 5 |
| 11075  |      |      |      |      |      |      |      |      |       | 3      | 2      | 2     | 4     | 4     | 4 |
| 11083  |      |      |      |      |      |      |      |      |       | 4      | 3      | 3     | 5     | 4     | 5 |
| 11092  |      |      |      |      |      |      |      |      | 2     | 3      | 3      | 3     | 5     | 5     | 5 |
| 11118  |      |      |      |      |      |      |      |      |       | 3      | 2      | 2     | 4     | 4     | 4 |
| 11119  |      |      |      |      |      |      |      |      |       | 2      | 1      | 2     | 2     | 2     | 2 |
| 11134  |      |      |      |      |      |      |      |      |       | 4      | 3      | 3     | 4     | 4     | 4 |
| 11139  |      |      |      |      |      |      |      |      |       | 4      | 2      | 2     | 1     | 1     | 1 |
| 11154  |      |      |      |      |      |      |      |      |       | 4      | 3      | 3     | 5     | 5     | 5 |
| 11166  |      |      |      |      |      |      |      |      |       | 2      | 2      | 2     | 4     | 4     | 4 |
| 11168  |      |      |      |      |      |      |      |      |       | 4      | 3      | 3     | 4     | 4     | 4 |
| 11176  |      |      |      |      |      |      |      |      |       | 2      | 2      | 2     | 3     | 3     | 3 |
| 11183  |      | 6    | 6    | 1    | 6    | 6    | 6    | 5    | 1     | 2      | 2      | 3     | 3     | 3     | 4 |
| 11189  |      |      |      |      |      |      |      |      |       | 3      | 3      | 3     | 5     | 5     | 5 |
| 11196  |      | 2    | 3    | 2    | 2    | 2    | 3    | 3    | 2     | 2      | 2      | 2     | 2     | 2     | 2 |
| 11200  |      |      |      |      |      |      |      |      |       | 3      | 3      | 2     | 4     | 4     | 4 |
| 11201  |      |      |      |      |      |      |      |      |       | 4      | 3      | 2     | 5     | 4     | 5 |
| 11211  |      | 3    | 2    | 2    | 2    | 3    | 2    | 3    | 2     | 2      | 2      | 2     | 3     | 3     | 3 |
| 11218  |      | 4    | 4    | 4    | 4    | 4    | 4    | 4    | 3     | 3      | 3      | 2     | 4     | 4     | 4 |
| 11219  |      | 6    | 6    | 2    | 6    | 6    | 6    | 6    | 2     | 4      | 3      | 2     | 4     | 4     | 4 |
| 11221  |      |      |      |      |      |      |      |      |       | 2      | 3      | 3     | 4     | 4     | 4 |
| 11222  |      | 2    | 4    | 6    | 1    | 5    | 3    | 4    | 4     | 3      | 3      | 2     | 3     | 3     | 4 |
| 11230  |      | 3    | 3    | 2    | 3    | 2    | 2    | 3    | 2     | 2      | 2      | 2     | 3     | 3     | 3 |
| 11236  |      | 2    | 3    | 2    | 3    | 2    | 3    | 2    | 3     | 2      | 2      | 2     | 3     | 3     | 3 |
| 11237  |      |      |      |      |      |      |      |      |       | 2      | 1      | 1     | 3     | 3     | 3 |
| 11240  |      | 3    | 3    | 3    | 5    | 6    | 5    | 6    | 5     | 2      | 2      | 2     | 4     | 3     | 2 |
| 11244  |      | 2    | 3    | 3    | 2    | 3    | 3    | 3    | 2     | 2      | 2      | 2     | 3     | 3     | 3 |
| 11249  |      | 6    | 5    | 4    | 5    | 4    | 3    | 4    | 4     | 4      | 2      | 2     | 4     | 4     | 4 |
| 11252  |      | 3    | 2    | 2    | 2    | 3    | 3    | 3    | 2     | 2      | 2      | 2     | 3     | 3     | 3 |

| respid | Q48k | Q48l | Q48m | Q48n | Q48o | Q48p | Q48q | Q48r | Q49_1 | Q50a_1 | Q50b_1 | Q51_1 | Q51_2 | Q52_1 |
|--------|------|------|------|------|------|------|------|------|-------|--------|--------|-------|-------|-------|
| 11254  |      |      |      |      |      |      |      |      |       | 3      | 2      | 2     | 2     | 2     |
| 11255  |      |      |      |      |      |      |      |      |       | 2      | 2      | 2     | 3     | 3     |
| 11258  | 2    | 2    | 2    | 3    | 2    | 3    | 3    | 2    | 2     | 2      | 2      | 2     | 3     | 3     |
| 11260  |      |      |      |      |      |      |      |      | 3     | 3      | 3      | 4     | 4     | 4     |
| 11264  |      |      |      |      |      |      |      |      | 2     | 2      | 2      | 2     | 2     | 3     |
| 11266  |      |      |      |      |      |      |      |      | 2     | 2      | 2      | 4     | 3     | 4     |
| 11268  |      |      |      |      |      |      |      |      | 2     | 2      | 3      | 4     | 4     | 3     |
| 11269  |      |      |      |      |      |      |      |      | 2     | 3      | 3      | 5     | 5     | 5     |
| 11272  |      |      |      |      |      |      |      |      | 2     | 2      | 3      | 4     | 4     | 4     |
| 11273  |      |      |      |      |      |      |      |      | 4     | 3      | 3      | 4     | 4     | 4     |
| 11275  | 6    | 6    | 2    | 6    | 6    | 6    | 3    | 5    | 2     | 2      | 3      | 4     | 5     | 4     |
| 11276  | 5    | 4    | 4    | 4    | 6    | 5    | 4    | 5    | 3     | 3      | 3      | 5     | 5     | 4     |
| 11278  |      |      |      | 1    | 1    |      | 1    | 6    | 2     | 1      | 1      | 2     | 3     | 2     |
| 11288  |      |      |      |      |      |      |      |      | 2     | 2      | 2      | 5     | 4     | 5     |
| 11289  |      |      |      |      |      |      |      |      | 3     | 3      | 3      | 5     | 5     | 5     |
| 11291  |      |      |      |      |      |      |      |      | 2     | 3      | 3      | 4     | 5     | 5     |
| 11295  |      |      |      |      |      |      |      |      | 2     | 3      | 3      | 4     | 5     | 5     |
| 11297  | 4    | 4    | 4    | 4    | 4    | 4    | 4    | 3    | 3     | 3      | 3      | 5     | 5     | 5     |
| 11304  |      |      |      |      |      |      |      |      | 2     | 2      | 2      | 4     | 2     | 3     |
| 11305  |      |      |      |      |      |      |      |      | 3     | 3      | 3      | 5     | 5     | 5     |
| 11311  | 6    | 6    | 3    | 6    | 6    | 6    | 6    | 3    | 2     | 3      | 3      | 5     | 5     | 5     |
| 11313  | 5    | 5    | 2    | 5    | 6    | 6    | 5    | 2    | 3     | 3      | 2      | 4     | 5     | 4     |
| 11315  |      |      |      |      |      |      |      |      | 2     | 1      | 1      | 3     | 3     | 3     |
| 11316  |      |      |      |      |      |      |      |      | 2     | 1      | 1      | 3     | 3     | 3     |
| 11318  | 3    | 4    | 2    | 3    | 4    | 2    | 2    | 3    | 3     | 2      | 2      | 2     | 3     | 3     |
| 11323  | 5    | 6    | 3    | 6    | 6    | 6    | 6    | 1    | 5     | 3      | 3      | 5     | 5     | 5     |
| 11331  | 5    | 5    | 3    | 4    | 3    | 3    | 3    | 4    | 2     | 2      | 2      | 3     | 4     | 2     |
| 11333  | 5    | 6    | 6    | 6    | 6    | 6    | 6    | 6    | 2     | 2      | 2      | 5     | 3     | 5     |
| 11334  |      |      |      |      |      |      |      |      | 3     | 2      | 2      | 4     | 3     | 3     |
| 11340  |      |      |      |      |      |      |      |      | 2     | 2      | 3      | 3     | 2     | 2     |
| 11345  |      |      |      |      |      |      |      |      | 4     | 3      | 3      | 4     | 5     | 4     |
| 11354  |      |      |      |      |      |      |      |      | 2     | 3      | 3      | 5     | 5     | 3     |

| respid | Q48k | Q48l | Q48m | Q48n | Q48o | Q48p | Q48q | Q48r | Q49_1 | Q50a_1 | Q50b_1 | Q51_1 | Q51_2 | Q52_1 |
|--------|------|------|------|------|------|------|------|------|-------|--------|--------|-------|-------|-------|
| 11360  |      |      |      |      |      |      |      |      |       | 2      | 3      | 2     | 3     | 3     |
| 11361  |      |      |      |      |      |      |      |      |       | 3      | 2      | 2     | 1     | 2     |
| 11367  |      |      |      |      |      |      |      |      |       | 5      | 3      | 3     | 5     | 5     |
| 11370  |      |      |      |      |      |      |      |      |       | 4      | 3      | 3     | 5     | 5     |
| 11371  | 4    | 4    | 4    | 3    | 6    | 3    | 3    | 4    | 2     | 2      | 2      | 2     | 3     | 4     |
| 11372  | 4    | 3    | 3    | 4    | 4    | 4    | 4    | 4    | 2     | 2      | 2      | 3     | 3     | 3     |
| 11373  | 3    | 4    | 3    | 3    | 6    | 6    | 6    | 4    | 2     | 2      | 3      | 3     | 3     | 5     |
| 11382  |      |      |      |      |      |      |      |      | 4     | 3      | 3      | 5     | 5     | 5     |
| 11394  |      |      |      |      |      |      |      |      | 1     | 1      | 1      | 2     | 2     | 2     |
| 11395  |      |      |      |      |      |      |      |      | 3     | 2      | 2      | 2     | 3     | 4     |
| 11397  |      |      |      |      |      |      |      |      | 4     | 3      | 3      | 5     | 5     | 5     |
| 11402  |      |      |      |      |      |      |      |      | 2     | 3      | 3      | 5     | 5     | 5     |
| 11409  |      |      |      |      |      |      |      |      | 3     | 3      | 3      | 5     | 4     | 4     |
| 11410  |      |      |      |      |      |      |      |      | 2     | 3      | 3      | 5     | 5     | 5     |
| 11411  |      |      |      |      |      |      |      |      | 2     | 3      | 3      | 5     | 5     | 3     |
| 11418  |      |      |      |      |      |      |      |      | 2     | 3      | 3      | 4     | 5     | 4     |
| 11425  | 2    | 3    | 3    | 2    | 4    | 3    | 3    | 4    | 2     | 2      | 2      | 3     | 3     | 3     |
| 11429  | 4    | 4    | 3    | 4    | 4    | 4    | 4    | 4    | 2     | 3      | 3      | 5     | 5     | 5     |
| 11430  |      |      |      |      |      |      |      |      | 2     | 2      | 2      | 3     | 2     | 3     |
| 11431  | 5    | 1    | 2    | 5    | 6    | 2    | 1    | 6    | 2     | 2      | 2      | 3     | 3     | 2     |
| 11432  |      |      |      |      |      |      |      |      | 4     | 3      | 3      | 5     | 5     | 5     |
| 11433  |      |      |      |      |      |      |      |      | 3     | 3      | 3      | 5     | 5     | 5     |
| 11435  |      |      |      |      |      |      |      |      | 3     | 2      | 2      | 3     | 3     | 4     |
| 11436  | 6    | 5    | 1    | 6    | 6    | 5    | 5    | 1    | 3     | 3      | 3      | 4     | 4     | 4     |
| 11437  | 4    | 4    | 3    | 4    | 4    | 3    | 4    | 3    | 2     | 2      | 2      | 3     | 3     | 3     |
| 11439  |      |      |      |      |      |      |      |      | 3     | 3      | 3      | 5     | 5     | 5     |
| 11440  |      |      |      |      |      |      |      |      | 3     | 3      | 2      | 4     | 4     | 5     |
| 11447  |      |      |      |      |      |      |      |      | 3     | 2      | 3      | 5     | 5     | 5     |
| 11455  | 6    | 6    | 2    | 6    | 6    | 5    | 5    | 2    | 4     | 2      | 3      | 4     | 4     | 4     |
| 11456  | 4    | 3    | 4    | 3    | 4    | 4    | 3    | 4    | 2     | 2      | 2      | 3     | 3     | 3     |
| 11461  |      |      |      |      |      |      |      |      | 3     | 3      | 3      | 4     | 4     | 4     |
| 11463  |      |      |      |      |      |      |      |      | 5     | 3      | 3      | 4     | 4     | 4     |

| respid | Q48k | Q48l | Q48m | Q48n | Q48o | Q48p | Q48q | Q48r | Q49_1 | Q50a_1 | Q50b_1 | Q51_1 | Q51_2 | Q52_1 |   |
|--------|------|------|------|------|------|------|------|------|-------|--------|--------|-------|-------|-------|---|
| 11470  |      |      |      |      |      |      |      |      |       | 2      | 3      | 2     | 2     | 3     | 2 |
| 11472  |      |      |      |      |      |      |      |      |       | 3      | 3      | 3     | 5     | 5     | 5 |
| 11475  |      |      |      |      |      |      |      |      |       | 5      | 3      | 3     | 5     | 5     | 5 |
| 11476  | 6    | 5    | 1    | 6    | 6    | 6    | 6    | 6    | 1     | 2      | 3      | 3     | 4     | 3     | 4 |
| 11482  | 3    | 4    | 3    | 3    | 3    | 4    | 3    | 4    | 4     | 2      | 2      | 2     | 3     | 3     | 3 |
| 11501  |      |      |      |      |      |      |      |      |       | 2      | 2      | 3     | 3     | 2     | 3 |
| 11503  | 5    | 5    | 3    | 6    | 6    | 5    | 5    | 2    | 2     | 3      | 2      | 2     | 1     | 2     | 2 |
| 11505  |      |      |      |      |      |      |      |      |       | 2      | 2      | 3     | 4     | 4     | 4 |
| 11510  | 6    | 6    | 2    | 6    | 6    | 4    | 6    | 2    | 2     | 4      | 3      | 3     | 4     | 5     | 4 |
| 11519  |      |      |      |      |      |      |      |      |       | 4      | 3      | 3     | 5     | 5     | 4 |
| 11527  |      |      |      |      |      |      |      |      |       | 3      | 2      | 3     | 3     | 3     | 4 |
| 11529  | 3    | 3    | 3    | 3    | 4    | 3    | 3    | 5    | 5     | 2      | 2      | 2     | 3     | 3     | 3 |
| 11530  |      |      |      |      |      |      |      |      |       | 2      | 1      | 1     | 1     | 2     | 2 |
| 11536  |      |      |      |      |      |      |      |      |       | 2      | 2      | 2     | 3     | 3     | 4 |
| 11543  |      |      |      |      |      |      |      |      |       | 2      | 3      | 3     | 5     | 5     | 5 |
| 11548  |      |      |      |      |      |      |      |      |       | 4      | 3      | 3     | 4     | 4     | 4 |
| 11566  |      |      |      |      |      |      |      |      |       | 2      | 2      | 2     | 3     | 3     | 3 |
| 11570  | 5    | 5    | 3    | 4    | 5    | 4    | 5    | 2    | 2     | 3      | 3      | 3     | 5     | 5     | 5 |
| 11571  |      |      |      |      |      |      |      |      |       | 2      | 2      | 2     | 4     | 4     | 4 |
| 11578  |      |      |      |      |      |      |      |      |       | 4      | 3      | 3     | 5     | 5     | 3 |
| 11579  | 6    | 6    | 1    | 6    | 6    | 6    | 6    | 6    | 1     | 4      | 2      | 3     | 5     | 4     | 4 |
| 11581  |      |      |      |      |      |      |      |      |       | 4      | 3      | 3     | 1     | 2     | 2 |
| 11582  | 6    | 6    | 2    | 6    | 6    | 6    | 6    | 6    | 1     | 3      | 2      | 3     | 4     | 4     | 4 |
| 11583  |      |      |      |      |      |      |      |      |       | 5      | 3      | 3     | 5     | 5     | 5 |
| 11589  |      |      |      |      |      |      |      |      |       | 2      | 2      | 2     | 2     | 3     | 3 |
| 11590  |      |      |      |      |      |      |      |      |       | 4      | 3      | 3     | 3     | 5     | 4 |
| 11592  |      |      |      |      |      |      |      |      |       | 2      | 3      | 3     | 5     | 5     | 5 |
| 11596  |      |      |      |      |      |      |      |      |       | 4      | 3      | 3     | 4     | 5     | 3 |
| 11598  |      |      |      |      |      |      |      |      |       | 2      | 3      | 3     | 4     | 4     | 3 |
| 11602  | 5    | 4    | 3    | 4    | 5    | 4    | 4    | 4    | 5     | 2      | 3      | 3     | 4     | 4     | 4 |
| 11605  |      |      |      |      |      |      |      |      |       | 3      | 3      | 2     | 3     | 4     | 4 |
| 11618  |      |      | 3    | 2    |      | 2    | 3    | 3    | 3     | 2      | 2      | 2     | 3     | 4     | 3 |

| respid | Q48k | Q48l | Q48m | Q48n | Q48o | Q48p | Q48q | Q48r | Q49_1 | Q50a_1 | Q50b_1 | Q51_1 | Q51_2 | Q52_1 |   |
|--------|------|------|------|------|------|------|------|------|-------|--------|--------|-------|-------|-------|---|
| 11621  |      |      |      |      |      |      |      |      |       | 4      | 2      | 2     | 2     | 3     | 2 |
| 11630  | 6    | 6    | 6    | 6    | 6    | 6    | 6    | 6    | 6     | 4      | 3      | 3     | 5     | 4     | 5 |
| 11636  | 2    | 2    | 2    | 4    | 2    | 3    | 4    | 1    | 2     | 2      | 2      | 2     | 3     | 3     | 2 |
| 11640  | 6    | 6    | 2    | 6    | 6    | 6    | 6    | 1    | 2     | 2      | 1      | 2     | 2     | 1     | 2 |
| 11658  |      |      |      |      |      |      |      |      |       | 4      | 2      | 2     | 3     | 4     | 4 |
| 11665  | 5    | 6    | 1    | 5    | 6    | 5    | 5    | 1    | 2     | 2      | 2      | 2     | 5     | 4     | 4 |
| 11666  | 3    | 4    | 4    | 3    | 3    | 3    | 3    | 3    | 4     | 3      | 3      | 3     | 4     | 5     | 4 |
| 11667  |      |      |      |      |      |      |      |      |       | 2      | 2      | 1     | 2     | 1     | 3 |
| 11674  | 6    | 6    | 1    | 6    | 6    | 6    | 6    | 1    | 3     | 3      | 3      | 3     | 5     | 5     | 5 |
| 11680  |      |      |      |      |      |      |      |      |       | 2      | 3      | 2     | 4     | 4     | 3 |
| 11683  |      |      |      |      |      |      |      |      |       | 3      | 2      | 2     | 4     | 4     | 5 |
| 11688  |      |      |      |      |      |      |      |      |       | 2      | 1      | 1     | 2     | 3     | 3 |
| 11690  |      |      |      |      |      |      |      |      |       | 5      | 3      | 3     | 5     | 5     | 5 |
| 11694  |      |      |      |      |      |      |      |      |       | 2      | 3      | 3     | 4     | 4     | 4 |
| 11705  | 5    | 6    | 1    | 6    | 6    |      | 6    | 5    | 3     | 2      | 3      | 3     | 4     | 5     | 5 |
| 11720  |      |      |      |      |      |      |      |      |       | 3      | 2      | 3     | 2     | 1     | 3 |
| 11724  |      |      |      |      |      |      |      |      |       | 5      | 3      | 3     | 5     | 5     | 5 |
| 11738  | 6    | 5    | 2    | 6    | 6    | 5    | 5    | 4    | 3     | 3      | 2      | 2     | 4     | 4     | 5 |
| 11744  | 6    | 6    | 1    | 6    | 6    | 6    | 6    | 1    | 3     | 3      | 3      | 3     | 4     | 4     | 4 |
| 11745  | 2    | 2    | 1    | 6    | 6    | 6    | 6    | 2    | 5     | 1      | 1      | 1     | 2     | 3     | 3 |
| 11747  |      |      |      |      |      |      |      |      |       | 5      | 3      | 3     | 5     | 5     | 5 |
| 11755  | 5    | 6    | 1    | 6    | 6    | 5    | 6    | 2    | 2     | 2      | 3      | 3     | 4     | 5     | 4 |
| 11756  |      |      |      |      |      |      |      |      |       | 2      | 1      | 2     | 3     | 2     | 3 |
| 11772  | 6    | 5    | 2    | 6    | 6    | 4    | 5    | 2    | 2     | 2      | 3      | 2     | 4     | 4     | 4 |
| 11773  |      |      |      |      |      |      |      |      |       | 5      | 3      | 3     | 5     | 5     | 5 |
| 11778  |      |      |      |      |      |      |      |      |       | 2      | 2      | 1     | 4     | 4     | 3 |
| 11790  |      |      |      |      |      |      |      |      |       | 3      | 3      | 2     | 4     | 5     | 4 |
| 11794  |      |      |      |      |      |      |      |      |       | 5      | 3      | 3     | 5     | 5     | 5 |
| 11795  |      |      |      |      |      |      |      |      |       | 3      | 2      | 2     | 2     | 3     | 3 |
| 11799  |      |      |      |      |      |      |      |      |       | 3      | 2      | 2     | 2     | 1     | 1 |
| 11803  |      |      |      |      |      |      |      |      |       | 2      | 2      | 2     | 4     | 4     | 4 |
| 11806  | 2    | 3    | 2    | 4    | 3    | 3    | 3    | 2    | 2     | 2      | 1      | 2     | 3     | 2     | 3 |

| respid | Q48k | Q48l | Q48m | Q48n | Q48o | Q48p | Q48q | Q48r | Q49_1 | Q50a_1 | Q50b_1 | Q51_1 | Q51_2 | Q52_1 |   |
|--------|------|------|------|------|------|------|------|------|-------|--------|--------|-------|-------|-------|---|
| 11808  |      | 6    | 6    | 5    | 6    | 6    | 6    | 6    | 1     | 4      | 2      | 2     | 5     | 5     | 5 |
| 11810  |      |      |      |      |      |      |      |      |       | 2      | 2      | 2     | 3     | 3     | 3 |
| 11811  |      |      |      |      |      |      |      |      |       | 5      | 3      | 3     | 5     | 5     | 5 |
| 11812  |      |      |      |      |      |      |      |      |       | 2      | 2      | 2     | 3     | 4     | 3 |
| 11813  |      |      |      |      |      |      |      |      |       | 2      | 2      | 2     | 4     | 3     | 3 |
| 11821  | 4    | 5    | 3    | 4    | 5    | 3    | 2    | 3    | 2     | 2      | 2      | 2     | 2     | 2     | 4 |
| 11827  |      |      |      |      |      |      |      |      |       | 5      | 3      | 3     | 5     | 5     | 5 |
| 11831  | 3    | 4    | 2    | 3    | 2    | 2    | 2    | 1    | 2     | 3      | 2      | 1     | 2     | 2     | 3 |
| 11841  |      |      |      |      |      |      |      |      |       | 5      | 3      | 3     | 5     | 5     | 5 |
| 11872  | 4    | 4    | 3    | 4    | 5    | 5    | 5    | 5    | 4     | 2      | 2      | 2     | 3     | 4     | 3 |
| 11898  |      |      |      |      |      |      |      |      |       | 3      | 3      | 3     | 5     | 5     | 5 |
| 11902  |      |      |      |      |      |      |      |      |       | 1      | 1      | 2     | 2     | 2     | 3 |
| 11912  |      |      |      |      |      |      |      |      |       | 3      | 2      | 2     | 3     | 3     | 3 |
| 11926  |      |      |      |      |      |      |      |      |       | 3      | 3      | 3     | 5     | 5     | 4 |
| 11928  | 2    | 1    | 1    | 2    | 2    | 2    | 2    | 2    | 2     | 2      | 2      | 1     | 1     | 1     | 1 |
| 11932  |      |      |      |      |      |      |      |      |       | 2      | 3      | 3     | 5     | 5     | 5 |
| 11934  |      |      |      |      |      |      |      |      |       | 3      | 3      | 3     | 5     | 5     | 4 |
| 11941  |      |      |      |      |      |      |      |      |       | 1      | 2      | 2     | 4     | 3     | 3 |
| 11942  |      |      |      |      |      |      |      |      |       | 3      | 3      | 3     | 5     | 5     | 5 |
| 11943  |      |      |      |      |      |      |      |      |       | 2      | 2      | 2     | 4     | 4     | 4 |
| 11944  | 4    | 1    | 3    | 3    | 2    | 3    | 3    | 3    | 3     | 2      | 2      | 2     | 4     | 4     | 1 |
| 11955  |      |      |      |      |      |      |      |      |       | 3      | 2      | 2     | 4     | 4     | 3 |
| 11958  |      |      |      |      |      |      |      |      |       | 1      | 2      | 3     | 2     | 4     | 4 |
| 11968  |      |      |      |      |      |      |      |      |       | 2      | 2      | 3     | 4     | 3     | 4 |
| 11979  | 3    | 2    | 4    | 3    | 3    | 2    | 4    | 3    | 3     | 3      | 2      | 1     | 2     | 3     | 3 |
| 11988  |      |      |      |      |      |      |      |      |       | 4      | 2      | 2     | 3     | 3     | 4 |
| 11999  |      |      |      |      |      |      |      |      |       | 2      | 2      | 3     | 3     | 4     | 5 |
| 12002  | 6    | 6    | 1    | 6    | 6    | 6    | 6    | 6    | 1     | 4      | 2      | 3     | 5     | 5     | 4 |
| 12004  |      |      |      |      |      |      |      |      |       | 4      | 2      | 3     | 4     | 3     | 4 |
| 12008  |      |      |      |      |      |      |      |      |       | 3      | 3      | 3     | 4     | 4     | 4 |
| 12013  | 1    | 5    | 6    | 1    | 6    | 6    | 6    | 6    | 1     | 2      | 1      | 1     | 5     | 5     | 5 |
| 12018  |      |      |      |      |      |      |      |      |       | 2      | 3      | 2     | 3     | 3     | 4 |

| respid | Q48k | Q48l | Q48m | Q48n | Q48o | Q48p | Q48q | Q48r | Q49_1 | Q50a_1 | Q50b_1 | Q51_1 | Q51_2 | Q52_1 |   |
|--------|------|------|------|------|------|------|------|------|-------|--------|--------|-------|-------|-------|---|
| 12023  |      |      |      |      |      |      |      |      |       | 2      | 3      | 2     | 4     | 4     | 4 |
| 12027  | 4    | 4    | 2    | 4    | 5    | 3    | 4    | 3    | 2     | 2      | 2      | 2     | 2     | 3     | 3 |
| 12030  | 4    | 3    | 3    | 4    | 4    | 4    | 4    | 3    | 2     | 3      | 3      | 4     | 4     | 4     | 4 |
| 12031  | 1    | 4    | 5    | 1    | 6    | 6    | 6    | 4    | 2     | 2      | 2      | 4     | 3     | 5     | 5 |
| 12036  |      |      |      |      |      |      |      |      | 2     | 3      | 3      | 5     | 4     | 5     | 5 |
| 12037  |      |      |      |      |      |      |      |      | 2     | 2      | 2      | 3     | 3     | 3     | 3 |
| 12038  |      |      |      |      |      |      |      |      | 3     | 2      | 2      | 3     | 3     | 3     | 3 |
| 12039  |      |      |      |      |      |      |      |      | 4     | 3      | 3      | 4     | 5     | 4     | 4 |
| 12045  | 4    | 3    | 3    | 6    | 6    | 6    | 3    | 4    | 2     | 2      | 2      | 4     | 3     | 4     | 4 |
| 12046  |      |      |      |      |      |      |      |      | 2     | 2      | 2      | 2     | 3     | 2     | 2 |
| 12054  |      |      |      |      |      |      |      |      | 2     | 1      | 1      | 2     | 3     | 2     | 2 |
| 12055  | 5    | 5    | 1    | 5    | 5    | 3    | 3    | 3    | 4     | 3      | 3      | 5     | 4     | 5     | 5 |
| 12069  |      |      |      |      |      |      |      |      | 2     | 2      | 1      | 2     | 2     | 2     | 2 |
| 12070  |      |      |      |      |      |      |      |      | 2     | 2      | 1      | 3     | 4     | 4     | 4 |
| 12074  | 6    | 6    |      |      | 6    |      |      |      | 4     | 3      | 3      | 5     | 5     | 4     | 4 |
| 12075  |      |      |      |      |      |      |      |      | 2     | 2      | 2      | 3     | 3     | 3     | 3 |
| 12078  |      |      |      |      |      |      |      |      | 4     | 3      | 3      | 4     | 3     | 4     | 4 |
| 12089  | 6    | 6    | 6    | 6    |      | 6    | 6    | 2    | 3     | 1      | 3      | 5     | 5     | 4     | 4 |
| 12091  |      |      |      |      |      |      |      |      | 2     | 2      | 2      | 3     | 4     | 3     | 3 |
| 12092  | 2    | 3    | 5    | 1    | 6    | 4    | 5    | 4    | 1     | 2      | 1      | 2     | 2     | 2     | 3 |
| 12108  |      |      |      |      |      |      |      |      | 2     | 2      | 2      | 3     | 2     | 2     | 2 |
| 12111  |      |      |      |      |      |      |      |      | 3     | 2      | 2      | 2     | 3     | 3     | 3 |
| 12112  |      |      |      |      |      |      |      |      | 2     | 2      | 3      | 4     | 3     | 3     | 3 |
| 12126  |      |      |      |      |      |      |      |      | 2     | 3      | 3      | 4     | 4     | 4     | 4 |
| 12132  |      |      |      |      |      |      |      |      | 2     | 2      | 2      | 3     | 3     | 4     | 4 |
| 12150  |      |      |      |      |      |      |      |      | 2     | 2      | 2      | 3     | 3     | 3     | 3 |
| 12152  |      |      |      |      |      |      |      |      | 2     | 2      | 2      | 4     | 4     | 4     | 4 |
| 12154  |      |      |      |      |      |      |      |      | 3     | 2      | 2      | 3     | 3     | 4     | 4 |
| 12157  |      |      |      |      |      |      |      |      | 3     | 2      | 2      | 3     | 3     | 3     | 3 |
| 12165  | 6    | 6    | 2    | 6    | 6    | 6    | 6    | 2    | 4     | 3      | 3      | 5     | 5     | 4     | 4 |
| 12169  |      |      |      |      |      |      |      |      | 2     | 2      | 3      | 3     | 3     | 3     | 3 |
| 12182  |      |      |      |      |      |      |      |      | 2     | 1      | 2      | 2     | 2     | 2     | 2 |



| respid | Q48k | Q48l | Q48m | Q48n | Q48o | Q48p | Q48q | Q48r | Q49_1 | Q50a_1 | Q50b_1 | Q51_1 | Q51_2 | Q52_1 |   |
|--------|------|------|------|------|------|------|------|------|-------|--------|--------|-------|-------|-------|---|
| 12198  | 5    | 6    | 1    | 5    | 6    | 6    | 6    | 6    | 5     | 4      | 3      | 3     | 5     | 5     | 5 |
| 12199  |      |      |      |      |      |      |      |      |       | 4      | 3      | 3     | 5     | 5     | 5 |
| 12202  | 2    | 2    | 2    | 2    | 2    | 2    | 2    | 2    | 1     | 3      | 2      | 2     | 3     | 3     | 3 |
| 12207  |      |      |      |      |      |      |      |      |       | 4      | 3      | 3     | 5     | 5     | 4 |
| 12208  |      |      |      |      |      |      |      |      |       | 2      | 2      | 3     | 3     | 4     | 3 |
| 12210  |      |      |      |      |      |      |      |      |       | 3      | 3      | 3     | 5     | 5     | 5 |
| 12219  |      |      |      | 3    | 6    | 5    | 3    | 3    | 3     | 2      | 2      | 2     | 2     | 2     | 2 |
| 12224  |      |      |      |      |      |      |      |      |       | 2      | 3      | 3     | 5     | 5     | 5 |
| 12230  |      |      |      |      |      |      |      |      |       | 3      | 2      | 3     | 3     | 4     | 3 |
| 12238  | 3    | 3    | 3    | 3    | 3    | 3    | 3    | 3    | 3     | 2      | 2      | 2     | 3     | 3     | 3 |
| 12239  | 5    | 6    | 2    | 5    | 6    | 6    | 6    | 6    | 2     | 3      | 3      | 3     | 5     | 5     | 5 |
| 12243  |      |      |      |      |      |      |      |      |       | 4      | 3      | 3     | 5     | 5     | 5 |
| 12245  |      |      |      |      |      |      |      |      |       | 2      | 3      | 3     | 5     | 5     | 4 |
| 12246  |      |      |      |      |      |      |      |      |       | 2      | 2      | 1     | 1     | 2     | 2 |
| 12247  |      |      |      |      |      |      |      |      |       | 4      | 2      | 2     | 4     | 4     | 5 |
| 12248  |      |      |      |      |      |      |      |      |       | 4      | 3      | 3     | 4     | 4     | 3 |
| 12249  | 6    | 6    | 1    | 6    | 6    | 6    | 6    | 6    | 1     | 3      | 2      | 2     | 4     | 4     | 4 |
| 12258  |      |      |      |      |      |      |      |      |       | 2      | 2      | 1     | 3     | 2     | 2 |
| 12265  |      |      |      |      |      |      |      |      |       | 2      | 2      | 2     | 2     | 2     | 2 |
| 12269  | 6    | 6    | 1    | 6    | 6    | 6    | 6    | 6    | 1     | 4      | 3      | 3     | 5     | 4     | 5 |
| 12270  |      |      |      |      |      |      |      |      |       | 2      | 2      | 3     | 5     | 4     | 5 |
| 12279  |      |      |      |      |      |      |      |      |       | 4      | 3      | 3     | 2     | 2     | 4 |
| 12280  |      |      |      |      |      |      |      |      |       | 2      | 3      | 3     | 4     | 5     | 5 |
| 12282  |      |      |      |      |      |      |      |      |       | 3      | 2      | 2     | 3     | 3     | 2 |
| 12283  |      |      |      |      |      |      |      |      |       | 2      | 2      | 3     | 5     | 4     | 4 |
| 12287  | 6    | 6    | 1    | 6    | 6    | 6    | 6    | 6    | 2     | 4      | 3      | 3     | 4     | 5     | 4 |
| 12288  | 5    | 5    | 2    | 5    | 6    | 5    | 5    | 5    | 3     | 3      | 2      | 2     | 4     | 4     | 4 |
| 12290  | 3    | 5    | 2    | 3    | 6    | 6    | 6    | 6    | 5     | 4      | 3      | 2     | 3     | 5     | 4 |
| 12292  | 3    | 5    | 5    | 3    | 6    | 5    | 2    | 5    | 5     | 3      | 2      | 2     | 4     | 4     | 4 |
| 12294  |      |      |      |      |      |      |      |      |       | 3      | 3      | 3     | 5     | 5     | 5 |
| 12296  |      |      |      |      |      |      |      |      |       | 5      | 2      | 3     | 5     | 5     | 5 |
| 12307  | 4    | 4    | 4    | 5    | 6    | 6    | 6    | 5    | 5     | 2      | 2      | 2     | 5     | 4     | 4 |

| respid | Q48k | Q48l | Q48m | Q48n | Q48o | Q48p | Q48q | Q48r | Q49_1 | Q50a_1 | Q50b_1 | Q51_1 | Q51_2 | Q52_1 |   |
|--------|------|------|------|------|------|------|------|------|-------|--------|--------|-------|-------|-------|---|
| 12309  |      |      |      |      |      |      |      |      |       | 3      | 3      | 3     | 4     | 5     | 3 |
| 12312  |      |      |      |      |      |      |      |      |       | 2      | 1      | 2     | 3     | 3     | 4 |
| 12317  | 5    | 5    | 1    | 4    | 6    | 5    | 5    | 2    | 2     | 3      | 2      | 2     | 3     | 4     | 3 |
| 12319  |      |      |      |      |      |      |      |      |       | 5      | 3      | 3     | 1     | 1     | 1 |
| 12320  |      |      |      |      |      |      |      |      |       | 3      | 3      | 3     | 5     | 5     | 4 |
| 12322  |      |      |      |      |      |      |      |      |       | 3      | 3      | 2     | 3     | 3     | 3 |
| 12328  |      |      |      |      |      |      |      |      |       | 2      | 2      | 2     | 3     | 3     | 3 |
| 12331  |      |      |      |      |      |      |      |      |       | 4      | 2      | 2     | 1     | 2     | 2 |
| 12332  |      |      |      |      |      |      |      |      |       | 3      | 3      | 3     | 5     | 5     | 5 |
| 12334  |      |      |      |      |      |      |      |      |       | 2      | 3      | 3     | 1     | 5     | 5 |
| 12337  |      |      |      |      |      |      |      |      |       | 2      | 3      | 3     | 5     | 5     | 4 |
| 12338  |      |      |      |      |      |      |      |      |       | 3      | 3      | 3     | 5     | 5     | 5 |
| 12342  |      |      |      |      |      |      |      |      |       | 3      | 3      | 3     | 5     | 5     | 5 |
| 12349  | 5    | 5    | 3    | 6    | 6    | 6    | 6    | 4    | 4     | 3      | 3      | 3     | 4     | 4     | 5 |
| 12352  |      |      |      |      |      |      |      |      |       | 1      | 2      | 2     | 4     | 4     | 4 |
| 12355  |      |      |      |      |      |      |      |      |       | 2      | 3      | 2     | 4     | 4     | 4 |
| 12357  |      |      |      |      |      |      |      |      |       | 2      | 2      | 3     | 3     | 4     | 4 |
| 12358  |      |      |      |      |      |      |      |      |       | 2      | 3      | 3     | 4     | 3     | 4 |
| 12371  |      |      |      |      |      |      |      |      |       | 2      | 2      | 3     | 3     | 4     | 4 |
| 12372  | 6    | 6    | 3    |      | 6    | 6    | 6    | 3    | 3     | 3      | 3      | 3     | 5     | 5     | 5 |
| 12373  |      |      |      |      |      |      |      |      |       | 3      | 2      | 2     | 4     | 4     | 4 |
| 12379  |      |      |      |      |      |      |      |      |       | 3      | 3      | 3     | 5     | 5     | 4 |
| 12381  | 2    | 3    | 4    | 3    | 3    | 3    | 3    | 2    | 3     | 2      | 2      | 2     | 3     | 4     | 4 |
| 12383  |      |      |      |      |      |      |      |      |       | 3      | 3      | 3     | 5     | 5     | 4 |
| 12384  | 3    | 6    | 2    | 5    | 6    | 6    | 6    | 2    | 2     | 4      | 3      | 3     | 3     | 5     | 5 |
| 12386  |      |      |      |      |      |      |      |      |       | 3      | 2      | 2     | 4     | 4     | 4 |
| 12389  |      |      |      |      |      |      |      |      |       | 3      | 2      | 2     | 4     | 4     | 4 |
| 12392  | 5    | 5    | 2    | 5    | 5    | 5    | 5    | 5    | 3     | 3      | 3      | 3     | 5     | 5     | 5 |
| 12396  |      |      |      |      |      |      |      |      |       | 4      | 3      | 3     | 5     | 5     | 5 |
| 12397  | 2    | 2    | 2    | 4    | 5    | 3    | 2    | 2    | 2     | 2      | 3      | 2     | 2     | 2     | 5 |
| 12399  |      | 3    |      |      |      |      |      |      |       | 2      | 1      | 2     | 3     | 3     | 3 |
| 12400  |      |      |      |      |      |      |      |      |       | 3      | 3      | 3     | 4     | 4     | 4 |

| respid | Q48k | Q48l | Q48m | Q48n | Q48o | Q48p | Q48q | Q48r | Q49_1 | Q50a_1 | Q50b_1 | Q51_1 | Q51_2 | Q52_1 |
|--------|------|------|------|------|------|------|------|------|-------|--------|--------|-------|-------|-------|
| 12406  |      | 3    | 4    | 5    | 6    | 6    | 6    | 3    | 6     | 2      | 2      | 2     | 2     | 3     |
| 12407  |      | 3    | 4    | 2    | 4    | 5    | 5    | 5    | 4     | 2      | 3      | 3     | 5     | 4     |
| 12410  |      |      |      |      |      |      |      |      |       | 4      | 3      | 3     | 5     | 5     |
| 12413  |      | 3    | 4    | 1    | 6    | 6    | 6    | 6    | 4     | 4      | 3      | 2     | 3     | 3     |
| 12416  |      |      |      |      |      |      |      |      |       | 2      | 2      | 3     | 3     | 4     |
| 12419  |      |      |      |      |      |      |      |      |       | 3      | 3      | 3     | 4     | 3     |
| 12422  |      |      |      |      |      |      |      |      |       | 2      | 2      | 2     | 2     | 2     |
| 12423  |      | 6    | 6    | 2    | 5    | 5    | 5    | 5    | 4     | 3      | 3      | 3     | 5     | 5     |
| 12429  |      |      |      |      |      |      |      |      |       | 3      | 1      | 2     | 4     | 3     |
| 12434  |      | 4    | 5    | 2    | 4    | 3    | 4    | 3    | 3     | 2      | 2      | 2     | 4     | 4     |
| 12435  |      |      |      |      |      |      |      |      |       | 4      | 3      | 2     | 5     | 5     |
| 12436  |      |      |      |      |      |      |      |      |       | 3      | 3      | 3     | 4     | 5     |
| 12442  |      |      |      |      |      |      |      |      |       | 3      | 3      | 3     | 5     | 5     |
| 12449  |      | 6    | 6    | 1    | 6    | 6    | 6    | 6    | 1     | 3      | 3      | 3     | 4     | 5     |
| 12451  |      |      |      |      |      |      |      |      |       | 4      | 3      | 3     | 5     | 5     |
| 12456  |      | 5    | 4    | 4    | 4    | 4    | 6    | 5    | 4     | 1      | 2      | 2     | 4     | 5     |
| 12457  |      |      |      |      |      |      |      |      |       | 4      | 3      | 3     | 5     | 5     |
| 12458  |      | 6    | 6    | 1    | 6    | 6    | 6    | 6    | 1     | 4      | 3      | 3     | 4     | 5     |
| 12461  |      | 4    | 4    | 3    | 4    | 5    | 4    | 4    | 3     | 2      | 2      | 2     | 3     | 4     |
| 12462  |      |      |      |      |      |      |      |      |       | 4      | 3      | 3     | 4     | 4     |
| 12463  |      |      |      |      |      |      |      |      |       | 4      | 2      | 2     | 3     | 3     |
| 12466  |      |      |      |      |      |      |      |      |       | 3      | 3      | 3     | 5     | 5     |
| 12470  |      |      |      |      |      |      |      |      |       | 2      | 2      | 2     | 3     | 4     |
| 12471  |      |      |      |      |      |      |      |      |       | 4      | 2      | 2     | 3     | 3     |
| 12472  |      |      |      |      |      |      |      |      |       | 2      | 3      | 3     | 5     | 5     |
| 12478  |      |      |      |      |      |      |      |      |       | 3      | 2      | 2     | 4     | 4     |
| 12479  |      |      |      |      |      |      |      |      |       | 2      | 2      | 2     | 3     | 4     |
| 12481  |      | 6    | 5    | 3    | 5    | 6    | 6    | 6    | 3     | 3      | 2      | 2     | 5     | 4     |
| 12482  |      |      |      |      |      |      |      |      |       | 2      | 2      | 2     | 3     | 4     |
| 12483  |      |      |      |      |      |      |      |      |       | 2      | 3      | 3     | 4     | 4     |
| 12496  |      | 5    | 3    | 4    | 3    | 5    | 3    | 5    | 4     | 3      | 3      | 3     | 4     | 4     |
| 12497  |      | 4    | 4    | 4    | 4    | 5    | 4    | 4    | 3     | 2      | 2      | 2     | 3     | 4     |

| respid | Q48k | Q48l | Q48m | Q48n | Q48o | Q48p | Q48q | Q48r | Q49_1 | Q50a_1 | Q50b_1 | Q51_1 | Q51_2 | Q52_1 |
|--------|------|------|------|------|------|------|------|------|-------|--------|--------|-------|-------|-------|
| 12498  | 4    | 3    | 3    | 4    | 4    | 3    | 3    | 4    | 3     | 2      | 2      | 4     | 4     | 4     |
| 12500  |      |      |      |      |      |      |      |      | 1     | 3      | 3      | 2     | 2     | 2     |
| 12501  | 5    | 4    | 3    |      |      |      |      | 4    | 3     | 3      | 3      | 4     | 5     | 5     |
| 12502  | 4    | 4    | 4    | 4    | 4    | 4    | 4    | 4    | 2     | 2      | 2      | 3     | 3     | 3     |
| 12503  | 6    | 6    | 6    | 2    | 6    | 6    | 6    | 6    | 4     | 3      | 3      | 5     | 5     | 5     |
| 12505  | 1    | 1    | 4    | 1    | 1    | 1    | 1    | 6    | 2     | 2      | 1      | 5     | 3     | 5     |
| 12508  |      | 5    | 3    | 3    | 5    | 2    |      | 4    | 2     | 2      | 2      | 4     | 3     | 4     |
| 12509  |      |      |      |      |      |      |      |      | 3     | 2      | 2      | 2     | 2     | 3     |
| 12510  |      |      |      |      |      |      |      |      | 4     | 3      | 3      | 5     | 5     | 5     |
| 12512  | 5    | 5    | 3    | 2    | 5    | 5    | 5    |      | 3     | 3      | 3      | 4     | 4     | 4     |
| 12514  | 3    | 3    | 5    | 2    | 3    | 5    | 3    |      | 1     | 2      | 2      | 2     | 3     | 2     |
| 12515  | 3    | 5    | 5    | 4    | 4    | 5    | 3    | 4    | 4     | 2      | 3      | 2     | 2     | 2     |
| 12520  |      |      |      |      |      |      |      |      | 4     | 3      | 3      | 5     | 5     | 5     |
| 12522  | 5    | 6    | 1    | 6    | 6    | 6    | 6    | 2    | 3     | 3      | 3      | 4     | 5     | 4     |
| 12526  |      |      |      |      |      |      |      |      | 2     | 1      | 2      | 2     | 3     | 3     |
| 12527  |      |      |      |      |      |      |      |      | 3     | 3      | 3      | 5     | 5     | 5     |
| 12528  | 5    | 5    | 2    | 5    | 6    | 6    | 5    | 2    | 3     | 3      | 3      | 4     | 5     | 4     |
| 12530  | 3    | 5    | 5    | 2    | 3    | 4    | 3    | 3    | 3     | 2      | 2      | 3     | 3     | 3     |
| 12535  | 5    | 5    | 2    | 3    | 5    | 5    | 5    | 4    | 3     | 3      | 3      | 5     | 5     | 5     |
| 12539  | 5    | 5    | 3    | 5    | 5    | 5    | 5    | 3    | 2     | 2      | 2      | 4     | 4     | 4     |
| 12541  |      |      |      |      |      |      |      |      | 3     | 2      | 2      | 1     | 2     | 2     |
| 12542  |      |      |      |      |      |      |      |      | 2     | 3      | 3      | 5     | 5     | 4     |
| 12545  | 1    | 3    | 6    | 2    | 3    | 3    | 2    | 5    | 3     | 2      | 2      | 4     | 3     | 4     |
| 12547  | 5    | 6    | 1    | 6    | 4    | 2    | 4    | 2    | 3     | 2      | 3      | 4     | 3     | 4     |
| 12549  |      |      |      |      |      |      |      |      | 3     | 2      | 2      | 3     | 3     | 2     |
| 12550  | 3    |      |      | 3    |      |      |      |      | 2     | 3      | 3      | 4     | 4     | 5     |
| 12555  |      |      |      |      |      |      |      |      | 3     | 3      | 3      | 4     | 5     | 4     |
| 12557  |      |      |      |      |      |      |      |      | 1     | 1      | 1      | 3     | 2     | 3     |
| 12559  | 4    | 5    | 5    | 3    | 5    | 5    | 5    | 4    | 3     | 3      | 3      | 4     | 4     | 3     |
| 12561  | 6    | 6    | 1    | 6    | 6    | 6    | 6    | 6    | 3     | 2      | 3      | 3     | 4     | 3     |
| 12562  |      |      |      |      |      |      |      |      | 2     | 3      | 3      | 4     | 3     | 3     |
| 12563  | 6    | 6    | 1    | 6    | 6    | 5    | 6    | 1    | 4     | 3      | 3      | 4     | 4     | 4     |

| respid | Q48k | Q48l | Q48m | Q48n | Q48o | Q48p | Q48q | Q48r | Q49_1 | Q50a_1 | Q50b_1 | Q51_1 | Q51_2 | Q52_1 |
|--------|------|------|------|------|------|------|------|------|-------|--------|--------|-------|-------|-------|
| 12565  | 1    | 1    | 6    | 1    | 5    | 2    | 1    | 6    | 2     | 2      | 2      | 1     | 1     | 1     |
| 12566  |      |      |      |      |      |      |      |      | 5     | 3      | 3      | 3     | 5     | 4     |
| 12570  |      |      |      |      |      |      |      |      | 2     | 3      | 3      | 4     | 4     | 3     |
| 12571  | 5    | 5    | 5    | 5    | 5    | 5    | 5    | 5    | 3     | 3      | 3      | 5     | 5     | 5     |
| 12572  |      |      |      |      |      |      |      |      | 4     | 2      | 2      | 2     | 3     | 3     |
| 12578  |      |      |      |      |      |      |      |      | 3     | 3      | 3      | 3     | 4     | 3     |
| 12579  |      |      |      |      |      |      |      |      | 3     | 3      | 3      | 5     | 5     | 5     |
| 12581  | 4    | 3    | 4    | 4    | 4    | 4    | 5    | 4    | 3     | 3      | 3      | 4     | 4     | 5     |
| 12582  | 3    | 4    | 4    | 4    | 4    | 3    | 4    | 4    | 2     | 2      | 2      | 3     | 3     | 3     |
| 12585  |      |      |      |      |      |      |      |      | 4     | 3      | 3      | 5     | 5     | 4     |
| 12586  | 3    | 4    | 4    | 3    | 5    | 4    | 3    | 4    | 3     | 3      | 3      | 4     | 4     | 4     |
| 12588  | 6    | 4    | 2    | 5    | 6    | 5    | 4    | 2    | 2     | 2      | 1      | 4     | 3     | 3     |
| 12589  | 5    | 5    | 2    | 4    | 6    | 5    | 5    | 4    | 3     | 3      | 3      | 5     | 4     | 5     |
| 12590  | 5    | 5    | 2    | 5    | 5    | 5    | 5    | 2    | 3     | 3      | 3      | 5     | 5     | 5     |
| 12591  |      |      |      |      |      |      |      |      | 3     | 2      | 2      | 3     | 4     | 4     |
| 12593  |      |      |      |      |      |      |      |      | 3     | 2      | 2      | 2     | 2     | 2     |
| 12594  | 5    | 5    | 4    | 5    | 5    | 4    | 4    | 3    | 4     | 3      | 2      | 4     | 5     | 3     |
| 12599  | 6    | 6    | 1    | 6    | 6    | 6    | 6    | 6    | 1     | 3      | 2      | 2     | 3     | 4     |
| 12600  | 5    | 5    | 2    | 5    | 5    | 5    | 5    | 2    | 2     | 2      | 2      | 3     | 3     | 4     |
| 12602  | 3    | 5    | 3    | 5    | 5    | 3    | 2    | 5    | 2     | 2      | 2      | 3     | 4     | 3     |
| 12606  | 2    | 2    | 4    | 3    | 3    | 1    | 4    | 3    | 2     | 2      | 2      | 2     | 2     | 2     |
| 12607  |      |      |      |      |      |      |      |      | 4     | 3      | 3      | 5     | 5     | 5     |
| 12608  |      |      |      |      |      |      |      |      | 3     | 3      | 3      | 5     | 5     | 4     |
| 12610  | 6    | 2    | 2    | 4    | 5    | 6    | 5    | 5    | 2     | 3      | 3      | 3     | 2     | 2     |
| 12611  |      |      |      |      |      |      |      |      | 3     | 3      | 3      | 5     | 5     | 5     |
| 12613  | 2    | 3    | 5    | 3    | 4    | 4    | 2    | 5    | 2     | 2      | 3      | 3     | 4     | 2     |
| 12616  | 1    | 6    | 6    | 6    | 6    | 6    | 6    | 6    | 3     | 2      | 2      | 3     | 4     | 2     |
| 12617  |      |      |      |      |      |      |      |      | 1     | 2      | 2      | 3     | 3     | 4     |
| 12619  | 3    | 5    | 2    | 5    | 5    | 5    | 5    | 3    | 4     | 3      | 3      | 5     | 5     | 4     |
| 12622  |      |      |      |      |      |      |      |      | 4     | 3      | 3      | 5     | 5     | 5     |
| 12628  | 3    | 3    | 3    |      |      |      |      |      | 2     | 2      | 2      | 4     | 4     | 4     |
| 12631  | 5    | 4    | 5    | 5    | 5    | 5    | 5    | 3    | 3     | 3      | 3      | 5     | 5     | 5     |

| respid | Q48k | Q48l | Q48m | Q48n | Q48o | Q48p | Q48q | Q48r | Q49_1 | Q50a_1 | Q50b_1 | Q51_1 | Q51_2 | Q52_1 |   |
|--------|------|------|------|------|------|------|------|------|-------|--------|--------|-------|-------|-------|---|
| 12635  |      |      |      |      |      |      |      |      |       | 4      | 2      | 2     | 3     | 3     | 3 |
| 12638  | 6    | 6    | 6    | 6    | 6    | 6    | 6    | 6    | 6     | 3      | 3      | 2     | 5     | 5     | 5 |
| 12639  | 6    | 6    | 1    | 6    | 6    | 6    | 6    | 6    | 1     | 4      | 3      | 3     | 5     | 5     | 5 |
| 12640  | 6    | 6    | 1    | 6    | 6    | 6    | 6    | 6    | 1     | 4      | 3      | 3     | 5     | 5     | 5 |
| 12643  |      |      |      |      |      |      |      |      |       | 3      | 1      | 1     | 3     | 4     | 3 |
| 12646  |      |      |      |      |      |      |      |      |       | 2      | 3      | 2     | 3     | 4     | 3 |
| 12648  | 1    | 2    | 5    | 2    | 4    | 5    | 1    | 6    | 6     | 1      | 1      | 2     | 2     | 2     | 2 |
| 12650  |      |      |      |      |      |      |      |      |       | 3      | 2      | 2     | 3     | 2     | 3 |
| 12651  | 4    | 5    | 4    | 4    | 6    | 4    | 4    | 4    | 3     | 3      | 2      | 2     | 3     | 2     | 3 |
| 12658  | 5    | 5    | 1    | 5    | 6    | 5    | 5    | 5    | 2     | 3      | 2      | 2     | 4     | 4     | 4 |
| 12662  | 2    | 3    | 5    | 1    | 4    | 3    | 5    | 5    | 5     | 2      | 2      | 2     | 3     | 3     | 3 |
| 12663  |      |      |      |      |      |      |      |      |       | 3      | 3      | 3     | 2     | 2     | 2 |
| 12664  |      |      |      |      |      |      |      |      |       | 1      | 1      | 1     | 2     | 2     | 2 |
| 12669  | 6    | 6    | 1    | 6    | 6    | 6    | 6    | 6    | 1     | 1      | 2      | 2     | 3     | 4     | 3 |
| 12670  | 1    | 6    | 2    | 5    | 6    | 6    | 6    | 5    | 2     | 3      | 2      | 2     | 3     | 4     | 4 |
| 12673  |      |      |      |      |      |      |      |      |       | 2      | 1      | 1     | 4     | 4     | 5 |
| 12675  | 5    | 6    | 1    | 5    | 6    | 5    | 5    | 5    | 2     | 2      | 3      | 2     | 3     | 3     | 3 |
| 12677  | 6    | 6    | 2    | 6    | 6    | 6    | 6    | 3    | 3     | 3      | 2      | 2     | 3     | 4     | 4 |
| 12679  | 2    | 2    | 5    | 1    | 2    | 2    | 2    | 2    | 5     | 3      | 3      | 3     | 4     | 5     | 4 |
| 12682  |      |      |      |      |      |      |      |      |       | 2      | 2      | 2     | 2     | 2     | 2 |
| 12696  | 4    | 4    | 4    | 5    | 4    | 5    | 5    | 5    | 4     | 3      | 3      | 3     | 3     | 3     | 3 |
| 12697  | 6    | 4    | 2    | 5    | 1    | 3    | 5    | 5    | 2     | 3      | 2      | 2     | 3     | 3     | 4 |
| 12699  | 5    | 4    | 2    | 5    | 4    | 5    | 4    | 4    | 2     | 4      | 3      | 3     | 5     | 5     | 5 |
| 12700  | 5    | 6    | 2    | 6    | 6    | 5    | 5    | 5    | 3     | 3      | 3      | 3     | 5     | 5     | 4 |
| 12701  | 5    | 4    | 4    | 6    | 6    | 6    | 4    | 5    | 3     | 2      | 2      | 3     | 3     | 2     | 3 |
| 12702  | 6    | 6    | 2    | 6    | 6    | 6    | 6    | 5    | 2     | 3      | 2      | 2     | 3     | 3     | 4 |
| 12704  |      |      |      |      |      |      |      |      |       | 1      | 1      | 1     | 2     | 2     | 2 |
| 12705  | 2    | 2    | 5    | 5    | 6    | 5    | 5    | 2    | 6     | 3      | 2      | 3     | 3     | 4     | 3 |
| 12709  |      |      |      |      |      |      |      |      |       | 5      | 3      | 3     | 5     | 5     | 5 |
| 12710  | 6    | 6    | 1    | 6    | 6    | 5    | 5    | 2    | 2     | 3      | 2      | 2     | 3     | 4     | 4 |
| 12713  | 3    | 5    | 2    | 3    | 5    | 3    | 5    | 5    | 4     | 5      | 3      | 2     | 4     | 4     | 3 |
| 12716  | 4    | 4    | 1    | 2    | 2    | 2    | 1    | 2    | 3     | 2      | 3      | 3     | 3     | 2     | 2 |

| respid | Q48k | Q48l | Q48m | Q48n | Q48o | Q48p | Q48q | Q48r | Q49_1 | Q50a_1 | Q50b_1 | Q51_1 | Q51_2 | Q52_1 |   |
|--------|------|------|------|------|------|------|------|------|-------|--------|--------|-------|-------|-------|---|
| 12719  |      |      |      |      |      |      |      |      |       | 3      | 3      | 3     | 4     | 4     | 4 |
| 12720  | 6    | 6    | 1    | 6    | 6    | 6    | 6    | 3    | 2     | 3      | 2      | 2     | 3     | 4     | 3 |
| 12723  | 5    | 6    | 2    | 6    | 6    | 6    | 6    | 2    | 6     | 4      | 3      | 3     | 5     | 5     | 4 |
| 12726  | 5    | 6    | 2    | 6    | 6    | 6    | 6    | 6    | 2     | 3      | 2      | 2     | 3     | 4     | 4 |
| 12728  |      |      |      |      |      |      |      |      |       | 2      | 2      | 2     | 2     | 3     | 3 |
| 12729  | 4    | 5    | 3    | 4    | 5    | 5    | 5    | 5    | 3     | 2      | 2      | 2     | 4     | 5     | 4 |
| 12731  | 5    | 5    | 2    | 6    | 6    | 5    | 6    | 6    | 2     | 2      | 2      | 2     | 3     | 4     | 4 |
| 12732  |      |      |      |      |      |      |      |      |       | 3      | 2      | 2     | 2     | 2     | 3 |
| 12733  | 6    | 6    | 2    | 6    | 6    | 5    | 6    | 6    | 3     | 4      | 3      | 3     | 4     | 4     | 4 |
| 12736  |      |      |      |      |      |      |      |      |       | 3      | 3      | 3     | 5     | 5     | 5 |
| 12737  | 5    | 6    | 2    | 6    | 6    | 6    | 6    | 6    | 2     | 3      | 2      | 2     | 4     | 3     | 3 |
| 12739  |      |      |      |      |      |      |      |      |       | 2      | 3      | 3     | 2     | 3     | 3 |
| 12742  | 6    | 6    | 2    | 6    | 6    | 6    | 6    | 6    | 2     | 2      | 2      | 2     | 3     | 4     | 3 |
| 12743  |      |      |      |      |      |      |      |      |       | 2      | 1      | 1     | 2     | 2     | 3 |
| 12744  | 2    | 2    | 5    | 3    | 3    | 3    | 3    | 2    | 5     | 2      | 2      | 2     | 4     | 4     | 4 |
| 12747  |      |      |      |      |      |      |      |      |       | 1      | 1      | 3     | 3     | 4     | 4 |
| 12751  |      |      |      |      |      |      |      |      |       | 3      | 2      | 2     | 4     | 4     | 4 |
| 12754  | 6    | 6    | 1    | 6    | 6    | 6    | 6    | 5    | 1     | 2      | 2      | 2     | 3     | 3     | 4 |
| 12756  |      |      |      |      |      |      |      |      |       | 2      | 2      | 3     | 2     | 2     | 2 |
| 12757  | 6    | 6    | 6    | 6    | 6    | 6    | 6    | 6    | 1     | 3      | 2      | 2     | 3     | 4     | 4 |
| 12760  |      |      |      |      |      |      |      |      |       | 2      | 2      | 3     | 2     | 2     | 2 |
| 12761  | 6    | 6    | 2    | 6    | 6    | 6    | 6    | 6    | 1     | 3      | 2      | 2     | 3     | 4     | 4 |
| 12762  | 5    | 3    | 2    | 3    | 4    | 5    | 5    | 5    | 2     | 3      | 3      | 3     | 4     | 5     | 5 |
| 12766  |      |      |      |      |      |      |      |      |       | 4      | 3      | 3     | 4     | 4     | 4 |
| 12769  |      |      |      |      |      |      |      |      |       | 4      | 3      | 2     | 5     | 5     | 5 |
| 12770  |      |      |      |      |      |      |      |      |       | 2      | 2      | 3     | 3     | 4     | 4 |
| 12773  | 2    | 3    | 1    | 2    | 3    | 1    | 3    | 3    | 3     | 4      | 2      | 3     | 1     | 2     | 3 |
| 12780  |      |      |      |      |      |      |      |      |       | 1      | 3      | 3     | 5     | 5     | 3 |
| 12789  | 5    | 4    | 4    | 4    | 5    | 4    | 4    | 4    | 4     | 3      | 3      | 3     | 3     | 3     | 3 |
| 12792  |      |      |      |      |      |      |      |      |       | 2      | 2      | 2     | 3     | 4     | 3 |
| 12795  |      |      |      |      |      |      |      |      |       | 3      | 3      | 3     | 4     | 4     | 4 |
| 12804  |      |      |      |      |      |      |      |      |       | 2      | 2      | 2     | 2     | 3     | 3 |

| respid | Q48k | Q48l | Q48m | Q48n | Q48o | Q48p | Q48q | Q48r | Q49_1 | Q50a_1 | Q50b_1 | Q51_1 | Q51_2 | Q52_1 |   |
|--------|------|------|------|------|------|------|------|------|-------|--------|--------|-------|-------|-------|---|
| 12811  |      | 2    | 2    | 2    | 3    | 3    | 2    | 2    | 2     | 4      | 2      | 2     | 3     | 3     | 3 |
| 12813  |      | 3    | 3    | 4    | 3    | 4    | 3    | 4    | 4     | 2      | 3      | 3     | 3     | 3     | 3 |
| 12814  |      |      |      |      |      |      |      |      |       | 2      | 2      | 2     | 3     | 3     | 3 |
| 12815  |      | 3    | 3    | 4    | 3    | 4    | 4    | 3    | 4     | 3      | 3      | 3     | 5     | 5     | 5 |
| 12816  |      |      |      |      |      |      |      |      |       | 3      | 3      | 3     | 5     | 5     | 4 |
| 12817  |      | 2    | 5    | 5    | 2    | 6    | 5    | 5    | 6     | 3      | 3      | 3     | 5     | 5     | 5 |
| 12818  |      | 4    | 5    | 2    | 4    | 6    | 4    | 5    | 2     | 2      | 3      | 3     | 5     | 5     | 4 |
| 12819  |      |      |      |      |      |      |      |      |       | 3      | 3      | 3     | 5     | 5     | 5 |
| 12820  |      | 2    | 5    | 2    | 3    | 6    | 6    | 6    | 5     | 3      | 3      | 3     | 5     | 5     | 5 |
| 12821  |      |      |      |      |      |      |      |      |       | 4      | 3      | 3     | 5     | 5     | 4 |
| 12824  |      | 5    | 3    | 3    | 3    | 6    | 3    | 5    | 3     | 3      | 2      | 2     | 3     | 3     | 4 |
| 12827  |      |      |      |      |      |      |      |      |       | 3      | 2      | 2     | 4     | 4     | 4 |
| 12836  |      |      |      |      |      |      |      |      |       | 2      | 2      | 2     | 4     | 3     | 3 |
| 12837  |      |      |      |      |      |      |      |      |       | 2      | 2      | 2     | 3     | 3     | 3 |
| 12838  |      | 4    | 4    | 4    | 4    | 4    | 5    | 3    | 4     | 2      | 2      | 2     | 3     | 4     | 3 |
| 12845  |      | 5    | 5    | 4    | 4    | 5    | 4    | 5    | 3     | 2      | 3      | 3     | 4     | 4     | 4 |
| 12847  |      |      |      |      |      |      |      |      |       | 2      | 1      | 3     | 3     | 1     | 5 |
| 12849  |      | 2    | 2    | 2    | 1    | 2    | 2    | 2    | 2     | 4      | 1      | 2     | 1     | 1     | 1 |
| 12850  |      | 5    | 5    | 5    | 4    | 4    | 4    | 4    | 4     | 2      | 3      | 3     | 2     | 2     | 2 |
| 12852  |      |      |      |      |      |      |      |      |       | 2      | 3      | 3     | 5     | 5     | 5 |
| 12853  |      | 1    | 1    | 3    | 2    | 1    | 1    | 1    | 1     | 3      | 2      | 2     | 1     | 1     | 1 |
| 12854  |      |      |      |      |      |      |      |      |       | 3      | 3      | 3     | 4     | 5     | 4 |
| 12860  |      |      |      |      |      |      |      |      |       | 4      | 3      | 3     | 5     | 5     | 5 |
| 12861  |      |      |      |      |      |      |      |      |       | 4      | 2      | 3     | 5     | 5     | 5 |
| 12863  |      | 6    | 6    | 1    | 6    | 6    | 6    | 6    | 1     | 3      | 2      | 2     | 5     | 5     | 5 |
| 12865  |      | 4    | 4    | 4    | 3    | 4    | 3    | 3    | 4     | 3      | 3      | 3     | 5     | 5     | 4 |
| 12870  |      | 3    | 3    | 5    | 3    | 5    | 3    | 5    | 3     | 3      | 3      | 2     | 4     | 5     | 4 |
| 12871  |      |      |      |      |      |      |      |      |       | 4      | 2      | 2     | 5     | 5     | 5 |
| 12873  |      |      |      |      |      |      |      |      |       | 2      | 2      | 2     | 4     | 3     | 4 |
| 12877  |      |      |      |      |      |      |      |      |       | 3      | 2      | 3     | 5     | 5     | 4 |
| 12880  |      | 4    | 5    | 2    | 5    |      | 5    |      | 5     | 4      | 3      | 3     | 5     | 5     | 4 |
| 12881  |      | 4    | 4    | 3    | 3    | 5    | 5    | 5    | 3     | 2      | 2      | 2     | 3     | 3     | 1 |



| respid | Q48k | Q48l | Q48m | Q48n | Q48o | Q48p | Q48q | Q48r | Q49_1 | Q50a_1 | Q50b_1 | Q51_1 | Q51_2 | Q52_1 |
|--------|------|------|------|------|------|------|------|------|-------|--------|--------|-------|-------|-------|
| 12882  | 3    | 6    | 2    | 3    | 6    | 5    | 6    | 2    | 3     | 2      | 2      | 4     | 4     | 5     |
| 12883  | 3    | 4    | 5    | 3    | 4    | 5    | 3    | 5    | 3     | 2      | 2      | 4     | 4     | 5     |
| 12885  |      |      |      |      |      |      |      |      | 2     | 2      | 2      | 3     | 3     | 3     |
| 12887  | 6    | 5    | 2    | 4    | 5    | 4    | 5    | 3    | 3     | 3      | 3      | 4     | 4     | 4     |
| 12889  | 3    | 5    | 2    | 6    | 6    | 6    | 3    | 4    | 3     | 3      | 3      | 3     | 3     | 4     |
| 12890  |      |      |      |      |      |      |      |      | 2     | 2      | 2      | 3     | 3     | 3     |
| 12891  | 4    | 6    | 2    | 4    | 6    | 3    | 4    | 3    | 3     | 3      | 3      | 5     | 5     | 4     |
| 12892  | 1    | 1    | 6    | 1    | 1    | 6    | 1    | 6    | 2     | 2      | 3      | 3     | 3     | 3     |
| 12893  |      |      |      |      |      |      |      |      | 3     | 3      | 3      | 3     | 3     | 3     |
| 12895  | 3    | 3    | 3    | 3    | 3    | 3    | 4    | 5    | 3     | 2      | 2      | 3     | 3     | 3     |
| 12898  |      |      |      |      |      |      |      |      | 3     | 2      | 2      | 4     | 3     | 4     |
| 12907  |      |      |      |      |      |      |      |      | 2     | 2      | 2      | 4     | 3     | 4     |
| 12908  | 5    | 5    | 5    | 5    | 5    | 5    | 5    | 5    | 2     | 2      | 2      | 4     | 5     | 4     |
| 12909  |      |      |      |      |      |      |      |      | 3     | 3      | 3      | 5     | 5     | 5     |
| 12914  |      |      |      |      |      |      |      |      | 3     | 2      | 3      | 5     | 3     | 5     |
| 12915  | 3    | 5    | 3    | 3    | 4    | 4    | 5    | 3    | 2     | 3      | 3      | 3     | 4     | 3     |
| 12916  |      |      |      |      |      |      |      |      | 2     | 3      | 3      | 3     | 4     | 3     |
| 12921  | 4    | 4    | 4    | 4    | 4    | 4    | 3    | 3    | 3     | 2      | 2      | 3     | 3     | 4     |
| 12922  | 4    | 4    | 3    | 4    | 6    | 6    | 6    | 3    | 2     | 3      | 2      | 3     | 4     | 4     |
| 12923  |      |      |      |      |      |      |      |      | 2     | 2      | 2      | 3     | 3     | 4     |
| 12926  |      |      |      |      |      |      |      |      | 2     | 2      | 2      | 4     | 4     | 3     |
| 12927  | 6    | 6    | 1    | 6    | 6    | 6    | 6    | 1    | 3     | 3      | 3      | 4     | 4     | 4     |
| 12932  |      |      |      |      |      |      |      |      | 3     | 3      | 3      | 5     | 5     | 5     |
| 12936  |      |      |      |      |      |      |      |      | 2     | 3      | 3      | 4     | 4     | 4     |
| 12937  | 5    | 4    | 5    | 5    | 6    | 5    | 6    | 4    | 3     | 3      | 3      | 5     | 5     | 5     |
| 12938  | 3    | 4    | 3    | 3    | 5    | 3    | 4    | 2    | 2     | 1      | 2      | 3     | 2     | 3     |
| 12939  | 6    | 6    | 1    | 6    | 6    | 6    | 6    | 1    | 4     | 2      | 3      | 5     | 4     | 5     |
| 12940  | 3    | 3    | 3    | 2    | 3    | 3    | 3    | 3    | 3     | 2      | 2      | 2     | 3     | 2     |
| 12945  | 5    | 5    | 3    | 5    | 5    | 3    | 5    | 3    | 2     | 2      | 3      | 4     | 3     | 3     |
| 12946  | 4    | 3    | 5    | 2    | 5    | 3    | 5    | 2    | 3     | 3      | 3      | 4     | 4     | 4     |
| 12947  |      |      |      |      |      |      |      |      | 3     | 2      | 3      | 4     | 4     | 4     |
| 12948  |      |      |      |      |      |      |      |      | 2     | 2      | 2      | 3     | 3     | 3     |

| respid | Q48k | Q48l | Q48m | Q48n | Q48o | Q48p | Q48q | Q48r | Q49_1 | Q50a_1 | Q50b_1 | Q51_1 | Q51_2 | Q52_1 |   |
|--------|------|------|------|------|------|------|------|------|-------|--------|--------|-------|-------|-------|---|
| 12951  |      | 2    | 5    | 6    | 1    | 5    | 2    | 5    | 1     | 3      | 3      | 2     | 3     | 5     | 4 |
| 12952  |      | 3    | 5    | 5    | 3    | 5    | 5    | 5    | 3     | 2      | 3      | 3     | 3     | 4     | 4 |
| 12954  |      | 3    | 4    | 3    | 3    | 4    | 4    | 4    | 4     | 2      | 2      | 2     | 3     | 3     | 3 |
| 12960  |      | 6    | 6    | 6    | 1    | 6    | 2    | 6    | 2     | 3      | 3      | 3     | 4     | 5     | 4 |
| 12961  |      | 3    | 4    | 5    | 3    | 6    | 5    | 5    | 2     | 2      | 3      | 2     | 5     | 4     | 4 |
| 12962  |      | 6    |      | 1    |      | 6    | 6    |      | 1     | 4      | 3      | 3     | 5     | 5     | 5 |
| 12963  |      |      |      |      |      |      |      |      |       | 4      | 3      | 3     | 5     | 5     | 5 |
| 12964  |      | 2    | 3    | 5    | 2    | 5    | 3    | 5    | 5     | 2      | 2      | 2     | 4     | 5     | 5 |
| 12966  |      |      |      |      |      |      |      |      |       | 2      | 1      | 1     | 2     | 2     | 3 |
| 12967  |      |      |      |      |      |      |      |      |       | 2      | 3      | 3     | 3     | 3     | 4 |
| 12969  |      |      |      |      |      |      |      |      |       | 3      | 3      | 3     | 4     | 5     | 4 |
| 12970  |      |      |      |      |      |      |      |      |       | 2      | 3      | 3     | 4     | 4     | 4 |
| 12974  |      |      |      |      |      |      |      |      |       | 2      | 2      | 2     | 3     | 3     | 3 |
| 12979  |      |      |      |      |      |      |      |      |       | 3      | 3      | 3     | 4     | 4     | 4 |
| 12980  |      |      |      |      |      |      |      |      |       | 3      | 2      | 3     | 3     | 3     | 2 |
| 12983  |      | 2    | 5    | 5    | 5    | 5    | 5    | 5    | 5     | 3      | 3      | 3     | 5     | 5     | 5 |
| 12988  |      | 2    | 2    | 5    | 2    | 5    | 5    | 2    | 5     | 3      | 3      | 3     | 5     | 5     | 5 |
| 12994  |      | 5    | 3    | 6    | 5    | 3    | 3    | 3    | 3     | 3      | 2      | 3     | 5     | 5     | 3 |
| 12995  |      | 2    | 6    | 2    | 1    | 6    | 3    | 5    | 4     | 2      | 2      | 2     | 2     | 3     | 5 |
| 12996  |      | 5    | 5    | 2    | 5    | 5    | 4    | 5    | 4     | 3      | 3      | 3     | 5     | 5     | 5 |
| 12998  |      | 3    | 3    | 4    | 2    | 3    | 1    | 1    | 6     | 3      | 3      | 3     | 5     | 5     | 5 |
| 12999  |      | 5    | 6    | 2    | 5    | 6    | 4    | 6    | 2     | 4      | 2      | 3     | 4     | 4     | 4 |
| 13001  |      |      |      |      |      |      |      |      |       | 4      | 3      | 3     | 5     | 5     | 5 |
| 13005  |      | 4    | 4    | 3    | 4    | 4    | 4    | 4    | 3     | 2      | 2      | 2     | 3     | 4     | 3 |
| 13006  |      | 1    | 1    | 6    | 1    | 1    | 3    | 5    | 6     | 2      | 3      | 3     | 3     | 3     | 3 |
| 13007  |      | 2    | 6    | 5    | 5    | 6    | 6    | 5    | 2     | 1      | 1      | 1     | 3     | 4     | 4 |
| 13011  |      | 5    | 5    | 5    |      | 5    | 4    | 5    | 5     | 2      | 2      | 2     | 2     | 3     | 3 |
| 13012  |      |      |      |      |      |      |      |      |       | 4      | 2      | 3     | 4     | 5     | 5 |
| 13013  |      | 2    | 2    | 3    | 3    | 3    | 2    | 3    | 3     | 2      | 2      | 2     | 3     | 3     | 3 |
| 13016  |      |      |      |      |      |      |      |      |       | 2      | 3      | 3     | 5     | 4     | 4 |
| 13018  |      |      |      |      |      |      |      |      |       | 2      | 3      | 3     | 5     | 5     | 5 |
| 13020  |      |      |      |      |      |      |      |      |       | 4      | 3      | 3     | 5     | 5     | 5 |

| respid | Q48k | Q48l | Q48m | Q48n | Q48o | Q48p | Q48q | Q48r | Q49_1 | Q50a_1 | Q50b_1 | Q51_1 | Q51_2 | Q52_1 |   |
|--------|------|------|------|------|------|------|------|------|-------|--------|--------|-------|-------|-------|---|
| 13024  |      |      |      |      |      |      |      |      |       | 3      | 3      | 3     | 5     | 5     | 5 |
| 13025  | 4    | 4    | 3    | 3    | 5    | 4    | 4    | 3    | 4     | 3      | 3      | 5     | 5     | 5     |   |
| 13027  | 3    | 3    | 6    | 3    | 4    | 4    | 4    | 6    | 2     | 1      | 1      | 3     | 3     | 4     |   |
| 13031  |      |      |      |      |      |      |      |      | 2     | 3      | 3      | 5     | 5     | 4     |   |
| 13032  |      |      |      |      |      |      |      |      | 2     | 2      | 2      | 3     | 4     | 3     |   |
| 13034  | 3    | 4    | 3    | 2    | 3    | 2    | 3    | 3    | 3     | 2      | 2      | 4     | 3     | 3     |   |
| 13036  |      |      | 2    | 1    |      |      |      |      | 2     | 2      | 2      | 4     | 4     | 3     |   |
| 13037  |      |      |      |      |      |      |      |      | 3     | 3      | 3      | 5     | 5     | 5     |   |
| 13038  | 1    | 1    | 4    | 2    | 2    | 1    | 1    | 5    | 1     | 1      | 1      | 3     | 4     | 4     |   |
| 13039  | 5    | 5    | 2    | 5    | 6    | 5    | 5    | 2    | 3     | 3      | 2      | 4     | 3     | 3     |   |
| 13040  | 5    | 5    | 5    | 5    | 5    | 5    | 5    | 4    | 2     | 2      | 2      | 4     | 4     | 4     |   |
| 13041  | 2    | 2    | 6    | 5    | 6    |      | 2    | 6    | 3     | 3      | 2      | 5     | 5     | 5     |   |
| 13045  | 3    | 3    | 3    | 3    | 3    | 3    | 3    | 3    | 3     | 1      | 2      | 2     | 2     | 2     |   |
| 13046  | 5    | 3    | 4    | 4    | 3    | 5    | 5    | 4    | 3     | 2      | 2      | 4     | 4     | 5     |   |
| 13048  | 6    |      | 2    |      | 6    | 6    | 6    | 2    | 3     | 3      | 3      | 5     | 5     | 5     |   |
| 13051  | 2    | 4    | 2    | 1    | 2    | 1    | 2    | 2    | 3     | 2      | 3      | 2     | 1     | 3     |   |
| 13053  |      |      |      |      |      |      |      |      | 2     | 3      | 3      | 4     | 4     | 4     |   |
| 13055  | 4    | 2    | 3    | 5    | 3    | 4    | 4    | 4    | 2     | 1      | 1      | 2     | 2     | 2     |   |
| 13059  | 2    | 5    | 6    | 2    | 6    | 5    | 6    | 2    | 3     | 3      | 2      | 4     | 4     | 4     |   |
| 13068  |      |      |      |      |      |      |      |      | 3     | 2      | 2      | 3     | 3     | 3     |   |
| 13069  | 5    | 5    | 5    | 2    | 5    | 5    |      | 4    | 3     | 3      | 3      | 5     | 5     | 5     |   |
| 13076  | 1    | 2    | 6    | 1    | 5    | 5    | 3    | 5    | 2     | 2      | 2      | 5     | 4     | 4     |   |
| 13081  | 3    | 4    | 3    | 3    | 5    | 3    | 5    | 3    | 3     | 2      | 3      | 2     | 2     | 2     |   |
| 13082  | 5    | 6    | 2    | 5    | 6    | 6    | 6    | 3    | 3     | 3      | 3      | 4     | 4     | 4     |   |
| 13084  | 5    | 5    | 2    | 6    | 6    | 5    | 6    | 5    | 2     | 2      | 2      | 3     | 3     | 3     |   |
| 13085  |      |      |      |      |      |      |      |      | 3     | 2      | 3      | 4     | 4     | 4     |   |
| 13086  | 5    | 6    | 1    | 3    | 6    | 3    | 6    | 4    | 3     | 3      | 3      | 5     | 5     | 3     |   |
| 13093  | 4    | 3    | 3    | 5    | 5    | 3    | 5    | 5    | 2     | 2      | 2      | 3     | 3     | 3     |   |
| 13094  | 3    | 3    | 3    | 3    | 3    | 3    | 3    | 3    | 3     | 2      | 2      | 3     | 3     | 3     |   |
| 13097  | 4    | 5    | 4    | 4    | 5    | 5    | 4    | 4    | 3     | 3      | 2      | 4     | 4     | 4     |   |
| 13098  | 5    | 5    | 3    | 3    | 5    | 5    | 5    | 5    | 3     | 3      | 3      | 5     | 5     | 5     |   |
| 13099  | 5    | 5    | 2    | 5    | 5    | 5    | 5    | 2    | 3     | 2      | 2      | 3     | 3     | 3     |   |

| respid | Q48k | Q48l | Q48m | Q48n | Q48o | Q48p | Q48q | Q48r | Q49_1 | Q50a_1 | Q50b_1 | Q51_1 | Q51_2 | Q52_1 |   |
|--------|------|------|------|------|------|------|------|------|-------|--------|--------|-------|-------|-------|---|
| 13100  |      |      |      |      |      |      |      |      |       | 2      | 3      | 3     | 4     | 4     | 4 |
| 13101  |      |      |      |      |      |      |      |      |       | 3      | 2      | 3     | 4     | 4     | 4 |
| 13103  |      |      |      |      |      |      |      |      |       | 2      | 3      | 3     | 5     | 5     | 4 |
| 13105  |      |      |      | 2    |      |      |      |      |       | 3      | 3      | 2     | 5     | 5     | 5 |
| 13106  | 5    | 5    | 3    | 4    | 5    | 4    | 5    | 4    | 4     | 4      | 3      | 3     | 4     | 4     | 4 |
| 13107  | 5    | 3    | 3    | 3    | 6    | 3    | 5    | 3    | 3     | 3      | 3      | 3     | 5     | 5     | 4 |
| 13110  | 5    | 4    | 3    | 4    | 6    | 5    | 5    | 2    | 2     | 2      | 2      | 2     | 3     | 3     | 4 |
| 13118  | 4    |      |      |      | 6    | 6    | 6    | 6    |       | 3      | 3      | 3     | 4     | 4     | 4 |
| 13120  | 4    | 4    | 3    | 4    | 6    | 6    | 6    | 2    | 2     | 2      | 2      | 2     | 3     | 3     | 3 |
| 13130  |      |      |      |      |      |      |      |      |       | 3      | 2      | 3     | 5     | 4     | 5 |
| 13133  | 2    | 2    | 6    | 2    | 5    | 6    | 3    | 3    | 3     | 4      | 3      | 2     | 1     | 2     | 2 |
| 13134  |      |      |      |      |      |      |      |      |       | 3      | 3      | 3     | 4     | 4     | 4 |
| 13139  | 5    | 5    | 5    | 5    | 5    | 5    | 5    | 5    | 5     | 2      | 3      | 2     | 3     | 3     | 3 |
| 13142  | 5    | 3    | 3    | 3    | 5    | 3    | 5    | 5    | 5     | 4      | 3      | 3     | 4     | 5     | 5 |
| 13143  | 5    | 3    | 4    | 4    | 4    | 3    | 3    | 3    | 5     | 2      | 2      | 2     | 4     | 4     | 3 |
| 13145  | 6    | 6    | 6    | 6    | 6    | 6    | 6    | 6    | 6     | 2      | 2      | 2     | 3     | 3     | 3 |
| 13148  |      |      |      |      |      |      |      |      |       | 4      | 3      | 3     | 4     | 5     | 5 |
| 13149  |      |      |      |      |      |      |      |      |       | 4      | 3      | 3     | 5     | 5     | 5 |
| 13151  | 6    | 6    | 5    | 5    | 6    | 6    | 6    | 6    | 5     | 2      | 2      | 2     | 3     | 4     | 5 |
| 13153  | 6    | 5    | 2    | 6    | 6    | 6    | 6    | 6    | 2     | 3      | 3      | 3     | 4     | 4     | 4 |
| 13158  | 4    | 3    | 4    | 3    | 4    | 4    | 4    | 4    | 4     | 3      | 3      | 3     | 4     | 5     | 5 |
| 13160  | 6    | 6    | 1    | 6    | 6    | 6    | 6    | 6    | 1     | 3      | 2      | 2     | 5     | 5     | 5 |
| 13162  | 4    | 1    | 2    | 2    | 4    | 4    | 4    | 4    | 4     | 3      | 2      | 2     | 2     | 2     | 2 |
| 13169  |      |      |      |      |      |      |      |      |       | 3      | 2      | 3     | 5     | 4     | 5 |
| 13172  | 4    | 3    | 2    | 3    | 5    | 5    | 3    | 3    | 3     | 3      | 2      | 2     | 5     | 5     | 5 |
| 13173  | 4    | 4    | 3    | 4    | 4    |      | 4    | 3    | 2     | 2      | 3      | 2     | 4     | 4     | 5 |
| 13176  | 5    | 6    | 1    | 5    | 6    | 5    | 6    | 2    | 3     | 3      | 2      | 2     | 4     | 4     | 5 |
| 13179  | 6    | 6    | 1    | 6    | 6    | 5    | 6    | 2    | 3     | 3      | 3      | 2     | 4     | 4     | 4 |
| 13184  | 6    | 1    | 6    | 5    | 6    | 3    | 3    | 2    | 2     | 2      | 3      | 3     | 4     | 4     | 5 |
| 13185  | 6    | 6    | 2    | 6    | 6    | 6    | 6    | 6    | 2     | 2      | 2      | 2     | 3     | 4     | 4 |
| 13186  | 5    | 5    | 2    | 5    | 5    | 5    | 5    | 5    | 2     | 3      | 3      | 3     | 4     | 5     | 5 |
| 13188  | 5    | 5    | 2    | 5    | 5    | 5    | 5    | 5    | 5     | 3      | 3      | 3     | 4     | 5     | 4 |

| respid | Q48k | Q48l | Q48m | Q48n | Q48o | Q48p | Q48q | Q48r | Q49_1 | Q50a_1 | Q50b_1 | Q51_1 | Q51_2 | Q52_1 |   |
|--------|------|------|------|------|------|------|------|------|-------|--------|--------|-------|-------|-------|---|
| 13190  |      | 4    | 4    | 4    | 2    | 4    |      | 2    | 3     | 2      | 2      | 2     | 4     | 4     | 5 |
| 13192  |      | 5    | 6    | 2    | 5    | 6    | 5    | 6    | 2     | 3      | 2      | 2     | 4     | 3     | 5 |
| 13193  |      |      |      |      |      |      |      |      |       | 3      | 3      | 3     | 4     | 4     | 4 |
| 13201  |      | 6    | 6    | 2    | 6    | 6    | 6    | 6    | 1     | 3      | 2      | 2     | 3     | 4     | 4 |
| 13207  |      | 5    | 5    | 5    | 5    | 5    | 5    | 5    | 5     | 2      | 3      | 3     | 5     | 5     | 5 |
| 13208  |      |      |      |      |      |      |      |      |       | 3      | 3      | 3     | 5     | 5     | 5 |
| 13209  |      |      |      |      |      |      |      |      |       | 2      | 2      | 2     | 2     | 3     | 4 |
| 13212  |      | 6    | 6    | 2    | 6    | 6    | 6    | 6    | 2     | 3      | 3      | 2     | 5     | 5     | 5 |
| 13215  |      | 3    | 3    | 2    | 3    | 3    | 2    | 2    | 2     | 3      | 3      | 3     | 4     | 4     | 4 |
| 13218  |      | 5    | 5    | 3    | 5    | 5    | 5    | 5    | 3     | 2      | 2      | 1     | 4     | 4     | 4 |
| 13219  |      |      |      |      |      |      |      |      |       | 4      | 3      | 3     | 5     | 5     | 5 |
| 13224  |      | 5    | 5    | 2    | 6    | 6    | 6    | 6    | 1     | 2      | 2      | 2     | 3     | 4     | 4 |
| 13225  |      | 6    | 5    | 4    |      | 6    |      | 5    |       | 3      | 3      | 3     | 4     | 5     | 5 |
| 13226  |      | 6    | 6    |      |      |      |      |      |       | 2      | 2      | 2     | 3     | 3     | 3 |
| 13232  |      |      |      |      |      |      |      |      |       | 4      | 3      | 3     | 5     | 5     | 5 |
| 13237  |      | 2    | 1    | 3    | 1    | 1    | 2    | 1    | 5     | 1      | 3      | 3     | 4     | 4     | 4 |
| 13239  |      | 3    | 3    | 4    | 3    | 4    |      | 3    | 4     | 2      | 2      | 2     | 3     | 3     | 4 |
| 13241  |      | 2    | 3    | 3    | 3    | 6    | 5    | 5    | 5     | 3      | 2      | 2     | 4     | 5     | 4 |
| 13243  |      | 5    | 5    | 5    | 5    | 5    | 5    | 5    | 5     | 3      | 3      | 2     | 4     | 4     | 4 |
| 13247  |      |      |      |      |      |      |      |      |       | 2      | 3      | 3     | 5     | 5     | 4 |
| 13248  |      | 3    | 6    | 2    | 5    | 6    | 6    |      | 5     | 2      | 3      | 3     | 5     | 5     | 5 |
| 13251  |      | 1    | 1    | 2    | 1    | 5    | 2    | 5    | 3     | 2      | 2      | 2     | 4     | 4     | 4 |
| 13256  |      | 2    | 2    | 2    | 1    | 5    | 3    | 6    | 1     | 3      | 3      | 3     | 5     | 5     | 4 |
| 13260  |      |      |      |      |      |      |      |      |       | 3      | 3      | 3     | 5     | 5     | 4 |
| 13261  |      | 4    | 5    | 3    | 3    | 6    | 4    | 3    | 4     | 2      | 3      | 3     | 4     | 4     | 4 |
| 13264  |      | 3    | 3    | 4    | 3    | 5    | 5    | 5    | 5     | 4      | 3      | 2     | 3     | 4     | 5 |
| 13273  |      | 5    | 5    | 2    | 5    | 5    | 5    | 5    | 4     | 2      | 3      | 3     | 4     | 4     | 4 |
| 13274  |      | 4    | 4    | 3    | 4    | 4    | 4    | 4    | 3     | 2      | 3      | 2     | 4     | 4     | 4 |
| 13276  |      | 5    | 3    | 3    | 4    | 5    | 5    | 5    | 3     | 3      | 3      | 3     | 4     | 5     | 4 |
| 13278  |      |      |      |      |      |      |      |      |       | 3      | 2      | 2     | 3     | 3     | 3 |
| 13279  |      | 3    | 5    | 1    | 5    | 6    | 5    | 6    | 2     | 3      | 3      | 3     | 4     | 4     | 4 |
| 13282  |      | 5    | 5    | 4    | 5    | 6    | 5    | 5    | 3     | 3      | 3      | 3     | 5     | 5     | 5 |

| respid | Q48k | Q48l | Q48m | Q48n | Q48o | Q48p | Q48q | Q48r | Q49_1 | Q50a_1 | Q50b_1 | Q51_1 | Q51_2 | Q52_1 |   |
|--------|------|------|------|------|------|------|------|------|-------|--------|--------|-------|-------|-------|---|
| 13283  |      |      |      |      |      |      |      |      |       | 4      | 3      | 3     | 3     | 4     | 2 |
| 13285  | 5    | 6    | 1    | 5    | 6    | 5    | 6    | 2    | 2     | 2      | 3      | 3     | 5     | 5     | 5 |
| 13286  | 4    | 3    | 2    | 3    | 4    | 4    | 3    | 3    | 2     | 2      | 3      | 3     | 4     | 4     | 5 |
| 13299  | 6    | 6    | 1    | 6    | 6    | 6    | 6    | 6    | 1     | 4      | 3      | 3     | 4     | 4     | 4 |
| 13300  | 3    | 3    | 3    | 3    | 3    | 3    | 3    | 4    | 3     | 2      | 2      | 2     | 3     | 4     | 3 |
| 13301  |      |      |      |      |      |      |      |      |       | 3      | 3      | 3     | 5     | 5     | 4 |
| 13303  | 2    | 6    | 6    | 1    | 6    | 6    | 6    | 6    | 1     | 2      | 1      | 2     | 3     | 3     | 3 |
| 13304  | 5    | 5    | 2    | 5    | 5    | 5    | 5    | 5    | 2     | 3      | 3      | 3     | 5     | 5     | 5 |
| 13307  |      |      |      | 1    |      |      |      | 6    |       | 2      | 3      | 2     | 4     | 4     | 4 |
| 13308  |      |      |      |      |      |      |      |      |       | 4      | 3      | 2     | 4     | 4     | 4 |
| 13312  | 1    | 6    | 6    | 1    | 6    | 6    | 6    | 6    | 1     | 2      | 3      | 3     | 5     | 5     | 5 |
| 13313  | 2    | 6    |      | 2    |      |      |      |      |       | 3      | 3      | 2     | 4     | 5     | 4 |
| 13314  | 6    | 5    | 6    | 2    | 3    | 5    | 6    | 6    | 6     | 3      | 2      | 2     | 3     | 3     | 3 |
| 13318  | 5    | 3    | 5    | 4    | 4    | 5    | 4    | 5    | 2     | 1      | 2      | 2     | 3     | 3     | 3 |
| 13320  | 3    | 6    | 2    | 3    | 6    | 3    | 6    | 4    | 3     | 3      | 3      | 3     | 5     | 5     | 5 |
| 13322  | 6    | 5    | 1    | 1    | 1    | 1    | 1    | 1    | 6     | 3      | 2      | 2     | 3     | 3     | 3 |
| 13324  | 2    | 5    | 5    | 2    | 4    | 3    | 4    | 2    | 2     | 3      | 3      | 3     | 5     | 4     | 4 |
| 13325  |      |      |      |      |      |      |      |      |       | 2      | 2      | 3     | 4     | 4     | 5 |
| 13327  |      |      |      |      |      |      |      |      |       | 3      | 3      | 3     | 5     | 5     | 5 |
| 13330  | 6    | 6    | 2    | 4    | 5    | 6    | 6    | 6    | 2     | 3      | 3      | 3     | 5     | 5     | 5 |
| 13332  |      |      |      |      |      |      |      |      |       | 2      | 3      | 2     | 4     | 5     | 4 |
| 13333  | 5    | 5    | 2    | 5    | 5    | 5    | 5    | 5    | 2     | 2      | 2      | 2     | 4     | 4     | 4 |
| 13334  | 6    | 6    | 2    | 6    | 6    | 6    | 6    | 6    | 1     | 3      | 3      | 2     | 5     | 5     | 5 |
| 13351  | 1    | 2    | 1    | 2    | 1    | 2    | 4    | 4    | 4     | 5      | 1      | 1     | 1     | 2     | 2 |
| 13353  | 5    | 5    | 2    | 4    | 6    | 5    | 5    | 5    | 3     | 3      | 3      | 3     | 4     | 4     | 4 |
| 13354  | 6    | 6    | 6    | 6    | 6    | 6    | 6    | 6    | 6     | 4      | 3      | 3     | 5     | 5     | 5 |
| 13355  | 5    | 6    | 2    | 5    | 6    | 6    | 6    | 6    | 3     | 2      | 2      | 3     | 2     | 5     | 3 |
| 13358  | 1    | 1    | 6    | 2    | 6    | 5    | 1    | 6    | 2     | 2      | 3      | 3     | 4     | 5     | 4 |
| 13359  | 2    | 2    | 6    | 2    | 3    | 3    | 3    | 3    | 5     | 3      | 2      | 2     | 4     | 5     | 3 |
| 13360  | 3    | 3    | 5    | 2    | 5    | 5    | 2    | 3    | 3     | 3      | 3      | 3     | 4     | 4     | 4 |
| 13364  | 3    | 6    | 1    | 3    | 6    | 2    | 5    | 6    | 6     | 3      | 2      | 3     | 4     | 4     | 3 |
| 13365  |      |      |      |      |      |      |      |      |       | 2      | 2      | 1     | 1     | 2     | 2 |

| respid | Q48k | Q48l | Q48m | Q48n | Q48o | Q48p | Q48q | Q48r | Q49_1 | Q50a_1 | Q50b_1 | Q51_1 | Q51_2 | Q52_1 |   |
|--------|------|------|------|------|------|------|------|------|-------|--------|--------|-------|-------|-------|---|
| 13368  |      |      |      |      |      |      |      |      |       | 4      | 3      | 3     | 5     | 5     | 5 |
| 13370  | 5    | 5    | 5    | 5    | 5    | 5    | 5    | 5    | 5     | 2      | 2      | 3     | 4     | 5     | 4 |
| 13375  | 4    | 3    | 3    | 3    | 3    | 3    | 4    | 3    | 3     | 3      | 3      | 3     | 5     | 5     | 5 |
| 13384  | 5    | 5    | 3    | 4    | 6    | 6    | 5    | 3    | 3     | 3      | 3      | 3     | 5     | 5     | 5 |
| 13387  | 5    | 5    | 5    | 5    | 5    | 5    | 6    | 5    | 2     | 2      | 2      | 2     | 2     | 2     | 2 |
| 13395  | 3    | 6    | 2    | 5    | 6    | 6    | 6    | 1    | 3     | 3      | 3      | 4     | 5     | 4     | 4 |
| 13398  | 5    | 5    | 2    | 5    | 5    | 5    | 5    | 2    | 2     | 2      | 1      | 2     | 2     | 2     | 3 |
| 13404  | 3    | 5    | 5    | 5    | 5    | 5    | 5    | 5    | 3     | 2      | 2      | 5     | 5     | 5     | 5 |
| 13405  | 4    | 4    | 3    | 3    | 5    | 5    | 4    | 2    | 3     | 2      | 3      | 3     | 3     | 3     | 3 |
| 13408  |      |      |      |      |      |      |      |      |       | 3      | 3      | 3     | 5     | 5     | 5 |
| 13411  | 3    | 5    | 1    | 3    | 6    | 6    | 3    | 6    | 2     | 1      | 1      | 2     | 4     | 4     | 3 |
| 13413  | 6    | 6    | 6    | 6    | 6    | 6    | 6    | 6    | 5     | 3      | 3      | 5     | 5     | 5     | 5 |
| 13419  | 3    | 5    | 2    | 3    | 6    | 3    | 5    | 2    | 3     | 3      | 3      | 4     | 4     | 4     | 5 |
| 13420  | 2    | 5    | 3    | 2    | 5    | 4    | 3    | 5    | 3     | 3      | 3      | 5     | 5     | 5     | 5 |
| 13427  | 3    | 3    | 3    | 3    | 4    | 3    | 3    | 3    | 1     | 1      | 1      | 3     | 3     | 3     | 3 |
| 13441  | 3    | 3    | 4    | 5    | 3    | 4    | 4    | 4    | 2     | 1      | 1      | 2     | 2     | 2     | 2 |
| 13444  | 4    | 2    | 2    | 1    | 4    | 4    | 3    | 2    | 3     | 3      | 1      | 3     | 4     | 4     | 3 |
| 13456  |      |      |      |      |      |      |      |      |       | 5      | 3      | 3     | 5     | 5     | 5 |
| 13466  | 4    | 4    | 3    | 3    | 5    | 5    | 4    | 4    | 3     | 2      | 2      | 3     | 4     | 4     | 3 |
| 13468  | 5    | 5    | 3    | 5    | 5    | 5    | 5    | 2    | 3     | 3      | 3      | 4     | 5     | 5     | 5 |
| 13475  | 5    | 5    | 2    | 5    | 5    | 5    | 5    | 2    | 4     | 3      | 3      | 5     | 5     | 5     | 5 |
| 13484  | 6    |      |      |      |      |      |      |      |       | 3      | 3      | 2     | 4     | 4     | 5 |
| 13486  | 3    | 3    | 4    | 5    | 5    | 4    | 3    | 4    | 3     | 3      | 3      | 5     | 5     | 5     | 5 |
| 13487  | 3    | 4    | 3    | 5    | 5    | 5    | 5    | 3    | 2     | 3      | 3      | 5     | 5     | 5     | 5 |
| 13491  |      |      |      |      |      |      |      |      |       | 3      | 1      | 1     | 4     | 4     | 4 |
| 13496  |      |      |      |      |      |      |      |      |       | 3      | 3      | 3     | 3     | 3     | 3 |
| 13497  | 3    | 5    | 3    | 4    | 5    | 5    | 5    | 3    | 2     | 2      | 2      | 3     | 3     | 3     | 3 |
| 13498  | 6    | 5    | 4    | 5    | 6    | 5    | 5    | 4    | 2     | 3      | 3      | 3     | 3     | 3     | 4 |
| 13502  |      |      |      |      |      |      |      |      |       | 3      | 3      | 3     | 1     | 2     | 1 |
| 13503  |      |      |      |      |      |      |      |      |       | 2      | 2      | 2     | 3     | 4     | 3 |
| 13505  |      |      |      |      |      |      |      |      |       | 2      | 2      | 1     | 2     | 2     | 4 |
| 13509  | 4    | 4    | 4    | 4    | 4    | 4    | 4    | 4    | 4     | 2      | 2      | 3     | 3     | 3     | 4 |

| respid | Q48k | Q48l | Q48m | Q48n | Q48o | Q48p | Q48q | Q48r | Q49_1 | Q50a_1 | Q50b_1 | Q51_1 | Q51_2 | Q52_1 |   |
|--------|------|------|------|------|------|------|------|------|-------|--------|--------|-------|-------|-------|---|
| 13510  | 3    | 3    | 3    | 4    | 3    | 3    | 3    | 3    | 3     | 2      | 2      | 2     | 4     | 4     | 4 |
| 13518  |      |      |      |      |      |      |      |      |       | 3      | 2      | 1     | 2     | 1     | 3 |
| 13521  | 5    | 5    | 3    | 5    | 5    | 5    | 5    | 4    | 3     | 3      | 2      | 4     | 5     | 4     |   |
| 13523  | 3    | 2    | 2    | 1    | 6    | 3    | 2    | 3    | 1     | 2      | 2      | 3     | 4     | 4     |   |
| 13528  | 6    | 6    | 6    | 6    | 6    | 6    | 6    | 6    | 3     | 2      | 2      | 3     | 3     | 3     |   |
| 13531  | 6    | 2    | 3    | 4    | 4    | 4    | 4    | 3    | 2     | 3      | 3      | 3     | 3     | 3     |   |
| 13532  | 5    | 5    | 2    | 4    | 5    | 5    | 5    | 3    | 4     | 3      | 3      | 5     | 5     | 5     |   |
| 13533  |      |      |      | 3    | 3    |      |      |      | 3     | 3      | 3      | 5     | 5     | 5     |   |
| 13534  |      |      |      |      |      |      |      |      | 4     | 3      | 3      | 4     | 4     | 4     |   |
| 13535  | 3    | 3    | 2    | 3    | 6    | 5    | 5    | 5    | 3     | 3      | 2      | 4     | 5     | 3     |   |
| 13538  | 3    | 3    | 3    | 3    | 3    | 3    | 3    | 3    | 3     | 2      | 2      | 3     | 4     | 3     |   |
| 13540  | 3    | 3    | 4    | 3    | 5    | 5    | 4    | 4    | 2     | 2      | 1      | 3     | 4     | 4     |   |
| 13541  | 5    | 5    | 5    | 5    | 5    | 5    | 5    | 5    | 3     | 3      | 2      | 3     | 3     | 3     |   |
| 13542  |      | 5    | 5    | 2    |      | 6    | 5    |      | 3     | 3      | 3      | 4     | 4     | 3     |   |
| 13550  | 4    | 5    | 5    | 3    | 5    | 4    | 5    | 4    | 3     | 3      | 3      | 4     | 4     | 4     |   |
| 13553  | 3    | 4    | 4    | 4    | 5    | 5    | 4    | 3    | 2     | 3      | 3      | 4     | 4     | 5     |   |
| 13554  | 5    | 5    | 4    | 2    | 5    | 5    | 5    | 3    | 3     | 3      | 3      | 5     | 5     | 5     |   |
| 13555  | 3    | 2    | 3    |      | 3    | 4    | 2    | 5    | 3     | 3      | 2      | 3     | 4     | 3     |   |
| 13556  |      |      |      |      |      |      |      |      | 1     | 1      | 1      | 2     | 2     | 2     |   |
| 13563  | 4    | 3    | 4    | 4    | 4    | 5    | 5    | 4    | 3     | 2      | 3      | 3     | 5     | 2     |   |
| 13564  | 4    | 3    | 3    | 4    | 3    | 3    | 4    | 3    | 2     | 2      | 2      | 3     | 3     | 3     |   |
| 13567  |      |      |      |      |      |      |      |      | 3     | 2      | 2      | 3     | 3     | 3     |   |
| 13568  |      |      |      |      |      |      |      |      | 2     | 3      | 2      | 1     | 2     | 1     |   |
| 13570  |      |      |      |      |      |      |      |      | 4     | 3      | 3      | 5     | 5     | 5     |   |
| 13573  | 4    | 4    | 4    | 4    | 4    | 4    | 4    | 4    | 3     | 2      | 2      | 4     | 4     | 4     |   |
| 13575  | 4    | 4    | 4    | 5    | 5    | 4    | 4    | 5    | 3     | 3      | 3      | 5     | 5     | 5     |   |
| 13577  |      |      |      |      |      |      |      |      | 2     | 3      | 2      | 1     | 2     | 2     |   |
| 13580  |      |      |      |      |      |      |      |      | 2     | 3      | 2      | 2     | 3     | 2     |   |
| 13582  | 5    | 5    | 2    | 5    | 5    | 5    | 5    | 2    | 2     | 3      | 3      | 5     | 5     | 5     |   |
| 13584  |      |      |      |      |      |      |      |      | 2     | 3      | 2      | 2     | 3     | 2     |   |
| 13585  |      |      |      |      |      |      |      |      | 2     | 3      | 3      | 5     | 5     | 4     |   |
| 13586  | 4    | 6    | 2    | 4    | 6    | 5    |      | 1    | 2     | 2      | 3      | 3     | 4     | 4     |   |



| respid | Q48k | Q48l | Q48m | Q48n | Q48o | Q48p | Q48q | Q48r | Q49_1 | Q50a_1 | Q50b_1 | Q51_1 | Q51_2 | Q52_1 |
|--------|------|------|------|------|------|------|------|------|-------|--------|--------|-------|-------|-------|
| 13587  | 4    | 5    | 2    | 3    | 5    | 3    | 3    | 4    | 2     | 3      | 2      | 4     | 4     | 3     |
| 13592  |      |      |      |      |      |      |      |      | 2     | 3      | 2      | 2     | 3     | 1     |
| 13596  | 6    | 6    | 1    | 3    | 6    |      |      |      | 4     | 3      | 3      | 5     | 5     | 4     |
| 13597  | 3    | 5    | 3    | 3    | 5    | 5    | 3    | 5    | 2     | 3      | 3      | 4     | 5     | 5     |
| 13599  | 2    | 2    | 1    | 2    | 5    | 3    | 2    | 2    | 3     | 2      | 2      | 3     | 4     | 4     |
| 13601  | 5    | 5    | 2    | 2    | 5    | 5    | 5    | 2    | 3     | 2      | 2      | 5     | 5     | 5     |
| 13604  |      |      |      |      |      |      |      |      | 3     | 3      | 3      | 5     | 5     | 4     |
| 13608  |      |      |      |      |      |      |      |      | 3     | 3      | 3      | 4     | 5     | 4     |
| 13616  | 3    | 3    | 3    | 2    | 4    | 3    | 3    | 4    | 3     | 3      | 3      | 2     | 4     | 4     |
| 13618  | 4    | 4    | 3    | 4    | 3    | 4    | 3    | 3    | 2     | 2      | 2      | 3     | 3     | 3     |
| 13619  | 6    | 6    | 1    | 6    | 6    | 6    | 6    | 2    | 5     | 3      | 3      | 4     | 5     | 5     |
| 13626  |      |      |      |      |      |      |      |      | 4     | 3      | 3      | 2     | 3     | 5     |
| 13628  |      |      |      |      |      |      |      |      | 3     | 3      | 3      | 4     | 4     | 4     |
| 13640  |      |      |      |      |      |      |      |      | 2     | 3      | 3      | 4     | 4     | 4     |
| 13645  |      |      |      |      |      |      |      |      | 4     | 3      | 3      | 4     | 4     | 4     |
| 13648  |      |      |      |      |      |      |      |      | 4     | 3      | 3      | 5     | 5     | 5     |
| 13653  | 6    | 6    | 1    | 6    | 6    | 6    | 6    | 1    | 4     | 3      | 3      | 5     | 5     | 5     |
| 13655  |      |      |      |      |      |      |      |      | 3     | 3      | 3      | 4     | 5     | 4     |
| 13662  |      |      |      |      |      |      |      |      | 2     | 2      | 2      | 4     | 5     | 4     |
| 13670  |      |      |      |      |      |      |      |      | 3     | 3      | 3      | 4     | 4     | 4     |
| 13673  | 2    | 3    | 3    | 2    | 5    | 5    | 5    | 5    | 2     | 3      | 2      | 5     | 5     | 4     |
| 13674  | 1    | 3    | 5    | 2    | 5    | 4    | 1    | 6    | 3     | 3      | 3      | 4     | 5     | 3     |
| 13675  |      |      |      |      |      |      |      |      | 1     | 1      | 1      | 1     | 2     | 2     |
| 13678  |      |      |      |      |      |      |      |      | 2     | 2      | 2      | 3     | 4     | 4     |
| 13680  | 6    | 6    | 1    | 6    | 6    | 3    | 6    | 1    | 4     | 3      | 3      | 5     | 5     | 3     |
| 13681  |      |      |      |      |      |      |      |      | 2     | 2      | 2      | 4     | 5     | 4     |
| 13683  | 5    | 4    | 4    | 5    | 5    | 5    | 5    | 4    | 2     | 3      | 3      | 5     | 5     | 5     |
| 13684  | 3    | 3    | 5    | 4    | 5    | 5    | 4    | 6    | 2     | 3      | 3      | 5     | 5     | 5     |
| 13685  | 3    | 6    | 2    | 4    |      |      |      | 3    | 2     | 3      | 3      | 5     | 5     | 4     |
| 13687  |      |      |      |      |      |      |      |      | 4     | 3      | 3      | 5     | 5     | 5     |
| 13690  |      |      |      |      |      |      |      |      | 3     | 3      | 3      | 4     | 4     | 4     |
| 13700  |      |      |      |      |      |      |      |      | 3     | 3      | 2      | 3     | 4     | 3     |

| respid | Q48k | Q48l | Q48m | Q48n | Q48o | Q48p | Q48q | Q48r | Q49_1 | Q50a_1 | Q50b_1 | Q51_1 | Q51_2 | Q52_1 |   |
|--------|------|------|------|------|------|------|------|------|-------|--------|--------|-------|-------|-------|---|
| 13705  |      |      |      |      |      |      |      |      |       | 3      | 3      | 2     | 4     | 4     | 4 |
| 13710  |      |      |      |      |      |      |      |      |       | 3      | 3      | 3     | 5     | 5     | 5 |
| 13711  |      |      |      |      |      |      |      |      |       | 2      | 2      | 2     | 5     | 2     | 4 |
| 13713  |      |      |      |      |      |      |      |      |       | 5      | 3      | 3     | 5     | 5     | 5 |
| 13716  |      |      |      |      |      |      |      |      |       | 5      | 3      | 3     | 5     | 5     | 5 |
| 13721  | 4    | 2    | 3    | 3    | 4    | 5    | 5    | 3    | 3     | 3      | 3      | 3     | 4     | 4     | 4 |
| 13722  |      |      |      |      |      |      |      |      |       | 3      | 3      | 3     | 2     | 5     | 2 |
| 13723  |      |      |      |      |      |      |      |      |       | 3      | 3      | 3     | 4     | 4     | 4 |
| 13726  |      |      |      |      |      |      |      |      |       | 2      | 2      | 2     | 2     | 3     | 3 |
| 13728  |      |      |      |      |      |      |      |      |       | 3      | 2      | 2     | 3     | 3     | 3 |
| 13730  |      |      |      |      |      |      |      |      |       | 2      | 2      | 2     | 3     | 3     | 3 |
| 13734  |      |      |      |      |      |      |      |      |       | 3      | 2      | 3     | 5     | 5     | 3 |
| 13736  | 3    | 3    | 5    | 2    | 3    | 1    | 2    | 6    | 2     | 2      | 1      | 2     | 2     | 3     | 2 |
| 13737  |      |      |      |      |      |      |      |      |       | 2      | 3      | 3     | 5     | 5     | 5 |
| 13739  |      |      |      |      |      |      |      |      |       | 3      | 2      | 2     | 3     | 3     | 4 |
| 13742  |      |      |      |      |      |      |      |      |       | 3      | 3      | 3     | 5     | 5     | 4 |
| 13746  | 5    | 5    | 2    | 5    | 6    | 6    | 6    | 2    | 3     | 3      | 2      | 4     | 4     | 4     | 5 |
| 13747  |      |      |      |      |      |      |      |      |       | 3      | 3      | 3     | 5     | 5     | 4 |
| 13749  | 6    | 6    | 2    | 6    | 6    | 5    | 6    | 2    | 3     | 3      | 3      | 5     | 5     | 5     | 5 |
| 13751  |      |      |      |      |      |      |      |      |       | 1      | 3      | 2     | 4     | 3     | 3 |
| 13752  | 5    | 5    | 3    | 3    | 6    | 5    | 5    | 2    | 3     | 3      | 3      | 5     | 5     | 5     | 5 |
| 13756  | 3    | 3    | 5    | 2    | 5    | 5    | 5    | 5    | 2     | 2      | 2      | 2     | 4     | 3     | 3 |
| 13757  |      |      |      |      |      |      |      |      |       | 5      | 3      | 3     | 5     | 5     | 5 |
| 13767  | 2    | 2    | 1    |      |      |      | 2    | 2    |       | 2      | 2      | 2     | 3     | 3     | 3 |
| 13771  |      |      |      |      |      |      |      |      |       | 4      | 3      | 3     | 5     | 5     | 5 |
| 13772  |      |      |      |      |      |      |      |      |       | 2      | 3      | 2     | 3     | 4     | 2 |
| 13779  |      |      |      |      |      |      |      |      |       | 3      | 3      | 3     | 5     | 5     | 5 |
| 13782  |      |      |      |      |      |      |      |      |       | 2      | 2      | 2     | 4     | 4     | 4 |
| 13783  | 6    | 6    | 3    | 6    | 6    | 5    | 6    | 1    | 3     | 3      | 3      | 5     | 5     | 5     | 5 |
| 13785  |      |      |      |      |      |      |      |      |       | 3      | 3      | 2     | 4     | 4     | 4 |
| 13786  | 2    | 5    | 1    | 2    | 5    | 3    | 3    | 5    | 1     | 2      | 2      | 5     | 4     | 4     | 4 |
| 13792  |      |      |      |      |      |      |      |      |       | 1      | 2      | 2     | 2     | 2     | 2 |

| respid | Q48k | Q48l | Q48m | Q48n | Q48o | Q48p | Q48q | Q48r | Q49_1 | Q50a_1 | Q50b_1 | Q51_1 | Q51_2 | Q52_1 |   |
|--------|------|------|------|------|------|------|------|------|-------|--------|--------|-------|-------|-------|---|
| 13796  |      |      |      |      |      |      |      |      |       | 3      | 3      | 3     | 5     | 5     | 5 |
| 13798  |      |      |      |      |      |      |      |      |       | 2      | 3      | 3     | 3     | 4     | 3 |
| 13799  |      |      |      |      |      |      |      |      |       | 2      | 2      | 2     | 2     | 3     | 3 |
| 13804  |      |      |      |      |      |      |      |      |       | 4      | 3      | 3     | 5     | 5     | 4 |
| 13805  |      |      |      | 3    | 4    | 5    |      |      |       | 2      | 3      | 3     | 4     | 4     | 4 |
| 13810  | 6    | 6    | 1    | 6    | 6    | 6    | 6    | 2    | 2     | 2      | 2      | 2     | 3     | 3     | 3 |
| 13811  | 6    | 3    | 2    | 5    | 6    | 5    | 6    | 1    | 4     | 2      | 3      | 4     | 4     | 4     | 4 |
| 13819  |      |      |      |      |      |      |      |      |       | 2      | 2      | 2     | 2     | 2     | 2 |
| 13821  | 1    | 3    | 1    | 1    | 1    | 1    | 1    | 1    | 1     | 1      | 1      | 2     | 3     | 4     | 3 |
| 13824  |      |      |      |      |      |      |      |      |       | 3      | 2      | 3     | 5     | 5     | 4 |
| 13828  | 2    | 5    | 5    | 2    | 5    | 5    | 5    | 5    | 2     | 2      | 3      | 4     | 3     | 3     | 3 |
| 13829  | 2    | 1    | 1    | 1    | 1    | 1    | 1    | 1    | 4     | 5      | 3      | 3     | 1     | 2     | 1 |
| 13831  |      |      |      |      |      |      |      |      |       | 4      | 3      | 3     | 5     | 5     | 5 |
| 13833  |      |      |      |      |      |      |      |      |       | 2      | 2      | 2     | 3     | 4     | 3 |
| 13835  |      |      |      |      |      |      |      |      |       | 2      | 3      | 2     | 3     | 3     | 3 |
| 13838  |      |      |      |      |      |      |      |      |       | 5      | 3      | 3     | 5     | 5     | 5 |
| 13839  | 1    | 2    | 2    | 2    | 2    | 2    | 2    | 1    | 2     | 4      | 2      | 3     | 2     | 1     | 1 |
| 13845  |      |      |      |      |      |      |      |      |       | 5      | 3      | 3     | 5     | 5     | 5 |
| 13846  |      |      |      |      |      |      |      |      |       | 3      | 2      | 2     | 1     | 1     | 4 |
| 13853  |      |      |      |      |      |      |      |      |       | 2      | 2      | 2     | 3     | 3     | 3 |
| 13855  | 2    | 2    | 2    | 1    | 2    | 2    | 2    | 2    | 1     | 2      | 2      | 2     | 3     | 2     | 2 |
| 13858  | 3    | 4    | 2    | 5    | 6    | 5    | 6    | 3    | 2     | 3      | 2      | 3     | 4     | 4     | 3 |
| 13860  |      |      |      |      |      |      |      |      |       | 4      | 2      | 2     | 5     | 5     | 5 |
| 13865  | 1    | 1    | 1    | 1    | 3    | 1    | 1    | 1    | 2     | 4      | 3      | 3     | 2     | 2     | 2 |
| 13870  |      |      |      |      |      |      |      |      |       | 3      | 3      | 3     | 5     | 5     | 5 |
| 13872  | 6    | 5    | 1    | 3    | 6    | 3    | 4    | 1    | 3     | 3      | 2      | 3     | 4     | 4     | 4 |
| 13873  | 3    | 2    | 2    | 2    | 2    | 2    | 2    | 3    | 3     | 3      | 2      | 2     | 3     | 3     | 4 |
| 13874  |      |      |      |      |      |      |      |      |       | 5      | 3      | 2     | 5     | 5     | 5 |
| 13875  | 2    | 1    | 2    | 1    | 2    | 2    | 2    | 1    | 3     | 3      | 2      | 2     | 1     | 2     | 2 |
| 13881  |      |      |      |      |      |      |      |      |       | 4      | 1      | 2     | 4     | 4     | 4 |
| 13887  |      |      |      |      |      |      |      |      |       | 3      | 3      | 3     | 5     | 5     | 5 |
| 13888  | 5    | 5    | 5    | 5    | 5    | 5    | 5    | 5    | 5     | 3      | 3      | 3     | 4     | 5     | 4 |

| respid | Q48k | Q48l | Q48m | Q48n | Q48o | Q48p | Q48q | Q48r | Q49_1 | Q50a_1 | Q50b_1 | Q51_1 | Q51_2 | Q52_1 |   |
|--------|------|------|------|------|------|------|------|------|-------|--------|--------|-------|-------|-------|---|
| 13889  |      | 3    | 2    | 3    | 2    | 3    | 2    | 2    | 3     | 2      | 2      | 1     | 3     | 2     | 3 |
| 13895  |      |      |      |      |      |      |      |      |       | 2      | 3      | 2     | 2     | 4     | 2 |
| 13897  |      |      |      |      |      |      |      |      |       | 5      | 3      | 3     | 5     | 5     | 4 |
| 13898  |      |      |      |      |      |      |      |      |       | 2      | 2      | 2     | 3     | 3     | 4 |
| 13901  |      |      |      |      |      |      |      |      |       | 3      | 3      | 3     | 5     | 5     | 4 |
| 13902  | 1    | 1    | 1    | 2    | 1    | 2    | 1    | 1    | 1     | 3      | 3      | 3     | 1     | 2     | 2 |
| 13903  |      |      |      |      |      |      |      |      |       | 2      | 3      | 3     | 5     | 5     | 5 |
| 13905  | 3    | 1    | 2    | 2    | 2    | 1    | 2    | 2    | 2     | 4      | 2      | 2     | 1     | 2     | 1 |
| 13908  |      | 3    | 2    | 3    | 3    | 3    | 3    | 3    | 3     | 2      | 1      | 1     | 2     | 2     | 2 |
| 13909  |      |      |      |      |      |      |      |      |       | 4      | 2      | 2     | 1     | 1     | 1 |
| 13910  | 2    | 2    | 2    | 2    | 2    | 2    | 2    | 2    | 1     | 5      | 3      | 3     | 2     | 1     | 2 |
| 13911  |      |      |      |      |      |      |      |      |       | 5      | 3      | 3     | 5     | 5     | 4 |
| 13914  | 3    | 2    |      | 2    |      |      |      |      | 5     | 1      | 1      | 1     | 2     | 2     | 2 |
| 13920  |      |      |      | 1    |      |      | 1    |      |       | 1      | 1      | 1     | 2     | 2     | 3 |
| 13926  | 5    | 6    | 3    | 4    | 6    | 3    | 4    | 4    | 4     | 3      | 2      | 2     | 3     | 3     | 3 |
| 13929  | 2    | 2    | 1    | 1    | 3    | 1    | 1    | 1    | 2     | 2      | 2      | 2     | 2     | 2     | 1 |
| 13930  |      |      |      |      |      |      |      |      |       | 1      | 2      | 2     | 2     | 4     | 2 |
| 13931  |      |      |      |      |      |      |      |      |       | 2      | 3      | 3     | 4     | 4     | 3 |
| 13932  |      |      |      |      |      |      |      |      |       | 3      | 2      | 3     | 4     | 4     | 3 |
| 13934  |      |      |      |      |      |      |      | 2    | 5     | 2      | 2      | 2     | 3     | 4     | 3 |
| 13938  |      |      |      |      |      |      |      |      |       | 3      | 3      | 3     | 5     | 5     | 4 |
| 13942  | 6    | 6    | 1    | 5    | 6    | 5    | 6    | 2    | 2     | 4      | 3      | 3     | 5     | 5     | 4 |
| 13945  | 3    | 2    |      |      |      |      | 2    |      |       | 2      | 2      | 2     | 2     | 3     | 2 |
| 13947  |      |      |      |      |      |      |      |      |       | 1      | 2      | 3     | 4     | 5     | 4 |
| 13948  |      |      |      |      |      |      |      |      |       | 3      | 3      | 3     | 4     | 5     | 5 |
| 13959  |      |      |      |      |      |      |      |      |       | 3      | 3      | 3     | 5     | 5     | 5 |
| 13962  |      |      |      |      |      |      |      |      |       | 3      | 3      | 3     | 5     | 5     | 5 |
| 13963  |      |      |      |      |      |      |      |      |       | 3      | 3      | 3     | 5     | 5     | 5 |
| 13964  |      |      |      |      |      |      |      |      |       | 3      | 3      | 3     | 5     | 5     | 5 |
| 13966  |      | 2    | 2    | 2    | 2    | 2    | 2    | 2    | 2     | 2      | 2      | 2     | 1     | 2     | 2 |
| 13968  |      |      |      |      |      |      |      |      |       | 4      | 2      | 3     | 3     | 4     | 5 |
| 13971  |      |      |      |      |      |      |      |      |       | 2      | 2      | 2     | 1     | 1     | 2 |

| respid | Q48k | Q48l | Q48m | Q48n | Q48o | Q48p | Q48q | Q48r | Q49_1 | Q50a_1 | Q50b_1 | Q51_1 | Q51_2 | Q52_1 |   |
|--------|------|------|------|------|------|------|------|------|-------|--------|--------|-------|-------|-------|---|
| 13979  |      | 3    | 3    | 3    | 3    | 3    | 3    | 3    | 3     | 3      | 2      | 2     | 3     | 3     | 3 |
| 13980  |      | 3    | 3    | 3    | 3    | 3    | 3    | 3    | 3     | 2      | 2      | 2     | 4     | 4     | 4 |
| 13981  |      | 6    | 6    | 1    | 6    | 6    | 6    | 6    | 2     | 2      | 2      | 2     | 3     | 4     | 4 |
| 13982  |      |      |      |      |      |      |      |      |       | 2      | 3      | 3     | 4     | 5     | 4 |
| 13984  |      |      |      |      |      |      |      |      |       | 3      | 2      | 2     | 3     | 3     | 3 |
| 13989  |      |      |      |      |      |      |      |      |       | 4      | 3      | 3     | 5     | 5     | 5 |
| 13990  |      | 5    | 5    | 2    | 5    | 5    | 5    | 5    | 2     | 3      | 3      | 2     | 5     | 5     | 5 |
| 13992  |      | 1    | 2    | 6    | 3    | 4    | 3    | 6    | 1     | 2      | 2      | 2     | 2     | 3     | 3 |
| 13998  |      | 3    | 2    | 6    | 1    | 3    | 2    | 3    | 6     | 3      | 2      | 2     | 5     | 4     | 4 |
| 13999  |      |      |      |      |      | 2    |      |      |       | 2      | 2      | 2     | 2     | 3     | 3 |
| 14000  |      |      |      |      |      |      |      |      |       | 2      | 3      | 2     | 4     | 4     | 4 |
| 14003  |      |      |      |      |      |      |      |      |       | 2      | 3      | 3     | 5     | 5     | 4 |
| 14004  |      | 2    | 3    | 3    | 3    | 4    | 2    | 3    | 4     | 3      | 2      | 2     | 3     | 4     | 4 |
| 14006  |      |      |      |      |      |      |      |      |       | 4      | 3      | 3     | 5     | 5     | 4 |
| 14007  |      | 5    | 4    | 3    | 3    | 5    | 3    | 5    | 3     | 3      | 3      | 3     | 4     | 4     | 3 |
| 14008  |      |      |      |      |      |      |      |      |       | 4      | 3      | 3     | 5     | 5     | 4 |
| 14013  |      | 5    | 5    | 2    | 3    | 6    | 5    | 6    | 2     | 3      | 3      | 3     | 4     | 5     | 4 |
| 14015  |      | 5    | 5    |      | 5    | 6    | 6    | 6    | 6     | 2      | 2      | 2     | 4     | 4     | 4 |
| 14018  |      | 6    | 6    | 1    | 5    | 6    | 4    | 4    | 3     | 3      | 3      | 3     | 5     | 5     | 5 |
| 14021  |      | 2    | 2    | 2    | 3    | 2    | 1    | 2    | 2     | 3      | 2      | 2     | 1     | 2     | 2 |
| 14023  |      |      |      |      |      |      |      |      |       | 2      | 3      | 3     | 3     | 3     | 3 |
| 14024  |      |      |      |      |      |      |      |      |       | 1      | 2      | 1     | 1     | 2     | 1 |
| 14026  |      |      |      |      |      |      |      |      |       | 3      | 3      | 3     | 5     | 5     | 5 |
| 14030  |      |      |      |      |      |      |      |      |       | 2      | 2      | 2     | 3     | 4     | 4 |
| 14032  |      |      |      |      |      |      |      |      |       | 2      | 2      | 2     | 4     | 4     | 4 |
| 14040  |      |      |      |      |      |      |      |      |       | 4      | 3      | 3     | 5     | 5     | 5 |
| 14045  |      |      |      |      |      |      |      |      |       | 2      | 2      | 2     | 5     | 4     | 5 |
| 14048  |      |      |      |      |      | 3    | 3    |      |       | 2      | 2      | 1     | 2     | 3     | 2 |
| 14049  |      |      |      |      |      |      |      |      |       | 2      | 3      | 3     | 3     | 4     | 3 |
| 14050  |      | 5    | 5    | 5    | 3    | 5    | 3    | 5    | 2     | 2      | 3      | 3     | 4     | 4     | 4 |
| 14051  |      | 1    | 1    | 1    | 1    | 1    | 1    | 1    | 1     | 4      | 3      | 3     | 1     | 1     | 1 |
| 14052  |      |      |      |      |      |      |      |      |       | 4      | 3      | 3     | 4     | 3     | 3 |

| respid | Q48k | Q48l | Q48m | Q48n | Q48o | Q48p | Q48q | Q48r | Q49_1 | Q50a_1 | Q50b_1 | Q51_1 | Q51_2 | Q52_1 |   |
|--------|------|------|------|------|------|------|------|------|-------|--------|--------|-------|-------|-------|---|
| 14054  | 5    | 5    | 2    | 5    | 5    | 5    | 5    | 5    | 2     | 3      | 3      | 3     | 5     | 5     | 5 |
| 14055  |      |      |      |      |      |      |      |      |       | 4      | 3      | 3     | 5     | 5     | 5 |
| 14057  | 5    | 5    | 2    | 5    | 5    | 5    | 5    | 5    | 2     | 3      | 2      | 2     | 3     | 3     | 3 |
| 14058  | 1    | 1    | 6    | 1    | 6    | 6    | 6    | 6    | 6     | 2      | 3      | 3     | 5     | 5     | 5 |
| 14059  |      |      |      |      |      |      |      |      |       | 4      | 3      | 3     | 5     | 5     | 5 |
| 14060  | 5    | 5    | 3    | 4    | 5    | 5    | 5    | 5    | 2     | 3      | 3      | 3     | 5     | 5     | 4 |
| 14061  |      |      |      |      |      |      |      |      |       | 2      | 2      | 2     | 3     | 4     | 3 |
| 14071  |      |      |      |      |      |      |      |      |       | 3      | 2      | 2     | 4     | 3     | 5 |
| 14073  |      |      |      |      |      |      |      |      |       | 2      | 3      | 3     | 5     | 4     | 5 |
| 14074  |      |      |      |      |      |      |      |      |       | 3      | 3      | 3     | 5     | 5     | 3 |
| 14076  | 4    | 4    | 3    | 4    | 3    | 3    | 3    | 4    | 3     | 2      | 2      | 2     | 3     | 3     | 3 |
| 14080  |      |      |      |      |      |      |      |      |       | 2      | 3      | 3     | 5     | 5     | 5 |
| 14082  |      |      |      |      |      |      |      |      |       | 5      | 3      | 3     | 5     | 5     | 5 |
| 14083  | 6    | 6    | 3    | 6    | 6    | 6    | 6    | 6    | 2     | 3      | 2      | 3     | 4     | 4     | 4 |
| 14084  | 4    | 3    | 5    | 2    | 3    | 3    | 3    | 3    | 3     | 3      | 2      | 3     | 4     | 4     | 4 |
| 14085  |      |      |      |      |      |      |      |      |       | 4      | 3      | 3     | 5     | 5     | 5 |
| 14086  |      |      |      |      |      |      |      |      |       | 3      | 3      | 2     | 4     | 4     | 4 |
| 14088  | 5    | 5    | 4    | 4    | 6    | 6    | 6    | 6    | 3     | 3      | 3      | 3     | 5     | 5     | 4 |
| 14090  |      |      |      |      |      |      |      |      |       | 4      | 3      | 3     | 5     | 5     | 5 |
| 14092  |      |      |      |      |      |      |      |      |       | 3      | 3      | 3     | 5     | 5     | 5 |
| 14093  |      |      |      |      |      |      |      |      |       | 5      | 3      | 3     | 1     | 1     | 1 |
| 14096  | 4    | 3    | 3    | 4    | 6    | 6    | 6    | 6    | 3     | 3      | 3      | 3     | 5     | 5     | 4 |
| 14103  |      |      |      |      |      |      |      |      |       | 2      | 2      | 1     | 2     | 2     | 2 |
| 14105  | 5    |      | 5    | 5    |      |      | 5    | 5    | 2     | 4      | 3      | 3     | 5     | 5     | 5 |
| 14106  |      |      |      |      |      |      |      |      |       | 2      | 2      | 2     | 1     | 1     | 2 |
| 14107  | 1    | 3    | 2    | 1    | 2    | 2    | 2    | 1    | 2     | 1      | 2      | 2     | 1     | 2     | 1 |
| 14108  | 3    | 3    | 3    | 2    | 2    | 2    | 2    | 3    | 3     | 2      | 2      | 2     | 3     | 3     | 3 |
| 14112  | 3    | 3    | 4    | 2    | 4    | 3    | 4    | 4    | 3     | 3      | 3      | 2     | 5     | 5     | 5 |
| 14114  | 1    | 2    | 5    | 2    | 2    | 2    | 2    | 1    | 5     | 3      | 2      | 2     | 3     | 4     | 3 |
| 14115  |      |      |      |      |      |      |      |      |       | 3      | 3      | 3     | 3     | 3     | 3 |
| 14116  |      |      |      |      |      |      |      |      |       | 4      | 3      | 3     | 4     | 4     | 4 |
| 14117  |      |      |      |      |      |      |      |      |       | 2      | 3      | 3     | 4     | 5     | 5 |

| respid | Q48k | Q48l | Q48m | Q48n | Q48o | Q48p | Q48q | Q48r | Q49_1 | Q50a_1 | Q50b_1 | Q51_1 | Q51_2 | Q52_1 |
|--------|------|------|------|------|------|------|------|------|-------|--------|--------|-------|-------|-------|
| 14118  |      |      |      |      |      |      |      |      |       | 2      | 2      | 1     | 2     | 2     |
| 14119  |      | 3    |      | 3    |      |      |      |      | 2     | 2      | 3      | 3     | 5     | 5     |
| 14127  |      |      |      |      |      |      |      |      |       | 5      | 3      | 3     | 5     | 4     |
| 14129  | 1    | 5    | 2    | 2    | 5    | 5    | 2    | 3    | 2     | 2      | 2      | 1     | 3     | 3     |
| 14131  | 1    | 1    | 5    | 1    | 2    | 1    | 3    | 5    | 2     | 2      | 2      | 2     | 3     | 3     |
| 14132  |      |      |      |      |      |      |      |      |       | 3      | 3      | 3     | 5     | 5     |
| 14133  | 3    | 3    | 3    | 3    | 3    | 3    | 3    | 3    | 3     | 2      | 2      | 2     | 3     | 3     |
| 14134  |      |      |      |      |      |      |      |      |       | 3      | 3      | 3     | 5     | 4     |
| 14135  |      |      |      |      |      |      |      |      |       | 2      | 1      | 1     | 2     | 3     |
| 14136  | 1    | 2    | 3    | 1    | 4    | 3    | 1    | 4    | 2     | 2      | 2      | 2     | 3     | 2     |
| 14138  |      |      |      |      |      |      |      |      |       | 4      | 3      | 3     | 4     | 4     |
| 14139  |      |      |      |      |      |      |      |      |       | 3      | 3      | 3     | 5     | 5     |
| 14140  | 5    | 3    | 5    | 3    | 5    | 5    | 5    | 4    | 3     | 2      | 1      | 3     | 3     | 3     |
| 14141  |      |      |      |      |      |      |      |      |       | 4      | 3      | 3     | 5     | 5     |
| 14143  |      |      |      |      |      |      |      |      |       | 4      | 3      | 3     | 5     | 5     |
| 14146  |      | 6    | 3    | 6    | 6    | 6    | 6    | 6    | 3     | 2      | 2      | 3     | 3     | 3     |
| 14147  |      |      |      |      |      |      |      |      |       | 1      | 2      | 1     | 3     | 3     |
| 14148  | 4    | 4    | 4    | 4    | 4    | 4    | 4    | 4    | 3     | 2      | 2      | 2     | 3     | 5     |
| 14151  | 1    | 5    | 5    | 1    | 6    | 3    | 2    | 6    | 2     | 2      | 1      | 2     | 2     | 3     |
| 14152  |      |      |      |      |      |      |      |      |       | 2      | 2      | 2     | 3     | 3     |
| 14153  |      |      |      |      |      |      |      |      |       | 2      | 2      | 2     | 4     | 4     |
| 14154  |      |      |      |      |      |      |      |      |       | 3      | 3      | 3     | 4     | 5     |
| 14158  | 5    | 5    | 3    | 5    | 5    | 5    | 5    | 2    | 4     | 3      | 3      | 3     | 5     | 5     |
| 14159  | 2    | 1    | 3    | 2    | 2    | 2    | 2    | 1    | 3     | 2      | 1      | 1     | 1     | 1     |
| 14160  |      |      |      |      |      |      |      |      |       | 2      | 2      | 2     | 5     | 5     |
| 14161  |      |      |      |      |      |      |      |      |       | 2      | 2      | 2     | 3     | 3     |
| 14162  |      |      |      |      |      |      |      |      |       | 3      | 3      | 3     | 5     | 5     |
| 14165  |      |      |      |      |      |      |      |      |       | 3      | 3      | 3     | 5     | 4     |
| 14166  |      |      |      |      |      |      |      |      |       | 2      | 2      | 2     | 3     | 3     |
| 14167  | 4    | 3    | 2    | 4    | 6    | 5    | 5    | 4    | 2     | 2      | 2      | 2     | 4     | 4     |
| 14169  | 5    | 4    | 5    |      | 5    | 5    | 6    | 6    | 3     | 3      | 3      | 3     | 2     | 2     |
| 14170  | 1    | 2    | 2    | 3    | 4    | 5    | 3    | 5    | 4     | 3      | 3      | 3     | 5     | 5     |

| respid | Q48k | Q48l | Q48m | Q48n | Q48o | Q48p | Q48q | Q48r | Q49_1 | Q50a_1 | Q50b_1 | Q51_1 | Q51_2 | Q52_1 |   |
|--------|------|------|------|------|------|------|------|------|-------|--------|--------|-------|-------|-------|---|
| 14172  |      |      |      |      |      |      |      |      |       | 3      | 3      | 3     | 2     | 3     | 1 |
| 14173  |      |      |      |      |      |      |      |      |       | 3      | 3      | 3     | 3     | 3     | 3 |
| 14174  | 5    | 6    | 2    | 5    | 6    | 4    | 5    | 3    | 3     | 3      | 3      | 3     | 5     | 5     | 4 |
| 14175  | 5    | 4    | 2    | 5    | 5    | 5    | 5    | 3    | 2     | 2      | 2      | 3     | 4     | 4     | 5 |
| 14176  |      |      |      |      |      |      |      |      | 2     | 2      | 2      | 2     | 5     | 5     | 5 |
| 14178  |      |      |      |      |      |      |      |      | 4     | 3      | 3      | 3     | 5     | 4     | 5 |
| 14179  |      |      |      |      |      |      |      |      | 4     | 3      | 3      | 3     | 5     | 5     | 5 |
| 14180  |      |      |      |      |      |      |      |      | 2     | 1      | 1      | 1     | 2     | 2     | 2 |
| 14183  | 1    | 3    | 1    | 1    | 1    | 1    | 1    | 2    | 2     | 1      | 2      | 2     | 1     | 2     | 2 |
| 14185  | 2    | 3    | 2    | 1    | 5    | 2    | 3    | 2    | 3     | 3      | 3      | 3     | 5     | 5     | 5 |
| 14187  |      |      |      |      |      |      |      |      | 2     | 2      | 2      | 3     | 4     | 4     | 4 |
| 14189  | 3    | 5    | 4    | 5    | 5    | 3    | 5    | 5    | 1     | 3      | 3      | 3     | 2     | 2     | 4 |
| 14191  |      |      |      |      |      |      |      |      | 2     | 2      | 2      | 1     | 2     | 3     | 3 |
| 14192  |      |      |      |      |      |      |      |      | 3     | 3      | 3      | 3     | 5     | 5     | 5 |
| 14195  | 2    | 2    | 5    | 3    | 3    | 3    | 3    | 2    | 6     | 2      | 2      | 2     | 3     | 4     | 3 |
| 14197  | 2    | 2    | 5    | 2    | 4    | 3    | 3    | 3    | 5     | 3      | 2      | 1     | 3     | 4     | 4 |
| 14203  |      |      |      |      |      |      |      |      | 2     | 1      | 1      | 1     | 2     | 2     | 2 |
| 14204  | 5    | 5    | 2    | 5    | 5    | 5    | 5    | 5    | 2     | 3      | 2      | 3     | 4     | 4     | 5 |
| 14205  | 2    | 5    | 4    | 2    | 5    | 5    | 5    | 5    | 5     | 2      | 2      | 2     | 2     | 2     | 4 |
| 14208  |      |      |      |      |      |      |      |      | 3     | 3      | 3      | 3     | 4     | 4     | 4 |
| 14211  | 2    | 1    | 5    | 1    | 3    | 1    | 1    | 1    | 6     | 1      | 2      | 1     | 2     | 3     | 2 |
| 14214  | 3    | 5    | 1    | 4    | 6    | 6    | 6    | 4    | 4     | 4      | 3      | 3     | 5     | 5     | 5 |
| 14215  |      |      |      |      |      |      |      |      | 2     | 2      | 2      | 2     | 3     | 3     | 4 |
| 14216  |      |      |      |      |      |      |      |      | 2     | 2      | 2      | 2     | 3     | 3     | 3 |
| 14218  |      |      |      |      |      |      |      |      | 3     | 3      | 3      | 3     | 5     | 5     | 5 |
| 14220  |      |      |      |      |      |      |      |      | 3     | 3      | 3      | 2     | 4     | 4     | 4 |
| 14223  |      |      |      |      |      |      |      |      | 2     | 3      | 3      | 3     | 4     | 4     | 4 |
| 14225  |      |      |      |      |      |      |      |      | 2     | 2      | 2      | 2     | 3     | 3     | 3 |
| 14226  |      |      |      |      |      |      |      |      | 3     | 2      | 2      | 2     | 4     | 4     | 5 |
| 14228  | 3    | 2    | 1    | 1    | 1    | 1    | 1    | 2    | 1     | 2      | 2      | 2     | 1     | 2     | 1 |
| 14231  | 4    | 4    | 4    | 3    | 3    | 3    | 3    | 4    | 4     | 2      | 2      | 2     | 3     | 3     | 3 |
| 14233  | 3    | 4    | 3    | 4    | 5    | 4    | 4    | 4    | 4     | 2      | 3      | 2     | 2     | 2     | 3 |



| respid | Q48k | Q48l | Q48m | Q48n | Q48o | Q48p | Q48q | Q48r | Q49_1 | Q50a_1 | Q50b_1 | Q51_1 | Q51_2 | Q52_1 |   |
|--------|------|------|------|------|------|------|------|------|-------|--------|--------|-------|-------|-------|---|
| 14237  |      | 5    | 5    | 5    | 5    | 5    | 4    | 5    | 5     | 3      | 3      | 3     | 5     | 5     | 5 |
| 14238  |      |      |      |      |      |      |      |      |       | 1      | 1      | 1     | 2     | 2     | 2 |
| 14243  |      |      |      |      |      |      |      |      |       | 1      | 2      | 3     | 5     | 5     | 4 |
| 14245  |      |      |      |      |      |      |      |      |       | 4      | 2      | 2     | 1     | 2     | 2 |
| 14246  | 4    |      | 2    | 2    | 1    | 2    | 1    | 2    | 2     | 2      | 2      | 2     | 1     | 2     | 1 |
| 14248  |      |      |      |      |      |      |      |      |       | 2      | 3      | 3     | 4     | 4     | 4 |
| 14250  | 3    |      | 5    | 2    | 4    | 6    | 5    | 2    | 2     | 3      | 3      | 3     | 4     | 5     | 5 |
| 14253  | 5    |      | 5    | 3    | 3    | 5    | 2    | 5    | 2     | 3      | 3      | 3     | 5     | 5     | 4 |
| 14254  |      |      |      |      |      |      |      |      |       | 3      | 2      | 3     | 5     | 5     | 5 |
| 14255  |      |      |      |      |      |      |      |      |       | 2      | 3      | 2     | 4     | 5     | 4 |
| 14257  | 5    |      | 3    | 3    | 5    |      | 3    | 5    | 3     | 3      | 3      | 3     | 4     | 5     | 4 |
| 14258  | 4    |      |      |      |      |      |      |      |       | 3      | 3      | 3     | 3     | 3     | 3 |
| 14259  |      |      |      |      |      |      |      |      |       | 3      | 2      | 3     | 5     | 5     | 5 |
| 14260  |      |      |      |      |      |      |      |      |       | 3      | 3      | 3     | 5     | 5     | 5 |
| 14261  | 1    |      | 2    | 4    | 1    | 4    | 3    | 1    | 2     | 2      | 2      | 1     | 2     | 3     | 3 |
| 14263  | 5    |      | 5    | 2    | 3    | 5    | 5    | 5    | 3     | 2      | 3      | 3     | 3     | 4     | 4 |
| 14264  | 3    |      | 4    | 6    | 2    | 4    | 5    | 5    | 4     | 3      | 1      | 2     | 5     | 3     | 4 |
| 14266  | 6    |      | 5    | 4    | 4    | 6    | 6    | 4    | 4     | 3      | 2      | 3     | 3     | 3     | 3 |
| 14267  | 2    |      | 1    | 2    | 1    | 1    | 2    | 2    | 1     | 1      | 2      | 2     | 2     | 1     | 1 |
| 14268  |      |      |      |      |      |      |      |      |       | 4      | 3      | 3     | 5     | 5     | 5 |
| 14275  | 3    |      | 4    | 5    | 5    | 4    | 5    | 5    | 4     | 3      | 3      | 2     | 3     | 2     | 3 |
| 14278  | 1    |      | 1    | 6    | 1    | 5    | 6    | 1    | 6     | 2      | 2      | 2     | 2     | 1     | 3 |
| 14279  |      |      |      |      |      |      |      |      |       | 5      | 3      | 3     | 5     | 5     | 5 |
| 14280  |      |      |      |      |      |      |      |      |       | 2      | 1      | 2     | 2     | 2     | 3 |
| 14281  | 1    |      | 3    | 6    | 1    | 5    | 5    | 4    | 6     | 2      | 2      | 2     | 3     | 3     | 4 |
| 14282  | 1    |      | 2    | 1    | 2    | 2    | 2    | 1    | 1     | 2      | 2      | 2     | 2     | 1     | 2 |
| 14283  |      |      |      |      |      |      |      |      |       | 3      | 3      | 2     | 4     | 4     | 3 |
| 14286  | 3    |      | 5    | 6    | 1    | 6    | 3    | 3    | 2     | 2      | 3      | 3     | 3     | 3     | 5 |
| 14287  |      |      |      |      |      |      |      |      |       | 4      | 3      | 3     | 5     | 5     | 3 |
| 14288  | 3    |      | 3    | 3    | 3    | 4    | 3    | 3    | 3     | 2      | 3      | 2     | 4     | 4     | 4 |
| 14291  |      |      |      |      |      |      |      |      |       | 4      | 3      | 3     | 5     | 5     | 5 |
| 14292  |      |      |      |      |      |      |      |      |       | 3      | 3      | 3     | 5     | 5     | 3 |

| respid | Q48k | Q48l | Q48m | Q48n | Q48o | Q48p | Q48q | Q48r | Q49_1 | Q50a_1 | Q50b_1 | Q51_1 | Q51_2 | Q52_1 |   |
|--------|------|------|------|------|------|------|------|------|-------|--------|--------|-------|-------|-------|---|
| 14293  |      |      | 3    | 4    | 3    | 5    | 5    | 5    | 3     | 3      | 3      | 3     | 4     | 4     | 4 |
| 14304  | 1    | 1    | 3    | 1    | 2    | 3    | 1    | 1    | 1     | 4      | 2      | 3     | 3     | 4     | 4 |
| 14308  |      |      |      |      |      |      |      |      |       | 2      | 2      | 3     | 3     | 4     | 4 |
| 14313  | 4    | 4    |      | 4    | 4    | 4    | 4    | 4    | 4     | 3      | 2      | 2     | 3     | 3     | 3 |
| 14314  |      |      |      |      |      |      |      |      |       | 1      | 1      | 1     | 1     | 1     | 1 |
| 14316  | 6    | 6    | 2    | 6    | 6    | 6    | 6    | 1    | 3     | 3      | 3      | 4     | 4     | 4     | 3 |
| 14317  |      |      |      |      |      |      |      |      |       | 3      | 3      | 3     | 4     | 4     | 5 |
| 14318  | 3    | 3    | 4    | 3    | 3    | 4    | 3    | 4    | 4     | 2      | 2      | 1     | 3     | 2     | 2 |
| 14319  |      |      |      |      |      |      |      |      |       | 2      | 3      | 2     | 4     | 5     | 5 |
| 14320  | 1    | 1    | 1    | 1    | 1    | 1    | 1    | 1    | 1     | 2      | 2      | 2     | 1     | 2     | 1 |
| 14321  | 5    | 5    | 2    | 5    | 5    | 5    | 5    | 5    | 2     | 3      | 3      | 3     | 5     | 5     | 5 |
| 14322  | 3    | 3    | 3    | 3    | 3    | 3    | 3    | 3    | 3     | 2      | 2      | 2     | 3     | 3     | 3 |
| 14326  | 1    | 1    | 2    | 1    | 5    | 6    | 5    | 6    | 6     | 3      | 3      | 3     | 3     | 3     | 2 |
| 14327  | 1    | 2    | 2    | 1    | 2    | 1    | 1    | 2    | 2     | 5      | 2      | 2     | 3     | 4     | 4 |
| 14328  |      |      |      |      |      |      |      |      |       | 4      | 3      | 3     | 3     | 3     | 2 |
| 14330  |      | 5    | 5    | 5    | 5    | 5    | 5    | 2    | 3     | 3      | 3      | 5     | 5     | 5     | 5 |
| 14332  | 3    | 5    | 3    | 2    | 6    | 4    | 6    | 4    | 4     | 4      | 3      | 3     | 5     | 5     | 5 |
| 14334  | 4    | 2    |      | 2    | 6    | 2    | 5    | 6    | 6     | 4      | 3      | 3     | 4     | 4     | 3 |
| 14336  | 2    | 3    | 6    |      | 3    | 3    |      |      |       | 2      | 2      | 1     | 3     | 4     | 4 |
| 14337  | 5    | 5    | 3    | 5    | 5    | 5    | 5    | 5    | 2     | 3      | 3      | 2     | 4     | 4     | 4 |
| 14339  |      |      |      |      |      |      |      |      |       | 5      | 3      | 2     | 4     | 4     | 4 |
| 14340  | 6    | 5    | 2    | 5    | 6    | 4    | 5    | 3    | 3     | 3      | 3      | 1     | 4     | 4     | 4 |
| 14341  | 6    | 6    | 1    | 6    | 6    | 6    | 6    | 6    | 1     | 4      | 3      | 3     | 5     | 5     | 5 |
| 14344  |      |      |      |      |      |      |      |      |       | 2      | 3      | 3     | 5     | 5     | 5 |
| 14345  |      |      |      |      |      |      |      |      |       | 3      | 3      | 3     | 4     | 5     | 4 |
| 14346  |      |      |      |      |      |      |      |      |       | 5      | 3      | 3     | 1     | 2     | 1 |
| 14348  |      |      |      |      |      |      |      |      |       | 4      | 3      | 3     | 5     | 5     | 5 |
| 14349  |      |      |      |      |      |      |      |      |       | 3      | 3      | 3     | 4     | 4     | 4 |
| 14358  | 3    | 3    | 3    | 3    | 3    | 3    | 3    | 3    | 3     | 2      | 2      | 2     | 3     | 3     | 3 |
| 14360  | 5    | 5    | 2    | 5    | 5    | 5    | 5    | 5    | 2     | 3      | 3      | 2     | 4     | 4     | 4 |
| 14362  |      |      |      |      |      |      |      |      |       | 4      | 1      | 1     | 1     | 1     | 4 |
| 14366  |      |      |      |      |      |      |      |      |       | 2      | 3      | 3     | 4     | 5     | 5 |

| respid | Q48k | Q48l | Q48m | Q48n | Q48o | Q48p | Q48q | Q48r | Q49_1 | Q50a_1 | Q50b_1 | Q51_1 | Q51_2 | Q52_1 |   |
|--------|------|------|------|------|------|------|------|------|-------|--------|--------|-------|-------|-------|---|
| 14367  |      |      |      |      |      |      |      |      |       | 2      | 1      | 2     | 5     | 1     | 4 |
| 14369  |      |      |      |      |      |      |      |      |       | 2      | 2      | 3     | 4     | 4     | 4 |
| 14371  | 2    | 5    | 3    | 5    | 5    | 5    | 4    | 4    | 4     | 4      | 2      | 3     | 5     | 5     | 5 |
| 14372  | 1    | 1    | 6    | 1    | 1    | 1    | 1    | 6    | 4     | 4      | 3      | 3     | 5     | 5     | 5 |
| 14374  | 1    | 5    | 3    | 2    | 5    | 5    | 5    | 6    | 1     | 1      | 1      | 1     | 1     | 1     | 3 |
| 14376  | 6    | 5    | 5    | 6    | 5    | 5    | 5    | 5    | 3     | 2      | 3      | 3     | 5     | 5     | 5 |
| 14377  |      |      |      |      |      |      |      |      |       | 3      | 3      | 3     | 3     | 4     | 4 |
| 14378  | 6    | 6    | 2    | 5    | 6    | 6    | 6    | 6    | 1     | 2      | 2      | 2     | 3     | 4     | 4 |
| 14379  |      |      |      |      |      |      |      |      |       | 3      | 3      | 3     | 5     | 5     | 4 |
| 14381  |      |      |      |      |      |      |      |      |       | 2      | 3      | 3     | 5     | 4     | 5 |
| 14383  | 6    | 6    | 6    | 6    | 6    | 6    | 6    | 6    | 6     | 3      | 3      | 3     | 4     | 4     | 5 |
| 14384  | 6    | 6    | 1    | 6    | 6    | 5    | 6    | 2    | 3     | 3      | 3      | 2     | 4     | 4     | 4 |
| 14385  | 1    | 5    | 1    | 2    | 3    | 2    | 1    | 4    | 4     | 4      | 3      | 2     | 2     | 3     | 2 |
| 14386  | 3    | 5    | 4    | 2    | 5    | 5    | 5    | 5    | 5     | 2      | 3      | 2     | 3     | 4     | 3 |
| 14390  |      |      |      |      |      |      |      |      |       | 2      | 2      | 3     | 2     | 4     | 3 |
| 14391  | 6    | 5    | 2    | 6    | 6    | 4    | 5    | 2    | 4     | 4      | 3      | 3     | 5     | 5     | 5 |
| 14392  |      |      |      |      |      |      |      |      |       | 3      | 2      | 2     | 3     | 4     | 3 |
| 14393  | 5    | 4    | 1    | 6    | 6    | 5    | 4    | 3    | 3     | 3      | 2      | 3     | 4     | 5     | 4 |
| 14394  | 2    | 3    | 5    | 1    | 2    | 5    | 4    | 2    | 2     | 2      | 2      | 2     | 4     | 4     | 4 |
| 14395  |      |      |      |      |      |      |      |      |       | 2      | 3      | 3     | 5     | 5     | 5 |
| 14396  |      |      |      |      |      |      |      |      |       | 5      | 3      | 3     | 1     | 3     | 3 |
| 14397  |      |      |      |      |      |      |      |      |       | 4      | 3      | 3     | 5     | 5     | 5 |
| 14398  | 4    | 5    | 6    | 6    | 5    | 5    | 5    | 5    | 4     | 3      | 2      | 2     | 4     | 4     | 3 |
| 14399  | 6    | 6    | 6    | 6    | 6    | 6    | 6    | 6    |       | 3      | 3      | 3     | 4     | 5     | 5 |
| 14400  | 1    | 3    | 4    | 2    | 4    | 3    | 3    | 3    | 3     | 2      | 3      | 3     | 5     | 5     | 4 |
| 14403  | 5    | 5    | 3    | 5    | 5    | 5    | 5    | 5    | 3     | 3      | 3      | 3     | 4     | 4     | 4 |
| 14404  | 3    | 3    | 4    | 4    | 5    | 6    | 4    | 4    | 5     | 3      | 2      | 2     | 3     | 4     | 4 |
| 14405  |      |      |      |      |      |      |      |      |       | 4      | 3      | 2     | 4     | 5     | 5 |
| 14407  |      |      |      |      |      |      |      |      |       | 3      | 3      | 3     | 4     | 5     | 4 |
| 14408  |      |      |      |      |      |      |      |      |       | 3      | 2      | 2     | 3     | 2     | 3 |
| 14410  | 1    | 1    | 1    | 1    | 2    | 1    | 1    | 2    | 2     | 2      | 2      | 2     | 1     | 2     | 1 |
| 14415  |      |      |      |      |      |      |      |      |       | 2      | 3      | 3     | 3     | 5     | 3 |

| respid | Q48k | Q48l | Q48m | Q48n | Q48o | Q48p | Q48q | Q48r | Q49_1 | Q50a_1 | Q50b_1 | Q51_1 | Q51_2 | Q52_1 |   |
|--------|------|------|------|------|------|------|------|------|-------|--------|--------|-------|-------|-------|---|
| 14419  | 3    | 5    | 2    | 3    | 5    | 4    | 3    | 3    | 3     | 3      | 3      | 2     | 3     | 3     | 4 |
| 14420  |      |      |      |      |      |      |      |      |       | 2      | 2      | 2     | 5     | 5     | 4 |
| 14421  |      |      |      |      |      |      |      |      |       | 5      | 3      | 3     | 5     | 5     | 5 |
| 14423  |      |      |      |      |      |      |      |      |       | 3      | 3      | 3     | 4     | 4     | 5 |
| 14424  |      |      |      |      |      |      |      |      |       | 4      | 3      | 3     | 5     | 5     | 5 |
| 14425  | 5    | 3    | 4    | 4    | 4    |      | 4    |      |       | 4      | 2      | 3     | 4     | 5     | 4 |
| 14426  |      |      |      |      |      |      |      |      |       | 2      | 3      | 3     | 4     | 4     | 4 |
| 14427  | 3    | 5    | 3    | 3    | 5    | 3    | 3    | 4    |       | 3      | 3      | 2     | 3     | 4     | 5 |
| 14428  | 2    | 2    | 3    | 2    | 3    | 3    | 4    | 2    |       | 4      | 3      | 2     | 3     | 4     | 4 |
| 14431  | 6    | 6    | 1    | 6    | 6    | 6    | 1    | 1    |       | 2      | 3      | 3     | 4     | 5     | 4 |
| 14433  |      |      |      |      |      |      |      |      |       | 3      | 2      | 2     | 3     | 4     | 2 |
| 14434  | 3    | 5    | 2    | 5    | 6    | 5    | 6    | 4    |       | 4      | 3      | 3     | 5     | 5     | 5 |
| 14435  | 5    | 5    | 1    | 5    | 6    | 5    | 3    | 2    |       | 3      | 3      | 3     | 4     | 5     | 4 |
| 14436  | 2    | 5    | 5    | 2    | 5    | 4    | 3    | 3    |       | 2      | 3      | 2     | 4     | 4     | 4 |
| 14438  |      |      |      |      |      |      |      |      |       | 4      | 3      | 3     | 5     | 4     | 4 |
| 14442  | 3    | 3    | 3    | 4    | 3    | 3    | 2    | 4    |       | 2      | 2      | 2     | 3     | 2     | 2 |
| 14447  |      |      |      |      |      |      |      |      |       | 4      | 3      | 3     | 5     | 5     | 5 |
| 14448  |      |      |      |      |      |      |      |      |       | 4      | 3      | 3     | 4     | 5     | 4 |
| 14450  |      |      |      |      |      |      |      |      |       | 2      | 3      | 3     | 4     | 5     | 3 |
| 14451  | 2    | 5    | 2    | 2    | 3    | 5    | 5    | 1    |       | 3      | 3      | 2     | 4     | 4     | 4 |
| 14454  |      |      |      |      |      |      |      |      |       | 3      | 2      | 2     | 2     | 3     | 2 |
| 14455  | 6    | 6    | 6    | 6    | 6    | 6    | 6    | 6    |       | 2      | 2      | 2     | 4     | 5     | 5 |
| 14456  |      |      |      |      |      |      |      |      |       | 3      | 3      | 3     | 5     | 5     | 5 |
| 14457  | 1    | 1    | 1    | 1    | 3    | 1    | 2    | 2    |       | 4      | 3      | 3     | 2     | 2     | 1 |
| 14458  | 3    | 3    | 1    | 3    | 2    | 2    | 1    | 3    |       | 4      | 3      | 2     | 4     | 5     | 2 |
| 14459  |      |      |      |      |      |      |      |      |       | 3      | 2      | 2     | 4     | 4     | 5 |
| 14460  |      |      |      |      |      |      |      |      |       | 4      | 3      | 3     | 5     | 5     | 4 |
| 14464  | 6    | 5    | 1    | 6    | 6    | 5    | 6    | 1    |       | 4      | 3      | 2     | 5     | 4     | 4 |
| 14465  |      |      |      |      |      |      |      |      |       | 2      | 2      | 2     | 4     | 4     | 3 |
| 14466  |      |      |      |      |      |      |      |      |       | 3      | 3      | 3     | 3     | 4     | 3 |
| 14467  |      |      |      |      |      |      |      | 2    |       | 2      | 2      | 3     | 4     | 4     | 4 |
| 14470  | 2    | 5    | 3    | 2    | 5    | 5    | 5    | 4    |       | 2      | 2      | 2     | 3     | 3     | 3 |

| respid | Q48k | Q48l | Q48m | Q48n | Q48o | Q48p | Q48q | Q48r | Q49_1 | Q50a_1 | Q50b_1 | Q51_1 | Q51_2 | Q52_1 |   |
|--------|------|------|------|------|------|------|------|------|-------|--------|--------|-------|-------|-------|---|
| 14472  |      |      |      |      |      |      |      |      |       | 3      | 2      | 3     | 5     | 5     | 5 |
| 14473  | 5    | 5    | 3    | 4    | 5    | 4    | 5    | 3    |       | 3      | 2      | 3     | 5     | 5     | 4 |
| 14474  |      |      |      |      |      |      |      |      |       | 3      | 3      | 3     | 5     | 5     | 5 |
| 14477  | 6    | 6    | 1    | 5    | 6    | 6    | 6    | 5    |       | 2      | 3      | 3     | 4     | 4     | 4 |
| 14478  | 6    | 5    | 2    | 5    | 6    | 5    | 5    | 2    |       | 3      | 3      | 3     | 4     | 5     | 4 |
| 14479  |      |      |      |      |      |      |      |      |       | 4      | 3      | 3     | 5     | 5     | 5 |
| 14484  |      |      |      |      |      |      |      |      |       | 2      | 3      | 3     | 5     | 5     | 5 |
| 14485  |      |      |      |      |      |      |      |      |       | 4      | 3      | 3     | 5     | 4     | 5 |
| 14486  | 4    | 4    | 5    | 3    | 6    | 6    | 4    | 5    |       | 3      | 2      | 2     | 3     | 2     | 3 |
| 14487  |      |      |      |      |      |      |      |      |       | 4      | 3      | 3     | 3     | 4     | 3 |
| 14488  | 2    | 1    | 3    | 2    | 1    | 3    | 2    | 1    |       | 3      | 2      | 2     | 2     | 3     | 3 |
| 14491  |      |      |      |      |      |      |      |      |       | 3      | 2      | 3     | 4     | 5     | 4 |
| 14495  | 3    | 6    | 1    | 3    | 6    | 1    | 6    | 2    |       | 3      | 3      | 3     | 4     | 4     | 5 |
| 14500  | 5    | 5    | 2    | 5    | 6    | 5    | 5    | 4    |       | 2      | 2      | 2     | 4     | 4     | 4 |
| 14502  |      |      |      |      |      |      |      |      |       | 4      | 3      | 2     | 4     | 4     | 5 |
| 14504  |      |      |      |      |      |      |      |      |       | 3      | 2      | 2     | 2     | 3     | 2 |
| 14505  | 1    | 4    | 1    | 1    | 1    | 1    | 1    | 1    |       | 3      | 3      | 3     | 1     | 1     | 1 |
| 14507  |      |      |      |      |      |      |      |      |       | 3      | 3      | 3     | 5     | 5     | 5 |
| 14517  | 3    | 5    | 3    | 3    | 5    | 5    | 5    | 3    |       | 3      | 2      | 3     | 3     | 3     | 5 |
| 14518  |      |      |      |      |      |      |      |      |       | 3      | 3      | 3     | 5     | 5     | 5 |
| 14519  | 1    | 1    | 5    | 2    | 3    | 2    | 2    | 4    |       | 2      | 3      | 3     | 4     | 4     | 4 |
| 14521  |      |      |      |      |      |      |      |      |       | 3      | 2      | 2     | 2     | 3     | 2 |
| 14522  | 5    | 5    | 2    | 5    | 5    | 5    | 5    | 2    |       | 3      | 3      | 3     | 4     | 5     | 4 |
| 14526  | 5    | 5    | 3    | 3    | 5    | 5    | 5    | 4    |       | 3      | 3      | 3     | 5     | 5     | 4 |
| 14528  |      |      |      |      |      |      |      |      |       | 2      | 2      | 2     | 2     | 2     | 2 |
| 14529  |      |      |      |      |      |      |      |      |       | 2      | 3      | 3     | 3     | 3     | 3 |
| 14530  |      |      |      |      |      |      |      |      |       | 3      | 2      | 2     | 4     | 4     | 5 |
| 14531  |      |      |      |      |      |      |      |      |       | 2      | 1      | 1     | 2     | 2     | 2 |
| 14534  | 4    | 3    | 2    | 4    | 2    | 4    | 2    | 3    |       | 3      | 3      | 2     | 2     | 3     | 2 |
| 14538  |      |      |      |      |      |      |      |      |       | 4      | 3      | 3     | 4     | 4     | 5 |
| 14539  |      |      |      |      |      |      |      |      |       | 3      | 3      | 3     | 3     | 3     | 3 |
| 14545  | 3    | 3    | 3    | 2    | 5    | 4    | 5    | 5    |       | 4      | 3      | 3     | 4     | 4     | 4 |

| respid | Q48k | Q48l | Q48m | Q48n | Q48o | Q48p | Q48q | Q48r | Q49_1 | Q50a_1 | Q50b_1 | Q51_1 | Q51_2 | Q52_1 |   |
|--------|------|------|------|------|------|------|------|------|-------|--------|--------|-------|-------|-------|---|
| 14546  |      |      |      |      | 2    |      |      |      |       | 2      | 1      | 1     | 2     | 3     | 3 |
| 14551  |      |      |      |      |      |      |      |      |       | 3      | 3      | 2     | 5     | 4     | 5 |
| 14553  | 3    | 3    | 3    | 3    | 3    | 3    | 3    | 3    | 3     | 2      | 2      | 2     | 3     | 3     | 3 |
| 14557  |      |      |      |      |      |      |      |      |       | 2      | 2      | 2     | 3     | 3     | 3 |
| 14558  |      |      |      |      |      |      |      |      |       | 3      | 3      | 3     | 4     | 5     | 5 |
| 14559  |      |      |      |      |      |      |      |      |       | 3      | 2      | 2     | 2     | 3     | 2 |
| 14560  | 3    | 3    | 3    | 5    | 5    | 5    | 5    | 5    | 5     | 3      | 3      | 3     | 4     | 4     | 4 |
| 14563  | 5    | 5    | 5    | 6    | 6    | 5    | 2    | 6    | 6     | 3      | 3      | 2     | 5     | 5     | 5 |
| 14565  | 6    | 6    | 6    | 6    | 6    | 6    | 6    | 6    | 6     | 3      | 3      | 3     | 3     | 3     | 3 |
| 14571  | 1    |      | 1    | 1    | 1    | 1    | 1    | 2    | 1     | 3      | 3      | 2     | 4     | 4     | 1 |
| 14572  |      |      |      |      |      |      |      |      |       | 3      | 3      | 2     | 5     | 3     | 5 |
| 14573  | 5    | 5    | 4    | 4    | 5    | 5    |      |      |       | 3      | 3      | 3     | 2     | 3     | 3 |
| 14575  | 6    | 5    | 5    | 5    | 5    | 5    | 5    | 5    | 5     | 3      | 3      | 2     | 3     | 2     | 3 |
| 14576  |      |      |      |      |      |      |      |      |       | 4      | 2      | 3     | 3     | 3     | 3 |
| 14578  | 5    | 5    | 3    | 6    | 6    | 5    | 5    | 4    | 4     | 3      | 3      | 3     | 5     | 5     | 5 |
| 14579  |      |      |      |      |      |      |      |      |       | 3      | 3      | 3     | 5     | 5     | 4 |
| 14580  |      |      |      |      |      |      |      |      |       | 2      | 3      | 3     | 4     | 5     | 5 |
| 14582  | 5    | 5    | 2    | 3    | 5    | 3    | 5    | 5    | 5     | 3      | 2      | 2     | 4     | 4     | 4 |
| 14585  | 5    | 4    | 3    | 3    | 5    | 2    | 3    | 5    | 5     | 3      | 3      | 3     | 3     | 4     | 3 |
| 14588  | 4    | 4    | 3    | 4    | 4    | 4    | 4    | 4    | 4     | 3      | 3      | 3     | 4     | 4     | 4 |
| 14590  |      |      |      |      |      |      |      |      |       | 3      | 2      | 2     | 2     | 3     | 3 |
| 14592  | 4    | 5    | 2    | 5    | 5    | 5    | 5    | 3    | 3     | 2      | 2      | 2     | 3     | 4     | 3 |
| 14593  |      |      |      |      |      |      |      |      |       | 3      | 3      | 3     | 4     | 3     | 3 |
| 14595  |      |      |      |      |      |      |      |      |       | 2      | 3      | 3     | 4     | 4     | 4 |
| 14597  | 3    | 3    | 4    | 3    | 5    | 3    | 5    | 3    | 3     | 2      | 2      | 1     | 2     | 3     | 3 |
| 14600  |      |      |      |      |      |      |      |      |       | 2      | 2      | 2     | 2     | 4     | 5 |
| 14602  | 3    | 3    | 3    | 3    | 3    | 3    | 3    | 3    | 3     | 2      | 2      | 2     | 3     | 3     | 3 |
| 14604  |      |      |      |      |      |      |      |      |       | 3      | 2      | 3     | 4     | 4     | 4 |
| 14605  |      |      |      |      |      |      |      |      |       | 2      | 2      | 2     | 3     | 3     | 3 |
| 14609  | 3    | 3    | 4    | 3    | 3    | 3    | 3    | 3    | 4     | 2      | 2      | 2     | 3     | 3     | 3 |
| 14610  |      |      |      |      |      |      |      |      |       | 3      | 2      | 2     | 4     | 4     | 5 |
| 14611  |      |      |      |      |      |      |      |      |       | 3      | 3      | 2     | 5     | 5     | 4 |

| respid | Q48k | Q48l | Q48m | Q48n | Q48o | Q48p | Q48q | Q48r | Q49_1 | Q50a_1 | Q50b_1 | Q51_1 | Q51_2 | Q52_1 |   |
|--------|------|------|------|------|------|------|------|------|-------|--------|--------|-------|-------|-------|---|
| 14612  |      |      |      |      |      |      |      |      |       | 2      | 2      | 3     | 3     | 4     | 3 |
| 14614  |      |      |      |      |      |      |      |      |       | 3      | 2      | 2     | 2     | 2     | 2 |
| 14615  | 4    | 4    | 4    | 3    | 5    | 3    | 5    | 4    |       | 2      | 3      | 2     | 5     | 5     | 5 |
| 14618  | 5    | 4    | 3    | 4    | 4    | 4    | 4    |      |       | 2      | 2      | 2     | 2     | 2     | 2 |
| 14621  |      |      |      |      |      |      |      |      |       | 4      | 3      | 3     | 5     | 5     | 3 |
| 14624  | 3    | 5    | 2    | 2    | 6    | 5    | 3    | 2    |       | 2      | 2      | 1     | 1     | 2     | 3 |
| 14626  | 6    | 6    |      | 6    | 6    | 6    | 6    | 6    |       | 3      | 3      | 3     | 4     | 4     | 5 |
| 14627  | 5    | 5    | 3    | 3    | 5    | 2    | 4    |      |       | 2      | 2      | 3     | 4     | 4     | 4 |
| 14628  | 1    | 1    | 1    | 1    | 1    | 1    | 1    | 1    |       | 3      | 2      | 2     | 1     | 1     | 3 |
| 14631  |      |      |      |      |      |      |      |      |       | 1      | 3      | 2     | 3     | 3     | 3 |
| 14633  |      |      |      |      |      |      |      |      |       | 4      | 2      | 2     | 2     | 2     | 2 |
| 14642  |      |      |      |      |      |      |      |      |       | 4      | 2      | 3     | 3     | 2     | 2 |
| 14647  |      |      |      |      |      |      |      |      |       | 5      | 3      | 3     | 5     | 5     | 5 |
| 14658  |      |      |      |      |      |      |      |      |       | 2      | 2      | 3     | 4     | 4     | 4 |
| 14659  |      |      |      |      |      |      |      |      |       | 3      | 2      | 2     | 3     | 2     | 2 |
| 14660  |      |      |      |      |      |      |      |      |       | 4      | 3      | 3     | 2     | 3     | 2 |
| 14661  |      |      |      |      |      |      |      |      |       | 2      | 3      | 3     | 3     | 5     | 5 |
| 14662  |      |      |      |      |      |      |      |      |       | 4      | 3      | 3     | 1     | 2     | 1 |
| 14663  |      |      |      |      |      |      |      |      |       | 2      | 3      | 2     | 3     | 3     | 2 |
| 14670  |      |      |      |      |      |      |      |      |       | 1      | 2      | 2     | 2     | 1     | 2 |
| 14671  |      |      |      |      |      |      |      |      |       | 3      | 3      | 3     | 4     | 4     | 4 |
| 14672  |      |      |      |      |      |      |      |      |       | 3      | 2      | 2     | 2     | 3     | 2 |
| 14675  |      |      |      |      |      |      |      |      |       | 4      | 3      | 3     | 4     | 4     | 3 |
| 14676  |      |      |      |      |      |      |      |      |       | 1      | 3      | 1     | 2     | 2     | 4 |
| 14677  | 1    | 1    | 1    | 1    | 3    | 4    | 3    | 1    |       | 2      | 3      | 2     | 2     | 3     | 1 |
| 14678  |      |      |      |      |      |      |      |      |       | 2      | 3      | 3     | 2     | 3     | 2 |
| 14681  |      |      |      |      |      |      |      |      |       | 3      | 2      | 2     | 2     | 3     | 2 |
| 14684  |      |      |      |      |      |      |      |      |       | 2      | 2      | 2     | 4     | 4     | 4 |
| 14688  |      |      |      |      |      |      |      |      |       | 5      | 3      | 2     | 1     | 2     | 1 |
| 14690  |      |      |      |      |      |      |      |      |       | 3      | 2      | 2     | 2     | 3     | 1 |
| 14694  |      |      |      |      |      |      |      |      |       | 3      | 2      | 2     | 2     | 3     | 2 |
| 14696  |      |      |      |      |      |      |      |      |       | 3      | 3      | 3     | 2     | 2     | 1 |

| respid | Q48k | Q48l | Q48m | Q48n | Q48o | Q48p | Q48q | Q48r | Q49_1 | Q50a_1 | Q50b_1 | Q51_1 | Q51_2 | Q52_1 |   |
|--------|------|------|------|------|------|------|------|------|-------|--------|--------|-------|-------|-------|---|
| 14700  |      |      |      |      |      |      |      |      |       | 5      | 3      | 3     | 5     | 5     | 4 |
| 14701  |      |      |      |      |      |      |      |      |       | 2      | 2      | 2     | 3     | 3     | 3 |
| 14703  | 4    | 4    | 4    | 4    | 3    | 5    | 3    | 4    | 4     | 4      | 3      | 3     | 1     | 2     | 1 |
| 14707  |      |      |      |      |      |      |      |      |       | 3      | 2      | 2     | 3     | 4     | 4 |
| 14711  |      |      |      |      |      |      |      |      |       | 3      | 2      | 1     | 2     | 3     | 2 |
| 14714  |      |      |      |      |      |      |      |      |       | 4      | 3      | 2     | 2     | 2     | 3 |
| 14715  | 2    | 1    | 2    | 3    | 2    | 3    | 2    | 2    | 2     | 3      | 3      | 3     | 3     | 3     | 1 |
| 14716  |      |      |      |      |      |      |      |      |       | 2      | 2      | 2     | 5     | 5     | 5 |
| 14720  |      |      |      |      |      |      |      |      |       | 2      | 3      | 3     | 5     | 5     | 5 |
| 14725  | 6    | 6    | 4    | 6    | 6    | 6    | 6    | 3    | 1     | 1      | 1      | 2     | 3     | 3     | 3 |
| 14726  | 6    | 6    | 3    | 6    | 6    | 6    | 6    | 4    | 4     | 2      | 2      | 2     | 3     | 3     | 4 |
| 14734  |      |      |      |      |      |      |      |      |       | 2      | 3      | 3     | 5     | 5     | 4 |
| 14735  |      |      |      |      |      |      |      |      |       | 2      | 3      | 3     | 4     | 4     | 5 |
| 14736  |      |      |      |      |      |      |      |      |       | 3      | 2      | 2     | 2     | 2     | 2 |
| 14740  |      |      |      |      |      |      |      |      |       | 3      | 3      | 3     | 5     | 5     | 4 |
| 14745  |      |      |      |      |      |      |      |      |       | 3      | 3      | 3     | 5     | 5     | 5 |
| 14747  |      |      |      |      |      |      |      |      |       | 5      | 3      | 3     | 5     | 5     | 5 |
| 14750  |      |      |      |      |      |      |      |      |       | 3      | 2      | 2     | 2     | 3     | 2 |
| 14751  |      |      |      |      |      |      |      |      |       | 4      | 3      | 3     | 3     | 3     | 4 |
| 14753  |      |      |      |      |      |      |      |      |       | 3      | 3      | 3     | 5     | 5     | 4 |
| 14756  | 1    | 1    | 6    | 1    | 3    | 1    | 1    | 6    | 1     | 1      | 1      | 1     | 2     | 2     | 3 |
| 14780  | 6    | 5    | 1    | 6    | 6    | 5    | 5    | 1    | 4     | 4      | 3      | 2     | 4     | 4     | 4 |
| 14782  |      |      |      |      |      |      |      |      |       | 4      | 3      | 3     | 5     | 5     | 5 |
| 14800  | 4    | 3    | 2    | 1    | 4    | 5    | 3    | 3    | 4     | 4      | 3      | 3     | 2     | 3     | 1 |
| 14801  |      |      |      |      |      |      |      |      |       | 2      | 3      | 3     | 5     | 5     | 5 |
| 14802  | 1    | 2    | 2    | 2    | 2    | 1    | 2    | 2    | 4     | 4      | 1      | 2     | 1     | 2     | 2 |
| 14805  | 5    | 4    | 4    | 3    | 5    | 2    | 4    | 3    | 2     | 2      | 2      | 1     | 3     | 4     | 3 |
| 14811  |      |      |      |      |      |      |      |      |       | 3      | 1      | 1     | 3     | 3     | 3 |
| 14814  | 2    | 2    | 1    | 2    | 3    | 2    | 2    | 1    | 1     | 1      | 1      | 1     | 2     | 2     | 2 |
| 14822  | 2    | 2    |      |      |      |      |      | 2    | 2     | 2      | 2      | 2     | 2     | 2     | 1 |
| 14827  | 1    | 2    | 4    | 3    | 2    | 4    | 1    | 2    | 2     | 3      | 3      | 3     | 3     | 4     | 3 |
| 14828  |      |      |      |      |      |      |      |      |       | 2      | 1      | 2     | 3     | 3     | 3 |



| respid | Q48k | Q48l | Q48m | Q48n | Q48o | Q48p | Q48q | Q48r | Q49_1 | Q50a_1 | Q50b_1 | Q51_1 | Q51_2 | Q52_1 |   |
|--------|------|------|------|------|------|------|------|------|-------|--------|--------|-------|-------|-------|---|
| 14830  |      |      |      |      |      |      |      |      |       | 1      | 2      | 2     | 4     | 4     | 4 |
| 14832  | 2    | 2    | 1    | 1    | 1    | 1    | 1    | 1    | 1     | 3      | 3      | 3     | 1     | 2     | 1 |
| 14835  | 3    | 3    | 4    | 2    | 3    | 1    | 2    | 5    |       | 2      | 2      | 1     | 3     | 3     | 3 |
| 14841  |      |      |      |      |      |      |      |      |       | 2      | 2      | 2     | 3     | 3     | 3 |
| 14849  | 6    | 5    | 2    | 5    | 6    | 5    | 5    | 2    |       | 4      | 3      | 2     | 4     | 5     | 4 |
| 14850  |      |      |      |      |      |      |      |      |       | 3      | 3      | 3     | 5     | 5     | 5 |
| 14851  |      |      |      |      |      |      |      |      |       | 3      | 3      | 3     | 4     | 4     | 5 |
| 14856  | 3    | 2    | 2    | 2    | 2    | 2    | 2    | 3    |       | 3      | 2      | 2     | 3     | 3     | 3 |
| 14862  | 2    | 2    | 2    | 2    | 2    | 3    | 2    | 2    |       | 2      | 2      | 2     | 2     | 3     | 1 |
| 14863  | 6    | 6    | 1    | 6    | 6    | 6    | 6    | 4    |       | 3      | 3      | 3     | 5     | 5     | 5 |
| 14864  | 5    | 5    | 2    | 5    | 6    | 6    | 6    | 5    |       | 4      | 3      | 3     | 3     | 5     | 4 |
| 14866  | 6    | 6    | 1    | 6    | 6    | 3    | 6    | 1    |       | 3      | 3      | 3     | 4     | 4     | 4 |
| 14867  | 2    | 3    | 2    | 2    | 2    | 3    | 2    | 1    |       | 4      | 2      | 2     | 3     | 3     | 3 |
| 14868  |      |      |      |      |      |      |      |      |       | 3      | 3      | 3     | 4     | 4     | 3 |
| 14870  | 6    | 6    | 1    | 6    | 6    | 5    | 6    | 2    |       | 4      | 3      | 2     | 4     | 4     | 4 |
| 14873  |      |      |      |      |      |      |      |      |       | 2      | 3      | 2     | 3     | 3     | 3 |
| 14878  |      |      |      |      |      |      |      |      |       | 2      | 2      | 2     | 5     | 4     | 5 |
| 14879  |      |      |      |      |      |      |      |      |       | 3      | 3      | 3     | 4     | 4     | 3 |
| 14881  |      |      |      |      |      |      |      |      |       | 4      | 2      | 2     | 2     | 2     | 2 |
| 14888  | 1    | 3    | 2    | 3    | 3    | 2    | 3    | 2    |       | 3      | 2      | 2     | 2     | 3     | 2 |
| 14895  | 6    | 5    | 2    | 5    | 6    | 5    | 5    | 1    |       | 4      | 3      | 1     | 4     | 4     | 4 |
| 14900  | 3    | 3    | 2    | 2    | 2    | 2    | 6    | 1    |       | 3      | 2      | 2     | 1     | 2     | 1 |
| 14912  |      |      |      |      |      |      |      |      |       | 3      | 3      | 3     | 5     | 5     | 4 |
| 14922  | 2    | 2    | 2    | 2    | 2    | 2    | 2    | 2    |       | 2      | 2      | 2     | 1     | 2     | 2 |
| 14923  | 3    | 2    | 1    | 2    | 2    | 2    | 2    | 1    |       | 4      | 3      | 2     | 2     | 2     | 3 |
| 14924  |      |      |      |      |      |      |      |      |       | 1      | 1      | 1     | 4     | 2     | 3 |
| 14925  | 1    | 1    | 1    | 1    | 1    | 1    | 2    | 1    |       | 4      | 3      | 2     | 2     | 2     | 1 |
| 14926  | 6    | 6    | 6    | 6    | 6    | 2    | 6    | 2    |       | 2      | 2      | 2     | 4     | 4     | 3 |
| 14927  | 3    | 2    |      | 2    | 3    | 2    | 3    | 3    |       | 3      | 2      | 2     | 3     | 3     | 3 |
| 14930  | 3    | 2    | 4    | 1    | 3    | 4    | 2    | 2    |       | 2      | 2      | 2     | 1     | 2     | 1 |
| 14937  | 2    | 2    | 2    | 2    | 2    | 3    | 2    | 2    |       | 2      | 2      | 2     | 2     | 2     | 2 |
| 14938  |      | 1    | 1    | 2    | 2    | 2    | 2    | 1    |       | 3      | 2      | 3     | 2     | 1     | 2 |

| respid | Q48k | Q48l | Q48m | Q48n | Q48o | Q48p | Q48q | Q48r | Q49_1 | Q50a_1 | Q50b_1 | Q51_1 | Q51_2 | Q52_1 |   |
|--------|------|------|------|------|------|------|------|------|-------|--------|--------|-------|-------|-------|---|
| 14939  |      | 2    | 2    | 3    | 2    | 2    | 2    | 2    | 2     | 2      | 2      | 2     | 3     | 2     | 3 |
| 14942  |      |      |      |      |      |      |      |      |       | 3      | 3      | 3     | 5     | 5     | 5 |
| 14943  |      |      |      |      |      |      |      |      |       | 1      | 3      | 3     | 4     | 4     | 2 |
| 14953  | 6    | 5    | 3    | 5    | 5    | 3    | 5    | 3    | 2     | 3      | 1      | 3     | 4     | 3     | 3 |
| 14954  | 6    | 6    | 2    | 6    | 6    | 6    | 6    | 2    | 3     | 2      | 2      | 3     | 3     | 3     | 3 |
| 14955  |      |      |      |      |      |      |      |      |       | 2      | 2      | 2     | 3     | 4     | 3 |
| 14957  | 5    | 5    | 3    | 5    | 6    | 6    | 6    | 2    | 2     | 2      | 2      | 3     | 3     | 3     | 3 |
| 14958  | 4    | 3    | 1    | 2    | 4    | 3    | 3    | 2    | 3     | 2      | 1      | 1     | 4     | 3     | 3 |
| 14959  |      | 3    | 2    | 3    |      |      |      |      |       | 3      | 2      | 2     | 3     | 3     | 3 |
| 14961  |      |      |      |      |      |      |      |      |       | 4      | 3      | 3     | 5     | 5     | 5 |
| 14963  | 3    | 3    | 2    | 3    | 2    | 2    | 3    | 2    | 4     | 2      | 2      | 3     | 3     | 3     | 3 |
| 14964  |      |      |      |      |      |      |      |      |       | 4      | 2      | 2     | 4     | 4     | 4 |
| 14965  | 6    | 6    | 1    | 6    | 6    | 2    | 6    | 2    | 2     | 2      | 2      | 3     | 4     | 4     | 4 |
| 14967  | 1    | 1    | 2    | 1    | 2    | 3    | 1    | 1    | 5     | 3      | 3      | 2     | 3     | 2     | 2 |
| 14970  | 3    | 1    | 1    | 1    | 2    | 3    | 3    | 4    | 2     | 2      | 1      | 1     | 2     | 2     | 2 |
| 14972  |      |      |      |      |      |      |      |      |       | 2      | 2      | 2     | 2     | 3     | 2 |
| 14975  | 3    | 4    | 2    | 3    | 3    | 5    | 4    | 4    | 2     | 1      | 2      | 1     | 3     | 4     | 4 |
| 14977  | 6    | 6    | 2    | 3    | 6    | 6    | 2    | 3    | 3     | 2      | 2      | 3     | 3     | 4     | 4 |
| 14982  |      |      |      |      |      |      |      |      |       | 1      | 3      | 2     | 4     | 4     | 3 |
| 14985  |      |      |      |      |      |      |      |      |       | 2      | 2      | 2     | 2     | 2     | 2 |
| 14986  |      |      |      |      |      |      |      |      |       | 3      | 3      | 3     | 4     | 4     | 4 |
| 14987  |      |      |      |      |      |      |      |      |       | 3      | 2      | 3     | 3     | 4     | 4 |
| 14988  | 2    | 2    | 1    | 2    | 4    | 2    | 2    | 4    | 3     | 2      | 1      | 1     | 2     | 1     | 1 |
| 14989  | 5    | 5    | 1    | 5    | 6    | 1    | 2    | 4    | 2     | 2      | 2      | 2     | 2     | 2     | 3 |
| 14993  |      |      |      |      |      |      |      |      |       | 2      | 2      | 2     | 2     | 3     | 2 |
| 15001  |      |      |      |      |      |      |      |      |       | 4      | 2      | 2     | 4     | 3     | 4 |
| 15002  | 3    | 2    | 3    | 1    | 1    | 3    | 1    | 2    | 2     | 3      | 2      | 1     | 2     | 3     | 3 |
| 15006  |      |      |      |      |      |      |      |      |       | 2      | 2      | 2     | 2     | 3     | 2 |
| 15007  | 6    | 5    | 4    | 6    | 6    | 6    | 6    | 3    | 3     | 2      | 2      | 3     | 4     | 3     | 3 |
| 15014  | 3    | 2    | 2    | 2    | 3    | 2    | 3    | 2    | 3     | 2      | 2      | 3     | 2     | 2     | 2 |
| 15020  |      |      |      |      |      |      |      |      |       | 2      | 2      | 2     | 3     | 3     | 3 |
| 15021  | 5    | 4    | 2    | 5    | 4    | 5    | 4    | 2    | 2     | 3      | 3      | 2     | 3     | 2     | 2 |

| respid | Q48k | Q48l | Q48m | Q48n | Q48o | Q48p | Q48q | Q48r | Q49_1 | Q50a_1 | Q50b_1 | Q51_1 | Q51_2 | Q52_1 |   |
|--------|------|------|------|------|------|------|------|------|-------|--------|--------|-------|-------|-------|---|
| 15023  | 1    | 2    | 3    | 3    | 3    | 3    | 2    | 2    | 3     | 3      | 1      | 2     | 1     | 1     | 3 |
| 15030  | 6    | 4    | 6    | 5    | 5    | 5    | 6    | 6    | 3     | 2      | 2      | 2     | 3     | 3     | 3 |
| 15032  |      |      |      |      |      |      |      |      |       | 2      | 3      | 3     | 4     | 4     | 5 |
| 15033  | 3    | 3    | 3    | 3    | 3    | 3    | 3    | 3    | 3     | 2      | 2      | 2     | 3     | 3     | 3 |
| 15034  |      |      |      |      |      |      |      |      |       | 2      | 2      | 2     | 4     | 4     | 5 |
| 15035  | 6    | 6    | 2    | 6    | 6    | 6    | 5    | 6    | 1     | 4      | 3      | 2     | 4     | 4     | 5 |
| 15037  |      |      |      |      |      |      |      |      |       | 2      | 3      | 3     | 5     | 5     | 3 |
| 15039  | 2    | 2    | 2    | 2    | 2    | 2    | 2    | 2    | 2     | 3      | 2      | 2     | 3     | 3     | 3 |
| 15040  |      |      |      |      |      |      |      |      |       | 4      | 3      | 3     | 5     | 5     | 5 |
| 15042  | 5    | 5    | 3    | 5    | 5    | 5    | 4    | 5    | 3     | 3      | 3      | 1     | 4     | 4     | 4 |
| 15044  |      |      |      |      |      |      |      |      |       | 4      | 3      | 3     | 4     | 4     | 5 |
| 15045  | 5    | 5    | 5    | 5    | 5    | 5    | 5    | 5    | 5     | 3      | 3      | 3     | 5     | 5     | 5 |
| 15046  |      |      |      |      |      |      |      |      |       | 4      | 2      | 2     | 1     | 2     | 4 |
| 15052  | 1    | 1    | 2    | 3    | 2    | 3    | 3    | 1    | 2     | 3      | 3      | 2     | 1     | 2     | 1 |
| 15058  | 4    | 3    | 3    | 4    | 4    | 2    | 2    | 1    | 6     | 2      | 1      | 2     | 1     | 2     | 3 |
| 15063  | 2    | 1    | 2    | 2    | 2    | 2    | 2    | 2    | 2     | 3      | 2      | 2     | 2     | 3     | 2 |
| 15066  |      | 1    | 1    | 1    | 1    | 1    | 1    | 1    | 1     | 5      | 3      | 3     | 1     | 2     | 3 |
| 15069  |      |      |      |      |      |      |      |      |       | 2      | 2      | 3     | 5     | 4     | 3 |
| 15071  | 3    | 2    | 3    | 2    | 5    | 2    | 2    | 2    | 5     | 2      | 2      | 3     | 3     | 3     | 2 |
| 15076  |      |      |      |      |      |      |      |      |       | 2      | 2      | 3     | 1     | 2     | 2 |
| 15078  | 3    | 3    | 4    | 4    | 4    | 4    | 4    | 4    | 4     | 3      | 3      | 3     | 5     | 5     | 5 |
| 15087  | 4    | 4    | 4    | 4    | 3    | 5    | 2    | 3    | 4     | 2      | 3      | 1     | 3     | 3     | 3 |
| 15090  |      |      |      |      |      |      |      |      | 2     | 3      | 3      | 3     | 2     | 3     | 2 |
| 15091  | 1    | 5    | 3    | 5    | 3    | 3    | 3    | 6    | 3     | 2      | 3      | 2     | 2     | 2     | 2 |
| 15092  | 5    | 6    | 1    | 5    | 5    | 5    | 5    | 5    | 2     | 4      | 3      | 3     | 5     | 5     | 4 |
| 15096  | 5    | 5    | 4    | 4    | 4    | 5    | 4    | 4    | 3     | 4      | 2      | 2     | 4     | 4     | 3 |
| 15106  | 2    | 2    | 2    | 2    | 2    | 2    | 2    | 2    | 2     | 2      | 2      | 2     | 2     | 2     | 2 |
| 15108  |      |      |      |      |      |      |      |      |       | 5      | 2      | 2     | 5     | 5     | 4 |
| 15113  | 4    | 3    | 3    | 2    | 5    | 3    | 4    | 4    | 1     | 3      | 3      | 2     | 2     | 3     | 1 |
| 15116  |      |      |      |      |      |      |      |      |       | 2      | 3      | 3     | 5     | 5     | 5 |
| 15119  |      |      |      |      |      |      |      |      |       | 3      | 2      | 2     | 4     | 5     | 2 |
| 15120  |      |      |      |      |      |      |      |      |       | 3      | 2      | 2     | 1     | 2     | 1 |

| respid | Q48k | Q48l | Q48m | Q48n | Q48o | Q48p | Q48q | Q48r | Q49_1 | Q50a_1 | Q50b_1 | Q51_1 | Q51_2 | Q52_1 |   |
|--------|------|------|------|------|------|------|------|------|-------|--------|--------|-------|-------|-------|---|
| 15121  |      |      |      |      |      |      |      |      |       | 2      | 3      | 2     | 4     | 4     | 4 |
| 15123  |      |      |      |      |      |      |      |      |       | 5      | 3      | 3     | 3     | 4     | 4 |
| 15124  | 5    | 5    | 4    | 3    | 6    | 4    | 5    | 3    | 2     | 2      | 3      | 2     | 4     | 5     | 5 |
| 15128  | 5    | 5    | 1    | 5    | 6    | 5    | 6    | 2    | 4     | 4      | 3      | 3     | 5     | 5     | 4 |
| 15131  |      |      |      |      |      |      |      |      |       | 2      | 3      | 3     | 5     | 5     | 5 |
| 15136  | 2    | 2    | 3    | 2    | 4    | 2    | 1    | 2    | 2     | 2      | 2      | 1     | 1     | 1     | 2 |
| 15137  | 3    | 2    | 4    | 2    | 3    | 3    | 3    | 3    | 4     | 4      | 2      | 2     | 2     | 3     | 1 |
| 15141  |      |      |      |      |      |      |      |      |       | 4      | 3      | 2     | 5     | 4     | 5 |
| 15144  | 3    | 2    | 3    | 4    | 2    | 2    | 2    | 2    | 2     | 4      | 3      | 2     | 3     | 2     | 2 |
| 15147  |      |      |      |      |      |      |      |      |       | 3      | 2      | 2     | 2     | 4     | 3 |
| 15151  |      |      |      |      |      |      |      |      |       | 1      | 2      | 2     | 2     | 2     | 2 |
| 15154  | 4    | 3    | 3    | 4    | 4    | 3    | 2    | 3    | 3     | 1      | 2      | 2     | 1     | 3     | 2 |
| 15157  |      |      |      |      |      |      |      |      |       | 1      | 2      | 2     | 2     | 3     | 1 |
| 15164  | 5    | 5    | 3    | 6    | 6    | 6    | 5    | 3    | 3     | 1      | 2      | 2     | 3     | 3     | 3 |
| 15168  |      |      |      |      |      |      |      |      |       | 1      | 2      | 2     | 2     | 2     | 2 |
| 15169  |      |      |      |      |      |      |      |      |       | 3      | 2      | 2     | 4     | 4     | 3 |
| 15172  | 2    | 3    | 2    | 2    | 2    | 2    | 2    | 2    | 3     | 3      | 2      | 2     | 3     | 3     | 3 |
| 15177  | 2    | 3    | 4    |      |      |      |      |      |       | 2      | 2      | 2     | 3     | 3     | 3 |
| 15178  |      |      |      |      |      |      |      |      |       | 1      | 2      | 3     | 5     | 4     | 3 |
| 15180  | 2    | 2    | 2    | 2    | 2    | 2    | 2    | 2    | 2     | 2      | 2      | 2     | 1     | 2     | 1 |
| 15181  |      |      |      |      |      |      |      |      |       | 4      | 3      | 3     | 5     | 5     | 5 |
| 15182  |      |      |      |      |      |      |      |      |       | 2      | 3      | 2     | 3     | 5     | 3 |
| 15183  |      |      |      |      |      |      |      |      |       | 4      | 2      | 2     | 3     | 4     | 2 |
| 15188  | 4    | 2    | 3    | 4    | 3    | 2    | 2    | 2    | 2     | 2      | 2      | 3     | 1     | 2     | 2 |
| 15190  | 1    | 1    | 1    | 2    | 1    | 2    | 1    | 1    | 1     | 3      | 1      | 2     | 1     | 3     | 1 |
| 15195  |      |      |      |      |      |      |      |      |       | 2      | 2      | 1     | 5     | 4     | 4 |
| 15201  | 3    | 3    | 5    | 4    | 3    | 2    | 1    | 1    | 1     | 2      | 1      | 2     | 1     | 1     | 2 |
| 15203  |      |      |      |      |      |      |      |      |       | 4      | 3      | 2     | 2     | 2     | 2 |
| 15204  |      |      |      |      |      |      |      |      |       | 4      | 3      | 3     | 5     | 5     | 4 |
| 15207  |      |      |      |      |      |      |      |      |       | 4      | 3      | 3     | 5     | 5     | 4 |
| 15208  | 4    | 4    | 3    | 2    | 3    | 3    | 4    | 5    | 5     | 1      | 2      | 1     | 1     | 4     | 1 |
| 15209  |      |      |      |      |      |      |      |      |       | 4      | 3      | 3     | 4     | 5     | 4 |

| respid | Q48k | Q48l | Q48m | Q48n | Q48o | Q48p | Q48q | Q48r | Q49_1 | Q50a_1 | Q50b_1 | Q51_1 | Q51_2 | Q52_1 |   |
|--------|------|------|------|------|------|------|------|------|-------|--------|--------|-------|-------|-------|---|
| 15212  |      |      |      |      |      |      |      |      |       | 4      | 3      | 3     | 5     | 5     | 5 |
| 15213  |      |      |      |      |      |      |      |      |       | 2      | 2      | 3     | 4     | 4     | 4 |
| 15219  |      |      |      |      |      |      |      |      |       | 3      | 3      | 2     | 4     | 5     | 4 |
| 15220  |      |      |      |      |      |      |      |      |       | 2      | 3      | 2     | 4     | 4     | 4 |
| 15221  | 6    | 5    | 2    | 6    | 5    | 6    | 6    | 2    | 2     | 2      | 2      | 2     | 3     | 4     | 4 |
| 15223  | 2    | 2    | 2    | 2    |      | 2    | 2    | 2    | 2     | 2      | 2      | 2     | 2     | 1     | 2 |
| 15224  |      |      |      |      |      |      |      |      |       | 3      | 3      | 2     | 4     | 5     | 5 |
| 15225  | 5    | 5    | 1    | 6    | 5    | 1    | 5    | 2    | 4     | 3      | 3      | 3     | 5     | 5     | 5 |
| 15226  | 6    | 5    | 6    | 6    | 6    | 6    | 6    | 1    | 2     | 3      | 2      | 2     | 3     | 4     | 3 |
| 15230  | 6    | 6    | 1    | 6    | 6    | 5    | 6    | 1    | 2     | 2      | 2      | 2     | 3     | 4     | 4 |
| 15231  | 2    | 1    | 1    | 2    | 1    | 1    | 2    | 3    | 2     | 2      | 1      | 1     | 1     | 2     | 1 |
| 15232  |      |      |      |      |      |      |      |      |       | 3      | 2      | 3     | 2     | 3     | 3 |
| 15237  |      |      |      |      |      |      |      |      |       | 4      | 3      | 3     | 5     | 5     | 5 |
| 15239  | 6    | 4    | 2    | 6    | 5    | 6    | 6    | 2    | 3     | 2      | 2      | 2     | 3     | 4     | 3 |
| 15241  | 6    | 5    | 3    | 6    | 6    | 6    | 6    | 6    | 1     | 2      | 2      | 2     | 3     | 4     | 4 |
| 15242  |      |      |      |      |      |      |      |      |       | 2      | 2      | 2     | 4     | 4     | 3 |
| 15247  | 6    | 5    | 2    | 6    | 6    | 6    | 6    | 6    | 2     | 3      | 2      | 2     | 3     | 4     | 4 |
| 15248  |      |      |      |      |      |      |      |      |       | 4      | 3      | 2     | 5     | 5     | 5 |
| 15251  |      |      |      |      |      |      |      |      |       | 4      | 3      | 3     | 3     | 2     | 3 |
| 15257  |      |      |      |      |      |      |      |      |       | 3      | 2      | 2     | 4     | 4     | 3 |
| 15260  | 6    | 4    | 2    | 6    | 4    | 5    | 6    | 2    | 2     | 2      | 2      | 2     | 4     | 4     | 3 |
| 15261  |      |      |      |      |      |      |      |      |       | 4      | 3      | 2     | 3     | 4     | 4 |
| 15262  |      |      |      |      |      |      |      |      |       | 2      | 2      | 1     | 3     | 3     | 3 |
| 15263  |      |      |      |      |      |      |      |      |       | 3      | 2      | 3     | 4     | 5     | 3 |
| 15265  | 6    | 6    | 1    | 6    | 6    | 6    | 6    | 6    | 1     | 2      | 2      | 2     | 4     | 4     | 3 |
| 15266  |      |      |      |      |      |      |      |      |       | 3      | 3      | 2     | 4     | 4     | 5 |
| 15268  |      |      |      |      |      |      |      |      |       | 3      | 2      | 3     | 5     | 4     | 4 |
| 15269  |      |      |      |      |      |      |      |      |       | 3      | 3      | 3     | 5     | 5     | 5 |
| 15270  |      |      |      |      |      |      |      |      |       | 3      | 3      | 3     | 4     | 5     | 5 |
| 15273  | 2    | 2    | 4    | 3    | 4    | 3    | 3    | 3    | 3     | 2      | 2      | 2     | 1     | 2     | 1 |
| 15276  |      |      |      |      |      |      |      |      |       | 4      | 3      | 2     | 3     | 4     | 2 |
| 15277  | 1    | 6    | 1    | 6    | 6    | 6    | 6    | 6    | 1     | 2      | 2      | 2     | 3     | 3     | 3 |

| respid | Q48k | Q48l | Q48m | Q48n | Q48o | Q48p | Q48q | Q48r | Q49_1 | Q50a_1 | Q50b_1 | Q51_1 | Q51_2 | Q52_1 |   |
|--------|------|------|------|------|------|------|------|------|-------|--------|--------|-------|-------|-------|---|
| 15282  | 6    | 6    | 6    | 1    | 6    | 6    | 6    | 6    | 6     | 1      | 3      | 3     | 2     | 2     | 2 |
| 15284  |      |      |      |      |      |      |      |      |       | 2      | 3      | 1     | 3     | 2     | 3 |
| 15285  |      |      |      |      |      |      |      |      |       | 2      | 2      | 3     | 4     | 4     | 3 |
| 15286  | 6    | 4    | 2    | 1    | 3    | 4    | 5    | 4    | 4     | 4      | 3      | 1     | 4     | 2     | 1 |
| 15288  |      |      |      |      |      |      |      |      |       | 3      | 2      | 2     | 2     | 4     | 3 |
| 15292  |      |      |      |      |      |      |      |      |       | 4      | 3      | 3     | 3     | 4     | 2 |
| 15296  | 5    | 6    | 1    | 5    | 6    | 5    | 6    | 2    | 4     | 4      | 3      | 3     | 5     | 5     | 4 |
| 15297  | 6    | 6    | 1    | 6    | 6    |      | 6    | 1    | 2     | 2      | 3      | 3     | 4     | 4     | 2 |
| 15298  |      |      |      |      |      |      |      |      |       | 3      | 3      | 3     | 5     | 5     | 5 |
| 15301  | 5    | 6    | 4    | 6    | 6    | 6    | 5    | 5    | 5     | 3      | 3      | 3     | 4     | 4     | 4 |
| 15302  |      |      |      |      |      |      |      |      |       | 4      | 3      | 3     | 5     | 5     | 5 |
| 15305  |      |      |      |      |      |      |      |      |       | 4      | 3      | 2     | 4     | 4     | 4 |
| 15307  |      |      |      |      |      |      |      |      |       | 4      | 3      | 3     | 5     | 5     | 5 |
| 15308  | 5    | 5    | 4    | 3    | 3    | 5    | 5    | 5    | 5     | 3      | 3      | 3     | 5     | 5     | 4 |
| 15309  |      |      |      |      |      |      |      |      |       | 3      | 3      | 3     | 3     | 5     | 4 |
| 15311  |      |      |      |      |      |      |      |      |       | 3      | 2      | 3     | 4     | 4     | 4 |
| 15315  |      |      |      |      |      |      |      |      |       | 3      | 3      | 3     | 5     | 5     | 4 |
| 15316  | 6    | 6    | 2    | 6    | 6    | 6    | 6    | 2    | 2     | 3      | 3      | 3     | 4     | 4     | 5 |
| 15318  |      |      |      |      |      |      |      |      |       | 1      | 1      | 2     | 2     | 3     | 1 |
| 15321  |      |      |      |      |      |      |      |      |       | 3      | 3      | 3     | 2     | 3     | 2 |
| 15322  |      |      |      |      |      |      |      |      |       | 4      | 3      | 3     | 5     | 5     | 5 |
| 15324  |      | 5    | 2    | 6    | 6    | 5    | 6    | 4    | 4     | 3      | 3      | 3     | 4     | 5     | 5 |
| 15326  |      |      |      |      |      |      |      |      |       | 2      | 3      | 3     | 4     | 4     | 5 |
| 15327  |      |      |      |      |      |      |      |      |       | 3      | 2      | 3     | 4     | 5     | 4 |
| 15328  | 3    | 2    | 3    | 1    | 4    | 3    | 2    | 2    | 2     | 5      | 3      | 3     | 2     | 3     | 1 |
| 15330  | 4    | 5    | 2    | 3    | 6    | 5    | 5    | 5    | 5     | 2      | 3      | 3     | 5     | 5     | 4 |
| 15332  |      |      |      |      |      |      |      |      |       | 2      | 2      | 2     | 4     | 4     | 4 |
| 15333  |      |      |      |      |      |      |      |      |       | 4      | 3      | 1     | 5     | 5     | 3 |
| 15334  |      |      |      |      |      |      |      |      |       | 4      | 3      | 3     | 4     | 5     | 5 |
| 15336  |      |      |      |      |      |      |      |      |       | 4      | 3      | 2     | 3     | 4     | 3 |
| 15337  | 2    | 3    | 4    | 4    | 4    | 3    | 3    | 4    | 4     | 2      | 3      | 2     | 4     | 3     | 5 |
| 15338  | 6    | 6    | 2    | 6    | 6    | 6    | 6    | 6    | 1     | 2      | 2      | 2     | 4     | 4     | 3 |

| respid | Q48k | Q48l | Q48m | Q48n | Q48o | Q48p | Q48q | Q48r | Q49_1 | Q50a_1 | Q50b_1 | Q51_1 | Q51_2 | Q52_1 |   |
|--------|------|------|------|------|------|------|------|------|-------|--------|--------|-------|-------|-------|---|
| 15339  | 6    | 6    | 4    | 3    | 6    | 6    | 6    | 6    | 1     | 3      | 3      | 3     | 5     | 5     | 2 |
| 15341  |      |      |      |      |      |      |      |      |       | 4      | 3      | 3     | 5     | 5     | 5 |
| 15344  |      |      |      |      |      |      |      |      |       | 3      | 3      | 3     | 4     | 5     | 3 |
| 15345  | 4    | 4    | 3    | 4    | 4    | 4    | 4    | 4    | 3     | 2      | 2      | 3     | 3     | 4     | 3 |
| 15350  |      |      |      |      |      |      |      |      |       | 1      | 2      | 2     | 2     | 3     | 2 |
| 15351  |      |      |      |      |      |      |      |      |       | 3      | 3      | 3     | 5     | 5     | 5 |
| 15352  | 4    | 3    | 4    | 3    | 4    | 3    | 2    | 5    | 5     | 3      | 2      | 2     | 4     | 5     | 4 |
| 15372  |      |      |      |      |      |      |      |      |       | 4      | 3      | 3     | 5     | 5     | 4 |
| 15373  | 1    | 1    | 1    | 1    | 1    | 1    | 1    | 1    | 1     | 3      | 3      | 2     | 1     | 2     | 2 |
| 15376  |      |      |      |      |      |      |      |      |       | 2      | 2      | 1     | 4     | 4     | 4 |
| 15377  | 6    | 4    | 2    | 6    | 5    | 6    | 6    | 6    | 2     | 2      | 2      | 2     | 3     | 4     | 4 |
| 15382  |      |      |      |      |      |      |      |      |       | 4      | 3      | 3     | 5     | 5     | 4 |
| 15383  |      |      |      |      |      |      |      |      |       | 4      | 2      | 2     | 2     | 3     | 2 |
| 15385  |      |      |      |      |      |      |      | 3    | 2     | 3      | 2      | 2     | 3     | 3     | 3 |
| 15390  | 5    | 4    | 1    | 6    | 5    | 6    | 6    | 6    | 1     | 3      | 2      | 2     | 3     | 4     | 4 |
| 15399  |      |      |      |      |      |      |      |      |       | 4      | 3      | 3     | 5     | 5     | 4 |
| 15404  |      |      |      |      |      |      |      |      |       | 2      | 2      | 2     | 3     | 3     | 3 |
| 15410  | 6    | 6    | 1    | 6    | 6    | 2    | 6    | 6    | 2     | 4      | 3      | 3     | 5     | 5     | 4 |
| 15411  |      |      |      |      |      |      |      |      |       | 3      | 2      | 2     | 2     | 3     | 2 |
| 15412  | 5    | 4    | 2    | 5    | 6    | 5    | 5    | 5    | 4     | 3      | 3      | 2     | 4     | 3     | 4 |
| 15413  |      |      |      |      |      |      |      |      |       | 2      | 3      | 3     | 4     | 5     | 5 |
| 15414  | 1    | 6    | 6    | 6    | 1    | 6    | 6    | 6    | 1     | 3      | 2      | 2     | 3     | 4     | 4 |
| 15417  | 6    | 6    | 1    | 6    | 6    | 1    | 6    | 6    | 1     | 3      | 3      | 2     | 5     | 5     | 5 |
| 15418  |      |      |      |      |      |      |      |      |       | 3      | 2      | 2     | 4     | 4     | 4 |
| 15421  | 1    | 6    | 1    | 6    | 6    | 6    | 6    | 6    | 1     | 3      | 2      | 2     | 4     | 4     | 3 |
| 15423  |      |      |      |      |      |      |      |      |       | 3      | 3      | 3     | 5     | 4     | 5 |
| 15425  | 5    | 5    | 2    | 5    | 5    | 5    | 5    | 5    | 2     | 3      | 3      | 3     | 4     | 4     | 4 |
| 15426  |      |      |      |      |      |      |      |      |       | 4      | 3      | 2     | 3     | 4     | 2 |
| 15430  |      |      |      |      |      |      |      |      |       | 3      | 3      | 3     | 5     | 5     | 4 |
| 15431  | 3    |      |      |      |      |      |      |      |       | 2      | 2      | 2     | 3     | 3     | 2 |
| 15435  |      |      |      |      |      |      |      |      |       | 3      | 3      | 3     | 5     | 5     | 5 |
| 15436  |      |      |      |      |      |      |      |      |       | 3      | 3      | 3     | 5     | 5     | 5 |

| respid | Q48k | Q48l | Q48m | Q48n | Q48o | Q48p | Q48q | Q48r | Q49_1 | Q50a_1 | Q50b_1 | Q51_1 | Q51_2 | Q52_1 |   |
|--------|------|------|------|------|------|------|------|------|-------|--------|--------|-------|-------|-------|---|
| 15437  |      |      |      |      |      |      |      |      |       | 1      | 3      | 2     | 4     | 4     | 5 |
| 15438  | 6    | 6    | 2    | 4    | 6    | 6    | 6    | 6    |       | 4      | 3      | 3     | 5     | 5     | 5 |
| 15439  |      |      |      |      |      |      |      |      |       | 3      | 3      | 3     | 5     | 5     | 5 |
| 15441  | 4    | 2    | 4    | 3    | 1    | 3    | 2    | 4    |       | 3      | 3      | 3     | 2     | 3     | 4 |
| 15443  |      |      |      |      |      |      |      |      |       | 3      | 2      | 2     | 3     | 4     | 4 |
| 15446  |      |      |      |      |      |      |      |      |       | 2      | 3      | 3     | 5     | 5     | 5 |
| 15449  |      |      |      |      |      |      |      |      |       | 3      | 2      | 2     | 2     | 3     | 2 |
| 15451  | 5    | 1    | 3    | 1    | 1    | 3    | 1    | 6    |       | 3      | 3      | 3     | 5     | 5     | 2 |
| 15452  |      |      |      |      |      |      | 3    | 2    |       | 4      | 2      | 1     | 3     | 3     | 2 |
| 15454  |      |      |      |      |      |      |      |      |       | 4      | 2      | 3     | 4     | 4     | 5 |
| 15456  |      |      |      |      |      |      |      |      |       | 3      | 2      | 3     | 5     | 5     | 4 |
| 15457  |      |      |      |      |      |      |      |      |       | 3      | 3      | 3     | 3     | 3     | 3 |
| 15458  | 4    | 3    | 5    | 4    | 4    | 3    | 4    | 4    |       | 3      | 3      | 3     | 3     | 4     | 3 |
| 15462  |      |      |      |      |      |      |      |      |       | 2      | 2      | 1     | 2     | 2     | 3 |
| 15467  | 4    | 5    | 2    | 3    | 5    | 2    | 2    | 4    |       | 2      | 3      | 3     | 3     | 4     | 3 |
| 15470  | 6    | 3    | 2    | 5    | 6    | 5    | 4    | 5    |       | 2      | 2      | 2     | 3     | 4     | 3 |
| 15472  |      |      |      |      |      |      |      |      |       | 3      | 3      | 3     | 4     | 5     | 4 |
| 15476  | 6    | 4    | 6    | 1    | 6    | 6    | 6    | 6    |       | 2      | 3      | 3     | 5     | 5     | 5 |
| 15477  | 5    | 5    | 1    | 4    | 6    | 6    | 6    | 6    | 1     | 3      | 2      | 2     | 3     | 4     | 4 |
| 15488  | 5    | 6    | 2    | 2    | 6    | 2    | 2    | 2    | 2     | 2      | 3      | 3     | 4     | 5     | 4 |
| 15489  | 1    | 3    | 4    | 1    | 4    | 4    | 3    | 4    |       | 2      | 3      | 3     | 5     | 5     | 4 |
| 15490  | 1    | 5    | 2    | 6    | 6    | 6    | 6    | 6    | 2     | 3      | 2      | 2     | 3     | 3     | 4 |
| 15496  |      |      |      |      |      |      |      |      |       | 2      | 2      | 2     | 3     | 2     | 4 |
| 15497  | 1    | 6    | 6    | 1    | 6    | 1    | 5    | 2    |       | 2      | 2      | 2     | 3     | 3     | 4 |
| 15498  |      |      |      |      |      |      |      |      |       | 5      | 3      | 3     | 5     | 5     | 5 |
| 15509  |      |      |      |      |      |      |      |      |       | 2      | 2      | 2     | 2     | 3     | 2 |
| 15510  | 6    | 6    | 2    | 6    | 6    | 6    | 6    | 6    | 1     | 2      | 2      | 2     | 3     | 4     | 3 |
| 15516  | 1    | 1    | 6    | 1    | 2    | 2    | 3    | 2    |       | 3      | 2      | 3     | 4     | 5     | 3 |
| 15519  | 4    | 4    | 3    | 4    | 4    | 4    | 3    | 4    |       | 3      | 3      | 3     | 5     | 5     | 4 |
| 15520  | 5    | 5    | 1    | 6    | 6    | 6    | 6    | 6    | 1     | 3      | 2      | 2     | 3     | 4     | 4 |
| 15524  | 6    | 5    | 4    | 5    | 5    | 4    | 6    | 4    |       | 2      | 2      | 3     | 3     | 3     | 3 |
| 15525  |      |      |      |      |      |      |      |      |       | 5      | 3      | 3     | 5     | 5     | 5 |



| respid | Q48k | Q48l | Q48m | Q48n | Q48o | Q48p | Q48q | Q48r | Q49_1 | Q50a_1 | Q50b_1 | Q51_1 | Q51_2 | Q52_1 |   |
|--------|------|------|------|------|------|------|------|------|-------|--------|--------|-------|-------|-------|---|
| 15526  |      | 2    | 4    | 2    | 3    | 2    | 4    | 3    | 2     | 2      | 3      | 2     | 3     | 4     | 4 |
| 15531  |      | 4    | 3    | 3    | 3    | 4    | 1    | 3    | 3     | 2      | 2      | 3     | 4     | 5     | 2 |
| 15532  |      | 6    | 6    |      | 2    | 6    | 6    | 6    |       | 3      | 3      | 3     | 5     | 5     | 4 |
| 15534  |      | 2    | 3    | 2    | 2    | 3    | 2    | 2    | 3     | 3      | 2      | 2     | 3     | 2     | 2 |
| 15535  |      | 3    | 2    | 2    | 3    | 3    | 3    | 3    | 2     | 3      | 2      | 2     | 2     | 3     | 2 |
| 15539  |      |      |      |      |      |      |      |      |       | 2      | 3      | 3     | 3     | 3     | 4 |
| 15550  |      |      |      |      |      |      |      |      |       | 4      | 3      | 3     | 5     | 5     | 5 |
| 15556  | 1    | 1    | 3    | 5    | 6    | 6    | 6    | 6    | 1     | 2      | 2      | 2     | 3     | 4     | 4 |
| 15558  | 2    | 2    | 3    | 3    | 2    | 2    | 2    | 3    | 3     | 3      | 2      | 2     | 3     | 2     | 3 |
| 15565  | 5    | 3    | 2    | 6    | 6    | 6    | 2    | 6    | 6     | 3      | 3      | 3     | 5     | 5     | 5 |
| 15567  | 2    | 3    | 3    | 2    | 2    | 2    |      | 2    | 2     | 2      | 2      | 2     | 1     | 2     | 2 |
| 15568  | 3    | 1    | 1    | 1    | 2    | 1    | 2    | 2    | 2     | 3      | 2      | 2     | 3     | 2     | 2 |
| 15571  |      |      |      |      |      |      |      |      |       | 2      | 3      | 3     | 5     | 5     | 5 |
| 15573  |      |      |      |      |      |      |      |      |       | 4      | 3      | 3     | 4     | 4     | 4 |
| 15574  | 1    | 1    | 2    | 1    | 2    | 1    | 2    | 1    | 1     | 3      | 2      | 2     | 2     | 2     | 2 |
| 15576  |      |      |      |      |      |      |      |      |       | 4      | 2      | 2     | 4     | 4     | 4 |
| 15587  | 3    | 3    | 4    | 3    | 5    | 3    | 3    | 3    | 5     | 2      | 2      | 2     | 3     | 3     | 4 |
| 15588  | 2    | 2    | 5    | 2    | 4    | 3    | 2    | 2    | 6     | 1      | 2      | 2     | 2     | 3     | 3 |
| 15593  |      |      |      |      |      |      |      |      |       | 1      | 1      | 1     | 3     | 3     | 3 |
| 15597  | 5    | 5    | 3    | 4    | 5    | 5    | 5    | 5    | 2     | 3      | 3      | 3     | 5     | 5     | 5 |
| 15598  |      |      |      |      |      |      |      |      |       | 3      | 2      | 2     | 4     | 5     | 4 |
| 15599  |      |      |      |      |      |      |      |      |       | 3      | 3      | 3     | 5     | 5     | 4 |
| 15601  |      |      |      |      |      |      |      |      |       | 4      | 3      | 3     | 4     | 4     | 4 |
| 15604  | 4    | 4    | 3    | 4    | 4    | 4    | 4    | 4    | 3     | 3      | 2      | 2     | 3     | 3     | 4 |
| 15611  |      |      |      |      |      |      |      |      |       | 2      | 3      | 3     | 5     | 5     | 5 |
| 15613  |      |      |      |      |      |      |      |      |       | 3      | 3      | 3     | 5     | 5     | 5 |
| 15614  |      |      |      |      |      |      |      |      |       | 2      | 3      | 3     | 5     | 5     | 5 |
| 15617  | 6    | 6    |      |      |      |      |      | 6    |       | 4      | 2      | 3     | 2     | 2     | 3 |
| 15622  |      |      |      |      |      |      |      |      |       | 3      | 3      | 3     | 5     | 5     | 5 |
| 15623  | 6    | 6    | 1    | 6    | 6    | 6    | 6    | 6    | 1     | 4      | 3      | 3     | 5     | 5     | 5 |
| 15625  |      |      |      |      |      |      |      |      |       | 2      | 3      | 3     | 5     | 5     | 5 |
| 15627  |      |      |      |      |      |      |      |      |       | 2      | 3      | 3     | 5     | 5     | 5 |

| respid | Q48k | Q48l | Q48m | Q48n | Q48o | Q48p | Q48q | Q48r | Q49_1 | Q50a_1 | Q50b_1 | Q51_1 | Q51_2 | Q52_1 |   |
|--------|------|------|------|------|------|------|------|------|-------|--------|--------|-------|-------|-------|---|
| 15628  |      |      |      |      |      |      |      |      |       | 3      | 3      | 3     | 5     | 5     | 5 |
| 15633  |      |      |      |      |      |      |      |      |       | 3      | 2      | 3     | 4     | 4     | 4 |
| 15634  |      |      |      |      |      |      |      |      |       | 2      | 3      | 3     | 4     | 4     | 4 |
| 15637  |      |      |      |      |      |      |      |      |       | 2      | 3      | 3     | 5     | 4     | 4 |
| 15644  |      |      |      |      |      |      |      |      |       | 2      | 3      | 3     | 5     | 4     | 4 |
| 15645  |      |      |      |      |      |      |      |      |       | 3      | 3      | 3     | 5     | 4     | 4 |
| 15649  |      |      |      |      |      |      |      |      |       | 2      | 3      | 3     | 2     | 2     | 3 |
| 15650  |      |      |      |      |      |      |      |      |       | 3      | 3      | 3     | 5     | 5     | 5 |
| 15651  | 5    | 5    | 2    | 5    | 5    | 5    | 5    | 5    | 2     | 3      | 3      | 3     | 5     | 5     | 5 |
| 15657  |      |      |      |      |      |      |      |      |       | 1      | 2      | 1     | 3     | 3     | 3 |
| 15658  | 5    | 5    | 2    | 5    | 4    | 3    | 5    | 5    | 3     | 3      | 3      | 3     | 4     | 5     | 4 |
| 15660  |      |      |      |      |      |      |      |      |       | 2      | 2      | 2     | 5     | 4     | 4 |
| 15667  | 6    | 6    | 1    | 6    | 6    | 6    | 6    | 6    | 2     | 4      | 3      | 3     | 5     | 5     | 4 |
| 15671  |      |      |      |      |      |      |      |      |       | 3      | 3      | 3     | 4     | 5     | 5 |
| 15679  |      |      |      |      |      |      |      |      |       | 1      | 3      | 3     | 5     | 5     | 5 |
| 15712  | 6    | 6    | 3    | 6    | 6    | 6    | 6    | 6    | 1     | 5      | 3      | 3     | 5     | 5     | 4 |
| 15715  |      |      |      |      |      |      |      |      |       | 4      | 3      | 3     | 4     | 4     | 4 |
| 15749  | 5    | 6    | 3    | 3    | 6    | 6    | 6    | 2    | 4     | 3      | 3      | 3     | 5     | 5     | 4 |
| 15754  |      |      |      |      |      |      |      |      |       | 3      | 3      | 3     | 1     | 1     | 4 |
| 15756  |      |      |      |      |      |      |      |      |       | 3      | 3      | 2     | 4     | 4     | 4 |
| 15773  |      |      |      |      |      |      |      |      |       | 3      | 3      | 2     | 4     | 4     | 4 |
| 15774  |      |      |      |      |      |      |      |      |       | 3      | 3      | 3     | 5     | 4     | 4 |
| 15776  |      |      |      |      |      |      |      |      |       | 3      | 3      | 3     | 5     | 5     | 5 |
| 15777  |      |      |      |      |      |      |      |      |       | 3      | 2      | 2     | 2     | 3     | 2 |
| 15779  |      |      |      |      |      |      |      |      |       | 2      | 3      | 2     | 3     | 4     | 4 |
| 15780  |      |      |      |      |      |      |      |      |       | 2      | 3      | 3     | 4     | 4     | 4 |
| 15792  |      |      |      |      |      |      |      |      |       | 3      | 3      | 3     | 5     | 5     | 4 |
| 15793  |      |      |      |      |      |      |      |      |       | 3      | 2      | 2     | 2     | 3     | 2 |
| 15796  |      |      |      |      |      |      |      |      |       | 2      | 3      | 3     | 4     | 4     | 4 |
| 15798  | 4    | 3    | 1    | 4    | 4    | 3    | 4    | 4    | 3     | 2      | 3      | 3     | 5     | 5     | 5 |
| 15809  |      |      |      |      |      |      |      |      |       | 4      | 3      | 3     | 5     | 5     | 5 |
| 15810  |      |      |      |      |      |      |      |      |       | 3      | 3      | 3     | 5     | 5     | 4 |

| respid | Q48k | Q48l | Q48m | Q48n | Q48o | Q48p | Q48q | Q48r | Q49_1 | Q50a_1 | Q50b_1 | Q51_1 | Q51_2 | Q52_1 |   |
|--------|------|------|------|------|------|------|------|------|-------|--------|--------|-------|-------|-------|---|
| 15815  | 4    | 3    | 4    | 3    | 4    | 5    | 4    | 4    |       | 2      | 3      | 2     | 5     | 4     | 4 |
| 15816  |      |      |      |      |      |      |      |      |       | 1      | 3      | 3     | 4     | 4     | 5 |
| 15817  |      |      |      |      |      |      |      |      |       | 4      | 3      | 3     | 5     | 5     | 5 |
| 15821  | 2    | 2    | 2    | 2    | 3    | 3    | 2    | 3    | 3     | 3      | 2      | 2     | 2     | 3     | 2 |
| 15823  | 4    | 4    | 4    | 4    | 4    | 4    | 4    | 4    | 3     | 2      | 2      | 2     | 3     | 3     | 3 |
| 15834  |      |      |      |      |      |      |      |      |       | 1      | 3      | 3     | 4     | 4     | 5 |
| 15835  |      |      |      |      |      |      |      |      |       | 5      | 3      | 3     | 5     | 5     | 5 |
| 15836  | 6    | 5    | 3    | 6    | 5    | 5    | 6    | 2    | 4     | 4      | 3      | 3     | 5     | 4     | 5 |
| 15837  | 6    | 5    | 2    | 5    | 5    | 6    | 6    | 2    | 3     | 2      | 2      | 2     | 4     | 4     | 4 |
| 15839  |      |      |      |      |      |      |      |      |       | 2      | 3      | 3     | 5     | 5     | 5 |
| 15840  | 6    | 6    | 6    | 6    | 6    | 5    | 6    | 1    | 3     | 3      | 2      | 2     | 3     | 4     | 3 |
| 15844  |      |      |      |      |      |      |      |      |       | 2      | 2      | 3     | 5     | 5     | 5 |
| 15845  |      |      |      |      |      |      |      |      |       | 4      | 3      | 3     | 3     | 3     | 4 |
| 15847  |      |      |      |      |      |      |      |      |       | 3      | 2      | 2     | 2     | 2     | 2 |
| 15848  | 3    | 4    | 3    | 3    | 5    | 3    | 5    | 2    | 2     | 2      | 3      | 3     | 4     | 4     | 3 |
| 15849  |      |      |      |      |      |      |      |      |       | 1      | 2      | 2     | 3     | 3     | 4 |
| 15857  | 4    | 4    | 3    | 4    | 4    | 4    | 4    | 3    | 2     | 2      | 2      | 2     | 4     | 4     | 3 |
| 15858  |      |      |      |      |      |      |      |      |       | 4      | 3      | 3     | 5     | 4     | 5 |
| 15862  |      |      |      |      |      |      |      |      |       | 4      | 3      | 2     | 4     | 3     | 2 |
| 15866  | 6    | 5    | 1    | 6    | 6    | 6    | 6    | 1    | 3     | 3      | 2      | 2     | 3     | 4     | 4 |
| 15870  | 5    | 6    | 2    | 6    | 6    | 5    | 6    | 1    | 3     | 3      | 2      | 2     | 3     | 4     | 4 |
| 15871  |      |      |      |      |      |      |      |      |       | 3      | 3      | 3     | 5     | 5     | 3 |
| 15872  |      |      |      |      |      |      |      |      |       | 3      | 2      | 3     | 4     | 4     | 5 |
| 15873  |      |      |      |      |      |      |      |      |       | 4      | 3      | 3     | 5     | 5     | 5 |
| 15874  |      |      |      |      |      |      |      |      |       | 5      | 3      | 3     | 5     | 5     | 5 |
| 15875  | 3    | 3    | 4    | 3    | 4    | 4    | 4    | 4    | 3     | 3      | 2      | 2     | 2     | 3     | 1 |
| 15876  | 2    | 2    | 2    | 2    | 2    | 2    | 2    | 2    | 2     | 3      | 2      | 2     | 2     | 3     | 2 |
| 15882  | 3    | 3    | 4    | 2    | 2    | 1    | 2    | 5    | 2     | 2      | 2      | 2     | 3     | 3     | 2 |
| 15884  | 5    | 4    | 3    | 3    | 5    | 5    | 3    | 4    | 2     | 2      | 2      | 2     | 3     | 4     | 3 |
| 15890  |      |      |      |      |      |      |      |      |       | 2      | 3      | 2     | 3     | 3     | 4 |
| 15892  | 1    | 2    | 3    | 1    | 2    | 1    | 2    | 5    | 2     | 2      | 2      | 2     | 2     | 3     | 2 |
| 15908  |      |      |      |      |      |      |      |      |       | 2      | 3      | 3     | 4     | 4     | 3 |

| respid | Q48k | Q48l | Q48m | Q48n | Q48o | Q48p | Q48q | Q48r | Q49_1 | Q50a_1 | Q50b_1 | Q51_1 | Q51_2 | Q52_1 |   |
|--------|------|------|------|------|------|------|------|------|-------|--------|--------|-------|-------|-------|---|
| 15914  |      | 4    | 6    | 6    | 5    | 5    | 6    | 6    | 1     | 3      | 2      | 2     | 3     | 4     | 3 |
| 15932  |      |      |      |      |      |      |      |      |       | 3      | 3      | 3     | 2     | 1     | 2 |
| 15933  |      |      |      |      |      |      |      |      |       | 4      | 3      | 3     | 5     | 5     | 4 |
| 15938  |      |      |      |      |      |      |      |      |       | 3      | 3      | 3     | 5     | 5     | 5 |
| 15940  | 1    | 4    | 3    | 3    | 3    | 3    | 5    | 1    | 2     | 2      | 2      | 2     | 3     | 1     |   |
| 15945  | 6    | 6    | 2    | 6    | 6    | 6    | 6    | 1    | 3     | 2      | 3      | 4     | 4     | 4     | 4 |
| 15947  |      |      |      |      |      |      |      |      |       | 5      | 3      | 3     | 5     | 5     | 5 |
| 15950  | 5    | 6    | 2    | 6    | 6    | 6    | 6    | 1    | 3     | 2      | 2      | 3     | 4     | 4     | 4 |
| 15951  | 6    | 6    | 2    | 6    | 6    | 6    | 6    | 6    | 2     | 3      | 3      | 4     | 4     | 4     | 4 |
| 15952  |      |      |      |      |      |      |      |      |       | 3      | 2      | 2     | 2     | 3     | 2 |
| 15953  | 3    | 6    | 2    | 3    | 6    | 3    | 4    | 3    | 3     | 3      | 3      | 3     | 5     | 5     | 4 |
| 15954  | 5    | 5    | 3    | 4    | 4    | 4    | 4    | 3    | 1     | 2      | 2      | 2     | 2     | 2     | 3 |
| 15957  | 1    | 3    | 4    | 4    | 2    | 4    | 2    | 3    | 4     | 3      | 3      | 1     | 2     | 2     | 1 |
| 15965  | 2    | 2    | 1    | 2    | 2    | 1    | 4    | 3    | 2     | 2      | 2      | 4     | 3     | 3     | 2 |
| 15966  |      |      |      |      |      |      |      |      |       | 4      | 3      | 3     | 5     | 5     | 5 |
| 15967  |      |      |      |      |      |      |      |      |       | 2      | 3      | 2     | 5     | 5     | 3 |
| 15968  |      |      |      |      |      |      |      |      |       | 2      | 3      | 1     | 4     | 3     | 3 |
| 15970  | 5    | 6    | 4    | 3    | 6    | 6    | 6    | 6    | 3     | 3      | 3      | 3     | 5     | 5     | 5 |
| 15973  | 6    | 6    | 2    | 6    | 6    | 6    | 6    | 5    | 2     | 3      | 2      | 2     | 3     | 4     | 4 |
| 15974  | 6    | 6    | 1    | 5    | 6    | 4    | 6    | 1    | 3     | 2      | 3      | 3     | 3     | 4     | 3 |
| 15975  |      |      |      |      |      |      |      |      |       | 3      | 3      | 3     | 5     | 5     | 5 |
| 15980  | 2    | 1    | 1    | 2    | 2    | 2    | 1    | 6    | 1     | 1      | 2      | 1     | 2     | 2     | 1 |
| 15984  |      |      |      |      |      |      |      |      |       | 2      | 3      | 3     | 4     | 4     | 5 |
| 15985  | 2    | 2    | 3    | 3    | 3    | 2    | 2    | 2    | 4     | 2      | 1      | 2     | 3     | 3     | 2 |
| 15994  |      |      |      |      |      |      |      |      |       | 2      | 3      | 3     | 5     | 5     | 5 |
| 15995  | 5    | 5    | 2    | 5    | 5    | 4    | 4    | 2    | 3     | 3      | 3      | 5     | 5     | 5     | 5 |
| 16000  |      |      |      |      |      |      |      |      |       | 4      | 3      | 2     | 4     | 4     | 3 |
| 16004  | 6    | 6    | 2    | 6    | 6    | 6    | 6    | 1    | 3     | 2      | 2      | 3     | 4     | 4     | 4 |
| 16005  | 6    | 6    | 6    | 6    | 6    | 6    | 6    | 1    | 3     | 2      | 3      | 3     | 4     | 4     | 4 |
| 16006  |      |      |      |      |      |      |      |      |       | 3      | 3      | 2     | 1     | 2     | 1 |
| 16009  |      |      |      |      |      |      |      |      |       | 1      | 2      | 2     | 5     | 5     | 3 |
| 16017  | 6    | 2    | 2    | 3    | 6    | 6    | 6    | 6    | 2     | 4      | 3      | 3     | 5     | 5     | 5 |

| respid | Q48k | Q48l | Q48m | Q48n | Q48o | Q48p | Q48q | Q48r | Q49_1 | Q50a_1 | Q50b_1 | Q51_1 | Q51_2 | Q52_1 |   |
|--------|------|------|------|------|------|------|------|------|-------|--------|--------|-------|-------|-------|---|
| 16019  |      | 6    | 6    | 1    | 6    | 6    | 5    | 6    | 2     | 4      | 2      | 3     | 4     | 5     | 4 |
| 16021  |      | 3    | 6    | 4    | 1    | 6    | 6    | 6    | 6     | 4      | 2      | 2     | 3     | 3     | 3 |
| 16024  |      |      |      |      |      |      |      |      |       | 3      | 3      | 3     | 5     | 5     | 5 |
| 16026  |      |      |      |      |      |      |      |      |       | 3      | 2      | 3     | 4     | 5     | 5 |
| 16029  |      |      |      |      |      |      |      |      |       | 3      | 3      | 3     | 5     | 5     | 5 |
| 16031  |      |      |      |      |      |      |      |      |       | 1      | 3      | 2     | 4     | 5     | 4 |
| 16037  | 6    | 6    | 3    | 6    | 6    | 6    | 6    | 6    | 1     | 5      | 3      | 3     | 5     | 5     | 4 |
| 16043  |      |      |      |      |      |      |      |      |       | 3      | 3      | 2     | 3     | 3     | 4 |
| 16044  | 3    | 6    | 1    | 6    | 6    | 5    | 6    | 6    | 1     | 3      | 3      | 2     | 4     | 4     | 4 |
| 16047  |      |      |      |      |      |      |      |      |       | 3      | 3      | 3     | 4     | 4     | 5 |
| 16048  |      |      |      |      |      |      |      |      |       | 2      | 3      | 3     | 5     | 5     | 5 |
| 16049  | 5    | 5    | 5    | 4    | 6    | 5    | 5    | 5    | 3     | 3      | 3      | 3     | 5     | 5     | 5 |
| 16051  | 5    | 3    | 3    | 3    | 6    | 3    | 5    | 5    | 2     | 3      | 2      | 2     | 4     | 4     | 5 |
| 16053  |      |      |      |      |      |      |      |      |       | 2      | 3      | 3     | 5     | 5     | 5 |
| 16054  | 5    | 5    | 3    | 5    | 5    | 5    | 5    | 5    | 2     | 3      | 3      | 3     | 5     | 5     | 5 |
| 16069  | 4    | 4    | 3    | 3    | 4    | 2    | 3    | 3    | 3     | 2      | 2      | 2     | 4     | 4     | 4 |
| 16070  |      |      |      |      |      |      |      |      |       | 3      | 3      | 2     | 5     | 5     | 4 |
| 16074  |      |      |      |      |      |      |      |      |       | 3      | 3      | 3     | 5     | 5     | 5 |
| 16076  |      |      |      |      |      |      |      |      |       | 3      | 3      | 3     | 5     | 5     | 5 |
| 16078  |      |      |      |      |      |      |      |      |       | 4      | 3      | 3     | 5     | 5     | 5 |
| 16081  | 5    | 5    | 4    | 3    | 5    | 3    | 5    | 5    | 4     | 3      | 2      | 2     | 3     | 4     | 3 |
| 16085  |      |      |      |      |      |      |      |      |       | 2      | 2      | 2     | 4     | 4     | 4 |
| 16088  |      |      |      |      |      |      |      |      |       | 4      | 3      | 3     | 5     | 5     | 4 |
| 16091  | 2    | 3    | 5    | 3    | 4    | 2    | 4    | 4    | 4     | 4      | 2      | 3     | 3     | 3     | 3 |
| 16092  |      |      |      |      |      |      |      |      |       | 3      | 3      | 3     | 5     | 5     | 4 |
| 16093  |      |      |      |      |      |      |      |      |       | 3      | 2      | 3     | 5     | 5     | 4 |
| 16097  |      |      |      |      |      |      |      |      |       | 3      | 3      | 3     | 5     | 5     | 5 |
| 16100  | 1    | 3    | 4    | 1    | 2    | 2    | 1    | 4    | 4     | 3      | 2      | 3     | 5     | 5     | 3 |
| 16101  | 6    | 6    | 1    | 6    | 6    | 6    | 6    | 6    | 2     | 4      | 3      | 3     | 5     | 5     | 5 |
| 16105  |      |      |      |      |      |      |      |      |       | 3      | 2      | 2     | 5     | 5     | 4 |
| 16118  | 4    | 3    | 2    | 4    | 3    | 3    | 3    | 3    | 3     | 2      | 2      | 1     | 2     | 2     | 2 |
| 16129  |      |      |      |      |      |      |      |      |       | 3      | 3      | 3     | 5     | 5     | 5 |

| respid | Q48k | Q48l | Q48m | Q48n | Q48o | Q48p | Q48q | Q48r | Q49_1 | Q50a_1 | Q50b_1 | Q51_1 | Q51_2 | Q52_1 |   |
|--------|------|------|------|------|------|------|------|------|-------|--------|--------|-------|-------|-------|---|
| 16130  |      |      |      |      |      |      |      |      |       | 2      | 3      | 2     | 3     | 3     | 4 |
| 16131  |      |      |      |      |      |      |      |      |       | 2      | 2      | 2     | 3     | 3     | 3 |
| 16136  | 2    | 5    | 4    | 2    | 5    | 3    | 2    | 5    | 3     | 2      | 3      | 4     | 4     | 3     |   |
| 16137  | 3    | 4    | 4    | 2    | 5    | 3    | 3    | 3    | 3     | 3      | 3      | 4     | 4     | 4     |   |
| 16138  | 6    | 5    | 1    | 6    | 6    | 6    | 6    | 3    | 3     | 2      | 2      | 3     | 4     | 5     |   |
| 16139  | 6    | 5    | 2    | 3    | 5    | 6    | 5    | 3    | 3     | 3      | 2      | 3     | 3     | 3     |   |
| 16140  | 2    | 6    | 1    | 1    | 6    | 6    | 6    | 1    | 4     | 3      | 3      | 5     | 5     | 5     |   |
| 16145  | 3    | 5    | 5    | 4    | 6    | 6    | 5    | 4    | 2     | 2      | 2      | 5     | 5     | 5     |   |
| 16150  | 6    | 6    | 6    | 1    | 6    | 6    | 6    | 6    | 1     | 3      | 1      | 1     | 3     | 3     |   |
| 16151  |      |      |      |      |      |      |      |      |       | 3      | 3      | 3     | 5     | 5     | 5 |
| 16153  |      |      |      |      |      |      |      |      |       | 4      | 3      | 3     | 5     | 5     | 5 |
| 16164  |      |      |      |      |      |      |      |      |       | 4      | 3      | 3     | 5     | 5     | 5 |
| 16168  |      |      |      |      |      |      |      |      |       | 2      | 2      | 2     | 3     | 3     | 3 |
| 16173  | 2    | 3    | 4    | 2    | 5    | 3    | 3    | 3    | 2     | 2      | 2      | 3     | 3     | 3     |   |
| 16174  |      |      |      |      |      |      |      |      |       | 3      | 3      | 3     | 5     | 5     | 5 |
| 16177  |      |      |      |      |      |      |      |      |       | 2      | 3      | 2     | 1     | 1     | 1 |
| 16185  |      |      |      |      |      |      |      |      |       | 3      | 3      | 3     | 5     | 5     | 5 |
| 16189  | 3    | 3    | 5    | 3    | 3    | 3    | 4    | 4    | 3     | 3      | 3      | 4     | 4     | 4     |   |
| 16192  |      |      |      |      |      |      |      |      |       | 2      | 3      | 3     | 5     | 4     | 4 |
| 16193  | 5    | 5    | 5    | 3    | 5    | 4    | 5    | 4    | 2     | 2      | 2      | 3     | 3     | 3     |   |
| 16194  |      |      |      |      |      |      |      |      |       | 3      | 3      | 3     | 5     | 5     | 5 |
| 16196  |      |      |      |      |      |      |      |      |       | 3      | 2      | 2     | 2     | 2     | 2 |
| 16202  |      |      |      |      |      |      |      |      |       | 2      | 2      | 2     | 2     | 2     | 3 |
| 16205  | 5    | 5    | 3    | 6    | 6    | 5    | 2    | 6    | 2     | 2      | 3      | 4     | 4     | 3     |   |
| 16206  | 5    | 5    | 2    | 5    | 5    | 5    | 5    | 2    | 2     | 3      | 2      | 1     | 3     | 3     |   |
| 16208  |      |      |      |      |      |      |      |      |       | 3      | 3      | 3     | 5     | 5     | 5 |
| 16211  | 6    | 5    | 1    | 6    | 6    | 3    | 6    | 2    | 3     | 2      | 3      | 2     | 3     | 2     |   |
| 16212  | 6    | 6    | 2    | 5    | 6    | 6    | 6    | 6    | 3     | 3      | 3      | 5     | 5     | 5     |   |
| 16215  |      |      |      |      |      |      |      |      |       | 3      | 3      | 3     | 5     | 5     | 5 |
| 16217  |      |      |      |      |      |      |      |      |       | 3      | 3      | 2     | 3     | 4     | 4 |
| 16221  |      |      |      |      |      |      |      |      |       | 3      | 3      | 3     | 5     | 5     | 4 |
| 16226  | 5    | 5    | 2    | 4    | 5    | 5    | 5    | 4    | 2     | 2      | 2      | 4     | 4     | 4     |   |

| respid | Q48k | Q48l | Q48m | Q48n | Q48o | Q48p | Q48q | Q48r | Q49_1 | Q50a_1 | Q50b_1 | Q51_1 | Q51_2 | Q52_1 |   |
|--------|------|------|------|------|------|------|------|------|-------|--------|--------|-------|-------|-------|---|
| 16228  |      |      |      |      |      |      |      |      |       | 2      | 2      | 2     | 4     | 2     | 2 |
| 16229  |      |      |      |      |      |      |      |      |       | 2      | 2      | 3     | 5     | 4     | 5 |
| 16230  |      |      |      |      |      |      |      |      |       | 2      | 3      | 3     | 4     | 4     | 4 |
| 16231  |      |      |      |      |      |      |      |      |       | 2      | 3      | 3     | 5     | 5     | 5 |
| 16232  |      |      |      |      |      |      |      |      |       | 2      | 2      | 2     | 4     | 3     | 5 |
| 16234  |      |      |      |      |      |      |      |      |       | 2      | 3      | 3     | 4     | 4     | 4 |
| 16235  |      |      |      |      |      |      |      |      |       | 3      | 2      | 2     | 3     | 3     | 3 |
| 16236  |      |      |      |      |      |      |      |      |       | 2      | 2      | 3     | 4     | 4     | 5 |
| 16237  |      |      |      |      |      |      |      |      |       | 2      | 2      | 3     | 4     | 4     | 5 |
| 16238  |      |      |      |      |      |      |      |      |       | 2      | 3      | 2     | 2     | 1     | 2 |
| 16239  | 6    | 6    | 6    | 6    | 6    | 6    | 6    | 6    | 6     | 2      | 3      | 3     | 4     | 4     | 4 |
| 16243  | 6    | 6    | 1    | 6    | 6    | 6    | 6    | 6    | 2     | 3      | 3      | 2     | 3     | 3     | 3 |
| 16248  |      |      |      |      |      |      |      |      |       | 2      | 3      | 2     | 3     | 4     | 3 |
| 16249  | 6    | 6    | 6    | 6    | 6    | 6    | 6    | 6    | 6     | 2      | 3      | 3     | 5     | 5     | 5 |
| 16251  |      |      |      |      |      |      |      |      |       | 3      | 3      | 3     | 5     | 5     | 5 |
| 16263  |      |      |      |      |      |      |      |      |       | 2      | 3      | 2     | 5     | 5     | 5 |
| 16265  | 4    | 6    | 4    | 4    | 4    | 5    | 4    | 2    | 2     | 2      | 1      | 3     | 3     | 4     | 4 |
| 16269  | 5    | 5    | 2    | 5    | 5    | 5    | 5    | 5    | 3     | 3      | 3      | 3     | 4     | 5     | 4 |
| 16272  | 3    | 3    | 6    | 2    | 3    | 3    | 3    | 3    | 6     | 2      | 2      | 1     | 4     | 3     | 4 |
| 16273  |      |      |      |      |      |      |      |      |       | 4      | 3      | 3     | 5     | 5     | 5 |
| 16281  | 4    | 5    | 4    | 3    | 5    | 4    | 5    | 5    | 5     | 3      | 3      | 2     | 5     | 3     | 5 |
| 16282  | 6    | 6    | 2    | 6    | 6    | 6    | 6    | 6    | 2     | 2      | 3      | 3     | 5     | 5     | 4 |
| 16287  |      |      |      |      |      |      |      |      |       | 3      | 3      | 3     | 2     | 2     | 2 |
| 16290  |      |      |      |      |      |      |      |      |       | 2      | 3      | 3     | 5     | 5     | 5 |
| 16294  |      |      |      |      |      |      |      |      |       | 3      | 3      | 3     | 5     | 5     | 5 |
| 16295  |      |      |      |      |      |      |      |      |       | 4      | 2      | 3     | 5     | 5     | 1 |
| 16296  | 6    | 6    | 2    | 5    | 6    | 6    | 6    | 6    | 6     | 2      | 3      | 3     | 5     | 5     | 3 |
| 16299  |      |      |      |      |      |      |      |      |       | 2      | 2      | 1     | 2     | 4     | 4 |
| 16302  |      |      |      |      |      |      |      |      |       | 2      | 3      | 3     | 5     | 5     | 5 |
| 16303  |      |      |      |      |      |      |      |      |       | 2      | 3      | 3     | 4     | 4     | 4 |
| 16304  | 2    | 5    | 4    | 2    | 6    |      |      | 2    | 3     | 2      | 2      | 2     | 1     | 3     | 4 |
| 16306  | 6    | 6    | 6    | 6    | 6    | 6    | 6    | 6    | 2     | 2      | 3      | 3     | 5     | 5     | 5 |

| respid | Q48k | Q48l | Q48m | Q48n | Q48o | Q48p | Q48q | Q48r | Q49_1 | Q50a_1 | Q50b_1 | Q51_1 | Q51_2 | Q52_1 |   |
|--------|------|------|------|------|------|------|------|------|-------|--------|--------|-------|-------|-------|---|
| 16318  |      |      |      |      |      |      |      |      |       | 2      | 3      | 3     | 4     | 3     | 3 |
| 16320  |      |      |      |      |      |      |      |      |       | 3      | 3      | 3     | 5     | 5     | 4 |
| 16321  |      |      |      |      |      |      |      |      |       | 2      | 3      | 3     | 5     | 5     | 5 |
| 16322  |      |      |      |      |      |      |      |      |       | 2      | 3      | 3     | 5     | 5     | 5 |
| 16324  | 4    | 5    | 5    | 3    | 5    | 5    | 5    | 5    |       | 3      | 2      | 2     | 3     | 3     | 3 |
| 16326  |      |      |      |      |      |      |      |      |       | 2      | 2      | 2     | 2     | 2     | 3 |
| 16328  | 2    | 2    | 2    | 2    | 2    | 2    | 2    | 2    |       | 2      | 2      | 2     | 3     | 3     | 4 |
| 16336  |      |      |      |      |      |      |      |      |       | 3      | 3      | 3     | 4     | 5     | 4 |
| 16341  |      |      |      |      |      |      |      |      |       | 2      | 3      | 3     | 4     | 4     | 4 |
| 16342  | 6    | 6    | 1    | 6    | 6    | 6    | 6    | 6    |       | 4      | 3      | 3     | 5     | 5     | 4 |
| 16343  | 1    | 2    | 6    | 1    | 6    | 6    | 2    | 6    |       | 1      | 1      | 1     | 2     | 2     | 3 |
| 16345  |      |      |      |      |      |      |      |      |       | 2      | 2      | 2     | 2     | 3     | 2 |
| 16349  | 5    | 5    | 3    | 5    | 6    | 5    | 5    | 3    |       | 2      | 3      | 2     | 5     | 4     | 5 |
| 16355  |      |      |      |      |      |      |      |      |       | 3      | 2      | 2     | 3     | 3     | 3 |
| 16364  |      |      |      |      |      |      |      |      |       | 2      | 2      | 2     | 3     | 4     | 3 |
| 16374  | 6    | 6    | 6    | 6    | 6    | 6    | 6    | 2    |       | 3      | 2      | 3     | 4     | 4     | 4 |
| 16375  |      |      |      |      |      |      |      |      |       | 4      | 3      | 3     | 5     | 5     | 5 |
| 16376  |      |      |      |      |      |      |      |      |       | 2      | 2      | 2     | 2     | 3     | 3 |
| 16393  | 4    | 3    | 3    | 3    | 3    | 4    | 4    | 4    |       | 2      | 2      | 2     | 4     | 4     | 4 |
| 16394  | 4    | 4    | 4    | 4    | 4    | 4    | 4    | 4    |       | 2      | 2      | 2     | 3     | 3     | 3 |
| 16395  |      |      |      |      |      |      |      |      |       | 3      | 3      | 2     | 4     | 4     | 5 |
| 16397  |      |      |      |      |      |      |      |      |       | 3      | 3      | 3     | 5     | 5     | 4 |
| 16398  |      |      |      |      |      |      |      |      |       | 2      | 2      | 2     | 3     | 3     | 3 |
| 16402  |      |      |      |      |      |      |      |      |       | 4      | 3      | 3     | 5     | 5     | 5 |
| 16405  |      |      |      |      |      |      |      |      |       | 3      | 3      | 3     | 5     | 5     | 5 |
| 16416  |      |      |      |      |      |      |      |      |       | 3      | 2      | 2     | 3     | 3     | 3 |
| 16422  |      |      |      |      |      |      |      |      |       | 2      | 2      | 2     | 2     | 3     | 2 |
| 16429  | 6    | 6    | 2    | 5    | 1    | 5    | 5    | 2    |       | 3      | 3      | 3     | 4     | 5     | 5 |
| 16430  | 5    | 5    | 3    | 3    | 6    | 4    | 5    | 3    |       | 3      | 3      | 3     | 5     | 5     | 4 |
| 16432  |      |      |      |      |      |      |      |      |       | 3      | 2      | 2     | 3     | 2     | 2 |
| 16433  |      |      |      |      |      |      |      |      |       | 4      | 3      | 3     | 4     | 4     | 4 |
| 16434  |      |      |      |      |      |      |      |      |       | 2      | 3      | 3     | 4     | 4     | 4 |



| respid | Q48k | Q48l | Q48m | Q48n | Q48o | Q48p | Q48q | Q48r | Q49_1 | Q50a_1 | Q50b_1 | Q51_1 | Q51_2 | Q52_1 |   |
|--------|------|------|------|------|------|------|------|------|-------|--------|--------|-------|-------|-------|---|
| 16437  | 2    | 2    | 5    | 1    | 3    | 3    | 3    | 3    | 4     | 2      | 2      | 2     | 1     | 3     | 3 |
| 16439  |      |      |      |      |      |      |      |      |       | 4      | 3      | 3     | 4     | 4     | 4 |
| 16440  | 5    | 3    | 4    | 2    | 5    | 2    | 5    | 4    | 4     | 2      | 3      | 3     | 4     | 5     | 5 |
| 16441  |      |      |      |      |      |      |      |      |       | 2      | 1      | 2     | 3     | 3     | 4 |
| 16442  |      |      |      |      |      |      |      |      |       | 4      | 3      | 3     | 5     | 5     | 5 |
| 16450  | 4    | 5    | 5    | 5    | 5    | 5    | 5    | 4    | 4     | 2      | 2      | 2     | 4     | 4     | 4 |
| 16451  |      |      |      |      |      |      |      |      |       | 2      | 3      | 3     | 5     | 5     | 4 |
| 16452  | 3    | 4    | 3    | 3    | 4    | 3    | 3    | 3    | 4     | 1      | 2      | 2     | 1     | 2     | 3 |
| 16467  | 2    | 5    | 4    | 3    | 5    | 5    | 5    | 5    | 6     | 1      | 2      | 2     | 4     | 3     | 5 |
| 16468  |      |      |      |      |      |      |      |      |       | 4      | 3      | 3     | 5     | 5     | 5 |
| 16469  |      |      |      |      |      |      |      |      |       | 3      | 3      | 2     | 5     | 4     | 5 |
| 16470  |      |      |      |      |      |      |      |      |       | 3      | 3      | 3     | 4     | 4     | 4 |
| 16471  | 5    | 6    | 4    | 3    | 6    | 5    | 6    | 6    | 2     | 4      | 3      | 3     | 5     | 5     | 5 |
| 16473  |      | 6    | 2    | 6    | 6    | 6    | 6    | 6    | 1     | 4      | 3      | 3     | 5     | 5     | 5 |
| 16476  |      |      |      |      |      |      |      |      |       | 3      | 3      | 3     | 5     | 5     | 5 |
| 16478  |      |      |      |      |      |      |      |      |       | 2      | 3      | 2     | 5     | 4     | 4 |
| 16484  | 2    | 2    | 5    | 2    | 5    | 4    | 2    | 5    | 5     | 2      | 2      | 2     | 3     | 3     | 3 |
| 16499  | 3    | 4    | 4    | 3    | 4    | 4    | 4    | 4    | 4     | 3      | 3      | 3     | 3     | 3     | 3 |
| 16502  |      |      |      |      |      |      |      |      |       | 3      | 3      | 3     | 5     | 5     | 5 |
| 16505  |      |      |      |      |      |      |      |      |       | 3      | 3      | 3     | 4     | 4     | 4 |
| 16514  |      |      |      |      |      |      |      |      |       | 3      | 3      | 3     | 5     | 5     | 5 |
| 16515  |      |      |      |      |      |      |      |      |       | 4      | 3      | 3     | 4     | 4     | 3 |
| 16517  | 6    | 6    | 6    | 6    | 6    | 6    | 6    | 6    | 6     | 2      | 2      | 2     | 2     | 3     | 2 |
| 16518  |      |      |      |      |      |      |      |      |       | 2      | 3      | 2     | 5     | 3     | 5 |
| 16519  |      |      |      |      |      |      |      |      |       | 3      | 3      | 2     | 3     | 4     | 3 |
| 16525  |      |      |      |      |      |      |      |      |       | 3      | 3      | 3     | 5     | 5     | 5 |
| 16526  | 6    | 6    | 1    | 6    | 6    | 6    | 6    | 6    | 1     | 2      | 3      | 2     | 5     | 5     | 5 |
| 16530  | 6    | 6    | 1    | 6    | 6    | 6    | 6    | 6    | 2     | 4      | 3      | 3     | 4     | 5     | 5 |
| 16532  |      |      |      |      |      |      |      |      |       | 4      | 3      | 3     | 5     | 5     | 5 |
| 16536  |      |      |      |      |      |      |      |      |       | 4      | 3      | 3     | 5     | 5     | 5 |
| 16537  | 3    | 4    | 3    | 4    | 4    | 3    | 3    | 3    | 4     | 2      | 2      | 3     | 3     | 3     | 4 |
| 16541  |      |      |      |      |      |      |      |      |       | 2      | 2      | 1     | 3     | 2     | 2 |

| respid | Q48k | Q48l | Q48m | Q48n | Q48o | Q48p | Q48q | Q48r | Q49_1 | Q50a_1 | Q50b_1 | Q51_1 | Q51_2 | Q52_1 |   |
|--------|------|------|------|------|------|------|------|------|-------|--------|--------|-------|-------|-------|---|
| 16543  |      |      |      |      |      |      |      |      |       | 3      | 3      | 3     | 5     | 5     | 5 |
| 16544  | 6    | 1    | 1    | 4    | 5    | 5    | 5    | 1    |       | 4      | 2      | 2     | 4     | 4     | 4 |
| 16545  |      |      |      |      |      |      |      |      |       | 3      | 3      | 3     | 4     | 5     | 4 |
| 16546  | 2    | 2    | 5    | 2    | 3    | 2    | 5    | 5    |       | 3      | 2      | 2     | 4     | 4     | 4 |
| 16548  |      |      |      |      |      |      |      |      |       | 3      | 3      | 3     | 5     | 5     | 4 |
| 16552  |      |      |      |      |      |      |      |      |       | 2      | 3      | 3     | 3     | 4     | 2 |
| 16559  | 6    | 6    | 6    | 5    | 6    | 6    | 6    | 6    |       | 3      | 1      | 1     | 2     | 2     | 2 |
| 16564  | 4    | 5    | 4    | 3    | 3    | 3    | 3    | 3    |       | 1      | 3      | 2     | 4     | 3     | 3 |
| 16565  |      |      |      |      |      |      |      |      |       | 2      | 2      | 2     | 1     | 1     | 1 |
| 16567  | 6    | 6    | 1    | 6    | 6    | 6    | 6    | 1    |       | 2      | 2      | 2     | 3     | 3     | 3 |
| 16571  |      |      |      |      |      |      |      |      |       | 3      | 3      | 3     | 5     | 5     | 5 |
| 16572  | 5    | 6    | 2    | 5    | 6    | 4    | 3    | 1    |       | 2      | 3      | 3     | 4     | 3     | 3 |
| 16579  | 5    | 4    | 2    | 4    | 4    | 2    | 3    | 2    |       | 4      | 3      | 3     | 4     | 4     | 4 |
| 16588  | 3    | 2    | 3    | 2    | 3    | 3    | 1    | 6    |       | 1      | 1      | 2     | 2     | 3     | 2 |
| 16599  | 2    | 2    | 5    | 1    | 5    | 2    | 2    | 6    |       | 2      | 2      | 2     | 4     | 4     | 4 |
| 16605  |      |      |      |      |      |      |      |      |       | 3      | 2      | 2     | 4     | 4     | 4 |
| 16622  | 4    | 4    | 4    | 4    | 4    | 4    | 4    | 4    |       | 2      | 2      | 2     | 3     | 3     | 3 |
| 16635  |      |      |      |      |      |      |      |      |       | 3      | 3      | 2     | 4     | 4     | 3 |
| 16638  | 6    | 6    | 3    | 6    | 6    | 6    | 6    | 6    |       | 3      | 3      | 3     | 4     | 4     | 4 |
| 16652  | 6    | 6    | 3    | 6    | 6    | 6    | 6    | 3    |       | 2      | 3      | 3     | 5     | 5     | 5 |
| 16656  |      |      |      |      |      |      |      |      |       | 2      | 1      | 1     | 3     | 2     | 3 |
| 16671  |      |      |      |      |      |      |      |      |       | 2      | 3      | 3     | 4     | 4     | 5 |
| 16676  |      |      |      |      |      |      |      |      |       | 2      | 3      | 3     | 1     | 1     | 1 |
| 16678  |      |      |      |      |      |      |      |      |       | 3      | 2      | 2     | 2     | 2     | 2 |
| 16702  |      |      |      |      |      |      |      |      |       | 3      | 3      | 2     | 4     | 4     | 4 |
| 16705  | 3    | 6    |      | 3    | 6    | 5    | 3    | 5    |       | 3      | 3      | 3     | 5     | 5     | 5 |
| 16707  |      |      |      |      |      |      |      |      |       | 2      | 1      | 2     | 2     | 4     | 2 |
| 16711  | 2    | 2    | 5    | 5    | 2    | 5    | 2    | 5    |       | 3      | 1      | 1     | 2     | 3     | 3 |
| 16712  |      |      |      |      |      |      |      |      |       | 3      | 3      | 3     | 5     | 5     | 4 |
| 16716  |      |      |      |      |      |      |      |      |       | 3      | 2      | 2     | 4     | 4     | 4 |
| 16724  | 4    | 3    | 3    | 4    | 4    | 4    | 4    | 3    |       | 3      | 3      | 3     | 4     | 5     | 4 |
| 16727  |      |      |      |      |      |      |      |      |       | 2      | 2      | 2     | 4     | 4     | 4 |

| respid | Q48k | Q48l | Q48m | Q48n | Q48o | Q48p | Q48q | Q48r | Q49_1 | Q50a_1 | Q50b_1 | Q51_1 | Q51_2 | Q52_1 |   |
|--------|------|------|------|------|------|------|------|------|-------|--------|--------|-------|-------|-------|---|
| 16734  |      |      |      |      |      |      |      |      |       | 2      | 2      | 3     | 4     | 4     | 4 |
| 16740  | 6    | 6    | 1    | 6    | 6    | 6    | 6    | 6    | 1     | 2      | 3      | 2     | 4     | 4     | 4 |
| 16748  |      |      |      |      |      |      |      |      |       | 2      | 2      | 2     | 4     | 4     | 4 |
| 16759  |      |      |      |      |      |      |      |      |       | 4      | 3      | 3     | 5     | 5     | 5 |
| 16761  |      |      |      |      |      |      |      |      |       | 2      | 3      | 3     | 5     | 5     | 5 |
| 16763  |      |      |      |      |      |      |      |      |       | 2      | 3      | 3     | 5     | 5     | 4 |
| 16764  |      |      |      |      |      |      |      |      |       | 2      | 2      | 2     | 2     | 3     | 3 |
| 16766  | 6    | 4    | 3    | 3    | 3    | 3    | 3    | 3    | 5     | 4      | 3      | 2     | 4     | 4     | 4 |
| 16767  |      |      |      |      |      |      |      |      |       | 3      | 3      | 2     | 4     | 2     | 5 |
| 16776  | 4    | 3    | 3    | 3    | 5    | 5    | 6    | 2    | 2     | 4      | 3      | 3     | 5     | 5     | 4 |
| 16781  |      |      |      |      |      |      |      |      |       | 3      | 3      | 3     | 4     | 4     | 5 |
| 16793  |      |      |      |      |      |      |      |      |       | 2      | 2      | 2     | 3     | 3     | 3 |
| 16796  | 2    | 2    | 5    | 2    | 3    | 3    | 2    | 5    | 5     | 1      | 1      | 1     | 1     | 2     | 2 |
| 16810  | 6    | 5    | 3    | 6    | 6    | 6    | 6    | 6    | 3     | 3      | 3      | 2     | 3     | 4     | 3 |
| 16811  | 4    | 5    | 3    | 5    | 6    | 4    | 5    | 5    | 2     | 3      | 2      | 3     | 4     | 5     | 4 |
| 16813  |      |      |      |      |      |      |      |      |       | 4      | 3      | 3     | 5     | 5     | 5 |
| 16814  |      |      |      |      |      |      |      |      |       | 2      | 2      | 2     | 3     | 4     | 5 |
| 16831  | 6    | 5    | 5    | 3    | 6    | 3    | 6    | 6    | 2     | 3      | 2      | 2     | 3     | 3     | 4 |
| 16833  | 5    | 5    | 3    | 3    | 6    | 6    | 4    | 4    | 2     | 3      | 2      | 2     | 3     | 4     | 5 |
| 16839  |      |      |      |      |      |      |      |      |       | 3      | 3      | 3     | 4     | 4     | 5 |
| 16843  | 5    | 5    | 4    | 5    | 6    | 3    | 5    | 5    | 5     | 3      | 3      | 3     | 4     | 4     | 3 |
| 16860  |      |      |      |      |      |      |      |      |       | 1      | 2      | 3     | 4     | 3     | 4 |
| 16871  |      |      |      |      |      |      |      |      |       | 4      | 3      | 3     | 5     | 5     | 5 |
| 16881  |      |      |      |      |      |      |      |      |       | 2      | 2      | 2     | 3     | 3     | 3 |
| 16884  | 2    | 4    | 3    | 2    | 5    | 3    | 4    | 4    | 5     | 2      | 2      | 2     | 4     | 4     | 4 |
| 16891  |      |      |      |      |      |      |      |      |       | 3      | 3      | 3     | 5     | 5     | 5 |
| 16909  | 3    | 4    | 3    | 3    | 5    | 3    | 3    | 3    | 4     | 3      | 3      | 2     | 5     | 5     | 5 |
| 16911  |      |      |      |      |      |      |      |      |       | 5      | 3      | 3     | 5     | 5     | 5 |
| 16922  |      |      |      |      |      |      |      |      |       | 3      | 3      | 2     | 3     | 3     | 3 |
| 16935  |      |      |      |      |      |      |      |      |       | 3      | 2      | 2     | 2     | 2     | 3 |
| 16942  | 2    | 2    | 2    | 2    | 2    | 2    | 3    | 2    | 2     | 4      | 2      | 2     | 2     | 3     | 3 |
| 16950  |      |      |      |      |      |      |      |      |       | 2      | 2      | 3     | 4     | 3     | 3 |

| respid | Q48k | Q48l | Q48m | Q48n | Q48o | Q48p | Q48q | Q48r | Q49_1 | Q50a_1 | Q50b_1 | Q51_1 | Q51_2 | Q52_1 |   |
|--------|------|------|------|------|------|------|------|------|-------|--------|--------|-------|-------|-------|---|
| 16952  | 4    | 3    | 4    | 3    | 4    | 3    | 4    | 3    |       | 2      | 2      | 2     | 3     | 2     | 2 |
| 16963  |      |      |      |      |      |      |      |      |       | 3      | 3      | 3     | 4     | 5     | 3 |
| 16967  |      |      |      |      |      |      |      |      |       | 3      | 2      | 2     | 3     | 3     | 3 |
| 16970  | 1    | 1    | 6    | 3    | 5    | 3    | 1    | 5    |       | 2      | 1      | 3     | 1     | 1     | 1 |
| 16976  |      |      |      |      |      |      |      |      |       | 3      | 2      | 2     | 4     | 4     | 4 |
| 16982  |      |      |      |      |      |      |      |      |       | 3      | 3      | 3     | 5     | 5     | 5 |
| 16995  |      |      |      |      |      |      |      |      |       | 3      | 3      | 3     | 5     | 5     | 5 |
| 17004  |      |      |      |      |      |      |      |      |       | 2      | 1      | 3     | 4     | 4     | 4 |
| 17006  |      |      |      |      |      |      |      |      |       | 3      | 3      | 3     | 4     | 5     | 5 |
| 17009  |      |      |      |      |      |      |      |      |       | 2      | 2      | 3     | 5     | 5     | 5 |
| 17021  |      |      |      |      |      |      |      |      |       | 2      | 3      | 3     | 5     | 5     | 5 |
| 17040  | 3    | 5    | 4    | 3    | 5    | 3    | 3    | 5    |       | 3      | 2      | 2     | 3     | 3     | 4 |
| 17041  |      |      |      |      |      |      |      |      |       | 4      | 2      | 2     | 4     | 4     | 4 |
| 17044  | 2    | 6    | 5    | 2    | 6    | 6    | 6    | 2    |       | 2      | 2      | 2     | 4     | 4     | 4 |
| 17046  | 3    | 4    | 3    | 3    | 2    | 2    | 2    | 2    |       | 3      | 2      | 2     | 3     | 3     | 3 |
| 17052  |      |      |      |      |      |      |      |      |       | 3      | 3      | 3     | 4     | 4     | 4 |
| 17055  | 3    | 3    | 3    | 3    | 3    | 3    | 3    | 3    |       | 2      | 2      | 2     | 3     | 3     | 3 |
| 17108  |      |      |      |      |      |      |      |      |       | 2      | 1      | 1     | 1     | 1     | 1 |
| 17109  | 5    | 6    | 1    | 5    | 6    | 4    | 6    | 2    |       | 2      | 3      | 3     | 4     | 5     | 4 |
| 17113  |      |      |      |      |      |      |      |      |       | 3      | 3      | 3     | 5     | 5     | 5 |
| 17115  |      |      |      |      |      |      |      |      |       | 1      | 3      | 2     | 4     | 4     | 3 |
| 17132  |      |      |      |      |      |      |      |      |       | 2      | 3      | 3     | 3     | 4     | 4 |
| 17135  | 5    | 5    | 3    | 5    | 6    | 6    | 6    | 2    |       | 2      | 3      | 3     | 4     | 4     | 4 |
| 17138  | 3    | 4    | 3    | 4    | 3    | 3    | 4    | 3    |       | 2      | 2      | 2     | 3     | 4     | 4 |
| 17141  |      |      |      |      |      |      |      |      |       | 3      | 3      | 3     | 5     | 5     | 5 |
| 17143  |      |      |      |      |      |      |      |      |       | 2      | 2      | 3     | 5     | 4     | 4 |
| 17148  |      |      |      |      |      |      |      |      |       | 3      | 3      | 3     | 1     | 1     | 1 |
| 17151  |      |      |      |      |      |      |      |      |       | 2      | 3      | 3     | 4     | 5     | 5 |
| 17153  |      |      |      |      |      |      |      |      |       | 3      | 3      | 3     | 4     | 5     | 5 |
| 17154  |      |      |      |      |      |      |      |      |       | 2      | 2      | 3     | 5     | 5     | 5 |
| 17157  |      |      |      |      |      |      |      |      |       | 2      | 3      | 3     | 5     | 5     | 4 |
| 17160  |      |      |      |      |      |      |      |      |       | 4      | 3      | 3     | 5     | 5     | 5 |

| respid | Q48k | Q48l | Q48m | Q48n | Q48o | Q48p | Q48q | Q48r | Q49_1 | Q50a_1 | Q50b_1 | Q51_1 | Q51_2 | Q52_1 |   |
|--------|------|------|------|------|------|------|------|------|-------|--------|--------|-------|-------|-------|---|
| 17167  |      |      |      |      |      |      |      |      |       | 2      | 2      | 2     | 3     | 3     | 4 |
| 17169  |      |      |      |      |      |      |      |      |       | 3      | 3      | 3     | 5     | 5     | 4 |
| 17174  |      |      |      |      |      |      |      |      |       | 4      | 2      | 2     | 2     | 3     | 2 |
| 17179  |      |      |      |      |      |      |      |      |       | 3      | 3      | 3     | 5     | 5     | 5 |
| 17180  |      |      |      |      |      |      |      |      |       | 3      | 2      | 2     | 3     | 4     | 4 |
| 17182  |      |      |      |      |      |      |      |      |       | 3      | 3      | 3     | 5     | 5     | 5 |
| 17184  |      |      |      |      |      |      |      |      |       | 1      | 2      | 2     | 3     | 3     | 3 |
| 17186  |      |      |      |      |      |      |      |      |       | 4      | 3      | 3     | 5     | 5     | 5 |
| 17187  |      |      |      |      |      |      |      |      |       | 4      | 3      | 3     | 4     | 4     | 5 |
| 17192  |      |      |      |      |      |      |      |      |       | 2      | 2      | 1     | 4     | 3     | 5 |
| 17197  |      |      |      |      |      |      |      |      |       | 3      | 3      | 3     | 1     | 1     | 1 |
| 17217  | 6    | 6    | 2    | 6    | 6    | 6    | 6    | 2    |       | 3      | 3      | 3     | 4     | 4     | 4 |
| 17226  |      |      |      |      |      |      |      |      |       | 3      | 2      | 2     | 4     | 4     | 4 |
| 17228  |      |      |      |      |      |      |      |      |       | 3      | 3      | 3     | 5     | 5     | 5 |
| 17245  |      |      |      |      |      |      |      |      |       | 3      | 3      | 3     | 4     | 5     | 5 |
| 17247  |      |      |      |      |      |      |      |      |       | 3      | 3      | 3     | 5     | 5     | 5 |
| 17258  | 3    | 3    | 3    | 3    | 4    | 4    | 4    | 3    |       | 3      | 3      | 3     | 3     | 3     | 4 |
| 17259  |      |      |      |      |      |      |      |      |       | 2      | 2      | 2     | 3     | 3     | 3 |
| 17262  |      |      |      |      |      |      |      |      |       | 4      | 3      | 3     | 5     | 5     | 5 |
| 17265  | 4    | 5    | 4    | 5    | 6    | 5    | 5    | 3    |       | 3      | 3      | 3     | 5     | 5     | 5 |
| 17281  |      |      |      |      |      |      |      |      |       | 3      | 3      | 3     | 4     | 4     | 5 |
| 17282  | 3    | 5    | 4    | 5    | 5    | 5    | 5    | 3    |       | 2      | 2      | 2     | 3     | 3     | 3 |
| 17293  |      |      |      |      |      |      |      |      |       | 3      | 3      | 3     | 5     | 5     | 5 |
| 17306  | 4    | 4    | 4    | 3    | 4    | 3    | 4    | 4    |       | 1      | 2      | 2     | 4     | 4     | 3 |
| 17312  |      |      |      |      |      |      |      |      |       | 3      | 3      | 3     | 3     | 2     | 3 |
| 17318  |      |      |      |      |      |      |      |      |       | 3      | 3      | 3     | 3     | 3     | 3 |
| 17328  | 2    | 5    | 4    | 3    | 5    | 5    | 5    | 4    |       | 2      | 2      | 2     | 4     | 4     | 4 |
| 17343  |      |      |      |      |      |      |      |      |       | 4      | 3      | 3     | 4     | 4     | 4 |
| 17344  | 3    | 3    | 3    | 2    | 4    | 4    | 3    | 4    |       | 2      | 2      | 2     | 3     | 4     | 2 |
| 17348  |      |      |      |      |      |      |      |      |       | 2      | 3      | 3     | 4     | 5     | 3 |
| 17352  | 4    | 4    | 3    | 4    | 4    | 4    | 4    | 3    |       | 2      | 3      | 3     | 5     | 5     | 5 |
| 17355  |      |      |      |      |      |      |      |      |       | 3      | 2      | 2     | 3     | 3     | 3 |

| respid | Q48k | Q48l | Q48m | Q48n | Q48o | Q48p | Q48q | Q48r | Q49_1 | Q50a_1 | Q50b_1 | Q51_1 | Q51_2 | Q52_1 |   |
|--------|------|------|------|------|------|------|------|------|-------|--------|--------|-------|-------|-------|---|
| 17356  | 6    | 5    | 3    | 5    | 5    | 5    | 5    | 5    | 3     | 2      | 3      | 3     | 5     | 5     | 4 |
| 17359  | 3    | 4    | 3    | 4    | 4    | 4    | 4    | 4    |       | 2      | 3      | 3     | 4     | 4     | 5 |
| 17373  | 3    | 3    | 3    | 4    | 4    | 5    | 3    | 4    | 4     | 2      | 2      | 2     | 2     | 3     | 3 |
| 17381  |      |      |      | 1    |      |      |      |      |       | 3      | 3      | 3     | 5     | 5     | 4 |
| 17388  | 5    | 5    | 3    | 5    | 5    | 5    | 5    | 3    | 2     | 2      | 3      | 3     | 4     | 5     | 4 |
| 17394  | 4    | 4    | 3    | 4    | 4    | 4    | 4    | 4    | 3     | 2      | 2      | 2     | 4     | 3     | 4 |
| 17401  |      |      |      |      |      |      |      |      |       | 3      | 3      | 3     | 4     | 4     | 5 |
| 17403  | 6    | 6    | 1    | 6    | 6    | 6    | 6    | 6    | 1     | 3      | 3      | 3     | 5     | 5     | 5 |
| 17411  |      |      |      |      |      |      |      |      |       | 3      | 1      | 2     | 2     | 3     | 3 |
| 17423  | 5    | 5    | 5    | 5    | 4    | 5    | 5    | 5    | 6     | 3      | 2      | 2     | 4     | 4     | 4 |
| 17427  |      |      |      |      |      |      |      |      |       | 4      | 3      | 3     | 5     | 5     | 5 |
| 17433  | 5    |      |      |      |      |      |      |      |       | 3      | 2      | 3     | 4     | 3     | 3 |
| 17441  |      |      |      |      |      |      |      |      |       | 4      | 3      | 3     | 4     | 4     | 4 |
| 17442  |      |      |      |      |      |      |      |      |       | 4      | 3      | 3     | 5     | 5     | 5 |
| 17447  |      |      |      |      |      |      |      |      |       | 3      | 3      | 3     | 4     | 4     | 5 |
| 17458  | 6    | 6    | 2    | 6    | 6    | 6    | 6    | 6    | 1     | 4      | 3      | 3     | 5     | 5     | 4 |
| 17474  |      |      |      |      | 1    | 6    | 6    | 6    |       | 2      | 3      | 3     | 4     | 5     | 4 |
| 17475  |      |      |      |      |      |      |      |      |       | 3      | 2      | 2     | 3     | 3     | 2 |
| 17476  |      |      |      |      |      |      |      |      |       | 3      | 2      | 3     | 3     | 4     | 3 |
| 17480  | 6    | 5    | 1    | 6    | 6    | 6    | 6    | 6    | 2     | 3      | 3      | 3     | 4     | 5     | 4 |
| 17484  |      |      |      |      |      |      |      |      |       | 3      | 3      | 3     | 5     | 5     | 5 |
| 17490  | 3    | 3    | 3    | 4    | 4    | 3    | 4    | 4    | 4     | 3      | 3      | 3     | 3     | 3     | 3 |
| 17491  | 5    | 5    | 4    | 5    | 5    | 5    | 5    | 5    | 5     | 3      | 3      | 3     | 5     | 5     | 5 |
| 17500  | 3    | 4    | 4    | 3    | 5    | 5    | 5    | 4    | 3     | 3      | 2      | 2     | 4     | 4     | 4 |
| 17507  |      |      |      |      |      |      |      |      |       | 4      | 3      | 3     | 5     | 5     | 5 |
| 17517  |      |      |      |      |      |      |      |      |       | 3      | 3      | 3     | 3     | 3     | 3 |
| 17520  |      |      |      |      |      |      |      |      |       | 2      | 2      | 1     | 3     | 3     | 4 |
| 17521  |      |      |      |      |      |      |      |      |       | 3      | 2      | 3     | 4     | 4     | 4 |
| 17531  |      |      |      |      |      |      |      |      |       | 2      | 3      | 3     | 3     | 3     | 3 |
| 17540  | 3    | 4    | 3    | 4    | 2    | 2    | 2    | 2    | 2     | 3      | 2      | 2     | 3     | 3     | 4 |
| 17550  |      |      |      |      |      |      |      |      |       | 4      | 3      | 3     | 5     | 5     | 5 |
| 17551  | 4    | 5    | 3    | 5    | 5    | 5    | 5    | 5    | 2     | 3      | 3      | 3     | 4     | 5     | 5 |

| respid | Q48k | Q48l | Q48m | Q48n | Q48o | Q48p | Q48q | Q48r | Q49_1 | Q50a_1 | Q50b_1 | Q51_1 | Q51_2 | Q52_1 |   |
|--------|------|------|------|------|------|------|------|------|-------|--------|--------|-------|-------|-------|---|
| 17555  |      |      |      |      |      |      |      |      |       | 2      | 2      | 2     | 3     | 3     | 3 |
| 17556  | 3    | 3    | 3    | 3    | 4    | 3    | 3    | 3    | 3     | 4      | 3      | 3     | 4     | 4     | 5 |
| 17574  |      |      |      |      |      |      |      |      |       | 2      | 3      | 3     | 5     | 5     | 5 |
| 17575  | 6    | 6    | 2    | 6    | 6    | 6    | 6    | 6    | 2     | 3      | 2      | 3     | 5     | 5     | 5 |
| 17582  |      |      |      |      |      |      |      |      |       | 4      | 3      | 2     | 5     | 5     | 5 |
| 17587  |      |      |      |      |      |      |      |      |       | 3      | 3      | 3     | 4     | 4     | 4 |
| 17601  |      |      |      |      |      |      |      |      |       | 3      | 3      | 3     | 5     | 5     | 5 |
| 17607  |      |      |      |      |      |      |      |      |       | 2      | 2      | 3     | 4     | 4     | 4 |
| 17609  | 3    | 3    | 3    | 3    | 3    | 5    | 1    | 5    | 5     | 2      | 3      | 3     | 5     | 5     | 5 |
| 17611  | 6    | 5    | 3    | 5    | 6    | 4    | 4    | 4    | 2     | 4      | 3      | 3     | 5     | 5     | 4 |
| 17613  | 3    | 5    | 3    | 4    | 6    | 6    | 3    | 5    | 5     | 2      | 2      | 2     | 3     | 3     | 3 |
| 17615  | 5    | 5    | 5    | 5    | 5    |      | 5    | 5    | 5     | 3      | 2      | 2     | 4     | 4     | 4 |
| 17620  |      |      |      |      |      |      |      |      |       | 3      | 2      | 3     | 5     | 4     | 5 |
| 17624  | 4    | 4    | 4    | 4    | 3    | 3    | 4    | 4    | 4     | 2      | 3      | 2     | 3     | 3     | 3 |
| 17635  |      |      |      |      |      |      |      |      |       | 3      | 3      | 3     | 3     | 3     | 3 |
| 17643  | 2    | 3    | 4    | 2    | 6    | 4    | 3    | 6    | 6     | 2      | 2      | 2     | 1     | 1     | 1 |
| 17645  | 3    | 3    | 5    | 4    | 5    | 5    | 3    | 4    | 4     | 3      | 3      | 3     | 5     | 5     | 4 |
| 17646  | 5    | 4    | 2    | 3    | 6    | 5    | 1    | 6    | 6     | 2      | 2      | 2     | 5     | 4     | 4 |
| 17649  |      |      |      |      |      |      |      |      |       | 4      | 2      | 3     | 4     | 5     | 4 |
| 17658  |      |      |      |      |      |      |      |      |       | 4      | 2      | 3     | 5     | 5     | 5 |
| 17666  |      |      |      |      |      |      |      |      |       | 2      | 3      | 3     | 5     | 5     | 5 |
| 17670  | 5    | 5    | 2    | 2    | 5    | 6    | 5    | 4    | 4     | 4      | 3      | 3     | 5     | 4     | 5 |
| 17678  | 6    | 6    | 4    | 6    | 6    | 3    | 6    | 2    | 2     | 3      | 3      | 2     | 5     | 5     | 3 |
| 17679  | 3    | 3    | 4    | 5    | 6    | 5    | 3    | 3    | 3     | 2      | 2      | 3     | 4     | 4     | 4 |
| 17695  | 4    | 4    | 3    | 3    | 5    | 3    | 4    | 4    | 4     | 3      | 3      | 3     | 5     | 5     | 5 |
| 17697  |      |      |      |      |      |      |      |      |       | 2      | 2      | 2     | 3     | 3     | 4 |
| 17698  |      |      |      |      |      |      |      |      |       | 3      | 3      | 3     | 4     | 5     | 5 |
| 17723  | 3    | 2    | 3    | 3    | 2    | 3    | 3    | 3    | 2     | 4      | 2      | 2     | 3     | 3     | 2 |
| 17727  |      |      |      |      |      |      |      |      |       | 5      | 3      | 3     | 5     | 5     | 5 |
| 17734  | 6    | 4    | 3    | 6    | 6    | 6    | 6    | 6    | 3     | 2      | 3      | 3     | 5     | 5     | 5 |
| 17737  | 4    | 6    | 5    | 5    | 6    | 5    | 6    | 6    | 2     | 2      | 3      | 2     | 3     | 4     | 4 |
| 17748  |      |      |      |      |      |      |      |      |       | 2      | 2      | 3     | 5     | 5     | 5 |

| respid | Q48k | Q48l | Q48m | Q48n | Q48o | Q48p | Q48q | Q48r | Q49_1 | Q50a_1 | Q50b_1 | Q51_1 | Q51_2 | Q52_1 |   |
|--------|------|------|------|------|------|------|------|------|-------|--------|--------|-------|-------|-------|---|
| 17749  |      |      |      |      |      |      |      |      |       | 3      | 3      | 3     | 5     | 5     | 5 |
| 17754  |      |      |      |      |      |      |      |      |       | 4      | 2      | 2     | 3     | 4     | 4 |
| 17766  | 1    | 3    | 5    | 1    | 6    | 6    | 6    | 2    | 1     | 1      | 1      | 5     | 4     | 5     |   |
| 17777  | 6    | 6    | 3    | 5    | 6    | 6    | 6    | 3    | 2     | 3      | 2      | 4     | 4     | 4     |   |
| 17780  |      |      |      |      |      |      |      |      | 2     | 2      | 2      | 5     | 5     | 5     |   |
| 17788  |      |      |      |      |      |      |      |      | 3     | 2      | 3      | 4     | 4     | 5     |   |
| 17801  |      |      |      |      |      |      |      |      | 3     | 3      | 3      | 4     | 5     | 4     |   |
| 17803  |      |      | 5    |      |      |      |      |      | 2     | 1      | 2      | 4     | 4     | 4     |   |
| 17807  |      |      |      |      |      |      |      |      | 4     | 3      | 3      | 5     | 5     | 5     |   |
| 17808  |      |      |      |      |      |      |      |      | 3     | 3      | 3      | 5     | 5     | 5     |   |
| 17809  |      |      |      |      |      |      |      |      | 3     | 2      | 2      | 3     | 3     | 3     |   |
| 17821  |      |      |      |      |      |      |      |      | 3     | 2      | 2      | 3     | 3     | 4     |   |
| 17827  |      |      |      |      |      |      |      |      | 2     | 2      | 2      | 3     | 3     | 3     |   |
| 17834  |      |      |      |      |      |      |      |      | 3     | 2      | 2      | 2     | 2     | 2     |   |
| 17838  |      |      |      |      |      |      |      |      | 3     | 3      | 3      | 5     | 5     | 5     |   |
| 17842  | 5    | 6    | 5    | 5    | 6    | 6    | 6    | 2    | 4     | 3      | 3      | 5     | 5     | 5     |   |
| 17862  |      |      |      |      |      |      |      |      | 3     | 3      | 3      | 5     | 5     | 5     |   |
| 17863  |      | 1    |      | 1    | 1    |      |      |      | 2     | 3      | 3      | 4     | 4     | 3     |   |
| 17871  |      |      |      |      |      |      |      |      | 2     | 2      | 2      | 3     | 4     | 4     |   |
| 17872  |      |      |      |      |      |      |      |      | 3     | 3      | 2      | 4     | 4     | 5     |   |
| 17903  | 3    | 3    | 3    | 3    | 3    | 4    | 4    | 4    | 2     | 2      | 2      | 2     | 2     | 2     |   |
| 17906  |      |      |      |      |      |      |      |      | 3     | 3      | 2      | 4     | 4     | 4     |   |
| 17910  | 3    | 3    | 3    | 3    | 3    | 3    | 3    | 3    | 3     | 2      | 2      | 3     | 3     | 3     |   |
| 17922  |      |      |      |      |      |      |      |      | 2     | 2      | 3      | 4     | 5     | 5     |   |
| 17923  |      |      |      |      |      |      |      |      | 3     | 2      | 3      | 3     | 4     | 4     |   |
| 17925  |      |      |      |      |      |      |      |      | 3     | 3      | 3      | 5     | 5     | 5     |   |
| 17926  |      |      |      |      |      |      |      |      | 5     | 3      | 3      | 5     | 5     | 4     |   |
| 17937  |      |      |      |      |      |      |      |      | 5     | 3      | 3      | 5     | 5     | 5     |   |
| 17956  |      |      |      |      |      |      |      |      | 4     | 3      | 3      | 4     | 4     | 4     |   |
| 17958  |      |      |      |      |      |      |      |      | 4     | 3      | 3      | 5     | 5     | 5     |   |
| 17985  |      |      |      |      |      |      |      |      | 2     | 3      | 3      | 5     | 5     | 4     |   |
| 17989  |      |      |      |      |      |      |      |      | 3     | 2      | 2      | 3     | 4     | 5     |   |



| respid | Q48k | Q48l | Q48m | Q48n | Q48o | Q48p | Q48q | Q48r | Q49_1 | Q50a_1 | Q50b_1 | Q51_1 | Q51_2 | Q52_1 |   |
|--------|------|------|------|------|------|------|------|------|-------|--------|--------|-------|-------|-------|---|
| 17995  |      |      |      |      |      |      |      |      |       | 4      | 3      | 3     | 5     | 5     | 5 |
| 18000  | 3    |      |      | 4    | 4    | 4    | 3    | 3    | 4     | 2      | 2      | 2     | 3     | 3     | 4 |
| 18010  |      |      |      |      |      |      |      |      |       | 3      | 3      | 3     | 5     | 5     | 4 |
| 18015  |      |      |      |      |      |      |      |      |       | 3      | 2      | 2     | 5     | 5     | 5 |
| 18018  | 5    | 5    | 3    | 4    | 6    | 5    | 5    | 4    | 1     | 3      | 3      | 4     | 4     | 4     | 4 |
| 18031  | 3    | 3    | 3    | 3    | 3    | 3    | 3    | 3    | 3     | 2      | 2      | 2     | 2     | 2     | 3 |
| 18033  | 3    | 3    | 3    | 5    | 5    | 5    | 5    | 3    | 2     | 2      | 2      | 2     | 3     | 3     | 4 |
| 18036  | 3    | 3    | 1    | 4    | 6    | 3    | 6    | 3    | 2     | 2      | 2      | 2     | 2     | 2     | 4 |
| 18041  |      |      |      |      |      |      |      |      |       | 3      | 3      | 3     | 5     | 5     | 5 |
| 18068  |      |      |      |      |      |      |      |      |       | 4      | 3      | 3     | 5     | 5     | 5 |
| 18080  |      |      |      |      |      |      |      |      |       | 2      | 3      | 2     | 3     | 3     | 3 |
| 18081  |      |      |      |      |      |      |      |      |       | 3      | 3      | 3     | 4     | 4     | 4 |
| 18083  |      |      |      |      |      |      |      |      |       | 2      | 2      | 2     | 4     | 4     | 3 |
| 18113  |      |      |      |      |      |      |      |      |       | 3      | 3      | 3     | 5     | 5     | 4 |
| 18115  |      |      |      |      |      |      |      |      |       | 3      | 3      | 2     | 3     | 3     | 3 |
| 18117  | 2    | 1    | 5    | 1    | 2    | 1    | 1    | 6    | 1     | 1      | 2      | 2     | 2     | 2     | 2 |
| 18129  | 6    | 6    | 4    | 3    | 6    | 6    | 6    | 2    | 4     | 2      | 2      | 5     | 4     | 4     | 4 |
| 18132  |      |      |      |      |      |      |      |      |       | 3      | 3      | 3     | 4     | 4     | 4 |
| 18146  |      |      |      |      |      |      |      |      |       | 3      | 3      | 3     | 5     | 5     | 5 |
| 18147  |      |      |      |      |      |      |      |      |       | 2      | 2      | 3     | 4     | 5     | 5 |
| 18153  |      |      |      |      |      |      |      |      |       | 2      | 3      | 3     | 5     | 5     | 5 |
| 18154  |      |      |      |      |      |      |      |      |       | 3      | 3      | 3     | 5     | 5     | 4 |
| 18157  |      |      |      |      |      |      |      |      |       | 3      | 2      | 3     | 4     | 5     | 4 |
| 18166  |      |      |      |      |      |      |      |      |       | 4      | 2      | 3     | 3     | 3     | 5 |
| 18169  |      |      |      |      |      |      |      |      |       | 3      | 3      | 3     | 5     | 5     | 5 |
| 18171  | 5    | 5    | 1    | 5    | 6    | 5    | 6    | 2    | 4     | 3      | 3      | 5     | 5     | 5     | 4 |
| 18173  | 4    | 4    | 3    | 4    | 5    | 4    | 4    | 4    | 4     | 2      | 2      | 3     | 3     | 3     | 3 |
| 18204  |      |      |      |      |      |      |      |      |       | 2      | 3      | 2     | 5     | 4     | 4 |
| 18210  |      |      |      |      |      |      |      |      |       | 2      | 3      | 3     | 5     | 5     | 5 |
| 18212  |      |      |      |      |      |      |      |      |       | 5      | 3      | 3     | 1     | 1     | 1 |
| 18220  |      |      |      |      |      |      |      |      |       | 2      | 2      | 2     | 3     | 4     | 2 |
| 18221  |      |      |      |      |      |      |      |      |       | 3      | 3      | 3     | 4     | 4     | 4 |

| respid | Q48k | Q48l | Q48m | Q48n | Q48o | Q48p | Q48q | Q48r | Q49_1 | Q50a_1 | Q50b_1 | Q51_1 | Q51_2 | Q52_1 |   |
|--------|------|------|------|------|------|------|------|------|-------|--------|--------|-------|-------|-------|---|
| 18228  |      |      |      |      |      |      |      |      |       | 3      | 3      | 3     | 5     | 5     | 4 |
| 18231  |      |      |      |      |      |      |      |      |       | 4      | 3      | 3     | 5     | 5     | 4 |
| 18233  |      |      |      |      |      |      |      |      |       | 3      | 3      | 3     | 5     | 5     | 5 |
| 18235  | 3    | 3    | 3    | 4    | 4    | 3    | 4    | 4    |       | 3      | 2      | 2     | 2     | 3     | 3 |
| 18237  |      |      |      |      |      |      |      |      |       | 2      | 3      | 3     | 5     | 5     | 5 |
| 18250  | 4    | 6    | 4    | 4    | 5    | 5    | 4    | 3    |       | 3      | 2      | 3     | 4     | 3     | 4 |
| 18253  | 4    | 4    | 3    | 4    | 5    | 4    | 3    | 5    |       | 2      | 3      | 2     | 4     | 3     | 4 |
| 18264  | 5    | 5    | 3    | 5    | 5    | 4    | 5    | 3    |       | 3      | 2      | 2     | 3     | 4     | 5 |
| 18285  |      |      |      |      |      |      |      |      |       | 2      | 2      | 2     | 4     | 4     | 3 |
| 18287  |      |      |      |      |      |      |      |      |       | 4      | 3      | 3     | 4     | 4     | 4 |
| 18296  | 3    | 3    | 4    | 2    | 5    | 5    | 5    | 4    |       | 3      | 3      | 3     | 5     | 5     | 5 |
| 18299  |      |      |      |      |      |      |      |      |       | 2      | 3      | 2     | 2     | 3     | 3 |
| 18313  |      |      |      |      |      |      |      |      |       | 3      | 3      | 2     | 4     | 4     | 4 |
| 18321  | 6    | 6    | 3    | 3    | 4    | 3    | 4    | 3    |       | 3      | 3      | 3     | 5     | 5     | 5 |
| 18324  |      |      |      |      |      |      |      |      |       | 3      | 2      | 2     | 4     | 4     | 4 |
| 18329  |      |      |      |      |      |      |      |      |       | 3      | 2      | 3     | 5     | 5     | 5 |
| 18332  | 3    | 4    | 4    | 3    | 4    | 4    | 4    | 4    |       | 2      | 1      | 1     | 3     | 3     | 3 |
| 18339  |      |      |      |      |      |      |      |      |       | 2      | 3      | 3     | 4     | 5     | 4 |
| 18340  |      |      |      |      |      |      |      |      |       | 4      | 3      | 3     | 4     | 4     | 4 |
| 18348  | 5    | 6    | 1    | 4    | 6    | 6    | 6    | 4    |       | 2      | 3      | 3     | 4     | 5     | 4 |
| 18355  |      |      |      |      |      |      |      |      |       | 2      | 3      | 2     | 3     | 3     | 5 |
| 18360  |      |      |      |      |      |      |      |      |       | 3      | 3      | 3     | 4     | 4     | 5 |
| 18380  | 4    | 4    | 3    | 3    | 3    | 5    | 4    | 5    |       | 3      | 3      | 3     | 4     | 5     | 2 |
| 18403  | 5    | 5    | 3    | 4    | 5    | 4    | 5    | 4    |       | 2      | 2      | 2     | 4     | 4     | 4 |
| 18405  |      |      |      |      |      |      |      |      |       | 2      | 2      | 2     | 3     | 3     | 3 |
| 18409  |      |      |      |      |      |      |      |      |       | 2      | 2      | 2     | 2     | 3     | 3 |
| 18445  |      |      |      |      |      |      |      |      |       | 4      | 3      | 3     | 5     | 4     | 5 |
| 18458  |      |      |      |      |      |      |      |      |       | 3      | 3      | 3     | 4     | 4     | 5 |
| 18477  | 1    | 6    | 1    | 3    | 6    | 6    | 6    | 1    |       | 2      | 3      | 3     | 5     | 5     | 5 |
| 18481  |      |      |      |      |      |      |      |      |       | 2      | 2      | 2     | 4     | 4     | 4 |
| 18491  |      |      |      |      |      |      |      |      |       | 3      | 3      | 3     | 5     | 5     | 5 |
| 18492  |      |      |      |      |      |      |      |      |       | 2      | 2      | 2     | 4     | 3     | 5 |

| respid | Q48k | Q48l | Q48m | Q48n | Q48o | Q48p | Q48q | Q48r | Q49_1 | Q50a_1 | Q50b_1 | Q51_1 | Q51_2 | Q52_1 |   |
|--------|------|------|------|------|------|------|------|------|-------|--------|--------|-------|-------|-------|---|
| 18494  |      | 5    | 6    | 6    | 3    | 6    | 3    | 3    |       | 2      | 3      | 3     | 4     | 4     | 3 |
| 18495  |      | 6    | 6    | 6    | 6    | 6    | 6    | 6    | 6     | 2      | 2      | 1     | 1     | 3     | 5 |
| 18496  |      | 2    | 6    | 2    | 2    | 6    | 6    | 6    | 2     | 2      | 1      | 1     | 2     | 1     | 5 |
| 18507  |      | 3    | 2    | 3    | 6    | 6    | 5    | 3    | 3     | 3      | 2      | 1     | 2     | 2     | 1 |
| 18509  |      |      |      |      |      |      |      |      |       | 3      | 2      | 2     | 3     | 3     | 3 |
| 18510  |      | 5    | 3    | 2    | 5    | 5    | 5    | 5    | 3     | 2      | 1      | 1     | 2     | 2     | 3 |
| 18513  |      | 4    | 4    | 5    | 3    | 5    | 5    | 4    | 4     | 2      | 2      | 2     | 3     | 4     | 3 |
| 18525  |      |      |      |      |      |      |      |      |       | 2      | 3      | 3     | 5     | 5     | 5 |
| 18526  |      | 3    | 3    | 4    | 3    | 4    | 3    | 3    | 5     | 2      | 2      | 2     | 4     | 3     | 4 |
| 18527  |      |      |      |      |      |      |      |      |       | 2      | 2      | 2     | 2     | 3     | 4 |
| 18536  |      | 3    | 3    | 3    | 3    | 3    | 3    | 3    | 3     | 3      | 3      | 2     | 3     | 3     | 4 |
| 18540  |      | 3    | 3    | 4    | 4    | 4    | 4    | 4    | 3     | 2      | 3      | 3     | 4     | 5     | 5 |
| 18548  |      | 4    | 4    | 4    | 4    | 4    | 4    | 4    | 3     | 4      | 2      | 3     | 5     | 4     | 5 |
| 18550  |      |      |      |      |      |      |      |      |       | 5      | 3      | 3     | 5     | 5     | 5 |
| 18556  |      |      |      |      |      |      |      |      |       | 3      | 3      | 2     | 3     | 3     | 3 |
| 18561  |      |      |      |      |      |      |      |      |       | 5      | 3      | 3     | 5     | 5     | 5 |
| 18577  |      |      |      |      |      |      |      |      |       | 2      | 2      | 3     | 5     | 5     | 5 |
| 18580  |      | 6    | 5    | 3    | 6    | 6    | 6    | 5    | 3     | 2      | 3      | 3     | 5     | 5     | 5 |
| 18633  |      |      |      |      |      |      |      |      |       | 1      | 2      | 2     | 3     | 3     | 3 |
| 18635  |      |      |      |      |      |      |      |      |       | 2      | 3      | 3     | 4     | 4     | 4 |
| 18636  |      |      |      |      |      |      |      |      |       | 3      | 3      | 3     | 5     | 5     | 4 |
| 18645  |      | 6    | 5    | 2    | 5    | 6    | 5    | 5    | 3     | 3      | 3      | 3     | 5     | 5     | 4 |
| 18649  |      | 4    | 3    | 1    | 6    | 6    | 5    | 4    | 1     | 2      | 2      | 3     | 4     | 4     | 4 |
| 18664  |      |      |      |      |      |      |      |      |       | 3      | 3      | 3     | 5     | 5     | 5 |
| 18668  |      |      |      |      |      |      |      |      |       | 3      | 2      | 2     | 4     | 4     | 3 |
| 18682  |      |      |      |      |      |      |      |      |       | 2      | 2      | 2     | 3     | 3     | 4 |
| 18685  |      | 2    | 3    | 2    | 3    | 4    | 3    | 2    | 6     | 1      | 1      | 1     | 2     | 2     | 2 |
| 18688  |      | 4    | 4    | 3    | 4    | 4    | 4    | 4    | 3     | 2      | 3      | 2     | 4     | 4     | 4 |
| 18689  |      |      |      |      |      |      |      |      |       | 2      | 2      | 2     | 3     | 4     | 3 |
| 18693  |      | 4    | 4    | 4    | 4    | 4    | 4    | 4    | 4     | 3      | 3      | 3     | 5     | 5     | 5 |
| 18694  |      |      |      |      |      |      |      |      |       | 2      | 3      | 3     | 5     | 5     | 5 |
| 18705  |      |      |      |      |      |      |      |      |       | 2      | 3      | 3     | 5     | 5     | 5 |

| respid | Q48k | Q48l | Q48m | Q48n | Q48o | Q48p | Q48q | Q48r | Q49_1 | Q50a_1 | Q50b_1 | Q51_1 | Q51_2 | Q52_1 |   |
|--------|------|------|------|------|------|------|------|------|-------|--------|--------|-------|-------|-------|---|
| 18710  |      |      |      |      |      |      |      |      |       | 3      | 3      | 3     | 5     | 5     | 4 |
| 18715  | 3    | 6    | 1    | 6    | 6    | 6    | 4    | 4    |       | 4      | 3      | 3     | 5     | 5     | 5 |
| 18718  |      |      |      |      |      |      |      |      |       | 3      | 2      | 2     | 3     | 3     | 3 |
| 18727  | 4    | 4    | 4    | 4    | 4    | 4    | 4    | 4    |       | 2      | 2      | 2     | 4     | 4     | 4 |
| 18732  |      |      |      |      |      |      |      |      | 3     | 3      | 2      | 2     | 3     | 3     | 3 |
| 18735  | 3    | 4    | 4    | 4    | 4    | 5    | 3    | 2    |       | 2      | 1      | 2     | 2     | 2     | 4 |
| 18742  |      |      |      |      |      |      |      |      |       | 2      | 3      | 3     | 5     | 5     | 5 |
| 18745  |      |      |      |      |      |      |      |      |       | 2      | 3      | 3     | 5     | 5     | 5 |
| 18747  |      |      |      |      |      |      |      |      |       | 3      | 3      | 3     | 5     | 5     | 5 |
| 18750  | 5    | 5    | 2    | 5    | 5    | 5    | 5    | 2    |       | 3      | 2      | 2     | 4     | 4     | 4 |
| 18751  |      |      |      |      |      |      |      |      |       | 3      | 3      | 3     | 5     | 5     | 5 |
| 18753  |      |      |      |      |      |      |      |      |       | 2      | 3      | 3     | 4     | 4     | 4 |
| 18754  |      |      |      |      |      |      |      |      |       | 2      | 2      | 2     | 4     | 4     | 4 |
| 18759  | 4    | 5    | 4    | 3    | 5    | 6    | 5    | 4    |       | 3      | 3      | 3     | 5     | 5     | 4 |
| 18780  | 6    | 5    | 1    | 6    | 6    | 6    | 6    | 1    |       | 4      | 3      | 3     | 5     | 5     | 4 |
| 18782  | 6    | 6    | 5    | 2    | 6    | 3    | 3    | 3    |       | 2      | 2      | 2     | 3     | 4     | 5 |
| 18807  | 1    | 1    | 1    | 4    | 3    | 2    | 3    | 3    |       | 4      | 2      | 1     | 1     | 1     | 2 |
| 18815  |      |      |      |      |      |      |      |      |       | 2      | 2      | 2     | 2     | 2     | 4 |
| 18818  | 5    | 6    | 1    | 4    | 6    | 4    | 6    | 3    |       | 2      | 2      | 2     | 3     | 2     | 4 |
| 18820  | 2    | 3    | 5    | 1    | 6    | 5    | 3    | 5    |       | 2      | 1      | 2     | 3     | 3     | 2 |
| 18823  | 3    | 3    | 2    | 4    | 4    | 3    | 3    | 3    |       | 3      | 2      | 2     | 2     | 2     | 2 |
| 18825  | 6    | 6    | 3    | 6    | 6    | 6    | 6    | 2    |       | 3      | 3      | 3     | 3     | 4     | 3 |
| 18828  |      |      |      |      |      |      |      |      |       | 2      | 3      | 3     | 5     | 5     | 5 |
| 18832  | 4    | 4    | 3    | 3    | 3    | 3    | 4    | 3    |       | 2      | 3      | 3     | 4     | 3     | 3 |
| 18834  |      |      |      |      |      |      |      |      |       | 3      | 2      | 3     | 4     | 4     | 4 |
| 18835  |      |      |      |      |      |      |      |      |       | 1      | 2      | 2     | 2     | 2     | 2 |
| 18837  | 3    | 3    | 4    | 2    | 5    | 5    | 5    | 3    |       | 2      | 3      | 2     | 4     | 3     | 3 |
| 18842  | 4    | 4    |      |      |      |      |      |      |       | 2      | 2      | 2     | 4     | 4     | 4 |
| 18846  |      |      |      |      |      |      |      |      |       | 3      | 3      | 3     | 4     | 4     | 4 |
| 18855  |      |      |      |      |      |      |      |      |       | 4      | 2      | 2     | 2     | 3     | 2 |
| 18856  |      |      |      |      |      |      |      |      |       | 3      | 3      | 2     | 3     | 4     | 5 |
| 18887  |      |      |      |      |      |      |      |      |       | 1      | 2      | 2     | 4     | 4     | 5 |

| respid | Q48k | Q48l | Q48m | Q48n | Q48o | Q48p | Q48q | Q48r | Q49_1 | Q50a_1 | Q50b_1 | Q51_1 | Q51_2 | Q52_1 |   |
|--------|------|------|------|------|------|------|------|------|-------|--------|--------|-------|-------|-------|---|
| 18903  |      |      |      |      |      |      |      |      |       | 3      | 2      | 3     | 4     | 4     | 4 |
| 18906  |      |      |      |      |      |      |      |      |       | 2      | 2      | 3     | 5     | 5     | 4 |
| 18910  |      |      |      |      |      |      |      |      |       | 5      | 3      | 3     | 5     | 5     | 5 |
| 18919  | 4    | 3    | 2    | 5    | 5    | 5    | 3    | 3    |       | 2      | 3      | 2     | 4     | 4     | 5 |
| 18928  |      |      |      |      |      |      |      |      |       | 2      | 2      | 2     | 2     | 2     | 4 |
| 18931  |      |      |      |      |      |      |      |      |       | 2      | 2      | 3     | 3     | 3     | 4 |
| 18939  |      |      |      |      |      |      |      |      |       | 4      | 3      | 3     | 4     | 4     | 4 |
| 18946  | 4    | 4    | 3    | 4    | 4    | 4    | 4    | 3    |       | 3      | 2      | 3     | 5     | 5     | 5 |
| 18952  | 4    | 3    | 3    | 4    | 5    | 4    | 4    | 3    |       | 3      | 2      | 2     | 4     | 4     | 4 |
| 18954  |      |      |      |      |      |      |      |      |       | 3      | 3      | 3     | 5     | 5     | 5 |
| 18982  |      |      |      |      |      |      |      |      |       | 4      | 3      | 3     | 5     | 5     | 5 |
| 18986  |      |      |      |      |      |      |      |      |       | 2      | 2      | 2     | 3     | 3     | 3 |
| 18989  |      |      |      |      |      |      |      |      |       | 4      | 2      | 2     | 4     | 4     | 4 |
| 18990  |      |      |      |      |      |      |      |      |       | 2      | 3      | 2     | 4     | 4     | 5 |
| 18996  |      |      |      |      |      |      |      |      |       | 4      | 3      | 3     | 5     | 5     | 5 |
| 18998  | 2    | 6    | 2    | 6    | 6    | 6    | 6    | 5    |       | 3      | 3      | 3     | 5     | 5     | 5 |
| 19009  | 4    | 3    | 3    | 4    | 3    | 4    | 4    | 5    |       | 3      | 2      | 3     | 2     | 3     | 4 |
| 19010  | 2    | 6    | 1    | 6    | 5    | 6    | 5    | 2    |       | 4      | 3      | 3     | 5     | 5     | 5 |
| 19017  | 5    | 5    | 2    | 5    | 6    | 6    | 6    | 1    |       | 4      | 3      | 3     | 5     | 5     | 5 |
| 19018  |      |      |      |      |      |      |      |      |       | 4      | 3      | 3     | 5     | 5     | 4 |
| 19020  |      |      |      |      |      |      |      |      |       | 4      | 3      | 3     | 4     | 4     | 4 |
| 19027  | 5    | 5    | 4    | 5    | 4    | 3    | 4    | 3    |       | 3      | 3      | 3     | 3     | 3     | 4 |
| 19035  | 3    | 3    | 5    | 3    | 5    | 3    | 3    | 4    |       | 2      | 2      | 3     | 5     | 4     | 5 |
| 19037  |      |      |      |      |      |      |      |      |       | 2      | 2      | 2     | 2     | 2     | 3 |
| 19048  |      |      |      |      |      |      |      |      |       | 4      | 3      | 3     | 5     | 5     | 4 |
| 19051  | 4    | 5    | 2    | 5    | 5    | 4    | 4    | 3    |       | 2      | 3      | 2     | 4     | 4     | 4 |
| 19054  |      |      |      |      |      |      |      |      |       | 3      | 3      | 3     | 4     | 4     | 4 |
| 19057  | 1    | 1    | 1    | 1    | 1    | 1    | 1    | 1    |       | 2      | 2      | 2     | 3     | 1     | 2 |
| 19073  | 3    | 4    | 2    | 6    | 6    | 4    | 2    | 3    |       | 2      | 1      | 2     | 2     | 3     | 2 |
| 19075  |      |      |      |      |      |      |      |      |       | 3      | 2      | 3     | 4     | 4     | 4 |
| 19079  |      |      |      |      |      |      |      |      |       | 2      | 1      | 2     | 3     | 3     | 3 |
| 19087  | 2    | 2    | 2    | 2    | 2    | 2    | 2    | 2    |       | 3      | 3      | 3     | 5     | 5     | 5 |

| respid | Q48k | Q48l | Q48m | Q48n | Q48o | Q48p | Q48q | Q48r | Q49_1 | Q50a_1 | Q50b_1 | Q51_1 | Q51_2 | Q52_1 |   |
|--------|------|------|------|------|------|------|------|------|-------|--------|--------|-------|-------|-------|---|
| 19090  | 3    | 6    |      |      | 4    | 5    |      | 3    |       | 2      | 2      | 2     | 3     | 3     | 3 |
| 19093  |      |      |      |      |      |      |      |      |       | 4      | 3      | 3     | 5     | 5     | 5 |
| 19099  | 4    | 3    |      |      | 3    | 4    | 3    | 3    | 4     | 2      | 2      | 3     | 2     | 2     | 3 |
| 19100  | 5    | 6    | 2    |      | 5    | 5    | 6    | 6    | 1     | 3      | 2      | 2     | 5     | 5     | 4 |
| 19101  | 3    | 3    | 2    |      | 2    | 2    | 3    | 3    | 2     | 5      | 3      | 3     | 4     | 4     | 4 |
| 19105  | 6    | 6    | 1    |      | 6    | 6    | 6    | 6    | 2     | 2      | 3      | 3     | 4     | 4     | 4 |
| 19111  |      |      |      |      |      |      |      |      |       | 3      | 2      | 3     | 4     | 4     | 4 |
| 19112  | 5    | 5    | 5    |      | 5    | 6    | 6    | 6    | 2     | 2      | 2      | 3     | 4     | 4     | 5 |
| 19117  | 6    | 6    | 1    |      | 6    | 6    | 6    | 6    | 1     | 3      | 2      | 3     | 5     | 4     | 5 |
| 19122  | 5    | 6    |      |      | 5    | 6    | 6    | 6    | 2     | 3      | 3      | 3     | 4     | 4     | 5 |
| 19126  |      |      |      |      |      |      |      |      |       | 3      | 3      | 3     | 5     | 5     | 5 |
| 19127  |      |      |      |      |      |      |      |      |       | 3      | 2      | 2     | 4     | 4     | 4 |
| 19131  |      |      |      |      |      |      |      |      |       | 2      | 2      | 3     | 3     | 4     | 4 |
| 19134  | 6    | 6    | 6    |      | 6    | 6    | 6    | 6    | 1     | 2      | 3      | 3     | 5     | 5     | 5 |
| 19149  | 3    | 3    | 4    |      | 1    | 5    | 4    | 3    | 4     | 2      | 3      | 2     | 4     | 4     | 4 |
| 19151  |      |      |      |      |      |      |      |      |       | 2      | 3      | 3     | 3     | 4     | 4 |
| 19164  |      |      |      |      |      |      |      |      |       | 3      | 3      | 2     | 4     | 4     | 4 |
| 19166  |      |      |      |      |      |      |      |      |       | 2      | 3      | 3     | 4     | 4     | 4 |
| 19172  |      | 6    | 1    |      |      | 6    |      |      |       | 2      | 2      | 3     | 4     | 4     | 4 |
| 19173  |      |      |      |      |      |      |      |      |       | 2      | 2      | 2     | 3     | 3     | 3 |
| 19180  |      |      |      |      |      |      |      |      |       | 2      | 3      | 2     | 5     | 5     | 5 |
| 19185  |      |      |      |      |      |      |      |      |       | 2      | 2      | 3     | 2     | 2     | 2 |
| 19189  |      |      |      |      |      |      |      |      |       | 3      | 3      | 3     | 5     | 5     | 5 |
| 19191  |      |      |      |      |      |      |      |      |       | 4      | 3      | 3     | 5     | 5     | 5 |
| 19198  | 3    | 6    | 2    |      | 6    | 6    | 6    | 6    | 2     | 2      | 2      | 2     | 4     | 4     | 5 |
| 19203  |      |      |      |      |      |      |      |      |       | 3      | 3      | 3     | 4     | 5     | 5 |
| 19209  | 6    | 6    | 1    |      | 6    | 6    | 6    | 6    | 2     | 2      | 3      | 3     | 5     | 5     | 4 |
| 19210  |      |      |      |      |      |      |      |      |       | 3      | 3      | 3     | 4     | 4     | 4 |
| 19218  |      |      |      |      |      |      |      |      |       | 4      | 3      | 3     | 5     | 5     | 5 |
| 19220  |      |      |      |      |      |      |      |      |       | 3      | 3      | 3     | 5     | 5     | 4 |
| 19225  |      |      |      |      |      |      |      |      |       | 2      | 2      | 2     | 3     | 3     | 3 |
| 19227  |      |      |      |      |      |      |      |      |       | 4      | 3      | 3     | 5     | 5     | 5 |

| respid | Q48k | Q48l | Q48m | Q48n | Q48o | Q48p | Q48q | Q48r | Q49_1 | Q50a_1 | Q50b_1 | Q51_1 | Q51_2 | Q52_1 |   |
|--------|------|------|------|------|------|------|------|------|-------|--------|--------|-------|-------|-------|---|
| 19228  |      |      |      |      |      |      |      |      |       | 4      | 3      | 3     | 5     | 5     | 5 |
| 19243  | 3    | 4    | 3    | 3    | 6    | 4    | 3    | 4    |       | 2      | 3      | 3     | 5     | 5     | 4 |
| 19244  |      |      |      |      |      |      |      |      |       | 3      | 2      | 2     | 4     | 4     | 4 |
| 19246  | 6    | 6    | 1    | 6    | 6    | 6    | 6    | 1    |       | 2      | 3      | 3     | 4     | 5     | 4 |
| 19248  |      |      |      |      |      |      |      |      |       | 2      | 3      | 2     | 5     | 5     | 4 |
| 19249  |      |      |      |      |      |      |      |      |       | 3      | 2      | 2     | 4     | 4     | 4 |
| 19252  | 4    | 4    | 4    | 4    | 5    | 4    | 3    | 4    |       | 2      | 2      | 3     | 4     | 3     | 5 |
| 19255  |      |      |      |      |      |      |      |      |       | 3      | 3      | 3     | 5     | 4     | 3 |
| 19257  | 6    | 6    | 5    | 5    | 6    | 5    | 5    | 5    |       | 2      | 2      | 3     | 4     | 4     | 4 |
| 19274  |      |      |      |      |      |      |      |      |       | 3      | 3      | 3     | 5     | 5     | 5 |
| 19279  |      |      |      |      |      |      |      |      |       | 3      | 2      | 2     | 4     | 4     | 4 |
| 19291  |      |      |      |      |      |      |      |      |       | 4      | 3      | 3     | 4     | 4     | 4 |
| 19292  | 6    | 5    | 5    | 6    | 4    | 4    | 5    | 4    |       | 2      | 1      | 3     | 4     | 4     | 4 |
| 19308  |      |      |      |      |      |      |      |      |       | 2      | 2      | 2     | 3     | 3     | 3 |
| 19310  |      |      |      |      |      |      |      |      |       | 1      | 3      | 3     | 5     | 5     | 5 |
| 19311  |      |      |      |      |      |      |      |      |       | 1      | 1      | 1     | 5     | 5     | 5 |
| 19326  | 5    | 6    | 2    | 5    | 6    | 4    | 6    | 3    |       | 2      | 3      | 2     | 4     | 3     | 3 |
| 19327  |      |      |      |      |      |      |      |      |       | 4      | 3      | 3     | 5     | 5     | 5 |
| 19329  |      |      |      |      |      |      |      |      |       | 3      | 3      | 3     | 5     | 5     | 5 |
| 19330  |      |      |      |      |      |      |      |      |       | 4      | 2      | 2     | 3     | 3     | 3 |
| 19333  | 4    | 4    | 3    | 4    | 4    | 4    | 4    | 3    |       | 2      | 2      | 2     | 2     | 2     | 3 |
| 19336  | 4    | 4    | 5    | 5    | 5    | 4    | 4    | 4    |       | 3      | 2      | 2     | 3     | 3     | 3 |
| 19343  | 6    | 6    | 2    | 6    | 6    | 2    | 6    | 3    |       | 2      | 3      | 3     | 5     | 3     | 4 |
| 19348  | 6    | 6    | 1    | 6    | 6    | 6    | 6    | 6    | 1     | 4      | 3      | 3     | 5     | 5     | 5 |
| 19349  |      |      |      | 3    |      | 3    | 3    |      |       | 2      | 2      | 1     | 3     | 3     | 2 |
| 19352  |      |      |      |      |      |      |      |      |       | 2      | 2      | 2     | 3     | 4     | 3 |
| 19356  | 6    | 5    | 3    | 5    | 6    | 6    | 6    | 6    | 2     | 2      | 3      | 3     | 5     | 5     | 4 |
| 19357  |      |      |      |      |      |      |      |      |       | 2      | 2      | 3     | 4     | 4     | 4 |
| 19358  | 3    | 3    | 3    | 2    | 4    | 3    | 3    | 3    | 5     | 3      | 3      | 3     | 5     | 4     | 4 |
| 19367  |      |      |      |      |      |      |      |      |       | 2      | 3      | 3     | 5     | 5     | 5 |
| 19376  |      |      |      |      |      |      |      |      |       | 3      | 2      | 2     | 4     | 4     | 4 |
| 19377  |      |      |      |      |      |      |      |      |       | 2      | 3      | 3     | 5     | 5     | 5 |

| respid | Q48k | Q48l | Q48m | Q48n | Q48o | Q48p | Q48q | Q48r | Q49_1 | Q50a_1 | Q50b_1 | Q51_1 | Q51_2 | Q52_1 |   |
|--------|------|------|------|------|------|------|------|------|-------|--------|--------|-------|-------|-------|---|
| 19380  |      |      |      |      |      |      |      |      |       | 2      | 2      | 2     | 3     | 3     | 5 |
| 19384  |      |      |      |      |      |      |      |      |       | 3      | 3      | 3     | 4     | 4     | 4 |
| 19391  |      |      |      |      |      |      |      |      |       | 2      | 3      | 3     | 5     | 5     | 5 |
| 19397  |      |      |      |      |      |      |      |      |       | 2      | 2      | 2     | 4     | 4     | 4 |
| 19398  | 6    | 6    | 6    | 6    | 6    | 6    | 6    | 6    | 1     | 4      | 3      | 3     | 5     | 5     | 5 |
| 19401  |      |      |      |      |      |      |      |      |       | 4      | 3      | 3     | 4     | 4     | 5 |
| 19402  |      |      |      |      |      |      |      |      |       | 2      | 3      | 3     | 5     | 5     | 4 |
| 19403  |      |      |      |      |      |      |      |      |       | 4      | 3      | 3     | 5     | 5     | 4 |
| 19405  |      |      |      |      |      |      |      |      |       | 5      | 3      | 3     | 5     | 5     | 5 |
| 19407  |      |      |      |      |      |      |      |      |       | 2      | 3      | 3     | 5     | 5     | 4 |
| 19415  | 5    | 5    | 5    | 3    | 5    | 5    | 5    | 5    | 3     | 4      | 3      | 3     | 4     | 5     | 5 |
| 19420  |      |      |      |      |      |      |      |      |       | 3      | 3      | 3     | 5     | 5     | 5 |
| 19423  |      |      |      |      |      |      |      |      |       | 2      | 2      | 2     | 3     | 2     | 3 |
| 19424  | 4    | 4    | 4    | 4    | 4    | 4    | 4    | 4    | 4     | 3      | 3      | 3     | 4     | 4     | 4 |
| 19426  | 3    | 3    | 1    | 5    | 6    | 4    | 3    | 4    | 4     | 2      | 2      | 2     | 4     | 3     | 4 |
| 19429  | 5    | 6    | 2    | 3    | 6    | 6    | 6    | 6    | 1     | 5      | 3      | 3     | 4     | 5     | 5 |
| 19435  | 5    | 4    | 4    | 5    | 5    | 4    | 5    | 4    | 4     | 2      | 2      | 2     | 2     | 3     | 2 |
| 19441  | 6    | 6    | 1    | 6    | 6    | 3    | 6    | 6    | 1     | 2      | 3      | 2     | 4     | 5     | 4 |
| 19450  |      |      |      |      |      |      |      |      |       | 5      | 3      | 3     | 5     | 5     | 5 |
| 19456  |      |      |      |      |      |      |      |      |       | 2      | 2      | 2     | 2     | 4     | 4 |
| 19457  | 6    | 6    | 1    | 6    | 4    | 6    | 6    | 6    | 2     | 3      | 2      | 3     | 4     | 5     | 4 |
| 19463  | 5    | 6    | 1    | 6    | 6    | 6    | 6    | 6    | 4     | 2      | 2      | 2     | 3     | 3     | 3 |
| 19467  |      |      |      |      |      |      |      |      |       | 2      | 2      | 2     | 3     | 2     | 3 |
| 19468  |      |      |      |      |      |      |      |      |       | 4      | 3      | 3     | 5     | 5     | 5 |
| 19471  | 4    | 4    | 2    | 4    | 6    | 4    | 5    | 3    | 3     | 3      | 3      | 3     | 5     | 4     | 5 |
| 19473  |      |      |      |      |      |      |      |      |       | 2      | 3      | 3     | 4     | 5     | 4 |
| 19478  |      |      |      |      |      |      |      |      |       | 2      | 2      | 2     | 4     | 3     | 3 |
| 19480  |      |      |      |      |      |      |      |      |       | 3      | 3      | 3     | 5     | 4     | 4 |
| 19481  | 2    | 6    | 1    | 6    | 6    | 3    | 3    | 3    | 5     | 3      | 2      | 2     | 4     | 4     | 4 |
| 19484  |      |      |      |      |      |      |      |      |       | 4      | 3      | 3     | 5     | 5     | 5 |
| 19487  |      |      |      |      |      |      |      |      |       | 3      | 2      | 2     | 3     | 3     | 3 |
| 19491  | 5    | 3    | 3    | 2    | 5    | 3    | 2    | 5    | 5     | 2      | 2      | 2     | 4     | 3     | 4 |



| respid | Q48k | Q48l | Q48m | Q48n | Q48o | Q48p | Q48q | Q48r | Q49_1 | Q50a_1 | Q50b_1 | Q51_1 | Q51_2 | Q52_1 |   |
|--------|------|------|------|------|------|------|------|------|-------|--------|--------|-------|-------|-------|---|
| 19495  |      |      |      |      |      |      |      |      |       | 5      | 2      | 3     | 4     | 4     | 4 |
| 19498  | 1    | 1    | 2    | 3    | 1    | 1    | 1    | 1    | 6     | 3      | 2      | 2     | 4     | 4     | 3 |
| 19500  |      |      |      |      |      |      |      |      |       | 2      | 3      | 3     | 4     | 4     | 4 |
| 19501  | 6    | 6    | 1    | 6    | 6    | 6    | 6    | 6    | 1     | 3      | 2      | 2     | 4     | 4     | 4 |
| 19503  |      |      |      |      |      |      |      |      |       | 2      | 3      | 3     | 4     | 4     | 4 |
| 19506  |      |      |      |      |      |      |      |      |       | 4      | 3      | 3     | 5     | 5     | 4 |
| 19508  | 5    | 6    | 4    | 6    | 6    | 6    | 6    | 6    | 1     | 5      | 3      | 3     | 5     | 5     | 4 |
| 19509  |      |      |      |      |      |      |      |      |       | 2      | 2      | 2     | 2     | 3     | 5 |
| 19518  | 4    | 4    | 1    | 4    | 6    | 6    | 5    | 3    | 3     | 3      | 2      | 2     | 2     | 2     | 2 |
| 19520  |      |      |      |      |      |      |      |      |       | 3      | 2      | 2     | 2     | 2     | 2 |
| 19536  | 6    | 6    | 1    | 2    | 6    | 6    | 2    | 2    | 2     | 2      | 3      | 3     | 4     | 4     | 4 |
| 19538  | 6    | 6    | 1    | 6    | 6    | 3    | 6    | 1    | 3     | 3      | 3      | 2     | 4     | 4     | 4 |
| 19541  |      |      |      | 1    |      |      |      | 3    | 2     | 2      | 3      | 2     | 3     | 4     | 5 |
| 19548  |      |      |      |      |      |      |      |      |       | 2      | 3      | 3     | 3     | 3     | 4 |
| 19553  |      |      |      |      |      |      |      |      |       | 3      | 3      | 3     | 5     | 5     | 5 |
| 19556  | 6    | 6    | 1    | 6    | 6    | 5    | 3    | 5    | 4     | 4      | 2      | 3     | 5     | 5     | 4 |
| 19559  |      |      |      |      |      |      |      |      |       | 2      | 2      | 2     | 4     | 4     | 4 |
| 19561  | 2    | 4    | 2    | 4    | 6    | 4    | 4    | 5    | 3     | 2      | 2      | 2     | 4     | 4     | 4 |
| 19562  | 6    | 6    | 3    | 4    | 4    | 4    | 4    | 4    | 3     | 4      | 3      | 3     | 5     | 5     | 5 |
| 19564  |      |      |      |      |      |      |      |      |       | 3      | 3      | 3     | 5     | 5     | 5 |
| 19567  |      |      |      |      |      |      |      |      |       | 2      | 1      | 1     | 2     | 2     | 2 |
| 19571  |      |      |      |      |      |      |      |      |       | 3      | 2      | 2     | 4     | 4     | 4 |
| 19576  |      |      |      |      |      |      |      |      |       | 3      | 2      | 2     | 3     | 4     | 3 |
| 19578  | 6    | 6    | 1    | 6    | 6    | 6    | 6    | 6    | 1     | 3      | 2      | 3     | 5     | 5     | 5 |
| 19606  |      |      |      |      |      |      |      |      |       | 2      | 3      | 3     | 5     | 5     | 4 |
| 19607  |      |      |      |      |      |      |      |      |       | 3      | 3      | 3     | 5     | 5     | 5 |
| 19608  | 5    | 4    | 3    | 4    | 5    | 3    | 4    | 4    | 5     | 2      | 3      | 3     | 5     | 5     | 3 |
| 19612  | 2    | 3    | 1    | 6    | 5    | 4    | 6    | 6    | 3     | 2      | 2      | 2     | 1     | 1     | 1 |
| 19618  | 4    | 3    | 3    | 3    | 4    | 3    | 3    | 3    | 2     | 2      | 2      | 2     | 2     | 3     | 2 |
| 19621  | 6    | 3    | 4    | 4    | 6    | 6    | 6    | 6    | 1     | 3      | 3      | 3     | 4     | 4     | 3 |
| 19624  |      |      |      |      |      |      |      |      |       | 2      | 2      | 2     | 3     | 2     | 3 |
| 19630  |      |      |      |      |      |      |      |      |       | 3      | 3      | 3     | 4     | 5     | 5 |

| respid | Q48k | Q48l | Q48m | Q48n | Q48o | Q48p | Q48q | Q48r | Q49_1 | Q50a_1 | Q50b_1 | Q51_1 | Q51_2 | Q52_1 |
|--------|------|------|------|------|------|------|------|------|-------|--------|--------|-------|-------|-------|
| 19637  |      |      |      |      |      |      |      |      |       | 1      | 2      | 2     | 2     | 2     |
| 19639  |      |      |      |      |      |      |      |      |       | 3      | 3      | 3     | 4     | 4     |
| 19647  | 4    | 6    | 2    | 4    | 5    | 4    | 4    | 6    | 3     | 3      | 3      | 5     | 5     | 4     |
| 19648  |      |      |      |      |      |      |      |      | 4     | 2      | 3      | 1     | 2     | 1     |
| 19660  |      |      |      |      |      |      |      |      | 3     | 3      | 3      | 5     | 5     | 5     |
| 19662  | 3    | 4    | 3    | 2    | 4    | 3    | 4    | 4    | 3     | 2      | 3      | 3     | 4     | 2     |
| 19669  | 6    | 6    | 2    | 6    | 6    | 2    | 6    | 2    | 4     | 3      | 3      | 4     | 4     | 4     |
| 19680  |      |      |      |      |      |      |      |      | 5     | 3      | 3      | 5     | 5     | 5     |
| 19682  | 3    | 4    | 4    | 3    | 5    | 4    | 4    | 4    | 2     | 2      | 3      | 3     | 3     | 3     |
| 19686  | 6    | 6    | 2    | 6    | 6    | 6    | 5    | 4    | 2     | 3      | 2      | 4     | 4     | 4     |
| 19700  | 5    | 6    | 1    | 5    | 6    | 6    | 6    | 6    | 2     | 3      | 3      | 4     | 5     | 4     |
| 19701  | 6    | 6    | 1    | 6    | 6    | 6    | 6    | 6    | 1     | 2      | 3      | 3     | 5     | 5     |
| 19704  |      |      |      |      |      |      |      |      | 4     | 3      | 3      | 5     | 5     | 5     |
| 19706  | 2    | 3    | 1    | 3    | 2    | 4    | 3    | 2    | 3     | 3      | 3      | 2     | 3     | 3     |
| 19707  |      |      |      |      |      |      |      |      | 3     | 2      | 3      | 4     | 5     | 5     |
| 19717  | 6    | 6    | 1    | 6    | 6    | 6    | 6    | 6    | 1     | 2      | 2      | 2     | 4     | 4     |
| 19718  | 4    | 6    | 4    | 4    | 1    | 6    | 3    | 4    | 2     | 3      | 2      | 5     | 4     | 5     |
| 19721  | 3    | 3    | 4    | 3    | 3    | 3    | 3    | 4    | 1     | 1      | 1      | 3     | 2     | 2     |
| 19722  |      |      |      |      |      |      |      |      | 4     | 3      | 3      | 5     | 5     | 5     |
| 19729  |      |      |      |      |      |      |      |      | 3     | 3      | 3      | 5     | 5     | 4     |
| 19738  | 3    | 5    | 3    | 5    | 6    | 4    | 5    | 3    | 2     | 2      | 2      | 3     | 5     | 4     |
| 19741  | 6    | 6    | 1    | 6    | 6    | 6    | 6    | 6    | 5     | 2      | 3      | 3     | 5     | 4     |
| 19742  |      |      |      |      |      |      |      |      | 3     | 2      | 2      | 2     | 3     | 2     |
| 19747  |      |      |      |      |      |      |      |      | 3     | 2      | 2      | 4     | 3     | 5     |
| 19748  | 5    | 2    | 2    | 3    | 2    | 3    | 3    | 3    | 4     | 3      | 3      | 5     | 5     | 5     |
| 19749  | 5    | 6    | 3    | 3    | 5    | 3    | 5    | 3    | 3     | 3      | 3      | 4     | 5     | 5     |
| 19756  |      |      |      |      |      |      |      |      | 2     | 2      | 3      | 4     | 5     | 4     |
| 19771  | 6    | 6    | 6    | 1    | 1    | 2    | 2    | 2    | 2     | 2      | 2      | 3     | 3     | 3     |
| 19772  | 2    | 2    | 5    | 5    | 5    | 2    | 2    | 6    | 2     | 2      | 2      | 3     | 3     | 3     |
| 19775  |      |      |      |      |      |      |      |      | 2     | 2      | 3      | 4     | 5     | 4     |
| 19783  |      |      |      |      |      |      |      |      | 4     | 3      | 3      | 5     | 5     | 5     |
| 19787  |      |      |      |      |      |      |      |      | 3     | 2      | 3      | 4     | 3     | 5     |

| respid | Q48k | Q48l | Q48m | Q48n | Q48o | Q48p | Q48q | Q48r | Q49_1 | Q50a_1 | Q50b_1 | Q51_1 | Q51_2 | Q52_1 |   |
|--------|------|------|------|------|------|------|------|------|-------|--------|--------|-------|-------|-------|---|
| 19790  |      |      |      |      |      |      |      |      |       | 5      | 3      | 3     | 5     | 5     | 4 |
| 19797  | 3    | 4    | 1    | 6    | 6    | 1    | 1    | 6    | 2     | 2      | 2      | 3     | 1     | 1     | 1 |
| 19802  | 6    | 6    | 2    | 6    | 6    | 6    | 6    | 2    | 3     | 3      | 3      | 3     | 5     | 5     | 4 |
| 19808  |      |      |      |      |      |      |      |      | 2     | 2      | 2      | 2     | 2     | 2     | 3 |
| 19810  | 6    | 6    | 1    | 3    | 6    | 6    | 6    | 2    | 3     | 3      | 3      | 3     | 5     | 5     | 5 |
| 19811  |      |      |      |      |      |      |      |      | 2     | 3      | 3      | 3     | 5     | 5     | 5 |
| 19812  | 5    | 6    | 1    | 5    | 5    | 6    | 6    | 2    | 3     | 3      | 3      | 3     | 4     | 3     | 4 |
| 19821  |      |      |      |      |      |      |      |      | 2     | 2      | 2      | 2     | 4     | 4     | 4 |
| 19826  | 4    | 4    | 4    | 4    | 4    | 4    | 4    | 3    | 2     | 2      | 2      | 2     | 3     | 3     | 3 |
| 19827  |      |      |      |      |      |      |      |      | 1     | 2      | 2      | 2     | 4     | 4     | 5 |
| 19830  | 3    | 4    | 2    | 4    | 6    | 6    | 6    | 4    | 2     | 2      | 2      | 2     | 3     | 3     | 3 |
| 19834  | 4    | 5    | 3    | 5    | 5    | 5    | 5    | 4    | 3     | 3      | 2      | 2     | 5     | 5     | 5 |
| 19838  |      |      |      |      |      |      |      |      | 1     | 3      | 3      | 3     | 3     | 3     | 4 |
| 19843  |      |      |      |      |      |      |      |      | 2     | 3      | 3      | 3     | 2     | 2     | 1 |
| 19845  |      |      |      |      |      |      |      |      | 3     | 2      | 2      | 2     | 3     | 4     | 3 |
| 19846  |      |      |      |      |      |      |      |      | 4     | 2      | 3      | 3     | 5     | 4     | 4 |
| 19852  |      |      |      |      |      |      |      |      | 2     | 3      | 3      | 3     | 3     | 4     | 4 |
| 19855  | 3    | 5    | 3    | 4    | 6    | 6    | 6    | 2    | 3     | 3      | 3      | 3     | 4     | 5     | 5 |
| 19858  |      |      |      |      |      |      |      |      | 3     | 3      | 3      | 3     | 4     | 4     | 5 |
| 19861  | 1    |      |      |      | 6    | 6    | 6    | 6    | 2     | 3      | 2      | 2     | 3     | 2     | 3 |
| 19863  | 6    | 6    | 4    | 6    | 6    | 6    | 6    | 1    | 4     | 2      | 2      | 3     | 3     | 4     | 4 |
| 19868  |      |      |      |      |      |      |      |      | 3     | 3      | 3      | 3     | 4     | 4     | 4 |
| 19874  | 6    | 6    | 1    | 5    | 6    | 6    | 6    | 2    | 3     | 3      | 3      | 3     | 4     | 4     | 4 |
| 19876  |      |      |      |      |      |      |      |      | 4     | 3      | 3      | 3     | 4     | 5     | 5 |
| 19880  | 2    | 1    | 1    | 1    | 3    | 1    | 2    | 6    | 2     | 2      | 2      | 1     | 2     | 2     | 3 |
| 19885  |      |      |      |      |      |      |      |      | 4     | 3      | 3      | 3     | 5     | 5     | 5 |
| 19890  |      |      |      |      |      |      |      |      | 3     | 3      | 3      | 3     | 5     | 5     | 4 |
| 19894  |      |      |      |      |      |      |      |      | 3     | 3      | 3      | 3     | 5     | 5     | 5 |
| 19895  |      |      |      |      |      |      |      |      | 2     | 2      | 2      | 2     | 3     | 3     | 3 |
| 19897  | 1    | 6    | 6    |      |      |      |      |      | 3     | 2      | 2      | 3     | 1     | 1     | 3 |
| 19906  | 4    | 4    | 4    | 4    | 5    | 5    | 5    | 3    | 3     | 3      | 3      | 3     | 5     | 5     | 5 |
| 19908  | 6    | 6    | 1    | 6    | 6    | 6    | 6    | 6    | 1     | 4      | 3      | 3     | 5     | 5     | 5 |

| respid | Q48k | Q48l | Q48m | Q48n | Q48o | Q48p | Q48q | Q48r | Q49_1 | Q50a_1 | Q50b_1 | Q51_1 | Q51_2 | Q52_1 |   |
|--------|------|------|------|------|------|------|------|------|-------|--------|--------|-------|-------|-------|---|
| 19912  |      | 6    | 6    | 3    | 3    | 6    | 3    | 6    | 3     | 3      | 3      | 3     | 5     | 5     | 5 |
| 19913  |      | 4    | 5    | 4    | 4    | 5    | 5    | 5    | 4     | 2      | 3      | 2     | 4     | 4     | 4 |
| 19914  |      | 4    | 4    | 2    | 4    | 6    | 3    | 4    | 3     | 3      | 2      | 3     | 3     | 3     | 4 |
| 19918  |      | 5    | 5    | 2    | 5    | 6    | 3    | 5    | 4     | 1      | 2      | 2     | 2     | 3     | 2 |
| 19924  |      | 6    | 5    | 1    | 6    | 6    | 4    | 6    | 3     | 3      | 2      | 2     | 4     | 4     | 4 |
| 19936  |      |      |      |      |      |      |      |      |       | 2      | 2      | 2     | 5     | 5     | 4 |
| 19940  |      |      |      |      |      |      |      |      |       | 5      | 3      | 3     | 5     | 5     | 5 |
| 19945  |      | 5    | 5    | 2    | 5    | 6    | 5    | 5    | 2     | 3      | 3      | 2     | 4     | 5     | 4 |
| 19948  |      |      |      |      |      |      |      |      |       | 3      | 3      | 3     | 5     | 5     | 4 |
| 19959  |      | 5    | 5    | 2    | 5    | 6    | 5    | 5    | 3     | 3      | 3      | 3     | 5     | 5     | 3 |
| 19961  |      |      |      |      |      |      |      |      |       | 2      | 3      | 3     | 5     | 5     | 5 |
| 19962  |      |      |      |      |      |      |      |      |       | 2      | 3      | 3     | 5     | 5     | 5 |
| 19965  |      | 2    | 6    | 6    | 6    | 6    | 6    | 6    | 2     | 3      | 3      | 2     | 4     | 5     | 4 |
| 19966  |      | 4    | 4    | 4    | 3    | 4    | 4    | 4    | 4     | 2      | 2      | 2     | 3     | 4     | 3 |
| 19973  |      | 6    | 6    | 4    | 3    | 5    | 4    | 6    | 5     | 4      | 2      | 2     | 4     | 4     | 3 |
| 19981  |      |      |      |      |      |      |      |      |       | 2      | 2      | 2     | 3     | 3     | 3 |
| 19986  |      |      |      |      |      |      |      |      |       | 3      | 3      | 3     | 3     | 3     | 3 |
| 19989  |      |      |      |      |      |      |      |      |       | 4      | 3      | 3     | 5     | 5     | 5 |
| 19998  |      | 4    | 4    | 4    | 4    | 4    | 4    |      | 4     | 2      | 2      | 3     | 3     | 3     | 3 |
| 20001  |      |      |      |      |      |      |      |      |       | 4      | 3      | 3     | 5     | 5     | 5 |
| 20005  |      |      |      |      |      |      |      |      |       | 5      | 3      | 3     | 5     | 5     | 5 |
| 20013  |      | 3    | 2    | 3    | 4    | 3    | 3    | 2    | 4     | 1      | 1      | 1     | 2     | 2     | 2 |
| 20015  |      |      |      |      |      |      |      |      |       | 4      | 3      | 3     | 5     | 5     | 4 |
| 20017  |      | 5    | 5    | 2    | 4    | 6    | 5    | 5    | 4     | 2      | 2      | 2     | 4     | 4     | 4 |
| 20020  |      | 5    | 6    | 4    | 4    | 6    | 5    | 4    | 2     | 3      | 3      | 2     | 4     | 4     | 4 |
| 20021  |      |      |      |      |      |      |      |      |       | 2      | 2      | 2     | 4     | 4     | 5 |
| 20026  |      | 3    | 6    | 3    | 5    | 6    | 6    |      | 5     | 2      | 3      | 3     | 5     | 5     | 4 |
| 20028  |      |      |      |      |      |      |      |      |       | 4      | 3      | 3     | 4     | 5     | 4 |
| 20030  |      | 2    | 6    | 4    | 2    | 6    | 5    | 6    | 3     | 3      | 3      | 3     | 5     | 5     | 5 |
| 20031  |      |      |      |      |      |      |      |      |       | 4      | 3      | 3     | 3     | 3     | 3 |
| 20034  |      | 6    | 6    | 5    | 6    | 6    | 6    | 6    | 4     | 3      | 2      | 2     | 4     | 5     | 4 |
| 20035  |      |      |      |      |      |      |      |      |       | 4      | 3      | 3     | 5     | 5     | 4 |

| respid | Q48k | Q48l | Q48m | Q48n | Q48o | Q48p | Q48q | Q48r | Q49_1 | Q50a_1 | Q50b_1 | Q51_1 | Q51_2 | Q52_1 |
|--------|------|------|------|------|------|------|------|------|-------|--------|--------|-------|-------|-------|
| 20040  | 1    | 4    | 1    | 1    | 6    | 6    | 3    | 2    | 2     | 2      | 3      | 5     | 5     | 5     |
| 20045  |      |      |      |      |      |      |      |      |       | 3      | 2      | 2     | 1     | 2     |
| 20048  |      |      |      |      |      |      |      |      |       | 1      | 2      | 2     | 5     | 2     |
| 20053  |      |      |      |      |      |      |      |      |       | 1      | 1      | 1     | 3     | 3     |
| 20064  |      |      |      |      |      |      |      |      |       | 2      | 2      | 2     | 3     | 3     |
| 20071  |      |      |      |      |      |      |      |      |       | 2      | 3      | 3     | 4     | 4     |
| 20072  |      |      |      |      |      |      |      |      |       | 2      | 2      | 3     | 2     | 1     |
| 20076  | 1    | 6    | 1    | 6    | 6    | 6    | 6    | 1    | 3     | 3      | 3      | 5     | 5     | 5     |
| 20081  |      |      |      |      |      |      |      |      |       | 2      | 2      | 2     | 4     | 4     |
| 20082  |      |      |      |      |      |      |      |      |       | 3      | 2      | 2     | 1     | 1     |
| 20083  | 5    | 5    | 4    | 2    | 5    | 5    | 5    | 4    | 4     | 4      | 3      | 3     | 4     | 4     |
| 20088  |      |      |      |      |      |      |      |      |       | 4      | 3      | 3     | 4     | 5     |
| 20089  |      |      |      |      |      |      |      |      |       | 3      | 3      | 2     | 5     | 5     |
| 20099  |      |      |      |      |      |      |      |      |       | 2      | 3      | 3     | 5     | 5     |
| 20101  | 6    | 6    | 1    | 6    | 6    | 6    | 6    | 3    | 2     | 2      | 2      | 4     | 4     | 4     |
| 20102  |      |      |      |      |      |      |      |      |       | 4      | 2      | 3     | 5     | 5     |
| 20109  |      |      |      |      |      |      |      |      |       | 2      | 3      | 3     | 5     | 5     |
| 20118  | 3    | 4    | 4    | 2    | 6    | 3    | 5    | 4    | 2     | 3      | 2      | 5     | 5     | 5     |
| 20119  |      |      |      |      |      |      |      |      |       | 2      | 3      | 3     | 5     | 5     |
| 20124  |      |      |      |      |      |      |      |      |       | 3      | 3      | 3     | 5     | 5     |
| 20126  | 5    | 5    | 4    | 4    | 6    | 3    | 5    | 3    | 3     | 3      | 3      | 4     | 4     | 4     |
| 20130  |      |      |      |      |      |      |      |      |       | 2      | 3      | 3     | 5     | 5     |
| 20131  | 5    | 5    | 3    | 4    | 6    | 5    | 4    | 4    | 3     | 3      | 3      | 5     | 5     | 4     |
| 20134  | 5    | 4    | 5    | 5    | 5    | 2    | 6    | 2    | 3     | 3      | 3      | 4     | 3     | 3     |
| 20146  | 6    | 6    | 1    | 6    | 6    | 6    | 6    | 2    | 4     | 3      | 3      | 5     | 5     | 5     |
| 20152  |      |      |      |      |      |      |      |      |       | 4      | 3      | 2     | 5     | 4     |
| 20155  | 6    | 4    | 2    | 6    | 6    | 5    | 5    | 4    | 2     | 3      | 3      | 5     | 5     | 5     |
| 20156  |      |      |      |      |      |      |      |      |       | 3      | 3      | 3     | 5     | 5     |
| 20157  |      |      |      |      |      |      |      |      |       | 3      | 3      | 3     | 5     | 5     |
| 20164  | 6    | 6    | 2    | 6    | 6    | 6    | 6    | 2    | 4     | 3      | 3      | 5     | 5     | 5     |
| 20168  | 3    | 5    | 4    | 2    | 6    | 5    | 5    | 2    | 2     | 2      | 1      | 2     | 2     | 4     |
| 20173  |      |      |      |      |      |      |      |      |       | 2      | 2      | 2     | 1     | 2     |

| respid | Q48k | Q48l | Q48m | Q48n | Q48o | Q48p | Q48q | Q48r | Q49_1 | Q50a_1 | Q50b_1 | Q51_1 | Q51_2 | Q52_1 |   |
|--------|------|------|------|------|------|------|------|------|-------|--------|--------|-------|-------|-------|---|
| 20174  |      |      |      |      |      |      |      |      |       | 4      | 2      | 2     | 4     | 5     | 4 |
| 20175  |      |      |      |      |      |      |      |      |       | 2      | 3      | 3     | 4     | 4     | 5 |
| 20189  |      |      |      |      |      |      |      |      |       | 4      | 3      | 3     | 5     | 5     | 5 |
| 20190  | 4    | 6    | 2    | 3    | 5    | 3    | 5    | 3    | 3     | 2      | 2      | 4     | 3     | 4     |   |
| 20201  |      |      |      |      |      |      |      |      |       | 4      | 3      | 3     | 5     | 5     | 4 |
| 20202  |      |      |      |      |      |      |      |      |       | 2      | 3      | 2     | 4     | 4     | 4 |
| 20204  |      |      |      |      |      |      |      |      |       | 4      | 3      | 3     | 1     | 1     | 1 |
| 20206  | 3    | 3    | 2    | 4    | 5    | 5    | 4    | 4    | 2     | 2      | 3      | 4     | 5     | 4     |   |
| 20207  | 6    | 6    | 2    | 6    | 6    | 6    | 5    | 3    | 3     | 3      | 2      | 5     | 4     | 5     |   |
| 20212  |      |      |      |      |      |      |      |      |       | 2      | 3      | 2     | 3     | 3     | 3 |
| 20213  | 5    | 4    | 4    | 3    | 3    | 3    | 4    | 4    | 2     | 2      | 2      | 3     | 3     | 3     |   |
| 20217  | 6    | 4    | 3    | 6    | 4    | 4    | 4    | 3    | 2     | 2      | 2      | 4     | 4     | 5     |   |
| 20222  |      |      |      |      |      |      |      |      |       | 2      | 2      | 2     | 4     | 4     | 4 |
| 20227  |      |      |      |      |      |      |      |      |       | 2      | 3      | 3     | 5     | 5     | 4 |
| 20228  | 6    | 6    | 2    | 5    | 6    | 6    | 6    | 2    | 4     | 3      | 3      | 5     | 5     | 5     |   |
| 20238  | 6    | 6    | 3    |      | 5    | 6    | 6    | 3    | 3     | 3      | 3      | 3     | 3     | 3     |   |
| 20242  |      |      |      |      |      |      |      |      |       | 2      | 3      | 3     | 5     | 5     | 5 |
| 20246  | 6    | 6    | 2    | 5    | 6    | 6    | 6    | 5    | 3     | 3      | 3      | 4     | 5     | 4     |   |
| 20255  |      |      |      |      |      |      |      |      |       | 3      | 2      | 2     | 3     | 3     | 3 |
| 20256  |      |      |      |      |      |      |      |      |       | 1      | 2      | 3     | 3     | 4     | 4 |
| 20259  |      |      |      |      |      |      |      |      |       | 1      | 2      | 2     | 3     | 3     | 3 |
| 20262  |      |      |      |      |      |      |      |      |       | 3      | 3      | 3     | 5     | 5     | 5 |
| 20274  |      |      |      |      |      |      |      |      |       | 3      | 3      | 3     | 5     | 5     | 5 |
| 20283  | 6    | 6    | 1    | 6    | 6    | 6    | 5    | 5    | 3     | 2      | 3      | 2     | 4     | 3     |   |
| 20284  |      |      |      |      |      |      |      |      |       | 3      | 3      | 2     | 4     | 5     | 5 |
| 20291  | 6    | 5    | 2    | 6    | 6    | 3    | 5    | 2    | 4     | 3      | 3      | 4     | 5     | 4     |   |
| 20292  | 5    | 5    | 2    | 5    | 6    | 5    | 5    | 2    | 2     | 2      | 3      | 4     | 5     | 5     |   |
| 20293  | 3    | 3    | 4    | 3    | 6    | 3    | 4    | 4    | 2     | 2      | 2      | 3     | 3     | 4     |   |
| 20298  | 4    | 4    | 4    | 4    | 3    | 5    | 4    | 5    | 4     | 3      | 3      | 4     | 3     | 2     |   |
| 20301  |      |      |      |      |      |      |      |      |       | 2      | 3      | 3     | 5     | 5     | 5 |
| 20303  |      |      |      |      |      |      |      |      |       | 3      | 3      | 3     | 4     | 4     | 4 |
| 20309  |      |      |      |      |      |      |      |      |       | 3      | 3      | 3     | 5     | 5     | 5 |

| respid | Q48k | Q48l | Q48m | Q48n | Q48o | Q48p | Q48q | Q48r | Q49_1 | Q50a_1 | Q50b_1 | Q51_1 | Q51_2 | Q52_1 |   |
|--------|------|------|------|------|------|------|------|------|-------|--------|--------|-------|-------|-------|---|
| 20318  |      |      |      |      |      |      |      |      |       | 2      | 3      | 3     | 4     | 4     | 4 |
| 20324  |      |      |      |      |      |      |      |      |       | 4      | 2      | 3     | 5     | 5     | 5 |
| 20335  |      |      |      |      |      |      |      |      |       | 4      | 3      | 3     | 5     | 5     | 5 |
| 20336  | 3    | 4    | 6    | 3    | 6    | 4    | 1    | 6    | 4     | 4      | 3      | 3     | 4     | 4     | 4 |
| 20339  |      |      |      |      |      |      |      |      |       | 3      | 3      | 3     | 5     | 5     | 5 |
| 20348  | 2    | 4    | 2    | 3    | 5    | 6    | 3    | 3    | 4     | 4      | 3      | 3     | 5     | 5     | 5 |
| 20351  |      |      |      |      |      |      |      |      |       | 4      | 3      | 3     | 3     | 3     | 3 |
| 20353  | 6    | 6    | 3    | 6    | 6    | 5    | 6    | 3    | 3     | 3      | 2      | 2     | 4     | 4     | 4 |
| 20356  | 1    | 6    | 4    | 3    | 6    | 6    | 6    | 6    | 4     | 2      | 2      | 2     | 3     | 3     | 3 |
| 20357  |      |      |      |      |      |      |      |      |       | 3      | 3      | 3     | 5     | 5     | 5 |
| 20366  |      |      |      |      |      |      |      |      |       | 2      | 3      | 3     | 4     | 4     | 5 |
| 20369  |      |      |      |      |      |      |      |      |       | 2      | 1      | 1     | 2     | 2     | 2 |
| 20372  |      |      |      |      |      |      |      |      |       | 2      | 2      | 3     | 5     | 5     | 4 |
| 20375  | 3    | 4    | 3    | 4    | 5    | 4    | 3    | 4    | 5     | 5      | 3      | 3     | 4     | 4     | 4 |
| 20379  | 6    | 6    | 1    | 6    | 6    | 6    | 6    | 2    | 1     | 3      | 3      | 3     | 5     | 5     | 3 |
| 20380  | 6    | 6    | 6    | 6    | 6    | 6    | 6    | 6    | 6     | 1      | 3      | 3     | 4     | 4     | 2 |
| 20396  | 6    | 6    | 2    | 6    | 6    | 6    | 6    | 6    | 2     | 3      | 3      | 2     | 4     | 4     | 4 |
| 20398  | 3    | 3    | 4    | 4    | 4    | 4    | 4    | 3    | 4     | 2      | 2      | 3     | 4     | 4     | 4 |
| 20412  | 6    | 6    | 1    | 6    | 6    | 6    | 6    | 6    | 2     | 3      | 2      | 2     | 4     | 4     | 4 |
| 20415  | 3    | 4    | 4    | 4    | 4    | 4    | 4    | 4    | 4     | 2      | 2      | 3     | 4     | 4     | 4 |
| 20424  | 3    | 4    | 3    | 3    | 3    | 4    | 4    | 4    | 3     | 2      | 3      | 3     | 3     | 3     | 3 |
| 20434  | 5    | 5    | 4    | 4    | 5    | 5    | 5    | 5    | 3     | 3      | 3      | 2     | 4     | 5     | 5 |
| 20435  |      |      |      |      |      |      |      |      |       | 2      | 3      | 3     | 4     | 4     | 4 |
| 20440  |      |      |      |      |      |      |      |      |       | 2      | 2      | 3     | 4     | 4     | 5 |
| 20441  |      |      |      |      |      |      |      |      |       | 3      | 3      | 3     | 4     | 3     | 3 |
| 20445  | 4    | 6    | 2    | 5    | 6    | 5    | 6    | 2    | 3     | 3      | 2      | 2     | 5     | 5     | 4 |
| 20446  | 5    | 5    | 5    | 5    | 4    | 4    | 4    | 4    | 5     | 2      | 2      | 2     | 3     | 3     | 3 |
| 20450  | 6    | 6    | 1    | 6    | 6    | 6    | 6    | 6    | 1     | 4      | 3      | 3     | 5     | 5     | 4 |
| 20453  | 3    | 2    | 2    | 2    | 2    | 2    | 3    | 2    | 2     | 2      | 2      | 2     | 2     | 3     | 2 |
| 20458  | 2    | 2    | 2    | 5    | 6    | 6    | 6    | 6    | 1     | 3      | 3      | 3     | 5     | 5     | 5 |
| 20464  |      |      |      |      |      |      |      |      |       | 3      | 3      | 3     | 5     | 5     | 5 |
| 20471  | 3    | 4    | 4    | 3    | 4    | 4    | 4    | 4    | 5     | 2      | 2      | 2     | 3     | 3     | 3 |

| respid | Q48k | Q48l | Q48m | Q48n | Q48o | Q48p | Q48q | Q48r | Q49_1 | Q50a_1 | Q50b_1 | Q51_1 | Q51_2 | Q52_1 |   |
|--------|------|------|------|------|------|------|------|------|-------|--------|--------|-------|-------|-------|---|
| 20473  |      |      |      |      |      |      |      |      |       | 1      | 2      | 2     | 3     | 3     | 3 |
| 20474  |      |      |      |      | 6    | 6    |      |      | 3     | 3      | 3      | 2     | 4     | 4     | 4 |
| 20477  |      |      |      |      |      |      |      |      |       | 3      | 3      | 3     | 5     | 5     | 5 |
| 20479  | 5    | 3    | 2    | 5    | 5    | 5    | 3    | 3    | 2     | 2      | 3      | 4     | 4     | 4     | 4 |
| 20485  | 5    | 5    | 2    | 6    | 6    | 6    | 6    | 5    | 4     | 2      | 3      | 4     | 5     | 5     | 5 |
| 20487  | 4    | 5    | 3    | 4    | 4    | 4    | 4    | 3    | 5     | 3      | 3      | 4     | 4     | 4     | 4 |
| 20488  |      |      |      |      |      |      |      |      |       | 3      | 3      | 3     | 5     | 5     | 5 |
| 20494  | 3    | 5    | 3    | 2    | 4    | 4    | 3    | 4    | 2     | 3      | 3      | 3     | 5     | 5     | 4 |
| 20502  |      |      |      |      |      |      |      |      |       | 1      | 2      | 2     | 2     | 2     | 2 |
| 20503  | 4    | 4    | 3    | 4    | 5    | 5    | 4    | 3    | 2     | 3      | 2      | 5     | 5     | 5     | 5 |
| 20510  |      |      |      |      |      |      |      |      |       | 3      | 3      | 3     | 5     | 5     | 5 |
| 20512  |      |      |      |      |      |      |      |      |       | 5      | 3      | 3     | 5     | 5     | 5 |
| 20516  |      |      |      |      |      |      |      |      |       | 2      | 2      | 2     | 3     | 3     | 3 |
| 20522  | 3    | 4    | 4    | 3    | 5    | 3    | 5    | 4    | 1     | 2      | 1      | 2     | 2     | 2     | 4 |
| 20527  | 6    | 6    | 3    | 6    | 6    | 6    | 6    | 6    | 3     | 3      | 2      | 2     | 3     | 3     | 4 |
| 20529  |      |      |      |      |      |      |      |      |       | 2      | 2      | 2     | 4     | 4     | 4 |
| 20535  |      |      |      |      |      |      |      |      |       | 2      | 2      | 2     | 2     | 3     | 2 |
| 20543  |      |      |      |      |      |      |      |      |       | 3      | 2      | 2     | 4     | 4     | 4 |
| 20546  | 5    | 6    | 2    | 6    | 6    | 6    | 5    | 2    | 2     | 3      | 2      | 4     | 4     | 4     | 4 |
| 20548  |      |      |      |      |      |      |      |      |       | 3      | 3      | 3     | 5     | 5     | 5 |
| 20552  |      |      |      |      |      |      |      |      |       | 3      | 2      | 2     | 3     | 3     | 3 |
| 20556  |      |      |      |      |      |      |      |      |       | 2      | 3      | 3     | 4     | 4     | 3 |
| 20566  |      |      |      |      |      |      |      |      |       | 2      | 2      | 2     | 3     | 3     | 3 |
| 20576  |      |      |      |      |      |      |      |      |       | 3      | 2      | 3     | 4     | 4     | 4 |
| 20587  |      |      |      |      |      |      |      |      |       | 3      | 3      | 3     | 5     | 5     | 5 |
| 20589  |      |      |      |      |      |      |      |      |       | 4      | 3      | 3     | 4     | 5     | 4 |
| 20593  |      |      |      |      |      |      |      |      |       | 3      | 3      | 3     | 5     | 5     | 5 |
| 20594  |      |      |      |      |      |      |      |      |       | 2      | 2      | 2     | 3     | 3     | 3 |
| 20602  | 3    | 3    | 4    | 3    | 3    | 3    | 3    | 3    | 4     | 2      | 2      | 2     | 3     | 2     | 3 |
| 20607  |      |      |      |      |      |      |      |      |       | 2      | 2      | 1     | 3     | 2     | 5 |
| 20608  |      |      |      |      |      |      |      |      |       | 3      | 3      | 3     | 5     | 5     | 4 |
| 20611  |      |      |      |      |      |      |      |      |       | 4      | 3      | 3     | 5     | 5     | 4 |



| respid | Q48k | Q48l | Q48m | Q48n | Q48o | Q48p | Q48q | Q48r | Q49_1 | Q50a_1 | Q50b_1 | Q51_1 | Q51_2 | Q52_1 |   |
|--------|------|------|------|------|------|------|------|------|-------|--------|--------|-------|-------|-------|---|
| 20612  |      |      |      |      |      |      |      |      |       | 4      | 3      | 2     | 4     | 5     | 5 |
| 20615  |      |      |      |      |      |      |      |      |       | 3      | 3      | 3     | 2     | 2     | 2 |
| 20625  |      |      |      |      |      |      |      |      |       | 4      | 3      | 3     | 4     | 5     | 4 |
| 20630  |      |      |      |      |      |      |      |      |       | 3      | 3      | 2     | 4     | 4     | 5 |
| 20639  | 2    | 2    | 5    | 1    | 2    | 2    | 2    | 2    | 5     | 2      | 2      | 2     | 3     | 3     | 3 |
| 20643  |      |      |      |      |      |      |      |      |       | 3      | 3      | 3     | 5     | 5     | 5 |
| 20645  |      |      |      |      |      |      |      |      |       | 3      | 3      | 3     | 5     | 5     | 4 |
| 20647  |      |      |      |      |      |      |      |      |       | 4      | 3      | 3     | 5     | 5     | 5 |
| 20652  | 4    | 3    | 2    | 4    | 5    | 3    | 2    | 4    | 4     | 2      | 1      | 2     | 3     | 2     | 3 |
| 20661  |      | 6    | 1    | 6    | 6    | 3    |      | 4    | 4     | 2      | 3      | 3     | 4     | 5     | 5 |
| 20665  |      |      |      |      |      |      |      |      |       | 1      | 1      | 2     | 2     | 2     | 3 |
| 20679  |      |      |      |      |      |      |      |      |       | 4      | 3      | 3     | 5     | 5     | 4 |
| 20682  |      |      |      |      |      |      |      |      |       | 2      | 2      | 2     | 3     | 4     | 3 |
| 20683  |      |      |      |      |      |      |      |      |       | 3      | 3      | 3     | 4     | 4     | 4 |
| 20700  |      |      |      |      |      |      |      |      |       | 2      | 3      | 3     | 3     | 3     | 4 |
| 20702  | 1    | 2    | 5    | 1    | 2    | 4    | 5    | 5    | 5     | 2      | 2      | 2     | 2     | 3     | 4 |
| 20709  |      |      |      |      |      |      |      |      |       | 3      | 3      | 2     | 4     | 4     | 4 |
| 20715  |      |      |      |      |      |      |      |      |       | 2      | 2      | 2     | 3     | 3     | 3 |
| 20718  | 2    | 2    | 1    | 2    | 5    | 3    | 5    | 1    | 1     | 3      | 3      | 3     | 5     | 5     | 4 |
| 20722  |      |      |      |      |      |      |      |      |       | 3      | 3      | 3     | 5     | 5     | 4 |
| 20729  |      |      |      |      |      |      |      |      |       | 2      | 1      | 1     | 2     | 1     | 2 |
| 20732  |      |      |      |      |      |      |      |      |       | 3      | 3      | 3     | 4     | 4     | 4 |
| 20746  |      |      |      |      |      |      |      |      |       | 2      | 2      | 2     | 3     | 3     | 4 |
| 20747  |      |      |      |      |      |      |      |      |       | 3      | 2      | 2     | 2     | 1     | 3 |
| 20758  |      |      |      |      |      |      |      |      |       | 3      | 3      | 3     | 5     | 5     | 4 |
| 20767  | 6    | 6    | 1    | 6    | 6    | 6    | 6    | 6    | 3     | 2      | 3      | 3     | 3     | 4     | 4 |
| 20777  |      |      |      |      |      |      |      |      |       | 5      | 3      | 3     | 5     | 5     | 5 |
| 20778  | 6    | 6    | 4    | 6    | 6    | 6    | 6    | 6    | 3     | 2      | 2      | 2     | 3     | 3     | 4 |
| 20780  | 5    | 4    | 3    | 5    | 6    |      |      | 6    | 4     | 5      | 2      | 2     | 1     | 1     | 1 |
| 20800  | 6    | 6    | 2    | 6    | 5    | 5    | 3    | 5    | 5     | 4      | 3      | 3     | 5     | 5     | 3 |
| 20810  |      |      |      |      |      |      |      |      |       | 4      | 3      | 3     | 5     | 5     | 4 |
| 20814  | 4    | 4    | 4    | 4    | 4    | 4    | 4    | 4    | 4     | 2      | 2      | 2     | 3     | 3     | 3 |

| respid | Q48k | Q48l | Q48m | Q48n | Q48o | Q48p | Q48q | Q48r | Q49_1 | Q50a_1 | Q50b_1 | Q51_1 | Q51_2 | Q52_1 |   |
|--------|------|------|------|------|------|------|------|------|-------|--------|--------|-------|-------|-------|---|
| 20816  |      | 1    | 2    | 6    | 1    | 2    | 4    | 3    | 6     | 4      | 3      | 3     | 5     | 5     | 5 |
| 20832  |      | 6    | 6    | 1    | 6    | 6    | 6    | 6    | 1     | 5      | 3      | 3     | 5     | 5     | 5 |
| 20838  |      |      |      |      |      |      |      |      |       | 5      | 2      | 3     | 2     | 2     | 3 |
| 20841  |      | 3    | 4    | 4    | 3    | 4    | 4    | 4    | 4     | 2      | 1      | 1     | 2     | 2     | 4 |
| 20848  |      |      |      |      |      |      |      |      |       | 3      | 3      | 3     | 5     | 5     | 5 |
| 20850  |      |      |      |      |      |      |      |      |       | 4      | 3      | 3     | 5     | 5     | 5 |
| 20851  |      | 6    | 6    | 3    | 6    | 6    |      | 6    | 3     | 3      | 2      | 2     | 3     | 3     | 3 |
| 20861  |      |      |      |      |      |      |      |      |       | 2      | 2      | 2     | 4     | 4     | 4 |
| 20870  |      |      |      |      |      |      |      |      |       | 3      | 3      | 3     | 4     | 4     | 4 |
| 20880  |      |      |      |      |      |      |      |      |       | 3      | 3      | 3     | 5     | 5     | 5 |
| 20883  |      |      |      |      |      |      |      |      |       | 4      | 2      | 2     | 4     | 4     | 4 |
| 20894  |      | 4    | 5    | 4    | 4    | 4    | 4    | 4    | 3     | 2      | 3      | 2     | 4     | 4     | 4 |
| 20896  |      |      |      |      |      |      |      |      |       | 3      | 2      | 3     | 3     | 2     | 2 |
| 20901  |      |      |      |      |      |      |      |      |       | 2      | 2      | 2     | 2     | 3     | 3 |
| 20903  |      | 6    | 6    | 2    | 6    | 6    | 6    | 6    | 2     | 4      | 3      | 3     | 5     | 5     | 5 |
| 20909  |      |      |      |      |      |      |      |      |       | 2      | 3      | 3     | 3     | 3     | 4 |
| 20919  |      |      |      |      |      |      |      |      |       | 2      | 3      | 3     | 4     | 5     | 5 |
| 20925  |      |      |      |      |      |      |      |      |       | 3      | 3      | 2     | 5     | 5     | 3 |
| 20935  |      |      |      |      |      |      |      |      |       | 2      | 3      | 3     | 5     | 5     | 5 |
| 20939  |      | 5    | 6    | 1    | 3    | 6    | 3    | 5    | 5     | 2      | 2      | 2     | 2     | 3     | 3 |
| 20956  |      |      |      |      |      |      |      |      |       | 1      | 1      | 1     | 2     | 2     | 2 |
| 20970  |      | 5    | 5    | 2    | 5    | 6    | 5    | 5    | 4     | 2      | 3      | 3     | 5     | 5     | 3 |
| 20974  |      |      |      |      |      |      |      |      |       | 2      | 3      | 3     | 3     | 3     | 5 |
| 20975  |      |      |      |      |      |      |      |      |       | 4      | 3      | 3     | 5     | 5     | 5 |
| 20984  |      |      |      |      |      |      |      |      |       | 2      | 2      | 2     | 2     | 2     | 4 |
| 20988  |      |      |      |      |      |      |      |      |       | 4      | 3      | 3     | 5     | 5     | 5 |
| 20996  |      | 5    | 4    | 3    | 4    | 4    | 3    | 3    | 4     | 1      | 2      | 3     | 2     | 2     | 3 |
| 20998  |      |      |      |      |      |      |      |      |       | 3      | 3      | 3     | 4     | 4     | 4 |
| 21007  |      |      |      |      |      |      |      |      |       | 4      | 3      | 3     | 5     | 5     | 5 |
| 21008  |      |      |      |      |      |      |      |      |       | 2      | 3      | 3     | 4     | 4     | 4 |
| 21014  |      | 6    | 5    | 2    | 5    | 6    | 6    | 6    | 2     | 4      | 3      | 3     | 4     | 4     | 4 |
| 21020  |      | 6    | 6    | 4    | 6    | 6    | 6    | 6    | 3     | 4      | 3      | 3     | 4     | 4     | 5 |

| respid | Q48k | Q48l | Q48m | Q48n | Q48o | Q48p | Q48q | Q48r | Q49_1 | Q50a_1 | Q50b_1 | Q51_1 | Q51_2 | Q52_1 |
|--------|------|------|------|------|------|------|------|------|-------|--------|--------|-------|-------|-------|
| 21022  |      |      |      |      |      |      |      |      |       | 3      | 3      | 3     | 3     | 3     |
| 21024  |      |      |      |      |      |      |      |      |       | 3      | 3      | 3     | 4     | 3     |
| 21026  |      |      |      |      |      |      |      |      |       | 4      | 3      | 2     | 4     | 4     |
| 21027  |      |      |      |      |      |      |      |      |       | 4      | 3      | 3     | 4     | 5     |
| 21030  | 4    | 4    | 3    | 4    | 4    | 4    | 4    | 4    | 3     | 2      | 3      | 5     | 5     | 5     |
| 21032  | 3    | 2    | 2    | 4    | 2    |      | 4    | 3    | 2     | 2      | 2      | 2     | 2     | 2     |
| 21040  | 3    | 3    | 2    | 6    | 6    | 5    | 6    | 2    | 3     | 3      | 3      | 5     | 5     | 4     |
| 21045  |      |      |      |      |      |      |      |      | 4     | 3      | 3      | 5     | 5     | 5     |
| 21058  |      |      |      |      |      |      |      |      | 3     | 3      | 3      | 5     | 5     | 5     |
| 21064  | 5    | 6    | 2    | 5    | 6    | 4    | 6    | 4    | 2     | 3      | 3      | 4     | 4     | 4     |
| 21073  | 3    | 5    | 2    | 4    | 6    | 6    | 6    | 3    | 3     | 3      | 3      | 4     | 5     | 4     |
| 21086  |      |      |      |      |      |      |      |      | 2     | 2      | 2      | 3     | 3     | 2     |
| 21092  |      |      |      |      |      |      |      |      | 2     | 2      | 2      | 2     | 2     | 2     |
| 21096  | 2    | 3    | 2    | 3    | 2    | 3    | 3    | 2    | 2     | 2      | 2      | 3     | 4     | 3     |
| 21103  |      |      |      |      |      |      |      |      | 4     | 3      | 3      | 5     | 4     | 4     |
| 21120  | 5    | 5    | 4    | 4    | 5    | 3    | 5    | 3    | 3     | 2      | 3      | 3     | 3     | 4     |
| 21125  |      |      |      |      |      |      |      |      | 3     | 3      | 3      | 5     | 5     | 5     |
| 21126  |      |      |      |      |      |      |      |      | 2     | 3      | 3      | 4     | 4     | 4     |
| 21132  |      |      |      |      |      |      |      |      | 2     | 2      | 1      | 3     | 3     | 5     |
| 21139  | 3    | 2    | 3    | 2    | 2    | 2    | 2    | 2    | 2     | 2      | 2      | 2     | 2     | 2     |
| 21147  |      |      |      |      |      |      |      |      | 2     | 3      | 3      | 3     | 3     | 3     |
| 21148  |      |      |      |      |      |      |      |      | 1     | 1      | 2      | 4     | 3     | 4     |
| 21149  | 4    | 4    | 3    | 4    | 4    | 5    | 4    | 3    | 2     | 2      | 2      | 3     | 2     | 5     |
| 21164  |      |      |      |      |      |      |      |      | 3     | 2      | 2      | 4     | 4     | 4     |
| 21165  |      |      |      |      |      |      |      |      | 2     | 2      | 2      | 5     | 5     | 4     |
| 21171  | 4    | 4    | 2    | 5    | 5    | 4    | 3    | 4    | 2     | 2      | 2      | 3     | 3     | 3     |
| 21176  | 2    | 3    | 4    | 3    | 2    | 3    | 3    | 4    | 4     | 3      | 3      | 5     | 5     | 5     |
| 21187  | 4    | 4    | 4    | 3    | 4    | 4    | 4    | 4    | 3     | 2      | 2      | 3     | 3     | 3     |
| 21192  | 6    | 5    | 3    | 6    | 6    | 6    | 6    | 2    | 2     | 2      | 3      | 3     | 4     | 3     |
| 21198  | 4    | 4    | 3    | 5    | 5    | 5    | 5    | 3    | 2     | 3      | 2      | 3     | 4     | 4     |
| 21199  | 2    | 3    | 5    | 4    | 5    | 3    | 5    | 3    | 2     | 2      | 1      | 4     | 4     | 4     |
| 21206  | 4    | 3    | 2    | 3    | 3    | 2    | 2    | 2    | 2     | 2      | 2      | 2     | 3     | 3     |

| respid | Q48k | Q48l | Q48m | Q48n | Q48o | Q48p | Q48q | Q48r | Q49_1 | Q50a_1 | Q50b_1 | Q51_1 | Q51_2 | Q52_1 |   |
|--------|------|------|------|------|------|------|------|------|-------|--------|--------|-------|-------|-------|---|
| 21212  |      |      |      |      |      |      |      |      |       | 2      | 2      | 2     | 5     | 5     | 5 |
| 21216  | 5    | 6    | 2    | 5    | 6    | 5    | 5    | 2    |       | 2      | 3      | 3     | 4     | 4     | 5 |
| 21217  |      |      |      |      |      |      |      |      |       | 3      | 2      | 2     | 2     | 3     | 3 |
| 21228  |      |      |      |      |      |      |      |      |       | 3      | 2      | 2     | 3     | 4     | 4 |
| 21229  | 4    | 5    | 4    | 4    | 4    | 4    | 5    | 4    |       | 3      | 2      | 2     | 3     | 3     | 2 |
| 21230  | 6    | 6    | 2    | 6    | 6    | 6    | 6    | 5    | 2     | 2      | 3      | 3     | 4     | 4     | 5 |
| 21243  | 4    | 4    | 3    | 5    | 3    | 3    | 4    | 3    |       | 2      | 2      | 3     | 4     | 4     | 3 |
| 21247  | 4    | 2    | 6    | 2    | 2    | 4    | 4    | 4    | 5     | 2      | 3      | 3     | 4     | 5     | 4 |
| 21253  |      |      |      |      |      |      |      |      |       | 3      | 3      | 3     | 5     | 5     | 5 |
| 21264  |      |      |      |      |      |      |      |      |       | 4      | 2      | 2     | 1     | 1     | 1 |
| 21265  |      |      |      |      |      |      |      |      |       | 2      | 2      | 3     | 4     | 4     | 4 |
| 21273  |      |      |      |      |      |      |      |      |       | 2      | 2      | 3     | 4     | 3     | 4 |
| 21275  | 6    | 6    | 6    | 6    | 6    | 6    | 6    | 6    | 2     | 2      | 3      | 3     | 5     | 5     | 5 |
| 21278  | 3    | 3    | 4    | 3    | 3    | 3    | 3    | 3    |       | 3      | 2      | 2     | 3     | 3     | 3 |
| 21291  |      |      |      |      |      |      |      |      |       | 3      | 2      | 2     | 4     | 4     | 4 |
| 21298  |      |      |      |      |      |      |      |      |       | 3      | 3      | 3     | 4     | 5     | 4 |
| 21301  |      |      |      |      |      |      |      |      |       | 3      | 3      | 3     | 5     | 5     | 4 |
| 21312  |      |      |      |      |      |      |      |      |       | 2      | 2      | 3     | 3     | 3     | 5 |
| 21323  | 4    | 4    | 3    | 4    | 4    | 5    | 5    | 3    |       | 2      | 1      | 1     | 3     | 3     | 4 |
| 21325  |      |      |      |      |      |      |      |      |       | 2      | 3      | 3     | 4     | 4     | 4 |
| 21341  | 6    | 6    | 1    | 5    | 6    | 6    | 6    | 6    | 2     | 2      | 3      | 3     | 4     | 4     | 4 |
| 21349  | 6    | 6    | 1    | 6    | 6    | 6    | 6    | 6    | 1     | 3      | 2      | 2     | 4     | 4     | 4 |
| 21350  | 4    | 4    | 3    | 4    | 4    | 4    | 4    | 4    | 3     | 2      | 2      | 2     | 3     | 3     | 5 |
| 21354  |      |      |      |      |      |      |      |      |       | 1      | 1      | 1     | 2     | 2     | 2 |
| 21372  |      | 6    | 4    |      | 6    | 6    | 6    | 5    |       | 2      | 2      | 2     | 4     | 4     | 4 |
| 21373  | 6    | 6    | 4    | 4    | 5    | 4    | 5    | 3    |       | 3      | 2      | 2     | 2     | 2     | 2 |
| 21378  |      |      |      |      |      |      |      |      |       | 3      | 2      | 3     | 3     | 3     | 3 |
| 21393  |      |      |      |      |      |      |      |      |       | 3      | 3      | 3     | 4     | 4     | 4 |
| 21401  |      |      |      |      |      |      |      |      |       | 3      | 2      | 3     | 3     | 3     | 3 |
| 21405  |      |      |      |      |      |      |      |      |       | 3      | 2      | 2     | 3     | 3     | 3 |
| 21406  |      |      |      |      |      |      |      |      |       | 3      | 3      | 3     | 4     | 4     | 4 |
| 21407  |      |      |      |      |      |      |      |      |       | 2      | 3      | 3     | 3     | 4     | 3 |

| respid | Q48k | Q48l | Q48m | Q48n | Q48o | Q48p | Q48q | Q48r | Q49_1 | Q50a_1 | Q50b_1 | Q51_1 | Q51_2 | Q52_1 |   |
|--------|------|------|------|------|------|------|------|------|-------|--------|--------|-------|-------|-------|---|
| 21418  |      |      |      |      |      |      |      |      |       | 3      | 3      | 3     | 5     | 5     | 5 |
| 21420  |      |      |      |      |      |      |      |      |       | 3      | 3      | 3     | 4     | 4     | 4 |
| 21421  |      |      |      |      |      |      |      |      |       | 3      | 3      | 3     | 4     | 4     | 5 |
| 21446  |      |      |      |      |      |      |      |      |       | 2      | 2      | 2     | 3     | 3     | 4 |
| 21449  |      |      |      |      |      |      |      |      |       | 3      | 3      | 2     | 4     | 4     | 4 |
| 21452  | 3    | 4    | 4    | 4    | 4    | 4    | 4    | 3    | 3     | 3      | 3      | 3     | 4     | 4     | 4 |
| 21455  |      |      |      |      |      |      |      |      |       | 4      | 2      | 2     | 3     | 4     | 2 |
| 21469  | 5    | 4    | 4    | 4    | 4    | 4    | 4    | 4    | 3     | 3      | 3      | 3     | 3     | 3     | 4 |
| 21471  | 4    | 4    | 3    | 4    | 4    | 4    | 4    | 4    | 4     | 2      | 3      | 3     | 3     | 3     | 4 |
| 21472  | 3    | 4    | 3    | 4    | 4    | 6    | 4    | 4    | 3     | 3      | 3      | 3     | 4     | 4     | 4 |
| 21474  | 5    | 5    | 5    | 5    | 4    | 5    |      |      | 5     | 2      | 3      | 3     | 5     | 5     | 5 |
| 21479  | 6    | 6    | 2    | 5    | 6    | 6    | 6    | 6    | 2     | 3      | 3      | 3     | 3     | 5     | 2 |
| 21485  |      |      |      |      |      |      |      |      |       | 3      | 3      | 3     | 5     | 5     | 5 |
| 21512  |      |      |      |      |      |      |      |      |       | 4      | 3      | 3     | 4     | 4     | 4 |
| 21513  |      |      |      |      |      |      |      |      |       | 3      | 3      | 3     | 4     | 4     | 5 |
| 21514  |      |      |      |      |      |      |      |      |       | 2      | 2      | 2     | 3     | 3     | 3 |
| 21520  |      |      |      |      |      |      |      | 3    |       | 2      | 2      | 3     | 4     | 4     | 4 |
| 21539  | 5    | 5    | 2    | 5    | 5    | 5    | 5    | 5    | 2     | 4      | 3      | 2     | 4     | 4     | 4 |
| 21553  |      |      |      |      |      |      |      |      |       | 1      | 3      | 2     | 4     | 4     | 3 |
| 21560  | 5    | 4    | 2    | 4    | 3    | 4    | 4    | 5    | 3     | 3      | 3      | 3     | 4     | 4     | 4 |
| 21561  | 4    | 3    | 5    | 3    | 3    | 3    | 3    | 6    | 3     | 3      | 3      | 3     | 5     | 5     | 3 |
| 21563  | 5    | 5    | 4    | 5    | 4    | 4    | 4    | 5    | 3     | 2      | 2      | 1     | 3     | 2     | 4 |
| 21565  |      |      |      |      |      |      |      |      |       | 3      | 3      | 2     | 3     | 3     | 3 |
| 21582  | 2    | 2    | 6    | 1    | 1    | 1    | 1    | 1    | 2     | 2      | 3      | 2     | 5     | 5     | 5 |
| 21584  |      |      |      |      |      |      |      |      |       | 2      | 2      | 2     | 5     | 4     | 4 |
| 21585  |      |      |      |      |      |      |      |      |       | 2      | 2      | 2     | 2     | 2     | 2 |
| 21586  |      |      |      |      |      |      |      |      |       | 4      | 3      | 3     | 4     | 4     | 4 |
| 21587  |      |      |      |      |      |      |      |      |       | 3      | 2      | 2     | 3     | 3     | 4 |
| 21590  |      |      |      |      |      |      |      |      |       | 1      | 1      | 1     | 2     | 2     | 2 |
| 21601  | 3    | 3    | 3    | 3    | 3    | 3    | 3    | 3    | 3     | 3      | 2      | 2     | 3     | 3     | 4 |
| 21611  | 6    | 3    | 1    | 3    | 6    | 3    | 3    | 3    | 4     | 3      | 2      | 2     | 4     | 4     | 3 |
| 21612  |      |      |      |      |      |      |      |      |       | 2      | 3      | 2     | 4     | 5     | 4 |

| respid | Q48k | Q48l | Q48m | Q48n | Q48o | Q48p | Q48q | Q48r | Q49_1 | Q50a_1 | Q50b_1 | Q51_1 | Q51_2 | Q52_1 |   |
|--------|------|------|------|------|------|------|------|------|-------|--------|--------|-------|-------|-------|---|
| 21625  |      |      |      |      |      |      |      |      |       | 2      | 2      | 2     | 3     | 3     | 4 |
| 21633  |      |      |      |      |      |      |      |      |       | 4      | 3      | 3     | 5     | 5     | 5 |
| 21640  |      |      |      |      |      |      |      |      |       | 3      | 3      | 2     | 3     | 4     | 5 |
| 21647  | 6    | 6    | 1    | 6    | 6    | 6    | 6    | 6    | 1     | 5      | 3      | 3     | 5     | 5     | 5 |
| 21648  |      |      |      |      |      |      |      |      |       | 2      | 1      | 1     | 2     | 2     | 2 |
| 21656  | 3    | 1    | 4    | 3    | 5    | 6    | 6    | 6    | 4     | 3      | 2      | 3     | 5     | 4     | 5 |
| 21657  | 4    | 4    | 3    | 4    | 4    | 5    | 4    | 4    | 2     | 3      | 2      | 3     | 4     | 4     | 4 |
| 21658  |      |      |      |      |      |      |      |      |       | 2      | 2      | 2     | 2     | 2     | 3 |
| 21665  | 3    | 4    | 2    | 4    | 4    | 3    | 4    | 4    | 4     | 2      | 2      | 2     | 3     | 3     | 4 |
| 21666  |      |      |      |      |      |      |      |      |       | 1      | 2      | 2     | 3     | 3     | 3 |
| 21668  |      |      |      |      |      |      |      |      |       | 2      | 2      | 2     | 3     | 4     | 3 |
| 21673  | 2    |      |      | 1    |      |      |      |      |       | 2      | 3      | 2     | 3     | 3     | 3 |
| 21681  |      |      |      |      |      |      |      |      |       | 2      | 2      | 2     | 2     | 3     | 2 |
| 21682  |      |      |      |      |      |      |      |      |       | 3      | 3      | 3     | 4     | 4     | 4 |
| 21685  |      |      |      |      |      |      |      |      |       | 2      | 3      | 2     | 3     | 4     | 3 |
| 21692  | 6    | 6    | 4    | 6    | 6    | 2    | 6    | 5    |       | 3      | 2      | 2     | 3     | 3     | 3 |
| 21697  |      | 3    | 2    |      | 5    | 2    | 2    |      |       | 2      | 1      | 1     | 3     | 3     | 5 |
| 21711  | 4    | 4    | 4    | 4    | 4    | 4    | 4    | 4    |       | 2      | 2      | 2     | 3     | 3     | 3 |
| 21715  | 2    | 2    | 2    | 4    | 4    | 4    | 4    | 2    | 4     | 1      | 2      | 2     | 3     | 3     | 5 |
| 21726  |      |      |      |      |      |      |      |      |       | 4      | 2      | 2     | 4     | 4     | 5 |
| 21748  |      |      |      |      |      |      |      |      |       | 3      | 3      | 3     | 3     | 3     | 3 |
| 21761  | 2    | 2    | 2    | 1    | 6    | 6    | 3    | 1    |       | 2      | 3      | 3     | 5     | 5     | 5 |
| 21769  | 4    | 4    | 3    | 4    | 4    | 4    | 4    | 4    | 3     | 2      | 2      | 2     | 3     | 3     | 3 |
| 21774  |      |      |      |      |      |      |      |      |       | 3      | 2      | 2     | 2     | 2     | 2 |
| 21778  |      |      |      |      |      |      |      |      |       | 4      | 3      | 3     | 5     | 5     | 5 |
| 21785  |      |      |      |      |      |      |      |      |       | 2      | 2      | 2     | 2     | 2     | 2 |
| 21799  |      |      |      |      |      |      |      |      |       | 2      | 2      | 2     | 4     | 3     | 4 |
| 21820  | 2    | 2    | 2    | 3    | 2    | 2    | 1    | 5    |       | 2      | 1      | 2     | 2     | 2     | 1 |
| 21837  |      |      |      |      |      |      |      |      |       | 3      | 3      | 3     | 3     | 3     | 3 |
| 21845  |      |      |      |      |      |      |      |      |       | 2      | 2      | 2     | 3     | 4     | 3 |
| 21846  | 6    | 6    | 6    | 6    | 6    | 6    | 6    | 6    | 6     | 4      | 2      | 2     | 4     | 4     | 4 |
| 21849  |      |      |      |      |      |      |      |      |       | 2      | 2      | 2     | 3     | 3     | 3 |

| respid | Q48k | Q48l | Q48m | Q48n | Q48o | Q48p | Q48q | Q48r | Q49_1 | Q50a_1 | Q50b_1 | Q51_1 | Q51_2 | Q52_1 |   |
|--------|------|------|------|------|------|------|------|------|-------|--------|--------|-------|-------|-------|---|
| 21850  |      | 4    | 4    | 4    | 4    | 4    | 4    | 4    | 3     | 3      | 3      | 2     | 3     | 3     | 3 |
| 21855  |      |      |      |      |      |      |      |      |       | 3      | 3      | 3     | 5     | 5     | 5 |
| 21859  |      |      |      |      |      |      |      |      |       | 4      | 3      | 3     | 4     | 4     | 5 |
| 21861  |      |      |      |      |      |      |      |      |       | 3      | 2      | 2     | 3     | 3     | 4 |
| 21866  |      |      |      |      |      |      |      |      |       | 5      | 3      | 3     | 5     | 5     | 5 |
| 21873  |      |      |      |      |      |      |      |      |       | 2      | 2      | 2     | 3     | 4     | 3 |
| 21876  |      |      |      |      |      |      |      |      |       | 2      | 2      | 2     | 3     | 3     | 4 |
| 21882  |      |      |      |      |      |      |      |      |       | 3      | 3      | 3     | 5     | 5     | 5 |
| 21884  |      | 2    | 3    | 6    | 1    | 5    | 6    | 3    | 1     | 3      | 2      | 1     | 2     | 2     | 3 |
| 21887  |      |      |      |      |      |      |      |      |       | 3      | 2      | 2     | 4     | 4     | 4 |
| 21892  |      |      |      |      |      |      |      |      |       | 3      | 2      | 2     | 4     | 4     | 4 |
| 21907  |      | 6    | 4    | 4    | 5    | 5    | 5    | 5    | 3     | 2      | 3      | 3     | 4     | 4     | 4 |
| 21910  |      |      |      |      |      |      |      |      |       | 1      | 1      | 1     | 2     | 2     | 2 |
| 21912  |      | 3    | 3    | 4    | 1    | 3    | 2    | 2    | 6     | 3      | 2      | 2     | 3     | 3     | 2 |
| 21914  |      |      |      |      |      |      |      |      |       | 3      | 3      | 3     | 4     | 4     | 3 |
| 21925  |      |      |      |      |      |      |      |      |       | 2      | 2      | 2     | 3     | 3     | 4 |
| 21937  |      |      |      |      |      |      |      |      |       | 4      | 3      | 3     | 4     | 4     | 4 |
| 21938  |      | 3    | 3    | 5    | 3    | 4    | 5    | 3    | 4     | 2      | 2      | 2     | 4     | 4     | 3 |
| 21940  |      |      |      |      |      |      |      |      |       | 4      | 2      | 3     | 5     | 5     | 5 |
| 21942  |      |      |      |      |      |      |      |      |       | 3      | 3      | 3     | 5     | 5     | 5 |
| 21947  |      |      |      |      |      |      |      |      |       | 3      | 3      | 3     | 5     | 5     | 4 |
| 21948  |      |      | 6    | 6    | 6    | 6    | 6    | 6    | 6     | 2      | 2      | 2     | 2     | 3     | 2 |
| 21961  |      | 2    | 2    | 5    | 2    | 4    | 3    | 3    | 3     | 2      | 3      | 3     | 3     | 4     | 5 |
| 21977  |      |      |      |      |      |      |      |      |       | 2      | 2      | 2     | 3     | 2     | 3 |
| 21983  |      |      |      |      |      |      |      |      |       | 2      | 2      | 2     | 4     | 4     | 4 |
| 21986  |      | 4    | 4    | 3    | 4    | 4    | 4    | 4    | 3     | 2      | 2      | 2     | 3     | 3     | 3 |
| 21988  |      |      |      |      |      |      |      |      |       | 4      | 2      | 2     | 3     | 3     | 4 |
| 21996  |      |      |      |      |      |      |      |      |       | 2      | 3      | 2     | 4     | 4     | 4 |
| 21997  |      | 4    | 5    | 3    | 4    | 5    | 3    | 5    | 3     | 3      | 2      | 2     | 4     | 4     | 4 |
| 22005  |      |      |      |      |      |      |      |      |       | 2      | 2      | 2     | 5     | 5     | 5 |
| 22013  |      | 6    | 6    | 1    | 6    | 6    | 6    | 6    | 1     | 4      | 3      | 3     | 5     | 5     | 5 |
| 22018  |      |      |      |      |      |      |      |      |       | 4      | 3      | 3     | 5     | 5     | 5 |

| respid | Q48k | Q48l | Q48m | Q48n | Q48o | Q48p | Q48q | Q48r | Q49_1 | Q50a_1 | Q50b_1 | Q51_1 | Q51_2 | Q52_1 |   |
|--------|------|------|------|------|------|------|------|------|-------|--------|--------|-------|-------|-------|---|
| 22019  | 3    | 3    | 5    | 3    | 5    | 5    | 5    | 5    | 5     | 3      | 2      | 2     | 4     | 4     | 4 |
| 22071  | 1    | 1    | 1    | 1    | 1    | 1    | 1    | 1    | 1     | 5      | 3      | 1     | 1     | 1     | 1 |
| 22082  | 5    | 6    | 3    | 5    | 6    | 5    | 4    | 3    | 3     | 3      | 2      | 3     | 4     | 4     | 4 |
| 22085  |      |      |      |      |      |      |      |      |       | 4      | 2      | 2     | 4     | 3     | 5 |
| 22092  | 6    | 6    | 1    | 6    | 6    | 6    | 6    | 1    | 3     | 3      | 3      | 3     | 5     | 5     | 5 |
| 22097  |      |      |      | 1    | 6    |      |      |      |       | 2      | 2      | 2     | 3     | 3     | 3 |
| 22111  |      |      |      |      |      |      |      |      |       | 3      | 3      | 2     | 4     | 4     | 4 |
| 22118  |      |      |      |      |      |      |      |      |       | 3      | 3      | 3     | 4     | 4     | 3 |
| 22132  | 6    | 6    | 6    | 6    | 6    | 6    | 6    | 6    | 2     | 2      | 2      | 2     | 3     | 3     | 3 |
| 22133  |      |      |      |      |      |      |      |      |       | 3      | 3      | 2     | 4     | 4     | 3 |
| 22139  |      |      |      |      |      |      |      |      |       | 3      | 3      | 3     | 5     | 5     | 5 |
| 22142  |      |      |      |      |      |      |      |      |       | 2      | 2      | 2     | 3     | 3     | 3 |
| 22146  | 6    | 6    | 3    | 6    | 6    | 6    | 6    | 3    | 2     | 3      | 3      | 3     | 5     | 5     | 4 |
| 22181  |      |      |      |      |      |      |      |      |       | 3      | 3      | 3     | 5     | 5     | 5 |
| 22202  |      |      |      |      |      |      |      |      |       | 2      | 3      | 3     | 5     | 5     | 5 |
| 22214  |      |      |      |      |      |      |      |      |       | 4      | 3      | 3     | 5     | 5     | 5 |
| 22223  |      |      |      |      |      |      |      |      |       | 4      | 3      | 3     | 4     | 4     | 4 |
| 22227  | 5    | 5    | 1    | 5    | 5    | 5    | 5    | 2    | 3     | 3      | 2      | 3     | 4     | 4     | 4 |
| 22229  | 2    | 3    | 2    | 3    | 2    | 3    | 2    | 3    | 3     | 3      | 2      | 2     | 4     | 4     | 4 |
| 22239  | 6    | 6    | 6    | 6    | 6    | 6    | 6    | 6    | 6     | 1      | 2      | 2     | 4     | 2     | 4 |
| 22245  |      |      |      |      |      |      |      |      |       | 1      | 1      | 1     | 4     | 4     | 2 |
| 22256  |      |      |      |      |      |      |      |      |       | 3      | 3      | 2     | 5     | 5     | 5 |
| 22260  | 3    | 5    | 4    | 2    | 5    | 4    | 4    | 2    | 3     | 3      | 3      | 2     | 4     | 4     | 5 |
| 22298  |      |      |      |      |      |      |      |      |       | 2      | 2      | 2     | 3     | 3     | 3 |
| 22321  | 6    | 6    | 2    | 4    | 6    | 6    | 6    | 3    | 4     | 4      | 3      | 3     | 5     | 5     | 5 |
| 22340  |      |      |      |      |      |      |      |      |       | 4      | 3      | 3     | 5     | 5     | 5 |
| 22346  | 2    | 6    | 1    | 4    | 6    | 3    | 4    | 3    | 1     | 1      | 2      | 2     | 3     | 3     | 4 |
| 22356  |      |      |      |      |      |      |      |      |       | 3      | 3      | 3     | 5     | 5     | 5 |
| 22361  |      |      |      |      |      |      |      |      |       | 2      | 2      | 3     | 3     | 3     | 4 |
| 22364  |      |      |      |      |      |      |      |      |       | 3      | 2      | 2     | 3     | 3     | 3 |
| 22368  |      |      |      |      |      |      |      |      |       | 4      | 3      | 3     | 5     | 5     | 5 |
| 22374  | 3    | 6    | 2    | 5    | 6    | 3    | 1    | 4    | 2     | 2      | 2      | 2     | 4     | 3     | 2 |



| respid | Q48k | Q48l | Q48m | Q48n | Q48o | Q48p | Q48q | Q48r | Q49_1 | Q50a_1 | Q50b_1 | Q51_1 | Q51_2 | Q52_1 |   |
|--------|------|------|------|------|------|------|------|------|-------|--------|--------|-------|-------|-------|---|
| 22375  | 6    | 6    | 4    | 6    | 6    | 6    | 6    | 6    | 2     | 3      | 3      | 2     | 4     | 4     | 4 |
| 22377  | 4    | 6    | 1    | 4    | 5    | 4    | 4    | 4    | 2     | 2      | 3      | 2     | 3     | 3     | 4 |
| 22383  |      |      |      |      |      |      |      |      |       | 4      | 3      | 3     | 5     | 5     | 5 |
| 22387  | 6    | 5    | 3    | 4    | 6    | 6    | 4    | 4    | 4     | 3      | 3      | 3     | 5     | 5     | 5 |
| 22392  |      |      |      |      |      |      |      |      |       | 3      | 3      | 3     | 4     | 4     | 3 |
| 22393  | 5    | 4    | 3    | 4    | 5    | 5    | 5    | 5    | 3     | 3      | 3      | 3     | 4     | 4     | 4 |
| 22394  | 5    | 6    | 1    | 3    | 6    | 2    | 3    | 4    | 4     | 2      | 3      | 2     | 3     | 4     | 3 |
| 22395  |      |      |      |      |      |      |      |      |       | 3      | 2      | 2     | 3     | 3     | 4 |
| 22401  |      |      |      |      |      |      |      |      |       | 2      | 2      | 3     | 4     | 5     | 3 |
| 22407  |      |      |      |      |      |      |      |      |       | 4      | 3      | 3     | 5     | 5     | 5 |
| 22410  |      |      |      |      |      |      |      |      |       | 3      | 3      | 3     | 4     | 4     | 5 |
| 22418  |      |      |      |      |      |      |      |      |       | 2      | 3      | 2     | 3     | 3     | 4 |
| 22421  |      |      |      |      |      |      |      |      |       | 4      | 3      | 3     | 5     | 5     | 5 |
| 22423  |      |      |      |      |      |      |      |      |       | 4      | 3      | 3     | 5     | 5     | 5 |
| 22425  | 6    | 2    | 2    | 5    | 5    | 5    | 5    | 4    | 4     | 2      | 3      | 3     | 5     | 5     | 4 |
| 22427  |      |      |      |      |      |      |      |      |       | 5      | 3      | 3     | 5     | 5     | 5 |
| 22431  | 3    | 3    | 3    | 3    | 4    | 3    | 3    | 3    | 4     | 2      | 2      | 2     | 2     | 3     | 2 |
| 22435  |      |      |      |      |      |      |      |      |       | 2      | 3      | 3     | 3     | 4     | 3 |
| 22436  | 4    | 4    | 4    | 4    | 4    | 4    | 4    | 3    | 4     | 2      | 3      | 2     | 3     | 3     | 3 |
| 22442  |      |      |      |      |      |      |      |      |       | 3      | 3      | 3     | 5     | 5     | 5 |
| 22444  |      |      |      |      |      |      |      |      |       | 2      | 2      | 2     | 3     | 3     | 4 |
| 22445  |      |      | 6    | 2    |      | 3    | 4    | 4    | 4     | 4      | 2      | 2     | 3     | 4     | 3 |
| 22446  |      |      |      |      |      |      |      |      |       | 5      | 3      | 3     | 5     | 5     | 5 |
| 22448  | 4    | 5    | 3    | 5    | 5    | 5    | 5    | 5    |       | 3      | 3      | 2     | 4     | 3     | 3 |
| 22449  | 4    | 5    | 4    | 4    | 5    | 6    | 5    | 5    | 3     | 4      | 3      | 2     | 2     | 2     | 5 |
| 22450  |      |      |      |      |      |      |      |      |       | 2      | 2      | 2     | 4     | 4     | 4 |
| 22453  |      |      |      |      |      |      |      |      |       | 3      | 2      | 2     | 3     | 4     | 3 |
| 22465  | 4    | 4    | 3    | 4    | 4    | 4    | 4    | 4    | 4     | 2      | 3      | 2     | 4     | 4     | 4 |
| 22472  |      |      |      |      |      |      |      |      |       | 2      | 3      | 3     | 4     | 4     | 4 |
| 22475  | 4    | 4    | 3    | 5    | 5    | 4    | 3    | 4    | 4     | 3      | 2      | 3     | 4     | 3     | 3 |
| 22478  |      |      |      |      |      |      |      |      |       | 1      | 2      | 3     | 5     | 5     | 5 |
| 22491  |      |      |      |      |      |      |      |      |       | 4      | 3      | 3     | 4     | 4     | 4 |

| respid | Q48k | Q48l | Q48m | Q48n | Q48o | Q48p | Q48q | Q48r | Q49_1 | Q50a_1 | Q50b_1 | Q51_1 | Q51_2 | Q52_1 |   |
|--------|------|------|------|------|------|------|------|------|-------|--------|--------|-------|-------|-------|---|
| 22497  | 3    | 4    | 3    | 3    | 4    | 4    | 4    | 3    | 4     | 2      | 2      | 2     | 3     | 3     | 3 |
| 22498  | 3    | 3    | 4    | 3    | 3    | 3    | 3    | 3    | 4     | 2      | 2      | 2     | 4     | 4     | 4 |
| 22499  |      |      |      |      |      |      |      |      |       | 1      | 2      | 2     | 1     | 1     | 1 |
| 22503  |      |      |      |      |      |      |      |      |       | 3      | 3      | 3     | 4     | 4     | 4 |
| 22507  | 3    | 3    | 4    | 4    | 4    | 4    | 4    | 3    | 4     | 3      | 2      | 2     | 3     | 3     | 4 |
| 22513  | 3    | 5    | 3    | 3    | 6    | 4    | 4    | 4    | 4     | 1      | 2      | 3     | 3     | 3     | 4 |
| 22517  | 6    | 6    | 1    | 5    | 6    | 6    | 6    | 6    | 2     | 4      | 3      | 3     | 4     | 4     | 5 |
| 22524  |      |      |      |      |      |      |      |      |       | 1      | 3      | 2     | 3     | 3     | 3 |
| 22528  | 5    | 6    | 2    | 4    | 6    | 6    | 6    | 6    | 1     | 2      | 3      | 3     | 5     | 4     | 4 |
| 22544  |      |      |      |      |      |      |      |      |       | 1      | 3      | 3     | 3     | 3     | 2 |
| 22571  |      |      |      |      |      |      |      |      |       | 4      | 2      | 3     | 5     | 5     | 5 |
| 22576  | 4    | 5    | 4    | 5    | 4    | 3    | 5    | 5    | 5     | 2      | 2      | 2     | 1     | 1     | 2 |
| 22579  | 4    | 4    | 4    | 4    | 4    | 4    | 4    | 4    | 4     | 2      | 2      | 2     | 4     | 4     | 4 |
| 22583  | 3    | 4    | 4    | 4    | 5    | 4    | 4    | 3    | 3     | 3      | 2      | 2     | 3     | 3     | 4 |
| 22591  |      |      |      |      |      |      |      |      |       | 2      | 2      | 2     | 3     | 3     | 3 |
| 22592  | 3    | 4    | 4    | 3    | 3    | 3    | 4    | 4    | 4     | 3      | 2      | 2     | 3     | 3     | 3 |
| 22612  | 5    | 6    | 5    | 5    | 5    | 6    | 6    | 6    | 6     | 2      | 1      | 1     | 1     | 1     | 2 |
| 22613  |      |      |      |      |      |      |      |      |       | 3      | 3      | 3     | 4     | 5     | 5 |
| 22615  |      |      |      |      |      |      |      |      |       | 3      | 2      | 3     | 4     | 4     | 4 |
| 22621  |      |      |      |      |      |      |      |      |       | 3      | 3      | 3     | 4     | 5     | 4 |
| 22625  |      |      |      |      |      |      |      |      |       | 2      | 3      | 2     | 3     | 3     | 3 |
| 22628  | 5    | 5    | 5    | 5    | 5    | 5    | 5    | 5    | 5     | 3      | 3      | 2     | 4     | 4     | 4 |
| 22632  | 6    | 6    | 1    | 6    | 6    | 6    | 6    | 6    | 1     | 3      | 3      | 3     | 5     | 5     | 5 |
| 22639  |      |      |      |      |      |      |      |      |       | 4      | 3      | 3     | 5     | 5     | 5 |
| 22648  | 5    | 5    | 5    | 5    | 6    | 6    | 6    | 1    | 1     | 2      | 2      | 2     | 3     | 3     | 3 |
| 22649  |      |      |      |      |      |      |      |      |       | 3      | 3      | 3     | 5     | 4     | 4 |
| 22655  |      |      |      |      |      |      |      |      |       | 3      | 3      | 3     | 4     | 4     | 4 |
| 22659  |      |      |      |      |      |      |      |      |       | 2      | 3      | 3     | 4     | 4     | 4 |
| 22660  |      |      |      |      |      |      |      |      |       | 3      | 3      | 3     | 5     | 5     | 5 |
| 22666  |      |      |      |      |      |      |      |      |       | 2      | 2      | 2     | 3     | 3     | 4 |
| 22667  |      |      |      |      |      |      |      |      |       | 3      | 3      | 3     | 5     | 5     | 5 |
| 22670  |      |      |      |      |      |      |      |      |       | 2      | 3      | 3     | 4     | 5     | 4 |

| respid | Q48k | Q48l | Q48m | Q48n | Q48o | Q48p | Q48q | Q48r | Q49_1 | Q50a_1 | Q50b_1 | Q51_1 | Q51_2 | Q52_1 |   |
|--------|------|------|------|------|------|------|------|------|-------|--------|--------|-------|-------|-------|---|
| 22681  |      |      |      |      |      |      |      |      |       | 5      | 3      | 3     | 5     | 5     | 5 |
| 22683  | 6    | 6    | 3    | 6    | 6    | 6    | 6    | 3    |       | 2      | 3      | 3     | 3     | 4     | 3 |
| 22688  | 3    | 4    | 4    | 4    | 4    | 4    | 4    | 3    |       | 2      | 3      | 3     | 3     | 3     | 4 |
| 22695  |      |      |      |      |      |      |      |      |       | 3      | 2      | 3     | 5     | 4     | 4 |
| 22696  |      |      |      |      |      |      |      |      |       | 3      | 3      | 3     | 5     | 4     | 5 |
| 22705  | 2    | 2    | 3    | 2    | 4    | 5    | 3    | 3    |       | 2      | 1      | 2     | 3     | 3     | 3 |
| 22718  |      |      |      |      |      |      |      |      |       | 2      | 2      | 2     | 3     | 3     | 3 |
| 22720  |      |      |      |      |      |      |      |      |       | 2      | 2      | 2     | 5     | 5     | 5 |
| 22724  | 5    | 5    | 3    | 5    | 5    | 5    | 6    | 2    |       | 4      | 3      | 3     | 5     | 5     | 4 |
| 22728  |      |      |      |      |      |      |      |      |       | 3      | 2      | 3     | 4     | 5     | 5 |
| 22751  |      |      |      |      |      |      |      |      |       | 4      | 3      | 3     | 5     | 5     | 5 |
| 22782  |      |      |      |      |      |      |      |      |       | 1      | 1      | 1     | 1     | 1     | 2 |
| 22786  |      |      |      |      |      |      |      |      |       | 2      | 3      | 3     | 4     | 4     | 4 |
| 22788  | 5    | 5    | 2    | 5    | 6    | 6    | 6    | 2    |       | 4      | 3      | 3     | 5     | 5     | 4 |
| 22810  | 5    | 5    | 1    | 5    | 5    | 5    | 5    | 2    |       | 3      | 3      | 2     | 4     | 4     | 4 |
| 22816  |      | 6    |      |      | 6    |      | 6    |      |       | 5      | 3      | 3     | 4     | 5     | 5 |
| 22818  | 6    | 6    | 1    | 6    | 6    | 6    | 6    | 1    |       | 3      | 3      | 3     | 5     | 5     | 5 |
| 22854  |      |      |      |      |      |      |      |      |       | 2      | 2      | 2     | 3     | 3     | 3 |
| 22858  | 6    | 6    | 2    | 5    | 6    | 3    | 5    | 2    |       | 4      | 3      | 3     | 5     | 5     | 5 |
| 22862  | 6    | 6    | 1    | 6    | 6    | 6    | 6    | 1    |       | 3      | 2      | 2     | 3     | 3     | 3 |
| 22865  |      |      |      |      |      |      |      |      |       | 3      | 3      | 3     | 4     | 4     | 4 |
| 22868  | 6    | 6    | 3    | 4    | 6    | 6    | 6    | 3    |       | 4      | 3      | 3     | 5     | 5     | 5 |
| 22869  |      |      |      |      |      |      |      |      |       | 3      | 2      | 2     | 3     | 4     | 3 |
| 22873  | 2    | 6    | 1    | 2    | 6    | 5    | 6    | 4    |       | 4      | 3      | 3     | 5     | 5     | 3 |
| 22875  |      |      |      |      |      |      |      |      |       | 2      | 3      | 3     | 4     | 5     | 5 |
| 22876  | 6    | 6    | 1    | 6    | 6    | 6    | 6    | 1    |       | 3      | 3      | 3     | 5     | 5     | 5 |
| 22882  | 5    | 5    | 1    | 3    | 5    | 5    | 4    | 3    |       | 2      | 3      | 2     | 3     | 2     | 2 |
| 22884  |      |      |      |      |      |      |      |      |       | 2      | 3      | 3     | 5     | 4     | 4 |
| 22887  |      | 3    | 4    | 4    | 3    | 2    | 3    |      |       | 2      | 2      | 2     | 3     | 2     | 2 |
| 22888  |      |      |      |      |      |      |      |      |       | 3      | 3      | 3     | 5     | 5     | 5 |
| 22900  |      |      |      |      |      |      |      |      |       | 3      | 3      | 3     | 5     | 5     | 5 |
| 22901  |      |      |      |      |      |      |      |      |       | 3      | 3      | 2     | 4     | 4     | 4 |

| respid | Q48k | Q48l | Q48m | Q48n | Q48o | Q48p | Q48q | Q48r | Q49_1 | Q50a_1 | Q50b_1 | Q51_1 | Q51_2 | Q52_1 |   |
|--------|------|------|------|------|------|------|------|------|-------|--------|--------|-------|-------|-------|---|
| 22912  |      |      |      |      |      |      |      |      |       | 2      | 3      | 3     | 5     | 5     | 5 |
| 22913  |      |      |      |      |      |      |      |      |       | 3      | 2      | 3     | 4     | 4     | 4 |
| 22921  |      |      |      |      |      |      |      |      |       | 4      | 3      | 3     | 5     | 5     | 5 |
| 22925  |      |      |      |      |      |      |      |      |       | 3      | 3      | 3     | 5     | 5     | 5 |
| 22940  | 6    | 6    | 1    | 6    | 6    | 6    | 6    | 6    | 1     | 4      | 3      | 3     | 5     | 5     | 5 |
| 22941  |      |      |      |      |      |      |      |      |       | 2      | 2      | 2     | 1     | 3     | 2 |
| 22947  |      |      |      |      |      |      |      |      |       | 2      | 3      | 3     | 4     | 4     | 5 |
| 22948  |      |      |      |      |      |      |      |      |       | 5      | 3      | 3     | 5     | 5     | 5 |
| 22964  | 4    | 4    | 4    | 4    | 5    | 3    | 5    | 3    | 3     | 3      | 3      | 3     | 5     | 4     | 4 |
| 22966  |      |      |      |      |      |      |      |      |       | 1      | 2      | 2     | 2     | 3     | 3 |
| 22969  | 5    | 5    | 3    | 6    | 6    | 6    | 6    | 6    | 3     | 2      | 3      | 2     | 4     | 4     | 4 |
| 22971  |      |      |      |      |      |      |      |      |       | 3      | 3      | 3     | 5     | 5     | 5 |
| 22988  |      |      |      |      |      |      |      |      |       | 2      | 3      | 3     | 4     | 5     | 5 |
| 22990  |      |      |      |      |      |      |      |      |       | 2      | 2      | 2     | 3     | 3     | 3 |
| 23000  | 4    | 4    | 3    | 4    | 4    | 4    | 4    | 4    | 3     | 2      | 3      | 3     | 4     | 5     | 4 |
| 23016  |      |      |      |      |      |      |      |      |       | 2      | 2      | 2     | 3     | 3     | 4 |
| 23026  |      |      |      |      |      |      |      |      |       | 2      | 3      | 3     | 5     | 5     | 5 |
| 23035  |      |      |      |      |      |      |      |      |       | 4      | 3      | 3     | 5     | 5     | 5 |
| 23037  |      |      |      |      |      |      |      |      |       | 2      | 1      | 3     | 3     | 3     | 3 |
| 23044  | 6    | 6    | 1    | 6    |      | 6    | 6    | 6    | 5     | 3      | 2      | 2     | 4     | 4     | 4 |
| 23046  |      |      |      |      |      |      |      |      |       | 2      | 2      | 2     | 2     | 3     | 3 |
| 23047  | 2    | 5    | 2    | 5    | 6    | 5    | 6    | 6    | 2     | 3      | 2      | 2     | 5     | 4     | 4 |
| 23049  | 6    | 6    | 2    | 6    | 6    | 4    | 6    | 6    | 2     | 3      | 3      | 3     | 4     | 5     | 4 |
| 23055  |      |      |      |      |      |      |      |      |       | 3      | 3      | 3     | 5     | 5     | 5 |
| 23066  |      |      |      |      |      |      |      |      |       | 3      | 3      | 3     | 4     | 4     | 4 |
| 23075  | 3    | 5    | 2    | 2    | 6    | 4    | 5    | 5    | 5     | 2      | 2      | 2     | 3     | 3     | 5 |
| 23081  |      |      |      |      |      |      |      |      |       | 2      | 3      | 3     | 5     | 5     | 5 |
| 23087  |      |      |      |      |      |      |      |      |       | 3      | 3      | 3     | 5     | 5     | 4 |
| 23094  |      |      |      |      |      |      |      |      |       | 3      | 2      | 3     | 4     | 4     | 4 |
| 23099  |      |      |      |      |      |      |      |      |       | 2      | 3      | 3     | 5     | 5     | 5 |
| 23101  | 3    | 3    | 3    | 3    | 3    | 3    | 3    | 3    | 3     | 3      | 2      | 2     | 2     | 2     | 2 |
| 23105  |      |      |      |      |      |      |      |      |       | 4      | 3      | 3     | 5     | 5     | 5 |

| respid | Q48k | Q48l | Q48m | Q48n | Q48o | Q48p | Q48q | Q48r | Q49_1 | Q50a_1 | Q50b_1 | Q51_1 | Q51_2 | Q52_1 |   |
|--------|------|------|------|------|------|------|------|------|-------|--------|--------|-------|-------|-------|---|
| 23115  | 6    | 5    | 6    | 6    | 6    | 6    | 6    | 6    | 6     | 3      | 2      | 3     | 2     | 2     | 1 |
| 23121  | 4    | 4    | 5    | 2    | 5    | 5    | 5    | 5    | 4     | 2      | 3      | 3     | 5     | 5     | 4 |
| 23127  | 6    | 6    | 4    | 6    | 6    | 6    | 6    | 6    | 1     | 3      | 3      | 3     | 5     | 5     | 5 |
| 23131  | 1    | 1    | 1    | 1    | 1    | 1    | 1    | 1    | 1     | 2      | 2      | 2     | 3     | 3     | 3 |
| 23134  | 5    | 4    | 4    | 5    | 4    | 4    | 4    | 4    | 4     | 3      | 3      | 3     | 5     | 5     | 5 |
| 23145  |      |      |      |      |      |      |      |      |       | 3      | 2      | 3     | 5     | 5     | 5 |
| 23151  |      |      |      |      |      |      |      |      |       | 3      | 2      | 2     | 4     | 4     | 4 |
| 23161  | 4    | 3    | 4    |      | 5    | 4    | 4    | 4    | 4     | 2      | 2      | 3     | 3     | 4     | 3 |
| 23169  | 4    | 4    | 4    | 4    | 4    | 4    | 4    | 4    | 4     | 2      | 2      | 2     | 2     | 2     | 2 |
| 23173  |      |      |      |      |      |      |      |      |       | 4      | 3      | 3     | 5     | 5     | 5 |
| 23174  |      |      |      |      |      |      |      |      |       | 4      | 3      | 3     | 5     | 5     | 5 |
| 23186  |      |      |      |      |      |      |      |      |       | 3      | 1      | 2     | 3     | 3     | 3 |
| 23195  |      |      |      |      |      |      |      |      |       | 2      | 3      | 3     | 4     | 4     | 4 |
| 23197  |      |      |      |      |      |      |      |      |       | 2      | 2      | 2     | 2     | 2     | 3 |
| 23198  |      |      |      |      |      |      |      |      |       | 3      | 3      | 3     | 5     | 5     | 5 |
| 23203  |      |      |      |      |      |      |      |      |       | 3      | 3      | 3     | 5     | 5     | 5 |
| 23204  |      |      |      |      |      |      |      |      |       | 1      | 3      | 3     | 4     | 3     | 4 |
| 23212  |      |      |      |      |      |      |      |      |       | 2      | 3      | 2     | 4     | 5     | 4 |
| 23214  | 3    | 4    | 2    | 3    | 6    | 6    | 6    | 6    | 1     | 2      | 2      | 2     | 4     | 4     | 4 |
| 23221  |      |      |      |      |      |      |      |      |       | 2      | 3      | 3     | 3     | 4     | 3 |
| 23237  |      |      |      |      |      |      |      |      |       | 4      | 3      | 3     | 5     | 5     | 5 |
| 23251  | 6    | 6    | 1    | 6    | 6    | 6    | 6    | 6    | 1     | 4      | 3      | 3     | 5     | 5     | 5 |
| 23254  |      |      |      |      |      |      |      |      |       | 3      | 2      | 2     | 2     | 2     | 2 |
| 23262  | 4    | 4    | 3    | 4    | 4    | 4    | 4    | 4    | 3     | 3      | 2      | 2     | 3     | 3     | 3 |
| 23267  |      |      |      |      |      |      |      |      |       | 4      | 3      | 3     | 4     | 5     | 4 |
| 23268  |      |      |      |      |      |      |      |      |       | 2      | 3      | 2     | 4     | 4     | 3 |
| 23273  | 6    | 6    | 2    | 6    | 6    | 6    | 6    | 6    | 1     | 3      | 3      | 3     | 4     | 4     | 4 |
| 23278  |      |      |      |      |      |      |      |      |       | 3      | 3      | 3     | 5     | 5     | 5 |
| 23279  |      |      |      |      |      |      |      |      |       | 1      | 1      | 1     | 2     | 2     | 2 |
| 23281  |      |      |      |      |      |      |      |      |       | 3      | 3      | 3     | 4     | 5     | 4 |
| 23282  |      |      |      |      |      |      |      |      |       | 2      | 2      | 2     | 2     | 2     | 2 |
| 23283  | 4    | 5    | 4    | 2    | 6    | 5    | 3    | 5    | 5     | 2      | 2      | 3     | 4     | 5     | 5 |

| respid | Q48k | Q48l | Q48m | Q48n | Q48o | Q48p | Q48q | Q48r | Q49_1 | Q50a_1 | Q50b_1 | Q51_1 | Q51_2 | Q52_1 |
|--------|------|------|------|------|------|------|------|------|-------|--------|--------|-------|-------|-------|
| 23285  | 6    | 5    | 2    | 3    | 6    | 6    | 5    | 6    | 2     | 2      | 2      | 3     | 3     | 3     |
| 23305  | 6    | 6    | 6    | 6    | 6    | 6    | 6    | 6    | 2     | 2      | 1      | 4     | 3     | 4     |
| 23309  | 5    | 3    | 5    | 3    | 5    | 3    | 3    | 5    | 3     | 3      | 3      | 4     | 4     | 4     |
| 23310  |      |      |      |      |      |      |      |      | 3     | 2      | 3      | 4     | 3     | 4     |
| 23311  | 6    | 3    | 5    | 4    | 6    | 6    | 6    | 3    | 3     | 2      | 3      | 5     | 4     | 5     |
| 23312  |      |      |      |      |      |      |      |      | 3     | 3      | 3      | 3     | 3     | 2     |
| 23319  |      |      |      |      |      |      |      |      | 2     | 3      | 3      | 4     | 4     | 5     |
| 23320  |      |      |      |      |      |      |      |      | 3     | 3      | 3      | 4     | 5     | 4     |
| 23322  | 4    | 5    | 6    | 2    | 6    | 6    | 6    |      | 2     | 3      | 2      | 3     | 3     | 4     |
| 23334  | 6    | 5    | 2    | 5    | 6    | 6    | 6    | 1    | 4     | 3      | 3      | 4     | 5     | 4     |
| 23340  |      |      |      |      |      |      |      |      | 3     | 3      | 2      | 4     | 4     | 5     |
| 23346  | 6    | 6    | 1    | 6    | 6    | 6    | 6    | 1    | 5     | 3      | 3      | 5     | 5     | 5     |
| 23353  |      |      |      |      |      |      |      |      | 2     | 3      | 3      | 5     | 5     | 4     |
| 23363  | 4    | 3    | 3    | 4    | 4    | 4    | 4    | 4    | 2     | 2      | 2      | 3     | 3     | 3     |
| 23364  | 3    | 3    | 3    | 3    | 4    | 3    | 3    | 3    | 1     | 2      | 2      | 2     | 3     | 2     |
| 23376  |      |      |      |      |      |      |      |      | 3     | 3      | 3      | 5     | 5     | 5     |
| 23378  |      |      |      |      |      |      |      |      | 3     | 3      | 3      | 3     | 5     | 3     |
| 23382  |      |      |      |      |      |      |      |      | 3     | 3      | 3      | 5     | 5     | 5     |
| 23383  |      |      |      |      |      |      |      |      | 2     | 2      | 2      | 3     | 3     | 2     |
| 23390  |      |      |      |      |      |      |      |      | 3     | 3      | 3      | 5     | 5     | 5     |
| 23395  |      |      |      |      |      |      |      |      | 5     | 2      | 3      | 4     | 5     | 4     |
| 23398  | 3    | 2    | 2    | 2    | 2    | 3    | 3    | 4    | 2     | 2      | 2      | 1     | 2     | 2     |
| 23399  |      |      |      |      |      |      |      |      | 2     | 2      | 2      | 4     | 4     | 4     |
| 23406  |      |      |      |      |      |      |      |      | 3     | 3      | 2      | 4     | 4     | 4     |
| 23418  |      |      |      |      |      |      |      |      | 3     | 3      | 3      | 5     | 5     | 4     |
| 23427  | 6    | 6    | 4    | 6    | 6    | 6    | 6    | 3    | 4     | 3      | 3      | 5     | 5     | 5     |
| 23428  | 5    | 6    | 1    | 5    | 6    | 6    | 6    | 4    | 3     | 2      | 2      | 3     | 3     | 3     |
| 23435  |      |      |      |      |      |      |      |      | 2     | 3      | 3      | 4     | 4     | 5     |
| 23439  | 5    | 6    | 2    | 6    | 6    | 6    | 6    | 1    | 4     | 3      | 3      | 3     | 5     | 3     |
| 23440  |      |      |      |      |      |      |      |      | 3     | 3      | 3      | 5     | 5     | 5     |
| 23444  | 3    | 4    | 3    | 5    | 6    | 6    | 6    | 4    | 2     | 2      | 3      | 4     | 4     | 4     |
| 23445  |      |      |      |      |      |      |      |      | 3     | 3      | 2      | 5     | 5     | 5     |

| respid | Q48k | Q48l | Q48m | Q48n | Q48o | Q48p | Q48q | Q48r | Q49_1 | Q50a_1 | Q50b_1 | Q51_1 | Q51_2 | Q52_1 |   |
|--------|------|------|------|------|------|------|------|------|-------|--------|--------|-------|-------|-------|---|
| 23455  |      |      |      |      |      |      |      |      |       | 4      | 3      | 3     | 5     | 5     | 5 |
| 23467  |      |      |      |      |      |      |      |      |       | 2      | 2      | 3     | 4     | 4     | 4 |
| 23478  |      |      |      |      |      |      |      |      |       | 2      | 2      | 2     | 2     | 3     | 4 |
| 23492  |      |      |      |      |      |      |      |      |       | 2      | 3      | 3     | 5     | 5     | 4 |
| 23498  | 6    | 6    | 2    | 6    | 6    | 6    | 6    | 4    |       | 3      | 2      | 2     | 3     | 3     | 5 |
| 23511  | 6    | 6    | 1    | 6    | 6    | 6    | 6    | 6    | 5     | 3      | 3      | 3     | 4     | 4     | 4 |
| 23514  | 5    | 5    | 4    | 3    | 6    | 6    | 3    | 4    |       | 3      | 2      | 3     | 4     | 3     | 5 |
| 23515  |      |      |      |      |      |      |      |      |       | 3      | 3      | 3     | 4     | 3     | 4 |
| 23522  |      |      |      |      |      |      |      |      |       | 4      | 3      | 3     | 4     | 4     | 4 |
| 23524  |      |      |      |      |      |      |      |      |       | 2      | 2      | 3     | 5     | 5     | 5 |
| 23531  |      |      |      |      |      |      |      |      |       | 3      | 3      | 3     | 5     | 5     | 4 |
| 23532  | 3    | 3    | 1    | 2    | 6    | 5    | 5    | 5    |       | 2      | 2      | 2     | 3     | 3     | 3 |
| 23533  | 5    | 5    | 1    | 4    | 6    | 6    | 6    | 6    | 2     | 3      | 3      | 3     | 4     | 4     | 4 |
| 23534  |      |      |      |      |      |      |      |      |       | 4      | 3      | 3     | 3     | 3     | 3 |
| 23538  | 6    | 5    | 2    | 3    | 6    | 3    | 5    | 5    |       | 2      | 3      | 2     | 3     | 4     | 4 |
| 23539  |      |      |      |      |      |      |      |      |       | 1      | 3      | 3     | 4     | 4     | 4 |
| 23548  | 4    | 5    | 4    | 5    | 5    | 5    | 5    | 5    | 3     | 3      | 3      | 2     | 4     | 3     | 5 |
| 23553  |      |      |      |      |      |      |      |      |       | 3      | 3      | 3     | 5     | 5     | 5 |
| 23556  |      |      |      |      |      |      |      |      |       | 3      | 3      | 3     | 5     | 5     | 5 |
| 23563  |      |      |      |      |      |      |      |      |       | 2      | 2      | 3     | 4     | 4     | 4 |
| 23572  |      |      |      |      |      |      |      |      |       | 2      | 3      | 2     | 4     | 4     | 4 |
| 23575  | 6    | 6    | 3    | 6    | 6    | 6    | 6    | 6    |       | 2      | 3      | 3     | 4     | 4     | 5 |
| 23576  |      |      |      |      |      |      |      |      |       | 3      | 2      | 2     | 3     | 3     | 3 |
| 23577  |      |      |      |      |      |      |      |      |       | 2      | 2      | 2     | 4     | 5     | 4 |
| 23578  | 4    | 4    |      | 5    | 5    | 3    | 5    | 2    |       | 3      | 3      | 3     | 3     | 4     | 3 |
| 23587  |      |      |      |      |      |      |      |      |       | 3      | 3      | 3     | 4     | 5     | 4 |
| 23597  | 5    | 5    | 3    | 5    | 6    | 5    | 5    | 5    | 3     | 2      | 2      | 2     | 3     | 3     | 3 |
| 23598  |      |      |      |      |      |      |      |      |       | 3      | 3      | 3     | 4     | 4     | 4 |
| 23604  |      |      |      |      |      |      |      |      |       | 5      | 3      | 3     | 5     | 5     | 4 |
| 23617  | 6    | 6    | 5    | 2    | 5    | 3    | 3    | 2    |       | 2      | 3      | 3     | 5     | 5     | 5 |
| 23620  |      |      |      |      |      |      |      |      |       | 4      | 3      | 3     | 5     | 5     | 4 |
| 23621  |      |      |      |      |      |      |      |      |       | 3      | 2      | 2     | 3     | 3     | 3 |

| respid | Q48k | Q48l | Q48m | Q48n | Q48o | Q48p | Q48q | Q48r | Q49_1 | Q50a_1 | Q50b_1 | Q51_1 | Q51_2 | Q52_1 |   |
|--------|------|------|------|------|------|------|------|------|-------|--------|--------|-------|-------|-------|---|
| 23625  |      |      |      |      |      |      |      |      |       | 4      | 3      | 3     | 5     | 5     | 5 |
| 23629  | 6    | 6    | 1    | 6    | 6    | 6    | 6    | 6    | 1     | 3      | 2      | 3     | 3     | 3     | 5 |
| 23635  |      |      |      |      |      |      |      |      |       | 3      | 2      | 2     | 3     | 4     | 3 |
| 23636  | 6    | 5    | 2    | 4    | 5    | 3    | 3    | 3    | 3     | 3      | 2      | 2     | 3     | 3     | 3 |
| 23637  |      |      |      |      |      |      |      |      |       | 2      | 2      | 2     | 3     | 3     | 3 |
| 23638  |      |      |      |      |      |      |      |      |       | 4      | 3      | 3     | 5     | 5     | 5 |
| 23644  | 5    | 6    | 3    | 5    | 6    | 6    | 5    | 4    | 4     | 3      | 3      | 2     | 3     | 4     | 4 |
| 23645  | 4    | 3    | 4    | 4    | 5    | 3    | 4    | 4    | 4     | 2      | 2      | 3     | 4     | 4     | 4 |
| 23649  |      |      |      |      |      |      |      |      |       | 3      | 2      | 2     | 2     | 2     | 2 |
| 23654  |      |      |      |      |      |      |      |      |       | 2      | 2      | 2     | 4     | 4     | 4 |
| 23662  | 6    | 6    | 1    | 6    | 6    | 6    | 6    | 6    | 6     | 2      | 1      | 3     | 3     | 4     | 3 |
| 23664  | 3    | 4    | 3    | 4    | 4    | 4    | 3    | 3    | 3     | 3      | 3      | 3     | 5     | 5     | 4 |
| 23665  |      |      |      |      |      |      |      |      |       | 3      | 2      | 2     | 3     | 3     | 4 |
| 23666  | 3    | 3    | 4    | 3    | 4    | 3    | 3    | 3    | 3     | 2      | 2      | 2     | 3     | 3     | 3 |
| 23671  | 6    | 6    | 1    | 6    | 6    | 6    | 6    | 6    | 1     | 4      | 3      | 3     | 5     | 5     | 5 |
| 23672  |      |      |      |      |      |      |      |      |       | 2      | 3      | 2     | 4     | 4     | 5 |
| 23685  |      |      |      |      |      |      |      |      |       | 2      | 3      | 3     | 5     | 5     | 5 |
| 23686  |      |      |      |      |      |      |      |      |       | 3      | 3      | 2     | 5     | 5     | 5 |
| 23689  |      |      |      |      |      |      |      |      |       | 2      | 2      | 2     | 4     | 3     | 4 |
| 23690  |      |      |      |      |      |      |      |      |       | 2      | 2      | 2     | 3     | 3     | 3 |
| 23695  | 6    | 5    | 1    | 5    | 6    | 5    | 4    | 5    | 5     | 2      | 3      | 3     | 4     | 4     | 4 |
| 23700  |      |      |      |      |      |      |      |      |       | 2      | 3      | 3     | 5     | 5     | 5 |
| 23714  | 6    | 6    | 1    | 6    | 6    | 6    | 6    | 6    | 1     | 2      | 3      | 2     | 4     | 4     | 4 |
| 23719  |      |      |      |      |      |      |      |      |       | 4      | 2      | 2     | 4     | 5     | 4 |
| 23720  | 6    | 6    | 1    | 6    | 6    | 6    | 6    | 6    | 1     | 4      | 2      | 2     | 5     | 4     | 5 |
| 23721  |      |      |      |      |      |      |      |      |       | 4      | 3      | 3     | 5     | 5     | 4 |
| 23729  |      |      |      |      |      |      |      |      |       | 5      | 3      | 3     | 5     | 5     | 4 |
| 23730  |      |      |      |      |      |      |      |      |       | 4      | 3      | 3     | 5     | 5     | 5 |
| 23732  | 5    | 3    | 2    | 5    | 6    | 4    | 2    | 4    | 4     | 2      | 2      | 2     | 4     | 4     | 4 |
| 23736  |      |      |      |      |      |      |      |      |       | 2      | 3      | 3     | 5     | 5     | 4 |
| 23754  |      |      |      |      |      |      |      |      |       | 3      | 3      | 3     | 5     | 5     | 5 |
| 23756  |      |      |      |      |      |      |      |      |       | 3      | 3      | 3     | 3     | 3     | 4 |



| respid | Q48k | Q48l | Q48m | Q48n | Q48o | Q48p | Q48q | Q48r | Q49_1 | Q50a_1 | Q50b_1 | Q51_1 | Q51_2 | Q52_1 |   |
|--------|------|------|------|------|------|------|------|------|-------|--------|--------|-------|-------|-------|---|
| 23759  |      | 5    | 5    | 2    | 6    | 6    | 5    | 4    | 2     | 3      | 3      | 2     | 4     | 4     | 4 |
| 23761  |      | 5    | 4    | 3    | 5    | 5    | 5    | 6    | 3     | 3      | 2      | 2     | 3     | 4     | 4 |
| 23766  |      |      |      |      |      |      |      |      |       | 2      | 2      | 2     | 3     | 3     | 3 |
| 23768  |      | 3    | 2    | 2    | 1    | 2    | 2    | 2    | 2     | 3      | 2      | 2     | 4     | 4     | 4 |
| 23773  |      |      |      |      |      |      |      |      |       | 3      | 3      | 3     | 5     | 5     | 4 |
| 23781  |      |      |      |      |      |      |      |      |       | 4      | 3      | 3     | 5     | 5     | 5 |
| 23782  |      | 3    | 4    | 5    | 3    | 4    | 3    | 3    | 5     | 2      | 3      | 2     | 2     | 3     | 3 |
| 23787  |      | 5    | 6    | 3    | 5    | 6    | 5    | 5    | 2     | 2      | 2      | 2     | 3     | 3     | 3 |
| 23788  |      | 1    | 2    |      |      |      |      |      |       | 1      | 2      | 2     | 2     | 2     | 3 |
| 23790  |      |      |      |      |      |      |      |      |       | 3      | 3      | 3     | 4     | 5     | 4 |
| 23794  |      |      |      |      |      |      |      |      |       | 3      | 3      | 3     | 5     | 5     | 4 |
| 23795  |      |      |      |      |      |      |      |      |       | 2      | 2      | 3     | 4     | 4     | 4 |
| 23801  |      | 5    | 4    | 2    | 4    | 4    | 4    | 4    | 3     | 2      | 3      | 3     | 4     | 4     | 4 |
| 23806  |      | 5    | 5    | 3    | 4    | 6    | 6    | 6    | 3     | 4      | 3      | 3     | 3     | 4     | 4 |
| 23809  |      |      |      |      |      |      |      |      |       | 3      | 3      | 3     | 4     | 4     | 4 |
| 23813  |      | 3    | 4    | 3    | 3    | 6    | 5    | 5    | 3     | 3      | 3      | 2     | 4     | 4     | 4 |
| 23815  |      | 3    | 3    | 5    | 4    | 6    | 4    | 4    | 1     | 3      | 2      | 3     | 5     | 5     | 5 |
| 23821  |      |      |      |      |      |      |      |      |       | 3      | 3      | 3     | 5     | 5     | 5 |
| 23825  |      | 6    | 6    | 5    | 6    | 6    | 6    | 4    | 3     | 2      | 3      | 2     | 4     | 4     | 4 |
| 23826  |      |      |      |      |      |      |      |      |       | 3      | 3      | 3     | 5     | 5     | 4 |
| 23830  |      | 1    | 1    | 5    | 1    | 5    | 5    | 1    | 6     | 2      | 2      | 2     | 3     | 4     | 3 |
| 23833  |      | 6    | 6    | 1    | 6    | 6    | 6    | 6    | 1     | 3      | 3      | 3     | 5     | 5     | 5 |
| 23837  |      |      |      |      |      |      |      |      |       | 4      | 3      | 3     | 1     | 1     | 5 |
| 23848  |      | 6    | 6    | 6    | 6    | 6    | 6    | 6    | 6     | 5      | 3      | 3     | 5     | 5     | 5 |
| 23850  |      | 4    | 4    | 4    | 4    | 4    | 4    | 4    | 4     | 2      | 3      | 3     | 5     | 5     | 4 |
| 23870  |      |      |      |      |      |      |      |      |       | 3      | 3      | 3     | 4     | 5     | 4 |
| 23877  |      |      |      |      |      |      |      |      |       | 2      | 3      | 3     | 3     | 4     | 3 |
| 23880  |      |      |      |      |      |      |      |      |       | 2      | 2      | 2     | 3     | 4     | 4 |
| 23882  |      | 3    | 3    | 3    | 3    | 6    | 5    | 5    | 3     | 3      | 2      | 2     | 4     | 4     | 4 |
| 23888  |      |      |      |      |      |      |      |      |       | 4      | 3      | 3     | 5     | 5     | 5 |
| 23908  |      |      |      |      |      |      |      |      |       | 2      | 3      | 2     | 4     | 4     | 4 |
| 23914  |      | 5    | 5    | 4    | 5    | 6    | 3    | 6    | 4     | 3      | 3      | 3     | 4     | 4     | 4 |

| respid | Q48k | Q48l | Q48m | Q48n | Q48o | Q48p | Q48q | Q48r | Q49_1 | Q50a_1 | Q50b_1 | Q51_1 | Q51_2 | Q52_1 |   |
|--------|------|------|------|------|------|------|------|------|-------|--------|--------|-------|-------|-------|---|
| 23916  |      |      |      |      |      |      |      |      |       | 3      | 2      | 2     | 3     | 3     | 3 |
| 23922  |      |      |      |      |      |      |      |      |       | 3      | 2      | 2     | 2     | 2     | 3 |
| 23932  |      |      |      |      |      |      |      |      |       | 4      | 3      | 3     | 4     | 5     | 5 |
| 23934  |      |      |      |      |      |      |      |      |       | 4      | 3      | 3     | 5     | 5     | 4 |
| 23942  | 6    | 6    | 2    | 6    | 6    | 5    | 2    | 5    |       | 3      | 2      | 3     | 5     | 5     | 3 |
| 23945  |      |      |      |      |      |      |      |      |       | 3      | 3      | 3     | 5     | 5     | 4 |
| 23948  |      |      |      |      |      |      |      |      |       | 2      | 3      | 3     | 5     | 5     | 4 |
| 23955  |      |      |      |      |      |      |      |      |       | 3      | 3      | 3     | 5     | 5     | 4 |
| 23956  | 5    | 6    | 2    | 5    | 6    | 6    | 6    | 1    |       | 2      | 2      | 2     | 3     | 5     | 5 |
| 23978  |      |      |      |      |      |      |      |      |       | 2      | 3      | 3     | 5     | 5     | 4 |
| 23981  |      |      |      |      |      |      |      |      |       | 2      | 2      | 3     | 4     | 4     | 4 |
| 23982  | 1    | 1    | 1    | 1    | 6    | 6    | 1    | 6    |       | 1      | 1      | 2     | 5     | 5     | 2 |
| 23991  | 4    | 6    | 4    | 4    | 6    | 6    | 6    | 4    |       | 3      | 3      | 3     | 4     | 5     | 5 |
| 23994  |      |      |      |      |      |      |      |      |       | 2      | 2      | 2     | 3     | 3     | 4 |
| 23995  |      |      |      |      |      |      |      |      |       | 3      | 3      | 3     | 5     | 4     | 4 |
| 23999  | 5    | 5    | 3    |      | 4    | 4    | 4    | 3    |       | 2      | 2      | 2     | 3     | 4     | 3 |
| 24005  | 2    | 1    | 4    | 3    | 6    | 2    | 2    | 5    |       | 2      | 1      | 2     | 3     | 2     | 4 |
| 24018  |      |      |      |      |      |      |      |      |       | 4      | 3      | 3     | 4     | 5     | 5 |
| 24021  |      |      |      |      |      |      |      |      |       | 3      | 3      | 3     | 5     | 5     | 5 |
| 24035  |      |      |      |      |      |      |      |      |       | 2      | 2      | 3     | 5     | 5     | 5 |
| 24040  |      |      |      |      |      |      |      |      |       | 2      | 2      | 3     | 4     | 4     | 5 |
| 24043  |      |      |      |      |      |      |      |      |       | 5      | 3      | 3     | 5     | 5     | 5 |
| 24046  |      |      |      |      |      |      |      |      |       | 2      | 2      | 3     | 3     | 4     | 4 |
| 24047  | 3    | 3    | 3    | 2    | 2    | 1    | 3    | 2    |       | 2      | 3      | 2     | 1     | 1     | 4 |
| 24048  |      |      |      |      |      |      |      |      |       | 3      | 3      | 3     | 5     | 5     | 4 |
| 24062  |      |      |      |      |      |      |      |      |       | 3      | 2      | 2     | 2     | 2     | 2 |
| 24063  |      |      |      |      |      |      |      |      |       | 3      | 3      | 2     | 4     | 4     | 4 |
| 24066  | 4    | 4    | 3    | 4    | 6    | 6    | 4    | 3    |       | 4      | 3      | 2     | 5     | 5     | 5 |
| 24069  | 5    | 5    | 5    | 5    | 5    | 5    | 5    | 5    |       | 2      | 2      | 2     | 5     | 5     | 5 |
| 24070  | 6    | 6    | 5    | 5    | 5    | 5    | 5    | 5    |       | 2      | 2      | 3     | 1     | 1     | 1 |
| 24074  | 6    | 4    | 1    | 6    | 6    | 5    | 6    | 5    |       | 2      | 3      | 3     | 5     | 4     | 4 |
| 24080  | 5    | 6    | 6    | 5    | 6    | 5    | 6    | 1    |       | 3      | 3      | 2     | 5     | 5     | 5 |

| respid | Q48k | Q48l | Q48m | Q48n | Q48o | Q48p | Q48q | Q48r | Q49_1 | Q50a_1 | Q50b_1 | Q51_1 | Q51_2 | Q52_1 |   |
|--------|------|------|------|------|------|------|------|------|-------|--------|--------|-------|-------|-------|---|
| 24082  | 6    | 6    | 2    | 6    | 6    | 6    | 6    | 6    | 1     | 4      | 2      | 3     | 4     | 4     | 4 |
| 24088  | 3    | 4    | 3    | 5    | 2    | 3    | 4    | 4    | 5     | 2      | 3      | 3     | 4     | 4     | 5 |
| 24089  |      |      |      |      |      |      |      |      |       | 3      | 3      | 3     | 5     | 5     | 5 |
| 24091  | 3    | 4    | 3    | 2    | 5    | 2    | 3    | 3    | 5     | 3      | 3      | 2     | 4     | 5     | 4 |
| 24095  |      |      |      |      |      |      |      |      |       | 3      | 3      | 3     | 4     | 4     | 4 |
| 24100  | 4    | 3    | 3    | 5    | 6    | 5    | 3    | 3    | 3     | 1      | 2      | 1     | 3     | 3     | 4 |
| 24105  |      |      |      |      |      |      |      |      |       | 3      | 3      | 3     | 4     | 4     | 4 |
| 24107  | 2    | 2    | 2    | 2    | 2    | 3    | 2    | 3    | 3     | 1      | 2      | 1     | 2     | 2     | 3 |
| 24108  |      |      |      |      |      |      |      |      |       | 2      | 3      | 3     | 5     | 5     | 3 |
| 24113  | 6    | 3    | 4    | 3    | 4    | 5    | 3    | 2    | 2     | 2      | 3      | 3     | 5     | 5     | 5 |
| 24120  |      |      |      |      |      |      |      |      |       | 2      | 3      | 3     | 5     | 5     | 4 |
| 24122  | 3    | 3    | 4    | 3    | 4    | 4    | 4    | 4    | 4     | 2      | 2      | 3     | 3     | 3     | 3 |
| 24123  |      |      |      |      |      |      |      |      |       | 2      | 1      | 1     | 1     | 1     | 2 |
| 24125  | 3    | 1    | 6    | 3    | 3    | 2    | 4    | 2    | 2     | 2      | 2      | 3     | 3     | 3     | 3 |
| 24132  |      |      |      |      |      |      |      |      |       | 4      | 3      | 3     | 5     | 5     | 5 |
| 24139  |      |      |      |      |      |      |      |      |       | 3      | 2      | 3     | 4     | 4     | 5 |
| 24140  |      |      |      |      |      |      |      |      |       | 3      | 2      | 3     | 3     | 4     | 2 |
| 24143  | 3    | 3    | 6    | 3    | 5    | 6    | 3    | 2    | 2     | 2      | 2      | 2     | 3     | 3     | 3 |
| 24150  |      |      |      |      |      |      |      |      |       | 2      | 3      | 3     | 2     | 3     | 3 |
| 24153  |      |      |      |      |      |      |      |      |       | 2      | 3      | 3     | 5     | 5     | 5 |
| 24161  |      |      |      |      |      |      |      |      |       | 4      | 3      | 3     | 5     | 5     | 5 |
| 24168  |      |      |      |      |      |      |      |      |       | 2      | 1      | 2     | 3     | 3     | 3 |
| 24179  |      |      |      |      |      |      |      |      |       | 3      | 3      | 3     | 4     | 5     | 4 |
| 24182  |      |      |      |      |      |      |      |      |       | 2      | 2      | 3     | 4     | 4     | 4 |
| 24194  |      |      |      |      |      |      |      |      |       | 3      | 3      | 3     | 3     | 3     | 3 |
| 24206  |      |      |      |      |      |      |      |      |       | 5      | 3      | 3     | 5     | 5     | 5 |
| 24214  |      |      |      |      |      |      |      |      |       | 3      | 1      | 1     | 3     | 3     | 3 |
| 24215  |      |      |      |      |      |      |      |      |       | 3      | 2      | 3     | 4     | 4     | 5 |
| 24224  | 5    | 6    | 2    | 2    | 6    | 6    | 5    | 5    | 5     | 2      | 3      | 3     | 5     | 5     | 5 |
| 24225  | 5    | 5    | 2    | 5    | 5    | 5    | 5    | 5    | 2     | 3      | 2      | 3     | 5     | 5     | 4 |
| 24227  |      |      |      |      |      |      |      |      |       | 3      | 3      | 3     | 5     | 5     | 5 |
| 24229  | 6    | 6    | 1    | 6    | 6    | 6    | 6    | 6    | 1     | 5      | 3      | 3     | 3     | 4     | 4 |

| respid | Q48k | Q48l | Q48m | Q48n | Q48o | Q48p | Q48q | Q48r | Q49_1 | Q50a_1 | Q50b_1 | Q51_1 | Q51_2 | Q52_1 |   |
|--------|------|------|------|------|------|------|------|------|-------|--------|--------|-------|-------|-------|---|
| 24230  |      |      |      |      |      |      |      |      |       | 4      | 3      | 3     | 5     | 5     | 5 |
| 24232  | 4    | 4    | 3    | 4    | 5    | 3    | 4    | 3    |       | 2      | 2      | 3     | 3     | 4     | 3 |
| 24253  |      |      |      |      |      |      |      |      |       | 2      | 2      | 2     | 3     | 3     | 3 |
| 24267  | 6    | 6    | 1    | 5    | 6    | 6    | 5    | 2    |       | 4      | 3      | 3     | 4     | 4     | 4 |
| 24274  |      |      |      |      |      |      |      |      |       | 4      | 3      | 3     | 5     | 5     | 4 |
| 24275  | 3    | 4    | 4    | 4    | 4    | 4    | 4    | 3    |       | 2      | 3      | 2     | 3     | 3     | 3 |
| 24277  |      |      |      |      |      |      |      |      |       | 3      | 3      | 3     | 5     | 5     | 5 |
| 24280  |      |      |      |      |      |      |      |      |       | 3      | 3      | 3     | 4     | 4     | 4 |
| 24285  |      |      |      |      |      |      |      |      |       | 3      | 3      | 3     | 4     | 5     | 4 |
| 24293  |      |      |      |      |      |      |      |      |       | 3      | 3      | 3     | 5     | 5     | 5 |
| 24295  | 6    | 6    | 6    | 1    | 6    | 6    | 6    | 6    |       | 2      | 2      | 3     | 3     | 3     | 3 |
| 24299  |      |      |      |      |      |      |      |      |       | 3      | 3      | 3     | 5     | 5     | 4 |
| 24303  |      |      |      |      |      |      |      |      |       | 4      | 3      | 3     | 5     | 5     | 5 |
| 24308  |      |      |      |      |      |      |      |      |       | 3      | 3      | 3     | 4     | 4     | 5 |
| 24322  |      |      |      |      |      |      |      |      |       | 2      | 2      | 3     | 5     | 5     | 4 |
| 24325  |      |      |      |      |      |      |      |      |       | 2      | 3      | 2     | 4     | 5     | 3 |
| 24328  | 5    | 5    | 4    | 5    | 6    | 2    | 3    | 5    |       | 2      | 2      | 3     | 3     | 4     | 4 |
| 24334  |      |      |      |      |      |      |      |      |       | 2      | 2      | 2     | 4     | 4     | 4 |
| 24342  | 5    | 5    | 3    | 5    | 5    | 5    | 5    | 3    |       | 4      | 3      | 3     | 5     | 4     | 5 |
| 24343  |      |      |      |      |      |      |      |      |       | 3      | 1      | 3     | 3     | 3     | 4 |
| 24348  |      |      |      |      |      |      |      |      |       | 4      | 1      | 2     | 3     | 2     | 4 |
| 24352  | 2    | 2    | 3    | 5    | 5    | 3    | 2    | 3    |       | 2      | 2      | 2     | 3     | 4     | 3 |
| 24354  |      |      |      |      |      |      |      |      |       | 3      | 2      | 2     | 4     | 4     | 4 |
| 24357  | 6    | 6    | 1    | 6    | 6    | 4    | 6    | 6    |       | 5      | 3      | 3     | 5     | 5     | 4 |
| 24360  |      |      |      |      |      |      |      |      |       | 3      | 3      | 3     | 4     | 5     | 4 |
| 24369  |      |      |      |      |      |      |      |      |       | 1      | 3      | 3     | 3     | 3     | 4 |
| 24373  |      |      |      |      |      |      |      |      |       | 3      | 2      | 2     | 3     | 3     | 3 |
| 24398  |      |      |      |      |      |      |      |      |       | 1      | 1      | 1     | 1     | 2     | 2 |
| 24402  | 4    | 4    | 2    | 4    | 6    | 6    | 6    | 3    |       | 2      | 3      | 3     | 4     | 4     | 4 |
| 24405  | 5    | 3    | 6    | 3    | 6    | 2    | 4    | 3    |       | 2      | 2      | 3     | 3     | 3     | 3 |
| 24407  |      |      |      |      |      |      |      |      |       | 3      | 3      | 3     | 4     | 5     | 4 |
| 24413  | 6    | 6    | 1    | 6    | 6    | 6    | 6    | 6    | 1     | 2      | 3      | 3     | 5     | 5     | 5 |

| respid | Q48k | Q48l | Q48m | Q48n | Q48o | Q48p | Q48q | Q48r | Q49_1 | Q50a_1 | Q50b_1 | Q51_1 | Q51_2 | Q52_1 |   |
|--------|------|------|------|------|------|------|------|------|-------|--------|--------|-------|-------|-------|---|
| 24443  | 3    | 3    | 3    | 4    | 4    | 4    | 4    | 4    | 4     | 2      | 2      | 2     | 3     | 3     | 3 |
| 24451  |      |      |      |      |      |      |      |      |       | 2      | 3      | 3     | 5     | 5     | 5 |
| 24459  |      |      |      |      |      |      |      |      |       | 3      | 2      | 2     | 3     | 2     | 3 |
| 24465  | 5    | 6    | 2    | 6    | 6    | 4    | 5    | 3    | 3     | 2      | 2      | 4     | 4     | 4     | 4 |
| 24481  | 3    | 4    | 3    | 4    | 4    | 4    | 4    | 4    | 4     | 3      | 2      | 2     | 3     | 4     | 4 |
| 24482  |      |      |      |      |      |      |      |      |       | 2      | 3      | 3     | 5     | 5     | 4 |
| 24491  | 3    | 4    | 4    | 4    | 3    | 4    | 4    | 4    | 4     | 3      | 3      | 3     | 4     | 4     | 4 |
| 24495  |      |      |      |      |      |      |      |      |       | 3      | 3      | 3     | 5     | 5     | 5 |
| 24497  |      |      |      |      |      |      |      |      |       | 2      | 2      | 2     | 2     | 2     | 2 |
| 24511  | 3    | 4    | 4    | 3    | 4    | 3    | 3    | 3    | 3     | 2      | 2      | 2     | 2     | 2     | 2 |
| 24513  |      |      |      |      |      |      |      |      |       | 3      | 2      | 3     | 3     | 4     | 3 |
| 24516  |      |      |      |      |      |      |      |      |       | 2      | 2      | 2     | 3     | 4     | 3 |
| 24518  | 6    | 6    | 4    | 6    | 6    | 3    | 5    | 3    | 3     | 3      | 3      | 3     | 4     | 4     | 4 |
| 24524  | 3    | 3    | 4    | 3    | 4    | 2    | 3    | 5    | 2     | 2      | 2      | 2     | 4     | 4     | 3 |
| 24528  |      |      |      |      |      |      |      |      |       | 2      | 2      | 2     | 5     | 5     | 5 |
| 24531  |      |      |      |      |      |      |      |      |       | 2      | 3      | 3     | 4     | 4     | 5 |
| 24533  |      |      |      |      |      |      |      |      |       | 1      | 2      | 1     | 2     | 3     | 2 |
| 24547  | 1    | 6    | 6    | 1    | 2    | 6    | 6    | 6    | 6     | 2      | 2      | 2     | 4     | 4     | 5 |
| 24557  | 3    | 3    | 3    | 2    | 3    | 3    | 2    | 3    | 2     | 2      | 2      | 2     | 3     | 3     | 3 |
| 24559  |      |      |      |      |      |      |      |      |       | 3      | 2      | 2     | 3     | 3     | 3 |
| 24567  | 2    | 5    | 3    | 4    | 6    | 6    | 6    | 2    | 2     | 3      | 2      | 2     | 4     | 4     | 4 |
| 24568  |      |      |      |      |      |      |      |      |       | 3      | 3      | 3     | 5     | 5     | 5 |
| 24577  |      |      |      |      |      |      |      |      |       | 2      | 3      | 3     | 5     | 5     | 5 |
| 24581  | 5    | 6    | 3    | 6    | 6    | 5    | 6    | 2    | 2     | 2      | 3      | 2     | 4     | 4     | 4 |
| 24588  | 6    | 6    | 2    | 6    | 6    | 6    | 6    | 6    | 3     | 5      | 3      | 3     | 5     | 5     | 5 |
| 24604  |      |      |      |      |      |      |      |      |       | 1      | 1      | 2     | 2     | 2     | 3 |
| 24612  |      |      |      |      |      |      |      |      |       | 3      | 3      | 3     | 4     | 4     | 4 |
| 24621  | 3    | 2    | 3    | 2    | 4    | 2    | 4    | 2    | 2     | 2      | 2      | 2     | 2     | 3     | 3 |
| 24625  | 4    | 4    | 3    | 3    | 4    | 3    | 2    | 4    | 4     | 2      | 2      | 1     | 3     | 3     | 3 |
| 24627  | 6    | 5    | 2    | 6    | 6    | 5    | 6    | 1    | 3     | 3      | 3      | 2     | 5     | 4     | 4 |
| 24640  | 6    | 6    | 6    | 6    | 6    | 6    | 6    | 6    | 6     | 1      | 1      | 1     | 1     | 1     | 4 |
| 24644  | 5    | 5    | 2    |      | 4    | 5    | 5    | 5    | 1     | 3      | 2      | 2     | 3     | 3     | 3 |

| respid | Q48k | Q48l | Q48m | Q48n | Q48o | Q48p | Q48q | Q48r | Q49_1 | Q50a_1 | Q50b_1 | Q51_1 | Q51_2 | Q52_1 |   |
|--------|------|------|------|------|------|------|------|------|-------|--------|--------|-------|-------|-------|---|
| 24664  |      |      |      |      |      |      |      |      |       | 2      | 3      | 3     | 4     | 5     | 4 |
| 24669  |      |      |      |      |      |      |      |      |       | 4      | 2      | 3     | 4     | 2     | 2 |
| 24685  |      |      |      |      |      |      |      |      |       | 5      | 3      | 3     | 5     | 4     | 5 |
| 24687  | 4    | 4    | 3    | 4    | 4    | 4    | 4    | 4    | 3     | 3      | 2      | 3     | 3     | 3     | 3 |
| 24688  |      |      |      |      |      |      |      |      |       | 2      | 2      | 2     | 3     | 3     | 3 |
| 24691  | 2    | 3    | 2    | 3    | 2    | 2    | 2    | 3    | 2     | 2      | 2      | 2     | 3     | 3     | 3 |
| 24693  |      |      |      |      |      |      |      |      |       | 3      | 2      | 2     | 4     | 4     | 3 |
| 24706  |      |      |      |      |      |      |      |      |       | 4      | 3      | 3     | 5     | 5     | 5 |
| 24710  |      |      |      |      |      |      |      |      |       | 4      | 3      | 3     | 5     | 5     | 5 |
| 24717  |      |      |      |      |      |      |      |      |       | 4      | 3      | 3     | 5     | 5     | 5 |
| 24720  | 5    | 5    | 3    | 4    | 5    | 6    | 5    | 5    | 2     | 4      | 3      | 3     | 4     | 4     | 4 |
| 24731  |      |      |      |      |      |      |      |      |       | 2      | 2      | 2     | 2     | 2     | 3 |
| 24732  |      |      |      |      |      |      |      |      |       | 2      | 2      | 2     | 2     | 2     | 3 |
| 24733  |      |      |      |      |      |      |      |      |       | 2      | 1      | 1     | 1     | 1     | 4 |
| 24747  | 3    | 4    | 5    | 3    | 5    | 5    | 6    | 4    | 4     | 1      | 2      | 2     | 3     | 3     | 3 |
| 24750  |      |      |      |      |      |      |      |      |       | 2      | 2      | 2     | 3     | 3     | 3 |
| 24758  | 2    | 4    | 2    | 5    | 6    | 6    | 6    | 5    | 5     | 2      | 2      | 2     | 3     | 4     | 4 |
| 24760  | 6    | 6    | 3    | 6    | 6    | 6    | 6    | 6    | 1     | 3      | 2      | 2     | 3     | 4     | 4 |
| 24765  |      |      |      |      |      |      |      |      |       | 3      | 3      | 3     | 4     | 5     | 4 |
| 24772  | 6    | 5    | 2    | 6    | 6    | 6    | 6    | 6    | 1     | 4      | 3      | 3     | 5     | 5     | 5 |
| 24779  |      |      |      |      |      |      |      |      |       | 3      | 2      | 2     | 2     | 2     | 2 |
| 24794  |      |      |      |      |      |      |      |      |       | 3      | 3      | 3     | 4     | 4     | 5 |
| 24796  | 6    | 5    | 1    | 5    | 6    | 6    | 6    | 6    | 2     | 2      | 3      | 3     | 4     | 4     | 5 |
| 24797  |      |      |      |      |      |      |      |      |       | 2      | 2      | 2     | 3     | 3     | 4 |
| 24800  |      |      |      |      |      |      |      |      |       | 3      | 3      | 3     | 4     | 4     | 4 |
| 24813  |      |      |      | 1    |      |      |      |      |       | 1      | 2      | 1     | 3     | 2     | 3 |
| 24815  | 3    | 5    | 5    | 2    | 5    | 5    | 6    | 3    | 3     | 2      | 3      | 2     | 3     | 3     | 3 |
| 24821  | 3    | 4    | 3    | 3    | 4    | 4    | 4    | 4    | 3     | 2      | 3      | 3     | 5     | 5     | 5 |
| 24822  | 6    | 6    | 2    | 5    | 6    | 5    | 6    | 3    | 3     | 3      | 3      | 3     | 5     | 5     | 5 |
| 24831  | 3    | 6    | 6    | 6    | 6    | 6    | 6    | 6    |       | 3      | 1      | 2     | 2     | 2     | 3 |
| 24835  |      |      |      |      |      |      |      |      |       | 4      | 3      | 3     | 5     | 5     | 5 |
| 24843  | 3    | 5    | 4    | 4    | 3    | 4    | 3    | 5    | 5     | 2      | 2      | 2     | 2     | 3     | 3 |

| respid | Q48k | Q48l | Q48m | Q48n | Q48o | Q48p | Q48q | Q48r | Q49_1 | Q50a_1 | Q50b_1 | Q51_1 | Q51_2 | Q52_1 |
|--------|------|------|------|------|------|------|------|------|-------|--------|--------|-------|-------|-------|
| 24844  |      |      |      |      |      |      |      |      |       | 2      | 2      | 2     | 2     | 2     |
| 24860  |      |      |      |      |      |      |      |      |       | 4      | 3      | 3     | 4     | 4     |
| 24861  |      |      |      |      |      |      |      |      |       | 2      | 2      | 2     | 3     | 3     |
| 24865  | 3    | 3    | 2    | 3    | 2    | 3    | 2    | 3    |       | 2      | 2      | 2     | 3     | 3     |
| 24870  |      |      |      |      |      |      |      |      |       | 2      | 2      | 2     | 2     | 3     |
| 24887  | 6    | 6    | 2    | 6    | 6    | 6    | 6    | 2    |       | 3      | 3      | 3     | 5     | 5     |
| 24897  |      |      |      |      |      |      |      |      |       | 3      | 2      | 3     | 4     | 4     |
| 24902  |      |      |      |      |      |      |      |      |       | 2      | 3      | 2     | 3     | 3     |
| 24914  | 6    | 6    | 1    | 6    | 6    | 6    | 6    | 1    |       | 2      | 2      | 2     | 3     | 3     |
| 24921  | 4    | 4    | 3    | 4    | 4    | 4    | 4    | 5    | 3     | 2      | 2      | 2     | 4     | 4     |
| 24922  |      |      |      |      |      |      |      |      |       | 4      | 3      | 3     | 5     | 5     |
| 24924  |      |      |      |      |      |      |      |      |       | 4      | 3      | 3     | 5     | 5     |
| 24927  | 2    | 2    | 2    | 2    | 2    | 2    | 2    | 2    | 2     | 2      | 2      | 2     | 4     | 4     |
| 24936  | 2    | 6    |      | 6    | 6    |      |      | 6    | 2     | 1      | 3      | 2     | 5     | 5     |
| 24937  | 6    | 6    | 4    | 2    | 6    | 6    | 6    | 6    | 2     | 2      | 2      | 3     | 4     | 4     |
| 24942  |      |      |      |      |      |      |      |      |       | 3      | 3      | 3     | 5     | 5     |
| 24947  | 6    | 6    | 1    | 6    | 6    | 6    | 6    | 6    | 1     | 3      | 3      | 3     | 4     | 5     |
| 24953  |      |      |      |      |      |      |      |      |       | 2      | 3      | 3     | 4     | 4     |
| 24954  |      |      |      |      |      |      |      |      |       | 3      | 2      | 2     | 2     | 2     |
| 24960  |      |      |      |      |      |      |      |      |       | 3      | 2      | 1     | 2     | 3     |
| 24965  |      |      |      |      |      |      |      |      |       | 2      | 2      | 2     | 3     | 3     |
| 24975  | 6    | 6    | 6    | 6    | 6    | 6    | 6    | 6    | 6     | 4      | 3      | 3     | 5     | 5     |
| 24983  | 2    | 3    | 2    | 3    | 2    | 2    | 2    | 2    | 2     | 2      | 2      | 2     | 3     | 3     |
| 24985  |      |      |      |      |      |      |      |      |       | 4      | 3      | 3     | 4     | 4     |
| 24990  |      |      |      |      |      |      |      |      |       | 1      | 1      | 1     | 3     | 2     |
| 25000  | 4    | 4    | 3    | 4    | 4    | 4    | 4    |      |       | 4      | 3      | 3     | 5     | 5     |
| 25007  | 4    | 4    | 3    | 4    | 4    | 4    | 4    | 4    | 3     | 3      | 3      | 3     | 4     | 4     |
| 25008  | 6    | 6    | 2    | 5    | 6    | 6    | 6    | 6    | 1     | 3      | 3      | 3     | 4     | 4     |
| 25010  |      |      |      |      |      |      |      |      |       | 3      | 2      | 2     | 3     | 3     |
| 25016  |      |      |      |      |      |      |      |      |       | 3      | 3      | 3     | 4     | 4     |
| 25021  |      |      |      |      |      |      |      |      |       | 1      | 1      | 1     | 1     | 1     |
| 25040  |      |      |      |      |      |      |      |      |       | 3      | 3      | 3     | 5     | 5     |

| respid | Q48k | Q48l | Q48m | Q48n | Q48o | Q48p | Q48q | Q48r | Q49_1 | Q50a_1 | Q50b_1 | Q51_1 | Q51_2 | Q52_1 |   |
|--------|------|------|------|------|------|------|------|------|-------|--------|--------|-------|-------|-------|---|
| 25043  |      |      |      |      |      |      |      |      |       | 4      | 2      | 3     | 5     | 5     | 4 |
| 25055  |      |      |      |      |      |      |      |      |       | 4      | 3      | 3     | 4     | 4     | 5 |
| 25057  |      |      |      |      |      |      |      |      |       | 3      | 3      | 3     | 4     | 4     | 4 |
| 25060  |      |      |      |      |      |      |      |      |       | 3      | 2      | 3     | 3     | 3     | 2 |
| 25062  |      |      |      |      |      |      |      |      |       | 4      | 3      | 3     | 4     | 5     | 5 |
| 25064  | 3    | 3    | 2    | 3    | 5    | 4    | 3    | 4    |       | 2      | 2      | 2     | 4     | 4     | 4 |
| 25069  |      |      |      |      |      |      |      |      |       | 4      | 3      | 3     | 5     | 5     | 5 |
| 25077  | 6    | 6    | 1    | 6    | 6    | 6    | 6    | 6    | 2     | 2      | 3      | 3     | 5     | 5     | 5 |
| 25088  |      |      |      |      |      |      |      |      |       | 3      | 3      | 3     | 5     | 5     | 5 |
| 25093  |      |      |      |      |      |      |      |      |       | 3      | 3      | 3     | 4     | 4     | 4 |
| 25121  | 3    | 2    | 2    | 2    | 2    | 3    | 2    | 2    |       | 4      | 2      | 2     | 3     | 3     | 3 |
| 25140  | 2    | 2    | 3    | 3    | 2    | 2    | 2    | 2    | 3     | 2      | 2      | 2     | 3     | 3     | 3 |
| 25144  | 4    | 4    | 3    | 4    | 4    | 4    | 4    | 4    | 3     | 2      | 3      | 3     | 5     | 5     | 5 |
| 25149  | 3    | 2    | 6    | 2    | 3    | 2    | 3    | 6    |       | 2      | 2      | 2     | 3     | 4     | 4 |
| 25159  |      |      |      |      |      |      |      |      |       | 2      | 3      | 3     | 4     | 4     | 5 |
| 25191  |      |      |      |      |      |      |      |      |       | 3      | 3      | 3     | 5     | 5     | 5 |
| 25193  | 5    | 6    | 1    | 6    | 6    | 3    | 5    | 4    |       | 2      | 2      | 2     | 3     | 4     | 4 |
| 25202  | 3    | 3    | 2    | 2    | 3    | 2    | 2    | 2    | 3     | 2      | 2      | 2     | 3     | 3     | 3 |
| 25215  |      |      |      |      |      |      |      |      |       | 4      | 2      | 2     | 4     | 5     | 3 |
| 25229  |      |      |      |      |      |      |      |      |       | 2      | 2      | 2     | 3     | 3     | 3 |
| 25231  | 6    | 6    | 3    | 6    | 6    | 6    | 6    | 6    | 2     | 3      | 3      | 3     | 4     | 4     | 4 |
| 25236  | 4    | 6    | 6    | 4    | 6    | 6    | 6    | 6    | 3     | 4      | 2      | 2     | 3     | 3     | 4 |
| 25242  |      |      |      |      |      |      |      |      |       | 3      | 3      | 3     | 5     | 5     | 5 |
| 25252  |      |      |      |      |      |      |      |      |       | 4      | 3      | 3     | 5     | 5     | 5 |
| 25253  | 6    | 5    | 1    | 6    | 5    | 3    | 3    | 3    | 1     | 2      | 2      | 3     | 3     | 2     | 2 |
| 25256  | 3    | 2    | 3    | 3    | 2    | 3    | 3    | 3    | 3     | 2      | 2      | 2     | 3     | 3     | 3 |
| 25260  |      |      |      |      |      |      |      |      |       | 4      | 3      | 3     | 4     | 5     | 5 |
| 25261  |      |      |      |      |      |      |      |      |       | 2      | 2      | 2     | 3     | 4     | 3 |
| 25280  | 5    | 4    | 3    | 3    | 4    | 4    | 4    | 4    | 4     | 2      | 2      | 2     | 2     | 4     | 4 |
| 25282  | 5    | 5    | 2    | 5    | 6    | 5    | 5    | 5    | 2     | 3      | 3      | 3     | 5     | 5     | 5 |
| 25289  |      |      |      |      |      |      |      |      |       | 4      | 3      | 3     | 1     | 1     | 2 |
| 25303  |      |      |      |      |      |      |      |      |       | 2      | 3      | 3     | 3     | 4     | 5 |



| respid | Q48k | Q48l | Q48m | Q48n | Q48o | Q48p | Q48q | Q48r | Q49_1 | Q50a_1 | Q50b_1 | Q51_1 | Q51_2 | Q52_1 |   |
|--------|------|------|------|------|------|------|------|------|-------|--------|--------|-------|-------|-------|---|
| 25304  | 6    | 6    | 4    | 6    | 6    | 6    | 6    | 6    | 4     | 1      | 2      | 2     | 3     | 2     | 3 |
| 25309  | 2    | 1    | 1    | 2    | 2    | 2    | 2    | 2    | 1     | 4      | 2      | 2     | 2     | 3     | 2 |
| 25317  |      |      | 4    | 5    | 5    | 4    | 4    | 4    |       | 2      | 2      | 2     | 2     | 3     | 2 |
| 25318  | 4    | 4    | 2    | 5    | 6    | 4    | 4    | 4    | 4     | 2      | 2      | 2     | 3     | 3     | 3 |
| 25320  | 3    | 2    | 3    | 3    | 3    | 3    | 3    | 3    | 2     | 4      | 3      | 2     | 2     | 2     | 3 |
| 25324  | 2    | 2    | 3    | 3    | 2    | 3    | 2    | 2    | 2     | 2      | 2      | 2     | 3     | 3     | 3 |
| 25331  | 6    | 6    | 2    | 6    | 6    | 2    | 6    | 3    | 3     | 3      | 3      | 3     | 4     | 4     | 5 |
| 25340  |      |      |      |      |      |      |      |      |       | 3      | 3      | 3     | 5     | 4     | 5 |
| 25342  |      |      |      |      |      |      |      |      |       | 2      | 2      | 2     | 4     | 4     | 4 |
| 25350  | 6    | 6    | 2    | 6    | 4    | 3    | 6    | 3    | 3     | 3      | 3      | 3     | 5     | 5     | 5 |
| 25352  |      |      |      |      |      |      |      |      |       | 2      | 2      | 3     | 4     | 3     | 3 |
| 25358  | 5    | 5    | 2    | 5    | 5    | 5    | 5    | 2    | 3     | 3      | 3      | 3     | 5     | 5     | 5 |
| 25375  | 6    | 6    | 1    | 6    | 6    | 6    | 6    | 6    | 1     | 3      | 3      | 2     | 5     | 5     | 5 |
| 25386  |      |      |      |      |      |      |      |      |       | 2      | 2      | 2     | 4     | 4     | 4 |
| 25388  |      |      |      |      |      |      |      |      |       | 3      | 3      | 3     | 5     | 5     | 5 |
| 25390  | 4    | 4    | 3    | 4    | 4    | 3    | 4    | 4    | 4     | 2      | 2      | 2     | 4     | 4     | 3 |
| 25391  |      |      |      |      |      |      |      |      |       | 3      | 3      | 3     | 4     | 5     | 4 |
| 25400  | 6    | 6    | 1    | 6    | 6    | 6    | 6    | 6    | 2     | 3      | 3      | 3     | 5     | 5     | 3 |
| 25413  | 3    | 2    | 3    | 3    | 3    | 2    | 2    | 2    | 3     | 2      | 2      | 2     | 3     | 3     | 3 |
| 25424  |      |      |      |      |      |      |      |      |       | 4      | 3      | 2     | 4     | 5     | 4 |
| 25426  |      |      |      |      |      |      |      |      |       | 2      | 2      | 2     | 3     | 3     | 3 |
| 25430  | 5    | 6    | 2    | 5    | 6    | 6    | 6    | 6    | 1     | 4      | 3      | 3     | 5     | 4     | 5 |
| 25434  | 5    | 4    | 5    | 4    | 5    | 4    | 5    | 4    | 4     | 2      | 2      | 2     | 2     | 2     | 2 |
| 25439  |      |      |      |      |      |      |      |      |       | 2      | 2      | 2     | 3     | 3     | 3 |
| 25441  |      |      |      |      |      |      |      |      |       | 2      | 3      | 3     | 5     | 5     | 5 |
| 25445  |      |      |      |      |      |      |      |      |       | 2      | 3      | 3     | 5     | 5     | 5 |
| 25451  |      |      |      |      |      |      |      |      |       | 3      | 2      | 2     | 4     | 4     | 4 |
| 25469  | 2    | 3    | 3    | 2    | 2    | 3    | 3    | 3    | 3     | 2      | 2      | 2     | 3     | 3     | 3 |
| 25471  |      |      |      |      |      |      |      |      |       | 2      | 2      | 2     | 3     | 3     | 3 |
| 25476  | 3    | 3    | 2    | 2    | 3    | 2    | 3    | 3    | 3     | 3      | 2      | 2     | 2     | 2     | 2 |
| 25480  |      |      |      |      |      |      |      |      |       | 2      | 1      | 2     | 2     | 2     | 3 |
| 25482  | 5    | 5    | 5    | 5    | 5    | 5    | 5    | 5    | 5     | 2      | 2      | 2     | 3     | 4     | 3 |

| respid | Q48k | Q48l | Q48m | Q48n | Q48o | Q48p | Q48q | Q48r | Q49_1 | Q50a_1 | Q50b_1 | Q51_1 | Q51_2 | Q52_1 |   |
|--------|------|------|------|------|------|------|------|------|-------|--------|--------|-------|-------|-------|---|
| 25500  |      |      |      |      |      |      |      |      |       | 2      | 2      | 2     | 3     | 3     | 3 |
| 25516  |      |      |      |      |      |      |      |      |       | 3      | 3      | 3     | 5     | 5     | 4 |
| 25521  |      |      |      |      |      |      |      |      |       | 2      | 2      | 2     | 3     | 2     | 3 |
| 25525  |      |      |      |      |      |      |      |      |       | 2      | 2      | 2     | 3     | 3     | 4 |
| 25530  |      |      |      |      |      |      |      |      |       | 2      | 2      | 2     | 2     | 2     | 2 |
| 25555  |      |      |      |      |      |      |      |      |       | 2      | 3      | 2     | 4     | 4     | 4 |
| 25558  | 3    | 3    | 4    | 3    | 4    | 4    | 3    | 4    | 4     | 1      | 2      | 2     | 2     | 2     | 3 |
| 25561  | 4    | 4    | 4    | 4    | 4    | 4    | 4    | 4    | 4     | 2      | 2      | 2     | 2     | 3     | 4 |
| 25566  |      |      |      |      |      |      |      |      |       | 2      | 2      | 3     | 5     | 5     | 4 |
| 25571  | 6    | 6    | 3    | 4    | 5    | 6    | 6    | 4    | 4     | 2      | 3      | 3     | 3     | 3     | 3 |
| 25572  |      |      |      |      |      |      |      |      |       | 3      | 3      | 2     | 4     | 4     | 5 |
| 25574  |      |      |      |      |      |      |      |      |       | 2      | 2      | 2     | 2     | 3     | 3 |
| 25588  | 3    | 3    | 3    | 4    | 4    | 3    | 3    | 6    | 3     | 3      | 3      | 3     | 4     | 4     | 4 |
| 25591  | 5    | 5    | 2    | 6    | 6    | 3    | 5    | 3    | 3     | 3      | 3      | 3     | 3     | 4     | 3 |
| 25599  | 5    | 6    | 1    | 5    | 5    | 5    | 5    | 5    | 2     | 3      | 3      | 3     | 4     | 4     | 4 |
| 25604  |      |      |      |      |      |      |      |      |       | 4      | 2      | 2     | 5     | 5     | 5 |
| 25614  | 4    | 5    | 3    | 5    | 5    | 5    | 5    | 5    | 5     | 1      | 2      | 2     | 3     | 3     | 4 |
| 25634  |      |      |      |      |      |      |      |      |       | 2      | 2      | 2     | 3     | 4     | 3 |
| 25642  |      |      |      |      |      |      |      |      |       | 3      | 3      | 3     | 5     | 5     | 5 |
| 25647  |      |      |      |      |      |      |      |      |       | 4      | 3      | 3     | 3     | 3     | 3 |
| 25653  |      |      |      |      |      |      |      |      |       | 4      | 3      | 3     | 5     | 4     | 4 |
| 25654  | 3    | 5    | 3    | 5    | 6    | 4    | 5    | 3    | 3     | 3      | 2      | 2     | 4     | 4     | 5 |
| 25660  |      |      |      |      |      |      |      |      |       | 4      | 3      | 3     | 4     | 4     | 4 |
| 25664  |      |      |      |      |      |      |      |      |       | 4      | 3      | 3     | 4     | 5     | 5 |
| 25665  |      |      |      |      |      |      |      |      |       | 3      | 3      | 3     | 4     | 4     | 4 |
| 25672  |      |      |      |      |      |      |      |      |       | 2      | 2      | 2     | 5     | 3     | 5 |
| 25677  |      |      |      |      |      |      |      |      |       | 2      | 2      | 2     | 3     | 3     | 2 |
| 25685  |      |      |      |      |      |      |      |      |       | 1      | 2      | 3     | 4     | 4     | 4 |
| 25699  |      |      |      |      |      |      |      |      |       | 3      | 2      | 2     | 3     | 3     | 3 |
| 25703  |      |      |      |      |      |      |      |      |       | 2      | 3      | 3     | 5     | 5     | 5 |
| 25704  |      |      |      |      |      |      |      |      |       | 2      | 2      | 3     | 3     | 3     | 4 |
| 25705  |      |      |      |      |      |      |      |      |       | 2      | 2      | 2     | 3     | 3     | 2 |

| respid | Q48k | Q48l | Q48m | Q48n | Q48o | Q48p | Q48q | Q48r | Q49_1 | Q50a_1 | Q50b_1 | Q51_1 | Q51_2 | Q52_1 |   |
|--------|------|------|------|------|------|------|------|------|-------|--------|--------|-------|-------|-------|---|
| 25711  | 3    | 3    | 3    | 3    | 3    | 3    | 3    | 3    | 3     | 3      | 3      | 3     | 5     | 5     | 5 |
| 25727  |      |      |      |      |      |      |      |      |       | 1      | 2      | 2     | 4     | 4     | 4 |
| 25728  |      |      |      |      |      |      |      |      |       | 2      | 3      | 3     | 4     | 4     | 4 |
| 25733  |      |      |      |      |      |      |      |      |       | 1      | 2      | 3     | 3     | 4     | 4 |
| 25735  | 4    | 4    | 4    | 4    | 4    | 4    | 4    | 4    | 2     | 3      | 2      | 3     | 3     | 3     | 3 |
| 25736  | 5    | 5    | 1    | 5    | 6    | 6    | 6    | 2    | 3     | 3      | 3      | 3     | 5     | 5     | 5 |
| 25742  | 5    | 6    | 2    | 5    | 6    | 6    | 5    | 2    | 3     | 2      | 2      | 2     | 4     | 5     | 4 |
| 25750  |      |      |      |      |      |      |      |      |       | 2      | 3      | 3     | 5     | 5     | 5 |
| 25754  |      |      |      |      |      |      |      |      |       | 2      | 3      | 3     | 5     | 5     | 5 |
| 25776  | 1    | 3    | 1    | 3    | 2    | 3    | 3    | 2    | 3     | 2      | 1      | 1     | 2     | 3     | 1 |
| 25778  |      |      |      |      |      |      |      |      |       | 2      | 2      | 2     | 4     | 4     | 4 |
| 25796  | 4    | 4    | 3    | 4    | 6    | 4    | 4    | 3    | 3     | 3      | 3      | 3     | 4     | 4     | 4 |
| 25852  | 3    | 2    | 3    | 3    | 3    | 3    | 3    | 2    | 4     | 2      | 3      | 3     | 4     | 4     | 5 |
| 25858  | 2    | 3    | 2    | 5    | 6    | 5    | 6    | 2    | 3     | 3      | 3      | 3     | 4     | 4     | 3 |
| 25859  |      |      |      |      |      |      |      |      |       | 3      | 2      | 2     | 4     | 4     | 4 |
| 25886  |      |      |      |      |      |      |      |      |       | 3      | 2      | 2     | 4     | 4     | 4 |
| 25890  |      |      |      |      |      |      |      |      |       | 4      | 2      | 2     | 4     | 4     | 4 |
| 25897  |      |      |      |      |      |      |      |      |       | 3      | 2      | 2     | 4     | 4     | 4 |
| 25903  | 6    | 6    | 6    | 6    | 6    |      | 6    | 2    | 2     | 2      | 2      | 2     | 4     | 4     | 5 |
| 25905  | 3    | 3    | 3    | 2    | 3    | 3    | 3    | 3    | 3     | 4      | 2      | 2     | 3     | 3     | 3 |
| 25917  |      |      |      |      |      |      |      |      |       | 3      | 3      | 3     | 4     | 4     | 4 |
| 25918  | 5    | 5    | 3    | 5    | 6    | 6    | 6    | 3    | 3     | 3      | 3      | 3     | 5     | 5     | 5 |
| 25928  |      |      |      |      |      |      |      |      |       | 2      | 2      | 3     | 4     | 4     | 4 |
| 25930  |      |      |      |      |      |      |      |      |       | 5      | 3      | 3     | 5     | 5     | 5 |
| 25949  | 5    | 5    | 3    | 4    | 4    | 4    | 4    | 3    | 2     | 3      | 2      | 2     | 4     | 4     | 3 |
| 25955  | 1    | 2    | 6    | 1    | 6    | 6    | 6    | 6    | 6     | 3      | 3      | 3     | 5     | 5     | 5 |
| 25959  | 4    | 5    | 3    | 5    | 5    | 5    | 5    | 2    | 4     | 3      | 2      | 2     | 4     | 4     | 5 |
| 25964  |      |      |      |      |      |      |      |      |       | 2      | 3      | 3     | 3     | 3     | 4 |
| 25972  |      |      |      |      |      |      |      |      |       | 3      | 3      | 3     | 4     | 5     | 4 |
| 25999  | 3    | 3    | 3    | 3    | 4    | 3    | 3    | 4    | 2     | 2      | 2      | 2     | 3     | 4     | 3 |
| 26019  |      |      |      |      |      |      |      |      |       | 2      | 3      | 3     | 4     | 5     | 4 |
| 26025  |      |      |      |      |      |      |      |      |       | 3      | 2      | 3     | 4     | 4     | 4 |

| respid | Q48k | Q48l | Q48m | Q48n | Q48o | Q48p | Q48q | Q48r | Q49_1 | Q50a_1 | Q50b_1 | Q51_1 | Q51_2 | Q52_1 |   |
|--------|------|------|------|------|------|------|------|------|-------|--------|--------|-------|-------|-------|---|
| 26039  |      |      |      |      |      |      |      |      |       | 2      | 2      | 2     | 2     | 3     | 2 |
| 26055  | 6    | 6    | 2    | 5    | 6    | 4    | 5    | 2    | 4     | 4      | 3      | 3     | 5     | 5     | 4 |
| 26061  | 4    | 4    | 3    | 4    | 4    | 4    | 5    | 3    | 2     | 2      | 2      | 2     | 4     | 4     | 4 |
| 26076  |      |      |      |      |      |      |      |      | 2     | 2      | 3      | 3     | 5     | 5     | 5 |
| 26088  |      |      |      |      |      |      |      |      | 2     | 2      | 2      | 2     | 3     | 3     | 4 |
| 26094  |      |      |      |      |      |      |      |      | 4     | 4      | 3      | 3     | 5     | 5     | 4 |
| 26104  | 2    | 2    | 2    | 1    | 3    | 2    | 4    | 2    | 4     | 4      | 3      | 3     | 1     | 1     | 1 |
| 26131  |      |      |      |      |      |      |      |      | 4     | 4      | 2      | 3     | 5     | 5     | 5 |
| 26134  |      |      |      |      |      |      |      |      | 2     | 2      | 2      | 2     | 4     | 3     | 3 |
| 26160  |      |      |      |      |      |      |      |      | 2     | 2      | 2      | 3     | 4     | 4     | 4 |
| 26168  |      |      |      |      |      |      |      |      | 4     | 4      | 3      | 3     | 5     | 5     | 5 |
| 26170  |      |      |      |      |      |      |      |      | 5     | 5      | 3      | 3     | 4     | 4     | 4 |
| 26191  | 2    | 2    | 2    | 2    | 2    | 2    | 2    | 2    | 2     | 2      | 3      | 3     | 2     | 2     | 2 |
| 26192  |      |      |      |      |      |      |      |      | 2     | 2      | 2      | 2     | 4     | 4     | 4 |
| 26195  |      |      |      |      |      |      |      |      | 2     | 2      | 2      | 2     | 4     | 4     | 3 |
| 26198  | 6    | 6    | 3    | 5    | 6    | 5    | 5    | 1    | 4     | 4      | 2      | 2     | 3     | 4     | 4 |
| 26199  | 4    | 4    | 6    | 3    | 4    | 4    | 4    | 3    | 4     | 2      | 3      | 2     | 3     | 3     | 4 |
| 26201  |      |      |      |      |      |      |      |      | 2     | 2      | 3      | 2     | 4     | 3     | 5 |
| 26202  |      |      |      |      |      |      |      |      | 2     | 2      | 3      | 3     | 4     | 4     | 4 |
| 26226  |      |      |      |      |      |      |      |      | 2     | 2      | 3      | 3     | 4     | 4     | 4 |
| 26233  | 6    | 6    | 2    | 6    | 6    | 6    | 6    | 2    | 3     | 3      | 3      | 2     | 2     | 3     | 3 |
| 26236  | 4    | 6    | 3    | 6    | 6    | 6    | 6    | 3    | 3     | 3      | 3      | 2     | 4     | 4     | 4 |
| 26242  | 4    | 5    | 3    | 4    | 4    | 4    | 4    | 5    | 3     | 2      | 3      | 3     | 4     | 4     | 3 |
| 26244  |      |      |      |      |      |      |      |      | 4     | 4      | 3      | 3     | 5     | 5     | 5 |
| 26250  | 3    | 3    | 3    | 2    | 3    | 3    | 3    | 3    | 3     | 3      | 2      | 3     | 2     | 2     | 2 |
| 26266  | 3    | 3    | 3    | 2    | 5    | 4    | 4    | 4    | 3     | 4      | 2      | 3     | 3     | 5     | 4 |
| 26274  |      |      |      |      |      |      |      |      | 2     | 2      | 2      | 3     | 4     | 4     | 4 |
| 26286  | 3    | 3    | 3    | 3    | 3    | 3    | 3    | 3    | 3     | 2      | 3      | 3     | 3     | 3     | 3 |
| 26288  | 5    | 6    | 1    | 6    | 6    | 5    | 5    | 2    | 4     | 4      | 3      | 3     | 5     | 5     | 5 |
| 26295  |      |      |      |      |      |      |      |      | 5     | 5      | 3      | 3     | 4     | 4     | 4 |
| 26296  |      |      |      |      |      |      |      |      | 4     | 4      | 3      | 3     | 5     | 5     | 5 |
| 26297  |      |      |      |      |      |      |      |      | 2     | 2      | 3      | 3     | 4     | 4     | 5 |

| respid | Q48k | Q48l | Q48m | Q48n | Q48o | Q48p | Q48q | Q48r | Q49_1 | Q50a_1 | Q50b_1 | Q51_1 | Q51_2 | Q52_1 |   |
|--------|------|------|------|------|------|------|------|------|-------|--------|--------|-------|-------|-------|---|
| 26300  | 4    | 4    | 3    | 4    | 4    | 4    | 4    | 4    | 3     | 3      | 2      | 2     | 3     | 3     | 3 |
| 26317  |      |      |      |      |      |      |      |      |       | 1      | 1      | 2     | 2     | 2     | 3 |
| 26343  |      |      |      |      |      |      |      |      |       | 3      | 3      | 3     | 5     | 5     | 4 |
| 26367  | 1    | 6    |      |      | 6    | 6    | 6    |      |       | 1      | 1      | 1     | 1     | 1     | 2 |
| 26372  |      |      |      |      |      |      |      |      |       | 3      | 2      | 2     | 3     | 3     | 3 |
| 26403  | 4    | 4    | 3    | 4    | 4    | 4    | 4    | 3    |       | 3      | 2      | 2     | 3     | 3     | 3 |
| 26423  |      |      |      |      |      |      |      |      |       | 5      | 3      | 3     | 5     | 5     | 5 |
| 26430  |      |      |      |      |      |      |      |      |       | 4      | 3      | 3     | 5     | 5     | 5 |
| 26437  |      |      |      |      |      |      |      |      |       | 2      | 2      | 3     | 4     | 3     | 3 |
| 26457  |      |      |      |      |      |      |      |      |       | 3      | 3      | 3     | 5     | 5     | 5 |
| 26466  |      |      |      |      |      |      |      |      |       | 4      | 3      | 3     | 5     | 5     | 5 |
| 26467  | 6    | 6    | 1    | 6    | 6    | 6    | 6    | 2    |       | 4      | 3      | 3     | 5     | 5     | 5 |
| 26469  | 6    | 6    | 2    | 6    | 6    | 6    | 5    | 6    | 3     | 3      | 2      | 2     | 4     | 4     | 4 |
| 26494  | 3    | 4    | 3    | 3    | 4    | 3    | 4    | 3    |       | 2      | 2      | 2     | 3     | 3     | 3 |
| 26510  |      |      |      |      |      |      |      |      |       | 2      | 2      | 2     | 3     | 3     | 4 |
| 26519  | 5    | 6    | 1    | 6    | 6    | 6    | 6    | 1    |       | 3      | 2      | 3     | 4     | 4     | 3 |
| 26525  |      | 6    |      |      | 6    |      |      |      |       | 1      | 2      | 2     | 2     | 2     | 4 |
| 26529  |      |      |      |      |      |      |      |      |       | 3      | 3      | 3     | 4     | 4     | 5 |
| 26533  |      |      |      |      |      |      |      |      |       | 5      | 2      | 2     | 3     | 3     | 3 |
| 26556  |      |      |      |      |      |      |      |      |       | 3      | 2      | 2     | 3     | 4     | 5 |
| 26559  | 6    | 6    | 1    | 6    | 6    | 6    | 6    | 1    |       | 3      | 2      | 2     | 4     | 4     | 4 |
| 26565  |      |      |      |      |      |      |      |      |       | 2      | 1      | 2     | 3     | 3     | 4 |
| 26576  |      |      |      |      |      |      |      |      |       | 2      | 2      | 3     | 3     | 4     | 3 |
| 26601  |      |      |      |      |      |      |      |      |       | 2      | 3      | 3     | 5     | 5     | 5 |
| 26607  | 4    | 4    | 3    | 4    | 4    | 3    | 4    | 4    |       | 2      | 2      | 2     | 4     | 3     | 4 |
| 26611  | 5    | 6    | 4    | 5    | 1    | 3    | 5    | 5    |       | 2      | 3      | 3     | 2     | 2     | 1 |
| 26619  | 3    | 4    | 3    | 3    | 5    | 5    | 5    | 3    |       | 3      | 2      | 2     | 4     | 4     | 3 |
| 26631  |      |      |      |      |      |      |      |      |       | 2      | 1      | 1     | 2     | 2     | 2 |
| 26654  |      |      |      |      |      |      |      |      |       | 2      | 3      | 3     | 4     | 3     | 3 |
| 26656  | 3    | 4    |      | 5    | 5    | 4    | 4    | 3    |       | 2      | 2      | 3     | 4     | 4     | 4 |
| 26664  |      |      |      |      |      |      |      |      |       | 2      | 3      | 3     | 4     | 4     | 4 |
| 26667  |      |      |      |      |      |      |      |      |       | 3      | 3      | 3     | 5     | 5     | 5 |

| respid | Q48k | Q48l | Q48m | Q48n | Q48o | Q48p | Q48q | Q48r | Q49_1 | Q50a_1 | Q50b_1 | Q51_1 | Q51_2 | Q52_1 |
|--------|------|------|------|------|------|------|------|------|-------|--------|--------|-------|-------|-------|
| 26674  | 6    | 3    | 4    | 4    | 3    | 4    | 3    | 4    | 1     | 2      | 2      | 3     | 3     | 3     |
| 26678  |      |      |      |      |      |      |      |      | 2     | 2      | 2      | 4     | 4     | 4     |
| 26693  |      |      |      |      |      |      |      |      | 4     | 2      | 3      | 4     | 4     | 5     |
| 26696  | 3    | 3    | 4    | 3    | 4    | 3    | 3    | 4    | 2     | 2      | 2      | 2     | 2     | 2     |
| 26703  | 2    | 2    | 2    | 3    | 3    | 2    | 3    | 4    | 2     | 2      | 2      | 3     | 3     | 3     |
| 26705  | 3    | 4    | 2    | 3    | 3    | 1    | 2    | 2    | 2     | 2      | 2      | 4     | 4     | 4     |
| 26706  |      |      |      |      |      |      |      |      | 2     | 2      | 2      | 3     | 3     | 3     |
| 26716  | 5    | 5    | 5    | 5    | 4    |      | 5    | 3    | 2     | 2      | 2      | 2     | 3     | 3     |
| 26721  | 6    | 6    | 2    | 6    | 6    | 6    | 6    | 3    | 4     | 2      | 2      | 4     | 3     | 4     |
| 26730  | 4    | 2    | 4    | 5    | 6    | 4    | 2    | 5    | 1     | 3      | 3      | 5     | 5     | 5     |
| 26752  | 6    | 6    | 4    | 6    | 5    | 4    | 6    | 3    | 4     | 2      | 1      | 5     | 5     | 5     |
| 26755  | 4    | 3    | 3    | 5    | 6    | 5    | 6    | 4    | 2     | 3      | 2      | 5     | 5     | 5     |
| 26791  |      |      |      |      |      |      |      |      | 3     | 2      | 2      | 3     | 3     | 3     |
| 26804  |      |      |      |      |      |      |      |      | 2     | 2      | 2      | 3     | 3     | 3     |
| 26810  | 2    | 5    | 3    | 4    | 2    | 2    | 5    | 5    | 3     | 1      | 3      | 3     | 4     | 4     |
| 26813  |      |      |      |      |      |      |      |      | 2     | 2      | 2      | 3     | 3     | 3     |
| 26833  | 4    | 4    | 3    | 3    | 3    | 3    | 3    | 3    | 3     | 2      | 3      | 3     | 3     | 3     |
| 26880  | 5    | 2    | 4    | 4    | 3    | 4    | 2    | 4    | 3     | 2      | 2      | 2     | 2     | 2     |
| 26884  | 6    | 6    | 2    | 6    | 6    | 6    | 6    | 2    | 4     | 3      | 3      | 4     | 4     | 4     |
| 26885  |      |      |      |      |      |      |      |      | 4     | 3      | 3      | 3     | 3     | 3     |
| 26890  |      |      |      |      |      |      |      |      | 2     | 1      | 2      | 2     | 2     | 3     |
| 26937  | 6    | 6    | 6    | 6    | 6    | 6    | 6    | 6    | 4     | 3      | 3      | 4     | 5     | 5     |
| 26939  | 6    | 6    | 3    | 5    | 6    | 6    | 5    | 3    | 3     | 2      | 2      | 4     | 4     | 4     |
| 26941  |      |      |      |      |      |      |      |      | 2     | 2      | 2      | 4     | 4     | 4     |
| 26992  | 6    | 6    | 2    | 6    | 6    | 5    | 6    | 5    | 2     | 2      | 2      | 3     | 4     | 4     |
| 27037  |      |      |      |      |      |      |      |      | 2     | 2      | 2      | 5     | 4     | 5     |
| 27045  | 6    | 6    | 1    | 6    | 6    | 6    | 6    | 1    | 2     | 2      | 2      | 3     | 3     | 3     |
| 27053  | 2    | 3    | 6    | 5    | 6    | 4    | 6    | 6    | 2     | 2      | 1      | 1     | 3     | 1     |
| 27060  | 1    | 6    | 1    | 6    | 6    | 6    | 6    | 1    | 2     | 2      | 2      | 3     | 3     | 4     |
| 27076  | 6    | 6    | 2    | 6    | 6    | 6    | 3    | 2    | 4     | 2      | 3      | 5     | 4     | 4     |
| 27124  | 6    | 5    | 1    | 6    | 6    | 6    | 6    | 1    | 3     | 3      | 3      | 5     | 5     | 5     |
| 27125  |      |      |      |      |      |      |      |      | 1     | 2      | 2      | 3     | 3     | 3     |

| respid | Q48k | Q48l | Q48m | Q48n | Q48o | Q48p | Q48q | Q48r | Q49_1 | Q50a_1 | Q50b_1 | Q51_1 | Q51_2 | Q52_1 |   |
|--------|------|------|------|------|------|------|------|------|-------|--------|--------|-------|-------|-------|---|
| 27132  |      |      |      |      |      |      |      |      |       | 4      | 3      | 3     | 5     | 5     | 5 |
| 27166  | 6    | 6    | 1    | 6    | 6    | 6    | 6    | 6    | 1     | 3      | 3      | 3     | 5     | 5     | 5 |
| 27190  |      |      |      |      |      |      |      |      |       | 2      | 2      | 2     | 1     | 2     | 1 |
| 27199  |      |      |      |      |      |      |      |      |       | 1      | 1      | 2     | 4     | 4     | 4 |
| 27221  | 6    | 6    | 1    | 6    | 6    | 6    | 6    | 6    | 1     | 2      | 2      | 2     | 3     | 4     | 4 |
| 27233  | 4    | 6    | 4    | 4    | 6    | 6    | 6    | 6    | 3     | 2      | 1      | 1     | 2     | 1     | 4 |
| 27241  | 4    | 4    | 3    | 4    | 4    | 4    | 4    | 4    | 4     | 3      | 2      | 2     | 4     | 4     | 4 |
| 27244  |      |      |      |      |      |      |      |      |       | 2      | 3      | 2     | 4     | 4     | 3 |
| 27245  | 1    | 2    | 5    | 1    | 2    | 1    | 1    | 1    | 6     | 2      | 2      | 2     | 4     | 3     | 3 |
| 27246  | 5    | 6    | 2    | 5    | 6    | 5    | 6    | 6    | 2     | 3      | 2      | 2     | 4     | 4     | 4 |
| 27253  |      |      |      |      |      |      |      |      |       | 3      | 2      | 2     | 4     | 4     | 4 |
| 27255  | 3    | 3    | 2    | 2    | 3    | 2    | 3    | 2    | 2     | 3      | 2      | 2     | 4     | 3     | 3 |
| 27267  |      |      |      |      |      |      |      |      |       | 3      | 3      | 3     | 2     | 2     | 2 |
| 27283  | 3    | 4    | 3    | 3    | 5    | 3    | 4    | 3    | 3     | 2      | 2      | 2     | 3     | 3     | 5 |
| 27289  | 2    | 1    | 6    | 2    | 1    | 2    | 2    | 2    | 5     | 2      | 2      | 2     | 3     | 4     | 3 |
| 27302  | 6    | 6    | 1    | 6    | 6    | 6    | 6    | 6    | 1     | 3      | 2      | 3     | 4     | 4     | 5 |
| 27317  | 1    | 6    | 6    | 1    | 1    | 6    | 6    | 6    | 1     | 5      | 3      | 3     | 1     | 5     | 5 |
| 27319  | 6    | 6    | 2    | 6    | 6    | 6    | 6    | 6    | 1     | 4      | 3      | 2     | 4     | 3     | 4 |
| 27331  |      |      |      |      |      |      |      |      |       | 3      | 3      | 3     | 4     | 4     | 4 |
| 27333  |      |      |      |      |      |      |      |      |       | 2      | 2      | 3     | 4     | 4     | 4 |
| 27340  |      |      |      |      |      |      |      |      |       | 3      | 3      | 2     | 4     | 4     | 3 |
| 27362  |      |      |      |      |      |      |      |      |       | 1      | 1      | 1     | 1     | 2     | 1 |
| 27370  |      |      |      |      |      |      |      |      |       | 3      | 3      | 3     | 4     | 4     | 5 |
| 27379  | 2    | 5    | 5    | 3    | 4    | 4    | 4    | 5    | 5     | 2      | 2      | 2     | 3     | 3     | 3 |
| 27386  |      |      |      |      |      |      |      |      |       | 3      | 3      | 3     | 5     | 5     | 5 |
| 27398  |      |      |      |      |      |      |      |      |       | 3      | 3      | 3     | 5     | 5     | 4 |
| 27404  | 5    | 5    | 2    | 2    | 5    | 5    | 5    | 5    | 2     | 3      | 2      | 2     | 3     | 3     | 5 |
| 27408  | 3    | 5    | 4    | 4    | 6    | 6    | 6    | 6    | 4     | 2      | 3      | 2     | 4     | 5     | 4 |
| 27412  | 3    | 4    | 4    | 4    | 4    | 4    | 4    | 4    | 3     | 2      | 2      | 2     | 3     | 4     | 3 |
| 27426  | 4    | 4    | 3    | 4    | 4    | 4    | 4    | 4    | 3     | 2      | 2      | 3     | 4     | 4     | 4 |
| 27455  | 6    | 6    | 2    | 6    | 6    | 6    | 6    | 6    | 2     | 4      | 2      | 3     | 4     | 4     | 5 |
| 27464  |      |      |      |      |      |      |      |      |       | 2      | 2      | 2     | 2     | 2     | 2 |

| respid | Q48k | Q48l | Q48m | Q48n | Q48o | Q48p | Q48q | Q48r | Q49_1 | Q50a_1 | Q50b_1 | Q51_1 | Q51_2 | Q52_1 |   |
|--------|------|------|------|------|------|------|------|------|-------|--------|--------|-------|-------|-------|---|
| 27484  |      |      |      |      |      |      |      |      |       | 3      | 2      | 3     | 4     | 5     | 4 |
| 27493  | 4    | 3    | 4    | 3    | 4    | 2    | 3    | 4    |       | 2      | 3      | 3     | 3     | 3     | 2 |
| 27512  |      |      |      |      |      |      |      |      |       | 2      | 1      | 2     | 2     | 3     | 3 |
| 27525  |      |      |      |      |      |      |      |      |       | 2      | 2      | 3     | 4     | 4     | 4 |
| 27532  | 3    | 4    | 2    | 3    | 3    | 3    | 3    | 3    |       | 2      | 2      | 2     | 1     | 1     | 1 |
| 27539  | 4    | 6    | 5    | 6    | 6    | 6    | 6    | 6    | 5     | 3      | 3      | 3     | 5     | 4     | 4 |
| 27540  |      |      |      |      |      |      |      |      |       | 3      | 2      | 2     | 3     | 4     | 3 |
| 27552  |      |      |      |      |      |      |      |      |       | 1      | 2      | 1     | 3     | 2     | 3 |
| 27562  | 6    | 6    | 2    | 6    | 6    | 6    | 6    | 6    | 2     | 5      | 3      | 3     | 5     | 5     | 4 |
| 27568  | 4    | 4    | 3    | 4    | 5    | 4    | 4    | 5    | 3     | 4      | 3      | 3     | 5     | 5     | 5 |
| 27574  |      |      |      |      |      |      |      |      |       | 1      | 2      | 2     | 2     | 3     | 3 |
| 27575  | 4    | 4    | 4    | 4    | 4    | 4    | 4    | 4    | 4     | 2      | 2      | 2     | 3     | 3     | 3 |
| 27577  |      |      |      |      |      |      |      |      |       | 3      | 3      | 3     | 3     | 4     | 5 |
| 27589  | 5    | 6    | 2    | 6    | 6    | 6    | 6    | 6    | 1     | 2      | 3      | 3     | 5     | 5     | 4 |
| 27593  | 6    | 6    | 2    | 6    | 6    | 6    | 6    | 6    | 1     | 4      | 2      | 2     | 4     | 4     | 3 |
| 27594  |      |      |      |      |      |      |      |      |       | 2      | 2      | 2     | 4     | 3     | 3 |
| 27595  | 6    | 6    | 1    | 6    | 6    | 6    | 6    | 6    | 2     | 1      | 2      | 1     | 3     | 2     | 3 |
| 27598  | 5    |      | 2    | 3    | 6    | 5    | 3    | 2    |       | 1      | 1      | 2     | 4     | 3     | 4 |
| 27620  |      |      |      |      |      |      |      |      |       | 2      | 1      | 2     | 3     | 3     | 3 |
| 27621  |      |      |      |      |      |      |      |      |       | 2      | 2      | 2     | 3     | 3     | 3 |
| 27628  |      |      |      |      |      |      |      |      |       | 2      | 2      | 2     | 3     | 3     | 2 |
| 27633  | 4    | 5    | 2    | 5    | 6    | 6    | 5    | 3    |       | 2      | 2      | 2     | 4     | 3     | 4 |
| 27643  | 3    | 3    | 3    | 3    | 3    | 3    | 3    | 3    |       | 3      | 3      | 3     | 2     | 3     | 3 |
| 27644  |      |      |      |      |      |      |      |      |       | 2      | 2      | 2     | 3     | 3     | 3 |
| 27668  | 4    | 4    | 2    | 6    | 6    | 4    | 5    | 1    |       | 2      | 2      | 3     | 4     | 4     | 3 |
| 27681  |      |      |      |      |      |      |      |      |       | 3      | 2      | 2     | 3     | 3     | 3 |
| 27691  | 4    | 4    | 3    | 4    | 4    | 4    | 4    | 4    | 3     | 3      | 3      | 3     | 5     | 5     | 5 |
| 27693  |      |      |      |      |      |      |      |      |       | 2      | 2      | 2     | 3     | 3     | 2 |
| 27703  | 4    | 4    | 4    | 5    | 6    | 6    | 4    | 3    |       | 2      | 2      | 3     | 4     | 4     | 5 |
| 27708  | 2    | 2    | 5    | 3    | 5    | 4    | 2    | 4    |       | 2      | 2      | 1     | 3     | 3     | 4 |
| 27719  | 4    | 4    | 3    | 4    | 4    | 4    | 4    | 4    |       | 2      | 3      | 3     | 5     | 5     | 5 |
| 27720  | 6    | 6    | 2    | 6    | 6    | 6    | 6    | 6    | 2     | 3      | 3      | 3     | 4     | 4     | 4 |



| respid | Q48k | Q48l | Q48m | Q48n | Q48o | Q48p | Q48q | Q48r | Q49_1 | Q50a_1 | Q50b_1 | Q51_1 | Q51_2 | Q52_1 |   |
|--------|------|------|------|------|------|------|------|------|-------|--------|--------|-------|-------|-------|---|
| 27723  | 6    | 6    | 3    | 6    | 6    | 6    | 6    | 6    | 3     | 3      | 3      | 3     | 4     | 4     | 4 |
| 27725  | 3    | 4    | 6    | 1    | 5    | 6    | 5    | 4    | 4     | 2      | 3      | 2     | 5     | 3     | 3 |
| 27734  | 5    | 4    | 2    | 5    | 6    | 3    | 4    | 3    | 3     | 3      | 3      | 3     | 3     | 3     | 3 |
| 27744  |      |      |      |      |      |      |      |      |       | 3      | 2      | 2     | 4     | 3     | 4 |
| 27749  |      |      |      |      |      |      |      |      |       | 2      | 2      | 3     | 2     | 3     | 3 |
| 27762  | 3    | 3    | 3    | 4    | 4    | 4    | 4    | 4    | 4     | 2      | 2      | 2     | 3     | 3     | 3 |
| 27808  | 6    | 5    | 3    | 5    | 4    | 4    | 4    | 3    | 3     | 2      | 2      | 2     | 2     | 3     | 2 |
| 27810  | 5    | 6    | 1    | 6    | 6    | 5    | 6    | 2    | 2     | 2      | 2      | 2     | 3     | 3     | 3 |
| 27812  |      |      |      |      |      |      |      |      |       | 4      | 3      | 3     | 4     | 4     | 4 |
| 27815  |      |      |      |      |      |      |      |      |       | 2      | 2      | 3     | 4     | 4     | 4 |
| 27818  | 3    | 3    | 4    | 4    | 5    | 3    | 3    | 5    | 2     | 3      | 3      | 3     | 5     | 5     | 5 |
| 27823  | 4    | 4    | 3    | 4    | 4    | 4    | 4    | 4    | 4     | 2      | 2      | 2     | 4     | 4     | 4 |
| 27841  | 3    | 3    | 3    | 4    | 2    | 3    | 5    | 4    | 4     | 3      | 3      | 3     | 4     | 4     | 4 |
| 27843  |      |      |      |      |      |      |      |      |       | 3      | 3      | 3     | 5     | 5     | 5 |
| 27851  | 1    | 1    |      | 3    |      |      |      |      |       | 2      | 3      | 3     | 5     | 5     | 4 |
| 27858  |      |      |      |      |      |      |      |      |       | 1      | 2      | 2     | 3     | 3     | 5 |
| 27859  |      |      |      |      |      |      |      |      |       | 1      | 2      | 2     | 2     | 3     | 4 |
| 27869  | 6    | 6    | 6    | 6    | 6    | 6    | 6    | 6    | 1     | 4      | 3      | 3     | 5     | 5     | 5 |
| 27872  |      |      |      |      |      |      |      |      |       | 3      | 2      | 2     | 4     | 4     | 4 |
| 27873  | 6    | 6    | 6    | 6    | 6    | 6    | 6    | 6    | 6     | 3      | 3      | 2     | 5     | 5     | 4 |
| 27884  |      |      |      |      |      |      |      |      |       | 2      | 2      | 3     | 2     | 3     | 3 |
| 27904  | 5    | 5    | 5    | 5    | 5    | 5    | 5    | 5    | 5     | 4      | 2      | 2     | 3     | 3     | 3 |
| 27915  |      |      |      |      |      |      |      |      |       | 3      | 3      | 2     | 4     | 4     | 5 |
| 27918  |      |      |      |      |      |      |      |      |       | 2      | 2      | 2     | 4     | 4     | 4 |
| 27937  | 6    | 5    | 3    | 4    | 5    | 4    | 4    | 4    | 3     | 3      | 2      | 3     | 4     | 4     | 3 |
| 27943  | 6    | 6    | 6    | 6    | 6    | 6    | 6    | 6    | 6     | 3      | 3      | 3     | 3     | 3     | 5 |
| 27948  |      |      |      |      | 6    | 6    | 6    | 6    |       | 4      | 3      | 3     | 5     | 5     | 5 |
| 27971  | 4    | 5    | 3    | 5    | 5    | 4    | 4    | 4    | 5     | 2      | 2      | 2     | 4     | 4     | 3 |
| 27991  | 4    | 4    | 4    | 4    | 4    | 3    | 3    | 3    | 4     | 2      | 2      | 2     | 4     | 4     | 4 |
| 28000  |      |      |      |      |      |      |      |      |       | 3      | 3      | 3     | 5     | 4     | 5 |
| 28011  |      |      | 3    | 3    |      |      | 3    |      |       | 2      | 3      | 3     | 4     | 4     | 4 |
| 28022  | 2    | 2    | 2    | 2    | 3    | 4    | 2    | 3    | 3     | 4      | 2      | 2     | 3     | 3     | 3 |

| respid | Q48k | Q48l | Q48m | Q48n | Q48o | Q48p | Q48q | Q48r | Q49_1 | Q50a_1 | Q50b_1 | Q51_1 | Q51_2 | Q52_1 |   |
|--------|------|------|------|------|------|------|------|------|-------|--------|--------|-------|-------|-------|---|
| 28025  | 6    | 5    | 1    | 6    | 6    | 6    | 2    | 6    | 1     | 4      | 2      | 2     | 4     | 4     | 5 |
| 28041  |      |      |      |      |      |      |      |      |       | 4      | 3      | 3     | 5     | 5     | 5 |
| 28057  |      |      |      |      |      |      |      |      |       | 2      | 2      | 2     | 3     | 4     | 3 |
| 28080  |      |      |      |      |      |      |      |      |       | 3      | 2      | 2     | 4     | 4     | 4 |
| 28098  | 5    | 5    | 2    | 5    | 5    | 5    | 5    | 2    | 2     | 2      | 3      | 2     | 5     | 5     | 5 |
| 28104  | 5    | 6    | 3    | 5    | 6    | 5    | 5    | 5    | 3     | 4      | 2      | 2     | 3     | 4     | 4 |
| 28109  |      |      |      |      |      |      |      |      |       | 3      | 3      | 3     | 4     | 4     | 4 |
| 28129  | 1    | 1    | 4    | 5    | 6    | 2    | 1    | 3    | 3     | 4      | 2      | 1     | 2     | 3     | 1 |
| 28141  |      |      |      |      |      |      |      |      |       | 3      | 2      | 2     | 3     | 3     | 4 |
| 28143  |      |      |      |      |      |      |      |      |       | 3      | 3      | 3     | 5     | 5     | 4 |
| 28149  | 2    | 2    | 6    |      | 6    | 6    | 6    | 1    | 6     | 2      | 2      | 2     | 3     | 3     | 3 |
| 28151  | 3    | 3    | 3    | 3    | 3    | 3    | 3    | 3    | 4     | 2      | 3      | 3     | 3     | 3     | 3 |
| 28161  |      |      |      |      |      |      |      |      |       | 1      | 3      | 3     | 3     | 3     | 2 |
| 28169  |      |      |      |      |      |      |      |      |       | 4      | 2      | 2     | 3     | 3     | 5 |
| 28194  | 3    | 3    | 3    | 3    | 3    | 3    | 3    | 3    | 3     | 1      | 2      | 2     | 3     | 3     | 3 |
| 28197  |      |      |      |      |      |      |      |      |       | 4      | 3      | 3     | 4     | 4     | 5 |
| 28206  |      |      |      |      |      |      |      |      |       | 3      | 2      | 3     | 4     | 4     | 4 |
| 28218  |      |      |      |      |      |      |      |      |       | 2      | 3      | 3     | 5     | 5     | 5 |
| 28227  |      |      |      |      |      |      |      |      |       | 4      | 3      | 3     | 5     | 5     | 5 |
| 28235  | 6    | 6    | 5    | 3    | 6    | 6    | 6    | 6    | 3     | 3      | 2      | 3     | 4     | 4     | 4 |
| 28246  | 3    | 4    | 4    | 2    | 4    | 4    | 4    | 2    | 5     | 1      | 3      | 2     | 2     | 5     | 2 |
| 28259  | 5    | 5    | 2    | 5    | 5    | 4    | 5    | 5    | 2     | 2      | 3      | 3     | 4     | 4     | 5 |
| 28263  | 6    | 6    | 2    | 6    | 6    | 6    | 6    | 6    | 3     | 2      | 3      | 2     | 2     | 3     | 3 |
| 28267  |      |      |      |      |      |      |      |      |       | 2      | 2      | 1     | 2     | 2     | 3 |
| 28274  |      |      |      |      |      |      |      |      |       | 4      | 3      | 3     | 5     | 5     | 5 |
| 28278  | 4    | 4    | 3    | 1    | 6    | 2    | 3    | 2    | 2     | 4      | 3      | 3     | 5     | 5     | 5 |
| 28288  |      |      |      |      |      |      |      |      |       | 4      | 3      | 3     | 5     | 5     | 4 |
| 28308  |      |      |      |      |      |      |      |      |       | 4      | 3      | 3     | 5     | 5     | 5 |
| 28309  | 3    | 2    |      | 3    | 4    | 4    | 4    | 3    | 4     | 3      | 2      | 2     | 3     | 3     | 3 |
| 28323  | 2    | 1    | 6    | 3    | 5    | 3    | 4    | 4    | 3     | 3      | 2      | 2     | 4     | 5     | 5 |
| 28335  |      |      |      |      |      |      |      |      |       | 2      | 3      | 3     | 1     | 2     | 1 |
| 28354  |      |      |      |      |      |      |      |      |       | 2      | 3      | 2     | 1     | 1     | 1 |

| respid | Q48k | Q48l | Q48m | Q48n | Q48o | Q48p | Q48q | Q48r | Q49_1 | Q50a_1 | Q50b_1 | Q51_1 | Q51_2 | Q52_1 |   |
|--------|------|------|------|------|------|------|------|------|-------|--------|--------|-------|-------|-------|---|
| 28355  |      |      |      |      |      |      |      |      |       | 2      | 1      | 2     | 2     | 3     | 3 |
| 28356  |      |      |      |      |      |      |      |      |       | 2      | 1      | 1     | 2     | 2     | 4 |
| 28357  |      |      |      |      |      |      |      |      |       | 4      | 3      | 3     | 5     | 5     | 5 |
| 28363  |      |      |      |      |      |      |      |      |       | 3      | 3      | 3     | 5     | 5     | 5 |
| 28366  |      |      |      |      |      |      |      |      |       | 2      | 3      | 3     | 4     | 4     | 4 |
| 28372  | 3    | 2    | 2    | 3    | 5    | 3    | 2    | 2    | 2     | 2      | 2      | 2     | 3     | 3     | 4 |
| 28381  | 4    | 4    | 3    | 4    | 4    | 4    | 4    | 4    | 3     | 2      | 2      | 2     | 3     | 3     | 4 |
| 28388  |      |      |      |      |      |      |      |      |       | 4      | 2      | 3     | 3     | 4     | 4 |
| 28413  |      |      |      |      |      |      |      |      |       | 2      | 3      | 2     | 1     | 1     | 1 |
| 28421  |      |      |      |      |      |      |      |      |       | 3      | 2      | 2     | 3     | 3     | 3 |
| 28430  |      |      |      |      |      |      |      |      |       | 3      | 3      | 2     | 1     | 1     | 2 |
| 28439  |      |      |      |      |      |      |      |      |       | 3      | 3      | 2     | 2     | 2     | 1 |
| 28458  | 6    | 6    | 1    | 6    | 6    | 6    | 6    | 5    | 2     | 2      | 2      | 2     | 4     | 4     | 3 |
| 28461  |      |      |      |      |      |      |      |      |       | 4      | 3      | 3     | 5     | 5     | 5 |
| 28466  | 6    | 6    | 6    | 6    | 6    | 6    | 6    | 6    | 6     | 3      | 3      | 3     | 3     | 3     | 3 |
| 28492  |      |      |      |      |      |      |      |      |       | 2      | 2      | 3     | 5     | 5     | 5 |
| 28534  |      |      |      |      |      |      |      |      |       | 4      | 3      | 3     | 5     | 5     | 5 |
| 28537  |      |      |      |      |      |      |      |      |       | 3      | 3      | 2     | 3     | 4     | 3 |
| 28560  |      |      |      |      |      |      |      |      |       | 3      | 2      | 2     | 4     | 4     | 5 |
| 28566  | 5    | 5    | 5    | 5    | 4    | 5    | 4    | 3    | 3     | 3      | 3      | 2     | 5     | 5     | 5 |
| 28569  |      |      |      |      |      |      |      |      |       | 2      | 2      | 2     | 4     | 4     | 5 |
| 28584  |      |      |      |      |      |      |      |      |       | 3      | 1      | 1     | 2     | 1     | 2 |
| 28590  |      |      |      |      |      |      |      |      |       | 2      | 3      | 3     | 4     | 5     | 5 |
| 28596  |      |      |      |      |      |      |      |      |       | 3      | 3      | 2     | 4     | 4     | 4 |
| 28608  |      |      |      |      |      |      |      |      |       | 4      | 2      | 3     | 4     | 4     | 4 |
| 28631  | 5    | 4    | 3    | 5    | 3    | 4    | 3    | 1    | 2     | 2      | 2      | 2     | 2     | 3     | 3 |
| 28644  | 4    | 4    | 3    | 3    | 4    | 3    | 3    | 3    | 4     | 3      | 2      | 2     | 4     | 4     | 4 |
| 28646  | 6    | 6    | 1    | 6    | 6    | 6    | 6    | 6    | 1     | 2      | 3      | 3     | 5     | 5     | 4 |
| 28665  |      |      |      |      |      |      |      |      |       | 3      | 3      | 3     | 5     | 5     | 5 |
| 28686  |      |      |      |      |      |      |      |      |       | 3      | 3      | 3     | 5     | 5     | 5 |
| 28704  | 4    | 4    | 4    | 5    | 4    | 4    | 4    | 4    | 4     | 3      | 3      | 2     | 3     | 3     | 4 |
| 28719  |      |      |      |      |      |      |      |      |       | 4      | 3      | 3     | 4     | 5     | 4 |

| respid | Q48k | Q48l | Q48m | Q48n | Q48o | Q48p | Q48q | Q48r | Q49_1 | Q50a_1 | Q50b_1 | Q51_1 | Q51_2 | Q52_1 |   |
|--------|------|------|------|------|------|------|------|------|-------|--------|--------|-------|-------|-------|---|
| 28736  |      |      |      |      |      |      |      |      |       | 3      | 2      | 2     | 3     | 3     | 4 |
| 28739  |      |      |      |      |      |      |      |      |       | 2      | 2      | 2     | 4     | 3     | 3 |
| 28758  | 1    | 1    | 4    |      | 4    | 6    | 1    | 5    | 1     | 1      | 1      | 2     | 1     | 3     |   |
| 28761  | 5    | 5    | 1    | 6    | 6    | 6    | 5    | 6    | 3     | 2      | 2      | 3     | 3     | 3     |   |
| 28770  | 6    | 6    | 1    | 6    | 6    | 6    | 6    | 3    | 2     | 2      | 2      | 3     | 3     | 3     |   |
| 28774  | 6    | 6    | 6    | 6    | 6    | 6    | 4    | 2    | 4     | 2      | 2      | 3     | 4     | 5     |   |
| 28778  |      |      |      |      |      |      |      |      |       | 1      | 2      | 2     | 3     | 3     | 2 |
| 28783  |      |      |      |      |      |      |      |      |       | 3      | 3      | 3     | 4     | 4     | 4 |
| 28785  |      |      |      |      |      |      |      |      |       | 4      | 3      | 3     | 5     | 5     | 5 |
| 28797  |      |      |      |      |      |      |      |      |       | 1      | 2      | 2     | 3     | 2     | 3 |
| 28801  |      |      |      |      |      |      |      |      |       | 2      | 1      | 3     | 3     | 3     | 3 |
| 28821  |      |      |      |      |      |      |      |      |       | 3      | 3      | 3     | 5     | 5     | 5 |
| 28827  |      |      |      |      |      |      |      |      |       | 2      | 2      | 2     | 4     | 4     | 4 |
| 28828  | 5    | 6    | 6    | 5    | 5    | 5    | 6    | 4    | 2     | 2      | 2      | 4     | 4     | 4     |   |
| 28871  | 3    | 5    | 3    | 4    | 3    | 4    | 3    | 3    | 2     | 2      | 2      | 2     | 3     | 3     |   |
| 28876  |      |      |      |      |      |      |      |      |       | 3      | 2      | 3     | 5     | 4     | 5 |
| 28891  |      |      |      |      |      |      |      |      |       | 4      | 2      | 3     | 5     | 4     | 5 |
| 28898  |      |      |      |      |      |      |      |      |       | 4      | 3      | 3     | 5     | 5     | 4 |
| 28909  |      |      |      |      |      |      |      |      |       | 2      | 3      | 3     | 5     | 5     | 5 |
| 28930  | 3    | 4    | 3    | 4    | 5    | 3    | 4    | 3    | 3     | 2      | 2      | 3     | 3     | 4     |   |
| 28935  |      |      |      |      |      |      |      |      |       | 3      | 2      | 2     | 3     | 3     | 3 |
| 28964  |      |      |      |      |      |      |      |      |       | 2      | 3      | 3     | 5     | 5     | 5 |
| 28965  |      |      |      |      |      |      |      |      |       | 2      | 3      | 3     | 5     | 4     | 5 |
| 28967  |      |      |      |      |      |      |      |      |       | 3      | 2      | 2     | 2     | 3     | 2 |
| 28975  |      |      |      |      |      |      |      |      |       | 3      | 3      | 3     | 5     | 5     | 5 |
| 28982  |      |      |      |      |      |      |      |      |       | 4      | 3      | 3     | 3     | 3     | 3 |
| 28989  |      |      |      |      |      |      |      |      |       | 3      | 3      | 3     | 4     | 4     | 4 |
| 29003  |      |      |      |      |      |      |      |      |       | 2      | 3      | 3     | 4     | 4     | 4 |
| 29004  | 6    | 6    | 3    | 4    | 5    | 4    | 5    | 3    | 3     | 3      | 2      | 4     | 4     | 4     |   |
| 29007  | 2    | 6    | 6    | 6    | 3    | 6    | 6    | 6    | 2     | 3      | 2      | 3     | 3     | 3     |   |
| 29008  |      |      |      |      |      |      |      |      |       | 2      | 3      | 3     | 3     | 3     | 4 |
| 29011  | 5    | 5    | 1    | 2    | 5    | 2    | 5    | 1    | 4     | 2      | 2      | 4     | 4     | 4     |   |

| respid | Q48k | Q48l | Q48m | Q48n | Q48o | Q48p | Q48q | Q48r | Q49_1 | Q50a_1 | Q50b_1 | Q51_1 | Q51_2 | Q52_1 |   |
|--------|------|------|------|------|------|------|------|------|-------|--------|--------|-------|-------|-------|---|
| 29012  |      |      |      |      |      |      |      |      |       | 3      | 3      | 3     | 4     | 4     | 4 |
| 29014  |      |      |      |      |      |      |      |      |       | 4      | 3      | 3     | 4     | 4     | 4 |
| 29016  |      |      |      |      |      |      |      |      |       | 2      | 2      | 2     | 3     | 3     | 4 |
| 29018  | 6    | 6    | 3    | 4    | 6    | 6    | 6    | 3    | 1     | 3      | 2      | 4     | 5     | 5     | 5 |
| 29048  | 5    | 6    |      | 3    | 5    | 5    | 5    | 2    | 3     | 3      | 2      | 4     | 4     | 4     | 4 |
| 29184  | 4    | 3    | 4    | 3    | 4    | 4    | 4    | 3    | 4     | 3      | 3      | 3     | 4     | 4     | 4 |
| 29237  | 3    | 2    | 2    | 2    | 6    | 6    | 6    | 2    | 3     | 2      | 2      | 5     | 5     | 5     | 5 |
| 29252  |      |      |      |      |      |      |      |      | 3     | 3      | 2      | 4     | 4     | 4     | 4 |
| 29267  |      |      |      |      |      |      |      |      | 3     | 1      | 3      | 3     | 3     | 3     | 3 |
| 29276  |      |      |      |      |      |      |      |      | 2     | 2      | 2      | 2     | 2     | 2     | 2 |
| 29281  | 1    | 2    | 6    | 4    | 4    | 4    | 3    | 5    | 2     | 2      | 2      | 2     | 2     | 2     | 3 |
| 29285  | 5    | 5    | 5    | 5    | 5    | 5    | 5    | 3    | 3     | 2      | 3      | 3     | 3     | 5     | 4 |
| 29291  |      |      |      |      |      |      |      |      | 2     | 1      | 1      | 2     | 3     | 2     | 2 |
| 29304  |      |      |      |      |      |      |      |      | 2     | 2      | 2      | 3     | 3     | 3     | 3 |
| 29323  | 5    | 5    | 4    | 5    | 5    | 5    | 5    | 3    | 3     | 3      | 3      | 5     | 5     | 5     | 5 |
| 29330  |      |      |      |      |      |      |      |      | 2     | 2      | 3      | 4     | 4     | 4     | 4 |
| 29357  |      |      |      |      |      |      |      |      | 3     | 2      | 2      | 4     | 4     | 4     | 4 |
| 29416  | 5    | 6    | 3    | 5    | 6    | 6    | 5    | 2    | 3     | 3      | 2      | 4     | 4     | 4     | 5 |
| 29432  |      |      |      |      |      |      |      |      | 4     | 3      | 3      | 3     | 3     | 3     | 3 |
| 29482  | 2    | 2    | 2    | 2    | 3    | 1    | 2    | 3    | 5     | 2      | 2      | 2     | 2     | 3     | 4 |
| 29506  |      |      |      |      |      |      |      |      | 2     | 2      | 2      | 4     | 3     | 3     | 4 |
| 29509  |      |      |      |      |      |      |      |      | 2     | 2      | 2      | 3     | 3     | 3     | 3 |
| 29512  | 1    | 2    | 1    | 2    | 1    | 2    | 1    | 2    | 4     | 2      | 2      | 2     | 2     | 2     | 2 |
| 29519  | 4    | 4    | 3    | 4    | 4    | 4    | 4    | 3    | 2     | 2      | 2      | 3     | 3     | 3     | 4 |
| 29520  | 6    | 6    | 2    | 4    | 6    | 3    | 4    | 4    | 3     | 2      | 3      | 3     | 3     | 3     | 4 |
| 29521  | 2    | 1    | 2    | 1    | 2    | 1    | 2    | 1    | 3     | 2      | 2      | 2     | 2     | 3     | 4 |
| 29529  | 1    | 2    | 5    | 2    | 2    | 2    | 2    | 2    | 5     | 2      | 2      | 2     | 2     | 3     | 3 |
| 29532  |      |      |      |      |      |      |      |      | 4     | 3      | 2      | 5     | 5     | 5     | 5 |
| 29547  | 1    | 1    | 5    | 2    | 3    | 3    | 1    | 6    | 1     | 2      | 3      | 4     | 3     | 3     | 3 |
| 29551  |      |      |      |      |      |      |      |      | 4     | 2      | 2      | 3     | 3     | 3     | 3 |
| 29584  |      |      |      |      |      |      |      |      | 2     | 1      | 2      | 3     | 2     | 2     | 2 |
| 29591  | 1    | 2    | 2    | 1    | 2    | 6    | 3    | 2    | 2     | 2      | 2      | 3     | 3     | 3     | 3 |

| respid | Q48k | Q48l | Q48m | Q48n | Q48o | Q48p | Q48q | Q48r | Q49_1 | Q50a_1 | Q50b_1 | Q51_1 | Q51_2 | Q52_1 |   |
|--------|------|------|------|------|------|------|------|------|-------|--------|--------|-------|-------|-------|---|
| 29613  |      | 5    | 6    | 5    | 2    | 6    | 6    | 6    | 2     | 3      | 3      | 3     | 5     | 4     | 5 |
| 29615  |      | 1    | 2    | 3    | 1    | 2    | 3    | 2    | 4     | 1      | 2      | 2     | 4     | 4     | 4 |
| 29625  |      |      |      |      |      |      |      |      |       | 2      | 2      | 3     | 4     | 4     | 4 |
| 29660  |      | 4    | 5    | 5    | 5    | 4    | 4    | 5    | 3     | 2      | 2      | 3     | 2     | 2     | 1 |
| 29677  |      |      |      |      |      |      |      |      |       | 2      | 3      | 3     | 4     | 4     | 4 |
| 29700  |      |      |      |      |      |      |      |      |       | 2      | 2      | 2     | 4     | 4     | 3 |
| 29715  |      |      |      |      |      |      |      |      |       | 2      | 2      | 2     | 3     | 3     | 3 |
| 29720  |      |      |      |      |      |      |      |      |       | 2      | 2      | 2     | 3     | 3     | 3 |
| 29730  |      |      |      |      |      |      |      |      |       | 3      | 3      | 3     | 4     | 4     | 4 |
| 29734  |      | 1    | 1    | 3    | 1    | 1    | 5    | 4    | 3     | 2      | 2      | 2     | 4     | 4     | 4 |
| 29754  |      |      |      |      |      |      |      |      |       | 3      | 3      | 3     | 4     | 4     | 5 |
| 29771  |      |      |      |      |      |      |      |      |       | 2      | 2      | 2     | 3     | 3     | 4 |
| 29774  |      |      |      |      |      |      |      |      |       | 2      | 3      | 2     | 4     | 4     | 3 |
| 29783  |      | 6    | 6    | 2    | 6    | 6    | 6    | 6    | 4     | 4      | 3      | 3     | 5     | 5     | 5 |
| 29812  |      | 3    | 3    | 4    | 3    | 3    | 3    | 3    | 4     | 2      | 2      | 2     | 3     | 3     | 3 |
| 29813  |      |      |      |      |      |      |      |      |       | 2      | 2      | 2     | 3     | 3     | 4 |
| 29814  |      | 1    | 3    | 4    | 2    | 2    | 3    | 3    | 3     | 2      | 2      | 2     | 3     | 3     | 3 |
| 29820  |      |      |      |      |      |      |      |      |       | 2      | 2      | 2     | 3     | 3     | 3 |
| 29906  |      |      |      |      |      |      |      |      |       | 2      | 3      | 3     | 4     | 5     | 4 |
| 29907  |      | 5    | 5    | 2    | 5    | 5    | 3    | 5    | 2     | 2      | 2      | 2     | 3     | 3     | 2 |
| 29928  |      |      |      |      |      |      |      |      |       | 3      | 2      | 3     | 5     | 5     | 5 |
| 29932  |      |      |      |      |      |      |      |      |       | 2      | 2      | 2     | 4     | 3     | 5 |
| 29958  |      | 3    | 3    | 3    | 3    | 3    | 3    | 3    | 3     | 3      | 2      | 2     | 3     | 3     | 3 |
| 29982  |      |      |      |      |      |      |      |      |       | 3      | 2      | 3     | 4     | 4     | 4 |
| 29989  |      |      |      |      |      |      |      |      |       | 3      | 2      | 2     | 4     | 4     | 4 |
| 29994  |      |      |      |      |      |      |      |      |       | 2      | 2      | 2     | 3     | 4     | 3 |
| 30005  |      | 5    | 1    | 1    | 5    | 6    | 5    | 6    | 1     | 5      | 1      | 1     | 1     | 2     | 2 |
| 30077  |      |      |      |      |      |      |      |      |       | 2      | 2      | 2     | 5     | 4     | 5 |
| 30098  |      |      |      |      |      |      |      |      |       | 3      | 3      | 3     | 4     | 4     | 4 |
| 30107  |      | 4    | 4    | 4    | 3    | 4    | 4    | 4    |       | 3      | 2      | 2     | 3     | 3     | 5 |
| 30154  |      |      |      |      |      |      |      |      |       | 2      | 2      | 2     | 2     | 2     | 3 |
| 30159  |      |      |      |      |      |      |      |      |       | 4      | 3      | 3     | 5     | 5     | 5 |

| respid | Q48k | Q48l | Q48m | Q48n | Q48o | Q48p | Q48q | Q48r | Q49_1 | Q50a_1 | Q50b_1 | Q51_1 | Q51_2 | Q52_1 |   |
|--------|------|------|------|------|------|------|------|------|-------|--------|--------|-------|-------|-------|---|
| 30162  |      |      |      |      |      |      |      |      |       | 2      | 3      | 3     | 5     | 5     | 5 |
| 30163  |      |      |      |      |      |      |      |      |       | 3      | 3      | 3     | 5     | 5     | 5 |
| 30189  | 4    | 4    | 3    | 5    | 5    | 5    | 3    | 3    |       | 2      | 2      | 2     | 3     | 3     | 3 |
| 30230  | 6    | 6    | 2    | 6    | 6    | 3    | 6    | 3    |       | 2      | 3      | 3     | 4     | 4     | 4 |
| 30259  |      |      |      |      |      |      |      |      |       | 4      | 2      | 3     | 3     | 3     | 2 |
| 30284  |      |      |      |      |      |      |      |      |       | 3      | 2      | 3     | 5     | 5     | 5 |
| 30296  | 6    | 6    | 6    | 6    | 6    | 6    | 6    | 6    |       | 3      | 2      | 2     | 3     | 3     | 3 |
| 30330  |      |      |      |      |      |      |      |      |       | 2      | 2      | 2     | 3     | 3     | 4 |
| 30341  | 5    | 3    | 3    | 6    | 4    | 5    | 2    | 4    |       | 3      | 3      | 2     | 4     | 4     | 3 |
| 30352  | 3    | 1    | 3    | 4    | 3    | 2    | 3    | 3    |       | 3      | 2      | 2     | 1     | 2     | 2 |
| 30379  |      |      |      |      |      |      |      |      |       | 3      | 3      | 3     | 1     | 1     | 1 |
| 30424  | 3    | 3    | 5    | 2    | 4    | 3    | 3    | 5    |       | 3      | 3      | 3     | 5     | 5     | 5 |
| 30447  |      |      |      |      |      |      |      |      |       | 4      | 3      | 3     | 5     | 5     | 5 |
| 30477  |      |      |      |      |      |      |      |      |       | 2      | 2      | 2     | 3     | 3     | 3 |
| 30503  |      |      |      |      |      |      |      |      |       | 3      | 2      | 2     | 3     | 3     | 3 |
| 30515  |      |      |      |      |      |      |      |      |       | 1      | 2      | 2     | 4     | 3     | 4 |
| 30516  | 1    | 1    | 4    | 1    | 1    | 1    | 1    | 6    |       | 4      | 3      | 2     | 5     | 5     | 5 |
| 30623  |      |      |      |      |      |      |      |      |       | 2      | 2      | 2     | 2     | 2     | 2 |
| 30639  |      |      |      |      |      |      |      |      |       | 1      | 2      | 2     | 3     | 3     | 3 |
| 30670  |      |      |      |      |      |      |      |      |       | 3      | 2      | 3     | 3     | 4     | 2 |
| 30697  |      |      |      |      |      |      |      |      |       | 5      | 3      | 3     | 5     | 5     | 5 |
| 30735  |      |      | 3    | 3    | 6    | 6    | 6    | 3    |       | 2      | 3      | 3     | 2     | 2     | 2 |
| 30742  |      |      |      |      |      |      |      |      |       | 2      | 2      | 2     | 3     | 3     | 3 |
| 30751  |      |      |      |      |      |      |      |      |       | 2      | 2      | 2     | 3     | 4     | 3 |
| 30789  |      |      |      |      |      |      |      |      |       | 4      | 3      | 3     | 5     | 5     | 5 |
| 30867  |      |      |      |      |      |      |      |      |       | 3      | 3      | 2     | 1     | 1     | 2 |
| 30876  | 6    | 6    | 1    | 6    | 6    | 6    | 6    | 1    |       | 4      | 3      | 3     | 5     | 5     | 5 |
| 30877  |      |      |      |      |      |      |      |      |       | 2      | 2      | 3     | 4     | 4     | 4 |
| 30887  |      |      |      |      |      |      |      |      |       | 3      | 2      | 2     | 3     | 3     | 3 |
| 30891  |      |      |      |      |      |      |      |      |       | 4      | 2      | 2     | 2     | 2     | 2 |
| 31030  | 4    | 3    | 3    | 5    | 6    | 5    | 6    | 2    |       | 3      | 2      | 2     | 3     | 4     | 4 |
| 31059  |      |      |      |      |      |      |      |      |       | 2      | 3      | 3     | 2     | 3     | 3 |

| respid | Q48k | Q48l | Q48m | Q48n | Q48o | Q48p | Q48q | Q48r | Q49_1 | Q50a_1 | Q50b_1 | Q51_1 | Q51_2 | Q52_1 |   |
|--------|------|------|------|------|------|------|------|------|-------|--------|--------|-------|-------|-------|---|
| 31082  |      |      |      |      |      |      |      |      |       | 5      | 3      | 3     | 5     | 5     | 5 |
| 31106  |      |      |      |      |      |      |      |      |       | 2      | 3      | 3     | 5     | 5     | 5 |
| 31110  |      |      |      |      |      |      |      |      |       | 4      | 3      | 3     | 5     | 5     | 5 |
| 31265  |      |      |      |      |      |      |      |      |       | 1      | 1      | 1     | 2     | 2     | 2 |
| 31266  |      |      |      |      |      |      |      |      |       | 1      | 1      | 1     | 2     | 2     | 2 |
| 31267  |      |      |      |      |      |      |      |      |       | 1      | 1      | 1     | 2     | 2     | 2 |
| 31310  |      |      |      |      |      |      |      |      |       | 4      | 3      | 3     | 5     | 5     | 5 |
| 31325  |      |      |      |      |      |      |      |      |       | 3      | 3      | 3     | 5     | 5     | 5 |
| 31367  |      |      |      |      |      |      |      |      |       | 3      | 2      | 3     | 3     | 4     | 4 |
| 31389  | 6    | 6    | 1    | 6    | 6    | 6    | 6    | 6    | 1     | 5      | 3      | 3     | 5     | 5     | 5 |
| 31440  |      |      |      |      |      |      |      |      |       | 2      | 2      | 2     | 3     | 3     | 3 |
| 31465  |      |      |      |      |      |      |      |      |       | 2      | 2      | 2     | 3     | 4     | 4 |
| 31477  | 4    | 5    | 4    | 4    | 2    | 4    | 3    | 6    |       | 2      | 2      | 2     | 2     | 2     | 1 |
| 31491  |      |      |      |      |      |      |      |      |       | 2      | 1      | 1     | 3     | 3     | 3 |
| 31494  |      |      |      |      |      |      |      |      |       | 3      | 2      | 2     | 2     | 2     | 2 |
| 31509  |      |      |      |      |      |      |      |      |       | 1      | 2      | 2     | 2     | 2     | 2 |
| 31533  |      |      |      |      |      |      |      |      |       | 4      | 3      | 3     | 5     | 5     | 5 |
| 31547  |      |      |      |      |      |      |      |      |       | 2      | 2      | 3     | 4     | 3     | 4 |
| 31558  | 3    | 3    | 6    | 4    | 4    | 4    | 3    | 4    |       | 2      | 3      | 3     | 4     | 4     | 4 |
| 31579  | 2    | 1    | 5    | 1    | 3    | 4    | 3    | 5    |       | 1      | 2      | 2     | 2     | 2     | 3 |
| 31591  | 5    | 5    | 3    | 5    | 6    | 4    | 6    | 3    |       | 3      | 2      | 3     | 4     | 4     | 4 |
| 31596  | 3    | 3    | 4    | 4    | 4    | 4    | 3    | 3    |       | 3      | 3      | 3     | 2     | 2     | 3 |
| 31601  |      |      |      |      |      |      |      |      |       | 2      | 2      | 2     | 3     | 2     | 3 |
| 31605  | 5    | 5    | 2    | 6    | 6    | 5    | 5    | 2    |       | 4      | 2      | 3     | 4     | 4     | 4 |
| 31637  | 3    | 3    | 3    | 1    | 1    | 3    | 1    | 4    |       | 1      | 1      | 2     | 1     | 1     | 3 |
| 31646  | 4    | 5    | 4    | 4    | 6    | 4    | 4    | 3    |       | 4      | 2      | 3     | 4     | 4     | 4 |
| 31647  | 4    | 4    | 4    | 1    | 4    | 4    | 4    | 4    |       | 1      | 1      | 1     | 1     | 1     | 2 |
| 31650  |      |      |      |      |      |      |      |      |       | 4      | 2      | 2     | 5     | 4     | 5 |
| 31651  |      |      |      |      |      |      |      |      |       | 3      | 2      | 3     | 3     | 4     | 3 |
| 31657  |      |      |      |      |      |      |      |      |       | 4      | 3      | 3     | 5     | 5     | 5 |
| 31660  | 6    | 6    | 2    | 6    | 6    | 6    | 6    | 6    | 2     | 3      | 3      | 3     | 4     | 4     | 4 |
| 31661  |      |      |      |      |      |      |      |      |       | 3      | 2      | 3     | 3     | 4     | 3 |



| respid | Q48k | Q48l | Q48m | Q48n | Q48o | Q48p | Q48q | Q48r | Q49_1 | Q50a_1 | Q50b_1 | Q51_1 | Q51_2 | Q52_1 |   |
|--------|------|------|------|------|------|------|------|------|-------|--------|--------|-------|-------|-------|---|
| 31667  |      |      |      |      |      |      |      |      |       | 3      | 2      | 1     | 3     | 4     | 4 |
| 31674  |      |      |      |      |      |      |      |      |       | 3      | 2      | 3     | 4     | 4     | 4 |
| 31686  |      |      |      |      |      |      |      |      |       | 2      | 2      | 2     | 3     | 3     | 3 |
| 31693  |      |      |      |      |      |      |      |      |       | 4      | 2      | 2     | 4     | 4     | 5 |
| 31716  |      |      |      |      |      |      |      |      |       | 3      | 3      | 3     | 5     | 5     | 4 |
| 31818  |      |      |      |      |      |      |      |      |       | 1      | 2      | 2     | 2     | 2     | 2 |
| 31886  |      |      |      |      |      |      |      |      |       | 3      | 3      | 2     | 4     | 4     | 5 |
| 31945  |      |      |      |      |      |      |      |      |       | 2      | 1      | 1     | 2     | 3     | 3 |
| 31957  | 3    |      |      |      |      |      |      |      |       | 2      | 2      | 2     | 3     | 3     | 4 |
| 31966  | 4    | 4    | 3    | 4    | 3    | 4    | 4    | 3    | 4     | 4      | 3      | 2     | 3     | 3     | 3 |
| 31978  |      |      |      |      |      |      |      |      |       | 2      | 3      | 3     | 4     | 4     | 5 |
| 31999  | 5    | 6    | 2    | 3    | 6    | 3    | 5    | 2    | 2     | 2      | 3      | 3     | 4     | 3     | 5 |
| 32026  | 4    | 3    | 4    | 4    | 3    | 4    | 4    | 4    | 3     | 3      | 2      | 2     | 2     | 2     | 2 |
| 32033  | 4    | 4    | 3    | 4    | 3    | 4    | 4    | 4    | 3     | 3      | 2      | 2     | 3     | 3     | 3 |
| 32037  |      |      |      |      |      |      |      |      |       | 1      | 1      | 1     | 3     | 3     | 3 |
| 32038  |      |      |      |      |      |      |      |      |       | 1      | 1      | 1     | 3     | 3     | 3 |
| 32047  | 3    | 3    | 2    | 3    | 3    | 3    | 3    | 3    | 3     | 2      | 2      | 2     | 3     | 3     | 3 |
| 32053  |      |      |      |      |      |      |      |      |       | 4      | 3      | 3     | 5     | 5     | 5 |
| 32069  | 3    | 3    | 3    | 3    | 3    | 3    | 4    | 4    | 4     | 3      | 3      | 3     | 2     | 2     | 2 |
| 32081  |      |      |      |      |      |      |      |      |       | 3      | 2      | 2     | 4     | 3     | 3 |
| 32123  | 6    | 6    | 2    | 6    | 6    | 6    | 6    | 6    | 2     | 4      | 3      | 2     | 4     | 4     | 4 |
| 32130  | 5    | 5    | 3    | 5    | 6    | 5    | 5    | 5    | 3     | 4      | 2      | 2     | 4     | 4     | 4 |
| 32141  |      |      |      |      |      |      |      |      |       | 3      | 3      | 3     | 2     | 5     | 5 |
| 32158  |      |      |      |      |      |      |      |      |       | 4      | 3      | 3     | 5     | 5     | 5 |
| 32165  | 6    | 6    | 4    | 6    | 6    | 6    | 6    | 6    | 2     | 2      | 3      | 2     | 3     | 3     | 3 |
| 32180  | 6    | 6    | 6    | 6    | 6    | 6    | 6    | 6    | 6     | 2      | 3      | 3     | 5     | 5     | 5 |
| 32221  |      | 2    | 2    | 2    | 3    | 4    | 3    | 4    | 4     | 2      | 1      | 2     | 3     | 1     | 2 |
| 32292  |      |      |      |      |      |      |      |      |       | 3      | 3      | 3     | 4     | 4     | 5 |
| 32318  | 4    | 4    | 5    | 4    | 4    | 4    | 4    | 4    | 4     | 3      | 3      | 2     | 4     | 4     | 4 |
| 32346  | 5    | 5    | 4    | 3    | 5    | 5    | 5    | 5    | 4     | 3      | 2      | 3     | 3     | 4     | 4 |
| 32402  |      |      |      |      |      |      |      |      |       | 2      | 2      | 2     | 3     | 3     | 3 |
| 32422  | 5    | 5    | 2    | 5    | 6    | 6    | 6    | 6    | 2     | 4      | 3      | 3     | 5     | 5     | 4 |

| respid | Q48k | Q48l | Q48m | Q48n | Q48o | Q48p | Q48q | Q48r | Q49_1 | Q50a_1 | Q50b_1 | Q51_1 | Q51_2 | Q52_1 |   |
|--------|------|------|------|------|------|------|------|------|-------|--------|--------|-------|-------|-------|---|
| 32439  |      |      |      |      |      |      |      |      |       | 3      | 3      | 3     | 5     | 5     | 5 |
| 32507  |      |      |      |      |      |      |      |      |       | 2      | 3      | 3     | 3     | 3     | 3 |
| 32522  |      |      |      |      |      |      |      |      |       | 1      | 2      | 2     | 3     | 3     | 3 |
| 32535  |      |      |      |      |      |      |      |      |       | 2      | 2      | 2     | 3     | 3     | 3 |
| 32546  | 6    | 6    | 6    | 3    | 3    | 6    | 6    | 3    |       | 1      | 3      | 3     | 3     | 3     | 3 |
| 32553  |      |      |      |      |      |      |      |      |       | 2      | 2      | 2     | 3     | 3     | 3 |
| 32570  |      |      |      |      |      |      |      |      |       | 3      | 2      | 2     | 3     | 3     | 3 |
| 32592  |      |      |      |      |      |      |      |      |       | 2      | 2      | 2     | 3     | 4     | 3 |
| 32605  | 4    | 4    | 5    | 3    | 4    | 4    | 4    |      |       | 1      | 2      | 2     | 2     | 2     | 3 |
| 32630  |      |      |      |      |      |      |      |      |       | 2      | 2      | 3     | 2     | 1     | 1 |
| 32642  |      |      |      |      |      |      |      |      |       | 2      | 2      | 2     | 3     | 3     | 2 |
| 32646  | 6    | 6    | 3    | 6    | 6    | 6    | 6    | 3    |       | 3      | 2      | 2     | 4     | 3     | 4 |
| 32665  |      |      |      |      |      |      |      |      |       | 2      | 2      | 2     | 3     | 4     | 4 |
| 32677  | 6    | 6    | 6    | 1    | 6    | 6    | 6    | 2    |       | 2      | 1      | 1     | 2     | 2     | 4 |
| 32694  | 6    | 6    | 1    | 6    | 6    | 6    | 6    | 2    |       | 4      | 3      | 2     | 4     | 4     | 4 |
| 32698  | 3    | 5    | 3    | 4    | 5    | 5    | 6    | 3    |       | 2      | 2      | 1     | 3     | 3     | 3 |
| 32754  | 3    | 4    | 4    | 3    | 4    | 4    | 4    | 3    |       | 1      | 1      | 1     | 2     | 3     | 2 |
| 32799  | 4    | 3    | 2    | 4    | 6    | 3    |      | 4    |       | 3      | 2      | 2     | 3     | 4     | 4 |
| 32816  |      |      |      |      |      |      |      |      |       | 2      | 2      | 2     | 3     | 3     | 3 |
| 32819  | 5    |      |      | 5    | 4    | 4    | 4    | 3    |       | 3      | 2      | 2     | 3     | 4     | 4 |
| 32840  | 4    | 5    | 3    | 5    | 6    | 5    | 5    | 3    |       | 2      | 2      | 2     | 4     | 4     | 4 |
| 32861  |      |      |      |      |      |      |      |      |       | 2      | 2      | 2     | 5     | 5     | 5 |
| 32866  | 6    | 4    | 1    | 5    | 5    | 4    | 5    | 4    |       | 2      | 2      | 2     | 3     | 3     | 3 |
| 32889  | 4    | 3    | 3    | 3    | 5    | 3    | 3    | 3    |       | 2      | 2      | 2     | 3     | 3     | 4 |
| 32960  |      |      |      |      |      |      |      |      |       | 3      | 2      | 3     | 4     | 4     | 4 |
| 32965  | 4    | 4    | 3    | 4    | 4    | 4    | 4    | 3    |       | 3      | 3      | 2     | 4     | 4     | 5 |
| 32986  |      |      |      |      |      |      |      |      |       | 2      | 2      | 2     | 3     | 3     | 3 |
| 33005  | 2    | 2    | 3    | 2    | 3    | 3    | 4    | 3    |       | 3      | 1      | 1     | 2     | 3     | 3 |
| 33054  |      |      |      |      |      |      |      |      |       | 2      | 3      | 3     | 3     | 4     | 4 |
| 33072  | 6    | 4    | 3    | 2    | 5    | 2    | 3    | 2    |       | 3      | 3      | 2     | 4     | 3     | 5 |
| 33095  |      |      |      |      |      |      |      |      |       | 1      | 2      | 2     | 3     | 3     | 3 |
| 33099  | 3    | 3    | 4    | 4    | 6    | 4    | 4    | 3    |       | 2      | 3      | 3     | 5     | 5     | 5 |

| respid | Q48k | Q48l | Q48m | Q48n | Q48o | Q48p | Q48q | Q48r | Q49_1 | Q50a_1 | Q50b_1 | Q51_1 | Q51_2 | Q52_1 |   |
|--------|------|------|------|------|------|------|------|------|-------|--------|--------|-------|-------|-------|---|
| 33121  |      |      |      |      |      |      |      |      |       | 4      | 3      | 3     | 5     | 5     | 5 |
| 33152  | 3    | 3    | 4    | 3    | 4    | 3    | 3    | 4    | 4     | 2      | 2      | 2     | 4     | 3     | 4 |
| 33159  |      |      |      |      |      |      |      |      |       | 3      | 2      | 2     | 4     | 4     | 4 |
| 33189  |      |      |      |      |      |      |      |      |       | 3      | 2      | 2     | 4     | 4     | 4 |
| 33198  | 5    | 5    |      |      |      |      |      | 4    | 4     | 2      | 2      | 1     | 2     | 3     | 5 |
| 33202  | 3    | 4    | 4    | 2    | 2    | 3    | 3    | 4    | 4     | 2      | 2      | 2     | 4     | 3     | 4 |
| 33204  |      |      |      |      |      |      |      |      |       | 3      | 3      | 3     | 5     | 5     | 5 |
| 33224  |      |      |      |      |      |      |      |      |       | 4      | 3      | 3     | 5     | 5     | 5 |
| 33272  | 2    | 2    | 4    | 2    | 4    | 2    | 3    | 2    | 2     | 2      | 2      | 2     | 2     | 2     | 2 |
| 33294  | 3    | 3    | 3    | 3    | 3    | 3    | 3    | 3    | 3     | 2      | 3      | 2     | 3     | 3     | 3 |
| 33300  |      |      |      |      |      |      |      |      |       | 2      | 2      | 2     | 2     | 3     | 2 |
| 33314  | 2    | 1    | 2    | 2    | 2    | 3    | 2    | 3    | 3     | 2      | 2      | 1     | 3     | 4     | 2 |
| 33338  |      |      |      |      |      |      |      |      |       | 5      | 2      | 2     | 4     | 4     | 4 |
| 33350  |      |      |      |      |      |      |      |      |       | 2      | 2      | 2     | 3     | 3     | 3 |
| 33362  |      |      |      |      |      |      |      |      |       | 2      | 2      | 2     | 3     | 3     | 3 |
| 33368  |      |      |      |      |      |      |      |      |       | 4      | 2      | 2     | 3     | 3     | 3 |
| 33374  |      |      |      |      |      |      |      |      |       | 2      | 2      | 2     | 2     | 3     | 3 |
| 33380  |      |      |      |      |      |      |      |      |       | 2      | 2      | 3     | 3     | 4     | 3 |
| 33385  |      |      |      |      |      |      |      |      |       | 3      | 3      | 3     | 4     | 4     | 4 |
| 33402  |      |      |      |      |      |      |      |      |       | 3      | 2      | 2     | 3     | 4     | 3 |
| 33414  |      |      |      |      |      |      |      |      |       | 3      | 3      | 3     | 4     | 5     | 5 |
| 33439  |      |      |      |      |      |      |      |      |       | 3      | 2      | 2     | 3     | 4     | 3 |
| 33449  |      |      |      |      |      |      |      |      |       | 4      | 3      | 3     | 4     | 4     | 4 |
| 33533  | 5    | 3    | 4    | 5    | 5    | 4    | 5    | 5    | 5     | 4      | 3      | 3     | 5     | 5     | 5 |
| 33540  | 3    | 4    | 5    | 3    | 5    | 4    | 4    | 4    | 4     | 2      | 3      | 3     | 5     | 5     | 5 |
| 33556  | 5    | 5    | 4    | 3    | 5    | 5    | 5    | 5    | 3     | 2      | 2      | 2     | 3     | 3     | 4 |
| 33615  | 5    | 5    | 4    | 4    | 5    | 4    | 5    | 5    | 3     | 3      | 1      | 3     | 5     | 5     | 5 |
| 33694  |      |      |      |      |      |      |      |      |       | 2      | 1      | 1     | 2     | 2     | 2 |
| 33717  |      |      |      |      |      |      |      |      |       | 2      | 3      | 2     | 4     | 4     | 4 |
| 33729  | 2    | 4    | 2    | 5    | 6    | 2    | 5    | 4    | 4     | 3      | 3      | 3     | 5     | 5     | 4 |
| 33746  |      |      |      |      |      |      |      |      |       | 2      | 2      | 1     | 3     | 2     | 5 |
| 33764  | 2    | 2    | 6    | 1    | 4    | 3    | 2    | 5    | 5     | 2      | 2      | 3     | 3     | 3     | 1 |

| respid | Q48k | Q48l | Q48m | Q48n | Q48o | Q48p | Q48q | Q48r | Q49_1 | Q50a_1 | Q50b_1 | Q51_1 | Q51_2 | Q52_1 |
|--------|------|------|------|------|------|------|------|------|-------|--------|--------|-------|-------|-------|
| 33790  | 4    | 3    | 3    | 3    | 6    | 3    | 3    | 6    | 2     | 2      | 2      | 3     | 3     | 4     |
| 33868  |      |      |      |      |      |      |      |      | 1     | 2      | 3      | 2     | 3     | 2     |
| 33872  |      |      |      |      |      |      |      |      | 2     | 2      | 3      | 3     | 3     | 2     |
| 33883  | 4    | 4    | 3    | 4    | 4    | 3    | 4    | 3    | 4     | 3      | 2      | 5     | 5     | 4     |
| 33884  | 3    | 3    | 4    | 3    | 3    | 3    | 3    | 4    | 3     | 3      | 2      | 4     | 4     | 4     |
| 33900  | 4    | 5    | 2    | 4    | 5    | 4    | 5    | 2    | 3     | 2      | 2      | 4     | 4     | 4     |
| 33933  | 4    | 5    | 5    | 3    | 6    | 6    | 6    | 2    | 2     | 2      | 2      | 4     | 3     | 4     |
| 33949  | 3    | 3    | 4    | 5    | 5    | 5    | 5    | 3    | 1     | 2      | 3      | 4     | 4     | 4     |
| 34005  |      |      |      |      |      |      |      |      | 2     | 2      | 3      | 4     | 3     | 5     |
| 34016  |      |      |      |      |      |      |      |      | 3     | 3      | 3      | 5     | 5     | 5     |
| 34041  |      |      |      |      |      |      |      |      | 2     | 2      | 1      | 1     | 2     | 2     |
| 34053  |      |      |      |      |      |      |      |      | 3     | 2      | 2      | 4     | 4     | 4     |
| 34056  | 4    | 4    | 5    | 5    | 5    | 5    | 5    | 5    | 3     | 3      | 3      | 3     | 3     | 3     |
| 34093  |      |      |      |      |      |      |      |      | 3     | 2      | 2      | 2     | 3     | 3     |
| 34112  | 5    | 6    | 1    | 6    | 6    | 5    | 5    | 2    | 3     | 2      | 2      | 3     | 3     | 4     |
| 34136  |      |      |      |      |      |      |      |      | 4     | 2      | 3      | 2     | 3     | 2     |
| 34138  |      |      |      |      |      |      |      |      | 2     | 3      | 3      | 5     | 5     | 4     |
| 34139  |      |      |      |      |      |      |      |      | 2     | 2      | 2      | 3     | 3     | 3     |
| 34189  |      |      |      |      |      |      |      |      | 3     | 3      | 3      | 2     | 4     | 5     |
| 34239  | 6    | 6    | 6    | 2    | 6    | 6    | 6    | 6    | 3     | 3      | 3      | 5     | 5     | 4     |
| 34240  | 4    | 4    | 4    | 4    | 6    | 5    | 4    | 5    | 3     | 2      | 2      | 3     | 4     | 4     |
| 34241  | 3    | 3    | 2    | 3    | 5    | 2    | 5    | 2    | 3     | 3      | 3      | 5     | 5     | 4     |
| 34259  |      |      |      |      |      |      |      |      | 2     | 2      | 3      | 3     | 3     | 2     |
| 34303  |      |      |      |      |      |      |      |      | 2     | 2      | 2      | 1     | 2     | 1     |
| 34306  |      |      |      |      |      |      |      |      | 4     | 2      | 2      | 4     | 4     | 3     |
| 34395  |      |      |      |      |      |      |      |      | 2     | 2      | 1      | 3     | 3     | 3     |
| 34463  | 5    | 3    | 4    | 3    | 3    | 3    | 4    | 3    | 3     | 2      | 2      | 4     | 4     | 4     |
| 34466  |      |      |      |      |      |      |      |      | 2     | 2      | 2      | 3     | 3     | 3     |
| 34471  | 2    | 3    | 3    | 3    | 4    | 4    | 4    | 3    | 3     | 2      | 2      | 4     | 3     | 3     |
| 34489  |      |      |      |      |      |      |      |      | 2     | 2      | 2      | 3     | 3     | 3     |
| 34518  | 2    | 3    | 4    | 3    | 4    | 3    | 3    | 4    | 2     | 3      | 2      | 3     | 3     | 1     |
| 34542  | 4    | 4    | 4    | 3    | 5    | 3    | 5    | 5    | 3     | 2      | 2      | 3     | 3     | 2     |

| respid | Q48k | Q48l | Q48m | Q48n | Q48o | Q48p | Q48q | Q48r | Q49_1 | Q50a_1 | Q50b_1 | Q51_1 | Q51_2 | Q52_1 |   |
|--------|------|------|------|------|------|------|------|------|-------|--------|--------|-------|-------|-------|---|
| 34595  |      |      |      |      |      |      |      |      |       | 4      | 3      | 3     | 5     | 5     | 5 |
| 34604  | 6    | 5    | 5    | 3    | 5    | 5    | 5    | 5    | 6     | 4      | 2      | 2     | 4     | 4     | 4 |
| 34631  | 5    | 5    | 3    | 5    | 4    | 4    | 4    | 4    | 3     | 2      | 2      | 2     | 1     | 1     | 4 |
| 34665  | 6    | 6    | 4    | 5    | 6    | 6    | 6    | 6    | 2     | 4      | 3      | 2     | 5     | 5     | 5 |
| 34716  |      |      |      |      |      |      |      |      |       | 4      | 3      | 3     | 5     | 5     | 5 |
| 34729  | 5    | 3    | 2    | 5    | 4    | 3    | 5    | 3    | 4     | 4      | 3      | 3     | 5     | 5     | 5 |
| 34772  | 1    | 1    | 6    | 1    | 1    | 1    | 1    | 1    | 6     | 1      | 2      | 2     | 2     | 2     | 2 |
| 34800  | 4    | 4    | 4    | 4    | 4    | 4    | 4    | 4    | 4     | 2      | 3      | 3     | 4     | 4     | 4 |
| 34819  | 3    | 1    | 2    | 4    | 4    | 4    | 4    | 6    | 4     | 2      | 2      | 2     | 3     | 3     | 3 |
| 34829  | 4    | 3    | 2    | 5    | 5    | 6    | 5    | 3    | 2     | 2      | 2      | 2     | 3     | 4     | 2 |
| 34831  | 4    | 4    | 4    | 3    | 4    | 4    | 4    | 4    | 4     | 3      | 2      | 2     | 2     | 2     | 2 |
| 34839  |      |      |      |      |      |      |      |      |       | 2      | 2      | 3     | 4     | 4     | 5 |
| 34868  | 5    | 3    | 4    | 4    | 5    | 4    | 5    | 2    | 3     | 3      | 2      | 3     | 2     | 4     | 3 |
| 34869  |      |      |      |      |      |      |      |      |       | 2      | 2      | 2     | 3     | 3     | 4 |
| 34882  | 6    | 6    | 6    | 6    | 6    | 6    | 6    | 6    | 6     | 2      | 2      | 2     | 3     | 3     | 3 |
| 34895  |      |      |      |      |      |      |      |      |       | 3      | 2      | 2     | 4     | 3     | 4 |
| 34901  |      |      |      |      |      |      |      |      |       | 2      | 1      | 1     | 2     | 2     | 3 |
| 34904  | 4    | 3    | 3    | 4    | 2    | 3    | 3    | 3    | 4     | 2      | 2      | 2     | 2     | 3     | 2 |
| 34907  |      |      |      |      |      |      |      |      |       | 2      | 2      | 2     | 3     | 3     | 3 |
| 34914  |      |      |      |      |      |      |      |      |       | 2      | 2      | 2     | 4     | 4     | 4 |
| 34918  |      |      |      |      |      |      |      |      |       | 3      | 2      | 2     | 3     | 3     | 3 |
| 34924  | 3    | 3    | 4    | 2    | 6    | 5    | 5    | 4    | 4     | 4      | 2      | 2     | 5     | 5     | 5 |
| 34933  | 5    | 6    | 1    | 6    | 6    | 6    | 6    | 6    | 1     | 2      | 2      | 2     | 3     | 3     | 3 |
| 34938  |      |      |      |      |      |      |      |      |       | 4      | 3      | 3     | 5     | 5     | 5 |
| 34952  |      |      |      |      |      |      |      |      |       | 1      | 1      | 1     | 2     | 2     | 2 |
| 34959  |      |      |      |      |      |      |      |      |       | 2      | 3      | 3     | 5     | 5     | 5 |
| 34972  |      |      |      |      | 6    |      |      |      |       | 3      | 3      | 3     | 4     | 5     | 4 |
| 34973  | 3    | 4    | 3    | 3    | 4    | 3    | 4    | 4    | 4     | 2      | 2      | 2     | 3     | 4     | 3 |
| 34975  |      |      |      |      |      |      |      |      |       | 2      | 2      | 2     | 3     | 3     | 4 |
| 34977  |      |      |      |      |      |      |      |      |       | 2      | 2      | 3     | 3     | 4     | 4 |
| 34978  | 4    | 5    | 1    | 6    | 6    | 6    | 5    | 2    | 2     | 3      | 2      | 1     | 3     | 4     | 4 |
| 34980  |      |      |      |      |      |      |      |      |       | 4      | 3      | 3     | 5     | 5     | 4 |

| respid | Q48k | Q48l | Q48m | Q48n | Q48o | Q48p | Q48q | Q48r | Q49_1 | Q50a_1 | Q50b_1 | Q51_1 | Q51_2 | Q52_1 |   |
|--------|------|------|------|------|------|------|------|------|-------|--------|--------|-------|-------|-------|---|
| 34984  | 4    | 4    | 3    | 4    | 4    | 4    | 4    | 4    | 3     | 2      | 2      | 2     | 3     | 4     | 3 |
| 34986  |      |      |      |      |      |      |      |      |       | 2      | 2      | 2     | 3     | 3     | 3 |
| 34994  | 6    | 6    | 6    | 6    | 6    | 6    | 6    | 6    | 6     | 3      | 3      | 3     | 4     | 4     | 4 |
| 34996  |      |      |      |      |      |      |      |      |       | 3      | 2      | 3     | 4     | 4     | 3 |
| 35003  |      |      |      |      |      |      |      |      |       | 4      | 3      | 2     | 4     | 4     | 4 |
| 35014  | 3    | 4    | 5    | 4    | 6    | 5    | 5    | 3    | 2     | 2      | 3      | 3     | 3     | 3     | 4 |
| 35029  |      |      |      |      |      |      |      |      |       | 2      | 2      | 2     | 4     | 4     | 4 |
| 35030  |      |      |      |      |      |      |      |      |       | 1      | 2      | 1     | 2     | 2     | 2 |
| 35037  | 5    | 6    | 1    | 5    | 6    | 6    | 6    | 6    | 2     | 3      | 1      | 1     | 3     | 3     | 3 |
| 35043  |      |      |      |      |      |      |      |      |       | 5      | 3      | 3     | 5     | 5     | 5 |
| 35048  |      |      |      |      |      |      |      |      |       | 4      | 3      | 3     | 5     | 5     | 5 |
| 35055  | 6    | 3    | 2    | 6    | 6    | 5    | 6    | 1    | 2     | 2      | 2      | 2     | 3     | 3     | 3 |
| 35067  | 4    | 6    | 1    | 5    | 6    | 6    | 6    | 5    | 3     | 3      | 2      | 2     | 3     | 3     | 4 |
| 35072  | 4    | 4    | 3    | 4    | 5    | 4    | 4    | 4    | 3     | 3      | 2      | 2     | 4     | 4     | 5 |
| 35078  |      |      |      |      |      |      |      |      |       | 2      | 2      | 2     | 3     | 3     | 4 |
| 35084  |      |      |      |      |      |      |      |      |       | 3      | 3      | 3     | 3     | 2     | 5 |
| 35095  |      |      |      |      |      |      |      |      |       | 3      | 3      | 3     | 4     | 4     | 4 |
| 35096  |      |      |      |      |      |      |      |      |       | 5      | 3      | 3     | 5     | 5     | 5 |
| 35097  |      |      |      |      |      |      |      |      |       | 3      | 2      | 1     | 2     | 2     | 3 |
| 35098  | 4    | 4    | 3    | 4    | 4    | 4    | 4    | 4    | 3     | 3      | 3      | 2     | 4     | 4     | 4 |
| 35109  |      |      |      |      |      |      |      |      |       | 1      | 1      | 2     | 2     | 2     | 2 |
| 35114  | 1    | 6    | 6    | 1    | 6    | 6    | 6    | 6    | 6     | 4      | 2      | 2     | 4     | 4     | 5 |
| 35115  |      |      |      |      |      |      |      |      |       | 4      | 3      | 1     | 3     | 3     | 4 |
| 35124  | 3    | 3    | 3    | 3    | 2    | 3    | 2    | 3    | 3     | 2      | 2      | 2     | 3     | 3     | 3 |
| 35125  |      |      |      |      |      |      |      |      |       | 4      | 2      | 3     | 4     | 4     | 4 |
| 35141  |      |      |      |      |      |      |      |      |       | 3      | 3      | 3     | 5     | 5     | 4 |
| 35142  | 3    | 3    | 3    | 3    | 3    | 3    | 3    | 3    | 3     | 3      | 3      | 2     | 5     | 5     | 4 |
| 35145  |      |      |      |      |      |      |      |      |       | 4      | 2      | 2     | 4     | 4     | 4 |
| 35149  | 3    | 3    | 6    | 1    | 6    | 3    | 3    | 3    | 5     | 4      | 3      | 3     | 4     | 4     | 3 |
| 35159  | 4    | 6    | 6    | 6    | 5    | 5    | 4    | 4    | 4     | 3      | 3      | 3     | 5     | 5     | 4 |
| 35163  | 6    | 6    | 5    | 6    | 6    | 6    | 6    | 6    | 6     | 1      | 1      | 1     | 2     | 2     | 2 |
| 35174  | 6    | 6    | 2    | 6    | 6    | 6    | 6    | 5    | 2     | 3      | 2      | 2     | 4     | 4     | 4 |

| respid | Q48k | Q48l | Q48m | Q48n | Q48o | Q48p | Q48q | Q48r | Q49_1 | Q50a_1 | Q50b_1 | Q51_1 | Q51_2 | Q52_1 |   |
|--------|------|------|------|------|------|------|------|------|-------|--------|--------|-------|-------|-------|---|
| 35188  |      |      |      |      |      |      |      |      |       | 4      | 3      | 3     | 5     | 5     | 5 |
| 35189  | 2    | 5    | 3    | 6    | 6    | 6    | 5    | 3    | 4     | 2      | 2      | 1     | 2     | 2     | 2 |
| 35201  | 6    | 3    | 3    | 6    | 6    | 6    | 6    | 4    | 2     | 2      | 2      | 3     | 4     | 5     | 4 |
| 35215  | 5    | 5    | 5    | 4    | 6    | 6    | 3    | 5    | 3     | 2      | 3      | 2     | 4     | 4     | 4 |
| 35228  | 2    | 3    | 6    | 3    | 6    | 6    | 2    | 1    | 4     | 2      | 2      | 3     | 4     | 4     | 5 |
| 35235  | 5    | 5    | 2    | 5    | 6    | 6    | 6    | 4    | 4     | 3      | 3      | 2     | 4     | 4     | 4 |
| 35239  |      |      |      |      |      |      |      |      |       | 3      | 2      | 2     | 3     | 4     | 2 |
| 35243  |      |      |      |      |      |      |      |      |       | 2      | 3      | 3     | 3     | 4     | 3 |
| 35245  |      |      |      |      |      |      |      |      |       | 3      | 2      | 2     | 3     | 3     | 4 |
| 35259  |      |      |      |      |      |      |      |      |       | 3      | 3      | 3     | 5     | 5     | 5 |
| 35265  |      |      |      |      |      |      |      |      |       | 2      | 2      | 2     | 3     | 3     | 3 |
| 35272  | 2    | 3    | 2    | 2    | 3    | 3    | 3    | 3    | 4     | 2      | 1      | 1     | 2     | 2     | 2 |
| 35280  | 6    | 6    | 1    | 6    | 6    | 6    | 6    | 6    | 6     | 1      | 2      | 2     | 2     | 2     | 4 |
| 35298  |      |      |      |      |      |      |      |      |       | 4      | 3      | 3     | 5     | 5     | 5 |
| 35305  | 5    | 6    | 3    | 5    | 6    | 6    | 5    | 5    | 3     | 3      | 2      | 1     | 3     | 4     | 3 |
| 35306  |      |      |      |      |      |      |      |      |       | 2      | 2      | 1     | 2     | 2     | 3 |
| 35307  |      |      |      |      |      |      |      |      |       | 4      | 3      | 3     | 5     | 5     | 5 |
| 35311  | 6    | 6    | 1    | 6    | 6    | 6    | 6    | 6    | 1     | 4      | 2      | 3     | 3     | 3     | 3 |
| 35322  | 6    | 3    |      | 5    |      |      |      | 6    | 6     | 2      | 1      | 2     | 3     | 3     | 4 |
| 35323  |      |      |      |      |      |      |      |      |       | 2      | 2      | 2     | 3     | 3     | 3 |
| 35327  | 5    | 4    | 3    | 5    | 4    | 3    | 4    | 4    | 3     | 3      | 2      | 3     | 4     | 5     | 4 |
| 35366  |      |      |      |      |      |      |      |      |       | 5      | 3      | 3     | 4     | 4     | 4 |
| 35378  | 5    | 5    | 3    | 4    | 3    | 4    | 4    | 5    | 3     | 3      | 2      | 3     | 4     | 4     | 3 |
| 35389  |      |      |      |      |      |      |      |      |       | 3      | 3      | 3     | 5     | 5     | 5 |
| 35390  |      |      |      |      |      |      |      |      |       | 3      | 2      | 2     | 3     | 3     | 3 |
| 35395  |      |      |      |      |      |      |      |      |       | 2      | 2      | 2     | 2     | 3     | 2 |
| 35411  |      |      |      |      |      |      |      |      |       | 2      | 2      | 2     | 2     | 3     | 3 |
| 35423  |      |      |      |      |      |      |      |      |       | 2      | 3      | 3     | 3     | 4     | 4 |
| 35425  | 1    | 1    | 6    | 1    | 6    | 6    | 1    | 1    | 6     | 1      | 2      | 2     | 2     | 2     | 4 |
| 35434  |      |      |      |      |      |      |      |      |       | 3      | 1      | 1     | 2     | 2     | 2 |
| 35462  | 6    | 3    | 1    | 6    | 6    | 6    | 6    | 6    | 3     | 3      | 3      | 3     | 3     | 4     | 3 |
| 35478  |      |      |      |      |      |      |      |      |       | 2      | 2      | 2     | 3     | 3     | 3 |

| respid | Q48k | Q48l | Q48m | Q48n | Q48o | Q48p | Q48q | Q48r | Q49_1 | Q50a_1 | Q50b_1 | Q51_1 | Q51_2 | Q52_1 |   |
|--------|------|------|------|------|------|------|------|------|-------|--------|--------|-------|-------|-------|---|
| 35481  |      |      |      |      |      |      |      |      |       | 3      | 2      | 2     | 3     | 2     | 3 |
| 35498  |      |      |      |      |      |      |      |      |       | 2      | 2      | 2     | 4     | 3     | 5 |
| 35499  |      |      |      |      |      |      |      |      |       | 3      | 3      | 3     | 3     | 4     | 4 |
| 35502  | 4    | 3    | 4    | 5    | 3    | 3    | 4    | 4    | 4     | 3      | 2      | 2     | 2     | 3     | 2 |
| 35503  |      |      |      |      |      |      |      |      |       | 4      | 2      | 3     | 4     | 4     | 4 |
| 35504  |      |      |      |      |      |      |      |      |       | 3      | 3      | 3     | 5     | 5     | 5 |
| 35508  | 3    | 3    | 2    | 4    | 4    | 5    | 4    | 4    | 4     | 1      | 2      | 2     | 2     | 3     | 3 |
| 35513  |      |      |      |      |      |      |      |      |       | 4      | 3      | 2     | 4     | 4     | 4 |
| 35516  |      |      |      |      |      |      |      |      |       | 3      | 2      | 1     | 4     | 3     | 5 |
| 35519  | 3    | 1    | 3    | 1    | 3    | 3    | 3    | 3    | 6     | 1      | 1      | 1     | 2     | 2     | 2 |
| 35530  | 3    | 4    | 4    | 4    | 6    | 6    | 3    | 5    | 5     | 2      | 2      | 2     | 3     | 3     | 3 |
| 35533  | 6    | 6    | 2    | 6    | 6    | 6    | 6    | 6    | 3     | 1      | 2      | 2     | 3     | 3     | 3 |
| 35561  | 5    | 4    | 3    | 4    | 6    | 5    | 6    | 6    | 2     | 4      | 2      | 2     | 2     | 2     | 3 |
| 35565  |      |      |      |      |      |      |      |      |       | 4      | 2      | 2     | 3     | 3     | 3 |
| 35588  |      |      |      |      |      |      |      |      |       | 4      | 2      | 2     | 4     | 3     | 4 |
| 35598  |      |      |      |      |      |      |      |      |       | 4      | 3      | 3     | 4     | 4     | 5 |
| 35607  |      |      |      |      |      |      |      |      |       | 4      | 2      | 3     | 5     | 5     | 5 |
| 35638  | 6    | 6    | 2    | 6    | 6    | 6    | 6    | 6    | 2     | 4      | 3      | 3     | 4     | 5     | 5 |
| 35642  |      |      |      |      |      |      |      |      |       | 2      | 3      | 3     | 5     | 4     | 5 |
| 35643  |      |      |      |      |      |      |      |      |       | 2      | 2      | 2     | 2     | 2     | 2 |
| 35680  | 5    | 6    | 1    | 6    | 6    | 6    | 6    | 6    | 2     | 3      | 3      | 3     | 4     | 4     | 4 |
| 35697  | 6    |      | 6    | 5    | 5    | 5    | 5    | 5    | 3     | 3      | 2      | 3     | 5     | 5     | 5 |
| 35703  |      |      |      |      |      |      |      |      |       | 2      | 3      | 3     | 5     | 5     | 5 |
| 35709  | 5    | 3    | 2    | 5    | 6    | 2    | 3    | 5    | 5     | 2      | 3      | 3     | 3     | 4     | 3 |
| 35710  |      |      |      |      |      |      |      |      |       | 4      | 3      | 3     | 5     | 5     | 4 |
| 35721  |      |      |      |      |      |      |      |      |       | 1      | 2      | 2     | 1     | 2     | 1 |
| 35723  | 6    | 6    | 1    | 6    | 6    | 6    | 6    | 6    | 1     | 4      | 3      | 3     | 5     | 5     | 4 |
| 35736  | 1    | 6    | 6    | 1    | 6    | 6    | 6    | 6    | 6     | 1      | 1      | 1     | 2     | 2     | 2 |
| 35739  | 6    | 6    | 6    | 6    | 6    | 6    | 6    | 6    | 3     | 2      | 1      | 2     | 3     | 3     | 4 |
| 35745  | 2    | 3    | 5    | 2    | 5    | 5    | 4    | 4    | 2     | 2      | 3      | 2     | 3     | 4     | 4 |
| 35748  |      |      |      |      |      |      |      |      |       | 2      | 2      | 2     | 3     | 3     | 2 |
| 35750  | 6    | 6    | 1    | 6    | 6    | 6    | 6    | 6    | 1     | 2      | 2      | 1     | 3     | 3     | 4 |



| respid | Q48k | Q48l | Q48m | Q48n | Q48o | Q48p | Q48q | Q48r | Q49_1 | Q50a_1 | Q50b_1 | Q51_1 | Q51_2 | Q52_1 |   |
|--------|------|------|------|------|------|------|------|------|-------|--------|--------|-------|-------|-------|---|
| 35752  |      |      |      |      |      |      |      |      |       | 3      | 2      | 2     | 4     | 4     | 5 |
| 35773  | 1    | 4    | 4    | 4    | 4    | 4    | 4    |      |       | 2      | 2      | 2     | 2     | 2     | 3 |
| 35779  |      |      |      |      |      |      |      |      |       | 2      | 2      | 2     | 5     | 5     | 5 |
| 35791  |      |      |      |      |      |      |      |      |       | 3      | 3      | 3     | 4     | 4     | 4 |
| 35801  | 4    | 6    | 4    | 4    | 6    | 6    | 6    | 3    |       | 4      | 2      | 2     | 3     | 3     | 3 |
| 35802  | 5    | 5    | 4    | 5    | 5    | 5    | 5    | 5    | 3     | 4      | 2      | 3     | 4     | 4     | 4 |
| 35837  | 4    | 5    | 5    |      | 5    |      | 4    |      |       | 2      | 2      | 2     | 3     | 3     | 4 |
| 35853  | 6    | 4    | 3    |      | 5    | 4    | 2    | 5    |       | 2      | 2      | 2     | 3     | 4     | 3 |
| 35858  |      |      |      |      |      |      |      |      |       | 3      | 2      | 2     | 3     | 3     | 4 |
| 35860  | 1    | 2    | 3    | 2    | 4    | 4    | 3    | 5    |       | 1      | 2      | 1     | 2     | 2     | 2 |
| 35875  |      |      |      |      |      |      |      |      |       | 2      | 3      | 3     | 3     | 4     | 5 |
| 35883  |      |      |      |      |      |      |      |      |       | 3      | 3      | 3     | 4     | 5     | 4 |
| 35890  |      |      |      |      |      |      |      |      |       | 3      | 3      | 2     | 4     | 4     | 5 |
| 35898  | 1    | 4    | 6    | 1    | 6    | 6    | 4    | 1    |       | 2      | 1      | 2     | 2     | 2     | 5 |
| 35901  | 4    | 2    |      | 3    | 3    | 5    | 3    | 5    |       | 1      | 1      | 1     | 2     | 2     | 2 |
| 35914  |      |      |      |      |      |      |      |      |       | 3      | 2      | 2     | 2     | 2     | 2 |
| 35924  | 4    | 3    | 2    | 5    | 4    | 4    | 3    | 4    |       | 3      | 3      | 2     | 2     | 3     | 2 |
| 35950  |      |      |      |      |      |      |      |      |       | 2      | 2      | 3     | 2     | 4     | 4 |
| 35961  |      |      |      |      |      |      |      |      |       | 3      | 2      | 3     | 3     | 4     | 4 |
| 35966  | 1    | 1    | 6    |      | 1    | 6    |      | 6    |       | 2      | 2      | 2     | 3     | 3     | 4 |
| 35967  |      |      |      |      |      |      |      |      |       | 5      | 3      | 3     | 5     | 5     | 5 |
| 35971  |      |      |      |      |      |      |      |      |       | 3      | 2      | 2     | 2     | 2     | 3 |
| 35974  |      |      |      |      |      |      |      |      |       | 3      | 2      | 2     | 4     | 4     | 5 |
| 35983  |      | 6    | 3    | 6    | 4    | 4    | 4    | 4    |       | 3      | 1      | 2     | 3     | 3     | 3 |
| 35992  | 6    | 5    | 1    | 5    | 5    | 2    | 2    | 1    |       | 1      | 1      | 1     | 2     | 2     | 2 |
| 36010  | 5    | 5    | 3    | 5    | 6    | 5    | 4    | 3    |       | 3      | 2      | 2     | 4     | 4     | 4 |
| 36019  |      |      |      |      |      |      |      |      |       | 2      | 3      | 3     | 3     | 3     | 4 |
| 36029  | 4    | 4    | 3    | 4    | 1    | 3    | 3    | 3    |       | 3      | 3      | 3     | 5     | 5     | 4 |
| 36033  |      |      |      |      |      |      |      |      |       | 2      | 3      | 2     | 5     | 4     | 5 |
| 36042  | 6    | 5    | 3    | 6    | 5    | 6    | 5    |      |       | 3      | 3      | 3     | 3     | 4     | 4 |
| 36043  | 6    | 6    | 5    | 6    | 6    | 6    | 5    | 6    |       | 2      | 2      | 2     | 3     | 3     | 3 |
| 36048  | 4    | 4    | 5    | 3    | 5    | 3    | 3    | 3    |       | 1      | 3      | 2     | 3     | 4     | 3 |

| respid | Q48k | Q48l | Q48m | Q48n | Q48o | Q48p | Q48q | Q48r | Q49_1 | Q50a_1 | Q50b_1 | Q51_1 | Q51_2 | Q52_1 |   |
|--------|------|------|------|------|------|------|------|------|-------|--------|--------|-------|-------|-------|---|
| 36050  |      |      |      |      |      |      |      |      |       | 3      | 2      | 3     | 4     | 3     | 3 |
| 36062  | 5    | 6    | 5    | 5    | 6    | 5    | 5    | 3    |       | 2      | 2      | 2     | 3     | 4     | 3 |
| 36063  |      |      |      |      |      |      |      |      |       | 4      | 3      | 3     | 5     | 5     | 5 |
| 36092  | 5    | 6    | 1    | 5    | 6    | 6    | 4    | 2    |       | 2      | 2      | 2     | 3     | 3     | 3 |
| 36097  | 4    | 5    | 3    | 4    | 4    | 4    | 5    | 4    |       | 2      | 2      | 2     | 3     | 3     | 3 |
| 36108  |      |      |      |      |      |      |      |      |       | 4      | 3      | 3     | 5     | 5     | 5 |
| 36113  |      |      |      |      |      |      |      |      |       | 2      | 1      | 1     | 2     | 3     | 2 |
| 36117  | 4    | 5    | 2    | 4    | 5    | 4    | 5    | 3    |       | 2      | 3      | 3     | 4     | 4     | 3 |
| 36129  |      |      |      |      |      |      |      |      |       | 2      | 2      | 3     | 3     | 3     | 3 |
| 36144  |      |      |      |      |      |      |      |      |       | 4      | 3      | 3     | 5     | 5     | 5 |
| 36152  |      |      |      |      |      |      |      |      |       | 3      | 2      | 2     | 3     | 3     | 4 |
| 36154  | 5    | 3    | 5    | 4    | 4    | 4    | 5    | 5    |       | 4      | 2      | 2     | 2     | 3     | 2 |
| 36155  |      |      |      |      |      |      |      |      |       | 4      | 2      | 2     | 3     | 3     | 3 |
| 36167  | 6    | 6    | 1    | 6    | 6    | 6    | 6    | 1    |       | 5      | 3      | 3     | 5     | 5     | 5 |
| 36172  |      |      |      |      |      |      |      |      |       | 3      | 3      | 3     | 5     | 5     | 5 |
| 36173  | 3    | 3    | 5    | 3    | 4    | 4    | 4    | 3    |       | 3      | 3      | 3     | 4     | 4     | 3 |
| 36174  | 4    | 5    | 3    | 5    | 6    | 4    | 5    | 3    |       | 3      | 3      | 2     | 3     | 5     | 3 |
| 36182  | 3    | 3    | 3    | 5    | 6    | 6    | 4    | 2    |       | 3      | 2      | 2     | 4     | 4     | 4 |
| 36192  | 3    | 3    | 3    |      |      |      | 5    | 3    |       | 2      | 3      | 2     | 3     | 3     | 3 |
| 36195  |      |      |      |      |      |      |      |      |       | 2      | 2      | 2     | 3     | 3     | 3 |
| 36204  |      |      |      |      |      |      |      |      |       | 2      | 3      | 2     | 3     | 3     | 3 |
| 36205  | 1    | 1    |      | 1    |      |      | 6    | 6    |       | 2      | 1      | 1     | 3     | 2     | 4 |
| 36208  |      |      |      |      |      |      |      |      |       | 3      | 3      | 2     | 4     | 4     | 4 |
| 36216  | 4    | 4    | 3    | 4    | 5    | 3    | 3    | 4    |       | 2      | 2      | 2     | 3     | 3     | 3 |
| 36221  | 1    | 1    | 6    | 1    | 1    | 1    | 2    | 4    |       | 2      | 1      | 1     | 2     | 2     | 5 |
| 36244  |      |      |      |      |      |      |      |      |       | 5      | 3      | 3     | 5     | 5     | 5 |
| 36255  |      |      |      |      |      |      |      |      |       | 3      | 2      | 2     | 2     | 2     | 1 |
| 36259  |      |      |      |      |      |      |      |      |       | 4      | 3      | 2     | 4     | 4     | 4 |
| 36262  |      |      |      |      |      |      |      |      |       | 2      | 2      | 2     | 2     | 2     | 2 |
| 36268  | 6    | 6    | 6    | 6    | 6    | 6    | 6    | 6    |       | 4      | 2      | 2     | 2     | 2     | 5 |
| 36308  |      |      |      |      |      |      |      |      |       | 2      | 2      | 3     | 3     | 2     | 4 |
| 36324  | 5    | 6    | 6    | 2    | 6    | 6    | 6    | 3    |       | 2      | 3      | 2     | 5     | 4     | 4 |

| respid | Q48k | Q48l | Q48m | Q48n | Q48o | Q48p | Q48q | Q48r | Q49_1 | Q50a_1 | Q50b_1 | Q51_1 | Q51_2 | Q52_1 |   |
|--------|------|------|------|------|------|------|------|------|-------|--------|--------|-------|-------|-------|---|
| 36330  | 6    | 6    | 6    | 6    | 6    | 6    | 6    | 6    | 6     | 3      | 3      | 3     | 4     | 5     | 4 |
| 36331  | 1    |      |      |      | 6    |      |      |      | 4     | 1      | 1      | 1     | 2     | 2     | 2 |
| 36336  |      |      |      |      |      |      |      |      |       | 3      | 3      | 3     | 3     | 4     | 4 |
| 36337  |      |      |      |      |      |      |      |      |       | 2      | 3      | 3     | 4     | 5     | 4 |
| 36364  |      |      |      |      |      |      |      |      |       | 3      | 2      | 2     | 2     | 2     | 3 |
| 36365  |      |      |      |      |      |      |      |      |       | 2      | 2      | 3     | 2     | 2     | 4 |
| 36396  | 6    | 5    | 2    | 4    | 5    | 4    | 4    | 3    | 2     | 2      | 2      | 2     | 3     | 2     | 3 |
| 36403  |      |      |      |      |      |      |      |      |       | 2      | 2      | 2     | 3     | 2     | 4 |
| 36410  |      |      |      |      |      |      |      |      |       | 4      | 3      | 3     | 5     | 5     | 5 |
| 36413  | 1    | 1    | 1    | 1    | 1    | 1    | 1    | 1    | 1     | 4      | 3      | 3     | 5     | 5     | 5 |
| 36422  |      |      |      |      |      |      |      |      |       | 3      | 3      | 3     | 4     | 5     | 4 |
| 36424  |      |      |      |      |      |      |      |      |       | 2      | 2      | 2     | 4     | 4     | 3 |
| 36425  |      |      |      |      |      |      |      |      |       | 2      | 2      | 1     | 3     | 4     | 1 |
| 36432  |      |      |      |      |      |      |      |      |       | 2      | 2      | 2     | 3     | 3     | 3 |
| 36435  |      |      |      |      |      |      |      |      |       | 1      | 1      | 1     | 2     | 2     | 3 |
| 36446  | 2    | 5    | 2    | 5    | 5    | 5    | 5    | 5    | 2     | 2      | 2      | 2     | 3     | 5     | 3 |
| 36451  |      | 6    | 5    | 5    | 6    | 2    | 6    | 1    | 3     | 2      | 3      | 3     | 3     | 4     | 4 |
| 36453  |      |      |      |      |      |      |      |      |       | 3      | 2      | 2     | 3     | 3     | 2 |
| 36459  | 3    | 4    | 3    | 3    | 3    | 3    | 4    | 3    | 3     | 2      | 2      | 2     | 3     | 3     | 3 |
| 36464  | 6    | 6    | 1    | 6    | 6    | 5    | 5    | 3    | 2     | 3      | 3      | 3     | 5     | 5     | 4 |
| 36465  | 2    | 4    | 4    | 2    | 4    | 3    | 4    | 4    | 4     | 4      | 2      | 2     | 4     | 4     | 4 |
| 36466  |      |      |      |      |      |      |      |      |       | 2      | 2      | 2     | 2     | 2     | 4 |
| 36476  |      |      |      |      |      |      |      |      |       | 3      | 2      | 2     | 3     | 3     | 4 |
| 36487  |      |      |      |      |      |      |      |      |       | 2      | 1      | 3     | 5     | 5     | 5 |
| 36488  |      |      |      |      |      |      |      |      |       | 5      | 3      | 3     | 5     | 5     | 5 |
| 36500  |      |      |      |      |      |      |      |      |       | 2      | 3      | 3     | 5     | 5     | 5 |
| 36504  | 3    | 6    | 3    | 6    | 6    | 6    | 6    | 3    | 4     | 3      | 2      | 2     | 4     | 4     | 4 |
| 36513  | 2    | 3    | 3    | 4    | 3    | 3    | 4    | 3    | 3     | 3      | 3      | 3     | 3     | 3     | 4 |
| 36515  |      |      |      |      |      |      |      |      |       | 2      | 2      | 2     | 3     | 3     | 3 |
| 36521  | 4    | 4    | 2    | 5    | 6    | 2    | 6    | 5    | 3     | 1      | 2      | 2     | 4     | 4     | 3 |
| 36530  |      |      |      |      |      |      |      |      |       | 4      | 2      | 2     | 2     | 2     | 2 |
| 36556  | 5    | 5    | 2    | 6    | 6    | 5    | 5    | 2    | 1     | 2      | 2      | 2     | 3     | 3     | 4 |

| respid | Q48k | Q48l | Q48m | Q48n | Q48o | Q48p | Q48q | Q48r | Q49_1 | Q50a_1 | Q50b_1 | Q51_1 | Q51_2 | Q52_1 |   |
|--------|------|------|------|------|------|------|------|------|-------|--------|--------|-------|-------|-------|---|
| 36564  |      |      |      |      |      |      |      |      |       | 2      | 2      | 2     | 2     | 3     | 2 |
| 36584  |      |      |      |      |      |      |      |      |       | 5      | 3      | 3     | 5     | 5     | 5 |
| 36585  |      |      |      |      |      |      |      |      |       | 3      | 2      | 3     | 3     | 3     | 4 |
| 36586  |      |      |      |      |      |      |      |      |       | 4      | 3      | 3     | 4     | 4     | 4 |
| 36606  | 3    | 4    | 3    | 3    | 4    | 2    | 3    | 3    |       | 1      | 1      | 2     | 3     | 3     | 3 |
| 36615  | 6    | 6    | 1    | 6    | 6    | 5    | 6    | 2    |       | 3      | 3      | 3     | 5     | 5     | 4 |
| 36628  | 4    | 4    | 3    | 4    | 4    | 4    | 4    | 3    |       | 2      | 3      | 2     | 3     | 3     | 4 |
| 36630  |      |      |      |      |      |      |      |      |       | 2      | 2      | 2     | 2     | 2     | 2 |
| 36631  |      |      |      |      |      |      |      |      |       | 2      | 2      | 2     | 4     | 4     | 4 |
| 36636  | 3    | 4    | 4    | 4    | 4    | 4    | 4    | 4    |       | 3      | 3      | 3     | 4     | 4     | 4 |
| 36637  | 3    | 4    | 3    | 3    | 4    | 4    | 3    | 4    |       | 3      | 2      | 2     | 4     | 3     | 4 |
| 36651  |      |      |      |      |      |      |      |      |       | 2      | 2      | 2     | 3     | 4     | 2 |
| 36661  |      |      |      |      |      |      |      |      |       | 3      | 3      | 3     | 5     | 5     | 4 |
| 36670  | 6    | 1    | 4    | 2    | 2    | 4    | 3    | 3    |       | 2      | 2      | 2     | 2     | 2     | 4 |
| 36671  |      |      |      |      |      |      |      |      |       | 2      | 2      | 2     | 3     | 3     | 2 |
| 36688  |      |      |      |      |      |      |      |      |       | 4      | 3      | 3     | 5     | 5     | 5 |
| 36694  |      |      |      |      |      |      |      |      |       | 3      | 2      | 2     | 2     | 3     | 3 |
| 36696  |      |      |      |      |      |      |      |      |       | 3      | 2      | 2     | 4     | 4     | 3 |
| 36703  |      |      |      |      |      |      |      |      |       | 3      | 3      | 3     | 5     | 5     | 3 |
| 36719  |      |      |      |      |      |      |      |      |       | 2      | 1      | 1     | 3     | 3     | 3 |
| 36721  |      |      |      |      |      |      |      |      |       | 2      | 1      | 1     | 3     | 3     | 3 |
| 36740  |      |      |      |      |      |      |      |      |       | 5      | 1      | 2     | 3     | 3     | 2 |
| 36755  |      |      |      |      |      |      |      |      |       | 4      | 3      | 3     | 4     | 5     | 4 |
| 36765  | 2    | 2    | 6    | 5    | 4    |      | 3    | 3    |       | 2      | 2      | 2     | 2     | 2     | 2 |
| 36770  |      |      |      |      |      |      |      |      |       | 3      | 3      | 2     | 4     | 4     | 4 |
| 36773  |      |      |      |      |      |      |      |      |       | 3      | 2      | 2     | 2     | 2     | 2 |
| 36813  | 4    | 3    |      | 4    |      | 3    |      |      |       | 2      | 2      | 3     | 2     | 3     | 2 |
| 36819  |      |      |      |      |      |      |      |      |       | 2      | 2      | 2     | 2     | 2     | 3 |
| 36820  | 6    | 6    | 3    | 6    | 6    | 3    | 6    | 1    |       | 4      | 2      | 2     | 3     | 3     | 3 |
| 36821  |      |      |      |      |      |      |      |      |       | 4      | 3      | 3     | 5     | 5     | 5 |
| 36827  |      |      |      |      |      |      |      |      |       | 2      | 3      | 2     | 5     | 3     | 3 |
| 36835  | 1    | 1    | 6    | 1    | 2    | 3    | 4    | 1    |       | 3      | 3      | 2     | 5     | 5     | 5 |

| respid | Q48k | Q48l | Q48m | Q48n | Q48o | Q48p | Q48q | Q48r | Q49_1 | Q50a_1 | Q50b_1 | Q51_1 | Q51_2 | Q52_1 |   |
|--------|------|------|------|------|------|------|------|------|-------|--------|--------|-------|-------|-------|---|
| 36837  | 3    | 2    | 2    | 2    | 2    | 2    | 2    | 2    | 2     | 2      | 1      | 2     | 2     | 3     | 2 |
| 36849  |      |      |      |      |      |      |      |      |       | 2      | 2      | 2     | 3     | 3     | 2 |
| 36851  | 4    | 4    | 4    | 4    | 4    | 4    | 5    | 6    | 1     | 2      | 3      | 3     | 5     | 5     | 5 |
| 36868  |      |      |      |      |      |      |      |      |       | 3      | 2      | 2     | 3     | 4     | 3 |
| 36870  |      |      |      |      |      |      |      |      |       | 4      | 3      | 2     | 4     | 4     | 4 |
| 36871  |      |      |      |      |      |      |      |      |       | 2      | 2      | 3     | 5     | 5     | 5 |
| 36874  |      |      |      |      |      |      |      |      |       | 2      | 2      | 2     | 3     | 3     | 3 |
| 36878  |      |      |      |      |      |      |      |      |       | 2      | 2      | 2     | 3     | 4     | 3 |
| 36887  | 6    | 5    | 4    | 6    | 6    | 6    | 6    | 6    | 3     | 3      | 2      | 2     | 3     | 4     | 4 |
| 36889  |      |      |      | 1    |      |      |      |      |       | 2      | 2      | 2     | 5     | 4     | 5 |
| 36891  |      |      |      |      |      |      |      |      |       | 4      | 3      | 3     | 4     | 4     | 4 |
| 36903  |      |      |      |      |      |      |      |      |       | 2      | 1      | 1     | 2     | 2     | 2 |
| 36905  | 1    | 1    | 1    | 1    | 6    | 2    | 2    | 6    |       | 1      | 1      | 1     | 1     | 1     | 3 |
| 36913  |      |      |      |      |      |      |      |      |       | 4      | 3      | 3     | 3     | 3     | 3 |
| 36949  |      |      |      |      |      |      |      |      |       | 2      | 2      | 2     | 3     | 3     | 3 |
| 36954  |      |      |      |      |      |      |      |      |       | 2      | 2      | 2     | 3     | 3     | 2 |
| 36962  | 3    | 2    | 4    | 2    | 5    | 2    | 4    | 2    |       | 2      | 2      | 2     | 2     | 2     | 3 |
| 36965  |      |      |      |      |      |      |      |      |       | 3      | 3      | 2     | 3     | 4     | 3 |
| 36970  |      |      |      |      |      |      |      |      |       | 3      | 3      | 3     | 5     | 5     | 5 |
| 36979  | 6    | 6    | 6    | 6    | 6    | 6    | 6    | 6    | 6     | 3      | 3      | 3     | 4     | 5     | 4 |
| 36990  | 3    | 3    | 3    | 3    | 3    | 3    | 3    | 3    | 3     | 2      | 2      | 2     | 3     | 3     | 4 |
| 36991  |      |      |      |      |      |      |      |      |       | 3      | 3      | 3     | 4     | 3     | 3 |
| 36992  |      |      |      |      |      |      |      |      |       | 2      | 2      | 2     | 2     | 3     | 2 |
| 37015  |      |      |      |      |      |      |      |      |       | 2      | 2      | 2     | 4     | 4     | 3 |
| 37017  |      |      |      |      |      |      |      |      |       | 2      | 2      | 2     | 4     | 4     | 4 |
| 37020  |      |      |      |      |      |      |      |      |       | 3      | 3      | 2     | 4     | 3     | 4 |
| 37033  |      |      |      |      |      |      |      |      |       | 2      | 2      | 2     | 3     | 4     | 3 |
| 37041  |      |      |      |      |      |      |      |      |       | 1      | 1      | 1     | 2     | 2     | 2 |
| 37048  | 4    | 4    | 2    | 4    | 5    | 2    | 4    | 3    |       | 2      | 2      | 2     | 3     | 3     | 3 |
| 37050  |      |      |      |      |      |      |      |      |       | 3      | 3      | 3     | 4     | 4     | 5 |
| 37054  | 4    | 5    | 1    | 6    | 6    | 3    | 4    | 5    |       | 2      | 2      | 2     | 2     | 2     | 2 |
| 37057  | 4    | 3    | 3    | 3    | 4    | 3    | 3    | 3    |       | 2      | 1      | 1     | 3     | 3     | 3 |

| respid | Q48k | Q48l | Q48m | Q48n | Q48o | Q48p | Q48q | Q48r | Q49_1 | Q50a_1 | Q50b_1 | Q51_1 | Q51_2 | Q52_1 |   |
|--------|------|------|------|------|------|------|------|------|-------|--------|--------|-------|-------|-------|---|
| 37067  |      |      |      |      |      |      |      |      |       | 2      | 2      | 3     | 2     | 3     | 4 |
| 37074  |      |      |      |      |      |      |      |      |       | 2      | 1      | 2     | 3     | 4     | 4 |
| 37088  | 2    | 2    | 3    | 2    | 3    | 2    | 2    | 4    |       | 2      | 3      | 2     | 2     | 4     | 4 |
| 37090  |      |      |      |      |      |      |      |      |       | 2      | 2      | 2     | 2     | 3     | 2 |
| 37110  |      |      |      |      |      |      |      |      |       | 3      | 2      | 2     | 2     | 1     | 2 |
| 37122  |      |      |      |      |      |      |      |      |       | 3      | 2      | 3     | 3     | 4     | 4 |
| 37124  |      |      |      |      |      |      |      |      |       | 1      | 1      | 1     | 2     | 2     | 2 |
| 37126  |      |      |      |      |      |      |      |      |       | 4      | 3      | 3     | 5     | 5     | 5 |
| 37129  |      |      |      |      |      |      |      |      |       | 2      | 2      | 2     | 3     | 3     | 2 |
| 37130  | 6    | 6    | 1    | 6    | 6    | 2    | 6    | 1    |       | 4      | 2      | 2     | 4     | 4     | 4 |
| 37142  |      |      |      |      |      |      |      |      |       | 2      | 2      | 2     | 4     | 4     | 4 |
| 37160  |      |      |      |      |      |      |      |      |       | 2      | 2      | 2     | 2     | 3     | 2 |
| 37168  | 1    | 2    | 6    | 1    | 6    | 6    | 6    | 1    |       | 1      | 3      | 2     | 4     | 5     | 5 |
| 37169  |      |      |      |      |      |      |      |      |       | 2      | 2      | 2     | 2     | 2     | 2 |
| 37191  |      |      |      |      |      |      |      |      |       | 2      | 2      | 2     | 4     | 3     | 4 |
| 37197  |      |      |      |      |      |      |      |      |       | 4      | 1      | 1     | 2     | 3     | 2 |
| 37204  | 3    | 4    | 6    | 4    | 6    | 6    | 4    | 1    |       | 3      | 2      | 2     | 4     | 4     | 4 |
| 37213  | 2    | 1    | 2    | 2    | 2    | 2    | 2    | 3    | 2     | 3      | 2      | 2     | 3     | 2     | 2 |
| 37238  | 2    | 2    | 3    | 2    | 6    | 3    | 5    | 4    |       | 2      | 3      | 2     | 2     | 3     | 2 |
| 37242  | 4    | 4    | 4    | 4    | 4    | 4    | 4    | 4    |       | 2      | 2      | 2     | 3     | 3     | 3 |
| 37243  |      |      |      |      |      |      |      |      |       | 2      | 1      | 1     | 1     | 2     | 2 |
| 37275  | 6    | 5    | 3    | 5    | 6    | 6    | 5    | 5    |       | 3      | 3      | 3     | 4     | 4     | 4 |
| 37305  | 4    | 3    | 4    | 3    | 4    | 3    | 3    | 3    | 5     | 2      | 2      | 2     | 3     | 3     | 3 |
| 37357  | 4    | 3    | 3    | 3    | 2    | 3    | 2    | 2    |       | 3      | 1      | 2     | 2     | 3     | 1 |
| 37365  | 2    | 3    | 3    | 2    | 2    | 3    | 2    | 3    |       | 2      | 2      | 2     | 2     | 2     | 1 |
| 37370  |      |      |      |      |      |      |      |      |       | 3      | 2      | 3     | 4     | 4     | 4 |
| 37406  |      | 2    | 3    | 4    | 3    | 3    | 3    | 3    |       | 2      | 2      | 2     | 4     | 4     | 2 |
| 37410  |      | 4    | 4    | 5    | 4    | 6    | 5    | 6    |       | 2      | 2      | 2     | 3     | 3     | 3 |
| 37411  | 3    | 3    | 3    | 3    | 3    | 3    | 3    | 3    |       | 3      | 2      | 2     | 4     | 3     | 2 |
| 37427  | 2    | 2    | 3    | 2    | 3    | 2    | 2    | 2    |       | 3      | 2      | 2     | 2     | 1     | 2 |
| 37437  | 1    | 1    | 1    | 1    | 1    | 2    | 4    | 3    |       | 2      | 1      | 2     | 2     | 3     | 2 |
| 37440  |      |      |      |      |      |      |      |      |       | 2      | 2      | 2     | 3     | 3     | 3 |

| respid | Q48k | Q48l | Q48m | Q48n | Q48o | Q48p | Q48q | Q48r | Q49_1 | Q50a_1 | Q50b_1 | Q51_1 | Q51_2 | Q52_1 |   |
|--------|------|------|------|------|------|------|------|------|-------|--------|--------|-------|-------|-------|---|
| 37452  |      |      |      |      |      |      |      | 4    | 4     | 3      | 2      | 2     | 2     | 3     | 3 |
| 37465  | 3    | 2    | 3    | 2    | 2    | 3    | 3    | 3    | 3     | 2      | 2      | 2     | 3     | 3     | 3 |
| 37468  | 6    | 6    | 1    | 6    | 6    | 5    | 5    | 2    | 1     | 2      | 2      | 2     | 2     | 2     | 3 |
| 37469  | 5    | 4    | 2    | 5    | 6    | 4    | 4    | 3    | 3     | 2      | 2      | 2     | 4     | 4     | 3 |
| 37477  | 3    | 2    | 2    | 3    | 4    | 3    | 3    | 3    | 2     | 2      | 2      | 2     | 2     | 3     | 2 |
| 37509  | 2    | 2    | 6    | 1    | 5    | 6    | 2    | 5    | 3     | 2      | 2      | 2     | 3     | 3     | 3 |
| 37513  | 4    | 4    | 5    | 4    | 5    | 2    | 1    | 1    | 3     | 2      | 2      | 2     | 2     | 3     | 3 |
| 37534  | 3    | 3    | 1    | 4    | 6    | 1    | 4    | 6    | 2     | 2      | 2      | 2     | 3     | 3     | 3 |
| 37537  |      |      |      |      |      |      |      |      | 2     | 3      | 3      | 5     | 5     | 5     | 5 |
| 37560  | 2    | 2    | 1    | 3    | 3    | 2    | 2    | 2    | 2     | 2      | 2      | 2     | 2     | 1     | 2 |
| 37566  | 3    | 3    | 3    | 3    | 3    | 3    | 3    | 3    | 4     | 2      | 2      | 2     | 4     | 3     | 3 |
| 37572  | 5    | 6    | 1    | 6    | 6    | 6    | 5    | 2    | 3     | 2      | 2      | 2     | 4     | 4     | 4 |
| 37574  | 5    | 3    | 2    | 4    | 6    | 4    | 4    | 4    | 3     | 2      | 2      | 3     | 4     | 4     | 4 |
| 37575  |      |      |      |      |      |      |      |      |       | 2      | 2      | 3     | 4     | 5     | 5 |
| 37590  | 1    | 1    | 1    | 1    | 1    |      |      | 1    |       | 3      | 2      | 2     | 2     | 2     | 3 |
| 37593  |      |      |      |      |      |      |      |      |       | 2      | 2      | 2     | 3     | 3     | 4 |
| 37599  |      |      | 3    | 1    | 6    | 3    | 3    | 2    | 3     | 3      | 3      | 4     | 5     | 5     | 4 |
| 37641  |      |      |      |      |      |      |      |      |       | 2      | 3      | 2     | 4     | 4     | 5 |
| 37651  | 5    | 5    | 2    | 5    | 5    | 5    | 5    | 2    | 2     | 2      | 2      | 4     | 4     | 4     | 4 |
| 37670  | 3    | 6    | 3    | 4    | 6    | 6    | 4    | 3    | 4     | 4      | 2      | 2     | 4     | 4     | 4 |
| 37680  |      |      |      |      |      |      |      |      |       | 4      | 1      | 2     | 3     | 2     | 2 |
| 37690  |      |      |      |      |      |      |      | 1    |       | 1      | 2      | 3     | 5     | 5     | 4 |
| 37694  |      |      |      |      |      |      |      |      |       | 2      | 3      | 3     | 5     | 5     | 5 |
| 37705  | 4    | 4    | 3    | 4    | 4    | 4    | 4    | 4    | 3     | 2      | 2      | 2     | 3     | 2     | 3 |
| 37710  | 2    | 2    | 2    | 2    | 3    | 1    | 2    | 2    | 2     | 3      | 2      | 2     | 2     | 2     | 2 |
| 37719  | 5    | 5    | 4    | 5    | 4    | 3    | 4    | 3    | 2     | 2      | 2      | 2     | 3     | 3     | 3 |
| 37741  | 4    | 4    | 3    | 2    | 3    | 4    | 2    | 4    | 3     | 2      | 2      | 2     | 1     | 2     | 1 |
| 37752  | 2    | 6    | 2    | 5    | 6    | 6    | 5    | 2    | 4     | 3      | 2      | 2     | 4     | 4     | 4 |
| 37755  | 5    | 2    | 2    | 2    | 2    | 2    | 2    | 2    |       | 2      | 2      | 2     | 3     | 3     | 3 |
| 37757  | 6    | 6    | 1    | 6    | 6    | 6    | 6    | 6    | 2     | 3      | 2      | 2     | 5     | 5     | 5 |
| 37783  |      | 3    |      | 3    | 3    |      |      |      |       | 2      | 2      | 2     | 3     | 3     | 3 |
| 37793  | 3    | 4    | 3    | 4    |      |      |      |      |       | 2      | 2      | 3     | 3     | 4     | 4 |

| respid | Q48k | Q48l | Q48m | Q48n | Q48o | Q48p | Q48q | Q48r | Q49_1 | Q50a_1 | Q50b_1 | Q51_1 | Q51_2 | Q52_1 |
|--------|------|------|------|------|------|------|------|------|-------|--------|--------|-------|-------|-------|
| 37800  | 4    | 3    | 3    | 4    | 4    | 3    | 4    | 3    | 2     | 2      | 2      | 3     | 2     | 3     |
| 37801  |      |      |      |      |      |      |      |      | 2     | 3      | 3      | 5     | 5     | 5     |
| 37820  | 2    | 2    | 1    | 3    | 4    | 4    | 4    | 1    | 2     | 2      | 2      | 3     | 3     | 3     |
| 37826  | 1    | 6    | 3    | 2    | 3    | 6    | 6    | 3    | 2     | 2      | 1      | 3     | 3     | 4     |
| 37835  | 3    | 3    | 3    | 3    | 4    | 5    | 4    | 5    | 2     | 2      | 1      | 2     | 3     | 1     |
| 37839  | 4    | 4    | 3    | 3    | 3    | 2    | 3    | 2    | 2     | 2      | 2      | 4     | 4     | 4     |
| 37871  | 3    | 3    | 3    | 3    | 2    |      |      |      | 2     | 1      | 1      | 3     | 3     | 2     |
| 37876  | 2    | 3    | 2    | 2    | 3    | 3    | 4    | 2    | 2     | 2      | 1      | 3     | 2     | 2     |
| 37879  |      |      |      |      |      |      |      |      | 2     | 2      | 2      | 3     | 3     | 3     |
| 37894  | 4    | 5    | 3    | 4    | 6    | 4    | 4    | 3    | 3     | 2      | 2      | 4     | 4     | 4     |
| 37895  | 5    | 5    | 3    | 6    | 5    | 6    | 6    | 3    | 2     | 2      | 2      | 3     | 3     | 3     |
| 37901  | 5    | 3    | 1    | 4    | 6    | 6    | 6    | 3    | 3     | 2      | 2      | 2     | 2     | 2     |
| 37926  | 3    | 3    | 3    | 3    | 6    | 5    | 6    | 3    | 2     | 2      | 2      | 4     | 4     | 4     |
| 37937  | 3    | 2    | 3    | 3    | 3    | 4    | 5    | 5    | 3     | 2      | 2      | 2     | 3     | 2     |
| 37938  |      |      |      |      |      |      |      |      | 1     | 3      | 2      | 5     | 5     | 5     |
| 37959  | 5    | 6    | 2    | 6    | 6    | 5    | 6    | 2    | 2     | 3      | 3      | 5     | 5     | 4     |
| 37970  |      |      |      |      |      |      |      |      | 2     | 2      | 2      | 2     | 3     | 2     |
| 37972  |      |      |      |      |      |      |      |      | 2     | 1      | 2      | 2     | 2     | 2     |
| 37988  |      |      |      |      |      |      |      |      | 3     | 2      | 2      | 3     | 3     | 3     |
| 37989  | 3    | 2    | 6    | 3    | 3    | 2    | 3    | 5    | 3     | 3      | 2      | 3     | 2     | 2     |
| 38000  | 5    | 6    | 1    | 5    | 6    | 2    | 4    | 1    | 2     | 2      | 2      | 3     | 4     | 4     |
| 38028  | 4    |      |      |      |      | 3    | 2    |      | 1     | 2      | 2      | 4     | 4     | 2     |
| 38042  | 4    | 4    | 4    | 4    | 3    | 3    | 4    | 4    | 3     | 2      | 2      | 3     | 4     | 3     |
| 38052  | 1    | 6    | 6    | 6    | 3    | 6    | 2    | 6    | 2     | 2      | 1      | 3     | 2     | 4     |
| 38056  | 6    | 6    | 2    | 6    | 6    | 6    | 6    | 6    | 1     | 4      | 3      | 3     | 5     | 5     |
| 38106  | 2    | 1    | 2    | 1    | 1    | 1    | 1    | 2    | 2     | 2      | 2      | 1     | 2     | 2     |
| 38114  |      |      |      |      |      |      |      |      | 1     | 2      | 2      | 3     | 3     | 2     |
| 38134  | 2    | 2    | 2    | 1    | 3    | 3    | 4    | 5    | 3     | 3      | 2      | 5     | 5     | 5     |
| 38135  | 3    | 3    | 3    | 3    | 4    | 5    | 4    | 4    | 1     | 1      | 1      | 1     | 1     | 2     |
| 38139  | 1    | 2    | 1    | 2    | 2    | 3    | 4    | 3    | 2     | 2      | 2      | 1     | 2     | 3     |
| 38160  |      |      |      |      |      |      |      |      | 2     | 2      | 1      | 3     | 3     | 4     |
| 38164  |      |      |      |      |      |      |      |      | 5     | 3      | 2      | 2     | 2     | 3     |



| respid | Q48k | Q48l | Q48m | Q48n | Q48o | Q48p | Q48q | Q48r | Q49_1 | Q50a_1 | Q50b_1 | Q51_1 | Q51_2 | Q52_1 |   |
|--------|------|------|------|------|------|------|------|------|-------|--------|--------|-------|-------|-------|---|
| 38168  |      |      |      |      |      |      |      |      |       | 4      | 3      | 3     | 5     | 5     | 5 |
| 38173  |      |      |      |      |      |      |      |      |       | 4      | 3      | 3     | 4     | 4     | 4 |
| 38193  | 6    | 1    | 6    | 2    | 1    | 2    | 1    | 1    | 1     | 3      | 2      | 2     | 3     | 2     | 2 |
| 38204  | 6    | 6    | 1    | 6    | 6    | 6    | 6    | 6    | 1     | 4      | 3      | 2     | 4     | 4     | 4 |
| 38206  | 4    | 4    | 3    | 3    | 4    | 4    | 4    | 3    | 4     | 2      | 2      | 2     | 2     | 2     | 2 |
| 38233  |      |      |      |      |      |      |      |      |       | 2      | 2      | 1     | 2     | 1     | 1 |
| 38242  | 4    | 4    | 4    | 4    | 4    | 3    | 3    | 3    | 3     | 2      | 2      | 2     | 2     | 2     | 3 |
| 38245  |      |      |      |      |      |      |      |      |       | 3      | 2      | 2     | 3     | 3     | 3 |
| 38261  | 3    | 3    | 3    | 3    | 3    | 3    | 3    | 3    | 3     | 3      | 2      | 2     | 4     | 3     | 3 |
| 38288  | 2    | 3    | 4    | 3    | 4    | 3    | 4    | 4    | 4     | 2      | 2      | 2     | 3     | 3     | 3 |
| 38296  | 6    | 5    | 2    | 6    | 6    | 6    | 5    | 2    | 2     | 2      | 3      | 3     | 2     | 3     | 4 |
| 38299  |      |      |      |      |      |      |      |      |       | 2      | 2      | 2     | 1     | 2     | 1 |
| 38300  |      |      |      |      |      |      |      |      |       | 3      | 2      | 2     | 4     | 3     | 3 |
| 38303  |      |      |      |      |      |      |      |      |       | 2      | 2      | 3     | 4     | 4     | 4 |
| 38317  | 6    | 6    | 1    | 6    | 6    | 2    | 6    | 1    | 4     | 4      | 2      | 2     | 3     | 4     | 4 |
| 38328  |      |      |      |      |      |      |      |      |       | 1      | 1      | 1     | 2     | 2     | 2 |
| 38333  | 4    | 4    | 4    | 4    | 4    | 4    | 3    | 3    | 2     | 2      | 2      | 3     | 4     | 4     | 4 |
| 38336  |      |      |      |      |      |      |      |      |       | 4      | 3      | 3     | 5     | 5     | 5 |
| 38338  |      |      |      |      |      |      |      |      |       | 4      | 3      | 3     | 5     | 5     | 5 |
| 38342  |      |      |      |      |      |      |      |      |       | 2      | 2      | 2     | 3     | 3     | 4 |
| 38360  |      |      |      |      |      |      |      |      |       | 4      | 3      | 3     | 5     | 5     | 4 |
| 38362  |      |      |      |      |      |      |      |      |       | 3      | 2      | 2     | 3     | 2     | 3 |
| 38364  |      |      |      |      |      |      |      |      |       | 1      | 1      | 2     | 2     | 2     | 2 |
| 38402  |      |      |      |      |      |      |      |      |       | 3      | 2      | 3     | 4     | 4     | 4 |
| 38423  | 6    | 3    | 2    | 5    | 6    | 3    | 5    | 3    | 1     | 1      | 1      | 1     | 2     | 2     | 2 |
| 38424  |      |      |      |      |      |      |      |      |       | 3      | 3      | 3     | 4     | 5     | 2 |
| 38435  | 3    | 2    | 2    | 2    | 2    | 2    | 2    | 1    | 2     | 3      | 3      | 3     | 2     | 3     | 1 |
| 38450  |      |      |      |      |      |      |      |      |       | 5      | 3      | 3     | 5     | 5     | 5 |
| 38455  |      |      |      |      |      |      |      |      |       | 2      | 3      | 3     | 2     | 2     | 5 |
| 38467  | 5    | 5    | 2    | 4    | 6    | 5    | 6    | 6    | 6     | 1      | 1      | 1     | 2     | 2     | 4 |
| 38468  |      |      |      |      |      |      |      |      |       | 2      | 2      | 2     | 3     | 3     | 4 |
| 38472  | 2    | 1    | 2    | 2    | 2    | 2    | 2    | 1    | 3     | 2      | 2      | 2     | 3     | 3     | 2 |

| respid | Q48k | Q48l | Q48m | Q48n | Q48o | Q48p | Q48q | Q48r | Q49_1 | Q50a_1 | Q50b_1 | Q51_1 | Q51_2 | Q52_1 |   |
|--------|------|------|------|------|------|------|------|------|-------|--------|--------|-------|-------|-------|---|
| 38484  |      |      |      |      |      |      |      |      |       | 3      | 3      | 3     | 4     | 4     | 3 |
| 38498  |      |      |      |      |      |      |      |      |       | 3      | 2      | 2     | 2     | 2     | 2 |
| 38507  |      |      |      |      |      |      |      |      |       | 2      | 2      | 2     | 3     | 3     | 3 |
| 38511  | 4    | 4    | 3    | 4    | 4    | 3    | 4    | 3    |       | 2      | 2      | 3     | 4     | 4     | 5 |
| 38524  |      |      |      |      |      |      |      |      |       | 1      | 1      | 2     | 2     | 2     | 2 |
| 38526  |      |      |      |      |      |      |      |      |       | 2      | 3      | 3     | 4     | 4     | 4 |
| 38534  | 4    | 3    | 3    | 2    | 3    | 2    | 3    | 3    |       | 2      | 1      | 2     | 2     | 3     | 4 |
| 38536  |      |      |      |      |      |      |      |      |       | 3      | 2      | 2     | 4     | 4     | 4 |
| 38539  |      |      |      |      |      |      |      |      |       | 3      | 2      | 3     | 5     | 5     | 4 |
| 38547  | 6    | 6    | 2    | 6    | 5    |      |      | 5    |       | 4      | 3      | 3     | 5     | 5     | 5 |
| 38549  |      |      |      |      |      |      |      |      |       | 4      | 3      | 3     | 5     | 5     | 5 |
| 38575  | 4    | 4    | 4    | 4    | 4    | 4    | 3    | 4    |       | 3      | 2      | 2     | 2     | 3     | 3 |
| 38579  | 5    | 6    | 3    | 6    | 6    | 6    | 6    | 5    | 3     | 3      | 3      | 3     | 5     | 5     | 5 |
| 38585  |      |      |      |      |      |      |      |      |       | 2      | 2      | 2     | 4     | 4     | 4 |
| 38589  |      |      |      |      |      |      |      |      |       | 1      | 1      | 1     | 2     | 2     | 2 |
| 38595  | 2    | 4    | 2    | 2    | 1    | 3    | 2    | 3    |       | 2      | 2      | 1     | 2     | 3     | 3 |
| 38602  | 5    |      | 2    |      |      | 6    | 6    | 1    |       | 4      | 2      | 2     | 5     | 4     | 5 |
| 38603  | 6    | 6    | 1    | 6    | 6    | 6    | 6    | 6    | 1     | 2      | 3      | 3     | 4     | 4     | 3 |
| 38612  |      | 3    | 2    | 4    | 4    | 4    | 3    | 3    |       | 2      | 2      | 2     | 4     | 4     | 3 |
| 38621  |      |      | 3    | 4    | 2    |      | 3    | 3    |       | 2      | 2      | 2     | 2     | 2     | 3 |
| 38624  | 3    | 3    | 2    | 2    | 4    | 2    | 3    | 4    |       | 2      | 2      | 2     | 2     | 2     | 3 |
| 38636  |      |      |      |      |      |      |      |      |       | 3      | 3      | 2     | 4     | 4     | 4 |
| 38656  |      |      |      |      |      |      |      |      |       | 2      | 2      | 2     | 5     | 4     | 4 |
| 38668  |      |      |      |      |      |      |      |      |       | 4      | 3      | 3     | 3     | 3     | 3 |
| 38675  | 4    | 4    | 4    | 3    | 4    | 4    | 4    | 4    |       | 2      | 2      | 3     | 4     | 4     | 4 |
| 38676  |      |      |      |      |      |      |      |      |       | 2      | 2      | 3     | 3     | 4     | 4 |
| 38682  |      |      |      |      |      |      |      |      |       | 3      | 2      | 2     | 4     | 4     | 4 |
| 38689  |      |      |      |      |      |      |      |      |       | 3      | 2      | 2     | 4     | 3     | 4 |
| 38702  |      |      |      |      |      |      |      |      |       | 3      | 2      | 2     | 3     | 3     | 3 |
| 38704  | 2    | 2    | 2    | 3    |      |      |      | 3    |       | 1      | 1      | 1     | 2     | 3     | 2 |
| 38713  |      |      |      |      |      |      |      |      |       | 2      | 2      | 3     | 4     | 4     | 4 |
| 38718  |      |      |      |      |      |      |      |      |       | 2      | 3      | 2     | 4     | 4     | 3 |

| respid | Q48k | Q48l | Q48m | Q48n | Q48o | Q48p | Q48q | Q48r | Q49_1 | Q50a_1 | Q50b_1 | Q51_1 | Q51_2 | Q52_1 |
|--------|------|------|------|------|------|------|------|------|-------|--------|--------|-------|-------|-------|
| 38725  | 5    | 4    | 2    | 5    | 5    | 5    | 5    | 2    | 3     | 1      | 2      | 4     | 4     | 4     |
| 38730  | 4    | 4    | 4    | 4    | 4    | 4    | 3    | 4    | 3     | 2      | 3      | 4     | 2     | 3     |
| 38737  |      |      |      |      |      |      |      |      | 3     | 2      | 3      | 3     | 4     | 4     |
| 38738  | 3    | 3    | 2    | 4    | 6    | 3    | 5    | 2    | 1     | 1      | 2      | 2     | 2     | 3     |
| 38744  |      |      |      |      |      |      |      |      | 3     | 3      | 3      | 5     | 5     | 5     |
| 38746  |      | 3    |      | 3    | 3    | 3    | 3    | 3    | 3     | 2      | 2      | 1     | 1     | 2     |
| 38753  | 1    | 4    | 3    | 2    | 4    | 2    | 1    | 3    | 3     | 1      | 2      | 5     | 2     | 2     |
| 38756  | 3    | 4    | 2    | 4    | 3    | 4    | 2    | 2    | 2     | 2      | 2      | 2     | 2     | 2     |
| 38760  | 6    | 6    | 4    | 6    | 6    | 4    | 6    | 4    | 3     | 3      | 3      | 4     | 4     | 4     |
| 38762  | 4    | 3    | 2    | 5    | 2    | 1    | 2    | 2    | 3     | 3      | 2      | 2     | 3     | 2     |
| 38765  | 5    | 5    | 5    | 5    | 5    | 4    | 4    | 5    | 4     | 2      | 3      | 3     | 4     | 4     |
| 38769  | 4    | 4    | 3    | 4    | 2    | 3    | 3    | 3    | 3     | 2      | 2      | 3     | 3     | 3     |
| 38781  | 3    | 2    | 2    | 1    | 2    | 3    | 2    |      | 4     | 3      | 2      | 2     | 3     | 3     |
| 38786  | 5    | 5    | 5    | 5    | 5    | 3    | 3    | 3    | 4     | 3      | 3      | 4     | 5     | 3     |
| 38790  |      |      |      |      |      |      |      |      | 2     | 2      | 3      | 3     | 3     | 3     |
| 38793  | 5    | 4    | 3    | 4    | 5    | 6    | 6    | 5    | 3     | 3      | 2      | 4     | 4     | 5     |
| 38797  | 4    | 5    | 2    | 5    | 6    | 5    | 5    | 3    | 3     | 3      | 3      | 5     | 5     | 4     |
| 38802  | 3    | 3    | 3    | 3    | 3    | 3    | 3    | 3    | 4     | 2      | 2      | 3     | 4     | 3     |
| 38815  |      |      |      |      |      |      |      |      | 2     | 2      | 2      | 3     | 3     | 3     |
| 38826  | 3    | 2    | 3    | 4    | 5    | 2    | 2    | 3    | 1     | 1      | 1      | 3     | 2     | 3     |
| 38828  |      |      |      |      |      |      |      |      | 3     | 3      | 3      | 4     | 4     | 4     |
| 38829  | 5    | 2    | 5    | 2    | 3    | 4    | 4    | 4    | 1     | 1      | 1      | 2     | 2     | 2     |
| 38835  |      |      |      |      |      |      |      |      | 2     | 2      | 2      | 3     | 4     | 4     |
| 38842  | 3    | 4    | 2    | 3    | 1    | 2    | 4    | 2    | 3     | 3      | 2      | 2     | 3     | 1     |
| 38853  |      |      |      |      |      |      |      |      | 2     | 2      | 2      | 3     | 3     | 3     |
| 38855  | 2    | 3    | 2    | 4    | 3    | 2    |      |      | 4     | 2      | 2      | 2     | 2     | 3     |
| 38860  | 2    | 4    | 3    | 4    | 3    | 3    | 3    | 2    | 2     | 2      | 2      | 2     | 2     | 3     |
| 38869  | 4    | 4    | 4    | 3    | 4    | 3    | 3    | 4    | 2     | 3      | 3      | 4     | 5     | 3     |
| 38882  | 1    | 3    | 4    | 2    | 1    | 4    | 3    | 2    | 3     | 2      | 1      | 3     | 2     | 2     |
| 38897  | 5    | 1    | 2    | 1    | 6    | 5    | 5    | 6    | 3     | 3      | 3      | 5     | 5     | 4     |
| 38903  | 2    |      |      |      |      |      |      |      | 5     | 3      | 3      | 3     | 2     | 2     |
| 38910  | 3    | 3    | 2    | 3    | 3    | 3    | 4    | 3    | 1     | 1      | 1      | 2     | 2     | 3     |

| respid | Q48k | Q48l | Q48m | Q48n | Q48o | Q48p | Q48q | Q48r | Q49_1 | Q50a_1 | Q50b_1 | Q51_1 | Q51_2 | Q52_1 |
|--------|------|------|------|------|------|------|------|------|-------|--------|--------|-------|-------|-------|
| 38948  | 1    | 3    | 1    | 2    | 4    | 2    | 1    | 2    | 4     | 3      | 2      | 2     | 3     | 2     |
| 38949  |      |      |      |      |      |      |      |      | 2     | 2      | 2      | 3     | 2     | 4     |
| 38953  | 3    | 3    | 3    | 3    | 3    | 3    | 2    | 2    | 2     | 2      | 1      | 3     | 3     | 3     |
| 38989  | 1    | 2    | 4    | 1    | 5    | 1    | 1    | 6    | 1     | 1      | 2      | 2     | 2     | 3     |
| 38997  | 5    | 4    | 4    | 3    | 5    | 3    | 5    | 3    | 2     | 2      | 3      | 4     | 4     | 4     |
| 38999  |      |      |      |      |      |      |      |      | 2     | 3      | 3      | 4     | 4     | 4     |
| 39002  | 6    | 5    | 3    | 6    | 6    | 2    | 6    | 5    | 1     | 1      | 1      | 2     | 2     | 2     |
| 39003  | 4    | 2    | 3    | 1    | 2    | 1    | 4    | 4    | 3     | 3      | 2      | 2     | 3     | 3     |
| 39006  |      |      |      |      |      |      |      |      | 3     | 1      | 3      | 5     | 3     | 5     |
| 39014  |      |      |      |      |      |      |      |      | 3     | 2      | 3      | 4     | 5     | 4     |
| 39017  | 3    | 3    | 3    | 3    |      |      |      |      | 1     | 2      | 1      | 2     | 3     | 3     |
| 39018  | 3    | 3    | 2    | 4    | 4    | 3    | 2    | 4    | 1     | 1      | 1      | 2     | 2     | 2     |
| 39025  | 3    | 3    | 2    | 3    | 5    | 6    | 5    | 4    | 1     | 1      | 1      | 2     | 2     | 1     |
| 39031  | 1    | 2    | 4    | 5    | 1    | 6    | 4    | 3    | 3     | 2      | 1      | 4     | 2     | 2     |
| 39061  | 3    | 2    | 5    | 2    | 1    | 4    | 3    | 2    | 3     | 1      | 2      | 2     | 1     | 4     |
| 39131  | 5    | 5    | 2    | 5    | 6    | 5    | 6    |      | 2     | 3      | 3      | 5     | 5     | 5     |
| 39153  | 4    | 3    | 2    | 3    | 2    | 3    | 3    | 3    | 1     | 2      | 2      | 3     | 2     | 3     |
| 39194  |      |      |      |      |      |      |      |      | 2     | 2      | 2      | 3     | 4     | 3     |
| 39204  | 2    | 6    | 6    | 2    | 6    | 6    | 6    | 1    | 2     | 3      | 2      | 5     | 4     | 4     |
| 39208  |      | 1    | 1    | 1    | 1    | 6    | 6    | 1    | 2     | 3      | 2      | 4     | 4     | 3     |
| 39213  | 3    | 2    | 3    | 2    | 1    | 3    | 2    | 1    | 3     | 2      | 1      | 3     | 3     | 3     |
| 39231  | 3    | 4    | 3    | 3    | 4    | 4    | 3    | 3    | 2     | 2      | 2      | 4     | 4     | 4     |
| 39251  | 1    | 2    | 3    | 1    | 2    | 1    | 2    | 2    | 2     | 1      | 1      | 2     | 2     | 3     |
| 39257  | 3    | 2    | 1    | 3    | 1    | 3    | 2    | 1    | 4     | 1      | 1      | 4     | 3     | 4     |
| 39262  | 2    | 2    | 4    | 5    | 4    | 6    | 4    | 3    | 2     | 1      | 1      | 2     | 4     | 3     |
| 39269  | 2    | 3    | 2    | 4    | 3    | 2    | 3    | 1    | 1     | 1      | 2      | 2     | 3     | 2     |
| 39272  | 6    | 3    | 3    | 4    | 5    | 6    | 5    | 4    | 1     | 2      | 2      | 3     | 3     | 2     |
| 39280  | 4    | 3    | 3    | 4    | 3    | 3    | 3    | 3    | 2     | 2      | 2      | 4     | 3     | 3     |
| 39294  | 2    | 4    | 1    | 3    | 2    | 2    | 2    | 4    | 2     | 2      | 2      | 3     | 2     | 3     |
| 39297  | 3    | 3    | 3    | 2    | 3    | 3    | 3    | 3    | 3     | 2      | 2      | 2     | 3     | 4     |
| 39300  | 4    | 5    | 2    | 2    | 6    | 5    | 6    | 5    | 2     | 3      | 3      | 5     | 5     | 3     |
| 39307  | 1    | 3    | 2    | 4    | 3    | 5    | 2    | 1    | 2     | 1      | 1      | 4     | 2     | 3     |

| respid | Q48k | Q48l | Q48m | Q48n | Q48o | Q48p | Q48q | Q48r | Q49_1 | Q50a_1 | Q50b_1 | Q51_1 | Q51_2 | Q52_1 |
|--------|------|------|------|------|------|------|------|------|-------|--------|--------|-------|-------|-------|
| 39320  | 5    | 4    | 2    | 1    | 5    | 3    | 5    | 3    | 2     | 1      | 2      | 3     | 2     | 2     |
| 39333  | 6    | 6    | 2    | 6    | 6    | 5    | 5    | 6    | 3     | 3      | 3      | 5     | 5     | 5     |
| 39335  | 2    | 2    | 4    | 2    | 3    | 1    | 2    | 6    | 1     | 1      | 2      | 2     | 2     | 2     |
| 39339  | 2    | 3    | 2    | 3    | 1    | 4    | 3    | 2    | 4     | 3      | 3      | 4     | 4     | 4     |
| 39375  | 1    | 1    | 1    | 1    | 1    | 1    | 1    | 1    | 2     | 2      | 2      | 2     | 3     | 1     |
| 39377  |      |      |      |      |      |      |      |      | 2     | 3      | 3      | 5     | 5     | 5     |
| 39380  | 4    | 3    | 2    | 5    | 3    | 2    | 5    | 2    | 2     | 1      | 1      | 2     | 3     | 2     |
| 39425  | 6    | 3    | 3    | 3    | 3    | 3    | 3    | 4    | 3     | 3      | 3      | 4     | 4     | 4     |
| 39590  | 4    | 3    | 4    | 4    | 3    | 3    | 4    | 4    | 2     | 3      | 3      | 4     | 4     | 4     |
| 40529  | 5    | 5    | 2    | 5    | 5    | 5    | 5    | 2    | 3     | 3      | 3      | 4     | 4     | 4     |
| 40702  |      | 5    | 5    | 6    | 6    | 5    | 5    | 5    | 3     | 2      | 3      | 4     | 4     | 4     |
| 40788  | 4    | 4    | 3    | 4    |      | 3    | 4    | 3    | 2     | 2      | 3      | 4     | 4     | 4     |
| 40841  | 6    | 6    | 2    | 5    | 6    | 6    | 6    | 6    | 1     | 4      | 2      | 2     | 4     | 5     |
| 40965  | 5    | 5    | 5    | 5    | 6    | 6    | 5    | 5    | 2     | 2      | 3      | 3     | 3     | 3     |
| 41092  |      |      |      |      |      |      |      |      | 2     | 3      | 3      | 5     | 4     | 5     |
| 41534  |      |      |      |      |      |      |      |      | 3     | 3      | 3      | 4     | 4     | 5     |
| 41919  | 6    | 6    | 3    | 4    | 4    | 4    | 6    | 3    | 4     | 3      | 3      | 5     | 5     | 5     |
| 42110  |      |      |      |      |      |      |      |      | 3     | 2      | 2      | 3     | 2     | 2     |
| 42135  |      |      |      |      |      |      |      |      | 3     | 3      | 3      | 5     | 5     | 4     |
| 42142  |      |      |      |      |      |      |      |      | 3     | 3      | 3      | 5     | 5     | 5     |
| 42163  | 5    | 5    | 6    | 3    | 3    | 3    | 4    | 4    | 1     | 2      | 2      | 3     | 3     | 4     |
| 42164  |      |      |      |      |      |      |      |      | 3     | 3      | 3      | 4     | 5     | 3     |
| 42172  | 4    | 3    | 2    | 4    | 5    | 3    | 3    | 4    | 2     | 2      | 2      | 2     | 2     | 2     |
| 42177  |      |      |      |      |      |      |      |      | 4     | 3      | 3      | 5     | 5     | 5     |
| 42181  |      |      |      |      |      |      |      |      | 4     | 2      | 3      | 4     | 4     | 5     |
| 42193  |      |      |      |      |      |      |      |      | 1     | 1      | 2      | 3     | 2     | 3     |
| 42196  |      |      |      |      |      |      |      |      | 3     | 3      | 2      | 3     | 3     | 4     |
| 42202  | 6    | 6    | 1    | 6    | 6    | 6    | 6    | 2    | 2     | 2      | 2      | 3     | 3     | 4     |
| 42248  |      |      |      |      |      |      |      |      | 2     | 2      | 2      | 2     | 2     | 3     |
| 42283  |      |      |      |      |      |      |      |      | 4     | 3      | 3      | 4     | 5     | 3     |
| 42284  |      |      |      |      |      |      |      |      | 3     | 2      | 2      | 3     | 3     | 4     |
| 42323  |      |      |      |      |      |      |      |      | 3     | 3      | 3      | 5     | 5     | 5     |

| respid | Q48k | Q48l | Q48m | Q48n | Q48o | Q48p | Q48q | Q48r | Q49_1 | Q50a_1 | Q50b_1 | Q51_1 | Q51_2 | Q52_1 |   |
|--------|------|------|------|------|------|------|------|------|-------|--------|--------|-------|-------|-------|---|
| 42349  | 3    | 3    | 3    | 4    | 4    | 4    | 3    | 4    |       | 2      | 2      | 2     | 2     | 2     | 3 |
| 42351  |      |      |      |      |      |      |      |      |       | 3      | 3      | 2     | 4     | 4     | 4 |
| 42357  | 6    | 6    | 1    | 6    | 6    | 6    | 6    | 1    | 5     | 3      | 3      | 5     | 5     | 5     | 5 |
| 42366  |      |      |      |      |      |      |      |      | 3     | 3      | 3      | 4     | 4     | 4     | 4 |
| 42380  | 5    | 6    | 2    | 5    | 6    | 6    | 6    | 3    | 3     | 2      | 3      | 5     | 4     | 4     | 4 |
| 42414  |      |      |      |      |      |      |      |      | 3     | 2      | 2      | 1     | 1     | 1     | 1 |
| 42420  |      |      |      |      |      |      |      |      | 2     | 2      | 2      | 2     | 3     | 3     | 3 |
| 42454  |      |      |      |      |      |      |      |      | 2     | 2      | 2      | 3     | 3     | 4     | 4 |
| 42458  | 5    | 5    | 1    | 6    | 6    | 6    | 5    | 3    | 3     | 3      | 3      | 5     | 5     | 4     | 4 |
| 42461  |      |      |      |      |      |      |      |      | 2     | 3      | 3      | 3     | 3     | 3     | 3 |
| 42488  | 4    | 4    | 3    | 4    | 5    | 3    | 4    | 3    | 2     | 2      | 2      | 3     | 4     | 3     | 3 |
| 42511  |      |      |      |      |      |      |      |      | 2     | 3      | 3      | 5     | 5     | 5     | 5 |
| 42512  | 4    | 4    | 4    | 3    | 4    | 4    | 4    | 5    | 2     | 2      | 2      | 4     | 4     | 5     | 5 |
| 42530  | 3    | 3    | 4    | 2    | 4    | 3    | 2    | 5    | 2     | 2      | 2      | 3     | 3     | 2     | 2 |
| 42531  |      |      |      |      |      |      |      |      | 2     | 1      | 2      | 2     | 2     | 2     | 2 |
| 42533  |      |      |      |      |      |      |      |      | 3     | 2      | 1      | 2     | 2     | 5     | 5 |
| 42549  |      |      |      |      |      |      |      |      | 2     | 3      | 3      | 4     | 4     | 4     | 4 |
| 42550  | 3    | 4    | 5    | 3    | 4    | 3    | 3    | 4    | 1     | 2      | 1      | 2     | 2     | 3     | 3 |
| 42553  |      |      |      |      |      |      |      |      | 3     | 3      | 3      | 5     | 5     | 5     | 5 |
| 42562  | 3    | 2    | 3    | 3    | 3    | 3    | 3    | 3    | 2     | 2      | 2      | 3     | 3     | 3     | 3 |
| 42567  |      |      |      |      |      |      |      |      | 2     | 3      | 3      | 4     | 4     | 4     | 4 |
| 42589  | 3    | 4    | 5    | 3    | 5    | 3    | 3    | 4    | 2     | 2      | 2      | 3     | 3     | 3     | 3 |
| 42604  | 4    | 4    | 4    | 4    | 4    | 4    | 3    | 5    | 3     | 2      | 2      | 3     | 4     | 3     | 3 |
| 42618  | 5    | 1    | 1    | 1    | 5    | 5    | 6    | 1    | 2     | 3      | 3      | 4     | 4     | 3     | 3 |
| 42621  |      |      |      |      |      |      |      |      | 2     | 2      | 3      | 4     | 3     | 3     | 3 |
| 42627  | 6    | 6    | 2    | 6    | 4    | 5    | 6    | 3    | 2     | 3      | 3      | 5     | 5     | 5     | 5 |
| 42641  |      |      |      |      |      |      |      |      | 3     | 3      | 3      | 5     | 5     | 5     | 5 |
| 42655  |      |      |      |      |      |      |      |      | 3     | 3      | 3      | 2     | 2     | 1     | 1 |
| 42666  | 5    | 4    | 3    | 5    | 5    | 3    | 4    | 3    | 3     | 3      | 3      | 4     | 5     | 4     | 4 |
| 42667  |      |      |      |      |      |      |      |      | 2     | 3      | 3      | 3     | 3     | 3     | 3 |
| 42697  | 5    | 3    | 3    | 3    | 4    | 4    | 3    | 4    | 3     | 3      | 2      | 4     | 5     | 5     | 5 |
| 42703  | 3    | 5    | 2    | 5    | 5    | 5    | 5    | 4    | 2     | 3      | 3      | 4     | 4     | 4     | 4 |

| respid | Q48k | Q48l | Q48m | Q48n | Q48o | Q48p | Q48q | Q48r | Q49_1 | Q50a_1 | Q50b_1 | Q51_1 | Q51_2 | Q52_1 |   |
|--------|------|------|------|------|------|------|------|------|-------|--------|--------|-------|-------|-------|---|
| 42712  |      |      |      |      |      |      |      |      |       | 2      | 2      | 3     | 5     | 5     | 5 |
| 42731  |      |      |      |      |      |      |      |      |       | 2      | 2      | 3     | 4     | 5     | 4 |
| 42780  |      |      |      |      |      |      |      |      |       | 3      | 3      | 3     | 3     | 3     | 4 |
| 42785  | 4    | 4    | 3    | 4    | 4    | 4    | 4    | 4    | 3     | 3      | 3      | 3     | 4     | 4     | 4 |
| 42788  |      |      |      |      |      |      |      |      |       | 2      | 2      | 2     | 4     | 3     | 3 |
| 42802  |      |      |      |      |      |      |      |      |       | 1      | 2      | 1     | 2     | 3     | 2 |
| 42818  | 6    | 5    | 4    | 5    | 4    | 6    | 6    | 4    | 4     | 2      | 3      | 2     | 3     | 3     | 3 |
| 42821  | 5    | 5    | 5    | 3    | 6    | 3    | 5    | 5    | 2     | 2      | 2      | 3     | 4     | 5     | 3 |
| 42824  | 3    | 3    | 4    | 4    | 3    | 5    | 3    | 3    | 3     | 2      | 2      | 2     | 3     | 3     | 3 |
| 42831  | 6    |      |      | 3    | 6    |      |      |      |       | 2      | 3      | 2     | 3     | 5     | 3 |
| 42836  |      |      |      |      |      |      |      |      |       | 3      | 3      | 2     | 4     | 4     | 4 |
| 42864  |      |      |      |      |      |      |      |      |       | 2      | 1      | 1     | 3     | 3     | 3 |
| 42875  |      |      |      |      |      |      |      |      |       | 3      | 3      | 3     | 5     | 5     | 5 |
| 42891  | 1    | 1    | 6    | 1    | 2    | 2    | 1    | 6    | 6     | 3      | 2      | 2     | 2     | 3     | 2 |
| 42897  | 4    | 4    | 4    | 4    | 4    | 4    | 4    | 4    | 4     | 3      | 3      | 3     | 4     | 4     | 4 |
| 42900  | 4    | 3    | 6    | 1    | 2    | 1    | 3    |      |       | 2      | 1      | 1     | 4     | 3     | 3 |
| 42902  |      |      |      |      |      |      |      |      |       | 2      | 2      | 2     | 2     | 3     | 2 |
| 42921  | 5    | 6    | 5    | 4    | 4    | 2    | 6    | 6    | 6     | 3      | 3      | 2     | 5     | 5     | 4 |
| 42925  | 2    | 5    | 2    | 3    | 4    | 2    | 2    | 2    | 2     | 3      | 2      | 2     | 4     | 4     | 3 |
| 42944  |      |      |      |      |      |      |      |      |       | 4      | 3      | 3     | 4     | 4     | 4 |
| 42950  |      |      |      |      |      |      |      |      |       | 5      | 3      | 3     | 4     | 5     | 5 |
| 42963  | 5    | 5    | 3    | 5    | 6    | 4    | 5    | 3    | 3     | 3      | 3      | 3     | 4     | 5     | 5 |
| 42967  |      |      |      |      |      |      |      |      |       | 3      | 3      | 3     | 5     | 5     | 5 |
| 42985  |      |      |      |      |      |      |      |      |       | 2      | 2      | 2     | 3     | 3     | 3 |
| 42990  |      |      |      |      |      |      |      |      |       | 2      | 2      | 2     | 4     | 4     | 5 |
| 42996  |      |      |      |      |      |      |      |      |       | 2      | 2      | 2     | 5     | 4     | 5 |
| 43002  | 1    | 5    | 2    | 5    | 5    | 5    | 5    | 5    | 2     | 2      | 3      | 2     | 5     | 4     | 5 |
| 43004  |      |      |      |      |      |      |      |      |       | 1      | 3      | 3     | 5     | 5     | 4 |
| 43012  | 4    | 5    |      | 4    | 5    | 3    | 4    | 3    | 3     | 1      | 3      | 3     | 5     | 5     | 5 |
| 43027  |      |      |      |      |      |      |      |      |       | 3      | 2      | 2     | 1     | 1     | 3 |
| 43028  |      |      |      |      |      |      |      |      |       | 2      | 2      | 3     | 3     | 3     | 3 |
| 43029  | 1    | 6    | 6    | 6    | 6    | 6    | 6    | 3    | 6     | 3      | 1      | 2     | 2     | 2     | 4 |

| respid | Q48k | Q48l | Q48m | Q48n | Q48o | Q48p | Q48q | Q48r | Q49_1 | Q50a_1 | Q50b_1 | Q51_1 | Q51_2 | Q52_1 |   |
|--------|------|------|------|------|------|------|------|------|-------|--------|--------|-------|-------|-------|---|
| 43031  |      | 4    | 5    | 2    | 4    | 3    | 3    | 4    | 4     | 3      | 3      | 3     | 4     | 4     | 4 |
| 43042  |      |      |      |      |      |      |      |      |       | 5      | 1      | 1     | 1     | 1     | 1 |
| 43054  |      |      |      |      |      |      |      |      |       | 2      | 2      | 2     | 4     | 4     | 3 |
| 43058  |      |      |      |      |      |      |      |      |       | 3      | 3      | 3     | 5     | 5     | 5 |
| 43064  |      | 1    |      |      |      |      |      |      |       | 2      | 2      | 2     | 3     | 3     | 2 |
| 43069  |      | 5    | 5    | 5    | 5    | 5    | 5    | 5    | 5     | 2      | 1      | 2     | 2     | 1     | 2 |
| 43071  |      |      |      |      |      |      |      |      |       | 3      | 3      | 3     | 5     | 5     | 4 |
| 43072  |      |      |      |      |      |      |      |      |       | 3      | 3      | 3     | 5     | 5     | 5 |
| 43077  |      |      |      |      |      |      |      |      |       | 3      | 2      | 2     | 3     | 3     | 3 |
| 43078  |      |      |      |      |      |      |      |      |       | 3      | 2      | 2     | 1     | 1     | 2 |
| 43082  |      |      |      |      |      |      |      |      |       | 2      | 2      | 2     | 2     | 4     | 5 |
| 43092  |      |      |      |      |      |      |      |      |       | 4      | 2      | 2     | 2     | 3     | 5 |
| 43096  |      |      |      |      |      |      |      |      |       | 3      | 3      | 3     | 5     | 5     | 5 |
| 43109  |      |      |      |      |      |      |      |      |       | 2      | 2      | 3     | 3     | 3     | 5 |
| 43113  |      | 4    | 3    | 4    | 4    | 4    | 3    | 3    | 3     | 3      | 2      | 2     | 3     | 3     | 3 |
| 43123  |      | 6    | 6    | 2    | 3    | 6    | 1    | 6    | 3     | 2      | 2      | 2     | 4     | 4     | 5 |
| 43127  |      |      | 4    | 5    | 5    | 5    | 5    | 5    | 3     | 4      | 3      | 3     | 4     | 5     | 4 |
| 43128  |      | 1    | 1    | 3    | 2    | 2    | 1    | 1    | 6     | 1      | 2      | 3     | 3     | 3     | 3 |
| 43129  |      | 4    | 6    | 2    | 5    | 5    | 4    | 4    | 3     | 2      | 3      | 2     | 4     | 4     | 4 |
| 43133  |      | 2    | 2    | 3    | 3    | 2    | 3    | 2    | 3     | 2      | 2      | 2     | 3     | 4     | 2 |
| 43140  |      |      |      |      |      |      |      |      |       | 3      | 3      | 3     | 4     | 4     | 4 |
| 43143  |      | 2    | 2    | 2    | 2    | 2    | 2    | 2    | 2     | 3      | 2      | 2     | 1     | 1     | 2 |
| 43149  |      | 3    | 1    | 1    | 2    | 1    | 2    | 2    | 2     | 3      | 2      | 2     | 2     | 2     | 1 |
| 43150  |      | 3    | 1    | 1    | 2    | 2    | 1    | 1    | 2     | 3      | 2      | 1     | 2     | 3     | 2 |
| 43153  |      | 2    | 4    | 5    | 4    | 4    | 5    | 4    | 4     | 2      | 2      | 2     | 2     | 3     | 2 |
| 43170  |      |      |      |      |      |      |      |      |       | 3      | 3      | 3     | 5     | 5     | 5 |
| 43187  |      | 3    | 3    | 4    | 3    | 3    | 4    | 3    | 4     | 1      | 1      | 1     | 1     | 1     | 1 |
| 43188  |      | 3    | 3    |      | 3    | 4    | 3    | 3    | 4     | 3      | 2      | 3     | 2     | 4     | 4 |
| 43198  |      |      |      |      |      |      |      |      |       | 3      | 3      | 2     | 4     | 4     | 4 |
| 43208  |      | 6    | 6    | 3    |      | 6    | 6    | 6    | 2     | 4      | 3      | 3     | 4     | 5     | 5 |
| 43216  |      |      |      |      |      |      |      |      |       | 2      | 3      | 2     | 4     | 4     | 4 |
| 43222  |      | 2    | 2    | 2    | 2    | 2    | 2    | 2    | 2     | 3      | 2      | 2     | 2     | 3     | 2 |



| respid | Q48k | Q48l | Q48m | Q48n | Q48o | Q48p | Q48q | Q48r | Q49_1 | Q50a_1 | Q50b_1 | Q51_1 | Q51_2 | Q52_1 |   |
|--------|------|------|------|------|------|------|------|------|-------|--------|--------|-------|-------|-------|---|
| 43224  |      | 5    | 4    | 2    | 5    | 5    | 5    | 5    | 3     | 4      | 2      | 2     | 4     | 4     | 4 |
| 43230  |      |      |      |      |      |      |      |      |       | 3      | 2      | 2     | 1     | 2     | 2 |
| 43231  |      |      |      |      |      |      |      |      |       | 3      | 2      | 2     | 1     | 2     | 1 |
| 43265  |      |      |      |      |      |      |      |      |       | 2      | 2      | 2     | 3     | 3     | 2 |
| 43270  |      |      |      |      |      |      |      |      |       | 2      | 1      | 2     | 2     | 2     | 2 |
| 43283  |      |      |      |      |      |      |      |      |       | 3      | 2      | 2     | 1     | 2     | 1 |
| 43295  |      |      |      |      |      |      |      |      |       | 3      | 2      | 2     | 3     | 3     | 2 |
| 43297  |      |      |      |      |      |      |      |      |       | 3      | 3      | 3     | 4     | 4     | 4 |
| 43299  | 4    | 4    | 3    | 3    | 4    | 3    | 4    | 3    | 2     | 2      | 2      | 2     | 3     | 2     | 3 |
| 43307  | 6    | 6    | 4    | 6    | 6    | 6    | 6    | 6    | 2     | 2      | 3      | 2     | 4     | 4     | 4 |
| 43316  |      |      |      |      |      |      |      |      |       | 4      | 1      | 2     | 1     | 1     | 1 |
| 43318  |      |      |      |      |      |      |      |      |       | 2      | 2      | 2     | 2     | 3     | 2 |
| 43319  |      |      |      |      |      |      |      |      |       | 2      | 3      | 3     | 5     | 5     | 5 |
| 43324  |      |      |      |      |      |      |      |      |       | 1      | 2      | 2     | 2     | 2     | 2 |
| 43325  | 4    | 4    | 3    | 4    | 4    | 3    | 6    | 3    | 1     | 1      | 1      | 1     | 3     | 1     | 2 |
| 43327  | 5    | 5    | 2    | 4    | 5    | 5    | 5    | 5    | 2     | 2      | 3      | 3     | 5     | 5     | 5 |
| 43338  | 4    | 5    | 3    | 4    | 5    | 5    | 4    | 3    | 3     | 2      | 3      | 4     | 4     | 4     | 3 |
| 43342  | 3    | 4    | 2    | 4    | 4    | 5    | 4    | 4    | 2     | 2      | 2      | 2     | 4     | 3     | 4 |
| 43348  |      |      |      |      |      |      |      |      |       | 3      | 2      | 2     | 4     | 5     | 5 |
| 43395  |      |      |      |      |      |      |      |      |       | 2      | 2      | 2     | 1     | 1     | 1 |
| 43404  |      |      |      |      |      |      |      |      |       | 3      | 2      | 2     | 2     | 3     | 3 |
| 43406  |      |      |      |      |      |      |      |      |       | 3      | 3      | 3     | 4     | 4     | 4 |
| 43407  | 6    | 6    | 6    | 6    | 6    | 6    | 6    | 6    | 6     | 5      | 3      | 3     | 1     | 1     | 5 |
| 43411  | 5    | 5    | 2    | 4    | 5    | 3    | 5    | 3    | 3     | 3      | 3      | 3     | 3     | 4     | 4 |
| 43416  |      |      |      |      |      |      |      |      |       | 3      | 2      | 2     | 2     | 2     | 2 |
| 43428  |      |      |      |      |      |      |      |      |       | 4      | 3      | 3     | 1     | 1     | 5 |
| 43429  |      |      |      |      |      |      |      |      |       | 2      | 2      | 2     | 3     | 2     | 3 |
| 43432  |      |      |      |      |      |      |      |      |       | 3      | 3      | 2     | 4     | 3     | 5 |
| 43443  |      |      |      |      |      |      |      |      |       | 3      | 3      | 2     | 4     | 4     | 5 |
| 43455  |      |      |      |      |      |      |      |      |       | 2      | 3      | 3     | 5     | 5     | 5 |
| 43457  |      |      |      |      |      |      |      |      |       | 3      | 2      | 2     | 3     | 4     | 3 |
| 43458  | 6    | 6    | 1    | 5    | 6    | 2    | 6    | 2    | 4     | 4      | 3      | 3     | 4     | 4     | 4 |

| respid | Q48k | Q48l | Q48m | Q48n | Q48o | Q48p | Q48q | Q48r | Q49_1 | Q50a_1 | Q50b_1 | Q51_1 | Q51_2 | Q52_1 |   |
|--------|------|------|------|------|------|------|------|------|-------|--------|--------|-------|-------|-------|---|
| 43477  | 5    | 4    | 3    | 4    | 4    | 4    | 4    | 4    | 4     | 2      | 3      | 3     | 4     | 4     | 4 |
| 43520  | 1    |      |      |      |      |      |      |      |       | 2      | 3      | 3     | 5     | 5     | 5 |
| 43521  |      |      |      |      |      |      |      |      |       | 2      | 3      | 2     | 4     | 4     | 3 |
| 43550  | 6    | 5    | 2    | 6    | 6    | 6    | 6    | 2    | 5     | 2      | 3      | 4     | 5     | 4     | 4 |
| 43551  |      |      |      |      |      |      |      |      |       | 2      | 3      | 2     | 4     | 4     | 4 |
| 43554  |      | 5    |      | 5    | 6    | 4    | 5    | 3    | 2     | 2      | 2      | 4     | 4     | 4     | 3 |
| 43560  | 3    | 5    | 3    | 4    | 5    | 5    | 3    | 2    | 3     | 2      | 2      | 4     | 4     | 4     | 4 |
| 43569  | 6    | 6    | 6    | 6    | 6    | 6    | 6    | 6    | 2     | 2      | 3      | 3     | 5     | 5     | 5 |
| 43583  | 5    | 4    | 2    | 5    | 6    | 5    | 6    | 2    | 3     | 2      | 3      | 4     | 4     | 4     | 4 |
| 43590  | 3    | 3    | 5    | 3    | 4    | 5    | 3    | 6    | 1     | 1      | 1      | 1     | 1     | 1     | 3 |
| 43591  | 6    | 6    | 1    | 6    | 6    | 6    | 6    | 1    | 4     | 3      | 3      | 5     | 5     | 5     | 5 |
| 43595  |      |      |      |      |      |      |      |      |       | 2      | 1      | 1     | 2     | 3     | 2 |
| 43599  | 3    |      |      | 3    | 4    |      | 4    |      | 2     | 2      | 1      | 2     | 2     | 2     | 3 |
| 43606  | 5    | 5    | 3    | 4    | 5    | 4    | 5    | 3    | 3     | 3      | 3      | 4     | 4     | 4     | 4 |
| 43609  | 2    | 4    | 5    | 3    | 5    | 6    | 6    | 6    | 2     | 3      | 3      | 5     | 5     | 5     | 5 |
| 43629  |      |      |      |      |      |      |      |      |       | 1      | 2      | 1     | 3     | 3     | 4 |
| 43636  | 1    | 6    | 1    | 1    | 1    | 3    | 2    | 4    | 5     | 3      | 3      | 5     | 5     | 5     | 5 |
| 43661  |      |      |      |      |      |      |      |      |       | 3      | 3      | 3     | 5     | 5     | 5 |
| 43668  |      |      |      |      |      |      |      |      |       | 3      | 2      | 3     | 4     | 4     | 4 |
| 43672  |      |      |      |      |      |      |      |      |       | 2      | 3      | 3     | 4     | 5     | 5 |
| 43677  | 5    | 4    | 3    | 4    | 5    | 4    | 5    | 3    | 3     | 2      | 3      | 4     | 4     | 4     | 4 |
| 43683  |      |      |      |      | 3    |      |      |      |       | 2      | 3      | 2     | 3     | 3     | 1 |
| 43708  |      |      |      |      |      |      |      |      |       | 2      | 2      | 2     | 4     | 3     | 4 |
| 43713  | 1    | 2    | 4    | 1    | 6    | 5    | 1    | 6    | 2     | 2      | 2      | 3     | 3     | 3     | 1 |
| 43718  |      |      |      |      |      |      |      |      |       | 3      | 3      | 3     | 4     | 4     | 4 |
| 43725  | 3    | 5    | 2    | 3    | 5    | 5    | 5    | 4    | 4     | 4      | 3      | 3     | 4     | 5     | 5 |
| 43747  | 2    | 3    | 5    | 2    | 3    | 1    | 2    | 5    | 3     | 2      | 2      | 3     | 3     | 3     | 3 |
| 43755  | 6    | 6    | 2    | 6    | 6    | 6    | 6    | 2    | 2     | 2      | 3      | 2     | 4     | 4     | 4 |
| 43770  |      |      |      |      |      |      |      |      |       | 2      | 3      | 3     | 5     | 5     | 5 |
| 43775  | 4    | 3    | 3    | 4    | 5    | 4    | 4    | 3    | 2     | 2      | 3      | 3     | 4     | 5     | 4 |
| 43788  |      |      |      |      |      |      |      |      |       | 4      | 3      | 3     | 5     | 5     | 5 |
| 43790  | 2    | 2    | 2    | 2    | 2    | 2    | 2    | 2    | 2     | 3      | 2      | 2     | 2     | 2     | 2 |

| respid | Q48k | Q48l | Q48m | Q48n | Q48o | Q48p | Q48q | Q48r | Q49_1 | Q50a_1 | Q50b_1 | Q51_1 | Q51_2 | Q52_1 |   |
|--------|------|------|------|------|------|------|------|------|-------|--------|--------|-------|-------|-------|---|
| 43797  | 1    | 2    | 2    | 1    | 1    | 2    | 2    | 2    | 2     | 3      | 2      | 2     | 1     | 1     | 1 |
| 43798  | 1    | 2    | 2    | 2    | 2    | 2    | 2    | 2    | 2     | 3      | 2      | 2     | 3     | 4     | 4 |
| 43811  | 2    | 2    | 1    | 1    | 1    | 1    | 2    | 2    | 2     | 3      | 2      | 1     | 1     | 1     | 1 |
| 43819  | 1    | 2    | 1    | 2    | 2    | 1    | 2    | 1    | 3     | 2      | 2      | 1     | 1     | 1     | 1 |
| 43821  | 2    | 2    | 1    | 1    | 1    | 1    | 1    | 1    | 3     | 2      | 2      | 2     | 3     | 2     | 2 |
| 43822  | 1    | 6    | 6    |      |      |      |      |      | 2     | 3      | 2      | 4     | 4     | 3     | 3 |
| 43825  | 3    | 5    | 3    | 3    | 6    | 3    | 4    | 4    | 2     | 2      | 2      | 4     | 3     | 2     | 2 |
| 43826  | 4    | 4    | 3    | 3    | 3    | 3    | 4    | 3    | 2     | 3      | 3      | 4     | 3     | 4     | 4 |
| 43831  | 6    | 6    | 3    | 5    | 6    | 4    | 5    | 3    | 2     | 2      | 1      | 3     | 2     | 3     | 3 |
| 43836  | 2    | 2    | 3    | 1    | 2    | 2    | 2    | 1    | 3     | 1      | 2      | 1     | 1     | 1     | 1 |
| 43852  | 1    | 2    | 3    | 4    | 4    | 2    | 1    | 2    | 3     | 2      | 2      | 3     | 3     | 4     | 4 |
| 43857  | 1    | 6    | 6    | 1    | 6    | 6    | 6    | 6    | 2     | 2      | 2      | 4     | 4     | 3     | 3 |
| 43858  |      |      |      |      |      |      |      |      | 2     | 3      | 3      | 5     | 5     | 5     | 5 |
| 43859  | 4    | 2    | 2    | 2    | 2    | 3    | 3    | 1    | 2     | 2      | 2      | 1     | 1     | 1     | 1 |
| 43863  |      |      |      |      |      |      |      |      | 4     | 3      | 3      | 5     | 5     | 5     | 5 |
| 43868  | 2    | 1    | 1    | 1    | 1    | 1    | 3    | 3    | 2     | 2      | 2      | 1     | 1     | 1     | 1 |
| 43872  | 2    | 2    | 2    | 2    | 2    | 2    |      | 2    | 3     | 2      | 2      | 2     | 3     | 1     | 1 |
| 43874  | 2    | 2    | 2    | 2    | 2    | 2    | 2    | 2    | 3     | 2      | 2      | 3     | 3     | 3     | 3 |
| 43882  | 6    | 6    | 2    | 6    | 6    | 3    | 6    | 2    | 4     | 3      | 3      | 5     | 5     | 5     | 5 |
| 43886  |      |      |      |      |      |      |      |      | 1     | 2      | 2      | 3     | 3     | 4     | 4 |
| 43903  |      |      |      | 3    |      |      |      |      | 2     | 2      | 2      | 3     | 2     | 3     | 3 |
| 43929  | 6    | 6    | 2    | 6    | 4    | 6    | 6    | 5    | 3     | 3      | 2      | 3     | 4     | 3     | 3 |
| 43932  | 5    | 5    | 3    | 5    | 5    | 5    | 5    | 3    | 3     | 3      | 3      | 5     | 5     | 5     | 5 |
| 43936  | 2    | 3    | 4    | 2    | 4    | 4    | 3    |      | 3     | 3      | 2      | 3     | 4     | 4     | 4 |
| 43962  | 6    | 6    | 1    | 2    | 6    | 6    | 6    | 2    | 2     | 3      | 3      | 5     | 5     | 5     | 5 |
| 43964  | 6    | 5    | 2    | 6    | 6    | 6    | 6    | 2    | 4     | 3      | 3      | 4     | 4     | 4     | 4 |
| 43968  | 1    | 1    | 1    | 3    | 6    | 1    | 2    | 2    | 4     | 1      | 3      | 1     | 5     | 1     | 1 |
| 43979  | 3    | 4    | 3    | 4    | 5    | 4    | 4    | 4    | 2     | 3      | 3      | 4     | 5     | 4     | 4 |
| 44006  |      |      |      |      |      |      |      |      | 3     | 2      | 2      | 3     | 3     | 3     | 3 |
| 44009  |      |      |      |      |      |      |      |      | 2     | 2      | 2      | 3     | 2     | 4     | 4 |
| 44023  | 4    | 4    | 3    | 5    | 5    | 5    | 5    | 3    | 3     | 3      | 3      | 4     | 5     | 5     | 5 |
| 44035  | 2    | 2    | 1    | 1    | 2    | 1    | 2    | 2    | 2     | 2      | 2      | 2     | 2     | 2     | 2 |

| respid | Q48k | Q48l | Q48m | Q48n | Q48o | Q48p | Q48q | Q48r | Q49_1 | Q50a_1 | Q50b_1 | Q51_1 | Q51_2 | Q52_1 |   |
|--------|------|------|------|------|------|------|------|------|-------|--------|--------|-------|-------|-------|---|
| 44038  |      |      |      |      |      |      |      |      |       | 3      | 2      | 3     | 4     | 3     | 4 |
| 44039  | 2    | 2    | 2    | 2    | 2    | 2    | 2    | 2    | 2     | 2      | 2      | 2     | 2     | 3     | 1 |
| 44043  | 4    | 4    | 4    | 4    | 4    | 4    | 4    | 4    | 4     | 2      | 3      | 2     | 3     | 3     | 3 |
| 44048  | 1    | 2    | 1    | 3    | 2    | 1    | 3    | 1    | 3     | 3      | 2      | 2     | 1     | 1     | 1 |
| 44050  | 1    | 6    | 5    | 6    | 6    | 6    | 6    | 6    | 6     | 2      | 2      | 2     | 4     | 4     | 5 |
| 44051  | 2    | 2    | 2    | 2    | 2    | 2    | 1    | 2    | 2     | 3      | 2      | 2     | 3     | 4     | 3 |
| 44061  | 2    | 2    | 2    | 2    | 2    | 2    | 2    | 2    | 2     | 3      | 2      | 2     | 2     | 2     | 2 |
| 44063  | 2    | 2    | 2    | 1    | 2    | 2    | 2    | 2    | 2     | 2      | 2      | 2     | 2     | 3     | 3 |
| 44072  | 2    | 3    | 2    | 2    | 2    | 2    | 3    | 2    | 3     | 2      | 2      | 2     | 2     | 2     | 3 |
| 44075  | 2    | 1    | 2    | 2    | 2    | 2    | 2    | 2    | 2     | 2      | 2      | 2     | 1     | 1     | 2 |
| 44089  | 3    | 2    | 2    | 2    | 2    | 3    | 2    | 1    | 3     | 2      | 2      | 2     | 3     | 3     | 3 |
| 44090  |      |      |      |      |      |      |      |      |       | 1      | 2      | 2     | 4     | 3     | 4 |
| 44091  | 2    | 2    | 2    | 1    | 2    | 2    | 2    | 2    | 2     | 3      | 2      | 2     | 3     | 4     | 3 |
| 44092  | 5    | 6    | 3    | 5    | 6    | 6    | 6    | 6    | 3     | 2      | 2      | 2     | 4     | 4     | 4 |
| 44110  | 3    | 2    | 2    | 2    | 2    | 2    | 2    | 2    | 2     | 3      | 2      | 2     | 1     | 1     | 1 |
| 44112  | 2    | 2    | 1    | 1    | 2    | 2    | 2    | 2    | 1     | 3      | 2      | 2     | 3     | 2     | 3 |
| 44114  | 3    | 2    | 2    | 2    | 3    | 2    | 2    | 2    | 2     | 2      | 2      | 2     | 2     | 2     | 2 |
| 44143  |      |      |      |      |      |      |      |      |       | 3      | 2      | 2     | 3     | 3     | 3 |
| 44179  | 4    | 4    | 3    | 4    | 4    | 4    | 4    | 4    | 3     | 3      | 3      | 3     | 4     | 4     | 4 |
| 44234  |      |      |      |      |      |      |      |      |       | 3      | 2      | 2     | 5     | 5     | 4 |
| 44236  |      |      |      |      |      |      |      |      |       | 3      | 3      | 3     | 4     | 4     | 4 |
| 44239  |      |      |      |      |      |      |      |      |       | 3      | 2      | 2     | 2     | 3     | 2 |
| 44241  |      |      |      |      |      |      |      |      |       | 3      | 2      | 2     | 1     | 1     | 2 |
| 44253  |      |      |      |      |      |      |      |      |       | 2      | 3      | 3     | 3     | 4     | 3 |
| 44260  |      |      |      |      |      |      |      |      |       | 3      | 2      | 2     | 1     | 1     | 2 |
| 44261  |      |      |      |      |      |      |      |      |       | 3      | 2      | 2     | 1     | 2     | 1 |
| 44263  |      |      |      |      |      |      |      |      |       | 3      | 2      | 2     | 3     | 4     | 3 |
| 44264  | 4    | 4    | 3    | 4    | 4    | 3    | 4    | 3    | 2     | 3      | 3      | 5     | 5     | 5     | 5 |
| 44265  |      |      |      |      |      |      |      |      |       | 3      | 3      | 3     | 5     | 5     | 5 |
| 44267  |      |      |      |      |      |      |      |      |       | 3      | 2      | 2     | 2     | 2     | 1 |
| 44306  | 3    | 4    | 4    | 5    | 4    | 4    | 5    | 3    | 2     | 3      | 2      | 4     | 5     | 5     | 4 |
| 44309  | 3    | 3    | 4    | 3    | 3    | 4    | 3    | 4    | 3     | 3      | 2      | 2     | 2     | 3     | 1 |

| respid | Q48k | Q48l | Q48m | Q48n | Q48o | Q48p | Q48q | Q48r | Q49_1 | Q50a_1 | Q50b_1 | Q51_1 | Q51_2 | Q52_1 |   |
|--------|------|------|------|------|------|------|------|------|-------|--------|--------|-------|-------|-------|---|
| 44310  |      | 6    | 1    | 2    | 6    | 6    | 6    | 1    | 5     | 2      | 2      | 3     | 1     | 1     | 5 |
| 44361  |      | 3    | 5    | 4    | 2    | 4    | 3    | 2    | 3     | 2      | 2      | 2     | 4     | 3     | 3 |
| 44380  |      | 4    | 3    | 5    | 3    | 4    | 6    | 5    | 6     | 2      | 3      | 2     | 4     | 5     | 3 |
| 44386  |      | 3    | 3    | 6    | 3    | 5    | 3    | 3    | 6     | 3      | 3      | 3     | 5     | 5     | 4 |
| 44419  |      | 4    | 4    | 4    | 3    | 4    | 3    | 4    | 4     | 2      | 3      | 3     | 3     | 3     | 3 |
| 44426  |      | 6    | 6    | 1    | 6    | 6    | 5    | 6    | 5     | 3      | 3      | 3     | 4     | 4     | 5 |
| 44479  |      |      |      |      |      |      |      |      |       | 2      | 2      | 1     | 3     | 4     | 4 |
| 44484  |      |      |      |      |      |      |      |      |       | 2      | 1      | 2     | 2     | 3     | 3 |
| 44487  |      |      |      |      |      |      |      |      |       | 1      | 2      | 2     | 2     | 3     | 2 |
| 44509  |      | 5    | 5    | 3    | 5    | 5    | 5    | 5    | 3     | 3      | 3      | 3     | 5     | 5     | 5 |
| 44540  |      | 3    | 4    |      | 4    | 4    | 5    | 5    | 4     | 3      | 3      | 3     | 4     | 5     | 4 |
| 44551  |      |      |      |      |      |      |      |      |       | 3      | 2      | 2     | 3     | 3     | 2 |
| 44553  |      |      |      |      |      |      |      |      |       | 4      | 3      | 3     | 5     | 5     | 4 |
| 44650  |      | 4    | 4    | 3    | 4    | 4    | 4    | 4    | 3     | 3      | 2      | 3     | 4     | 4     | 5 |
| 44665  |      | 3    | 3    |      | 3    |      | 3    | 3    | 5     | 2      | 2      | 3     | 3     | 4     | 3 |
| 44779  |      |      |      |      |      |      |      |      |       | 3      | 3      | 2     | 5     | 5     | 4 |
| 44797  |      | 3    | 4    | 2    | 3    | 4    | 2    | 3    | 4     | 3      | 2      | 3     | 4     | 5     | 4 |
| 44807  |      |      |      |      |      |      |      |      |       | 3      | 2      | 2     | 2     | 2     | 2 |
| 44815  |      | 4    |      |      | 3    | 4    | 3    | 4    | 4     | 3      | 2      | 2     | 3     | 4     | 3 |
| 44836  |      | 3    | 4    | 3    | 5    | 5    | 4    | 4    | 5     | 4      | 3      | 3     | 4     | 5     | 5 |
| 44868  |      |      |      |      |      |      |      |      |       | 3      | 2      | 2     | 3     | 4     | 3 |
| 44927  |      |      |      |      |      |      |      |      |       | 2      | 2      | 2     | 4     | 4     | 4 |
| 44983  |      |      |      |      |      |      |      |      |       | 4      | 3      | 3     | 5     | 5     | 5 |
| 45040  |      |      |      | 6    | 6    |      |      |      |       | 2      | 2      | 2     | 4     | 4     | 3 |
| 45051  |      | 4    | 2    | 2    | 3    | 5    | 4    | 5    | 3     | 3      | 3      | 2     | 3     | 4     | 4 |
| 45067  |      | 3    | 5    | 3    | 4    | 5    | 6    | 4    | 2     | 3      | 2      | 2     | 5     | 5     | 5 |
| 45074  |      |      |      |      |      |      |      |      |       | 3      | 2      | 2     | 3     | 3     | 3 |
| 45115  |      | 5    | 4    | 4    | 5    | 6    | 6    | 5    | 4     | 2      | 1      | 1     | 2     | 2     | 2 |
| 45187  |      |      |      |      |      |      |      |      |       | 1      | 1      | 1     | 2     | 2     | 3 |
| 45221  |      |      |      |      |      |      |      |      |       | 2      | 2      | 2     | 3     | 3     | 3 |
| 45279  |      | 5    | 5    | 4    | 4    | 5    | 4    | 4    | 2     | 2      | 2      | 2     | 5     | 4     | 3 |
| 45308  |      | 4    | 4    | 4    | 5    | 4    | 4    | 4    | 5     | 2      | 2      | 2     | 3     | 2     | 2 |

| respid | Q48k | Q48l | Q48m | Q48n | Q48o | Q48p | Q48q | Q48r | Q49_1 | Q50a_1 | Q50b_1 | Q51_1 | Q51_2 | Q52_1 |   |
|--------|------|------|------|------|------|------|------|------|-------|--------|--------|-------|-------|-------|---|
| 45317  |      |      |      |      |      |      |      |      |       | 2      | 2      | 3     | 4     | 5     | 5 |
| 45379  |      |      |      |      |      |      |      |      |       | 3      | 2      | 2     | 2     | 2     | 3 |
| 45451  | 4    | 4    | 3    | 4    | 4    | 4    | 4    | 4    | 4     | 2      | 2      | 2     | 4     | 4     | 4 |
| 45472  |      |      |      |      |      |      |      |      |       | 1      | 2      | 2     | 3     | 3     | 2 |
| 45474  |      |      |      |      |      |      |      |      |       | 2      | 1      | 1     | 2     | 2     | 3 |
| 45544  |      |      |      |      |      |      |      |      |       | 4      | 3      | 1     | 5     | 4     | 4 |
| 45561  |      |      | 5    |      |      | 5    |      | 5    |       | 2      | 2      | 2     | 4     | 4     | 4 |
| 45596  | 3    | 2    | 6    | 3    | 5    | 6    | 6    | 6    | 3     | 3      | 3      | 3     | 4     | 5     | 4 |

**InstrumSF-12 SF-12 SF-12 SF-12 SF-12 SF-12 HADS HADS HADS HADS HADS HADS HADS HADS**

**Symptom**

**Type of R**

**Descripti**

| respid | Q52_2 | Q53_1 | Q54_1 | Q54_2 | Q54_3 | Q55_1 | Q56a_1 | Q56b_1 | Q56c_1 | Q56d_1 | Q56e_1 | Q56f_1 | Q56g_1 | Q56h_1 |
|--------|-------|-------|-------|-------|-------|-------|--------|--------|--------|--------|--------|--------|--------|--------|
| 241    | 5     | 1     | 1     | 1     | 5     | 5     | 0      | 1      | 0      | 1      | 1      | 1      | 0      | 1      |
| 242    | 5     | 1     | 1     | 1     | 5     | 5     | 0      | 1      | 0      | 0      | 0      | 0      | 0      | 0      |
| 243    | 4     | 2     | 3     | 3     | 4     | 4     | 1      | 1      | 2      | 1      | 2      | 1      | 2      | 1      |
| 244    | 5     | 1     | 1     | 1     | 5     | 5     | 1      | 1      | 0      | 0      | 1      | 0      | 0      | 1      |
| 245    | 5     | 2     | 1     | 3     | 4     | 5     | 1      | 1      | 1      | 0      | 1      | 0      | 1      | 1      |
| 246    | 5     | 2     | 1     | 1     | 4     | 4     | 0      | 1      | 0      | 1      | 0      | 1      | 1      | 1      |
| 247    | 5     | 3     | 1     | 5     | 3     | 5     | 1      | 1      | 0      | 1      | 1      | 2      | 1      | 1      |
| 253    | 4     | 4     | 4     | 4     | 4     | 4     | 1      | 1      | 0      | 1      | 1      | 2      | 2      | 1      |
| 256    | 3     | 2     | 1     | 3     | 3     | 3     | 1      | 1      | 1      | 1      | 2      | 1      | 1      | 1      |
| 257    | 5     | 1     | 1     | 1     | 4     | 4     | 1      | 2      | 0      | 0      | 1      | 0      | 1      | 1      |
| 258    | 4     | 3     | 3     | 3     | 3     | 3     | 2      | 1      | 2      | 2      | 2      | 1      | 2      | 1      |
| 259    | 4     | 1     | 1     | 3     | 4     | 4     | 1      | 1      | 2      | 1      | 1      | 1      | 1      | 2      |
| 263    | 4     | 1     | 1     | 4     | 3     | 3     | 1      | 3      | 1      | 1      | 3      | 2      | 2      | 2      |
| 264    | 4     | 1     | 1     | 0     | 4     | 5     | 0      | 0      | 1      | 1      | 1      | 0      | 0      | 1      |
| 265    | 4     | 3     | 3     | 4     | 4     | 4     | 2      | 2      | 1      | 0      | 2      | 2      | 2      | 1      |
| 266    | 5     | 2     | 1     | 3     | 4     | 5     | 1      | 2      | 2      | 0      | 1      | 1      | 1      | 1      |
| 268    | 2     | 2     | 1     | 4     | 1     | 2     | 2      | 1      | 2      | 1      | 3      | 2      | 1      | 2      |
| 270    | 4     | 1     | 4     | 4     | 3     | 5     | 1      | 1      | 2      | 1      | 2      | 1      | 1      | 1      |
| 272    | 4     | 1     | 0     | 0     | 5     | 5     | 0      | 0      | 0      | 1      | 1      | 1      | 1      | 1      |
| 274    | 5     | 3     | 0     | 1     | 4     | 5     | 0      | 1      | 0      | 1      | 1      | 1      | 0      | 0      |

| respid | Q52_2 | Q53_1 | Q54_1 | Q54_2 | Q54_3 | Q55_1 | Q56a_1 | Q56b_1 | Q56c_1 | Q56d_1 | Q56e_1 | Q56f_1 | Q56g_1 | Q56h_1 |
|--------|-------|-------|-------|-------|-------|-------|--------|--------|--------|--------|--------|--------|--------|--------|
| 275    | 5     | 2     | 1     | 3     | 4     | 4     | 1      | 1      | 0      | 1      | 1      | 2      | 1      | 1      |
| 276    | 5     | 1     | 3     | 1     | 3     | 5     | 1      | 2      | 0      | 2      | 1      | 1      | 1      | 0      |
| 277    | 4     | 2     | 3     | 3     | 4     | 4     | 1      | 1      | 1      | 1      | 1      | 2      | 1      | 1      |
| 279    | 3     | 3     | 3     | 3     | 3     | 3     | 1      | 1      | 1      | 1      | 1      | 1      | 1      | 1      |
| 286    | 5     | 1     | 1     | 1     | 4     | 5     | 1      | 0      | 0      | 1      | 1      | 0      | 0      | 1      |
| 290    | 5     | 2     | 3     | 1     | 3     | 4     | 1      | 1      | 1      | 0      | 1      | 1      | 1      | 1      |
| 291    | 5     | 1     | 5     | 5     | 5     | 5     | 1      | 0      | 1      | 2      | 1      | 2      | 1      | 0      |
| 295    | 5     | 1     | 1     | 1     | 5     | 5     | 0      | 0      | 0      | 0      | 0      | 0      | 0      | 0      |
| 297    | 5     | 2     | 1     | 1     | 4     | 4     | 0      | 0      | 0      | 0      | 1      | 1      | 1      | 1      |
| 299    | 2     | 2     | 4     | 4     | 3     | 2     | 1      | 2      | 2      | 2      | 2      | 2      | 2      | 1      |
| 300    | 4     | 1     | 1     | 1     | 4     | 4     | 2      | 1      | 0      | 0      | 2      | 1      | 1      | 1      |
| 303    | 5     | 1     | 1     | 1     | 5     | 5     | 0      | 0      | 0      | 0      | 0      | 0      | 0      | 0      |
| 304    | 5     | 1     | 1     | 4     | 4     | 5     | 1      | 2      | 0      | 1      | 2      | 1      | 2      | 2      |
| 306    | 5     | 1     | 1     | 3     | 4     | 5     | 0      | 0      | 0      | 0      | 0      | 1      | 0      | 1      |
| 307    | 4     | 1     | 1     | 1     | 4     | 4     | 0      | 0      | 0      | 0      | 1      | 0      | 1      | 0      |
| 312    | 3     | 3     | 3     | 3     | 3     | 3     | 1      | 1      | 1      | 1      | 1      | 1      | 2      | 1      |
| 315    | 3     | 3     | 3     | 3     | 1     | 3     | 1      | 1      | 1      | 1      | 1      | 1      | 2      | 1      |
| 317    | 5     | 1     | 1     | 1     | 4     | 5     | 1      | 1      | 0      | 0      | 0      | 2      | 2      | 1      |
| 322    | 3     | 1     | 1     | 3     | 0     | 5     | 2      | 0      | 3      | 1      | 3      | 3      | 2      | 0      |
| 335    | 4     | 3     | 4     | 4     | 5     | 5     | 1      | 1      | 0      | 0      | 0      | 2      | 2      | 0      |
| 374    | 3     | 3     | 3     | 4     | 3     | 3     | 2      | 1      | 1      | 1      | 2      | 1      | 2      | 2      |
| 378    | 3     | 3     | 1     | 3     | 3     | 3     | 1      | 1      | 1      | 1      | 1      | 1      | 1      | 1      |
| 380    | 5     | 2     | 3     | 3     | 4     | 4     | 1      | 2      | 1      | 0      | 1      | 1      | 2      | 1      |
| 382    | 4     | 1     | 1     | 3     | 4     | 5     | 1      | 1      | 1      | 2      | 2      | 2      | 1      | 2      |
| 384    | 4     | 1     | 3     | 3     | 3     | 4     | 1      | 1      | 1      | 1      | 1      | 1      | 2      | 1      |
| 385    | 3     | 2     | 5     | 5     | 1     | 3     | 1      | 2      | 2      | 1      | 2      | 3      | 2      | 2      |
| 395    | 5     | 1     | 1     | 1     | 4     | 5     | 1      | 1      | 0      | 1      | 1      | 1      | 1      | 0      |
| 396    | 5     | 2     | 1     | 1     | 4     | 5     | 0      | 0      | 0      | 0      | 1      | 0      | 1      | 0      |
| 398    | 5     | 1     | 1     | 1     | 4     | 5     | 0      | 1      | 0      | 1      | 1      | 1      | 1      | 1      |
| 402    | 3     | 3     | 3     | 3     | 3     | 3     | 1      | 1      | 1      | 1      | 1      | 1      | 2      | 1      |
| 414    | 5     | 5     | 3     | 3     | 5     | 5     | 0      | 1      | 0      | 2      | 1      | 2      | 2      | 1      |
| 415    | 5     | 1     | 5     | 5     | 5     | 5     | 0      | 0      | 2      | 0      | 1      | 0      | 0      | 0      |



| respid | Q52_2 | Q53_1 | Q54_1 | Q54_2 | Q54_3 | Q55_1 | Q56a_1 | Q56b_1 | Q56c_1 | Q56d_1 | Q56e_1 | Q56f_1 | Q56g_1 | Q56h_1 |
|--------|-------|-------|-------|-------|-------|-------|--------|--------|--------|--------|--------|--------|--------|--------|
| 416    | 5     | 2     | 1     | 3     | 4     | 3     | 1      | 0      | 1      | 0      | 1      | 0      | 1      | 0      |
| 420    | 4     | 2     | 3     | 4     | 3     | 4     | 1      | 2      | 0      | 0      | 2      | 1      | 0      | 1      |
| 421    | 5     | 1     | 0     | 1     | 4     | 4     | 0      | 0      | 0      | 0      | 1      | 1      | 0      | 1      |
| 422    | 5     | 1     | 1     | 1     | 4     | 5     | 0      | 1      | 0      | 0      | 0      | 2      | 0      | 0      |
| 423    | 4     | 2     | 1     | 3     | 4     | 4     | 1      | 1      | 1      | 0      | 1      | 1      | 1      | 1      |
| 424    | 4     | 1     | 1     | 1     | 4     | 4     | 0      | 0      | 0      | 0      | 0      | 0      | 0      | 0      |
| 425    | 4     | 2     | 1     | 3     | 4     | 4     | 1      | 1      | 1      | 1      | 1      | 1      | 1      | 1      |
| 428    | 4     | 2     | 4     | 4     | 5     | 4     | 0      | 0      | 0      | 0      | 0      | 0      | 0      | 0      |
| 429    | 5     | 1     | 3     | 3     | 3     | 4     | 1      | 1      | 0      | 0      | 1      | 1      | 0      | 1      |
| 431    | 5     | 1     | 0     | 1     | 5     | 5     | 0      | 0      | 0      | 0      | 0      | 0      | 0      | 0      |
| 437    | 3     | 2     | 1     | 1     | 4     | 3     | 1      | 1      | 1      | 1      | 1      | 1      | 1      | 1      |
| 438    | 5     | 3     | 5     | 5     | 5     | 4     | 0      | 1      | 0      | 2      | 1      | 3      | 1      | 1      |
| 441    | 5     | 2     | 1     | 1     | 4     | 5     | 1      | 1      | 0      | 1      | 1      | 2      | 1      | 0      |
| 444    | 5     | 1     | 1     | 1     | 4     | 5     | 3      | 0      | 1      | 0      | 1      | 0      | 0      | 1      |
| 448    | 5     | 1     | 1     | 1     | 5     | 5     | 0      | 0      | 0      | 0      | 1      | 0      | 0      | 0      |
| 449    | 4     | 2     | 3     | 3     | 4     | 5     | 1      | 2      | 0      | 0      | 1      | 1      | 2      | 1      |
| 457    | 3     | 4     | 4     | 4     | 3     | 4     | 1      | 2      | 1      | 1      | 1      | 2      | 2      | 2      |
| 460    | 5     | 2     | 1     | 1     | 4     | 5     | 1      | 0      | 1      | 0      | 1      | 1      | 1      | 1      |
| 469    | 5     | 1     | 1     | 1     | 4     | 4     | 1      | 1      | 1      | 1      | 1      | 1      | 1      | 1      |
| 471    | 3     | 3     | 1     | 4     | 4     | 5     | 1      | 2      | 0      | 2      | 1      | 1      | 1      | 1      |
| 473    | 4     | 1     | 1     | 3     | 3     | 4     | 1      | 0      | 1      | 0      | 1      | 1      | 1      | 0      |
| 476    | 4     | 1     | 3     | 3     | 3     | 3     | 1      | 1      | 0      | 2      | 1      | 1      | 1      | 1      |
| 479    | 5     | 1     | 0     | 0     | 4     | 5     | 0      | 0      | 1      | 0      | 0      | 0      | 0      | 0      |
| 485    | 5     | 2     | 0     | 1     | 5     | 5     | 0      | 0      | 1      | 0      | 1      | 0      | 0      | 0      |
| 488    | 5     | 2     | 3     | 3     | 3     | 3     | 1      | 1      | 1      | 2      | 2      | 1      | 2      | 1      |
| 494    | 5     | 2     | 1     | 3     | 4     | 4     | 1      | 1      | 0      | 0      | 1      | 1      | 0      | 2      |
| 496    | 5     | 1     | 3     | 1     | 5     | 5     | 0      | 0      | 0      | 0      | 0      | 0      | 0      | 0      |
| 501    | 4     | 3     | 3     | 3     | 3     | 4     | 1      | 1      | 1      | 1      | 1      | 1      | 1      | 1      |
| 502    | 3     | 3     | 3     | 3     | 3     | 3     | 1      | 1      | 2      | 1      | 1      | 1      | 1      | 1      |
| 503    | 5     | 1     | 1     | 0     | 5     | 5     | 0      | 0      | 0      | 0      | 0      | 0      | 0      | 0      |
| 506    | 5     | 1     | 1     | 1     | 4     | 5     | 0      | 0      | 0      | 0      | 1      | 0      | 1      | 0      |
| 514    | 3     | 2     | 3     | 4     | 4     | 3     | 1      | 1      | 1      | 1      | 1      | 1      | 1      | 1      |

| respid | Q52_2 | Q53_1 | Q54_1 | Q54_2 | Q54_3 | Q55_1 | Q56a_1 | Q56b_1 | Q56c_1 | Q56d_1 | Q56e_1 | Q56f_1 | Q56g_1 | Q56h_1 |
|--------|-------|-------|-------|-------|-------|-------|--------|--------|--------|--------|--------|--------|--------|--------|
| 515    | 4     | 2     | 1     | 3     | 4     | 5     | 1      | 0      | 2      | 2      | 2      | 1      | 1      | 1      |
| 516    | 4     | 1     | 4     | 4     | 0     | 4     | 2      | 1      | 2      | 0      | 3      | 1      | 2      | 1      |
| 519    | 5     | 1     | 3     | 3     | 5     | 3     | 1      | 2      | 0      | 0      | 1      | 1      | 1      | 0      |
| 522    | 3     | 1     | 1     | 3     | 4     | 5     | 1      | 1      | 1      | 1      | 1      | 1      | 1      | 1      |
| 525    | 5     | 1     | 1     | 0     | 0     | 5     | 0      | 1      | 0      | 1      | 0      | 0      | 0      | 1      |
| 528    | 5     | 1     | 3     | 3     | 3     | 3     | 1      | 0      | 0      | 0      | 0      | 1      | 0      | 0      |
| 532    | 4     | 1     | 1     | 1     | 3     | 4     | 1      | 1      | 1      | 1      | 1      | 1      | 1      | 1      |
| 536    | 4     | 2     | 1     | 1     | 4     | 4     | 1      | 1      | 2      | 1      | 1      | 1      | 2      | 1      |
| 539    | 4     | 4     | 5     | 5     | 0     | 5     | 3      | 3      | 3      | 3      | 3      | 3      | 3      | 3      |
| 540    | 3     | 2     | 1     | 3     | 1     | 4     | 1      | 1      | 2      | 1      | 2      | 2      | 2      | 1      |
| 547    | 5     | 2     | 1     | 3     | 4     | 5     | 0      | 1      | 1      | 0      | 0      | 1      | 0      | 2      |
| 551    | 5     | 1     | 1     | 1     | 4     | 5     | 0      | 1      | 0      | 0      | 1      | 0      | 1      | 1      |
| 554    | 2     | 2     | 4     | 4     | 3     | 4     | 1      | 1      | 2      | 1      | 2      | 1      | 2      | 1      |
| 558    | 3     | 3     | 3     | 3     | 3     | 3     | 2      | 2      | 1      | 1      | 2      | 2      | 1      | 1      |
| 563    | 5     | 1     | 1     | 1     | 5     | 5     | 1      | 1      | 0      | 0      | 0      | 1      | 0      | 1      |
| 564    | 2     | 2     | 1     | 1     | 1     | 2     | 0      | 1      | 1      | 1      | 1      | 1      | 1      | 1      |
| 565    | 4     | 2     | 1     | 1     | 4     | 4     | 1      | 1      | 1      | 1      | 1      | 1      | 1      | 1      |
| 567    | 5     | 1     | 1     | 1     | 4     | 5     | 0      | 0      | 0      | 0      | 1      | 2      | 1      | 1      |
| 569    | 5     | 1     | 1     | 3     | 3     | 5     | 1      | 1      | 2      | 1      | 2      | 1      | 1      | 1      |
| 572    | 4     | 2     | 3     | 3     | 3     | 4     | 0      | 2      | 0      | 2      | 1      | 2      | 2      | 1      |
| 574    | 5     | 1     | 1     | 3     | 4     | 5     | 0      | 0      | 1      | 0      | 0      | 0      | 0      | 0      |
| 583    | 2     | 4     | 4     | 4     | 1     | 4     | 2      | 0      | 2      | 2      | 2      | 2      | 2      | 3      |
| 589    | 5     | 1     | 1     | 1     | 4     | 5     | 0      | 0      | 0      | 0      | 0      | 0      | 0      | 0      |
| 592    | 5     | 2     | 1     | 1     | 5     | 5     | 3      | 0      | 0      | 0      | 0      | 0      | 0      | 0      |
| 593    | 5     | 2     | 4     | 3     | 4     | 3     | 0      | 1      | 1      | 0      | 1      | 1      | 1      | 1      |
| 594    | 2     | 2     | 1     | 4     | 3     | 2     | 1      | 0      | 0      | 1      | 1      | 1      | 1      | 1      |
| 597    | 4     | 2     | 1     | 1     | 5     | 5     | 1      | 2      | 0      | 1      | 2      | 1      | 1      | 2      |
| 601    | 5     | 1     | 0     | 1     | 5     | 5     | 0      | 2      | 0      | 0      | 0      | 0      | 0      | 0      |
| 607    | 4     | 2     | 1     | 3     | 4     | 4     | 1      | 2      | 1      | 1      | 1      | 1      | 2      | 1      |
| 610    | 4     | 1     | 1     | 1     | 4     | 5     | 0      | 0      | 0      | 0      | 1      | 1      | 1      | 0      |
| 612    | 4     | 1     | 0     | 0     | 0     | 5     | 0      | 0      | 0      | 0      | 0      | 0      | 0      | 0      |
| 627    | 5     | 1     | 1     | 1     | 4     | 5     | 0      | 0      | 0      | 0      | 0      | 0      | 1      | 0      |

| respid | Q52_2 | Q53_1 | Q54_1 | Q54_2 | Q54_3 | Q55_1 | Q56a_1 | Q56b_1 | Q56c_1 | Q56d_1 | Q56e_1 | Q56f_1 | Q56g_1 | Q56h_1 |
|--------|-------|-------|-------|-------|-------|-------|--------|--------|--------|--------|--------|--------|--------|--------|
| 631    | 5     | 2     | 1     | 1     | 4     | 5     | 1      | 1      | 1      | 1      | 1      | 1      | 2      | 1      |
| 633    | 4     | 3     | 1     | 1     | 3     | 3     | 1      | 2      | 0      | 1      | 2      | 1      | 2      | 1      |
| 636    | 5     | 1     | 1     | 1     | 4     | 4     | 1      | 1      | 1      | 0      | 1      | 1      | 1      | 1      |
| 656    | 5     | 1     | 1     | 3     | 4     | 5     | 0      | 0      | 1      | 0      | 1      | 0      | 0      | 0      |
| 659    | 5     | 2     | 3     | 3     | 3     | 5     | 1      | 0      | 0      | 0      | 1      | 1      | 1      | 0      |
| 670    | 5     | 1     | 3     | 3     | 4     | 5     | 0      | 0      | 0      | 0      | 1      | 0      | 0      | 0      |
| 672    | 5     | 1     | 3     | 3     | 3     | 4     | 2      | 3      | 2      | 3      | 3      | 2      | 3      | 0      |
| 673    | 4     | 2     | 1     | 3     | 4     | 4     | 1      | 1      | 1      | 1      | 1      | 2      | 2      | 1      |
| 675    | 5     | 1     | 1     | 1     | 5     | 5     | 0      | 0      | 0      | 0      | 0      | 0      | 0      | 0      |
| 676    | 3     | 3     | 3     | 4     | 3     | 3     | 1      | 1      | 1      | 1      | 1      | 1      | 2      | 1      |
| 679    | 3     | 3     | 3     | 3     | 3     | 3     | 2      | 1      | 1      | 1      | 2      | 2      | 1      | 2      |
| 683    | 5     | 1     | 1     | 1     | 5     | 5     | 0      | 0      | 1      | 1      | 1      | 0      | 1      | 0      |
| 684    | 4     | 1     | 0     | 1     | 4     | 5     | 1      | 1      | 0      | 0      | 1      | 0      | 0      | 1      |
| 690    | 5     | 1     | 4     | 1     | 3     | 5     | 1      | 1      | 1      | 1      | 1      | 1      | 1      | 1      |
| 701    | 4     | 2     | 4     | 4     | 1     | 4     | 1      | 1      | 1      | 1      | 2      | 2      | 2      | 2      |
| 709    | 5     | 1     | 1     | 3     | 3     | 4     | 1      | 0      | 0      | 0      | 1      | 1      | 1      | 1      |
| 719    | 5     | 1     | 1     | 1     | 3     | 4     | 1      | 1      | 1      | 0      | 1      | 0      | 1      | 1      |
| 726    | 4     | 2     | 1     | 4     | 4     | 5     | 1      | 0      | 1      | 0      | 1      | 1      | 1      | 1      |
| 730    | 4     | 1     | 1     | 3     | 5     | 5     | 1      | 1      | 2      | 1      | 1      | 1      | 1      | 0      |
| 731    | 4     | 2     | 0     | 1     | 4     | 5     | 1      | 0      | 1      | 0      | 1      | 1      | 0      | 2      |
| 732    | 4     | 2     | 1     | 1     | 3     | 3     | 1      | 0      | 1      | 0      | 1      | 0      | 1      | 1      |
| 733    | 5     | 1     | 1     | 3     | 4     | 5     | 0      | 0      | 0      | 0      | 0      | 0      | 0      | 1      |
| 735    | 5     | 2     | 1     | 1     | 4     | 5     | 0      | 0      | 0      | 0      | 0      | 0      | 0      | 0      |
| 738    | 5     | 2     | 1     | 3     | 3     | 4     | 1      | 1      | 0      | 1      | 1      | 1      | 1      | 1      |
| 740    | 5     | 2     | 0     | 3     | 5     | 4     | 1      | 0      | 0      | 0      | 1      | 0      | 0      | 1      |
| 742    | 5     | 2     | 1     | 3     | 3     | 4     | 0      | 1      | 2      | 0      | 2      | 1      | 1      | 1      |
| 744    | 5     | 1     | 1     | 3     | 4     | 5     | 0      | 0      | 0      | 0      | 0      | 1      | 0      | 1      |
| 749    | 4     | 2     | 1     | 3     | 3     | 4     | 1      | 0      | 1      | 0      | 1      | 1      | 2      | 1      |
| 751    | 4     | 1     | 1     | 1     | 4     | 3     | 1      | 1      | 1      | 0      | 1      | 1      | 1      | 0      |
| 752    | 4     | 2     | 0     | 3     | 4     | 5     | 0      | 0      | 0      | 0      | 0      | 2      | 1      | 1      |
| 753    | 4     | 2     | 1     | 3     | 4     | 3     | 0      | 0      | 1      | 0      | 1      | 1      | 1      | 1      |
| 755    | 5     | 3     | 0     | 1     | 4     | 4     | 0      | 0      | 0      | 0      | 1      | 0      | 0      | 1      |

| respid | Q52_2 | Q53_1 | Q54_1 | Q54_2 | Q54_3 | Q55_1 | Q56a_1 | Q56b_1 | Q56c_1 | Q56d_1 | Q56e_1 | Q56f_1 | Q56g_1 | Q56h_1 |
|--------|-------|-------|-------|-------|-------|-------|--------|--------|--------|--------|--------|--------|--------|--------|
| 756    | 5     | 2     | 0     | 0     | 4     | 4     | 1      | 0      | 0      | 0      | 1      | 1      | 1      | 1      |
| 759    | 5     | 2     | 1     | 4     | 3     | 5     | 0      | 0      | 1      | 0      | 1      | 1      | 0      | 1      |
| 760    | 5     | 1     | 1     | 1     | 5     | 5     | 0      | 0      | 0      | 0      | 0      | 0      | 1      | 2      |
| 763    | 5     | 2     | 1     | 3     | 1     | 4     | 0      | 0      | 0      | 0      | 0      | 1      | 1      | 0      |
| 764    | 3     | 2     | 3     | 3     | 1     | 4     | 1      | 2      | 1      | 2      | 2      | 2      | 2      | 2      |
| 765    | 4     | 1     | 1     | 1     | 4     | 4     | 1      | 2      | 0      | 0      | 1      | 1      | 1      | 1      |
| 766    | 3     | 1     | 1     | 1     | 3     | 4     | 1      | 0      | 1      | 1      | 1      | 0      | 1      | 0      |
| 767    | 3     | 3     | 1     | 3     | 3     | 4     | 1      | 1      | 2      | 0      | 1      | 0      | 1      | 1      |
| 771    | 4     | 3     | 1     | 3     | 3     | 5     | 1      | 0      | 1      | 1      | 1      | 2      | 2      | 2      |
| 773    | 5     | 1     | 0     | 1     | 5     | 5     | 0      | 0      | 0      | 0      | 0      | 0      | 0      | 0      |
| 774    | 4     | 2     | 1     | 1     | 4     | 4     | 1      | 0      | 0      | 0      | 1      | 0      | 1      | 1      |
| 775    | 4     | 3     | 1     | 4     | 5     | 3     | 1      | 2      | 1      | 0      | 1      | 1      | 2      | 2      |
| 776    | 4     | 1     | 1     | 1     | 4     | 4     | 1      | 0      | 1      | 0      | 1      | 1      | 1      | 1      |
| 778    | 4     | 1     | 1     | 1     | 4     | 4     | 0      | 0      | 0      | 0      | 1      | 1      | 1      | 1      |
| 780    | 5     | 1     | 1     | 1     | 4     | 4     | 2      | 0      | 0      | 0      | 0      | 0      | 0      | 1      |
| 781    | 5     | 1     | 1     | 3     | 4     | 5     | 1      | 0      | 0      | 0      | 1      | 1      | 1      | 2      |
| 782    | 3     | 2     | 3     | 3     | 3     | 3     | 1      | 1      | 2      | 1      | 1      | 1      | 1      | 1      |
| 783    | 3     | 2     | 1     | 4     | 4     | 3     | 1      | 2      | 1      | 2      | 1      | 1      | 1      | 1      |
| 786    | 3     | 3     | 3     | 3     | 4     | 3     | 1      | 2      | 2      | 1      | 2      | 2      | 1      | 1      |
| 788    | 4     | 1     | 1     | 1     | 3     | 5     | 1      | 0      | 1      | 0      | 1      | 0      | 0      | 1      |
| 792    | 4     | 4     | 1     | 3     | 4     | 4     | 1      | 2      | 1      | 2      | 1      | 1      | 1      | 1      |
| 794    | 5     | 1     | 4     | 3     | 1     | 3     | 3      | 1      | 2      | 2      | 2      | 2      | 2      | 0      |
| 795    | 5     | 1     | 0     | 1     | 5     | 5     | 0      | 0      | 0      | 0      | 0      | 0      | 0      | 0      |
| 799    | 5     | 2     | 1     | 1     | 4     | 4     | 1      | 1      | 1      | 1      | 1      | 1      | 1      | 1      |
| 800    | 5     | 1     | 1     | 3     | 3     | 5     | 1      | 0      | 2      | 0      | 0      | 1      | 0      | 0      |
| 801    | 5     | 2     | 1     | 3     | 3     | 1     | 1      | 0      | 1      | 0      | 1      | 1      | 1      | 1      |
| 804    | 4     | 2     | 1     | 3     | 4     | 5     | 0      | 0      | 0      | 0      | 0      | 0      | 0      | 0      |
| 806    | 5     | 1     | 1     | 1     | 3     | 4     | 0      | 0      | 0      | 0      | 1      | 0      | 0      | 1      |
| 807    | 5     | 2     | 1     | 3     | 3     | 4     | 1      | 2      | 0      | 2      | 2      | 1      | 1      | 1      |
| 808    | 4     | 1     | 1     | 1     | 3     | 4     | 1      | 0      | 1      | 0      | 1      | 1      | 1      | 1      |
| 809    | 5     | 2     | 1     | 3     | 3     | 5     | 0      | 0      | 0      | 0      | 1      | 2      | 1      | 1      |
| 811    | 5     | 1     | 1     | 1     | 4     | 5     | 0      | 0      | 1      | 0      | 1      | 0      | 0      | 0      |

| respid | Q52_2 | Q53_1 | Q54_1 | Q54_2 | Q54_3 | Q55_1 | Q56a_1 | Q56b_1 | Q56c_1 | Q56d_1 | Q56e_1 | Q56f_1 | Q56g_1 | Q56h_1 |
|--------|-------|-------|-------|-------|-------|-------|--------|--------|--------|--------|--------|--------|--------|--------|
| 812    | 4     | 2     | 1     | 3     | 5     | 4     | 1      | 0      | 0      | 0      | 0      | 0      | 0      | 1      |
| 815    | 5     | 1     | 0     | 0     | 5     | 5     | 0      | 0      | 0      | 0      | 0      | 0      | 0      | 0      |
| 817    | 4     | 3     | 1     | 3     | 3     | 5     | 1      | 1      | 0      | 1      | 1      | 2      | 1      | 1      |
| 818    | 4     | 2     | 1     | 1     | 4     | 4     | 1      | 0      | 1      | 0      | 1      | 1      | 1      | 1      |
| 819    | 5     | 1     | 3     | 3     | 3     | 3     | 0      | 0      | 1      | 0      | 1      | 1      | 0      | 0      |
| 821    | 3     | 2     | 4     | 4     | 1     | 3     | 2      | 0      | 3      | 2      | 3      | 2      | 2      | 3      |
| 824    | 5     | 1     | 1     | 3     | 3     | 4     | 1      | 1      | 2      | 2      | 1      | 2      | 2      | 1      |
| 825    | 5     | 1     | 5     | 3     | 5     | 5     | 0      | 0      | 0      | 1      | 0      | 1      | 0      | 1      |
| 828    | 4     | 2     | 1     | 1     | 4     | 4     | 0      | 0      | 1      | 0      | 1      | 0      | 1      | 1      |
| 832    | 4     | 1     | 1     | 3     | 3     | 4     | 2      | 2      | 2      | 2      | 2      | 1      | 1      | 1      |
| 834    | 4     | 2     | 1     | 1     | 4     | 4     | 1      | 0      | 1      | 0      | 1      | 1      | 1      | 2      |
| 835    | 5     | 1     | 3     | 3     | 3     | 3     | 1      | 1      | 1      | 1      | 1      | 1      | 2      | 1      |
| 836    | 5     | 2     | 1     | 1     | 3     | 5     | 1      | 1      | 1      | 1      | 1      | 1      | 1      | 1      |
| 837    | 5     | 1     | 0     | 0     | 5     | 5     | 0      | 0      | 0      | 0      | 0      | 0      | 0      | 0      |
| 840    | 3     | 2     | 1     | 3     | 3     | 4     | 1      | 1      | 1      | 1      | 1      | 0      | 1      | 1      |
| 841    | 4     | 1     | 1     | 3     | 4     | 4     | 1      | 0      | 0      | 0      | 1      | 0      | 0      | 1      |
| 845    | 5     | 1     | 4     | 3     | 3     | 4     | 3      | 0      | 2      | 0      | 2      | 1      | 1      | 0      |
| 846    | 4     | 1     | 0     | 3     | 4     | 4     | 0      | 1      | 0      | 0      | 1      | 0      | 0      | 1      |
| 849    | 5     | 2     | 0     | 1     | 4     | 4     | 1      | 0      | 0      | 0      | 1      | 0      | 0      | 1      |
| 852    | 5     | 2     | 1     | 0     | 5     | 5     | 0      | 0      | 1      | 0      | 1      | 1      | 1      | 0      |
| 854    | 4     | 2     | 3     | 4     | 3     | 4     | 2      | 1      | 1      | 2      | 1      | 2      | 2      | 2      |
| 856    | 5     | 1     | 0     | 0     | 5     | 5     | 1      | 0      | 0      | 0      | 0      | 0      | 0      | 0      |
| 858    | 4     | 2     | 3     | 3     | 3     | 3     | 1      | 2      | 0      | 0      | 1      | 0      | 0      | 0      |
| 859    | 4     | 3     | 1     | 3     | 3     | 3     | 1      | 0      | 2      | 1      | 1      | 0      | 0      | 1      |
| 861    | 4     | 2     | 0     | 1     | 4     | 3     | 1      | 0      | 2      | 0      | 1      | 0      | 1      | 2      |
| 863    | 5     | 1     | 1     | 1     | 4     | 5     | 0      | 0      | 0      | 1      | 0      | 1      | 1      | 0      |
| 864    | 5     | 2     | 1     | 3     | 3     | 4     | 0      | 0      | 0      | 0      | 1      | 1      | 1      | 1      |
| 866    | 4     | 1     | 1     | 3     | 3     | 4     | 0      | 2      | 1      | 0      | 1      | 0      | 0      | 1      |
| 869    | 5     | 1     | 1     | 1     | 4     | 4     | 1      | 0      | 1      | 0      | 0      | 1      | 1      | 0      |
| 870    | 5     | 2     | 1     | 1     | 5     | 4     | 0      | 0      | 0      | 0      | 0      | 0      | 0      | 1      |
| 871    | 4     | 1     | 1     | 1     | 3     | 4     | 0      | 0      | 1      | 0      | 0      | 0      | 0      | 1      |
| 873    | 3     | 1     | 1     | 3     | 3     | 4     | 1      | 1      | 2      | 1      | 1      | 1      | 1      | 1      |

| respid | Q52_2 | Q53_1 | Q54_1 | Q54_2 | Q54_3 | Q55_1 | Q56a_1 | Q56b_1 | Q56c_1 | Q56d_1 | Q56e_1 | Q56f_1 | Q56g_1 | Q56h_1 |
|--------|-------|-------|-------|-------|-------|-------|--------|--------|--------|--------|--------|--------|--------|--------|
| 879    | 3     | 3     | 1     | 3     | 4     | 4     | 1      | 1      | 1      | 1      | 1      | 1      | 2      | 1      |
| 880    | 4     | 1     | 1     | 1     | 4     | 4     | 1      | 1      | 1      | 0      | 1      | 1      | 1      | 0      |
| 881    | 4     | 2     | 1     | 1     | 4     | 4     | 1      | 0      | 1      | 0      | 1      | 1      | 1      | 1      |
| 882    | 5     | 2     | 1     | 3     | 5     | 5     | 0      | 0      | 0      | 0      | 0      | 0      | 0      | 0      |
| 885    | 4     | 1     | 1     | 1     | 4     | 5     | 0      | 0      | 0      | 0      | 1      | 0      | 0      | 1      |
| 886    | 5     | 2     | 1     | 3     | 4     | 4     | 0      | 0      | 0      | 0      | 0      | 1      | 1      | 0      |
| 887    | 4     | 3     | 3     | 4     | 4     | 4     | 1      | 1      | 1      | 1      | 1      | 2      | 2      | 2      |
| 888    | 4     | 2     | 1     | 3     | 4     | 4     | 1      | 2      | 1      | 1      | 1      | 1      | 1      | 1      |
| 889    | 5     | 2     | 0     | 1     | 4     | 4     | 0      | 0      | 0      | 0      | 0      | 0      | 0      | 0      |
| 890    | 4     | 1     | 0     | 1     | 5     | 5     | 0      | 0      | 0      | 0      | 0      | 0      | 0      | 0      |
| 900    | 5     | 1     | 1     | 1     | 4     | 5     | 0      | 0      | 0      | 0      | 0      | 0      | 0      | 0      |
| 901    | 5     | 2     | 0     | 3     | 4     | 5     | 0      | 1      | 0      | 0      | 0      | 0      | 0      | 0      |
| 902    | 5     | 2     | 0     | 3     | 4     | 4     | 0      | 0      | 1      | 0      | 1      | 0      | 0      | 1      |
| 903    | 5     | 1     | 0     | 0     | 4     | 5     | 0      | 0      | 0      | 0      | 1      | 0      | 0      | 1      |
| 906    | 2     | 2     | 1     | 5     | 4     | 2     | 0      | 1      | 2      | 1      | 2      | 1      | 0      | 3      |
| 907    | 4     | 2     | 1     | 3     | 3     | 4     | 1      | 1      | 1      | 0      | 1      | 1      | 1      | 1      |
| 908    | 3     | 2     | 3     | 1     | 3     | 4     | 1      | 0      | 1      | 0      | 1      | 1      | 1      | 0      |
| 910    | 5     | 2     | 1     | 1     | 4     | 4     | 0      | 0      | 1      | 0      | 0      | 0      | 1      | 1      |
| 911    | 4     | 2     | 1     | 1     | 3     | 4     | 1      | 0      | 1      | 2      | 1      | 1      | 1      | 1      |
| 912    | 4     | 2     | 1     | 3     | 3     | 3     | 1      | 1      | 2      | 0      | 1      | 1      | 2      | 1      |
| 915    | 5     | 2     | 0     | 1     | 4     | 5     | 1      | 0      | 0      | 0      | 1      | 0      | 0      | 0      |
| 923    | 2     | 2     | 3     | 4     | 1     | 3     | 1      | 0      | 1      | 2      | 2      | 2      | 2      | 2      |
| 925    | 5     | 1     | 1     | 1     | 4     | 5     | 0      | 0      | 0      | 0      | 1      | 0      | 0      | 0      |
| 926    | 5     | 2     | 1     | 1     | 4     | 5     | 1      | 2      | 1      | 0      | 1      | 1      | 1      | 1      |
| 929    | 5     | 1     | 1     | 1     | 4     | 5     | 0      | 0      | 0      | 0      | 0      | 1      | 1      | 0      |
| 932    | 1     | 5     | 1     | 4     | 5     | 1     | 0      | 2      | 3      | 2      | 3      | 3      | 3      | 0      |
| 933    | 5     | 1     | 1     | 1     | 4     | 5     | 0      | 0      | 0      | 0      | 1      | 0      | 0      | 1      |
| 934    | 5     | 1     | 1     | 3     | 4     | 5     | 1      | 1      | 1      | 2      | 1      | 1      | 1      | 1      |
| 938    | 3     | 3     | 3     | 3     | 1     | 3     | 1      | 1      | 2      | 1      | 2      | 2      | 2      | 2      |
| 941    | 5     | 1     | 0     | 0     | 4     | 2     | 0      | 0      | 1      | 0      | 0      | 0      | 0      | 0      |
| 942    | 4     | 2     | 1     | 1     | 4     | 4     | 1      | 0      | 0      | 0      | 1      | 0      | 1      | 1      |
| 943    | 5     | 1     | 1     | 1     | 4     | 5     | 0      | 0      | 0      | 1      | 0      | 1      | 1      | 0      |

| respid | Q52_2 | Q53_1 | Q54_1 | Q54_2 | Q54_3 | Q55_1 | Q56a_1 | Q56b_1 | Q56c_1 | Q56d_1 | Q56e_1 | Q56f_1 | Q56g_1 | Q56h_1 |
|--------|-------|-------|-------|-------|-------|-------|--------|--------|--------|--------|--------|--------|--------|--------|
| 945    | 5     | 1     | 1     | 1     | 4     | 5     | 0      | 0      | 0      | 0      | 1      | 0      | 0      | 0      |
| 946    | 3     | 2     | 1     | 3     | 3     | 3     | 1      | 0      | 1      | 0      | 1      | 1      | 1      | 1      |
| 947    | 5     | 1     | 3     | 4     | 1     | 5     | 2      | 2      | 1      | 2      | 1      | 1      | 1      | 1      |
| 948    | 5     | 1     | 1     | 1     | 3     | 4     | 0      | 0      | 0      | 0      | 0      | 0      | 0      | 0      |
| 949    | 5     | 1     | 1     | 3     | 5     | 5     | 0      | 0      | 0      | 0      | 0      | 1      | 0      | 2      |
| 952    | 5     | 1     | 1     | 1     | 3     | 5     | 1      | 0      | 1      | 1      | 1      | 1      | 1      | 1      |
| 956    | 4     | 1     | 1     | 1     | 4     | 4     | 1      | 0      | 1      | 0      | 1      | 0      | 0      | 2      |
| 957    | 5     | 1     | 1     | 1     | 4     | 5     | 1      | 0      | 0      | 0      | 0      | 1      | 0      | 0      |
| 959    | 4     | 2     | 1     | 1     | 4     | 5     | 0      | 0      | 1      | 0      | 1      | 0      | 0      | 1      |
| 961    | 3     | 1     | 1     | 3     | 3     | 3     | 2      | 1      | 0      | 2      | 1      | 1      | 2      | 1      |
| 962    | 4     | 3     | 3     | 3     | 4     | 3     | 1      | 0      | 1      | 1      | 1      | 1      | 1      | 1      |
| 965    | 3     | 2     | 1     | 3     | 4     | 3     | 1      | 0      | 0      | 1      | 1      | 1      | 2      | 1      |
| 967    | 3     | 2     | 3     | 3     | 4     | 3     | 1      | 1      | 1      | 1      | 1      | 1      | 1      | 1      |
| 969    | 5     | 2     | 1     | 1     | 4     | 5     | 0      | 0      | 1      | 2      | 0      | 0      | 0      | 0      |
| 970    | 5     | 1     | 1     | 1     | 4     | 5     | 0      | 0      | 0      | 0      | 0      | 1      | 1      | 0      |
| 973    | 5     | 2     | 3     | 1     | 4     | 5     | 0      | 0      | 0      | 0      | 1      | 0      | 0      | 0      |
| 974    | 4     | 2     | 1     | 1     | 4     | 5     | 1      | 0      | 0      | 0      | 1      | 1      | 1      | 1      |
| 975    | 4     | 2     | 3     | 4     | 1     | 4     | 1      | 1      | 1      | 1      | 1      | 2      | 2      | 1      |
| 976    | 4     | 2     | 1     | 1     | 3     | 3     | 1      | 1      | 1      | 0      | 1      | 1      | 1      | 0      |
| 977    | 5     | 2     | 0     | 0     | 5     | 5     | 0      | 0      | 0      | 1      | 1      | 1      | 1      | 0      |
| 979    | 4     | 1     | 1     | 1     | 4     | 5     | 1      | 0      | 1      | 0      | 1      | 0      | 1      | 2      |
| 981    | 4     | 2     | 3     | 3     | 4     | 5     | 2      | 1      | 1      | 2      | 1      | 1      | 1      | 0      |
| 983    | 5     | 1     | 3     | 4     | 0     | 5     | 3      | 1      | 0      | 2      | 3      | 3      | 2      | 0      |
| 987    | 4     | 2     | 1     | 3     | 4     | 3     | 1      | 0      | 1      | 2      | 1      | 1      | 2      | 1      |
| 991    | 5     | 1     | 1     | 1     | 4     | 5     | 0      | 0      | 0      | 1      | 1      | 1      | 1      | 0      |
| 992    | 5     | 2     | 1     | 3     | 5     | 5     | 1      | 0      | 0      | 0      | 0      | 1      | 1      | 1      |
| 993    | 5     | 4     | 4     | 4     | 4     | 5     | 3      | 0      | 0      | 0      | 1      | 1      | 1      | 1      |
| 994    | 3     | 1     | 4     | 4     | 0     | 3     | 1      | 0      | 2      | 2      | 1      | 2      | 1      | 2      |
| 995    | 5     | 2     | 0     | 1     | 4     | 4     | 1      | 0      | 0      | 0      | 1      | 1      | 0      | 1      |
| 998    | 4     | 1     | 1     | 1     | 4     | 4     | 0      | 1      | 0      | 1      | 0      | 0      | 1      | 0      |
| 1000   | 3     | 2     | 1     | 4     | 3     | 1     | 2      | 0      | 3      | 1      | 2      | 1      | 2      | 3      |
| 1001   | 3     | 2     | 4     | 4     | 1     | 4     | 1      | 1      | 2      | 1      | 2      | 1      | 1      | 2      |

| respid | Q52_2 | Q53_1 | Q54_1 | Q54_2 | Q54_3 | Q55_1 | Q56a_1 | Q56b_1 | Q56c_1 | Q56d_1 | Q56e_1 | Q56f_1 | Q56g_1 | Q56h_1 |
|--------|-------|-------|-------|-------|-------|-------|--------|--------|--------|--------|--------|--------|--------|--------|
| 1002   | 5     | 1     | 1     | 1     | 5     | 5     | 0      | 0      | 0      | 0      | 0      | 0      | 0      | 0      |
| 1004   | 4     | 1     | 1     | 1     | 4     | 4     | 1      | 1      | 0      | 0      | 1      | 0      | 1      | 1      |
| 1005   | 4     | 1     | 1     | 1     | 4     | 4     | 0      | 0      | 1      | 0      | 1      | 0      | 0      | 0      |
| 1006   | 5     | 1     | 1     | 1     | 4     | 5     | 0      | 0      | 0      | 0      | 1      | 0      | 0      | 1      |
| 1007   | 5     | 2     | 3     | 4     | 0     | 1     | 2      | 2      | 1      | 3      | 2      | 2      | 2      | 1      |
| 1009   | 4     | 1     | 1     | 1     | 4     | 5     | 0      | 0      | 0      | 0      | 1      | 0      | 1      | 0      |
| 1013   | 3     | 3     | 3     | 4     | 3     | 3     | 1      | 2      | 2      | 2      | 2      | 2      | 1      | 1      |
| 1015   | 4     | 2     | 1     | 1     | 4     | 4     | 0      | 0      | 0      | 0      | 1      | 1      | 1      | 1      |
| 1020   | 5     | 3     | 3     | 3     | 4     | 4     | 1      | 1      | 1      | 0      | 1      | 1      | 1      | 1      |
| 1022   | 4     | 2     | 1     | 1     | 3     | 4     | 1      | 1      | 2      | 0      | 1      | 0      | 1      | 1      |
| 1024   | 5     | 1     | 1     | 1     | 4     | 5     | 1      | 0      | 0      | 0      | 0      | 0      | 1      | 0      |
| 1025   | 4     | 2     | 1     | 1     | 4     | 5     | 0      | 0      | 0      | 0      | 0      | 1      | 1      | 0      |
| 1027   | 4     | 2     | 1     | 1     | 4     | 4     | 0      | 1      | 0      | 1      | 1      | 0      | 0      | 1      |
| 1031   | 4     | 2     | 1     | 1     | 4     | 4     | 0      | 0      | 1      | 0      | 1      | 0      | 0      | 1      |
| 1037   | 5     | 1     | 1     | 3     | 5     | 5     | 0      | 0      | 0      | 0      | 1      | 1      | 0      | 0      |
| 1039   | 5     | 1     | 0     | 0     | 5     | 5     | 0      | 0      | 0      | 0      | 0      | 0      | 0      | 0      |
| 1040   | 5     | 1     | 1     | 1     | 4     | 5     | 0      | 0      | 0      | 0      | 0      | 1      | 1      | 1      |
| 1056   | 4     | 2     | 1     | 1     | 4     | 4     | 1      | 1      | 1      | 1      | 1      | 1      | 1      | 1      |
| 1057   | 4     | 2     | 1     | 3     | 4     | 5     | 1      | 0      | 1      | 0      | 1      | 1      | 1      | 1      |
| 1062   | 3     | 3     | 1     | 3     | 4     | 4     | 1      | 0      | 1      | 0      | 1      | 0      | 1      | 1      |
| 1069   | 4     | 2     | 1     | 1     | 4     | 4     | 0      | 0      | 0      | 0      | 0      | 0      | 0      | 0      |
| 1070   | 4     | 1     | 1     | 1     | 4     | 5     | 0      | 0      | 0      | 1      | 0      | 1      | 1      | 1      |
| 1072   | 4     | 2     | 1     | 1     | 3     | 3     | 1      | 0      | 1      | 0      | 1      | 1      | 1      | 2      |
| 1076   | 5     | 2     | 1     | 1     | 4     | 5     | 0      | 0      | 0      | 0      | 0      | 0      | 0      | 1      |
| 1077   | 3     | 2     | 1     | 3     | 4     | 4     | 1      | 0      | 1      | 0      | 1      | 1      | 1      | 1      |
| 1078   | 5     | 1     | 1     | 3     | 3     | 5     | 1      | 1      | 2      | 0      | 1      | 1      | 1      | 1      |
| 1080   | 5     | 3     | 1     | 1     | 4     | 4     | 1      | 3      | 1      | 0      | 1      | 0      | 1      | 1      |
| 1094   | 3     | 3     | 3     | 3     | 3     | 3     | 1      | 1      | 1      | 1      | 1      | 1      | 2      | 2      |
| 1098   | 4     | 1     | 1     | 3     | 4     | 4     | 0      | 0      | 0      | 0      | 0      | 1      | 1      | 1      |
| 1099   | 5     | 1     | 1     | 1     | 4     | 5     | 0      | 0      | 0      | 0      | 0      | 0      | 0      | 0      |
| 1102   | 5     | 1     | 1     | 1     | 4     | 4     | 1      | 0      | 1      | 1      | 1      | 1      | 1      | 0      |
| 1110   | 5     | 2     | 3     | 3     | 3     | 3     | 1      | 1      | 0      | 1      | 1      | 1      | 1      | 0      |



| respid | Q52_2 | Q53_1 | Q54_1 | Q54_2 | Q54_3 | Q55_1 | Q56a_1 | Q56b_1 | Q56c_1 | Q56d_1 | Q56e_1 | Q56f_1 | Q56g_1 | Q56h_1 |
|--------|-------|-------|-------|-------|-------|-------|--------|--------|--------|--------|--------|--------|--------|--------|
| 1117   | 3     | 4     | 3     | 3     | 4     | 4     | 1      | 1      | 2      | 2      | 1      | 2      | 2      | 2      |
| 1119   | 5     | 1     | 0     | 0     | 4     | 5     | 0      | 0      | 0      | 0      | 1      | 0      | 0      | 0      |
| 1126   | 5     | 1     | 3     | 3     | 3     | 4     | 1      | 1      | 0      | 1      | 1      | 2      | 2      | 1      |
| 1127   | 5     | 1     | 1     | 1     | 5     | 5     | 0      | 0      | 0      | 0      | 0      | 0      | 0      | 0      |
| 1130   | 3     | 3     | 3     | 3     | 4     | 3     | 1      | 1      | 1      | 0      | 0      | 0      | 0      | 0      |
| 1131   | 5     | 2     | 1     | 3     | 5     | 5     | 1      | 0      | 0      | 0      | 1      | 0      | 0      | 1      |
| 1135   | 3     | 3     | 3     | 5     | 1     | 3     | 2      | 1      | 2      | 1      | 1      | 1      | 1      | 2      |
| 1138   | 4     | 2     | 3     | 3     | 4     | 4     | 1      | 1      | 1      | 1      | 1      | 1      | 2      | 1      |
| 1139   | 3     | 1     | 1     | 1     | 4     | 5     | 0      | 0      | 0      | 0      | 0      | 0      | 0      | 0      |
| 1140   | 4     | 2     | 0     | 0     | 4     | 5     | 0      | 0      | 0      | 0      | 0      | 0      | 0      | 0      |
| 1142   | 5     | 1     | 0     | 0     | 5     | 5     | 0      | 0      | 0      | 0      | 0      | 0      | 0      | 0      |
| 1143   | 5     | 1     | 4     | 3     | 4     | 4     | 0      | 0      | 0      | 0      | 0      | 3      | 3      | 0      |
| 1145   | 4     | 2     | 3     | 1     | 3     | 4     | 1      | 0      | 1      | 1      | 1      | 0      | 1      | 1      |
| 1149   | 5     | 1     | 1     | 1     | 4     | 5     | 0      | 0      | 0      | 0      | 0      | 0      | 0      | 0      |
| 1152   | 4     | 4     | 1     | 1     | 4     | 4     | 1      | 0      | 0      | 0      | 1      | 0      | 1      | 1      |
| 1160   | 5     | 2     | 1     | 1     | 3     | 5     | 1      | 0      | 0      | 0      | 1      | 0      | 0      | 0      |
| 1164   | 5     | 1     | 1     | 1     | 5     | 5     | 0      | 0      | 0      | 0      | 0      | 0      | 0      | 0      |
| 1165   | 4     | 2     | 1     | 1     | 3     | 4     | 1      | 2      | 1      | 0      | 1      | 0      | 1      | 1      |
| 1169   | 5     | 2     | 1     | 3     | 4     | 5     | 1      | 0      | 2      | 0      | 1      | 1      | 1      | 1      |
| 1170   | 5     | 1     | 1     | 1     | 4     | 4     | 0      | 0      | 1      | 0      | 1      | 0      | 1      | 1      |
| 1179   | 4     | 2     | 1     | 3     | 4     | 4     | 1      | 0      | 0      | 0      | 1      | 1      | 1      | 1      |
| 1180   | 5     | 2     | 1     | 3     | 4     | 5     | 0      | 2      | 1      | 1      | 1      | 1      | 1      | 2      |
| 1183   | 5     | 1     | 5     | 5     | 5     | 5     | 0      | 0      | 0      | 0      | 0      | 0      | 0      | 0      |
| 1187   | 5     | 1     | 0     | 0     | 5     | 5     | 0      | 0      | 0      | 0      | 0      | 0      | 0      | 0      |
| 1188   | 3     | 3     | 3     | 4     | 1     | 3     | 2      | 2      | 3      | 2      | 2      | 2      | 2      | 2      |
| 1193   | 5     | 2     | 1     | 1     | 3     | 5     | 1      | 0      | 0      | 0      | 1      | 1      | 2      | 1      |
| 1194   | 4     | 3     | 1     | 3     | 3     | 3     | 1      | 2      | 2      | 1      | 2      | 1      | 1      | 2      |
| 1197   | 5     | 1     | 1     | 1     | 4     | 3     | 1      | 2      | 1      | 2      | 0      | 0      | 0      | 1      |
| 1202   | 4     | 1     | 1     | 3     | 4     | 5     | 0      | 0      | 0      | 0      | 1      | 0      | 0      | 1      |
| 1204   | 4     | 3     | 3     | 3     | 4     | 2     | 2      | 2      | 2      | 2      | 1      | 1      | 1      | 2      |
| 1211   | 5     | 1     | 1     | 1     | 4     | 5     | 1      | 0      | 0      | 0      | 1      | 0      | 1      | 0      |
| 1224   | 5     | 1     | 0     | 1     | 5     | 5     | 0      | 0      | 0      | 0      | 0      | 0      | 0      | 0      |

| respid | Q52_2 | Q53_1 | Q54_1 | Q54_2 | Q54_3 | Q55_1 | Q56a_1 | Q56b_1 | Q56c_1 | Q56d_1 | Q56e_1 | Q56f_1 | Q56g_1 | Q56h_1 |
|--------|-------|-------|-------|-------|-------|-------|--------|--------|--------|--------|--------|--------|--------|--------|
| 1225   | 4     | 1     | 4     | 4     | 3     | 4     | 2      | 1      | 0      | 2      | 2      | 2      | 2      | 1      |
| 1230   | 4     | 1     | 1     | 1     | 4     | 4     | 0      | 1      | 1      | 0      | 1      | 1      | 0      | 1      |
| 1232   | 3     | 1     | 1     | 1     | 4     | 5     | 1      | 1      | 0      | 0      | 1      | 1      | 0      | 0      |
| 1233   | 4     | 1     | 1     | 4     | 4     | 5     | 1      | 0      | 1      | 1      | 1      | 1      | 0      | 1      |
| 1234   | 5     | 2     | 1     | 1     | 4     | 5     | 1      | 0      | 0      | 0      | 1      | 0      | 0      | 1      |
| 1235   | 3     | 4     | 4     | 3     | 4     | 4     | 1      | 1      | 2      | 1      | 1      | 1      | 1      | 1      |
| 1236   | 3     | 1     | 1     | 4     | 4     | 4     | 1      | 1      | 2      | 1      | 2      | 1      | 2      | 1      |
| 1237   | 3     | 1     | 3     | 3     | 3     | 3     | 1      | 1      | 2      | 1      | 2      | 1      | 2      | 1      |
| 1238   | 4     | 2     | 1     | 3     | 3     | 4     | 1      | 0      | 1      | 2      | 1      | 1      | 1      | 1      |
| 1239   | 5     | 1     | 1     | 1     | 4     | 4     | 1      | 0      | 0      | 0      | 1      | 0      | 0      | 0      |
| 1241   | 4     | 2     | 0     | 1     | 4     | 4     | 0      | 0      | 0      | 0      | 0      | 0      | 0      | 1      |
| 1242   | 4     | 2     | 0     | 0     | 5     | 5     | 0      | 0      | 0      | 0      | 0      | 0      | 0      | 0      |
| 1244   | 5     | 1     | 1     | 1     | 4     | 4     | 0      | 0      | 1      | 0      | 0      | 0      | 0      | 3      |
| 1245   | 4     | 1     | 1     | 3     | 4     | 5     | 1      | 2      | 0      | 1      | 1      | 1      | 1      | 1      |
| 1247   | 5     | 2     | 0     | 1     | 4     | 4     | 1      | 0      | 1      | 0      | 0      | 1      | 1      | 0      |
| 1248   | 5     | 1     | 1     | 1     | 4     | 5     | 0      | 1      | 0      | 1      | 1      | 1      | 1      | 1      |
| 1249   | 5     | 1     | 4     | 4     | 1     | 4     | 2      | 1      | 1      | 2      | 2      | 1      | 2      | 1      |
| 1250   | 5     | 1     | 1     | 3     | 3     | 4     | 1      | 1      | 2      | 1      | 1      | 1      | 1      | 1      |
| 1251   | 5     | 1     | 1     | 1     | 4     | 5     | 0      | 0      | 0      | 1      | 0      | 0      | 1      | 0      |
| 1252   | 5     | 2     | 1     | 1     | 4     | 5     | 0      | 0      | 0      | 0      | 0      | 0      | 0      | 0      |
| 1253   | 5     | 1     | 1     | 1     | 4     | 4     | 0      | 0      | 1      | 0      | 0      | 0      | 1      | 0      |
| 1254   | 3     | 2     | 3     | 4     | 3     | 4     | 1      | 1      | 2      | 2      | 1      | 1      | 2      | 1      |
| 1258   | 5     | 3     | 0     | 3     | 5     | 5     | 0      | 0      | 0      | 0      | 0      | 0      | 0      | 1      |
| 1260   | 4     | 3     | 3     | 4     | 3     | 4     | 1      | 0      | 0      | 1      | 1      | 2      | 1      | 3      |
| 1261   | 5     | 1     | 5     | 5     | 5     | 5     | 0      | 1      | 0      | 1      | 0      | 1      | 3      | 1      |
| 1262   | 3     | 3     | 3     | 3     | 1     | 3     | 1      | 0      | 0      | 2      | 1      | 2      | 1      | 2      |
| 1263   | 3     | 2     | 3     | 3     | 3     | 4     | 1      | 0      | 1      | 0      | 1      | 1      | 1      | 1      |
| 1264   | 5     | 1     | 1     | 3     | 3     | 5     | 0      | 1      | 1      | 2      | 1      | 2      | 1      | 0      |
| 1265   | 4     | 2     | 4     | 4     | 1     | 3     | 3      | 1      | 2      | 2      | 2      | 2      | 2      | 2      |
| 1266   | 4     | 1     | 1     | 1     | 4     | 5     | 0      | 0      | 0      | 0      | 0      | 0      | 0      | 1      |
| 1270   | 5     | 2     | 1     | 1     | 3     | 4     | 1      | 2      | 1      | 0      | 1      | 1      | 1      | 1      |
| 1272   | 4     | 4     | 3     | 4     | 1     | 3     | 1      | 1      | 2      | 2      | 2      | 1      | 2      | 3      |

| respid | Q52_2 | Q53_1 | Q54_1 | Q54_2 | Q54_3 | Q55_1 | Q56a_1 | Q56b_1 | Q56c_1 | Q56d_1 | Q56e_1 | Q56f_1 | Q56g_1 | Q56h_1 |   |
|--------|-------|-------|-------|-------|-------|-------|--------|--------|--------|--------|--------|--------|--------|--------|---|
| 1273   | 5     | 1     | 1     | 1     | 1     | 1     | 5      | 0      | 1      | 0      | 1      | 2      | 1      | 1      | 1 |
| 1276   | 5     | 1     | 1     | 1     | 1     | 4     | 5      | 1      | 1      | 0      | 1      | 0      | 1      | 1      | 1 |
| 1277   | 4     | 2     | 1     | 1     | 1     | 4     | 4      | 0      | 1      | 1      | 0      | 0      | 0      | 0      | 1 |
| 1278   | 5     | 1     | 1     | 1     | 1     | 4     | 5      | 1      | 1      | 1      | 0      | 1      | 1      | 1      | 1 |
| 1280   | 5     | 1     | 1     | 1     | 1     | 3     | 4      | 1      | 0      | 1      | 2      | 1      | 1      | 1      | 2 |
| 1281   | 5     | 1     | 1     | 1     | 1     | 5     | 5      | 0      | 0      | 0      | 0      | 1      | 2      | 2      | 1 |
| 1282   | 4     | 1     | 1     | 1     | 1     | 4     | 4      | 0      | 0      | 0      | 0      | 1      | 1      | 1      | 1 |
| 1283   | 5     | 1     | 0     | 0     | 3     | 5     | 5      | 0      | 0      | 0      | 1      | 1      | 1      | 1      | 1 |
| 1288   | 3     | 1     | 0     | 0     | 5     | 5     | 5      | 0      | 0      | 0      | 0      | 0      | 0      | 0      | 0 |
| 1289   | 4     | 1     | 1     | 1     | 3     | 3     | 5      | 1      | 1      | 0      | 1      | 1      | 1      | 1      | 1 |
| 1290   | 4     | 2     | 1     | 1     | 3     | 4     | 3      | 1      | 0      | 1      | 2      | 1      | 1      | 1      | 1 |
| 1291   | 5     | 1     | 1     | 1     | 3     | 4     | 5      | 0      | 0      | 0      | 0      | 1      | 1      | 0      | 0 |
| 1293   | 5     | 1     | 3     | 3     | 3     | 1     | 5      | 1      | 1      | 1      | 1      | 3      | 1      | 2      | 0 |
| 1294   | 4     | 1     | 1     | 1     | 3     | 4     | 4      | 1      | 1      | 0      | 1      | 1      | 1      | 1      | 0 |
| 1295   | 4     | 1     | 1     | 1     | 1     | 5     | 5      | 1      | 0      | 3      | 0      | 1      | 1      | 1      | 3 |
| 1296   | 5     | 1     | 1     | 1     | 1     | 4     | 5      | 1      | 2      | 1      | 2      | 3      | 1      | 1      | 1 |
| 1297   | 3     | 3     | 1     | 1     | 3     | 3     | 4      | 1      | 1      | 1      | 1      | 1      | 1      | 1      | 1 |
| 1298   | 5     | 1     | 1     | 1     | 3     | 4     | 5      | 1      | 1      | 0      | 0      | 1      | 1      | 1      | 1 |
| 1300   | 4     | 3     | 1     | 1     | 3     | 4     | 4      | 1      | 1      | 0      | 2      | 1      | 2      | 2      | 1 |
| 1302   | 5     | 1     | 0     | 0     | 0     | 4     | 5      | 0      | 0      | 0      | 0      | 1      | 0      | 0      | 0 |
| 1303   | 4     | 2     | 1     | 1     | 1     | 3     | 4      | 1      | 0      | 2      | 1      | 1      | 1      | 1      | 2 |
| 1304   | 5     | 1     | 1     | 1     | 1     | 4     | 5      | 1      | 1      | 0      | 1      | 1      | 1      | 2      | 0 |
| 1305   | 4     | 1     | 3     | 3     | 4     | 1     | 4      | 1      | 2      | 1      | 2      | 1      | 2      | 2      | 1 |
| 1307   | 5     | 1     | 1     | 1     | 1     | 4     | 5      | 0      | 0      | 0      | 0      | 0      | 0      | 0      | 0 |
| 1312   | 4     | 1     | 3     | 3     | 3     | 4     | 5      | 1      | 2      | 0      | 0      | 2      | 1      | 1      | 1 |
| 1313   | 5     | 2     | 1     | 1     | 5     | 3     | 5      | 0      | 0      | 0      | 1      | 1      | 2      | 1      | 2 |
| 1314   | 3     | 2     | 3     | 3     | 4     | 3     | 4      | 1      | 2      | 0      | 2      | 2      | 2      | 2      | 0 |
| 1317   | 3     | 1     | 0     | 0     | 0     | 3     | 5      | 0      | 0      | 0      | 0      | 1      | 0      | 0      | 1 |
| 1318   | 5     | 1     | 3     | 3     | 3     | 1     | 4      | 1      | 2      | 1      | 1      | 1      | 1      | 2      | 1 |
| 1319   | 3     | 3     | 4     | 4     | 4     | 3     | 4      | 1      | 1      | 1      | 2      | 1      | 1      | 1      | 2 |
| 1321   | 5     | 1     | 1     | 1     | 1     | 4     | 5      | 0      | 1      | 0      | 0      | 0      | 1      | 1      | 1 |
| 1324   | 3     | 3     | 3     | 3     | 4     | 3     | 4      | 1      | 1      | 1      | 2      | 1      | 2      | 2      | 2 |

| respid | Q52_2 | Q53_1 | Q54_1 | Q54_2 | Q54_3 | Q55_1 | Q56a_1 | Q56b_1 | Q56c_1 | Q56d_1 | Q56e_1 | Q56f_1 | Q56g_1 | Q56h_1 |
|--------|-------|-------|-------|-------|-------|-------|--------|--------|--------|--------|--------|--------|--------|--------|
| 1325   | 5     | 1     | 1     | 3     | 3     | 5     | 2      | 1      | 1      | 1      | 2      | 1      | 1      | 2      |
| 1326   | 4     | 1     | 1     | 3     | 3     | 4     | 1      | 1      | 1      | 2      | 1      | 1      | 1      | 1      |
| 1327   | 5     | 1     | 0     | 0     | 3     | 5     | 0      | 0      | 0      | 0      | 0      | 0      | 0      | 0      |
| 1329   | 3     | 2     | 1     | 1     | 1     | 4     | 1      | 1      | 1      | 1      | 1      | 1      | 1      | 1      |
| 1330   | 4     | 5     | 1     | 4     | 1     | 5     | 0      | 3      | 1      | 1      | 3      | 3      | 1      | 0      |
| 1331   | 3     | 3     | 1     | 4     | 4     | 3     | 2      | 1      | 0      | 1      | 3      | 1      | 0      | 3      |
| 1335   | 3     | 3     | 3     | 1     | 1     | 3     | 1      | 1      | 1      | 2      | 2      | 1      | 2      | 2      |
| 1337   | 5     | 1     | 1     | 3     | 4     | 5     | 0      | 0      | 0      | 0      | 0      | 1      | 0      | 0      |
| 1341   | 5     | 1     | 4     | 3     | 4     | 5     | 1      | 1      | 0      | 0      | 1      | 0      | 1      | 1      |
| 1342   | 5     | 1     | 0     | 1     | 5     | 5     | 0      | 0      | 0      | 0      | 0      | 0      | 0      | 0      |
| 1344   | 4     | 2     | 3     | 3     | 1     | 3     | 2      | 1      | 2      | 1      | 2      | 1      | 2      | 2      |
| 1345   | 4     | 1     | 3     | 4     | 3     | 3     | 1      | 2      | 2      | 0      | 1      | 1      | 1      | 0      |
| 1346   | 5     | 1     | 1     | 1     | 4     | 5     | 1      | 1      | 2      | 0      | 1      | 1      | 1      | 1      |
| 1350   | 3     | 2     | 3     | 3     | 3     | 3     | 1      | 1      | 2      | 1      | 1      | 1      | 2      | 1      |
| 1352   | 5     | 1     | 1     | 1     | 4     | 4     | 1      | 0      | 1      | 0      | 1      | 0      | 0      | 0      |
| 1353   | 4     | 2     | 1     | 3     | 3     | 4     | 1      | 1      | 1      | 1      | 1      | 1      | 1      | 1      |
| 1354   | 4     | 1     | 0     | 0     | 5     | 5     | 0      | 1      | 1      | 0      | 1      | 0      | 0      | 1      |
| 1355   | 5     | 1     | 1     | 1     | 5     | 5     | 0      | 0      | 0      | 0      | 0      | 0      | 0      | 0      |
| 1357   | 5     | 2     | 1     | 1     | 4     | 3     | 0      | 0      | 1      | 0      | 1      | 2      | 1      | 0      |
| 1360   | 5     | 1     | 1     | 1     | 5     | 5     | 0      | 2      | 0      | 0      | 0      | 2      | 0      | 0      |
| 1362   | 3     | 3     | 3     | 3     | 5     | 4     | 1      | 0      | 1      | 0      | 0      | 0      | 1      | 1      |
| 1363   | 4     | 1     | 1     | 3     | 3     | 3     | 1      | 0      | 2      | 1      | 2      | 1      | 1      | 1      |
| 1367   | 4     | 2     | 3     | 4     | 1     | 5     | 3      | 0      | 1      | 0      | 1      | 2      | 2      | 1      |
| 1369   | 5     | 1     | 1     | 1     | 4     | 5     | 1      | 1      | 0      | 0      | 1      | 1      | 1      | 0      |
| 1371   | 5     | 1     | 1     | 1     | 4     | 4     | 0      | 0      | 1      | 0      | 0      | 0      | 1      | 1      |
| 1372   | 5     | 1     | 1     | 1     | 1     | 4     | 0      | 0      | 0      | 0      | 0      | 1      | 1      | 1      |
| 1375   | 5     | 1     | 3     | 4     | 4     | 5     | 1      | 2      | 0      | 1      | 1      | 1      | 2      | 0      |
| 1377   | 4     | 1     | 0     | 1     | 5     | 5     | 0      | 0      | 0      | 0      | 0      | 0      | 0      | 0      |
| 1379   | 1     | 2     | 1     | 4     | 4     | 3     | 1      | 1      | 1      | 1      | 1      | 1      | 1      | 1      |
| 1380   | 5     | 4     | 4     | 3     | 1     | 3     | 1      | 1      | 1      | 0      | 2      | 1      | 0      | 1      |
| 1382   | 4     | 3     | 3     | 3     | 1     | 3     | 1      | 1      | 0      | 1      | 2      | 1      | 1      | 1      |
| 1383   | 5     | 1     | 1     | 1     | 3     | 4     | 1      | 1      | 1      | 2      | 1      | 0      | 1      | 1      |

| respid | Q52_2 | Q53_1 | Q54_1 | Q54_2 | Q54_3 | Q55_1 | Q56a_1 | Q56b_1 | Q56c_1 | Q56d_1 | Q56e_1 | Q56f_1 | Q56g_1 | Q56h_1 |
|--------|-------|-------|-------|-------|-------|-------|--------|--------|--------|--------|--------|--------|--------|--------|
| 1384   | 5     | 1     | 0     | 1     | 5     | 4     | 0      | 0      | 0      | 0      | 0      | 0      | 0      | 0      |
| 1385   | 5     | 1     | 0     | 0     | 5     | 5     | 1      | 0      | 0      | 0      | 0      | 0      | 0      | 0      |
| 1387   | 5     | 1     | 0     | 1     | 4     | 5     | 0      | 0      | 0      | 1      | 1      | 1      | 0      | 1      |
| 1388   | 4     | 1     | 1     | 3     | 4     | 5     | 1      | 1      | 2      | 2      | 2      | 2      | 1      | 1      |
| 1389   | 2     | 2     | 1     | 3     | 1     | 5     | 1      | 3      | 2      | 2      | 2      | 2      | 2      | 2      |
| 1390   | 4     | 2     | 1     | 1     | 4     | 4     | 1      | 0      | 1      | 1      | 1      | 0      | 2      | 0      |
| 1395   | 5     | 1     | 0     | 0     | 4     | 5     | 0      | 0      | 0      | 0      | 0      | 0      | 0      | 0      |
| 1396   | 3     | 2     | 3     | 3     | 3     | 3     | 1      | 1      | 1      | 1      | 1      | 1      | 2      | 1      |
| 1397   | 4     | 2     | 4     | 3     | 4     | 4     | 1      | 1      | 1      | 1      | 1      | 2      | 0      | 1      |
| 1398   | 5     | 1     | 0     | 0     | 5     | 5     | 0      | 0      | 0      | 0      | 1      | 0      | 0      | 0      |
| 1399   | 5     | 1     | 1     | 3     | 4     | 5     | 0      | 1      | 0      | 1      | 1      | 1      | 1      | 0      |
| 1403   | 4     | 3     | 1     | 1     | 4     | 4     | 1      | 0      | 1      | 0      | 1      | 0      | 1      | 1      |
| 1405   | 5     | 1     | 1     | 1     | 5     | 5     | 0      | 0      | 0      | 0      | 0      | 0      | 0      | 0      |
| 1406   | 3     | 2     | 1     | 4     | 4     | 4     | 1      | 1      | 0      | 0      | 1      | 1      | 1      | 1      |
| 1407   | 5     | 4     | 0     | 4     | 5     | 4     | 0      | 2      | 2      | 0      | 2      | 1      | 0      | 2      |
| 1408   | 5     | 1     | 1     | 1     | 5     | 5     | 0      | 0      | 0      | 0      | 0      | 0      | 0      | 0      |
| 1409   | 5     | 1     | 1     | 0     | 4     | 5     | 0      | 0      | 0      | 0      | 1      | 0      | 0      | 0      |
| 1410   | 3     | 1     | 5     | 5     | 0     | 1     | 3      | 1      | 3      | 3      | 3      | 3      | 3      | 3      |
| 1411   | 5     | 2     | 1     | 1     | 4     | 5     | 1      | 0      | 0      | 1      | 1      | 0      | 0      | 1      |
| 1412   | 5     | 1     | 1     | 1     | 1     | 5     | 2      | 1      | 1      | 1      | 1      | 1      | 1      | 0      |
| 1413   | 5     | 3     | 1     | 3     | 4     | 5     | 1      | 1      | 1      | 1      | 1      | 1      | 1      | 1      |
| 1414   | 3     | 1     | 1     | 1     | 4     | 4     | 1      | 1      | 1      | 1      | 1      | 0      | 0      | 1      |
| 1415   | 4     | 3     | 1     | 1     | 4     | 4     | 0      | 0      | 0      | 0      | 1      | 0      | 0      | 0      |
| 1416   | 4     | 2     | 1     | 1     | 4     | 4     | 0      | 0      | 1      | 2      | 1      | 1      | 1      | 0      |
| 1417   | 5     | 2     | 0     | 3     | 3     | 3     | 1      | 0      | 1      | 1      | 1      | 2      | 1      | 2      |
| 1418   | 5     | 1     | 0     | 1     | 5     | 5     | 1      | 0      | 0      | 0      | 1      | 1      | 0      | 1      |
| 1419   | 2     | 4     | 0     | 1     | 3     | 3     | 1      | 1      | 0      | 1      | 1      | 0      | 0      | 1      |
| 1420   | 5     | 2     | 1     | 1     | 4     | 5     | 1      | 1      | 0      | 0      | 0      | 0      | 0      | 1      |
| 1421   | 4     | 2     | 4     | 4     | 4     | 4     | 1      | 2      | 2      | 2      | 2      | 1      | 2      | 2      |
| 1422   | 5     | 1     | 0     | 0     | 5     | 5     | 0      | 0      | 0      | 0      | 0      | 0      | 0      | 0      |
| 1423   | 4     | 2     | 1     | 3     | 3     | 4     | 1      | 2      | 1      | 1      | 2      | 1      | 2      | 1      |
| 1424   | 3     | 2     | 4     | 3     | 4     | 4     | 1      | 2      | 1      | 1      | 2      | 1      | 2      | 1      |

| respid | Q52_2 | Q53_1 | Q54_1 | Q54_2 | Q54_3 | Q55_1 | Q56a_1 | Q56b_1 | Q56c_1 | Q56d_1 | Q56e_1 | Q56f_1 | Q56g_1 | Q56h_1 |
|--------|-------|-------|-------|-------|-------|-------|--------|--------|--------|--------|--------|--------|--------|--------|
| 1429   | 5     | 1     | 3     | 1     | 3     | 5     | 1      | 1      | 2      | 1      | 2      | 2      | 2      | 2      |
| 1430   | 5     | 1     | 0     | 1     | 5     | 5     | 0      | 0      | 0      | 0      | 0      | 0      | 0      | 0      |
| 1431   | 2     | 4     | 3     | 3     | 4     | 4     | 1      | 2      | 0      | 2      | 2      | 3      | 3      | 2      |
| 1433   | 3     | 3     | 3     | 3     | 3     | 4     | 1      | 2      | 1      | 1      | 1      | 1      | 1      | 1      |
| 1435   | 4     | 1     | 1     | 1     | 4     | 4     | 0      | 0      | 0      | 1      | 1      | 1      | 1      | 0      |
| 1436   | 5     | 1     | 1     | 1     | 5     | 5     | 0      | 0      | 1      | 0      | 0      | 0      | 0      | 1      |
| 1438   | 5     | 1     | 5     | 5     | 5     | 5     | 3      | 3      | 0      | 3      | 0      | 0      | 0      | 0      |
| 1439   | 5     | 2     | 1     | 1     | 5     | 5     | 0      | 1      | 0      | 1      | 0      | 0      | 0      | 1      |
| 1441   | 5     | 2     | 1     | 1     | 5     | 5     | 0      | 1      | 1      | 0      | 1      | 0      | 1      | 1      |
| 1442   | 5     | 1     | 0     | 0     | 0     | 5     | 0      | 0      | 0      | 0      | 0      | 0      | 0      | 0      |
| 1443   | 5     | 1     | 5     | 5     | 5     | 5     | 3      | 3      | 3      | 3      | 3      | 3      | 3      | 3      |
| 1444   | 4     | 2     | 3     | 1     | 3     | 3     | 1      | 2      | 2      | 1      | 1      | 1      | 1      | 1      |
| 1445   | 4     | 2     | 0     | 1     | 1     | 5     | 2      | 1      | 2      | 1      | 2      | 1      | 1      | 1      |
| 1446   | 5     | 2     | 1     | 4     | 4     | 4     | 1      | 2      | 1      | 2      | 1      | 2      | 0      | 1      |
| 1447   | 5     | 1     | 1     | 1     | 1     | 5     | 0      | 0      | 0      | 0      | 0      | 0      | 0      | 0      |
| 1449   | 5     | 2     | 1     | 3     | 4     | 4     | 0      | 1      | 0      | 1      | 0      | 0      | 0      | 1      |
| 1450   | 5     | 1     | 5     | 5     | 5     | 5     | 1      | 1      | 0      | 3      | 1      | 3      | 3      | 1      |
| 1451   | 5     | 1     | 3     | 3     | 4     | 5     | 1      | 2      | 2      | 2      | 1      | 1      | 1      | 1      |
| 1452   | 5     | 1     | 1     | 1     | 5     | 5     | 2      | 1      | 0      | 0      | 1      | 0      | 1      | 0      |
| 1453   | 4     | 3     | 3     | 4     | 3     | 3     | 1      | 2      | 1      | 2      | 1      | 1      | 1      | 1      |
| 1454   | 4     | 2     | 3     | 3     | 4     | 4     | 1      | 1      | 1      | 1      | 1      | 1      | 1      | 1      |
| 1456   | 4     | 1     | 1     | 1     | 1     | 4     | 1      | 2      | 0      | 1      | 0      | 1      | 1      | 2      |
| 1457   | 4     | 3     | 1     | 1     | 4     | 5     | 1      | 1      | 0      | 1      | 1      | 1      | 1      | 2      |
| 1459   | 4     | 1     | 4     | 4     | 4     | 4     | 0      | 2      | 0      | 1      | 0      | 2      | 1      | 1      |
| 1460   | 5     | 1     | 1     | 1     | 4     | 4     | 1      | 0      | 0      | 0      | 0      | 0      | 0      | 0      |
| 1463   | 5     | 1     | 1     | 1     | 4     | 5     | 1      | 1      | 0      | 0      | 0      | 0      | 1      | 1      |
| 1465   | 4     | 2     | 3     | 3     | 4     | 4     | 1      | 2      | 1      | 1      | 0      | 2      | 2      | 2      |
| 1467   | 4     | 2     | 3     | 3     | 4     | 4     | 1      | 1      | 2      | 2      | 2      | 2      | 2      | 1      |
| 1470   | 3     | 4     | 1     | 3     | 3     | 3     | 1      | 1      | 1      | 1      | 1      | 1      | 1      | 1      |
| 1471   | 3     | 3     | 4     | 4     | 1     | 3     | 1      | 1      | 1      | 1      | 1      | 2      | 2      | 2      |
| 1472   | 5     | 1     | 0     | 0     | 5     | 5     | 0      | 0      | 0      | 0      | 0      | 0      | 0      | 0      |
| 1474   | 5     | 2     | 1     | 1     | 4     | 4     | 0      | 0      | 0      | 0      | 1      | 0      | 1      | 0      |

| respid | Q52_2 | Q53_1 | Q54_1 | Q54_2 | Q54_3 | Q55_1 | Q56a_1 | Q56b_1 | Q56c_1 | Q56d_1 | Q56e_1 | Q56f_1 | Q56g_1 | Q56h_1 |
|--------|-------|-------|-------|-------|-------|-------|--------|--------|--------|--------|--------|--------|--------|--------|
| 1475   | 4     | 2     | 1     | 4     | 4     | 4     | 1      | 0      | 0      | 0      | 0      | 0      | 0      | 1      |
| 1477   | 5     | 1     | 1     | 1     | 5     | 5     | 0      | 0      | 0      | 0      | 0      | 0      | 0      | 0      |
| 1478   | 3     | 2     | 3     | 3     | 3     | 4     | 1      | 2      | 1      | 1      | 2      | 2      | 1      | 1      |
| 1480   | 5     | 1     | 1     | 1     | 4     | 5     | 0      | 1      | 0      | 1      | 1      | 1      | 1      | 0      |
| 1481   | 3     | 3     | 4     | 4     | 4     | 4     | 1      | 2      | 1      | 1      | 1      | 1      | 1      | 1      |
| 1483   | 5     | 1     | 1     | 1     | 5     | 5     | 0      | 0      | 0      | 0      | 0      | 0      | 0      | 0      |
| 1484   | 5     | 1     | 1     | 1     | 5     | 5     | 3      | 1      | 1      | 1      | 0      | 2      | 2      | 1      |
| 1485   | 3     | 2     | 3     | 4     | 1     | 4     | 1      | 0      | 0      | 0      | 1      | 2      | 0      | 2      |
| 1486   | 5     | 1     | 1     | 1     | 4     | 5     | 0      | 0      | 0      | 0      | 0      | 0      | 0      | 0      |
| 1487   | 3     | 3     | 1     | 3     | 3     | 4     | 1      | 1      | 2      | 1      | 1      | 1      | 1      | 1      |
| 1488   | 5     | 1     | 1     | 1     | 5     | 5     | 0      | 1      | 0      | 0      | 1      | 1      | 0      | 0      |
| 1489   | 5     | 1     | 1     | 1     | 4     | 5     | 1      | 0      | 0      | 0      | 1      | 0      | 0      | 0      |
| 1490   | 3     | 4     | 4     | 3     | 1     | 4     | 1      | 1      | 1      | 1      | 2      | 2      | 1      | 2      |
| 1491   | 4     | 3     | 3     | 4     | 3     | 4     | 2      | 1      | 1      | 2      | 2      | 2      | 1      | 2      |
| 1492   | 5     | 1     | 1     | 1     | 5     | 5     | 0      | 0      | 0      | 0      | 0      | 1      | 1      | 0      |
| 1494   | 5     | 2     | 0     | 0     | 5     | 4     | 0      | 0      | 0      | 0      | 0      | 1      | 0      | 2      |
| 1495   | 5     | 1     | 0     | 1     | 5     | 5     | 0      | 1      | 1      | 1      | 1      | 1      | 0      | 1      |
| 1496   | 4     | 1     | 4     | 3     | 1     | 4     | 2      | 1      | 1      | 0      | 1      | 1      | 2      | 1      |
| 1498   | 5     | 3     | 1     | 3     | 5     | 4     | 0      | 0      | 0      | 0      | 0      | 0      | 0      | 0      |
| 1499   | 4     | 2     | 1     | 1     | 4     | 4     | 0      | 1      | 1      | 1      | 1      | 0      | 0      | 0      |
| 1500   | 4     | 2     | 4     | 4     | 4     | 4     | 1      | 1      | 1      | 2      | 1      | 2      | 2      | 1      |
| 1501   | 5     | 1     | 1     | 1     | 5     | 5     | 1      | 0      | 0      | 0      | 0      | 0      | 0      | 0      |
| 1503   | 5     | 2     | 0     | 1     | 5     | 5     | 0      | 2      | 0      | 1      | 1      | 1      | 1      | 0      |
| 1504   | 5     | 1     | 5     | 5     | 5     | 5     | 0      | 0      | 0      | 0      | 0      | 1      | 1      | 0      |
| 1508   | 5     | 1     | 5     | 5     | 5     | 5     | 0      | 0      | 0      | 0      | 0      | 0      | 0      | 0      |
| 1509   | 4     | 2     | 1     | 1     | 4     | 5     | 0      | 1      | 1      | 0      | 1      | 0      | 1      | 1      |
| 1511   | 5     | 1     | 0     | 4     | 4     | 2     | 0      | 0      | 1      | 1      | 1      | 1      | 1      | 2      |
| 1512   | 5     | 1     | 3     | 3     | 3     | 4     | 1      | 1      | 1      | 1      | 1      | 1      | 1      | 0      |
| 1513   | 5     | 5     | 3     | 3     | 3     | 5     | 0      | 0      | 0      | 0      | 1      | 0      | 0      | 0      |
| 1515   | 2     | 3     | 1     | 1     | 1     | 3     | 1      | 1      | 1      | 1      | 1      | 1      | 1      | 1      |
| 1517   | 5     | 1     | 0     | 1     | 4     | 5     | 1      | 1      | 1      | 0      | 1      | 1      | 1      | 1      |
| 1518   | 5     | 1     | 1     | 1     | 5     | 5     | 0      | 0      | 0      | 0      | 1      | 1      | 1      | 1      |

| respid | Q52_2 | Q53_1 | Q54_1 | Q54_2 | Q54_3 | Q55_1 | Q56a_1 | Q56b_1 | Q56c_1 | Q56d_1 | Q56e_1 | Q56f_1 | Q56g_1 | Q56h_1 |
|--------|-------|-------|-------|-------|-------|-------|--------|--------|--------|--------|--------|--------|--------|--------|
| 1519   | 4     | 2     | 3     | 3     | 4     | 4     | 1      | 1      | 2      | 1      | 1      | 1      | 2      | 1      |
| 1520   | 3     | 3     | 4     | 4     | 1     | 4     | 2      | 1      | 2      | 2      | 2      | 2      | 2      | 1      |
| 1521   | 3     | 4     | 1     | 3     | 4     | 4     | 1      | 2      | 1      | 1      | 2      | 2      | 1      | 1      |
| 1522   | 5     | 1     | 0     | 1     | 4     | 4     | 1      | 1      | 1      | 1      | 0      | 0      | 0      | 2      |
| 1523   | 3     | 1     | 1     | 4     | 3     | 5     | 1      | 3      | 2      | 3      | 3      | 2      | 3      | 1      |
| 1524   | 4     | 2     | 1     | 3     | 3     | 3     | 1      | 1      | 0      | 0      | 1      | 1      | 1      | 1      |
| 1525   | 5     | 1     | 1     | 1     | 4     | 4     | 1      | 0      | 1      | 0      | 1      | 1      | 1      | 1      |
| 1526   | 4     | 2     | 1     | 4     | 3     | 4     | 2      | 1      | 2      | 0      | 2      | 1      | 1      | 1      |
| 1527   | 5     | 2     | 0     | 5     | 0     | 3     | 0      | 1      | 0      | 0      | 1      | 3      | 0      | 3      |
| 1534   | 5     | 2     | 1     | 1     | 4     | 5     | 0      | 0      | 0      | 0      | 1      | 0      | 0      | 0      |
| 1535   | 5     | 1     | 1     | 3     | 5     | 5     | 1      | 1      | 0      | 1      | 1      | 1      | 2      | 1      |
| 1536   | 4     | 2     | 3     | 3     | 4     | 4     | 1      | 1      | 1      | 1      | 1      | 1      | 2      | 1      |
| 1538   | 5     | 2     | 1     | 3     | 4     | 4     | 1      | 1      | 1      | 1      | 1      | 1      | 1      | 0      |
| 1539   | 5     | 2     | 1     | 3     | 5     | 5     | 1      | 1      | 1      | 1      | 1      | 1      | 1      | 1      |
| 1540   | 5     | 1     | 1     | 1     | 4     | 5     | 0      | 0      | 1      | 0      | 1      | 0      | 1      | 0      |
| 1541   | 5     | 1     | 1     | 1     | 5     | 5     | 0      | 0      | 0      | 0      | 0      | 1      | 0      | 0      |
| 1542   | 5     | 1     | 4     | 4     | 4     | 4     | 1      | 2      | 1      | 0      | 0      | 3      | 0      | 1      |
| 1543   | 4     | 2     | 3     | 3     | 4     | 4     | 1      | 1      | 1      | 1      | 1      | 1      | 1      | 1      |
| 1545   | 3     | 2     | 3     | 4     | 4     | 3     | 1      | 2      | 1      | 2      | 1      | 2      | 2      | 2      |
| 1546   | 4     | 1     | 1     | 1     | 4     | 5     | 1      | 0      | 0      | 0      | 1      | 0      | 0      | 1      |
| 1548   | 3     | 5     | 1     | 1     | 4     | 5     | 0      | 0      | 0      | 0      | 1      | 1      | 1      | 2      |
| 1549   | 5     | 1     | 1     | 1     | 4     | 5     | 1      | 0      | 0      | 0      | 1      | 0      | 0      | 0      |
| 1551   | 5     | 1     | 1     | 1     | 5     | 5     | 3      | 0      | 0      | 0      | 0      | 1      | 1      | 1      |
| 1552   | 4     | 2     | 4     | 3     | 3     | 4     | 1      | 2      | 2      | 1      | 2      | 1      | 2      | 1      |
| 1556   | 3     | 1     | 1     | 3     | 4     | 4     | 1      | 1      | 0      | 1      | 1      | 1      | 1      | 1      |
| 1557   | 3     | 3     | 3     | 3     | 3     | 4     | 1      | 2      | 1      | 1      | 1      | 0      | 1      | 1      |
| 1558   | 5     | 1     | 1     | 1     | 4     | 5     | 0      | 1      | 1      | 1      | 1      | 1      | 1      | 1      |
| 1561   | 5     | 1     | 1     | 0     | 4     | 5     | 0      | 0      | 0      | 0      | 1      | 0      | 0      | 0      |
| 1562   | 4     | 1     | 1     | 1     | 3     | 4     | 1      | 1      | 1      | 1      | 1      | 1      | 1      | 1      |
| 1563   | 4     | 2     | 1     | 1     | 3     | 4     | 1      | 0      | 2      | 0      | 0      | 0      | 0      | 1      |
| 1564   | 3     | 4     | 3     | 4     | 1     | 2     | 1      | 2      | 3      | 2      | 2      | 2      | 2      | 2      |
| 1565   | 5     | 1     | 1     | 1     | 4     | 5     | 0      | 3      | 0      | 2      | 0      | 1      | 1      | 0      |



| respid | Q52_2 | Q53_1 | Q54_1 | Q54_2 | Q54_3 | Q55_1 | Q56a_1 | Q56b_1 | Q56c_1 | Q56d_1 | Q56e_1 | Q56f_1 | Q56g_1 | Q56h_1 |
|--------|-------|-------|-------|-------|-------|-------|--------|--------|--------|--------|--------|--------|--------|--------|
| 1566   | 5     | 1     | 0     | 0     | 5     | 5     | 0      | 0      | 0      | 0      | 0      | 0      | 0      | 0      |
| 1567   | 5     | 1     | 1     | 1     | 4     | 5     | 1      | 0      | 1      | 0      | 1      | 1      | 1      | 0      |
| 1569   | 4     | 2     | 3     | 4     | 4     | 4     | 1      | 0      | 0      | 0      | 0      | 1      | 0      | 0      |
| 1570   | 5     | 1     | 1     | 1     | 4     | 5     | 1      | 0      | 1      | 0      | 0      | 0      | 0      | 1      |
| 1574   | 4     | 1     | 1     | 3     | 1     | 4     | 1      | 0      | 2      | 2      | 1      | 2      | 2      | 1      |
| 1575   | 5     | 1     | 0     | 0     | 5     | 5     | 0      | 0      | 0      | 0      | 0      | 0      | 1      | 0      |
| 1576   | 4     | 1     | 1     | 1     | 1     | 3     | 1      | 2      | 2      | 2      | 2      | 1      | 1      | 1      |
| 1577   | 5     | 2     | 4     | 1     | 3     | 4     | 3      | 2      | 1      | 1      | 1      | 0      | 1      | 0      |
| 1581   | 5     | 2     | 0     | 4     | 5     | 4     | 1      | 0      | 1      | 0      | 1      | 0      | 1      | 0      |
| 1583   | 5     | 1     | 1     | 3     | 4     | 5     | 1      | 0      | 1      | 0      | 1      | 1      | 1      | 0      |
| 1585   | 5     | 1     | 0     | 0     | 5     | 5     | 3      | 0      | 3      | 0      | 0      | 0      | 0      | 0      |
| 1586   | 3     | 3     | 3     | 3     | 3     | 3     | 1      | 2      | 0      | 0      | 0      | 1      | 1      | 0      |
| 1588   | 5     | 1     | 1     | 1     | 4     | 5     | 0      | 1      | 0      | 0      | 0      | 1      | 0      | 1      |
| 1590   | 5     | 2     | 1     | 1     | 4     | 4     | 1      | 0      | 1      | 0      | 0      | 0      | 1      | 0      |
| 1592   | 4     | 1     | 1     | 1     | 4     | 5     | 1      | 0      | 0      | 0      | 0      | 1      | 1      | 1      |
| 1594   | 4     | 2     | 1     | 1     | 4     | 4     | 1      | 1      | 1      | 1      | 1      | 1      | 1      | 1      |
| 1598   | 3     | 2     | 1     | 1     | 1     | 3     | 1      | 2      | 1      | 1      | 1      | 1      | 1      | 1      |
| 1599   | 5     | 2     | 1     | 3     | 4     | 5     | 0      | 0      | 0      | 0      | 1      | 0      | 1      | 1      |
| 1600   | 5     | 1     | 0     | 0     | 4     | 5     | 0      | 0      | 0      | 0      | 1      | 0      | 0      | 0      |
| 1602   | 4     | 1     | 3     | 4     | 1     | 5     | 1      | 0      | 2      | 1      | 2      | 2      | 2      | 0      |
| 1603   | 4     | 1     | 1     | 3     | 4     | 4     | 1      | 0      | 0      | 0      | 0      | 0      | 0      | 1      |
| 1604   | 4     | 1     | 1     | 4     | 4     | 5     | 1      | 0      | 0      | 0      | 1      | 1      | 2      | 1      |
| 1605   | 3     | 3     | 1     | 4     | 3     | 3     | 1      | 2      | 1      | 2      | 1      | 2      | 2      | 3      |
| 1606   | 5     | 1     | 1     | 1     | 4     | 5     | 1      | 0      | 0      | 0      | 0      | 0      | 0      | 0      |
| 1610   | 5     | 1     | 3     | 3     | 4     | 5     | 0      | 1      | 0      | 0      | 1      | 1      | 2      | 1      |
| 1611   | 5     | 1     | 3     | 3     | 3     | 5     | 1      | 1      | 0      | 2      | 1      | 1      | 1      | 2      |
| 1612   | 5     | 1     | 1     | 3     | 4     | 5     | 1      | 1      | 0      | 1      | 1      | 1      | 0      | 0      |
| 1613   | 4     | 2     | 1     | 3     | 3     | 4     | 0      | 0      | 1      | 0      | 1      | 0      | 0      | 1      |
| 1615   | 3     | 2     | 5     | 5     | 1     | 4     | 2      | 3      | 3      | 1      | 3      | 3      | 2      | 1      |
| 1616   | 5     | 2     | 1     | 3     | 4     | 4     | 0      | 1      | 0      | 0      | 1      | 0      | 0      | 1      |
| 1617   | 4     | 2     | 4     | 4     | 4     | 4     | 1      | 1      | 1      | 1      | 1      | 2      | 2      | 1      |
| 1618   | 5     | 2     | 1     | 1     | 4     | 5     | 0      | 0      | 0      | 0      | 0      | 0      | 0      | 0      |

| respid | Q52_2 | Q53_1 | Q54_1 | Q54_2 | Q54_3 | Q55_1 | Q56a_1 | Q56b_1 | Q56c_1 | Q56d_1 | Q56e_1 | Q56f_1 | Q56g_1 | Q56h_1 |
|--------|-------|-------|-------|-------|-------|-------|--------|--------|--------|--------|--------|--------|--------|--------|
| 1620   | 5     | 1     | 1     | 3     | 4     | 3     | 1      | 1      | 0      | 0      | 1      | 0      | 0      | 0      |
| 1621   | 3     | 2     | 4     | 5     | 3     | 4     | 1      | 2      | 1      | 1      | 1      | 2      | 2      | 2      |
| 1622   | 5     | 1     | 0     | 0     | 4     | 5     | 0      | 0      | 0      | 0      | 0      | 0      | 0      | 0      |
| 1623   | 5     | 1     | 3     | 3     | 3     | 5     | 1      | 0      | 1      | 0      | 1      | 1      | 1      | 1      |
| 1624   | 5     | 1     | 1     | 1     | 4     | 5     | 0      | 0      | 0      | 0      | 0      | 0      | 0      | 0      |
| 1625   | 5     | 1     | 0     | 1     | 4     | 5     | 0      | 0      | 0      | 0      | 1      | 0      | 1      | 1      |
| 1626   | 2     | 1     | 1     | 1     | 1     | 4     | 1      | 1      | 0      | 1      | 0      | 0      | 0      | 1      |
| 1627   | 5     | 1     | 1     | 1     | 4     | 5     | 0      | 1      | 0      | 0      | 1      | 0      | 1      | 0      |
| 1629   | 5     | 1     | 3     | 1     | 3     | 5     | 1      | 1      | 0      | 0      | 1      | 1      | 1      | 1      |
| 1630   | 5     | 1     | 0     | 3     | 4     | 5     | 0      | 1      | 1      | 0      | 0      | 0      | 1      | 1      |
| 1631   | 5     | 1     | 1     | 3     | 3     | 5     | 1      | 1      | 1      | 1      | 1      | 1      | 1      | 1      |
| 1634   | 5     | 1     | 1     | 1     | 4     | 4     | 0      | 0      | 0      | 0      | 0      | 0      | 1      | 0      |
| 1635   | 4     | 2     | 0     | 1     | 4     | 5     | 1      | 0      | 1      | 0      | 1      | 0      | 0      | 0      |
| 1636   | 5     | 1     | 0     | 0     | 5     | 5     | 0      | 0      | 0      | 0      | 0      | 0      | 0      | 0      |
| 1637   | 5     | 1     | 0     | 0     | 0     | 5     | 0      | 0      | 0      | 0      | 1      | 0      | 0      | 0      |
| 1640   | 5     | 1     | 3     | 3     | 4     | 5     | 0      | 1      | 0      | 0      | 1      | 0      | 1      | 0      |
| 1642   | 4     | 1     | 1     | 1     | 5     | 4     | 0      | 0      | 0      | 0      | 0      | 1      | 0      | 2      |
| 1643   | 5     | 2     | 3     | 1     | 4     | 5     | 1      | 1      | 1      | 1      | 1      | 0      | 0      | 0      |
| 1644   | 3     | 3     | 3     | 3     | 3     | 3     | 1      | 1      | 1      | 0      | 1      | 1      | 1      | 1      |
| 1645   | 4     | 3     | 3     | 5     | 4     | 3     | 2      | 1      | 1      | 0      | 1      | 2      | 2      | 1      |
| 1646   | 5     | 1     | 4     | 5     | 3     | 3     | 3      | 1      | 0      | 1      | 3      | 2      | 2      | 1      |
| 1647   | 4     | 1     | 3     | 3     | 3     | 4     | 1      | 1      | 1      | 1      | 1      | 2      | 1      | 1      |
| 1650   | 2     | 2     | 3     | 4     | 3     | 3     | 2      | 1      | 3      | 1      | 2      | 2      | 2      | 2      |
| 1654   | 3     | 3     | 3     | 3     | 4     | 4     | 1      | 0      | 1      | 1      | 1      | 1      | 1      | 2      |
| 1656   | 5     | 1     | 3     | 1     | 4     | 5     | 0      | 0      | 0      | 0      | 1      | 1      | 1      | 0      |
| 1657   | 3     | 1     | 4     | 4     | 1     | 3     | 2      | 0      | 3      | 2      | 2      | 1      | 2      | 2      |
| 1659   | 4     | 3     | 1     | 3     | 3     | 5     | 0      | 0      | 1      | 0      | 1      | 0      | 1      | 1      |
| 1662   | 4     | 2     | 4     | 3     | 4     | 4     | 2      | 2      | 2      | 2      | 1      | 1      | 2      | 1      |
| 1663   | 2     | 1     | 4     | 5     | 0     | 2     | 3      | 1      | 1      | 1      | 2      | 2      | 2      | 3      |
| 1664   | 5     | 1     | 1     | 1     | 4     | 5     | 0      | 0      | 0      | 0      | 0      | 0      | 0      | 2      |
| 1665   | 4     | 1     | 1     | 1     | 4     | 4     | 1      | 0      | 0      | 0      | 1      | 0      | 0      | 1      |
| 1667   | 2     | 2     | 3     | 3     | 3     | 3     | 1      | 1      | 0      | 0      | 0      | 1      | 1      | 1      |

| respid | Q52_2 | Q53_1 | Q54_1 | Q54_2 | Q54_3 | Q55_1 | Q56a_1 | Q56b_1 | Q56c_1 | Q56d_1 | Q56e_1 | Q56f_1 | Q56g_1 | Q56h_1 |
|--------|-------|-------|-------|-------|-------|-------|--------|--------|--------|--------|--------|--------|--------|--------|
| 1668   | 4     | 1     | 0     | 1     | 4     | 4     | 0      | 0      | 2      | 0      | 1      | 0      | 0      | 0      |
| 1670   | 5     | 3     | 1     | 3     | 3     | 5     | 1      | 1      | 0      | 1      | 1      | 1      | 2      | 0      |
| 1671   | 5     | 1     | 1     | 1     | 5     | 5     | 0      | 0      | 1      | 0      | 1      | 0      | 0      | 1      |
| 1673   | 4     | 2     | 1     | 3     | 4     | 4     | 1      | 0      | 0      | 0      | 1      | 1      | 1      | 1      |
| 1674   | 4     | 3     | 1     | 1     | 3     | 4     | 1      | 0      | 1      | 0      | 1      | 0      | 1      | 2      |
| 1676   | 5     | 2     | 0     | 3     | 4     | 4     | 2      | 2      | 2      | 2      | 1      | 1      | 1      | 1      |
| 1677   | 5     | 1     | 1     | 1     | 5     | 5     | 0      | 0      | 0      | 0      | 0      | 0      | 0      | 0      |
| 1678   | 5     | 3     | 3     | 3     | 3     | 5     | 1      | 0      | 0      | 0      | 1      | 1      | 1      | 2      |
| 1680   | 5     | 1     | 1     | 1     | 5     | 5     | 0      | 0      | 0      | 0      | 0      | 0      | 0      | 0      |
| 1681   | 5     | 2     | 1     | 3     | 4     | 4     | 0      | 1      | 0      | 1      | 1      | 1      | 1      | 1      |
| 1683   | 5     | 1     | 1     | 3     | 4     | 5     | 0      | 0      | 0      | 0      | 1      | 1      | 1      | 0      |
| 1685   | 3     | 1     | 1     | 4     | 1     | 3     | 2      | 1      | 2      | 3      | 1      | 3      | 2      | 1      |
| 1686   | 4     | 3     | 1     | 3     | 3     | 4     | 1      | 1      | 1      | 1      | 1      | 1      | 1      | 2      |
| 1690   | 5     | 2     | 1     | 3     | 4     | 4     | 1      | 0      | 0      | 0      | 0      | 0      | 0      | 1      |
| 1691   | 5     | 2     | 5     | 5     | 5     | 3     | 2      | 3      | 2      | 1      | 3      | 3      | 3      | 3      |
| 1692   | 4     | 2     | 1     | 3     | 5     | 5     | 0      | 1      | 1      | 0      | 0      | 1      | 1      | 2      |
| 1693   | 5     | 1     | 1     | 1     | 5     | 5     | 0      | 1      | 0      | 1      | 0      | 0      | 1      | 0      |
| 1695   | 5     | 2     | 3     | 4     | 3     | 3     | 1      | 1      | 2      | 1      | 1      | 1      | 1      | 1      |
| 1696   | 5     | 2     | 0     | 3     | 4     | 5     | 0      | 0      | 0      | 0      | 0      | 2      | 0      | 0      |
| 1698   | 4     | 1     | 3     | 3     | 4     | 5     | 1      | 0      | 0      | 0      | 1      | 1      | 1      | 0      |
| 1699   | 5     | 2     | 1     | 1     | 4     | 5     | 1      | 1      | 1      | 0      | 1      | 0      | 1      | 1      |
| 1701   | 4     | 4     | 1     | 3     | 4     | 4     | 1      | 2      | 1      | 2      | 2      | 1      | 1      | 2      |
| 1702   | 5     | 1     | 1     | 1     | 4     | 5     | 1      | 2      | 1      | 1      | 1      | 1      | 1      | 1      |
| 1703   | 5     | 1     | 1     | 1     | 5     | 5     | 0      | 0      | 0      | 0      | 0      | 0      | 0      | 0      |
| 1705   | 5     | 1     | 0     | 1     | 4     | 5     | 1      | 0      | 0      | 0      | 0      | 0      | 0      | 0      |
| 1706   | 4     | 2     | 3     | 3     | 3     | 3     | 1      | 1      | 1      | 1      | 1      | 1      | 2      | 1      |
| 1708   | 4     | 2     | 1     | 1     | 4     | 4     | 1      | 1      | 2      | 2      | 1      | 1      | 1      | 2      |
| 1711   | 4     | 2     | 4     | 4     | 4     | 4     | 1      | 2      | 1      | 1      | 1      | 2      | 1      | 1      |
| 1712   | 5     | 1     | 0     | 1     | 0     | 5     | 1      | 0      | 0      | 0      | 1      | 0      | 0      | 0      |
| 1713   | 5     | 2     | 1     | 3     | 4     | 5     | 1      | 1      | 1      | 0      | 0      | 1      | 1      | 1      |
| 1715   | 5     | 1     | 0     | 1     | 5     | 5     | 0      | 0      | 0      | 0      | 1      | 0      | 0      | 1      |
| 1717   | 5     | 1     | 0     | 0     | 5     | 5     | 0      | 0      | 0      | 0      | 0      | 0      | 0      | 0      |

| respid | Q52_2 | Q53_1 | Q54_1 | Q54_2 | Q54_3 | Q55_1 | Q56a_1 | Q56b_1 | Q56c_1 | Q56d_1 | Q56e_1 | Q56f_1 | Q56g_1 | Q56h_1 |
|--------|-------|-------|-------|-------|-------|-------|--------|--------|--------|--------|--------|--------|--------|--------|
| 1718   | 1     | 5     | 1     | 1     | 1     | 2     | 1      | 2      | 1      | 1      | 1      | 1      | 1      | 1      |
| 1719   | 4     | 1     | 1     | 1     | 4     | 5     | 1      | 1      | 0      | 1      | 1      | 1      | 2      | 0      |
| 1721   | 4     | 2     | 4     | 4     | 4     | 5     | 1      | 0      | 1      | 0      | 1      | 1      | 0      | 1      |
| 1722   | 3     | 2     | 4     | 4     | 3     | 4     | 1      | 2      | 1      | 1      | 1      | 1      | 1      | 2      |
| 1724   | 5     | 2     | 1     | 1     | 4     | 5     | 0      | 0      | 0      | 0      | 0      | 0      | 0      | 1      |
| 1725   | 5     | 1     | 0     | 0     | 0     | 5     | 1      | 1      | 2      | 0      | 1      | 0      | 0      | 0      |
| 1726   | 5     | 2     | 1     | 3     | 3     | 4     | 1      | 2      | 2      | 2      | 2      | 1      | 1      | 2      |
| 1727   | 5     | 1     | 4     | 1     | 3     | 5     | 1      | 1      | 0      | 0      | 1      | 1      | 1      | 0      |
| 1728   | 5     | 1     | 4     | 4     | 3     | 5     | 1      | 2      | 1      | 1      | 2      | 1      | 2      | 1      |
| 1731   | 3     | 2     | 1     | 3     | 4     | 3     | 1      | 2      | 0      | 0      | 1      | 1      | 1      | 1      |
| 1733   | 5     | 1     | 1     | 3     | 5     | 5     | 0      | 2      | 0      | 2      | 1      | 1      | 0      | 2      |
| 1734   | 5     | 2     | 1     | 1     | 3     | 4     | 0      | 0      | 2      | 0      | 1      | 1      | 1      | 0      |
| 1735   | 5     | 1     | 0     | 0     | 5     | 5     | 0      | 0      | 0      | 0      | 0      | 0      | 0      | 0      |
| 1736   | 5     | 1     | 1     | 1     | 4     | 4     | 1      | 0      | 0      | 1      | 1      | 1      | 0      | 0      |
| 1737   | 4     | 1     | 1     | 3     | 3     | 4     | 1      | 1      | 2      | 2      | 1      | 2      | 2      | 1      |
| 1738   | 5     | 1     | 1     | 4     | 4     | 4     | 1      | 1      | 1      | 2      | 1      | 1      | 0      | 1      |
| 1743   | 3     | 2     | 3     | 4     | 4     | 3     | 0      | 3      | 1      | 2      | 0      | 2      | 1      | 1      |
| 1755   | 4     | 3     | 3     | 1     | 3     | 3     | 2      | 2      | 1      | 2      | 1      | 0      | 2      | 1      |
| 1756   | 5     | 2     | 1     | 3     | 3     | 5     | 1      | 0      | 1      | 0      | 1      | 1      | 1      | 1      |
| 1757   | 5     | 1     | 0     | 0     | 5     | 5     | 1      | 0      | 0      | 0      | 1      | 0      | 0      | 1      |
| 1758   | 3     | 2     | 3     | 3     | 3     | 3     | 1      | 1      | 2      | 2      | 2      | 2      | 2      | 2      |
| 1759   | 4     | 2     | 1     | 1     | 4     | 4     | 1      | 0      | 0      | 0      | 1      | 0      | 0      | 0      |
| 1761   | 4     | 3     | 1     | 4     | 4     | 5     | 0      | 0      | 0      | 0      | 0      | 0      | 0      | 1      |
| 1762   | 5     | 1     | 1     | 1     | 4     | 5     | 0      | 0      | 0      | 0      | 0      | 0      | 0      | 1      |
| 1764   | 5     | 1     | 5     | 5     | 5     | 4     | 0      | 1      | 0      | 0      | 0      | 1      | 1      | 0      |
| 1767   | 4     | 2     | 1     | 1     | 4     | 5     | 1      | 1      | 0      | 0      | 1      | 1      | 1      | 0      |
| 1768   | 3     | 1     | 4     | 4     | 3     | 4     | 1      | 0      | 1      | 0      | 1      | 1      | 1      | 1      |
| 1769   | 5     | 2     | 1     | 1     | 3     | 5     | 0      | 0      | 0      | 0      | 1      | 0      | 0      | 1      |
| 1770   | 5     | 2     | 4     | 5     | 0     | 1     | 2      | 3      | 1      | 2      | 2      | 2      | 2      | 1      |
| 1771   | 3     | 2     | 1     | 3     | 1     | 3     | 2      | 2      | 2      | 2      | 2      | 1      | 2      | 2      |
| 1776   | 3     | 2     | 3     | 4     | 4     | 4     | 1      | 2      | 1      | 0      | 0      | 1      | 1      | 2      |
| 1777   | 4     | 2     | 1     | 1     | 4     | 4     | 1      | 0      | 1      | 2      | 0      | 1      | 1      | 0      |

| respid | Q52_2 | Q53_1 | Q54_1 | Q54_2 | Q54_3 | Q55_1 | Q56a_1 | Q56b_1 | Q56c_1 | Q56d_1 | Q56e_1 | Q56f_1 | Q56g_1 | Q56h_1 |
|--------|-------|-------|-------|-------|-------|-------|--------|--------|--------|--------|--------|--------|--------|--------|
| 1778   | 5     | 2     | 0     | 3     | 4     | 4     | 0      | 0      | 1      | 0      | 1      | 0      | 0      | 1      |
| 1779   | 4     | 2     | 1     | 1     | 3     | 4     | 1      | 1      | 1      | 1      | 1      | 1      | 2      | 1      |
| 1780   | 5     | 2     | 1     | 3     | 4     | 5     | 1      | 0      | 0      | 0      | 1      | 1      | 0      | 1      |
| 1781   | 5     | 1     | 1     | 3     | 4     | 5     | 1      | 1      | 1      | 2      | 1      | 1      | 2      | 1      |
| 1783   | 5     | 2     | 1     | 1     | 3     | 4     | 1      | 0      | 2      | 0      | 1      | 0      | 1      | 1      |
| 1784   | 4     | 2     | 3     | 3     | 1     | 3     | 2      | 0      | 2      | 0      | 2      | 2      | 2      | 2      |
| 1785   | 4     | 1     | 1     | 3     | 4     | 5     | 1      | 1      | 0      | 1      | 1      | 1      | 2      | 1      |
| 1788   | 2     | 3     | 1     | 1     | 1     | 3     | 1      | 1      | 1      | 1      | 1      | 1      | 1      | 2      |
| 1792   | 4     | 2     | 1     | 1     | 4     | 4     | 1      | 0      | 1      | 0      | 1      | 0      | 1      | 2      |
| 1794   | 3     | 1     | 4     | 5     | 0     | 3     | 2      | 1      | 1      | 0      | 3      | 2      | 2      | 1      |
| 1798   | 3     | 2     | 4     | 4     | 3     | 4     | 1      | 2      | 1      | 1      | 2      | 1      | 2      | 3      |
| 1799   | 4     | 3     | 3     | 1     | 4     | 4     | 1      | 1      | 2      | 1      | 1      | 1      | 2      | 0      |
| 1800   | 5     | 1     | 5     | 5     | 1     | 5     | 1      | 1      | 0      | 1      | 1      | 2      | 2      | 1      |
| 1804   | 3     | 2     | 4     | 4     | 4     | 3     | 1      | 1      | 2      | 1      | 1      | 1      | 1      | 1      |
| 1806   | 3     | 2     | 3     | 3     | 4     | 4     | 1      | 1      | 1      | 1      | 1      | 1      | 1      | 1      |
| 1807   | 4     | 1     | 4     | 4     | 1     | 5     | 2      | 1      | 1      | 1      | 1      | 2      | 2      | 1      |
| 1808   | 5     | 1     | 0     | 1     | 4     | 5     | 1      | 0      | 2      | 0      | 1      | 0      | 0      | 0      |
| 1809   | 3     | 2     | 3     | 3     | 3     | 3     | 1      | 1      | 2      | 2      | 2      | 1      | 2      | 1      |
| 1811   | 3     | 2     | 1     | 4     | 3     | 3     | 1      | 1      | 0      | 1      | 1      | 1      | 1      | 2      |
| 1812   | 5     | 1     | 1     | 1     | 4     | 5     | 0      | 1      | 1      | 1      | 1      | 1      | 1      | 2      |
| 1813   | 3     | 1     | 3     | 3     | 3     | 3     | 1      | 1      | 0      | 1      | 1      | 1      | 0      | 0      |
| 1814   | 5     | 1     | 1     | 1     | 4     | 2     | 1      | 2      | 1      | 0      | 1      | 0      | 0      | 1      |
| 1815   | 3     | 2     | 1     | 1     | 3     | 3     | 1      | 1      | 2      | 1      | 2      | 1      | 1      | 1      |
| 1817   | 4     | 2     | 1     | 3     | 3     | 4     | 2      | 1      | 2      | 2      | 2      | 1      | 2      | 1      |
| 1820   | 4     | 1     | 3     | 3     | 3     | 4     | 1      | 1      | 1      | 0      | 1      | 1      | 1      | 1      |
| 1821   | 5     | 1     | 0     | 0     | 4     | 5     | 0      | 0      | 0      | 0      | 0      | 0      | 0      | 0      |
| 1822   | 3     | 2     | 1     | 1     | 3     | 4     | 1      | 1      | 2      | 1      | 1      | 2      | 1      | 1      |
| 1823   | 5     | 1     | 0     | 5     | 5     | 3     | 0      | 0      | 0      | 0      | 0      | 2      | 0      | 0      |
| 1824   | 3     | 1     | 1     | 4     | 4     | 3     | 1      | 2      | 1      | 2      | 1      | 2      | 1      | 0      |
| 1826   | 5     | 1     | 0     | 0     | 5     | 5     | 0      | 0      | 0      | 0      | 0      | 0      | 0      | 0      |
| 1828   | 3     | 2     | 1     | 3     | 3     | 4     | 0      | 0      | 1      | 0      | 1      | 1      | 1      | 1      |
| 1829   | 5     | 1     | 1     | 1     | 3     | 5     | 0      | 1      | 1      | 0      | 1      | 0      | 0      | 1      |

| respid | Q52_2 | Q53_1 | Q54_1 | Q54_2 | Q54_3 | Q55_1 | Q56a_1 | Q56b_1 | Q56c_1 | Q56d_1 | Q56e_1 | Q56f_1 | Q56g_1 | Q56h_1 |
|--------|-------|-------|-------|-------|-------|-------|--------|--------|--------|--------|--------|--------|--------|--------|
| 1830   | 5     | 1     | 4     | 4     | 4     | 5     | 0      | 0      | 0      | 0      | 0      | 0      | 0      | 0      |
| 1831   | 5     | 1     | 1     | 1     | 4     | 5     | 1      | 1      | 0      | 0      | 1      | 0      | 0      | 0      |
| 1832   | 4     | 1     | 1     | 1     | 4     | 5     | 1      | 1      | 1      | 0      | 1      | 0      | 0      | 1      |
| 1836   | 4     | 2     | 1     | 1     | 4     | 4     | 0      | 0      | 1      | 0      | 1      | 0      | 0      | 1      |
| 1838   | 5     | 2     | 1     | 3     | 4     | 5     | 1      | 2      | 1      | 0      | 1      | 1      | 0      | 1      |
| 1839   | 5     | 1     | 1     | 3     | 4     | 5     | 0      | 0      | 1      | 0      | 0      | 1      | 1      | 2      |
| 1840   | 5     | 1     | 1     | 1     | 5     | 5     | 1      | 0      | 1      | 2      | 1      | 1      | 1      | 2      |
| 1841   | 2     | 1     | 5     | 5     | 5     | 5     | 0      | 3      | 1      | 1      | 0      | 1      | 1      | 1      |
| 1842   | 5     | 2     | 0     | 1     | 4     | 5     | 0      | 0      | 0      | 0      | 1      | 0      | 0      | 1      |
| 1843   | 3     | 2     | 1     | 1     | 4     | 4     | 1      | 0      | 1      | 0      | 1      | 0      | 1      | 2      |
| 1844   | 2     | 2     | 3     | 3     | 3     | 4     | 1      | 1      | 1      | 1      | 1      | 1      | 1      | 1      |
| 1845   | 4     | 1     | 0     | 1     | 4     | 5     | 0      | 1      | 1      | 0      | 1      | 0      | 0      | 0      |
| 1849   | 4     | 3     | 1     | 3     | 1     | 3     | 2      | 0      | 2      | 2      | 2      | 1      | 2      | 1      |
| 1850   | 4     | 1     | 3     | 4     | 3     | 4     | 1      | 1      | 1      | 0      | 1      | 1      | 1      | 0      |
| 1851   | 5     | 1     | 0     | 1     | 4     | 4     | 0      | 0      | 0      | 0      | 1      | 0      | 0      | 1      |
| 1852   | 4     | 1     | 1     | 1     | 4     | 4     | 1      | 0      | 1      | 0      | 1      | 0      | 0      | 1      |
| 1857   | 5     | 1     | 3     | 3     | 3     | 5     | 1      | 1      | 3      | 0      | 1      | 1      | 1      | 3      |
| 1858   | 5     | 2     | 1     | 1     | 5     | 5     | 0      | 0      | 0      | 0      | 1      | 0      | 0      | 1      |
| 1861   | 5     | 1     | 1     | 1     | 4     | 5     | 0      | 0      | 0      | 0      | 0      | 0      | 0      | 0      |
| 1862   | 4     | 1     | 1     | 1     | 4     | 4     | 0      | 1      | 1      | 1      | 1      | 1      | 1      | 0      |
| 1863   | 3     | 2     | 3     | 3     | 3     | 4     | 1      | 1      | 1      | 1      | 1      | 1      | 2      | 1      |
| 1864   | 4     | 1     | 1     | 1     | 4     | 4     | 1      | 2      | 1      | 1      | 1      | 1      | 1      | 1      |
| 1865   | 5     | 1     | 5     | 5     | 4     | 5     | 0      | 0      | 0      | 0      | 0      | 0      | 0      | 0      |
| 1867   | 5     | 1     | 0     | 1     | 4     | 4     | 0      | 1      | 0      | 1      | 1      | 1      | 0      | 2      |
| 1868   | 5     | 1     | 1     | 3     | 3     | 4     | 1      | 0      | 2      | 0      | 1      | 1      | 2      | 1      |
| 1869   | 3     | 2     | 1     | 3     | 3     | 4     | 1      | 1      | 1      | 2      | 2      | 2      | 1      | 1      |
| 1870   | 5     | 1     | 0     | 1     | 3     | 5     | 0      | 0      | 0      | 0      | 0      | 1      | 0      | 1      |
| 1871   | 5     | 3     | 3     | 3     | 1     | 4     | 1      | 1      | 1      | 1      | 1      | 2      | 2      | 2      |
| 1872   | 4     | 2     | 1     | 1     | 4     | 4     | 1      | 0      | 0      | 0      | 0      | 0      | 0      | 0      |
| 1873   | 5     | 1     | 1     | 1     | 5     | 5     | 0      | 0      | 0      | 0      | 0      | 1      | 0      | 0      |
| 1876   | 5     | 1     | 1     | 1     | 5     | 5     | 0      | 0      | 0      | 0      | 0      | 0      | 0      | 0      |
| 1877   | 5     | 1     | 0     | 0     | 5     | 5     | 1      | 0      | 0      | 0      | 0      | 0      | 0      | 0      |

| respid | Q52_2 | Q53_1 | Q54_1 | Q54_2 | Q54_3 | Q55_1 | Q56a_1 | Q56b_1 | Q56c_1 | Q56d_1 | Q56e_1 | Q56f_1 | Q56g_1 | Q56h_1 |
|--------|-------|-------|-------|-------|-------|-------|--------|--------|--------|--------|--------|--------|--------|--------|
| 1878   | 4     | 2     | 1     | 1     | 4     | 4     | 0      | 1      | 1      | 0      | 0      | 1      | 1      | 1      |
| 1879   | 5     | 1     | 3     | 4     | 4     | 5     | 1      | 1      | 0      | 1      | 1      | 2      | 2      | 1      |
| 1880   | 5     | 1     | 1     | 1     | 5     | 5     | 0      | 0      | 0      | 0      | 0      | 0      | 0      | 0      |
| 1881   | 5     | 1     | 0     | 1     | 4     | 5     | 1      | 0      | 0      | 0      | 1      | 0      | 0      | 0      |
| 1883   | 5     | 1     | 1     | 3     | 4     | 4     | 1      | 0      | 0      | 0      | 1      | 0      | 0      | 1      |
| 1886   | 5     | 1     | 1     | 1     | 3     | 5     | 0      | 0      | 0      | 0      | 1      | 0      | 0      | 1      |
| 1888   | 3     | 4     | 1     | 1     | 1     | 4     | 1      | 1      | 1      | 1      | 2      | 2      | 2      | 1      |
| 1889   | 4     | 2     | 1     | 1     | 3     | 2     | 1      | 1      | 1      | 2      | 1      | 1      | 2      | 1      |
| 1890   | 3     | 3     | 3     | 3     | 3     | 4     | 1      | 1      | 0      | 2      | 1      | 1      | 1      | 1      |
| 1891   | 5     | 1     | 1     | 3     | 3     | 5     | 0      | 0      | 1      | 0      | 1      | 1      | 1      | 0      |
| 1893   | 5     | 1     | 1     | 1     | 5     | 5     | 0      | 1      | 0      | 0      | 1      | 1      | 1      | 0      |
| 1894   | 5     | 2     | 4     | 4     | 4     | 5     | 0      | 1      | 0      | 1      | 1      | 1      | 1      | 1      |
| 1895   | 5     | 1     | 1     | 1     | 4     | 5     | 1      | 0      | 1      | 0      | 0      | 0      | 0      | 1      |
| 1896   | 3     | 3     | 4     | 5     | 1     | 4     | 2      | 2      | 2      | 2      | 3      | 3      | 3      | 2      |
| 1897   | 5     | 1     | 1     | 1     | 1     | 5     | 0      | 1      | 0      | 0      | 1      | 0      | 1      | 1      |
| 1898   | 2     | 4     | 4     | 5     | 1     | 4     | 2      | 1      | 3      | 1      | 3      | 3      | 3      | 2      |
| 1899   | 5     | 2     | 3     | 4     | 3     | 3     | 2      | 1      | 1      | 1      | 2      | 1      | 2      | 1      |
| 1900   | 3     | 1     | 3     | 3     | 3     | 4     | 1      | 0      | 1      | 0      | 1      | 0      | 1      | 0      |
| 1903   | 5     | 1     | 0     | 0     | 4     | 4     | 0      | 0      | 0      | 0      | 0      | 0      | 1      | 1      |
| 1906   | 3     | 1     | 4     | 4     | 1     | 3     | 1      | 0      | 2      | 1      | 2      | 2      | 2      | 2      |
| 1907   | 3     | 4     | 3     | 4     | 1     | 3     | 1      | 1      | 1      | 2      | 1      | 1      | 1      | 1      |
| 1908   | 4     | 2     | 1     | 3     | 3     | 2     | 1      | 2      | 2      | 1      | 2      | 1      | 2      | 1      |
| 1909   | 3     | 2     | 3     | 3     | 3     | 3     | 1      | 0      | 1      | 1      | 1      | 1      | 1      | 2      |
| 1910   | 4     | 1     | 1     | 1     | 1     | 3     | 1      | 1      | 1      | 2      | 2      | 1      | 1      | 0      |
| 1911   | 5     | 2     | 1     | 1     | 4     | 5     | 3      | 0      | 0      | 0      | 1      | 1      | 0      | 1      |
| 1912   | 5     | 1     | 3     | 3     | 3     | 4     | 1      | 2      | 1      | 0      | 1      | 1      | 1      | 1      |
| 1917   | 5     | 1     | 1     | 1     | 4     | 4     | 1      | 2      | 1      | 0      | 1      | 1      | 1      | 0      |
| 1918   | 4     | 4     | 0     | 4     | 5     | 3     | 1      | 1      | 0      | 0      | 0      | 0      | 1      | 2      |
| 1919   | 5     | 1     | 3     | 0     | 5     | 5     | 0      | 0      | 0      | 0      | 1      | 0      | 0      | 0      |
| 1922   | 4     | 2     | 1     | 3     | 4     | 4     | 0      | 1      | 0      | 0      | 0      | 0      | 0      | 1      |
| 1925   | 5     | 1     | 1     | 1     | 1     | 3     | 1      | 2      | 1      | 1      | 1      | 1      | 1      | 1      |
| 1926   | 4     | 2     | 1     | 3     | 4     | 4     | 1      | 0      | 1      | 0      | 1      | 1      | 1      | 1      |

| respid | Q52_2 | Q53_1 | Q54_1 | Q54_2 | Q54_3 | Q55_1 | Q56a_1 | Q56b_1 | Q56c_1 | Q56d_1 | Q56e_1 | Q56f_1 | Q56g_1 | Q56h_1 |
|--------|-------|-------|-------|-------|-------|-------|--------|--------|--------|--------|--------|--------|--------|--------|
| 1927   | 4     | 2     | 1     | 3     | 4     | 5     | 0      | 0      | 1      | 0      | 1      | 0      | 0      | 1      |
| 1928   | 5     | 1     | 1     | 1     | 5     | 5     | 0      | 0      | 0      | 0      | 0      | 0      | 0      | 1      |
| 1929   | 5     | 1     | 0     | 1     | 5     | 5     | 0      | 0      | 0      | 0      | 0      | 0      | 0      | 0      |
| 1934   | 4     | 2     | 1     | 4     | 4     | 4     | 0      | 1      | 0      | 0      | 0      | 1      | 0      | 1      |
| 1935   | 5     | 1     | 1     | 1     | 5     | 5     | 0      | 0      | 0      | 0      | 0      | 0      | 0      | 0      |
| 1936   | 3     | 1     | 4     | 4     | 3     | 4     | 1      | 1      | 1      | 2      | 2      | 2      | 2      | 2      |
| 1937   | 5     | 1     | 0     | 1     | 5     | 5     | 0      | 1      | 0      | 0      | 0      | 1      | 1      | 0      |
| 1938   | 4     | 2     | 1     | 1     | 4     | 4     | 0      | 1      | 2      | 0      | 1      | 0      | 1      | 0      |
| 1939   | 5     | 1     | 1     | 1     | 3     | 5     | 2      | 0      | 2      | 1      | 2      | 1      | 2      | 1      |
| 1940   | 5     | 1     | 1     | 1     | 5     | 5     | 0      | 0      | 0      | 0      | 0      | 0      | 0      | 1      |
| 1941   | 5     | 1     | 1     | 1     | 3     | 4     | 0      | 0      | 0      | 0      | 1      | 1      | 1      | 1      |
| 1948   | 5     | 1     | 0     | 1     | 5     | 5     | 1      | 1      | 0      | 0      | 1      | 1      | 1      | 2      |
| 1950   | 5     | 1     | 0     | 1     | 3     | 3     | 1      | 0      | 1      | 0      | 1      | 2      | 2      | 0      |
| 1955   | 4     | 2     | 1     | 1     | 4     | 4     | 1      | 0      | 1      | 1      | 1      | 1      | 1      | 1      |
| 1958   | 5     | 2     | 1     | 1     | 4     | 4     | 0      | 0      | 0      | 0      | 0      | 0      | 1      | 1      |
| 1960   | 5     | 1     | 1     | 1     | 3     | 5     | 1      | 1      | 1      | 2      | 1      | 2      | 2      | 1      |
| 1961   | 5     | 1     | 1     | 3     | 3     | 3     | 0      | 0      | 0      | 0      | 0      | 1      | 0      | 0      |
| 1962   | 5     | 1     | 1     | 1     | 5     | 5     | 0      | 0      | 0      | 0      | 0      | 0      | 0      | 0      |
| 1965   | 5     | 1     | 1     | 1     | 4     | 5     | 0      | 0      | 0      | 0      | 0      | 1      | 0      | 1      |
| 1966   | 4     | 2     | 1     | 1     | 4     | 4     | 1      | 2      | 1      | 1      | 1      | 0      | 1      | 0      |
| 1967   | 5     | 1     | 0     | 1     | 5     | 5     | 0      | 0      | 0      | 0      | 0      | 0      | 0      | 0      |
| 1968   | 3     | 2     | 1     | 4     | 4     | 3     | 0      | 0      | 0      | 0      | 0      | 0      | 0      | 1      |
| 1973   | 4     | 2     | 1     | 3     | 4     | 4     | 2      | 1      | 1      | 1      | 2      | 2      | 2      | 1      |
| 1974   | 3     | 2     | 3     | 4     | 3     | 3     | 1      | 1      | 2      | 2      | 2      | 2      | 2      | 2      |
| 1975   | 5     | 1     | 5     | 5     | 5     | 5     | 0      | 0      | 0      | 0      | 0      | 0      | 0      | 0      |
| 1977   | 4     | 2     | 1     | 1     | 4     | 2     | 1      | 1      | 1      | 0      | 1      | 0      | 0      | 0      |
| 1978   | 5     | 1     | 0     | 0     | 5     | 5     | 0      | 0      | 1      | 0      | 0      | 0      | 0      | 0      |
| 1979   | 3     | 3     | 3     | 3     | 3     | 3     | 1      | 1      | 1      | 1      | 1      | 1      | 2      | 2      |
| 1982   | 5     | 1     | 1     | 1     | 4     | 4     | 0      | 0      | 0      | 2      | 0      | 0      | 0      | 0      |
| 1983   | 4     | 2     | 1     | 1     | 3     | 5     | 0      | 0      | 0      | 1      | 0      | 1      | 1      | 1      |
| 1987   | 5     | 2     | 1     | 3     | 5     | 5     | 0      | 0      | 0      | 1      | 0      | 0      | 0      | 0      |
| 1988   | 3     | 3     | 1     | 3     | 3     | 3     | 1      | 0      | 0      | 0      | 1      | 0      | 1      | 1      |



| respid | Q52_2 | Q53_1 | Q54_1 | Q54_2 | Q54_3 | Q55_1 | Q56a_1 | Q56b_1 | Q56c_1 | Q56d_1 | Q56e_1 | Q56f_1 | Q56g_1 | Q56h_1 |
|--------|-------|-------|-------|-------|-------|-------|--------|--------|--------|--------|--------|--------|--------|--------|
| 1991   | 5     | 3     | 1     | 1     | 4     | 5     | 1      | 1      | 1      | 0      | 1      | 1      | 0      | 2      |
| 1992   | 5     | 1     | 1     | 1     | 4     | 5     | 0      | 0      | 0      | 0      | 0      | 0      | 0      | 0      |
| 1993   | 5     | 3     | 1     | 1     | 4     | 5     | 2      | 0      | 0      | 1      | 2      | 1      | 2      | 1      |
| 1994   | 3     | 3     | 4     | 3     | 4     | 3     | 1      | 2      | 2      | 2      | 2      | 2      | 2      | 2      |
| 1995   | 5     | 1     | 1     | 3     | 4     | 5     | 0      | 1      | 1      | 0      | 1      | 1      | 1      | 1      |
| 1996   | 4     | 2     | 1     | 1     | 1     | 4     | 0      | 0      | 0      | 0      | 0      | 0      | 0      | 0      |
| 1997   | 4     | 2     | 3     | 4     | 4     | 4     | 1      | 2      | 2      | 2      | 2      | 2      | 1      | 0      |
| 1998   | 5     | 1     | 0     | 0     | 5     | 5     | 0      | 0      | 0      | 0      | 0      | 0      | 0      | 0      |
| 1999   | 4     | 3     | 4     | 4     | 3     | 3     | 2      | 1      | 1      | 2      | 2      | 2      | 2      | 2      |
| 2000   | 2     | 4     | 4     | 4     | 3     | 4     | 1      | 1      | 2      | 2      | 2      | 1      | 1      | 1      |
| 2001   | 5     | 2     | 3     | 4     | 3     | 4     | 1      | 1      | 1      | 0      | 1      | 1      | 2      | 1      |
| 2002   | 5     | 2     | 0     | 1     | 4     | 5     | 1      | 0      | 1      | 0      | 1      | 0      | 0      | 1      |
| 2003   | 4     | 3     | 4     | 1     | 5     | 4     | 1      | 2      | 1      | 0      | 1      | 1      | 0      | 0      |
| 2004   | 5     | 1     | 0     | 0     | 5     | 5     | 0      | 0      | 0      | 0      | 1      | 0      | 0      | 0      |
| 2005   | 5     | 1     | 1     | 1     | 4     | 5     | 1      | 1      | 0      | 1      | 1      | 0      | 0      | 0      |
| 2007   | 4     | 2     | 1     | 0     | 4     | 5     | 0      | 0      | 1      | 0      | 1      | 0      | 0      | 1      |
| 2009   | 5     | 2     | 1     | 3     | 4     | 4     | 1      | 1      | 1      | 1      | 1      | 0      | 1      | 1      |
| 2010   | 5     | 1     | 5     | 5     | 5     | 5     | 0      | 1      | 0      | 0      | 1      | 1      | 1      | 0      |
| 2011   | 5     | 1     | 1     | 3     | 4     | 5     | 0      | 1      | 1      | 0      | 1      | 1      | 0      | 1      |
| 2013   | 5     | 1     | 1     | 3     | 3     | 5     | 1      | 0      | 1      | 0      | 1      | 1      | 1      | 0      |
| 2014   | 5     | 2     | 1     | 1     | 3     | 5     | 1      | 0      | 0      | 0      | 1      | 1      | 2      | 2      |
| 2017   | 4     | 2     | 1     | 3     | 4     | 4     | 1      | 1      | 1      | 1      | 1      | 1      | 1      | 1      |
| 2020   | 5     | 1     | 0     | 1     | 4     | 4     | 0      | 0      | 2      | 0      | 1      | 0      | 0      | 0      |
| 2023   | 5     | 2     | 1     | 3     | 4     | 5     | 0      | 1      | 1      | 1      | 1      | 1      | 1      | 1      |
| 2024   | 4     | 2     | 1     | 3     | 4     | 4     | 1      | 1      | 1      | 1      | 1      | 2      | 2      | 1      |
| 2029   | 5     | 1     | 0     | 0     | 5     | 5     | 0      | 0      | 0      | 1      | 0      | 2      | 1      | 2      |
| 2030   | 5     | 1     | 0     | 1     | 5     | 5     | 1      | 0      | 0      | 0      | 0      | 0      | 0      | 0      |
| 2031   | 3     | 2     | 1     | 3     | 3     | 4     | 1      | 1      | 1      | 1      | 1      | 2      | 2      | 2      |
| 2032   | 4     | 2     | 3     | 4     | 1     | 5     | 2      | 1      | 2      | 2      | 2      | 2      | 1      | 1      |
| 2033   | 4     | 2     | 1     | 1     | 4     | 3     | 0      | 0      | 0      | 0      | 0      | 0      | 0      | 1      |
| 2034   | 5     | 1     | 1     | 3     | 3     | 5     | 1      | 1      | 0      | 1      | 1      | 1      | 1      | 0      |
| 2036   | 5     | 1     | 1     | 1     | 3     | 4     | 1      | 1      | 1      | 1      | 1      | 1      | 2      | 1      |

| respid | Q52_2 | Q53_1 | Q54_1 | Q54_2 | Q54_3 | Q55_1 | Q56a_1 | Q56b_1 | Q56c_1 | Q56d_1 | Q56e_1 | Q56f_1 | Q56g_1 | Q56h_1 |
|--------|-------|-------|-------|-------|-------|-------|--------|--------|--------|--------|--------|--------|--------|--------|
| 2037   | 3     | 3     | 3     | 3     | 1     | 3     | 1      | 1      | 1      | 1      | 2      | 2      | 2      | 1      |
| 2038   | 5     | 1     | 1     | 1     | 5     | 5     | 0      | 0      | 0      | 0      | 0      | 1      | 1      | 0      |
| 2039   | 5     | 2     | 1     | 1     | 5     | 5     | 0      | 1      | 0      | 1      | 1      | 1      | 1      | 1      |
| 2040   | 4     | 1     | 1     | 3     | 4     | 4     | 0      | 0      | 1      | 0      | 1      | 1      | 0      | 1      |
| 2041   | 5     | 1     | 0     | 1     | 4     | 5     | 0      | 0      | 1      | 0      | 0      | 1      | 0      | 0      |
| 2042   | 5     | 1     | 0     | 3     | 5     | 5     | 1      | 0      | 0      | 0      | 0      | 1      | 0      | 1      |
| 2043   | 5     | 2     | 1     | 1     | 3     | 5     | 1      | 0      | 1      | 0      | 1      | 0      | 1      | 1      |
| 2051   | 4     | 2     | 4     | 4     | 1     | 4     | 2      | 1      | 2      | 2      | 1      | 2      | 2      | 1      |
| 2052   | 4     | 2     | 1     | 1     | 4     | 5     | 0      | 0      | 1      | 1      | 1      | 1      | 1      | 1      |
| 2053   | 5     | 2     | 0     | 0     | 0     | 5     | 0      | 0      | 0      | 0      | 0      | 0      | 0      | 0      |
| 2054   | 4     | 3     | 3     | 4     | 1     | 4     | 1      | 1      | 2      | 2      | 2      | 1      | 2      | 1      |
| 2055   | 4     | 1     | 3     | 3     | 4     | 4     | 0      | 0      | 0      | 0      | 1      | 1      | 1      | 1      |
| 2056   | 3     | 3     | 3     | 3     | 1     | 3     | 1      | 2      | 1      | 1      | 1      | 1      | 1      | 1      |
| 2057   | 4     | 1     | 1     | 1     | 4     | 5     | 0      | 0      | 1      | 0      | 0      | 0      | 0      | 1      |
| 2059   | 4     | 1     | 0     | 1     | 4     | 5     | 0      | 1      | 0      | 0      | 1      | 0      | 0      | 0      |
| 2063   | 4     | 1     | 3     | 4     | 4     | 5     | 1      | 1      | 0      | 1      | 1      | 1      | 1      | 1      |
| 2066   | 4     | 2     | 3     | 4     | 0     | 1     | 2      | 2      | 2      | 3      | 3      | 2      | 3      | 2      |
| 2068   | 5     | 1     | 0     | 1     | 5     | 5     | 0      | 0      | 0      | 0      | 1      | 0      | 0      | 1      |
| 2069   | 5     | 1     | 1     | 1     | 4     | 4     | 0      | 1      | 0      | 0      | 0      | 0      | 0      | 1      |
| 2070   | 5     | 1     | 1     | 1     | 4     | 5     | 0      | 1      | 0      | 1      | 0      | 1      | 1      | 0      |
| 2071   | 5     | 1     | 3     | 1     | 3     | 4     | 1      | 0      | 1      | 2      | 1      | 1      | 1      | 1      |
| 2073   | 5     | 1     | 3     | 3     | 3     | 5     | 1      | 0      | 0      | 0      | 1      | 1      | 1      | 0      |
| 2077   | 4     | 1     | 3     | 3     | 3     | 4     | 1      | 1      | 1      | 1      | 1      | 1      | 1      | 1      |
| 2079   | 4     | 1     | 1     | 1     | 4     | 4     | 1      | 2      | 1      | 1      | 1      | 1      | 2      | 0      |
| 2080   | 1     | 5     | 0     | 5     | 0     | 1     | 2      | 0      | 3      | 2      | 3      | 3      | 0      | 3      |
| 2081   | 3     | 3     | 3     | 4     | 1     | 3     | 1      | 1      | 1      | 2      | 2      | 2      | 2      | 1      |
| 2084   | 5     | 1     | 4     | 4     | 4     | 4     | 1      | 1      | 1      | 2      | 1      | 1      | 1      | 1      |
| 2085   | 5     | 1     | 1     | 1     | 4     | 5     | 0      | 0      | 0      | 0      | 0      | 0      | 0      | 0      |
| 2087   | 4     | 3     | 3     | 3     | 4     | 5     | 1      | 1      | 0      | 2      | 1      | 1      | 1      | 2      |
| 2089   | 5     | 1     | 1     | 1     | 4     | 4     | 1      | 0      | 0      | 0      | 1      | 1      | 1      | 1      |
| 2093   | 5     | 2     | 1     | 3     | 4     | 5     | 1      | 1      | 0      | 1      | 1      | 1      | 1      | 0      |
| 2094   | 5     | 2     | 1     | 3     | 4     | 5     | 1      | 0      | 0      | 1      | 1      | 1      | 1      | 1      |

| respid | Q52_2 | Q53_1 | Q54_1 | Q54_2 | Q54_3 | Q55_1 | Q56a_1 | Q56b_1 | Q56c_1 | Q56d_1 | Q56e_1 | Q56f_1 | Q56g_1 | Q56h_1 |
|--------|-------|-------|-------|-------|-------|-------|--------|--------|--------|--------|--------|--------|--------|--------|
| 2095   | 5     | 2     | 1     | 1     | 4     | 4     | 0      | 0      | 0      | 0      | 1      | 1      | 1      | 2      |
| 2097   | 5     | 1     | 1     | 1     | 5     | 5     | 0      | 0      | 0      | 0      | 0      | 0      | 0      | 0      |
| 2099   | 2     | 3     | 3     | 3     | 4     | 3     | 2      | 1      | 2      | 1      | 2      | 1      | 1      | 2      |
| 2100   | 4     | 2     | 1     | 1     | 4     | 4     | 1      | 0      | 1      | 0      | 1      | 0      | 1      | 1      |
| 2101   | 5     | 2     | 1     | 1     | 4     | 3     | 0      | 0      | 0      | 1      | 1      | 1      | 1      | 0      |
| 2103   | 5     | 2     | 1     | 3     | 3     | 4     | 1      | 0      | 0      | 0      | 0      | 1      | 1      | 0      |
| 2104   | 4     | 2     | 1     | 1     | 4     | 4     | 1      | 0      | 1      | 0      | 1      | 0      | 0      | 1      |
| 2106   | 5     | 1     | 1     | 3     | 3     | 5     | 1      | 0      | 1      | 0      | 1      | 1      | 1      | 1      |
| 2111   | 5     | 1     | 1     | 1     | 1     | 5     | 1      | 0      | 1      | 0      | 1      | 1      | 1      | 1      |
| 2113   | 5     | 1     | 5     | 5     | 5     | 5     | 0      | 0      | 0      | 0      | 0      | 1      | 1      | 0      |
| 2115   | 5     | 1     | 1     | 1     | 4     | 5     | 0      | 0      | 0      | 0      | 1      | 0      | 1      | 1      |
| 2119   | 4     | 2     | 1     | 4     | 4     | 3     | 1      | 0      | 1      | 2      | 1      | 1      | 1      | 1      |
| 2120   | 4     | 1     | 3     | 3     | 3     | 5     | 1      | 1      | 1      | 1      | 1      | 1      | 1      | 1      |
| 2123   | 5     | 1     | 1     | 1     | 5     | 5     | 0      | 0      | 0      | 0      | 0      | 0      | 0      | 0      |
| 2124   | 5     | 2     | 1     | 1     | 4     | 5     | 0      | 0      | 1      | 0      | 0      | 0      | 1      | 1      |
| 2130   | 5     | 2     | 5     | 1     | 5     | 5     | 0      | 0      | 0      | 0      | 0      | 0      | 0      | 1      |
| 2131   | 4     | 2     | 1     | 3     | 3     | 3     | 1      | 2      | 1      | 1      | 1      | 1      | 1      | 1      |
| 2133   | 4     | 3     | 4     | 4     | 3     | 3     | 2      | 2      | 1      | 0      | 1      | 0      | 1      | 1      |
| 2139   | 2     | 2     | 3     | 4     | 1     | 3     | 1      | 1      | 2      | 1      | 2      | 2      | 2      | 2      |
| 2141   | 4     | 1     | 4     | 4     | 4     | 4     | 1      | 0      | 1      | 0      | 1      | 1      | 1      | 0      |
| 2143   | 5     | 2     | 1     | 1     | 3     | 5     | 1      | 1      | 0      | 0      | 0      | 0      | 1      | 1      |
| 2144   | 5     | 1     | 1     | 3     | 4     | 5     | 1      | 1      | 1      | 0      | 1      | 0      | 1      | 0      |
| 2147   | 5     | 1     | 0     | 1     | 5     | 5     | 0      | 0      | 0      | 0      | 0      | 0      | 0      | 0      |
| 2151   | 4     | 2     | 1     | 1     | 3     | 5     | 1      | 1      | 1      | 1      | 1      | 1      | 1      | 1      |
| 2153   | 4     | 1     | 1     | 1     | 4     | 5     | 1      | 0      | 0      | 0      | 1      | 0      | 1      | 0      |
| 2154   | 5     | 2     | 1     | 1     | 4     | 4     | 0      | 0      | 2      | 0      | 1      | 0      | 0      | 1      |
| 2155   | 4     | 2     | 3     | 1     | 3     | 4     | 1      | 2      | 1      | 0      | 1      | 1      | 1      | 0      |
| 2159   | 3     | 3     | 1     | 3     | 3     | 3     | 1      | 1      | 1      | 1      | 1      | 1      | 1      | 1      |
| 2160   | 3     | 2     | 3     | 3     | 3     | 4     | 1      | 1      | 1      | 1      | 1      | 1      | 2      | 1      |
| 2161   | 4     | 2     | 4     | 4     | 4     | 4     | 1      | 0      | 0      | 0      | 0      | 0      | 0      | 0      |
| 2163   | 4     | 3     | 5     | 5     | 5     | 5     | 2      | 3      | 1      | 3      | 3      | 3      | 3      | 3      |
| 2164   | 5     | 1     | 1     | 0     | 4     | 5     | 0      | 0      | 0      | 0      | 1      | 1      | 1      | 0      |

| respid | Q52_2 | Q53_1 | Q54_1 | Q54_2 | Q54_3 | Q55_1 | Q56a_1 | Q56b_1 | Q56c_1 | Q56d_1 | Q56e_1 | Q56f_1 | Q56g_1 | Q56h_1 |
|--------|-------|-------|-------|-------|-------|-------|--------|--------|--------|--------|--------|--------|--------|--------|
| 2168   | 3     | 4     | 4     | 4     | 5     | 4     | 3      | 3      | 3      | 3      | 2      | 2      | 2      | 1      |
| 2169   | 4     | 2     | 4     | 4     | 4     | 4     | 1      | 1      | 1      | 1      | 1      | 2      | 1      | 1      |
| 2170   | 5     | 2     | 1     | 3     | 3     | 4     | 1      | 1      | 1      | 2      | 1      | 2      | 2      | 1      |
| 2171   | 4     | 2     | 1     | 1     | 4     | 3     | 1      | 1      | 1      | 1      | 1      | 0      | 1      | 1      |
| 2172   | 3     | 3     | 3     | 3     | 3     | 4     | 1      | 1      | 1      | 1      | 1      | 1      | 2      | 2      |
| 2173   | 5     | 1     | 0     | 1     | 5     | 5     | 0      | 0      | 0      | 0      | 0      | 0      | 0      | 0      |
| 2174   | 5     | 1     | 0     | 0     | 0     | 5     | 0      | 0      | 1      | 0      | 0      | 1      | 0      | 1      |
| 2175   | 4     | 1     | 3     | 3     | 3     | 3     | 1      | 1      | 1      | 1      | 1      | 2      | 2      | 1      |
| 2176   | 5     | 2     | 1     | 3     | 4     | 5     | 1      | 0      | 2      | 0      | 1      | 1      | 1      | 1      |
| 2177   | 3     | 3     | 1     | 3     | 4     | 3     | 1      | 0      | 1      | 1      | 1      | 1      | 1      | 1      |
| 2179   | 5     | 1     | 3     | 3     | 3     | 5     | 1      | 2      | 0      | 2      | 1      | 1      | 2      | 1      |
| 2181   | 5     | 1     | 1     | 1     | 4     | 5     | 0      | 0      | 0      | 0      | 1      | 0      | 0      | 0      |
| 2182   | 5     | 2     | 1     | 1     | 4     | 5     | 0      | 0      | 0      | 0      | 0      | 0      | 0      | 0      |
| 2183   | 3     | 3     | 1     | 3     | 1     | 3     | 1      | 1      | 1      | 1      | 1      | 1      | 1      | 1      |
| 2184   | 4     | 2     | 1     | 3     | 4     | 4     | 1      | 1      | 0      | 0      | 0      | 0      | 1      | 1      |
| 2185   | 5     | 1     | 1     | 1     | 4     | 5     | 0      | 0      | 0      | 0      | 0      | 1      | 1      | 0      |
| 2186   | 5     | 1     | 1     | 1     | 4     | 4     | 0      | 0      | 0      | 0      | 0      | 0      | 3      | 1      |
| 2187   | 5     | 2     | 0     | 1     | 4     | 5     | 0      | 1      | 0      | 0      | 1      | 1      | 0      | 0      |
| 2188   | 4     | 1     | 3     | 3     | 3     | 5     | 2      | 1      | 1      | 1      | 1      | 1      | 2      | 1      |
| 2189   | 4     | 2     | 3     | 1     | 4     | 5     | 1      | 0      | 0      | 0      | 1      | 0      | 1      | 0      |
| 2190   | 5     | 1     | 0     | 1     | 4     | 5     | 0      | 0      | 1      | 0      | 1      | 0      | 0      | 0      |
| 2193   | 4     | 2     | 3     | 3     | 4     | 5     | 1      | 1      | 0      | 1      | 1      | 2      | 1      | 0      |
| 2195   | 3     | 3     | 3     | 3     | 4     | 4     | 1      | 2      | 2      | 2      | 2      | 2      | 2      | 1      |
| 2198   | 5     | 1     | 0     | 0     | 5     | 5     | 0      | 0      | 0      | 0      | 0      | 0      | 0      | 0      |
| 2200   | 4     | 1     | 1     | 1     | 4     | 5     | 1      | 2      | 0      | 0      | 1      | 1      | 2      | 1      |
| 2205   | 4     | 3     | 3     | 4     | 3     | 4     | 1      | 2      | 1      | 2      | 2      | 1      | 1      | 2      |
| 2208   | 5     | 1     | 5     | 5     | 5     | 5     | 0      | 0      | 0      | 0      | 1      | 0      | 1      | 1      |
| 2209   | 2     | 3     | 1     | 1     | 3     | 4     | 1      | 1      | 1      | 2      | 1      | 1      | 1      | 1      |
| 2210   | 4     | 2     | 1     | 3     | 4     | 4     | 0      | 1      | 0      | 0      | 1      | 1      | 1      | 1      |
| 2211   | 5     | 2     | 0     | 1     | 4     | 5     | 1      | 1      | 1      | 1      | 1      | 1      | 1      | 1      |
| 2213   | 5     | 1     | 1     | 3     | 4     | 5     | 0      | 0      | 0      | 0      | 0      | 0      | 0      | 1      |
| 2214   | 2     | 2     | 3     | 4     | 3     | 3     | 1      | 1      | 2      | 2      | 3      | 2      | 2      | 2      |

| respid | Q52_2 | Q53_1 | Q54_1 | Q54_2 | Q54_3 | Q55_1 | Q56a_1 | Q56b_1 | Q56c_1 | Q56d_1 | Q56e_1 | Q56f_1 | Q56g_1 | Q56h_1 |
|--------|-------|-------|-------|-------|-------|-------|--------|--------|--------|--------|--------|--------|--------|--------|
| 2216   | 4     | 4     | 4     | 1     | 5     | 5     | 2      | 0      | 0      | 1      | 1      | 1      | 2      | 2      |
| 2220   | 4     | 2     | 1     | 3     | 3     | 4     | 1      | 0      | 1      | 0      | 1      | 0      | 0      | 1      |
| 2225   | 4     | 2     | 1     | 1     | 4     | 4     | 0      | 1      | 0      | 0      | 1      | 0      | 0      | 1      |
| 2227   | 4     | 2     | 1     | 3     | 3     | 4     | 1      | 0      | 2      | 1      | 1      | 1      | 1      | 1      |
| 2228   | 3     | 2     | 1     | 1     | 4     | 4     | 1      | 1      | 2      | 1      | 1      | 1      | 1      | 1      |
| 2229   | 5     | 1     | 1     | 1     | 4     | 5     | 0      | 0      | 0      | 0      | 1      | 0      | 0      | 0      |
| 2230   | 5     | 1     | 1     | 1     | 4     | 5     | 0      | 0      | 0      | 0      | 0      | 0      | 0      | 0      |
| 2236   | 5     | 1     | 1     | 1     | 4     | 5     | 0      | 0      | 0      | 0      | 0      | 0      | 0      | 0      |
| 2238   | 3     | 4     | 4     | 3     | 1     | 3     | 2      | 1      | 1      | 3      | 3      | 2      | 2      | 1      |
| 2239   | 5     | 1     | 1     | 1     | 4     | 5     | 0      | 0      | 0      | 0      | 0      | 0      | 0      | 0      |
| 2240   | 5     | 1     | 0     | 1     | 5     | 5     | 0      | 0      | 0      | 0      | 0      | 0      | 0      | 1      |
| 2241   | 4     | 2     | 3     | 3     | 3     | 3     | 2      | 2      | 1      | 1      | 1      | 1      | 1      | 2      |
| 2243   | 5     | 1     | 5     | 5     | 5     | 5     | 0      | 0      | 0      | 0      | 0      | 0      | 0      | 1      |
| 2245   | 3     | 2     | 1     | 4     | 3     | 2     | 1      | 0      | 1      | 1      | 1      | 1      | 0      | 2      |
| 2247   | 4     | 1     | 1     | 1     | 5     | 5     | 0      | 1      | 0      | 0      | 0      | 1      | 1      | 0      |
| 2248   | 5     | 1     | 1     | 1     | 5     | 5     | 1      | 0      | 1      | 0      | 1      | 0      | 0      | 2      |
| 2249   | 5     | 2     | 1     | 1     | 4     | 5     | 0      | 0      | 1      | 1      | 1      | 0      | 0      | 1      |
| 2254   | 5     | 3     | 1     | 4     | 5     | 5     | 0      | 1      | 1      | 0      | 1      | 0      | 0      | 1      |
| 2256   | 4     | 2     | 1     | 1     | 4     | 4     | 1      | 0      | 0      | 0      | 1      | 0      | 0      | 1      |
| 2259   | 5     | 1     | 0     | 1     | 5     | 5     | 0      | 0      | 0      | 0      | 0      | 0      | 0      | 0      |
| 2261   | 4     | 2     | 3     | 1     | 4     | 4     | 0      | 0      | 0      | 0      | 1      | 0      | 0      | 0      |
| 2262   | 2     | 2     | 0     | 1     | 0     | 4     | 0      | 0      | 0      | 0      | 0      | 0      | 0      | 0      |
| 2263   | 2     | 5     | 4     | 5     | 1     | 3     | 1      | 2      | 3      | 2      | 2      | 2      | 2      | 2      |
| 2264   | 5     | 2     | 1     | 1     | 4     | 4     | 1      | 2      | 1      | 0      | 1      | 0      | 1      | 1      |
| 2265   | 5     | 1     | 3     | 3     | 1     | 5     | 1      | 2      | 2      | 3      | 3      | 2      | 2      | 2      |
| 2270   | 5     | 1     | 1     | 3     | 4     | 4     | 0      | 1      | 1      | 1      | 0      | 0      | 0      | 2      |
| 2271   | 5     | 2     | 1     | 1     | 4     | 5     | 0      | 0      | 0      | 0      | 0      | 0      | 0      | 1      |
| 2272   | 4     | 2     | 1     | 3     | 3     | 4     | 1      | 0      | 1      | 0      | 1      | 2      | 1      | 2      |
| 2273   | 3     | 3     | 3     | 3     | 3     | 3     | 1      | 0      | 1      | 0      | 1      | 1      | 1      | 1      |
| 2274   | 5     | 1     | 3     | 4     | 4     | 5     | 1      | 1      | 0      | 0      | 0      | 1      | 1      | 1      |
| 2276   | 4     | 3     | 5     | 3     | 3     | 4     | 1      | 2      | 2      | 2      | 2      | 2      | 3      | 2      |
| 2277   | 5     | 2     | 1     | 3     | 4     | 4     | 1      | 0      | 1      | 0      | 1      | 0      | 1      | 1      |

| respid | Q52_2 | Q53_1 | Q54_1 | Q54_2 | Q54_3 | Q55_1 | Q56a_1 | Q56b_1 | Q56c_1 | Q56d_1 | Q56e_1 | Q56f_1 | Q56g_1 | Q56h_1 |
|--------|-------|-------|-------|-------|-------|-------|--------|--------|--------|--------|--------|--------|--------|--------|
| 2281   | 5     | 1     | 1     | 1     | 5     | 5     | 0      | 0      | 0      | 0      | 0      | 0      | 0      | 0      |
| 2288   | 5     | 1     | 0     | 0     | 4     | 5     | 1      | 0      | 0      | 0      | 1      | 0      | 0      | 0      |
| 2290   | 3     | 3     | 1     | 3     | 4     | 3     | 1      | 1      | 1      | 1      | 1      | 1      | 1      | 1      |
| 2294   | 4     | 3     | 4     | 3     | 3     | 4     | 1      | 0      | 1      | 0      | 1      | 0      | 0      | 1      |
| 2295   | 5     | 1     | 0     | 0     | 4     | 5     | 0      | 0      | 0      | 0      | 1      | 0      | 0      | 1      |
| 2296   | 4     | 2     | 4     | 4     | 4     | 4     | 1      | 2      | 1      | 1      | 1      | 2      | 2      | 2      |
| 2297   | 5     | 2     | 0     | 0     | 4     | 5     | 0      | 0      | 0      | 0      | 1      | 0      | 0      | 0      |
| 2298   | 5     | 1     | 1     | 1     | 5     | 5     | 1      | 1      | 0      | 1      | 1      | 0      | 1      | 1      |
| 2301   | 4     | 1     | 1     | 1     | 4     | 5     | 0      | 1      | 0      | 1      | 1      | 1      | 1      | 1      |
| 2302   | 3     | 2     | 3     | 4     | 3     | 3     | 1      | 1      | 1      | 2      | 1      | 1      | 2      | 1      |
| 2303   | 5     | 1     | 1     | 0     | 5     | 5     | 0      | 0      | 0      | 0      | 0      | 0      | 0      | 0      |
| 2305   | 5     | 5     | 1     | 3     | 4     | 5     | 0      | 0      | 0      | 0      | 0      | 0      | 0      | 0      |
| 2309   | 5     | 1     | 0     | 0     | 5     | 5     | 1      | 0      | 0      | 0      | 0      | 0      | 0      | 1      |
| 2310   | 4     | 2     | 1     | 1     | 4     | 4     | 1      | 0      | 0      | 0      | 1      | 0      | 1      | 0      |
| 2311   | 4     | 2     | 3     | 3     | 3     | 4     | 1      | 1      | 1      | 1      | 2      | 2      | 2      | 2      |
| 2313   | 3     | 3     | 4     | 4     | 3     | 4     | 1      | 1      | 1      | 1      | 2      | 2      | 2      | 1      |
| 2316   | 2     | 4     | 3     | 1     | 1     | 1     | 0      | 1      | 1      | 1      | 1      | 0      | 0      | 1      |
| 2317   | 4     | 2     | 1     | 3     | 4     | 4     | 1      | 0      | 0      | 0      | 0      | 0      | 0      | 0      |
| 2318   | 5     | 1     | 4     | 3     | 4     | 4     | 1      | 2      | 1      | 1      | 1      | 1      | 2      | 1      |
| 2319   | 1     | 2     | 5     | 5     | 0     | 2     | 3      | 1      | 1      | 3      | 3      | 3      | 3      | 1      |
| 2321   | 4     | 2     | 1     | 3     | 3     | 3     | 1      | 1      | 1      | 1      | 1      | 1      | 2      | 1      |
| 2324   | 4     | 1     | 0     | 0     | 0     | 4     | 0      | 0      | 0      | 0      | 0      | 0      | 0      | 0      |
| 2328   | 5     | 1     | 1     | 1     | 4     | 5     | 0      | 0      | 0      | 0      | 0      | 0      | 0      | 1      |
| 2329   | 5     | 1     | 3     | 4     | 4     | 4     | 1      | 2      | 1      | 1      | 1      | 2      | 2      | 1      |
| 2330   | 3     | 1     | 1     | 1     | 4     | 3     | 1      | 1      | 1      | 1      | 1      | 1      | 2      | 0      |
| 2333   | 3     | 4     | 4     | 4     | 3     | 2     | 1      | 2      | 2      | 2      | 1      | 2      | 2      | 2      |
| 2334   | 3     | 2     | 3     | 3     | 3     | 3     | 1      | 2      | 1      | 0      | 1      | 1      | 1      | 0      |
| 2338   | 5     | 1     | 1     | 1     | 1     | 5     | 0      | 0      | 0      | 1      | 0      | 3      | 0      | 0      |
| 2341   | 4     | 2     | 3     | 3     | 3     | 3     | 1      | 1      | 0      | 1      | 1      | 1      | 1      | 1      |
| 2342   | 3     | 3     | 3     | 4     | 3     | 4     | 2      | 1      | 2      | 2      | 2      | 1      | 1      | 2      |
| 2343   | 4     | 2     | 1     | 1     | 3     | 3     | 1      | 1      | 2      | 1      | 1      | 1      | 0      | 1      |
| 2346   | 4     | 1     | 3     | 3     | 3     | 5     | 1      | 1      | 3      | 1      | 3      | 1      | 2      | 1      |

| respid | Q52_2 | Q53_1 | Q54_1 | Q54_2 | Q54_3 | Q55_1 | Q56a_1 | Q56b_1 | Q56c_1 | Q56d_1 | Q56e_1 | Q56f_1 | Q56g_1 | Q56h_1 |
|--------|-------|-------|-------|-------|-------|-------|--------|--------|--------|--------|--------|--------|--------|--------|
| 2347   | 3     | 3     | 1     | 3     | 4     | 4     | 1      | 1      | 1      | 1      | 1      | 1      | 1      | 1      |
| 2348   | 3     | 3     | 3     | 3     | 3     | 3     | 1      | 1      | 1      | 1      | 1      | 1      | 1      | 1      |
| 2349   | 4     | 2     | 4     | 4     | 3     | 4     | 2      | 2      | 1      | 1      | 2      | 2      | 2      | 2      |
| 2350   | 5     | 1     | 0     | 1     | 4     | 5     | 0      | 0      | 0      | 0      | 0      | 1      | 1      | 0      |
| 2351   | 5     | 2     | 1     | 3     | 4     | 4     | 1      | 0      | 1      | 2      | 1      | 1      | 1      | 0      |
| 2352   | 5     | 2     | 0     | 1     | 5     | 5     | 0      | 0      | 0      | 0      | 0      | 2      | 0      | 0      |
| 2359   | 5     | 1     | 0     | 0     | 4     | 5     | 0      | 0      | 0      | 0      | 1      | 0      | 1      | 1      |
| 2362   | 5     | 1     | 5     | 5     | 5     | 5     | 0      | 0      | 0      | 3      | 0      | 1      | 1      | 0      |
| 2363   | 5     | 1     | 0     | 0     | 5     | 5     | 3      | 0      | 0      | 0      | 0      | 0      | 0      | 0      |
| 2365   | 4     | 2     | 3     | 3     | 3     | 4     | 0      | 0      | 0      | 0      | 0      | 0      | 0      | 0      |
| 2367   | 4     | 2     | 1     | 3     | 1     | 3     | 1      | 1      | 1      | 1      | 1      | 1      | 1      | 1      |
| 2368   | 5     | 1     | 0     | 0     | 5     | 5     | 0      | 0      | 0      | 0      | 0      | 0      | 0      | 0      |
| 2369   | 5     | 2     | 1     | 1     | 4     | 4     | 1      | 1      | 1      | 0      | 1      | 0      | 0      | 1      |
| 2372   | 5     | 1     | 3     | 4     | 3     | 3     | 1      | 1      | 1      | 1      | 1      | 1      | 1      | 1      |
| 2374   | 4     | 1     | 1     | 3     | 4     | 4     | 0      | 1      | 0      | 1      | 1      | 0      | 1      | 0      |
| 2376   | 5     | 1     | 0     | 0     | 5     | 5     | 0      | 0      | 0      | 0      | 0      | 0      | 0      | 0      |
| 2379   | 4     | 2     | 1     | 1     | 4     | 4     | 1      | 0      | 0      | 0      | 1      | 0      | 0      | 1      |
| 2380   | 5     | 2     | 1     | 1     | 4     | 4     | 0      | 0      | 0      | 0      | 0      | 0      | 0      | 1      |
| 2381   | 1     | 5     | 5     | 5     | 0     | 1     | 3      | 3      | 3      | 2      | 3      | 3      | 3      | 2      |
| 2382   | 3     | 2     | 3     | 3     | 1     | 2     | 1      | 2      | 1      | 0      | 2      | 1      | 1      | 1      |
| 2385   | 4     | 2     | 1     | 1     | 4     | 5     | 1      | 0      | 1      | 1      | 1      | 1      | 2      | 1      |
| 2387   | 4     | 2     | 1     | 3     | 4     | 4     | 0      | 0      | 1      | 0      | 1      | 0      | 0      | 1      |
| 2388   | 5     | 1     | 1     | 1     | 4     | 5     | 0      | 0      | 0      | 0      | 0      | 0      | 0      | 0      |
| 2389   | 4     | 2     | 1     | 3     | 4     | 3     | 1      | 0      | 2      | 2      | 1      | 1      | 1      | 1      |
| 2391   | 4     | 1     | 3     | 5     | 4     | 5     | 1      | 2      | 0      | 2      | 1      | 3      | 2      | 0      |
| 2392   | 4     | 2     | 3     | 1     | 4     | 4     | 1      | 2      | 1      | 0      | 2      | 1      | 1      | 2      |
| 2393   | 5     | 1     | 1     | 1     | 4     | 5     | 0      | 0      | 0      | 0      | 1      | 0      | 1      | 0      |
| 2394   | 2     | 2     | 3     | 4     | 1     | 4     | 0      | 1      | 1      | 1      | 1      | 1      | 1      | 1      |
| 2397   | 4     | 2     | 1     | 1     | 4     | 4     | 1      | 0      | 1      | 1      | 1      | 1      | 1      | 0      |
| 2398   | 4     | 2     | 3     | 4     | 3     | 4     | 1      | 2      | 1      | 2      | 1      | 2      | 2      | 1      |
| 2400   | 4     | 1     | 1     | 3     | 4     | 5     | 1      | 1      | 1      | 1      | 1      | 1      | 1      | 0      |
| 2402   | 4     | 1     | 1     | 1     | 4     | 4     | 0      | 0      | 1      | 0      | 1      | 1      | 1      | 0      |

| respid | Q52_2 | Q53_1 | Q54_1 | Q54_2 | Q54_3 | Q55_1 | Q56a_1 | Q56b_1 | Q56c_1 | Q56d_1 | Q56e_1 | Q56f_1 | Q56g_1 | Q56h_1 |
|--------|-------|-------|-------|-------|-------|-------|--------|--------|--------|--------|--------|--------|--------|--------|
| 2406   | 4     | 1     | 1     | 1     | 4     | 5     | 0      | 0      | 1      | 0      | 0      | 0      | 0      | 1      |
| 2408   | 4     | 2     | 1     | 1     | 4     | 5     | 1      | 1      | 0      | 0      | 1      | 0      | 1      | 1      |
| 2410   | 5     | 1     | 1     | 1     | 5     | 5     | 0      | 0      | 0      | 0      | 0      | 0      | 0      | 0      |
| 2411   | 3     | 3     | 1     | 3     | 3     | 3     | 1      | 1      | 2      | 1      | 1      | 1      | 1      | 1      |
| 2412   | 5     | 2     | 1     | 1     | 1     | 5     | 0      | 1      | 0      | 0      | 0      | 0      | 0      | 1      |
| 2414   | 2     | 3     | 1     | 3     | 1     | 3     | 1      | 1      | 1      | 1      | 2      | 2      | 1      | 1      |
| 2421   | 3     | 2     | 0     | 1     | 4     | 4     | 0      | 0      | 1      | 0      | 1      | 0      | 0      | 1      |
| 2423   | 4     | 2     | 1     | 3     | 4     | 4     | 1      | 1      | 1      | 1      | 1      | 1      | 1      | 1      |
| 2424   | 5     | 1     | 3     | 3     | 3     | 5     | 0      | 0      | 0      | 0      | 1      | 0      | 0      | 1      |
| 2425   | 5     | 2     | 1     | 1     | 4     | 4     | 0      | 0      | 0      | 0      | 1      | 1      | 1      | 1      |
| 2426   | 5     | 1     | 1     | 1     | 3     | 5     | 1      | 0      | 0      | 0      | 1      | 1      | 1      | 0      |
| 2429   | 2     | 2     | 1     | 1     | 1     | 2     | 1      | 0      | 1      | 1      | 1      | 2      | 2      | 2      |
| 2430   | 5     | 2     | 0     | 1     | 4     | 5     | 1      | 0      | 0      | 0      | 0      | 0      | 0      | 0      |
| 2432   | 5     | 1     | 1     | 1     | 4     | 5     | 1      | 1      | 1      | 1      | 1      | 0      | 0      | 0      |
| 2433   | 5     | 1     | 1     | 1     | 4     | 5     | 0      | 1      | 1      | 0      | 1      | 0      | 1      | 0      |
| 2434   | 4     | 2     | 1     | 1     | 4     | 3     | 1      | 1      | 1      | 0      | 1      | 1      | 1      | 1      |
| 2435   | 4     | 1     | 1     | 1     | 3     | 3     | 1      | 1      | 2      | 0      | 1      | 0      | 1      | 0      |
| 2436   | 5     | 2     | 3     | 3     | 4     | 5     | 0      | 1      | 0      | 0      | 1      | 1      | 1      | 1      |
| 2439   | 4     | 3     | 3     | 3     | 4     | 4     | 1      | 1      | 1      | 2      | 1      | 1      | 1      | 1      |
| 2440   | 4     | 2     | 1     | 3     | 4     | 4     | 1      | 1      | 0      | 1      | 0      | 2      | 1      | 1      |
| 2441   | 5     | 1     | 1     | 1     | 4     | 5     | 0      | 0      | 0      | 0      | 1      | 1      | 0      | 0      |
| 2446   | 5     | 1     | 1     | 3     | 4     | 4     | 1      | 0      | 0      | 0      | 1      | 1      | 1      | 1      |
| 2448   | 4     | 2     | 1     | 1     | 4     | 4     | 1      | 1      | 2      | 1      | 2      | 1      | 1      | 1      |
| 2449   | 5     | 1     | 0     | 0     | 0     | 5     | 3      | 1      | 0      | 1      | 2      | 1      | 3      | 1      |
| 2451   | 5     | 1     | 1     | 3     | 4     | 4     | 1      | 0      | 1      | 1      | 1      | 1      | 1      | 0      |
| 2452   | 4     | 2     | 4     | 4     | 3     | 4     | 1      | 1      | 1      | 2      | 2      | 1      | 2      | 0      |
| 2455   | 4     | 3     | 4     | 4     | 4     | 5     | 0      | 2      | 1      | 1      | 0      | 0      | 2      | 2      |
| 2457   | 3     | 2     | 3     | 4     | 3     | 4     | 1      | 1      | 1      | 1      | 1      | 2      | 2      | 1      |
| 2458   | 5     | 1     | 5     | 5     | 5     | 5     | 0      | 2      | 0      | 2      | 2      | 1      | 2      | 1      |
| 2459   | 5     | 1     | 1     | 1     | 5     | 5     | 1      | 1      | 1      | 0      | 1      | 1      | 1      | 0      |
| 2460   | 3     | 1     | 1     | 1     | 4     | 5     | 1      | 0      | 1      | 0      | 0      | 1      | 1      | 1      |
| 2462   | 3     | 4     | 3     | 3     | 3     | 3     | 1      | 1      | 2      | 1      | 2      | 2      | 2      | 1      |



| respid | Q52_2 | Q53_1 | Q54_1 | Q54_2 | Q54_3 | Q55_1 | Q56a_1 | Q56b_1 | Q56c_1 | Q56d_1 | Q56e_1 | Q56f_1 | Q56g_1 | Q56h_1 |
|--------|-------|-------|-------|-------|-------|-------|--------|--------|--------|--------|--------|--------|--------|--------|
| 2464   | 2     | 4     | 1     | 4     | 1     | 2     | 2      | 1      | 1      | 1      | 2      | 2      | 2      | 2      |
| 2465   | 4     | 1     | 4     | 4     | 4     | 4     | 2      | 2      | 0      | 2      | 1      | 1      | 2      | 1      |
| 2468   | 4     | 2     | 4     | 3     | 4     | 4     | 1      | 1      | 1      | 1      | 0      | 1      | 1      | 1      |
| 2469   | 5     | 1     | 1     | 1     | 4     | 5     | 1      | 2      | 0      | 1      | 1      | 1      | 1      | 0      |
| 2470   | 4     | 2     | 1     | 3     | 4     | 4     | 0      | 1      | 0      | 1      | 1      | 1      | 0      | 1      |
| 2471   | 4     | 2     | 4     | 4     | 3     | 4     | 1      | 1      | 1      | 2      | 1      | 1      | 2      | 1      |
| 2472   | 4     | 1     | 3     | 3     | 3     | 4     | 1      | 1      | 2      | 2      | 1      | 1      | 2      | 1      |
| 2474   | 4     | 1     | 1     | 1     | 3     | 5     | 1      | 0      | 1      | 1      | 1      | 1      | 1      | 1      |
| 2476   | 4     | 2     | 1     | 4     | 4     | 3     | 0      | 0      | 1      | 1      | 0      | 1      | 1      | 2      |
| 2478   | 4     | 2     | 1     | 3     | 4     | 4     | 1      | 1      | 1      | 2      | 1      | 1      | 1      | 1      |
| 2479   | 4     | 1     | 1     | 1     | 3     | 4     | 1      | 2      | 1      | 2      | 1      | 2      | 1      | 2      |
| 2480   | 5     | 2     | 4     | 4     | 5     | 5     | 0      | 1      | 0      | 1      | 0      | 2      | 3      | 1      |
| 2482   | 5     | 4     | 4     | 4     | 4     | 4     | 1      | 3      | 1      | 1      | 2      | 3      | 2      | 0      |
| 2486   | 5     | 3     | 0     | 0     | 4     | 5     | 0      | 0      | 0      | 0      | 1      | 0      | 0      | 0      |
| 2488   | 4     | 2     | 1     | 3     | 5     | 4     | 0      | 1      | 0      | 1      | 1      | 1      | 1      | 1      |
| 2489   | 4     | 2     | 1     | 3     | 4     | 4     | 2      | 1      | 2      | 1      | 1      | 1      | 1      | 1      |
| 2491   | 5     | 1     | 1     | 1     | 4     | 5     | 0      | 0      | 0      | 0      | 0      | 0      | 0      | 1      |
| 2495   | 5     | 1     | 3     | 3     | 4     | 4     | 1      | 0      | 1      | 0      | 1      | 1      | 1      | 0      |
| 2496   | 5     | 1     | 4     | 0     | 5     | 4     | 1      | 1      | 1      | 3      | 1      | 0      | 2      | 2      |
| 2498   | 5     | 1     | 1     | 1     | 4     | 5     | 0      | 0      | 0      | 0      | 1      | 1      | 0      | 1      |
| 2501   | 3     | 2     | 3     | 3     | 3     | 3     | 1      | 1      | 2      | 2      | 2      | 2      | 2      | 1      |
| 2502   | 3     | 4     | 3     | 4     | 3     | 4     | 2      | 2      | 2      | 2      | 2      | 2      | 2      | 1      |
| 2503   | 5     | 1     | 1     | 1     | 4     | 5     | 0      | 0      | 0      | 0      | 0      | 0      | 0      | 1      |
| 2504   | 5     | 1     | 0     | 1     | 3     | 5     | 0      | 0      | 0      | 0      | 0      | 1      | 0      | 0      |
| 2507   | 4     | 1     | 3     | 3     | 3     | 3     | 1      | 2      | 2      | 0      | 1      | 1      | 1      | 1      |
| 2509   | 4     | 1     | 1     | 3     | 3     | 3     | 1      | 1      | 1      | 1      | 1      | 1      | 1      | 1      |
| 2512   | 3     | 3     | 3     | 4     | 3     | 4     | 2      | 1      | 2      | 1      | 2      | 2      | 2      | 1      |
| 2514   | 5     | 1     | 1     | 0     | 4     | 5     | 1      | 0      | 0      | 1      | 1      | 1      | 1      | 1      |
| 2516   | 4     | 1     | 1     | 1     | 4     | 3     | 0      | 1      | 2      | 0      | 1      | 1      | 1      | 1      |
| 2517   | 5     | 1     | 1     | 3     | 4     | 5     | 0      | 0      | 0      | 1      | 0      | 0      | 0      | 0      |
| 2521   | 5     | 2     | 1     | 3     | 3     | 5     | 1      | 0      | 0      | 0      | 1      | 1      | 1      | 1      |
| 2522   | 4     | 1     | 0     | 0     | 5     | 1     | 0      | 0      | 0      | 0      | 0      | 0      | 0      | 2      |

| respid | Q52_2 | Q53_1 | Q54_1 | Q54_2 | Q54_3 | Q55_1 | Q56a_1 | Q56b_1 | Q56c_1 | Q56d_1 | Q56e_1 | Q56f_1 | Q56g_1 | Q56h_1 |
|--------|-------|-------|-------|-------|-------|-------|--------|--------|--------|--------|--------|--------|--------|--------|
| 2524   | 4     | 2     | 1     | 1     | 4     | 4     | 0      | 0      | 0      | 0      | 0      | 0      | 1      | 0      |
| 2525   | 5     | 1     | 1     | 1     | 4     | 4     | 0      | 2      | 0      | 0      | 0      | 0      | 1      | 1      |
| 2526   | 5     | 1     | 0     | 3     | 3     | 4     | 1      | 0      | 1      | 0      | 1      | 1      | 1      | 0      |
| 2527   | 5     | 2     | 0     | 0     | 5     | 5     | 0      | 0      | 0      | 0      | 0      | 0      | 0      | 0      |
| 2528   | 4     | 1     | 0     | 0     | 4     | 4     | 1      | 2      | 0      | 0      | 1      | 0      | 0      | 1      |
| 2531   | 5     | 1     | 1     | 3     | 5     | 5     | 0      | 1      | 0      | 2      | 1      | 1      | 1      | 1      |
| 2533   | 3     | 2     | 1     | 3     | 1     | 3     | 1      | 1      | 1      | 1      | 1      | 1      | 1      | 1      |
| 2535   | 4     | 2     | 1     | 1     | 5     | 5     | 0      | 0      | 0      | 0      | 0      | 0      | 1      | 0      |
| 2536   | 3     | 3     | 3     | 4     | 3     | 4     | 2      | 1      | 2      | 1      | 2      | 1      | 2      | 2      |
| 2539   | 5     | 1     | 1     | 1     | 4     | 5     | 0      | 0      | 0      | 0      | 0      | 0      | 0      | 0      |
| 2540   | 5     | 1     | 1     | 1     | 4     | 4     | 1      | 2      | 1      | 1      | 1      | 1      | 1      | 1      |
| 2543   | 5     | 1     | 1     | 1     | 4     | 5     | 1      | 0      | 1      | 0      | 1      | 0      | 0      | 0      |
| 2546   | 4     | 2     | 4     | 4     | 3     | 3     | 1      | 2      | 1      | 1      | 2      | 1      | 2      | 0      |
| 2547   | 5     | 1     | 0     | 3     | 3     | 4     | 1      | 0      | 1      | 0      | 1      | 1      | 1      | 1      |
| 2549   | 4     | 2     | 1     | 1     | 4     | 4     | 0      | 0      | 1      | 1      | 1      | 0      | 0      | 1      |
| 2553   | 4     | 1     | 3     | 3     | 3     | 4     | 1      | 1      | 1      | 0      | 1      | 1      | 1      | 0      |
| 2554   | 5     | 1     | 0     | 1     | 4     | 5     | 0      | 0      | 0      | 0      | 1      | 1      | 0      | 0      |
| 2555   | 5     | 1     | 1     | 3     | 4     | 5     | 1      | 0      | 1      | 0      | 0      | 1      | 0      | 0      |
| 2556   | 5     | 1     | 0     | 0     | 5     | 5     | 0      | 0      | 0      | 0      | 0      | 0      | 0      | 0      |
| 2557   | 3     | 2     | 3     | 1     | 3     | 3     | 0      | 0      | 0      | 0      | 0      | 1      | 1      | 1      |
| 2559   | 4     | 1     | 0     | 1     | 4     | 5     | 0      | 0      | 0      | 0      | 0      | 0      | 0      | 0      |
| 2560   | 3     | 2     | 1     | 1     | 3     | 4     | 1      | 0      | 1      | 1      | 1      | 1      | 1      | 1      |
| 2561   | 4     | 1     | 1     | 1     | 4     | 4     | 0      | 1      | 0      | 0      | 0      | 0      | 0      | 1      |
| 2566   | 4     | 1     | 3     | 1     | 4     | 5     | 0      | 0      | 2      | 0      | 1      | 1      | 1      | 1      |
| 2567   | 5     | 2     | 1     | 4     | 3     | 5     | 0      | 2      | 0      | 0      | 2      | 2      | 1      | 1      |
| 2570   | 4     | 2     | 5     | 5     | 5     | 4     | 2      | 2      | 2      | 3      | 3      | 3      | 2      | 1      |
| 2574   | 3     | 3     | 3     | 4     | 3     | 3     | 1      | 2      | 1      | 2      | 1      | 2      | 2      | 1      |
| 2578   | 5     | 1     | 1     | 1     | 5     | 5     | 0      | 0      | 1      | 0      | 1      | 0      | 1      | 0      |
| 2580   | 5     | 1     | 1     | 3     | 3     | 4     | 0      | 0      | 1      | 1      | 1      | 1      | 1      | 1      |
| 2590   | 5     | 1     | 1     | 3     | 4     | 5     | 0      | 1      | 2      | 2      | 1      | 1      | 1      | 1      |
| 2593   | 4     | 1     | 3     | 4     | 3     | 3     | 1      | 0      | 1      | 1      | 1      | 1      | 0      | 2      |
| 2594   | 4     | 3     | 4     | 4     | 3     | 4     | 2      | 1      | 1      | 2      | 2      | 2      | 2      | 2      |

| respid | Q52_2 | Q53_1 | Q54_1 | Q54_2 | Q54_3 | Q55_1 | Q56a_1 | Q56b_1 | Q56c_1 | Q56d_1 | Q56e_1 | Q56f_1 | Q56g_1 | Q56h_1 |
|--------|-------|-------|-------|-------|-------|-------|--------|--------|--------|--------|--------|--------|--------|--------|
| 2595   | 4     | 2     | 4     | 4     | 4     | 4     | 0      | 1      | 0      | 1      | 1      | 2      | 2      | 0      |
| 2596   | 5     | 1     | 3     | 3     | 4     | 5     | 0      | 1      | 1      | 1      | 1      | 2      | 2      | 1      |
| 2597   | 2     | 3     | 1     | 3     | 4     | 4     | 1      | 2      | 1      | 1      | 2      | 1      | 2      | 1      |
| 2598   | 4     | 2     | 1     | 3     | 4     | 4     | 1      | 0      | 1      | 0      | 1      | 0      | 0      | 1      |
| 2602   | 4     | 1     | 1     | 1     | 4     | 5     | 0      | 0      | 1      | 0      | 1      | 0      | 1      | 1      |
| 2605   | 5     | 3     | 1     | 3     | 3     | 4     | 1      | 1      | 1      | 1      | 1      | 1      | 2      | 1      |
| 2606   | 5     | 1     | 1     | 1     | 4     | 5     | 0      | 0      | 0      | 0      | 0      | 0      | 0      | 0      |
| 2607   | 3     | 4     | 3     | 3     | 4     | 4     | 1      | 0      | 1      | 2      | 1      | 1      | 2      | 1      |
| 2608   | 5     | 1     | 0     | 0     | 5     | 5     | 0      | 0      | 0      | 0      | 0      | 0      | 0      | 0      |
| 2609   | 3     | 3     | 4     | 5     | 1     | 4     | 1      | 0      | 1      | 0      | 1      | 1      | 1      | 0      |
| 2610   | 5     | 1     | 4     | 4     | 4     | 5     | 0      | 1      | 0      | 2      | 1      | 2      | 2      | 1      |
| 2614   | 5     | 2     | 1     | 1     | 3     | 5     | 1      | 0      | 1      | 0      | 1      | 1      | 0      | 0      |
| 2615   | 4     | 1     | 1     | 1     | 4     | 5     | 1      | 1      | 0      | 0      | 0      | 0      | 0      | 1      |
| 2616   | 5     | 1     | 1     | 1     | 3     | 5     | 0      | 1      | 1      | 0      | 1      | 1      | 1      | 0      |
| 2618   | 3     | 1     | 1     | 0     | 4     | 4     | 0      | 0      | 0      | 0      | 0      | 0      | 1      | 1      |
| 2630   | 2     | 2     | 3     | 4     | 1     | 1     | 1      | 3      | 2      | 2      | 2      | 2      | 3      | 3      |
| 2633   | 5     | 1     | 1     | 1     | 4     | 5     | 0      | 1      | 0      | 0      | 0      | 0      | 0      | 1      |
| 2637   | 4     | 2     | 1     | 3     | 3     | 3     | 1      | 1      | 1      | 0      | 1      | 2      | 1      | 1      |
| 2638   | 3     | 2     | 1     | 3     | 4     | 4     | 1      | 1      | 1      | 1      | 1      | 1      | 1      | 1      |
| 2641   | 4     | 2     | 1     | 4     | 3     | 3     | 1      | 2      | 2      | 1      | 1      | 1      | 2      | 1      |
| 2644   | 5     | 1     | 1     | 1     | 4     | 5     | 0      | 0      | 0      | 0      | 0      | 0      | 0      | 0      |
| 2645   | 5     | 2     | 1     | 1     | 3     | 3     | 2      | 0      | 0      | 0      | 1      | 1      | 1      | 2      |
| 2646   | 5     | 1     | 1     | 1     | 4     | 4     | 1      | 0      | 1      | 0      | 1      | 1      | 1      | 1      |
| 2648   | 4     | 2     | 3     | 3     | 4     | 5     | 0      | 1      | 0      | 0      | 0      | 1      | 1      | 1      |
| 2651   | 5     | 1     | 1     | 0     | 5     | 5     | 0      | 0      | 0      | 0      | 0      | 0      | 1      | 0      |
| 2652   | 2     | 4     | 3     | 3     | 4     | 4     | 1      | 0      | 0      | 0      | 1      | 1      | 1      | 1      |
| 2653   | 5     | 2     | 1     | 3     | 4     | 4     | 0      | 1      | 1      | 1      | 0      | 0      | 0      | 2      |
| 2656   | 3     | 1     | 3     | 3     | 3     | 2     | 1      | 0      | 0      | 0      | 0      | 1      | 1      | 1      |
| 2657   | 5     | 1     | 0     | 0     | 5     | 5     | 0      | 1      | 0      | 0      | 0      | 0      | 0      | 1      |
| 2658   | 3     | 1     | 3     | 3     | 3     | 4     | 1      | 0      | 0      | 0      | 1      | 1      | 2      | 0      |
| 2661   | 3     | 3     | 3     | 3     | 3     | 3     | 0      | 0      | 0      | 0      | 1      | 2      | 1      | 2      |
| 2663   | 5     | 2     | 1     | 1     | 4     | 4     | 1      | 0      | 0      | 1      | 1      | 0      | 0      | 1      |

| respid | Q52_2 | Q53_1 | Q54_1 | Q54_2 | Q54_3 | Q55_1 | Q56a_1 | Q56b_1 | Q56c_1 | Q56d_1 | Q56e_1 | Q56f_1 | Q56g_1 | Q56h_1 |
|--------|-------|-------|-------|-------|-------|-------|--------|--------|--------|--------|--------|--------|--------|--------|
| 2665   | 3     | 2     | 3     | 3     | 3     | 5     | 1      | 1      | 1      | 1      | 1      | 1      | 1      | 0      |
| 2670   | 5     | 1     | 0     | 0     | 5     | 5     | 0      | 0      | 0      | 0      | 1      | 1      | 0      | 0      |
| 2672   | 5     | 1     | 1     | 1     | 4     | 4     | 1      | 0      | 1      | 0      | 1      | 0      | 0      | 1      |
| 2673   | 4     | 2     | 4     | 4     | 4     | 5     | 0      | 0      | 0      | 0      | 0      | 1      | 1      | 1      |
| 2677   | 5     | 1     | 1     | 1     | 4     | 5     | 0      | 0      | 0      | 0      | 0      | 0      | 0      | 0      |
| 2686   | 2     | 4     | 1     | 3     | 3     | 3     | 1      | 2      | 2      | 1      | 1      | 1      | 1      | 1      |
| 2688   | 5     | 2     | 1     | 1     | 4     | 5     | 0      | 0      | 1      | 0      | 0      | 0      | 0      | 0      |
| 2689   | 4     | 2     | 1     | 3     | 1     | 4     | 2      | 2      | 2      | 1      | 1      | 1      | 1      | 1      |
| 2691   | 4     | 1     | 1     | 1     | 4     | 5     | 0      | 0      | 0      | 0      | 0      | 1      | 0      | 1      |
| 2695   | 5     | 1     | 1     | 1     | 1     | 5     | 0      | 0      | 0      | 0      | 0      | 0      | 0      | 0      |
| 2696   | 5     | 1     | 0     | 4     | 3     | 5     | 2      | 1      | 1      | 1      | 1      | 2      | 2      | 2      |
| 2697   | 5     | 1     | 3     | 3     | 3     | 5     | 1      | 1      | 0      | 1      | 1      | 2      | 2      | 1      |
| 2698   | 5     | 1     | 1     | 1     | 5     | 5     | 0      | 0      | 0      | 0      | 0      | 0      | 0      | 1      |
| 2703   | 5     | 1     | 0     | 1     | 4     | 5     | 2      | 0      | 3      | 0      | 2      | 1      | 0      | 1      |
| 2704   | 4     | 1     | 1     | 1     | 3     | 4     | 1      | 1      | 1      | 0      | 1      | 1      | 1      | 1      |
| 2706   | 3     | 4     | 1     | 3     | 3     | 3     | 1      | 0      | 1      | 1      | 1      | 1      | 1      | 2      |
| 2707   | 4     | 2     | 3     | 3     | 4     | 3     | 1      | 1      | 2      | 1      | 1      | 1      | 2      | 1      |
| 2710   | 5     | 1     | 0     | 0     | 3     | 5     | 2      | 2      | 2      | 2      | 2      | 2      | 2      | 2      |
| 2711   | 5     | 1     | 4     | 5     | 0     | 3     | 2      | 1      | 2      | 1      | 2      | 3      | 2      | 1      |
| 2712   | 5     | 1     | 1     | 3     | 3     | 4     | 1      | 0      | 1      | 0      | 1      | 1      | 1      | 1      |
| 2713   | 4     | 2     | 1     | 3     | 3     | 4     | 1      | 0      | 1      | 0      | 1      | 1      | 0      | 1      |
| 2721   | 4     | 2     | 1     | 1     | 4     | 4     | 1      | 0      | 2      | 1      | 1      | 1      | 2      | 2      |
| 2730   | 4     | 2     | 1     | 1     | 4     | 4     | 1      | 0      | 0      | 0      | 0      | 1      | 1      | 1      |
| 2731   | 4     | 1     | 5     | 5     | 5     | 5     | 3      | 0      | 1      | 0      | 1      | 1      | 1      | 0      |
| 2732   | 4     | 2     | 3     | 3     | 3     | 3     | 1      | 1      | 1      | 1      | 1      | 1      | 2      | 1      |
| 2733   | 5     | 1     | 3     | 4     | 1     | 4     | 2      | 2      | 2      | 2      | 2      | 2      | 2      | 2      |
| 2735   | 4     | 2     | 3     | 4     | 1     | 4     | 2      | 2      | 1      | 1      | 2      | 3      | 2      | 1      |
| 2736   | 4     | 1     | 1     | 0     | 5     | 5     | 1      | 0      | 0      | 0      | 1      | 1      | 1      | 1      |
| 2740   | 5     | 1     | 3     | 4     | 3     | 4     | 1      | 1      | 2      | 2      | 2      | 2      | 2      | 2      |
| 2741   | 4     | 2     | 3     | 3     | 3     | 4     | 2      | 2      | 2      | 1      | 1      | 1      | 1      | 2      |
| 2742   | 4     | 2     | 1     | 1     | 3     | 3     | 1      | 1      | 1      | 1      | 1      | 1      | 1      | 1      |
| 2743   | 4     | 2     | 3     | 1     | 4     | 4     | 2      | 1      | 2      | 1      | 1      | 0      | 1      | 0      |

| respid | Q52_2 | Q53_1 | Q54_1 | Q54_2 | Q54_3 | Q55_1 | Q56a_1 | Q56b_1 | Q56c_1 | Q56d_1 | Q56e_1 | Q56f_1 | Q56g_1 | Q56h_1 |
|--------|-------|-------|-------|-------|-------|-------|--------|--------|--------|--------|--------|--------|--------|--------|
| 2744   | 5     | 1     | 5     | 5     | 5     | 5     | 0      | 2      | 1      | 2      | 1      | 2      | 2      | 1      |
| 2745   | 3     | 3     | 1     | 3     | 3     | 3     | 2      | 0      | 1      | 0      | 1      | 1      | 1      | 1      |
| 2749   | 5     | 1     | 0     | 0     | 5     | 5     | 0      | 0      | 0      | 0      | 0      | 0      | 0      | 0      |
| 2751   | 4     | 2     | 3     | 3     | 4     | 4     | 0      | 1      | 1      | 0      | 1      | 0      | 0      | 1      |
| 2754   | 3     | 1     | 4     | 5     | 3     | 4     | 2      | 1      | 1      | 3      | 3      | 3      | 3      | 3      |
| 2755   | 4     | 2     | 1     | 3     | 3     | 4     | 1      | 1      | 1      | 1      | 1      | 1      | 1      | 1      |
| 2757   | 5     | 1     | 3     | 4     | 5     | 5     | 0      | 3      | 0      | 3      | 1      | 2      | 2      | 1      |
| 2758   | 5     | 2     | 1     | 1     | 4     | 4     | 1      | 1      | 1      | 0      | 1      | 1      | 1      | 1      |
| 2759   | 5     | 3     | 0     | 1     | 3     | 5     | 2      | 2      | 0      | 0      | 0      | 0      | 1      | 2      |
| 2761   | 5     | 1     | 0     | 0     | 0     | 5     | 0      | 0      | 2      | 0      | 2      | 1      | 1      | 0      |
| 2762   | 4     | 2     | 1     | 4     | 3     | 3     | 1      | 0      | 1      | 2      | 2      | 2      | 2      | 1      |
| 2763   | 4     | 1     | 1     | 1     | 3     | 5     | 1      | 1      | 1      | 0      | 1      | 0      | 1      | 1      |
| 2764   | 2     | 3     | 4     | 4     | 1     | 3     | 2      | 2      | 0      | 1      | 3      | 1      | 2      | 1      |
| 2765   | 4     | 2     | 1     | 3     | 4     | 4     | 1      | 1      | 1      | 0      | 1      | 1      | 1      | 1      |
| 2766   | 5     | 1     | 1     | 1     | 5     | 5     | 1      | 1      | 0      | 1      | 1      | 1      | 2      | 0      |
| 2767   | 3     | 1     | 1     | 1     | 3     | 4     | 1      | 0      | 1      | 0      | 1      | 1      | 2      | 1      |
| 2769   | 5     | 1     | 1     | 3     | 4     | 5     | 1      | 0      | 0      | 0      | 1      | 0      | 0      | 0      |
| 2770   | 4     | 2     | 1     | 4     | 4     | 4     | 1      | 2      | 0      | 0      | 1      | 1      | 1      | 1      |
| 2771   | 3     | 2     | 4     | 4     | 1     | 4     | 1      | 2      | 2      | 0      | 1      | 2      | 2      | 1      |
| 2774   | 4     | 1     | 1     | 3     | 4     | 4     | 1      | 0      | 0      | 1      | 0      | 1      | 0      | 1      |
| 2777   | 4     | 2     | 4     | 4     | 3     | 4     | 2      | 1      | 1      | 1      | 1      | 2      | 2      | 1      |
| 2778   | 5     | 1     | 1     | 3     | 5     | 5     | 1      | 1      | 0      | 0      | 1      | 1      | 1      | 1      |
| 2781   | 3     | 2     | 3     | 3     | 3     | 4     | 1      | 2      | 1      | 1      | 1      | 1      | 1      | 1      |
| 2782   | 4     | 2     | 3     | 3     | 3     | 4     | 1      | 1      | 1      | 1      | 1      | 1      | 1      | 1      |
| 2784   | 3     | 4     | 1     | 4     | 3     | 4     | 1      | 1      | 1      | 1      | 2      | 1      | 1      | 2      |
| 2785   | 4     | 2     | 1     | 1     | 4     | 4     | 1      | 1      | 1      | 0      | 1      | 0      | 1      | 1      |
| 2786   | 5     | 1     | 0     | 1     | 5     | 5     | 0      | 0      | 0      | 0      | 0      | 0      | 0      | 0      |
| 2787   | 5     | 1     | 0     | 0     | 5     | 5     | 0      | 0      | 0      | 0      | 1      | 0      | 0      | 1      |
| 2789   | 4     | 3     | 3     | 4     | 4     | 3     | 1      | 2      | 2      | 1      | 1      | 2      | 2      | 1      |
| 2790   | 5     | 1     | 1     | 3     | 4     | 4     | 1      | 0      | 1      | 0      | 1      | 1      | 1      | 0      |
| 2791   | 4     | 3     | 1     | 4     | 4     | 4     | 1      | 1      | 0      | 0      | 1      | 0      | 1      | 2      |
| 2793   | 4     | 1     | 4     | 5     | 3     | 4     | 1      | 1      | 0      | 1      | 1      | 3      | 2      | 0      |

| respid | Q52_2 | Q53_1 | Q54_1 | Q54_2 | Q54_3 | Q55_1 | Q56a_1 | Q56b_1 | Q56c_1 | Q56d_1 | Q56e_1 | Q56f_1 | Q56g_1 | Q56h_1 |
|--------|-------|-------|-------|-------|-------|-------|--------|--------|--------|--------|--------|--------|--------|--------|
| 2797   | 3     | 1     | 1     | 3     | 3     | 5     | 1      | 1      | 0      | 0      | 1      | 1      | 1      | 1      |
| 2798   | 4     | 1     | 3     | 1     | 4     | 5     | 0      | 0      | 0      | 0      | 1      | 1      | 1      | 0      |
| 2799   | 4     | 2     | 1     | 1     | 4     | 4     | 1      | 1      | 1      | 0      | 1      | 1      | 1      | 1      |
| 2801   | 4     | 1     | 3     | 3     | 3     | 2     | 1      | 1      | 1      | 1      | 1      | 1      | 2      | 1      |
| 2802   | 3     | 2     | 1     | 4     | 5     | 5     | 0      | 2      | 2      | 2      | 1      | 2      | 1      | 3      |
| 2803   | 5     | 2     | 1     | 3     | 4     | 5     | 0      | 1      | 0      | 0      | 1      | 1      | 1      | 0      |
| 2804   | 2     | 2     | 1     | 3     | 3     | 3     | 1      | 1      | 2      | 0      | 1      | 2      | 2      | 2      |
| 2807   | 4     | 2     | 1     | 1     | 4     | 4     | 1      | 0      | 2      | 1      | 1      | 1      | 1      | 1      |
| 2809   | 5     | 1     | 3     | 3     | 3     | 5     | 1      | 1      | 0      | 0      | 1      | 1      | 1      | 1      |
| 2810   | 4     | 1     | 1     | 1     | 4     | 5     | 1      | 1      | 1      | 2      | 1      | 1      | 1      | 1      |
| 2812   | 5     | 1     | 1     | 1     | 4     | 5     | 0      | 1      | 0      | 2      | 1      | 1      | 1      | 0      |
| 2814   | 5     | 1     | 0     | 0     | 5     | 5     | 0      | 0      | 1      | 0      | 1      | 0      | 0      | 2      |
| 2815   | 3     | 2     | 1     | 3     | 3     | 4     | 1      | 1      | 0      | 2      | 2      | 1      | 2      | 1      |
| 2816   | 4     | 2     | 1     | 1     | 4     | 5     | 1      | 1      | 0      | 0      | 0      | 1      | 1      | 0      |
| 2817   | 4     | 1     | 3     | 3     | 3     | 5     | 1      | 1      | 1      | 1      | 1      | 1      | 2      | 1      |
| 2819   | 4     | 2     | 3     | 3     | 3     | 3     | 1      | 1      | 1      | 1      | 1      | 1      | 2      | 1      |
| 2820   | 5     | 1     | 1     | 1     | 4     | 5     | 1      | 1      | 0      | 0      | 0      | 0      | 1      | 0      |
| 2821   | 3     | 2     | 1     | 3     | 5     | 5     | 0      | 1      | 2      | 1      | 2      | 2      | 2      | 1      |
| 2822   | 5     | 2     | 1     | 3     | 3     | 4     | 1      | 1      | 1      | 1      | 1      | 2      | 2      | 2      |
| 2823   | 5     | 1     | 3     | 3     | 3     | 5     | 1      | 0      | 0      | 0      | 1      | 1      | 1      | 0      |
| 2824   | 4     | 2     | 1     | 3     | 4     | 4     | 1      | 2      | 0      | 0      | 1      | 1      | 1      | 0      |
| 2825   | 5     | 1     | 1     | 1     | 4     | 5     | 1      | 0      | 1      | 0      | 1      | 1      | 1      | 1      |
| 2826   | 4     | 2     | 1     | 1     | 4     | 4     | 1      | 0      | 1      | 1      | 1      | 0      | 1      | 0      |
| 2827   | 4     | 2     | 1     | 1     | 4     | 3     | 0      | 0      | 0      | 0      | 0      | 0      | 0      | 1      |
| 2828   | 5     | 1     | 1     | 1     | 4     | 5     | 0      | 0      | 0      | 0      | 0      | 0      | 0      | 0      |
| 2829   | 3     | 3     | 3     | 3     | 3     | 3     | 1      | 1      | 1      | 1      | 1      | 1      | 1      | 1      |
| 2830   | 4     | 2     | 4     | 4     | 4     | 4     | 1      | 1      | 2      | 2      | 2      | 1      | 2      | 2      |
| 2831   | 4     | 3     | 4     | 3     | 1     | 4     | 2      | 1      | 1      | 2      | 3      | 1      | 2      | 2      |
| 2832   | 3     | 1     | 1     | 1     | 4     | 5     | 1      | 1      | 1      | 1      | 1      | 1      | 1      | 1      |
| 2833   | 4     | 1     | 3     | 3     | 3     | 5     | 1      | 3      | 0      | 2      | 1      | 1      | 2      | 1      |
| 2834   | 5     | 1     | 1     | 3     | 3     | 4     | 1      | 1      | 1      | 0      | 1      | 1      | 1      | 1      |
| 2835   | 2     | 4     | 3     | 1     | 4     | 4     | 1      | 3      | 2      | 3      | 1      | 3      | 1      | 0      |

| respid | Q52_2 | Q53_1 | Q54_1 | Q54_2 | Q54_3 | Q55_1 | Q56a_1 | Q56b_1 | Q56c_1 | Q56d_1 | Q56e_1 | Q56f_1 | Q56g_1 | Q56h_1 |
|--------|-------|-------|-------|-------|-------|-------|--------|--------|--------|--------|--------|--------|--------|--------|
| 2836   | 4     | 2     | 1     | 4     | 1     | 4     | 1      | 2      | 1      | 1      | 1      | 2      | 2      | 2      |
| 2837   | 4     | 1     | 1     | 3     | 3     | 3     | 1      | 0      | 1      | 2      | 1      | 1      | 1      | 1      |
| 2838   | 5     | 2     | 1     | 3     | 3     | 5     | 1      | 1      | 0      | 1      | 1      | 2      | 1      | 0      |
| 2844   | 3     | 2     | 3     | 4     | 3     | 3     | 2      | 1      | 2      | 2      | 3      | 1      | 2      | 2      |
| 2845   | 5     | 2     | 0     | 1     | 5     | 4     | 1      | 0      | 0      | 0      | 0      | 0      | 0      | 0      |
| 2847   | 3     | 1     | 5     | 5     | 0     | 3     | 3      | 1      | 3      | 3      | 3      | 3      | 3      | 3      |
| 2848   | 3     | 2     | 1     | 3     | 3     | 4     | 1      | 1      | 0      | 2      | 0      | 1      | 1      | 2      |
| 2849   | 5     | 2     | 3     | 3     | 3     | 5     | 1      | 2      | 1      | 1      | 1      | 1      | 2      | 0      |
| 2851   | 4     | 2     | 3     | 3     | 3     | 4     | 1      | 1      | 1      | 2      | 1      | 1      | 2      | 0      |
| 2852   | 4     | 2     | 3     | 4     | 1     | 4     | 1      | 1      | 1      | 1      | 1      | 1      | 2      | 1      |
| 2853   | 3     | 2     | 3     | 3     | 3     | 3     | 1      | 1      | 1      | 1      | 1      | 1      | 1      | 1      |
| 2854   | 5     | 2     | 0     | 3     | 4     | 4     | 2      | 0      | 0      | 0      | 1      | 2      | 2      | 0      |
| 2856   | 5     | 2     | 3     | 4     | 0     | 3     | 2      | 1      | 0      | 1      | 3      | 2      | 2      | 2      |
| 2857   | 3     | 3     | 3     | 3     | 3     | 4     | 1      | 2      | 1      | 2      | 1      | 2      | 2      | 2      |
| 2858   | 4     | 2     | 1     | 3     | 3     | 4     | 1      | 1      | 1      | 1      | 1      | 1      | 2      | 1      |
| 2859   | 4     | 2     | 3     | 4     | 3     | 3     | 2      | 1      | 3      | 1      | 2      | 1      | 2      | 1      |
| 2860   | 1     | 3     | 4     | 4     | 0     | 3     | 3      | 1      | 3      | 2      | 3      | 2      | 2      | 2      |
| 2861   | 3     | 3     | 3     | 3     | 3     | 3     | 2      | 2      | 2      | 2      | 1      | 1      | 2      | 1      |
| 2863   | 5     | 1     | 1     | 3     | 3     | 5     | 0      | 1      | 0      | 0      | 1      | 0      | 1      | 0      |
| 2864   | 5     | 1     | 4     | 4     | 1     | 3     | 2      | 1      | 1      | 1      | 1      | 1      | 2      | 2      |
| 2866   | 5     | 2     | 1     | 3     | 4     | 5     | 3      | 0      | 2      | 0      | 1      | 0      | 2      | 0      |
| 2872   | 2     | 3     | 4     | 5     | 1     | 3     | 2      | 1      | 1      | 2      | 3      | 3      | 2      | 2      |
| 2875   | 5     | 1     | 0     | 0     | 4     | 5     | 0      | 1      | 1      | 0      | 1      | 0      | 0      | 0      |
| 2879   | 5     | 1     | 1     | 0     | 5     | 5     | 0      | 0      | 0      | 0      | 0      | 0      | 2      | 0      |
| 2881   | 4     | 2     | 3     | 3     | 4     | 4     | 2      | 1      | 1      | 2      | 1      | 1      | 2      | 1      |
| 2882   | 4     | 2     | 3     | 3     | 4     | 5     | 1      | 0      | 0      | 0      | 1      | 0      | 0      | 0      |
| 2883   | 5     | 1     | 1     | 1     | 5     | 5     | 0      | 0      | 0      | 0      | 0      | 0      | 0      | 0      |
| 2884   | 3     | 3     | 3     | 3     | 4     | 3     | 1      | 1      | 1      | 1      | 2      | 2      | 1      | 1      |
| 2885   | 3     | 2     | 1     | 3     | 3     | 4     | 1      | 1      | 1      | 2      | 1      | 1      | 2      | 1      |
| 2887   | 4     | 2     | 1     | 1     | 4     | 4     | 1      | 0      | 1      | 0      | 0      | 1      | 1      | 1      |
| 2888   | 4     | 2     | 0     | 1     | 0     | 5     | 0      | 0      | 0      | 0      | 0      | 0      | 0      | 0      |
| 2890   | 3     | 2     | 1     | 1     | 4     | 4     | 0      | 2      | 0      | 0      | 1      | 1      | 0      | 0      |

| respid | Q52_2 | Q53_1 | Q54_1 | Q54_2 | Q54_3 | Q55_1 | Q56a_1 | Q56b_1 | Q56c_1 | Q56d_1 | Q56e_1 | Q56f_1 | Q56g_1 | Q56h_1 |
|--------|-------|-------|-------|-------|-------|-------|--------|--------|--------|--------|--------|--------|--------|--------|
| 2891   | 5     | 1     | 4     | 4     | 4     | 5     | 1      | 2      | 0      | 0      | 1      | 1      | 2      | 1      |
| 2892   | 5     | 1     | 1     | 1     | 1     | 5     | 1      | 0      | 1      | 0      | 0      | 1      | 0      | 0      |
| 2895   | 3     | 2     | 1     | 3     | 4     | 3     | 1      | 0      | 0      | 1      | 1      | 1      | 1      | 0      |
| 2899   | 5     | 1     | 1     | 1     | 4     | 5     | 1      | 0      | 1      | 1      | 2      | 2      | 2      | 1      |
| 2900   | 3     | 2     | 1     | 1     | 5     | 2     | 1      | 0      | 0      | 1      | 2      | 0      | 1      | 1      |
| 2902   | 5     | 1     | 3     | 1     | 4     | 3     | 2      | 1      | 1      | 1      | 1      | 1      | 2      | 1      |
| 2903   | 5     | 1     | 3     | 3     | 1     | 5     | 1      | 2      | 1      | 2      | 2      | 2      | 2      | 1      |
| 2904   | 5     | 1     | 1     | 1     | 4     | 5     | 0      | 0      | 0      | 0      | 0      | 0      | 0      | 1      |
| 2906   | 4     | 2     | 1     | 3     | 4     | 5     | 0      | 1      | 0      | 0      | 1      | 1      | 0      | 1      |
| 2908   | 5     | 1     | 0     | 0     | 0     | 5     | 1      | 1      | 1      | 2      | 1      | 2      | 1      | 1      |
| 2910   | 4     | 1     | 3     | 3     | 3     | 5     | 0      | 0      | 0      | 0      | 0      | 1      | 1      | 0      |
| 2917   | 3     | 2     | 4     | 4     | 1     | 4     | 1      | 1      | 1      | 2      | 2      | 3      | 2      | 2      |
| 2918   | 4     | 2     | 1     | 4     | 3     | 4     | 1      | 1      | 1      | 1      | 1      | 2      | 1      | 2      |
| 2919   | 5     | 1     | 0     | 1     | 4     | 5     | 0      | 0      | 0      | 0      | 0      | 0      | 0      | 0      |
| 2920   | 5     | 1     | 0     | 0     | 4     | 5     | 0      | 0      | 0      | 0      | 1      | 0      | 0      | 0      |
| 2921   | 4     | 2     | 1     | 3     | 3     | 3     | 2      | 2      | 2      | 2      | 2      | 2      | 2      | 2      |
| 2922   | 4     | 1     | 1     | 3     | 4     | 5     | 1      | 1      | 0      | 1      | 1      | 2      | 1      | 0      |
| 2923   | 4     | 1     | 3     | 3     | 3     | 4     | 1      | 1      | 1      | 1      | 1      | 1      | 1      | 1      |
| 2924   | 4     | 2     | 0     | 0     | 1     | 4     | 0      | 0      | 0      | 0      | 0      | 1      | 0      | 0      |
| 2926   | 5     | 2     | 1     | 1     | 4     | 4     | 1      | 0      | 2      | 0      | 1      | 0      | 1      | 1      |
| 2928   | 4     | 2     | 1     | 1     | 1     | 5     | 1      | 1      | 0      | 1      | 1      | 1      | 1      | 0      |
| 2930   | 4     | 1     | 1     | 4     | 4     | 4     | 1      | 2      | 0      | 2      | 0      | 1      | 1      | 1      |
| 2931   | 4     | 1     | 1     | 3     | 4     | 4     | 1      | 0      | 1      | 0      | 1      | 0      | 1      | 1      |
| 2933   | 5     | 3     | 1     | 1     | 1     | 2     | 1      | 1      | 1      | 1      | 1      | 1      | 2      | 1      |
| 2935   | 5     | 1     | 1     | 1     | 4     | 4     | 0      | 0      | 1      | 0      | 1      | 1      | 0      | 1      |
| 2936   | 5     | 1     | 0     | 1     | 1     | 5     | 1      | 0      | 1      | 0      | 1      | 1      | 1      | 0      |
| 2937   | 3     | 4     | 1     | 3     | 1     | 4     | 1      | 0      | 1      | 1      | 1      | 1      | 1      | 2      |
| 2938   | 4     | 1     | 4     | 3     | 3     | 3     | 1      | 0      | 2      | 2      | 1      | 1      | 2      | 2      |
| 2944   | 4     | 2     | 0     | 3     | 4     | 4     | 1      | 0      | 1      | 0      | 0      | 1      | 1      | 0      |
| 2945   | 5     | 1     | 1     | 1     | 5     | 5     | 1      | 1      | 0      | 0      | 1      | 1      | 0      | 1      |
| 2947   | 5     | 1     | 3     | 1     | 4     | 5     | 1      | 0      | 0      | 0      | 1      | 0      | 0      | 1      |
| 2949   | 5     | 2     | 0     | 1     | 5     | 5     | 0      | 0      | 0      | 0      | 0      | 0      | 0      | 1      |



| respid | Q52_2 | Q53_1 | Q54_1 | Q54_2 | Q54_3 | Q55_1 | Q56a_1 | Q56b_1 | Q56c_1 | Q56d_1 | Q56e_1 | Q56f_1 | Q56g_1 | Q56h_1 |
|--------|-------|-------|-------|-------|-------|-------|--------|--------|--------|--------|--------|--------|--------|--------|
| 2951   | 4     | 2     | 3     | 4     | 3     | 5     | 3      | 1      | 2      | 2      | 2      | 2      | 2      | 2      |
| 2952   | 3     | 3     | 4     | 3     | 3     | 4     | 2      | 2      | 2      | 1      | 2      | 1      | 2      | 2      |
| 2953   | 4     | 3     | 1     | 3     | 3     | 4     | 0      | 1      | 1      | 1      | 2      | 2      | 1      | 1      |
| 2955   | 5     | 1     | 1     | 1     | 4     | 5     | 0      | 0      | 0      | 0      | 0      | 0      | 0      | 0      |
| 2957   | 5     | 1     | 0     | 0     | 5     | 5     | 0      | 0      | 0      | 0      | 0      | 0      | 0      | 0      |
| 2958   | 4     | 1     | 1     | 3     | 4     | 5     | 1      | 1      | 1      | 1      | 0      | 1      | 1      | 1      |
| 2960   | 5     | 2     | 1     | 1     | 4     | 5     | 0      | 0      | 1      | 0      | 1      | 1      | 1      | 2      |
| 2963   | 3     | 1     | 1     | 1     | 4     | 3     | 1      | 1      | 1      | 0      | 1      | 0      | 0      | 1      |
| 2964   | 5     | 1     | 0     | 0     | 0     | 4     | 0      | 2      | 0      | 0      | 0      | 1      | 0      | 1      |
| 2967   | 5     | 1     | 0     | 0     | 5     | 5     | 0      | 0      | 0      | 0      | 0      | 0      | 0      | 0      |
| 2968   | 5     | 1     | 1     | 1     | 4     | 5     | 0      | 0      | 0      | 0      | 0      | 0      | 0      | 0      |
| 2971   | 3     | 2     | 3     | 3     | 3     | 3     | 2      | 2      | 1      | 2      | 2      | 1      | 1      | 0      |
| 2974   | 5     | 1     | 0     | 1     | 4     | 5     | 0      | 0      | 0      | 0      | 0      | 0      | 0      | 0      |
| 2975   | 4     | 2     | 3     | 3     | 3     | 3     | 1      | 1      | 0      | 0      | 1      | 1      | 1      | 1      |
| 2982   | 5     | 1     | 1     | 1     | 5     | 5     | 0      | 0      | 0      | 0      | 1      | 1      | 0      | 0      |
| 2983   | 5     | 1     | 1     | 3     | 4     | 4     | 1      | 0      | 0      | 0      | 0      | 1      | 1      | 1      |
| 2985   | 5     | 1     | 3     | 3     | 4     | 5     | 1      | 1      | 0      | 0      | 1      | 1      | 1      | 1      |
| 2986   | 4     | 3     | 4     | 4     | 4     | 4     | 1      | 2      | 2      | 2      | 2      | 1      | 1      | 1      |
| 2987   | 3     | 1     | 1     | 3     | 3     | 3     | 1      | 1      | 1      | 1      | 1      | 1      | 1      | 1      |
| 2988   | 4     | 2     | 1     | 3     | 4     | 4     | 0      | 1      | 0      | 0      | 1      | 0      | 1      | 2      |
| 2993   | 5     | 1     | 4     | 4     | 5     | 5     | 3      | 1      | 0      | 2      | 1      | 1      | 2      | 1      |
| 2996   | 5     | 1     | 0     | 1     | 4     | 4     | 0      | 0      | 0      | 0      | 1      | 0      | 1      | 1      |
| 2997   | 4     | 5     | 0     | 0     | 0     | 2     | 1      | 0      | 0      | 0      | 0      | 1      | 1      | 0      |
| 2998   | 4     | 2     | 3     | 3     | 4     | 4     | 0      | 0      | 0      | 1      | 1      | 1      | 1      | 0      |
| 3004   | 5     | 1     | 1     | 1     | 5     | 5     | 0      | 0      | 0      | 0      | 0      | 0      | 0      | 0      |
| 3007   | 4     | 1     | 0     | 1     | 3     | 5     | 1      | 0      | 0      | 2      | 1      | 1      | 1      | 1      |
| 3011   | 3     | 3     | 3     | 1     | 3     | 3     | 1      | 0      | 1      | 0      | 1      | 1      | 1      | 2      |
| 3012   | 5     | 1     | 0     | 3     | 4     | 5     | 0      | 0      | 0      | 0      | 0      | 0      | 0      | 0      |
| 3013   | 4     | 2     | 3     | 4     | 3     | 4     | 2      | 0      | 0      | 1      | 1      | 1      | 2      | 0      |
| 3014   | 5     | 1     | 0     | 0     | 5     | 5     | 0      | 0      | 0      | 0      | 0      | 0      | 0      | 0      |
| 3015   | 5     | 1     | 1     | 1     | 3     | 4     | 1      | 0      | 1      | 1      | 1      | 1      | 1      | 0      |
| 3016   | 3     | 2     | 1     | 1     | 3     | 4     | 1      | 0      | 1      | 1      | 1      | 1      | 1      | 1      |

| respid | Q52_2 | Q53_1 | Q54_1 | Q54_2 | Q54_3 | Q55_1 | Q56a_1 | Q56b_1 | Q56c_1 | Q56d_1 | Q56e_1 | Q56f_1 | Q56g_1 | Q56h_1 |
|--------|-------|-------|-------|-------|-------|-------|--------|--------|--------|--------|--------|--------|--------|--------|
| 3017   | 4     | 2     | 3     | 1     | 4     | 5     | 1      | 1      | 0      | 0      | 1      | 2      | 1      | 1      |
| 3020   | 4     | 3     | 4     | 5     | 4     | 4     | 1      | 1      | 1      | 0      | 1      | 1      | 2      | 2      |
| 3022   | 4     | 1     | 1     | 1     | 4     | 4     | 0      | 0      | 0      | 0      | 0      | 0      | 0      | 1      |
| 3023   | 5     | 2     | 0     | 1     | 5     | 5     | 0      | 0      | 0      | 0      | 0      | 0      | 0      | 0      |
| 3026   | 4     | 2     | 1     | 1     | 4     | 4     | 1      | 0      | 2      | 2      | 2      | 2      | 2      | 1      |
| 3038   | 2     | 2     | 3     | 1     | 1     | 3     | 1      | 2      | 2      | 2      | 2      | 2      | 1      | 2      |
| 3039   | 4     | 3     | 1     | 1     | 3     | 4     | 1      | 0      | 1      | 0      | 1      | 1      | 1      | 1      |
| 3040   | 4     | 2     | 1     | 3     | 4     | 5     | 0      | 0      | 0      | 2      | 0      | 1      | 1      | 0      |
| 3041   | 5     | 1     | 1     | 1     | 5     | 4     | 1      | 1      | 1      | 1      | 1      | 1      | 1      | 1      |
| 3042   | 3     | 1     | 1     | 3     | 3     | 3     | 1      | 1      | 1      | 1      | 1      | 1      | 1      | 1      |
| 3044   | 4     | 2     | 1     | 1     | 4     | 4     | 1      | 0      | 1      | 0      | 1      | 0      | 0      | 0      |
| 3050   | 4     | 2     | 3     | 3     | 3     | 4     | 1      | 2      | 1      | 1      | 1      | 1      | 2      | 1      |
| 3052   | 4     | 1     | 1     | 1     | 4     | 4     | 0      | 0      | 1      | 0      | 1      | 0      | 0      | 1      |
| 3056   | 4     | 3     | 1     | 1     | 3     | 4     | 1      | 1      | 2      | 1      | 2      | 1      | 1      | 1      |
| 3059   | 4     | 2     | 1     | 1     | 3     | 4     | 1      | 1      | 0      | 1      | 1      | 1      | 1      | 1      |
| 3060   | 4     | 2     | 4     | 3     | 1     | 3     | 1      | 1      | 2      | 2      | 2      | 1      | 2      | 1      |
| 3063   | 4     | 2     | 1     | 3     | 4     | 4     | 1      | 1      | 0      | 1      | 1      | 1      | 1      | 1      |
| 3065   | 3     | 1     | 1     | 3     | 3     | 3     | 1      | 0      | 1      | 1      | 1      | 1      | 2      | 1      |
| 3067   | 5     | 2     | 4     | 4     | 3     | 4     | 2      | 1      | 0      | 1      | 1      | 2      | 2      | 1      |
| 3068   | 4     | 1     | 5     | 4     | 3     | 5     | 0      | 1      | 1      | 1      | 0      | 3      | 3      | 0      |
| 3072   | 5     | 1     | 1     | 1     | 4     | 4     | 1      | 0      | 1      | 0      | 1      | 0      | 0      | 1      |
| 3074   | 5     | 1     | 3     | 3     | 3     | 5     | 1      | 0      | 0      | 2      | 1      | 1      | 2      | 1      |
| 3075   | 5     | 1     | 1     | 3     | 3     | 5     | 1      | 1      | 0      | 0      | 1      | 1      | 2      | 1      |
| 3076   | 5     | 1     | 1     | 1     | 4     | 5     | 1      | 1      | 1      | 1      | 2      | 1      | 1      | 1      |
| 3079   | 5     | 2     | 0     | 1     | 4     | 3     | 1      | 0      | 1      | 0      | 0      | 0      | 0      | 1      |
| 3082   | 2     | 3     | 4     | 3     | 3     | 3     | 2      | 2      | 1      | 1      | 1      | 1      | 1      | 1      |
| 3083   | 5     | 1     | 1     | 1     | 4     | 5     | 0      | 0      | 0      | 0      | 1      | 0      | 0      | 1      |
| 3084   | 3     | 1     | 3     | 3     | 1     | 2     | 2      | 1      | 1      | 1      | 1      | 2      | 0      | 0      |
| 3085   | 5     | 1     | 0     | 0     | 5     | 5     | 0      | 0      | 0      | 0      | 1      | 1      | 1      | 0      |
| 3090   | 5     | 2     | 0     | 1     | 4     | 4     | 1      | 0      | 0      | 2      | 1      | 1      | 1      | 0      |
| 3091   | 5     | 3     | 1     | 3     | 3     | 3     | 1      | 0      | 0      | 2      | 1      | 1      | 1      | 1      |
| 3092   | 4     | 2     | 1     | 3     | 4     | 4     | 0      | 0      | 0      | 1      | 0      | 1      | 1      | 0      |

| respid | Q52_2 | Q53_1 | Q54_1 | Q54_2 | Q54_3 | Q55_1 | Q56a_1 | Q56b_1 | Q56c_1 | Q56d_1 | Q56e_1 | Q56f_1 | Q56g_1 | Q56h_1 |
|--------|-------|-------|-------|-------|-------|-------|--------|--------|--------|--------|--------|--------|--------|--------|
| 3095   | 5     | 1     | 1     | 3     | 4     | 5     | 1      | 1      | 0      | 1      | 2      | 2      | 2      | 1      |
| 3096   | 3     | 3     | 3     | 4     | 3     | 4     | 1      | 1      | 2      | 1      | 2      | 2      | 2      | 1      |
| 3097   | 4     | 2     | 1     | 3     | 4     | 4     | 1      | 0      | 1      | 0      | 1      | 1      | 1      | 1      |
| 3099   | 2     | 4     | 4     | 3     | 3     | 4     | 2      | 2      | 2      | 2      | 2      | 2      | 2      | 2      |
| 3101   | 5     | 1     | 0     | 0     | 3     | 5     | 0      | 0      | 0      | 0      | 1      | 1      | 0      | 1      |
| 3103   | 4     | 1     | 0     | 0     | 5     | 5     | 0      | 0      | 0      | 0      | 0      | 0      | 0      | 0      |
| 3104   | 4     | 2     | 4     | 4     | 5     | 4     | 1      | 1      | 0      | 1      | 0      | 1      | 1      | 1      |
| 3105   | 5     | 1     | 5     | 3     | 5     | 5     | 0      | 0      | 0      | 0      | 0      | 0      | 0      | 0      |
| 3107   | 4     | 1     | 3     | 3     | 4     | 3     | 0      | 2      | 0      | 2      | 2      | 1      | 2      | 3      |
| 3108   | 5     | 1     | 1     | 3     | 4     | 4     | 2      | 2      | 2      | 2      | 2      | 2      | 2      | 2      |
| 3109   | 4     | 2     | 0     | 0     | 4     | 1     | 1      | 1      | 1      | 0      | 1      | 0      | 0      | 1      |
| 3116   | 4     | 2     | 1     | 1     | 4     | 4     | 0      | 0      | 1      | 0      | 1      | 1      | 1      | 0      |
| 3117   | 5     | 1     | 1     | 1     | 3     | 4     | 1      | 2      | 1      | 0      | 2      | 1      | 2      | 1      |
| 3119   | 5     | 1     | 1     | 3     | 4     | 5     | 0      | 0      | 0      | 1      | 1      | 0      | 1      | 1      |
| 3120   | 5     | 1     | 1     | 1     | 5     | 5     | 0      | 1      | 0      | 0      | 0      | 1      | 1      | 0      |
| 3130   | 5     | 1     | 0     | 0     | 0     | 5     | 1      | 0      | 1      | 0      | 1      | 1      | 1      | 1      |
| 3131   | 4     | 2     | 1     | 4     | 4     | 4     | 0      | 2      | 1      | 2      | 1      | 1      | 1      | 1      |
| 3133   | 5     | 1     | 1     | 3     | 4     | 5     | 1      | 1      | 0      | 1      | 1      | 1      | 0      | 0      |
| 3134   | 4     | 2     | 1     | 3     | 4     | 3     | 1      | 1      | 1      | 1      | 1      | 2      | 2      | 2      |
| 3135   | 4     | 2     | 1     | 4     | 3     | 4     | 1      | 1      | 1      | 1      | 2      | 2      | 1      | 2      |
| 3145   | 5     | 1     | 3     | 3     | 3     | 5     | 1      | 0      | 0      | 0      | 1      | 0      | 1      | 1      |
| 3147   | 5     | 1     | 1     | 1     | 5     | 5     | 0      | 0      | 0      | 0      | 1      | 0      | 0      | 1      |
| 3152   | 4     | 1     | 1     | 1     | 4     | 5     | 1      | 1      | 1      | 1      | 1      | 1      | 1      | 0      |
| 3155   | 2     | 4     | 5     | 4     | 1     | 4     | 3      | 1      | 2      | 2      | 2      | 3      | 2      | 3      |
| 3156   | 5     | 1     | 3     | 3     | 3     | 5     | 1      | 0      | 0      | 0      | 1      | 1      | 1      | 1      |
| 3157   | 3     | 2     | 3     | 3     | 3     | 4     | 1      | 1      | 1      | 1      | 1      | 1      | 1      | 2      |
| 3166   | 3     | 4     | 1     | 1     | 3     | 4     | 1      | 0      | 1      | 2      | 1      | 1      | 1      | 1      |
| 3169   | 5     | 3     | 3     | 4     | 5     | 5     | 1      | 2      | 1      | 2      | 1      | 2      | 1      | 1      |
| 3179   | 3     | 2     | 1     | 4     | 4     | 5     | 1      | 0      | 2      | 0      | 1      | 1      | 1      | 1      |
| 3181   | 4     | 2     | 3     | 3     | 3     | 4     | 0      | 1      | 1      | 1      | 1      | 1      | 2      | 1      |
| 3185   | 5     | 1     | 1     | 1     | 4     | 5     | 1      | 1      | 1      | 0      | 0      | 0      | 1      | 0      |
| 3190   | 5     | 1     | 5     | 5     | 5     | 5     | 1      | 1      | 1      | 1      | 1      | 1      | 2      | 1      |

| respid | Q52_2 | Q53_1 | Q54_1 | Q54_2 | Q54_3 | Q55_1 | Q56a_1 | Q56b_1 | Q56c_1 | Q56d_1 | Q56e_1 | Q56f_1 | Q56g_1 | Q56h_1 |
|--------|-------|-------|-------|-------|-------|-------|--------|--------|--------|--------|--------|--------|--------|--------|
| 3191   | 5     | 1     | 1     | 1     | 4     | 4     | 1      | 0      | 1      | 1      | 1      | 1      | 1      | 0      |
| 3192   | 5     | 2     | 0     | 0     | 5     | 5     | 1      | 0      | 0      | 0      | 0      | 0      | 0      | 0      |
| 3193   | 5     | 1     | 4     | 4     | 4     | 4     | 2      | 1      | 0      | 0      | 1      | 1      | 0      | 0      |
| 3195   | 5     | 1     | 1     | 3     | 4     | 5     | 0      | 2      | 1      | 0      | 1      | 1      | 1      | 1      |
| 3202   | 4     | 2     | 1     | 3     | 3     | 3     | 1      | 0      | 2      | 1      | 2      | 1      | 2      | 1      |
| 3204   | 4     | 1     | 1     | 1     | 3     | 4     | 1      | 0      | 1      | 1      | 1      | 1      | 2      | 1      |
| 3208   | 4     | 2     | 1     | 1     | 4     | 4     | 1      | 0      | 1      | 0      | 1      | 1      | 1      | 1      |
| 3212   | 5     | 1     | 1     | 3     | 4     | 5     | 0      | 0      | 0      | 0      | 0      | 0      | 0      | 0      |
| 3218   | 4     | 1     | 4     | 4     | 4     | 4     | 0      | 0      | 0      | 0      | 0      | 0      | 0      | 0      |
| 3219   | 4     | 2     | 0     | 1     | 4     | 4     | 1      | 1      | 0      | 1      | 1      | 0      | 0      | 1      |
| 3220   | 4     | 1     | 1     | 3     | 4     | 5     | 1      | 1      | 0      | 1      | 1      | 2      | 1      | 1      |
| 3221   | 3     | 2     | 3     | 4     | 1     | 4     | 2      | 1      | 1      | 2      | 1      | 2      | 1      | 1      |
| 3223   | 5     | 1     | 1     | 1     | 5     | 5     | 0      | 0      | 0      | 0      | 0      | 0      | 0      | 0      |
| 3231   | 3     | 2     | 4     | 4     | 1     | 3     | 2      | 2      | 3      | 1      | 2      | 1      | 2      | 2      |
| 3232   | 3     | 3     | 3     | 3     | 4     | 3     | 2      | 2      | 1      | 1      | 1      | 1      | 1      | 1      |
| 3234   | 4     | 2     | 3     | 0     | 3     | 3     | 1      | 2      | 2      | 2      | 2      | 1      | 1      | 2      |
| 3235   | 5     | 1     | 0     | 0     | 5     | 5     | 0      | 0      | 0      | 3      | 1      | 0      | 0      | 3      |
| 3237   | 5     | 1     | 0     | 3     | 5     | 5     | 0      | 0      | 0      | 0      | 0      | 1      | 1      | 0      |
| 3238   | 5     | 1     | 0     | 0     | 5     | 5     | 0      | 0      | 0      | 0      | 0      | 0      | 0      | 0      |
| 3240   | 4     | 1     | 1     | 1     | 4     | 5     | 0      | 0      | 0      | 0      | 0      | 0      | 0      | 0      |
| 3241   | 5     | 2     | 1     | 1     | 4     | 4     | 0      | 0      | 1      | 0      | 0      | 1      | 1      | 1      |
| 3243   | 4     | 2     | 3     | 4     | 3     | 3     | 1      | 1      | 2      | 2      | 2      | 2      | 2      | 1      |
| 3244   | 4     | 1     | 1     | 3     | 3     | 4     | 1      | 1      | 1      | 1      | 1      | 1      | 2      | 1      |
| 3247   | 4     | 1     | 3     | 3     | 4     | 4     | 1      | 1      | 0      | 1      | 1      | 0      | 1      | 2      |
| 3250   | 5     | 1     | 1     | 1     | 1     | 5     | 0      | 1      | 0      | 1      | 0      | 2      | 1      | 0      |
| 3251   | 3     | 3     | 3     | 3     | 3     | 3     | 1      | 1      | 1      | 2      | 2      | 1      | 2      | 2      |
| 3255   | 5     | 1     | 0     | 1     | 4     | 5     | 0      | 0      | 0      | 0      | 0      | 0      | 0      | 0      |
| 3256   | 5     | 2     | 1     | 1     | 4     | 4     | 0      | 1      | 0      | 1      | 1      | 1      | 2      | 1      |
| 3257   | 5     | 1     | 1     | 1     | 4     | 5     | 1      | 0      | 0      | 0      | 0      | 0      | 0      | 0      |
| 3258   | 5     | 1     | 0     | 1     | 5     | 5     | 0      | 0      | 0      | 0      | 1      | 0      | 0      | 1      |
| 3259   | 4     | 1     | 3     | 4     | 3     | 4     | 1      | 2      | 0      | 1      | 2      | 3      | 2      | 1      |
| 3260   | 5     | 2     | 4     | 1     | 1     | 4     | 0      | 0      | 2      | 2      | 2      | 1      | 1      | 1      |

| respid | Q52_2 | Q53_1 | Q54_1 | Q54_2 | Q54_3 | Q55_1 | Q56a_1 | Q56b_1 | Q56c_1 | Q56d_1 | Q56e_1 | Q56f_1 | Q56g_1 | Q56h_1 |   |
|--------|-------|-------|-------|-------|-------|-------|--------|--------|--------|--------|--------|--------|--------|--------|---|
| 3261   | 5     | 1     | 1     | 1     | 1     | 5     | 5      | 1      | 0      | 0      | 0      | 1      | 0      | 0      | 1 |
| 3262   | 4     | 3     | 1     | 1     | 1     | 4     | 4      | 0      | 0      | 1      | 0      | 1      | 0      | 0      | 1 |
| 3264   | 4     | 2     | 1     | 3     | 3     | 3     | 4      | 1      | 1      | 2      | 0      | 1      | 1      | 1      | 1 |
| 3265   | 5     | 3     | 1     | 3     | 3     | 4     | 5      | 0      | 0      | 0      | 0      | 1      | 0      | 1      | 0 |
| 3267   | 4     | 1     | 3     | 3     | 3     | 4     | 4      | 1      | 1      | 1      | 2      | 1      | 1      | 1      | 1 |
| 3268   | 4     | 2     | 1     | 4     | 4     | 3     | 4      | 1      | 3      | 2      | 2      | 1      | 2      | 1      | 1 |
| 3270   | 5     | 1     | 0     | 1     | 1     | 5     | 5      | 0      | 0      | 0      | 0      | 0      | 1      | 0      | 0 |
| 3271   | 5     | 1     | 1     | 1     | 1     | 5     | 5      | 0      | 0      | 0      | 0      | 1      | 0      | 1      | 0 |
| 3274   | 5     | 1     | 0     | 1     | 1     | 4     | 5      | 0      | 0      | 0      | 0      | 0      | 0      | 0      | 1 |
| 3276   | 5     | 2     | 1     | 1     | 1     | 4     | 5      | 0      | 0      | 0      | 0      | 1      | 0      | 0      | 1 |
| 3277   | 5     | 2     | 1     | 1     | 1     | 4     | 4      | 0      | 0      | 1      | 0      | 1      | 0      | 1      | 1 |
| 3279   | 4     | 1     | 3     | 3     | 3     | 3     | 3      | 1      | 1      | 1      | 0      | 1      | 1      | 1      | 1 |
| 3281   | 5     | 1     | 0     | 0     | 0     | 5     | 5      | 0      | 0      | 0      | 0      | 1      | 0      | 0      | 0 |
| 3283   | 4     | 2     | 1     | 3     | 3     | 3     | 3      | 0      | 0      | 1      | 0      | 1      | 2      | 1      | 1 |
| 3285   | 4     | 2     | 1     | 1     | 1     | 3     | 4      | 1      | 2      | 0      | 1      | 1      | 0      | 1      | 1 |
| 3286   | 5     | 1     | 1     | 1     | 1     | 4     | 4      | 1      | 0      | 0      | 0      | 1      | 0      | 1      | 2 |
| 3287   | 4     | 2     | 3     | 3     | 3     | 4     | 4      | 1      | 1      | 2      | 2      | 1      | 1      | 2      | 1 |
| 3289   | 5     | 2     | 1     | 1     | 1     | 4     | 5      | 1      | 0      | 0      | 0      | 1      | 1      | 1      | 1 |
| 3290   | 5     | 2     | 0     | 0     | 0     | 4     | 3      | 0      | 1      | 1      | 2      | 1      | 0      | 1      | 0 |
| 3291   | 5     | 2     | 0     | 1     | 1     | 5     | 5      | 0      | 1      | 0      | 0      | 0      | 0      | 0      | 0 |
| 3292   | 2     | 3     | 3     | 4     | 4     | 3     | 3      | 1      | 2      | 2      | 2      | 1      | 2      | 2      | 1 |
| 3293   | 3     | 2     | 1     | 3     | 3     | 4     | 4      | 1      | 1      | 0      | 1      | 0      | 1      | 1      | 1 |
| 3294   | 4     | 2     | 1     | 1     | 1     | 1     | 4      | 1      | 2      | 2      | 2      | 1      | 1      | 1      | 1 |
| 3296   | 4     | 2     | 1     | 1     | 1     | 3     | 4      | 2      | 1      | 1      | 1      | 1      | 1      | 1      | 1 |
| 3306   | 5     | 1     | 1     | 1     | 1     | 4     | 4      | 0      | 0      | 0      | 0      | 0      | 0      | 0      | 0 |
| 3307   | 4     | 4     | 3     | 3     | 3     | 4     | 3      | 1      | 2      | 1      | 0      | 1      | 1      | 1      | 2 |
| 3308   | 5     | 1     | 1     | 1     | 1     | 4     | 4      | 1      | 1      | 1      | 0      | 1      | 0      | 1      | 0 |
| 3312   | 5     | 1     | 1     | 1     | 1     | 4     | 5      | 1      | 0      | 0      | 0      | 1      | 0      | 0      | 1 |
| 3313   | 3     | 2     | 3     | 3     | 3     | 3     | 4      | 1      | 0      | 2      | 1      | 1      | 1      | 1      | 0 |
| 3316   | 5     | 2     | 1     | 4     | 4     | 4     | 5      | 0      | 0      | 1      | 0      | 1      | 1      | 2      | 2 |
| 3317   | 5     | 3     | 1     | 1     | 1     | 4     | 4      | 1      | 2      | 1      | 1      | 1      | 1      | 1      | 2 |
| 3320   | 4     | 2     | 3     | 3     | 3     | 3     | 3      | 1      | 0      | 0      | 0      | 1      | 0      | 1      | 1 |

| respid | Q52_2 | Q53_1 | Q54_1 | Q54_2 | Q54_3 | Q55_1 | Q56a_1 | Q56b_1 | Q56c_1 | Q56d_1 | Q56e_1 | Q56f_1 | Q56g_1 | Q56h_1 |
|--------|-------|-------|-------|-------|-------|-------|--------|--------|--------|--------|--------|--------|--------|--------|
| 3321   | 4     | 3     | 1     | 1     | 4     | 4     | 2      | 1      | 1      | 1      | 1      | 1      | 1      | 1      |
| 3322   | 5     | 1     | 1     | 1     | 5     | 5     | 0      | 0      | 0      | 0      | 1      | 0      | 0      | 0      |
| 3323   | 5     | 1     | 1     | 1     | 4     | 4     | 0      | 0      | 1      | 0      | 1      | 0      | 0      | 1      |
| 3325   | 2     | 3     | 0     | 3     | 1     | 4     | 1      | 0      | 0      | 2      | 2      | 1      | 0      | 2      |
| 3332   | 5     | 1     | 0     | 1     | 5     | 5     | 0      | 0      | 0      | 0      | 0      | 0      | 0      | 0      |
| 3334   | 5     | 1     | 0     | 3     | 4     | 5     | 0      | 0      | 0      | 0      | 1      | 0      | 0      | 0      |
| 3335   | 3     | 4     | 3     | 3     | 4     | 3     | 1      | 0      | 0      | 1      | 1      | 2      | 1      | 0      |
| 3341   | 3     | 2     | 3     | 3     | 3     | 5     | 1      | 1      | 1      | 2      | 1      | 1      | 2      | 2      |
| 3345   | 3     | 3     | 3     | 4     | 3     | 3     | 1      | 1      | 2      | 1      | 1      | 1      | 2      | 1      |
| 3346   | 4     | 2     | 3     | 3     | 3     | 4     | 1      | 2      | 1      | 1      | 1      | 1      | 1      | 1      |
| 3349   | 4     | 1     | 1     | 1     | 4     | 5     | 1      | 0      | 1      | 0      | 1      | 0      | 1      | 1      |
| 3351   | 5     | 1     | 1     | 1     | 4     | 4     | 1      | 1      | 0      | 1      | 1      | 1      | 1      | 1      |
| 3353   | 5     | 1     | 1     | 1     | 4     | 5     | 1      | 1      | 1      | 2      | 1      | 1      | 1      | 1      |
| 3354   | 5     | 3     | 0     | 3     | 4     | 5     | 2      | 2      | 2      | 2      | 2      | 1      | 3      | 2      |
| 3356   | 4     | 1     | 3     | 3     | 3     | 4     | 1      | 2      | 1      | 1      | 1      | 1      | 2      | 1      |
| 3357   | 4     | 1     | 3     | 3     | 1     | 3     | 2      | 2      | 2      | 2      | 2      | 1      | 2      | 0      |
| 3360   | 3     | 2     | 1     | 3     | 0     | 3     | 1      | 0      | 2      | 1      | 1      | 2      | 1      | 1      |
| 3361   | 5     | 2     | 1     | 0     | 5     | 5     | 0      | 0      | 1      | 0      | 0      | 0      | 0      | 1      |
| 3362   | 5     | 1     | 1     | 0     | 4     | 5     | 1      | 1      | 0      | 0      | 1      | 0      | 1      | 1      |
| 3363   | 4     | 2     | 1     | 3     | 4     | 3     | 1      | 0      | 0      | 0      | 1      | 0      | 0      | 0      |
| 3364   | 2     | 4     | 3     | 4     | 4     | 3     | 1      | 2      | 2      | 1      | 3      | 2      | 1      | 2      |
| 3368   | 4     | 2     | 1     | 1     | 3     | 3     | 1      | 1      | 2      | 0      | 1      | 1      | 1      | 1      |
| 3370   | 3     | 3     | 1     | 1     | 3     | 2     | 1      | 0      | 0      | 0      | 1      | 0      | 0      | 1      |
| 3371   | 5     | 1     | 3     | 3     | 3     | 4     | 0      | 0      | 0      | 0      | 0      | 0      | 0      | 0      |
| 3379   | 5     | 1     | 1     | 1     | 3     | 5     | 0      | 0      | 0      | 0      | 1      | 0      | 0      | 0      |
| 3380   | 4     | 1     | 3     | 4     | 4     | 4     | 1      | 1      | 1      | 0      | 1      | 0      | 0      | 1      |
| 3382   | 5     | 4     | 1     | 3     | 3     | 5     | 1      | 0      | 0      | 0      | 1      | 1      | 1      | 1      |
| 3384   | 4     | 2     | 1     | 1     | 4     | 4     | 1      | 1      | 1      | 1      | 1      | 1      | 1      | 1      |
| 3385   | 4     | 1     | 3     | 4     | 1     | 5     | 1      | 1      | 2      | 1      | 1      | 2      | 2      | 1      |
| 3388   | 5     | 2     | 1     | 1     | 1     | 5     | 3      | 0      | 1      | 0      | 1      | 0      | 1      | 1      |
| 3392   | 4     | 1     | 4     | 4     | 4     | 4     | 1      | 2      | 1      | 1      | 1      | 1      | 2      | 1      |
| 3393   | 5     | 2     | 1     | 3     | 3     | 5     | 1      | 2      | 1      | 0      | 1      | 1      | 1      | 1      |

| respid | Q52_2 | Q53_1 | Q54_1 | Q54_2 | Q54_3 | Q55_1 | Q56a_1 | Q56b_1 | Q56c_1 | Q56d_1 | Q56e_1 | Q56f_1 | Q56g_1 | Q56h_1 |
|--------|-------|-------|-------|-------|-------|-------|--------|--------|--------|--------|--------|--------|--------|--------|
| 3394   | 4     | 2     | 1     | 3     | 4     | 3     | 1      | 2      | 1      | 2      | 1      | 1      | 1      | 1      |
| 3395   | 5     | 4     | 0     | 0     | 5     | 5     | 0      | 0      | 0      | 0      | 0      | 0      | 0      | 0      |
| 3396   | 4     | 3     | 4     | 5     | 1     | 2     | 2      | 2      | 2      | 2      | 3      | 3      | 3      | 3      |
| 3397   | 4     | 2     | 1     | 1     | 3     | 4     | 1      | 1      | 0      | 0      | 1      | 0      | 1      | 1      |
| 3398   | 5     | 2     | 1     | 3     | 4     | 5     | 1      | 0      | 1      | 0      | 0      | 0      | 0      | 1      |
| 3399   | 3     | 4     | 3     | 4     | 1     | 2     | 1      | 1      | 2      | 2      | 2      | 2      | 1      | 2      |
| 3400   | 3     | 2     | 3     | 3     | 3     | 3     | 1      | 1      | 0      | 0      | 1      | 1      | 1      | 1      |
| 3401   | 2     | 4     | 3     | 3     | 1     | 3     | 1      | 2      | 1      | 2      | 3      | 2      | 2      | 1      |
| 3402   | 4     | 2     | 3     | 4     | 3     | 5     | 1      | 1      | 1      | 2      | 1      | 1      | 1      | 1      |
| 3403   | 4     | 2     | 1     | 3     | 3     | 4     | 1      | 2      | 2      | 2      | 1      | 1      | 1      | 1      |
| 3405   | 2     | 3     | 0     | 1     | 3     | 3     | 0      | 0      | 0      | 0      | 0      | 0      | 0      | 0      |
| 3407   | 3     | 3     | 3     | 3     | 3     | 3     | 2      | 2      | 1      | 1      | 1      | 1      | 1      | 1      |
| 3410   | 5     | 2     | 3     | 3     | 1     | 5     | 1      | 0      | 2      | 1      | 1      | 2      | 2      | 2      |
| 3411   | 4     | 3     | 3     | 3     | 3     | 3     | 1      | 1      | 2      | 1      | 1      | 2      | 2      | 1      |
| 3413   | 5     | 1     | 0     | 0     | 5     | 5     | 0      | 0      | 0      | 0      | 0      | 0      | 0      | 0      |
| 3414   | 5     | 1     | 0     | 0     | 5     | 5     | 0      | 0      | 0      | 0      | 1      | 0      | 0      | 0      |
| 3420   | 5     | 1     | 0     | 0     | 4     | 5     | 0      | 0      | 0      | 0      | 0      | 0      | 0      | 0      |
| 3421   | 3     | 3     | 1     | 3     | 3     | 3     | 1      | 0      | 2      | 0      | 1      | 1      | 1      | 1      |
| 3425   | 5     | 2     | 1     | 3     | 4     | 5     | 1      | 1      | 0      | 1      | 1      | 2      | 1      | 0      |
| 3426   | 3     | 3     | 3     | 4     | 3     | 3     | 1      | 2      | 1      | 1      | 1      | 1      | 2      | 1      |
| 3429   | 2     | 3     | 1     | 3     | 5     | 3     | 1      | 1      | 1      | 1      | 1      | 1      | 0      | 3      |
| 3430   | 3     | 3     | 3     | 3     | 4     | 3     | 1      | 2      | 2      | 0      | 1      | 1      | 1      | 0      |
| 3433   | 4     | 2     | 1     | 4     | 3     | 4     | 1      | 1      | 1      | 1      | 1      | 2      | 2      | 1      |
| 3434   | 3     | 3     | 1     | 3     | 3     | 3     | 1      | 1      | 2      | 1      | 1      | 1      | 2      | 1      |
| 3437   | 3     | 1     | 3     | 3     | 3     | 5     | 0      | 0      | 1      | 1      | 1      | 1      | 1      | 1      |
| 3439   | 4     | 2     | 1     | 3     | 4     | 4     | 1      | 0      | 1      | 2      | 1      | 1      | 1      | 0      |
| 3441   | 3     | 2     | 3     | 3     | 3     | 4     | 1      | 2      | 1      | 1      | 1      | 1      | 2      | 1      |
| 3442   | 4     | 2     | 1     | 3     | 4     | 5     | 1      | 1      | 1      | 1      | 1      | 1      | 0      | 1      |
| 3444   | 5     | 1     | 1     | 1     | 4     | 5     | 1      | 0      | 2      | 0      | 1      | 0      | 1      | 0      |
| 3445   | 4     | 2     | 1     | 1     | 4     | 4     | 0      | 0      | 0      | 0      | 0      | 0      | 1      | 1      |
| 3450   | 4     | 2     | 1     | 3     | 4     | 4     | 1      | 1      | 1      | 1      | 1      | 1      | 1      | 0      |
| 3452   | 5     | 4     | 3     | 5     | 4     | 4     | 1      | 0      | 1      | 2      | 2      | 2      | 1      | 2      |

| respid | Q52_2 | Q53_1 | Q54_1 | Q54_2 | Q54_3 | Q55_1 | Q56a_1 | Q56b_1 | Q56c_1 | Q56d_1 | Q56e_1 | Q56f_1 | Q56g_1 | Q56h_1 |
|--------|-------|-------|-------|-------|-------|-------|--------|--------|--------|--------|--------|--------|--------|--------|
| 3456   | 5     | 1     | 1     | 3     | 3     | 4     | 1      | 1      | 1      | 1      | 1      | 1      | 1      | 1      |
| 3459   | 5     | 1     | 5     | 5     | 5     | 5     | 0      | 0      | 0      | 0      | 0      | 0      | 0      | 3      |
| 3460   | 5     | 2     | 1     | 1     | 4     | 5     | 1      | 1      | 1      | 2      | 1      | 2      | 1      | 1      |
| 3461   | 4     | 2     | 1     | 3     | 4     | 4     | 1      | 1      | 1      | 2      | 1      | 1      | 1      | 1      |
| 3466   | 3     | 3     | 3     | 4     | 3     | 3     | 1      | 1      | 1      | 1      | 1      | 1      | 2      | 1      |
| 3471   | 4     | 1     | 1     | 1     | 4     | 4     | 1      | 0      | 1      | 0      | 1      | 1      | 1      | 1      |
| 3473   | 5     | 1     | 0     | 0     | 5     | 5     | 1      | 0      | 1      | 0      | 1      | 0      | 0      | 0      |
| 3475   | 2     | 2     | 1     | 1     | 3     | 4     | 1      | 1      | 2      | 2      | 2      | 2      | 2      | 1      |
| 3476   | 3     | 2     | 4     | 3     | 4     | 4     | 1      | 2      | 2      | 2      | 2      | 2      | 2      | 1      |
| 3477   | 2     | 2     | 1     | 4     | 0     | 2     | 2      | 1      | 2      | 2      | 2      | 3      | 3      | 3      |
| 3478   | 5     | 1     | 0     | 1     | 4     | 4     | 0      | 0      | 1      | 0      | 1      | 0      | 0      | 0      |
| 3479   | 4     | 2     | 3     | 3     | 1     | 5     | 1      | 0      | 2      | 1      | 1      | 1      | 1      | 1      |
| 3482   | 3     | 2     | 3     | 3     | 1     | 3     | 2      | 1      | 2      | 1      | 2      | 2      | 2      | 1      |
| 3483   | 3     | 2     | 1     | 3     | 4     | 3     | 1      | 1      | 0      | 0      | 1      | 0      | 1      | 0      |
| 3485   | 4     | 2     | 3     | 1     | 3     | 4     | 1      | 2      | 1      | 0      | 2      | 1      | 2      | 2      |
| 3489   | 5     | 1     | 5     | 5     | 5     | 5     | 0      | 0      | 0      | 0      | 0      | 0      | 0      | 0      |
| 3490   | 4     | 2     | 1     | 1     | 3     | 2     | 0      | 0      | 0      | 1      | 1      | 1      | 1      | 2      |
| 3491   | 3     | 2     | 1     | 3     | 4     | 3     | 1      | 0      | 1      | 0      | 1      | 1      | 2      | 0      |
| 3494   | 4     | 2     | 1     | 4     | 3     | 4     | 1      | 1      | 1      | 1      | 1      | 1      | 1      | 1      |
| 3495   | 3     | 1     | 3     | 3     | 3     | 3     | 1      | 1      | 1      | 1      | 1      | 1      | 1      | 1      |
| 3501   | 5     | 1     | 1     | 1     | 4     | 5     | 0      | 0      | 0      | 0      | 0      | 0      | 0      | 0      |
| 3506   | 5     | 2     | 1     | 1     | 4     | 4     | 1      | 0      | 1      | 2      | 1      | 1      | 0      | 2      |
| 3507   | 5     | 1     | 0     | 1     | 4     | 5     | 1      | 0      | 0      | 0      | 1      | 0      | 0      | 1      |
| 3517   | 5     | 2     | 4     | 3     | 4     | 4     | 1      | 1      | 1      | 1      | 1      | 2      | 2      | 1      |
| 3520   | 4     | 2     | 3     | 1     | 1     | 2     | 1      | 1      | 2      | 2      | 3      | 1      | 2      | 0      |
| 3521   | 5     | 1     | 0     | 1     | 4     | 5     | 1      | 1      | 2      | 2      | 1      | 1      | 1      | 1      |
| 3522   | 5     | 3     | 3     | 4     | 4     | 4     | 1      | 1      | 1      | 1      | 1      | 1      | 1      | 2      |
| 3524   | 2     | 3     | 1     | 3     | 3     | 2     | 1      | 1      | 1      | 1      | 1      | 1      | 1      | 1      |
| 3527   | 5     | 1     | 1     | 1     | 3     | 5     | 1      | 0      | 1      | 0      | 1      | 0      | 1      | 1      |
| 3528   | 4     | 1     | 0     | 1     | 4     | 4     | 1      | 0      | 0      | 0      | 1      | 0      | 1      | 0      |
| 3529   | 5     | 1     | 1     | 3     | 3     | 5     | 1      | 1      | 2      | 1      | 2      | 2      | 2      | 0      |
| 3536   | 3     | 2     | 4     | 3     | 3     | 4     | 1      | 1      | 2      | 1      | 1      | 2      | 2      | 1      |



| respid | Q52_2 | Q53_1 | Q54_1 | Q54_2 | Q54_3 | Q55_1 | Q56a_1 | Q56b_1 | Q56c_1 | Q56d_1 | Q56e_1 | Q56f_1 | Q56g_1 | Q56h_1 |   |
|--------|-------|-------|-------|-------|-------|-------|--------|--------|--------|--------|--------|--------|--------|--------|---|
| 3537   | 4     | 2     | 1     | 1     | 1     | 1     | 5      | 0      | 1      | 2      | 0      | 2      | 1      | 2      | 1 |
| 3538   | 4     | 2     | 1     | 3     | 4     | 5     | 5      | 0      | 0      | 1      | 0      | 1      | 0      | 1      | 1 |
| 3540   | 4     | 3     | 1     | 3     | 3     | 3     | 3      | 2      | 1      | 2      | 1      | 2      | 1      | 1      | 1 |
| 3545   | 5     | 2     | 1     | 3     | 3     | 5     | 1      | 1      | 1      | 2      | 1      | 1      | 1      | 2      | 0 |
| 3547   | 4     | 3     | 1     | 1     | 3     | 4     | 1      | 1      | 1      | 1      | 1      | 1      | 1      | 0      | 2 |
| 3554   | 4     | 1     | 4     | 5     | 3     | 4     | 4      | 1      | 1      | 1      | 2      | 1      | 2      | 2      | 0 |
| 3556   | 3     | 3     | 3     | 3     | 3     | 3     | 3      | 1      | 1      | 1      | 2      | 2      | 1      | 1      | 1 |
| 3557   | 5     | 1     | 1     | 1     | 1     | 1     | 5      | 0      | 1      | 0      | 1      | 1      | 1      | 2      | 1 |
| 3559   | 4     | 3     | 4     | 3     | 4     | 4     | 4      | 1      | 1      | 1      | 2      | 1      | 1      | 2      | 1 |
| 3560   | 5     | 1     | 1     | 1     | 4     | 5     | 5      | 1      | 1      | 1      | 1      | 1      | 1      | 2      | 1 |
| 3562   | 5     | 1     | 1     | 1     | 4     | 5     | 5      | 0      | 1      | 0      | 0      | 0      | 1      | 0      | 1 |
| 3564   | 5     | 2     | 1     | 3     | 4     | 4     | 4      | 1      | 2      | 0      | 2      | 1      | 0      | 2      | 1 |
| 3565   | 3     | 4     | 4     | 3     | 1     | 3     | 3      | 1      | 2      | 2      | 1      | 1      | 2      | 2      | 2 |
| 3568   | 4     | 2     | 1     | 1     | 4     | 4     | 4      | 2      | 0      | 1      | 1      | 1      | 1      | 2      | 0 |
| 3572   | 5     | 1     | 0     | 0     | 4     | 5     | 5      | 0      | 0      | 0      | 0      | 0      | 0      | 0      | 0 |
| 3578   | 4     | 1     | 3     | 4     | 4     | 4     | 4      | 1      | 1      | 1      | 1      | 1      | 1      | 1      | 1 |
| 3581   | 3     | 1     | 3     | 3     | 3     | 5     | 5      | 3      | 2      | 2      | 2      | 2      | 1      | 2      | 0 |
| 3583   | 1     | 4     | 4     | 4     | 0     | 1     | 1      | 3      | 0      | 3      | 1      | 2      | 2      | 3      | 2 |
| 3588   | 5     | 2     | 1     | 1     | 1     | 4     | 4      | 1      | 0      | 0      | 0      | 2      | 0      | 1      | 1 |
| 3591   | 5     | 1     | 0     | 0     | 4     | 5     | 5      | 0      | 0      | 0      | 0      | 1      | 1      | 1      | 0 |
| 3594   | 5     | 1     | 0     | 1     | 5     | 5     | 5      | 1      | 1      | 0      | 1      | 0      | 1      | 0      | 1 |
| 3595   | 5     | 1     | 0     | 0     | 5     | 5     | 5      | 0      | 0      | 0      | 0      | 0      | 0      | 0      | 0 |
| 3596   | 3     | 2     | 3     | 3     | 3     | 4     | 4      | 1      | 1      | 1      | 1      | 1      | 1      | 1      | 1 |
| 3597   | 4     | 3     | 4     | 4     | 3     | 4     | 4      | 2      | 2      | 2      | 2      | 1      | 1      | 2      | 2 |
| 3598   | 5     | 1     | 0     | 4     | 5     | 5     | 5      | 0      | 0      | 0      | 0      | 0      | 0      | 1      | 0 |
| 3600   | 3     | 2     | 1     | 4     | 1     | 3     | 3      | 2      | 3      | 2      | 3      | 3      | 3      | 3      | 0 |
| 3602   | 4     | 1     | 1     | 1     | 4     | 5     | 5      | 1      | 1      | 0      | 0      | 0      | 0      | 1      | 1 |
| 3604   | 5     | 1     | 0     | 1     | 3     | 5     | 5      | 0      | 0      | 0      | 0      | 0      | 0      | 0      | 3 |
| 3605   | 2     | 3     | 1     | 4     | 3     | 4     | 4      | 0      | 1      | 1      | 1      | 1      | 2      | 1      | 1 |
| 3606   | 4     | 1     | 1     | 3     | 4     | 4     | 4      | 1      | 0      | 0      | 1      | 1      | 1      | 1      | 1 |
| 3607   | 5     | 2     | 1     | 3     | 5     | 5     | 5      | 0      | 1      | 1      | 0      | 0      | 1      | 1      | 1 |
| 3610   | 5     | 1     | 0     | 1     | 5     | 5     | 5      | 0      | 0      | 0      | 0      | 1      | 0      | 0      | 0 |

| respid | Q52_2 | Q53_1 | Q54_1 | Q54_2 | Q54_3 | Q55_1 | Q56a_1 | Q56b_1 | Q56c_1 | Q56d_1 | Q56e_1 | Q56f_1 | Q56g_1 | Q56h_1 |
|--------|-------|-------|-------|-------|-------|-------|--------|--------|--------|--------|--------|--------|--------|--------|
| 3611   | 5     | 1     | 1     | 1     | 4     | 4     | 0      | 0      | 1      | 0      | 1      | 0      | 1      | 1      |
| 3612   | 5     | 1     | 3     | 3     | 3     | 5     | 1      | 0      | 0      | 0      | 1      | 1      | 1      | 1      |
| 3614   | 5     | 1     | 0     | 0     | 4     | 5     | 0      | 1      | 1      | 0      | 1      | 0      | 0      | 1      |
| 3616   | 5     | 1     | 1     | 1     | 3     | 5     | 0      | 1      | 0      | 0      | 1      | 1      | 1      | 1      |
| 3617   | 4     | 1     | 3     | 3     | 4     | 4     | 1      | 1      | 1      | 1      | 2      | 1      | 1      | 1      |
| 3618   | 5     | 1     | 0     | 0     | 5     | 5     | 0      | 0      | 0      | 0      | 0      | 0      | 0      | 0      |
| 3619   | 3     | 2     | 4     | 4     | 3     | 3     | 2      | 2      | 2      | 2      | 2      | 1      | 2      | 2      |
| 3621   | 3     | 2     | 4     | 4     | 3     | 4     | 1      | 2      | 1      | 1      | 1      | 1      | 2      | 1      |
| 3622   | 5     | 2     | 1     | 1     | 4     | 4     | 0      | 1      | 0      | 1      | 0      | 0      | 0      | 1      |
| 3624   | 5     | 1     | 0     | 0     | 5     | 5     | 0      | 0      | 0      | 0      | 0      | 0      | 0      | 0      |
| 3626   | 5     | 1     | 0     | 1     | 4     | 5     | 1      | 0      | 0      | 0      | 1      | 0      | 0      | 0      |
| 3629   | 5     | 1     | 1     | 1     | 4     | 4     | 0      | 3      | 0      | 0      | 1      | 0      | 1      | 0      |
| 3631   | 5     | 1     | 1     | 1     | 4     | 5     | 0      | 0      | 1      | 1      | 1      | 0      | 0      | 0      |
| 3632   | 4     | 2     | 1     | 1     | 3     | 4     | 1      | 1      | 1      | 1      | 1      | 1      | 1      | 1      |
| 3638   | 4     | 1     | 1     | 1     | 3     | 5     | 1      | 0      | 0      | 1      | 1      | 1      | 1      | 1      |
| 3640   | 5     | 1     | 1     | 3     | 4     | 5     | 1      | 1      | 1      | 1      | 1      | 1      | 1      | 2      |
| 3641   | 4     | 2     | 1     | 3     | 4     | 4     | 0      | 1      | 0      | 2      | 1      | 1      | 1      | 1      |
| 3645   | 4     | 2     | 1     | 3     | 4     | 4     | 1      | 2      | 1      | 1      | 1      | 1      | 2      | 2      |
| 3650   | 5     | 1     | 0     | 0     | 5     | 5     | 0      | 0      | 0      | 0      | 0      | 0      | 0      | 0      |
| 3653   | 3     | 2     | 3     | 3     | 4     | 3     | 2      | 2      | 1      | 2      | 2      | 1      | 2      | 2      |
| 3655   | 3     | 4     | 4     | 4     | 1     | 3     | 2      | 3      | 1      | 2      | 2      | 3      | 2      | 2      |
| 3657   | 5     | 2     | 1     | 3     | 5     | 5     | 0      | 1      | 0      | 0      | 1      | 1      | 1      | 1      |
| 3658   | 5     | 2     | 3     | 1     | 5     | 5     | 3      | 0      | 0      | 0      | 0      | 0      | 3      | 1      |
| 3659   | 5     | 1     | 1     | 1     | 5     | 5     | 0      | 0      | 0      | 0      | 0      | 0      | 0      | 0      |
| 3664   | 3     | 3     | 1     | 4     | 3     | 3     | 1      | 2      | 1      | 2      | 1      | 1      | 2      | 2      |
| 3665   | 5     | 1     | 0     | 0     | 4     | 5     | 1      | 1      | 2      | 1      | 1      | 0      | 1      | 1      |
| 3667   | 5     | 1     | 1     | 1     | 5     | 5     | 0      | 0      | 0      | 0      | 0      | 0      | 0      | 0      |
| 3668   | 2     | 5     | 3     | 4     | 4     | 4     | 1      | 1      | 0      | 1      | 3      | 2      | 1      | 2      |
| 3675   | 3     | 1     | 1     | 1     | 3     | 5     | 0      | 0      | 1      | 1      | 1      | 1      | 0      | 0      |
| 3678   | 5     | 1     | 1     | 1     | 4     | 4     | 0      | 0      | 0      | 0      | 0      | 0      | 0      | 0      |
| 3680   | 3     | 3     | 3     | 3     | 3     | 3     | 1      | 1      | 1      | 1      | 1      | 1      | 1      | 1      |
| 3684   | 5     | 2     | 1     | 1     | 4     | 4     | 2      | 1      | 2      | 1      | 2      | 1      | 1      | 0      |

| respid | Q52_2 | Q53_1 | Q54_1 | Q54_2 | Q54_3 | Q55_1 | Q56a_1 | Q56b_1 | Q56c_1 | Q56d_1 | Q56e_1 | Q56f_1 | Q56g_1 | Q56h_1 |
|--------|-------|-------|-------|-------|-------|-------|--------|--------|--------|--------|--------|--------|--------|--------|
| 3685   | 5     | 1     | 5     | 5     | 5     | 5     | 3      | 3      | 0      | 3      | 1      | 1      | 1      | 0      |
| 3687   | 3     | 2     | 1     | 3     | 3     | 2     | 1      | 1      | 2      | 1      | 1      | 2      | 1      | 2      |
| 3689   | 2     | 4     | 3     | 4     | 1     | 3     | 1      | 2      | 2      | 1      | 2      | 1      | 1      | 2      |
| 3690   | 3     | 1     | 3     | 1     | 3     | 4     | 1      | 1      | 1      | 1      | 2      | 1      | 1      | 1      |
| 3693   | 5     | 1     | 1     | 1     | 3     | 5     | 1      | 0      | 1      | 0      | 1      | 0      | 1      | 2      |
| 3694   | 5     | 1     | 0     | 0     | 5     | 5     | 0      | 0      | 0      | 0      | 1      | 0      | 0      | 0      |
| 3695   | 5     | 1     | 1     | 1     | 5     | 5     | 0      | 0      | 0      | 0      | 0      | 1      | 1      | 0      |
| 3700   | 5     | 2     | 0     | 1     | 5     | 5     | 1      | 0      | 0      | 0      | 0      | 0      | 0      | 0      |
| 3701   | 5     | 1     | 1     | 1     | 4     | 5     | 1      | 0      | 1      | 2      | 2      | 1      | 1      | 1      |
| 3703   | 4     | 1     | 1     | 1     | 4     | 4     | 1      | 0      | 0      | 0      | 1      | 0      | 0      | 1      |
| 3704   | 3     | 4     | 3     | 3     | 4     | 3     | 1      | 1      | 1      | 1      | 1      | 2      | 2      | 1      |
| 3705   | 5     | 1     | 0     | 0     | 5     | 5     | 0      | 0      | 0      | 0      | 0      | 0      | 0      | 0      |
| 3709   | 4     | 2     | 0     | 1     | 3     | 5     | 0      | 0      | 0      | 0      | 0      | 0      | 0      | 1      |
| 3710   | 5     | 2     | 1     | 1     | 4     | 5     | 0      | 0      | 1      | 1      | 0      | 0      | 1      | 0      |
| 3722   | 5     | 1     | 1     | 1     | 4     | 4     | 1      | 0      | 0      | 0      | 0      | 0      | 1      | 1      |
| 3725   | 3     | 2     | 1     | 1     | 1     | 5     | 1      | 0      | 1      | 0      | 1      | 1      | 1      | 1      |
| 3726   | 4     | 2     | 1     | 1     | 4     | 4     | 1      | 2      | 1      | 0      | 1      | 0      | 0      | 3      |
| 3727   | 5     | 1     | 1     | 3     | 4     | 5     | 1      | 1      | 0      | 2      | 2      | 1      | 1      | 0      |
| 3728   | 2     | 3     | 1     | 3     | 3     | 3     | 1      | 2      | 1      | 1      | 2      | 2      | 1      | 1      |
| 3729   | 5     | 1     | 0     | 0     | 5     | 5     | 1      | 1      | 1      | 0      | 0      | 0      | 0      | 1      |
| 3731   | 5     | 1     | 5     | 5     | 5     | 5     | 0      | 0      | 0      | 0      | 0      | 0      | 0      | 0      |
| 3738   | 3     | 1     | 1     | 1     | 3     | 5     | 1      | 0      | 1      | 0      | 1      | 1      | 1      | 1      |
| 3739   | 5     | 1     | 1     | 1     | 4     | 5     | 0      | 0      | 0      | 0      | 0      | 0      | 0      | 1      |
| 3740   | 4     | 2     | 1     | 1     | 3     | 5     | 0      | 0      | 0      | 0      | 0      | 1      | 0      | 0      |
| 3749   | 3     | 3     | 3     | 3     | 3     | 3     | 1      | 1      | 1      | 1      | 1      | 1      | 1      | 1      |
| 3758   | 4     | 3     | 1     | 3     | 4     | 3     | 2      | 1      | 1      | 2      | 2      | 2      | 2      | 2      |
| 3762   | 5     | 2     | 0     | 3     | 3     | 4     | 1      | 0      | 2      | 0      | 0      | 1      | 1      | 0      |
| 3765   | 5     | 2     | 3     | 4     | 3     | 4     | 1      | 0      | 1      | 0      | 1      | 1      | 1      | 1      |
| 3770   | 5     | 1     | 1     | 1     | 4     | 5     | 0      | 0      | 0      | 0      | 0      | 0      | 1      | 0      |
| 3771   | 5     | 2     | 3     | 4     | 1     | 4     | 2      | 2      | 1      | 1      | 2      | 2      | 2      | 1      |
| 3778   | 5     | 1     | 1     | 1     | 4     | 5     | 1      | 0      | 0      | 0      | 1      | 1      | 1      | 0      |
| 3779   | 3     | 2     | 3     | 3     | 3     | 3     | 1      | 1      | 0      | 1      | 1      | 1      | 1      | 1      |

| respid | Q52_2 | Q53_1 | Q54_1 | Q54_2 | Q54_3 | Q55_1 | Q56a_1 | Q56b_1 | Q56c_1 | Q56d_1 | Q56e_1 | Q56f_1 | Q56g_1 | Q56h_1 |
|--------|-------|-------|-------|-------|-------|-------|--------|--------|--------|--------|--------|--------|--------|--------|
| 3780   | 5     | 1     | 3     | 3     | 4     | 5     | 1      | 1      | 1      | 1      | 1      | 1      | 1      | 0      |
| 3782   | 5     | 1     | 3     | 3     | 3     | 5     | 1      | 0      | 0      | 1      | 1      | 1      | 1      | 1      |
| 3784   | 5     | 3     | 1     | 1     | 4     | 4     | 1      | 1      | 1      | 1      | 1      | 1      | 2      | 0      |
| 3787   | 5     | 1     | 0     | 0     | 3     | 5     | 0      | 0      | 0      | 0      | 1      | 0      | 0      | 0      |
| 3790   | 4     | 2     | 1     | 3     | 4     | 4     | 1      | 0      | 1      | 0      | 1      | 0      | 1      | 1      |
| 3791   | 4     | 2     | 3     | 3     | 3     | 4     | 1      | 1      | 0      | 1      | 1      | 1      | 2      | 1      |
| 3793   | 5     | 1     | 1     | 1     | 5     | 5     | 1      | 1      | 0      | 1      | 1      | 0      | 1      | 1      |
| 3795   | 5     | 1     | 5     | 5     | 5     | 5     | 0      | 2      | 0      | 0      | 0      | 0      | 0      | 0      |
| 3799   | 5     | 1     | 5     | 5     | 5     | 5     | 0      | 0      | 0      | 0      | 0      | 0      | 3      | 0      |
| 3801   | 2     | 3     | 3     | 4     | 3     | 3     | 1      | 1      | 1      | 1      | 1      | 1      | 2      | 1      |
| 3804   | 5     | 2     | 1     | 3     | 4     | 5     | 0      | 1      | 1      | 0      | 1      | 1      | 1      | 1      |
| 3809   | 5     | 1     | 1     | 1     | 4     | 5     | 1      | 0      | 1      | 0      | 1      | 0      | 1      | 0      |
| 3810   | 4     | 2     | 3     | 4     | 3     | 3     | 2      | 2      | 1      | 1      | 2      | 2      | 2      | 2      |
| 3813   | 4     | 3     | 1     | 1     | 4     | 4     | 1      | 2      | 1      | 2      | 1      | 1      | 1      | 0      |
| 3816   | 4     | 2     | 1     | 3     | 4     | 4     | 2      | 0      | 0      | 0      | 1      | 0      | 1      | 1      |
| 3820   | 5     | 1     | 1     | 3     | 4     | 5     | 1      | 1      | 1      | 0      | 1      | 1      | 0      | 1      |
| 3821   | 5     | 1     | 1     | 1     | 4     | 5     | 0      | 0      | 0      | 0      | 0      | 0      | 0      | 0      |
| 3823   | 3     | 3     | 3     | 5     | 1     | 3     | 2      | 2      | 3      | 2      | 2      | 2      | 2      | 2      |
| 3828   | 3     | 2     | 3     | 3     | 3     | 3     | 0      | 1      | 1      | 1      | 1      | 1      | 1      | 1      |
| 3829   | 5     | 1     | 1     | 1     | 4     | 4     | 1      | 0      | 0      | 0      | 1      | 0      | 0      | 1      |
| 3832   | 4     | 1     | 1     | 1     | 4     | 5     | 1      | 0      | 1      | 0      | 1      | 0      | 0      | 1      |
| 3835   | 5     | 1     | 3     | 1     | 1     | 5     | 1      | 1      | 2      | 1      | 2      | 0      | 1      | 2      |
| 3837   | 4     | 1     | 1     | 1     | 4     | 5     | 1      | 0      | 1      | 0      | 1      | 1      | 0      | 1      |
| 3838   | 5     | 2     | 1     | 3     | 3     | 3     | 1      | 0      | 0      | 0      | 1      | 1      | 1      | 0      |
| 3839   | 3     | 5     | 4     | 5     | 1     | 2     | 2      | 2      | 2      | 2      | 1      | 2      | 2      | 2      |
| 3840   | 5     | 1     | 1     | 3     | 3     | 5     | 1      | 0      | 0      | 0      | 0      | 1      | 1      | 0      |
| 3842   | 5     | 1     | 1     | 3     | 3     | 5     | 0      | 2      | 0      | 2      | 1      | 2      | 2      | 0      |
| 3843   | 5     | 1     | 1     | 3     | 4     | 5     | 0      | 0      | 0      | 0      | 0      | 1      | 1      | 0      |
| 3844   | 4     | 1     | 1     | 3     | 3     | 3     | 1      | 1      | 0      | 0      | 1      | 1      | 1      | 1      |
| 3850   | 4     | 2     | 1     | 1     | 3     | 5     | 1      | 1      | 0      | 1      | 1      | 1      | 1      | 1      |
| 3851   | 5     | 1     | 0     | 0     | 4     | 5     | 0      | 0      | 0      | 0      | 0      | 0      | 0      | 0      |
| 3856   | 4     | 3     | 4     | 4     | 1     | 3     | 2      | 1      | 1      | 1      | 1      | 2      | 2      | 1      |

| respid | Q52_2 | Q53_1 | Q54_1 | Q54_2 | Q54_3 | Q55_1 | Q56a_1 | Q56b_1 | Q56c_1 | Q56d_1 | Q56e_1 | Q56f_1 | Q56g_1 | Q56h_1 |
|--------|-------|-------|-------|-------|-------|-------|--------|--------|--------|--------|--------|--------|--------|--------|
| 3859   | 4     | 1     | 4     | 4     | 4     | 4     | 1      | 0      | 0      | 0      | 1      | 1      | 1      | 0      |
| 3860   | 5     | 1     | 1     | 1     | 4     | 5     | 0      | 0      | 0      | 0      | 0      | 0      | 0      | 1      |
| 3863   | 4     | 2     | 1     | 1     | 4     | 4     | 1      | 0      | 0      | 2      | 0      | 1      | 1      | 1      |
| 3866   | 5     | 1     | 0     | 1     | 5     | 5     | 0      | 0      | 0      | 0      | 0      | 0      | 0      | 0      |
| 3867   | 4     | 1     | 1     | 3     | 3     | 3     | 1      | 1      | 0      | 2      | 2      | 2      | 2      | 1      |
| 3870   | 5     | 1     | 1     | 3     | 3     | 5     | 0      | 0      | 0      | 0      | 1      | 1      | 1      | 1      |
| 3873   | 2     | 3     | 4     | 5     | 4     | 3     | 1      | 2      | 1      | 3      | 3      | 3      | 3      | 2      |
| 3875   | 4     | 2     | 1     | 3     | 3     | 4     | 1      | 0      | 2      | 0      | 1      | 1      | 1      | 1      |
| 3878   | 5     | 2     | 0     | 1     | 4     | 4     | 0      | 0      | 1      | 0      | 1      | 0      | 0      | 1      |
| 3881   | 5     | 1     | 1     | 3     | 4     | 5     | 0      | 1      | 1      | 1      | 1      | 2      | 1      | 1      |
| 3883   | 3     | 4     | 3     | 1     | 1     | 4     | 2      | 1      | 2      | 1      | 2      | 2      | 1      | 1      |
| 3884   | 4     | 1     | 1     | 1     | 4     | 4     | 1      | 1      | 1      | 1      | 1      | 1      | 1      | 1      |
| 3885   | 3     | 3     | 1     | 4     | 3     | 3     | 1      | 1      | 1      | 1      | 1      | 1      | 2      | 2      |
| 3886   | 4     | 3     | 3     | 4     | 3     | 3     | 2      | 1      | 1      | 1      | 2      | 2      | 2      | 2      |
| 3887   | 4     | 3     | 1     | 1     | 3     | 4     | 0      | 0      | 0      | 0      | 0      | 0      | 0      | 0      |
| 3888   | 5     | 1     | 1     | 1     | 4     | 5     | 1      | 0      | 1      | 0      | 0      | 0      | 0      | 0      |
| 3889   | 3     | 3     | 3     | 3     | 4     | 3     | 2      | 0      | 2      | 2      | 1      | 1      | 1      | 1      |
| 3890   | 3     | 4     | 1     | 1     | 4     | 2     | 1      | 0      | 2      | 0      | 1      | 0      | 0      | 1      |
| 3896   | 5     | 1     | 1     | 1     | 4     | 5     | 1      | 0      | 1      | 0      | 1      | 0      | 1      | 0      |
| 3902   | 3     | 3     | 1     | 3     | 4     | 3     | 1      | 0      | 1      | 0      | 1      | 1      | 1      | 2      |
| 3909   | 5     | 1     | 3     | 3     | 4     | 4     | 0      | 0      | 0      | 0      | 0      | 0      | 0      | 0      |
| 3912   | 5     | 2     | 1     | 3     | 5     | 4     | 0      | 0      | 0      | 1      | 0      | 1      | 1      | 1      |
| 3922   | 5     | 1     | 0     | 0     | 4     | 5     | 0      | 0      | 0      | 0      | 1      | 0      | 0      | 0      |
| 3928   | 4     | 1     | 1     | 1     | 3     | 5     | 1      | 1      | 0      | 0      | 1      | 0      | 1      | 0      |
| 3930   | 5     | 1     | 1     | 3     | 3     | 5     | 1      | 0      | 0      | 0      | 1      | 0      | 0      | 1      |
| 3931   | 4     | 3     | 4     | 1     | 3     | 2     | 1      | 0      | 1      | 1      | 1      | 1      | 0      | 1      |
| 3933   | 1     | 3     | 4     | 5     | 1     | 5     | 1      | 0      | 2      | 2      | 3      | 2      | 2      | 0      |
| 3935   | 5     | 1     | 3     | 3     | 3     | 3     | 1      | 1      | 1      | 1      | 1      | 1      | 1      | 1      |
| 3937   | 5     | 1     | 0     | 0     | 5     | 5     | 1      | 1      | 1      | 0      | 1      | 1      | 1      | 1      |
| 3939   | 5     | 1     | 1     | 1     | 4     | 5     | 0      | 0      | 0      | 0      | 1      | 0      | 1      | 1      |
| 3942   | 5     | 1     | 3     | 3     | 3     | 5     | 1      | 1      | 2      | 0      | 1      | 1      | 1      | 1      |
| 3943   | 4     | 2     | 3     | 3     | 4     | 4     | 1      | 1      | 2      | 2      | 1      | 1      | 1      | 2      |

| respid | Q52_2 | Q53_1 | Q54_1 | Q54_2 | Q54_3 | Q55_1 | Q56a_1 | Q56b_1 | Q56c_1 | Q56d_1 | Q56e_1 | Q56f_1 | Q56g_1 | Q56h_1 |
|--------|-------|-------|-------|-------|-------|-------|--------|--------|--------|--------|--------|--------|--------|--------|
| 3944   | 4     | 2     | 1     | 1     | 3     | 4     | 1      | 0      | 1      | 0      | 0      | 0      | 1      | 1      |
| 3945   | 4     | 1     | 1     | 1     | 5     | 5     | 1      | 0      | 0      | 0      | 0      | 0      | 0      | 0      |
| 3947   | 4     | 1     | 4     | 4     | 1     | 4     | 1      | 2      | 1      | 1      | 1      | 2      | 2      | 1      |
| 3948   | 5     | 2     | 1     | 1     | 3     | 4     | 0      | 0      | 1      | 2      | 1      | 1      | 1      | 1      |
| 3951   | 3     | 3     | 3     | 3     | 4     | 3     | 2      | 1      | 1      | 1      | 2      | 2      | 2      | 1      |
| 3959   | 5     | 1     | 1     | 1     | 3     | 5     | 1      | 2      | 0      | 1      | 0      | 1      | 1      | 0      |
| 3969   | 3     | 5     | 3     | 4     | 1     | 2     | 1      | 1      | 2      | 1      | 2      | 1      | 2      | 2      |
| 3973   | 5     | 1     | 1     | 1     | 4     | 4     | 1      | 0      | 1      | 0      | 1      | 1      | 1      | 1      |
| 3975   | 2     | 3     | 3     | 3     | 3     | 3     | 1      | 1      | 1      | 1      | 1      | 1      | 2      | 0      |
| 3976   | 3     | 2     | 1     | 3     | 4     | 5     | 1      | 1      | 0      | 1      | 1      | 1      | 1      | 0      |
| 3977   | 5     | 1     | 0     | 1     | 3     | 4     | 1      | 1      | 1      | 1      | 1      | 0      | 1      | 0      |
| 3978   | 4     | 2     | 3     | 3     | 3     | 4     | 1      | 0      | 0      | 2      | 1      | 1      | 1      | 1      |
| 3994   | 4     | 2     | 1     | 1     | 3     | 3     | 2      | 1      | 0      | 2      | 0      | 2      | 1      | 2      |
| 3995   | 5     | 1     | 3     | 4     | 3     | 5     | 1      | 0      | 1      | 2      | 1      | 2      | 2      | 0      |
| 3997   | 4     | 2     | 1     | 3     | 4     | 5     | 0      | 1      | 0      | 0      | 2      | 2      | 2      | 1      |
| 3998   | 4     | 1     | 3     | 3     | 4     | 5     | 0      | 1      | 1      | 1      | 1      | 1      | 1      | 0      |
| 3999   | 2     | 2     | 1     | 1     | 1     | 2     | 1      | 0      | 1      | 0      | 0      | 1      | 1      | 1      |
| 4002   | 4     | 1     | 3     | 4     | 4     | 4     | 1      | 1      | 2      | 1      | 2      | 2      | 1      | 2      |
| 4004   | 5     | 1     | 0     | 1     | 5     | 5     | 0      | 1      | 0      | 0      | 1      | 1      | 1      | 1      |
| 4005   | 5     | 1     | 0     | 0     | 5     | 5     | 1      | 1      | 0      | 0      | 0      | 0      | 0      | 1      |
| 4006   | 4     | 3     | 3     | 4     | 3     | 4     | 1      | 1      | 1      | 1      | 1      | 1      | 2      | 1      |
| 4008   | 5     | 2     | 1     | 1     | 5     | 5     | 0      | 1      | 0      | 1      | 0      | 1      | 1      | 0      |
| 4010   | 5     | 1     | 1     | 3     | 3     | 5     | 1      | 1      | 1      | 1      | 2      | 1      | 2      | 1      |
| 4011   | 3     | 3     | 3     | 3     | 3     | 3     | 1      | 1      | 1      | 2      | 1      | 1      | 2      | 1      |
| 4013   | 5     | 1     | 1     | 3     | 3     | 5     | 0      | 0      | 0      | 0      | 0      | 0      | 0      | 0      |
| 4014   | 5     | 1     | 0     | 0     | 4     | 5     | 0      | 0      | 0      | 0      | 0      | 0      | 0      | 0      |
| 4016   | 5     | 1     | 1     | 1     | 5     | 5     | 1      | 0      | 1      | 0      | 1      | 0      | 0      | 1      |
| 4017   | 4     | 3     | 5     | 5     | 0     | 1     | 3      | 3      | 3      | 3      | 3      | 3      | 3      | 3      |
| 4019   | 5     | 1     | 1     | 3     | 4     | 5     | 0      | 1      | 1      | 1      | 2      | 2      | 2      | 1      |
| 4021   | 5     | 1     | 1     | 1     | 4     | 5     | 1      | 0      | 1      | 0      | 1      | 1      | 1      | 0      |
| 4023   | 4     | 4     | 1     | 4     | 3     | 4     | 1      | 1      | 0      | 0      | 1      | 1      | 1      | 1      |
| 4024   | 5     | 2     | 1     | 1     | 5     | 5     | 1      | 1      | 0      | 0      | 1      | 2      | 2      | 1      |

| respid | Q52_2 | Q53_1 | Q54_1 | Q54_2 | Q54_3 | Q55_1 | Q56a_1 | Q56b_1 | Q56c_1 | Q56d_1 | Q56e_1 | Q56f_1 | Q56g_1 | Q56h_1 |
|--------|-------|-------|-------|-------|-------|-------|--------|--------|--------|--------|--------|--------|--------|--------|
| 4025   | 3     | 3     | 3     | 3     | 3     | 3     | 4      | 1      | 2      | 0      | 0      | 1      | 1      | 1      |
| 4027   | 3     | 3     | 3     | 4     | 4     | 4     | 2      | 1      | 1      | 2      | 2      | 2      | 2      | 2      |
| 4032   | 4     | 1     | 1     | 1     | 3     | 4     | 0      | 0      | 1      | 0      | 1      | 1      | 1      | 1      |
| 4034   | 4     | 2     | 1     | 1     | 5     | 5     | 1      | 1      | 1      | 1      | 0      | 1      | 1      | 1      |
| 4035   | 4     | 1     | 4     | 4     | 4     | 4     | 2      | 1      | 0      | 0      | 2      | 0      | 1      | 1      |
| 4037   | 3     | 3     | 4     | 4     | 1     | 4     | 2      | 2      | 2      | 1      | 2      | 2      | 2      | 2      |
| 4040   | 3     | 1     | 4     | 3     | 3     | 4     | 1      | 1      | 1      | 1      | 2      | 2      | 2      | 1      |
| 4041   | 5     | 1     | 1     | 1     | 3     | 4     | 1      | 0      | 1      | 0      | 1      | 0      | 1      | 1      |
| 4042   | 3     | 2     | 4     | 4     | 0     | 3     | 3      | 0      | 2      | 3      | 2      | 2      | 2      | 1      |
| 4043   | 2     | 1     | 3     | 3     | 1     | 3     | 1      | 1      | 1      | 1      | 2      | 2      | 2      | 3      |
| 4045   | 3     | 2     | 4     | 4     | 1     | 3     | 2      | 2      | 1      | 1      | 1      | 2      | 2      | 1      |
| 4046   | 4     | 2     | 1     | 1     | 3     | 3     | 1      | 0      | 1      | 2      | 1      | 2      | 1      | 1      |
| 4048   | 3     | 2     | 4     | 3     | 4     | 4     | 1      | 1      | 1      | 2      | 1      | 2      | 1      | 2      |
| 4049   | 5     | 1     | 0     | 0     | 5     | 5     | 3      | 0      | 0      | 0      | 1      | 1      | 0      | 0      |
| 4050   | 2     | 1     | 3     | 3     | 4     | 4     | 0      | 0      | 0      | 0      | 1      | 1      | 1      | 1      |
| 4052   | 4     | 1     | 1     | 3     | 3     | 4     | 1      | 1      | 1      | 0      | 1      | 1      | 2      | 1      |
| 4053   | 5     | 1     | 1     | 3     | 5     | 5     | 1      | 2      | 0      | 0      | 1      | 0      | 0      | 0      |
| 4060   | 4     | 1     | 1     | 1     | 4     | 5     | 1      | 0      | 0      | 0      | 1      | 0      | 0      | 1      |
| 4065   | 3     | 3     | 3     | 3     | 1     | 3     | 1      | 1      | 1      | 1      | 1      | 1      | 1      | 1      |
| 4066   | 4     | 1     | 3     | 3     | 3     | 4     | 1      | 0      | 2      | 0      | 1      | 1      | 1      | 0      |
| 4067   | 5     | 1     | 1     | 4     | 4     | 5     | 1      | 1      | 0      | 1      | 1      | 1      | 1      | 1      |
| 4068   | 3     | 3     | 3     | 3     | 3     | 3     | 1      | 2      | 1      | 1      | 2      | 1      | 1      | 1      |
| 4069   | 5     | 2     | 1     | 3     | 4     | 4     | 1      | 0      | 0      | 0      | 1      | 1      | 1      | 1      |
| 4070   | 5     | 1     | 3     | 3     | 3     | 4     | 0      | 0      | 2      | 0      | 1      | 1      | 0      | 1      |
| 4071   | 3     | 3     | 3     | 1     | 1     | 3     | 1      | 2      | 1      | 2      | 2      | 1      | 1      | 2      |
| 4072   | 5     | 1     | 1     | 1     | 4     | 5     | 0      | 1      | 0      | 0      | 1      | 0      | 1      | 1      |
| 4073   | 5     | 1     | 1     | 1     | 5     | 5     | 1      | 1      | 0      | 0      | 1      | 0      | 1      | 0      |
| 4074   | 5     | 1     | 1     | 1     | 4     | 5     | 1      | 1      | 0      | 1      | 1      | 0      | 0      | 1      |
| 4075   | 5     | 3     | 1     | 3     | 3     | 5     | 1      | 2      | 1      | 2      | 2      | 1      | 1      | 0      |
| 4078   | 4     | 1     | 1     | 3     | 4     | 5     | 0      | 1      | 0      | 1      | 1      | 1      | 1      | 1      |
| 4080   | 5     | 1     | 4     | 4     | 3     | 5     | 1      | 1      | 1      | 1      | 2      | 2      | 1      | 1      |
| 4081   | 5     | 3     | 3     | 3     | 3     | 3     | 1      | 1      | 1      | 1      | 1      | 1      | 1      | 1      |

| respid | Q52_2 | Q53_1 | Q54_1 | Q54_2 | Q54_3 | Q55_1 | Q56a_1 | Q56b_1 | Q56c_1 | Q56d_1 | Q56e_1 | Q56f_1 | Q56g_1 | Q56h_1 |
|--------|-------|-------|-------|-------|-------|-------|--------|--------|--------|--------|--------|--------|--------|--------|
| 4082   | 5     | 1     | 3     | 3     | 3     | 5     | 1      | 1      | 0      | 1      | 2      | 1      | 1      | 1      |
| 4083   | 4     | 3     | 3     | 3     | 4     | 4     | 2      | 2      | 2      | 2      | 2      | 2      | 1      | 2      |
| 4084   | 5     | 1     | 0     | 0     | 5     | 5     | 0      | 0      | 0      | 0      | 0      | 0      | 0      | 0      |
| 4086   | 5     | 2     | 1     | 1     | 4     | 5     | 1      | 0      | 1      | 0      | 0      | 1      | 1      | 1      |
| 4087   | 5     | 1     | 1     | 1     | 5     | 5     | 0      | 0      | 0      | 1      | 1      | 1      | 0      | 1      |
| 4088   | 4     | 4     | 1     | 3     | 4     | 4     | 1      | 2      | 1      | 1      | 1      | 1      | 1      | 1      |
| 4089   | 4     | 1     | 1     | 1     | 0     | 4     | 1      | 0      | 1      | 0      | 1      | 1      | 1      | 1      |
| 4090   | 5     | 1     | 1     | 1     | 3     | 4     | 1      | 0      | 0      | 0      | 1      | 0      | 1      | 1      |
| 4093   | 4     | 1     | 3     | 1     | 1     | 5     | 2      | 1      | 2      | 0      | 2      | 0      | 0      | 0      |
| 4094   | 5     | 1     | 1     | 3     | 5     | 5     | 0      | 1      | 0      | 1      | 0      | 0      | 0      | 1      |
| 4095   | 4     | 1     | 1     | 3     | 4     | 4     | 1      | 1      | 0      | 1      | 1      | 1      | 1      | 1      |
| 4096   | 5     | 1     | 1     | 1     | 5     | 5     | 0      | 0      | 0      | 0      | 0      | 0      | 0      | 3      |
| 4098   | 5     | 1     | 0     | 0     | 0     | 5     | 0      | 1      | 0      | 0      | 0      | 1      | 1      | 0      |
| 4103   | 4     | 2     | 1     | 1     | 3     | 5     | 1      | 1      | 0      | 2      | 2      | 1      | 1      | 1      |
| 4104   | 5     | 2     | 1     | 1     | 4     | 5     | 1      | 2      | 1      | 1      | 1      | 1      | 1      | 1      |
| 4107   | 5     | 1     | 0     | 0     | 5     | 5     | 0      | 0      | 0      | 3      | 1      | 0      | 1      | 0      |
| 4109   | 5     | 1     | 0     | 1     | 4     | 5     | 0      | 0      | 1      | 0      | 0      | 0      | 0      | 2      |
| 4110   | 5     | 2     | 4     | 4     | 1     | 4     | 1      | 2      | 1      | 2      | 2      | 2      | 2      | 0      |
| 4113   | 4     | 1     | 3     | 3     | 3     | 4     | 1      | 1      | 0      | 1      | 1      | 1      | 1      | 1      |
| 4114   | 4     | 1     | 1     | 1     | 3     | 4     | 0      | 1      | 1      | 2      | 1      | 1      | 1      | 0      |
| 4116   | 3     | 1     | 0     | 1     | 3     | 5     | 0      | 0      | 0      | 0      | 0      | 0      | 0      | 1      |
| 4119   | 5     | 1     | 1     | 1     | 4     | 5     | 0      | 0      | 0      | 0      | 0      | 0      | 0      | 0      |
| 4120   | 5     | 1     | 1     | 1     | 5     | 5     | 0      | 0      | 0      | 0      | 0      | 0      | 0      | 0      |
| 4121   | 4     | 1     | 1     | 1     | 4     | 4     | 1      | 0      | 1      | 0      | 1      | 0      | 1      | 1      |
| 4122   | 4     | 2     | 4     | 4     | 4     | 4     | 2      | 2      | 0      | 0      | 1      | 1      | 2      | 1      |
| 4124   | 4     | 2     | 1     | 3     | 3     | 4     | 1      | 2      | 1      | 1      | 1      | 1      | 1      | 1      |
| 4126   | 3     | 3     | 4     | 4     | 1     | 3     | 1      | 1      | 2      | 1      | 1      | 2      | 2      | 1      |
| 4127   | 3     | 3     | 3     | 3     | 3     | 3     | 1      | 1      | 1      | 1      | 1      | 2      | 2      | 1      |
| 4131   | 4     | 1     | 1     | 3     | 4     | 4     | 0      | 0      | 1      | 0      | 1      | 1      | 1      | 1      |
| 4134   | 3     | 2     | 3     | 3     | 3     | 3     | 1      | 1      | 1      | 1      | 1      | 1      | 1      | 1      |
| 4144   | 5     | 1     | 0     | 0     | 5     | 5     | 0      | 0      | 0      | 0      | 0      | 0      | 0      | 0      |
| 4145   | 5     | 1     | 1     | 1     | 4     | 5     | 1      | 1      | 0      | 0      | 1      | 0      | 1      | 0      |



| respid | Q52_2 | Q53_1 | Q54_1 | Q54_2 | Q54_3 | Q55_1 | Q56a_1 | Q56b_1 | Q56c_1 | Q56d_1 | Q56e_1 | Q56f_1 | Q56g_1 | Q56h_1 |
|--------|-------|-------|-------|-------|-------|-------|--------|--------|--------|--------|--------|--------|--------|--------|
| 4146   | 5     | 1     | 1     | 1     | 5     | 5     | 0      | 0      | 0      | 0      | 0      | 0      | 0      | 0      |
| 4147   | 5     | 1     | 0     | 0     | 0     | 5     | 0      | 0      | 0      | 0      | 0      | 0      | 0      | 0      |
| 4149   | 4     | 3     | 1     | 1     | 4     | 4     | 1      | 0      | 1      | 0      | 1      | 1      | 0      | 0      |
| 4150   | 5     | 1     | 0     | 0     | 5     | 5     | 0      | 0      | 0      | 0      | 0      | 0      | 0      | 0      |
| 4151   | 5     | 2     | 3     | 3     | 4     | 3     | 1      | 1      | 1      | 0      | 2      | 1      | 2      | 1      |
| 4153   | 5     | 3     | 3     | 3     | 3     | 3     | 3      | 3      | 3      | 3      | 2      | 0      | 1      | 1      |
| 4155   | 5     | 1     | 3     | 3     | 3     | 3     | 1      | 1      | 1      | 1      | 1      | 1      | 1      | 1      |
| 4157   | 5     | 1     | 1     | 3     | 3     | 5     | 1      | 0      | 1      | 0      | 1      | 1      | 1      | 0      |
| 4159   | 4     | 1     | 1     | 1     | 4     | 4     | 1      | 0      | 0      | 0      | 1      | 1      | 1      | 1      |
| 4160   | 4     | 1     | 1     | 1     | 4     | 4     | 1      | 1      | 0      | 1      | 1      | 1      | 1      | 1      |
| 4161   | 4     | 1     | 1     | 3     | 3     | 4     | 1      | 2      | 2      | 0      | 2      | 1      | 1      | 1      |
| 4163   | 5     | 1     | 1     | 0     | 5     | 5     | 1      | 0      | 0      | 0      | 0      | 0      | 1      | 0      |
| 4164   | 5     | 2     | 1     | 3     | 4     | 5     | 0      | 1      | 0      | 2      | 1      | 1      | 1      | 1      |
| 4165   | 5     | 1     | 0     | 0     | 4     | 4     | 1      | 1      | 0      | 0      | 1      | 0      | 0      | 0      |
| 4166   | 5     | 1     | 3     | 3     | 4     | 5     | 0      | 1      | 0      | 1      | 1      | 1      | 1      | 0      |
| 4167   | 5     | 1     | 1     | 1     | 4     | 4     | 0      | 0      | 0      | 0      | 0      | 1      | 0      | 0      |
| 4170   | 4     | 1     | 1     | 1     | 4     | 4     | 1      | 1      | 1      | 1      | 1      | 0      | 1      | 1      |
| 4172   | 2     | 4     | 1     | 3     | 1     | 2     | 1      | 1      | 1      | 1      | 1      | 1      | 2      | 3      |
| 4173   | 5     | 1     | 0     | 0     | 5     | 5     | 0      | 0      | 0      | 0      | 0      | 0      | 0      | 0      |
| 4180   | 4     | 2     | 1     | 1     | 4     | 3     | 1      | 1      | 0      | 1      | 1      | 1      | 1      | 1      |
| 4185   | 3     | 1     | 1     | 1     | 4     | 4     | 1      | 1      | 0      | 1      | 1      | 1      | 1      | 0      |
| 4187   | 5     | 1     | 1     | 1     | 5     | 5     | 0      | 0      | 0      | 0      | 0      | 0      | 0      | 0      |
| 4190   | 4     | 1     | 3     | 4     | 4     | 5     | 0      | 1      | 0      | 1      | 1      | 2      | 2      | 1      |
| 4191   | 3     | 2     | 1     | 4     | 3     | 3     | 1      | 1      | 1      | 3      | 2      | 2      | 2      | 1      |
| 4193   | 5     | 1     | 0     | 0     | 0     | 5     | 0      | 0      | 0      | 3      | 1      | 1      | 0      | 0      |
| 4194   | 5     | 2     | 1     | 1     | 4     | 5     | 1      | 0      | 0      | 0      | 1      | 0      | 1      | 3      |
| 4195   | 5     | 1     | 1     | 1     | 3     | 5     | 1      | 0      | 1      | 0      | 1      | 0      | 1      | 0      |
| 4196   | 5     | 1     | 1     | 1     | 4     | 5     | 0      | 0      | 0      | 0      | 0      | 0      | 0      | 0      |
| 4197   | 5     | 1     | 1     | 1     | 4     | 5     | 1      | 0      | 1      | 1      | 1      | 0      | 0      | 1      |
| 4198   | 5     | 2     | 1     | 1     | 1     | 3     | 1      | 0      | 1      | 2      | 1      | 2      | 1      | 1      |
| 4199   | 4     | 2     | 4     | 4     | 4     | 4     | 0      | 0      | 0      | 0      | 0      | 0      | 0      | 0      |
| 4205   | 4     | 2     | 1     | 4     | 3     | 4     | 1      | 2      | 1      | 2      | 2      | 1      | 2      | 1      |

| respid | Q52_2 | Q53_1 | Q54_1 | Q54_2 | Q54_3 | Q55_1 | Q56a_1 | Q56b_1 | Q56c_1 | Q56d_1 | Q56e_1 | Q56f_1 | Q56g_1 | Q56h_1 |
|--------|-------|-------|-------|-------|-------|-------|--------|--------|--------|--------|--------|--------|--------|--------|
| 4206   | 4     | 2     | 1     | 1     | 3     | 4     | 1      | 1      | 1      | 1      | 1      | 1      | 1      | 1      |
| 4207   | 5     | 2     | 1     | 3     | 3     | 4     | 0      | 1      | 1      | 1      | 1      | 1      | 2      | 1      |
| 4214   | 5     | 1     | 1     | 1     | 4     | 4     | 0      | 0      | 0      | 0      | 1      | 0      | 1      | 0      |
| 4215   | 5     | 1     | 1     | 1     | 5     | 5     | 1      | 1      | 0      | 0      | 1      | 0      | 0      | 1      |
| 4217   | 5     | 1     | 1     | 3     | 4     | 5     | 1      | 1      | 1      | 1      | 1      | 1      | 1      | 1      |
| 4219   | 4     | 1     | 0     | 1     | 4     | 5     | 0      | 1      | 1      | 1      | 1      | 0      | 0      | 1      |
| 4223   | 3     | 3     | 3     | 3     | 3     | 3     | 1      | 1      | 1      | 2      | 2      | 1      | 2      | 1      |
| 4226   | 3     | 1     | 4     | 3     | 3     | 3     | 1      | 1      | 2      | 1      | 1      | 1      | 1      | 1      |
| 4229   | 4     | 1     | 0     | 3     | 3     | 4     | 1      | 1      | 1      | 0      | 2      | 2      | 1      | 0      |
| 4230   | 5     | 2     | 1     | 1     | 4     | 4     | 1      | 1      | 1      | 0      | 0      | 0      | 0      | 1      |
| 4232   | 5     | 1     | 4     | 3     | 4     | 3     | 1      | 2      | 0      | 1      | 1      | 1      | 2      | 1      |
| 4233   | 5     | 1     | 0     | 0     | 4     | 5     | 0      | 0      | 0      | 0      | 0      | 0      | 0      | 0      |
| 4234   | 4     | 2     | 1     | 1     | 3     | 5     | 1      | 0      | 0      | 0      | 1      | 0      | 2      | 1      |
| 4235   | 3     | 3     | 4     | 3     | 4     | 5     | 0      | 0      | 0      | 0      | 0      | 1      | 0      | 1      |
| 4236   | 5     | 1     | 1     | 3     | 4     | 4     | 1      | 1      | 2      | 2      | 1      | 1      | 2      | 1      |
| 4237   | 4     | 2     | 1     | 1     | 4     | 4     | 1      | 1      | 1      | 0      | 1      | 0      | 2      | 1      |
| 4238   | 4     | 1     | 1     | 1     | 4     | 4     | 0      | 0      | 0      | 0      | 1      | 1      | 0      | 1      |
| 4240   | 4     | 2     | 1     | 1     | 3     | 3     | 0      | 0      | 0      | 0      | 1      | 2      | 1      | 1      |
| 4241   | 5     | 1     | 0     | 1     | 5     | 5     | 0      | 0      | 0      | 0      | 0      | 0      | 0      | 0      |
| 4247   | 5     | 1     | 1     | 1     | 5     | 5     | 0      | 0      | 0      | 0      | 1      | 1      | 1      | 0      |
| 4250   | 5     | 1     | 0     | 0     | 0     | 5     | 0      | 2      | 0      | 0      | 0      | 3      | 1      | 0      |
| 4251   | 3     | 3     | 3     | 3     | 3     | 4     | 1      | 1      | 2      | 1      | 1      | 1      | 1      | 1      |
| 4253   | 4     | 2     | 4     | 4     | 1     | 2     | 2      | 3      | 3      | 3      | 2      | 2      | 2      | 3      |
| 4254   | 5     | 1     | 1     | 4     | 5     | 5     | 0      | 2      | 0      | 1      | 1      | 1      | 1      | 1      |
| 4258   | 3     | 3     | 3     | 3     | 3     | 3     | 1      | 1      | 1      | 1      | 1      | 1      | 1      | 1      |
| 4260   | 5     | 1     | 0     | 0     | 4     | 4     | 0      | 0      | 0      | 0      | 0      | 0      | 0      | 0      |
| 4263   | 4     | 4     | 4     | 4     | 3     | 5     | 2      | 1      | 0      | 1      | 1      | 2      | 2      | 2      |
| 4265   | 3     | 1     | 3     | 3     | 4     | 4     | 1      | 2      | 1      | 1      | 2      | 1      | 2      | 1      |
| 4266   | 5     | 1     | 1     | 3     | 3     | 4     | 1      | 0      | 0      | 0      | 0      | 1      | 1      | 0      |
| 4267   | 5     | 1     | 0     | 1     | 4     | 4     | 1      | 0      | 0      | 0      | 0      | 0      | 0      | 0      |
| 4270   | 5     | 1     | 1     | 1     | 4     | 5     | 1      | 1      | 1      | 0      | 1      | 0      | 1      | 0      |
| 4273   | 5     | 1     | 3     | 3     | 4     | 5     | 0      | 1      | 0      | 1      | 1      | 1      | 1      | 1      |

| respid | Q52_2 | Q53_1 | Q54_1 | Q54_2 | Q54_3 | Q55_1 | Q56a_1 | Q56b_1 | Q56c_1 | Q56d_1 | Q56e_1 | Q56f_1 | Q56g_1 | Q56h_1 |
|--------|-------|-------|-------|-------|-------|-------|--------|--------|--------|--------|--------|--------|--------|--------|
| 4280   | 5     | 2     | 1     | 1     | 4     | 4     | 1      | 0      | 1      | 0      | 1      | 0      | 1      | 1      |
| 4281   | 5     | 1     | 1     | 1     | 3     | 5     | 1      | 1      | 1      | 0      | 1      | 1      | 2      | 3      |
| 4282   | 4     | 2     | 1     | 1     | 4     | 4     | 1      | 1      | 1      | 0      | 1      | 0      | 1      | 1      |
| 4283   | 5     | 1     | 3     | 3     | 4     | 5     | 1      | 1      | 0      | 1      | 1      | 1      | 1      | 1      |
| 4286   | 5     | 2     | 1     | 4     | 4     | 3     | 2      | 2      | 3      | 1      | 3      | 2      | 2      | 2      |
| 4287   | 5     | 1     | 3     | 3     | 3     | 4     | 0      | 0      | 1      | 0      | 0      | 0      | 0      | 0      |
| 4289   | 3     | 1     | 4     | 5     | 3     | 2     | 1      | 3      | 1      | 2      | 2      | 3      | 2      | 1      |
| 4290   | 4     | 1     | 0     | 1     | 3     | 5     | 2      | 0      | 0      | 2      | 2      | 2      | 2      | 2      |
| 4291   | 5     | 1     | 1     | 1     | 1     | 4     | 1      | 1      | 0      | 0      | 1      | 1      | 1      | 0      |
| 4292   | 4     | 2     | 1     | 1     | 4     | 5     | 0      | 1      | 0      | 0      | 1      | 0      | 0      | 1      |
| 4293   | 3     | 1     | 1     | 1     | 3     | 3     | 1      | 0      | 2      | 2      | 1      | 1      | 1      | 1      |
| 4294   | 2     | 3     | 5     | 5     | 0     | 2     | 1      | 1      | 1      | 1      | 2      | 3      | 3      | 1      |
| 4295   | 5     | 1     | 1     | 3     | 4     | 5     | 1      | 2      | 1      | 1      | 1      | 1      | 1      | 2      |
| 4296   | 3     | 3     | 3     | 3     | 3     | 3     | 1      | 1      | 1      | 1      | 1      | 1      | 1      | 1      |
| 4297   | 3     | 3     | 1     | 3     | 3     | 4     | 1      | 2      | 1      | 2      | 2      | 2      | 2      | 1      |
| 4298   | 5     | 2     | 1     | 1     | 5     | 3     | 0      | 1      | 0      | 0      | 1      | 1      | 1      | 1      |
| 4299   | 3     | 4     | 1     | 1     | 3     | 2     | 1      | 2      | 1      | 0      | 1      | 0      | 0      | 1      |
| 4300   | 4     | 1     | 1     | 3     | 3     | 3     | 1      | 1      | 0      | 0      | 1      | 1      | 1      | 1      |
| 4301   | 5     | 2     | 1     | 1     | 4     | 5     | 0      | 0      | 0      | 0      | 0      | 1      | 0      | 0      |
| 4302   | 4     | 1     | 3     | 3     | 4     | 5     | 1      | 0      | 0      | 0      | 0      | 0      | 0      | 0      |
| 4304   | 3     | 1     | 1     | 3     | 4     | 5     | 1      | 1      | 0      | 1      | 1      | 1      | 1      | 0      |
| 4305   | 3     | 2     | 1     | 1     | 3     | 4     | 0      | 1      | 0      | 2      | 1      | 1      | 1      | 1      |
| 4307   | 3     | 4     | 1     | 3     | 3     | 3     | 1      | 1      | 2      | 2      | 2      | 2      | 2      | 2      |
| 4308   | 3     | 3     | 3     | 3     | 3     | 3     | 1      | 1      | 1      | 1      | 1      | 1      | 2      | 1      |
| 4312   | 5     | 1     | 1     | 4     | 3     | 5     | 0      | 1      | 0      | 1      | 1      | 2      | 2      | 1      |
| 4314   | 4     | 2     | 1     | 3     | 4     | 4     | 1      | 1      | 1      | 1      | 1      | 2      | 2      | 1      |
| 4316   | 5     | 2     | 1     | 3     | 3     | 4     | 1      | 0      | 1      | 0      | 1      | 0      | 0      | 1      |
| 4317   | 4     | 1     | 1     | 4     | 3     | 3     | 2      | 2      | 1      | 1      | 0      | 2      | 2      | 1      |
| 4319   | 4     | 1     | 3     | 3     | 3     | 4     | 1      | 1      | 0      | 0      | 1      | 1      | 2      | 1      |
| 4323   | 3     | 4     | 3     | 4     | 3     | 2     | 2      | 2      | 2      | 1      | 1      | 1      | 2      | 2      |
| 4337   | 5     | 1     | 0     | 0     | 5     | 5     | 0      | 0      | 0      | 0      | 0      | 0      | 1      | 0      |
| 4341   | 3     | 2     | 5     | 5     | 3     | 3     | 2      | 2      | 1      | 2      | 2      | 2      | 2      | 3      |

| respid | Q52_2 | Q53_1 | Q54_1 | Q54_2 | Q54_3 | Q55_1 | Q56a_1 | Q56b_1 | Q56c_1 | Q56d_1 | Q56e_1 | Q56f_1 | Q56g_1 | Q56h_1 |
|--------|-------|-------|-------|-------|-------|-------|--------|--------|--------|--------|--------|--------|--------|--------|
| 4342   | 5     | 2     | 1     | 3     | 5     | 5     | 1      | 1      | 0      | 0      | 1      | 1      | 0      | 1      |
| 4344   | 4     | 2     | 3     | 3     | 4     | 4     | 1      | 1      | 1      | 1      | 1      | 1      | 2      | 1      |
| 4345   | 5     | 2     | 1     | 4     | 5     | 3     | 1      | 1      | 0      | 0      | 0      | 1      | 1      | 1      |
| 4346   | 5     | 1     | 0     | 0     | 0     | 4     | 2      | 2      | 0      | 0      | 1      | 1      | 1      | 1      |
| 4347   | 4     | 1     | 1     | 1     | 4     | 4     | 1      | 2      | 1      | 0      | 0      | 0      | 0      | 1      |
| 4350   | 5     | 1     | 0     | 1     | 4     | 4     | 0      | 0      | 1      | 0      | 1      | 1      | 1      | 1      |
| 4352   | 5     | 1     | 0     | 0     | 5     | 5     | 1      | 0      | 0      | 0      | 0      | 0      | 1      | 0      |
| 4353   | 4     | 1     | 1     | 1     | 4     | 5     | 1      | 0      | 2      | 2      | 1      | 1      | 1      | 1      |
| 4355   | 5     | 1     | 1     | 3     | 4     | 5     | 2      | 2      | 0      | 1      | 1      | 1      | 2      | 1      |
| 4356   | 4     | 1     | 1     | 3     | 3     | 4     | 1      | 1      | 1      | 1      | 1      | 2      | 2      | 1      |
| 4358   | 4     | 3     | 0     | 0     | 4     | 4     | 1      | 0      | 0      | 0      | 1      | 0      | 0      | 0      |
| 4359   | 5     | 1     | 1     | 1     | 4     | 5     | 0      | 3      | 0      | 0      | 1      | 0      | 1      | 0      |
| 4360   | 4     | 2     | 1     | 1     | 4     | 5     | 1      | 1      | 1      | 2      | 1      | 1      | 2      | 1      |
| 4361   | 4     | 2     | 4     | 4     | 4     | 3     | 2      | 1      | 2      | 2      | 3      | 2      | 2      | 2      |
| 4363   | 4     | 1     | 3     | 3     | 3     | 5     | 1      | 1      | 1      | 1      | 1      | 1      | 1      | 1      |
| 4364   | 5     | 2     | 3     | 3     | 3     | 5     | 2      | 3      | 1      | 2      | 1      | 2      | 2      | 1      |
| 4365   | 4     | 2     | 1     | 1     | 3     | 5     | 1      | 1      | 1      | 1      | 1      | 1      | 3      | 1      |
| 4367   | 3     | 5     | 1     | 1     | 5     | 3     | 3      | 0      | 3      | 1      | 0      | 0      | 1      | 0      |
| 4369   | 4     | 2     | 1     | 3     | 4     | 4     | 1      | 1      | 2      | 0      | 1      | 1      | 1      | 1      |
| 4373   | 4     | 2     | 1     | 3     | 3     | 3     | 2      | 1      | 0      | 1      | 1      | 2      | 1      | 3      |
| 4374   | 3     | 3     | 1     | 3     | 4     | 3     | 2      | 1      | 1      | 2      | 1      | 1      | 1      | 2      |
| 4375   | 4     | 1     | 0     | 0     | 4     | 4     | 1      | 0      | 1      | 0      | 1      | 0      | 0      | 1      |
| 4378   | 4     | 1     | 0     | 1     | 5     | 5     | 0      | 0      | 0      | 1      | 1      | 0      | 0      | 1      |
| 4379   | 4     | 1     | 1     | 1     | 4     | 5     | 1      | 1      | 0      | 2      | 1      | 1      | 1      | 1      |
| 4382   | 3     | 3     | 4     | 4     | 1     | 4     | 2      | 2      | 1      | 2      | 2      | 2      | 2      | 3      |
| 4383   | 4     | 1     | 1     | 1     | 1     | 5     | 0      | 0      | 0      | 0      | 0      | 0      | 0      | 0      |
| 4384   | 5     | 1     | 1     | 1     | 5     | 5     | 0      | 0      | 0      | 0      | 0      | 0      | 0      | 0      |
| 4385   | 5     | 1     | 1     | 1     | 4     | 5     | 1      | 1      | 1      | 1      | 1      | 1      | 1      | 1      |
| 4388   | 3     | 2     | 3     | 3     | 3     | 3     | 1      | 1      | 1      | 1      | 1      | 1      | 2      | 1      |
| 4389   | 5     | 1     | 1     | 1     | 4     | 5     | 0      | 0      | 0      | 0      | 0      | 0      | 0      | 0      |
| 4391   | 5     | 2     | 3     | 3     | 1     | 5     | 1      | 0      | 2      | 0      | 2      | 1      | 0      | 1      |
| 4392   | 4     | 2     | 1     | 1     | 4     | 4     | 0      | 0      | 0      | 0      | 1      | 1      | 0      | 1      |

| respid | Q52_2 | Q53_1 | Q54_1 | Q54_2 | Q54_3 | Q55_1 | Q56a_1 | Q56b_1 | Q56c_1 | Q56d_1 | Q56e_1 | Q56f_1 | Q56g_1 | Q56h_1 |
|--------|-------|-------|-------|-------|-------|-------|--------|--------|--------|--------|--------|--------|--------|--------|
| 4393   | 5     | 2     | 3     | 3     | 4     | 5     | 2      | 3      | 1      | 0      | 1      | 0      | 2      | 0      |
| 4395   | 4     | 2     | 1     | 1     | 4     | 5     | 1      | 0      | 0      | 0      | 1      | 0      | 1      | 1      |
| 4397   | 4     | 1     | 4     | 4     | 1     | 2     | 3      | 1      | 2      | 1      | 3      | 2      | 2      | 1      |
| 4398   | 4     | 2     | 0     | 0     | 4     | 4     | 1      | 0      | 2      | 0      | 1      | 0      | 0      | 0      |
| 4399   | 5     | 1     | 0     | 1     | 5     | 5     | 0      | 0      | 0      | 0      | 0      | 0      | 0      | 0      |
| 4400   | 5     | 1     | 0     | 0     | 5     | 5     | 0      | 0      | 0      | 0      | 0      | 0      | 0      | 0      |
| 4401   | 5     | 2     | 0     | 0     | 4     | 5     | 0      | 0      | 0      | 0      | 0      | 1      | 1      | 0      |
| 4402   | 5     | 1     | 1     | 1     | 5     | 5     | 0      | 1      | 0      | 0      | 1      | 0      | 1      | 1      |
| 4404   | 5     | 2     | 1     | 1     | 5     | 4     | 1      | 1      | 0      | 1      | 0      | 1      | 0      | 0      |
| 4405   | 5     | 1     | 0     | 0     | 4     | 5     | 0      | 0      | 0      | 0      | 0      | 0      | 0      | 0      |
| 4407   | 5     | 2     | 1     | 1     | 4     | 3     | 1      | 0      | 0      | 0      | 1      | 0      | 1      | 0      |
| 4408   | 3     | 3     | 4     | 5     | 5     | 3     | 1      | 3      | 2      | 1      | 1      | 1      | 1      | 2      |
| 4411   | 4     | 3     | 1     | 1     | 4     | 5     | 0      | 0      | 0      | 0      | 0      | 0      | 1      | 1      |
| 4420   | 5     | 1     | 1     | 1     | 4     | 5     | 0      | 1      | 0      | 0      | 0      | 0      | 0      | 1      |
| 4421   | 5     | 1     | 1     | 3     | 4     | 5     | 0      | 0      | 0      | 0      | 0      | 1      | 0      | 1      |
| 4424   | 3     | 2     | 1     | 0     | 3     | 2     | 1      | 0      | 1      | 0      | 2      | 2      | 1      | 2      |
| 4425   | 4     | 1     | 1     | 1     | 5     | 5     | 0      | 1      | 0      | 1      | 1      | 1      | 1      | 1      |
| 4427   | 5     | 1     | 1     | 1     | 4     | 5     | 1      | 0      | 1      | 0      | 1      | 0      | 1      | 0      |
| 4430   | 4     | 2     | 1     | 1     | 4     | 4     | 0      | 1      | 0      | 1      | 1      | 0      | 1      | 1      |
| 4431   | 2     | 3     | 3     | 3     | 3     | 3     | 0      | 0      | 0      | 1      | 1      | 1      | 1      | 1      |
| 4432   | 3     | 3     | 3     | 3     | 3     | 3     | 1      | 1      | 1      | 1      | 1      | 1      | 1      | 1      |
| 4436   | 5     | 1     | 4     | 4     | 4     | 4     | 1      | 2      | 1      | 0      | 1      | 1      | 1      | 1      |
| 4439   | 4     | 2     | 1     | 1     | 3     | 4     | 1      | 1      | 1      | 1      | 1      | 1      | 1      | 1      |
| 4451   | 3     | 2     | 3     | 3     | 4     | 4     | 1      | 1      | 1      | 1      | 1      | 1      | 1      | 1      |
| 4452   | 3     | 3     | 3     | 1     | 3     | 3     | 1      | 1      | 1      | 1      | 2      | 1      | 1      | 2      |
| 4458   | 5     | 1     | 1     | 1     | 4     | 5     | 0      | 1      | 0      | 1      | 1      | 1      | 1      | 1      |
| 4464   | 3     | 2     | 1     | 1     | 3     | 3     | 1      | 1      | 1      | 2      | 1      | 0      | 0      | 2      |
| 4465   | 5     | 1     | 1     | 1     | 5     | 5     | 0      | 1      | 0      | 1      | 1      | 1      | 1      | 0      |
| 4467   | 3     | 2     | 3     | 4     | 1     | 3     | 1      | 2      | 1      | 2      | 2      | 2      | 2      | 1      |
| 4470   | 4     | 3     | 4     | 4     | 3     | 4     | 1      | 1      | 2      | 2      | 2      | 2      | 2      | 1      |
| 4471   | 4     | 2     | 4     | 1     | 3     | 4     | 1      | 0      | 2      | 1      | 2      | 1      | 2      | 1      |
| 4472   | 5     | 1     | 1     | 3     | 4     | 4     | 1      | 1      | 1      | 1      | 1      | 1      | 1      | 0      |

| respid | Q52_2 | Q53_1 | Q54_1 | Q54_2 | Q54_3 | Q55_1 | Q56a_1 | Q56b_1 | Q56c_1 | Q56d_1 | Q56e_1 | Q56f_1 | Q56g_1 | Q56h_1 |
|--------|-------|-------|-------|-------|-------|-------|--------|--------|--------|--------|--------|--------|--------|--------|
| 4473   | 5     | 1     | 1     | 1     | 5     | 5     | 1      | 1      | 0      | 0      | 1      | 0      | 1      | 0      |
| 4475   | 4     | 2     | 4     | 4     | 4     | 5     | 1      | 3      | 1      | 1      | 3      | 1      | 2      | 0      |
| 4476   | 4     | 2     | 3     | 4     | 3     | 4     | 2      | 2      | 1      | 2      | 2      | 2      | 2      | 2      |
| 4478   | 5     | 1     | 1     | 1     | 4     | 5     | 0      | 2      | 2      | 0      | 2      | 1      | 2      | 0      |
| 4485   | 5     | 2     | 0     | 1     | 5     | 5     | 0      | 0      | 0      | 0      | 0      | 0      | 0      | 0      |
| 4486   | 5     | 2     | 1     | 3     | 5     | 5     | 0      | 1      | 0      | 1      | 1      | 1      | 1      | 1      |
| 4490   | 5     | 1     | 5     | 5     | 5     | 5     | 0      | 0      | 0      | 0      | 1      | 3      | 0      | 2      |
| 4502   | 5     | 1     | 0     | 0     | 4     | 5     | 0      | 0      | 0      | 0      | 0      | 0      | 0      | 0      |
| 4503   | 5     | 1     | 3     | 4     | 5     | 5     | 0      | 3      | 1      | 0      | 1      | 1      | 2      | 2      |
| 4504   | 5     | 1     | 1     | 1     | 4     | 5     | 0      | 0      | 0      | 0      | 0      | 0      | 0      | 1      |
| 4506   | 5     | 1     | 1     | 1     | 4     | 4     | 0      | 0      | 0      | 0      | 1      | 1      | 1      | 0      |
| 4508   | 5     | 1     | 0     | 1     | 5     | 5     | 0      | 0      | 0      | 0      | 0      | 0      | 0      | 1      |
| 4515   | 5     | 2     | 0     | 1     | 4     | 5     | 1      | 0      | 1      | 0      | 1      | 1      | 1      | 1      |
| 4516   | 5     | 1     | 1     | 1     | 5     | 4     | 0      | 2      | 0      | 0      | 0      | 0      | 0      | 1      |
| 4519   | 1     | 2     | 0     | 0     | 0     | 3     | 1      | 1      | 1      | 1      | 1      | 1      | 0      | 0      |
| 4523   | 3     | 3     | 4     | 4     | 4     | 4     | 0      | 0      | 1      | 1      | 1      | 1      | 2      | 2      |
| 4525   | 5     | 2     | 1     | 1     | 5     | 5     | 1      | 2      | 0      | 1      | 1      | 1      | 1      | 1      |
| 4526   | 5     | 1     | 1     | 1     | 5     | 5     | 0      | 1      | 0      | 0      | 1      | 0      | 0      | 0      |
| 4528   | 4     | 1     | 1     | 1     | 4     | 5     | 0      | 0      | 0      | 0      | 0      | 0      | 0      | 0      |
| 4530   | 5     | 1     | 0     | 0     | 3     | 5     | 0      | 0      | 0      | 0      | 0      | 0      | 0      | 0      |
| 4531   | 2     | 2     | 1     | 1     | 3     | 4     | 1      | 1      | 2      | 1      | 2      | 1      | 1      | 1      |
| 4532   | 4     | 3     | 1     | 1     | 4     | 4     | 0      | 0      | 0      | 0      | 1      | 0      | 1      | 1      |
| 4537   | 4     | 3     | 1     | 3     | 4     | 4     | 1      | 1      | 1      | 0      | 1      | 1      | 1      | 1      |
| 4538   | 3     | 1     | 0     | 1     | 4     | 5     | 0      | 1      | 0      | 0      | 0      | 1      | 0      | 0      |
| 4539   | 3     | 2     | 4     | 4     | 5     | 4     | 1      | 2      | 1      | 1      | 1      | 1      | 2      | 1      |
| 4541   | 5     | 1     | 4     | 4     | 1     | 3     | 2      | 1      | 0      | 3      | 1      | 2      | 3      | 0      |
| 4543   | 5     | 1     | 1     | 1     | 4     | 4     | 0      | 0      | 0      | 0      | 0      | 1      | 0      | 0      |
| 4544   | 3     | 2     | 1     | 3     | 4     | 5     | 1      | 2      | 2      | 2      | 1      | 1      | 2      | 1      |
| 4546   | 5     | 1     | 0     | 0     | 5     | 5     | 0      | 0      | 0      | 0      | 0      | 0      | 0      | 2      |
| 4547   | 4     | 2     | 1     | 1     | 4     | 4     | 1      | 0      | 0      | 0      | 0      | 0      | 0      | 0      |
| 4549   | 2     | 4     | 3     | 3     | 3     | 3     | 1      | 1      | 1      | 1      | 1      | 2      | 2      | 2      |
| 4550   | 3     | 3     | 3     | 3     | 3     | 3     | 1      | 2      | 1      | 2      | 1      | 1      | 2      | 1      |

| respid | Q52_2 | Q53_1 | Q54_1 | Q54_2 | Q54_3 | Q55_1 | Q56a_1 | Q56b_1 | Q56c_1 | Q56d_1 | Q56e_1 | Q56f_1 | Q56g_1 | Q56h_1 |
|--------|-------|-------|-------|-------|-------|-------|--------|--------|--------|--------|--------|--------|--------|--------|
| 4551   | 5     | 1     | 1     | 3     | 4     | 4     | 0      | 0      | 0      | 0      | 0      | 0      | 1      | 0      |
| 4554   | 5     | 1     | 1     | 1     | 4     | 5     | 0      | 0      | 0      | 0      | 0      | 0      | 0      | 0      |
| 4557   | 5     | 1     | 0     | 0     | 5     | 5     | 0      | 0      | 0      | 0      | 0      | 0      | 0      | 0      |
| 4565   | 5     | 1     | 1     | 1     | 4     | 5     | 1      | 0      | 0      | 0      | 0      | 0      | 0      | 0      |
| 4568   | 5     | 1     | 0     | 3     | 4     | 5     | 1      | 1      | 0      | 1      | 1      | 1      | 0      | 0      |
| 4569   | 5     | 1     | 1     | 3     | 4     | 5     | 0      | 0      | 0      | 0      | 0      | 0      | 0      | 1      |
| 4570   | 5     | 2     | 1     | 1     | 4     | 4     | 0      | 0      | 0      | 0      | 1      | 0      | 0      | 1      |
| 4572   | 5     | 2     | 0     | 1     | 5     | 5     | 0      | 0      | 0      | 0      | 0      | 0      | 0      | 1      |
| 4574   | 5     | 2     | 1     | 3     | 4     | 4     | 1      | 1      | 0      | 1      | 2      | 1      | 1      | 1      |
| 4576   | 4     | 2     | 5     | 4     | 4     | 3     | 2      | 3      | 1      | 1      | 3      | 1      | 2      | 2      |
| 4578   | 5     | 1     | 1     | 1     | 4     | 5     | 3      | 0      | 0      | 0      | 0      | 0      | 0      | 0      |
| 4579   | 5     | 1     | 3     | 3     | 4     | 5     | 1      | 0      | 0      | 0      | 1      | 1      | 1      | 0      |
| 4580   | 5     | 1     | 1     | 4     | 4     | 5     | 1      | 0      | 0      | 0      | 1      | 0      | 1      | 1      |
| 4581   | 4     | 1     | 1     | 3     | 3     | 4     | 1      | 1      | 1      | 2      | 1      | 1      | 1      | 1      |
| 4584   | 5     | 1     | 0     | 0     | 5     | 5     | 0      | 0      | 0      | 0      | 0      | 0      | 0      | 0      |
| 4586   | 4     | 1     | 1     | 3     | 3     | 4     | 1      | 0      | 1      | 0      | 1      | 1      | 1      | 1      |
| 4587   | 3     | 2     | 3     | 4     | 1     | 4     | 1      | 1      | 2      | 2      | 2      | 2      | 1      | 2      |
| 4590   | 4     | 2     | 3     | 3     | 3     | 3     | 1      | 2      | 1      | 2      | 2      | 1      | 2      | 1      |
| 4592   | 5     | 2     | 0     | 1     | 4     | 5     | 1      | 2      | 1      | 2      | 1      | 1      | 1      | 0      |
| 4593   | 4     | 2     | 4     | 4     | 4     | 2     | 1      | 1      | 1      | 1      | 2      | 3      | 2      | 1      |
| 4595   | 4     | 2     | 1     | 1     | 4     | 4     | 0      | 1      | 0      | 1      | 1      | 1      | 1      | 1      |
| 4597   | 4     | 1     | 1     | 1     | 4     | 4     | 0      | 0      | 0      | 0      | 1      | 0      | 0      | 1      |
| 4598   | 3     | 3     | 3     | 3     | 3     | 3     | 1      | 2      | 1      | 1      | 1      | 1      | 2      | 2      |
| 4599   | 5     | 2     | 4     | 4     | 3     | 3     | 1      | 2      | 1      | 2      | 1      | 2      | 1      | 1      |
| 4600   | 5     | 2     | 1     | 1     | 4     | 5     | 1      | 0      | 0      | 0      | 1      | 0      | 1      | 1      |
| 4601   | 3     | 3     | 3     | 3     | 3     | 3     | 1      | 1      | 1      | 1      | 1      | 2      | 0      | 0      |
| 4608   | 4     | 5     | 4     | 5     | 3     | 3     | 0      | 1      | 1      | 0      | 1      | 1      | 1      | 2      |
| 4609   | 4     | 2     | 1     | 3     | 5     | 4     | 0      | 0      | 0      | 0      | 0      | 0      | 1      | 1      |
| 4611   | 3     | 3     | 1     | 4     | 3     | 4     | 1      | 1      | 0      | 2      | 2      | 2      | 1      | 3      |
| 4612   | 4     | 3     | 3     | 4     | 4     | 4     | 2      | 2      | 1      | 1      | 1      | 1      | 1      | 1      |
| 4613   | 5     | 1     | 5     | 5     | 5     | 5     | 0      | 0      | 0      | 0      | 0      | 0      | 0      | 0      |
| 4616   | 4     | 2     | 1     | 3     | 3     | 4     | 1      | 0      | 1      | 0      | 1      | 1      | 1      | 2      |

| respid | Q52_2 | Q53_1 | Q54_1 | Q54_2 | Q54_3 | Q55_1 | Q56a_1 | Q56b_1 | Q56c_1 | Q56d_1 | Q56e_1 | Q56f_1 | Q56g_1 | Q56h_1 |
|--------|-------|-------|-------|-------|-------|-------|--------|--------|--------|--------|--------|--------|--------|--------|
| 4617   | 4     | 2     | 0     | 0     | 3     | 4     | 1      | 0      | 1      | 0      | 1      | 0      | 0      | 0      |
| 4620   | 4     | 2     | 1     | 5     | 1     | 3     | 2      | 0      | 1      | 2      | 1      | 2      | 2      | 1      |
| 4621   | 4     | 2     | 0     | 0     | 4     | 5     | 1      | 0      | 1      | 0      | 0      | 0      | 0      | 0      |
| 4622   | 3     | 3     | 3     | 3     | 3     | 3     | 1      | 1      | 1      | 1      | 1      | 1      | 2      | 1      |
| 4624   | 4     | 2     | 1     | 1     | 4     | 5     | 1      | 0      | 2      | 0      | 1      | 1      | 1      | 1      |
| 4625   | 3     | 2     | 3     | 3     | 3     | 3     | 1      | 0      | 1      | 0      | 1      | 1      | 1      | 1      |
| 4627   | 5     | 1     | 3     | 4     | 4     | 5     | 1      | 1      | 1      | 1      | 1      | 2      | 1      | 1      |
| 4628   | 3     | 3     | 3     | 3     | 3     | 3     | 1      | 1      | 1      | 1      | 1      | 1      | 1      | 1      |
| 4629   | 4     | 2     | 3     | 3     | 4     | 4     | 1      | 0      | 1      | 0      | 1      | 1      | 1      | 1      |
| 4630   | 4     | 2     | 0     | 1     | 4     | 4     | 1      | 1      | 1      | 1      | 1      | 0      | 1      | 1      |
| 4632   | 5     | 2     | 3     | 3     | 3     | 4     | 1      | 0      | 1      | 0      | 1      | 1      | 1      | 1      |
| 4634   | 4     | 2     | 1     | 1     | 4     | 4     | 1      | 0      | 1      | 0      | 1      | 1      | 1      | 0      |
| 4635   | 5     | 3     | 1     | 4     | 1     | 3     | 1      | 0      | 2      | 1      | 2      | 2      | 2      | 1      |
| 4636   | 5     | 1     | 1     | 1     | 5     | 5     | 1      | 1      | 0      | 2      | 1      | 1      | 2      | 1      |
| 4637   | 2     | 2     | 1     | 1     | 1     | 2     | 1      | 1      | 1      | 1      | 1      | 1      | 2      | 1      |
| 4638   | 5     | 2     | 1     | 1     | 3     | 4     | 1      | 0      | 1      | 1      | 1      | 0      | 0      | 1      |
| 4639   | 3     | 2     | 3     | 3     | 3     | 3     | 1      | 1      | 3      | 2      | 2      | 1      | 2      | 2      |
| 4641   | 5     | 1     | 1     | 1     | 5     | 5     | 0      | 0      | 0      | 0      | 0      | 0      | 0      | 0      |
| 4643   | 4     | 1     | 1     | 3     | 4     | 5     | 1      | 2      | 0      | 1      | 2      | 2      | 2      | 1      |
| 4645   | 5     | 1     | 1     | 0     | 4     | 5     | 0      | 0      | 0      | 0      | 0      | 0      | 0      | 0      |
| 4646   | 3     | 3     | 3     | 4     | 3     | 3     | 1      | 1      | 2      | 1      | 1      | 2      | 2      | 1      |
| 4647   | 4     | 2     | 0     | 0     | 5     | 5     | 0      | 0      | 1      | 0      | 1      | 0      | 1      | 2      |
| 4648   | 5     | 2     | 1     | 1     | 4     | 4     | 0      | 0      | 0      | 0      | 1      | 0      | 0      | 0      |
| 4649   | 4     | 2     | 1     | 3     | 4     | 4     | 1      | 0      | 1      | 1      | 1      | 1      | 1      | 1      |
| 4650   | 4     | 3     | 3     | 3     | 1     | 4     | 2      | 1      | 2      | 2      | 2      | 1      | 2      | 2      |
| 4651   | 4     | 3     | 1     | 4     | 3     | 3     | 1      | 2      | 3      | 1      | 2      | 2      | 2      | 2      |
| 4652   | 4     | 2     | 3     | 4     | 4     | 4     | 1      | 1      | 1      | 1      | 1      | 2      | 2      | 2      |
| 4653   | 5     | 1     | 1     | 0     | 4     | 5     | 0      | 0      | 0      | 0      | 0      | 0      | 0      | 0      |
| 4657   | 5     | 1     | 1     | 1     | 5     | 5     | 0      | 0      | 0      | 0      | 0      | 0      | 0      | 0      |
| 4660   | 5     | 1     | 4     | 5     | 1     | 5     | 1      | 0      | 2      | 2      | 2      | 2      | 2      | 2      |
| 4661   | 5     | 4     | 1     | 3     | 4     | 4     | 1      | 1      | 1      | 0      | 2      | 1      | 1      | 1      |
| 4662   | 4     | 2     | 1     | 1     | 4     | 3     | 1      | 1      | 1      | 1      | 0      | 0      | 0      | 1      |



| respid | Q52_2 | Q53_1 | Q54_1 | Q54_2 | Q54_3 | Q55_1 | Q56a_1 | Q56b_1 | Q56c_1 | Q56d_1 | Q56e_1 | Q56f_1 | Q56g_1 | Q56h_1 |
|--------|-------|-------|-------|-------|-------|-------|--------|--------|--------|--------|--------|--------|--------|--------|
| 4667   | 4     | 2     | 1     | 3     | 3     | 4     | 1      | 1      | 0      | 1      | 1      | 1      | 2      | 1      |
| 4669   | 5     | 1     | 3     | 3     | 3     | 3     | 1      | 0      | 1      | 0      | 2      | 1      | 1      | 1      |
| 4671   | 4     | 1     | 1     | 1     | 1     | 4     | 0      | 0      | 0      | 0      | 0      | 0      | 0      | 0      |
| 4672   | 4     | 1     | 4     | 5     | 1     | 5     | 1      | 1      | 1      | 1      | 2      | 3      | 3      | 1      |
| 4673   | 3     | 3     | 3     | 4     | 1     | 3     | 2      | 1      | 2      | 2      | 2      | 2      | 2      | 1      |
| 4677   | 5     | 1     | 1     | 1     | 5     | 5     | 0      | 1      | 0      | 0      | 1      | 1      | 1      | 1      |
| 4679   | 5     | 2     | 1     | 3     | 3     | 5     | 0      | 1      | 0      | 0      | 1      | 0      | 0      | 0      |
| 4683   | 5     | 3     | 1     | 1     | 4     | 3     | 1      | 0      | 0      | 0      | 1      | 0      | 0      | 1      |
| 4684   | 5     | 1     | 1     | 3     | 1     | 4     | 1      | 0      | 2      | 1      | 2      | 1      | 2      | 1      |
| 4685   | 5     | 1     | 0     | 3     | 3     | 4     | 0      | 0      | 1      | 1      | 1      | 2      | 1      | 1      |
| 4686   | 4     | 1     | 1     | 1     | 3     | 4     | 1      | 0      | 2      | 1      | 1      | 1      | 1      | 1      |
| 4687   | 5     | 2     | 1     | 1     | 4     | 5     | 0      | 0      | 0      | 0      | 0      | 0      | 0      | 1      |
| 4688   | 3     | 1     | 1     | 3     | 1     | 4     | 1      | 2      | 1      | 1      | 1      | 1      | 1      | 1      |
| 4691   | 4     | 1     | 1     | 1     | 4     | 4     | 1      | 0      | 1      | 0      | 1      | 1      | 1      | 1      |
| 4692   | 5     | 1     | 0     | 1     | 4     | 5     | 1      | 1      | 1      | 1      | 1      | 0      | 0      | 1      |
| 4694   | 3     | 2     | 3     | 3     | 3     | 5     | 1      | 0      | 1      | 0      | 1      | 1      | 1      | 0      |
| 4695   | 5     | 1     | 3     | 3     | 4     | 5     | 1      | 2      | 0      | 0      | 1      | 1      | 1      | 0      |
| 4696   | 4     | 2     | 3     | 3     | 4     | 3     | 0      | 1      | 1      | 1      | 1      | 1      | 1      | 1      |
| 4697   | 5     | 1     | 1     | 1     | 4     | 5     | 0      | 1      | 0      | 1      | 0      | 1      | 1      | 0      |
| 4698   | 3     | 3     | 1     | 3     | 3     | 4     | 2      | 1      | 1      | 1      | 1      | 1      | 2      | 1      |
| 4699   | 5     | 1     | 0     | 0     | 5     | 5     | 0      | 0      | 0      | 0      | 0      | 0      | 0      | 0      |
| 4701   | 5     | 1     | 1     | 1     | 4     | 4     | 1      | 2      | 1      | 2      | 2      | 0      | 0      | 0      |
| 4703   | 4     | 2     | 1     | 1     | 4     | 4     | 1      | 1      | 2      | 2      | 1      | 1      | 1      | 1      |
| 4704   | 1     | 4     | 5     | 5     | 0     | 1     | 2      | 2      | 2      | 1      | 3      | 3      | 3      | 1      |
| 4705   | 5     | 1     | 1     | 3     | 4     | 4     | 0      | 0      | 0      | 0      | 0      | 0      | 0      | 0      |
| 4706   | 5     | 1     | 1     | 1     | 5     | 5     | 0      | 0      | 1      | 0      | 0      | 0      | 0      | 0      |
| 4707   | 5     | 2     | 3     | 3     | 4     | 4     | 1      | 1      | 0      | 0      | 1      | 0      | 1      | 1      |
| 4708   | 4     | 2     | 1     | 1     | 3     | 4     | 0      | 0      | 1      | 1      | 1      | 2      | 1      | 1      |
| 4710   | 4     | 1     | 3     | 4     | 3     | 3     | 1      | 0      | 1      | 1      | 1      | 2      | 2      | 1      |
| 4711   | 3     | 3     | 3     | 4     | 3     | 3     | 1      | 1      | 2      | 2      | 1      | 1      | 1      | 1      |
| 4715   | 4     | 2     | 1     | 1     | 3     | 5     | 1      | 1      | 1      | 0      | 1      | 1      | 1      | 0      |
| 4716   | 4     | 2     | 3     | 1     | 4     | 4     | 1      | 1      | 0      | 0      | 2      | 1      | 2      | 1      |

| respid | Q52_2 | Q53_1 | Q54_1 | Q54_2 | Q54_3 | Q55_1 | Q56a_1 | Q56b_1 | Q56c_1 | Q56d_1 | Q56e_1 | Q56f_1 | Q56g_1 | Q56h_1 |   |
|--------|-------|-------|-------|-------|-------|-------|--------|--------|--------|--------|--------|--------|--------|--------|---|
| 4717   | 5     | 1     | 1     | 1     | 1     | 5     | 5      | 0      | 1      | 0      | 0      | 1      | 0      | 0      | 1 |
| 4718   | 4     | 2     | 1     | 3     | 4     | 4     | 4      | 1      | 1      | 1      | 0      | 1      | 0      | 1      | 1 |
| 4722   | 3     | 3     | 3     | 3     | 3     | 3     | 4      | 1      | 1      | 1      | 1      | 2      | 2      | 1      | 2 |
| 4727   | 4     | 2     | 3     | 3     | 3     | 3     | 4      | 1      | 2      | 1      | 1      | 1      | 1      | 1      | 1 |
| 4728   | 4     | 1     | 3     | 4     | 1     | 2     | 3      | 2      | 2      | 2      | 2      | 1      | 2      | 2      | 2 |
| 4729   | 5     | 1     | 1     | 1     | 4     | 4     | 4      | 1      | 0      | 0      | 0      | 1      | 0      | 0      | 1 |
| 4732   | 4     | 1     | 3     | 3     | 4     | 4     | 4      | 1      | 2      | 1      | 1      | 1      | 2      | 2      | 1 |
| 4733   | 5     | 2     | 1     | 1     | 4     | 4     | 4      | 1      | 2      | 1      | 1      | 0      | 1      | 1      | 0 |
| 4734   | 3     | 3     | 3     | 3     | 3     | 3     | 3      | 1      | 1      | 0      | 1      | 1      | 1      | 1      | 1 |
| 4735   | 5     | 2     | 0     | 0     | 0     | 0     | 5      | 0      | 1      | 0      | 0      | 0      | 0      | 0      | 0 |
| 4737   | 5     | 3     | 1     | 3     | 5     | 5     | 5      | 0      | 0      | 0      | 0      | 1      | 2      | 1      | 2 |
| 4738   | 5     | 3     | 0     | 1     | 5     | 5     | 5      | 0      | 0      | 0      | 0      | 1      | 0      | 0      | 1 |
| 4740   | 5     | 2     | 1     | 1     | 4     | 4     | 4      | 1      | 0      | 1      | 0      | 0      | 0      | 0      | 0 |
| 4741   | 4     | 2     | 1     | 1     | 3     | 5     | 5      | 1      | 0      | 0      | 1      | 1      | 0      | 0      | 0 |
| 4743   | 5     | 1     | 3     | 3     | 3     | 3     | 4      | 1      | 1      | 0      | 0      | 1      | 1      | 1      | 1 |
| 4746   | 4     | 1     | 1     | 1     | 4     | 5     | 5      | 1      | 0      | 0      | 0      | 1      | 1      | 1      | 0 |
| 4750   | 4     | 2     | 4     | 3     | 4     | 4     | 4      | 1      | 0      | 2      | 0      | 1      | 1      | 2      | 1 |
| 4752   | 5     | 1     | 1     | 1     | 4     | 5     | 5      | 1      | 1      | 1      | 1      | 1      | 1      | 0      | 1 |
| 4753   | 4     | 2     | 1     | 1     | 4     | 4     | 4      | 1      | 1      | 0      | 1      | 0      | 0      | 0      | 1 |
| 4754   | 5     | 2     | 3     | 4     | 4     | 4     | 5      | 1      | 1      | 0      | 0      | 0      | 2      | 1      | 1 |
| 4755   | 2     | 3     | 4     | 5     | 1     | 3     | 3      | 2      | 1      | 1      | 2      | 2      | 3      | 3      | 2 |
| 4758   | 3     | 3     | 4     | 3     | 1     | 3     | 3      | 2      | 0      | 3      | 1      | 3      | 2      | 2      | 0 |
| 4766   | 5     | 1     | 1     | 1     | 4     | 5     | 5      | 0      | 1      | 0      | 1      | 0      | 1      | 1      | 0 |
| 4767   | 4     | 2     | 5     | 5     | 4     | 4     | 4      | 1      | 3      | 1      | 2      | 1      | 2      | 2      | 3 |
| 4768   | 3     | 2     | 1     | 4     | 3     | 4     | 4      | 1      | 1      | 1      | 3      | 1      | 2      | 2      | 1 |
| 4769   | 5     | 1     | 3     | 3     | 3     | 3     | 5      | 0      | 1      | 0      | 0      | 1      | 1      | 1      | 1 |
| 4771   | 3     | 3     | 4     | 3     | 1     | 3     | 3      | 1      | 1      | 2      | 2      | 2      | 2      | 1      | 2 |
| 4772   | 4     | 1     | 1     | 1     | 4     | 4     | 4      | 1      | 0      | 1      | 1      | 1      | 1      | 1      | 0 |
| 4773   | 4     | 2     | 4     | 4     | 4     | 4     | 4      | 1      | 0      | 1      | 0      | 1      | 0      | 0      | 1 |
| 4774   | 3     | 2     | 1     | 3     | 3     | 3     | 5      | 1      | 1      | 1      | 1      | 2      | 1      | 1      | 2 |
| 4776   | 4     | 1     | 0     | 1     | 1     | 1     | 4      | 1      | 1      | 2      | 1      | 2      | 1      | 1      | 2 |
| 4777   | 3     | 3     | 3     | 1     | 3     | 3     | 3      | 1      | 1      | 1      | 1      | 2      | 2      | 2      | 2 |

| respid | Q52_2 | Q53_1 | Q54_1 | Q54_2 | Q54_3 | Q55_1 | Q56a_1 | Q56b_1 | Q56c_1 | Q56d_1 | Q56e_1 | Q56f_1 | Q56g_1 | Q56h_1 |
|--------|-------|-------|-------|-------|-------|-------|--------|--------|--------|--------|--------|--------|--------|--------|
| 4779   | 5     | 1     | 1     | 1     | 4     | 5     | 0      | 1      | 0      | 0      | 0      | 1      | 1      | 0      |
| 4780   | 5     | 2     | 0     | 1     | 5     | 5     | 3      | 1      | 0      | 0      | 0      | 0      | 0      | 0      |
| 4781   | 5     | 1     | 1     | 1     | 4     | 5     | 1      | 0      | 0      | 1      | 2      | 2      | 1      | 1      |
| 4783   | 3     | 3     | 3     | 3     | 4     | 4     | 1      | 1      | 1      | 1      | 1      | 1      | 2      | 1      |
| 4784   | 5     | 1     | 1     | 1     | 5     | 5     | 0      | 0      | 0      | 0      | 0      | 0      | 0      | 0      |
| 4785   | 4     | 2     | 3     | 3     | 3     | 4     | 0      | 1      | 0      | 1      | 1      | 1      | 2      | 1      |
| 4788   | 5     | 1     | 0     | 0     | 5     | 5     | 0      | 0      | 0      | 0      | 0      | 0      | 0      | 0      |
| 4789   | 3     | 1     | 4     | 4     | 5     | 3     | 1      | 2      | 0      | 0      | 1      | 1      | 2      | 1      |
| 4790   | 3     | 3     | 3     | 3     | 3     | 3     | 0      | 0      | 0      | 0      | 0      | 0      | 0      | 0      |
| 4791   | 5     | 1     | 1     | 1     | 4     | 5     | 0      | 2      | 0      | 0      | 1      | 0      | 1      | 0      |
| 4794   | 5     | 1     | 1     | 3     | 3     | 4     | 0      | 1      | 1      | 1      | 1      | 1      | 1      | 0      |
| 4795   | 5     | 1     | 3     | 1     | 5     | 5     | 0      | 0      | 0      | 0      | 0      | 0      | 1      | 0      |
| 4797   | 4     | 1     | 1     | 3     | 4     | 4     | 1      | 1      | 1      | 2      | 1      | 2      | 2      | 1      |
| 4802   | 3     | 2     | 3     | 4     | 3     | 4     | 1      | 1      | 2      | 2      | 2      | 2      | 2      | 2      |
| 4803   | 4     | 1     | 4     | 4     | 3     | 4     | 1      | 1      | 1      | 1      | 1      | 2      | 2      | 1      |
| 4804   | 4     | 2     | 1     | 3     | 4     | 4     | 1      | 0      | 1      | 0      | 1      | 0      | 1      | 1      |
| 4805   | 5     | 1     | 3     | 3     | 3     | 5     | 1      | 1      | 0      | 1      | 2      | 1      | 3      | 0      |
| 4807   | 5     | 2     | 1     | 1     | 4     | 4     | 0      | 0      | 0      | 0      | 1      | 0      | 0      | 0      |
| 4808   | 5     | 2     | 1     | 1     | 4     | 4     | 1      | 1      | 2      | 2      | 1      | 1      | 1      | 0      |
| 4809   | 3     | 3     | 3     | 4     | 4     | 3     | 1      | 2      | 1      | 1      | 2      | 3      | 2      | 2      |
| 4811   | 3     | 2     | 1     | 1     | 3     | 4     | 1      | 1      | 2      | 1      | 1      | 1      | 1      | 0      |
| 4817   | 3     | 3     | 4     | 3     | 3     | 4     | 1      | 2      | 2      | 1      | 1      | 1      | 1      | 1      |
| 4819   | 5     | 1     | 4     | 3     | 4     | 5     | 1      | 1      | 0      | 1      | 0      | 1      | 2      | 1      |
| 4820   | 4     | 2     | 0     | 3     | 5     | 5     | 0      | 0      | 0      | 0      | 1      | 0      | 0      | 0      |
| 4821   | 3     | 4     | 3     | 1     | 4     | 4     | 0      | 0      | 1      | 1      | 0      | 1      | 1      | 2      |
| 4822   | 5     | 1     | 1     | 1     | 5     | 5     | 0      | 0      | 0      | 0      | 0      | 0      | 0      | 0      |
| 4823   | 5     | 2     | 1     | 1     | 4     | 4     | 0      | 0      | 0      | 0      | 0      | 0      | 1      | 1      |
| 4825   | 5     | 1     | 4     | 4     | 4     | 5     | 1      | 1      | 0      | 1      | 1      | 1      | 1      | 1      |
| 4826   | 5     | 1     | 1     | 1     | 3     | 5     | 0      | 0      | 0      | 1      | 1      | 2      | 1      | 0      |
| 4830   | 4     | 2     | 3     | 4     | 3     | 4     | 0      | 1      | 0      | 0      | 1      | 1      | 1      | 0      |
| 4832   | 5     | 1     | 1     | 1     | 5     | 5     | 0      | 0      | 0      | 0      | 0      | 0      | 0      | 0      |
| 4838   | 3     | 2     | 3     | 3     | 3     | 3     | 1      | 1      | 1      | 1      | 1      | 1      | 2      | 1      |

| respid | Q52_2 | Q53_1 | Q54_1 | Q54_2 | Q54_3 | Q55_1 | Q56a_1 | Q56b_1 | Q56c_1 | Q56d_1 | Q56e_1 | Q56f_1 | Q56g_1 | Q56h_1 |
|--------|-------|-------|-------|-------|-------|-------|--------|--------|--------|--------|--------|--------|--------|--------|
| 4840   | 5     | 2     | 1     | 3     | 5     | 5     | 0      | 1      | 0      | 0      | 1      | 0      | 0      | 1      |
| 4841   | 5     | 1     | 1     | 1     | 4     | 5     | 1      | 0      | 0      | 0      | 1      | 0      | 0      | 0      |
| 4843   | 3     | 2     | 1     | 1     | 4     | 4     | 1      | 0      | 1      | 0      | 1      | 0      | 0      | 1      |
| 4845   | 4     | 2     | 3     | 3     | 4     | 5     | 1      | 1      | 0      | 1      | 1      | 1      | 1      | 1      |
| 4846   | 4     | 2     | 4     | 4     | 4     | 3     | 1      | 1      | 1      | 1      | 1      | 1      | 1      | 1      |
| 4848   | 5     | 1     | 1     | 1     | 4     | 5     | 0      | 0      | 0      | 0      | 1      | 0      | 0      | 1      |
| 4853   | 5     | 1     | 0     | 1     | 5     | 5     | 0      | 0      | 0      | 1      | 0      | 0      | 0      | 0      |
| 4854   | 4     | 2     | 1     | 3     | 4     | 4     | 1      | 0      | 2      | 1      | 1      | 1      | 1      | 0      |
| 4859   | 5     | 1     | 1     | 3     | 4     | 3     | 1      | 1      | 1      | 0      | 1      | 1      | 1      | 1      |
| 4861   | 4     | 2     | 1     | 1     | 4     | 4     | 1      | 1      | 1      | 0      | 1      | 0      | 0      | 2      |
| 4864   | 5     | 2     | 1     | 4     | 4     | 5     | 0      | 0      | 1      | 0      | 1      | 1      | 1      | 0      |
| 4867   | 5     | 2     | 1     | 1     | 4     | 4     | 0      | 0      | 0      | 0      | 0      | 1      | 0      | 1      |
| 4870   | 5     | 1     | 3     | 4     | 4     | 5     | 0      | 1      | 0      | 1      | 1      | 1      | 1      | 0      |
| 4872   | 4     | 2     | 1     | 3     | 4     | 5     | 1      | 1      | 0      | 1      | 1      | 2      | 2      | 1      |
| 4873   | 2     | 4     | 3     | 3     | 1     | 4     | 2      | 2      | 1      | 1      | 2      | 2      | 2      | 1      |
| 4874   | 5     | 2     | 0     | 0     | 4     | 5     | 0      | 0      | 0      | 0      | 0      | 1      | 1      | 0      |
| 4878   | 5     | 1     | 5     | 5     | 5     | 5     | 0      | 1      | 0      | 0      | 0      | 1      | 1      | 1      |
| 4880   | 5     | 1     | 5     | 5     | 5     | 4     | 1      | 0      | 0      | 0      | 1      | 1      | 1      | 0      |
| 4881   | 3     | 3     | 1     | 3     | 4     | 4     | 1      | 2      | 0      | 1      | 2      | 1      | 1      | 2      |
| 4882   | 3     | 1     | 3     | 1     | 4     | 4     | 3      | 1      | 1      | 2      | 2      | 1      | 3      | 0      |
| 4883   | 4     | 2     | 1     | 1     | 4     | 5     | 0      | 0      | 0      | 0      | 0      | 1      | 1      | 1      |
| 4885   | 4     | 2     | 1     | 1     | 4     | 5     | 0      | 0      | 0      | 0      | 1      | 1      | 1      | 1      |
| 4889   | 2     | 3     | 3     | 3     | 3     | 3     | 1      | 1      | 1      | 1      | 1      | 1      | 1      | 1      |
| 4890   | 1     | 1     | 0     | 0     | 0     | 1     | 0      | 0      | 0      | 0      | 0      | 1      | 0      | 0      |
| 4891   | 4     | 1     | 1     | 1     | 5     | 5     | 0      | 0      | 1      | 1      | 1      | 0      | 0      | 1      |
| 4894   | 4     | 2     | 1     | 1     | 5     | 5     | 1      | 0      | 1      | 0      | 1      | 1      | 1      | 1      |
| 4895   | 3     | 3     | 3     | 4     | 3     | 4     | 1      | 1      | 3      | 2      | 2      | 1      | 1      | 1      |
| 4896   | 5     | 3     | 3     | 3     | 3     | 5     | 1      | 1      | 1      | 1      | 1      | 2      | 2      | 2      |
| 4897   | 5     | 1     | 1     | 1     | 1     | 4     | 1      | 1      | 2      | 2      | 1      | 1      | 1      | 0      |
| 4898   | 3     | 3     | 3     | 3     | 3     | 3     | 1      | 1      | 1      | 1      | 1      | 2      | 2      | 2      |
| 4899   | 5     | 1     | 0     | 0     | 5     | 5     | 0      | 0      | 0      | 0      | 0      | 0      | 0      | 0      |
| 4900   | 5     | 2     | 3     | 4     | 3     | 4     | 1      | 2      | 2      | 1      | 2      | 1      | 2      | 1      |

| respid | Q52_2 | Q53_1 | Q54_1 | Q54_2 | Q54_3 | Q55_1 | Q56a_1 | Q56b_1 | Q56c_1 | Q56d_1 | Q56e_1 | Q56f_1 | Q56g_1 | Q56h_1 |
|--------|-------|-------|-------|-------|-------|-------|--------|--------|--------|--------|--------|--------|--------|--------|
| 4901   | 5     | 1     | 4     | 4     | 1     | 5     | 1      | 1      | 2      | 2      | 2      | 1      | 2      | 2      |
| 4903   | 4     | 1     | 1     | 3     | 4     | 4     | 1      | 2      | 0      | 0      | 1      | 0      | 1      | 1      |
| 4904   | 5     | 1     | 3     | 3     | 3     | 4     | 2      | 1      | 0      | 1      | 1      | 1      | 2      | 1      |
| 4908   | 5     | 1     | 1     | 0     | 3     | 4     | 0      | 0      | 1      | 0      | 0      | 0      | 0      | 0      |
| 4909   | 2     | 2     | 3     | 1     | 3     | 3     | 0      | 2      | 0      | 1      | 1      | 1      | 0      | 1      |
| 4913   | 5     | 1     | 1     | 1     | 3     | 5     | 1      | 0      | 0      | 0      | 1      | 0      | 0      | 0      |
| 4917   | 4     | 3     | 3     | 3     | 1     | 3     | 2      | 3      | 1      | 1      | 2      | 3      | 2      | 2      |
| 4918   | 3     | 2     | 4     | 4     | 1     | 3     | 2      | 1      | 2      | 1      | 1      | 2      | 2      | 2      |
| 4920   | 5     | 1     | 0     | 0     | 5     | 5     | 0      | 0      | 0      | 0      | 0      | 0      | 0      | 0      |
| 4921   | 5     | 1     | 3     | 3     | 4     | 4     | 1      | 1      | 0      | 0      | 1      | 1      | 0      | 1      |
| 4925   | 3     | 3     | 1     | 1     | 4     | 4     | 1      | 0      | 1      | 2      | 2      | 2      | 2      | 1      |
| 4926   | 4     | 1     | 4     | 4     | 4     | 4     | 1      | 2      | 1      | 1      | 2      | 2      | 2      | 1      |
| 4927   | 4     | 1     | 1     | 1     | 4     | 5     | 1      | 1      | 0      | 0      | 0      | 1      | 0      | 1      |
| 4928   | 5     | 1     | 0     | 1     | 5     | 5     | 0      | 1      | 0      | 1      | 0      | 1      | 3      | 1      |
| 4929   | 2     | 2     | 3     | 3     | 3     | 3     | 1      | 0      | 0      | 0      | 1      | 1      | 1      | 1      |
| 4930   | 5     | 2     | 1     | 1     | 1     | 3     | 2      | 2      | 2      | 0      | 2      | 1      | 2      | 2      |
| 4931   | 4     | 2     | 1     | 4     | 3     | 4     | 1      | 0      | 1      | 0      | 1      | 1      | 1      | 2      |
| 4932   | 4     | 3     | 3     | 3     | 4     | 3     | 1      | 1      | 1      | 2      | 2      | 1      | 2      | 1      |
| 4933   | 4     | 1     | 1     | 1     | 4     | 4     | 1      | 0      | 1      | 1      | 1      | 1      | 1      | 1      |
| 4934   | 5     | 2     | 1     | 1     | 4     | 4     | 0      | 0      | 0      | 0      | 1      | 1      | 0      | 1      |
| 5934   | 5     | 2     | 1     | 1     | 4     | 4     | 1      | 0      | 1      | 0      | 1      | 0      | 0      | 1      |
| 5935   | 5     | 2     | 1     | 1     | 3     | 5     | 1      | 2      | 1      | 1      | 1      | 1      | 1      | 0      |
| 5936   | 5     | 1     | 3     | 3     | 3     | 4     | 1      | 0      | 1      | 0      | 1      | 1      | 1      | 1      |
| 5938   | 5     | 1     | 0     | 1     | 5     | 5     | 0      | 0      | 0      | 0      | 0      | 0      | 0      | 0      |
| 5939   | 5     | 1     | 1     | 1     | 4     | 5     | 0      | 0      | 0      | 0      | 1      | 0      | 0      | 0      |
| 5940   | 4     | 2     | 1     | 4     | 3     | 5     | 1      | 0      | 0      | 1      | 1      | 1      | 1      | 1      |
| 5942   | 3     | 2     | 1     | 3     | 4     | 4     | 1      | 1      | 1      | 1      | 1      | 1      | 1      | 1      |
| 5944   | 4     | 2     | 1     | 3     | 4     | 3     | 1      | 0      | 2      | 0      | 1      | 1      | 1      | 1      |
| 5951   | 2     | 2     | 3     | 3     | 1     | 2     | 2      | 2      | 2      | 2      | 2      | 2      | 2      | 2      |
| 5952   | 3     | 3     | 4     | 4     | 1     | 5     | 1      | 0      | 1      | 1      | 2      | 1      | 1      | 0      |
| 5954   | 5     | 2     | 1     | 0     | 3     | 4     | 1      | 0      | 1      | 0      | 1      | 1      | 1      | 0      |
| 5956   | 4     | 1     | 1     | 1     | 4     | 5     | 1      | 0      | 0      | 0      | 0      | 0      | 1      | 0      |

| respid | Q52_2 | Q53_1 | Q54_1 | Q54_2 | Q54_3 | Q55_1 | Q56a_1 | Q56b_1 | Q56c_1 | Q56d_1 | Q56e_1 | Q56f_1 | Q56g_1 | Q56h_1 |
|--------|-------|-------|-------|-------|-------|-------|--------|--------|--------|--------|--------|--------|--------|--------|
| 5957   | 4     | 1     | 0     | 1     | 1     | 3     | 1      | 2      | 1      | 0      | 1      | 1      | 1      | 1      |
| 5958   | 4     | 1     | 1     | 1     | 4     | 4     | 0      | 1      | 3      | 0      | 2      | 0      | 2      | 2      |
| 5959   | 3     | 2     | 5     | 4     | 3     | 4     | 2      | 2      | 2      | 2      | 2      | 2      | 3      | 2      |
| 5960   | 5     | 1     | 0     | 1     | 5     | 5     | 0      | 0      | 0      | 0      | 0      | 0      | 0      | 0      |
| 5963   | 5     | 1     | 0     | 0     | 5     | 5     | 0      | 0      | 0      | 0      | 0      | 0      | 0      | 0      |
| 5966   | 5     | 1     | 1     | 1     | 4     | 5     | 0      | 0      | 0      | 0      | 0      | 0      | 1      | 1      |
| 5968   | 5     | 3     | 1     | 3     | 3     | 3     | 0      | 0      | 1      | 0      | 1      | 1      | 1      | 1      |
| 5974   | 5     | 1     | 0     | 0     | 4     | 5     | 0      | 0      | 0      | 0      | 0      | 0      | 0      | 1      |
| 5975   | 4     | 2     | 4     | 4     | 4     | 4     | 0      | 0      | 0      | 0      | 1      | 1      | 0      | 0      |
| 5976   | 3     | 3     | 3     | 1     | 3     | 3     | 1      | 1      | 1      | 1      | 2      | 2      | 1      | 2      |
| 5977   | 5     | 1     | 1     | 1     | 4     | 4     | 1      | 0      | 1      | 0      | 1      | 0      | 1      | 1      |
| 5978   | 3     | 2     | 3     | 3     | 3     | 3     | 1      | 1      | 1      | 1      | 1      | 1      | 1      | 1      |
| 5979   | 5     | 1     | 1     | 1     | 4     | 4     | 1      | 1      | 0      | 1      | 1      | 1      | 0      | 1      |
| 5983   | 5     | 1     | 1     | 1     | 4     | 4     | 1      | 0      | 2      | 0      | 1      | 1      | 0      | 1      |
| 5984   | 4     | 1     | 0     | 3     | 3     | 3     | 1      | 0      | 0      | 2      | 1      | 1      | 0      | 0      |
| 5990   | 5     | 1     | 1     | 1     | 4     | 4     | 0      | 0      | 1      | 0      | 1      | 0      | 1      | 1      |
| 5991   | 5     | 1     | 4     | 4     | 0     | 5     | 3      | 0      | 2      | 2      | 3      | 3      | 3      | 0      |
| 5992   | 4     | 1     | 1     | 1     | 1     | 4     | 1      | 0      | 1      | 0      | 1      | 0      | 1      | 1      |
| 5993   | 5     | 2     | 1     | 4     | 3     | 3     | 3      | 2      | 1      | 1      | 1      | 1      | 1      | 2      |
| 5994   | 4     | 1     | 1     | 1     | 4     | 4     | 1      | 1      | 2      | 0      | 1      | 0      | 1      | 1      |
| 5996   | 5     | 1     | 4     | 4     | 3     | 4     | 1      | 0      | 0      | 2      | 1      | 2      | 2      | 1      |
| 6001   | 3     | 3     | 3     | 3     | 3     | 4     | 1      | 2      | 1      | 1      | 1      | 1      | 2      | 1      |
| 6003   | 5     | 1     | 1     | 1     | 3     | 4     | 1      | 0      | 1      | 0      | 0      | 0      | 0      | 0      |
| 6004   | 5     | 5     | 4     | 4     | 0     | 1     | 3      | 1      | 1      | 1      | 1      | 1      | 2      | 1      |
| 6005   | 4     | 3     | 4     | 4     | 5     | 5     | 1      | 1      | 1      | 0      | 1      | 1      | 1      | 1      |
| 6006   | 4     | 2     | 1     | 3     | 4     | 4     | 1      | 0      | 1      | 0      | 1      | 1      | 1      | 1      |
| 6008   | 4     | 1     | 1     | 3     | 3     | 5     | 1      | 0      | 2      | 0      | 1      | 2      | 1      | 1      |
| 6009   | 5     | 2     | 1     | 1     | 4     | 4     | 1      | 0      | 1      | 0      | 1      | 1      | 1      | 0      |
| 6014   | 5     | 1     | 1     | 1     | 4     | 5     | 0      | 0      | 0      | 0      | 0      | 0      | 0      | 1      |
| 6016   | 5     | 2     | 0     | 1     | 4     | 4     | 1      | 0      | 2      | 2      | 1      | 1      | 1      | 1      |
| 6017   | 5     | 1     | 0     | 1     | 3     | 2     | 1      | 1      | 0      | 1      | 1      | 0      | 0      | 1      |
| 6018   | 3     | 4     | 1     | 3     | 3     | 3     | 1      | 1      | 1      | 0      | 1      | 1      | 1      | 1      |

| respid | Q52_2 | Q53_1 | Q54_1 | Q54_2 | Q54_3 | Q55_1 | Q56a_1 | Q56b_1 | Q56c_1 | Q56d_1 | Q56e_1 | Q56f_1 | Q56g_1 | Q56h_1 |
|--------|-------|-------|-------|-------|-------|-------|--------|--------|--------|--------|--------|--------|--------|--------|
| 6020   | 4     | 2     | 5     | 5     | 0     | 3     | 2      | 0      | 2      | 2      | 2      | 3      | 2      | 2      |
| 6021   | 5     | 1     | 3     | 5     | 5     | 4     | 2      | 0      | 1      | 0      | 1      | 2      | 2      | 0      |
| 6024   | 5     | 1     | 1     | 3     | 4     | 5     | 0      | 1      | 0      | 0      | 0      | 0      | 1      | 1      |
| 6025   | 5     | 1     | 5     | 5     | 5     | 5     | 0      | 0      | 0      | 0      | 0      | 0      | 0      | 0      |
| 6026   | 4     | 2     | 1     | 4     | 3     | 4     | 2      | 1      | 1      | 1      | 1      | 0      | 0      | 1      |
| 6032   | 4     | 1     | 1     | 3     | 4     | 4     | 0      | 1      | 1      | 2      | 1      | 0      | 1      | 2      |
| 6035   | 4     | 2     | 1     | 3     | 4     | 4     | 1      | 1      | 1      | 1      | 1      | 1      | 1      | 1      |
| 6038   | 3     | 1     | 1     | 3     | 4     | 3     | 1      | 0      | 1      | 0      | 1      | 1      | 1      | 1      |
| 6043   | 3     | 3     | 3     | 3     | 3     | 3     | 1      | 2      | 2      | 1      | 1      | 1      | 1      | 1      |
| 6044   | 5     | 2     | 1     | 3     | 4     | 4     | 1      | 0      | 1      | 2      | 1      | 1      | 2      | 1      |
| 6046   | 4     | 1     | 3     | 4     | 4     | 5     | 1      | 1      | 0      | 0      | 0      | 1      | 1      | 0      |
| 6047   | 5     | 1     | 0     | 3     | 5     | 5     | 1      | 0      | 0      | 0      | 1      | 0      | 0      | 1      |
| 6048   | 3     | 1     | 1     | 3     | 3     | 4     | 1      | 0      | 1      | 0      | 1      | 1      | 1      | 1      |
| 6050   | 4     | 2     | 1     | 1     | 4     | 4     | 1      | 1      | 0      | 0      | 1      | 1      | 1      | 1      |
| 6051   | 4     | 3     | 1     | 4     | 4     | 4     | 0      | 0      | 0      | 0      | 0      | 0      | 0      | 1      |
| 6053   | 5     | 1     | 0     | 1     | 0     | 5     | 0      | 0      | 0      | 0      | 0      | 1      | 1      | 0      |
| 6054   | 3     | 2     | 1     | 3     | 1     | 3     | 1      | 1      | 2      | 2      | 2      | 2      | 1      | 2      |
| 6056   | 5     | 2     | 1     | 1     | 4     | 5     | 1      | 0      | 1      | 0      | 1      | 0      | 1      | 1      |
| 6058   | 4     | 2     | 1     | 3     | 4     | 4     | 0      | 1      | 0      | 0      | 0      | 1      | 1      | 0      |
| 6060   | 5     | 2     | 1     | 1     | 4     | 4     | 0      | 0      | 1      | 0      | 1      | 0      | 0      | 1      |
| 6061   | 4     | 2     | 3     | 3     | 3     | 4     | 1      | 1      | 2      | 1      | 1      | 1      | 1      | 1      |
| 6062   | 4     | 2     | 3     | 4     | 3     | 3     | 1      | 1      | 0      | 1      | 1      | 1      | 1      | 1      |
| 6067   | 5     | 1     | 1     | 1     | 3     | 4     | 1      | 0      | 1      | 0      | 1      | 1      | 1      | 0      |
| 6070   | 5     | 1     | 1     | 3     | 4     | 4     | 1      | 0      | 1      | 0      | 1      | 1      | 2      | 0      |
| 6074   | 4     | 2     | 1     | 3     | 3     | 4     | 1      | 0      | 2      | 3      | 3      | 1      | 2      | 1      |
| 6076   | 3     | 1     | 4     | 4     | 3     | 4     | 1      | 0      | 0      | 0      | 1      | 1      | 1      | 1      |
| 6078   | 5     | 1     | 3     | 3     | 3     | 5     | 0      | 0      | 1      | 0      | 1      | 1      | 1      | 0      |
| 6081   | 5     | 1     | 1     | 1     | 4     | 4     | 1      | 0      | 0      | 0      | 1      | 0      | 1      | 0      |
| 6085   | 3     | 3     | 1     | 3     | 4     | 4     | 1      | 2      | 2      | 2      | 1      | 1      | 1      | 2      |
| 6088   | 5     | 1     | 3     | 3     | 4     | 4     | 0      | 1      | 1      | 1      | 0      | 1      | 1      | 1      |
| 6092   | 5     | 2     | 3     | 4     | 3     | 4     | 1      | 1      | 2      | 1      | 1      | 1      | 2      | 1      |
| 6095   | 5     | 2     | 1     | 1     | 5     | 5     | 0      | 0      | 1      | 0      | 0      | 0      | 0      | 1      |

| respid | Q52_2 | Q53_1 | Q54_1 | Q54_2 | Q54_3 | Q55_1 | Q56a_1 | Q56b_1 | Q56c_1 | Q56d_1 | Q56e_1 | Q56f_1 | Q56g_1 | Q56h_1 |
|--------|-------|-------|-------|-------|-------|-------|--------|--------|--------|--------|--------|--------|--------|--------|
| 6098   | 4     | 2     | 1     | 3     | 4     | 4     | 0      | 2      | 1      | 1      | 1      | 1      | 1      | 1      |
| 6101   | 4     | 2     | 1     | 1     | 4     | 4     | 0      | 0      | 0      | 0      | 1      | 0      | 1      | 1      |
| 6102   | 4     | 2     | 1     | 3     | 4     | 5     | 1      | 1      | 1      | 0      | 1      | 1      | 0      | 1      |
| 6105   | 4     | 2     | 3     | 3     | 3     | 3     | 0      | 0      | 1      | 1      | 1      | 0      | 1      | 0      |
| 6106   | 5     | 1     | 1     | 0     | 4     | 4     | 0      | 1      | 0      | 0      | 0      | 0      | 0      | 2      |
| 6107   | 2     | 3     | 1     | 1     | 1     | 3     | 1      | 1      | 1      | 1      | 1      | 2      | 2      | 2      |
| 6111   | 3     | 3     | 3     | 3     | 3     | 3     | 1      | 0      | 2      | 1      | 1      | 0      | 0      | 0      |
| 6112   | 4     | 2     | 1     | 1     | 1     | 4     | 0      | 0      | 1      | 0      | 1      | 0      | 1      | 1      |
| 6113   | 3     | 3     | 3     | 4     | 3     | 3     | 1      | 1      | 1      | 1      | 1      | 2      | 2      | 1      |
| 6115   | 4     | 2     | 1     | 3     | 3     | 4     | 1      | 0      | 1      | 1      | 1      | 1      | 2      | 1      |
| 6116   | 5     | 1     | 0     | 0     | 0     | 5     | 0      | 0      | 0      | 0      | 0      | 0      | 0      | 0      |
| 6117   | 3     | 2     | 1     | 3     | 4     | 4     | 1      | 1      | 1      | 1      | 1      | 1      | 1      | 1      |
| 6124   | 4     | 2     | 3     | 4     | 3     | 3     | 1      | 1      | 2      | 2      | 2      | 2      | 2      | 1      |
| 6125   | 4     | 2     | 1     | 1     | 3     | 3     | 1      | 1      | 0      | 1      | 1      | 1      | 1      | 1      |
| 6128   | 4     | 2     | 3     | 3     | 4     | 4     | 1      | 1      | 1      | 1      | 1      | 1      | 0      | 1      |
| 6133   | 4     | 2     | 1     | 1     | 4     | 4     | 0      | 0      | 0      | 0      | 0      | 0      | 0      | 1      |
| 6134   | 5     | 2     | 1     | 1     | 4     | 4     | 1      | 0      | 0      | 0      | 0      | 0      | 1      | 1      |
| 6135   | 4     | 3     | 4     | 4     | 3     | 2     | 1      | 1      | 2      | 2      | 2      | 2      | 2      | 1      |
| 6138   | 4     | 2     | 1     | 4     | 3     | 4     | 1      | 1      | 0      | 1      | 1      | 2      | 2      | 2      |
| 6140   | 4     | 2     | 1     | 3     | 3     | 4     | 1      | 1      | 2      | 1      | 1      | 1      | 1      | 1      |
| 6143   | 4     | 1     | 1     | 1     | 4     | 5     | 0      | 0      | 1      | 0      | 1      | 0      | 1      | 0      |
| 6147   | 4     | 2     | 1     | 1     | 4     | 3     | 1      | 0      | 1      | 2      | 1      | 1      | 1      | 2      |
| 6154   | 5     | 3     | 1     | 1     | 4     | 4     | 0      | 0      | 0      | 0      | 1      | 1      | 1      | 0      |
| 6162   | 5     | 1     | 1     | 1     | 3     | 5     | 0      | 1      | 0      | 1      | 0      | 1      | 0      | 0      |
| 6165   | 5     | 1     | 0     | 0     | 4     | 5     | 1      | 1      | 0      | 0      | 3      | 0      | 1      | 1      |
| 6166   | 4     | 2     | 1     | 1     | 4     | 3     | 1      | 1      | 1      | 1      | 1      | 1      | 1      | 1      |
| 6173   | 3     | 2     | 3     | 4     | 1     | 3     | 2      | 2      | 3      | 3      | 3      | 3      | 3      | 0      |
| 6180   | 4     | 1     | 1     | 3     | 3     | 4     | 1      | 0      | 0      | 2      | 2      | 1      | 1      | 2      |
| 6184   | 3     | 3     | 3     | 4     | 3     | 3     | 1      | 1      | 2      | 1      | 2      | 2      | 2      | 2      |
| 6185   | 4     | 2     | 1     | 3     | 3     | 3     | 1      | 1      | 2      | 2      | 2      | 1      | 1      | 0      |
| 6186   | 4     | 1     | 3     | 3     | 3     | 3     | 1      | 1      | 2      | 2      | 1      | 1      | 1      | 1      |
| 6188   | 5     | 2     | 1     | 1     | 3     | 4     | 1      | 0      | 0      | 0      | 1      | 0      | 0      | 1      |



| respid | Q52_2 | Q53_1 | Q54_1 | Q54_2 | Q54_3 | Q55_1 | Q56a_1 | Q56b_1 | Q56c_1 | Q56d_1 | Q56e_1 | Q56f_1 | Q56g_1 | Q56h_1 |
|--------|-------|-------|-------|-------|-------|-------|--------|--------|--------|--------|--------|--------|--------|--------|
| 6192   | 4     | 2     | 1     | 4     | 1     | 3     | 2      | 2      | 2      | 1      | 2      | 1      | 1      | 2      |
| 6194   | 4     | 1     | 4     | 4     | 4     | 4     | 1      | 2      | 0      | 1      | 1      | 0      | 0      | 1      |
| 6195   | 5     | 2     | 4     | 3     | 1     | 5     | 3      | 1      | 3      | 1      | 3      | 1      | 2      | 1      |
| 6196   | 4     | 1     | 3     | 3     | 3     | 4     | 1      | 1      | 1      | 1      | 1      | 1      | 1      | 1      |
| 6199   | 5     | 1     | 1     | 3     | 4     | 4     | 1      | 1      | 1      | 1      | 0      | 0      | 1      | 1      |
| 6200   | 5     | 1     | 0     | 3     | 4     | 4     | 0      | 0      | 1      | 0      | 1      | 1      | 1      | 1      |
| 6201   | 5     | 1     | 1     | 1     | 4     | 5     | 0      | 0      | 1      | 0      | 0      | 0      | 0      | 1      |
| 6202   | 4     | 2     | 1     | 1     | 4     | 4     | 0      | 0      | 1      | 0      | 1      | 0      | 1      | 0      |
| 6203   | 5     | 2     | 0     | 1     | 3     | 3     | 0      | 0      | 0      | 0      | 0      | 0      | 1      | 0      |
| 6205   | 5     | 3     | 0     | 1     | 4     | 4     | 0      | 0      | 1      | 0      | 1      | 0      | 0      | 1      |
| 6210   | 3     | 3     | 3     | 1     | 3     | 3     | 0      | 1      | 1      | 1      | 2      | 2      | 1      | 1      |
| 6212   | 4     | 2     | 1     | 1     | 3     | 4     | 1      | 1      | 2      | 2      | 1      | 2      | 1      | 1      |
| 6216   | 3     | 3     | 3     | 5     | 1     | 3     | 2      | 1      | 2      | 1      | 2      | 2      | 2      | 2      |
| 6218   | 4     | 3     | 4     | 4     | 3     | 3     | 1      | 1      | 1      | 1      | 1      | 2      | 2      | 3      |
| 6221   | 4     | 3     | 1     | 3     | 4     | 4     | 1      | 1      | 1      | 0      | 1      | 0      | 0      | 2      |
| 6224   | 5     | 1     | 0     | 0     | 5     | 5     | 0      | 1      | 0      | 0      | 1      | 1      | 1      | 1      |
| 6225   | 4     | 1     | 1     | 1     | 4     | 5     | 0      | 0      | 0      | 2      | 0      | 0      | 0      | 0      |
| 6227   | 5     | 1     | 1     | 1     | 1     | 4     | 0      | 1      | 0      | 1      | 1      | 1      | 1      | 0      |
| 6230   | 4     | 2     | 1     | 3     | 3     | 4     | 1      | 1      | 1      | 1      | 1      | 1      | 1      | 1      |
| 6231   | 5     | 2     | 1     | 3     | 4     | 4     | 0      | 0      | 1      | 1      | 1      | 1      | 1      | 1      |
| 6233   | 3     | 1     | 1     | 3     | 3     | 3     | 1      | 2      | 2      | 0      | 1      | 0      | 0      | 0      |
| 6234   | 3     | 2     | 3     | 3     | 3     | 3     | 1      | 1      | 1      | 1      | 2      | 2      | 2      | 1      |
| 6235   | 3     | 3     | 1     | 1     | 1     | 3     | 1      | 2      | 1      | 1      | 0      | 1      | 1      | 1      |
| 6237   | 4     | 2     | 1     | 3     | 4     | 4     | 0      | 0      | 0      | 2      | 0      | 1      | 1      | 1      |
| 6240   | 4     | 1     | 3     | 4     | 3     | 3     | 1      | 1      | 0      | 0      | 0      | 0      | 0      | 0      |
| 6248   | 4     | 1     | 3     | 3     | 4     | 5     | 0      | 0      | 1      | 0      | 1      | 1      | 1      | 1      |
| 6249   | 4     | 1     | 4     | 4     | 1     | 3     | 1      | 0      | 1      | 2      | 1      | 2      | 2      | 1      |
| 6252   | 5     | 1     | 3     | 3     | 3     | 4     | 1      | 0      | 1      | 1      | 1      | 1      | 1      | 1      |
| 6254   | 5     | 1     | 1     | 1     | 3     | 4     | 1      | 0      | 1      | 0      | 2      | 1      | 0      | 1      |
| 6269   | 4     | 3     | 1     | 3     | 3     | 3     | 1      | 0      | 1      | 1      | 1      | 1      | 1      | 1      |
| 6304   | 5     | 2     | 3     | 4     | 4     | 4     | 1      | 1      | 1      | 1      | 1      | 1      | 2      | 2      |
| 6334   | 4     | 3     | 1     | 1     | 4     | 4     | 1      | 0      | 1      | 0      | 1      | 1      | 1      | 1      |

| respid | Q52_2 | Q53_1 | Q54_1 | Q54_2 | Q54_3 | Q55_1 | Q56a_1 | Q56b_1 | Q56c_1 | Q56d_1 | Q56e_1 | Q56f_1 | Q56g_1 | Q56h_1 |
|--------|-------|-------|-------|-------|-------|-------|--------|--------|--------|--------|--------|--------|--------|--------|
| 6341   | 5     | 3     | 3     | 4     | 3     | 4     | 1      | 0      | 0      | 0      | 0      | 1      | 1      | 1      |
| 6350   | 4     | 3     | 3     | 3     | 4     | 4     | 1      | 1      | 2      | 1      | 1      | 1      | 1      | 1      |
| 6370   | 5     | 1     | 1     | 0     | 4     | 5     | 1      | 0      | 1      | 0      | 1      | 0      | 0      | 1      |
| 6384   | 5     | 2     | 1     | 1     | 5     | 4     | 0      | 1      | 0      | 0      | 0      | 0      | 1      | 0      |
| 6400   | 3     | 1     | 0     | 1     | 4     | 4     | 1      | 0      | 1      | 0      | 0      | 0      | 0      | 1      |
| 6418   | 5     | 1     | 0     | 1     | 5     | 5     | 0      | 0      | 1      | 0      | 1      | 0      | 0      | 0      |
| 6467   | 5     | 1     | 1     | 3     | 4     | 5     | 0      | 0      | 0      | 0      | 1      | 0      | 0      | 1      |
| 6469   | 5     | 1     | 1     | 0     | 4     | 5     | 0      | 0      | 0      | 0      | 0      | 0      | 0      | 0      |
| 6474   | 5     | 1     | 0     | 0     | 4     | 5     | 0      | 0      | 0      | 0      | 0      | 0      | 0      | 0      |
| 6475   | 5     | 1     | 1     | 1     | 5     | 5     | 1      | 0      | 1      | 0      | 1      | 0      | 1      | 0      |
| 6476   | 3     | 2     | 3     | 3     | 4     | 3     | 1      | 1      | 1      | 1      | 1      | 1      | 1      | 1      |
| 6477   | 5     | 1     | 1     | 1     | 4     | 4     | 0      | 0      | 0      | 0      | 0      | 0      | 0      | 0      |
| 6480   | 5     | 2     | 1     | 3     | 4     | 5     | 1      | 0      | 1      | 0      | 1      | 0      | 0      | 1      |
| 6481   | 2     | 2     | 1     | 1     | 3     | 3     | 1      | 2      | 2      | 2      | 2      | 2      | 2      | 1      |
| 6485   | 5     | 1     | 1     | 1     | 3     | 5     | 1      | 0      | 1      | 0      | 1      | 0      | 1      | 0      |
| 6488   | 3     | 3     | 3     | 1     | 1     | 3     | 1      | 1      | 1      | 1      | 1      | 2      | 2      | 1      |
| 6495   | 5     | 1     | 1     | 1     | 5     | 5     | 0      | 1      | 0      | 0      | 0      | 0      | 0      | 1      |
| 6499   | 5     | 1     | 4     | 5     | 3     | 4     | 2      | 3      | 2      | 3      | 3      | 2      | 3      | 0      |
| 6500   | 4     | 2     | 3     | 1     | 3     | 3     | 1      | 2      | 1      | 1      | 1      | 1      | 2      | 1      |
| 6504   | 3     | 2     | 1     | 1     | 4     | 4     | 2      | 1      | 1      | 1      | 1      | 2      | 2      | 1      |
| 6507   | 5     | 2     | 0     | 1     | 4     | 5     | 0      | 0      | 1      | 0      | 1      | 0      | 1      | 0      |
| 6512   | 4     | 2     | 1     | 3     | 4     | 4     | 1      | 0      | 1      | 0      | 1      | 0      | 1      | 1      |
| 6525   | 3     | 2     | 4     | 4     | 3     | 3     | 2      | 2      | 1      | 3      | 2      | 2      | 0      | 1      |
| 6532   | 5     | 1     | 0     | 1     | 4     | 5     | 0      | 0      | 0      | 0      | 1      | 0      | 0      | 0      |
| 6535   | 5     | 1     | 1     | 1     | 4     | 4     | 1      | 0      | 0      | 0      | 0      | 0      | 0      | 0      |
| 6546   | 5     | 1     | 1     | 1     | 5     | 5     | 0      | 0      | 0      | 0      | 0      | 0      | 0      | 0      |
| 6551   | 4     | 2     | 1     | 1     | 4     | 4     | 1      | 0      | 0      | 0      | 1      | 0      | 1      | 0      |
| 6556   | 3     | 2     | 3     | 3     | 3     | 3     | 1      | 1      | 2      | 1      | 1      | 1      | 1      | 1      |
| 6566   | 4     | 2     | 3     | 1     | 1     | 3     | 1      | 1      | 1      | 1      | 1      | 1      | 1      | 1      |
| 6569   | 4     | 2     | 1     | 1     | 4     | 4     | 1      | 1      | 1      | 0      | 1      | 0      | 1      | 0      |
| 6574   | 5     | 2     | 3     | 3     | 3     | 4     | 1      | 0      | 1      | 0      | 1      | 1      | 1      | 0      |
| 6576   | 4     | 3     | 0     | 3     | 3     | 2     | 1      | 1      | 2      | 2      | 2      | 1      | 1      | 2      |

| respid | Q52_2 | Q53_1 | Q54_1 | Q54_2 | Q54_3 | Q55_1 | Q56a_1 | Q56b_1 | Q56c_1 | Q56d_1 | Q56e_1 | Q56f_1 | Q56g_1 | Q56h_1 |
|--------|-------|-------|-------|-------|-------|-------|--------|--------|--------|--------|--------|--------|--------|--------|
| 6580   | 5     | 1     | 0     | 0     | 4     | 5     | 1      | 0      | 1      | 0      | 1      | 0      | 0      | 0      |
| 6584   | 5     | 1     | 1     | 1     | 4     | 5     | 0      | 0      | 0      | 0      | 1      | 0      | 0      | 1      |
| 6585   | 4     | 2     | 1     | 3     | 3     | 4     | 1      | 1      | 2      | 1      | 1      | 1      | 1      | 1      |
| 6589   | 5     | 2     | 1     | 1     | 4     | 5     | 1      | 1      | 0      | 0      | 1      | 1      | 1      | 1      |
| 6590   | 5     | 2     | 5     | 4     | 1     | 3     | 2      | 1      | 3      | 2      | 2      | 2      | 2      | 1      |
| 6598   | 5     | 1     | 1     | 1     | 4     | 5     | 0      | 0      | 1      | 0      | 1      | 1      | 1      | 0      |
| 6603   | 1     | 3     | 0     | 1     | 3     | 4     | 0      | 0      | 0      | 0      | 2      | 2      | 2      | 2      |
| 6618   | 2     | 2     | 0     | 3     | 1     | 3     | 1      | 0      | 1      | 1      | 1      | 1      | 0      | 1      |
| 6630   | 2     | 2     | 1     | 3     | 1     | 2     | 1      | 1      | 1      | 1      | 1      | 1      | 1      | 1      |
| 6636   | 4     | 2     | 1     | 1     | 4     | 4     | 1      | 2      | 2      | 2      | 1      | 1      | 1      | 1      |
| 6649   | 5     | 1     | 1     | 1     | 5     | 5     | 0      | 0      | 0      | 0      | 0      | 0      | 0      | 0      |
| 6675   | 2     | 4     | 3     | 5     | 3     | 2     | 1      | 1      | 1      | 1      | 1      | 2      | 2      | 2      |
| 6678   | 4     | 1     | 3     | 1     | 3     | 5     | 1      | 0      | 1      | 2      | 2      | 2      | 2      | 0      |
| 6681   | 5     | 1     | 0     | 0     | 5     | 5     | 0      | 0      | 0      | 0      | 0      | 0      | 0      | 0      |
| 6684   | 3     | 4     | 4     | 4     | 1     | 3     | 2      | 1      | 2      | 2      | 2      | 2      | 2      | 2      |
| 6688   | 5     | 2     | 0     | 0     | 4     | 5     | 1      | 0      | 1      | 0      | 2      | 1      | 1      | 1      |
| 6691   | 5     | 1     | 1     | 1     | 3     | 5     | 1      | 0      | 0      | 0      | 1      | 1      | 1      | 1      |
| 6694   | 4     | 2     | 3     | 3     | 4     | 5     | 1      | 0      | 1      | 0      | 1      | 1      | 1      | 0      |
| 6696   | 4     | 2     | 1     | 1     | 4     | 5     | 0      | 0      | 1      | 1      | 1      | 1      | 1      | 1      |
| 6720   | 3     | 4     | 1     | 3     | 1     | 4     | 1      | 1      | 2      | 0      | 1      | 1      | 1      | 1      |
| 6722   | 2     | 4     | 4     | 4     | 1     | 2     | 2      | 2      | 2      | 1      | 2      | 2      | 2      | 2      |
| 6724   | 5     | 1     | 1     | 1     | 5     | 5     | 0      | 0      | 0      | 0      | 0      | 0      | 0      | 0      |
| 6725   | 4     | 1     | 1     | 1     | 3     | 4     | 1      | 0      | 1      | 0      | 1      | 0      | 0      | 1      |
| 6727   | 5     | 1     | 0     | 0     | 5     | 5     | 0      | 0      | 0      | 0      | 0      | 0      | 0      | 0      |
| 6734   | 4     | 2     | 1     | 3     | 4     | 4     | 1      | 0      | 1      | 0      | 1      | 1      | 1      | 0      |
| 6739   | 4     | 3     | 1     | 1     | 4     | 5     | 0      | 1      | 1      | 0      | 1      | 1      | 0      | 1      |
| 6743   | 2     | 3     | 4     | 1     | 1     | 4     | 1      | 0      | 0      | 0      | 1      | 1      | 1      | 2      |
| 6749   | 4     | 1     | 3     | 3     | 3     | 3     | 1      | 1      | 1      | 1      | 2      | 2      | 1      | 1      |
| 6756   | 5     | 1     | 1     | 1     | 4     | 4     | 1      | 0      | 0      | 1      | 1      | 1      | 1      | 1      |
| 6764   | 5     | 2     | 1     | 1     | 4     | 4     | 0      | 0      | 0      | 0      | 0      | 0      | 0      | 0      |
| 6765   | 3     | 4     | 3     | 3     | 3     | 3     | 1      | 0      | 1      | 2      | 1      | 1      | 2      | 1      |
| 6768   | 5     | 1     | 3     | 3     | 4     | 5     | 1      | 0      | 2      | 0      | 1      | 1      | 1      | 1      |

| respid | Q52_2 | Q53_1 | Q54_1 | Q54_2 | Q54_3 | Q55_1 | Q56a_1 | Q56b_1 | Q56c_1 | Q56d_1 | Q56e_1 | Q56f_1 | Q56g_1 | Q56h_1 |
|--------|-------|-------|-------|-------|-------|-------|--------|--------|--------|--------|--------|--------|--------|--------|
| 6773   | 5     | 2     | 1     | 1     | 4     | 5     | 0      | 0      | 0      | 1      | 0      | 0      | 1      | 0      |
| 6775   | 4     | 1     | 1     | 3     | 3     | 4     | 1      | 0      | 1      | 0      | 1      | 1      | 1      | 1      |
| 6777   | 5     | 3     | 1     | 1     | 4     | 5     | 1      | 0      | 1      | 2      | 1      | 1      | 0      | 1      |
| 6779   | 4     | 1     | 0     | 1     | 4     | 3     | 0      | 0      | 0      | 0      | 0      | 0      | 0      | 0      |
| 6790   | 4     | 3     | 3     | 3     | 4     | 3     | 1      | 2      | 1      | 1      | 1      | 1      | 2      | 1      |
| 6797   | 4     | 1     | 1     | 3     | 4     | 4     | 0      | 0      | 0      | 0      | 1      | 0      | 1      | 1      |
| 6798   | 3     | 3     | 1     | 4     | 3     | 4     | 1      | 1      | 2      | 1      | 1      | 1      | 2      | 2      |
| 6808   | 5     | 1     | 0     | 1     | 5     | 5     | 0      | 0      | 0      | 0      | 0      | 0      | 0      | 0      |
| 6810   | 4     | 3     | 1     | 1     | 3     | 4     | 2      | 2      | 2      | 1      | 2      | 2      | 1      | 1      |
| 6811   | 2     | 3     | 5     | 5     | 1     | 3     | 2      | 3      | 2      | 3      | 2      | 3      | 3      | 1      |
| 6812   | 5     | 1     | 1     | 1     | 4     | 5     | 0      | 0      | 0      | 0      | 0      | 0      | 0      | 0      |
| 6814   | 4     | 2     | 1     | 3     | 4     | 5     | 1      | 1      | 0      | 1      | 2      | 1      | 1      | 3      |
| 6819   | 3     | 2     | 1     | 4     | 3     | 4     | 1      | 0      | 2      | 0      | 2      | 1      | 1      | 0      |
| 6820   | 4     | 3     | 3     | 1     | 4     | 4     | 1      | 2      | 1      | 0      | 2      | 1      | 1      | 1      |
| 6832   | 5     | 1     | 1     | 1     | 4     | 4     | 1      | 1      | 0      | 0      | 1      | 0      | 1      | 1      |
| 6854   | 5     | 2     | 1     | 3     | 3     | 4     | 1      | 0      | 0      | 0      | 1      | 1      | 1      | 1      |
| 6855   | 5     | 1     | 1     | 1     | 4     | 5     | 3      | 1      | 1      | 1      | 0      | 1      | 1      | 0      |
| 6857   | 4     | 2     | 1     | 1     | 5     | 4     | 1      | 0      | 0      | 0      | 0      | 0      | 0      | 1      |
| 6858   | 5     | 1     | 0     | 1     | 4     | 5     | 0      | 1      | 0      | 0      | 0      | 0      | 0      | 0      |
| 6859   | 4     | 3     | 1     | 1     | 3     | 4     | 1      | 0      | 1      | 0      | 1      | 0      | 1      | 1      |
| 6860   | 3     | 2     | 3     | 4     | 3     | 3     | 1      | 1      | 1      | 1      | 2      | 1      | 2      | 1      |
| 6862   | 5     | 2     | 1     | 1     | 3     | 4     | 1      | 0      | 1      | 0      | 1      | 0      | 0      | 1      |
| 6879   | 5     | 2     | 3     | 3     | 4     | 5     | 1      | 1      | 1      | 2      | 1      | 1      | 1      | 1      |
| 6893   | 5     | 1     | 1     | 1     | 5     | 5     | 0      | 0      | 0      | 0      | 1      | 0      | 1      | 0      |
| 6898   | 4     | 4     | 4     | 4     | 4     | 4     | 1      | 2      | 2      | 2      | 1      | 1      | 2      | 1      |
| 6902   | 4     | 2     | 1     | 1     | 3     | 4     | 1      | 0      | 1      | 1      | 1      | 1      | 1      | 1      |
| 6903   | 2     | 3     | 1     | 3     | 4     | 3     | 2      | 1      | 2      | 2      | 1      | 1      | 1      | 1      |
| 6907   | 4     | 3     | 3     | 3     | 4     | 4     | 1      | 0      | 1      | 0      | 1      | 1      | 1      | 1      |
| 6908   | 2     | 3     | 1     | 1     | 1     | 3     | 0      | 0      | 0      | 0      | 1      | 0      | 0      | 1      |
| 6912   | 5     | 1     | 1     | 3     | 4     | 4     | 0      | 0      | 0      | 0      | 0      | 1      | 1      | 0      |
| 6915   | 3     | 2     | 3     | 3     | 3     | 3     | 1      | 1      | 1      | 1      | 1      | 1      | 2      | 2      |
| 6916   | 2     | 3     | 3     | 4     | 1     | 2     | 1      | 0      | 1      | 1      | 1      | 1      | 1      | 1      |

| respid | Q52_2 | Q53_1 | Q54_1 | Q54_2 | Q54_3 | Q55_1 | Q56a_1 | Q56b_1 | Q56c_1 | Q56d_1 | Q56e_1 | Q56f_1 | Q56g_1 | Q56h_1 |
|--------|-------|-------|-------|-------|-------|-------|--------|--------|--------|--------|--------|--------|--------|--------|
| 6917   | 3     | 1     | 4     | 3     | 1     | 3     | 2      | 1      | 0      | 0      | 1      | 1      | 1      | 1      |
| 6923   | 3     | 2     | 3     | 3     | 3     | 5     | 1      | 1      | 1      | 0      | 1      | 0      | 1      | 0      |
| 6934   | 5     | 1     | 1     | 1     | 5     | 5     | 0      | 0      | 0      | 0      | 1      | 0      | 0      | 0      |
| 6937   | 4     | 2     | 1     | 1     | 4     | 5     | 0      | 0      | 0      | 0      | 1      | 0      | 0      | 0      |
| 6945   | 3     | 2     | 1     | 1     | 3     | 5     | 1      | 0      | 2      | 1      | 1      | 1      | 1      | 1      |
| 6954   | 4     | 1     | 3     | 3     | 3     | 4     | 1      | 1      | 1      | 1      | 2      | 2      | 2      | 1      |
| 6956   | 5     | 2     | 1     | 1     | 4     | 5     | 0      | 0      | 0      | 0      | 0      | 0      | 0      | 0      |
| 6958   | 3     | 2     | 0     | 0     | 3     | 4     | 1      | 2      | 0      | 1      | 1      | 0      | 0      | 1      |
| 6961   | 4     | 3     | 1     | 1     | 4     | 4     | 1      | 0      | 0      | 0      | 1      | 0      | 1      | 1      |
| 6963   | 4     | 2     | 1     | 1     | 4     | 5     | 0      | 0      | 1      | 1      | 1      | 1      | 0      | 1      |
| 6964   | 5     | 1     | 1     | 1     | 4     | 5     | 0      | 0      | 0      | 0      | 0      | 1      | 0      | 1      |
| 6976   | 4     | 3     | 3     | 1     | 3     | 4     | 1      | 0      | 1      | 2      | 1      | 1      | 1      | 0      |
| 6977   | 2     | 3     | 3     | 3     | 3     | 3     | 1      | 1      | 1      | 1      | 1      | 1      | 2      | 1      |
| 7000   | 4     | 3     | 1     | 3     | 3     | 4     | 1      | 2      | 1      | 2      | 2      | 2      | 2      | 2      |
| 7001   | 5     | 1     | 0     | 1     | 1     | 5     | 0      | 0      | 0      | 0      | 0      | 0      | 0      | 0      |
| 7005   | 4     | 1     | 1     | 1     | 4     | 5     | 0      | 1      | 1      | 2      | 1      | 1      | 1      | 0      |
| 7006   | 3     | 2     | 1     | 3     | 4     | 3     | 1      | 1      | 2      | 1      | 1      | 2      | 1      | 2      |
| 7008   | 5     | 2     | 3     | 5     | 1     | 2     | 1      | 2      | 2      | 2      | 3      | 3      | 3      | 2      |
| 7009   | 3     | 2     | 1     | 3     | 4     | 5     | 1      | 1      | 1      | 0      | 1      | 1      | 1      | 1      |
| 7019   | 4     | 1     | 1     | 3     | 3     | 4     | 1      | 0      | 1      | 1      | 1      | 1      | 1      | 1      |
| 7021   | 5     | 3     | 1     | 1     | 3     | 4     | 1      | 1      | 2      | 1      | 1      | 0      | 0      | 1      |
| 7026   | 4     | 2     | 1     | 1     | 3     | 5     | 1      | 1      | 1      | 1      | 1      | 1      | 1      | 1      |
| 7030   | 3     | 3     | 1     | 3     | 3     | 3     | 1      | 1      | 2      | 1      | 2      | 1      | 1      | 1      |
| 7034   | 3     | 2     | 3     | 3     | 3     | 4     | 1      | 1      | 1      | 1      | 1      | 1      | 1      | 1      |
| 7039   | 5     | 1     | 3     | 1     | 3     | 5     | 2      | 2      | 2      | 1      | 3      | 1      | 2      | 0      |
| 7041   | 5     | 1     | 0     | 0     | 5     | 5     | 0      | 0      | 0      | 0      | 0      | 0      | 0      | 0      |
| 7047   | 5     | 2     | 1     | 1     | 4     | 4     | 0      | 0      | 1      | 1      | 1      | 1      | 2      | 0      |
| 7051   | 4     | 2     | 1     | 1     | 3     | 4     | 1      | 1      | 1      | 1      | 2      | 1      | 1      | 1      |
| 7052   | 4     | 2     | 1     | 1     | 1     | 4     | 1      | 0      | 1      | 0      | 1      | 1      | 1      | 1      |
| 7059   | 4     | 2     | 3     | 3     | 3     | 4     | 1      | 1      | 1      | 0      | 1      | 1      | 1      | 1      |
| 7062   | 3     | 2     | 3     | 4     | 3     | 4     | 1      | 2      | 1      | 1      | 1      | 1      | 1      | 2      |
| 7065   | 5     | 2     | 1     | 1     | 3     | 3     | 1      | 1      | 0      | 1      | 1      | 1      | 1      | 1      |

| respid | Q52_2 | Q53_1 | Q54_1 | Q54_2 | Q54_3 | Q55_1 | Q56a_1 | Q56b_1 | Q56c_1 | Q56d_1 | Q56e_1 | Q56f_1 | Q56g_1 | Q56h_1 |
|--------|-------|-------|-------|-------|-------|-------|--------|--------|--------|--------|--------|--------|--------|--------|
| 7066   | 5     | 1     | 1     | 1     | 4     | 5     | 0      | 0      | 0      | 0      | 0      | 0      | 1      | 0      |
| 7069   | 5     | 1     | 1     | 3     | 4     | 5     | 0      | 1      | 2      | 1      | 1      | 3      | 0      | 1      |
| 7070   | 5     | 1     | 1     | 1     | 3     | 5     | 0      | 0      | 0      | 0      | 1      | 1      | 0      | 1      |
| 7073   | 5     | 1     | 5     | 5     | 5     | 5     | 3      | 3      | 0      | 0      | 0      | 0      | 0      | 0      |
| 7078   | 5     | 1     | 1     | 1     | 3     | 5     | 1      | 0      | 0      | 0      | 0      | 0      | 0      | 1      |
| 7083   | 5     | 2     | 1     | 3     | 4     | 4     | 0      | 0      | 0      | 0      | 0      | 1      | 1      | 1      |
| 7084   | 3     | 4     | 3     | 4     | 3     | 3     | 1      | 1      | 2      | 2      | 2      | 2      | 2      | 2      |
| 7085   | 5     | 2     | 1     | 1     | 4     | 4     | 1      | 0      | 1      | 0      | 1      | 1      | 1      | 0      |
| 7088   | 4     | 3     | 3     | 3     | 3     | 4     | 2      | 2      | 2      | 2      | 2      | 2      | 1      | 2      |
| 7090   | 1     | 3     | 0     | 1     | 3     | 3     | 1      | 1      | 1      | 1      | 1      | 1      | 1      | 1      |
| 7095   | 5     | 3     | 1     | 3     | 3     | 3     | 2      | 2      | 2      | 1      | 2      | 2      | 2      | 1      |
| 7100   | 5     | 2     | 1     | 1     | 4     | 4     | 1      | 0      | 0      | 0      | 1      | 0      | 0      | 1      |
| 7102   | 4     | 2     | 3     | 3     | 3     | 3     | 1      | 1      | 1      | 2      | 1      | 2      | 2      | 1      |
| 7103   | 5     | 1     | 1     | 1     | 4     | 5     | 1      | 0      | 1      | 0      | 1      | 0      | 0      | 1      |
| 7108   | 5     | 1     | 1     | 1     | 5     | 5     | 0      | 0      | 0      | 0      | 0      | 0      | 1      | 1      |
| 7109   | 5     | 1     | 0     | 3     | 4     | 5     | 0      | 0      | 1      | 0      | 1      | 1      | 0      | 1      |
| 7110   | 5     | 1     | 0     | 0     | 3     | 5     | 0      | 0      | 0      | 0      | 0      | 0      | 0      | 0      |
| 7112   | 5     | 1     | 0     | 0     | 4     | 5     | 0      | 0      | 0      | 0      | 0      | 0      | 0      | 3      |
| 7114   | 5     | 1     | 1     | 3     | 4     | 5     | 1      | 0      | 1      | 1      | 1      | 1      | 1      | 1      |
| 7116   | 3     | 3     | 4     | 4     | 1     | 2     | 1      | 2      | 1      | 1      | 1      | 2      | 2      | 1      |
| 7117   | 4     | 3     | 1     | 1     | 3     | 3     | 0      | 2      | 0      | 1      | 1      | 1      | 0      | 1      |
| 7118   | 3     | 3     | 3     | 3     | 3     | 4     | 1      | 2      | 1      | 0      | 1      | 1      | 2      | 2      |
| 7120   | 3     | 4     | 3     | 3     | 4     | 4     | 1      | 0      | 1      | 1      | 2      | 1      | 2      | 1      |
| 7124   | 4     | 1     | 3     | 4     | 4     | 3     | 1      | 0      | 1      | 0      | 1      | 1      | 1      | 1      |
| 7130   | 4     | 2     | 1     | 3     | 4     | 4     | 1      | 0      | 0      | 0      | 1      | 1      | 1      | 1      |
| 7135   | 5     | 1     | 0     | 1     | 4     | 5     | 0      | 0      | 0      | 0      | 0      | 0      | 0      | 0      |
| 7137   | 3     | 3     | 1     | 4     | 3     | 3     | 1      | 2      | 2      | 2      | 1      | 1      | 2      | 1      |
| 7140   | 4     | 3     | 1     | 3     | 4     | 4     | 1      | 1      | 0      | 1      | 1      | 1      | 1      | 2      |
| 7141   | 4     | 1     | 1     | 1     | 4     | 4     | 0      | 0      | 1      | 0      | 1      | 0      | 0      | 1      |
| 7148   | 5     | 1     | 1     | 1     | 4     | 5     | 0      | 0      | 0      | 0      | 0      | 0      | 0      | 0      |
| 7152   | 5     | 1     | 1     | 1     | 5     | 5     | 0      | 0      | 0      | 0      | 0      | 3      | 3      | 0      |
| 7154   | 4     | 1     | 0     | 4     | 4     | 4     | 0      | 0      | 1      | 0      | 1      | 1      | 0      | 1      |

| respid | Q52_2 | Q53_1 | Q54_1 | Q54_2 | Q54_3 | Q55_1 | Q56a_1 | Q56b_1 | Q56c_1 | Q56d_1 | Q56e_1 | Q56f_1 | Q56g_1 | Q56h_1 |
|--------|-------|-------|-------|-------|-------|-------|--------|--------|--------|--------|--------|--------|--------|--------|
| 7156   | 5     | 1     | 1     | 1     | 4     | 4     | 1      | 0      | 1      | 0      | 1      | 0      | 1      | 1      |
| 7158   | 3     | 4     | 1     | 3     | 4     | 3     | 2      | 1      | 1      | 2      | 1      | 2      | 1      | 2      |
| 7159   | 5     | 2     | 1     | 1     | 3     | 4     | 0      | 0      | 1      | 0      | 1      | 0      | 0      | 1      |
| 7161   | 4     | 2     | 1     | 1     | 3     | 4     | 1      | 0      | 1      | 0      | 0      | 0      | 0      | 0      |
| 7164   | 5     | 1     | 3     | 3     | 1     | 5     | 0      | 0      | 0      | 0      | 1      | 1      | 2      | 1      |
| 7166   | 5     | 1     | 3     | 3     | 3     | 5     | 0      | 0      | 0      | 0      | 1      | 1      | 1      | 1      |
| 7167   | 4     | 2     | 1     | 1     | 3     | 4     | 1      | 1      | 1      | 2      | 1      | 1      | 1      | 1      |
| 7168   | 5     | 1     | 1     | 1     | 4     | 5     | 1      | 0      | 1      | 0      | 1      | 0      | 0      | 0      |
| 7170   | 5     | 2     | 1     | 1     | 4     | 4     | 0      | 0      | 0      | 0      | 0      | 0      | 1      | 1      |
| 7171   | 4     | 1     | 0     | 1     | 4     | 4     | 1      | 1      | 1      | 0      | 1      | 1      | 1      | 1      |
| 7172   | 4     | 1     | 1     | 1     | 4     | 4     | 0      | 0      | 1      | 1      | 1      | 1      | 1      | 0      |
| 7173   | 4     | 1     | 1     | 1     | 3     | 5     | 1      | 1      | 2      | 2      | 2      | 2      | 1      | 1      |
| 7175   | 4     | 1     | 1     | 3     | 4     | 4     | 0      | 0      | 1      | 0      | 1      | 1      | 1      | 1      |
| 7176   | 3     | 3     | 3     | 3     | 3     | 3     | 1      | 1      | 0      | 1      | 1      | 1      | 1      | 1      |
| 7180   | 5     | 1     | 0     | 0     | 5     | 5     | 0      | 0      | 0      | 0      | 0      | 0      | 0      | 0      |
| 7183   | 4     | 1     | 1     | 1     | 4     | 4     | 1      | 0      | 1      | 0      | 1      | 1      | 1      | 1      |
| 7189   | 5     | 1     | 1     | 1     | 4     | 5     | 1      | 0      | 0      | 0      | 0      | 0      | 0      | 0      |
| 7193   | 5     | 1     | 0     | 0     | 3     | 5     | 1      | 0      | 1      | 2      | 1      | 1      | 1      | 1      |
| 7194   | 4     | 1     | 0     | 3     | 3     | 5     | 0      | 0      | 1      | 2      | 2      | 1      | 2      | 0      |
| 7195   | 4     | 2     | 3     | 3     | 3     | 4     | 2      | 2      | 2      | 2      | 1      | 1      | 2      | 1      |
| 7200   | 4     | 2     | 3     | 4     | 3     | 3     | 0      | 0      | 0      | 0      | 1      | 2      | 1      | 1      |
| 7201   | 5     | 2     | 1     | 3     | 3     | 4     | 1      | 0      | 0      | 0      | 1      | 1      | 0      | 1      |
| 7205   | 4     | 2     | 1     | 4     | 3     | 3     | 1      | 0      | 1      | 1      | 1      | 2      | 2      | 1      |
| 7207   | 5     | 1     | 0     | 0     | 5     | 5     | 0      | 0      | 0      | 0      | 0      | 0      | 0      | 0      |
| 7208   | 5     | 1     | 1     | 1     | 4     | 5     | 0      | 1      | 0      | 1      | 0      | 1      | 1      | 0      |
| 7210   | 3     | 1     | 1     | 3     | 4     | 4     | 0      | 0      | 0      | 0      | 0      | 1      | 1      | 1      |
| 7211   | 5     | 1     | 0     | 0     | 4     | 5     | 0      | 0      | 0      | 0      | 0      | 0      | 0      | 0      |
| 7217   | 3     | 2     | 3     | 3     | 3     | 3     | 1      | 1      | 1      | 1      | 1      | 1      | 2      | 1      |
| 7218   | 5     | 1     | 1     | 3     | 4     | 4     | 1      | 0      | 0      | 2      | 1      | 1      | 1      | 1      |
| 7220   | 5     | 1     | 1     | 1     | 4     | 4     | 1      | 0      | 1      | 0      | 1      | 0      | 0      | 0      |
| 7225   | 4     | 1     | 1     | 1     | 3     | 4     | 0      | 0      | 0      | 0      | 0      | 0      | 0      | 0      |
| 7228   | 4     | 1     | 1     | 1     | 3     | 3     | 1      | 1      | 2      | 1      | 1      | 1      | 1      | 2      |

| respid | Q52_2 | Q53_1 | Q54_1 | Q54_2 | Q54_3 | Q55_1 | Q56a_1 | Q56b_1 | Q56c_1 | Q56d_1 | Q56e_1 | Q56f_1 | Q56g_1 | Q56h_1 |
|--------|-------|-------|-------|-------|-------|-------|--------|--------|--------|--------|--------|--------|--------|--------|
| 7230   | 5     | 1     | 1     | 1     | 4     | 4     | 1      | 0      | 1      | 0      | 1      | 0      | 0      | 1      |
| 7233   | 5     | 1     | 1     | 1     | 4     | 5     | 1      | 0      | 1      | 0      | 1      | 1      | 1      | 1      |
| 7234   | 3     | 2     | 1     | 3     | 4     | 4     | 0      | 0      | 0      | 0      | 0      | 0      | 0      | 1      |
| 7235   | 5     | 1     | 0     | 0     | 5     | 5     | 0      | 0      | 0      | 0      | 0      | 0      | 0      | 0      |
| 7236   | 3     | 2     | 3     | 3     | 3     | 3     | 1      | 1      | 1      | 1      | 1      | 1      | 1      | 1      |
| 7241   | 4     | 2     | 1     | 1     | 4     | 4     | 1      | 0      | 1      | 0      | 0      | 0      | 1      | 1      |
| 7251   | 4     | 1     | 1     | 1     | 4     | 4     | 1      | 0      | 1      | 0      | 1      | 1      | 1      | 0      |
| 7253   | 4     | 3     | 1     | 3     | 4     | 4     | 1      | 1      | 0      | 1      | 1      | 1      | 1      | 0      |
| 7259   | 4     | 2     | 1     | 1     | 4     | 4     | 1      | 0      | 0      | 0      | 1      | 0      | 0      | 0      |
| 7260   | 4     | 3     | 1     | 1     | 4     | 4     | 1      | 1      | 1      | 0      | 1      | 1      | 0      | 1      |
| 7261   | 3     | 3     | 3     | 3     | 3     | 3     | 1      | 1      | 1      | 1      | 1      | 1      | 1      | 1      |
| 7263   | 5     | 1     | 0     | 1     | 4     | 4     | 0      | 0      | 0      | 0      | 1      | 0      | 0      | 1      |
| 7265   | 5     | 1     | 1     | 1     | 3     | 5     | 1      | 0      | 1      | 0      | 1      | 1      | 0      | 0      |
| 7268   | 5     | 2     | 0     | 3     | 4     | 4     | 0      | 0      | 0      | 0      | 0      | 0      | 0      | 1      |
| 7269   | 5     | 1     | 1     | 1     | 5     | 5     | 0      | 2      | 0      | 0      | 0      | 0      | 0      | 0      |
| 7271   | 3     | 3     | 3     | 3     | 3     | 3     | 1      | 2      | 1      | 2      | 2      | 1      | 1      | 2      |
| 7276   | 3     | 4     | 1     | 3     | 1     | 3     | 1      | 0      | 2      | 0      | 2      | 0      | 1      | 2      |
| 7280   | 2     | 2     | 4     | 4     | 3     | 3     | 1      | 0      | 2      | 1      | 2      | 2      | 2      | 2      |
| 7283   | 4     | 1     | 1     | 1     | 4     | 4     | 0      | 0      | 1      | 0      | 1      | 0      | 1      | 1      |
| 7284   | 5     | 3     | 1     | 1     | 4     | 3     | 1      | 0      | 1      | 0      | 2      | 0      | 1      | 0      |
| 7286   | 4     | 2     | 1     | 3     | 4     | 4     | 1      | 1      | 1      | 1      | 1      | 1      | 1      | 1      |
| 7287   | 5     | 1     | 0     | 1     | 5     | 5     | 0      | 0      | 0      | 1      | 0      | 0      | 0      | 0      |
| 7288   | 3     | 3     | 3     | 3     | 3     | 3     | 1      | 1      | 1      | 1      | 1      | 1      | 1      | 1      |
| 7294   | 5     | 1     | 1     | 1     | 4     | 4     | 1      | 0      | 1      | 0      | 1      | 1      | 1      | 1      |
| 7295   | 5     | 1     | 0     | 0     | 0     | 5     | 0      | 0      | 0      | 0      | 0      | 0      | 0      | 0      |
| 7296   | 2     | 2     | 1     | 1     | 4     | 4     | 1      | 0      | 1      | 0      | 1      | 1      | 1      | 1      |
| 7297   | 5     | 1     | 5     | 5     | 5     | 3     | 0      | 0      | 0      | 0      | 1      | 0      | 0      | 0      |
| 7299   | 5     | 2     | 1     | 1     | 4     | 4     | 1      | 0      | 0      | 0      | 1      | 0      | 0      | 0      |
| 7300   | 2     | 2     | 1     | 3     | 0     | 3     | 1      | 0      | 0      | 0      | 2      | 1      | 2      | 2      |
| 7301   | 4     | 2     | 1     | 3     | 4     | 4     | 0      | 1      | 1      | 1      | 1      | 1      | 1      | 1      |
| 7302   | 4     | 1     | 1     | 1     | 4     | 5     | 1      | 0      | 1      | 0      | 0      | 0      | 0      | 1      |
| 7306   | 5     | 1     | 1     | 1     | 4     | 5     | 0      | 0      | 0      | 0      | 0      | 0      | 0      | 1      |



| respid | Q52_2 | Q53_1 | Q54_1 | Q54_2 | Q54_3 | Q55_1 | Q56a_1 | Q56b_1 | Q56c_1 | Q56d_1 | Q56e_1 | Q56f_1 | Q56g_1 | Q56h_1 |
|--------|-------|-------|-------|-------|-------|-------|--------|--------|--------|--------|--------|--------|--------|--------|
| 7313   | 2     | 3     | 4     | 5     | 1     | 3     | 2      | 1      | 2      | 1      | 2      | 2      | 2      | 2      |
| 7315   | 3     | 2     | 1     | 3     | 3     | 3     | 2      | 1      | 1      | 1      | 1      | 1      | 2      | 2      |
| 7317   | 4     | 2     | 1     | 1     | 4     | 5     | 1      | 0      | 1      | 0      | 0      | 0      | 1      | 1      |
| 7321   | 5     | 1     | 1     | 1     | 4     | 4     | 1      | 0      | 1      | 0      | 1      | 1      | 1      | 1      |
| 7322   | 5     | 2     | 1     | 3     | 4     | 5     | 0      | 0      | 1      | 1      | 1      | 2      | 1      | 1      |
| 7323   | 2     | 3     | 1     | 3     | 3     | 3     | 1      | 1      | 2      | 1      | 2      | 1      | 2      | 1      |
| 7333   | 4     | 2     | 1     | 3     | 3     | 4     | 1      | 1      | 1      | 1      | 1      | 1      | 1      | 2      |
| 7335   | 4     | 4     | 0     | 3     | 5     | 3     | 1      | 0      | 0      | 1      | 1      | 1      | 1      | 1      |
| 7336   | 4     | 1     | 1     | 1     | 4     | 4     | 0      | 0      | 3      | 0      | 1      | 1      | 1      | 2      |
| 7337   | 3     | 2     | 1     | 1     | 3     | 4     | 0      | 1      | 1      | 1      | 1      | 1      | 1      | 1      |
| 7338   | 5     | 1     | 5     | 5     | 5     | 5     | 0      | 0      | 0      | 0      | 0      | 0      | 0      | 0      |
| 7340   | 4     | 1     | 1     | 1     | 3     | 4     | 1      | 1      | 0      | 2      | 2      | 1      | 1      | 1      |
| 7341   | 4     | 2     | 1     | 3     | 4     | 4     | 1      | 2      | 1      | 1      | 1      | 0      | 2      | 1      |
| 7342   | 5     | 1     | 4     | 4     | 4     | 3     | 1      | 2      | 2      | 2      | 1      | 1      | 1      | 1      |
| 7344   | 3     | 3     | 3     | 3     | 3     | 4     | 1      | 1      | 2      | 2      | 2      | 1      | 1      | 0      |
| 7346   | 4     | 2     | 1     | 3     | 1     | 4     | 1      | 1      | 1      | 1      | 1      | 1      | 1      | 2      |
| 7347   | 4     | 2     | 1     | 1     | 3     | 4     | 1      | 0      | 3      | 2      | 1      | 1      | 1      | 1      |
| 7349   | 2     | 3     | 3     | 4     | 1     | 3     | 1      | 1      | 2      | 2      | 2      | 1      | 2      | 2      |
| 7352   | 4     | 2     | 1     | 1     | 4     | 3     | 1      | 1      | 2      | 1      | 1      | 1      | 1      | 1      |
| 7353   | 5     | 1     | 1     | 1     | 4     | 5     | 1      | 0      | 1      | 0      | 1      | 1      | 0      | 1      |
| 7355   | 4     | 2     | 1     | 1     | 4     | 4     | 1      | 0      | 1      | 0      | 1      | 0      | 1      | 1      |
| 7356   | 4     | 1     | 1     | 1     | 4     | 1     | 1      | 0      | 2      | 1      | 1      | 1      | 1      | 1      |
| 7360   | 2     | 4     | 1     | 3     | 1     | 4     | 2      | 2      | 1      | 2      | 2      | 2      | 1      | 2      |
| 7371   | 4     | 1     | 1     | 1     | 4     | 4     | 1      | 1      | 1      | 0      | 1      | 0      | 1      | 1      |
| 7376   | 2     | 2     | 1     | 1     | 3     | 2     | 1      | 1      | 1      | 1      | 1      | 1      | 1      | 1      |
| 7379   | 4     | 2     | 3     | 4     | 1     | 4     | 3      | 1      | 1      | 1      | 3      | 2      | 2      | 0      |
| 7381   | 5     | 1     | 0     | 3     | 4     | 5     | 0      | 0      | 0      | 1      | 0      | 0      | 0      | 0      |
| 7386   | 4     | 2     | 1     | 1     | 3     | 3     | 1      | 0      | 1      | 0      | 1      | 1      | 1      | 1      |
| 7389   | 4     | 2     | 1     | 1     | 4     | 4     | 0      | 0      | 0      | 0      | 1      | 0      | 1      | 0      |
| 7390   | 3     | 2     | 1     | 1     | 3     | 4     | 1      | 2      | 2      | 1      | 1      | 1      | 1      | 1      |
| 7393   | 4     | 1     | 1     | 1     | 5     | 5     | 0      | 0      | 0      | 0      | 0      | 0      | 0      | 1      |
| 7394   | 4     | 2     | 1     | 1     | 4     | 5     | 0      | 0      | 0      | 0      | 0      | 0      | 0      | 0      |

| respid | Q52_2 | Q53_1 | Q54_1 | Q54_2 | Q54_3 | Q55_1 | Q56a_1 | Q56b_1 | Q56c_1 | Q56d_1 | Q56e_1 | Q56f_1 | Q56g_1 | Q56h_1 |
|--------|-------|-------|-------|-------|-------|-------|--------|--------|--------|--------|--------|--------|--------|--------|
| 7396   | 3     | 1     | 1     | 3     | 1     | 3     | 1      | 2      | 2      | 2      | 1      | 2      | 1      | 2      |
| 7400   | 3     | 4     | 4     | 5     | 3     | 3     | 2      | 2      | 0      | 0      | 1      | 1      | 1      | 2      |
| 7401   | 3     | 3     | 3     | 4     | 4     | 4     | 1      | 2      | 1      | 2      | 1      | 1      | 1      | 0      |
| 7403   | 4     | 2     | 1     | 1     | 4     | 4     | 1      | 0      | 1      | 0      | 1      | 0      | 0      | 1      |
| 7406   | 5     | 1     | 1     | 1     | 4     | 5     | 1      | 0      | 0      | 0      | 1      | 0      | 0      | 1      |
| 7409   | 4     | 2     | 0     | 3     | 4     | 4     | 0      | 1      | 1      | 0      | 0      | 0      | 0      | 0      |
| 7410   | 4     | 2     | 1     | 3     | 4     | 4     | 2      | 1      | 1      | 0      | 1      | 1      | 1      | 1      |
| 7412   | 5     | 1     | 5     | 5     | 5     | 5     | 3      | 0      | 0      | 0      | 0      | 0      | 0      | 0      |
| 7414   | 3     | 1     | 1     | 1     | 3     | 5     | 1      | 0      | 1      | 0      | 1      | 1      | 1      | 2      |
| 7415   | 4     | 2     | 1     | 1     | 4     | 4     | 0      | 0      | 0      | 0      | 0      | 1      | 1      | 0      |
| 7417   | 5     | 1     | 5     | 5     | 4     | 5     | 1      | 1      | 1      | 0      | 1      | 1      | 1      | 1      |
| 7421   | 2     | 4     | 1     | 1     | 1     | 4     | 2      | 2      | 2      | 2      | 2      | 2      | 2      | 2      |
| 7425   | 4     | 1     | 1     | 1     | 4     | 5     | 1      | 1      | 1      | 1      | 1      | 1      | 1      | 1      |
| 7430   | 4     | 2     | 1     | 1     | 3     | 4     | 0      | 0      | 1      | 0      | 0      | 0      | 1      | 0      |
| 7432   | 5     | 1     | 1     | 1     | 4     | 5     | 0      | 0      | 0      | 0      | 0      | 1      | 0      | 1      |
| 7433   | 3     | 2     | 1     | 1     | 3     | 3     | 1      | 1      | 2      | 1      | 2      | 1      | 2      | 1      |
| 7442   | 4     | 2     | 1     | 1     | 3     | 4     | 1      | 0      | 2      | 2      | 2      | 0      | 1      | 1      |
| 7445   | 4     | 2     | 1     | 1     | 3     | 3     | 1      | 0      | 0      | 0      | 0      | 0      | 0      | 0      |
| 7446   | 5     | 1     | 3     | 1     | 3     | 4     | 1      | 0      | 1      | 2      | 1      | 2      | 1      | 1      |
| 7449   | 4     | 1     | 0     | 3     | 4     | 5     | 2      | 0      | 0      | 0      | 1      | 2      | 1      | 1      |
| 7450   | 5     | 1     | 1     | 1     | 3     | 3     | 1      | 1      | 1      | 1      | 1      | 1      | 1      | 1      |
| 7451   | 4     | 2     | 4     | 4     | 4     | 5     | 1      | 0      | 1      | 1      | 1      | 1      | 1      | 1      |
| 7459   | 5     | 1     | 0     | 0     | 5     | 5     | 0      | 0      | 0      | 2      | 0      | 0      | 0      | 1      |
| 7462   | 4     | 3     | 1     | 3     | 3     | 5     | 1      | 0      | 1      | 0      | 1      | 0      | 1      | 2      |
| 7463   | 4     | 3     | 3     | 3     | 4     | 4     | 1      | 2      | 1      | 1      | 2      | 2      | 1      | 1      |
| 7469   | 5     | 1     | 1     | 1     | 4     | 4     | 0      | 0      | 0      | 0      | 0      | 1      | 0      | 0      |
| 7482   | 5     | 1     | 3     | 4     | 4     | 4     | 0      | 1      | 0      | 0      | 1      | 1      | 1      | 0      |
| 7484   | 5     | 1     | 1     | 1     | 3     | 3     | 1      | 1      | 1      | 1      | 1      | 1      | 1      | 1      |
| 7486   | 5     | 2     | 0     | 1     | 3     | 5     | 1      | 0      | 0      | 0      | 1      | 0      | 0      | 0      |
| 7496   | 5     | 5     | 5     | 5     | 5     | 5     | 0      | 0      | 0      | 0      | 0      | 0      | 0      | 0      |
| 7502   | 4     | 1     | 3     | 4     | 3     | 4     | 1      | 2      | 1      | 2      | 1      | 2      | 0      | 1      |
| 7504   | 4     | 2     | 1     | 1     | 3     | 4     | 1      | 0      | 3      | 1      | 3      | 1      | 1      | 1      |

| respid | Q52_2 | Q53_1 | Q54_1 | Q54_2 | Q54_3 | Q55_1 | Q56a_1 | Q56b_1 | Q56c_1 | Q56d_1 | Q56e_1 | Q56f_1 | Q56g_1 | Q56h_1 |
|--------|-------|-------|-------|-------|-------|-------|--------|--------|--------|--------|--------|--------|--------|--------|
| 7509   | 2     | 4     | 1     | 4     | 3     | 2     | 2      | 1      | 2      | 0      | 2      | 1      | 1      | 3      |
| 7513   | 3     | 3     | 3     | 4     | 3     | 2     | 2      | 2      | 2      | 2      | 2      | 1      | 1      | 1      |
| 7514   | 5     | 2     | 1     | 1     | 3     | 5     | 3      | 0      | 0      | 0      | 1      | 0      | 0      | 2      |
| 7520   | 5     | 1     | 0     | 1     | 4     | 5     | 1      | 0      | 0      | 0      | 1      | 0      | 0      | 0      |
| 7523   | 5     | 2     | 3     | 4     | 1     | 4     | 2      | 1      | 2      | 1      | 2      | 2      | 2      | 1      |
| 7526   | 5     | 2     | 3     | 3     | 4     | 5     | 1      | 1      | 2      | 0      | 2      | 1      | 1      | 0      |
| 7529   | 2     | 3     | 3     | 4     | 1     | 3     | 2      | 0      | 2      | 2      | 2      | 1      | 2      | 2      |
| 7534   | 5     | 2     | 1     | 1     | 4     | 4     | 1      | 1      | 1      | 0      | 1      | 1      | 1      | 1      |
| 7536   | 4     | 2     | 3     | 4     | 3     | 3     | 1      | 1      | 2      | 1      | 2      | 1      | 2      | 2      |
| 7540   | 5     | 2     | 1     | 1     | 4     | 5     | 1      | 1      | 1      | 2      | 1      | 1      | 1      | 1      |
| 7541   | 2     | 4     | 4     | 4     | 4     | 3     | 2      | 2      | 1      | 2      | 2      | 3      | 2      | 2      |
| 7542   | 4     | 2     | 1     | 1     | 4     | 4     | 1      | 0      | 1      | 1      | 1      | 1      | 1      | 1      |
| 7555   | 5     | 2     | 3     | 3     | 3     | 4     | 1      | 1      | 1      | 1      | 1      | 1      | 2      | 1      |
| 7566   | 5     | 2     | 3     | 3     | 3     | 3     | 1      | 2      | 0      | 2      | 0      | 2      | 2      | 1      |
| 7568   | 4     | 2     | 1     | 1     | 1     | 3     | 1      | 1      | 0      | 0      | 1      | 1      | 1      | 1      |
| 7570   | 2     | 3     | 3     | 1     | 3     | 3     | 1      | 1      | 2      | 1      | 1      | 1      | 1      | 1      |
| 7572   | 4     | 2     | 1     | 1     | 3     | 3     | 0      | 0      | 0      | 0      | 0      | 0      | 3      | 0      |
| 7573   | 4     | 3     | 1     | 1     | 4     | 3     | 3      | 2      | 2      | 2      | 1      | 0      | 0      | 1      |
| 7576   | 4     | 2     | 3     | 3     | 3     | 4     | 1      | 0      | 1      | 0      | 1      | 1      | 1      | 0      |
| 7577   | 2     | 2     | 3     | 3     | 3     | 2     | 1      | 1      | 1      | 2      | 2      | 1      | 1      | 1      |
| 7583   | 5     | 1     | 0     | 1     | 1     | 5     | 0      | 0      | 0      | 0      | 0      | 0      | 0      | 0      |
| 7584   | 3     | 2     | 1     | 1     | 4     | 3     | 1      | 2      | 2      | 1      | 1      | 1      | 1      | 0      |
| 7585   | 3     | 4     | 1     | 3     | 3     | 3     | 1      | 0      | 0      | 0      | 1      | 0      | 1      | 1      |
| 7586   | 2     | 2     | 1     | 1     | 1     | 3     | 1      | 1      | 0      | 1      | 1      | 1      | 1      | 1      |
| 7587   | 5     | 1     | 1     | 1     | 4     | 5     | 0      | 0      | 0      | 0      | 0      | 0      | 0      | 0      |
| 7588   | 5     | 1     | 1     | 1     | 4     | 5     | 0      | 0      | 0      | 0      | 0      | 0      | 0      | 0      |
| 7596   | 5     | 1     | 1     | 3     | 4     | 4     | 0      | 0      | 0      | 0      | 0      | 0      | 0      | 0      |
| 7599   | 5     | 2     | 1     | 1     | 4     | 5     | 0      | 0      | 1      | 0      | 0      | 0      | 0      | 0      |
| 7600   | 3     | 3     | 3     | 4     | 3     | 3     | 1      | 2      | 2      | 2      | 1      | 1      | 1      | 1      |
| 7602   | 5     | 1     | 0     | 1     | 5     | 5     | 0      | 0      | 0      | 0      | 3      | 0      | 0      | 0      |
| 7613   | 5     | 1     | 0     | 0     | 4     | 5     | 0      | 0      | 0      | 0      | 0      | 0      | 0      | 2      |
| 7620   | 5     | 2     | 0     | 0     | 0     | 5     | 1      | 0      | 0      | 0      | 0      | 0      | 0      | 1      |

| respid | Q52_2 | Q53_1 | Q54_1 | Q54_2 | Q54_3 | Q55_1 | Q56a_1 | Q56b_1 | Q56c_1 | Q56d_1 | Q56e_1 | Q56f_1 | Q56g_1 | Q56h_1 |
|--------|-------|-------|-------|-------|-------|-------|--------|--------|--------|--------|--------|--------|--------|--------|
| 7623   | 4     | 1     | 3     | 3     | 1     | 3     | 2      | 0      | 2      | 1      | 3      | 2      | 2      | 1      |
| 7635   | 5     | 1     | 3     | 1     | 3     | 5     | 1      | 0      | 1      | 0      | 1      | 0      | 1      | 1      |
| 7636   | 4     | 2     | 1     | 3     | 4     | 5     | 1      | 1      | 2      | 1      | 1      | 2      | 2      | 0      |
| 7643   | 5     | 2     | 1     | 1     | 4     | 4     | 0      | 0      | 0      | 0      | 0      | 0      | 0      | 0      |
| 7645   | 5     | 1     | 1     | 1     | 4     | 4     | 1      | 0      | 0      | 0      | 1      | 1      | 0      | 1      |
| 7649   | 2     | 3     | 1     | 1     | 1     | 3     | 1      | 1      | 1      | 1      | 2      | 2      | 2      | 2      |
| 7651   | 5     | 1     | 0     | 1     | 4     | 5     | 0      | 0      | 1      | 0      | 1      | 0      | 0      | 1      |
| 7652   | 3     | 4     | 3     | 3     | 3     | 2     | 1      | 0      | 2      | 2      | 1      | 1      | 1      | 1      |
| 7655   | 4     | 3     | 3     | 3     | 4     | 3     | 1      | 0      | 1      | 1      | 1      | 1      | 1      | 1      |
| 7657   | 4     | 1     | 0     | 1     | 4     | 4     | 1      | 0      | 1      | 0      | 1      | 0      | 1      | 0      |
| 7675   | 5     | 1     | 0     | 0     | 4     | 5     | 1      | 1      | 0      | 0      | 0      | 0      | 1      | 1      |
| 7676   | 2     | 3     | 3     | 4     | 1     | 3     | 1      | 1      | 2      | 2      | 2      | 2      | 2      | 2      |
| 7684   | 4     | 3     | 1     | 3     | 3     | 4     | 1      | 1      | 0      | 1      | 1      | 1      | 1      | 1      |
| 7693   | 4     | 2     | 1     | 1     | 3     | 4     | 1      | 0      | 1      | 0      | 1      | 0      | 1      | 1      |
| 7694   | 2     | 5     | 4     | 4     | 4     | 4     | 2      | 1      | 3      | 2      | 3      | 2      | 2      | 3      |
| 7695   | 5     | 2     | 1     | 1     | 4     | 4     | 1      | 0      | 1      | 0      | 1      | 0      | 0      | 0      |
| 7696   | 2     | 5     | 4     | 4     | 4     | 2     | 1      | 1      | 3      | 2      | 3      | 2      | 2      | 3      |
| 7698   | 2     | 3     | 1     | 1     | 1     | 4     | 1      | 0      | 0      | 0      | 0      | 0      | 0      | 1      |
| 7700   | 5     | 1     | 1     | 1     | 4     | 5     | 0      | 0      | 1      | 0      | 1      | 0      | 0      | 1      |
| 7701   | 5     | 2     | 1     | 1     | 5     | 5     | 1      | 1      | 1      | 0      | 1      | 0      | 0      | 1      |
| 7704   | 5     | 1     | 0     | 1     | 5     | 5     | 0      | 0      | 0      | 0      | 0      | 0      | 0      | 1      |
| 7709   | 4     | 2     | 1     | 1     | 4     | 4     | 1      | 0      | 1      | 0      | 1      | 0      | 0      | 0      |
| 7713   | 5     | 2     | 1     | 3     | 4     | 4     | 0      | 1      | 1      | 1      | 0      | 2      | 1      | 0      |
| 7714   | 5     | 1     | 0     | 0     | 5     | 5     | 0      | 0      | 0      | 0      | 0      | 0      | 0      | 0      |
| 7718   | 3     | 5     | 4     | 4     | 1     | 2     | 2      | 1      | 2      | 2      | 2      | 2      | 2      | 2      |
| 7720   | 4     | 1     | 0     | 1     | 3     | 4     | 1      | 0      | 2      | 1      | 1      | 1      | 1      | 1      |
| 7721   | 5     | 1     | 0     | 0     | 4     | 5     | 0      | 0      | 0      | 0      | 0      | 0      | 0      | 1      |
| 7722   | 5     | 3     | 1     | 1     | 4     | 4     | 1      | 0      | 1      | 0      | 1      | 0      | 0      | 0      |
| 7724   | 5     | 1     | 1     | 3     | 3     | 4     | 2      | 2      | 2      | 1      | 1      | 2      | 2      | 1      |
| 7728   | 4     | 1     | 3     | 3     | 3     | 3     | 1      | 0      | 0      | 0      | 0      | 1      | 1      | 0      |
| 7731   | 4     | 3     | 1     | 3     | 3     | 3     | 1      | 1      | 1      | 1      | 1      | 1      | 1      | 1      |
| 7735   | 3     | 3     | 3     | 4     | 3     | 3     | 1      | 2      | 1      | 2      | 2      | 1      | 2      | 1      |

| respid | Q52_2 | Q53_1 | Q54_1 | Q54_2 | Q54_3 | Q55_1 | Q56a_1 | Q56b_1 | Q56c_1 | Q56d_1 | Q56e_1 | Q56f_1 | Q56g_1 | Q56h_1 |
|--------|-------|-------|-------|-------|-------|-------|--------|--------|--------|--------|--------|--------|--------|--------|
| 7737   | 4     | 1     | 1     | 1     | 3     | 5     | 0      | 0      | 1      | 0      | 0      | 1      | 1      | 1      |
| 7741   | 4     | 1     | 1     | 0     | 4     | 5     | 0      | 0      | 0      | 0      | 0      | 0      | 0      | 0      |
| 7746   | 5     | 2     | 1     | 1     | 4     | 4     | 1      | 0      | 1      | 0      | 1      | 0      | 1      | 0      |
| 7747   | 4     | 2     | 1     | 1     | 4     | 4     | 0      | 0      | 0      | 0      | 0      | 0      | 0      | 0      |
| 7748   | 5     | 1     | 1     | 3     | 4     | 5     | 0      | 0      | 0      | 0      | 0      | 0      | 1      | 2      |
| 7750   | 3     | 1     | 1     | 3     | 3     | 4     | 1      | 0      | 0      | 0      | 1      | 1      | 0      | 2      |
| 7754   | 3     | 3     | 1     | 3     | 1     | 3     | 1      | 2      | 1      | 1      | 1      | 1      | 0      | 1      |
| 7755   | 3     | 3     | 3     | 3     | 1     | 3     | 1      | 1      | 2      | 2      | 2      | 1      | 1      | 2      |
| 7762   | 3     | 3     | 3     | 3     | 4     | 4     | 1      | 1      | 1      | 2      | 2      | 2      | 1      | 1      |
| 7764   | 4     | 1     | 4     | 4     | 4     | 4     | 2      | 0      | 2      | 0      | 1      | 1      | 1      | 1      |
| 7766   | 5     | 1     | 5     | 5     | 5     | 5     | 1      | 0      | 0      | 0      | 1      | 1      | 1      | 1      |
| 7768   | 4     | 3     | 4     | 4     | 4     | 4     | 1      | 0      | 0      | 0      | 1      | 0      | 1      | 1      |
| 7770   | 2     | 3     | 3     | 5     | 1     | 2     | 1      | 2      | 2      | 1      | 2      | 2      | 2      | 2      |
| 7771   | 5     | 2     | 1     | 1     | 4     | 4     | 1      | 0      | 1      | 0      | 1      | 0      | 1      | 1      |
| 7777   | 5     | 1     | 1     | 1     | 3     | 5     | 1      | 0      | 0      | 0      | 1      | 0      | 0      | 1      |
| 7778   | 5     | 1     | 0     | 0     | 4     | 5     | 0      | 0      | 0      | 0      | 0      | 0      | 0      | 0      |
| 7783   | 3     | 4     | 1     | 4     | 3     | 3     | 1      | 1      | 1      | 1      | 1      | 1      | 2      | 2      |
| 7789   | 5     | 2     | 1     | 3     | 4     | 5     | 1      | 0      | 1      | 0      | 1      | 1      | 1      | 1      |
| 7790   | 1     | 5     | 5     | 5     | 1     | 1     | 3      | 3      | 3      | 2      | 2      | 2      | 2      | 3      |
| 7795   | 4     | 2     | 1     | 3     | 3     | 3     | 1      | 0      | 1      | 0      | 1      | 0      | 1      | 0      |
| 7807   | 5     | 1     | 0     | 0     | 5     | 5     | 0      | 0      | 0      | 0      | 0      | 0      | 0      | 1      |
| 7808   | 5     | 2     | 1     | 1     | 4     | 5     | 0      | 0      | 1      | 0      | 1      | 0      | 0      | 1      |
| 7818   | 4     | 2     | 1     | 1     | 4     | 5     | 0      | 0      | 0      | 0      | 1      | 0      | 0      | 0      |
| 7820   | 5     | 1     | 0     | 0     | 5     | 5     | 0      | 0      | 0      | 0      | 0      | 0      | 0      | 0      |
| 7831   | 4     | 2     | 1     | 1     | 4     | 4     | 1      | 0      | 0      | 0      | 1      | 0      | 0      | 0      |
| 7832   | 4     | 1     | 1     | 3     | 3     | 5     | 1      | 2      | 0      | 0      | 1      | 1      | 1      | 1      |
| 7837   | 5     | 1     | 0     | 3     | 3     | 3     | 1      | 2      | 2      | 2      | 1      | 2      | 2      | 1      |
| 7841   | 4     | 4     | 1     | 3     | 4     | 4     | 1      | 0      | 2      | 2      | 1      | 1      | 1      | 1      |
| 7845   | 3     | 3     | 3     | 3     | 3     | 4     | 2      | 1      | 1      | 1      | 1      | 2      | 1      | 1      |
| 7853   | 5     | 1     | 1     | 3     | 4     | 5     | 0      | 2      | 0      | 1      | 0      | 1      | 1      | 1      |
| 7854   | 4     | 2     | 1     | 1     | 4     | 4     | 1      | 0      | 1      | 0      | 1      | 0      | 1      | 1      |
| 7862   | 3     | 3     | 3     | 3     | 3     | 3     | 1      | 2      | 1      | 2      | 1      | 1      | 1      | 1      |

| respid | Q52_2 | Q53_1 | Q54_1 | Q54_2 | Q54_3 | Q55_1 | Q56a_1 | Q56b_1 | Q56c_1 | Q56d_1 | Q56e_1 | Q56f_1 | Q56g_1 | Q56h_1 |
|--------|-------|-------|-------|-------|-------|-------|--------|--------|--------|--------|--------|--------|--------|--------|
| 7871   | 4     | 2     | 1     | 1     | 3     | 4     | 1      | 0      | 1      | 0      | 1      | 0      | 0      | 0      |
| 7875   | 5     | 3     | 1     | 3     | 3     | 2     | 2      | 1      | 0      | 0      | 1      | 1      | 2      | 2      |
| 7880   | 5     | 2     | 1     | 1     | 4     | 5     | 0      | 0      | 0      | 0      | 0      | 0      | 0      | 1      |
| 7881   | 4     | 1     | 1     | 1     | 3     | 4     | 1      | 0      | 0      | 0      | 1      | 1      | 1      | 0      |
| 7883   | 4     | 1     | 3     | 3     | 3     | 4     | 1      | 1      | 1      | 0      | 1      | 1      | 1      | 1      |
| 7896   | 5     | 2     | 1     | 3     | 4     | 4     | 1      | 0      | 1      | 0      | 1      | 0      | 0      | 1      |
| 7905   | 4     | 1     | 1     | 1     | 3     | 4     | 1      | 1      | 1      | 2      | 1      | 1      | 1      | 1      |
| 7919   | 5     | 1     | 1     | 1     | 4     | 5     | 0      | 0      | 0      | 0      | 0      | 0      | 1      | 0      |
| 7928   | 4     | 2     | 1     | 4     | 4     | 3     | 1      | 1      | 1      | 1      | 0      | 1      | 1      | 1      |
| 7929   | 4     | 1     | 0     | 3     | 4     | 4     | 0      | 1      | 0      | 0      | 0      | 0      | 0      | 1      |
| 7938   | 3     | 2     | 1     | 1     | 3     | 4     | 1      | 0      | 2      | 1      | 1      | 1      | 1      | 0      |
| 7940   | 4     | 2     | 3     | 3     | 4     | 5     | 1      | 0      | 1      | 0      | 1      | 1      | 1      | 1      |
| 7941   | 5     | 2     | 1     | 1     | 4     | 4     | 0      | 0      | 0      | 0      | 0      | 0      | 0      | 0      |
| 7952   | 5     | 1     | 1     | 1     | 4     | 5     | 0      | 0      | 0      | 0      | 1      | 1      | 0      | 1      |
| 7962   | 5     | 1     | 1     | 1     | 4     | 5     | 1      | 1      | 0      | 0      | 1      | 0      | 1      | 1      |
| 7968   | 4     | 2     | 1     | 1     | 4     | 4     | 1      | 0      | 2      | 0      | 1      | 0      | 1      | 1      |
| 7972   | 5     | 1     | 1     | 1     | 4     | 5     | 0      | 0      | 0      | 0      | 1      | 0      | 0      | 1      |
| 7983   | 4     | 3     | 1     | 3     | 3     | 3     | 1      | 1      | 2      | 2      | 2      | 1      | 1      | 1      |
| 7990   | 5     | 1     | 0     | 0     | 4     | 5     | 1      | 0      | 0      | 0      | 0      | 0      | 0      | 1      |
| 7993   | 5     | 1     | 0     | 0     | 5     | 5     | 0      | 0      | 0      | 0      | 0      | 0      | 0      | 0      |
| 8005   | 5     | 3     | 1     | 3     | 3     | 5     | 1      | 0      | 2      | 2      | 2      | 1      | 2      | 2      |
| 8008   | 5     | 1     | 1     | 3     | 4     | 5     | 0      | 0      | 0      | 0      | 0      | 0      | 0      | 1      |
| 8012   | 4     | 3     | 1     | 1     | 3     | 4     | 1      | 2      | 1      | 0      | 1      | 1      | 1      | 1      |
| 8021   | 5     | 1     | 4     | 4     | 1     | 4     | 1      | 1      | 2      | 1      | 2      | 2      | 2      | 1      |
| 8024   | 4     | 2     | 1     | 4     | 4     | 4     | 0      | 0      | 1      | 1      | 1      | 2      | 2      | 0      |
| 8043   | 5     | 1     | 1     | 1     | 3     | 5     | 0      | 1      | 2      | 2      | 1      | 1      | 1      | 1      |
| 8051   | 5     | 2     | 1     | 4     | 4     | 5     | 0      | 0      | 2      | 0      | 1      | 1      | 1      | 1      |
| 8056   | 4     | 3     | 3     | 4     | 1     | 4     | 1      | 1      | 2      | 1      | 2      | 2      | 2      | 1      |
| 8061   | 5     | 2     | 1     | 3     | 4     | 3     | 1      | 2      | 1      | 1      | 1      | 1      | 0      | 1      |
| 8066   | 5     | 1     | 1     | 1     | 4     | 5     | 1      | 0      | 1      | 0      | 1      | 0      | 0      | 1      |
| 8069   | 4     | 2     | 3     | 3     | 4     | 4     | 1      | 1      | 1      | 1      | 1      | 1      | 1      | 1      |
| 8071   | 5     | 2     | 1     | 1     | 4     | 4     | 0      | 0      | 1      | 0      | 0      | 0      | 0      | 1      |

| respid | Q52_2 | Q53_1 | Q54_1 | Q54_2 | Q54_3 | Q55_1 | Q56a_1 | Q56b_1 | Q56c_1 | Q56d_1 | Q56e_1 | Q56f_1 | Q56g_1 | Q56h_1 |
|--------|-------|-------|-------|-------|-------|-------|--------|--------|--------|--------|--------|--------|--------|--------|
| 8072   | 3     | 3     | 4     | 4     | 4     | 3     | 1      | 1      | 1      | 1      | 1      | 2      | 2      | 2      |
| 8076   | 4     | 1     | 1     | 1     | 3     | 4     | 0      | 2      | 1      | 0      | 0      | 0      | 1      | 0      |
| 8080   | 4     | 1     | 1     | 1     | 4     | 5     | 0      | 0      | 0      | 0      | 1      | 0      | 0      | 0      |
| 8083   | 4     | 2     | 1     | 3     | 4     | 4     | 1      | 0      | 1      | 0      | 1      | 0      | 1      | 1      |
| 8093   | 4     | 2     | 1     | 1     | 3     | 4     | 1      | 2      | 1      | 2      | 1      | 0      | 1      | 1      |
| 8095   | 3     | 2     | 1     | 1     | 3     | 3     | 1      | 1      | 1      | 2      | 1      | 1      | 1      | 1      |
| 8099   | 3     | 3     | 1     | 3     | 4     | 3     | 1      | 1      | 1      | 1      | 1      | 1      | 1      | 1      |
| 8100   | 4     | 1     | 1     | 4     | 3     | 5     | 0      | 0      | 0      | 2      | 0      | 2      | 0      | 1      |
| 8103   | 4     | 1     | 1     | 3     | 3     | 4     | 2      | 2      | 2      | 2      | 1      | 1      | 1      | 1      |
| 8104   | 2     | 5     | 4     | 5     | 1     | 2     | 2      | 1      | 1      | 1      | 3      | 2      | 2      | 2      |
| 8115   | 3     | 3     | 3     | 4     | 4     | 3     | 1      | 1      | 2      | 2      | 1      | 1      | 1      | 2      |
| 8121   | 5     | 2     | 1     | 1     | 4     | 5     | 1      | 0      | 0      | 0      | 1      | 0      | 1      | 1      |
| 8128   | 5     | 1     | 1     | 1     | 4     | 5     | 0      | 0      | 0      | 0      | 0      | 0      | 0      | 0      |
| 8130   | 5     | 1     | 0     | 1     | 4     | 5     | 0      | 0      | 0      | 0      | 0      | 0      | 0      | 1      |
| 8131   | 4     | 1     | 0     | 1     | 4     | 5     | 0      | 0      | 0      | 0      | 0      | 1      | 0      | 0      |
| 8133   | 5     | 2     | 1     | 1     | 4     | 4     | 1      | 0      | 0      | 0      | 0      | 0      | 0      | 0      |
| 8143   | 5     | 2     | 0     | 1     | 4     | 4     | 0      | 0      | 0      | 0      | 0      | 0      | 0      | 0      |
| 8144   | 4     | 2     | 1     | 1     | 3     | 4     | 1      | 0      | 0      | 0      | 0      | 0      | 1      | 1      |
| 8146   | 5     | 1     | 1     | 1     | 3     | 5     | 1      | 0      | 0      | 0      | 0      | 0      | 1      | 1      |
| 8148   | 5     | 1     | 1     | 1     | 4     | 5     | 0      | 0      | 0      | 0      | 0      | 0      | 0      | 0      |
| 8157   | 5     | 1     | 1     | 3     | 4     | 5     | 0      | 0      | 0      | 0      | 0      | 1      | 1      | 0      |
| 8164   | 5     | 1     | 5     | 5     | 4     | 5     | 0      | 0      | 0      | 0      | 0      | 0      | 0      | 0      |
| 8173   | 5     | 1     | 0     | 0     | 5     | 5     | 0      | 0      | 0      | 0      | 0      | 0      | 0      | 0      |
| 8176   | 5     | 1     | 1     | 1     | 3     | 5     | 1      | 0      | 0      | 0      | 0      | 0      | 0      | 1      |
| 8179   | 4     | 2     | 1     | 1     | 1     | 3     | 1      | 1      | 1      | 1      | 1      | 1      | 2      | 1      |
| 8181   | 3     | 3     | 3     | 3     | 3     | 3     | 1      | 1      | 2      | 1      | 2      | 1      | 1      | 2      |
| 8182   | 3     | 3     | 3     | 3     | 3     | 4     | 1      | 1      | 1      | 1      | 1      | 1      | 1      | 1      |
| 8196   | 4     | 2     | 1     | 1     | 5     | 5     | 1      | 2      | 1      | 0      | 1      | 0      | 1      | 1      |
| 8200   | 4     | 2     | 1     | 3     | 4     | 4     | 1      | 1      | 2      | 0      | 1      | 1      | 1      | 1      |
| 8203   | 5     | 1     | 1     | 3     | 3     | 4     | 1      | 0      | 1      | 0      | 1      | 1      | 1      | 2      |
| 8204   | 4     | 4     | 4     | 5     | 0     | 3     | 3      | 0      | 3      | 2      | 3      | 2      | 3      | 2      |
| 8206   | 4     | 2     | 1     | 1     | 4     | 4     | 1      | 0      | 0      | 0      | 0      | 0      | 1      | 1      |

| respid | Q52_2 | Q53_1 | Q54_1 | Q54_2 | Q54_3 | Q55_1 | Q56a_1 | Q56b_1 | Q56c_1 | Q56d_1 | Q56e_1 | Q56f_1 | Q56g_1 | Q56h_1 |
|--------|-------|-------|-------|-------|-------|-------|--------|--------|--------|--------|--------|--------|--------|--------|
| 8208   | 5     | 1     | 1     | 1     | 1     | 5     | 5      | 0      | 0      | 0      | 0      | 0      | 0      | 0      |
| 8212   | 4     | 3     | 1     | 4     | 3     | 3     | 1      | 0      | 1      | 2      | 1      | 2      | 1      | 2      |
| 8222   | 3     | 3     | 1     | 1     | 4     | 3     | 1      | 2      | 2      | 2      | 2      | 2      | 1      | 1      |
| 8223   | 5     | 1     | 1     | 1     | 4     | 5     | 0      | 0      | 0      | 0      | 1      | 0      | 0      | 0      |
| 8225   | 5     | 1     | 1     | 1     | 4     | 5     | 1      | 0      | 1      | 0      | 1      | 0      | 0      | 0      |
| 8226   | 5     | 1     | 0     | 0     | 5     | 5     | 0      | 0      | 0      | 0      | 0      | 0      | 0      | 0      |
| 8228   | 4     | 2     | 4     | 3     | 4     | 3     | 1      | 1      | 1      | 0      | 1      | 1      | 2      | 1      |
| 8229   | 5     | 1     | 1     | 1     | 4     | 5     | 0      | 0      | 0      | 0      | 0      | 0      | 0      | 1      |
| 8239   | 4     | 1     | 0     | 1     | 4     | 5     | 1      | 1      | 0      | 1      | 0      | 0      | 0      | 1      |
| 8246   | 4     | 5     | 1     | 3     | 4     | 2     | 0      | 0      | 1      | 0      | 1      | 0      | 1      | 2      |
| 8258   | 3     | 4     | 1     | 3     | 3     | 4     | 1      | 1      | 1      | 2      | 2      | 1      | 1      | 1      |
| 8260   | 5     | 1     | 1     | 1     | 4     | 4     | 0      | 0      | 1      | 0      | 1      | 1      | 1      | 0      |
| 8262   | 4     | 2     | 1     | 3     | 3     | 4     | 0      | 0      | 1      | 1      | 1      | 1      | 1      | 1      |
| 8263   | 4     | 2     | 4     | 4     | 4     | 4     | 1      | 1      | 2      | 1      | 1      | 1      | 1      | 1      |
| 8267   | 3     | 3     | 3     | 3     | 1     | 2     | 2      | 1      | 2      | 2      | 2      | 2      | 2      | 2      |
| 8271   | 2     | 3     | 4     | 4     | 3     | 3     | 1      | 1      | 2      | 1      | 1      | 1      | 2      | 1      |
| 8274   | 4     | 1     | 1     | 0     | 4     | 5     | 0      | 1      | 0      | 1      | 1      | 2      | 1      | 0      |
| 8275   | 4     | 2     | 1     | 3     | 4     | 4     | 0      | 0      | 2      | 0      | 0      | 0      | 1      | 1      |
| 8279   | 5     | 3     | 1     | 3     | 1     | 5     | 0      | 0      | 0      | 0      | 0      | 0      | 0      | 0      |
| 8285   | 3     | 3     | 3     | 4     | 3     | 3     | 1      | 1      | 1      | 1      | 1      | 1      | 2      | 1      |
| 8287   | 2     | 5     | 4     | 4     | 1     | 2     | 3      | 2      | 2      | 1      | 2      | 2      | 2      | 1      |
| 8289   | 5     | 1     | 1     | 1     | 5     | 5     | 0      | 1      | 0      | 2      | 1      | 0      | 0      | 0      |
| 8291   | 3     | 4     | 1     | 1     | 3     | 4     | 1      | 1      | 1      | 2      | 1      | 1      | 1      | 1      |
| 8299   | 4     | 2     | 1     | 1     | 4     | 4     | 1      | 0      | 1      | 0      | 1      | 1      | 1      | 1      |
| 8301   | 3     | 3     | 3     | 4     | 0     | 1     | 1      | 2      | 2      | 2      | 1      | 1      | 2      | 2      |
| 8302   | 5     | 3     | 1     | 4     | 4     | 5     | 0      | 0      | 0      | 0      | 1      | 0      | 0      | 1      |
| 8308   | 4     | 3     | 3     | 3     | 1     | 3     | 1      | 1      | 1      | 1      | 1      | 1      | 1      | 2      |
| 8313   | 4     | 2     | 1     | 1     | 4     | 4     | 0      | 0      | 1      | 0      | 1      | 0      | 1      | 0      |
| 8316   | 5     | 2     | 1     | 3     | 3     | 4     | 1      | 1      | 1      | 2      | 1      | 1      | 2      | 1      |
| 8317   | 4     | 3     | 3     | 4     | 4     | 3     | 1      | 0      | 0      | 0      | 1      | 1      | 1      | 2      |
| 8319   | 5     | 1     | 0     | 0     | 4     | 5     | 1      | 0      | 0      | 0      | 0      | 0      | 0      | 0      |
| 8323   | 5     | 2     | 1     | 1     | 4     | 4     | 1      | 2      | 1      | 2      | 1      | 1      | 2      | 2      |



| respid | Q52_2 | Q53_1 | Q54_1 | Q54_2 | Q54_3 | Q55_1 | Q56a_1 | Q56b_1 | Q56c_1 | Q56d_1 | Q56e_1 | Q56f_1 | Q56g_1 | Q56h_1 |
|--------|-------|-------|-------|-------|-------|-------|--------|--------|--------|--------|--------|--------|--------|--------|
| 8324   | 4     | 1     | 1     | 1     | 1     | 1     | 4      | 1      | 0      | 1      | 0      | 0      | 0      | 1      |
| 8327   | 3     | 3     | 3     | 4     | 1     | 3     | 1      | 1      | 1      | 1      | 2      | 2      | 1      | 2      |
| 8328   | 2     | 3     | 4     | 4     | 1     | 2     | 2      | 2      | 3      | 3      | 3      | 3      | 3      | 2      |
| 8342   | 4     | 1     | 1     | 1     | 4     | 5     | 1      | 0      | 1      | 0      | 1      | 0      | 1      | 1      |
| 8350   | 5     | 1     | 1     | 3     | 3     | 3     | 1      | 1      | 1      | 1      | 1      | 1      | 2      | 2      |
| 8352   | 4     | 1     | 1     | 3     | 4     | 5     | 1      | 0      | 0      | 0      | 1      | 0      | 1      | 1      |
| 8353   | 4     | 2     | 3     | 3     | 3     | 4     | 1      | 0      | 2      | 0      | 1      | 1      | 2      | 1      |
| 8356   | 4     | 3     | 0     | 1     | 4     | 4     | 0      | 1      | 0      | 0      | 0      | 0      | 0      | 0      |
| 8367   | 4     | 2     | 1     | 1     | 4     | 3     | 1      | 2      | 1      | 0      | 1      | 0      | 0      | 0      |
| 8373   | 4     | 1     | 3     | 3     | 4     | 4     | 1      | 1      | 2      | 1      | 2      | 1      | 1      | 2      |
| 8379   | 5     | 2     | 1     | 1     | 4     | 4     | 0      | 0      | 0      | 0      | 0      | 1      | 1      | 2      |
| 8382   | 4     | 3     | 1     | 3     | 1     | 4     | 2      | 2      | 2      | 2      | 2      | 2      | 2      | 2      |
| 8387   | 4     | 3     | 1     | 3     | 3     | 4     | 1      | 0      | 1      | 1      | 1      | 1      | 0      | 2      |
| 8409   | 4     | 3     | 1     | 1     | 4     | 4     | 0      | 0      | 1      | 1      | 1      | 0      | 0      | 1      |
| 8410   | 5     | 1     | 1     | 3     | 4     | 5     | 0      | 0      | 0      | 0      | 0      | 1      | 0      | 0      |
| 8412   | 3     | 2     | 1     | 3     | 4     | 3     | 1      | 1      | 2      | 1      | 1      | 1      | 1      | 1      |
| 8415   | 5     | 2     | 1     | 1     | 4     | 4     | 1      | 1      | 2      | 1      | 1      | 1      | 1      | 1      |
| 8417   | 4     | 2     | 0     | 1     | 4     | 5     | 0      | 0      | 0      | 0      | 2      | 0      | 1      | 0      |
| 8422   | 3     | 2     | 1     | 3     | 3     | 3     | 1      | 1      | 1      | 1      | 1      | 1      | 2      | 1      |
| 8430   | 4     | 3     | 3     | 4     | 1     | 4     | 1      | 0      | 1      | 1      | 1      | 2      | 2      | 1      |
| 8434   | 5     | 1     | 1     | 1     | 5     | 5     | 0      | 0      | 1      | 0      | 0      | 0      | 0      | 0      |
| 8436   | 5     | 1     | 1     | 1     | 4     | 5     | 0      | 0      | 0      | 0      | 0      | 0      | 0      | 1      |
| 8446   | 4     | 2     | 1     | 1     | 4     | 5     | 1      | 0      | 1      | 0      | 1      | 1      | 1      | 1      |
| 8447   | 4     | 2     | 1     | 1     | 3     | 3     | 1      | 1      | 1      | 1      | 1      | 1      | 1      | 0      |
| 8448   | 5     | 3     | 1     | 3     | 3     | 5     | 0      | 0      | 2      | 0      | 2      | 1      | 1      | 2      |
| 8455   | 4     | 3     | 1     | 4     | 3     | 4     | 1      | 0      | 1      | 1      | 1      | 1      | 2      | 1      |
| 8456   | 4     | 1     | 1     | 1     | 5     | 4     | 0      | 0      | 0      | 0      | 0      | 0      | 0      | 1      |
| 8459   | 4     | 3     | 4     | 4     | 1     | 3     | 1      | 0      | 2      | 2      | 2      | 1      | 2      | 2      |
| 8460   | 5     | 1     | 1     | 1     | 4     | 5     | 0      | 0      | 0      | 0      | 1      | 0      | 0      | 1      |
| 8464   | 3     | 3     | 4     | 4     | 1     | 2     | 3      | 0      | 2      | 2      | 2      | 2      | 2      | 2      |
| 8470   | 5     | 1     | 1     | 1     | 4     | 5     | 0      | 1      | 0      | 0      | 1      | 0      | 0      | 1      |
| 8473   | 5     | 2     | 1     | 1     | 4     | 5     | 1      | 0      | 1      | 0      | 1      | 1      | 1      | 1      |

| respid | Q52_2 | Q53_1 | Q54_1 | Q54_2 | Q54_3 | Q55_1 | Q56a_1 | Q56b_1 | Q56c_1 | Q56d_1 | Q56e_1 | Q56f_1 | Q56g_1 | Q56h_1 |
|--------|-------|-------|-------|-------|-------|-------|--------|--------|--------|--------|--------|--------|--------|--------|
| 8486   | 5     | 1     | 0     | 0     | 5     | 5     | 0      | 0      | 0      | 0      | 0      | 0      | 0      | 0      |
| 8487   | 5     | 1     | 1     | 3     | 4     | 5     | 1      | 0      | 1      | 0      | 0      | 1      | 0      | 1      |
| 8489   | 5     | 1     | 1     | 1     | 4     | 5     | 0      | 0      | 0      | 0      | 0      | 0      | 1      | 0      |
| 8494   | 3     | 3     | 3     | 1     | 1     | 3     | 1      | 0      | 0      | 0      | 1      | 1      | 1      | 1      |
| 8495   | 2     | 4     | 3     | 1     | 1     | 3     | 1      | 1      | 2      | 1      | 2      | 1      | 1      | 2      |
| 8497   | 4     | 1     | 0     | 0     | 3     | 4     | 0      | 0      | 1      | 0      | 0      | 0      | 0      | 0      |
| 8510   | 4     | 3     | 1     | 1     | 4     | 4     | 1      | 0      | 2      | 2      | 1      | 1      | 1      | 0      |
| 8515   | 3     | 3     | 1     | 3     | 4     | 4     | 1      | 0      | 1      | 1      | 0      | 1      | 0      | 2      |
| 8526   | 5     | 1     | 0     | 0     | 5     | 5     | 0      | 0      | 0      | 0      | 0      | 0      | 0      | 0      |
| 8530   | 4     | 2     | 4     | 4     | 4     | 4     | 1      | 2      | 1      | 2      | 2      | 2      | 2      | 2      |
| 8532   | 4     | 1     | 1     | 1     | 3     | 4     | 2      | 0      | 1      | 0      | 1      | 0      | 0      | 1      |
| 8533   | 4     | 2     | 3     | 3     | 3     | 3     | 1      | 1      | 1      | 1      | 1      | 1      | 1      | 1      |
| 8534   | 5     | 2     | 1     | 3     | 4     | 5     | 1      | 2      | 1      | 1      | 1      | 1      | 1      | 0      |
| 8572   | 4     | 3     | 1     | 3     | 1     | 4     | 1      | 1      | 1      | 1      | 1      | 1      | 1      | 1      |
| 8582   | 5     | 1     | 1     | 1     | 3     | 5     | 0      | 0      | 0      | 0      | 1      | 1      | 1      | 1      |
| 8584   | 4     | 2     | 1     | 1     | 4     | 5     | 0      | 0      | 0      | 0      | 0      | 0      | 0      | 0      |
| 8585   | 4     | 2     | 3     | 3     | 3     | 4     | 1      | 1      | 1      | 1      | 1      | 1      | 2      | 1      |
| 8586   | 4     | 1     | 1     | 1     | 4     | 5     | 1      | 1      | 1      | 1      | 1      | 1      | 1      | 1      |
| 8589   | 3     | 4     | 1     | 1     | 1     | 3     | 0      | 1      | 2      | 0      | 2      | 2      | 1      | 1      |
| 8593   | 4     | 2     | 0     | 3     | 5     | 4     | 1      | 0      | 1      | 0      | 1      | 0      | 0      | 1      |
| 8594   | 4     | 1     | 1     | 1     | 4     | 4     | 1      | 1      | 1      | 1      | 1      | 1      | 1      | 1      |
| 8601   | 4     | 2     | 0     | 1     | 4     | 5     | 0      | 0      | 0      | 0      | 1      | 0      | 0      | 0      |
| 8603   | 3     | 2     | 1     | 4     | 3     | 3     | 1      | 0      | 2      | 1      | 1      | 2      | 2      | 1      |
| 8604   | 4     | 2     | 1     | 1     | 4     | 4     | 0      | 0      | 0      | 0      | 0      | 0      | 1      | 1      |
| 8605   | 5     | 1     | 1     | 1     | 4     | 5     | 0      | 0      | 0      | 0      | 0      | 0      | 0      | 0      |
| 8607   | 5     | 1     | 3     | 4     | 3     | 4     | 0      | 0      | 1      | 0      | 1      | 1      | 1      | 1      |
| 8623   | 4     | 1     | 1     | 1     | 4     | 4     | 0      | 0      | 1      | 0      | 1      | 0      | 0      | 1      |
| 8626   | 5     | 2     | 1     | 1     | 4     | 4     | 1      | 0      | 2      | 1      | 1      | 1      | 1      | 0      |
| 8638   | 4     | 2     | 5     | 5     | 0     | 2     | 3      | 2      | 3      | 1      | 3      | 2      | 3      | 2      |
| 8640   | 4     | 4     | 4     | 4     | 3     | 4     | 1      | 0      | 1      | 2      | 1      | 2      | 2      | 3      |
| 8641   | 5     | 1     | 1     | 1     | 4     | 5     | 0      | 0      | 0      | 1      | 0      | 1      | 1      | 0      |
| 8643   | 5     | 1     | 1     | 3     | 4     | 5     | 0      | 0      | 0      | 0      | 0      | 0      | 0      | 1      |

| respid | Q52_2 | Q53_1 | Q54_1 | Q54_2 | Q54_3 | Q55_1 | Q56a_1 | Q56b_1 | Q56c_1 | Q56d_1 | Q56e_1 | Q56f_1 | Q56g_1 | Q56h_1 |
|--------|-------|-------|-------|-------|-------|-------|--------|--------|--------|--------|--------|--------|--------|--------|
| 8644   | 5     | 2     | 3     | 3     | 4     | 4     | 1      | 1      | 1      | 1      | 2      | 1      | 1      | 1      |
| 8646   | 4     | 1     | 0     | 0     | 4     | 4     | 0      | 0      | 1      | 0      | 0      | 0      | 0      | 1      |
| 8647   | 5     | 1     | 1     | 1     | 4     | 4     | 1      | 0      | 1      | 0      | 0      | 0      | 0      | 0      |
| 8649   | 5     | 1     | 1     | 4     | 1     | 5     | 1      | 2      | 0      | 1      | 1      | 1      | 2      | 1      |
| 8650   | 5     | 1     | 1     | 1     | 3     | 5     | 1      | 0      | 1      | 1      | 1      | 0      | 1      | 0      |
| 8658   | 5     | 2     | 1     | 1     | 4     | 5     | 0      | 0      | 0      | 0      | 1      | 0      | 0      | 1      |
| 8659   | 4     | 1     | 1     | 1     | 3     | 5     | 1      | 0      | 0      | 0      | 0      | 0      | 0      | 1      |
| 8669   | 4     | 2     | 1     | 1     | 4     | 4     | 0      | 1      | 1      | 1      | 1      | 1      | 1      | 1      |
| 8672   | 5     | 4     | 3     | 4     | 3     | 4     | 1      | 2      | 1      | 1      | 2      | 1      | 1      | 1      |
| 8673   | 5     | 1     | 1     | 1     | 4     | 4     | 0      | 0      | 1      | 1      | 0      | 1      | 1      | 0      |
| 8676   | 5     | 1     | 1     | 1     | 4     | 5     | 0      | 0      | 0      | 0      | 1      | 0      | 0      | 0      |
| 8677   | 5     | 2     | 0     | 0     | 4     | 4     | 0      | 1      | 0      | 0      | 0      | 0      | 0      | 0      |
| 8681   | 5     | 1     | 1     | 1     | 4     | 5     | 0      | 0      | 0      | 0      | 0      | 0      | 0      | 0      |
| 8688   | 5     | 1     | 3     | 1     | 4     | 5     | 1      | 0      | 1      | 0      | 0      | 1      | 1      | 0      |
| 8689   | 5     | 1     | 1     | 1     | 3     | 4     | 1      | 1      | 1      | 1      | 1      | 1      | 1      | 0      |
| 8690   | 5     | 1     | 1     | 1     | 4     | 5     | 1      | 0      | 0      | 0      | 1      | 1      | 0      | 1      |
| 8693   | 5     | 1     | 1     | 3     | 5     | 5     | 1      | 0      | 0      | 2      | 1      | 1      | 0      | 1      |
| 8694   | 5     | 1     | 1     | 3     | 3     | 5     | 1      | 0      | 1      | 2      | 2      | 1      | 1      | 1      |
| 8699   | 5     | 1     | 3     | 3     | 4     | 4     | 1      | 0      | 1      | 2      | 1      | 1      | 1      | 1      |
| 8700   | 4     | 2     | 1     | 1     | 4     | 5     | 1      | 0      | 1      | 1      | 0      | 1      | 1      | 1      |
| 8703   | 3     | 1     | 1     | 3     | 3     | 4     | 1      | 1      | 1      | 1      | 1      | 1      | 1      | 2      |
| 8704   | 5     | 1     | 0     | 1     | 5     | 4     | 0      | 0      | 0      | 0      | 0      | 0      | 0      | 0      |
| 8706   | 3     | 2     | 4     | 3     | 3     | 3     | 2      | 1      | 1      | 1      | 1      | 2      | 2      | 2      |
| 8709   | 5     | 2     | 1     | 3     | 3     | 4     | 1      | 1      | 1      | 1      | 1      | 1      | 1      | 1      |
| 8715   | 4     | 1     | 3     | 3     | 4     | 4     | 0      | 0      | 1      | 0      | 1      | 1      | 1      | 1      |
| 8728   | 4     | 2     | 1     | 3     | 4     | 4     | 1      | 2      | 1      | 2      | 2      | 2      | 1      | 0      |
| 8729   | 4     | 2     | 1     | 4     | 3     | 2     | 1      | 1      | 2      | 2      | 2      | 1      | 2      | 2      |
| 8730   | 5     | 2     | 3     | 3     | 3     | 4     | 0      | 1      | 0      | 1      | 1      | 1      | 1      | 1      |
| 8742   | 4     | 2     | 1     | 3     | 4     | 4     | 1      | 1      | 1      | 1      | 1      | 1      | 1      | 1      |
| 8748   | 4     | 2     | 3     | 3     | 1     | 3     | 1      | 1      | 1      | 1      | 1      | 2      | 2      | 2      |
| 8749   | 5     | 1     | 3     | 1     | 4     | 5     | 0      | 0      | 0      | 0      | 0      | 1      | 1      | 0      |
| 8750   | 5     | 1     | 1     | 4     | 3     | 5     | 2      | 1      | 0      | 0      | 0      | 1      | 1      | 1      |

| respid | Q52_2 | Q53_1 | Q54_1 | Q54_2 | Q54_3 | Q55_1 | Q56a_1 | Q56b_1 | Q56c_1 | Q56d_1 | Q56e_1 | Q56f_1 | Q56g_1 | Q56h_1 |
|--------|-------|-------|-------|-------|-------|-------|--------|--------|--------|--------|--------|--------|--------|--------|
| 8751   | 4     | 2     | 0     | 1     | 4     | 4     | 1      | 0      | 1      | 0      | 0      | 0      | 0      | 1      |
| 8752   | 4     | 3     | 1     | 4     | 4     | 4     | 1      | 1      | 1      | 0      | 1      | 2      | 2      | 1      |
| 8754   | 4     | 1     | 1     | 3     | 4     | 4     | 1      | 1      | 0      | 1      | 1      | 1      | 1      | 1      |
| 8757   | 5     | 2     | 1     | 1     | 4     | 4     | 0      | 0      | 1      | 0      | 1      | 1      | 1      | 1      |
| 8760   | 5     | 2     | 4     | 4     | 5     | 1     | 0      | 2      | 0      | 2      | 1      | 2      | 1      | 2      |
| 8761   | 3     | 2     | 3     | 3     | 3     | 4     | 1      | 2      | 1      | 1      | 1      | 1      | 1      | 1      |
| 8762   | 5     | 3     | 1     | 1     | 4     | 5     | 1      | 0      | 1      | 0      | 1      | 0      | 1      | 1      |
| 8763   | 5     | 2     | 1     | 3     | 3     | 4     | 1      | 0      | 1      | 0      | 1      | 1      | 0      | 0      |
| 8764   | 5     | 3     | 0     | 5     | 5     | 2     | 0      | 1      | 1      | 0      | 1      | 1      | 1      | 1      |
| 8765   | 4     | 1     | 1     | 1     | 4     | 4     | 0      | 0      | 0      | 0      | 1      | 0      | 0      | 1      |
| 8766   | 5     | 2     | 5     | 3     | 1     | 5     | 1      | 2      | 2      | 3      | 3      | 2      | 2      | 1      |
| 8767   | 4     | 1     | 1     | 1     | 4     | 5     | 0      | 1      | 0      | 0      | 0      | 0      | 0      | 1      |
| 8768   | 4     | 2     | 1     | 1     | 3     | 4     | 1      | 1      | 2      | 1      | 1      | 1      | 1      | 2      |
| 8770   | 5     | 1     | 5     | 5     | 5     | 5     | 0      | 0      | 0      | 0      | 0      | 3      | 1      | 0      |
| 8771   | 5     | 1     | 0     | 0     | 5     | 5     | 0      | 0      | 0      | 0      | 0      | 0      | 0      | 0      |
| 8773   | 5     | 1     | 0     | 1     | 5     | 4     | 0      | 1      | 0      | 1      | 1      | 0      | 0      | 1      |
| 8774   | 3     | 3     | 3     | 3     | 3     | 3     | 1      | 0      | 1      | 1      | 1      | 1      | 1      | 1      |
| 8776   | 5     | 1     | 1     | 1     | 4     | 5     | 1      | 0      | 0      | 0      | 1      | 1      | 1      | 1      |
| 8777   | 5     | 1     | 1     | 1     | 5     | 5     | 1      | 1      | 0      | 0      | 1      | 0      | 1      | 1      |
| 8778   | 5     | 2     | 0     | 0     | 1     | 3     | 1      | 2      | 0      | 0      | 0      | 0      | 1      | 1      |
| 8779   | 4     | 2     | 1     | 1     | 4     | 5     | 1      | 0      | 1      | 2      | 1      | 1      | 0      | 0      |
| 8784   | 4     | 2     | 1     | 1     | 1     | 4     | 1      | 0      | 0      | 0      | 0      | 0      | 0      | 1      |
| 8786   | 5     | 1     | 1     | 1     | 5     | 5     | 0      | 0      | 0      | 0      | 0      | 0      | 0      | 0      |
| 8787   | 4     | 1     | 1     | 3     | 3     | 4     | 1      | 1      | 0      | 1      | 1      | 1      | 1      | 1      |
| 8790   | 3     | 1     | 1     | 3     | 5     | 5     | 0      | 0      | 0      | 0      | 1      | 1      | 1      | 0      |
| 8791   | 4     | 2     | 1     | 3     | 4     | 4     | 0      | 1      | 1      | 2      | 0      | 1      | 1      | 1      |
| 8793   | 3     | 1     | 3     | 1     | 5     | 4     | 0      | 0      | 0      | 0      | 0      | 0      | 0      | 0      |
| 8795   | 5     | 1     | 0     | 0     | 4     | 4     | 0      | 0      | 1      | 0      | 1      | 0      | 0      | 1      |
| 8797   | 4     | 1     | 1     | 4     | 3     | 5     | 0      | 0      | 0      | 0      | 0      | 1      | 0      | 2      |
| 8801   | 4     | 2     | 1     | 1     | 4     | 4     | 1      | 0      | 1      | 0      | 1      | 0      | 0      | 1      |
| 8802   | 5     | 2     | 1     | 1     | 4     | 4     | 1      | 0      | 0      | 0      | 0      | 1      | 1      | 0      |
| 8807   | 5     | 1     | 5     | 5     | 5     | 5     | 0      | 0      | 0      | 0      | 0      | 0      | 0      | 0      |

| respid | Q52_2 | Q53_1 | Q54_1 | Q54_2 | Q54_3 | Q55_1 | Q56a_1 | Q56b_1 | Q56c_1 | Q56d_1 | Q56e_1 | Q56f_1 | Q56g_1 | Q56h_1 |
|--------|-------|-------|-------|-------|-------|-------|--------|--------|--------|--------|--------|--------|--------|--------|
| 8813   | 4     | 1     | 1     | 3     | 4     | 5     | 1      | 1      | 1      | 0      | 2      | 1      | 2      | 2      |
| 8817   | 4     | 1     | 1     | 3     | 3     | 4     | 2      | 2      | 2      | 2      | 2      | 2      | 2      | 1      |
| 8818   | 4     | 2     | 1     | 3     | 3     | 4     | 1      | 0      | 1      | 1      | 1      | 1      | 1      | 1      |
| 8821   | 4     | 1     | 1     | 1     | 4     | 5     | 0      | 0      | 0      | 0      | 1      | 0      | 0      | 1      |
| 8822   | 3     | 3     | 1     | 1     | 3     | 4     | 1      | 0      | 0      | 0      | 0      | 0      | 0      | 0      |
| 8823   | 4     | 2     | 1     | 4     | 4     | 4     | 1      | 1      | 0      | 0      | 1      | 1      | 1      | 1      |
| 8824   | 4     | 2     | 1     | 1     | 4     | 4     | 2      | 1      | 2      | 1      | 2      | 1      | 1      | 3      |
| 8825   | 4     | 2     | 0     | 3     | 4     | 4     | 2      | 0      | 1      | 0      | 1      | 0      | 1      | 1      |
| 8834   | 2     | 5     | 1     | 3     | 3     | 4     | 0      | 1      | 1      | 1      | 2      | 1      | 2      | 1      |
| 8840   | 2     | 4     | 1     | 0     | 1     | 3     | 1      | 2      | 2      | 3      | 2      | 2      | 1      | 1      |
| 8843   | 5     | 5     | 5     | 5     | 5     | 5     | 3      | 0      | 3      | 3      | 3      | 3      | 3      | 3      |
| 8846   | 3     | 3     | 1     | 1     | 4     | 4     | 1      | 0      | 1      | 1      | 0      | 1      | 0      | 1      |
| 8862   | 5     | 1     | 1     | 1     | 4     | 5     | 0      | 0      | 0      | 0      | 0      | 0      | 0      | 0      |
| 8866   | 4     | 2     | 1     | 1     | 4     | 5     | 1      | 0      | 1      | 0      | 1      | 0      | 0      | 1      |
| 8869   | 5     | 1     | 3     | 1     | 4     | 5     | 0      | 0      | 0      | 0      | 0      | 1      | 1      | 0      |
| 8872   | 4     | 4     | 1     | 1     | 4     | 4     | 1      | 2      | 0      | 2      | 1      | 0      | 1      | 1      |
| 8903   | 3     | 3     | 1     | 1     | 5     | 5     | 0      | 0      | 0      | 0      | 0      | 0      | 0      | 0      |
| 8909   | 5     | 1     | 0     | 0     | 5     | 5     | 0      | 0      | 0      | 0      | 0      | 0      | 0      | 0      |
| 8926   | 4     | 4     | 1     | 1     | 4     | 4     | 1      | 0      | 1      | 0      | 1      | 0      | 0      | 0      |
| 8936   | 5     | 1     | 1     | 1     | 4     | 5     | 0      | 0      | 0      | 0      | 1      | 0      | 1      | 1      |
| 8945   | 5     | 1     | 0     | 3     | 3     | 5     | 1      | 1      | 1      | 1      | 1      | 1      | 1      | 1      |
| 8954   | 4     | 3     | 1     | 1     | 4     | 5     | 1      | 0      | 0      | 0      | 1      | 1      | 1      | 1      |
| 8955   | 4     | 2     | 1     | 4     | 3     | 3     | 1      | 2      | 1      | 1      | 1      | 2      | 2      | 2      |
| 8958   | 5     | 1     | 3     | 3     | 4     | 5     | 1      | 1      | 1      | 1      | 1      | 1      | 1      | 1      |
| 8959   | 4     | 4     | 3     | 3     | 4     | 4     | 1      | 2      | 1      | 1      | 1      | 1      | 1      | 1      |
| 8960   | 5     | 1     | 0     | 1     | 4     | 5     | 0      | 0      | 0      | 0      | 0      | 0      | 0      | 0      |
| 8976   | 5     | 2     | 1     | 3     | 4     | 4     | 1      | 1      | 1      | 0      | 1      | 2      | 1      | 0      |
| 8977   | 4     | 2     | 1     | 1     | 5     | 4     | 1      | 0      | 0      | 0      | 1      | 1      | 1      | 1      |
| 8979   | 3     | 3     | 1     | 3     | 4     | 3     | 1      | 1      | 1      | 1      | 1      | 1      | 1      | 1      |
| 8985   | 4     | 2     | 0     | 0     | 3     | 4     | 0      | 0      | 1      | 0      | 1      | 1      | 1      | 0      |
| 8994   | 4     | 5     | 0     | 0     | 4     | 5     | 0      | 0      | 0      | 0      | 0      | 0      | 0      | 0      |
| 8997   | 5     | 1     | 5     | 5     | 5     | 5     | 0      | 1      | 0      | 0      | 3      | 0      | 0      | 1      |

| respid | Q52_2 | Q53_1 | Q54_1 | Q54_2 | Q54_3 | Q55_1 | Q56a_1 | Q56b_1 | Q56c_1 | Q56d_1 | Q56e_1 | Q56f_1 | Q56g_1 | Q56h_1 |
|--------|-------|-------|-------|-------|-------|-------|--------|--------|--------|--------|--------|--------|--------|--------|
| 9002   | 5     | 1     | 5     | 5     | 5     | 5     | 0      | 3      | 2      | 1      | 1      | 1      | 2      | 1      |
| 9005   | 3     | 4     | 1     | 4     | 4     | 2     | 1      | 1      | 2      | 0      | 1      | 2      | 2      | 1      |
| 9017   | 4     | 1     | 1     | 1     | 3     | 4     | 1      | 0      | 1      | 0      | 1      | 1      | 1      | 1      |
| 9018   | 5     | 1     | 0     | 0     | 5     | 5     | 0      | 0      | 0      | 0      | 0      | 0      | 0      | 0      |
| 9021   | 5     | 1     | 1     | 1     | 5     | 5     | 0      | 2      | 0      | 0      | 0      | 0      | 0      | 1      |
| 9029   | 2     | 4     | 4     | 4     | 3     | 3     | 2      | 2      | 2      | 2      | 2      | 2      | 2      | 2      |
| 9035   | 4     | 1     | 1     | 3     | 4     | 4     | 1      | 0      | 0      | 0      | 1      | 1      | 0      | 0      |
| 9038   | 5     | 1     | 1     | 1     | 4     | 5     | 0      | 0      | 1      | 0      | 0      | 0      | 0      | 0      |
| 9039   | 5     | 1     | 1     | 1     | 3     | 5     | 0      | 0      | 0      | 0      | 1      | 1      | 1      | 1      |
| 9040   | 4     | 2     | 3     | 3     | 4     | 4     | 1      | 1      | 0      | 2      | 1      | 1      | 1      | 0      |
| 9042   | 5     | 2     | 1     | 1     | 3     | 4     | 1      | 0      | 0      | 1      | 1      | 1      | 1      | 0      |
| 9043   | 5     | 1     | 1     | 1     | 5     | 5     | 0      | 0      | 0      | 0      | 0      | 0      | 0      | 0      |
| 9045   | 5     | 2     | 1     | 3     | 4     | 4     | 1      | 0      | 1      | 0      | 1      | 1      | 1      | 1      |
| 9051   | 5     | 2     | 1     | 1     | 4     | 4     | 1      | 0      | 1      | 0      | 0      | 0      | 0      | 3      |
| 9067   | 5     | 1     | 1     | 1     | 4     | 5     | 0      | 0      | 0      | 0      | 0      | 0      | 0      | 0      |
| 9069   | 2     | 1     | 4     | 1     | 0     | 2     | 2      | 0      | 2      | 2      | 2      | 2      | 2      | 2      |
| 9073   | 4     | 1     | 1     | 1     | 3     | 4     | 2      | 1      | 1      | 1      | 1      | 1      | 1      | 1      |
| 9084   | 3     | 3     | 3     | 4     | 3     | 4     | 1      | 1      | 1      | 1      | 1      | 1      | 2      | 1      |
| 9096   | 5     | 1     | 1     | 3     | 5     | 5     | 0      | 0      | 0      | 0      | 0      | 0      | 0      | 0      |
| 9100   | 2     | 2     | 3     | 3     | 1     | 4     | 1      | 1      | 0      | 1      | 2      | 1      | 0      | 1      |
| 9107   | 5     | 1     | 1     | 1     | 5     | 5     | 0      | 0      | 0      | 0      | 0      | 0      | 0      | 0      |
| 9110   | 5     | 1     | 1     | 1     | 4     | 5     | 0      | 0      | 0      | 0      | 0      | 1      | 1      | 0      |
| 9120   | 5     | 2     | 5     | 0     | 5     | 5     | 0      | 0      | 0      | 0      | 0      | 0      | 0      | 0      |
| 9122   | 5     | 2     | 1     | 1     | 3     | 4     | 1      | 1      | 0      | 0      | 1      | 0      | 1      | 1      |
| 9130   | 3     | 2     | 3     | 3     | 3     | 3     | 1      | 0      | 2      | 0      | 1      | 0      | 1      | 1      |
| 9134   | 4     | 3     | 3     | 3     | 4     | 4     | 1      | 2      | 2      | 1      | 1      | 2      | 1      | 1      |
| 9137   | 4     | 2     | 0     | 1     | 3     | 5     | 1      | 2      | 2      | 1      | 1      | 1      | 2      | 1      |
| 9139   | 3     | 2     | 1     | 1     | 3     | 3     | 1      | 0      | 1      | 2      | 1      | 1      | 1      | 1      |
| 9144   | 5     | 1     | 1     | 1     | 4     | 4     | 1      | 0      | 0      | 0      | 0      | 0      | 0      | 1      |
| 9157   | 2     | 2     | 3     | 3     | 4     | 3     | 1      | 1      | 3      | 2      | 2      | 1      | 1      | 3      |
| 9166   | 3     | 3     | 4     | 4     | 1     | 4     | 1      | 1      | 2      | 2      | 2      | 2      | 2      | 2      |
| 9177   | 5     | 2     | 3     | 4     | 1     | 4     | 2      | 0      | 1      | 2      | 2      | 2      | 1      | 2      |

| respid | Q52_2 | Q53_1 | Q54_1 | Q54_2 | Q54_3 | Q55_1 | Q56a_1 | Q56b_1 | Q56c_1 | Q56d_1 | Q56e_1 | Q56f_1 | Q56g_1 | Q56h_1 |
|--------|-------|-------|-------|-------|-------|-------|--------|--------|--------|--------|--------|--------|--------|--------|
| 9181   | 1     | 1     | 0     | 0     | 5     | 5     | 0      | 0      | 0      | 0      | 0      | 0      | 0      | 3      |
| 9183   | 3     | 3     | 3     | 3     | 3     | 3     | 1      | 2      | 1      | 1      | 1      | 1      | 2      | 1      |
| 9184   | 4     | 1     | 1     | 1     | 3     | 5     | 0      | 1      | 1      | 1      | 2      | 1      | 1      | 1      |
| 9188   | 5     | 1     | 0     | 0     | 5     | 5     | 0      | 0      | 0      | 0      | 0      | 0      | 0      | 0      |
| 9197   | 3     | 3     | 3     | 3     | 3     | 3     | 1      | 1      | 1      | 1      | 2      | 1      | 1      | 1      |
| 9200   | 4     | 4     | 3     | 3     | 3     | 4     | 1      | 0      | 2      | 1      | 1      | 1      | 2      | 1      |
| 9205   | 5     | 1     | 0     | 0     | 4     | 4     | 1      | 0      | 1      | 0      | 1      | 0      | 0      | 0      |
| 9207   | 5     | 1     | 1     | 1     | 4     | 5     | 0      | 0      | 0      | 0      | 0      | 0      | 0      | 0      |
| 9213   | 4     | 1     | 1     | 3     | 3     | 4     | 1      | 0      | 1      | 0      | 1      | 2      | 2      | 1      |
| 9216   | 3     | 3     | 1     | 3     | 4     | 3     | 1      | 0      | 1      | 1      | 1      | 1      | 1      | 1      |
| 9217   | 5     | 2     | 1     | 1     | 4     | 4     | 1      | 0      | 0      | 0      | 1      | 0      | 0      | 0      |
| 9218   | 4     | 1     | 1     | 3     | 1     | 4     | 1      | 1      | 1      | 1      | 2      | 2      | 1      | 1      |
| 9219   | 3     | 3     | 4     | 4     | 3     | 3     | 1      | 1      | 2      | 1      | 2      | 2      | 2      | 2      |
| 9220   | 4     | 1     | 1     | 1     | 4     | 4     | 1      | 0      | 1      | 1      | 1      | 1      | 1      | 1      |
| 9221   | 4     | 2     | 1     | 1     | 4     | 4     | 1      | 0      | 1      | 0      | 0      | 0      | 1      | 1      |
| 9223   | 2     | 3     | 1     | 1     | 3     | 2     | 1      | 1      | 1      | 1      | 2      | 2      | 2      | 2      |
| 9228   | 5     | 1     | 0     | 1     | 5     | 5     | 0      | 0      | 0      | 0      | 0      | 0      | 0      | 0      |
| 9230   | 5     | 1     | 1     | 1     | 3     | 4     | 1      | 0      | 1      | 0      | 1      | 0      | 0      | 2      |
| 9231   | 5     | 5     | 1     | 1     | 4     | 5     | 1      | 0      | 1      | 0      | 1      | 0      | 0      | 0      |
| 9233   | 3     | 3     | 1     | 1     | 4     | 4     | 1      | 0      | 0      | 0      | 1      | 1      | 0      | 1      |
| 9235   | 5     | 1     | 1     | 1     | 5     | 5     | 1      | 1      | 0      | 0      | 0      | 2      | 0      | 0      |
| 9237   | 5     | 1     | 1     | 1     | 4     | 4     | 0      | 0      | 0      | 0      | 1      | 0      | 0      | 1      |
| 9242   | 4     | 2     | 1     | 3     | 4     | 4     | 1      | 0      | 0      | 0      | 0      | 0      | 1      | 1      |
| 9250   | 5     | 1     | 1     | 3     | 3     | 5     | 1      | 0      | 1      | 0      | 1      | 1      | 1      | 0      |
| 9253   | 3     | 4     | 3     | 3     | 3     | 3     | 1      | 2      | 1      | 1      | 1      | 1      | 1      | 1      |
| 9257   | 3     | 4     | 1     | 1     | 3     | 3     | 1      | 1      | 1      | 1      | 1      | 1      | 1      | 1      |
| 9263   | 5     | 3     | 1     | 3     | 4     | 3     | 1      | 0      | 1      | 1      | 1      | 1      | 1      | 0      |
| 9267   | 5     | 2     | 1     | 1     | 5     | 4     | 0      | 0      | 0      | 0      | 1      | 0      | 1      | 0      |
| 9272   | 5     | 2     | 1     | 1     | 4     | 4     | 0      | 1      | 0      | 0      | 0      | 0      | 1      | 0      |
| 9279   | 5     | 1     | 0     | 0     | 4     | 5     | 1      | 0      | 1      | 0      | 1      | 1      | 0      | 0      |
| 9281   | 4     | 3     | 4     | 1     | 4     | 4     | 2      | 0      | 1      | 0      | 1      | 0      | 0      | 0      |
| 9285   | 5     | 1     | 0     | 0     | 5     | 5     | 0      | 0      | 0      | 0      | 0      | 0      | 0      | 1      |

| respid | Q52_2 | Q53_1 | Q54_1 | Q54_2 | Q54_3 | Q55_1 | Q56a_1 | Q56b_1 | Q56c_1 | Q56d_1 | Q56e_1 | Q56f_1 | Q56g_1 | Q56h_1 |
|--------|-------|-------|-------|-------|-------|-------|--------|--------|--------|--------|--------|--------|--------|--------|
| 9286   | 5     | 1     | 3     | 3     | 3     | 3     | 1      | 2      | 1      | 1      | 1      | 1      | 1      | 2      |
| 9294   | 4     | 1     | 1     | 1     | 4     | 5     | 1      | 0      | 1      | 0      | 1      | 0      | 1      | 0      |
| 9295   | 4     | 2     | 1     | 3     | 3     | 4     | 1      | 1      | 0      | 0      | 0      | 0      | 0      | 1      |
| 9297   | 4     | 2     | 1     | 3     | 4     | 4     | 1      | 0      | 1      | 0      | 1      | 0      | 0      | 1      |
| 9299   | 3     | 2     | 3     | 3     | 3     | 4     | 1      | 1      | 2      | 0      | 1      | 2      | 2      | 0      |
| 9309   | 3     | 3     | 3     | 4     | 1     | 4     | 1      | 1      | 1      | 1      | 1      | 1      | 2      | 1      |
| 9315   | 5     | 2     | 1     | 3     | 4     | 5     | 0      | 0      | 0      | 0      | 0      | 1      | 0      | 1      |
| 9320   | 5     | 2     | 1     | 1     | 4     | 5     | 0      | 1      | 0      | 0      | 0      | 0      | 1      | 0      |
| 9324   | 4     | 1     | 1     | 1     | 4     | 4     | 3      | 0      | 0      | 0      | 0      | 0      | 1      | 0      |
| 9326   | 4     | 2     | 1     | 1     | 4     | 4     | 1      | 1      | 1      | 0      | 1      | 1      | 1      | 1      |
| 9333   | 4     | 2     | 1     | 1     | 4     | 4     | 0      | 0      | 1      | 0      | 1      | 0      | 1      | 1      |
| 9334   | 3     | 3     | 4     | 4     | 4     | 4     | 1      | 1      | 1      | 1      | 1      | 1      | 2      | 1      |
| 9336   | 4     | 3     | 3     | 3     | 4     | 3     | 1      | 1      | 0      | 0      | 2      | 0      | 1      | 1      |
| 9337   | 5     | 1     | 1     | 1     | 3     | 5     | 1      | 2      | 1      | 1      | 1      | 1      | 1      | 1      |
| 9342   | 5     | 1     | 1     | 1     | 4     | 4     | 0      | 0      | 0      | 1      | 0      | 1      | 0      | 1      |
| 9347   | 4     | 2     | 1     | 1     | 4     | 4     | 1      | 0      | 1      | 0      | 1      | 0      | 0      | 1      |
| 9352   | 5     | 1     | 1     | 1     | 4     | 5     | 0      | 0      | 0      | 0      | 0      | 0      | 0      | 0      |
| 9355   | 5     | 1     | 0     | 1     | 5     | 5     | 0      | 0      | 0      | 0      | 0      | 0      | 0      | 1      |
| 9356   | 5     | 2     | 4     | 4     | 3     | 3     | 1      | 1      | 2      | 2      | 2      | 2      | 2      | 2      |
| 9359   | 3     | 2     | 3     | 3     | 3     | 3     | 1      | 1      | 1      | 1      | 1      | 1      | 1      | 1      |
| 9368   | 4     | 1     | 4     | 4     | 3     | 5     | 2      | 1      | 0      | 2      | 1      | 2      | 2      | 1      |
| 9375   | 5     | 1     | 1     | 1     | 5     | 5     | 1      | 0      | 0      | 0      | 1      | 1      | 2      | 0      |
| 9384   | 2     | 3     | 1     | 3     | 3     | 3     | 1      | 1      | 1      | 1      | 1      | 1      | 1      | 1      |
| 9388   | 2     | 1     | 3     | 5     | 0     | 1     | 2      | 1      | 1      | 2      | 3      | 3      | 2      | 2      |
| 9397   | 4     | 4     | 3     | 3     | 3     | 4     | 1      | 1      | 1      | 1      | 1      | 1      | 1      | 1      |
| 9400   | 5     | 1     | 1     | 1     | 4     | 4     | 0      | 1      | 1      | 1      | 1      | 0      | 1      | 1      |
| 9401   | 4     | 3     | 1     | 1     | 1     | 4     | 1      | 2      | 1      | 1      | 1      | 1      | 1      | 1      |
| 9402   | 5     | 1     | 1     | 1     | 4     | 4     | 1      | 0      | 1      | 0      | 1      | 0      | 0      | 1      |
| 9417   | 4     | 3     | 1     | 1     | 3     | 4     | 1      | 2      | 2      | 0      | 1      | 1      | 1      | 1      |
| 9424   | 5     | 1     | 1     | 1     | 3     | 5     | 0      | 0      | 1      | 1      | 0      | 1      | 1      | 1      |
| 9427   | 4     | 3     | 1     | 1     | 4     | 4     | 1      | 0      | 1      | 0      | 1      | 0      | 0      | 1      |
| 9429   | 4     | 1     | 1     | 1     | 4     | 5     | 0      | 0      | 1      | 0      | 1      | 0      | 1      | 1      |



| respid | Q52_2 | Q53_1 | Q54_1 | Q54_2 | Q54_3 | Q55_1 | Q56a_1 | Q56b_1 | Q56c_1 | Q56d_1 | Q56e_1 | Q56f_1 | Q56g_1 | Q56h_1 |
|--------|-------|-------|-------|-------|-------|-------|--------|--------|--------|--------|--------|--------|--------|--------|
| 9437   | 3     | 3     | 3     | 3     | 3     | 3     | 4      | 2      | 2      | 2      | 2      | 2      | 2      | 2      |
| 9442   | 4     | 2     | 3     | 3     | 4     | 4     | 4      | 1      | 0      | 1      | 2      | 1      | 1      | 2      |
| 9446   | 4     | 2     | 3     | 3     | 4     | 4     | 4      | 1      | 0      | 1      | 1      | 1      | 1      | 1      |
| 9447   | 5     | 1     | 0     | 1     | 5     | 5     | 0      | 0      | 0      | 0      | 0      | 0      | 0      | 1      |
| 9448   | 5     | 1     | 0     | 1     | 4     | 2     | 1      | 1      | 1      | 1      | 1      | 1      | 1      | 1      |
| 9449   | 4     | 2     | 1     | 1     | 3     | 4     | 1      | 1      | 0      | 0      | 1      | 0      | 1      | 0      |
| 9455   | 2     | 2     | 1     | 1     | 1     | 2     | 1      | 1      | 1      | 1      | 1      | 1      | 1      | 1      |
| 9459   | 2     | 2     | 3     | 3     | 1     | 3     | 2      | 1      | 1      | 1      | 1      | 3      | 1      | 2      |
| 9460   | 5     | 1     | 0     | 0     | 4     | 5     | 0      | 0      | 1      | 0      | 0      | 1      | 0      | 1      |
| 9461   | 4     | 2     | 1     | 3     | 4     | 4     | 4      | 1      | 0      | 1      | 0      | 1      | 1      | 1      |
| 9463   | 5     | 2     | 3     | 1     | 4     | 4     | 4      | 1      | 2      | 0      | 0      | 0      | 0      | 0      |
| 9464   | 4     | 2     | 4     | 4     | 4     | 4     | 4      | 1      | 1      | 1      | 0      | 1      | 1      | 1      |
| 9466   | 4     | 2     | 3     | 3     | 3     | 3     | 3      | 1      | 1      | 2      | 1      | 1      | 1      | 1      |
| 9477   | 4     | 1     | 0     | 0     | 0     | 2     | 0      | 0      | 0      | 0      | 0      | 0      | 0      | 0      |
| 9482   | 3     | 3     | 3     | 4     | 1     | 2     | 2      | 2      | 1      | 1      | 2      | 1      | 1      | 2      |
| 9486   | 4     | 2     | 4     | 4     | 4     | 4     | 3      | 1      | 2      | 1      | 2      | 2      | 2      | 2      |
| 9488   | 4     | 5     | 3     | 1     | 4     | 4     | 4      | 2      | 3      | 1      | 2      | 3      | 1      | 2      |
| 9489   | 5     | 1     | 3     | 3     | 3     | 3     | 5      | 1      | 2      | 0      | 0      | 1      | 0      | 0      |
| 9496   | 3     | 3     | 1     | 3     | 4     | 3     | 3      | 1      | 1      | 1      | 1      | 2      | 2      | 1      |
| 9499   | 5     | 2     | 4     | 4     | 4     | 4     | 4      | 1      | 1      | 1      | 1      | 1      | 1      | 2      |
| 9512   | 5     | 1     | 1     | 1     | 4     | 5     | 0      | 0      | 0      | 0      | 0      | 0      | 0      | 0      |
| 9514   | 3     | 3     | 1     | 1     | 4     | 5     | 0      | 0      | 1      | 0      | 0      | 1      | 0      | 0      |
| 9516   | 4     | 2     | 4     | 5     | 4     | 5     | 5      | 1      | 0      | 2      | 0      | 0      | 0      | 3      |
| 9517   | 3     | 3     | 3     | 3     | 4     | 4     | 4      | 2      | 1      | 2      | 2      | 2      | 2      | 2      |
| 9520   | 3     | 3     | 1     | 3     | 3     | 3     | 4      | 1      | 1      | 0      | 0      | 1      | 1      | 1      |
| 9527   | 4     | 2     | 3     | 3     | 3     | 3     | 3      | 2      | 0      | 1      | 1      | 1      | 1      | 1      |
| 9532   | 4     | 2     | 1     | 3     | 4     | 5     | 5      | 0      | 0      | 0      | 0      | 1      | 0      | 1      |
| 9533   | 5     | 1     | 0     | 1     | 4     | 5     | 5      | 1      | 0      | 0      | 0      | 1      | 0      | 0      |
| 9543   | 5     | 1     | 1     | 1     | 3     | 5     | 5      | 0      | 1      | 0      | 1      | 1      | 0      | 0      |
| 9550   | 3     | 2     | 4     | 4     | 1     | 5     | 5      | 1      | 1      | 0      | 2      | 1      | 2      | 1      |
| 9553   | 4     | 3     | 1     | 3     | 4     | 3     | 3      | 1      | 1      | 1      | 0      | 1      | 0      | 0      |
| 9555   | 4     | 2     | 4     | 4     | 3     | 3     | 3      | 1      | 0      | 3      | 2      | 2      | 1      | 2      |

| respid | Q52_2 | Q53_1 | Q54_1 | Q54_2 | Q54_3 | Q55_1 | Q56a_1 | Q56b_1 | Q56c_1 | Q56d_1 | Q56e_1 | Q56f_1 | Q56g_1 | Q56h_1 |
|--------|-------|-------|-------|-------|-------|-------|--------|--------|--------|--------|--------|--------|--------|--------|
| 9565   | 2     | 2     | 3     | 4     | 1     | 2     | 1      | 1      | 1      | 2      | 2      | 2      | 1      | 1      |
| 9583   | 4     | 1     | 3     | 1     | 4     | 5     | 1      | 0      | 1      | 0      | 2      | 1      | 1      | 0      |
| 9594   | 5     | 1     | 0     | 0     | 0     | 1     | 3      | 0      | 3      | 0      | 3      | 0      | 0      | 3      |
| 9596   | 5     | 3     | 1     | 3     | 4     | 4     | 1      | 0      | 2      | 1      | 1      | 1      | 1      | 2      |
| 9600   | 4     | 3     | 3     | 3     | 3     | 4     | 1      | 0      | 1      | 0      | 1      | 0      | 1      | 1      |
| 9602   | 3     | 2     | 1     | 1     | 4     | 4     | 1      | 0      | 1      | 0      | 1      | 1      | 0      | 2      |
| 9606   | 2     | 3     | 1     | 1     | 3     | 3     | 1      | 0      | 1      | 0      | 0      | 0      | 0      | 0      |
| 9608   | 3     | 3     | 3     | 3     | 3     | 4     | 1      | 2      | 2      | 2      | 1      | 1      | 0      | 0      |
| 9610   | 4     | 2     | 1     | 1     | 3     | 5     | 0      | 0      | 0      | 0      | 1      | 1      | 1      | 1      |
| 9612   | 4     | 3     | 3     | 3     | 4     | 3     | 1      | 1      | 1      | 1      | 1      | 1      | 1      | 1      |
| 9613   | 4     | 2     | 1     | 1     | 4     | 4     | 1      | 1      | 1      | 2      | 1      | 0      | 0      | 1      |
| 9614   | 5     | 2     | 1     | 1     | 3     | 5     | 0      | 0      | 1      | 0      | 1      | 0      | 1      | 1      |
| 9620   | 3     | 1     | 1     | 3     | 1     | 3     | 1      | 2      | 1      | 2      | 1      | 1      | 1      | 1      |
| 9628   | 5     | 2     | 1     | 1     | 4     | 4     | 0      | 0      | 2      | 1      | 1      | 1      | 1      | 1      |
| 9631   | 3     | 2     | 3     | 3     | 4     | 4     | 1      | 0      | 0      | 0      | 1      | 1      | 1      | 1      |
| 9632   | 3     | 2     | 1     | 4     | 3     | 4     | 1      | 1      | 3      | 0      | 2      | 2      | 2      | 1      |
| 9633   | 4     | 2     | 1     | 3     | 4     | 5     | 1      | 0      | 0      | 0      | 1      | 1      | 1      | 1      |
| 9639   | 3     | 3     | 3     | 3     | 4     | 3     | 1      | 2      | 1      | 1      | 1      | 1      | 1      | 2      |
| 9640   | 5     | 2     | 0     | 0     | 5     | 4     | 1      | 0      | 0      | 0      | 0      | 0      | 0      | 0      |
| 9642   | 5     | 1     | 1     | 1     | 4     | 5     | 0      | 0      | 0      | 0      | 0      | 1      | 0      | 0      |
| 9653   | 5     | 1     | 1     | 1     | 4     | 5     | 0      | 0      | 0      | 0      | 0      | 0      | 0      | 1      |
| 9658   | 4     | 2     | 3     | 3     | 3     | 4     | 1      | 1      | 1      | 0      | 1      | 1      | 1      | 1      |
| 9659   | 4     | 5     | 5     | 5     | 3     | 2     | 1      | 3      | 0      | 0      | 1      | 1      | 1      | 3      |
| 9661   | 3     | 2     | 4     | 3     | 3     | 5     | 0      | 0      | 0      | 1      | 1      | 2      | 1      | 0      |
| 9664   | 5     | 1     | 0     | 0     | 5     | 5     | 0      | 0      | 0      | 0      | 0      | 0      | 0      | 0      |
| 9665   | 5     | 1     | 1     | 1     | 4     | 4     | 1      | 1      | 0      | 0      | 1      | 0      | 1      | 1      |
| 9666   | 4     | 3     | 3     | 1     | 4     | 3     | 1      | 0      | 1      | 0      | 1      | 0      | 1      | 1      |
| 9667   | 4     | 2     | 3     | 3     | 4     | 4     | 3      | 1      | 1      | 2      | 1      | 1      | 2      | 1      |
| 9668   | 5     | 1     | 5     | 5     | 5     | 5     | 0      | 0      | 0      | 0      | 0      | 0      | 0      | 3      |
| 9670   | 5     | 2     | 1     | 3     | 4     | 4     | 1      | 1      | 1      | 1      | 1      | 1      | 1      | 1      |
| 9671   | 4     | 1     | 3     | 3     | 3     | 4     | 1      | 1      | 0      | 1      | 1      | 0      | 0      | 1      |
| 9681   | 5     | 1     | 0     | 1     | 5     | 5     | 0      | 0      | 1      | 0      | 1      | 0      | 1      | 3      |

| respid | Q52_2 | Q53_1 | Q54_1 | Q54_2 | Q54_3 | Q55_1 | Q56a_1 | Q56b_1 | Q56c_1 | Q56d_1 | Q56e_1 | Q56f_1 | Q56g_1 | Q56h_1 |
|--------|-------|-------|-------|-------|-------|-------|--------|--------|--------|--------|--------|--------|--------|--------|
| 9684   | 4     | 1     | 3     | 4     | 1     | 3     | 1      | 0      | 1      | 1      | 2      | 1      | 1      | 1      |
| 9685   | 5     | 2     | 1     | 3     | 4     | 4     | 1      | 0      | 0      | 0      | 1      | 1      | 1      | 1      |
| 9686   | 5     | 2     | 1     | 3     | 3     | 4     | 1      | 1      | 0      | 2      | 1      | 1      | 1      | 1      |
| 9688   | 4     | 3     | 3     | 3     | 1     | 3     | 2      | 0      | 3      | 2      | 2      | 2      | 2      | 2      |
| 9692   | 4     | 1     | 1     | 1     | 3     | 4     | 1      | 1      | 2      | 1      | 1      | 1      | 1      | 1      |
| 9693   | 4     | 3     | 3     | 4     | 1     | 2     | 1      | 1      | 2      | 1      | 1      | 2      | 1      | 1      |
| 9698   | 4     | 3     | 3     | 3     | 4     | 4     | 1      | 1      | 2      | 1      | 2      | 2      | 1      | 2      |
| 9699   | 5     | 2     | 0     | 0     | 4     | 4     | 1      | 0      | 1      | 0      | 1      | 0      | 0      | 1      |
| 9701   | 5     | 1     | 1     | 1     | 5     | 5     | 0      | 0      | 0      | 0      | 0      | 0      | 0      | 0      |
| 9702   | 5     | 1     | 1     | 1     | 3     | 4     | 1      | 0      | 0      | 0      | 1      | 0      | 0      | 1      |
| 9709   | 4     | 1     | 5     | 5     | 5     | 5     | 0      | 3      | 1      | 1      | 3      | 1      | 0      | 2      |
| 9713   | 5     | 1     | 0     | 1     | 4     | 5     | 0      | 0      | 1      | 0      | 0      | 0      | 0      | 0      |
| 9715   | 5     | 1     | 0     | 0     | 5     | 5     | 0      | 0      | 0      | 0      | 0      | 0      | 0      | 0      |
| 9721   | 3     | 4     | 1     | 1     | 4     | 2     | 1      | 0      | 2      | 2      | 1      | 1      | 1      | 1      |
| 9725   | 4     | 1     | 1     | 1     | 3     | 4     | 1      | 0      | 1      | 0      | 1      | 0      | 1      | 1      |
| 9729   | 4     | 2     | 4     | 3     | 3     | 4     | 1      | 1      | 1      | 2      | 1      | 2      | 2      | 1      |
| 9731   | 5     | 2     | 1     | 1     | 4     | 4     | 1      | 0      | 2      | 0      | 1      | 1      | 1      | 1      |
| 9736   | 4     | 1     | 1     | 3     | 3     | 5     | 1      | 1      | 0      | 0      | 2      | 1      | 2      | 2      |
| 9740   | 5     | 1     | 3     | 1     | 4     | 5     | 1      | 1      | 0      | 3      | 1      | 1      | 1      | 0      |
| 9741   | 5     | 1     | 5     | 5     | 5     | 5     | 0      | 0      | 0      | 0      | 0      | 3      | 3      | 0      |
| 9749   | 4     | 2     | 1     | 1     | 4     | 5     | 0      | 0      | 1      | 0      | 1      | 1      | 0      | 1      |
| 9750   | 4     | 1     | 4     | 4     | 4     | 4     | 1      | 2      | 2      | 2      | 2      | 1      | 2      | 1      |
| 9751   | 4     | 3     | 1     | 3     | 4     | 3     | 1      | 1      | 1      | 1      | 1      | 1      | 1      | 0      |
| 9753   | 4     | 2     | 3     | 3     | 3     | 4     | 1      | 1      | 2      | 0      | 1      | 1      | 1      | 0      |
| 9754   | 2     | 4     | 4     | 4     | 1     | 2     | 1      | 1      | 2      | 2      | 3      | 2      | 2      | 2      |
| 9756   | 3     | 3     | 3     | 3     | 3     | 3     | 1      | 1      | 1      | 2      | 1      | 1      | 2      | 1      |
| 9758   | 3     | 3     | 3     | 4     | 3     | 3     | 1      | 1      | 1      | 2      | 2      | 1      | 2      | 2      |
| 9759   | 4     | 2     | 0     | 3     | 4     | 4     | 1      | 1      | 1      | 1      | 0      | 0      | 0      | 1      |
| 9760   | 3     | 2     | 3     | 3     | 3     | 3     | 1      | 1      | 1      | 1      | 1      | 1      | 2      | 0      |
| 9761   | 5     | 1     | 0     | 0     | 5     | 5     | 0      | 0      | 0      | 0      | 0      | 0      | 0      | 0      |
| 9762   | 5     | 2     | 1     | 1     | 4     | 4     | 0      | 0      | 0      | 0      | 1      | 1      | 1      | 1      |
| 9764   | 4     | 2     | 1     | 1     | 3     | 4     | 1      | 0      | 1      | 2      | 1      | 0      | 1      | 1      |

| respid | Q52_2 | Q53_1 | Q54_1 | Q54_2 | Q54_3 | Q55_1 | Q56a_1 | Q56b_1 | Q56c_1 | Q56d_1 | Q56e_1 | Q56f_1 | Q56g_1 | Q56h_1 |
|--------|-------|-------|-------|-------|-------|-------|--------|--------|--------|--------|--------|--------|--------|--------|
| 9768   | 4     | 1     | 0     | 1     | 4     | 5     | 1      | 0      | 0      | 0      | 0      | 0      | 0      | 1      |
| 9769   | 3     | 2     | 1     | 3     | 3     | 4     | 1      | 2      | 1      | 0      | 1      | 1      | 1      | 1      |
| 9770   | 4     | 1     | 1     | 1     | 4     | 4     | 0      | 2      | 0      | 0      | 1      | 0      | 0      | 2      |
| 9771   | 5     | 1     | 0     | 1     | 4     | 5     | 0      | 0      | 0      | 0      | 0      | 0      | 0      | 0      |
| 9772   | 4     | 2     | 3     | 4     | 3     | 3     | 2      | 0      | 2      | 2      | 1      | 2      | 1      | 2      |
| 9773   | 5     | 2     | 1     | 3     | 3     | 4     | 1      | 1      | 1      | 1      | 1      | 1      | 2      | 1      |
| 9776   | 5     | 1     | 0     | 0     | 5     | 5     | 0      | 0      | 0      | 0      | 0      | 0      | 0      | 0      |
| 9786   | 5     | 2     | 5     | 5     | 5     | 5     | 0      | 0      | 0      | 0      | 0      | 0      | 0      | 1      |
| 9790   | 4     | 1     | 4     | 1     | 3     | 3     | 2      | 0      | 2      | 0      | 1      | 1      | 1      | 0      |
| 9791   | 5     | 1     | 1     | 1     | 4     | 5     | 1      | 0      | 0      | 0      | 1      | 0      | 0      | 0      |
| 9794   | 3     | 2     | 1     | 1     | 4     | 4     | 1      | 2      | 2      | 1      | 1      | 1      | 2      | 1      |
| 9797   | 3     | 2     | 1     | 3     | 4     | 4     | 1      | 1      | 1      | 1      | 1      | 1      | 1      | 1      |
| 9799   | 4     | 1     | 0     | 0     | 5     | 5     | 0      | 0      | 0      | 0      | 1      | 0      | 0      | 1      |
| 9804   | 5     | 1     | 1     | 1     | 5     | 5     | 0      | 0      | 0      | 0      | 0      | 0      | 0      | 0      |
| 9805   | 4     | 2     | 3     | 3     | 3     | 4     | 1      | 1      | 1      | 2      | 1      | 1      | 2      | 1      |
| 9806   | 5     | 1     | 1     | 3     | 5     | 5     | 0      | 0      | 0      | 0      | 0      | 0      | 0      | 0      |
| 9807   | 2     | 3     | 1     | 3     | 3     | 3     | 1      | 1      | 3      | 2      | 2      | 1      | 1      | 1      |
| 9813   | 4     | 2     | 1     | 1     | 3     | 4     | 1      | 0      | 0      | 1      | 1      | 1      | 2      | 1      |
| 9817   | 4     | 1     | 1     | 3     | 4     | 5     | 0      | 0      | 0      | 0      | 0      | 0      | 0      | 0      |
| 9823   | 5     | 1     | 1     | 1     | 5     | 5     | 0      | 0      | 0      | 0      | 1      | 0      | 0      | 0      |
| 9826   | 5     | 3     | 1     | 1     | 4     | 5     | 1      | 0      | 0      | 1      | 1      | 0      | 1      | 1      |
| 9830   | 4     | 2     | 3     | 4     | 0     | 3     | 2      | 0      | 2      | 2      | 3      | 2      | 2      | 2      |
| 9835   | 4     | 2     | 1     | 1     | 3     | 3     | 1      | 0      | 2      | 2      | 2      | 1      | 1      | 1      |
| 9836   | 5     | 1     | 1     | 1     | 4     | 2     | 1      | 2      | 1      | 0      | 1      | 1      | 1      | 1      |
| 9841   | 5     | 1     | 0     | 0     | 5     | 5     | 0      | 0      | 0      | 0      | 0      | 1      | 0      | 0      |
| 9842   | 4     | 1     | 4     | 1     | 4     | 2     | 1      | 0      | 0      | 0      | 0      | 0      | 0      | 0      |
| 9844   | 5     | 1     | 3     | 3     | 4     | 4     | 0      | 2      | 0      | 0      | 0      | 1      | 0      | 2      |
| 9847   | 5     | 1     | 1     | 1     | 5     | 5     | 0      | 0      | 0      | 0      | 1      | 0      | 0      | 0      |
| 9851   | 4     | 1     | 3     | 4     | 3     | 3     | 1      | 0      | 1      | 1      | 1      | 2      | 2      | 1      |
| 9852   | 3     | 3     | 1     | 3     | 4     | 4     | 0      | 0      | 0      | 1      | 0      | 1      | 1      | 1      |
| 9854   | 4     | 2     | 1     | 1     | 4     | 3     | 1      | 1      | 1      | 0      | 1      | 1      | 0      | 0      |
| 9855   | 4     | 2     | 1     | 3     | 3     | 3     | 1      | 2      | 2      | 2      | 1      | 1      | 1      | 1      |

| respid | Q52_2 | Q53_1 | Q54_1 | Q54_2 | Q54_3 | Q55_1 | Q56a_1 | Q56b_1 | Q56c_1 | Q56d_1 | Q56e_1 | Q56f_1 | Q56g_1 | Q56h_1 |
|--------|-------|-------|-------|-------|-------|-------|--------|--------|--------|--------|--------|--------|--------|--------|
| 9856   | 4     | 2     | 1     | 1     | 4     | 4     | 1      | 2      | 1      | 0      | 1      | 1      | 1      | 2      |
| 9862   | 3     | 1     | 1     | 1     | 3     | 3     | 1      | 1      | 1      | 2      | 1      | 1      | 1      | 1      |
| 9863   | 5     | 1     | 1     | 1     | 5     | 5     | 0      | 0      | 0      | 0      | 0      | 0      | 0      | 1      |
| 9866   | 5     | 1     | 1     | 1     | 4     | 4     | 1      | 1      | 0      | 0      | 1      | 1      | 1      | 1      |
| 9867   | 5     | 2     | 3     | 4     | 5     | 5     | 0      | 1      | 0      | 1      | 0      | 1      | 2      | 0      |
| 9868   | 3     | 3     | 0     | 5     | 5     | 4     | 1      | 1      | 0      | 0      | 0      | 0      | 0      | 2      |
| 9869   | 5     | 2     | 1     | 1     | 3     | 4     | 2      | 2      | 1      | 1      | 2      | 0      | 1      | 0      |
| 9878   | 4     | 2     | 1     | 3     | 4     | 4     | 1      | 1      | 0      | 1      | 1      | 2      | 1      | 1      |
| 9879   | 3     | 3     | 3     | 3     | 4     | 4     | 1      | 1      | 2      | 2      | 1      | 1      | 2      | 0      |
| 9881   | 3     | 2     | 3     | 1     | 3     | 5     | 2      | 1      | 2      | 1      | 2      | 1      | 1      | 2      |
| 9882   | 5     | 1     | 1     | 3     | 4     | 5     | 0      | 1      | 0      | 1      | 1      | 2      | 2      | 1      |
| 9884   | 3     | 3     | 1     | 1     | 1     | 4     | 0      | 0      | 1      | 0      | 0      | 0      | 0      | 1      |
| 9885   | 5     | 2     | 0     | 4     | 5     | 5     | 1      | 1      | 0      | 1      | 1      | 1      | 1      | 1      |
| 9888   | 4     | 4     | 1     | 3     | 3     | 3     | 1      | 0      | 2      | 1      | 2      | 1      | 1      | 1      |
| 9889   | 5     | 1     | 1     | 1     | 5     | 5     | 0      | 0      | 0      | 0      | 0      | 0      | 0      | 0      |
| 9894   | 4     | 2     | 1     | 1     | 4     | 4     | 1      | 1      | 1      | 1      | 1      | 1      | 2      | 1      |
| 9895   | 4     | 1     | 1     | 1     | 4     | 5     | 1      | 0      | 0      | 0      | 1      | 1      | 1      | 1      |
| 9896   | 3     | 4     | 4     | 3     | 3     | 3     | 2      | 2      | 2      | 2      | 2      | 2      | 2      | 1      |
| 9897   | 4     | 2     | 4     | 4     | 1     | 4     | 2      | 3      | 3      | 3      | 2      | 2      | 2      | 2      |
| 9905   | 4     | 1     | 0     | 0     | 4     | 5     | 0      | 1      | 1      | 0      | 0      | 0      | 0      | 1      |
| 9907   | 3     | 2     | 1     | 1     | 4     | 4     | 0      | 0      | 0      | 2      | 0      | 2      | 0      | 2      |
| 9908   | 4     | 2     | 1     | 1     | 4     | 5     | 0      | 0      | 0      | 0      | 1      | 0      | 0      | 1      |
| 9909   | 3     | 2     | 3     | 4     | 1     | 3     | 2      | 2      | 2      | 1      | 2      | 1      | 2      | 1      |
| 9910   | 5     | 2     | 1     | 3     | 3     | 5     | 1      | 1      | 0      | 0      | 0      | 1      | 1      | 0      |
| 9913   | 5     | 1     | 0     | 1     | 5     | 5     | 0      | 0      | 0      | 0      | 0      | 0      | 0      | 1      |
| 9914   | 5     | 2     | 3     | 3     | 3     | 5     | 1      | 2      | 1      | 1      | 1      | 1      | 2      | 1      |
| 9915   | 4     | 2     | 1     | 4     | 3     | 4     | 1      | 0      | 1      | 0      | 1      | 2      | 2      | 1      |
| 9916   | 5     | 1     | 1     | 1     | 5     | 2     | 0      | 1      | 0      | 0      | 0      | 1      | 1      | 1      |
| 9918   | 5     | 1     | 1     | 1     | 5     | 5     | 0      | 0      | 0      | 0      | 0      | 0      | 0      | 1      |
| 9919   | 4     | 2     | 1     | 1     | 4     | 4     | 1      | 1      | 1      | 1      | 1      | 1      | 1      | 1      |
| 9922   | 4     | 3     | 1     | 3     | 4     | 4     | 1      | 1      | 1      | 0      | 1      | 0      | 1      | 1      |
| 9930   | 5     | 1     | 1     | 1     | 4     | 5     | 1      | 0      | 0      | 0      | 1      | 0      | 0      | 0      |

| respid | Q52_2 | Q53_1 | Q54_1 | Q54_2 | Q54_3 | Q55_1 | Q56a_1 | Q56b_1 | Q56c_1 | Q56d_1 | Q56e_1 | Q56f_1 | Q56g_1 | Q56h_1 |
|--------|-------|-------|-------|-------|-------|-------|--------|--------|--------|--------|--------|--------|--------|--------|
| 9934   | 5     | 1     | 0     | 0     | 5     | 5     | 0      | 0      | 0      | 0      | 0      | 0      | 0      | 0      |
| 9936   | 3     | 3     | 3     | 4     | 3     | 3     | 1      | 1      | 1      | 1      | 1      | 1      | 1      | 1      |
| 9938   | 5     | 1     | 1     | 1     | 4     | 5     | 0      | 0      | 1      | 0      | 0      | 0      | 0      | 1      |
| 9940   | 4     | 3     | 1     | 3     | 4     | 3     | 1      | 0      | 1      | 0      | 0      | 0      | 0      | 1      |
| 9944   | 3     | 3     | 1     | 3     | 4     | 4     | 1      | 1      | 1      | 1      | 1      | 0      | 1      | 1      |
| 9945   | 5     | 2     | 1     | 1     | 4     | 5     | 0      | 1      | 1      | 1      | 1      | 0      | 0      | 1      |
| 9948   | 5     | 2     | 1     | 1     | 4     | 4     | 1      | 2      | 0      | 0      | 1      | 2      | 2      | 1      |
| 9949   | 3     | 3     | 1     | 3     | 3     | 3     | 1      | 0      | 1      | 0      | 1      | 1      | 1      | 1      |
| 9951   | 4     | 3     | 4     | 4     | 4     | 4     | 2      | 2      | 2      | 0      | 0      | 0      | 0      | 0      |
| 9952   | 3     | 3     | 3     | 4     | 3     | 4     | 1      | 1      | 1      | 1      | 1      | 1      | 1      | 1      |
| 9954   | 5     | 1     | 1     | 1     | 5     | 4     | 2      | 1      | 0      | 0      | 0      | 0      | 0      | 0      |
| 9955   | 5     | 1     | 1     | 3     | 4     | 5     | 1      | 0      | 0      | 0      | 1      | 0      | 0      | 1      |
| 9956   | 4     | 2     | 1     | 1     | 3     | 4     | 1      | 0      | 1      | 1      | 1      | 1      | 2      | 2      |
| 9957   | 3     | 3     | 3     | 3     | 3     | 3     | 1      | 2      | 2      | 2      | 1      | 1      | 1      | 1      |
| 9958   | 2     | 3     | 1     | 3     | 1     | 3     | 1      | 1      | 1      | 1      | 1      | 1      | 1      | 1      |
| 9959   | 3     | 3     | 1     | 3     | 4     | 4     | 3      | 0      | 2      | 1      | 0      | 1      | 1      | 1      |
| 9960   | 5     | 3     | 1     | 4     | 3     | 4     | 0      | 2      | 0      | 2      | 1      | 2      | 2      | 1      |
| 9961   | 5     | 2     | 1     | 1     | 3     | 5     | 1      | 0      | 0      | 0      | 1      | 1      | 1      | 0      |
| 9962   | 4     | 1     | 4     | 4     | 4     | 5     | 0      | 0      | 1      | 0      | 0      | 3      | 3      | 0      |
| 9969   | 3     | 2     | 1     | 3     | 3     | 4     | 1      | 1      | 1      | 1      | 2      | 1      | 2      | 1      |
| 9982   | 4     | 2     | 3     | 3     | 3     | 3     | 1      | 1      | 1      | 1      | 1      | 1      | 1      | 1      |
| 9984   | 3     | 2     | 3     | 3     | 3     | 4     | 1      | 0      | 1      | 1      | 1      | 1      | 2      | 1      |
| 9990   | 5     | 2     | 1     | 1     | 4     | 5     | 0      | 0      | 0      | 0      | 0      | 1      | 1      | 1      |
| 9992   | 3     | 2     | 4     | 1     | 4     | 4     | 1      | 0      | 1      | 1      | 1      | 2      | 2      | 1      |
| 9993   | 3     | 2     | 1     | 1     | 3     | 3     | 1      | 2      | 2      | 2      | 2      | 1      | 1      | 1      |
| 9997   | 5     | 1     | 0     | 0     | 0     | 5     | 0      | 0      | 0      | 0      | 0      | 0      | 0      | 0      |
| 9999   | 5     | 1     | 1     | 1     | 5     | 5     | 0      | 0      | 0      | 0      | 1      | 1      | 1      | 0      |
| 10000  | 5     | 1     | 0     | 0     | 5     | 5     | 0      | 1      | 0      | 1      | 0      | 1      | 1      | 1      |
| 10005  | 5     | 2     | 1     | 4     | 3     | 5     | 1      | 0      | 1      | 2      | 1      | 1      | 1      | 1      |
| 10014  | 5     | 1     | 1     | 1     | 4     | 5     | 1      | 0      | 0      | 0      | 1      | 0      | 0      | 0      |
| 10016  | 5     | 3     | 0     | 3     | 5     | 4     | 1      | 0      | 0      | 0      | 0      | 0      | 0      | 2      |
| 10017  | 5     | 1     | 0     | 1     | 4     | 4     | 1      | 1      | 1      | 1      | 1      | 1      | 1      | 0      |

| respid | Q52_2 | Q53_1 | Q54_1 | Q54_2 | Q54_3 | Q55_1 | Q56a_1 | Q56b_1 | Q56c_1 | Q56d_1 | Q56e_1 | Q56f_1 | Q56g_1 | Q56h_1 |
|--------|-------|-------|-------|-------|-------|-------|--------|--------|--------|--------|--------|--------|--------|--------|
| 10018  | 3     | 1     | 1     | 3     | 3     | 3     | 1      | 0      | 0      | 1      | 1      | 1      | 1      | 3      |
| 10021  | 3     | 3     | 3     | 3     | 4     | 3     | 1      | 1      | 1      | 1      | 1      | 1      | 1      | 1      |
| 10025  | 4     | 2     | 1     | 3     | 3     | 4     | 1      | 0      | 0      | 0      | 1      | 1      | 1      | 2      |
| 10027  | 4     | 2     | 3     | 4     | 1     | 4     | 2      | 1      | 1      | 1      | 2      | 1      | 2      | 2      |
| 10028  | 5     | 1     | 1     | 1     | 1     | 5     | 3      | 2      | 2      | 1      | 1      | 1      | 1      | 0      |
| 10031  | 5     | 2     | 1     | 3     | 4     | 5     | 0      | 1      | 1      | 2      | 1      | 1      | 1      | 2      |
| 10036  | 3     | 3     | 1     | 3     | 4     | 5     | 1      | 0      | 1      | 0      | 1      | 0      | 1      | 1      |
| 10037  | 3     | 4     | 3     | 3     | 3     | 3     | 0      | 1      | 0      | 1      | 2      | 2      | 2      | 3      |
| 10038  | 5     | 1     | 1     | 3     | 4     | 5     | 0      | 1      | 0      | 0      | 1      | 1      | 1      | 1      |
| 10039  | 4     | 2     | 3     | 3     | 4     | 4     | 0      | 0      | 0      | 0      | 1      | 0      | 0      | 2      |
| 10041  | 1     | 2     | 0     | 0     | 0     | 2     | 0      | 0      | 0      | 0      | 1      | 1      | 0      | 0      |
| 10045  | 5     | 4     | 1     | 3     | 4     | 2     | 0      | 0      | 0      | 1      | 0      | 1      | 0      | 2      |
| 10046  | 4     | 1     | 3     | 3     | 4     | 5     | 1      | 1      | 2      | 1      | 1      | 1      | 1      | 1      |
| 10047  | 3     | 2     | 3     | 4     | 3     | 2     | 1      | 0      | 0      | 0      | 0      | 3      | 0      | 1      |
| 10048  | 3     | 2     | 1     | 1     | 3     | 3     | 1      | 0      | 3      | 2      | 2      | 1      | 1      | 1      |
| 10049  | 4     | 2     | 1     | 3     | 3     | 3     | 1      | 1      | 1      | 1      | 1      | 2      | 2      | 1      |
| 10051  | 5     | 1     | 5     | 5     | 5     | 5     | 0      | 0      | 0      | 0      | 0      | 0      | 1      | 0      |
| 10052  | 4     | 1     | 1     | 3     | 1     | 4     | 1      | 1      | 2      | 2      | 1      | 1      | 1      | 2      |
| 10056  | 4     | 1     | 1     | 1     | 4     | 5     | 0      | 0      | 0      | 0      | 1      | 0      | 1      | 1      |
| 10061  | 4     | 2     | 1     | 1     | 4     | 4     | 0      | 0      | 0      | 2      | 1      | 1      | 1      | 1      |
| 10064  | 4     | 1     | 0     | 1     | 4     | 5     | 0      | 0      | 0      | 0      | 0      | 0      | 1      | 0      |
| 10066  | 4     | 2     | 4     | 4     | 4     | 3     | 1      | 2      | 2      | 2      | 1      | 1      | 2      | 1      |
| 10069  | 5     | 1     | 1     | 0     | 4     | 5     | 0      | 0      | 0      | 0      | 0      | 0      | 0      | 0      |
| 10071  | 5     | 2     | 1     | 3     | 4     | 4     | 0      | 0      | 0      | 0      | 1      | 0      | 0      | 1      |
| 10074  | 3     | 2     | 1     | 3     | 3     | 3     | 0      | 0      | 0      | 0      | 0      | 0      | 0      | 1      |
| 10079  | 5     | 1     | 1     | 1     | 4     | 5     | 0      | 0      | 1      | 0      | 1      | 0      | 0      | 3      |
| 10087  | 3     | 3     | 1     | 3     | 3     | 3     | 1      | 1      | 1      | 1      | 1      | 1      | 2      | 1      |
| 10095  | 4     | 3     | 0     | 0     | 5     | 5     | 0      | 0      | 1      | 0      | 1      | 0      | 0      | 1      |
| 10097  | 4     | 1     | 0     | 0     | 5     | 5     | 2      | 0      | 0      | 0      | 0      | 0      | 0      | 0      |
| 10100  | 5     | 1     | 1     | 1     | 3     | 5     | 1      | 0      | 2      | 1      | 1      | 1      | 1      | 1      |
| 10105  | 5     | 2     | 0     | 1     | 4     | 4     | 0      | 0      | 0      | 0      | 0      | 0      | 0      | 0      |
| 10107  | 4     | 1     | 0     | 0     | 5     | 4     | 0      | 1      | 1      | 1      | 0      | 0      | 1      | 1      |

| respid | Q52_2 | Q53_1 | Q54_1 | Q54_2 | Q54_3 | Q55_1 | Q56a_1 | Q56b_1 | Q56c_1 | Q56d_1 | Q56e_1 | Q56f_1 | Q56g_1 | Q56h_1 |
|--------|-------|-------|-------|-------|-------|-------|--------|--------|--------|--------|--------|--------|--------|--------|
| 10111  | 4     | 1     | 0     | 0     | 4     | 5     | 0      | 0      | 0      | 0      | 0      | 0      | 0      | 0      |
| 10116  | 3     | 2     | 4     | 4     | 1     | 3     | 2      | 1      | 3      | 1      | 3      | 2      | 2      | 2      |
| 10118  | 5     | 1     | 5     | 5     | 5     | 5     | 0      | 2      | 0      | 0      | 0      | 0      | 3      | 0      |
| 10123  | 4     | 1     | 3     | 1     | 3     | 4     | 2      | 1      | 2      | 2      | 1      | 0      | 1      | 1      |
| 10124  | 5     | 2     | 4     | 3     | 3     | 4     | 0      | 1      | 0      | 1      | 1      | 2      | 1      | 0      |
| 10130  | 4     | 1     | 1     | 4     | 4     | 4     | 1      | 1      | 1      | 2      | 2      | 2      | 2      | 2      |
| 10134  | 4     | 1     | 1     | 4     | 4     | 5     | 1      | 0      | 1      | 0      | 1      | 1      | 1      | 1      |
| 10135  | 5     | 1     | 0     | 1     | 4     | 4     | 1      | 1      | 1      | 0      | 1      | 0      | 0      | 0      |
| 10136  | 5     | 1     | 4     | 4     | 1     | 4     | 1      | 1      | 0      | 2      | 3      | 2      | 2      | 3      |
| 10141  | 4     | 2     | 0     | 3     | 0     | 1     | 1      | 0      | 2      | 2      | 1      | 2      | 2      | 1      |
| 10142  | 5     | 1     | 1     | 1     | 3     | 5     | 0      | 0      | 0      | 0      | 1      | 0      | 1      | 1      |
| 10143  | 4     | 2     | 1     | 1     | 4     | 4     | 1      | 1      | 1      | 1      | 1      | 1      | 1      | 0      |
| 10145  | 5     | 2     | 1     | 3     | 3     | 1     | 0      | 1      | 0      | 0      | 2      | 1      | 0      | 1      |
| 10149  | 5     | 2     | 4     | 3     | 4     | 5     | 1      | 1      | 0      | 2      | 1      | 1      | 1      | 1      |
| 10150  | 4     | 1     | 0     | 0     | 0     | 3     | 1      | 0      | 0      | 0      | 0      | 1      | 1      | 1      |
| 10151  | 5     | 2     | 1     | 1     | 4     | 4     | 0      | 0      | 0      | 0      | 1      | 0      | 0      | 1      |
| 10152  | 4     | 1     | 1     | 3     | 4     | 4     | 1      | 2      | 0      | 1      | 1      | 1      | 1      | 2      |
| 10153  | 5     | 1     | 0     | 1     | 4     | 4     | 1      | 1      | 0      | 0      | 0      | 0      | 0      | 1      |
| 10156  | 4     | 2     | 1     | 3     | 4     | 4     | 1      | 1      | 1      | 1      | 1      | 1      | 1      | 1      |
| 10160  | 4     | 4     | 1     | 5     | 3     | 2     | 1      | 0      | 2      | 0      | 1      | 1      | 1      | 2      |
| 10161  | 5     | 2     | 0     | 1     | 4     | 5     | 0      | 0      | 0      | 0      | 0      | 0      | 1      | 1      |
| 10167  | 4     | 3     | 3     | 1     | 4     | 4     | 1      | 2      | 1      | 2      | 2      | 1      | 2      | 1      |
| 10171  | 1     | 5     | 0     | 4     | 1     | 1     | 2      | 0      | 2      | 1      | 2      | 2      | 2      | 2      |
| 10172  | 5     | 1     | 0     | 0     | 4     | 5     | 0      | 0      | 0      | 0      | 1      | 0      | 0      | 0      |
| 10176  | 5     | 2     | 3     | 3     | 3     | 3     | 1      | 0      | 1      | 0      | 1      | 1      | 1      | 1      |
| 10177  | 4     | 1     | 3     | 3     | 3     | 5     | 2      | 0      | 2      | 0      | 2      | 1      | 1      | 1      |
| 10182  | 3     | 2     | 1     | 3     | 4     | 4     | 1      | 1      | 1      | 1      | 2      | 1      | 2      | 2      |
| 10184  | 3     | 2     | 1     | 4     | 3     | 2     | 1      | 0      | 1      | 0      | 1      | 1      | 1      | 2      |
| 10186  | 4     | 3     | 1     | 1     | 4     | 3     | 1      | 0      | 0      | 0      | 1      | 0      | 0      | 1      |
| 10189  | 5     | 1     | 0     | 1     | 5     | 5     | 0      | 0      | 0      | 0      | 0      | 0      | 1      | 1      |
| 10191  | 5     | 1     | 3     | 3     | 3     | 4     | 1      | 0      | 0      | 0      | 0      | 1      | 1      | 1      |
| 10192  | 5     | 1     | 1     | 3     | 4     | 4     | 1      | 1      | 1      | 1      | 2      | 2      | 2      | 0      |



| respid | Q52_2 | Q53_1 | Q54_1 | Q54_2 | Q54_3 | Q55_1 | Q56a_1 | Q56b_1 | Q56c_1 | Q56d_1 | Q56e_1 | Q56f_1 | Q56g_1 | Q56h_1 |
|--------|-------|-------|-------|-------|-------|-------|--------|--------|--------|--------|--------|--------|--------|--------|
| 10195  | 5     | 2     | 0     | 0     | 5     | 5     | 0      | 0      | 0      | 0      | 0      | 0      | 0      | 0      |
| 10199  | 5     | 1     | 1     | 1     | 3     | 5     | 0      | 1      | 1      | 0      | 1      | 0      | 0      | 1      |
| 10201  | 5     | 1     | 0     | 0     | 5     | 5     | 0      | 0      | 0      | 0      | 0      | 0      | 0      | 0      |
| 10213  | 5     | 1     | 0     | 1     | 5     | 5     | 1      | 0      | 0      | 0      | 0      | 0      | 0      | 1      |
| 10222  | 4     | 2     | 3     | 3     | 4     | 4     | 1      | 0      | 1      | 1      | 1      | 1      | 1      | 1      |
| 10224  | 3     | 1     | 0     | 0     | 4     | 5     | 1      | 0      | 0      | 1      | 1      | 1      | 0      | 1      |
| 10245  | 5     | 1     | 0     | 0     | 4     | 5     | 1      | 0      | 0      | 0      | 0      | 0      | 0      | 1      |
| 10254  | 3     | 3     | 1     | 4     | 3     | 3     | 0      | 0      | 0      | 0      | 1      | 0      | 1      | 2      |
| 10255  | 4     | 4     | 4     | 5     | 1     | 2     | 1      | 1      | 2      | 2      | 2      | 2      | 2      | 2      |
| 10257  | 5     | 1     | 1     | 1     | 3     | 5     | 1      | 0      | 1      | 0      | 1      | 1      | 1      | 0      |
| 10260  | 5     | 1     | 1     | 1     | 5     | 5     | 0      | 1      | 0      | 0      | 0      | 0      | 0      | 0      |
| 10261  | 4     | 2     | 4     | 4     | 1     | 3     | 1      | 1      | 2      | 1      | 2      | 1      | 2      | 2      |
| 10263  | 2     | 5     | 4     | 5     | 1     | 2     | 2      | 1      | 3      | 3      | 3      | 2      | 2      | 3      |
| 10264  | 4     | 1     | 1     | 1     | 4     | 4     | 0      | 0      | 0      | 0      | 0      | 0      | 0      | 1      |
| 10268  | 4     | 2     | 3     | 4     | 4     | 3     | 1      | 0      | 1      | 1      | 1      | 1      | 1      | 1      |
| 10269  | 5     | 3     | 1     | 1     | 4     | 4     | 0      | 1      | 1      | 0      | 1      | 0      | 1      | 1      |
| 10270  | 4     | 1     | 1     | 1     | 4     | 4     | 1      | 0      | 2      | 0      | 1      | 1      | 1      | 1      |
| 10282  | 4     | 1     | 1     | 1     | 3     | 4     | 0      | 0      | 0      | 2      | 1      | 0      | 0      | 1      |
| 10285  | 2     | 2     | 1     | 1     | 0     | 3     | 1      | 1      | 1      | 1      | 1      | 1      | 1      | 1      |
| 10288  | 5     | 1     | 0     | 0     | 5     | 5     | 0      | 0      | 0      | 0      | 0      | 0      | 1      | 0      |
| 10291  | 5     | 1     | 1     | 1     | 4     | 3     | 1      | 1      | 0      | 1      | 1      | 1      | 1      | 1      |
| 10292  | 5     | 2     | 0     | 3     | 3     | 5     | 1      | 0      | 2      | 2      | 1      | 1      | 1      | 1      |
| 10304  | 5     | 1     | 0     | 1     | 5     | 5     | 0      | 0      | 0      | 0      | 0      | 0      | 1      | 0      |
| 10305  | 4     | 3     | 4     | 3     | 3     | 3     | 1      | 1      | 2      | 2      | 1      | 1      | 1      | 1      |
| 10310  | 4     | 1     | 1     | 1     | 4     | 3     | 1      | 0      | 0      | 2      | 0      | 0      | 0      | 1      |
| 10324  | 4     | 2     | 4     | 3     | 4     | 4     | 1      | 1      | 1      | 1      | 1      | 2      | 2      | 2      |
| 10325  | 4     | 1     | 0     | 3     | 4     | 4     | 1      | 1      | 1      | 0      | 1      | 1      | 1      | 1      |
| 10326  | 4     | 1     | 1     | 1     | 4     | 5     | 0      | 1      | 1      | 1      | 1      | 0      | 1      | 1      |
| 10329  | 5     | 1     | 5     | 5     | 5     | 5     | 0      | 0      | 0      | 0      | 0      | 1      | 0      | 0      |
| 10332  | 4     | 1     | 3     | 3     | 3     | 4     | 1      | 0      | 1      | 0      | 1      | 1      | 1      | 0      |
| 10337  | 4     | 1     | 1     | 1     | 4     | 4     | 1      | 1      | 1      | 1      | 1      | 1      | 2      | 1      |
| 10341  | 4     | 3     | 4     | 5     | 1     | 4     | 2      | 2      | 1      | 2      | 2      | 3      | 3      | 1      |

| respid | Q52_2 | Q53_1 | Q54_1 | Q54_2 | Q54_3 | Q55_1 | Q56a_1 | Q56b_1 | Q56c_1 | Q56d_1 | Q56e_1 | Q56f_1 | Q56g_1 | Q56h_1 |
|--------|-------|-------|-------|-------|-------|-------|--------|--------|--------|--------|--------|--------|--------|--------|
| 10353  | 4     | 2     | 1     | 3     | 3     | 4     | 1      | 1      | 1      | 1      | 1      | 1      | 2      | 2      |
| 10354  | 5     | 1     | 0     | 0     | 5     | 5     | 0      | 0      | 0      | 0      | 0      | 0      | 0      | 0      |
| 10359  | 5     | 2     | 1     | 3     | 3     | 3     | 2      | 1      | 2      | 2      | 1      | 2      | 2      | 1      |
| 10360  | 4     | 2     | 1     | 1     | 4     | 4     | 0      | 0      | 0      | 0      | 0      | 0      | 0      | 0      |
| 10362  | 4     | 2     | 1     | 3     | 4     | 4     | 2      | 1      | 2      | 2      | 2      | 1      | 2      | 2      |
| 10364  | 5     | 1     | 0     | 1     | 4     | 5     | 0      | 1      | 0      | 1      | 1      | 1      | 1      | 1      |
| 10366  | 4     | 3     | 3     | 3     | 4     | 3     | 1      | 1      | 1      | 1      | 1      | 1      | 1      | 2      |
| 10367  | 2     | 2     | 1     | 1     | 1     | 4     | 2      | 1      | 1      | 1      | 1      | 1      | 0      | 1      |
| 10371  | 5     | 1     | 1     | 1     | 5     | 5     | 0      | 0      | 0      | 0      | 0      | 0      | 0      | 0      |
| 10374  | 5     | 2     | 0     | 0     | 5     | 4     | 0      | 1      | 1      | 1      | 1      | 0      | 0      | 2      |
| 10375  | 5     | 1     | 1     | 3     | 4     | 5     | 1      | 1      | 0      | 0      | 1      | 2      | 1      | 1      |
| 10376  | 5     | 1     | 1     | 1     | 4     | 5     | 0      | 0      | 0      | 0      | 0      | 0      | 1      | 0      |
| 10377  | 5     | 1     | 1     | 4     | 4     | 5     | 1      | 0      | 0      | 0      | 1      | 1      | 0      | 0      |
| 10378  | 3     | 3     | 3     | 1     | 3     | 3     | 1      | 2      | 1      | 2      | 1      | 1      | 2      | 1      |
| 10387  | 5     | 2     | 0     | 1     | 5     | 5     | 0      | 0      | 0      | 0      | 0      | 0      | 0      | 1      |
| 10396  | 3     | 2     | 1     | 1     | 3     | 4     | 1      | 1      | 2      | 2      | 1      | 0      | 1      | 1      |
| 10397  | 5     | 2     | 1     | 1     | 4     | 4     | 0      | 0      | 0      | 0      | 1      | 0      | 1      | 0      |
| 10399  | 2     | 3     | 3     | 3     | 4     | 4     | 2      | 2      | 2      | 2      | 2      | 2      | 1      | 2      |
| 10405  | 4     | 3     | 1     | 3     | 3     | 3     | 1      | 1      | 1      | 1      | 1      | 2      | 2      | 1      |
| 10406  | 3     | 4     | 3     | 4     | 3     | 3     | 1      | 0      | 2      | 0      | 1      | 2      | 1      | 3      |
| 10408  | 5     | 1     | 3     | 3     | 3     | 4     | 2      | 0      | 1      | 1      | 2      | 2      | 2      | 1      |
| 10409  | 5     | 1     | 1     | 1     | 4     | 5     | 0      | 0      | 0      | 0      | 0      | 0      | 0      | 0      |
| 10412  | 4     | 2     | 1     | 1     | 4     | 5     | 0      | 0      | 0      | 0      | 0      | 0      | 0      | 1      |
| 10413  | 5     | 1     | 0     | 0     | 5     | 4     | 3      | 0      | 0      | 0      | 0      | 0      | 0      | 0      |
| 10419  | 4     | 3     | 1     | 3     | 4     | 4     | 0      | 1      | 1      | 0      | 1      | 0      | 0      | 1      |
| 10423  | 4     | 2     | 1     | 3     | 4     | 4     | 1      | 0      | 1      | 0      | 1      | 0      | 1      | 1      |
| 10426  | 3     | 2     | 0     | 1     | 5     | 4     | 0      | 0      | 0      | 0      | 1      | 0      | 1      | 0      |
| 10446  | 4     | 2     | 1     | 3     | 3     | 3     | 0      | 0      | 0      | 0      | 1      | 1      | 1      | 1      |
| 10448  | 5     | 1     | 1     | 3     | 4     | 5     | 0      | 0      | 0      | 0      | 1      | 2      | 1      | 0      |
| 10450  | 5     | 2     | 1     | 3     | 4     | 5     | 0      | 1      | 1      | 0      | 1      | 1      | 1      | 1      |
| 10455  | 5     | 2     | 0     | 0     | 5     | 5     | 2      | 2      | 2      | 2      | 2      | 0      | 0      | 1      |
| 10460  | 4     | 1     | 1     | 3     | 4     | 4     | 2      | 0      | 2      | 1      | 1      | 1      | 1      | 1      |

| respid | Q52_2 | Q53_1 | Q54_1 | Q54_2 | Q54_3 | Q55_1 | Q56a_1 | Q56b_1 | Q56c_1 | Q56d_1 | Q56e_1 | Q56f_1 | Q56g_1 | Q56h_1 |
|--------|-------|-------|-------|-------|-------|-------|--------|--------|--------|--------|--------|--------|--------|--------|
| 10461  | 4     | 1     | 1     | 1     | 4     | 4     | 1      | 1      | 1      | 1      | 1      | 1      | 1      | 0      |
| 10471  | 5     | 2     | 1     | 1     | 4     | 5     | 0      | 0      | 0      | 1      | 1      | 1      | 0      | 0      |
| 10472  | 5     | 1     | 1     | 1     | 4     | 5     | 0      | 0      | 0      | 0      | 0      | 0      | 0      | 0      |
| 10491  | 3     | 3     | 3     | 4     | 4     | 4     | 1      | 1      | 1      | 2      | 1      | 2      | 1      | 1      |
| 10493  | 3     | 2     | 1     | 3     | 4     | 4     | 0      | 0      | 1      | 0      | 1      | 1      | 1      | 1      |
| 10498  | 4     | 2     | 0     | 3     | 4     | 4     | 1      | 1      | 0      | 0      | 1      | 0      | 0      | 1      |
| 10533  | 5     | 1     | 1     | 1     | 4     | 5     | 0      | 1      | 0      | 0      | 1      | 1      | 1      | 1      |
| 10539  | 4     | 2     | 1     | 3     | 4     | 4     | 1      | 0      | 1      | 0      | 1      | 1      | 1      | 1      |
| 10540  | 4     | 1     | 1     | 1     | 4     | 4     | 0      | 1      | 0      | 0      | 1      | 0      | 0      | 1      |
| 10557  | 4     | 2     | 1     | 3     | 3     | 3     | 1      | 1      | 1      | 1      | 1      | 1      | 2      | 1      |
| 10558  | 3     | 3     | 3     | 1     | 3     | 3     | 1      | 1      | 1      | 1      | 1      | 1      | 1      | 1      |
| 10559  | 3     | 4     | 3     | 4     | 1     | 3     | 1      | 0      | 1      | 2      | 2      | 1      | 2      | 2      |
| 10564  | 4     | 1     | 1     | 1     | 4     | 4     | 1      | 1      | 1      | 1      | 1      | 1      | 1      | 1      |
| 10570  | 4     | 2     | 1     | 1     | 4     | 4     | 1      | 1      | 0      | 0      | 1      | 0      | 0      | 1      |
| 10572  | 5     | 2     | 4     | 4     | 1     | 4     | 2      | 0      | 2      | 2      | 2      | 2      | 2      | 1      |
| 10576  | 5     | 1     | 1     | 1     | 5     | 5     | 0      | 0      | 0      | 0      | 0      | 0      | 0      | 0      |
| 10582  | 3     | 2     | 0     | 1     | 3     | 1     | 0      | 1      | 1      | 0      | 0      | 1      | 2      | 0      |
| 10593  | 5     | 1     | 3     | 1     | 4     | 5     | 0      | 0      | 1      | 1      | 1      | 0      | 1      | 1      |
| 10596  | 4     | 3     | 3     | 4     | 1     | 2     | 2      | 0      | 2      | 0      | 2      | 1      | 2      | 1      |
| 10615  | 5     | 1     | 0     | 0     | 5     | 5     | 0      | 0      | 0      | 0      | 0      | 0      | 0      | 0      |
| 10616  | 5     | 3     | 1     | 1     | 4     | 4     | 1      | 0      | 1      | 1      | 1      | 0      | 1      | 1      |
| 10623  | 5     | 3     | 1     | 1     | 3     | 3     | 1      | 0      | 1      | 2      | 1      | 0      | 1      | 1      |
| 10626  | 5     | 1     | 1     | 3     | 4     | 4     | 1      | 0      | 1      | 0      | 1      | 1      | 1      | 1      |
| 10627  | 1     | 2     | 0     | 1     | 1     | 2     | 1      | 1      | 1      | 1      | 2      | 3      | 2      | 2      |
| 10629  | 2     | 3     | 3     | 3     | 1     | 2     | 1      | 0      | 3      | 1      | 2      | 1      | 1      | 2      |
| 10632  | 1     | 2     | 0     | 0     | 0     | 3     | 2      | 1      | 1      | 1      | 2      | 2      | 1      | 2      |
| 10641  | 5     | 1     | 0     | 0     | 5     | 5     | 0      | 0      | 0      | 0      | 0      | 0      | 0      | 0      |
| 10648  | 2     | 2     | 1     | 3     | 4     | 4     | 1      | 2      | 2      | 2      | 1      | 1      | 2      | 1      |
| 10651  | 3     | 3     | 4     | 4     | 1     | 3     | 2      | 0      | 1      | 1      | 2      | 2      | 2      | 3      |
| 10654  | 5     | 1     | 1     | 1     | 4     | 5     | 0      | 0      | 0      | 0      | 0      | 0      | 0      | 1      |
| 10673  | 5     | 1     | 1     | 1     | 4     | 5     | 1      | 0      | 0      | 0      | 1      | 0      | 0      | 1      |
| 10675  | 5     | 3     | 1     | 3     | 4     | 4     | 0      | 2      | 0      | 0      | 0      | 0      | 0      | 1      |

| respid | Q52_2 | Q53_1 | Q54_1 | Q54_2 | Q54_3 | Q55_1 | Q56a_1 | Q56b_1 | Q56c_1 | Q56d_1 | Q56e_1 | Q56f_1 | Q56g_1 | Q56h_1 |   |
|--------|-------|-------|-------|-------|-------|-------|--------|--------|--------|--------|--------|--------|--------|--------|---|
| 10689  | 4     | 3     | 0     | 0     | 1     | 3     | 1      | 1      | 1      | 1      | 2      | 3      | 2      | 0      | 2 |
| 10692  | 4     | 4     | 3     | 4     | 3     | 1     | 2      | 2      | 2      | 1      | 2      | 2      | 2      | 2      | 2 |
| 10694  | 5     | 1     | 0     | 0     | 5     | 5     | 0      | 0      | 0      | 0      | 0      | 0      | 0      | 0      | 0 |
| 10695  | 3     | 3     | 3     | 4     | 3     | 3     | 2      | 1      | 2      | 1      | 1      | 1      | 1      | 2      | 1 |
| 10702  | 3     | 3     | 3     | 3     | 1     | 3     | 1      | 1      | 1      | 1      | 1      | 2      | 2      | 2      | 2 |
| 10703  | 3     | 3     | 3     | 3     | 3     | 3     | 2      | 2      | 2      | 2      | 2      | 1      | 0      | 0      | 1 |
| 10708  | 4     | 2     | 1     | 1     | 4     | 4     | 1      | 0      | 0      | 0      | 0      | 1      | 0      | 0      | 1 |
| 10719  | 4     | 2     | 1     | 1     | 4     | 4     | 0      | 1      | 0      | 0      | 0      | 1      | 0      | 1      | 0 |
| 10722  | 4     | 2     | 1     | 3     | 4     | 4     | 1      | 0      | 2      | 0      | 0      | 1      | 0      | 1      | 2 |
| 10723  | 4     | 1     | 1     | 1     | 4     | 5     | 0      | 0      | 0      | 0      | 0      | 0      | 0      | 1      | 1 |
| 10726  | 5     | 2     | 0     | 1     | 5     | 5     | 0      | 0      | 1      | 0      | 0      | 0      | 0      | 0      | 0 |
| 10727  | 5     | 1     | 1     | 1     | 5     | 5     | 0      | 0      | 0      | 0      | 0      | 1      | 0      | 1      | 0 |
| 10730  | 5     | 1     | 1     | 1     | 4     | 5     | 0      | 0      | 0      | 0      | 0      | 0      | 1      | 1      | 0 |
| 10731  | 5     | 1     | 0     | 0     | 4     | 5     | 0      | 0      | 0      | 0      | 0      | 0      | 0      | 0      | 0 |
| 10737  | 5     | 1     | 1     | 3     | 4     | 5     | 0      | 0      | 0      | 0      | 0      | 1      | 1      | 0      | 0 |
| 10743  | 4     | 4     | 1     | 1     | 4     | 4     | 1      | 2      | 2      | 1      | 2      | 1      | 1      | 1      | 1 |
| 10763  | 5     | 2     | 1     | 1     | 4     | 5     | 1      | 0      | 0      | 0      | 0      | 1      | 0      | 1      | 1 |
| 10777  | 4     | 1     | 1     | 3     | 4     | 5     | 0      | 2      | 0      | 1      | 1      | 1      | 0      | 0      | 1 |
| 10787  | 4     | 1     | 5     | 4     | 5     | 4     | 1      | 3      | 1      | 1      | 1      | 2      | 3      | 2      | 1 |
| 10798  | 1     | 2     | 0     | 0     | 0     | 2     | 1      | 1      | 1      | 1      | 1      | 2      | 2      | 0      | 0 |
| 10800  | 5     | 2     | 1     | 1     | 4     | 4     | 0      | 0      | 0      | 0      | 0      | 0      | 0      | 1      | 1 |
| 10802  | 1     | 3     | 0     | 0     | 0     | 3     | 1      | 0      | 0      | 0      | 0      | 1      | 1      | 0      | 0 |
| 10803  | 2     | 3     | 4     | 4     | 3     | 2     | 1      | 1      | 1      | 1      | 1      | 1      | 2      | 2      | 2 |
| 10808  | 4     | 2     | 1     | 1     | 3     | 4     | 1      | 1      | 1      | 1      | 0      | 1      | 1      | 1      | 0 |
| 10810  | 4     | 5     | 1     | 1     | 4     | 1     | 1      | 0      | 0      | 0      | 0      | 1      | 1      | 1      | 1 |
| 10819  | 4     | 2     | 0     | 1     | 4     | 5     | 0      | 0      | 0      | 0      | 0      | 0      | 0      | 0      | 1 |
| 10825  | 4     | 2     | 1     | 1     | 4     | 4     | 0      | 0      | 0      | 0      | 0      | 0      | 0      | 0      | 0 |
| 10827  | 4     | 2     | 1     | 1     | 1     | 4     | 1      | 0      | 0      | 0      | 0      | 1      | 0      | 0      | 0 |
| 10830  | 5     | 1     | 4     | 4     | 5     | 4     | 1      | 1      | 1      | 1      | 1      | 1      | 1      | 1      | 1 |
| 10847  | 4     | 2     | 3     | 3     | 4     | 4     | 0      | 0      | 1      | 1      | 1      | 1      | 1      | 1      | 1 |
| 10849  | 5     | 3     | 1     | 1     | 1     | 3     | 0      | 1      | 1      | 1      | 2      | 2      | 1      | 1      | 1 |
| 10852  | 4     | 3     | 1     | 1     | 4     | 4     | 0      | 2      | 1      | 0      | 0      | 1      | 1      | 1      | 1 |

| respid | Q52_2 | Q53_1 | Q54_1 | Q54_2 | Q54_3 | Q55_1 | Q56a_1 | Q56b_1 | Q56c_1 | Q56d_1 | Q56e_1 | Q56f_1 | Q56g_1 | Q56h_1 |   |
|--------|-------|-------|-------|-------|-------|-------|--------|--------|--------|--------|--------|--------|--------|--------|---|
| 10854  | 3     | 2     | 3     | 3     | 3     | 3     | 1      | 2      | 1      | 1      | 1      | 1      | 1      | 2      | 1 |
| 10857  | 5     | 1     | 1     | 1     | 4     | 5     | 0      | 0      | 0      | 0      | 0      | 0      | 0      | 0      | 0 |
| 10861  | 4     | 5     | 1     | 4     | 1     | 1     | 3      | 1      | 2      | 1      | 3      | 1      | 1      | 1      | 2 |
| 10862  | 5     | 1     | 1     | 1     | 4     | 5     | 0      | 0      | 0      | 0      | 0      | 0      | 0      | 0      | 0 |
| 10870  | 3     | 3     | 1     | 3     | 4     | 3     | 1      | 2      | 2      | 2      | 1      | 1      | 2      | 1      | 1 |
| 10873  | 5     | 2     | 0     | 4     | 3     | 4     | 2      | 1      | 2      | 1      | 2      | 2      | 1      | 2      | 2 |
| 10881  | 4     | 1     | 0     | 1     | 4     | 4     | 0      | 1      | 0      | 0      | 0      | 0      | 0      | 1      | 0 |
| 10893  | 4     | 3     | 1     | 1     | 5     | 5     | 0      | 0      | 0      | 0      | 0      | 0      | 0      | 0      | 0 |
| 10898  | 2     | 2     | 1     | 4     | 1     | 2     | 1      | 1      | 1      | 0      | 2      | 2      | 2      | 2      | 1 |
| 10899  | 2     | 3     | 3     | 3     | 3     | 3     | 1      | 0      | 2      | 1      | 1      | 1      | 1      | 2      | 1 |
| 10905  | 3     | 2     | 1     | 3     | 4     | 4     | 1      | 0      | 1      | 1      | 1      | 1      | 1      | 1      | 1 |
| 10910  | 5     | 1     | 0     | 0     | 5     | 5     | 0      | 0      | 0      | 0      | 0      | 0      | 0      | 0      | 0 |
| 10911  | 4     | 2     | 1     | 1     | 3     | 4     | 1      | 1      | 1      | 1      | 1      | 1      | 1      | 1      | 1 |
| 10912  | 4     | 2     | 1     | 3     | 3     | 4     | 1      | 1      | 1      | 2      | 1      | 2      | 1      | 1      | 1 |
| 10913  | 5     | 2     | 1     | 3     | 4     | 4     | 1      | 1      | 1      | 1      | 1      | 1      | 1      | 1      | 1 |
| 10918  | 5     | 3     | 0     | 3     | 5     | 5     | 0      | 0      | 0      | 0      | 0      | 0      | 0      | 0      | 1 |
| 10995  | 4     | 1     | 1     | 1     | 4     | 5     | 1      | 1      | 0      | 1      | 1      | 1      | 1      | 1      | 0 |
| 11002  | 5     | 1     | 1     | 1     | 4     | 5     | 1      | 0      | 1      | 0      | 1      | 0      | 0      | 0      | 1 |
| 11003  | 5     | 1     | 0     | 0     | 5     | 5     | 0      | 0      | 0      | 0      | 0      | 0      | 0      | 0      | 0 |
| 11005  | 5     | 1     | 1     | 4     | 4     | 5     | 1      | 0      | 0      | 0      | 1      | 2      | 0      | 0      | 3 |
| 11015  | 4     | 1     | 1     | 0     | 4     | 5     | 0      | 0      | 0      | 0      | 0      | 0      | 0      | 0      | 0 |
| 11016  | 1     | 5     | 5     | 5     | 5     | 5     | 3      | 3      | 3      | 3      | 3      | 3      | 3      | 3      | 3 |
| 11017  | 5     | 1     | 0     | 0     | 5     | 5     | 0      | 0      | 0      | 0      | 0      | 0      | 0      | 0      | 0 |
| 11020  | 1     | 4     | 1     | 1     | 1     | 4     | 1      | 1      | 1      | 2      | 3      | 2      | 1      | 1      | 2 |
| 11024  | 4     | 2     | 1     | 3     | 3     | 4     | 1      | 0      | 1      | 0      | 1      | 1      | 1      | 1      | 1 |
| 11026  | 4     | 2     | 3     | 3     | 4     | 4     | 1      | 0      | 2      | 1      | 1      | 1      | 1      | 1      | 1 |
| 11028  | 3     | 2     | 3     | 4     | 3     | 3     | 1      | 1      | 1      | 1      | 1      | 1      | 1      | 2      | 1 |
| 11029  | 1     | 2     | 0     | 0     | 0     | 3     | 1      | 1      | 0      | 0      | 1      | 1      | 1      | 1      | 2 |
| 11030  | 4     | 2     | 1     | 1     | 4     | 4     | 1      | 1      | 1      | 0      | 1      | 1      | 1      | 1      | 1 |
| 11031  | 5     | 1     | 0     | 1     | 4     | 5     | 0      | 0      | 0      | 0      | 0      | 0      | 0      | 1      | 1 |
| 11038  | 4     | 3     | 1     | 4     | 1     | 3     | 1      | 1      | 1      | 1      | 2      | 2      | 1      | 1      | 1 |
| 11051  | 5     | 2     | 1     | 3     | 3     | 4     | 1      | 0      | 2      | 2      | 2      | 1      | 1      | 1      | 1 |

| respid | Q52_2 | Q53_1 | Q54_1 | Q54_2 | Q54_3 | Q55_1 | Q56a_1 | Q56b_1 | Q56c_1 | Q56d_1 | Q56e_1 | Q56f_1 | Q56g_1 | Q56h_1 |
|--------|-------|-------|-------|-------|-------|-------|--------|--------|--------|--------|--------|--------|--------|--------|
| 11052  | 1     | 3     | 1     | 1     | 1     | 4     | 1      | 1      | 0      | 0      | 1      | 1      | 0      | 1      |
| 11053  | 3     | 1     | 3     | 3     | 4     | 3     | 0      | 2      | 1      | 0      | 1      | 0      | 0      | 1      |
| 11054  | 1     | 4     | 1     | 1     | 1     | 3     | 0      | 1      | 1      | 1      | 2      | 2      | 0      | 1      |
| 11063  | 5     | 1     | 1     | 3     | 4     | 4     | 0      | 0      | 2      | 0      | 1      | 0      | 1      | 1      |
| 11075  | 4     | 4     | 4     | 4     | 4     | 4     | 1      | 2      | 1      | 2      | 1      | 0      | 0      | 2      |
| 11083  | 5     | 2     | 1     | 1     | 4     | 4     | 1      | 0      | 2      | 0      | 1      | 0      | 1      | 1      |
| 11092  | 5     | 1     | 1     | 1     | 5     | 5     | 0      | 0      | 0      | 0      | 0      | 0      | 1      | 0      |
| 11118  | 4     | 2     | 1     | 1     | 4     | 4     | 1      | 0      | 0      | 0      | 1      | 0      | 1      | 1      |
| 11119  | 2     | 3     | 1     | 4     | 3     | 3     | 1      | 1      | 1      | 1      | 1      | 1      | 1      | 1      |
| 11134  | 4     | 2     | 1     | 1     | 4     | 5     | 0      | 0      | 0      | 0      | 1      | 0      | 0      | 0      |
| 11139  | 1     | 4     | 3     | 3     | 3     | 4     | 1      | 2      | 2      | 2      | 3      | 3      | 2      | 2      |
| 11154  | 5     | 1     | 1     | 1     | 4     | 5     | 0      | 0      | 0      | 0      | 0      | 0      | 1      | 0      |
| 11166  | 4     | 2     | 4     | 4     | 4     | 4     | 0      | 1      | 1      | 0      | 1      | 0      | 1      | 1      |
| 11168  | 4     | 1     | 3     | 1     | 4     | 4     | 0      | 0      | 0      | 0      | 1      | 0      | 0      | 1      |
| 11176  | 3     | 3     | 3     | 3     | 4     | 3     | 1      | 0      | 1      | 1      | 2      | 1      | 2      | 1      |
| 11183  | 3     | 2     | 1     | 1     | 4     | 3     | 1      | 1      | 1      | 1      | 1      | 1      | 1      | 1      |
| 11189  | 5     | 1     | 0     | 0     | 0     | 5     | 0      | 0      | 0      | 0      | 0      | 0      | 0      | 0      |
| 11196  | 2     | 3     | 3     | 4     | 1     | 3     | 1      | 2      | 2      | 2      | 2      | 2      | 2      | 2      |
| 11200  | 4     | 2     | 1     | 1     | 4     | 4     | 2      | 0      | 1      | 0      | 1      | 1      | 1      | 1      |
| 11201  | 5     | 2     | 3     | 3     | 3     | 4     | 0      | 0      | 2      | 2      | 1      | 1      | 1      | 1      |
| 11211  | 3     | 3     | 3     | 3     | 4     | 3     | 1      | 2      | 2      | 1      | 1      | 1      | 2      | 1      |
| 11218  | 5     | 1     | 4     | 3     | 5     | 5     | 0      | 0      | 0      | 0      | 1      | 0      | 0      | 1      |
| 11219  | 4     | 2     | 1     | 1     | 4     | 4     | 1      | 0      | 1      | 0      | 1      | 0      | 1      | 1      |
| 11221  | 4     | 2     | 1     | 3     | 4     | 4     | 1      | 0      | 1      | 0      | 0      | 0      | 0      | 0      |
| 11222  | 5     | 1     | 1     | 1     | 3     | 3     | 0      | 1      | 1      | 1      | 0      | 1      | 0      | 1      |
| 11230  | 3     | 3     | 3     | 3     | 4     | 3     | 1      | 1      | 2      | 1      | 1      | 1      | 2      | 1      |
| 11236  | 3     | 3     | 3     | 3     | 4     | 3     | 1      | 1      | 1      | 1      | 1      | 1      | 2      | 1      |
| 11237  | 3     | 2     | 4     | 4     | 1     | 3     | 1      | 1      | 3      | 2      | 2      | 1      | 2      | 1      |
| 11240  | 3     | 2     | 4     | 4     | 1     | 4     | 2      | 2      | 2      | 1      | 2      | 1      | 2      | 1      |
| 11244  | 3     | 3     | 3     | 3     | 4     | 3     | 1      | 1      | 2      | 1      | 1      | 1      | 1      | 1      |
| 11249  | 4     | 2     | 1     | 1     | 4     | 4     | 1      | 1      | 2      | 1      | 1      | 1      | 1      | 1      |
| 11252  | 3     | 3     | 3     | 3     | 4     | 3     | 1      | 1      | 2      | 1      | 1      | 1      | 2      | 1      |

| respid | Q52_2 | Q53_1 | Q54_1 | Q54_2 | Q54_3 | Q55_1 | Q56a_1 | Q56b_1 | Q56c_1 | Q56d_1 | Q56e_1 | Q56f_1 | Q56g_1 | Q56h_1 |   |
|--------|-------|-------|-------|-------|-------|-------|--------|--------|--------|--------|--------|--------|--------|--------|---|
| 11254  | 2     | 3     | 1     | 1     | 1     | 3     | 1      | 1      | 1      | 1      | 1      | 1      | 1      | 2      | 1 |
| 11255  | 3     | 3     | 4     | 4     | 1     | 3     | 1      | 1      | 1      | 2      | 1      | 2      | 2      | 2      | 1 |
| 11258  | 3     | 3     | 3     | 3     | 4     | 3     | 1      | 1      | 2      | 1      | 1      | 1      | 2      | 1      | 1 |
| 11260  | 4     | 2     | 3     | 3     | 4     | 4     | 0      | 2      | 2      | 1      | 1      | 1      | 1      | 1      | 1 |
| 11264  | 4     | 3     | 3     | 4     | 3     | 3     | 1      | 1      | 2      | 2      | 1      | 1      | 2      | 2      | 2 |
| 11266  | 4     | 4     | 3     | 3     | 4     | 4     | 1      | 1      | 0      | 1      | 0      | 1      | 1      | 1      | 0 |
| 11268  | 4     | 2     | 1     | 3     | 3     | 5     | 1      | 1      | 1      | 1      | 1      | 1      | 2      | 1      | 1 |
| 11269  | 5     | 2     | 3     | 1     | 4     | 5     | 0      | 0      | 1      | 0      | 1      | 2      | 1      | 1      | 0 |
| 11272  | 3     | 2     | 3     | 3     | 4     | 4     | 1      | 2      | 0      | 1      | 1      | 1      | 1      | 1      | 0 |
| 11273  | 4     | 2     | 1     | 1     | 4     | 4     | 1      | 2      | 2      | 2      | 1      | 1      | 1      | 1      | 1 |
| 11275  | 4     | 2     | 3     | 3     | 4     | 3     | 0      | 0      | 1      | 0      | 1      | 1      | 1      | 1      | 1 |
| 11276  | 4     | 1     | 3     | 3     | 3     | 5     | 0      | 0      | 0      | 1      | 1      | 1      | 1      | 0      | 0 |
| 11278  | 3     | 4     | 1     | 3     | 1     | 2     | 1      | 1      | 1      | 1      | 2      | 1      | 1      | 1      | 1 |
| 11288  | 5     | 2     | 0     | 0     | 5     | 5     | 0      | 1      | 0      | 0      | 0      | 0      | 1      | 1      | 1 |
| 11289  | 5     | 2     | 1     | 1     | 5     | 4     | 0      | 0      | 0      | 0      | 0      | 0      | 0      | 0      | 0 |
| 11291  | 5     | 1     | 3     | 3     | 4     | 5     | 1      | 0      | 1      | 1      | 1      | 1      | 2      | 1      | 1 |
| 11295  | 5     | 2     | 1     | 1     | 5     | 4     | 0      | 0      | 0      | 0      | 1      | 0      | 0      | 0      | 1 |
| 11297  | 5     | 1     | 0     | 3     | 4     | 5     | 0      | 0      | 1      | 0      | 1      | 0      | 0      | 0      | 0 |
| 11304  | 2     | 2     | 3     | 4     | 3     | 3     | 1      | 0      | 3      | 2      | 2      | 2      | 2      | 2      | 2 |
| 11305  | 5     | 1     | 1     | 1     | 3     | 5     | 0      | 0      | 0      | 0      | 1      | 1      | 1      | 1      | 0 |
| 11311  | 5     | 1     | 1     | 3     | 3     | 4     | 1      | 1      | 1      | 1      | 1      | 1      | 1      | 1      | 1 |
| 11313  | 5     | 1     | 1     | 1     | 4     | 5     | 0      | 0      | 0      | 0      | 0      | 0      | 0      | 0      | 1 |
| 11315  | 3     | 4     | 1     | 1     | 1     | 2     | 2      | 1      | 3      | 2      | 2      | 2      | 2      | 2      | 2 |
| 11316  | 3     | 4     | 1     | 1     | 1     | 2     | 2      | 1      | 3      | 2      | 2      | 2      | 2      | 2      | 2 |
| 11318  | 2     | 3     | 3     | 1     | 4     | 3     | 1      | 2      | 1      | 2      | 1      | 2      | 1      | 2      | 2 |
| 11323  | 5     | 1     | 1     | 1     | 4     | 5     | 0      | 0      | 0      | 0      | 1      | 0      | 0      | 0      | 0 |
| 11331  | 2     | 3     | 3     | 3     | 1     | 3     | 1      | 1      | 2      | 0      | 1      | 0      | 1      | 3      | 3 |
| 11333  | 5     | 2     | 1     | 3     | 3     | 4     | 1      | 0      | 2      | 1      | 1      | 1      | 1      | 1      | 1 |
| 11334  | 4     | 3     | 3     | 4     | 4     | 3     | 1      | 0      | 1      | 1      | 1      | 1      | 2      | 2      | 2 |
| 11340  | 2     | 3     | 1     | 4     | 1     | 3     | 2      | 2      | 3      | 2      | 2      | 2      | 2      | 2      | 3 |
| 11345  | 5     | 1     | 1     | 1     | 4     | 5     | 1      | 0      | 0      | 0      | 0      | 1      | 1      | 1      | 0 |
| 11354  | 3     | 3     | 3     | 3     | 3     | 3     | 1      | 1      | 1      | 1      | 1      | 1      | 1      | 0      | 0 |

| respid | Q52_2 | Q53_1 | Q54_1 | Q54_2 | Q54_3 | Q55_1 | Q56a_1 | Q56b_1 | Q56c_1 | Q56d_1 | Q56e_1 | Q56f_1 | Q56g_1 | Q56h_1 |
|--------|-------|-------|-------|-------|-------|-------|--------|--------|--------|--------|--------|--------|--------|--------|
| 11360  | 3     | 3     | 3     | 3     | 3     | 3     | 3      | 1      | 0      | 1      | 1      | 1      | 1      | 1      |
| 11361  | 1     | 4     | 1     | 3     | 3     | 3     | 3      | 1      | 1      | 1      | 1      | 1      | 2      | 1      |
| 11367  | 5     | 1     | 1     | 1     | 5     | 5     | 0      | 0      | 0      | 0      | 0      | 0      | 0      | 0      |
| 11370  | 5     | 1     | 1     | 1     | 5     | 5     | 0      | 0      | 0      | 0      | 0      | 0      | 0      | 0      |
| 11371  | 4     | 2     | 1     | 1     | 3     | 4     | 1      | 1      | 1      | 1      | 1      | 1      | 2      | 1      |
| 11372  | 3     | 3     | 3     | 3     | 3     | 3     | 3      | 1      | 1      | 1      | 1      | 1      | 1      | 2      |
| 11373  | 5     | 3     | 1     | 3     | 4     | 3     | 1      | 1      | 1      | 1      | 1      | 1      | 0      | 0      |
| 11382  | 5     | 1     | 1     | 1     | 3     | 5     | 1      | 1      | 1      | 1      | 0      | 1      | 2      | 1      |
| 11394  | 2     | 3     | 1     | 4     | 3     | 1     | 1      | 3      | 1      | 2      | 2      | 1      | 2      | 3      |
| 11395  | 4     | 3     | 3     | 4     | 1     | 4     | 1      | 2      | 2      | 2      | 3      | 1      | 2      | 1      |
| 11397  | 5     | 1     | 1     | 1     | 4     | 5     | 0      | 0      | 0      | 0      | 0      | 1      | 1      | 0      |
| 11402  | 5     | 1     | 0     | 0     | 5     | 5     | 0      | 0      | 0      | 0      | 0      | 0      | 0      | 0      |
| 11409  | 4     | 1     | 1     | 1     | 4     | 4     | 1      | 2      | 0      | 1      | 1      | 1      | 0      | 1      |
| 11410  | 5     | 1     | 1     | 1     | 4     | 5     | 0      | 0      | 0      | 0      | 0      | 2      | 0      | 0      |
| 11411  | 4     | 1     | 1     | 4     | 3     | 4     | 1      | 1      | 2      | 1      | 2      | 2      | 2      | 1      |
| 11418  | 4     | 2     | 1     | 1     | 4     | 5     | 0      | 0      | 0      | 0      | 1      | 0      | 1      | 1      |
| 11425  | 3     | 3     | 3     | 3     | 3     | 3     | 3      | 1      | 1      | 1      | 1      | 1      | 1      | 2      |
| 11429  | 5     | 2     | 1     | 3     | 4     | 5     | 1      | 0      | 1      | 0      | 1      | 1      | 1      | 0      |
| 11430  | 2     | 3     | 3     | 4     | 3     | 4     | 1      | 2      | 2      | 2      | 2      | 2      | 2      | 1      |
| 11431  | 3     | 3     | 3     | 4     | 1     | 3     | 1      | 1      | 1      | 1      | 1      | 1      | 2      | 2      |
| 11432  | 5     | 1     | 1     | 1     | 5     | 5     | 0      | 0      | 0      | 0      | 0      | 0      | 0      | 1      |
| 11433  | 5     | 1     | 3     | 1     | 4     | 5     | 0      | 0      | 0      | 0      | 1      | 0      | 0      | 0      |
| 11435  | 3     | 4     | 3     | 3     | 4     | 3     | 1      | 2      | 2      | 1      | 2      | 2      | 2      | 2      |
| 11436  | 4     | 2     | 1     | 1     | 4     | 5     | 0      | 0      | 0      | 0      | 0      | 0      | 0      | 0      |
| 11437  | 2     | 3     | 3     | 3     | 4     | 3     | 1      | 1      | 2      | 1      | 1      | 1      | 1      | 1      |
| 11439  | 5     | 1     | 0     | 1     | 4     | 5     | 0      | 0      | 0      | 0      | 0      | 0      | 0      | 0      |
| 11440  | 4     | 2     | 1     | 4     | 4     | 5     | 0      | 0      | 0      | 2      | 2      | 3      | 0      | 1      |
| 11447  | 5     | 1     | 1     | 1     | 4     | 5     | 0      | 0      | 0      | 0      | 0      | 0      | 0      | 1      |
| 11455  | 5     | 1     | 1     | 1     | 4     | 5     | 1      | 1      | 0      | 0      | 1      | 0      | 0      | 1      |
| 11456  | 3     | 3     | 3     | 3     | 3     | 3     | 3      | 1      | 1      | 1      | 1      | 1      | 1      | 2      |
| 11461  | 4     | 2     | 4     | 4     | 4     | 4     | 4      | 1      | 1      | 1      | 2      | 1      | 0      | 1      |
| 11463  | 4     | 2     | 1     | 1     | 4     | 4     | 4      | 1      | 0      | 0      | 0      | 1      | 0      | 0      |



| respid | Q52_2 | Q53_1 | Q54_1 | Q54_2 | Q54_3 | Q55_1 | Q56a_1 | Q56b_1 | Q56c_1 | Q56d_1 | Q56e_1 | Q56f_1 | Q56g_1 | Q56h_1 |
|--------|-------|-------|-------|-------|-------|-------|--------|--------|--------|--------|--------|--------|--------|--------|
| 11470  | 3     | 3     | 3     | 1     | 3     | 4     | 2      | 2      | 1      | 2      | 2      | 2      | 1      | 2      |
| 11472  | 5     | 1     | 1     | 1     | 4     | 5     | 0      | 0      | 0      | 0      | 0      | 0      | 1      | 0      |
| 11475  | 5     | 2     | 1     | 1     | 3     | 5     | 3      | 0      | 0      | 0      | 2      | 1      | 1      | 1      |
| 11476  | 3     | 4     | 1     | 1     | 3     | 3     | 1      | 1      | 1      | 1      | 1      | 1      | 1      | 1      |
| 11482  | 3     | 3     | 3     | 3     | 3     | 3     | 1      | 1      | 1      | 1      | 1      | 1      | 2      | 1      |
| 11501  | 3     | 4     | 3     | 4     | 3     | 3     | 1      | 2      | 2      | 1      | 2      | 2      | 2      | 1      |
| 11503  | 3     | 3     | 1     | 1     | 4     | 3     | 1      | 0      | 1      | 1      | 1      | 1      | 1      | 1      |
| 11505  | 4     | 3     | 1     | 3     | 3     | 4     | 1      | 1      | 1      | 1      | 1      | 2      | 0      | 2      |
| 11510  | 5     | 2     | 0     | 0     | 4     | 5     | 0      | 0      | 0      | 0      | 0      | 0      | 0      | 1      |
| 11519  | 5     | 1     | 1     | 1     | 4     | 5     | 0      | 0      | 1      | 0      | 0      | 0      | 1      | 0      |
| 11527  | 4     | 2     | 1     | 3     | 4     | 4     | 1      | 0      | 0      | 0      | 1      | 1      | 1      | 1      |
| 11529  | 3     | 2     | 3     | 4     | 4     | 3     | 1      | 2      | 1      | 2      | 1      | 1      | 2      | 1      |
| 11530  | 2     | 4     | 3     | 1     | 1     | 3     | 1      | 1      | 1      | 1      | 1      | 1      | 2      | 1      |
| 11536  | 4     | 3     | 4     | 5     | 3     | 3     | 1      | 1      | 1      | 1      | 2      | 2      | 2      | 2      |
| 11543  | 5     | 1     | 1     | 1     | 4     | 5     | 0      | 0      | 0      | 0      | 0      | 1      | 1      | 0      |
| 11548  | 4     | 2     | 3     | 3     | 4     | 4     | 1      | 0      | 1      | 0      | 1      | 0      | 1      | 0      |
| 11566  | 3     | 1     | 1     | 1     | 3     | 3     | 0      | 0      | 2      | 1      | 1      | 1      | 1      | 0      |
| 11570  | 5     | 1     | 1     | 1     | 4     | 5     | 0      | 1      | 1      | 1      | 1      | 1      | 1      | 1      |
| 11571  | 4     | 3     | 1     | 1     | 4     | 4     | 1      | 0      | 1      | 0      | 1      | 0      | 0      | 1      |
| 11578  | 4     | 2     | 3     | 1     | 4     | 4     | 1      | 0      | 1      | 0      | 1      | 1      | 1      | 1      |
| 11579  | 4     | 1     | 1     | 1     | 4     | 5     | 0      | 0      | 1      | 0      | 1      | 0      | 0      | 0      |
| 11581  | 2     | 5     | 1     | 1     | 4     | 4     | 3      | 2      | 1      | 2      | 0      | 0      | 0      | 0      |
| 11582  | 4     | 2     | 1     | 1     | 4     | 4     | 1      | 1      | 1      | 0      | 1      | 0      | 0      | 1      |
| 11583  | 5     | 1     | 0     | 0     | 5     | 5     | 0      | 0      | 0      | 0      | 1      | 0      | 0      | 0      |
| 11589  | 3     | 3     | 3     | 3     | 4     | 3     | 1      | 1      | 1      | 1      | 1      | 1      | 1      | 1      |
| 11590  | 5     | 1     | 0     | 0     | 5     | 5     | 0      | 0      | 0      | 0      | 1      | 0      | 1      | 0      |
| 11592  | 5     | 1     | 0     | 0     | 5     | 5     | 0      | 0      | 0      | 0      | 0      | 0      | 0      | 0      |
| 11596  | 4     | 2     | 3     | 1     | 4     | 4     | 1      | 0      | 0      | 0      | 1      | 1      | 1      | 1      |
| 11598  | 4     | 2     | 1     | 3     | 4     | 4     | 1      | 0      | 0      | 0      | 1      | 1      | 1      | 1      |
| 11602  | 4     | 2     | 1     | 3     | 4     | 4     | 0      | 1      | 2      | 0      | 1      | 1      | 1      | 1      |
| 11605  | 4     | 2     | 3     | 1     | 4     | 4     | 0      | 0      | 1      | 0      | 1      | 0      | 1      | 1      |
| 11618  | 3     | 3     | 3     | 5     | 1     | 3     | 1      | 2      | 2      | 1      | 2      | 2      | 2      | 2      |

| respid | Q52_2 | Q53_1 | Q54_1 | Q54_2 | Q54_3 | Q55_1 | Q56a_1 | Q56b_1 | Q56c_1 | Q56d_1 | Q56e_1 | Q56f_1 | Q56g_1 | Q56h_1 |
|--------|-------|-------|-------|-------|-------|-------|--------|--------|--------|--------|--------|--------|--------|--------|
| 11621  | 3     | 3     | 1     | 3     | 1     | 3     | 1      | 1      | 1      | 2      | 1      | 1      | 2      | 1      |
| 11630  | 4     | 3     | 5     | 1     | 4     | 5     | 0      | 0      | 0      | 0      | 0      | 0      | 0      | 1      |
| 11636  | 3     | 4     | 0     | 1     | 3     | 4     | 2      | 1      | 0      | 0      | 1      | 1      | 1      | 2      |
| 11640  | 1     | 4     | 4     | 5     | 1     | 2     | 3      | 1      | 2      | 1      | 2      | 2      | 1      | 2      |
| 11658  | 4     | 3     | 4     | 3     | 4     | 4     | 1      | 0      | 2      | 1      | 1      | 1      | 1      | 0      |
| 11665  | 4     | 2     | 1     | 4     | 3     | 4     | 1      | 0      | 1      | 1      | 1      | 1      | 1      | 2      |
| 11666  | 4     | 2     | 1     | 3     | 3     | 3     | 1      | 0      | 1      | 0      | 2      | 1      | 1      | 1      |
| 11667  | 2     | 4     | 3     | 4     | 3     | 4     | 1      | 2      | 1      | 2      | 2      | 2      | 1      | 2      |
| 11674  | 5     | 1     | 0     | 0     | 5     | 5     | 0      | 0      | 0      | 0      | 0      | 1      | 0      | 0      |
| 11680  | 4     | 2     | 1     | 3     | 4     | 4     | 0      | 0      | 1      | 0      | 1      | 0      | 0      | 1      |
| 11683  | 5     | 2     | 1     | 3     | 4     | 5     | 0      | 0      | 2      | 0      | 1      | 2      | 1      | 1      |
| 11688  | 3     | 3     | 4     | 3     | 3     | 3     | 1      | 2      | 0      | 1      | 3      | 2      | 1      | 2      |
| 11690  | 5     | 1     | 0     | 0     | 4     | 5     | 0      | 0      | 0      | 0      | 0      | 0      | 0      | 0      |
| 11694  | 4     | 2     | 3     | 3     | 4     | 4     | 1      | 0      | 1      | 2      | 1      | 1      | 1      | 1      |
| 11705  | 4     | 2     | 4     | 4     | 4     | 4     | 2      | 2      | 2      | 1      | 2      | 1      | 1      | 1      |
| 11720  | 2     | 4     | 4     | 3     | 1     | 4     | 1      | 1      | 1      | 1      | 2      | 2      | 1      | 2      |
| 11724  | 5     | 1     | 0     | 0     | 5     | 5     | 0      | 0      | 0      | 0      | 0      | 0      | 0      | 0      |
| 11738  | 5     | 3     | 1     | 1     | 5     | 5     | 0      | 0      | 0      | 0      | 1      | 1      | 1      | 1      |
| 11744  | 4     | 2     | 1     | 1     | 4     | 4     | 1      | 0      | 0      | 0      | 1      | 0      | 1      | 0      |
| 11745  | 3     | 3     | 3     | 3     | 1     | 4     | 1      | 1      | 0      | 2      | 1      | 2      | 1      | 1      |
| 11747  | 5     | 1     | 0     | 0     | 5     | 5     | 0      | 0      | 0      | 0      | 0      | 0      | 0      | 0      |
| 11755  | 4     | 2     | 1     | 1     | 4     | 4     | 1      | 2      | 0      | 0      | 1      | 0      | 0      | 0      |
| 11756  | 2     | 3     | 3     | 1     | 3     | 2     | 1      | 1      | 1      | 2      | 2      | 2      | 0      | 1      |
| 11772  | 5     | 2     | 1     | 3     | 4     | 4     | 1      | 0      | 1      | 2      | 1      | 1      | 2      | 1      |
| 11773  | 5     | 1     | 0     | 0     | 4     | 5     | 0      | 0      | 0      | 0      | 0      | 0      | 0      | 0      |
| 11778  | 4     | 3     | 1     | 4     | 4     | 4     | 1      | 1      | 1      | 2      | 1      | 1      | 2      | 0      |
| 11790  | 4     | 2     | 1     | 3     | 4     | 5     | 0      | 1      | 1      | 1      | 1      | 1      | 1      | 2      |
| 11794  | 5     | 1     | 0     | 0     | 4     | 5     | 0      | 0      | 0      | 0      | 0      | 0      | 0      | 0      |
| 11795  | 3     | 3     | 3     | 4     | 3     | 3     | 1      | 2      | 1      | 2      | 1      | 1      | 2      | 2      |
| 11799  | 2     | 4     | 1     | 3     | 1     | 3     | 1      | 1      | 1      | 1      | 2      | 1      | 2      | 1      |
| 11803  | 4     | 2     | 4     | 4     | 4     | 4     | 1      | 2      | 1      | 2      | 1      | 0      | 1      | 1      |
| 11806  | 2     | 4     | 3     | 4     | 1     | 2     | 2      | 2      | 2      | 2      | 2      | 2      | 2      | 2      |

| respid | Q52_2 | Q53_1 | Q54_1 | Q54_2 | Q54_3 | Q55_1 | Q56a_1 | Q56b_1 | Q56c_1 | Q56d_1 | Q56e_1 | Q56f_1 | Q56g_1 | Q56h_1 |
|--------|-------|-------|-------|-------|-------|-------|--------|--------|--------|--------|--------|--------|--------|--------|
| 11808  | 5     | 2     | 1     | 1     | 4     | 4     | 0      | 0      | 1      | 1      | 0      | 1      | 1      | 1      |
| 11810  | 3     | 3     | 3     | 1     | 4     | 3     | 1      | 0      | 1      | 0      | 1      | 1      | 1      | 1      |
| 11811  | 5     | 1     | 0     | 0     | 5     | 5     | 0      | 0      | 0      | 0      | 0      | 0      | 0      | 0      |
| 11812  | 3     | 3     | 3     | 4     | 3     | 3     | 1      | 1      | 1      | 1      | 1      | 1      | 2      | 1      |
| 11813  | 3     | 2     | 1     | 1     | 4     | 4     | 1      | 1      | 2      | 0      | 1      | 0      | 1      | 1      |
| 11821  | 5     | 2     | 1     | 3     | 4     | 3     | 1      | 2      | 2      | 1      | 1      | 1      | 1      | 1      |
| 11827  | 5     | 1     | 0     | 0     | 4     | 5     | 0      | 0      | 0      | 0      | 0      | 0      | 0      | 0      |
| 11831  | 3     | 4     | 1     | 1     | 3     | 3     | 2      | 0      | 1      | 0      | 1      | 1      | 1      | 2      |
| 11841  | 5     | 1     | 0     | 0     | 5     | 5     | 0      | 0      | 0      | 0      | 0      | 0      | 0      | 0      |
| 11872  | 2     | 3     | 1     | 3     | 4     | 5     | 3      | 0      | 0      | 0      | 1      | 1      | 0      | 0      |
| 11898  | 5     | 1     | 1     | 1     | 5     | 5     | 0      | 0      | 0      | 0      | 0      | 0      | 0      | 0      |
| 11902  | 3     | 3     | 3     | 4     | 1     | 2     | 1      | 1      | 2      | 1      | 1      | 1      | 1      | 2      |
| 11912  | 3     | 3     | 3     | 4     | 3     | 4     | 1      | 2      | 1      | 2      | 1      | 1      | 1      | 1      |
| 11926  | 5     | 2     | 3     | 1     | 3     | 5     | 1      | 0      | 0      | 2      | 0      | 1      | 1      | 0      |
| 11928  | 1     | 2     | 1     | 1     | 1     | 4     | 1      | 1      | 1      | 0      | 1      | 1      | 1      | 2      |
| 11932  | 5     | 2     | 1     | 3     | 4     | 5     | 0      | 1      | 0      | 0      | 1      | 0      | 1      | 1      |
| 11934  | 4     | 1     | 1     | 3     | 3     | 4     | 1      | 2      | 2      | 1      | 1      | 1      | 1      | 1      |
| 11941  | 3     | 2     | 3     | 4     | 1     | 3     | 1      | 1      | 2      | 1      | 2      | 2      | 2      | 2      |
| 11942  | 5     | 1     | 1     | 1     | 3     | 5     | 0      | 0      | 1      | 0      | 1      | 0      | 0      | 0      |
| 11943  | 4     | 2     | 1     | 1     | 4     | 4     | 1      | 0      | 2      | 0      | 2      | 0      | 0      | 1      |
| 11944  | 1     | 3     | 4     | 4     | 1     | 2     | 1      | 1      | 2      | 2      | 2      | 2      | 2      | 1      |
| 11955  | 3     | 2     | 1     | 1     | 4     | 4     | 1      | 0      | 1      | 0      | 1      | 0      | 1      | 1      |
| 11958  | 4     | 3     | 1     | 4     | 4     | 5     | 1      | 1      | 2      | 0      | 1      | 1      | 0      | 2      |
| 11968  | 4     | 3     | 3     | 3     | 4     | 4     | 0      | 0      | 1      | 0      | 1      | 0      | 1      | 1      |
| 11979  | 2     | 3     | 1     | 3     | 4     | 3     | 2      | 1      | 2      | 0      | 2      | 1      | 2      | 1      |
| 11988  | 4     | 3     | 4     | 4     | 4     | 3     | 0      | 1      | 1      | 1      | 2      | 1      | 2      | 2      |
| 11999  | 5     | 1     | 1     | 4     | 4     | 4     | 1      | 1      | 1      | 2      | 1      | 1      | 1      | 1      |
| 12002  | 4     | 2     | 1     | 1     | 3     | 5     | 0      | 0      | 1      | 2      | 0      | 0      | 1      | 2      |
| 12004  | 4     | 2     | 1     | 1     | 4     | 4     | 0      | 1      | 1      | 0      | 1      | 0      | 1      | 1      |
| 12008  | 4     | 1     | 4     | 4     | 4     | 5     | 1      | 1      | 1      | 1      | 1      | 2      | 2      | 1      |
| 12013  | 5     | 2     | 1     | 3     | 4     | 4     | 0      | 0      | 0      | 0      | 0      | 1      | 0      | 1      |
| 12018  | 4     | 2     | 3     | 4     | 3     | 4     | 2      | 0      | 2      | 1      | 2      | 1      | 2      | 1      |

| respid | Q52_2 | Q53_1 | Q54_1 | Q54_2 | Q54_3 | Q55_1 | Q56a_1 | Q56b_1 | Q56c_1 | Q56d_1 | Q56e_1 | Q56f_1 | Q56g_1 | Q56h_1 |
|--------|-------|-------|-------|-------|-------|-------|--------|--------|--------|--------|--------|--------|--------|--------|
| 12023  | 4     | 4     | 1     | 1     | 4     | 5     | 1      | 0      | 0      | 0      | 1      | 0      | 1      | 1      |
| 12027  | 2     | 3     | 3     | 4     | 1     | 3     | 1      | 0      | 1      | 1      | 1      | 1      | 1      | 1      |
| 12030  | 4     | 1     | 1     | 1     | 4     | 5     | 1      | 0      | 0      | 0      | 1      | 1      | 1      | 2      |
| 12031  | 5     | 4     | 3     | 4     | 4     | 4     | 1      | 1      | 0      | 1      | 1      | 1      | 1      | 0      |
| 12036  | 5     | 2     | 1     | 3     | 4     | 4     | 1      | 0      | 0      | 1      | 1      | 1      | 1      | 1      |
| 12037  | 3     | 4     | 3     | 3     | 1     | 3     | 2      | 1      | 1      | 1      | 1      | 1      | 1      | 1      |
| 12038  | 3     | 4     | 3     | 3     | 3     | 2     | 1      | 2      | 2      | 2      | 2      | 1      | 1      | 1      |
| 12039  | 5     | 2     | 1     | 1     | 4     | 5     | 0      | 0      | 1      | 0      | 1      | 0      | 0      | 0      |
| 12045  | 3     | 3     | 1     | 3     | 3     | 4     | 1      | 0      | 1      | 0      | 1      | 1      | 0      | 1      |
| 12046  | 3     | 3     | 1     | 3     | 3     | 3     | 0      | 1      | 0      | 1      | 0      | 1      | 1      | 1      |
| 12054  | 2     | 4     | 1     | 1     | 3     | 2     | 2      | 1      | 2      | 1      | 2      | 1      | 2      | 1      |
| 12055  | 4     | 5     | 5     | 4     | 4     | 5     | 0      | 0      | 0      | 0      | 0      | 0      | 0      | 0      |
| 12069  | 2     | 3     | 3     | 4     | 1     | 2     | 1      | 1      | 1      | 2      | 1      | 1      | 1      | 1      |
| 12070  | 4     | 3     | 3     | 4     | 3     | 3     | 1      | 1      | 2      | 1      | 2      | 1      | 2      | 2      |
| 12074  | 4     | 2     | 1     | 1     | 3     | 4     | 1      | 0      | 0      | 0      | 1      | 0      | 1      | 1      |
| 12075  | 3     | 3     | 3     | 4     | 3     | 3     | 1      | 1      | 1      | 1      | 1      | 2      | 2      | 1      |
| 12078  | 4     | 1     | 1     | 1     | 1     | 4     | 0      | 0      | 1      | 0      | 0      | 0      | 0      | 0      |
| 12089  | 4     | 2     | 1     | 3     | 4     | 4     | 1      | 0      | 0      | 0      | 1      | 0      | 0      | 1      |
| 12091  | 4     | 3     | 3     | 4     | 4     | 3     | 1      | 2      | 2      | 1      | 1      | 2      | 1      | 1      |
| 12092  | 3     | 3     | 3     | 3     | 3     | 2     | 2      | 2      | 2      | 1      | 2      | 2      | 2      | 2      |
| 12108  | 1     | 4     | 3     | 4     | 1     | 4     | 1      | 2      | 1      | 2      | 2      | 2      | 1      | 2      |
| 12111  | 3     | 4     | 4     | 3     | 3     | 3     | 1      | 1      | 1      | 1      | 2      | 1      | 2      | 2      |
| 12112  | 4     | 3     | 3     | 4     | 3     | 3     | 1      | 0      | 1      | 0      | 1      | 1      | 2      | 1      |
| 12126  | 4     | 2     | 4     | 4     | 3     | 3     | 1      | 0      | 1      | 1      | 1      | 1      | 2      | 2      |
| 12132  | 3     | 3     | 3     | 4     | 4     | 3     | 1      | 0      | 2      | 1      | 1      | 1      | 2      | 1      |
| 12150  | 3     | 3     | 3     | 3     | 3     | 3     | 1      | 1      | 2      | 1      | 1      | 1      | 2      | 1      |
| 12152  | 4     | 2     | 1     | 1     | 4     | 4     | 1      | 2      | 1      | 2      | 1      | 0      | 1      | 1      |
| 12154  | 3     | 3     | 1     | 1     | 3     | 4     | 1      | 0      | 1      | 1      | 1      | 1      | 1      | 2      |
| 12157  | 4     | 4     | 3     | 1     | 3     | 4     | 1      | 2      | 1      | 2      | 1      | 1      | 2      | 2      |
| 12165  | 5     | 1     | 1     | 1     | 4     | 5     | 0      | 0      | 1      | 0      | 1      | 0      | 0      | 0      |
| 12169  | 3     | 3     | 1     | 3     | 4     | 3     | 1      | 1      | 2      | 1      | 2      | 1      | 1      | 2      |
| 12182  | 2     | 4     | 3     | 4     | 1     | 2     | 2      | 0      | 3      | 1      | 2      | 1      | 2      | 3      |

| respid | Q52_2 | Q53_1 | Q54_1 | Q54_2 | Q54_3 | Q55_1 | Q56a_1 | Q56b_1 | Q56c_1 | Q56d_1 | Q56e_1 | Q56f_1 | Q56g_1 | Q56h_1 |
|--------|-------|-------|-------|-------|-------|-------|--------|--------|--------|--------|--------|--------|--------|--------|
| 12198  | 5     | 1     | 1     | 3     | 5     | 5     | 0      | 0      | 0      | 0      | 0      | 0      | 0      | 3      |
| 12199  | 5     | 2     | 1     | 1     | 4     | 4     | 1      | 1      | 0      | 2      | 1      | 1      | 0      | 1      |
| 12202  | 3     | 3     | 3     | 3     | 3     | 4     | 1      | 0      | 1      | 0      | 0      | 0      | 0      | 0      |
| 12207  | 5     | 2     | 1     | 1     | 4     | 5     | 0      | 0      | 0      | 1      | 0      | 0      | 0      | 0      |
| 12208  | 4     | 3     | 1     | 1     | 3     | 3     | 1      | 0      | 1      | 0      | 1      | 1      | 1      | 1      |
| 12210  | 5     | 1     | 1     | 1     | 4     | 5     | 0      | 0      | 0      | 0      | 0      | 0      | 0      | 1      |
| 12219  | 2     | 4     | 3     | 4     | 4     | 3     | 2      | 2      | 2      | 1      | 2      | 2      | 2      | 3      |
| 12224  | 5     | 1     | 1     | 4     | 4     | 5     | 1      | 0      | 0      | 0      | 1      | 1      | 0      | 2      |
| 12230  | 4     | 3     | 3     | 4     | 4     | 3     | 1      | 1      | 1      | 1      | 1      | 1      | 2      | 1      |
| 12238  | 3     | 3     | 1     | 3     | 3     | 3     | 1      | 1      | 1      | 1      | 1      | 1      | 2      | 1      |
| 12239  | 5     | 1     | 1     | 0     | 4     | 5     | 0      | 1      | 0      | 1      | 1      | 1      | 1      | 0      |
| 12243  | 5     | 2     | 1     | 1     | 4     | 5     | 1      | 0      | 0      | 0      | 1      | 0      | 0      | 1      |
| 12245  | 5     | 1     | 3     | 3     | 1     | 2     | 1      | 0      | 2      | 1      | 2      | 2      | 2      | 1      |
| 12246  | 2     | 4     | 1     | 4     | 1     | 3     | 1      | 1      | 2      | 2      | 2      | 2      | 2      | 3      |
| 12247  | 5     | 1     | 1     | 1     | 4     | 5     | 0      | 0      | 0      | 0      | 0      | 0      | 0      | 0      |
| 12248  | 3     | 3     | 3     | 1     | 4     | 3     | 1      | 1      | 2      | 1      | 2      | 2      | 2      | 2      |
| 12249  | 4     | 2     | 3     | 3     | 4     | 5     | 0      | 0      | 0      | 0      | 1      | 1      | 1      | 1      |
| 12258  | 3     | 4     | 3     | 3     | 1     | 4     | 2      | 2      | 1      | 1      | 2      | 2      | 2      | 2      |
| 12265  | 2     | 3     | 3     | 4     | 1     | 4     | 1      | 1      | 1      | 1      | 2      | 2      | 0      | 2      |
| 12269  | 5     | 1     | 1     | 1     | 4     | 5     | 0      | 0      | 0      | 0      | 0      | 0      | 0      | 0      |
| 12270  | 5     | 1     | 0     | 0     | 5     | 5     | 0      | 0      | 0      | 0      | 1      | 0      | 0      | 0      |
| 12279  | 2     | 2     | 1     | 1     | 3     | 3     | 0      | 0      | 0      | 0      | 1      | 1      | 1      | 1      |
| 12280  | 5     | 3     | 3     | 3     | 3     | 3     | 1      | 2      | 1      | 1      | 2      | 1      | 2      | 1      |
| 12282  | 3     | 4     | 1     | 3     | 3     | 3     | 2      | 1      | 2      | 2      | 2      | 1      | 2      | 1      |
| 12283  | 3     | 2     | 1     | 3     | 3     | 3     | 2      | 1      | 1      | 2      | 2      | 1      | 2      | 1      |
| 12287  | 4     | 2     | 1     | 1     | 4     | 4     | 1      | 0      | 0      | 0      | 3      | 1      | 1      | 1      |
| 12288  | 4     | 2     | 1     | 1     | 3     | 4     | 1      | 1      | 1      | 1      | 0      | 0      | 1      | 1      |
| 12290  | 4     | 2     | 1     | 1     | 3     | 5     | 1      | 1      | 0      | 0      | 1      | 1      | 1      | 1      |
| 12292  | 4     | 2     | 3     | 3     | 4     | 4     | 1      | 1      | 1      | 1      | 1      | 1      | 1      | 1      |
| 12294  | 5     | 1     | 3     | 3     | 5     | 5     | 0      | 2      | 0      | 1      | 1      | 1      | 1      | 1      |
| 12296  | 5     | 1     | 1     | 0     | 4     | 5     | 0      | 0      | 0      | 0      | 0      | 0      | 0      | 0      |
| 12307  | 4     | 2     | 1     | 1     | 4     | 4     | 0      | 1      | 1      | 1      | 1      | 0      | 1      | 1      |

| respid | Q52_2 | Q53_1 | Q54_1 | Q54_2 | Q54_3 | Q55_1 | Q56a_1 | Q56b_1 | Q56c_1 | Q56d_1 | Q56e_1 | Q56f_1 | Q56g_1 | Q56h_1 |
|--------|-------|-------|-------|-------|-------|-------|--------|--------|--------|--------|--------|--------|--------|--------|
| 12309  | 4     | 1     | 1     | 1     | 4     | 5     | 0      | 0      | 0      | 0      | 0      | 0      | 1      | 1      |
| 12312  | 4     | 2     | 1     | 3     | 4     | 4     | 1      | 1      | 1      | 0      | 1      | 1      | 1      | 1      |
| 12317  | 3     | 2     | 1     | 1     | 3     | 3     | 1      | 1      | 2      | 2      | 1      | 1      | 0      | 2      |
| 12319  | 1     | 5     | 0     | 0     | 0     | 2     | 0      | 0      | 0      | 0      | 1      | 1      | 0      | 1      |
| 12320  | 4     | 1     | 1     | 3     | 3     | 4     | 1      | 1      | 0      | 1      | 1      | 1      | 1      | 0      |
| 12322  | 3     | 2     | 3     | 1     | 3     | 4     | 1      | 0      | 1      | 1      | 1      | 1      | 1      | 1      |
| 12328  | 3     | 3     | 1     | 1     | 4     | 3     | 1      | 1      | 1      | 1      | 2      | 2      | 2      | 1      |
| 12331  | 3     | 4     | 1     | 0     | 1     | 3     | 2      | 2      | 3      | 1      | 2      | 1      | 0      | 2      |
| 12332  | 5     | 1     | 1     | 0     | 5     | 5     | 0      | 0      | 0      | 0      | 0      | 0      | 1      | 0      |
| 12334  | 5     | 3     | 3     | 4     | 3     | 5     | 0      | 0      | 0      | 0      | 1      | 1      | 1      | 1      |
| 12337  | 4     | 1     | 3     | 3     | 4     | 5     | 1      | 0      | 0      | 0      | 2      | 1      | 1      | 0      |
| 12338  | 4     | 2     | 0     | 1     | 4     | 5     | 1      | 1      | 0      | 0      | 1      | 1      | 0      | 0      |
| 12342  | 5     | 1     | 0     | 0     | 5     | 5     | 0      | 0      | 0      | 0      | 0      | 0      | 0      | 0      |
| 12349  | 5     | 1     | 1     | 1     | 4     | 4     | 1      | 1      | 1      | 0      | 1      | 0      | 0      | 1      |
| 12352  | 4     | 2     | 1     | 4     | 4     | 4     | 1      | 1      | 1      | 1      | 1      | 2      | 2      | 1      |
| 12355  | 4     | 2     | 3     | 3     | 3     | 5     | 1      | 0      | 0      | 0      | 1      | 1      | 1      | 0      |
| 12357  | 4     | 2     | 1     | 1     | 3     | 4     | 1      | 0      | 1      | 1      | 2      | 1      | 2      | 2      |
| 12358  | 4     | 2     | 0     | 3     | 4     | 3     | 1      | 0      | 1      | 0      | 1      | 1      | 1      | 0      |
| 12371  | 3     | 4     | 1     | 1     | 3     | 3     | 1      | 2      | 0      | 1      | 1      | 1      | 0      | 2      |
| 12372  | 5     | 1     | 1     | 1     | 5     | 5     | 0      | 0      | 0      | 0      | 0      | 0      | 0      | 0      |
| 12373  | 4     | 2     | 1     | 1     | 4     | 4     | 1      | 0      | 0      | 0      | 1      | 0      | 0      | 1      |
| 12379  | 4     | 1     | 0     | 0     | 4     | 5     | 0      | 0      | 0      | 0      | 0      | 0      | 1      | 0      |
| 12381  | 3     | 2     | 4     | 4     | 1     | 4     | 2      | 1      | 2      | 1      | 2      | 1      | 2      | 1      |
| 12383  | 4     | 1     | 1     | 3     | 4     | 5     | 1      | 1      | 1      | 1      | 1      | 2      | 1      | 1      |
| 12384  | 5     | 1     | 1     | 1     | 5     | 5     | 0      | 0      | 0      | 0      | 1      | 0      | 0      | 0      |
| 12386  | 4     | 3     | 1     | 3     | 4     | 4     | 1      | 0      | 1      | 1      | 1      | 0      | 1      | 1      |
| 12389  | 4     | 2     | 3     | 3     | 4     | 4     | 0      | 1      | 0      | 0      | 0      | 1      | 0      | 1      |
| 12392  | 5     | 1     | 3     | 3     | 3     | 5     | 1      | 2      | 2      | 1      | 1      | 1      | 1      | 0      |
| 12396  | 5     | 1     | 0     | 0     | 3     | 5     | 0      | 0      | 0      | 0      | 0      | 0      | 0      | 0      |
| 12397  | 4     | 1     | 3     | 1     | 5     | 4     | 0      | 2      | 0      | 2      | 1      | 0      | 0      | 1      |
| 12399  | 3     | 3     | 4     | 4     | 1     | 3     | 2      | 1      | 3      | 2      | 2      | 1      | 2      | 2      |
| 12400  | 4     | 2     | 4     | 4     | 3     | 4     | 1      | 2      | 1      | 1      | 1      | 1      | 2      | 1      |

| respid | Q52_2 | Q53_1 | Q54_1 | Q54_2 | Q54_3 | Q55_1 | Q56a_1 | Q56b_1 | Q56c_1 | Q56d_1 | Q56e_1 | Q56f_1 | Q56g_1 | Q56h_1 |
|--------|-------|-------|-------|-------|-------|-------|--------|--------|--------|--------|--------|--------|--------|--------|
| 12406  | 4     | 3     | 5     | 5     | 0     | 5     | 3      | 1      | 1      | 1      | 3      | 3      | 3      | 2      |
| 12407  | 4     | 2     | 1     | 3     | 3     | 4     | 1      | 1      | 2      | 0      | 1      | 1      | 1      | 1      |
| 12410  | 5     | 1     | 1     | 1     | 1     | 5     | 1      | 1      | 0      | 0      | 0      | 1      | 1      | 0      |
| 12413  | 5     | 3     | 1     | 1     | 4     | 4     | 0      | 0      | 0      | 0      | 1      | 0      | 0      | 1      |
| 12416  | 4     | 4     | 3     | 3     | 4     | 3     | 1      | 1      | 2      | 2      | 1      | 1      | 2      | 1      |
| 12419  | 4     | 2     | 1     | 1     | 4     | 5     | 0      | 0      | 1      | 0      | 1      | 1      | 0      | 1      |
| 12422  | 2     | 4     | 1     | 1     | 1     | 2     | 1      | 0      | 2      | 0      | 1      | 1      | 1      | 1      |
| 12423  | 5     | 1     | 3     | 1     | 3     | 3     | 0      | 1      | 0      | 0      | 1      | 0      | 1      | 1      |
| 12429  | 5     | 3     | 0     | 1     | 3     | 5     | 0      | 0      | 0      | 0      | 1      | 1      | 1      | 0      |
| 12434  | 4     | 2     | 4     | 3     | 4     | 4     | 1      | 1      | 1      | 1      | 1      | 1      | 1      | 1      |
| 12435  | 5     | 1     | 1     | 1     | 4     | 5     | 1      | 0      | 0      | 0      | 0      | 0      | 1      | 1      |
| 12436  | 4     | 3     | 1     | 1     | 4     | 3     | 1      | 0      | 3      | 3      | 1      | 1      | 1      | 1      |
| 12442  | 5     | 1     | 0     | 0     | 5     | 5     | 0      | 0      | 0      | 0      | 0      | 0      | 0      | 0      |
| 12449  | 5     | 2     | 1     | 1     | 3     | 5     | 1      | 1      | 2      | 2      | 1      | 0      | 1      | 1      |
| 12451  | 5     | 1     | 1     | 1     | 4     | 4     | 0      | 0      | 0      | 0      | 0      | 0      | 0      | 0      |
| 12456  | 5     | 4     | 1     | 0     | 4     | 3     | 1      | 1      | 1      | 0      | 0      | 1      | 0      | 1      |
| 12457  | 5     | 1     | 0     | 0     | 5     | 5     | 0      | 0      | 0      | 0      | 0      | 0      | 0      | 1      |
| 12458  | 5     | 1     | 1     | 1     | 4     | 4     | 1      | 0      | 1      | 0      | 0      | 0      | 0      | 1      |
| 12461  | 4     | 3     | 4     | 3     | 4     | 4     | 1      | 1      | 1      | 2      | 1      | 1      | 1      | 1      |
| 12462  | 4     | 1     | 1     | 1     | 4     | 4     | 0      | 0      | 0      | 0      | 0      | 1      | 1      | 0      |
| 12463  | 3     | 3     | 3     | 3     | 4     | 3     | 2      | 2      | 2      | 2      | 2      | 2      | 2      | 2      |
| 12466  | 5     | 1     | 1     | 1     | 5     | 5     | 0      | 1      | 0      | 1      | 1      | 1      | 1      | 0      |
| 12470  | 3     | 3     | 1     | 0     | 4     | 3     | 1      | 1      | 0      | 1      | 1      | 1      | 0      | 1      |
| 12471  | 3     | 3     | 3     | 1     | 4     | 3     | 2      | 2      | 1      | 1      | 2      | 2      | 1      | 2      |
| 12472  | 4     | 2     | 0     | 1     | 3     | 4     | 0      | 0      | 1      | 0      | 1      | 0      | 0      | 0      |
| 12478  | 3     | 1     | 1     | 3     | 3     | 5     | 1      | 0      | 0      | 2      | 2      | 2      | 2      | 1      |
| 12479  | 3     | 3     | 1     | 3     | 4     | 3     | 1      | 1      | 1      | 1      | 1      | 1      | 1      | 1      |
| 12481  | 5     | 1     | 1     | 1     | 4     | 4     | 1      | 0      | 0      | 0      | 1      | 0      | 0      | 1      |
| 12482  | 2     | 4     | 1     | 3     | 4     | 3     | 1      | 1      | 0      | 0      | 1      | 1      | 1      | 1      |
| 12483  | 4     | 2     | 3     | 3     | 4     | 4     | 1      | 2      | 0      | 1      | 1      | 1      | 1      | 1      |
| 12496  | 3     | 2     | 1     | 3     | 4     | 5     | 0      | 1      | 0      | 1      | 1      | 1      | 1      | 1      |
| 12497  | 3     | 3     | 4     | 5     | 3     | 3     | 2      | 3      | 1      | 2      | 2      | 2      | 2      | 2      |

| respid | Q52_2 | Q53_1 | Q54_1 | Q54_2 | Q54_3 | Q55_1 | Q56a_1 | Q56b_1 | Q56c_1 | Q56d_1 | Q56e_1 | Q56f_1 | Q56g_1 | Q56h_1 |
|--------|-------|-------|-------|-------|-------|-------|--------|--------|--------|--------|--------|--------|--------|--------|
| 12498  | 4     | 2     | 1     | 3     | 4     | 4     | 1      | 2      | 1      | 2      | 1      | 2      | 1      | 1      |
| 12500  | 2     | 4     | 3     | 4     | 1     | 3     | 1      | 1      | 0      | 0      | 1      | 1      | 0      | 1      |
| 12501  | 5     | 2     | 3     | 3     | 4     | 4     | 0      | 1      | 0      | 1      | 1      | 1      | 1      | 1      |
| 12502  | 3     | 3     | 3     | 3     | 3     | 3     | 1      | 1      | 1      | 1      | 1      | 1      | 1      | 1      |
| 12503  | 5     | 3     | 4     | 5     | 4     | 4     | 0      | 0      | 0      | 2      | 1      | 1      | 1      | 0      |
| 12505  | 4     | 3     | 1     | 3     | 4     | 4     | 0      | 1      | 1      | 1      | 3      | 1      | 0      | 2      |
| 12508  | 4     | 3     | 1     | 3     | 4     | 4     | 1      | 2      | 2      | 1      | 2      | 1      | 2      | 2      |
| 12509  | 3     | 2     | 3     | 1     | 3     | 4     | 1      | 1      | 1      | 0      | 1      | 1      | 1      | 1      |
| 12510  | 5     | 1     | 1     | 1     | 5     | 5     | 0      | 1      | 0      | 0      | 0      | 1      | 1      | 0      |
| 12512  | 4     | 1     | 1     | 1     | 4     | 3     | 1      | 1      | 1      | 0      | 1      | 1      | 1      | 0      |
| 12514  | 2     | 2     | 4     | 4     | 1     | 3     | 1      | 1      | 1      | 1      | 3      | 3      | 2      | 1      |
| 12515  | 3     | 4     | 3     | 4     | 1     | 3     | 1      | 0      | 0      | 0      | 0      | 0      | 0      | 0      |
| 12520  | 5     | 1     | 0     | 0     | 5     | 5     | 0      | 0      | 0      | 0      | 0      | 0      | 0      | 0      |
| 12522  | 4     | 1     | 1     | 1     | 5     | 5     | 0      | 0      | 0      | 1      | 0      | 0      | 0      | 0      |
| 12526  | 3     | 3     | 3     | 1     | 4     | 3     | 1      | 0      | 0      | 1      | 1      | 1      | 2      | 1      |
| 12527  | 5     | 1     | 1     | 3     | 5     | 5     | 0      | 0      | 0      | 0      | 0      | 1      | 2      | 0      |
| 12528  | 5     | 2     | 1     | 1     | 4     | 4     | 1      | 0      | 0      | 0      | 0      | 0      | 0      | 1      |
| 12530  | 3     | 3     | 4     | 3     | 4     | 3     | 1      | 1      | 1      | 2      | 1      | 1      | 2      | 1      |
| 12535  | 5     | 1     | 1     | 3     | 5     | 4     | 0      | 1      | 0      | 0      | 1      | 1      | 1      | 1      |
| 12539  | 4     | 1     | 1     | 1     | 4     | 4     | 1      | 1      | 0      | 1      | 1      | 0      | 1      | 2      |
| 12541  | 3     | 4     | 1     | 1     | 0     | 3     | 1      | 0      | 1      | 0      | 2      | 2      | 1      | 0      |
| 12542  | 4     | 2     | 0     | 3     | 3     | 5     | 1      | 0      | 1      | 0      | 1      | 1      | 1      | 1      |
| 12545  | 3     | 3     | 4     | 5     | 3     | 2     | 1      | 3      | 1      | 2      | 2      | 3      | 3      | 2      |
| 12547  | 3     | 3     | 4     | 3     | 1     | 3     | 1      | 0      | 0      | 1      | 1      | 1      | 2      | 1      |
| 12549  | 2     | 3     | 1     | 1     | 3     | 3     | 1      | 1      | 1      | 1      | 2      | 2      | 1      | 2      |
| 12550  | 5     | 2     | 1     | 1     | 3     | 5     | 1      | 1      | 2      | 1      | 1      | 1      | 0      | 0      |
| 12555  | 4     | 1     | 1     | 1     | 4     | 5     | 0      | 1      | 1      | 1      | 1      | 1      | 1      | 2      |
| 12557  | 3     | 4     | 4     | 4     | 1     | 2     | 2      | 1      | 2      | 1      | 1      | 1      | 2      | 2      |
| 12559  | 4     | 1     | 4     | 4     | 3     | 3     | 2      | 2      | 2      | 1      | 2      | 2      | 2      | 1      |
| 12561  | 4     | 2     | 1     | 1     | 4     | 4     | 1      | 0      | 1      | 1      | 1      | 0      | 0      | 0      |
| 12562  | 3     | 3     | 1     | 1     | 4     | 4     | 2      | 2      | 1      | 2      | 2      | 1      | 1      | 1      |
| 12563  | 4     | 2     | 1     | 0     | 4     | 4     | 1      | 0      | 0      | 0      | 1      | 0      | 0      | 1      |



| respid | Q52_2 | Q53_1 | Q54_1 | Q54_2 | Q54_3 | Q55_1 | Q56a_1 | Q56b_1 | Q56c_1 | Q56d_1 | Q56e_1 | Q56f_1 | Q56g_1 | Q56h_1 |
|--------|-------|-------|-------|-------|-------|-------|--------|--------|--------|--------|--------|--------|--------|--------|
| 12565  | 1     | 2     | 3     | 4     | 1     | 1     | 2      | 3      | 3      | 2      | 3      | 3      | 3      | 3      |
| 12566  | 5     | 1     | 1     | 1     | 3     | 5     | 1      | 1      | 0      | 1      | 1      | 0      | 1      | 0      |
| 12570  | 3     | 1     | 3     | 3     | 3     | 4     | 1      | 2      | 1      | 2      | 1      | 1      | 1      | 1      |
| 12571  | 5     | 1     | 5     | 5     | 5     | 5     | 3      | 3      | 0      | 3      | 0      | 3      | 3      | 0      |
| 12572  | 4     | 2     | 3     | 3     | 1     | 3     | 1      | 1      | 1      | 0      | 1      | 1      | 0      | 2      |
| 12578  | 3     | 2     | 1     | 1     | 4     | 4     | 1      | 0      | 1      | 0      | 1      | 0      | 0      | 0      |
| 12579  | 5     | 2     | 1     | 1     | 4     | 5     | 1      | 1      | 0      | 1      | 1      | 2      | 2      | 1      |
| 12581  | 5     | 2     | 1     | 1     | 5     | 5     | 0      | 0      | 0      | 1      | 1      | 1      | 1      | 1      |
| 12582  | 3     | 3     | 3     | 3     | 3     | 3     | 1      | 1      | 1      | 1      | 1      | 1      | 2      | 0      |
| 12585  | 4     | 2     | 1     | 3     | 3     | 4     | 1      | 0      | 1      | 0      | 1      | 0      | 1      | 0      |
| 12586  | 4     | 2     | 1     | 3     | 3     | 4     | 1      | 1      | 1      | 2      | 1      | 1      | 1      | 1      |
| 12588  | 4     | 3     | 3     | 5     | 3     | 4     | 2      | 2      | 1      | 0      | 1      | 1      | 2      | 1      |
| 12589  | 5     | 1     | 1     | 1     | 5     | 5     | 1      | 2      | 0      | 0      | 0      | 0      | 1      | 1      |
| 12590  | 5     | 1     | 1     | 1     | 5     | 5     | 0      | 0      | 0      | 0      | 0      | 0      | 0      | 0      |
| 12591  | 3     | 4     | 3     | 3     | 4     | 3     | 0      | 1      | 1      | 2      | 2      | 1      | 1      | 1      |
| 12593  | 2     | 4     | 3     | 1     | 1     | 3     | 2      | 2      | 2      | 2      | 2      | 2      | 1      | 1      |
| 12594  | 4     | 2     | 1     | 1     | 4     | 4     | 1      | 0      | 1      | 2      | 2      | 1      | 2      | 1      |
| 12599  | 4     | 2     | 1     | 1     | 3     | 3     | 1      | 1      | 1      | 0      | 1      | 0      | 0      | 1      |
| 12600  | 4     | 4     | 1     | 1     | 4     | 4     | 1      | 1      | 1      | 0      | 1      | 0      | 0      | 1      |
| 12602  | 3     | 3     | 4     | 4     | 3     | 4     | 1      | 1      | 1      | 2      | 2      | 2      | 2      | 2      |
| 12606  | 2     | 4     | 4     | 5     | 1     | 2     | 1      | 1      | 1      | 1      | 2      | 3      | 3      | 3      |
| 12607  | 5     | 1     | 0     | 1     | 5     | 5     | 0      | 0      | 0      | 0      | 0      | 0      | 0      | 0      |
| 12608  | 4     | 1     | 1     | 1     | 4     | 5     | 0      | 0      | 0      | 0      | 0      | 0      | 1      | 1      |
| 12610  | 3     | 3     | 3     | 4     | 1     | 3     | 1      | 0      | 2      | 1      | 2      | 2      | 2      | 2      |
| 12611  | 5     | 1     | 1     | 1     | 4     | 4     | 0      | 0      | 0      | 0      | 0      | 1      | 1      | 0      |
| 12613  | 3     | 3     | 4     | 3     | 3     | 3     | 1      | 2      | 0      | 2      | 1      | 2      | 1      | 0      |
| 12616  | 4     | 3     | 1     | 1     | 4     | 3     | 2      | 1      | 1      | 1      | 1      | 0      | 0      | 1      |
| 12617  | 4     | 2     | 4     | 3     | 5     | 5     | 0      | 0      | 1      | 2      | 2      | 1      | 1      | 0      |
| 12619  | 4     | 1     | 1     | 3     | 4     | 5     | 0      | 2      | 1      | 1      | 1      | 2      | 1      | 1      |
| 12622  | 5     | 1     | 0     | 0     | 5     | 5     | 0      | 0      | 0      | 0      | 0      | 0      | 0      | 0      |
| 12628  | 4     | 1     | 3     | 4     | 1     | 4     | 1      | 0      | 1      | 1      | 1      | 1      | 1      | 1      |
| 12631  | 5     | 1     | 1     | 3     | 4     | 5     | 1      | 2      | 0      | 0      | 1      | 0      | 0      | 1      |

| respid | Q52_2 | Q53_1 | Q54_1 | Q54_2 | Q54_3 | Q55_1 | Q56a_1 | Q56b_1 | Q56c_1 | Q56d_1 | Q56e_1 | Q56f_1 | Q56g_1 | Q56h_1 |
|--------|-------|-------|-------|-------|-------|-------|--------|--------|--------|--------|--------|--------|--------|--------|
| 12635  | 3     | 4     | 1     | 3     | 4     | 3     | 1      | 2      | 1      | 2      | 2      | 2      | 1      | 1      |
| 12638  | 5     | 2     | 1     | 1     | 1     | 5     | 1      | 0      | 0      | 0      | 1      | 1      | 2      | 1      |
| 12639  | 5     | 1     | 1     | 1     | 4     | 5     | 0      | 0      | 0      | 0      | 0      | 0      | 0      | 0      |
| 12640  | 5     | 1     | 1     | 1     | 4     | 4     | 0      | 0      | 0      | 0      | 0      | 0      | 0      | 0      |
| 12643  | 4     | 1     | 3     | 3     | 3     | 5     | 1      | 0      | 1      | 0      | 0      | 0      | 0      | 0      |
| 12646  | 4     | 2     | 1     | 3     | 3     | 4     | 1      | 1      | 2      | 0      | 1      | 1      | 1      | 1      |
| 12648  | 2     | 3     | 4     | 3     | 1     | 3     | 3      | 2      | 3      | 1      | 3      | 2      | 2      | 2      |
| 12650  | 2     | 3     | 4     | 3     | 3     | 4     | 1      | 1      | 1      | 1      | 2      | 2      | 1      | 1      |
| 12651  | 3     | 3     | 3     | 4     | 3     | 3     | 1      | 0      | 1      | 2      | 3      | 1      | 0      | 2      |
| 12658  | 4     | 2     | 0     | 1     | 0     | 4     | 0      | 0      | 0      | 0      | 0      | 0      | 0      | 0      |
| 12662  | 3     | 3     | 4     | 3     | 3     | 3     | 2      | 1      | 1      | 2      | 2      | 2      | 2      | 2      |
| 12663  | 2     | 3     | 3     | 1     | 3     | 4     | 1      | 1      | 1      | 1      | 2      | 1      | 1      | 2      |
| 12664  | 2     | 3     | 1     | 4     | 3     | 3     | 1      | 1      | 1      | 1      | 1      | 2      | 2      | 2      |
| 12669  | 4     | 3     | 1     | 3     | 4     | 4     | 1      | 0      | 1      | 0      | 1      | 1      | 1      | 1      |
| 12670  | 4     | 3     | 1     | 1     | 4     | 3     | 1      | 1      | 1      | 0      | 1      | 0      | 1      | 1      |
| 12673  | 5     | 2     | 4     | 4     | 4     | 4     | 1      | 1      | 1      | 1      | 1      | 2      | 2      | 3      |
| 12675  | 3     | 2     | 3     | 4     | 3     | 3     | 1      | 1      | 1      | 1      | 2      | 1      | 2      | 2      |
| 12677  | 4     | 3     | 1     | 1     | 4     | 4     | 1      | 1      | 1      | 1      | 1      | 1      | 0      | 1      |
| 12679  | 4     | 1     | 1     | 1     | 4     | 4     | 1      | 1      | 1      | 2      | 2      | 1      | 2      | 0      |
| 12682  | 2     | 3     | 3     | 3     | 1     | 3     | 0      | 0      | 0      | 0      | 2      | 2      | 1      | 1      |
| 12696  | 4     | 2     | 3     | 4     | 3     | 3     | 1      | 1      | 1      | 1      | 1      | 1      | 1      | 1      |
| 12697  | 4     | 3     | 1     | 1     | 4     | 3     | 1      | 1      | 1      | 1      | 1      | 0      | 1      | 1      |
| 12699  | 5     | 1     | 1     | 1     | 4     | 5     | 1      | 2      | 0      | 0      | 1      | 1      | 1      | 1      |
| 12700  | 5     | 2     | 1     | 1     | 4     | 5     | 1      | 0      | 1      | 0      | 1      | 0      | 0      | 1      |
| 12701  | 2     | 3     | 3     | 1     | 3     | 3     | 1      | 1      | 1      | 1      | 1      | 1      | 1      | 1      |
| 12702  | 4     | 3     | 1     | 1     | 4     | 3     | 1      | 1      | 1      | 1      | 1      | 1      | 1      | 1      |
| 12704  | 2     | 4     | 4     | 4     | 3     | 2     | 2      | 1      | 2      | 2      | 2      | 2      | 2      | 2      |
| 12705  | 4     | 4     | 1     | 3     | 4     | 4     | 1      | 0      | 0      | 1      | 1      | 2      | 2      | 0      |
| 12709  | 5     | 1     | 1     | 1     | 4     | 5     | 0      | 0      | 0      | 0      | 1      | 0      | 0      | 0      |
| 12710  | 4     | 3     | 1     | 1     | 3     | 3     | 1      | 1      | 1      | 1      | 1      | 1      | 1      | 1      |
| 12713  | 2     | 2     | 1     | 0     | 3     | 5     | 1      | 0      | 1      | 0      | 1      | 0      | 1      | 1      |
| 12716  | 3     | 3     | 3     | 3     | 4     | 3     | 1      | 1      | 1      | 0      | 2      | 2      | 2      | 2      |

| respid | Q52_2 | Q53_1 | Q54_1 | Q54_2 | Q54_3 | Q55_1 | Q56a_1 | Q56b_1 | Q56c_1 | Q56d_1 | Q56e_1 | Q56f_1 | Q56g_1 | Q56h_1 |
|--------|-------|-------|-------|-------|-------|-------|--------|--------|--------|--------|--------|--------|--------|--------|
| 12719  | 4     | 2     | 1     | 1     | 3     | 4     | 1      | 1      | 1      | 1      | 1      | 1      | 1      | 0      |
| 12720  | 4     | 3     | 1     | 1     | 4     | 3     | 1      | 1      | 1      | 1      | 1      | 1      | 1      | 1      |
| 12723  | 5     | 1     | 1     | 1     | 4     | 5     | 0      | 1      | 1      | 0      | 1      | 0      | 1      | 1      |
| 12726  | 4     | 2     | 1     | 1     | 4     | 4     | 1      | 0      | 1      | 0      | 1      | 1      | 1      | 1      |
| 12728  | 3     | 3     | 3     | 3     | 1     | 3     | 2      | 2      | 0      | 1      | 2      | 2      | 1      | 2      |
| 12729  | 4     | 2     | 4     | 3     | 4     | 4     | 1      | 2      | 2      | 2      | 1      | 1      | 2      | 1      |
| 12731  | 4     | 2     | 1     | 1     | 3     | 4     | 1      | 1      | 1      | 1      | 1      | 1      | 1      | 1      |
| 12732  | 2     | 2     | 1     | 3     | 3     | 3     | 1      | 1      | 1      | 1      | 2      | 1      | 1      | 1      |
| 12733  | 4     | 3     | 3     | 3     | 3     | 3     | 1      | 1      | 0      | 0      | 1      | 1      | 1      | 1      |
| 12736  | 5     | 1     | 1     | 1     | 1     | 5     | 0      | 0      | 0      | 0      | 0      | 0      | 0      | 0      |
| 12737  | 4     | 3     | 1     | 1     | 3     | 3     | 1      | 1      | 1      | 1      | 1      | 1      | 1      | 0      |
| 12739  | 2     | 4     | 1     | 3     | 4     | 4     | 1      | 1      | 1      | 1      | 2      | 1      | 1      | 1      |
| 12742  | 3     | 3     | 1     | 1     | 4     | 3     | 1      | 1      | 1      | 1      | 1      | 1      | 1      | 1      |
| 12743  | 4     | 5     | 3     | 4     | 3     | 1     | 2      | 2      | 3      | 2      | 2      | 2      | 2      | 2      |
| 12744  | 4     | 2     | 1     | 1     | 4     | 4     | 1      | 1      | 0      | 2      | 1      | 1      | 1      | 1      |
| 12747  | 2     | 4     | 1     | 1     | 3     | 3     | 1      | 1      | 1      | 1      | 1      | 1      | 1      | 2      |
| 12751  | 4     | 1     | 1     | 3     | 4     | 4     | 0      | 0      | 1      | 1      | 0      | 1      | 1      | 1      |
| 12754  | 4     | 2     | 1     | 1     | 3     | 3     | 1      | 1      | 1      | 1      | 1      | 1      | 1      | 1      |
| 12756  | 2     | 4     | 4     | 3     | 1     | 3     | 1      | 1      | 1      | 1      | 2      | 2      | 1      | 1      |
| 12757  | 4     | 3     | 1     | 1     | 3     | 4     | 1      | 1      | 1      | 1      | 1      | 1      | 1      | 1      |
| 12760  | 2     | 4     | 1     | 1     | 3     | 4     | 1      | 1      | 1      | 1      | 2      | 2      | 1      | 1      |
| 12761  | 4     | 3     | 1     | 1     | 3     | 3     | 1      | 1      | 1      | 1      | 1      | 1      | 0      | 1      |
| 12762  | 5     | 2     | 1     | 1     | 4     | 4     | 1      | 0      | 0      | 0      | 0      | 0      | 0      | 0      |
| 12766  | 4     | 2     | 4     | 4     | 4     | 5     | 0      | 1      | 0      | 0      | 0      | 0      | 0      | 0      |
| 12769  | 5     | 1     | 1     | 1     | 5     | 5     | 0      | 1      | 0      | 0      | 0      | 0      | 0      | 1      |
| 12770  | 4     | 3     | 3     | 4     | 3     | 4     | 1      | 0      | 0      | 0      | 1      | 1      | 1      | 1      |
| 12773  | 3     | 4     | 3     | 1     | 1     | 4     | 2      | 2      | 2      | 2      | 2      | 3      | 2      | 2      |
| 12780  | 5     | 2     | 4     | 5     | 3     | 2     | 0      | 2      | 2      | 1      | 1      | 2      | 2      | 2      |
| 12789  | 4     | 3     | 3     | 4     | 3     | 3     | 2      | 1      | 2      | 1      | 2      | 1      | 2      | 1      |
| 12792  | 4     | 3     | 3     | 3     | 3     | 3     | 1      | 0      | 2      | 2      | 2      | 2      | 2      | 1      |
| 12795  | 4     | 3     | 3     | 1     | 4     | 4     | 1      | 0      | 1      | 0      | 1      | 0      | 1      | 0      |
| 12804  | 2     | 2     | 1     | 1     | 3     | 4     | 0      | 1      | 1      | 2      | 2      | 2      | 1      | 2      |

| respid | Q52_2 | Q53_1 | Q54_1 | Q54_2 | Q54_3 | Q55_1 | Q56a_1 | Q56b_1 | Q56c_1 | Q56d_1 | Q56e_1 | Q56f_1 | Q56g_1 | Q56h_1 |
|--------|-------|-------|-------|-------|-------|-------|--------|--------|--------|--------|--------|--------|--------|--------|
| 12811  | 3     | 2     | 3     | 3     | 3     | 4     | 1      | 2      | 1      | 1      | 1      | 1      | 2      | 1      |
| 12813  | 3     | 2     | 1     | 3     | 4     | 3     | 2      | 1      | 1      | 1      | 1      | 1      | 2      | 1      |
| 12814  | 3     | 3     | 4     | 4     | 3     | 2     | 2      | 2      | 2      | 1      | 2      | 2      | 2      | 1      |
| 12815  | 5     | 1     | 1     | 1     | 4     | 5     | 1      | 0      | 0      | 0      | 1      | 1      | 1      | 0      |
| 12816  | 4     | 1     | 1     | 1     | 5     | 5     | 0      | 0      | 0      | 0      | 1      | 0      | 0      | 0      |
| 12817  | 5     | 1     | 1     | 4     | 3     | 5     | 1      | 2      | 0      | 2      | 1      | 3      | 2      | 0      |
| 12818  | 4     | 2     | 1     | 4     | 4     | 4     | 1      | 1      | 0      | 2      | 0      | 2      | 2      | 2      |
| 12819  | 5     | 5     | 1     | 1     | 4     | 5     | 0      | 0      | 0      | 0      | 0      | 0      | 0      | 0      |
| 12820  | 5     | 1     | 0     | 1     | 5     | 5     | 1      | 1      | 0      | 1      | 1      | 1      | 0      | 1      |
| 12821  | 5     | 1     | 1     | 1     | 4     | 4     | 1      | 0      | 0      | 0      | 1      | 1      | 1      | 0      |
| 12824  | 5     | 2     | 1     | 3     | 4     | 5     | 1      | 1      | 0      | 0      | 1      | 1      | 1      | 1      |
| 12827  | 4     | 3     | 1     | 1     | 3     | 4     | 1      | 0      | 1      | 1      | 1      | 1      | 1      | 1      |
| 12836  | 4     | 4     | 3     | 4     | 4     | 4     | 2      | 2      | 1      | 2      | 2      | 2      | 2      | 2      |
| 12837  | 3     | 3     | 3     | 4     | 4     | 3     | 1      | 1      | 1      | 1      | 1      | 1      | 2      | 1      |
| 12838  | 4     | 2     | 1     | 1     | 4     | 4     | 2      | 2      | 0      | 0      | 1      | 1      | 2      | 1      |
| 12845  | 4     | 2     | 3     | 3     | 3     | 5     | 2      | 1      | 1      | 1      | 2      | 1      | 2      | 2      |
| 12847  | 5     | 5     | 0     | 3     | 4     | 2     | 1      | 0      | 2      | 0      | 1      | 1      | 1      | 1      |
| 12849  | 1     | 3     | 0     | 0     | 0     | 4     | 1      | 1      | 0      | 1      | 2      | 2      | 1      | 2      |
| 12850  | 2     | 2     | 1     | 4     | 4     | 3     | 1      | 1      | 2      | 0      | 0      | 0      | 0      | 0      |
| 12852  | 5     | 1     | 0     | 0     | 5     | 5     | 0      | 0      | 0      | 0      | 0      | 0      | 0      | 0      |
| 12853  | 1     | 4     | 1     | 1     | 1     | 3     | 1      | 0      | 0      | 0      | 1      | 1      | 0      | 1      |
| 12854  | 4     | 2     | 1     | 1     | 4     | 5     | 0      | 0      | 0      | 1      | 1      | 1      | 1      | 0      |
| 12860  | 5     | 1     | 1     | 1     | 5     | 5     | 0      | 0      | 0      | 0      | 0      | 0      | 0      | 0      |
| 12861  | 5     | 1     | 1     | 1     | 4     | 5     | 1      | 0      | 1      | 0      | 1      | 0      | 1      | 0      |
| 12863  | 5     | 1     | 1     | 1     | 4     | 5     | 0      | 0      | 0      | 0      | 0      | 0      | 0      | 1      |
| 12865  | 4     | 1     | 1     | 3     | 4     | 5     | 1      | 0      | 0      | 0      | 1      | 1      | 2      | 0      |
| 12870  | 4     | 2     | 1     | 3     | 4     | 4     | 1      | 2      | 0      | 0      | 1      | 1      | 1      | 1      |
| 12871  | 5     | 3     | 4     | 4     | 4     | 3     | 0      | 1      | 0      | 0      | 0      | 0      | 0      | 0      |
| 12873  | 3     | 2     | 1     | 4     | 3     | 3     | 1      | 1      | 0      | 1      | 1      | 2      | 1      | 1      |
| 12877  | 4     | 1     | 1     | 1     | 4     | 5     | 1      | 0      | 1      | 0      | 1      | 1      | 1      | 1      |
| 12880  | 4     | 1     | 1     | 1     | 3     | 5     | 1      | 1      | 1      | 1      | 1      | 1      | 2      | 1      |
| 12881  | 1     | 2     | 5     | 5     | 0     | 2     | 3      | 2      | 2      | 0      | 3      | 3      | 2      | 1      |

| respid | Q52_2 | Q53_1 | Q54_1 | Q54_2 | Q54_3 | Q55_1 | Q56a_1 | Q56b_1 | Q56c_1 | Q56d_1 | Q56e_1 | Q56f_1 | Q56g_1 | Q56h_1 |
|--------|-------|-------|-------|-------|-------|-------|--------|--------|--------|--------|--------|--------|--------|--------|
| 12882  | 5     | 2     | 0     | 1     | 4     | 4     | 1      | 0      | 1      | 0      | 1      | 0      | 0      | 1      |
| 12883  | 5     | 2     | 3     | 4     | 4     | 4     | 1      | 1      | 1      | 1      | 1      | 1      | 1      | 1      |
| 12885  | 3     | 3     | 3     | 3     | 3     | 3     | 1      | 1      | 1      | 1      | 1      | 1      | 1      | 1      |
| 12887  | 5     | 2     | 3     | 3     | 4     | 4     | 1      | 1      | 1      | 1      | 1      | 1      | 1      | 1      |
| 12889  | 3     | 2     | 3     | 4     | 4     | 5     | 0      | 1      | 0      | 0      | 0      | 0      | 1      | 3      |
| 12890  | 3     | 3     | 3     | 3     | 3     | 3     | 1      | 0      | 2      | 2      | 1      | 2      | 2      | 0      |
| 12891  | 4     | 1     | 1     | 3     | 5     | 5     | 0      | 1      | 1      | 0      | 1      | 1      | 1      | 1      |
| 12892  | 3     | 3     | 3     | 3     | 3     | 3     | 1      | 2      | 2      | 2      | 1      | 1      | 1      | 2      |
| 12893  | 3     | 1     | 3     | 3     | 3     | 3     | 1      | 0      | 0      | 0      | 1      | 1      | 2      | 0      |
| 12895  | 3     | 3     | 3     | 3     | 3     | 3     | 1      | 1      | 1      | 1      | 1      | 1      | 2      | 1      |
| 12898  | 4     | 1     | 1     | 1     | 4     | 5     | 0      | 0      | 0      | 1      | 1      | 0      | 1      | 1      |
| 12907  | 3     | 3     | 1     | 1     | 4     | 4     | 1      | 0      | 1      | 0      | 1      | 0      | 1      | 1      |
| 12908  | 4     | 2     | 1     | 3     | 4     | 4     | 1      | 1      | 1      | 1      | 1      | 2      | 1      | 1      |
| 12909  | 5     | 1     | 1     | 1     | 4     | 5     | 0      | 0      | 0      | 0      | 1      | 1      | 1      | 1      |
| 12914  | 4     | 2     | 4     | 3     | 4     | 5     | 3      | 2      | 0      | 0      | 1      | 1      | 0      | 1      |
| 12915  | 5     | 2     | 1     | 4     | 4     | 4     | 1      | 1      | 0      | 0      | 1      | 1      | 1      | 2      |
| 12916  | 3     | 2     | 3     | 3     | 3     | 4     | 1      | 0      | 1      | 2      | 0      | 1      | 1      | 2      |
| 12921  | 4     | 2     | 3     | 3     | 4     | 4     | 1      | 1      | 1      | 2      | 1      | 1      | 1      | 1      |
| 12922  | 4     | 3     | 1     | 1     | 4     | 4     | 0      | 0      | 1      | 0      | 0      | 1      | 0      | 0      |
| 12923  | 3     | 3     | 1     | 3     | 4     | 4     | 0      | 1      | 1      | 1      | 1      | 1      | 1      | 1      |
| 12926  | 3     | 3     | 1     | 3     | 4     | 3     | 1      | 1      | 1      | 1      | 1      | 1      | 1      | 1      |
| 12927  | 4     | 1     | 1     | 1     | 4     | 4     | 0      | 1      | 0      | 0      | 1      | 0      | 0      | 1      |
| 12932  | 5     | 2     | 3     | 1     | 3     | 5     | 1      | 0      | 1      | 2      | 1      | 0      | 1      | 0      |
| 12936  | 4     | 1     | 3     | 4     | 3     | 4     | 1      | 0      | 2      | 0      | 2      | 1      | 2      | 0      |
| 12937  | 5     | 1     | 3     | 4     | 5     | 5     | 0      | 1      | 0      | 2      | 1      | 1      | 0      | 1      |
| 12938  | 3     | 4     | 3     | 4     | 1     | 3     | 2      | 1      | 2      | 2      | 2      | 1      | 2      | 1      |
| 12939  | 5     | 1     | 0     | 0     | 5     | 5     | 0      | 0      | 0      | 0      | 0      | 0      | 0      | 0      |
| 12940  | 3     | 3     | 3     | 1     | 3     | 3     | 1      | 1      | 1      | 1      | 1      | 1      | 1      | 1      |
| 12945  | 3     | 2     | 3     | 3     | 3     | 3     | 1      | 0      | 2      | 1      | 1      | 1      | 1      | 1      |
| 12946  | 4     | 2     | 1     | 1     | 4     | 4     | 0      | 1      | 1      | 1      | 1      | 1      | 1      | 1      |
| 12947  | 4     | 2     | 1     | 1     | 3     | 4     | 1      | 0      | 1      | 1      | 1      | 0      | 0      | 1      |
| 12948  | 3     | 3     | 4     | 3     | 4     | 3     | 1      | 1      | 1      | 1      | 1      | 1      | 2      | 1      |

| respid | Q52_2 | Q53_1 | Q54_1 | Q54_2 | Q54_3 | Q55_1 | Q56a_1 | Q56b_1 | Q56c_1 | Q56d_1 | Q56e_1 | Q56f_1 | Q56g_1 | Q56h_1 |
|--------|-------|-------|-------|-------|-------|-------|--------|--------|--------|--------|--------|--------|--------|--------|
| 12951  | 4     | 2     | 1     | 3     | 4     | 4     | 1      | 1      | 0      | 2      | 1      | 1      | 1      | 1      |
| 12952  | 4     | 2     | 3     | 4     | 3     | 5     | 2      | 1      | 0      | 1      | 2      | 2      | 2      | 1      |
| 12954  | 3     | 3     | 4     | 5     | 4     | 3     | 2      | 1      | 1      | 1      | 1      | 2      | 2      | 3      |
| 12960  | 4     | 3     | 1     | 1     | 4     | 4     | 1      | 0      | 1      | 0      | 1      | 0      | 0      | 1      |
| 12961  | 4     | 3     | 3     | 4     | 1     | 4     | 3      | 2      | 1      | 2      | 2      | 2      | 3      | 1      |
| 12962  | 5     | 1     | 0     | 1     | 4     | 5     | 0      | 0      | 1      | 0      | 1      | 0      | 0      | 0      |
| 12963  | 5     | 1     | 1     | 1     | 5     | 5     | 0      | 0      | 0      | 0      | 0      | 0      | 0      | 0      |
| 12964  | 5     | 3     | 3     | 3     | 3     | 4     | 1      | 1      | 0      | 0      | 0      | 0      | 0      | 1      |
| 12966  | 3     | 5     | 1     | 3     | 4     | 3     | 1      | 0      | 1      | 1      | 1      | 1      | 1      | 2      |
| 12967  | 5     | 1     | 1     | 1     | 4     | 5     | 2      | 1      | 2      | 2      | 1      | 1      | 2      | 1      |
| 12969  | 4     | 2     | 4     | 4     | 4     | 4     | 1      | 1      | 0      | 2      | 1      | 1      | 2      | 1      |
| 12970  | 4     | 1     | 1     | 4     | 4     | 5     | 0      | 0      | 0      | 0      | 1      | 1      | 1      | 0      |
| 12974  | 3     | 4     | 3     | 3     | 3     | 3     | 1      | 1      | 1      | 1      | 1      | 1      | 2      | 1      |
| 12979  | 5     | 1     | 1     | 1     | 3     | 4     | 0      | 0      | 0      | 0      | 1      | 0      | 0      | 0      |
| 12980  | 2     | 3     | 4     | 4     | 1     | 2     | 2      | 0      | 2      | 1      | 2      | 2      | 2      | 1      |
| 12983  | 5     | 1     | 1     | 1     | 5     | 5     | 0      | 0      | 0      | 0      | 0      | 0      | 0      | 0      |
| 12988  | 5     | 1     | 1     | 3     | 3     | 4     | 1      | 1      | 2      | 0      | 1      | 0      | 1      | 1      |
| 12994  | 3     | 2     | 4     | 1     | 3     | 4     | 1      | 1      | 2      | 1      | 2      | 1      | 1      | 1      |
| 12995  | 5     | 1     | 0     | 1     | 5     | 5     | 0      | 0      | 0      | 0      | 0      | 0      | 0      | 1      |
| 12996  | 5     | 2     | 3     | 3     | 3     | 5     | 1      | 2      | 1      | 2      | 1      | 1      | 1      | 0      |
| 12998  | 5     | 1     | 3     | 3     | 4     | 5     | 1      | 0      | 1      | 0      | 1      | 0      | 1      | 0      |
| 12999  | 3     | 2     | 1     | 1     | 3     | 4     | 1      | 0      | 1      | 0      | 1      | 0      | 0      | 0      |
| 13001  | 5     | 3     | 0     | 0     | 4     | 4     | 1      | 0      | 0      | 0      | 1      | 0      | 0      | 2      |
| 13005  | 4     | 3     | 3     | 4     | 4     | 4     | 1      | 2      | 2      | 2      | 1      | 2      | 2      | 1      |
| 13006  | 3     | 3     | 3     | 3     | 3     | 4     | 1      | 2      | 1      | 2      | 1      | 1      | 2      | 1      |
| 13007  | 4     | 4     | 4     | 4     | 1     | 4     | 2      | 1      | 1      | 1      | 3      | 1      | 2      | 2      |
| 13011  | 4     | 3     | 1     | 3     | 4     | 3     | 2      | 2      | 1      | 1      | 2      | 2      | 1      | 1      |
| 13012  | 5     | 1     | 1     | 3     | 5     | 5     | 0      | 0      | 0      | 0      | 0      | 0      | 0      | 1      |
| 13013  | 3     | 3     | 3     | 3     | 4     | 3     | 1      | 1      | 2      | 1      | 1      | 1      | 2      | 1      |
| 13016  | 4     | 2     | 1     | 1     | 3     | 4     | 1      | 1      | 1      | 1      | 2      | 2      | 1      | 1      |
| 13018  | 5     | 1     | 1     | 1     | 5     | 5     | 0      | 0      | 0      | 0      | 0      | 0      | 0      | 0      |
| 13020  | 5     | 1     | 5     | 5     | 5     | 5     | 0      | 0      | 0      | 2      | 1      | 1      | 0      | 0      |

| respid | Q52_2 | Q53_1 | Q54_1 | Q54_2 | Q54_3 | Q55_1 | Q56a_1 | Q56b_1 | Q56c_1 | Q56d_1 | Q56e_1 | Q56f_1 | Q56g_1 | Q56h_1 |
|--------|-------|-------|-------|-------|-------|-------|--------|--------|--------|--------|--------|--------|--------|--------|
| 13024  | 5     | 1     | 1     | 1     | 4     | 5     | 0      | 0      | 0      | 0      | 0      | 0      | 0      | 0      |
| 13025  | 5     | 2     | 1     | 1     | 4     | 5     | 0      | 0      | 2      | 0      | 1      | 1      | 1      | 0      |
| 13027  | 4     | 2     | 1     | 3     | 4     | 4     | 1      | 1      | 1      | 0      | 1      | 0      | 0      | 2      |
| 13031  | 4     | 1     | 5     | 4     | 3     | 3     | 1      | 1      | 1      | 1      | 1      | 1      | 1      | 1      |
| 13032  | 4     | 3     | 3     | 3     | 3     | 3     | 1      | 2      | 2      | 1      | 1      | 1      | 2      | 1      |
| 13034  | 3     | 2     | 1     | 3     | 4     | 4     | 1      | 1      | 1      | 1      | 1      | 2      | 2      | 2      |
| 13036  | 3     | 2     | 1     | 3     | 4     | 4     | 1      | 0      | 3      | 0      | 1      | 1      | 2      | 0      |
| 13037  | 5     | 1     | 5     | 5     | 5     | 5     | 0      | 1      | 0      | 0      | 2      | 1      | 2      | 0      |
| 13038  | 2     | 4     | 4     | 4     | 1     | 3     | 2      | 1      | 3      | 1      | 3      | 1      | 2      | 2      |
| 13039  | 4     | 3     | 1     | 3     | 3     | 4     | 0      | 2      | 1      | 1      | 1      | 1      | 2      | 1      |
| 13040  | 4     | 2     | 1     | 1     | 1     | 4     | 1      | 1      | 2      | 2      | 1      | 2      | 1      | 2      |
| 13041  | 5     | 1     | 3     | 1     | 1     | 5     | 1      | 0      | 0      | 0      | 1      | 0      | 1      | 1      |
| 13045  | 2     | 4     | 0     | 0     | 0     | 4     | 1      | 1      | 1      | 0      | 1      | 1      | 1      | 1      |
| 13046  | 5     | 1     | 1     | 1     | 1     | 4     | 0      | 1      | 1      | 1      | 1      | 1      | 0      | 0      |
| 13048  | 5     | 1     | 1     | 1     | 5     | 5     | 0      | 1      | 0      | 0      | 0      | 1      | 1      | 1      |
| 13051  | 3     | 3     | 3     | 1     | 3     | 3     | 1      | 1      | 2      | 1      | 1      | 1      | 1      | 0      |
| 13053  | 4     | 2     | 1     | 3     | 3     | 4     | 0      | 0      | 1      | 0      | 1      | 0      | 0      | 1      |
| 13055  | 3     | 3     | 4     | 4     | 1     | 2     | 1      | 1      | 2      | 2      | 2      | 3      | 2      | 2      |
| 13059  | 4     | 2     | 3     | 5     | 1     | 4     | 1      | 2      | 1      | 2      | 1      | 3      | 1      | 2      |
| 13068  | 3     | 3     | 3     | 3     | 3     | 3     | 1      | 1      | 1      | 1      | 1      | 1      | 1      | 1      |
| 13069  | 5     | 1     | 1     | 1     | 5     | 5     | 0      | 1      | 0      | 1      | 1      | 0      | 1      | 0      |
| 13076  | 4     | 2     | 1     | 4     | 3     | 4     | 2      | 2      | 2      | 1      | 2      | 2      | 2      | 1      |
| 13081  | 2     | 4     | 1     | 1     | 3     | 4     | 1      | 1      | 1      | 1      | 1      | 1      | 2      | 1      |
| 13082  | 4     | 2     | 1     | 1     | 3     | 5     | 1      | 1      | 0      | 0      | 1      | 0      | 0      | 1      |
| 13084  | 3     | 2     | 0     | 4     | 3     | 3     | 1      | 2      | 1      | 1      | 1      | 1      | 1      | 1      |
| 13085  | 4     | 1     | 1     | 1     | 4     | 5     | 1      | 1      | 1      | 1      | 1      | 1      | 2      | 1      |
| 13086  | 4     | 2     | 1     | 1     | 3     | 5     | 2      | 0      | 0      | 0      | 1      | 0      | 1      | 0      |
| 13093  | 3     | 2     | 3     | 4     | 3     | 3     | 1      | 0      | 1      | 2      | 1      | 1      | 1      | 1      |
| 13094  | 3     | 3     | 3     | 3     | 3     | 3     | 1      | 1      | 1      | 1      | 1      | 1      | 2      | 1      |
| 13097  | 4     | 2     | 1     | 1     | 4     | 4     | 1      | 0      | 1      | 2      | 1      | 1      | 1      | 1      |
| 13098  | 5     | 1     | 1     | 1     | 5     | 5     | 0      | 1      | 0      | 1      | 1      | 1      | 1      | 0      |
| 13099  | 3     | 3     | 1     | 1     | 4     | 4     | 1      | 1      | 1      | 0      | 1      | 1      | 1      | 1      |

| respid | Q52_2 | Q53_1 | Q54_1 | Q54_2 | Q54_3 | Q55_1 | Q56a_1 | Q56b_1 | Q56c_1 | Q56d_1 | Q56e_1 | Q56f_1 | Q56g_1 | Q56h_1 |
|--------|-------|-------|-------|-------|-------|-------|--------|--------|--------|--------|--------|--------|--------|--------|
| 13100  | 4     | 2     | 3     | 3     | 4     | 3     | 1      | 1      | 1      | 1      | 1      | 1      | 2      | 0      |
| 13101  | 4     | 2     | 1     | 4     | 3     | 4     | 1      | 1      | 1      | 2      | 1      | 1      | 1      | 1      |
| 13103  | 4     | 2     | 1     | 1     | 4     | 5     | 0      | 0      | 1      | 0      | 1      | 1      | 1      | 0      |
| 13105  | 5     | 2     | 1     | 1     | 5     | 5     | 1      | 0      | 0      | 0      | 0      | 0      | 1      | 1      |
| 13106  | 4     | 2     | 1     | 1     | 0     | 4     | 0      | 1      | 1      | 1      | 1      | 1      | 1      | 1      |
| 13107  | 4     | 1     | 1     | 3     | 3     | 5     | 1      | 1      | 0      | 0      | 1      | 1      | 0      | 1      |
| 13110  | 4     | 2     | 1     | 1     | 3     | 4     | 1      | 1      | 2      | 1      | 1      | 2      | 1      | 1      |
| 13118  | 4     | 2     | 1     | 1     | 3     | 4     | 0      | 1      | 0      | 1      | 1      | 1      | 2      | 1      |
| 13120  | 3     | 3     | 3     | 4     | 1     | 4     | 1      | 1      | 1      | 1      | 1      | 0      | 1      | 2      |
| 13130  | 5     | 3     | 1     | 1     | 5     | 5     | 0      | 1      | 0      | 1      | 1      | 1      | 1      | 1      |
| 13133  | 4     | 2     | 3     | 3     | 4     | 4     | 1      | 0      | 1      | 1      | 1      | 3      | 2      | 1      |
| 13134  | 4     | 2     | 3     | 1     | 4     | 5     | 1      | 0      | 1      | 1      | 1      | 1      | 1      | 0      |
| 13139  | 3     | 3     | 4     | 4     | 4     | 3     | 1      | 1      | 1      | 1      | 2      | 2      | 1      | 1      |
| 13142  | 5     | 2     | 1     | 1     | 4     | 5     | 1      | 0      | 1      | 2      | 1      | 1      | 1      | 1      |
| 13143  | 3     | 2     | 3     | 3     | 3     | 3     | 1      | 0      | 2      | 1      | 1      | 1      | 1      | 1      |
| 13145  | 3     | 2     | 3     | 3     | 3     | 3     | 1      | 1      | 1      | 1      | 2      | 1      | 2      | 1      |
| 13148  | 5     | 1     | 0     | 0     | 5     | 5     | 0      | 0      | 0      | 0      | 1      | 1      | 1      | 0      |
| 13149  | 5     | 1     | 1     | 1     | 4     | 5     | 0      | 0      | 0      | 0      | 0      | 0      | 0      | 0      |
| 13151  | 5     | 2     | 1     | 3     | 1     | 4     | 2      | 1      | 1      | 1      | 2      | 1      | 2      | 0      |
| 13153  | 4     | 2     | 1     | 0     | 4     | 4     | 0      | 0      | 0      | 0      | 0      | 0      | 0      | 1      |
| 13158  | 5     | 2     | 1     | 3     | 3     | 5     | 1      | 1      | 1      | 2      | 2      | 1      | 2      | 0      |
| 13160  | 5     | 2     | 0     | 1     | 3     | 4     | 2      | 0      | 0      | 0      | 1      | 0      | 0      | 1      |
| 13162  | 3     | 2     | 1     | 3     | 3     | 3     | 1      | 2      | 1      | 2      | 1      | 1      | 1      | 1      |
| 13169  | 5     | 1     | 1     | 1     | 5     | 5     | 0      | 0      | 0      | 0      | 0      | 0      | 0      | 1      |
| 13172  | 4     | 3     | 3     | 3     | 5     | 5     | 0      | 1      | 0      | 2      | 1      | 1      | 1      | 1      |
| 13173  | 4     | 1     | 1     | 1     | 4     | 4     | 1      | 0      | 1      | 0      | 1      | 1      | 1      | 1      |
| 13176  | 5     | 2     | 1     | 1     | 5     | 5     | 0      | 1      | 0      | 0      | 0      | 0      | 1      | 0      |
| 13179  | 4     | 1     | 3     | 3     | 3     | 4     | 1      | 0      | 2      | 0      | 1      | 1      | 1      | 1      |
| 13184  | 4     | 3     | 1     | 3     | 4     | 4     | 2      | 0      | 0      | 2      | 2      | 1      | 1      | 1      |
| 13185  | 4     | 3     | 1     | 1     | 4     | 4     | 1      | 1      | 1      | 1      | 1      | 1      | 1      | 1      |
| 13186  | 5     | 1     | 0     | 0     | 5     | 5     | 0      | 0      | 0      | 0      | 0      | 0      | 0      | 0      |
| 13188  | 4     | 1     | 1     | 1     | 5     | 5     | 0      | 0      | 0      | 1      | 0      | 1      | 1      | 0      |



| respid | Q52_2 | Q53_1 | Q54_1 | Q54_2 | Q54_3 | Q55_1 | Q56a_1 | Q56b_1 | Q56c_1 | Q56d_1 | Q56e_1 | Q56f_1 | Q56g_1 | Q56h_1 |
|--------|-------|-------|-------|-------|-------|-------|--------|--------|--------|--------|--------|--------|--------|--------|
| 13190  | 5     | 2     | 4     | 1     | 4     | 4     | 0      | 0      | 0      | 0      | 1      | 0      | 0      | 1      |
| 13192  | 4     | 1     | 1     | 1     | 4     | 5     | 0      | 1      | 0      | 0      | 1      | 1      | 1      | 1      |
| 13193  | 4     | 2     | 1     | 1     | 4     | 4     | 0      | 0      | 0      | 0      | 0      | 1      | 0      | 2      |
| 13201  | 3     | 3     | 1     | 1     | 3     | 4     | 1      | 1      | 1      | 1      | 1      | 1      | 1      | 1      |
| 13207  | 5     | 1     | 4     | 4     | 4     | 5     | 1      | 1      | 2      | 0      | 1      | 1      | 1      | 0      |
| 13208  | 5     | 1     | 0     | 0     | 0     | 5     | 0      | 0      | 0      | 0      | 0      | 0      | 0      | 0      |
| 13209  | 3     | 3     | 3     | 4     | 1     | 3     | 1      | 1      | 0      | 1      | 1      | 1      | 1      | 1      |
| 13212  | 5     | 1     | 1     | 1     | 4     | 5     | 0      | 1      | 0      | 0      | 1      | 0      | 0      | 1      |
| 13215  | 4     | 2     | 1     | 1     | 4     | 5     | 0      | 0      | 0      | 2      | 2      | 1      | 1      | 1      |
| 13218  | 4     | 4     | 3     | 3     | 4     | 4     | 1      | 2      | 0      | 1      | 1      | 2      | 2      | 1      |
| 13219  | 5     | 1     | 1     | 1     | 5     | 5     | 0      | 0      | 0      | 0      | 0      | 0      | 0      | 0      |
| 13224  | 3     | 3     | 1     | 1     | 3     | 4     | 1      | 1      | 1      | 1      | 1      | 1      | 1      | 1      |
| 13225  | 5     | 2     | 1     | 1     | 4     | 5     | 0      | 0      | 0      | 0      | 1      | 0      | 1      | 1      |
| 13226  | 3     | 3     | 3     | 3     | 3     | 3     | 1      | 1      | 1      | 1      | 2      | 1      | 1      | 1      |
| 13232  | 5     | 1     | 0     | 1     | 4     | 5     | 1      | 1      | 1      | 0      | 1      | 0      | 0      | 1      |
| 13237  | 4     | 2     | 5     | 5     | 0     | 3     | 1      | 2      | 1      | 3      | 2      | 3      | 2      | 1      |
| 13239  | 4     | 2     | 3     | 4     | 3     | 3     | 1      | 2      | 1      | 2      | 1      | 2      | 2      | 2      |
| 13241  | 4     | 1     | 4     | 4     | 1     | 3     | 2      | 0      | 1      | 2      | 2      | 2      | 2      | 0      |
| 13243  | 4     | 3     | 3     | 3     | 3     | 3     | 1      | 2      | 1      | 1      | 1      | 2      | 2      | 1      |
| 13247  | 4     | 2     | 4     | 4     | 3     | 4     | 2      | 3      | 1      | 0      | 3      | 2      | 1      | 2      |
| 13248  | 5     | 2     | 1     | 1     | 5     | 5     | 1      | 1      | 0      | 1      | 1      | 1      | 1      | 0      |
| 13251  | 3     | 2     | 1     | 3     | 3     | 4     | 1      | 1      | 0      | 0      | 1      | 1      | 1      | 1      |
| 13256  | 4     | 1     | 1     | 1     | 4     | 5     | 0      | 0      | 0      | 0      | 1      | 1      | 2      | 1      |
| 13260  | 5     | 1     | 0     | 1     | 5     | 5     | 0      | 0      | 0      | 0      | 1      | 1      | 1      | 1      |
| 13261  | 3     | 2     | 3     | 4     | 4     | 4     | 1      | 1      | 0      | 1      | 1      | 1      | 1      | 1      |
| 13264  | 5     | 1     | 1     | 1     | 5     | 5     | 0      | 1      | 0      | 1      | 1      | 1      | 1      | 0      |
| 13273  | 4     | 2     | 4     | 4     | 4     | 4     | 1      | 1      | 1      | 1      | 1      | 1      | 2      | 1      |
| 13274  | 4     | 1     | 1     | 1     | 4     | 4     | 1      | 0      | 1      | 0      | 1      | 1      | 0      | 1      |
| 13276  | 4     | 2     | 1     | 1     | 4     | 5     | 1      | 1      | 1      | 1      | 1      | 1      | 1      | 1      |
| 13278  | 3     | 2     | 3     | 4     | 3     | 3     | 1      | 2      | 1      | 1      | 2      | 2      | 2      | 1      |
| 13279  | 4     | 2     | 0     | 0     | 0     | 3     | 1      | 0      | 0      | 0      | 0      | 1      | 0      | 1      |
| 13282  | 5     | 1     | 4     | 3     | 3     | 5     | 1      | 3      | 1      | 1      | 1      | 1      | 1      | 1      |

| respid | Q52_2 | Q53_1 | Q54_1 | Q54_2 | Q54_3 | Q55_1 | Q56a_1 | Q56b_1 | Q56c_1 | Q56d_1 | Q56e_1 | Q56f_1 | Q56g_1 | Q56h_1 |
|--------|-------|-------|-------|-------|-------|-------|--------|--------|--------|--------|--------|--------|--------|--------|
| 13283  | 3     | 2     | 1     | 3     | 4     | 4     | 2      | 1      | 2      | 2      | 2      | 2      | 1      | 2      |
| 13285  | 5     | 1     | 1     | 3     | 4     | 5     | 1      | 1      | 0      | 0      | 1      | 1      | 1      | 1      |
| 13286  | 5     | 2     | 3     | 3     | 3     | 4     | 1      | 1      | 1      | 1      | 1      | 1      | 1      | 1      |
| 13299  | 4     | 1     | 0     | 1     | 4     | 4     | 1      | 0      | 1      | 1      | 1      | 0      | 1      | 1      |
| 13300  | 4     | 3     | 3     | 4     | 4     | 4     | 1      | 1      | 1      | 1      | 1      | 1      | 2      | 1      |
| 13301  | 4     | 1     | 4     | 4     | 4     | 4     | 1      | 2      | 1      | 1      | 1      | 2      | 2      | 1      |
| 13303  | 3     | 3     | 1     | 3     | 3     | 3     | 1      | 1      | 1      | 1      | 1      | 1      | 1      | 1      |
| 13304  | 5     | 1     | 0     | 1     | 5     | 5     | 0      | 0      | 0      | 0      | 0      | 0      | 0      | 0      |
| 13307  | 4     | 1     | 1     | 3     | 3     | 4     | 1      | 3      | 1      | 3      | 2      | 2      | 1      | 1      |
| 13308  | 5     | 3     | 0     | 1     | 4     | 5     | 1      | 1      | 0      | 0      | 0      | 0      | 0      | 0      |
| 13312  | 5     | 2     | 1     | 1     | 4     | 4     | 0      | 0      | 0      | 1      | 1      | 0      | 0      | 0      |
| 13313  | 4     | 1     | 1     | 1     | 4     | 5     | 1      | 1      | 0      | 0      | 1      | 0      | 1      | 0      |
| 13314  | 3     | 3     | 3     | 3     | 3     | 3     | 1      | 1      | 1      | 1      | 2      | 2      | 2      | 2      |
| 13318  | 2     | 2     | 3     | 1     | 3     | 2     | 2      | 1      | 1      | 0      | 1      | 1      | 2      | 1      |
| 13320  | 4     | 2     | 3     | 3     | 4     | 4     | 1      | 1      | 2      | 1      | 2      | 1      | 1      | 1      |
| 13322  | 3     | 4     | 3     | 3     | 3     | 3     | 1      | 2      | 1      | 1      | 2      | 2      | 2      | 2      |
| 13324  | 5     | 1     | 1     | 1     | 4     | 4     | 1      | 0      | 1      | 0      | 1      | 0      | 0      | 0      |
| 13325  | 5     | 2     | 1     | 1     | 1     | 5     | 1      | 1      | 0      | 1      | 1      | 0      | 0      | 1      |
| 13327  | 5     | 1     | 1     | 1     | 5     | 5     | 0      | 1      | 0      | 1      | 0      | 0      | 0      | 0      |
| 13330  | 5     | 1     | 1     | 4     | 4     | 5     | 1      | 3      | 0      | 2      | 2      | 2      | 1      | 1      |
| 13332  | 4     | 1     | 1     | 3     | 3     | 3     | 2      | 0      | 0      | 1      | 2      | 2      | 2      | 2      |
| 13333  | 4     | 2     | 1     | 3     | 5     | 3     | 1      | 1      | 0      | 0      | 1      | 0      | 1      | 2      |
| 13334  | 5     | 1     | 0     | 1     | 4     | 5     | 0      | 0      | 0      | 0      | 0      | 0      | 1      | 0      |
| 13351  | 3     | 2     | 1     | 3     | 5     | 2     | 0      | 1      | 1      | 0      | 1      | 3      | 0      | 3      |
| 13353  | 4     | 1     | 1     | 3     | 4     | 5     | 0      | 1      | 0      | 1      | 1      | 0      | 1      | 1      |
| 13354  | 5     | 1     | 1     | 1     | 1     | 5     | 0      | 0      | 1      | 0      | 0      | 0      | 0      | 0      |
| 13355  | 3     | 4     | 1     | 3     | 1     | 4     | 1      | 3      | 1      | 0      | 2      | 1      | 2      | 2      |
| 13358  | 3     | 1     | 1     | 3     | 4     | 4     | 1      | 2      | 0      | 1      | 1      | 1      | 1      | 1      |
| 13359  | 3     | 2     | 1     | 3     | 3     | 3     | 1      | 1      | 1      | 1      | 1      | 1      | 1      | 1      |
| 13360  | 4     | 3     | 3     | 3     | 3     | 3     | 1      | 1      | 1      | 1      | 1      | 1      | 1      | 1      |
| 13364  | 2     | 1     | 1     | 3     | 4     | 4     | 1      | 1      | 0      | 1      | 0      | 1      | 1      | 1      |
| 13365  | 2     | 3     | 3     | 4     | 3     | 3     | 1      | 1      | 2      | 2      | 1      | 2      | 2      | 2      |

| respid | Q52_2 | Q53_1 | Q54_1 | Q54_2 | Q54_3 | Q55_1 | Q56a_1 | Q56b_1 | Q56c_1 | Q56d_1 | Q56e_1 | Q56f_1 | Q56g_1 | Q56h_1 |
|--------|-------|-------|-------|-------|-------|-------|--------|--------|--------|--------|--------|--------|--------|--------|
| 13368  | 5     | 1     | 1     | 3     | 3     | 4     | 1      | 0      | 2      | 2      | 1      | 1      | 1      | 2      |
| 13370  | 5     | 2     | 3     | 3     | 5     | 4     | 1      | 0      | 1      | 0      | 1      | 1      | 2      | 1      |
| 13375  | 5     | 2     | 3     | 1     | 3     | 5     | 1      | 2      | 1      | 0      | 1      | 1      | 1      | 1      |
| 13384  | 5     | 1     | 1     | 1     | 5     | 5     | 0      | 1      | 0      | 0      | 0      | 0      | 0      | 0      |
| 13387  | 2     | 2     | 1     | 0     | 3     | 4     | 1      | 1      | 1      | 1      | 1      | 0      | 1      | 1      |
| 13395  | 4     | 1     | 3     | 3     | 1     | 4     | 1      | 0      | 1      | 0      | 1      | 1      | 1      | 1      |
| 13398  | 3     | 3     | 1     | 3     | 4     | 4     | 1      | 1      | 1      | 0      | 1      | 1      | 0      | 1      |
| 13404  | 5     | 2     | 1     | 1     | 5     | 5     | 1      | 1      | 0      | 1      | 0      | 2      | 1      | 1      |
| 13405  | 4     | 3     | 1     | 3     | 4     | 4     | 1      | 1      | 0      | 1      | 1      | 1      | 1      | 1      |
| 13408  | 5     | 1     | 5     | 5     | 5     | 5     | 0      | 0      | 0      | 0      | 0      | 0      | 0      | 0      |
| 13411  | 5     | 2     | 4     | 5     | 0     | 2     | 2      | 1      | 1      | 3      | 3      | 3      | 2      | 1      |
| 13413  | 5     | 1     | 0     | 0     | 0     | 5     | 0      | 0      | 0      | 0      | 0      | 0      | 0      | 0      |
| 13419  | 4     | 1     | 3     | 3     | 4     | 5     | 0      | 0      | 1      | 1      | 1      | 1      | 1      | 1      |
| 13420  | 5     | 1     | 3     | 3     | 3     | 5     | 0      | 1      | 0      | 0      | 1      | 1      | 1      | 1      |
| 13427  | 3     | 3     | 3     | 3     | 3     | 3     | 1      | 1      | 1      | 1      | 1      | 1      | 1      | 1      |
| 13441  | 2     | 4     | 1     | 1     | 1     | 2     | 2      | 2      | 1      | 2      | 2      | 2      | 1      | 2      |
| 13444  | 2     | 3     | 3     | 4     | 4     | 3     | 2      | 3      | 2      | 2      | 3      | 3      | 2      | 1      |
| 13456  | 5     | 1     | 0     | 0     | 5     | 5     | 0      | 0      | 0      | 0      | 0      | 0      | 0      | 0      |
| 13466  | 3     | 2     | 4     | 4     | 3     | 2     | 2      | 1      | 1      | 2      | 2      | 2      | 2      | 1      |
| 13468  | 5     | 1     | 1     | 3     | 5     | 5     | 0      | 1      | 0      | 0      | 1      | 1      | 0      | 0      |
| 13475  | 5     | 1     | 1     | 1     | 5     | 5     | 0      | 0      | 0      | 0      | 0      | 0      | 0      | 0      |
| 13484  | 5     | 1     | 1     | 4     | 5     | 5     | 0      | 1      | 0      | 0      | 0      | 0      | 1      | 1      |
| 13486  | 5     | 1     | 1     | 1     | 4     | 5     | 1      | 1      | 1      | 0      | 0      | 0      | 0      | 0      |
| 13487  | 5     | 1     | 4     | 4     | 5     | 5     | 0      | 2      | 0      | 2      | 1      | 1      | 1      | 0      |
| 13491  | 4     | 1     | 3     | 3     | 4     | 5     | 0      | 1      | 0      | 1      | 0      | 1      | 0      | 1      |
| 13496  | 3     | 2     | 1     | 0     | 4     | 5     | 1      | 1      | 1      | 0      | 0      | 2      | 0      | 1      |
| 13497  | 3     | 2     | 3     | 3     | 3     | 4     | 1      | 1      | 1      | 2      | 1      | 1      | 1      | 1      |
| 13498  | 3     | 3     | 3     | 4     | 4     | 5     | 1      | 0      | 0      | 1      | 1      | 1      | 0      | 0      |
| 13502  | 2     | 1     | 0     | 1     | 3     | 5     | 2      | 2      | 1      | 1      | 2      | 1      | 1      | 1      |
| 13503  | 4     | 3     | 3     | 3     | 3     | 1     | 1      | 2      | 1      | 1      | 1      | 1      | 1      | 1      |
| 13505  | 3     | 3     | 3     | 3     | 4     | 4     | 1      | 1      | 1      | 1      | 1      | 1      | 1      | 1      |
| 13509  | 4     | 2     | 3     | 3     | 3     | 5     | 1      | 1      | 0      | 0      | 1      | 1      | 1      | 0      |

| respid | Q52_2 | Q53_1 | Q54_1 | Q54_2 | Q54_3 | Q55_1 | Q56a_1 | Q56b_1 | Q56c_1 | Q56d_1 | Q56e_1 | Q56f_1 | Q56g_1 | Q56h_1 |   |
|--------|-------|-------|-------|-------|-------|-------|--------|--------|--------|--------|--------|--------|--------|--------|---|
| 13510  | 4     | 2     | 4     | 4     | 4     | 4     | 4      | 1      | 2      | 2      | 2      | 1      | 3      | 2      | 2 |
| 13518  | 2     | 4     | 0     | 1     | 0     | 3     | 1      | 1      | 1      | 0      | 2      | 2      | 1      | 1      |   |
| 13521  | 4     | 2     | 1     | 3     | 4     | 4     | 1      | 1      | 0      | 1      | 1      | 1      | 1      | 0      |   |
| 13523  | 4     | 2     | 3     | 4     | 4     | 4     | 1      | 1      | 1      | 2      | 1      | 1      | 1      | 1      |   |
| 13528  | 3     | 3     | 3     | 3     | 3     | 3     | 1      | 1      | 1      | 1      | 1      | 2      | 1      | 1      |   |
| 13531  | 3     | 1     | 3     | 3     | 3     | 3     | 2      | 0      | 1      | 2      | 2      | 2      | 2      | 1      |   |
| 13532  | 5     | 2     | 3     | 3     | 3     | 4     | 0      | 1      | 0      | 2      | 1      | 1      | 1      | 1      |   |
| 13533  | 5     | 1     | 1     | 1     | 4     | 5     | 0      | 1      | 0      | 1      | 1      | 2      | 1      | 0      |   |
| 13534  | 5     | 1     | 5     | 4     | 5     | 5     | 0      | 1      | 0      | 0      | 1      | 0      | 1      | 1      |   |
| 13535  | 5     | 1     | 1     | 3     | 4     | 5     | 1      | 1      | 0      | 1      | 0      | 1      | 0      | 1      |   |
| 13538  | 4     | 3     | 3     | 4     | 4     | 4     | 1      | 1      | 1      | 1      | 1      | 1      | 2      | 2      |   |
| 13540  | 3     | 3     | 3     | 4     | 3     | 4     | 1      | 2      | 1      | 2      | 2      | 1      | 2      | 2      |   |
| 13541  | 4     | 3     | 3     | 3     | 4     | 3     | 1      | 1      | 1      | 2      | 1      | 2      | 2      | 1      |   |
| 13542  | 3     | 1     | 1     | 4     | 3     | 3     | 0      | 3      | 0      | 1      | 2      | 2      | 1      | 1      |   |
| 13550  | 4     | 1     | 3     | 3     | 3     | 4     | 0      | 2      | 0      | 1      | 1      | 1      | 1      | 1      |   |
| 13553  | 4     | 3     | 4     | 4     | 1     | 3     | 1      | 1      | 2      | 2      | 3      | 2      | 2      | 1      |   |
| 13554  | 5     | 2     | 1     | 1     | 5     | 5     | 0      | 1      | 1      | 0      | 1      | 1      | 1      | 0      |   |
| 13555  | 4     | 4     | 3     | 3     | 4     | 3     | 2      | 1      | 2      | 2      | 2      | 1      | 1      | 2      |   |
| 13556  | 2     | 4     | 5     | 5     | 1     | 1     | 2      | 1      | 3      | 2      | 2      | 2      | 2      | 2      |   |
| 13563  | 3     | 2     | 1     | 3     | 4     | 5     | 1      | 1      | 0      | 2      | 1      | 1      | 1      | 1      |   |
| 13564  | 3     | 3     | 1     | 1     | 3     | 3     | 1      | 1      | 1      | 1      | 1      | 1      | 1      | 1      |   |
| 13567  | 3     | 3     | 3     | 4     | 4     | 4     | 1      | 1      | 1      | 2      | 2      | 1      | 2      | 1      |   |
| 13568  | 2     | 3     | 0     | 1     | 1     | 3     | 0      | 1      | 1      | 1      | 2      | 2      | 0      | 1      |   |
| 13570  | 5     | 2     | 1     | 1     | 5     | 5     | 0      | 0      | 0      | 0      | 0      | 0      | 0      | 0      |   |
| 13573  | 4     | 2     | 1     | 1     | 1     | 3     | 1      | 1      | 1      | 1      | 1      | 1      | 1      | 1      |   |
| 13575  | 5     | 2     | 1     | 1     | 5     | 5     | 1      | 1      | 0      | 0      | 0      | 1      | 1      | 0      |   |
| 13577  | 3     | 4     | 1     | 3     | 3     | 3     | 1      | 1      | 1      | 2      | 2      | 2      | 1      | 1      |   |
| 13580  | 2     | 4     | 1     | 3     | 0     | 3     | 2      | 1      | 1      | 1      | 3      | 2      | 1      | 1      |   |
| 13582  | 5     | 1     | 1     | 1     | 5     | 5     | 0      | 0      | 0      | 0      | 0      | 0      | 0      | 0      |   |
| 13584  | 3     | 4     | 1     | 3     | 3     | 4     | 2      | 1      | 1      | 1      | 2      | 1      | 1      | 2      |   |
| 13585  | 5     | 1     | 4     | 4     | 3     | 5     | 0      | 1      | 1      | 1      | 1      | 0      | 0      | 1      |   |
| 13586  | 4     | 2     | 1     | 1     | 4     | 4     | 1      | 0      | 2      | 0      | 1      | 0      | 1      | 0      |   |

| respid | Q52_2 | Q53_1 | Q54_1 | Q54_2 | Q54_3 | Q55_1 | Q56a_1 | Q56b_1 | Q56c_1 | Q56d_1 | Q56e_1 | Q56f_1 | Q56g_1 | Q56h_1 |
|--------|-------|-------|-------|-------|-------|-------|--------|--------|--------|--------|--------|--------|--------|--------|
| 13587  | 4     | 2     | 4     | 3     | 4     | 4     | 1      | 1      | 1      | 2      | 1      | 3      | 2      | 1      |
| 13592  | 1     | 4     | 1     | 3     | 3     | 4     | 1      | 2      | 1      | 1      | 2      | 2      | 1      | 2      |
| 13596  | 5     | 1     | 1     | 1     | 4     | 5     | 0      | 0      | 2      | 1      | 1      | 0      | 1      | 0      |
| 13597  | 5     | 1     | 3     | 3     | 4     | 5     | 0      | 1      | 0      | 0      | 1      | 1      | 1      | 1      |
| 13599  | 3     | 3     | 3     | 4     | 1     | 3     | 2      | 1      | 1      | 2      | 2      | 3      | 1      | 2      |
| 13601  | 5     | 2     | 4     | 3     | 4     | 4     | 1      | 1      | 1      | 2      | 1      | 2      | 2      | 1      |
| 13604  | 3     | 2     | 1     | 3     | 4     | 4     | 1      | 1      | 1      | 1      | 1      | 1      | 1      | 1      |
| 13608  | 4     | 2     | 1     | 1     | 4     | 5     | 1      | 0      | 0      | 0      | 0      | 0      | 1      | 0      |
| 13616  | 4     | 1     | 3     | 1     | 4     | 3     | 1      | 2      | 2      | 0      | 1      | 1      | 1      | 0      |
| 13618  | 4     | 3     | 3     | 3     | 4     | 3     | 1      | 1      | 1      | 1      | 1      | 1      | 1      | 1      |
| 13619  | 5     | 2     | 1     | 1     | 4     | 4     | 1      | 1      | 1      | 1      | 1      | 1      | 1      | 0      |
| 13626  | 5     | 1     | 0     | 1     | 5     | 5     | 0      | 0      | 0      | 0      | 0      | 0      | 0      | 0      |
| 13628  | 4     | 2     | 1     | 1     | 4     | 4     | 1      | 1      | 1      | 1      | 1      | 0      | 1      | 1      |
| 13640  | 4     | 3     | 1     | 3     | 3     | 4     | 0      | 1      | 1      | 1      | 1      | 1      | 2      | 1      |
| 13645  | 4     | 2     | 1     | 1     | 4     | 4     | 0      | 0      | 0      | 0      | 1      | 1      | 1      | 1      |
| 13648  | 5     | 1     | 1     | 1     | 3     | 5     | 0      | 0      | 0      | 0      | 0      | 0      | 0      | 0      |
| 13653  | 5     | 1     | 0     | 0     | 5     | 5     | 0      | 0      | 0      | 0      | 0      | 0      | 0      | 0      |
| 13655  | 4     | 1     | 1     | 1     | 3     | 5     | 1      | 0      | 1      | 0      | 1      | 1      | 0      | 0      |
| 13662  | 4     | 2     | 1     | 1     | 4     | 4     | 0      | 0      | 0      | 0      | 1      | 1      | 1      | 0      |
| 13670  | 4     | 2     | 3     | 1     | 4     | 4     | 1      | 0      | 1      | 1      | 1      | 1      | 1      | 1      |
| 13673  | 4     | 1     | 1     | 3     | 4     | 4     | 1      | 1      | 1      | 1      | 1      | 1      | 1      | 1      |
| 13674  | 3     | 2     | 3     | 3     | 3     | 4     | 1      | 1      | 0      | 2      | 1      | 1      | 2      | 1      |
| 13675  | 1     | 5     | 0     | 3     | 4     | 1     | 1      | 0      | 1      | 0      | 1      | 1      | 1      | 1      |
| 13678  | 3     | 3     | 3     | 3     | 4     | 3     | 1      | 1      | 1      | 1      | 1      | 1      | 0      | 1      |
| 13680  | 5     | 1     | 1     | 0     | 5     | 5     | 0      | 0      | 1      | 0      | 1      | 0      | 0      | 0      |
| 13681  | 4     | 2     | 3     | 3     | 4     | 3     | 1      | 1      | 1      | 1      | 1      | 1      | 1      | 1      |
| 13683  | 5     | 1     | 1     | 1     | 4     | 5     | 1      | 1      | 0      | 1      | 0      | 1      | 1      | 1      |
| 13684  | 5     | 1     | 1     | 3     | 3     | 5     | 1      | 1      | 0      | 1      | 1      | 1      | 2      | 1      |
| 13685  | 4     | 1     | 3     | 3     | 4     | 5     | 1      | 0      | 1      | 0      | 1      | 1      | 1      | 1      |
| 13687  | 5     | 1     | 0     | 0     | 5     | 5     | 0      | 0      | 0      | 0      | 0      | 0      | 0      | 0      |
| 13690  | 4     | 1     | 1     | 3     | 4     | 5     | 1      | 1      | 1      | 1      | 1      | 1      | 1      | 1      |
| 13700  | 3     | 2     | 1     | 4     | 3     | 4     | 1      | 2      | 2      | 1      | 1      | 1      | 2      | 1      |

| respid | Q52_2 | Q53_1 | Q54_1 | Q54_2 | Q54_3 | Q55_1 | Q56a_1 | Q56b_1 | Q56c_1 | Q56d_1 | Q56e_1 | Q56f_1 | Q56g_1 | Q56h_1 |
|--------|-------|-------|-------|-------|-------|-------|--------|--------|--------|--------|--------|--------|--------|--------|
| 13705  | 4     | 1     | 1     | 1     | 4     | 4     | 1      | 0      | 0      | 1      | 1      | 0      | 0      | 0      |
| 13710  | 5     | 2     | 1     | 1     | 3     | 5     | 0      | 1      | 0      | 0      | 0      | 0      | 0      | 1      |
| 13711  | 4     | 4     | 3     | 3     | 1     | 3     | 0      | 1      | 1      | 0      | 1      | 2      | 0      | 1      |
| 13713  | 5     | 1     | 0     | 0     | 5     | 5     | 0      | 0      | 0      | 0      | 0      | 0      | 0      | 0      |
| 13716  | 5     | 1     | 0     | 0     | 4     | 5     | 0      | 0      | 2      | 0      | 0      | 0      | 0      | 0      |
| 13721  | 4     | 2     | 1     | 1     | 4     | 4     | 2      | 1      | 0      | 1      | 1      | 1      | 2      | 1      |
| 13722  | 5     | 2     | 3     | 3     | 4     | 5     | 0      | 1      | 0      | 0      | 1      | 0      | 1      | 1      |
| 13723  | 4     | 3     | 0     | 0     | 4     | 4     | 1      | 0      | 0      | 0      | 0      | 0      | 0      | 1      |
| 13726  | 2     | 3     | 3     | 4     | 3     | 3     | 1      | 1      | 1      | 1      | 1      | 1      | 2      | 1      |
| 13728  | 3     | 3     | 3     | 3     | 3     | 4     | 1      | 2      | 1      | 1      | 1      | 1      | 1      | 1      |
| 13730  | 3     | 3     | 1     | 3     | 3     | 3     | 1      | 1      | 1      | 1      | 1      | 1      | 1      | 1      |
| 13734  | 3     | 2     | 3     | 1     | 3     | 4     | 1      | 1      | 1      | 2      | 2      | 1      | 2      | 1      |
| 13736  | 3     | 4     | 3     | 3     | 1     | 3     | 1      | 1      | 2      | 1      | 2      | 1      | 2      | 2      |
| 13737  | 5     | 2     | 1     | 1     | 4     | 4     | 1      | 0      | 1      | 0      | 1      | 0      | 1      | 1      |
| 13739  | 4     | 2     | 1     | 1     | 4     | 4     | 1      | 1      | 1      | 0      | 1      | 0      | 1      | 1      |
| 13742  | 4     | 1     | 0     | 1     | 4     | 5     | 0      | 0      | 0      | 0      | 1      | 0      | 1      | 0      |
| 13746  | 5     | 1     | 1     | 1     | 5     | 5     | 0      | 0      | 0      | 0      | 1      | 0      | 1      | 1      |
| 13747  | 4     | 2     | 1     | 1     | 4     | 4     | 1      | 0      | 2      | 2      | 1      | 1      | 1      | 1      |
| 13749  | 5     | 1     | 5     | 4     | 4     | 5     | 3      | 1      | 0      | 0      | 0      | 0      | 0      | 1      |
| 13751  | 4     | 2     | 1     | 1     | 4     | 4     | 1      | 0      | 1      | 1      | 1      | 0      | 1      | 1      |
| 13752  | 5     | 2     | 1     | 3     | 1     | 4     | 1      | 1      | 1      | 1      | 2      | 2      | 2      | 1      |
| 13756  | 3     | 3     | 4     | 4     | 3     | 3     | 2      | 2      | 2      | 1      | 1      | 1      | 2      | 2      |
| 13757  | 5     | 1     | 0     | 0     | 4     | 5     | 1      | 0      | 0      | 0      | 0      | 0      | 0      | 1      |
| 13767  | 3     | 1     | 1     | 1     | 3     | 4     | 1      | 1      | 1      | 1      | 1      | 1      | 1      | 1      |
| 13771  | 5     | 1     | 0     | 0     | 5     | 5     | 0      | 0      | 0      | 0      | 0      | 0      | 0      | 0      |
| 13772  | 3     | 3     | 3     | 3     | 1     | 4     | 1      | 1      | 1      | 1      | 1      | 1      | 1      | 1      |
| 13779  | 5     | 1     | 0     | 0     | 5     | 5     | 0      | 0      | 0      | 0      | 0      | 0      | 0      | 0      |
| 13782  | 4     | 1     | 1     | 1     | 4     | 4     | 1      | 1      | 1      | 1      | 1      | 1      | 1      | 1      |
| 13783  | 5     | 1     | 0     | 1     | 4     | 5     | 0      | 0      | 0      | 0      | 1      | 0      | 0      | 0      |
| 13785  | 4     | 1     | 3     | 3     | 1     | 5     | 1      | 2      | 1      | 1      | 1      | 1      | 1      | 1      |
| 13786  | 3     | 2     | 4     | 4     | 0     | 3     | 3      | 1      | 3      | 0      | 3      | 2      | 2      | 3      |
| 13792  | 2     | 3     | 1     | 4     | 1     | 3     | 1      | 1      | 1      | 1      | 1      | 2      | 2      | 1      |

| respid | Q52_2 | Q53_1 | Q54_1 | Q54_2 | Q54_3 | Q55_1 | Q56a_1 | Q56b_1 | Q56c_1 | Q56d_1 | Q56e_1 | Q56f_1 | Q56g_1 | Q56h_1 |
|--------|-------|-------|-------|-------|-------|-------|--------|--------|--------|--------|--------|--------|--------|--------|
| 13796  | 4     | 1     | 1     | 1     | 4     | 5     | 0      | 0      | 0      | 0      | 0      | 0      | 0      | 1      |
| 13798  | 4     | 2     | 4     | 4     | 4     | 4     | 1      | 2      | 2      | 2      | 1      | 1      | 2      | 1      |
| 13799  | 3     | 3     | 1     | 3     | 4     | 3     | 1      | 1      | 1      | 1      | 1      | 1      | 1      | 2      |
| 13804  | 4     | 1     | 1     | 1     | 4     | 4     | 1      | 0      | 2      | 0      | 1      | 1      | 1      | 1      |
| 13805  | 4     | 2     | 1     | 4     | 4     | 4     | 1      | 0      | 1      | 0      | 1      | 1      | 1      | 1      |
| 13810  | 3     | 3     | 3     | 3     | 3     | 3     | 1      | 1      | 2      | 2      | 1      | 1      | 1      | 1      |
| 13811  | 4     | 2     | 1     | 1     | 4     | 4     | 0      | 0      | 0      | 0      | 0      | 0      | 0      | 1      |
| 13819  | 2     | 3     | 3     | 3     | 3     | 2     | 1      | 1      | 3      | 2      | 1      | 1      | 0      | 3      |
| 13821  | 4     | 5     | 1     | 3     | 3     | 4     | 1      | 2      | 2      | 1      | 3      | 1      | 0      | 1      |
| 13824  | 3     | 3     | 4     | 4     | 3     | 4     | 1      | 1      | 2      | 1      | 2      | 2      | 2      | 2      |
| 13828  | 4     | 1     | 4     | 3     | 4     | 4     | 1      | 2      | 1      | 2      | 1      | 3      | 2      | 2      |
| 13829  | 2     | 5     | 3     | 3     | 1     | 5     | 0      | 1      | 1      | 1      | 3      | 2      | 2      | 1      |
| 13831  | 5     | 2     | 1     | 1     | 5     | 5     | 0      | 0      | 0      | 0      | 0      | 0      | 0      | 0      |
| 13833  | 3     | 3     | 4     | 3     | 3     | 4     | 1      | 1      | 2      | 1      | 1      | 2      | 2      | 1      |
| 13835  | 3     | 3     | 1     | 3     | 3     | 3     | 1      | 0      | 1      | 0      | 1      | 1      | 1      | 2      |
| 13838  | 5     | 1     | 0     | 0     | 5     | 5     | 0      | 0      | 0      | 0      | 0      | 0      | 0      | 0      |
| 13839  | 2     | 5     | 3     | 3     | 1     | 4     | 1      | 1      | 1      | 2      | 3      | 2      | 1      | 2      |
| 13845  | 5     | 1     | 0     | 0     | 5     | 5     | 0      | 0      | 0      | 0      | 0      | 0      | 0      | 0      |
| 13846  | 4     | 3     | 1     | 3     | 4     | 4     | 1      | 1      | 1      | 2      | 1      | 1      | 1      | 1      |
| 13853  | 3     | 3     | 3     | 3     | 3     | 3     | 2      | 1      | 1      | 1      | 1      | 1      | 1      | 1      |
| 13855  | 3     | 3     | 0     | 1     | 3     | 2     | 1      | 1      | 1      | 1      | 0      | 1      | 1      | 2      |
| 13858  | 3     | 2     | 1     | 3     | 1     | 3     | 1      | 1      | 1      | 0      | 1      | 1      | 1      | 1      |
| 13860  | 5     | 1     | 0     | 0     | 5     | 5     | 0      | 0      | 0      | 0      | 0      | 0      | 0      | 0      |
| 13865  | 3     | 5     | 5     | 4     | 5     | 5     | 2      | 2      | 2      | 2      | 3      | 3      | 3      | 3      |
| 13870  | 5     | 1     | 1     | 1     | 4     | 5     | 0      | 0      | 0      | 0      | 0      | 0      | 0      | 0      |
| 13872  | 5     | 1     | 1     | 1     | 3     | 3     | 2      | 1      | 3      | 2      | 2      | 1      | 2      | 1      |
| 13873  | 4     | 3     | 3     | 4     | 4     | 4     | 1      | 1      | 1      | 1      | 1      | 1      | 1      | 1      |
| 13874  | 5     | 1     | 0     | 0     | 4     | 5     | 0      | 0      | 1      | 0      | 0      | 0      | 0      | 0      |
| 13875  | 1     | 3     | 0     | 1     | 0     | 2     | 0      | 1      | 0      | 1      | 1      | 2      | 0      | 1      |
| 13881  | 4     | 2     | 1     | 1     | 4     | 5     | 0      | 0      | 0      | 0      | 0      | 0      | 0      | 0      |
| 13887  | 5     | 2     | 3     | 3     | 4     | 4     | 1      | 2      | 1      | 0      | 1      | 1      | 1      | 0      |
| 13888  | 4     | 1     | 1     | 3     | 4     | 4     | 1      | 0      | 1      | 1      | 1      | 1      | 1      | 1      |

| respid | Q52_2 | Q53_1 | Q54_1 | Q54_2 | Q54_3 | Q55_1 | Q56a_1 | Q56b_1 | Q56c_1 | Q56d_1 | Q56e_1 | Q56f_1 | Q56g_1 | Q56h_1 |
|--------|-------|-------|-------|-------|-------|-------|--------|--------|--------|--------|--------|--------|--------|--------|
| 13889  | 3     | 3     | 3     | 3     | 4     | 2     | 1      | 1      | 2      | 2      | 2      | 1      | 2      | 1      |
| 13895  | 4     | 3     | 3     | 3     | 1     | 3     | 1      | 1      | 1      | 2      | 1      | 2      | 2      | 2      |
| 13897  | 4     | 1     | 0     | 0     | 4     | 4     | 0      | 0      | 0      | 0      | 0      | 0      | 0      | 0      |
| 13898  | 4     | 2     | 1     | 3     | 4     | 4     | 1      | 0      | 0      | 2      | 1      | 1      | 1      | 1      |
| 13901  | 4     | 1     | 1     | 1     | 4     | 5     | 0      | 0      | 1      | 0      | 0      | 0      | 1      | 0      |
| 13902  | 1     | 5     | 3     | 4     | 4     | 3     | 1      | 1      | 1      | 1      | 2      | 2      | 1      | 2      |
| 13903  | 5     | 2     | 1     | 1     | 4     | 1     | 0      | 1      | 1      | 1      | 0      | 1      | 0      | 0      |
| 13905  | 3     | 3     | 0     | 1     | 3     | 3     | 0      | 0      | 0      | 1      | 2      | 1      | 0      | 0      |
| 13908  | 2     | 3     | 3     | 3     | 3     | 3     | 2      | 2      | 2      | 2      | 2      | 2      | 2      | 2      |
| 13909  | 1     | 3     | 0     | 0     | 0     | 4     | 1      | 2      | 2      | 2      | 1      | 1      | 1      | 1      |
| 13910  | 3     | 4     | 1     | 4     | 3     | 3     | 1      | 2      | 0      | 1      | 2      | 1      | 1      | 2      |
| 13911  | 4     | 2     | 0     | 0     | 3     | 5     | 0      | 0      | 0      | 0      | 0      | 0      | 0      | 0      |
| 13914  | 2     | 4     | 4     | 5     | 1     | 2     | 2      | 1      | 1      | 2      | 2      | 1      | 2      | 2      |
| 13920  | 2     | 4     | 4     | 4     | 1     | 3     | 1      | 1      | 2      | 2      | 2      | 2      | 2      | 2      |
| 13926  | 3     | 2     | 1     | 4     | 3     | 3     | 2      | 3      | 2      | 2      | 2      | 3      | 2      | 3      |
| 13929  | 2     | 3     | 0     | 1     | 0     | 3     | 0      | 0      | 0      | 0      | 1      | 1      | 0      | 1      |
| 13930  | 3     | 4     | 4     | 4     | 1     | 3     | 1      | 2      | 1      | 2      | 2      | 2      | 2      | 2      |
| 13931  | 3     | 2     | 1     | 1     | 3     | 4     | 0      | 0      | 0      | 0      | 0      | 0      | 0      | 0      |
| 13932  | 4     | 1     | 1     | 3     | 4     | 3     | 1      | 0      | 1      | 0      | 1      | 1      | 1      | 1      |
| 13934  | 4     | 3     | 1     | 4     | 3     | 3     | 1      | 1      | 2      | 2      | 2      | 2      | 2      | 2      |
| 13938  | 4     | 1     | 1     | 1     | 4     | 4     | 0      | 1      | 0      | 0      | 0      | 1      | 1      | 1      |
| 13942  | 4     | 1     | 1     | 1     | 5     | 5     | 0      | 0      | 1      | 0      | 0      | 0      | 0      | 1      |
| 13945  | 2     | 3     | 3     | 3     | 4     | 3     | 2      | 2      | 2      | 2      | 2      | 2      | 2      | 2      |
| 13947  | 4     | 2     | 4     | 4     | 1     | 4     | 1      | 1      | 1      | 1      | 2      | 2      | 2      | 2      |
| 13948  | 4     | 2     | 1     | 3     | 4     | 5     | 0      | 0      | 0      | 1      | 0      | 1      | 1      | 1      |
| 13959  | 5     | 2     | 1     | 1     | 4     | 5     | 0      | 2      | 0      | 0      | 1      | 1      | 0      | 0      |
| 13962  | 5     | 1     | 1     | 1     | 5     | 5     | 0      | 1      | 0      | 0      | 1      | 1      | 1      | 0      |
| 13963  | 5     | 3     | 3     | 3     | 3     | 4     | 0      | 0      | 0      | 0      | 0      | 0      | 1      | 1      |
| 13964  | 5     | 1     | 1     | 3     | 4     | 4     | 1      | 2      | 0      | 1      | 1      | 1      | 1      | 1      |
| 13966  | 1     | 3     | 0     | 1     | 0     | 2     | 1      | 0      | 0      | 1      | 1      | 1      | 0      | 1      |
| 13968  | 4     | 2     | 1     | 3     | 5     | 5     | 0      | 0      | 1      | 1      | 1      | 1      | 0      | 0      |
| 13971  | 1     | 2     | 1     | 1     | 1     | 2     | 1      | 1      | 1      | 2      | 1      | 1      | 1      | 1      |



| respid | Q52_2 | Q53_1 | Q54_1 | Q54_2 | Q54_3 | Q55_1 | Q56a_1 | Q56b_1 | Q56c_1 | Q56d_1 | Q56e_1 | Q56f_1 | Q56g_1 | Q56h_1 |
|--------|-------|-------|-------|-------|-------|-------|--------|--------|--------|--------|--------|--------|--------|--------|
| 13979  | 3     | 3     | 3     | 3     | 3     | 3     | 3      | 1      | 1      | 1      | 1      | 1      | 1      | 1      |
| 13980  | 4     | 2     | 4     | 4     | 4     | 4     | 4      | 1      | 1      | 1      | 1      | 1      | 1      | 2      |
| 13981  | 4     | 2     | 1     | 1     | 1     | 4     | 4      | 1      | 1      | 0      | 1      | 1      | 0      | 1      |
| 13982  | 4     | 1     | 1     | 4     | 4     | 5     | 5      | 1      | 1      | 0      | 1      | 1      | 1      | 1      |
| 13984  | 3     | 3     | 1     | 1     | 3     | 5     | 0      | 1      | 0      | 1      | 1      | 1      | 1      | 2      |
| 13989  | 5     | 1     | 0     | 0     | 0     | 5     | 0      | 0      | 0      | 0      | 0      | 0      | 0      | 0      |
| 13990  | 5     | 1     | 1     | 1     | 5     | 5     | 5      | 1      | 0      | 2      | 0      | 1      | 0      | 1      |
| 13992  | 3     | 5     | 4     | 5     | 0     | 2     | 2      | 2      | 2      | 2      | 0      | 2      | 2      | 3      |
| 13998  | 5     | 1     | 1     | 3     | 4     | 3     | 3      | 1      | 1      | 1      | 1      | 2      | 1      | 1      |
| 13999  | 3     | 3     | 1     | 3     | 4     | 3     | 3      | 1      | 2      | 1      | 1      | 2      | 2      | 2      |
| 14000  | 5     | 1     | 1     | 3     | 4     | 4     | 5      | 1      | 2      | 1      | 0      | 1      | 1      | 2      |
| 14003  | 5     | 1     | 1     | 1     | 4     | 5     | 5      | 1      | 0      | 0      | 0      | 1      | 1      | 1      |
| 14004  | 3     | 3     | 4     | 3     | 3     | 3     | 3      | 1      | 2      | 1      | 2      | 1      | 1      | 2      |
| 14006  | 3     | 1     | 1     | 1     | 3     | 5     | 5      | 1      | 1      | 2      | 2      | 1      | 0      | 0      |
| 14007  | 3     | 2     | 3     | 4     | 4     | 4     | 4      | 1      | 1      | 1      | 1      | 1      | 2      | 2      |
| 14008  | 4     | 2     | 0     | 0     | 4     | 4     | 1      | 0      | 0      | 0      | 0      | 0      | 0      | 0      |
| 14013  | 4     | 1     | 3     | 3     | 4     | 4     | 4      | 1      | 1      | 2      | 1      | 1      | 1      | 1      |
| 14015  | 5     | 1     | 4     | 4     | 5     | 5     | 5      | 0      | 3      | 0      | 0      | 1      | 0      | 0      |
| 14018  | 5     | 1     | 1     | 3     | 4     | 5     | 5      | 1      | 1      | 1      | 0      | 1      | 1      | 0      |
| 14021  | 1     | 3     | 3     | 4     | 3     | 5     | 5      | 3      | 0      | 0      | 1      | 2      | 2      | 1      |
| 14023  | 4     | 3     | 3     | 4     | 4     | 3     | 3      | 1      | 3      | 1      | 2      | 1      | 2      | 2      |
| 14024  | 2     | 2     | 1     | 5     | 4     | 4     | 4      | 2      | 1      | 2      | 3      | 2      | 3      | 2      |
| 14026  | 5     | 1     | 1     | 3     | 4     | 5     | 5      | 0      | 1      | 0      | 1      | 0      | 1      | 1      |
| 14030  | 4     | 2     | 1     | 3     | 3     | 4     | 4      | 1      | 1      | 1      | 1      | 1      | 2      | 1      |
| 14032  | 4     | 2     | 3     | 3     | 4     | 4     | 4      | 1      | 2      | 1      | 1      | 1      | 1      | 1      |
| 14040  | 5     | 1     | 1     | 1     | 5     | 5     | 5      | 1      | 0      | 0      | 0      | 1      | 1      | 1      |
| 14045  | 5     | 2     | 1     | 3     | 4     | 5     | 5      | 0      | 0      | 1      | 0      | 0      | 0      | 1      |
| 14048  | 3     | 3     | 3     | 3     | 1     | 3     | 3      | 1      | 1      | 2      | 2      | 3      | 2      | 2      |
| 14049  | 4     | 2     | 1     | 3     | 4     | 5     | 5      | 1      | 2      | 1      | 2      | 2      | 2      | 2      |
| 14050  | 4     | 2     | 4     | 4     | 4     | 4     | 5      | 1      | 1      | 2      | 1      | 2      | 2      | 2      |
| 14051  | 1     | 5     | 3     | 3     | 4     | 5     | 5      | 2      | 2      | 3      | 2      | 3      | 3      | 3      |
| 14052  | 4     | 1     | 1     | 3     | 4     | 4     | 4      | 1      | 2      | 1      | 1      | 2      | 2      | 1      |

| respid | Q52_2 | Q53_1 | Q54_1 | Q54_2 | Q54_3 | Q55_1 | Q56a_1 | Q56b_1 | Q56c_1 | Q56d_1 | Q56e_1 | Q56f_1 | Q56g_1 | Q56h_1 |
|--------|-------|-------|-------|-------|-------|-------|--------|--------|--------|--------|--------|--------|--------|--------|
| 14054  | 5     | 1     | 1     | 1     | 5     | 5     | 0      | 0      | 0      | 0      | 0      | 0      | 0      | 0      |
| 14055  | 5     | 1     | 0     | 0     | 4     | 2     | 0      | 0      | 0      | 0      | 0      | 0      | 0      | 0      |
| 14057  | 2     | 3     | 3     | 3     | 4     | 3     | 2      | 1      | 1      | 1      | 1      | 1      | 1      | 1      |
| 14058  | 5     | 2     | 0     | 1     | 5     | 5     | 0      | 1      | 0      | 3      | 1      | 2      | 2      | 1      |
| 14059  | 5     | 1     | 1     | 1     | 5     | 5     | 1      | 1      | 0      | 1      | 0      | 0      | 0      | 0      |
| 14060  | 4     | 1     | 4     | 3     | 3     | 5     | 1      | 2      | 0      | 1      | 1      | 1      | 2      | 1      |
| 14061  | 3     | 4     | 4     | 3     | 3     | 4     | 1      | 2      | 2      | 2      | 2      | 1      | 2      | 1      |
| 14071  | 4     | 2     | 1     | 3     | 4     | 4     | 0      | 1      | 0      | 1      | 1      | 1      | 1      | 1      |
| 14073  | 4     | 2     | 1     | 4     | 4     | 5     | 1      | 2      | 0      | 1      | 0      | 1      | 1      | 1      |
| 14074  | 3     | 2     | 1     | 3     | 4     | 2     | 2      | 1      | 1      | 1      | 2      | 1      | 2      | 2      |
| 14076  | 3     | 3     | 3     | 3     | 4     | 3     | 1      | 2      | 0      | 2      | 1      | 2      | 1      | 2      |
| 14080  | 5     | 2     | 1     | 1     | 4     | 5     | 0      | 1      | 0      | 0      | 1      | 0      | 0      | 0      |
| 14082  | 5     | 1     | 0     | 0     | 5     | 5     | 0      | 0      | 0      | 1      | 0      | 0      | 0      | 1      |
| 14083  | 4     | 1     | 1     | 1     | 4     | 5     | 0      | 0      | 0      | 0      | 0      | 0      | 0      | 1      |
| 14084  | 5     | 2     | 1     | 3     | 3     | 4     | 1      | 1      | 1      | 0      | 1      | 1      | 1      | 1      |
| 14085  | 5     | 1     | 1     | 1     | 4     | 5     | 0      | 0      | 0      | 0      | 1      | 0      | 0      | 0      |
| 14086  | 4     | 2     | 1     | 3     | 3     | 4     | 1      | 0      | 1      | 0      | 1      | 1      | 1      | 1      |
| 14088  | 4     | 2     | 1     | 1     | 3     | 4     | 0      | 0      | 0      | 0      | 1      | 1      | 1      | 1      |
| 14090  | 5     | 1     | 1     | 1     | 4     | 5     | 0      | 1      | 0      | 0      | 1      | 0      | 0      | 0      |
| 14092  | 5     | 1     | 1     | 1     | 4     | 5     | 0      | 1      | 0      | 1      | 1      | 1      | 1      | 1      |
| 14093  | 2     | 2     | 1     | 0     | 1     | 2     | 0      | 0      | 0      | 0      | 0      | 0      | 0      | 0      |
| 14096  | 3     | 2     | 3     | 3     | 5     | 5     | 0      | 1      | 0      | 0      | 0      | 0      | 0      | 1      |
| 14103  | 3     | 3     | 1     | 1     | 4     | 3     | 1      | 2      | 1      | 2      | 2      | 2      | 2      | 2      |
| 14105  | 5     | 1     | 0     | 0     | 5     | 5     | 0      | 1      | 0      | 0      | 1      | 0      | 0      | 0      |
| 14106  | 2     | 2     | 0     | 4     | 4     | 4     | 1      | 3      | 1      | 2      | 1      | 2      | 1      | 2      |
| 14107  | 2     | 5     | 3     | 1     | 1     | 3     | 1      | 1      | 1      | 1      | 2      | 2      | 1      | 1      |
| 14108  | 3     | 3     | 1     | 3     | 3     | 3     | 1      | 2      | 2      | 2      | 2      | 1      | 1      | 1      |
| 14112  | 5     | 1     | 1     | 3     | 4     | 5     | 0      | 2      | 0      | 0      | 1      | 1      | 2      | 1      |
| 14114  | 4     | 2     | 4     | 5     | 3     | 3     | 1      | 2      | 1      | 2      | 2      | 3      | 3      | 2      |
| 14115  | 3     | 1     | 3     | 3     | 4     | 4     | 1      | 1      | 1      | 1      | 1      | 1      | 1      | 1      |
| 14116  | 5     | 1     | 1     | 1     | 4     | 5     | 0      | 0      | 0      | 0      | 1      | 0      | 0      | 0      |
| 14117  | 5     | 1     | 1     | 1     | 5     | 5     | 0      | 1      | 0      | 2      | 1      | 1      | 1      | 1      |

| respid | Q52_2 | Q53_1 | Q54_1 | Q54_2 | Q54_3 | Q55_1 | Q56a_1 | Q56b_1 | Q56c_1 | Q56d_1 | Q56e_1 | Q56f_1 | Q56g_1 | Q56h_1 |
|--------|-------|-------|-------|-------|-------|-------|--------|--------|--------|--------|--------|--------|--------|--------|
| 14118  | 2     | 3     | 3     | 1     | 3     | 3     | 1      | 1      | 1      | 1      | 2      | 1      | 1      | 2      |
| 14119  | 4     | 2     | 3     | 3     | 3     | 4     | 2      | 1      | 2      | 1      | 1      | 1      | 2      | 1      |
| 14127  | 4     | 1     | 0     | 0     | 4     | 5     | 1      | 0      | 0      | 0      | 0      | 0      | 0      | 0      |
| 14129  | 3     | 3     | 1     | 1     | 3     | 4     | 0      | 0      | 2      | 0      | 3      | 2      | 1      | 2      |
| 14131  | 3     | 2     | 1     | 5     | 4     | 4     | 1      | 1      | 0      | 1      | 3      | 2      | 2      | 2      |
| 14132  | 5     | 1     | 1     | 1     | 4     | 4     | 1      | 1      | 1      | 0      | 0      | 1      | 0      | 0      |
| 14133  | 3     | 3     | 3     | 3     | 3     | 3     | 1      | 1      | 2      | 1      | 2      | 1      | 1      | 2      |
| 14134  | 4     | 1     | 1     | 1     | 4     | 5     | 1      | 1      | 0      | 1      | 1      | 1      | 1      | 1      |
| 14135  | 4     | 3     | 1     | 1     | 3     | 3     | 1      | 1      | 1      | 1      | 1      | 0      | 2      | 2      |
| 14136  | 2     | 4     | 3     | 5     | 3     | 3     | 1      | 3      | 0      | 0      | 1      | 2      | 2      | 3      |
| 14138  | 4     | 2     | 1     | 1     | 4     | 5     | 0      | 0      | 0      | 0      | 1      | 0      | 0      | 0      |
| 14139  | 5     | 1     | 1     | 1     | 3     | 5     | 0      | 1      | 1      | 0      | 0      | 1      | 0      | 0      |
| 14140  | 4     | 3     | 3     | 4     | 4     | 3     | 1      | 2      | 2      | 1      | 2      | 1      | 2      | 2      |
| 14141  | 5     | 1     | 1     | 1     | 5     | 5     | 0      | 1      | 0      | 1      | 1      | 1      | 0      | 1      |
| 14143  | 5     | 2     | 1     | 1     | 5     | 5     | 1      | 0      | 0      | 0      | 1      | 0      | 1      | 0      |
| 14146  | 3     | 3     | 3     | 3     | 3     | 3     | 1      | 1      | 1      | 2      | 1      | 1      | 1      | 1      |
| 14147  | 3     | 4     | 4     | 4     | 1     | 3     | 1      | 2      | 2      | 1      | 1      | 2      | 2      | 2      |
| 14148  | 3     | 3     | 1     | 3     | 3     | 3     | 2      | 2      | 2      | 2      | 2      | 2      | 1      | 1      |
| 14151  | 4     | 3     | 3     | 4     | 1     | 3     | 1      | 1      | 2      | 1      | 1      | 2      | 2      | 3      |
| 14152  | 2     | 3     | 1     | 1     | 3     | 4     | 1      | 1      | 1      | 2      | 2      | 0      | 1      | 3      |
| 14153  | 5     | 3     | 1     | 1     | 4     | 4     | 1      | 1      | 0      | 1      | 0      | 0      | 0      | 1      |
| 14154  | 5     | 1     | 1     | 4     | 4     | 5     | 0      | 2      | 0      | 1      | 1      | 1      | 2      | 1      |
| 14158  | 5     | 2     | 3     | 1     | 1     | 5     | 1      | 0      | 0      | 1      | 1      | 1      | 1      | 1      |
| 14159  | 2     | 3     | 0     | 1     | 0     | 3     | 0      | 1      | 2      | 1      | 1      | 2      | 2      | 1      |
| 14160  | 4     | 2     | 4     | 4     | 4     | 4     | 1      | 2      | 1      | 2      | 2      | 1      | 2      | 2      |
| 14161  | 3     | 3     | 1     | 1     | 3     | 3     | 1      | 3      | 1      | 1      | 2      | 1      | 2      | 3      |
| 14162  | 5     | 1     | 1     | 1     | 4     | 5     | 1      | 1      | 1      | 1      | 1      | 1      | 1      | 1      |
| 14165  | 5     | 1     | 1     | 4     | 3     | 4     | 1      | 2      | 1      | 1      | 1      | 1      | 1      | 2      |
| 14166  | 3     | 3     | 1     | 1     | 3     | 3     | 1      | 1      | 1      | 1      | 1      | 2      | 1      | 2      |
| 14167  | 4     | 3     | 1     | 3     | 4     | 4     | 1      | 0      | 1      | 1      | 1      | 1      | 1      | 1      |
| 14169  | 2     | 3     | 1     | 1     | 3     | 3     | 0      | 1      | 1      | 1      | 1      | 1      | 1      | 1      |
| 14170  | 5     | 2     | 1     | 1     | 4     | 5     | 1      | 1      | 0      | 0      | 1      | 1      | 1      | 1      |

| respid | Q52_2 | Q53_1 | Q54_1 | Q54_2 | Q54_3 | Q55_1 | Q56a_1 | Q56b_1 | Q56c_1 | Q56d_1 | Q56e_1 | Q56f_1 | Q56g_1 | Q56h_1 |
|--------|-------|-------|-------|-------|-------|-------|--------|--------|--------|--------|--------|--------|--------|--------|
| 14172  | 3     | 4     | 1     | 3     | 3     | 5     | 1      | 1      | 2      | 2      | 1      | 1      | 1      | 2      |
| 14173  | 3     | 1     | 3     | 3     | 3     | 4     | 1      | 2      | 0      | 1      | 1      | 2      | 2      | 1      |
| 14174  | 4     | 1     | 1     | 1     | 5     | 5     | 0      | 1      | 0      | 1      | 1      | 0      | 1      | 1      |
| 14175  | 4     | 2     | 1     | 3     | 4     | 4     | 1      | 1      | 2      | 1      | 1      | 1      | 1      | 1      |
| 14176  | 5     | 1     | 3     | 4     | 1     | 4     | 1      | 2      | 1      | 2      | 2      | 3      | 2      | 1      |
| 14178  | 4     | 1     | 5     | 4     | 5     | 5     | 0      | 2      | 0      | 0      | 0      | 0      | 0      | 0      |
| 14179  | 5     | 1     | 0     | 0     | 5     | 5     | 0      | 0      | 0      | 0      | 1      | 0      | 0      | 0      |
| 14180  | 2     | 3     | 1     | 1     | 4     | 4     | 1      | 1      | 2      | 2      | 2      | 1      | 2      | 1      |
| 14183  | 2     | 3     | 0     | 1     | 3     | 3     | 1      | 1      | 1      | 0      | 2      | 1      | 1      | 1      |
| 14185  | 5     | 1     | 5     | 5     | 4     | 5     | 3      | 0      | 1      | 0      | 2      | 1      | 1      | 2      |
| 14187  | 4     | 2     | 1     | 3     | 4     | 4     | 2      | 1      | 2      | 2      | 2      | 2      | 2      | 1      |
| 14189  | 4     | 3     | 1     | 3     | 4     | 4     | 1      | 1      | 0      | 2      | 1      | 2      | 2      | 2      |
| 14191  | 3     | 3     | 3     | 3     | 4     | 3     | 1      | 1      | 1      | 2      | 2      | 1      | 2      | 3      |
| 14192  | 5     | 1     | 0     | 0     | 5     | 5     | 0      | 0      | 0      | 0      | 0      | 0      | 0      | 0      |
| 14195  | 4     | 3     | 5     | 5     | 3     | 4     | 1      | 3      | 1      | 1      | 2      | 3      | 3      | 2      |
| 14197  | 3     | 1     | 4     | 5     | 4     | 4     | 1      | 2      | 0      | 2      | 1      | 2      | 2      | 0      |
| 14203  | 3     | 3     | 3     | 3     | 4     | 3     | 2      | 1      | 2      | 1      | 2      | 1      | 1      | 1      |
| 14204  | 5     | 1     | 1     | 1     | 4     | 5     | 0      | 1      | 0      | 1      | 1      | 1      | 1      | 1      |
| 14205  | 4     | 2     | 4     | 4     | 3     | 2     | 2      | 2      | 1      | 2      | 2      | 2      | 2      | 3      |
| 14208  | 4     | 2     | 0     | 0     | 3     | 5     | 0      | 0      | 0      | 0      | 0      | 0      | 0      | 0      |
| 14211  | 3     | 4     | 3     | 4     | 1     | 3     | 2      | 1      | 2      | 2      | 2      | 2      | 2      | 2      |
| 14214  | 5     | 1     | 1     | 1     | 4     | 5     | 0      | 1      | 0      | 0      | 0      | 0      | 0      | 0      |
| 14215  | 4     | 2     | 1     | 3     | 3     | 3     | 1      | 1      | 1      | 1      | 1      | 1      | 1      | 1      |
| 14216  | 3     | 3     | 1     | 1     | 1     | 3     | 1      | 1      | 1      | 1      | 2      | 1      | 1      | 2      |
| 14218  | 5     | 1     | 0     | 0     | 5     | 5     | 0      | 0      | 0      | 3      | 1      | 0      | 0      | 0      |
| 14220  | 4     | 1     | 3     | 1     | 3     | 5     | 1      | 1      | 1      | 1      | 1      | 1      | 1      | 1      |
| 14223  | 4     | 2     | 0     | 1     | 3     | 3     | 0      | 0      | 0      | 0      | 0      | 0      | 1      | 0      |
| 14225  | 4     | 4     | 4     | 4     | 1     | 2     | 2      | 1      | 2      | 1      | 2      | 1      | 2      | 2      |
| 14226  | 5     | 1     | 1     | 3     | 4     | 4     | 0      | 0      | 0      | 0      | 0      | 0      | 0      | 1      |
| 14228  | 2     | 2     | 0     | 1     | 0     | 2     | 0      | 1      | 1      | 1      | 1      | 0      | 0      | 0      |
| 14231  | 3     | 3     | 3     | 3     | 3     | 3     | 1      | 1      | 1      | 1      | 1      | 1      | 1      | 1      |
| 14233  | 3     | 3     | 1     | 3     | 4     | 4     | 1      | 2      | 1      | 1      | 1      | 1      | 2      | 1      |

| respid | Q52_2 | Q53_1 | Q54_1 | Q54_2 | Q54_3 | Q55_1 | Q56a_1 | Q56b_1 | Q56c_1 | Q56d_1 | Q56e_1 | Q56f_1 | Q56g_1 | Q56h_1 |
|--------|-------|-------|-------|-------|-------|-------|--------|--------|--------|--------|--------|--------|--------|--------|
| 14237  | 5     | 1     | 0     | 0     | 5     | 5     | 1      | 2      | 2      | 1      | 2      | 2      | 2      | 2      |
| 14238  | 3     | 2     | 1     | 1     | 3     | 4     | 1      | 1      | 1      | 1      | 1      | 1      | 2      | 3      |
| 14243  | 4     | 2     | 1     | 3     | 4     | 3     | 2      | 1      | 1      | 1      | 1      | 1      | 1      | 2      |
| 14245  | 1     | 3     | 0     | 1     | 1     | 3     | 0      | 0      | 0      | 0      | 1      | 1      | 1      | 0      |
| 14246  | 2     | 3     | 1     | 1     | 0     | 3     | 1      | 1      | 0      | 1      | 1      | 1      | 1      | 2      |
| 14248  | 4     | 2     | 1     | 1     | 3     | 4     | 0      | 0      | 0      | 0      | 0      | 0      | 0      | 0      |
| 14250  | 5     | 1     | 3     | 4     | 1     | 4     | 1      | 2      | 1      | 2      | 1      | 1      | 2      | 1      |
| 14253  | 4     | 1     | 1     | 1     | 4     | 5     | 1      | 1      | 0      | 0      | 1      | 1      | 0      | 1      |
| 14254  | 5     | 1     | 1     | 1     | 3     | 5     | 1      | 1      | 1      | 1      | 2      | 1      | 2      | 1      |
| 14255  | 4     | 1     | 1     | 1     | 4     | 5     | 1      | 3      | 1      | 2      | 2      | 2      | 1      | 1      |
| 14257  | 5     | 2     | 1     | 3     | 4     | 4     | 0      | 1      | 1      | 0      | 1      | 1      | 1      | 1      |
| 14258  | 3     | 2     | 3     | 3     | 3     | 3     | 1      | 1      | 1      | 1      | 1      | 1      | 2      | 1      |
| 14259  | 5     | 1     | 0     | 1     | 5     | 5     | 1      | 1      | 0      | 0      | 1      | 1      | 1      | 1      |
| 14260  | 5     | 1     | 1     | 1     | 5     | 5     | 0      | 0      | 0      | 1      | 0      | 0      | 0      | 0      |
| 14261  | 2     | 4     | 3     | 1     | 4     | 2     | 2      | 2      | 2      | 2      | 3      | 2      | 1      | 2      |
| 14263  | 4     | 2     | 1     | 3     | 3     | 5     | 1      | 1      | 0      | 1      | 1      | 1      | 1      | 2      |
| 14264  | 3     | 4     | 3     | 4     | 3     | 4     | 1      | 1      | 1      | 1      | 2      | 1      | 1      | 3      |
| 14266  | 4     | 4     | 1     | 3     | 3     | 4     | 1      | 2      | 1      | 2      | 2      | 2      | 1      | 1      |
| 14267  | 2     | 4     | 1     | 0     | 1     | 2     | 0      | 0      | 1      | 1      | 1      | 1      | 0      | 1      |
| 14268  | 5     | 2     | 1     | 1     | 5     | 5     | 0      | 1      | 1      | 1      | 1      | 0      | 0      | 1      |
| 14275  | 3     | 3     | 3     | 3     | 4     | 4     | 1      | 1      | 1      | 2      | 1      | 1      | 2      | 1      |
| 14278  | 2     | 3     | 5     | 5     | 0     | 2     | 3      | 1      | 2      | 3      | 3      | 3      | 2      | 3      |
| 14279  | 5     | 1     | 1     | 1     | 4     | 5     | 1      | 0      | 0      | 0      | 1      | 0      | 1      | 0      |
| 14280  | 2     | 5     | 4     | 5     | 5     | 2     | 3      | 2      | 3      | 3      | 3      | 0      | 2      | 3      |
| 14281  | 1     | 5     | 1     | 4     | 0     | 3     | 2      | 3      | 2      | 1      | 3      | 3      | 2      | 0      |
| 14282  | 1     | 2     | 0     | 1     | 0     | 3     | 0      | 0      | 0      | 1      | 2      | 1      | 1      | 1      |
| 14283  | 4     | 2     | 4     | 4     | 3     | 2     | 2      | 2      | 3      | 1      | 3      | 2      | 3      | 2      |
| 14286  | 4     | 3     | 4     | 4     | 1     | 3     | 1      | 3      | 1      | 0      | 2      | 1      | 2      | 2      |
| 14287  | 3     | 2     | 1     | 1     | 5     | 4     | 0      | 0      | 0      | 0      | 0      | 0      | 0      | 0      |
| 14288  | 4     | 2     | 1     | 1     | 4     | 4     | 1      | 1      | 1      | 2      | 1      | 1      | 1      | 1      |
| 14291  | 5     | 1     | 0     | 0     | 5     | 5     | 0      | 0      | 0      | 0      | 0      | 0      | 0      | 0      |
| 14292  | 5     | 1     | 0     | 1     | 3     | 5     | 1      | 0      | 1      | 0      | 1      | 1      | 1      | 1      |

| respid | Q52_2 | Q53_1 | Q54_1 | Q54_2 | Q54_3 | Q55_1 | Q56a_1 | Q56b_1 | Q56c_1 | Q56d_1 | Q56e_1 | Q56f_1 | Q56g_1 | Q56h_1 |
|--------|-------|-------|-------|-------|-------|-------|--------|--------|--------|--------|--------|--------|--------|--------|
| 14293  | 4     | 1     | 1     | 1     | 4     | 5     | 1      | 0      | 0      | 0      | 1      | 1      | 1      | 1      |
| 14304  | 5     | 4     | 4     | 5     | 3     | 5     | 2      | 1      | 3      | 3      | 2      | 1      | 3      | 2      |
| 14308  | 4     | 1     | 1     | 1     | 4     | 3     | 1      | 1      | 0      | 0      | 1      | 0      | 0      | 1      |
| 14313  | 3     | 3     | 3     | 3     | 3     | 3     | 1      | 2      | 1      | 1      | 1      | 1      | 1      | 1      |
| 14314  | 1     | 5     | 5     | 5     | 1     | 1     | 1      | 1      | 2      | 1      | 2      | 2      | 2      | 1      |
| 14316  | 3     | 3     | 1     | 1     | 5     | 4     | 1      | 1      | 0      | 0      | 1      | 1      | 1      | 1      |
| 14317  | 5     | 1     | 1     | 1     | 3     | 5     | 1      | 1      | 1      | 0      | 1      | 1      | 1      | 1      |
| 14318  | 3     | 3     | 4     | 3     | 4     | 4     | 1      | 2      | 1      | 1      | 2      | 2      | 2      | 2      |
| 14319  | 5     | 1     | 0     | 1     | 5     | 5     | 1      | 1      | 0      | 0      | 0      | 0      | 0      | 0      |
| 14320  | 2     | 3     | 0     | 1     | 0     | 2     | 0      | 1      | 1      | 1      | 1      | 1      | 1      | 1      |
| 14321  | 5     | 1     | 1     | 1     | 4     | 4     | 1      | 2      | 0      | 0      | 1      | 0      | 2      | 1      |
| 14322  | 3     | 3     | 3     | 3     | 3     | 3     | 1      | 1      | 2      | 2      | 1      | 1      | 1      | 1      |
| 14326  | 2     | 2     | 1     | 3     | 3     | 5     | 3      | 1      | 0      | 0      | 2      | 0      | 0      | 0      |
| 14327  | 2     | 4     | 4     | 5     | 5     | 4     | 3      | 2      | 3      | 2      | 3      | 2      | 2      | 3      |
| 14328  | 3     | 1     | 1     | 1     | 5     | 5     | 0      | 1      | 1      | 0      | 1      | 1      | 1      | 0      |
| 14330  | 5     | 1     | 1     | 1     | 5     | 5     | 0      | 0      | 0      | 0      | 0      | 1      | 1      | 1      |
| 14332  | 5     | 1     | 3     | 1     | 4     | 5     | 0      | 1      | 0      | 0      | 0      | 0      | 0      | 0      |
| 14334  | 3     | 2     | 1     | 1     | 3     | 4     | 1      | 1      | 1      | 0      | 1      | 0      | 0      | 0      |
| 14336  | 4     | 2     | 1     | 4     | 4     | 5     | 0      | 1      | 0      | 0      | 1      | 1      | 0      | 1      |
| 14337  | 4     | 2     | 1     | 1     | 4     | 4     | 1      | 1      | 2      | 1      | 1      | 0      | 0      | 1      |
| 14339  | 4     | 4     | 1     | 1     | 3     | 3     | 0      | 0      | 1      | 1      | 0      | 1      | 0      | 1      |
| 14340  | 4     | 2     | 1     | 3     | 4     | 4     | 1      | 0      | 0      | 0      | 1      | 1      | 1      | 1      |
| 14341  | 5     | 1     | 0     | 1     | 5     | 5     | 0      | 0      | 0      | 0      | 0      | 0      | 0      | 0      |
| 14344  | 5     | 4     | 5     | 4     | 5     | 3     | 0      | 0      | 0      | 1      | 1      | 1      | 1      | 1      |
| 14345  | 4     | 2     | 1     | 1     | 4     | 5     | 1      | 1      | 1      | 1      | 1      | 1      | 1      | 0      |
| 14346  | 2     | 1     | 3     | 0     | 1     | 4     | 1      | 0      | 1      | 0      | 1      | 0      | 0      | 0      |
| 14348  | 5     | 5     | 0     | 0     | 5     | 5     | 3      | 0      | 0      | 0      | 0      | 0      | 0      | 0      |
| 14349  | 4     | 2     | 1     | 1     | 4     | 3     | 0      | 1      | 0      | 1      | 0      | 1      | 1      | 1      |
| 14358  | 3     | 3     | 3     | 3     | 3     | 3     | 1      | 1      | 2      | 2      | 1      | 1      | 1      | 2      |
| 14360  | 4     | 2     | 1     | 1     | 4     | 5     | 1      | 0      | 0      | 0      | 0      | 0      | 0      | 1      |
| 14362  | 4     | 1     | 1     | 1     | 1     | 5     | 3      | 2      | 0      | 0      | 2      | 1      | 0      | 0      |
| 14366  | 4     | 2     | 1     | 1     | 1     | 3     | 1      | 2      | 1      | 0      | 1      | 1      | 1      | 0      |

| respid | Q52_2 | Q53_1 | Q54_1 | Q54_2 | Q54_3 | Q55_1 | Q56a_1 | Q56b_1 | Q56c_1 | Q56d_1 | Q56e_1 | Q56f_1 | Q56g_1 | Q56h_1 |
|--------|-------|-------|-------|-------|-------|-------|--------|--------|--------|--------|--------|--------|--------|--------|
| 14367  | 4     | 2     | 1     | 1     | 4     | 4     | 1      | 0      | 1      | 0      | 1      | 0      | 0      | 0      |
| 14369  | 4     | 2     | 1     | 1     | 4     | 4     | 0      | 1      | 0      | 1      | 0      | 0      | 1      | 0      |
| 14371  | 5     | 1     | 1     | 3     | 5     | 5     | 0      | 1      | 0      | 1      | 0      | 1      | 1      | 0      |
| 14372  | 4     | 1     | 4     | 4     | 3     | 4     | 1      | 2      | 0      | 1      | 1      | 1      | 1      | 0      |
| 14374  | 2     | 5     | 5     | 5     | 0     | 1     | 2      | 3      | 2      | 2      | 3      | 3      | 3      | 3      |
| 14376  | 5     | 1     | 4     | 4     | 4     | 5     | 1      | 0      | 0      | 0      | 1      | 2      | 2      | 1      |
| 14377  | 5     | 1     | 4     | 3     | 5     | 5     | 0      | 1      | 0      | 1      | 0      | 1      | 2      | 1      |
| 14378  | 4     | 2     | 1     | 1     | 4     | 5     | 0      | 1      | 0      | 0      | 1      | 0      | 0      | 2      |
| 14379  | 4     | 1     | 1     | 1     | 4     | 4     | 1      | 1      | 0      | 1      | 0      | 1      | 1      | 1      |
| 14381  | 3     | 2     | 5     | 5     | 4     | 3     | 0      | 1      | 1      | 2      | 2      | 2      | 2      | 1      |
| 14383  | 5     | 1     | 4     | 4     | 4     | 5     | 0      | 1      | 0      | 0      | 1      | 1      | 2      | 1      |
| 14384  | 4     | 2     | 1     | 3     | 4     | 4     | 1      | 0      | 0      | 0      | 1      | 0      | 1      | 1      |
| 14385  | 1     | 4     | 3     | 4     | 1     | 4     | 1      | 1      | 0      | 1      | 3      | 2      | 0      | 1      |
| 14386  | 3     | 3     | 3     | 3     | 3     | 3     | 1      | 1      | 1      | 1      | 2      | 2      | 1      | 1      |
| 14390  | 4     | 2     | 3     | 4     | 3     | 4     | 1      | 2      | 1      | 1      | 1      | 1      | 2      | 2      |
| 14391  | 5     | 1     | 0     | 1     | 0     | 5     | 0      | 0      | 0      | 0      | 0      | 0      | 0      | 0      |
| 14392  | 4     | 2     | 1     | 1     | 3     | 4     | 1      | 1      | 1      | 0      | 1      | 0      | 1      | 0      |
| 14393  | 5     | 2     | 1     | 3     | 5     | 5     | 0      | 0      | 0      | 0      | 0      | 1      | 1      | 1      |
| 14394  | 4     | 2     | 3     | 3     | 1     | 4     | 1      | 2      | 1      | 1      | 2      | 2      | 2      | 1      |
| 14395  | 4     | 1     | 1     | 1     | 3     | 5     | 1      | 0      | 0      | 1      | 1      | 1      | 1      | 1      |
| 14396  | 3     | 4     | 0     | 1     | 3     | 4     | 1      | 0      | 0      | 0      | 1      | 2      | 1      | 1      |
| 14397  | 5     | 1     | 1     | 1     | 5     | 5     | 0      | 0      | 0      | 0      | 0      | 1      | 0      | 0      |
| 14398  | 3     | 2     | 3     | 0     | 5     | 5     | 1      | 0      | 0      | 0      | 1      | 2      | 0      | 1      |
| 14399  | 5     | 1     | 5     | 5     | 5     | 5     | 3      | 3      | 0      | 0      | 1      | 0      | 0      | 0      |
| 14400  | 4     | 1     | 1     | 3     | 4     | 4     | 1      | 1      | 1      | 1      | 2      | 1      | 1      | 1      |
| 14403  | 4     | 1     | 1     | 3     | 4     | 5     | 1      | 1      | 0      | 0      | 1      | 0      | 1      | 1      |
| 14404  | 4     | 3     | 3     | 3     | 4     | 3     | 1      | 1      | 0      | 1      | 1      | 1      | 1      | 1      |
| 14405  | 5     | 2     | 1     | 3     | 4     | 4     | 1      | 1      | 0      | 2      | 1      | 2      | 1      | 0      |
| 14407  | 5     | 2     | 1     | 1     | 4     | 3     | 0      | 0      | 1      | 0      | 1      | 1      | 2      | 1      |
| 14408  | 2     | 3     | 3     | 3     | 1     | 3     | 2      | 0      | 2      | 0      | 2      | 1      | 2      | 2      |
| 14410  | 2     | 5     | 3     | 3     | 1     | 2     | 1      | 3      | 1      | 1      | 2      | 2      | 2      | 2      |
| 14415  | 3     | 2     | 4     | 4     | 3     | 5     | 1      | 2      | 1      | 1      | 1      | 2      | 2      | 1      |

| respid | Q52_2 | Q53_1 | Q54_1 | Q54_2 | Q54_3 | Q55_1 | Q56a_1 | Q56b_1 | Q56c_1 | Q56d_1 | Q56e_1 | Q56f_1 | Q56g_1 | Q56h_1 |
|--------|-------|-------|-------|-------|-------|-------|--------|--------|--------|--------|--------|--------|--------|--------|
| 14419  | 4     | 2     | 4     | 3     | 3     | 2     | 2      | 1      | 0      | 2      | 1      | 1      | 2      | 2      |
| 14420  | 4     | 3     | 4     | 4     | 4     | 5     | 1      | 0      | 1      | 1      | 1      | 1      | 1      | 1      |
| 14421  | 5     | 1     | 5     | 0     | 5     | 5     | 0      | 0      | 0      | 0      | 0      | 0      | 0      | 0      |
| 14423  | 4     | 1     | 0     | 0     | 4     | 5     | 0      | 2      | 2      | 0      | 1      | 1      | 1      | 1      |
| 14424  | 5     | 1     | 0     | 1     | 3     | 5     | 2      | 0      | 0      | 0      | 1      | 0      | 2      | 1      |
| 14425  | 5     | 2     | 3     | 3     | 3     | 4     | 0      | 1      | 0      | 0      | 1      | 1      | 1      | 0      |
| 14426  | 4     | 1     | 1     | 1     | 3     | 4     | 0      | 0      | 0      | 1      | 1      | 1      | 0      | 0      |
| 14427  | 5     | 1     | 1     | 1     | 3     | 5     | 1      | 2      | 1      | 0      | 1      | 1      | 2      | 1      |
| 14428  | 5     | 5     | 3     | 4     | 5     | 4     | 1      | 2      | 2      | 1      | 3      | 2      | 3      | 2      |
| 14431  | 5     | 1     | 1     | 1     | 3     | 5     | 0      | 0      | 0      | 0      | 1      | 0      | 0      | 0      |
| 14433  | 3     | 3     | 4     | 3     | 3     | 5     | 1      | 2      | 0      | 1      | 0      | 2      | 2      | 1      |
| 14434  | 5     | 1     | 3     | 1     | 5     | 5     | 0      | 0      | 0      | 0      | 1      | 0      | 1      | 1      |
| 14435  | 4     | 1     | 1     | 1     | 4     | 4     | 1      | 1      | 1      | 1      | 1      | 1      | 1      | 0      |
| 14436  | 4     | 2     | 3     | 4     | 3     | 4     | 1      | 2      | 1      | 1      | 1      | 2      | 2      | 1      |
| 14438  | 5     | 1     | 0     | 0     | 1     | 5     | 0      | 0      | 1      | 1      | 0      | 1      | 1      | 1      |
| 14442  | 3     | 3     | 3     | 3     | 1     | 3     | 1      | 1      | 1      | 1      | 2      | 1      | 1      | 1      |
| 14447  | 5     | 1     | 1     | 0     | 5     | 5     | 3      | 0      | 0      | 0      | 0      | 0      | 0      | 0      |
| 14448  | 5     | 2     | 0     | 1     | 4     | 5     | 1      | 0      | 2      | 1      | 2      | 1      | 1      | 1      |
| 14450  | 4     | 2     | 4     | 4     | 4     | 3     | 1      | 2      | 1      | 1      | 2      | 1      | 1      | 2      |
| 14451  | 4     | 2     | 4     | 4     | 5     | 4     | 0      | 0      | 0      | 1      | 0      | 1      | 1      | 1      |
| 14454  | 3     | 3     | 3     | 1     | 1     | 3     | 1      | 2      | 1      | 1      | 1      | 1      | 2      | 1      |
| 14455  | 5     | 2     | 1     | 1     | 3     | 5     | 1      | 2      | 1      | 1      | 2      | 1      | 1      | 2      |
| 14456  | 4     | 2     | 1     | 1     | 4     | 4     | 1      | 1      | 1      | 2      | 2      | 1      | 2      | 1      |
| 14457  | 2     | 4     | 3     | 4     | 4     | 3     | 1      | 2      | 2      | 1      | 3      | 2      | 2      | 3      |
| 14458  | 3     | 5     | 3     | 4     | 3     | 5     | 2      | 3      | 2      | 2      | 2      | 2      | 3      | 2      |
| 14459  | 5     | 4     | 1     | 1     | 4     | 5     | 1      | 1      | 0      | 1      | 1      | 0      | 0      | 1      |
| 14460  | 5     | 2     | 1     | 1     | 3     | 4     | 1      | 1      | 2      | 1      | 1      | 1      | 2      | 1      |
| 14464  | 4     | 1     | 3     | 3     | 3     | 4     | 2      | 2      | 1      | 1      | 1      | 1      | 1      | 1      |
| 14465  | 3     | 2     | 1     | 3     | 4     | 4     | 1      | 1      | 1      | 1      | 1      | 1      | 1      | 1      |
| 14466  | 4     | 2     | 1     | 1     | 4     | 3     | 1      | 0      | 1      | 0      | 1      | 2      | 1      | 1      |
| 14467  | 4     | 3     | 1     | 3     | 3     | 4     | 1      | 2      | 1      | 0      | 1      | 1      | 1      | 1      |
| 14470  | 3     | 2     | 3     | 3     | 3     | 3     | 1      | 2      | 0      | 2      | 1      | 1      | 2      | 1      |



| respid | Q52_2 | Q53_1 | Q54_1 | Q54_2 | Q54_3 | Q55_1 | Q56a_1 | Q56b_1 | Q56c_1 | Q56d_1 | Q56e_1 | Q56f_1 | Q56g_1 | Q56h_1 |
|--------|-------|-------|-------|-------|-------|-------|--------|--------|--------|--------|--------|--------|--------|--------|
| 14472  | 5     | 1     | 3     | 3     | 4     | 5     | 1      | 1      | 0      | 1      | 1      | 1      | 2      | 1      |
| 14473  | 4     | 2     | 1     | 3     | 4     | 5     | 0      | 0      | 0      | 0      | 1      | 1      | 1      | 1      |
| 14474  | 5     | 1     | 1     | 3     | 5     | 5     | 0      | 0      | 1      | 1      | 1      | 1      | 1      | 0      |
| 14477  | 4     | 4     | 3     | 4     | 3     | 3     | 1      | 1      | 1      | 0      | 1      | 1      | 2      | 2      |
| 14478  | 5     | 2     | 1     | 1     | 4     | 4     | 1      | 1      | 0      | 1      | 1      | 1      | 1      | 1      |
| 14479  | 5     | 1     | 1     | 0     | 5     | 5     | 0      | 0      | 0      | 0      | 0      | 0      | 0      | 0      |
| 14484  | 5     | 1     | 0     | 1     | 5     | 5     | 0      | 0      | 0      | 0      | 0      | 0      | 0      | 0      |
| 14485  | 5     | 1     | 1     | 1     | 4     | 5     | 0      | 1      | 0      | 1      | 0      | 1      | 1      | 0      |
| 14486  | 2     | 3     | 3     | 3     | 1     | 3     | 1      | 1      | 1      | 2      | 1      | 1      | 0      | 2      |
| 14487  | 5     | 2     | 1     | 1     | 4     | 4     | 1      | 2      | 0      | 1      | 2      | 1      | 2      | 1      |
| 14488  | 3     | 3     | 3     | 3     | 3     | 4     | 1      | 1      | 1      | 1      | 2      | 1      | 1      | 2      |
| 14491  | 4     | 2     | 1     | 3     | 4     | 4     | 1      | 2      | 2      | 2      | 2      | 1      | 1      | 1      |
| 14495  | 5     | 1     | 1     | 4     | 4     | 5     | 1      | 1      | 0      | 2      | 1      | 2      | 2      | 2      |
| 14500  | 4     | 2     | 1     | 1     | 3     | 4     | 1      | 2      | 1      | 0      | 0      | 0      | 1      | 1      |
| 14502  | 5     | 2     | 1     | 0     | 4     | 4     | 1      | 2      | 1      | 2      | 2      | 1      | 1      | 2      |
| 14504  | 3     | 3     | 3     | 3     | 4     | 3     | 2      | 1      | 1      | 2      | 1      | 2      | 1      | 2      |
| 14505  | 2     | 5     | 4     | 4     | 3     | 3     | 0      | 2      | 2      | 2      | 3      | 3      | 1      | 3      |
| 14507  | 5     | 1     | 0     | 1     | 4     | 5     | 0      | 0      | 0      | 0      | 0      | 0      | 1      | 0      |
| 14517  | 5     | 2     | 1     | 1     | 5     | 5     | 0      | 2      | 0      | 0      | 0      | 0      | 0      | 0      |
| 14518  | 4     | 1     | 1     | 1     | 4     | 5     | 1      | 1      | 1      | 1      | 1      | 1      | 0      | 1      |
| 14519  | 4     | 2     | 4     | 4     | 1     | 4     | 2      | 2      | 3      | 2      | 3      | 2      | 2      | 1      |
| 14521  | 3     | 4     | 3     | 1     | 1     | 4     | 2      | 1      | 2      | 1      | 1      | 1      | 1      | 2      |
| 14522  | 5     | 1     | 1     | 1     | 4     | 5     | 0      | 0      | 0      | 0      | 0      | 0      | 0      | 0      |
| 14526  | 4     | 2     | 1     | 3     | 4     | 5     | 0      | 0      | 0      | 0      | 0      | 1      | 1      | 1      |
| 14528  | 2     | 2     | 1     | 1     | 1     | 2     | 1      | 1      | 1      | 1      | 1      | 1      | 1      | 2      |
| 14529  | 3     | 2     | 4     | 4     | 4     | 3     | 1      | 1      | 1      | 0      | 2      | 2      | 2      | 2      |
| 14530  | 5     | 2     | 1     | 1     | 4     | 4     | 0      | 0      | 1      | 1      | 1      | 1      | 1      | 1      |
| 14531  | 2     | 4     | 3     | 4     | 1     | 3     | 2      | 1      | 2      | 2      | 2      | 2      | 2      | 2      |
| 14534  | 3     | 3     | 1     | 3     | 1     | 3     | 1      | 2      | 1      | 2      | 1      | 2      | 1      | 2      |
| 14538  | 5     | 3     | 0     | 0     | 4     | 2     | 2      | 1      | 1      | 2      | 1      | 2      | 1      | 1      |
| 14539  | 4     | 3     | 5     | 4     | 5     | 5     | 3      | 1      | 2      | 3      | 2      | 2      | 2      | 1      |
| 14545  | 4     | 3     | 1     | 1     | 4     | 4     | 1      | 2      | 0      | 2      | 1      | 1      | 1      | 2      |

| respid | Q52_2 | Q53_1 | Q54_1 | Q54_2 | Q54_3 | Q55_1 | Q56a_1 | Q56b_1 | Q56c_1 | Q56d_1 | Q56e_1 | Q56f_1 | Q56g_1 | Q56h_1 |
|--------|-------|-------|-------|-------|-------|-------|--------|--------|--------|--------|--------|--------|--------|--------|
| 14546  | 5     | 1     | 4     | 5     | 5     | 3     | 2      | 3      | 1      | 2      | 3      | 3      | 2      | 2      |
| 14551  | 5     | 2     | 0     | 1     | 5     | 5     | 0      | 0      | 0      | 0      | 0      | 0      | 0      | 1      |
| 14553  | 3     | 3     | 3     | 3     | 3     | 3     | 1      | 1      | 2      | 2      | 1      | 1      | 1      | 1      |
| 14557  | 3     | 3     | 4     | 4     | 4     | 3     | 1      | 1      | 1      | 1      | 1      | 1      | 1      | 1      |
| 14558  | 5     | 2     | 0     | 1     | 4     | 4     | 2      | 1      | 0      | 0      | 2      | 1      | 1      | 1      |
| 14559  | 2     | 4     | 1     | 1     | 3     | 3     | 2      | 2      | 2      | 2      | 2      | 2      | 2      | 2      |
| 14560  | 4     | 3     | 3     | 3     | 3     | 3     | 2      | 1      | 2      | 1      | 1      | 1      | 2      | 1      |
| 14563  | 4     | 1     | 3     | 1     | 4     | 5     | 1      | 0      | 1      | 0      | 1      | 1      | 1      | 0      |
| 14565  | 3     | 4     | 3     | 4     | 3     | 5     | 0      | 3      | 2      | 1      | 3      | 2      | 2      | 1      |
| 14571  | 2     | 5     | 3     | 3     | 1     | 4     | 2      | 2      | 3      | 2      | 1      | 1      | 3      | 1      |
| 14572  | 5     | 2     | 0     | 0     | 5     | 4     | 3      | 2      | 1      | 1      | 1      | 1      | 2      | 2      |
| 14573  | 4     | 1     | 1     | 1     | 4     | 4     | 1      | 0      | 0      | 0      | 1      | 1      | 2      | 1      |
| 14575  | 3     | 3     | 3     | 3     | 1     | 4     | 1      | 2      | 1      | 2      | 2      | 2      | 1      | 1      |
| 14576  | 4     | 3     | 3     | 4     | 3     | 3     | 2      | 2      | 2      | 2      | 2      | 1      | 1      | 1      |
| 14578  | 5     | 1     | 1     | 1     | 4     | 5     | 0      | 0      | 0      | 0      | 1      | 0      | 2      | 0      |
| 14579  | 4     | 2     | 4     | 4     | 5     | 4     | 1      | 2      | 0      | 1      | 0      | 2      | 2      | 0      |
| 14580  | 3     | 4     | 1     | 0     | 4     | 4     | 0      | 1      | 0      | 0      | 2      | 1      | 1      | 1      |
| 14582  | 4     | 2     | 3     | 3     | 4     | 4     | 1      | 2      | 0      | 2      | 1      | 1      | 1      | 1      |
| 14585  | 3     | 2     | 4     | 3     | 3     | 4     | 1      | 2      | 1      | 1      | 1      | 1      | 1      | 2      |
| 14588  | 4     | 2     | 3     | 3     | 4     | 4     | 1      | 2      | 1      | 1      | 1      | 1      | 1      | 1      |
| 14590  | 2     | 3     | 3     | 1     | 3     | 3     | 2      | 1      | 1      | 1      | 1      | 1      | 2      | 1      |
| 14592  | 3     | 4     | 1     | 3     | 4     | 4     | 2      | 2      | 1      | 1      | 2      | 2      | 2      | 1      |
| 14593  | 4     | 3     | 1     | 1     | 3     | 4     | 0      | 0      | 0      | 1      | 1      | 1      | 1      | 0      |
| 14595  | 4     | 2     | 1     | 3     | 4     | 4     | 1      | 1      | 2      | 1      | 1      | 2      | 2      | 1      |
| 14597  | 3     | 3     | 1     | 3     | 3     | 3     | 1      | 1      | 1      | 2      | 2      | 1      | 1      | 2      |
| 14600  | 5     | 2     | 1     | 3     | 4     | 4     | 0      | 0      | 0      | 2      | 1      | 1      | 1      | 1      |
| 14602  | 3     | 3     | 3     | 3     | 3     | 3     | 1      | 2      | 2      | 2      | 1      | 1      | 2      | 1      |
| 14604  | 4     | 2     | 1     | 1     | 4     | 4     | 1      | 0      | 1      | 0      | 1      | 0      | 1      | 0      |
| 14605  | 4     | 3     | 3     | 4     | 4     | 4     | 1      | 2      | 1      | 2      | 1      | 2      | 2      | 1      |
| 14609  | 3     | 3     | 4     | 4     | 3     | 4     | 1      | 1      | 2      | 2      | 2      | 1      | 1      | 1      |
| 14610  | 5     | 4     | 1     | 3     | 4     | 5     | 0      | 1      | 0      | 1      | 1      | 1      | 1      | 1      |
| 14611  | 4     | 2     | 3     | 4     | 4     | 5     | 0      | 1      | 0      | 0      | 1      | 2      | 1      | 0      |

| respid | Q52_2 | Q53_1 | Q54_1 | Q54_2 | Q54_3 | Q55_1 | Q56a_1 | Q56b_1 | Q56c_1 | Q56d_1 | Q56e_1 | Q56f_1 | Q56g_1 | Q56h_1 |
|--------|-------|-------|-------|-------|-------|-------|--------|--------|--------|--------|--------|--------|--------|--------|
| 14612  | 2     | 4     | 1     | 0     | 4     | 3     | 0      | 1      | 2      | 1      | 1      | 0      | 2      | 1      |
| 14614  | 1     | 2     | 1     | 3     | 3     | 3     | 1      | 1      | 1      | 1      | 1      | 1      | 1      | 1      |
| 14615  | 5     | 2     | 3     | 3     | 3     | 5     | 1      | 2      | 1      | 1      | 1      | 2      | 1      | 1      |
| 14618  | 3     | 3     | 4     | 4     | 1     | 2     | 2      | 2      | 2      | 2      | 2      | 1      | 2      | 1      |
| 14621  | 3     | 1     | 0     | 0     | 5     | 1     | 0      | 0      | 0      | 0      | 0      | 0      | 0      | 0      |
| 14624  | 3     | 3     | 1     | 1     | 4     | 3     | 1      | 1      | 1      | 1      | 1      | 1      | 0      | 3      |
| 14626  | 4     | 1     | 4     | 4     | 4     | 5     | 0      | 0      | 0      | 0      | 1      | 1      | 0      | 1      |
| 14627  | 3     | 2     | 3     | 3     | 4     | 4     | 1      | 1      | 1      | 2      | 1      | 1      | 1      | 2      |
| 14628  | 3     | 3     | 1     | 3     | 3     | 4     | 1      | 1      | 0      | 1      | 2      | 2      | 1      | 1      |
| 14631  | 2     | 4     | 3     | 3     | 4     | 4     | 1      | 2      | 0      | 1      | 1      | 1      | 1      | 1      |
| 14633  | 3     | 3     | 1     | 3     | 3     | 3     | 1      | 1      | 1      | 1      | 2      | 1      | 0      | 1      |
| 14642  | 3     | 4     | 1     | 3     | 3     | 4     | 1      | 2      | 1      | 1      | 2      | 3      | 2      | 2      |
| 14647  | 5     | 1     | 0     | 0     | 5     | 5     | 0      | 0      | 0      | 0      | 0      | 0      | 0      | 0      |
| 14658  | 4     | 2     | 5     | 4     | 4     | 4     | 1      | 1      | 1      | 0      | 1      | 1      | 1      | 1      |
| 14659  | 3     | 3     | 1     | 1     | 3     | 3     | 1      | 1      | 2      | 1      | 1      | 1      | 1      | 2      |
| 14660  | 3     | 4     | 1     | 1     | 3     | 3     | 1      | 0      | 0      | 1      | 0      | 0      | 0      | 1      |
| 14661  | 5     | 2     | 1     | 3     | 5     | 5     | 0      | 1      | 0      | 2      | 0      | 1      | 0      | 1      |
| 14662  | 2     | 5     | 3     | 4     | 4     | 5     | 2      | 3      | 2      | 2      | 3      | 3      | 2      | 2      |
| 14663  | 3     | 3     | 0     | 1     | 4     | 4     | 1      | 2      | 0      | 0      | 1      | 1      | 0      | 0      |
| 14670  | 3     | 5     | 0     | 1     | 1     | 3     | 1      | 0      | 0      | 3      | 0      | 1      | 0      | 1      |
| 14671  | 4     | 1     | 1     | 1     | 4     | 4     | 1      | 0      | 1      | 0      | 0      | 1      | 0      | 1      |
| 14672  | 3     | 3     | 3     | 3     | 1     | 3     | 1      | 1      | 2      | 1      | 2      | 1      | 1      | 2      |
| 14675  | 3     | 5     | 3     | 4     | 4     | 5     | 0      | 0      | 0      | 0      | 0      | 0      | 0      | 0      |
| 14676  | 4     | 4     | 0     | 1     | 3     | 4     | 2      | 3      | 1      | 1      | 0      | 1      | 0      | 0      |
| 14677  | 2     | 3     | 0     | 1     | 1     | 3     | 0      | 0      | 1      | 1      | 2      | 1      | 3      | 3      |
| 14678  | 3     | 4     | 1     | 3     | 1     | 4     | 0      | 1      | 2      | 0      | 0      | 0      | 0      | 1      |
| 14681  | 2     | 3     | 1     | 3     | 1     | 3     | 1      | 1      | 1      | 1      | 1      | 1      | 0      | 1      |
| 14684  | 4     | 1     | 3     | 3     | 3     | 4     | 1      | 1      | 1      | 0      | 0      | 0      | 0      | 0      |
| 14688  | 2     | 5     | 1     | 0     | 1     | 3     | 0      | 0      | 0      | 1      | 1      | 0      | 0      | 0      |
| 14690  | 2     | 3     | 1     | 3     | 3     | 3     | 1      | 0      | 0      | 0      | 0      | 0      | 0      | 0      |
| 14694  | 3     | 3     | 3     | 1     | 1     | 3     | 1      | 1      | 1      | 2      | 1      | 1      | 1      | 2      |
| 14696  | 2     | 4     | 1     | 3     | 3     | 4     | 2      | 0      | 0      | 0      | 0      | 0      | 0      | 0      |

| respid | Q52_2 | Q53_1 | Q54_1 | Q54_2 | Q54_3 | Q55_1 | Q56a_1 | Q56b_1 | Q56c_1 | Q56d_1 | Q56e_1 | Q56f_1 | Q56g_1 | Q56h_1 |
|--------|-------|-------|-------|-------|-------|-------|--------|--------|--------|--------|--------|--------|--------|--------|
| 14700  | 4     | 2     | 1     | 1     | 4     | 4     | 0      | 0      | 0      | 0      | 0      | 0      | 0      | 0      |
| 14701  | 3     | 3     | 4     | 4     | 1     | 3     | 1      | 1      | 3      | 1      | 2      | 1      | 2      | 1      |
| 14703  | 2     | 4     | 3     | 4     | 4     | 4     | 1      | 1      | 1      | 2      | 3      | 3      | 2      | 2      |
| 14707  | 4     | 3     | 3     | 3     | 3     | 4     | 1      | 0      | 0      | 0      | 1      | 1      | 1      | 1      |
| 14711  | 3     | 4     | 1     | 3     | 4     | 4     | 1      | 2      | 1      | 2      | 1      | 2      | 0      | 2      |
| 14714  | 2     | 3     | 0     | 1     | 3     | 4     | 3      | 2      | 0      | 0      | 2      | 1      | 2      | 1      |
| 14715  | 2     | 5     | 3     | 4     | 3     | 4     | 1      | 0      | 1      | 1      | 2      | 1      | 2      | 1      |
| 14716  | 5     | 1     | 0     | 1     | 5     | 5     | 0      | 0      | 0      | 0      | 0      | 0      | 1      | 0      |
| 14720  | 5     | 3     | 3     | 3     | 3     | 4     | 1      | 0      | 0      | 0      | 1      | 0      | 0      | 1      |
| 14725  | 3     | 4     | 3     | 5     | 4     | 3     | 2      | 1      | 2      | 2      | 1      | 3      | 3      | 1      |
| 14726  | 4     | 1     | 1     | 1     | 4     | 4     | 1      | 1      | 1      | 0      | 1      | 1      | 1      | 1      |
| 14734  | 5     | 2     | 1     | 1     | 3     | 4     | 0      | 0      | 0      | 1      | 1      | 0      | 1      | 0      |
| 14735  | 5     | 2     | 0     | 1     | 3     | 4     | 1      | 0      | 0      | 2      | 1      | 0      | 1      | 0      |
| 14736  | 3     | 2     | 1     | 3     | 1     | 3     | 1      | 1      | 1      | 1      | 1      | 1      | 1      | 1      |
| 14740  | 5     | 2     | 0     | 0     | 4     | 5     | 1      | 0      | 0      | 1      | 0      | 1      | 0      | 0      |
| 14745  | 5     | 3     | 1     | 0     | 3     | 3     | 0      | 0      | 0      | 0      | 1      | 0      | 0      | 0      |
| 14747  | 5     | 1     | 0     | 1     | 4     | 5     | 1      | 0      | 1      | 1      | 0      | 1      | 2      | 2      |
| 14750  | 3     | 3     | 1     | 3     | 1     | 3     | 1      | 1      | 1      | 2      | 2      | 2      | 1      | 2      |
| 14751  | 4     | 3     | 0     | 1     | 3     | 3     | 1      | 1      | 0      | 2      | 0      | 1      | 1      | 1      |
| 14753  | 5     | 2     | 0     | 0     | 3     | 4     | 0      | 0      | 0      | 1      | 0      | 1      | 0      | 0      |
| 14756  | 3     | 4     | 4     | 5     | 1     | 3     | 2      | 2      | 2      | 2      | 2      | 2      | 2      | 3      |
| 14780  | 4     | 2     | 1     | 3     | 4     | 4     | 0      | 0      | 0      | 0      | 1      | 0      | 0      | 1      |
| 14782  | 5     | 1     | 0     | 1     | 5     | 5     | 0      | 0      | 0      | 0      | 0      | 0      | 0      | 1      |
| 14800  | 2     | 4     | 3     | 4     | 3     | 4     | 2      | 2      | 2      | 2      | 3      | 2      | 1      | 2      |
| 14801  | 5     | 1     | 1     | 1     | 3     | 5     | 0      | 1      | 0      | 0      | 1      | 0      | 1      | 0      |
| 14802  | 2     | 4     | 1     | 3     | 3     | 3     | 0      | 1      | 1      | 1      | 2      | 2      | 1      | 1      |
| 14805  | 4     | 2     | 1     | 4     | 3     | 4     | 1      | 0      | 1      | 0      | 1      | 0      | 1      | 1      |
| 14811  | 3     | 3     | 1     | 3     | 3     | 4     | 1      | 1      | 1      | 1      | 1      | 1      | 1      | 1      |
| 14814  | 3     | 3     | 1     | 1     | 3     | 3     | 2      | 1      | 1      | 2      | 1      | 1      | 0      | 2      |
| 14822  | 2     | 2     | 0     | 1     | 0     | 2     | 0      | 1      | 0      | 1      | 1      | 1      | 0      | 1      |
| 14827  | 2     | 4     | 1     | 3     | 1     | 4     | 2      | 3      | 3      | 2      | 2      | 3      | 2      | 1      |
| 14828  | 3     | 4     | 3     | 3     | 4     | 4     | 1      | 2      | 1      | 1      | 1      | 1      | 1      | 2      |

| respid | Q52_2 | Q53_1 | Q54_1 | Q54_2 | Q54_3 | Q55_1 | Q56a_1 | Q56b_1 | Q56c_1 | Q56d_1 | Q56e_1 | Q56f_1 | Q56g_1 | Q56h_1 |
|--------|-------|-------|-------|-------|-------|-------|--------|--------|--------|--------|--------|--------|--------|--------|
| 14830  | 4     | 1     | 3     | 3     | 3     | 5     | 1      | 1      | 1      | 0      | 0      | 0      | 0      | 0      |
| 14832  | 2     | 3     | 0     | 1     | 1     | 4     | 0      | 0      | 0      | 1      | 1      | 0      | 0      | 0      |
| 14835  | 3     | 3     | 3     | 5     | 1     | 3     | 1      | 1      | 2      | 1      | 2      | 1      | 2      | 2      |
| 14841  | 3     | 1     | 0     | 0     | 5     | 5     | 0      | 0      | 0      | 0      | 0      | 0      | 0      | 0      |
| 14849  | 4     | 1     | 1     | 3     | 4     | 5     | 1      | 0      | 0      | 0      | 1      | 0      | 1      | 1      |
| 14850  | 5     | 1     | 1     | 1     | 4     | 5     | 0      | 1      | 0      | 1      | 0      | 0      | 1      | 0      |
| 14851  | 5     | 1     | 1     | 1     | 3     | 4     | 0      | 0      | 2      | 0      | 0      | 1      | 0      | 0      |
| 14856  | 3     | 3     | 3     | 3     | 3     | 4     | 1      | 2      | 2      | 1      | 2      | 2      | 1      | 1      |
| 14862  | 2     | 2     | 0     | 1     | 0     | 2     | 1      | 0      | 1      | 1      | 1      | 1      | 1      | 1      |
| 14863  | 5     | 1     | 3     | 1     | 4     | 5     | 1      | 0      | 0      | 0      | 0      | 0      | 0      | 0      |
| 14864  | 5     | 2     | 3     | 1     | 4     | 5     | 1      | 0      | 1      | 0      | 1      | 0      | 0      | 0      |
| 14866  | 4     | 2     | 1     | 1     | 4     | 4     | 1      | 0      | 1      | 0      | 1      | 0      | 0      | 1      |
| 14867  | 4     | 3     | 3     | 3     | 4     | 4     | 1      | 1      | 1      | 1      | 2      | 2      | 1      | 2      |
| 14868  | 3     | 1     | 1     | 1     | 4     | 5     | 0      | 1      | 1      | 1      | 1      | 1      | 1      | 1      |
| 14870  | 5     | 3     | 1     | 1     | 4     | 4     | 0      | 1      | 0      | 0      | 1      | 0      | 1      | 1      |
| 14873  | 3     | 3     | 3     | 3     | 3     | 3     | 1      | 1      | 1      | 1      | 1      | 1      | 2      | 1      |
| 14878  | 5     | 1     | 1     | 1     | 3     | 4     | 1      | 0      | 1      | 2      | 1      | 1      | 1      | 1      |
| 14879  | 4     | 2     | 1     | 1     | 4     | 4     | 1      | 1      | 1      | 2      | 1      | 1      | 1      | 1      |
| 14881  | 2     | 4     | 1     | 1     | 4     | 4     | 1      | 1      | 1      | 1      | 2      | 2      | 2      | 2      |
| 14888  | 4     | 4     | 3     | 4     | 1     | 4     | 1      | 1      | 2      | 2      | 2      | 1      | 0      | 1      |
| 14895  | 4     | 2     | 1     | 4     | 4     | 5     | 1      | 0      | 0      | 0      | 1      | 0      | 0      | 0      |
| 14900  | 2     | 4     | 1     | 3     | 0     | 4     | 2      | 1      | 3      | 2      | 2      | 2      | 0      | 2      |
| 14912  | 5     | 1     | 1     | 1     | 4     | 5     | 0      | 1      | 0      | 0      | 0      | 0      | 0      | 0      |
| 14922  | 2     | 3     | 1     | 1     | 3     | 2     | 0      | 1      | 1      | 1      | 1      | 1      | 1      | 1      |
| 14923  | 1     | 4     | 1     | 3     | 1     | 4     | 1      | 1      | 2      | 2      | 2      | 2      | 1      | 2      |
| 14924  | 3     | 4     | 4     | 5     | 4     | 2     | 1      | 0      | 2      | 2      | 2      | 1      | 1      | 0      |
| 14925  | 2     | 2     | 1     | 1     | 0     | 3     | 1      | 0      | 1      | 1      | 0      | 2      | 0      | 1      |
| 14926  | 4     | 2     | 1     | 1     | 3     | 4     | 1      | 1      | 1      | 1      | 1      | 0      | 1      | 1      |
| 14927  | 3     | 3     | 1     | 1     | 3     | 3     | 1      | 1      | 1      | 1      | 2      | 2      | 1      | 2      |
| 14930  | 3     | 4     | 1     | 3     | 1     | 4     | 1      | 2      | 1      | 0      | 2      | 2      | 0      | 1      |
| 14937  | 2     | 2     | 0     | 1     | 1     | 3     | 2      | 2      | 2      | 2      | 2      | 1      | 1      | 1      |
| 14938  | 1     | 4     | 3     | 4     | 1     | 2     | 3      | 1      | 2      | 1      | 3      | 1      | 1      | 2      |

| respid | Q52_2 | Q53_1 | Q54_1 | Q54_2 | Q54_3 | Q55_1 | Q56a_1 | Q56b_1 | Q56c_1 | Q56d_1 | Q56e_1 | Q56f_1 | Q56g_1 | Q56h_1 |
|--------|-------|-------|-------|-------|-------|-------|--------|--------|--------|--------|--------|--------|--------|--------|
| 14939  | 2     | 2     | 1     | 1     | 3     | 3     | 1      | 2      | 1      | 2      | 2      | 1      | 1      | 1      |
| 14942  | 5     | 1     | 1     | 1     | 4     | 5     | 0      | 0      | 0      | 1      | 1      | 0      | 0      | 0      |
| 14943  | 2     | 3     | 3     | 3     | 3     | 3     | 1      | 1      | 2      | 0      | 1      | 1      | 2      | 1      |
| 14953  | 3     | 2     | 3     | 4     | 3     | 4     | 1      | 0      | 0      | 0      | 1      | 1      | 1      | 1      |
| 14954  | 4     | 3     | 1     | 1     | 3     | 4     | 1      | 1      | 1      | 1      | 1      | 1      | 0      | 1      |
| 14955  | 4     | 3     | 1     | 3     | 4     | 3     | 1      | 1      | 1      | 2      | 2      | 2      | 1      | 1      |
| 14957  | 4     | 3     | 1     | 1     | 3     | 3     | 1      | 1      | 2      | 2      | 1      | 0      | 1      | 1      |
| 14958  | 1     | 4     | 1     | 0     | 0     | 2     | 2      | 0      | 1      | 3      | 2      | 3      | 1      | 0      |
| 14959  | 3     | 3     | 3     | 3     | 4     | 4     | 1      | 2      | 2      | 1      | 2      | 2      | 2      | 1      |
| 14961  | 5     | 2     | 1     | 1     | 4     | 5     | 1      | 0      | 1      | 0      | 0      | 0      | 0      | 0      |
| 14963  | 4     | 4     | 1     | 1     | 3     | 4     | 1      | 1      | 1      | 1      | 2      | 2      | 2      | 2      |
| 14964  | 3     | 2     | 1     | 1     | 3     | 4     | 1      | 0      | 1      | 0      | 1      | 0      | 1      | 1      |
| 14965  | 4     | 3     | 1     | 1     | 4     | 4     | 1      | 1      | 1      | 0      | 1      | 1      | 1      | 1      |
| 14967  | 3     | 3     | 1     | 3     | 3     | 4     | 2      | 2      | 2      | 2      | 3      | 3      | 0      | 3      |
| 14970  | 2     | 4     | 4     | 3     | 1     | 3     | 1      | 0      | 1      | 1      | 2      | 3      | 1      | 2      |
| 14972  | 2     | 3     | 1     | 1     | 3     | 3     | 1      | 2      | 1      | 1      | 1      | 1      | 2      | 1      |
| 14975  | 2     | 5     | 3     | 3     | 1     | 2     | 2      | 2      | 1      | 2      | 2      | 3      | 1      | 3      |
| 14977  | 4     | 2     | 1     | 1     | 4     | 4     | 1      | 1      | 1      | 1      | 1      | 1      | 1      | 1      |
| 14982  | 3     | 2     | 1     | 3     | 3     | 3     | 1      | 2      | 1      | 1      | 1      | 1      | 1      | 0      |
| 14985  | 3     | 3     | 1     | 1     | 3     | 3     | 1      | 2      | 1      | 1      | 2      | 1      | 1      | 3      |
| 14986  | 4     | 2     | 1     | 1     | 3     | 4     | 1      | 1      | 0      | 0      | 0      | 1      | 1      | 1      |
| 14987  | 4     | 2     | 4     | 4     | 4     | 4     | 1      | 1      | 1      | 1      | 1      | 1      | 2      | 1      |
| 14988  | 3     | 4     | 3     | 1     | 0     | 4     | 0      | 2      | 0      | 3      | 2      | 2      | 1      | 2      |
| 14989  | 4     | 3     | 3     | 3     | 4     | 4     | 1      | 1      | 2      | 0      | 2      | 1      | 1      | 3      |
| 14993  | 3     | 3     | 1     | 1     | 3     | 4     | 1      | 2      | 1      | 2      | 1      | 0      | 1      | 3      |
| 15001  | 4     | 2     | 1     | 3     | 1     | 4     | 1      | 1      | 1      | 1      | 1      | 1      | 1      | 1      |
| 15002  | 2     | 4     | 3     | 1     | 1     | 3     | 3      | 0      | 2      | 1      | 3      | 2      | 2      | 3      |
| 15006  | 2     | 2     | 1     | 1     | 4     | 3     | 1      | 1      | 1      | 1      | 2      | 1      | 1      | 2      |
| 15007  | 3     | 3     | 1     | 1     | 3     | 3     | 1      | 1      | 1      | 0      | 1      | 1      | 1      | 0      |
| 15014  | 4     | 3     | 3     | 1     | 3     | 4     | 1      | 2      | 1      | 2      | 2      | 1      | 1      | 1      |
| 15020  | 4     | 2     | 1     | 1     | 4     | 4     | 1      | 1      | 1      | 0      | 1      | 2      | 1      | 1      |
| 15021  | 3     | 4     | 3     | 4     | 1     | 3     | 2      | 2      | 1      | 1      | 1      | 1      | 1      | 2      |

| respid | Q52_2 | Q53_1 | Q54_1 | Q54_2 | Q54_3 | Q55_1 | Q56a_1 | Q56b_1 | Q56c_1 | Q56d_1 | Q56e_1 | Q56f_1 | Q56g_1 | Q56h_1 |
|--------|-------|-------|-------|-------|-------|-------|--------|--------|--------|--------|--------|--------|--------|--------|
| 15023  | 4     | 4     | 3     | 4     | 5     | 3     | 0      | 1      | 2      | 2      | 2      | 1      | 2      | 2      |
| 15030  | 3     | 3     | 1     | 1     | 4     | 3     | 1      | 1      | 0      | 0      | 1      | 1      | 0      | 0      |
| 15032  | 5     | 1     | 1     | 1     | 4     | 5     | 0      | 0      | 0      | 1      | 1      | 2      | 2      | 1      |
| 15033  | 3     | 3     | 3     | 3     | 3     | 3     | 1      | 1      | 1      | 1      | 1      | 1      | 2      | 1      |
| 15034  | 4     | 2     | 0     | 0     | 4     | 4     | 1      | 1      | 2      | 2      | 1      | 0      | 1      | 1      |
| 15035  | 4     | 2     | 1     | 3     | 4     | 5     | 0      | 0      | 0      | 0      | 0      | 0      | 0      | 0      |
| 15037  | 3     | 2     | 0     | 0     | 4     | 5     | 2      | 0      | 0      | 1      | 0      | 1      | 1      | 0      |
| 15039  | 3     | 3     | 3     | 3     | 4     | 3     | 2      | 2      | 2      | 2      | 1      | 1      | 1      | 1      |
| 15040  | 5     | 1     | 0     | 0     | 5     | 5     | 1      | 0      | 1      | 0      | 0      | 0      | 0      | 0      |
| 15042  | 4     | 2     | 1     | 4     | 3     | 4     | 1      | 0      | 0      | 0      | 1      | 0      | 0      | 0      |
| 15044  | 5     | 1     | 3     | 3     | 4     | 4     | 0      | 0      | 0      | 0      | 0      | 0      | 0      | 0      |
| 15045  | 5     | 1     | 3     | 3     | 3     | 5     | 1      | 2      | 1      | 2      | 2      | 2      | 2      | 2      |
| 15046  | 4     | 3     | 3     | 4     | 4     | 4     | 2      | 1      | 1      | 1      | 1      | 0      | 0      | 0      |
| 15052  | 2     | 5     | 3     | 4     | 4     | 4     | 2      | 2      | 1      | 1      | 3      | 2      | 1      | 3      |
| 15058  | 3     | 4     | 3     | 1     | 3     | 4     | 1      | 2      | 0      | 1      | 3      | 2      | 0      | 2      |
| 15063  | 3     | 4     | 3     | 4     | 3     | 4     | 2      | 1      | 2      | 1      | 2      | 2      | 2      | 2      |
| 15066  | 3     | 4     | 3     | 3     | 3     | 5     | 3      | 3      | 2      | 2      | 3      | 0      | 0      | 0      |
| 15069  | 3     | 4     | 1     | 1     | 3     | 4     | 1      | 0      | 0      | 0      | 1      | 2      | 1      | 3      |
| 15071  | 2     | 4     | 3     | 4     | 1     | 3     | 1      | 1      | 2      | 1      | 2      | 2      | 2      | 2      |
| 15076  | 2     | 3     | 1     | 3     | 3     | 4     | 1      | 2      | 0      | 1      | 2      | 2      | 0      | 2      |
| 15078  | 5     | 1     | 1     | 1     | 3     | 5     | 1      | 1      | 1      | 1      | 1      | 1      | 1      | 1      |
| 15087  | 3     | 3     | 1     | 4     | 3     | 3     | 1      | 1      | 1      | 1      | 1      | 1      | 1      | 1      |
| 15090  | 2     | 4     | 3     | 1     | 3     | 3     | 1      | 1      | 1      | 1      | 2      | 1      | 1      | 2      |
| 15091  | 3     | 4     | 1     | 1     | 3     | 4     | 2      | 1      | 2      | 2      | 2      | 2      | 2      | 2      |
| 15092  | 5     | 1     | 1     | 1     | 4     | 4     | 0      | 1      | 0      | 0      | 1      | 0      | 1      | 0      |
| 15096  | 4     | 4     | 3     | 4     | 4     | 4     | 0      | 0      | 0      | 0      | 0      | 0      | 0      | 0      |
| 15106  | 3     | 2     | 1     | 3     | 3     | 4     | 2      | 2      | 2      | 2      | 2      | 2      | 2      | 2      |
| 15108  | 4     | 1     | 1     | 1     | 4     | 5     | 1      | 0      | 0      | 0      | 0      | 0      | 0      | 0      |
| 15113  | 2     | 4     | 1     | 1     | 3     | 3     | 3      | 1      | 0      | 2      | 2      | 1      | 1      | 2      |
| 15116  | 5     | 1     | 0     | 0     | 4     | 5     | 0      | 0      | 0      | 0      | 0      | 0      | 0      | 1      |
| 15119  | 3     | 4     | 3     | 4     | 4     | 4     | 1      | 0      | 0      | 0      | 0      | 0      | 0      | 0      |
| 15120  | 2     | 4     | 3     | 3     | 4     | 4     | 1      | 2      | 1      | 3      | 2      | 2      | 0      | 2      |

| respid | Q52_2 | Q53_1 | Q54_1 | Q54_2 | Q54_3 | Q55_1 | Q56a_1 | Q56b_1 | Q56c_1 | Q56d_1 | Q56e_1 | Q56f_1 | Q56g_1 | Q56h_1 |
|--------|-------|-------|-------|-------|-------|-------|--------|--------|--------|--------|--------|--------|--------|--------|
| 15121  | 4     | 3     | 3     | 4     | 3     | 4     | 1      | 0      | 0      | 0      | 1      | 1      | 1      | 0      |
| 15123  | 3     | 3     | 1     | 4     | 3     | 4     | 1      | 0      | 2      | 0      | 1      | 0      | 1      | 0      |
| 15124  | 5     | 1     | 1     | 1     | 4     | 5     | 0      | 2      | 0      | 2      | 3      | 2      | 0      | 2      |
| 15128  | 5     | 2     | 1     | 1     | 4     | 4     | 1      | 0      | 1      | 0      | 0      | 0      | 0      | 0      |
| 15131  | 5     | 1     | 0     | 0     | 5     | 5     | 0      | 1      | 2      | 0      | 0      | 0      | 0      | 0      |
| 15136  | 2     | 2     | 0     | 1     | 1     | 3     | 3      | 1      | 1      | 1      | 2      | 2      | 0      | 1      |
| 15137  | 2     | 4     | 1     | 3     | 3     | 3     | 1      | 0      | 0      | 0      | 0      | 0      | 0      | 0      |
| 15141  | 4     | 2     | 1     | 3     | 4     | 5     | 0      | 0      | 0      | 0      | 0      | 1      | 1      | 0      |
| 15144  | 3     | 5     | 3     | 3     | 1     | 5     | 3      | 1      | 1      | 2      | 2      | 0      | 2      | 1      |
| 15147  | 3     | 4     | 1     | 3     | 3     | 3     | 2      | 0      | 1      | 0      | 1      | 0      | 0      | 0      |
| 15151  | 3     | 3     | 1     | 4     | 3     | 3     | 1      | 2      | 2      | 2      | 2      | 2      | 2      | 2      |
| 15154  | 3     | 4     | 3     | 4     | 1     | 3     | 1      | 2      | 2      | 1      | 1      | 1      | 2      | 3      |
| 15157  | 1     | 5     | 1     | 3     | 3     | 4     | 1      | 2      | 1      | 1      | 3      | 1      | 1      | 2      |
| 15164  | 3     | 3     | 3     | 3     | 4     | 3     | 1      | 0      | 1      | 0      | 1      | 1      | 1      | 1      |
| 15168  | 3     | 4     | 1     | 3     | 3     | 4     | 1      | 2      | 1      | 2      | 2      | 1      | 2      | 2      |
| 15169  | 4     | 3     | 3     | 4     | 4     | 3     | 1      | 0      | 0      | 0      | 0      | 0      | 0      | 0      |
| 15172  | 2     | 4     | 4     | 3     | 3     | 4     | 1      | 2      | 1      | 2      | 2      | 1      | 1      | 2      |
| 15177  | 3     | 4     | 3     | 3     | 3     | 4     | 2      | 2      | 1      | 1      | 1      | 2      | 1      | 1      |
| 15178  | 4     | 3     | 3     | 3     | 1     | 5     | 1      | 1      | 0      | 1      | 3      | 2      | 1      | 2      |
| 15180  | 2     | 2     | 0     | 1     | 3     | 3     | 0      | 0      | 0      | 0      | 0      | 0      | 1      | 1      |
| 15181  | 5     | 2     | 1     | 1     | 5     | 5     | 0      | 1      | 0      | 0      | 0      | 0      | 0      | 0      |
| 15182  | 3     | 2     | 3     | 3     | 3     | 4     | 1      | 1      | 0      | 0      | 1      | 1      | 1      | 0      |
| 15183  | 3     | 4     | 4     | 3     | 1     | 4     | 2      | 3      | 1      | 2      | 2      | 1      | 2      | 1      |
| 15188  | 3     | 4     | 4     | 4     | 3     | 4     | 2      | 2      | 1      | 2      | 2      | 3      | 2      | 3      |
| 15190  | 2     | 4     | 4     | 1     | 0     | 2     | 0      | 1      | 0      | 2      | 1      | 2      | 0      | 1      |
| 15195  | 3     | 4     | 1     | 1     | 3     | 4     | 2      | 1      | 2      | 1      | 1      | 3      | 2      | 2      |
| 15201  | 2     | 5     | 4     | 4     | 1     | 4     | 0      | 1      | 1      | 0      | 2      | 2      | 0      | 1      |
| 15203  | 3     | 5     | 3     | 4     | 3     | 4     | 3      | 2      | 2      | 2      | 3      | 2      | 2      | 2      |
| 15204  | 5     | 1     | 1     | 1     | 4     | 5     | 0      | 0      | 0      | 0      | 0      | 0      | 0      | 0      |
| 15207  | 4     | 2     | 1     | 1     | 3     | 2     | 1      | 1      | 1      | 0      | 0      | 0      | 0      | 0      |
| 15208  | 2     | 2     | 0     | 1     | 3     | 3     | 0      | 0      | 2      | 2      | 2      | 2      | 2      | 2      |
| 15209  | 4     | 2     | 1     | 1     | 4     | 5     | 1      | 0      | 0      | 0      | 1      | 1      | 0      | 0      |



| respid | Q52_2 | Q53_1 | Q54_1 | Q54_2 | Q54_3 | Q55_1 | Q56a_1 | Q56b_1 | Q56c_1 | Q56d_1 | Q56e_1 | Q56f_1 | Q56g_1 | Q56h_1 |
|--------|-------|-------|-------|-------|-------|-------|--------|--------|--------|--------|--------|--------|--------|--------|
| 15212  | 5     | 1     | 0     | 0     | 0     | 5     | 0      | 0      | 0      | 0      | 0      | 0      | 0      | 0      |
| 15213  | 5     | 1     | 0     | 1     | 3     | 4     | 1      | 0      | 0      | 0      | 1      | 0      | 0      | 1      |
| 15219  | 4     | 2     | 0     | 0     | 4     | 4     | 0      | 1      | 0      | 0      | 0      | 0      | 0      | 0      |
| 15220  | 4     | 2     | 3     | 4     | 3     | 4     | 1      | 0      | 0      | 0      | 1      | 1      | 1      | 1      |
| 15221  | 4     | 3     | 1     | 1     | 3     | 4     | 1      | 1      | 1      | 0      | 1      | 1      | 1      | 1      |
| 15223  | 1     | 2     | 0     | 1     | 0     | 2     | 1      | 1      | 1      | 1      | 1      | 1      | 1      | 1      |
| 15224  | 5     | 2     | 0     | 1     | 3     | 5     | 0      | 1      | 0      | 0      | 1      | 0      | 1      | 0      |
| 15225  | 5     | 2     | 1     | 1     | 5     | 5     | 0      | 0      | 0      | 0      | 0      | 1      | 1      | 0      |
| 15226  | 3     | 2     | 1     | 1     | 3     | 4     | 1      | 1      | 1      | 1      | 1      | 1      | 1      | 1      |
| 15230  | 3     | 2     | 1     | 1     | 4     | 2     | 1      | 1      | 1      | 0      | 1      | 1      | 1      | 1      |
| 15231  | 3     | 4     | 4     | 0     | 1     | 3     | 0      | 2      | 1      | 2      | 3      | 1      | 1      | 1      |
| 15232  | 4     | 3     | 3     | 1     | 3     | 4     | 1      | 1      | 1      | 2      | 2      | 2      | 1      | 2      |
| 15237  | 4     | 2     | 0     | 0     | 5     | 4     | 1      | 0      | 1      | 1      | 0      | 1      | 0      | 1      |
| 15239  | 3     | 2     | 1     | 1     | 4     | 4     | 1      | 1      | 1      | 1      | 1      | 1      | 1      | 1      |
| 15241  | 4     | 2     | 1     | 1     | 4     | 4     | 0      | 1      | 0      | 0      | 1      | 1      | 1      | 1      |
| 15242  | 4     | 2     | 1     | 3     | 4     | 4     | 1      | 1      | 1      | 2      | 1      | 2      | 1      | 1      |
| 15247  | 3     | 2     | 1     | 1     | 4     | 4     | 1      | 1      | 1      | 1      | 1      | 1      | 1      | 0      |
| 15248  | 5     | 2     | 1     | 1     | 5     | 5     | 1      | 0      | 1      | 1      | 0      | 0      | 0      | 0      |
| 15251  | 4     | 4     | 1     | 3     | 1     | 3     | 0      | 0      | 0      | 0      | 2      | 1      | 0      | 2      |
| 15257  | 4     | 2     | 1     | 1     | 4     | 4     | 1      | 0      | 1      | 0      | 1      | 1      | 1      | 1      |
| 15260  | 4     | 2     | 1     | 1     | 4     | 3     | 1      | 1      | 1      | 1      | 1      | 1      | 1      | 1      |
| 15261  | 5     | 5     | 3     | 4     | 5     | 5     | 2      | 2      | 3      | 3      | 2      | 3      | 2      | 3      |
| 15262  | 3     | 2     | 3     | 4     | 3     | 4     | 1      | 1      | 0      | 1      | 1      | 1      | 2      | 1      |
| 15263  | 4     | 3     | 1     | 1     | 4     | 4     | 0      | 1      | 1      | 0      | 1      | 0      | 1      | 1      |
| 15265  | 3     | 2     | 1     | 1     | 4     | 4     | 1      | 1      | 1      | 1      | 1      | 1      | 1      | 1      |
| 15266  | 5     | 1     | 1     | 1     | 4     | 4     | 2      | 1      | 1      | 1      | 1      | 1      | 1      | 1      |
| 15268  | 4     | 2     | 0     | 0     | 3     | 4     | 1      | 1      | 0      | 0      | 1      | 1      | 0      | 1      |
| 15269  | 5     | 1     | 1     | 3     | 4     | 5     | 0      | 2      | 0      | 2      | 0      | 2      | 0      | 0      |
| 15270  | 3     | 2     | 4     | 4     | 3     | 4     | 2      | 2      | 2      | 2      | 1      | 2      | 2      | 1      |
| 15273  | 2     | 3     | 3     | 1     | 3     | 4     | 1      | 1      | 1      | 1      | 2      | 2      | 1      | 1      |
| 15276  | 3     | 5     | 4     | 5     | 4     | 5     | 2      | 2      | 1      | 3      | 2      | 2      | 2      | 2      |
| 15277  | 3     | 2     | 1     | 1     | 4     | 3     | 1      | 1      | 1      | 1      | 1      | 1      | 1      | 1      |

| respid | Q52_2 | Q53_1 | Q54_1 | Q54_2 | Q54_3 | Q55_1 | Q56a_1 | Q56b_1 | Q56c_1 | Q56d_1 | Q56e_1 | Q56f_1 | Q56g_1 | Q56h_1 |
|--------|-------|-------|-------|-------|-------|-------|--------|--------|--------|--------|--------|--------|--------|--------|
| 15282  | 2     | 3     | 1     | 1     | 1     | 2     | 0      | 1      | 0      | 0      | 1      | 2      | 2      | 0      |
| 15284  | 2     | 3     | 3     | 4     | 3     | 4     | 1      | 1      | 2      | 1      | 1      | 1      | 2      | 1      |
| 15285  | 4     | 2     | 3     | 4     | 1     | 5     | 1      | 1      | 1      | 1      | 2      | 2      | 2      | 2      |
| 15286  | 1     | 4     | 0     | 1     | 1     | 3     | 1      | 0      | 1      | 2      | 2      | 1      | 1      | 3      |
| 15288  | 4     | 3     | 1     | 3     | 3     | 3     | 1      | 2      | 1      | 2      | 1      | 2      | 1      | 2      |
| 15292  | 3     | 5     | 3     | 4     | 5     | 5     | 2      | 2      | 3      | 2      | 3      | 3      | 2      | 2      |
| 15296  | 4     | 2     | 1     | 1     | 4     | 4     | 0      | 0      | 2      | 0      | 1      | 0      | 0      | 1      |
| 15297  | 2     | 3     | 3     | 4     | 3     | 3     | 1      | 0      | 1      | 0      | 2      | 1      | 1      | 1      |
| 15298  | 5     | 1     | 3     | 3     | 1     | 5     | 1      | 2      | 1      | 1      | 1      | 1      | 1      | 1      |
| 15301  | 4     | 2     | 3     | 3     | 4     | 4     | 1      | 0      | 1      | 1      | 1      | 1      | 2      | 1      |
| 15302  | 5     | 2     | 0     | 0     | 1     | 4     | 1      | 1      | 0      | 2      | 1      | 0      | 0      | 1      |
| 15305  | 5     | 2     | 1     | 3     | 4     | 5     | 0      | 0      | 0      | 0      | 0      | 0      | 0      | 0      |
| 15307  | 5     | 1     | 0     | 1     | 5     | 5     | 0      | 1      | 0      | 0      | 1      | 0      | 0      | 0      |
| 15308  | 5     | 1     | 5     | 5     | 4     | 5     | 1      | 3      | 1      | 1      | 1      | 2      | 2      | 1      |
| 15309  | 4     | 2     | 1     | 1     | 4     | 5     | 1      | 1      | 1      | 2      | 2      | 1      | 2      | 1      |
| 15311  | 4     | 1     | 1     | 3     | 4     | 3     | 2      | 1      | 1      | 1      | 1      | 1      | 1      | 0      |
| 15315  | 4     | 2     | 0     | 0     | 4     | 3     | 0      | 0      | 1      | 0      | 1      | 1      | 0      | 1      |
| 15316  | 5     | 2     | 1     | 1     | 4     | 4     | 1      | 0      | 0      | 0      | 0      | 1      | 0      | 0      |
| 15318  | 2     | 4     | 1     | 3     | 3     | 4     | 1      | 2      | 2      | 1      | 3      | 3      | 2      | 3      |
| 15321  | 3     | 5     | 4     | 5     | 4     | 4     | 2      | 2      | 2      | 3      | 3      | 2      | 2      | 3      |
| 15322  | 5     | 1     | 0     | 0     | 5     | 5     | 0      | 0      | 0      | 0      | 0      | 0      | 0      | 0      |
| 15324  | 5     | 1     | 3     | 3     | 4     | 5     | 1      | 0      | 0      | 0      | 1      | 0      | 1      | 0      |
| 15326  | 5     | 2     | 0     | 0     | 4     | 3     | 0      | 0      | 0      | 0      | 1      | 1      | 1      | 1      |
| 15327  | 4     | 1     | 3     | 3     | 4     | 4     | 1      | 1      | 1      | 1      | 1      | 1      | 1      | 1      |
| 15328  | 2     | 5     | 3     | 4     | 3     | 5     | 2      | 3      | 2      | 1      | 3      | 2      | 2      | 3      |
| 15330  | 4     | 2     | 1     | 1     | 4     | 3     | 1      | 1      | 1      | 1      | 1      | 1      | 1      | 0      |
| 15332  | 4     | 2     | 1     | 1     | 4     | 4     | 1      | 0      | 1      | 0      | 0      | 0      | 0      | 1      |
| 15333  | 4     | 2     | 3     | 3     | 1     | 5     | 1      | 1      | 2      | 1      | 1      | 1      | 2      | 2      |
| 15334  | 5     | 2     | 0     | 0     | 3     | 3     | 0      | 1      | 1      | 0      | 1      | 0      | 1      | 1      |
| 15336  | 4     | 5     | 4     | 5     | 4     | 5     | 2      | 3      | 2      | 2      | 3      | 2      | 3      | 2      |
| 15337  | 5     | 2     | 1     | 5     | 3     | 4     | 1      | 0      | 1      | 1      | 1      | 2      | 2      | 2      |
| 15338  | 4     | 3     | 1     | 1     | 3     | 4     | 1      | 1      | 1      | 1      | 1      | 1      | 1      | 1      |

| respid | Q52_2 | Q53_1 | Q54_1 | Q54_2 | Q54_3 | Q55_1 | Q56a_1 | Q56b_1 | Q56c_1 | Q56d_1 | Q56e_1 | Q56f_1 | Q56g_1 | Q56h_1 |
|--------|-------|-------|-------|-------|-------|-------|--------|--------|--------|--------|--------|--------|--------|--------|
| 15339  | 4     | 3     | 3     | 3     | 4     | 4     | 1      | 1      | 2      | 1      | 2      | 1      | 1      | 1      |
| 15341  | 5     | 2     | 1     | 1     | 4     | 5     | 0      | 0      | 0      | 0      | 0      | 0      | 1      | 0      |
| 15344  | 4     | 1     | 1     | 0     | 4     | 5     | 2      | 2      | 1      | 1      | 0      | 0      | 1      | 1      |
| 15345  | 3     | 2     | 1     | 1     | 3     | 4     | 1      | 0      | 0      | 1      | 1      | 1      | 2      | 1      |
| 15350  | 3     | 5     | 3     | 3     | 1     | 5     | 3      | 2      | 0      | 0      | 2      | 3      | 2      | 3      |
| 15351  | 5     | 3     | 0     | 1     | 4     | 3     | 1      | 2      | 1      | 1      | 1      | 2      | 1      | 2      |
| 15352  | 4     | 2     | 3     | 4     | 1     | 3     | 1      | 2      | 2      | 1      | 2      | 2      | 2      | 2      |
| 15372  | 4     | 2     | 0     | 0     | 5     | 5     | 2      | 1      | 1      | 2      | 1      | 1      | 1      | 0      |
| 15373  | 3     | 4     | 3     | 3     | 4     | 4     | 2      | 2      | 1      | 2      | 2      | 3      | 3      | 2      |
| 15376  | 4     | 3     | 3     | 4     | 3     | 4     | 1      | 2      | 1      | 1      | 2      | 2      | 2      | 0      |
| 15377  | 3     | 3     | 1     | 1     | 3     | 2     | 1      | 1      | 1      | 0      | 1      | 1      | 0      | 1      |
| 15382  | 4     | 2     | 0     | 0     | 3     | 4     | 1      | 0      | 2      | 1      | 1      | 1      | 1      | 0      |
| 15383  | 3     | 3     | 1     | 3     | 3     | 4     | 1      | 2      | 1      | 1      | 2      | 1      | 2      | 1      |
| 15385  | 3     | 3     | 3     | 3     | 3     | 3     | 1      | 2      | 1      | 2      | 2      | 1      | 2      | 2      |
| 15390  | 3     | 2     | 1     | 1     | 3     | 4     | 1      | 1      | 1      | 1      | 1      | 1      | 0      | 1      |
| 15399  | 5     | 2     | 1     | 1     | 5     | 5     | 0      | 0      | 0      | 0      | 0      | 1      | 1      | 0      |
| 15404  | 3     | 2     | 3     | 3     | 4     | 3     | 1      | 1      | 1      | 1      | 1      | 1      | 2      | 1      |
| 15410  | 4     | 2     | 1     | 1     | 3     | 3     | 1      | 1      | 1      | 0      | 1      | 1      | 1      | 0      |
| 15411  | 2     | 3     | 1     | 3     | 1     | 3     | 1      | 1      | 1      | 1      | 2      | 1      | 1      | 1      |
| 15412  | 3     | 2     | 1     | 3     | 4     | 4     | 1      | 0      | 1      | 1      | 1      | 0      | 1      | 1      |
| 15413  | 5     | 2     | 4     | 4     | 0     | 3     | 3      | 2      | 2      | 2      | 3      | 3      | 2      | 3      |
| 15414  | 3     | 3     | 1     | 1     | 3     | 4     | 1      | 1      | 1      | 1      | 2      | 1      | 1      | 1      |
| 15417  | 5     | 2     | 1     | 1     | 4     | 5     | 0      | 1      | 1      | 0      | 1      | 0      | 0      | 0      |
| 15418  | 4     | 1     | 1     | 3     | 4     | 4     | 1      | 1      | 1      | 1      | 2      | 2      | 2      | 1      |
| 15421  | 3     | 2     | 1     | 1     | 4     | 4     | 1      | 1      | 1      | 1      | 1      | 1      | 1      | 1      |
| 15423  | 5     | 3     | 0     | 0     | 3     | 4     | 1      | 0      | 1      | 2      | 1      | 1      | 2      | 1      |
| 15425  | 4     | 2     | 1     | 1     | 3     | 5     | 1      | 0      | 0      | 0      | 0      | 0      | 0      | 1      |
| 15426  | 3     | 5     | 3     | 4     | 5     | 5     | 2      | 3      | 2      | 2      | 3      | 3      | 2      | 2      |
| 15430  | 5     | 1     | 0     | 0     | 4     | 5     | 1      | 0      | 1      | 1      | 1      | 1      | 1      | 0      |
| 15431  | 3     | 3     | 3     | 4     | 4     | 4     | 1      | 1      | 2      | 2      | 2      | 2      | 1      | 2      |
| 15435  | 5     | 1     | 1     | 1     | 4     | 4     | 1      | 2      | 1      | 1      | 1      | 1      | 1      | 1      |
| 15436  | 5     | 1     | 0     | 1     | 5     | 5     | 0      | 0      | 0      | 0      | 0      | 0      | 0      | 0      |

| respid | Q52_2 | Q53_1 | Q54_1 | Q54_2 | Q54_3 | Q55_1 | Q56a_1 | Q56b_1 | Q56c_1 | Q56d_1 | Q56e_1 | Q56f_1 | Q56g_1 | Q56h_1 |
|--------|-------|-------|-------|-------|-------|-------|--------|--------|--------|--------|--------|--------|--------|--------|
| 15437  | 5     | 1     | 1     | 3     | 4     | 4     | 0      | 0      | 1      | 0      | 1      | 1      | 2      | 1      |
| 15438  | 5     | 2     | 0     | 0     | 5     | 4     | 0      | 1      | 1      | 0      | 0      | 1      | 1      | 1      |
| 15439  | 5     | 2     | 0     | 1     | 4     | 5     | 1      | 1      | 1      | 2      | 1      | 2      | 1      | 3      |
| 15441  | 3     | 5     | 3     | 4     | 5     | 5     | 3      | 2      | 3      | 2      | 3      | 3      | 2      | 3      |
| 15443  | 4     | 3     | 3     | 4     | 4     | 4     | 2      | 1      | 0      | 1      | 1      | 1      | 2      | 1      |
| 15446  | 5     | 1     | 0     | 0     | 3     | 4     | 2      | 1      | 0      | 1      | 1      | 1      | 2      | 2      |
| 15449  | 3     | 3     | 1     | 3     | 1     | 3     | 1      | 1      | 1      | 1      | 1      | 1      | 1      | 1      |
| 15451  | 2     | 2     | 5     | 4     | 0     | 3     | 3      | 1      | 3      | 1      | 3      | 2      | 3      | 3      |
| 15452  | 2     | 4     | 3     | 3     | 3     | 4     | 2      | 2      | 1      | 2      | 2      | 2      | 2      | 2      |
| 15454  | 5     | 1     | 0     | 0     | 5     | 5     | 0      | 0      | 0      | 0      | 0      | 0      | 0      | 1      |
| 15456  | 5     | 1     | 3     | 3     | 1     | 5     | 1      | 0      | 0      | 2      | 1      | 2      | 1      | 1      |
| 15457  | 4     | 1     | 4     | 4     | 1     | 5     | 2      | 1      | 2      | 2      | 2      | 1      | 2      | 0      |
| 15458  | 4     | 4     | 1     | 3     | 3     | 4     | 2      | 2      | 1      | 1      | 2      | 2      | 2      | 2      |
| 15462  | 2     | 4     | 4     | 4     | 3     | 3     | 1      | 1      | 2      | 1      | 1      | 1      | 1      | 2      |
| 15467  | 5     | 2     | 1     | 3     | 4     | 4     | 1      | 0      | 1      | 2      | 1      | 1      | 1      | 1      |
| 15470  | 4     | 3     | 1     | 1     | 4     | 4     | 1      | 0      | 0      | 1      | 1      | 1      | 1      | 0      |
| 15472  | 4     | 1     | 1     | 1     | 4     | 5     | 1      | 0      | 2      | 2      | 1      | 1      | 0      | 1      |
| 15476  | 5     | 1     | 3     | 4     | 5     | 5     | 0      | 2      | 0      | 1      | 0      | 1      | 2      | 0      |
| 15477  | 3     | 3     | 1     | 1     | 4     | 4     | 1      | 1      | 1      | 1      | 1      | 1      | 1      | 1      |
| 15488  | 3     | 1     | 1     | 3     | 4     | 4     | 1      | 1      | 1      | 0      | 1      | 1      | 1      | 1      |
| 15489  | 5     | 1     | 1     | 3     | 4     | 4     | 1      | 0      | 0      | 0      | 1      | 1      | 1      | 0      |
| 15490  | 4     | 3     | 1     | 1     | 4     | 4     | 1      | 1      | 1      | 1      | 1      | 1      | 1      | 1      |
| 15496  | 4     | 3     | 3     | 4     | 3     | 3     | 1      | 1      | 1      | 1      | 1      | 2      | 2      | 1      |
| 15497  | 4     | 2     | 1     | 3     | 4     | 4     | 1      | 1      | 0      | 1      | 1      | 1      | 1      | 2      |
| 15498  | 5     | 1     | 0     | 0     | 5     | 5     | 0      | 0      | 0      | 0      | 0      | 0      | 0      | 0      |
| 15509  | 3     | 3     | 1     | 1     | 3     | 3     | 1      | 1      | 1      | 1      | 1      | 1      | 1      | 1      |
| 15510  | 4     | 2     | 1     | 1     | 3     | 4     | 1      | 1      | 1      | 1      | 1      | 2      | 1      | 1      |
| 15516  | 3     | 2     | 3     | 4     | 3     | 4     | 1      | 1      | 2      | 2      | 3      | 2      | 1      | 1      |
| 15519  | 4     | 1     | 1     | 3     | 4     | 4     | 1      | 0      | 2      | 0      | 1      | 0      | 1      | 1      |
| 15520  | 3     | 3     | 3     | 3     | 4     | 4     | 1      | 1      | 1      | 1      | 1      | 1      | 1      | 1      |
| 15524  | 3     | 2     | 1     | 4     | 4     | 3     | 2      | 1      | 1      | 1      | 1      | 2      | 2      | 1      |
| 15525  | 5     | 1     | 1     | 0     | 5     | 5     | 1      | 0      | 0      | 0      | 0      | 1      | 0      | 1      |

| respid | Q52_2 | Q53_1 | Q54_1 | Q54_2 | Q54_3 | Q55_1 | Q56a_1 | Q56b_1 | Q56c_1 | Q56d_1 | Q56e_1 | Q56f_1 | Q56g_1 | Q56h_1 |
|--------|-------|-------|-------|-------|-------|-------|--------|--------|--------|--------|--------|--------|--------|--------|
| 15526  | 3     | 3     | 1     | 0     | 4     | 4     | 2      | 0      | 1      | 1      | 1      | 1      | 0      | 1      |
| 15531  | 3     | 2     | 3     | 1     | 4     | 2     | 1      | 1      | 0      | 1      | 1      | 0      | 0      | 1      |
| 15532  | 5     | 1     | 1     | 1     | 4     | 4     | 1      | 0      | 1      | 0      | 1      | 0      | 1      | 1      |
| 15534  | 3     | 3     | 1     | 3     | 3     | 3     | 1      | 2      | 2      | 1      | 2      | 2      | 2      | 2      |
| 15535  | 3     | 4     | 3     | 3     | 4     | 4     | 1      | 2      | 1      | 2      | 2      | 2      | 1      | 2      |
| 15539  | 4     | 3     | 1     | 3     | 3     | 3     | 1      | 1      | 2      | 1      | 1      | 1      | 1      | 2      |
| 15550  | 5     | 1     | 1     | 1     | 5     | 5     | 0      | 0      | 0      | 0      | 0      | 0      | 0      | 2      |
| 15556  | 3     | 2     | 1     | 1     | 3     | 4     | 1      | 1      | 1      | 1      | 1      | 1      | 1      | 1      |
| 15558  | 2     | 4     | 3     | 1     | 3     | 4     | 2      | 2      | 1      | 1      | 2      | 2      | 2      | 1      |
| 15565  | 5     | 2     | 1     | 3     | 3     | 5     | 1      | 0      | 1      | 0      | 1      | 1      | 0      | 0      |
| 15567  | 2     | 2     | 3     | 1     | 1     | 4     | 2      | 1      | 2      | 2      | 2      | 2      | 1      | 1      |
| 15568  | 3     | 3     | 3     | 3     | 4     | 4     | 1      | 2      | 1      | 1      | 2      | 2      | 1      | 2      |
| 15571  | 5     | 1     | 1     | 3     | 5     | 5     | 0      | 0      | 0      | 0      | 0      | 2      | 2      | 1      |
| 15573  | 4     | 1     | 1     | 1     | 4     | 4     | 1      | 0      | 0      | 0      | 1      | 0      | 0      | 0      |
| 15574  | 3     | 3     | 1     | 3     | 3     | 4     | 2      | 1      | 1      | 1      | 2      | 2      | 1      | 2      |
| 15576  | 4     | 2     | 1     | 1     | 3     | 4     | 1      | 0      | 2      | 0      | 1      | 1      | 2      | 1      |
| 15587  | 4     | 2     | 4     | 3     | 4     | 4     | 1      | 1      | 1      | 1      | 1      | 2      | 2      | 1      |
| 15588  | 3     | 4     | 3     | 5     | 1     | 3     | 1      | 1      | 1      | 2      | 2      | 2      | 2      | 1      |
| 15593  | 3     | 3     | 3     | 3     | 3     | 3     | 1      | 1      | 1      | 1      | 2      | 2      | 2      | 2      |
| 15597  | 5     | 2     | 1     | 1     | 3     | 5     | 1      | 0      | 0      | 0      | 1      | 0      | 1      | 1      |
| 15598  | 4     | 1     | 1     | 1     | 3     | 5     | 1      | 0      | 1      | 0      | 1      | 0      | 0      | 1      |
| 15599  | 4     | 1     | 1     | 1     | 4     | 5     | 1      | 1      | 0      | 1      | 0      | 1      | 0      | 1      |
| 15601  | 4     | 2     | 1     | 1     | 4     | 4     | 1      | 1      | 1      | 1      | 1      | 0      | 1      | 1      |
| 15604  | 4     | 2     | 1     | 1     | 4     | 3     | 1      | 0      | 1      | 1      | 1      | 1      | 2      | 1      |
| 15611  | 5     | 1     | 0     | 1     | 5     | 5     | 0      | 1      | 0      | 0      | 0      | 2      | 0      | 0      |
| 15613  | 5     | 1     | 0     | 1     | 5     | 5     | 0      | 1      | 0      | 0      | 1      | 0      | 0      | 0      |
| 15614  | 5     | 1     | 1     | 1     | 3     | 5     | 0      | 0      | 0      | 1      | 1      | 1      | 1      | 0      |
| 15617  | 3     | 3     | 3     | 4     | 4     | 4     | 1      | 2      | 0      | 1      | 1      | 1      | 2      | 0      |
| 15622  | 5     | 4     | 3     | 3     | 3     | 5     | 0      | 1      | 0      | 1      | 0      | 1      | 0      | 0      |
| 15623  | 5     | 1     | 1     | 1     | 4     | 5     | 1      | 0      | 1      | 1      | 1      | 1      | 0      | 1      |
| 15625  | 5     | 1     | 3     | 4     | 4     | 5     | 1      | 2      | 0      | 2      | 1      | 2      | 2      | 1      |
| 15627  | 5     | 1     | 5     | 5     | 5     | 5     | 0      | 3      | 0      | 3      | 3      | 3      | 3      | 0      |

| respid | Q52_2 | Q53_1 | Q54_1 | Q54_2 | Q54_3 | Q55_1 | Q56a_1 | Q56b_1 | Q56c_1 | Q56d_1 | Q56e_1 | Q56f_1 | Q56g_1 | Q56h_1 |
|--------|-------|-------|-------|-------|-------|-------|--------|--------|--------|--------|--------|--------|--------|--------|
| 15628  | 5     | 1     | 0     | 0     | 4     | 4     | 0      | 1      | 0      | 1      | 1      | 1      | 1      | 0      |
| 15633  | 4     | 1     | 4     | 5     | 5     | 5     | 3      | 0      | 0      | 0      | 1      | 0      | 0      | 1      |
| 15634  | 4     | 2     | 1     | 1     | 3     | 5     | 0      | 1      | 1      | 1      | 1      | 1      | 1      | 1      |
| 15637  | 4     | 2     | 1     | 1     | 4     | 4     | 1      | 0      | 1      | 0      | 1      | 2      | 0      | 1      |
| 15644  | 4     | 1     | 0     | 0     | 4     | 5     | 0      | 0      | 0      | 0      | 0      | 0      | 0      | 1      |
| 15645  | 5     | 2     | 3     | 3     | 4     | 4     | 1      | 1      | 1      | 2      | 2      | 2      | 1      | 1      |
| 15649  | 2     | 2     | 1     | 4     | 3     | 4     | 1      | 0      | 1      | 0      | 1      | 1      | 1      | 2      |
| 15650  | 5     | 1     | 1     | 1     | 5     | 5     | 0      | 0      | 0      | 0      | 1      | 0      | 0      | 1      |
| 15651  | 5     | 1     | 1     | 1     | 4     | 5     | 0      | 0      | 0      | 0      | 1      | 0      | 0      | 0      |
| 15657  | 3     | 3     | 3     | 5     | 3     | 3     | 1      | 1      | 2      | 1      | 1      | 1      | 2      | 2      |
| 15658  | 4     | 1     | 1     | 3     | 4     | 4     | 1      | 1      | 0      | 0      | 1      | 0      | 1      | 1      |
| 15660  | 4     | 2     | 0     | 0     | 4     | 4     | 0      | 1      | 0      | 0      | 0      | 0      | 0      | 1      |
| 15667  | 4     | 2     | 3     | 3     | 4     | 5     | 1      | 1      | 2      | 0      | 0      | 1      | 2      | 0      |
| 15671  | 5     | 1     | 1     | 1     | 5     | 5     | 0      | 1      | 0      | 2      | 1      | 1      | 2      | 0      |
| 15679  | 5     | 1     | 1     | 1     | 4     | 4     | 1      | 1      | 0      | 1      | 1      | 1      | 1      | 2      |
| 15712  | 4     | 2     | 1     | 1     | 3     | 4     | 0      | 0      | 0      | 0      | 0      | 0      | 0      | 0      |
| 15715  | 4     | 1     | 4     | 4     | 4     | 4     | 0      | 2      | 0      | 1      | 1      | 1      | 2      | 1      |
| 15749  | 4     | 2     | 1     | 1     | 4     | 5     | 1      | 0      | 2      | 1      | 1      | 1      | 0      | 2      |
| 15754  | 5     | 1     | 0     | 1     | 4     | 5     | 0      | 0      | 1      | 1      | 1      | 0      | 0      | 0      |
| 15756  | 4     | 2     | 1     | 3     | 3     | 4     | 1      | 0      | 0      | 0      | 1      | 1      | 1      | 0      |
| 15773  | 5     | 1     | 5     | 4     | 5     | 5     | 0      | 1      | 0      | 1      | 0      | 0      | 1      | 1      |
| 15774  | 5     | 1     | 3     | 3     | 4     | 5     | 1      | 1      | 0      | 0      | 1      | 1      | 1      | 0      |
| 15776  | 5     | 2     | 1     | 1     | 4     | 3     | 0      | 1      | 0      | 1      | 1      | 1      | 1      | 1      |
| 15777  | 3     | 3     | 1     | 1     | 3     | 3     | 1      | 1      | 1      | 1      | 1      | 1      | 1      | 1      |
| 15779  | 4     | 2     | 1     | 3     | 4     | 5     | 1      | 1      | 0      | 0      | 1      | 1      | 1      | 1      |
| 15780  | 5     | 1     | 0     | 1     | 4     | 5     | 0      | 0      | 1      | 1      | 0      | 0      | 0      | 0      |
| 15792  | 5     | 1     | 1     | 1     | 3     | 5     | 1      | 1      | 1      | 1      | 1      | 1      | 1      | 2      |
| 15793  | 2     | 3     | 1     | 1     | 3     | 3     | 1      | 1      | 1      | 1      | 1      | 1      | 1      | 1      |
| 15796  | 4     | 2     | 1     | 1     | 4     | 5     | 0      | 1      | 0      | 1      | 1      | 2      | 2      | 0      |
| 15798  | 5     | 1     | 3     | 3     | 3     | 4     | 1      | 2      | 1      | 1      | 1      | 1      | 0      | 1      |
| 15809  | 5     | 1     | 0     | 1     | 5     | 5     | 0      | 1      | 0      | 0      | 1      | 0      | 0      | 1      |
| 15810  | 4     | 1     | 0     | 0     | 4     | 4     | 1      | 1      | 1      | 0      | 0      | 0      | 0      | 0      |

| respid | Q52_2 | Q53_1 | Q54_1 | Q54_2 | Q54_3 | Q55_1 | Q56a_1 | Q56b_1 | Q56c_1 | Q56d_1 | Q56e_1 | Q56f_1 | Q56g_1 | Q56h_1 |
|--------|-------|-------|-------|-------|-------|-------|--------|--------|--------|--------|--------|--------|--------|--------|
| 15815  | 4     | 2     | 1     | 1     | 4     | 4     | 0      | 0      | 2      | 1      | 1      | 0      | 1      | 1      |
| 15816  | 5     | 1     | 0     | 0     | 4     | 4     | 1      | 2      | 0      | 1      | 1      | 1      | 0      | 0      |
| 15817  | 5     | 1     | 0     | 0     | 5     | 5     | 0      | 0      | 0      | 0      | 0      | 0      | 0      | 0      |
| 15821  | 3     | 3     | 1     | 3     | 3     | 4     | 1      | 1      | 1      | 1      | 2      | 1      | 1      | 1      |
| 15823  | 3     | 2     | 4     | 4     | 4     | 4     | 1      | 1      | 1      | 1      | 1      | 1      | 1      | 1      |
| 15834  | 5     | 4     | 1     | 1     | 3     | 3     | 1      | 2      | 1      | 1      | 0      | 0      | 1      | 0      |
| 15835  | 5     | 1     | 3     | 4     | 3     | 5     | 0      | 0      | 0      | 0      | 0      | 0      | 0      | 0      |
| 15836  | 5     | 2     | 1     | 1     | 5     | 5     | 1      | 1      | 0      | 0      | 0      | 1      | 1      | 0      |
| 15837  | 4     | 2     | 1     | 3     | 4     | 4     | 1      | 0      | 0      | 0      | 0      | 0      | 1      | 1      |
| 15839  | 5     | 3     | 0     | 0     | 3     | 4     | 1      | 1      | 2      | 0      | 1      | 0      | 1      | 1      |
| 15840  | 4     | 2     | 1     | 1     | 4     | 4     | 1      | 1      | 1      | 1      | 1      | 1      | 1      | 1      |
| 15844  | 5     | 2     | 3     | 3     | 4     | 4     | 1      | 2      | 1      | 1      | 1      | 1      | 2      | 2      |
| 15845  | 4     | 4     | 3     | 4     | 4     | 4     | 2      | 1      | 2      | 2      | 2      | 2      | 2      | 1      |
| 15847  | 2     | 3     | 1     | 1     | 3     | 3     | 1      | 1      | 2      | 1      | 2      | 1      | 2      | 1      |
| 15848  | 3     | 2     | 3     | 3     | 3     | 4     | 1      | 1      | 0      | 1      | 1      | 1      | 1      | 1      |
| 15849  | 3     | 3     | 3     | 3     | 4     | 3     | 1      | 1      | 2      | 1      | 1      | 1      | 2      | 0      |
| 15857  | 3     | 2     | 3     | 3     | 3     | 3     | 1      | 1      | 1      | 1      | 1      | 1      | 1      | 1      |
| 15858  | 4     | 1     | 1     | 3     | 4     | 5     | 0      | 0      | 0      | 0      | 0      | 1      | 0      | 0      |
| 15862  | 3     | 5     | 4     | 5     | 4     | 5     | 2      | 2      | 2      | 3      | 2      | 3      | 2      | 2      |
| 15866  | 3     | 2     | 1     | 1     | 4     | 4     | 1      | 1      | 1      | 1      | 1      | 1      | 1      | 1      |
| 15870  | 3     | 2     | 1     | 1     | 4     | 4     | 1      | 1      | 1      | 1      | 1      | 1      | 1      | 1      |
| 15871  | 4     | 1     | 3     | 3     | 4     | 5     | 1      | 0      | 0      | 0      | 1      | 1      | 2      | 0      |
| 15872  | 5     | 2     | 3     | 3     | 3     | 3     | 1      | 2      | 1      | 1      | 1      | 1      | 1      | 1      |
| 15873  | 5     | 1     | 1     | 0     | 5     | 5     | 0      | 0      | 0      | 0      | 0      | 0      | 0      | 0      |
| 15874  | 5     | 1     | 0     | 0     | 5     | 5     | 0      | 0      | 0      | 0      | 0      | 0      | 0      | 0      |
| 15875  | 2     | 4     | 1     | 3     | 3     | 4     | 1      | 2      | 1      | 1      | 2      | 2      | 1      | 1      |
| 15876  | 2     | 3     | 1     | 3     | 1     | 3     | 1      | 1      | 1      | 1      | 2      | 1      | 1      | 2      |
| 15882  | 2     | 4     | 4     | 4     | 1     | 2     | 1      | 1      | 2      | 2      | 2      | 2      | 2      | 2      |
| 15884  | 4     | 2     | 1     | 3     | 4     | 4     | 0      | 0      | 1      | 0      | 1      | 0      | 1      | 1      |
| 15890  | 4     | 3     | 3     | 1     | 4     | 4     | 1      | 0      | 2      | 1      | 1      | 2      | 0      | 1      |
| 15892  | 3     | 3     | 4     | 5     | 1     | 2     | 3      | 3      | 2      | 1      | 3      | 3      | 2      | 3      |
| 15908  | 4     | 2     | 3     | 1     | 5     | 4     | 1      | 1      | 1      | 1      | 1      | 1      | 2      | 1      |

| respid | Q52_2 | Q53_1 | Q54_1 | Q54_2 | Q54_3 | Q55_1 | Q56a_1 | Q56b_1 | Q56c_1 | Q56d_1 | Q56e_1 | Q56f_1 | Q56g_1 | Q56h_1 |
|--------|-------|-------|-------|-------|-------|-------|--------|--------|--------|--------|--------|--------|--------|--------|
| 15914  | 3     | 2     | 1     | 1     | 4     | 4     | 1      | 1      | 1      | 1      | 1      | 1      | 1      | 1      |
| 15932  | 3     | 3     | 1     | 3     | 1     | 3     | 1      | 1      | 1      | 1      | 1      | 1      | 1      | 1      |
| 15933  | 4     | 1     | 1     | 3     | 4     | 5     | 0      | 0      | 0      | 0      | 0      | 0      | 0      | 0      |
| 15938  | 4     | 1     | 1     | 1     | 4     | 5     | 0      | 0      | 1      | 0      | 1      | 1      | 1      | 0      |
| 15940  | 3     | 5     | 4     | 1     | 0     | 4     | 2      | 0      | 2      | 3      | 1      | 2      | 0      | 2      |
| 15945  | 4     | 2     | 1     | 1     | 4     | 4     | 1      | 1      | 1      | 1      | 1      | 1      | 1      | 1      |
| 15947  | 5     | 2     | 0     | 1     | 4     | 4     | 1      | 0      | 2      | 1      | 1      | 2      | 2      | 0      |
| 15950  | 4     | 2     | 1     | 1     | 3     | 4     | 1      | 1      | 1      | 1      | 1      | 2      | 1      | 1      |
| 15951  | 5     | 2     | 1     | 1     | 3     | 5     | 1      | 0      | 2      | 1      | 1      | 0      | 1      | 1      |
| 15952  | 3     | 3     | 1     | 3     | 3     | 3     | 1      | 1      | 1      | 1      | 2      | 2      | 1      | 1      |
| 15953  | 5     | 1     | 1     | 1     | 4     | 4     | 0      | 0      | 0      | 1      | 1      | 0      | 0      | 1      |
| 15954  | 3     | 3     | 3     | 4     | 3     | 3     | 1      | 2      | 1      | 1      | 1      | 1      | 2      | 2      |
| 15957  | 2     | 3     | 1     | 3     | 3     | 4     | 2      | 2      | 1      | 2      | 2      | 2      | 2      | 2      |
| 15965  | 3     | 3     | 3     | 1     | 3     | 3     | 1      | 1      | 1      | 1      | 2      | 2      | 1      | 2      |
| 15966  | 5     | 1     | 0     | 0     | 5     | 5     | 0      | 1      | 1      | 0      | 0      | 0      | 0      | 0      |
| 15967  | 4     | 3     | 1     | 1     | 3     | 5     | 1      | 2      | 0      | 1      | 1      | 1      | 1      | 1      |
| 15968  | 3     | 2     | 1     | 4     | 3     | 5     | 0      | 0      | 0      | 0      | 0      | 0      | 0      | 2      |
| 15970  | 5     | 1     | 3     | 3     | 3     | 5     | 0      | 2      | 0      | 1      | 1      | 2      | 1      | 0      |
| 15973  | 3     | 3     | 1     | 1     | 4     | 4     | 1      | 1      | 1      | 1      | 1      | 1      | 1      | 1      |
| 15974  | 3     | 2     | 1     | 1     | 4     | 4     | 1      | 1      | 1      | 1      | 1      | 1      | 1      | 1      |
| 15975  | 5     | 1     | 1     | 1     | 4     | 4     | 0      | 0      | 0      | 0      | 1      | 0      | 1      | 1      |
| 15980  | 1     | 4     | 4     | 1     | 0     | 4     | 0      | 2      | 2      | 2      | 3      | 2      | 1      | 2      |
| 15984  | 5     | 1     | 1     | 1     | 3     | 5     | 1      | 2      | 1      | 0      | 1      | 0      | 1      | 1      |
| 15985  | 3     | 3     | 1     | 3     | 1     | 3     | 1      | 1      | 1      | 1      | 1      | 1      | 1      | 2      |
| 15994  | 5     | 1     | 0     | 0     | 4     | 5     | 0      | 0      | 1      | 0      | 0      | 0      | 0      | 0      |
| 15995  | 5     | 1     | 1     | 3     | 5     | 5     | 0      | 0      | 1      | 0      | 0      | 1      | 1      | 0      |
| 16000  | 3     | 3     | 3     | 3     | 4     | 3     | 0      | 1      | 1      | 1      | 1      | 1      | 1      | 1      |
| 16004  | 3     | 2     | 1     | 1     | 4     | 4     | 1      | 1      | 1      | 1      | 1      | 1      | 1      | 1      |
| 16005  | 3     | 2     | 1     | 1     | 4     | 4     | 1      | 1      | 1      | 1      | 1      | 1      | 1      | 1      |
| 16006  | 2     | 5     | 3     | 4     | 4     | 4     | 1      | 2      | 1      | 2      | 2      | 2      | 1      | 2      |
| 16009  | 3     | 1     | 4     | 4     | 4     | 4     | 1      | 3      | 0      | 1      | 1      | 2      | 2      | 0      |
| 16017  | 5     | 1     | 0     | 0     | 5     | 5     | 0      | 0      | 0      | 0      | 0      | 0      | 0      | 0      |



| respid | Q52_2 | Q53_1 | Q54_1 | Q54_2 | Q54_3 | Q55_1 | Q56a_1 | Q56b_1 | Q56c_1 | Q56d_1 | Q56e_1 | Q56f_1 | Q56g_1 | Q56h_1 |
|--------|-------|-------|-------|-------|-------|-------|--------|--------|--------|--------|--------|--------|--------|--------|
| 16019  | 4     | 2     | 1     | 1     | 4     | 4     | 0      | 0      | 0      | 0      | 1      | 0      | 0      | 1      |
| 16021  | 4     | 2     | 1     | 3     | 4     | 4     | 1      | 1      | 2      | 2      | 1      | 1      | 1      | 2      |
| 16024  | 5     | 1     | 1     | 3     | 5     | 5     | 0      | 1      | 1      | 1      | 1      | 1      | 1      | 1      |
| 16026  | 5     | 2     | 3     | 1     | 4     | 5     | 0      | 1      | 0      | 2      | 1      | 1      | 1      | 1      |
| 16029  | 5     | 1     | 1     | 1     | 5     | 5     | 0      | 1      | 0      | 0      | 0      | 1      | 1      | 0      |
| 16031  | 3     | 2     | 1     | 4     | 3     | 4     | 1      | 1      | 1      | 1      | 1      | 2      | 1      | 2      |
| 16037  | 4     | 1     | 1     | 1     | 4     | 5     | 0      | 0      | 0      | 0      | 1      | 0      | 0      | 0      |
| 16043  | 4     | 1     | 1     | 1     | 4     | 5     | 1      | 0      | 1      | 0      | 1      | 0      | 0      | 1      |
| 16044  | 4     | 2     | 1     | 1     | 3     | 4     | 0      | 0      | 2      | 0      | 1      | 0      | 0      | 2      |
| 16047  | 5     | 2     | 1     | 3     | 4     | 4     | 1      | 1      | 1      | 1      | 1      | 1      | 2      | 1      |
| 16048  | 5     | 1     | 1     | 3     | 4     | 5     | 1      | 1      | 0      | 2      | 1      | 2      | 1      | 1      |
| 16049  | 4     | 1     | 1     | 3     | 3     | 3     | 1      | 2      | 0      | 1      | 2      | 2      | 2      | 1      |
| 16051  | 4     | 2     | 1     | 1     | 3     | 4     | 1      | 1      | 1      | 0      | 1      | 1      | 1      | 1      |
| 16053  | 5     | 1     | 1     | 1     | 4     | 5     | 1      | 1      | 1      | 2      | 1      | 0      | 1      | 0      |
| 16054  | 5     | 1     | 1     | 1     | 3     | 5     | 1      | 1      | 2      | 1      | 1      | 1      | 1      | 2      |
| 16069  | 4     | 2     | 3     | 3     | 4     | 4     | 1      | 2      | 1      | 1      | 1      | 1      | 2      | 1      |
| 16070  | 4     | 1     | 1     | 3     | 3     | 4     | 1      | 2      | 1      | 1      | 2      | 2      | 2      | 0      |
| 16074  | 5     | 1     | 5     | 5     | 5     | 5     | 0      | 1      | 0      | 0      | 0      | 0      | 1      | 1      |
| 16076  | 5     | 1     | 1     | 1     | 5     | 5     | 1      | 1      | 1      | 0      | 1      | 1      | 1      | 1      |
| 16078  | 5     | 1     | 0     | 0     | 5     | 5     | 0      | 0      | 0      | 0      | 0      | 0      | 0      | 0      |
| 16081  | 3     | 2     | 3     | 4     | 1     | 3     | 2      | 2      | 2      | 1      | 2      | 2      | 1      | 2      |
| 16085  | 4     | 2     | 4     | 3     | 1     | 3     | 2      | 1      | 2      | 2      | 2      | 2      | 2      | 2      |
| 16088  | 5     | 1     | 0     | 1     | 3     | 5     | 0      | 0      | 0      | 1      | 1      | 0      | 0      | 1      |
| 16091  | 3     | 2     | 1     | 1     | 3     | 4     | 1      | 1      | 2      | 1      | 1      | 1      | 1      | 1      |
| 16092  | 4     | 1     | 4     | 3     | 4     | 4     | 1      | 0      | 0      | 0      | 1      | 0      | 1      | 1      |
| 16093  | 5     | 2     | 1     | 3     | 4     | 5     | 0      | 0      | 0      | 1      | 1      | 1      | 1      | 2      |
| 16097  | 5     | 1     | 4     | 4     | 4     | 5     | 1      | 2      | 2      | 1      | 1      | 2      | 2      | 2      |
| 16100  | 3     | 3     | 3     | 4     | 4     | 3     | 1      | 1      | 2      | 2      | 2      | 1      | 2      | 2      |
| 16101  | 5     | 1     | 1     | 1     | 4     | 4     | 1      | 0      | 2      | 0      | 1      | 0      | 1      | 1      |
| 16105  | 5     | 1     | 1     | 1     | 3     | 4     | 1      | 0      | 1      | 0      | 0      | 1      | 1      | 1      |
| 16118  | 2     | 4     | 3     | 3     | 1     | 2     | 1      | 1      | 2      | 2      | 2      | 2      | 2      | 2      |
| 16129  | 5     | 1     | 0     | 0     | 5     | 5     | 0      | 0      | 0      | 0      | 1      | 0      | 1      | 0      |

| respid | Q52_2 | Q53_1 | Q54_1 | Q54_2 | Q54_3 | Q55_1 | Q56a_1 | Q56b_1 | Q56c_1 | Q56d_1 | Q56e_1 | Q56f_1 | Q56g_1 | Q56h_1 |
|--------|-------|-------|-------|-------|-------|-------|--------|--------|--------|--------|--------|--------|--------|--------|
| 16130  | 4     | 2     | 1     | 1     | 4     | 4     | 1      | 0      | 0      | 0      | 1      | 1      | 1      | 1      |
| 16131  | 3     | 3     | 3     | 3     | 3     | 3     | 1      | 2      | 1      | 2      | 2      | 2      | 2      | 1      |
| 16136  | 4     | 3     | 4     | 3     | 3     | 5     | 0      | 2      | 0      | 2      | 3      | 1      | 2      | 1      |
| 16137  | 4     | 1     | 4     | 4     | 3     | 5     | 1      | 1      | 1      | 1      | 1      | 2      | 2      | 1      |
| 16138  | 5     | 2     | 1     | 1     | 4     | 4     | 1      | 2      | 1      | 0      | 2      | 2      | 1      | 1      |
| 16139  | 3     | 2     | 1     | 1     | 3     | 5     | 0      | 0      | 0      | 0      | 0      | 0      | 1      | 1      |
| 16140  | 5     | 2     | 1     | 1     | 1     | 5     | 0      | 0      | 0      | 0      | 1      | 0      | 1      | 0      |
| 16145  | 5     | 2     | 1     | 4     | 4     | 4     | 1      | 0      | 0      | 0      | 0      | 0      | 1      | 1      |
| 16150  | 1     | 2     | 4     | 1     | 0     | 4     | 0      | 1      | 2      | 0      | 1      | 1      | 2      | 1      |
| 16151  | 5     | 1     | 0     | 0     | 0     | 5     | 0      | 0      | 0      | 0      | 0      | 0      | 0      | 0      |
| 16153  | 5     | 1     | 1     | 3     | 5     | 5     | 1      | 1      | 0      | 0      | 1      | 1      | 2      | 1      |
| 16164  | 5     | 1     | 1     | 1     | 4     | 4     | 1      | 1      | 1      | 0      | 1      | 0      | 1      | 2      |
| 16168  | 3     | 3     | 3     | 4     | 3     | 4     | 1      | 1      | 1      | 2      | 1      | 1      | 2      | 1      |
| 16173  | 3     | 3     | 4     | 5     | 3     | 4     | 1      | 2      | 1      | 2      | 1      | 3      | 2      | 1      |
| 16174  | 5     | 1     | 0     | 1     | 5     | 5     | 1      | 0      | 0      | 0      | 0      | 0      | 0      | 0      |
| 16177  | 4     | 2     | 1     | 1     | 3     | 4     | 1      | 1      | 1      | 2      | 1      | 1      | 1      | 2      |
| 16185  | 5     | 1     | 1     | 1     | 5     | 5     | 0      | 1      | 0      | 0      | 1      | 1      | 0      | 0      |
| 16189  | 4     | 2     | 3     | 3     | 3     | 4     | 1      | 0      | 1      | 0      | 1      | 1      | 1      | 1      |
| 16192  | 3     | 2     | 3     | 3     | 4     | 4     | 1      | 1      | 1      | 1      | 2      | 1      | 1      | 1      |
| 16193  | 3     | 3     | 3     | 3     | 3     | 5     | 1      | 1      | 1      | 1      | 1      | 1      | 1      | 1      |
| 16194  | 5     | 1     | 1     | 3     | 4     | 5     | 1      | 1      | 0      | 1      | 1      | 1      | 2      | 1      |
| 16196  | 2     | 2     | 3     | 4     | 3     | 3     | 1      | 1      | 2      | 2      | 1      | 1      | 1      | 1      |
| 16202  | 3     | 3     | 1     | 3     | 3     | 3     | 1      | 1      | 2      | 2      | 2      | 1      | 1      | 1      |
| 16205  | 3     | 2     | 3     | 4     | 3     | 4     | 1      | 2      | 1      | 1      | 2      | 2      | 2      | 1      |
| 16206  | 4     | 4     | 1     | 4     | 4     | 4     | 2      | 1      | 0      | 1      | 1      | 0      | 1      | 1      |
| 16208  | 5     | 1     | 1     | 3     | 4     | 5     | 0      | 1      | 0      | 1      | 1      | 1      | 1      | 0      |
| 16211  | 4     | 3     | 1     | 3     | 4     | 3     | 1      | 1      | 2      | 1      | 1      | 1      | 1      | 1      |
| 16212  | 5     | 1     | 1     | 1     | 4     | 5     | 1      | 1      | 0      | 0      | 0      | 1      | 1      | 0      |
| 16215  | 5     | 1     | 0     | 0     | 4     | 5     | 0      | 0      | 0      | 0      | 0      | 0      | 0      | 0      |
| 16217  | 4     | 2     | 1     | 1     | 4     | 4     | 1      | 0      | 1      | 1      | 1      | 1      | 0      | 1      |
| 16221  | 4     | 2     | 1     | 3     | 4     | 4     | 1      | 1      | 2      | 0      | 1      | 1      | 1      | 0      |
| 16226  | 4     | 2     | 1     | 3     | 4     | 4     | 1      | 1      | 1      | 2      | 1      | 1      | 1      | 2      |

| respid | Q52_2 | Q53_1 | Q54_1 | Q54_2 | Q54_3 | Q55_1 | Q56a_1 | Q56b_1 | Q56c_1 | Q56d_1 | Q56e_1 | Q56f_1 | Q56g_1 | Q56h_1 |
|--------|-------|-------|-------|-------|-------|-------|--------|--------|--------|--------|--------|--------|--------|--------|
| 16228  | 2     | 3     | 1     | 3     | 3     | 3     | 1      | 1      | 1      | 1      | 2      | 1      | 2      | 2      |
| 16229  | 5     | 2     | 3     | 1     | 3     | 4     | 1      | 1      | 0      | 2      | 2      | 2      | 1      | 1      |
| 16230  | 3     | 3     | 1     | 3     | 3     | 3     | 1      | 1      | 2      | 1      | 1      | 1      | 1      | 0      |
| 16231  | 5     | 2     | 5     | 1     | 4     | 4     | 2      | 2      | 1      | 2      | 2      | 1      | 2      | 1      |
| 16232  | 4     | 4     | 3     | 3     | 4     | 4     | 1      | 3      | 0      | 2      | 1      | 2      | 2      | 0      |
| 16234  | 5     | 2     | 1     | 3     | 4     | 4     | 1      | 1      | 1      | 1      | 1      | 2      | 1      | 1      |
| 16235  | 2     | 3     | 3     | 1     | 4     | 3     | 2      | 1      | 1      | 2      | 2      | 2      | 2      | 2      |
| 16236  | 5     | 1     | 1     | 3     | 5     | 5     | 0      | 2      | 0      | 0      | 0      | 1      | 0      | 2      |
| 16237  | 5     | 2     | 3     | 3     | 4     | 5     | 1      | 1      | 1      | 1      | 1      | 1      | 2      | 1      |
| 16238  | 1     | 3     | 3     | 3     | 3     | 2     | 1      | 2      | 1      | 2      | 2      | 1      | 1      | 2      |
| 16239  | 4     | 2     | 1     | 3     | 3     | 4     | 1      | 0      | 1      | 0      | 1      | 1      | 1      | 1      |
| 16243  | 3     | 3     | 3     | 3     | 3     | 3     | 1      | 1      | 1      | 1      | 1      | 1      | 1      | 1      |
| 16248  | 3     | 1     | 1     | 1     | 1     | 5     | 1      | 1      | 0      | 2      | 2      | 1      | 2      | 1      |
| 16249  | 5     | 1     | 1     | 1     | 3     | 5     | 1      | 0      | 1      | 0      | 1      | 1      | 1      | 0      |
| 16251  | 5     | 1     | 1     | 1     | 4     | 5     | 1      | 0      | 1      | 0      | 1      | 0      | 0      | 0      |
| 16263  | 5     | 2     | 0     | 4     | 4     | 5     | 0      | 0      | 1      | 0      | 1      | 1      | 1      | 1      |
| 16265  | 3     | 2     | 4     | 5     | 5     | 4     | 2      | 1      | 2      | 2      | 2      | 3      | 2      | 1      |
| 16269  | 4     | 1     | 1     | 1     | 4     | 4     | 1      | 0      | 0      | 0      | 0      | 1      | 1      | 1      |
| 16272  | 4     | 4     | 1     | 3     | 3     | 4     | 1      | 1      | 1      | 1      | 1      | 1      | 2      | 1      |
| 16273  | 5     | 1     | 1     | 1     | 5     | 5     | 0      | 0      | 0      | 0      | 0      | 0      | 0      | 0      |
| 16281  | 5     | 3     | 1     | 1     | 4     | 4     | 0      | 2      | 1      | 1      | 1      | 1      | 0      | 2      |
| 16282  | 5     | 1     | 1     | 1     | 4     | 4     | 1      | 0      | 1      | 0      | 1      | 0      | 1      | 1      |
| 16287  | 2     | 1     | 1     | 1     | 1     | 5     | 0      | 0      | 0      | 3      | 3      | 1      | 0      | 0      |
| 16290  | 5     | 1     | 1     | 1     | 4     | 5     | 0      | 0      | 0      | 0      | 0      | 0      | 0      | 0      |
| 16294  | 5     | 1     | 1     | 1     | 4     | 5     | 1      | 0      | 1      | 0      | 1      | 1      | 1      | 0      |
| 16295  | 3     | 1     | 4     | 4     | 1     | 4     | 2      | 1      | 1      | 1      | 3      | 2      | 2      | 1      |
| 16296  | 4     | 2     | 4     | 4     | 3     | 5     | 2      | 1      | 0      | 0      | 1      | 1      | 1      | 1      |
| 16299  | 4     | 4     | 4     | 5     | 1     | 4     | 1      | 3      | 2      | 2      | 2      | 2      | 2      | 3      |
| 16302  | 5     | 1     | 4     | 4     | 1     | 4     | 2      | 2      | 2      | 2      | 2      | 2      | 2      | 1      |
| 16303  | 4     | 1     | 1     | 1     | 4     | 4     | 0      | 0      | 0      | 0      | 0      | 1      | 1      | 1      |
| 16304  | 5     | 3     | 1     | 3     | 3     | 2     | 1      | 2      | 3      | 1      | 3      | 1      | 1      | 0      |
| 16306  | 5     | 2     | 3     | 4     | 4     | 5     | 1      | 1      | 1      | 1      | 1      | 2      | 2      | 1      |

| respid | Q52_2 | Q53_1 | Q54_1 | Q54_2 | Q54_3 | Q55_1 | Q56a_1 | Q56b_1 | Q56c_1 | Q56d_1 | Q56e_1 | Q56f_1 | Q56g_1 | Q56h_1 |
|--------|-------|-------|-------|-------|-------|-------|--------|--------|--------|--------|--------|--------|--------|--------|
| 16318  | 3     | 2     | 1     | 3     | 3     | 2     | 1      | 1      | 1      | 2      | 1      | 1      | 1      | 3      |
| 16320  | 4     | 2     | 1     | 1     | 3     | 4     | 1      | 1      | 0      | 0      | 1      | 0      | 1      | 1      |
| 16321  | 5     | 1     | 3     | 4     | 1     | 5     | 1      | 1      | 1      | 2      | 2      | 2      | 2      | 0      |
| 16322  | 5     | 2     | 1     | 1     | 4     | 5     | 1      | 1      | 0      | 1      | 1      | 1      | 1      | 1      |
| 16324  | 3     | 3     | 1     | 4     | 5     | 5     | 0      | 1      | 1      | 1      | 0      | 1      | 1      | 0      |
| 16326  | 2     | 3     | 3     | 3     | 4     | 3     | 1      | 1      | 1      | 1      | 1      | 1      | 1      | 1      |
| 16328  | 4     | 3     | 1     | 3     | 4     | 3     | 1      | 1      | 2      | 1      | 1      | 1      | 1      | 1      |
| 16336  | 4     | 2     | 1     | 3     | 4     | 4     | 1      | 0      | 0      | 0      | 0      | 0      | 1      | 1      |
| 16341  | 4     | 1     | 3     | 4     | 4     | 4     | 1      | 1      | 1      | 1      | 2      | 2      | 1      | 1      |
| 16342  | 4     | 1     | 1     | 1     | 4     | 4     | 0      | 0      | 0      | 0      | 1      | 0      | 0      | 0      |
| 16343  | 3     | 4     | 4     | 4     | 1     | 3     | 1      | 1      | 1      | 2      | 1      | 2      | 2      | 2      |
| 16345  | 4     | 3     | 1     | 3     | 3     | 3     | 1      | 1      | 1      | 1      | 1      | 2      | 2      | 1      |
| 16349  | 5     | 2     | 1     | 3     | 4     | 4     | 1      | 1      | 0      | 1      | 1      | 2      | 1      | 1      |
| 16355  | 3     | 3     | 3     | 3     | 3     | 3     | 1      | 2      | 0      | 0      | 1      | 1      | 1      | 1      |
| 16364  | 4     | 3     | 3     | 4     | 3     | 3     | 1      | 2      | 2      | 1      | 3      | 2      | 1      | 2      |
| 16374  | 4     | 1     | 0     | 0     | 4     | 5     | 1      | 0      | 1      | 1      | 1      | 0      | 0      | 2      |
| 16375  | 5     | 2     | 1     | 1     | 3     | 4     | 1      | 0      | 0      | 0      | 1      | 0      | 0      | 0      |
| 16376  | 2     | 3     | 1     | 3     | 1     | 3     | 1      | 1      | 1      | 1      | 1      | 2      | 2      | 1      |
| 16393  | 4     | 2     | 1     | 4     | 4     | 4     | 1      | 2      | 2      | 2      | 1      | 1      | 1      | 2      |
| 16394  | 3     | 2     | 3     | 4     | 4     | 4     | 1      | 2      | 2      | 2      | 1      | 1      | 2      | 2      |
| 16395  | 5     | 2     | 1     | 4     | 3     | 2     | 1      | 0      | 1      | 0      | 1      | 1      | 0      | 1      |
| 16397  | 3     | 1     | 3     | 4     | 5     | 5     | 2      | 2      | 3      | 2      | 2      | 2      | 1      | 1      |
| 16398  | 3     | 3     | 3     | 3     | 3     | 3     | 1      | 1      | 2      | 2      | 1      | 1      | 2      | 1      |
| 16402  | 5     | 1     | 1     | 1     | 3     | 5     | 1      | 1      | 2      | 1      | 2      | 1      | 1      | 2      |
| 16405  | 5     | 1     | 1     | 1     | 4     | 5     | 1      | 1      | 1      | 0      | 1      | 2      | 1      | 1      |
| 16416  | 3     | 3     | 3     | 3     | 3     | 3     | 1      | 1      | 1      | 1      | 1      | 1      | 1      | 1      |
| 16422  | 2     | 3     | 1     | 1     | 3     | 3     | 1      | 2      | 1      | 1      | 2      | 2      | 1      | 1      |
| 16429  | 5     | 2     | 1     | 1     | 4     | 5     | 0      | 0      | 1      | 1      | 1      | 1      | 1      | 0      |
| 16430  | 5     | 1     | 1     | 1     | 4     | 5     | 1      | 0      | 0      | 0      | 1      | 0      | 0      | 0      |
| 16432  | 3     | 3     | 1     | 3     | 3     | 3     | 1      | 1      | 1      | 1      | 1      | 1      | 1      | 2      |
| 16433  | 4     | 1     | 1     | 1     | 5     | 5     | 0      | 0      | 0      | 2      | 0      | 0      | 0      | 0      |
| 16434  | 4     | 2     | 1     | 4     | 3     | 4     | 1      | 1      | 1      | 1      | 2      | 2      | 2      | 1      |

| respid | Q52_2 | Q53_1 | Q54_1 | Q54_2 | Q54_3 | Q55_1 | Q56a_1 | Q56b_1 | Q56c_1 | Q56d_1 | Q56e_1 | Q56f_1 | Q56g_1 | Q56h_1 |
|--------|-------|-------|-------|-------|-------|-------|--------|--------|--------|--------|--------|--------|--------|--------|
| 16437  | 3     | 4     | 3     | 4     | 4     | 3     | 1      | 1      | 0      | 1      | 1      | 2      | 2      | 2      |
| 16439  | 4     | 2     | 1     | 1     | 4     | 4     | 1      | 1      | 1      | 1      | 1      | 1      | 1      | 1      |
| 16440  | 5     | 1     | 1     | 1     | 4     | 5     | 1      | 0      | 1      | 0      | 1      | 1      | 1      | 1      |
| 16441  | 3     | 5     | 1     | 3     | 3     | 2     | 1      | 0      | 0      | 2      | 1      | 1      | 2      | 2      |
| 16442  | 5     | 1     | 0     | 0     | 5     | 5     | 0      | 0      | 0      | 0      | 0      | 0      | 0      | 0      |
| 16450  | 4     | 3     | 3     | 3     | 4     | 4     | 1      | 1      | 1      | 2      | 1      | 1      | 1      | 1      |
| 16451  | 4     | 2     | 1     | 1     | 3     | 3     | 1      | 1      | 0      | 0      | 0      | 0      | 1      | 1      |
| 16452  | 3     | 2     | 4     | 5     | 0     | 3     | 1      | 1      | 2      | 1      | 1      | 2      | 2      | 2      |
| 16467  | 5     | 2     | 0     | 0     | 5     | 4     | 0      | 1      | 1      | 0      | 1      | 0      | 0      | 2      |
| 16468  | 5     | 1     | 1     | 1     | 4     | 5     | 0      | 0      | 0      | 0      | 0      | 0      | 0      | 1      |
| 16469  | 5     | 1     | 1     | 3     | 3     | 5     | 1      | 1      | 0      | 1      | 2      | 2      | 2      | 1      |
| 16470  | 4     | 2     | 3     | 3     | 4     | 5     | 0      | 1      | 0      | 0      | 0      | 1      | 1      | 0      |
| 16471  | 5     | 1     | 1     | 0     | 4     | 4     | 1      | 0      | 2      | 0      | 1      | 0      | 0      | 0      |
| 16473  | 5     | 1     | 1     | 1     | 5     | 5     | 0      | 0      | 0      | 0      | 0      | 1      | 1      | 0      |
| 16476  | 5     | 1     | 1     | 1     | 1     | 5     | 0      | 0      | 0      | 0      | 0      | 1      | 0      | 0      |
| 16478  | 4     | 2     | 1     | 1     | 4     | 5     | 1      | 2      | 0      | 0      | 1      | 2      | 2      | 0      |
| 16484  | 3     | 3     | 3     | 4     | 1     | 3     | 1      | 1      | 1      | 1      | 2      | 1      | 1      | 1      |
| 16499  | 3     | 3     | 1     | 1     | 3     | 4     | 1      | 1      | 1      | 1      | 1      | 1      | 1      | 1      |
| 16502  | 5     | 1     | 1     | 1     | 4     | 5     | 1      | 0      | 0      | 0      | 1      | 1      | 0      | 0      |
| 16505  | 4     | 1     | 1     | 4     | 3     | 4     | 0      | 0      | 1      | 0      | 1      | 1      | 0      | 0      |
| 16514  | 5     | 1     | 0     | 1     | 4     | 5     | 0      | 0      | 0      | 1      | 0      | 0      | 0      | 0      |
| 16515  | 4     | 2     | 3     | 3     | 4     | 3     | 1      | 0      | 1      | 2      | 1      | 1      | 1      | 1      |
| 16517  | 2     | 2     | 1     | 1     | 4     | 2     | 1      | 1      | 1      | 1      | 1      | 1      | 1      | 1      |
| 16518  | 5     | 2     | 1     | 1     | 4     | 4     | 0      | 0      | 1      | 0      | 0      | 0      | 0      | 0      |
| 16519  | 4     | 4     | 3     | 1     | 1     | 4     | 3      | 0      | 2      | 2      | 3      | 2      | 1      | 0      |
| 16525  | 5     | 3     | 1     | 3     | 4     | 5     | 1      | 1      | 1      | 0      | 1      | 1      | 1      | 1      |
| 16526  | 5     | 3     | 1     | 3     | 3     | 4     | 1      | 1      | 2      | 0      | 1      | 1      | 1      | 1      |
| 16530  | 5     | 1     | 1     | 1     | 4     | 4     | 0      | 0      | 1      | 0      | 0      | 1      | 1      | 1      |
| 16532  | 5     | 2     | 1     | 1     | 4     | 5     | 0      | 0      | 0      | 0      | 1      | 0      | 0      | 1      |
| 16536  | 5     | 1     | 1     | 1     | 4     | 5     | 0      | 0      | 0      | 0      | 0      | 0      | 0      | 0      |
| 16537  | 3     | 3     | 3     | 4     | 3     | 3     | 1      | 1      | 2      | 1      | 1      | 1      | 2      | 2      |
| 16541  | 2     | 3     | 3     | 3     | 4     | 4     | 1      | 1      | 1      | 1      | 1      | 1      | 1      | 1      |

| respid | Q52_2 | Q53_1 | Q54_1 | Q54_2 | Q54_3 | Q55_1 | Q56a_1 | Q56b_1 | Q56c_1 | Q56d_1 | Q56e_1 | Q56f_1 | Q56g_1 | Q56h_1 |
|--------|-------|-------|-------|-------|-------|-------|--------|--------|--------|--------|--------|--------|--------|--------|
| 16543  | 5     | 1     | 0     | 0     | 5     | 5     | 3      | 0      | 0      | 0      | 0      | 0      | 0      | 0      |
| 16544  | 4     | 2     | 1     | 1     | 4     | 4     | 1      | 0      | 2      | 0      | 1      | 0      | 1      | 1      |
| 16545  | 4     | 2     | 3     | 3     | 4     | 5     | 1      | 1      | 1      | 1      | 1      | 1      | 1      | 1      |
| 16546  | 4     | 2     | 4     | 4     | 4     | 4     | 2      | 2      | 1      | 1      | 2      | 2      | 2      | 1      |
| 16548  | 4     | 2     | 1     | 3     | 4     | 5     | 1      | 1      | 1      | 1      | 1      | 1      | 1      | 1      |
| 16552  | 4     | 2     | 1     | 4     | 1     | 1     | 2      | 0      | 1      | 0      | 2      | 1      | 1      | 1      |
| 16559  | 2     | 3     | 1     | 4     | 4     | 4     | 0      | 0      | 0      | 0      | 1      | 1      | 2      | 2      |
| 16564  | 2     | 3     | 4     | 4     | 1     | 3     | 1      | 1      | 1      | 2      | 2      | 2      | 1      | 2      |
| 16565  | 1     | 5     | 3     | 3     | 3     | 5     | 3      | 3      | 3      | 3      | 3      | 3      | 2      | 3      |
| 16567  | 3     | 2     | 3     | 3     | 3     | 3     | 1      | 0      | 2      | 0      | 1      | 1      | 1      | 1      |
| 16571  | 5     | 1     | 5     | 5     | 5     | 5     | 0      | 3      | 0      | 3      | 0      | 3      | 3      | 0      |
| 16572  | 3     | 2     | 3     | 3     | 3     | 3     | 1      | 0      | 2      | 2      | 2      | 2      | 2      | 2      |
| 16579  | 4     | 2     | 1     | 1     | 4     | 4     | 1      | 0      | 2      | 2      | 1      | 1      | 1      | 1      |
| 16588  | 2     | 4     | 4     | 5     | 1     | 2     | 2      | 1      | 3      | 2      | 3      | 2      | 2      | 2      |
| 16599  | 4     | 2     | 4     | 4     | 0     | 3     | 1      | 2      | 0      | 3      | 2      | 3      | 2      | 2      |
| 16605  | 4     | 2     | 1     | 1     | 1     | 4     | 1      | 1      | 1      | 1      | 1      | 1      | 1      | 1      |
| 16622  | 3     | 3     | 3     | 3     | 3     | 4     | 1      | 1      | 1      | 2      | 1      | 2      | 1      | 1      |
| 16635  | 3     | 3     | 3     | 3     | 3     | 3     | 1      | 2      | 1      | 1      | 1      | 1      | 1      | 1      |
| 16638  | 4     | 2     | 1     | 3     | 4     | 3     | 1      | 2      | 0      | 0      | 1      | 1      | 1      | 1      |
| 16652  | 5     | 1     | 1     | 1     | 1     | 5     | 1      | 1      | 1      | 1      | 1      | 1      | 2      | 1      |
| 16656  | 3     | 2     | 4     | 4     | 3     | 4     | 1      | 2      | 2      | 2      | 2      | 1      | 2      | 1      |
| 16671  | 5     | 1     | 1     | 1     | 1     | 5     | 0      | 0      | 0      | 0      | 0      | 0      | 0      | 0      |
| 16676  | 1     | 2     | 3     | 3     | 0     | 3     | 0      | 0      | 3      | 3      | 3      | 3      | 2      | 1      |
| 16678  | 2     | 3     | 1     | 1     | 1     | 3     | 1      | 1      | 1      | 1      | 1      | 1      | 1      | 1      |
| 16702  | 4     | 2     | 3     | 3     | 4     | 4     | 1      | 1      | 1      | 2      | 1      | 2      | 2      | 1      |
| 16705  | 5     | 2     | 1     | 3     | 3     | 5     | 1      | 1      | 1      | 2      | 1      | 2      | 1      | 1      |
| 16707  | 3     | 3     | 3     | 3     | 3     | 4     | 1      | 2      | 2      | 1      | 2      | 2      | 1      | 2      |
| 16711  | 3     | 4     | 3     | 3     | 4     | 3     | 2      | 1      | 1      | 1      | 2      | 1      | 1      | 1      |
| 16712  | 4     | 2     | 3     | 4     | 3     | 4     | 1      | 1      | 0      | 1      | 1      | 2      | 2      | 0      |
| 16716  | 4     | 2     | 1     | 1     | 4     | 4     | 0      | 2      | 1      | 1      | 1      | 1      | 1      | 1      |
| 16724  | 5     | 1     | 4     | 3     | 4     | 4     | 1      | 1      | 1      | 0      | 1      | 1      | 1      | 1      |
| 16727  | 4     | 2     | 3     | 3     | 3     | 3     | 1      | 2      | 1      | 2      | 1      | 1      | 1      | 1      |

| respid | Q52_2 | Q53_1 | Q54_1 | Q54_2 | Q54_3 | Q55_1 | Q56a_1 | Q56b_1 | Q56c_1 | Q56d_1 | Q56e_1 | Q56f_1 | Q56g_1 | Q56h_1 |   |
|--------|-------|-------|-------|-------|-------|-------|--------|--------|--------|--------|--------|--------|--------|--------|---|
| 16734  | 4     | 2     | 3     | 3     | 1     | 2     | 1      | 2      | 2      | 2      | 2      | 2      | 2      | 1      | 2 |
| 16740  | 4     | 2     | 3     | 3     | 4     | 4     | 1      | 0      | 2      | 0      | 1      | 1      | 1      | 1      | 1 |
| 16748  | 4     | 2     | 4     | 4     | 3     | 3     | 1      | 2      | 0      | 1      | 2      | 2      | 2      | 2      | 1 |
| 16759  | 5     | 1     | 0     | 0     | 5     | 5     | 0      | 0      | 0      | 0      | 0      | 0      | 0      | 0      | 0 |
| 16761  | 5     | 1     | 0     | 0     | 5     | 5     | 0      | 0      | 0      | 0      | 0      | 0      | 0      | 0      | 0 |
| 16763  | 4     | 1     | 4     | 1     | 4     | 5     | 1      | 1      | 0      | 1      | 1      | 1      | 1      | 1      | 1 |
| 16764  | 3     | 3     | 1     | 3     | 3     | 3     | 1      | 1      | 1      | 1      | 1      | 1      | 1      | 1      | 1 |
| 16766  | 4     | 1     | 1     | 1     | 4     | 5     | 1      | 1      | 2      | 2      | 1      | 0      | 1      | 1      | 1 |
| 16767  | 5     | 2     | 1     | 4     | 3     | 3     | 1      | 0      | 2      | 2      | 1      | 1      | 1      | 1      | 0 |
| 16776  | 4     | 1     | 1     | 1     | 4     | 5     | 0      | 1      | 0      | 1      | 1      | 1      | 1      | 1      | 1 |
| 16781  | 5     | 1     | 0     | 1     | 5     | 4     | 0      | 1      | 0      | 2      | 1      | 1      | 1      | 1      | 1 |
| 16793  | 3     | 2     | 3     | 3     | 4     | 4     | 0      | 0      | 0      | 0      | 0      | 1      | 1      | 1      | 1 |
| 16796  | 2     | 4     | 5     | 5     | 1     | 2     | 2      | 1      | 3      | 1      | 2      | 1      | 3      | 3      | 3 |
| 16810  | 5     | 2     | 1     | 1     | 4     | 5     | 1      | 1      | 0      | 0      | 1      | 1      | 1      | 1      | 1 |
| 16811  | 4     | 2     | 1     | 3     | 4     | 5     | 1      | 1      | 0      | 1      | 1      | 1      | 1      | 1      | 1 |
| 16813  | 5     | 1     | 0     | 0     | 0     | 5     | 1      | 0      | 0      | 0      | 1      | 2      | 0      | 0      | 0 |
| 16814  | 5     | 2     | 1     | 1     | 4     | 5     | 1      | 3      | 2      | 1      | 1      | 2      | 2      | 2      | 1 |
| 16831  | 4     | 3     | 1     | 4     | 4     | 4     | 1      | 1      | 1      | 1      | 2      | 1      | 1      | 1      | 2 |
| 16833  | 4     | 2     | 1     | 3     | 4     | 5     | 1      | 1      | 2      | 2      | 2      | 1      | 1      | 1      | 1 |
| 16839  | 4     | 1     | 1     | 1     | 5     | 5     | 1      | 1      | 0      | 1      | 1      | 0      | 1      | 1      | 0 |
| 16843  | 3     | 1     | 4     | 3     | 3     | 5     | 1      | 1      | 2      | 1      | 2      | 1      | 1      | 1      | 1 |
| 16860  | 4     | 2     | 0     | 0     | 4     | 4     | 2      | 2      | 1      | 1      | 1      | 1      | 1      | 1      | 3 |
| 16871  | 5     | 1     | 0     | 0     | 0     | 1     | 0      | 0      | 0      | 3      | 1      | 1      | 3      | 3      | 3 |
| 16881  | 3     | 2     | 1     | 1     | 4     | 4     | 1      | 1      | 1      | 0      | 1      | 1      | 1      | 1      | 1 |
| 16884  | 4     | 2     | 3     | 3     | 1     | 4     | 1      | 1      | 0      | 1      | 1      | 2      | 2      | 2      | 1 |
| 16891  | 5     | 1     | 1     | 1     | 5     | 5     | 0      | 0      | 0      | 0      | 0      | 1      | 0      | 0      | 0 |
| 16909  | 5     | 1     | 1     | 1     | 4     | 5     | 1      | 1      | 1      | 0      | 1      | 1      | 1      | 1      | 1 |
| 16911  | 5     | 5     | 0     | 0     | 0     | 5     | 3      | 3      | 0      | 0      | 0      | 3      | 0      | 0      | 0 |
| 16922  | 3     | 3     | 3     | 3     | 3     | 3     | 2      | 2      | 1      | 1      | 1      | 1      | 2      | 1      | 1 |
| 16935  | 2     | 3     | 3     | 3     | 1     | 3     | 2      | 1      | 1      | 2      | 1      | 1      | 1      | 1      | 2 |
| 16942  | 3     | 3     | 3     | 3     | 3     | 3     | 1      | 1      | 1      | 1      | 1      | 1      | 1      | 1      | 1 |
| 16950  | 3     | 2     | 1     | 3     | 3     | 4     | 1      | 0      | 2      | 1      | 1      | 1      | 1      | 1      | 1 |

| respid | Q52_2 | Q53_1 | Q54_1 | Q54_2 | Q54_3 | Q55_1 | Q56a_1 | Q56b_1 | Q56c_1 | Q56d_1 | Q56e_1 | Q56f_1 | Q56g_1 | Q56h_1 |
|--------|-------|-------|-------|-------|-------|-------|--------|--------|--------|--------|--------|--------|--------|--------|
| 16952  | 3     | 4     | 1     | 3     | 3     | 4     | 1      | 2      | 2      | 1      | 2      | 3      | 1      | 2      |
| 16963  | 4     | 1     | 1     | 1     | 4     | 4     | 0      | 0      | 0      | 0      | 0      | 1      | 1      | 0      |
| 16967  | 3     | 3     | 3     | 3     | 3     | 3     | 1      | 1      | 1      | 1      | 1      | 1      | 2      | 1      |
| 16970  | 1     | 3     | 4     | 5     | 0     | 1     | 3      | 2      | 3      | 1      | 3      | 3      | 3      | 3      |
| 16976  | 4     | 2     | 1     | 3     | 4     | 4     | 1      | 1      | 1      | 1      | 1      | 1      | 1      | 1      |
| 16982  | 5     | 1     | 1     | 1     | 5     | 5     | 0      | 0      | 0      | 0      | 1      | 0      | 1      | 1      |
| 16995  | 5     | 1     | 1     | 1     | 5     | 5     | 0      | 1      | 0      | 0      | 1      | 0      | 0      | 0      |
| 17004  | 4     | 1     | 4     | 4     | 1     | 5     | 1      | 1      | 1      | 2      | 1      | 2      | 2      | 2      |
| 17006  | 5     | 2     | 1     | 1     | 4     | 5     | 1      | 1      | 0      | 0      | 0      | 1      | 0      | 1      |
| 17009  | 5     | 2     | 1     | 0     | 5     | 5     | 2      | 0      | 0      | 0      | 1      | 0      | 0      | 0      |
| 17021  | 5     | 1     | 0     | 0     | 5     | 5     | 0      | 0      | 0      | 0      | 0      | 0      | 0      | 0      |
| 17040  | 3     | 2     | 1     | 1     | 3     | 5     | 1      | 0      | 1      | 1      | 1      | 1      | 0      | 1      |
| 17041  | 4     | 2     | 1     | 1     | 1     | 4     | 1      | 1      | 1      | 1      | 1      | 1      | 1      | 1      |
| 17044  | 4     | 2     | 3     | 3     | 4     | 4     | 1      | 1      | 1      | 2      | 1      | 2      | 2      | 1      |
| 17046  | 3     | 2     | 3     | 3     | 3     | 3     | 1      | 1      | 1      | 1      | 1      | 1      | 2      | 1      |
| 17052  | 4     | 1     | 1     | 3     | 4     | 4     | 1      | 1      | 0      | 1      | 1      | 1      | 2      | 1      |
| 17055  | 3     | 3     | 3     | 3     | 3     | 3     | 1      | 2      | 2      | 1      | 1      | 1      | 2      | 1      |
| 17108  | 1     | 2     | 3     | 3     | 0     | 4     | 0      | 1      | 0      | 0      | 0      | 0      | 0      | 0      |
| 17109  | 4     | 2     | 3     | 3     | 3     | 4     | 1      | 2      | 1      | 0      | 1      | 1      | 1      | 1      |
| 17113  | 5     | 1     | 3     | 3     | 4     | 4     | 0      | 0      | 0      | 0      | 0      | 0      | 0      | 0      |
| 17115  | 3     | 2     | 4     | 4     | 1     | 5     | 2      | 0      | 3      | 2      | 1      | 1      | 2      | 1      |
| 17132  | 4     | 2     | 3     | 4     | 3     | 4     | 1      | 2      | 2      | 2      | 2      | 1      | 1      | 1      |
| 17135  | 4     | 1     | 1     | 1     | 4     | 4     | 0      | 1      | 1      | 1      | 0      | 1      | 1      | 0      |
| 17138  | 4     | 3     | 4     | 4     | 4     | 4     | 1      | 1      | 2      | 1      | 2      | 1      | 2      | 1      |
| 17141  | 5     | 1     | 1     | 1     | 5     | 5     | 0      | 0      | 0      | 1      | 1      | 1      | 0      | 1      |
| 17143  | 4     | 2     | 1     | 1     | 4     | 5     | 1      | 0      | 0      | 0      | 1      | 2      | 0      | 1      |
| 17148  | 1     | 1     | 0     | 0     | 0     | 2     | 0      | 0      | 0      | 0      | 0      | 0      | 0      | 0      |
| 17151  | 5     | 2     | 1     | 3     | 4     | 5     | 1      | 1      | 0      | 0      | 1      | 1      | 2      | 0      |
| 17153  | 5     | 1     | 1     | 3     | 4     | 5     | 1      | 0      | 0      | 0      | 1      | 1      | 1      | 0      |
| 17154  | 5     | 1     | 4     | 4     | 5     | 5     | 1      | 0      | 1      | 2      | 1      | 1      | 2      | 2      |
| 17157  | 5     | 1     | 3     | 4     | 4     | 5     | 1      | 1      | 0      | 2      | 1      | 2      | 2      | 0      |
| 17160  | 5     | 1     | 1     | 1     | 4     | 5     | 0      | 0      | 0      | 0      | 0      | 0      | 0      | 0      |



| respid | Q52_2 | Q53_1 | Q54_1 | Q54_2 | Q54_3 | Q55_1 | Q56a_1 | Q56b_1 | Q56c_1 | Q56d_1 | Q56e_1 | Q56f_1 | Q56g_1 | Q56h_1 |
|--------|-------|-------|-------|-------|-------|-------|--------|--------|--------|--------|--------|--------|--------|--------|
| 17167  | 4     | 3     | 1     | 4     | 4     | 3     | 1      | 1      | 1      | 2      | 1      | 2      | 2      | 2      |
| 17169  | 4     | 1     | 3     | 3     | 4     | 4     | 2      | 1      | 1      | 1      | 1      | 1      | 1      | 2      |
| 17174  | 3     | 4     | 4     | 4     | 5     | 4     | 2      | 2      | 2      | 2      | 2      | 2      | 1      | 2      |
| 17179  | 5     | 1     | 1     | 1     | 4     | 5     | 0      | 0      | 0      | 0      | 0      | 1      | 0      | 0      |
| 17180  | 4     | 1     | 1     | 1     | 4     | 5     | 1      | 1      | 1      | 0      | 1      | 1      | 1      | 1      |
| 17182  | 5     | 1     | 0     | 1     | 4     | 5     | 0      | 0      | 0      | 0      | 0      | 0      | 0      | 0      |
| 17184  | 2     | 2     | 4     | 3     | 3     | 3     | 2      | 1      | 1      | 2      | 2      | 2      | 2      | 2      |
| 17186  | 5     | 1     | 0     | 0     | 5     | 5     | 0      | 0      | 0      | 0      | 0      | 0      | 0      | 1      |
| 17187  | 4     | 2     | 1     | 1     | 4     | 5     | 0      | 1      | 0      | 0      | 0      | 0      | 1      | 0      |
| 17192  | 5     | 1     | 3     | 3     | 4     | 3     | 1      | 1      | 0      | 0      | 2      | 2      | 1      | 2      |
| 17197  | 1     | 1     | 3     | 3     | 3     | 5     | 1      | 2      | 2      | 2      | 2      | 1      | 1      | 1      |
| 17217  | 4     | 1     | 1     | 1     | 4     | 4     | 1      | 0      | 1      | 0      | 1      | 0      | 0      | 0      |
| 17226  | 4     | 1     | 3     | 3     | 5     | 5     | 0      | 1      | 0      | 2      | 1      | 1      | 1      | 2      |
| 17228  | 5     | 1     | 1     | 1     | 3     | 5     | 1      | 0      | 1      | 0      | 1      | 1      | 1      | 1      |
| 17245  | 5     | 1     | 0     | 1     | 5     | 5     | 0      | 1      | 0      | 1      | 0      | 2      | 1      | 1      |
| 17247  | 5     | 1     | 1     | 1     | 1     | 5     | 0      | 1      | 0      | 0      | 0      | 0      | 0      | 0      |
| 17258  | 4     | 1     | 1     | 1     | 4     | 5     | 0      | 0      | 0      | 0      | 0      | 0      | 1      | 0      |
| 17259  | 3     | 3     | 3     | 4     | 3     | 3     | 1      | 1      | 1      | 1      | 1      | 1      | 1      | 1      |
| 17262  | 5     | 1     | 1     | 1     | 5     | 5     | 0      | 1      | 0      | 1      | 1      | 0      | 1      | 0      |
| 17265  | 5     | 1     | 4     | 4     | 3     | 5     | 3      | 1      | 0      | 1      | 2      | 1      | 1      | 0      |
| 17281  | 4     | 2     | 1     | 0     | 4     | 4     | 0      | 0      | 1      | 0      | 1      | 0      | 1      | 0      |
| 17282  | 3     | 3     | 3     | 4     | 4     | 4     | 1      | 1      | 2      | 1      | 1      | 1      | 1      | 1      |
| 17293  | 5     | 1     | 1     | 3     | 5     | 5     | 1      | 1      | 0      | 1      | 1      | 1      | 1      | 1      |
| 17306  | 3     | 3     | 3     | 4     | 3     | 4     | 2      | 1      | 1      | 1      | 2      | 2      | 2      | 1      |
| 17312  | 3     | 3     | 4     | 4     | 4     | 4     | 1      | 1      | 2      | 1      | 2      | 2      | 2      | 2      |
| 17318  | 3     | 2     | 3     | 3     | 3     | 3     | 1      | 0      | 1      | 0      | 1      | 1      | 1      | 1      |
| 17328  | 4     | 2     | 3     | 3     | 3     | 4     | 1      | 1      | 1      | 1      | 2      | 1      | 2      | 1      |
| 17343  | 4     | 1     | 1     | 1     | 4     | 4     | 1      | 2      | 1      | 1      | 1      | 1      | 1      | 1      |
| 17344  | 3     | 3     | 3     | 1     | 3     | 3     | 2      | 1      | 2      | 2      | 2      | 2      | 2      | 2      |
| 17348  | 4     | 2     | 3     | 3     | 3     | 4     | 1      | 1      | 1      | 2      | 1      | 1      | 2      | 1      |
| 17352  | 5     | 2     | 3     | 3     | 4     | 3     | 0      | 0      | 0      | 0      | 1      | 1      | 1      | 2      |
| 17355  | 3     | 2     | 3     | 1     | 4     | 4     | 1      | 2      | 1      | 2      | 1      | 1      | 1      | 0      |

| respid | Q52_2 | Q53_1 | Q54_1 | Q54_2 | Q54_3 | Q55_1 | Q56a_1 | Q56b_1 | Q56c_1 | Q56d_1 | Q56e_1 | Q56f_1 | Q56g_1 | Q56h_1 |
|--------|-------|-------|-------|-------|-------|-------|--------|--------|--------|--------|--------|--------|--------|--------|
| 17356  | 4     | 2     | 3     | 3     | 4     | 4     | 1      | 1      | 1      | 1      | 1      | 1      | 1      | 1      |
| 17359  | 5     | 1     | 3     | 1     | 4     | 5     | 1      | 0      | 0      | 0      | 1      | 0      | 0      | 1      |
| 17373  | 3     | 3     | 3     | 4     | 4     | 3     | 1      | 1      | 1      | 2      | 1      | 1      | 2      | 1      |
| 17381  | 4     | 1     | 1     | 1     | 4     | 4     | 0      | 0      | 1      | 2      | 1      | 1      | 1      | 0      |
| 17388  | 4     | 2     | 1     | 1     | 4     | 5     | 1      | 0      | 1      | 1      | 1      | 1      | 1      | 1      |
| 17394  | 4     | 2     | 1     | 4     | 4     | 4     | 1      | 1      | 1      | 2      | 1      | 1      | 0      | 1      |
| 17401  | 4     | 1     | 1     | 1     | 5     | 5     | 0      | 0      | 0      | 0      | 0      | 1      | 1      | 0      |
| 17403  | 5     | 1     | 0     | 0     | 5     | 5     | 0      | 0      | 0      | 0      | 0      | 0      | 0      | 0      |
| 17411  | 3     | 3     | 3     | 3     | 4     | 1     | 0      | 0      | 1      | 0      | 1      | 1      | 1      | 0      |
| 17423  | 4     | 2     | 3     | 4     | 4     | 4     | 1      | 2      | 0      | 0      | 3      | 3      | 2      | 2      |
| 17427  | 5     | 1     | 1     | 1     | 4     | 5     | 0      | 0      | 0      | 1      | 0      | 0      | 1      | 0      |
| 17433  | 3     | 4     | 3     | 3     | 3     | 4     | 1      | 1      | 2      | 1      | 2      | 2      | 1      | 2      |
| 17441  | 4     | 1     | 1     | 1     | 3     | 3     | 1      | 0      | 0      | 1      | 0      | 0      | 0      | 1      |
| 17442  | 5     | 3     | 0     | 0     | 5     | 4     | 1      | 0      | 0      | 0      | 0      | 0      | 0      | 0      |
| 17447  | 4     | 4     | 1     | 3     | 4     | 4     | 0      | 1      | 0      | 0      | 0      | 0      | 0      | 1      |
| 17458  | 4     | 2     | 1     | 1     | 4     | 4     | 1      | 0      | 0      | 0      | 1      | 0      | 1      | 1      |
| 17474  | 5     | 2     | 1     | 1     | 4     | 4     | 1      | 1      | 1      | 0      | 1      | 1      | 1      | 1      |
| 17475  | 2     | 4     | 1     | 1     | 1     | 3     | 2      | 2      | 1      | 1      | 2      | 1      | 1      | 1      |
| 17476  | 4     | 2     | 3     | 3     | 4     | 4     | 1      | 2      | 2      | 1      | 1      | 1      | 2      | 1      |
| 17480  | 5     | 1     | 1     | 1     | 4     | 5     | 1      | 1      | 1      | 2      | 1      | 1      | 1      | 0      |
| 17484  | 5     | 1     | 5     | 5     | 5     | 5     | 0      | 0      | 3      | 0      | 2      | 1      | 1      | 1      |
| 17490  | 3     | 2     | 3     | 3     | 3     | 4     | 0      | 1      | 0      | 0      | 1      | 1      | 1      | 1      |
| 17491  | 5     | 1     | 3     | 3     | 4     | 2     | 1      | 2      | 1      | 1      | 1      | 1      | 2      | 1      |
| 17500  | 4     | 2     | 3     | 4     | 3     | 4     | 1      | 1      | 0      | 0      | 1      | 1      | 2      | 1      |
| 17507  | 5     | 1     | 0     | 1     | 5     | 5     | 0      | 0      | 0      | 3      | 0      | 0      | 0      | 0      |
| 17517  | 3     | 1     | 3     | 3     | 3     | 5     | 1      | 2      | 0      | 0      | 1      | 1      | 1      | 1      |
| 17520  | 3     | 2     | 3     | 3     | 3     | 4     | 1      | 2      | 1      | 1      | 1      | 2      | 1      | 1      |
| 17521  | 4     | 2     | 1     | 1     | 4     | 4     | 1      | 0      | 2      | 0      | 1      | 0      | 0      | 1      |
| 17531  | 3     | 1     | 4     | 4     | 4     | 4     | 1      | 2      | 1      | 2      | 1      | 1      | 1      | 0      |
| 17540  | 4     | 3     | 3     | 3     | 3     | 3     | 1      | 1      | 1      | 1      | 2      | 1      | 1      | 1      |
| 17550  | 5     | 1     | 1     | 1     | 4     | 5     | 0      | 0      | 0      | 0      | 0      | 0      | 1      | 0      |
| 17551  | 5     | 2     | 1     | 3     | 5     | 5     | 1      | 1      | 1      | 0      | 1      | 1      | 1      | 0      |

| respid | Q52_2 | Q53_1 | Q54_1 | Q54_2 | Q54_3 | Q55_1 | Q56a_1 | Q56b_1 | Q56c_1 | Q56d_1 | Q56e_1 | Q56f_1 | Q56g_1 | Q56h_1 |
|--------|-------|-------|-------|-------|-------|-------|--------|--------|--------|--------|--------|--------|--------|--------|
| 17555  | 4     | 3     | 3     | 3     | 4     | 3     | 1      | 1      | 1      | 2      | 1      | 1      | 2      | 1      |
| 17556  | 5     | 1     | 0     | 0     | 0     | 5     | 1      | 0      | 0      | 0      | 0      | 1      | 0      | 1      |
| 17574  | 5     | 1     | 1     | 1     | 5     | 5     | 0      | 1      | 0      | 1      | 1      | 1      | 1      | 1      |
| 17575  | 5     | 1     | 1     | 1     | 4     | 5     | 0      | 0      | 0      | 0      | 1      | 0      | 0      | 1      |
| 17582  | 5     | 1     | 0     | 1     | 4     | 4     | 1      | 0      | 2      | 1      | 2      | 1      | 1      | 1      |
| 17587  | 4     | 2     | 1     | 1     | 4     | 3     | 1      | 1      | 0      | 0      | 1      | 1      | 0      | 0      |
| 17601  | 5     | 1     | 1     | 3     | 4     | 5     | 1      | 1      | 0      | 1      | 1      | 1      | 1      | 1      |
| 17607  | 4     | 2     | 1     | 1     | 4     | 5     | 1      | 0      | 0      | 0      | 0      | 1      | 1      | 0      |
| 17609  | 5     | 2     | 1     | 3     | 3     | 4     | 1      | 2      | 1      | 2      | 2      | 2      | 2      | 1      |
| 17611  | 4     | 1     | 1     | 3     | 3     | 4     | 1      | 0      | 0      | 0      | 0      | 0      | 1      | 0      |
| 17613  | 3     | 2     | 1     | 3     | 3     | 4     | 1      | 0      | 0      | 0      | 0      | 1      | 1      | 0      |
| 17615  | 4     | 1     | 3     | 3     | 4     | 5     | 0      | 1      | 1      | 1      | 1      | 1      | 1      | 1      |
| 17620  | 5     | 2     | 1     | 3     | 4     | 4     | 1      | 0      | 1      | 0      | 1      | 1      | 1      | 1      |
| 17624  | 3     | 2     | 4     | 5     | 4     | 4     | 1      | 2      | 2      | 2      | 1      | 3      | 2      | 1      |
| 17635  | 3     | 4     | 1     | 3     | 1     | 4     | 2      | 2      | 1      | 2      | 2      | 1      | 2      | 1      |
| 17643  | 1     | 3     | 4     | 4     | 0     | 2     | 2      | 1      | 2      | 2      | 3      | 1      | 2      | 2      |
| 17645  | 4     | 2     | 1     | 1     | 3     | 4     | 1      | 0      | 1      | 0      | 1      | 1      | 1      | 1      |
| 17646  | 4     | 2     | 1     | 3     | 4     | 5     | 0      | 1      | 1      | 2      | 1      | 2      | 2      | 1      |
| 17649  | 4     | 1     | 4     | 5     | 4     | 4     | 0      | 1      | 2      | 3      | 2      | 1      | 2      | 1      |
| 17658  | 5     | 2     | 0     | 0     | 5     | 5     | 0      | 0      | 0      | 0      | 1      | 0      | 0      | 0      |
| 17666  | 5     | 2     | 1     | 1     | 4     | 5     | 0      | 0      | 0      | 0      | 1      | 0      | 1      | 1      |
| 17670  | 5     | 1     | 4     | 3     | 4     | 4     | 1      | 3      | 0      | 2      | 1      | 1      | 3      | 1      |
| 17678  | 4     | 1     | 1     | 1     | 4     | 3     | 1      | 1      | 0      | 1      | 1      | 1      | 1      | 1      |
| 17679  | 4     | 2     | 3     | 4     | 3     | 5     | 0      | 1      | 1      | 2      | 1      | 1      | 1      | 1      |
| 17695  | 5     | 1     | 1     | 3     | 5     | 5     | 0      | 0      | 0      | 1      | 1      | 1      | 0      | 0      |
| 17697  | 4     | 4     | 4     | 4     | 3     | 4     | 2      | 1      | 2      | 2      | 3      | 3      | 2      | 2      |
| 17698  | 4     | 2     | 4     | 3     | 5     | 5     | 1      | 0      | 0      | 0      | 1      | 2      | 0      | 1      |
| 17723  | 2     | 4     | 1     | 1     | 0     | 4     | 1      | 2      | 2      | 1      | 2      | 2      | 1      | 1      |
| 17727  | 5     | 1     | 0     | 0     | 5     | 5     | 0      | 0      | 0      | 0      | 0      | 0      | 0      | 0      |
| 17734  | 5     | 1     | 1     | 1     | 5     | 5     | 0      | 0      | 1      | 0      | 1      | 0      | 0      | 0      |
| 17737  | 4     | 1     | 1     | 3     | 4     | 5     | 0      | 0      | 0      | 0      | 1      | 1      | 0      | 0      |
| 17748  | 5     | 1     | 4     | 4     | 3     | 5     | 1      | 1      | 0      | 1      | 2      | 2      | 2      | 1      |

| respid | Q52_2 | Q53_1 | Q54_1 | Q54_2 | Q54_3 | Q55_1 | Q56a_1 | Q56b_1 | Q56c_1 | Q56d_1 | Q56e_1 | Q56f_1 | Q56g_1 | Q56h_1 |
|--------|-------|-------|-------|-------|-------|-------|--------|--------|--------|--------|--------|--------|--------|--------|
| 17749  | 5     | 1     | 3     | 3     | 3     | 5     | 1      | 1      | 2      | 1      | 1      | 2      | 2      | 1      |
| 17754  | 3     | 2     | 3     | 1     | 4     | 4     | 2      | 1      | 1      | 2      | 2      | 1      | 2      | 2      |
| 17766  | 4     | 4     | 5     | 5     | 1     | 2     | 2      | 3      | 2      | 2      | 2      | 2      | 2      | 1      |
| 17777  | 4     | 2     | 1     | 0     | 4     | 5     | 0      | 0      | 0      | 0      | 1      | 0      | 0      | 0      |
| 17780  | 5     | 1     | 1     | 1     | 1     | 5     | 0      | 1      | 0      | 2      | 1      | 0      | 1      | 1      |
| 17788  | 5     | 2     | 1     | 1     | 5     | 5     | 1      | 0      | 0      | 0      | 0      | 0      | 0      | 1      |
| 17801  | 5     | 1     | 3     | 3     | 4     | 5     | 1      | 0      | 1      | 1      | 1      | 1      | 1      | 1      |
| 17803  | 4     | 2     | 1     | 3     | 3     | 3     | 1      | 2      | 1      | 0      | 1      | 0      | 1      | 1      |
| 17807  | 5     | 1     | 3     | 0     | 5     | 5     | 0      | 0      | 0      | 1      | 0      | 1      | 0      | 1      |
| 17808  | 5     | 1     | 1     | 1     | 4     | 5     | 0      | 1      | 0      | 0      | 0      | 1      | 1      | 0      |
| 17809  | 3     | 3     | 3     | 3     | 1     | 3     | 1      | 1      | 0      | 1      | 1      | 2      | 1      | 1      |
| 17821  | 4     | 3     | 1     | 1     | 4     | 4     | 0      | 0      | 1      | 0      | 1      | 0      | 0      | 1      |
| 17827  | 3     | 3     | 3     | 3     | 3     | 3     | 1      | 1      | 1      | 1      | 1      | 1      | 2      | 2      |
| 17834  | 3     | 3     | 1     | 3     | 3     | 4     | 2      | 2      | 1      | 1      | 2      | 2      | 1      | 1      |
| 17838  | 5     | 2     | 4     | 4     | 4     | 4     | 1      | 0      | 0      | 0      | 1      | 2      | 2      | 1      |
| 17842  | 5     | 1     | 1     | 1     | 4     | 5     | 0      | 0      | 0      | 0      | 0      | 1      | 0      | 1      |
| 17862  | 4     | 2     | 3     | 3     | 3     | 5     | 1      | 1      | 0      | 1      | 1      | 1      | 0      | 1      |
| 17863  | 3     | 3     | 3     | 3     | 3     | 3     | 1      | 1      | 2      | 2      | 1      | 2      | 2      | 1      |
| 17871  | 4     | 3     | 3     | 4     | 4     | 4     | 1      | 1      | 1      | 1      | 1      | 2      | 2      | 1      |
| 17872  | 5     | 1     | 1     | 1     | 4     | 5     | 0      | 0      | 0      | 0      | 0      | 2      | 1      | 1      |
| 17903  | 3     | 2     | 1     | 1     | 1     | 2     | 0      | 1      | 1      | 1      | 1      | 1      | 1      | 1      |
| 17906  | 4     | 1     | 3     | 3     | 3     | 4     | 0      | 2      | 0      | 2      | 1      | 2      | 2      | 1      |
| 17910  | 3     | 3     | 3     | 3     | 3     | 3     | 2      | 2      | 3      | 2      | 1      | 1      | 1      | 1      |
| 17922  | 5     | 1     | 1     | 1     | 5     | 5     | 1      | 1      | 0      | 1      | 1      | 1      | 1      | 1      |
| 17923  | 4     | 2     | 1     | 3     | 4     | 4     | 0      | 0      | 1      | 0      | 1      | 1      | 0      | 1      |
| 17925  | 5     | 1     | 1     | 1     | 5     | 5     | 0      | 1      | 0      | 1      | 1      | 1      | 1      | 0      |
| 17926  | 4     | 1     | 1     | 0     | 5     | 5     | 0      | 0      | 0      | 0      | 0      | 0      | 0      | 0      |
| 17937  | 5     | 2     | 0     | 1     | 5     | 5     | 0      | 0      | 0      | 0      | 0      | 0      | 0      | 0      |
| 17956  | 4     | 1     | 1     | 1     | 3     | 4     | 1      | 0      | 1      | 0      | 1      | 1      | 1      | 1      |
| 17958  | 5     | 2     | 1     | 1     | 4     | 4     | 1      | 0      | 0      | 1      | 1      | 1      | 1      | 1      |
| 17985  | 4     | 2     | 4     | 4     | 3     | 4     | 1      | 2      | 1      | 1      | 1      | 1      | 1      | 1      |
| 17989  | 5     | 2     | 1     | 1     | 4     | 5     | 0      | 1      | 0      | 0      | 1      | 1      | 1      | 1      |

| respid | Q52_2 | Q53_1 | Q54_1 | Q54_2 | Q54_3 | Q55_1 | Q56a_1 | Q56b_1 | Q56c_1 | Q56d_1 | Q56e_1 | Q56f_1 | Q56g_1 | Q56h_1 |
|--------|-------|-------|-------|-------|-------|-------|--------|--------|--------|--------|--------|--------|--------|--------|
| 17995  | 5     | 2     | 4     | 1     | 4     | 5     | 1      | 0      | 0      | 0      | 1      | 0      | 1      | 0      |
| 18000  | 4     | 2     | 1     | 4     | 3     | 3     | 1      | 1      | 3      | 2      | 2      | 2      | 2      | 1      |
| 18010  | 4     | 1     | 1     | 1     | 4     | 5     | 0      | 1      | 1      | 0      | 0      | 0      | 0      | 0      |
| 18015  | 5     | 1     | 1     | 3     | 4     | 5     | 0      | 0      | 0      | 0      | 0      | 0      | 0      | 0      |
| 18018  | 4     | 2     | 3     | 5     | 4     | 4     | 1      | 1      | 0      | 2      | 1      | 1      | 1      | 1      |
| 18031  | 3     | 2     | 3     | 3     | 3     | 3     | 1      | 1      | 1      | 1      | 1      | 1      | 1      | 1      |
| 18033  | 4     | 3     | 4     | 4     | 4     | 4     | 2      | 2      | 0      | 2      | 1      | 1      | 2      | 1      |
| 18036  | 5     | 3     | 1     | 4     | 4     | 4     | 1      | 0      | 2      | 0      | 1      | 1      | 1      | 3      |
| 18041  | 5     | 1     | 0     | 1     | 5     | 5     | 0      | 0      | 0      | 0      | 1      | 0      | 0      | 0      |
| 18068  | 5     | 1     | 1     | 1     | 5     | 5     | 0      | 1      | 0      | 0      | 0      | 1      | 0      | 0      |
| 18080  | 3     | 2     | 1     | 1     | 1     | 4     | 0      | 1      | 0      | 0      | 0      | 2      | 1      | 1      |
| 18081  | 4     | 1     | 4     | 4     | 4     | 4     | 1      | 0      | 1      | 1      | 1      | 1      | 1      | 1      |
| 18083  | 3     | 3     | 4     | 3     | 1     | 4     | 2      | 2      | 1      | 2      | 2      | 1      | 2      | 2      |
| 18113  | 5     | 2     | 3     | 1     | 4     | 5     | 1      | 1      | 0      | 1      | 1      | 1      | 1      | 1      |
| 18115  | 3     | 3     | 3     | 3     | 4     | 3     | 1      | 2      | 1      | 1      | 1      | 1      | 1      | 2      |
| 18117  | 2     | 3     | 4     | 4     | 1     | 2     | 2      | 2      | 3      | 3      | 3      | 3      | 3      | 2      |
| 18129  | 4     | 2     | 1     | 1     | 4     | 4     | 0      | 0      | 0      | 0      | 0      | 1      | 1      | 1      |
| 18132  | 4     | 2     | 3     | 3     | 4     | 5     | 1      | 1      | 0      | 1      | 1      | 1      | 1      | 0      |
| 18146  | 5     | 1     | 3     | 1     | 5     | 5     | 1      | 1      | 0      | 1      | 1      | 1      | 1      | 1      |
| 18147  | 5     | 3     | 1     | 3     | 4     | 5     | 1      | 1      | 1      | 1      | 1      | 1      | 1      | 2      |
| 18153  | 5     | 1     | 1     | 1     | 4     | 4     | 0      | 0      | 0      | 0      | 1      | 1      | 0      | 0      |
| 18154  | 4     | 1     | 3     | 3     | 3     | 4     | 2      | 0      | 0      | 1      | 1      | 1      | 1      | 1      |
| 18157  | 5     | 2     | 4     | 3     | 3     | 4     | 1      | 0      | 1      | 1      | 0      | 1      | 1      | 1      |
| 18166  | 5     | 3     | 1     | 3     | 4     | 5     | 1      | 0      | 0      | 0      | 0      | 1      | 1      | 0      |
| 18169  | 5     | 1     | 1     | 1     | 5     | 5     | 0      | 0      | 2      | 0      | 1      | 1      | 1      | 1      |
| 18171  | 4     | 2     | 1     | 3     | 4     | 3     | 1      | 1      | 0      | 1      | 2      | 1      | 1      | 2      |
| 18173  | 3     | 3     | 3     | 4     | 3     | 4     | 1      | 0      | 1      | 1      | 1      | 1      | 1      | 1      |
| 18204  | 4     | 3     | 4     | 4     | 3     | 5     | 2      | 1      | 2      | 1      | 3      | 2      | 2      | 1      |
| 18210  | 5     | 1     | 5     | 4     | 4     | 5     | 0      | 1      | 0      | 0      | 1      | 1      | 2      | 1      |
| 18212  | 1     | 5     | 0     | 0     | 0     | 2     | 3      | 0      | 0      | 0      | 0      | 0      | 0      | 1      |
| 18220  | 3     | 3     | 4     | 5     | 3     | 3     | 2      | 1      | 1      | 1      | 2      | 3      | 2      | 3      |
| 18221  | 4     | 2     | 1     | 1     | 4     | 4     | 1      | 0      | 0      | 0      | 1      | 0      | 0      | 1      |

| respid | Q52_2 | Q53_1 | Q54_1 | Q54_2 | Q54_3 | Q55_1 | Q56a_1 | Q56b_1 | Q56c_1 | Q56d_1 | Q56e_1 | Q56f_1 | Q56g_1 | Q56h_1 |
|--------|-------|-------|-------|-------|-------|-------|--------|--------|--------|--------|--------|--------|--------|--------|
| 18228  | 5     | 1     | 0     | 1     | 5     | 5     | 0      | 0      | 0      | 0      | 0      | 0      | 0      | 0      |
| 18231  | 4     | 2     | 1     | 1     | 4     | 5     | 0      | 0      | 1      | 0      | 0      | 0      | 0      | 0      |
| 18233  | 5     | 1     | 0     | 0     | 5     | 5     | 0      | 1      | 0      | 0      | 0      | 0      | 0      | 0      |
| 18235  | 2     | 3     | 3     | 1     | 3     | 4     | 1      | 0      | 1      | 1      | 1      | 1      | 2      | 1      |
| 18237  | 5     | 1     | 1     | 1     | 3     | 5     | 0      | 0      | 0      | 0      | 1      | 0      | 0      | 0      |
| 18250  | 4     | 2     | 1     | 3     | 3     | 4     | 1      | 1      | 2      | 2      | 1      | 1      | 0      | 1      |
| 18253  | 4     | 2     | 1     | 3     | 3     | 3     | 1      | 0      | 2      | 2      | 2      | 1      | 1      | 2      |
| 18264  | 4     | 3     | 1     | 1     | 4     | 4     | 0      | 1      | 0      | 1      | 1      | 1      | 0      | 0      |
| 18285  | 3     | 2     | 3     | 3     | 1     | 4     | 1      | 1      | 0      | 2      | 1      | 2      | 1      | 1      |
| 18287  | 4     | 1     | 1     | 1     | 4     | 4     | 0      | 0      | 0      | 0      | 0      | 0      | 0      | 0      |
| 18296  | 5     | 1     | 4     | 4     | 1     | 5     | 3      | 3      | 2      | 2      | 3      | 1      | 2      | 1      |
| 18299  | 3     | 1     | 0     | 0     | 0     | 2     | 1      | 0      | 1      | 1      | 1      | 0      | 0      | 1      |
| 18313  | 4     | 1     | 0     | 1     | 4     | 5     | 1      | 0      | 2      | 0      | 1      | 0      | 0      | 1      |
| 18321  | 5     | 1     | 4     | 4     | 0     | 5     | 3      | 0      | 2      | 1      | 3      | 1      | 2      | 0      |
| 18324  | 4     | 1     | 3     | 3     | 4     | 4     | 0      | 1      | 1      | 1      | 1      | 1      | 1      | 1      |
| 18329  | 5     | 2     | 1     | 3     | 4     | 4     | 1      | 0      | 2      | 0      | 1      | 1      | 0      | 0      |
| 18332  | 3     | 2     | 3     | 3     | 3     | 3     | 1      | 2      | 1      | 1      | 1      | 1      | 1      | 1      |
| 18339  | 5     | 1     | 4     | 4     | 3     | 3     | 1      | 1      | 1      | 1      | 1      | 2      | 2      | 1      |
| 18340  | 4     | 1     | 1     | 1     | 4     | 4     | 1      | 0      | 1      | 1      | 1      | 1      | 1      | 1      |
| 18348  | 4     | 1     | 3     | 3     | 3     | 5     | 1      | 0      | 0      | 0      | 1      | 1      | 1      | 1      |
| 18355  | 5     | 3     | 1     | 3     | 3     | 5     | 0      | 0      | 0      | 1      | 2      | 1      | 1      | 2      |
| 18360  | 5     | 1     | 1     | 1     | 4     | 5     | 1      | 1      | 1      | 1      | 1      | 1      | 1      | 1      |
| 18380  | 3     | 1     | 1     | 3     | 4     | 5     | 1      | 0      | 1      | 0      | 1      | 1      | 1      | 1      |
| 18403  | 5     | 2     | 3     | 4     | 3     | 4     | 0      | 1      | 0      | 1      | 0      | 1      | 1      | 1      |
| 18405  | 3     | 3     | 3     | 3     | 3     | 3     | 1      | 2      | 2      | 1      | 1      | 1      | 1      | 1      |
| 18409  | 3     | 3     | 1     | 3     | 1     | 4     | 1      | 1      | 0      | 1      | 1      | 1      | 1      | 1      |
| 18445  | 5     | 1     | 1     | 1     | 4     | 4     | 1      | 0      | 0      | 0      | 1      | 1      | 1      | 0      |
| 18458  | 5     | 1     | 0     | 0     | 5     | 5     | 0      | 0      | 0      | 0      | 0      | 0      | 0      | 0      |
| 18477  | 5     | 2     | 1     | 4     | 3     | 4     | 1      | 2      | 1      | 0      | 1      | 1      | 1      | 1      |
| 18481  | 4     | 1     | 3     | 4     | 1     | 3     | 2      | 0      | 3      | 0      | 2      | 2      | 1      | 2      |
| 18491  | 5     | 1     | 1     | 1     | 5     | 5     | 0      | 0      | 0      | 0      | 0      | 0      | 0      | 0      |
| 18492  | 5     | 2     | 0     | 1     | 5     | 5     | 0      | 0      | 0      | 0      | 0      | 0      | 0      | 0      |

| respid | Q52_2 | Q53_1 | Q54_1 | Q54_2 | Q54_3 | Q55_1 | Q56a_1 | Q56b_1 | Q56c_1 | Q56d_1 | Q56e_1 | Q56f_1 | Q56g_1 | Q56h_1 |
|--------|-------|-------|-------|-------|-------|-------|--------|--------|--------|--------|--------|--------|--------|--------|
| 18494  | 3     | 1     | 4     | 3     | 1     | 3     | 1      | 0      | 1      | 0      | 1      | 1      | 1      | 1      |
| 18495  | 5     | 4     | 1     | 1     | 5     | 5     | 0      | 1      | 0      | 1      | 0      | 1      | 1      | 1      |
| 18496  | 5     | 4     | 3     | 1     | 4     | 2     | 1      | 1      | 0      | 0      | 1      | 0      | 0      | 1      |
| 18507  | 2     | 4     | 3     | 3     | 4     | 3     | 2      | 1      | 1      | 1      | 2      | 2      | 1      | 2      |
| 18509  | 3     | 1     | 3     | 3     | 3     | 4     | 0      | 0      | 0      | 0      | 0      | 0      | 0      | 0      |
| 18510  | 3     | 3     | 3     | 3     | 3     | 3     | 1      | 1      | 1      | 1      | 1      | 1      | 2      | 1      |
| 18513  | 4     | 2     | 1     | 3     | 1     | 4     | 1      | 0      | 1      | 1      | 1      | 1      | 1      | 2      |
| 18525  | 5     | 1     | 0     | 0     | 3     | 5     | 0      | 0      | 1      | 0      | 1      | 0      | 0      | 1      |
| 18526  | 3     | 2     | 3     | 4     | 3     | 4     | 1      | 1      | 1      | 1      | 1      | 1      | 2      | 1      |
| 18527  | 4     | 2     | 1     | 3     | 4     | 4     | 0      | 2      | 0      | 2      | 0      | 1      | 0      | 2      |
| 18536  | 4     | 1     | 3     | 3     | 3     | 4     | 1      | 2      | 2      | 1      | 1      | 1      | 1      | 1      |
| 18540  | 5     | 2     | 1     | 1     | 4     | 5     | 0      | 0      | 0      | 0      | 1      | 1      | 1      | 1      |
| 18548  | 5     | 2     | 1     | 1     | 4     | 4     | 1      | 0      | 1      | 0      | 1      | 0      | 0      | 1      |
| 18550  | 5     | 1     | 5     | 5     | 5     | 5     | 0      | 0      | 0      | 0      | 0      | 0      | 0      | 0      |
| 18556  | 3     | 3     | 3     | 3     | 4     | 4     | 1      | 1      | 0      | 1      | 0      | 1      | 1      | 1      |
| 18561  | 5     | 1     | 0     | 0     | 5     | 5     | 0      | 0      | 0      | 0      | 0      | 0      | 0      | 0      |
| 18577  | 5     | 1     | 0     | 1     | 5     | 5     | 0      | 0      | 0      | 0      | 0      | 0      | 0      | 1      |
| 18580  | 5     | 2     | 1     | 1     | 4     | 5     | 1      | 1      | 0      | 0      | 2      | 1      | 1      | 1      |
| 18633  | 3     | 2     | 3     | 3     | 3     | 3     | 1      | 0      | 1      | 0      | 1      | 2      | 1      | 1      |
| 18635  | 4     | 2     | 3     | 4     | 1     | 3     | 1      | 1      | 2      | 2      | 2      | 2      | 2      | 2      |
| 18636  | 4     | 2     | 1     | 1     | 4     | 4     | 1      | 0      | 0      | 0      | 1      | 0      | 0      | 1      |
| 18645  | 4     | 1     | 1     | 3     | 4     | 5     | 1      | 0      | 1      | 0      | 1      | 0      | 1      | 0      |
| 18649  | 4     | 2     | 1     | 3     | 4     | 4     | 1      | 0      | 1      | 1      | 1      | 1      | 1      | 2      |
| 18664  | 5     | 1     | 1     | 3     | 3     | 5     | 0      | 0      | 1      | 0      | 1      | 0      | 0      | 0      |
| 18668  | 3     | 2     | 4     | 3     | 3     | 4     | 1      | 2      | 1      | 1      | 1      | 1      | 2      | 2      |
| 18682  | 4     | 1     | 1     | 1     | 4     | 4     | 0      | 0      | 0      | 0      | 0      | 0      | 0      | 0      |
| 18685  | 2     | 2     | 3     | 4     | 1     | 4     | 1      | 1      | 0      | 2      | 1      | 2      | 1      | 2      |
| 18688  | 4     | 2     | 3     | 3     | 3     | 4     | 1      | 0      | 1      | 0      | 1      | 0      | 0      | 1      |
| 18689  | 2     | 4     | 3     | 1     | 3     | 4     | 2      | 1      | 2      | 1      | 3      | 2      | 1      | 2      |
| 18693  | 5     | 5     | 5     | 5     | 5     | 5     | 3      | 3      | 3      | 2      | 3      | 3      | 3      | 2      |
| 18694  | 5     | 1     | 1     | 3     | 4     | 4     | 0      | 1      | 0      | 0      | 1      | 1      | 1      | 1      |
| 18705  | 5     | 2     | 1     | 1     | 4     | 4     | 0      | 2      | 0      | 0      | 1      | 0      | 0      | 1      |

| respid | Q52_2 | Q53_1 | Q54_1 | Q54_2 | Q54_3 | Q55_1 | Q56a_1 | Q56b_1 | Q56c_1 | Q56d_1 | Q56e_1 | Q56f_1 | Q56g_1 | Q56h_1 |
|--------|-------|-------|-------|-------|-------|-------|--------|--------|--------|--------|--------|--------|--------|--------|
| 18710  | 4     | 1     | 1     | 1     | 4     | 5     | 1      | 1      | 1      | 0      | 1      | 1      | 1      | 0      |
| 18715  | 5     | 3     | 5     | 4     | 4     | 4     | 3      | 0      | 0      | 0      | 1      | 1      | 0      | 1      |
| 18718  | 3     | 2     | 1     | 3     | 5     | 5     | 1      | 1      | 0      | 2      | 1      | 1      | 2      | 1      |
| 18727  | 4     | 2     | 3     | 4     | 4     | 4     | 1      | 2      | 1      | 2      | 2      | 1      | 2      | 2      |
| 18732  | 3     | 2     | 3     | 3     | 4     | 3     | 1      | 1      | 1      | 0      | 1      | 1      | 2      | 1      |
| 18735  | 4     | 4     | 1     | 4     | 4     | 3     | 1      | 0      | 2      | 1      | 1      | 1      | 1      | 2      |
| 18742  | 5     | 1     | 1     | 1     | 4     | 4     | 1      | 0      | 0      | 0      | 1      | 0      | 1      | 0      |
| 18745  | 4     | 1     | 1     | 1     | 4     | 4     | 1      | 1      | 2      | 1      | 1      | 1      | 1      | 1      |
| 18747  | 5     | 1     | 1     | 1     | 5     | 5     | 0      | 0      | 0      | 0      | 0      | 0      | 0      | 0      |
| 18750  | 4     | 2     | 1     | 1     | 4     | 5     | 1      | 1      | 1      | 1      | 1      | 1      | 1      | 1      |
| 18751  | 5     | 1     | 1     | 1     | 5     | 5     | 0      | 0      | 0      | 0      | 1      | 0      | 0      | 3      |
| 18753  | 4     | 1     | 0     | 1     | 5     | 4     | 0      | 0      | 0      | 0      | 0      | 0      | 0      | 1      |
| 18754  | 4     | 2     | 1     | 3     | 5     | 4     | 1      | 2      | 1      | 1      | 1      | 1      | 1      | 1      |
| 18759  | 4     | 1     | 3     | 3     | 4     | 5     | 1      | 1      | 1      | 1      | 1      | 1      | 2      | 1      |
| 18780  | 5     | 2     | 1     | 1     | 4     | 5     | 0      | 0      | 0      | 1      | 1      | 1      | 1      | 1      |
| 18782  | 5     | 2     | 1     | 1     | 3     | 5     | 3      | 2      | 1      | 2      | 2      | 1      | 2      | 1      |
| 18807  | 2     | 5     | 4     | 3     | 1     | 3     | 3      | 0      | 1      | 1      | 3      | 2      | 0      | 1      |
| 18815  | 4     | 2     | 1     | 3     | 4     | 3     | 1      | 1      | 1      | 1      | 1      | 1      | 1      | 1      |
| 18818  | 4     | 4     | 4     | 4     | 1     | 2     | 2      | 0      | 1      | 2      | 2      | 2      | 1      | 1      |
| 18820  | 3     | 3     | 5     | 5     | 1     | 2     | 1      | 3      | 2      | 2      | 2      | 3      | 3      | 2      |
| 18823  | 2     | 4     | 3     | 3     | 1     | 2     | 2      | 1      | 1      | 1      | 2      | 1      | 2      | 2      |
| 18825  | 3     | 2     | 1     | 1     | 4     | 4     | 0      | 0      | 0      | 0      | 0      | 0      | 0      | 0      |
| 18828  | 5     | 1     | 5     | 5     | 5     | 5     | 0      | 0      | 0      | 0      | 0      | 0      | 0      | 3      |
| 18832  | 3     | 2     | 4     | 4     | 3     | 3     | 2      | 1      | 2      | 2      | 2      | 2      | 2      | 0      |
| 18834  | 4     | 1     | 1     | 1     | 5     | 5     | 1      | 1      | 0      | 0      | 0      | 1      | 0      | 0      |
| 18835  | 2     | 4     | 1     | 1     | 3     | 3     | 1      | 1      | 1      | 2      | 2      | 2      | 2      | 2      |
| 18837  | 3     | 3     | 0     | 4     | 4     | 4     | 1      | 1      | 1      | 0      | 1      | 1      | 0      | 1      |
| 18842  | 4     | 2     | 1     | 3     | 4     | 4     | 1      | 0      | 0      | 1      | 1      | 1      | 1      | 1      |
| 18846  | 4     | 2     | 1     | 3     | 4     | 4     | 1      | 1      | 0      | 2      | 1      | 1      | 1      | 0      |
| 18855  | 2     | 4     | 1     | 3     | 3     | 4     | 1      | 1      | 1      | 1      | 1      | 1      | 1      | 2      |
| 18856  | 5     | 1     | 1     | 1     | 4     | 5     | 0      | 1      | 0      | 0      | 1      | 0      | 0      | 1      |
| 18887  | 5     | 2     | 0     | 1     | 1     | 5     | 0      | 0      | 0      | 0      | 0      | 0      | 0      | 0      |



| respid | Q52_2 | Q53_1 | Q54_1 | Q54_2 | Q54_3 | Q55_1 | Q56a_1 | Q56b_1 | Q56c_1 | Q56d_1 | Q56e_1 | Q56f_1 | Q56g_1 | Q56h_1 |
|--------|-------|-------|-------|-------|-------|-------|--------|--------|--------|--------|--------|--------|--------|--------|
| 18903  | 5     | 2     | 1     | 1     | 3     | 5     | 1      | 0      | 1      | 2      | 1      | 0      | 0      | 0      |
| 18906  | 5     | 2     | 1     | 3     | 4     | 4     | 1      | 2      | 1      | 0      | 1      | 0      | 1      | 0      |
| 18910  | 5     | 1     | 0     | 0     | 5     | 5     | 0      | 0      | 0      | 0      | 0      | 0      | 0      | 0      |
| 18919  | 5     | 2     | 1     | 1     | 4     | 4     | 1      | 1      | 1      | 0      | 0      | 0      | 1      | 1      |
| 18928  | 4     | 3     | 1     | 1     | 4     | 3     | 1      | 1      | 0      | 0      | 1      | 1      | 1      | 1      |
| 18931  | 4     | 3     | 1     | 3     | 4     | 3     | 1      | 1      | 0      | 1      | 1      | 1      | 1      | 0      |
| 18939  | 4     | 2     | 0     | 1     | 4     | 4     | 1      | 0      | 1      | 0      | 1      | 0      | 0      | 1      |
| 18946  | 5     | 1     | 5     | 5     | 4     | 4     | 1      | 0      | 1      | 0      | 0      | 0      | 0      | 0      |
| 18952  | 4     | 2     | 1     | 3     | 4     | 4     | 1      | 2      | 1      | 0      | 1      | 1      | 1      | 1      |
| 18954  | 5     | 1     | 1     | 1     | 4     | 4     | 0      | 0      | 1      | 0      | 1      | 0      | 0      | 1      |
| 18982  | 5     | 1     | 0     | 0     | 5     | 5     | 0      | 0      | 0      | 0      | 0      | 0      | 0      | 0      |
| 18986  | 3     | 3     | 3     | 3     | 3     | 4     | 1      | 1      | 1      | 1      | 1      | 1      | 1      | 1      |
| 18989  | 4     | 2     | 1     | 1     | 4     | 4     | 0      | 0      | 0      | 0      | 0      | 0      | 0      | 0      |
| 18990  | 5     | 2     | 1     | 1     | 4     | 5     | 0      | 0      | 0      | 0      | 0      | 0      | 0      | 0      |
| 18996  | 5     | 1     | 1     | 1     | 4     | 5     | 1      | 0      | 1      | 0      | 1      | 0      | 1      | 1      |
| 18998  | 5     | 1     | 1     | 3     | 3     | 5     | 0      | 0      | 0      | 0      | 0      | 1      | 0      | 0      |
| 19009  | 2     | 4     | 1     | 3     | 3     | 4     | 0      | 1      | 1      | 1      | 3      | 2      | 1      | 0      |
| 19010  | 5     | 1     | 0     | 0     | 5     | 5     | 0      | 0      | 0      | 0      | 0      | 0      | 0      | 0      |
| 19017  | 5     | 2     | 1     | 1     | 5     | 5     | 0      | 0      | 0      | 0      | 0      | 0      | 0      | 1      |
| 19018  | 5     | 1     | 0     | 0     | 4     | 4     | 0      | 0      | 0      | 0      | 0      | 0      | 0      | 0      |
| 19020  | 4     | 2     | 1     | 1     | 4     | 5     | 1      | 0      | 2      | 0      | 1      | 0      | 0      | 1      |
| 19027  | 4     | 3     | 4     | 4     | 3     | 3     | 1      | 2      | 2      | 1      | 1      | 1      | 1      | 1      |
| 19035  | 5     | 2     | 3     | 3     | 3     | 3     | 0      | 0      | 0      | 1      | 1      | 1      | 1      | 1      |
| 19037  | 3     | 3     | 3     | 3     | 4     | 3     | 1      | 1      | 1      | 1      | 2      | 1      | 2      | 2      |
| 19048  | 5     | 1     | 1     | 1     | 5     | 5     | 0      | 0      | 0      | 0      | 0      | 0      | 0      | 0      |
| 19051  | 4     | 2     | 1     | 1     | 3     | 4     | 1      | 0      | 1      | 0      | 1      | 1      | 0      | 1      |
| 19054  | 4     | 2     | 1     | 1     | 4     | 4     | 1      | 0      | 0      | 0      | 1      | 0      | 0      | 1      |
| 19057  | 1     | 5     | 4     | 3     | 1     | 3     | 1      | 2      | 1      | 1      | 2      | 3      | 1      | 2      |
| 19073  | 3     | 3     | 0     | 1     | 3     | 4     | 1      | 0      | 1      | 0      | 1      | 0      | 0      | 1      |
| 19075  | 4     | 1     | 1     | 1     | 4     | 5     | 0      | 0      | 1      | 0      | 0      | 0      | 0      | 0      |
| 19079  | 3     | 3     | 3     | 3     | 4     | 3     | 1      | 1      | 2      | 2      | 1      | 1      | 2      | 1      |
| 19087  | 5     | 1     | 1     | 1     | 4     | 5     | 1      | 2      | 1      | 0      | 1      | 1      | 1      | 0      |

| respid | Q52_2 | Q53_1 | Q54_1 | Q54_2 | Q54_3 | Q55_1 | Q56a_1 | Q56b_1 | Q56c_1 | Q56d_1 | Q56e_1 | Q56f_1 | Q56g_1 | Q56h_1 |
|--------|-------|-------|-------|-------|-------|-------|--------|--------|--------|--------|--------|--------|--------|--------|
| 19090  | 3     | 2     | 1     | 3     | 3     | 2     | 1      | 1      | 2      | 2      | 2      | 1      | 1      | 1      |
| 19093  | 5     | 1     | 1     | 1     | 4     | 5     | 0      | 0      | 0      | 0      | 0      | 0      | 0      | 1      |
| 19099  | 3     | 2     | 3     | 4     | 3     | 3     | 1      | 1      | 1      | 1      | 1      | 2      | 2      | 2      |
| 19100  | 5     | 1     | 1     | 1     | 4     | 5     | 0      | 0      | 0      | 0      | 0      | 0      | 0      | 1      |
| 19101  | 5     | 1     | 1     | 1     | 4     | 4     | 0      | 0      | 1      | 1      | 1      | 0      | 0      | 1      |
| 19105  | 4     | 2     | 1     | 3     | 4     | 4     | 1      | 0      | 1      | 0      | 1      | 1      | 0      | 0      |
| 19111  | 4     | 2     | 3     | 3     | 4     | 4     | 1      | 1      | 2      | 1      | 1      | 1      | 1      | 2      |
| 19112  | 5     | 2     | 1     | 1     | 4     | 4     | 1      | 0      | 0      | 0      | 1      | 0      | 0      | 0      |
| 19117  | 5     | 2     | 0     | 0     | 0     | 5     | 0      | 0      | 0      | 0      | 0      | 0      | 0      | 1      |
| 19122  | 5     | 1     | 1     | 1     | 5     | 5     | 0      | 0      | 0      | 0      | 1      | 0      | 0      | 1      |
| 19126  | 5     | 3     | 1     | 3     | 5     | 5     | 1      | 0      | 1      | 0      | 1      | 0      | 0      | 0      |
| 19127  | 4     | 2     | 1     | 1     | 3     | 4     | 1      | 1      | 1      | 1      | 1      | 1      | 1      | 0      |
| 19131  | 4     | 3     | 1     | 3     | 4     | 4     | 0      | 1      | 1      | 1      | 1      | 1      | 1      | 0      |
| 19134  | 5     | 1     | 0     | 0     | 4     | 5     | 1      | 0      | 0      | 0      | 0      | 0      | 0      | 1      |
| 19149  | 4     | 2     | 1     | 1     | 3     | 3     | 1      | 0      | 1      | 0      | 1      | 1      | 1      | 1      |
| 19151  | 5     | 2     | 4     | 3     | 5     | 4     | 1      | 0      | 1      | 2      | 1      | 0      | 1      | 1      |
| 19164  | 4     | 2     | 1     | 3     | 3     | 4     | 1      | 0      | 1      | 0      | 1      | 1      | 1      | 0      |
| 19166  | 4     | 2     | 1     | 1     | 4     | 4     | 1      | 0      | 1      | 1      | 1      | 1      | 2      | 1      |
| 19172  | 4     | 2     | 1     | 3     | 4     | 4     | 1      | 1      | 1      | 1      | 1      | 1      | 1      | 1      |
| 19173  | 3     | 3     | 3     | 4     | 3     | 3     | 1      | 1      | 2      | 1      | 1      | 1      | 1      | 1      |
| 19180  | 5     | 1     | 3     | 4     | 3     | 5     | 0      | 0      | 0      | 1      | 1      | 1      | 2      | 1      |
| 19185  | 2     | 2     | 1     | 3     | 1     | 3     | 1      | 1      | 1      | 2      | 1      | 1      | 2      | 1      |
| 19189  | 5     | 1     | 1     | 1     | 3     | 5     | 0      | 1      | 1      | 0      | 1      | 0      | 1      | 0      |
| 19191  | 5     | 1     | 1     | 1     | 4     | 5     | 0      | 0      | 0      | 0      | 0      | 0      | 0      | 0      |
| 19198  | 5     | 2     | 1     | 1     | 5     | 5     | 0      | 0      | 0      | 0      | 1      | 1      | 0      | 1      |
| 19203  | 5     | 1     | 1     | 1     | 4     | 4     | 0      | 0      | 2      | 1      | 1      | 0      | 1      | 1      |
| 19209  | 4     | 2     | 1     | 3     | 3     | 5     | 1      | 0      | 2      | 2      | 1      | 1      | 1      | 2      |
| 19210  | 4     | 3     | 1     | 3     | 4     | 3     | 1      | 1      | 1      | 1      | 1      | 1      | 0      | 1      |
| 19218  | 5     | 1     | 1     | 1     | 4     | 5     | 0      | 0      | 0      | 0      | 0      | 1      | 0      | 0      |
| 19220  | 5     | 2     | 1     | 3     | 4     | 5     | 0      | 0      | 0      | 0      | 1      | 1      | 1      | 0      |
| 19225  | 3     | 3     | 1     | 3     | 3     | 3     | 1      | 1      | 2      | 1      | 1      | 1      | 1      | 1      |
| 19227  | 5     | 1     | 0     | 0     | 5     | 5     | 0      | 0      | 0      | 0      | 0      | 0      | 0      | 0      |

| respid | Q52_2 | Q53_1 | Q54_1 | Q54_2 | Q54_3 | Q55_1 | Q56a_1 | Q56b_1 | Q56c_1 | Q56d_1 | Q56e_1 | Q56f_1 | Q56g_1 | Q56h_1 |
|--------|-------|-------|-------|-------|-------|-------|--------|--------|--------|--------|--------|--------|--------|--------|
| 19228  | 5     | 1     | 1     | 1     | 5     | 5     | 0      | 0      | 0      | 0      | 0      | 0      | 1      | 0      |
| 19243  | 4     | 1     | 1     | 1     | 4     | 5     | 1      | 0      | 0      | 0      | 1      | 1      | 1      | 1      |
| 19244  | 4     | 2     | 3     | 4     | 3     | 3     | 1      | 1      | 2      | 2      | 1      | 1      | 1      | 1      |
| 19246  | 5     | 2     | 1     | 4     | 4     | 5     | 1      | 0      | 1      | 1      | 1      | 1      | 1      | 2      |
| 19248  | 4     | 2     | 1     | 1     | 4     | 5     | 0      | 0      | 0      | 0      | 0      | 0      | 1      | 0      |
| 19249  | 4     | 2     | 1     | 1     | 4     | 4     | 1      | 0      | 2      | 0      | 1      | 0      | 1      | 1      |
| 19252  | 5     | 2     | 3     | 1     | 3     | 4     | 1      | 2      | 1      | 0      | 0      | 1      | 2      | 0      |
| 19255  | 3     | 2     | 0     | 0     | 4     | 5     | 1      | 0      | 1      | 0      | 1      | 0      | 0      | 0      |
| 19257  | 4     | 2     | 4     | 4     | 4     | 4     | 1      | 1      | 1      | 1      | 1      | 1      | 0      | 1      |
| 19274  | 5     | 1     | 0     | 1     | 5     | 5     | 0      | 0      | 0      | 0      | 0      | 0      | 0      | 1      |
| 19279  | 4     | 2     | 1     | 1     | 1     | 4     | 1      | 1      | 1      | 2      | 1      | 1      | 1      | 1      |
| 19291  | 4     | 1     | 1     | 1     | 4     | 5     | 0      | 0      | 0      | 0      | 1      | 0      | 0      | 1      |
| 19292  | 4     | 2     | 3     | 3     | 4     | 4     | 1      | 1      | 2      | 0      | 2      | 1      | 1      | 1      |
| 19308  | 3     | 2     | 3     | 3     | 3     | 3     | 1      | 1      | 2      | 2      | 1      | 1      | 2      | 1      |
| 19310  | 5     | 1     | 1     | 4     | 3     | 5     | 0      | 1      | 1      | 2      | 1      | 1      | 2      | 2      |
| 19311  | 5     | 4     | 5     | 5     | 5     | 2     | 2      | 3      | 0      | 3      | 3      | 3      | 3      | 3      |
| 19326  | 3     | 2     | 1     | 3     | 3     | 4     | 1      | 1      | 1      | 0      | 1      | 0      | 0      | 1      |
| 19327  | 5     | 1     | 1     | 1     | 4     | 5     | 0      | 0      | 1      | 0      | 1      | 1      | 1      | 0      |
| 19329  | 5     | 1     | 1     | 1     | 4     | 4     | 1      | 2      | 1      | 0      | 1      | 0      | 1      | 3      |
| 19330  | 3     | 3     | 3     | 4     | 3     | 4     | 2      | 2      | 1      | 1      | 1      | 1      | 2      | 1      |
| 19333  | 3     | 3     | 3     | 3     | 4     | 4     | 1      | 1      | 1      | 1      | 1      | 1      | 1      | 1      |
| 19336  | 3     | 3     | 1     | 1     | 1     | 4     | 1      | 1      | 1      | 1      | 1      | 0      | 1      | 1      |
| 19343  | 4     | 3     | 1     | 4     | 4     | 3     | 0      | 0      | 0      | 0      | 1      | 1      | 1      | 1      |
| 19348  | 5     | 1     | 1     | 1     | 4     | 5     | 0      | 0      | 1      | 0      | 0      | 0      | 1      | 0      |
| 19349  | 2     | 4     | 3     | 3     | 3     | 3     | 1      | 1      | 1      | 2      | 1      | 1      | 2      | 2      |
| 19352  | 3     | 4     | 3     | 5     | 1     | 4     | 1      | 0      | 2      | 2      | 2      | 2      | 2      | 3      |
| 19356  | 4     | 2     | 1     | 1     | 4     | 5     | 1      | 0      | 0      | 0      | 1      | 0      | 0      | 1      |
| 19357  | 4     | 2     | 3     | 3     | 4     | 4     | 1      | 0      | 1      | 0      | 1      | 1      | 1      | 1      |
| 19358  | 4     | 2     | 1     | 3     | 4     | 5     | 1      | 1      | 1      | 1      | 2      | 2      | 1      | 2      |
| 19367  | 5     | 1     | 4     | 3     | 4     | 4     | 1      | 1      | 2      | 2      | 1      | 1      | 1      | 1      |
| 19376  | 4     | 2     | 1     | 1     | 4     | 4     | 0      | 0      | 0      | 0      | 0      | 1      | 0      | 1      |
| 19377  | 5     | 1     | 1     | 0     | 5     | 5     | 0      | 0      | 0      | 0      | 0      | 1      | 1      | 0      |

| respid | Q52_2 | Q53_1 | Q54_1 | Q54_2 | Q54_3 | Q55_1 | Q56a_1 | Q56b_1 | Q56c_1 | Q56d_1 | Q56e_1 | Q56f_1 | Q56g_1 | Q56h_1 |
|--------|-------|-------|-------|-------|-------|-------|--------|--------|--------|--------|--------|--------|--------|--------|
| 19380  | 5     | 3     | 1     | 4     | 3     | 4     | 0      | 0      | 0      | 2      | 1      | 1      | 1      | 1      |
| 19384  | 4     | 2     | 4     | 4     | 4     | 4     | 1      | 0      | 1      | 0      | 1      | 0      | 1      | 1      |
| 19391  | 5     | 2     | 1     | 3     | 3     | 4     | 2      | 1      | 2      | 0      | 2      | 1      | 1      | 1      |
| 19397  | 4     | 2     | 3     | 3     | 4     | 4     | 1      | 0      | 0      | 0      | 1      | 1      | 1      | 0      |
| 19398  | 5     | 1     | 1     | 1     | 5     | 5     | 0      | 0      | 0      | 0      | 1      | 0      | 0      | 0      |
| 19401  | 5     | 1     | 4     | 4     | 4     | 5     | 0      | 2      | 0      | 0      | 0      | 0      | 0      | 0      |
| 19402  | 5     | 1     | 1     | 1     | 4     | 5     | 0      | 0      | 1      | 0      | 1      | 0      | 0      | 0      |
| 19403  | 4     | 1     | 1     | 1     | 4     | 5     | 0      | 0      | 0      | 0      | 1      | 0      | 0      | 0      |
| 19405  | 5     | 1     | 1     | 1     | 4     | 4     | 0      | 0      | 0      | 0      | 0      | 0      | 0      | 0      |
| 19407  | 4     | 1     | 1     | 1     | 4     | 5     | 0      | 0      | 1      | 0      | 1      | 0      | 1      | 1      |
| 19415  | 5     | 3     | 4     | 3     | 4     | 5     | 0      | 1      | 0      | 0      | 1      | 1      | 1      | 1      |
| 19420  | 5     | 1     | 0     | 0     | 5     | 5     | 3      | 0      | 0      | 0      | 0      | 0      | 0      | 0      |
| 19423  | 4     | 3     | 3     | 1     | 3     | 3     | 1      | 1      | 2      | 1      | 2      | 1      | 1      | 2      |
| 19424  | 4     | 1     | 3     | 1     | 3     | 4     | 1      | 0      | 1      | 0      | 1      | 1      | 1      | 1      |
| 19426  | 4     | 3     | 1     | 1     | 4     | 3     | 0      | 1      | 1      | 0      | 1      | 0      | 0      | 1      |
| 19429  | 5     | 2     | 1     | 1     | 4     | 4     | 1      | 1      | 0      | 0      | 1      | 1      | 0      | 1      |
| 19435  | 3     | 4     | 3     | 4     | 3     | 4     | 1      | 2      | 1      | 1      | 1      | 2      | 1      | 1      |
| 19441  | 5     | 3     | 1     | 3     | 4     | 5     | 1      | 0      | 0      | 1      | 1      | 1      | 1      | 0      |
| 19450  | 5     | 1     | 0     | 0     | 0     | 5     | 0      | 0      | 0      | 0      | 0      | 1      | 0      | 0      |
| 19456  | 4     | 2     | 3     | 4     | 4     | 4     | 0      | 1      | 0      | 1      | 1      | 1      | 1      | 0      |
| 19457  | 4     | 1     | 1     | 1     | 4     | 5     | 0      | 0      | 1      | 0      | 1      | 0      | 1      | 0      |
| 19463  | 3     | 3     | 1     | 3     | 3     | 3     | 1      | 2      | 1      | 2      | 1      | 1      | 1      | 1      |
| 19467  | 3     | 2     | 3     | 3     | 3     | 3     | 1      | 1      | 1      | 2      | 1      | 1      | 2      | 1      |
| 19468  | 5     | 1     | 1     | 1     | 3     | 4     | 0      | 0      | 0      | 0      | 1      | 1      | 0      | 0      |
| 19471  | 5     | 2     | 1     | 1     | 4     | 4     | 0      | 0      | 1      | 0      | 0      | 0      | 1      | 0      |
| 19473  | 5     | 5     | 1     | 4     | 1     | 5     | 2      | 1      | 2      | 2      | 1      | 2      | 2      | 2      |
| 19478  | 3     | 3     | 1     | 1     | 4     | 3     | 1      | 0      | 0      | 1      | 1      | 0      | 0      | 2      |
| 19480  | 5     | 1     | 1     | 1     | 4     | 4     | 0      | 0      | 0      | 0      | 0      | 1      | 1      | 0      |
| 19481  | 4     | 2     | 3     | 4     | 4     | 4     | 0      | 1      | 1      | 2      | 1      | 1      | 1      | 1      |
| 19484  | 5     | 1     | 1     | 1     | 3     | 5     | 0      | 0      | 0      | 0      | 0      | 0      | 0      | 2      |
| 19487  | 3     | 5     | 5     | 5     | 5     | 5     | 3      | 3      | 3      | 3      | 3      | 3      | 3      | 3      |
| 19491  | 5     | 2     | 1     | 3     | 4     | 4     | 1      | 1      | 1      | 0      | 1      | 1      | 0      | 1      |

| respid | Q52_2 | Q53_1 | Q54_1 | Q54_2 | Q54_3 | Q55_1 | Q56a_1 | Q56b_1 | Q56c_1 | Q56d_1 | Q56e_1 | Q56f_1 | Q56g_1 | Q56h_1 |
|--------|-------|-------|-------|-------|-------|-------|--------|--------|--------|--------|--------|--------|--------|--------|
| 19495  | 4     | 3     | 0     | 0     | 4     | 4     | 0      | 0      | 0      | 0      | 0      | 0      | 0      | 0      |
| 19498  | 3     | 2     | 3     | 4     | 1     | 2     | 2      | 2      | 2      | 2      | 2      | 1      | 1      | 1      |
| 19500  | 4     | 2     | 1     | 1     | 4     | 5     | 0      | 0      | 0      | 1      | 1      | 0      | 1      | 1      |
| 19501  | 4     | 2     | 1     | 1     | 4     | 4     | 1      | 0      | 1      | 0      | 1      | 1      | 1      | 1      |
| 19503  | 5     | 1     | 1     | 1     | 4     | 4     | 1      | 0      | 1      | 0      | 1      | 0      | 0      | 1      |
| 19506  | 4     | 2     | 1     | 1     | 4     | 5     | 1      | 0      | 1      | 0      | 1      | 1      | 0      | 0      |
| 19508  | 5     | 1     | 1     | 1     | 4     | 5     | 0      | 0      | 0      | 0      | 1      | 0      | 0      | 0      |
| 19509  | 4     | 2     | 0     | 1     | 4     | 4     | 0      | 0      | 0      | 0      | 1      | 0      | 0      | 1      |
| 19518  | 2     | 3     | 1     | 1     | 1     | 3     | 1      | 1      | 1      | 1      | 1      | 0      | 1      | 1      |
| 19520  | 3     | 4     | 3     | 4     | 3     | 3     | 2      | 1      | 1      | 2      | 1      | 1      | 2      | 1      |
| 19536  | 4     | 1     | 1     | 4     | 4     | 4     | 1      | 1      | 1      | 0      | 1      | 1      | 1      | 2      |
| 19538  | 4     | 4     | 1     | 1     | 3     | 4     | 1      | 0      | 0      | 0      | 1      | 0      | 0      | 1      |
| 19541  | 5     | 2     | 1     | 1     | 4     | 3     | 1      | 1      | 1      | 0      | 1      | 0      | 1      | 1      |
| 19548  | 4     | 2     | 4     | 4     | 4     | 4     | 0      | 0      | 0      | 0      | 1      | 1      | 2      | 3      |
| 19553  | 5     | 1     | 1     | 1     | 4     | 5     | 1      | 0      | 0      | 0      | 1      | 0      | 0      | 0      |
| 19556  | 4     | 2     | 1     | 1     | 4     | 5     | 0      | 0      | 0      | 0      | 0      | 1      | 1      | 0      |
| 19559  | 4     | 2     | 1     | 3     | 4     | 4     | 0      | 1      | 1      | 1      | 1      | 1      | 1      | 0      |
| 19561  | 4     | 2     | 1     | 3     | 4     | 3     | 0      | 0      | 0      | 1      | 1      | 1      | 1      | 0      |
| 19562  | 5     | 1     | 4     | 1     | 4     | 4     | 1      | 0      | 1      | 0      | 0      | 0      | 0      | 2      |
| 19564  | 5     | 1     | 1     | 1     | 4     | 5     | 1      | 0      | 1      | 0      | 1      | 1      | 1      | 1      |
| 19567  | 2     | 4     | 4     | 5     | 1     | 2     | 2      | 1      | 2      | 1      | 2      | 2      | 2      | 2      |
| 19571  | 4     | 2     | 1     | 3     | 4     | 4     | 1      | 0      | 1      | 1      | 1      | 1      | 1      | 0      |
| 19576  | 4     | 3     | 3     | 4     | 3     | 3     | 1      | 1      | 2      | 1      | 1      | 1      | 1      | 1      |
| 19578  | 5     | 2     | 1     | 1     | 4     | 5     | 0      | 0      | 0      | 0      | 0      | 0      | 0      | 1      |
| 19606  | 4     | 1     | 1     | 3     | 4     | 5     | 1      | 2      | 0      | 1      | 1      | 1      | 1      | 1      |
| 19607  | 5     | 1     | 1     | 1     | 4     | 5     | 0      | 0      | 0      | 0      | 1      | 0      | 0      | 1      |
| 19608  | 4     | 2     | 1     | 3     | 4     | 4     | 1      | 1      | 1      | 1      | 1      | 2      | 2      | 1      |
| 19612  | 1     | 3     | 0     | 0     | 4     | 4     | 1      | 2      | 0      | 0      | 1      | 0      | 0      | 2      |
| 19618  | 2     | 3     | 1     | 0     | 1     | 2     | 1      | 2      | 1      | 1      | 1      | 1      | 2      | 1      |
| 19621  | 3     | 2     | 1     | 1     | 4     | 3     | 1      | 1      | 0      | 1      | 1      | 0      | 1      | 1      |
| 19624  | 3     | 3     | 3     | 3     | 1     | 3     | 1      | 1      | 1      | 1      | 2      | 2      | 2      | 2      |
| 19630  | 5     | 1     | 1     | 1     | 4     | 5     | 1      | 0      | 2      | 1      | 1      | 1      | 1      | 0      |

| respid | Q52_2 | Q53_1 | Q54_1 | Q54_2 | Q54_3 | Q55_1 | Q56a_1 | Q56b_1 | Q56c_1 | Q56d_1 | Q56e_1 | Q56f_1 | Q56g_1 | Q56h_1 |   |
|--------|-------|-------|-------|-------|-------|-------|--------|--------|--------|--------|--------|--------|--------|--------|---|
| 19637  | 2     | 5     | 3     | 3     | 3     | 3     | 3      | 3      | 0      | 3      | 1      | 3      | 2      | 2      | 2 |
| 19639  | 4     | 2     | 1     | 3     | 3     | 4     | 1      | 0      | 1      | 0      | 1      | 1      | 1      | 1      | 1 |
| 19647  | 4     | 1     | 4     | 3     | 3     | 4     | 1      | 1      | 1      | 1      | 1      | 1      | 1      | 1      | 2 |
| 19648  | 1     | 5     | 1     | 1     | 0     | 4     | 1      | 2      | 2      | 1      | 3      | 0      | 1      | 1      | 2 |
| 19660  | 5     | 1     | 0     | 1     | 4     | 5     | 0      | 0      | 0      | 0      | 1      | 0      | 0      | 0      | 0 |
| 19662  | 3     | 2     | 3     | 3     | 1     | 4     | 1      | 1      | 1      | 1      | 1      | 1      | 1      | 1      | 1 |
| 19669  | 4     | 1     | 1     | 1     | 3     | 5     | 1      | 0      | 1      | 0      | 1      | 0      | 0      | 0      | 1 |
| 19680  | 5     | 1     | 0     | 1     | 4     | 5     | 0      | 0      | 1      | 1      | 1      | 1      | 0      | 0      | 0 |
| 19682  | 3     | 3     | 3     | 4     | 1     | 3     | 1      | 0      | 1      | 0      | 1      | 1      | 1      | 1      | 1 |
| 19686  | 4     | 2     | 1     | 4     | 4     | 4     | 1      | 0      | 1      | 0      | 1      | 1      | 1      | 1      | 2 |
| 19700  | 4     | 1     | 1     | 1     | 4     | 5     | 1      | 0      | 1      | 0      | 1      | 0      | 0      | 0      | 1 |
| 19701  | 5     | 1     | 1     | 1     | 4     | 5     | 0      | 0      | 0      | 0      | 1      | 0      | 0      | 0      | 0 |
| 19704  | 5     | 1     | 0     | 0     | 4     | 5     | 0      | 1      | 0      | 0      | 0      | 0      | 0      | 0      | 0 |
| 19706  | 4     | 2     | 1     | 4     | 4     | 4     | 0      | 1      | 0      | 1      | 1      | 1      | 2      | 2      | 1 |
| 19707  | 5     | 2     | 1     | 1     | 4     | 4     | 0      | 0      | 1      | 0      | 1      | 0      | 0      | 0      | 1 |
| 19717  | 4     | 2     | 1     | 3     | 3     | 4     | 1      | 0      | 1      | 0      | 2      | 1      | 1      | 1      | 1 |
| 19718  | 4     | 2     | 1     | 3     | 4     | 4     | 0      | 0      | 0      | 1      | 1      | 1      | 1      | 1      | 3 |
| 19721  | 2     | 2     | 4     | 4     | 1     | 3     | 1      | 2      | 2      | 2      | 2      | 2      | 2      | 2      | 1 |
| 19722  | 5     | 1     | 0     | 0     | 5     | 5     | 0      | 0      | 0      | 0      | 0      | 0      | 0      | 0      | 0 |
| 19729  | 3     | 3     | 4     | 4     | 4     | 4     | 1      | 2      | 1      | 2      | 2      | 2      | 1      | 1      | 1 |
| 19738  | 5     | 2     | 1     | 3     | 3     | 3     | 0      | 1      | 0      | 1      | 1      | 1      | 1      | 2      | 1 |
| 19741  | 5     | 2     | 1     | 1     | 4     | 4     | 1      | 0      | 1      | 0      | 1      | 0      | 0      | 0      | 1 |
| 19742  | 2     | 4     | 3     | 1     | 1     | 3     | 1      | 1      | 1      | 1      | 1      | 1      | 1      | 0      | 1 |
| 19747  | 5     | 2     | 1     | 3     | 3     | 4     | 1      | 0      | 2      | 1      | 1      | 1      | 1      | 1      | 1 |
| 19748  | 5     | 1     | 1     | 0     | 3     | 5     | 0      | 0      | 0      | 0      | 1      | 1      | 1      | 0      | 1 |
| 19749  | 5     | 1     | 1     | 1     | 4     | 2     | 1      | 0      | 1      | 0      | 1      | 0      | 0      | 0      | 1 |
| 19756  | 4     | 2     | 3     | 3     | 4     | 5     | 1      | 0      | 1      | 0      | 1      | 0      | 1      | 1      | 0 |
| 19771  | 3     | 3     | 1     | 4     | 3     | 3     | 1      | 1      | 1      | 1      | 1      | 1      | 1      | 1      | 1 |
| 19772  | 3     | 3     | 1     | 3     | 3     | 3     | 1      | 1      | 1      | 1      | 1      | 1      | 1      | 1      | 1 |
| 19775  | 5     | 2     | 1     | 3     | 4     | 4     | 1      | 1      | 2      | 1      | 1      | 1      | 1      | 1      | 1 |
| 19783  | 5     | 1     | 1     | 1     | 5     | 5     | 0      | 0      | 0      | 1      | 0      | 1      | 1      | 1      | 0 |
| 19787  | 5     | 1     | 1     | 3     | 4     | 5     | 0      | 0      | 0      | 1      | 1      | 0      | 1      | 1      | 1 |

| respid | Q52_2 | Q53_1 | Q54_1 | Q54_2 | Q54_3 | Q55_1 | Q56a_1 | Q56b_1 | Q56c_1 | Q56d_1 | Q56e_1 | Q56f_1 | Q56g_1 | Q56h_1 |
|--------|-------|-------|-------|-------|-------|-------|--------|--------|--------|--------|--------|--------|--------|--------|
| 19790  | 4     | 1     | 1     | 1     | 4     | 5     | 0      | 0      | 0      | 1      | 1      | 0      | 0      | 0      |
| 19797  | 1     | 2     | 4     | 4     | 0     | 3     | 0      | 1      | 3      | 1      | 3      | 3      | 2      | 3      |
| 19802  | 5     | 2     | 1     | 1     | 4     | 5     | 0      | 0      | 0      | 0      | 0      | 0      | 1      | 0      |
| 19808  | 4     | 2     | 1     | 3     | 3     | 4     | 1      | 0      | 1      | 2      | 1      | 1      | 1      | 1      |
| 19810  | 5     | 1     | 1     | 1     | 1     | 5     | 0      | 0      | 1      | 1      | 1      | 1      | 1      | 1      |
| 19811  | 5     | 2     | 1     | 1     | 3     | 5     | 1      | 0      | 0      | 0      | 1      | 0      | 0      | 1      |
| 19812  | 4     | 2     | 1     | 1     | 4     | 4     | 0      | 0      | 0      | 0      | 0      | 1      | 0      | 1      |
| 19821  | 4     | 2     | 3     | 4     | 3     | 4     | 1      | 1      | 0      | 1      | 1      | 1      | 2      | 1      |
| 19826  | 3     | 3     | 3     | 3     | 3     | 3     | 1      | 2      | 1      | 2      | 1      | 1      | 1      | 1      |
| 19827  | 5     | 2     | 4     | 4     | 4     | 4     | 0      | 0      | 0      | 0      | 0      | 2      | 2      | 0      |
| 19830  | 3     | 3     | 1     | 3     | 4     | 3     | 0      | 0      | 0      | 0      | 0      | 0      | 0      | 1      |
| 19834  | 5     | 1     | 1     | 1     | 3     | 5     | 1      | 0      | 1      | 2      | 1      | 0      | 1      | 1      |
| 19838  | 4     | 2     | 3     | 3     | 3     | 4     | 1      | 1      | 2      | 2      | 2      | 1      | 0      | 1      |
| 19843  | 1     | 2     | 5     | 1     | 5     | 3     | 1      | 1      | 1      | 1      | 2      | 2      | 2      | 2      |
| 19845  | 2     | 4     | 1     | 0     | 3     | 2     | 1      | 1      | 2      | 1      | 1      | 2      | 1      | 2      |
| 19846  | 4     | 2     | 1     | 1     | 4     | 5     | 1      | 0      | 0      | 0      | 1      | 0      | 1      | 0      |
| 19852  | 3     | 4     | 3     | 4     | 3     | 3     | 1      | 1      | 2      | 1      | 1      | 1      | 2      | 1      |
| 19855  | 5     | 3     | 1     | 1     | 4     | 4     | 1      | 0      | 0      | 0      | 1      | 0      | 0      | 0      |
| 19858  | 5     | 2     | 1     | 1     | 4     | 5     | 1      | 0      | 0      | 0      | 1      | 0      | 1      | 1      |
| 19861  | 3     | 3     | 3     | 4     | 1     | 4     | 2      | 1      | 1      | 2      | 2      | 2      | 1      | 2      |
| 19863  | 4     | 2     | 4     | 4     | 4     | 5     | 2      | 2      | 0      | 0      | 1      | 1      | 1      | 1      |
| 19868  | 4     | 1     | 1     | 1     | 3     | 4     | 2      | 2      | 1      | 1      | 1      | 1      | 2      | 1      |
| 19874  | 4     | 2     | 1     | 3     | 4     | 4     | 1      | 0      | 2      | 0      | 1      | 1      | 1      | 1      |
| 19876  | 5     | 1     | 1     | 1     | 4     | 5     | 0      | 0      | 0      | 0      | 0      | 0      | 0      | 0      |
| 19880  | 2     | 3     | 3     | 4     | 1     | 3     | 1      | 1      | 2      | 1      | 2      | 2      | 2      | 3      |
| 19885  | 5     | 2     | 1     | 1     | 4     | 5     | 0      | 1      | 1      | 0      | 1      | 0      | 0      | 1      |
| 19890  | 4     | 1     | 1     | 1     | 4     | 5     | 1      | 0      | 2      | 0      | 1      | 1      | 1      | 1      |
| 19894  | 5     | 1     | 3     | 3     | 3     | 3     | 0      | 0      | 0      | 0      | 0      | 0      | 2      | 0      |
| 19895  | 4     | 2     | 3     | 3     | 4     | 4     | 1      | 1      | 1      | 1      | 1      | 2      | 2      | 1      |
| 19897  | 3     | 2     | 4     | 4     | 0     | 2     | 2      | 1      | 3      | 3      | 3      | 2      | 3      | 3      |
| 19906  | 5     | 1     | 0     | 1     | 4     | 5     | 0      | 0      | 0      | 0      | 0      | 0      | 0      | 0      |
| 19908  | 5     | 1     | 0     | 0     | 5     | 5     | 0      | 0      | 0      | 0      | 0      | 0      | 0      | 0      |

| respid | Q52_2 | Q53_1 | Q54_1 | Q54_2 | Q54_3 | Q55_1 | Q56a_1 | Q56b_1 | Q56c_1 | Q56d_1 | Q56e_1 | Q56f_1 | Q56g_1 | Q56h_1 |
|--------|-------|-------|-------|-------|-------|-------|--------|--------|--------|--------|--------|--------|--------|--------|
| 19912  | 5     | 1     | 0     | 1     | 4     | 5     | 0      | 0      | 0      | 0      | 1      | 0      | 0      | 1      |
| 19913  | 4     | 2     | 1     | 3     | 3     | 4     | 1      | 1      | 1      | 0      | 1      | 1      | 1      | 1      |
| 19914  | 4     | 2     | 1     | 1     | 4     | 4     | 1      | 2      | 1      | 2      | 1      | 1      | 1      | 1      |
| 19918  | 3     | 3     | 1     | 1     | 3     | 3     | 1      | 1      | 2      | 2      | 2      | 2      | 2      | 1      |
| 19924  | 3     | 3     | 3     | 3     | 4     | 4     | 1      | 0      | 1      | 1      | 1      | 1      | 2      | 1      |
| 19936  | 4     | 2     | 1     | 3     | 4     | 4     | 1      | 1      | 1      | 1      | 1      | 1      | 1      | 2      |
| 19940  | 5     | 1     | 0     | 0     | 4     | 5     | 0      | 0      | 0      | 0      | 0      | 0      | 0      | 0      |
| 19945  | 5     | 1     | 1     | 3     | 5     | 5     | 1      | 0      | 0      | 1      | 1      | 1      | 1      | 1      |
| 19948  | 4     | 2     | 1     | 3     | 4     | 4     | 1      | 0      | 1      | 0      | 1      | 1      | 1      | 1      |
| 19959  | 4     | 1     | 1     | 3     | 3     | 3     | 1      | 1      | 1      | 0      | 1      | 1      | 1      | 0      |
| 19961  | 5     | 1     | 5     | 5     | 5     | 5     | 0      | 0      | 1      | 2      | 1      | 1      | 0      | 1      |
| 19962  | 5     | 1     | 3     | 3     | 1     | 5     | 0      | 0      | 0      | 2      | 1      | 2      | 1      | 0      |
| 19965  | 5     | 2     | 3     | 1     | 3     | 5     | 1      | 0      | 1      | 0      | 0      | 0      | 1      | 0      |
| 19966  | 4     | 3     | 3     | 4     | 3     | 3     | 1      | 1      | 1      | 2      | 2      | 2      | 1      | 2      |
| 19973  | 4     | 3     | 1     | 3     | 4     | 4     | 1      | 1      | 1      | 1      | 1      | 1      | 1      | 1      |
| 19981  | 3     | 1     | 0     | 3     | 4     | 4     | 1      | 0      | 0      | 0      | 0      | 0      | 0      | 1      |
| 19986  | 3     | 2     | 1     | 3     | 3     | 3     | 1      | 2      | 0      | 1      | 1      | 1      | 1      | 1      |
| 19989  | 5     | 1     | 0     | 0     | 5     | 5     | 0      | 0      | 0      | 0      | 1      | 0      | 0      | 0      |
| 19998  | 3     | 3     | 3     | 3     | 3     | 3     | 1      | 1      | 1      | 1      | 1      | 1      | 2      | 1      |
| 20001  | 5     | 1     | 0     | 0     | 4     | 5     | 3      | 0      | 0      | 0      | 0      | 0      | 0      | 0      |
| 20005  | 5     | 1     | 0     | 0     | 5     | 5     | 0      | 0      | 0      | 0      | 0      | 0      | 0      | 0      |
| 20013  | 2     | 4     | 4     | 4     | 1     | 2     | 2      | 2      | 2      | 2      | 2      | 2      | 2      | 2      |
| 20015  | 5     | 1     | 1     | 1     | 5     | 5     | 1      | 0      | 2      | 0      | 1      | 1      | 1      | 0      |
| 20017  | 4     | 3     | 1     | 3     | 4     | 5     | 1      | 0      | 2      | 0      | 1      | 1      | 1      | 1      |
| 20020  | 4     | 2     | 1     | 3     | 3     | 4     | 1      | 1      | 0      | 0      | 1      | 1      | 1      | 1      |
| 20021  | 5     | 2     | 1     | 3     | 4     | 4     | 0      | 2      | 1      | 0      | 1      | 1      | 1      | 0      |
| 20026  | 5     | 2     | 1     | 3     | 4     | 5     | 0      | 0      | 0      | 0      | 1      | 1      | 1      | 1      |
| 20028  | 4     | 2     | 1     | 1     | 4     | 4     | 1      | 0      | 1      | 2      | 0      | 0      | 0      | 1      |
| 20030  | 5     | 1     | 1     | 3     | 4     | 5     | 1      | 0      | 0      | 0      | 0      | 0      | 1      | 0      |
| 20031  | 3     | 3     | 3     | 3     | 3     | 3     | 1      | 1      | 1      | 2      | 1      | 1      | 2      | 1      |
| 20034  | 5     | 2     | 1     | 0     | 4     | 5     | 0      | 0      | 0      | 0      | 1      | 0      | 1      | 1      |
| 20035  | 5     | 1     | 1     | 1     | 4     | 4     | 0      | 0      | 0      | 0      | 0      | 0      | 0      | 0      |



| respid | Q52_2 | Q53_1 | Q54_1 | Q54_2 | Q54_3 | Q55_1 | Q56a_1 | Q56b_1 | Q56c_1 | Q56d_1 | Q56e_1 | Q56f_1 | Q56g_1 | Q56h_1 |
|--------|-------|-------|-------|-------|-------|-------|--------|--------|--------|--------|--------|--------|--------|--------|
| 20040  | 5     | 2     | 1     | 3     | 4     | 5     | 0      | 0      | 0      | 0      | 0      | 0      | 0      | 0      |
| 20045  | 1     | 3     | 1     | 3     | 1     | 3     | 1      | 1      | 1      | 1      | 2      | 2      | 2      | 1      |
| 20048  | 3     | 3     | 5     | 1     | 1     | 1     | 1      | 1      | 0      | 3      | 2      | 3      | 2      | 2      |
| 20053  | 4     | 4     | 3     | 4     | 3     | 4     | 1      | 0      | 2      | 0      | 2      | 2      | 1      | 0      |
| 20064  | 4     | 3     | 3     | 3     | 3     | 3     | 1      | 1      | 1      | 1      | 1      | 1      | 1      | 1      |
| 20071  | 5     | 2     | 1     | 3     | 3     | 5     | 1      | 1      | 0      | 0      | 1      | 1      | 2      | 2      |
| 20072  | 1     | 4     | 3     | 4     | 1     | 2     | 1      | 1      | 2      | 2      | 3      | 2      | 2      | 1      |
| 20076  | 5     | 1     | 1     | 1     | 4     | 5     | 0      | 0      | 1      | 0      | 1      | 0      | 0      | 2      |
| 20081  | 4     | 2     | 1     | 1     | 4     | 4     | 1      | 1      | 1      | 0      | 1      | 1      | 1      | 2      |
| 20082  | 2     | 4     | 1     | 1     | 1     | 4     | 0      | 1      | 1      | 1      | 2      | 2      | 1      | 1      |
| 20083  | 4     | 1     | 1     | 1     | 4     | 4     | 0      | 0      | 1      | 1      | 1      | 1      | 1      | 1      |
| 20088  | 5     | 2     | 1     | 1     | 5     | 5     | 0      | 0      | 0      | 0      | 1      | 0      | 0      | 0      |
| 20089  | 4     | 2     | 1     | 3     | 4     | 5     | 1      | 0      | 1      | 0      | 1      | 1      | 1      | 1      |
| 20099  | 5     | 1     | 1     | 1     | 5     | 5     | 1      | 0      | 1      | 0      | 1      | 0      | 0      | 1      |
| 20101  | 4     | 1     | 1     | 1     | 4     | 5     | 0      | 0      | 0      | 0      | 0      | 0      | 0      | 2      |
| 20102  | 5     | 1     | 0     | 0     | 4     | 5     | 0      | 0      | 0      | 0      | 0      | 0      | 0      | 1      |
| 20109  | 5     | 1     | 0     | 1     | 4     | 5     | 1      | 1      | 1      | 2      | 1      | 0      | 0      | 1      |
| 20118  | 5     | 1     | 3     | 1     | 4     | 5     | 1      | 1      | 0      | 0      | 1      | 1      | 0      | 0      |
| 20119  | 5     | 1     | 1     | 1     | 4     | 5     | 0      | 0      | 1      | 0      | 1      | 0      | 0      | 0      |
| 20124  | 5     | 1     | 0     | 0     | 5     | 5     | 0      | 0      | 0      | 0      | 0      | 0      | 0      | 0      |
| 20126  | 4     | 2     | 1     | 4     | 4     | 4     | 1      | 0      | 1      | 1      | 1      | 1      | 1      | 0      |
| 20130  | 3     | 1     | 1     | 1     | 4     | 5     | 0      | 1      | 1      | 0      | 1      | 0      | 1      | 1      |
| 20131  | 5     | 1     | 1     | 1     | 4     | 5     | 0      | 0      | 1      | 0      | 0      | 1      | 0      | 1      |
| 20134  | 4     | 3     | 4     | 3     | 3     | 2     | 2      | 1      | 1      | 1      | 2      | 1      | 2      | 1      |
| 20146  | 5     | 1     | 1     | 1     | 3     | 4     | 1      | 0      | 2      | 1      | 1      | 2      | 1      | 2      |
| 20152  | 5     | 1     | 0     | 1     | 5     | 5     | 0      | 0      | 0      | 0      | 0      | 0      | 0      | 0      |
| 20155  | 5     | 2     | 3     | 3     | 3     | 4     | 1      | 1      | 1      | 0      | 1      | 1      | 1      | 1      |
| 20156  | 5     | 1     | 1     | 1     | 4     | 5     | 0      | 0      | 0      | 0      | 0      | 0      | 0      | 0      |
| 20157  | 5     | 1     | 1     | 1     | 4     | 5     | 0      | 0      | 0      | 0      | 0      | 0      | 1      | 1      |
| 20164  | 5     | 1     | 1     | 1     | 4     | 5     | 0      | 0      | 0      | 0      | 1      | 0      | 1      | 1      |
| 20168  | 4     | 2     | 3     | 1     | 4     | 4     | 0      | 1      | 0      | 0      | 1      | 1      | 1      | 0      |
| 20173  | 3     | 3     | 3     | 3     | 1     | 3     | 1      | 2      | 2      | 2      | 1      | 1      | 1      | 1      |

| respid | Q52_2 | Q53_1 | Q54_1 | Q54_2 | Q54_3 | Q55_1 | Q56a_1 | Q56b_1 | Q56c_1 | Q56d_1 | Q56e_1 | Q56f_1 | Q56g_1 | Q56h_1 |
|--------|-------|-------|-------|-------|-------|-------|--------|--------|--------|--------|--------|--------|--------|--------|
| 20174  | 5     | 1     | 4     | 4     | 4     | 3     | 0      | 0      | 2      | 2      | 2      | 2      | 1      | 1      |
| 20175  | 5     | 2     | 1     | 1     | 4     | 4     | 1      | 0      | 0      | 0      | 1      | 1      | 1      | 1      |
| 20189  | 5     | 1     | 5     | 5     | 5     | 5     | 0      | 0      | 0      | 0      | 0      | 0      | 0      | 1      |
| 20190  | 4     | 3     | 1     | 3     | 4     | 3     | 1      | 1      | 1      | 0      | 1      | 0      | 0      | 1      |
| 20201  | 5     | 1     | 1     | 1     | 4     | 5     | 0      | 0      | 0      | 0      | 0      | 0      | 1      | 0      |
| 20202  | 4     | 1     | 4     | 3     | 3     | 4     | 1      | 0      | 0      | 0      | 1      | 1      | 1      | 1      |
| 20204  | 1     | 4     | 3     | 3     | 3     | 4     | 2      | 2      | 2      | 1      | 2      | 2      | 2      | 2      |
| 20206  | 4     | 2     | 1     | 3     | 4     | 4     | 0      | 1      | 1      | 1      | 1      | 1      | 2      | 2      |
| 20207  | 4     | 1     | 1     | 1     | 4     | 5     | 0      | 0      | 1      | 0      | 1      | 1      | 1      | 0      |
| 20212  | 3     | 2     | 3     | 3     | 3     | 3     | 2      | 2      | 2      | 2      | 2      | 2      | 2      | 1      |
| 20213  | 3     | 3     | 3     | 1     | 4     | 4     | 1      | 2      | 0      | 1      | 1      | 1      | 2      | 1      |
| 20217  | 5     | 2     | 3     | 3     | 3     | 4     | 1      | 1      | 1      | 2      | 1      | 1      | 1      | 1      |
| 20222  | 4     | 2     | 1     | 1     | 4     | 4     | 1      | 0      | 0      | 0      | 1      | 1      | 0      | 1      |
| 20227  | 4     | 1     | 0     | 0     | 5     | 1     | 3      | 0      | 0      | 0      | 3      | 0      | 0      | 3      |
| 20228  | 4     | 2     | 4     | 3     | 4     | 4     | 1      | 0      | 1      | 1      | 1      | 1      | 1      | 1      |
| 20238  | 3     | 2     | 1     | 1     | 1     | 4     | 0      | 1      | 0      | 0      | 1      | 1      | 2      | 0      |
| 20242  | 5     | 1     | 3     | 3     | 1     | 5     | 1      | 0      | 1      | 1      | 1      | 2      | 2      | 0      |
| 20246  | 4     | 2     | 3     | 3     | 4     | 4     | 1      | 1      | 1      | 1      | 1      | 0      | 1      | 1      |
| 20255  | 3     | 3     | 3     | 3     | 3     | 3     | 1      | 2      | 1      | 1      | 1      | 2      | 1      | 2      |
| 20256  | 4     | 3     | 1     | 3     | 5     | 4     | 1      | 0      | 0      | 0      | 1      | 0      | 0      | 1      |
| 20259  | 3     | 3     | 4     | 4     | 3     | 3     | 1      | 2      | 2      | 2      | 1      | 2      | 2      | 1      |
| 20262  | 4     | 2     | 1     | 1     | 4     | 4     | 0      | 0      | 1      | 0      | 0      | 0      | 0      | 1      |
| 20274  | 5     | 1     | 1     | 1     | 4     | 5     | 1      | 0      | 0      | 0      | 0      | 0      | 0      | 0      |
| 20283  | 3     | 3     | 1     | 3     | 3     | 4     | 1      | 0      | 1      | 0      | 1      | 1      | 1      | 0      |
| 20284  | 5     | 2     | 1     | 3     | 4     | 4     | 1      | 1      | 2      | 1      | 1      | 1      | 2      | 1      |
| 20291  | 4     | 2     | 1     | 3     | 4     | 4     | 1      | 1      | 1      | 0      | 0      | 0      | 0      | 1      |
| 20292  | 5     | 2     | 1     | 3     | 4     | 4     | 1      | 0      | 1      | 2      | 1      | 1      | 1      | 0      |
| 20293  | 3     | 3     | 4     | 5     | 3     | 4     | 1      | 1      | 2      | 1      | 2      | 2      | 2      | 1      |
| 20298  | 2     | 4     | 4     | 3     | 3     | 4     | 1      | 2      | 1      | 2      | 2      | 2      | 2      | 1      |
| 20301  | 5     | 1     | 0     | 0     | 5     | 5     | 0      | 0      | 0      | 0      | 0      | 0      | 0      | 0      |
| 20303  | 3     | 2     | 1     | 1     | 3     | 3     | 1      | 0      | 1      | 0      | 2      | 1      | 1      | 0      |
| 20309  | 5     | 2     | 1     | 1     | 3     | 4     | 1      | 1      | 1      | 1      | 1      | 1      | 1      | 0      |

| respid | Q52_2 | Q53_1 | Q54_1 | Q54_2 | Q54_3 | Q55_1 | Q56a_1 | Q56b_1 | Q56c_1 | Q56d_1 | Q56e_1 | Q56f_1 | Q56g_1 | Q56h_1 |
|--------|-------|-------|-------|-------|-------|-------|--------|--------|--------|--------|--------|--------|--------|--------|
| 20318  | 4     | 1     | 1     | 1     | 4     | 5     | 0      | 0      | 1      | 0      | 0      | 0      | 0      | 1      |
| 20324  | 5     | 1     | 0     | 1     | 4     | 4     | 0      | 0      | 0      | 0      | 1      | 0      | 0      | 0      |
| 20335  | 5     | 1     | 1     | 3     | 3     | 5     | 1      | 1      | 1      | 1      | 0      | 1      | 1      | 0      |
| 20336  | 4     | 1     | 1     | 3     | 3     | 3     | 1      | 0      | 1      | 0      | 1      | 1      | 0      | 0      |
| 20339  | 5     | 1     | 1     | 0     | 4     | 5     | 0      | 0      | 0      | 0      | 0      | 0      | 0      | 0      |
| 20348  | 5     | 1     | 1     | 1     | 3     | 5     | 1      | 2      | 0      | 0      | 0      | 0      | 1      | 1      |
| 20351  | 3     | 2     | 1     | 1     | 4     | 4     | 0      | 0      | 0      | 0      | 0      | 0      | 0      | 0      |
| 20353  | 4     | 2     | 3     | 1     | 3     | 4     | 1      | 1      | 1      | 1      | 1      | 2      | 2      | 1      |
| 20356  | 3     | 3     | 3     | 3     | 1     | 3     | 1      | 2      | 1      | 0      | 1      | 1      | 1      | 0      |
| 20357  | 5     | 2     | 1     | 0     | 4     | 5     | 0      | 2      | 0      | 1      | 1      | 1      | 1      | 1      |
| 20366  | 5     | 2     | 0     | 0     | 5     | 4     | 0      | 0      | 0      | 0      | 0      | 0      | 0      | 0      |
| 20369  | 2     | 4     | 4     | 4     | 1     | 2     | 1      | 2      | 2      | 2      | 2      | 2      | 2      | 2      |
| 20372  | 4     | 2     | 1     | 1     | 4     | 5     | 0      | 0      | 0      | 0      | 0      | 1      | 1      | 0      |
| 20375  | 4     | 1     | 1     | 1     | 4     | 5     | 0      | 0      | 0      | 0      | 0      | 0      | 0      | 1      |
| 20379  | 3     | 2     | 1     | 1     | 4     | 5     | 0      | 1      | 0      | 0      | 0      | 0      | 0      | 0      |
| 20380  | 2     | 5     | 4     | 5     | 4     | 5     | 2      | 2      | 2      | 2      | 3      | 2      | 2      | 2      |
| 20396  | 4     | 2     | 3     | 3     | 3     | 4     | 1      | 0      | 0      | 1      | 1      | 1      | 1      | 1      |
| 20398  | 4     | 2     | 4     | 4     | 3     | 5     | 1      | 1      | 1      | 1      | 1      | 1      | 1      | 0      |
| 20412  | 4     | 1     | 1     | 1     | 4     | 4     | 1      | 0      | 1      | 0      | 1      | 1      | 1      | 1      |
| 20415  | 4     | 3     | 3     | 4     | 4     | 4     | 1      | 0      | 1      | 1      | 1      | 1      | 1      | 1      |
| 20424  | 3     | 2     | 3     | 3     | 3     | 3     | 2      | 1      | 3      | 1      | 2      | 2      | 2      | 2      |
| 20434  | 5     | 2     | 1     | 1     | 4     | 5     | 0      | 1      | 0      | 0      | 0      | 0      | 0      | 0      |
| 20435  | 4     | 3     | 1     | 3     | 4     | 4     | 1      | 0      | 1      | 0      | 1      | 1      | 1      | 1      |
| 20440  | 5     | 3     | 1     | 3     | 4     | 5     | 1      | 0      | 1      | 1      | 1      | 1      | 1      | 1      |
| 20441  | 3     | 2     | 1     | 1     | 3     | 4     | 1      | 0      | 1      | 0      | 1      | 1      | 1      | 1      |
| 20445  | 4     | 1     | 1     | 1     | 4     | 3     | 1      | 1      | 2      | 1      | 1      | 1      | 1      | 1      |
| 20446  | 3     | 2     | 3     | 3     | 4     | 3     | 1      | 1      | 2      | 1      | 1      | 1      | 1      | 1      |
| 20450  | 5     | 1     | 1     | 1     | 4     | 5     | 1      | 0      | 1      | 0      | 1      | 0      | 1      | 1      |
| 20453  | 3     | 4     | 1     | 3     | 1     | 3     | 1      | 1      | 2      | 1      | 2      | 1      | 1      | 2      |
| 20458  | 5     | 1     | 1     | 1     | 4     | 4     | 1      | 0      | 0      | 0      | 0      | 0      | 1      | 1      |
| 20464  | 5     | 1     | 0     | 0     | 5     | 5     | 0      | 0      | 0      | 0      | 1      | 0      | 0      | 0      |
| 20471  | 3     | 3     | 3     | 3     | 3     | 3     | 0      | 1      | 1      | 1      | 1      | 1      | 1      | 1      |

| respid | Q52_2 | Q53_1 | Q54_1 | Q54_2 | Q54_3 | Q55_1 | Q56a_1 | Q56b_1 | Q56c_1 | Q56d_1 | Q56e_1 | Q56f_1 | Q56g_1 | Q56h_1 |
|--------|-------|-------|-------|-------|-------|-------|--------|--------|--------|--------|--------|--------|--------|--------|
| 20473  | 3     | 2     | 0     | 4     | 4     | 3     | 1      | 1      | 1      | 1      | 1      | 1      | 1      | 2      |
| 20474  | 4     | 2     | 1     | 1     | 3     | 4     | 0      | 0      | 1      | 0      | 1      | 1      | 0      | 2      |
| 20477  | 5     | 1     | 1     | 3     | 4     | 5     | 0      | 0      | 1      | 0      | 1      | 0      | 0      | 0      |
| 20479  | 4     | 5     | 1     | 1     | 4     | 2     | 1      | 0      | 2      | 0      | 1      | 0      | 0      | 3      |
| 20485  | 5     | 2     | 1     | 1     | 4     | 5     | 0      | 0      | 0      | 1      | 0      | 1      | 0      | 0      |
| 20487  | 4     | 1     | 1     | 1     | 4     | 5     | 0      | 0      | 0      | 0      | 1      | 1      | 0      | 1      |
| 20488  | 5     | 1     | 0     | 0     | 4     | 5     | 0      | 0      | 0      | 0      | 0      | 0      | 0      | 0      |
| 20494  | 3     | 2     | 3     | 3     | 3     | 4     | 1      | 2      | 2      | 2      | 2      | 2      | 2      | 1      |
| 20502  | 2     | 4     | 3     | 4     | 3     | 3     | 1      | 1      | 1      | 1      | 1      | 1      | 2      | 2      |
| 20503  | 5     | 2     | 1     | 4     | 3     | 5     | 1      | 0      | 0      | 0      | 0      | 2      | 2      | 1      |
| 20510  | 5     | 1     | 1     | 3     | 4     | 4     | 1      | 0      | 0      | 0      | 0      | 0      | 1      | 1      |
| 20512  | 5     | 1     | 0     | 0     | 5     | 5     | 0      | 0      | 0      | 0      | 0      | 0      | 0      | 0      |
| 20516  | 3     | 2     | 3     | 1     | 3     | 4     | 1      | 0      | 1      | 0      | 1      | 1      | 1      | 1      |
| 20522  | 4     | 5     | 4     | 4     | 3     | 3     | 1      | 0      | 2      | 2      | 3      | 2      | 3      | 3      |
| 20527  | 4     | 2     | 1     | 3     | 3     | 2     | 1      | 0      | 0      | 2      | 1      | 1      | 1      | 1      |
| 20529  | 4     | 3     | 1     | 3     | 4     | 4     | 0      | 1      | 0      | 1      | 1      | 1      | 1      | 1      |
| 20535  | 3     | 4     | 1     | 3     | 3     | 4     | 1      | 1      | 0      | 0      | 1      | 1      | 1      | 1      |
| 20543  | 4     | 2     | 1     | 3     | 3     | 4     | 1      | 0      | 1      | 1      | 2      | 1      | 1      | 1      |
| 20546  | 4     | 2     | 1     | 1     | 3     | 4     | 0      | 0      | 1      | 0      | 1      | 0      | 1      | 1      |
| 20548  | 5     | 1     | 1     | 1     | 3     | 2     | 2      | 2      | 2      | 2      | 1      | 1      | 1      | 0      |
| 20552  | 3     | 3     | 3     | 3     | 3     | 4     | 1      | 1      | 2      | 0      | 1      | 1      | 1      | 1      |
| 20556  | 4     | 2     | 1     | 3     | 3     | 4     | 1      | 1      | 0      | 1      | 2      | 1      | 2      | 2      |
| 20566  | 3     | 3     | 3     | 4     | 3     | 3     | 1      | 1      | 1      | 1      | 1      | 1      | 1      | 0      |
| 20576  | 4     | 2     | 1     | 1     | 3     | 4     | 1      | 0      | 1      | 1      | 1      | 1      | 1      | 1      |
| 20587  | 5     | 1     | 1     | 1     | 4     | 5     | 0      | 0      | 0      | 0      | 0      | 0      | 0      | 0      |
| 20589  | 5     | 1     | 1     | 1     | 4     | 4     | 0      | 0      | 1      | 0      | 1      | 0      | 0      | 1      |
| 20593  | 5     | 1     | 1     | 1     | 4     | 5     | 0      | 0      | 0      | 0      | 0      | 0      | 0      | 0      |
| 20594  | 3     | 3     | 3     | 3     | 3     | 3     | 1      | 0      | 1      | 1      | 1      | 1      | 1      | 1      |
| 20602  | 3     | 2     | 3     | 3     | 3     | 2     | 1      | 2      | 1      | 2      | 2      | 1      | 1      | 1      |
| 20607  | 5     | 2     | 3     | 3     | 4     | 3     | 1      | 1      | 0      | 3      | 2      | 1      | 2      | 1      |
| 20608  | 4     | 1     | 1     | 1     | 4     | 4     | 0      | 0      | 0      | 0      | 0      | 0      | 0      | 1      |
| 20611  | 5     | 1     | 1     | 1     | 4     | 4     | 1      | 0      | 1      | 0      | 1      | 0      | 0      | 1      |

| respid | Q52_2 | Q53_1 | Q54_1 | Q54_2 | Q54_3 | Q55_1 | Q56a_1 | Q56b_1 | Q56c_1 | Q56d_1 | Q56e_1 | Q56f_1 | Q56g_1 | Q56h_1 |
|--------|-------|-------|-------|-------|-------|-------|--------|--------|--------|--------|--------|--------|--------|--------|
| 20612  | 5     | 1     | 0     | 0     | 4     | 5     | 1      | 1      | 1      | 0      | 1      | 1      | 0      | 0      |
| 20615  | 2     | 1     | 1     | 1     | 3     | 4     | 1      | 2      | 0      | 0      | 1      | 0      | 0      | 1      |
| 20625  | 5     | 2     | 1     | 1     | 3     | 4     | 0      | 0      | 1      | 0      | 0      | 0      | 0      | 1      |
| 20630  | 4     | 2     | 1     | 1     | 4     | 4     | 0      | 0      | 1      | 0      | 1      | 0      | 1      | 1      |
| 20639  | 3     | 3     | 1     | 3     | 4     | 3     | 0      | 0      | 0      | 0      | 0      | 0      | 1      | 1      |
| 20643  | 5     | 1     | 0     | 0     | 0     | 1     | 0      | 0      | 0      | 0      | 0      | 0      | 0      | 0      |
| 20645  | 4     | 1     | 1     | 1     | 3     | 5     | 0      | 0      | 0      | 0      | 0      | 1      | 1      | 0      |
| 20647  | 5     | 1     | 1     | 1     | 4     | 4     | 0      | 0      | 0      | 0      | 1      | 0      | 1      | 1      |
| 20652  | 2     | 3     | 3     | 4     | 1     | 2     | 1      | 1      | 2      | 2      | 2      | 1      | 2      | 2      |
| 20661  | 5     | 2     | 1     | 3     | 4     | 5     | 1      | 1      | 0      | 0      | 1      | 0      | 0      | 2      |
| 20665  | 3     | 2     | 3     | 3     | 3     | 3     | 1      | 1      | 1      | 1      | 1      | 1      | 1      | 1      |
| 20679  | 5     | 1     | 1     | 1     | 4     | 4     | 0      | 0      | 1      | 0      | 1      | 1      | 1      | 0      |
| 20682  | 3     | 3     | 3     | 4     | 3     | 3     | 1      | 1      | 1      | 1      | 1      | 2      | 2      | 1      |
| 20683  | 4     | 1     | 0     | 0     | 0     | 5     | 0      | 0      | 0      | 0      | 0      | 0      | 0      | 0      |
| 20700  | 4     | 1     | 1     | 1     | 3     | 5     | 0      | 0      | 0      | 0      | 1      | 0      | 0      | 1      |
| 20702  | 4     | 3     | 3     | 4     | 4     | 4     | 1      | 1      | 0      | 1      | 2      | 1      | 1      | 1      |
| 20709  | 4     | 2     | 1     | 1     | 3     | 5     | 0      | 0      | 1      | 0      | 1      | 1      | 1      | 1      |
| 20715  | 3     | 3     | 3     | 3     | 3     | 3     | 1      | 1      | 1      | 1      | 1      | 1      | 2      | 1      |
| 20718  | 4     | 3     | 1     | 1     | 4     | 4     | 1      | 0      | 0      | 0      | 1      | 0      | 0      | 0      |
| 20722  | 4     | 2     | 1     | 1     | 4     | 4     | 1      | 0      | 0      | 0      | 1      | 0      | 1      | 1      |
| 20729  | 2     | 4     | 3     | 4     | 1     | 2     | 2      | 1      | 3      | 2      | 2      | 2      | 2      | 2      |
| 20732  | 4     | 4     | 1     | 1     | 4     | 5     | 0      | 1      | 0      | 0      | 0      | 0      | 0      | 0      |
| 20746  | 4     | 2     | 1     | 3     | 3     | 4     | 1      | 0      | 1      | 1      | 1      | 1      | 1      | 2      |
| 20747  | 4     | 2     | 3     | 4     | 4     | 4     | 1      | 1      | 1      | 1      | 2      | 2      | 0      | 2      |
| 20758  | 4     | 1     | 1     | 1     | 4     | 5     | 0      | 0      | 0      | 1      | 1      | 1      | 1      | 0      |
| 20767  | 4     | 2     | 1     | 1     | 4     | 4     | 1      | 0      | 0      | 0      | 1      | 1      | 1      | 1      |
| 20777  | 5     | 1     | 0     | 0     | 4     | 5     | 0      | 0      | 0      | 0      | 0      | 0      | 0      | 0      |
| 20778  | 4     | 3     | 1     | 1     | 3     | 3     | 0      | 2      | 1      | 1      | 1      | 1      | 1      | 0      |
| 20780  | 1     | 2     | 0     | 0     | 3     | 3     | 1      | 0      | 0      | 0      | 0      | 0      | 0      | 0      |
| 20800  | 4     | 1     | 1     | 1     | 4     | 4     | 1      | 0      | 0      | 0      | 1      | 0      | 0      | 0      |
| 20810  | 4     | 1     | 1     | 1     | 4     | 5     | 0      | 0      | 0      | 0      | 1      | 1      | 1      | 0      |
| 20814  | 3     | 2     | 4     | 3     | 3     | 4     | 2      | 1      | 1      | 1      | 1      | 1      | 2      | 2      |

| respid | Q52_2 | Q53_1 | Q54_1 | Q54_2 | Q54_3 | Q55_1 | Q56a_1 | Q56b_1 | Q56c_1 | Q56d_1 | Q56e_1 | Q56f_1 | Q56g_1 | Q56h_1 |
|--------|-------|-------|-------|-------|-------|-------|--------|--------|--------|--------|--------|--------|--------|--------|
| 20816  | 5     | 1     | 0     | 0     | 5     | 5     | 0      | 0      | 0      | 0      | 1      | 0      | 0      | 1      |
| 20832  | 5     | 3     | 0     | 0     | 5     | 5     | 0      | 0      | 0      | 0      | 1      | 0      | 0      | 1      |
| 20838  | 2     | 5     | 4     | 3     | 1     | 4     | 1      | 0      | 2      | 0      | 1      | 0      | 0      | 0      |
| 20841  | 4     | 3     | 3     | 4     | 3     | 3     | 1      | 1      | 1      | 1      | 1      | 1      | 1      | 2      |
| 20848  | 5     | 2     | 1     | 1     | 4     | 4     | 0      | 0      | 2      | 0      | 1      | 1      | 1      | 1      |
| 20850  | 5     | 1     | 0     | 0     | 5     | 5     | 0      | 0      | 0      | 0      | 0      | 0      | 0      | 0      |
| 20851  | 3     | 2     | 1     | 1     | 3     | 3     | 1      | 0      | 0      | 0      | 1      | 0      | 0      | 1      |
| 20861  | 4     | 2     | 1     | 3     | 4     | 4     | 0      | 2      | 0      | 0      | 1      | 1      | 1      | 1      |
| 20870  | 4     | 2     | 1     | 3     | 4     | 4     | 1      | 1      | 1      | 1      | 1      | 1      | 1      | 1      |
| 20880  | 5     | 1     | 1     | 1     | 3     | 5     | 0      | 0      | 0      | 0      | 0      | 0      | 1      | 0      |
| 20883  | 4     | 2     | 0     | 1     | 3     | 4     | 1      | 2      | 1      | 1      | 1      | 1      | 1      | 1      |
| 20894  | 4     | 1     | 1     | 1     | 4     | 4     | 1      | 0      | 0      | 0      | 1      | 0      | 0      | 1      |
| 20896  | 3     | 3     | 3     | 1     | 3     | 3     | 2      | 1      | 1      | 2      | 1      | 2      | 1      | 2      |
| 20901  | 3     | 2     | 1     | 3     | 3     | 3     | 1      | 2      | 2      | 1      | 1      | 1      | 2      | 1      |
| 20903  | 5     | 2     | 1     | 1     | 4     | 4     | 0      | 0      | 0      | 0      | 0      | 0      | 0      | 0      |
| 20909  | 4     | 2     | 0     | 3     | 4     | 4     | 0      | 0      | 0      | 0      | 0      | 0      | 0      | 1      |
| 20919  | 5     | 1     | 1     | 3     | 4     | 5     | 0      | 0      | 0      | 0      | 1      | 0      | 0      | 2      |
| 20925  | 3     | 2     | 3     | 3     | 3     | 5     | 1      | 0      | 3      | 0      | 2      | 0      | 0      | 2      |
| 20935  | 5     | 1     | 1     | 1     | 4     | 4     | 0      | 0      | 0      | 0      | 0      | 0      | 0      | 1      |
| 20939  | 3     | 3     | 3     | 4     | 3     | 3     | 1      | 1      | 1      | 1      | 2      | 1      | 2      | 2      |
| 20956  | 3     | 5     | 4     | 3     | 1     | 2     | 2      | 1      | 3      | 3      | 2      | 2      | 2      | 2      |
| 20970  | 5     | 2     | 3     | 3     | 3     | 5     | 1      | 1      | 0      | 0      | 1      | 1      | 1      | 2      |
| 20974  | 5     | 2     | 1     | 3     | 3     | 4     | 3      | 0      | 0      | 2      | 1      | 1      | 1      | 1      |
| 20975  | 5     | 1     | 1     | 1     | 5     | 5     | 0      | 0      | 0      | 0      | 0      | 0      | 0      | 0      |
| 20984  | 4     | 2     | 0     | 1     | 3     | 4     | 1      | 2      | 2      | 0      | 1      | 1      | 1      | 0      |
| 20988  | 5     | 1     | 1     | 0     | 4     | 5     | 3      | 0      | 0      | 0      | 0      | 0      | 0      | 0      |
| 20996  | 3     | 3     | 3     | 3     | 3     | 3     | 1      | 1      | 1      | 1      | 1      | 1      | 1      | 1      |
| 20998  | 4     | 1     | 1     | 1     | 4     | 4     | 0      | 0      | 0      | 0      | 1      | 1      | 0      | 0      |
| 21007  | 5     | 1     | 1     | 1     | 4     | 5     | 0      | 0      | 0      | 0      | 0      | 0      | 0      | 0      |
| 21008  | 4     | 2     | 3     | 3     | 3     | 4     | 1      | 0      | 1      | 1      | 1      | 1      | 2      | 0      |
| 21014  | 5     | 1     | 1     | 1     | 4     | 5     | 0      | 0      | 1      | 0      | 0      | 0      | 0      | 0      |
| 21020  | 5     | 2     | 1     | 1     | 4     | 5     | 0      | 0      | 1      | 1      | 1      | 0      | 0      | 1      |

| respid | Q52_2 | Q53_1 | Q54_1 | Q54_2 | Q54_3 | Q55_1 | Q56a_1 | Q56b_1 | Q56c_1 | Q56d_1 | Q56e_1 | Q56f_1 | Q56g_1 | Q56h_1 |
|--------|-------|-------|-------|-------|-------|-------|--------|--------|--------|--------|--------|--------|--------|--------|
| 21022  | 3     | 2     | 1     | 1     | 3     | 4     | 1      | 1      | 1      | 1      | 1      | 1      | 1      | 1      |
| 21024  | 4     | 2     | 1     | 3     | 3     | 3     | 0      | 0      | 0      | 1      | 1      | 1      | 1      | 0      |
| 21026  | 4     | 2     | 1     | 1     | 4     | 4     | 1      | 1      | 1      | 2      | 1      | 1      | 1      | 1      |
| 21027  | 5     | 2     | 1     | 1     | 4     | 5     | 0      | 0      | 0      | 0      | 0      | 0      | 0      | 0      |
| 21030  | 5     | 1     | 3     | 3     | 3     | 5     | 1      | 0      | 0      | 0      | 1      | 1      | 1      | 1      |
| 21032  | 2     | 2     | 1     | 1     | 3     | 2     | 1      | 1      | 2      | 1      | 2      | 1      | 1      | 1      |
| 21040  | 4     | 2     | 0     | 0     | 5     | 4     | 0      | 0      | 0      | 0      | 1      | 0      | 0      | 0      |
| 21045  | 5     | 1     | 1     | 1     | 4     | 4     | 1      | 0      | 1      | 0      | 1      | 0      | 0      | 1      |
| 21058  | 5     | 1     | 1     | 1     | 5     | 5     | 0      | 0      | 0      | 0      | 0      | 0      | 0      | 0      |
| 21064  | 4     | 2     | 1     | 1     | 4     | 4     | 1      | 0      | 1      | 0      | 1      | 0      | 0      | 1      |
| 21073  | 4     | 2     | 1     | 1     | 4     | 4     | 1      | 0      | 0      | 0      | 1      | 0      | 1      | 1      |
| 21086  | 3     | 3     | 3     | 3     | 1     | 3     | 1      | 1      | 1      | 1      | 1      | 1      | 1      | 2      |
| 21092  | 3     | 4     | 1     | 0     | 0     | 2     | 2      | 0      | 1      | 1      | 2      | 1      | 2      | 1      |
| 21096  | 4     | 3     | 1     | 3     | 4     | 3     | 1      | 1      | 1      | 0      | 2      | 1      | 1      | 1      |
| 21103  | 5     | 1     | 1     | 3     | 4     | 5     | 1      | 1      | 0      | 1      | 1      | 0      | 1      | 1      |
| 21120  | 3     | 2     | 1     | 1     | 3     | 3     | 1      | 0      | 1      | 1      | 2      | 1      | 1      | 1      |
| 21125  | 5     | 1     | 1     | 1     | 4     | 5     | 0      | 0      | 0      | 0      | 1      | 0      | 1      | 1      |
| 21126  | 4     | 2     | 1     | 3     | 4     | 4     | 1      | 0      | 1      | 1      | 2      | 2      | 2      | 1      |
| 21132  | 5     | 1     | 0     | 4     | 5     | 5     | 0      | 0      | 0      | 0      | 0      | 0      | 0      | 2      |
| 21139  | 2     | 2     | 1     | 1     | 1     | 2     | 1      | 1      | 1      | 1      | 2      | 2      | 2      | 2      |
| 21147  | 3     | 1     | 3     | 3     | 3     | 2     | 1      | 1      | 1      | 1      | 1      | 1      | 1      | 1      |
| 21148  | 3     | 3     | 1     | 3     | 4     | 3     | 1      | 1      | 2      | 1      | 1      | 1      | 1      | 1      |
| 21149  | 5     | 2     | 3     | 3     | 3     | 5     | 1      | 0      | 1      | 2      | 1      | 1      | 1      | 0      |
| 21164  | 4     | 2     | 1     | 1     | 4     | 4     | 0      | 0      | 1      | 2      | 1      | 1      | 1      | 1      |
| 21165  | 4     | 2     | 1     | 3     | 3     | 4     | 1      | 0      | 1      | 1      | 2      | 1      | 0      | 0      |
| 21171  | 4     | 3     | 1     | 3     | 4     | 3     | 1      | 1      | 2      | 2      | 1      | 1      | 1      | 1      |
| 21176  | 5     | 2     | 5     | 5     | 4     | 5     | 0      | 0      | 1      | 0      | 1      | 0      | 0      | 1      |
| 21187  | 3     | 2     | 4     | 4     | 3     | 4     | 1      | 2      | 2      | 2      | 1      | 1      | 2      | 1      |
| 21192  | 4     | 3     | 1     | 1     | 3     | 3     | 2      | 0      | 0      | 0      | 1      | 0      | 1      | 1      |
| 21198  | 4     | 3     | 1     | 3     | 3     | 4     | 1      | 0      | 0      | 0      | 1      | 1      | 0      | 2      |
| 21199  | 4     | 2     | 1     | 3     | 4     | 4     | 1      | 1      | 1      | 1      | 1      | 1      | 1      | 1      |
| 21206  | 3     | 3     | 3     | 1     | 3     | 3     | 1      | 0      | 0      | 1      | 1      | 2      | 1      | 1      |

| respid | Q52_2 | Q53_1 | Q54_1 | Q54_2 | Q54_3 | Q55_1 | Q56a_1 | Q56b_1 | Q56c_1 | Q56d_1 | Q56e_1 | Q56f_1 | Q56g_1 | Q56h_1 |
|--------|-------|-------|-------|-------|-------|-------|--------|--------|--------|--------|--------|--------|--------|--------|
| 21212  | 5     | 1     | 1     | 1     | 4     | 5     | 0      | 0      | 0      | 0      | 0      | 0      | 0      | 1      |
| 21216  | 5     | 1     | 3     | 3     | 4     | 5     | 0      | 1      | 1      | 2      | 2      | 1      | 2      | 1      |
| 21217  | 3     | 4     | 3     | 4     | 3     | 3     | 1      | 0      | 1      | 2      | 1      | 1      | 2      | 1      |
| 21228  | 4     | 3     | 3     | 4     | 3     | 4     | 1      | 0      | 1      | 1      | 1      | 1      | 2      | 0      |
| 21229  | 2     | 3     | 3     | 3     | 3     | 4     | 1      | 1      | 1      | 1      | 1      | 2      | 1      | 1      |
| 21230  | 5     | 2     | 1     | 3     | 4     | 4     | 0      | 0      | 1      | 0      | 1      | 0      | 0      | 1      |
| 21243  | 4     | 2     | 4     | 3     | 3     | 3     | 1      | 1      | 2      | 0      | 1      | 2      | 2      | 1      |
| 21247  | 5     | 2     | 3     | 3     | 4     | 5     | 1      | 0      | 2      | 1      | 2      | 1      | 1      | 1      |
| 21253  | 5     | 1     | 1     | 1     | 4     | 5     | 1      | 0      | 0      | 0      | 1      | 1      | 0      | 0      |
| 21264  | 1     | 5     | 0     | 0     | 0     | 3     | 1      | 1      | 1      | 1      | 1      | 2      | 1      | 1      |
| 21265  | 4     | 1     | 1     | 1     | 4     | 5     | 0      | 0      | 0      | 0      | 1      | 1      | 1      | 1      |
| 21273  | 5     | 3     | 1     | 1     | 4     | 4     | 1      | 1      | 1      | 0      | 1      | 0      | 1      | 1      |
| 21275  | 5     | 4     | 3     | 1     | 4     | 4     | 1      | 1      | 2      | 0      | 1      | 1      | 1      | 1      |
| 21278  | 3     | 3     | 3     | 4     | 3     | 3     | 1      | 1      | 1      | 1      | 1      | 2      | 1      | 2      |
| 21291  | 4     | 2     | 1     | 3     | 3     | 4     | 1      | 0      | 1      | 2      | 1      | 1      | 1      | 1      |
| 21298  | 5     | 2     | 1     | 1     | 4     | 5     | 0      | 0      | 0      | 0      | 1      | 0      | 0      | 1      |
| 21301  | 5     | 1     | 1     | 0     | 4     | 5     | 0      | 0      | 1      | 0      | 1      | 0      | 1      | 0      |
| 21312  | 5     | 2     | 1     | 3     | 4     | 4     | 1      | 2      | 1      | 1      | 1      | 1      | 1      | 2      |
| 21323  | 3     | 3     | 1     | 4     | 3     | 2     | 1      | 2      | 2      | 1      | 2      | 2      | 2      | 2      |
| 21325  | 4     | 2     | 1     | 3     | 3     | 4     | 1      | 0      | 0      | 1      | 1      | 1      | 1      | 1      |
| 21341  | 4     | 2     | 1     | 1     | 4     | 4     | 1      | 0      | 1      | 0      | 0      | 0      | 0      | 1      |
| 21349  | 4     | 2     | 1     | 3     | 4     | 4     | 1      | 1      | 1      | 1      | 1      | 1      | 2      | 2      |
| 21350  | 5     | 2     | 3     | 3     | 3     | 5     | 1      | 0      | 0      | 2      | 1      | 1      | 1      | 1      |
| 21354  | 2     | 4     | 3     | 4     | 1     | 2     | 2      | 1      | 1      | 1      | 2      | 2      | 2      | 2      |
| 21372  | 4     | 2     | 1     | 4     | 3     | 4     | 1      | 0      | 2      | 2      | 1      | 1      | 2      | 2      |
| 21373  | 2     | 2     | 1     | 1     | 3     | 3     | 1      | 1      | 1      | 1      | 2      | 2      | 2      | 1      |
| 21378  | 3     | 2     | 1     | 1     | 5     | 4     | 1      | 1      | 0      | 0      | 1      | 0      | 1      | 1      |
| 21393  | 4     | 2     | 1     | 1     | 3     | 4     | 1      | 0      | 2      | 1      | 1      | 1      | 1      | 0      |
| 21401  | 2     | 2     | 3     | 3     | 4     | 4     | 0      | 2      | 1      | 0      | 1      | 1      | 0      | 0      |
| 21405  | 3     | 2     | 3     | 3     | 3     | 3     | 1      | 0      | 0      | 0      | 0      | 0      | 0      | 0      |
| 21406  | 4     | 1     | 1     | 1     | 4     | 4     | 0      | 0      | 1      | 1      | 1      | 1      | 1      | 0      |
| 21407  | 4     | 2     | 1     | 3     | 4     | 4     | 1      | 0      | 1      | 0      | 1      | 0      | 1      | 1      |



| respid | Q52_2 | Q53_1 | Q54_1 | Q54_2 | Q54_3 | Q55_1 | Q56a_1 | Q56b_1 | Q56c_1 | Q56d_1 | Q56e_1 | Q56f_1 | Q56g_1 | Q56h_1 |
|--------|-------|-------|-------|-------|-------|-------|--------|--------|--------|--------|--------|--------|--------|--------|
| 21418  | 5     | 1     | 3     | 3     | 3     | 5     | 0      | 0      | 0      | 0      | 0      | 0      | 0      | 0      |
| 21420  | 4     | 2     | 1     | 1     | 4     | 4     | 1      | 0      | 2      | 0      | 1      | 1      | 1      | 0      |
| 21421  | 5     | 2     | 1     | 4     | 4     | 5     | 0      | 0      | 0      | 0      | 0      | 0      | 1      | 1      |
| 21446  | 4     | 2     | 1     | 1     | 4     | 4     | 1      | 1      | 1      | 2      | 1      | 1      | 1      | 1      |
| 21449  | 4     | 2     | 3     | 3     | 3     | 3     | 2      | 1      | 1      | 2      | 2      | 2      | 2      | 2      |
| 21452  | 4     | 2     | 3     | 1     | 4     | 4     | 0      | 0      | 0      | 2      | 1      | 0      | 0      | 1      |
| 21455  | 2     | 3     | 3     | 3     | 4     | 4     | 1      | 2      | 1      | 0      | 1      | 2      | 1      | 2      |
| 21469  | 4     | 2     | 1     | 1     | 4     | 5     | 0      | 0      | 0      | 0      | 1      | 0      | 1      | 1      |
| 21471  | 4     | 1     | 3     | 4     | 3     | 2     | 1      | 1      | 1      | 3      | 2      | 2      | 2      | 2      |
| 21472  | 4     | 2     | 1     | 1     | 4     | 4     | 1      | 0      | 1      | 0      | 1      | 0      | 1      | 0      |
| 21474  | 5     | 1     | 1     | 1     | 4     | 5     | 0      | 0      | 0      | 0      | 0      | 0      | 0      | 1      |
| 21479  | 5     | 2     | 1     | 1     | 3     | 4     | 1      | 0      | 0      | 0      | 1      | 1      | 1      | 1      |
| 21485  | 5     | 2     | 1     | 1     | 3     | 3     | 1      | 0      | 1      | 1      | 1      | 1      | 1      | 0      |
| 21512  | 4     | 2     | 1     | 1     | 4     | 4     | 1      | 0      | 1      | 1      | 1      | 1      | 1      | 1      |
| 21513  | 5     | 1     | 0     | 1     | 4     | 5     | 0      | 1      | 0      | 0      | 1      | 0      | 0      | 0      |
| 21514  | 3     | 3     | 1     | 3     | 3     | 3     | 1      | 1      | 1      | 1      | 1      | 1      | 1      | 1      |
| 21520  | 4     | 2     | 1     | 3     | 4     | 4     | 1      | 0      | 2      | 1      | 1      | 1      | 1      | 1      |
| 21539  | 4     | 1     | 1     | 1     | 3     | 3     | 1      | 0      | 2      | 2      | 1      | 1      | 1      | 1      |
| 21553  | 3     | 1     | 3     | 3     | 1     | 3     | 1      | 1      | 1      | 0      | 1      | 2      | 2      | 0      |
| 21560  | 4     | 2     | 1     | 1     | 4     | 4     | 1      | 0      | 1      | 1      | 1      | 1      | 1      | 1      |
| 21561  | 3     | 1     | 3     | 3     | 3     | 5     | 3      | 2      | 2      | 2      | 1      | 1      | 2      | 1      |
| 21563  | 4     | 2     | 1     | 3     | 4     | 5     | 2      | 0      | 1      | 0      | 1      | 1      | 1      | 0      |
| 21565  | 3     | 2     | 1     | 1     | 1     | 3     | 1      | 1      | 1      | 0      | 0      | 0      | 0      | 0      |
| 21582  | 5     | 1     | 0     | 1     | 3     | 3     | 1      | 1      | 2      | 1      | 2      | 2      | 1      | 2      |
| 21584  | 4     | 1     | 1     | 3     | 3     | 4     | 1      | 0      | 1      | 0      | 1      | 1      | 1      | 1      |
| 21585  | 2     | 3     | 1     | 1     | 3     | 3     | 1      | 1      | 1      | 1      | 1      | 1      | 1      | 1      |
| 21586  | 4     | 1     | 3     | 3     | 3     | 3     | 1      | 1      | 1      | 1      | 1      | 1      | 0      | 1      |
| 21587  | 3     | 2     | 3     | 3     | 3     | 3     | 1      | 1      | 1      | 2      | 1      | 1      | 1      | 1      |
| 21590  | 2     | 4     | 4     | 4     | 1     | 1     | 1      | 2      | 1      | 1      | 1      | 2      | 2      | 2      |
| 21601  | 4     | 2     | 4     | 4     | 4     | 4     | 1      | 2      | 1      | 1      | 1      | 1      | 2      | 1      |
| 21611  | 4     | 3     | 1     | 3     | 1     | 4     | 1      | 1      | 1      | 2      | 1      | 1      | 1      | 1      |
| 21612  | 4     | 3     | 3     | 3     | 1     | 4     | 1      | 1      | 1      | 2      | 1      | 1      | 1      | 1      |

| respid | Q52_2 | Q53_1 | Q54_1 | Q54_2 | Q54_3 | Q55_1 | Q56a_1 | Q56b_1 | Q56c_1 | Q56d_1 | Q56e_1 | Q56f_1 | Q56g_1 | Q56h_1 |
|--------|-------|-------|-------|-------|-------|-------|--------|--------|--------|--------|--------|--------|--------|--------|
| 21625  | 4     | 2     | 3     | 3     | 4     | 4     | 1      | 1      | 1      | 0      | 1      | 1      | 1      | 1      |
| 21633  | 5     | 1     | 1     | 1     | 4     | 5     | 0      | 0      | 1      | 0      | 0      | 0      | 1      | 1      |
| 21640  | 5     | 3     | 1     | 3     | 4     | 4     | 0      | 1      | 0      | 1      | 1      | 1      | 1      | 0      |
| 21647  | 5     | 1     | 0     | 0     | 5     | 5     | 0      | 0      | 0      | 0      | 0      | 0      | 0      | 0      |
| 21648  | 2     | 4     | 4     | 4     | 1     | 2     | 2      | 1      | 2      | 2      | 2      | 2      | 2      | 1      |
| 21656  | 5     | 2     | 3     | 3     | 4     | 5     | 1      | 1      | 0      | 0      | 1      | 2      | 1      | 0      |
| 21657  | 4     | 2     | 3     | 3     | 4     | 4     | 0      | 2      | 1      | 0      | 1      | 1      | 1      | 1      |
| 21658  | 2     | 3     | 3     | 4     | 3     | 3     | 2      | 1      | 1      | 1      | 1      | 2      | 2      | 1      |
| 21665  | 3     | 4     | 3     | 4     | 1     | 3     | 1      | 2      | 1      | 1      | 1      | 1      | 2      | 1      |
| 21666  | 3     | 3     | 3     | 4     | 3     | 3     | 2      | 1      | 1      | 2      | 3      | 2      | 1      | 1      |
| 21668  | 3     | 4     | 3     | 3     | 4     | 4     | 1      | 2      | 1      | 2      | 2      | 2      | 1      | 1      |
| 21673  | 3     | 2     | 3     | 4     | 1     | 3     | 1      | 1      | 1      | 1      | 1      | 2      | 2      | 1      |
| 21681  | 2     | 2     | 1     | 1     | 3     | 3     | 1      | 1      | 1      | 1      | 1      | 1      | 1      | 1      |
| 21682  | 4     | 1     | 1     | 1     | 4     | 5     | 0      | 0      | 0      | 0      | 1      | 1      | 1      | 0      |
| 21685  | 3     | 3     | 3     | 3     | 3     | 3     | 1      | 1      | 2      | 1      | 1      | 1      | 2      | 2      |
| 21692  | 3     | 2     | 1     | 1     | 3     | 4     | 1      | 1      | 1      | 1      | 1      | 1      | 1      | 1      |
| 21697  | 5     | 2     | 1     | 1     | 4     | 4     | 1      | 0      | 1      | 0      | 1      | 0      | 0      | 1      |
| 21711  | 3     | 3     | 4     | 4     | 3     | 3     | 2      | 2      | 1      | 2      | 2      | 2      | 1      | 1      |
| 21715  | 5     | 2     | 3     | 3     | 0     | 4     | 1      | 0      | 2      | 0      | 2      | 2      | 2      | 2      |
| 21726  | 5     | 2     | 0     | 3     | 5     | 4     | 0      | 2      | 0      | 0      | 0      | 0      | 0      | 1      |
| 21748  | 3     | 2     | 1     | 1     | 3     | 3     | 1      | 2      | 1      | 1      | 1      | 1      | 1      | 0      |
| 21761  | 5     | 1     | 1     | 3     | 4     | 5     | 1      | 0      | 1      | 0      | 1      | 1      | 1      | 0      |
| 21769  | 3     | 3     | 3     | 3     | 4     | 3     | 1      | 2      | 2      | 2      | 1      | 1      | 2      | 1      |
| 21774  | 2     | 3     | 1     | 1     | 1     | 3     | 1      | 1      | 1      | 1      | 1      | 1      | 1      | 1      |
| 21778  | 5     | 1     | 5     | 5     | 5     | 5     | 0      | 0      | 3      | 2      | 3      | 3      | 3      | 3      |
| 21785  | 2     | 3     | 1     | 1     | 3     | 3     | 1      | 1      | 1      | 1      | 1      | 1      | 1      | 1      |
| 21799  | 4     | 2     | 3     | 4     | 4     | 4     | 1      | 1      | 1      | 2      | 2      | 1      | 1      | 1      |
| 21820  | 2     | 4     | 1     | 3     | 4     | 3     | 2      | 2      | 0      | 0      | 1      | 1      | 1      | 2      |
| 21837  | 3     | 1     | 1     | 1     | 4     | 5     | 1      | 2      | 1      | 1      | 0      | 1      | 0      | 0      |
| 21845  | 4     | 3     | 3     | 4     | 4     | 3     | 1      | 1      | 2      | 2      | 2      | 2      | 1      | 2      |
| 21846  | 4     | 1     | 0     | 1     | 4     | 2     | 0      | 0      | 0      | 0      | 0      | 0      | 0      | 1      |
| 21849  | 3     | 2     | 1     | 3     | 3     | 4     | 1      | 1      | 1      | 1      | 1      | 1      | 1      | 1      |

| respid | Q52_2 | Q53_1 | Q54_1 | Q54_2 | Q54_3 | Q55_1 | Q56a_1 | Q56b_1 | Q56c_1 | Q56d_1 | Q56e_1 | Q56f_1 | Q56g_1 | Q56h_1 |
|--------|-------|-------|-------|-------|-------|-------|--------|--------|--------|--------|--------|--------|--------|--------|
| 21850  | 3     | 2     | 3     | 3     | 3     | 3     | 1      | 2      | 0      | 0      | 1      | 1      | 1      | 1      |
| 21855  | 5     | 1     | 1     | 1     | 4     | 5     | 0      | 0      | 1      | 0      | 1      | 0      | 0      | 1      |
| 21859  | 4     | 1     | 1     | 1     | 4     | 4     | 1      | 0      | 0      | 0      | 1      | 0      | 0      | 0      |
| 21861  | 4     | 3     | 3     | 4     | 4     | 3     | 1      | 1      | 1      | 1      | 1      | 1      | 1      | 1      |
| 21866  | 5     | 1     | 1     | 1     | 4     | 5     | 0      | 0      | 0      | 0      | 0      | 0      | 0      | 0      |
| 21873  | 4     | 3     | 3     | 4     | 4     | 3     | 1      | 2      | 1      | 1      | 1      | 1      | 2      | 1      |
| 21876  | 4     | 2     | 1     | 3     | 3     | 4     | 1      | 0      | 2      | 0      | 1      | 0      | 1      | 1      |
| 21882  | 5     | 2     | 1     | 1     | 3     | 5     | 0      | 0      | 0      | 0      | 0      | 0      | 0      | 0      |
| 21884  | 3     | 5     | 3     | 1     | 3     | 2     | 1      | 1      | 1      | 1      | 1      | 2      | 1      | 1      |
| 21887  | 4     | 2     | 1     | 3     | 3     | 3     | 1      | 0      | 1      | 0      | 1      | 1      | 2      | 2      |
| 21892  | 4     | 2     | 1     | 1     | 4     | 4     | 1      | 1      | 1      | 0      | 0      | 1      | 1      | 1      |
| 21907  | 3     | 2     | 1     | 1     | 3     | 4     | 0      | 1      | 0      | 0      | 0      | 1      | 0      | 1      |
| 21910  | 2     | 4     | 4     | 4     | 4     | 2     | 1      | 1      | 3      | 2      | 2      | 2      | 2      | 2      |
| 21912  | 3     | 2     | 3     | 1     | 3     | 3     | 1      | 1      | 1      | 1      | 1      | 1      | 2      | 1      |
| 21914  | 4     | 2     | 1     | 3     | 3     | 3     | 1      | 1      | 1      | 1      | 1      | 1      | 2      | 2      |
| 21925  | 4     | 2     | 1     | 3     | 4     | 4     | 1      | 2      | 0      | 0      | 1      | 0      | 0      | 1      |
| 21937  | 4     | 1     | 1     | 1     | 4     | 4     | 1      | 0      | 1      | 0      | 1      | 1      | 0      | 1      |
| 21938  | 3     | 3     | 3     | 3     | 3     | 3     | 1      | 1      | 1      | 1      | 1      | 1      | 1      | 1      |
| 21940  | 5     | 2     | 1     | 3     | 3     | 4     | 1      | 0      | 1      | 2      | 1      | 1      | 1      | 1      |
| 21942  | 5     | 2     | 1     | 1     | 3     | 4     | 0      | 0      | 1      | 0      | 1      | 0      | 1      | 1      |
| 21947  | 4     | 1     | 1     | 1     | 4     | 4     | 0      | 0      | 0      | 0      | 0      | 0      | 1      | 0      |
| 21948  | 2     | 3     | 1     | 3     | 3     | 3     | 1      | 1      | 1      | 1      | 1      | 1      | 1      | 1      |
| 21961  | 5     | 2     | 3     | 4     | 4     | 3     | 0      | 0      | 0      | 0      | 1      | 0      | 1      | 0      |
| 21977  | 2     | 2     | 3     | 4     | 3     | 3     | 1      | 0      | 1      | 2      | 1      | 1      | 1      | 1      |
| 21983  | 4     | 1     | 4     | 4     | 4     | 4     | 0      | 1      | 1      | 1      | 1      | 2      | 2      | 1      |
| 21986  | 3     | 3     | 3     | 3     | 3     | 3     | 1      | 1      | 1      | 1      | 1      | 1      | 2      | 1      |
| 21988  | 4     | 2     | 3     | 3     | 4     | 4     | 1      | 0      | 0      | 0      | 0      | 0      | 0      | 1      |
| 21996  | 5     | 2     | 1     | 3     | 4     | 4     | 1      | 0      | 1      | 2      | 1      | 1      | 1      | 1      |
| 21997  | 4     | 2     | 3     | 4     | 3     | 3     | 3      | 2      | 2      | 2      | 2      | 2      | 2      | 0      |
| 22005  | 5     | 3     | 1     | 1     | 4     | 4     | 1      | 0      | 1      | 0      | 1      | 0      | 1      | 0      |
| 22013  | 5     | 1     | 0     | 0     | 5     | 5     | 0      | 0      | 0      | 0      | 0      | 0      | 0      | 0      |
| 22018  | 5     | 1     | 0     | 1     | 4     | 5     | 0      | 1      | 0      | 1      | 1      | 1      | 0      | 1      |

| respid | Q52_2 | Q53_1 | Q54_1 | Q54_2 | Q54_3 | Q55_1 | Q56a_1 | Q56b_1 | Q56c_1 | Q56d_1 | Q56e_1 | Q56f_1 | Q56g_1 | Q56h_1 |
|--------|-------|-------|-------|-------|-------|-------|--------|--------|--------|--------|--------|--------|--------|--------|
| 22019  | 4     | 2     | 1     | 1     | 4     | 4     | 1      | 1      | 0      | 0      | 1      | 0      | 1      | 1      |
| 22071  | 1     | 5     | 0     | 0     | 0     | 3     | 3      | 2      | 0      | 1      | 2      | 1      | 2      | 2      |
| 22082  | 5     | 2     | 3     | 3     | 4     | 4     | 1      | 0      | 1      | 1      | 1      | 1      | 1      | 0      |
| 22085  | 4     | 1     | 0     | 1     | 3     | 4     | 0      | 1      | 1      | 0      | 1      | 1      | 0      | 1      |
| 22092  | 5     | 2     | 1     | 1     | 4     | 5     | 0      | 0      | 0      | 0      | 0      | 0      | 1      | 1      |
| 22097  | 3     | 3     | 3     | 3     | 3     | 3     | 1      | 2      | 2      | 2      | 1      | 1      | 1      | 1      |
| 22111  | 4     | 1     | 0     | 0     | 5     | 5     | 0      | 0      | 0      | 0      | 1      | 0      | 0      | 0      |
| 22118  | 3     | 2     | 1     | 1     | 3     | 4     | 1      | 0      | 1      | 1      | 1      | 1      | 2      | 1      |
| 22132  | 3     | 2     | 1     | 3     | 4     | 3     | 1      | 1      | 1      | 1      | 1      | 1      | 1      | 0      |
| 22133  | 3     | 2     | 3     | 1     | 3     | 3     | 2      | 0      | 2      | 1      | 0      | 1      | 1      | 0      |
| 22139  | 5     | 1     | 1     | 0     | 5     | 5     | 0      | 0      | 0      | 0      | 0      | 0      | 0      | 0      |
| 22142  | 3     | 3     | 3     | 3     | 3     | 3     | 1      | 2      | 2      | 2      | 1      | 1      | 2      | 1      |
| 22146  | 4     | 4     | 3     | 4     | 3     | 4     | 1      | 2      | 1      | 0      | 1      | 2      | 2      | 1      |
| 22181  | 5     | 1     | 0     | 0     | 4     | 5     | 0      | 0      | 0      | 0      | 0      | 0      | 0      | 0      |
| 22202  | 5     | 1     | 3     | 3     | 4     | 4     | 0      | 0      | 0      | 0      | 0      | 1      | 1      | 2      |
| 22214  | 5     | 1     | 1     | 1     | 4     | 5     | 0      | 2      | 0      | 1      | 0      | 0      | 0      | 0      |
| 22223  | 4     | 1     | 1     | 1     | 4     | 4     | 0      | 0      | 0      | 0      | 0      | 1      | 1      | 1      |
| 22227  | 4     | 2     | 1     | 1     | 3     | 4     | 1      | 0      | 1      | 0      | 0      | 0      | 1      | 1      |
| 22229  | 4     | 2     | 4     | 4     | 5     | 4     | 0      | 1      | 1      | 1      | 0      | 0      | 2      | 0      |
| 22239  | 3     | 3     | 5     | 5     | 1     | 4     | 2      | 2      | 2      | 2      | 3      | 1      | 2      | 1      |
| 22245  | 2     | 4     | 1     | 1     | 3     | 3     | 2      | 1      | 2      | 2      | 2      | 2      | 2      | 2      |
| 22256  | 5     | 1     | 0     | 0     | 5     | 5     | 0      | 0      | 0      | 0      | 1      | 0      | 0      | 0      |
| 22260  | 5     | 2     | 3     | 3     | 1     | 3     | 1      | 0      | 1      | 2      | 1      | 1      | 2      | 0      |
| 22298  | 3     | 2     | 1     | 4     | 3     | 3     | 1      | 1      | 1      | 2      | 1      | 1      | 1      | 1      |
| 22321  | 5     | 1     | 0     | 0     | 5     | 5     | 0      | 0      | 0      | 0      | 0      | 0      | 0      | 0      |
| 22340  | 5     | 1     | 1     | 1     | 4     | 5     | 0      | 0      | 0      | 0      | 0      | 0      | 0      | 0      |
| 22346  | 3     | 3     | 3     | 4     | 1     | 3     | 1      | 1      | 0      | 2      | 1      | 2      | 1      | 2      |
| 22356  | 5     | 1     | 1     | 1     | 4     | 4     | 1      | 0      | 0      | 0      | 2      | 1      | 1      | 1      |
| 22361  | 4     | 2     | 1     | 3     | 4     | 4     | 1      | 0      | 1      | 1      | 1      | 1      | 0      | 1      |
| 22364  | 3     | 1     | 3     | 4     | 1     | 3     | 1      | 2      | 2      | 2      | 2      | 2      | 2      | 2      |
| 22368  | 5     | 1     | 1     | 1     | 5     | 5     | 0      | 0      | 0      | 0      | 0      | 0      | 0      | 0      |
| 22374  | 3     | 3     | 4     | 3     | 4     | 4     | 0      | 1      | 1      | 2      | 1      | 2      | 2      | 2      |

| respid | Q52_2 | Q53_1 | Q54_1 | Q54_2 | Q54_3 | Q55_1 | Q56a_1 | Q56b_1 | Q56c_1 | Q56d_1 | Q56e_1 | Q56f_1 | Q56g_1 | Q56h_1 |
|--------|-------|-------|-------|-------|-------|-------|--------|--------|--------|--------|--------|--------|--------|--------|
| 22375  | 4     | 2     | 1     | 1     | 4     | 4     | 1      | 0      | 1      | 0      | 1      | 0      | 0      | 1      |
| 22377  | 4     | 2     | 1     | 1     | 4     | 4     | 0      | 1      | 1      | 0      | 1      | 1      | 1      | 1      |
| 22383  | 5     | 1     | 1     | 1     | 4     | 5     | 0      | 0      | 0      | 0      | 0      | 0      | 0      | 0      |
| 22387  | 5     | 2     | 1     | 1     | 3     | 5     | 0      | 0      | 1      | 0      | 1      | 0      | 0      | 0      |
| 22392  | 3     | 2     | 1     | 3     | 3     | 4     | 1      | 1      | 0      | 1      | 1      | 1      | 0      | 2      |
| 22393  | 4     | 1     | 1     | 1     | 4     | 4     | 0      | 0      | 0      | 0      | 0      | 0      | 0      | 1      |
| 22394  | 2     | 3     | 4     | 3     | 1     | 3     | 1      | 2      | 1      | 1      | 1      | 1      | 1      | 0      |
| 22395  | 4     | 2     | 1     | 3     | 3     | 3     | 1      | 0      | 1      | 0      | 1      | 0      | 0      | 1      |
| 22401  | 4     | 2     | 3     | 1     | 1     | 3     | 1      | 0      | 0      | 1      | 1      | 1      | 1      | 0      |
| 22407  | 5     | 1     | 1     | 1     | 4     | 5     | 1      | 0      | 0      | 0      | 0      | 0      | 0      | 0      |
| 22410  | 5     | 2     | 1     | 3     | 4     | 4     | 1      | 2      | 1      | 1      | 1      | 1      | 1      | 1      |
| 22418  | 5     | 2     | 1     | 1     | 3     | 3     | 0      | 0      | 1      | 1      | 2      | 1      | 1      | 2      |
| 22421  | 5     | 1     | 1     | 1     | 4     | 5     | 0      | 0      | 0      | 0      | 0      | 0      | 0      | 0      |
| 22423  | 5     | 1     | 1     | 1     | 4     | 5     | 0      | 0      | 0      | 2      | 1      | 1      | 0      | 2      |
| 22425  | 5     | 2     | 1     | 1     | 4     | 4     | 0      | 1      | 0      | 0      | 1      | 1      | 1      | 1      |
| 22427  | 5     | 1     | 1     | 1     | 4     | 5     | 0      | 0      | 0      | 0      | 0      | 0      | 0      | 0      |
| 22431  | 3     | 4     | 4     | 4     | 3     | 3     | 0      | 1      | 0      | 1      | 1      | 2      | 2      | 2      |
| 22435  | 4     | 1     | 1     | 3     | 4     | 5     | 0      | 0      | 0      | 0      | 1      | 1      | 1      | 1      |
| 22436  | 3     | 2     | 5     | 3     | 4     | 3     | 2      | 0      | 2      | 1      | 3      | 1      | 2      | 1      |
| 22442  | 5     | 1     | 1     | 1     | 5     | 5     | 0      | 0      | 1      | 0      | 1      | 0      | 0      | 1      |
| 22444  | 4     | 2     | 3     | 4     | 3     | 2     | 1      | 2      | 2      | 2      | 2      | 1      | 2      | 1      |
| 22445  | 3     | 2     | 1     | 3     | 4     | 4     | 1      | 2      | 1      | 2      | 1      | 0      | 1      | 2      |
| 22446  | 5     | 1     | 0     | 0     | 5     | 5     | 0      | 0      | 0      | 0      | 0      | 0      | 0      | 0      |
| 22448  | 3     | 2     | 1     | 1     | 4     | 4     | 1      | 0      | 2      | 0      | 1      | 0      | 1      | 1      |
| 22449  | 5     | 1     | 1     | 1     | 4     | 5     | 0      | 1      | 1      | 1      | 1      | 1      | 1      | 1      |
| 22450  | 4     | 3     | 1     | 4     | 3     | 4     | 1      | 1      | 2      | 1      | 1      | 1      | 1      | 2      |
| 22453  | 4     | 3     | 3     | 4     | 3     | 4     | 1      | 2      | 2      | 2      | 1      | 1      | 1      | 1      |
| 22465  | 4     | 1     | 1     | 3     | 3     | 3     | 1      | 1      | 1      | 1      | 1      | 1      | 2      | 0      |
| 22472  | 4     | 1     | 4     | 4     | 4     | 5     | 0      | 2      | 1      | 0      | 0      | 0      | 0      | 0      |
| 22475  | 4     | 3     | 1     | 3     | 4     | 4     | 1      | 1      | 2      | 1      | 1      | 1      | 1      | 1      |
| 22478  | 5     | 2     | 1     | 1     | 4     | 4     | 1      | 0      | 0      | 1      | 1      | 1      | 1      | 1      |
| 22491  | 4     | 2     | 1     | 1     | 4     | 4     | 1      | 0      | 2      | 2      | 0      | 0      | 1      | 1      |

| respid | Q52_2 | Q53_1 | Q54_1 | Q54_2 | Q54_3 | Q55_1 | Q56a_1 | Q56b_1 | Q56c_1 | Q56d_1 | Q56e_1 | Q56f_1 | Q56g_1 | Q56h_1 |
|--------|-------|-------|-------|-------|-------|-------|--------|--------|--------|--------|--------|--------|--------|--------|
| 22497  | 3     | 2     | 1     | 3     | 4     | 3     | 1      | 1      | 1      | 1      | 1      | 1      | 1      | 1      |
| 22498  | 4     | 2     | 1     | 3     | 3     | 4     | 1      | 0      | 1      | 1      | 1      | 1      | 1      | 1      |
| 22499  | 1     | 4     | 4     | 4     | 1     | 2     | 1      | 1      | 0      | 1      | 1      | 2      | 2      | 2      |
| 22503  | 4     | 2     | 1     | 3     | 4     | 4     | 1      | 0      | 0      | 0      | 1      | 1      | 0      | 1      |
| 22507  | 3     | 2     | 1     | 1     | 3     | 4     | 1      | 0      | 1      | 2      | 1      | 0      | 0      | 1      |
| 22513  | 4     | 2     | 1     | 3     | 3     | 4     | 1      | 1      | 2      | 0      | 2      | 1      | 0      | 1      |
| 22517  | 5     | 1     | 1     | 1     | 4     | 4     | 1      | 0      | 1      | 0      | 1      | 0      | 0      | 1      |
| 22524  | 3     | 3     | 4     | 3     | 3     | 3     | 1      | 1      | 1      | 2      | 2      | 2      | 2      | 3      |
| 22528  | 5     | 2     | 1     | 1     | 4     | 4     | 0      | 0      | 0      | 0      | 1      | 0      | 1      | 0      |
| 22544  | 2     | 3     | 1     | 3     | 3     | 4     | 1      | 0      | 2      | 2      | 1      | 1      | 2      | 2      |
| 22571  | 5     | 3     | 0     | 1     | 4     | 5     | 1      | 0      | 0      | 0      | 1      | 0      | 1      | 1      |
| 22576  | 2     | 3     | 1     | 3     | 3     | 3     | 1      | 1      | 0      | 1      | 1      | 2      | 1      | 1      |
| 22579  | 4     | 2     | 1     | 3     | 4     | 4     | 0      | 0      | 1      | 1      | 1      | 1      | 2      | 1      |
| 22583  | 4     | 3     | 1     | 1     | 3     | 3     | 1      | 1      | 2      | 1      | 1      | 1      | 1      | 1      |
| 22591  | 4     | 3     | 3     | 1     | 4     | 3     | 1      | 2      | 2      | 2      | 1      | 1      | 2      | 1      |
| 22592  | 3     | 3     | 3     | 3     | 3     | 3     | 1      | 1      | 2      | 1      | 1      | 1      | 1      | 1      |
| 22612  | 2     | 4     | 1     | 1     | 3     | 3     | 0      | 0      | 0      | 1      | 2      | 2      | 1      | 1      |
| 22613  | 4     | 2     | 0     | 0     | 4     | 4     | 0      | 0      | 0      | 1      | 1      | 1      | 1      | 1      |
| 22615  | 5     | 3     | 1     | 1     | 3     | 4     | 1      | 1      | 2      | 2      | 1      | 1      | 1      | 1      |
| 22621  | 5     | 2     | 1     | 1     | 4     | 4     | 0      | 0      | 0      | 0      | 0      | 0      | 1      | 1      |
| 22625  | 3     | 2     | 1     | 1     | 3     | 3     | 0      | 0      | 1      | 2      | 1      | 1      | 1      | 0      |
| 22628  | 4     | 1     | 1     | 1     | 1     | 2     | 0      | 1      | 0      | 0      | 1      | 1      | 1      | 1      |
| 22632  | 5     | 1     | 1     | 1     | 5     | 5     | 0      | 0      | 0      | 0      | 0      | 0      | 0      | 0      |
| 22639  | 5     | 1     | 1     | 1     | 4     | 5     | 0      | 0      | 0      | 0      | 0      | 0      | 0      | 0      |
| 22648  | 3     | 2     | 1     | 4     | 4     | 5     | 1      | 1      | 0      | 2      | 3      | 1      | 1      | 1      |
| 22649  | 3     | 1     | 0     | 1     | 3     | 4     | 1      | 2      | 1      | 2      | 2      | 1      | 2      | 1      |
| 22655  | 4     | 2     | 1     | 1     | 3     | 4     | 1      | 2      | 1      | 1      | 1      | 1      | 2      | 1      |
| 22659  | 4     | 1     | 0     | 0     | 4     | 3     | 1      | 0      | 1      | 1      | 1      | 1      | 0      | 0      |
| 22660  | 5     | 1     | 3     | 3     | 4     | 5     | 0      | 0      | 0      | 0      | 1      | 1      | 1      | 1      |
| 22666  | 4     | 2     | 3     | 4     | 3     | 4     | 1      | 1      | 1      | 1      | 1      | 1      | 2      | 1      |
| 22667  | 5     | 1     | 1     | 1     | 3     | 4     | 0      | 0      | 1      | 2      | 2      | 2      | 2      | 2      |
| 22670  | 5     | 1     | 1     | 3     | 1     | 5     | 2      | 0      | 0      | 0      | 1      | 1      | 2      | 1      |

| respid | Q52_2 | Q53_1 | Q54_1 | Q54_2 | Q54_3 | Q55_1 | Q56a_1 | Q56b_1 | Q56c_1 | Q56d_1 | Q56e_1 | Q56f_1 | Q56g_1 | Q56h_1 |
|--------|-------|-------|-------|-------|-------|-------|--------|--------|--------|--------|--------|--------|--------|--------|
| 22681  | 5     | 1     | 0     | 0     | 5     | 5     | 0      | 0      | 0      | 0      | 0      | 0      | 0      | 0      |
| 22683  | 4     | 2     | 3     | 3     | 3     | 5     | 1      | 0      | 0      | 2      | 0      | 1      | 0      | 2      |
| 22688  | 3     | 1     | 1     | 3     | 3     | 3     | 1      | 2      | 1      | 0      | 1      | 1      | 1      | 1      |
| 22695  | 4     | 2     | 1     | 1     | 4     | 4     | 1      | 0      | 1      | 0      | 1      | 0      | 1      | 1      |
| 22696  | 5     | 1     | 1     | 1     | 4     | 5     | 0      | 1      | 0      | 0      | 1      | 0      | 1      | 0      |
| 22705  | 2     | 2     | 4     | 4     | 1     | 3     | 2      | 2      | 1      | 2      | 2      | 3      | 3      | 2      |
| 22718  | 3     | 2     | 1     | 3     | 4     | 4     | 1      | 0      | 0      | 0      | 1      | 1      | 1      | 2      |
| 22720  | 5     | 1     | 3     | 3     | 3     | 4     | 1      | 2      | 1      | 1      | 1      | 1      | 1      | 1      |
| 22724  | 4     | 1     | 1     | 1     | 4     | 5     | 0      | 0      | 0      | 0      | 1      | 0      | 0      | 1      |
| 22728  | 5     | 1     | 1     | 1     | 4     | 5     | 0      | 0      | 1      | 0      | 1      | 1      | 1      | 0      |
| 22751  | 5     | 1     | 1     | 1     | 4     | 5     | 0      | 0      | 0      | 0      | 0      | 1      | 1      | 0      |
| 22782  | 2     | 4     | 0     | 3     | 0     | 2     | 1      | 2      | 3      | 2      | 2      | 1      | 3      | 3      |
| 22786  | 4     | 1     | 0     | 0     | 0     | 5     | 0      | 0      | 0      | 0      | 0      | 0      | 0      | 0      |
| 22788  | 4     | 1     | 1     | 1     | 4     | 4     | 0      | 0      | 0      | 0      | 0      | 0      | 0      | 1      |
| 22810  | 4     | 2     | 1     | 1     | 5     | 4     | 1      | 1      | 1      | 0      | 0      | 2      | 0      | 1      |
| 22816  | 5     | 1     | 1     | 1     | 4     | 5     | 0      | 0      | 0      | 0      | 0      | 0      | 0      | 1      |
| 22818  | 5     | 1     | 0     | 1     | 5     | 5     | 0      | 0      | 0      | 0      | 0      | 0      | 0      | 0      |
| 22854  | 3     | 2     | 3     | 3     | 3     | 3     | 1      | 1      | 2      | 2      | 1      | 1      | 2      | 1      |
| 22858  | 5     | 1     | 0     | 1     | 4     | 5     | 0      | 0      | 0      | 0      | 0      | 0      | 0      | 0      |
| 22862  | 3     | 2     | 1     | 3     | 4     | 3     | 1      | 0      | 1      | 1      | 1      | 1      | 1      | 1      |
| 22865  | 4     | 1     | 3     | 3     | 3     | 4     | 1      | 1      | 2      | 1      | 1      | 1      | 1      | 1      |
| 22868  | 5     | 2     | 1     | 1     | 4     | 4     | 1      | 2      | 1      | 1      | 1      | 1      | 1      | 1      |
| 22869  | 4     | 2     | 1     | 1     | 4     | 4     | 1      | 1      | 1      | 2      | 1      | 0      | 1      | 1      |
| 22873  | 4     | 1     | 1     | 3     | 4     | 4     | 0      | 0      | 0      | 0      | 1      | 0      | 0      | 1      |
| 22875  | 5     | 1     | 1     | 1     | 3     | 4     | 1      | 0      | 0      | 1      | 1      | 1      | 1      | 1      |
| 22876  | 5     | 1     | 0     | 1     | 3     | 5     | 0      | 0      | 0      | 0      | 0      | 0      | 0      | 0      |
| 22882  | 1     | 4     | 3     | 1     | 1     | 4     | 0      | 2      | 2      | 1      | 2      | 1      | 2      | 2      |
| 22884  | 5     | 2     | 3     | 3     | 4     | 4     | 0      | 0      | 1      | 1      | 1      | 2      | 2      | 1      |
| 22887  | 3     | 2     | 1     | 1     | 1     | 2     | 1      | 1      | 1      | 1      | 1      | 1      | 0      | 1      |
| 22888  | 5     | 1     | 0     | 4     | 5     | 5     | 1      | 0      | 1      | 0      | 1      | 1      | 0      | 1      |
| 22900  | 5     | 1     | 5     | 5     | 5     | 5     | 0      | 0      | 0      | 0      | 0      | 0      | 0      | 0      |
| 22901  | 4     | 2     | 1     | 1     | 4     | 4     | 1      | 0      | 2      | 0      | 0      | 0      | 0      | 0      |

| respid | Q52_2 | Q53_1 | Q54_1 | Q54_2 | Q54_3 | Q55_1 | Q56a_1 | Q56b_1 | Q56c_1 | Q56d_1 | Q56e_1 | Q56f_1 | Q56g_1 | Q56h_1 |
|--------|-------|-------|-------|-------|-------|-------|--------|--------|--------|--------|--------|--------|--------|--------|
| 22912  | 5     | 1     | 1     | 3     | 4     | 5     | 1      | 0      | 1      | 0      | 1      | 0      | 0      | 2      |
| 22913  | 4     | 1     | 3     | 1     | 3     | 4     | 1      | 2      | 1      | 2      | 1      | 1      | 1      | 1      |
| 22921  | 5     | 1     | 1     | 1     | 4     | 5     | 0      | 0      | 0      | 0      | 0      | 0      | 0      | 0      |
| 22925  | 5     | 1     | 1     | 1     | 3     | 4     | 0      | 0      | 0      | 0      | 1      | 0      | 0      | 1      |
| 22940  | 5     | 1     | 0     | 1     | 5     | 5     | 0      | 0      | 0      | 0      | 0      | 0      | 0      | 0      |
| 22941  | 3     | 2     | 0     | 4     | 3     | 4     | 0      | 1      | 1      | 2      | 1      | 2      | 2      | 2      |
| 22947  | 5     | 1     | 1     | 1     | 4     | 5     | 0      | 0      | 1      | 0      | 1      | 0      | 0      | 1      |
| 22948  | 5     | 1     | 0     | 0     | 4     | 5     | 1      | 0      | 0      | 0      | 1      | 0      | 0      | 0      |
| 22964  | 4     | 2     | 4     | 3     | 4     | 4     | 2      | 1      | 2      | 2      | 3      | 1      | 2      | 3      |
| 22966  | 3     | 3     | 4     | 4     | 1     | 3     | 1      | 1      | 1      | 1      | 1      | 2      | 2      | 2      |
| 22969  | 4     | 3     | 1     | 1     | 3     | 4     | 1      | 0      | 1      | 0      | 1      | 1      | 1      | 1      |
| 22971  | 5     | 1     | 1     | 1     | 4     | 5     | 0      | 0      | 0      | 0      | 0      | 0      | 0      | 1      |
| 22988  | 5     | 2     | 1     | 3     | 4     | 5     | 0      | 0      | 0      | 0      | 1      | 0      | 1      | 1      |
| 22990  | 4     | 2     | 1     | 3     | 4     | 4     | 1      | 0      | 1      | 0      | 1      | 0      | 1      | 1      |
| 23000  | 5     | 2     | 1     | 3     | 3     | 3     | 1      | 0      | 1      | 2      | 1      | 1      | 1      | 1      |
| 23016  | 4     | 2     | 1     | 3     | 3     | 3     | 1      | 1      | 1      | 1      | 1      | 1      | 2      | 1      |
| 23026  | 5     | 1     | 1     | 4     | 5     | 5     | 0      | 1      | 1      | 0      | 1      | 1      | 0      | 0      |
| 23035  | 5     | 1     | 0     | 0     | 5     | 5     | 0      | 0      | 0      | 0      | 0      | 0      | 0      | 1      |
| 23037  | 3     | 3     | 3     | 4     | 3     | 3     | 1      | 0      | 3      | 2      | 1      | 2      | 2      | 2      |
| 23044  | 4     | 3     | 1     | 3     | 4     | 4     | 1      | 1      | 2      | 0      | 1      | 1      | 1      | 1      |
| 23046  | 4     | 3     | 3     | 3     | 4     | 4     | 1      | 1      | 1      | 1      | 1      | 2      | 1      | 1      |
| 23047  | 4     | 2     | 1     | 1     | 4     | 4     | 1      | 0      | 1      | 0      | 1      | 0      | 1      | 1      |
| 23049  | 5     | 1     | 1     | 1     | 4     | 4     | 1      | 0      | 1      | 0      | 0      | 1      | 0      | 1      |
| 23055  | 5     | 1     | 1     | 3     | 4     | 5     | 0      | 1      | 0      | 0      | 1      | 0      | 0      | 0      |
| 23066  | 4     | 2     | 1     | 1     | 4     | 4     | 0      | 0      | 0      | 0      | 1      | 0      | 0      | 1      |
| 23075  | 5     | 2     | 1     | 3     | 4     | 5     | 0      | 0      | 0      | 0      | 0      | 1      | 0      | 1      |
| 23081  | 5     | 1     | 0     | 3     | 5     | 5     | 0      | 0      | 1      | 0      | 1      | 1      | 0      | 1      |
| 23087  | 4     | 1     | 1     | 1     | 3     | 4     | 1      | 0      | 0      | 0      | 1      | 1      | 0      | 1      |
| 23094  | 4     | 2     | 4     | 4     | 4     | 4     | 1      | 1      | 1      | 1      | 1      | 2      | 2      | 0      |
| 23099  | 5     | 1     | 1     | 1     | 4     | 5     | 0      | 0      | 0      | 0      | 0      | 0      | 0      | 0      |
| 23101  | 2     | 2     | 0     | 0     | 0     | 2     | 1      | 1      | 0      | 1      | 1      | 1      | 1      | 0      |
| 23105  | 5     | 1     | 0     | 0     | 5     | 5     | 0      | 0      | 0      | 0      | 0      | 0      | 0      | 0      |



| respid | Q52_2 | Q53_1 | Q54_1 | Q54_2 | Q54_3 | Q55_1 | Q56a_1 | Q56b_1 | Q56c_1 | Q56d_1 | Q56e_1 | Q56f_1 | Q56g_1 | Q56h_1 |
|--------|-------|-------|-------|-------|-------|-------|--------|--------|--------|--------|--------|--------|--------|--------|
| 23115  | 1     | 3     | 1     | 1     | 4     | 4     | 1      | 1      | 1      | 1      | 1      | 1      | 1      | 1      |
| 23121  | 4     | 2     | 3     | 3     | 3     | 5     | 1      | 1      | 1      | 0      | 1      | 0      | 1      | 1      |
| 23127  | 5     | 2     | 1     | 1     | 4     | 5     | 0      | 0      | 0      | 0      | 0      | 0      | 0      | 0      |
| 23131  | 3     | 3     | 3     | 3     | 3     | 3     | 1      | 1      | 1      | 1      | 1      | 1      | 1      | 1      |
| 23134  | 5     | 2     | 1     | 1     | 5     | 5     | 0      | 0      | 1      | 0      | 1      | 3      | 0      | 1      |
| 23145  | 4     | 2     | 1     | 1     | 4     | 4     | 0      | 0      | 0      | 0      | 0      | 0      | 0      | 0      |
| 23151  | 4     | 2     | 4     | 4     | 4     | 4     | 1      | 0      | 0      | 0      | 1      | 1      | 0      | 1      |
| 23161  | 4     | 2     | 1     | 3     | 4     | 3     | 1      | 0      | 1      | 1      | 1      | 1      | 2      | 0      |
| 23169  | 2     | 4     | 3     | 3     | 3     | 3     | 1      | 1      | 1      | 1      | 2      | 2      | 2      | 2      |
| 23173  | 5     | 1     | 0     | 0     | 1     | 5     | 0      | 1      | 0      | 0      | 0      | 0      | 0      | 2      |
| 23174  | 5     | 1     | 1     | 1     | 3     | 5     | 1      | 1      | 1      | 0      | 1      | 0      | 1      | 1      |
| 23186  | 3     | 3     | 1     | 3     | 4     | 3     | 0      | 1      | 1      | 1      | 1      | 1      | 1      | 2      |
| 23195  | 4     | 2     | 3     | 3     | 3     | 4     | 1      | 1      | 1      | 2      | 1      | 1      | 1      | 1      |
| 23197  | 3     | 3     | 1     | 3     | 3     | 4     | 1      | 2      | 1      | 2      | 1      | 1      | 2      | 1      |
| 23198  | 5     | 1     | 0     | 0     | 5     | 5     | 0      | 0      | 0      | 0      | 0      | 0      | 0      | 0      |
| 23203  | 5     | 1     | 0     | 0     | 4     | 5     | 0      | 0      | 0      | 0      | 0      | 0      | 0      | 0      |
| 23204  | 5     | 2     | 1     | 3     | 4     | 4     | 1      | 1      | 1      | 0      | 1      | 1      | 0      | 1      |
| 23212  | 5     | 1     | 1     | 3     | 4     | 5     | 0      | 0      | 0      | 0      | 1      | 0      | 0      | 1      |
| 23214  | 4     | 2     | 3     | 1     | 4     | 5     | 1      | 2      | 0      | 1      | 1      | 1      | 0      | 1      |
| 23221  | 3     | 1     | 1     | 3     | 3     | 3     | 1      | 1      | 1      | 0      | 1      | 1      | 1      | 1      |
| 23237  | 5     | 1     | 0     | 0     | 5     | 5     | 0      | 0      | 0      | 0      | 0      | 0      | 0      | 0      |
| 23251  | 5     | 1     | 1     | 1     | 5     | 5     | 1      | 0      | 0      | 0      | 0      | 0      | 0      | 1      |
| 23254  | 2     | 2     | 0     | 0     | 3     | 4     | 1      | 0      | 0      | 0      | 1      | 0      | 0      | 0      |
| 23262  | 3     | 2     | 1     | 1     | 3     | 3     | 1      | 0      | 0      | 0      | 1      | 1      | 1      | 1      |
| 23267  | 5     | 3     | 3     | 3     | 3     | 5     | 1      | 1      | 1      | 1      | 1      | 1      | 1      | 2      |
| 23268  | 3     | 4     | 3     | 1     | 3     | 3     | 2      | 1      | 1      | 2      | 1      | 2      | 2      | 1      |
| 23273  | 4     | 2     | 1     | 1     | 4     | 5     | 0      | 2      | 0      | 0      | 0      | 0      | 0      | 0      |
| 23278  | 5     | 1     | 1     | 1     | 4     | 5     | 0      | 0      | 1      | 0      | 1      | 0      | 0      | 1      |
| 23279  | 2     | 4     | 4     | 4     | 1     | 2     | 1      | 1      | 1      | 1      | 1      | 1      | 2      | 2      |
| 23281  | 4     | 2     | 1     | 1     | 1     | 3     | 1      | 1      | 2      | 1      | 1      | 1      | 1      | 2      |
| 23282  | 2     | 3     | 3     | 3     | 3     | 3     | 1      | 1      | 1      | 1      | 1      | 1      | 1      | 1      |
| 23283  | 5     | 3     | 1     | 3     | 4     | 5     | 1      | 0      | 1      | 0      | 1      | 0      | 0      | 1      |

| respid | Q52_2 | Q53_1 | Q54_1 | Q54_2 | Q54_3 | Q55_1 | Q56a_1 | Q56b_1 | Q56c_1 | Q56d_1 | Q56e_1 | Q56f_1 | Q56g_1 | Q56h_1 |
|--------|-------|-------|-------|-------|-------|-------|--------|--------|--------|--------|--------|--------|--------|--------|
| 23285  | 3     | 2     | 3     | 4     | 3     | 4     | 1      | 1      | 1      | 1      | 2      | 1      | 2      | 2      |
| 23305  | 4     | 4     | 1     | 4     | 3     | 3     | 1      | 1      | 2      | 2      | 1      | 1      | 2      | 0      |
| 23309  | 3     | 2     | 3     | 4     | 3     | 5     | 1      | 2      | 2      | 2      | 2      | 2      | 2      | 2      |
| 23310  | 4     | 2     | 1     | 3     | 3     | 4     | 1      | 1      | 0      | 2      | 1      | 1      | 1      | 2      |
| 23311  | 5     | 2     | 1     | 1     | 5     | 5     | 0      | 0      | 0      | 0      | 0      | 0      | 1      | 1      |
| 23312  | 2     | 3     | 3     | 4     | 3     | 4     | 1      | 1      | 2      | 1      | 2      | 2      | 0      | 1      |
| 23319  | 5     | 1     | 1     | 3     | 4     | 4     | 0      | 1      | 1      | 2      | 1      | 1      | 0      | 1      |
| 23320  | 4     | 1     | 1     | 3     | 4     | 4     | 1      | 1      | 1      | 0      | 1      | 1      | 1      | 1      |
| 23322  | 4     | 2     | 4     | 4     | 4     | 3     | 1      | 2      | 1      | 2      | 0      | 1      | 1      | 0      |
| 23334  | 4     | 2     | 1     | 0     | 4     | 4     | 0      | 0      | 2      | 0      | 1      | 0      | 0      | 1      |
| 23340  | 5     | 2     | 1     | 1     | 3     | 5     | 0      | 0      | 1      | 0      | 1      | 1      | 1      | 1      |
| 23346  | 5     | 1     | 0     | 0     | 5     | 5     | 0      | 0      | 0      | 0      | 0      | 0      | 0      | 0      |
| 23353  | 4     | 2     | 1     | 1     | 3     | 4     | 1      | 0      | 0      | 0      | 1      | 0      | 0      | 1      |
| 23363  | 3     | 3     | 4     | 3     | 3     | 3     | 2      | 1      | 1      | 1      | 1      | 1      | 2      | 1      |
| 23364  | 3     | 3     | 1     | 4     | 3     | 3     | 1      | 0      | 2      | 1      | 1      | 1      | 0      | 1      |
| 23376  | 5     | 1     | 3     | 3     | 3     | 4     | 0      | 0      | 0      | 0      | 0      | 1      | 1      | 0      |
| 23378  | 4     | 2     | 3     | 3     | 3     | 4     | 1      | 1      | 2      | 2      | 1      | 1      | 1      | 1      |
| 23382  | 5     | 1     | 0     | 0     | 5     | 5     | 0      | 0      | 0      | 0      | 0      | 0      | 0      | 0      |
| 23383  | 2     | 2     | 3     | 3     | 3     | 4     | 1      | 2      | 1      | 1      | 1      | 1      | 2      | 1      |
| 23390  | 5     | 1     | 1     | 1     | 4     | 5     | 0      | 0      | 0      | 0      | 1      | 1      | 0      | 0      |
| 23395  | 5     | 2     | 0     | 1     | 4     | 5     | 1      | 0      | 0      | 2      | 1      | 0      | 0      | 1      |
| 23398  | 2     | 3     | 3     | 3     | 4     | 3     | 1      | 0      | 1      | 0      | 3      | 2      | 1      | 1      |
| 23399  | 4     | 1     | 0     | 4     | 3     | 4     | 1      | 1      | 0      | 1      | 1      | 1      | 1      | 1      |
| 23406  | 4     | 2     | 3     | 3     | 3     | 4     | 1      | 1      | 1      | 1      | 1      | 1      | 1      | 2      |
| 23418  | 4     | 1     | 1     | 1     | 4     | 5     | 0      | 0      | 1      | 0      | 0      | 0      | 1      | 1      |
| 23427  | 5     | 1     | 0     | 0     | 3     | 5     | 1      | 1      | 1      | 1      | 3      | 1      | 1      | 0      |
| 23428  | 3     | 2     | 1     | 1     | 3     | 4     | 1      | 1      | 0      | 1      | 1      | 0      | 1      | 1      |
| 23435  | 5     | 2     | 4     | 4     | 4     | 5     | 1      | 1      | 0      | 0      | 1      | 0      | 0      | 1      |
| 23439  | 4     | 2     | 1     | 1     | 3     | 2     | 1      | 0      | 2      | 2      | 1      | 0      | 1      | 0      |
| 23440  | 5     | 2     | 1     | 1     | 5     | 5     | 0      | 0      | 0      | 0      | 0      | 0      | 0      | 0      |
| 23444  | 4     | 2     | 1     | 1     | 4     | 4     | 1      | 2      | 1      | 1      | 1      | 1      | 1      | 1      |
| 23445  | 5     | 1     | 0     | 0     | 4     | 5     | 0      | 0      | 1      | 0      | 0      | 0      | 0      | 0      |

| respid | Q52_2 | Q53_1 | Q54_1 | Q54_2 | Q54_3 | Q55_1 | Q56a_1 | Q56b_1 | Q56c_1 | Q56d_1 | Q56e_1 | Q56f_1 | Q56g_1 | Q56h_1 |
|--------|-------|-------|-------|-------|-------|-------|--------|--------|--------|--------|--------|--------|--------|--------|
| 23455  | 5     | 1     | 5     | 5     | 5     | 5     | 0      | 0      | 0      | 0      | 0      | 0      | 0      | 0      |
| 23467  | 4     | 2     | 1     | 3     | 4     | 4     | 0      | 1      | 0      | 1      | 1      | 1      | 1      | 1      |
| 23478  | 3     | 3     | 4     | 3     | 4     | 4     | 0      | 0      | 1      | 1      | 0      | 1      | 2      | 1      |
| 23492  | 4     | 3     | 3     | 3     | 1     | 4     | 1      | 2      | 1      | 1      | 1      | 1      | 2      | 1      |
| 23498  | 5     | 2     | 0     | 1     | 5     | 4     | 0      | 0      | 0      | 0      | 0      | 0      | 0      | 1      |
| 23511  | 4     | 3     | 3     | 3     | 1     | 3     | 1      | 1      | 1      | 1      | 1      | 2      | 2      | 2      |
| 23514  | 5     | 2     | 1     | 3     | 3     | 4     | 1      | 1      | 0      | 1      | 1      | 1      | 1      | 2      |
| 23515  | 4     | 2     | 4     | 4     | 3     | 4     | 1      | 2      | 1      | 2      | 1      | 2      | 2      | 1      |
| 23522  | 4     | 1     | 1     | 1     | 4     | 5     | 1      | 0      | 0      | 0      | 1      | 0      | 1      | 0      |
| 23524  | 5     | 2     | 1     | 1     | 4     | 4     | 0      | 0      | 0      | 0      | 0      | 0      | 1      | 1      |
| 23531  | 5     | 1     | 3     | 1     | 4     | 5     | 0      | 2      | 1      | 1      | 1      | 1      | 1      | 1      |
| 23532  | 3     | 2     | 1     | 3     | 4     | 4     | 0      | 0      | 0      | 2      | 1      | 1      | 1      | 1      |
| 23533  | 4     | 2     | 1     | 1     | 4     | 4     | 1      | 1      | 2      | 1      | 1      | 1      | 1      | 1      |
| 23534  | 3     | 2     | 1     | 1     | 4     | 5     | 0      | 0      | 0      | 0      | 0      | 0      | 0      | 0      |
| 23538  | 4     | 2     | 1     | 1     | 4     | 3     | 1      | 1      | 2      | 1      | 0      | 1      | 1      | 0      |
| 23539  | 4     | 2     | 1     | 1     | 4     | 4     | 1      | 2      | 2      | 1      | 2      | 1      | 2      | 1      |
| 23548  | 4     | 2     | 1     | 3     | 4     | 4     | 1      | 1      | 1      | 0      | 2      | 0      | 0      | 1      |
| 23553  | 5     | 1     | 1     | 1     | 5     | 5     | 0      | 0      | 0      | 0      | 0      | 0      | 0      | 1      |
| 23556  | 5     | 1     | 1     | 1     | 5     | 5     | 0      | 0      | 0      | 0      | 0      | 0      | 0      | 0      |
| 23563  | 4     | 2     | 1     | 4     | 3     | 4     | 1      | 1      | 1      | 1      | 1      | 2      | 2      | 2      |
| 23572  | 4     | 2     | 3     | 3     | 3     | 5     | 0      | 0      | 0      | 0      | 1      | 0      | 0      | 1      |
| 23575  | 5     | 5     | 3     | 3     | 3     | 4     | 2      | 1      | 1      | 1      | 2      | 2      | 1      | 2      |
| 23576  | 3     | 3     | 3     | 3     | 3     | 4     | 1      | 0      | 1      | 0      | 1      | 1      | 2      | 1      |
| 23577  | 4     | 2     | 1     | 1     | 3     | 3     | 1      | 0      | 1      | 1      | 1      | 1      | 1      | 1      |
| 23578  | 4     | 2     | 3     | 3     | 4     | 5     | 1      | 1      | 1      | 1      | 1      | 2      | 1      | 1      |
| 23587  | 4     | 1     | 1     | 1     | 4     | 5     | 0      | 0      | 0      | 1      | 1      | 1      | 1      | 1      |
| 23597  | 3     | 3     | 1     | 3     | 4     | 3     | 1      | 2      | 1      | 0      | 1      | 1      | 1      | 1      |
| 23598  | 4     | 2     | 1     | 1     | 4     | 4     | 1      | 0      | 1      | 0      | 2      | 0      | 1      | 2      |
| 23604  | 4     | 1     | 0     | 0     | 5     | 5     | 0      | 0      | 0      | 0      | 0      | 0      | 0      | 0      |
| 23617  | 5     | 2     | 1     | 1     | 4     | 4     | 1      | 0      | 1      | 0      | 1      | 1      | 1      | 0      |
| 23620  | 5     | 1     | 1     | 1     | 4     | 4     | 0      | 0      | 1      | 0      | 0      | 1      | 1      | 1      |
| 23621  | 3     | 2     | 1     | 1     | 3     | 4     | 1      | 2      | 1      | 1      | 1      | 1      | 1      | 1      |

| respid | Q52_2 | Q53_1 | Q54_1 | Q54_2 | Q54_3 | Q55_1 | Q56a_1 | Q56b_1 | Q56c_1 | Q56d_1 | Q56e_1 | Q56f_1 | Q56g_1 | Q56h_1 |
|--------|-------|-------|-------|-------|-------|-------|--------|--------|--------|--------|--------|--------|--------|--------|
| 23625  | 5     | 1     | 0     | 0     | 5     | 5     | 0      | 0      | 0      | 0      | 0      | 0      | 0      | 0      |
| 23629  | 5     | 3     | 1     | 1     | 3     | 4     | 0      | 0      | 0      | 0      | 0      | 0      | 0      | 0      |
| 23635  | 3     | 2     | 1     | 1     | 4     | 4     | 1      | 0      | 1      | 1      | 0      | 1      | 1      | 1      |
| 23636  | 3     | 3     | 3     | 3     | 4     | 3     | 1      | 1      | 1      | 2      | 1      | 1      | 2      | 1      |
| 23637  | 3     | 2     | 3     | 3     | 3     | 3     | 1      | 1      | 1      | 1      | 1      | 1      | 1      | 1      |
| 23638  | 5     | 1     | 0     | 0     | 5     | 5     | 0      | 0      | 0      | 0      | 0      | 0      | 0      | 0      |
| 23644  | 4     | 2     | 1     | 1     | 3     | 4     | 1      | 1      | 1      | 0      | 1      | 0      | 0      | 1      |
| 23645  | 5     | 2     | 3     | 4     | 3     | 4     | 1      | 0      | 1      | 1      | 2      | 1      | 1      | 0      |
| 23649  | 2     | 3     | 3     | 3     | 3     | 4     | 2      | 2      | 1      | 2      | 2      | 3      | 2      | 2      |
| 23654  | 4     | 2     | 1     | 3     | 4     | 4     | 1      | 1      | 1      | 2      | 1      | 1      | 1      | 0      |
| 23662  | 3     | 3     | 1     | 3     | 4     | 4     | 1      | 1      | 1      | 0      | 1      | 1      | 1      | 1      |
| 23664  | 5     | 2     | 1     | 1     | 3     | 5     | 1      | 0      | 1      | 0      | 1      | 1      | 0      | 1      |
| 23665  | 4     | 2     | 4     | 4     | 4     | 4     | 1      | 0      | 0      | 0      | 1      | 0      | 0      | 1      |
| 23666  | 3     | 3     | 3     | 3     | 3     | 3     | 1      | 1      | 1      | 1      | 2      | 2      | 1      | 2      |
| 23671  | 5     | 1     | 0     | 0     | 5     | 5     | 0      | 0      | 0      | 0      | 0      | 0      | 0      | 0      |
| 23672  | 5     | 1     | 0     | 3     | 3     | 5     | 1      | 0      | 2      | 0      | 1      | 0      | 0      | 2      |
| 23685  | 5     | 1     | 1     | 1     | 4     | 5     | 0      | 0      | 1      | 1      | 1      | 1      | 1      | 1      |
| 23686  | 5     | 1     | 3     | 3     | 3     | 4     | 0      | 0      | 1      | 0      | 1      | 1      | 0      | 1      |
| 23689  | 4     | 2     | 1     | 3     | 3     | 4     | 1      | 1      | 2      | 1      | 1      | 1      | 0      | 1      |
| 23690  | 3     | 2     | 3     | 3     | 3     | 2     | 1      | 1      | 1      | 2      | 1      | 2      | 2      | 1      |
| 23695  | 5     | 2     | 1     | 3     | 4     | 4     | 1      | 1      | 1      | 1      | 0      | 1      | 0      | 2      |
| 23700  | 5     | 3     | 3     | 3     | 4     | 5     | 0      | 0      | 0      | 0      | 0      | 0      | 0      | 0      |
| 23714  | 4     | 2     | 0     | 0     | 3     | 4     | 1      | 0      | 0      | 1      | 1      | 1      | 1      | 1      |
| 23719  | 4     | 2     | 1     | 3     | 3     | 4     | 1      | 0      | 1      | 0      | 1      | 1      | 1      | 1      |
| 23720  | 4     | 1     | 1     | 1     | 4     | 5     | 0      | 0      | 0      | 0      | 0      | 0      | 0      | 1      |
| 23721  | 5     | 1     | 0     | 1     | 3     | 5     | 0      | 0      | 0      | 0      | 0      | 0      | 0      | 0      |
| 23729  | 5     | 2     | 0     | 0     | 4     | 5     | 0      | 0      | 0      | 0      | 1      | 0      | 0      | 0      |
| 23730  | 5     | 1     | 0     | 0     | 5     | 5     | 0      | 0      | 0      | 0      | 0      | 0      | 0      | 0      |
| 23732  | 4     | 2     | 3     | 3     | 3     | 4     | 2      | 1      | 1      | 2      | 1      | 2      | 1      | 1      |
| 23736  | 4     | 1     | 1     | 1     | 4     | 5     | 0      | 0      | 0      | 0      | 0      | 0      | 0      | 1      |
| 23754  | 5     | 1     | 1     | 1     | 3     | 5     | 1      | 1      | 0      | 0      | 1      | 0      | 1      | 1      |
| 23756  | 4     | 1     | 1     | 1     | 1     | 4     | 1      | 0      | 0      | 0      | 1      | 1      | 1      | 1      |

| respid | Q52_2 | Q53_1 | Q54_1 | Q54_2 | Q54_3 | Q55_1 | Q56a_1 | Q56b_1 | Q56c_1 | Q56d_1 | Q56e_1 | Q56f_1 | Q56g_1 | Q56h_1 |
|--------|-------|-------|-------|-------|-------|-------|--------|--------|--------|--------|--------|--------|--------|--------|
| 23759  | 5     | 1     | 1     | 1     | 4     | 4     | 1      | 0      | 0      | 0      | 1      | 0      | 0      | 1      |
| 23761  | 4     | 3     | 1     | 1     | 4     | 4     | 1      | 0      | 0      | 0      | 1      | 1      | 0      | 1      |
| 23766  | 3     | 3     | 1     | 3     | 4     | 3     | 1      | 2      | 1      | 1      | 1      | 0      | 1      | 1      |
| 23768  | 3     | 3     | 1     | 1     | 3     | 4     | 1      | 0      | 1      | 1      | 1      | 1      | 1      | 1      |
| 23773  | 4     | 1     | 1     | 1     | 3     | 5     | 3      | 0      | 1      | 2      | 1      | 1      | 1      | 0      |
| 23781  | 5     | 1     | 1     | 1     | 4     | 4     | 1      | 0      | 1      | 0      | 1      | 1      | 1      | 1      |
| 23782  | 3     | 3     | 3     | 4     | 3     | 3     | 2      | 2      | 2      | 2      | 2      | 1      | 1      | 3      |
| 23787  | 3     | 2     | 1     | 3     | 3     | 3     | 1      | 1      | 1      | 1      | 0      | 1      | 1      | 1      |
| 23788  | 3     | 3     | 3     | 4     | 1     | 4     | 1      | 1      | 1      | 2      | 2      | 2      | 2      | 1      |
| 23790  | 4     | 1     | 1     | 1     | 4     | 4     | 1      | 0      | 0      | 0      | 1      | 0      | 1      | 1      |
| 23794  | 5     | 1     | 0     | 1     | 5     | 5     | 0      | 0      | 0      | 0      | 1      | 0      | 0      | 1      |
| 23795  | 4     | 3     | 3     | 4     | 1     | 2     | 2      | 2      | 1      | 0      | 1      | 1      | 1      | 1      |
| 23801  | 4     | 2     | 1     | 1     | 4     | 4     | 1      | 1      | 0      | 0      | 1      | 0      | 1      | 1      |
| 23806  | 4     | 1     | 1     | 1     | 4     | 4     | 1      | 0      | 0      | 0      | 1      | 0      | 0      | 0      |
| 23809  | 4     | 3     | 1     | 3     | 4     | 3     | 1      | 0      | 0      | 0      | 1      | 0      | 1      | 0      |
| 23813  | 4     | 1     | 1     | 3     | 3     | 4     | 0      | 0      | 0      | 0      | 1      | 1      | 1      | 2      |
| 23815  | 5     | 1     | 1     | 1     | 4     | 5     | 0      | 0      | 0      | 0      | 0      | 0      | 0      | 0      |
| 23821  | 5     | 1     | 1     | 1     | 4     | 5     | 0      | 0      | 0      | 0      | 0      | 1      | 0      | 0      |
| 23825  | 4     | 2     | 3     | 3     | 3     | 4     | 1      | 1      | 1      | 0      | 1      | 1      | 1      | 1      |
| 23826  | 4     | 2     | 3     | 3     | 3     | 4     | 0      | 0      | 1      | 0      | 1      | 1      | 2      | 1      |
| 23830  | 5     | 1     | 1     | 3     | 1     | 5     | 2      | 0      | 2      | 2      | 2      | 2      | 2      | 0      |
| 23833  | 5     | 1     | 0     | 1     | 5     | 5     | 0      | 0      | 0      | 0      | 0      | 0      | 0      | 0      |
| 23837  | 5     | 1     | 0     | 0     | 4     | 5     | 0      | 0      | 0      | 0      | 1      | 0      | 0      | 1      |
| 23848  | 5     | 5     | 5     | 5     | 5     | 5     | 3      | 3      | 3      | 3      | 3      | 3      | 3      | 3      |
| 23850  | 4     | 1     | 4     | 1     | 3     | 4     | 1      | 0      | 1      | 0      | 3      | 1      | 1      | 0      |
| 23870  | 4     | 2     | 0     | 0     | 5     | 4     | 1      | 0      | 0      | 0      | 1      | 0      | 0      | 1      |
| 23877  | 3     | 3     | 3     | 3     | 5     | 5     | 1      | 0      | 1      | 2      | 1      | 0      | 0      | 1      |
| 23880  | 4     | 2     | 3     | 3     | 4     | 4     | 1      | 0      | 1      | 1      | 1      | 1      | 1      | 0      |
| 23882  | 4     | 2     | 3     | 3     | 3     | 4     | 1      | 2      | 1      | 2      | 1      | 1      | 1      | 1      |
| 23888  | 5     | 1     | 1     | 1     | 5     | 5     | 0      | 0      | 0      | 0      | 0      | 0      | 0      | 0      |
| 23908  | 4     | 3     | 1     | 1     | 4     | 4     | 0      | 1      | 0      | 1      | 1      | 1      | 0      | 0      |
| 23914  | 4     | 1     | 1     | 1     | 4     | 4     | 1      | 0      | 1      | 0      | 1      | 1      | 1      | 0      |

| respid | Q52_2 | Q53_1 | Q54_1 | Q54_2 | Q54_3 | Q55_1 | Q56a_1 | Q56b_1 | Q56c_1 | Q56d_1 | Q56e_1 | Q56f_1 | Q56g_1 | Q56h_1 |
|--------|-------|-------|-------|-------|-------|-------|--------|--------|--------|--------|--------|--------|--------|--------|
| 23916  | 3     | 3     | 3     | 3     | 3     | 3     | 4      | 1      | 1      | 1      | 1      | 1      | 1      | 1      |
| 23922  | 4     | 2     | 3     | 3     | 4     | 4     | 4      | 2      | 2      | 2      | 2      | 1      | 1      | 2      |
| 23932  | 5     | 1     | 1     | 1     | 4     | 4     | 4      | 0      | 1      | 0      | 0      | 0      | 0      | 1      |
| 23934  | 5     | 1     | 1     | 0     | 4     | 4     | 4      | 0      | 0      | 0      | 0      | 0      | 0      | 0      |
| 23942  | 4     | 2     | 1     | 1     | 4     | 4     | 4      | 1      | 0      | 1      | 0      | 1      | 0      | 1      |
| 23945  | 4     | 1     | 1     | 1     | 4     | 4     | 5      | 1      | 0      | 1      | 0      | 1      | 0      | 0      |
| 23948  | 5     | 2     | 3     | 3     | 4     | 4     | 4      | 1      | 0      | 1      | 0      | 1      | 1      | 1      |
| 23955  | 4     | 2     | 1     | 1     | 4     | 4     | 5      | 0      | 0      | 0      | 0      | 0      | 0      | 0      |
| 23956  | 4     | 3     | 1     | 3     | 4     | 3     | 3      | 1      | 0      | 1      | 0      | 1      | 0      | 1      |
| 23978  | 4     | 2     | 1     | 1     | 3     | 5     | 5      | 0      | 0      | 0      | 0      | 0      | 0      | 0      |
| 23981  | 4     | 2     | 3     | 3     | 3     | 3     | 3      | 1      | 1      | 2      | 1      | 1      | 1      | 1      |
| 23982  | 2     | 4     | 4     | 4     | 0     | 1     | 1      | 1      | 3      | 3      | 1      | 3      | 3      | 3      |
| 23991  | 5     | 2     | 1     | 4     | 5     | 5     | 5      | 0      | 0      | 0      | 1      | 0      | 1      | 1      |
| 23994  | 4     | 2     | 1     | 3     | 3     | 3     | 3      | 1      | 2      | 1      | 1      | 1      | 1      | 2      |
| 23995  | 4     | 1     | 1     | 3     | 4     | 5     | 5      | 0      | 0      | 2      | 0      | 0      | 1      | 0      |
| 23999  | 4     | 2     | 1     | 1     | 4     | 4     | 4      | 1      | 0      | 1      | 0      | 1      | 0      | 1      |
| 24005  | 5     | 3     | 3     | 4     | 1     | 4     | 4      | 2      | 2      | 3      | 2      | 0      | 1      | 2      |
| 24018  | 5     | 1     | 1     | 1     | 4     | 4     | 5      | 0      | 0      | 1      | 0      | 1      | 1      | 1      |
| 24021  | 5     | 1     | 1     | 3     | 4     | 4     | 4      | 1      | 0      | 1      | 1      | 1      | 2      | 2      |
| 24035  | 5     | 2     | 1     | 3     | 0     | 5     | 5      | 1      | 1      | 0      | 1      | 2      | 1      | 2      |
| 24040  | 5     | 2     | 1     | 3     | 4     | 5     | 5      | 0      | 0      | 0      | 0      | 0      | 0      | 1      |
| 24043  | 5     | 1     | 0     | 0     | 5     | 5     | 5      | 0      | 0      | 0      | 0      | 0      | 0      | 0      |
| 24046  | 4     | 2     | 3     | 3     | 3     | 3     | 3      | 1      | 1      | 2      | 1      | 1      | 1      | 2      |
| 24047  | 4     | 3     | 0     | 0     | 0     | 3     | 3      | 0      | 0      | 1      | 1      | 2      | 0      | 1      |
| 24048  | 4     | 2     | 1     | 1     | 3     | 4     | 4      | 1      | 1      | 0      | 0      | 1      | 0      | 1      |
| 24062  | 2     | 3     | 1     | 1     | 1     | 3     | 3      | 1      | 1      | 1      | 1      | 2      | 2      | 2      |
| 24063  | 4     | 2     | 1     | 3     | 4     | 4     | 4      | 1      | 1      | 1      | 1      | 1      | 1      | 1      |
| 24066  | 5     | 1     | 1     | 1     | 5     | 5     | 5      | 0      | 0      | 0      | 0      | 0      | 0      | 0      |
| 24069  | 5     | 3     | 4     | 3     | 3     | 3     | 3      | 1      | 0      | 1      | 0      | 1      | 0      | 1      |
| 24070  | 1     | 4     | 4     | 4     | 4     | 4     | 4      | 2      | 2      | 2      | 2      | 3      | 3      | 3      |
| 24074  | 5     | 2     | 1     | 4     | 4     | 4     | 4      | 1      | 1      | 1      | 2      | 1      | 1      | 1      |
| 24080  | 5     | 2     | 0     | 0     | 5     | 5     | 5      | 0      | 0      | 0      | 0      | 0      | 0      | 0      |

| respid | Q52_2 | Q53_1 | Q54_1 | Q54_2 | Q54_3 | Q55_1 | Q56a_1 | Q56b_1 | Q56c_1 | Q56d_1 | Q56e_1 | Q56f_1 | Q56g_1 | Q56h_1 |
|--------|-------|-------|-------|-------|-------|-------|--------|--------|--------|--------|--------|--------|--------|--------|
| 24082  | 5     | 2     | 1     | 1     | 4     | 4     | 0      | 0      | 1      | 0      | 0      | 0      | 0      | 1      |
| 24088  | 5     | 2     | 3     | 4     | 3     | 3     | 1      | 1      | 2      | 2      | 1      | 2      | 2      | 1      |
| 24089  | 5     | 1     | 1     | 1     | 4     | 5     | 0      | 0      | 0      | 0      | 0      | 0      | 0      | 1      |
| 24091  | 4     | 2     | 1     | 3     | 4     | 4     | 1      | 2      | 2      | 1      | 1      | 1      | 1      | 1      |
| 24095  | 4     | 2     | 1     | 1     | 4     | 4     | 1      | 0      | 1      | 2      | 1      | 1      | 1      | 1      |
| 24100  | 4     | 2     | 1     | 1     | 4     | 3     | 1      | 2      | 0      | 0      | 1      | 1      | 0      | 1      |
| 24105  | 4     | 1     | 3     | 3     | 3     | 4     | 1      | 1      | 1      | 1      | 1      | 1      | 2      | 1      |
| 24107  | 3     | 3     | 1     | 5     | 3     | 3     | 1      | 1      | 2      | 1      | 1      | 2      | 2      | 3      |
| 24108  | 3     | 3     | 1     | 1     | 3     | 4     | 1      | 0      | 0      | 0      | 1      | 1      | 1      | 1      |
| 24113  | 5     | 1     | 1     | 3     | 1     | 3     | 1      | 1      | 1      | 2      | 3      | 1      | 3      | 3      |
| 24120  | 4     | 1     | 3     | 3     | 1     | 5     | 1      | 2      | 1      | 2      | 1      | 1      | 2      | 1      |
| 24122  | 2     | 3     | 4     | 4     | 1     | 3     | 2      | 2      | 2      | 2      | 2      | 2      | 2      | 2      |
| 24123  | 1     | 4     | 1     | 4     | 3     | 2     | 1      | 1      | 2      | 1      | 1      | 1      | 1      | 3      |
| 24125  | 3     | 4     | 1     | 1     | 4     | 3     | 2      | 2      | 2      | 2      | 2      | 2      | 1      | 2      |
| 24132  | 5     | 1     | 1     | 1     | 5     | 5     | 0      | 0      | 0      | 0      | 0      | 0      | 0      | 0      |
| 24139  | 5     | 3     | 1     | 1     | 4     | 5     | 0      | 0      | 0      | 0      | 0      | 0      | 0      | 1      |
| 24140  | 2     | 2     | 3     | 4     | 1     | 4     | 1      | 0      | 1      | 1      | 1      | 1      | 2      | 1      |
| 24143  | 3     | 4     | 3     | 3     | 4     | 4     | 1      | 0      | 2      | 0      | 2      | 1      | 2      | 1      |
| 24150  | 3     | 3     | 1     | 4     | 3     | 3     | 1      | 1      | 1      | 1      | 1      | 1      | 1      | 1      |
| 24153  | 5     | 1     | 1     | 1     | 3     | 5     | 1      | 0      | 0      | 1      | 1      | 1      | 1      | 0      |
| 24161  | 5     | 1     | 0     | 0     | 5     | 5     | 0      | 0      | 0      | 0      | 0      | 0      | 0      | 0      |
| 24168  | 3     | 4     | 1     | 3     | 4     | 4     | 1      | 1      | 1      | 0      | 1      | 1      | 1      | 1      |
| 24179  | 5     | 2     | 1     | 1     | 4     | 5     | 0      | 1      | 1      | 1      | 1      | 1      | 1      | 1      |
| 24182  | 4     | 2     | 3     | 3     | 4     | 4     | 1      | 1      | 1      | 1      | 1      | 1      | 1      | 1      |
| 24194  | 3     | 2     | 1     | 1     | 3     | 4     | 1      | 0      | 1      | 0      | 1      | 1      | 1      | 0      |
| 24206  | 5     | 1     | 0     | 0     | 5     | 4     | 1      | 0      | 0      | 0      | 0      | 1      | 1      | 0      |
| 24214  | 3     | 1     | 1     | 1     | 1     | 3     | 1      | 2      | 2      | 2      | 2      | 2      | 2      | 2      |
| 24215  | 4     | 2     | 1     | 3     | 1     | 5     | 1      | 0      | 1      | 0      | 0      | 0      | 1      | 1      |
| 24224  | 5     | 1     | 1     | 1     | 4     | 5     | 0      | 0      | 0      | 0      | 0      | 1      | 0      | 1      |
| 24225  | 4     | 2     | 1     | 1     | 4     | 5     | 0      | 0      | 1      | 0      | 1      | 1      | 1      | 1      |
| 24227  | 5     | 1     | 5     | 5     | 5     | 5     | 0      | 0      | 0      | 0      | 0      | 3      | 3      | 0      |
| 24229  | 4     | 1     | 0     | 0     | 4     | 4     | 0      | 0      | 0      | 0      | 0      | 0      | 0      | 0      |

| respid | Q52_2 | Q53_1 | Q54_1 | Q54_2 | Q54_3 | Q55_1 | Q56a_1 | Q56b_1 | Q56c_1 | Q56d_1 | Q56e_1 | Q56f_1 | Q56g_1 | Q56h_1 |
|--------|-------|-------|-------|-------|-------|-------|--------|--------|--------|--------|--------|--------|--------|--------|
| 24230  | 5     | 1     | 1     | 1     | 3     | 5     | 0      | 0      | 0      | 0      | 0      | 1      | 0      | 0      |
| 24232  | 3     | 3     | 1     | 1     | 3     | 3     | 1      | 0      | 1      | 2      | 1      | 1      | 1      | 2      |
| 24253  | 3     | 2     | 1     | 3     | 4     | 4     | 0      | 0      | 0      | 0      | 0      | 1      | 1      | 1      |
| 24267  | 4     | 2     | 1     | 1     | 4     | 4     | 1      | 0      | 1      | 0      | 1      | 0      | 1      | 0      |
| 24274  | 4     | 1     | 1     | 1     | 4     | 5     | 0      | 0      | 1      | 0      | 1      | 0      | 0      | 1      |
| 24275  | 3     | 3     | 3     | 4     | 3     | 4     | 1      | 2      | 1      | 0      | 1      | 1      | 1      | 1      |
| 24277  | 5     | 1     | 1     | 1     | 4     | 4     | 1      | 1      | 1      | 1      | 1      | 1      | 1      | 0      |
| 24280  | 4     | 2     | 1     | 3     | 3     | 4     | 0      | 0      | 1      | 1      | 0      | 1      | 1      | 1      |
| 24285  | 4     | 2     | 1     | 3     | 3     | 4     | 0      | 0      | 0      | 0      | 1      | 0      | 0      | 0      |
| 24293  | 5     | 1     | 1     | 1     | 4     | 4     | 1      | 0      | 1      | 0      | 1      | 0      | 0      | 1      |
| 24295  | 3     | 3     | 1     | 3     | 3     | 4     | 1      | 1      | 1      | 2      | 1      | 1      | 1      | 1      |
| 24299  | 5     | 1     | 3     | 4     | 1     | 4     | 0      | 2      | 2      | 0      | 1      | 2      | 2      | 1      |
| 24303  | 5     | 1     | 1     | 1     | 4     | 5     | 0      | 0      | 0      | 0      | 1      | 0      | 0      | 0      |
| 24308  | 5     | 1     | 1     | 1     | 5     | 5     | 0      | 0      | 1      | 0      | 1      | 1      | 0      | 1      |
| 24322  | 5     | 2     | 1     | 1     | 3     | 4     | 1      | 0      | 0      | 0      | 1      | 0      | 1      | 0      |
| 24325  | 4     | 2     | 3     | 3     | 5     | 5     | 0      | 0      | 0      | 0      | 0      | 0      | 1      | 1      |
| 24328  | 4     | 2     | 1     | 1     | 4     | 4     | 0      | 0      | 0      | 1      | 1      | 1      | 1      | 1      |
| 24334  | 4     | 2     | 3     | 3     | 3     | 3     | 1      | 1      | 1      | 1      | 1      | 2      | 2      | 1      |
| 24342  | 5     | 2     | 1     | 1     | 3     | 4     | 1      | 2      | 1      | 1      | 1      | 1      | 0      | 1      |
| 24343  | 4     | 3     | 3     | 1     | 4     | 4     | 1      | 2      | 1      | 1      | 2      | 1      | 1      | 1      |
| 24348  | 3     | 3     | 1     | 3     | 3     | 4     | 0      | 1      | 0      | 0      | 0      | 1      | 0      | 3      |
| 24352  | 4     | 3     | 3     | 4     | 3     | 4     | 1      | 2      | 2      | 2      | 2      | 1      | 1      | 2      |
| 24354  | 4     | 2     | 1     | 3     | 4     | 4     | 0      | 0      | 0      | 0      | 0      | 0      | 1      | 1      |
| 24357  | 4     | 2     | 1     | 3     | 3     | 4     | 0      | 1      | 1      | 0      | 0      | 0      | 0      | 1      |
| 24360  | 4     | 2     | 1     | 1     | 4     | 5     | 0      | 0      | 0      | 0      | 1      | 0      | 0      | 1      |
| 24369  | 4     | 3     | 4     | 3     | 1     | 5     | 1      | 0      | 1      | 2      | 1      | 1      | 2      | 1      |
| 24373  | 3     | 2     | 3     | 4     | 3     | 2     | 1      | 2      | 1      | 2      | 1      | 2      | 1      | 2      |
| 24398  | 1     | 4     | 4     | 5     | 4     | 2     | 2      | 2      | 2      | 2      | 2      | 2      | 2      | 2      |
| 24402  | 4     | 3     | 3     | 3     | 4     | 4     | 1      | 2      | 2      | 0      | 1      | 1      | 2      | 1      |
| 24405  | 3     | 2     | 1     | 3     | 3     | 4     | 1      | 2      | 2      | 2      | 2      | 1      | 2      | 2      |
| 24407  | 4     | 3     | 3     | 4     | 3     | 5     | 1      | 0      | 1      | 0      | 1      | 1      | 1      | 0      |
| 24413  | 5     | 1     | 0     | 0     | 4     | 5     | 0      | 0      | 0      | 0      | 0      | 0      | 0      | 0      |



| respid | Q52_2 | Q53_1 | Q54_1 | Q54_2 | Q54_3 | Q55_1 | Q56a_1 | Q56b_1 | Q56c_1 | Q56d_1 | Q56e_1 | Q56f_1 | Q56g_1 | Q56h_1 |
|--------|-------|-------|-------|-------|-------|-------|--------|--------|--------|--------|--------|--------|--------|--------|
| 24443  | 3     | 2     | 3     | 3     | 3     | 3     | 1      | 2      | 1      | 1      | 1      | 1      | 2      | 2      |
| 24451  | 5     | 1     | 1     | 1     | 4     | 5     | 0      | 0      | 0      | 0      | 0      | 0      | 0      | 1      |
| 24459  | 3     | 4     | 4     | 4     | 1     | 4     | 1      | 2      | 1      | 2      | 1      | 2      | 2      | 1      |
| 24465  | 4     | 2     | 1     | 3     | 4     | 4     | 1      | 2      | 1      | 1      | 1      | 1      | 1      | 1      |
| 24481  | 4     | 2     | 3     | 4     | 4     | 4     | 1      | 2      | 1      | 1      | 1      | 3      | 2      | 1      |
| 24482  | 5     | 1     | 4     | 4     | 5     | 4     | 1      | 1      | 0      | 1      | 1      | 1      | 2      | 2      |
| 24491  | 4     | 1     | 3     | 3     | 3     | 4     | 1      | 1      | 0      | 0      | 1      | 1      | 2      | 1      |
| 24495  | 5     | 1     | 1     | 1     | 4     | 5     | 0      | 0      | 0      | 0      | 1      | 0      | 1      | 1      |
| 24497  | 2     | 3     | 1     | 1     | 1     | 2     | 1      | 1      | 2      | 1      | 1      | 1      | 1      | 2      |
| 24511  | 2     | 3     | 1     | 1     | 3     | 1     | 1      | 0      | 0      | 1      | 2      | 1      | 1      | 1      |
| 24513  | 3     | 4     | 3     | 3     | 4     | 4     | 1      | 1      | 1      | 1      | 1      | 1      | 1      | 1      |
| 24516  | 4     | 2     | 1     | 3     | 4     | 3     | 1      | 0      | 1      | 0      | 1      | 0      | 0      | 1      |
| 24518  | 5     | 2     | 0     | 4     | 4     | 4     | 0      | 0      | 0      | 0      | 2      | 1      | 1      | 2      |
| 24524  | 3     | 3     | 3     | 4     | 1     | 3     | 1      | 2      | 2      | 2      | 2      | 2      | 2      | 1      |
| 24528  | 5     | 2     | 0     | 1     | 4     | 4     | 0      | 0      | 0      | 0      | 0      | 1      | 0      | 0      |
| 24531  | 5     | 2     | 0     | 1     | 4     | 4     | 0      | 0      | 0      | 0      | 1      | 1      | 1      | 0      |
| 24533  | 2     | 3     | 4     | 5     | 1     | 2     | 2      | 2      | 3      | 2      | 2      | 2      | 2      | 2      |
| 24547  | 5     | 2     | 1     | 1     | 4     | 4     | 1      | 2      | 1      | 1      | 1      | 1      | 1      | 0      |
| 24557  | 3     | 3     | 1     | 3     | 1     | 3     | 1      | 1      | 1      | 1      | 1      | 1      | 2      | 1      |
| 24559  | 3     | 2     | 3     | 1     | 3     | 3     | 1      | 1      | 2      | 1      | 2      | 2      | 1      | 2      |
| 24567  | 4     | 2     | 1     | 1     | 3     | 4     | 1      | 0      | 2      | 0      | 1      | 0      | 0      | 1      |
| 24568  | 5     | 1     | 1     | 1     | 3     | 4     | 1      | 0      | 1      | 0      | 1      | 0      | 0      | 1      |
| 24577  | 5     | 2     | 1     | 3     | 3     | 5     | 1      | 0      | 0      | 0      | 1      | 0      | 1      | 0      |
| 24581  | 4     | 2     | 3     | 3     | 4     | 4     | 1      | 1      | 2      | 2      | 1      | 1      | 1      | 1      |
| 24588  | 5     | 1     | 1     | 1     | 4     | 5     | 0      | 1      | 0      | 1      | 1      | 1      | 0      | 0      |
| 24604  | 3     | 3     | 3     | 4     | 3     | 3     | 1      | 2      | 1      | 2      | 1      | 1      | 1      | 2      |
| 24612  | 4     | 1     | 1     | 3     | 4     | 4     | 0      | 0      | 0      | 0      | 1      | 1      | 1      | 1      |
| 24621  | 3     | 3     | 1     | 1     | 3     | 3     | 1      | 1      | 1      | 1      | 1      | 1      | 1      | 1      |
| 24625  | 3     | 2     | 1     | 3     | 3     | 4     | 1      | 0      | 2      | 2      | 2      | 1      | 1      | 1      |
| 24627  | 4     | 1     | 1     | 3     | 4     | 5     | 0      | 0      | 2      | 0      | 1      | 1      | 0      | 1      |
| 24640  | 4     | 4     | 3     | 3     | 3     | 3     | 3      | 2      | 3      | 1      | 3      | 1      | 2      | 3      |
| 24644  | 3     | 3     | 3     | 3     | 3     | 3     | 1      | 1      | 1      | 0      | 1      | 0      | 1      | 0      |

| respid | Q52_2 | Q53_1 | Q54_1 | Q54_2 | Q54_3 | Q55_1 | Q56a_1 | Q56b_1 | Q56c_1 | Q56d_1 | Q56e_1 | Q56f_1 | Q56g_1 | Q56h_1 |
|--------|-------|-------|-------|-------|-------|-------|--------|--------|--------|--------|--------|--------|--------|--------|
| 24664  | 4     | 2     | 1     | 3     | 4     | 5     | 1      | 0      | 0      | 2      | 1      | 1      | 1      | 1      |
| 24669  | 3     | 4     | 4     | 3     | 1     | 4     | 0      | 2      | 2      | 2      | 2      | 1      | 2      | 2      |
| 24685  | 5     | 1     | 1     | 0     | 5     | 5     | 0      | 0      | 0      | 0      | 0      | 1      | 1      | 0      |
| 24687  | 3     | 2     | 3     | 3     | 3     | 3     | 1      | 2      | 1      | 2      | 1      | 1      | 2      | 2      |
| 24688  | 3     | 3     | 3     | 3     | 3     | 4     | 1      | 1      | 1      | 1      | 1      | 1      | 2      | 1      |
| 24691  | 3     | 3     | 3     | 3     | 1     | 3     | 1      | 1      | 1      | 1      | 1      | 1      | 1      | 1      |
| 24693  | 3     | 2     | 1     | 3     | 3     | 4     | 2      | 1      | 2      | 1      | 1      | 1      | 1      | 1      |
| 24706  | 5     | 1     | 1     | 1     | 4     | 5     | 0      | 1      | 1      | 1      | 1      | 1      | 1      | 0      |
| 24710  | 5     | 1     | 0     | 0     | 5     | 5     | 0      | 0      | 0      | 0      | 0      | 0      | 0      | 0      |
| 24717  | 5     | 1     | 0     | 0     | 5     | 5     | 0      | 0      | 0      | 0      | 0      | 0      | 0      | 0      |
| 24720  | 4     | 2     | 1     | 1     | 4     | 4     | 1      | 0      | 0      | 1      | 1      | 1      | 1      | 1      |
| 24731  | 3     | 3     | 3     | 4     | 1     | 3     | 1      | 1      | 1      | 2      | 1      | 2      | 2      | 2      |
| 24732  | 2     | 3     | 1     | 4     | 3     | 4     | 2      | 1      | 2      | 1      | 1      | 1      | 2      | 2      |
| 24733  | 4     | 4     | 1     | 4     | 4     | 2     | 1      | 1      | 0      | 0      | 1      | 0      | 1      | 3      |
| 24747  | 3     | 2     | 3     | 4     | 1     | 4     | 1      | 1      | 1      | 1      | 2      | 2      | 2      | 2      |
| 24750  | 4     | 4     | 3     | 3     | 4     | 3     | 1      | 2      | 1      | 0      | 1      | 1      | 1      | 1      |
| 24758  | 4     | 3     | 1     | 3     | 4     | 3     | 1      | 2      | 1      | 1      | 1      | 1      | 2      | 1      |
| 24760  | 4     | 2     | 1     | 1     | 4     | 4     | 0      | 0      | 0      | 0      | 0      | 0      | 0      | 0      |
| 24765  | 5     | 2     | 1     | 1     | 4     | 5     | 0      | 0      | 1      | 0      | 1      | 1      | 1      | 0      |
| 24772  | 4     | 2     | 1     | 1     | 4     | 5     | 0      | 0      | 0      | 0      | 0      | 0      | 0      | 0      |
| 24779  | 2     | 3     | 1     | 3     | 3     | 3     | 1      | 1      | 1      | 1      | 1      | 1      | 2      | 2      |
| 24794  | 5     | 1     | 0     | 0     | 0     | 4     | 0      | 0      | 0      | 0      | 0      | 0      | 0      | 0      |
| 24796  | 5     | 2     | 1     | 3     | 4     | 4     | 1      | 0      | 0      | 0      | 1      | 0      | 1      | 0      |
| 24797  | 3     | 3     | 1     | 1     | 3     | 4     | 0      | 0      | 2      | 2      | 1      | 0      | 1      | 0      |
| 24800  | 5     | 2     | 1     | 1     | 3     | 4     | 1      | 0      | 1      | 0      | 1      | 1      | 0      | 0      |
| 24813  | 2     | 2     | 4     | 4     | 1     | 3     | 1      | 1      | 2      | 1      | 1      | 2      | 2      | 1      |
| 24815  | 3     | 2     | 1     | 3     | 4     | 3     | 1      | 1      | 1      | 0      | 0      | 1      | 1      | 0      |
| 24821  | 5     | 1     | 1     | 3     | 4     | 5     | 2      | 2      | 0      | 0      | 0      | 1      | 1      | 0      |
| 24822  | 5     | 1     | 1     | 1     | 5     | 5     | 0      | 0      | 0      | 0      | 0      | 1      | 0      | 0      |
| 24831  | 3     | 2     | 1     | 1     | 3     | 1     | 1      | 0      | 1      | 1      | 1      | 1      | 0      | 2      |
| 24835  | 5     | 2     | 0     | 0     | 4     | 5     | 0      | 0      | 0      | 0      | 0      | 0      | 0      | 0      |
| 24843  | 3     | 3     | 4     | 4     | 1     | 2     | 2      | 2      | 2      | 1      | 2      | 2      | 2      | 1      |

| respid | Q52_2 | Q53_1 | Q54_1 | Q54_2 | Q54_3 | Q55_1 | Q56a_1 | Q56b_1 | Q56c_1 | Q56d_1 | Q56e_1 | Q56f_1 | Q56g_1 | Q56h_1 |
|--------|-------|-------|-------|-------|-------|-------|--------|--------|--------|--------|--------|--------|--------|--------|
| 24844  | 2     | 3     | 1     | 1     | 3     | 3     | 1      | 1      | 1      | 1      | 1      | 1      | 1      | 1      |
| 24860  | 5     | 1     | 1     | 1     | 4     | 5     | 1      | 0      | 0      | 1      | 1      | 1      | 1      | 1      |
| 24861  | 3     | 2     | 1     | 1     | 4     | 3     | 1      | 0      | 0      | 0      | 0      | 0      | 0      | 2      |
| 24865  | 3     | 3     | 3     | 3     | 1     | 3     | 1      | 1      | 1      | 1      | 1      | 1      | 2      | 1      |
| 24870  | 3     | 3     | 1     | 3     | 3     | 3     | 1      | 1      | 1      | 1      | 1      | 1      | 1      | 1      |
| 24887  | 5     | 1     | 1     | 1     | 4     | 5     | 1      | 0      | 1      | 1      | 1      | 1      | 1      | 0      |
| 24897  | 4     | 2     | 1     | 3     | 4     | 5     | 1      | 1      | 0      | 0      | 1      | 1      | 1      | 0      |
| 24902  | 3     | 2     | 3     | 3     | 3     | 3     | 1      | 1      | 1      | 1      | 1      | 1      | 2      | 1      |
| 24914  | 3     | 2     | 1     | 1     | 4     | 3     | 1      | 0      | 0      | 1      | 0      | 0      | 0      | 2      |
| 24921  | 4     | 2     | 4     | 4     | 4     | 4     | 1      | 1      | 1      | 2      | 1      | 1      | 2      | 1      |
| 24922  | 5     | 1     | 1     | 1     | 5     | 5     | 0      | 0      | 0      | 0      | 0      | 1      | 0      | 0      |
| 24924  | 5     | 1     | 1     | 1     | 4     | 5     | 0      | 0      | 1      | 0      | 0      | 0      | 0      | 0      |
| 24927  | 3     | 3     | 1     | 1     | 3     | 3     | 1      | 0      | 2      | 2      | 1      | 1      | 1      | 1      |
| 24936  | 4     | 1     | 3     | 3     | 3     | 4     | 2      | 1      | 3      | 3      | 3      | 3      | 3      | 0      |
| 24937  | 5     | 2     | 1     | 1     | 4     | 4     | 1      | 0      | 0      | 0      | 1      | 1      | 1      | 1      |
| 24942  | 5     | 2     | 0     | 1     | 3     | 3     | 1      | 1      | 1      | 0      | 1      | 1      | 1      | 1      |
| 24947  | 4     | 1     | 1     | 3     | 4     | 4     | 1      | 0      | 1      | 0      | 1      | 0      | 1      | 1      |
| 24953  | 4     | 2     | 3     | 3     | 4     | 3     | 1      | 1      | 2      | 2      | 2      | 1      | 1      | 1      |
| 24954  | 1     | 3     | 3     | 1     | 1     | 2     | 1      | 1      | 1      | 1      | 1      | 1      | 1      | 1      |
| 24960  | 3     | 3     | 1     | 3     | 3     | 3     | 1      | 1      | 2      | 1      | 2      | 1      | 2      | 2      |
| 24965  | 4     | 2     | 1     | 4     | 4     | 3     | 2      | 0      | 1      | 2      | 1      | 1      | 2      | 2      |
| 24975  | 5     | 1     | 0     | 3     | 4     | 2     | 1      | 2      | 1      | 0      | 1      | 0      | 0      | 1      |
| 24983  | 3     | 3     | 3     | 3     | 1     | 3     | 1      | 1      | 1      | 1      | 1      | 1      | 2      | 1      |
| 24985  | 4     | 2     | 1     | 3     | 4     | 4     | 1      | 0      | 1      | 0      | 1      | 0      | 1      | 1      |
| 24990  | 2     | 3     | 4     | 4     | 1     | 1     | 3      | 2      | 3      | 3      | 3      | 3      | 3      | 1      |
| 25000  | 5     | 1     | 0     | 0     | 4     | 5     | 0      | 0      | 0      | 0      | 2      | 0      | 0      | 1      |
| 25007  | 4     | 2     | 3     | 3     | 3     | 3     | 1      | 2      | 2      | 2      | 1      | 1      | 1      | 1      |
| 25008  | 5     | 1     | 0     | 1     | 4     | 4     | 1      | 0      | 2      | 0      | 0      | 0      | 1      | 1      |
| 25010  | 3     | 2     | 1     | 3     | 4     | 4     | 1      | 0      | 0      | 3      | 1      | 2      | 3      | 0      |
| 25016  | 4     | 2     | 1     | 1     | 4     | 5     | 1      | 0      | 0      | 1      | 1      | 1      | 1      | 1      |
| 25021  | 3     | 5     | 5     | 5     | 3     | 3     | 3      | 1      | 1      | 3      | 1      | 1      | 2      | 3      |
| 25040  | 5     | 1     | 1     | 1     | 4     | 5     | 0      | 1      | 0      | 0      | 0      | 0      | 0      | 1      |

| respid | Q52_2 | Q53_1 | Q54_1 | Q54_2 | Q54_3 | Q55_1 | Q56a_1 | Q56b_1 | Q56c_1 | Q56d_1 | Q56e_1 | Q56f_1 | Q56g_1 | Q56h_1 |
|--------|-------|-------|-------|-------|-------|-------|--------|--------|--------|--------|--------|--------|--------|--------|
| 25043  | 5     | 2     | 1     | 1     | 4     | 5     | 0      | 0      | 0      | 0      | 0      | 0      | 0      | 0      |
| 25055  | 5     | 2     | 0     | 0     | 4     | 4     | 0      | 0      | 0      | 0      | 1      | 2      | 0      | 0      |
| 25057  | 4     | 2     | 1     | 3     | 4     | 4     | 1      | 0      | 1      | 0      | 1      | 1      | 1      | 0      |
| 25060  | 3     | 2     | 3     | 4     | 3     | 3     | 1      | 1      | 1      | 1      | 1      | 1      | 2      | 0      |
| 25062  | 5     | 2     | 0     | 1     | 4     | 4     | 1      | 0      | 1      | 0      | 1      | 0      | 0      | 1      |
| 25064  | 4     | 3     | 4     | 4     | 4     | 4     | 1      | 1      | 1      | 1      | 1      | 2      | 2      | 1      |
| 25069  | 5     | 1     | 1     | 1     | 5     | 5     | 0      | 0      | 0      | 0      | 0      | 1      | 0      | 0      |
| 25077  | 5     | 1     | 1     | 1     | 4     | 4     | 0      | 1      | 0      | 0      | 1      | 1      | 0      | 1      |
| 25088  | 5     | 2     | 1     | 1     | 4     | 5     | 0      | 0      | 2      | 1      | 1      | 0      | 1      | 0      |
| 25093  | 4     | 2     | 1     | 3     | 4     | 3     | 1      | 1      | 2      | 1      | 1      | 1      | 1      | 2      |
| 25121  | 3     | 3     | 3     | 4     | 3     | 4     | 2      | 2      | 2      | 2      | 2      | 2      | 1      | 1      |
| 25140  | 3     | 3     | 3     | 3     | 1     | 3     | 1      | 1      | 1      | 1      | 1      | 1      | 2      | 1      |
| 25144  | 5     | 1     | 1     | 3     | 4     | 3     | 1      | 1      | 1      | 2      | 1      | 1      | 1      | 1      |
| 25149  | 4     | 2     | 4     | 4     | 3     | 4     | 1      | 1      | 1      | 2      | 1      | 3      | 2      | 1      |
| 25159  | 5     | 1     | 1     | 1     | 5     | 5     | 0      | 0      | 0      | 0      | 0      | 0      | 0      | 1      |
| 25191  | 5     | 1     | 3     | 3     | 3     | 4     | 1      | 0      | 0      | 1      | 1      | 1      | 1      | 1      |
| 25193  | 4     | 3     | 1     | 3     | 3     | 3     | 1      | 0      | 1      | 0      | 1      | 1      | 1      | 2      |
| 25202  | 3     | 3     | 3     | 3     | 1     | 3     | 1      | 1      | 1      | 1      | 1      | 1      | 2      | 1      |
| 25215  | 2     | 2     | 4     | 1     | 3     | 4     | 2      | 1      | 2      | 1      | 1      | 1      | 2      | 2      |
| 25229  | 3     | 3     | 3     | 3     | 3     | 3     | 1      | 1      | 1      | 1      | 1      | 1      | 1      | 1      |
| 25231  | 4     | 2     | 4     | 3     | 3     | 4     | 1      | 2      | 2      | 2      | 1      | 1      | 2      | 2      |
| 25236  | 4     | 3     | 1     | 3     | 4     | 5     | 0      | 0      | 0      | 0      | 1      | 1      | 0      | 1      |
| 25242  | 5     | 1     | 0     | 1     | 4     | 5     | 0      | 1      | 0      | 0      | 1      | 0      | 0      | 2      |
| 25252  | 5     | 1     | 5     | 5     | 5     | 5     | 0      | 0      | 0      | 0      | 0      | 0      | 0      | 0      |
| 25253  | 4     | 2     | 3     | 4     | 4     | 4     | 1      | 0      | 1      | 1      | 1      | 1      | 0      | 2      |
| 25256  | 3     | 3     | 3     | 3     | 1     | 3     | 1      | 1      | 1      | 1      | 1      | 1      | 2      | 1      |
| 25260  | 5     | 1     | 0     | 1     | 5     | 5     | 0      | 0      | 1      | 0      | 1      | 0      | 0      | 0      |
| 25261  | 4     | 3     | 1     | 1     | 4     | 4     | 1      | 0      | 1      | 0      | 1      | 1      | 1      | 0      |
| 25280  | 4     | 2     | 3     | 1     | 4     | 4     | 2      | 1      | 1      | 1      | 0      | 0      | 0      | 1      |
| 25282  | 5     | 1     | 1     | 1     | 4     | 5     | 0      | 0      | 0      | 0      | 1      | 1      | 1      | 0      |
| 25289  | 2     | 4     | 3     | 4     | 4     | 5     | 3      | 2      | 2      | 2      | 3      | 3      | 2      | 2      |
| 25303  | 5     | 2     | 1     | 3     | 4     | 3     | 0      | 0      | 0      | 0      | 1      | 1      | 1      | 0      |

| respid | Q52_2 | Q53_1 | Q54_1 | Q54_2 | Q54_3 | Q55_1 | Q56a_1 | Q56b_1 | Q56c_1 | Q56d_1 | Q56e_1 | Q56f_1 | Q56g_1 | Q56h_1 |
|--------|-------|-------|-------|-------|-------|-------|--------|--------|--------|--------|--------|--------|--------|--------|
| 25304  | 3     | 4     | 3     | 4     | 3     | 3     | 2      | 0      | 2      | 3      | 2      | 1      | 2      | 2      |
| 25309  | 3     | 2     | 1     | 3     | 1     | 2     | 2      | 2      | 0      | 1      | 2      | 1      | 2      | 2      |
| 25317  | 3     | 2     | 4     | 4     | 1     | 3     | 1      | 2      | 1      | 1      | 2      | 2      | 2      | 2      |
| 25318  | 3     | 2     | 3     | 3     | 3     | 3     | 1      | 1      | 1      | 1      | 1      | 1      | 1      | 1      |
| 25320  | 3     | 3     | 3     | 3     | 3     | 4     | 1      | 1      | 2      | 2      | 2      | 2      | 2      | 1      |
| 25324  | 3     | 3     | 3     | 3     | 1     | 3     | 1      | 1      | 1      | 1      | 1      | 1      | 1      | 1      |
| 25331  | 5     | 2     | 1     | 1     | 4     | 5     | 0      | 0      | 0      | 0      | 0      | 0      | 0      | 0      |
| 25340  | 4     | 2     | 1     | 3     | 4     | 4     | 1      | 0      | 0      | 0      | 1      | 0      | 0      | 1      |
| 25342  | 4     | 2     | 3     | 3     | 4     | 4     | 1      | 0      | 1      | 0      | 1      | 1      | 1      | 1      |
| 25350  | 5     | 2     | 1     | 1     | 5     | 5     | 1      | 0      | 0      | 0      | 1      | 0      | 0      | 1      |
| 25352  | 4     | 2     | 3     | 1     | 4     | 4     | 1      | 1      | 0      | 0      | 0      | 1      | 1      | 1      |
| 25358  | 5     | 1     | 0     | 1     | 4     | 4     | 1      | 1      | 0      | 0      | 1      | 1      | 1      | 0      |
| 25375  | 5     | 2     | 0     | 0     | 4     | 5     | 1      | 1      | 1      | 0      | 1      | 0      | 0      | 1      |
| 25386  | 4     | 3     | 0     | 3     | 4     | 4     | 1      | 1      | 1      | 1      | 1      | 1      | 1      | 1      |
| 25388  | 5     | 1     | 1     | 3     | 4     | 5     | 0      | 0      | 1      | 0      | 0      | 0      | 1      | 0      |
| 25390  | 4     | 2     | 4     | 5     | 3     | 3     | 3      | 0      | 2      | 1      | 3      | 2      | 3      | 1      |
| 25391  | 5     | 2     | 1     | 3     | 4     | 4     | 1      | 0      | 0      | 1      | 1      | 1      | 1      | 1      |
| 25400  | 4     | 2     | 3     | 3     | 1     | 3     | 2      | 0      | 2      | 1      | 1      | 1      | 2      | 2      |
| 25413  | 3     | 3     | 3     | 3     | 1     | 3     | 1      | 1      | 1      | 1      | 1      | 1      | 2      | 1      |
| 25424  | 4     | 2     | 1     | 0     | 4     | 4     | 0      | 0      | 1      | 0      | 1      | 0      | 0      | 1      |
| 25426  | 3     | 2     | 3     | 3     | 3     | 4     | 1      | 2      | 1      | 1      | 1      | 2      | 2      | 1      |
| 25430  | 5     | 1     | 1     | 0     | 4     | 4     | 1      | 1      | 0      | 0      | 1      | 1      | 0      | 1      |
| 25434  | 2     | 3     | 3     | 3     | 3     | 3     | 2      | 2      | 2      | 1      | 2      | 2      | 2      | 2      |
| 25439  | 3     | 3     | 1     | 4     | 4     | 3     | 2      | 2      | 1      | 1      | 1      | 1      | 1      | 2      |
| 25441  | 5     | 5     | 0     | 3     | 5     | 4     | 0      | 0      | 0      | 2      | 0      | 1      | 1      | 1      |
| 25445  | 5     | 2     | 3     | 3     | 3     | 5     | 1      | 0      | 1      | 1      | 1      | 1      | 1      | 1      |
| 25451  | 4     | 2     | 4     | 4     | 4     | 4     | 1      | 0      | 1      | 0      | 1      | 1      | 1      | 1      |
| 25469  | 3     | 3     | 3     | 3     | 1     | 3     | 1      | 1      | 1      | 1      | 1      | 1      | 2      | 1      |
| 25471  | 4     | 3     | 3     | 4     | 3     | 4     | 1      | 2      | 1      | 1      | 1      | 2      | 2      | 1      |
| 25476  | 1     | 3     | 1     | 1     | 1     | 3     | 1      | 0      | 1      | 1      | 1      | 1      | 1      | 1      |
| 25480  | 2     | 2     | 0     | 1     | 3     | 4     | 1      | 1      | 1      | 1      | 1      | 1      | 1      | 1      |
| 25482  | 4     | 3     | 3     | 4     | 3     | 3     | 1      | 2      | 1      | 2      | 1      | 1      | 2      | 1      |

| respid | Q52_2 | Q53_1 | Q54_1 | Q54_2 | Q54_3 | Q55_1 | Q56a_1 | Q56b_1 | Q56c_1 | Q56d_1 | Q56e_1 | Q56f_1 | Q56g_1 | Q56h_1 |
|--------|-------|-------|-------|-------|-------|-------|--------|--------|--------|--------|--------|--------|--------|--------|
| 25500  | 3     | 3     | 3     | 3     | 3     | 3     | 2      | 1      | 1      | 2      | 2      | 2      | 1      | 2      |
| 25516  | 4     | 1     | 1     | 1     | 4     | 5     | 0      | 0      | 1      | 0      | 1      | 0      | 0      | 1      |
| 25521  | 2     | 4     | 3     | 3     | 4     | 3     | 2      | 2      | 1      | 1      | 1      | 2      | 1      | 2      |
| 25525  | 4     | 2     | 1     | 3     | 4     | 3     | 1      | 1      | 1      | 1      | 1      | 1      | 1      | 1      |
| 25530  | 2     | 3     | 4     | 4     | 3     | 2     | 1      | 1      | 1      | 2      | 1      | 1      | 2      | 2      |
| 25555  | 4     | 2     | 1     | 1     | 4     | 4     | 1      | 2      | 1      | 1      | 1      | 1      | 1      | 1      |
| 25558  | 3     | 3     | 1     | 3     | 3     | 3     | 1      | 1      | 1      | 1      | 2      | 1      | 1      | 1      |
| 25561  | 3     | 3     | 3     | 3     | 4     | 4     | 2      | 2      | 2      | 1      | 2      | 2      | 2      | 2      |
| 25566  | 4     | 3     | 0     | 3     | 4     | 4     | 0      | 1      | 0      | 0      | 1      | 1      | 1      | 1      |
| 25571  | 3     | 3     | 3     | 3     | 3     | 3     | 2      | 1      | 1      | 2      | 1      | 1      | 1      | 1      |
| 25572  | 5     | 1     | 1     | 3     | 4     | 4     | 0      | 0      | 0      | 0      | 0      | 1      | 0      | 1      |
| 25574  | 3     | 3     | 3     | 4     | 3     | 3     | 1      | 1      | 1      | 1      | 1      | 1      | 2      | 1      |
| 25588  | 4     | 1     | 1     | 1     | 4     | 5     | 0      | 0      | 0      | 0      | 1      | 0      | 0      | 1      |
| 25591  | 4     | 3     | 1     | 1     | 3     | 4     | 1      | 0      | 1      | 0      | 1      | 1      | 0      | 1      |
| 25599  | 4     | 2     | 1     | 1     | 4     | 5     | 0      | 0      | 1      | 1      | 1      | 0      | 1      | 1      |
| 25604  | 5     | 2     | 0     | 1     | 1     | 5     | 1      | 0      | 2      | 2      | 2      | 1      | 2      | 2      |
| 25614  | 4     | 3     | 3     | 4     | 3     | 4     | 1      | 1      | 0      | 1      | 1      | 1      | 2      | 1      |
| 25634  | 4     | 3     | 3     | 4     | 4     | 3     | 1      | 2      | 2      | 1      | 1      | 1      | 2      | 1      |
| 25642  | 5     | 2     | 5     | 5     | 5     | 5     | 0      | 0      | 0      | 0      | 1      | 1      | 1      | 1      |
| 25647  | 3     | 1     | 1     | 1     | 4     | 5     | 0      | 0      | 0      | 0      | 0      | 0      | 0      | 0      |
| 25653  | 5     | 2     | 4     | 4     | 4     | 5     | 0      | 0      | 1      | 0      | 1      | 1      | 1      | 1      |
| 25654  | 5     | 3     | 3     | 4     | 3     | 4     | 1      | 1      | 1      | 1      | 1      | 2      | 2      | 1      |
| 25660  | 4     | 1     | 0     | 0     | 4     | 4     | 0      | 0      | 0      | 0      | 0      | 0      | 0      | 1      |
| 25664  | 5     | 1     | 0     | 1     | 4     | 4     | 0      | 0      | 1      | 0      | 0      | 0      | 1      | 1      |
| 25665  | 4     | 2     | 1     | 1     | 4     | 4     | 1      | 0      | 1      | 0      | 1      | 0      | 0      | 1      |
| 25672  | 5     | 2     | 1     | 3     | 4     | 3     | 1      | 1      | 2      | 1      | 1      | 2      | 2      | 2      |
| 25677  | 2     | 4     | 3     | 3     | 3     | 4     | 2      | 1      | 1      | 1      | 2      | 2      | 1      | 1      |
| 25685  | 4     | 2     | 1     | 1     | 3     | 4     | 0      | 0      | 1      | 0      | 1      | 0      | 1      | 1      |
| 25699  | 3     | 2     | 3     | 3     | 3     | 3     | 1      | 2      | 2      | 2      | 2      | 1      | 1      | 1      |
| 25703  | 5     | 1     | 3     | 3     | 3     | 5     | 1      | 2      | 1      | 2      | 2      | 2      | 2      | 2      |
| 25704  | 3     | 3     | 1     | 3     | 3     | 3     | 1      | 2      | 1      | 1      | 1      | 2      | 2      | 1      |
| 25705  | 2     | 3     | 4     | 4     | 1     | 3     | 2      | 1      | 2      | 1      | 2      | 2      | 2      | 1      |

| respid | Q52_2 | Q53_1 | Q54_1 | Q54_2 | Q54_3 | Q55_1 | Q56a_1 | Q56b_1 | Q56c_1 | Q56d_1 | Q56e_1 | Q56f_1 | Q56g_1 | Q56h_1 |
|--------|-------|-------|-------|-------|-------|-------|--------|--------|--------|--------|--------|--------|--------|--------|
| 25711  | 5     | 1     | 5     | 5     | 5     | 5     | 0      | 1      | 0      | 2      | 0      | 1      | 2      | 1      |
| 25727  | 4     | 2     | 3     | 3     | 4     | 5     | 1      | 0      | 1      | 1      | 1      | 1      | 1      | 0      |
| 25728  | 4     | 2     | 1     | 3     | 3     | 4     | 1      | 1      | 1      | 0      | 1      | 1      | 1      | 1      |
| 25733  | 4     | 3     | 3     | 3     | 1     | 4     | 1      | 1      | 1      | 1      | 2      | 2      | 2      | 2      |
| 25735  | 3     | 2     | 1     | 3     | 3     | 4     | 1      | 2      | 1      | 2      | 1      | 1      | 1      | 2      |
| 25736  | 5     | 2     | 1     | 1     | 4     | 4     | 0      | 0      | 0      | 0      | 1      | 0      | 1      | 0      |
| 25742  | 4     | 1     | 1     | 3     | 4     | 5     | 0      | 0      | 1      | 0      | 1      | 0      | 0      | 1      |
| 25750  | 5     | 2     | 3     | 3     | 3     | 5     | 1      | 2      | 1      | 0      | 1      | 1      | 2      | 1      |
| 25754  | 5     | 1     | 0     | 0     | 5     | 5     | 0      | 1      | 0      | 3      | 0      | 0      | 0      | 0      |
| 25776  | 2     | 3     | 1     | 3     | 3     | 3     | 2      | 1      | 2      | 2      | 2      | 1      | 1      | 1      |
| 25778  | 4     | 2     | 4     | 4     | 4     | 4     | 1      | 1      | 1      | 1      | 1      | 1      | 2      | 1      |
| 25796  | 4     | 2     | 1     | 1     | 4     | 5     | 1      | 0      | 1      | 0      | 1      | 0      | 1      | 0      |
| 25852  | 5     | 1     | 1     | 1     | 3     | 5     | 1      | 0      | 0      | 0      | 1      | 1      | 1      | 1      |
| 25858  | 4     | 1     | 1     | 1     | 4     | 5     | 1      | 0      | 0      | 0      | 0      | 1      | 1      | 0      |
| 25859  | 4     | 1     | 1     | 3     | 3     | 4     | 1      | 0      | 1      | 0      | 1      | 0      | 1      | 1      |
| 25886  | 4     | 2     | 1     | 1     | 3     | 4     | 1      | 0      | 0      | 0      | 1      | 1      | 1      | 1      |
| 25890  | 4     | 2     | 1     | 1     | 3     | 3     | 1      | 1      | 0      | 1      | 1      | 1      | 0      | 1      |
| 25897  | 4     | 3     | 3     | 3     | 3     | 3     | 1      | 1      | 1      | 1      | 1      | 1      | 2      | 1      |
| 25903  | 5     | 2     | 1     | 1     | 4     | 3     | 1      | 1      | 1      | 0      | 1      | 0      | 0      | 0      |
| 25905  | 3     | 3     | 3     | 3     | 3     | 3     | 1      | 2      | 2      | 1      | 1      | 1      | 1      | 1      |
| 25917  | 5     | 1     | 1     | 1     | 1     | 4     | 1      | 0      | 0      | 0      | 1      | 1      | 1      | 1      |
| 25918  | 5     | 1     | 1     | 3     | 4     | 4     | 1      | 1      | 0      | 0      | 0      | 1      | 1      | 1      |
| 25928  | 4     | 2     | 3     | 3     | 1     | 3     | 1      | 0      | 2      | 2      | 2      | 1      | 2      | 2      |
| 25930  | 5     | 1     | 1     | 1     | 4     | 5     | 2      | 0      | 1      | 1      | 1      | 1      | 1      | 1      |
| 25949  | 3     | 2     | 1     | 4     | 3     | 4     | 1      | 0      | 1      | 1      | 1      | 1      | 1      | 1      |
| 25955  | 5     | 1     | 1     | 1     | 4     | 4     | 0      | 0      | 0      | 0      | 1      | 1      | 1      | 0      |
| 25959  | 4     | 2     | 0     | 1     | 4     | 4     | 0      | 0      | 1      | 0      | 1      | 0      | 0      | 1      |
| 25964  | 4     | 2     | 1     | 3     | 4     | 3     | 1      | 1      | 1      | 2      | 1      | 1      | 1      | 1      |
| 25972  | 4     | 1     | 3     | 1     | 4     | 5     | 1      | 0      | 0      | 1      | 1      | 1      | 1      | 0      |
| 25999  | 4     | 4     | 3     | 4     | 3     | 3     | 2      | 2      | 2      | 2      | 2      | 2      | 1      | 1      |
| 26019  | 4     | 2     | 0     | 1     | 4     | 4     | 1      | 1      | 1      | 0      | 1      | 0      | 1      | 2      |
| 26025  | 4     | 2     | 1     | 1     | 4     | 4     | 1      | 0      | 0      | 2      | 0      | 1      | 1      | 0      |

| respid | Q52_2 | Q53_1 | Q54_1 | Q54_2 | Q54_3 | Q55_1 | Q56a_1 | Q56b_1 | Q56c_1 | Q56d_1 | Q56e_1 | Q56f_1 | Q56g_1 | Q56h_1 |
|--------|-------|-------|-------|-------|-------|-------|--------|--------|--------|--------|--------|--------|--------|--------|
| 26039  | 3     | 3     | 1     | 3     | 3     | 3     | 1      | 0      | 1      | 1      | 1      | 1      | 1      | 2      |
| 26055  | 4     | 1     | 1     | 1     | 4     | 5     | 0      | 0      | 0      | 0      | 1      | 0      | 1      | 1      |
| 26061  | 3     | 2     | 3     | 4     | 3     | 4     | 2      | 1      | 1      | 0      | 1      | 1      | 2      | 2      |
| 26076  | 5     | 1     | 0     | 0     | 5     | 5     | 0      | 0      | 0      | 0      | 0      | 0      | 0      | 0      |
| 26088  | 4     | 2     | 1     | 1     | 3     | 4     | 1      | 0      | 1      | 0      | 1      | 0      | 1      | 1      |
| 26094  | 4     | 2     | 1     | 3     | 3     | 4     | 1      | 0      | 2      | 2      | 1      | 1      | 1      | 1      |
| 26104  | 1     | 4     | 3     | 3     | 3     | 4     | 2      | 2      | 1      | 1      | 1      | 2      | 1      | 1      |
| 26131  | 5     | 1     | 0     | 0     | 3     | 5     | 0      | 0      | 0      | 0      | 0      | 0      | 0      | 1      |
| 26134  | 3     | 3     | 1     | 4     | 1     | 4     | 2      | 0      | 2      | 1      | 2      | 1      | 2      | 2      |
| 26160  | 5     | 1     | 1     | 1     | 4     | 4     | 0      | 1      | 0      | 0      | 0      | 1      | 1      | 1      |
| 26168  | 5     | 1     | 1     | 1     | 5     | 5     | 0      | 0      | 0      | 0      | 0      | 0      | 0      | 1      |
| 26170  | 4     | 1     | 0     | 1     | 3     | 5     | 1      | 0      | 1      | 0      | 1      | 0      | 1      | 0      |
| 26191  | 2     | 4     | 1     | 1     | 1     | 4     | 2      | 2      | 2      | 2      | 2      | 2      | 2      | 2      |
| 26192  | 4     | 2     | 3     | 4     | 3     | 4     | 1      | 1      | 1      | 1      | 1      | 1      | 1      | 2      |
| 26195  | 3     | 2     | 3     | 3     | 4     | 4     | 1      | 1      | 1      | 1      | 1      | 1      | 1      | 1      |
| 26198  | 4     | 2     | 1     | 3     | 4     | 5     | 0      | 0      | 0      | 1      | 1      | 0      | 0      | 0      |
| 26199  | 4     | 3     | 1     | 1     | 3     | 3     | 1      | 0      | 1      | 1      | 2      | 1      | 1      | 1      |
| 26201  | 5     | 2     | 4     | 3     | 4     | 4     | 1      | 1      | 1      | 0      | 2      | 1      | 1      | 0      |
| 26202  | 4     | 2     | 1     | 1     | 3     | 4     | 1      | 1      | 1      | 1      | 1      | 1      | 1      | 1      |
| 26226  | 4     | 2     | 1     | 3     | 4     | 4     | 1      | 0      | 0      | 0      | 1      | 1      | 1      | 1      |
| 26233  | 4     | 3     | 3     | 4     | 3     | 3     | 1      | 2      | 1      | 1      | 1      | 1      | 1      | 1      |
| 26236  | 4     | 1     | 1     | 1     | 4     | 4     | 1      | 2      | 1      | 1      | 1      | 1      | 1      | 1      |
| 26242  | 3     | 2     | 3     | 4     | 3     | 4     | 1      | 1      | 1      | 1      | 1      | 1      | 1      | 1      |
| 26244  | 5     | 1     | 0     | 1     | 5     | 5     | 0      | 0      | 0      | 0      | 0      | 0      | 0      | 0      |
| 26250  | 2     | 3     | 1     | 1     | 1     | 3     | 1      | 1      | 1      | 1      | 1      | 1      | 1      | 1      |
| 26266  | 5     | 1     | 1     | 1     | 3     | 4     | 0      | 0      | 0      | 1      | 1      | 1      | 0      | 1      |
| 26274  | 3     | 2     | 1     | 1     | 4     | 4     | 1      | 0      | 0      | 1      | 0      | 1      | 1      | 0      |
| 26286  | 3     | 2     | 3     | 3     | 3     | 3     | 1      | 1      | 2      | 1      | 1      | 1      | 1      | 1      |
| 26288  | 5     | 2     | 1     | 1     | 4     | 5     | 0      | 0      | 1      | 0      | 1      | 0      | 0      | 0      |
| 26295  | 4     | 1     | 1     | 1     | 4     | 5     | 0      | 0      | 1      | 0      | 1      | 0      | 0      | 0      |
| 26296  | 5     | 1     | 0     | 0     | 4     | 1     | 0      | 0      | 0      | 0      | 0      | 0      | 0      | 0      |
| 26297  | 5     | 2     | 4     | 1     | 3     | 3     | 1      | 0      | 2      | 1      | 2      | 1      | 2      | 0      |



| respid | Q52_2 | Q53_1 | Q54_1 | Q54_2 | Q54_3 | Q55_1 | Q56a_1 | Q56b_1 | Q56c_1 | Q56d_1 | Q56e_1 | Q56f_1 | Q56g_1 | Q56h_1 |
|--------|-------|-------|-------|-------|-------|-------|--------|--------|--------|--------|--------|--------|--------|--------|
| 26300  | 3     | 2     | 1     | 3     | 4     | 3     | 1      | 2      | 1      | 1      | 1      | 1      | 1      | 1      |
| 26317  | 3     | 3     | 4     | 4     | 3     | 3     | 2      | 2      | 2      | 2      | 2      | 2      | 2      | 2      |
| 26343  | 4     | 1     | 1     | 1     | 1     | 4     | 1      | 0      | 1      | 0      | 1      | 1      | 1      | 1      |
| 26367  | 2     | 5     | 3     | 5     | 1     | 1     | 3      | 1      | 2      | 1      | 3      | 2      | 2      | 1      |
| 26372  | 4     | 2     | 0     | 0     | 1     | 3     | 1      | 1      | 2      | 1      | 2      | 2      | 1      | 1      |
| 26403  | 3     | 2     | 1     | 1     | 4     | 3     | 1      | 0      | 2      | 1      | 1      | 1      | 1      | 1      |
| 26423  | 5     | 1     | 1     | 1     | 3     | 4     | 1      | 0      | 1      | 2      | 1      | 2      | 1      | 1      |
| 26430  | 5     | 1     | 1     | 1     | 4     | 5     | 3      | 0      | 0      | 0      | 0      | 1      | 1      | 1      |
| 26437  | 4     | 2     | 3     | 4     | 3     | 3     | 1      | 1      | 1      | 1      | 1      | 1      | 2      | 0      |
| 26457  | 5     | 1     | 1     | 1     | 4     | 5     | 0      | 0      | 0      | 0      | 0      | 0      | 0      | 0      |
| 26466  | 5     | 1     | 4     | 1     | 1     | 2     | 0      | 0      | 0      | 0      | 0      | 0      | 0      | 0      |
| 26467  | 5     | 2     | 1     | 1     | 4     | 4     | 0      | 0      | 1      | 0      | 0      | 0      | 0      | 0      |
| 26469  | 4     | 3     | 1     | 1     | 4     | 3     | 1      | 0      | 1      | 0      | 1      | 0      | 1      | 1      |
| 26494  | 3     | 2     | 3     | 4     | 3     | 3     | 2      | 2      | 2      | 2      | 1      | 1      | 2      | 3      |
| 26510  | 4     | 2     | 1     | 1     | 4     | 4     | 1      | 1      | 1      | 0      | 1      | 0      | 1      | 1      |
| 26519  | 3     | 1     | 1     | 1     | 4     | 4     | 1      | 1      | 0      | 0      | 0      | 0      | 1      | 1      |
| 26525  | 4     | 2     | 1     | 4     | 5     | 2     | 0      | 2      | 0      | 0      | 0      | 0      | 1      | 2      |
| 26529  | 5     | 1     | 4     | 3     | 4     | 4     | 1      | 2      | 1      | 0      | 1      | 1      | 1      | 2      |
| 26533  | 3     | 3     | 3     | 3     | 3     | 3     | 1      | 1      | 1      | 1      | 1      | 1      | 1      | 1      |
| 26556  | 5     | 2     | 1     | 1     | 1     | 4     | 1      | 0      | 2      | 2      | 1      | 1      | 1      | 0      |
| 26559  | 4     | 2     | 1     | 1     | 4     | 4     | 1      | 0      | 2      | 1      | 1      | 0      | 1      | 1      |
| 26565  | 3     | 3     | 3     | 4     | 3     | 3     | 1      | 1      | 2      | 1      | 1      | 1      | 2      | 1      |
| 26576  | 4     | 3     | 3     | 4     | 1     | 3     | 1      | 1      | 1      | 1      | 1      | 2      | 2      | 1      |
| 26601  | 5     | 1     | 0     | 0     | 4     | 5     | 0      | 0      | 0      | 0      | 0      | 0      | 0      | 1      |
| 26607  | 3     | 2     | 3     | 4     | 1     | 3     | 1      | 1      | 1      | 2      | 1      | 2      | 2      | 1      |
| 26611  | 1     | 3     | 0     | 0     | 1     | 4     | 3      | 1      | 1      | 0      | 2      | 0      | 2      | 1      |
| 26619  | 4     | 2     | 3     | 1     | 4     | 5     | 0      | 1      | 1      | 2      | 1      | 1      | 1      | 1      |
| 26631  | 2     | 2     | 1     | 3     | 3     | 3     | 1      | 0      | 1      | 2      | 1      | 1      | 2      | 1      |
| 26654  | 3     | 2     | 1     | 1     | 4     | 4     | 0      | 0      | 0      | 1      | 0      | 0      | 0      | 1      |
| 26656  | 4     | 2     | 1     | 1     | 3     | 4     | 1      | 1      | 1      | 2      | 1      | 1      | 1      | 1      |
| 26664  | 4     | 2     | 1     | 1     | 4     | 4     | 1      | 0      | 1      | 2      | 2      | 1      | 1      | 1      |
| 26667  | 5     | 1     | 0     | 3     | 3     | 5     | 1      | 1      | 1      | 2      | 1      | 1      | 1      | 2      |

| respid | Q52_2 | Q53_1 | Q54_1 | Q54_2 | Q54_3 | Q55_1 | Q56a_1 | Q56b_1 | Q56c_1 | Q56d_1 | Q56e_1 | Q56f_1 | Q56g_1 | Q56h_1 |
|--------|-------|-------|-------|-------|-------|-------|--------|--------|--------|--------|--------|--------|--------|--------|
| 26674  | 2     | 3     | 1     | 3     | 3     | 3     | 1      | 2      | 2      | 2      | 1      | 1      | 1      | 1      |
| 26678  | 4     | 2     | 1     | 1     | 4     | 4     | 1      | 0      | 1      | 0      | 1      | 0      | 1      | 1      |
| 26693  | 5     | 1     | 0     | 1     | 5     | 5     | 1      | 0      | 0      | 0      | 1      | 0      | 0      | 0      |
| 26696  | 2     | 4     | 4     | 4     | 1     | 2     | 2      | 1      | 1      | 1      | 2      | 2      | 2      | 1      |
| 26703  | 3     | 4     | 4     | 4     | 3     | 3     | 1      | 1      | 2      | 2      | 1      | 2      | 2      | 1      |
| 26705  | 4     | 3     | 3     | 3     | 3     | 4     | 1      | 1      | 1      | 1      | 1      | 1      | 2      | 2      |
| 26706  | 4     | 2     | 1     | 3     | 3     | 3     | 1      | 1      | 2      | 1      | 1      | 1      | 1      | 1      |
| 26716  | 3     | 3     | 3     | 4     | 4     | 3     | 1      | 1      | 2      | 1      | 1      | 1      | 2      | 1      |
| 26721  | 3     | 2     | 1     | 1     | 4     | 4     | 0      | 0      | 0      | 0      | 0      | 0      | 0      | 1      |
| 26730  | 5     | 1     | 3     | 3     | 3     | 5     | 1      | 1      | 0      | 2      | 1      | 1      | 1      | 1      |
| 26752  | 5     | 1     | 0     | 0     | 4     | 5     | 0      | 0      | 0      | 0      | 0      | 0      | 0      | 1      |
| 26755  | 5     | 1     | 1     | 3     | 4     | 5     | 1      | 1      | 2      | 1      | 1      | 1      | 1      | 0      |
| 26791  | 3     | 2     | 3     | 3     | 1     | 3     | 1      | 2      | 1      | 1      | 2      | 1      | 1      | 1      |
| 26804  | 3     | 3     | 3     | 3     | 3     | 3     | 1      | 1      | 1      | 1      | 1      | 1      | 2      | 1      |
| 26810  | 4     | 1     | 5     | 4     | 4     | 4     | 0      | 2      | 1      | 0      | 2      | 1      | 0      | 2      |
| 26813  | 4     | 3     | 1     | 3     | 3     | 4     | 1      | 1      | 1      | 1      | 1      | 1      | 1      | 1      |
| 26833  | 3     | 2     | 3     | 3     | 3     | 3     | 1      | 1      | 1      | 1      | 1      | 1      | 1      | 1      |
| 26880  | 1     | 4     | 3     | 0     | 1     | 4     | 2      | 2      | 1      | 1      | 3      | 2      | 1      | 1      |
| 26884  | 4     | 1     | 1     | 1     | 4     | 4     | 0      | 0      | 0      | 0      | 1      | 0      | 0      | 1      |
| 26885  | 3     | 1     | 1     | 1     | 4     | 5     | 0      | 0      | 0      | 0      | 0      | 0      | 0      | 0      |
| 26890  | 3     | 3     | 3     | 4     | 3     | 3     | 1      | 1      | 1      | 1      | 1      | 1      | 2      | 2      |
| 26937  | 5     | 1     | 5     | 5     | 5     | 5     | 0      | 3      | 0      | 0      | 0      | 3      | 3      | 0      |
| 26939  | 4     | 1     | 0     | 0     | 3     | 4     | 1      | 0      | 1      | 2      | 1      | 0      | 0      | 1      |
| 26941  | 4     | 2     | 1     | 3     | 4     | 5     | 1      | 0      | 0      | 1      | 1      | 1      | 1      | 2      |
| 26992  | 4     | 2     | 1     | 4     | 3     | 3     | 1      | 1      | 2      | 2      | 2      | 1      | 1      | 1      |
| 27037  | 5     | 2     | 1     | 3     | 4     | 5     | 1      | 0      | 1      | 1      | 1      | 1      | 1      | 0      |
| 27045  | 3     | 3     | 1     | 1     | 3     | 3     | 1      | 1      | 1      | 1      | 1      | 1      | 1      | 1      |
| 27053  | 3     | 2     | 4     | 4     | 1     | 4     | 3      | 2      | 2      | 2      | 2      | 3      | 2      | 2      |
| 27060  | 3     | 2     | 1     | 1     | 3     | 4     | 1      | 1      | 1      | 1      | 1      | 1      | 1      | 1      |
| 27076  | 4     | 2     | 1     | 1     | 4     | 5     | 0      | 0      | 0      | 0      | 0      | 0      | 1      | 1      |
| 27124  | 5     | 1     | 0     | 0     | 5     | 5     | 0      | 0      | 0      | 0      | 0      | 0      | 0      | 0      |
| 27125  | 3     | 4     | 1     | 1     | 1     | 3     | 1      | 1      | 2      | 1      | 1      | 1      | 1      | 3      |

| respid | Q52_2 | Q53_1 | Q54_1 | Q54_2 | Q54_3 | Q55_1 | Q56a_1 | Q56b_1 | Q56c_1 | Q56d_1 | Q56e_1 | Q56f_1 | Q56g_1 | Q56h_1 |
|--------|-------|-------|-------|-------|-------|-------|--------|--------|--------|--------|--------|--------|--------|--------|
| 27132  | 5     | 1     | 5     | 5     | 5     | 5     | 0      | 0      | 0      | 0      | 0      | 0      | 0      | 0      |
| 27166  | 5     | 1     | 0     | 0     | 5     | 5     | 0      | 0      | 0      | 0      | 0      | 0      | 0      | 0      |
| 27190  | 1     | 2     | 1     | 3     | 1     | 3     | 1      | 1      | 1      | 1      | 1      | 1      | 1      | 1      |
| 27199  | 5     | 2     | 1     | 3     | 4     | 5     | 1      | 1      | 1      | 1      | 1      | 1      | 1      | 1      |
| 27221  | 3     | 2     | 1     | 1     | 3     | 4     | 1      | 0      | 1      | 2      | 1      | 1      | 1      | 1      |
| 27233  | 4     | 5     | 1     | 4     | 4     | 2     | 2      | 0      | 1      | 1      | 1      | 1      | 2      | 1      |
| 27241  | 4     | 2     | 4     | 3     | 4     | 4     | 1      | 2      | 1      | 2      | 0      | 1      | 1      | 1      |
| 27244  | 3     | 3     | 0     | 1     | 4     | 4     | 0      | 1      | 1      | 0      | 1      | 1      | 0      | 1      |
| 27245  | 3     | 3     | 3     | 4     | 1     | 3     | 1      | 1      | 1      | 1      | 1      | 2      | 2      | 2      |
| 27246  | 3     | 3     | 1     | 0     | 4     | 4     | 1      | 0      | 1      | 1      | 1      | 0      | 0      | 1      |
| 27253  | 4     | 2     | 1     | 1     | 3     | 4     | 1      | 1      | 1      | 1      | 1      | 1      | 1      | 1      |
| 27255  | 4     | 3     | 3     | 3     | 3     | 3     | 1      | 2      | 2      | 1      | 1      | 1      | 1      | 1      |
| 27267  | 2     | 1     | 1     | 1     | 4     | 4     | 1      | 1      | 1      | 1      | 1      | 1      | 1      | 1      |
| 27283  | 5     | 3     | 1     | 3     | 4     | 4     | 1      | 1      | 1      | 2      | 1      | 2      | 0      | 2      |
| 27289  | 4     | 3     | 4     | 3     | 1     | 4     | 2      | 1      | 2      | 1      | 2      | 2      | 2      | 2      |
| 27302  | 5     | 2     | 1     | 3     | 4     | 4     | 1      | 0      | 1      | 0      | 1      | 1      | 1      | 1      |
| 27317  | 5     | 1     | 0     | 0     | 5     | 1     | 0      | 0      | 0      | 0      | 0      | 0      | 0      | 0      |
| 27319  | 4     | 2     | 0     | 1     | 1     | 4     | 0      | 0      | 1      | 0      | 1      | 0      | 0      | 0      |
| 27331  | 4     | 2     | 1     | 1     | 4     | 4     | 1      | 0      | 1      | 0      | 1      | 1      | 1      | 1      |
| 27333  | 3     | 2     | 1     | 1     | 4     | 4     | 0      | 1      | 1      | 0      | 1      | 0      | 1      | 0      |
| 27340  | 4     | 2     | 1     | 1     | 3     | 5     | 1      | 1      | 0      | 1      | 1      | 2      | 2      | 1      |
| 27362  | 2     | 4     | 0     | 1     | 3     | 2     | 1      | 1      | 1      | 2      | 2      | 2      | 1      | 2      |
| 27370  | 5     | 2     | 1     | 1     | 4     | 4     | 1      | 0      | 1      | 0      | 1      | 1      | 1      | 0      |
| 27379  | 3     | 1     | 1     | 3     | 3     | 3     | 2      | 2      | 2      | 2      | 1      | 2      | 1      | 1      |
| 27386  | 5     | 1     | 1     | 1     | 5     | 5     | 0      | 0      | 0      | 0      | 0      | 0      | 0      | 0      |
| 27398  | 4     | 1     | 1     | 1     | 3     | 5     | 1      | 0      | 1      | 1      | 1      | 1      | 1      | 1      |
| 27404  | 5     | 2     | 1     | 1     | 4     | 4     | 0      | 0      | 0      | 0      | 0      | 0      | 0      | 0      |
| 27408  | 5     | 2     | 1     | 1     | 4     | 5     | 0      | 1      | 0      | 1      | 1      | 1      | 2      | 1      |
| 27412  | 4     | 3     | 1     | 3     | 4     | 3     | 1      | 2      | 2      | 2      | 1      | 1      | 1      | 2      |
| 27426  | 4     | 2     | 1     | 1     | 3     | 4     | 1      | 1      | 1      | 1      | 1      | 1      | 1      | 1      |
| 27455  | 5     | 1     | 0     | 0     | 4     | 4     | 0      | 0      | 1      | 0      | 1      | 1      | 1      | 0      |
| 27464  | 2     | 2     | 1     | 4     | 3     | 3     | 1      | 1      | 1      | 0      | 1      | 1      | 1      | 2      |

| respid | Q52_2 | Q53_1 | Q54_1 | Q54_2 | Q54_3 | Q55_1 | Q56a_1 | Q56b_1 | Q56c_1 | Q56d_1 | Q56e_1 | Q56f_1 | Q56g_1 | Q56h_1 |
|--------|-------|-------|-------|-------|-------|-------|--------|--------|--------|--------|--------|--------|--------|--------|
| 27484  | 5     | 2     | 0     | 1     | 5     | 5     | 1      | 0      | 0      | 0      | 0      | 0      | 1      | 1      |
| 27493  | 3     | 3     | 1     | 3     | 4     | 2     | 1      | 1      | 1      | 2      | 1      | 1      | 2      | 1      |
| 27512  | 4     | 4     | 3     | 4     | 1     | 2     | 1      | 1      | 2      | 1      | 2      | 2      | 2      | 2      |
| 27525  | 4     | 3     | 1     | 3     | 3     | 4     | 1      | 1      | 1      | 1      | 1      | 1      | 1      | 1      |
| 27532  | 1     | 3     | 0     | 0     | 0     | 3     | 1      | 1      | 0      | 0      | 1      | 1      | 1      | 1      |
| 27539  | 4     | 2     | 1     | 1     | 4     | 5     | 1      | 1      | 1      | 1      | 1      | 2      | 1      | 0      |
| 27540  | 4     | 2     | 3     | 4     | 4     | 5     | 1      | 2      | 1      | 1      | 1      | 1      | 1      | 1      |
| 27552  | 3     | 3     | 1     | 3     | 4     | 4     | 1      | 0      | 2      | 1      | 1      | 1      | 1      | 1      |
| 27562  | 5     | 1     | 1     | 1     | 5     | 5     | 0      | 1      | 0      | 1      | 0      | 0      | 0      | 1      |
| 27568  | 5     | 1     | 1     | 3     | 4     | 5     | 0      | 0      | 0      | 0      | 0      | 0      | 0      | 0      |
| 27574  | 3     | 4     | 3     | 4     | 3     | 3     | 1      | 1      | 1      | 1      | 1      | 1      | 2      | 2      |
| 27575  | 3     | 2     | 3     | 3     | 3     | 4     | 1      | 2      | 1      | 1      | 0      | 2      | 2      | 1      |
| 27577  | 5     | 1     | 0     | 0     | 5     | 5     | 0      | 1      | 0      | 0      | 0      | 0      | 0      | 0      |
| 27589  | 4     | 5     | 1     | 3     | 3     | 2     | 2      | 0      | 1      | 2      | 2      | 1      | 2      | 2      |
| 27593  | 5     | 2     | 1     | 3     | 4     | 4     | 1      | 0      | 0      | 0      | 1      | 0      | 1      | 0      |
| 27594  | 3     | 2     | 3     | 3     | 3     | 3     | 1      | 2      | 1      | 2      | 1      | 1      | 1      | 1      |
| 27595  | 2     | 3     | 0     | 1     | 4     | 3     | 1      | 0      | 1      | 0      | 1      | 0      | 1      | 2      |
| 27598  | 4     | 3     | 0     | 1     | 4     | 3     | 1      | 0      | 1      | 2      | 1      | 1      | 1      | 1      |
| 27620  | 4     | 3     | 3     | 1     | 4     | 4     | 2      | 2      | 1      | 1      | 2      | 1      | 2      | 1      |
| 27621  | 3     | 3     | 1     | 4     | 3     | 4     | 1      | 1      | 1      | 1      | 1      | 1      | 1      | 1      |
| 27628  | 3     | 3     | 4     | 4     | 3     | 2     | 1      | 2      | 2      | 2      | 2      | 2      | 2      | 1      |
| 27633  | 4     | 3     | 1     | 3     | 4     | 3     | 1      | 0      | 1      | 0      | 1      | 1      | 1      | 1      |
| 27643  | 3     | 3     | 3     | 3     | 3     | 3     | 1      | 2      | 2      | 2      | 1      | 1      | 1      | 1      |
| 27644  | 2     | 3     | 3     | 3     | 4     | 3     | 1      | 2      | 2      | 2      | 2      | 1      | 1      | 1      |
| 27668  | 3     | 2     | 1     | 3     | 3     | 4     | 0      | 1      | 2      | 1      | 1      | 2      | 1      | 1      |
| 27681  | 3     | 2     | 1     | 1     | 3     | 4     | 1      | 1      | 1      | 1      | 1      | 0      | 1      | 1      |
| 27691  | 5     | 1     | 1     | 1     | 4     | 5     | 0      | 0      | 0      | 0      | 0      | 0      | 1      | 0      |
| 27693  | 2     | 4     | 1     | 1     | 1     | 4     | 2      | 1      | 1      | 2      | 2      | 2      | 1      | 1      |
| 27703  | 4     | 1     | 1     | 3     | 4     | 4     | 1      | 0      | 2      | 0      | 2      | 1      | 1      | 2      |
| 27708  | 4     | 4     | 4     | 4     | 1     | 1     | 2      | 3      | 3      | 1      | 3      | 2      | 2      | 1      |
| 27719  | 5     | 1     | 1     | 1     | 4     | 5     | 0      | 0      | 1      | 1      | 1      | 1      | 0      | 1      |
| 27720  | 4     | 1     | 1     | 1     | 4     | 4     | 0      | 0      | 0      | 0      | 1      | 1      | 1      | 1      |

| respid | Q52_2 | Q53_1 | Q54_1 | Q54_2 | Q54_3 | Q55_1 | Q56a_1 | Q56b_1 | Q56c_1 | Q56d_1 | Q56e_1 | Q56f_1 | Q56g_1 | Q56h_1 |
|--------|-------|-------|-------|-------|-------|-------|--------|--------|--------|--------|--------|--------|--------|--------|
| 27723  | 4     | 2     | 3     | 3     | 3     | 4     | 1      | 2      | 1      | 1      | 1      | 1      | 1      | 1      |
| 27725  | 3     | 1     | 3     | 4     | 3     | 4     | 1      | 2      | 2      | 2      | 2      | 2      | 2      | 1      |
| 27734  | 3     | 3     | 3     | 3     | 3     | 3     | 1      | 1      | 1      | 0      | 1      | 1      | 1      | 1      |
| 27744  | 4     | 3     | 1     | 3     | 4     | 4     | 1      | 0      | 1      | 0      | 1      | 0      | 1      | 1      |
| 27749  | 2     | 4     | 1     | 3     | 4     | 3     | 1      | 1      | 2      | 1      | 1      | 2      | 1      | 2      |
| 27762  | 3     | 3     | 3     | 4     | 3     | 3     | 1      | 1      | 1      | 1      | 2      | 1      | 1      | 1      |
| 27808  | 3     | 3     | 3     | 4     | 1     | 3     | 2      | 2      | 2      | 1      | 2      | 2      | 2      | 2      |
| 27810  | 2     | 3     | 3     | 4     | 1     | 3     | 2      | 2      | 0      | 2      | 1      | 2      | 2      | 1      |
| 27812  | 4     | 1     | 1     | 1     | 5     | 5     | 0      | 0      | 0      | 0      | 0      | 0      | 0      | 0      |
| 27815  | 4     | 2     | 4     | 4     | 4     | 4     | 0      | 1      | 1      | 1      | 1      | 1      | 0      | 0      |
| 27818  | 5     | 1     | 1     | 1     | 4     | 4     | 1      | 0      | 1      | 0      | 1      | 1      | 0      | 0      |
| 27823  | 4     | 2     | 3     | 3     | 3     | 4     | 1      | 1      | 1      | 1      | 1      | 1      | 1      | 1      |
| 27841  | 4     | 1     | 3     | 3     | 3     | 3     | 1      | 2      | 0      | 0      | 1      | 1      | 1      | 2      |
| 27843  | 5     | 1     | 1     | 1     | 5     | 5     | 0      | 0      | 0      | 0      | 0      | 0      | 0      | 0      |
| 27851  | 4     | 2     | 1     | 3     | 4     | 4     | 1      | 0      | 1      | 0      | 1      | 1      | 1      | 1      |
| 27858  | 5     | 2     | 0     | 1     | 4     | 4     | 0      | 0      | 0      | 0      | 1      | 0      | 0      | 0      |
| 27859  | 3     | 3     | 4     | 5     | 3     | 4     | 1      | 2      | 1      | 2      | 2      | 2      | 2      | 2      |
| 27869  | 5     | 1     | 0     | 0     | 5     | 5     | 0      | 0      | 0      | 0      | 0      | 0      | 0      | 0      |
| 27872  | 4     | 2     | 1     | 3     | 4     | 4     | 1      | 1      | 1      | 0      | 1      | 1      | 1      | 1      |
| 27873  | 5     | 2     | 5     | 5     | 5     | 5     | 0      | 0      | 0      | 0      | 0      | 0      | 0      | 0      |
| 27884  | 4     | 2     | 1     | 4     | 3     | 4     | 1      | 2      | 2      | 2      | 1      | 1      | 2      | 1      |
| 27904  | 3     | 2     | 1     | 3     | 3     | 2     | 1      | 1      | 1      | 1      | 1      | 1      | 1      | 1      |
| 27915  | 4     | 2     | 1     | 3     | 5     | 5     | 1      | 0      | 1      | 1      | 1      | 0      | 1      | 0      |
| 27918  | 4     | 2     | 3     | 3     | 4     | 3     | 1      | 1      | 1      | 1      | 1      | 1      | 1      | 1      |
| 27937  | 3     | 2     | 1     | 1     | 3     | 3     | 1      | 2      | 1      | 1      | 1      | 1      | 2      | 1      |
| 27943  | 5     | 3     | 5     | 5     | 5     | 5     | 3      | 2      | 3      | 2      | 1      | 2      | 1      | 2      |
| 27948  | 5     | 1     | 1     | 0     | 4     | 5     | 0      | 0      | 0      | 0      | 1      | 0      | 0      | 0      |
| 27971  | 4     | 3     | 1     | 3     | 4     | 4     | 1      | 1      | 2      | 2      | 2      | 1      | 2      | 2      |
| 27991  | 4     | 2     | 1     | 1     | 3     | 4     | 1      | 2      | 1      | 1      | 1      | 1      | 1      | 1      |
| 28000  | 5     | 1     | 3     | 3     | 5     | 5     | 0      | 0      | 0      | 0      | 0      | 1      | 1      | 1      |
| 28011  | 4     | 1     | 1     | 3     | 3     | 4     | 1      | 0      | 1      | 0      | 1      | 1      | 1      | 2      |
| 28022  | 3     | 1     | 1     | 1     | 4     | 4     | 1      | 0      | 0      | 0      | 1      | 0      | 1      | 1      |

| respid | Q52_2 | Q53_1 | Q54_1 | Q54_2 | Q54_3 | Q55_1 | Q56a_1 | Q56b_1 | Q56c_1 | Q56d_1 | Q56e_1 | Q56f_1 | Q56g_1 | Q56h_1 |
|--------|-------|-------|-------|-------|-------|-------|--------|--------|--------|--------|--------|--------|--------|--------|
| 28025  | 5     | 1     | 1     | 1     | 4     | 5     | 1      | 0      | 1      | 0      | 0      | 0      | 0      | 1      |
| 28041  | 5     | 1     | 0     | 1     | 4     | 5     | 0      | 0      | 0      | 0      | 0      | 0      | 0      | 0      |
| 28057  | 4     | 3     | 3     | 4     | 3     | 3     | 1      | 1      | 2      | 1      | 1      | 1      | 1      | 1      |
| 28080  | 4     | 2     | 1     | 1     | 4     | 4     | 0      | 1      | 1      | 0      | 0      | 0      | 0      | 1      |
| 28098  | 5     | 1     | 0     | 0     | 4     | 5     | 1      | 0      | 1      | 0      | 0      | 0      | 0      | 0      |
| 28104  | 4     | 3     | 1     | 3     | 4     | 4     | 0      | 0      | 0      | 2      | 0      | 1      | 0      | 1      |
| 28109  | 4     | 2     | 3     | 3     | 3     | 4     | 1      | 1      | 1      | 1      | 1      | 1      | 1      | 1      |
| 28129  | 5     | 4     | 3     | 3     | 3     | 4     | 1      | 0      | 1      | 2      | 3      | 0      | 0      | 3      |
| 28141  | 4     | 1     | 3     | 3     | 3     | 4     | 0      | 1      | 0      | 2      | 1      | 2      | 2      | 2      |
| 28143  | 4     | 2     | 1     | 1     | 4     | 4     | 0      | 0      | 1      | 0      | 1      | 1      | 1      | 0      |
| 28149  | 3     | 3     | 4     | 4     | 3     | 3     | 1      | 1      | 1      | 3      | 2      | 2      | 2      | 1      |
| 28151  | 3     | 2     | 3     | 3     | 3     | 3     | 0      | 2      | 2      | 2      | 2      | 2      | 2      | 2      |
| 28161  | 2     | 1     | 4     | 5     | 1     | 3     | 2      | 1      | 3      | 2      | 3      | 2      | 2      | 2      |
| 28169  | 5     | 3     | 0     | 1     | 5     | 5     | 0      | 0      | 0      | 0      | 0      | 0      | 0      | 1      |
| 28194  | 3     | 4     | 5     | 5     | 0     | 2     | 3      | 1      | 3      | 3      | 3      | 3      | 3      | 2      |
| 28197  | 5     | 1     | 1     | 1     | 4     | 5     | 1      | 1      | 1      | 1      | 1      | 1      | 1      | 1      |
| 28206  | 5     | 2     | 1     | 1     | 4     | 5     | 1      | 0      | 1      | 1      | 1      | 0      | 0      | 2      |
| 28218  | 5     | 2     | 1     | 3     | 4     | 5     | 0      | 0      | 1      | 0      | 1      | 1      | 1      | 1      |
| 28227  | 5     | 1     | 1     | 1     | 4     | 5     | 0      | 0      | 0      | 0      | 0      | 0      | 0      | 0      |
| 28235  | 4     | 2     | 1     | 1     | 4     | 4     | 1      | 1      | 1      | 1      | 1      | 0      | 0      | 1      |
| 28246  | 3     | 2     | 4     | 4     | 1     | 4     | 1      | 2      | 1      | 1      | 1      | 2      | 2      | 2      |
| 28259  | 5     | 1     | 1     | 1     | 4     | 5     | 0      | 0      | 1      | 0      | 1      | 0      | 1      | 0      |
| 28263  | 3     | 2     | 4     | 4     | 1     | 3     | 2      | 1      | 2      | 1      | 2      | 2      | 2      | 1      |
| 28267  | 3     | 4     | 3     | 4     | 1     | 3     | 1      | 1      | 2      | 2      | 2      | 2      | 2      | 2      |
| 28274  | 5     | 1     | 1     | 4     | 4     | 5     | 1      | 2      | 1      | 1      | 1      | 1      | 1      | 1      |
| 28278  | 5     | 1     | 0     | 0     | 5     | 5     | 0      | 0      | 0      | 0      | 1      | 0      | 0      | 0      |
| 28288  | 4     | 3     | 3     | 3     | 3     | 5     | 1      | 2      | 0      | 2      | 1      | 2      | 2      | 1      |
| 28308  | 5     | 1     | 5     | 5     | 5     | 5     | 0      | 2      | 3      | 3      | 1      | 1      | 1      | 0      |
| 28309  | 3     | 2     | 3     | 4     | 3     | 4     | 1      | 1      | 2      | 1      | 1      | 1      | 2      | 2      |
| 28323  | 5     | 2     | 3     | 3     | 4     | 5     | 2      | 1      | 3      | 2      | 2      | 1      | 2      | 2      |
| 28335  | 1     | 4     | 1     | 1     | 3     | 3     | 2      | 1      | 1      | 2      | 2      | 3      | 2      | 2      |
| 28354  | 1     | 4     | 0     | 1     | 1     | 4     | 1      | 1      | 1      | 1      | 3      | 2      | 0      | 2      |

| respid | Q52_2 | Q53_1 | Q54_1 | Q54_2 | Q54_3 | Q55_1 | Q56a_1 | Q56b_1 | Q56c_1 | Q56d_1 | Q56e_1 | Q56f_1 | Q56g_1 | Q56h_1 |
|--------|-------|-------|-------|-------|-------|-------|--------|--------|--------|--------|--------|--------|--------|--------|
| 28355  | 3     | 3     | 3     | 4     | 3     | 3     | 1      | 1      | 1      | 1      | 1      | 1      | 1      | 2      |
| 28356  | 3     | 4     | 3     | 5     | 4     | 1     | 1      | 1      | 1      | 1      | 1      | 2      | 2      | 2      |
| 28357  | 5     | 1     | 0     | 1     | 4     | 5     | 0      | 0      | 0      | 0      | 0      | 0      | 0      | 0      |
| 28363  | 5     | 1     | 5     | 5     | 5     | 5     | 0      | 0      | 0      | 0      | 0      | 0      | 0      | 0      |
| 28366  | 4     | 2     | 1     | 1     | 4     | 4     | 1      | 1      | 1      | 1      | 1      | 1      | 1      | 1      |
| 28372  | 3     | 3     | 3     | 4     | 1     | 3     | 1      | 1      | 2      | 2      | 1      | 2      | 2      | 1      |
| 28381  | 4     | 2     | 3     | 3     | 4     | 4     | 1      | 1      | 2      | 2      | 1      | 1      | 2      | 2      |
| 28388  | 4     | 3     | 3     | 1     | 4     | 4     | 1      | 2      | 1      | 2      | 2      | 2      | 2      | 1      |
| 28413  | 1     | 4     | 1     | 1     | 3     | 4     | 1      | 1      | 1      | 2      | 2      | 2      | 1      | 2      |
| 28421  | 3     | 3     | 3     | 3     | 3     | 3     | 1      | 1      | 1      | 1      | 1      | 1      | 2      | 1      |
| 28430  | 2     | 5     | 1     | 1     | 3     | 3     | 2      | 2      | 1      | 1      | 2      | 1      | 1      | 2      |
| 28439  | 1     | 4     | 1     | 1     | 3     | 4     | 0      | 1      | 1      | 1      | 3      | 1      | 1      | 2      |
| 28458  | 4     | 3     | 4     | 3     | 4     | 3     | 1      | 2      | 1      | 2      | 2      | 1      | 2      | 2      |
| 28461  | 5     | 1     | 1     | 1     | 4     | 4     | 1      | 0      | 0      | 0      | 0      | 1      | 0      | 1      |
| 28466  | 3     | 2     | 1     | 1     | 4     | 4     | 1      | 0      | 0      | 2      | 1      | 1      | 1      | 0      |
| 28492  | 5     | 2     | 1     | 3     | 4     | 4     | 0      | 0      | 0      | 0      | 0      | 1      | 1      | 0      |
| 28534  | 5     | 1     | 0     | 0     | 5     | 5     | 0      | 0      | 0      | 0      | 0      | 0      | 0      | 0      |
| 28537  | 4     | 3     | 3     | 3     | 4     | 3     | 1      | 1      | 1      | 1      | 1      | 1      | 1      | 1      |
| 28560  | 5     | 2     | 1     | 1     | 5     | 4     | 0      | 0      | 0      | 0      | 1      | 0      | 0      | 0      |
| 28566  | 5     | 3     | 0     | 3     | 5     | 5     | 0      | 0      | 0      | 0      | 0      | 0      | 0      | 1      |
| 28569  | 5     | 2     | 1     | 3     | 4     | 5     | 0      | 0      | 1      | 0      | 0      | 0      | 1      | 1      |
| 28584  | 1     | 2     | 1     | 0     | 0     | 3     | 1      | 0      | 1      | 1      | 1      | 0      | 0      | 1      |
| 28590  | 5     | 1     | 1     | 3     | 4     | 5     | 0      | 0      | 0      | 0      | 1      | 1      | 0      | 1      |
| 28596  | 4     | 2     | 1     | 1     | 3     | 3     | 1      | 0      | 1      | 1      | 1      | 1      | 1      | 1      |
| 28608  | 5     | 2     | 1     | 0     | 5     | 4     | 0      | 0      | 0      | 0      | 0      | 0      | 1      | 0      |
| 28631  | 3     | 3     | 3     | 4     | 1     | 3     | 2      | 1      | 1      | 2      | 1      | 2      | 1      | 2      |
| 28644  | 4     | 2     | 3     | 3     | 3     | 3     | 1      | 2      | 1      | 1      | 1      | 2      | 2      | 2      |
| 28646  | 4     | 2     | 1     | 1     | 4     | 5     | 0      | 0      | 1      | 0      | 1      | 0      | 0      | 0      |
| 28665  | 5     | 1     | 1     | 1     | 5     | 4     | 0      | 0      | 0      | 0      | 0      | 0      | 0      | 0      |
| 28686  | 5     | 1     | 1     | 1     | 4     | 5     | 0      | 0      | 0      | 0      | 0      | 1      | 1      | 1      |
| 28704  | 3     | 4     | 3     | 4     | 4     | 4     | 2      | 1      | 1      | 2      | 2      | 1      | 1      | 1      |
| 28719  | 5     | 1     | 3     | 1     | 3     | 4     | 1      | 0      | 0      | 0      | 1      | 0      | 1      | 1      |

| respid | Q52_2 | Q53_1 | Q54_1 | Q54_2 | Q54_3 | Q55_1 | Q56a_1 | Q56b_1 | Q56c_1 | Q56d_1 | Q56e_1 | Q56f_1 | Q56g_1 | Q56h_1 |
|--------|-------|-------|-------|-------|-------|-------|--------|--------|--------|--------|--------|--------|--------|--------|
| 28736  | 4     | 2     | 3     | 4     | 1     | 4     | 1      | 2      | 1      | 2      | 1      | 2      | 2      | 1      |
| 28739  | 3     | 3     | 3     | 1     | 4     | 3     | 1      | 1      | 0      | 1      | 1      | 1      | 2      | 1      |
| 28758  | 2     | 4     | 3     | 4     | 3     | 3     | 1      | 1      | 2      | 2      | 2      | 2      | 2      | 3      |
| 28761  | 3     | 3     | 1     | 3     | 3     | 4     | 1      | 0      | 0      | 0      | 2      | 0      | 1      | 0      |
| 28770  | 4     | 3     | 4     | 3     | 3     | 3     | 1      | 2      | 1      | 1      | 1      | 1      | 1      | 1      |
| 28774  | 5     | 3     | 1     | 1     | 4     | 4     | 0      | 0      | 0      | 0      | 0      | 0      | 1      | 0      |
| 28778  | 3     | 4     | 3     | 4     | 1     | 3     | 2      | 1      | 2      | 2      | 2      | 2      | 2      | 2      |
| 28783  | 4     | 2     | 1     | 3     | 4     | 4     | 1      | 1      | 1      | 1      | 1      | 1      | 2      | 1      |
| 28785  | 5     | 1     | 0     | 1     | 5     | 5     | 0      | 1      | 0      | 0      | 1      | 1      | 1      | 1      |
| 28797  | 3     | 3     | 4     | 4     | 3     | 4     | 1      | 2      | 1      | 2      | 1      | 2      | 2      | 1      |
| 28801  | 3     | 3     | 3     | 3     | 3     | 4     | 0      | 0      | 0      | 0      | 1      | 1      | 1      | 1      |
| 28821  | 5     | 1     | 1     | 1     | 4     | 5     | 1      | 0      | 0      | 2      | 0      | 1      | 0      | 0      |
| 28827  | 4     | 2     | 4     | 4     | 4     | 4     | 1      | 1      | 1      | 1      | 1      | 2      | 2      | 1      |
| 28828  | 4     | 1     | 1     | 1     | 4     | 4     | 0      | 0      | 0      | 1      | 1      | 1      | 1      | 1      |
| 28871  | 3     | 2     | 1     | 3     | 3     | 3     | 1      | 1      | 1      | 1      | 2      | 1      | 1      | 1      |
| 28876  | 5     | 2     | 0     | 0     | 4     | 5     | 0      | 0      | 0      | 0      | 0      | 0      | 1      | 0      |
| 28891  | 4     | 2     | 1     | 1     | 4     | 4     | 1      | 0      | 0      | 1      | 1      | 0      | 0      | 0      |
| 28898  | 4     | 1     | 1     | 1     | 4     | 4     | 1      | 0      | 0      | 0      | 1      | 0      | 1      | 0      |
| 28909  | 5     | 1     | 1     | 3     | 5     | 5     | 3      | 0      | 0      | 0      | 1      | 0      | 0      | 0      |
| 28930  | 4     | 2     | 1     | 3     | 3     | 4     | 0      | 0      | 0      | 0      | 0      | 1      | 1      | 1      |
| 28935  | 3     | 2     | 1     | 3     | 4     | 3     | 0      | 0      | 0      | 0      | 1      | 1      | 0      | 1      |
| 28964  | 5     | 1     | 1     | 1     | 3     | 5     | 0      | 0      | 0      | 0      | 1      | 1      | 0      | 1      |
| 28965  | 5     | 1     | 3     | 3     | 4     | 5     | 0      | 0      | 0      | 0      | 1      | 1      | 0      | 1      |
| 28967  | 3     | 4     | 3     | 3     | 4     | 3     | 1      | 0      | 2      | 0      | 1      | 1      | 2      | 2      |
| 28975  | 5     | 1     | 1     | 3     | 3     | 5     | 0      | 1      | 0      | 0      | 0      | 1      | 0      | 1      |
| 28982  | 3     | 1     | 1     | 1     | 4     | 5     | 0      | 0      | 0      | 0      | 0      | 0      | 0      | 0      |
| 28989  | 3     | 2     | 1     | 1     | 4     | 5     | 0      | 0      | 0      | 0      | 1      | 1      | 0      | 0      |
| 29003  | 4     | 2     | 1     | 1     | 4     | 4     | 0      | 0      | 0      | 0      | 1      | 0      | 1      | 0      |
| 29004  | 4     | 1     | 1     | 1     | 4     | 4     | 0      | 0      | 0      | 0      | 0      | 0      | 0      | 0      |
| 29007  | 3     | 2     | 1     | 4     | 3     | 4     | 0      | 0      | 0      | 0      | 0      | 1      | 0      | 1      |
| 29008  | 4     | 2     | 3     | 4     | 0     | 4     | 0      | 0      | 0      | 0      | 1      | 1      | 1      | 0      |
| 29011  | 3     | 2     | 1     | 3     | 4     | 4     | 1      | 1      | 1      | 2      | 1      | 1      | 1      | 1      |



| respid | Q52_2 | Q53_1 | Q54_1 | Q54_2 | Q54_3 | Q55_1 | Q56a_1 | Q56b_1 | Q56c_1 | Q56d_1 | Q56e_1 | Q56f_1 | Q56g_1 | Q56h_1 |
|--------|-------|-------|-------|-------|-------|-------|--------|--------|--------|--------|--------|--------|--------|--------|
| 29012  | 4     | 1     | 1     | 1     | 4     | 5     | 0      | 0      | 1      | 0      | 1      | 0      | 0      | 2      |
| 29014  | 4     | 1     | 1     | 1     | 4     | 5     | 0      | 0      | 0      | 0      | 0      | 0      | 0      | 1      |
| 29016  | 4     | 2     | 3     | 3     | 4     | 3     | 1      | 0      | 1      | 0      | 1      | 1      | 1      | 1      |
| 29018  | 5     | 2     | 3     | 4     | 4     | 5     | 1      | 2      | 1      | 2      | 3      | 1      | 1      | 1      |
| 29048  | 4     | 2     | 3     | 4     | 3     | 4     | 1      | 1      | 2      | 2      | 2      | 2      | 2      | 1      |
| 29184  | 4     | 2     | 1     | 1     | 3     | 3     | 1      | 1      | 1      | 2      | 1      | 1      | 1      | 1      |
| 29237  | 5     | 2     | 1     | 3     | 4     | 5     | 1      | 2      | 0      | 1      | 0      | 1      | 1      | 1      |
| 29252  | 4     | 2     | 1     | 3     | 4     | 4     | 0      | 1      | 0      | 0      | 1      | 1      | 1      | 1      |
| 29267  | 3     | 2     | 1     | 3     | 4     | 3     | 1      | 0      | 1      | 0      | 1      | 1      | 1      | 2      |
| 29276  | 1     | 2     | 1     | 3     | 3     | 3     | 1      | 1      | 1      | 2      | 1      | 1      | 2      | 1      |
| 29281  | 3     | 3     | 4     | 4     | 3     | 3     | 1      | 2      | 2      | 2      | 2      | 2      | 2      | 1      |
| 29285  | 4     | 2     | 4     | 4     | 4     | 4     | 1      | 2      | 1      | 1      | 0      | 1      | 1      | 1      |
| 29291  | 3     | 4     | 3     | 4     | 3     | 2     | 1      | 1      | 1      | 1      | 2      | 1      | 2      | 2      |
| 29304  | 3     | 2     | 3     | 3     | 4     | 4     | 0      | 0      | 0      | 0      | 0      | 1      | 1      | 1      |
| 29323  | 5     | 1     | 3     | 4     | 3     | 4     | 1      | 2      | 0      | 2      | 2      | 1      | 2      | 1      |
| 29330  | 4     | 1     | 1     | 1     | 4     | 5     | 1      | 0      | 0      | 0      | 1      | 0      | 0      | 2      |
| 29357  | 4     | 3     | 0     | 0     | 4     | 4     | 0      | 0      | 0      | 0      | 0      | 0      | 0      | 0      |
| 29416  | 4     | 2     | 1     | 3     | 5     | 5     | 0      | 0      | 0      | 0      | 0      | 1      | 1      | 2      |
| 29432  | 3     | 4     | 1     | 1     | 4     | 5     | 0      | 0      | 0      | 0      | 0      | 0      | 0      | 0      |
| 29482  | 3     | 2     | 4     | 4     | 3     | 4     | 1      | 1      | 2      | 1      | 1      | 1      | 2      | 1      |
| 29506  | 4     | 2     | 3     | 4     | 3     | 4     | 1      | 1      | 1      | 2      | 1      | 1      | 1      | 2      |
| 29509  | 3     | 2     | 3     | 4     | 3     | 3     | 1      | 1      | 1      | 1      | 1      | 2      | 2      | 1      |
| 29512  | 3     | 3     | 3     | 4     | 4     | 3     | 1      | 1      | 1      | 1      | 1      | 1      | 1      | 1      |
| 29519  | 4     | 3     | 3     | 3     | 4     | 3     | 1      | 2      | 1      | 0      | 1      | 1      | 1      | 1      |
| 29520  | 4     | 2     | 3     | 3     | 4     | 4     | 1      | 2      | 2      | 1      | 1      | 1      | 1      | 1      |
| 29521  | 4     | 2     | 3     | 3     | 4     | 4     | 1      | 1      | 1      | 1      | 1      | 2      | 2      | 1      |
| 29529  | 3     | 3     | 3     | 4     | 1     | 3     | 1      | 1      | 2      | 2      | 1      | 1      | 2      | 2      |
| 29532  | 5     | 2     | 1     | 1     | 4     | 5     | 0      | 0      | 0      | 0      | 0      | 0      | 0      | 0      |
| 29547  | 3     | 2     | 4     | 3     | 1     | 3     | 2      | 1      | 3      | 1      | 2      | 3      | 2      | 1      |
| 29551  | 3     | 1     | 1     | 1     | 4     | 2     | 1      | 1      | 1      | 1      | 1      | 1      | 1      | 1      |
| 29584  | 2     | 4     | 4     | 4     | 1     | 2     | 2      | 1      | 2      | 1      | 2      | 2      | 2      | 3      |
| 29591  | 3     | 2     | 3     | 3     | 1     | 3     | 1      | 1      | 2      | 1      | 1      | 2      | 2      | 1      |

| respid | Q52_2 | Q53_1 | Q54_1 | Q54_2 | Q54_3 | Q55_1 | Q56a_1 | Q56b_1 | Q56c_1 | Q56d_1 | Q56e_1 | Q56f_1 | Q56g_1 | Q56h_1 |
|--------|-------|-------|-------|-------|-------|-------|--------|--------|--------|--------|--------|--------|--------|--------|
| 29613  | 5     | 2     | 1     | 1     | 4     | 5     | 1      | 1      | 1      | 0      | 1      | 1      | 1      | 0      |
| 29615  | 4     | 2     | 3     | 3     | 3     | 4     | 1      | 1      | 2      | 1      | 1      | 2      | 1      | 1      |
| 29625  | 4     | 2     | 1     | 3     | 3     | 4     | 1      | 0      | 1      | 1      | 1      | 0      | 0      | 1      |
| 29660  | 1     | 3     | 1     | 0     | 0     | 2     | 1      | 1      | 1      | 2      | 2      | 2      | 0      | 2      |
| 29677  | 4     | 2     | 1     | 3     | 3     | 3     | 0      | 0      | 1      | 2      | 1      | 2      | 1      | 1      |
| 29700  | 2     | 3     | 1     | 3     | 4     | 4     | 0      | 2      | 0      | 1      | 1      | 1      | 1      | 2      |
| 29715  | 3     | 3     | 1     | 3     | 1     | 4     | 1      | 1      | 1      | 0      | 1      | 1      | 1      | 1      |
| 29720  | 3     | 3     | 3     | 3     | 3     | 4     | 2      | 3      | 2      | 2      | 2      | 2      | 2      | 2      |
| 29730  | 4     | 1     | 4     | 4     | 4     | 4     | 1      | 0      | 2      | 2      | 1      | 1      | 1      | 1      |
| 29734  | 4     | 4     | 3     | 3     | 3     | 4     | 1      | 1      | 1      | 2      | 1      | 1      | 1      | 1      |
| 29754  | 5     | 1     | 0     | 3     | 4     | 4     | 1      | 0      | 1      | 0      | 2      | 0      | 0      | 0      |
| 29771  | 4     | 3     | 1     | 4     | 4     | 4     | 2      | 1      | 1      | 1      | 1      | 1      | 0      | 2      |
| 29774  | 3     | 1     | 1     | 3     | 3     | 3     | 1      | 0      | 2      | 1      | 1      | 1      | 1      | 1      |
| 29783  | 5     | 1     | 1     | 3     | 4     | 5     | 0      | 0      | 0      | 0      | 1      | 0      | 0      | 1      |
| 29812  | 3     | 2     | 3     | 3     | 3     | 3     | 1      | 1      | 1      | 1      | 1      | 2      | 2      | 1      |
| 29813  | 3     | 3     | 3     | 4     | 4     | 4     | 1      | 0      | 1      | 1      | 0      | 1      | 2      | 1      |
| 29814  | 4     | 3     | 3     | 3     | 4     | 4     | 1      | 1      | 1      | 1      | 1      | 1      | 2      | 1      |
| 29820  | 3     | 2     | 3     | 3     | 3     | 3     | 1      | 1      | 1      | 1      | 1      | 1      | 2      | 1      |
| 29906  | 5     | 2     | 1     | 3     | 4     | 4     | 1      | 0      | 0      | 0      | 1      | 0      | 0      | 0      |
| 29907  | 2     | 3     | 3     | 4     | 1     | 2     | 1      | 1      | 2      | 1      | 3      | 2      | 1      | 3      |
| 29928  | 5     | 3     | 1     | 4     | 3     | 3     | 1      | 2      | 2      | 2      | 2      | 1      | 1      | 1      |
| 29932  | 5     | 2     | 1     | 4     | 4     | 3     | 1      | 0      | 1      | 0      | 1      | 1      | 1      | 1      |
| 29958  | 3     | 3     | 3     | 3     | 3     | 3     | 2      | 2      | 2      | 2      | 1      | 1      | 1      | 1      |
| 29982  | 4     | 2     | 4     | 1     | 3     | 2     | 0      | 0      | 1      | 0      | 0      | 1      | 1      | 0      |
| 29989  | 4     | 2     | 1     | 1     | 4     | 5     | 1      | 0      | 1      | 0      | 0      | 0      | 1      | 1      |
| 29994  | 3     | 2     | 3     | 3     | 3     | 4     | 1      | 1      | 1      | 0      | 1      | 1      | 2      | 1      |
| 30005  | 2     | 1     | 0     | 1     | 4     | 1     | 2      | 0      | 3      | 0      | 0      | 0      | 0      | 1      |
| 30077  | 5     | 1     | 3     | 3     | 4     | 4     | 0      | 0      | 0      | 0      | 0      | 1      | 1      | 0      |
| 30098  | 4     | 1     | 1     | 1     | 1     | 4     | 1      | 2      | 1      | 1      | 1      | 0      | 0      | 1      |
| 30107  | 5     | 2     | 1     | 1     | 1     | 3     | 2      | 2      | 1      | 1      | 1      | 2      | 1      | 2      |
| 30154  | 3     | 2     | 1     | 3     | 4     | 3     | 0      | 1      | 1      | 1      | 1      | 0      | 1      | 1      |
| 30159  | 5     | 1     | 0     | 1     | 5     | 5     | 0      | 1      | 0      | 0      | 1      | 0      | 0      | 1      |

| respid | Q52_2 | Q53_1 | Q54_1 | Q54_2 | Q54_3 | Q55_1 | Q56a_1 | Q56b_1 | Q56c_1 | Q56d_1 | Q56e_1 | Q56f_1 | Q56g_1 | Q56h_1 |
|--------|-------|-------|-------|-------|-------|-------|--------|--------|--------|--------|--------|--------|--------|--------|
| 30162  | 5     | 1     | 0     | 1     | 5     | 5     | 0      | 1      | 0      | 0      | 0      | 0      | 1      | 0      |
| 30163  | 5     | 1     | 5     | 5     | 5     | 5     | 0      | 0      | 0      | 0      | 0      | 0      | 0      | 0      |
| 30189  | 3     | 2     | 1     | 3     | 3     | 3     | 1      | 1      | 1      | 1      | 1      | 1      | 2      | 1      |
| 30230  | 4     | 1     | 1     | 3     | 3     | 4     | 1      | 1      | 1      | 1      | 1      | 1      | 1      | 2      |
| 30259  | 2     | 3     | 3     | 3     | 3     | 4     | 1      | 2      | 0      | 2      | 2      | 2      | 1      | 1      |
| 30284  | 5     | 2     | 1     | 1     | 5     | 4     | 1      | 2      | 0      | 0      | 1      | 1      | 1      | 1      |
| 30296  | 3     | 2     | 1     | 1     | 3     | 4     | 0      | 0      | 0      | 0      | 0      | 1      | 1      | 1      |
| 30330  | 4     | 3     | 3     | 3     | 4     | 4     | 0      | 0      | 0      | 1      | 1      | 1      | 1      | 1      |
| 30341  | 5     | 1     | 1     | 1     | 3     | 4     | 1      | 1      | 2      | 0      | 2      | 1      | 1      | 1      |
| 30352  | 3     | 2     | 1     | 1     | 3     | 3     | 1      | 1      | 1      | 1      | 1      | 2      | 1      | 1      |
| 30379  | 1     | 1     | 0     | 0     | 0     | 1     | 0      | 0      | 0      | 0      | 0      | 0      | 0      | 0      |
| 30424  | 5     | 1     | 1     | 1     | 4     | 5     | 1      | 0      | 1      | 2      | 1      | 1      | 1      | 1      |
| 30447  | 5     | 1     | 0     | 0     | 5     | 5     | 0      | 0      | 0      | 0      | 0      | 0      | 0      | 0      |
| 30477  | 3     | 3     | 3     | 3     | 3     | 4     | 2      | 1      | 2      | 2      | 2      | 2      | 2      | 1      |
| 30503  | 3     | 2     | 3     | 3     | 3     | 3     | 1      | 2      | 1      | 1      | 1      | 1      | 1      | 1      |
| 30515  | 4     | 2     | 1     | 3     | 4     | 2     | 1      | 1      | 1      | 1      | 1      | 1      | 1      | 1      |
| 30516  | 5     | 2     | 0     | 0     | 4     | 5     | 1      | 0      | 1      | 0      | 0      | 0      | 0      | 0      |
| 30623  | 2     | 2     | 1     | 1     | 3     | 3     | 1      | 1      | 1      | 1      | 1      | 1      | 1      | 1      |
| 30639  | 3     | 1     | 3     | 3     | 3     | 3     | 1      | 1      | 1      | 2      | 1      | 1      | 2      | 1      |
| 30670  | 5     | 1     | 3     | 4     | 5     | 2     | 1      | 1      | 2      | 2      | 1      | 0      | 0      | 1      |
| 30697  | 5     | 1     | 0     | 0     | 0     | 5     | 0      | 0      | 0      | 0      | 0      | 0      | 0      | 1      |
| 30735  | 2     | 2     | 1     | 1     | 1     | 3     | 1      | 1      | 1      | 1      | 1      | 2      | 2      | 1      |
| 30742  | 3     | 2     | 1     | 1     | 4     | 4     | 0      | 0      | 1      | 1      | 1      | 1      | 1      | 1      |
| 30751  | 4     | 4     | 3     | 4     | 1     | 3     | 2      | 2      | 2      | 1      | 1      | 2      | 2      | 1      |
| 30789  | 5     | 1     | 0     | 0     | 4     | 4     | 0      | 0      | 0      | 0      | 0      | 0      | 0      | 1      |
| 30867  | 2     | 4     | 1     | 1     | 0     | 3     | 1      | 2      | 1      | 2      | 1      | 2      | 0      | 2      |
| 30876  | 5     | 1     | 1     | 1     | 4     | 5     | 1      | 0      | 0      | 0      | 1      | 0      | 0      | 0      |
| 30877  | 4     | 1     | 0     | 0     | 0     | 5     | 0      | 0      | 0      | 0      | 0      | 0      | 0      | 0      |
| 30887  | 4     | 3     | 3     | 3     | 4     | 4     | 1      | 0      | 1      | 1      | 0      | 1      | 1      | 1      |
| 30891  | 2     | 4     | 1     | 0     | 1     | 3     | 1      | 1      | 1      | 1      | 2      | 1      | 1      | 1      |
| 31030  | 4     | 2     | 1     | 1     | 4     | 4     | 2      | 2      | 1      | 1      | 1      | 1      | 1      | 1      |
| 31059  | 2     | 3     | 3     | 3     | 3     | 3     | 1      | 2      | 2      | 1      | 2      | 2      | 1      | 2      |

| respid | Q52_2 | Q53_1 | Q54_1 | Q54_2 | Q54_3 | Q55_1 | Q56a_1 | Q56b_1 | Q56c_1 | Q56d_1 | Q56e_1 | Q56f_1 | Q56g_1 | Q56h_1 |
|--------|-------|-------|-------|-------|-------|-------|--------|--------|--------|--------|--------|--------|--------|--------|
| 31082  | 5     | 1     | 1     | 0     | 4     | 5     | 0      | 0      | 0      | 0      | 1      | 0      | 0      | 0      |
| 31106  | 5     | 2     | 3     | 3     | 3     | 5     | 0      | 0      | 0      | 0      | 0      | 1      | 1      | 0      |
| 31110  | 5     | 1     | 0     | 1     | 3     | 3     | 1      | 1      | 1      | 1      | 1      | 1      | 1      | 1      |
| 31265  | 2     | 4     | 1     | 1     | 1     | 2     | 2      | 1      | 3      | 3      | 2      | 2      | 2      | 3      |
| 31266  | 2     | 4     | 1     | 1     | 1     | 2     | 2      | 1      | 3      | 2      | 2      | 2      | 2      | 3      |
| 31267  | 2     | 4     | 1     | 1     | 1     | 2     | 2      | 1      | 3      | 2      | 2      | 2      | 2      | 3      |
| 31310  | 5     | 1     | 3     | 1     | 4     | 4     | 1      | 1      | 1      | 1      | 1      | 1      | 1      | 1      |
| 31325  | 5     | 1     | 1     | 1     | 3     | 4     | 0      | 0      | 0      | 0      | 1      | 0      | 1      | 0      |
| 31367  | 4     | 2     | 4     | 4     | 4     | 4     | 1      | 1      | 1      | 1      | 1      | 0      | 0      | 1      |
| 31389  | 5     | 1     | 0     | 0     | 0     | 5     | 0      | 0      | 0      | 0      | 0      | 0      | 0      | 0      |
| 31440  | 3     | 2     | 1     | 3     | 3     | 4     | 1      | 0      | 1      | 0      | 1      | 1      | 1      | 1      |
| 31465  | 5     | 3     | 3     | 4     | 3     | 4     | 1      | 1      | 1      | 1      | 2      | 1      | 1      | 1      |
| 31477  | 1     | 3     | 1     | 3     | 1     | 4     | 1      | 2      | 1      | 1      | 2      | 1      | 1      | 1      |
| 31491  | 3     | 3     | 3     | 3     | 3     | 3     | 1      | 1      | 1      | 1      | 2      | 1      | 1      | 1      |
| 31494  | 2     | 3     | 3     | 3     | 4     | 2     | 1      | 2      | 1      | 1      | 1      | 2      | 1      | 1      |
| 31509  | 3     | 1     | 5     | 4     | 1     | 2     | 3      | 1      | 3      | 2      | 3      | 2      | 2      | 2      |
| 31533  | 5     | 1     | 0     | 0     | 5     | 5     | 0      | 0      | 0      | 0      | 0      | 0      | 0      | 0      |
| 31547  | 4     | 2     | 1     | 3     | 4     | 4     | 0      | 0      | 0      | 0      | 0      | 0      | 0      | 1      |
| 31558  | 4     | 2     | 1     | 3     | 4     | 4     | 0      | 2      | 1      | 0      | 1      | 1      | 1      | 1      |
| 31579  | 3     | 2     | 4     | 5     | 1     | 3     | 3      | 1      | 2      | 1      | 3      | 1      | 2      | 2      |
| 31591  | 3     | 2     | 1     | 1     | 4     | 4     | 1      | 0      | 1      | 1      | 1      | 1      | 1      | 1      |
| 31596  | 3     | 2     | 1     | 1     | 3     | 3     | 1      | 1      | 1      | 1      | 1      | 1      | 1      | 1      |
| 31601  | 2     | 3     | 3     | 3     | 1     | 2     | 1      | 1      | 2      | 1      | 2      | 2      | 1      | 1      |
| 31605  | 4     | 2     | 1     | 1     | 4     | 4     | 1      | 0      | 1      | 0      | 1      | 0      | 0      | 1      |
| 31637  | 2     | 3     | 3     | 0     | 0     | 2     | 0      | 0      | 0      | 0      | 0      | 0      | 0      | 0      |
| 31646  | 4     | 2     | 1     | 1     | 4     | 4     | 3      | 0      | 1      | 0      | 0      | 1      | 1      | 1      |
| 31647  | 2     | 4     | 1     | 4     | 3     | 4     | 2      | 0      | 3      | 2      | 2      | 2      | 2      | 1      |
| 31650  | 5     | 1     | 3     | 1     | 4     | 4     | 1      | 0      | 0      | 0      | 0      | 1      | 1      | 0      |
| 31651  | 4     | 4     | 3     | 4     | 4     | 4     | 0      | 1      | 2      | 2      | 2      | 1      | 1      | 2      |
| 31657  | 5     | 1     | 0     | 0     | 5     | 5     | 0      | 0      | 0      | 0      | 0      | 0      | 0      | 0      |
| 31660  | 5     | 2     | 1     | 1     | 4     | 4     | 0      | 0      | 0      | 0      | 0      | 1      | 1      | 1      |
| 31661  | 4     | 3     | 3     | 4     | 4     | 4     | 1      | 1      | 1      | 0      | 1      | 1      | 2      | 2      |

| respid | Q52_2 | Q53_1 | Q54_1 | Q54_2 | Q54_3 | Q55_1 | Q56a_1 | Q56b_1 | Q56c_1 | Q56d_1 | Q56e_1 | Q56f_1 | Q56g_1 | Q56h_1 |
|--------|-------|-------|-------|-------|-------|-------|--------|--------|--------|--------|--------|--------|--------|--------|
| 31667  | 4     | 2     | 4     | 4     | 5     | 4     | 0      | 0      | 0      | 1      | 1      | 0      | 1      | 1      |
| 31674  | 4     | 4     | 4     | 3     | 3     | 4     | 1      | 1      | 2      | 1      | 1      | 1      | 2      | 1      |
| 31686  | 3     | 3     | 3     | 4     | 3     | 3     | 1      | 0      | 0      | 1      | 1      | 1      | 1      | 2      |
| 31693  | 5     | 1     | 1     | 1     | 5     | 5     | 0      | 0      | 0      | 1      | 0      | 1      | 0      | 1      |
| 31716  | 5     | 2     | 1     | 1     | 4     | 4     | 0      | 0      | 1      | 0      | 1      | 0      | 1      | 0      |
| 31818  | 3     | 3     | 3     | 3     | 3     | 3     | 1      | 2      | 1      | 2      | 1      | 1      | 2      | 1      |
| 31886  | 5     | 2     | 1     | 1     | 4     | 4     | 0      | 0      | 0      | 0      | 1      | 0      | 1      | 1      |
| 31945  | 3     | 4     | 3     | 4     | 1     | 3     | 2      | 1      | 2      | 1      | 2      | 1      | 2      | 1      |
| 31957  | 5     | 1     | 4     | 4     | 1     | 3     | 2      | 2      | 2      | 2      | 2      | 2      | 2      | 2      |
| 31966  | 3     | 3     | 3     | 3     | 1     | 4     | 1      | 1      | 1      | 1      | 1      | 1      | 1      | 1      |
| 31978  | 5     | 1     | 0     | 1     | 4     | 5     | 0      | 1      | 1      | 1      | 1      | 0      | 0      | 1      |
| 31999  | 5     | 2     | 1     | 1     | 4     | 5     | 0      | 0      | 0      | 0      | 1      | 0      | 0      | 0      |
| 32026  | 2     | 2     | 3     | 3     | 1     | 3     | 1      | 1      | 1      | 1      | 1      | 1      | 1      | 1      |
| 32033  | 3     | 2     | 3     | 3     | 3     | 3     | 1      | 1      | 2      | 1      | 1      | 1      | 2      | 1      |
| 32037  | 3     | 5     | 3     | 3     | 3     | 3     | 2      | 2      | 1      | 2      | 2      | 2      | 2      | 2      |
| 32038  | 3     | 5     | 3     | 3     | 3     | 4     | 2      | 2      | 2      | 2      | 2      | 2      | 2      | 2      |
| 32047  | 4     | 3     | 1     | 1     | 3     | 4     | 1      | 1      | 1      | 1      | 1      | 1      | 1      | 1      |
| 32053  | 5     | 1     | 0     | 0     | 5     | 5     | 0      | 0      | 0      | 0      | 0      | 0      | 0      | 0      |
| 32069  | 2     | 3     | 3     | 3     | 3     | 4     | 2      | 1      | 1      | 1      | 2      | 2      | 1      | 1      |
| 32081  | 4     | 2     | 1     | 1     | 3     | 4     | 1      | 1      | 1      | 1      | 1      | 1      | 1      | 1      |
| 32123  | 4     | 1     | 1     | 1     | 4     | 4     | 0      | 0      | 0      | 0      | 1      | 1      | 1      | 1      |
| 32130  | 4     | 2     | 1     | 1     | 4     | 4     | 1      | 0      | 1      | 0      | 1      | 0      | 1      | 1      |
| 32141  | 5     | 1     | 1     | 1     | 5     | 5     | 0      | 0      | 0      | 0      | 0      | 0      | 0      | 0      |
| 32158  | 5     | 1     | 0     | 0     | 5     | 5     | 0      | 0      | 0      | 0      | 0      | 0      | 0      | 0      |
| 32165  | 3     | 2     | 4     | 4     | 4     | 4     | 0      | 2      | 1      | 2      | 1      | 1      | 0      | 1      |
| 32180  | 5     | 3     | 4     | 3     | 3     | 4     | 1      | 0      | 0      | 0      | 1      | 1      | 1      | 1      |
| 32221  | 1     | 4     | 4     | 1     | 4     | 4     | 2      | 1      | 2      | 2      | 2      | 1      | 1      | 2      |
| 32292  | 5     | 1     | 1     | 3     | 4     | 4     | 2      | 0      | 1      | 0      | 1      | 1      | 2      | 1      |
| 32318  | 4     | 2     | 1     | 3     | 4     | 4     | 1      | 1      | 1      | 2      | 1      | 1      | 2      | 0      |
| 32346  | 4     | 2     | 1     | 1     | 4     | 4     | 1      | 1      | 1      | 0      | 1      | 0      | 1      | 1      |
| 32402  | 3     | 3     | 3     | 3     | 3     | 3     | 1      | 1      | 1      | 1      | 1      | 1      | 2      | 1      |
| 32422  | 4     | 1     | 1     | 1     | 4     | 4     | 0      | 0      | 0      | 0      | 0      | 0      | 0      | 0      |

| respid | Q52_2 | Q53_1 | Q54_1 | Q54_2 | Q54_3 | Q55_1 | Q56a_1 | Q56b_1 | Q56c_1 | Q56d_1 | Q56e_1 | Q56f_1 | Q56g_1 | Q56h_1 |
|--------|-------|-------|-------|-------|-------|-------|--------|--------|--------|--------|--------|--------|--------|--------|
| 32439  | 5     | 1     | 1     | 0     | 3     | 5     | 0      | 2      | 2      | 2      | 1      | 1      | 1      | 0      |
| 32507  | 3     | 2     | 1     | 1     | 1     | 3     | 1      | 1      | 1      | 2      | 1      | 1      | 1      | 1      |
| 32522  | 3     | 3     | 3     | 3     | 3     | 3     | 1      | 2      | 1      | 2      | 2      | 1      | 1      | 1      |
| 32535  | 3     | 3     | 3     | 3     | 3     | 3     | 1      | 2      | 1      | 2      | 1      | 1      | 1      | 1      |
| 32546  | 3     | 2     | 3     | 3     | 3     | 4     | 1      | 0      | 1      | 2      | 1      | 2      | 1      | 0      |
| 32553  | 3     | 3     | 3     | 3     | 3     | 3     | 1      | 2      | 1      | 2      | 2      | 1      | 1      | 1      |
| 32570  | 3     | 1     | 3     | 3     | 3     | 3     | 0      | 0      | 0      | 0      | 0      | 0      | 0      | 0      |
| 32592  | 4     | 3     | 3     | 3     | 4     | 2     | 1      | 0      | 1      | 2      | 2      | 1      | 2      | 1      |
| 32605  | 3     | 4     | 3     | 4     | 1     | 3     | 1      | 1      | 3      | 2      | 1      | 2      | 2      | 1      |
| 32630  | 2     | 2     | 1     | 0     | 0     | 3     | 1      | 0      | 0      | 0      | 1      | 2      | 1      | 1      |
| 32642  | 2     | 3     | 1     | 4     | 3     | 3     | 0      | 1      | 1      | 1      | 2      | 1      | 1      | 1      |
| 32646  | 4     | 2     | 1     | 1     | 4     | 4     | 1      | 2      | 1      | 0      | 1      | 1      | 1      | 1      |
| 32665  | 4     | 2     | 4     | 4     | 4     | 4     | 1      | 1      | 1      | 1      | 1      | 1      | 1      | 1      |
| 32677  | 4     | 2     | 3     | 3     | 3     | 2     | 1      | 1      | 2      | 1      | 2      | 1      | 2      | 3      |
| 32694  | 4     | 1     | 1     | 0     | 1     | 5     | 0      | 0      | 1      | 0      | 1      | 0      | 0      | 1      |
| 32698  | 3     | 4     | 3     | 4     | 4     | 3     | 1      | 1      | 1      | 2      | 1      | 1      | 1      | 2      |
| 32754  | 2     | 2     | 4     | 4     | 1     | 3     | 1      | 1      | 2      | 2      | 2      | 1      | 1      | 3      |
| 32799  | 3     | 2     | 1     | 3     | 4     | 4     | 1      | 0      | 1      | 1      | 1      | 1      | 1      | 0      |
| 32816  | 3     | 2     | 0     | 1     | 1     | 3     | 0      | 0      | 0      | 0      | 0      | 0      | 0      | 0      |
| 32819  | 4     | 2     | 1     | 3     | 4     | 4     | 1      | 0      | 1      | 1      | 1      | 1      | 1      | 1      |
| 32840  | 4     | 2     | 3     | 3     | 3     | 4     | 1      | 0      | 1      | 0      | 1      | 1      | 1      | 1      |
| 32861  | 5     | 2     | 1     | 3     | 3     | 5     | 1      | 1      | 1      | 0      | 1      | 1      | 1      | 2      |
| 32866  | 3     | 2     | 3     | 3     | 3     | 3     | 1      | 2      | 1      | 1      | 1      | 1      | 2      | 1      |
| 32889  | 4     | 1     | 1     | 3     | 3     | 2     | 1      | 1      | 2      | 1      | 2      | 2      | 2      | 2      |
| 32960  | 4     | 1     | 3     | 3     | 4     | 5     | 0      | 0      | 0      | 0      | 1      | 0      | 0      | 1      |
| 32965  | 5     | 1     | 1     | 1     | 4     | 5     | 0      | 0      | 0      | 0      | 0      | 0      | 0      | 0      |
| 32986  | 3     | 2     | 3     | 3     | 3     | 3     | 1      | 1      | 1      | 1      | 1      | 1      | 2      | 1      |
| 33005  | 3     | 2     | 1     | 1     | 3     | 3     | 1      | 2      | 1      | 1      | 1      | 1      | 1      | 1      |
| 33054  | 4     | 2     | 3     | 4     | 4     | 4     | 1      | 1      | 2      | 1      | 1      | 1      | 2      | 1      |
| 33072  | 3     | 2     | 1     | 4     | 3     | 4     | 1      | 1      | 1      | 1      | 1      | 1      | 1      | 1      |
| 33095  | 3     | 2     | 3     | 3     | 3     | 3     | 2      | 0      | 2      | 1      | 2      | 1      | 1      | 2      |
| 33099  | 5     | 2     | 1     | 3     | 4     | 4     | 1      | 1      | 2      | 2      | 2      | 1      | 1      | 1      |

| respid | Q52_2 | Q53_1 | Q54_1 | Q54_2 | Q54_3 | Q55_1 | Q56a_1 | Q56b_1 | Q56c_1 | Q56d_1 | Q56e_1 | Q56f_1 | Q56g_1 | Q56h_1 |
|--------|-------|-------|-------|-------|-------|-------|--------|--------|--------|--------|--------|--------|--------|--------|
| 33121  | 4     | 1     | 0     | 1     | 0     | 5     | 0      | 0      | 0      | 0      | 0      | 0      | 0      | 1      |
| 33152  | 3     | 2     | 4     | 4     | 3     | 3     | 2      | 2      | 1      | 1      | 1      | 2      | 2      | 1      |
| 33159  | 5     | 2     | 1     | 1     | 4     | 4     | 0      | 0      | 0      | 0      | 0      | 0      | 0      | 0      |
| 33189  | 4     | 2     | 1     | 1     | 5     | 5     | 0      | 0      | 0      | 0      | 0      | 0      | 0      | 0      |
| 33198  | 5     | 3     | 1     | 3     | 3     | 3     | 1      | 0      | 1      | 0      | 1      | 1      | 1      | 1      |
| 33202  | 2     | 3     | 4     | 3     | 3     | 4     | 1      | 1      | 2      | 1      | 2      | 1      | 1      | 2      |
| 33204  | 5     | 2     | 1     | 1     | 1     | 3     | 1      | 0      | 1      | 0      | 1      | 1      | 0      | 1      |
| 33224  | 5     | 2     | 3     | 3     | 3     | 5     | 0      | 0      | 0      | 0      | 0      | 0      | 0      | 0      |
| 33272  | 2     | 2     | 3     | 3     | 1     | 2     | 1      | 1      | 2      | 1      | 1      | 1      | 1      | 2      |
| 33294  | 3     | 2     | 3     | 3     | 3     | 3     | 1      | 1      | 1      | 1      | 1      | 1      | 1      | 1      |
| 33300  | 3     | 3     | 1     | 3     | 3     | 3     | 1      | 1      | 1      | 1      | 1      | 1      | 1      | 1      |
| 33314  | 3     | 3     | 3     | 4     | 3     | 2     | 1      | 2      | 1      | 2      | 1      | 1      | 1      | 1      |
| 33338  | 4     | 2     | 1     | 1     | 4     | 4     | 0      | 0      | 1      | 0      | 0      | 0      | 0      | 0      |
| 33350  | 3     | 3     | 1     | 1     | 3     | 3     | 1      | 0      | 1      | 0      | 1      | 0      | 0      | 1      |
| 33362  | 3     | 1     | 1     | 1     | 3     | 3     | 0      | 0      | 0      | 0      | 0      | 0      | 1      | 0      |
| 33368  | 3     | 3     | 1     | 1     | 5     | 4     | 0      | 0      | 0      | 0      | 1      | 0      | 1      | 1      |
| 33374  | 3     | 3     | 3     | 1     | 1     | 3     | 1      | 1      | 1      | 1      | 1      | 1      | 2      | 2      |
| 33380  | 3     | 3     | 3     | 3     | 4     | 3     | 1      | 2      | 2      | 1      | 1      | 1      | 1      | 2      |
| 33385  | 4     | 1     | 1     | 1     | 4     | 4     | 0      | 0      | 0      | 0      | 0      | 0      | 1      | 0      |
| 33402  | 3     | 3     | 1     | 1     | 4     | 3     | 1      | 0      | 1      | 0      | 1      | 1      | 1      | 1      |
| 33414  | 5     | 2     | 1     | 3     | 4     | 5     | 0      | 0      | 0      | 0      | 1      | 1      | 1      | 1      |
| 33439  | 4     | 3     | 3     | 4     | 3     | 3     | 1      | 0      | 1      | 0      | 1      | 1      | 1      | 1      |
| 33449  | 4     | 2     | 1     | 1     | 3     | 4     | 2      | 2      | 2      | 1      | 2      | 1      | 1      | 2      |
| 33533  | 4     | 2     | 4     | 4     | 4     | 4     | 1      | 1      | 0      | 1      | 0      | 1      | 1      | 0      |
| 33540  | 5     | 2     | 3     | 4     | 3     | 4     | 0      | 2      | 2      | 2      | 1      | 1      | 1      | 1      |
| 33556  | 4     | 4     | 3     | 3     | 4     | 3     | 1      | 1      | 1      | 1      | 1      | 2      | 1      | 1      |
| 33615  | 5     | 2     | 4     | 3     | 4     | 5     | 0      | 3      | 0      | 0      | 1      | 1      | 1      | 1      |
| 33694  | 3     | 2     | 3     | 3     | 1     | 3     | 1      | 1      | 1      | 1      | 2      | 2      | 1      | 1      |
| 33717  | 4     | 1     | 0     | 4     | 4     | 4     | 1      | 1      | 1      | 1      | 1      | 1      | 1      | 1      |
| 33729  | 4     | 1     | 1     | 3     | 3     | 4     | 1      | 1      | 1      | 1      | 2      | 1      | 1      | 1      |
| 33746  | 5     | 2     | 3     | 1     | 3     | 4     | 0      | 1      | 0      | 0      | 1      | 1      | 1      | 1      |
| 33764  | 3     | 3     | 4     | 4     | 1     | 3     | 2      | 1      | 1      | 2      | 3      | 2      | 2      | 0      |

| respid | Q52_2 | Q53_1 | Q54_1 | Q54_2 | Q54_3 | Q55_1 | Q56a_1 | Q56b_1 | Q56c_1 | Q56d_1 | Q56e_1 | Q56f_1 | Q56g_1 | Q56h_1 |
|--------|-------|-------|-------|-------|-------|-------|--------|--------|--------|--------|--------|--------|--------|--------|
| 33790  | 4     | 2     | 1     | 3     | 3     | 4     | 0      | 0      | 1      | 0      | 1      | 0      | 1      | 1      |
| 33868  | 3     | 3     | 3     | 4     | 1     | 3     | 2      | 1      | 3      | 1      | 1      | 2      | 2      | 2      |
| 33872  | 3     | 4     | 3     | 3     | 4     | 3     | 2      | 2      | 1      | 1      | 3      | 3      | 2      | 3      |
| 33883  | 4     | 2     | 1     | 1     | 4     | 5     | 1      | 1      | 1      | 0      | 1      | 1      | 1      | 1      |
| 33884  | 4     | 2     | 3     | 3     | 4     | 4     | 1      | 0      | 0      | 0      | 0      | 1      | 1      | 1      |
| 33900  | 4     | 2     | 0     | 1     | 4     | 4     | 1      | 0      | 0      | 0      | 1      | 0      | 0      | 1      |
| 33933  | 4     | 3     | 3     | 1     | 3     | 3     | 0      | 0      | 2      | 0      | 1      | 0      | 1      | 1      |
| 33949  | 4     | 2     | 4     | 4     | 4     | 4     | 2      | 3      | 3      | 2      | 2      | 2      | 3      | 2      |
| 34005  | 5     | 2     | 3     | 1     | 4     | 4     | 1      | 0      | 1      | 0      | 1      | 0      | 1      | 0      |
| 34016  | 5     | 1     | 0     | 0     | 0     | 5     | 0      | 0      | 0      | 0      | 0      | 0      | 0      | 0      |
| 34041  | 3     | 4     | 1     | 0     | 1     | 3     | 2      | 1      | 2      | 1      | 2      | 1      | 1      | 1      |
| 34053  | 4     | 2     | 1     | 3     | 4     | 4     | 1      | 1      | 0      | 0      | 0      | 0      | 0      | 1      |
| 34056  | 3     | 2     | 4     | 4     | 4     | 4     | 0      | 2      | 0      | 0      | 0      | 0      | 0      | 0      |
| 34093  | 3     | 3     | 3     | 3     | 3     | 3     | 1      | 1      | 1      | 1      | 1      | 1      | 1      | 1      |
| 34112  | 3     | 3     | 1     | 3     | 4     | 4     | 1      | 0      | 0      | 1      | 1      | 1      | 0      | 1      |
| 34136  | 1     | 4     | 3     | 1     | 1     | 4     | 1      | 1      | 2      | 2      | 2      | 1      | 1      | 2      |
| 34138  | 5     | 1     | 1     | 4     | 4     | 4     | 0      | 2      | 2      | 2      | 1      | 2      | 2      | 1      |
| 34139  | 3     | 3     | 1     | 1     | 4     | 3     | 1      | 0      | 1      | 0      | 1      | 1      | 0      | 1      |
| 34189  | 5     | 1     | 1     | 4     | 1     | 4     | 1      | 1      | 2      | 0      | 1      | 1      | 1      | 2      |
| 34239  | 3     | 2     | 1     | 4     | 3     | 3     | 1      | 2      | 1      | 1      | 1      | 1      | 1      | 2      |
| 34240  | 4     | 1     | 3     | 4     | 4     | 4     | 1      | 2      | 1      | 1      | 1      | 1      | 2      | 1      |
| 34241  | 4     | 1     | 1     | 0     | 4     | 4     | 0      | 0      | 0      | 0      | 1      | 1      | 0      | 0      |
| 34259  | 3     | 3     | 3     | 4     | 3     | 3     | 1      | 2      | 0      | 1      | 1      | 1      | 2      | 1      |
| 34303  | 3     | 4     | 3     | 3     | 1     | 4     | 1      | 1      | 0      | 1      | 2      | 2      | 2      | 1      |
| 34306  | 3     | 2     | 1     | 1     | 4     | 5     | 1      | 1      | 1      | 0      | 0      | 0      | 0      | 0      |
| 34395  | 3     | 2     | 1     | 3     | 3     | 3     | 1      | 1      | 2      | 1      | 1      | 1      | 1      | 1      |
| 34463  | 4     | 2     | 3     | 1     | 4     | 3     | 1      | 1      | 2      | 2      | 1      | 1      | 1      | 2      |
| 34466  | 4     | 3     | 3     | 4     | 4     | 3     | 1      | 2      | 2      | 1      | 1      | 2      | 1      | 1      |
| 34471  | 3     | 3     | 1     | 1     | 4     | 4     | 1      | 0      | 0      | 0      | 0      | 0      | 0      | 1      |
| 34489  | 3     | 3     | 3     | 4     | 3     | 3     | 1      | 0      | 1      | 1      | 1      | 1      | 2      | 1      |
| 34518  | 1     | 2     | 4     | 4     | 1     | 4     | 2      | 1      | 0      | 2      | 3      | 2      | 2      | 1      |
| 34542  | 2     | 3     | 3     | 3     | 3     | 3     | 0      | 1      | 1      | 1      | 2      | 2      | 1      | 1      |



| respid | Q52_2 | Q53_1 | Q54_1 | Q54_2 | Q54_3 | Q55_1 | Q56a_1 | Q56b_1 | Q56c_1 | Q56d_1 | Q56e_1 | Q56f_1 | Q56g_1 | Q56h_1 |
|--------|-------|-------|-------|-------|-------|-------|--------|--------|--------|--------|--------|--------|--------|--------|
| 34595  | 5     | 1     | 5     | 5     | 5     | 5     | 0      | 1      | 1      | 1      | 0      | 3      | 1      | 1      |
| 34604  | 3     | 3     | 4     | 4     | 5     | 4     | 1      | 1      | 1      | 1      | 0      | 1      | 2      | 1      |
| 34631  | 4     | 2     | 3     | 4     | 4     | 3     | 0      | 0      | 1      | 1      | 1      | 2      | 2      | 2      |
| 34665  | 5     | 2     | 1     | 3     | 4     | 4     | 1      | 0      | 0      | 0      | 1      | 0      | 1      | 1      |
| 34716  | 5     | 1     | 0     | 0     | 5     | 1     | 0      | 0      | 0      | 0      | 0      | 0      | 0      | 0      |
| 34729  | 5     | 1     | 1     | 1     | 4     | 5     | 0      | 0      | 0      | 0      | 1      | 1      | 1      | 0      |
| 34772  | 2     | 4     | 3     | 5     | 3     | 2     | 2      | 1      | 3      | 1      | 2      | 2      | 2      | 2      |
| 34800  | 4     | 1     | 0     | 1     | 5     | 5     | 0      | 0      | 0      | 0      | 0      | 0      | 0      | 0      |
| 34819  | 3     | 3     | 3     | 3     | 3     | 4     | 1      | 2      | 1      | 2      | 1      | 2      | 1      | 1      |
| 34829  | 3     | 3     | 1     | 3     | 4     | 3     | 1      | 2      | 2      | 1      | 2      | 1      | 1      | 1      |
| 34831  | 1     | 3     | 1     | 3     | 4     | 3     | 0      | 1      | 0      | 0      | 0      | 0      | 1      | 0      |
| 34839  | 5     | 2     | 1     | 3     | 4     | 4     | 1      | 1      | 1      | 0      | 1      | 1      | 1      | 0      |
| 34868  | 5     | 2     | 3     | 4     | 3     | 4     | 1      | 1      | 2      | 1      | 1      | 2      | 2      | 1      |
| 34869  | 4     | 3     | 3     | 3     | 4     | 4     | 0      | 1      | 0      | 0      | 1      | 0      | 1      | 2      |
| 34882  | 3     | 3     | 3     | 3     | 3     | 3     | 1      | 1      | 2      | 1      | 1      | 1      | 1      | 1      |
| 34895  | 4     | 3     | 1     | 1     | 3     | 4     | 1      | 0      | 1      | 0      | 1      | 0      | 1      | 1      |
| 34901  | 3     | 4     | 3     | 3     | 1     | 1     | 0      | 1      | 1      | 1      | 1      | 2      | 2      | 3      |
| 34904  | 3     | 2     | 1     | 3     | 1     | 2     | 1      | 1      | 1      | 1      | 2      | 1      | 1      | 1      |
| 34907  | 3     | 3     | 3     | 3     | 3     | 3     | 1      | 0      | 2      | 0      | 1      | 1      | 1      | 1      |
| 34914  | 4     | 3     | 4     | 4     | 4     | 4     | 1      | 1      | 2      | 2      | 2      | 1      | 1      | 1      |
| 34918  | 3     | 3     | 1     | 1     | 4     | 3     | 1      | 1      | 2      | 0      | 1      | 0      | 1      | 1      |
| 34924  | 5     | 1     | 0     | 0     | 4     | 5     | 1      | 0      | 0      | 0      | 1      | 0      | 0      | 0      |
| 34933  | 3     | 3     | 3     | 3     | 3     | 3     | 1      | 1      | 1      | 1      | 1      | 1      | 1      | 1      |
| 34938  | 5     | 1     | 1     | 1     | 4     | 5     | 0      | 0      | 0      | 0      | 0      | 0      | 0      | 0      |
| 34952  | 2     | 4     | 3     | 4     | 4     | 3     | 1      | 1      | 2      | 1      | 1      | 1      | 1      | 1      |
| 34959  | 5     | 2     | 3     | 1     | 4     | 5     | 0      | 0      | 0      | 1      | 1      | 0      | 0      | 1      |
| 34972  | 5     | 2     | 1     | 1     | 4     | 5     | 1      | 1      | 0      | 0      | 1      | 1      | 1      | 1      |
| 34973  | 3     | 3     | 3     | 3     | 4     | 3     | 1      | 1      | 1      | 1      | 1      | 1      | 1      | 1      |
| 34975  | 3     | 3     | 3     | 3     | 4     | 3     | 1      | 0      | 1      | 1      | 1      | 1      | 1      | 0      |
| 34977  | 5     | 2     | 0     | 1     | 3     | 4     | 1      | 1      | 1      | 0      | 1      | 0      | 1      | 0      |
| 34978  | 4     | 2     | 1     | 1     | 4     | 2     | 1      | 0      | 1      | 0      | 1      | 0      | 1      | 2      |
| 34980  | 4     | 2     | 1     | 1     | 4     | 5     | 0      | 0      | 0      | 0      | 0      | 0      | 0      | 1      |

| respid | Q52_2 | Q53_1 | Q54_1 | Q54_2 | Q54_3 | Q55_1 | Q56a_1 | Q56b_1 | Q56c_1 | Q56d_1 | Q56e_1 | Q56f_1 | Q56g_1 | Q56h_1 |
|--------|-------|-------|-------|-------|-------|-------|--------|--------|--------|--------|--------|--------|--------|--------|
| 34984  | 4     | 3     | 3     | 3     | 4     | 4     | 1      | 1      | 2      | 1      | 1      | 2      | 1      | 1      |
| 34986  | 3     | 2     | 3     | 3     | 3     | 3     | 1      | 1      | 1      | 2      | 1      | 1      | 1      | 1      |
| 34994  | 4     | 1     | 4     | 4     | 4     | 5     | 0      | 0      | 0      | 0      | 0      | 0      | 0      | 0      |
| 34996  | 3     | 2     | 3     | 3     | 3     | 4     | 2      | 1      | 1      | 1      | 2      | 1      | 2      | 1      |
| 35003  | 4     | 2     | 1     | 1     | 3     | 4     | 0      | 1      | 0      | 1      | 0      | 0      | 0      | 1      |
| 35014  | 5     | 3     | 3     | 3     | 3     | 5     | 0      | 1      | 0      | 1      | 1      | 1      | 1      | 0      |
| 35029  | 4     | 3     | 4     | 4     | 4     | 2     | 1      | 2      | 1      | 1      | 1      | 2      | 1      | 1      |
| 35030  | 3     | 4     | 3     | 4     | 1     | 2     | 2      | 1      | 2      | 2      | 2      | 2      | 2      | 2      |
| 35037  | 3     | 3     | 1     | 3     | 4     | 3     | 1      | 1      | 1      | 1      | 1      | 1      | 2      | 2      |
| 35043  | 5     | 1     | 1     | 1     | 5     | 5     | 0      | 0      | 0      | 0      | 0      | 0      | 0      | 0      |
| 35048  | 5     | 1     | 0     | 0     | 5     | 5     | 0      | 0      | 0      | 0      | 0      | 0      | 0      | 0      |
| 35055  | 3     | 3     | 1     | 3     | 3     | 3     | 1      | 1      | 1      | 1      | 1      | 1      | 1      | 2      |
| 35067  | 3     | 2     | 1     | 3     | 3     | 3     | 1      | 1      | 1      | 1      | 1      | 1      | 0      | 2      |
| 35072  | 5     | 2     | 1     | 1     | 4     | 4     | 1      | 2      | 1      | 2      | 1      | 1      | 1      | 1      |
| 35078  | 4     | 3     | 1     | 3     | 4     | 4     | 0      | 0      | 1      | 1      | 1      | 1      | 2      | 2      |
| 35084  | 5     | 3     | 1     | 1     | 4     | 3     | 1      | 1      | 1      | 0      | 0      | 0      | 0      | 1      |
| 35095  | 5     | 1     | 0     | 0     | 0     | 5     | 0      | 0      | 0      | 0      | 0      | 0      | 0      | 0      |
| 35096  | 5     | 1     | 0     | 0     | 5     | 5     | 0      | 0      | 0      | 0      | 0      | 0      | 0      | 0      |
| 35097  | 3     | 3     | 1     | 3     | 3     | 3     | 1      | 1      | 1      | 1      | 1      | 1      | 1      | 1      |
| 35098  | 4     | 2     | 3     | 3     | 4     | 4     | 1      | 1      | 1      | 2      | 1      | 1      | 2      | 1      |
| 35109  | 2     | 5     | 4     | 5     | 1     | 1     | 2      | 3      | 3      | 2      | 3      | 2      | 2      | 3      |
| 35114  | 5     | 2     | 1     | 1     | 4     | 4     | 0      | 1      | 0      | 0      | 0      | 0      | 0      | 0      |
| 35115  | 4     | 3     | 1     | 3     | 3     | 4     | 1      | 0      | 1      | 1      | 1      | 1      | 1      | 1      |
| 35124  | 3     | 3     | 4     | 4     | 3     | 3     | 1      | 2      | 1      | 1      | 2      | 2      | 1      | 1      |
| 35125  | 4     | 1     | 1     | 1     | 4     | 5     | 0      | 0      | 0      | 0      | 1      | 0      | 0      | 1      |
| 35141  | 5     | 2     | 1     | 1     | 5     | 5     | 0      | 0      | 1      | 0      | 0      | 1      | 1      | 0      |
| 35142  | 5     | 1     | 4     | 1     | 3     | 4     | 2      | 0      | 2      | 0      | 0      | 0      | 1      | 1      |
| 35145  | 3     | 3     | 1     | 1     | 3     | 3     | 2      | 0      | 0      | 0      | 1      | 0      | 0      | 1      |
| 35149  | 3     | 3     | 1     | 1     | 3     | 3     | 1      | 0      | 2      | 1      | 1      | 0      | 1      | 1      |
| 35159  | 5     | 3     | 4     | 1     | 3     | 3     | 1      | 0      | 1      | 0      | 1      | 1      | 1      | 1      |
| 35163  | 2     | 3     | 4     | 4     | 3     | 2     | 1      | 1      | 2      | 2      | 1      | 2      | 2      | 2      |
| 35174  | 4     | 2     | 1     | 1     | 4     | 4     | 1      | 0      | 1      | 0      | 1      | 0      | 0      | 1      |

| respid | Q52_2 | Q53_1 | Q54_1 | Q54_2 | Q54_3 | Q55_1 | Q56a_1 | Q56b_1 | Q56c_1 | Q56d_1 | Q56e_1 | Q56f_1 | Q56g_1 | Q56h_1 |
|--------|-------|-------|-------|-------|-------|-------|--------|--------|--------|--------|--------|--------|--------|--------|
| 35188  | 5     | 1     | 0     | 0     | 5     | 5     | 0      | 0      | 0      | 0      | 0      | 0      | 0      | 0      |
| 35189  | 2     | 3     | 3     | 4     | 1     | 3     | 1      | 1      | 1      | 1      | 3      | 2      | 2      | 2      |
| 35201  | 4     | 2     | 1     | 3     | 4     | 4     | 0      | 1      | 1      | 1      | 1      | 1      | 0      | 2      |
| 35215  | 4     | 2     | 1     | 1     | 4     | 4     | 0      | 1      | 2      | 0      | 1      | 0      | 1      | 1      |
| 35228  | 4     | 1     | 4     | 3     | 5     | 5     | 0      | 2      | 0      | 3      | 1      | 2      | 2      | 1      |
| 35235  | 4     | 2     | 1     | 3     | 4     | 4     | 1      | 1      | 1      | 1      | 1      | 1      | 1      | 2      |
| 35239  | 3     | 3     | 1     | 1     | 3     | 3     | 1      | 2      | 2      | 2      | 2      | 2      | 2      | 2      |
| 35243  | 3     | 2     | 3     | 4     | 3     | 4     | 2      | 1      | 2      | 1      | 2      | 2      | 2      | 1      |
| 35245  | 3     | 2     | 1     | 3     | 3     | 3     | 1      | 1      | 2      | 2      | 1      | 2      | 1      | 2      |
| 35259  | 5     | 1     | 0     | 3     | 4     | 5     | 0      | 0      | 0      | 0      | 0      | 1      | 1      | 0      |
| 35265  | 3     | 3     | 4     | 4     | 3     | 3     | 1      | 2      | 2      | 1      | 1      | 1      | 2      | 2      |
| 35272  | 2     | 4     | 4     | 4     | 3     | 3     | 2      | 0      | 1      | 1      | 1      | 1      | 2      | 1      |
| 35280  | 4     | 3     | 4     | 4     | 3     | 4     | 0      | 0      | 3      | 1      | 2      | 0      | 2      | 1      |
| 35298  | 5     | 1     | 1     | 1     | 5     | 5     | 0      | 0      | 0      | 0      | 0      | 0      | 0      | 0      |
| 35305  | 3     | 3     | 1     | 1     | 4     | 4     | 1      | 1      | 1      | 2      | 1      | 1      | 1      | 1      |
| 35306  | 2     | 3     | 3     | 1     | 1     | 2     | 1      | 1      | 2      | 2      | 2      | 2      | 2      | 1      |
| 35307  | 5     | 1     | 0     | 0     | 5     | 5     | 0      | 0      | 0      | 0      | 0      | 0      | 0      | 0      |
| 35311  | 3     | 4     | 1     | 3     | 4     | 3     | 1      | 1      | 0      | 0      | 1      | 0      | 0      | 1      |
| 35322  | 4     | 3     | 1     | 1     | 3     | 4     | 1      | 1      | 1      | 1      | 1      | 1      | 1      | 1      |
| 35323  | 3     | 3     | 3     | 3     | 3     | 3     | 1      | 1      | 1      | 1      | 1      | 1      | 1      | 1      |
| 35327  | 5     | 2     | 1     | 1     | 4     | 4     | 1      | 0      | 1      | 0      | 1      | 0      | 1      | 1      |
| 35366  | 4     | 4     | 0     | 0     | 4     | 4     | 1      | 0      | 1      | 0      | 1      | 0      | 0      | 0      |
| 35378  | 3     | 2     | 3     | 4     | 4     | 4     | 1      | 1      | 1      | 1      | 1      | 1      | 1      | 2      |
| 35389  | 5     | 1     | 1     | 1     | 4     | 5     | 1      | 1      | 1      | 1      | 1      | 1      | 1      | 1      |
| 35390  | 3     | 3     | 3     | 3     | 3     | 3     | 1      | 1      | 1      | 1      | 1      | 1      | 2      | 1      |
| 35395  | 3     | 3     | 3     | 4     | 3     | 3     | 1      | 1      | 1      | 2      | 2      | 1      | 1      | 1      |
| 35411  | 4     | 3     | 1     | 4     | 3     | 3     | 0      | 2      | 1      | 2      | 1      | 1      | 1      | 1      |
| 35423  | 4     | 1     | 1     | 1     | 4     | 5     | 0      | 0      | 0      | 0      | 1      | 0      | 1      | 1      |
| 35425  | 4     | 3     | 3     | 3     | 4     | 4     | 1      | 1      | 1      | 1      | 2      | 1      | 1      | 2      |
| 35434  | 3     | 3     | 3     | 3     | 3     | 3     | 1      | 1      | 1      | 0      | 1      | 0      | 1      | 1      |
| 35462  | 3     | 2     | 1     | 1     | 4     | 5     | 0      | 0      | 0      | 1      | 1      | 0      | 0      | 1      |
| 35478  | 3     | 3     | 3     | 3     | 3     | 3     | 1      | 1      | 2      | 2      | 1      | 1      | 2      | 2      |

| respid | Q52_2 | Q53_1 | Q54_1 | Q54_2 | Q54_3 | Q55_1 | Q56a_1 | Q56b_1 | Q56c_1 | Q56d_1 | Q56e_1 | Q56f_1 | Q56g_1 | Q56h_1 |
|--------|-------|-------|-------|-------|-------|-------|--------|--------|--------|--------|--------|--------|--------|--------|
| 35481  | 2     | 3     | 1     | 3     | 4     | 3     | 1      | 2      | 1      | 1      | 2      | 1      | 1      | 2      |
| 35498  | 5     | 1     | 1     | 1     | 3     | 5     | 0      | 0      | 0      | 0      | 0      | 1      | 0      | 1      |
| 35499  | 4     | 2     | 1     | 1     | 4     | 3     | 0      | 1      | 1      | 1      | 1      | 1      | 1      | 1      |
| 35502  | 2     | 3     | 1     | 3     | 3     | 3     | 1      | 2      | 1      | 1      | 2      | 1      | 2      | 1      |
| 35503  | 5     | 2     | 1     | 1     | 4     | 4     | 1      | 0      | 1      | 1      | 1      | 0      | 1      | 1      |
| 35504  | 5     | 2     | 1     | 1     | 5     | 5     | 0      | 0      | 0      | 0      | 0      | 0      | 0      | 1      |
| 35508  | 3     | 3     | 3     | 4     | 3     | 3     | 1      | 0      | 1      | 0      | 1      | 1      | 1      | 3      |
| 35513  | 4     | 2     | 1     | 3     | 4     | 4     | 1      | 0      | 1      | 0      | 1      | 1      | 0      | 1      |
| 35516  | 3     | 1     | 5     | 5     | 4     | 5     | 0      | 1      | 0      | 1      | 0      | 0      | 1      | 1      |
| 35519  | 2     | 4     | 3     | 5     | 3     | 2     | 2      | 1      | 3      | 2      | 1      | 2      | 2      | 2      |
| 35530  | 3     | 4     | 4     | 3     | 4     | 4     | 2      | 1      | 0      | 1      | 2      | 1      | 2      | 2      |
| 35533  | 3     | 3     | 3     | 3     | 4     | 4     | 1      | 0      | 2      | 1      | 2      | 2      | 2      | 1      |
| 35561  | 2     | 4     | 3     | 4     | 1     | 1     | 2      | 2      | 2      | 2      | 2      | 2      | 2      | 0      |
| 35565  | 3     | 2     | 1     | 1     | 4     | 4     | 0      | 0      | 1      | 0      | 1      | 0      | 1      | 0      |
| 35588  | 4     | 2     | 1     | 4     | 3     | 4     | 1      | 2      | 1      | 1      | 0      | 0      | 0      | 1      |
| 35598  | 5     | 2     | 1     | 1     | 4     | 5     | 0      | 1      | 0      | 0      | 1      | 0      | 1      | 1      |
| 35607  | 5     | 2     | 0     | 3     | 4     | 5     | 1      | 1      | 0      | 1      | 1      | 1      | 1      | 2      |
| 35638  | 5     | 2     | 3     | 4     | 5     | 4     | 1      | 0      | 0      | 0      | 1      | 0      | 1      | 1      |
| 35642  | 5     | 2     | 1     | 1     | 1     | 5     | 1      | 0      | 1      | 0      | 1      | 1      | 0      | 1      |
| 35643  | 2     | 4     | 1     | 4     | 4     | 3     | 1      | 2      | 1      | 1      | 1      | 2      | 2      | 2      |
| 35680  | 4     | 2     | 4     | 4     | 3     | 4     | 1      | 0      | 2      | 1      | 1      | 1      | 1      | 0      |
| 35697  | 5     | 2     | 1     | 1     | 4     | 4     | 1      | 1      | 1      | 2      | 2      | 1      | 1      | 1      |
| 35703  | 5     | 1     | 1     | 3     | 4     | 5     | 0      | 0      | 1      | 0      | 0      | 0      | 0      | 0      |
| 35709  | 4     | 3     | 3     | 4     | 1     | 3     | 2      | 1      | 2      | 1      | 1      | 1      | 2      | 2      |
| 35710  | 5     | 1     | 1     | 1     | 4     | 5     | 0      | 0      | 0      | 0      | 0      | 0      | 0      | 1      |
| 35721  | 3     | 3     | 3     | 5     | 1     | 4     | 1      | 3      | 3      | 2      | 3      | 2      | 2      | 3      |
| 35723  | 4     | 3     | 1     | 1     | 4     | 5     | 0      | 0      | 0      | 0      | 0      | 0      | 0      | 0      |
| 35736  | 2     | 5     | 5     | 5     | 0     | 1     | 3      | 2      | 3      | 2      | 3      | 2      | 2      | 3      |
| 35739  | 4     | 2     | 1     | 1     | 3     | 3     | 2      | 0      | 2      | 1      | 2      | 1      | 1      | 2      |
| 35745  | 4     | 1     | 3     | 3     | 3     | 4     | 1      | 2      | 1      | 2      | 3      | 1      | 2      | 2      |
| 35748  | 2     | 1     | 3     | 4     | 1     | 3     | 2      | 1      | 3      | 2      | 3      | 1      | 2      | 2      |
| 35750  | 4     | 2     | 3     | 3     | 4     | 4     | 1      | 0      | 1      | 0      | 3      | 1      | 1      | 0      |

| respid | Q52_2 | Q53_1 | Q54_1 | Q54_2 | Q54_3 | Q55_1 | Q56a_1 | Q56b_1 | Q56c_1 | Q56d_1 | Q56e_1 | Q56f_1 | Q56g_1 | Q56h_1 |
|--------|-------|-------|-------|-------|-------|-------|--------|--------|--------|--------|--------|--------|--------|--------|
| 35752  | 5     | 2     | 1     | 1     | 4     | 4     | 1      | 0      | 1      | 1      | 1      | 1      | 1      | 1      |
| 35773  | 3     | 3     | 3     | 3     | 4     | 3     | 1      | 1      | 1      | 1      | 1      | 1      | 1      | 1      |
| 35779  | 5     | 2     | 1     | 1     | 4     | 5     | 1      | 0      | 0      | 0      | 1      | 0      | 1      | 0      |
| 35791  | 4     | 2     | 1     | 1     | 4     | 5     | 1      | 0      | 1      | 0      | 1      | 0      | 0      | 0      |
| 35801  | 3     | 3     | 1     | 4     | 4     | 3     | 1      | 1      | 1      | 1      | 1      | 1      | 1      | 1      |
| 35802  | 4     | 2     | 1     | 1     | 1     | 5     | 0      | 0      | 1      | 0      | 0      | 0      | 0      | 0      |
| 35837  | 4     | 3     | 1     | 1     | 3     | 4     | 1      | 0      | 1      | 1      | 1      | 0      | 1      | 1      |
| 35853  | 4     | 2     | 1     | 3     | 4     | 3     | 1      | 1      | 1      | 2      | 2      | 0      | 1      | 2      |
| 35858  | 3     | 3     | 1     | 1     | 3     | 3     | 1      | 0      | 2      | 2      | 1      | 1      | 1      | 1      |
| 35860  | 2     | 3     | 4     | 4     | 1     | 3     | 1      | 1      | 1      | 1      | 1      | 2      | 1      | 1      |
| 35875  | 5     | 2     | 1     | 3     | 5     | 4     | 1      | 0      | 0      | 0      | 1      | 1      | 1      | 0      |
| 35883  | 5     | 2     | 1     | 3     | 4     | 4     | 0      | 0      | 1      | 0      | 1      | 0      | 1      | 0      |
| 35890  | 5     | 2     | 1     | 1     | 3     | 4     | 0      | 0      | 0      | 0      | 0      | 0      | 0      | 2      |
| 35898  | 5     | 2     | 1     | 4     | 4     | 2     | 0      | 1      | 2      | 0      | 1      | 0      | 0      | 1      |
| 35901  | 3     | 5     | 3     | 3     | 1     | 3     | 1      | 1      | 2      | 1      | 2      | 1      | 2      | 2      |
| 35914  | 2     | 3     | 1     | 1     | 1     | 2     | 1      | 1      | 1      | 1      | 1      | 1      | 1      | 1      |
| 35924  | 3     | 3     | 4     | 4     | 4     | 4     | 2      | 1      | 1      | 1      | 2      | 1      | 1      | 2      |
| 35950  | 4     | 2     | 1     | 3     | 4     | 4     | 0      | 0      | 1      | 0      | 1      | 0      | 1      | 0      |
| 35961  | 4     | 3     | 1     | 1     | 3     | 4     | 0      | 1      | 2      | 2      | 1      | 1      | 1      | 1      |
| 35966  | 4     | 2     | 3     | 4     | 4     | 4     | 1      | 2      | 0      | 0      | 1      | 1      | 1      | 1      |
| 35967  | 5     | 1     | 1     | 1     | 4     | 5     | 0      | 0      | 0      | 0      | 0      | 0      | 0      | 0      |
| 35971  | 3     | 3     | 3     | 3     | 3     | 3     | 1      | 0      | 0      | 0      | 0      | 0      | 0      | 0      |
| 35974  | 5     | 2     | 3     | 1     | 4     | 4     | 1      | 0      | 1      | 0      | 1      | 1      | 0      | 0      |
| 35983  | 3     | 4     | 1     | 3     | 3     | 4     | 2      | 2      | 2      | 2      | 1      | 1      | 1      | 2      |
| 35992  | 2     | 3     | 3     | 4     | 3     | 3     | 1      | 2      | 1      | 2      | 1      | 1      | 2      | 2      |
| 36010  | 4     | 1     | 1     | 1     | 4     | 4     | 0      | 0      | 0      | 0      | 1      | 1      | 1      | 1      |
| 36019  | 4     | 2     | 3     | 3     | 1     | 3     | 1      | 1      | 1      | 1      | 1      | 1      | 1      | 2      |
| 36029  | 4     | 2     | 1     | 1     | 3     | 4     | 1      | 0      | 0      | 0      | 1      | 1      | 1      | 1      |
| 36033  | 5     | 3     | 4     | 4     | 5     | 4     | 0      | 0      | 0      | 0      | 0      | 0      | 1      | 0      |
| 36042  | 4     | 2     | 1     | 1     | 4     | 4     | 0      | 0      | 0      | 0      | 1      | 0      | 1      | 0      |
| 36043  | 4     | 3     | 3     | 3     | 3     | 3     | 2      | 1      | 2      | 2      | 1      | 1      | 1      | 1      |
| 36048  | 3     | 4     | 1     | 4     | 3     | 4     | 1      | 1      | 2      | 2      | 1      | 1      | 2      | 2      |

| respid | Q52_2 | Q53_1 | Q54_1 | Q54_2 | Q54_3 | Q55_1 | Q56a_1 | Q56b_1 | Q56c_1 | Q56d_1 | Q56e_1 | Q56f_1 | Q56g_1 | Q56h_1 |
|--------|-------|-------|-------|-------|-------|-------|--------|--------|--------|--------|--------|--------|--------|--------|
| 36050  | 3     | 2     | 3     | 4     | 4     | 4     | 0      | 1      | 1      | 2      | 1      | 1      | 1      | 1      |
| 36062  | 4     | 2     | 1     | 4     | 3     | 5     | 0      | 1      | 0      | 0      | 1      | 1      | 1      | 2      |
| 36063  | 5     | 1     | 1     | 1     | 5     | 5     | 0      | 0      | 0      | 0      | 0      | 0      | 0      | 0      |
| 36092  | 3     | 3     | 1     | 3     | 3     | 4     | 1      | 0      | 2      | 0      | 1      | 0      | 1      | 1      |
| 36097  | 3     | 3     | 1     | 3     | 3     | 3     | 1      | 1      | 1      | 1      | 1      | 1      | 1      | 1      |
| 36108  | 5     | 1     | 0     | 0     | 5     | 5     | 0      | 0      | 0      | 0      | 0      | 0      | 0      | 0      |
| 36113  | 3     | 3     | 3     | 4     | 3     | 3     | 1      | 1      | 2      | 1      | 1      | 1      | 2      | 2      |
| 36117  | 4     | 2     | 1     | 3     | 3     | 4     | 1      | 1      | 2      | 1      | 1      | 1      | 2      | 1      |
| 36129  | 3     | 3     | 3     | 3     | 3     | 3     | 1      | 2      | 2      | 2      | 2      | 1      | 1      | 1      |
| 36144  | 5     | 1     | 0     | 0     | 5     | 5     | 0      | 3      | 0      | 0      | 0      | 0      | 0      | 0      |
| 36152  | 4     | 3     | 1     | 1     | 4     | 4     | 1      | 0      | 1      | 0      | 1      | 1      | 1      | 1      |
| 36154  | 4     | 3     | 3     | 1     | 4     | 3     | 1      | 0      | 1      | 2      | 1      | 0      | 1      | 1      |
| 36155  | 3     | 3     | 1     | 1     | 1     | 3     | 1      | 0      | 1      | 1      | 1      | 0      | 0      | 1      |
| 36167  | 5     | 1     | 0     | 0     | 5     | 5     | 0      | 0      | 0      | 0      | 0      | 0      | 0      | 0      |
| 36172  | 5     | 1     | 1     | 1     | 4     | 5     | 0      | 0      | 0      | 0      | 1      | 0      | 0      | 0      |
| 36173  | 4     | 2     | 3     | 3     | 4     | 4     | 0      | 2      | 1      | 2      | 2      | 3      | 2      | 1      |
| 36174  | 5     | 2     | 1     | 1     | 4     | 4     | 1      | 1      | 0      | 1      | 1      | 1      | 1      | 1      |
| 36182  | 4     | 2     | 1     | 1     | 4     | 3     | 1      | 0      | 1      | 0      | 1      | 0      | 1      | 0      |
| 36192  | 3     | 3     | 1     | 4     | 3     | 3     | 2      | 1      | 1      | 0      | 1      | 0      | 1      | 1      |
| 36195  | 3     | 3     | 3     | 3     | 3     | 3     | 1      | 1      | 1      | 1      | 1      | 1      | 2      | 2      |
| 36204  | 3     | 3     | 1     | 4     | 4     | 3     | 0      | 1      | 1      | 2      | 1      | 1      | 2      | 1      |
| 36205  | 4     | 3     | 0     | 4     | 4     | 3     | 2      | 3      | 0      | 2      | 2      | 2      | 1      | 2      |
| 36208  | 5     | 1     | 3     | 3     | 4     | 4     | 1      | 0      | 1      | 1      | 2      | 1      | 1      | 0      |
| 36216  | 4     | 3     | 1     | 3     | 4     | 4     | 1      | 1      | 2      | 1      | 1      | 1      | 1      | 1      |
| 36221  | 3     | 4     | 4     | 4     | 3     | 3     | 1      | 1      | 1      | 1      | 2      | 1      | 1      | 2      |
| 36244  | 5     | 5     | 0     | 0     | 5     | 5     | 0      | 0      | 0      | 0      | 0      | 0      | 0      | 0      |
| 36255  | 2     | 2     | 0     | 1     | 1     | 2     | 1      | 0      | 1      | 0      | 1      | 1      | 1      | 1      |
| 36259  | 4     | 1     | 1     | 1     | 4     | 4     | 1      | 1      | 0      | 0      | 1      | 1      | 1      | 1      |
| 36262  | 2     | 3     | 1     | 1     | 4     | 3     | 1      | 2      | 2      | 1      | 1      | 1      | 2      | 1      |
| 36268  | 5     | 1     | 0     | 0     | 4     | 4     | 0      | 0      | 0      | 0      | 0      | 0      | 0      | 0      |
| 36308  | 4     | 1     | 1     | 3     | 3     | 3     | 1      | 1      | 1      | 1      | 1      | 1      | 1      | 2      |
| 36324  | 4     | 2     | 1     | 1     | 4     | 5     | 0      | 0      | 2      | 0      | 1      | 1      | 0      | 1      |

| respid | Q52_2 | Q53_1 | Q54_1 | Q54_2 | Q54_3 | Q55_1 | Q56a_1 | Q56b_1 | Q56c_1 | Q56d_1 | Q56e_1 | Q56f_1 | Q56g_1 | Q56h_1 |
|--------|-------|-------|-------|-------|-------|-------|--------|--------|--------|--------|--------|--------|--------|--------|
| 36330  | 5     | 2     | 1     | 1     | 5     | 4     | 0      | 0      | 0      | 0      | 0      | 1      | 0      | 0      |
| 36331  | 3     | 4     | 3     | 5     | 1     | 3     | 2      | 1      | 2      | 2      | 2      | 2      | 2      | 3      |
| 36336  | 4     | 2     | 1     | 1     | 4     | 4     | 1      | 0      | 1      | 1      | 1      | 1      | 0      | 1      |
| 36337  | 4     | 2     | 1     | 3     | 4     | 5     | 1      | 1      | 1      | 1      | 0      | 1      | 1      | 0      |
| 36364  | 3     | 3     | 3     | 4     | 3     | 4     | 2      | 1      | 2      | 1      | 1      | 1      | 1      | 1      |
| 36365  | 3     | 3     | 1     | 3     | 3     | 3     | 1      | 1      | 1      | 1      | 1      | 0      | 2      | 2      |
| 36396  | 3     | 3     | 1     | 4     | 3     | 4     | 1      | 1      | 2      | 2      | 1      | 1      | 1      | 2      |
| 36403  | 4     | 2     | 1     | 3     | 4     | 4     | 0      | 0      | 0      | 0      | 1      | 0      | 0      | 0      |
| 36410  | 5     | 1     | 1     | 0     | 4     | 5     | 0      | 0      | 0      | 0      | 0      | 0      | 0      | 0      |
| 36413  | 5     | 1     | 0     | 0     | 0     | 5     | 0      | 0      | 0      | 0      | 0      | 0      | 0      | 0      |
| 36422  | 4     | 1     | 1     | 1     | 4     | 4     | 0      | 0      | 1      | 0      | 1      | 0      | 1      | 1      |
| 36424  | 3     | 3     | 1     | 3     | 4     | 4     | 1      | 2      | 2      | 2      | 1      | 2      | 1      | 2      |
| 36425  | 1     | 4     | 3     | 3     | 4     | 3     | 2      | 0      | 2      | 2      | 2      | 2      | 2      | 2      |
| 36432  | 3     | 3     | 3     | 3     | 3     | 3     | 1      | 0      | 1      | 0      | 0      | 0      | 0      | 1      |
| 36435  | 3     | 4     | 1     | 3     | 1     | 3     | 2      | 1      | 2      | 2      | 2      | 1      | 2      | 2      |
| 36446  | 5     | 3     | 3     | 4     | 3     | 3     | 1      | 2      | 1      | 2      | 1      | 2      | 1      | 2      |
| 36451  | 3     | 3     | 1     | 3     | 4     | 4     | 2      | 0      | 1      | 2      | 1      | 1      | 1      | 1      |
| 36453  | 3     | 3     | 4     | 3     | 4     | 3     | 1      | 1      | 1      | 2      | 1      | 1      | 1      | 1      |
| 36459  | 3     | 3     | 3     | 3     | 3     | 3     | 1      | 1      | 1      | 1      | 2      | 1      | 1      | 2      |
| 36464  | 4     | 2     | 1     | 3     | 3     | 3     | 0      | 3      | 0      | 3      | 1      | 1      | 1      | 1      |
| 36465  | 4     | 3     | 1     | 1     | 4     | 4     | 1      | 1      | 1      | 1      | 1      | 0      | 0      | 1      |
| 36466  | 4     | 2     | 1     | 1     | 4     | 4     | 0      | 0      | 0      | 0      | 0      | 0      | 0      | 1      |
| 36476  | 3     | 3     | 1     | 3     | 3     | 4     | 1      | 1      | 1      | 1      | 1      | 1      | 1      | 1      |
| 36487  | 5     | 3     | 1     | 3     | 3     | 3     | 1      | 0      | 2      | 1      | 1      | 1      | 1      | 1      |
| 36488  | 5     | 1     | 0     | 0     | 3     | 3     | 0      | 1      | 0      | 0      | 1      | 0      | 0      | 0      |
| 36500  | 5     | 1     | 1     | 1     | 4     | 5     | 0      | 0      | 0      | 0      | 0      | 1      | 1      | 0      |
| 36504  | 4     | 2     | 1     | 1     | 4     | 5     | 1      | 0      | 1      | 0      | 1      | 0      | 1      | 1      |
| 36513  | 4     | 2     | 3     | 4     | 4     | 4     | 0      | 0      | 1      | 1      | 1      | 0      | 1      | 1      |
| 36515  | 3     | 3     | 1     | 3     | 4     | 3     | 1      | 0      | 2      | 1      | 1      | 1      | 1      | 1      |
| 36521  | 3     | 4     | 1     | 1     | 4     | 3     | 1      | 0      | 0      | 1      | 1      | 0      | 0      | 1      |
| 36530  | 2     | 3     | 1     | 1     | 1     | 3     | 1      | 1      | 1      | 1      | 2      | 1      | 0      | 1      |
| 36556  | 4     | 2     | 3     | 3     | 4     | 4     | 1      | 0      | 1      | 0      | 1      | 1      | 1      | 1      |

| respid | Q52_2 | Q53_1 | Q54_1 | Q54_2 | Q54_3 | Q55_1 | Q56a_1 | Q56b_1 | Q56c_1 | Q56d_1 | Q56e_1 | Q56f_1 | Q56g_1 | Q56h_1 |
|--------|-------|-------|-------|-------|-------|-------|--------|--------|--------|--------|--------|--------|--------|--------|
| 36564  | 4     | 2     | 3     | 4     | 4     | 4     | 1      | 1      | 2      | 0      | 2      | 1      | 1      | 1      |
| 36584  | 5     | 1     | 0     | 0     | 5     | 5     | 0      | 0      | 0      | 0      | 0      | 0      | 0      | 0      |
| 36585  | 4     | 1     | 1     | 1     | 4     | 4     | 1      | 0      | 1      | 1      | 1      | 1      | 1      | 1      |
| 36586  | 4     | 1     | 4     | 4     | 4     | 4     | 1      | 1      | 1      | 1      | 0      | 0      | 0      | 1      |
| 36606  | 3     | 4     | 4     | 4     | 3     | 3     | 3      | 1      | 2      | 1      | 1      | 2      | 2      | 1      |
| 36615  | 4     | 1     | 1     | 1     | 4     | 5     | 0      | 0      | 1      | 0      | 1      | 0      | 0      | 0      |
| 36628  | 4     | 2     | 1     | 3     | 4     | 4     | 1      | 0      | 1      | 1      | 1      | 1      | 1      | 1      |
| 36630  | 2     | 4     | 1     | 1     | 3     | 2     | 0      | 0      | 1      | 1      | 1      | 1      | 1      | 2      |
| 36631  | 4     | 2     | 1     | 3     | 4     | 4     | 1      | 1      | 1      | 1      | 1      | 1      | 1      | 1      |
| 36636  | 4     | 2     | 1     | 3     | 3     | 4     | 1      | 1      | 1      | 0      | 1      | 1      | 1      | 0      |
| 36637  | 3     | 3     | 1     | 3     | 4     | 4     | 1      | 1      | 1      | 0      | 1      | 1      | 1      | 1      |
| 36651  | 3     | 3     | 4     | 3     | 3     | 1     | 2      | 1      | 1      | 1      | 2      | 2      | 2      | 2      |
| 36661  | 4     | 1     | 1     | 1     | 4     | 5     | 0      | 0      | 1      | 0      | 0      | 0      | 0      | 1      |
| 36670  | 4     | 3     | 3     | 3     | 4     | 4     | 2      | 2      | 2      | 1      | 2      | 2      | 2      | 3      |
| 36671  | 4     | 2     | 1     | 4     | 3     | 4     | 1      | 0      | 1      | 2      | 1      | 0      | 1      | 1      |
| 36688  | 5     | 2     | 0     | 1     | 5     | 5     | 0      | 0      | 0      | 0      | 1      | 0      | 0      | 1      |
| 36694  | 3     | 3     | 3     | 3     | 3     | 2     | 1      | 1      | 1      | 1      | 1      | 1      | 1      | 2      |
| 36696  | 3     | 1     | 1     | 3     | 4     | 4     | 1      | 0      | 0      | 0      | 0      | 0      | 0      | 0      |
| 36703  | 3     | 3     | 3     | 3     | 3     | 3     | 2      | 2      | 1      | 1      | 1      | 2      | 1      | 1      |
| 36719  | 3     | 5     | 3     | 3     | 3     | 3     | 2      | 3      | 2      | 2      | 2      | 2      | 2      | 2      |
| 36721  | 3     | 5     | 3     | 3     | 3     | 3     | 1      | 1      | 2      | 2      | 2      | 2      | 2      | 2      |
| 36740  | 2     | 3     | 3     | 3     | 3     | 3     | 1      | 1      | 1      | 2      | 1      | 2      | 1      | 1      |
| 36755  | 4     | 2     | 1     | 0     | 4     | 4     | 0      | 0      | 0      | 0      | 0      | 0      | 0      | 0      |
| 36765  | 2     | 3     | 1     | 1     | 1     | 3     | 1      | 1      | 1      | 1      | 2      | 2      | 1      | 2      |
| 36770  | 4     | 2     | 1     | 1     | 4     | 4     | 1      | 0      | 1      | 0      | 1      | 0      | 1      | 0      |
| 36773  | 3     | 3     | 4     | 3     | 1     | 3     | 1      | 1      | 1      | 1      | 1      | 1      | 1      | 1      |
| 36813  | 3     | 2     | 3     | 4     | 1     | 3     | 1      | 1      | 1      | 1      | 1      | 1      | 1      | 2      |
| 36819  | 3     | 3     | 3     | 3     | 3     | 3     | 2      | 1      | 2      | 1      | 2      | 1      | 1      | 1      |
| 36820  | 3     | 3     | 1     | 1     | 3     | 4     | 1      | 0      | 1      | 0      | 1      | 0      | 1      | 1      |
| 36821  | 5     | 1     | 0     | 0     | 5     | 5     | 0      | 0      | 0      | 0      | 0      | 0      | 0      | 1      |
| 36827  | 3     | 4     | 3     | 4     | 3     | 3     | 2      | 2      | 0      | 0      | 2      | 1      | 2      | 0      |
| 36835  | 5     | 1     | 1     | 1     | 5     | 5     | 0      | 2      | 0      | 0      | 0      | 0      | 0      | 1      |



| respid | Q52_2 | Q53_1 | Q54_1 | Q54_2 | Q54_3 | Q55_1 | Q56a_1 | Q56b_1 | Q56c_1 | Q56d_1 | Q56e_1 | Q56f_1 | Q56g_1 | Q56h_1 |
|--------|-------|-------|-------|-------|-------|-------|--------|--------|--------|--------|--------|--------|--------|--------|
| 36837  | 3     | 3     | 3     | 4     | 1     | 3     | 1      | 1      | 1      | 1      | 1      | 1      | 2      | 1      |
| 36849  | 2     | 3     | 3     | 3     | 3     | 2     | 1      | 1      | 2      | 1      | 1      | 1      | 2      | 2      |
| 36851  | 5     | 2     | 1     | 1     | 3     | 3     | 1      | 1      | 1      | 0      | 1      | 0      | 0      | 1      |
| 36868  | 4     | 3     | 3     | 4     | 3     | 3     | 2      | 2      | 2      | 2      | 2      | 2      | 1      | 2      |
| 36870  | 4     | 1     | 0     | 1     | 4     | 5     | 0      | 0      | 0      | 0      | 0      | 1      | 0      | 0      |
| 36871  | 5     | 1     | 3     | 3     | 3     | 3     | 1      | 0      | 1      | 0      | 1      | 1      | 1      | 1      |
| 36874  | 3     | 3     | 1     | 3     | 3     | 3     | 1      | 0      | 0      | 1      | 1      | 0      | 0      | 2      |
| 36878  | 4     | 3     | 1     | 3     | 4     | 3     | 1      | 1      | 2      | 2      | 1      | 0      | 1      | 1      |
| 36887  | 4     | 1     | 1     | 3     | 4     | 4     | 1      | 0      | 1      | 0      | 1      | 1      | 1      | 1      |
| 36889  | 4     | 1     | 3     | 4     | 5     | 5     | 0      | 0      | 1      | 0      | 0      | 0      | 0      | 0      |
| 36891  | 5     | 2     | 1     | 1     | 5     | 5     | 0      | 0      | 0      | 1      | 0      | 1      | 1      | 1      |
| 36903  | 2     | 4     | 3     | 3     | 3     | 3     | 1      | 1      | 1      | 1      | 2      | 1      | 2      | 2      |
| 36905  | 3     | 5     | 1     | 4     | 1     | 2     | 1      | 0      | 1      | 0      | 1      | 1      | 1      | 2      |
| 36913  | 3     | 1     | 1     | 1     | 4     | 5     | 0      | 0      | 0      | 0      | 0      | 0      | 0      | 0      |
| 36949  | 3     | 3     | 3     | 3     | 3     | 3     | 1      | 1      | 1      | 1      | 1      | 1      | 2      | 1      |
| 36954  | 3     | 3     | 1     | 3     | 4     | 3     | 1      | 1      | 1      | 1      | 1      | 1      | 2      | 1      |
| 36962  | 2     | 3     | 1     | 3     | 1     | 3     | 1      | 1      | 1      | 1      | 1      | 1      | 1      | 1      |
| 36965  | 4     | 2     | 3     | 1     | 3     | 3     | 1      | 1      | 2      | 2      | 1      | 0      | 1      | 1      |
| 36970  | 5     | 1     | 1     | 1     | 4     | 5     | 0      | 0      | 0      | 0      | 3      | 0      | 0      | 0      |
| 36979  | 5     | 3     | 1     | 1     | 4     | 4     | 1      | 0      | 0      | 0      | 0      | 0      | 1      | 1      |
| 36990  | 4     | 2     | 1     | 1     | 3     | 3     | 1      | 1      | 1      | 1      | 1      | 1      | 1      | 1      |
| 36991  | 4     | 2     | 1     | 1     | 4     | 5     | 0      | 0      | 1      | 0      | 1      | 0      | 0      | 1      |
| 36992  | 2     | 2     | 3     | 1     | 3     | 3     | 1      | 0      | 1      | 1      | 1      | 1      | 1      | 1      |
| 37015  | 3     | 4     | 3     | 3     | 3     | 4     | 1      | 1      | 2      | 0      | 1      | 1      | 1      | 0      |
| 37017  | 4     | 4     | 1     | 1     | 4     | 4     | 1      | 1      | 1      | 0      | 1      | 0      | 1      | 1      |
| 37020  | 4     | 1     | 1     | 4     | 4     | 5     | 0      | 1      | 0      | 1      | 1      | 0      | 0      | 1      |
| 37033  | 3     | 4     | 3     | 1     | 3     | 3     | 1      | 1      | 2      | 2      | 2      | 2      | 1      | 1      |
| 37041  | 2     | 3     | 3     | 3     | 3     | 1     | 1      | 1      | 0      | 1      | 1      | 1      | 1      | 1      |
| 37048  | 3     | 3     | 3     | 4     | 4     | 3     | 1      | 0      | 2      | 1      | 1      | 1      | 2      | 2      |
| 37050  | 5     | 1     | 1     | 1     | 4     | 4     | 0      | 0      | 1      | 2      | 1      | 1      | 1      | 0      |
| 37054  | 2     | 3     | 3     | 4     | 1     | 3     | 1      | 1      | 2      | 1      | 1      | 1      | 2      | 2      |
| 37057  | 3     | 3     | 3     | 3     | 3     | 3     | 1      | 0      | 3      | 1      | 3      | 1      | 2      | 2      |

| respid | Q52_2 | Q53_1 | Q54_1 | Q54_2 | Q54_3 | Q55_1 | Q56a_1 | Q56b_1 | Q56c_1 | Q56d_1 | Q56e_1 | Q56f_1 | Q56g_1 | Q56h_1 |
|--------|-------|-------|-------|-------|-------|-------|--------|--------|--------|--------|--------|--------|--------|--------|
| 37067  | 4     | 4     | 4     | 5     | 4     | 5     | 1      | 1      | 1      | 0      | 1      | 1      | 1      | 1      |
| 37074  | 3     | 4     | 1     | 1     | 4     | 2     | 1      | 1      | 2      | 1      | 1      | 2      | 0      | 2      |
| 37088  | 4     | 3     | 4     | 3     | 3     | 3     | 1      | 2      | 2      | 2      | 1      | 2      | 2      | 1      |
| 37090  | 1     | 3     | 1     | 3     | 1     | 3     | 1      | 1      | 1      | 1      | 1      | 1      | 2      | 1      |
| 37110  | 3     | 3     | 1     | 3     | 4     | 3     | 1      | 1      | 1      | 1      | 1      | 1      | 1      | 1      |
| 37122  | 3     | 4     | 1     | 1     | 4     | 3     | 1      | 2      | 1      | 0      | 1      | 0      | 1      | 1      |
| 37124  | 3     | 3     | 3     | 4     | 4     | 3     | 1      | 1      | 1      | 2      | 1      | 1      | 2      | 1      |
| 37126  | 4     | 1     | 0     | 0     | 5     | 5     | 0      | 1      | 0      | 0      | 0      | 0      | 0      | 0      |
| 37129  | 2     | 2     | 1     | 3     | 1     | 3     | 1      | 2      | 2      | 1      | 1      | 1      | 2      | 2      |
| 37130  | 4     | 2     | 1     | 1     | 4     | 4     | 1      | 1      | 1      | 0      | 1      | 0      | 0      | 1      |
| 37142  | 4     | 2     | 3     | 3     | 4     | 4     | 1      | 0      | 1      | 0      | 1      | 1      | 1      | 1      |
| 37160  | 4     | 3     | 3     | 1     | 3     | 3     | 1      | 1      | 0      | 2      | 2      | 1      | 2      | 1      |
| 37168  | 5     | 3     | 1     | 3     | 5     | 4     | 0      | 0      | 2      | 0      | 1      | 1      | 1      | 0      |
| 37169  | 2     | 4     | 3     | 3     | 3     | 4     | 1      | 1      | 1      | 2      | 3      | 2      | 0      | 1      |
| 37191  | 4     | 2     | 1     | 3     | 4     | 4     | 1      | 1      | 1      | 1      | 1      | 1      | 1      | 1      |
| 37197  | 3     | 3     | 1     | 3     | 3     | 3     | 1      | 1      | 0      | 1      | 1      | 1      | 0      | 1      |
| 37204  | 4     | 2     | 1     | 1     | 4     | 4     | 1      | 0      | 1      | 0      | 1      | 0      | 0      | 1      |
| 37213  | 3     | 3     | 3     | 1     | 3     | 3     | 1      | 1      | 2      | 1      | 1      | 1      | 1      | 1      |
| 37238  | 2     | 3     | 3     | 4     | 3     | 3     | 0      | 1      | 1      | 0      | 2      | 1      | 1      | 1      |
| 37242  | 3     | 3     | 3     | 3     | 3     | 3     | 1      | 1      | 2      | 1      | 2      | 2      | 2      | 2      |
| 37243  | 1     | 3     | 0     | 1     | 0     | 2     | 0      | 1      | 1      | 0      | 1      | 0      | 0      | 2      |
| 37275  | 4     | 2     | 4     | 4     | 4     | 4     | 1      | 0      | 1      | 1      | 1      | 1      | 2      | 1      |
| 37305  | 3     | 3     | 3     | 4     | 4     | 3     | 1      | 1      | 2      | 1      | 1      | 1      | 1      | 2      |
| 37357  | 2     | 3     | 1     | 3     | 3     | 4     | 1      | 1      | 1      | 1      | 2      | 2      | 1      | 1      |
| 37365  | 1     | 3     | 1     | 3     | 1     | 3     | 1      | 1      | 1      | 1      | 1      | 1      | 1      | 1      |
| 37370  | 4     | 2     | 1     | 3     | 4     | 4     | 1      | 0      | 2      | 2      | 0      | 0      | 0      | 1      |
| 37406  | 2     | 3     | 1     | 3     | 4     | 3     | 1      | 2      | 1      | 1      | 1      | 1      | 2      | 1      |
| 37410  | 4     | 3     | 1     | 4     | 1     | 3     | 1      | 1      | 1      | 1      | 1      | 1      | 1      | 2      |
| 37411  | 3     | 3     | 1     | 3     | 3     | 4     | 1      | 2      | 2      | 2      | 1      | 2      | 2      | 1      |
| 37427  | 3     | 3     | 3     | 1     | 0     | 3     | 1      | 1      | 1      | 1      | 1      | 1      | 1      | 1      |
| 37437  | 3     | 4     | 3     | 1     | 3     | 4     | 1      | 1      | 1      | 1      | 2      | 1      | 1      | 3      |
| 37440  | 3     | 3     | 3     | 4     | 1     | 2     | 1      | 1      | 2      | 2      | 2      | 2      | 2      | 2      |

| respid | Q52_2 | Q53_1 | Q54_1 | Q54_2 | Q54_3 | Q55_1 | Q56a_1 | Q56b_1 | Q56c_1 | Q56d_1 | Q56e_1 | Q56f_1 | Q56g_1 | Q56h_1 |
|--------|-------|-------|-------|-------|-------|-------|--------|--------|--------|--------|--------|--------|--------|--------|
| 37452  | 4     | 3     | 4     | 3     | 5     | 4     | 0      | 0      | 0      | 0      | 0      | 2      | 0      | 1      |
| 37465  | 3     | 3     | 3     | 4     | 3     | 3     | 1      | 2      | 1      | 1      | 1      | 1      | 1      | 1      |
| 37468  | 3     | 3     | 1     | 4     | 4     | 2     | 1      | 1      | 1      | 1      | 1      | 1      | 2      | 2      |
| 37469  | 4     | 2     | 1     | 1     | 4     | 4     | 0      | 0      | 1      | 0      | 1      | 0      | 1      | 1      |
| 37477  | 3     | 4     | 1     | 3     | 1     | 3     | 1      | 1      | 2      | 1      | 1      | 1      | 1      | 1      |
| 37509  | 3     | 2     | 1     | 1     | 4     | 3     | 1      | 1      | 1      | 2      | 1      | 1      | 1      | 1      |
| 37513  | 2     | 5     | 3     | 1     | 1     | 5     | 1      | 2      | 1      | 2      | 3      | 3      | 2      | 2      |
| 37534  | 3     | 3     | 1     | 3     | 4     | 4     | 1      | 1      | 1      | 1      | 1      | 1      | 1      | 1      |
| 37537  | 4     | 1     | 0     | 0     | 5     | 4     | 0      | 0      | 0      | 0      | 0      | 0      | 0      | 1      |
| 37560  | 3     | 3     | 3     | 3     | 1     | 3     | 1      | 1      | 1      | 1      | 2      | 1      | 1      | 1      |
| 37566  | 4     | 2     | 4     | 3     | 3     | 3     | 1      | 2      | 1      | 1      | 1      | 1      | 1      | 1      |
| 37572  | 4     | 3     | 1     | 1     | 4     | 4     | 0      | 0      | 1      | 1      | 2      | 1      | 1      | 1      |
| 37574  | 4     | 2     | 1     | 3     | 4     | 4     | 0      | 0      | 0      | 0      | 1      | 0      | 1      | 1      |
| 37575  | 5     | 2     | 1     | 1     | 3     | 4     | 1      | 0      | 1      | 1      | 1      | 0      | 1      | 0      |
| 37590  | 2     | 4     | 0     | 3     | 1     | 4     | 1      | 1      | 1      | 2      | 2      | 1      | 1      | 2      |
| 37593  | 4     | 2     | 3     | 3     | 4     | 3     | 1      | 0      | 1      | 2      | 1      | 1      | 1      | 2      |
| 37599  | 4     | 1     | 1     | 1     | 4     | 5     | 1      | 0      | 0      | 0      | 1      | 0      | 0      | 1      |
| 37641  | 5     | 3     | 1     | 1     | 5     | 4     | 1      | 2      | 0      | 1      | 1      | 1      | 1      | 1      |
| 37651  | 4     | 3     | 3     | 3     | 4     | 4     | 1      | 1      | 1      | 1      | 1      | 1      | 1      | 1      |
| 37670  | 4     | 2     | 1     | 1     | 4     | 4     | 0      | 0      | 0      | 0      | 0      | 0      | 0      | 1      |
| 37680  | 2     | 3     | 1     | 0     | 3     | 3     | 1      | 1      | 1      | 1      | 2      | 2      | 1      | 2      |
| 37690  | 5     | 3     | 1     | 1     | 4     | 4     | 1      | 1      | 1      | 1      | 1      | 0      | 0      | 0      |
| 37694  | 5     | 1     | 0     | 0     | 5     | 5     | 1      | 0      | 1      | 0      | 1      | 0      | 0      | 0      |
| 37705  | 3     | 3     | 3     | 3     | 3     | 3     | 1      | 1      | 2      | 1      | 1      | 1      | 2      | 1      |
| 37710  | 2     | 3     | 3     | 1     | 1     | 3     | 1      | 1      | 1      | 1      | 1      | 1      | 1      | 1      |
| 37719  | 2     | 4     | 1     | 3     | 4     | 4     | 1      | 0      | 2      | 1      | 1      | 0      | 1      | 2      |
| 37741  | 2     | 3     | 1     | 1     | 3     | 2     | 1      | 1      | 1      | 2      | 1      | 1      | 1      | 1      |
| 37752  | 4     | 2     | 0     | 1     | 3     | 4     | 0      | 0      | 0      | 0      | 0      | 0      | 1      | 1      |
| 37755  | 2     | 3     | 3     | 3     | 3     | 4     | 1      | 1      | 1      | 1      | 2      | 2      | 1      | 2      |
| 37757  | 5     | 1     | 0     | 1     | 4     | 5     | 0      | 0      | 0      | 0      | 0      | 0      | 0      | 0      |
| 37783  | 3     | 3     | 3     | 1     | 1     | 3     | 1      | 1      | 1      | 1      | 1      | 1      | 1      | 1      |
| 37793  | 4     | 4     | 4     | 4     | 3     | 4     | 1      | 2      | 2      | 1      | 2      | 2      | 1      | 2      |

| respid | Q52_2 | Q53_1 | Q54_1 | Q54_2 | Q54_3 | Q55_1 | Q56a_1 | Q56b_1 | Q56c_1 | Q56d_1 | Q56e_1 | Q56f_1 | Q56g_1 | Q56h_1 |
|--------|-------|-------|-------|-------|-------|-------|--------|--------|--------|--------|--------|--------|--------|--------|
| 37800  | 2     | 3     | 3     | 4     | 3     | 3     | 1      | 1      | 2      | 1      | 1      | 2      | 2      | 1      |
| 37801  | 5     | 2     | 1     | 1     | 5     | 4     | 0      | 1      | 2      | 1      | 1      | 1      | 0      | 0      |
| 37820  | 3     | 3     | 1     | 3     | 3     | 3     | 1      | 1      | 1      | 1      | 1      | 1      | 2      | 2      |
| 37826  | 4     | 2     | 1     | 4     | 4     | 4     | 1      | 1      | 1      | 1      | 1      | 1      | 1      | 1      |
| 37835  | 2     | 3     | 1     | 3     | 3     | 3     | 2      | 0      | 0      | 0      | 0      | 0      | 1      | 1      |
| 37839  | 4     | 2     | 4     | 3     | 3     | 4     | 1      | 1      | 1      | 2      | 1      | 1      | 1      | 1      |
| 37871  | 2     | 4     | 4     | 3     | 3     | 4     | 1      | 1      | 1      | 2      | 2      | 1      | 2      | 2      |
| 37876  | 1     | 3     | 1     | 3     | 1     | 3     | 1      | 1      | 1      | 1      | 1      | 1      | 1      | 0      |
| 37879  | 3     | 3     | 1     | 1     | 3     | 3     | 1      | 1      | 2      | 1      | 2      | 1      | 1      | 2      |
| 37894  | 4     | 2     | 1     | 1     | 4     | 4     | 1      | 0      | 1      | 0      | 1      | 2      | 1      | 1      |
| 37895  | 3     | 2     | 1     | 3     | 4     | 4     | 1      | 0      | 1      | 0      | 1      | 1      | 1      | 1      |
| 37901  | 2     | 3     | 3     | 4     | 4     | 3     | 1      | 0      | 2      | 1      | 2      | 1      | 2      | 1      |
| 37926  | 3     | 3     | 1     | 4     | 3     | 3     | 1      | 1      | 1      | 1      | 1      | 1      | 1      | 2      |
| 37937  | 3     | 3     | 1     | 1     | 3     | 3     | 1      | 1      | 0      | 1      | 3      | 1      | 0      | 1      |
| 37938  | 5     | 2     | 1     | 1     | 5     | 5     | 0      | 1      | 1      | 0      | 0      | 1      | 0      | 0      |
| 37959  | 5     | 2     | 1     | 3     | 4     | 4     | 0      | 2      | 0      | 0      | 0      | 1      | 1      | 1      |
| 37970  | 3     | 3     | 1     | 3     | 3     | 3     | 1      | 1      | 1      | 1      | 1      | 1      | 2      | 1      |
| 37972  | 2     | 4     | 4     | 4     | 1     | 4     | 1      | 2      | 2      | 0      | 3      | 2      | 1      | 1      |
| 37988  | 3     | 3     | 3     | 3     | 3     | 4     | 1      | 1      | 1      | 1      | 1      | 1      | 1      | 1      |
| 37989  | 3     | 3     | 3     | 1     | 1     | 4     | 1      | 1      | 1      | 1      | 2      | 1      | 1      | 1      |
| 38000  | 4     | 2     | 4     | 5     | 3     | 5     | 3      | 2      | 2      | 1      | 1      | 1      | 1      | 1      |
| 38028  | 2     | 4     | 4     | 4     | 3     | 4     | 2      | 1      | 1      | 2      | 2      | 2      | 1      | 1      |
| 38042  | 4     | 3     | 3     | 4     | 1     | 3     | 1      | 2      | 1      | 1      | 1      | 1      | 1      | 1      |
| 38052  | 4     | 2     | 1     | 3     | 4     | 4     | 0      | 0      | 1      | 1      | 1      | 1      | 0      | 2      |
| 38056  | 5     | 1     | 0     | 0     | 5     | 5     | 0      | 0      | 0      | 0      | 0      | 0      | 0      | 0      |
| 38106  | 2     | 3     | 1     | 3     | 1     | 3     | 1      | 1      | 2      | 1      | 2      | 2      | 1      | 2      |
| 38114  | 2     | 4     | 3     | 4     | 1     | 3     | 1      | 2      | 1      | 1      | 2      | 2      | 2      | 2      |
| 38134  | 5     | 2     | 3     | 1     | 3     | 4     | 1      | 1      | 1      | 0      | 1      | 1      | 1      | 0      |
| 38135  | 2     | 5     | 3     | 4     | 3     | 2     | 1      | 1      | 1      | 1      | 1      | 1      | 1      | 1      |
| 38139  | 2     | 3     | 3     | 3     | 4     | 4     | 1      | 0      | 1      | 1      | 2      | 2      | 1      | 0      |
| 38160  | 4     | 2     | 1     | 4     | 4     | 4     | 0      | 0      | 0      | 1      | 1      | 0      | 1      | 2      |
| 38164  | 1     | 4     | 3     | 3     | 1     | 4     | 3      | 1      | 2      | 3      | 3      | 3      | 3      | 3      |

| respid | Q52_2 | Q53_1 | Q54_1 | Q54_2 | Q54_3 | Q55_1 | Q56a_1 | Q56b_1 | Q56c_1 | Q56d_1 | Q56e_1 | Q56f_1 | Q56g_1 | Q56h_1 |
|--------|-------|-------|-------|-------|-------|-------|--------|--------|--------|--------|--------|--------|--------|--------|
| 38168  | 5     | 1     | 0     | 1     | 5     | 5     | 0      | 0      | 0      | 0      | 0      | 0      | 0      | 0      |
| 38173  | 4     | 2     | 1     | 1     | 1     | 4     | 0      | 0      | 1      | 1      | 1      | 1      | 1      | 0      |
| 38193  | 3     | 3     | 4     | 1     | 3     | 4     | 1      | 2      | 1      | 2      | 2      | 2      | 1      | 2      |
| 38204  | 4     | 2     | 1     | 1     | 4     | 4     | 1      | 0      | 0      | 0      | 1      | 0      | 0      | 1      |
| 38206  | 3     | 2     | 1     | 3     | 1     | 2     | 1      | 1      | 1      | 1      | 2      | 1      | 1      | 1      |
| 38233  | 1     | 4     | 0     | 3     | 1     | 3     | 0      | 2      | 3      | 1      | 1      | 2      | 1      | 2      |
| 38242  | 2     | 3     | 3     | 1     | 3     | 3     | 1      | 2      | 2      | 2      | 1      | 1      | 2      | 1      |
| 38245  | 4     | 3     | 1     | 1     | 3     | 4     | 1      | 0      | 1      | 1      | 1      | 1      | 1      | 1      |
| 38261  | 3     | 3     | 3     | 4     | 3     | 3     | 1      | 2      | 1      | 1      | 1      | 1      | 1      | 1      |
| 38288  | 4     | 3     | 3     | 3     | 4     | 4     | 1      | 1      | 1      | 1      | 1      | 1      | 1      | 1      |
| 38296  | 3     | 3     | 1     | 3     | 4     | 4     | 1      | 1      | 0      | 0      | 1      | 1      | 1      | 1      |
| 38299  | 2     | 1     | 0     | 1     | 1     | 2     | 1      | 1      | 1      | 0      | 1      | 1      | 1      | 1      |
| 38300  | 3     | 2     | 1     | 1     | 3     | 4     | 1      | 1      | 1      | 2      | 1      | 0      | 1      | 1      |
| 38303  | 4     | 2     | 1     | 1     | 4     | 5     | 1      | 0      | 0      | 0      | 1      | 0      | 0      | 1      |
| 38317  | 4     | 2     | 1     | 3     | 4     | 4     | 1      | 1      | 1      | 0      | 1      | 0      | 0      | 1      |
| 38328  | 2     | 4     | 4     | 5     | 1     | 2     | 2      | 1      | 2      | 2      | 2      | 2      | 2      | 2      |
| 38333  | 4     | 2     | 4     | 3     | 4     | 4     | 1      | 2      | 1      | 2      | 1      | 2      | 2      | 1      |
| 38336  | 5     | 1     | 1     | 1     | 5     | 5     | 0      | 0      | 0      | 0      | 0      | 0      | 0      | 0      |
| 38338  | 5     | 1     | 1     | 1     | 5     | 5     | 1      | 1      | 1      | 0      | 0      | 1      | 0      | 0      |
| 38342  | 4     | 2     | 1     | 1     | 4     | 3     | 0      | 2      | 1      | 0      | 1      | 0      | 1      | 1      |
| 38360  | 4     | 2     | 1     | 1     | 4     | 4     | 0      | 0      | 0      | 2      | 0      | 1      | 1      | 1      |
| 38362  | 4     | 3     | 3     | 1     | 4     | 3     | 1      | 1      | 2      | 2      | 1      | 1      | 2      | 2      |
| 38364  | 2     | 4     | 4     | 5     | 1     | 3     | 2      | 2      | 2      | 2      | 2      | 2      | 2      | 2      |
| 38402  | 3     | 3     | 1     | 1     | 4     | 4     | 0      | 1      | 2      | 0      | 1      | 1      | 1      | 1      |
| 38423  | 2     | 3     | 3     | 3     | 3     | 3     | 1      | 2      | 2      | 1      | 1      | 1      | 1      | 1      |
| 38424  | 3     | 5     | 4     | 4     | 4     | 5     | 3      | 3      | 2      | 2      | 3      | 3      | 3      | 3      |
| 38435  | 2     | 5     | 3     | 3     | 1     | 4     | 2      | 1      | 1      | 1      | 2      | 1      | 0      | 2      |
| 38450  | 5     | 1     | 3     | 3     | 3     | 5     | 0      | 0      | 0      | 0      | 0      | 0      | 0      | 0      |
| 38455  | 5     | 4     | 0     | 0     | 5     | 5     | 0      | 0      | 0      | 0      | 1      | 0      | 0      | 2      |
| 38467  | 4     | 5     | 3     | 4     | 3     | 1     | 1      | 0      | 2      | 2      | 1      | 0      | 2      | 3      |
| 38468  | 3     | 3     | 1     | 3     | 4     | 3     | 1      | 0      | 1      | 1      | 1      | 0      | 1      | 1      |
| 38472  | 3     | 3     | 3     | 4     | 3     | 4     | 1      | 2      | 2      | 2      | 2      | 2      | 2      | 2      |

| respid | Q52_2 | Q53_1 | Q54_1 | Q54_2 | Q54_3 | Q55_1 | Q56a_1 | Q56b_1 | Q56c_1 | Q56d_1 | Q56e_1 | Q56f_1 | Q56g_1 | Q56h_1 |
|--------|-------|-------|-------|-------|-------|-------|--------|--------|--------|--------|--------|--------|--------|--------|
| 38484  | 4     | 2     | 1     | 1     | 3     | 5     | 0      | 1      | 2      | 1      | 1      | 1      | 1      | 1      |
| 38498  | 3     | 2     | 1     | 3     | 1     | 2     | 1      | 1      | 2      | 2      | 2      | 1      | 1      | 3      |
| 38507  | 4     | 3     | 4     | 4     | 5     | 4     | 0      | 0      | 1      | 1      | 0      | 1      | 1      | 1      |
| 38511  | 5     | 2     | 1     | 1     | 3     | 4     | 1      | 2      | 1      | 1      | 1      | 1      | 1      | 1      |
| 38524  | 2     | 5     | 5     | 5     | 1     | 1     | 2      | 2      | 3      | 3      | 3      | 3      | 2      | 2      |
| 38526  | 4     | 2     | 1     | 4     | 4     | 4     | 1      | 1      | 1      | 1      | 0      | 1      | 1      | 1      |
| 38534  | 2     | 5     | 5     | 3     | 4     | 4     | 1      | 2      | 0      | 3      | 2      | 1      | 2      | 3      |
| 38536  | 4     | 3     | 1     | 1     | 4     | 4     | 1      | 0      | 1      | 1      | 1      | 1      | 1      | 1      |
| 38539  | 5     | 1     | 0     | 0     | 5     | 5     | 0      | 0      | 0      | 0      | 0      | 0      | 0      | 0      |
| 38547  | 5     | 1     | 1     | 1     | 4     | 5     | 0      | 0      | 1      | 0      | 1      | 0      | 0      | 0      |
| 38549  | 4     | 2     | 4     | 4     | 4     | 5     | 0      | 0      | 0      | 0      | 1      | 0      | 1      | 1      |
| 38575  | 2     | 3     | 1     | 3     | 3     | 3     | 1      | 2      | 2      | 2      | 2      | 1      | 1      | 1      |
| 38579  | 5     | 2     | 1     | 1     | 4     | 5     | 0      | 0      | 0      | 0      | 0      | 0      | 0      | 0      |
| 38585  | 4     | 2     | 3     | 3     | 3     | 1     | 1      | 1      | 1      | 1      | 1      | 1      | 2      | 1      |
| 38589  | 2     | 4     | 4     | 5     | 3     | 2     | 2      | 2      | 2      | 2      | 2      | 2      | 2      | 1      |
| 38595  | 2     | 4     | 1     | 4     | 3     | 3     | 2      | 1      | 2      | 1      | 2      | 2      | 1      | 0      |
| 38602  | 5     | 2     | 1     | 1     | 4     | 5     | 1      | 0      | 0      | 0      | 0      | 0      | 0      | 1      |
| 38603  | 3     | 2     | 3     | 3     | 1     | 4     | 2      | 1      | 1      | 1      | 1      | 1      | 1      | 1      |
| 38612  | 4     | 3     | 1     | 3     | 4     | 4     | 1      | 1      | 1      | 1      | 1      | 1      | 2      | 1      |
| 38621  | 3     | 2     | 3     | 3     | 4     | 3     | 2      | 2      | 1      | 2      | 2      | 1      | 1      | 2      |
| 38624  | 4     | 3     | 3     | 4     | 1     | 3     | 1      | 1      | 2      | 2      | 2      | 2      | 2      | 2      |
| 38636  | 4     | 1     | 1     | 1     | 4     | 4     | 0      | 0      | 1      | 2      | 1      | 0      | 1      | 2      |
| 38656  | 3     | 2     | 1     | 3     | 4     | 4     | 1      | 1      | 1      | 1      | 1      | 0      | 1      | 1      |
| 38668  | 3     | 1     | 1     | 1     | 4     | 5     | 0      | 0      | 0      | 0      | 0      | 0      | 0      | 0      |
| 38675  | 4     | 2     | 3     | 4     | 4     | 4     | 1      | 1      | 1      | 2      | 1      | 2      | 2      | 1      |
| 38676  | 3     | 3     | 1     | 3     | 4     | 4     | 1      | 0      | 1      | 2      | 1      | 1      | 1      | 1      |
| 38682  | 5     | 2     | 1     | 1     | 4     | 4     | 1      | 1      | 1      | 1      | 1      | 0      | 1      | 1      |
| 38689  | 4     | 2     | 1     | 3     | 5     | 4     | 0      | 1      | 0      | 1      | 0      | 0      | 1      | 1      |
| 38702  | 3     | 3     | 1     | 1     | 3     | 3     | 1      | 1      | 1      | 1      | 1      | 1      | 1      | 1      |
| 38704  | 2     | 4     | 3     | 4     | 1     | 4     | 1      | 2      | 1      | 1      | 1      | 1      | 1      | 1      |
| 38713  | 4     | 2     | 1     | 3     | 4     | 5     | 0      | 0      | 0      | 0      | 1      | 1      | 1      | 1      |
| 38718  | 4     | 3     | 1     | 1     | 4     | 4     | 1      | 0      | 1      | 1      | 1      | 0      | 1      | 1      |

| respid | Q52_2 | Q53_1 | Q54_1 | Q54_2 | Q54_3 | Q55_1 | Q56a_1 | Q56b_1 | Q56c_1 | Q56d_1 | Q56e_1 | Q56f_1 | Q56g_1 | Q56h_1 |
|--------|-------|-------|-------|-------|-------|-------|--------|--------|--------|--------|--------|--------|--------|--------|
| 38725  | 4     | 2     | 1     | 1     | 4     | 4     | 1      | 2      | 1      | 2      | 1      | 1      | 1      | 2      |
| 38730  | 2     | 3     | 3     | 4     | 3     | 3     | 1      | 2      | 1      | 1      | 2      | 1      | 1      | 2      |
| 38737  | 4     | 3     | 1     | 1     | 3     | 3     | 1      | 1      | 1      | 2      | 1      | 1      | 2      | 0      |
| 38738  | 2     | 4     | 3     | 3     | 3     | 3     | 1      | 1      | 2      | 2      | 1      | 1      | 1      | 1      |
| 38744  | 5     | 2     | 0     | 0     | 5     | 4     | 1      | 1      | 1      | 0      | 0      | 0      | 0      | 0      |
| 38746  | 3     | 3     | 1     | 3     | 4     | 3     | 1      | 0      | 3      | 0      | 0      | 1      | 1      | 1      |
| 38753  | 2     | 2     | 1     | 1     | 4     | 4     | 1      | 1      | 1      | 1      | 1      | 1      | 1      | 2      |
| 38756  | 2     | 3     | 1     | 1     | 1     | 3     | 1      | 2      | 1      | 1      | 2      | 2      | 2      | 1      |
| 38760  | 4     | 2     | 3     | 4     | 3     | 4     | 1      | 2      | 1      | 0      | 1      | 1      | 1      | 1      |
| 38762  | 3     | 4     | 3     | 1     | 3     | 4     | 0      | 1      | 2      | 2      | 2      | 3      | 0      | 1      |
| 38765  | 4     | 2     | 4     | 4     | 4     | 4     | 1      | 2      | 2      | 2      | 1      | 1      | 2      | 1      |
| 38769  | 3     | 3     | 3     | 1     | 3     | 2     | 1      | 1      | 1      | 1      | 1      | 2      | 1      | 1      |
| 38781  | 3     | 4     | 4     | 4     | 4     | 4     | 2      | 2      | 2      | 2      | 2      | 2      | 2      | 2      |
| 38786  | 3     | 2     | 3     | 1     | 4     | 4     | 1      | 0      | 0      | 0      | 1      | 0      | 0      | 1      |
| 38790  | 4     | 2     | 1     | 1     | 4     | 4     | 0      | 0      | 0      | 0      | 1      | 0      | 0      | 1      |
| 38793  | 5     | 3     | 1     | 1     | 4     | 4     | 0      | 1      | 0      | 0      | 1      | 0      | 0      | 1      |
| 38797  | 4     | 2     | 1     | 1     | 4     | 4     | 0      | 0      | 0      | 0      | 0      | 0      | 0      | 1      |
| 38802  | 4     | 3     | 3     | 4     | 3     | 4     | 1      | 2      | 1      | 1      | 1      | 2      | 2      | 1      |
| 38815  | 3     | 2     | 1     | 3     | 4     | 4     | 1      | 1      | 1      | 1      | 1      | 2      | 1      | 2      |
| 38826  | 3     | 4     | 4     | 4     | 3     | 3     | 1      | 2      | 2      | 2      | 2      | 1      | 2      | 2      |
| 38828  | 4     | 1     | 1     | 1     | 4     | 5     | 0      | 0      | 0      | 0      | 0      | 0      | 0      | 0      |
| 38829  | 2     | 4     | 4     | 4     | 1     | 2     | 1      | 1      | 2      | 1      | 2      | 2      | 2      | 1      |
| 38835  | 3     | 2     | 1     | 3     | 4     | 4     | 1      | 2      | 1      | 1      | 1      | 1      | 1      | 1      |
| 38842  | 2     | 5     | 3     | 1     | 1     | 2     | 2      | 1      | 2      | 3      | 0      | 1      | 0      | 2      |
| 38853  | 3     | 3     | 0     | 3     | 4     | 3     | 1      | 0      | 0      | 0      | 1      | 0      | 0      | 1      |
| 38855  | 3     | 5     | 3     | 3     | 3     | 3     | 2      | 1      | 1      | 2      | 1      | 2      | 1      | 2      |
| 38860  | 2     | 3     | 3     | 4     | 1     | 3     | 1      | 2      | 1      | 2      | 2      | 1      | 2      | 1      |
| 38869  | 4     | 2     | 1     | 1     | 3     | 4     | 1      | 1      | 2      | 1      | 1      | 1      | 1      | 1      |
| 38882  | 3     | 3     | 3     | 1     | 4     | 4     | 1      | 2      | 1      | 2      | 3      | 0      | 0      | 2      |
| 38897  | 5     | 2     | 1     | 1     | 4     | 5     | 0      | 0      | 0      | 0      | 0      | 0      | 0      | 1      |
| 38903  | 2     | 5     | 3     | 3     | 3     | 5     | 2      | 1      | 0      | 1      | 2      | 2      | 2      | 2      |
| 38910  | 2     | 4     | 3     | 3     | 1     | 2     | 2      | 3      | 2      | 2      | 2      | 2      | 2      | 2      |

| respid | Q52_2 | Q53_1 | Q54_1 | Q54_2 | Q54_3 | Q55_1 | Q56a_1 | Q56b_1 | Q56c_1 | Q56d_1 | Q56e_1 | Q56f_1 | Q56g_1 | Q56h_1 |
|--------|-------|-------|-------|-------|-------|-------|--------|--------|--------|--------|--------|--------|--------|--------|
| 38948  | 3     | 4     | 1     | 3     | 4     | 4     | 3      | 2      | 1      | 2      | 3      | 2      | 1      | 2      |
| 38949  | 3     | 4     | 3     | 4     | 1     | 3     | 2      | 1      | 1      | 2      | 1      | 2      | 2      | 1      |
| 38953  | 3     | 4     | 4     | 3     | 3     | 4     | 2      | 2      | 1      | 2      | 2      | 2      | 1      | 1      |
| 38989  | 2     | 4     | 4     | 5     | 1     | 2     | 2      | 1      | 2      | 1      | 2      | 2      | 2      | 3      |
| 38997  | 4     | 2     | 1     | 1     | 4     | 4     | 0      | 0      | 1      | 0      | 1      | 0      | 0      | 1      |
| 38999  | 4     | 2     | 1     | 3     | 4     | 4     | 0      | 1      | 0      | 1      | 1      | 2      | 1      | 1      |
| 39002  | 2     | 4     | 3     | 3     | 1     | 2     | 2      | 3      | 3      | 2      | 2      | 2      | 2      | 2      |
| 39003  | 2     | 5     | 1     | 3     | 1     | 4     | 0      | 0      | 2      | 1      | 2      | 2      | 1      | 0      |
| 39006  | 5     | 2     | 1     | 1     | 1     | 4     | 0      | 0      | 0      | 1      | 1      | 1      | 0      | 0      |
| 39014  | 5     | 2     | 1     | 1     | 4     | 4     | 1      | 0      | 0      | 0      | 0      | 1      | 1      | 1      |
| 39017  | 2     | 4     | 3     | 3     | 4     | 4     | 1      | 1      | 2      | 3      | 2      | 1      | 1      | 2      |
| 39018  | 2     | 4     | 4     | 4     | 1     | 2     | 2      | 2      | 2      | 2      | 2      | 2      | 2      | 2      |
| 39025  | 2     | 5     | 4     | 4     | 1     | 1     | 2      | 3      | 3      | 3      | 3      | 2      | 1      | 2      |
| 39031  | 4     | 4     | 5     | 3     | 1     | 4     | 1      | 2      | 1      | 0      | 2      | 2      | 0      | 0      |
| 39061  | 3     | 5     | 3     | 1     | 4     | 4     | 1      | 3      | 2      | 1      | 2      | 0      | 3      | 2      |
| 39131  | 5     | 1     | 3     | 3     | 3     | 3     | 0      | 0      | 1      | 0      | 1      | 1      | 2      | 1      |
| 39153  | 2     | 4     | 1     | 3     | 1     | 4     | 1      | 2      | 1      | 2      | 1      | 2      | 1      | 2      |
| 39194  | 3     | 4     | 4     | 4     | 3     | 3     | 2      | 1      | 2      | 2      | 1      | 1      | 2      | 2      |
| 39204  | 4     | 2     | 1     | 1     | 3     | 5     | 1      | 1      | 2      | 0      | 1      | 0      | 1      | 1      |
| 39208  | 3     | 2     | 1     | 3     | 3     | 4     | 0      | 1      | 2      | 1      | 1      | 1      | 1      | 1      |
| 39213  | 3     | 2     | 1     | 3     | 1     | 4     | 2      | 1      | 2      | 3      | 2      | 3      | 1      | 3      |
| 39231  | 4     | 2     | 4     | 4     | 4     | 4     | 1      | 2      | 1      | 2      | 1      | 1      | 2      | 1      |
| 39251  | 4     | 3     | 1     | 4     | 3     | 4     | 0      | 1      | 1      | 2      | 1      | 1      | 1      | 2      |
| 39257  | 3     | 4     | 3     | 1     | 3     | 4     | 2      | 2      | 0      | 2      | 2      | 3      | 0      | 1      |
| 39262  | 2     | 3     | 0     | 3     | 3     | 5     | 1      | 1      | 1      | 2      | 2      | 1      | 2      | 2      |
| 39269  | 4     | 3     | 3     | 4     | 1     | 4     | 1      | 2      | 0      | 1      | 3      | 3      | 1      | 2      |
| 39272  | 2     | 4     | 1     | 3     | 3     | 4     | 0      | 1      | 1      | 1      | 2      | 2      | 1      | 1      |
| 39280  | 4     | 3     | 3     | 1     | 3     | 3     | 1      | 2      | 2      | 1      | 1      | 1      | 1      | 2      |
| 39294  | 3     | 3     | 0     | 3     | 3     | 3     | 2      | 1      | 1      | 2      | 2      | 1      | 1      | 2      |
| 39297  | 3     | 3     | 3     | 1     | 3     | 4     | 1      | 2      | 1      | 1      | 1      | 1      | 1      | 1      |
| 39300  | 3     | 3     | 4     | 4     | 3     | 4     | 2      | 1      | 2      | 2      | 2      | 1      | 2      | 2      |
| 39307  | 1     | 5     | 1     | 1     | 3     | 4     | 3      | 1      | 2      | 0      | 2      | 1      | 1      | 2      |



| respid | Q52_2 | Q53_1 | Q54_1 | Q54_2 | Q54_3 | Q55_1 | Q56a_1 | Q56b_1 | Q56c_1 | Q56d_1 | Q56e_1 | Q56f_1 | Q56g_1 | Q56h_1 |
|--------|-------|-------|-------|-------|-------|-------|--------|--------|--------|--------|--------|--------|--------|--------|
| 39320  | 3     | 5     | 3     | 3     | 1     | 5     | 1      | 1      | 0      | 1      | 3      | 1      | 2      | 2      |
| 39333  | 5     | 2     | 1     | 1     | 4     | 5     | 0      | 1      | 1      | 0      | 1      | 1      | 1      | 0      |
| 39335  | 3     | 5     | 4     | 4     | 1     | 2     | 1      | 1      | 2      | 2      | 2      | 2      | 2      | 1      |
| 39339  | 4     | 2     | 4     | 4     | 4     | 4     | 0      | 0      | 1      | 0      | 2      | 1      | 0      | 1      |
| 39375  | 2     | 3     | 0     | 1     | 3     | 2     | 0      | 1      | 1      | 1      | 2      | 2      | 1      | 2      |
| 39377  | 5     | 1     | 0     | 0     | 5     | 5     | 1      | 1      | 1      | 0      | 0      | 0      | 0      | 1      |
| 39380  | 3     | 3     | 1     | 3     | 3     | 3     | 1      | 1      | 1      | 1      | 3      | 2      | 2      | 1      |
| 39425  | 4     | 1     | 1     | 1     | 1     | 4     | 2      | 2      | 2      | 2      | 2      | 2      | 2      | 2      |
| 39590  | 4     | 1     | 1     | 1     | 4     | 4     | 2      | 0      | 1      | 0      | 1      | 0      | 0      | 0      |
| 40529  | 4     | 1     | 1     | 1     | 3     | 4     | 1      | 0      | 1      | 0      | 1      | 0      | 0      | 0      |
| 40702  | 4     | 2     | 1     | 1     | 3     | 4     | 1      | 2      | 1      | 2      | 1      | 1      | 1      | 1      |
| 40788  | 4     | 2     | 3     | 3     | 3     | 3     | 1      | 1      | 2      | 2      | 1      | 1      | 1      | 1      |
| 40841  | 5     | 2     | 1     | 1     | 4     | 4     | 0      | 0      | 0      | 0      | 1      | 1      | 1      | 1      |
| 40965  | 3     | 2     | 3     | 3     | 3     | 3     | 1      | 0      | 1      | 2      | 2      | 2      | 1      | 1      |
| 41092  | 5     | 2     | 1     | 3     | 4     | 4     | 1      | 1      | 1      | 0      | 0      | 1      | 1      | 1      |
| 41534  | 5     | 1     | 1     | 1     | 4     | 4     | 1      | 1      | 0      | 1      | 1      | 0      | 0      | 1      |
| 41919  | 5     | 1     | 1     | 4     | 4     | 5     | 0      | 0      | 0      | 0      | 1      | 0      | 0      | 0      |
| 42110  | 3     | 4     | 3     | 1     | 4     | 4     | 2      | 2      | 0      | 2      | 1      | 3      | 1      | 1      |
| 42135  | 5     | 2     | 1     | 1     | 3     | 4     | 0      | 0      | 1      | 0      | 1      | 0      | 0      | 0      |
| 42142  | 5     | 1     | 1     | 1     | 3     | 4     | 0      | 0      | 0      | 0      | 0      | 1      | 0      | 1      |
| 42163  | 4     | 2     | 3     | 3     | 1     | 3     | 1      | 1      | 2      | 2      | 1      | 2      | 2      | 1      |
| 42164  | 4     | 1     | 1     | 1     | 4     | 5     | 0      | 0      | 0      | 0      | 0      | 0      | 1      | 1      |
| 42172  | 3     | 3     | 3     | 4     | 3     | 2     | 2      | 0      | 2      | 1      | 1      | 1      | 1      | 2      |
| 42177  | 5     | 4     | 1     | 1     | 4     | 5     | 0      | 0      | 1      | 0      | 1      | 0      | 1      | 1      |
| 42181  | 5     | 2     | 1     | 1     | 4     | 4     | 1      | 1      | 1      | 1      | 1      | 1      | 1      | 1      |
| 42193  | 2     | 3     | 1     | 3     | 1     | 2     | 1      | 1      | 1      | 2      | 1      | 1      | 2      | 2      |
| 42196  | 4     | 3     | 1     | 3     | 4     | 4     | 1      | 0      | 0      | 0      | 1      | 0      | 1      | 1      |
| 42202  | 4     | 3     | 1     | 1     | 4     | 3     | 1      | 0      | 1      | 0      | 1      | 0      | 1      | 1      |
| 42248  | 4     | 3     | 1     | 3     | 4     | 4     | 1      | 1      | 1      | 1      | 1      | 1      | 1      | 1      |
| 42283  | 4     | 1     | 1     | 0     | 4     | 4     | 0      | 1      | 1      | 2      | 1      | 1      | 0      | 0      |
| 42284  | 4     | 1     | 1     | 1     | 1     | 3     | 1      | 0      | 1      | 2      | 1      | 1      | 0      | 1      |
| 42323  | 5     | 1     | 1     | 3     | 4     | 5     | 0      | 0      | 0      | 0      | 1      | 1      | 0      | 1      |

| respid | Q52_2 | Q53_1 | Q54_1 | Q54_2 | Q54_3 | Q55_1 | Q56a_1 | Q56b_1 | Q56c_1 | Q56d_1 | Q56e_1 | Q56f_1 | Q56g_1 | Q56h_1 |
|--------|-------|-------|-------|-------|-------|-------|--------|--------|--------|--------|--------|--------|--------|--------|
| 42349  | 3     | 3     | 3     | 4     | 3     | 4     | 2      | 1      | 2      | 2      | 2      | 2      | 2      | 2      |
| 42351  | 4     | 2     | 1     | 3     | 4     | 4     | 0      | 0      | 1      | 0      | 1      | 1      | 1      | 1      |
| 42357  | 5     | 1     | 0     | 0     | 5     | 3     | 1      | 0      | 0      | 0      | 0      | 0      | 1      | 1      |
| 42366  | 4     | 1     | 3     | 3     | 4     | 4     | 1      | 0      | 1      | 1      | 1      | 2      | 2      | 0      |
| 42380  | 4     | 1     | 1     | 3     | 4     | 4     | 0      | 0      | 0      | 0      | 0      | 0      | 1      | 1      |
| 42414  | 1     | 4     | 0     | 1     | 3     | 3     | 2      | 1      | 2      | 2      | 2      | 2      | 1      | 2      |
| 42420  | 3     | 2     | 3     | 1     | 1     | 3     | 1      | 1      | 2      | 2      | 2      | 1      | 2      | 2      |
| 42454  | 4     | 3     | 3     | 3     | 3     | 4     | 0      | 0      | 0      | 0      | 0      | 0      | 0      | 1      |
| 42458  | 5     | 1     | 1     | 3     | 4     | 4     | 1      | 1      | 1      | 0      | 1      | 1      | 0      | 1      |
| 42461  | 3     | 3     | 3     | 3     | 3     | 5     | 3      | 1      | 0      | 1      | 1      | 1      | 1      | 2      |
| 42488  | 4     | 2     | 4     | 4     | 3     | 3     | 2      | 1      | 2      | 0      | 1      | 1      | 2      | 2      |
| 42511  | 5     | 1     | 1     | 1     | 5     | 5     | 0      | 0      | 1      | 0      | 0      | 0      | 0      | 1      |
| 42512  | 5     | 2     | 1     | 1     | 4     | 4     | 1      | 0      | 1      | 0      | 1      | 0      | 1      | 1      |
| 42530  | 2     | 4     | 1     | 3     | 3     | 3     | 0      | 2      | 2      | 1      | 2      | 2      | 1      | 2      |
| 42531  | 3     | 4     | 3     | 1     | 1     | 2     | 2      | 1      | 2      | 1      | 1      | 1      | 2      | 2      |
| 42533  | 5     | 1     | 0     | 1     | 5     | 5     | 0      | 1      | 0      | 0      | 0      | 0      | 0      | 1      |
| 42549  | 4     | 2     | 1     | 3     | 4     | 4     | 1      | 2      | 2      | 1      | 1      | 2      | 1      | 2      |
| 42550  | 2     | 3     | 1     | 4     | 4     | 3     | 1      | 2      | 1      | 2      | 2      | 1      | 1      | 2      |
| 42553  | 5     | 1     | 1     | 1     | 4     | 5     | 0      | 0      | 0      | 0      | 2      | 1      | 1      | 0      |
| 42562  | 3     | 2     | 1     | 4     | 3     | 3     | 1      | 1      | 1      | 1      | 1      | 2      | 1      | 1      |
| 42567  | 4     | 1     | 1     | 3     | 4     | 4     | 0      | 2      | 1      | 1      | 1      | 1      | 1      | 1      |
| 42589  | 3     | 3     | 3     | 3     | 3     | 3     | 1      | 1      | 1      | 1      | 1      | 1      | 1      | 1      |
| 42604  | 3     | 2     | 3     | 4     | 1     | 4     | 1      | 3      | 1      | 2      | 1      | 2      | 1      | 1      |
| 42618  | 3     | 1     | 4     | 4     | 3     | 4     | 1      | 0      | 1      | 1      | 1      | 1      | 2      | 1      |
| 42621  | 2     | 1     | 3     | 1     | 4     | 1     | 3      | 2      | 0      | 2      | 1      | 2      | 1      | 2      |
| 42627  | 5     | 1     | 4     | 3     | 3     | 5     | 1      | 1      | 1      | 0      | 1      | 1      | 2      | 1      |
| 42641  | 5     | 2     | 1     | 0     | 4     | 4     | 0      | 0      | 0      | 1      | 1      | 2      | 1      | 0      |
| 42655  | 1     | 3     | 0     | 0     | 1     | 4     | 1      | 0      | 1      | 1      | 2      | 2      | 2      | 2      |
| 42666  | 4     | 2     | 1     | 1     | 5     | 4     | 0      | 1      | 0      | 0      | 1      | 0      | 0      | 1      |
| 42667  | 3     | 2     | 1     | 3     | 3     | 3     | 1      | 2      | 1      | 2      | 1      | 1      | 1      | 1      |
| 42697  | 5     | 5     | 1     | 1     | 4     | 5     | 1      | 1      | 1      | 1      | 1      | 1      | 0      | 1      |
| 42703  | 4     | 2     | 3     | 3     | 3     | 5     | 1      | 2      | 1      | 1      | 1      | 2      | 2      | 1      |

| respid | Q52_2 | Q53_1 | Q54_1 | Q54_2 | Q54_3 | Q55_1 | Q56a_1 | Q56b_1 | Q56c_1 | Q56d_1 | Q56e_1 | Q56f_1 | Q56g_1 | Q56h_1 |
|--------|-------|-------|-------|-------|-------|-------|--------|--------|--------|--------|--------|--------|--------|--------|
| 42712  | 4     | 2     | 1     | 1     | 4     | 5     | 0      | 1      | 0      | 1      | 2      | 1      | 1      | 1      |
| 42731  | 4     | 2     | 1     | 3     | 4     | 4     | 1      | 0      | 0      | 0      | 1      | 0      | 1      | 1      |
| 42780  | 4     | 2     | 1     | 1     | 3     | 4     | 0      | 1      | 2      | 0      | 1      | 1      | 1      | 1      |
| 42785  | 4     | 1     | 1     | 1     | 3     | 4     | 1      | 0      | 1      | 0      | 1      | 1      | 1      | 1      |
| 42788  | 3     | 2     | 1     | 4     | 4     | 3     | 1      | 1      | 1      | 2      | 2      | 2      | 1      | 1      |
| 42802  | 3     | 3     | 4     | 4     | 3     | 3     | 1      | 1      | 1      | 2      | 1      | 2      | 2      | 1      |
| 42818  | 3     | 1     | 4     | 4     | 3     | 4     | 1      | 1      | 0      | 1      | 0      | 2      | 1      | 1      |
| 42821  | 3     | 2     | 3     | 4     | 1     | 2     | 1      | 3      | 1      | 1      | 2      | 2      | 2      | 2      |
| 42824  | 3     | 2     | 1     | 3     | 4     | 3     | 1      | 1      | 1      | 0      | 1      | 1      | 1      | 1      |
| 42831  | 5     | 2     | 1     | 3     | 4     | 5     | 1      | 1      | 1      | 1      | 1      | 1      | 1      | 1      |
| 42836  | 4     | 2     | 3     | 3     | 3     | 3     | 1      | 1      | 1      | 1      | 1      | 1      | 1      | 1      |
| 42864  | 3     | 2     | 3     | 1     | 4     | 4     | 1      | 2      | 1      | 2      | 2      | 1      | 2      | 2      |
| 42875  | 5     | 1     | 1     | 1     | 5     | 5     | 0      | 1      | 0      | 0      | 0      | 1      | 0      | 1      |
| 42891  | 2     | 2     | 5     | 5     | 0     | 2     | 3      | 3      | 3      | 3      | 3      | 3      | 3      | 3      |
| 42897  | 4     | 1     | 3     | 3     | 3     | 3     | 1      | 2      | 2      | 2      | 2      | 1      | 2      | 1      |
| 42900  | 3     | 4     | 4     | 4     | 3     | 2     | 2      | 1      | 1      | 2      | 2      | 2      | 2      | 2      |
| 42902  | 2     | 4     | 1     | 3     | 1     | 3     | 1      | 1      | 1      | 2      | 1      | 2      | 1      | 1      |
| 42921  | 4     | 2     | 4     | 4     | 4     | 5     | 1      | 1      | 1      | 1      | 1      | 1      | 1      | 1      |
| 42925  | 3     | 2     | 1     | 4     | 4     | 4     | 0      | 1      | 0      | 0      | 1      | 1      | 1      | 1      |
| 42944  | 4     | 1     | 1     | 1     | 4     | 4     | 1      | 0      | 0      | 0      | 1      | 1      | 1      | 0      |
| 42950  | 5     | 1     | 0     | 3     | 3     | 5     | 0      | 0      | 1      | 0      | 1      | 0      | 0      | 0      |
| 42963  | 5     | 3     | 3     | 3     | 4     | 5     | 1      | 1      | 1      | 1      | 1      | 1      | 1      | 1      |
| 42967  | 5     | 1     | 1     | 3     | 5     | 5     | 1      | 1      | 0      | 0      | 1      | 1      | 1      | 1      |
| 42985  | 3     | 3     | 1     | 1     | 4     | 4     | 1      | 1      | 2      | 1      | 1      | 1      | 1      | 2      |
| 42990  | 4     | 2     | 1     | 1     | 4     | 4     | 1      | 1      | 1      | 1      | 1      | 1      | 0      | 1      |
| 42996  | 5     | 3     | 3     | 3     | 3     | 2     | 1      | 0      | 1      | 1      | 1      | 2      | 2      | 2      |
| 43002  | 5     | 2     | 1     | 1     | 4     | 5     | 1      | 1      | 2      | 0      | 1      | 0      | 1      | 1      |
| 43004  | 4     | 1     | 3     | 4     | 1     | 4     | 0      | 1      | 1      | 0      | 1      | 2      | 2      | 1      |
| 43012  | 5     | 3     | 1     | 0     | 5     | 5     | 1      | 0      | 0      | 0      | 0      | 0      | 0      | 1      |
| 43027  | 3     | 3     | 3     | 3     | 3     | 3     | 1      | 1      | 1      | 1      | 2      | 2      | 1      | 1      |
| 43028  | 3     | 2     | 1     | 3     | 3     | 3     | 2      | 1      | 2      | 1      | 2      | 1      | 1      | 1      |
| 43029  | 4     | 4     | 1     | 4     | 5     | 2     | 1      | 0      | 2      | 1      | 2      | 1      | 1      | 2      |

| respid | Q52_2 | Q53_1 | Q54_1 | Q54_2 | Q54_3 | Q55_1 | Q56a_1 | Q56b_1 | Q56c_1 | Q56d_1 | Q56e_1 | Q56f_1 | Q56g_1 | Q56h_1 |
|--------|-------|-------|-------|-------|-------|-------|--------|--------|--------|--------|--------|--------|--------|--------|
| 43031  | 4     | 2     | 3     | 3     | 4     | 4     | 1      | 1      | 1      | 0      | 1      | 1      | 1      | 2      |
| 43042  | 1     | 1     | 0     | 0     | 0     | 1     | 0      | 0      | 0      | 0      | 0      | 0      | 0      | 0      |
| 43054  | 4     | 2     | 3     | 3     | 3     | 4     | 1      | 1      | 1      | 2      | 1      | 1      | 1      | 0      |
| 43058  | 5     | 2     | 1     | 1     | 4     | 5     | 1      | 1      | 1      | 0      | 1      | 0      | 1      | 1      |
| 43064  | 3     | 2     | 1     | 3     | 4     | 3     | 1      | 0      | 1      | 1      | 1      | 2      | 1      | 1      |
| 43069  | 2     | 4     | 1     | 1     | 3     | 3     | 1      | 1      | 1      | 1      | 1      | 1      | 1      | 1      |
| 43071  | 5     | 2     | 0     | 1     | 5     | 5     | 0      | 0      | 0      | 0      | 0      | 0      | 0      | 0      |
| 43072  | 5     | 1     | 1     | 3     | 4     | 5     | 1      | 1      | 1      | 2      | 1      | 2      | 1      | 1      |
| 43077  | 3     | 3     | 3     | 3     | 3     | 3     | 1      | 1      | 1      | 1      | 1      | 1      | 1      | 1      |
| 43078  | 2     | 3     | 3     | 3     | 3     | 3     | 1      | 1      | 1      | 1      | 2      | 1      | 2      | 1      |
| 43082  | 5     | 4     | 3     | 5     | 1     | 3     | 1      | 0      | 0      | 1      | 3      | 3      | 1      | 0      |
| 43092  | 5     | 1     | 1     | 1     | 5     | 5     | 0      | 0      | 0      | 0      | 2      | 2      | 1      | 0      |
| 43096  | 5     | 1     | 1     | 3     | 3     | 5     | 1      | 0      | 1      | 2      | 1      | 1      | 0      | 1      |
| 43109  | 5     | 2     | 1     | 1     | 4     | 4     | 1      | 0      | 1      | 0      | 1      | 1      | 1      | 1      |
| 43113  | 3     | 3     | 3     | 3     | 3     | 3     | 1      | 1      | 1      | 1      | 1      | 1      | 1      | 0      |
| 43123  | 5     | 2     | 3     | 4     | 3     | 4     | 1      | 0      | 1      | 0      | 1      | 1      | 1      | 1      |
| 43127  | 4     | 2     | 1     | 1     | 4     | 4     | 1      | 0      | 1      | 0      | 0      | 1      | 0      | 1      |
| 43128  | 3     | 2     | 3     | 3     | 1     | 3     | 1      | 2      | 2      | 2      | 2      | 1      | 2      | 2      |
| 43129  | 4     | 1     | 1     | 3     | 4     | 5     | 0      | 0      | 0      | 0      | 1      | 0      | 0      | 1      |
| 43133  | 3     | 3     | 1     | 3     | 0     | 3     | 1      | 1      | 1      | 2      | 1      | 1      | 1      | 1      |
| 43140  | 4     | 1     | 3     | 3     | 3     | 4     | 2      | 2      | 2      | 2      | 2      | 2      | 2      | 2      |
| 43143  | 2     | 2     | 1     | 3     | 4     | 3     | 1      | 1      | 1      | 1      | 1      | 1      | 2      | 1      |
| 43149  | 1     | 3     | 0     | 0     | 0     | 3     | 1      | 0      | 0      | 1      | 1      | 1      | 0      | 1      |
| 43150  | 2     | 3     | 3     | 3     | 3     | 3     | 1      | 1      | 1      | 1      | 0      | 1      | 1      | 1      |
| 43153  | 2     | 3     | 3     | 4     | 3     | 3     | 1      | 2      | 2      | 1      | 2      | 1      | 1      | 1      |
| 43170  | 5     | 2     | 1     | 3     | 4     | 4     | 1      | 0      | 1      | 2      | 1      | 1      | 1      | 1      |
| 43187  | 1     | 4     | 4     | 4     | 1     | 2     | 2      | 1      | 2      | 2      | 3      | 2      | 2      | 3      |
| 43188  | 4     | 2     | 1     | 1     | 4     | 4     | 2      | 1      | 0      | 1      | 1      | 1      | 1      | 1      |
| 43198  | 4     | 2     | 1     | 1     | 4     | 4     | 1      | 0      | 2      | 1      | 2      | 1      | 2      | 1      |
| 43208  | 5     | 1     | 0     | 1     | 5     | 5     | 0      | 0      | 0      | 0      | 1      | 1      | 0      | 0      |
| 43216  | 4     | 1     | 3     | 3     | 3     | 4     | 1      | 1      | 1      | 1      | 2      | 2      | 1      | 2      |
| 43222  | 2     | 3     | 1     | 1     | 1     | 3     | 1      | 1      | 0      | 1      | 1      | 1      | 1      | 1      |

| respid | Q52_2 | Q53_1 | Q54_1 | Q54_2 | Q54_3 | Q55_1 | Q56a_1 | Q56b_1 | Q56c_1 | Q56d_1 | Q56e_1 | Q56f_1 | Q56g_1 | Q56h_1 |
|--------|-------|-------|-------|-------|-------|-------|--------|--------|--------|--------|--------|--------|--------|--------|
| 43224  | 4     | 1     | 1     | 1     | 4     | 5     | 0      | 1      | 1      | 1      | 1      | 1      | 0      | 1      |
| 43230  | 3     | 3     | 1     | 3     | 4     | 3     | 1      | 0      | 0      | 0      | 1      | 1      | 1      | 1      |
| 43231  | 2     | 3     | 1     | 1     | 1     | 3     | 0      | 1      | 0      | 1      | 1      | 1      | 1      | 1      |
| 43265  | 3     | 3     | 1     | 3     | 1     | 2     | 1      | 1      | 1      | 1      | 1      | 1      | 1      | 1      |
| 43270  | 2     | 2     | 0     | 0     | 0     | 3     | 1      | 0      | 0      | 0      | 1      | 0      | 0      | 1      |
| 43283  | 2     | 3     | 1     | 1     | 1     | 2     | 0      | 1      | 1      | 1      | 2      | 0      | 0      | 1      |
| 43295  | 3     | 2     | 1     | 3     | 1     | 2     | 0      | 1      | 0      | 1      | 0      | 0      | 0      | 0      |
| 43297  | 4     | 1     | 1     | 1     | 4     | 4     | 1      | 1      | 1      | 1      | 1      | 1      | 1      | 0      |
| 43299  | 3     | 3     | 3     | 3     | 3     | 3     | 1      | 1      | 1      | 1      | 2      | 1      | 2      | 1      |
| 43307  | 4     | 2     | 1     | 1     | 3     | 4     | 1      | 0      | 2      | 2      | 1      | 1      | 1      | 1      |
| 43316  | 1     | 3     | 1     | 1     | 1     | 3     | 0      | 1      | 0      | 0      | 1      | 1      | 1      | 1      |
| 43318  | 3     | 3     | 1     | 3     | 1     | 2     | 1      | 1      | 1      | 1      | 1      | 1      | 1      | 1      |
| 43319  | 5     | 1     | 3     | 3     | 3     | 5     | 1      | 0      | 2      | 0      | 1      | 1      | 1      | 1      |
| 43324  | 2     | 3     | 0     | 0     | 0     | 3     | 0      | 0      | 1      | 0      | 1      | 1      | 0      | 0      |
| 43325  | 1     | 5     | 3     | 4     | 1     | 1     | 2      | 2      | 3      | 3      | 3      | 1      | 2      | 0      |
| 43327  | 5     | 2     | 1     | 3     | 4     | 4     | 1      | 0      | 1      | 0      | 1      | 1      | 1      | 1      |
| 43338  | 4     | 2     | 3     | 3     | 4     | 4     | 1      | 1      | 1      | 0      | 1      | 1      | 2      | 1      |
| 43342  | 4     | 2     | 3     | 3     | 3     | 4     | 1      | 2      | 2      | 2      | 2      | 2      | 2      | 1      |
| 43348  | 3     | 2     | 1     | 3     | 4     | 5     | 1      | 1      | 0      | 0      | 0      | 2      | 1      | 0      |
| 43395  | 1     | 3     | 0     | 0     | 0     | 2     | 1      | 0      | 1      | 0      | 1      | 0      | 1      | 0      |
| 43404  | 3     | 3     | 3     | 3     | 3     | 2     | 1      | 1      | 1      | 1      | 0      | 1      | 1      | 1      |
| 43406  | 4     | 2     | 1     | 1     | 4     | 5     | 1      | 2      | 1      | 1      | 1      | 2      | 1      | 1      |
| 43407  | 5     | 1     | 0     | 0     | 0     | 5     | 0      | 0      | 0      | 0      | 0      | 0      | 0      | 0      |
| 43411  | 4     | 2     | 4     | 4     | 4     | 4     | 1      | 1      | 1      | 0      | 1      | 1      | 1      | 1      |
| 43416  | 2     | 2     | 0     | 0     | 0     | 3     | 0      | 1      | 0      | 0      | 1      | 1      | 0      | 1      |
| 43428  | 5     | 2     | 0     | 0     | 0     | 5     | 1      | 1      | 0      | 0      | 1      | 0      | 0      | 1      |
| 43429  | 3     | 2     | 1     | 1     | 3     | 3     | 1      | 1      | 2      | 2      | 2      | 1      | 1      | 1      |
| 43432  | 5     | 1     | 1     | 3     | 3     | 4     | 1      | 0      | 1      | 1      | 1      | 1      | 1      | 3      |
| 43443  | 5     | 2     | 5     | 4     | 5     | 5     | 0      | 0      | 0      | 0      | 0      | 1      | 0      | 0      |
| 43455  | 5     | 1     | 3     | 3     | 3     | 4     | 0      | 0      | 0      | 2      | 1      | 1      | 1      | 0      |
| 43457  | 4     | 2     | 4     | 3     | 3     | 4     | 1      | 1      | 1      | 1      | 2      | 2      | 2      | 1      |
| 43458  | 4     | 2     | 1     | 1     | 4     | 3     | 1      | 0      | 1      | 0      | 1      | 0      | 0      | 1      |

| respid | Q52_2 | Q53_1 | Q54_1 | Q54_2 | Q54_3 | Q55_1 | Q56a_1 | Q56b_1 | Q56c_1 | Q56d_1 | Q56e_1 | Q56f_1 | Q56g_1 | Q56h_1 |
|--------|-------|-------|-------|-------|-------|-------|--------|--------|--------|--------|--------|--------|--------|--------|
| 43477  | 4     | 2     | 1     | 1     | 4     | 4     | 1      | 1      | 1      | 1      | 0      | 0      | 1      | 1      |
| 43520  | 5     | 2     | 3     | 3     | 5     | 3     | 1      | 2      | 0      | 1      | 1      | 1      | 1      | 1      |
| 43521  | 4     | 2     | 3     | 4     | 3     | 4     | 2      | 2      | 2      | 2      | 2      | 2      | 2      | 1      |
| 43550  | 4     | 1     | 0     | 1     | 5     | 5     | 0      | 0      | 0      | 0      | 1      | 0      | 0      | 1      |
| 43551  | 4     | 2     | 3     | 3     | 3     | 3     | 1      | 1      | 1      | 0      | 1      | 1      | 1      | 1      |
| 43554  | 4     | 2     | 1     | 1     | 3     | 4     | 0      | 1      | 1      | 0      | 1      | 1      | 1      | 2      |
| 43560  | 4     | 2     | 1     | 1     | 4     | 5     | 1      | 0      | 0      | 0      | 1      | 0      | 1      | 1      |
| 43569  | 5     | 2     | 1     | 4     | 4     | 5     | 0      | 0      | 0      | 1      | 2      | 2      | 1      | 0      |
| 43583  | 3     | 3     | 3     | 1     | 4     | 5     | 1      | 1      | 0      | 0      | 1      | 0      | 2      | 1      |
| 43590  | 3     | 5     | 4     | 4     | 3     | 2     | 1      | 3      | 3      | 2      | 3      | 2      | 3      | 2      |
| 43591  | 5     | 1     | 1     | 1     | 4     | 5     | 0      | 0      | 0      | 1      | 1      | 0      | 1      | 0      |
| 43595  | 3     | 2     | 0     | 1     | 1     | 2     | 1      | 1      | 0      | 1      | 2      | 2      | 1      | 0      |
| 43599  | 3     | 3     | 1     | 4     | 3     | 2     | 1      | 1      | 1      | 2      | 1      | 1      | 2      | 2      |
| 43606  | 4     | 2     | 1     | 1     | 4     | 4     | 1      | 1      | 0      | 0      | 1      | 0      | 1      | 1      |
| 43609  | 5     | 1     | 3     | 3     | 4     | 5     | 1      | 1      | 1      | 0      | 1      | 1      | 1      | 2      |
| 43629  | 4     | 3     | 1     | 3     | 4     | 4     | 1      | 0      | 0      | 0      | 0      | 0      | 1      | 1      |
| 43636  | 5     | 1     | 0     | 0     | 5     | 5     | 0      | 0      | 0      | 0      | 0      | 0      | 0      | 0      |
| 43661  | 5     | 1     | 5     | 5     | 5     | 5     | 1      | 0      | 0      | 1      | 2      | 1      | 1      | 0      |
| 43668  | 4     | 2     | 1     | 1     | 4     | 4     | 1      | 2      | 1      | 2      | 1      | 1      | 1      | 1      |
| 43672  | 5     | 1     | 1     | 1     | 5     | 5     | 1      | 0      | 0      | 0      | 0      | 0      | 0      | 1      |
| 43677  | 4     | 2     | 1     | 3     | 3     | 4     | 1      | 1      | 1      | 0      | 1      | 1      | 1      | 1      |
| 43683  | 1     | 2     | 3     | 5     | 1     | 4     | 2      | 1      | 2      | 1      | 2      | 1      | 1      | 1      |
| 43708  | 4     | 3     | 1     | 3     | 4     | 3     | 1      | 0      | 1      | 1      | 1      | 1      | 1      | 0      |
| 43713  | 1     | 2     | 4     | 4     | 0     | 3     | 3      | 0      | 3      | 1      | 3      | 2      | 2      | 2      |
| 43718  | 4     | 1     | 0     | 1     | 4     | 5     | 0      | 0      | 0      | 0      | 0      | 0      | 0      | 1      |
| 43725  | 5     | 1     | 1     | 1     | 4     | 5     | 0      | 1      | 0      | 0      | 1      | 0      | 0      | 1      |
| 43747  | 4     | 2     | 1     | 3     | 3     | 4     | 1      | 2      | 2      | 1      | 1      | 1      | 2      | 1      |
| 43755  | 4     | 2     | 0     | 1     | 4     | 4     | 1      | 0      | 0      | 0      | 1      | 0      | 0      | 1      |
| 43770  | 5     | 1     | 3     | 3     | 3     | 5     | 0      | 1      | 0      | 1      | 1      | 1      | 0      | 1      |
| 43775  | 4     | 3     | 1     | 1     | 3     | 4     | 2      | 0      | 2      | 1      | 1      | 1      | 1      | 1      |
| 43788  | 5     | 1     | 1     | 1     | 4     | 4     | 1      | 0      | 1      | 0      | 1      | 1      | 1      | 0      |
| 43790  | 2     | 3     | 1     | 3     | 4     | 4     | 1      | 1      | 1      | 1      | 2      | 1      | 1      | 0      |

| respid | Q52_2 | Q53_1 | Q54_1 | Q54_2 | Q54_3 | Q55_1 | Q56a_1 | Q56b_1 | Q56c_1 | Q56d_1 | Q56e_1 | Q56f_1 | Q56g_1 | Q56h_1 |
|--------|-------|-------|-------|-------|-------|-------|--------|--------|--------|--------|--------|--------|--------|--------|
| 43797  | 2     | 2     | 1     | 1     | 3     | 2     | 0      | 1      | 1      | 1      | 1      | 0      | 0      | 1      |
| 43798  | 4     | 2     | 3     | 3     | 3     | 3     | 1      | 1      | 1      | 1      | 1      | 1      | 1      | 1      |
| 43811  | 1     | 2     | 0     | 1     | 3     | 2     | 0      | 1      | 0      | 0      | 1      | 1      | 0      | 0      |
| 43819  | 1     | 2     | 0     | 0     | 0     | 3     | 0      | 0      | 0      | 0      | 1      | 0      | 0      | 1      |
| 43821  | 3     | 2     | 1     | 1     | 1     | 2     | 0      | 1      | 0      | 1      | 1      | 1      | 0      | 1      |
| 43822  | 3     | 5     | 5     | 3     | 1     | 1     | 1      | 0      | 1      | 3      | 1      | 2      | 2      | 2      |
| 43825  | 4     | 2     | 1     | 3     | 4     | 3     | 1      | 1      | 1      | 1      | 1      | 1      | 1      | 2      |
| 43826  | 4     | 2     | 1     | 3     | 4     | 5     | 0      | 0      | 1      | 0      | 1      | 1      | 1      | 1      |
| 43831  | 3     | 4     | 4     | 3     | 1     | 4     | 2      | 1      | 3      | 2      | 3      | 1      | 2      | 2      |
| 43836  | 1     | 3     | 0     | 0     | 0     | 3     | 1      | 0      | 0      | 1      | 1      | 1      | 0      | 1      |
| 43852  | 3     | 3     | 3     | 3     | 3     | 3     | 0      | 1      | 1      | 1      | 1      | 1      | 1      | 1      |
| 43857  | 3     | 3     | 1     | 3     | 3     | 4     | 1      | 2      | 1      | 1      | 1      | 1      | 1      | 0      |
| 43858  | 5     | 1     | 1     | 3     | 4     | 5     | 1      | 0      | 0      | 0      | 1      | 2      | 2      | 1      |
| 43859  | 2     | 2     | 1     | 1     | 1     | 2     | 1      | 1      | 1      | 1      | 1      | 1      | 0      | 0      |
| 43863  | 5     | 1     | 1     | 1     | 5     | 5     | 0      | 0      | 0      | 0      | 0      | 0      | 0      | 0      |
| 43868  | 2     | 3     | 1     | 1     | 1     | 3     | 1      | 1      | 1      | 1      | 1      | 0      | 1      | 1      |
| 43872  | 2     | 2     | 0     | 1     | 3     | 3     | 0      | 0      | 0      | 0      | 1      | 1      | 0      | 1      |
| 43874  | 3     | 3     | 1     | 3     | 4     | 3     | 1      | 1      | 1      | 1      | 1      | 1      | 1      | 1      |
| 43882  | 5     | 1     | 1     | 1     | 5     | 5     | 0      | 0      | 0      | 0      | 0      | 0      | 0      | 0      |
| 43886  | 4     | 2     | 1     | 1     | 3     | 3     | 1      | 0      | 1      | 0      | 0      | 0      | 0      | 1      |
| 43903  | 4     | 2     | 3     | 4     | 1     | 3     | 1      | 1      | 1      | 1      | 1      | 1      | 1      | 1      |
| 43929  | 4     | 2     | 1     | 4     | 3     | 4     | 3      | 2      | 2      | 2      | 3      | 2      | 2      | 1      |
| 43932  | 5     | 2     | 1     | 1     | 4     | 5     | 0      | 1      | 0      | 0      | 0      | 0      | 0      | 0      |
| 43936  | 4     | 2     | 3     | 3     | 4     | 4     | 1      | 2      | 1      | 0      | 1      | 1      | 1      | 0      |
| 43962  | 5     | 1     | 0     | 0     | 5     | 4     | 0      | 2      | 1      | 2      | 1      | 1      | 1      | 2      |
| 43964  | 4     | 1     | 1     | 1     | 4     | 4     | 1      | 1      | 1      | 0      | 1      | 0      | 0      | 1      |
| 43968  | 1     | 1     | 0     | 3     | 3     | 3     | 1      | 1      | 0      | 1      | 1      | 1      | 1      | 2      |
| 43979  | 5     | 2     | 1     | 3     | 4     | 4     | 0      | 0      | 0      | 0      | 1      | 1      | 1      | 1      |
| 44006  | 3     | 3     | 3     | 3     | 3     | 3     | 1      | 1      | 2      | 2      | 2      | 1      | 1      | 1      |
| 44009  | 5     | 4     | 1     | 1     | 4     | 4     | 1      | 0      | 1      | 0      | 1      | 0      | 1      | 1      |
| 44023  | 5     | 2     | 3     | 3     | 4     | 4     | 1      | 0      | 2      | 0      | 2      | 1      | 2      | 0      |
| 44035  | 2     | 2     | 1     | 3     | 4     | 2     | 1      | 1      | 1      | 1      | 1      | 0      | 1      | 1      |

| respid | Q52_2 | Q53_1 | Q54_1 | Q54_2 | Q54_3 | Q55_1 | Q56a_1 | Q56b_1 | Q56c_1 | Q56d_1 | Q56e_1 | Q56f_1 | Q56g_1 | Q56h_1 |
|--------|-------|-------|-------|-------|-------|-------|--------|--------|--------|--------|--------|--------|--------|--------|
| 44038  | 4     | 2     | 1     | 1     | 3     | 4     | 1      | 0      | 1      | 2      | 1      | 1      | 1      | 2      |
| 44039  | 2     | 3     | 1     | 3     | 4     | 3     | 0      | 1      | 1      | 0      | 1      | 1      | 0      | 0      |
| 44043  | 3     | 2     | 3     | 3     | 3     | 3     | 1      | 1      | 2      | 2      | 1      | 1      | 2      | 1      |
| 44048  | 1     | 3     | 0     | 0     | 0     | 4     | 1      | 0      | 0      | 0      | 1      | 1      | 0      | 0      |
| 44050  | 5     | 3     | 1     | 3     | 4     | 4     | 1      | 0      | 1      | 0      | 1      | 1      | 0      | 1      |
| 44051  | 4     | 2     | 3     | 3     | 3     | 2     | 1      | 1      | 1      | 1      | 1      | 1      | 1      | 1      |
| 44061  | 2     | 3     | 3     | 3     | 3     | 3     | 1      | 0      | 1      | 1      | 2      | 2      | 0      | 0      |
| 44063  | 3     | 3     | 1     | 1     | 1     | 3     | 1      | 1      | 1      | 1      | 1      | 1      | 1      | 1      |
| 44072  | 3     | 3     | 1     | 1     | 1     | 3     | 1      | 1      | 1      | 1      | 1      | 0      | 1      | 1      |
| 44075  | 2     | 2     | 0     | 0     | 0     | 2     | 0      | 1      | 1      | 0      | 1      | 1      | 1      | 1      |
| 44089  | 3     | 4     | 1     | 1     | 1     | 4     | 1      | 1      | 0      | 0      | 1      | 0      | 0      | 1      |
| 44090  | 3     | 3     | 3     | 4     | 3     | 3     | 1      | 1      | 2      | 2      | 2      | 1      | 2      | 1      |
| 44091  | 4     | 3     | 1     | 3     | 4     | 3     | 1      | 1      | 1      | 1      | 0      | 1      | 1      | 1      |
| 44092  | 4     | 2     | 1     | 3     | 4     | 4     | 1      | 1      | 1      | 0      | 1      | 1      | 1      | 1      |
| 44110  | 1     | 3     | 0     | 1     | 3     | 3     | 1      | 1      | 1      | 0      | 1      | 1      | 1      | 1      |
| 44112  | 2     | 3     | 3     | 1     | 3     | 3     | 1      | 1      | 1      | 1      | 1      | 1      | 1      | 1      |
| 44114  | 2     | 2     | 1     | 3     | 4     | 2     | 0      | 1      | 0      | 0      | 0      | 0      | 0      | 1      |
| 44143  | 3     | 3     | 3     | 3     | 3     | 3     | 1      | 1      | 1      | 1      | 1      | 1      | 2      | 1      |
| 44179  | 4     | 2     | 3     | 3     | 4     | 5     | 1      | 0      | 0      | 1      | 1      | 1      | 2      | 1      |
| 44234  | 4     | 1     | 5     | 5     | 1     | 4     | 2      | 1      | 1      | 1      | 2      | 2      | 2      | 1      |
| 44236  | 4     | 2     | 4     | 4     | 4     | 4     | 1      | 0      | 1      | 0      | 1      | 0      | 1      | 1      |
| 44239  | 3     | 3     | 1     | 3     | 4     | 2     | 1      | 1      | 1      | 1      | 1      | 1      | 1      | 1      |
| 44241  | 3     | 3     | 3     | 3     | 3     | 3     | 1      | 1      | 1      | 0      | 1      | 1      | 1      | 1      |
| 44253  | 4     | 1     | 1     | 1     | 4     | 4     | 0      | 1      | 1      | 1      | 1      | 0      | 0      | 1      |
| 44260  | 3     | 3     | 0     | 0     | 0     | 3     | 1      | 1      | 1      | 1      | 2      | 2      | 0      | 1      |
| 44261  | 2     | 3     | 1     | 3     | 4     | 3     | 1      | 1      | 1      | 1      | 2      | 2      | 1      | 1      |
| 44263  | 4     | 3     | 3     | 4     | 3     | 3     | 1      | 1      | 1      | 1      | 1      | 1      | 1      | 1      |
| 44264  | 5     | 3     | 1     | 3     | 1     | 4     | 0      | 2      | 0      | 2      | 1      | 1      | 2      | 1      |
| 44265  | 5     | 2     | 3     | 3     | 3     | 4     | 1      | 1      | 1      | 1      | 1      | 1      | 1      | 1      |
| 44267  | 2     | 2     | 1     | 3     | 4     | 2     | 1      | 1      | 1      | 1      | 1      | 1      | 1      | 1      |
| 44306  | 4     | 2     | 1     | 1     | 3     | 4     | 1      | 0      | 1      | 1      | 1      | 1      | 1      | 1      |
| 44309  | 2     | 3     | 3     | 1     | 4     | 4     | 1      | 1      | 2      | 1      | 1      | 1      | 1      | 1      |



| respid | Q52_2 | Q53_1 | Q54_1 | Q54_2 | Q54_3 | Q55_1 | Q56a_1 | Q56b_1 | Q56c_1 | Q56d_1 | Q56e_1 | Q56f_1 | Q56g_1 | Q56h_1 |
|--------|-------|-------|-------|-------|-------|-------|--------|--------|--------|--------|--------|--------|--------|--------|
| 44310  | 5     | 2     | 3     | 3     | 3     | 4     | 1      | 1      | 1      | 0      | 2      | 2      | 1      | 1      |
| 44361  | 3     | 4     | 3     | 3     | 3     | 4     | 1      | 1      | 1      | 1      | 1      | 1      | 2      | 1      |
| 44380  | 3     | 2     | 3     | 4     | 3     | 4     | 2      | 1      | 1      | 2      | 3      | 3      | 2      | 1      |
| 44386  | 4     | 2     | 4     | 4     | 1     | 5     | 2      | 1      | 0      | 1      | 1      | 3      | 3      | 0      |
| 44419  | 3     | 2     | 3     | 4     | 1     | 3     | 1      | 0      | 1      | 0      | 1      | 2      | 2      | 1      |
| 44426  | 5     | 2     | 1     | 3     | 4     | 4     | 1      | 1      | 1      | 2      | 1      | 1      | 1      | 0      |
| 44479  | 4     | 3     | 4     | 3     | 4     | 3     | 2      | 2      | 1      | 2      | 2      | 1      | 2      | 2      |
| 44484  | 3     | 3     | 3     | 3     | 3     | 3     | 1      | 2      | 1      | 1      | 1      | 1      | 1      | 1      |
| 44487  | 3     | 4     | 3     | 3     | 1     | 3     | 2      | 0      | 2      | 2      | 2      | 1      | 2      | 1      |
| 44509  | 5     | 1     | 0     | 1     | 4     | 5     | 0      | 0      | 0      | 0      | 1      | 0      | 0      | 0      |
| 44540  | 4     | 2     | 1     | 1     | 4     | 4     | 0      | 1      | 1      | 0      | 1      | 0      | 1      | 1      |
| 44551  | 2     | 2     | 3     | 3     | 3     | 3     | 1      | 2      | 1      | 0      | 1      | 1      | 1      | 1      |
| 44553  | 5     | 1     | 0     | 1     | 4     | 5     | 0      | 0      | 0      | 0      | 1      | 1      | 1      | 1      |
| 44650  | 5     | 2     | 1     | 0     | 5     | 4     | 0      | 0      | 0      | 0      | 1      | 0      | 0      | 0      |
| 44665  | 3     | 3     | 1     | 3     | 3     | 4     | 1      | 0      | 1      | 1      | 1      | 1      | 1      | 2      |
| 44779  | 4     | 2     | 1     | 1     | 4     | 3     | 0      | 1      | 0      | 1      | 1      | 1      | 1      | 1      |
| 44797  | 4     | 2     | 4     | 3     | 3     | 5     | 1      | 1      | 1      | 1      | 3      | 3      | 1      | 0      |
| 44807  | 2     | 2     | 1     | 3     | 4     | 3     | 1      | 1      | 1      | 0      | 1      | 1      | 1      | 1      |
| 44815  | 3     | 3     | 1     | 3     | 3     | 3     | 1      | 1      | 1      | 1      | 1      | 1      | 1      | 2      |
| 44836  | 5     | 1     | 1     | 3     | 1     | 5     | 1      | 1      | 0      | 2      | 1      | 1      | 2      | 1      |
| 44868  | 4     | 2     | 1     | 1     | 4     | 4     | 1      | 0      | 1      | 0      | 1      | 0      | 1      | 1      |
| 44927  | 4     | 2     | 1     | 1     | 4     | 4     | 1      | 0      | 1      | 0      | 1      | 0      | 1      | 1      |
| 44983  | 5     | 1     | 5     | 5     | 5     | 5     | 0      | 0      | 1      | 1      | 1      | 0      | 0      | 0      |
| 45040  | 4     | 3     | 1     | 1     | 3     | 4     | 1      | 1      | 1      | 0      | 1      | 2      | 1      | 1      |
| 45051  | 4     | 2     | 3     | 1     | 3     | 4     | 1      | 1      | 1      | 0      | 1      | 1      | 0      | 1      |
| 45067  | 4     | 2     | 1     | 3     | 4     | 5     | 1      | 1      | 1      | 1      | 2      | 2      | 2      | 2      |
| 45074  | 3     | 3     | 3     | 3     | 3     | 3     | 1      | 1      | 1      | 1      | 1      | 1      | 1      | 1      |
| 45115  | 3     | 4     | 3     | 3     | 1     | 3     | 1      | 1      | 3      | 0      | 1      | 1      | 2      | 1      |
| 45187  | 2     | 3     | 4     | 5     | 3     | 2     | 2      | 2      | 2      | 1      | 2      | 2      | 2      | 2      |
| 45221  | 3     | 3     | 1     | 4     | 3     | 2     | 1      | 0      | 1      | 1      | 1      | 2      | 2      | 2      |
| 45279  | 3     | 2     | 1     | 1     | 4     | 5     | 1      | 2      | 2      | 2      | 1      | 2      | 2      | 1      |
| 45308  | 3     | 3     | 3     | 3     | 1     | 3     | 1      | 1      | 2      | 1      | 2      | 1      | 2      | 1      |

| respid | Q52_2 | Q53_1 | Q54_1 | Q54_2 | Q54_3 | Q55_1 | Q56a_1 | Q56b_1 | Q56c_1 | Q56d_1 | Q56e_1 | Q56f_1 | Q56g_1 | Q56h_1 |
|--------|-------|-------|-------|-------|-------|-------|--------|--------|--------|--------|--------|--------|--------|--------|
| 45317  | 5     | 1     | 0     | 1     | 4     | 4     | 0      | 0      | 1      | 0      | 1      | 1      | 1      | 1      |
| 45379  | 3     | 2     | 0     | 1     | 4     | 4     | 1      | 1      | 0      | 1      | 1      | 1      | 1      | 1      |
| 45451  | 4     | 2     | 1     | 1     | 4     | 4     | 0      | 2      | 1      | 1      | 1      | 1      | 1      | 1      |
| 45472  | 3     | 3     | 1     | 1     | 3     | 3     | 1      | 1      | 2      | 1      | 1      | 2      | 2      | 2      |
| 45474  | 2     | 4     | 4     | 5     | 1     | 2     | 2      | 1      | 2      | 2      | 2      | 3      | 3      | 2      |
| 45544  | 2     | 4     | 4     | 3     | 4     | 4     | 2      | 2      | 2      | 2      | 2      | 2      | 2      | 2      |
| 45561  | 4     | 2     | 3     | 4     | 3     | 4     | 1      | 0      | 1      | 0      | 1      | 2      | 1      | 0      |
| 45596  | 4     | 2     | 1     | 3     | 4     | 5     | 1      | 1      | 0      | 1      | 2      | 2      | 2      | 1      |

---

**InstrumHADS HADS HADS HADS HADS HADS**

---

**Symptom**

---

**Type of R**

**Descripti**

| respid | Q56i_1 | Q56j_1 | Q56k_1 | Q56l_1 | Q56m_1 | Q56n_1 |
|--------|--------|--------|--------|--------|--------|--------|
| 241    | 0      | 0      | 1      | 1      | 0      | 0      |
| 242    | 0      | 2      | 0      | 1      | 0      | 1      |
| 243    | 1      | 1      | 1      | 1      | 1      | 1      |
| 244    | 0      | 0      | 0      | 1      | 0      | 0      |
| 245    | 1      | 1      | 1      | 0      | 0      | 0      |
| 246    | 0      | 1      | 0      | 1      | 0      | 1      |
| 247    | 0      | 1      | 1      | 1      | 0      | 0      |
| 253    | 0      | 2      | 2      | 2      | 0      | 1      |
| 256    | 1      | 1      | 1      | 2      | 1      | 1      |
| 257    | 1      | 1      | 0      | 1      | 1      | 0      |
| 258    | 1      | 1      | 2      | 1      | 2      | 2      |
| 259    | 1      | 2      | 1      | 0      | 1      | 0      |
| 263    | 1      | 2      | 1      | 3      | 1      | 2      |
| 264    | 1      | 0      | 0      | 0      | 1      | 1      |
| 265    | 1      | 2      | 1      | 2      | 1      | 1      |
| 266    | 1      | 1      | 0      | 1      | 0      | 0      |
| 268    | 3      | 3      | 2      | 2      | 1      | 0      |
| 270    | 2      | 2      | 2      | 1      | 1      | 1      |
| 272    | 1      | 1      | 1      | 1      | 0      | 0      |
| 274    | 0      | 1      | 0      | 0      | 0      | 0      |

| respid | Q56i_1 | Q56j_1 | Q56k_1 | Q56l_1 | Q56m_1 | Q56n_1 |
|--------|--------|--------|--------|--------|--------|--------|
| 275    | 0      | 1      | 1      | 2      | 0      | 1      |
| 276    | 1      | 0      | 1      | 1      | 0      | 0      |
| 277    | 1      | 2      | 1      | 2      | 0      | 1      |
| 279    | 1      | 1      | 1      | 1      | 1      | 1      |
| 286    | 0      | 2      | 1      | 1      | 0      | 0      |
| 290    | 1      | 0      | 1      | 1      | 1      | 0      |
| 291    | 1      | 1      | 1      | 0      | 1      | 0      |
| 295    | 0      | 3      | 0      | 0      | 0      | 0      |
| 297    | 0      | 1      | 1      | 0      | 0      | 1      |
| 299    | 1      | 1      | 2      | 2      | 2      | 1      |
| 300    | 0      | 1      | 2      | 2      | 0      | 1      |
| 303    | 0      | 1      | 0      | 0      | 0      | 0      |
| 304    | 2      | 1      | 2      | 2      | 1      | 2      |
| 306    | 0      | 1      | 0      | 1      | 0      | 0      |
| 307    | 0      | 0      | 0      | 0      | 0      | 0      |
| 312    | 1      | 1      | 1      | 1      | 1      | 1      |
| 315    | 1      | 1      | 1      | 1      | 1      | 1      |
| 317    | 0      | 1      | 1      | 1      | 0      | 0      |
| 322    | 2      | 0      | 2      | 1      | 1      | 0      |
| 335    | 0      | 0      | 0      | 3      | 0      | 0      |
| 374    | 1      | 1      | 1      | 1      | 1      | 1      |
| 378    | 1      | 1      | 1      | 1      | 1      | 1      |
| 380    | 1      | 1      | 1      | 1      | 1      | 1      |
| 382    | 1      | 1      | 2      | 2      | 0      | 1      |
| 384    | 1      | 0      | 2      | 1      | 0      | 1      |
| 385    | 2      | 2      | 1      | 3      | 2      | 1      |
| 395    | 0      | 1      | 0      | 2      | 0      | 0      |
| 396    | 0      | 0      | 0      | 0      | 0      | 1      |
| 398    | 0      | 1      | 0      | 1      | 0      | 0      |
| 402    | 1      | 1      | 1      | 1      | 1      | 2      |
| 414    | 0      | 1      | 1      | 1      | 0      | 2      |
| 415    | 0      | 2      | 0      | 0      | 0      | 0      |

| respid | Q56i_1 | Q56j_1 | Q56k_1 | Q56l_1 | Q56m_1 | Q56n_1 |
|--------|--------|--------|--------|--------|--------|--------|
| 416    | 1      | 1      | 0      | 1      | 0      | 1      |
| 420    | 1      | 3      | 2      | 1      | 0      | 0      |
| 421    | 0      | 0      | 0      | 0      | 0      | 0      |
| 422    | 0      | 0      | 0      | 0      | 0      | 0      |
| 423    | 0      | 0      | 1      | 0      | 0      | 0      |
| 424    | 0      | 3      | 0      | 0      | 0      | 0      |
| 425    | 1      | 1      | 1      | 1      | 1      | 1      |
| 428    | 0      | 0      | 0      | 0      | 0      | 1      |
| 429    | 1      | 1      | 1      | 1      | 0      | 0      |
| 431    | 0      | 1      | 0      | 0      | 0      | 0      |
| 437    | 0      | 1      | 1      | 1      | 1      | 1      |
| 438    | 0      | 2      | 0      | 1      | 0      | 1      |
| 441    | 0      | 0      | 0      | 0      | 0      | 0      |
| 444    | 1      | 0      | 0      | 0      | 0      | 0      |
| 448    | 0      | 0      | 0      | 0      | 0      | 2      |
| 449    | 0      | 1      | 0      | 0      | 0      | 1      |
| 457    | 0      | 1      | 0      | 1      | 0      | 2      |
| 460    | 0      | 1      | 1      | 1      | 0      | 0      |
| 469    | 1      | 2      | 1      | 1      | 0      | 0      |
| 471    | 1      | 1      | 1      | 2      | 0      | 2      |
| 473    | 1      | 1      | 0      | 0      | 1      | 0      |
| 476    | 0      | 1      | 1      | 2      | 0      | 2      |
| 479    | 0      | 0      | 0      | 0      | 0      | 0      |
| 485    | 0      | 2      | 0      | 0      | 0      | 0      |
| 488    | 1      | 2      | 1      | 2      | 1      | 2      |
| 494    | 0      | 0      | 2      | 2      | 0      | 0      |
| 496    | 0      | 3      | 0      | 0      | 0      | 0      |
| 501    | 1      | 1      | 1      | 1      | 1      | 1      |
| 502    | 1      | 1      | 1      | 1      | 1      | 1      |
| 503    | 0      | 0      | 0      | 0      | 0      | 0      |
| 506    | 0      | 0      | 1      | 1      | 0      | 0      |
| 514    | 1      | 2      | 1      | 2      | 0      | 1      |

| respid | Q56i_1 | Q56j_1 | Q56k_1 | Q56l_1 | Q56m_1 | Q56n_1 |
|--------|--------|--------|--------|--------|--------|--------|
| 515    | 1      | 1      | 1      | 0      | 1      | 0      |
| 516    | 2      | 2      | 1      | 3      | 1      | 0      |
| 519    | 0      | 0      | 1      | 1      | 0      | 0      |
| 522    | 1      | 2      | 1      | 1      | 1      | 2      |
| 525    | 0      | 1      | 0      | 0      | 0      | 0      |
| 528    | 0      | 2      | 0      | 0      | 0      | 1      |
| 532    | 1      | 1      | 1      | 1      | 0      | 1      |
| 536    | 1      | 1      | 1      | 1      | 0      | 1      |
| 539    | 3      | 1      | 1      | 1      | 3      | 1      |
| 540    | 1      | 1      | 2      | 1      | 1      | 1      |
| 547    | 0      | 1      | 0      | 0      | 0      | 0      |
| 551    | 0      | 2      | 1      | 1      | 0      | 1      |
| 554    | 1      | 2      | 2      | 2      | 1      | 0      |
| 558    | 1      | 1      | 1      | 2      | 1      | 1      |
| 563    | 0      | 0      | 1      | 0      | 0      | 0      |
| 564    | 1      | 1      | 1      | 1      | 1      | 1      |
| 565    | 1      | 2      | 1      | 1      | 1      | 2      |
| 567    | 0      | 0      | 0      | 0      | 1      | 0      |
| 569    | 1      | 1      | 0      | 2      | 1      | 1      |
| 572    | 1      | 2      | 0      | 2      | 0      | 2      |
| 574    | 0      | 0      | 0      | 0      | 0      | 0      |
| 583    | 2      | 3      | 1      | 2      | 1      | 1      |
| 589    | 0      | 1      | 0      | 0      | 0      | 0      |
| 592    | 0      | 1      | 3      | 1      | 0      | 0      |
| 593    | 0      | 1      | 1      | 2      | 0      | 0      |
| 594    | 0      | 0      | 1      | 3      | 0      | 0      |
| 597    | 1      | 1      | 1      | 1      | 0      | 1      |
| 601    | 0      | 2      | 0      | 0      | 0      | 1      |
| 607    | 0      | 1      | 0      | 1      | 0      | 1      |
| 610    | 0      | 1      | 0      | 1      | 0      | 0      |
| 612    | 0      | 2      | 0      | 0      | 0      | 0      |
| 627    | 0      | 2      | 0      | 1      | 0      | 0      |

| respid | Q56i_1 | Q56j_1 | Q56k_1 | Q56l_1 | Q56m_1 | Q56n_1 |
|--------|--------|--------|--------|--------|--------|--------|
| 631    | 1      | 2      | 1      | 1      | 1      | 1      |
| 633    | 1      | 1      | 1      | 1      | 0      | 0      |
| 636    | 1      | 2      | 0      | 0      | 0      | 0      |
| 656    | 0      | 1      | 0      | 0      | 0      | 1      |
| 659    | 0      | 3      | 0      | 0      | 0      | 0      |
| 670    | 0      | 0      | 0      | 0      | 0      | 0      |
| 672    | 1      | 2      | 2      | 1      | 1      | 1      |
| 673    | 0      | 0      | 0      | 1      | 0      | 1      |
| 675    | 0      | 1      | 0      | 1      | 0      | 0      |
| 676    | 1      | 1      | 1      | 2      | 1      | 1      |
| 679    | 1      | 2      | 1      | 2      | 1      | 1      |
| 683    | 0      | 1      | 0      | 1      | 0      | 0      |
| 684    | 0      | 0      | 1      | 0      | 0      | 1      |
| 690    | 1      | 1      | 2      | 0      | 1      | 1      |
| 701    | 1      | 1      | 2      | 2      | 1      | 1      |
| 709    | 0      | 0      | 0      | 0      | 0      | 0      |
| 719    | 0      | 0      | 1      | 1      | 1      | 0      |
| 726    | 1      | 0      | 1      | 0      | 1      | 1      |
| 730    | 0      | 1      | 1      | 1      | 0      | 1      |
| 731    | 0      | 1      | 0      | 0      | 0      | 0      |
| 732    | 0      | 2      | 0      | 1      | 1      | 0      |
| 733    | 0      | 1      | 0      | 3      | 0      | 0      |
| 735    | 0      | 0      | 1      | 0      | 0      | 0      |
| 738    | 1      | 0      | 0      | 0      | 0      | 0      |
| 740    | 0      | 0      | 0      | 0      | 1      | 0      |
| 742    | 0      | 0      | 0      | 1      | 1      | 0      |
| 744    | 0      | 0      | 0      | 0      | 0      | 0      |
| 749    | 1      | 1      | 0      | 1      | 1      | 1      |
| 751    | 0      | 0      | 0      | 0      | 1      | 1      |
| 752    | 0      | 3      | 0      | 0      | 0      | 0      |
| 753    | 0      | 2      | 0      | 1      | 1      | 1      |
| 755    | 1      | 1      | 0      | 0      | 1      | 0      |

| respid | Q56i_1 | Q56j_1 | Q56k_1 | Q56l_1 | Q56m_1 | Q56n_1 |
|--------|--------|--------|--------|--------|--------|--------|
| 756    | 0      | 0      | 0      | 2      | 2      | 1      |
| 759    | 0      | 3      | 0      | 2      | 0      | 0      |
| 760    | 0      | 0      | 0      | 0      | 0      | 1      |
| 763    | 0      | 3      | 0      | 2      | 0      | 2      |
| 764    | 0      | 1      | 0      | 1      | 1      | 1      |
| 765    | 1      | 1      | 0      | 1      | 0      | 1      |
| 766    | 0      | 0      | 0      | 1      | 0      | 0      |
| 767    | 1      | 0      | 1      | 0      | 1      | 0      |
| 771    | 1      | 3      | 0      | 1      | 2      | 0      |
| 773    | 0      | 1      | 0      | 0      | 0      | 1      |
| 774    | 1      | 0      | 1      | 0      | 1      | 3      |
| 775    | 0      | 0      | 0      | 0      | 0      | 0      |
| 776    | 0      | 3      | 1      | 1      | 1      | 1      |
| 778    | 0      | 1      | 0      | 0      | 0      | 1      |
| 780    | 0      | 0      | 0      | 0      | 0      | 0      |
| 781    | 0      | 1      | 0      | 0      | 0      | 0      |
| 782    | 1      | 1      | 1      | 1      | 1      | 3      |
| 783    | 1      | 1      | 1      | 1      | 1      | 1      |
| 786    | 1      | 2      | 1      | 1      | 1      | 1      |
| 788    | 0      | 3      | 0      | 0      | 1      | 0      |
| 792    | 0      | 2      | 0      | 1      | 1      | 0      |
| 794    | 1      | 1      | 1      | 1      | 2      | 0      |
| 795    | 0      | 3      | 0      | 0      | 0      | 0      |
| 799    | 0      | 0      | 1      | 0      | 1      | 0      |
| 800    | 0      | 3      | 0      | 0      | 0      | 1      |
| 801    | 0      | 3      | 0      | 3      | 0      | 1      |
| 804    | 0      | 1      | 0      | 0      | 0      | 0      |
| 806    | 1      | 0      | 0      | 0      | 1      | 0      |
| 807    | 0      | 3      | 0      | 2      | 1      | 0      |
| 808    | 1      | 1      | 0      | 0      | 1      | 0      |
| 809    | 0      | 2      | 0      | 0      | 0      | 2      |
| 811    | 0      | 0      | 0      | 0      | 1      | 0      |



| respid | Q56i_1 | Q56j_1 | Q56k_1 | Q56l_1 | Q56m_1 | Q56n_1 |
|--------|--------|--------|--------|--------|--------|--------|
| 812    | 0      | 2      | 0      | 0      | 0      | 0      |
| 815    | 0      | 3      | 0      | 0      | 0      | 1      |
| 817    | 1      | 1      | 1      | 2      | 1      | 1      |
| 818    | 0      | 1      | 0      | 0      | 1      | 0      |
| 819    | 0      | 1      | 0      | 0      | 0      | 0      |
| 821    | 1      | 0      | 1      | 3      | 3      | 2      |
| 824    | 0      | 2      | 1      | 1      | 1      | 1      |
| 825    | 0      | 1      | 0      | 2      | 0      | 1      |
| 828    | 1      | 2      | 1      | 0      | 0      | 0      |
| 832    | 0      | 1      | 0      | 1      | 0      | 0      |
| 834    | 0      | 3      | 0      | 0      | 0      | 0      |
| 835    | 0      | 1      | 1      | 1      | 1      | 1      |
| 836    | 0      | 1      | 0      | 1      | 0      | 1      |
| 837    | 0      | 0      | 0      | 0      | 0      | 0      |
| 840    | 0      | 2      | 0      | 2      | 0      | 1      |
| 841    | 0      | 0      | 0      | 0      | 1      | 0      |
| 845    | 0      | 0      | 0      | 0      | 1      | 0      |
| 846    | 1      | 2      | 0      | 3      | 0      | 1      |
| 849    | 0      | 1      | 0      | 0      | 1      | 0      |
| 852    | 1      | 2      | 1      | 0      | 1      | 1      |
| 854    | 1      | 1      | 1      | 1      | 1      | 1      |
| 856    | 0      | 0      | 0      | 0      | 0      | 0      |
| 858    | 0      | 0      | 0      | 0      | 0      | 1      |
| 859    | 1      | 0      | 1      | 1      | 1      | 1      |
| 861    | 0      | 1      | 0      | 0      | 1      | 0      |
| 863    | 0      | 0      | 1      | 1      | 0      | 1      |
| 864    | 0      | 1      | 0      | 0      | 0      | 1      |
| 866    | 1      | 1      | 1      | 0      | 0      | 0      |
| 869    | 0      | 1      | 0      | 0      | 0      | 1      |
| 870    | 0      | 2      | 0      | 0      | 0      | 0      |
| 871    | 0      | 0      | 0      | 0      | 1      | 0      |
| 873    | 1      | 1      | 0      | 1      | 0      | 0      |

| respid | Q56i_1 | Q56j_1 | Q56k_1 | Q56l_1 | Q56m_1 | Q56n_1 |
|--------|--------|--------|--------|--------|--------|--------|
| 879    | 1      | 1      | 1      | 1      | 1      | 1      |
| 880    | 0      | 0      | 1      | 0      | 1      | 1      |
| 881    | 0      | 0      | 0      | 0      | 0      | 1      |
| 882    | 1      | 3      | 0      | 0      | 0      | 0      |
| 885    | 1      | 1      | 0      | 0      | 0      | 0      |
| 886    | 0      | 1      | 0      | 0      | 0      | 1      |
| 887    | 1      | 1      | 1      | 2      | 1      | 1      |
| 888    | 1      | 1      | 1      | 1      | 1      | 1      |
| 889    | 0      | 3      | 1      | 1      | 0      | 0      |
| 890    | 0      | 3      | 0      | 0      | 0      | 0      |
| 900    | 0      | 0      | 0      | 0      | 1      | 0      |
| 901    | 0      | 0      | 0      | 0      | 0      | 0      |
| 902    | 0      | 0      | 0      | 0      | 0      | 0      |
| 903    | 0      | 0      | 0      | 0      | 0      | 0      |
| 906    | 2      | 1      | 0      | 1      | 2      | 1      |
| 907    | 0      | 0      | 0      | 1      | 1      | 0      |
| 908    | 0      | 0      | 1      | 0      | 1      | 1      |
| 910    | 1      | 0      | 0      | 0      | 1      | 0      |
| 911    | 0      | 3      | 0      | 1      | 1      | 1      |
| 912    | 0      | 1      | 1      | 0      | 1      | 1      |
| 915    | 1      | 1      | 1      | 0      | 0      | 1      |
| 923    | 2      | 2      | 1      | 1      | 1      | 0      |
| 925    | 0      | 0      | 0      | 0      | 0      | 0      |
| 926    | 0      | 2      | 0      | 0      | 1      | 0      |
| 929    | 0      | 0      | 0      | 0      | 0      | 1      |
| 932    | 0      | 2      | 1      | 0      | 2      | 3      |
| 933    | 0      | 0      | 0      | 1      | 0      | 0      |
| 934    | 0      | 1      | 0      | 0      | 1      | 1      |
| 938    | 1      | 1      | 1      | 1      | 1      | 2      |
| 941    | 0      | 3      | 0      | 0      | 0      | 0      |
| 942    | 0      | 1      | 0      | 0      | 0      | 0      |
| 943    | 0      | 0      | 0      | 1      | 0      | 1      |

| respid | Q56i_1 | Q56j_1 | Q56k_1 | Q56l_1 | Q56m_1 | Q56n_1 |
|--------|--------|--------|--------|--------|--------|--------|
| 945    | 0      | 1      | 0      | 0      | 0      | 1      |
| 946    | 1      | 3      | 0      | 0      | 1      | 1      |
| 947    | 1      | 3      | 2      | 1      | 1      | 2      |
| 948    | 0      | 1      | 0      | 0      | 0      | 1      |
| 949    | 0      | 0      | 0      | 1      | 0      | 0      |
| 952    | 1      | 1      | 1      | 1      | 1      | 1      |
| 956    | 1      | 2      | 1      | 0      | 0      | 0      |
| 957    | 0      | 1      | 0      | 1      | 0      | 0      |
| 959    | 0      | 3      | 1      | 0      | 0      | 0      |
| 961    | 0      | 1      | 1      | 2      | 1      | 0      |
| 962    | 1      | 0      | 1      | 1      | 1      | 0      |
| 965    | 0      | 3      | 0      | 1      | 1      | 1      |
| 967    | 0      | 2      | 1      | 1      | 1      | 1      |
| 969    | 1      | 0      | 0      | 0      | 0      | 0      |
| 970    | 0      | 0      | 0      | 0      | 0      | 1      |
| 973    | 0      | 0      | 0      | 0      | 0      | 0      |
| 974    | 0      | 0      | 0      | 0      | 0      | 1      |
| 975    | 1      | 2      | 2      | 2      | 1      | 1      |
| 976    | 0      | 1      | 0      | 1      | 1      | 0      |
| 977    | 1      | 1      | 1      | 0      | 0      | 0      |
| 979    | 1      | 0      | 0      | 0      | 0      | 0      |
| 981    | 1      | 0      | 0      | 0      | 1      | 0      |
| 983    | 0      | 3      | 1      | 3      | 2      | 2      |
| 987    | 1      | 1      | 1      | 1      | 1      | 1      |
| 991    | 0      | 0      | 0      | 0      | 0      | 1      |
| 992    | 0      | 0      | 1      | 1      | 1      | 1      |
| 993    | 1      | 1      | 1      | 0      | 0      | 2      |
| 994    | 0      | 1      | 0      | 2      | 1      | 1      |
| 995    | 0      | 1      | 0      | 0      | 0      | 0      |
| 998    | 0      | 1      | 0      | 1      | 1      | 1      |
| 1000   | 1      | 1      | 2      | 2      | 2      | 1      |
| 1001   | 1      | 2      | 1      | 1      | 2      | 1      |

| respid | Q56i_1 | Q56j_1 | Q56k_1 | Q56l_1 | Q56m_1 | Q56n_1 |
|--------|--------|--------|--------|--------|--------|--------|
| 1002   | 0      | 0      | 0      | 0      | 0      | 0      |
| 1004   | 0      | 1      | 1      | 1      | 1      | 0      |
| 1005   | 0      | 0      | 0      | 0      | 0      | 0      |
| 1006   | 0      | 2      | 0      | 2      | 0      | 0      |
| 1007   | 0      | 1      | 1      | 1      | 2      | 0      |
| 1009   | 0      | 1      | 0      | 0      | 0      | 0      |
| 1013   | 1      | 1      | 1      | 1      | 2      | 1      |
| 1015   | 1      | 1      | 1      | 1      | 1      | 0      |
| 1020   | 1      | 0      | 1      | 1      | 1      | 0      |
| 1022   | 1      | 0      | 1      | 1      | 1      | 0      |
| 1024   | 0      | 1      | 0      | 0      | 0      | 0      |
| 1025   | 0      | 0      | 1      | 1      | 1      | 2      |
| 1027   | 0      | 1      | 0      | 0      | 1      | 1      |
| 1031   | 0      | 1      | 0      | 0      | 0      | 0      |
| 1037   | 0      | 1      | 0      | 0      | 0      | 0      |
| 1039   | 0      | 3      | 0      | 0      | 0      | 1      |
| 1040   | 0      | 1      | 0      | 0      | 0      | 0      |
| 1056   | 1      | 1      | 1      | 0      | 0      | 0      |
| 1057   | 1      | 0      | 1      | 0      | 1      | 0      |
| 1062   | 1      | 1      | 1      | 0      | 0      | 0      |
| 1069   | 0      | 0      | 0      | 0      | 0      | 0      |
| 1070   | 0      | 1      | 0      | 1      | 0      | 0      |
| 1072   | 1      | 0      | 1      | 0      | 1      | 1      |
| 1076   | 0      | 2      | 0      | 0      | 0      | 0      |
| 1077   | 1      | 1      | 1      | 0      | 1      | 0      |
| 1078   | 1      | 0      | 1      | 0      | 1      | 0      |
| 1080   | 1      | 0      | 1      | 0      | 0      | 0      |
| 1094   | 2      | 1      | 1      | 1      | 1      | 1      |
| 1098   | 1      | 1      | 1      | 0      | 1      | 0      |
| 1099   | 0      | 3      | 0      | 0      | 0      | 1      |
| 1102   | 1      | 1      | 0      | 1      | 0      | 1      |
| 1110   | 0      | 1      | 0      | 1      | 0      | 1      |

| respid | Q56i_1 | Q56j_1 | Q56k_1 | Q56l_1 | Q56m_1 | Q56n_1 |
|--------|--------|--------|--------|--------|--------|--------|
| 1117   | 1      | 2      | 1      | 1      | 2      | 1      |
| 1119   | 0      | 0      | 0      | 0      | 0      | 0      |
| 1126   | 1      | 1      | 1      | 1      | 1      | 0      |
| 1127   | 0      | 0      | 0      | 0      | 0      | 0      |
| 1130   | 0      | 0      | 0      | 0      | 0      | 0      |
| 1131   | 0      | 1      | 0      | 0      | 0      | 0      |
| 1135   | 2      | 1      | 1      | 2      | 1      | 1      |
| 1138   | 1      | 1      | 1      | 1      | 1      | 1      |
| 1139   | 0      | 0      | 0      | 0      | 0      | 0      |
| 1140   | 0      | 0      | 0      | 0      | 0      | 0      |
| 1142   | 0      | 0      | 2      | 0      | 2      | 1      |
| 1143   | 0      | 0      | 2      | 0      | 2      | 1      |
| 1145   | 1      | 0      | 1      | 1      | 0      | 0      |
| 1149   | 0      | 0      | 0      | 0      | 1      | 0      |
| 1152   | 1      | 0      | 1      | 0      | 1      | 0      |
| 1160   | 0      | 2      | 0      | 0      | 0      | 0      |
| 1164   | 0      | 1      | 0      | 0      | 0      | 0      |
| 1165   | 1      | 0      | 1      | 0      | 0      | 0      |
| 1169   | 1      | 1      | 1      | 1      | 1      | 1      |
| 1170   | 0      | 0      | 1      | 0      | 0      | 0      |
| 1179   | 0      | 0      | 1      | 0      | 0      | 0      |
| 1180   | 0      | 0      | 0      | 0      | 1      | 1      |
| 1183   | 0      | 0      | 0      | 0      | 0      | 0      |
| 1187   | 0      | 1      | 0      | 0      | 0      | 0      |
| 1188   | 3      | 3      | 2      | 3      | 2      | 3      |
| 1193   | 0      | 0      | 1      | 1      | 0      | 0      |
| 1194   | 1      | 0      | 1      | 1      | 1      | 1      |
| 1197   | 0      | 2      | 2      | 1      | 1      | 0      |
| 1202   | 0      | 1      | 0      | 0      | 0      | 0      |
| 1204   | 2      | 2      | 2      | 2      | 2      | 2      |
| 1211   | 0      | 3      | 0      | 0      | 0      | 0      |
| 1224   | 0      | 3      | 0      | 0      | 0      | 0      |

| respid | Q56i_1 | Q56j_1 | Q56k_1 | Q56l_1 | Q56m_1 | Q56n_1 |
|--------|--------|--------|--------|--------|--------|--------|
| 1225   | 1      | 2      | 1      | 2      | 1      | 1      |
| 1230   | 0      | 1      | 0      | 0      | 0      | 0      |
| 1232   | 1      | 2      | 0      | 0      | 0      | 1      |
| 1233   | 1      | 0      | 1      | 1      | 0      | 1      |
| 1234   | 0      | 0      | 0      | 0      | 0      | 0      |
| 1235   | 1      | 2      | 1      | 2      | 1      | 1      |
| 1236   | 1      | 1      | 1      | 2      | 2      | 1      |
| 1237   | 1      | 1      | 1      | 1      | 1      | 1      |
| 1238   | 0      | 0      | 1      | 0      | 1      | 1      |
| 1239   | 0      | 0      | 0      | 0      | 0      | 0      |
| 1241   | 0      | 0      | 0      | 1      | 0      | 2      |
| 1242   | 0      | 0      | 0      | 0      | 0      | 0      |
| 1244   | 0      | 2      | 0      | 0      | 1      | 1      |
| 1245   | 0      | 2      | 1      | 2      | 0      | 1      |
| 1247   | 0      | 2      | 0      | 0      | 0      | 0      |
| 1248   | 0      | 2      | 0      | 1      | 0      | 1      |
| 1249   | 2      | 2      | 2      | 2      | 2      | 1      |
| 1250   | 1      | 1      | 1      | 1      | 1      | 0      |
| 1251   | 0      | 0      | 1      | 1      | 0      | 2      |
| 1252   | 0      | 2      | 0      | 0      | 0      | 0      |
| 1253   | 0      | 3      | 0      | 0      | 0      | 1      |
| 1254   | 1      | 1      | 0      | 1      | 1      | 1      |
| 1258   | 0      | 0      | 0      | 0      | 0      | 0      |
| 1260   | 1      | 1      | 0      | 0      | 1      | 0      |
| 1261   | 0      | 2      | 0      | 0      | 0      | 1      |
| 1262   | 0      | 0      | 0      | 0      | 0      | 0      |
| 1263   | 1      | 1      | 0      | 1      | 1      | 1      |
| 1264   | 0      | 1      | 0      | 1      | 1      | 1      |
| 1265   | 0      | 1      | 3      | 1      | 2      | 1      |
| 1266   | 1      | 2      | 0      | 2      | 0      | 1      |
| 1270   | 1      | 3      | 1      | 2      | 1      | 1      |
| 1272   | 1      | 2      | 1      | 1      | 1      | 1      |

| respid | Q56i_1 | Q56j_1 | Q56k_1 | Q56l_1 | Q56m_1 | Q56n_1 |
|--------|--------|--------|--------|--------|--------|--------|
| 1273   | 1      | 3      | 1      | 1      | 1      | 1      |
| 1276   | 0      | 0      | 0      | 1      | 0      | 1      |
| 1277   | 0      | 0      | 0      | 1      | 1      | 1      |
| 1278   | 1      | 1      | 0      | 1      | 1      | 0      |
| 1280   | 0      | 0      | 3      | 0      | 1      | 0      |
| 1281   | 0      | 1      | 1      | 0      | 0      | 0      |
| 1282   | 0      | 1      | 1      | 1      | 1      | 1      |
| 1283   | 0      | 1      | 0      | 1      | 0      | 0      |
| 1288   | 0      | 0      | 0      | 0      | 0      | 1      |
| 1289   | 0      | 2      | 1      | 1      | 0      | 0      |
| 1290   | 0      | 1      | 1      | 1      | 1      | 1      |
| 1291   | 0      | 0      | 0      | 0      | 0      | 0      |
| 1293   | 1      | 0      | 1      | 1      | 0      | 1      |
| 1294   | 0      | 2      | 0      | 1      | 0      | 0      |
| 1295   | 0      | 0      | 1      | 0      | 0      | 0      |
| 1296   | 0      | 2      | 1      | 2      | 0      | 0      |
| 1297   | 1      | 1      | 1      | 1      | 0      | 0      |
| 1298   | 1      | 1      | 1      | 0      | 0      | 0      |
| 1300   | 1      | 2      | 1      | 2      | 0      | 1      |
| 1302   | 0      | 1      | 0      | 0      | 0      | 0      |
| 1303   | 1      | 1      | 1      | 1      | 1      | 1      |
| 1304   | 1      | 0      | 1      | 2      | 0      | 0      |
| 1305   | 1      | 1      | 1      | 2      | 1      | 1      |
| 1307   | 0      | 0      | 0      | 0      | 0      | 0      |
| 1312   | 0      | 1      | 2      | 1      | 0      | 1      |
| 1313   | 0      | 3      | 0      | 2      | 0      | 0      |
| 1314   | 1      | 0      | 1      | 2      | 1      | 2      |
| 1317   | 0      | 0      | 0      | 1      | 1      | 1      |
| 1318   | 2      | 1      | 1      | 1      | 1      | 0      |
| 1319   | 1      | 2      | 1      | 2      | 1      | 2      |
| 1321   | 0      | 1      | 0      | 0      | 0      | 0      |
| 1324   | 1      | 2      | 2      | 1      | 1      | 2      |

| respid | Q56i_1 | Q56j_1 | Q56k_1 | Q56l_1 | Q56m_1 | Q56n_1 |
|--------|--------|--------|--------|--------|--------|--------|
| 1325   | 1      | 1      | 0      | 1      | 1      | 1      |
| 1326   | 0      | 1      | 1      | 1      | 1      | 1      |
| 1327   | 0      | 0      | 0      | 0      | 0      | 0      |
| 1329   | 1      | 1      | 0      | 0      | 1      | 1      |
| 1330   | 1      | 2      | 1      | 1      | 2      | 0      |
| 1331   | 0      | 1      | 1      | 2      | 1      | 0      |
| 1335   | 0      | 0      | 1      | 0      | 1      | 1      |
| 1337   | 0      | 0      | 0      | 0      | 0      | 0      |
| 1341   | 0      | 0      | 1      | 1      | 1      | 0      |
| 1342   | 0      | 0      | 0      | 0      | 0      | 0      |
| 1344   | 2      | 1      | 2      | 1      | 1      | 1      |
| 1345   | 1      | 0      | 1      | 1      | 1      | 1      |
| 1346   | 1      | 1      | 1      | 0      | 1      | 0      |
| 1350   | 1      | 1      | 1      | 2      | 1      | 0      |
| 1352   | 1      | 0      | 0      | 0      | 0      | 1      |
| 1353   | 1      | 2      | 1      | 1      | 1      | 1      |
| 1354   | 0      | 3      | 0      | 0      | 0      | 0      |
| 1355   | 0      | 0      | 0      | 0      | 0      | 0      |
| 1357   | 0      | 3      | 0      | 0      | 1      | 1      |
| 1360   | 0      | 0      | 0      | 1      | 0      | 0      |
| 1362   | 1      | 0      | 0      | 0      | 1      | 0      |
| 1363   | 1      | 0      | 0      | 1      | 2      | 1      |
| 1367   | 1      | 0      | 0      | 0      | 0      | 0      |
| 1369   | 0      | 1      | 0      | 0      | 0      | 0      |
| 1371   | 0      | 0      | 1      | 0      | 0      | 0      |
| 1372   | 0      | 0      | 0      | 0      | 0      | 0      |
| 1375   | 0      | 1      | 0      | 0      | 1      | 1      |
| 1377   | 0      | 0      | 0      | 0      | 0      | 0      |
| 1379   | 1      | 1      | 1      | 1      | 1      | 1      |
| 1380   | 0      | 0      | 2      | 1      | 1      | 0      |
| 1382   | 1      | 2      | 1      | 2      | 1      | 0      |
| 1383   | 0      | 2      | 1      | 0      | 1      | 1      |



| respid | Q56i_1 | Q56j_1 | Q56k_1 | Q56l_1 | Q56m_1 | Q56n_1 |
|--------|--------|--------|--------|--------|--------|--------|
| 1384   | 0      | 1      | 0      | 0      | 0      | 0      |
| 1385   | 0      | 0      | 0      | 0      | 0      | 0      |
| 1387   | 0      | 1      | 1      | 0      | 0      | 0      |
| 1388   | 2      | 2      | 1      | 1      | 1      | 0      |
| 1389   | 1      | 3      | 1      | 2      | 1      | 2      |
| 1390   | 1      | 0      | 1      | 2      | 0      | 0      |
| 1395   | 0      | 0      | 0      | 0      | 0      | 0      |
| 1396   | 0      | 1      | 1      | 1      | 1      | 2      |
| 1397   | 1      | 1      | 1      | 0      | 1      | 0      |
| 1398   | 0      | 0      | 0      | 0      | 0      | 0      |
| 1399   | 0      | 1      | 0      | 1      | 0      | 0      |
| 1403   | 0      | 0      | 1      | 0      | 0      | 0      |
| 1405   | 0      | 0      | 0      | 0      | 0      | 0      |
| 1406   | 0      | 2      | 0      | 1      | 0      | 0      |
| 1407   | 0      | 2      | 2      | 0      | 1      | 0      |
| 1408   | 0      | 0      | 0      | 1      | 0      | 0      |
| 1409   | 0      | 1      | 0      | 1      | 0      | 1      |
| 1410   | 3      | 3      | 3      | 3      | 3      | 2      |
| 1411   | 0      | 1      | 1      | 1      | 0      | 0      |
| 1412   | 0      | 2      | 1      | 0      | 0      | 1      |
| 1413   | 1      | 0      | 1      | 0      | 1      | 0      |
| 1414   | 0      | 3      | 0      | 1      | 0      | 0      |
| 1415   | 0      | 1      | 0      | 0      | 0      | 1      |
| 1416   | 0      | 0      | 0      | 0      | 1      | 0      |
| 1417   | 2      | 2      | 1      | 2      | 1      | 1      |
| 1418   | 0      | 2      | 1      | 0      | 0      | 0      |
| 1419   | 1      | 1      | 1      | 1      | 1      | 0      |
| 1420   | 0      | 0      | 0      | 0      | 0      | 0      |
| 1421   | 1      | 1      | 1      | 1      | 1      | 1      |
| 1422   | 0      | 0      | 0      | 0      | 0      | 0      |
| 1423   | 1      | 2      | 1      | 1      | 1      | 0      |
| 1424   | 1      | 0      | 2      | 1      | 0      | 1      |

| respid | Q56i_1 | Q56j_1 | Q56k_1 | Q56l_1 | Q56m_1 | Q56n_1 |
|--------|--------|--------|--------|--------|--------|--------|
| 1429   | 2      | 1      | 1      | 1      | 1      | 1      |
| 1430   | 0      | 0      | 0      | 0      | 0      | 0      |
| 1431   | 2      | 1      | 0      | 1      | 2      | 1      |
| 1433   | 0      | 1      | 1      | 1      | 1      | 1      |
| 1435   | 0      | 2      | 0      | 0      | 0      | 1      |
| 1436   | 0      | 2      | 1      | 0      | 0      | 0      |
| 1438   | 0      | 0      | 0      | 0      | 0      | 0      |
| 1439   | 0      | 1      | 0      | 0      | 0      | 0      |
| 1441   | 0      | 1      | 0      | 1      | 0      | 0      |
| 1442   | 0      | 0      | 0      | 0      | 0      | 0      |
| 1443   | 3      | 3      | 3      | 3      | 3      | 1      |
| 1444   | 1      | 1      | 1      | 1      | 1      | 2      |
| 1445   | 0      | 1      | 1      | 1      | 1      | 0      |
| 1446   | 1      | 2      | 2      | 2      | 1      | 2      |
| 1447   | 0      | 2      | 0      | 0      | 0      | 0      |
| 1449   | 0      | 1      | 0      | 1      | 0      | 1      |
| 1450   | 1      | 1      | 1      | 3      | 1      | 1      |
| 1451   | 1      | 3      | 1      | 1      | 0      | 0      |
| 1452   | 0      | 0      | 0      | 0      | 0      | 0      |
| 1453   | 1      | 1      | 1      | 1      | 1      | 1      |
| 1454   | 1      | 1      | 1      | 1      | 1      | 1      |
| 1456   | 0      | 1      | 1      | 1      | 0      | 1      |
| 1457   | 1      | 0      | 1      | 1      | 0      | 0      |
| 1459   | 1      | 1      | 1      | 2      | 1      | 0      |
| 1460   | 0      | 2      | 0      | 0      | 0      | 0      |
| 1463   | 0      | 1      | 0      | 0      | 0      | 0      |
| 1465   | 2      | 1      | 1      | 2      | 2      | 1      |
| 1467   | 1      | 1      | 1      | 1      | 1      | 1      |
| 1470   | 1      | 1      | 0      | 1      | 0      | 2      |
| 1471   | 2      | 1      | 2      | 2      | 1      | 1      |
| 1472   | 0      | 1      | 0      | 0      | 0      | 0      |
| 1474   | 0      | 0      | 0      | 0      | 0      | 0      |

| respid | Q56i_1 | Q56j_1 | Q56k_1 | Q56l_1 | Q56m_1 | Q56n_1 |
|--------|--------|--------|--------|--------|--------|--------|
| 1475   | 0      | 0      | 0      | 0      | 0      | 0      |
| 1477   | 0      | 0      | 0      | 0      | 0      | 1      |
| 1478   | 1      | 1      | 1      | 1      | 1      | 1      |
| 1480   | 0      | 0      | 0      | 1      | 0      | 1      |
| 1481   | 1      | 1      | 1      | 1      | 1      | 2      |
| 1483   | 0      | 0      | 0      | 0      | 0      | 0      |
| 1484   | 0      | 2      | 0      | 1      | 0      | 2      |
| 1485   | 1      | 0      | 0      | 1      | 1      | 1      |
| 1486   | 0      | 0      | 0      | 0      | 0      | 0      |
| 1487   | 1      | 1      | 0      | 1      | 1      | 0      |
| 1488   | 0      | 1      | 0      | 1      | 0      | 0      |
| 1489   | 0      | 2      | 0      | 0      | 0      | 0      |
| 1490   | 1      | 2      | 2      | 2      | 1      | 1      |
| 1491   | 1      | 1      | 1      | 1      | 2      | 2      |
| 1492   | 0      | 0      | 0      | 0      | 0      | 0      |
| 1494   | 0      | 1      | 0      | 0      | 0      | 0      |
| 1495   | 0      | 0      | 1      | 0      | 1      | 0      |
| 1496   | 1      | 1      | 2      | 1      | 0      | 1      |
| 1498   | 0      | 0      | 0      | 0      | 0      | 0      |
| 1499   | 0      | 1      | 0      | 1      | 1      | 0      |
| 1500   | 1      | 2      | 1      | 2      | 1      | 1      |
| 1501   | 0      | 0      | 0      | 1      | 0      | 0      |
| 1503   | 0      | 1      | 0      | 1      | 0      | 0      |
| 1504   | 0      | 0      | 0      | 0      | 0      | 0      |
| 1508   | 0      | 0      | 0      | 0      | 0      | 0      |
| 1509   | 1      | 0      | 0      | 2      | 0      | 1      |
| 1511   | 1      | 3      | 0      | 1      | 1      | 0      |
| 1512   | 0      | 3      | 0      | 1      | 0      | 2      |
| 1513   | 0      | 0      | 0      | 0      | 0      | 0      |
| 1515   | 1      | 1      | 1      | 1      | 1      | 1      |
| 1517   | 1      | 0      | 1      | 1      | 0      | 1      |
| 1518   | 0      | 3      | 0      | 1      | 0      | 0      |

| respid | Q56i_1 | Q56j_1 | Q56k_1 | Q56l_1 | Q56m_1 | Q56n_1 |
|--------|--------|--------|--------|--------|--------|--------|
| 1519   | 1      | 2      | 1      | 2      | 1      | 1      |
| 1520   | 0      | 1      | 1      | 1      | 2      | 2      |
| 1521   | 2      | 1      | 2      | 1      | 2      | 0      |
| 1522   | 1      | 0      | 1      | 1      | 0      | 1      |
| 1523   | 1      | 2      | 2      | 3      | 1      | 1      |
| 1524   | 1      | 0      | 0      | 1      | 1      | 0      |
| 1525   | 0      | 1      | 0      | 0      | 0      | 0      |
| 1526   | 1      | 1      | 2      | 2      | 1      | 1      |
| 1527   | 3      | 1      | 1      | 3      | 0      | 0      |
| 1534   | 0      | 0      | 1      | 0      | 0      | 0      |
| 1535   | 1      | 1      | 1      | 1      | 0      | 2      |
| 1536   | 1      | 1      | 1      | 2      | 1      | 1      |
| 1538   | 1      | 1      | 0      | 1      | 0      | 0      |
| 1539   | 0      | 2      | 0      | 1      | 0      | 1      |
| 1540   | 0      | 0      | 0      | 0      | 0      | 1      |
| 1541   | 0      | 1      | 0      | 1      | 0      | 0      |
| 1542   | 1      | 1      | 1      | 1      | 1      | 1      |
| 1543   | 1      | 1      | 1      | 1      | 1      | 1      |
| 1545   | 2      | 1      | 2      | 2      | 1      | 2      |
| 1546   | 0      | 1      | 0      | 0      | 0      | 0      |
| 1548   | 0      | 3      | 0      | 1      | 0      | 0      |
| 1549   | 0      | 0      | 1      | 0      | 1      | 0      |
| 1551   | 0      | 0      | 1      | 0      | 0      | 0      |
| 1552   | 1      | 0      | 1      | 2      | 0      | 0      |
| 1556   | 0      | 1      | 1      | 1      | 0      | 1      |
| 1557   | 1      | 1      | 1      | 0      | 1      | 0      |
| 1558   | 1      | 3      | 1      | 1      | 1      | 0      |
| 1561   | 0      | 0      | 0      | 0      | 0      | 0      |
| 1562   | 1      | 1      | 1      | 1      | 1      | 1      |
| 1563   | 1      | 1      | 1      | 1      | 1      | 1      |
| 1564   | 2      | 2      | 2      | 2      | 2      | 2      |
| 1565   | 0      | 2      | 1      | 1      | 0      | 1      |

| respid | Q56i_1 | Q56j_1 | Q56k_1 | Q56l_1 | Q56m_1 | Q56n_1 |
|--------|--------|--------|--------|--------|--------|--------|
| 1566   | 0      | 0      | 0      | 0      | 0      | 0      |
| 1567   | 0      | 0      | 0      | 0      | 0      | 0      |
| 1569   | 0      | 0      | 0      | 0      | 0      | 0      |
| 1570   | 0      | 0      | 0      | 0      | 1      | 0      |
| 1574   | 0      | 1      | 1      | 2      | 1      | 3      |
| 1575   | 0      | 0      | 0      | 0      | 0      | 0      |
| 1576   | 1      | 2      | 1      | 1      | 1      | 1      |
| 1577   | 0      | 1      | 1      | 0      | 1      | 0      |
| 1581   | 1      | 1      | 0      | 0      | 1      | 1      |
| 1583   | 0      | 1      | 0      | 1      | 0      | 0      |
| 1585   | 0      | 1      | 0      | 1      | 0      | 0      |
| 1586   | 0      | 2      | 0      | 1      | 0      | 1      |
| 1588   | 1      | 1      | 1      | 1      | 0      | 0      |
| 1590   | 0      | 0      | 0      | 0      | 1      | 0      |
| 1592   | 1      | 1      | 1      | 0      | 1      | 0      |
| 1594   | 1      | 1      | 1      | 1      | 1      | 0      |
| 1598   | 1      | 1      | 1      | 1      | 1      | 1      |
| 1599   | 0      | 3      | 0      | 0      | 1      | 0      |
| 1600   | 0      | 1      | 0      | 1      | 0      | 0      |
| 1602   | 0      | 0      | 1      | 1      | 1      | 1      |
| 1603   | 0      | 0      | 0      | 0      | 1      | 0      |
| 1604   | 0      | 0      | 0      | 0      | 0      | 2      |
| 1605   | 1      | 3      | 2      | 2      | 1      | 0      |
| 1606   | 0      | 0      | 0      | 0      | 0      | 0      |
| 1610   | 1      | 1      | 0      | 0      | 0      | 0      |
| 1611   | 0      | 2      | 0      | 0      | 0      | 0      |
| 1612   | 0      | 0      | 1      | 1      | 0      | 1      |
| 1613   | 1      | 3      | 1      | 1      | 1      | 1      |
| 1615   | 2      | 3      | 1      | 1      | 2      | 1      |
| 1616   | 0      | 2      | 0      | 1      | 0      | 0      |
| 1617   | 1      | 2      | 1      | 2      | 1      | 2      |
| 1618   | 0      | 0      | 0      | 0      | 0      | 0      |

| respid | Q56i_1 | Q56j_1 | Q56k_1 | Q56l_1 | Q56m_1 | Q56n_1 |
|--------|--------|--------|--------|--------|--------|--------|
| 1620   | 0      | 2      | 1      | 0      | 0      | 0      |
| 1621   | 0      | 2      | 1      | 2      | 0      | 3      |
| 1622   | 0      | 0      | 0      | 0      | 0      | 0      |
| 1623   | 0      | 2      | 0      | 1      | 1      | 1      |
| 1624   | 0      | 0      | 0      | 0      | 0      | 1      |
| 1625   | 0      | 2      | 0      | 0      | 1      | 0      |
| 1626   | 0      | 0      | 0      | 0      | 0      | 0      |
| 1627   | 0      | 0      | 1      | 1      | 0      | 0      |
| 1629   | 0      | 1      | 1      | 0      | 0      | 1      |
| 1630   | 0      | 1      | 0      | 0      | 0      | 0      |
| 1631   | 0      | 1      | 1      | 1      | 0      | 1      |
| 1634   | 0      | 1      | 0      | 0      | 0      | 0      |
| 1635   | 0      | 3      | 0      | 0      | 1      | 0      |
| 1636   | 0      | 0      | 0      | 0      | 0      | 0      |
| 1637   | 0      | 3      | 0      | 3      | 0      | 0      |
| 1640   | 0      | 1      | 0      | 0      | 1      | 0      |
| 1642   | 0      | 2      | 0      | 1      | 0      | 0      |
| 1643   | 1      | 0      | 0      | 1      | 0      | 0      |
| 1644   | 0      | 1      | 0      | 1      | 1      | 1      |
| 1645   | 1      | 1      | 1      | 1      | 1      | 0      |
| 1646   | 2      | 0      | 1      | 1      | 1      | 1      |
| 1647   | 1      | 1      | 1      | 0      | 0      | 1      |
| 1650   | 2      | 2      | 2      | 2      | 2      | 2      |
| 1654   | 1      | 3      | 1      | 0      | 1      | 0      |
| 1656   | 0      | 1      | 0      | 0      | 0      | 0      |
| 1657   | 1      | 1      | 2      | 2      | 1      | 0      |
| 1659   | 0      | 1      | 0      | 1      | 0      | 0      |
| 1662   | 1      | 1      | 1      | 1      | 1      | 1      |
| 1663   | 2      | 2      | 2      | 1      | 0      | 2      |
| 1664   | 0      | 0      | 0      | 0      | 0      | 0      |
| 1665   | 1      | 0      | 1      | 0      | 0      | 0      |
| 1667   | 1      | 1      | 1      | 2      | 1      | 1      |

| respid | Q56i_1 | Q56j_1 | Q56k_1 | Q56l_1 | Q56m_1 | Q56n_1 |
|--------|--------|--------|--------|--------|--------|--------|
| 1668   | 0      | 1      | 0      | 0      | 1      | 0      |
| 1670   | 0      | 1      | 1      | 0      | 1      | 0      |
| 1671   | 0      | 1      | 0      | 0      | 0      | 0      |
| 1673   | 0      | 0      | 0      | 1      | 0      | 1      |
| 1674   | 0      | 1      | 0      | 0      | 0      | 0      |
| 1676   | 1      | 1      | 1      | 1      | 0      | 0      |
| 1677   | 0      | 0      | 0      | 0      | 0      | 0      |
| 1678   | 0      | 0      | 0      | 1      | 0      | 0      |
| 1680   | 0      | 0      | 0      | 0      | 0      | 0      |
| 1681   | 0      | 2      | 1      | 0      | 0      | 1      |
| 1683   | 0      | 0      | 0      | 0      | 0      | 0      |
| 1685   | 1      | 1      | 0      | 1      | 1      | 1      |
| 1686   | 1      | 2      | 1      | 2      | 1      | 0      |
| 1690   | 0      | 1      | 0      | 0      | 1      | 1      |
| 1691   | 1      | 1      | 3      | 3      | 3      | 1      |
| 1692   | 1      | 2      | 0      | 1      | 0      | 1      |
| 1693   | 0      | 0      | 0      | 2      | 0      | 0      |
| 1695   | 1      | 1      | 0      | 1      | 1      | 1      |
| 1696   | 0      | 3      | 0      | 0      | 0      | 0      |
| 1698   | 1      | 1      | 0      | 0      | 1      | 1      |
| 1699   | 0      | 1      | 1      | 1      | 0      | 1      |
| 1701   | 1      | 2      | 1      | 2      | 1      | 1      |
| 1702   | 0      | 1      | 1      | 1      | 0      | 0      |
| 1703   | 0      | 0      | 0      | 0      | 0      | 0      |
| 1705   | 0      | 3      | 0      | 3      | 0      | 0      |
| 1706   | 1      | 0      | 1      | 0      | 0      | 1      |
| 1708   | 0      | 1      | 1      | 1      | 1      | 1      |
| 1711   | 1      | 1      | 1      | 2      | 1      | 1      |
| 1712   | 0      | 1      | 0      | 0      | 0      | 0      |
| 1713   | 0      | 0      | 0      | 1      | 0      | 0      |
| 1715   | 0      | 0      | 0      | 0      | 0      | 0      |
| 1717   | 0      | 0      | 0      | 0      | 0      | 0      |

| respid | Q56i_1 | Q56j_1 | Q56k_1 | Q56l_1 | Q56m_1 | Q56n_1 |
|--------|--------|--------|--------|--------|--------|--------|
| 1718   | 1      | 1      | 1      | 1      | 1      | 1      |
| 1719   | 0      | 1      | 1      | 1      | 0      | 1      |
| 1721   | 1      | 1      | 1      | 0      | 0      | 1      |
| 1722   | 1      | 1      | 1      | 1      | 1      | 1      |
| 1724   | 0      | 0      | 0      | 0      | 0      | 0      |
| 1725   | 1      | 2      | 1      | 1      | 1      | 1      |
| 1726   | 1      | 0      | 0      | 1      | 1      | 1      |
| 1727   | 0      | 3      | 0      | 0      | 1      | 0      |
| 1728   | 1      | 2      | 2      | 1      | 1      | 1      |
| 1731   | 1      | 1      | 1      | 0      | 0      | 1      |
| 1733   | 0      | 0      | 1      | 2      | 0      | 1      |
| 1734   | 1      | 0      | 0      | 0      | 0      | 0      |
| 1735   | 0      | 1      | 0      | 0      | 0      | 0      |
| 1736   | 1      | 0      | 0      | 0      | 0      | 0      |
| 1737   | 1      | 0      | 1      | 2      | 1      | 3      |
| 1738   | 0      | 2      | 0      | 1      | 1      | 1      |
| 1743   | 0      | 2      | 2      | 1      | 0      | 2      |
| 1755   | 1      | 1      | 1      | 1      | 1      | 0      |
| 1756   | 1      | 1      | 0      | 1      | 1      | 0      |
| 1757   | 0      | 0      | 0      | 0      | 0      | 0      |
| 1758   | 2      | 2      | 2      | 2      | 2      | 1      |
| 1759   | 0      | 0      | 0      | 0      | 0      | 0      |
| 1761   | 0      | 0      | 0      | 0      | 0      | 0      |
| 1762   | 0      | 0      | 0      | 0      | 0      | 0      |
| 1764   | 1      | 0      | 0      | 1      | 0      | 0      |
| 1767   | 0      | 0      | 0      | 0      | 0      | 0      |
| 1768   | 1      | 2      | 1      | 0      | 0      | 0      |
| 1769   | 0      | 0      | 0      | 0      | 1      | 0      |
| 1770   | 0      | 2      | 1      | 3      | 0      | 3      |
| 1771   | 3      | 1      | 2      | 2      | 2      | 1      |
| 1776   | 0      | 2      | 0      | 0      | 0      | 0      |
| 1777   | 0      | 2      | 0      | 1      | 0      | 1      |



| respid | Q56i_1 | Q56j_1 | Q56k_1 | Q56l_1 | Q56m_1 | Q56n_1 |
|--------|--------|--------|--------|--------|--------|--------|
| 1778   | 0      | 1      | 1      | 1      | 0      | 0      |
| 1779   | 1      | 2      | 0      | 1      | 1      | 0      |
| 1780   | 1      | 0      | 0      | 0      | 1      | 0      |
| 1781   | 1      | 2      | 1      | 2      | 1      | 1      |
| 1783   | 0      | 1      | 0      | 1      | 1      | 0      |
| 1784   | 2      | 0      | 2      | 2      | 1      | 1      |
| 1785   | 0      | 1      | 1      | 1      | 0      | 2      |
| 1788   | 2      | 2      | 1      | 1      | 2      | 1      |
| 1792   | 0      | 2      | 0      | 0      | 1      | 0      |
| 1794   | 1      | 1      | 1      | 3      | 1      | 0      |
| 1798   | 1      | 2      | 1      | 0      | 1      | 0      |
| 1799   | 1      | 2      | 2      | 1      | 1      | 0      |
| 1800   | 0      | 3      | 0      | 2      | 0      | 3      |
| 1804   | 1      | 1      | 1      | 1      | 2      | 1      |
| 1806   | 1      | 1      | 0      | 1      | 0      | 0      |
| 1807   | 1      | 2      | 1      | 1      | 1      | 2      |
| 1808   | 0      | 0      | 0      | 0      | 0      | 0      |
| 1809   | 1      | 0      | 1      | 0      | 2      | 1      |
| 1811   | 1      | 1      | 1      | 1      | 1      | 0      |
| 1812   | 1      | 1      | 0      | 1      | 0      | 1      |
| 1813   | 0      | 0      | 0      | 0      | 1      | 2      |
| 1814   | 0      | 0      | 0      | 0      | 1      | 1      |
| 1815   | 1      | 1      | 1      | 1      | 1      | 1      |
| 1817   | 2      | 1      | 1      | 2      | 2      | 1      |
| 1820   | 1      | 1      | 0      | 1      | 0      | 1      |
| 1821   | 0      | 3      | 0      | 0      | 0      | 1      |
| 1822   | 1      | 2      | 1      | 1      | 1      | 0      |
| 1823   | 1      | 3      | 0      | 3      | 0      | 0      |
| 1824   | 1      | 1      | 1      | 2      | 0      | 1      |
| 1826   | 0      | 0      | 0      | 0      | 0      | 0      |
| 1828   | 0      | 0      | 0      | 0      | 0      | 0      |
| 1829   | 1      | 1      | 1      | 0      | 1      | 0      |

| respid | Q56i_1 | Q56j_1 | Q56k_1 | Q56l_1 | Q56m_1 | Q56n_1 |
|--------|--------|--------|--------|--------|--------|--------|
| 1830   | 0      | 0      | 0      | 0      | 0      | 0      |
| 1831   | 1      | 1      | 1      | 1      | 0      | 1      |
| 1832   | 1      | 0      | 1      | 0      | 1      | 0      |
| 1836   | 0      | 1      | 0      | 0      | 0      | 0      |
| 1838   | 1      | 2      | 1      | 1      | 1      | 0      |
| 1839   | 0      | 1      | 0      | 0      | 0      | 0      |
| 1840   | 1      | 1      | 1      | 1      | 0      | 1      |
| 1841   | 1      | 1      | 1      | 2      | 2      | 1      |
| 1842   | 0      | 1      | 0      | 0      | 0      | 0      |
| 1843   | 0      | 0      | 0      | 0      | 1      | 0      |
| 1844   | 1      | 1      | 1      | 1      | 1      | 1      |
| 1845   | 0      | 2      | 0      | 1      | 0      | 0      |
| 1849   | 1      | 1      | 1      | 1      | 2      | 2      |
| 1850   | 0      | 0      | 0      | 1      | 0      | 1      |
| 1851   | 0      | 0      | 0      | 0      | 0      | 0      |
| 1852   | 1      | 2      | 0      | 0      | 0      | 0      |
| 1857   | 0      | 0      | 1      | 0      | 0      | 0      |
| 1858   | 0      | 0      | 0      | 0      | 0      | 0      |
| 1861   | 0      | 0      | 0      | 0      | 0      | 0      |
| 1862   | 0      | 2      | 0      | 0      | 0      | 1      |
| 1863   | 1      | 1      | 1      | 1      | 1      | 1      |
| 1864   | 1      | 3      | 1      | 1      | 1      | 1      |
| 1865   | 0      | 0      | 0      | 0      | 0      | 0      |
| 1867   | 0      | 3      | 0      | 1      | 0      | 1      |
| 1868   | 0      | 2      | 1      | 2      | 1      | 1      |
| 1869   | 1      | 2      | 1      | 1      | 1      | 1      |
| 1870   | 0      | 1      | 0      | 0      | 0      | 1      |
| 1871   | 2      | 0      | 2      | 1      | 2      | 1      |
| 1872   | 0      | 0      | 0      | 0      | 0      | 0      |
| 1873   | 0      | 1      | 0      | 1      | 0      | 0      |
| 1876   | 0      | 0      | 0      | 0      | 0      | 0      |
| 1877   | 0      | 0      | 0      | 0      | 0      | 0      |

| respid | Q56i_1 | Q56j_1 | Q56k_1 | Q56l_1 | Q56m_1 | Q56n_1 |
|--------|--------|--------|--------|--------|--------|--------|
| 1878   | 1      | 1      | 1      | 1      | 0      | 1      |
| 1879   | 1      | 1      | 1      | 2      | 0      | 1      |
| 1880   | 0      | 0      | 0      | 0      | 0      | 0      |
| 1881   | 0      | 0      | 0      | 0      | 0      | 0      |
| 1883   | 1      | 1      | 0      | 0      | 0      | 0      |
| 1886   | 0      | 1      | 0      | 0      | 0      | 0      |
| 1888   | 2      | 1      | 1      | 2      | 1      | 0      |
| 1889   | 1      | 2      | 1      | 2      | 1      | 0      |
| 1890   | 0      | 1      | 0      | 1      | 1      | 1      |
| 1891   | 0      | 3      | 0      | 0      | 0      | 0      |
| 1893   | 1      | 1      | 1      | 1      | 0      | 0      |
| 1894   | 0      | 2      | 0      | 0      | 0      | 0      |
| 1895   | 1      | 2      | 0      | 0      | 1      | 0      |
| 1896   | 2      | 2      | 1      | 0      | 1      | 0      |
| 1897   | 1      | 1      | 0      | 0      | 0      | 0      |
| 1898   | 3      | 3      | 3      | 1      | 3      | 1      |
| 1899   | 2      | 2      | 2      | 1      | 1      | 1      |
| 1900   | 0      | 0      | 0      | 0      | 0      | 0      |
| 1903   | 0      | 2      | 0      | 0      | 0      | 1      |
| 1906   | 2      | 3      | 1      | 3      | 2      | 1      |
| 1907   | 1      | 1      | 1      | 1      | 1      | 1      |
| 1908   | 1      | 3      | 1      | 2      | 1      | 1      |
| 1909   | 1      | 1      | 1      | 1      | 1      | 0      |
| 1910   | 0      | 0      | 1      | 1      | 1      | 0      |
| 1911   | 1      | 1      | 0      | 1      | 0      | 0      |
| 1912   | 1      | 1      | 1      | 1      | 1      | 1      |
| 1917   | 0      | 0      | 1      | 0      | 1      | 1      |
| 1918   | 1      | 0      | 0      | 0      | 1      | 0      |
| 1919   | 0      | 0      | 0      | 0      | 0      | 0      |
| 1922   | 0      | 2      | 0      | 1      | 0      | 1      |
| 1925   | 1      | 1      | 1      | 1      | 1      | 1      |
| 1926   | 1      | 0      | 1      | 0      | 1      | 0      |

| respid | Q56i_1 | Q56j_1 | Q56k_1 | Q56l_1 | Q56m_1 | Q56n_1 |
|--------|--------|--------|--------|--------|--------|--------|
| 1927   | 1      | 1      | 0      | 0      | 1      | 0      |
| 1928   | 0      | 0      | 0      | 1      | 0      | 0      |
| 1929   | 0      | 3      | 0      | 0      | 0      | 0      |
| 1934   | 0      | 0      | 0      | 0      | 0      | 0      |
| 1935   | 0      | 0      | 0      | 0      | 0      | 1      |
| 1936   | 2      | 1      | 2      | 2      | 1      | 1      |
| 1937   | 0      | 0      | 0      | 1      | 0      | 0      |
| 1938   | 0      | 0      | 1      | 1      | 0      | 0      |
| 1939   | 1      | 1      | 1      | 1      | 1      | 0      |
| 1940   | 0      | 0      | 1      | 0      | 1      | 0      |
| 1941   | 1      | 1      | 1      | 1      | 0      | 1      |
| 1948   | 0      | 0      | 0      | 0      | 1      | 0      |
| 1950   | 1      | 0      | 0      | 0      | 1      | 0      |
| 1955   | 0      | 1      | 0      | 1      | 1      | 1      |
| 1958   | 0      | 1      | 1      | 0      | 1      | 1      |
| 1960   | 0      | 1      | 1      | 1      | 1      | 1      |
| 1961   | 1      | 2      | 1      | 0      | 0      | 1      |
| 1962   | 0      | 0      | 0      | 0      | 0      | 0      |
| 1965   | 0      | 0      | 0      | 0      | 0      | 0      |
| 1966   | 1      | 1      | 0      | 0      | 1      | 0      |
| 1967   | 0      | 0      | 0      | 0      | 0      | 0      |
| 1968   | 0      | 1      | 0      | 0      | 1      | 0      |
| 1973   | 1      | 0      | 1      | 1      | 2      | 0      |
| 1974   | 1      | 2      | 0      | 0      | 1      | 0      |
| 1975   | 0      | 0      | 0      | 0      | 0      | 0      |
| 1977   | 0      | 0      | 1      | 0      | 1      | 1      |
| 1978   | 0      | 0      | 0      | 0      | 0      | 0      |
| 1979   | 1      | 1      | 1      | 2      | 1      | 1      |
| 1982   | 0      | 3      | 0      | 0      | 0      | 0      |
| 1983   | 0      | 1      | 0      | 1      | 0      | 0      |
| 1987   | 0      | 0      | 0      | 0      | 0      | 0      |
| 1988   | 0      | 0      | 0      | 0      | 0      | 0      |

| respid | Q56i_1 | Q56j_1 | Q56k_1 | Q56l_1 | Q56m_1 | Q56n_1 |
|--------|--------|--------|--------|--------|--------|--------|
| 1991   | 0      | 2      | 2      | 2      | 0      | 0      |
| 1992   | 0      | 0      | 0      | 0      | 0      | 0      |
| 1993   | 0      | 0      | 1      | 1      | 0      | 0      |
| 1994   | 2      | 0      | 2      | 1      | 1      | 0      |
| 1995   | 0      | 1      | 0      | 1      | 0      | 1      |
| 1996   | 0      | 0      | 0      | 0      | 0      | 0      |
| 1997   | 0      | 1      | 0      | 1      | 1      | 1      |
| 1998   | 0      | 0      | 0      | 0      | 0      | 0      |
| 1999   | 1      | 1      | 1      | 2      | 1      | 1      |
| 2000   | 1      | 2      | 1      | 2      | 2      | 1      |
| 2001   | 0      | 1      | 0      | 1      | 1      | 1      |
| 2002   | 1      | 2      | 0      | 1      | 1      | 0      |
| 2003   | 0      | 2      | 0      | 0      | 0      | 1      |
| 2004   | 0      | 1      | 0      | 0      | 0      | 1      |
| 2005   | 0      | 0      | 0      | 1      | 0      | 0      |
| 2007   | 1      | 1      | 1      | 0      | 0      | 0      |
| 2009   | 1      | 1      | 1      | 0      | 1      | 0      |
| 2010   | 0      | 1      | 1      | 1      | 0      | 1      |
| 2011   | 1      | 1      | 1      | 0      | 0      | 0      |
| 2013   | 1      | 2      | 1      | 1      | 0      | 0      |
| 2014   | 1      | 1      | 1      | 2      | 1      | 0      |
| 2017   | 1      | 1      | 0      | 1      | 1      | 1      |
| 2020   | 0      | 0      | 0      | 0      | 0      | 1      |
| 2023   | 0      | 1      | 0      | 1      | 0      | 0      |
| 2024   | 0      | 2      | 0      | 2      | 1      | 2      |
| 2029   | 0      | 1      | 0      | 0      | 0      | 0      |
| 2030   | 0      | 0      | 0      | 0      | 0      | 0      |
| 2031   | 1      | 1      | 0      | 2      | 1      | 0      |
| 2032   | 1      | 0      | 1      | 1      | 1      | 0      |
| 2033   | 0      | 0      | 0      | 0      | 0      | 0      |
| 2034   | 0      | 2      | 0      | 2      | 0      | 1      |
| 2036   | 1      | 1      | 1      | 2      | 1      | 2      |

| respid | Q56i_1 | Q56j_1 | Q56k_1 | Q56l_1 | Q56m_1 | Q56n_1 |
|--------|--------|--------|--------|--------|--------|--------|
| 2037   | 2      | 2      | 2      | 2      | 1      | 1      |
| 2038   | 0      | 0      | 0      | 0      | 0      | 0      |
| 2039   | 0      | 1      | 1      | 1      | 0      | 1      |
| 2040   | 0      | 2      | 0      | 2      | 0      | 0      |
| 2041   | 0      | 0      | 0      | 2      | 0      | 0      |
| 2042   | 0      | 0      | 0      | 0      | 0      | 0      |
| 2043   | 1      | 1      | 1      | 0      | 1      | 1      |
| 2051   | 2      | 2      | 1      | 1      | 1      | 0      |
| 2052   | 1      | 0      | 1      | 1      | 1      | 0      |
| 2053   | 0      | 0      | 0      | 0      | 0      | 0      |
| 2054   | 1      | 2      | 2      | 2      | 1      | 3      |
| 2055   | 1      | 1      | 1      | 0      | 1      | 2      |
| 2056   | 1      | 1      | 1      | 1      | 1      | 0      |
| 2057   | 0      | 1      | 0      | 1      | 0      | 1      |
| 2059   | 0      | 2      | 0      | 0      | 0      | 0      |
| 2063   | 1      | 1      | 2      | 1      | 0      | 0      |
| 2066   | 0      | 2      | 2      | 2      | 1      | 2      |
| 2068   | 0      | 1      | 1      | 0      | 0      | 0      |
| 2069   | 0      | 0      | 0      | 0      | 0      | 0      |
| 2070   | 0      | 0      | 0      | 1      | 0      | 1      |
| 2071   | 0      | 0      | 0      | 0      | 0      | 0      |
| 2073   | 0      | 0      | 1      | 1      | 0      | 0      |
| 2077   | 1      | 0      | 0      | 1      | 1      | 1      |
| 2079   | 0      | 2      | 1      | 0      | 1      | 1      |
| 2080   | 2      | 0      | 0      | 3      | 3      | 3      |
| 2081   | 1      | 1      | 1      | 2      | 1      | 1      |
| 2084   | 0      | 1      | 1      | 2      | 0      | 1      |
| 2085   | 0      | 0      | 0      | 0      | 0      | 1      |
| 2087   | 1      | 0      | 1      | 0      | 0      | 0      |
| 2089   | 0      | 0      | 0      | 0      | 0      | 1      |
| 2093   | 0      | 0      | 1      | 1      | 0      | 1      |
| 2094   | 0      | 1      | 0      | 1      | 0      | 1      |

| respid | Q56i_1 | Q56j_1 | Q56k_1 | Q56l_1 | Q56m_1 | Q56n_1 |
|--------|--------|--------|--------|--------|--------|--------|
| 2095   | 0      | 0      | 0      | 0      | 1      | 0      |
| 2097   | 0      | 0      | 0      | 0      | 0      | 0      |
| 2099   | 1      | 1      | 2      | 1      | 1      | 1      |
| 2100   | 1      | 0      | 1      | 0      | 1      | 0      |
| 2101   | 0      | 1      | 0      | 1      | 0      | 1      |
| 2103   | 0      | 0      | 0      | 1      | 1      | 0      |
| 2104   | 1      | 0      | 0      | 0      | 0      | 0      |
| 2106   | 1      | 1      | 0      | 2      | 0      | 1      |
| 2111   | 0      | 0      | 2      | 1      | 0      | 0      |
| 2113   | 0      | 1      | 1      | 1      | 1      | 2      |
| 2115   | 0      | 0      | 0      | 0      | 0      | 0      |
| 2119   | 0      | 1      | 0      | 1      | 1      | 1      |
| 2120   | 1      | 1      | 0      | 1      | 1      | 1      |
| 2123   | 0      | 0      | 0      | 0      | 0      | 0      |
| 2124   | 0      | 0      | 1      | 0      | 1      | 0      |
| 2130   | 0      | 0      | 0      | 0      | 0      | 0      |
| 2131   | 1      | 2      | 1      | 1      | 1      | 0      |
| 2133   | 1      | 2      | 1      | 0      | 0      | 0      |
| 2139   | 2      | 2      | 1      | 2      | 1      | 1      |
| 2141   | 0      | 1      | 0      | 0      | 0      | 1      |
| 2143   | 0      | 1      | 0      | 0      | 0      | 0      |
| 2144   | 0      | 1      | 1      | 1      | 1      | 0      |
| 2147   | 0      | 0      | 0      | 0      | 0      | 0      |
| 2151   | 1      | 1      | 1      | 1      | 1      | 1      |
| 2153   | 0      | 0      | 0      | 0      | 0      | 0      |
| 2154   | 0      | 1      | 1      | 0      | 1      | 1      |
| 2155   | 0      | 2      | 0      | 0      | 1      | 1      |
| 2159   | 1      | 1      | 1      | 1      | 0      | 1      |
| 2160   | 1      | 0      | 1      | 1      | 1      | 1      |
| 2161   | 0      | 1      | 0      | 0      | 0      | 1      |
| 2163   | 1      | 0      | 0      | 0      | 2      | 1      |
| 2164   | 0      | 1      | 0      | 0      | 1      | 1      |

| respid | Q56i_1 | Q56j_1 | Q56k_1 | Q56l_1 | Q56m_1 | Q56n_1 |
|--------|--------|--------|--------|--------|--------|--------|
| 2168   | 1      | 1      | 1      | 1      | 1      | 0      |
| 2169   | 1      | 1      | 1      | 1      | 1      | 1      |
| 2170   | 1      | 2      | 1      | 2      | 1      | 1      |
| 2171   | 1      | 2      | 1      | 1      | 1      | 0      |
| 2172   | 1      | 0      | 1      | 2      | 1      | 0      |
| 2173   | 0      | 3      | 0      | 0      | 0      | 1      |
| 2174   | 1      | 3      | 0      | 0      | 1      | 0      |
| 2175   | 0      | 1      | 2      | 1      | 0      | 2      |
| 2176   | 1      | 0      | 0      | 1      | 1      | 0      |
| 2177   | 1      | 0      | 1      | 1      | 0      | 0      |
| 2179   | 0      | 1      | 1      | 1      | 0      | 0      |
| 2181   | 0      | 0      | 0      | 0      | 0      | 0      |
| 2182   | 0      | 0      | 0      | 0      | 0      | 0      |
| 2183   | 1      | 1      | 1      | 1      | 1      | 1      |
| 2184   | 0      | 0      | 1      | 0      | 0      | 0      |
| 2185   | 0      | 0      | 0      | 1      | 0      | 1      |
| 2186   | 0      | 1      | 1      | 1      | 0      | 0      |
| 2187   | 0      | 1      | 0      | 0      | 0      | 0      |
| 2188   | 0      | 1      | 0      | 1      | 1      | 2      |
| 2189   | 0      | 0      | 1      | 0      | 1      | 0      |
| 2190   | 0      | 0      | 0      | 0      | 0      | 2      |
| 2193   | 0      | 1      | 1      | 2      | 0      | 0      |
| 2195   | 1      | 1      | 2      | 2      | 2      | 2      |
| 2198   | 1      | 3      | 0      | 0      | 0      | 1      |
| 2200   | 0      | 1      | 1      | 0      | 0      | 0      |
| 2205   | 2      | 1      | 1      | 2      | 2      | 1      |
| 2208   | 0      | 1      | 0      | 0      | 0      | 0      |
| 2209   | 1      | 1      | 1      | 1      | 1      | 1      |
| 2210   | 0      | 0      | 1      | 1      | 0      | 1      |
| 2211   | 1      | 2      | 1      | 1      | 1      | 1      |
| 2213   | 0      | 1      | 0      | 0      | 0      | 0      |
| 2214   | 1      | 1      | 3      | 2      | 1      | 1      |



| respid | Q56i_1 | Q56j_1 | Q56k_1 | Q56l_1 | Q56m_1 | Q56n_1 |
|--------|--------|--------|--------|--------|--------|--------|
| 2216   | 1      | 2      | 3      | 2      | 0      | 0      |
| 2220   | 1      | 0      | 1      | 0      | 1      | 0      |
| 2225   | 0      | 1      | 0      | 0      | 0      | 1      |
| 2227   | 0      | 3      | 0      | 1      | 1      | 0      |
| 2228   | 1      | 0      | 1      | 1      | 1      | 1      |
| 2229   | 0      | 0      | 1      | 0      | 0      | 0      |
| 2230   | 0      | 1      | 0      | 0      | 0      | 0      |
| 2236   | 0      | 0      | 0      | 0      | 0      | 0      |
| 2238   | 1      | 0      | 2      | 2      | 1      | 1      |
| 2239   | 0      | 0      | 0      | 0      | 0      | 0      |
| 2240   | 1      | 0      | 0      | 0      | 0      | 0      |
| 2241   | 0      | 1      | 1      | 2      | 1      | 1      |
| 2243   | 0      | 0      | 0      | 0      | 0      | 0      |
| 2245   | 0      | 1      | 0      | 1      | 2      | 0      |
| 2247   | 0      | 1      | 0      | 0      | 1      | 0      |
| 2248   | 0      | 0      | 0      | 0      | 0      | 0      |
| 2249   | 1      | 1      | 1      | 0      | 1      | 0      |
| 2254   | 0      | 0      | 2      | 1      | 0      | 0      |
| 2256   | 0      | 1      | 0      | 0      | 0      | 0      |
| 2259   | 0      | 3      | 0      | 3      | 0      | 0      |
| 2261   | 0      | 0      | 1      | 0      | 0      | 0      |
| 2262   | 0      | 0      | 0      | 0      | 0      | 0      |
| 2263   | 2      | 3      | 2      | 1      | 2      | 2      |
| 2264   | 1      | 1      | 0      | 0      | 1      | 0      |
| 2265   | 0      | 1      | 0      | 2      | 1      | 1      |
| 2270   | 1      | 1      | 0      | 0      | 1      | 0      |
| 2271   | 0      | 1      | 1      | 0      | 0      | 0      |
| 2272   | 1      | 1      | 1      | 0      | 1      | 2      |
| 2273   | 1      | 0      | 0      | 1      | 1      | 0      |
| 2274   | 1      | 0      | 0      | 0      | 0      | 1      |
| 2276   | 1      | 0      | 2      | 2      | 1      | 0      |
| 2277   | 1      | 1      | 0      | 1      | 1      | 1      |

| respid | Q56i_1 | Q56j_1 | Q56k_1 | Q56l_1 | Q56m_1 | Q56n_1 |
|--------|--------|--------|--------|--------|--------|--------|
| 2281   | 0      | 0      | 0      | 0      | 0      | 0      |
| 2288   | 0      | 0      | 0      | 0      | 0      | 0      |
| 2290   | 1      | 0      | 0      | 0      | 1      | 0      |
| 2294   | 0      | 0      | 0      | 0      | 1      | 0      |
| 2295   | 0      | 0      | 0      | 1      | 0      | 0      |
| 2296   | 1      | 1      | 1      | 1      | 1      | 1      |
| 2297   | 0      | 2      | 0      | 0      | 0      | 0      |
| 2298   | 0      | 0      | 0      | 0      | 1      | 0      |
| 2301   | 0      | 2      | 1      | 0      | 0      | 0      |
| 2302   | 1      | 1      | 1      | 1      | 1      | 1      |
| 2303   | 0      | 0      | 0      | 0      | 0      | 0      |
| 2305   | 0      | 1      | 0      | 0      | 1      | 0      |
| 2309   | 1      | 1      | 1      | 0      | 1      | 0      |
| 2310   | 0      | 0      | 0      | 0      | 0      | 0      |
| 2311   | 1      | 2      | 1      | 2      | 1      | 1      |
| 2313   | 2      | 2      | 1      | 1      | 1      | 1      |
| 2316   | 1      | 1      | 0      | 1      | 1      | 0      |
| 2317   | 0      | 0      | 0      | 0      | 1      | 0      |
| 2318   | 1      | 0      | 1      | 1      | 1      | 0      |
| 2319   | 1      | 0      | 2      | 2      | 2      | 2      |
| 2321   | 1      | 1      | 1      | 1      | 1      | 1      |
| 2324   | 0      | 0      | 0      | 0      | 0      | 0      |
| 2328   | 0      | 0      | 1      | 0      | 1      | 0      |
| 2329   | 1      | 2      | 1      | 1      | 0      | 0      |
| 2330   | 0      | 0      | 0      | 2      | 1      | 0      |
| 2333   | 1      | 1      | 1      | 2      | 1      | 2      |
| 2334   | 0      | 1      | 1      | 1      | 1      | 1      |
| 2338   | 0      | 1      | 0      | 3      | 0      | 1      |
| 2341   | 0      | 1      | 0      | 0      | 1      | 1      |
| 2342   | 1      | 2      | 1      | 2      | 1      | 0      |
| 2343   | 1      | 0      | 1      | 1      | 1      | 0      |
| 2346   | 1      | 1      | 1      | 1      | 1      | 1      |

| respid | Q56i_1 | Q56j_1 | Q56k_1 | Q56l_1 | Q56m_1 | Q56n_1 |
|--------|--------|--------|--------|--------|--------|--------|
| 2347   | 1      | 1      | 1      | 1      | 1      | 0      |
| 2348   | 1      | 1      | 1      | 1      | 1      | 1      |
| 2349   | 2      | 2      | 2      | 2      | 2      | 1      |
| 2350   | 0      | 0      | 0      | 0      | 0      | 0      |
| 2351   | 0      | 1      | 0      | 1      | 1      | 1      |
| 2352   | 0      | 3      | 0      | 0      | 0      | 0      |
| 2359   | 0      | 0      | 1      | 0      | 1      | 0      |
| 2362   | 0      | 0      | 0      | 3      | 0      | 0      |
| 2363   | 0      | 3      | 0      | 0      | 0      | 0      |
| 2365   | 0      | 3      | 0      | 2      | 0      | 3      |
| 2367   | 0      | 0      | 1      | 1      | 1      | 1      |
| 2368   | 0      | 0      | 0      | 0      | 0      | 0      |
| 2369   | 0      | 1      | 2      | 0      | 0      | 0      |
| 2372   | 0      | 0      | 0      | 0      | 1      | 1      |
| 2374   | 1      | 0      | 0      | 1      | 0      | 0      |
| 2376   | 0      | 1      | 0      | 0      | 0      | 0      |
| 2379   | 1      | 1      | 1      | 0      | 0      | 0      |
| 2380   | 0      | 1      | 0      | 0      | 0      | 0      |
| 2381   | 2      | 0      | 1      | 1      | 1      | 1      |
| 2382   | 0      | 0      | 0      | 2      | 1      | 0      |
| 2385   | 1      | 0      | 1      | 1      | 1      | 1      |
| 2387   | 1      | 1      | 0      | 0      | 0      | 0      |
| 2388   | 0      | 0      | 0      | 0      | 0      | 0      |
| 2389   | 1      | 1      | 0      | 1      | 1      | 1      |
| 2391   | 0      | 2      | 1      | 1      | 0      | 0      |
| 2392   | 1      | 0      | 1      | 1      | 1      | 1      |
| 2393   | 0      | 1      | 0      | 0      | 1      | 0      |
| 2394   | 1      | 2      | 1      | 2      | 0      | 1      |
| 2397   | 0      | 1      | 0      | 1      | 1      | 1      |
| 2398   | 0      | 1      | 1      | 1      | 1      | 1      |
| 2400   | 0      | 2      | 1      | 1      | 1      | 1      |
| 2402   | 1      | 2      | 0      | 1      | 1      | 0      |

| respid | Q56i_1 | Q56j_1 | Q56k_1 | Q56l_1 | Q56m_1 | Q56n_1 |
|--------|--------|--------|--------|--------|--------|--------|
| 2406   | 0      | 1      | 1      | 0      | 0      | 0      |
| 2408   | 1      | 2      | 1      | 2      | 0      | 0      |
| 2410   | 0      | 2      | 0      | 0      | 0      | 0      |
| 2411   | 1      | 1      | 1      | 1      | 1      | 1      |
| 2412   | 0      | 0      | 0      | 0      | 0      | 0      |
| 2414   | 1      | 1      | 1      | 1      | 1      | 1      |
| 2421   | 0      | 1      | 0      | 0      | 0      | 2      |
| 2423   | 1      | 1      | 1      | 1      | 1      | 0      |
| 2424   | 0      | 2      | 0      | 0      | 0      | 0      |
| 2425   | 0      | 0      | 0      | 0      | 1      | 1      |
| 2426   | 0      | 1      | 0      | 1      | 0      | 0      |
| 2429   | 1      | 1      | 1      | 1      | 1      | 0      |
| 2430   | 1      | 3      | 0      | 0      | 0      | 0      |
| 2432   | 0      | 2      | 1      | 0      | 1      | 0      |
| 2433   | 0      | 1      | 1      | 1      | 0      | 1      |
| 2434   | 1      | 0      | 1      | 1      | 1      | 0      |
| 2435   | 1      | 1      | 0      | 1      | 1      | 1      |
| 2436   | 0      | 1      | 0      | 1      | 0      | 0      |
| 2439   | 1      | 1      | 2      | 2      | 1      | 2      |
| 2440   | 0      | 2      | 0      | 2      | 0      | 0      |
| 2441   | 0      | 0      | 0      | 0      | 1      | 1      |
| 2446   | 1      | 1      | 1      | 0      | 0      | 0      |
| 2448   | 1      | 1      | 1      | 1      | 1      | 0      |
| 2449   | 1      | 3      | 3      | 2      | 0      | 3      |
| 2451   | 0      | 1      | 0      | 1      | 1      | 1      |
| 2452   | 1      | 0      | 1      | 0      | 0      | 0      |
| 2455   | 0      | 3      | 2      | 2      | 1      | 1      |
| 2457   | 0      | 1      | 1      | 2      | 0      | 1      |
| 2458   | 1      | 2      | 0      | 0      | 1      | 0      |
| 2459   | 1      | 1      | 0      | 1      | 1      | 0      |
| 2460   | 1      | 1      | 1      | 0      | 0      | 0      |
| 2462   | 2      | 2      | 1      | 2      | 2      | 1      |

| respid | Q56i_1 | Q56j_1 | Q56k_1 | Q56l_1 | Q56m_1 | Q56n_1 |
|--------|--------|--------|--------|--------|--------|--------|
| 2464   | 2      | 2      | 2      | 2      | 0      | 1      |
| 2465   | 1      | 1      | 1      | 1      | 1      | 0      |
| 2468   | 1      | 1      | 1      | 0      | 1      | 1      |
| 2469   | 0      | 2      | 0      | 0      | 0      | 1      |
| 2470   | 0      | 2      | 1      | 2      | 1      | 1      |
| 2471   | 1      | 2      | 1      | 2      | 1      | 1      |
| 2472   | 1      | 1      | 1      | 1      | 1      | 0      |
| 2474   | 0      | 2      | 0      | 2      | 0      | 0      |
| 2476   | 1      | 0      | 1      | 1      | 0      | 1      |
| 2478   | 0      | 0      | 1      | 1      | 1      | 1      |
| 2479   | 0      | 1      | 0      | 1      | 0      | 1      |
| 2480   | 0      | 0      | 0      | 1      | 0      | 1      |
| 2482   | 1      | 3      | 1      | 1      | 0      | 2      |
| 2486   | 0      | 0      | 0      | 0      | 0      | 0      |
| 2488   | 0      | 1      | 1      | 0      | 0      | 1      |
| 2489   | 1      | 1      | 0      | 1      | 1      | 0      |
| 2491   | 0      | 0      | 0      | 0      | 0      | 0      |
| 2495   | 0      | 0      | 1      | 0      | 0      | 0      |
| 2496   | 2      | 1      | 2      | 0      | 0      | 0      |
| 2498   | 0      | 0      | 0      | 0      | 0      | 0      |
| 2501   | 1      | 1      | 1      | 2      | 2      | 1      |
| 2502   | 1      | 1      | 2      | 2      | 1      | 1      |
| 2503   | 0      | 1      | 0      | 0      | 0      | 0      |
| 2504   | 0      | 1      | 0      | 0      | 0      | 1      |
| 2507   | 1      | 1      | 1      | 1      | 1      | 1      |
| 2509   | 0      | 0      | 0      | 1      | 1      | 0      |
| 2512   | 1      | 1      | 2      | 1      | 1      | 2      |
| 2514   | 0      | 0      | 0      | 1      | 1      | 0      |
| 2516   | 0      | 1      | 0      | 2      | 1      | 0      |
| 2517   | 0      | 1      | 1      | 1      | 1      | 0      |
| 2521   | 0      | 2      | 0      | 1      | 1      | 0      |
| 2522   | 0      | 0      | 0      | 0      | 0      | 0      |

| respid | Q56i_1 | Q56j_1 | Q56k_1 | Q56l_1 | Q56m_1 | Q56n_1 |
|--------|--------|--------|--------|--------|--------|--------|
| 2524   | 0      | 1      | 0      | 0      | 0      | 1      |
| 2525   | 0      | 1      | 0      | 1      | 0      | 0      |
| 2526   | 0      | 0      | 0      | 0      | 0      | 0      |
| 2527   | 0      | 3      | 0      | 0      | 0      | 0      |
| 2528   | 0      | 0      | 0      | 0      | 0      | 1      |
| 2531   | 0      | 2      | 0      | 2      | 0      | 1      |
| 2533   | 1      | 2      | 0      | 1      | 1      | 1      |
| 2535   | 0      | 1      | 0      | 0      | 0      | 0      |
| 2536   | 2      | 2      | 2      | 1      | 1      | 2      |
| 2539   | 0      | 0      | 0      | 0      | 0      | 0      |
| 2540   | 1      | 1      | 2      | 1      | 1      | 1      |
| 2543   | 0      | 3      | 0      | 1      | 0      | 0      |
| 2546   | 0      | 1      | 0      | 1      | 1      | 1      |
| 2547   | 1      | 1      | 1      | 1      | 1      | 0      |
| 2549   | 0      | 1      | 0      | 0      | 1      | 1      |
| 2553   | 1      | 0      | 1      | 1      | 1      | 1      |
| 2554   | 0      | 3      | 0      | 0      | 0      | 0      |
| 2555   | 1      | 1      | 1      | 0      | 1      | 0      |
| 2556   | 0      | 3      | 0      | 0      | 0      | 0      |
| 2557   | 1      | 2      | 1      | 1      | 1      | 2      |
| 2559   | 0      | 0      | 0      | 0      | 0      | 0      |
| 2560   | 1      | 0      | 1      | 1      | 0      | 0      |
| 2561   | 0      | 2      | 1      | 1      | 0      | 0      |
| 2566   | 0      | 2      | 0      | 1      | 0      | 0      |
| 2567   | 0      | 0      | 0      | 2      | 2      | 0      |
| 2570   | 0      | 0      | 1      | 3      | 3      | 2      |
| 2574   | 1      | 2      | 1      | 2      | 1      | 2      |
| 2578   | 0      | 0      | 0      | 0      | 0      | 1      |
| 2580   | 1      | 1      | 0      | 1      | 1      | 0      |
| 2590   | 0      | 1      | 1      | 2      | 1      | 1      |
| 2593   | 0      | 2      | 0      | 2      | 0      | 2      |
| 2594   | 2      | 1      | 2      | 1      | 2      | 2      |

| respid | Q56i_1 | Q56j_1 | Q56k_1 | Q56l_1 | Q56m_1 | Q56n_1 |
|--------|--------|--------|--------|--------|--------|--------|
| 2595   | 0      | 2      | 1      | 1      | 0      | 1      |
| 2596   | 0      | 1      | 0      | 1      | 0      | 0      |
| 2597   | 2      | 2      | 1      | 2      | 1      | 1      |
| 2598   | 1      | 3      | 1      | 0      | 1      | 0      |
| 2602   | 1      | 0      | 1      | 0      | 0      | 3      |
| 2605   | 1      | 2      | 2      | 1      | 1      | 2      |
| 2606   | 0      | 1      | 0      | 0      | 0      | 0      |
| 2607   | 1      | 0      | 1      | 1      | 1      | 1      |
| 2608   | 0      | 0      | 0      | 0      | 0      | 0      |
| 2609   | 0      | 1      | 1      | 0      | 1      | 0      |
| 2610   | 0      | 0      | 1      | 3      | 0      | 2      |
| 2614   | 1      | 0      | 0      | 0      | 1      | 0      |
| 2615   | 0      | 2      | 0      | 0      | 0      | 0      |
| 2616   | 0      | 2      | 0      | 1      | 1      | 0      |
| 2618   | 0      | 3      | 1      | 1      | 1      | 1      |
| 2630   | 2      | 3      | 2      | 2      | 2      | 2      |
| 2633   | 0      | 1      | 1      | 0      | 0      | 0      |
| 2637   | 0      | 2      | 0      | 0      | 1      | 1      |
| 2638   | 1      | 3      | 0      | 1      | 0      | 0      |
| 2641   | 1      | 2      | 1      | 2      | 2      | 3      |
| 2644   | 0      | 0      | 0      | 0      | 0      | 0      |
| 2645   | 0      | 3      | 0      | 1      | 0      | 0      |
| 2646   | 1      | 0      | 1      | 0      | 1      | 0      |
| 2648   | 0      | 1      | 1      | 1      | 0      | 1      |
| 2651   | 0      | 3      | 0      | 0      | 0      | 0      |
| 2652   | 1      | 1      | 1      | 1      | 1      | 1      |
| 2653   | 0      | 1      | 0      | 1      | 0      | 0      |
| 2656   | 1      | 1      | 0      | 0      | 0      | 0      |
| 2657   | 0      | 1      | 0      | 0      | 0      | 0      |
| 2658   | 0      | 2      | 0      | 0      | 0      | 0      |
| 2661   | 1      | 1      | 0      | 0      | 0      | 0      |
| 2663   | 1      | 2      | 1      | 2      | 0      | 1      |

| respid | Q56i_1 | Q56j_1 | Q56k_1 | Q56l_1 | Q56m_1 | Q56n_1 |
|--------|--------|--------|--------|--------|--------|--------|
| 2665   | 1      | 3      | 1      | 1      | 1      | 1      |
| 2670   | 0      | 0      | 0      | 0      | 0      | 0      |
| 2672   | 1      | 0      | 0      | 0      | 0      | 0      |
| 2673   | 1      | 1      | 0      | 1      | 1      | 1      |
| 2677   | 0      | 0      | 0      | 0      | 0      | 0      |
| 2686   | 1      | 1      | 2      | 1      | 1      | 2      |
| 2688   | 1      | 1      | 1      | 0      | 1      | 0      |
| 2689   | 1      | 1      | 1      | 1      | 1      | 0      |
| 2691   | 0      | 1      | 0      | 0      | 0      | 0      |
| 2695   | 0      | 0      | 0      | 0      | 0      | 0      |
| 2696   | 1      | 0      | 1      | 1      | 2      | 1      |
| 2697   | 0      | 1      | 1      | 1      | 1      | 1      |
| 2698   | 0      | 1      | 0      | 0      | 1      | 0      |
| 2703   | 1      | 0      | 0      | 1      | 2      | 1      |
| 2704   | 1      | 1      | 1      | 1      | 1      | 1      |
| 2706   | 1      | 0      | 1      | 1      | 1      | 0      |
| 2707   | 0      | 2      | 1      | 1      | 1      | 1      |
| 2710   | 0      | 3      | 1      | 1      | 1      | 1      |
| 2711   | 1      | 1      | 1      | 2      | 2      | 1      |
| 2712   | 0      | 1      | 0      | 1      | 0      | 1      |
| 2713   | 1      | 1      | 0      | 1      | 0      | 0      |
| 2721   | 1      | 1      | 0      | 1      | 0      | 1      |
| 2730   | 0      | 2      | 0      | 0      | 0      | 0      |
| 2731   | 0      | 0      | 0      | 0      | 0      | 0      |
| 2732   | 1      | 1      | 1      | 1      | 1      | 1      |
| 2733   | 2      | 1      | 1      | 2      | 2      | 1      |
| 2735   | 1      | 1      | 1      | 2      | 1      | 1      |
| 2736   | 0      | 0      | 1      | 1      | 0      | 1      |
| 2740   | 2      | 1      | 1      | 1      | 1      | 2      |
| 2741   | 0      | 2      | 0      | 0      | 1      | 0      |
| 2742   | 1      | 1      | 1      | 1      | 1      | 0      |
| 2743   | 0      | 1      | 0      | 1      | 1      | 0      |



| respid | Q56i_1 | Q56j_1 | Q56k_1 | Q56l_1 | Q56m_1 | Q56n_1 |
|--------|--------|--------|--------|--------|--------|--------|
| 2744   | 1      | 1      | 0      | 1      | 1      | 2      |
| 2745   | 1      | 1      | 1      | 0      | 1      | 1      |
| 2749   | 0      | 0      | 0      | 0      | 0      | 1      |
| 2751   | 0      | 0      | 1      | 0      | 0      | 0      |
| 2754   | 2      | 1      | 3      | 3      | 1      | 2      |
| 2755   | 1      | 1      | 1      | 1      | 1      | 1      |
| 2757   | 0      | 3      | 2      | 1      | 0      | 2      |
| 2758   | 1      | 1      | 1      | 0      | 1      | 0      |
| 2759   | 1      | 3      | 1      | 3      | 3      | 1      |
| 2761   | 1      | 0      | 1      | 0      | 1      | 0      |
| 2762   | 1      | 3      | 1      | 1      | 1      | 1      |
| 2763   | 1      | 2      | 1      | 1      | 0      | 1      |
| 2764   | 1      | 2      | 2      | 2      | 1      | 1      |
| 2765   | 0      | 1      | 1      | 1      | 1      | 0      |
| 2766   | 0      | 1      | 0      | 1      | 0      | 1      |
| 2767   | 1      | 1      | 1      | 1      | 1      | 0      |
| 2769   | 0      | 0      | 0      | 0      | 0      | 0      |
| 2770   | 1      | 0      | 2      | 0      | 1      | 0      |
| 2771   | 2      | 1      | 1      | 1      | 1      | 1      |
| 2774   | 0      | 1      | 0      | 1      | 0      | 0      |
| 2777   | 1      | 1      | 1      | 1      | 1      | 1      |
| 2778   | 1      | 3      | 0      | 1      | 0      | 0      |
| 2781   | 1      | 2      | 1      | 1      | 1      | 1      |
| 2782   | 1      | 1      | 1      | 1      | 1      | 1      |
| 2784   | 1      | 2      | 1      | 1      | 1      | 1      |
| 2785   | 0      | 1      | 1      | 2      | 1      | 1      |
| 2786   | 0      | 3      | 0      | 0      | 0      | 0      |
| 2787   | 0      | 1      | 0      | 0      | 0      | 0      |
| 2789   | 1      | 0      | 1      | 2      | 1      | 1      |
| 2790   | 0      | 1      | 0      | 0      | 1      | 0      |
| 2791   | 0      | 1      | 1      | 1      | 0      | 1      |
| 2793   | 1      | 3      | 1      | 3      | 0      | 1      |

| respid | Q56i_1 | Q56j_1 | Q56k_1 | Q56l_1 | Q56m_1 | Q56n_1 |
|--------|--------|--------|--------|--------|--------|--------|
| 2797   | 0      | 1      | 1      | 1      | 0      | 0      |
| 2798   | 0      | 0      | 1      | 0      | 0      | 0      |
| 2799   | 1      | 2      | 2      | 2      | 1      | 0      |
| 2801   | 1      | 0      | 1      | 1      | 1      | 1      |
| 2802   | 1      | 3      | 2      | 1      | 1      | 2      |
| 2803   | 0      | 1      | 1      | 1      | 0      | 0      |
| 2804   | 1      | 0      | 1      | 2      | 0      | 0      |
| 2807   | 0      | 1      | 1      | 1      | 1      | 1      |
| 2809   | 0      | 2      | 0      | 1      | 0      | 1      |
| 2810   | 1      | 2      | 1      | 1      | 0      | 1      |
| 2812   | 0      | 0      | 0      | 0      | 0      | 2      |
| 2814   | 0      | 0      | 0      | 0      | 0      | 0      |
| 2815   | 1      | 2      | 1      | 3      | 0      | 0      |
| 2816   | 0      | 1      | 0      | 1      | 0      | 0      |
| 2817   | 1      | 1      | 2      | 2      | 1      | 2      |
| 2819   | 1      | 1      | 1      | 1      | 1      | 1      |
| 2820   | 0      | 0      | 0      | 0      | 0      | 0      |
| 2821   | 1      | 1      | 1      | 1      | 1      | 0      |
| 2822   | 1      | 1      | 1      | 1      | 1      | 1      |
| 2823   | 0      | 0      | 2      | 0      | 0      | 0      |
| 2824   | 0      | 2      | 0      | 1      | 0      | 0      |
| 2825   | 1      | 1      | 1      | 1      | 1      | 0      |
| 2826   | 1      | 0      | 1      | 1      | 0      | 0      |
| 2827   | 0      | 1      | 0      | 0      | 0      | 0      |
| 2828   | 0      | 0      | 0      | 0      | 0      | 0      |
| 2829   | 1      | 1      | 1      | 1      | 1      | 1      |
| 2830   | 2      | 1      | 1      | 1      | 2      | 2      |
| 2831   | 2      | 2      | 1      | 1      | 2      | 1      |
| 2832   | 1      | 3      | 1      | 2      | 0      | 0      |
| 2833   | 0      | 3      | 2      | 1      | 0      | 0      |
| 2834   | 1      | 1      | 2      | 2      | 0      | 1      |
| 2835   | 1      | 1      | 2      | 2      | 1      | 1      |

| respid | Q56i_1 | Q56j_1 | Q56k_1 | Q56l_1 | Q56m_1 | Q56n_1 |
|--------|--------|--------|--------|--------|--------|--------|
| 2836   | 1      | 2      | 1      | 1      | 1      | 1      |
| 2837   | 1      | 0      | 1      | 1      | 1      | 1      |
| 2838   | 0      | 0      | 1      | 1      | 0      | 1      |
| 2844   | 2      | 2      | 2      | 1      | 2      | 1      |
| 2845   | 0      | 1      | 0      | 0      | 0      | 0      |
| 2847   | 3      | 3      | 3      | 3      | 3      | 0      |
| 2848   | 1      | 1      | 1      | 1      | 1      | 1      |
| 2849   | 0      | 2      | 1      | 1      | 0      | 1      |
| 2851   | 0      | 0      | 0      | 1      | 1      | 1      |
| 2852   | 1      | 2      | 1      | 1      | 1      | 2      |
| 2853   | 1      | 1      | 1      | 1      | 1      | 1      |
| 2854   | 1      | 0      | 2      | 1      | 0      | 0      |
| 2856   | 2      | 3      | 2      | 2      | 1      | 1      |
| 2857   | 1      | 1      | 1      | 1      | 1      | 1      |
| 2858   | 1      | 1      | 1      | 1      | 0      | 1      |
| 2859   | 1      | 1      | 2      | 1      | 2      | 1      |
| 2860   | 3      | 2      | 3      | 2      | 2      | 1      |
| 2861   | 2      | 2      | 1      | 2      | 2      | 1      |
| 2863   | 0      | 2      | 0      | 1      | 1      | 0      |
| 2864   | 1      | 3      | 1      | 2      | 1      | 1      |
| 2866   | 0      | 0      | 0      | 0      | 1      | 0      |
| 2872   | 1      | 1      | 2      | 0      | 0      | 0      |
| 2875   | 0      | 2      | 0      | 0      | 0      | 0      |
| 2879   | 0      | 0      | 0      | 0      | 0      | 0      |
| 2881   | 1      | 2      | 1      | 1      | 1      | 0      |
| 2882   | 0      | 3      | 0      | 1      | 0      | 0      |
| 2883   | 0      | 1      | 0      | 1      | 0      | 0      |
| 2884   | 2      | 1      | 1      | 2      | 1      | 1      |
| 2885   | 1      | 2      | 1      | 2      | 1      | 1      |
| 2887   | 0      | 0      | 1      | 1      | 0      | 0      |
| 2888   | 0      | 0      | 0      | 0      | 0      | 0      |
| 2890   | 0      | 0      | 0      | 0      | 1      | 0      |

| respid | Q56i_1 | Q56j_1 | Q56k_1 | Q56l_1 | Q56m_1 | Q56n_1 |
|--------|--------|--------|--------|--------|--------|--------|
| 2891   | 0      | 1      | 0      | 1      | 0      | 0      |
| 2892   | 0      | 2      | 0      | 2      | 0      | 0      |
| 2895   | 0      | 3      | 1      | 2      | 1      | 0      |
| 2899   | 1      | 2      | 2      | 0      | 1      | 0      |
| 2900   | 0      | 1      | 0      | 0      | 0      | 1      |
| 2902   | 1      | 2      | 1      | 2      | 1      | 1      |
| 2903   | 1      | 3      | 2      | 2      | 0      | 1      |
| 2904   | 0      | 1      | 0      | 0      | 1      | 0      |
| 2906   | 0      | 1      | 1      | 0      | 0      | 1      |
| 2908   | 1      | 2      | 1      | 1      | 0      | 1      |
| 2910   | 0      | 0      | 1      | 1      | 1      | 0      |
| 2917   | 2      | 1      | 2      | 2      | 1      | 1      |
| 2918   | 1      | 2      | 1      | 2      | 1      | 2      |
| 2919   | 0      | 0      | 0      | 0      | 0      | 0      |
| 2920   | 0      | 2      | 0      | 0      | 0      | 0      |
| 2921   | 2      | 1      | 2      | 2      | 2      | 2      |
| 2922   | 0      | 0      | 0      | 1      | 0      | 1      |
| 2923   | 1      | 1      | 1      | 1      | 0      | 1      |
| 2924   | 0      | 0      | 1      | 0      | 0      | 0      |
| 2926   | 0      | 0      | 0      | 0      | 1      | 0      |
| 2928   | 0      | 1      | 1      | 1      | 1      | 0      |
| 2930   | 1      | 1      | 0      | 1      | 1      | 1      |
| 2931   | 1      | 1      | 0      | 0      | 0      | 0      |
| 2933   | 1      | 1      | 1      | 2      | 2      | 1      |
| 2935   | 1      | 2      | 0      | 1      | 0      | 0      |
| 2936   | 0      | 1      | 1      | 0      | 1      | 1      |
| 2937   | 2      | 3      | 1      | 1      | 1      | 0      |
| 2938   | 1      | 0      | 0      | 1      | 1      | 0      |
| 2944   | 0      | 1      | 0      | 1      | 0      | 0      |
| 2945   | 0      | 2      | 0      | 0      | 0      | 1      |
| 2947   | 0      | 2      | 0      | 0      | 1      | 1      |
| 2949   | 0      | 0      | 0      | 0      | 0      | 0      |

| respid | Q56i_1 | Q56j_1 | Q56k_1 | Q56l_1 | Q56m_1 | Q56n_1 |
|--------|--------|--------|--------|--------|--------|--------|
| 2951   | 1      | 1      | 1      | 2      | 1      | 0      |
| 2952   | 2      | 1      | 2      | 1      | 2      | 1      |
| 2953   | 1      | 2      | 0      | 0      | 0      | 1      |
| 2955   | 0      | 0      | 0      | 0      | 0      | 0      |
| 2957   | 0      | 0      | 0      | 0      | 0      | 0      |
| 2958   | 0      | 1      | 0      | 1      | 0      | 1      |
| 2960   | 0      | 1      | 0      | 1      | 1      | 1      |
| 2963   | 0      | 1      | 0      | 0      | 1      | 0      |
| 2964   | 0      | 1      | 0      | 0      | 0      | 0      |
| 2967   | 0      | 0      | 0      | 0      | 0      | 0      |
| 2968   | 0      | 0      | 0      | 0      | 0      | 1      |
| 2971   | 2      | 2      | 2      | 1      | 1      | 2      |
| 2974   | 0      | 0      | 0      | 0      | 0      | 0      |
| 2975   | 0      | 1      | 1      | 1      | 1      | 1      |
| 2982   | 0      | 0      | 0      | 0      | 0      | 0      |
| 2983   | 0      | 1      | 0      | 1      | 0      | 1      |
| 2985   | 0      | 0      | 0      | 0      | 0      | 0      |
| 2986   | 1      | 2      | 2      | 2      | 1      | 2      |
| 2987   | 0      | 1      | 1      | 1      | 1      | 1      |
| 2988   | 0      | 0      | 0      | 1      | 1      | 0      |
| 2993   | 0      | 0      | 0      | 2      | 0      | 1      |
| 2996   | 0      | 1      | 1      | 1      | 1      | 1      |
| 2997   | 1      | 1      | 1      | 1      | 1      | 0      |
| 2998   | 0      | 3      | 0      | 1      | 1      | 1      |
| 3004   | 0      | 1      | 0      | 0      | 0      | 0      |
| 3007   | 1      | 1      | 1      | 1      | 1      | 0      |
| 3011   | 1      | 2      | 2      | 2      | 2      | 1      |
| 3012   | 0      | 0      | 0      | 0      | 0      | 0      |
| 3013   | 0      | 1      | 0      | 0      | 1      | 1      |
| 3014   | 0      | 1      | 0      | 0      | 0      | 0      |
| 3015   | 0      | 3      | 1      | 0      | 1      | 0      |
| 3016   | 1      | 2      | 1      | 1      | 1      | 1      |

| respid | Q56i_1 | Q56j_1 | Q56k_1 | Q56l_1 | Q56m_1 | Q56n_1 |
|--------|--------|--------|--------|--------|--------|--------|
| 3017   | 0      | 2      | 0      | 0      | 0      | 1      |
| 3020   | 1      | 1      | 2      | 1      | 1      | 2      |
| 3022   | 0      | 1      | 0      | 0      | 0      | 0      |
| 3023   | 0      | 0      | 0      | 0      | 0      | 0      |
| 3026   | 1      | 1      | 1      | 1      | 2      | 2      |
| 3038   | 1      | 1      | 1      | 1      | 2      | 1      |
| 3039   | 1      | 1      | 1      | 1      | 1      | 1      |
| 3040   | 0      | 0      | 0      | 0      | 0      | 1      |
| 3041   | 1      | 2      | 1      | 1      | 1      | 1      |
| 3042   | 1      | 1      | 1      | 1      | 1      | 1      |
| 3044   | 1      | 0      | 1      | 0      | 1      | 0      |
| 3050   | 1      | 1      | 1      | 1      | 1      | 1      |
| 3052   | 0      | 1      | 0      | 0      | 0      | 1      |
| 3056   | 1      | 0      | 1      | 1      | 1      | 0      |
| 3059   | 1      | 0      | 1      | 1      | 1      | 1      |
| 3060   | 0      | 1      | 0      | 1      | 1      | 1      |
| 3063   | 1      | 1      | 1      | 0      | 1      | 1      |
| 3065   | 1      | 0      | 1      | 1      | 1      | 2      |
| 3067   | 0      | 0      | 1      | 1      | 0      | 1      |
| 3068   | 0      | 3      | 0      | 3      | 0      | 3      |
| 3072   | 1      | 1      | 1      | 0      | 0      | 0      |
| 3074   | 0      | 1      | 1      | 1      | 2      | 2      |
| 3075   | 0      | 2      | 0      | 0      | 0      | 1      |
| 3076   | 0      | 1      | 1      | 1      | 1      | 0      |
| 3079   | 0      | 3      | 0      | 0      | 0      | 0      |
| 3082   | 1      | 1      | 2      | 1      | 2      | 1      |
| 3083   | 0      | 0      | 1      | 0      | 0      | 0      |
| 3084   | 2      | 2      | 1      | 1      | 0      | 1      |
| 3085   | 0      | 1      | 0      | 0      | 0      | 1      |
| 3090   | 0      | 2      | 0      | 0      | 1      | 0      |
| 3091   | 0      | 1      | 0      | 1      | 1      | 0      |
| 3092   | 0      | 1      | 1      | 1      | 0      | 1      |

| respid | Q56i_1 | Q56j_1 | Q56k_1 | Q56l_1 | Q56m_1 | Q56n_1 |
|--------|--------|--------|--------|--------|--------|--------|
| 3095   | 1      | 2      | 1      | 2      | 1      | 1      |
| 3096   | 2      | 1      | 2      | 2      | 1      | 1      |
| 3097   | 0      | 1      | 2      | 1      | 0      | 0      |
| 3099   | 2      | 2      | 1      | 2      | 2      | 1      |
| 3101   | 0      | 3      | 0      | 0      | 1      | 0      |
| 3103   | 0      | 0      | 0      | 0      | 0      | 0      |
| 3104   | 0      | 3      | 0      | 0      | 0      | 1      |
| 3105   | 0      | 0      | 0      | 0      | 0      | 0      |
| 3107   | 1      | 2      | 3      | 2      | 0      | 1      |
| 3108   | 1      | 2      | 1      | 2      | 1      | 1      |
| 3109   | 0      | 2      | 0      | 0      | 1      | 0      |
| 3116   | 1      | 1      | 0      | 2      | 1      | 1      |
| 3117   | 1      | 2      | 2      | 3      | 1      | 1      |
| 3119   | 1      | 1      | 1      | 2      | 0      | 1      |
| 3120   | 0      | 1      | 0      | 0      | 0      | 0      |
| 3130   | 0      | 3      | 0      | 1      | 1      | 1      |
| 3131   | 1      | 2      | 2      | 1      | 1      | 0      |
| 3133   | 0      | 0      | 0      | 1      | 0      | 0      |
| 3134   | 1      | 2      | 2      | 2      | 2      | 1      |
| 3135   | 1      | 1      | 0      | 2      | 1      | 2      |
| 3145   | 1      | 1      | 1      | 1      | 1      | 1      |
| 3147   | 0      | 1      | 0      | 0      | 0      | 1      |
| 3152   | 1      | 1      | 1      | 2      | 0      | 1      |
| 3155   | 2      | 2      | 2      | 3      | 1      | 1      |
| 3156   | 0      | 0      | 0      | 0      | 0      | 1      |
| 3157   | 2      | 2      | 1      | 2      | 1      | 1      |
| 3166   | 1      | 2      | 1      | 1      | 1      | 0      |
| 3169   | 2      | 1      | 1      | 1      | 0      | 2      |
| 3179   | 1      | 0      | 0      | 0      | 1      | 0      |
| 3181   | 0      | 1      | 1      | 1      | 1      | 1      |
| 3185   | 0      | 1      | 1      | 0      | 0      | 0      |
| 3190   | 0      | 3      | 1      | 1      | 1      | 0      |

| respid | Q56i_1 | Q56j_1 | Q56k_1 | Q56l_1 | Q56m_1 | Q56n_1 |
|--------|--------|--------|--------|--------|--------|--------|
| 3191   | 0      | 1      | 1      | 0      | 1      | 1      |
| 3192   | 0      | 3      | 0      | 0      | 1      | 0      |
| 3193   | 0      | 0      | 0      | 0      | 0      | 0      |
| 3195   | 0      | 1      | 1      | 1      | 0      | 0      |
| 3202   | 0      | 1      | 1      | 1      | 1      | 1      |
| 3204   | 1      | 2      | 0      | 1      | 1      | 1      |
| 3208   | 1      | 0      | 1      | 0      | 1      | 0      |
| 3212   | 0      | 1      | 0      | 0      | 1      | 0      |
| 3218   | 0      | 1      | 0      | 0      | 0      | 1      |
| 3219   | 0      | 1      | 0      | 1      | 0      | 0      |
| 3220   | 1      | 1      | 2      | 1      | 1      | 1      |
| 3221   | 1      | 1      | 2      | 2      | 1      | 2      |
| 3223   | 0      | 0      | 0      | 0      | 0      | 0      |
| 3231   | 2      | 3      | 1      | 1      | 2      | 1      |
| 3232   | 0      | 1      | 1      | 2      | 1      | 1      |
| 3234   | 1      | 1      | 0      | 1      | 1      | 1      |
| 3235   | 0      | 3      | 0      | 0      | 0      | 0      |
| 3237   | 0      | 0      | 0      | 1      | 0      | 0      |
| 3238   | 0      | 0      | 0      | 0      | 0      | 0      |
| 3240   | 1      | 2      | 0      | 0      | 0      | 0      |
| 3241   | 0      | 0      | 0      | 0      | 1      | 0      |
| 3243   | 1      | 2      | 1      | 2      | 1      | 2      |
| 3244   | 1      | 2      | 1      | 1      | 1      | 2      |
| 3247   | 1      | 1      | 1      | 1      | 0      | 1      |
| 3250   | 0      | 2      | 0      | 1      | 0      | 1      |
| 3251   | 1      | 1      | 1      | 1      | 1      | 1      |
| 3255   | 0      | 0      | 0      | 0      | 0      | 0      |
| 3256   | 0      | 0      | 0      | 1      | 0      | 1      |
| 3257   | 0      | 1      | 0      | 0      | 0      | 0      |
| 3258   | 0      | 1      | 0      | 0      | 0      | 0      |
| 3259   | 1      | 0      | 1      | 1      | 0      | 2      |
| 3260   | 0      | 0      | 0      | 0      | 2      | 0      |



| respid | Q56i_1 | Q56j_1 | Q56k_1 | Q56l_1 | Q56m_1 | Q56n_1 |
|--------|--------|--------|--------|--------|--------|--------|
| 3261   | 0      | 0      | 0      | 1      | 0      | 0      |
| 3262   | 0      | 0      | 0      | 0      | 0      | 0      |
| 3264   | 0      | 0      | 0      | 1      | 0      | 0      |
| 3265   | 0      | 0      | 0      | 0      | 0      | 0      |
| 3267   | 0      | 0      | 1      | 0      | 0      | 1      |
| 3268   | 1      | 2      | 1      | 1      | 2      | 1      |
| 3270   | 0      | 0      | 0      | 0      | 0      | 0      |
| 3271   | 0      | 2      | 0      | 1      | 0      | 0      |
| 3274   | 0      | 0      | 0      | 0      | 0      | 0      |
| 3276   | 0      | 0      | 0      | 0      | 0      | 1      |
| 3277   | 0      | 1      | 1      | 1      | 0      | 2      |
| 3279   | 0      | 0      | 1      | 0      | 0      | 0      |
| 3281   | 0      | 2      | 0      | 0      | 0      | 0      |
| 3283   | 1      | 1      | 0      | 1      | 1      | 0      |
| 3285   | 1      | 0      | 1      | 1      | 1      | 0      |
| 3286   | 1      | 3      | 1      | 2      | 1      | 2      |
| 3287   | 1      | 1      | 1      | 2      | 2      | 0      |
| 3289   | 0      | 2      | 0      | 2      | 1      | 0      |
| 3290   | 0      | 1      | 0      | 1      | 2      | 0      |
| 3291   | 0      | 0      | 0      | 1      | 0      | 0      |
| 3292   | 1      | 1      | 2      | 1      | 1      | 1      |
| 3293   | 0      | 2      | 1      | 1      | 0      | 0      |
| 3294   | 1      | 2      | 1      | 1      | 1      | 1      |
| 3296   | 0      | 1      | 1      | 1      | 0      | 0      |
| 3306   | 0      | 1      | 0      | 0      | 0      | 0      |
| 3307   | 1      | 0      | 1      | 2      | 1      | 0      |
| 3308   | 0      | 0      | 0      | 0      | 0      | 0      |
| 3312   | 1      | 0      | 0      | 0      | 0      | 0      |
| 3313   | 1      | 0      | 1      | 0      | 1      | 1      |
| 3316   | 1      | 1      | 0      | 1      | 0      | 0      |
| 3317   | 0      | 2      | 0      | 1      | 0      | 0      |
| 3320   | 0      | 2      | 0      | 1      | 1      | 0      |

| respid | Q56i_1 | Q56j_1 | Q56k_1 | Q56l_1 | Q56m_1 | Q56n_1 |
|--------|--------|--------|--------|--------|--------|--------|
| 3321   | 1      | 0      | 1      | 1      | 1      | 0      |
| 3322   | 0      | 0      | 0      | 1      | 0      | 0      |
| 3323   | 0      | 0      | 0      | 0      | 0      | 0      |
| 3325   | 1      | 1      | 1      | 2      | 1      | 0      |
| 3332   | 0      | 3      | 0      | 0      | 0      | 1      |
| 3334   | 0      | 3      | 0      | 0      | 0      | 0      |
| 3335   | 0      | 1      | 0      | 1      | 0      | 1      |
| 3341   | 1      | 2      | 2      | 2      | 1      | 1      |
| 3345   | 1      | 1      | 1      | 1      | 1      | 1      |
| 3346   | 0      | 1      | 0      | 0      | 1      | 0      |
| 3349   | 1      | 0      | 1      | 0      | 1      | 0      |
| 3351   | 1      | 0      | 1      | 1      | 0      | 0      |
| 3353   | 0      | 1      | 0      | 1      | 1      | 0      |
| 3354   | 1      | 1      | 1      | 0      | 1      | 0      |
| 3356   | 1      | 1      | 1      | 2      | 1      | 1      |
| 3357   | 1      | 0      | 1      | 2      | 2      | 1      |
| 3360   | 0      | 1      | 0      | 2      | 1      | 0      |
| 3361   | 1      | 2      | 0      | 0      | 0      | 0      |
| 3362   | 0      | 0      | 1      | 0      | 0      | 1      |
| 3363   | 0      | 1      | 0      | 0      | 1      | 0      |
| 3364   | 2      | 1      | 1      | 2      | 2      | 1      |
| 3368   | 1      | 2      | 0      | 1      | 1      | 0      |
| 3370   | 0      | 0      | 0      | 0      | 0      | 0      |
| 3371   | 0      | 0      | 0      | 0      | 0      | 0      |
| 3379   | 0      | 0      | 0      | 0      | 0      | 3      |
| 3380   | 1      | 1      | 0      | 1      | 1      | 1      |
| 3382   | 0      | 3      | 1      | 1      | 0      | 0      |
| 3384   | 1      | 1      | 1      | 1      | 1      | 0      |
| 3385   | 1      | 0      | 1      | 1      | 2      | 1      |
| 3388   | 0      | 2      | 1      | 0      | 0      | 0      |
| 3392   | 1      | 0      | 1      | 0      | 0      | 0      |
| 3393   | 0      | 2      | 1      | 1      | 1      | 1      |

| respid | Q56i_1 | Q56j_1 | Q56k_1 | Q56l_1 | Q56m_1 | Q56n_1 |
|--------|--------|--------|--------|--------|--------|--------|
| 3394   | 1      | 0      | 1      | 1      | 1      | 1      |
| 3395   | 0      | 0      | 0      | 0      | 0      | 0      |
| 3396   | 2      | 3      | 1      | 2      | 2      | 2      |
| 3397   | 1      | 0      | 1      | 0      | 1      | 1      |
| 3398   | 0      | 0      | 0      | 0      | 0      | 0      |
| 3399   | 2      | 2      | 1      | 1      | 2      | 1      |
| 3400   | 0      | 1      | 0      | 1      | 1      | 1      |
| 3401   | 2      | 2      | 1      | 2      | 2      | 1      |
| 3402   | 1      | 1      | 1      | 1      | 1      | 1      |
| 3403   | 1      | 1      | 1      | 1      | 1      | 1      |
| 3405   | 0      | 0      | 0      | 0      | 0      | 0      |
| 3407   | 1      | 1      | 1      | 1      | 1      | 1      |
| 3410   | 1      | 2      | 0      | 1      | 0      | 1      |
| 3411   | 1      | 1      | 1      | 1      | 1      | 0      |
| 3413   | 0      | 0      | 0      | 0      | 0      | 0      |
| 3414   | 0      | 1      | 0      | 0      | 0      | 1      |
| 3420   | 0      | 1      | 0      | 0      | 0      | 0      |
| 3421   | 1      | 0      | 1      | 0      | 1      | 0      |
| 3425   | 0      | 1      | 0      | 0      | 0      | 1      |
| 3426   | 1      | 0      | 1      | 1      | 1      | 1      |
| 3429   | 1      | 0      | 1      | 0      | 0      | 0      |
| 3430   | 1      | 1      | 1      | 0      | 1      | 1      |
| 3433   | 1      | 0      | 1      | 1      | 1      | 2      |
| 3434   | 1      | 1      | 1      | 1      | 1      | 1      |
| 3437   | 0      | 2      | 0      | 3      | 1      | 1      |
| 3439   | 1      | 0      | 2      | 2      | 1      | 0      |
| 3441   | 1      | 2      | 1      | 1      | 1      | 1      |
| 3442   | 1      | 1      | 1      | 1      | 0      | 0      |
| 3444   | 0      | 2      | 0      | 0      | 0      | 0      |
| 3445   | 0      | 0      | 0      | 0      | 0      | 0      |
| 3450   | 1      | 2      | 0      | 1      | 1      | 0      |
| 3452   | 0      | 2      | 1      | 0      | 1      | 0      |

| respid | Q56i_1 | Q56j_1 | Q56k_1 | Q56l_1 | Q56m_1 | Q56n_1 |
|--------|--------|--------|--------|--------|--------|--------|
| 3456   | 0      | 1      | 1      | 1      | 1      | 0      |
| 3459   | 0      | 0      | 0      | 0      | 0      | 0      |
| 3460   | 1      | 2      | 1      | 2      | 0      | 0      |
| 3461   | 0      | 0      | 1      | 1      | 1      | 1      |
| 3466   | 1      | 2      | 1      | 1      | 1      | 1      |
| 3471   | 1      | 1      | 1      | 0      | 1      | 0      |
| 3473   | 0      | 0      | 0      | 0      | 0      | 0      |
| 3475   | 1      | 2      | 2      | 2      | 1      | 1      |
| 3476   | 1      | 1      | 1      | 1      | 1      | 1      |
| 3477   | 1      | 2      | 2      | 2      | 3      | 2      |
| 3478   | 0      | 3      | 0      | 0      | 0      | 0      |
| 3479   | 0      | 0      | 0      | 0      | 1      | 0      |
| 3482   | 0      | 1      | 1      | 1      | 1      | 1      |
| 3483   | 1      | 0      | 0      | 1      | 1      | 1      |
| 3485   | 1      | 2      | 1      | 1      | 1      | 0      |
| 3489   | 0      | 0      | 0      | 0      | 0      | 0      |
| 3490   | 0      | 1      | 1      | 1      | 0      | 1      |
| 3491   | 1      | 0      | 1      | 1      | 0      | 0      |
| 3494   | 0      | 2      | 1      | 1      | 0      | 0      |
| 3495   | 0      | 1      | 1      | 0      | 1      | 1      |
| 3501   | 0      | 0      | 0      | 0      | 0      | 0      |
| 3506   | 0      | 2      | 1      | 1      | 1      | 1      |
| 3507   | 0      | 0      | 0      | 0      | 0      | 0      |
| 3517   | 1      | 0      | 1      | 1      | 1      | 2      |
| 3520   | 0      | 2      | 1      | 2      | 0      | 1      |
| 3521   | 1      | 0      | 1      | 1      | 1      | 1      |
| 3522   | 1      | 0      | 1      | 1      | 0      | 1      |
| 3524   | 1      | 1      | 1      | 1      | 1      | 1      |
| 3527   | 0      | 2      | 0      | 0      | 1      | 1      |
| 3528   | 0      | 0      | 0      | 1      | 1      | 1      |
| 3529   | 1      | 2      | 1      | 2      | 0      | 0      |
| 3536   | 1      | 0      | 1      | 1      | 1      | 0      |

| respid | Q56i_1 | Q56j_1 | Q56k_1 | Q56l_1 | Q56m_1 | Q56n_1 |
|--------|--------|--------|--------|--------|--------|--------|
| 3537   | 0      | 0      | 1      | 2      | 0      | 1      |
| 3538   | 0      | 1      | 0      | 1      | 0      | 0      |
| 3540   | 2      | 1      | 1      | 2      | 1      | 1      |
| 3545   | 0      | 1      | 0      | 1      | 0      | 1      |
| 3547   | 1      | 2      | 1      | 1      | 1      | 0      |
| 3554   | 0      | 1      | 1      | 1      | 1      | 1      |
| 3556   | 1      | 1      | 1      | 2      | 1      | 2      |
| 3557   | 0      | 0      | 0      | 0      | 0      | 1      |
| 3559   | 1      | 1      | 1      | 1      | 1      | 1      |
| 3560   | 1      | 1      | 1      | 1      | 1      | 1      |
| 3562   | 0      | 1      | 0      | 0      | 0      | 0      |
| 3564   | 1      | 2      | 1      | 2      | 1      | 1      |
| 3565   | 1      | 1      | 2      | 2      | 1      | 1      |
| 3568   | 0      | 1      | 0      | 0      | 0      | 0      |
| 3572   | 0      | 0      | 0      | 0      | 0      | 0      |
| 3578   | 1      | 1      | 1      | 1      | 1      | 1      |
| 3581   | 1      | 2      | 1      | 1      | 1      | 1      |
| 3583   | 0      | 2      | 0      | 2      | 2      | 1      |
| 3588   | 1      | 0      | 2      | 1      | 1      | 1      |
| 3591   | 0      | 3      | 0      | 0      | 0      | 0      |
| 3594   | 0      | 1      | 0      | 1      | 0      | 1      |
| 3595   | 0      | 0      | 0      | 0      | 0      | 0      |
| 3596   | 1      | 0      | 1      | 1      | 1      | 0      |
| 3597   | 1      | 2      | 1      | 1      | 1      | 1      |
| 3598   | 0      | 1      | 0      | 0      | 0      | 0      |
| 3600   | 2      | 1      | 3      | 2      | 2      | 2      |
| 3602   | 0      | 0      | 0      | 1      | 0      | 1      |
| 3604   | 0      | 3      | 0      | 0      | 0      | 0      |
| 3605   | 1      | 1      | 1      | 1      | 0      | 1      |
| 3606   | 1      | 1      | 0      | 1      | 1      | 0      |
| 3607   | 0      | 0      | 1      | 1      | 0      | 0      |
| 3610   | 1      | 0      | 0      | 0      | 0      | 1      |

| respid | Q56i_1 | Q56j_1 | Q56k_1 | Q56l_1 | Q56m_1 | Q56n_1 |
|--------|--------|--------|--------|--------|--------|--------|
| 3611   | 0      | 0      | 0      | 0      | 0      | 0      |
| 3612   | 0      | 0      | 0      | 1      | 1      | 1      |
| 3614   | 0      | 2      | 1      | 1      | 1      | 0      |
| 3616   | 0      | 0      | 0      | 1      | 0      | 0      |
| 3617   | 1      | 1      | 1      | 1      | 1      | 1      |
| 3618   | 0      | 0      | 0      | 0      | 0      | 0      |
| 3619   | 2      | 1      | 1      | 2      | 2      | 1      |
| 3621   | 1      | 0      | 1      | 1      | 1      | 1      |
| 3622   | 1      | 2      | 0      | 1      | 0      | 1      |
| 3624   | 0      | 2      | 0      | 0      | 0      | 0      |
| 3626   | 0      | 0      | 0      | 0      | 0      | 0      |
| 3629   | 0      | 0      | 1      | 0      | 0      | 0      |
| 3631   | 0      | 0      | 0      | 0      | 0      | 1      |
| 3632   | 1      | 1      | 1      | 1      | 1      | 1      |
| 3638   | 0      | 0      | 1      | 1      | 0      | 1      |
| 3640   | 1      | 2      | 1      | 2      | 1      | 1      |
| 3641   | 0      | 0      | 0      | 1      | 0      | 1      |
| 3645   | 1      | 2      | 1      | 1      | 1      | 2      |
| 3650   | 0      | 0      | 0      | 0      | 0      | 0      |
| 3653   | 1      | 1      | 1      | 2      | 1      | 1      |
| 3655   | 2      | 2      | 2      | 2      | 2      | 1      |
| 3657   | 0      | 1      | 0      | 1      | 0      | 0      |
| 3658   | 0      | 0      | 0      | 0      | 0      | 0      |
| 3659   | 0      | 2      | 0      | 1      | 0      | 1      |
| 3664   | 1      | 1      | 1      | 1      | 1      | 1      |
| 3665   | 1      | 2      | 1      | 1      | 1      | 0      |
| 3667   | 0      | 1      | 1      | 1      | 0      | 0      |
| 3668   | 2      | 2      | 1      | 2      | 1      | 1      |
| 3675   | 0      | 1      | 0      | 1      | 1      | 0      |
| 3678   | 0      | 1      | 0      | 0      | 0      | 0      |
| 3680   | 1      | 1      | 1      | 1      | 1      | 1      |
| 3684   | 1      | 0      | 1      | 1      | 0      | 1      |

| respid | Q56i_1 | Q56j_1 | Q56k_1 | Q56l_1 | Q56m_1 | Q56n_1 |
|--------|--------|--------|--------|--------|--------|--------|
| 3685   | 0      | 0      | 0      | 0      | 0      | 0      |
| 3687   | 0      | 2      | 0      | 2      | 1      | 2      |
| 3689   | 2      | 1      | 1      | 2      | 1      | 1      |
| 3690   | 1      | 1      | 1      | 1      | 1      | 0      |
| 3693   | 0      | 1      | 0      | 0      | 1      | 1      |
| 3694   | 0      | 0      | 0      | 0      | 0      | 0      |
| 3695   | 0      | 1      | 1      | 1      | 0      | 0      |
| 3700   | 0      | 3      | 0      | 0      | 0      | 0      |
| 3701   | 0      | 1      | 0      | 2      | 1      | 1      |
| 3703   | 0      | 0      | 1      | 0      | 1      | 0      |
| 3704   | 1      | 2      | 1      | 3      | 1      | 1      |
| 3705   | 0      | 0      | 0      | 0      | 0      | 0      |
| 3709   | 0      | 3      | 0      | 0      | 0      | 0      |
| 3710   | 1      | 0      | 0      | 0      | 0      | 0      |
| 3722   | 0      | 1      | 0      | 0      | 0      | 0      |
| 3725   | 0      | 3      | 0      | 0      | 1      | 0      |
| 3726   | 1      | 0      | 1      | 1      | 1      | 0      |
| 3727   | 1      | 0      | 1      | 1      | 0      | 1      |
| 3728   | 1      | 2      | 1      | 2      | 1      | 1      |
| 3729   | 0      | 1      | 0      | 1      | 0      | 0      |
| 3731   | 0      | 0      | 0      | 0      | 0      | 0      |
| 3738   | 1      | 1      | 1      | 1      | 0      | 1      |
| 3739   | 0      | 1      | 0      | 0      | 0      | 0      |
| 3740   | 0      | 0      | 0      | 0      | 0      | 1      |
| 3749   | 1      | 1      | 1      | 1      | 1      | 1      |
| 3758   | 2      | 1      | 2      | 1      | 1      | 2      |
| 3762   | 0      | 0      | 0      | 0      | 0      | 2      |
| 3765   | 0      | 3      | 0      | 0      | 0      | 0      |
| 3770   | 0      | 0      | 0      | 0      | 0      | 0      |
| 3771   | 1      | 1      | 2      | 2      | 2      | 1      |
| 3778   | 0      | 1      | 0      | 0      | 0      | 0      |
| 3779   | 1      | 1      | 1      | 1      | 0      | 1      |

| respid | Q56i_1 | Q56j_1 | Q56k_1 | Q56l_1 | Q56m_1 | Q56n_1 |
|--------|--------|--------|--------|--------|--------|--------|
| 3780   | 1      | 2      | 1      | 2      | 1      | 1      |
| 3782   | 1      | 1      | 1      | 1      | 1      | 1      |
| 3784   | 1      | 3      | 0      | 1      | 1      | 0      |
| 3787   | 0      | 2      | 0      | 0      | 0      | 0      |
| 3790   | 0      | 1      | 0      | 0      | 0      | 2      |
| 3791   | 0      | 1      | 1      | 1      | 0      | 1      |
| 3793   | 1      | 0      | 0      | 1      | 0      | 0      |
| 3795   | 0      | 0      | 0      | 0      | 0      | 0      |
| 3799   | 0      | 0      | 0      | 2      | 0      | 0      |
| 3801   | 1      | 1      | 1      | 2      | 1      | 1      |
| 3804   | 0      | 0      | 1      | 1      | 1      | 0      |
| 3809   | 1      | 2      | 1      | 0      | 1      | 0      |
| 3810   | 1      | 1      | 1      | 2      | 1      | 1      |
| 3813   | 1      | 3      | 0      | 1      | 1      | 0      |
| 3816   | 0      | 1      | 0      | 0      | 1      | 0      |
| 3820   | 1      | 1      | 0      | 1      | 0      | 0      |
| 3821   | 0      | 0      | 0      | 0      | 0      | 0      |
| 3823   | 2      | 2      | 1      | 2      | 1      | 1      |
| 3828   | 1      | 2      | 1      | 1      | 1      | 0      |
| 3829   | 0      | 1      | 1      | 0      | 0      | 0      |
| 3832   | 1      | 0      | 0      | 0      | 1      | 0      |
| 3835   | 0      | 0      | 1      | 0      | 1      | 1      |
| 3837   | 0      | 1      | 1      | 1      | 0      | 0      |
| 3838   | 0      | 2      | 1      | 0      | 1      | 0      |
| 3839   | 2      | 3      | 3      | 2      | 2      | 3      |
| 3840   | 0      | 1      | 0      | 1      | 1      | 0      |
| 3842   | 1      | 1      | 1      | 2      | 0      | 1      |
| 3843   | 0      | 0      | 0      | 0      | 0      | 0      |
| 3844   | 1      | 0      | 0      | 1      | 1      | 0      |
| 3850   | 0      | 1      | 1      | 1      | 1      | 0      |
| 3851   | 0      | 0      | 0      | 0      | 0      | 0      |
| 3856   | 0      | 1      | 1      | 2      | 1      | 3      |



| respid | Q56i_1 | Q56j_1 | Q56k_1 | Q56l_1 | Q56m_1 | Q56n_1 |
|--------|--------|--------|--------|--------|--------|--------|
| 3859   | 0      | 0      | 0      | 0      | 0      | 0      |
| 3860   | 0      | 1      | 0      | 0      | 0      | 0      |
| 3863   | 0      | 2      | 0      | 1      | 1      | 1      |
| 3866   | 0      | 0      | 0      | 0      | 0      | 0      |
| 3867   | 1      | 2      | 2      | 1      | 1      | 0      |
| 3870   | 0      | 0      | 0      | 1      | 1      | 0      |
| 3873   | 1      | 3      | 1      | 3      | 1      | 1      |
| 3875   | 0      | 1      | 0      | 1      | 1      | 1      |
| 3878   | 0      | 1      | 0      | 0      | 1      | 1      |
| 3881   | 0      | 1      | 0      | 1      | 0      | 0      |
| 3883   | 2      | 2      | 1      | 2      | 2      | 1      |
| 3884   | 1      | 0      | 1      | 1      | 1      | 0      |
| 3885   | 1      | 1      | 1      | 1      | 1      | 1      |
| 3886   | 1      | 2      | 1      | 1      | 1      | 2      |
| 3887   | 0      | 2      | 0      | 0      | 0      | 0      |
| 3888   | 0      | 1      | 0      | 0      | 0      | 0      |
| 3889   | 1      | 0      | 1      | 1      | 1      | 1      |
| 3890   | 1      | 1      | 1      | 0      | 1      | 0      |
| 3896   | 0      | 0      | 0      | 1      | 0      | 0      |
| 3902   | 1      | 0      | 1      | 0      | 1      | 0      |
| 3909   | 0      | 3      | 0      | 0      | 0      | 1      |
| 3912   | 0      | 0      | 1      | 1      | 1      | 1      |
| 3922   | 0      | 0      | 1      | 0      | 0      | 0      |
| 3928   | 0      | 0      | 0      | 1      | 0      | 0      |
| 3930   | 0      | 0      | 1      | 0      | 0      | 0      |
| 3931   | 1      | 1      | 1      | 1      | 1      | 1      |
| 3933   | 2      | 1      | 0      | 0      | 0      | 0      |
| 3935   | 1      | 2      | 1      | 0      | 1      | 0      |
| 3937   | 1      | 1      | 0      | 0      | 1      | 0      |
| 3939   | 0      | 1      | 0      | 0      | 0      | 1      |
| 3942   | 0      | 1      | 0      | 0      | 0      | 1      |
| 3943   | 2      | 2      | 2      | 1      | 2      | 1      |

| respid | Q56i_1 | Q56j_1 | Q56k_1 | Q56l_1 | Q56m_1 | Q56n_1 |
|--------|--------|--------|--------|--------|--------|--------|
| 3944   | 1      | 1      | 1      | 0      | 1      | 0      |
| 3945   | 0      | 2      | 0      | 1      | 0      | 1      |
| 3947   | 1      | 1      | 1      | 1      | 1      | 1      |
| 3948   | 1      | 0      | 0      | 1      | 0      | 0      |
| 3951   | 1      | 1      | 1      | 1      | 1      | 2      |
| 3959   | 0      | 3      | 0      | 2      | 1      | 0      |
| 3969   | 2      | 1      | 1      | 1      | 2      | 1      |
| 3973   | 1      | 3      | 0      | 0      | 1      | 0      |
| 3975   | 1      | 1      | 1      | 1      | 1      | 1      |
| 3976   | 0      | 1      | 0      | 0      | 0      | 0      |
| 3977   | 0      | 1      | 0      | 0      | 0      | 1      |
| 3978   | 0      | 0      | 0      | 0      | 1      | 0      |
| 3994   | 0      | 0      | 1      | 1      | 2      | 3      |
| 3995   | 0      | 1      | 1      | 1      | 1      | 1      |
| 3997   | 0      | 1      | 1      | 2      | 0      | 2      |
| 3998   | 1      | 1      | 1      | 1      | 0      | 0      |
| 3999   | 0      | 1      | 1      | 1      | 1      | 0      |
| 4002   | 1      | 2      | 1      | 0      | 1      | 1      |
| 4004   | 0      | 1      | 0      | 0      | 0      | 1      |
| 4005   | 0      | 0      | 0      | 0      | 0      | 0      |
| 4006   | 1      | 0      | 1      | 1      | 1      | 1      |
| 4008   | 0      | 1      | 0      | 1      | 0      | 1      |
| 4010   | 1      | 1      | 2      | 2      | 1      | 2      |
| 4011   | 1      | 1      | 1      | 2      | 1      | 1      |
| 4013   | 0      | 3      | 0      | 0      | 0      | 0      |
| 4014   | 0      | 0      | 0      | 0      | 0      | 0      |
| 4016   | 0      | 1      | 1      | 0      | 0      | 0      |
| 4017   | 0      | 3      | 3      | 3      | 2      | 1      |
| 4019   | 1      | 1      | 1      | 1      | 1      | 1      |
| 4021   | 0      | 0      | 0      | 1      | 1      | 2      |
| 4023   | 0      | 0      | 0      | 0      | 1      | 1      |
| 4024   | 0      | 2      | 0      | 1      | 0      | 1      |

| respid | Q56i_1 | Q56j_1 | Q56k_1 | Q56l_1 | Q56m_1 | Q56n_1 |
|--------|--------|--------|--------|--------|--------|--------|
| 4025   | 0      | 0      | 1      | 0      | 0      | 0      |
| 4027   | 2      | 1      | 1      | 1      | 1      | 3      |
| 4032   | 0      | 1      | 0      | 0      | 0      | 0      |
| 4034   | 1      | 1      | 1      | 1      | 1      | 1      |
| 4035   | 1      | 0      | 2      | 1      | 1      | 0      |
| 4037   | 2      | 2      | 2      | 1      | 2      | 2      |
| 4040   | 1      | 2      | 1      | 1      | 1      | 1      |
| 4041   | 0      | 3      | 0      | 0      | 1      | 1      |
| 4042   | 1      | 2      | 1      | 2      | 2      | 2      |
| 4043   | 0      | 3      | 1      | 3      | 0      | 2      |
| 4045   | 1      | 2      | 2      | 1      | 1      | 1      |
| 4046   | 0      | 0      | 0      | 1      | 1      | 0      |
| 4048   | 1      | 2      | 1      | 2      | 0      | 1      |
| 4049   | 1      | 0      | 0      | 0      | 1      | 0      |
| 4050   | 1      | 0      | 3      | 0      | 0      | 1      |
| 4052   | 1      | 0      | 1      | 0      | 1      | 0      |
| 4053   | 0      | 3      | 0      | 1      | 0      | 0      |
| 4060   | 0      | 1      | 0      | 0      | 1      | 0      |
| 4065   | 1      | 1      | 1      | 1      | 1      | 1      |
| 4066   | 0      | 0      | 1      | 0      | 1      | 1      |
| 4067   | 0      | 0      | 0      | 1      | 0      | 1      |
| 4068   | 1      | 1      | 1      | 1      | 1      | 1      |
| 4069   | 0      | 1      | 0      | 2      | 0      | 0      |
| 4070   | 0      | 3      | 0      | 1      | 0      | 3      |
| 4071   | 1      | 1      | 2      | 2      | 1      | 1      |
| 4072   | 0      | 1      | 0      | 0      | 0      | 0      |
| 4073   | 0      | 1      | 1      | 0      | 0      | 0      |
| 4074   | 0      | 1      | 1      | 0      | 1      | 0      |
| 4075   | 1      | 2      | 0      | 2      | 1      | 1      |
| 4078   | 0      | 1      | 1      | 1      | 0      | 0      |
| 4080   | 1      | 0      | 2      | 1      | 0      | 0      |
| 4081   | 1      | 1      | 1      | 1      | 1      | 1      |

| respid | Q56i_1 | Q56j_1 | Q56k_1 | Q56l_1 | Q56m_1 | Q56n_1 |
|--------|--------|--------|--------|--------|--------|--------|
| 4082   | 1      | 2      | 2      | 0      | 0      | 1      |
| 4083   | 1      | 1      | 1      | 2      | 1      | 1      |
| 4084   | 0      | 3      | 0      | 0      | 0      | 0      |
| 4086   | 1      | 0      | 1      | 1      | 0      | 1      |
| 4087   | 0      | 1      | 0      | 1      | 0      | 0      |
| 4088   | 1      | 2      | 2      | 2      | 1      | 1      |
| 4089   | 0      | 2      | 0      | 1      | 0      | 1      |
| 4090   | 0      | 2      | 0      | 0      | 1      | 0      |
| 4093   | 2      | 0      | 2      | 0      | 1      | 0      |
| 4094   | 0      | 0      | 0      | 0      | 0      | 0      |
| 4095   | 0      | 1      | 0      | 1      | 1      | 1      |
| 4096   | 0      | 0      | 0      | 0      | 0      | 0      |
| 4098   | 0      | 1      | 0      | 1      | 0      | 2      |
| 4103   | 1      | 2      | 1      | 1      | 0      | 0      |
| 4104   | 1      | 1      | 1      | 1      | 1      | 0      |
| 4107   | 0      | 3      | 0      | 0      | 0      | 3      |
| 4109   | 0      | 3      | 0      | 0      | 0      | 0      |
| 4110   | 0      | 0      | 1      | 1      | 1      | 1      |
| 4113   | 1      | 0      | 1      | 2      | 1      | 1      |
| 4114   | 0      | 1      | 0      | 1      | 1      | 1      |
| 4116   | 0      | 2      | 0      | 0      | 0      | 0      |
| 4119   | 0      | 0      | 0      | 0      | 0      | 0      |
| 4120   | 0      | 2      | 0      | 0      | 0      | 0      |
| 4121   | 1      | 2      | 1      | 1      | 1      | 0      |
| 4122   | 1      | 1      | 0      | 0      | 1      | 1      |
| 4124   | 1      | 1      | 1      | 1      | 1      | 0      |
| 4126   | 1      | 1      | 1      | 1      | 1      | 2      |
| 4127   | 2      | 1      | 1      | 1      | 1      | 1      |
| 4131   | 1      | 2      | 1      | 0      | 1      | 0      |
| 4134   | 1      | 0      | 3      | 2      | 1      | 1      |
| 4144   | 0      | 3      | 0      | 0      | 0      | 0      |
| 4145   | 0      | 0      | 1      | 0      | 0      | 0      |

| respid | Q56i_1 | Q56j_1 | Q56k_1 | Q56l_1 | Q56m_1 | Q56n_1 |
|--------|--------|--------|--------|--------|--------|--------|
| 4146   | 0      | 1      | 0      | 0      | 0      | 0      |
| 4147   | 0      | 0      | 0      | 0      | 0      | 0      |
| 4149   | 1      | 2      | 1      | 1      | 1      | 1      |
| 4150   | 0      | 0      | 0      | 0      | 0      | 0      |
| 4151   | 1      | 2      | 1      | 1      | 1      | 3      |
| 4153   | 1      | 1      | 1      | 1      | 1      | 1      |
| 4155   | 1      | 1      | 1      | 1      | 1      | 2      |
| 4157   | 0      | 1      | 0      | 0      | 0      | 1      |
| 4159   | 1      | 0      | 1      | 0      | 0      | 0      |
| 4160   | 1      | 0      | 1      | 1      | 0      | 1      |
| 4161   | 0      | 0      | 1      | 1      | 1      | 0      |
| 4163   | 0      | 0      | 0      | 0      | 0      | 1      |
| 4164   | 1      | 1      | 0      | 2      | 0      | 1      |
| 4165   | 0      | 0      | 0      | 0      | 0      | 0      |
| 4166   | 0      | 0      | 1      | 0      | 0      | 0      |
| 4167   | 0      | 0      | 0      | 0      | 0      | 3      |
| 4170   | 1      | 2      | 2      | 1      | 1      | 1      |
| 4172   | 0      | 1      | 1      | 1      | 1      | 0      |
| 4173   | 0      | 0      | 0      | 0      | 0      | 0      |
| 4180   | 0      | 0      | 0      | 1      | 1      | 1      |
| 4185   | 0      | 0      | 1      | 1      | 0      | 1      |
| 4187   | 0      | 0      | 0      | 0      | 0      | 0      |
| 4190   | 0      | 2      | 0      | 2      | 0      | 1      |
| 4191   | 0      | 1      | 1      | 1      | 1      | 0      |
| 4193   | 0      | 3      | 0      | 3      | 1      | 0      |
| 4194   | 1      | 1      | 1      | 0      | 1      | 0      |
| 4195   | 0      | 1      | 1      | 0      | 0      | 0      |
| 4196   | 0      | 1      | 0      | 0      | 0      | 0      |
| 4197   | 1      | 1      | 1      | 1      | 1      | 0      |
| 4198   | 1      | 0      | 1      | 2      | 1      | 1      |
| 4199   | 0      | 0      | 0      | 0      | 0      | 0      |
| 4205   | 1      | 1      | 1      | 1      | 0      | 2      |

| respid | Q56i_1 | Q56j_1 | Q56k_1 | Q56l_1 | Q56m_1 | Q56n_1 |
|--------|--------|--------|--------|--------|--------|--------|
| 4206   | 0      | 1      | 0      | 1      | 0      | 1      |
| 4207   | 0      | 2      | 1      | 1      | 0      | 0      |
| 4214   | 0      | 1      | 0      | 0      | 1      | 0      |
| 4215   | 0      | 1      | 0      | 1      | 0      | 1      |
| 4217   | 1      | 1      | 1      | 1      | 1      | 0      |
| 4219   | 0      | 0      | 0      | 0      | 0      | 0      |
| 4223   | 1      | 1      | 1      | 1      | 1      | 1      |
| 4226   | 0      | 2      | 1      | 1      | 1      | 0      |
| 4229   | 0      | 1      | 0      | 0      | 1      | 0      |
| 4230   | 1      | 0      | 0      | 0      | 0      | 0      |
| 4232   | 0      | 0      | 1      | 1      | 0      | 0      |
| 4233   | 0      | 0      | 0      | 0      | 0      | 0      |
| 4234   | 0      | 0      | 0      | 0      | 1      | 0      |
| 4235   | 0      | 1      | 0      | 0      | 1      | 0      |
| 4236   | 1      | 1      | 0      | 0      | 1      | 2      |
| 4237   | 1      | 0      | 1      | 1      | 1      | 0      |
| 4238   | 0      | 0      | 1      | 1      | 0      | 0      |
| 4240   | 0      | 1      | 0      | 2      | 1      | 0      |
| 4241   | 0      | 0      | 0      | 0      | 0      | 0      |
| 4247   | 0      | 0      | 0      | 0      | 0      | 1      |
| 4250   | 0      | 3      | 0      | 0      | 0      | 0      |
| 4251   | 1      | 2      | 1      | 1      | 2      | 2      |
| 4253   | 1      | 3      | 1      | 3      | 3      | 3      |
| 4254   | 0      | 1      | 1      | 1      | 0      | 0      |
| 4258   | 0      | 1      | 1      | 1      | 1      | 1      |
| 4260   | 1      | 0      | 1      | 0      | 1      | 0      |
| 4263   | 0      | 0      | 1      | 1      | 0      | 1      |
| 4265   | 0      | 2      | 2      | 1      | 0      | 1      |
| 4266   | 0      | 2      | 0      | 1      | 1      | 0      |
| 4267   | 0      | 1      | 0      | 0      | 0      | 0      |
| 4270   | 1      | 1      | 1      | 1      | 1      | 1      |
| 4273   | 1      | 1      | 1      | 1      | 1      | 0      |

| respid | Q56i_1 | Q56j_1 | Q56k_1 | Q56l_1 | Q56m_1 | Q56n_1 |
|--------|--------|--------|--------|--------|--------|--------|
| 4280   | 0      | 0      | 0      | 1      | 1      | 0      |
| 4281   | 1      | 1      | 1      | 2      | 1      | 2      |
| 4282   | 0      | 1      | 1      | 1      | 0      | 0      |
| 4283   | 0      | 0      | 1      | 2      | 0      | 1      |
| 4286   | 2      | 3      | 2      | 2      | 3      | 2      |
| 4287   | 0      | 1      | 0      | 0      | 0      | 0      |
| 4289   | 0      | 2      | 2      | 2      | 0      | 2      |
| 4290   | 2      | 1      | 1      | 1      | 1      | 0      |
| 4291   | 0      | 1      | 0      | 0      | 0      | 0      |
| 4292   | 0      | 1      | 1      | 0      | 0      | 0      |
| 4293   | 0      | 1      | 0      | 1      | 1      | 1      |
| 4294   | 2      | 0      | 2      | 3      | 2      | 0      |
| 4295   | 1      | 1      | 1      | 1      | 1      | 1      |
| 4296   | 1      | 1      | 1      | 1      | 1      | 1      |
| 4297   | 1      | 1      | 1      | 1      | 1      | 0      |
| 4298   | 0      | 1      | 0      | 0      | 0      | 2      |
| 4299   | 0      | 2      | 1      | 1      | 1      | 0      |
| 4300   | 0      | 1      | 1      | 0      | 0      | 1      |
| 4301   | 0      | 0      | 1      | 1      | 0      | 1      |
| 4302   | 0      | 1      | 0      | 0      | 0      | 0      |
| 4304   | 0      | 1      | 0      | 1      | 0      | 0      |
| 4305   | 1      | 2      | 1      | 1      | 1      | 0      |
| 4307   | 2      | 3      | 3      | 2      | 2      | 2      |
| 4308   | 1      | 2      | 1      | 2      | 0      | 1      |
| 4312   | 0      | 0      | 1      | 0      | 0      | 1      |
| 4314   | 2      | 1      | 2      | 1      | 1      | 2      |
| 4316   | 0      | 3      | 1      | 0      | 1      | 0      |
| 4317   | 2      | 1      | 2      | 2      | 1      | 1      |
| 4319   | 1      | 2      | 1      | 2      | 0      | 2      |
| 4323   | 1      | 0      | 0      | 1      | 1      | 0      |
| 4337   | 0      | 0      | 0      | 0      | 0      | 1      |
| 4341   | 1      | 2      | 3      | 2      | 0      | 2      |

| respid | Q56i_1 | Q56j_1 | Q56k_1 | Q56l_1 | Q56m_1 | Q56n_1 |
|--------|--------|--------|--------|--------|--------|--------|
| 4342   | 0      | 1      | 1      | 1      | 0      | 0      |
| 4344   | 1      | 1      | 1      | 1      | 0      | 1      |
| 4345   | 0      | 1      | 2      | 1      | 0      | 1      |
| 4346   | 1      | 1      | 1      | 1      | 1      | 1      |
| 4347   | 1      | 1      | 1      | 1      | 1      | 0      |
| 4350   | 1      | 0      | 0      | 1      | 1      | 0      |
| 4352   | 0      | 3      | 0      | 0      | 0      | 0      |
| 4353   | 1      | 1      | 0      | 1      | 1      | 0      |
| 4355   | 1      | 2      | 0      | 1      | 0      | 2      |
| 4356   | 1      | 1      | 1      | 1      | 0      | 2      |
| 4358   | 0      | 0      | 0      | 0      | 0      | 0      |
| 4359   | 1      | 0      | 0      | 0      | 0      | 0      |
| 4360   | 1      | 1      | 1      | 2      | 1      | 1      |
| 4361   | 1      | 2      | 2      | 2      | 2      | 2      |
| 4363   | 0      | 1      | 1      | 1      | 0      | 0      |
| 4364   | 1      | 2      | 2      | 3      | 1      | 2      |
| 4365   | 0      | 3      | 1      | 1      | 0      | 0      |
| 4367   | 0      | 1      | 0      | 0      | 0      | 0      |
| 4369   | 1      | 0      | 1      | 0      | 1      | 1      |
| 4373   | 1      | 2      | 0      | 3      | 0      | 0      |
| 4374   | 1      | 1      | 1      | 1      | 0      | 2      |
| 4375   | 1      | 3      | 0      | 0      | 1      | 0      |
| 4378   | 0      | 0      | 0      | 1      | 0      | 1      |
| 4379   | 0      | 1      | 0      | 2      | 0      | 0      |
| 4382   | 2      | 1      | 2      | 1      | 1      | 2      |
| 4383   | 0      | 0      | 0      | 0      | 0      | 0      |
| 4384   | 0      | 2      | 0      | 1      | 0      | 0      |
| 4385   | 0      | 2      | 0      | 1      | 0      | 1      |
| 4388   | 1      | 1      | 1      | 1      | 1      | 1      |
| 4389   | 0      | 0      | 0      | 0      | 0      | 0      |
| 4391   | 1      | 3      | 1      | 2      | 1      | 1      |
| 4392   | 0      | 0      | 0      | 0      | 0      | 0      |



| respid | Q56i_1 | Q56j_1 | Q56k_1 | Q56l_1 | Q56m_1 | Q56n_1 |
|--------|--------|--------|--------|--------|--------|--------|
| 4393   | 0      | 1      | 0      | 1      | 0      | 1      |
| 4395   | 0      | 1      | 1      | 1      | 0      | 0      |
| 4397   | 3      | 1      | 1      | 1      | 3      | 1      |
| 4398   | 0      | 0      | 0      | 0      | 1      | 0      |
| 4399   | 0      | 0      | 0      | 0      | 0      | 0      |
| 4400   | 0      | 0      | 0      | 0      | 0      | 0      |
| 4401   | 1      | 1      | 2      | 0      | 0      | 0      |
| 4402   | 0      | 1      | 1      | 1      | 0      | 0      |
| 4404   | 0      | 1      | 0      | 1      | 0      | 0      |
| 4405   | 0      | 3      | 0      | 0      | 0      | 1      |
| 4407   | 0      | 3      | 0      | 0      | 0      | 0      |
| 4408   | 0      | 1      | 0      | 2      | 0      | 1      |
| 4411   | 0      | 1      | 1      | 0      | 0      | 1      |
| 4420   | 0      | 0      | 1      | 0      | 1      | 0      |
| 4421   | 0      | 1      | 0      | 0      | 0      | 1      |
| 4424   | 3      | 1      | 1      | 2      | 2      | 1      |
| 4425   | 0      | 2      | 1      | 1      | 0      | 0      |
| 4427   | 1      | 0      | 0      | 0      | 0      | 0      |
| 4430   | 0      | 1      | 1      | 1      | 0      | 0      |
| 4431   | 1      | 1      | 1      | 1      | 1      | 1      |
| 4432   | 1      | 1      | 1      | 1      | 1      | 1      |
| 4436   | 0      | 0      | 0      | 0      | 1      | 1      |
| 4439   | 0      | 2      | 0      | 1      | 1      | 1      |
| 4451   | 1      | 1      | 1      | 1      | 1      | 1      |
| 4452   | 1      | 1      | 1      | 2      | 1      | 2      |
| 4458   | 0      | 0      | 0      | 0      | 0      | 1      |
| 4464   | 1      | 0      | 2      | 1      | 1      | 1      |
| 4465   | 0      | 1      | 1      | 1      | 0      | 1      |
| 4467   | 0      | 2      | 0      | 1      | 0      | 0      |
| 4470   | 1      | 1      | 1      | 1      | 1      | 1      |
| 4471   | 1      | 1      | 0      | 0      | 1      | 1      |
| 4472   | 0      | 1      | 1      | 2      | 0      | 1      |

| respid | Q56i_1 | Q56j_1 | Q56k_1 | Q56l_1 | Q56m_1 | Q56n_1 |
|--------|--------|--------|--------|--------|--------|--------|
| 4473   | 0      | 1      | 1      | 0      | 0      | 1      |
| 4475   | 1      | 0      | 1      | 1      | 1      | 1      |
| 4476   | 2      | 2      | 3      | 3      | 0      | 1      |
| 4478   | 1      | 2      | 1      | 1      | 0      | 2      |
| 4485   | 0      | 0      | 0      | 0      | 0      | 0      |
| 4486   | 0      | 1      | 1      | 1      | 0      | 0      |
| 4490   | 0      | 3      | 0      | 3      | 0      | 0      |
| 4502   | 0      | 0      | 0      | 0      | 0      | 0      |
| 4503   | 0      | 3      | 0      | 1      | 2      | 1      |
| 4504   | 0      | 0      | 1      | 0      | 0      | 0      |
| 4506   | 0      | 1      | 0      | 0      | 0      | 0      |
| 4508   | 0      | 1      | 0      | 0      | 0      | 0      |
| 4515   | 0      | 0      | 0      | 1      | 1      | 0      |
| 4516   | 0      | 2      | 0      | 0      | 0      | 1      |
| 4519   | 0      | 0      | 1      | 0      | 0      | 0      |
| 4523   | 0      | 1      | 1      | 1      | 1      | 1      |
| 4525   | 0      | 0      | 0      | 1      | 0      | 1      |
| 4526   | 0      | 0      | 0      | 0      | 0      | 0      |
| 4528   | 0      | 0      | 0      | 0      | 0      | 0      |
| 4530   | 0      | 3      | 0      | 0      | 0      | 0      |
| 4531   | 1      | 0      | 1      | 1      | 1      | 0      |
| 4532   | 0      | 3      | 0      | 0      | 0      | 0      |
| 4537   | 1      | 1      | 0      | 0      | 0      | 0      |
| 4538   | 0      | 1      | 0      | 0      | 0      | 1      |
| 4539   | 0      | 0      | 1      | 2      | 1      | 1      |
| 4541   | 0      | 0      | 0      | 3      | 0      | 0      |
| 4543   | 0      | 0      | 0      | 0      | 0      | 0      |
| 4544   | 1      | 3      | 1      | 2      | 2      | 1      |
| 4546   | 0      | 3      | 0      | 0      | 0      | 0      |
| 4547   | 0      | 2      | 0      | 0      | 0      | 0      |
| 4549   | 1      | 2      | 0      | 0      | 0      | 0      |
| 4550   | 1      | 1      | 1      | 2      | 1      | 1      |

| respid | Q56i_1 | Q56j_1 | Q56k_1 | Q56l_1 | Q56m_1 | Q56n_1 |
|--------|--------|--------|--------|--------|--------|--------|
| 4551   | 0      | 0      | 0      | 0      | 0      | 0      |
| 4554   | 0      | 1      | 0      | 0      | 0      | 0      |
| 4557   | 0      | 3      | 0      | 3      | 0      | 0      |
| 4565   | 0      | 1      | 0      | 0      | 1      | 0      |
| 4568   | 0      | 2      | 0      | 0      | 1      | 2      |
| 4569   | 0      | 0      | 0      | 0      | 0      | 0      |
| 4570   | 0      | 0      | 0      | 0      | 0      | 0      |
| 4572   | 1      | 2      | 0      | 0      | 0      | 0      |
| 4574   | 0      | 2      | 1      | 2      | 0      | 1      |
| 4576   | 1      | 2      | 3      | 1      | 1      | 1      |
| 4578   | 0      | 0      | 0      | 0      | 0      | 0      |
| 4579   | 0      | 0      | 0      | 0      | 0      | 0      |
| 4580   | 0      | 0      | 1      | 0      | 1      | 0      |
| 4581   | 0      | 1      | 0      | 0      | 1      | 1      |
| 4584   | 0      | 0      | 0      | 0      | 0      | 0      |
| 4586   | 1      | 0      | 0      | 1      | 1      | 0      |
| 4587   | 1      | 1      | 1      | 1      | 1      | 1      |
| 4590   | 1      | 2      | 1      | 2      | 1      | 2      |
| 4592   | 1      | 1      | 0      | 1      | 1      | 1      |
| 4593   | 1      | 0      | 0      | 0      | 0      | 1      |
| 4595   | 0      | 1      | 0      | 2      | 0      | 0      |
| 4597   | 0      | 3      | 0      | 0      | 0      | 1      |
| 4598   | 1      | 1      | 1      | 1      | 1      | 2      |
| 4599   | 0      | 2      | 0      | 1      | 1      | 0      |
| 4600   | 0      | 1      | 0      | 0      | 1      | 0      |
| 4601   | 1      | 1      | 0      | 0      | 0      | 0      |
| 4608   | 0      | 0      | 1      | 1      | 1      | 0      |
| 4609   | 0      | 3      | 0      | 1      | 0      | 0      |
| 4611   | 0      | 2      | 1      | 1      | 0      | 3      |
| 4612   | 1      | 1      | 1      | 1      | 1      | 1      |
| 4613   | 0      | 0      | 0      | 0      | 0      | 0      |
| 4616   | 0      | 0      | 0      | 1      | 1      | 0      |

| respid | Q56i_1 | Q56j_1 | Q56k_1 | Q56l_1 | Q56m_1 | Q56n_1 |
|--------|--------|--------|--------|--------|--------|--------|
| 4617   | 0      | 0      | 0      | 0      | 1      | 0      |
| 4620   | 0      | 0      | 0      | 1      | 0      | 0      |
| 4621   | 0      | 0      | 0      | 0      | 0      | 0      |
| 4622   | 1      | 1      | 1      | 1      | 1      | 1      |
| 4624   | 1      | 0      | 1      | 0      | 0      | 0      |
| 4625   | 1      | 1      | 1      | 0      | 1      | 0      |
| 4627   | 0      | 1      | 0      | 1      | 0      | 0      |
| 4628   | 1      | 1      | 1      | 1      | 1      | 1      |
| 4629   | 1      | 1      | 1      | 1      | 1      | 1      |
| 4630   | 1      | 0      | 1      | 1      | 1      | 1      |
| 4632   | 0      | 0      | 0      | 0      | 0      | 0      |
| 4634   | 1      | 0      | 1      | 0      | 1      | 0      |
| 4635   | 0      | 1      | 1      | 1      | 1      | 3      |
| 4636   | 0      | 1      | 0      | 1      | 0      | 0      |
| 4637   | 1      | 1      | 1      | 1      | 1      | 1      |
| 4638   | 0      | 2      | 0      | 0      | 1      | 0      |
| 4639   | 1      | 1      | 0      | 1      | 1      | 1      |
| 4641   | 0      | 3      | 0      | 0      | 0      | 0      |
| 4643   | 0      | 2      | 0      | 1      | 0      | 1      |
| 4645   | 0      | 0      | 0      | 0      | 0      | 0      |
| 4646   | 1      | 2      | 1      | 1      | 1      | 1      |
| 4647   | 0      | 2      | 0      | 1      | 1      | 0      |
| 4648   | 1      | 0      | 0      | 0      | 0      | 0      |
| 4649   | 0      | 1      | 1      | 1      | 1      | 1      |
| 4650   | 2      | 1      | 2      | 1      | 2      | 2      |
| 4651   | 2      | 2      | 2      | 2      | 2      | 2      |
| 4652   | 1      | 2      | 2      | 3      | 1      | 1      |
| 4653   | 0      | 0      | 0      | 0      | 0      | 0      |
| 4657   | 0      | 0      | 0      | 0      | 0      | 0      |
| 4660   | 1      | 2      | 0      | 3      | 1      | 1      |
| 4661   | 0      | 2      | 1      | 1      | 1      | 2      |
| 4662   | 0      | 1      | 0      | 0      | 0      | 0      |

| respid | Q56i_1 | Q56j_1 | Q56k_1 | Q56l_1 | Q56m_1 | Q56n_1 |
|--------|--------|--------|--------|--------|--------|--------|
| 4667   | 0      | 1      | 0      | 1      | 0      | 1      |
| 4669   | 1      | 1      | 0      | 0      | 1      | 1      |
| 4671   | 0      | 3      | 0      | 0      | 0      | 1      |
| 4672   | 1      | 2      | 1      | 1      | 1      | 1      |
| 4673   | 2      | 1      | 1      | 2      | 2      | 1      |
| 4677   | 0      | 0      | 2      | 2      | 1      | 1      |
| 4679   | 0      | 1      | 0      | 1      | 1      | 0      |
| 4683   | 0      | 0      | 0      | 0      | 0      | 0      |
| 4684   | 0      | 2      | 0      | 1      | 1      | 1      |
| 4685   | 0      | 3      | 0      | 3      | 0      | 1      |
| 4686   | 1      | 2      | 1      | 1      | 1      | 1      |
| 4687   | 1      | 0      | 1      | 0      | 1      | 0      |
| 4688   | 1      | 2      | 0      | 2      | 0      | 1      |
| 4691   | 1      | 1      | 0      | 1      | 0      | 0      |
| 4692   | 0      | 3      | 0      | 1      | 0      | 0      |
| 4694   | 1      | 1      | 1      | 0      | 1      | 1      |
| 4695   | 0      | 0      | 0      | 1      | 0      | 0      |
| 4696   | 1      | 2      | 0      | 1      | 1      | 1      |
| 4697   | 0      | 0      | 0      | 1      | 0      | 1      |
| 4698   | 1      | 2      | 2      | 2      | 2      | 1      |
| 4699   | 0      | 3      | 0      | 0      | 0      | 0      |
| 4701   | 1      | 0      | 0      | 0      | 1      | 0      |
| 4703   | 0      | 2      | 1      | 1      | 1      | 2      |
| 4704   | 1      | 2      | 1      | 1      | 2      | 1      |
| 4705   | 0      | 2      | 0      | 3      | 0      | 0      |
| 4706   | 1      | 0      | 0      | 0      | 0      | 0      |
| 4707   | 0      | 1      | 0      | 0      | 0      | 0      |
| 4708   | 0      | 2      | 0      | 1      | 0      | 1      |
| 4710   | 0      | 1      | 0      | 1      | 1      | 2      |
| 4711   | 1      | 1      | 1      | 1      | 2      | 1      |
| 4715   | 0      | 1      | 0      | 0      | 0      | 0      |
| 4716   | 1      | 2      | 1      | 1      | 0      | 0      |

| respid | Q56i_1 | Q56j_1 | Q56k_1 | Q56l_1 | Q56m_1 | Q56n_1 |
|--------|--------|--------|--------|--------|--------|--------|
| 4717   | 0      | 1      | 0      | 0      | 0      | 0      |
| 4718   | 1      | 3      | 1      | 1      | 1      | 2      |
| 4722   | 1      | 2      | 2      | 2      | 2      | 1      |
| 4727   | 1      | 1      | 1      | 1      | 1      | 1      |
| 4728   | 2      | 0      | 1      | 2      | 1      | 1      |
| 4729   | 0      | 1      | 2      | 0      | 0      | 0      |
| 4732   | 1      | 1      | 1      | 1      | 0      | 2      |
| 4733   | 0      | 0      | 0      | 0      | 0      | 0      |
| 4734   | 0      | 1      | 1      | 0      | 0      | 0      |
| 4735   | 0      | 0      | 0      | 0      | 0      | 0      |
| 4737   | 0      | 0      | 0      | 0      | 0      | 0      |
| 4738   | 0      | 0      | 0      | 0      | 0      | 0      |
| 4740   | 0      | 0      | 0      | 0      | 0      | 0      |
| 4741   | 0      | 1      | 1      | 0      | 0      | 0      |
| 4743   | 1      | 1      | 0      | 0      | 1      | 0      |
| 4746   | 0      | 1      | 0      | 0      | 0      | 0      |
| 4750   | 2      | 0      | 1      | 1      | 1      | 0      |
| 4752   | 0      | 0      | 1      | 0      | 0      | 0      |
| 4753   | 1      | 1      | 1      | 1      | 0      | 1      |
| 4754   | 0      | 0      | 0      | 0      | 0      | 1      |
| 4755   | 1      | 1      | 1      | 1      | 1      | 2      |
| 4758   | 2      | 0      | 1      | 3      | 3      | 1      |
| 4766   | 0      | 0      | 0      | 1      | 0      | 1      |
| 4767   | 1      | 2      | 0      | 1      | 0      | 0      |
| 4768   | 0      | 3      | 0      | 2      | 2      | 1      |
| 4769   | 0      | 1      | 0      | 1      | 0      | 1      |
| 4771   | 2      | 1      | 2      | 2      | 1      | 1      |
| 4772   | 1      | 0      | 0      | 1      | 0      | 0      |
| 4773   | 1      | 0      | 1      | 0      | 1      | 0      |
| 4774   | 1      | 2      | 1      | 1      | 0      | 1      |
| 4776   | 1      | 3      | 1      | 2      | 1      | 0      |
| 4777   | 1      | 2      | 0      | 1      | 1      | 1      |

| respid | Q56i_1 | Q56j_1 | Q56k_1 | Q56l_1 | Q56m_1 | Q56n_1 |
|--------|--------|--------|--------|--------|--------|--------|
| 4779   | 0      | 0      | 0      | 1      | 0      | 0      |
| 4780   | 0      | 2      | 0      | 0      | 0      | 0      |
| 4781   | 0      | 0      | 1      | 1      | 0      | 0      |
| 4783   | 2      | 1      | 1      | 1      | 0      | 1      |
| 4784   | 0      | 0      | 0      | 0      | 0      | 0      |
| 4785   | 1      | 1      | 1      | 1      | 0      | 1      |
| 4788   | 0      | 0      | 0      | 0      | 0      | 0      |
| 4789   | 0      | 1      | 0      | 0      | 0      | 1      |
| 4790   | 0      | 0      | 0      | 0      | 0      | 0      |
| 4791   | 0      | 0      | 0      | 1      | 0      | 0      |
| 4794   | 0      | 2      | 1      | 1      | 0      | 1      |
| 4795   | 0      | 0      | 0      | 0      | 0      | 0      |
| 4797   | 1      | 0      | 1      | 2      | 0      | 1      |
| 4802   | 2      | 2      | 2      | 1      | 2      | 1      |
| 4803   | 1      | 1      | 2      | 1      | 1      | 1      |
| 4804   | 1      | 3      | 1      | 0      | 1      | 0      |
| 4805   | 0      | 2      | 1      | 1      | 0      | 0      |
| 4807   | 0      | 1      | 0      | 0      | 0      | 0      |
| 4808   | 1      | 3      | 1      | 1      | 1      | 0      |
| 4809   | 1      | 2      | 1      | 1      | 1      | 2      |
| 4811   | 1      | 0      | 1      | 2      | 1      | 0      |
| 4817   | 1      | 2      | 1      | 1      | 1      | 2      |
| 4819   | 0      | 0      | 0      | 1      | 0      | 2      |
| 4820   | 0      | 1      | 0      | 0      | 0      | 1      |
| 4821   | 0      | 1      | 0      | 3      | 3      | 1      |
| 4822   | 0      | 1      | 0      | 0      | 0      | 0      |
| 4823   | 1      | 1      | 1      | 0      | 0      | 0      |
| 4825   | 0      | 1      | 1      | 1      | 1      | 1      |
| 4826   | 1      | 0      | 1      | 2      | 0      | 1      |
| 4830   | 0      | 2      | 0      | 1      | 0      | 0      |
| 4832   | 0      | 0      | 0      | 0      | 0      | 0      |
| 4838   | 1      | 1      | 1      | 1      | 1      | 1      |

| respid | Q56i_1 | Q56j_1 | Q56k_1 | Q56l_1 | Q56m_1 | Q56n_1 |
|--------|--------|--------|--------|--------|--------|--------|
| 4840   | 0      | 0      | 1      | 0      | 0      | 0      |
| 4841   | 0      | 2      | 0      | 0      | 0      | 0      |
| 4843   | 1      | 0      | 1      | 0      | 1      | 0      |
| 4845   | 1      | 1      | 1      | 1      | 0      | 1      |
| 4846   | 1      | 1      | 1      | 1      | 1      | 1      |
| 4848   | 0      | 1      | 1      | 0      | 0      | 0      |
| 4853   | 0      | 1      | 0      | 0      | 0      | 0      |
| 4854   | 1      | 2      | 1      | 0      | 1      | 0      |
| 4859   | 0      | 1      | 1      | 0      | 1      | 1      |
| 4861   | 1      | 1      | 1      | 1      | 1      | 0      |
| 4864   | 0      | 0      | 1      | 1      | 0      | 0      |
| 4867   | 0      | 1      | 0      | 0      | 1      | 0      |
| 4870   | 0      | 2      | 1      | 2      | 0      | 1      |
| 4872   | 0      | 1      | 1      | 1      | 0      | 1      |
| 4873   | 1      | 0      | 1      | 1      | 1      | 3      |
| 4874   | 1      | 0      | 1      | 0      | 1      | 0      |
| 4878   | 0      | 1      | 0      | 1      | 0      | 0      |
| 4880   | 1      | 0      | 1      | 1      | 0      | 0      |
| 4881   | 1      | 3      | 1      | 2      | 0      | 0      |
| 4882   | 1      | 1      | 3      | 0      | 1      | 2      |
| 4883   | 0      | 0      | 0      | 1      | 0      | 0      |
| 4885   | 0      | 1      | 0      | 0      | 0      | 0      |
| 4889   | 1      | 1      | 1      | 1      | 1      | 1      |
| 4890   | 0      | 0      | 0      | 0      | 0      | 0      |
| 4891   | 0      | 1      | 0      | 1      | 0      | 0      |
| 4894   | 0      | 0      | 1      | 0      | 0      | 0      |
| 4895   | 2      | 0      | 2      | 2      | 2      | 1      |
| 4896   | 1      | 3      | 1      | 2      | 0      | 1      |
| 4897   | 0      | 1      | 1      | 1      | 1      | 0      |
| 4898   | 1      | 2      | 1      | 1      | 1      | 1      |
| 4899   | 0      | 0      | 0      | 0      | 0      | 0      |
| 4900   | 0      | 1      | 2      | 1      | 1      | 1      |



| respid | Q56i_1 | Q56j_1 | Q56k_1 | Q56l_1 | Q56m_1 | Q56n_1 |
|--------|--------|--------|--------|--------|--------|--------|
| 4901   | 2      | 3      | 2      | 2      | 1      | 2      |
| 4903   | 0      | 1      | 1      | 0      | 0      | 1      |
| 4904   | 0      | 1      | 1      | 1      | 0      | 1      |
| 4908   | 0      | 3      | 0      | 3      | 0      | 3      |
| 4909   | 0      | 1      | 2      | 1      | 0      | 0      |
| 4913   | 0      | 0      | 0      | 0      | 1      | 1      |
| 4917   | 0      | 3      | 1      | 2      | 1      | 2      |
| 4918   | 1      | 2      | 2      | 2      | 1      | 3      |
| 4920   | 0      | 3      | 0      | 0      | 0      | 0      |
| 4921   | 0      | 2      | 0      | 2      | 1      | 0      |
| 4925   | 0      | 1      | 2      | 1      | 0      | 0      |
| 4926   | 1      | 1      | 1      | 2      | 1      | 1      |
| 4927   | 0      | 0      | 0      | 1      | 0      | 0      |
| 4928   | 0      | 0      | 0      | 1      | 0      | 1      |
| 4929   | 0      | 0      | 1      | 0      | 1      | 1      |
| 4930   | 2      | 0      | 2      | 0      | 2      | 2      |
| 4931   | 1      | 1      | 0      | 1      | 0      | 0      |
| 4932   | 1      | 1      | 1      | 1      | 1      | 1      |
| 4933   | 1      | 0      | 1      | 2      | 1      | 0      |
| 4934   | 0      | 0      | 1      | 0      | 0      | 0      |
| 5934   | 1      | 0      | 1      | 0      | 0      | 0      |
| 5935   | 1      | 2      | 1      | 1      | 0      | 1      |
| 5936   | 0      | 0      | 0      | 0      | 1      | 0      |
| 5938   | 0      | 1      | 0      | 0      | 0      | 0      |
| 5939   | 0      | 0      | 0      | 0      | 0      | 0      |
| 5940   | 0      | 2      | 1      | 0      | 1      | 1      |
| 5942   | 1      | 1      | 1      | 1      | 1      | 0      |
| 5944   | 0      | 0      | 1      | 0      | 1      | 0      |
| 5951   | 2      | 3      | 3      | 2      | 2      | 1      |
| 5952   | 1      | 0      | 0      | 1      | 0      | 0      |
| 5954   | 0      | 0      | 0      | 0      | 0      | 0      |
| 5956   | 0      | 0      | 0      | 0      | 0      | 0      |

| respid | Q56i_1 | Q56j_1 | Q56k_1 | Q56l_1 | Q56m_1 | Q56n_1 |
|--------|--------|--------|--------|--------|--------|--------|
| 5957   | 0      | 0      | 0      | 0      | 0      | 0      |
| 5958   | 2      | 2      | 1      | 0      | 1      | 0      |
| 5959   | 2      | 2      | 2      | 2      | 2      | 2      |
| 5960   | 0      | 1      | 0      | 0      | 0      | 1      |
| 5963   | 0      | 3      | 0      | 3      | 0      | 0      |
| 5966   | 0      | 0      | 0      | 0      | 0      | 0      |
| 5968   | 0      | 1      | 0      | 0      | 0      | 0      |
| 5974   | 0      | 0      | 0      | 0      | 0      | 1      |
| 5975   | 0      | 1      | 1      | 1      | 0      | 1      |
| 5976   | 2      | 1      | 1      | 2      | 2      | 1      |
| 5977   | 0      | 1      | 0      | 0      | 1      | 0      |
| 5978   | 1      | 2      | 1      | 1      | 0      | 0      |
| 5979   | 0      | 0      | 1      | 1      | 1      | 1      |
| 5983   | 0      | 0      | 0      | 0      | 1      | 0      |
| 5984   | 0      | 2      | 0      | 1      | 0      | 0      |
| 5990   | 0      | 1      | 0      | 0      | 1      | 0      |
| 5991   | 1      | 3      | 2      | 3      | 2      | 0      |
| 5992   | 0      | 3      | 0      | 1      | 1      | 2      |
| 5993   | 0      | 0      | 0      | 1      | 1      | 0      |
| 5994   | 0      | 1      | 0      | 0      | 1      | 0      |
| 5996   | 0      | 3      | 0      | 3      | 1      | 2      |
| 6001   | 1      | 1      | 1      | 1      | 1      | 1      |
| 6003   | 0      | 0      | 0      | 0      | 0      | 0      |
| 6004   | 0      | 3      | 1      | 3      | 1      | 1      |
| 6005   | 0      | 1      | 0      | 2      | 0      | 1      |
| 6006   | 0      | 1      | 0      | 0      | 1      | 0      |
| 6008   | 0      | 0      | 1      | 1      | 2      | 3      |
| 6009   | 0      | 0      | 0      | 0      | 1      | 0      |
| 6014   | 0      | 2      | 0      | 0      | 0      | 0      |
| 6016   | 1      | 3      | 1      | 2      | 2      | 1      |
| 6017   | 0      | 3      | 0      | 3      | 0      | 2      |
| 6018   | 0      | 2      | 1      | 0      | 1      | 1      |

| respid | Q56i_1 | Q56j_1 | Q56k_1 | Q56l_1 | Q56m_1 | Q56n_1 |
|--------|--------|--------|--------|--------|--------|--------|
| 6020   | 1      | 1      | 1      | 2      | 2      | 3      |
| 6021   | 0      | 3      | 0      | 3      | 1      | 2      |
| 6024   | 0      | 1      | 0      | 1      | 0      | 1      |
| 6025   | 0      | 0      | 0      | 0      | 0      | 0      |
| 6026   | 1      | 0      | 0      | 1      | 0      | 0      |
| 6032   | 0      | 1      | 0      | 1      | 1      | 0      |
| 6035   | 1      | 1      | 1      | 1      | 0      | 2      |
| 6038   | 0      | 2      | 1      | 2      | 1      | 1      |
| 6043   | 0      | 1      | 1      | 1      | 1      | 1      |
| 6044   | 0      | 1      | 0      | 1      | 1      | 1      |
| 6046   | 0      | 2      | 1      | 1      | 0      | 1      |
| 6047   | 0      | 0      | 0      | 0      | 1      | 0      |
| 6048   | 0      | 1      | 0      | 0      | 1      | 1      |
| 6050   | 0      | 2      | 0      | 1      | 0      | 0      |
| 6051   | 0      | 1      | 0      | 0      | 0      | 1      |
| 6053   | 0      | 0      | 0      | 0      | 0      | 2      |
| 6054   | 0      | 2      | 1      | 2      | 2      | 3      |
| 6056   | 1      | 1      | 1      | 0      | 1      | 1      |
| 6058   | 0      | 2      | 0      | 0      | 0      | 0      |
| 6060   | 1      | 3      | 0      | 1      | 0      | 0      |
| 6061   | 1      | 0      | 1      | 0      | 1      | 1      |
| 6062   | 1      | 1      | 0      | 1      | 1      | 1      |
| 6067   | 0      | 1      | 0      | 0      | 0      | 1      |
| 6070   | 0      | 1      | 0      | 1      | 0      | 0      |
| 6074   | 0      | 0      | 0      | 1      | 1      | 1      |
| 6076   | 0      | 0      | 0      | 1      | 0      | 0      |
| 6078   | 0      | 0      | 0      | 0      | 0      | 1      |
| 6081   | 0      | 0      | 0      | 0      | 0      | 0      |
| 6085   | 1      | 1      | 1      | 1      | 1      | 0      |
| 6088   | 0      | 1      | 1      | 1      | 1      | 2      |
| 6092   | 0      | 3      | 1      | 1      | 1      | 1      |
| 6095   | 0      | 1      | 0      | 0      | 0      | 0      |

| respid | Q56i_1 | Q56j_1 | Q56k_1 | Q56l_1 | Q56m_1 | Q56n_1 |
|--------|--------|--------|--------|--------|--------|--------|
| 6098   | 1      | 1      | 0      | 2      | 1      | 1      |
| 6101   | 0      | 0      | 0      | 0      | 0      | 0      |
| 6102   | 0      | 1      | 1      | 1      | 1      | 0      |
| 6105   | 1      | 1      | 0      | 0      | 0      | 1      |
| 6106   | 0      | 1      | 0      | 1      | 0      | 0      |
| 6107   | 1      | 1      | 1      | 2      | 2      | 1      |
| 6111   | 0      | 3      | 0      | 0      | 0      | 1      |
| 6112   | 0      | 1      | 1      | 0      | 0      | 0      |
| 6113   | 1      | 1      | 1      | 1      | 1      | 1      |
| 6115   | 1      | 1      | 0      | 0      | 1      | 1      |
| 6116   | 0      | 0      | 0      | 0      | 0      | 0      |
| 6117   | 1      | 0      | 1      | 1      | 1      | 0      |
| 6124   | 1      | 2      | 1      | 2      | 2      | 1      |
| 6125   | 0      | 1      | 0      | 0      | 1      | 1      |
| 6128   | 1      | 1      | 0      | 1      | 1      | 1      |
| 6133   | 1      | 0      | 0      | 0      | 0      | 0      |
| 6134   | 0      | 1      | 0      | 0      | 0      | 0      |
| 6135   | 1      | 2      | 1      | 1      | 2      | 2      |
| 6138   | 0      | 1      | 0      | 2      | 1      | 0      |
| 6140   | 0      | 1      | 1      | 1      | 1      | 1      |
| 6143   | 0      | 0      | 0      | 0      | 0      | 0      |
| 6147   | 0      | 2      | 0      | 1      | 1      | 0      |
| 6154   | 0      | 2      | 0      | 0      | 1      | 0      |
| 6162   | 0      | 1      | 0      | 1      | 1      | 1      |
| 6165   | 0      | 2      | 1      | 3      | 1      | 0      |
| 6166   | 1      | 1      | 1      | 1      | 1      | 1      |
| 6173   | 3      | 3      | 1      | 1      | 2      | 3      |
| 6180   | 0      | 0      | 1      | 2      | 1      | 3      |
| 6184   | 1      | 0      | 2      | 1      | 1      | 1      |
| 6185   | 0      | 1      | 0      | 2      | 1      | 2      |
| 6186   | 0      | 1      | 1      | 1      | 2      | 0      |
| 6188   | 0      | 1      | 0      | 0      | 1      | 0      |

| respid | Q56i_1 | Q56j_1 | Q56k_1 | Q56l_1 | Q56m_1 | Q56n_1 |
|--------|--------|--------|--------|--------|--------|--------|
| 6192   | 1      | 1      | 0      | 1      | 2      | 1      |
| 6194   | 1      | 3      | 1      | 0      | 1      | 0      |
| 6195   | 0      | 1      | 0      | 1      | 2      | 2      |
| 6196   | 1      | 2      | 1      | 1      | 1      | 0      |
| 6199   | 1      | 0      | 1      | 0      | 1      | 0      |
| 6200   | 0      | 0      | 0      | 1      | 0      | 3      |
| 6201   | 0      | 0      | 1      | 1      | 0      | 0      |
| 6202   | 0      | 0      | 0      | 0      | 0      | 0      |
| 6203   | 0      | 2      | 0      | 0      | 0      | 1      |
| 6205   | 0      | 3      | 0      | 0      | 0      | 0      |
| 6210   | 0      | 1      | 1      | 1      | 2      | 1      |
| 6212   | 1      | 1      | 1      | 1      | 0      | 1      |
| 6216   | 2      | 2      | 1      | 2      | 1      | 1      |
| 6218   | 0      | 1      | 0      | 1      | 1      | 3      |
| 6221   | 0      | 3      | 0      | 1      | 1      | 1      |
| 6224   | 1      | 0      | 0      | 0      | 0      | 0      |
| 6225   | 0      | 2      | 0      | 1      | 1      | 0      |
| 6227   | 0      | 0      | 0      | 1      | 1      | 0      |
| 6230   | 0      | 1      | 1      | 1      | 1      | 1      |
| 6231   | 0      | 1      | 0      | 1      | 1      | 0      |
| 6233   | 0      | 2      | 1      | 1      | 1      | 0      |
| 6234   | 2      | 2      | 1      | 1      | 2      | 1      |
| 6235   | 1      | 1      | 0      | 1      | 1      | 1      |
| 6237   | 0      | 1      | 0      | 1      | 0      | 0      |
| 6240   | 0      | 0      | 0      | 0      | 0      | 0      |
| 6248   | 0      | 1      | 0      | 0      | 1      | 1      |
| 6249   | 0      | 2      | 0      | 1      | 1      | 0      |
| 6252   | 0      | 1      | 0      | 1      | 1      | 1      |
| 6254   | 1      | 3      | 0      | 1      | 1      | 1      |
| 6269   | 1      | 1      | 1      | 1      | 1      | 1      |
| 6304   | 1      | 2      | 0      | 2      | 0      | 1      |
| 6334   | 1      | 0      | 1      | 0      | 1      | 0      |

| respid | Q56i_1 | Q56j_1 | Q56k_1 | Q56l_1 | Q56m_1 | Q56n_1 |
|--------|--------|--------|--------|--------|--------|--------|
| 6341   | 0      | 3      | 0      | 0      | 0      | 0      |
| 6350   | 1      | 1      | 1      | 2      | 1      | 1      |
| 6370   | 0      | 3      | 0      | 0      | 0      | 0      |
| 6384   | 0      | 1      | 0      | 0      | 0      | 0      |
| 6400   | 0      | 1      | 0      | 0      | 1      | 0      |
| 6418   | 0      | 0      | 0      | 0      | 0      | 0      |
| 6467   | 0      | 0      | 0      | 0      | 0      | 0      |
| 6469   | 0      | 0      | 0      | 0      | 0      | 0      |
| 6474   | 0      | 1      | 0      | 0      | 0      | 0      |
| 6475   | 0      | 0      | 0      | 1      | 1      | 0      |
| 6476   | 1      | 1      | 1      | 1      | 1      | 1      |
| 6477   | 0      | 0      | 0      | 0      | 0      | 3      |
| 6480   | 0      | 1      | 1      | 1      | 1      | 0      |
| 6481   | 1      | 2      | 1      | 2      | 2      | 1      |
| 6485   | 0      | 0      | 0      | 0      | 0      | 0      |
| 6488   | 1      | 1      | 2      | 2      | 2      | 1      |
| 6495   | 0      | 0      | 0      | 0      | 0      | 0      |
| 6499   | 2      | 3      | 1      | 3      | 3      | 3      |
| 6500   | 1      | 2      | 1      | 2      | 1      | 1      |
| 6504   | 0      | 1      | 1      | 1      | 1      | 1      |
| 6507   | 0      | 1      | 0      | 2      | 0      | 0      |
| 6512   | 1      | 2      | 1      | 1      | 1      | 0      |
| 6525   | 1      | 1      | 1      | 3      | 1      | 3      |
| 6532   | 0      | 1      | 0      | 0      | 1      | 0      |
| 6535   | 0      | 0      | 0      | 0      | 0      | 0      |
| 6546   | 0      | 1      | 0      | 0      | 0      | 2      |
| 6551   | 0      | 0      | 0      | 0      | 1      | 0      |
| 6556   | 1      | 3      | 1      | 1      | 1      | 1      |
| 6566   | 0      | 1      | 0      | 1      | 1      | 1      |
| 6569   | 1      | 0      | 1      | 0      | 1      | 0      |
| 6574   | 0      | 0      | 0      | 0      | 1      | 1      |
| 6576   | 0      | 2      | 0      | 1      | 0      | 0      |

| respid | Q56i_1 | Q56j_1 | Q56k_1 | Q56l_1 | Q56m_1 | Q56n_1 |
|--------|--------|--------|--------|--------|--------|--------|
| 6580   | 0      | 3      | 0      | 0      | 0      | 0      |
| 6584   | 0      | 1      | 0      | 0      | 1      | 0      |
| 6585   | 1      | 1      | 1      | 1      | 1      | 0      |
| 6589   | 0      | 2      | 0      | 1      | 1      | 1      |
| 6590   | 1      | 0      | 1      | 2      | 2      | 3      |
| 6598   | 0      | 1      | 0      | 1      | 0      | 0      |
| 6603   | 0      | 0      | 0      | 0      | 2      | 0      |
| 6618   | 1      | 1      | 1      | 1      | 1      | 1      |
| 6630   | 1      | 1      | 1      | 1      | 1      | 0      |
| 6636   | 1      | 1      | 1      | 1      | 1      | 1      |
| 6649   | 0      | 1      | 0      | 0      | 0      | 0      |
| 6675   | 2      | 3      | 2      | 3      | 1      | 1      |
| 6678   | 1      | 2      | 1      | 1      | 1      | 1      |
| 6681   | 0      | 0      | 0      | 0      | 0      | 0      |
| 6684   | 2      | 1      | 1      | 1      | 2      | 1      |
| 6688   | 0      | 0      | 1      | 1      | 0      | 0      |
| 6691   | 1      | 0      | 1      | 0      | 0      | 0      |
| 6694   | 1      | 0      | 1      | 0      | 1      | 0      |
| 6696   | 1      | 1      | 1      | 0      | 0      | 2      |
| 6720   | 1      | 0      | 1      | 0      | 1      | 0      |
| 6722   | 2      | 2      | 2      | 1      | 2      | 2      |
| 6724   | 0      | 3      | 0      | 0      | 0      | 0      |
| 6725   | 1      | 1      | 0      | 0      | 1      | 0      |
| 6727   | 0      | 0      | 0      | 0      | 0      | 0      |
| 6734   | 1      | 0      | 1      | 0      | 1      | 0      |
| 6739   | 0      | 1      | 0      | 1      | 0      | 0      |
| 6743   | 1      | 3      | 1      | 0      | 1      | 1      |
| 6749   | 0      | 2      | 2      | 1      | 1      | 0      |
| 6756   | 1      | 1      | 1      | 1      | 1      | 1      |
| 6764   | 0      | 0      | 0      | 0      | 1      | 0      |
| 6765   | 1      | 1      | 2      | 1      | 1      | 1      |
| 6768   | 1      | 1      | 1      | 0      | 1      | 0      |

| respid | Q56i_1 | Q56j_1 | Q56k_1 | Q56l_1 | Q56m_1 | Q56n_1 |
|--------|--------|--------|--------|--------|--------|--------|
| 6773   | 0      | 1      | 0      | 1      | 0      | 0      |
| 6775   | 1      | 1      | 1      | 0      | 0      | 0      |
| 6777   | 1      | 1      | 1      | 0      | 1      | 1      |
| 6779   | 0      | 0      | 0      | 0      | 0      | 0      |
| 6790   | 1      | 1      | 1      | 1      | 1      | 1      |
| 6797   | 1      | 1      | 1      | 0      | 0      | 2      |
| 6798   | 1      | 1      | 0      | 1      | 1      | 1      |
| 6808   | 0      | 1      | 0      | 1      | 0      | 1      |
| 6810   | 1      | 2      | 1      | 1      | 2      | 1      |
| 6811   | 3      | 2      | 2      | 3      | 2      | 3      |
| 6812   | 0      | 0      | 0      | 0      | 0      | 1      |
| 6814   | 0      | 3      | 0      | 0      | 0      | 0      |
| 6819   | 1      | 1      | 1      | 1      | 1      | 2      |
| 6820   | 1      | 0      | 0      | 0      | 1      | 0      |
| 6832   | 1      | 1      | 1      | 0      | 1      | 0      |
| 6854   | 1      | 0      | 1      | 0      | 1      | 0      |
| 6855   | 0      | 0      | 0      | 1      | 0      | 1      |
| 6857   | 0      | 1      | 1      | 0      | 0      | 0      |
| 6858   | 0      | 0      | 0      | 0      | 0      | 0      |
| 6859   | 1      | 0      | 1      | 0      | 1      | 0      |
| 6860   | 1      | 3      | 1      | 1      | 2      | 1      |
| 6862   | 1      | 2      | 1      | 1      | 1      | 0      |
| 6879   | 1      | 2      | 1      | 1      | 1      | 1      |
| 6893   | 0      | 0      | 1      | 0      | 0      | 0      |
| 6898   | 1      | 2      | 1      | 1      | 1      | 2      |
| 6902   | 1      | 0      | 1      | 1      | 1      | 0      |
| 6903   | 1      | 2      | 1      | 1      | 2      | 1      |
| 6907   | 1      | 0      | 1      | 0      | 1      | 0      |
| 6908   | 1      | 1      | 1      | 1      | 1      | 0      |
| 6912   | 0      | 1      | 0      | 0      | 0      | 1      |
| 6915   | 1      | 0      | 1      | 2      | 1      | 1      |
| 6916   | 2      | 1      | 0      | 1      | 1      | 1      |



| respid | Q56i_1 | Q56j_1 | Q56k_1 | Q56l_1 | Q56m_1 | Q56n_1 |
|--------|--------|--------|--------|--------|--------|--------|
| 6917   | 0      | 0      | 1      | 0      | 0      | 1      |
| 6923   | 1      | 1      | 0      | 1      | 1      | 1      |
| 6934   | 0      | 2      | 0      | 0      | 0      | 0      |
| 6937   | 0      | 0      | 1      | 0      | 0      | 0      |
| 6945   | 2      | 1      | 1      | 2      | 1      | 1      |
| 6954   | 0      | 1      | 1      | 1      | 1      | 1      |
| 6956   | 0      | 2      | 1      | 1      | 0      | 0      |
| 6958   | 1      | 0      | 1      | 1      | 1      | 0      |
| 6961   | 1      | 0      | 0      | 0      | 0      | 0      |
| 6963   | 1      | 0      | 0      | 0      | 1      | 2      |
| 6964   | 0      | 0      | 0      | 0      | 0      | 0      |
| 6976   | 0      | 1      | 1      | 0      | 1      | 0      |
| 6977   | 1      | 1      | 1      | 1      | 1      | 1      |
| 7000   | 1      | 1      | 1      | 1      | 2      | 0      |
| 7001   | 0      | 1      | 0      | 0      | 0      | 1      |
| 7005   | 0      | 1      | 1      | 1      | 1      | 1      |
| 7006   | 1      | 0      | 1      | 1      | 1      | 2      |
| 7008   | 1      | 1      | 1      | 3      | 2      | 2      |
| 7009   | 1      | 1      | 1      | 1      | 1      | 1      |
| 7019   | 1      | 1      | 1      | 1      | 0      | 1      |
| 7021   | 1      | 1      | 1      | 1      | 1      | 0      |
| 7026   | 1      | 1      | 1      | 1      | 1      | 1      |
| 7030   | 1      | 1      | 1      | 1      | 1      | 1      |
| 7034   | 1      | 1      | 1      | 1      | 1      | 0      |
| 7039   | 1      | 0      | 2      | 3      | 1      | 1      |
| 7041   | 0      | 1      | 0      | 0      | 0      | 0      |
| 7047   | 0      | 1      | 0      | 0      | 0      | 0      |
| 7051   | 1      | 0      | 1      | 1      | 1      | 0      |
| 7052   | 1      | 1      | 1      | 0      | 1      | 1      |
| 7059   | 1      | 0      | 0      | 0      | 0      | 0      |
| 7062   | 1      | 1      | 1      | 1      | 1      | 0      |
| 7065   | 0      | 2      | 0      | 1      | 1      | 1      |

| respid | Q56i_1 | Q56j_1 | Q56k_1 | Q56l_1 | Q56m_1 | Q56n_1 |
|--------|--------|--------|--------|--------|--------|--------|
| 7066   | 0      | 1      | 1      | 0      | 0      | 0      |
| 7069   | 1      | 1      | 1      | 1      | 1      | 0      |
| 7070   | 0      | 1      | 0      | 0      | 0      | 0      |
| 7073   | 0      | 3      | 0      | 3      | 0      | 0      |
| 7078   | 0      | 0      | 0      | 0      | 0      | 0      |
| 7083   | 0      | 0      | 0      | 1      | 0      | 0      |
| 7084   | 2      | 2      | 2      | 2      | 1      | 2      |
| 7085   | 0      | 1      | 1      | 0      | 1      | 0      |
| 7088   | 1      | 2      | 2      | 2      | 2      | 2      |
| 7090   | 1      | 2      | 1      | 1      | 2      | 1      |
| 7095   | 2      | 1      | 1      | 1      | 2      | 1      |
| 7100   | 1      | 1      | 1      | 0      | 1      | 0      |
| 7102   | 0      | 0      | 0      | 1      | 1      | 2      |
| 7103   | 0      | 2      | 0      | 0      | 1      | 0      |
| 7108   | 0      | 0      | 0      | 0      | 0      | 1      |
| 7109   | 0      | 1      | 0      | 1      | 0      | 0      |
| 7110   | 0      | 1      | 0      | 0      | 0      | 0      |
| 7112   | 0      | 0      | 0      | 0      | 0      | 0      |
| 7114   | 1      | 1      | 1      | 1      | 1      | 0      |
| 7116   | 1      | 1      | 2      | 2      | 2      | 1      |
| 7117   | 0      | 2      | 2      | 1      | 0      | 1      |
| 7118   | 1      | 1      | 2      | 2      | 1      | 1      |
| 7120   | 1      | 1      | 2      | 1      | 2      | 0      |
| 7124   | 0      | 1      | 0      | 1      | 1      | 1      |
| 7130   | 1      | 1      | 1      | 1      | 1      | 1      |
| 7135   | 0      | 3      | 0      | 0      | 0      | 0      |
| 7137   | 1      | 2      | 1      | 1      | 1      | 1      |
| 7140   | 0      | 2      | 1      | 1      | 0      | 0      |
| 7141   | 1      | 0      | 1      | 0      | 1      | 0      |
| 7148   | 0      | 0      | 0      | 0      | 0      | 0      |
| 7152   | 0      | 0      | 0      | 0      | 0      | 1      |
| 7154   | 0      | 0      | 0      | 0      | 1      | 0      |

| respid | Q56i_1 | Q56j_1 | Q56k_1 | Q56l_1 | Q56m_1 | Q56n_1 |
|--------|--------|--------|--------|--------|--------|--------|
| 7156   | 0      | 3      | 0      | 0      | 1      | 1      |
| 7158   | 0      | 2      | 1      | 2      | 1      | 2      |
| 7159   | 1      | 1      | 0      | 0      | 1      | 1      |
| 7161   | 0      | 0      | 0      | 0      | 0      | 0      |
| 7164   | 0      | 0      | 0      | 0      | 0      | 1      |
| 7166   | 0      | 1      | 0      | 1      | 0      | 0      |
| 7167   | 0      | 1      | 0      | 1      | 1      | 1      |
| 7168   | 0      | 2      | 0      | 0      | 1      | 0      |
| 7170   | 0      | 0      | 0      | 1      | 0      | 1      |
| 7171   | 0      | 1      | 0      | 0      | 1      | 1      |
| 7172   | 0      | 0      | 0      | 1      | 1      | 1      |
| 7173   | 1      | 1      | 0      | 1      | 2      | 2      |
| 7175   | 0      | 0      | 0      | 0      | 0      | 1      |
| 7176   | 1      | 1      | 1      | 1      | 1      | 1      |
| 7180   | 0      | 3      | 0      | 0      | 0      | 0      |
| 7183   | 0      | 1      | 0      | 0      | 1      | 1      |
| 7189   | 0      | 0      | 0      | 0      | 0      | 0      |
| 7193   | 1      | 1      | 0      | 1      | 1      | 1      |
| 7194   | 1      | 1      | 0      | 2      | 2      | 1      |
| 7195   | 0      | 1      | 1      | 2      | 1      | 1      |
| 7200   | 0      | 1      | 0      | 1      | 1      | 1      |
| 7201   | 0      | 2      | 0      | 0      | 0      | 0      |
| 7205   | 2      | 1      | 1      | 2      | 2      | 1      |
| 7207   | 0      | 0      | 0      | 0      | 0      | 0      |
| 7208   | 0      | 0      | 0      | 1      | 0      | 1      |
| 7210   | 0      | 0      | 0      | 0      | 0      | 0      |
| 7211   | 0      | 0      | 0      | 0      | 0      | 0      |
| 7217   | 1      | 1      | 1      | 1      | 1      | 1      |
| 7218   | 0      | 2      | 0      | 1      | 1      | 0      |
| 7220   | 0      | 1      | 1      | 0      | 1      | 0      |
| 7225   | 0      | 3      | 0      | 0      | 0      | 0      |
| 7228   | 1      | 2      | 0      | 1      | 2      | 2      |

| respid | Q56i_1 | Q56j_1 | Q56k_1 | Q56l_1 | Q56m_1 | Q56n_1 |
|--------|--------|--------|--------|--------|--------|--------|
| 7230   | 1      | 1      | 0      | 0      | 1      | 0      |
| 7233   | 1      | 1      | 1      | 0      | 0      | 0      |
| 7234   | 0      | 1      | 0      | 1      | 0      | 0      |
| 7235   | 0      | 0      | 0      | 0      | 0      | 1      |
| 7236   | 1      | 0      | 1      | 1      | 1      | 1      |
| 7241   | 1      | 0      | 1      | 0      | 0      | 0      |
| 7251   | 1      | 0      | 1      | 0      | 1      | 0      |
| 7253   | 0      | 2      | 0      | 1      | 1      | 0      |
| 7259   | 0      | 1      | 1      | 0      | 1      | 0      |
| 7260   | 1      | 1      | 0      | 1      | 1      | 0      |
| 7261   | 1      | 1      | 1      | 1      | 1      | 1      |
| 7263   | 0      | 0      | 0      | 0      | 0      | 0      |
| 7265   | 0      | 3      | 0      | 1      | 1      | 3      |
| 7268   | 0      | 1      | 0      | 0      | 0      | 0      |
| 7269   | 0      | 2      | 0      | 0      | 0      | 0      |
| 7271   | 1      | 1      | 1      | 1      | 2      | 1      |
| 7276   | 2      | 0      | 0      | 0      | 1      | 1      |
| 7280   | 0      | 2      | 0      | 3      | 2      | 2      |
| 7283   | 1      | 2      | 0      | 0      | 1      | 0      |
| 7284   | 1      | 0      | 0      | 0      | 1      | 0      |
| 7286   | 1      | 1      | 1      | 1      | 1      | 1      |
| 7287   | 0      | 0      | 0      | 0      | 1      | 0      |
| 7288   | 1      | 1      | 1      | 1      | 1      | 1      |
| 7294   | 0      | 2      | 0      | 2      | 1      | 0      |
| 7295   | 0      | 0      | 0      | 0      | 0      | 0      |
| 7296   | 1      | 0      | 1      | 0      | 1      | 0      |
| 7297   | 1      | 1      | 1      | 1      | 0      | 0      |
| 7299   | 0      | 0      | 0      | 0      | 0      | 0      |
| 7300   | 0      | 1      | 1      | 1      | 1      | 1      |
| 7301   | 0      | 1      | 0      | 1      | 0      | 0      |
| 7302   | 1      | 3      | 0      | 0      | 0      | 0      |
| 7306   | 0      | 1      | 0      | 0      | 0      | 0      |

| respid | Q56i_1 | Q56j_1 | Q56k_1 | Q56l_1 | Q56m_1 | Q56n_1 |
|--------|--------|--------|--------|--------|--------|--------|
| 7313   | 2      | 2      | 2      | 2      | 1      | 2      |
| 7315   | 0      | 2      | 0      | 1      | 1      | 1      |
| 7317   | 1      | 1      | 1      | 0      | 1      | 0      |
| 7321   | 0      | 0      | 0      | 0      | 1      | 1      |
| 7322   | 0      | 2      | 0      | 0      | 1      | 1      |
| 7323   | 1      | 0      | 2      | 1      | 2      | 1      |
| 7333   | 0      | 2      | 1      | 1      | 1      | 1      |
| 7335   | 0      | 1      | 1      | 1      | 1      | 0      |
| 7336   | 0      | 2      | 0      | 1      | 1      | 0      |
| 7337   | 1      | 1      | 0      | 1      | 0      | 0      |
| 7338   | 0      | 0      | 0      | 0      | 0      | 0      |
| 7340   | 0      | 2      | 0      | 1      | 0      | 0      |
| 7341   | 0      | 2      | 0      | 1      | 1      | 1      |
| 7342   | 1      | 1      | 1      | 1      | 1      | 1      |
| 7344   | 1      | 1      | 1      | 1      | 1      | 1      |
| 7346   | 1      | 2      | 1      | 2      | 1      | 0      |
| 7347   | 1      | 0      | 1      | 1      | 2      | 1      |
| 7349   | 1      | 0      | 1      | 2      | 1      | 2      |
| 7352   | 0      | 2      | 1      | 1      | 1      | 1      |
| 7353   | 0      | 0      | 1      | 0      | 1      | 0      |
| 7355   | 1      | 2      | 1      | 1      | 1      | 0      |
| 7356   | 1      | 0      | 1      | 1      | 1      | 0      |
| 7360   | 1      | 2      | 1      | 2      | 2      | 0      |
| 7371   | 1      | 0      | 1      | 0      | 1      | 0      |
| 7376   | 1      | 1      | 1      | 1      | 1      | 1      |
| 7379   | 2      | 0      | 2      | 2      | 1      | 1      |
| 7381   | 0      | 0      | 0      | 0      | 0      | 0      |
| 7386   | 1      | 1      | 1      | 1      | 1      | 1      |
| 7389   | 0      | 0      | 1      | 1      | 0      | 0      |
| 7390   | 1      | 3      | 1      | 1      | 1      | 1      |
| 7393   | 0      | 1      | 0      | 0      | 0      | 0      |
| 7394   | 0      | 0      | 0      | 0      | 0      | 0      |

| respid | Q56i_1 | Q56j_1 | Q56k_1 | Q56l_1 | Q56m_1 | Q56n_1 |
|--------|--------|--------|--------|--------|--------|--------|
| 7396   | 2      | 1      | 1      | 1      | 1      | 2      |
| 7400   | 1      | 0      | 1      | 1      | 1      | 0      |
| 7401   | 1      | 0      | 1      | 2      | 1      | 1      |
| 7403   | 0      | 0      | 1      | 0      | 0      | 0      |
| 7406   | 1      | 0      | 1      | 1      | 1      | 0      |
| 7409   | 0      | 1      | 0      | 0      | 0      | 0      |
| 7410   | 0      | 1      | 1      | 1      | 0      | 2      |
| 7412   | 0      | 0      | 0      | 0      | 0      | 0      |
| 7414   | 1      | 1      | 0      | 0      | 1      | 0      |
| 7415   | 0      | 0      | 0      | 0      | 0      | 0      |
| 7417   | 0      | 1      | 1      | 0      | 1      | 0      |
| 7421   | 2      | 3      | 2      | 2      | 2      | 1      |
| 7425   | 1      | 1      | 1      | 1      | 1      | 1      |
| 7430   | 0      | 0      | 0      | 0      | 0      | 0      |
| 7432   | 0      | 3      | 0      | 1      | 0      | 0      |
| 7433   | 2      | 1      | 2      | 1      | 2      | 1      |
| 7442   | 1      | 3      | 1      | 0      | 1      | 0      |
| 7445   | 0      | 0      | 0      | 0      | 0      | 1      |
| 7446   | 1      | 0      | 0      | 2      | 1      | 0      |
| 7449   | 0      | 3      | 0      | 0      | 0      | 0      |
| 7450   | 1      | 1      | 1      | 1      | 1      | 0      |
| 7451   | 1      | 1      | 1      | 1      | 1      | 1      |
| 7459   | 0      | 1      | 0      | 1      | 0      | 0      |
| 7462   | 0      | 2      | 1      | 1      | 1      | 0      |
| 7463   | 1      | 1      | 1      | 1      | 1      | 1      |
| 7469   | 0      | 2      | 0      | 0      | 0      | 1      |
| 7482   | 0      | 1      | 0      | 1      | 0      | 1      |
| 7484   | 0      | 1      | 1      | 1      | 1      | 1      |
| 7486   | 0      | 0      | 0      | 0      | 0      | 0      |
| 7496   | 0      | 0      | 0      | 0      | 0      | 0      |
| 7502   | 0      | 1      | 0      | 1      | 1      | 0      |
| 7504   | 0      | 2      | 1      | 1      | 2      | 1      |

| respid | Q56i_1 | Q56j_1 | Q56k_1 | Q56l_1 | Q56m_1 | Q56n_1 |
|--------|--------|--------|--------|--------|--------|--------|
| 7509   | 2      | 1      | 1      | 2      | 2      | 1      |
| 7513   | 2      | 1      | 2      | 1      | 1      | 1      |
| 7514   | 0      | 3      | 1      | 0      | 1      | 0      |
| 7520   | 1      | 0      | 0      | 0      | 1      | 0      |
| 7523   | 2      | 2      | 2      | 2      | 1      | 2      |
| 7526   | 1      | 0      | 1      | 0      | 1      | 0      |
| 7529   | 1      | 1      | 2      | 1      | 2      | 1      |
| 7534   | 1      | 1      | 0      | 0      | 0      | 0      |
| 7536   | 1      | 1      | 0      | 1      | 1      | 1      |
| 7540   | 1      | 1      | 1      | 0      | 1      | 0      |
| 7541   | 1      | 2      | 1      | 1      | 1      | 1      |
| 7542   | 1      | 0      | 1      | 1      | 1      | 0      |
| 7555   | 1      | 0      | 1      | 0      | 1      | 2      |
| 7566   | 1      | 2      | 0      | 1      | 0      | 1      |
| 7568   | 1      | 2      | 1      | 1      | 1      | 2      |
| 7570   | 1      | 1      | 1      | 1      | 1      | 1      |
| 7572   | 1      | 0      | 0      | 0      | 0      | 0      |
| 7573   | 1      | 2      | 1      | 1      | 1      | 1      |
| 7576   | 1      | 0      | 1      | 1      | 1      | 1      |
| 7577   | 1      | 1      | 1      | 2      | 1      | 1      |
| 7583   | 0      | 1      | 0      | 0      | 0      | 0      |
| 7584   | 1      | 1      | 1      | 1      | 1      | 1      |
| 7585   | 1      | 0      | 1      | 0      | 1      | 0      |
| 7586   | 1      | 1      | 1      | 1      | 1      | 0      |
| 7587   | 0      | 1      | 0      | 0      | 0      | 0      |
| 7588   | 0      | 0      | 0      | 0      | 0      | 0      |
| 7596   | 0      | 1      | 0      | 0      | 0      | 0      |
| 7599   | 0      | 1      | 0      | 0      | 0      | 0      |
| 7600   | 1      | 1      | 1      | 2      | 1      | 1      |
| 7602   | 0      | 2      | 0      | 0      | 0      | 0      |
| 7613   | 0      | 0      | 0      | 0      | 0      | 0      |
| 7620   | 0      | 0      | 0      | 0      | 0      | 0      |

| respid | Q56i_1 | Q56j_1 | Q56k_1 | Q56l_1 | Q56m_1 | Q56n_1 |
|--------|--------|--------|--------|--------|--------|--------|
| 7623   | 0      | 2      | 2      | 2      | 2      | 1      |
| 7635   | 1      | 3      | 1      | 0      | 1      | 1      |
| 7636   | 1      | 1      | 1      | 1      | 1      | 0      |
| 7643   | 0      | 0      | 0      | 0      | 0      | 0      |
| 7645   | 0      | 1      | 0      | 1      | 1      | 0      |
| 7649   | 2      | 0      | 2      | 2      | 2      | 2      |
| 7651   | 1      | 0      | 0      | 0      | 0      | 0      |
| 7652   | 1      | 2      | 1      | 2      | 1      | 1      |
| 7655   | 1      | 0      | 1      | 0      | 1      | 1      |
| 7657   | 1      | 0      | 0      | 0      | 1      | 0      |
| 7675   | 0      | 3      | 0      | 0      | 0      | 1      |
| 7676   | 2      | 2      | 2      | 2      | 1      | 1      |
| 7684   | 1      | 2      | 1      | 1      | 1      | 1      |
| 7693   | 1      | 1      | 1      | 0      | 0      | 0      |
| 7694   | 3      | 3      | 3      | 3      | 3      | 2      |
| 7695   | 0      | 0      | 0      | 0      | 0      | 0      |
| 7696   | 3      | 3      | 3      | 3      | 3      | 2      |
| 7698   | 1      | 0      | 1      | 0      | 1      | 0      |
| 7700   | 1      | 0      | 1      | 0      | 1      | 0      |
| 7701   | 0      | 0      | 0      | 0      | 1      | 1      |
| 7704   | 0      | 0      | 0      | 0      | 0      | 0      |
| 7709   | 0      | 0      | 0      | 0      | 1      | 0      |
| 7713   | 0      | 1      | 0      | 1      | 0      | 0      |
| 7714   | 0      | 2      | 0      | 0      | 0      | 0      |
| 7718   | 3      | 2      | 2      | 2      | 1      | 2      |
| 7720   | 0      | 2      | 0      | 0      | 1      | 1      |
| 7721   | 0      | 2      | 0      | 0      | 0      | 0      |
| 7722   | 0      | 0      | 0      | 0      | 0      | 0      |
| 7724   | 1      | 1      | 1      | 2      | 1      | 1      |
| 7728   | 0      | 2      | 0      | 0      | 0      | 1      |
| 7731   | 1      | 1      | 1      | 1      | 1      | 0      |
| 7735   | 0      | 2      | 2      | 2      | 0      | 3      |



| respid | Q56i_1 | Q56j_1 | Q56k_1 | Q56l_1 | Q56m_1 | Q56n_1 |
|--------|--------|--------|--------|--------|--------|--------|
| 7737   | 1      | 3      | 1      | 0      | 0      | 0      |
| 7741   | 0      | 0      | 0      | 0      | 0      | 0      |
| 7746   | 0      | 1      | 0      | 1      | 1      | 0      |
| 7747   | 0      | 1      | 0      | 0      | 0      | 0      |
| 7748   | 0      | 0      | 0      | 0      | 0      | 0      |
| 7750   | 1      | 2      | 0      | 0      | 1      | 1      |
| 7754   | 1      | 1      | 0      | 1      | 0      | 0      |
| 7755   | 1      | 1      | 1      | 2      | 1      | 1      |
| 7762   | 1      | 2      | 1      | 2      | 1      | 0      |
| 7764   | 1      | 1      | 1      | 0      | 1      | 0      |
| 7766   | 0      | 0      | 0      | 0      | 0      | 0      |
| 7768   | 0      | 1      | 0      | 0      | 1      | 0      |
| 7770   | 2      | 2      | 2      | 2      | 2      | 1      |
| 7771   | 1      | 1      | 0      | 0      | 1      | 0      |
| 7777   | 0      | 1      | 0      | 0      | 0      | 0      |
| 7778   | 0      | 0      | 0      | 0      | 0      | 0      |
| 7783   | 1      | 1      | 2      | 1      | 1      | 1      |
| 7789   | 0      | 0      | 0      | 2      | 0      | 1      |
| 7790   | 2      | 2      | 3      | 1      | 1      | 1      |
| 7795   | 1      | 1      | 0      | 0      | 0      | 0      |
| 7807   | 0      | 0      | 0      | 0      | 0      | 0      |
| 7808   | 0      | 0      | 0      | 0      | 0      | 0      |
| 7818   | 0      | 0      | 0      | 0      | 0      | 0      |
| 7820   | 0      | 0      | 0      | 0      | 0      | 0      |
| 7831   | 0      | 0      | 0      | 0      | 0      | 0      |
| 7832   | 1      | 1      | 1      | 1      | 1      | 1      |
| 7837   | 0      | 2      | 0      | 0      | 1      | 0      |
| 7841   | 1      | 1      | 1      | 1      | 0      | 0      |
| 7845   | 1      | 1      | 1      | 2      | 2      | 1      |
| 7853   | 0      | 3      | 0      | 1      | 0      | 0      |
| 7854   | 0      | 1      | 0      | 0      | 1      | 0      |
| 7862   | 1      | 1      | 1      | 1      | 1      | 0      |

| respid | Q56i_1 | Q56j_1 | Q56k_1 | Q56l_1 | Q56m_1 | Q56n_1 |
|--------|--------|--------|--------|--------|--------|--------|
| 7871   | 0      | 1      | 0      | 0      | 0      | 1      |
| 7875   | 1      | 1      | 2      | 1      | 2      | 1      |
| 7880   | 0      | 1      | 0      | 0      | 0      | 0      |
| 7881   | 0      | 0      | 0      | 0      | 0      | 0      |
| 7883   | 0      | 1      | 1      | 1      | 0      | 0      |
| 7896   | 1      | 1      | 1      | 0      | 1      | 0      |
| 7905   | 0      | 1      | 0      | 2      | 0      | 1      |
| 7919   | 0      | 0      | 0      | 0      | 0      | 0      |
| 7928   | 0      | 2      | 0      | 1      | 0      | 0      |
| 7929   | 0      | 0      | 0      | 0      | 0      | 1      |
| 7938   | 1      | 1      | 1      | 1      | 1      | 1      |
| 7940   | 1      | 1      | 1      | 0      | 1      | 1      |
| 7941   | 0      | 0      | 0      | 0      | 0      | 0      |
| 7952   | 0      | 0      | 1      | 0      | 0      | 0      |
| 7962   | 1      | 1      | 1      | 0      | 1      | 0      |
| 7968   | 1      | 0      | 2      | 0      | 1      | 0      |
| 7972   | 0      | 1      | 1      | 0      | 0      | 0      |
| 7983   | 1      | 1      | 1      | 2      | 1      | 1      |
| 7990   | 1      | 0      | 0      | 0      | 0      | 0      |
| 7993   | 0      | 0      | 0      | 0      | 0      | 0      |
| 8005   | 1      | 0      | 1      | 3      | 0      | 0      |
| 8008   | 0      | 0      | 0      | 0      | 0      | 0      |
| 8012   | 0      | 0      | 0      | 0      | 1      | 0      |
| 8021   | 2      | 2      | 2      | 1      | 1      | 0      |
| 8024   | 0      | 0      | 2      | 1      | 0      | 0      |
| 8043   | 1      | 0      | 0      | 1      | 1      | 1      |
| 8051   | 0      | 2      | 0      | 0      | 0      | 1      |
| 8056   | 1      | 1      | 1      | 1      | 1      | 1      |
| 8061   | 0      | 0      | 1      | 1      | 1      | 0      |
| 8066   | 0      | 1      | 0      | 0      | 1      | 0      |
| 8069   | 1      | 2      | 1      | 1      | 1      | 0      |
| 8071   | 0      | 1      | 0      | 0      | 0      | 0      |

| respid | Q56i_1 | Q56j_1 | Q56k_1 | Q56l_1 | Q56m_1 | Q56n_1 |
|--------|--------|--------|--------|--------|--------|--------|
| 8072   | 2      | 1      | 2      | 2      | 2      | 2      |
| 8076   | 0      | 1      | 0      | 0      | 0      | 2      |
| 8080   | 0      | 0      | 0      | 0      | 0      | 0      |
| 8083   | 1      | 2      | 1      | 0      | 1      | 1      |
| 8093   | 0      | 1      | 1      | 0      | 0      | 0      |
| 8095   | 0      | 2      | 1      | 1      | 1      | 0      |
| 8099   | 1      | 1      | 1      | 1      | 1      | 0      |
| 8100   | 0      | 1      | 0      | 1      | 0      | 1      |
| 8103   | 1      | 1      | 1      | 1      | 1      | 3      |
| 8104   | 2      | 3      | 1      | 2      | 2      | 1      |
| 8115   | 2      | 2      | 1      | 1      | 1      | 2      |
| 8121   | 1      | 2      | 1      | 1      | 1      | 0      |
| 8128   | 0      | 1      | 0      | 0      | 0      | 0      |
| 8130   | 0      | 1      | 1      | 0      | 1      | 1      |
| 8131   | 0      | 1      | 0      | 0      | 0      | 0      |
| 8133   | 0      | 0      | 0      | 0      | 0      | 0      |
| 8143   | 0      | 2      | 0      | 0      | 0      | 0      |
| 8144   | 0      | 0      | 1      | 0      | 1      | 0      |
| 8146   | 1      | 0      | 0      | 1      | 1      | 0      |
| 8148   | 0      | 0      | 0      | 0      | 0      | 0      |
| 8157   | 0      | 0      | 1      | 0      | 0      | 1      |
| 8164   | 0      | 0      | 0      | 0      | 0      | 0      |
| 8173   | 0      | 0      | 0      | 0      | 0      | 0      |
| 8176   | 1      | 0      | 1      | 0      | 0      | 0      |
| 8179   | 1      | 1      | 1      | 1      | 1      | 1      |
| 8181   | 1      | 1      | 1      | 1      | 1      | 1      |
| 8182   | 1      | 1      | 1      | 1      | 1      | 1      |
| 8196   | 1      | 2      | 0      | 0      | 1      | 0      |
| 8200   | 0      | 1      | 0      | 1      | 1      | 0      |
| 8203   | 1      | 1      | 1      | 0      | 1      | 1      |
| 8204   | 2      | 3      | 2      | 2      | 3      | 3      |
| 8206   | 0      | 0      | 1      | 0      | 1      | 0      |

| respid | Q56i_1 | Q56j_1 | Q56k_1 | Q56l_1 | Q56m_1 | Q56n_1 |
|--------|--------|--------|--------|--------|--------|--------|
| 8208   | 0      | 1      | 0      | 0      | 0      | 0      |
| 8212   | 0      | 1      | 1      | 2      | 0      | 1      |
| 8222   | 2      | 2      | 1      | 2      | 1      | 1      |
| 8223   | 0      | 0      | 0      | 0      | 0      | 0      |
| 8225   | 1      | 0      | 1      | 0      | 0      | 0      |
| 8226   | 0      | 0      | 0      | 0      | 0      | 0      |
| 8228   | 1      | 1      | 1      | 1      | 0      | 0      |
| 8229   | 0      | 3      | 1      | 0      | 1      | 0      |
| 8239   | 0      | 1      | 1      | 0      | 0      | 0      |
| 8246   | 0      | 1      | 0      | 1      | 1      | 0      |
| 8258   | 1      | 2      | 1      | 2      | 2      | 1      |
| 8260   | 0      | 1      | 1      | 0      | 1      | 2      |
| 8262   | 1      | 0      | 0      | 1      | 0      | 0      |
| 8263   | 1      | 1      | 1      | 2      | 2      | 1      |
| 8267   | 1      | 2      | 1      | 2      | 1      | 1      |
| 8271   | 1      | 0      | 1      | 2      | 1      | 1      |
| 8274   | 1      | 1      | 1      | 1      | 0      | 1      |
| 8275   | 0      | 1      | 0      | 0      | 1      | 0      |
| 8279   | 0      | 0      | 0      | 0      | 0      | 1      |
| 8285   | 1      | 1      | 2      | 1      | 1      | 1      |
| 8287   | 3      | 3      | 3      | 2      | 3      | 3      |
| 8289   | 0      | 1      | 1      | 2      | 0      | 1      |
| 8291   | 1      | 0      | 1      | 1      | 1      | 0      |
| 8299   | 1      | 1      | 1      | 0      | 1      | 0      |
| 8301   | 0      | 1      | 0      | 2      | 1      | 2      |
| 8302   | 0      | 0      | 0      | 0      | 0      | 0      |
| 8308   | 1      | 2      | 1      | 2      | 0      | 1      |
| 8313   | 0      | 1      | 0      | 0      | 0      | 0      |
| 8316   | 1      | 1      | 1      | 1      | 1      | 1      |
| 8317   | 0      | 0      | 0      | 0      | 1      | 0      |
| 8319   | 0      | 3      | 0      | 0      | 0      | 0      |
| 8323   | 2      | 2      | 1      | 1      | 1      | 1      |

| respid | Q56i_1 | Q56j_1 | Q56k_1 | Q56l_1 | Q56m_1 | Q56n_1 |
|--------|--------|--------|--------|--------|--------|--------|
| 8324   | 1      | 1      | 1      | 0      | 1      | 0      |
| 8327   | 1      | 2      | 2      | 2      | 1      | 1      |
| 8328   | 2      | 2      | 1      | 3      | 3      | 2      |
| 8342   | 0      | 0      | 1      | 0      | 1      | 0      |
| 8350   | 2      | 1      | 1      | 1      | 1      | 0      |
| 8352   | 1      | 1      | 1      | 0      | 0      | 0      |
| 8353   | 0      | 3      | 0      | 1      | 0      | 1      |
| 8356   | 0      | 0      | 0      | 0      | 0      | 1      |
| 8367   | 0      | 0      | 1      | 1      | 1      | 0      |
| 8373   | 1      | 1      | 1      | 1      | 1      | 1      |
| 8379   | 1      | 3      | 0      | 0      | 1      | 1      |
| 8382   | 1      | 1      | 1      | 1      | 1      | 1      |
| 8387   | 1      | 3      | 1      | 1      | 1      | 0      |
| 8409   | 0      | 0      | 1      | 1      | 0      | 0      |
| 8410   | 0      | 0      | 0      | 0      | 0      | 0      |
| 8412   | 1      | 2      | 2      | 1      | 1      | 1      |
| 8415   | 1      | 0      | 1      | 1      | 1      | 1      |
| 8417   | 0      | 1      | 1      | 0      | 0      | 1      |
| 8422   | 1      | 1      | 1      | 2      | 1      | 1      |
| 8430   | 1      | 1      | 1      | 1      | 1      | 2      |
| 8434   | 0      | 0      | 0      | 0      | 0      | 0      |
| 8436   | 0      | 0      | 0      | 0      | 0      | 0      |
| 8446   | 1      | 0      | 1      | 0      | 1      | 1      |
| 8447   | 1      | 2      | 1      | 1      | 1      | 1      |
| 8448   | 1      | 1      | 0      | 1      | 1      | 0      |
| 8455   | 0      | 2      | 1      | 1      | 0      | 2      |
| 8456   | 0      | 1      | 0      | 0      | 0      | 0      |
| 8459   | 0      | 0      | 1      | 1      | 2      | 1      |
| 8460   | 0      | 1      | 0      | 0      | 1      | 0      |
| 8464   | 2      | 2      | 2      | 2      | 2      | 2      |
| 8470   | 1      | 0      | 1      | 0      | 1      | 0      |
| 8473   | 0      | 1      | 0      | 0      | 0      | 0      |

| respid | Q56i_1 | Q56j_1 | Q56k_1 | Q56l_1 | Q56m_1 | Q56n_1 |
|--------|--------|--------|--------|--------|--------|--------|
| 8486   | 0      | 0      | 0      | 0      | 1      | 0      |
| 8487   | 0      | 0      | 0      | 0      | 0      | 1      |
| 8489   | 0      | 1      | 0      | 0      | 0      | 0      |
| 8494   | 0      | 1      | 0      | 0      | 0      | 0      |
| 8495   | 2      | 1      | 1      | 1      | 2      | 1      |
| 8497   | 0      | 0      | 0      | 0      | 0      | 0      |
| 8510   | 1      | 1      | 1      | 1      | 1      | 0      |
| 8515   | 1      | 1      | 0      | 0      | 1      | 1      |
| 8526   | 0      | 1      | 0      | 0      | 0      | 0      |
| 8530   | 2      | 2      | 1      | 2      | 2      | 2      |
| 8532   | 0      | 3      | 1      | 1      | 1      | 0      |
| 8533   | 0      | 1      | 1      | 2      | 1      | 1      |
| 8534   | 1      | 1      | 1      | 1      | 1      | 1      |
| 8572   | 1      | 1      | 1      | 2      | 1      | 1      |
| 8582   | 0      | 0      | 1      | 0      | 0      | 0      |
| 8584   | 0      | 0      | 0      | 0      | 0      | 0      |
| 8585   | 1      | 1      | 1      | 1      | 1      | 1      |
| 8586   | 0      | 2      | 0      | 1      | 0      | 1      |
| 8589   | 2      | 1      | 0      | 1      | 2      | 1      |
| 8593   | 0      | 0      | 1      | 3      | 1      | 0      |
| 8594   | 0      | 1      | 1      | 1      | 1      | 1      |
| 8601   | 0      | 1      | 0      | 0      | 1      | 0      |
| 8603   | 1      | 0      | 1      | 0      | 1      | 0      |
| 8604   | 0      | 1      | 1      | 1      | 1      | 1      |
| 8605   | 0      | 2      | 0      | 0      | 0      | 1      |
| 8607   | 1      | 1      | 0      | 1      | 1      | 1      |
| 8623   | 0      | 3      | 0      | 1      | 0      | 2      |
| 8626   | 1      | 2      | 1      | 0      | 0      | 1      |
| 8638   | 2      | 1      | 3      | 0      | 3      | 0      |
| 8640   | 1      | 2      | 1      | 1      | 1      | 0      |
| 8641   | 0      | 2      | 0      | 0      | 0      | 0      |
| 8643   | 0      | 1      | 0      | 0      | 0      | 0      |

| respid | Q56i_1 | Q56j_1 | Q56k_1 | Q56l_1 | Q56m_1 | Q56n_1 |
|--------|--------|--------|--------|--------|--------|--------|
| 8644   | 0      | 0      | 0      | 1      | 0      | 1      |
| 8646   | 0      | 1      | 0      | 3      | 1      | 2      |
| 8647   | 0      | 0      | 1      | 0      | 0      | 0      |
| 8649   | 1      | 0      | 0      | 1      | 0      | 0      |
| 8650   | 1      | 2      | 1      | 0      | 1      | 2      |
| 8658   | 0      | 0      | 0      | 0      | 0      | 0      |
| 8659   | 0      | 0      | 0      | 0      | 1      | 0      |
| 8669   | 0      | 2      | 0      | 1      | 0      | 0      |
| 8672   | 0      | 1      | 0      | 2      | 1      | 0      |
| 8673   | 0      | 1      | 0      | 1      | 0      | 0      |
| 8676   | 0      | 0      | 0      | 0      | 0      | 0      |
| 8677   | 0      | 0      | 0      | 0      | 0      | 0      |
| 8681   | 0      | 3      | 0      | 0      | 0      | 0      |
| 8688   | 0      | 1      | 0      | 0      | 0      | 0      |
| 8689   | 0      | 2      | 1      | 1      | 1      | 1      |
| 8690   | 1      | 0      | 1      | 0      | 1      | 0      |
| 8693   | 0      | 0      | 0      | 1      | 0      | 0      |
| 8694   | 1      | 1      | 1      | 2      | 2      | 2      |
| 8699   | 0      | 0      | 1      | 0      | 0      | 0      |
| 8700   | 1      | 0      | 0      | 1      | 1      | 1      |
| 8703   | 0      | 1      | 0      | 2      | 1      | 0      |
| 8704   | 0      | 0      | 0      | 0      | 0      | 0      |
| 8706   | 2      | 2      | 2      | 2      | 2      | 2      |
| 8709   | 1      | 1      | 0      | 1      | 1      | 1      |
| 8715   | 0      | 1      | 0      | 0      | 0      | 1      |
| 8728   | 1      | 1      | 1      | 2      | 3      | 2      |
| 8729   | 1      | 3      | 1      | 2      | 1      | 1      |
| 8730   | 1      | 1      | 0      | 1      | 1      | 1      |
| 8742   | 1      | 2      | 0      | 1      | 1      | 1      |
| 8748   | 0      | 0      | 0      | 1      | 1      | 3      |
| 8749   | 0      | 1      | 0      | 1      | 0      | 1      |
| 8750   | 0      | 1      | 0      | 0      | 0      | 1      |

| respid | Q56i_1 | Q56j_1 | Q56k_1 | Q56l_1 | Q56m_1 | Q56n_1 |
|--------|--------|--------|--------|--------|--------|--------|
| 8751   | 0      | 1      | 0      | 1      | 0      | 0      |
| 8752   | 0      | 2      | 0      | 1      | 0      | 2      |
| 8754   | 1      | 1      | 1      | 1      | 1      | 0      |
| 8757   | 0      | 2      | 1      | 1      | 0      | 0      |
| 8760   | 0      | 2      | 0      | 2      | 0      | 0      |
| 8761   | 1      | 1      | 1      | 1      | 1      | 1      |
| 8762   | 0      | 0      | 0      | 0      | 0      | 0      |
| 8763   | 1      | 3      | 1      | 1      | 1      | 1      |
| 8764   | 0      | 0      | 0      | 2      | 0      | 0      |
| 8765   | 0      | 1      | 0      | 1      | 0      | 0      |
| 8766   | 2      | 0      | 1      | 2      | 2      | 2      |
| 8767   | 0      | 1      | 0      | 1      | 0      | 0      |
| 8768   | 1      | 0      | 1      | 1      | 1      | 0      |
| 8770   | 0      | 0      | 0      | 0      | 0      | 1      |
| 8771   | 0      | 3      | 0      | 0      | 0      | 0      |
| 8773   | 0      | 0      | 1      | 0      | 0      | 0      |
| 8774   | 1      | 0      | 1      | 0      | 0      | 0      |
| 8776   | 1      | 2      | 0      | 0      | 0      | 0      |
| 8777   | 1      | 0      | 1      | 0      | 1      | 0      |
| 8778   | 0      | 1      | 1      | 0      | 0      | 0      |
| 8779   | 1      | 1      | 0      | 0      | 1      | 0      |
| 8784   | 1      | 1      | 0      | 0      | 0      | 0      |
| 8786   | 0      | 2      | 0      | 1      | 0      | 0      |
| 8787   | 0      | 1      | 0      | 1      | 0      | 0      |
| 8790   | 0      | 0      | 0      | 0      | 0      | 0      |
| 8791   | 1      | 1      | 0      | 1      | 0      | 1      |
| 8793   | 0      | 3      | 0      | 0      | 0      | 0      |
| 8795   | 0      | 0      | 0      | 0      | 1      | 1      |
| 8797   | 0      | 0      | 0      | 1      | 0      | 0      |
| 8801   | 0      | 0      | 0      | 0      | 0      | 0      |
| 8802   | 0      | 0      | 0      | 1      | 0      | 1      |
| 8807   | 0      | 0      | 0      | 0      | 0      | 0      |



| respid | Q56i_1 | Q56j_1 | Q56k_1 | Q56l_1 | Q56m_1 | Q56n_1 |
|--------|--------|--------|--------|--------|--------|--------|
| 8813   | 1      | 0      | 1      | 0      | 1      | 1      |
| 8817   | 0      | 2      | 0      | 2      | 2      | 1      |
| 8818   | 1      | 1      | 1      | 1      | 1      | 1      |
| 8821   | 0      | 0      | 1      | 0      | 1      | 0      |
| 8822   | 0      | 0      | 0      | 0      | 0      | 0      |
| 8823   | 0      | 0      | 0      | 0      | 1      | 0      |
| 8824   | 2      | 2      | 2      | 0      | 1      | 0      |
| 8825   | 1      | 1      | 0      | 1      | 1      | 0      |
| 8834   | 1      | 2      | 1      | 1      | 2      | 2      |
| 8840   | 2      | 3      | 2      | 1      | 0      | 1      |
| 8843   | 3      | 3      | 3      | 3      | 3      | 3      |
| 8846   | 0      | 0      | 0      | 1      | 0      | 0      |
| 8862   | 0      | 0      | 0      | 0      | 0      | 0      |
| 8866   | 1      | 0      | 0      | 0      | 1      | 0      |
| 8869   | 0      | 1      | 0      | 1      | 0      | 0      |
| 8872   | 1      | 0      | 1      | 2      | 1      | 1      |
| 8903   | 0      | 0      | 0      | 0      | 0      | 0      |
| 8909   | 0      | 1      | 0      | 0      | 0      | 1      |
| 8926   | 1      | 0      | 0      | 0      | 1      | 0      |
| 8936   | 0      | 0      | 1      | 0      | 1      | 0      |
| 8945   | 0      | 0      | 0      | 0      | 0      | 0      |
| 8954   | 1      | 1      | 1      | 1      | 1      | 0      |
| 8955   | 1      | 1      | 0      | 1      | 1      | 2      |
| 8958   | 0      | 1      | 0      | 1      | 0      | 1      |
| 8959   | 1      | 2      | 1      | 1      | 1      | 0      |
| 8960   | 0      | 0      | 0      | 0      | 0      | 0      |
| 8976   | 0      | 0      | 0      | 1      | 1      | 1      |
| 8977   | 0      | 1      | 0      | 0      | 0      | 0      |
| 8979   | 1      | 1      | 1      | 1      | 1      | 1      |
| 8985   | 0      | 2      | 0      | 1      | 0      | 2      |
| 8994   | 1      | 0      | 0      | 0      | 0      | 0      |
| 8997   | 1      | 3      | 2      | 3      | 3      | 0      |

| respid | Q56i_1 | Q56j_1 | Q56k_1 | Q56l_1 | Q56m_1 | Q56n_1 |
|--------|--------|--------|--------|--------|--------|--------|
| 9002   | 1      | 0      | 1      | 0      | 1      | 1      |
| 9005   | 0      | 1      | 0      | 1      | 2      | 1      |
| 9017   | 1      | 2      | 0      | 1      | 1      | 0      |
| 9018   | 0      | 1      | 0      | 0      | 0      | 0      |
| 9021   | 0      | 1      | 1      | 0      | 0      | 0      |
| 9029   | 2      | 2      | 2      | 2      | 2      | 0      |
| 9035   | 1      | 1      | 0      | 0      | 1      | 0      |
| 9038   | 0      | 1      | 0      | 0      | 0      | 0      |
| 9039   | 1      | 1      | 1      | 1      | 1      | 0      |
| 9040   | 1      | 2      | 1      | 1      | 1      | 1      |
| 9042   | 0      | 1      | 0      | 0      | 1      | 0      |
| 9043   | 0      | 0      | 0      | 0      | 0      | 0      |
| 9045   | 1      | 0      | 1      | 0      | 1      | 0      |
| 9051   | 0      | 2      | 0      | 0      | 0      | 0      |
| 9067   | 0      | 1      | 0      | 0      | 0      | 0      |
| 9069   | 0      | 2      | 2      | 1      | 2      | 1      |
| 9073   | 1      | 1      | 1      | 1      | 1      | 1      |
| 9084   | 1      | 1      | 1      | 1      | 1      | 2      |
| 9096   | 0      | 0      | 0      | 0      | 0      | 2      |
| 9100   | 1      | 2      | 1      | 1      | 2      | 1      |
| 9107   | 0      | 3      | 0      | 0      | 0      | 0      |
| 9110   | 0      | 0      | 0      | 0      | 0      | 0      |
| 9120   | 0      | 0      | 0      | 0      | 0      | 0      |
| 9122   | 0      | 1      | 1      | 1      | 0      | 1      |
| 9130   | 0      | 1      | 2      | 2      | 1      | 1      |
| 9134   | 1      | 2      | 1      | 1      | 1      | 0      |
| 9137   | 1      | 1      | 0      | 0      | 1      | 0      |
| 9139   | 0      | 1      | 0      | 1      | 1      | 0      |
| 9144   | 0      | 0      | 0      | 0      | 0      | 1      |
| 9157   | 2      | 2      | 1      | 1      | 2      | 1      |
| 9166   | 1      | 1      | 2      | 2      | 1      | 1      |
| 9177   | 2      | 2      | 0      | 2      | 1      | 1      |

| respid | Q56i_1 | Q56j_1 | Q56k_1 | Q56l_1 | Q56m_1 | Q56n_1 |
|--------|--------|--------|--------|--------|--------|--------|
| 9181   | 0      | 0      | 0      | 0      | 0      | 0      |
| 9183   | 0      | 1      | 2      | 1      | 1      | 1      |
| 9184   | 1      | 0      | 1      | 1      | 1      | 1      |
| 9188   | 0      | 0      | 0      | 0      | 0      | 0      |
| 9197   | 1      | 1      | 1      | 1      | 1      | 1      |
| 9200   | 1      | 2      | 1      | 1      | 1      | 3      |
| 9205   | 1      | 0      | 1      | 0      | 1      | 0      |
| 9207   | 0      | 0      | 0      | 0      | 0      | 0      |
| 9213   | 0      | 1      | 1      | 0      | 1      | 0      |
| 9216   | 1      | 1      | 1      | 1      | 1      | 1      |
| 9217   | 0      | 0      | 0      | 0      | 0      | 1      |
| 9218   | 1      | 0      | 0      | 2      | 2      | 1      |
| 9219   | 2      | 2      | 2      | 2      | 2      | 2      |
| 9220   | 1      | 1      | 1      | 1      | 0      | 1      |
| 9221   | 1      | 1      | 1      | 0      | 1      | 0      |
| 9223   | 1      | 2      | 1      | 2      | 2      | 1      |
| 9228   | 0      | 1      | 0      | 0      | 0      | 0      |
| 9230   | 1      | 1      | 1      | 0      | 0      | 0      |
| 9231   | 0      | 1      | 1      | 0      | 1      | 0      |
| 9233   | 1      | 1      | 1      | 1      | 1      | 1      |
| 9235   | 0      | 2      | 0      | 1      | 0      | 0      |
| 9237   | 0      | 1      | 0      | 0      | 0      | 0      |
| 9242   | 0      | 0      | 1      | 0      | 1      | 0      |
| 9250   | 1      | 0      | 1      | 0      | 1      | 0      |
| 9253   | 1      | 0      | 1      | 1      | 0      | 1      |
| 9257   | 1      | 0      | 0      | 0      | 1      | 0      |
| 9263   | 0      | 1      | 0      | 0      | 0      | 1      |
| 9267   | 0      | 0      | 0      | 0      | 0      | 0      |
| 9272   | 0      | 1      | 0      | 1      | 0      | 0      |
| 9279   | 0      | 2      | 0      | 0      | 0      | 0      |
| 9281   | 1      | 1      | 1      | 0      | 1      | 0      |
| 9285   | 0      | 1      | 0      | 0      | 0      | 0      |

| respid | Q56i_1 | Q56j_1 | Q56k_1 | Q56l_1 | Q56m_1 | Q56n_1 |
|--------|--------|--------|--------|--------|--------|--------|
| 9286   | 1      | 0      | 1      | 2      | 1      | 1      |
| 9294   | 1      | 3      | 1      | 0      | 1      | 0      |
| 9295   | 0      | 1      | 0      | 1      | 0      | 0      |
| 9297   | 1      | 1      | 0      | 0      | 0      | 0      |
| 9299   | 1      | 0      | 2      | 1      | 2      | 1      |
| 9309   | 0      | 0      | 2      | 1      | 1      | 0      |
| 9315   | 0      | 1      | 0      | 0      | 0      | 1      |
| 9320   | 0      | 0      | 0      | 0      | 0      | 0      |
| 9324   | 0      | 1      | 0      | 0      | 0      | 1      |
| 9326   | 1      | 1      | 1      | 1      | 1      | 1      |
| 9333   | 1      | 0      | 0      | 1      | 1      | 1      |
| 9334   | 1      | 1      | 1      | 1      | 1      | 1      |
| 9336   | 1      | 1      | 1      | 2      | 1      | 1      |
| 9337   | 0      | 1      | 0      | 1      | 1      | 0      |
| 9342   | 0      | 0      | 0      | 1      | 0      | 0      |
| 9347   | 1      | 2      | 0      | 0      | 1      | 0      |
| 9352   | 1      | 1      | 0      | 1      | 1      | 0      |
| 9355   | 0      | 0      | 0      | 0      | 0      | 0      |
| 9356   | 0      | 2      | 1      | 2      | 1      | 3      |
| 9359   | 0      | 1      | 1      | 1      | 1      | 1      |
| 9368   | 0      | 1      | 0      | 1      | 0      | 1      |
| 9375   | 0      | 0      | 2      | 1      | 0      | 0      |
| 9384   | 1      | 0      | 1      | 1      | 1      | 1      |
| 9388   | 1      | 0      | 0      | 0      | 3      | 1      |
| 9397   | 1      | 0      | 1      | 2      | 2      | 1      |
| 9400   | 1      | 1      | 1      | 2      | 1      | 0      |
| 9401   | 1      | 1      | 2      | 2      | 1      | 2      |
| 9402   | 0      | 0      | 0      | 0      | 1      | 0      |
| 9417   | 1      | 1      | 1      | 1      | 1      | 1      |
| 9424   | 0      | 1      | 0      | 0      | 1      | 0      |
| 9427   | 0      | 2      | 1      | 0      | 1      | 0      |
| 9429   | 0      | 1      | 1      | 0      | 1      | 0      |

| respid | Q56i_1 | Q56j_1 | Q56k_1 | Q56l_1 | Q56m_1 | Q56n_1 |
|--------|--------|--------|--------|--------|--------|--------|
| 9437   | 2      | 2      | 2      | 2      | 2      | 2      |
| 9442   | 1      | 2      | 0      | 2      | 1      | 2      |
| 9446   | 1      | 2      | 1      | 1      | 1      | 1      |
| 9447   | 0      | 1      | 0      | 0      | 0      | 0      |
| 9448   | 1      | 1      | 1      | 1      | 1      | 1      |
| 9449   | 0      | 3      | 0      | 0      | 1      | 1      |
| 9455   | 1      | 1      | 1      | 1      | 1      | 1      |
| 9459   | 1      | 0      | 1      | 1      | 2      | 1      |
| 9460   | 1      | 2      | 1      | 2      | 1      | 0      |
| 9461   | 0      | 0      | 0      | 1      | 1      | 1      |
| 9463   | 0      | 0      | 0      | 0      | 0      | 2      |
| 9464   | 1      | 3      | 1      | 1      | 1      | 0      |
| 9466   | 1      | 1      | 1      | 1      | 1      | 0      |
| 9477   | 0      | 0      | 0      | 0      | 0      | 0      |
| 9482   | 1      | 1      | 2      | 1      | 1      | 1      |
| 9486   | 1      | 1      | 1      | 2      | 2      | 2      |
| 9488   | 0      | 3      | 2      | 2      | 3      | 1      |
| 9489   | 1      | 1      | 0      | 0      | 0      | 0      |
| 9496   | 1      | 1      | 2      | 2      | 3      | 1      |
| 9499   | 1      | 1      | 1      | 1      | 1      | 2      |
| 9512   | 0      | 0      | 0      | 0      | 0      | 0      |
| 9514   | 0      | 0      | 1      | 0      | 0      | 0      |
| 9516   | 0      | 0      | 0      | 0      | 0      | 3      |
| 9517   | 1      | 2      | 1      | 1      | 2      | 0      |
| 9520   | 1      | 1      | 1      | 1      | 1      | 1      |
| 9527   | 0      | 1      | 1      | 1      | 1      | 1      |
| 9532   | 0      | 0      | 0      | 0      | 1      | 0      |
| 9533   | 0      | 1      | 0      | 0      | 0      | 1      |
| 9543   | 0      | 1      | 0      | 1      | 0      | 0      |
| 9550   | 1      | 1      | 1      | 2      | 1      | 2      |
| 9553   | 1      | 1      | 0      | 0      | 1      | 0      |
| 9555   | 1      | 1      | 1      | 2      | 2      | 1      |

| respid | Q56i_1 | Q56j_1 | Q56k_1 | Q56l_1 | Q56m_1 | Q56n_1 |
|--------|--------|--------|--------|--------|--------|--------|
| 9565   | 0      | 1      | 1      | 2      | 2      | 1      |
| 9583   | 1      | 3      | 0      | 1      | 0      | 2      |
| 9594   | 3      | 0      | 3      | 0      | 1      | 1      |
| 9596   | 0      | 2      | 0      | 1      | 0      | 0      |
| 9600   | 1      | 1      | 1      | 1      | 1      | 0      |
| 9602   | 0      | 0      | 0      | 0      | 0      | 0      |
| 9606   | 0      | 0      | 1      | 0      | 0      | 0      |
| 9608   | 1      | 1      | 1      | 0      | 1      | 0      |
| 9610   | 1      | 1      | 1      | 0      | 1      | 1      |
| 9612   | 1      | 1      | 1      | 1      | 1      | 1      |
| 9613   | 1      | 0      | 1      | 2      | 1      | 1      |
| 9614   | 0      | 0      | 0      | 0      | 0      | 0      |
| 9620   | 0      | 2      | 1      | 1      | 0      | 3      |
| 9628   | 0      | 2      | 0      | 3      | 1      | 0      |
| 9631   | 1      | 1      | 1      | 0      | 1      | 0      |
| 9632   | 2      | 1      | 2      | 1      | 2      | 1      |
| 9633   | 0      | 1      | 0      | 1      | 1      | 1      |
| 9639   | 0      | 1      | 0      | 0      | 1      | 1      |
| 9640   | 0      | 0      | 0      | 0      | 0      | 0      |
| 9642   | 0      | 0      | 0      | 0      | 0      | 2      |
| 9653   | 0      | 1      | 1      | 0      | 0      | 0      |
| 9658   | 2      | 0      | 0      | 2      | 1      | 0      |
| 9659   | 0      | 0      | 1      | 2      | 1      | 0      |
| 9661   | 0      | 1      | 0      | 1      | 1      | 0      |
| 9664   | 0      | 3      | 0      | 0      | 0      | 0      |
| 9665   | 0      | 1      | 0      | 0      | 0      | 0      |
| 9666   | 1      | 0      | 1      | 1      | 0      | 0      |
| 9667   | 0      | 1      | 1      | 1      | 1      | 0      |
| 9668   | 0      | 0      | 0      | 0      | 0      | 0      |
| 9670   | 1      | 2      | 0      | 1      | 1      | 1      |
| 9671   | 0      | 1      | 0      | 1      | 1      | 1      |
| 9681   | 1      | 3      | 0      | 0      | 1      | 0      |

| respid | Q56i_1 | Q56j_1 | Q56k_1 | Q56l_1 | Q56m_1 | Q56n_1 |
|--------|--------|--------|--------|--------|--------|--------|
| 9684   | 0      | 1      | 0      | 1      | 1      | 0      |
| 9685   | 1      | 1      | 1      | 1      | 0      | 1      |
| 9686   | 1      | 1      | 1      | 1      | 0      | 0      |
| 9688   | 0      | 1      | 0      | 2      | 2      | 3      |
| 9692   | 0      | 2      | 0      | 1      | 1      | 1      |
| 9693   | 1      | 1      | 1      | 1      | 1      | 2      |
| 9698   | 1      | 2      | 1      | 2      | 2      | 1      |
| 9699   | 0      | 0      | 0      | 0      | 0      | 0      |
| 9701   | 0      | 1      | 0      | 0      | 0      | 0      |
| 9702   | 1      | 0      | 0      | 0      | 1      | 0      |
| 9709   | 1      | 1      | 2      | 1      | 0      | 1      |
| 9713   | 0      | 1      | 0      | 0      | 0      | 0      |
| 9715   | 0      | 0      | 0      | 0      | 0      | 0      |
| 9721   | 0      | 3      | 0      | 1      | 0      | 0      |
| 9725   | 0      | 1      | 0      | 0      | 1      | 0      |
| 9729   | 0      | 1      | 1      | 2      | 1      | 1      |
| 9731   | 0      | 1      | 1      | 0      | 1      | 0      |
| 9736   | 1      | 0      | 1      | 2      | 1      | 1      |
| 9740   | 0      | 0      | 0      | 0      | 0      | 2      |
| 9741   | 0      | 0      | 0      | 0      | 0      | 0      |
| 9749   | 0      | 1      | 0      | 0      | 1      | 0      |
| 9750   | 1      | 2      | 1      | 2      | 1      | 1      |
| 9751   | 1      | 2      | 1      | 1      | 1      | 1      |
| 9753   | 0      | 1      | 0      | 1      | 1      | 2      |
| 9754   | 1      | 2      | 2      | 1      | 2      | 2      |
| 9756   | 1      | 2      | 1      | 2      | 1      | 1      |
| 9758   | 1      | 1      | 2      | 2      | 2      | 2      |
| 9759   | 0      | 1      | 0      | 0      | 1      | 1      |
| 9760   | 0      | 1      | 0      | 1      | 0      | 1      |
| 9761   | 0      | 0      | 0      | 0      | 0      | 0      |
| 9762   | 0      | 0      | 0      | 0      | 0      | 0      |
| 9764   | 1      | 0      | 1      | 0      | 0      | 1      |

| respid | Q56i_1 | Q56j_1 | Q56k_1 | Q56l_1 | Q56m_1 | Q56n_1 |
|--------|--------|--------|--------|--------|--------|--------|
| 9768   | 0      | 0      | 0      | 0      | 0      | 0      |
| 9769   | 1      | 0      | 0      | 0      | 1      | 1      |
| 9770   | 0      | 0      | 0      | 0      | 1      | 0      |
| 9771   | 0      | 2      | 0      | 0      | 0      | 0      |
| 9772   | 0      | 0      | 1      | 0      | 1      | 0      |
| 9773   | 0      | 0      | 1      | 0      | 1      | 1      |
| 9776   | 0      | 0      | 0      | 0      | 0      | 0      |
| 9786   | 0      | 1      | 1      | 0      | 0      | 0      |
| 9790   | 0      | 0      | 0      | 0      | 1      | 0      |
| 9791   | 0      | 1      | 0      | 0      | 0      | 0      |
| 9794   | 1      | 1      | 0      | 1      | 1      | 1      |
| 9797   | 0      | 1      | 1      | 2      | 0      | 2      |
| 9799   | 1      | 1      | 1      | 0      | 0      | 0      |
| 9804   | 0      | 1      | 0      | 0      | 0      | 0      |
| 9805   | 0      | 1      | 1      | 2      | 0      | 0      |
| 9806   | 0      | 1      | 1      | 0      | 0      | 0      |
| 9807   | 1      | 1      | 1      | 1      | 1      | 2      |
| 9813   | 0      | 2      | 0      | 1      | 1      | 3      |
| 9817   | 0      | 1      | 0      | 0      | 0      | 0      |
| 9823   | 0      | 0      | 0      | 0      | 0      | 0      |
| 9826   | 1      | 1      | 0      | 0      | 1      | 0      |
| 9830   | 0      | 0      | 1      | 2      | 2      | 1      |
| 9835   | 1      | 0      | 0      | 0      | 2      | 1      |
| 9836   | 0      | 2      | 0      | 0      | 1      | 0      |
| 9841   | 0      | 1      | 0      | 0      | 0      | 0      |
| 9842   | 0      | 0      | 0      | 0      | 0      | 0      |
| 9844   | 0      | 2      | 0      | 1      | 0      | 1      |
| 9847   | 0      | 1      | 0      | 0      | 0      | 0      |
| 9851   | 0      | 2      | 0      | 1      | 1      | 0      |
| 9852   | 0      | 1      | 1      | 1      | 0      | 0      |
| 9854   | 1      | 1      | 0      | 0      | 1      | 0      |
| 9855   | 0      | 1      | 0      | 1      | 1      | 0      |



| respid | Q56i_1 | Q56j_1 | Q56k_1 | Q56l_1 | Q56m_1 | Q56n_1 |
|--------|--------|--------|--------|--------|--------|--------|
| 9856   | 1      | 1      | 0      | 3      | 1      | 0      |
| 9862   | 1      | 1      | 1      | 1      | 1      | 1      |
| 9863   | 0      | 0      | 0      | 0      | 0      | 0      |
| 9866   | 0      | 0      | 0      | 0      | 0      | 0      |
| 9867   | 0      | 1      | 0      | 1      | 0      | 1      |
| 9868   | 0      | 2      | 0      | 0      | 0      | 0      |
| 9869   | 1      | 0      | 1      | 1      | 0      | 0      |
| 9878   | 1      | 2      | 1      | 2      | 1      | 0      |
| 9879   | 1      | 2      | 1      | 2      | 1      | 1      |
| 9881   | 1      | 2      | 2      | 2      | 1      | 2      |
| 9882   | 1      | 1      | 1      | 1      | 0      | 0      |
| 9884   | 0      | 1      | 1      | 1      | 1      | 1      |
| 9885   | 0      | 1      | 0      | 1      | 0      | 0      |
| 9888   | 1      | 2      | 1      | 1      | 2      | 1      |
| 9889   | 0      | 0      | 0      | 0      | 0      | 0      |
| 9894   | 1      | 1      | 1      | 1      | 1      | 2      |
| 9895   | 1      | 0      | 1      | 0      | 1      | 0      |
| 9896   | 1      | 2      | 1      | 1      | 2      | 1      |
| 9897   | 1      | 2      | 1      | 3      | 2      | 3      |
| 9905   | 0      | 2      | 1      | 0      | 0      | 0      |
| 9907   | 0      | 3      | 0      | 0      | 0      | 1      |
| 9908   | 0      | 0      | 0      | 0      | 0      | 0      |
| 9909   | 1      | 1      | 1      | 0      | 1      | 1      |
| 9910   | 0      | 0      | 2      | 0      | 0      | 0      |
| 9913   | 0      | 1      | 0      | 0      | 0      | 0      |
| 9914   | 1      | 2      | 1      | 1      | 1      | 0      |
| 9915   | 0      | 0      | 0      | 3      | 1      | 0      |
| 9916   | 0      | 1      | 1      | 0      | 0      | 2      |
| 9918   | 0      | 0      | 0      | 2      | 0      | 0      |
| 9919   | 1      | 0      | 1      | 1      | 0      | 0      |
| 9922   | 1      | 1      | 1      | 1      | 1      | 1      |
| 9930   | 0      | 0      | 0      | 0      | 1      | 0      |

| respid | Q56i_1 | Q56j_1 | Q56k_1 | Q56l_1 | Q56m_1 | Q56n_1 |
|--------|--------|--------|--------|--------|--------|--------|
| 9934   | 0      | 0      | 0      | 0      | 0      | 0      |
| 9936   | 1      | 1      | 1      | 1      | 1      | 1      |
| 9938   | 0      | 2      | 0      | 0      | 0      | 0      |
| 9940   | 1      | 3      | 1      | 0      | 0      | 0      |
| 9944   | 1      | 1      | 1      | 1      | 1      | 1      |
| 9945   | 1      | 3      | 0      | 2      | 0      | 0      |
| 9948   | 0      | 1      | 0      | 0      | 0      | 0      |
| 9949   | 1      | 1      | 1      | 1      | 1      | 1      |
| 9951   | 0      | 0      | 0      | 0      | 0      | 0      |
| 9952   | 1      | 1      | 1      | 1      | 1      | 1      |
| 9954   | 0      | 0      | 0      | 0      | 0      | 1      |
| 9955   | 0      | 2      | 0      | 0      | 0      | 0      |
| 9956   | 1      | 1      | 1      | 1      | 1      | 0      |
| 9957   | 1      | 1      | 1      | 1      | 1      | 1      |
| 9958   | 1      | 1      | 2      | 1      | 1      | 1      |
| 9959   | 0      | 0      | 0      | 1      | 1      | 0      |
| 9960   | 0      | 0      | 1      | 2      | 0      | 1      |
| 9961   | 1      | 1      | 0      | 0      | 1      | 0      |
| 9962   | 0      | 1      | 0      | 3      | 0      | 3      |
| 9969   | 1      | 1      | 1      | 2      | 2      | 1      |
| 9982   | 0      | 1      | 1      | 1      | 1      | 0      |
| 9984   | 1      | 2      | 0      | 2      | 1      | 1      |
| 9990   | 0      | 1      | 1      | 0      | 0      | 0      |
| 9992   | 1      | 2      | 1      | 2      | 1      | 0      |
| 9993   | 2      | 1      | 1      | 2      | 1      | 1      |
| 9997   | 0      | 0      | 0      | 0      | 0      | 0      |
| 9999   | 1      | 0      | 1      | 0      | 0      | 0      |
| 10000  | 0      | 2      | 1      | 1      | 0      | 0      |
| 10005  | 2      | 2      | 0      | 1      | 1      | 0      |
| 10014  | 0      | 3      | 0      | 0      | 0      | 0      |
| 10016  | 0      | 0      | 0      | 0      | 0      | 0      |
| 10017  | 0      | 0      | 0      | 0      | 0      | 0      |

| respid | Q56i_1 | Q56j_1 | Q56k_1 | Q56l_1 | Q56m_1 | Q56n_1 |
|--------|--------|--------|--------|--------|--------|--------|
| 10018  | 0      | 2      | 1      | 1      | 1      | 0      |
| 10021  | 1      | 1      | 1      | 1      | 1      | 1      |
| 10025  | 1      | 1      | 0      | 0      | 1      | 0      |
| 10027  | 1      | 2      | 1      | 3      | 1      | 1      |
| 10028  | 0      | 1      | 0      | 2      | 0      | 1      |
| 10031  | 0      | 0      | 0      | 0      | 0      | 0      |
| 10036  | 0      | 0      | 1      | 0      | 1      | 0      |
| 10037  | 0      | 2      | 1      | 2      | 0      | 2      |
| 10038  | 0      | 0      | 0      | 0      | 0      | 0      |
| 10039  | 0      | 1      | 1      | 0      | 0      | 1      |
| 10041  | 0      | 1      | 0      | 1      | 1      | 0      |
| 10045  | 0      | 3      | 0      | 0      | 0      | 0      |
| 10046  | 1      | 2      | 1      | 1      | 1      | 1      |
| 10047  | 1      | 3      | 0      | 0      | 0      | 1      |
| 10048  | 1      | 0      | 1      | 2      | 2      | 0      |
| 10049  | 0      | 1      | 0      | 1      | 0      | 1      |
| 10051  | 0      | 1      | 0      | 0      | 1      | 0      |
| 10052  | 1      | 1      | 1      | 2      | 1      | 1      |
| 10056  | 1      | 3      | 1      | 0      | 0      | 1      |
| 10061  | 0      | 3      | 0      | 1      | 0      | 1      |
| 10064  | 0      | 0      | 0      | 0      | 0      | 1      |
| 10066  | 0      | 1      | 0      | 1      | 1      | 1      |
| 10069  | 0      | 0      | 0      | 0      | 0      | 0      |
| 10071  | 0      | 0      | 0      | 0      | 0      | 0      |
| 10074  | 0      | 0      | 0      | 0      | 0      | 0      |
| 10079  | 0      | 0      | 1      | 1      | 1      | 0      |
| 10087  | 1      | 0      | 1      | 1      | 1      | 0      |
| 10095  | 0      | 3      | 0      | 1      | 0      | 2      |
| 10097  | 0      | 0      | 0      | 0      | 0      | 1      |
| 10100  | 0      | 1      | 0      | 1      | 1      | 0      |
| 10105  | 0      | 0      | 0      | 0      | 0      | 0      |
| 10107  | 0      | 1      | 0      | 0      | 0      | 0      |

| respid | Q56i_1 | Q56j_1 | Q56k_1 | Q56l_1 | Q56m_1 | Q56n_1 |
|--------|--------|--------|--------|--------|--------|--------|
| 10111  | 0      | 0      | 0      | 0      | 0      | 0      |
| 10116  | 1      | 1      | 1      | 2      | 2      | 2      |
| 10118  | 0      | 0      | 0      | 0      | 0      | 3      |
| 10123  | 0      | 0      | 1      | 1      | 1      | 1      |
| 10124  | 1      | 0      | 0      | 1      | 1      | 1      |
| 10130  | 1      | 2      | 2      | 1      | 1      | 1      |
| 10134  | 0      | 0      | 0      | 1      | 1      | 1      |
| 10135  | 0      | 1      | 0      | 0      | 0      | 0      |
| 10136  | 1      | 2      | 1      | 2      | 1      | 1      |
| 10141  | 0      | 2      | 0      | 0      | 1      | 0      |
| 10142  | 0      | 0      | 0      | 0      | 1      | 0      |
| 10143  | 1      | 0      | 0      | 0      | 1      | 0      |
| 10145  | 1      | 0      | 1      | 2      | 0      | 0      |
| 10149  | 0      | 1      | 1      | 1      | 0      | 3      |
| 10150  | 0      | 3      | 0      | 0      | 0      | 0      |
| 10151  | 0      | 1      | 1      | 0      | 0      | 0      |
| 10152  | 1      | 2      | 1      | 1      | 0      | 1      |
| 10153  | 0      | 1      | 0      | 1      | 0      | 1      |
| 10156  | 0      | 1      | 0      | 1      | 1      | 0      |
| 10160  | 1      | 3      | 0      | 0      | 0      | 0      |
| 10161  | 0      | 1      | 1      | 0      | 0      | 0      |
| 10167  | 2      | 2      | 2      | 1      | 2      | 1      |
| 10171  | 0      | 0      | 2      | 0      | 1      | 0      |
| 10172  | 0      | 0      | 0      | 0      | 1      | 0      |
| 10176  | 0      | 3      | 1      | 0      | 1      | 0      |
| 10177  | 0      | 3      | 0      | 0      | 0      | 0      |
| 10182  | 1      | 2      | 1      | 1      | 1      | 1      |
| 10184  | 1      | 2      | 1      | 1      | 1      | 2      |
| 10186  | 0      | 3      | 1      | 0      | 0      | 0      |
| 10189  | 0      | 1      | 0      | 0      | 0      | 0      |
| 10191  | 1      | 1      | 1      | 0      | 1      | 1      |
| 10192  | 1      | 2      | 2      | 2      | 1      | 2      |

| respid | Q56i_1 | Q56j_1 | Q56k_1 | Q56l_1 | Q56m_1 | Q56n_1 |
|--------|--------|--------|--------|--------|--------|--------|
| 10195  | 0      | 0      | 0      | 0      | 0      | 0      |
| 10199  | 1      | 1      | 1      | 0      | 1      | 0      |
| 10201  | 0      | 0      | 0      | 0      | 0      | 0      |
| 10213  | 0      | 1      | 0      | 1      | 0      | 0      |
| 10222  | 1      | 0      | 1      | 1      | 1      | 0      |
| 10224  | 1      | 1      | 0      | 0      | 0      | 0      |
| 10245  | 0      | 0      | 0      | 0      | 1      | 1      |
| 10254  | 1      | 0      | 0      | 1      | 0      | 0      |
| 10255  | 2      | 2      | 2      | 2      | 1      | 1      |
| 10257  | 1      | 3      | 0      | 0      | 0      | 0      |
| 10260  | 0      | 0      | 0      | 0      | 0      | 0      |
| 10261  | 2      | 2      | 1      | 1      | 2      | 2      |
| 10263  | 3      | 1      | 3      | 3      | 3      | 3      |
| 10264  | 0      | 1      | 1      | 0      | 1      | 0      |
| 10268  | 1      | 0      | 1      | 1      | 1      | 1      |
| 10269  | 1      | 3      | 0      | 1      | 1      | 0      |
| 10270  | 1      | 0      | 1      | 1      | 1      | 0      |
| 10282  | 0      | 2      | 0      | 0      | 0      | 0      |
| 10285  | 1      | 1      | 1      | 1      | 1      | 1      |
| 10288  | 0      | 0      | 0      | 0      | 0      | 0      |
| 10291  | 0      | 1      | 0      | 0      | 0      | 1      |
| 10292  | 0      | 3      | 0      | 0      | 1      | 0      |
| 10304  | 0      | 0      | 0      | 0      | 0      | 0      |
| 10305  | 1      | 1      | 1      | 1      | 1      | 1      |
| 10310  | 0      | 1      | 0      | 0      | 0      | 0      |
| 10324  | 1      | 0      | 1      | 1      | 1      | 1      |
| 10325  | 0      | 0      | 0      | 0      | 1      | 1      |
| 10326  | 0      | 1      | 1      | 0      | 0      | 1      |
| 10329  | 0      | 2      | 0      | 0      | 0      | 0      |
| 10332  | 0      | 3      | 1      | 0      | 1      | 0      |
| 10337  | 1      | 0      | 1      | 1      | 1      | 0      |
| 10341  | 1      | 1      | 1      | 3      | 2      | 3      |

| respid | Q56i_1 | Q56j_1 | Q56k_1 | Q56l_1 | Q56m_1 | Q56n_1 |
|--------|--------|--------|--------|--------|--------|--------|
| 10353  | 1      | 2      | 2      | 2      | 1      | 1      |
| 10354  | 0      | 2      | 0      | 0      | 0      | 0      |
| 10359  | 0      | 2      | 1      | 1      | 2      | 0      |
| 10360  | 0      | 0      | 0      | 0      | 0      | 0      |
| 10362  | 1      | 1      | 2      | 1      | 1      | 1      |
| 10364  | 0      | 0      | 0      | 1      | 0      | 0      |
| 10366  | 1      | 1      | 2      | 2      | 1      | 1      |
| 10367  | 1      | 2      | 1      | 1      | 1      | 0      |
| 10371  | 0      | 0      | 0      | 0      | 0      | 0      |
| 10374  | 0      | 1      | 0      | 0      | 0      | 0      |
| 10375  | 0      | 2      | 0      | 1      | 0      | 0      |
| 10376  | 0      | 1      | 0      | 0      | 0      | 0      |
| 10377  | 0      | 1      | 0      | 0      | 0      | 0      |
| 10378  | 1      | 1      | 1      | 1      | 1      | 1      |
| 10387  | 1      | 3      | 0      | 0      | 0      | 0      |
| 10396  | 1      | 2      | 1      | 0      | 1      | 0      |
| 10397  | 0      | 0      | 1      | 0      | 0      | 0      |
| 10399  | 2      | 2      | 1      | 2      | 2      | 1      |
| 10405  | 1      | 1      | 1      | 1      | 1      | 1      |
| 10406  | 1      | 3      | 1      | 2      | 1      | 0      |
| 10408  | 0      | 3      | 0      | 0      | 1      | 0      |
| 10409  | 0      | 3      | 0      | 0      | 0      | 0      |
| 10412  | 0      | 0      | 0      | 0      | 0      | 0      |
| 10413  | 0      | 0      | 0      | 0      | 0      | 0      |
| 10419  | 1      | 2      | 1      | 0      | 1      | 0      |
| 10423  | 0      | 0      | 1      | 0      | 0      | 0      |
| 10426  | 0      | 1      | 0      | 0      | 0      | 0      |
| 10446  | 0      | 1      | 0      | 0      | 0      | 0      |
| 10448  | 0      | 3      | 0      | 0      | 1      | 1      |
| 10450  | 1      | 0      | 0      | 1      | 1      | 0      |
| 10455  | 1      | 0      | 1      | 0      | 1      | 1      |
| 10460  | 0      | 1      | 0      | 1      | 1      | 1      |

| respid | Q56i_1 | Q56j_1 | Q56k_1 | Q56l_1 | Q56m_1 | Q56n_1 |
|--------|--------|--------|--------|--------|--------|--------|
| 10461  | 0      | 0      | 0      | 1      | 0      | 1      |
| 10471  | 0      | 1      | 0      | 0      | 0      | 1      |
| 10472  | 0      | 0      | 0      | 0      | 0      | 0      |
| 10491  | 1      | 2      | 1      | 2      | 1      | 2      |
| 10493  | 0      | 1      | 0      | 1      | 0      | 0      |
| 10498  | 0      | 1      | 0      | 0      | 0      | 0      |
| 10533  | 0      | 0      | 0      | 1      | 0      | 0      |
| 10539  | 0      | 1      | 1      | 1      | 1      | 1      |
| 10540  | 1      | 3      | 0      | 1      | 1      | 0      |
| 10557  | 1      | 1      | 1      | 1      | 1      | 1      |
| 10558  | 1      | 1      | 1      | 1      | 1      | 1      |
| 10559  | 1      | 1      | 2      | 1      | 1      | 0      |
| 10564  | 0      | 1      | 1      | 0      | 0      | 0      |
| 10570  | 0      | 1      | 1      | 0      | 0      | 0      |
| 10572  | 2      | 1      | 0      | 1      | 1      | 0      |
| 10576  | 0      | 0      | 0      | 0      | 0      | 0      |
| 10582  | 0      | 1      | 0      | 0      | 1      | 0      |
| 10593  | 1      | 1      | 0      | 0      | 0      | 1      |
| 10596  | 1      | 3      | 1      | 2      | 1      | 0      |
| 10615  | 0      | 2      | 0      | 0      | 0      | 0      |
| 10616  | 1      | 0      | 0      | 0      | 1      | 0      |
| 10623  | 1      | 1      | 1      | 1      | 1      | 0      |
| 10626  | 0      | 0      | 0      | 1      | 1      | 1      |
| 10627  | 2      | 3      | 2      | 2      | 2      | 1      |
| 10629  | 2      | 1      | 1      | 1      | 1      | 0      |
| 10632  | 1      | 1      | 1      | 1      | 2      | 1      |
| 10641  | 0      | 3      | 0      | 0      | 0      | 0      |
| 10648  | 0      | 1      | 1      | 2      | 1      | 1      |
| 10651  | 1      | 0      | 2      | 2      | 1      | 1      |
| 10654  | 0      | 0      | 0      | 0      | 0      | 0      |
| 10673  | 1      | 1      | 1      | 0      | 1      | 0      |
| 10675  | 0      | 1      | 0      | 0      | 0      | 2      |

| respid | Q56i_1 | Q56j_1 | Q56k_1 | Q56l_1 | Q56m_1 | Q56n_1 |
|--------|--------|--------|--------|--------|--------|--------|
| 10689  | 0      | 1      | 2      | 2      | 2      | 2      |
| 10692  | 1      | 3      | 1      | 1      | 1      | 1      |
| 10694  | 0      | 0      | 0      | 0      | 0      | 0      |
| 10695  | 1      | 1      | 1      | 1      | 1      | 2      |
| 10702  | 2      | 2      | 1      | 1      | 1      | 2      |
| 10703  | 1      | 2      | 1      | 1      | 1      | 2      |
| 10708  | 0      | 0      | 0      | 0      | 1      | 0      |
| 10719  | 0      | 0      | 0      | 0      | 0      | 0      |
| 10722  | 1      | 2      | 1      | 1      | 0      | 1      |
| 10723  | 0      | 1      | 1      | 0      | 0      | 1      |
| 10726  | 0      | 2      | 0      | 0      | 1      | 0      |
| 10727  | 0      | 3      | 1      | 0      | 0      | 1      |
| 10730  | 0      | 0      | 0      | 0      | 0      | 0      |
| 10731  | 0      | 0      | 0      | 0      | 0      | 1      |
| 10737  | 0      | 1      | 0      | 0      | 0      | 1      |
| 10743  | 1      | 1      | 1      | 2      | 1      | 0      |
| 10763  | 1      | 1      | 1      | 0      | 0      | 0      |
| 10777  | 0      | 1      | 0      | 1      | 0      | 2      |
| 10787  | 1      | 1      | 1      | 3      | 0      | 1      |
| 10798  | 1      | 2      | 1      | 1      | 1      | 0      |
| 10800  | 0      | 3      | 0      | 0      | 0      | 2      |
| 10802  | 0      | 1      | 0      | 1      | 2      | 0      |
| 10803  | 1      | 1      | 2      | 1      | 2      | 1      |
| 10808  | 1      | 1      | 0      | 0      | 1      | 0      |
| 10810  | 0      | 1      | 0      | 1      | 0      | 0      |
| 10819  | 0      | 2      | 0      | 0      | 0      | 0      |
| 10825  | 0      | 1      | 0      | 0      | 0      | 0      |
| 10827  | 0      | 0      | 1      | 0      | 0      | 0      |
| 10830  | 0      | 2      | 1      | 1      | 0      | 2      |
| 10847  | 0      | 0      | 0      | 1      | 0      | 1      |
| 10849  | 0      | 3      | 0      | 3      | 1      | 1      |
| 10852  | 1      | 1      | 1      | 0      | 1      | 0      |



| respid | Q56i_1 | Q56j_1 | Q56k_1 | Q56l_1 | Q56m_1 | Q56n_1 |
|--------|--------|--------|--------|--------|--------|--------|
| 10854  | 1      | 1      | 1      | 1      | 1      | 1      |
| 10857  | 0      | 0      | 0      | 0      | 0      | 1      |
| 10861  | 1      | 1      | 1      | 2      | 2      | 1      |
| 10862  | 0      | 3      | 0      | 0      | 0      | 0      |
| 10870  | 1      | 1      | 1      | 1      | 1      | 0      |
| 10873  | 2      | 2      | 1      | 1      | 2      | 2      |
| 10881  | 0      | 1      | 0      | 0      | 1      | 0      |
| 10893  | 0      | 1      | 0      | 0      | 0      | 0      |
| 10898  | 0      | 0      | 1      | 2      | 1      | 2      |
| 10899  | 1      | 1      | 1      | 0      | 1      | 0      |
| 10905  | 1      | 2      | 1      | 1      | 0      | 0      |
| 10910  | 0      | 1      | 0      | 0      | 0      | 0      |
| 10911  | 1      | 1      | 1      | 1      | 1      | 2      |
| 10912  | 0      | 2      | 0      | 2      | 1      | 1      |
| 10913  | 1      | 1      | 1      | 1      | 1      | 1      |
| 10918  | 0      | 1      | 0      | 1      | 0      | 0      |
| 10995  | 0      | 0      | 0      | 1      | 0      | 0      |
| 11002  | 0      | 1      | 0      | 0      | 1      | 1      |
| 11003  | 0      | 0      | 0      | 0      | 0      | 0      |
| 11005  | 0      | 1      | 0      | 1      | 0      | 0      |
| 11015  | 0      | 0      | 0      | 0      | 0      | 0      |
| 11016  | 3      | 3      | 3      | 3      | 3      | 1      |
| 11017  | 0      | 0      | 0      | 0      | 0      | 0      |
| 11020  | 0      | 2      | 2      | 2      | 2      | 0      |
| 11024  | 0      | 2      | 0      | 1      | 0      | 0      |
| 11026  | 1      | 1      | 1      | 1      | 1      | 1      |
| 11028  | 1      | 1      | 1      | 1      | 1      | 1      |
| 11029  | 1      | 2      | 0      | 2      | 1      | 0      |
| 11030  | 1      | 1      | 0      | 1      | 1      | 1      |
| 11031  | 0      | 0      | 0      | 0      | 0      | 0      |
| 11038  | 0      | 0      | 0      | 2      | 2      | 3      |
| 11051  | 1      | 2      | 1      | 2      | 1      | 1      |

| respid | Q56i_1 | Q56j_1 | Q56k_1 | Q56l_1 | Q56m_1 | Q56n_1 |
|--------|--------|--------|--------|--------|--------|--------|
| 11052  | 0      | 2      | 2      | 2      | 1      | 1      |
| 11053  | 1      | 0      | 1      | 0      | 1      | 0      |
| 11054  | 1      | 2      | 1      | 2      | 2      | 1      |
| 11063  | 0      | 1      | 1      | 1      | 0      | 0      |
| 11075  | 1      | 0      | 1      | 1      | 1      | 1      |
| 11083  | 0      | 1      | 0      | 0      | 0      | 1      |
| 11092  | 0      | 0      | 0      | 0      | 0      | 0      |
| 11118  | 0      | 1      | 1      | 0      | 1      | 1      |
| 11119  | 1      | 1      | 1      | 2      | 1      | 1      |
| 11134  | 0      | 3      | 0      | 0      | 0      | 0      |
| 11139  | 2      | 3      | 2      | 2      | 3      | 2      |
| 11154  | 0      | 1      | 0      | 0      | 0      | 0      |
| 11166  | 0      | 2      | 0      | 1      | 1      | 0      |
| 11168  | 0      | 0      | 0      | 0      | 0      | 0      |
| 11176  | 1      | 1      | 2      | 1      | 2      | 1      |
| 11183  | 1      | 1      | 1      | 1      | 1      | 0      |
| 11189  | 0      | 0      | 0      | 0      | 0      | 0      |
| 11196  | 2      | 0      | 2      | 1      | 2      | 1      |
| 11200  | 1      | 0      | 1      | 0      | 1      | 0      |
| 11201  | 0      | 3      | 1      | 2      | 1      | 1      |
| 11211  | 1      | 0      | 1      | 1      | 1      | 1      |
| 11218  | 0      | 3      | 0      | 0      | 0      | 0      |
| 11219  | 1      | 1      | 0      | 1      | 1      | 0      |
| 11221  | 0      | 0      | 0      | 0      | 0      | 0      |
| 11222  | 0      | 3      | 0      | 3      | 0      | 1      |
| 11230  | 1      | 0      | 1      | 1      | 1      | 1      |
| 11236  | 1      | 0      | 1      | 1      | 1      | 2      |
| 11237  | 2      | 2      | 2      | 2      | 1      | 1      |
| 11240  | 2      | 0      | 2      | 1      | 1      | 0      |
| 11244  | 1      | 0      | 1      | 1      | 1      | 1      |
| 11249  | 1      | 0      | 1      | 1      | 1      | 1      |
| 11252  | 1      | 0      | 1      | 1      | 1      | 1      |

| respid | Q56i_1 | Q56j_1 | Q56k_1 | Q56l_1 | Q56m_1 | Q56n_1 |
|--------|--------|--------|--------|--------|--------|--------|
| 11254  | 1      | 1      | 1      | 1      | 1      | 1      |
| 11255  | 1      | 1      | 0      | 1      | 1      | 2      |
| 11258  | 1      | 1      | 1      | 1      | 1      | 1      |
| 11260  | 1      | 1      | 1      | 1      | 1      | 1      |
| 11264  | 1      | 2      | 1      | 2      | 1      | 1      |
| 11266  | 0      | 1      | 1      | 0      | 0      | 1      |
| 11268  | 1      | 1      | 0      | 1      | 0      | 1      |
| 11269  | 0      | 0      | 0      | 0      | 0      | 2      |
| 11272  | 1      | 1      | 1      | 1      | 1      | 0      |
| 11273  | 1      | 1      | 1      | 2      | 1      | 1      |
| 11275  | 1      | 0      | 0      | 0      | 0      | 0      |
| 11276  | 0      | 1      | 0      | 0      | 0      | 0      |
| 11278  | 1      | 1      | 1      | 1      | 1      | 1      |
| 11288  | 0      | 1      | 0      | 1      | 0      | 2      |
| 11289  | 0      | 1      | 0      | 0      | 0      | 0      |
| 11291  | 1      | 1      | 1      | 1      | 1      | 2      |
| 11295  | 0      | 0      | 1      | 0      | 0      | 0      |
| 11297  | 0      | 1      | 0      | 0      | 0      | 0      |
| 11304  | 2      | 3      | 2      | 2      | 1      | 1      |
| 11305  | 0      | 0      | 1      | 0      | 0      | 0      |
| 11311  | 0      | 1      | 0      | 0      | 0      | 1      |
| 11313  | 0      | 1      | 0      | 0      | 0      | 0      |
| 11315  | 2      | 1      | 2      | 1      | 2      | 3      |
| 11316  | 2      | 1      | 2      | 1      | 2      | 3      |
| 11318  | 1      | 2      | 2      | 1      | 2      | 1      |
| 11323  | 0      | 1      | 0      | 0      | 0      | 2      |
| 11331  | 1      | 0      | 1      | 1      | 1      | 0      |
| 11333  | 0      | 1      | 1      | 1      | 1      | 1      |
| 11334  | 1      | 1      | 1      | 2      | 1      | 1      |
| 11340  | 2      | 2      | 2      | 3      | 2      | 3      |
| 11345  | 0      | 1      | 0      | 0      | 0      | 0      |
| 11354  | 0      | 1      | 2      | 0      | 0      | 0      |

| respid | Q56i_1 | Q56j_1 | Q56k_1 | Q56l_1 | Q56m_1 | Q56n_1 |
|--------|--------|--------|--------|--------|--------|--------|
| 11360  | 1      | 1      | 1      | 1      | 1      | 1      |
| 11361  | 1      | 1      | 1      | 1      | 2      | 0      |
| 11367  | 0      | 2      | 0      | 0      | 0      | 1      |
| 11370  | 0      | 1      | 0      | 0      | 0      | 0      |
| 11371  | 1      | 0      | 1      | 1      | 1      | 0      |
| 11372  | 1      | 1      | 1      | 1      | 1      | 1      |
| 11373  | 1      | 0      | 1      | 0      | 1      | 1      |
| 11382  | 1      | 3      | 1      | 1      | 1      | 2      |
| 11394  | 1      | 3      | 1      | 2      | 1      | 1      |
| 11395  | 2      | 0      | 2      | 1      | 1      | 1      |
| 11397  | 0      | 0      | 0      | 0      | 0      | 1      |
| 11402  | 0      | 1      | 0      | 0      | 0      | 0      |
| 11409  | 0      | 1      | 1      | 1      | 1      | 0      |
| 11410  | 0      | 0      | 0      | 0      | 0      | 0      |
| 11411  | 1      | 1      | 1      | 1      | 1      | 1      |
| 11418  | 0      | 0      | 1      | 0      | 0      | 1      |
| 11425  | 1      | 1      | 1      | 1      | 1      | 1      |
| 11429  | 1      | 2      | 1      | 0      | 1      | 1      |
| 11430  | 1      | 1      | 2      | 1      | 1      | 2      |
| 11431  | 1      | 1      | 1      | 1      | 1      | 0      |
| 11432  | 0      | 1      | 1      | 0      | 0      | 0      |
| 11433  | 0      | 3      | 0      | 0      | 0      | 0      |
| 11435  | 1      | 1      | 1      | 2      | 1      | 1      |
| 11436  | 0      | 0      | 0      | 0      | 0      | 0      |
| 11437  | 1      | 1      | 2      | 1      | 1      | 1      |
| 11439  | 0      | 0      | 0      | 0      | 0      | 0      |
| 11440  | 0      | 1      | 0      | 0      | 1      | 0      |
| 11447  | 0      | 0      | 1      | 0      | 1      | 0      |
| 11455  | 0      | 0      | 0      | 0      | 0      | 0      |
| 11456  | 1      | 1      | 1      | 1      | 1      | 1      |
| 11461  | 1      | 0      | 1      | 1      | 1      | 0      |
| 11463  | 1      | 0      | 1      | 0      | 0      | 0      |

| respid | Q56i_1 | Q56j_1 | Q56k_1 | Q56l_1 | Q56m_1 | Q56n_1 |
|--------|--------|--------|--------|--------|--------|--------|
| 11470  | 0      | 1      | 1      | 2      | 2      | 0      |
| 11472  | 0      | 0      | 1      | 0      | 0      | 0      |
| 11475  | 0      | 1      | 1      | 1      | 0      | 0      |
| 11476  | 1      | 1      | 1      | 1      | 1      | 1      |
| 11482  | 1      | 1      | 1      | 1      | 1      | 1      |
| 11501  | 2      | 0      | 1      | 1      | 1      | 0      |
| 11503  | 1      | 0      | 0      | 0      | 0      | 0      |
| 11505  | 1      | 3      | 0      | 1      | 1      | 0      |
| 11510  | 0      | 1      | 0      | 0      | 0      | 2      |
| 11519  | 0      | 2      | 1      | 0      | 0      | 0      |
| 11527  | 0      | 0      | 1      | 0      | 1      | 0      |
| 11529  | 1      | 0      | 1      | 1      | 1      | 1      |
| 11530  | 1      | 1      | 1      | 1      | 1      | 1      |
| 11536  | 1      | 1      | 1      | 2      | 1      | 1      |
| 11543  | 0      | 0      | 0      | 0      | 0      | 0      |
| 11548  | 1      | 0      | 1      | 0      | 1      | 0      |
| 11566  | 1      | 1      | 0      | 0      | 0      | 0      |
| 11570  | 1      | 1      | 0      | 2      | 1      | 0      |
| 11571  | 1      | 0      | 0      | 0      | 0      | 0      |
| 11578  | 0      | 0      | 1      | 0      | 0      | 1      |
| 11579  | 1      | 1      | 0      | 0      | 1      | 0      |
| 11581  | 1      | 0      | 0      | 1      | 0      | 0      |
| 11582  | 1      | 0      | 1      | 0      | 0      | 0      |
| 11583  | 0      | 0      | 0      | 0      | 0      | 0      |
| 11589  | 1      | 1      | 1      | 1      | 1      | 1      |
| 11590  | 0      | 1      | 0      | 0      | 0      | 0      |
| 11592  | 0      | 1      | 0      | 0      | 0      | 0      |
| 11596  | 0      | 0      | 1      | 0      | 0      | 1      |
| 11598  | 1      | 2      | 1      | 2      | 1      | 0      |
| 11602  | 0      | 0      | 1      | 0      | 1      | 1      |
| 11605  | 0      | 0      | 0      | 0      | 0      | 0      |
| 11618  | 1      | 1      | 1      | 2      | 1      | 2      |

| respid | Q56i_1 | Q56j_1 | Q56k_1 | Q56l_1 | Q56m_1 | Q56n_1 |
|--------|--------|--------|--------|--------|--------|--------|
| 11621  | 2      | 1      | 1      | 2      | 2      | 2      |
| 11630  | 0      | 0      | 1      | 0      | 1      | 0      |
| 11636  | 2      | 1      | 1      | 1      | 1      | 1      |
| 11640  | 2      | 0      | 2      | 2      | 3      | 2      |
| 11658  | 1      | 1      | 1      | 1      | 1      | 0      |
| 11665  | 0      | 2      | 1      | 1      | 0      | 0      |
| 11666  | 0      | 0      | 1      | 0      | 1      | 0      |
| 11667  | 1      | 3      | 2      | 2      | 2      | 1      |
| 11674  | 0      | 0      | 0      | 0      | 0      | 0      |
| 11680  | 1      | 3      | 1      | 0      | 0      | 0      |
| 11683  | 1      | 0      | 0      | 0      | 0      | 3      |
| 11688  | 1      | 1      | 1      | 2      | 1      | 1      |
| 11690  | 0      | 0      | 0      | 0      | 0      | 0      |
| 11694  | 1      | 1      | 1      | 1      | 1      | 1      |
| 11705  | 1      | 1      | 1      | 1      | 1      | 1      |
| 11720  | 1      | 2      | 2      | 2      | 2      | 1      |
| 11724  | 0      | 0      | 0      | 0      | 0      | 0      |
| 11738  | 0      | 0      | 1      | 0      | 0      | 1      |
| 11744  | 0      | 0      | 0      | 0      | 1      | 0      |
| 11745  | 1      | 3      | 2      | 2      | 1      | 0      |
| 11747  | 0      | 0      | 0      | 0      | 0      | 0      |
| 11755  | 1      | 2      | 1      | 0      | 0      | 1      |
| 11756  | 2      | 1      | 2      | 2      | 2      | 0      |
| 11772  | 1      | 0      | 1      | 1      | 1      | 0      |
| 11773  | 0      | 0      | 0      | 0      | 0      | 0      |
| 11778  | 0      | 0      | 1      | 2      | 0      | 1      |
| 11790  | 1      | 1      | 0      | 1      | 0      | 1      |
| 11794  | 0      | 0      | 0      | 0      | 0      | 0      |
| 11795  | 1      | 2      | 1      | 1      | 1      | 1      |
| 11799  | 1      | 1      | 1      | 2      | 1      | 1      |
| 11803  | 1      | 1      | 1      | 2      | 1      | 1      |
| 11806  | 2      | 2      | 2      | 2      | 2      | 2      |

| respid | Q56i_1 | Q56j_1 | Q56k_1 | Q56l_1 | Q56m_1 | Q56n_1 |
|--------|--------|--------|--------|--------|--------|--------|
| 11808  | 0      | 2      | 0      | 1      | 0      | 1      |
| 11810  | 0      | 1      | 1      | 1      | 1      | 0      |
| 11811  | 0      | 0      | 0      | 0      | 0      | 0      |
| 11812  | 1      | 0      | 1      | 0      | 1      | 1      |
| 11813  | 0      | 0      | 1      | 0      | 1      | 0      |
| 11821  | 1      | 1      | 0      | 1      | 0      | 0      |
| 11827  | 0      | 0      | 0      | 0      | 0      | 0      |
| 11831  | 2      | 2      | 1      | 0      | 1      | 0      |
| 11841  | 0      | 0      | 0      | 0      | 0      | 0      |
| 11872  | 0      | 0      | 0      | 0      | 0      | 0      |
| 11898  | 0      | 1      | 0      | 0      | 0      | 0      |
| 11902  | 1      | 3      | 2      | 2      | 2      | 0      |
| 11912  | 1      | 2      | 1      | 0      | 1      | 1      |
| 11926  | 0      | 1      | 0      | 1      | 0      | 0      |
| 11928  | 1      | 1      | 0      | 1      | 2      | 1      |
| 11932  | 0      | 1      | 0      | 0      | 0      | 0      |
| 11934  | 1      | 2      | 1      | 1      | 1      | 1      |
| 11941  | 2      | 1      | 2      | 2      | 1      | 1      |
| 11942  | 0      | 0      | 0      | 0      | 1      | 0      |
| 11943  | 1      | 0      | 1      | 0      | 1      | 0      |
| 11944  | 2      | 2      | 1      | 2      | 1      | 3      |
| 11955  | 1      | 1      | 0      | 0      | 1      | 0      |
| 11958  | 1      | 1      | 0      | 1      | 0      | 1      |
| 11968  | 0      | 1      | 0      | 0      | 1      | 1      |
| 11979  | 2      | 1      | 2      | 0      | 1      | 2      |
| 11988  | 1      | 1      | 1      | 1      | 1      | 0      |
| 11999  | 0      | 3      | 1      | 2      | 0      | 1      |
| 12002  | 0      | 3      | 0      | 0      | 0      | 0      |
| 12004  | 0      | 1      | 0      | 1      | 1      | 0      |
| 12008  | 1      | 1      | 1      | 1      | 1      | 1      |
| 12013  | 0      | 0      | 0      | 0      | 0      | 0      |
| 12018  | 1      | 0      | 0      | 1      | 1      | 0      |

| respid | Q56i_1 | Q56j_1 | Q56k_1 | Q56l_1 | Q56m_1 | Q56n_1 |
|--------|--------|--------|--------|--------|--------|--------|
| 12023  | 1      | 1      | 0      | 0      | 1      | 1      |
| 12027  | 1      | 1      | 1      | 2      | 1      | 1      |
| 12030  | 0      | 0      | 2      | 0      | 0      | 0      |
| 12031  | 0      | 1      | 0      | 1      | 0      | 1      |
| 12036  | 1      | 1      | 1      | 1      | 1      | 0      |
| 12037  | 2      | 1      | 1      | 2      | 1      | 1      |
| 12038  | 1      | 2      | 1      | 1      | 1      | 1      |
| 12039  | 0      | 2      | 0      | 0      | 0      | 1      |
| 12045  | 1      | 0      | 1      | 0      | 0      | 0      |
| 12046  | 1      | 1      | 1      | 0      | 1      | 0      |
| 12054  | 1      | 0      | 2      | 1      | 2      | 1      |
| 12055  | 0      | 0      | 0      | 0      | 0      | 0      |
| 12069  | 2      | 1      | 2      | 1      | 1      | 1      |
| 12070  | 1      | 1      | 1      | 1      | 1      | 1      |
| 12074  | 1      | 1      | 1      | 0      | 1      | 0      |
| 12075  | 1      | 1      | 1      | 1      | 1      | 1      |
| 12078  | 0      | 0      | 0      | 0      | 0      | 0      |
| 12089  | 1      | 2      | 1      | 0      | 0      | 0      |
| 12091  | 1      | 1      | 2      | 0      | 1      | 1      |
| 12092  | 2      | 2      | 1      | 1      | 1      | 1      |
| 12108  | 2      | 3      | 2      | 2      | 2      | 1      |
| 12111  | 2      | 1      | 2      | 1      | 1      | 1      |
| 12112  | 1      | 0      | 1      | 0      | 1      | 0      |
| 12126  | 1      | 1      | 1      | 1      | 1      | 3      |
| 12132  | 1      | 0      | 1      | 0      | 1      | 1      |
| 12150  | 1      | 2      | 2      | 1      | 2      | 1      |
| 12152  | 1      | 2      | 1      | 0      | 1      | 0      |
| 12154  | 1      | 2      | 0      | 1      | 0      | 1      |
| 12157  | 1      | 0      | 1      | 2      | 0      | 1      |
| 12165  | 1      | 0      | 1      | 0      | 0      | 0      |
| 12169  | 1      | 2      | 1      | 1      | 0      | 1      |
| 12182  | 3      | 2      | 2      | 2      | 2      | 2      |



| respid | Q56i_1 | Q56j_1 | Q56k_1 | Q56l_1 | Q56m_1 | Q56n_1 |
|--------|--------|--------|--------|--------|--------|--------|
| 12198  | 0      | 0      | 0      | 0      | 0      | 0      |
| 12199  | 0      | 1      | 1      | 0      | 1      | 1      |
| 12202  | 0      | 0      | 1      | 1      | 1      | 1      |
| 12207  | 0      | 0      | 0      | 0      | 0      | 0      |
| 12208  | 1      | 1      | 1      | 0      | 1      | 0      |
| 12210  | 0      | 1      | 0      | 0      | 0      | 0      |
| 12219  | 3      | 1      | 2      | 1      | 2      | 1      |
| 12224  | 1      | 3      | 1      | 0      | 1      | 0      |
| 12230  | 1      | 1      | 1      | 1      | 1      | 1      |
| 12238  | 1      | 2      | 1      | 2      | 2      | 1      |
| 12239  | 0      | 0      | 0      | 0      | 0      | 0      |
| 12243  | 0      | 1      | 1      | 1      | 1      | 0      |
| 12245  | 1      | 1      | 1      | 1      | 1      | 2      |
| 12246  | 1      | 1      | 2      | 1      | 2      | 1      |
| 12247  | 0      | 0      | 0      | 0      | 0      | 0      |
| 12248  | 2      | 2      | 2      | 1      | 2      | 2      |
| 12249  | 0      | 1      | 1      | 0      | 0      | 0      |
| 12258  | 2      | 2      | 2      | 2      | 2      | 1      |
| 12265  | 1      | 2      | 2      | 1      | 2      | 2      |
| 12269  | 0      | 0      | 0      | 0      | 0      | 0      |
| 12270  | 0      | 0      | 0      | 0      | 0      | 0      |
| 12279  | 0      | 0      | 1      | 0      | 1      | 0      |
| 12280  | 1      | 1      | 1      | 1      | 2      | 1      |
| 12282  | 1      | 1      | 0      | 2      | 0      | 2      |
| 12283  | 2      | 1      | 1      | 2      | 1      | 0      |
| 12287  | 1      | 0      | 1      | 0      | 1      | 2      |
| 12288  | 1      | 1      | 1      | 2      | 1      | 0      |
| 12290  | 0      | 0      | 1      | 0      | 0      | 1      |
| 12292  | 1      | 2      | 1      | 0      | 0      | 1      |
| 12294  | 0      | 1      | 0      | 1      | 0      | 1      |
| 12296  | 0      | 0      | 0      | 0      | 1      | 0      |
| 12307  | 0      | 1      | 1      | 1      | 1      | 0      |

| respid | Q56i_1 | Q56j_1 | Q56k_1 | Q56l_1 | Q56m_1 | Q56n_1 |
|--------|--------|--------|--------|--------|--------|--------|
| 12309  | 0      | 0      | 1      | 0      | 0      | 0      |
| 12312  | 1      | 1      | 1      | 1      | 1      | 0      |
| 12317  | 1      | 1      | 1      | 1      | 1      | 2      |
| 12319  | 1      | 2      | 2      | 1      | 1      | 0      |
| 12320  | 0      | 1      | 1      | 1      | 0      | 1      |
| 12322  | 1      | 1      | 1      | 3      | 0      | 0      |
| 12328  | 1      | 2      | 1      | 1      | 1      | 1      |
| 12331  | 2      | 2      | 2      | 1      | 2      | 2      |
| 12332  | 0      | 1      | 0      | 0      | 0      | 1      |
| 12334  | 0      | 0      | 2      | 1      | 0      | 3      |
| 12337  | 1      | 1      | 1      | 0      | 0      | 1      |
| 12338  | 0      | 1      | 1      | 1      | 0      | 0      |
| 12342  | 0      | 0      | 0      | 0      | 0      | 0      |
| 12349  | 0      | 1      | 0      | 0      | 0      | 1      |
| 12352  | 1      | 2      | 1      | 2      | 1      | 2      |
| 12355  | 0      | 2      | 0      | 1      | 0      | 0      |
| 12357  | 1      | 1      | 3      | 0      | 1      | 2      |
| 12358  | 0      | 0      | 0      | 0      | 0      | 1      |
| 12371  | 2      | 2      | 2      | 2      | 1      | 1      |
| 12372  | 0      | 0      | 0      | 2      | 0      | 0      |
| 12373  | 1      | 0      | 0      | 0      | 0      | 0      |
| 12379  | 0      | 0      | 0      | 0      | 0      | 0      |
| 12381  | 2      | 1      | 2      | 1      | 1      | 1      |
| 12383  | 1      | 2      | 1      | 1      | 0      | 1      |
| 12384  | 0      | 0      | 0      | 0      | 0      | 0      |
| 12386  | 1      | 1      | 1      | 0      | 0      | 1      |
| 12389  | 0      | 2      | 0      | 1      | 0      | 0      |
| 12392  | 1      | 1      | 1      | 1      | 1      | 1      |
| 12396  | 0      | 0      | 0      | 0      | 0      | 0      |
| 12397  | 0      | 2      | 0      | 0      | 0      | 0      |
| 12399  | 2      | 2      | 2      | 2      | 1      | 0      |
| 12400  | 1      | 1      | 0      | 1      | 0      | 1      |

| respid | Q56i_1 | Q56j_1 | Q56k_1 | Q56l_1 | Q56m_1 | Q56n_1 |
|--------|--------|--------|--------|--------|--------|--------|
| 12406  | 3      | 0      | 1      | 2      | 2      | 0      |
| 12407  | 0      | 0      | 1      | 1      | 0      | 0      |
| 12410  | 0      | 2      | 1      | 0      | 1      | 0      |
| 12413  | 0      | 1      | 0      | 1      | 0      | 0      |
| 12416  | 1      | 2      | 1      | 1      | 1      | 1      |
| 12419  | 1      | 1      | 0      | 1      | 1      | 0      |
| 12422  | 2      | 2      | 2      | 2      | 2      | 1      |
| 12423  | 0      | 0      | 1      | 0      | 0      | 0      |
| 12429  | 0      | 0      | 0      | 1      | 0      | 0      |
| 12434  | 1      | 0      | 1      | 1      | 1      | 1      |
| 12435  | 0      | 2      | 0      | 0      | 0      | 1      |
| 12436  | 1      | 1      | 1      | 1      | 1      | 1      |
| 12442  | 0      | 0      | 0      | 0      | 0      | 0      |
| 12449  | 1      | 1      | 1      | 1      | 1      | 0      |
| 12451  | 0      | 0      | 0      | 0      | 0      | 0      |
| 12456  | 2      | 3      | 3      | 1      | 3      | 1      |
| 12457  | 0      | 1      | 0      | 0      | 0      | 0      |
| 12458  | 1      | 0      | 1      | 0      | 1      | 0      |
| 12461  | 1      | 1      | 1      | 1      | 1      | 1      |
| 12462  | 0      | 1      | 0      | 0      | 0      | 0      |
| 12463  | 2      | 2      | 2      | 2      | 2      | 2      |
| 12466  | 0      | 0      | 0      | 1      | 0      | 1      |
| 12470  | 1      | 0      | 0      | 0      | 0      | 2      |
| 12471  | 1      | 2      | 1      | 1      | 1      | 1      |
| 12472  | 0      | 3      | 0      | 0      | 0      | 1      |
| 12478  | 1      | 2      | 0      | 1      | 0      | 0      |
| 12479  | 1      | 1      | 1      | 1      | 1      | 1      |
| 12481  | 0      | 1      | 0      | 0      | 0      | 0      |
| 12482  | 1      | 1      | 1      | 0      | 0      | 0      |
| 12483  | 1      | 1      | 1      | 1      | 1      | 0      |
| 12496  | 0      | 1      | 0      | 0      | 0      | 0      |
| 12497  | 1      | 1      | 1      | 2      | 1      | 3      |

| respid | Q56i_1 | Q56j_1 | Q56k_1 | Q56l_1 | Q56m_1 | Q56n_1 |
|--------|--------|--------|--------|--------|--------|--------|
| 12498  | 1      | 0      | 1      | 1      | 1      | 1      |
| 12500  | 1      | 1      | 2      | 1      | 2      | 1      |
| 12501  | 0      | 1      | 0      | 1      | 0      | 1      |
| 12502  | 1      | 1      | 1      | 1      | 1      | 1      |
| 12503  | 0      | 0      | 0      | 0      | 0      | 0      |
| 12505  | 0      | 0      | 1      | 1      | 0      | 0      |
| 12508  | 2      | 0      | 1      | 1      | 2      | 0      |
| 12509  | 1      | 1      | 1      | 1      | 1      | 1      |
| 12510  | 0      | 2      | 0      | 0      | 0      | 0      |
| 12512  | 1      | 0      | 1      | 0      | 1      | 1      |
| 12514  | 1      | 2      | 1      | 1      | 1      | 1      |
| 12515  | 0      | 0      | 0      | 2      | 2      | 0      |
| 12520  | 0      | 0      | 0      | 0      | 0      | 0      |
| 12522  | 0      | 1      | 0      | 1      | 0      | 0      |
| 12526  | 1      | 1      | 2      | 2      | 2      | 1      |
| 12527  | 0      | 0      | 0      | 0      | 0      | 0      |
| 12528  | 0      | 0      | 1      | 0      | 0      | 0      |
| 12530  | 1      | 1      | 1      | 1      | 2      | 1      |
| 12535  | 0      | 1      | 1      | 1      | 0      | 0      |
| 12539  | 0      | 2      | 1      | 1      | 0      | 0      |
| 12541  | 0      | 1      | 1      | 0      | 1      | 1      |
| 12542  | 0      | 1      | 0      | 0      | 0      | 0      |
| 12545  | 1      | 2      | 3      | 3      | 1      | 1      |
| 12547  | 2      | 2      | 1      | 0      | 1      | 1      |
| 12549  | 1      | 2      | 1      | 2      | 2      | 1      |
| 12550  | 1      | 1      | 1      | 1      | 1      | 0      |
| 12555  | 0      | 2      | 1      | 1      | 0      | 0      |
| 12557  | 1      | 1      | 1      | 2      | 1      | 0      |
| 12559  | 2      | 2      | 1      | 1      | 2      | 1      |
| 12561  | 0      | 1      | 1      | 1      | 0      | 0      |
| 12562  | 0      | 2      | 0      | 1      | 1      | 1      |
| 12563  | 0      | 1      | 0      | 1      | 1      | 0      |

| respid | Q56i_1 | Q56j_1 | Q56k_1 | Q56l_1 | Q56m_1 | Q56n_1 |
|--------|--------|--------|--------|--------|--------|--------|
| 12565  | 2      | 3      | 0      | 3      | 3      | 1      |
| 12566  | 1      | 1      | 1      | 1      | 1      | 1      |
| 12570  | 1      | 1      | 1      | 1      | 1      | 1      |
| 12571  | 0      | 3      | 0      | 3      | 0      | 3      |
| 12572  | 1      | 1      | 2      | 1      | 1      | 1      |
| 12578  | 0      | 1      | 0      | 0      | 1      | 0      |
| 12579  | 0      | 2      | 0      | 0      | 0      | 0      |
| 12581  | 0      | 1      | 0      | 1      | 0      | 0      |
| 12582  | 1      | 1      | 1      | 1      | 0      | 0      |
| 12585  | 0      | 1      | 0      | 0      | 0      | 0      |
| 12586  | 0      | 0      | 0      | 0      | 1      | 1      |
| 12588  | 2      | 1      | 2      | 1      | 1      | 1      |
| 12589  | 0      | 0      | 1      | 1      | 0      | 1      |
| 12590  | 0      | 0      | 0      | 0      | 0      | 0      |
| 12591  | 1      | 1      | 2      | 1      | 2      | 0      |
| 12593  | 1      | 2      | 1      | 1      | 2      | 1      |
| 12594  | 1      | 1      | 1      | 1      | 1      | 1      |
| 12599  | 1      | 1      | 1      | 0      | 1      | 0      |
| 12600  | 1      | 0      | 2      | 1      | 1      | 0      |
| 12602  | 1      | 1      | 2      | 2      | 1      | 1      |
| 12606  | 1      | 3      | 2      | 2      | 1      | 3      |
| 12607  | 0      | 3      | 0      | 1      | 0      | 0      |
| 12608  | 0      | 1      | 0      | 1      | 0      | 1      |
| 12610  | 1      | 2      | 2      | 2      | 2      | 2      |
| 12611  | 0      | 0      | 0      | 0      | 0      | 0      |
| 12613  | 2      | 1      | 1      | 1      | 1      | 1      |
| 12616  | 1      | 1      | 1      | 1      | 1      | 0      |
| 12617  | 0      | 2      | 0      | 2      | 1      | 1      |
| 12619  | 0      | 1      | 1      | 1      | 0      | 0      |
| 12622  | 0      | 0      | 0      | 0      | 0      | 0      |
| 12628  | 1      | 0      | 1      | 1      | 1      | 0      |
| 12631  | 0      | 2      | 0      | 0      | 0      | 0      |

| respid | Q56i_1 | Q56j_1 | Q56k_1 | Q56l_1 | Q56m_1 | Q56n_1 |
|--------|--------|--------|--------|--------|--------|--------|
| 12635  | 2      | 2      | 1      | 1      | 2      | 0      |
| 12638  | 0      | 1      | 1      | 1      | 0      | 0      |
| 12639  | 0      | 0      | 0      | 0      | 0      | 0      |
| 12640  | 0      | 0      | 0      | 0      | 1      | 0      |
| 12643  | 0      | 0      | 1      | 0      | 0      | 0      |
| 12646  | 1      | 0      | 1      | 1      | 1      | 1      |
| 12648  | 2      | 3      | 2      | 3      | 3      | 2      |
| 12650  | 1      | 1      | 1      | 1      | 1      | 0      |
| 12651  | 1      | 2      | 1      | 2      | 3      | 1      |
| 12658  | 0      | 0      | 0      | 0      | 0      | 0      |
| 12662  | 1      | 1      | 1      | 1      | 1      | 1      |
| 12663  | 1      | 2      | 1      | 1      | 2      | 1      |
| 12664  | 2      | 2      | 2      | 2      | 2      | 1      |
| 12669  | 1      | 0      | 1      | 0      | 1      | 0      |
| 12670  | 1      | 1      | 1      | 0      | 1      | 0      |
| 12673  | 1      | 2      | 1      | 2      | 1      | 1      |
| 12675  | 0      | 0      | 0      | 0      | 0      | 1      |
| 12677  | 1      | 1      | 1      | 1      | 1      | 0      |
| 12679  | 1      | 2      | 1      | 1      | 0      | 1      |
| 12682  | 1      | 1      | 1      | 2      | 2      | 2      |
| 12696  | 1      | 1      | 1      | 1      | 1      | 1      |
| 12697  | 1      | 1      | 1      | 1      | 1      | 0      |
| 12699  | 0      | 1      | 1      | 0      | 1      | 0      |
| 12700  | 0      | 0      | 1      | 0      | 1      | 0      |
| 12701  | 1      | 1      | 1      | 1      | 1      | 1      |
| 12702  | 1      | 1      | 1      | 1      | 1      | 0      |
| 12704  | 2      | 2      | 2      | 1      | 1      | 1      |
| 12705  | 0      | 0      | 0      | 1      | 0      | 0      |
| 12709  | 0      | 0      | 0      | 0      | 0      | 0      |
| 12710  | 1      | 1      | 1      | 1      | 1      | 0      |
| 12713  | 1      | 1      | 1      | 1      | 1      | 0      |
| 12716  | 2      | 1      | 1      | 1      | 2      | 1      |

| respid | Q56i_1 | Q56j_1 | Q56k_1 | Q56l_1 | Q56m_1 | Q56n_1 |
|--------|--------|--------|--------|--------|--------|--------|
| 12719  | 1      | 0      | 1      | 0      | 1      | 0      |
| 12720  | 1      | 1      | 1      | 1      | 1      | 0      |
| 12723  | 0      | 2      | 0      | 0      | 0      | 0      |
| 12726  | 1      | 1      | 1      | 1      | 1      | 0      |
| 12728  | 1      | 1      | 1      | 1      | 1      | 1      |
| 12729  | 1      | 2      | 1      | 1      | 1      | 0      |
| 12731  | 1      | 1      | 1      | 0      | 1      | 0      |
| 12732  | 1      | 1      | 0      | 1      | 1      | 1      |
| 12733  | 0      | 0      | 0      | 0      | 0      | 0      |
| 12736  | 0      | 0      | 0      | 2      | 0      | 0      |
| 12737  | 0      | 1      | 1      | 1      | 0      | 0      |
| 12739  | 1      | 2      | 1      | 2      | 2      | 0      |
| 12742  | 1      | 1      | 0      | 1      | 1      | 0      |
| 12743  | 2      | 3      | 2      | 2      | 2      | 2      |
| 12744  | 1      | 1      | 1      | 1      | 0      | 0      |
| 12747  | 1      | 2      | 1      | 1      | 2      | 1      |
| 12751  | 0      | 1      | 0      | 0      | 1      | 0      |
| 12754  | 1      | 1      | 1      | 0      | 1      | 0      |
| 12756  | 1      | 2      | 2      | 2      | 1      | 1      |
| 12757  | 1      | 1      | 1      | 1      | 1      | 0      |
| 12760  | 1      | 2      | 1      | 2      | 2      | 1      |
| 12761  | 0      | 1      | 0      | 1      | 1      | 0      |
| 12762  | 0      | 0      | 1      | 0      | 1      | 0      |
| 12766  | 0      | 1      | 1      | 0      | 1      | 1      |
| 12769  | 0      | 0      | 0      | 0      | 0      | 0      |
| 12770  | 1      | 0      | 1      | 0      | 0      | 1      |
| 12773  | 2      | 3      | 2      | 2      | 2      | 1      |
| 12780  | 1      | 1      | 1      | 1      | 1      | 2      |
| 12789  | 2      | 1      | 2      | 1      | 1      | 2      |
| 12792  | 1      | 1      | 2      | 2      | 2      | 1      |
| 12795  | 1      | 0      | 1      | 0      | 1      | 0      |
| 12804  | 0      | 2      | 1      | 1      | 2      | 1      |

| respid | Q56i_1 | Q56j_1 | Q56k_1 | Q56l_1 | Q56m_1 | Q56n_1 |
|--------|--------|--------|--------|--------|--------|--------|
| 12811  | 1      | 1      | 1      | 1      | 1      | 1      |
| 12813  | 1      | 1      | 1      | 2      | 1      | 1      |
| 12814  | 2      | 2      | 2      | 1      | 2      | 2      |
| 12815  | 1      | 2      | 0      | 0      | 0      | 0      |
| 12816  | 0      | 2      | 0      | 0      | 1      | 0      |
| 12817  | 0      | 1      | 1      | 1      | 0      | 0      |
| 12818  | 0      | 1      | 1      | 2      | 0      | 0      |
| 12819  | 0      | 0      | 0      | 0      | 0      | 0      |
| 12820  | 0      | 1      | 0      | 1      | 0      | 0      |
| 12821  | 1      | 0      | 0      | 0      | 0      | 0      |
| 12824  | 0      | 1      | 0      | 0      | 0      | 1      |
| 12827  | 1      | 1      | 1      | 1      | 1      | 0      |
| 12836  | 2      | 2      | 2      | 2      | 2      | 1      |
| 12837  | 1      | 1      | 1      | 2      | 1      | 1      |
| 12838  | 0      | 1      | 2      | 2      | 0      | 1      |
| 12845  | 1      | 1      | 1      | 1      | 1      | 0      |
| 12847  | 1      | 2      | 0      | 0      | 1      | 0      |
| 12849  | 1      | 0      | 1      | 1      | 2      | 0      |
| 12850  | 1      | 0      | 0      | 0      | 0      | 0      |
| 12852  | 0      | 0      | 0      | 0      | 0      | 0      |
| 12853  | 1      | 2      | 1      | 2      | 2      | 1      |
| 12854  | 0      | 1      | 0      | 1      | 0      | 0      |
| 12860  | 0      | 0      | 0      | 0      | 0      | 0      |
| 12861  | 1      | 1      | 0      | 0      | 0      | 0      |
| 12863  | 0      | 0      | 0      | 0      | 0      | 0      |
| 12865  | 1      | 0      | 1      | 1      | 1      | 0      |
| 12870  | 0      | 1      | 0      | 1      | 0      | 1      |
| 12871  | 0      | 0      | 0      | 0      | 0      | 0      |
| 12873  | 1      | 1      | 0      | 1      | 1      | 2      |
| 12877  | 1      | 0      | 1      | 1      | 1      | 0      |
| 12880  | 1      | 1      | 1      | 2      | 1      | 1      |
| 12881  | 2      | 1      | 1      | 2      | 1      | 1      |



| respid | Q56i_1 | Q56j_1 | Q56k_1 | Q56l_1 | Q56m_1 | Q56n_1 |
|--------|--------|--------|--------|--------|--------|--------|
| 12882  | 0      | 0      | 1      | 0      | 0      | 0      |
| 12883  | 0      | 2      | 1      | 2      | 0      | 2      |
| 12885  | 1      | 1      | 1      | 1      | 1      | 1      |
| 12887  | 1      | 0      | 1      | 1      | 1      | 1      |
| 12889  | 0      | 2      | 0      | 1      | 0      | 1      |
| 12890  | 1      | 0      | 1      | 2      | 1      | 1      |
| 12891  | 0      | 1      | 0      | 1      | 0      | 0      |
| 12892  | 0      | 2      | 1      | 1      | 1      | 2      |
| 12893  | 0      | 0      | 0      | 0      | 0      | 0      |
| 12895  | 1      | 1      | 1      | 1      | 1      | 1      |
| 12898  | 1      | 1      | 0      | 0      | 1      | 0      |
| 12907  | 1      | 1      | 1      | 1      | 1      | 0      |
| 12908  | 1      | 2      | 1      | 1      | 0      | 1      |
| 12909  | 0      | 0      | 0      | 0      | 0      | 0      |
| 12914  | 0      | 0      | 0      | 1      | 0      | 0      |
| 12915  | 1      | 1      | 1      | 2      | 0      | 1      |
| 12916  | 1      | 2      | 1      | 1      | 1      | 1      |
| 12921  | 1      | 1      | 1      | 1      | 1      | 0      |
| 12922  | 0      | 1      | 0      | 0      | 0      | 0      |
| 12923  | 1      | 1      | 1      | 2      | 1      | 0      |
| 12926  | 1      | 1      | 1      | 1      | 1      | 1      |
| 12927  | 0      | 1      | 0      | 0      | 1      | 0      |
| 12932  | 0      | 0      | 1      | 0      | 1      | 0      |
| 12936  | 1      | 1      | 1      | 1      | 1      | 1      |
| 12937  | 0      | 1      | 1      | 2      | 0      | 2      |
| 12938  | 2      | 2      | 2      | 2      | 1      | 2      |
| 12939  | 0      | 0      | 0      | 0      | 0      | 0      |
| 12940  | 1      | 1      | 1      | 1      | 1      | 1      |
| 12945  | 1      | 1      | 1      | 1      | 1      | 1      |
| 12946  | 1      | 2      | 1      | 2      | 0      | 0      |
| 12947  | 1      | 1      | 1      | 2      | 1      | 1      |
| 12948  | 1      | 1      | 1      | 1      | 1      | 1      |

| respid | Q56i_1 | Q56j_1 | Q56k_1 | Q56l_1 | Q56m_1 | Q56n_1 |
|--------|--------|--------|--------|--------|--------|--------|
| 12951  | 0      | 1      | 1      | 2      | 0      | 2      |
| 12952  | 1      | 2      | 1      | 1      | 0      | 2      |
| 12954  | 2      | 2      | 1      | 1      | 1      | 1      |
| 12960  | 1      | 1      | 1      | 0      | 1      | 0      |
| 12961  | 2      | 1      | 1      | 1      | 1      | 1      |
| 12962  | 0      | 1      | 0      | 0      | 0      | 0      |
| 12963  | 0      | 0      | 0      | 0      | 0      | 0      |
| 12964  | 1      | 2      | 1      | 1      | 0      | 0      |
| 12966  | 1      | 3      | 1      | 1      | 1      | 0      |
| 12967  | 1      | 0      | 1      | 1      | 0      | 0      |
| 12969  | 1      | 1      | 1      | 1      | 0      | 2      |
| 12970  | 0      | 0      | 0      | 0      | 0      | 0      |
| 12974  | 1      | 1      | 1      | 1      | 1      | 1      |
| 12979  | 0      | 0      | 0      | 1      | 0      | 1      |
| 12980  | 2      | 1      | 1      | 1      | 1      | 0      |
| 12983  | 0      | 0      | 0      | 1      | 0      | 0      |
| 12988  | 1      | 2      | 1      | 0      | 1      | 0      |
| 12994  | 2      | 2      | 1      | 1      | 1      | 0      |
| 12995  | 0      | 0      | 0      | 0      | 0      | 0      |
| 12996  | 0      | 0      | 1      | 1      | 0      | 0      |
| 12998  | 0      | 0      | 0      | 1      | 1      | 0      |
| 12999  | 1      | 0      | 1      | 0      | 1      | 0      |
| 13001  | 1      | 1      | 1      | 0      | 1      | 0      |
| 13005  | 1      | 1      | 1      | 2      | 1      | 1      |
| 13006  | 0      | 1      | 0      | 1      | 2      | 2      |
| 13007  | 1      | 2      | 1      | 2      | 1      | 0      |
| 13011  | 1      | 1      | 1      | 1      | 1      | 1      |
| 13012  | 0      | 0      | 0      | 1      | 0      | 0      |
| 13013  | 1      | 0      | 1      | 1      | 1      | 1      |
| 13016  | 0      | 1      | 2      | 2      | 0      | 0      |
| 13018  | 0      | 0      | 0      | 0      | 0      | 0      |
| 13020  | 0      | 0      | 0      | 3      | 0      | 1      |

| respid | Q56i_1 | Q56j_1 | Q56k_1 | Q56l_1 | Q56m_1 | Q56n_1 |
|--------|--------|--------|--------|--------|--------|--------|
| 13024  | 0      | 1      | 0      | 0      | 0      | 0      |
| 13025  | 3      | 2      | 1      | 1      | 0      | 0      |
| 13027  | 0      | 2      | 0      | 1      | 0      | 0      |
| 13031  | 1      | 1      | 1      | 1      | 1      | 2      |
| 13032  | 1      | 0      | 1      | 1      | 1      | 1      |
| 13034  | 1      | 2      | 1      | 1      | 0      | 0      |
| 13036  | 1      | 0      | 0      | 0      | 0      | 0      |
| 13037  | 0      | 2      | 0      | 1      | 0      | 0      |
| 13038  | 2      | 2      | 3      | 1      | 2      | 0      |
| 13039  | 1      | 3      | 1      | 1      | 1      | 3      |
| 13040  | 1      | 1      | 1      | 2      | 1      | 1      |
| 13041  | 0      | 1      | 1      | 1      | 0      | 0      |
| 13045  | 1      | 1      | 1      | 2      | 2      | 1      |
| 13046  | 0      | 2      | 1      | 1      | 1      | 0      |
| 13048  | 0      | 0      | 0      | 1      | 0      | 1      |
| 13051  | 1      | 2      | 1      | 1      | 1      | 2      |
| 13053  | 1      | 1      | 1      | 0      | 0      | 0      |
| 13055  | 2      | 1      | 1      | 2      | 1      | 1      |
| 13059  | 1      | 2      | 1      | 3      | 0      | 2      |
| 13068  | 1      | 1      | 1      | 1      | 1      | 0      |
| 13069  | 0      | 0      | 0      | 1      | 0      | 1      |
| 13076  | 1      | 1      | 2      | 1      | 1      | 1      |
| 13081  | 1      | 1      | 1      | 1      | 1      | 0      |
| 13082  | 1      | 0      | 1      | 0      | 0      | 0      |
| 13084  | 1      | 1      | 1      | 2      | 1      | 1      |
| 13085  | 0      | 1      | 0      | 1      | 0      | 1      |
| 13086  | 1      | 0      | 1      | 0      | 1      | 0      |
| 13093  | 1      | 2      | 1      | 2      | 1      | 0      |
| 13094  | 1      | 1      | 1      | 1      | 1      | 1      |
| 13097  | 0      | 0      | 0      | 1      | 1      | 1      |
| 13098  | 0      | 1      | 0      | 1      | 0      | 0      |
| 13099  | 1      | 0      | 1      | 1      | 1      | 0      |

| respid | Q56i_1 | Q56j_1 | Q56k_1 | Q56l_1 | Q56m_1 | Q56n_1 |
|--------|--------|--------|--------|--------|--------|--------|
| 13100  | 0      | 1      | 1      | 2      | 0      | 1      |
| 13101  | 1      | 1      | 2      | 2      | 1      | 0      |
| 13103  | 0      | 1      | 0      | 1      | 0      | 0      |
| 13105  | 0      | 0      | 1      | 2      | 0      | 1      |
| 13106  | 1      | 0      | 1      | 0      | 0      | 1      |
| 13107  | 1      | 0      | 1      | 1      | 1      | 0      |
| 13110  | 1      | 1      | 1      | 2      | 0      | 1      |
| 13118  | 1      | 1      | 2      | 1      | 1      | 1      |
| 13120  | 1      | 2      | 1      | 1      | 1      | 0      |
| 13130  | 0      | 0      | 0      | 1      | 0      | 1      |
| 13133  | 1      | 2      | 1      | 1      | 0      | 1      |
| 13134  | 0      | 2      | 0      | 0      | 0      | 1      |
| 13139  | 1      | 1      | 1      | 1      | 1      | 0      |
| 13142  | 1      | 1      | 1      | 1      | 0      | 0      |
| 13143  | 1      | 0      | 1      | 2      | 1      | 1      |
| 13145  | 1      | 1      | 1      | 1      | 1      | 1      |
| 13148  | 0      | 1      | 1      | 1      | 0      | 0      |
| 13149  | 0      | 0      | 0      | 0      | 0      | 0      |
| 13151  | 1      | 2      | 1      | 2      | 0      | 1      |
| 13153  | 0      | 2      | 0      | 1      | 0      | 1      |
| 13158  | 1      | 0      | 1      | 1      | 1      | 1      |
| 13160  | 0      | 1      | 0      | 0      | 0      | 0      |
| 13162  | 1      | 2      | 1      | 1      | 1      | 0      |
| 13169  | 0      | 1      | 0      | 0      | 0      | 0      |
| 13172  | 0      | 1      | 1      | 1      | 0      | 0      |
| 13173  | 1      | 0      | 1      | 1      | 1      | 1      |
| 13176  | 0      | 0      | 0      | 0      | 0      | 0      |
| 13179  | 0      | 0      | 0      | 1      | 1      | 1      |
| 13184  | 1      | 1      | 0      | 1      | 0      | 1      |
| 13185  | 1      | 1      | 1      | 1      | 1      | 0      |
| 13186  | 0      | 0      | 0      | 0      | 0      | 2      |
| 13188  | 0      | 0      | 0      | 0      | 0      | 1      |

| respid | Q56i_1 | Q56j_1 | Q56k_1 | Q56l_1 | Q56m_1 | Q56n_1 |
|--------|--------|--------|--------|--------|--------|--------|
| 13190  | 0      | 1      | 2      | 0      | 0      | 0      |
| 13192  | 0      | 2      | 0      | 0      | 0      | 0      |
| 13193  | 0      | 3      | 0      | 1      | 0      | 0      |
| 13201  | 1      | 1      | 1      | 1      | 1      | 0      |
| 13207  | 1      | 0      | 1      | 0      | 0      | 1      |
| 13208  | 0      | 0      | 0      | 0      | 0      | 0      |
| 13209  | 1      | 2      | 1      | 2      | 1      | 1      |
| 13212  | 0      | 0      | 1      | 1      | 0      | 0      |
| 13215  | 1      | 1      | 2      | 2      | 2      | 1      |
| 13218  | 1      | 1      | 1      | 1      | 0      | 0      |
| 13219  | 0      | 0      | 0      | 0      | 0      | 0      |
| 13224  | 1      | 1      | 1      | 1      | 1      | 0      |
| 13225  | 0      | 2      | 1      | 1      | 0      | 0      |
| 13226  | 1      | 1      | 1      | 1      | 1      | 1      |
| 13232  | 0      | 1      | 1      | 2      | 0      | 0      |
| 13237  | 1      | 1      | 1      | 3      | 2      | 1      |
| 13239  | 1      | 1      | 1      | 1      | 1      | 1      |
| 13241  | 1      | 0      | 0      | 1      | 1      | 2      |
| 13243  | 1      | 0      | 1      | 1      | 0      | 1      |
| 13247  | 2      | 2      | 1      | 2      | 1      | 0      |
| 13248  | 0      | 0      | 0      | 0      | 0      | 0      |
| 13251  | 0      | 1      | 0      | 0      | 0      | 0      |
| 13256  | 0      | 1      | 1      | 0      | 0      | 0      |
| 13260  | 1      | 2      | 1      | 1      | 1      | 0      |
| 13261  | 0      | 1      | 1      | 2      | 0      | 1      |
| 13264  | 0      | 1      | 1      | 1      | 0      | 0      |
| 13273  | 1      | 1      | 1      | 1      | 0      | 1      |
| 13274  | 1      | 0      | 1      | 0      | 1      | 0      |
| 13276  | 1      | 1      | 1      | 1      | 1      | 0      |
| 13278  | 1      | 1      | 1      | 1      | 1      | 2      |
| 13279  | 0      | 1      | 0      | 0      | 0      | 0      |
| 13282  | 0      | 0      | 0      | 1      | 0      | 0      |

| respid | Q56i_1 | Q56j_1 | Q56k_1 | Q56l_1 | Q56m_1 | Q56n_1 |
|--------|--------|--------|--------|--------|--------|--------|
| 13283  | 2      | 1      | 2      | 1      | 1      | 1      |
| 13285  | 0      | 0      | 0      | 0      | 0      | 0      |
| 13286  | 1      | 3      | 0      | 1      | 1      | 1      |
| 13299  | 1      | 1      | 0      | 1      | 1      | 1      |
| 13300  | 1      | 2      | 1      | 2      | 1      | 1      |
| 13301  | 1      | 1      | 1      | 1      | 0      | 2      |
| 13303  | 1      | 0      | 1      | 1      | 1      | 0      |
| 13304  | 0      | 0      | 0      | 0      | 0      | 0      |
| 13307  | 1      | 1      | 2      | 1      | 1      | 1      |
| 13308  | 0      | 0      | 0      | 0      | 0      | 0      |
| 13312  | 0      | 2      | 1      | 1      | 0      | 1      |
| 13313  | 1      | 2      | 0      | 1      | 0      | 0      |
| 13314  | 2      | 2      | 2      | 2      | 2      | 1      |
| 13318  | 1      | 1      | 1      | 1      | 0      | 1      |
| 13320  | 1      | 1      | 2      | 2      | 1      | 1      |
| 13322  | 2      | 2      | 2      | 2      | 2      | 1      |
| 13324  | 0      | 0      | 2      | 0      | 0      | 0      |
| 13325  | 0      | 0      | 0      | 1      | 0      | 0      |
| 13327  | 0      | 1      | 0      | 0      | 0      | 0      |
| 13330  | 0      | 1      | 0      | 1      | 0      | 0      |
| 13332  | 1      | 3      | 1      | 2      | 1      | 1      |
| 13333  | 0      | 2      | 1      | 1      | 1      | 1      |
| 13334  | 0      | 2      | 0      | 0      | 1      | 0      |
| 13351  | 1      | 0      | 0      | 1      | 1      | 0      |
| 13353  | 0      | 1      | 1      | 1      | 0      | 0      |
| 13354  | 0      | 0      | 0      | 0      | 0      | 0      |
| 13355  | 2      | 2      | 0      | 1      | 0      | 1      |
| 13358  | 0      | 0      | 0      | 1      | 0      | 0      |
| 13359  | 1      | 0      | 1      | 2      | 1      | 0      |
| 13360  | 1      | 1      | 1      | 1      | 1      | 1      |
| 13364  | 0      | 0      | 3      | 2      | 0      | 0      |
| 13365  | 1      | 1      | 1      | 1      | 1      | 1      |

| respid | Q56i_1 | Q56j_1 | Q56k_1 | Q56l_1 | Q56m_1 | Q56n_1 |
|--------|--------|--------|--------|--------|--------|--------|
| 13368  | 1      | 2      | 1      | 1      | 1      | 0      |
| 13370  | 0      | 1      | 1      | 1      | 0      | 2      |
| 13375  | 1      | 2      | 1      | 1      | 1      | 2      |
| 13384  | 0      | 1      | 0      | 0      | 0      | 0      |
| 13387  | 1      | 1      | 1      | 1      | 1      | 1      |
| 13395  | 1      | 2      | 1      | 1      | 0      | 1      |
| 13398  | 0      | 1      | 1      | 1      | 1      | 1      |
| 13404  | 0      | 0      | 0      | 1      | 0      | 0      |
| 13405  | 0      | 1      | 0      | 1      | 0      | 0      |
| 13408  | 0      | 0      | 0      | 0      | 0      | 0      |
| 13411  | 1      | 1      | 0      | 3      | 0      | 1      |
| 13413  | 0      | 0      | 0      | 0      | 0      | 0      |
| 13419  | 1      | 1      | 0      | 1      | 0      | 0      |
| 13420  | 0      | 2      | 0      | 1      | 0      | 0      |
| 13427  | 1      | 1      | 1      | 1      | 1      | 1      |
| 13441  | 2      | 2      | 1      | 2      | 2      | 2      |
| 13444  | 2      | 2      | 2      | 1      | 1      | 2      |
| 13456  | 0      | 0      | 0      | 0      | 0      | 0      |
| 13466  | 1      | 2      | 1      | 2      | 1      | 0      |
| 13468  | 0      | 1      | 1      | 0      | 0      | 0      |
| 13475  | 0      | 0      | 0      | 0      | 0      | 0      |
| 13484  | 0      | 1      | 1      | 0      | 0      | 1      |
| 13486  | 1      | 0      | 1      | 1      | 1      | 0      |
| 13487  | 0      | 1      | 0      | 3      | 0      | 1      |
| 13491  | 0      | 1      | 0      | 1      | 0      | 0      |
| 13496  | 0      | 1      | 1      | 1      | 0      | 1      |
| 13497  | 1      | 1      | 1      | 1      | 1      | 1      |
| 13498  | 0      | 0      | 1      | 1      | 0      | 0      |
| 13502  | 1      | 1      | 1      | 2      | 1      | 1      |
| 13503  | 1      | 1      | 1      | 1      | 1      | 1      |
| 13505  | 1      | 2      | 1      | 1      | 1      | 0      |
| 13509  | 0      | 0      | 1      | 0      | 0      | 1      |

| respid | Q56i_1 | Q56j_1 | Q56k_1 | Q56l_1 | Q56m_1 | Q56n_1 |
|--------|--------|--------|--------|--------|--------|--------|
| 13510  | 2      | 0      | 3      | 3      | 3      | 1      |
| 13518  | 0      | 1      | 2      | 1      | 2      | 0      |
| 13521  | 0      | 0      | 0      | 1      | 0      | 0      |
| 13523  | 1      | 1      | 1      | 2      | 1      | 0      |
| 13528  | 1      | 1      | 1      | 1      | 0      | 1      |
| 13531  | 2      | 0      | 1      | 1      | 1      | 1      |
| 13532  | 0      | 2      | 0      | 1      | 1      | 1      |
| 13533  | 1      | 0      | 1      | 2      | 0      | 2      |
| 13534  | 0      | 1      | 0      | 1      | 0      | 1      |
| 13535  | 0      | 1      | 1      | 2      | 0      | 1      |
| 13538  | 1      | 1      | 1      | 1      | 1      | 2      |
| 13540  | 1      | 2      | 1      | 2      | 1      | 0      |
| 13541  | 2      | 1      | 1      | 1      | 1      | 1      |
| 13542  | 0      | 3      | 2      | 3      | 0      | 1      |
| 13550  | 1      | 1      | 1      | 1      | 0      | 1      |
| 13553  | 1      | 0      | 1      | 1      | 1      | 1      |
| 13554  | 0      | 0      | 0      | 0      | 0      | 0      |
| 13555  | 1      | 2      | 1      | 2      | 1      | 2      |
| 13556  | 2      | 2      | 1      | 2      | 2      | 1      |
| 13563  | 1      | 2      | 1      | 1      | 0      | 1      |
| 13564  | 1      | 2      | 1      | 1      | 1      | 1      |
| 13567  | 1      | 2      | 1      | 2      | 1      | 1      |
| 13568  | 0      | 2      | 1      | 2      | 2      | 0      |
| 13570  | 0      | 0      | 0      | 0      | 0      | 0      |
| 13573  | 1      | 1      | 1      | 1      | 1      | 1      |
| 13575  | 0      | 1      | 0      | 1      | 0      | 0      |
| 13577  | 1      | 2      | 1      | 2      | 2      | 2      |
| 13580  | 0      | 2      | 1      | 2      | 1      | 0      |
| 13582  | 0      | 1      | 0      | 0      | 0      | 0      |
| 13584  | 1      | 2      | 1      | 2      | 2      | 0      |
| 13585  | 1      | 0      | 2      | 2      | 1      | 0      |
| 13586  | 1      | 1      | 1      | 0      | 2      | 0      |



| respid | Q56i_1 | Q56j_1 | Q56k_1 | Q56l_1 | Q56m_1 | Q56n_1 |
|--------|--------|--------|--------|--------|--------|--------|
| 13587  | 0      | 2      | 1      | 1      | 0      | 0      |
| 13592  | 1      | 2      | 1      | 2      | 2      | 0      |
| 13596  | 0      | 0      | 0      | 0      | 1      | 0      |
| 13597  | 0      | 0      | 0      | 1      | 0      | 1      |
| 13599  | 2      | 2      | 2      | 1      | 1      | 2      |
| 13601  | 1      | 1      | 1      | 2      | 1      | 1      |
| 13604  | 1      | 2      | 2      | 1      | 1      | 0      |
| 13608  | 1      | 3      | 1      | 0      | 0      | 0      |
| 13616  | 0      | 1      | 1      | 1      | 1      | 1      |
| 13618  | 1      | 1      | 1      | 1      | 1      | 0      |
| 13619  | 0      | 1      | 0      | 1      | 1      | 0      |
| 13626  | 0      | 0      | 0      | 0      | 0      | 0      |
| 13628  | 1      | 1      | 1      | 0      | 1      | 0      |
| 13640  | 1      | 1      | 1      | 1      | 1      | 1      |
| 13645  | 0      | 1      | 0      | 0      | 1      | 1      |
| 13648  | 0      | 2      | 0      | 0      | 0      | 0      |
| 13653  | 0      | 0      | 0      | 0      | 0      | 0      |
| 13655  | 1      | 1      | 1      | 0      | 1      | 0      |
| 13662  | 0      | 0      | 0      | 0      | 1      | 0      |
| 13670  | 0      | 0      | 1      | 0      | 1      | 1      |
| 13673  | 1      | 1      | 1      | 2      | 1      | 0      |
| 13674  | 0      | 3      | 2      | 1      | 0      | 1      |
| 13675  | 1      | 2      | 2      | 0      | 0      | 3      |
| 13678  | 1      | 1      | 1      | 0      | 1      | 0      |
| 13680  | 0      | 0      | 0      | 0      | 1      | 0      |
| 13681  | 1      | 1      | 1      | 1      | 0      | 1      |
| 13683  | 1      | 0      | 1      | 1      | 0      | 1      |
| 13684  | 0      | 0      | 1      | 1      | 0      | 0      |
| 13685  | 0      | 0      | 1      | 1      | 1      | 0      |
| 13687  | 0      | 0      | 0      | 0      | 0      | 0      |
| 13690  | 1      | 2      | 1      | 1      | 1      | 1      |
| 13700  | 1      | 2      | 1      | 1      | 1      | 2      |

| respid | Q56i_1 | Q56j_1 | Q56k_1 | Q56l_1 | Q56m_1 | Q56n_1 |
|--------|--------|--------|--------|--------|--------|--------|
| 13705  | 0      | 3      | 0      | 1      | 0      | 0      |
| 13710  | 0      | 1      | 0      | 0      | 0      | 0      |
| 13711  | 0      | 2      | 0      | 1      | 0      | 0      |
| 13713  | 0      | 0      | 0      | 0      | 0      | 0      |
| 13716  | 0      | 0      | 0      | 0      | 0      | 0      |
| 13721  | 0      | 2      | 1      | 1      | 1      | 1      |
| 13722  | 0      | 1      | 1      | 0      | 0      | 0      |
| 13723  | 0      | 0      | 0      | 0      | 0      | 0      |
| 13726  | 1      | 1      | 1      | 1      | 0      | 1      |
| 13728  | 1      | 1      | 1      | 1      | 1      | 1      |
| 13730  | 1      | 1      | 1      | 1      | 1      | 1      |
| 13734  | 1      | 2      | 1      | 1      | 1      | 1      |
| 13736  | 1      | 0      | 2      | 1      | 1      | 0      |
| 13737  | 1      | 0      | 1      | 1      | 1      | 0      |
| 13739  | 1      | 0      | 1      | 0      | 1      | 1      |
| 13742  | 0      | 1      | 1      | 1      | 0      | 0      |
| 13746  | 0      | 1      | 2      | 1      | 0      | 1      |
| 13747  | 0      | 1      | 1      | 1      | 1      | 1      |
| 13749  | 0      | 1      | 1      | 0      | 0      | 0      |
| 13751  | 0      | 2      | 1      | 0      | 0      | 0      |
| 13752  | 1      | 1      | 1      | 1      | 1      | 0      |
| 13756  | 1      | 1      | 2      | 1      | 1      | 1      |
| 13757  | 0      | 0      | 0      | 0      | 0      | 3      |
| 13767  | 1      | 1      | 0      | 1      | 1      | 0      |
| 13771  | 0      | 0      | 0      | 0      | 0      | 0      |
| 13772  | 1      | 1      | 1      | 1      | 1      | 0      |
| 13779  | 0      | 2      | 0      | 0      | 0      | 0      |
| 13782  | 0      | 2      | 0      | 1      | 1      | 1      |
| 13783  | 1      | 0      | 1      | 0      | 1      | 1      |
| 13785  | 1      | 0      | 2      | 2      | 1      | 1      |
| 13786  | 3      | 2      | 3      | 2      | 3      | 2      |
| 13792  | 1      | 2      | 2      | 2      | 2      | 1      |

| respid | Q56i_1 | Q56j_1 | Q56k_1 | Q56l_1 | Q56m_1 | Q56n_1 |
|--------|--------|--------|--------|--------|--------|--------|
| 13796  | 0      | 0      | 0      | 0      | 0      | 0      |
| 13798  | 1      | 0      | 1      | 2      | 1      | 1      |
| 13799  | 1      | 1      | 1      | 1      | 1      | 0      |
| 13804  | 1      | 3      | 1      | 0      | 1      | 0      |
| 13805  | 1      | 0      | 1      | 1      | 1      | 0      |
| 13810  | 1      | 0      | 1      | 1      | 1      | 1      |
| 13811  | 0      | 1      | 0      | 0      | 0      | 0      |
| 13819  | 1      | 1      | 1      | 1      | 1      | 0      |
| 13821  | 1      | 2      | 1      | 2      | 1      | 0      |
| 13824  | 2      | 3      | 1      | 1      | 1      | 2      |
| 13828  | 1      | 1      | 1      | 3      | 1      | 0      |
| 13829  | 2      | 1      | 1      | 2      | 3      | 2      |
| 13831  | 0      | 0      | 0      | 0      | 0      | 0      |
| 13833  | 1      | 2      | 1      | 1      | 1      | 1      |
| 13835  | 1      | 1      | 1      | 0      | 1      | 0      |
| 13838  | 0      | 0      | 0      | 0      | 0      | 0      |
| 13839  | 3      | 3      | 2      | 3      | 3      | 2      |
| 13845  | 0      | 0      | 0      | 0      | 0      | 0      |
| 13846  | 1      | 1      | 1      | 1      | 1      | 0      |
| 13853  | 1      | 1      | 0      | 0      | 1      | 0      |
| 13855  | 0      | 1      | 1      | 1      | 1      | 0      |
| 13858  | 1      | 1      | 1      | 1      | 2      | 0      |
| 13860  | 0      | 0      | 0      | 0      | 0      | 0      |
| 13865  | 3      | 3      | 3      | 3      | 3      | 3      |
| 13870  | 0      | 0      | 0      | 0      | 0      | 0      |
| 13872  | 2      | 0      | 2      | 1      | 2      | 1      |
| 13873  | 1      | 1      | 1      | 1      | 1      | 1      |
| 13874  | 0      | 1      | 0      | 1      | 0      | 0      |
| 13875  | 1      | 1      | 0      | 1      | 1      | 0      |
| 13881  | 0      | 0      | 0      | 0      | 0      | 0      |
| 13887  | 1      | 0      | 1      | 1      | 1      | 1      |
| 13888  | 1      | 1      | 1      | 1      | 1      | 1      |

| respid | Q56i_1 | Q56j_1 | Q56k_1 | Q56l_1 | Q56m_1 | Q56n_1 |
|--------|--------|--------|--------|--------|--------|--------|
| 13889  | 1      | 2      | 2      | 2      | 1      | 1      |
| 13895  | 1      | 2      | 1      | 2      | 1      | 1      |
| 13897  | 0      | 0      | 0      | 0      | 0      | 0      |
| 13898  | 1      | 1      | 1      | 1      | 1      | 1      |
| 13901  | 0      | 0      | 0      | 1      | 0      | 0      |
| 13902  | 2      | 3      | 2      | 2      | 1      | 1      |
| 13903  | 0      | 0      | 0      | 0      | 0      | 1      |
| 13905  | 1      | 2      | 1      | 1      | 1      | 1      |
| 13908  | 2      | 2      | 2      | 2      | 2      | 2      |
| 13909  | 1      | 1      | 1      | 1      | 1      | 1      |
| 13910  | 2      | 2      | 1      | 2      | 2      | 1      |
| 13911  | 0      | 0      | 0      | 0      | 0      | 0      |
| 13914  | 2      | 2      | 2      | 2      | 2      | 2      |
| 13920  | 2      | 3      | 2      | 2      | 2      | 3      |
| 13926  | 0      | 1      | 1      | 3      | 2      | 3      |
| 13929  | 0      | 1      | 0      | 1      | 1      | 0      |
| 13930  | 1      | 2      | 1      | 2      | 1      | 1      |
| 13931  | 0      | 1      | 0      | 0      | 0      | 0      |
| 13932  | 1      | 3      | 1      | 1      | 0      | 0      |
| 13934  | 2      | 2      | 2      | 1      | 2      | 2      |
| 13938  | 0      | 2      | 0      | 0      | 0      | 0      |
| 13942  | 0      | 1      | 1      | 1      | 1      | 0      |
| 13945  | 1      | 2      | 2      | 2      | 2      | 2      |
| 13947  | 1      | 2      | 2      | 2      | 1      | 1      |
| 13948  | 1      | 0      | 0      | 0      | 0      | 0      |
| 13959  | 0      | 1      | 0      | 1      | 0      | 0      |
| 13962  | 0      | 2      | 0      | 1      | 0      | 2      |
| 13963  | 0      | 1      | 0      | 0      | 0      | 0      |
| 13964  | 1      | 0      | 1      | 1      | 1      | 1      |
| 13966  | 1      | 1      | 0      | 1      | 1      | 0      |
| 13968  | 0      | 1      | 0      | 1      | 1      | 0      |
| 13971  | 1      | 1      | 1      | 1      | 1      | 1      |

| respid | Q56i_1 | Q56j_1 | Q56k_1 | Q56l_1 | Q56m_1 | Q56n_1 |
|--------|--------|--------|--------|--------|--------|--------|
| 13979  | 1      | 1      | 1      | 1      | 1      | 1      |
| 13980  | 1      | 1      | 1      | 1      | 1      | 2      |
| 13981  | 0      | 1      | 0      | 1      | 1      | 0      |
| 13982  | 0      | 1      | 1      | 2      | 0      | 3      |
| 13984  | 1      | 1      | 1      | 1      | 0      | 1      |
| 13989  | 0      | 0      | 0      | 0      | 0      | 0      |
| 13990  | 0      | 1      | 0      | 0      | 1      | 0      |
| 13992  | 3      | 3      | 3      | 3      | 3      | 3      |
| 13998  | 1      | 1      | 2      | 1      | 1      | 2      |
| 13999  | 1      | 2      | 1      | 2      | 2      | 2      |
| 14000  | 1      | 0      | 1      | 1      | 1      | 1      |
| 14003  | 1      | 2      | 1      | 0      | 0      | 1      |
| 14004  | 1      | 1      | 1      | 1      | 1      | 2      |
| 14006  | 0      | 1      | 0      | 1      | 0      | 1      |
| 14007  | 0      | 1      | 1      | 2      | 0      | 1      |
| 14008  | 0      | 0      | 0      | 0      | 0      | 0      |
| 14013  | 1      | 0      | 0      | 1      | 1      | 0      |
| 14015  | 0      | 0      | 0      | 0      | 0      | 3      |
| 14018  | 0      | 0      | 0      | 0      | 0      | 0      |
| 14021  | 1      | 0      | 0      | 1      | 0      | 1      |
| 14023  | 1      | 2      | 0      | 2      | 0      | 1      |
| 14024  | 1      | 2      | 1      | 0      | 1      | 2      |
| 14026  | 0      | 2      | 1      | 1      | 0      | 0      |
| 14030  | 1      | 2      | 1      | 2      | 1      | 1      |
| 14032  | 1      | 1      | 1      | 1      | 1      | 1      |
| 14040  | 1      | 1      | 1      | 1      | 1      | 1      |
| 14045  | 1      | 1      | 1      | 0      | 0      | 2      |
| 14048  | 1      | 3      | 2      | 2      | 2      | 2      |
| 14049  | 1      | 1      | 1      | 2      | 1      | 0      |
| 14050  | 1      | 2      | 1      | 1      | 0      | 1      |
| 14051  | 3      | 3      | 3      | 3      | 3      | 3      |
| 14052  | 1      | 1      | 1      | 1      | 0      | 0      |

| respid | Q56i_1 | Q56j_1 | Q56k_1 | Q56l_1 | Q56m_1 | Q56n_1 |
|--------|--------|--------|--------|--------|--------|--------|
| 14054  | 0      | 0      | 0      | 0      | 0      | 0      |
| 14055  | 0      | 0      | 0      | 1      | 0      | 0      |
| 14057  | 1      | 0      | 1      | 2      | 1      | 0      |
| 14058  | 0      | 0      | 0      | 2      | 0      | 1      |
| 14059  | 0      | 1      | 0      | 1      | 0      | 0      |
| 14060  | 0      | 0      | 1      | 2      | 0      | 0      |
| 14061  | 2      | 2      | 1      | 2      | 2      | 2      |
| 14071  | 0      | 1      | 0      | 1      | 1      | 0      |
| 14073  | 0      | 1      | 1      | 1      | 0      | 0      |
| 14074  | 2      | 2      | 2      | 1      | 1      | 0      |
| 14076  | 1      | 1      | 2      | 2      | 2      | 1      |
| 14080  | 0      | 1      | 0      | 0      | 0      | 0      |
| 14082  | 0      | 1      | 0      | 1      | 0      | 1      |
| 14083  | 0      | 0      | 0      | 1      | 0      | 0      |
| 14084  | 1      | 1      | 1      | 1      | 1      | 0      |
| 14085  | 0      | 0      | 0      | 0      | 0      | 0      |
| 14086  | 0      | 0      | 1      | 0      | 1      | 0      |
| 14088  | 0      | 0      | 0      | 0      | 0      | 0      |
| 14090  | 0      | 2      | 0      | 1      | 0      | 0      |
| 14092  | 0      | 1      | 0      | 1      | 0      | 1      |
| 14093  | 0      | 0      | 0      | 0      | 1      | 1      |
| 14096  | 0      | 0      | 0      | 0      | 0      | 0      |
| 14103  | 1      | 2      | 2      | 2      | 2      | 2      |
| 14105  | 0      | 1      | 1      | 1      | 0      | 0      |
| 14106  | 1      | 1      | 1      | 2      | 0      | 0      |
| 14107  | 0      | 1      | 0      | 0      | 1      | 0      |
| 14108  | 2      | 2      | 1      | 2      | 1      | 1      |
| 14112  | 0      | 0      | 0      | 0      | 0      | 1      |
| 14114  | 1      | 3      | 2      | 2      | 1      | 2      |
| 14115  | 1      | 1      | 1      | 1      | 1      | 1      |
| 14116  | 0      | 0      | 0      | 0      | 0      | 0      |
| 14117  | 1      | 1      | 1      | 2      | 0      | 0      |

| respid | Q56i_1 | Q56j_1 | Q56k_1 | Q56l_1 | Q56m_1 | Q56n_1 |
|--------|--------|--------|--------|--------|--------|--------|
| 14118  | 2      | 0      | 2      | 1      | 2      | 1      |
| 14119  | 1      | 1      | 1      | 1      | 1      | 2      |
| 14127  | 0      | 0      | 0      | 0      | 0      | 0      |
| 14129  | 1      | 2      | 1      | 1      | 1      | 0      |
| 14131  | 1      | 0      | 1      | 1      | 0      | 0      |
| 14132  | 0      | 0      | 1      | 0      | 1      | 0      |
| 14133  | 1      | 2      | 1      | 2      | 1      | 1      |
| 14134  | 0      | 0      | 1      | 0      | 0      | 0      |
| 14135  | 2      | 1      | 1      | 2      | 1      | 1      |
| 14136  | 1      | 1      | 1      | 1      | 0      | 0      |
| 14138  | 0      | 0      | 0      | 0      | 0      | 0      |
| 14139  | 0      | 1      | 0      | 0      | 0      | 1      |
| 14140  | 1      | 1      | 1      | 2      | 1      | 1      |
| 14141  | 0      | 0      | 0      | 0      | 0      | 0      |
| 14143  | 0      | 0      | 1      | 0      | 0      | 0      |
| 14146  | 1      | 1      | 1      | 2      | 1      | 0      |
| 14147  | 1      | 1      | 1      | 2      | 1      | 2      |
| 14148  | 1      | 0      | 1      | 1      | 1      | 1      |
| 14151  | 1      | 1      | 2      | 2      | 0      | 2      |
| 14152  | 1      | 2      | 1      | 2      | 2      | 2      |
| 14153  | 0      | 1      | 0      | 1      | 0      | 0      |
| 14154  | 0      | 1      | 1      | 1      | 0      | 1      |
| 14158  | 1      | 1      | 1      | 0      | 0      | 1      |
| 14159  | 0      | 1      | 0      | 1      | 1      | 1      |
| 14160  | 1      | 2      | 2      | 3      | 0      | 3      |
| 14161  | 2      | 1      | 1      | 1      | 1      | 1      |
| 14162  | 1      | 2      | 1      | 0      | 1      | 1      |
| 14165  | 1      | 1      | 1      | 1      | 1      | 2      |
| 14166  | 2      | 0      | 1      | 1      | 2      | 1      |
| 14167  | 0      | 1      | 0      | 1      | 0      | 0      |
| 14169  | 1      | 1      | 1      | 1      | 1      | 1      |
| 14170  | 0      | 1      | 0      | 0      | 0      | 0      |

| respid | Q56i_1 | Q56j_1 | Q56k_1 | Q56l_1 | Q56m_1 | Q56n_1 |
|--------|--------|--------|--------|--------|--------|--------|
| 14172  | 2      | 1      | 2      | 2      | 2      | 1      |
| 14173  | 1      | 1      | 1      | 1      | 1      | 1      |
| 14174  | 0      | 1      | 0      | 1      | 0      | 0      |
| 14175  | 1      | 1      | 1      | 1      | 1      | 0      |
| 14176  | 1      | 2      | 2      | 3      | 1      | 1      |
| 14178  | 0      | 0      | 0      | 0      | 0      | 0      |
| 14179  | 0      | 1      | 1      | 0      | 0      | 0      |
| 14180  | 2      | 1      | 1      | 2      | 2      | 1      |
| 14183  | 1      | 2      | 1      | 1      | 0      | 0      |
| 14185  | 0      | 0      | 0      | 2      | 3      | 0      |
| 14187  | 2      | 3      | 3      | 3      | 2      | 2      |
| 14189  | 0      | 1      | 0      | 1      | 0      | 1      |
| 14191  | 1      | 2      | 2      | 1      | 1      | 1      |
| 14192  | 0      | 0      | 0      | 0      | 0      | 0      |
| 14195  | 1      | 0      | 1      | 1      | 1      | 3      |
| 14197  | 0      | 2      | 0      | 1      | 0      | 0      |
| 14203  | 1      | 1      | 1      | 1      | 1      | 1      |
| 14204  | 0      | 1      | 1      | 1      | 0      | 0      |
| 14205  | 1      | 3      | 3      | 3      | 1      | 2      |
| 14208  | 0      | 0      | 0      | 0      | 1      | 1      |
| 14211  | 1      | 0      | 1      | 2      | 1      | 1      |
| 14214  | 0      | 0      | 0      | 1      | 0      | 0      |
| 14215  | 1      | 1      | 2      | 2      | 2      | 0      |
| 14216  | 1      | 1      | 2      | 1      | 1      | 0      |
| 14218  | 0      | 1      | 0      | 0      | 0      | 0      |
| 14220  | 1      | 1      | 1      | 1      | 1      | 0      |
| 14223  | 1      | 1      | 0      | 1      | 0      | 0      |
| 14225  | 1      | 1      | 1      | 2      | 2      | 1      |
| 14226  | 0      | 3      | 0      | 0      | 0      | 1      |
| 14228  | 0      | 1      | 0      | 0      | 1      | 0      |
| 14231  | 1      | 1      | 1      | 1      | 1      | 1      |
| 14233  | 0      | 2      | 1      | 1      | 1      | 0      |



| respid | Q56i_1 | Q56j_1 | Q56k_1 | Q56l_1 | Q56m_1 | Q56n_1 |
|--------|--------|--------|--------|--------|--------|--------|
| 14237  | 2      | 1      | 2      | 2      | 2      | 2      |
| 14238  | 2      | 2      | 1      | 1      | 1      | 2      |
| 14243  | 1      | 3      | 1      | 1      | 1      | 1      |
| 14245  | 0      | 1      | 1      | 0      | 1      | 0      |
| 14246  | 1      | 1      | 1      | 1      | 1      | 1      |
| 14248  | 0      | 0      | 0      | 0      | 0      | 0      |
| 14250  | 1      | 0      | 1      | 1      | 1      | 1      |
| 14253  | 0      | 0      | 0      | 1      | 0      | 0      |
| 14254  | 1      | 1      | 1      | 1      | 1      | 1      |
| 14255  | 1      | 1      | 2      | 1      | 1      | 0      |
| 14257  | 0      | 0      | 0      | 1      | 0      | 0      |
| 14258  | 1      | 2      | 1      | 1      | 1      | 1      |
| 14259  | 0      | 1      | 1      | 1      | 0      | 0      |
| 14260  | 0      | 1      | 0      | 0      | 0      | 0      |
| 14261  | 3      | 1      | 1      | 2      | 2      | 1      |
| 14263  | 1      | 0      | 1      | 2      | 1      | 1      |
| 14264  | 1      | 2      | 0      | 1      | 0      | 0      |
| 14266  | 2      | 1      | 1      | 3      | 1      | 1      |
| 14267  | 1      | 1      | 0      | 1      | 1      | 0      |
| 14268  | 0      | 0      | 0      | 0      | 0      | 2      |
| 14275  | 1      | 1      | 1      | 2      | 1      | 1      |
| 14278  | 3      | 3      | 1      | 3      | 3      | 1      |
| 14279  | 0      | 0      | 0      | 1      | 0      | 0      |
| 14280  | 3      | 2      | 1      | 2      | 3      | 1      |
| 14281  | 2      | 2      | 2      | 1      | 2      | 1      |
| 14282  | 1      | 2      | 0      | 1      | 1      | 0      |
| 14283  | 2      | 2      | 3      | 1      | 3      | 1      |
| 14286  | 1      | 2      | 2      | 1      | 0      | 2      |
| 14287  | 0      | 0      | 0      | 0      | 0      | 0      |
| 14288  | 1      | 0      | 1      | 2      | 2      | 0      |
| 14291  | 0      | 0      | 0      | 0      | 0      | 0      |
| 14292  | 1      | 1      | 1      | 1      | 1      | 1      |

| respid | Q56i_1 | Q56j_1 | Q56k_1 | Q56l_1 | Q56m_1 | Q56n_1 |
|--------|--------|--------|--------|--------|--------|--------|
| 14293  | 0      | 1      | 0      | 1      | 0      | 1      |
| 14304  | 1      | 3      | 2      | 3      | 2      | 0      |
| 14308  | 0      | 1      | 1      | 0      | 0      | 1      |
| 14313  | 1      | 1      | 1      | 1      | 1      | 1      |
| 14314  | 1      | 2      | 1      | 1      | 1      | 2      |
| 14316  | 1      | 1      | 1      | 1      | 0      | 0      |
| 14317  | 0      | 0      | 1      | 1      | 1      | 1      |
| 14318  | 2      | 1      | 2      | 1      | 1      | 1      |
| 14319  | 0      | 1      | 1      | 1      | 0      | 0      |
| 14320  | 1      | 1      | 0      | 1      | 2      | 0      |
| 14321  | 0      | 0      | 1      | 0      | 0      | 0      |
| 14322  | 1      | 2      | 1      | 2      | 1      | 2      |
| 14326  | 0      | 0      | 2      | 2      | 0      | 0      |
| 14327  | 1      | 3      | 2      | 1      | 0      | 1      |
| 14328  | 0      | 0      | 0      | 1      | 0      | 1      |
| 14330  | 0      | 1      | 0      | 0      | 0      | 0      |
| 14332  | 0      | 1      | 0      | 1      | 0      | 0      |
| 14334  | 0      | 2      | 0      | 0      | 0      | 0      |
| 14336  | 0      | 3      | 0      | 0      | 0      | 0      |
| 14337  | 1      | 1      | 1      | 1      | 0      | 0      |
| 14339  | 0      | 0      | 0      | 0      | 0      | 0      |
| 14340  | 1      | 0      | 1      | 0      | 1      | 0      |
| 14341  | 0      | 0      | 1      | 0      | 0      | 0      |
| 14344  | 1      | 2      | 1      | 1      | 0      | 0      |
| 14345  | 1      | 1      | 1      | 1      | 1      | 0      |
| 14346  | 0      | 0      | 0      | 1      | 1      | 0      |
| 14348  | 0      | 2      | 0      | 0      | 0      | 0      |
| 14349  | 0      | 1      | 1      | 1      | 0      | 1      |
| 14358  | 1      | 2      | 1      | 2      | 1      | 1      |
| 14360  | 1      | 0      | 0      | 0      | 0      | 1      |
| 14362  | 0      | 0      | 0      | 0      | 0      | 0      |
| 14366  | 2      | 1      | 1      | 1      | 1      | 1      |

| respid | Q56i_1 | Q56j_1 | Q56k_1 | Q56l_1 | Q56m_1 | Q56n_1 |
|--------|--------|--------|--------|--------|--------|--------|
| 14367  | 0      | 0      | 0      | 1      | 1      | 0      |
| 14369  | 0      | 2      | 0      | 1      | 0      | 0      |
| 14371  | 0      | 1      | 0      | 0      | 0      | 0      |
| 14372  | 0      | 1      | 0      | 1      | 1      | 0      |
| 14374  | 2      | 2      | 2      | 3      | 3      | 3      |
| 14376  | 0      | 1      | 0      | 0      | 0      | 1      |
| 14377  | 0      | 1      | 0      | 2      | 0      | 1      |
| 14378  | 0      | 0      | 1      | 0      | 1      | 0      |
| 14379  | 0      | 1      | 1      | 0      | 0      | 0      |
| 14381  | 1      | 2      | 1      | 2      | 1      | 0      |
| 14383  | 1      | 1      | 1      | 2      | 1      | 1      |
| 14384  | 1      | 0      | 0      | 0      | 1      | 0      |
| 14385  | 1      | 3      | 1      | 2      | 2      | 3      |
| 14386  | 1      | 1      | 1      | 2      | 1      | 1      |
| 14390  | 1      | 0      | 2      | 1      | 1      | 0      |
| 14391  | 0      | 0      | 0      | 0      | 0      | 0      |
| 14392  | 1      | 0      | 1      | 0      | 1      | 0      |
| 14393  | 0      | 0      | 0      | 0      | 0      | 0      |
| 14394  | 1      | 2      | 1      | 2      | 1      | 1      |
| 14395  | 1      | 1      | 1      | 2      | 1      | 1      |
| 14396  | 1      | 1      | 1      | 0      | 1      | 1      |
| 14397  | 0      | 1      | 1      | 1      | 0      | 0      |
| 14398  | 1      | 1      | 1      | 0      | 0      | 0      |
| 14399  | 0      | 0      | 0      | 1      | 0      | 0      |
| 14400  | 1      | 0      | 1      | 1      | 1      | 0      |
| 14403  | 0      | 1      | 1      | 1      | 1      | 0      |
| 14404  | 1      | 1      | 1      | 2      | 1      | 1      |
| 14405  | 0      | 1      | 0      | 2      | 0      | 2      |
| 14407  | 2      | 2      | 2      | 1      | 1      | 2      |
| 14408  | 2      | 2      | 1      | 1      | 1      | 2      |
| 14410  | 1      | 3      | 2      | 3      | 3      | 2      |
| 14415  | 1      | 1      | 1      | 1      | 0      | 1      |

| respid | Q56i_1 | Q56j_1 | Q56k_1 | Q56l_1 | Q56m_1 | Q56n_1 |
|--------|--------|--------|--------|--------|--------|--------|
| 14419  | 1      | 1      | 1      | 2      | 0      | 0      |
| 14420  | 1      | 1      | 1      | 1      | 1      | 1      |
| 14421  | 0      | 0      | 0      | 0      | 0      | 0      |
| 14423  | 0      | 2      | 0      | 1      | 1      | 0      |
| 14424  | 1      | 2      | 1      | 1      | 0      | 1      |
| 14425  | 0      | 1      | 1      | 1      | 0      | 1      |
| 14426  | 0      | 0      | 0      | 1      | 0      | 1      |
| 14427  | 0      | 1      | 1      | 1      | 0      | 1      |
| 14428  | 2      | 3      | 2      | 2      | 1      | 3      |
| 14431  | 0      | 0      | 0      | 0      | 0      | 0      |
| 14433  | 0      | 1      | 0      | 1      | 0      | 1      |
| 14434  | 0      | 2      | 1      | 1      | 0      | 0      |
| 14435  | 1      | 2      | 0      | 1      | 0      | 1      |
| 14436  | 1      | 0      | 0      | 3      | 1      | 2      |
| 14438  | 1      | 2      | 1      | 0      | 0      | 1      |
| 14442  | 1      | 2      | 1      | 2      | 2      | 1      |
| 14447  | 0      | 1      | 1      | 1      | 0      | 1      |
| 14448  | 1      | 1      | 2      | 1      | 1      | 1      |
| 14450  | 1      | 1      | 1      | 2      | 1      | 2      |
| 14451  | 0      | 0      | 0      | 1      | 0      | 0      |
| 14454  | 2      | 1      | 1      | 1      | 2      | 1      |
| 14455  | 0      | 3      | 2      | 0      | 0      | 0      |
| 14456  | 1      | 2      | 1      | 1      | 1      | 2      |
| 14457  | 2      | 3      | 2      | 2      | 3      | 2      |
| 14458  | 1      | 2      | 2      | 2      | 3      | 1      |
| 14459  | 0      | 1      | 0      | 0      | 0      | 0      |
| 14460  | 1      | 1      | 1      | 1      | 0      | 1      |
| 14464  | 1      | 1      | 1      | 1      | 0      | 0      |
| 14465  | 1      | 0      | 1      | 1      | 1      | 0      |
| 14466  | 1      | 3      | 1      | 0      | 1      | 3      |
| 14467  | 1      | 0      | 1      | 0      | 1      | 0      |
| 14470  | 0      | 2      | 1      | 1      | 0      | 1      |

| respid | Q56i_1 | Q56j_1 | Q56k_1 | Q56l_1 | Q56m_1 | Q56n_1 |
|--------|--------|--------|--------|--------|--------|--------|
| 14472  | 0      | 0      | 0      | 1      | 0      | 0      |
| 14473  | 0      | 0      | 1      | 0      | 0      | 0      |
| 14474  | 0      | 1      | 0      | 1      | 1      | 1      |
| 14477  | 1      | 0      | 1      | 0      | 1      | 0      |
| 14478  | 0      | 1      | 0      | 1      | 0      | 0      |
| 14479  | 0      | 0      | 0      | 0      | 0      | 0      |
| 14484  | 0      | 1      | 0      | 0      | 0      | 0      |
| 14485  | 0      | 0      | 1      | 1      | 0      | 0      |
| 14486  | 1      | 2      | 1      | 1      | 2      | 0      |
| 14487  | 2      | 0      | 0      | 1      | 3      | 1      |
| 14488  | 1      | 1      | 1      | 2      | 1      | 1      |
| 14491  | 1      | 2      | 1      | 1      | 1      | 1      |
| 14495  | 0      | 2      | 2      | 2      | 0      | 1      |
| 14500  | 1      | 0      | 1      | 0      | 1      | 1      |
| 14502  | 1      | 2      | 0      | 1      | 1      | 1      |
| 14504  | 1      | 1      | 1      | 1      | 1      | 2      |
| 14505  | 3      | 3      | 2      | 2      | 1      | 1      |
| 14507  | 0      | 0      | 0      | 0      | 0      | 1      |
| 14517  | 0      | 1      | 0      | 0      | 0      | 1      |
| 14518  | 0      | 2      | 0      | 2      | 1      | 0      |
| 14519  | 1      | 0      | 1      | 2      | 1      | 1      |
| 14521  | 1      | 1      | 1      | 1      | 1      | 2      |
| 14522  | 0      | 0      | 0      | 0      | 0      | 0      |
| 14526  | 0      | 1      | 0      | 0      | 0      | 0      |
| 14528  | 2      | 2      | 2      | 2      | 2      | 1      |
| 14529  | 1      | 1      | 1      | 1      | 1      | 1      |
| 14530  | 0      | 0      | 0      | 0      | 1      | 1      |
| 14531  | 2      | 1      | 2      | 1      | 2      | 2      |
| 14534  | 1      | 2      | 1      | 2      | 1      | 1      |
| 14538  | 0      | 1      | 1      | 1      | 1      | 2      |
| 14539  | 2      | 2      | 1      | 3      | 2      | 1      |
| 14545  | 1      | 0      | 1      | 2      | 1      | 0      |

| respid | Q56i_1 | Q56j_1 | Q56k_1 | Q56l_1 | Q56m_1 | Q56n_1 |
|--------|--------|--------|--------|--------|--------|--------|
| 14546  | 2      | 2      | 2      | 1      | 2      | 2      |
| 14551  | 0      | 1      | 1      | 1      | 0      | 0      |
| 14553  | 1      | 2      | 2      | 2      | 1      | 1      |
| 14557  | 1      | 1      | 1      | 1      | 1      | 1      |
| 14558  | 1      | 2      | 1      | 2      | 1      | 1      |
| 14559  | 1      | 1      | 1      | 2      | 1      | 1      |
| 14560  | 1      | 1      | 0      | 1      | 0      | 1      |
| 14563  | 1      | 0      | 0      | 0      | 1      | 0      |
| 14565  | 0      | 3      | 2      | 2      | 3      | 1      |
| 14571  | 3      | 3      | 1      | 1      | 3      | 2      |
| 14572  | 3      | 2      | 1      | 1      | 2      | 1      |
| 14573  | 0      | 0      | 0      | 1      | 1      | 1      |
| 14575  | 2      | 1      | 1      | 2      | 1      | 1      |
| 14576  | 1      | 2      | 2      | 1      | 2      | 1      |
| 14578  | 0      | 2      | 0      | 1      | 0      | 0      |
| 14579  | 0      | 1      | 0      | 2      | 0      | 1      |
| 14580  | 1      | 1      | 2      | 1      | 0      | 1      |
| 14582  | 0      | 1      | 1      | 2      | 0      | 0      |
| 14585  | 1      | 2      | 1      | 1      | 1      | 0      |
| 14588  | 1      | 0      | 1      | 1      | 0      | 1      |
| 14590  | 1      | 1      | 1      | 2      | 1      | 1      |
| 14592  | 1      | 1      | 0      | 1      | 1      | 0      |
| 14593  | 0      | 1      | 2      | 1      | 1      | 1      |
| 14595  | 1      | 2      | 1      | 2      | 1      | 1      |
| 14597  | 1      | 3      | 2      | 0      | 1      | 0      |
| 14600  | 0      | 0      | 0      | 1      | 0      | 0      |
| 14602  | 1      | 2      | 1      | 2      | 1      | 1      |
| 14604  | 1      | 1      | 1      | 0      | 0      | 0      |
| 14605  | 1      | 1      | 1      | 2      | 1      | 1      |
| 14609  | 1      | 1      | 1      | 1      | 1      | 1      |
| 14610  | 0      | 1      | 1      | 1      | 0      | 2      |
| 14611  | 0      | 1      | 1      | 1      | 0      | 0      |

| respid | Q56i_1 | Q56j_1 | Q56k_1 | Q56l_1 | Q56m_1 | Q56n_1 |
|--------|--------|--------|--------|--------|--------|--------|
| 14612  | 0      | 0      | 1      | 1      | 1      | 0      |
| 14614  | 1      | 1      | 1      | 1      | 1      | 1      |
| 14615  | 0      | 1      | 1      | 1      | 0      | 1      |
| 14618  | 1      | 2      | 2      | 2      | 2      | 1      |
| 14621  | 0      | 1      | 0      | 1      | 0      | 0      |
| 14624  | 1      | 0      | 1      | 2      | 1      | 1      |
| 14626  | 0      | 0      | 1      | 0      | 0      | 0      |
| 14627  | 2      | 1      | 1      | 2      | 2      | 0      |
| 14628  | 1      | 2      | 1      | 2      | 2      | 1      |
| 14631  | 0      | 2      | 0      | 0      | 1      | 0      |
| 14633  | 1      | 1      | 1      | 1      | 1      | 0      |
| 14642  | 1      | 3      | 2      | 2      | 2      | 1      |
| 14647  | 0      | 0      | 0      | 0      | 0      | 0      |
| 14658  | 0      | 1      | 1      | 1      | 0      | 1      |
| 14659  | 1      | 1      | 1      | 1      | 1      | 1      |
| 14660  | 0      | 0      | 0      | 0      | 0      | 0      |
| 14661  | 0      | 2      | 0      | 2      | 1      | 1      |
| 14662  | 2      | 2      | 2      | 3      | 3      | 2      |
| 14663  | 1      | 0      | 1      | 2      | 1      | 1      |
| 14670  | 0      | 0      | 1      | 2      | 1      | 0      |
| 14671  | 0      | 2      | 0      | 1      | 1      | 0      |
| 14672  | 1      | 2      | 1      | 2      | 2      | 1      |
| 14675  | 0      | 0      | 0      | 0      | 0      | 0      |
| 14676  | 0      | 1      | 1      | 0      | 1      | 0      |
| 14677  | 0      | 2      | 1      | 1      | 0      | 0      |
| 14678  | 0      | 0      | 1      | 0      | 2      | 3      |
| 14681  | 1      | 1      | 1      | 2      | 1      | 1      |
| 14684  | 0      | 0      | 0      | 0      | 0      | 0      |
| 14688  | 1      | 1      | 0      | 1      | 1      | 0      |
| 14690  | 0      | 0      | 0      | 0      | 0      | 0      |
| 14694  | 1      | 1      | 1      | 2      | 1      | 1      |
| 14696  | 0      | 0      | 0      | 0      | 0      | 0      |

| respid | Q56i_1 | Q56j_1 | Q56k_1 | Q56l_1 | Q56m_1 | Q56n_1 |
|--------|--------|--------|--------|--------|--------|--------|
| 14700  | 0      | 2      | 0      | 0      | 0      | 0      |
| 14701  | 3      | 0      | 2      | 1      | 2      | 1      |
| 14703  | 2      | 3      | 2      | 3      | 3      | 2      |
| 14707  | 1      | 0      | 1      | 1      | 1      | 1      |
| 14711  | 1      | 2      | 1      | 2      | 2      | 1      |
| 14714  | 2      | 2      | 1      | 2      | 1      | 1      |
| 14715  | 1      | 2      | 1      | 2      | 2      | 0      |
| 14716  | 0      | 0      | 0      | 0      | 0      | 0      |
| 14720  | 0      | 0      | 0      | 0      | 0      | 1      |
| 14725  | 1      | 0      | 1      | 1      | 1      | 1      |
| 14726  | 0      | 1      | 0      | 0      | 1      | 0      |
| 14734  | 0      | 2      | 1      | 1      | 1      | 1      |
| 14735  | 1      | 1      | 2      | 1      | 1      | 1      |
| 14736  | 1      | 1      | 1      | 1      | 1      | 0      |
| 14740  | 0      | 0      | 1      | 0      | 1      | 0      |
| 14745  | 1      | 0      | 1      | 1      | 1      | 1      |
| 14747  | 1      | 0      | 0      | 1      | 0      | 2      |
| 14750  | 1      | 2      | 1      | 2      | 1      | 1      |
| 14751  | 0      | 1      | 0      | 1      | 0      | 1      |
| 14753  | 1      | 0      | 1      | 0      | 1      | 0      |
| 14756  | 1      | 2      | 2      | 2      | 2      | 2      |
| 14780  | 0      | 0      | 0      | 0      | 0      | 0      |
| 14782  | 0      | 1      | 0      | 0      | 0      | 0      |
| 14800  | 2      | 3      | 3      | 1      | 1      | 2      |
| 14801  | 0      | 0      | 0      | 0      | 0      | 0      |
| 14802  | 1      | 2      | 2      | 2      | 1      | 0      |
| 14805  | 1      | 0      | 1      | 0      | 1      | 0      |
| 14811  | 1      | 1      | 1      | 1      | 1      | 1      |
| 14814  | 1      | 2      | 1      | 1      | 2      | 1      |
| 14822  | 1      | 1      | 1      | 1      | 1      | 1      |
| 14827  | 1      | 2      | 1      | 1      | 2      | 2      |
| 14828  | 1      | 1      | 1      | 1      | 1      | 1      |



| respid | Q56i_1 | Q56j_1 | Q56k_1 | Q56l_1 | Q56m_1 | Q56n_1 |
|--------|--------|--------|--------|--------|--------|--------|
| 14830  | 0      | 0      | 0      | 0      | 0      | 0      |
| 14832  | 0      | 0      | 0      | 2      | 0      | 0      |
| 14835  | 1      | 1      | 1      | 1      | 1      | 1      |
| 14841  | 0      | 0      | 0      | 0      | 0      | 0      |
| 14849  | 0      | 0      | 0      | 0      | 0      | 0      |
| 14850  | 0      | 0      | 0      | 1      | 0      | 1      |
| 14851  | 0      | 0      | 0      | 0      | 0      | 0      |
| 14856  | 1      | 1      | 1      | 2      | 2      | 1      |
| 14862  | 1      | 1      | 1      | 1      | 1      | 1      |
| 14863  | 0      | 0      | 0      | 0      | 0      | 0      |
| 14864  | 0      | 0      | 0      | 0      | 1      | 0      |
| 14866  | 1      | 1      | 1      | 0      | 1      | 0      |
| 14867  | 1      | 2      | 2      | 1      | 2      | 1      |
| 14868  | 0      | 1      | 1      | 1      | 0      | 0      |
| 14870  | 1      | 1      | 1      | 0      | 1      | 0      |
| 14873  | 1      | 1      | 1      | 1      | 1      | 0      |
| 14878  | 1      | 3      | 1      | 0      | 1      | 0      |
| 14879  | 1      | 1      | 1      | 1      | 1      | 1      |
| 14881  | 1      | 2      | 2      | 2      | 2      | 2      |
| 14888  | 1      | 2      | 2      | 2      | 2      | 0      |
| 14895  | 0      | 0      | 0      | 0      | 0      | 0      |
| 14900  | 1      | 2      | 1      | 1      | 2      | 1      |
| 14912  | 0      | 0      | 0      | 0      | 0      | 1      |
| 14922  | 1      | 1      | 1      | 1      | 1      | 1      |
| 14923  | 1      | 2      | 1      | 2      | 2      | 0      |
| 14924  | 0      | 1      | 0      | 2      | 1      | 1      |
| 14925  | 0      | 1      | 0      | 1      | 1      | 1      |
| 14926  | 1      | 1      | 1      | 1      | 1      | 0      |
| 14927  | 1      | 2      | 1      | 1      | 2      | 1      |
| 14930  | 1      | 1      | 1      | 1      | 1      | 0      |
| 14937  | 1      | 1      | 1      | 1      | 2      | 2      |
| 14938  | 2      | 3      | 1      | 1      | 1      | 1      |

| respid | Q56i_1 | Q56j_1 | Q56k_1 | Q56l_1 | Q56m_1 | Q56n_1 |
|--------|--------|--------|--------|--------|--------|--------|
| 14939  | 2      | 2      | 1      | 2      | 2      | 2      |
| 14942  | 0      | 0      | 0      | 0      | 0      | 0      |
| 14943  | 2      | 3      | 0      | 1      | 0      | 1      |
| 14953  | 0      | 0      | 1      | 0      | 0      | 0      |
| 14954  | 0      | 0      | 0      | 1      | 1      | 0      |
| 14955  | 2      | 1      | 1      | 1      | 1      | 0      |
| 14957  | 1      | 1      | 1      | 2      | 1      | 1      |
| 14958  | 2      | 3      | 1      | 2      | 1      | 0      |
| 14959  | 2      | 2      | 2      | 1      | 2      | 2      |
| 14961  | 1      | 1      | 0      | 0      | 0      | 0      |
| 14963  | 2      | 2      | 2      | 2      | 2      | 2      |
| 14964  | 1      | 1      | 1      | 1      | 1      | 0      |
| 14965  | 1      | 1      | 1      | 1      | 1      | 0      |
| 14967  | 2      | 2      | 1      | 2      | 3      | 1      |
| 14970  | 1      | 0      | 1      | 0      | 2      | 0      |
| 14972  | 2      | 2      | 1      | 2      | 2      | 1      |
| 14975  | 1      | 2      | 2      | 3      | 1      | 0      |
| 14977  | 0      | 1      | 1      | 1      | 1      | 0      |
| 14982  | 0      | 2      | 0      | 1      | 1      | 2      |
| 14985  | 3      | 2      | 1      | 1      | 2      | 1      |
| 14986  | 0      | 0      | 0      | 0      | 0      | 0      |
| 14987  | 1      | 1      | 1      | 1      | 1      | 1      |
| 14988  | 2      | 3      | 0      | 2      | 2      | 1      |
| 14989  | 1      | 2      | 1      | 1      | 1      | 0      |
| 14993  | 2      | 1      | 2      | 2      | 2      | 0      |
| 15001  | 1      | 1      | 1      | 1      | 1      | 1      |
| 15002  | 2      | 2      | 1      | 2      | 2      | 2      |
| 15006  | 2      | 3      | 1      | 2      | 2      | 1      |
| 15007  | 1      | 1      | 1      | 1      | 1      | 0      |
| 15014  | 2      | 2      | 1      | 2      | 1      | 1      |
| 15020  | 1      | 1      | 1      | 1      | 1      | 0      |
| 15021  | 1      | 1      | 2      | 1      | 1      | 1      |

| respid | Q56i_1 | Q56j_1 | Q56k_1 | Q56l_1 | Q56m_1 | Q56n_1 |
|--------|--------|--------|--------|--------|--------|--------|
| 15023  | 2      | 3      | 2      | 3      | 1      | 0      |
| 15030  | 0      | 0      | 0      | 0      | 1      | 0      |
| 15032  | 1      | 0      | 0      | 0      | 0      | 1      |
| 15033  | 1      | 1      | 1      | 1      | 1      | 1      |
| 15034  | 1      | 0      | 1      | 0      | 1      | 0      |
| 15035  | 0      | 0      | 0      | 0      | 0      | 0      |
| 15037  | 1      | 0      | 1      | 2      | 2      | 3      |
| 15039  | 1      | 1      | 1      | 1      | 1      | 1      |
| 15040  | 0      | 0      | 0      | 0      | 0      | 0      |
| 15042  | 0      | 0      | 0      | 0      | 0      | 0      |
| 15044  | 0      | 3      | 0      | 0      | 0      | 0      |
| 15045  | 2      | 2      | 2      | 2      | 2      | 2      |
| 15046  | 0      | 0      | 0      | 0      | 0      | 0      |
| 15052  | 2      | 2      | 1      | 2      | 1      | 0      |
| 15058  | 1      | 2      | 0      | 1      | 1      | 1      |
| 15063  | 2      | 2      | 2      | 2      | 2      | 1      |
| 15066  | 0      | 0      | 0      | 0      | 0      | 0      |
| 15069  | 2      | 0      | 0      | 1      | 1      | 0      |
| 15071  | 2      | 2      | 1      | 2      | 2      | 1      |
| 15076  | 1      | 2      | 1      | 2      | 1      | 0      |
| 15078  | 1      | 1      | 1      | 1      | 1      | 1      |
| 15087  | 1      | 0      | 1      | 1      | 1      | 1      |
| 15090  | 2      | 2      | 1      | 1      | 1      | 1      |
| 15091  | 2      | 2      | 1      | 2      | 2      | 1      |
| 15092  | 0      | 0      | 0      | 0      | 0      | 0      |
| 15096  | 0      | 0      | 0      | 0      | 0      | 0      |
| 15106  | 1      | 2      | 1      | 1      | 1      | 1      |
| 15108  | 0      | 3      | 0      | 0      | 0      | 0      |
| 15113  | 1      | 2      | 2      | 2      | 2      | 1      |
| 15116  | 0      | 0      | 0      | 0      | 0      | 0      |
| 15119  | 0      | 0      | 0      | 0      | 0      | 0      |
| 15120  | 1      | 2      | 1      | 2      | 3      | 1      |

| respid | Q56i_1 | Q56j_1 | Q56k_1 | Q56l_1 | Q56m_1 | Q56n_1 |
|--------|--------|--------|--------|--------|--------|--------|
| 15121  | 0      | 1      | 1      | 0      | 0      | 1      |
| 15123  | 1      | 1      | 0      | 0      | 0      | 0      |
| 15124  | 3      | 1      | 1      | 0      | 0      | 1      |
| 15128  | 0      | 0      | 0      | 0      | 1      | 0      |
| 15131  | 0      | 0      | 0      | 0      | 0      | 0      |
| 15136  | 1      | 1      | 2      | 2      | 2      | 1      |
| 15137  | 0      | 0      | 0      | 0      | 0      | 0      |
| 15141  | 0      | 0      | 0      | 0      | 0      | 0      |
| 15144  | 1      | 1      | 0      | 2      | 2      | 1      |
| 15147  | 0      | 0      | 1      | 0      | 0      | 0      |
| 15151  | 2      | 1      | 1      | 2      | 2      | 2      |
| 15154  | 1      | 3      | 1      | 2      | 1      | 0      |
| 15157  | 1      | 3      | 1      | 2      | 2      | 1      |
| 15164  | 1      | 1      | 1      | 1      | 1      | 1      |
| 15168  | 1      | 1      | 2      | 3      | 2      | 0      |
| 15169  | 0      | 0      | 0      | 0      | 0      | 0      |
| 15172  | 1      | 3      | 1      | 2      | 2      | 1      |
| 15177  | 2      | 1      | 1      | 2      | 2      | 2      |
| 15178  | 1      | 2      | 2      | 2      | 3      | 1      |
| 15180  | 1      | 1      | 1      | 1      | 1      | 0      |
| 15181  | 0      | 0      | 0      | 0      | 0      | 1      |
| 15182  | 0      | 0      | 1      | 0      | 0      | 1      |
| 15183  | 2      | 1      | 1      | 2      | 1      | 1      |
| 15188  | 2      | 2      | 2      | 3      | 2      | 2      |
| 15190  | 1      | 2      | 1      | 2      | 1      | 1      |
| 15195  | 2      | 3      | 2      | 3      | 3      | 2      |
| 15201  | 1      | 1      | 1      | 2      | 1      | 1      |
| 15203  | 1      | 2      | 2      | 2      | 2      | 2      |
| 15204  | 0      | 0      | 0      | 0      | 0      | 0      |
| 15207  | 1      | 1      | 1      | 1      | 0      | 0      |
| 15208  | 2      | 1      | 0      | 3      | 0      | 0      |
| 15209  | 0      | 0      | 0      | 0      | 0      | 0      |

| respid | Q56i_1 | Q56j_1 | Q56k_1 | Q56l_1 | Q56m_1 | Q56n_1 |
|--------|--------|--------|--------|--------|--------|--------|
| 15212  | 0      | 0      | 0      | 0      | 0      | 0      |
| 15213  | 0      | 0      | 0      | 0      | 0      | 0      |
| 15219  | 1      | 0      | 1      | 1      | 0      | 0      |
| 15220  | 0      | 1      | 1      | 0      | 0      | 1      |
| 15221  | 0      | 1      | 1      | 1      | 1      | 0      |
| 15223  | 1      | 1      | 0      | 1      | 1      | 0      |
| 15224  | 0      | 0      | 0      | 1      | 1      | 0      |
| 15225  | 0      | 0      | 0      | 1      | 0      | 0      |
| 15226  | 1      | 1      | 1      | 1      | 1      | 0      |
| 15230  | 1      | 1      | 1      | 1      | 1      | 1      |
| 15231  | 0      | 2      | 2      | 1      | 0      | 1      |
| 15232  | 1      | 2      | 0      | 1      | 2      | 2      |
| 15237  | 0      | 1      | 0      | 1      | 1      | 0      |
| 15239  | 1      | 1      | 1      | 1      | 1      | 0      |
| 15241  | 0      | 1      | 0      | 1      | 1      | 0      |
| 15242  | 1      | 2      | 1      | 2      | 1      | 0      |
| 15247  | 1      | 1      | 0      | 1      | 1      | 0      |
| 15248  | 0      | 0      | 0      | 0      | 0      | 0      |
| 15251  | 1      | 2      | 2      | 1      | 2      | 1      |
| 15257  | 1      | 1      | 1      | 1      | 1      | 0      |
| 15260  | 1      | 1      | 1      | 1      | 1      | 1      |
| 15261  | 2      | 2      | 2      | 3      | 3      | 2      |
| 15262  | 0      | 1      | 1      | 1      | 1      | 1      |
| 15263  | 1      | 0      | 1      | 0      | 1      | 0      |
| 15265  | 1      | 1      | 1      | 1      | 1      | 0      |
| 15266  | 0      | 0      | 1      | 1      | 0      | 1      |
| 15268  | 0      | 2      | 0      | 2      | 1      | 1      |
| 15269  | 0      | 3      | 0      | 2      | 0      | 0      |
| 15270  | 1      | 0      | 1      | 1      | 1      | 1      |
| 15273  | 1      | 2      | 1      | 1      | 2      | 1      |
| 15276  | 2      | 3      | 2      | 3      | 3      | 2      |
| 15277  | 1      | 1      | 1      | 1      | 1      | 0      |

| respid | Q56i_1 | Q56j_1 | Q56k_1 | Q56l_1 | Q56m_1 | Q56n_1 |
|--------|--------|--------|--------|--------|--------|--------|
| 15282  | 0      | 0      | 0      | 3      | 0      | 0      |
| 15284  | 1      | 2      | 1      | 1      | 1      | 1      |
| 15285  | 0      | 1      | 1      | 2      | 0      | 1      |
| 15286  | 3      | 3      | 2      | 3      | 3      | 0      |
| 15288  | 1      | 2      | 1      | 2      | 1      | 2      |
| 15292  | 1      | 2      | 1      | 3      | 3      | 2      |
| 15296  | 0      | 0      | 0      | 0      | 1      | 0      |
| 15297  | 1      | 0      | 1      | 0      | 1      | 0      |
| 15298  | 1      | 1      | 1      | 1      | 1      | 1      |
| 15301  | 1      | 1      | 1      | 2      | 1      | 1      |
| 15302  | 0      | 1      | 0      | 1      | 0      | 1      |
| 15305  | 0      | 0      | 0      | 0      | 0      | 0      |
| 15307  | 0      | 2      | 1      | 1      | 0      | 1      |
| 15308  | 0      | 1      | 1      | 1      | 1      | 1      |
| 15309  | 1      | 1      | 0      | 1      | 1      | 0      |
| 15311  | 1      | 1      | 1      | 1      | 1      | 1      |
| 15315  | 1      | 2      | 1      | 1      | 1      | 1      |
| 15316  | 0      | 0      | 0      | 0      | 0      | 0      |
| 15318  | 2      | 3      | 2      | 2      | 3      | 2      |
| 15321  | 2      | 2      | 1      | 3      | 3      | 1      |
| 15322  | 0      | 0      | 0      | 0      | 0      | 0      |
| 15324  | 0      | 0      | 0      | 0      | 0      | 0      |
| 15326  | 0      | 1      | 1      | 1      | 1      | 0      |
| 15327  | 0      | 1      | 1      | 1      | 1      | 1      |
| 15328  | 1      | 3      | 2      | 2      | 3      | 2      |
| 15330  | 1      | 0      | 1      | 0      | 1      | 0      |
| 15332  | 1      | 1      | 1      | 0      | 1      | 0      |
| 15333  | 1      | 1      | 1      | 1      | 1      | 0      |
| 15334  | 1      | 0      | 1      | 1      | 1      | 1      |
| 15336  | 1      | 3      | 2      | 3      | 2      | 2      |
| 15337  | 1      | 1      | 0      | 2      | 1      | 2      |
| 15338  | 1      | 1      | 1      | 1      | 1      | 0      |

| respid | Q56i_1 | Q56j_1 | Q56k_1 | Q56l_1 | Q56m_1 | Q56n_1 |
|--------|--------|--------|--------|--------|--------|--------|
| 15339  | 1      | 1      | 2      | 2      | 1      | 1      |
| 15341  | 0      | 1      | 0      | 0      | 0      | 0      |
| 15344  | 0      | 1      | 0      | 1      | 1      | 0      |
| 15345  | 0      | 1      | 1      | 1      | 1      | 0      |
| 15350  | 2      | 3      | 3      | 2      | 3      | 2      |
| 15351  | 0      | 1      | 1      | 2      | 1      | 2      |
| 15352  | 1      | 1      | 1      | 2      | 1      | 2      |
| 15372  | 0      | 2      | 1      | 2      | 1      | 1      |
| 15373  | 1      | 1      | 1      | 2      | 3      | 0      |
| 15376  | 1      | 2      | 1      | 2      | 0      | 0      |
| 15377  | 1      | 1      | 1      | 1      | 1      | 0      |
| 15382  | 1      | 2      | 0      | 2      | 1      | 1      |
| 15383  | 1      | 2      | 1      | 1      | 1      | 1      |
| 15385  | 1      | 2      | 1      | 2      | 2      | 1      |
| 15390  | 1      | 1      | 0      | 1      | 1      | 1      |
| 15399  | 0      | 0      | 0      | 1      | 1      | 0      |
| 15404  | 1      | 1      | 1      | 1      | 1      | 1      |
| 15410  | 0      | 3      | 1      | 0      | 0      | 0      |
| 15411  | 1      | 1      | 2      | 1      | 1      | 1      |
| 15412  | 1      | 1      | 0      | 1      | 0      | 0      |
| 15413  | 0      | 2      | 1      | 3      | 2      | 3      |
| 15414  | 1      | 1      | 1      | 1      | 1      | 1      |
| 15417  | 1      | 0      | 0      | 0      | 1      | 0      |
| 15418  | 1      | 2      | 1      | 2      | 1      | 2      |
| 15421  | 1      | 1      | 1      | 1      | 1      | 1      |
| 15423  | 1      | 1      | 1      | 2      | 1      | 1      |
| 15425  | 1      | 0      | 1      | 0      | 0      | 0      |
| 15426  | 1      | 3      | 3      | 3      | 3      | 2      |
| 15430  | 1      | 2      | 0      | 2      | 1      | 1      |
| 15431  | 1      | 1      | 1      | 2      | 2      | 2      |
| 15435  | 1      | 0      | 1      | 1      | 1      | 1      |
| 15436  | 0      | 0      | 0      | 0      | 0      | 0      |

| respid | Q56i_1 | Q56j_1 | Q56k_1 | Q56l_1 | Q56m_1 | Q56n_1 |
|--------|--------|--------|--------|--------|--------|--------|
| 15437  | 0      | 1      | 0      | 1      | 0      | 0      |
| 15438  | 1      | 1      | 0      | 1      | 0      | 1      |
| 15439  | 1      | 2      | 1      | 1      | 2      | 1      |
| 15441  | 3      | 3      | 2      | 2      | 2      | 0      |
| 15443  | 0      | 2      | 2      | 2      | 1      | 2      |
| 15446  | 0      | 1      | 0      | 1      | 1      | 2      |
| 15449  | 1      | 1      | 1      | 1      | 1      | 1      |
| 15451  | 3      | 2      | 3      | 1      | 3      | 1      |
| 15452  | 1      | 1      | 1      | 2      | 2      | 2      |
| 15454  | 0      | 3      | 0      | 0      | 0      | 0      |
| 15456  | 0      | 3      | 0      | 0      | 0      | 1      |
| 15457  | 1      | 3      | 1      | 2      | 0      | 1      |
| 15458  | 2      | 1      | 1      | 1      | 1      | 1      |
| 15462  | 1      | 1      | 1      | 2      | 1      | 1      |
| 15467  | 1      | 0      | 1      | 0      | 1      | 0      |
| 15470  | 0      | 0      | 1      | 0      | 0      | 0      |
| 15472  | 1      | 1      | 2      | 1      | 1      | 0      |
| 15476  | 0      | 0      | 0      | 1      | 0      | 2      |
| 15477  | 1      | 1      | 1      | 1      | 1      | 0      |
| 15488  | 1      | 0      | 1      | 1      | 1      | 0      |
| 15489  | 0      | 2      | 0      | 1      | 0      | 1      |
| 15490  | 1      | 1      | 1      | 1      | 1      | 0      |
| 15496  | 1      | 2      | 1      | 3      | 0      | 2      |
| 15497  | 0      | 1      | 1      | 2      | 1      | 1      |
| 15498  | 0      | 0      | 0      | 0      | 0      | 0      |
| 15509  | 1      | 1      | 1      | 1      | 1      | 1      |
| 15510  | 1      | 1      | 1      | 1      | 1      | 1      |
| 15516  | 2      | 0      | 2      | 1      | 2      | 0      |
| 15519  | 1      | 0      | 1      | 0      | 1      | 0      |
| 15520  | 1      | 1      | 0      | 1      | 1      | 0      |
| 15524  | 0      | 1      | 2      | 2      | 1      | 2      |
| 15525  | 0      | 1      | 1      | 0      | 0      | 1      |



| respid | Q56i_1 | Q56j_1 | Q56k_1 | Q56l_1 | Q56m_1 | Q56n_1 |
|--------|--------|--------|--------|--------|--------|--------|
| 15526  | 1      | 2      | 0      | 0      | 0      | 1      |
| 15531  | 1      | 3      | 2      | 0      | 1      | 0      |
| 15532  | 1      | 0      | 1      | 0      | 1      | 0      |
| 15534  | 2      | 2      | 2      | 2      | 2      | 2      |
| 15535  | 1      | 1      | 1      | 1      | 1      | 1      |
| 15539  | 1      | 2      | 1      | 2      | 1      | 1      |
| 15550  | 0      | 1      | 0      | 0      | 0      | 0      |
| 15556  | 1      | 1      | 1      | 1      | 1      | 1      |
| 15558  | 1      | 2      | 1      | 1      | 1      | 1      |
| 15565  | 0      | 0      | 0      | 0      | 0      | 0      |
| 15567  | 1      | 1      | 1      | 2      | 2      | 1      |
| 15568  | 1      | 2      | 1      | 1      | 2      | 1      |
| 15571  | 0      | 0      | 0      | 0      | 0      | 2      |
| 15573  | 0      | 1      | 0      | 1      | 0      | 0      |
| 15574  | 1      | 2      | 1      | 2      | 2      | 1      |
| 15576  | 1      | 1      | 1      | 0      | 1      | 0      |
| 15587  | 1      | 1      | 1      | 2      | 1      | 1      |
| 15588  | 1      | 1      | 2      | 2      | 1      | 3      |
| 15593  | 2      | 1      | 2      | 2      | 1      | 2      |
| 15597  | 0      | 1      | 1      | 0      | 0      | 1      |
| 15598  | 1      | 0      | 0      | 0      | 0      | 0      |
| 15599  | 0      | 1      | 0      | 1      | 0      | 0      |
| 15601  | 1      | 1      | 0      | 1      | 0      | 0      |
| 15604  | 1      | 1      | 1      | 2      | 1      | 1      |
| 15611  | 0      | 2      | 0      | 2      | 0      | 0      |
| 15613  | 0      | 0      | 1      | 0      | 0      | 1      |
| 15614  | 0      | 1      | 1      | 1      | 0      | 0      |
| 15617  | 0      | 1      | 1      | 1      | 0      | 1      |
| 15622  | 0      | 1      | 0      | 1      | 0      | 3      |
| 15623  | 1      | 2      | 0      | 0      | 1      | 1      |
| 15625  | 1      | 1      | 0      | 0      | 0      | 1      |
| 15627  | 0      | 3      | 0      | 3      | 0      | 3      |

| respid | Q56i_1 | Q56j_1 | Q56k_1 | Q56l_1 | Q56m_1 | Q56n_1 |
|--------|--------|--------|--------|--------|--------|--------|
| 15628  | 1      | 0      | 1      | 1      | 1      | 1      |
| 15633  | 1      | 0      | 0      | 0      | 1      | 0      |
| 15634  | 0      | 0      | 0      | 0      | 1      | 0      |
| 15637  | 1      | 1      | 1      | 2      | 1      | 1      |
| 15644  | 0      | 0      | 0      | 0      | 0      | 0      |
| 15645  | 1      | 2      | 1      | 2      | 1      | 1      |
| 15649  | 1      | 0      | 1      | 0      | 1      | 0      |
| 15650  | 0      | 1      | 0      | 1      | 0      | 0      |
| 15651  | 0      | 0      | 0      | 0      | 0      | 0      |
| 15657  | 1      | 3      | 1      | 1      | 1      | 2      |
| 15658  | 1      | 0      | 0      | 0      | 1      | 0      |
| 15660  | 0      | 1      | 0      | 0      | 1      | 0      |
| 15667  | 1      | 1      | 1      | 1      | 1      | 1      |
| 15671  | 0      | 3      | 1      | 3      | 0      | 0      |
| 15679  | 1      | 1      | 2      | 0      | 0      | 1      |
| 15712  | 0      | 0      | 1      | 0      | 0      | 0      |
| 15715  | 0      | 1      | 0      | 0      | 0      | 1      |
| 15749  | 1      | 0      | 1      | 0      | 1      | 0      |
| 15754  | 0      | 1      | 0      | 0      | 1      | 0      |
| 15756  | 0      | 0      | 0      | 0      | 0      | 1      |
| 15773  | 0      | 2      | 0      | 0      | 0      | 0      |
| 15774  | 0      | 0      | 0      | 1      | 0      | 1      |
| 15776  | 1      | 1      | 1      | 0      | 0      | 0      |
| 15777  | 1      | 1      | 1      | 1      | 1      | 0      |
| 15779  | 1      | 0      | 1      | 1      | 1      | 0      |
| 15780  | 1      | 1      | 0      | 1      | 0      | 0      |
| 15792  | 1      | 1      | 1      | 2      | 0      | 0      |
| 15793  | 2      | 1      | 2      | 1      | 1      | 1      |
| 15796  | 2      | 1      | 1      | 1      | 1      | 1      |
| 15798  | 1      | 2      | 1      | 0      | 1      | 1      |
| 15809  | 0      | 1      | 0      | 0      | 0      | 0      |
| 15810  | 0      | 0      | 0      | 0      | 0      | 0      |

| respid | Q56i_1 | Q56j_1 | Q56k_1 | Q56l_1 | Q56m_1 | Q56n_1 |
|--------|--------|--------|--------|--------|--------|--------|
| 15815  | 1      | 1      | 1      | 1      | 1      | 1      |
| 15816  | 1      | 0      | 1      | 1      | 1      | 1      |
| 15817  | 0      | 3      | 0      | 0      | 0      | 0      |
| 15821  | 1      | 1      | 1      | 1      | 1      | 1      |
| 15823  | 1      | 1      | 1      | 1      | 1      | 1      |
| 15834  | 0      | 2      | 1      | 1      | 1      | 1      |
| 15835  | 0      | 0      | 0      | 0      | 0      | 0      |
| 15836  | 0      | 2      | 0      | 0      | 0      | 1      |
| 15837  | 0      | 1      | 1      | 0      | 1      | 0      |
| 15839  | 1      | 0      | 0      | 1      | 0      | 1      |
| 15840  | 1      | 1      | 1      | 1      | 1      | 0      |
| 15844  | 1      | 1      | 1      | 2      | 1      | 1      |
| 15845  | 1      | 1      | 1      | 1      | 1      | 2      |
| 15847  | 1      | 1      | 1      | 1      | 1      | 1      |
| 15848  | 1      | 1      | 1      | 1      | 1      | 0      |
| 15849  | 1      | 2      | 1      | 1      | 1      | 0      |
| 15857  | 1      | 1      | 1      | 1      | 1      | 1      |
| 15858  | 0      | 0      | 0      | 0      | 0      | 0      |
| 15862  | 1      | 3      | 2      | 2      | 3      | 3      |
| 15866  | 1      | 1      | 1      | 1      | 1      | 1      |
| 15870  | 1      | 1      | 1      | 1      | 1      | 0      |
| 15871  | 0      | 0      | 1      | 1      | 0      | 0      |
| 15872  | 1      | 1      | 0      | 1      | 1      | 1      |
| 15873  | 0      | 0      | 0      | 0      | 0      | 0      |
| 15874  | 0      | 0      | 0      | 0      | 0      | 0      |
| 15875  | 2      | 1      | 2      | 1      | 2      | 0      |
| 15876  | 2      | 2      | 1      | 1      | 1      | 1      |
| 15882  | 2      | 2      | 2      | 2      | 1      | 2      |
| 15884  | 1      | 2      | 1      | 1      | 1      | 0      |
| 15890  | 2      | 1      | 1      | 1      | 2      | 1      |
| 15892  | 3      | 2      | 2      | 3      | 3      | 1      |
| 15908  | 0      | 1      | 1      | 2      | 1      | 2      |

| respid | Q56i_1 | Q56j_1 | Q56k_1 | Q56l_1 | Q56m_1 | Q56n_1 |
|--------|--------|--------|--------|--------|--------|--------|
| 15914  | 1      | 1      | 1      | 1      | 1      | 0      |
| 15932  | 1      | 1      | 1      | 1      | 1      | 1      |
| 15933  | 0      | 0      | 0      | 0      | 0      | 0      |
| 15938  | 0      | 0      | 0      | 0      | 1      | 0      |
| 15940  | 0      | 3      | 1      | 1      | 3      | 3      |
| 15945  | 1      | 1      | 1      | 1      | 1      | 0      |
| 15947  | 1      | 2      | 1      | 1      | 1      | 1      |
| 15950  | 1      | 1      | 1      | 1      | 0      | 0      |
| 15951  | 1      | 0      | 1      | 0      | 0      | 0      |
| 15952  | 1      | 1      | 1      | 1      | 1      | 1      |
| 15953  | 0      | 1      | 1      | 0      | 0      | 0      |
| 15954  | 1      | 0      | 2      | 1      | 1      | 1      |
| 15957  | 1      | 2      | 2      | 3      | 3      | 2      |
| 15965  | 1      | 2      | 1      | 2      | 2      | 1      |
| 15966  | 0      | 0      | 0      | 0      | 0      | 0      |
| 15967  | 1      | 2      | 1      | 2      | 1      | 1      |
| 15968  | 0      | 1      | 0      | 0      | 0      | 0      |
| 15970  | 1      | 2      | 1      | 0      | 0      | 0      |
| 15973  | 1      | 1      | 1      | 1      | 1      | 1      |
| 15974  | 1      | 1      | 1      | 1      | 1      | 0      |
| 15975  | 0      | 0      | 0      | 0      | 0      | 0      |
| 15980  | 2      | 3      | 2      | 3      | 3      | 2      |
| 15984  | 1      | 1      | 1      | 1      | 1      | 1      |
| 15985  | 1      | 2      | 2      | 1      | 2      | 1      |
| 15994  | 0      | 3      | 0      | 0      | 0      | 0      |
| 15995  | 0      | 0      | 1      | 0      | 0      | 1      |
| 16000  | 0      | 1      | 0      | 0      | 0      | 1      |
| 16004  | 1      | 1      | 1      | 1      | 1      | 0      |
| 16005  | 1      | 1      | 1      | 1      | 1      | 0      |
| 16006  | 2      | 3      | 2      | 2      | 3      | 1      |
| 16009  | 0      | 1      | 0      | 1      | 0      | 0      |
| 16017  | 0      | 0      | 0      | 0      | 0      | 1      |

| respid | Q56i_1 | Q56j_1 | Q56k_1 | Q56l_1 | Q56m_1 | Q56n_1 |
|--------|--------|--------|--------|--------|--------|--------|
| 16019  | 0      | 1      | 1      | 0      | 1      | 0      |
| 16021  | 0      | 1      | 0      | 1      | 1      | 1      |
| 16024  | 0      | 1      | 0      | 0      | 0      | 2      |
| 16026  | 0      | 0      | 1      | 0      | 0      | 1      |
| 16029  | 0      | 0      | 0      | 0      | 0      | 0      |
| 16031  | 1      | 1      | 2      | 1      | 0      | 0      |
| 16037  | 0      | 0      | 0      | 0      | 0      | 0      |
| 16043  | 0      | 1      | 0      | 0      | 0      | 0      |
| 16044  | 0      | 2      | 0      | 0      | 0      | 0      |
| 16047  | 1      | 1      | 1      | 1      | 1      | 2      |
| 16048  | 0      | 2      | 0      | 2      | 0      | 1      |
| 16049  | 1      | 1      | 1      | 1      | 0      | 1      |
| 16051  | 0      | 1      | 1      | 1      | 0      | 1      |
| 16053  | 1      | 0      | 1      | 1      | 0      | 0      |
| 16054  | 1      | 0      | 1      | 1      | 1      | 0      |
| 16069  | 0      | 1      | 1      | 1      | 0      | 1      |
| 16070  | 1      | 0      | 2      | 2      | 1      | 1      |
| 16074  | 0      | 1      | 0      | 1      | 0      | 1      |
| 16076  | 1      | 0      | 1      | 0      | 1      | 0      |
| 16078  | 0      | 3      | 0      | 0      | 0      | 2      |
| 16081  | 1      | 1      | 1      | 2      | 0      | 1      |
| 16085  | 2      | 3      | 2      | 2      | 2      | 2      |
| 16088  | 1      | 0      | 1      | 0      | 1      | 1      |
| 16091  | 1      | 0      | 2      | 1      | 1      | 1      |
| 16092  | 0      | 1      | 0      | 1      | 0      | 0      |
| 16093  | 0      | 3      | 0      | 1      | 1      | 0      |
| 16097  | 1      | 2      | 2      | 2      | 1      | 1      |
| 16100  | 1      | 1      | 1      | 1      | 1      | 1      |
| 16101  | 1      | 0      | 1      | 0      | 1      | 0      |
| 16105  | 1      | 2      | 1      | 1      | 0      | 1      |
| 16118  | 2      | 1      | 2      | 2      | 1      | 1      |
| 16129  | 0      | 1      | 0      | 1      | 0      | 0      |

| respid | Q56i_1 | Q56j_1 | Q56k_1 | Q56l_1 | Q56m_1 | Q56n_1 |
|--------|--------|--------|--------|--------|--------|--------|
| 16130  | 1      | 1      | 0      | 0      | 0      | 1      |
| 16131  | 1      | 2      | 1      | 2      | 2      | 1      |
| 16136  | 1      | 3      | 2      | 2      | 1      | 2      |
| 16137  | 0      | 2      | 0      | 2      | 0      | 1      |
| 16138  | 1      | 0      | 1      | 0      | 0      | 0      |
| 16139  | 0      | 1      | 1      | 2      | 0      | 0      |
| 16140  | 0      | 0      | 0      | 0      | 1      | 0      |
| 16145  | 0      | 1      | 1      | 0      | 1      | 1      |
| 16150  | 1      | 3      | 0      | 3      | 1      | 0      |
| 16151  | 0      | 3      | 0      | 0      | 0      | 0      |
| 16153  | 1      | 0      | 0      | 0      | 0      | 1      |
| 16164  | 0      | 1      | 0      | 1      | 1      | 0      |
| 16168  | 1      | 1      | 1      | 1      | 1      | 1      |
| 16173  | 1      | 1      | 1      | 2      | 1      | 1      |
| 16174  | 0      | 3      | 0      | 0      | 0      | 0      |
| 16177  | 1      | 0      | 2      | 1      | 0      | 0      |
| 16185  | 0      | 2      | 0      | 0      | 0      | 1      |
| 16189  | 1      | 1      | 1      | 1      | 1      | 1      |
| 16192  | 1      | 1      | 0      | 0      | 1      | 0      |
| 16193  | 1      | 1      | 1      | 1      | 1      | 1      |
| 16194  | 0      | 2      | 1      | 2      | 1      | 1      |
| 16196  | 1      | 0      | 1      | 1      | 1      | 1      |
| 16202  | 2      | 1      | 1      | 1      | 1      | 0      |
| 16205  | 1      | 1      | 2      | 2      | 1      | 1      |
| 16206  | 1      | 2      | 1      | 1      | 0      | 0      |
| 16208  | 0      | 0      | 1      | 0      | 0      | 0      |
| 16211  | 2      | 1      | 1      | 0      | 1      | 0      |
| 16212  | 0      | 1      | 0      | 1      | 0      | 0      |
| 16215  | 0      | 1      | 0      | 0      | 0      | 0      |
| 16217  | 1      | 2      | 1      | 0      | 1      | 0      |
| 16221  | 2      | 0      | 1      | 1      | 0      | 1      |
| 16226  | 1      | 2      | 1      | 1      | 1      | 0      |

| respid | Q56i_1 | Q56j_1 | Q56k_1 | Q56l_1 | Q56m_1 | Q56n_1 |
|--------|--------|--------|--------|--------|--------|--------|
| 16228  | 2      | 2      | 2      | 1      | 2      | 1      |
| 16229  | 1      | 2      | 1      | 1      | 0      | 1      |
| 16230  | 1      | 1      | 1      | 1      | 1      | 1      |
| 16231  | 1      | 2      | 1      | 1      | 2      | 1      |
| 16232  | 1      | 1      | 1      | 2      | 0      | 1      |
| 16234  | 1      | 1      | 1      | 2      | 0      | 0      |
| 16235  | 1      | 1      | 1      | 1      | 2      | 1      |
| 16236  | 0      | 1      | 0      | 0      | 0      | 0      |
| 16237  | 1      | 1      | 1      | 1      | 0      | 1      |
| 16238  | 1      | 0      | 1      | 1      | 2      | 0      |
| 16239  | 0      | 1      | 0      | 1      | 1      | 0      |
| 16243  | 1      | 1      | 1      | 1      | 1      | 1      |
| 16248  | 1      | 1      | 1      | 1      | 0      | 0      |
| 16249  | 0      | 1      | 0      | 1      | 1      | 0      |
| 16251  | 0      | 0      | 1      | 0      | 0      | 0      |
| 16263  | 1      | 1      | 0      | 0      | 0      | 0      |
| 16265  | 2      | 2      | 2      | 2      | 2      | 2      |
| 16269  | 1      | 1      | 1      | 1      | 0      | 1      |
| 16272  | 1      | 1      | 1      | 1      | 1      | 1      |
| 16273  | 0      | 0      | 0      | 0      | 0      | 0      |
| 16281  | 1      | 1      | 0      | 2      | 1      | 1      |
| 16282  | 0      | 1      | 0      | 0      | 1      | 0      |
| 16287  | 0      | 0      | 3      | 0      | 2      | 1      |
| 16290  | 0      | 1      | 1      | 0      | 0      | 0      |
| 16294  | 0      | 1      | 0      | 0      | 0      | 2      |
| 16295  | 2      | 1      | 3      | 2      | 3      | 2      |
| 16296  | 0      | 0      | 1      | 1      | 0      | 0      |
| 16299  | 2      | 2      | 1      | 2      | 1      | 2      |
| 16302  | 1      | 3      | 1      | 2      | 1      | 2      |
| 16303  | 0      | 3      | 0      | 1      | 0      | 2      |
| 16304  | 1      | 2      | 1      | 1      | 0      | 2      |
| 16306  | 1      | 1      | 1      | 1      | 1      | 2      |

| respid | Q56i_1 | Q56j_1 | Q56k_1 | Q56l_1 | Q56m_1 | Q56n_1 |
|--------|--------|--------|--------|--------|--------|--------|
| 16318  | 0      | 1      | 0      | 2      | 0      | 0      |
| 16320  | 1      | 1      | 1      | 0      | 0      | 1      |
| 16321  | 1      | 3      | 2      | 0      | 0      | 1      |
| 16322  | 0      | 2      | 1      | 1      | 0      | 0      |
| 16324  | 1      | 1      | 0      | 0      | 0      | 0      |
| 16326  | 1      | 1      | 1      | 1      | 2      | 1      |
| 16328  | 1      | 0      | 1      | 1      | 1      | 0      |
| 16336  | 0      | 0      | 1      | 0      | 0      | 0      |
| 16341  | 0      | 2      | 0      | 1      | 0      | 1      |
| 16342  | 0      | 1      | 0      | 0      | 0      | 0      |
| 16343  | 1      | 2      | 1      | 2      | 1      | 1      |
| 16345  | 1      | 2      | 1      | 2      | 2      | 1      |
| 16349  | 1      | 0      | 1      | 2      | 0      | 0      |
| 16355  | 0      | 1      | 0      | 1      | 0      | 1      |
| 16364  | 1      | 1      | 1      | 0      | 2      | 2      |
| 16374  | 0      | 0      | 1      | 1      | 0      | 0      |
| 16375  | 0      | 1      | 0      | 0      | 0      | 0      |
| 16376  | 2      | 1      | 2      | 1      | 1      | 1      |
| 16393  | 0      | 2      | 0      | 1      | 1      | 1      |
| 16394  | 0      | 2      | 0      | 2      | 1      | 1      |
| 16395  | 1      | 1      | 1      | 1      | 1      | 0      |
| 16397  | 1      | 2      | 2      | 1      | 1      | 1      |
| 16398  | 1      | 2      | 1      | 1      | 1      | 2      |
| 16402  | 1      | 2      | 1      | 1      | 1      | 1      |
| 16405  | 0      | 2      | 1      | 1      | 0      | 0      |
| 16416  | 1      | 1      | 1      | 1      | 1      | 1      |
| 16422  | 1      | 1      | 1      | 2      | 2      | 1      |
| 16429  | 1      | 0      | 1      | 1      | 1      | 1      |
| 16430  | 0      | 0      | 0      | 0      | 0      | 0      |
| 16432  | 1      | 2      | 1      | 1      | 1      | 1      |
| 16433  | 0      | 0      | 0      | 2      | 0      | 0      |
| 16434  | 1      | 2      | 0      | 1      | 1      | 1      |



| respid | Q56i_1 | Q56j_1 | Q56k_1 | Q56l_1 | Q56m_1 | Q56n_1 |
|--------|--------|--------|--------|--------|--------|--------|
| 16437  | 1      | 0      | 2      | 1      | 0      | 0      |
| 16439  | 1      | 1      | 1      | 1      | 1      | 0      |
| 16440  | 0      | 0      | 1      | 0      | 0      | 0      |
| 16441  | 0      | 2      | 1      | 2      | 0      | 1      |
| 16442  | 0      | 0      | 0      | 0      | 0      | 0      |
| 16450  | 1      | 2      | 1      | 1      | 1      | 0      |
| 16451  | 0      | 2      | 0      | 0      | 1      | 1      |
| 16452  | 2      | 1      | 1      | 2      | 2      | 2      |
| 16467  | 0      | 1      | 0      | 1      | 0      | 0      |
| 16468  | 0      | 2      | 0      | 0      | 0      | 0      |
| 16469  | 0      | 0      | 1      | 1      | 0      | 1      |
| 16470  | 0      | 1      | 0      | 0      | 0      | 0      |
| 16471  | 1      | 0      | 1      | 0      | 1      | 0      |
| 16473  | 0      | 0      | 0      | 0      | 0      | 1      |
| 16476  | 0      | 1      | 0      | 1      | 0      | 1      |
| 16478  | 0      | 2      | 0      | 1      | 1      | 0      |
| 16484  | 1      | 1      | 1      | 1      | 1      | 1      |
| 16499  | 1      | 1      | 1      | 1      | 0      | 0      |
| 16502  | 0      | 0      | 1      | 0      | 0      | 1      |
| 16505  | 0      | 0      | 0      | 0      | 0      | 0      |
| 16514  | 0      | 1      | 1      | 0      | 0      | 0      |
| 16515  | 1      | 1      | 1      | 1      | 1      | 1      |
| 16517  | 2      | 1      | 1      | 1      | 1      | 1      |
| 16518  | 0      | 2      | 0      | 1      | 1      | 0      |
| 16519  | 0      | 1      | 0      | 2      | 1      | 1      |
| 16525  | 0      | 0      | 0      | 1      | 1      | 0      |
| 16526  | 1      | 0      | 1      | 0      | 1      | 0      |
| 16530  | 0      | 0      | 1      | 0      | 0      | 0      |
| 16532  | 0      | 0      | 1      | 0      | 0      | 0      |
| 16536  | 0      | 1      | 0      | 0      | 0      | 0      |
| 16537  | 1      | 2      | 1      | 1      | 1      | 2      |
| 16541  | 1      | 3      | 1      | 1      | 1      | 0      |

| respid | Q56i_1 | Q56j_1 | Q56k_1 | Q56l_1 | Q56m_1 | Q56n_1 |
|--------|--------|--------|--------|--------|--------|--------|
| 16543  | 0      | 3      | 0      | 0      | 0      | 0      |
| 16544  | 1      | 1      | 1      | 0      | 1      | 0      |
| 16545  | 1      | 1      | 1      | 1      | 0      | 0      |
| 16546  | 1      | 2      | 1      | 1      | 1      | 2      |
| 16548  | 0      | 1      | 1      | 0      | 0      | 0      |
| 16552  | 1      | 1      | 1      | 0      | 1      | 0      |
| 16559  | 1      | 3      | 1      | 0      | 0      | 0      |
| 16564  | 1      | 2      | 2      | 2      | 1      | 0      |
| 16565  | 3      | 3      | 3      | 3      | 3      | 2      |
| 16567  | 1      | 1      | 1      | 1      | 1      | 1      |
| 16571  | 0      | 0      | 0      | 3      | 0      | 3      |
| 16572  | 1      | 2      | 1      | 3      | 2      | 2      |
| 16579  | 1      | 1      | 1      | 1      | 1      | 1      |
| 16588  | 2      | 2      | 2      | 2      | 2      | 2      |
| 16599  | 0      | 3      | 1      | 3      | 0      | 2      |
| 16605  | 1      | 2      | 1      | 2      | 1      | 2      |
| 16622  | 1      | 2      | 1      | 2      | 1      | 1      |
| 16635  | 1      | 0      | 1      | 1      | 1      | 0      |
| 16638  | 0      | 1      | 0      | 1      | 0      | 1      |
| 16652  | 1      | 1      | 1      | 3      | 1      | 1      |
| 16656  | 1      | 1      | 0      | 2      | 2      | 1      |
| 16671  | 0      | 3      | 0      | 0      | 0      | 0      |
| 16676  | 0      | 1      | 3      | 2      | 2      | 2      |
| 16678  | 1      | 1      | 1      | 1      | 1      | 1      |
| 16702  | 1      | 2      | 1      | 2      | 1      | 1      |
| 16705  | 0      | 2      | 0      | 2      | 1      | 2      |
| 16707  | 1      | 2      | 1      | 2      | 2      | 2      |
| 16711  | 1      | 2      | 1      | 2      | 1      | 1      |
| 16712  | 0      | 0      | 0      | 0      | 0      | 1      |
| 16716  | 0      | 2      | 0      | 0      | 0      | 1      |
| 16724  | 0      | 1      | 1      | 1      | 1      | 0      |
| 16727  | 1      | 0      | 1      | 1      | 1      | 1      |

| respid | Q56i_1 | Q56j_1 | Q56k_1 | Q56l_1 | Q56m_1 | Q56n_1 |
|--------|--------|--------|--------|--------|--------|--------|
| 16734  | 0      | 1      | 0      | 2      | 1      | 2      |
| 16740  | 0      | 0      | 0      | 0      | 1      | 1      |
| 16748  | 0      | 0      | 1      | 1      | 0      | 0      |
| 16759  | 0      | 0      | 0      | 0      | 0      | 0      |
| 16761  | 0      | 3      | 0      | 0      | 0      | 1      |
| 16763  | 1      | 3      | 0      | 1      | 1      | 0      |
| 16764  | 1      | 1      | 1      | 1      | 1      | 1      |
| 16766  | 1      | 1      | 1      | 2      | 1      | 0      |
| 16767  | 0      | 3      | 1      | 0      | 0      | 2      |
| 16776  | 0      | 0      | 0      | 0      | 0      | 0      |
| 16781  | 0      | 2      | 0      | 1      | 0      | 0      |
| 16793  | 0      | 1      | 0      | 0      | 0      | 1      |
| 16796  | 2      | 3      | 3      | 1      | 3      | 3      |
| 16810  | 1      | 0      | 0      | 0      | 0      | 0      |
| 16811  | 0      | 1      | 1      | 1      | 0      | 0      |
| 16813  | 0      | 0      | 0      | 1      | 0      | 1      |
| 16814  | 1      | 3      | 1      | 2      | 1      | 1      |
| 16831  | 1      | 1      | 1      | 1      | 1      | 1      |
| 16833  | 1      | 2      | 1      | 2      | 0      | 0      |
| 16839  | 0      | 0      | 0      | 1      | 0      | 0      |
| 16843  | 1      | 1      | 1      | 1      | 1      | 1      |
| 16860  | 3      | 0      | 1      | 1      | 1      | 0      |
| 16871  | 0      | 1      | 1      | 1      | 1      | 1      |
| 16881  | 1      | 1      | 1      | 1      | 1      | 1      |
| 16884  | 1      | 0      | 1      | 1      | 0      | 2      |
| 16891  | 0      | 1      | 0      | 0      | 0      | 0      |
| 16909  | 1      | 2      | 1      | 0      | 1      | 1      |
| 16911  | 0      | 1      | 1      | 1      | 1      | 0      |
| 16922  | 2      | 1      | 1      | 2      | 1      | 1      |
| 16935  | 1      | 0      | 3      | 2      | 3      | 0      |
| 16942  | 1      | 1      | 1      | 1      | 1      | 1      |
| 16950  | 1      | 0      | 0      | 1      | 1      | 1      |

| respid | Q56i_1 | Q56j_1 | Q56k_1 | Q56l_1 | Q56m_1 | Q56n_1 |
|--------|--------|--------|--------|--------|--------|--------|
| 16952  | 1      | 2      | 1      | 2      | 1      | 1      |
| 16963  | 0      | 1      | 0      | 1      | 0      | 0      |
| 16967  | 0      | 1      | 1      | 1      | 1      | 0      |
| 16970  | 3      | 0      | 3      | 3      | 3      | 2      |
| 16976  | 1      | 1      | 1      | 2      | 1      | 1      |
| 16982  | 0      | 0      | 0      | 0      | 0      | 0      |
| 16995  | 0      | 1      | 0      | 1      | 0      | 0      |
| 17004  | 1      | 3      | 1      | 2      | 1      | 0      |
| 17006  | 0      | 1      | 1      | 1      | 0      | 0      |
| 17009  | 0      | 0      | 0      | 1      | 0      | 0      |
| 17021  | 0      | 0      | 0      | 0      | 0      | 0      |
| 17040  | 0      | 0      | 1      | 1      | 0      | 1      |
| 17041  | 1      | 1      | 1      | 2      | 1      | 1      |
| 17044  | 1      | 2      | 1      | 3      | 1      | 1      |
| 17046  | 1      | 1      | 1      | 1      | 1      | 1      |
| 17052  | 0      | 1      | 1      | 1      | 0      | 1      |
| 17055  | 1      | 1      | 1      | 1      | 1      | 1      |
| 17108  | 0      | 1      | 0      | 0      | 0      | 1      |
| 17109  | 0      | 2      | 1      | 0      | 0      | 1      |
| 17113  | 0      | 0      | 0      | 0      | 0      | 2      |
| 17115  | 1      | 0      | 1      | 1      | 2      | 1      |
| 17132  | 1      | 3      | 1      | 2      | 1      | 3      |
| 17135  | 0      | 0      | 0      | 1      | 0      | 1      |
| 17138  | 1      | 2      | 1      | 2      | 1      | 1      |
| 17141  | 0      | 0      | 1      | 0      | 0      | 0      |
| 17143  | 1      | 1      | 1      | 1      | 0      | 0      |
| 17148  | 0      | 0      | 0      | 1      | 1      | 0      |
| 17151  | 1      | 2      | 1      | 1      | 0      | 0      |
| 17153  | 0      | 0      | 0      | 1      | 0      | 0      |
| 17154  | 1      | 2      | 1      | 0      | 1      | 1      |
| 17157  | 0      | 1      | 1      | 3      | 0      | 0      |
| 17160  | 0      | 0      | 0      | 0      | 0      | 0      |

| respid | Q56i_1 | Q56j_1 | Q56k_1 | Q56l_1 | Q56m_1 | Q56n_1 |
|--------|--------|--------|--------|--------|--------|--------|
| 17167  | 1      | 2      | 1      | 2      | 1      | 1      |
| 17169  | 1      | 2      | 1      | 2      | 1      | 0      |
| 17174  | 2      | 2      | 2      | 2      | 2      | 2      |
| 17179  | 0      | 1      | 0      | 1      | 0      | 0      |
| 17180  | 1      | 1      | 1      | 1      | 0      | 0      |
| 17182  | 0      | 3      | 0      | 0      | 0      | 0      |
| 17184  | 2      | 1      | 2      | 2      | 2      | 0      |
| 17186  | 0      | 2      | 0      | 0      | 0      | 1      |
| 17187  | 0      | 1      | 0      | 0      | 0      | 0      |
| 17192  | 0      | 1      | 2      | 2      | 0      | 0      |
| 17197  | 1      | 0      | 2      | 1      | 1      | 1      |
| 17217  | 0      | 0      | 0      | 0      | 1      | 1      |
| 17226  | 0      | 1      | 1      | 2      | 0      | 1      |
| 17228  | 1      | 0      | 0      | 0      | 1      | 0      |
| 17245  | 0      | 2      | 0      | 0      | 0      | 1      |
| 17247  | 0      | 0      | 0      | 1      | 0      | 0      |
| 17258  | 0      | 1      | 0      | 0      | 0      | 1      |
| 17259  | 1      | 1      | 1      | 1      | 2      | 1      |
| 17262  | 0      | 1      | 0      | 0      | 0      | 0      |
| 17265  | 1      | 1      | 0      | 1      | 0      | 2      |
| 17281  | 0      | 2      | 0      | 0      | 0      | 0      |
| 17282  | 1      | 1      | 1      | 2      | 1      | 1      |
| 17293  | 0      | 0      | 0      | 1      | 0      | 1      |
| 17306  | 1      | 1      | 2      | 2      | 1      | 1      |
| 17312  | 1      | 1      | 2      | 1      | 1      | 1      |
| 17318  | 1      | 1      | 1      | 1      | 1      | 2      |
| 17328  | 1      | 1      | 2      | 2      | 1      | 1      |
| 17343  | 1      | 1      | 1      | 1      | 1      | 1      |
| 17344  | 2      | 2      | 2      | 2      | 2      | 1      |
| 17348  | 1      | 1      | 2      | 1      | 1      | 1      |
| 17352  | 0      | 1      | 1      | 0      | 1      | 1      |
| 17355  | 1      | 0      | 1      | 1      | 1      | 0      |

| respid | Q56i_1 | Q56j_1 | Q56k_1 | Q56l_1 | Q56m_1 | Q56n_1 |
|--------|--------|--------|--------|--------|--------|--------|
| 17356  | 1      | 1      | 0      | 1      | 0      | 1      |
| 17359  | 0      | 1      | 0      | 0      | 0      | 0      |
| 17373  | 1      | 1      | 1      | 2      | 1      | 2      |
| 17381  | 1      | 2      | 1      | 1      | 1      | 0      |
| 17388  | 0      | 1      | 1      | 1      | 0      | 1      |
| 17394  | 0      | 1      | 0      | 1      | 1      | 0      |
| 17401  | 0      | 2      | 0      | 1      | 0      | 1      |
| 17403  | 0      | 0      | 0      | 0      | 0      | 0      |
| 17411  | 1      | 0      | 1      | 0      | 1      | 0      |
| 17423  | 0      | 0      | 0      | 0      | 0      | 0      |
| 17427  | 0      | 0      | 0      | 1      | 0      | 1      |
| 17433  | 2      | 2      | 2      | 2      | 2      | 2      |
| 17441  | 0      | 1      | 1      | 3      | 0      | 1      |
| 17442  | 0      | 0      | 0      | 0      | 0      | 0      |
| 17447  | 0      | 0      | 0      | 0      | 0      | 0      |
| 17458  | 1      | 0      | 1      | 0      | 1      | 0      |
| 17474  | 1      | 2      | 1      | 1      | 1      | 0      |
| 17475  | 1      | 1      | 1      | 1      | 1      | 1      |
| 17476  | 1      | 0      | 1      | 0      | 1      | 0      |
| 17480  | 1      | 2      | 0      | 1      | 0      | 1      |
| 17484  | 0      | 1      | 0      | 0      | 1      | 0      |
| 17490  | 1      | 1      | 1      | 1      | 1      | 1      |
| 17491  | 1      | 2      | 1      | 1      | 0      | 2      |
| 17500  | 1      | 1      | 1      | 2      | 0      | 1      |
| 17507  | 0      | 0      | 0      | 0      | 0      | 0      |
| 17517  | 1      | 0      | 1      | 1      | 0      | 1      |
| 17520  | 0      | 2      | 0      | 1      | 0      | 1      |
| 17521  | 1      | 0      | 1      | 0      | 1      | 0      |
| 17531  | 0      | 1      | 0      | 1      | 1      | 1      |
| 17540  | 1      | 1      | 1      | 2      | 1      | 1      |
| 17550  | 0      | 3      | 0      | 0      | 0      | 0      |
| 17551  | 0      | 0      | 0      | 1      | 0      | 0      |

| respid | Q56i_1 | Q56j_1 | Q56k_1 | Q56l_1 | Q56m_1 | Q56n_1 |
|--------|--------|--------|--------|--------|--------|--------|
| 17555  | 1      | 1      | 1      | 1      | 1      | 1      |
| 17556  | 1      | 1      | 1      | 1      | 0      | 0      |
| 17574  | 0      | 0      | 0      | 1      | 0      | 0      |
| 17575  | 0      | 1      | 0      | 1      | 0      | 0      |
| 17582  | 1      | 1      | 2      | 0      | 1      | 0      |
| 17587  | 0      | 0      | 0      | 0      | 0      | 0      |
| 17601  | 0      | 1      | 0      | 1      | 0      | 1      |
| 17607  | 0      | 0      | 0      | 0      | 0      | 0      |
| 17609  | 1      | 1      | 2      | 2      | 1      | 2      |
| 17611  | 0      | 1      | 0      | 0      | 0      | 1      |
| 17613  | 0      | 3      | 0      | 1      | 1      | 1      |
| 17615  | 0      | 2      | 1      | 1      | 1      | 0      |
| 17620  | 1      | 1      | 1      | 0      | 1      | 0      |
| 17624  | 1      | 1      | 1      | 2      | 1      | 1      |
| 17635  | 2      | 2      | 3      | 3      | 2      | 2      |
| 17643  | 3      | 2      | 1      | 2      | 3      | 2      |
| 17645  | 1      | 1      | 2      | 1      | 1      | 0      |
| 17646  | 1      | 0      | 1      | 1      | 2      | 1      |
| 17649  | 2      | 1      | 1      | 3      | 2      | 1      |
| 17658  | 0      | 2      | 0      | 0      | 0      | 0      |
| 17666  | 0      | 0      | 0      | 0      | 0      | 1      |
| 17670  | 1      | 1      | 1      | 2      | 0      | 3      |
| 17678  | 0      | 1      | 1      | 1      | 0      | 0      |
| 17679  | 1      | 0      | 1      | 1      | 3      | 0      |
| 17695  | 0      | 1      | 1      | 1      | 0      | 1      |
| 17697  | 2      | 1      | 1      | 1      | 2      | 2      |
| 17698  | 0      | 2      | 1      | 0      | 0      | 1      |
| 17723  | 2      | 2      | 1      | 2      | 2      | 2      |
| 17727  | 0      | 0      | 0      | 0      | 0      | 0      |
| 17734  | 1      | 3      | 0      | 0      | 0      | 0      |
| 17737  | 0      | 2      | 1      | 0      | 1      | 1      |
| 17748  | 1      | 1      | 1      | 1      | 0      | 1      |

| respid | Q56i_1 | Q56j_1 | Q56k_1 | Q56l_1 | Q56m_1 | Q56n_1 |
|--------|--------|--------|--------|--------|--------|--------|
| 17749  | 1      | 1      | 1      | 2      | 1      | 1      |
| 17754  | 1      | 1      | 1      | 2      | 1      | 0      |
| 17766  | 2      | 3      | 1      | 3      | 1      | 1      |
| 17777  | 0      | 0      | 0      | 0      | 1      | 1      |
| 17780  | 0      | 2      | 0      | 2      | 0      | 1      |
| 17788  | 0      | 0      | 0      | 0      | 0      | 0      |
| 17801  | 1      | 2      | 1      | 2      | 1      | 2      |
| 17803  | 1      | 1      | 1      | 1      | 1      | 0      |
| 17807  | 0      | 1      | 0      | 1      | 0      | 1      |
| 17808  | 0      | 2      | 1      | 2      | 0      | 0      |
| 17809  | 1      | 2      | 1      | 1      | 1      | 1      |
| 17821  | 0      | 2      | 1      | 0      | 1      | 0      |
| 17827  | 1      | 1      | 1      | 1      | 1      | 1      |
| 17834  | 1      | 2      | 1      | 2      | 1      | 2      |
| 17838  | 1      | 3      | 2      | 0      | 0      | 0      |
| 17842  | 0      | 0      | 0      | 0      | 0      | 0      |
| 17862  | 1      | 1      | 1      | 1      | 0      | 0      |
| 17863  | 1      | 2      | 1      | 2      | 1      | 0      |
| 17871  | 1      | 1      | 1      | 2      | 1      | 1      |
| 17872  | 0      | 1      | 0      | 1      | 0      | 0      |
| 17903  | 0      | 1      | 1      | 2      | 2      | 1      |
| 17906  | 1      | 1      | 1      | 1      | 0      | 2      |
| 17910  | 1      | 1      | 1      | 1      | 1      | 0      |
| 17922  | 1      | 2      | 0      | 1      | 0      | 0      |
| 17923  | 0      | 1      | 0      | 0      | 0      | 0      |
| 17925  | 0      | 1      | 1      | 1      | 1      | 1      |
| 17926  | 0      | 0      | 0      | 0      | 0      | 0      |
| 17937  | 0      | 0      | 0      | 0      | 0      | 0      |
| 17956  | 1      | 1      | 1      | 0      | 1      | 0      |
| 17958  | 0      | 1      | 1      | 1      | 0      | 0      |
| 17985  | 1      | 1      | 1      | 1      | 1      | 0      |
| 17989  | 0      | 0      | 1      | 0      | 0      | 0      |



| respid | Q56i_1 | Q56j_1 | Q56k_1 | Q56l_1 | Q56m_1 | Q56n_1 |
|--------|--------|--------|--------|--------|--------|--------|
| 17995  | 0      | 0      | 1      | 1      | 0      | 1      |
| 18000  | 0      | 2      | 1      | 2      | 2      | 3      |
| 18010  | 0      | 0      | 0      | 0      | 0      | 0      |
| 18015  | 0      | 3      | 0      | 0      | 0      | 0      |
| 18018  | 0      | 2      | 1      | 1      | 0      | 1      |
| 18031  | 1      | 1      | 1      | 1      | 1      | 1      |
| 18033  | 1      | 0      | 2      | 0      | 1      | 0      |
| 18036  | 1      | 2      | 1      | 1      | 1      | 0      |
| 18041  | 0      | 0      | 0      | 0      | 0      | 0      |
| 18068  | 0      | 0      | 0      | 0      | 0      | 0      |
| 18080  | 0      | 1      | 0      | 1      | 0      | 1      |
| 18081  | 1      | 1      | 1      | 2      | 1      | 2      |
| 18083  | 1      | 3      | 2      | 2      | 1      | 2      |
| 18113  | 0      | 0      | 1      | 1      | 0      | 0      |
| 18115  | 1      | 1      | 1      | 2      | 1      | 1      |
| 18117  | 3      | 3      | 3      | 3      | 3      | 2      |
| 18129  | 0      | 1      | 1      | 1      | 0      | 1      |
| 18132  | 1      | 2      | 1      | 0      | 1      | 1      |
| 18146  | 0      | 1      | 1      | 2      | 1      | 1      |
| 18147  | 1      | 2      | 2      | 1      | 1      | 0      |
| 18153  | 0      | 0      | 0      | 1      | 0      | 1      |
| 18154  | 0      | 1      | 0      | 0      | 1      | 0      |
| 18157  | 1      | 0      | 1      | 1      | 1      | 1      |
| 18166  | 1      | 1      | 0      | 0      | 0      | 0      |
| 18169  | 1      | 0      | 1      | 0      | 0      | 0      |
| 18171  | 1      | 2      | 2      | 1      | 0      | 1      |
| 18173  | 1      | 0      | 1      | 1      | 1      | 0      |
| 18204  | 2      | 2      | 2      | 1      | 1      | 0      |
| 18210  | 0      | 0      | 1      | 0      | 0      | 0      |
| 18212  | 3      | 1      | 3      | 1      | 3      | 0      |
| 18220  | 2      | 3      | 2      | 3      | 2      | 2      |
| 18221  | 1      | 0      | 1      | 0      | 0      | 0      |

| respid | Q56i_1 | Q56j_1 | Q56k_1 | Q56l_1 | Q56m_1 | Q56n_1 |
|--------|--------|--------|--------|--------|--------|--------|
| 18228  | 0      | 2      | 1      | 1      | 0      | 0      |
| 18231  | 0      | 0      | 0      | 0      | 0      | 0      |
| 18233  | 0      | 0      | 0      | 0      | 0      | 1      |
| 18235  | 1      | 1      | 1      | 2      | 1      | 1      |
| 18237  | 0      | 0      | 0      | 0      | 0      | 0      |
| 18250  | 1      | 1      | 1      | 1      | 1      | 1      |
| 18253  | 1      | 1      | 0      | 1      | 1      | 0      |
| 18264  | 0      | 1      | 1      | 0      | 0      | 1      |
| 18285  | 1      | 2      | 1      | 1      | 0      | 1      |
| 18287  | 0      | 0      | 0      | 0      | 0      | 0      |
| 18296  | 2      | 1      | 2      | 3      | 2      | 2      |
| 18299  | 1      | 1      | 1      | 0      | 1      | 1      |
| 18313  | 0      | 0      | 0      | 0      | 1      | 0      |
| 18321  | 1      | 1      | 1      | 2      | 2      | 2      |
| 18324  | 1      | 1      | 1      | 1      | 1      | 1      |
| 18329  | 1      | 1      | 1      | 2      | 1      | 1      |
| 18332  | 0      | 1      | 1      | 1      | 1      | 1      |
| 18339  | 1      | 2      | 1      | 2      | 1      | 0      |
| 18340  | 0      | 1      | 1      | 0      | 1      | 1      |
| 18348  | 1      | 0      | 1      | 0      | 1      | 0      |
| 18355  | 0      | 0      | 1      | 0      | 0      | 2      |
| 18360  | 1      | 1      | 1      | 1      | 1      | 1      |
| 18380  | 0      | 0      | 1      | 0      | 0      | 0      |
| 18403  | 0      | 2      | 0      | 1      | 0      | 1      |
| 18405  | 1      | 1      | 1      | 1      | 1      | 1      |
| 18409  | 1      | 3      | 1      | 1      | 1      | 1      |
| 18445  | 0      | 0      | 0      | 0      | 0      | 1      |
| 18458  | 0      | 3      | 0      | 0      | 0      | 0      |
| 18477  | 2      | 0      | 0      | 0      | 1      | 1      |
| 18481  | 2      | 1      | 1      | 2      | 0      | 0      |
| 18491  | 0      | 0      | 0      | 0      | 0      | 0      |
| 18492  | 0      | 3      | 0      | 0      | 0      | 0      |

| respid | Q56i_1 | Q56j_1 | Q56k_1 | Q56l_1 | Q56m_1 | Q56n_1 |
|--------|--------|--------|--------|--------|--------|--------|
| 18494  | 0      | 0      | 0      | 0      | 1      | 0      |
| 18495  | 0      | 1      | 0      | 0      | 0      | 0      |
| 18496  | 1      | 0      | 1      | 0      | 0      | 0      |
| 18507  | 1      | 2      | 1      | 1      | 1      | 1      |
| 18509  | 0      | 0      | 0      | 0      | 0      | 0      |
| 18510  | 1      | 2      | 1      | 1      | 0      | 0      |
| 18513  | 1      | 1      | 1      | 2      | 1      | 1      |
| 18525  | 0      | 0      | 0      | 0      | 1      | 0      |
| 18526  | 1      | 1      | 1      | 1      | 1      | 1      |
| 18527  | 0      | 1      | 1      | 2      | 0      | 0      |
| 18536  | 1      | 1      | 1      | 1      | 1      | 1      |
| 18540  | 1      | 1      | 1      | 1      | 0      | 0      |
| 18548  | 0      | 2      | 0      | 1      | 1      | 2      |
| 18550  | 0      | 3      | 0      | 3      | 0      | 0      |
| 18556  | 1      | 2      | 1      | 1      | 1      | 1      |
| 18561  | 0      | 0      | 0      | 0      | 0      | 0      |
| 18577  | 0      | 0      | 0      | 0      | 0      | 0      |
| 18580  | 1      | 1      | 1      | 1      | 0      | 0      |
| 18633  | 1      | 1      | 1      | 1      | 1      | 1      |
| 18635  | 1      | 2      | 2      | 1      | 1      | 2      |
| 18636  | 0      | 0      | 0      | 0      | 0      | 0      |
| 18645  | 0      | 0      | 1      | 1      | 1      | 0      |
| 18649  | 1      | 1      | 1      | 1      | 1      | 1      |
| 18664  | 1      | 2      | 0      | 0      | 1      | 0      |
| 18668  | 1      | 1      | 1      | 1      | 1      | 1      |
| 18682  | 0      | 3      | 0      | 0      | 0      | 0      |
| 18685  | 3      | 1      | 0      | 3      | 1      | 3      |
| 18688  | 0      | 0      | 0      | 0      | 1      | 1      |
| 18689  | 2      | 2      | 2      | 2      | 2      | 1      |
| 18693  | 2      | 3      | 2      | 3      | 2      | 1      |
| 18694  | 0      | 1      | 0      | 1      | 1      | 1      |
| 18705  | 0      | 1      | 0      | 0      | 0      | 1      |

| respid | Q56i_1 | Q56j_1 | Q56k_1 | Q56l_1 | Q56m_1 | Q56n_1 |
|--------|--------|--------|--------|--------|--------|--------|
| 18710  | 0      | 0      | 1      | 1      | 1      | 0      |
| 18715  | 1      | 1      | 1      | 2      | 1      | 0      |
| 18718  | 0      | 2      | 1      | 1      | 0      | 1      |
| 18727  | 2      | 1      | 1      | 1      | 1      | 1      |
| 18732  | 1      | 1      | 1      | 1      | 1      | 1      |
| 18735  | 2      | 2      | 1      | 2      | 1      | 2      |
| 18742  | 0      | 0      | 0      | 0      | 0      | 0      |
| 18745  | 0      | 1      | 0      | 1      | 1      | 0      |
| 18747  | 0      | 2      | 0      | 0      | 0      | 0      |
| 18750  | 0      | 1      | 1      | 1      | 0      | 1      |
| 18751  | 0      | 0      | 0      | 0      | 0      | 0      |
| 18753  | 0      | 3      | 0      | 3      | 0      | 0      |
| 18754  | 1      | 1      | 1      | 1      | 1      | 1      |
| 18759  | 1      | 3      | 2      | 1      | 0      | 1      |
| 18780  | 0      | 1      | 0      | 1      | 0      | 0      |
| 18782  | 1      | 0      | 0      | 0      | 2      | 1      |
| 18807  | 1      | 2      | 1      | 2      | 1      | 1      |
| 18815  | 0      | 3      | 1      | 1      | 1      | 1      |
| 18818  | 0      | 1      | 1      | 2      | 1      | 1      |
| 18820  | 2      | 1      | 1      | 3      | 1      | 2      |
| 18823  | 2      | 2      | 2      | 1      | 2      | 1      |
| 18825  | 0      | 0      | 0      | 0      | 0      | 0      |
| 18828  | 0      | 3      | 0      | 0      | 0      | 0      |
| 18832  | 1      | 0      | 1      | 1      | 2      | 2      |
| 18834  | 0      | 1      | 1      | 1      | 0      | 0      |
| 18835  | 2      | 0      | 2      | 1      | 1      | 0      |
| 18837  | 0      | 3      | 0      | 1      | 0      | 0      |
| 18842  | 0      | 1      | 0      | 0      | 1      | 0      |
| 18846  | 0      | 1      | 0      | 1      | 0      | 1      |
| 18855  | 2      | 2      | 2      | 2      | 2      | 2      |
| 18856  | 0      | 0      | 1      | 0      | 0      | 0      |
| 18887  | 0      | 0      | 0      | 0      | 0      | 0      |

| respid | Q56i_1 | Q56j_1 | Q56k_1 | Q56l_1 | Q56m_1 | Q56n_1 |
|--------|--------|--------|--------|--------|--------|--------|
| 18903  | 1      | 0      | 1      | 0      | 1      | 0      |
| 18906  | 1      | 1      | 0      | 0      | 1      | 1      |
| 18910  | 0      | 0      | 0      | 0      | 0      | 0      |
| 18919  | 0      | 1      | 1      | 0      | 1      | 0      |
| 18928  | 1      | 1      | 0      | 0      | 1      | 0      |
| 18931  | 0      | 0      | 1      | 1      | 0      | 1      |
| 18939  | 1      | 1      | 1      | 0      | 1      | 0      |
| 18946  | 0      | 0      | 0      | 0      | 0      | 0      |
| 18952  | 0      | 1      | 0      | 0      | 1      | 1      |
| 18954  | 0      | 1      | 0      | 0      | 0      | 0      |
| 18982  | 0      | 0      | 0      | 0      | 0      | 0      |
| 18986  | 1      | 2      | 1      | 1      | 1      | 1      |
| 18989  | 0      | 0      | 0      | 0      | 0      | 0      |
| 18990  | 0      | 0      | 0      | 0      | 0      | 0      |
| 18996  | 1      | 1      | 1      | 0      | 1      | 0      |
| 18998  | 0      | 0      | 0      | 0      | 0      | 0      |
| 19009  | 1      | 2      | 0      | 2      | 1      | 2      |
| 19010  | 0      | 0      | 0      | 0      | 0      | 0      |
| 19017  | 0      | 1      | 0      | 0      | 0      | 1      |
| 19018  | 0      | 0      | 0      | 0      | 0      | 0      |
| 19020  | 1      | 0      | 1      | 0      | 1      | 1      |
| 19027  | 1      | 1      | 2      | 2      | 1      | 0      |
| 19035  | 0      | 1      | 0      | 1      | 0      | 0      |
| 19037  | 2      | 2      | 2      | 1      | 1      | 1      |
| 19048  | 0      | 0      | 0      | 0      | 0      | 0      |
| 19051  | 0      | 1      | 0      | 0      | 1      | 0      |
| 19054  | 1      | 0      | 1      | 0      | 1      | 0      |
| 19057  | 3      | 3      | 2      | 3      | 2      | 1      |
| 19073  | 0      | 0      | 1      | 0      | 0      | 0      |
| 19075  | 0      | 3      | 0      | 0      | 0      | 1      |
| 19079  | 1      | 1      | 1      | 1      | 1      | 1      |
| 19087  | 0      | 0      | 0      | 0      | 0      | 2      |

| respid | Q56i_1 | Q56j_1 | Q56k_1 | Q56l_1 | Q56m_1 | Q56n_1 |
|--------|--------|--------|--------|--------|--------|--------|
| 19090  | 0      | 0      | 1      | 2      | 2      | 2      |
| 19093  | 0      | 3      | 0      | 1      | 0      | 0      |
| 19099  | 1      | 0      | 1      | 1      | 1      | 1      |
| 19100  | 0      | 1      | 0      | 0      | 0      | 0      |
| 19101  | 1      | 3      | 2      | 0      | 1      | 0      |
| 19105  | 1      | 0      | 0      | 0      | 0      | 0      |
| 19111  | 1      | 1      | 1      | 1      | 1      | 0      |
| 19112  | 0      | 1      | 0      | 0      | 0      | 0      |
| 19117  | 0      | 2      | 0      | 0      | 0      | 0      |
| 19122  | 0      | 0      | 1      | 0      | 1      | 0      |
| 19126  | 0      | 2      | 0      | 0      | 0      | 1      |
| 19127  | 0      | 2      | 0      | 2      | 1      | 0      |
| 19131  | 0      | 0      | 0      | 1      | 0      | 1      |
| 19134  | 0      | 0      | 0      | 0      | 0      | 0      |
| 19149  | 1      | 0      | 1      | 1      | 2      | 1      |
| 19151  | 1      | 1      | 0      | 0      | 0      | 1      |
| 19164  | 0      | 1      | 0      | 1      | 1      | 0      |
| 19166  | 0      | 1      | 0      | 1      | 0      | 1      |
| 19172  | 1      | 1      | 1      | 1      | 1      | 1      |
| 19173  | 1      | 1      | 1      | 1      | 1      | 1      |
| 19180  | 0      | 3      | 0      | 1      | 1      | 1      |
| 19185  | 1      | 2      | 1      | 1      | 0      | 2      |
| 19189  | 0      | 0      | 0      | 1      | 0      | 0      |
| 19191  | 0      | 0      | 0      | 0      | 0      | 0      |
| 19198  | 0      | 1      | 0      | 0      | 0      | 0      |
| 19203  | 0      | 1      | 0      | 1      | 0      | 2      |
| 19209  | 0      | 0      | 0      | 0      | 0      | 0      |
| 19210  | 1      | 1      | 1      | 0      | 1      | 1      |
| 19218  | 0      | 0      | 0      | 0      | 0      | 0      |
| 19220  | 0      | 3      | 0      | 0      | 0      | 0      |
| 19225  | 1      | 1      | 1      | 1      | 1      | 1      |
| 19227  | 0      | 0      | 0      | 0      | 0      | 0      |

| respid | Q56i_1 | Q56j_1 | Q56k_1 | Q56l_1 | Q56m_1 | Q56n_1 |
|--------|--------|--------|--------|--------|--------|--------|
| 19228  | 0      | 0      | 0      | 0      | 0      | 0      |
| 19243  | 0      | 1      | 0      | 0      | 0      | 0      |
| 19244  | 1      | 1      | 1      | 1      | 1      | 1      |
| 19246  | 1      | 0      | 0      | 1      | 1      | 0      |
| 19248  | 0      | 0      | 0      | 0      | 0      | 1      |
| 19249  | 1      | 0      | 1      | 1      | 0      | 0      |
| 19252  | 1      | 1      | 1      | 1      | 0      | 1      |
| 19255  | 0      | 1      | 0      | 0      | 1      | 0      |
| 19257  | 0      | 0      | 0      | 0      | 0      | 0      |
| 19274  | 0      | 0      | 0      | 0      | 0      | 0      |
| 19279  | 1      | 1      | 1      | 1      | 1      | 1      |
| 19291  | 0      | 1      | 0      | 0      | 0      | 0      |
| 19292  | 1      | 0      | 1      | 1      | 1      | 1      |
| 19308  | 1      | 2      | 1      | 1      | 1      | 2      |
| 19310  | 1      | 1      | 0      | 2      | 1      | 0      |
| 19311  | 3      | 3      | 3      | 3      | 3      | 3      |
| 19326  | 0      | 1      | 0      | 1      | 1      | 1      |
| 19327  | 0      | 1      | 0      | 0      | 0      | 0      |
| 19329  | 0      | 3      | 0      | 0      | 1      | 0      |
| 19330  | 1      | 0      | 1      | 1      | 1      | 1      |
| 19333  | 1      | 1      | 1      | 1      | 1      | 1      |
| 19336  | 1      | 1      | 1      | 1      | 1      | 0      |
| 19343  | 0      | 0      | 0      | 0      | 0      | 0      |
| 19348  | 0      | 0      | 0      | 0      | 0      | 0      |
| 19349  | 1      | 2      | 1      | 1      | 1      | 1      |
| 19352  | 2      | 0      | 2      | 2      | 2      | 1      |
| 19356  | 0      | 0      | 0      | 0      | 0      | 0      |
| 19357  | 1      | 1      | 1      | 1      | 1      | 0      |
| 19358  | 1      | 1      | 2      | 1      | 1      | 0      |
| 19367  | 1      | 0      | 0      | 1      | 0      | 0      |
| 19376  | 0      | 1      | 0      | 0      | 0      | 1      |
| 19377  | 0      | 0      | 0      | 0      | 0      | 0      |

| respid | Q56i_1 | Q56j_1 | Q56k_1 | Q56l_1 | Q56m_1 | Q56n_1 |
|--------|--------|--------|--------|--------|--------|--------|
| 19380  | 0      | 2      | 0      | 2      | 0      | 1      |
| 19384  | 1      | 1      | 1      | 0      | 1      | 1      |
| 19391  | 2      | 2      | 2      | 1      | 2      | 0      |
| 19397  | 1      | 0      | 1      | 0      | 1      | 0      |
| 19398  | 0      | 0      | 3      | 0      | 0      | 0      |
| 19401  | 0      | 0      | 0      | 0      | 0      | 0      |
| 19402  | 1      | 0      | 0      | 1      | 0      | 0      |
| 19403  | 0      | 0      | 1      | 0      | 0      | 0      |
| 19405  | 0      | 0      | 0      | 0      | 0      | 0      |
| 19407  | 0      | 1      | 1      | 1      | 1      | 0      |
| 19415  | 0      | 0      | 1      | 0      | 0      | 0      |
| 19420  | 0      | 0      | 0      | 0      | 0      | 0      |
| 19423  | 2      | 1      | 1      | 2      | 1      | 1      |
| 19424  | 1      | 0      | 1      | 1      | 1      | 1      |
| 19426  | 1      | 1      | 0      | 0      | 1      | 0      |
| 19429  | 1      | 1      | 1      | 1      | 0      | 0      |
| 19435  | 1      | 2      | 1      | 1      | 1      | 0      |
| 19441  | 0      | 0      | 1      | 1      | 0      | 0      |
| 19450  | 1      | 0      | 0      | 0      | 0      | 0      |
| 19456  | 0      | 2      | 0      | 2      | 0      | 1      |
| 19457  | 0      | 0      | 1      | 0      | 1      | 0      |
| 19463  | 1      | 1      | 1      | 1      | 1      | 1      |
| 19467  | 1      | 2      | 1      | 2      | 1      | 2      |
| 19468  | 0      | 0      | 0      | 0      | 0      | 1      |
| 19471  | 0      | 1      | 0      | 0      | 0      | 0      |
| 19473  | 2      | 2      | 1      | 1      | 1      | 3      |
| 19478  | 1      | 1      | 2      | 2      | 1      | 1      |
| 19480  | 0      | 0      | 0      | 0      | 0      | 0      |
| 19481  | 1      | 2      | 0      | 2      | 0      | 0      |
| 19484  | 0      | 0      | 0      | 0      | 0      | 0      |
| 19487  | 3      | 3      | 3      | 3      | 3      | 3      |
| 19491  | 0      | 0      | 1      | 1      | 1      | 0      |



| respid | Q56i_1 | Q56j_1 | Q56k_1 | Q56l_1 | Q56m_1 | Q56n_1 |
|--------|--------|--------|--------|--------|--------|--------|
| 19495  | 0      | 0      | 0      | 0      | 0      | 0      |
| 19498  | 1      | 2      | 2      | 2      | 2      | 2      |
| 19500  | 1      | 0      | 1      | 1      | 0      | 1      |
| 19501  | 1      | 0      | 1      | 0      | 1      | 1      |
| 19503  | 1      | 1      | 0      | 1      | 1      | 0      |
| 19506  | 1      | 0      | 1      | 0      | 1      | 0      |
| 19508  | 0      | 0      | 0      | 0      | 0      | 1      |
| 19509  | 2      | 2      | 0      | 0      | 0      | 0      |
| 19518  | 1      | 1      | 0      | 1      | 1      | 1      |
| 19520  | 1      | 2      | 1      | 2      | 1      | 1      |
| 19536  | 1      | 2      | 1      | 0      | 1      | 1      |
| 19538  | 1      | 0      | 1      | 0      | 1      | 0      |
| 19541  | 0      | 3      | 0      | 0      | 1      | 0      |
| 19548  | 3      | 2      | 0      | 1      | 0      | 1      |
| 19553  | 0      | 1      | 0      | 0      | 0      | 0      |
| 19556  | 1      | 0      | 0      | 0      | 0      | 0      |
| 19559  | 1      | 1      | 1      | 2      | 1      | 1      |
| 19561  | 1      | 1      | 1      | 1      | 1      | 0      |
| 19562  | 0      | 1      | 0      | 0      | 0      | 0      |
| 19564  | 0      | 2      | 0      | 1      | 1      | 1      |
| 19567  | 2      | 2      | 2      | 2      | 2      | 2      |
| 19571  | 0      | 0      | 1      | 0      | 0      | 0      |
| 19576  | 2      | 1      | 1      | 1      | 2      | 1      |
| 19578  | 0      | 0      | 0      | 0      | 0      | 0      |
| 19606  | 1      | 3      | 1      | 1      | 1      | 1      |
| 19607  | 1      | 0      | 0      | 0      | 1      | 0      |
| 19608  | 1      | 1      | 1      | 1      | 1      | 1      |
| 19612  | 1      | 0      | 1      | 0      | 0      | 0      |
| 19618  | 1      | 1      | 1      | 1      | 1      | 1      |
| 19621  | 1      | 2      | 1      | 1      | 0      | 0      |
| 19624  | 2      | 2      | 2      | 2      | 2      | 2      |
| 19630  | 1      | 0      | 0      | 0      | 1      | 1      |

| respid | Q56i_1 | Q56j_1 | Q56k_1 | Q56l_1 | Q56m_1 | Q56n_1 |
|--------|--------|--------|--------|--------|--------|--------|
| 19637  | 2      | 0      | 2      | 0      | 2      | 0      |
| 19639  | 0      | 3      | 1      | 0      | 0      | 0      |
| 19647  | 0      | 0      | 1      | 1      | 1      | 1      |
| 19648  | 1      | 3      | 1      | 2      | 2      | 2      |
| 19660  | 3      | 0      | 0      | 0      | 0      | 1      |
| 19662  | 1      | 0      | 1      | 1      | 1      | 0      |
| 19669  | 1      | 0      | 1      | 0      | 1      | 0      |
| 19680  | 0      | 0      | 0      | 0      | 0      | 0      |
| 19682  | 1      | 2      | 1      | 1      | 1      | 1      |
| 19686  | 1      | 3      | 0      | 1      | 1      | 2      |
| 19700  | 1      | 1      | 0      | 0      | 0      | 0      |
| 19701  | 0      | 0      | 0      | 0      | 0      | 0      |
| 19704  | 0      | 0      | 0      | 0      | 0      | 0      |
| 19706  | 0      | 2      | 0      | 1      | 1      | 2      |
| 19707  | 0      | 1      | 1      | 0      | 1      | 1      |
| 19717  | 1      | 1      | 1      | 1      | 2      | 1      |
| 19718  | 1      | 1      | 1      | 2      | 0      | 0      |
| 19721  | 1      | 2      | 1      | 1      | 2      | 1      |
| 19722  | 0      | 3      | 0      | 0      | 0      | 0      |
| 19729  | 1      | 1      | 0      | 0      | 0      | 1      |
| 19738  | 1      | 3      | 1      | 2      | 0      | 1      |
| 19741  | 0      | 0      | 0      | 0      | 0      | 0      |
| 19742  | 0      | 1      | 0      | 1      | 1      | 0      |
| 19747  | 0      | 3      | 1      | 2      | 2      | 0      |
| 19748  | 1      | 1      | 0      | 0      | 0      | 0      |
| 19749  | 1      | 1      | 0      | 0      | 1      | 0      |
| 19756  | 1      | 0      | 1      | 1      | 0      | 0      |
| 19771  | 1      | 0      | 1      | 1      | 1      | 1      |
| 19772  | 1      | 1      | 1      | 1      | 1      | 1      |
| 19775  | 1      | 1      | 1      | 1      | 1      | 1      |
| 19783  | 0      | 0      | 0      | 0      | 0      | 1      |
| 19787  | 0      | 0      | 1      | 1      | 1      | 1      |

| respid | Q56i_1 | Q56j_1 | Q56k_1 | Q56l_1 | Q56m_1 | Q56n_1 |
|--------|--------|--------|--------|--------|--------|--------|
| 19790  | 0      | 0      | 0      | 0      | 0      | 1      |
| 19797  | 1      | 0      | 0      | 2      | 2      | 1      |
| 19802  | 0      | 1      | 0      | 2      | 0      | 0      |
| 19808  | 1      | 1      | 1      | 1      | 1      | 1      |
| 19810  | 1      | 0      | 1      | 0      | 1      | 1      |
| 19811  | 1      | 0      | 1      | 0      | 0      | 1      |
| 19812  | 0      | 0      | 0      | 0      | 0      | 1      |
| 19821  | 0      | 1      | 1      | 1      | 0      | 1      |
| 19826  | 1      | 1      | 1      | 2      | 1      | 1      |
| 19827  | 0      | 1      | 1      | 1      | 1      | 2      |
| 19830  | 0      | 0      | 0      | 0      | 0      | 0      |
| 19834  | 0      | 0      | 0      | 1      | 1      | 0      |
| 19838  | 0      | 3      | 0      | 1      | 2      | 1      |
| 19843  | 2      | 2      | 2      | 2      | 3      | 2      |
| 19845  | 0      | 1      | 0      | 1      | 0      | 0      |
| 19846  | 1      | 1      | 1      | 0      | 0      | 1      |
| 19852  | 1      | 2      | 1      | 2      | 1      | 1      |
| 19855  | 1      | 0      | 1      | 1      | 0      | 0      |
| 19858  | 0      | 0      | 0      | 0      | 0      | 0      |
| 19861  | 1      | 3      | 2      | 2      | 0      | 0      |
| 19863  | 1      | 0      | 1      | 0      | 1      | 0      |
| 19868  | 1      | 0      | 1      | 1      | 1      | 1      |
| 19874  | 1      | 0      | 1      | 0      | 1      | 1      |
| 19876  | 0      | 2      | 0      | 0      | 0      | 0      |
| 19880  | 3      | 1      | 3      | 2      | 2      | 3      |
| 19885  | 1      | 2      | 1      | 1      | 0      | 0      |
| 19890  | 1      | 1      | 1      | 0      | 1      | 0      |
| 19894  | 0      | 1      | 0      | 0      | 0      | 1      |
| 19895  | 0      | 1      | 1      | 1      | 1      | 1      |
| 19897  | 2      | 3      | 2      | 3      | 3      | 3      |
| 19906  | 0      | 0      | 0      | 0      | 0      | 0      |
| 19908  | 0      | 0      | 0      | 0      | 0      | 0      |

| respid | Q56i_1 | Q56j_1 | Q56k_1 | Q56l_1 | Q56m_1 | Q56n_1 |
|--------|--------|--------|--------|--------|--------|--------|
| 19912  | 0      | 2      | 0      | 0      | 0      | 0      |
| 19913  | 0      | 2      | 1      | 1      | 1      | 1      |
| 19914  | 0      | 2      | 1      | 1      | 0      | 1      |
| 19918  | 1      | 0      | 1      | 2      | 1      | 1      |
| 19924  | 1      | 0      | 2      | 1      | 1      | 0      |
| 19936  | 1      | 3      | 1      | 0      | 1      | 0      |
| 19940  | 0      | 0      | 0      | 0      | 0      | 0      |
| 19945  | 1      | 2      | 1      | 1      | 0      | 0      |
| 19948  | 1      | 0      | 1      | 1      | 1      | 1      |
| 19959  | 1      | 0      | 1      | 1      | 1      | 1      |
| 19961  | 0      | 2      | 0      | 1      | 1      | 0      |
| 19962  | 1      | 3      | 0      | 2      | 0      | 1      |
| 19965  | 0      | 0      | 0      | 1      | 1      | 0      |
| 19966  | 2      | 2      | 1      | 2      | 1      | 1      |
| 19973  | 1      | 1      | 1      | 1      | 1      | 1      |
| 19981  | 0      | 2      | 0      | 0      | 0      | 0      |
| 19986  | 1      | 1      | 1      | 1      | 1      | 0      |
| 19989  | 0      | 0      | 0      | 0      | 0      | 0      |
| 19998  | 1      | 1      | 1      | 1      | 1      | 1      |
| 20001  | 0      | 0      | 0      | 0      | 0      | 0      |
| 20005  | 0      | 0      | 0      | 0      | 0      | 0      |
| 20013  | 2      | 2      | 2      | 2      | 2      | 2      |
| 20015  | 0      | 2      | 0      | 1      | 0      | 0      |
| 20017  | 1      | 1      | 0      | 0      | 1      | 0      |
| 20020  | 1      | 0      | 1      | 2      | 1      | 0      |
| 20021  | 0      | 1      | 0      | 0      | 0      | 0      |
| 20026  | 0      | 1      | 0      | 0      | 0      | 1      |
| 20028  | 1      | 1      | 0      | 1      | 1      | 0      |
| 20030  | 1      | 0      | 0      | 0      | 1      | 0      |
| 20031  | 1      | 2      | 1      | 1      | 1      | 2      |
| 20034  | 0      | 1      | 0      | 0      | 0      | 1      |
| 20035  | 0      | 0      | 0      | 0      | 0      | 0      |

| respid | Q56i_1 | Q56j_1 | Q56k_1 | Q56l_1 | Q56m_1 | Q56n_1 |
|--------|--------|--------|--------|--------|--------|--------|
| 20040  | 0      | 1      | 1      | 0      | 0      | 0      |
| 20045  | 0      | 1      | 1      | 2      | 2      | 1      |
| 20048  | 0      | 3      | 3      | 3      | 0      | 3      |
| 20053  | 1      | 0      | 0      | 0      | 0      | 3      |
| 20064  | 1      | 1      | 1      | 1      | 1      | 1      |
| 20071  | 1      | 0      | 0      | 0      | 0      | 1      |
| 20072  | 2      | 0      | 1      | 2      | 2      | 2      |
| 20076  | 0      | 0      | 0      | 0      | 0      | 0      |
| 20081  | 1      | 0      | 1      | 0      | 1      | 1      |
| 20082  | 1      | 1      | 1      | 1      | 1      | 0      |
| 20083  | 1      | 0      | 1      | 1      | 0      | 0      |
| 20088  | 0      | 1      | 0      | 0      | 0      | 0      |
| 20089  | 1      | 0      | 1      | 1      | 1      | 0      |
| 20099  | 1      | 1      | 1      | 0      | 0      | 0      |
| 20101  | 0      | 1      | 0      | 0      | 0      | 0      |
| 20102  | 0      | 1      | 0      | 0      | 0      | 1      |
| 20109  | 0      | 2      | 0      | 1      | 1      | 0      |
| 20118  | 0      | 0      | 1      | 0      | 0      | 0      |
| 20119  | 1      | 3      | 0      | 0      | 0      | 0      |
| 20124  | 0      | 0      | 0      | 0      | 0      | 0      |
| 20126  | 1      | 1      | 0      | 0      | 1      | 1      |
| 20130  | 1      | 1      | 0      | 0      | 1      | 1      |
| 20131  | 1      | 1      | 0      | 0      | 0      | 0      |
| 20134  | 1      | 2      | 1      | 1      | 2      | 0      |
| 20146  | 1      | 0      | 0      | 1      | 1      | 0      |
| 20152  | 0      | 0      | 0      | 0      | 0      | 0      |
| 20155  | 1      | 2      | 1      | 1      | 1      | 0      |
| 20156  | 0      | 0      | 0      | 0      | 0      | 0      |
| 20157  | 0      | 0      | 0      | 0      | 0      | 0      |
| 20164  | 1      | 0      | 0      | 0      | 0      | 0      |
| 20168  | 0      | 1      | 0      | 1      | 0      | 0      |
| 20173  | 1      | 1      | 1      | 1      | 1      | 1      |

| respid | Q56i_1 | Q56j_1 | Q56k_1 | Q56l_1 | Q56m_1 | Q56n_1 |
|--------|--------|--------|--------|--------|--------|--------|
| 20174  | 1      | 1      | 1      | 1      | 1      | 0      |
| 20175  | 0      | 0      | 0      | 0      | 0      | 0      |
| 20189  | 0      | 0      | 0      | 0      | 0      | 0      |
| 20190  | 0      | 2      | 0      | 1      | 1      | 0      |
| 20201  | 0      | 1      | 0      | 0      | 0      | 0      |
| 20202  | 1      | 1      | 1      | 1      | 1      | 1      |
| 20204  | 2      | 2      | 2      | 2      | 2      | 1      |
| 20206  | 1      | 0      | 1      | 1      | 1      | 2      |
| 20207  | 0      | 1      | 0      | 0      | 0      | 0      |
| 20212  | 1      | 1      | 1      | 1      | 1      | 1      |
| 20213  | 1      | 2      | 2      | 2      | 1      | 1      |
| 20217  | 0      | 2      | 1      | 1      | 1      | 1      |
| 20222  | 0      | 1      | 0      | 0      | 0      | 0      |
| 20227  | 0      | 0      | 0      | 0      | 0      | 0      |
| 20228  | 0      | 1      | 1      | 0      | 1      | 1      |
| 20238  | 0      | 0      | 1      | 0      | 0      | 0      |
| 20242  | 2      | 0      | 1      | 2      | 1      | 0      |
| 20246  | 0      | 1      | 0      | 0      | 0      | 0      |
| 20255  | 1      | 2      | 1      | 1      | 1      | 1      |
| 20256  | 0      | 0      | 0      | 0      | 0      | 0      |
| 20259  | 0      | 2      | 1      | 1      | 1      | 1      |
| 20262  | 0      | 0      | 0      | 0      | 0      | 0      |
| 20274  | 0      | 2      | 0      | 0      | 1      | 0      |
| 20283  | 1      | 0      | 1      | 2      | 0      | 0      |
| 20284  | 1      | 1      | 1      | 1      | 1      | 2      |
| 20291  | 0      | 1      | 1      | 0      | 0      | 1      |
| 20292  | 1      | 2      | 1      | 1      | 1      | 2      |
| 20293  | 1      | 2      | 1      | 1      | 1      | 1      |
| 20298  | 1      | 2      | 1      | 1      | 1      | 0      |
| 20301  | 0      | 3      | 0      | 0      | 0      | 0      |
| 20303  | 1      | 0      | 1      | 1      | 0      | 1      |
| 20309  | 1      | 0      | 1      | 1      | 1      | 1      |

| respid | Q56i_1 | Q56j_1 | Q56k_1 | Q56l_1 | Q56m_1 | Q56n_1 |
|--------|--------|--------|--------|--------|--------|--------|
| 20318  | 1      | 0      | 0      | 0      | 1      | 1      |
| 20324  | 0      | 2      | 0      | 0      | 0      | 0      |
| 20335  | 1      | 1      | 0      | 1      | 1      | 0      |
| 20336  | 0      | 0      | 0      | 0      | 0      | 0      |
| 20339  | 0      | 0      | 0      | 0      | 0      | 0      |
| 20348  | 0      | 0      | 0      | 0      | 1      | 0      |
| 20351  | 0      | 0      | 0      | 0      | 0      | 0      |
| 20353  | 1      | 0      | 1      | 1      | 1      | 1      |
| 20356  | 1      | 3      | 0      | 1      | 1      | 1      |
| 20357  | 0      | 2      | 0      | 1      | 1      | 0      |
| 20366  | 0      | 0      | 0      | 0      | 0      | 0      |
| 20369  | 2      | 2      | 2      | 2      | 2      | 2      |
| 20372  | 0      | 3      | 0      | 0      | 0      | 0      |
| 20375  | 0      | 2      | 0      | 0      | 0      | 1      |
| 20379  | 0      | 0      | 0      | 0      | 0      | 0      |
| 20380  | 1      | 2      | 2      | 0      | 1      | 0      |
| 20396  | 0      | 0      | 0      | 0      | 1      | 1      |
| 20398  | 1      | 2      | 1      | 1      | 1      | 3      |
| 20412  | 1      | 0      | 0      | 0      | 1      | 0      |
| 20415  | 1      | 0      | 0      | 1      | 1      | 0      |
| 20424  | 1      | 2      | 1      | 1      | 2      | 2      |
| 20434  | 0      | 1      | 0      | 0      | 0      | 0      |
| 20435  | 1      | 1      | 1      | 0      | 1      | 0      |
| 20440  | 0      | 3      | 0      | 0      | 0      | 0      |
| 20441  | 1      | 1      | 1      | 0      | 1      | 0      |
| 20445  | 0      | 1      | 1      | 1      | 0      | 1      |
| 20446  | 1      | 1      | 1      | 1      | 1      | 1      |
| 20450  | 1      | 0      | 1      | 0      | 1      | 0      |
| 20453  | 1      | 2      | 1      | 2      | 1      | 1      |
| 20458  | 0      | 2      | 0      | 0      | 0      | 0      |
| 20464  | 0      | 1      | 0      | 0      | 0      | 0      |
| 20471  | 1      | 0      | 1      | 1      | 1      | 1      |

| respid | Q56i_1 | Q56j_1 | Q56k_1 | Q56l_1 | Q56m_1 | Q56n_1 |
|--------|--------|--------|--------|--------|--------|--------|
| 20473  | 1      | 1      | 0      | 2      | 1      | 1      |
| 20474  | 0      | 2      | 0      | 0      | 0      | 3      |
| 20477  | 0      | 0      | 0      | 0      | 0      | 1      |
| 20479  | 1      | 0      | 0      | 0      | 1      | 2      |
| 20485  | 0      | 0      | 0      | 1      | 0      | 1      |
| 20487  | 0      | 0      | 1      | 0      | 1      | 1      |
| 20488  | 0      | 0      | 0      | 0      | 0      | 0      |
| 20494  | 1      | 1      | 2      | 1      | 1      | 1      |
| 20502  | 1      | 1      | 1      | 1      | 1      | 1      |
| 20503  | 0      | 0      | 0      | 3      | 1      | 0      |
| 20510  | 0      | 0      | 0      | 0      | 0      | 0      |
| 20512  | 0      | 0      | 0      | 0      | 0      | 0      |
| 20516  | 0      | 1      | 1      | 0      | 1      | 1      |
| 20522  | 3      | 1      | 2      | 2      | 2      | 3      |
| 20527  | 1      | 0      | 1      | 1      | 1      | 1      |
| 20529  | 0      | 0      | 1      | 1      | 0      | 0      |
| 20535  | 0      | 1      | 0      | 0      | 0      | 0      |
| 20543  | 1      | 3      | 1      | 2      | 1      | 1      |
| 20546  | 1      | 0      | 0      | 0      | 1      | 1      |
| 20548  | 1      | 3      | 0      | 0      | 0      | 1      |
| 20552  | 0      | 1      | 1      | 1      | 1      | 0      |
| 20556  | 1      | 0      | 1      | 1      | 0      | 1      |
| 20566  | 1      | 3      | 1      | 1      | 1      | 0      |
| 20576  | 1      | 1      | 1      | 1      | 1      | 1      |
| 20587  | 0      | 0      | 0      | 0      | 0      | 0      |
| 20589  | 0      | 2      | 0      | 1      | 0      | 0      |
| 20593  | 0      | 0      | 0      | 0      | 0      | 0      |
| 20594  | 1      | 0      | 1      | 1      | 1      | 0      |
| 20602  | 1      | 1      | 1      | 1      | 1      | 1      |
| 20607  | 1      | 1      | 1      | 2      | 1      | 3      |
| 20608  | 0      | 0      | 0      | 0      | 0      | 0      |
| 20611  | 0      | 1      | 0      | 0      | 1      | 0      |



| respid | Q56i_1 | Q56j_1 | Q56k_1 | Q56l_1 | Q56m_1 | Q56n_1 |
|--------|--------|--------|--------|--------|--------|--------|
| 20612  | 0      | 2      | 0      | 0      | 0      | 0      |
| 20615  | 0      | 0      | 0      | 1      | 0      | 2      |
| 20625  | 0      | 0      | 0      | 0      | 0      | 0      |
| 20630  | 0      | 1      | 0      | 0      | 1      | 0      |
| 20639  | 0      | 2      | 1      | 0      | 1      | 1      |
| 20643  | 0      | 3      | 0      | 0      | 0      | 0      |
| 20645  | 0      | 0      | 0      | 0      | 0      | 0      |
| 20647  | 0      | 0      | 0      | 0      | 0      | 0      |
| 20652  | 2      | 2      | 1      | 1      | 1      | 1      |
| 20661  | 1      | 0      | 1      | 0      | 1      | 0      |
| 20665  | 1      | 0      | 1      | 1      | 1      | 1      |
| 20679  | 0      | 3      | 1      | 0      | 1      | 1      |
| 20682  | 1      | 0      | 1      | 1      | 1      | 1      |
| 20683  | 0      | 3      | 0      | 0      | 0      | 3      |
| 20700  | 0      | 1      | 0      | 0      | 0      | 0      |
| 20702  | 1      | 0      | 1      | 3      | 1      | 1      |
| 20709  | 0      | 2      | 0      | 0      | 0      | 2      |
| 20715  | 1      | 1      | 1      | 2      | 1      | 1      |
| 20718  | 0      | 1      | 0      | 0      | 0      | 0      |
| 20722  | 1      | 1      | 1      | 1      | 1      | 1      |
| 20729  | 2      | 2      | 2      | 2      | 2      | 2      |
| 20732  | 0      | 0      | 0      | 0      | 0      | 0      |
| 20746  | 2      | 1      | 1      | 1      | 1      | 0      |
| 20747  | 1      | 2      | 1      | 1      | 1      | 0      |
| 20758  | 0      | 0      | 0      | 1      | 0      | 2      |
| 20767  | 1      | 2      | 0      | 0      | 1      | 0      |
| 20777  | 0      | 2      | 0      | 0      | 0      | 0      |
| 20778  | 0      | 0      | 0      | 1      | 1      | 1      |
| 20780  | 0      | 0      | 0      | 0      | 0      | 0      |
| 20800  | 0      | 1      | 0      | 1      | 0      | 0      |
| 20810  | 1      | 1      | 0      | 0      | 1      | 0      |
| 20814  | 2      | 2      | 1      | 1      | 2      | 1      |

| respid | Q56i_1 | Q56j_1 | Q56k_1 | Q56l_1 | Q56m_1 | Q56n_1 |
|--------|--------|--------|--------|--------|--------|--------|
| 20816  | 0      | 0      | 0      | 0      | 0      | 0      |
| 20832  | 1      | 0      | 0      | 0      | 1      | 0      |
| 20838  | 1      | 3      | 1      | 0      | 0      | 0      |
| 20841  | 0      | 1      | 0      | 1      | 0      | 1      |
| 20848  | 1      | 1      | 2      | 1      | 0      | 0      |
| 20850  | 0      | 0      | 0      | 0      | 0      | 0      |
| 20851  | 0      | 1      | 0      | 1      | 0      | 0      |
| 20861  | 1      | 0      | 1      | 0      | 1      | 0      |
| 20870  | 1      | 1      | 1      | 1      | 1      | 0      |
| 20880  | 0      | 1      | 0      | 0      | 0      | 0      |
| 20883  | 1      | 1      | 1      | 1      | 1      | 0      |
| 20894  | 0      | 2      | 1      | 0      | 1      | 0      |
| 20896  | 1      | 2      | 1      | 2      | 1      | 2      |
| 20901  | 1      | 1      | 1      | 1      | 1      | 1      |
| 20903  | 0      | 1      | 0      | 0      | 0      | 0      |
| 20909  | 0      | 1      | 0      | 0      | 1      | 1      |
| 20919  | 0      | 0      | 0      | 0      | 1      | 0      |
| 20925  | 3      | 0      | 0      | 2      | 0      | 3      |
| 20935  | 0      | 1      | 0      | 0      | 0      | 0      |
| 20939  | 1      | 1      | 1      | 2      | 1      | 2      |
| 20956  | 2      | 1      | 2      | 1      | 2      | 2      |
| 20970  | 1      | 3      | 0      | 1      | 0      | 0      |
| 20974  | 0      | 2      | 0      | 1      | 0      | 0      |
| 20975  | 0      | 0      | 0      | 0      | 0      | 0      |
| 20984  | 0      | 2      | 0      | 1      | 1      | 2      |
| 20988  | 0      | 0      | 0      | 0      | 0      | 0      |
| 20996  | 1      | 1      | 1      | 1      | 1      | 1      |
| 20998  | 0      | 0      | 0      | 0      | 0      | 1      |
| 21007  | 0      | 0      | 0      | 0      | 0      | 0      |
| 21008  | 1      | 1      | 1      | 1      | 0      | 0      |
| 21014  | 0      | 0      | 0      | 0      | 1      | 0      |
| 21020  | 0      | 1      | 0      | 1      | 1      | 0      |

| respid | Q56i_1 | Q56j_1 | Q56k_1 | Q56l_1 | Q56m_1 | Q56n_1 |
|--------|--------|--------|--------|--------|--------|--------|
| 21022  | 0      | 1      | 1      | 1      | 1      | 0      |
| 21024  | 0      | 3      | 0      | 1      | 1      | 1      |
| 21026  | 1      | 1      | 1      | 1      | 1      | 0      |
| 21027  | 0      | 0      | 0      | 0      | 1      | 0      |
| 21030  | 1      | 1      | 1      | 0      | 1      | 0      |
| 21032  | 1      | 2      | 1      | 1      | 2      | 1      |
| 21040  | 0      | 0      | 0      | 0      | 0      | 1      |
| 21045  | 0      | 2      | 0      | 0      | 1      | 0      |
| 21058  | 0      | 1      | 0      | 0      | 0      | 0      |
| 21064  | 1      | 1      | 1      | 1      | 1      | 0      |
| 21073  | 1      | 0      | 1      | 0      | 1      | 0      |
| 21086  | 2      | 2      | 2      | 1      | 1      | 1      |
| 21092  | 2      | 1      | 2      | 2      | 2      | 1      |
| 21096  | 0      | 0      | 0      | 2      | 1      | 1      |
| 21103  | 0      | 1      | 1      | 1      | 0      | 0      |
| 21120  | 1      | 1      | 1      | 0      | 0      | 1      |
| 21125  | 0      | 1      | 1      | 0      | 0      | 0      |
| 21126  | 1      | 1      | 1      | 1      | 1      | 2      |
| 21132  | 0      | 2      | 0      | 0      | 0      | 0      |
| 21139  | 1      | 1      | 1      | 1      | 2      | 0      |
| 21147  | 1      | 1      | 1      | 1      | 1      | 1      |
| 21148  | 1      | 1      | 1      | 1      | 1      | 1      |
| 21149  | 0      | 2      | 1      | 1      | 1      | 1      |
| 21164  | 1      | 3      | 0      | 1      | 0      | 0      |
| 21165  | 1      | 3      | 1      | 1      | 1      | 0      |
| 21171  | 1      | 0      | 1      | 0      | 1      | 0      |
| 21176  | 1      | 0      | 0      | 0      | 0      | 0      |
| 21187  | 1      | 2      | 1      | 1      | 1      | 0      |
| 21192  | 1      | 1      | 1      | 0      | 0      | 0      |
| 21198  | 1      | 3      | 0      | 0      | 1      | 1      |
| 21199  | 1      | 1      | 0      | 1      | 1      | 0      |
| 21206  | 1      | 1      | 1      | 1      | 1      | 1      |

| respid | Q56i_1 | Q56j_1 | Q56k_1 | Q56l_1 | Q56m_1 | Q56n_1 |
|--------|--------|--------|--------|--------|--------|--------|
| 21212  | 0      | 1      | 0      | 1      | 0      | 1      |
| 21216  | 1      | 1      | 1      | 1      | 1      | 1      |
| 21217  | 1      | 2      | 1      | 1      | 1      | 1      |
| 21228  | 0      | 0      | 1      | 1      | 1      | 1      |
| 21229  | 1      | 2      | 2      | 2      | 2      | 1      |
| 21230  | 1      | 0      | 0      | 0      | 1      | 0      |
| 21243  | 0      | 1      | 2      | 1      | 1      | 2      |
| 21247  | 1      | 1      | 1      | 2      | 1      | 0      |
| 21253  | 0      | 0      | 0      | 0      | 1      | 0      |
| 21264  | 1      | 2      | 1      | 2      | 2      | 0      |
| 21265  | 2      | 1      | 1      | 1      | 1      | 1      |
| 21273  | 1      | 0      | 1      | 1      | 1      | 0      |
| 21275  | 1      | 1      | 1      | 0      | 1      | 1      |
| 21278  | 1      | 1      | 1      | 1      | 1      | 1      |
| 21291  | 1      | 1      | 0      | 1      | 1      | 1      |
| 21298  | 0      | 1      | 0      | 0      | 0      | 0      |
| 21301  | 1      | 3      | 0      | 0      | 0      | 0      |
| 21312  | 1      | 0      | 1      | 1      | 1      | 3      |
| 21323  | 1      | 2      | 0      | 1      | 1      | 0      |
| 21325  | 0      | 1      | 0      | 1      | 1      | 1      |
| 21341  | 0      | 1      | 0      | 0      | 0      | 0      |
| 21349  | 1      | 0      | 2      | 1      | 2      | 1      |
| 21350  | 0      | 2      | 1      | 1      | 1      | 1      |
| 21354  | 2      | 1      | 2      | 2      | 2      | 2      |
| 21372  | 0      | 2      | 1      | 2      | 1      | 0      |
| 21373  | 2      | 0      | 1      | 1      | 2      | 1      |
| 21378  | 0      | 2      | 0      | 0      | 0      | 0      |
| 21393  | 1      | 0      | 1      | 1      | 1      | 1      |
| 21401  | 1      | 1      | 0      | 1      | 1      | 0      |
| 21405  | 0      | 0      | 0      | 0      | 0      | 1      |
| 21406  | 0      | 0      | 1      | 1      | 1      | 0      |
| 21407  | 1      | 0      | 1      | 0      | 1      | 0      |

| respid | Q56i_1 | Q56j_1 | Q56k_1 | Q56l_1 | Q56m_1 | Q56n_1 |
|--------|--------|--------|--------|--------|--------|--------|
| 21418  | 0      | 0      | 0      | 0      | 0      | 3      |
| 21420  | 0      | 1      | 0      | 0      | 1      | 1      |
| 21421  | 0      | 1      | 0      | 0      | 0      | 0      |
| 21446  | 1      | 2      | 1      | 1      | 1      | 2      |
| 21449  | 1      | 2      | 1      | 2      | 2      | 1      |
| 21452  | 0      | 2      | 0      | 2      | 1      | 2      |
| 21455  | 1      | 2      | 1      | 1      | 2      | 1      |
| 21469  | 0      | 0      | 0      | 0      | 1      | 1      |
| 21471  | 0      | 2      | 1      | 2      | 1      | 1      |
| 21472  | 1      | 1      | 1      | 0      | 1      | 0      |
| 21474  | 0      | 0      | 0      | 1      | 0      | 0      |
| 21479  | 1      | 1      | 1      | 1      | 0      | 0      |
| 21485  | 1      | 1      | 1      | 1      | 1      | 0      |
| 21512  | 0      | 0      | 1      | 0      | 1      | 0      |
| 21513  | 0      | 3      | 0      | 1      | 0      | 0      |
| 21514  | 1      | 1      | 1      | 1      | 1      | 1      |
| 21520  | 1      | 2      | 1      | 1      | 1      | 1      |
| 21539  | 0      | 0      | 1      | 1      | 1      | 0      |
| 21553  | 0      | 1      | 0      | 1      | 1      | 0      |
| 21560  | 1      | 1      | 1      | 1      | 1      | 1      |
| 21561  | 1      | 3      | 1      | 2      | 1      | 1      |
| 21563  | 0      | 1      | 0      | 1      | 1      | 0      |
| 21565  | 0      | 3      | 0      | 0      | 0      | 1      |
| 21582  | 1      | 2      | 0      | 2      | 2      | 1      |
| 21584  | 1      | 1      | 1      | 1      | 1      | 1      |
| 21585  | 1      | 1      | 1      | 1      | 1      | 1      |
| 21586  | 0      | 1      | 1      | 1      | 1      | 0      |
| 21587  | 1      | 2      | 1      | 1      | 1      | 1      |
| 21590  | 1      | 1      | 2      | 2      | 2      | 2      |
| 21601  | 1      | 2      | 1      | 1      | 1      | 2      |
| 21611  | 1      | 0      | 1      | 1      | 1      | 0      |
| 21612  | 0      | 3      | 0      | 2      | 1      | 3      |

| respid | Q56i_1 | Q56j_1 | Q56k_1 | Q56l_1 | Q56m_1 | Q56n_1 |
|--------|--------|--------|--------|--------|--------|--------|
| 21625  | 0      | 1      | 0      | 1      | 1      | 1      |
| 21633  | 0      | 1      | 0      | 0      | 0      | 0      |
| 21640  | 0      | 1      | 0      | 2      | 0      | 2      |
| 21647  | 0      | 0      | 0      | 0      | 0      | 0      |
| 21648  | 1      | 0      | 2      | 1      | 1      | 1      |
| 21656  | 0      | 1      | 1      | 1      | 0      | 1      |
| 21657  | 0      | 1      | 0      | 1      | 0      | 1      |
| 21658  | 1      | 1      | 2      | 1      | 1      | 1      |
| 21665  | 1      | 1      | 1      | 1      | 1      | 1      |
| 21666  | 1      | 3      | 1      | 1      | 1      | 0      |
| 21668  | 1      | 1      | 1      | 1      | 1      | 1      |
| 21673  | 0      | 1      | 1      | 1      | 1      | 0      |
| 21681  | 1      | 1      | 1      | 1      | 1      | 1      |
| 21682  | 1      | 1      | 1      | 0      | 0      | 1      |
| 21685  | 2      | 1      | 1      | 1      | 1      | 1      |
| 21692  | 1      | 1      | 1      | 1      | 1      | 0      |
| 21697  | 1      | 1      | 0      | 0      | 1      | 1      |
| 21711  | 1      | 2      | 1      | 1      | 1      | 1      |
| 21715  | 2      | 2      | 0      | 2      | 1      | 2      |
| 21726  | 0      | 3      | 1      | 2      | 0      | 2      |
| 21748  | 0      | 0      | 1      | 1      | 0      | 1      |
| 21761  | 1      | 0      | 0      | 0      | 1      | 0      |
| 21769  | 1      | 1      | 1      | 1      | 1      | 1      |
| 21774  | 1      | 1      | 1      | 1      | 1      | 1      |
| 21778  | 0      | 3      | 2      | 1      | 0      | 3      |
| 21785  | 1      | 1      | 1      | 1      | 1      | 1      |
| 21799  | 1      | 2      | 2      | 2      | 2      | 1      |
| 21820  | 1      | 1      | 1      | 1      | 1      | 1      |
| 21837  | 0      | 0      | 0      | 1      | 0      | 0      |
| 21845  | 2      | 2      | 2      | 1      | 1      | 0      |
| 21846  | 0      | 3      | 0      | 0      | 0      | 0      |
| 21849  | 1      | 1      | 1      | 1      | 1      | 0      |

| respid | Q56i_1 | Q56j_1 | Q56k_1 | Q56l_1 | Q56m_1 | Q56n_1 |
|--------|--------|--------|--------|--------|--------|--------|
| 21850  | 0      | 0      | 1      | 1      | 1      | 0      |
| 21855  | 1      | 1      | 1      | 0      | 1      | 0      |
| 21859  | 0      | 0      | 0      | 0      | 0      | 0      |
| 21861  | 1      | 1      | 1      | 1      | 1      | 1      |
| 21866  | 0      | 0      | 0      | 0      | 0      | 0      |
| 21873  | 1      | 1      | 1      | 1      | 1      | 1      |
| 21876  | 1      | 1      | 1      | 0      | 1      | 0      |
| 21882  | 0      | 0      | 0      | 0      | 0      | 0      |
| 21884  | 1      | 2      | 2      | 1      | 1      | 2      |
| 21887  | 1      | 0      | 1      | 1      | 1      | 1      |
| 21892  | 1      | 0      | 1      | 0      | 1      | 0      |
| 21907  | 0      | 1      | 0      | 1      | 0      | 2      |
| 21910  | 2      | 2      | 2      | 2      | 2      | 1      |
| 21912  | 1      | 3      | 1      | 2      | 1      | 0      |
| 21914  | 1      | 1      | 1      | 1      | 1      | 1      |
| 21925  | 0      | 2      | 0      | 1      | 0      | 2      |
| 21937  | 1      | 0      | 0      | 1      | 1      | 0      |
| 21938  | 1      | 1      | 1      | 1      | 1      | 1      |
| 21940  | 0      | 1      | 0      | 1      | 1      | 0      |
| 21942  | 0      | 1      | 1      | 0      | 0      | 0      |
| 21947  | 0      | 1      | 0      | 1      | 0      | 0      |
| 21948  | 1      | 1      | 1      | 1      | 1      | 1      |
| 21961  | 0      | 1      | 2      | 2      | 0      | 0      |
| 21977  | 0      | 1      | 1      | 0      | 1      | 0      |
| 21983  | 1      | 2      | 1      | 1      | 1      | 1      |
| 21986  | 1      | 2      | 1      | 2      | 1      | 1      |
| 21988  | 1      | 1      | 1      | 0      | 1      | 0      |
| 21996  | 1      | 1      | 1      | 1      | 2      | 0      |
| 21997  | 1      | 2      | 1      | 1      | 1      | 2      |
| 22005  | 1      | 1      | 1      | 0      | 0      | 0      |
| 22013  | 0      | 0      | 0      | 0      | 0      | 0      |
| 22018  | 0      | 1      | 0      | 1      | 0      | 0      |

| respid | Q56i_1 | Q56j_1 | Q56k_1 | Q56l_1 | Q56m_1 | Q56n_1 |
|--------|--------|--------|--------|--------|--------|--------|
| 22019  | 1      | 1      | 1      | 1      | 1      | 0      |
| 22071  | 2      | 2      | 2      | 2      | 3      | 3      |
| 22082  | 0      | 2      | 0      | 1      | 1      | 2      |
| 22085  | 0      | 2      | 0      | 2      | 0      | 1      |
| 22092  | 0      | 0      | 0      | 0      | 0      | 0      |
| 22097  | 1      | 2      | 2      | 2      | 0      | 1      |
| 22111  | 0      | 1      | 0      | 0      | 0      | 1      |
| 22118  | 1      | 1      | 1      | 1      | 1      | 2      |
| 22132  | 1      | 1      | 1      | 0      | 1      | 1      |
| 22133  | 0      | 2      | 1      | 0      | 2      | 1      |
| 22139  | 0      | 0      | 0      | 0      | 1      | 1      |
| 22142  | 1      | 1      | 1      | 2      | 1      | 1      |
| 22146  | 1      | 3      | 1      | 0      | 1      | 2      |
| 22181  | 0      | 0      | 0      | 0      | 0      | 0      |
| 22202  | 0      | 3      | 0      | 0      | 1      | 1      |
| 22214  | 0      | 1      | 1      | 1      | 1      | 3      |
| 22223  | 0      | 1      | 0      | 0      | 0      | 0      |
| 22227  | 1      | 1      | 1      | 0      | 0      | 0      |
| 22229  | 0      | 1      | 1      | 1      | 1      | 1      |
| 22239  | 1      | 0      | 1      | 1      | 1      | 0      |
| 22245  | 2      | 2      | 2      | 2      | 2      | 2      |
| 22256  | 0      | 2      | 0      | 0      | 0      | 2      |
| 22260  | 0      | 1      | 2      | 2      | 1      | 2      |
| 22298  | 1      | 2      | 1      | 1      | 1      | 1      |
| 22321  | 0      | 1      | 0      | 0      | 0      | 1      |
| 22340  | 0      | 1      | 0      | 0      | 0      | 0      |
| 22346  | 1      | 3      | 1      | 1      | 1      | 2      |
| 22356  | 0      | 1      | 1      | 2      | 1      | 1      |
| 22361  | 0      | 2      | 0      | 1      | 1      | 1      |
| 22364  | 2      | 1      | 2      | 2      | 1      | 1      |
| 22368  | 0      | 0      | 0      | 0      | 0      | 0      |
| 22374  | 2      | 2      | 1      | 1      | 1      | 1      |



| respid | Q56i_1 | Q56j_1 | Q56k_1 | Q56l_1 | Q56m_1 | Q56n_1 |
|--------|--------|--------|--------|--------|--------|--------|
| 22375  | 1      | 3      | 1      | 0      | 2      | 0      |
| 22377  | 0      | 1      | 0      | 1      | 1      | 0      |
| 22383  | 0      | 0      | 0      | 0      | 0      | 0      |
| 22387  | 1      | 0      | 0      | 0      | 0      | 0      |
| 22392  | 1      | 0      | 0      | 0      | 1      | 0      |
| 22393  | 0      | 1      | 0      | 0      | 0      | 0      |
| 22394  | 1      | 2      | 1      | 2      | 1      | 0      |
| 22395  | 0      | 1      | 0      | 0      | 0      | 0      |
| 22401  | 0      | 1      | 0      | 1      | 0      | 0      |
| 22407  | 0      | 0      | 0      | 0      | 0      | 0      |
| 22410  | 1      | 1      | 1      | 1      | 1      | 0      |
| 22418  | 0      | 2      | 0      | 2      | 1      | 1      |
| 22421  | 0      | 0      | 0      | 0      | 0      | 0      |
| 22423  | 0      | 1      | 1      | 1      | 1      | 1      |
| 22425  | 0      | 2      | 0      | 0      | 0      | 0      |
| 22427  | 0      | 0      | 0      | 0      | 0      | 0      |
| 22431  | 0      | 1      | 0      | 1      | 0      | 1      |
| 22435  | 0      | 2      | 0      | 1      | 0      | 1      |
| 22436  | 1      | 1      | 1      | 2      | 1      | 1      |
| 22442  | 0      | 1      | 0      | 0      | 1      | 0      |
| 22444  | 0      | 2      | 1      | 1      | 1      | 1      |
| 22445  | 0      | 1      | 1      | 1      | 1      | 0      |
| 22446  | 0      | 0      | 0      | 0      | 0      | 0      |
| 22448  | 1      | 0      | 1      | 0      | 0      | 0      |
| 22449  | 0      | 1      | 0      | 1      | 0      | 1      |
| 22450  | 1      | 1      | 1      | 1      | 1      | 1      |
| 22453  | 1      | 2      | 2      | 2      | 2      | 1      |
| 22465  | 1      | 0      | 1      | 2      | 2      | 2      |
| 22472  | 0      | 0      | 0      | 1      | 0      | 2      |
| 22475  | 1      | 0      | 0      | 0      | 0      | 0      |
| 22478  | 1      | 1      | 1      | 1      | 0      | 1      |
| 22491  | 1      | 2      | 1      | 1      | 1      | 1      |

| respid | Q56i_1 | Q56j_1 | Q56k_1 | Q56l_1 | Q56m_1 | Q56n_1 |
|--------|--------|--------|--------|--------|--------|--------|
| 22497  | 0      | 2      | 1      | 1      | 1      | 1      |
| 22498  | 0      | 1      | 1      | 1      | 1      | 1      |
| 22499  | 0      | 3      | 0      | 2      | 1      | 1      |
| 22503  | 0      | 2      | 0      | 0      | 0      | 1      |
| 22507  | 1      | 2      | 1      | 1      | 1      | 1      |
| 22513  | 1      | 2      | 1      | 1      | 2      | 0      |
| 22517  | 1      | 0      | 0      | 1      | 0      | 0      |
| 22524  | 3      | 2      | 2      | 3      | 3      | 2      |
| 22528  | 0      | 0      | 0      | 0      | 0      | 0      |
| 22544  | 1      | 2      | 1      | 1      | 1      | 1      |
| 22571  | 1      | 2      | 0      | 0      | 1      | 1      |
| 22576  | 0      | 2      | 1      | 1      | 2      | 1      |
| 22579  | 1      | 1      | 1      | 1      | 1      | 2      |
| 22583  | 1      | 1      | 1      | 1      | 1      | 0      |
| 22591  | 1      | 1      | 1      | 1      | 1      | 1      |
| 22592  | 1      | 1      | 1      | 1      | 1      | 1      |
| 22612  | 0      | 2      | 0      | 2      | 1      | 0      |
| 22613  | 1      | 1      | 1      | 0      | 1      | 1      |
| 22615  | 1      | 1      | 1      | 1      | 1      | 0      |
| 22621  | 0      | 0      | 1      | 0      | 1      | 0      |
| 22625  | 0      | 3      | 0      | 2      | 1      | 2      |
| 22628  | 1      | 1      | 1      | 1      | 1      | 1      |
| 22632  | 0      | 0      | 0      | 0      | 0      | 0      |
| 22639  | 0      | 3      | 0      | 0      | 0      | 0      |
| 22648  | 0      | 3      | 0      | 2      | 1      | 0      |
| 22649  | 1      | 2      | 0      | 1      | 1      | 1      |
| 22655  | 1      | 2      | 1      | 1      | 1      | 1      |
| 22659  | 1      | 1      | 0      | 0      | 1      | 0      |
| 22660  | 1      | 0      | 1      | 0      | 0      | 1      |
| 22666  | 1      | 1      | 1      | 1      | 1      | 2      |
| 22667  | 2      | 2      | 2      | 2      | 1      | 2      |
| 22670  | 1      | 2      | 0      | 0      | 0      | 1      |

| respid | Q56i_1 | Q56j_1 | Q56k_1 | Q56l_1 | Q56m_1 | Q56n_1 |
|--------|--------|--------|--------|--------|--------|--------|
| 22681  | 0      | 0      | 0      | 0      | 0      | 0      |
| 22683  | 0      | 2      | 0      | 1      | 0      | 1      |
| 22688  | 0      | 2      | 0      | 1      | 1      | 1      |
| 22695  | 1      | 0      | 1      | 1      | 1      | 0      |
| 22696  | 0      | 0      | 0      | 0      | 0      | 0      |
| 22705  | 1      | 3      | 2      | 3      | 1      | 2      |
| 22718  | 0      | 1      | 0      | 1      | 1      | 1      |
| 22720  | 0      | 2      | 0      | 1      | 1      | 1      |
| 22724  | 1      | 0      | 1      | 0      | 1      | 0      |
| 22728  | 0      | 0      | 0      | 1      | 0      | 1      |
| 22751  | 0      | 1      | 0      | 0      | 0      | 1      |
| 22782  | 2      | 3      | 1      | 2      | 2      | 1      |
| 22786  | 0      | 0      | 0      | 0      | 0      | 0      |
| 22788  | 0      | 0      | 0      | 0      | 0      | 0      |
| 22810  | 2      | 0      | 0      | 0      | 1      | 0      |
| 22816  | 0      | 1      | 0      | 0      | 0      | 0      |
| 22818  | 0      | 0      | 0      | 0      | 0      | 0      |
| 22854  | 1      | 1      | 1      | 1      | 1      | 1      |
| 22858  | 0      | 0      | 0      | 0      | 0      | 1      |
| 22862  | 1      | 0      | 1      | 1      | 1      | 1      |
| 22865  | 0      | 1      | 0      | 1      | 1      | 2      |
| 22868  | 1      | 1      | 0      | 1      | 1      | 0      |
| 22869  | 0      | 1      | 1      | 0      | 1      | 0      |
| 22873  | 0      | 2      | 0      | 1      | 1      | 1      |
| 22875  | 0      | 1      | 0      | 1      | 1      | 0      |
| 22876  | 0      | 0      | 0      | 0      | 0      | 1      |
| 22882  | 2      | 2      | 2      | 2      | 1      | 1      |
| 22884  | 1      | 0      | 1      | 1      | 0      | 0      |
| 22887  | 1      | 1      | 1      | 1      | 1      | 0      |
| 22888  | 0      | 1      | 0      | 1      | 0      | 0      |
| 22900  | 0      | 1      | 0      | 0      | 0      | 0      |
| 22901  | 0      | 2      | 0      | 0      | 0      | 0      |

| respid | Q56i_1 | Q56j_1 | Q56k_1 | Q56l_1 | Q56m_1 | Q56n_1 |
|--------|--------|--------|--------|--------|--------|--------|
| 22912  | 1      | 0      | 0      | 0      | 0      | 0      |
| 22913  | 1      | 2      | 1      | 1      | 1      | 1      |
| 22921  | 0      | 0      | 0      | 0      | 0      | 0      |
| 22925  | 0      | 1      | 0      | 0      | 0      | 0      |
| 22940  | 0      | 0      | 0      | 0      | 0      | 0      |
| 22941  | 0      | 3      | 0      | 2      | 1      | 0      |
| 22947  | 1      | 0      | 0      | 0      | 0      | 0      |
| 22948  | 0      | 3      | 0      | 0      | 0      | 0      |
| 22964  | 2      | 2      | 1      | 2      | 2      | 1      |
| 22966  | 2      | 1      | 1      | 3      | 2      | 3      |
| 22969  | 0      | 3      | 1      | 1      | 1      | 3      |
| 22971  | 0      | 0      | 0      | 0      | 1      | 0      |
| 22988  | 0      | 1      | 0      | 0      | 0      | 0      |
| 22990  | 1      | 2      | 1      | 1      | 1      | 1      |
| 23000  | 0      | 1      | 1      | 1      | 1      | 0      |
| 23016  | 1      | 1      | 1      | 1      | 1      | 2      |
| 23026  | 0      | 0      | 0      | 0      | 0      | 0      |
| 23035  | 0      | 1      | 0      | 0      | 0      | 0      |
| 23037  | 1      | 1      | 1      | 1      | 2      | 1      |
| 23044  | 1      | 0      | 2      | 1      | 1      | 0      |
| 23046  | 1      | 1      | 1      | 1      | 1      | 1      |
| 23047  | 1      | 1      | 1      | 0      | 0      | 0      |
| 23049  | 1      | 0      | 1      | 0      | 1      | 0      |
| 23055  | 0      | 0      | 0      | 0      | 0      | 0      |
| 23066  | 0      | 0      | 0      | 0      | 0      | 0      |
| 23075  | 0      | 1      | 0      | 0      | 0      | 0      |
| 23081  | 0      | 0      | 0      | 1      | 0      | 0      |
| 23087  | 0      | 3      | 0      | 0      | 0      | 1      |
| 23094  | 0      | 1      | 1      | 2      | 1      | 2      |
| 23099  | 0      | 0      | 0      | 0      | 0      | 0      |
| 23101  | 0      | 1      | 0      | 1      | 1      | 0      |
| 23105  | 0      | 0      | 0      | 0      | 0      | 0      |

| respid | Q56i_1 | Q56j_1 | Q56k_1 | Q56l_1 | Q56m_1 | Q56n_1 |
|--------|--------|--------|--------|--------|--------|--------|
| 23115  | 1      | 1      | 1      | 1      | 1      | 1      |
| 23121  | 1      | 2      | 0      | 1      | 1      | 1      |
| 23127  | 0      | 1      | 0      | 0      | 0      | 0      |
| 23131  | 1      | 1      | 1      | 1      | 1      | 1      |
| 23134  | 0      | 1      | 1      | 1      | 1      | 1      |
| 23145  | 0      | 0      | 0      | 0      | 0      | 0      |
| 23151  | 1      | 1      | 1      | 1      | 1      | 0      |
| 23161  | 1      | 2      | 1      | 1      | 1      | 1      |
| 23169  | 2      | 2      | 2      | 2      | 2      | 2      |
| 23173  | 0      | 1      | 0      | 0      | 0      | 0      |
| 23174  | 1      | 3      | 1      | 1      | 1      | 0      |
| 23186  | 1      | 1      | 1      | 2      | 1      | 1      |
| 23195  | 1      | 3      | 1      | 2      | 1      | 3      |
| 23197  | 1      | 1      | 1      | 1      | 1      | 1      |
| 23198  | 0      | 3      | 0      | 0      | 0      | 0      |
| 23203  | 0      | 3      | 0      | 0      | 0      | 0      |
| 23204  | 0      | 1      | 0      | 1      | 1      | 2      |
| 23212  | 1      | 0      | 0      | 0      | 0      | 0      |
| 23214  | 1      | 0      | 1      | 1      | 1      | 0      |
| 23221  | 1      | 1      | 0      | 1      | 1      | 1      |
| 23237  | 0      | 3      | 0      | 0      | 0      | 0      |
| 23251  | 0      | 0      | 1      | 0      | 0      | 0      |
| 23254  | 0      | 1      | 0      | 0      | 0      | 1      |
| 23262  | 1      | 1      | 1      | 1      | 1      | 1      |
| 23267  | 1      | 1      | 0      | 1      | 1      | 1      |
| 23268  | 1      | 3      | 1      | 2      | 1      | 1      |
| 23273  | 0      | 0      | 0      | 0      | 0      | 0      |
| 23278  | 0      | 0      | 0      | 0      | 1      | 0      |
| 23279  | 2      | 1      | 1      | 1      | 1      | 1      |
| 23281  | 2      | 2      | 1      | 1      | 1      | 1      |
| 23282  | 1      | 1      | 1      | 1      | 1      | 1      |
| 23283  | 1      | 0      | 0      | 0      | 1      | 1      |

| respid | Q56i_1 | Q56j_1 | Q56k_1 | Q56l_1 | Q56m_1 | Q56n_1 |
|--------|--------|--------|--------|--------|--------|--------|
| 23285  | 1      | 0      | 1      | 1      | 1      | 1      |
| 23305  | 0      | 1      | 1      | 1      | 1      | 2      |
| 23309  | 2      | 1      | 3      | 2      | 1      | 1      |
| 23310  | 1      | 2      | 0      | 1      | 1      | 2      |
| 23311  | 0      | 0      | 0      | 0      | 0      | 0      |
| 23312  | 1      | 1      | 1      | 2      | 1      | 1      |
| 23319  | 0      | 2      | 0      | 1      | 0      | 1      |
| 23320  | 1      | 0      | 1      | 1      | 1      | 0      |
| 23322  | 0      | 3      | 1      | 2      | 1      | 1      |
| 23334  | 1      | 0      | 1      | 0      | 1      | 0      |
| 23340  | 0      | 2      | 0      | 0      | 0      | 2      |
| 23346  | 0      | 1      | 0      | 0      | 0      | 1      |
| 23353  | 0      | 1      | 0      | 0      | 0      | 0      |
| 23363  | 1      | 1      | 1      | 1      | 1      | 1      |
| 23364  | 0      | 1      | 1      | 1      | 1      | 1      |
| 23376  | 0      | 1      | 0      | 0      | 0      | 1      |
| 23378  | 1      | 2      | 1      | 1      | 1      | 1      |
| 23382  | 0      | 3      | 0      | 0      | 0      | 0      |
| 23383  | 1      | 1      | 1      | 1      | 1      | 1      |
| 23390  | 0      | 1      | 0      | 1      | 0      | 0      |
| 23395  | 1      | 0      | 1      | 0      | 1      | 0      |
| 23398  | 1      | 2      | 1      | 1      | 1      | 0      |
| 23399  | 0      | 2      | 0      | 2      | 0      | 2      |
| 23406  | 1      | 1      | 1      | 1      | 1      | 1      |
| 23418  | 0      | 0      | 0      | 0      | 0      | 0      |
| 23427  | 1      | 3      | 0      | 2      | 1      | 1      |
| 23428  | 1      | 0      | 1      | 1      | 1      | 0      |
| 23435  | 1      | 0      | 1      | 1      | 0      | 1      |
| 23439  | 1      | 0      | 1      | 1      | 1      | 0      |
| 23440  | 0      | 0      | 0      | 0      | 0      | 0      |
| 23444  | 1      | 0      | 0      | 1      | 0      | 0      |
| 23445  | 0      | 0      | 0      | 0      | 0      | 0      |

| respid | Q56i_1 | Q56j_1 | Q56k_1 | Q56l_1 | Q56m_1 | Q56n_1 |
|--------|--------|--------|--------|--------|--------|--------|
| 23455  | 0      | 0      | 0      | 0      | 0      | 0      |
| 23467  | 0      | 1      | 1      | 1      | 1      | 0      |
| 23478  | 1      | 0      | 1      | 1      | 1      | 2      |
| 23492  | 1      | 2      | 1      | 2      | 1      | 0      |
| 23498  | 0      | 0      | 0      | 0      | 0      | 2      |
| 23511  | 1      | 0      | 0      | 1      | 0      | 2      |
| 23514  | 1      | 1      | 0      | 2      | 0      | 0      |
| 23515  | 0      | 2      | 0      | 1      | 1      | 3      |
| 23522  | 0      | 0      | 0      | 0      | 0      | 0      |
| 23524  | 0      | 1      | 1      | 0      | 1      | 1      |
| 23531  | 1      | 0      | 1      | 1      | 1      | 1      |
| 23532  | 1      | 0      | 0      | 0      | 0      | 1      |
| 23533  | 1      | 1      | 1      | 1      | 1      | 1      |
| 23534  | 0      | 0      | 0      | 0      | 0      | 0      |
| 23538  | 1      | 0      | 1      | 1      | 1      | 0      |
| 23539  | 1      | 1      | 2      | 2      | 1      | 1      |
| 23548  | 0      | 1      | 0      | 1      | 0      | 1      |
| 23553  | 0      | 0      | 0      | 0      | 0      | 0      |
| 23556  | 0      | 1      | 0      | 0      | 0      | 0      |
| 23563  | 1      | 2      | 1      | 1      | 1      | 1      |
| 23572  | 0      | 0      | 0      | 0      | 0      | 0      |
| 23575  | 1      | 0      | 0      | 1      | 1      | 0      |
| 23576  | 1      | 0      | 1      | 0      | 1      | 1      |
| 23577  | 1      | 1      | 1      | 1      | 1      | 0      |
| 23578  | 1      | 0      | 1      | 2      | 1      | 2      |
| 23587  | 0      | 1      | 0      | 0      | 0      | 1      |
| 23597  | 1      | 2      | 1      | 1      | 1      | 1      |
| 23598  | 1      | 2      | 1      | 1      | 1      | 1      |
| 23604  | 0      | 0      | 0      | 0      | 0      | 0      |
| 23617  | 1      | 1      | 0      | 2      | 0      | 0      |
| 23620  | 1      | 3      | 1      | 1      | 0      | 1      |
| 23621  | 1      | 1      | 1      | 1      | 1      | 1      |

| respid | Q56i_1 | Q56j_1 | Q56k_1 | Q56l_1 | Q56m_1 | Q56n_1 |
|--------|--------|--------|--------|--------|--------|--------|
| 23625  | 0      | 0      | 0      | 0      | 0      | 0      |
| 23629  | 0      | 0      | 1      | 0      | 1      | 0      |
| 23635  | 0      | 0      | 0      | 2      | 1      | 1      |
| 23636  | 1      | 1      | 1      | 0      | 1      | 1      |
| 23637  | 1      | 1      | 1      | 1      | 1      | 1      |
| 23638  | 0      | 3      | 0      | 1      | 0      | 1      |
| 23644  | 0      | 2      | 1      | 1      | 1      | 0      |
| 23645  | 0      | 1      | 0      | 1      | 1      | 0      |
| 23649  | 2      | 2      | 2      | 2      | 2      | 2      |
| 23654  | 0      | 2      | 1      | 0      | 1      | 0      |
| 23662  | 1      | 1      | 1      | 0      | 1      | 1      |
| 23664  | 1      | 1      | 1      | 0      | 1      | 0      |
| 23665  | 0      | 0      | 0      | 0      | 0      | 0      |
| 23666  | 2      | 2      | 1      | 2      | 2      | 1      |
| 23671  | 0      | 1      | 0      | 0      | 0      | 0      |
| 23672  | 0      | 2      | 0      | 0      | 0      | 0      |
| 23685  | 0      | 2      | 0      | 1      | 0      | 0      |
| 23686  | 1      | 3      | 1      | 3      | 1      | 1      |
| 23689  | 0      | 1      | 0      | 1      | 1      | 1      |
| 23690  | 1      | 2      | 1      | 2      | 1      | 1      |
| 23695  | 0      | 1      | 0      | 0      | 0      | 0      |
| 23700  | 0      | 3      | 0      | 0      | 0      | 0      |
| 23714  | 0      | 0      | 1      | 1      | 1      | 3      |
| 23719  | 1      | 2      | 1      | 1      | 1      | 1      |
| 23720  | 0      | 0      | 0      | 0      | 0      | 0      |
| 23721  | 0      | 1      | 1      | 0      | 0      | 0      |
| 23729  | 0      | 3      | 0      | 0      | 0      | 0      |
| 23730  | 0      | 0      | 0      | 0      | 0      | 0      |
| 23732  | 1      | 0      | 0      | 1      | 1      | 2      |
| 23736  | 0      | 0      | 0      | 1      | 0      | 0      |
| 23754  | 1      | 0      | 0      | 0      | 0      | 0      |
| 23756  | 0      | 0      | 1      | 0      | 0      | 0      |



| respid | Q56i_1 | Q56j_1 | Q56k_1 | Q56l_1 | Q56m_1 | Q56n_1 |
|--------|--------|--------|--------|--------|--------|--------|
| 23759  | 1      | 0      | 1      | 0      | 1      | 0      |
| 23761  | 0      | 2      | 0      | 0      | 0      | 0      |
| 23766  | 1      | 1      | 1      | 1      | 1      | 1      |
| 23768  | 1      | 1      | 1      | 1      | 1      | 1      |
| 23773  | 1      | 0      | 1      | 1      | 1      | 0      |
| 23781  | 1      | 1      | 1      | 1      | 1      | 0      |
| 23782  | 0      | 0      | 1      | 3      | 2      | 2      |
| 23787  | 1      | 1      | 1      | 1      | 1      | 1      |
| 23788  | 1      | 1      | 1      | 3      | 1      | 1      |
| 23790  | 1      | 0      | 1      | 0      | 1      | 0      |
| 23794  | 0      | 3      | 0      | 1      | 0      | 0      |
| 23795  | 1      | 0      | 1      | 1      | 1      | 1      |
| 23801  | 0      | 0      | 1      | 0      | 0      | 0      |
| 23806  | 1      | 0      | 1      | 0      | 0      | 0      |
| 23809  | 0      | 1      | 0      | 0      | 0      | 0      |
| 23813  | 1      | 1      | 0      | 1      | 0      | 0      |
| 23815  | 0      | 0      | 0      | 0      | 0      | 0      |
| 23821  | 0      | 1      | 0      | 0      | 0      | 0      |
| 23825  | 1      | 0      | 0      | 1      | 1      | 1      |
| 23826  | 0      | 1      | 0      | 0      | 0      | 1      |
| 23830  | 1      | 2      | 1      | 1      | 1      | 0      |
| 23833  | 0      | 0      | 0      | 0      | 0      | 0      |
| 23837  | 1      | 0      | 0      | 0      | 0      | 0      |
| 23848  | 3      | 3      | 3      | 3      | 3      | 3      |
| 23850  | 0      | 2      | 0      | 0      | 1      | 1      |
| 23870  | 0      | 3      | 0      | 0      | 0      | 1      |
| 23877  | 0      | 2      | 1      | 0      | 2      | 0      |
| 23880  | 0      | 1      | 0      | 2      | 0      | 2      |
| 23882  | 1      | 2      | 1      | 1      | 1      | 1      |
| 23888  | 0      | 0      | 0      | 0      | 0      | 0      |
| 23908  | 0      | 1      | 0      | 1      | 0      | 0      |
| 23914  | 1      | 1      | 1      | 0      | 1      | 0      |

| respid | Q56i_1 | Q56j_1 | Q56k_1 | Q56l_1 | Q56m_1 | Q56n_1 |
|--------|--------|--------|--------|--------|--------|--------|
| 23916  | 1      | 1      | 1      | 1      | 1      | 1      |
| 23922  | 1      | 1      | 1      | 1      | 1      | 1      |
| 23932  | 0      | 1      | 0      | 1      | 0      | 0      |
| 23934  | 0      | 3      | 0      | 0      | 0      | 0      |
| 23942  | 0      | 1      | 0      | 0      | 0      | 0      |
| 23945  | 1      | 0      | 1      | 0      | 0      | 0      |
| 23948  | 0      | 1      | 0      | 1      | 0      | 0      |
| 23955  | 0      | 0      | 0      | 0      | 1      | 0      |
| 23956  | 0      | 0      | 0      | 0      | 1      | 0      |
| 23978  | 0      | 1      | 0      | 0      | 0      | 0      |
| 23981  | 1      | 1      | 1      | 1      | 1      | 0      |
| 23982  | 3      | 1      | 3      | 3      | 3      | 0      |
| 23991  | 0      | 1      | 0      | 1      | 0      | 1      |
| 23994  | 0      | 2      | 0      | 1      | 1      | 2      |
| 23995  | 0      | 0      | 0      | 0      | 1      | 0      |
| 23999  | 0      | 3      | 1      | 0      | 1      | 1      |
| 24005  | 2      | 0      | 2      | 1      | 0      | 1      |
| 24018  | 1      | 1      | 0      | 0      | 1      | 0      |
| 24021  | 1      | 1      | 1      | 1      | 1      | 1      |
| 24035  | 0      | 3      | 1      | 1      | 1      | 1      |
| 24040  | 0      | 3      | 1      | 0      | 0      | 0      |
| 24043  | 0      | 0      | 0      | 0      | 0      | 0      |
| 24046  | 1      | 1      | 1      | 1      | 2      | 1      |
| 24047  | 1      | 1      | 0      | 0      | 1      | 0      |
| 24048  | 1      | 0      | 0      | 1      | 1      | 0      |
| 24062  | 1      | 1      | 1      | 1      | 1      | 1      |
| 24063  | 1      | 0      | 1      | 1      | 1      | 1      |
| 24066  | 0      | 0      | 0      | 0      | 0      | 0      |
| 24069  | 0      | 1      | 1      | 0      | 1      | 1      |
| 24070  | 3      | 3      | 3      | 3      | 3      | 3      |
| 24074  | 1      | 1      | 1      | 1      | 0      | 0      |
| 24080  | 0      | 1      | 0      | 0      | 0      | 0      |

| respid | Q56i_1 | Q56j_1 | Q56k_1 | Q56l_1 | Q56m_1 | Q56n_1 |
|--------|--------|--------|--------|--------|--------|--------|
| 24082  | 0      | 0      | 0      | 0      | 0      | 0      |
| 24088  | 1      | 1      | 1      | 1      | 1      | 1      |
| 24089  | 0      | 3      | 0      | 0      | 0      | 0      |
| 24091  | 1      | 1      | 1      | 0      | 1      | 0      |
| 24095  | 1      | 1      | 1      | 1      | 1      | 1      |
| 24100  | 1      | 1      | 1      | 1      | 0      | 1      |
| 24105  | 1      | 1      | 1      | 1      | 2      | 2      |
| 24107  | 2      | 1      | 2      | 1      | 1      | 1      |
| 24108  | 1      | 1      | 0      | 0      | 1      | 0      |
| 24113  | 1      | 3      | 0      | 3      | 1      | 0      |
| 24120  | 1      | 0      | 0      | 0      | 0      | 0      |
| 24122  | 2      | 2      | 1      | 3      | 2      | 3      |
| 24123  | 1      | 1      | 1      | 2      | 2      | 3      |
| 24125  | 2      | 2      | 1      | 0      | 1      | 1      |
| 24132  | 0      | 0      | 0      | 0      | 0      | 0      |
| 24139  | 0      | 1      | 1      | 0      | 0      | 0      |
| 24140  | 2      | 1      | 1      | 1      | 1      | 1      |
| 24143  | 2      | 1      | 1      | 1      | 2      | 1      |
| 24150  | 1      | 3      | 2      | 2      | 1      | 1      |
| 24153  | 1      | 0      | 0      | 0      | 1      | 0      |
| 24161  | 0      | 0      | 0      | 0      | 0      | 0      |
| 24168  | 1      | 1      | 1      | 0      | 0      | 0      |
| 24179  | 1      | 1      | 1      | 1      | 0      | 0      |
| 24182  | 1      | 0      | 1      | 1      | 1      | 1      |
| 24194  | 1      | 1      | 1      | 0      | 1      | 0      |
| 24206  | 0      | 2      | 0      | 0      | 0      | 1      |
| 24214  | 1      | 1      | 1      | 1      | 2      | 1      |
| 24215  | 1      | 0      | 0      | 0      | 1      | 0      |
| 24224  | 0      | 0      | 0      | 0      | 0      | 0      |
| 24225  | 0      | 1      | 0      | 1      | 1      | 1      |
| 24227  | 0      | 0      | 0      | 0      | 0      | 0      |
| 24229  | 0      | 0      | 0      | 0      | 0      | 0      |

| respid | Q56i_1 | Q56j_1 | Q56k_1 | Q56l_1 | Q56m_1 | Q56n_1 |
|--------|--------|--------|--------|--------|--------|--------|
| 24230  | 0      | 0      | 0      | 0      | 0      | 0      |
| 24232  | 1      | 1      | 1      | 1      | 0      | 0      |
| 24253  | 0      | 1      | 0      | 0      | 1      | 0      |
| 24267  | 1      | 0      | 1      | 0      | 1      | 0      |
| 24274  | 1      | 0      | 0      | 0      | 0      | 0      |
| 24275  | 1      | 1      | 1      | 1      | 1      | 1      |
| 24277  | 1      | 1      | 0      | 0      | 0      | 1      |
| 24280  | 0      | 1      | 0      | 1      | 0      | 1      |
| 24285  | 0      | 1      | 0      | 0      | 0      | 0      |
| 24293  | 0      | 0      | 1      | 0      | 1      | 2      |
| 24295  | 1      | 2      | 1      | 1      | 1      | 1      |
| 24299  | 1      | 2      | 1      | 1      | 0      | 1      |
| 24303  | 0      | 1      | 0      | 0      | 0      | 1      |
| 24308  | 1      | 1      | 1      | 0      | 1      | 0      |
| 24322  | 1      | 1      | 1      | 1      | 1      | 0      |
| 24325  | 0      | 0      | 0      | 0      | 0      | 0      |
| 24328  | 0      | 1      | 0      | 1      | 0      | 1      |
| 24334  | 0      | 2      | 0      | 1      | 0      | 1      |
| 24342  | 1      | 0      | 1      | 1      | 2      | 1      |
| 24343  | 1      | 2      | 1      | 1      | 1      | 1      |
| 24348  | 0      | 1      | 0      | 1      | 0      | 0      |
| 24352  | 2      | 2      | 2      | 2      | 2      | 1      |
| 24354  | 1      | 2      | 1      | 1      | 0      | 0      |
| 24357  | 0      | 0      | 0      | 0      | 0      | 0      |
| 24360  | 0      | 2      | 0      | 0      | 0      | 0      |
| 24369  | 1      | 0      | 1      | 2      | 1      | 0      |
| 24373  | 1      | 1      | 1      | 2      | 1      | 1      |
| 24398  | 2      | 1      | 2      | 2      | 2      | 2      |
| 24402  | 1      | 1      | 1      | 2      | 1      | 1      |
| 24405  | 2      | 2      | 1      | 2      | 1      | 1      |
| 24407  | 0      | 0      | 1      | 1      | 1      | 0      |
| 24413  | 0      | 0      | 0      | 0      | 0      | 0      |

| respid | Q56i_1 | Q56j_1 | Q56k_1 | Q56l_1 | Q56m_1 | Q56n_1 |
|--------|--------|--------|--------|--------|--------|--------|
| 24443  | 1      | 2      | 1      | 2      | 1      | 2      |
| 24451  | 0      | 0      | 0      | 0      | 0      | 0      |
| 24459  | 0      | 0      | 1      | 2      | 2      | 1      |
| 24465  | 1      | 1      | 1      | 1      | 1      | 3      |
| 24481  | 1      | 2      | 1      | 1      | 1      | 1      |
| 24482  | 0      | 0      | 0      | 1      | 0      | 1      |
| 24491  | 1      | 0      | 1      | 1      | 1      | 1      |
| 24495  | 0      | 1      | 1      | 0      | 0      | 0      |
| 24497  | 1      | 2      | 2      | 3      | 2      | 1      |
| 24511  | 1      | 0      | 1      | 0      | 1      | 1      |
| 24513  | 1      | 1      | 1      | 1      | 1      | 1      |
| 24516  | 1      | 2      | 1      | 0      | 0      | 0      |
| 24518  | 0      | 1      | 0      | 0      | 1      | 0      |
| 24524  | 1      | 1      | 1      | 2      | 1      | 2      |
| 24528  | 0      | 1      | 0      | 1      | 0      | 1      |
| 24531  | 0      | 0      | 0      | 0      | 0      | 0      |
| 24533  | 1      | 2      | 1      | 2      | 2      | 1      |
| 24547  | 0      | 2      | 0      | 2      | 0      | 2      |
| 24557  | 1      | 0      | 1      | 1      | 1      | 1      |
| 24559  | 1      | 2      | 1      | 2      | 1      | 2      |
| 24567  | 1      | 1      | 1      | 1      | 1      | 1      |
| 24568  | 1      | 1      | 1      | 0      | 1      | 0      |
| 24577  | 0      | 0      | 1      | 1      | 1      | 0      |
| 24581  | 1      | 1      | 1      | 2      | 1      | 2      |
| 24588  | 0      | 1      | 0      | 1      | 0      | 0      |
| 24604  | 0      | 1      | 0      | 1      | 1      | 0      |
| 24612  | 0      | 0      | 1      | 1      | 1      | 1      |
| 24621  | 2      | 2      | 1      | 2      | 2      | 1      |
| 24625  | 0      | 1      | 1      | 1      | 2      | 3      |
| 24627  | 1      | 2      | 0      | 1      | 0      | 0      |
| 24640  | 1      | 1      | 1      | 1      | 3      | 1      |
| 24644  | 1      | 1      | 0      | 0      | 1      | 0      |

| respid | Q56i_1 | Q56j_1 | Q56k_1 | Q56l_1 | Q56m_1 | Q56n_1 |
|--------|--------|--------|--------|--------|--------|--------|
| 24664  | 0      | 2      | 0      | 1      | 1      | 1      |
| 24669  | 0      | 0      | 0      | 0      | 0      | 0      |
| 24685  | 0      | 1      | 0      | 1      | 0      | 0      |
| 24687  | 1      | 1      | 1      | 1      | 1      | 1      |
| 24688  | 1      | 1      | 1      | 2      | 1      | 1      |
| 24691  | 1      | 0      | 1      | 1      | 1      | 1      |
| 24693  | 1      | 1      | 1      | 1      | 1      | 0      |
| 24706  | 0      | 0      | 0      | 1      | 0      | 0      |
| 24710  | 0      | 0      | 0      | 0      | 0      | 0      |
| 24717  | 0      | 0      | 0      | 0      | 0      | 0      |
| 24720  | 0      | 0      | 0      | 0      | 1      | 0      |
| 24731  | 1      | 1      | 1      | 1      | 1      | 1      |
| 24732  | 2      | 2      | 1      | 1      | 2      | 1      |
| 24733  | 1      | 3      | 0      | 0      | 1      | 2      |
| 24747  | 0      | 3      | 1      | 1      | 1      | 3      |
| 24750  | 1      | 1      | 1      | 2      | 1      | 0      |
| 24758  | 1      | 2      | 1      | 1      | 1      | 1      |
| 24760  | 0      | 0      | 0      | 0      | 0      | 0      |
| 24765  | 0      | 0      | 0      | 1      | 0      | 0      |
| 24772  | 0      | 1      | 0      | 0      | 0      | 0      |
| 24779  | 1      | 2      | 2      | 2      | 1      | 1      |
| 24794  | 0      | 2      | 0      | 0      | 0      | 0      |
| 24796  | 1      | 0      | 1      | 0      | 1      | 0      |
| 24797  | 0      | 2      | 1      | 1      | 0      | 0      |
| 24800  | 0      | 0      | 0      | 0      | 0      | 0      |
| 24813  | 1      | 1      | 1      | 2      | 2      | 1      |
| 24815  | 0      | 2      | 0      | 1      | 0      | 0      |
| 24821  | 0      | 3      | 0      | 0      | 0      | 0      |
| 24822  | 0      | 0      | 0      | 0      | 0      | 0      |
| 24831  | 0      | 0      | 0      | 0      | 2      | 3      |
| 24835  | 0      | 0      | 0      | 0      | 0      | 0      |
| 24843  | 0      | 2      | 1      | 2      | 2      | 1      |

| respid | Q56i_1 | Q56j_1 | Q56k_1 | Q56l_1 | Q56m_1 | Q56n_1 |
|--------|--------|--------|--------|--------|--------|--------|
| 24844  | 1      | 1      | 1      | 1      | 1      | 1      |
| 24860  | 0      | 1      | 0      | 1      | 0      | 0      |
| 24861  | 0      | 2      | 0      | 3      | 0      | 3      |
| 24865  | 1      | 0      | 1      | 1      | 1      | 1      |
| 24870  | 1      | 1      | 1      | 1      | 1      | 1      |
| 24887  | 1      | 1      | 1      | 1      | 0      | 0      |
| 24897  | 0      | 1      | 0      | 0      | 0      | 1      |
| 24902  | 1      | 1      | 1      | 1      | 2      | 2      |
| 24914  | 1      | 0      | 1      | 0      | 0      | 0      |
| 24921  | 1      | 0      | 1      | 1      | 1      | 1      |
| 24922  | 0      | 0      | 0      | 0      | 0      | 0      |
| 24924  | 0      | 3      | 0      | 1      | 0      | 2      |
| 24927  | 1      | 0      | 1      | 0      | 1      | 0      |
| 24936  | 3      | 3      | 2      | 3      | 3      | 3      |
| 24937  | 1      | 3      | 1      | 0      | 1      | 0      |
| 24942  | 0      | 2      | 1      | 1      | 0      | 1      |
| 24947  | 1      | 0      | 1      | 1      | 1      | 0      |
| 24953  | 0      | 0      | 1      | 1      | 1      | 0      |
| 24954  | 1      | 1      | 1      | 1      | 1      | 1      |
| 24960  | 1      | 1      | 2      | 1      | 1      | 1      |
| 24965  | 0      | 3      | 0      | 0      | 0      | 1      |
| 24975  | 0      | 2      | 0      | 0      | 1      | 1      |
| 24983  | 1      | 0      | 1      | 1      | 1      | 1      |
| 24985  | 0      | 1      | 1      | 1      | 1      | 1      |
| 24990  | 1      | 3      | 1      | 3      | 3      | 3      |
| 25000  | 0      | 0      | 0      | 0      | 1      | 1      |
| 25007  | 1      | 1      | 1      | 2      | 1      | 1      |
| 25008  | 1      | 0      | 1      | 0      | 1      | 0      |
| 25010  | 0      | 2      | 2      | 1      | 0      | 3      |
| 25016  | 0      | 1      | 1      | 1      | 1      | 1      |
| 25021  | 0      | 1      | 0      | 2      | 1      | 3      |
| 25040  | 0      | 0      | 0      | 0      | 0      | 0      |

| respid | Q56i_1 | Q56j_1 | Q56k_1 | Q56l_1 | Q56m_1 | Q56n_1 |
|--------|--------|--------|--------|--------|--------|--------|
| 25043  | 0      | 1      | 0      | 0      | 1      | 0      |
| 25055  | 1      | 0      | 0      | 0      | 0      | 0      |
| 25057  | 1      | 3      | 1      | 0      | 1      | 0      |
| 25060  | 1      | 1      | 1      | 2      | 1      | 1      |
| 25062  | 1      | 1      | 1      | 0      | 1      | 0      |
| 25064  | 1      | 2      | 1      | 1      | 1      | 1      |
| 25069  | 0      | 0      | 0      | 0      | 0      | 0      |
| 25077  | 0      | 0      | 0      | 0      | 0      | 0      |
| 25088  | 1      | 0      | 0      | 0      | 1      | 0      |
| 25093  | 1      | 2      | 2      | 2      | 1      | 0      |
| 25121  | 2      | 1      | 1      | 1      | 1      | 1      |
| 25140  | 1      | 0      | 1      | 1      | 1      | 1      |
| 25144  | 0      | 1      | 0      | 1      | 1      | 0      |
| 25149  | 1      | 2      | 1      | 1      | 0      | 1      |
| 25159  | 0      | 1      | 0      | 0      | 0      | 0      |
| 25191  | 1      | 1      | 1      | 1      | 1      | 2      |
| 25193  | 1      | 0      | 0      | 1      | 0      | 0      |
| 25202  | 1      | 0      | 1      | 1      | 1      | 1      |
| 25215  | 1      | 3      | 1      | 2      | 2      | 1      |
| 25229  | 1      | 1      | 1      | 1      | 1      | 1      |
| 25231  | 0      | 0      | 0      | 0      | 1      | 0      |
| 25236  | 1      | 0      | 0      | 1      | 0      | 0      |
| 25242  | 0      | 0      | 1      | 0      | 1      | 0      |
| 25252  | 0      | 0      | 0      | 0      | 0      | 0      |
| 25253  | 1      | 1      | 1      | 0      | 0      | 0      |
| 25256  | 1      | 0      | 1      | 1      | 1      | 1      |
| 25260  | 0      | 0      | 0      | 0      | 1      | 0      |
| 25261  | 1      | 2      | 0      | 2      | 1      | 1      |
| 25280  | 1      | 2      | 0      | 1      | 1      | 0      |
| 25282  | 0      | 1      | 1      | 0      | 0      | 0      |
| 25289  | 1      | 2      | 2      | 2      | 2      | 1      |
| 25303  | 0      | 0      | 0      | 0      | 0      | 0      |



| respid | Q56i_1 | Q56j_1 | Q56k_1 | Q56l_1 | Q56m_1 | Q56n_1 |
|--------|--------|--------|--------|--------|--------|--------|
| 25304  | 1      | 0      | 1      | 1      | 2      | 1      |
| 25309  | 2      | 0      | 1      | 1      | 1      | 1      |
| 25317  | 0      | 0      | 0      | 1      | 1      | 2      |
| 25318  | 1      | 1      | 1      | 1      | 1      | 1      |
| 25320  | 2      | 1      | 2      | 1      | 2      | 1      |
| 25324  | 1      | 0      | 1      | 1      | 1      | 1      |
| 25331  | 0      | 1      | 0      | 1      | 0      | 0      |
| 25340  | 0      | 0      | 0      | 0      | 1      | 0      |
| 25342  | 1      | 3      | 1      | 1      | 1      | 2      |
| 25350  | 0      | 1      | 0      | 0      | 0      | 0      |
| 25352  | 0      | 2      | 1      | 2      | 1      | 2      |
| 25358  | 0      | 1      | 0      | 1      | 0      | 0      |
| 25375  | 1      | 1      | 0      | 0      | 0      | 0      |
| 25386  | 1      | 3      | 1      | 1      | 0      | 0      |
| 25388  | 0      | 2      | 0      | 0      | 1      | 3      |
| 25390  | 0      | 1      | 1      | 1      | 2      | 1      |
| 25391  | 1      | 1      | 1      | 1      | 1      | 1      |
| 25400  | 1      | 0      | 1      | 1      | 1      | 1      |
| 25413  | 1      | 0      | 1      | 1      | 1      | 1      |
| 25424  | 0      | 0      | 1      | 0      | 0      | 0      |
| 25426  | 1      | 1      | 1      | 1      | 1      | 1      |
| 25430  | 1      | 0      | 1      | 1      | 0      | 0      |
| 25434  | 2      | 2      | 0      | 2      | 1      | 0      |
| 25439  | 1      | 1      | 1      | 1      | 1      | 1      |
| 25441  | 0      | 1      | 0      | 0      | 0      | 0      |
| 25445  | 1      | 0      | 1      | 0      | 1      | 1      |
| 25451  | 1      | 1      | 1      | 1      | 1      | 1      |
| 25469  | 1      | 0      | 1      | 1      | 1      | 1      |
| 25471  | 0      | 1      | 0      | 1      | 1      | 0      |
| 25476  | 1      | 1      | 1      | 1      | 1      | 1      |
| 25480  | 1      | 1      | 1      | 1      | 1      | 1      |
| 25482  | 1      | 1      | 1      | 1      | 0      | 1      |

| respid | Q56i_1 | Q56j_1 | Q56k_1 | Q56l_1 | Q56m_1 | Q56n_1 |
|--------|--------|--------|--------|--------|--------|--------|
| 25500  | 1      | 2      | 2      | 2      | 2      | 0      |
| 25516  | 1      | 0      | 1      | 0      | 1      | 0      |
| 25521  | 1      | 1      | 2      | 1      | 1      | 0      |
| 25525  | 1      | 1      | 1      | 1      | 0      | 1      |
| 25530  | 1      | 1      | 1      | 1      | 1      | 1      |
| 25555  | 1      | 1      | 1      | 1      | 1      | 1      |
| 25558  | 1      | 1      | 1      | 1      | 1      | 1      |
| 25561  | 1      | 1      | 1      | 1      | 1      | 1      |
| 25566  | 0      | 1      | 0      | 0      | 1      | 0      |
| 25571  | 1      | 1      | 1      | 1      | 0      | 1      |
| 25572  | 0      | 3      | 0      | 0      | 0      | 0      |
| 25574  | 1      | 1      | 1      | 1      | 1      | 2      |
| 25588  | 0      | 0      | 0      | 0      | 0      | 1      |
| 25591  | 1      | 0      | 1      | 0      | 0      | 0      |
| 25599  | 1      | 0      | 1      | 0      | 0      | 0      |
| 25604  | 0      | 1      | 0      | 1      | 0      | 1      |
| 25614  | 1      | 1      | 0      | 1      | 0      | 1      |
| 25634  | 1      | 0      | 1      | 1      | 1      | 1      |
| 25642  | 0      | 1      | 1      | 0      | 1      | 1      |
| 25647  | 0      | 0      | 0      | 0      | 0      | 0      |
| 25653  | 0      | 1      | 0      | 0      | 0      | 0      |
| 25654  | 1      | 2      | 0      | 1      | 1      | 0      |
| 25660  | 0      | 1      | 0      | 0      | 0      | 0      |
| 25664  | 0      | 1      | 1      | 1      | 1      | 1      |
| 25665  | 1      | 0      | 1      | 0      | 1      | 0      |
| 25672  | 2      | 2      | 1      | 2      | 2      | 2      |
| 25677  | 1      | 2      | 2      | 1      | 2      | 0      |
| 25685  | 0      | 0      | 1      | 0      | 0      | 1      |
| 25699  | 1      | 1      | 1      | 1      | 1      | 1      |
| 25703  | 2      | 3      | 2      | 2      | 2      | 1      |
| 25704  | 1      | 1      | 2      | 1      | 2      | 1      |
| 25705  | 1      | 1      | 1      | 2      | 1      | 1      |

| respid | Q56i_1 | Q56j_1 | Q56k_1 | Q56l_1 | Q56m_1 | Q56n_1 |
|--------|--------|--------|--------|--------|--------|--------|
| 25711  | 1      | 1      | 1      | 1      | 1      | 1      |
| 25727  | 1      | 0      | 0      | 1      | 0      | 0      |
| 25728  | 1      | 2      | 0      | 0      | 0      | 0      |
| 25733  | 1      | 1      | 1      | 1      | 1      | 1      |
| 25735  | 1      | 0      | 0      | 1      | 2      | 2      |
| 25736  | 0      | 1      | 0      | 0      | 0      | 0      |
| 25742  | 1      | 0      | 1      | 0      | 1      | 0      |
| 25750  | 1      | 1      | 1      | 1      | 1      | 1      |
| 25754  | 0      | 3      | 0      | 0      | 0      | 0      |
| 25776  | 1      | 2      | 1      | 2      | 2      | 1      |
| 25778  | 1      | 1      | 1      | 1      | 1      | 1      |
| 25796  | 0      | 1      | 1      | 0      | 1      | 0      |
| 25852  | 1      | 1      | 0      | 0      | 1      | 0      |
| 25858  | 0      | 0      | 0      | 0      | 1      | 0      |
| 25859  | 1      | 3      | 1      | 1      | 1      | 0      |
| 25886  | 0      | 1      | 0      | 0      | 0      | 0      |
| 25890  | 1      | 1      | 0      | 1      | 1      | 0      |
| 25897  | 1      | 1      | 1      | 1      | 1      | 1      |
| 25903  | 1      | 0      | 1      | 1      | 0      | 0      |
| 25905  | 1      | 1      | 1      | 2      | 2      | 1      |
| 25917  | 0      | 1      | 0      | 0      | 0      | 1      |
| 25918  | 1      | 1      | 0      | 3      | 0      | 2      |
| 25928  | 1      | 1      | 1      | 2      | 1      | 0      |
| 25930  | 1      | 0      | 1      | 2      | 1      | 1      |
| 25949  | 1      | 1      | 0      | 0      | 1      | 1      |
| 25955  | 1      | 1      | 0      | 1      | 0      | 0      |
| 25959  | 0      | 1      | 0      | 1      | 0      | 0      |
| 25964  | 0      | 1      | 0      | 1      | 1      | 2      |
| 25972  | 1      | 1      | 0      | 0      | 0      | 0      |
| 25999  | 1      | 1      | 1      | 1      | 1      | 1      |
| 26019  | 1      | 0      | 1      | 0      | 1      | 0      |
| 26025  | 0      | 2      | 0      | 2      | 0      | 1      |

| respid | Q56i_1 | Q56j_1 | Q56k_1 | Q56l_1 | Q56m_1 | Q56n_1 |
|--------|--------|--------|--------|--------|--------|--------|
| 26039  | 1      | 0      | 1      | 0      | 1      | 0      |
| 26055  | 0      | 0      | 0      | 0      | 0      | 0      |
| 26061  | 0      | 0      | 1      | 2      | 1      | 1      |
| 26076  | 0      | 1      | 0      | 0      | 0      | 0      |
| 26088  | 1      | 0      | 1      | 0      | 1      | 1      |
| 26094  | 1      | 1      | 1      | 1      | 1      | 1      |
| 26104  | 0      | 1      | 1      | 2      | 2      | 1      |
| 26131  | 1      | 1      | 0      | 0      | 0      | 0      |
| 26134  | 1      | 0      | 1      | 2      | 1      | 1      |
| 26160  | 0      | 1      | 0      | 0      | 0      | 0      |
| 26168  | 0      | 3      | 0      | 0      | 0      | 0      |
| 26170  | 0      | 1      | 0      | 0      | 0      | 0      |
| 26191  | 2      | 2      | 2      | 2      | 2      | 2      |
| 26192  | 1      | 0      | 1      | 1      | 1      | 0      |
| 26195  | 1      | 1      | 1      | 1      | 1      | 1      |
| 26198  | 0      | 2      | 1      | 1      | 1      | 0      |
| 26199  | 0      | 1      | 0      | 1      | 1      | 0      |
| 26201  | 1      | 1      | 0      | 1      | 1      | 0      |
| 26202  | 0      | 1      | 0      | 1      | 0      | 1      |
| 26226  | 0      | 0      | 1      | 0      | 1      | 0      |
| 26233  | 2      | 3      | 0      | 1      | 1      | 1      |
| 26236  | 0      | 1      | 0      | 0      | 1      | 1      |
| 26242  | 1      | 1      | 0      | 0      | 1      | 1      |
| 26244  | 0      | 0      | 0      | 0      | 0      | 0      |
| 26250  | 1      | 2      | 1      | 1      | 1      | 1      |
| 26266  | 0      | 1      | 0      | 0      | 0      | 1      |
| 26274  | 0      | 2      | 0      | 0      | 1      | 0      |
| 26286  | 1      | 1      | 0      | 1      | 2      | 1      |
| 26288  | 0      | 0      | 1      | 0      | 0      | 0      |
| 26295  | 0      | 1      | 0      | 0      | 0      | 1      |
| 26296  | 0      | 3      | 0      | 0      | 0      | 0      |
| 26297  | 1      | 1      | 1      | 2      | 1      | 1      |

| respid | Q56i_1 | Q56j_1 | Q56k_1 | Q56l_1 | Q56m_1 | Q56n_1 |
|--------|--------|--------|--------|--------|--------|--------|
| 26300  | 1      | 0      | 1      | 1      | 1      | 1      |
| 26317  | 0      | 2      | 1      | 3      | 1      | 3      |
| 26343  | 1      | 0      | 1      | 0      | 1      | 0      |
| 26367  | 0      | 1      | 2      | 2      | 1      | 0      |
| 26372  | 1      | 2      | 1      | 1      | 1      | 1      |
| 26403  | 1      | 0      | 1      | 1      | 1      | 1      |
| 26423  | 1      | 2      | 1      | 1      | 1      | 0      |
| 26430  | 0      | 1      | 0      | 1      | 0      | 1      |
| 26437  | 1      | 1      | 1      | 2      | 1      | 1      |
| 26457  | 0      | 0      | 0      | 0      | 0      | 0      |
| 26466  | 0      | 0      | 0      | 0      | 0      | 0      |
| 26467  | 1      | 0      | 0      | 0      | 0      | 0      |
| 26469  | 1      | 0      | 1      | 0      | 1      | 0      |
| 26494  | 2      | 2      | 1      | 1      | 2      | 1      |
| 26510  | 1      | 2      | 1      | 0      | 0      | 1      |
| 26519  | 0      | 1      | 0      | 1      | 0      | 0      |
| 26525  | 0      | 3      | 1      | 0      | 1      | 1      |
| 26529  | 1      | 1      | 1      | 0      | 1      | 1      |
| 26533  | 1      | 2      | 1      | 2      | 2      | 1      |
| 26556  | 0      | 1      | 0      | 0      | 2      | 1      |
| 26559  | 1      | 0      | 2      | 1      | 1      | 1      |
| 26565  | 1      | 1      | 1      | 1      | 2      | 1      |
| 26576  | 2      | 1      | 1      | 1      | 2      | 2      |
| 26601  | 0      | 1      | 0      | 0      | 0      | 0      |
| 26607  | 0      | 1      | 1      | 1      | 1      | 1      |
| 26611  | 0      | 2      | 1      | 2      | 2      | 0      |
| 26619  | 0      | 1      | 1      | 1      | 0      | 2      |
| 26631  | 0      | 0      | 1      | 1      | 1      | 1      |
| 26654  | 0      | 0      | 0      | 1      | 0      | 0      |
| 26656  | 1      | 2      | 1      | 1      | 1      | 1      |
| 26664  | 1      | 0      | 0      | 1      | 1      | 0      |
| 26667  | 0      | 1      | 1      | 1      | 0      | 1      |

| respid | Q56i_1 | Q56j_1 | Q56k_1 | Q56l_1 | Q56m_1 | Q56n_1 |
|--------|--------|--------|--------|--------|--------|--------|
| 26674  | 1      | 2      | 2      | 1      | 1      | 2      |
| 26678  | 1      | 0      | 1      | 0      | 1      | 0      |
| 26693  | 0      | 3      | 0      | 0      | 0      | 0      |
| 26696  | 1      | 1      | 1      | 2      | 2      | 1      |
| 26703  | 1      | 1      | 2      | 2      | 1      | 2      |
| 26705  | 1      | 2      | 1      | 2      | 1      | 1      |
| 26706  | 2      | 1      | 2      | 1      | 2      | 2      |
| 26716  | 1      | 1      | 1      | 1      | 1      | 2      |
| 26721  | 0      | 0      | 0      | 0      | 0      | 0      |
| 26730  | 0      | 1      | 1      | 2      | 1      | 2      |
| 26752  | 0      | 0      | 0      | 0      | 0      | 0      |
| 26755  | 0      | 2      | 1      | 2      | 0      | 1      |
| 26791  | 1      | 1      | 1      | 1      | 2      | 2      |
| 26804  | 1      | 2      | 1      | 2      | 1      | 1      |
| 26810  | 1      | 3      | 1      | 2      | 2      | 1      |
| 26813  | 1      | 2      | 1      | 1      | 1      | 1      |
| 26833  | 1      | 1      | 1      | 1      | 1      | 1      |
| 26880  | 1      | 2      | 1      | 2      | 1      | 1      |
| 26884  | 0      | 0      | 0      | 0      | 0      | 0      |
| 26885  | 0      | 0      | 0      | 0      | 0      | 0      |
| 26890  | 1      | 1      | 1      | 2      | 1      | 1      |
| 26937  | 0      | 3      | 0      | 3      | 0      | 3      |
| 26939  | 0      | 1      | 1      | 2      | 1      | 1      |
| 26941  | 1      | 1      | 1      | 1      | 1      | 1      |
| 26992  | 0      | 1      | 1      | 1      | 1      | 1      |
| 27037  | 1      | 1      | 0      | 0      | 1      | 0      |
| 27045  | 1      | 0      | 1      | 2      | 1      | 0      |
| 27053  | 3      | 3      | 2      | 3      | 2      | 1      |
| 27060  | 1      | 0      | 1      | 0      | 1      | 0      |
| 27076  | 1      | 0      | 0      | 0      | 0      | 0      |
| 27124  | 0      | 0      | 0      | 0      | 0      | 0      |
| 27125  | 3      | 0      | 1      | 1      | 1      | 2      |

| respid | Q56i_1 | Q56j_1 | Q56k_1 | Q56l_1 | Q56m_1 | Q56n_1 |
|--------|--------|--------|--------|--------|--------|--------|
| 27132  | 0      | 0      | 0      | 0      | 0      | 0      |
| 27166  | 0      | 0      | 0      | 0      | 0      | 0      |
| 27190  | 1      | 2      | 1      | 1      | 1      | 1      |
| 27199  | 1      | 0      | 1      | 1      | 1      | 0      |
| 27221  | 1      | 0      | 1      | 0      | 1      | 0      |
| 27233  | 0      | 1      | 1      | 2      | 2      | 0      |
| 27241  | 0      | 1      | 2      | 1      | 1      | 3      |
| 27244  | 0      | 1      | 0      | 0      | 0      | 0      |
| 27245  | 1      | 1      | 1      | 1      | 1      | 1      |
| 27246  | 1      | 2      | 1      | 1      | 1      | 0      |
| 27253  | 1      | 1      | 1      | 0      | 1      | 0      |
| 27255  | 1      | 2      | 1      | 1      | 1      | 1      |
| 27267  | 1      | 1      | 1      | 1      | 1      | 1      |
| 27283  | 0      | 1      | 0      | 1      | 0      | 0      |
| 27289  | 2      | 2      | 2      | 2      | 1      | 2      |
| 27302  | 1      | 0      | 0      | 0      | 1      | 1      |
| 27317  | 0      | 1      | 0      | 0      | 0      | 0      |
| 27319  | 1      | 0      | 1      | 1      | 1      | 0      |
| 27331  | 1      | 0      | 1      | 1      | 1      | 1      |
| 27333  | 0      | 0      | 0      | 1      | 1      | 0      |
| 27340  | 1      | 2      | 1      | 2      | 1      | 0      |
| 27362  | 2      | 2      | 2      | 2      | 2      | 1      |
| 27370  | 0      | 3      | 0      | 0      | 0      | 0      |
| 27379  | 2      | 1      | 2      | 2      | 2      | 1      |
| 27386  | 0      | 0      | 0      | 0      | 0      | 0      |
| 27398  | 1      | 1      | 1      | 0      | 1      | 1      |
| 27404  | 0      | 0      | 0      | 0      | 0      | 0      |
| 27408  | 1      | 1      | 1      | 2      | 0      | 0      |
| 27412  | 1      | 1      | 1      | 1      | 1      | 3      |
| 27426  | 1      | 1      | 1      | 1      | 1      | 0      |
| 27455  | 0      | 1      | 1      | 2      | 1      | 0      |
| 27464  | 0      | 2      | 1      | 1      | 1      | 1      |

| respid | Q56i_1 | Q56j_1 | Q56k_1 | Q56l_1 | Q56m_1 | Q56n_1 |
|--------|--------|--------|--------|--------|--------|--------|
| 27484  | 1      | 0      | 1      | 0      | 0      | 0      |
| 27493  | 2      | 1      | 2      | 1      | 1      | 1      |
| 27512  | 1      | 2      | 2      | 2      | 2      | 3      |
| 27525  | 1      | 1      | 1      | 1      | 1      | 1      |
| 27532  | 1      | 1      | 1      | 1      | 1      | 0      |
| 27539  | 0      | 1      | 0      | 1      | 0      | 0      |
| 27540  | 0      | 1      | 1      | 1      | 0      | 2      |
| 27552  | 0      | 0      | 1      | 0      | 1      | 0      |
| 27562  | 0      | 1      | 0      | 0      | 0      | 0      |
| 27568  | 0      | 0      | 1      | 0      | 0      | 1      |
| 27574  | 1      | 1      | 2      | 1      | 1      | 1      |
| 27575  | 1      | 0      | 1      | 0      | 0      | 2      |
| 27577  | 0      | 0      | 0      | 0      | 0      | 0      |
| 27589  | 1      | 1      | 1      | 2      | 1      | 1      |
| 27593  | 0      | 1      | 1      | 0      | 0      | 0      |
| 27594  | 1      | 2      | 1      | 1      | 1      | 1      |
| 27595  | 1      | 0      | 1      | 0      | 1      | 0      |
| 27598  | 1      | 2      | 0      | 1      | 0      | 0      |
| 27620  | 1      | 2      | 1      | 2      | 1      | 0      |
| 27621  | 1      | 1      | 1      | 1      | 1      | 1      |
| 27628  | 0      | 1      | 0      | 3      | 2      | 2      |
| 27633  | 1      | 2      | 0      | 1      | 1      | 0      |
| 27643  | 1      | 2      | 1      | 1      | 1      | 1      |
| 27644  | 1      | 1      | 1      | 1      | 1      | 1      |
| 27668  | 1      | 1      | 1      | 2      | 1      | 1      |
| 27681  | 1      | 1      | 1      | 1      | 1      | 0      |
| 27691  | 0      | 1      | 0      | 0      | 0      | 0      |
| 27693  | 1      | 2      | 2      | 2      | 2      | 1      |
| 27703  | 0      | 2      | 1      | 0      | 0      | 1      |
| 27708  | 2      | 2      | 1      | 3      | 2      | 0      |
| 27719  | 1      | 0      | 0      | 1      | 0      | 1      |
| 27720  | 1      | 2      | 0      | 1      | 1      | 2      |



| respid | Q56i_1 | Q56j_1 | Q56k_1 | Q56l_1 | Q56m_1 | Q56n_1 |
|--------|--------|--------|--------|--------|--------|--------|
| 27723  | 0      | 1      | 0      | 0      | 1      | 2      |
| 27725  | 1      | 0      | 0      | 1      | 1      | 0      |
| 27734  | 1      | 1      | 1      | 1      | 1      | 0      |
| 27744  | 1      | 2      | 1      | 0      | 1      | 0      |
| 27749  | 1      | 1      | 1      | 1      | 1      | 1      |
| 27762  | 1      | 1      | 1      | 1      | 1      | 2      |
| 27808  | 1      | 2      | 2      | 2      | 2      | 3      |
| 27810  | 0      | 2      | 2      | 1      | 0      | 2      |
| 27812  | 0      | 0      | 0      | 0      | 0      | 0      |
| 27815  | 0      | 1      | 1      | 0      | 1      | 1      |
| 27818  | 0      | 1      | 0      | 0      | 0      | 0      |
| 27823  | 1      | 1      | 1      | 1      | 1      | 1      |
| 27841  | 1      | 2      | 2      | 1      | 2      | 2      |
| 27843  | 0      | 0      | 0      | 0      | 0      | 0      |
| 27851  | 1      | 0      | 1      | 0      | 0      | 0      |
| 27858  | 0      | 0      | 0      | 1      | 0      | 3      |
| 27859  | 0      | 0      | 0      | 1      | 0      | 2      |
| 27869  | 0      | 0      | 0      | 0      | 0      | 0      |
| 27872  | 1      | 3      | 1      | 1      | 1      | 0      |
| 27873  | 0      | 1      | 0      | 0      | 0      | 0      |
| 27884  | 1      | 2      | 1      | 1      | 2      | 1      |
| 27904  | 1      | 1      | 1      | 1      | 1      | 1      |
| 27915  | 1      | 0      | 0      | 1      | 1      | 0      |
| 27918  | 1      | 1      | 0      | 1      | 1      | 0      |
| 27937  | 1      | 2      | 1      | 1      | 1      | 2      |
| 27943  | 1      | 1      | 1      | 1      | 1      | 0      |
| 27948  | 0      | 0      | 0      | 0      | 0      | 0      |
| 27971  | 1      | 2      | 2      | 2      | 1      | 2      |
| 27991  | 0      | 0      | 1      | 1      | 1      | 1      |
| 28000  | 0      | 0      | 0      | 0      | 0      | 1      |
| 28011  | 1      | 1      | 1      | 1      | 1      | 1      |
| 28022  | 0      | 1      | 0      | 0      | 0      | 0      |

| respid | Q56i_1 | Q56j_1 | Q56k_1 | Q56l_1 | Q56m_1 | Q56n_1 |
|--------|--------|--------|--------|--------|--------|--------|
| 28025  | 0      | 0      | 0      | 0      | 0      | 0      |
| 28041  | 0      | 1      | 0      | 1      | 0      | 0      |
| 28057  | 1      | 1      | 2      | 1      | 1      | 1      |
| 28080  | 0      | 0      | 0      | 0      | 0      | 0      |
| 28098  | 0      | 3      | 0      | 0      | 0      | 0      |
| 28104  | 0      | 1      | 0      | 0      | 0      | 0      |
| 28109  | 0      | 2      | 0      | 1      | 0      | 0      |
| 28129  | 2      | 2      | 0      | 3      | 0      | 0      |
| 28141  | 0      | 2      | 0      | 2      | 1      | 3      |
| 28143  | 1      | 1      | 0      | 0      | 1      | 0      |
| 28149  | 0      | 3      | 0      | 2      | 1      | 2      |
| 28151  | 2      | 0      | 0      | 1      | 1      | 1      |
| 28161  | 3      | 2      | 2      | 2      | 2      | 3      |
| 28169  | 0      | 1      | 0      | 0      | 0      | 0      |
| 28194  | 3      | 0      | 3      | 3      | 3      | 1      |
| 28197  | 1      | 1      | 1      | 1      | 1      | 1      |
| 28206  | 0      | 2      | 0      | 1      | 1      | 0      |
| 28218  | 1      | 1      | 1      | 0      | 1      | 0      |
| 28227  | 0      | 0      | 0      | 0      | 0      | 0      |
| 28235  | 1      | 1      | 1      | 1      | 1      | 0      |
| 28246  | 1      | 2      | 2      | 2      | 1      | 1      |
| 28259  | 0      | 0      | 1      | 0      | 0      | 1      |
| 28263  | 1      | 2      | 1      | 1      | 2      | 2      |
| 28267  | 2      | 1      | 2      | 2      | 2      | 1      |
| 28274  | 0      | 1      | 1      | 1      | 0      | 0      |
| 28278  | 0      | 0      | 0      | 0      | 0      | 0      |
| 28288  | 1      | 1      | 2      | 2      | 1      | 0      |
| 28308  | 1      | 3      | 2      | 1      | 1      | 1      |
| 28309  | 1      | 1      | 1      | 1      | 1      | 1      |
| 28323  | 2      | 2      | 1      | 2      | 2      | 1      |
| 28335  | 2      | 2      | 1      | 2      | 2      | 1      |
| 28354  | 1      | 2      | 1      | 2      | 2      | 0      |

| respid | Q56i_1 | Q56j_1 | Q56k_1 | Q56l_1 | Q56m_1 | Q56n_1 |
|--------|--------|--------|--------|--------|--------|--------|
| 28355  | 1      | 1      | 1      | 2      | 1      | 1      |
| 28356  | 1      | 1      | 1      | 1      | 1      | 0      |
| 28357  | 0      | 1      | 0      | 0      | 0      | 0      |
| 28363  | 0      | 0      | 0      | 0      | 0      | 0      |
| 28366  | 1      | 1      | 1      | 1      | 1      | 1      |
| 28372  | 1      | 0      | 1      | 1      | 1      | 1      |
| 28381  | 1      | 1      | 1      | 1      | 1      | 1      |
| 28388  | 1      | 2      | 1      | 2      | 2      | 1      |
| 28413  | 1      | 2      | 1      | 2      | 2      | 1      |
| 28421  | 1      | 1      | 1      | 1      | 1      | 1      |
| 28430  | 1      | 2      | 2      | 1      | 3      | 1      |
| 28439  | 1      | 1      | 1      | 2      | 1      | 1      |
| 28458  | 2      | 2      | 2      | 1      | 1      | 1      |
| 28461  | 0      | 1      | 0      | 0      | 0      | 0      |
| 28466  | 1      | 1      | 0      | 0      | 1      | 0      |
| 28492  | 0      | 1      | 0      | 0      | 0      | 0      |
| 28534  | 0      | 0      | 0      | 0      | 0      | 0      |
| 28537  | 1      | 1      | 1      | 0      | 1      | 1      |
| 28560  | 0      | 0      | 0      | 0      | 0      | 0      |
| 28566  | 0      | 0      | 0      | 0      | 0      | 0      |
| 28569  | 1      | 0      | 1      | 0      | 1      | 0      |
| 28584  | 1      | 0      | 1      | 0      | 0      | 1      |
| 28590  | 0      | 1      | 0      | 0      | 0      | 0      |
| 28596  | 1      | 1      | 1      | 1      | 1      | 1      |
| 28608  | 0      | 0      | 0      | 0      | 0      | 0      |
| 28631  | 1      | 2      | 1      | 2      | 1      | 0      |
| 28644  | 1      | 1      | 1      | 1      | 1      | 1      |
| 28646  | 1      | 0      | 0      | 1      | 1      | 0      |
| 28665  | 0      | 1      | 0      | 0      | 0      | 1      |
| 28686  | 0      | 1      | 1      | 0      | 1      | 0      |
| 28704  | 1      | 2      | 1      | 2      | 1      | 0      |
| 28719  | 1      | 0      | 1      | 0      | 1      | 0      |

| respid | Q56i_1 | Q56j_1 | Q56k_1 | Q56l_1 | Q56m_1 | Q56n_1 |
|--------|--------|--------|--------|--------|--------|--------|
| 28736  | 1      | 1      | 1      | 2      | 1      | 2      |
| 28739  | 1      | 1      | 2      | 1      | 1      | 2      |
| 28758  | 0      | 3      | 0      | 3      | 0      | 3      |
| 28761  | 0      | 0      | 0      | 0      | 0      | 0      |
| 28770  | 2      | 1      | 1      | 1      | 1      | 0      |
| 28774  | 0      | 0      | 0      | 0      | 0      | 0      |
| 28778  | 1      | 2      | 2      | 2      | 2      | 2      |
| 28783  | 1      | 0      | 1      | 1      | 1      | 1      |
| 28785  | 0      | 1      | 0      | 0      | 1      | 0      |
| 28797  | 1      | 2      | 1      | 2      | 1      | 1      |
| 28801  | 1      | 0      | 1      | 2      | 1      | 0      |
| 28821  | 0      | 1      | 0      | 1      | 0      | 1      |
| 28827  | 1      | 2      | 1      | 1      | 1      | 1      |
| 28828  | 1      | 2      | 0      | 1      | 1      | 1      |
| 28871  | 0      | 1      | 1      | 1      | 1      | 1      |
| 28876  | 0      | 1      | 0      | 0      | 0      | 1      |
| 28891  | 0      | 1      | 0      | 0      | 0      | 0      |
| 28898  | 0      | 0      | 0      | 0      | 0      | 0      |
| 28909  | 0      | 0      | 0      | 0      | 0      | 1      |
| 28930  | 0      | 2      | 1      | 1      | 1      | 1      |
| 28935  | 0      | 1      | 0      | 2      | 0      | 0      |
| 28964  | 1      | 1      | 0      | 1      | 0      | 0      |
| 28965  | 0      | 3      | 0      | 0      | 0      | 1      |
| 28967  | 0      | 0      | 1      | 1      | 1      | 1      |
| 28975  | 0      | 2      | 0      | 2      | 0      | 0      |
| 28982  | 0      | 0      | 0      | 0      | 0      | 0      |
| 28989  | 0      | 1      | 0      | 0      | 1      | 1      |
| 29003  | 0      | 0      | 1      | 0      | 1      | 0      |
| 29004  | 0      | 0      | 0      | 0      | 0      | 0      |
| 29007  | 0      | 1      | 0      | 0      | 0      | 0      |
| 29008  | 0      | 0      | 0      | 0      | 0      | 1      |
| 29011  | 1      | 1      | 1      | 0      | 1      | 0      |

| respid | Q56i_1 | Q56j_1 | Q56k_1 | Q56l_1 | Q56m_1 | Q56n_1 |
|--------|--------|--------|--------|--------|--------|--------|
| 29012  | 0      | 1      | 0      | 0      | 1      | 0      |
| 29014  | 0      | 0      | 0      | 0      | 0      | 0      |
| 29016  | 0      | 0      | 1      | 1      | 1      | 0      |
| 29018  | 0      | 0      | 1      | 2      | 0      | 1      |
| 29048  | 1      | 2      | 2      | 2      | 1      | 1      |
| 29184  | 0      | 0      | 0      | 2      | 1      | 1      |
| 29237  | 0      | 0      | 0      | 0      | 0      | 0      |
| 29252  | 0      | 2      | 0      | 1      | 0      | 0      |
| 29267  | 0      | 1      | 0      | 0      | 0      | 0      |
| 29276  | 1      | 1      | 1      | 1      | 1      | 1      |
| 29281  | 1      | 1      | 1      | 2      | 2      | 2      |
| 29285  | 1      | 0      | 0      | 0      | 1      | 0      |
| 29291  | 1      | 0      | 2      | 1      | 1      | 2      |
| 29304  | 0      | 1      | 0      | 0      | 1      | 1      |
| 29323  | 0      | 0      | 0      | 1      | 0      | 1      |
| 29330  | 1      | 3      | 0      | 0      | 0      | 0      |
| 29357  | 0      | 0      | 0      | 0      | 0      | 0      |
| 29416  | 1      | 1      | 1      | 1      | 0      | 0      |
| 29432  | 0      | 0      | 0      | 0      | 0      | 0      |
| 29482  | 1      | 1      | 1      | 1      | 1      | 2      |
| 29506  | 2      | 1      | 1      | 2      | 1      | 1      |
| 29509  | 0      | 2      | 0      | 1      | 1      | 2      |
| 29512  | 1      | 1      | 1      | 1      | 1      | 1      |
| 29519  | 1      | 1      | 1      | 1      | 1      | 2      |
| 29520  | 1      | 2      | 1      | 1      | 1      | 3      |
| 29521  | 1      | 2      | 1      | 1      | 1      | 1      |
| 29529  | 1      | 1      | 2      | 1      | 1      | 1      |
| 29532  | 0      | 0      | 0      | 0      | 0      | 2      |
| 29547  | 1      | 1      | 3      | 2      | 1      | 1      |
| 29551  | 1      | 1      | 1      | 1      | 1      | 1      |
| 29584  | 2      | 2      | 1      | 2      | 2      | 3      |
| 29591  | 1      | 2      | 1      | 1      | 1      | 1      |

| respid | Q56i_1 | Q56j_1 | Q56k_1 | Q56l_1 | Q56m_1 | Q56n_1 |
|--------|--------|--------|--------|--------|--------|--------|
| 29613  | 0      | 0      | 2      | 1      | 0      | 0      |
| 29615  | 1      | 1      | 1      | 1      | 2      | 1      |
| 29625  | 1      | 2      | 0      | 1      | 0      | 1      |
| 29660  | 0      | 1      | 0      | 1      | 1      | 0      |
| 29677  | 1      | 1      | 1      | 1      | 1      | 2      |
| 29700  | 1      | 3      | 0      | 1      | 1      | 0      |
| 29715  | 1      | 1      | 1      | 0      | 1      | 1      |
| 29720  | 2      | 2      | 1      | 2      | 2      | 1      |
| 29730  | 1      | 2      | 2      | 2      | 1      | 2      |
| 29734  | 1      | 2      | 1      | 1      | 1      | 1      |
| 29754  | 0      | 0      | 0      | 0      | 0      | 2      |
| 29771  | 0      | 2      | 0      | 2      | 0      | 1      |
| 29774  | 0      | 2      | 0      | 1      | 1      | 3      |
| 29783  | 0      | 1      | 0      | 0      | 0      | 1      |
| 29812  | 1      | 1      | 1      | 1      | 2      | 2      |
| 29813  | 1      | 0      | 0      | 1      | 0      | 2      |
| 29814  | 1      | 1      | 1      | 1      | 1      | 1      |
| 29820  | 1      | 1      | 1      | 1      | 1      | 1      |
| 29906  | 0      | 1      | 0      | 0      | 0      | 0      |
| 29907  | 1      | 1      | 0      | 2      | 1      | 1      |
| 29928  | 1      | 2      | 1      | 1      | 1      | 1      |
| 29932  | 0      | 1      | 0      | 0      | 0      | 1      |
| 29958  | 1      | 1      | 1      | 1      | 1      | 1      |
| 29982  | 0      | 2      | 0      | 1      | 0      | 2      |
| 29989  | 0      | 1      | 0      | 0      | 1      | 1      |
| 29994  | 1      | 1      | 0      | 1      | 1      | 1      |
| 30005  | 0      | 2      | 0      | 0      | 0      | 1      |
| 30077  | 0      | 2      | 0      | 3      | 0      | 2      |
| 30098  | 0      | 1      | 0      | 1      | 0      | 2      |
| 30107  | 1      | 1      | 1      | 2      | 2      | 1      |
| 30154  | 0      | 1      | 0      | 1      | 1      | 0      |
| 30159  | 0      | 1      | 0      | 0      | 0      | 1      |

| respid | Q56i_1 | Q56j_1 | Q56k_1 | Q56l_1 | Q56m_1 | Q56n_1 |
|--------|--------|--------|--------|--------|--------|--------|
| 30162  | 0      | 2      | 0      | 0      | 0      | 1      |
| 30163  | 0      | 0      | 0      | 0      | 0      | 0      |
| 30189  | 1      | 1      | 1      | 1      | 1      | 1      |
| 30230  | 0      | 0      | 0      | 1      | 1      | 1      |
| 30259  | 1      | 2      | 2      | 2      | 2      | 2      |
| 30284  | 0      | 2      | 0      | 0      | 0      | 2      |
| 30296  | 0      | 2      | 3      | 2      | 1      | 3      |
| 30330  | 0      | 1      | 0      | 0      | 1      | 1      |
| 30341  | 0      | 1      | 1      | 2      | 2      | 1      |
| 30352  | 0      | 1      | 1      | 1      | 2      | 0      |
| 30379  | 0      | 0      | 0      | 0      | 0      | 0      |
| 30424  | 1      | 1      | 1      | 2      | 1      | 2      |
| 30447  | 0      | 0      | 0      | 0      | 0      | 0      |
| 30477  | 1      | 1      | 2      | 1      | 1      | 1      |
| 30503  | 1      | 2      | 1      | 1      | 1      | 1      |
| 30515  | 0      | 0      | 0      | 1      | 0      | 0      |
| 30516  | 0      | 0      | 0      | 0      | 0      | 0      |
| 30623  | 1      | 1      | 1      | 1      | 1      | 1      |
| 30639  | 1      | 1      | 1      | 1      | 1      | 1      |
| 30670  | 1      | 2      | 2      | 0      | 0      | 0      |
| 30697  | 0      | 0      | 0      | 0      | 0      | 0      |
| 30735  | 1      | 0      | 1      | 0      | 1      | 1      |
| 30742  | 0      | 1      | 1      | 1      | 1      | 1      |
| 30751  | 1      | 1      | 1      | 1      | 2      | 2      |
| 30789  | 0      | 3      | 0      | 0      | 0      | 0      |
| 30867  | 0      | 2      | 0      | 1      | 2      | 0      |
| 30876  | 1      | 0      | 0      | 0      | 1      | 0      |
| 30877  | 0      | 0      | 0      | 3      | 0      | 0      |
| 30887  | 1      | 2      | 1      | 0      | 0      | 1      |
| 30891  | 1      | 1      | 1      | 2      | 2      | 1      |
| 31030  | 1      | 1      | 1      | 1      | 1      | 0      |
| 31059  | 1      | 2      | 1      | 2      | 3      | 0      |

| respid | Q56i_1 | Q56j_1 | Q56k_1 | Q56l_1 | Q56m_1 | Q56n_1 |
|--------|--------|--------|--------|--------|--------|--------|
| 31082  | 0      | 2      | 1      | 0      | 0      | 0      |
| 31106  | 0      | 3      | 0      | 3      | 0      | 1      |
| 31110  | 1      | 1      | 1      | 1      | 1      | 1      |
| 31265  | 3      | 3      | 3      | 3      | 3      | 3      |
| 31266  | 3      | 3      | 3      | 3      | 3      | 3      |
| 31267  | 3      | 3      | 3      | 3      | 3      | 3      |
| 31310  | 1      | 1      | 1      | 1      | 1      | 1      |
| 31325  | 1      | 0      | 1      | 0      | 0      | 0      |
| 31367  | 1      | 1      | 1      | 0      | 1      | 1      |
| 31389  | 0      | 0      | 0      | 0      | 0      | 0      |
| 31440  | 0      | 1      | 0      | 0      | 1      | 0      |
| 31465  | 1      | 2      | 1      | 2      | 0      | 0      |
| 31477  | 1      | 2      | 1      | 1      | 1      | 2      |
| 31491  | 1      | 1      | 1      | 2      | 2      | 1      |
| 31494  | 1      | 2      | 2      | 1      | 2      | 1      |
| 31509  | 2      | 2      | 2      | 3      | 2      | 2      |
| 31533  | 0      | 0      | 0      | 0      | 0      | 0      |
| 31547  | 0      | 2      | 0      | 0      | 0      | 1      |
| 31558  | 1      | 1      | 0      | 1      | 1      | 1      |
| 31579  | 2      | 1      | 2      | 1      | 2      | 2      |
| 31591  | 1      | 0      | 1      | 1      | 1      | 0      |
| 31596  | 1      | 1      | 1      | 1      | 2      | 1      |
| 31601  | 1      | 2      | 2      | 1      | 2      | 1      |
| 31605  | 0      | 0      | 0      | 0      | 0      | 0      |
| 31637  | 0      | 1      | 0      | 1      | 0      | 1      |
| 31646  | 0      | 0      | 0      | 1      | 0      | 1      |
| 31647  | 1      | 1      | 3      | 2      | 2      | 2      |
| 31650  | 0      | 0      | 0      | 0      | 0      | 0      |
| 31651  | 1      | 1      | 1      | 1      | 1      | 2      |
| 31657  | 0      | 0      | 0      | 0      | 0      | 0      |
| 31660  | 0      | 0      | 0      | 1      | 1      | 0      |
| 31661  | 1      | 1      | 1      | 1      | 1      | 1      |



| respid | Q56i_1 | Q56j_1 | Q56k_1 | Q56l_1 | Q56m_1 | Q56n_1 |
|--------|--------|--------|--------|--------|--------|--------|
| 31667  | 1      | 1      | 0      | 1      | 1      | 1      |
| 31674  | 0      | 0      | 1      | 1      | 1      | 2      |
| 31686  | 1      | 1      | 1      | 1      | 0      | 0      |
| 31693  | 0      | 3      | 0      | 0      | 0      | 0      |
| 31716  | 0      | 1      | 0      | 0      | 0      | 0      |
| 31818  | 1      | 0      | 1      | 1      | 1      | 1      |
| 31886  | 0      | 0      | 1      | 0      | 0      | 0      |
| 31945  | 1      | 0      | 2      | 1      | 1      | 1      |
| 31957  | 0      | 3      | 1      | 2      | 2      | 1      |
| 31966  | 1      | 1      | 1      | 1      | 1      | 1      |
| 31978  | 0      | 2      | 0      | 1      | 0      | 0      |
| 31999  | 0      | 1      | 0      | 1      | 0      | 0      |
| 32026  | 1      | 1      | 1      | 1      | 1      | 1      |
| 32033  | 1      | 1      | 2      | 1      | 1      | 1      |
| 32037  | 2      | 2      | 2      | 2      | 2      | 2      |
| 32038  | 2      | 2      | 2      | 2      | 2      | 2      |
| 32047  | 1      | 2      | 1      | 1      | 1      | 1      |
| 32053  | 0      | 0      | 0      | 0      | 0      | 0      |
| 32069  | 1      | 2      | 1      | 2      | 2      | 0      |
| 32081  | 1      | 1      | 1      | 1      | 1      | 1      |
| 32123  | 0      | 0      | 0      | 0      | 0      | 1      |
| 32130  | 1      | 0      | 1      | 0      | 1      | 0      |
| 32141  | 0      | 0      | 0      | 0      | 0      | 0      |
| 32158  | 0      | 0      | 0      | 0      | 0      | 0      |
| 32165  | 1      | 3      | 0      | 2      | 1      | 1      |
| 32180  | 1      | 1      | 0      | 2      | 1      | 1      |
| 32221  | 1      | 2      | 1      | 2      | 2      | 0      |
| 32292  | 0      | 0      | 1      | 0      | 1      | 1      |
| 32318  | 1      | 1      | 1      | 1      | 2      | 2      |
| 32346  | 1      | 2      | 1      | 0      | 1      | 0      |
| 32402  | 1      | 1      | 1      | 1      | 2      | 2      |
| 32422  | 0      | 0      | 0      | 0      | 0      | 0      |

| respid | Q56i_1 | Q56j_1 | Q56k_1 | Q56l_1 | Q56m_1 | Q56n_1 |
|--------|--------|--------|--------|--------|--------|--------|
| 32439  | 0      | 1      | 0      | 0      | 1      | 0      |
| 32507  | 1      | 2      | 1      | 2      | 2      | 1      |
| 32522  | 1      | 1      | 1      | 0      | 1      | 1      |
| 32535  | 1      | 1      | 1      | 1      | 1      | 1      |
| 32546  | 1      | 0      | 1      | 1      | 1      | 1      |
| 32553  | 1      | 1      | 1      | 2      | 1      | 1      |
| 32570  | 0      | 0      | 0      | 0      | 0      | 0      |
| 32592  | 1      | 1      | 1      | 2      | 1      | 1      |
| 32605  | 1      | 1      | 0      | 1      | 2      | 0      |
| 32630  | 1      | 1      | 0      | 1      | 1      | 1      |
| 32642  | 1      | 1      | 1      | 1      | 1      | 1      |
| 32646  | 1      | 1      | 1      | 1      | 1      | 0      |
| 32665  | 1      | 1      | 1      | 1      | 1      | 2      |
| 32677  | 2      | 2      | 1      | 2      | 2      | 2      |
| 32694  | 0      | 2      | 1      | 0      | 1      | 1      |
| 32698  | 1      | 2      | 0      | 1      | 0      | 1      |
| 32754  | 1      | 1      | 1      | 2      | 1      | 1      |
| 32799  | 1      | 0      | 1      | 0      | 0      | 0      |
| 32816  | 0      | 1      | 0      | 0      | 0      | 0      |
| 32819  | 0      | 1      | 1      | 1      | 1      | 0      |
| 32840  | 1      | 1      | 0      | 0      | 0      | 1      |
| 32861  | 0      | 2      | 0      | 2      | 1      | 1      |
| 32866  | 0      | 0      | 1      | 2      | 1      | 1      |
| 32889  | 0      | 1      | 0      | 1      | 1      | 1      |
| 32960  | 1      | 1      | 0      | 0      | 0      | 1      |
| 32965  | 0      | 1      | 0      | 1      | 0      | 0      |
| 32986  | 1      | 1      | 1      | 1      | 1      | 1      |
| 33005  | 1      | 1      | 1      | 1      | 1      | 1      |
| 33054  | 1      | 1      | 1      | 1      | 2      | 2      |
| 33072  | 1      | 0      | 0      | 1      | 1      | 0      |
| 33095  | 1      | 1      | 0      | 1      | 2      | 1      |
| 33099  | 1      | 1      | 0      | 1      | 1      | 0      |

| respid | Q56i_1 | Q56j_1 | Q56k_1 | Q56l_1 | Q56m_1 | Q56n_1 |
|--------|--------|--------|--------|--------|--------|--------|
| 33121  | 0      | 0      | 0      | 0      | 0      | 0      |
| 33152  | 0      | 2      | 1      | 2      | 2      | 1      |
| 33159  | 0      | 0      | 0      | 0      | 0      | 0      |
| 33189  | 0      | 0      | 0      | 0      | 0      | 0      |
| 33198  | 1      | 1      | 1      | 0      | 0      | 0      |
| 33202  | 2      | 1      | 1      | 2      | 1      | 0      |
| 33204  | 0      | 3      | 1      | 0      | 0      | 0      |
| 33224  | 0      | 0      | 0      | 0      | 0      | 0      |
| 33272  | 1      | 2      | 1      | 1      | 1      | 2      |
| 33294  | 1      | 1      | 1      | 1      | 1      | 1      |
| 33300  | 1      | 1      | 1      | 1      | 1      | 1      |
| 33314  | 1      | 1      | 1      | 1      | 1      | 1      |
| 33338  | 0      | 3      | 0      | 0      | 0      | 0      |
| 33350  | 1      | 1      | 1      | 1      | 0      | 0      |
| 33362  | 0      | 0      | 0      | 0      | 0      | 0      |
| 33368  | 1      | 1      | 1      | 0      | 1      | 1      |
| 33374  | 1      | 1      | 1      | 1      | 2      | 1      |
| 33380  | 1      | 2      | 1      | 1      | 1      | 1      |
| 33385  | 0      | 0      | 1      | 0      | 0      | 0      |
| 33402  | 1      | 2      | 1      | 1      | 1      | 1      |
| 33414  | 0      | 1      | 0      | 1      | 0      | 0      |
| 33439  | 1      | 2      | 1      | 0      | 1      | 1      |
| 33449  | 1      | 1      | 1      | 1      | 1      | 1      |
| 33533  | 0      | 1      | 1      | 0      | 0      | 0      |
| 33540  | 0      | 2      | 0      | 2      | 1      | 2      |
| 33556  | 0      | 0      | 0      | 1      | 0      | 0      |
| 33615  | 1      | 0      | 1      | 0      | 1      | 0      |
| 33694  | 1      | 2      | 1      | 1      | 1      | 2      |
| 33717  | 1      | 1      | 1      | 1      | 1      | 1      |
| 33729  | 1      | 1      | 1      | 2      | 0      | 0      |
| 33746  | 0      | 3      | 0      | 0      | 0      | 1      |
| 33764  | 1      | 3      | 1      | 3      | 1      | 1      |

| respid | Q56i_1 | Q56j_1 | Q56k_1 | Q56l_1 | Q56m_1 | Q56n_1 |
|--------|--------|--------|--------|--------|--------|--------|
| 33790  | 0      | 1      | 1      | 1      | 1      | 0      |
| 33868  | 2      | 1      | 1      | 1      | 1      | 0      |
| 33872  | 2      | 2      | 2      | 2      | 1      | 1      |
| 33883  | 1      | 0      | 0      | 1      | 0      | 0      |
| 33884  | 0      | 0      | 0      | 0      | 0      | 0      |
| 33900  | 1      | 1      | 0      | 0      | 1      | 0      |
| 33933  | 1      | 1      | 1      | 0      | 1      | 0      |
| 33949  | 2      | 2      | 1      | 2      | 2      | 1      |
| 34005  | 1      | 1      | 1      | 0      | 1      | 0      |
| 34016  | 0      | 0      | 0      | 3      | 0      | 0      |
| 34041  | 1      | 2      | 0      | 2      | 1      | 0      |
| 34053  | 1      | 0      | 1      | 1      | 1      | 1      |
| 34056  | 0      | 0      | 0      | 0      | 1      | 0      |
| 34093  | 1      | 1      | 1      | 2      | 1      | 2      |
| 34112  | 0      | 0      | 1      | 1      | 0      | 0      |
| 34136  | 2      | 2      | 2      | 2      | 1      | 1      |
| 34138  | 0      | 2      | 0      | 3      | 0      | 1      |
| 34139  | 1      | 1      | 1      | 1      | 1      | 0      |
| 34189  | 1      | 1      | 1      | 1      | 2      | 0      |
| 34239  | 1      | 1      | 1      | 2      | 1      | 1      |
| 34240  | 1      | 1      | 1      | 1      | 1      | 1      |
| 34241  | 0      | 1      | 1      | 0      | 0      | 0      |
| 34259  | 0      | 0      | 1      | 1      | 0      | 1      |
| 34303  | 1      | 2      | 2      | 2      | 0      | 1      |
| 34306  | 0      | 1      | 0      | 1      | 0      | 0      |
| 34395  | 0      | 2      | 1      | 2      | 0      | 1      |
| 34463  | 1      | 2      | 0      | 1      | 1      | 1      |
| 34466  | 1      | 1      | 1      | 1      | 1      | 1      |
| 34471  | 1      | 1      | 1      | 0      | 1      | 1      |
| 34489  | 1      | 2      | 1      | 1      | 1      | 1      |
| 34518  | 3      | 1      | 0      | 2      | 0      | 1      |
| 34542  | 1      | 1      | 1      | 2      | 1      | 1      |

| respid | Q56i_1 | Q56j_1 | Q56k_1 | Q56l_1 | Q56m_1 | Q56n_1 |
|--------|--------|--------|--------|--------|--------|--------|
| 34595  | 1      | 1      | 1      | 2      | 2      | 1      |
| 34604  | 1      | 1      | 1      | 1      | 0      | 2      |
| 34631  | 2      | 2      | 0      | 1      | 1      | 1      |
| 34665  | 0      | 1      | 0      | 0      | 0      | 0      |
| 34716  | 0      | 0      | 0      | 0      | 0      | 0      |
| 34729  | 0      | 0      | 0      | 0      | 0      | 0      |
| 34772  | 2      | 3      | 2      | 1      | 2      | 2      |
| 34800  | 0      | 3      | 0      | 0      | 0      | 0      |
| 34819  | 1      | 2      | 1      | 2      | 1      | 0      |
| 34829  | 1      | 2      | 1      | 1      | 1      | 1      |
| 34831  | 0      | 1      | 1      | 0      | 1      | 1      |
| 34839  | 0      | 3      | 1      | 1      | 1      | 0      |
| 34868  | 1      | 0      | 1      | 1      | 1      | 2      |
| 34869  | 1      | 1      | 0      | 1      | 1      | 2      |
| 34882  | 1      | 1      | 2      | 1      | 1      | 3      |
| 34895  | 1      | 1      | 1      | 0      | 1      | 0      |
| 34901  | 2      | 0      | 1      | 3      | 1      | 3      |
| 34904  | 1      | 1      | 1      | 1      | 1      | 1      |
| 34907  | 1      | 1      | 1      | 0      | 1      | 0      |
| 34914  | 1      | 1      | 1      | 1      | 1      | 1      |
| 34918  | 1      | 1      | 1      | 0      | 1      | 0      |
| 34924  | 0      | 0      | 0      | 0      | 0      | 0      |
| 34933  | 1      | 1      | 1      | 1      | 1      | 1      |
| 34938  | 0      | 0      | 0      | 0      | 0      | 0      |
| 34952  | 1      | 2      | 2      | 2      | 2      | 1      |
| 34959  | 0      | 0      | 0      | 1      | 0      | 0      |
| 34972  | 1      | 1      | 1      | 1      | 1      | 0      |
| 34973  | 1      | 1      | 1      | 1      | 1      | 0      |
| 34975  | 1      | 0      | 1      | 1      | 0      | 1      |
| 34977  | 0      | 3      | 1      | 1      | 0      | 1      |
| 34978  | 1      | 0      | 0      | 0      | 0      | 0      |
| 34980  | 0      | 1      | 0      | 0      | 0      | 0      |

| respid | Q56i_1 | Q56j_1 | Q56k_1 | Q56l_1 | Q56m_1 | Q56n_1 |
|--------|--------|--------|--------|--------|--------|--------|
| 34984  | 1      | 1      | 1      | 1      | 1      | 0      |
| 34986  | 0      | 1      | 1      | 1      | 1      | 1      |
| 34994  | 0      | 0      | 0      | 0      | 0      | 0      |
| 34996  | 1      | 2      | 2      | 2      | 1      | 0      |
| 35003  | 0      | 1      | 1      | 1      | 1      | 1      |
| 35014  | 0      | 1      | 0      | 0      | 0      | 1      |
| 35029  | 1      | 1      | 1      | 1      | 2      | 1      |
| 35030  | 2      | 1      | 1      | 2      | 1      | 2      |
| 35037  | 1      | 1      | 1      | 1      | 1      | 1      |
| 35043  | 0      | 0      | 0      | 0      | 0      | 0      |
| 35048  | 0      | 0      | 0      | 0      | 0      | 0      |
| 35055  | 1      | 1      | 1      | 2      | 1      | 1      |
| 35067  | 1      | 1      | 1      | 1      | 1      | 1      |
| 35072  | 1      | 1      | 1      | 2      | 1      | 1      |
| 35078  | 0      | 3      | 1      | 1      | 1      | 1      |
| 35084  | 0      | 1      | 1      | 0      | 1      | 0      |
| 35095  | 0      | 0      | 1      | 0      | 0      | 0      |
| 35096  | 0      | 0      | 0      | 0      | 0      | 0      |
| 35097  | 1      | 0      | 1      | 1      | 1      | 1      |
| 35098  | 1      | 1      | 1      | 1      | 1      | 1      |
| 35109  | 3      | 2      | 2      | 3      | 3      | 3      |
| 35114  | 0      | 1      | 0      | 0      | 0      | 0      |
| 35115  | 1      | 3      | 1      | 1      | 1      | 0      |
| 35124  | 1      | 1      | 1      | 1      | 1      | 1      |
| 35125  | 0      | 0      | 0      | 0      | 0      | 0      |
| 35141  | 0      | 1      | 1      | 0      | 0      | 1      |
| 35142  | 1      | 0      | 1      | 1      | 1      | 1      |
| 35145  | 1      | 3      | 1      | 1      | 1      | 0      |
| 35149  | 1      | 2      | 1      | 0      | 2      | 0      |
| 35159  | 1      | 1      | 1      | 1      | 1      | 1      |
| 35163  | 2      | 2      | 2      | 1      | 1      | 2      |
| 35174  | 1      | 1      | 1      | 0      | 1      | 0      |

| respid | Q56i_1 | Q56j_1 | Q56k_1 | Q56l_1 | Q56m_1 | Q56n_1 |
|--------|--------|--------|--------|--------|--------|--------|
| 35188  | 0      | 3      | 0      | 0      | 0      | 0      |
| 35189  | 2      | 2      | 2      | 2      | 1      | 2      |
| 35201  | 1      | 1      | 1      | 1      | 0      | 0      |
| 35215  | 1      | 1      | 1      | 0      | 1      | 0      |
| 35228  | 0      | 3      | 0      | 3      | 0      | 0      |
| 35235  | 1      | 1      | 1      | 1      | 1      | 1      |
| 35239  | 1      | 1      | 1      | 1      | 2      | 1      |
| 35243  | 1      | 2      | 1      | 1      | 1      | 1      |
| 35245  | 1      | 2      | 1      | 2      | 1      | 1      |
| 35259  | 0      | 1      | 0      | 0      | 0      | 1      |
| 35265  | 2      | 2      | 2      | 1      | 2      | 2      |
| 35272  | 0      | 1      | 2      | 1      | 1      | 1      |
| 35280  | 1      | 3      | 2      | 2      | 1      | 0      |
| 35298  | 0      | 0      | 0      | 0      | 0      | 0      |
| 35305  | 1      | 2      | 1      | 0      | 0      | 1      |
| 35306  | 2      | 1      | 1      | 2      | 2      | 1      |
| 35307  | 0      | 0      | 0      | 0      | 1      | 0      |
| 35311  | 0      | 2      | 0      | 1      | 0      | 0      |
| 35322  | 1      | 2      | 1      | 1      | 1      | 1      |
| 35323  | 1      | 1      | 1      | 1      | 1      | 1      |
| 35327  | 1      | 0      | 1      | 0      | 1      | 0      |
| 35366  | 0      | 0      | 0      | 0      | 0      | 0      |
| 35378  | 1      | 1      | 1      | 1      | 1      | 1      |
| 35389  | 0      | 0      | 1      | 1      | 1      | 1      |
| 35390  | 1      | 1      | 1      | 1      | 1      | 1      |
| 35395  | 1      | 1      | 1      | 1      | 1      | 1      |
| 35411  | 0      | 1      | 0      | 2      | 1      | 3      |
| 35423  | 0      | 0      | 1      | 0      | 0      | 1      |
| 35425  | 0      | 1      | 1      | 1      | 0      | 0      |
| 35434  | 1      | 1      | 1      | 1      | 2      | 1      |
| 35462  | 1      | 1      | 2      | 3      | 0      | 3      |
| 35478  | 1      | 1      | 2      | 2      | 2      | 1      |

| respid | Q56i_1 | Q56j_1 | Q56k_1 | Q56l_1 | Q56m_1 | Q56n_1 |
|--------|--------|--------|--------|--------|--------|--------|
| 35481  | 1      | 1      | 1      | 1      | 1      | 1      |
| 35498  | 0      | 0      | 1      | 0      | 0      | 0      |
| 35499  | 1      | 1      | 1      | 1      | 1      | 1      |
| 35502  | 2      | 1      | 2      | 1      | 2      | 1      |
| 35503  | 1      | 0      | 0      | 1      | 1      | 0      |
| 35504  | 0      | 1      | 0      | 0      | 0      | 0      |
| 35508  | 1      | 1      | 1      | 2      | 1      | 2      |
| 35513  | 0      | 1      | 1      | 0      | 0      | 0      |
| 35516  | 1      | 1      | 1      | 1      | 1      | 0      |
| 35519  | 1      | 1      | 1      | 2      | 2      | 1      |
| 35530  | 2      | 2      | 1      | 1      | 0      | 0      |
| 35533  | 2      | 1      | 1      | 1      | 1      | 1      |
| 35561  | 2      | 2      | 2      | 2      | 2      | 2      |
| 35565  | 1      | 0      | 1      | 0      | 1      | 0      |
| 35588  | 1      | 1      | 0      | 0      | 1      | 3      |
| 35598  | 1      | 2      | 2      | 0      | 1      | 0      |
| 35607  | 0      | 1      | 0      | 1      | 0      | 0      |
| 35638  | 1      | 1      | 1      | 1      | 1      | 1      |
| 35642  | 0      | 1      | 0      | 1      | 0      | 0      |
| 35643  | 1      | 2      | 1      | 1      | 1      | 1      |
| 35680  | 1      | 0      | 1      | 1      | 1      | 0      |
| 35697  | 0      | 1      | 0      | 2      | 1      | 1      |
| 35703  | 0      | 0      | 0      | 0      | 0      | 0      |
| 35709  | 2      | 0      | 2      | 1      | 2      | 1      |
| 35710  | 1      | 1      | 0      | 0      | 0      | 0      |
| 35721  | 3      | 1      | 3      | 3      | 2      | 2      |
| 35723  | 0      | 0      | 0      | 0      | 0      | 0      |
| 35736  | 3      | 3      | 3      | 3      | 3      | 3      |
| 35739  | 1      | 0      | 1      | 2      | 2      | 1      |
| 35745  | 1      | 2      | 2      | 1      | 1      | 1      |
| 35748  | 3      | 2      | 2      | 2      | 2      | 1      |
| 35750  | 0      | 2      | 0      | 2      | 1      | 3      |



| respid | Q56i_1 | Q56j_1 | Q56k_1 | Q56l_1 | Q56m_1 | Q56n_1 |
|--------|--------|--------|--------|--------|--------|--------|
| 35752  | 1      | 1      | 1      | 0      | 0      | 0      |
| 35773  | 1      | 1      | 1      | 1      | 1      | 1      |
| 35779  | 0      | 0      | 0      | 0      | 0      | 0      |
| 35791  | 1      | 1      | 0      | 0      | 1      | 0      |
| 35801  | 1      | 0      | 0      | 1      | 0      | 0      |
| 35802  | 0      | 1      | 0      | 0      | 0      | 0      |
| 35837  | 1      | 1      | 1      | 1      | 1      | 1      |
| 35853  | 1      | 1      | 1      | 2      | 1      | 0      |
| 35858  | 1      | 3      | 1      | 1      | 1      | 1      |
| 35860  | 1      | 1      | 1      | 1      | 1      | 1      |
| 35875  | 0      | 0      | 0      | 0      | 0      | 0      |
| 35883  | 1      | 1      | 1      | 0      | 1      | 0      |
| 35890  | 0      | 0      | 0      | 0      | 0      | 0      |
| 35898  | 0      | 3      | 0      | 0      | 0      | 0      |
| 35901  | 2      | 1      | 2      | 1      | 1      | 2      |
| 35914  | 1      | 1      | 1      | 2      | 1      | 1      |
| 35924  | 1      | 1      | 1      | 2      | 0      | 2      |
| 35950  | 1      | 3      | 1      | 0      | 0      | 0      |
| 35961  | 0      | 1      | 1      | 1      | 0      | 0      |
| 35966  | 0      | 3      | 1      | 1      | 1      | 1      |
| 35967  | 0      | 0      | 0      | 0      | 0      | 0      |
| 35971  | 0      | 0      | 0      | 0      | 0      | 0      |
| 35974  | 0      | 3      | 0      | 0      | 0      | 0      |
| 35983  | 2      | 1      | 1      | 2      | 2      | 1      |
| 35992  | 1      | 1      | 2      | 1      | 1      | 1      |
| 36010  | 0      | 1      | 1      | 0      | 1      | 1      |
| 36019  | 1      | 0      | 1      | 1      | 1      | 0      |
| 36029  | 0      | 0      | 1      | 1      | 1      | 0      |
| 36033  | 0      | 0      | 0      | 0      | 0      | 0      |
| 36042  | 0      | 0      | 0      | 0      | 1      | 0      |
| 36043  | 1      | 1      | 1      | 1      | 1      | 1      |
| 36048  | 2      | 2      | 1      | 2      | 1      | 1      |

| respid | Q56i_1 | Q56j_1 | Q56k_1 | Q56l_1 | Q56m_1 | Q56n_1 |
|--------|--------|--------|--------|--------|--------|--------|
| 36050  | 1      | 1      | 1      | 2      | 1      | 0      |
| 36062  | 0      | 3      | 0      | 1      | 0      | 0      |
| 36063  | 0      | 0      | 0      | 0      | 0      | 0      |
| 36092  | 1      | 2      | 0      | 0      | 1      | 0      |
| 36097  | 1      | 1      | 1      | 1      | 1      | 1      |
| 36108  | 0      | 0      | 0      | 0      | 0      | 0      |
| 36113  | 1      | 1      | 2      | 1      | 1      | 1      |
| 36117  | 1      | 2      | 1      | 2      | 1      | 1      |
| 36129  | 1      | 2      | 1      | 1      | 1      | 1      |
| 36144  | 0      | 2      | 0      | 0      | 0      | 0      |
| 36152  | 0      | 1      | 1      | 0      | 1      | 0      |
| 36154  | 1      | 2      | 1      | 0      | 1      | 0      |
| 36155  | 1      | 1      | 1      | 0      | 0      | 1      |
| 36167  | 0      | 0      | 0      | 0      | 0      | 0      |
| 36172  | 0      | 0      | 0      | 0      | 0      | 0      |
| 36173  | 1      | 2      | 1      | 2      | 2      | 1      |
| 36174  | 0      | 3      | 0      | 2      | 0      | 2      |
| 36182  | 1      | 1      | 1      | 0      | 1      | 0      |
| 36192  | 1      | 1      | 1      | 2      | 1      | 2      |
| 36195  | 2      | 1      | 1      | 2      | 2      | 1      |
| 36204  | 1      | 1      | 0      | 1      | 0      | 0      |
| 36205  | 0      | 3      | 1      | 3      | 1      | 1      |
| 36208  | 0      | 0      | 0      | 1      | 1      | 1      |
| 36216  | 1      | 1      | 1      | 1      | 1      | 1      |
| 36221  | 1      | 1      | 2      | 1      | 1      | 1      |
| 36244  | 0      | 0      | 0      | 0      | 0      | 0      |
| 36255  | 1      | 1      | 1      | 2      | 1      | 0      |
| 36259  | 1      | 3      | 1      | 1      | 1      | 0      |
| 36262  | 0      | 2      | 1      | 1      | 1      | 1      |
| 36268  | 0      | 0      | 0      | 0      | 0      | 0      |
| 36308  | 1      | 1      | 0      | 1      | 1      | 1      |
| 36324  | 1      | 1      | 0      | 1      | 1      | 0      |

| respid | Q56i_1 | Q56j_1 | Q56k_1 | Q56l_1 | Q56m_1 | Q56n_1 |
|--------|--------|--------|--------|--------|--------|--------|
| 36330  | 0      | 2      | 0      | 0      | 0      | 0      |
| 36331  | 1      | 2      | 2      | 2      | 2      | 3      |
| 36336  | 1      | 2      | 0      | 1      | 0      | 1      |
| 36337  | 0      | 1      | 0      | 1      | 1      | 1      |
| 36364  | 1      | 1      | 1      | 2      | 1      | 1      |
| 36365  | 1      | 1      | 1      | 1      | 1      | 0      |
| 36396  | 1      | 1      | 0      | 1      | 1      | 1      |
| 36403  | 0      | 1      | 0      | 0      | 0      | 0      |
| 36410  | 0      | 1      | 0      | 0      | 0      | 0      |
| 36413  | 0      | 0      | 0      | 0      | 0      | 0      |
| 36422  | 0      | 1      | 0      | 0      | 1      | 0      |
| 36424  | 1      | 1      | 1      | 2      | 1      | 1      |
| 36425  | 2      | 2      | 2      | 2      | 2      | 1      |
| 36432  | 0      | 0      | 0      | 0      | 0      | 1      |
| 36435  | 2      | 2      | 2      | 2      | 2      | 1      |
| 36446  | 1      | 2      | 1      | 2      | 1      | 1      |
| 36451  | 1      | 1      | 1      | 1      | 1      | 1      |
| 36453  | 1      | 1      | 1      | 1      | 1      | 1      |
| 36459  | 1      | 1      | 1      | 1      | 1      | 1      |
| 36464  | 0      | 2      | 0      | 2      | 1      | 3      |
| 36465  | 1      | 2      | 2      | 1      | 1      | 1      |
| 36466  | 0      | 0      | 0      | 0      | 0      | 0      |
| 36476  | 1      | 1      | 1      | 1      | 1      | 1      |
| 36487  | 1      | 0      | 1      | 1      | 1      | 1      |
| 36488  | 0      | 2      | 0      | 0      | 1      | 0      |
| 36500  | 0      | 0      | 0      | 0      | 0      | 0      |
| 36504  | 1      | 1      | 0      | 1      | 1      | 0      |
| 36513  | 1      | 1      | 1      | 1      | 1      | 1      |
| 36515  | 1      | 2      | 1      | 2      | 1      | 0      |
| 36521  | 1      | 2      | 0      | 0      | 2      | 0      |
| 36530  | 0      | 2      | 1      | 1      | 2      | 0      |
| 36556  | 1      | 0      | 1      | 1      | 1      | 0      |

| respid | Q56i_1 | Q56j_1 | Q56k_1 | Q56l_1 | Q56m_1 | Q56n_1 |
|--------|--------|--------|--------|--------|--------|--------|
| 36564  | 2      | 3      | 1      | 1      | 2      | 1      |
| 36584  | 0      | 0      | 0      | 1      | 0      | 0      |
| 36585  | 1      | 1      | 1      | 1      | 1      | 0      |
| 36586  | 0      | 0      | 1      | 1      | 0      | 1      |
| 36606  | 0      | 0      | 0      | 1      | 2      | 1      |
| 36615  | 0      | 0      | 0      | 0      | 0      | 0      |
| 36628  | 0      | 2      | 0      | 1      | 1      | 0      |
| 36630  | 2      | 2      | 1      | 1      | 1      | 2      |
| 36631  | 1      | 0      | 1      | 1      | 1      | 0      |
| 36636  | 1      | 1      | 1      | 1      | 1      | 0      |
| 36637  | 0      | 1      | 1      | 1      | 1      | 1      |
| 36651  | 2      | 2      | 2      | 2      | 2      | 0      |
| 36661  | 0      | 3      | 0      | 0      | 0      | 0      |
| 36670  | 2      | 2      | 2      | 2      | 1      | 1      |
| 36671  | 0      | 0      | 1      | 0      | 0      | 0      |
| 36688  | 0      | 1      | 0      | 0      | 1      | 1      |
| 36694  | 1      | 1      | 1      | 1      | 1      | 1      |
| 36696  | 0      | 0      | 0      | 0      | 0      | 0      |
| 36703  | 1      | 3      | 2      | 2      | 1      | 1      |
| 36719  | 2      | 2      | 2      | 2      | 2      | 2      |
| 36721  | 2      | 2      | 2      | 2      | 2      | 2      |
| 36740  | 1      | 1      | 1      | 1      | 1      | 1      |
| 36755  | 0      | 1      | 0      | 0      | 0      | 0      |
| 36765  | 1      | 2      | 1      | 2      | 2      | 1      |
| 36770  | 1      | 2      | 1      | 1      | 1      | 0      |
| 36773  | 1      | 2      | 1      | 1      | 1      | 1      |
| 36813  | 1      | 1      | 1      | 1      | 1      | 1      |
| 36819  | 1      | 2      | 1      | 2      | 1      | 0      |
| 36820  | 1      | 0      | 1      | 0      | 1      | 0      |
| 36821  | 0      | 1      | 0      | 0      | 0      | 0      |
| 36827  | 1      | 3      | 0      | 0      | 2      | 0      |
| 36835  | 0      | 1      | 0      | 0      | 0      | 0      |

| respid | Q56i_1 | Q56j_1 | Q56k_1 | Q56l_1 | Q56m_1 | Q56n_1 |
|--------|--------|--------|--------|--------|--------|--------|
| 36837  | 1      | 1      | 1      | 1      | 1      | 1      |
| 36849  | 1      | 1      | 1      | 2      | 1      | 0      |
| 36851  | 1      | 3      | 1      | 2      | 0      | 0      |
| 36868  | 2      | 2      | 1      | 2      | 1      | 1      |
| 36870  | 0      | 2      | 0      | 0      | 0      | 0      |
| 36871  | 1      | 3      | 1      | 1      | 1      | 1      |
| 36874  | 1      | 1      | 1      | 0      | 2      | 1      |
| 36878  | 1      | 1      | 1      | 1      | 1      | 0      |
| 36887  | 1      | 1      | 1      | 0      | 1      | 0      |
| 36889  | 0      | 0      | 0      | 0      | 0      | 1      |
| 36891  | 0      | 1      | 0      | 0      | 0      | 0      |
| 36903  | 1      | 2      | 1      | 1      | 1      | 1      |
| 36905  | 2      | 2      | 1      | 1      | 1      | 0      |
| 36913  | 0      | 0      | 0      | 0      | 0      | 0      |
| 36949  | 1      | 3      | 1      | 1      | 1      | 1      |
| 36954  | 1      | 1      | 1      | 1      | 1      | 1      |
| 36962  | 1      | 3      | 2      | 1      | 1      | 1      |
| 36965  | 1      | 1      | 1      | 0      | 1      | 0      |
| 36970  | 0      | 0      | 0      | 0      | 0      | 0      |
| 36979  | 0      | 0      | 0      | 0      | 0      | 0      |
| 36990  | 1      | 1      | 1      | 1      | 1      | 0      |
| 36991  | 0      | 1      | 0      | 0      | 1      | 0      |
| 36992  | 1      | 1      | 1      | 2      | 1      | 1      |
| 37015  | 1      | 3      | 1      | 1      | 1      | 2      |
| 37017  | 1      | 1      | 0      | 0      | 1      | 0      |
| 37020  | 0      | 1      | 0      | 1      | 0      | 0      |
| 37033  | 1      | 1      | 1      | 1      | 1      | 1      |
| 37041  | 1      | 1      | 1      | 1      | 1      | 0      |
| 37048  | 1      | 0      | 1      | 2      | 1      | 0      |
| 37050  | 1      | 3      | 3      | 1      | 0      | 1      |
| 37054  | 1      | 0      | 1      | 1      | 1      | 2      |
| 37057  | 3      | 2      | 2      | 2      | 3      | 1      |

| respid | Q56i_1 | Q56j_1 | Q56k_1 | Q56l_1 | Q56m_1 | Q56n_1 |
|--------|--------|--------|--------|--------|--------|--------|
| 37067  | 1      | 1      | 1      | 2      | 1      | 0      |
| 37074  | 1      | 3      | 3      | 1      | 0      | 1      |
| 37088  | 1      | 1      | 1      | 1      | 1      | 1      |
| 37090  | 2      | 2      | 2      | 2      | 1      | 1      |
| 37110  | 1      | 1      | 1      | 1      | 1      | 1      |
| 37122  | 1      | 1      | 1      | 2      | 1      | 0      |
| 37124  | 1      | 2      | 2      | 1      | 1      | 0      |
| 37126  | 0      | 1      | 0      | 0      | 0      | 1      |
| 37129  | 1      | 3      | 3      | 0      | 1      | 0      |
| 37130  | 1      | 1      | 1      | 0      | 1      | 0      |
| 37142  | 1      | 0      | 1      | 1      | 1      | 1      |
| 37160  | 1      | 2      | 1      | 2      | 1      | 1      |
| 37168  | 1      | 3      | 0      | 0      | 0      | 3      |
| 37169  | 1      | 2      | 2      | 2      | 2      | 1      |
| 37191  | 1      | 1      | 1      | 1      | 1      | 1      |
| 37197  | 1      | 1      | 0      | 1      | 1      | 0      |
| 37204  | 1      | 1      | 1      | 0      | 1      | 0      |
| 37213  | 1      | 1      | 1      | 1      | 2      | 1      |
| 37238  | 1      | 3      | 1      | 1      | 1      | 1      |
| 37242  | 2      | 2      | 2      | 2      | 2      | 1      |
| 37243  | 0      | 2      | 1      | 1      | 1      | 0      |
| 37275  | 1      | 1      | 1      | 1      | 1      | 1      |
| 37305  | 1      | 1      | 1      | 1      | 1      | 1      |
| 37357  | 0      | 1      | 1      | 0      | 1      | 1      |
| 37365  | 1      | 2      | 1      | 2      | 1      | 1      |
| 37370  | 0      | 2      | 0      | 1      | 1      | 0      |
| 37406  | 1      | 2      | 1      | 1      | 1      | 1      |
| 37410  | 1      | 3      | 1      | 1      | 1      | 1      |
| 37411  | 1      | 2      | 1      | 1      | 2      | 1      |
| 37427  | 1      | 1      | 1      | 1      | 1      | 1      |
| 37437  | 2      | 3      | 2      | 2      | 3      | 2      |
| 37440  | 1      | 2      | 2      | 1      | 2      | 2      |

| respid | Q56i_1 | Q56j_1 | Q56k_1 | Q56l_1 | Q56m_1 | Q56n_1 |
|--------|--------|--------|--------|--------|--------|--------|
| 37452  | 0      | 2      | 1      | 1      | 1      | 0      |
| 37465  | 1      | 1      | 1      | 1      | 2      | 1      |
| 37468  | 1      | 0      | 1      | 1      | 1      | 1      |
| 37469  | 0      | 0      | 0      | 0      | 0      | 0      |
| 37477  | 1      | 1      | 1      | 1      | 1      | 1      |
| 37509  | 0      | 1      | 0      | 0      | 1      | 1      |
| 37513  | 2      | 2      | 1      | 2      | 2      | 1      |
| 37534  | 1      | 1      | 1      | 2      | 1      | 0      |
| 37537  | 1      | 3      | 0      | 0      | 1      | 0      |
| 37560  | 0      | 1      | 1      | 1      | 2      | 1      |
| 37566  | 1      | 1      | 1      | 1      | 1      | 1      |
| 37572  | 1      | 2      | 1      | 1      | 1      | 1      |
| 37574  | 1      | 0      | 1      | 0      | 1      | 0      |
| 37575  | 0      | 0      | 1      | 1      | 1      | 0      |
| 37590  | 1      | 2      | 1      | 2      | 2      | 1      |
| 37593  | 1      | 1      | 1      | 1      | 1      | 2      |
| 37599  | 0      | 0      | 1      | 0      | 1      | 0      |
| 37641  | 0      | 1      | 0      | 0      | 0      | 2      |
| 37651  | 1      | 1      | 1      | 2      | 1      | 1      |
| 37670  | 0      | 0      | 0      | 0      | 0      | 0      |
| 37680  | 1      | 2      | 1      | 2      | 2      | 1      |
| 37690  | 1      | 0      | 1      | 0      | 0      | 0      |
| 37694  | 1      | 2      | 0      | 0      | 0      | 0      |
| 37705  | 1      | 1      | 1      | 1      | 1      | 1      |
| 37710  | 1      | 1      | 1      | 1      | 2      | 1      |
| 37719  | 1      | 0      | 1      | 1      | 1      | 0      |
| 37741  | 2      | 1      | 0      | 1      | 1      | 1      |
| 37752  | 0      | 0      | 0      | 1      | 0      | 0      |
| 37755  | 1      | 2      | 2      | 2      | 2      | 1      |
| 37757  | 0      | 1      | 0      | 0      | 0      | 0      |
| 37783  | 1      | 1      | 1      | 1      | 1      | 1      |
| 37793  | 1      | 2      | 2      | 2      | 2      | 1      |

| respid | Q56i_1 | Q56j_1 | Q56k_1 | Q56l_1 | Q56m_1 | Q56n_1 |
|--------|--------|--------|--------|--------|--------|--------|
| 37800  | 1      | 2      | 2      | 2      | 1      | 1      |
| 37801  | 1      | 1      | 0      | 0      | 1      | 1      |
| 37820  | 1      | 1      | 1      | 1      | 1      | 1      |
| 37826  | 1      | 1      | 1      | 1      | 1      | 0      |
| 37835  | 1      | 2      | 1      | 1      | 3      | 1      |
| 37839  | 1      | 1      | 1      | 1      | 1      | 1      |
| 37871  | 2      | 1      | 2      | 2      | 2      | 1      |
| 37876  | 1      | 1      | 1      | 2      | 1      | 1      |
| 37879  | 1      | 1      | 1      | 1      | 2      | 2      |
| 37894  | 1      | 0      | 1      | 0      | 1      | 1      |
| 37895  | 0      | 1      | 1      | 1      | 1      | 0      |
| 37901  | 2      | 1      | 1      | 2      | 1      | 1      |
| 37926  | 1      | 1      | 1      | 0      | 1      | 1      |
| 37937  | 1      | 1      | 0      | 1      | 1      | 0      |
| 37938  | 0      | 1      | 0      | 0      | 0      | 0      |
| 37959  | 0      | 2      | 0      | 1      | 0      | 0      |
| 37970  | 1      | 1      | 1      | 1      | 1      | 1      |
| 37972  | 1      | 1      | 1      | 1      | 1      | 0      |
| 37988  | 1      | 1      | 1      | 1      | 1      | 1      |
| 37989  | 1      | 1      | 1      | 0      | 2      | 2      |
| 38000  | 0      | 0      | 1      | 1      | 0      | 1      |
| 38028  | 1      | 2      | 2      | 2      | 2      | 1      |
| 38042  | 1      | 1      | 1      | 1      | 1      | 1      |
| 38052  | 0      | 3      | 0      | 2      | 0      | 1      |
| 38056  | 0      | 0      | 0      | 0      | 0      | 0      |
| 38106  | 1      | 1      | 1      | 1      | 1      | 1      |
| 38114  | 2      | 1      | 2      | 2      | 2      | 2      |
| 38134  | 1      | 3      | 1      | 2      | 1      | 1      |
| 38135  | 1      | 1      | 1      | 1      | 1      | 2      |
| 38139  | 1      | 1      | 1      | 1      | 3      | 1      |
| 38160  | 0      | 3      | 0      | 0      | 0      | 0      |
| 38164  | 3      | 2      | 2      | 2      | 2      | 1      |



| respid | Q56i_1 | Q56j_1 | Q56k_1 | Q56l_1 | Q56m_1 | Q56n_1 |
|--------|--------|--------|--------|--------|--------|--------|
| 38168  | 0      | 3      | 0      | 0      | 0      | 0      |
| 38173  | 0      | 0      | 1      | 0      | 1      | 0      |
| 38193  | 1      | 2      | 1      | 2      | 2      | 1      |
| 38204  | 0      | 0      | 1      | 0      | 1      | 0      |
| 38206  | 1      | 1      | 1      | 1      | 1      | 1      |
| 38233  | 3      | 0      | 3      | 2      | 3      | 1      |
| 38242  | 1      | 1      | 1      | 1      | 1      | 1      |
| 38245  | 1      | 1      | 1      | 1      | 1      | 1      |
| 38261  | 1      | 2      | 2      | 1      | 1      | 1      |
| 38288  | 1      | 2      | 1      | 2      | 1      | 1      |
| 38296  | 1      | 0      | 1      | 1      | 1      | 1      |
| 38299  | 1      | 1      | 1      | 1      | 1      | 1      |
| 38300  | 1      | 1      | 2      | 0      | 1      | 0      |
| 38303  | 1      | 1      | 1      | 0      | 1      | 0      |
| 38317  | 1      | 0      | 0      | 1      | 0      | 0      |
| 38328  | 3      | 2      | 2      | 1      | 2      | 2      |
| 38333  | 1      | 1      | 1      | 1      | 1      | 1      |
| 38336  | 0      | 0      | 0      | 0      | 0      | 0      |
| 38338  | 0      | 1      | 0      | 0      | 0      | 0      |
| 38342  | 1      | 2      | 1      | 1      | 0      | 0      |
| 38360  | 0      | 3      | 0      | 1      | 1      | 2      |
| 38362  | 1      | 1      | 2      | 1      | 1      | 1      |
| 38364  | 2      | 2      | 1      | 1      | 2      | 2      |
| 38402  | 1      | 2      | 1      | 1      | 2      | 1      |
| 38423  | 1      | 1      | 2      | 2      | 1      | 1      |
| 38424  | 2      | 3      | 3      | 3      | 3      | 3      |
| 38435  | 1      | 2      | 1      | 1      | 2      | 0      |
| 38450  | 0      | 0      | 0      | 0      | 0      | 0      |
| 38455  | 0      | 1      | 0      | 0      | 1      | 0      |
| 38467  | 1      | 1      | 2      | 1      | 1      | 0      |
| 38468  | 1      | 1      | 1      | 1      | 0      | 0      |
| 38472  | 2      | 2      | 2      | 1      | 2      | 2      |

| respid | Q56i_1 | Q56j_1 | Q56k_1 | Q56l_1 | Q56m_1 | Q56n_1 |
|--------|--------|--------|--------|--------|--------|--------|
| 38484  | 1      | 1      | 1      | 2      | 1      | 0      |
| 38498  | 1      | 1      | 1      | 1      | 1      | 0      |
| 38507  | 1      | 3      | 1      | 0      | 1      | 1      |
| 38511  | 1      | 1      | 1      | 2      | 0      | 1      |
| 38524  | 2      | 2      | 2      | 2      | 2      | 3      |
| 38526  | 1      | 1      | 1      | 1      | 1      | 2      |
| 38534  | 0      | 0      | 1      | 1      | 2      | 2      |
| 38536  | 1      | 1      | 1      | 1      | 1      | 0      |
| 38539  | 0      | 0      | 0      | 0      | 0      | 0      |
| 38547  | 0      | 1      | 0      | 0      | 0      | 0      |
| 38549  | 0      | 1      | 0      | 1      | 0      | 0      |
| 38575  | 1      | 1      | 2      | 1      | 2      | 1      |
| 38579  | 0      | 1      | 0      | 0      | 0      | 0      |
| 38585  | 1      | 1      | 1      | 1      | 1      | 1      |
| 38589  | 2      | 2      | 2      | 2      | 2      | 2      |
| 38595  | 2      | 3      | 2      | 1      | 0      | 1      |
| 38602  | 0      | 0      | 0      | 0      | 0      | 0      |
| 38603  | 1      | 0      | 1      | 1      | 2      | 0      |
| 38612  | 1      | 1      | 1      | 1      | 1      | 2      |
| 38621  | 1      | 2      | 1      | 2      | 2      | 1      |
| 38624  | 1      | 1      | 2      | 2      | 1      | 2      |
| 38636  | 0      | 2      | 1      | 2      | 1      | 1      |
| 38656  | 0      | 1      | 1      | 1      | 0      | 0      |
| 38668  | 0      | 0      | 0      | 0      | 0      | 0      |
| 38675  | 1      | 1      | 1      | 1      | 1      | 2      |
| 38676  | 1      | 1      | 1      | 1      | 1      | 0      |
| 38682  | 1      | 1      | 1      | 1      | 1      | 0      |
| 38689  | 0      | 3      | 0      | 1      | 1      | 0      |
| 38702  | 1      | 1      | 1      | 1      | 1      | 1      |
| 38704  | 1      | 1      | 2      | 1      | 2      | 2      |
| 38713  | 0      | 3      | 0      | 0      | 0      | 0      |
| 38718  | 1      | 2      | 1      | 1      | 1      | 0      |

| respid | Q56i_1 | Q56j_1 | Q56k_1 | Q56l_1 | Q56m_1 | Q56n_1 |
|--------|--------|--------|--------|--------|--------|--------|
| 38725  | 1      | 0      | 0      | 3      | 0      | 2      |
| 38730  | 2      | 1      | 1      | 2      | 2      | 1      |
| 38737  | 1      | 2      | 0      | 2      | 1      | 1      |
| 38738  | 1      | 2      | 2      | 1      | 1      | 1      |
| 38744  | 0      | 1      | 0      | 0      | 0      | 0      |
| 38746  | 1      | 0      | 0      | 0      | 0      | 0      |
| 38753  | 1      | 3      | 1      | 2      | 1      | 3      |
| 38756  | 1      | 1      | 1      | 1      | 1      | 1      |
| 38760  | 1      | 0      | 0      | 0      | 1      | 1      |
| 38762  | 1      | 2      | 1      | 2      | 1      | 0      |
| 38765  | 1      | 1      | 1      | 2      | 1      | 1      |
| 38769  | 1      | 1      | 1      | 1      | 1      | 1      |
| 38781  | 2      | 2      | 2      | 2      | 2      | 1      |
| 38786  | 1      | 1      | 1      | 0      | 1      | 0      |
| 38790  | 0      | 1      | 1      | 1      | 0      | 0      |
| 38793  | 0      | 1      | 1      | 0      | 1      | 0      |
| 38797  | 0      | 0      | 0      | 0      | 0      | 0      |
| 38802  | 1      | 2      | 1      | 1      | 1      | 1      |
| 38815  | 1      | 2      | 1      | 2      | 1      | 1      |
| 38826  | 2      | 2      | 2      | 2      | 2      | 2      |
| 38828  | 0      | 0      | 0      | 0      | 0      | 0      |
| 38829  | 2      | 1      | 2      | 2      | 2      | 2      |
| 38835  | 1      | 2      | 1      | 0      | 1      | 0      |
| 38842  | 2      | 2      | 0      | 1      | 2      | 0      |
| 38853  | 0      | 0      | 0      | 0      | 0      | 1      |
| 38855  | 1      | 2      | 1      | 2      | 1      | 1      |
| 38860  | 1      | 2      | 1      | 1      | 2      | 1      |
| 38869  | 1      | 1      | 1      | 1      | 1      | 2      |
| 38882  | 1      | 1      | 0      | 1      | 3      | 2      |
| 38897  | 0      | 1      | 0      | 0      | 0      | 0      |
| 38903  | 2      | 2      | 2      | 3      | 3      | 3      |
| 38910  | 2      | 3      | 2      | 2      | 2      | 2      |

| respid | Q56i_1 | Q56j_1 | Q56k_1 | Q56l_1 | Q56m_1 | Q56n_1 |
|--------|--------|--------|--------|--------|--------|--------|
| 38948  | 1      | 2      | 1      | 3      | 2      | 0      |
| 38949  | 1      | 1      | 2      | 2      | 1      | 3      |
| 38953  | 1      | 1      | 1      | 1      | 2      | 2      |
| 38989  | 2      | 1      | 2      | 2      | 2      | 1      |
| 38997  | 1      | 2      | 0      | 1      | 1      | 1      |
| 38999  | 0      | 1      | 0      | 1      | 0      | 0      |
| 39002  | 2      | 3      | 2      | 2      | 2      | 1      |
| 39003  | 1      | 3      | 1      | 2      | 2      | 0      |
| 39006  | 0      | 2      | 0      | 2      | 1      | 2      |
| 39014  | 0      | 1      | 1      | 0      | 0      | 0      |
| 39017  | 1      | 2      | 1      | 2      | 1      | 1      |
| 39018  | 2      | 2      | 2      | 2      | 2      | 2      |
| 39025  | 2      | 3      | 2      | 3      | 2      | 3      |
| 39031  | 2      | 1      | 2      | 0      | 2      | 1      |
| 39061  | 0      | 2      | 1      | 2      | 0      | 2      |
| 39131  | 1      | 0      | 1      | 1      | 1      | 1      |
| 39153  | 1      | 1      | 1      | 1      | 1      | 1      |
| 39194  | 2      | 1      | 2      | 2      | 2      | 1      |
| 39204  | 1      | 1      | 1      | 1      | 1      | 0      |
| 39208  | 1      | 1      | 1      | 1      | 0      | 0      |
| 39213  | 1      | 2      | 1      | 2      | 3      | 2      |
| 39231  | 1      | 1      | 1      | 1      | 2      | 1      |
| 39251  | 1      | 2      | 2      | 2      | 1      | 1      |
| 39257  | 1      | 2      | 2      | 2      | 1      | 2      |
| 39262  | 3      | 3      | 0      | 2      | 3      | 1      |
| 39269  | 2      | 3      | 2      | 2      | 1      | 1      |
| 39272  | 2      | 2      | 1      | 2      | 1      | 1      |
| 39280  | 1      | 1      | 2      | 1      | 2      | 1      |
| 39294  | 2      | 2      | 0      | 1      | 0      | 1      |
| 39297  | 1      | 1      | 2      | 1      | 2      | 1      |
| 39300  | 1      | 2      | 1      | 1      | 1      | 0      |
| 39307  | 0      | 1      | 0      | 1      | 1      | 2      |

| respid | Q56i_1 | Q56j_1 | Q56k_1 | Q56l_1 | Q56m_1 | Q56n_1 |
|--------|--------|--------|--------|--------|--------|--------|
| 39320  | 0      | 1      | 1      | 2      | 0      | 3      |
| 39333  | 1      | 3      | 1      | 2      | 1      | 0      |
| 39335  | 1      | 2      | 2      | 2      | 1      | 2      |
| 39339  | 0      | 1      | 0      | 0      | 0      | 1      |
| 39375  | 2      | 2      | 2      | 2      | 2      | 1      |
| 39377  | 1      | 1      | 0      | 0      | 0      | 0      |
| 39380  | 2      | 3      | 2      | 2      | 3      | 2      |
| 39425  | 2      | 2      | 2      | 2      | 2      | 1      |
| 39590  | 0      | 0      | 0      | 0      | 0      | 2      |
| 40529  | 0      | 0      | 0      | 0      | 1      | 0      |
| 40702  | 1      | 1      | 1      | 1      | 1      | 2      |
| 40788  | 1      | 2      | 1      | 1      | 1      | 0      |
| 40841  | 0      | 0      | 1      | 1      | 0      | 1      |
| 40965  | 1      | 2      | 1      | 2      | 2      | 0      |
| 41092  | 0      | 2      | 0      | 1      | 0      | 1      |
| 41534  | 0      | 2      | 1      | 2      | 1      | 0      |
| 41919  | 0      | 0      | 0      | 0      | 0      | 0      |
| 42110  | 1      | 2      | 1      | 2      | 2      | 1      |
| 42135  | 0      | 0      | 1      | 0      | 1      | 0      |
| 42142  | 0      | 0      | 0      | 0      | 0      | 0      |
| 42163  | 1      | 1      | 2      | 2      | 1      | 1      |
| 42164  | 0      | 1      | 1      | 0      | 0      | 0      |
| 42172  | 2      | 0      | 2      | 1      | 1      | 0      |
| 42177  | 1      | 2      | 0      | 0      | 0      | 0      |
| 42181  | 1      | 2      | 1      | 1      | 1      | 1      |
| 42193  | 1      | 1      | 1      | 1      | 1      | 2      |
| 42196  | 1      | 1      | 1      | 1      | 1      | 0      |
| 42202  | 0      | 1      | 1      | 0      | 1      | 0      |
| 42248  | 1      | 1      | 1      | 1      | 1      | 0      |
| 42283  | 0      | 2      | 0      | 2      | 1      | 1      |
| 42284  | 1      | 1      | 0      | 2      | 2      | 1      |
| 42323  | 0      | 1      | 0      | 0      | 0      | 0      |

| respid | Q56i_1 | Q56j_1 | Q56k_1 | Q56l_1 | Q56m_1 | Q56n_1 |
|--------|--------|--------|--------|--------|--------|--------|
| 42349  | 0      | 1      | 1      | 2      | 2      | 2      |
| 42351  | 0      | 1      | 0      | 1      | 1      | 0      |
| 42357  | 0      | 1      | 0      | 0      | 0      | 1      |
| 42366  | 1      | 2      | 2      | 1      | 1      | 2      |
| 42380  | 0      | 1      | 0      | 0      | 0      | 0      |
| 42414  | 0      | 2      | 1      | 2      | 2      | 0      |
| 42420  | 2      | 2      | 2      | 2      | 2      | 1      |
| 42454  | 0      | 0      | 0      | 0      | 0      | 0      |
| 42458  | 0      | 0      | 0      | 0      | 1      | 0      |
| 42461  | 1      | 2      | 0      | 1      | 1      | 0      |
| 42488  | 0      | 1      | 0      | 2      | 2      | 1      |
| 42511  | 0      | 1      | 0      | 0      | 0      | 0      |
| 42512  | 0      | 1      | 1      | 1      | 1      | 2      |
| 42530  | 1      | 2      | 2      | 1      | 1      | 0      |
| 42531  | 2      | 3      | 2      | 3      | 2      | 2      |
| 42533  | 0      | 0      | 1      | 1      | 0      | 1      |
| 42549  | 0      | 1      | 0      | 1      | 1      | 1      |
| 42550  | 1      | 1      | 1      | 1      | 1      | 1      |
| 42553  | 0      | 0      | 0      | 0      | 0      | 1      |
| 42562  | 0      | 0      | 0      | 2      | 0      | 0      |
| 42567  | 0      | 1      | 1      | 2      | 1      | 1      |
| 42589  | 1      | 1      | 1      | 1      | 1      | 1      |
| 42604  | 1      | 2      | 1      | 2      | 1      | 1      |
| 42618  | 1      | 0      | 1      | 1      | 1      | 1      |
| 42621  | 0      | 1      | 2      | 2      | 1      | 2      |
| 42627  | 1      | 2      | 1      | 0      | 1      | 1      |
| 42641  | 0      | 1      | 0      | 1      | 0      | 1      |
| 42655  | 1      | 2      | 1      | 2      | 2      | 1      |
| 42666  | 0      | 1      | 1      | 0      | 0      | 1      |
| 42667  | 2      | 2      | 1      | 2      | 2      | 0      |
| 42697  | 0      | 2      | 1      | 1      | 0      | 1      |
| 42703  | 1      | 1      | 1      | 1      | 1      | 1      |

| respid | Q56i_1 | Q56j_1 | Q56k_1 | Q56l_1 | Q56m_1 | Q56n_1 |
|--------|--------|--------|--------|--------|--------|--------|
| 42712  | 0      | 2      | 0      | 2      | 0      | 3      |
| 42731  | 0      | 1      | 1      | 1      | 0      | 0      |
| 42780  | 0      | 1      | 0      | 0      | 0      | 1      |
| 42785  | 1      | 1      | 1      | 0      | 1      | 1      |
| 42788  | 1      | 1      | 1      | 0      | 1      | 0      |
| 42802  | 1      | 1      | 1      | 2      | 1      | 2      |
| 42818  | 0      | 1      | 1      | 1      | 1      | 0      |
| 42821  | 1      | 1      | 3      | 2      | 0      | 0      |
| 42824  | 1      | 2      | 1      | 0      | 1      | 0      |
| 42831  | 0      | 1      | 0      | 1      | 1      | 1      |
| 42836  | 1      | 1      | 1      | 1      | 1      | 1      |
| 42864  | 2      | 1      | 1      | 2      | 0      | 1      |
| 42875  | 0      | 0      | 0      | 0      | 0      | 0      |
| 42891  | 3      | 3      | 3      | 3      | 3      | 1      |
| 42897  | 1      | 0      | 1      | 2      | 2      | 2      |
| 42900  | 2      | 1      | 1      | 1      | 1      | 2      |
| 42902  | 2      | 1      | 2      | 1      | 2      | 1      |
| 42921  | 1      | 1      | 0      | 1      | 1      | 1      |
| 42925  | 0      | 2      | 0      | 1      | 0      | 0      |
| 42944  | 1      | 0      | 1      | 1      | 1      | 0      |
| 42950  | 0      | 1      | 0      | 0      | 0      | 0      |
| 42963  | 1      | 1      | 0      | 2      | 0      | 1      |
| 42967  | 2      | 1      | 1      | 2      | 1      | 0      |
| 42985  | 0      | 1      | 1      | 1      | 1      | 2      |
| 42990  | 1      | 0      | 1      | 1      | 0      | 1      |
| 42996  | 0      | 1      | 1      | 1      | 1      | 1      |
| 43002  | 0      | 1      | 0      | 0      | 1      | 0      |
| 43004  | 1      | 2      | 1      | 0      | 1      | 1      |
| 43012  | 1      | 2      | 1      | 0      | 0      | 0      |
| 43027  | 1      | 1      | 2      | 1      | 1      | 0      |
| 43028  | 1      | 1      | 1      | 1      | 1      | 1      |
| 43029  | 1      | 0      | 1      | 2      | 1      | 2      |

| respid | Q56i_1 | Q56j_1 | Q56k_1 | Q56l_1 | Q56m_1 | Q56n_1 |
|--------|--------|--------|--------|--------|--------|--------|
| 43031  | 0      | 0      | 0      | 0      | 1      | 1      |
| 43042  | 0      | 0      | 0      | 0      | 0      | 0      |
| 43054  | 0      | 1      | 1      | 1      | 0      | 1      |
| 43058  | 0      | 2      | 0      | 0      | 1      | 0      |
| 43064  | 2      | 1      | 1      | 1      | 1      | 1      |
| 43069  | 1      | 1      | 1      | 1      | 1      | 1      |
| 43071  | 0      | 1      | 0      | 0      | 0      | 1      |
| 43072  | 1      | 0      | 0      | 1      | 1      | 0      |
| 43077  | 1      | 1      | 1      | 1      | 1      | 1      |
| 43078  | 1      | 1      | 1      | 2      | 1      | 1      |
| 43082  | 0      | 2      | 0      | 1      | 0      | 1      |
| 43092  | 0      | 2      | 1      | 1      | 0      | 1      |
| 43096  | 0      | 1      | 0      | 0      | 1      | 2      |
| 43109  | 0      | 1      | 0      | 0      | 1      | 1      |
| 43113  | 1      | 1      | 1      | 2      | 2      | 2      |
| 43123  | 1      | 1      | 1      | 1      | 1      | 1      |
| 43127  | 1      | 1      | 1      | 1      | 0      | 1      |
| 43128  | 2      | 2      | 1      | 1      | 2      | 1      |
| 43129  | 0      | 1      | 0      | 0      | 0      | 1      |
| 43133  | 1      | 1      | 1      | 1      | 1      | 1      |
| 43140  | 2      | 0      | 2      | 2      | 2      | 1      |
| 43143  | 1      | 2      | 1      | 1      | 1      | 0      |
| 43149  | 1      | 1      | 1      | 1      | 1      | 1      |
| 43150  | 1      | 0      | 0      | 1      | 1      | 1      |
| 43153  | 1      | 1      | 1      | 1      | 1      | 2      |
| 43170  | 0      | 0      | 0      | 0      | 0      | 0      |
| 43187  | 1      | 0      | 1      | 1      | 1      | 2      |
| 43188  | 1      | 0      | 2      | 1      | 0      | 1      |
| 43198  | 1      | 2      | 1      | 1      | 1      | 1      |
| 43208  | 0      | 0      | 0      | 1      | 0      | 0      |
| 43216  | 1      | 1      | 1      | 2      | 1      | 0      |
| 43222  | 1      | 1      | 1      | 1      | 1      | 1      |



| respid | Q56i_1 | Q56j_1 | Q56k_1 | Q56l_1 | Q56m_1 | Q56n_1 |
|--------|--------|--------|--------|--------|--------|--------|
| 43224  | 0      | 0      | 0      | 1      | 0      | 0      |
| 43230  | 1      | 1      | 1      | 1      | 1      | 0      |
| 43231  | 1      | 1      | 0      | 1      | 1      | 1      |
| 43265  | 1      | 1      | 1      | 0      | 0      | 1      |
| 43270  | 0      | 1      | 1      | 1      | 0      | 1      |
| 43283  | 1      | 0      | 1      | 1      | 1      | 0      |
| 43295  | 0      | 0      | 0      | 1      | 1      | 0      |
| 43297  | 1      | 1      | 1      | 1      | 0      | 0      |
| 43299  | 1      | 1      | 1      | 1      | 1      | 1      |
| 43307  | 1      | 1      | 1      | 1      | 1      | 1      |
| 43316  | 1      | 1      | 1      | 1      | 1      | 0      |
| 43318  | 0      | 0      | 1      | 1      | 1      | 1      |
| 43319  | 1      | 0      | 0      | 1      | 1      | 1      |
| 43324  | 1      | 1      | 1      | 1      | 0      | 1      |
| 43325  | 0      | 0      | 1      | 2      | 3      | 1      |
| 43327  | 0      | 1      | 0      | 1      | 1      | 1      |
| 43338  | 0      | 1      | 0      | 1      | 0      | 1      |
| 43342  | 1      | 1      | 2      | 1      | 2      | 1      |
| 43348  | 0      | 0      | 0      | 0      | 0      | 0      |
| 43395  | 0      | 0      | 0      | 0      | 1      | 1      |
| 43404  | 1      | 1      | 1      | 1      | 1      | 1      |
| 43406  | 1      | 2      | 1      | 2      | 1      | 1      |
| 43407  | 0      | 0      | 0      | 0      | 0      | 0      |
| 43411  | 1      | 2      | 1      | 1      | 1      | 1      |
| 43416  | 1      | 1      | 1      | 1      | 1      | 0      |
| 43428  | 0      | 0      | 0      | 1      | 1      | 0      |
| 43429  | 1      | 1      | 1      | 1      | 1      | 1      |
| 43432  | 0      | 1      | 0      | 1      | 0      | 1      |
| 43443  | 0      | 0      | 0      | 0      | 0      | 1      |
| 43455  | 0      | 1      | 0      | 0      | 0      | 2      |
| 43457  | 1      | 2      | 1      | 2      | 1      | 1      |
| 43458  | 0      | 1      | 1      | 0      | 1      | 0      |

| respid | Q56i_1 | Q56j_1 | Q56k_1 | Q56l_1 | Q56m_1 | Q56n_1 |
|--------|--------|--------|--------|--------|--------|--------|
| 43477  | 0      | 2      | 1      | 1      | 0      | 1      |
| 43520  | 1      | 0      | 1      | 1      | 1      | 2      |
| 43521  | 1      | 1      | 1      | 1      | 2      | 2      |
| 43550  | 0      | 0      | 0      | 0      | 0      | 0      |
| 43551  | 1      | 1      | 1      | 1      | 1      | 1      |
| 43554  | 1      | 1      | 1      | 1      | 0      | 1      |
| 43560  | 0      | 0      | 1      | 0      | 1      | 0      |
| 43569  | 1      | 3      | 0      | 2      | 0      | 3      |
| 43583  | 0      | 1      | 0      | 0      | 1      | 0      |
| 43590  | 0      | 2      | 0      | 2      | 2      | 3      |
| 43591  | 0      | 1      | 0      | 1      | 0      | 0      |
| 43595  | 0      | 1      | 1      | 2      | 2      | 1      |
| 43599  | 1      | 1      | 0      | 1      | 1      | 1      |
| 43606  | 0      | 1      | 1      | 0      | 1      | 0      |
| 43609  | 0      | 0      | 1      | 1      | 0      | 0      |
| 43629  | 0      | 1      | 0      | 0      | 0      | 0      |
| 43636  | 0      | 3      | 0      | 0      | 0      | 0      |
| 43661  | 0      | 1      | 0      | 1      | 0      | 0      |
| 43668  | 1      | 0      | 0      | 2      | 0      | 2      |
| 43672  | 0      | 0      | 0      | 1      | 0      | 1      |
| 43677  | 0      | 1      | 1      | 1      | 1      | 1      |
| 43683  | 2      | 0      | 3      | 1      | 1      | 1      |
| 43708  | 1      | 0      | 1      | 0      | 1      | 1      |
| 43713  | 1      | 1      | 2      | 3      | 3      | 3      |
| 43718  | 0      | 1      | 0      | 0      | 1      | 0      |
| 43725  | 0      | 0      | 0      | 1      | 0      | 1      |
| 43747  | 1      | 0      | 1      | 0      | 1      | 0      |
| 43755  | 1      | 1      | 0      | 0      | 0      | 1      |
| 43770  | 0      | 2      | 0      | 1      | 0      | 1      |
| 43775  | 1      | 1      | 1      | 1      | 1      | 1      |
| 43788  | 0      | 1      | 1      | 0      | 1      | 0      |
| 43790  | 1      | 1      | 1      | 1      | 1      | 1      |

| respid | Q56i_1 | Q56j_1 | Q56k_1 | Q56l_1 | Q56m_1 | Q56n_1 |
|--------|--------|--------|--------|--------|--------|--------|
| 43797  | 0      | 0      | 1      | 1      | 1      | 1      |
| 43798  | 1      | 1      | 1      | 1      | 1      | 1      |
| 43811  | 0      | 0      | 0      | 1      | 2      | 1      |
| 43819  | 1      | 1      | 0      | 1      | 1      | 0      |
| 43821  | 0      | 1      | 1      | 1      | 1      | 1      |
| 43822  | 0      | 1      | 1      | 0      | 0      | 3      |
| 43825  | 1      | 1      | 1      | 1      | 1      | 1      |
| 43826  | 0      | 2      | 0      | 0      | 1      | 1      |
| 43831  | 1      | 1      | 1      | 1      | 2      | 1      |
| 43836  | 1      | 1      | 1      | 1      | 2      | 0      |
| 43852  | 1      | 1      | 0      | 2      | 1      | 1      |
| 43857  | 1      | 2      | 0      | 1      | 0      | 1      |
| 43858  | 1      | 1      | 0      | 3      | 1      | 0      |
| 43859  | 1      | 1      | 1      | 1      | 1      | 1      |
| 43863  | 0      | 3      | 0      | 0      | 0      | 0      |
| 43868  | 1      | 0      | 0      | 1      | 2      | 1      |
| 43872  | 0      | 0      | 0      | 1      | 1      | 0      |
| 43874  | 1      | 1      | 1      | 1      | 1      | 1      |
| 43882  | 0      | 0      | 0      | 0      | 0      | 0      |
| 43886  | 1      | 1      | 1      | 1      | 1      | 0      |
| 43903  | 1      | 1      | 1      | 0      | 1      | 1      |
| 43929  | 1      | 0      | 0      | 2      | 1      | 1      |
| 43932  | 0      | 0      | 0      | 0      | 0      | 0      |
| 43936  | 1      | 1      | 1      | 1      | 0      | 1      |
| 43962  | 0      | 1      | 0      | 0      | 0      | 1      |
| 43964  | 0      | 0      | 0      | 1      | 0      | 1      |
| 43968  | 0      | 0      | 0      | 1      | 1      | 1      |
| 43979  | 0      | 1      | 0      | 0      | 1      | 0      |
| 44006  | 1      | 1      | 1      | 1      | 2      | 1      |
| 44009  | 0      | 0      | 1      | 0      | 1      | 0      |
| 44023  | 1      | 0      | 2      | 1      | 1      | 0      |
| 44035  | 1      | 1      | 1      | 1      | 1      | 1      |

| respid | Q56i_1 | Q56j_1 | Q56k_1 | Q56l_1 | Q56m_1 | Q56n_1 |
|--------|--------|--------|--------|--------|--------|--------|
| 44038  | 1      | 2      | 0      | 1      | 1      | 1      |
| 44039  | 1      | 1      | 0      | 1      | 1      | 0      |
| 44043  | 1      | 1      | 1      | 1      | 1      | 1      |
| 44048  | 0      | 1      | 0      | 0      | 1      | 1      |
| 44050  | 1      | 3      | 1      | 1      | 1      | 2      |
| 44051  | 1      | 1      | 0      | 1      | 0      | 1      |
| 44061  | 1      | 1      | 1      | 1      | 1      | 0      |
| 44063  | 1      | 1      | 1      | 0      | 1      | 1      |
| 44072  | 0      | 1      | 1      | 0      | 1      | 1      |
| 44075  | 0      | 1      | 1      | 1      | 1      | 1      |
| 44089  | 1      | 1      | 1      | 1      | 1      | 1      |
| 44090  | 1      | 1      | 2      | 1      | 1      | 1      |
| 44091  | 1      | 1      | 1      | 1      | 1      | 1      |
| 44092  | 1      | 1      | 0      | 1      | 1      | 0      |
| 44110  | 1      | 1      | 1      | 1      | 1      | 1      |
| 44112  | 1      | 1      | 1      | 1      | 1      | 1      |
| 44114  | 0      | 1      | 1      | 1      | 1      | 0      |
| 44143  | 1      | 1      | 1      | 1      | 1      | 1      |
| 44179  | 0      | 1      | 1      | 1      | 0      | 1      |
| 44234  | 2      | 2      | 1      | 1      | 0      | 2      |
| 44236  | 1      | 0      | 1      | 0      | 0      | 0      |
| 44239  | 1      | 1      | 1      | 1      | 1      | 1      |
| 44241  | 0      | 1      | 1      | 1      | 1      | 1      |
| 44253  | 0      | 1      | 1      | 0      | 1      | 0      |
| 44260  | 1      | 1      | 0      | 1      | 1      | 1      |
| 44261  | 1      | 1      | 1      | 1      | 1      | 1      |
| 44263  | 1      | 1      | 0      | 0      | 1      | 0      |
| 44264  | 0      | 0      | 0      | 0      | 1      | 0      |
| 44265  | 1      | 1      | 0      | 1      | 1      | 1      |
| 44267  | 1      | 1      | 1      | 1      | 1      | 1      |
| 44306  | 1      | 1      | 1      | 1      | 1      | 1      |
| 44309  | 1      | 1      | 1      | 2      | 2      | 1      |

| respid | Q56i_1 | Q56j_1 | Q56k_1 | Q56l_1 | Q56m_1 | Q56n_1 |
|--------|--------|--------|--------|--------|--------|--------|
| 44310  | 1      | 0      | 0      | 1      | 2      | 1      |
| 44361  | 1      | 2      | 1      | 1      | 1      | 1      |
| 44380  | 1      | 0      | 2      | 2      | 0      | 0      |
| 44386  | 0      | 2      | 0      | 2      | 0      | 0      |
| 44419  | 1      | 0      | 1      | 1      | 2      | 1      |
| 44426  | 0      | 2      | 0      | 1      | 1      | 0      |
| 44479  | 2      | 2      | 1      | 2      | 1      | 2      |
| 44484  | 1      | 1      | 1      | 1      | 1      | 1      |
| 44487  | 1      | 1      | 1      | 1      | 1      | 1      |
| 44509  | 0      | 0      | 0      | 0      | 0      | 0      |
| 44540  | 0      | 1      | 1      | 1      | 0      | 0      |
| 44551  | 1      | 1      | 1      | 1      | 1      | 1      |
| 44553  | 0      | 1      | 0      | 0      | 0      | 1      |
| 44650  | 0      | 0      | 0      | 0      | 0      | 0      |
| 44665  | 1      | 2      | 1      | 1      | 1      | 1      |
| 44779  | 0      | 3      | 0      | 1      | 0      | 1      |
| 44797  | 1      | 3      | 0      | 2      | 0      | 0      |
| 44807  | 1      | 0      | 0      | 0      | 0      | 1      |
| 44815  | 1      | 1      | 1      | 1      | 0      | 2      |
| 44836  | 0      | 0      | 1      | 1      | 1      | 0      |
| 44868  | 0      | 3      | 0      | 1      | 1      | 0      |
| 44927  | 0      | 1      | 1      | 0      | 0      | 0      |
| 44983  | 1      | 1      | 1      | 1      | 1      | 1      |
| 45040  | 1      | 3      | 2      | 2      | 0      | 2      |
| 45051  | 1      | 2      | 1      | 1      | 1      | 0      |
| 45067  | 1      | 0      | 2      | 1      | 1      | 0      |
| 45074  | 1      | 1      | 1      | 1      | 1      | 1      |
| 45115  | 0      | 0      | 1      | 1      | 0      | 1      |
| 45187  | 1      | 1      | 2      | 2      | 2      | 2      |
| 45221  | 1      | 2      | 0      | 1      | 0      | 0      |
| 45279  | 1      | 1      | 2      | 2      | 2      | 1      |
| 45308  | 2      | 2      | 2      | 2      | 1      | 2      |

| respid | Q56i_1 | Q56j_1 | Q56k_1 | Q56l_1 | Q56m_1 | Q56n_1 |
|--------|--------|--------|--------|--------|--------|--------|
| 45317  | 0      | 1      | 1      | 0      | 1      | 0      |
| 45379  | 1      | 1      | 1      | 1      | 1      | 3      |
| 45451  | 1      | 0      | 1      | 1      | 1      | 1      |
| 45472  | 1      | 1      | 1      | 2      | 1      | 2      |
| 45474  | 2      | 3      | 2      | 2      | 2      | 3      |
| 45544  | 2      | 2      | 2      | 2      | 2      | 1      |
| 45561  | 0      | 1      | 1      | 1      | 1      | 0      |
| 45596  | 1      | 2      | 0      | 2      | 0      | 3      |
